# Supplementary material
Source: PubMed Central journal article supplement (PMC4528763)
Supplement: supp_pp.15.00645_00645supptbls.pdf [file supp_pp.15.00645_00645supptbls.pdf]

### Primers used for Real-time PCR

| Genes         | Forward primer (5' to 3')        |
|---------------|----------------------------------|
| <b>DXS</b>    | 5'-CTCTTCCTTCGCCGTTTCC-3'        |
| <b>DXR</b>    | 5'-CGATTCTGCTACCCTTTTCAAC-3'     |
| <b>PSY</b>    | 5'-CCCGGACTGCTGTGTTTAAT-3'       |
| <b>PDS</b>    | 5'-ATAATTGGCGGACAGGCATA-3'       |
| <b>ZDS</b>    | 5'-ATCAGTGCTCGTTGTATGCTTACTATATT |
| <b>CRTISO</b> | 5'-TTCTTTCCATTACATGGGTGTT-3'     |
| <b>LCYe</b>   | 5'-CAACTGGATATTGAGGGCATCA-3'     |
| <b>LCYb2</b>  | 5'-TGGCTCAACCAGGATGATCA-3'       |
| <b>HYD</b>    | 5'-TTTGGGATGGCCTACATGTTC-3'      |
| <b>ZEP</b>    | 5'-GAAGCAATCTTCGACGTGACA-3'      |
| <b>FBN1</b>   | 5'-ACGGTCCAGAACTCCATCC-3'        |
| <b>FBN4</b>   | 5'-ACAGGGAATTATCACAGC-3'         |
| <b>NCED2</b>  | 5'-GCCCAACAAATCCTTGAAAGTAGA-3'   |
| <b>NCED3</b>  | 5'-TCTCTTCAAACACCTTCCATTCC-3'    |
| <b>CCD4a</b>  | 5'-AACCGAACGTGCCCATTT-3'         |
| <b>CCD4b</b>  | 5'-AAGTGATGCCGAGATGAAGTGGT-3'    |
| <b>Actin</b>  | 5'-CCAAGCAGCATGAAGATCAA-3'       |

DXS, 1-deoxy-D-xylulose 5-phosphate synthase; DXR, phosphate reductoisomerase; PSY, phytoene synthase; ZDS,  $\zeta$ -carotene desaturase; CRTISO, Carotenoid isomerase; LCYb2, Lycopene  $\epsilon$ -cyclase; HYD,  $\beta$ -carotene hydroxylase; FBN1/4, [fibrillin 1/4](#), NCED 2/3, 9-cis-epoxy xanthophyll synthase; CCD4a/4b, carotenoid cleavage dioxygenase 4a/4b. We note that the primer pairs used in this experiment came from FBN1/4 is designed using the Primer Express software (Applied Biosystems, Foster City, CA, USA).

**Cao H, Zhang J, Xu J, Ye J, Yun Z, Xu Q, Xu J, Deng X** (2013) Crystalline  $\beta$ -carotene accumulation by comparing natural carotenoid-rich system of citrus. *J Exp Bot* **63**

| Reverse primer (5' to 3')        | Accession No. |
|----------------------------------|---------------|
| 5'-CAGACCAGCGGCAAAAGTAAC-3'      | EY664196      |
| 5'-ATTGAGTGTATGATAGACTGTGGATG-3' | EY705355      |
| 5'-GAGCAAGGATGCCTCAAATC-3'       | DQ235260      |
| 5'-CCTCTGTCGTCACCTCGATCA-3'      | AJ319760      |
| 5'-CCCTTGAGCATCCGCAAT-3'         | AJ319762      |
| 5'-TCATCCTCAAGCACAAAATGGT-3'     | AY655751      |
| 5'-CAAGGAAACCGTGCCACATC-3'       | AY533827      |
| 5'-TTGGCCACAACCCATTCC-3'         | FJ516403      |
| 5'-GGCACGTCGGCAATGG-3'           | AB114661      |
| 5'-ACCGAGTCCCAAGCAAAGT-3'        | AB114662      |
| 5'-TACCTGAGGCGTCCCAAT-3'         | Cs2g02520.1   |
| 5'-TGCGGGTATCATTATCG-3'          | Cs9g09850.1   |
| 5'-GGGTAAGGCTGTTTAGGGAAATG-3'    | AB219171      |
| 5'-GCTGCAGGTGATGGAGGGTAT-3'      | AB219177      |
| 5'-TGTCTACGAACACCGCATACTT-3'     | DQ309330      |
| 5'-GATGTAGCATTTGTCGCACTAAGAA-3'  | DQ309331      |
| 5'-ATCTGCTGGAAGGTGCTGAG-3'       | GU911361      |

, 1-deoxy-D-xylulose 5-  
se; PDS, phytoene desaturase;  
erases; LCYb2, Lycopene  $\beta$ -  
e hydroxylase; ZEP, Zeaxanthin  
ycarotenoid dioxygenase 2/3;  
The boldface in row A denote  
rom Cao et al. (2012) and  
e 3 (Applied Biosystems, Foster

(2012) Comprehending  
ngineered cell models and the  
: 4403-4417

| FileScan          | Sequence           | MH+      | Diff(MH+) | Charg | Rank | Score | DeltaS |
|-------------------|--------------------|----------|-----------|-------|------|-------|--------|
| P12163_1_F2,19947 | K.AIDLVD EAAAK.L   | 1724.005 | 0.00359   | 2     | 1    | 36.2  | 0      |
| P12163_1_F2,20129 | K.AIDLVD EAAAK.L   | 1724.005 | 0.00375   | 3     | 1    | 74.9  | 0      |
| P12163_1_F3,20542 | K.AIDLVD EAAAK.L   | 1724.005 | 0.00723   | 2     | 1    | 74    | 0      |
| P12163_1_F3,20556 | K.AIDLVD EAAAK.L   | 1724.005 | 0.00537   | 3     | 1    | 74.9  | 0      |
| P12163_1_F5,19427 | K.AIDLVD EAAAK.L   | 1724.005 | -0.00132  | 3     | 1    | 38.8  | 0      |
| P12163_1_F5,19907 | K.AIDLVD EAAAK.L   | 1724.005 | 0.00438   | 3     | 1    | 61.9  | 0      |
| P12163_1_F5,19911 | K.AIDLVD EAAAK.L   | 1724.005 | 0.00875   | 2     | 1    | 29.1  | 0      |
| P12163_1_F6,19508 | K.AIDLVD EAAAK.L   | 1724.005 | 0.00279   | 3     | 1    | 70.1  | 0      |
| P12163_1_F6,19574 | K.AIDLVD EAAAK.L   | 1724.005 | 0.00327   | 2     | 1    | 36.8  | 0      |
| P12163_1_F6,19917 | K.AIDLVD EAAAK.L   | 1724.005 | 0.00207   | 3     | 1    | 50.4  | 0      |
| P12163_2_F2,19990 | K.AIDLVD EAAAK.L   | 1724.005 | 0.00534   | 3     | 1    | 44    | 0      |
| P12163_2_F2,20017 | K.AIDLVD EAAAK.L   | 1724.005 | 0.00585   | 2     | 1    | 62.9  | 0      |
| P12163_2_F4,18637 | K.AIDLVD EAAAK.L   | 1724.005 | 0.00507   | 3     | 1    | 52.7  | 0      |
| P12163_1_S1,20050 | K.ALASYM*FNTEEALVF | 2035.047 | -0.00179  | 2     | 1    | 25.3  | 0      |
| P12163_1_S1,20262 | K.ALASYM*FNTEEALVF | 2035.047 | 0.00143   | 3     | 1    | 42    | 0      |
| P12163_1_S1,19879 | K.ALASYMFNTEEALVR. | 2019.052 | 0.00665   | 3     | 1    | 34.6  | 0      |
| P12163_1_S1,24400 | K.ALASYMFNTEEALVR. | 2019.052 | 0.00341   | 3     | 1    | 59.5  | 0      |
| P12163_1_S1,24532 | K.ALASYMFNTEEALVR. | 2019.052 | 0.00097   | 2     | 1    | 70.9  | 0      |
| P12163_1_S1,24586 | K.ALASYMFNTEEALVR. | 2019.052 | 0.00398   | 3     | 1    | 60.8  | 0      |
| P12163_1_F4,12098 | K.DLTAM*ASAGK.L    | 1588.882 | 0.00604   | 2     | 1    | 35    | 0      |
| P12163_1_F4,15905 | K.DLTAM*ASAGK.L    | 1588.882 | 0.00391   | 3     | 1    | 25.9  | 0      |
| P12163_1_F4,15930 | K.DLTAM*ASAGK.L    | 1588.882 | 0.0026    | 2     | 1    | 26.1  | 0      |
| P12163_1_F4,16122 | K.DLTAM*ASAGK.L    | 1588.882 | 0.00454   | 3     | 1    | 41    | 0      |
| P12163_1_F4,16139 | K.DLTAM*ASAGK.L    | 1588.882 | 0.00903   | 2     | 1    | 24.9  | 0      |
| P12163_1_F3,15518 | K.DLTAMASAGK.L     | 1572.888 | 0.00499   | 2     | 1    | 49    | 0      |
| P12163_1_F4,15827 | K.DLTAMASAGK.L     | 1572.888 | 0.00087   | 2     | 1    | 48.1  | 0      |
| P12163_1_F4,15900 | K.DLTAMASAGK.L     | 1572.888 | 0.00598   | 3     | 1    | 29.1  | 0      |
| P12163_1_F4,16029 | K.DLTAMASAGK.L     | 1572.888 | 0.00659   | 2     | 1    | 48.6  | 0      |
| P12163_1_F4,16097 | K.DLTAMASAGK.L     | 1572.888 | 0.00724   | 3     | 1    | 29.4  | 0      |
| P12163_2_F1,15129 | K.DLTAMASAGK.L     | 1572.888 | 0.01125   | 2     | 1    | 46    | 0      |
| P12163_1_F4,17157 | K.ELNEYISSGK.S     | 1747.969 | 0.01058   | 2     | 1    | 27.4  | 0      |
| P12163_1_F4,17173 | K.ELNEYISSGK.S     | 1747.969 | 0.00741   | 3     | 1    | 30.1  | 0      |
| P12163_1_F5,15938 | K.ELNEYISSGK.S     | 1747.969 | 0.00646   | 2     | 1    | 35.1  | 0      |
| P12163_1_F5,15967 | K.ELNEYISSGK.S     | 1747.969 | 0.01215   | 3     | 1    | 23.6  | 0      |
| P12163_1_F7,15226 | K.ELNEYISSGK.S     | 1747.969 | 0.00454   | 2     | 1    | 41.4  | 0      |
| P12163_2_F1,16360 | K.ELNEYISSGK.S     | 1747.969 | 0.0045    | 3     | 1    | 32.1  | 0      |
| P12163_2_F1,16415 | K.ELNEYISSGK.S     | 1747.969 | 0.00608   | 2     | 1    | 39.7  | 0      |
| P12163_2_F4,14894 | K.ELNEYISSGK.S     | 1747.969 | 0.0052    | 2     | 1    | 31.1  | 0      |
| P12163_2_F9,15481 | K.ELNEYISSGK.S     | 1747.969 | 0.00549   | 3     | 1    | 29.3  | 0      |
| P12163_1_F4,14368 | K.ETAYETIK.Q       | 1562.889 | 0.01457   | 3     | 1    | 35.4  | 0      |
| P12163_1_F4,14392 | K.ETAYETIK.Q       | 1562.889 | 0.0188    | 2     | 1    | 36.1  | 0      |
| P12163_2_F1,13292 | K.ETAYETIK.Q       | 1562.889 | 0.00472   | 2     | 1    | 37.1  | 0      |
| P12163_2_F1,13312 | K.ETAYETIK.Q       | 1562.889 | 0.00842   | 3     | 1    | 25.8  | 0      |
| P12163_1_F6,11849 | K.HQIVETEHLK.A     | 1955.153 | 0.00341   | 4     | 1    | 22    | 0      |
| P12163_1_F6,14751 | K.HQIVETEHLK.A     | 1955.153 | 0.00318   | 3     | 1    | 30.4  | 0      |
| P12163_1_F6,14767 | K.HQIVETEHLK.A     | 1955.153 | 0.00245   | 4     | 1    | 28.5  | 0      |
| P12163_1_F6,14798 | K.HQIVETEHLK.A     | 1955.153 | 0.00316   | 2     | 1    | 51.5  | 0      |
| P12163_1_F7,13998 | K.HQIVETEHLK.A     | 1955.153 | 0.00192   | 3     | 1    | 39.9  | 0      |
| P12163_1_F7,14013 | K.HQIVETEHLK.A     | 1955.153 | 0.00577   | 4     | 1    | 27.2  | 0      |
| P12163_1_F7,14025 | K.HQIVETEHLK.A     | 1955.153 | 0.00454   | 2     | 1    | 62.2  | 0      |

|                   |                       |          |          |   |   |      |   |
|-------------------|-----------------------|----------|----------|---|---|------|---|
| P12163_1_F8,269   | K.HQIVETEHLK.A        | 1955.153 | 0.00486  | 3 | 1 | 41.6 | 0 |
| P12163_2_F8_12070 | K.HQIVETEHLK.A        | 1955.153 | 0.00636  | 3 | 1 | 35.5 | 0 |
| P12163_2_F9,13636 | K.HQIVETEHLK.A        | 1955.153 | 0.00461  | 4 | 1 | 23.6 | 0 |
| P12163_2_S5,13461 | K.HQIVETEHLK.A        | 1955.153 | 0.00144  | 3 | 1 | 22.3 | 0 |
| P12163_2_S5,13884 | K.HQIVETEHLK.A        | 1955.153 | 0.00594  | 3 | 1 | 25.1 | 0 |
| P12163_1_F2,15379 | K.LDPVIGR.D           | 1073.662 | 0.00271  | 2 | 1 | 26   | 0 |
| P12163_1_S1,14477 | K.LDPVIGR.D           | 1073.662 | 0.00422  | 3 | 1 | 39.7 | 0 |
| P12163_1_S1,14594 | K.LDPVIGR.D           | 1073.662 | 0.00351  | 2 | 1 | 24.4 | 0 |
| P12163_1_F2,22595 | K.LISLDM*GALIAGAK.Y   | 1997.192 | -0.00127 | 3 | 1 | 39.4 | 0 |
| P12163_1_F6,19270 | K.LLHLEEELHK.R        | 1869.105 | 0.00454  | 3 | 1 | 48.1 | 0 |
| P12163_2_F4,17695 | K.LLHLEEELHK.R        | 1869.105 | 0.00127  | 3 | 1 | 28   | 0 |
| P12163_2_F6,18724 | K.LLHLEEELHK.R        | 1869.105 | 0.00736  | 3 | 1 | 47.7 | 0 |
| P12163_2_F6,18746 | K.LLHLEEELHK.R        | 1869.105 | 0.00469  | 4 | 1 | 49.7 | 0 |
| P12163_2_F6,18757 | K.LLHLEEELHK.R        | 1869.105 | 0.00582  | 2 | 1 | 46.4 | 0 |
| P12163_1_F8,17503 | K.MEITSKPTALDEINR.S   | 2326.29  | 0.00746  | 4 | 1 | 23.1 | 0 |
| P12163_2_F6,16966 | K.MEITSKPTALDEINR.S   | 2326.29  | -0.00062 | 3 | 1 | 22.2 | 0 |
| P12163_2_F6,16989 | K.MEITSKPTALDEINR.S   | 2326.29  | 0.00265  | 2 | 1 | 45.6 | 0 |
| P12163_1_F3,16737 | K.NNPVIIGEPGVGK.T ! f | 1902.127 | 0.00297  | 3 | 1 | 31.1 | 0 |
| P12163_1_F3,16751 | K.NNPVIIGEPGVGK.T ! f | 1902.127 | 0.00722  | 2 | 1 | 48.9 | 0 |
| P12163_1_F4,17243 | K.NNPVIIGEPGVGK.T ! f | 1902.127 | 0.00414  | 3 | 1 | 50.9 | 0 |
| P12163_1_F4,17252 | K.NNPVIIGEPGVGK.T ! f | 1902.127 | 0.0091   | 2 | 1 | 42.6 | 0 |
| P12163_1_F5,16038 | K.NNPVIIGEPGVGK.T ! f | 1902.127 | 0.0046   | 2 | 1 | 42.6 | 0 |
| P12163_1_F6,16044 | K.NNPVIIGEPGVGK.T ! f | 1902.127 | 0.00396  | 2 | 1 | 27.9 | 0 |
| P12163_1_F6,16047 | K.NNPVIIGEPGVGK.T ! f | 1902.127 | -0.00045 | 3 | 1 | 50.9 | 0 |
| P12163_1_F6,16533 | K.NNPVIIGEPGVGK.T ! f | 1902.127 | 0.00396  | 2 | 1 | 24.1 | 0 |
| P12163_2_F1,16460 | K.NNPVIIGEPGVGK.T ! f | 1902.127 | 0.0069   | 3 | 1 | 68.8 | 0 |
| P12163_2_F1,16482 | K.NNPVIIGEPGVGK.T ! f | 1902.127 | 0.0034   | 2 | 1 | 61   | 0 |
| P12163_2_F2,429   | K.NNPVIIGEPGVGK.T ! f | 1902.127 | 0.00675  | 3 | 1 | 30.1 | 0 |
| P12163_2_F4,14921 | K.NNPVIIGEPGVGK.T ! f | 1902.127 | -0.00324 | 3 | 1 | 33.4 | 0 |
| P12163_2_F4,14959 | K.NNPVIIGEPGVGK.T ! f | 1902.127 | -0.00354 | 2 | 1 | 40.7 | 0 |
| P12163_1_F2,10375 | K.TAISEGLAQR.I        | 1349.769 | 0.00339  | 3 | 1 | 33.3 | 0 |
| P12163_1_F2,13543 | K.TAISEGLAQR.I        | 1349.769 | 0.00267  | 3 | 1 | 41.1 | 0 |
| P12163_1_F3,10749 | K.TAISEGLAQR.I        | 1349.769 | 0.00294  | 3 | 1 | 38   | 0 |
| P12163_2_F1,10248 | K.TAISEGLAQR.I        | 1349.769 | 0.00167  | 2 | 1 | 26.8 | 0 |
| P12163_2_F1,13323 | K.TAISEGLAQR.I        | 1349.769 | 0.00289  | 2 | 1 | 24.9 | 0 |
| P12163_1_S1,14546 | K.VLGETAGSMLGR.D      | 1494.825 | 0.00405  | 3 | 1 | 36.5 | 0 |
| P12163_1_S1,15094 | K.VLGETAGSMLGR.D      | 1494.825 | 0.00519  | 3 | 1 | 30.4 | 0 |
| P12163_1_S1,18496 | K.VLGETAGSMLGR.D      | 1494.825 | 0.00091  | 2 | 1 | 35.4 | 0 |
| P12163_1_S1,18557 | K.VLGETAGSMLGR.D      | 1494.825 | -0.00039 | 3 | 1 | 63.9 | 0 |
| P12163_1_S1,18745 | K.VLGETAGSMLGR.D      | 1494.825 | 0.00237  | 2 | 1 | 46.7 | 0 |
| P12163_1_F5,17576 | K.WTGIPVSK.L          | 1495.909 | 0.00725  | 2 | 1 | 33.6 | 0 |
| P12163_1_S10,1485 | K.YEALEK.Y            | 1360.793 | 0.00676  | 3 | 1 | 24   | 0 |
| P12163_2_F2,14695 | K.YEALEK.Y            | 1360.793 | 0.00493  | 3 | 1 | 21.9 | 0 |
| P12163_1_F3,11527 | K.YGSLNALQR.Q         | 1325.748 | 0.00374  | 3 | 1 | 23.8 | 0 |
| P12163_2_F10,1438 | K.YGSLNALQR.Q         | 1325.748 | 0.00494  | 3 | 1 | 32.1 | 0 |
| P12163_2_F10,1442 | K.YGSLNALQR.Q         | 1325.748 | 0.0046   | 2 | 1 | 26.8 | 0 |
| P12163_1_F4,10862 | K.YRGEFEDR.L          | 1375.691 | 0.00625  | 2 | 1 | 33.9 | 0 |
| P12163_2_F4,9516  | K.YRGEFEDR.L          | 1375.691 | 0.00453  | 2 | 1 | 40.4 | 0 |
| P12163_2_F8_12070 | R.AGLSDPHRPIASF*FM    | 3013.585 | 0.0031   | 4 | 1 | 23.9 | 0 |
| P12163_2_F8_12070 | R.AGLSDPHRPIASF*FM    | 2997.59  | 0.00806  | 4 | 1 | 32.9 | 0 |
| P12163_2_F8_12070 | R.AGLSDPHRPIASF*FM    | 2981.595 | 0.00058  | 4 | 1 | 24.5 | 0 |

|                                       |          |          |   |   |      |   |
|---------------------------------------|----------|----------|---|---|------|---|
| P12163_1_F2,15925 R.CIGATTLDEYR.K     | 1602.81  | 0.00249  | 2 | 1 | 27.3 | 0 |
| P12163_1_S1,15519 R.CIGATTLDEYR.K     | 1602.81  | 0.00523  | 2 | 1 | 40   | 0 |
| P12163_1_S1,15567 R.CIGATTLDEYR.K     | 1602.81  | 0.00188  | 3 | 1 | 91.7 | 0 |
| P12163_1_F8,14992 R.CIGATTLDEYRK.Y    | 2035.11  | 0.00359  | 2 | 1 | 31.2 | 0 |
| P12163_2_F6,14414 R.CIGATTLDEYRK.Y    | 2035.11  | 0.00093  | 2 | 1 | 44.6 | 0 |
| P12163_1_F3,14695 R.CIQILSR.R         | 1193.698 | 0.00388  | 3 | 1 | 25.8 | 0 |
| P12163_1_F3,20428 R.DFQISLPTLK.S      | 1770.062 | 0.00421  | 3 | 1 | 26   | 0 |
| P12163_1_F3,23359 R.DFQISLPTLK.S      | 1770.062 | 0.00505  | 2 | 1 | 47.2 | 0 |
| P12163_1_F3,23364 R.DFQISLPTLK.S      | 1770.062 | 0.00049  | 3 | 1 | 38.6 | 0 |
| P12163_1_F3,23626 R.DFQISLPTLK.S      | 1770.062 | 0.0115   | 3 | 1 | 25.9 | 0 |
| P12163_1_F6,21931 R.DFQISLPTLK.S      | 1770.062 | 0.00169  | 3 | 1 | 35.1 | 0 |
| P12163_1_F2,19796 R.DLEALIQR.S        | 1261.742 | 0.00553  | 2 | 1 | 33.8 | 0 |
| P12163_1_S1,18962 R.DLEALIQR.S        | 1261.742 | 0.00375  | 2 | 1 | 37.2 | 0 |
| P12163_1_S1,19074 R.DLEALIQR.S        | 1261.742 | 0.00808  | 3 | 1 | 45.4 | 0 |
| P12163_1_S1,19202 R.DLEALIQR.S        | 1261.742 | 0.00201  | 2 | 1 | 39.9 | 0 |
| P12163_1_S1,19332 R.DLEALIQR.S        | 1261.742 | 0.00304  | 3 | 1 | 48.5 | 0 |
| P12163_1_F3,10288 R.DQISSIVR.L        | 1221.71  | 0.00289  | 3 | 1 | 36.5 | 0 |
| P12163_1_F3,15103 R.DQISSIVR.L        | 1221.71  | 0.00303  | 2 | 1 | 28.4 | 0 |
| P12163_1_F2,19501 R.EEVTGSDIAEIVSK.W  | 2085.154 | 0.00925  | 3 | 1 | 39.2 | 0 |
| P12163_1_F5,18984 R.EEVTGSDIAEIVSK.W  | 2085.154 | 0.00194  | 2 | 1 | 39.6 | 0 |
| P12163_1_S1,15597 R.EEVTGSDIAEIVSK.W  | 2085.154 | 0.00613  | 3 | 1 | 51.7 | 0 |
| P12163_1_S1,15630 R.EEVTGSDIAEIVSK.W  | 2085.154 | 0.00244  | 2 | 1 | 27.9 | 0 |
| P12163_1_S1,16052 R.EEVTGSDIAEIVSK.W  | 2085.154 | 0.00574  | 3 | 1 | 22.7 | 0 |
| P12163_1_S1,18241 R.EEVTGSDIAEIVSK.W  | 2085.154 | 0.00376  | 3 | 1 | 38.8 | 0 |
| P12163_1_S1,18681 R.EEVTGSDIAEIVSK.W  | 2085.154 | 0.00475  | 3 | 1 | 41.2 | 0 |
| P12163_1_S1,18737 R.EEVTGSDIAEIVSK.W  | 2085.154 | 0.00248  | 2 | 1 | 80.4 | 0 |
| P12163_2_F1,19744 R.EEVTGSDIAEIVSK.W  | 2085.154 | 0.00247  | 3 | 1 | 40.1 | 0 |
| P12163_1_F3,14743 R.IDM*SEYMEK.H      | 1769.891 | 0.0039   | 2 | 1 | 25.8 | 0 |
| P12163_1_F3,18958 R.IDMSEYMEK.H       | 1753.896 | 0.00795  | 2 | 1 | 46.5 | 0 |
| P12163_1_F3,18985 R.IDMSEYMEK.H       | 1753.896 | 0.00558  | 3 | 1 | 27.6 | 0 |
| P12163_2_F9,17158 R.IDMSEYMEK.H       | 1753.896 | 0.009    | 3 | 1 | 35.3 | 0 |
| P12163_1_F3,24507 R.ISDSALVEAAILSDR.Y | 1864.033 | 0.00007  | 2 | 1 | 39.1 | 0 |
| P12163_1_S1,17965 R.IVQGDVPQALMNR.K   | 1744.968 | 0.00601  | 3 | 1 | 33.1 | 0 |
| P12163_2_F6,19418 R.KLISLDM*GALIAGAK  | 2429.493 | 0.01231  | 3 | 1 | 46.2 | 0 |
| P12163_1_F4,25636 R.LEAELSLLK.E       | 1624.014 | 0.0026   | 2 | 1 | 24.3 | 0 |
| P12163_1_F4,25759 R.LEAELSLLK.E       | 1624.014 | 0.00426  | 3 | 1 | 34.7 | 0 |
| P12163_1_F5,23832 R.LEAELSLLK.E       | 1624.014 | 0.00744  | 3 | 1 | 22.9 | 0 |
| P12163_1_F7,22323 R.LEAELSLLK.E       | 1624.014 | 0.0033   | 3 | 1 | 23.2 | 0 |
| P12163_2_F1,25005 R.LEAELSLLK.E       | 1624.014 | 0.00483  | 3 | 1 | 35.8 | 0 |
| P12163_2_S5,21568 R.LEAELSLLK.E       | 1624.014 | 0.00243  | 3 | 1 | 34.4 | 0 |
| P12163_1_F4,17413 R.LLEATEK.F         | 1411.862 | 0.00252  | 3 | 1 | 26.2 | 0 |
| P12163_1_F4,17549 R.LLEATEK.F         | 1411.862 | 0.0024   | 2 | 1 | 30.2 | 0 |
| P12163_1_F5,16163 R.LLEATEK.F         | 1411.862 | 0.00513  | 3 | 1 | 26.9 | 0 |
| P12163_1_F5,16178 R.LLEATEK.F         | 1411.862 | 0.0056   | 2 | 1 | 32.8 | 0 |
| P12163_1_F6,16746 R.LLEATEK.F         | 1411.862 | 0.00622  | 2 | 1 | 26.8 | 0 |
| P12163_1_F7,15351 R.LLEATEK.F         | 1411.862 | -0.00038 | 2 | 1 | 29   | 0 |
| P12163_1_F7,15358 R.LLEATEK.F         | 1411.862 | 0.00048  | 3 | 1 | 24.2 | 0 |
| P12163_2_F1,16581 R.LLEATEK.F         | 1411.862 | 0.00586  | 2 | 1 | 30.8 | 0 |
| P12163_2_F1,16582 R.LLEATEK.F         | 1411.862 | 0.00513  | 3 | 1 | 31   | 0 |
| P12163_2_F7,13358 R.QAQLTEQWEHEK.T    | 2135.134 | 0.0033   | 3 | 1 | 50.4 | 0 |
| P12163_1_F5,9555 R.QLESAEK.E          | 1412.82  | 0.00972  | 3 | 1 | 39.5 | 0 |

|                   |                    |          |          |   |   |      |   |
|-------------------|--------------------|----------|----------|---|---|------|---|
| P12163_2_F2,10427 | R.QLESAEK.E        | 1412.82  | 0.00495  | 3 | 1 | 31.1 | 0 |
| P12163_1_F2,12272 | R.QSVIDQDPEGK.Y    | 1823.996 | 0.00123  | 2 | 1 | 25.9 | 0 |
| P12163_1_F2,12274 | R.QSVIDQDPEGK.Y    | 1823.996 | 0.00291  | 3 | 1 | 32.7 | 0 |
| P12163_1_F3,9752  | R.QSVIDQDPEGK.Y    | 1823.996 | 0.00966  | 3 | 1 | 34   | 0 |
| P12163_1_F3,12599 | R.QSVIDQDPEGK.Y    | 1823.996 | 0.00249  | 2 | 1 | 34.8 | 0 |
| P12163_1_F3,12895 | R.QSVIDQDPEGK.Y    | 1823.996 | -0.00335 | 2 | 1 | 23.9 | 0 |
| P12163_1_S1,11125 | R.RLDTSSDASAADNQE/ | 2489.169 | 0.00228  | 3 | 1 | 34.5 | 0 |
| P12163_1_S1,11676 | R.RLDTSSDASAADNQE/ | 2489.169 | 0.00252  | 3 | 1 | 57.1 | 0 |
| P12163_1_S1,12227 | R.RLDTSSDASAADNQE/ | 2489.169 | 0.00282  | 3 | 1 | 52.5 | 0 |
| P12163_1_S1,12900 | R.RLDTSSDASAADNQE/ | 2489.169 | 0.00426  | 3 | 1 | 72.4 | 0 |
| P12163_1_S1,12994 | R.RLDTSSDASAADNQE/ | 2489.169 | -0.00378 | 2 | 1 | 83.9 | 0 |
| P12163_1_F3,23365 | R.VIQQYVENELAK.G   | 2042.174 | 0.01049  | 3 | 1 | 58   | 0 |
| P12163_1_F4,24071 | R.VIQQYVENELAK.G   | 2042.174 | 0.00432  | 2 | 1 | 41   | 0 |
| P12163_1_F4,24320 | R.VIQQYVENELAK.G   | 2042.174 | 0.00522  | 2 | 1 | 70.8 | 0 |
| P12163_1_F4,24369 | R.VIQQYVENELAK.G   | 2042.174 | 0.00626  | 3 | 1 | 54   | 0 |
| P12163_1_F2,15208 | R.VNLEIQQAER.E     | 1503.843 | 0.00193  | 2 | 1 | 29.6 | 0 |
| P12163_1_F3,15715 | R.VNLEIQQAER.E     | 1503.843 | 0.00285  | 2 | 1 | 28.6 | 0 |
| P12163_2_F1,14847 | R.VNLEIQQAER.E     | 1503.843 | 0.00261  | 2 | 1 | 27   | 0 |
| P12163_2_F1,15053 | R.VNLEIQQAER.E     | 1503.843 | 0.00519  | 2 | 1 | 28.4 | 0 |
| P12163_2_F4,14441 | R.VNLEIQQAER.E     | 1503.843 | 0.00085  | 2 | 1 | 29.5 | 0 |
| P12163_1_F3,4870  | R.VTDSQGR.T        | 1066.579 | 0.00324  | 3 | 1 | 24.3 | 0 |
| P12163_1_F3,12753 | R.VVGQDPAVK.S      | 1520.926 | 0.00406  | 2 | 1 | 44.3 | 0 |
| P12163_1_F3,12759 | R.VVGQDPAVK.S      | 1520.926 | 0.00726  | 3 | 1 | 45   | 0 |
| P12163_1_F4,13283 | R.VVGQDPAVK.S      | 1520.926 | 0.00628  | 2 | 1 | 32.6 | 0 |
| P12163_1_F5,11841 | R.VVGQDPAVK.S      | 1520.926 | 0.00474  | 2 | 1 | 30   | 0 |
| P12163_1_F7,11487 | R.VVGQDPAVK.S      | 1520.926 | 0.00087  | 3 | 1 | 30.5 | 0 |
| P12163_2_F1,12362 | R.VVGQDPAVK.S      | 1520.926 | 0.00604  | 2 | 1 | 32.2 | 0 |
| P12163_2_F1,12366 | R.VVGQDPAVK.S      | 1520.926 | 0.00528  | 3 | 1 | 31   | 0 |
| P12163_1_F3,8094  | R.YELHHGVR.I       | 1314.722 | 0.00257  | 3 | 1 | 36.2 | 0 |
| P12163_1_F3,8135  | R.YELHHGVR.I       | 1314.722 | 0.00401  | 4 | 1 | 30.6 | 0 |
| P12163_1_F4,8523  | R.YELHHGVR.I       | 1314.722 | 0.00347  | 3 | 1 | 36.7 | 0 |
| P12163_1_F4,8541  | R.YELHHGVR.I       | 1314.722 | 0.00505  | 4 | 1 | 36   | 0 |
| P12163_1_F5,6861  | R.YELHHGVR.I       | 1314.722 | 0.00215  | 3 | 1 | 37.1 | 0 |
| P12163_1_F6,8365  | R.YELHHGVR.I       | 1314.722 | -0.00235 | 3 | 1 | 32.8 | 0 |
| P12163_2_F2,7640  | R.YELHHGVR.I       | 1314.722 | 0.0038   | 3 | 1 | 37.3 | 0 |
| P12163_2_F4,7447  | R.YELHHGVR.I       | 1314.722 | -0.00316 | 3 | 1 | 36.7 | 0 |
| P12163_2_F4,7465  | R.YELHHGVR.I       | 1314.722 | 0.00397  | 4 | 1 | 39   | 0 |
| P12163_2_F7,7643  | R.YELHHGVR.I       | 1314.722 | 0.00353  | 3 | 1 | 32.5 | 0 |
| P12163_2_S3,7668  | R.YELHHGVR.I       | 1314.722 | 0.00185  | 3 | 1 | 32   | 0 |
| P12163_2_S5,8287  | R.YELHHGVR.I       | 1314.722 | 0.00269  | 3 | 1 | 30.4 | 0 |
| P12163_2_S5,8299  | R.YELHHGVR.I       | 1314.722 | 0.00089  | 4 | 1 | 30.5 | 0 |
| P12163_1_F3,17410 | K.ANSSSENELLVETNN  | 2712.426 | 0.00828  | 3 | 1 | 57.5 | 0 |
| P12163_1_F7,18147 | K.AVEDIDPIKETNGGLP | 2992.708 | 0.02116  | 3 | 1 | 27.5 | 0 |
| P12163_2_F2,15325 | K.EAALLQNK.V       | 1494.91  | 0.00394  | 2 | 1 | 26.1 | 0 |
| P12163_2_F6,14533 | K.EAEIQLHEAIQR.F   | 1740.955 | 0.00109  | 3 | 1 | 50.4 | 0 |
| P12163_2_F6,14575 | K.EAEIQLHEAIQR.F   | 1740.955 | 0.0034   | 2 | 1 | 38.3 | 0 |
| P12163_2_F10,1418 | K.EAELNSQLEDHAHEVI | 2457.283 | 0.00383  | 4 | 1 | 29.5 | 0 |
| P12163_1_F4,12598 | K.EALQAEEAK.R      | 1596.905 | 0.00026  | 2 | 1 | 39.8 | 0 |
| P12163_1_F5,11190 | K.EALQAEEAK.R      | 1596.905 | 0.00268  | 2 | 1 | 28.4 | 0 |
| P12163_2_F1,11609 | K.EALQAEEAK.R      | 1596.905 | 0.00192  | 2 | 1 | 47.1 | 0 |
| P12163_2_F1,11682 | K.EALQAEEAK.R      | 1596.905 | 0.0049   | 3 | 1 | 42.1 | 0 |

|                                       |          |          |   |   |      |   |
|---------------------------------------|----------|----------|---|---|------|---|
| P12163_1_S10,1693'K.EATGQQLASHMNTVT   | 2872.416 | 0.00219  | 4 | 1 | 69.4 | 0 |
| P12163_1_F4,16588 K.ELCSELEEK.L       | 1744.925 | 0.00904  | 3 | 1 | 23.1 | 0 |
| P12163_1_F3,20265 K.EVEGQMASLQEELK.C  | 2199.179 | 0.01001  | 3 | 1 | 56.2 | 0 |
| P12163_1_F4,17871 K.FQEQIVEAGEK.Y     | 1886.048 | -0.00141 | 2 | 1 | 52.6 | 0 |
| P12163_1_F4,17921 K.FQEQIVEAGEK.Y     | 1886.048 | 0.00487  | 3 | 1 | 45.4 | 0 |
| P12163_2_F1,17107 K.FQEQIVEAGEK.Y     | 1886.048 | 0.00815  | 2 | 1 | 64.1 | 0 |
| P12163_2_F1,17115 K.FQEQIVEAGEK.Y     | 1886.048 | 0.00073  | 3 | 1 | 37.4 | 0 |
| P12163_1_S1,20737 K.ITQLELTLNQSNT.R.S | 1935.081 | 0.00875  | 3 | 1 | 29   | 0 |
| P12163_1_F4,20863 K.LSQLSTALK.E       | 1568.983 | 0.00192  | 3 | 1 | 28.4 | 0 |
| P12163_1_F5,19743 K.LSQLSTALK.E       | 1568.983 | 0.00627  | 3 | 1 | 26.1 | 0 |
| P12163_1_F4,18473 K.MYEEQLAEAAGK.Y    | 1948.031 | 0.00586  | 3 | 1 | 49.5 | 0 |
| P12163_1_F4,18476 K.MYEEQLAEAAGK.Y    | 1948.031 | 0.00601  | 2 | 1 | 43.5 | 0 |
| P12163_2_F1,17786 K.MYEEQLAEAAGK.Y    | 1948.031 | 0.00664  | 3 | 1 | 29.3 | 0 |
| P12163_1_F4,9263 K.NAEIENAR.L         | 1220.654 | 0.00189  | 2 | 1 | 24.3 | 0 |
| P12163_1_F5,10504 K.NLEGQVK.M         | 1395.842 | 0.00947  | 2 | 1 | 25.5 | 0 |
| P12163_2_F2,11352 K.NLEGQVK.M         | 1395.842 | 0.00297  | 2 | 1 | 25.6 | 0 |
| P12163_1_S1,18165 K.NLESTVEELQTR.S    | 1722.917 | 0.00114  | 3 | 1 | 41.3 | 0 |
| P12163_1_S1,18476 K.NLESTVEELQTR.S    | 1722.917 | 0.00057  | 2 | 1 | 41.3 | 0 |
| P12163_1_S1,18520 K.NLESTVEELQTR.S    | 1722.917 | 0.00495  | 3 | 1 | 51.4 | 0 |
| P12163_1_F2,7734 K.SAEEQLEQQTR.V      | 1622.829 | 0.00041  | 3 | 1 | 30.1 | 0 |
| P12163_1_F2,9031 K.SAEEQLEQQTR.V      | 1622.829 | 0.00089  | 3 | 1 | 38.8 | 0 |
| P12163_1_F7,9379 K.SLEEQHNETGAAAAT    | 2275.122 | 0.00593  | 3 | 1 | 49.7 | 0 |
| P12163_1_S1,22649 K.TDSLSQLANNAELE    | 2538.423 | 0.01188  | 3 | 1 | 54.3 | 0 |
| P12163_2_F1,14582 K.VAELEQK.L         | 1424.857 | 0.00717  | 2 | 1 | 24.9 | 0 |
| P12163_1_S1,25098 K.VCELASELEAFQAR.T  | 1926.99  | 0.00293  | 3 | 1 | 29.7 | 0 |
| P12163_1_S1,25262 K.VCELASELEAFQAR.T  | 1926.99  | 0.00197  | 3 | 1 | 52.8 | 0 |
| P12163_1_F5,18258 K.VSELEDIK.L        | 1540.904 | 0.0112   | 2 | 1 | 28.9 | 0 |
| P12163_2_F1,18574 K.VSELEDIK.L        | 1540.904 | 0.00584  | 2 | 1 | 25.1 | 0 |
| P12163_2_F1,18600 K.VSELEDIK.L        | 1540.904 | 0.00438  | 3 | 1 | 27.1 | 0 |
| P12163_1_S1,15216 K.VTSLESTNEELQR.Q   | 1809.95  | -0.00062 | 2 | 1 | 27.5 | 0 |
| P12163_1_F5,14316 K.YNSELNAMK.E       | 1677.909 | 0.00776  | 2 | 1 | 42.2 | 0 |
| P12163_1_F5,7623 R.ASNEAAEEAK.S       | 1627.875 | 0.00552  | 2 | 1 | 59.8 | 0 |
| P12163_2_F1,8084 R.ASNEAAEEAK.S       | 1627.875 | 0.00422  | 2 | 1 | 57.8 | 0 |
| P12163_2_F1,8140 R.ASNEAAEEAK.S       | 1627.875 | 0.0082   | 3 | 1 | 29   | 0 |
| P12163_1_F4,13237 R.DIEANLNLEK.V      | 1767.97  | 0.00917  | 2 | 1 | 41   | 0 |
| P12163_1_F4,13302 R.DIEANLNLEK.V      | 1767.97  | 0.00528  | 3 | 1 | 29.6 | 0 |
| P12163_1_F2,6595 R.EASTVAETR.K        | 1267.68  | 0.00429  | 3 | 1 | 22.7 | 0 |
| P12163_1_S1,17844 R.ELQIAQTAIAEQR.G   | 1774.996 | 0.00484  | 3 | 1 | 58.7 | 0 |
| P12163_1_F3,17501 R.ELTESLNAAADEK.R   | 1999.08  | 0.00534  | 2 | 1 | 43.4 | 0 |
| P12163_1_F4,17067 R.ESVEAVLK.T        | 1482.899 | 0.00402  | 2 | 1 | 32.6 | 0 |
| P12163_1_F4,17102 R.ESVEAVLK.T        | 1482.899 | 0.00736  | 3 | 1 | 34.9 | 0 |
| P12163_2_F1,22065 R.IQELEEQISK.L      | 1825.053 | 0.0028   | 2 | 1 | 37   | 0 |
| P12163_1_F4,18107 R.LLETANVSAK.E      | 1653.999 | 0.00695  | 2 | 1 | 42.2 | 0 |
| P12163_2_F1,17366 R.LLETANVSAK.E      | 1653.999 | 0.00463  | 2 | 1 | 45   | 0 |
| P12163_1_F3,17675 R.LQDDVLVSK.E       | 1624.973 | 0.00875  | 2 | 1 | 47   | 0 |
| P12163_1_F2,21020 R.NALYEQVIQLQR.E    | 1779.007 | 0.00261  | 2 | 1 | 25.3 | 0 |
| P12163_1_F5,9644 R.NSDENFCK.T         | 1621.81  | 0.01121  | 2 | 1 | 26.3 | 0 |
| P12163_1_F3,4730 R.SAEDED.R.A         | 1125.533 | 0.00342  | 2 | 1 | 36.3 | 0 |
| P12163_1_F4,6530 R.SGHFER.E           | 1036.548 | 0.00336  | 3 | 1 | 26.2 | 0 |
| P12163_1_F8,21309 R.SIELEDLFQTSHSK.L  | 2242.218 | 0.00672  | 3 | 1 | 47   | 0 |
| P12163_2_F6,20898 R.SIELEDLFQTSHSK.L  | 2242.218 | 0.00279  | 3 | 1 | 49.6 | 0 |

|                   |                      |          |          |   |   |      |   |
|-------------------|----------------------|----------|----------|---|---|------|---|
| P12163_1_F3,21452 | R.SNTEISAIQEELGLSK.I | 2327.291 | -0.00127 | 3 | 1 | 43   | 0 |
| P12163_1_F3,23356 | R.SNTEISAIQEELGLSK.I | 2327.291 | 0.00647  | 3 | 1 | 54.5 | 0 |
| P12163_2_F2,16692 | K.ASGNWMYAAK.L       | 1706.914 | 0.0058   | 2 | 1 | 39.1 | 0 |
| P12163_2_F8_12070 | K.ATSVDEQPNLIEKPAQ   | 3292.779 | 0.01002  | 4 | 1 | 43.1 | 0 |
| P12163_1_S1,14929 | K.AVIVEVGPR.L        | 1243.768 | 0.00474  | 2 | 1 | 24.9 | 0 |
| P12163_1_F3,17796 | K.DSLSMAAYS GG EVVK  | 2122.131 | -0.00209 | 2 | 1 | 69.6 | 0 |
| P12163_1_S1,17578 | K.FGEPLIQGYTR.T      | 1584.869 | 0.0053   | 3 | 1 | 24.6 | 0 |
| P12163_1_S1,19055 | K.FGEPLIQGYTR.T      | 1584.869 | 0.00605  | 3 | 1 | 29.9 | 0 |
| P12163_1_F7,16504 | K.GALQDNQINDFAAM*    | 2335.14  | 0.00464  | 3 | 1 | 86   | 0 |
| P12163_1_F7,18957 | K.GALQDNQINDFAAM*    | 2335.14  | 0.00311  | 3 | 1 | 79.5 | 0 |
| P12163_2_S5,16290 | K.GALQDNQINDFAAM*    | 2335.14  | 0.00908  | 3 | 1 | 64.4 | 0 |
| P12163_2_S5,16523 | K.GALQDNQINDFAAM*    | 2335.14  | 0.0035   | 3 | 1 | 86.8 | 0 |
| P12163_1_F7,18965 | K.GALQDNQINDFAAMV    | 2319.145 | 0.00185  | 3 | 1 | 66.4 | 0 |
| P12163_1_F2,20398 | K.GEPDIGM*LVVK.I     | 1782.029 | 0.0042   | 3 | 1 | 30.6 | 0 |
| P12163_1_F3,20865 | K.GEPDIGMLVVK.I      | 1766.034 | 0.00975  | 3 | 1 | 29.4 | 0 |
| P12163_1_F8,17029 | K.GMEGSTLGVWAAHGI    | 2019.002 | 0.00463  | 3 | 1 | 66.1 | 0 |
| P12163_1_F8,17047 | K.GMEGSTLGVWAAHGI    | 2019.002 | 0.00031  | 2 | 1 | 55.2 | 0 |
| P12163_1_F5,17566 | K.ISNQIVGLK.T        | 1579.999 | 0.00879  | 2 | 1 | 32   | 0 |
| P12163_2_F1,18158 | K.ISNQIVGLK.T        | 1579.999 | 0.00383  | 3 | 1 | 44   | 0 |
| P12163_2_F6,14906 | K.IVDGKPMDR.T        | 1752.03  | 0.0012   | 2 | 1 | 27.6 | 0 |
| P12163_1_F7,21927 | K.LGDDGILLHIDLAK.G   | 2101.248 | -0.00075 | 3 | 1 | 38.5 | 0 |
| P12163_1_F3,17360 | K.LSFTPSLTDEK.Y      | 1846.042 | 0.0074   | 3 | 1 | 27.5 | 0 |
| P12163_1_F3,18025 | K.LSFTPSLTDEK.Y      | 1846.042 | 0.00857  | 3 | 1 | 26.7 | 0 |
| P12163_1_F3,19836 | K.LSFTPSLTDEK.Y      | 1846.042 | -0.00231 | 2 | 1 | 28.9 | 0 |
| P12163_2_F10,1628 | K.RNPTTVELFDIAQSNSI  | 2605.327 | 0.00841  | 4 | 1 | 33.2 | 0 |
| P12163_1_F3,17821 | K.STLQANPNNSVIGFK.I  | 2198.239 | 0.00408  | 3 | 1 | 46.3 | 0 |
| P12163_1_F4,18296 | K.STLQANPNNSVIGFK.I  | 2198.239 | 0.00534  | 3 | 1 | 29.3 | 0 |
| P12163_1_F4,18340 | K.STLQANPNNSVIGFK.I  | 2198.239 | 0.00332  | 2 | 1 | 58.6 | 0 |
| P12163_2_F1,17636 | K.STLQANPNNSVIGFK.I  | 2198.239 | 0.00254  | 2 | 1 | 67.9 | 0 |
| P12163_1_S1,14626 | K.TEQCFNIGLDSR.I     | 1743.864 | 0.00537  | 3 | 1 | 45.1 | 0 |
| P12163_1_S1,16427 | K.TEQCFNIGLDSR.I     | 1743.864 | 0.00272  | 2 | 1 | 53.6 | 0 |
| P12163_1_S1,16459 | K.TEQCFNIGLDSR.I     | 1743.864 | 0.00615  | 3 | 1 | 37.5 | 0 |
| P12163_1_F6,12260 | K.TFEFHHVDQAR.E      | 1690.86  | 0.00412  | 4 | 1 | 30.8 | 0 |
| P12163_2_F6,11757 | K.TFEFHHVDQAR.E      | 1690.86  | 0.00442  | 3 | 1 | 33.3 | 0 |
| P12163_2_F6,14600 | K.VDGLTHLNEK.T       | 1734.001 | 0.00409  | 2 | 1 | 54.3 | 0 |
| P12163_2_F7,13683 | K.VDGLTHLNEK.T       | 1734.001 | 0.00573  | 3 | 1 | 23.2 | 0 |
| P12163_1_F6,13347 | K.VTSLSHVK.A         | 1478.915 | 0.00389  | 3 | 1 | 24.1 | 0 |
| P12163_1_F2,13811 | R.DLLQSICER.E        | 1437.767 | 0.00184  | 3 | 1 | 36.6 | 0 |
| P12163_1_F3,25340 | R.FNQPLLNQFQEFYK.R   | 2424.317 | 0.00406  | 3 | 1 | 56.2 | 0 |
| P12163_1_F2,22982 | R.FSSVTIEDSPAIM*LK.C | 2262.251 | 0.01296  | 3 | 1 | 37.8 | 0 |
| P12163_1_S1,20022 | R.FSSVTIEDSPAIM*LK.C | 2262.251 | 0.00735  | 3 | 1 | 44.1 | 0 |
| P12163_2_F1,6852  | R.GDAEM*AQK.L        | 1473.783 | 0.00447  | 2 | 1 | 27.6 | 0 |
| P12163_1_F4,10030 | R.GDAEMAQK.L         | 1457.788 | 0.00799  | 2 | 1 | 27.1 | 0 |
| P12163_1_F5,8501  | R.GDAEMAQK.L         | 1457.788 | 0.00891  | 2 | 1 | 24   | 0 |
| P12163_2_F1,9157  | R.GDAEMAQK.L         | 1457.788 | 0.00905  | 2 | 1 | 36.4 | 0 |
| P12163_1_F6,10596 | R.HLAM*MPHPER.C      | 1538.787 | 0.00456  | 4 | 1 | 26.7 | 0 |
| P12163_1_F6,10643 | R.HLAM*MPHPER.C      | 1538.787 | -0.00251 | 3 | 1 | 45.9 | 0 |
| P12163_2_F6,11654 | R.HLAM*MPHPER.C      | 1538.787 | 0.00289  | 3 | 1 | 34.1 | 0 |
| P12163_1_F6,9340  | R.HLAMM*PHPER.C      | 1538.787 | -0.00632 | 4 | 1 | 49.2 | 0 |
| P12163_1_F6,12104 | R.HLAMM*PHPER.C      | 1538.787 | 0.00628  | 4 | 1 | 45.9 | 0 |
| P12163_2_F6,11643 | R.HLAMM*PHPER.C      | 1538.787 | 0.00096  | 4 | 1 | 45.8 | 0 |



|                    |                     |          |          |   |   |      |   |
|--------------------|---------------------|----------|----------|---|---|------|---|
| P12163_1_F6,12072  | R.HLAMMPHPER.C      | 1522.792 | 0.00372  | 4 | 1 | 45   | 0 |
| P12163_2_F6,11652  | R.HLAMMPHPER.C      | 1522.792 | 0.00228  | 4 | 1 | 50.9 | 0 |
| P12163_2_F8,12070  | R.HWFFTGK.I         | 1530.868 | 0.00481  | 3 | 1 | 22.2 | 0 |
| P12163_1_F6,13651  | R.ILHSHLAPVR.Y      | 1446.885 | 0.00178  | 3 | 1 | 60.8 | 0 |
| P12163_1_F6,13666  | R.ILHSHLAPVR.Y      | 1446.885 | 0.0058   | 2 | 1 | 31.4 | 0 |
| P12163_1_F6,13682  | R.ILHSHLAPVR.Y      | 1446.885 | 0.00669  | 4 | 1 | 33.2 | 0 |
| P12163_2_F6,12915  | R.ILHSHLAPVR.Y      | 1446.885 | 0.00223  | 3 | 1 | 60.8 | 0 |
| P12163_2_S5,12576  | R.ILHSHLAPVR.Y      | 1446.885 | 0.00361  | 4 | 1 | 35.2 | 0 |
| P12163_2_S5,12718  | R.ILHSHLAPVR.Y      | 1446.885 | -0.00407 | 3 | 1 | 26.6 | 0 |
| P12163_1_S1,24088  | R.IPLLQDSAAAELLK.S  | 2090.268 | 0.00607  | 3 | 1 | 52   | 0 |
| P12163_1_F4,14994  | R.LASCVESEK.E       | 1630.893 | 0.01328  | 2 | 1 | 27.3 | 0 |
| P12163_2_F1,13914  | R.LASCVESEK.E       | 1630.893 | 0.01428  | 2 | 1 | 33.5 | 0 |
| P12163_1_F3,27575  | R.LAVGEALTNLVWAK.V  | 2093.258 | 0.00483  | 3 | 1 | 46.1 | 0 |
| P12163_2_F1,13703  | R.MTECVYTEK.L       | 1768.907 | 0.00529  | 3 | 1 | 26.9 | 0 |
| P12163_1_F7,19024  | R.NPTTVELFDIAQSNSEI | 2449.226 | 0.01214  | 3 | 1 | 60.5 | 0 |
| P12163_2_F10,17630 | R.NPTTVELFDIAQSNSEI | 2449.226 | -0.00169 | 3 | 1 | 51.4 | 0 |
| P12163_2_F4,18603  | R.NPTTVELFDIAQSNSEI | 2449.226 | 0.00239  | 3 | 1 | 72.6 | 0 |
| P12163_2_S5,18441  | R.NPTTVELFDIAQSNSEI | 2449.226 | 0.00713  | 3 | 1 | 76.8 | 0 |
| P12163_1_F4,19537  | R.TLMQIVK.S         | 1440.907 | 0.00773  | 2 | 1 | 30.3 | 0 |
| P12163_2_F1,18922  | R.TLMQIVK.S         | 1440.907 | 0.00505  | 2 | 1 | 28.3 | 0 |
| P12163_1_F2,13026  | R.VCGLTEVTR.L       | 1338.735 | 0.00273  | 3 | 1 | 34.1 | 0 |
| P12163_1_S1,12123  | R.VSM*AVIGTISGEGR.V | 1696.921 | 0.00877  | 3 | 1 | 22   | 0 |
| P12163_1_S1,15043  | R.VSMAVIGTISGEGR.V  | 1680.926 | -0.00335 | 3 | 1 | 32.7 | 0 |
| P12163_1_S1,20536  | R.VSMAVIGTISGEGR.V  | 1680.926 | -0.00227 | 3 | 1 | 34.5 | 0 |
| P12163_1_F3,15299  | R.VVLVDSAAVQK.C     | 1737.073 | 0.00891  | 3 | 1 | 29.4 | 0 |
| P12163_1_F3,18443  | R.VVLVDSAAVQK.C     | 1737.073 | 0.00534  | 2 | 1 | 68.6 | 0 |
| P12163_1_F3,18467  | R.VVLVDSAAVQK.C     | 1737.073 | 0.01077  | 3 | 1 | 53.7 | 0 |
| P12163_1_F3,18554  | R.VVLVDSAAVQK.C     | 1737.073 | 0.00501  | 3 | 1 | 70.6 | 0 |
| P12163_1_F6,17620  | R.VVLVDSAAVQK.C     | 1737.073 | 0.00057  | 3 | 1 | 60.4 | 0 |
| P12163_1_F4,18151  | K.APELLYK.S         | 1441.887 | 0.00425  | 3 | 1 | 25.9 | 0 |
| P12163_1_F4,18739  | K.APELLYK.S         | 1441.887 | 0.00551  | 3 | 1 | 22.4 | 0 |
| P12163_1_F6,17445  | K.APELLYK.S         | 1441.887 | 0.00425  | 3 | 1 | 23.9 | 0 |
| P12163_1_F7,16030  | K.APELLYK.S         | 1441.887 | 0.00053  | 3 | 1 | 22.2 | 0 |
| P12163_1_F9,17114  | K.APELLYK.S         | 1441.887 | 0.00149  | 2 | 1 | 31.5 | 0 |
| P12163_1_S10,16680 | K.APELLYK.S         | 1441.887 | 0.00428  | 3 | 1 | 23   | 0 |
| P12163_2_F1,17376  | K.APELLYK.S         | 1441.887 | 0.00407  | 3 | 1 | 25.7 | 0 |
| P12163_2_F10,15090 | K.APELLYK.S         | 1441.887 | 0.00062  | 3 | 1 | 23   | 0 |
| P12163_2_F4,15672  | K.APELLYK.S         | 1441.887 | -0.00334 | 3 | 1 | 22.9 | 0 |
| P12163_2_F9,15879  | K.APELLYK.S         | 1441.887 | 0.00974  | 3 | 1 | 23.8 | 0 |
| P12163_2_S5,16028  | K.APELLYK.S         | 1441.887 | 0.00389  | 3 | 1 | 23.5 | 0 |
| P12163_1_F2,15200  | K.ASNPVVM*VQAYR.L   | 1654.889 | 0.00322  | 3 | 1 | 51.6 | 0 |
| P12163_1_S1,12279  | K.ASNPVVM*VQAYR.L   | 1654.889 | 0.00163  | 3 | 1 | 52.3 | 0 |
| P12163_1_S1,13957  | K.ASNPVVM*VQAYR.L   | 1654.889 | 0.00331  | 3 | 1 | 31.2 | 0 |
| P12163_1_S1,14034  | K.ASNPVVM*VQAYR.L   | 1654.889 | 0.00525  | 2 | 1 | 42.5 | 0 |
| P12163_2_F6,14427  | K.ASNPVVM*VQAYR.L   | 1654.889 | 0.00305  | 2 | 1 | 34.6 | 0 |
| P12163_1_F2,15186  | K.ASNPVVMVQAYR.L    | 1638.894 | 0.00151  | 3 | 1 | 28.1 | 0 |
| P12163_1_F2,17803  | K.ASNPVVMVQAYR.L    | 1638.894 | 0.00471  | 2 | 1 | 37.6 | 0 |
| P12163_1_F8,17865  | K.ASNPVVMVQAYR.L    | 1638.894 | 0.00287  | 2 | 1 | 50.5 | 0 |
| P12163_1_S1,14701  | K.ASNPVVMVQAYR.L    | 1638.894 | 0.00217  | 3 | 1 | 47.5 | 0 |
| P12163_1_S1,16904  | K.ASNPVVMVQAYR.L    | 1638.894 | 0.00377  | 2 | 1 | 50.5 | 0 |
| P12163_1_S1,16912  | K.ASNPVVMVQAYR.L    | 1638.894 | 0.0023   | 3 | 1 | 55.9 | 0 |

|                   |                     |          |         |   |   |      |   |
|-------------------|---------------------|----------|---------|---|---|------|---|
| P12163_1_S1,17135 | K.ASNPVVMVQAYR.L    | 1638.894 | 0.00461 | 2 | 1 | 51.8 | 0 |
| P12163_1_S1,17141 | K.ASNPVVMVQAYR.L    | 1638.894 | 0.00304 | 3 | 1 | 55.3 | 0 |
| P12163_2_F6,14812 | K.ASNPVVMVQAYR.L    | 1638.894 | 0.00032 | 3 | 1 | 40.7 | 0 |
| P12163_2_F6,17344 | K.ASNPVVMVQAYR.L    | 1638.894 | 0.00209 | 2 | 1 | 40.1 | 0 |
| P12163_1_F7,22316 | K.DIDATM*ILHDLPFNEI | 2611.353 | 0.00697 | 3 | 1 | 43.8 | 0 |
| P12163_1_F7,22936 | K.DIDATM*ILHDLPFNEI | 2611.353 | 0.00504 | 2 | 1 | 34.4 | 0 |
| P12163_1_F7,22915 | K.DIDATMILHDLPFNED  | 2595.358 | 0.0046  | 3 | 1 | 60.4 | 0 |
| P12163_1_F7,22951 | K.DIDATMILHDLPFNED  | 2595.358 | 0.0022  | 2 | 1 | 47.3 | 0 |
| P12163_1_F7,23088 | K.DIDATMILHDLPFNED  | 2595.358 | 0.00319 | 3 | 1 | 31.6 | 0 |
| P12163_1_S1,22780 | K.DLATVDSILLR.E     | 1519.9   | 0.00015 | 3 | 1 | 51.5 | 0 |
| P12163_1_S1,8612  | K.DVAGTVEEVM*R.I    | 1525.783 | 0.00199 | 3 | 1 | 32   | 0 |
| P12163_1_S1,10658 | K.DVAGTVEEVM*R.I    | 1525.783 | 0.00421 | 3 | 1 | 26.9 | 0 |
| P12163_1_S1,13699 | K.DVAGTVEEVM*R.I    | 1525.783 | 0.00247 | 3 | 1 | 57.2 | 0 |
| P12163_1_S1,13789 | K.DVAGTVEEVM*R.I    | 1525.783 | 0.00601 | 2 | 1 | 28.9 | 0 |
| P12163_1_S1,10613 | K.DVAGTVEEVMR.I     | 1509.788 | 0.00256 | 3 | 1 | 30.4 | 0 |
| P12163_1_S1,18719 | K.DVAGTVEEVMR.I     | 1509.788 | 0.00697 | 3 | 1 | 48.3 | 0 |
| P12163_1_S1,18725 | K.DVAGTVEEVMR.I     | 1509.788 | 0.00487 | 2 | 1 | 43   | 0 |
| P12163_1_S1,18936 | K.DVAGTVEEVMR.I     | 1509.788 | 0.00233 | 2 | 1 | 46.2 | 0 |
| P12163_1_F2,9680  | K.EGEEVDYR.G        | 1300.632 | 0.00345 | 2 | 1 | 28.7 | 0 |
| P12163_1_S1,9502  | K.EGEEVDYR.G        | 1300.632 | 0.00375 | 2 | 1 | 24.8 | 0 |
| P12163_1_F8,24375 | K.ELEHIEEVFSPLVEK.C | 2406.338 | 0.00462 | 3 | 1 | 32.9 | 0 |
| P12163_1_F4,19344 | K.IDLYVGK.T         | 1415.872 | 0.00809 | 2 | 1 | 31.5 | 0 |
| P12163_1_F4,19368 | K.IDLYVGK.T         | 1415.872 | 0.00715 | 3 | 1 | 28.9 | 0 |
| P12163_1_F4,19617 | K.IDLYVGK.T         | 1415.872 | 0.00989 | 2 | 1 | 31.7 | 0 |
| P12163_1_F4,20113 | K.IDLYVGK.T         | 1415.872 | 0.01235 | 2 | 1 | 24.2 | 0 |
| P12163_1_F4,20383 | K.IDLYVGK.T         | 1415.872 | 0.00289 | 2 | 1 | 25.2 | 0 |
| P12163_1_F4,20804 | K.IDLYVGK.T         | 1415.872 | 0.01017 | 2 | 1 | 31.2 | 0 |
| P12163_1_F4,23469 | K.IDLYVGK.T         | 1415.872 | 0.00599 | 2 | 1 | 29.5 | 0 |
| P12163_1_F5,18292 | K.IDLYVGK.T         | 1415.872 | 0.00979 | 2 | 1 | 32.9 | 0 |
| P12163_1_F6,18516 | K.IDLYVGK.T         | 1415.872 | 0.00587 | 2 | 1 | 32.8 | 0 |
| P12163_1_F7,16968 | K.IDLYVGK.T         | 1415.872 | 0.00157 | 2 | 1 | 30.6 | 0 |
| P12163_1_F7,17622 | K.IDLYVGK.T         | 1415.872 | 0.00957 | 2 | 1 | 24.7 | 0 |
| P12163_1_F9,17947 | K.IDLYVGK.T         | 1415.872 | 0.00607 | 2 | 1 | 33.5 | 0 |
| P12163_1_F9,17964 | K.IDLYVGK.T         | 1415.872 | 0.00652 | 3 | 1 | 22.5 | 0 |
| P12163_2_F1,18624 | K.IDLYVGK.T         | 1415.872 | 0.00783 | 2 | 1 | 31.4 | 0 |
| P12163_2_F1,18644 | K.IDLYVGK.T         | 1415.872 | 0.00859 | 3 | 1 | 29.5 | 0 |
| P12163_2_F4,16777 | K.IDLYVGK.T         | 1415.872 | 0.00163 | 2 | 1 | 29.5 | 0 |
| P12163_2_F9,16859 | K.IDLYVGK.T         | 1415.872 | 0.00579 | 2 | 1 | 24.1 | 0 |
| P12163_2_S5,17015 | K.IDLYVGK.T         | 1415.872 | 0.00706 | 3 | 1 | 26.4 | 0 |
| P12163_2_F6,20823 | K.LDFHNFVFSM*K.A    | 2009.077 | 0.00755 | 3 | 1 | 22.2 | 0 |
| P12163_1_F2,11613 | K.LLPEGTR.L         | 1089.657 | 0.00462 | 3 | 1 | 25.7 | 0 |
| P12163_1_F3,12236 | K.LLPEGTR.L         | 1089.657 | 0.00399 | 3 | 1 | 36   | 0 |
| P12163_2_F1,11426 | K.LLPEGTR.L         | 1089.657 | 0.00357 | 3 | 1 | 23   | 0 |
| P12163_1_F4,19410 | K.LVVGM*PFK.D       | 1514.922 | 0.00655 | 3 | 1 | 25   | 0 |
| P12163_1_F7,20163 | K.LVVGM*PFK.D       | 1514.922 | 0.00187 | 3 | 1 | 27.2 | 0 |
| P12163_2_F1,18703 | K.LVVGM*PFK.D       | 1514.922 | 0.00928 | 3 | 1 | 27.5 | 0 |
| P12163_2_F4,19709 | K.LVVGM*PFK.D       | 1514.922 | 0.00061 | 3 | 1 | 23.1 | 0 |
| P12163_1_F4,23069 | K.LVVGM*PFK.D       | 1498.928 | 0.00568 | 3 | 1 | 23.1 | 0 |
| P12163_1_F7,20283 | K.LVVGM*PFK.D       | 1498.928 | 0.00298 | 2 | 1 | 28.9 | 0 |
| P12163_1_F9,21014 | K.LVVGM*PFK.D       | 1498.928 | 0.00619 | 3 | 1 | 23.1 | 0 |
| P12163_2_F4,20135 | K.LVVGM*PFK.D       | 1498.928 | 0.00355 | 3 | 1 | 22.6 | 0 |

|                   |                     |          |          |   |   |      |   |
|-------------------|---------------------|----------|----------|---|---|------|---|
| P12163_2_S5,19158 | K.LVVGMPFK.D        | 1498.928 | 0.001    | 3 | 1 | 26.8 | 0 |
| P12163_2_S5,19659 | K.LVVGMPFK.D        | 1498.928 | 0.00826  | 3 | 1 | 22.2 | 0 |
| P12163_1_F5,10571 | K.NTLVQK.N          | 1310.825 | 0.0115   | 3 | 1 | 26.6 | 0 |
| P12163_2_F2,11367 | K.NTLVQK.N          | 1310.825 | 0.0082   | 3 | 1 | 24.2 | 0 |
| P12163_1_F6,23980 | K.NYNIPLVADIHFAPSV  | 2414.35  | 0.00065  | 3 | 1 | 34.4 | 0 |
| P12163_1_F3,26682 | K.SAIGIGTLLQDGLGDTI | 2104.192 | -0.00443 | 2 | 1 | 51.8 | 0 |
| P12163_1_F2,8615  | K.TEYVSCPSCGR.T     | 1619.746 | 0.00375  | 3 | 1 | 28.5 | 0 |
| P12163_1_F2,10879 | K.TEYVSCPSCGR.T     | 1619.746 | 0.0001   | 2 | 1 | 24.8 | 0 |
| P12163_1_F2,11084 | K.TEYVSCPSCGR.T     | 1619.746 | 0.00286  | 2 | 1 | 28.8 | 0 |
| P12163_1_F3,11228 | K.TEYVSCPSCGR.T     | 1619.746 | 0.00006  | 2 | 1 | 25.2 | 0 |
| P12163_1_F9,8730  | K.TEYVSCPSCGR.T     | 1619.746 | 0.00276  | 3 | 1 | 24.2 | 0 |
| P12163_2_F9,10873 | K.TEYVSCPSCGR.T     | 1619.746 | 0.00292  | 2 | 1 | 25.7 | 0 |
| P12163_1_F4,11485 | K.YCESIHK.T         | 1544.835 | 0.00502  | 3 | 1 | 27.1 | 0 |
| P12163_1_F5,10125 | K.YCESIHK.T         | 1544.835 | 0.00493  | 3 | 1 | 28.6 | 0 |
| P12163_1_F6,11202 | K.YCESIHK.T         | 1544.835 | 0.00631  | 3 | 1 | 33.6 | 0 |
| P12163_2_S5,10719 | K.YCESIHK.T         | 1544.835 | 0.00286  | 3 | 1 | 27.6 | 0 |
| P12163_2_S5,10942 | K.YCESIHK.T         | 1544.835 | 0.0061   | 3 | 1 | 34.1 | 0 |
| P12163_1_F3,19155 | R.AAELQQGVAPFEEK.H  | 2125.175 | 0.00671  | 2 | 1 | 74.4 | 0 |
| P12163_1_F6,18268 | R.AAELQQGVAPFEEK.H  | 2125.175 | 0.00735  | 3 | 1 | 35.9 | 0 |
| P12163_1_F2,15524 | R.AQFQQLEYTDDEYQK   | 2514.261 | 0.01646  | 3 | 1 | 30   | 0 |
| P12163_1_F2,16881 | R.AQFQQLEYTDDEYQK   | 2514.261 | 0.00767  | 3 | 1 | 45   | 0 |
| P12163_1_F3,16079 | R.AQFQQLEYTDDEYQK   | 2514.261 | 0.00731  | 3 | 1 | 41.7 | 0 |
| P12163_1_F3,17427 | R.AQFQQLEYTDDEYQK   | 2514.261 | 0.00608  | 3 | 1 | 55.5 | 0 |
| P12163_1_F2,20528 | R.DGSVLM*SVSLDQLK.. | 2116.178 | 0.01236  | 3 | 1 | 22.3 | 0 |
| P12163_1_S1,19392 | R.DGSVLM*SVSLDQLK.. | 2116.178 | 0.00342  | 2 | 1 | 43.8 | 0 |
| P12163_1_S1,19407 | R.DGSVLM*SVSLDQLK.. | 2116.178 | 0.00095  | 4 | 1 | 38.8 | 0 |
| P12163_1_S1,21267 | R.DGSVLM*SVSLDQLK.A | 2100.183 | 0.00639  | 3 | 1 | 29.2 | 0 |
| P12163_1_S1,21303 | R.DGSVLM*SVSLDQLK.A | 2100.183 | 0.00614  | 2 | 1 | 42.8 | 0 |
| P12163_1_S1,21435 | R.DGSVLM*SVSLDQLK.A | 2100.183 | 0.01569  | 3 | 1 | 32.2 | 0 |
| P12163_1_F2,15827 | R.DTSFNLLQGCR.M     | 1614.821 | 0.00304  | 3 | 1 | 35.2 | 0 |
| P12163_1_F2,15843 | R.DTSFNLLQGCR.M     | 1614.821 | 0.00455  | 2 | 1 | 28.4 | 0 |
| P12163_1_F2,16065 | R.DTSFNLLQGCR.M     | 1614.821 | 0.00184  | 3 | 1 | 34.8 | 0 |
| P12163_1_F2,16079 | R.DTSFNLLQGCR.M     | 1614.821 | 0.00483  | 2 | 1 | 31.8 | 0 |
| P12163_1_F2,18286 | R.DTSFNLLQGCR.M     | 1614.821 | 0.00519  | 2 | 1 | 29.2 | 0 |
| P12163_1_F2,18374 | R.DTSFNLLQGCR.M     | 1614.821 | 0.00169  | 3 | 1 | 26.7 | 0 |
| P12163_1_F2,18537 | R.DTSFNLLQGCR.M     | 1614.821 | 0.00555  | 2 | 1 | 34.5 | 0 |
| P12163_1_F6,17937 | R.DTSFNLLQGCR.M     | 1614.821 | 0.00311  | 2 | 1 | 31.4 | 0 |
| P12163_1_F6,18437 | R.DTSFNLLQGCR.M     | 1614.821 | 0.00423  | 2 | 1 | 41.3 | 0 |
| P12163_1_S1,15667 | R.DTSFNLLQGCR.M     | 1614.821 | 0.00274  | 3 | 1 | 28.7 | 0 |
| P12163_1_S1,17769 | R.DTSFNLLQGCR.M     | 1614.821 | -0.00062 | 3 | 1 | 25.3 | 0 |
| P12163_1_S1,17829 | R.DTSFNLLQGCR.M     | 1614.821 | 0.00343  | 2 | 1 | 42.8 | 0 |
| P12163_1_S10,221  | R.DTSFNLLQGCR.M     | 1614.821 | 0.00451  | 3 | 1 | 22.1 | 0 |
| P12163_1_F3,15843 | R.EADACFEIK.N       | 1690.893 | 0.00562  | 2 | 1 | 35.2 | 0 |
| P12163_1_F4,16784 | R.EADACFEIK.N       | 1690.893 | 0.00602  | 2 | 1 | 39.8 | 0 |
| P12163_1_F4,16827 | R.EADACFEIK.N       | 1690.893 | 0.00538  | 3 | 1 | 30.9 | 0 |
| P12163_1_F5,15557 | R.EADACFEIK.N       | 1690.893 | 0.00256  | 2 | 1 | 30.2 | 0 |
| P12163_1_F5,15616 | R.EADACFEIK.N       | 1690.893 | 0.00622  | 3 | 1 | 26.1 | 0 |
| P12163_1_F6,16186 | R.EADACFEIK.N       | 1690.893 | 0.01086  | 2 | 1 | 30.1 | 0 |
| P12163_1_F7,14843 | R.EADACFEIK.N       | 1690.893 | 0.00238  | 3 | 1 | 26.7 | 0 |
| P12163_2_F1,15912 | R.EADACFEIK.N       | 1690.893 | 0.0068   | 2 | 1 | 39.2 | 0 |
| P12163_2_F1,15925 | R.EADACFEIK.N       | 1690.893 | 0.0073   | 3 | 1 | 31.9 | 0 |

|                                     |          |          |   |   |      |   |
|-------------------------------------|----------|----------|---|---|------|---|
| P12163_1_F6,11641 R.ELPSVDDHDAR.L   | 1557.781 | 0.00069  | 2 | 1 | 28.2 | 0 |
| P12163_1_F6,11881 R.ELPSVDDHDAR.L   | 1557.781 | 0.00263  | 3 | 1 | 60.6 | 0 |
| P12163_1_F6,11882 R.ELPSVDDHDAR.L   | 1557.781 | 0.00264  | 2 | 1 | 51.7 | 0 |
| P12163_1_F7,11254 R.ELPSVDDHDAR.L   | 1557.781 | 0.00212  | 3 | 1 | 40.1 | 0 |
| P12163_1_F8,9062 R.ELPSVDDHDAR.L    | 1557.781 | 0.00357  | 2 | 1 | 35.6 | 0 |
| P12163_1_F8,11679 R.ELPSVDDHDAR.L   | 1557.781 | 0.0029   | 3 | 1 | 75.7 | 0 |
| P12163_1_F8,11857 R.ELPSVDDHDAR.L   | 1557.781 | 0.00192  | 2 | 1 | 41.1 | 0 |
| P12163_1_F9,11820 R.ELPSVDDHDAR.L   | 1557.781 | 0.00264  | 2 | 1 | 26.1 | 0 |
| P12163_1_F9,11843 R.ELPSVDDHDAR.L   | 1557.781 | 0.00269  | 3 | 1 | 51   | 0 |
| P12163_2_F4,11228 R.ELPSVDDHDAR.L   | 1557.781 | 0.00149  | 3 | 1 | 30.1 | 0 |
| P12163_2_F6,11486 R.ELPSVDDHDAR.L   | 1557.781 | 0.00365  | 3 | 1 | 48   | 0 |
| P12163_2_F6,11489 R.ELPSVDDHDAR.L   | 1557.781 | 0.00557  | 2 | 1 | 27.9 | 0 |
| P12163_2_F8_12070 R.ELPSVDDHDAR.L   | 1557.781 | -0.00124 | 3 | 1 | 25.2 | 0 |
| P12163_2_F9,11207 R.ELPSVDDHDAR.L   | 1557.781 | -0.00832 | 3 | 1 | 35.5 | 0 |
| P12163_2_S5,11047 R.ELPSVDDHDAR.L   | 1557.781 | 0.00173  | 3 | 1 | 41   | 0 |
| P12163_2_S5,11271 R.ELPSVDDHDAR.L   | 1557.781 | 0.00373  | 4 | 1 | 42.4 | 0 |
| P12163_2_S5,11275 R.ELPSVDDHDAR.L   | 1557.781 | -0.00205 | 3 | 1 | 76.4 | 0 |
| P12163_2_S5,11343 R.ELPSVDDHDAR.L   | 1557.781 | 0.004    | 2 | 1 | 42.1 | 0 |
| P12163_2_S5,11480 R.ELPSVDDHDAR.L   | 1557.781 | 0.00332  | 3 | 1 | 76.1 | 0 |
| P12163_1_F2,20036 R.GDESYYEELEILK.D | 2033.09  | 0.0063   | 3 | 1 | 48   | 0 |
| P12163_1_F3,20475 R.GDESYYEELEILK.D | 2033.09  | 0.00387  | 2 | 1 | 73.7 | 0 |
| P12163_1_F3,20509 R.GDESYYEELEILK.D | 2033.09  | 0.00906  | 3 | 1 | 54   | 0 |
| P12163_1_F2,14917 R.GM*VESAFEFAR.I  | 1563.778 | -0.0018  | 3 | 1 | 33.1 | 0 |
| P12163_1_F2,17054 R.GM*VESAFEFAR.I  | 1563.778 | 0.00246  | 3 | 1 | 32.1 | 0 |
| P12163_1_S1,14694 R.GM*VESAFEFAR.I  | 1563.778 | 0.00348  | 3 | 1 | 21.9 | 0 |
| P12163_1_S1,17862 R.GM*VESAFEFAR.I  | 1563.778 | 0.01334  | 2 | 1 | 25.8 | 0 |
| P12163_1_F2,16956 R.GMVESAFEFAR.I   | 1547.783 | 0.00024  | 3 | 1 | 29.9 | 0 |
| P12163_1_S1,16402 R.GMVESAFEFAR.I   | 1547.783 | 0.00405  | 3 | 1 | 46.2 | 0 |
| P12163_1_S1,20674 R.GMVESAFEFAR.I   | 1547.783 | 0.00111  | 3 | 1 | 48.3 | 0 |
| P12163_1_S1,20771 R.GMVESAFEFAR.I   | 1547.783 | 0.00418  | 2 | 1 | 42.8 | 0 |
| P12163_1_F4,15503 R.HYFDFQR.R       | 1316.669 | 0.00525  | 3 | 1 | 28.5 | 0 |
| P12163_1_F5,14288 R.HYFDFQR.R       | 1316.669 | 0.00309  | 3 | 1 | 28.2 | 0 |
| P12163_1_F6,14956 R.HYFDFQR.R       | 1316.669 | 0.00231  | 3 | 1 | 24.4 | 0 |
| P12163_1_F7,14506 R.HYFDFQR.R       | 1316.669 | 0.00285  | 3 | 1 | 31.2 | 0 |
| P12163_1_S10,15490 R.HYFDFQR.R      | 1316.669 | 0.00309  | 3 | 1 | 24.4 | 0 |
| P12163_1_S10,1569 R.HYFDFQR.R       | 1316.669 | 0.0033   | 3 | 1 | 26.2 | 0 |
| P12163_2_F4,23630 R.HYFDFQR.R       | 1316.669 | 0.00216  | 3 | 1 | 27.5 | 0 |
| P12163_2_S5,14780 R.HYFDFQR.R       | 1316.669 | 0.00261  | 3 | 1 | 27.1 | 0 |
| P12163_1_F4,15756 R.IADQGADLVR.I    | 1361.769 | 0.00219  | 2 | 1 | 27.9 | 0 |
| P12163_1_S1,14366 R.IADQGADLVR.I    | 1361.769 | 0.00771  | 2 | 1 | 28.5 | 0 |
| P12163_1_S1,14412 R.IADQGADLVR.I    | 1361.769 | 0.00074  | 3 | 1 | 75.2 | 0 |
| P12163_1_S1,14604 R.IADQGADLVR.I    | 1361.769 | 0.00137  | 2 | 1 | 46.3 | 0 |
| P12163_1_S1,14652 R.IADQGADLVR.I    | 1361.769 | 0.00296  | 3 | 1 | 78.6 | 0 |
| P12163_1_S1,14849 R.IADQGADLVR.I    | 1361.769 | 0.00733  | 2 | 1 | 30.1 | 0 |
| P12163_1_S1,14940 R.IADQGADLVR.I    | 1361.769 | 0.00572  | 3 | 1 | 81.1 | 0 |
| P12163_1_S1,15154 R.IADQGADLVR.I    | 1361.769 | 0.00425  | 2 | 1 | 46.1 | 0 |
| P12163_1_S1,15455 R.IADQGADLVR.I    | 1361.769 | -0.00355 | 2 | 1 | 33.7 | 0 |
| P12163_1_S10,242 R.IADQGADLVR.I     | 1361.769 | 0.00584  | 3 | 1 | 25.6 | 0 |
| P12163_1_S10,297 R.IADQGADLVR.I     | 1361.769 | 0.00427  | 2 | 1 | 29.7 | 0 |
| P12163_1_F3,9348 R.IGTNHGSLSDR.I    | 1460.776 | 0.00321  | 3 | 1 | 42.4 | 0 |
| P12163_1_F4,9872 R.IGTNHGSLSDR.I    | 1460.776 | 0.00552  | 3 | 1 | 25.2 | 0 |

|                   |                    |          |          |   |   |      |   |
|-------------------|--------------------|----------|----------|---|---|------|---|
| P12163_1_F5,8134  | R.IGTNHGSLSDR.I    | 1460.776 | 0.00093  | 2 | 1 | 28   | 0 |
| P12163_1_F5,8139  | R.IGTNHGSLSDR.I    | 1460.776 | 0.00252  | 3 | 1 | 34.4 | 0 |
| P12163_1_F6,9533  | R.IGTNHGSLSDR.I    | 1460.776 | -0.00565 | 2 | 1 | 34.4 | 0 |
| P12163_1_F6,9537  | R.IGTNHGSLSDR.I    | 1460.776 | -0.00345 | 3 | 1 | 31.8 | 0 |
| P12163_2_F4,8664  | R.IGTNHGSLSDR.I    | 1460.776 | -0.00228 | 3 | 1 | 34.2 | 0 |
| P12163_2_S5,7975  | R.IGTNHGSLSDR.I    | 1460.776 | 0.00322  | 4 | 1 | 28   | 0 |
| P12163_2_S5,7987  | R.IGTNHGSLSDR.I    | 1460.776 | 0.00387  | 3 | 1 | 23.9 | 0 |
| P12163_2_S5,9220  | R.IGTNHGSLSDR.I    | 1460.776 | 0.00315  | 2 | 1 | 27.7 | 0 |
| P12163_2_S5,9224  | R.IGTNHGSLSDR.I    | 1460.776 | 0.00219  | 3 | 1 | 33.6 | 0 |
| P12163_1_F2,13645 | R.IM*SYYGDSR.G     | 1508.736 | 0.00254  | 3 | 1 | 29.9 | 0 |
| P12163_1_F2,13950 | R.IM*SYYGDSR.G     | 1508.736 | 0.00215  | 2 | 1 | 28.7 | 0 |
| P12163_1_F2,15521 | R.IM*SYYGDSR.G     | 1508.736 | 0.0023   | 3 | 1 | 56.5 | 0 |
| P12163_1_F2,17450 | R.IM*SYYGDSR.G     | 1508.736 | 0.00767  | 2 | 1 | 27.1 | 0 |
| P12163_1_F9,17180 | R.IM*SYYGDSR.G     | 1508.736 | 0.00713  | 2 | 1 | 39.5 | 0 |
| P12163_2_F9,16593 | R.IM*SYYGDSR.G     | 1508.736 | 0.00533  | 2 | 1 | 29.4 | 0 |
| P12163_1_F2,15475 | R.IMSYYGDSR.G      | 1492.741 | 0.00266  | 3 | 1 | 30.5 | 0 |
| P12163_1_F2,15535 | R.IMSYYGDSR.G      | 1492.741 | 0.0042   | 2 | 1 | 40.4 | 0 |
| P12163_1_F9,17141 | R.IMSYYGDSR.G      | 1492.741 | 0.00906  | 2 | 1 | 30.3 | 0 |
| P12163_2_F4,16328 | R.IMSYYGDSR.G      | 1492.741 | 0.00542  | 2 | 1 | 26.1 | 0 |
| P12163_2_F9,16756 | R.IMSYYGDSR.G      | 1492.741 | 0.00418  | 2 | 1 | 31.7 | 0 |
| P12163_1_F5,11123 | R.ITVQGK.R         | 1253.804 | 0.00796  | 3 | 1 | 24.2 | 0 |
| P12163_2_F1,11640 | R.ITVQGK.R         | 1253.804 | 0.00244  | 3 | 1 | 25.1 | 0 |
| P12163_1_F5,13068 | R.SGQLPIQK.E       | 1478.915 | 0.00799  | 2 | 1 | 25.8 | 0 |
| P12163_1_F8,13230 | R.SGQLPIQK.E       | 1478.915 | 0.00247  | 2 | 1 | 24.8 | 0 |
| P12163_2_F1,13510 | R.SGQLPIQK.E       | 1478.915 | 0.00643  | 2 | 1 | 27   | 0 |
| P12163_2_F2,2858  | R.SGQLPIQK.E       | 1478.915 | 0.00533  | 2 | 1 | 30.6 | 0 |
| P12163_2_F2,2890  | R.SGQLPIQK.E       | 1478.915 | 0.00453  | 3 | 1 | 24   | 0 |
| P12163_2_F2,3033  | R.SGQLPIQK.E       | 1478.915 | 0.00501  | 2 | 1 | 27.6 | 0 |
| P12163_2_F2,13900 | R.SGQLPIQK.E       | 1478.915 | 0.00695  | 2 | 1 | 30.3 | 0 |
| P12163_1_F7,13182 | R.TVM*VGNVAIGSEHPI | 2000.09  | 0.00113  | 4 | 1 | 24.2 | 0 |
| P12163_1_F7,14765 | R.TVM*VGNVAIGSEHPI | 2000.09  | 0.00298  | 3 | 1 | 24   | 0 |
| P12163_1_F7,15106 | R.TVM*VGNVAIGSEHPI | 2000.09  | 0.00361  | 3 | 1 | 49.7 | 0 |
| P12163_1_F7,16402 | R.TVM*VGNVAIGSEHPI | 2000.09  | 0.00469  | 3 | 1 | 70.6 | 0 |
| P12163_1_F7,16408 | R.TVM*VGNVAIGSEHPI | 2000.09  | 0.0038   | 2 | 1 | 31.1 | 0 |
| P12163_1_F8,262   | R.TVM*VGNVAIGSEHPI | 2000.09  | 0.00562  | 3 | 1 | 51.6 | 0 |
| P12163_1_F8,598   | R.TVM*VGNVAIGSEHPI | 2000.09  | 0.00394  | 3 | 1 | 22.7 | 0 |
| P12163_2_F10,1268 | R.TVM*VGNVAIGSEHPI | 2000.09  | 0.00061  | 3 | 1 | 54.9 | 0 |
| P12163_2_F10,1403 | R.TVM*VGNVAIGSEHPI | 2000.09  | 0.00148  | 3 | 1 | 75.3 | 0 |
| P12163_2_F10,1424 | R.TVM*VGNVAIGSEHPI | 2000.09  | -0.00611 | 3 | 1 | 27.5 | 0 |
| P12163_2_S5,13031 | R.TVM*VGNVAIGSEHPI | 2000.09  | -0.00035 | 4 | 1 | 28.2 | 0 |
| P12163_2_S5,14336 | R.TVM*VGNVAIGSEHPI | 2000.09  | 0.00307  | 3 | 1 | 44.7 | 0 |
| P12163_1_F7,14386 | R.TVMVGNVAIGSEHPIR | 1984.095 | 0.0031   | 3 | 1 | 67.3 | 0 |
| P12163_1_F7,16414 | R.TVMVGNVAIGSEHPIR | 1984.095 | 0.00397  | 3 | 1 | 81.5 | 0 |
| P12163_1_F7,16422 | R.TVMVGNVAIGSEHPIR | 1984.095 | 0.00264  | 2 | 1 | 50.7 | 0 |
| P12163_1_F8,15021 | R.TVMVGNVAIGSEHPIR | 1984.095 | -0.00101 | 3 | 1 | 39.3 | 0 |
| P12163_1_F8,17120 | R.TVMVGNVAIGSEHPIR | 1984.095 | 0.00694  | 3 | 1 | 76.3 | 0 |
| P12163_1_F8,17131 | R.TVMVGNVAIGSEHPIR | 1984.095 | 0.00362  | 2 | 1 | 60.6 | 0 |
| P12163_2_F10,1372 | R.TVMVGNVAIGSEHPIR | 1984.095 | 0.00052  | 3 | 1 | 68.8 | 0 |
| P12163_2_F10,1373 | R.TVMVGNVAIGSEHPIR | 1984.095 | 0.00357  | 4 | 1 | 39.2 | 0 |
| P12163_2_F10,1529 | R.TVMVGNVAIGSEHPIR | 1984.095 | 0.00487  | 3 | 1 | 95.1 | 0 |
| P12163_2_S5,13981 | R.TVMVGNVAIGSEHPIR | 1984.095 | 0.00229  | 3 | 1 | 53.8 | 0 |

|                   |                     |          |          |   |   |      |   |
|-------------------|---------------------|----------|----------|---|---|------|---|
| P12163_2_S5,15691 | R.TVMVGNVAIGSEHPIR  | 1984.095 | -0.00209 | 3 | 1 | 50.2 | 0 |
| P12163_2_S5,15735 | R.TVMVGNVAIGSEHPIR  | 1984.095 | -0.0003  | 2 | 1 | 44.8 | 0 |
| P12163_2_S5,15792 | R.TVMVGNVAIGSEHPIR  | 1984.095 | 0.00169  | 4 | 1 | 51.1 | 0 |
| P12163_1_F4,9241  | R.VQTM*TTNDTK.D     | 1762.947 | 0.00567  | 2 | 1 | 35.2 | 0 |
| P12163_1_F4,12312 | R.VQTM*TTNDTK.D     | 1762.947 | 0.00579  | 2 | 1 | 40.4 | 0 |
| P12163_2_F1,8351  | R.VQTM*TTNDTK.D     | 1762.947 | 0.00099  | 2 | 1 | 26.4 | 0 |
| P12163_2_F1,8368  | R.VQTM*TTNDTK.D     | 1762.947 | -0.00238 | 3 | 1 | 38.9 | 0 |
| P12163_2_F1,11477 | R.VQTM*TTNDTK.D     | 1762.947 | 0.00271  | 2 | 1 | 36   | 0 |
| P12163_2_F1,11492 | R.VQTM*TTNDTK.D     | 1762.947 | 0.00716  | 3 | 1 | 26.4 | 0 |
| P12163_1_F4,10077 | R.VQTM*TTNDTK.D     | 1746.952 | 0.00895  | 2 | 1 | 35.4 | 0 |
| P12163_1_F4,10084 | R.VQTM*TTNDTK.D     | 1746.952 | 0.01073  | 3 | 1 | 35.1 | 0 |
| P12163_1_F4,10703 | R.VQTM*TTNDTK.D     | 1746.952 | 0.00836  | 3 | 1 | 29.1 | 0 |
| P12163_1_F4,12294 | R.VQTM*TTNDTK.D     | 1746.952 | 0.00641  | 2 | 1 | 54.4 | 0 |
| P12163_1_F4,12303 | R.VQTM*TTNDTK.D     | 1746.952 | 0.00998  | 3 | 1 | 39.7 | 0 |
| P12163_2_F1,9874  | R.VQTM*TTNDTK.D     | 1746.952 | 0.00855  | 2 | 1 | 29.5 | 0 |
| P12163_2_F1,11452 | R.VQTM*TTNDTK.D     | 1746.952 | 0.00308  | 3 | 1 | 51   | 0 |
| P12163_1_F3,14822 | R.VSLTEPPEK.E       | 1607.946 | 0.00662  | 2 | 1 | 28   | 0 |
| P12163_1_F3,14900 | R.VSLTEPPEK.E       | 1607.946 | 0.00481  | 3 | 1 | 37.4 | 0 |
| P12163_1_F4,15232 | R.VSLTEPPEK.E       | 1607.946 | 0.00551  | 2 | 1 | 34.9 | 0 |
| P12163_1_F4,15233 | R.VSLTEPPEK.E       | 1607.946 | 0.0046   | 3 | 1 | 25.4 | 0 |
| P12163_1_F4,17618 | R.VSLTEPPEK.E       | 1607.946 | 0.00319  | 2 | 1 | 26.5 | 0 |
| P12163_1_F7,13441 | R.VSLTEPPEK.E       | 1607.946 | 0.00489  | 2 | 1 | 29.2 | 0 |
| P12163_2_F1,14195 | R.VSLTEPPEK.E       | 1607.946 | 0.00628  | 3 | 1 | 43.3 | 0 |
| P12163_2_F1,14385 | R.VSLTEPPEK.E       | 1607.946 | 0.00405  | 2 | 1 | 26.9 | 0 |
| P12163_2_F4,13138 | R.VSLTEPPEK.E       | 1607.946 | 0.00425  | 2 | 1 | 30.6 | 0 |
| P12163_1_F4,13725 | K.ACASAEFFM*K.Q     | 1767.887 | 0.00677  | 2 | 1 | 37.8 | 0 |
| P12163_2_F1,12685 | K.ACASAEFFM*K.Q     | 1767.887 | 0.00475  | 2 | 1 | 37.4 | 0 |
| P12163_1_F4,16630 | K.ACASAEFFM*K.Q     | 1751.892 | 0.01292  | 2 | 1 | 37.3 | 0 |
| P12163_2_F1,15691 | K.ACASAEFFM*K.Q     | 1751.892 | 0.0084   | 2 | 1 | 48.2 | 0 |
| P12163_2_F1,15723 | K.ACASAEFFM*K.Q     | 1751.892 | 0.00496  | 3 | 1 | 39   | 0 |
| P12163_1_F4,18696 | K.ANSGPLDQYLK.L     | 1814.027 | 0.00369  | 3 | 1 | 41.3 | 0 |
| P12163_1_F5,17445 | K.ANSGPLDQYLK.L     | 1814.027 | -0.00581 | 2 | 1 | 44.4 | 0 |
| P12163_1_F7,16617 | K.ANSGPLDQYLK.L     | 1814.027 | 0.00129  | 3 | 1 | 27.5 | 0 |
| P12163_2_F1,17936 | K.ANSGPLDQYLK.L     | 1814.027 | 0.00801  | 3 | 1 | 47.2 | 0 |
| P12163_2_F1,17938 | K.ANSGPLDQYLK.L     | 1814.027 | 0.00611  | 2 | 1 | 51.8 | 0 |
| P12163_2_F9,16529 | K.ANSGPLDQYLK.L     | 1814.027 | 0.00855  | 3 | 1 | 43.6 | 0 |
| P12163_1_F4,18124 | K.AVAEALESK.F       | 1525.905 | 0.01034  | 2 | 1 | 38.2 | 0 |
| P12163_1_F4,18141 | K.AVAEALESK.F       | 1525.905 | 0.00657  | 3 | 1 | 32.4 | 0 |
| P12163_2_F1,17425 | K.AVAEALESK.F       | 1525.905 | 0.00669  | 3 | 1 | 45   | 0 |
| P12163_2_F1,17455 | K.AVAEALESK.F       | 1525.905 | 0.00562  | 2 | 1 | 45   | 0 |
| P12163_1_F8,21197 | K.DHPFAQLSGSDNIIAFT | 2670.435 | -0.00119 | 3 | 1 | 44.6 | 0 |
| P12163_1_F2,9758  | K.EAGYTEPDPR.D      | 1438.712 | 0.00379  | 2 | 1 | 38.7 | 0 |
| P12163_1_F9,9811  | K.EAGYTEPDPR.D      | 1438.712 | 0.00269  | 2 | 1 | 44.4 | 0 |
| P12163_1_S1,9872  | K.EAGYTEPDPR.D      | 1438.712 | 0.00531  | 2 | 1 | 50.1 | 0 |
| P12163_1_S1,10090 | K.EAGYTEPDPR.D      | 1438.712 | 0.00431  | 2 | 1 | 55.5 | 0 |
| P12163_1_S1,17299 | K.EDFNIDLR.V        | 1325.7   | 0.00374  | 2 | 1 | 30   | 0 |
| P12163_1_F3,13737 | K.EQPLIVR.G         | 1158.715 | 0.00192  | 2 | 1 | 24.4 | 0 |
| P12163_1_F3,9860  | K.FGGTCVGTQR.I      | 1473.742 | 0.00659  | 3 | 1 | 38.6 | 0 |
| P12163_2_F1,11596 | K.FGGTCVGTQR.I      | 1473.742 | 0.00461  | 2 | 1 | 37.3 | 0 |
| P12163_1_F9,15990 | K.KANSGPLDQYLK.L    | 2246.327 | 0.01205  | 3 | 1 | 28   | 0 |
| P12163_1_S1,16678 | K.LESLPVR.S         | 1345.799 | 0.00413  | 3 | 1 | 38   | 0 |

|                   |                      |          |          |   |   |      |   |
|-------------------|----------------------|----------|----------|---|---|------|---|
| P12163_1_S1,19106 | K.LELSDLPVR.S        | 1345.799 | 0.00254  | 3 | 1 | 36.8 | 0 |
| P12163_1_S1,19255 | K.LELSDLPVR.S        | 1345.799 | 0.00402  | 2 | 1 | 36.7 | 0 |
| P12163_1_F3,21120 | K.LIVVSAMSK.V        | 1555.97  | 0.00992  | 2 | 1 | 35.4 | 0 |
| P12163_1_F4,21791 | K.LIVVSAMSK.V        | 1555.97  | 0.00454  | 2 | 1 | 32.1 | 0 |
| P12163_1_F4,21816 | K.LIVVSAMSK.V        | 1555.97  | 0.007    | 3 | 1 | 36   | 0 |
| P12163_2_F1,21358 | K.LIVVSAMSK.V        | 1555.97  | 0.00748  | 2 | 1 | 33.3 | 0 |
| P12163_2_F1,21360 | K.LIVVSAMSK.V        | 1555.97  | 0.00217  | 3 | 1 | 32.8 | 0 |
| P12163_1_F2,22307 | K.M*ASTPGVSATLFNAL   | 2303.289 | 0.00699  | 3 | 1 | 38.9 | 0 |
| P12163_1_F3,23020 | K.M*ASTPGVSATLFNAL   | 2303.289 | 0.00576  | 3 | 1 | 22.8 | 0 |
| P12163_1_F3,24414 | K.MASTPGVSATLFNAL    | 2287.294 | 0.00763  | 3 | 1 | 36.3 | 0 |
| P12163_1_F8,15448 | K.NVGEIIVNDDTERK.L   | 2210.224 | 0.00559  | 3 | 1 | 28.6 | 0 |
| P12163_2_F6,14910 | K.NVGEIIVNDDTERK.L   | 2210.224 | 0.0034   | 3 | 1 | 29.4 | 0 |
| P12163_1_F3,19366 | K.QLPQFDEELAK.Q      | 1926.079 | 0.0007   | 2 | 1 | 47.9 | 0 |
| P12163_1_F3,19385 | K.QLPQFDEELAK.Q      | 1926.079 | 0.00669  | 3 | 1 | 34   | 0 |
| P12163_1_F3,19415 | K.QLPQFDEELAK.Q      | 1926.079 | 0.00558  | 3 | 1 | 53.4 | 0 |
| P12163_1_F9,11185 | K.QRQEAEDAGEVLR.Y    | 1804.945 | 0.00139  | 2 | 1 | 43.6 | 0 |
| P12163_1_F9,11237 | K.QRQEAEDAGEVLR.Y    | 1804.945 | 0.00346  | 3 | 1 | 50.4 | 0 |
| P12163_2_F7,10411 | K.QRQEAEDAGEVLR.Y    | 1804.945 | 0.00085  | 3 | 1 | 48   | 0 |
| P12163_2_F7,10412 | K.QRQEAEDAGEVLR.Y    | 1804.945 | 0.00197  | 2 | 1 | 57.5 | 0 |
| P12163_1_F2,13732 | K.VSEAVILR.T         | 1190.741 | 0.00407  | 3 | 1 | 47   | 0 |
| P12163_1_F3,26883 | K.VTDMM*YDLIYK.A     | 2016.064 | 0.00673  | 3 | 1 | 32.4 | 0 |
| P12163_1_F3,26891 | K.VTDMMYDLIYK.A      | 2000.069 | 0.00625  | 3 | 1 | 39.4 | 0 |
| P12163_1_F7,17689 | R.AHQVTIWTVDVGVYS    | 2434.23  | 0.0016   | 3 | 1 | 53.5 | 0 |
| P12163_2_F1,11720 | R.DQAAVLK.E          | 1352.836 | 0.00784  | 3 | 1 | 28.4 | 0 |
| P12163_1_F6,18305 | R.EVLIVNPTSSNQVDPD   | 3198.674 | 0.00074  | 3 | 1 | 34.4 | 0 |
| P12163_1_F6,18341 | R.EVLIVNPTSSNQVDPD   | 3198.674 | 0.00661  | 4 | 1 | 35.7 | 0 |
| P12163_1_F9,13653 | R.GIHVITPNK.K        | 1586.984 | 0.00412  | 2 | 1 | 25.7 | 0 |
| P12163_1_F8,14711 | R.GLLETGDHILR.I      | 1527.88  | -0.00237 | 3 | 1 | 55.2 | 0 |
| P12163_1_F8,17587 | R.GLLETGDHILR.I      | 1527.88  | 0.00471  | 3 | 1 | 80.5 | 0 |
| P12163_1_F8,17799 | R.GLLETGDHILR.I      | 1527.88  | 0.00192  | 3 | 1 | 74.7 | 0 |
| P12163_1_S10,1685 | R.GLLETGDHILR.I      | 1527.88  | 0.00021  | 3 | 1 | 29.4 | 0 |
| P12163_2_F6,14093 | R.GLLETGDHILR.I      | 1527.88  | -0.00015 | 3 | 1 | 31.6 | 0 |
| P12163_2_F6,14112 | R.GLLETGDHILR.I      | 1527.88  | 0.00311  | 4 | 1 | 39   | 0 |
| P12163_2_F6,17046 | R.GLLETGDHILR.I      | 1527.88  | 0.00135  | 3 | 1 | 68.5 | 0 |
| P12163_2_F6,17069 | R.GLLETGDHILR.I      | 1527.88  | 0.00616  | 2 | 1 | 30   | 0 |
| P12163_2_F6,17254 | R.GLLETGDHILR.I      | 1527.88  | 0.00237  | 3 | 1 | 77.6 | 0 |
| P12163_2_F6,17281 | R.GLLETGDHILR.I      | 1527.88  | 0.00158  | 2 | 1 | 33.1 | 0 |
| P12163_2_S5,15496 | R.GLLETGDHILR.I      | 1527.88  | 0.00381  | 3 | 1 | 45   | 0 |
| P12163_1_F9,18149 | R.KLIVVSAMSK.V       | 1988.27  | 0.00937  | 3 | 1 | 30.6 | 0 |
| P12163_2_F9,16799 | R.KLIVVSAMSK.V       | 1988.27  | 0.00955  | 3 | 1 | 37.9 | 0 |
| P12163_1_F5,21265 | R.LASYLGAPS.-        | 1182.667 | 0.00222  | 2 | 1 | 42.3 | 0 |
| P12163_2_F1,22087 | R.LASYLGAPS.-        | 1182.667 | 0.004    | 2 | 1 | 54.7 | 0 |
| P12163_1_F5,10569 | R.LHHDINNLK.A        | 1712.006 | 0.00201  | 2 | 1 | 38   | 0 |
| P12163_1_F6,11565 | R.LHHDINNLK.A        | 1712.006 | 0.00851  | 2 | 1 | 28.1 | 0 |
| P12163_1_F6,11568 | R.LHHDINNLK.A        | 1712.006 | 0.00516  | 3 | 1 | 26   | 0 |
| P12163_2_S5,10982 | R.LHHDINNLK.A        | 1712.006 | 0.00717  | 3 | 1 | 32.1 | 0 |
| P12163_1_S1,22106 | R.LSQVAIVPNCISILAAVC | 2576.505 | 0.00741  | 3 | 1 | 55.4 | 0 |
| P12163_1_S1,22178 | R.LSQVAIVPNCISILAAVC | 2576.505 | 0.003    | 4 | 1 | 55   | 0 |
| P12163_1_F3,25915 | R.NDSYLSALDAVFEK.H   | 2180.169 | 0.00743  | 3 | 1 | 40.6 | 0 |
| P12163_1_F3,25923 | R.NDSYLSALDAVFEK.H   | 2180.169 | 0.00131  | 2 | 1 | 47.3 | 0 |
| P12163_1_S1,12973 | R.QEAEDAGEVLR.Y      | 1520.786 | 0.00248  | 2 | 1 | 39.8 | 0 |

|                                      |          |          |   |   |      |   |
|--------------------------------------|----------|----------|---|---|------|---|
| P12163_1_S1,12992 R.QEAEDAGEVLR.Y    | 1520.786 | -0.00228 | 3 | 1 | 56.1 | 0 |
| P12163_1_F4,18605 R.SFSEVVAAEAK.E    | 1674.952 | 0.00758  | 2 | 1 | 55.2 | 0 |
| P12163_2_F1,17812 R.SFSEVVAAEAK.E    | 1674.952 | 0.00844  | 2 | 1 | 44.8 | 0 |
| P12163_2_F1,17822 R.SFSEVVAAEAK.E    | 1674.952 | 0.00991  | 3 | 1 | 38.2 | 0 |
| P12163_2_F1,17616 R.SLVPEPLK.A       | 1490.94  | 0.00568  | 3 | 1 | 26.2 | 0 |
| P12163_1_S1,19640 R.YDIPIVIR.N       | 1292.788 | 0.00218  | 3 | 1 | 36   | 0 |
| P12163_1_S10,1587'R.YHDWLR.R         | 1193.637 | 0.00366  | 3 | 1 | 24.1 | 0 |
| P12163_1_F3,19259 R.YVGVVDAINK.E     | 1686.005 | 0.00454  | 3 | 1 | 47.5 | 0 |
| P12163_1_F4,19750 R.YVGVVDAINK.E     | 1686.005 | 0.00876  | 2 | 1 | 43.4 | 0 |
| P12163_1_F4,19753 R.YVGVVDAINK.E     | 1686.005 | 0.01192  | 3 | 1 | 47.1 | 0 |
| P12163_1_F5,18575 R.YVGVVDAINK.E     | 1686.005 | 0.0075   | 2 | 1 | 37.4 | 0 |
| P12163_1_F6,18364 R.YVGVVDAINK.E     | 1686.005 | 0.0042   | 2 | 1 | 28.8 | 0 |
| P12163_1_F6,18370 R.YVGVVDAINK.E     | 1686.005 | -0.00086 | 3 | 1 | 43.4 | 0 |
| P12163_1_F6,18777 R.YVGVVDAINK.E     | 1686.005 | 0.00151  | 3 | 1 | 27.3 | 0 |
| P12163_1_F9,18304 R.YVGVVDAINK.E     | 1686.005 | 0.00487  | 3 | 1 | 36.1 | 0 |
| P12163_2_F1,19196 R.YVGVVDAINK.E     | 1686.005 | 0.00592  | 2 | 1 | 40.5 | 0 |
| P12163_2_F1,19283 R.YVGVVDAINK.E     | 1686.005 | 0.00217  | 3 | 1 | 48.6 | 0 |
| P12163_2_F1,19588 R.YVGVVDAINK.E     | 1686.005 | 0.01417  | 3 | 1 | 28.1 | 0 |
| P12163_2_F9,17152 R.YVGVVDAINK.E     | 1686.005 | 0.0097   | 3 | 1 | 56.3 | 0 |
| P12163_2_F9,17160 R.YVGVVDAINK.E     | 1686.005 | 0.0073   | 2 | 1 | 44.3 | 0 |
| P12163_2_F2,14426 K.ADWYQK.V         | 1418.789 | 0.00766  | 3 | 1 | 22.1 | 0 |
| P12163_1_F4,19255 K.APNQLVQELK.T     | 1748.053 | 0.00471  | 2 | 1 | 31.9 | 0 |
| P12163_1_F4,19271 K.APNQLVQELK.T     | 1748.053 | 0.00566  | 3 | 1 | 40.8 | 0 |
| P12163_2_F1,18560 K.APNQLVQELK.T     | 1748.053 | 0.00467  | 3 | 1 | 44.1 | 0 |
| P12163_2_F1,18561 K.APNQLVQELK.T     | 1748.053 | 0.00523  | 2 | 1 | 38.3 | 0 |
| P12163_1_F7,19286 K.AVHSGADLESAITNCL | 2338.176 | -0.00105 | 3 | 1 | 57.1 | 0 |
| P12163_1_F7,19304 K.AVHSGADLESAITNCL | 2338.176 | 0.00019  | 2 | 1 | 26.8 | 0 |
| P12163_1_F8,20240 K.AVHSGADLESAITNCL | 2338.176 | 0.00147  | 3 | 1 | 37   | 0 |
| P12163_2_S5,19270 K.AVHSGADLESAITNCL | 2338.176 | 0.00321  | 3 | 1 | 51.8 | 0 |
| P12163_1_F7,17501 K.ELLVLVHKPGGK.T   | 2202.41  | 0.00949  | 4 | 1 | 27.8 | 0 |
| P12163_2_F1,22916 K.GISLDEIWK.K      | 1668.978 | 0.00978  | 3 | 1 | 26.3 | 0 |
| P12163_2_F1,22917 K.GISLDEIWK.K      | 1668.978 | 0.00354  | 2 | 1 | 46.5 | 0 |
| P12163_1_F8,18326 K.GLGETLVGAYPGR.A  | 1593.89  | 0.00232  | 2 | 1 | 28.1 | 0 |
| P12163_1_S1,17446 K.GLGETLVGAYPGR.A  | 1593.89  | 0.00478  | 2 | 1 | 35.5 | 0 |
| P12163_1_S1,17453 K.GLGETLVGAYPGR.A  | 1593.89  | 0.00229  | 3 | 1 | 55.1 | 0 |
| P12163_2_F6,17875 K.GLGETLVGAYPGR.A  | 1593.89  | 0.00286  | 2 | 1 | 58.9 | 0 |
| P12163_2_F2,15815 K.GWSNALSM*SK.S    | 1704.92  | 0.00661  | 3 | 1 | 36.9 | 0 |
| P12163_2_F2,15829 K.GWSNALSM*SK.S    | 1704.92  | 0.00739  | 2 | 1 | 33   | 0 |
| P12163_2_F2,18092 K.GWSNALSMSK.S     | 1688.925 | 0.00183  | 2 | 1 | 29.9 | 0 |
| P12163_1_F3,13886 K.GYEELNEAGPEK.I   | 1944.017 | 0.00136  | 2 | 1 | 53   | 0 |
| P12163_1_F4,14298 K.GYEELNEAGPEK.I   | 1944.017 | 0.0031   | 2 | 1 | 62.2 | 0 |
| P12163_1_F4,14308 K.GYEELNEAGPEK.I   | 1944.017 | 0.00998  | 3 | 1 | 47.4 | 0 |
| P12163_1_F9,13676 K.GYEELNEAGPEK.I   | 1944.017 | 0.00518  | 2 | 1 | 66.1 | 0 |
| P12163_2_F1,13353 K.GYEELNEAGPEK.I   | 1944.017 | 0.00038  | 2 | 1 | 54.3 | 0 |
| P12163_2_F9,13021 K.GYEELNEAGPEK.I   | 1944.017 | 0.00398  | 3 | 1 | 50.1 | 0 |
| P12163_1_F7,7849 K.HVAEPTEK.K        | 1518.874 | 0.00282  | 3 | 1 | 30.2 | 0 |
| P12163_1_F9,8398 K.HVAEPTEK.K        | 1518.874 | 0.00555  | 3 | 1 | 56.2 | 0 |
| P12163_1_F9,8453 K.HVAEPTEK.K        | 1518.874 | 0.00769  | 4 | 1 | 30.7 | 0 |
| P12163_2_F10,8671 K.HVAEPTEK.K       | 1518.874 | 0.00633  | 3 | 1 | 28.7 | 0 |
| P12163_2_F7,8006 K.HVAEPTEK.K        | 1518.874 | 0        | 3 | 1 | 30.7 | 0 |
| P12163_2_F9,8444 K.HVAEPTEK.K        | 1518.874 | 0.00497  | 4 | 1 | 23.7 | 0 |



|                   |                    |          |          |   |   |      |   |
|-------------------|--------------------|----------|----------|---|---|------|---|
| P12163_1_F3,19584 | K.IAGLEIEAQK.S     | 1680.015 | -0.00143 | 2 | 1 | 38.7 | 0 |
| P12163_1_F4,20010 | K.IAGLEIEAQK.S     | 1680.015 | 0.00825  | 2 | 1 | 32.5 | 0 |
| P12163_1_F4,20059 | K.IAGLEIEAQK.S     | 1680.015 | 0.00628  | 3 | 1 | 44.1 | 0 |
| P12163_1_F4,20250 | K.IAGLEIEAQK.S     | 1680.015 | 0.00527  | 2 | 1 | 36   | 0 |
| P12163_1_F4,20303 | K.IAGLEIEAQK.S     | 1680.015 | 0.00784  | 3 | 1 | 27.7 | 0 |
| P12163_1_F5,18871 | K.IAGLEIEAQK.S     | 1680.015 | 0.00787  | 3 | 1 | 22.7 | 0 |
| P12163_2_F1,19476 | K.IAGLEIEAQK.S     | 1680.015 | 0.00358  | 3 | 1 | 42.1 | 0 |
| P12163_2_F1,19477 | K.IAGLEIEAQK.S     | 1680.015 | 0.00395  | 2 | 1 | 25.4 | 0 |
| P12163_2_F4,17318 | K.IAGLEIEAQK.S     | 1680.015 | 0.00121  | 3 | 1 | 28.3 | 0 |
| P12163_2_F4,17342 | K.IAGLEIEAQK.S     | 1680.015 | 0.00077  | 2 | 1 | 25.7 | 0 |
| P12163_1_F9,17010 | K.IHLATDFK.E       | 1552.931 | 0.00362  | 3 | 1 | 27.3 | 0 |
| P12163_2_F9,15823 | K.IHLATDFK.E       | 1552.931 | 0.00527  | 3 | 1 | 41.2 | 0 |
| P12163_2_F9,15877 | K.IHLATDFK.E       | 1552.931 | 0.0031   | 2 | 1 | 25.1 | 0 |
| P12163_2_F9,16046 | K.IHLATDFK.E       | 1552.931 | 0.00881  | 3 | 1 | 30.7 | 0 |
| P12163_1_F7,23187 | K.LHNNTSPDDVIICQAL | 3050.644 | 0.00339  | 4 | 1 | 41.2 | 0 |
| P12163_2_F8_12070 | K.NNGANFHVK.L      | 1608.907 | 0.00964  | 3 | 1 | 28.3 | 0 |
| P12163_1_F3,12022 | K.QVQQDFGDGK.G     | 1729.933 | 0.0072   | 2 | 1 | 24.1 | 0 |
| P12163_2_F1,12081 | K.QVQQDFGDGK.G     | 1729.933 | 0.00766  | 2 | 1 | 37.6 | 0 |
| P12163_1_F5,20067 | K.SDNWALFAK.S      | 1659.931 | 0.00343  | 3 | 1 | 28.2 | 0 |
| P12163_2_F1,20716 | K.SDNWALFAK.S      | 1659.931 | 0.00866  | 2 | 1 | 26.8 | 0 |
| P12163_2_F6,15821 | K.SYDRPTILLAR.R    | 1608.937 | 0.00341  | 2 | 1 | 25.4 | 0 |
| P12163_1_F3,18011 | K.VLSDNINQAVAEK.L  | 2009.149 | 0.00494  | 2 | 1 | 56.1 | 0 |
| P12163_1_S1,12712 | K.VVLDYSSDR.L      | 1357.726 | 0.00293  | 3 | 1 | 42.2 | 0 |
| P12163_1_S1,14969 | K.VVLDYSSDR.L      | 1357.726 | 0.00232  | 2 | 1 | 24.4 | 0 |
| P12163_1_F2,23095 | R.AGSAAALSLLLNR.L  | 1560.937 | 0.00171  | 3 | 1 | 54.6 | 0 |
| P12163_1_S1,22011 | R.AGSAAALSLLLNR.L  | 1560.937 | 0.00132  | 3 | 1 | 47   | 0 |
| P12163_1_F9,10901 | R.AIHSEPNFR.R      | 1374.743 | 0.00656  | 3 | 1 | 22.1 | 0 |
| P12163_1_F9,12129 | R.AIHSEPNFR.R      | 1374.743 | 0.00221  | 3 | 1 | 23.5 | 0 |
| P12163_1_F9,13317 | R.AIHSEPNFR.R      | 1374.743 | 0.00107  | 3 | 1 | 23.2 | 0 |
| P12163_2_F7,10165 | R.AIHSEPNFR.R      | 1374.743 | 0.0026   | 3 | 1 | 25.9 | 0 |
| P12163_2_F9,10725 | R.AIHSEPNFR.R      | 1374.743 | 0.00275  | 3 | 1 | 29.4 | 0 |
| P12163_1_F5,18298 | R.ALSFVCK.K        | 1432.844 | 0.00337  | 3 | 1 | 29   | 0 |
| P12163_1_F5,18335 | R.ALSFVCK.K        | 1432.844 | 0.00958  | 3 | 1 | 29.8 | 0 |
| P12163_1_F5,18435 | R.ALSFVCK.K        | 1432.844 | 0.00942  | 2 | 1 | 24.5 | 0 |
| P12163_2_F1,18663 | R.ALSFVCK.K        | 1432.844 | 0.01404  | 2 | 1 | 29.8 | 0 |
| P12163_2_F2,19010 | R.ALSFVCK.K        | 1432.844 | 0.00658  | 3 | 1 | 29.9 | 0 |
| P12163_2_F2,19058 | R.ALSFVCK.K        | 1432.844 | 0.00618  | 2 | 1 | 25   | 0 |
| P12163_1_F4,22809 | R.DFM*QILNK.H      | 1632.924 | 0.00424  | 3 | 1 | 25   | 0 |
| P12163_1_F4,22826 | R.DFM*QILNK.H      | 1632.924 | 0.00552  | 2 | 1 | 26.2 | 0 |
| P12163_2_F1,22345 | R.DFM*QILNK.H      | 1632.924 | 0.00625  | 3 | 1 | 24.9 | 0 |
| P12163_1_F4,22824 | R.DFMQILNK.H       | 1616.929 | 0.00385  | 3 | 1 | 29.6 | 0 |
| P12163_1_F4,22835 | R.DFMQILNK.H       | 1616.929 | 0.00612  | 2 | 1 | 40.1 | 0 |
| P12163_1_F5,21477 | R.DFMQILNK.H       | 1616.929 | 0.00502  | 3 | 1 | 23   | 0 |
| P12163_1_F5,21484 | R.DFMQILNK.H       | 1616.929 | 0.0075   | 2 | 1 | 38.9 | 0 |
| P12163_2_F1,22298 | R.DFMQILNK.H       | 1616.929 | 0.00437  | 3 | 1 | 33.7 | 0 |
| P12163_2_F1,22299 | R.DFMQILNK.H       | 1616.929 | 0.0049   | 2 | 1 | 38.1 | 0 |
| P12163_1_F4,15555 | R.DLGNYMR.T        | 1172.604 | 0.00321  | 2 | 1 | 24.1 | 0 |
| P12163_1_F4,16733 | R.ETVLQMK.A        | 1456.865 | 0.0051   | 3 | 1 | 25.1 | 0 |
| P12163_2_F1,15792 | R.ETVLQMK.A        | 1456.865 | 0.00948  | 2 | 1 | 25.6 | 0 |
| P12163_2_F1,15825 | R.ETVLQMK.A        | 1456.865 | 0.00177  | 3 | 1 | 26   | 0 |
| P12163_1_F3,25802 | R.FNIAADLIQEAK.E   | 1941.126 | 0.00428  | 3 | 1 | 41.2 | 0 |

|                   |                      |          |          |   |   |      |   |
|-------------------|----------------------|----------|----------|---|---|------|---|
| P12163_2_F1,5482  | R.GGEGDVGQR.I        | 1178.607 | 0.0026   | 2 | 1 | 30.6 | 0 |
| P12163_1_F2,9610  | R.GTSVEDLR.A         | 1180.647 | 0.00012  | 3 | 1 | 36.1 | 0 |
| P12163_2_F6,17636 | R.IRDEILVIQR.N       | 1558.958 | 0.00135  | 3 | 1 | 37.8 | 0 |
| P12163_2_F6,17653 | R.IRDEILVIQR.N       | 1558.958 | 0.00243  | 2 | 1 | 47.2 | 0 |
| P12163_2_F7,15664 | R.IRDEILVIQR.N       | 1558.958 | 0.00292  | 3 | 1 | 33.4 | 0 |
| P12163_1_F6,22550 | R.LITDGHFQQSILSSIAR. | 2190.218 | 0.00141  | 3 | 1 | 42.5 | 0 |
| P12163_1_F7,21908 | R.LITDGHFQQSILSSIAR. | 2190.218 | 0.00405  | 3 | 1 | 35.2 | 0 |
| P12163_1_F2,18611 | R.TELLEIVR.G         | 1405.82  | 0.0071   | 3 | 1 | 44.6 | 0 |
| P12163_1_F2,24315 | R.TELLEIVR.G         | 1405.82  | 0.00256  | 2 | 1 | 54.6 | 0 |
| P12163_1_S1,17914 | R.TELLEIVR.G         | 1405.82  | 0.00071  | 3 | 1 | 44.8 | 0 |
| P12163_1_S1,23553 | R.TELLEIVR.G         | 1405.82  | 0.00466  | 2 | 1 | 36.4 | 0 |
| P12163_1_S1,23617 | R.TELLEIVR.G         | 1405.82  | 0.0023   | 3 | 1 | 51.2 | 0 |
| P12163_1_S1,23761 | R.TELLEIVR.G         | 1405.82  | 0.00394  | 2 | 1 | 35.1 | 0 |
| P12163_1_S1,23824 | R.TELLEIVR.G         | 1405.82  | 0.00413  | 3 | 1 | 46.3 | 0 |
| P12163_1_S1,23963 | R.TELLEIVR.G         | 1405.82  | 0.0054   | 2 | 1 | 42   | 0 |
| P12163_1_S1,24035 | R.TELLEIVR.G         | 1405.82  | 0.00392  | 3 | 1 | 37.1 | 0 |
| P12163_1_F4,12770 | R.TPFVSSASK.S        | 1531.894 | 0.00669  | 2 | 1 | 29.6 | 0 |
| P12163_1_F4,14406 | R.TPFVSSASK.S        | 1531.894 | 0.01377  | 2 | 1 | 40.6 | 0 |
| P12163_2_F1,13358 | R.TPFVSSASK.S        | 1531.894 | 0.00103  | 2 | 1 | 32.9 | 0 |
| P12163_1_F2,20994 | R.YAITSDEFTGELVGAK   | 2309.248 | 0.00554  | 3 | 1 | 33.2 | 0 |
| P12163_1_F8,20984 | R.YAITSDEFTGELVGAK   | 2309.248 | 0.00704  | 3 | 1 | 31.3 | 0 |
| P12163_1_S1,18126 | R.YAITSDEFTGELVGAK   | 2309.248 | 0.00767  | 3 | 1 | 25.9 | 0 |
| P12163_1_S1,18144 | R.YAITSDEFTGELVGAK   | 2309.248 | 0.0061   | 4 | 1 | 32.4 | 0 |
| P12163_1_S1,20059 | R.YAITSDEFTGELVGAK   | 2309.248 | 0.00622  | 4 | 1 | 47.3 | 0 |
| P12163_1_S1,20097 | R.YAITSDEFTGELVGAK   | 2309.248 | 0.01091  | 3 | 1 | 65.3 | 0 |
| P12163_1_S1,20138 | R.YAITSDEFTGELVGAK   | 2309.248 | 0.00573  | 2 | 1 | 93.9 | 0 |
| P12163_2_F6,20621 | R.YAITSDEFTGELVGAK   | 2309.248 | 0.00179  | 3 | 1 | 50.1 | 0 |
| P12163_1_F5,10469 | K.AFSGDTAK.R         | 1404.794 | 0.00239  | 2 | 1 | 24.7 | 0 |
| P12163_2_F1,10992 | K.AFSGDTAK.R         | 1404.794 | 0.00575  | 3 | 1 | 37.1 | 0 |
| P12163_2_F2,11364 | K.AFSGDTAK.R         | 1404.794 | -0.0016  | 3 | 1 | 24.3 | 0 |
| P12163_1_F5,13505 | K.ASYEIVK.D          | 1417.851 | 0.00764  | 2 | 1 | 32.9 | 0 |
| P12163_2_F1,13806 | K.ASYEIVK.D          | 1417.851 | 0.00489  | 3 | 1 | 26.6 | 0 |
| P12163_2_F2,14289 | K.ASYEIVK.D          | 1417.851 | 0.00466  | 2 | 1 | 26.9 | 0 |
| P12163_2_F2,14329 | K.ASYEIVK.D          | 1417.851 | 0.00897  | 3 | 1 | 23.8 | 0 |
| P12163_2_F8_12070 | K.ASYEIVK.D          | 1417.851 | 0.00285  | 3 | 1 | 27   | 0 |
| P12163_1_F8,14460 | K.DALTALGCM*EHR.G    | 1693.83  | 0.0022   | 3 | 1 | 32.3 | 0 |
| P12163_2_F6,13882 | K.DALTALGCM*EHR.G    | 1693.83  | 0.00646  | 2 | 1 | 25   | 0 |
| P12163_2_F6,17143 | K.DALTALGCM*EHR.G    | 1693.83  | 0.00025  | 3 | 1 | 31.8 | 0 |
| P12163_1_F8,17617 | K.DALTALGCMEHR.G     | 1677.835 | -0.00075 | 2 | 1 | 24.2 | 0 |
| P12163_1_F8,17730 | K.DALTALGCMEHR.G     | 1677.835 | 0.00313  | 3 | 1 | 42   | 0 |
| P12163_2_F6,17110 | K.DALTALGCMEHR.G     | 1677.835 | 0.00427  | 3 | 1 | 39.6 | 0 |
| P12163_1_F4,13220 | K.DDDLMLK.K          | 1344.729 | 0.00529  | 2 | 1 | 27   | 0 |
| P12163_1_S1,8450  | K.EESVDDIER.E        | 1395.69  | -0.00021 | 3 | 1 | 24.4 | 0 |
| P12163_1_S1,12111 | K.EESVDDIER.E        | 1395.69  | 0.00401  | 2 | 1 | 45.8 | 0 |
| P12163_1_F2,13253 | K.EVIVNTR.Q          | 1281.747 | 0.00229  | 3 | 1 | 32.1 | 0 |
| P12163_1_F2,18054 | K.EVIVNTR.Q          | 1281.747 | 0.00224  | 2 | 1 | 27.7 | 0 |
| P12163_2_F1,13425 | K.GIEGSLEK.T         | 1440.852 | 0.00647  | 2 | 1 | 24.1 | 0 |
| P12163_2_F1,13441 | K.GIEGSLEK.T         | 1440.852 | 0.00049  | 3 | 1 | 53.1 | 0 |
| P12163_1_F4,13489 | K.GLQNGDTATSAIK.Q    | 1884.065 | -0.0008  | 3 | 1 | 50.7 | 0 |
| P12163_1_F4,13497 | K.GLQNGDTATSAIK.Q    | 1884.065 | 0.00775  | 2 | 1 | 48.3 | 0 |
| P12163_2_F1,12566 | K.GLQNGDTATSAIK.Q    | 1884.065 | 0.00617  | 2 | 1 | 68   | 0 |

|                   |                     |          |          |   |   |      |   |
|-------------------|---------------------|----------|----------|---|---|------|---|
| P12163_1_F7,17273 | K.GNADIIQISGHDGGTG. | 2903.568 | 0.01176  | 4 | 1 | 22.6 | 0 |
| P12163_1_F7,17313 | K.GNADIIQISGHDGGTG. | 2903.568 | 0.00663  | 3 | 1 | 80.1 | 0 |
| P12163_2_F8_12070 | K.HAGGPWELGLTETHQ   | 2775.484 | 0.0004   | 4 | 1 | 41.4 | 0 |
| P12163_1_S1,14507 | K.LCEAADDAVR.N      | 1423.715 | 0.00323  | 2 | 1 | 43.4 | 0 |
| P12163_1_S1,16651 | K.LDDVIGR.T         | 1091.636 | 0.00315  | 2 | 1 | 25.3 | 0 |
| P12163_2_F6,20696 | K.LHTGVGM*VFFPK.D   | 1957.119 | 0.00997  | 3 | 1 | 24.8 | 0 |
| P12163_2_F7,16814 | K.LHTGVGM*VFFPK.D   | 1957.119 | 0.01234  | 3 | 1 | 24.4 | 0 |
| P12163_2_F7,18783 | K.LHTGVGMVFFPK.D    | 1941.124 | 0.00334  | 3 | 1 | 47.6 | 0 |
| P12163_1_F2,15549 | K.LVGEAGIGTVASGVAI  | 2037.216 | 0.00287  | 4 | 1 | 24.3 | 0 |
| P12163_1_F2,19029 | K.LVGEAGIGTVASGVAI  | 2037.216 | 0.00549  | 3 | 1 | 63.2 | 0 |
| P12163_1_F3,19599 | K.LVGEAGIGTVASGVAI  | 2037.216 | -0.00033 | 3 | 1 | 35.9 | 0 |
| P12163_2_F4,8416  | K.NHPTLSK.K         | 1404.842 | -0.00124 | 3 | 1 | 26.1 | 0 |
| P12163_1_S10,1785 | K.SENAFSIYQQHLANRP  | 2760.485 | -0.0015  | 4 | 1 | 39.6 | 0 |
| P12163_2_F10,1676 | K.SENAFSIYQQHLANRP  | 2760.485 | 0.00434  | 4 | 1 | 50.1 | 0 |
| P12163_2_F8_12070 | K.SENAFSIYQQHLANRP  | 2760.485 | 0.00358  | 4 | 1 | 44.5 | 0 |
| P12163_1_F6,14359 | K.SLIEAHVEK.T       | 1633.973 | 0.00264  | 2 | 1 | 43.7 | 0 |
| P12163_2_F6,13677 | K.SLIEAHVEK.T       | 1633.973 | 0.00485  | 3 | 1 | 38.3 | 0 |
| P12163_2_F6,13692 | K.SLIEAHVEK.T       | 1633.973 | 0.00532  | 2 | 1 | 44.3 | 0 |
| P12163_2_F7,12618 | K.SLIEAHVEK.T       | 1633.973 | 0.00248  | 3 | 1 | 34.2 | 0 |
| P12163_2_F7,12638 | K.SLIEAHVEK.T       | 1633.973 | 0.00722  | 2 | 1 | 40   | 0 |
| P12163_1_F2,7151  | K.SNSGEGGEDPIR.W    | 1521.745 | 0.00161  | 3 | 1 | 26.5 | 0 |
| P12163_1_F3,7290  | K.SNSGEGGEDPIR.W    | 1521.745 | -0.00493 | 3 | 1 | 50.8 | 0 |
| P12163_1_F3,9072  | K.SNSGEGGEDPIR.W    | 1521.745 | 0.0042   | 2 | 1 | 26.9 | 0 |
| P12163_2_F4,11052 | K.TSFAIYHR.R        | 1298.716 | 0.00208  | 3 | 1 | 33.9 | 0 |
| P12163_2_F4,12873 | K.TSFAIYHR.R        | 1298.716 | 0.00338  | 3 | 1 | 35.8 | 0 |
| P12163_1_F3,8674  | K.TVGACLDL.R.N      | 1195.641 | 0.00365  | 3 | 1 | 23.4 | 0 |
| P12163_2_F6,13427 | K.VVKEESVDDIER.E    | 2026.128 | 0.00014  | 2 | 1 | 32.2 | 0 |
| P12163_2_F1,15197 | R.DISLVK.T          | 1282.819 | 0.00654  | 3 | 1 | 30.8 | 0 |
| P12163_1_F5,21096 | R.ESLSFWVK.A        | 1603.93  | 0.00507  | 2 | 1 | 27.3 | 0 |
| P12163_2_F1,21753 | R.ESLSFWVK.A        | 1603.93  | 0.00283  | 2 | 1 | 26.4 | 0 |
| P12163_1_F8,14782 | R.ETHEAIAIAM*NR.L   | 1675.874 | 0.00363  | 3 | 1 | 29.2 | 0 |
| P12163_1_F8,14799 | R.ETHEAIAIAM*NR.L   | 1675.874 | 0.00299  | 2 | 1 | 24.8 | 0 |
| P12163_2_F6,14190 | R.ETHEAIAIAM*NR.L   | 1675.874 | 0.00045  | 3 | 1 | 28   | 0 |
| P12163_2_F6,14216 | R.ETHEAIAIAM*NR.L   | 1675.874 | -0.00061 | 2 | 1 | 38.1 | 0 |
| P12163_1_F8,14743 | R.ETHEAIAIAMNR.L    | 1659.879 | 0.00168  | 3 | 1 | 42.7 | 0 |
| P12163_1_F8,14771 | R.ETHEAIAIAMNR.L    | 1659.879 | 0.00351  | 2 | 1 | 56.5 | 0 |
| P12163_2_F6,14160 | R.ETHEAIAIAMNR.L    | 1659.879 | 0.00366  | 3 | 1 | 34.4 | 0 |
| P12163_1_F2,19494 | R.FCTGGMSLGAISR.E   | 1660.845 | 0.00416  | 2 | 1 | 29.4 | 0 |
| P12163_1_S1,18656 | R.FCTGGMSLGAISR.E   | 1660.845 | 0.00373  | 3 | 1 | 86.6 | 0 |
| P12163_1_F4,18158 | R.IAGVIAK.K         | 1279.856 | 0.00776  | 2 | 1 | 26.5 | 0 |
| P12163_2_F1,17365 | R.IAGVIAK.K         | 1279.856 | 0.006    | 2 | 1 | 23.9 | 0 |
| P12163_1_F8,10547 | R.ICHNNCPVGVASQR.I  | 2017.001 | 0.0048   | 3 | 1 | 73   | 0 |
| P12163_2_F6,10344 | R.ICHNNCPVGVASQR.I  | 2017.001 | 0.00783  | 3 | 1 | 26.8 | 0 |
| P12163_2_F6,10362 | R.ICHNNCPVGVASQR.I  | 2017.001 | 0.00161  | 2 | 1 | 28.2 | 0 |
| P12163_1_F7,21280 | R.TLKPVNFFSATAM*DN  | 2862.564 | 0.00155  | 3 | 1 | 31.2 | 0 |
| P12163_1_F7,22372 | R.TLKPVNFFSATAMDNI  | 2846.569 | 0.00173  | 3 | 1 | 47.9 | 0 |
| P12163_1_F5,10977 | R.VAASNPYGK.W       | 1514.879 | 0.00874  | 2 | 1 | 31.4 | 0 |
| P12163_2_F1,11438 | R.VAASNPYGK.W       | 1514.879 | 0.00538  | 2 | 1 | 39.8 | 0 |
| P12163_1_S1,13130 | R.VEPAATIVQR.F      | 1387.821 | 0.00461  | 3 | 1 | 63.7 | 0 |
| P12163_1_F3,16531 | R.VIAPVGM*QLK.S     | 1808.092 | 0.00455  | 2 | 1 | 31.9 | 0 |
| P12163_1_F3,19618 | R.VIAPVGMQLK.S      | 1792.097 | -0.00019 | 2 | 1 | 49.8 | 0 |

|                   |                    |          |          |   |   |      |   |
|-------------------|--------------------|----------|----------|---|---|------|---|
| P12163_1_F3,19752 | R.VIAPVGQMQLK.S    | 1792.097 | 0.01004  | 3 | 1 | 35.8 | 0 |
| P12163_2_F1,19726 | R.VIAPVGQMQLK.S    | 1792.097 | 0.00611  | 3 | 1 | 37.5 | 0 |
| P12163_2_F1,19730 | R.VIAPVGQMQLK.S    | 1792.097 | 0.00121  | 2 | 1 | 35.6 | 0 |
| P12163_1_F7,22956 | R.WSPLTDVVDGYSPTLF | 2733.507 | 0.00415  | 3 | 1 | 35   | 0 |
| P12163_1_F5,18535 | K.AVVTVPAYFNDSQR.T | 1870.996 | -0.00144 | 2 | 1 | 30.4 | 0 |
| P12163_1_F5,18571 | K.AVVTVPAYFNDSQR.T | 1870.996 | 0.00056  | 3 | 1 | 23.3 | 0 |
| P12163_1_F8,19195 | K.AVVTVPAYFNDSQR.T | 1870.996 | -0.0014  | 2 | 1 | 27.9 | 0 |
| P12163_1_F8,19447 | K.AVVTVPAYFNDSQR.T | 1870.996 | 0.00268  | 2 | 1 | 41   | 0 |
| P12163_2_F2,19244 | K.AVVTVPAYFNDSQR.T | 1870.996 | 0.00119  | 3 | 1 | 25.5 | 0 |
| P12163_2_F6,18422 | K.AVVTVPAYFNDSQR.T | 1870.996 | 0.00028  | 2 | 1 | 38.9 | 0 |
| P12163_2_F6,18794 | K.AVVTVPAYFNDSQR.T | 1870.996 | 0.00306  | 2 | 1 | 24.3 | 0 |
| P12163_2_F6,18833 | K.AVVTVPAYFNDSQR.T | 1870.996 | 0.00707  | 3 | 1 | 30.5 | 0 |
| P12163_2_F6,18858 | K.AVVTVPAYFNDSQR.T | 1870.996 | 0.01403  | 3 | 1 | 29.4 | 0 |
| P12163_2_F6,18894 | K.AVVTVPAYFNDSQR.T | 1870.996 | 0.01346  | 3 | 1 | 28.5 | 0 |
| P12163_1_F3,10983 | K.DAIAEGSTQAM*K.D  | 1845.984 | 0.00646  | 3 | 1 | 66.7 | 0 |
| P12163_1_F3,11044 | K.DAIAEGSTQAM*K.D  | 1845.984 | 0.00531  | 2 | 1 | 47.9 | 0 |
| P12163_1_F3,13227 | K.DAIAEGSTQAM*K.D  | 1845.984 | 0.00663  | 2 | 1 | 36   | 0 |
| P12163_1_F3,13243 | K.DAIAEGSTQAM*K.D  | 1845.984 | 0.01117  | 3 | 1 | 65.4 | 0 |
| P12163_1_F4,11421 | K.DAIAEGSTQAM*K.D  | 1845.984 | 0.0118   | 3 | 1 | 41.8 | 0 |
| P12163_1_F4,11438 | K.DAIAEGSTQAM*K.D  | 1845.984 | 0.01015  | 2 | 1 | 46   | 0 |
| P12163_1_F4,13727 | K.DAIAEGSTQAM*K.D  | 1845.984 | 0.00721  | 3 | 1 | 71.4 | 0 |
| P12163_1_F4,13748 | K.DAIAEGSTQAM*K.D  | 1845.984 | 0.00539  | 2 | 1 | 28.5 | 0 |
| P12163_2_S3,11247 | K.DAIAEGSTQAM*K.D  | 1845.984 | 0.00271  | 3 | 1 | 28.4 | 0 |
| P12163_1_F3,10673 | K.DAIAEGSTQAMK.D   | 1829.989 | 0.00727  | 3 | 1 | 30   | 0 |
| P12163_1_F3,13156 | K.DAIAEGSTQAMK.D   | 1829.989 | 0.00457  | 3 | 1 | 42.3 | 0 |
| P12163_1_F3,13160 | K.DAIAEGSTQAMK.D   | 1829.989 | 0.00423  | 2 | 1 | 45.1 | 0 |
| P12163_1_F4,11140 | K.DAIAEGSTQAMK.D   | 1829.989 | 0.01367  | 2 | 1 | 48.3 | 0 |
| P12163_1_F4,11150 | K.DAIAEGSTQAMK.D   | 1829.989 | 0.01051  | 3 | 1 | 27   | 0 |
| P12163_1_F4,13693 | K.DAIAEGSTQAMK.D   | 1829.989 | 0.00433  | 2 | 1 | 52.9 | 0 |
| P12163_1_F4,13698 | K.DAIAEGSTQAMK.D   | 1829.989 | 0.007    | 3 | 1 | 63.6 | 0 |
| P12163_1_F6,12712 | K.DAIAEGSTQAMK.D   | 1829.989 | -0.00497 | 3 | 1 | 40   | 0 |
| P12163_2_F1,12783 | K.DAIAEGSTQAMK.D   | 1829.989 | 0.00661  | 2 | 1 | 69.4 | 0 |
| P12163_2_F4,11747 | K.DAIAEGSTQAMK.D   | 1829.989 | -0.00164 | 3 | 1 | 24.3 | 0 |
| P12163_2_S3,11128 | K.DAIAEGSTQAMK.D   | 1829.989 | 0.00184  | 3 | 1 | 40.9 | 0 |
| P12163_2_S3,11324 | K.DAIAEGSTQAMK.D   | 1829.989 | 0.00016  | 3 | 1 | 28.3 | 0 |
| P12163_2_F1,20805 | K.DLDEVILVGGSTR.I  | 1677.932 | 0.0012   | 2 | 1 | 40.9 | 0 |
| P12163_2_F6,20137 | K.DLDEVILVGGSTR.I  | 1677.932 | 0.00038  | 2 | 1 | 29   | 0 |
| P12163_1_F5,14419 | K.FLNDSVTK.A       | 1531.894 | 0.0111   | 3 | 1 | 23.2 | 0 |
| P12163_1_F5,16325 | K.FLNDSVTK.A       | 1531.894 | 0.00605  | 2 | 1 | 37   | 0 |
| P12163_1_F5,16362 | K.FLNDSVTK.A       | 1531.894 | 0.00522  | 3 | 1 | 37.9 | 0 |
| P12163_1_F6,16877 | K.FLNDSVTK.A       | 1531.894 | 0.00197  | 2 | 1 | 26.9 | 0 |
| P12163_1_F6,16901 | K.FLNDSVTK.A       | 1531.894 | 0.00279  | 3 | 1 | 26.5 | 0 |
| P12163_1_F7,15553 | K.FLNDSVTK.A       | 1531.894 | 0.00147  | 3 | 1 | 22.8 | 0 |
| P12163_1_F7,16088 | K.FLNDSVTK.A       | 1531.894 | 0.00703  | 2 | 1 | 39.4 | 0 |
| P12163_1_F8,16241 | K.FLNDSVTK.A       | 1531.894 | 0.0033   | 3 | 1 | 25.3 | 0 |
| P12163_1_F8,16294 | K.FLNDSVTK.A       | 1531.894 | 0.00325  | 2 | 1 | 37.6 | 0 |
| P12163_1_S10,1639 | K.FLNDSVTK.A       | 1531.894 | 0.00783  | 3 | 1 | 30.4 | 0 |
| P12163_2_F1,16771 | K.FLNDSVTK.A       | 1531.894 | 0.00515  | 2 | 1 | 41   | 0 |
| P12163_2_F2,208   | K.FLNDSVTK.A       | 1531.894 | 0.00557  | 2 | 1 | 39.7 | 0 |
| P12163_2_F2,589   | K.FLNDSVTK.A       | 1531.894 | 0.00555  | 3 | 1 | 34.3 | 0 |
| P12163_2_F2,655   | K.FLNDSVTK.A       | 1531.894 | 0.00575  | 2 | 1 | 34.3 | 0 |

|                   |                     |          |          |   |   |      |   |
|-------------------|---------------------|----------|----------|---|---|------|---|
| P12163_2_F2,1032  | K.FLND SVTK.A       | 1531.894 | 0.00671  | 2 | 1 | 40.2 | 0 |
| P12163_2_F2,1276  | K.FLND SVTK.A       | 1531.894 | 0.00575  | 2 | 1 | 41.1 | 0 |
| P12163_2_F2,2099  | K.FLND SVTK.A       | 1531.894 | 0.00293  | 2 | 1 | 40.9 | 0 |
| P12163_2_F2,2325  | K.FLND SVTK.A       | 1531.894 | 0.00693  | 2 | 1 | 41.4 | 0 |
| P12163_2_F2,2514  | K.FLND SVTK.A       | 1531.894 | 0.00306  | 3 | 1 | 23.4 | 0 |
| P12163_2_F2,2662  | K.FLND SVTK.A       | 1531.894 | 0.00497  | 2 | 1 | 25.5 | 0 |
| P12163_2_S5,15105 | K.FLND SVTK.A       | 1531.894 | 0.00432  | 3 | 1 | 30.7 | 0 |
| P12163_2_S5,15140 | K.FLND SVTK.A       | 1531.894 | 0.00129  | 2 | 1 | 37.6 | 0 |
| P12163_1_F5,15774 | K.QDGDVIDADFTDSK.   | 2191.097 | 0.0068   | 3 | 1 | 37.7 | 0 |
| P12163_2_F1,16231 | K.QDGDVIDADFTDSK.   | 2191.097 | -0.00638 | 2 | 1 | 36.4 | 0 |
| P12163_1_F6,11079 | K.HIDTTLTR.V        | 1260.721 | 0.00252  | 3 | 1 | 22   | 0 |
| P12163_1_F7,9923  | K.HIDTTLTR.V        | 1260.721 | 0.00261  | 3 | 1 | 33   | 0 |
| P12163_1_F9,10335 | K.HIDTTLTR.V        | 1260.721 | 0.00255  | 3 | 1 | 30.9 | 0 |
| P12163_1_F9,10848 | K.HIDTTLTR.V        | 1260.721 | 0.00273  | 3 | 1 | 33.9 | 0 |
| P12163_1_F9,11102 | K.HIDTTLTR.V        | 1260.721 | 0.00228  | 3 | 1 | 27.7 | 0 |
| P12163_1_F9,11368 | K.HIDTTLTR.V        | 1260.721 | 0.00216  | 3 | 1 | 24.7 | 0 |
| P12163_1_F9,11634 | K.HIDTTLTR.V        | 1260.721 | 0.00309  | 3 | 1 | 22.3 | 0 |
| P12163_1_F9,12048 | K.HIDTTLTR.V        | 1260.721 | 0.00324  | 3 | 1 | 28.1 | 0 |
| P12163_1_F9,12340 | K.HIDTTLTR.V        | 1260.721 | 0.00267  | 3 | 1 | 23.3 | 0 |
| P12163_1_F9,12593 | K.HIDTTLTR.V        | 1260.721 | 0.0036   | 3 | 1 | 27.3 | 0 |
| P12163_1_F9,12829 | K.HIDTTLTR.V        | 1260.721 | 0.00252  | 3 | 1 | 22.2 | 0 |
| P12163_2_F6,10271 | K.HIDTTLTR.V        | 1260.721 | 0.00255  | 3 | 1 | 29.6 | 0 |
| P12163_2_F7,9695  | K.HIDTTLTR.V        | 1260.721 | 0.00309  | 3 | 1 | 26.3 | 0 |
| P12163_2_F7,10225 | K.HIDTTLTR.V        | 1260.721 | 0.00288  | 3 | 1 | 32.2 | 0 |
| P12163_2_F7,10819 | K.HIDTTLTR.V        | 1260.721 | 0.00357  | 3 | 1 | 32.6 | 0 |
| P12163_2_F9,10330 | K.HIDTTLTR.V        | 1260.721 | 0.00369  | 3 | 1 | 22.2 | 0 |
| P12163_1_F8,14569 | K.KQDITITGASTLPNDEV | 2694.488 | 0.00376  | 3 | 1 | 79.5 | 0 |
| P12163_1_F8,15850 | K.KQDITITGASTLPNDEV | 2694.488 | 0.00466  | 3 | 1 | 34.2 | 0 |
| P12163_1_F8,17324 | K.KQDITITGASTLPNDEV | 2694.488 | 0.00616  | 3 | 1 | 58.3 | 0 |
| P12163_1_F8,17633 | K.KQDITITGASTLPNDEV | 2694.488 | 0.00457  | 3 | 1 | 61.5 | 0 |
| P12163_1_F8,18149 | K.KQDITITGASTLPNDEV | 2694.488 | 0.00171  | 3 | 1 | 50.1 | 0 |
| P12163_2_F6,15387 | K.KQDITITGASTLPNDEV | 2694.488 | 0.00643  | 3 | 1 | 71.4 | 0 |
| P12163_2_S5,12951 | K.KQDITITGASTLPNDEV | 2694.488 | 0.00655  | 4 | 1 | 39.6 | 0 |
| P12163_2_S5,13552 | K.KQDITITGASTLPNDEV | 2694.488 | 0.01335  | 4 | 1 | 33.8 | 0 |
| P12163_2_S5,13677 | K.KQDITITGASTLPNDEV | 2694.488 | 0.00769  | 3 | 1 | 38.1 | 0 |
| P12163_2_S5,14241 | K.KQDITITGASTLPNDEV | 2694.488 | 0.00175  | 3 | 1 | 60   | 0 |
| P12163_2_S5,14601 | K.KQDITITGASTLPNDEV | 2694.488 | 0.004    | 3 | 1 | 58.1 | 0 |
| P12163_1_F4,15519 | K.LECPAIGK.Q        | 1495.876 | 0.00397  | 2 | 1 | 29   | 0 |
| P12163_1_F4,16606 | K.LECPAIGK.Q        | 1495.876 | 0.00649  | 2 | 1 | 24   | 0 |
| P12163_1_F4,17506 | K.LECPAIGK.Q        | 1495.876 | 0.00045  | 2 | 1 | 25.1 | 0 |
| P12163_1_F7,13835 | K.LECPAIGK.Q        | 1495.876 | -0.00011 | 2 | 1 | 24.2 | 0 |
| P12163_2_F1,14548 | K.LECPAIGK.Q        | 1495.876 | 0.00331  | 2 | 1 | 24.3 | 0 |
| P12163_2_F2,759   | K.LECPAIGK.Q        | 1495.876 | 0.00538  | 3 | 1 | 22.6 | 0 |
| P12163_1_F3,11070 | K.M*VEVDEESK.Q      | 1689.882 | 0.00779  | 2 | 1 | 40.7 | 0 |
| P12163_1_F3,11119 | K.M*VEVDEESK.Q      | 1689.882 | 0.00636  | 3 | 1 | 35.6 | 0 |
| P12163_1_F3,13954 | K.M*VEVDEESK.Q      | 1689.882 | 0.00173  | 2 | 1 | 36.2 | 0 |
| P12163_1_F3,13990 | K.M*VEVDEESK.Q      | 1689.882 | 0.00426  | 3 | 1 | 25   | 0 |
| P12163_1_F4,11553 | K.M*VEVDEESK.Q      | 1689.882 | 0.00625  | 2 | 1 | 39.4 | 0 |
| P12163_1_F4,11573 | K.M*VEVDEESK.Q      | 1689.882 | 0.00501  | 3 | 1 | 40.9 | 0 |
| P12163_1_F4,14443 | K.M*VEVDEESK.Q      | 1689.882 | 0.0147   | 3 | 1 | 34.8 | 0 |
| P12163_1_F4,14457 | K.M*VEVDEESK.Q      | 1689.882 | 0.01663  | 2 | 1 | 39.3 | 0 |

|                                     |          |          |   |   |      |   |
|-------------------------------------|----------|----------|---|---|------|---|
| P12163_1_F7,12525 K.M*VEVDEESK.Q    | 1689.882 | 0.00192  | 3 | 1 | 22.6 | 0 |
| P12163_1_F2,13038 K.MVEVDEESK.Q     | 1673.888 | 0.00645  | 2 | 1 | 41.5 | 0 |
| P12163_1_F3,12118 K.MVEVDEESK.Q     | 1673.888 | 0.00528  | 3 | 1 | 25.2 | 0 |
| P12163_1_F3,12152 K.MVEVDEESK.Q     | 1673.888 | 0.00495  | 2 | 1 | 29.9 | 0 |
| P12163_1_F3,13920 K.MVEVDEESK.Q     | 1673.888 | 0.00503  | 2 | 1 | 42.7 | 0 |
| P12163_1_F3,13948 K.MVEVDEESK.Q     | 1673.888 | 0.00615  | 3 | 1 | 36.5 | 0 |
| P12163_1_F4,12616 K.MVEVDEESK.Q     | 1673.888 | 0.00471  | 3 | 1 | 38   | 0 |
| P12163_1_F4,12654 K.MVEVDEESK.Q     | 1673.888 | 0.00813  | 2 | 1 | 29.1 | 0 |
| P12163_1_F4,14419 K.MVEVDEESK.Q     | 1673.888 | 0.01689  | 2 | 1 | 43.5 | 0 |
| P12163_1_F4,14421 K.MVEVDEESK.Q     | 1673.888 | 0.01809  | 3 | 1 | 38.9 | 0 |
| P12163_1_F5,13066 K.MVEVDEESK.Q     | 1673.888 | 0.00793  | 2 | 1 | 42.6 | 0 |
| P12163_1_F6,13914 K.MVEVDEESK.Q     | 1673.888 | 0.01339  | 2 | 1 | 42.2 | 0 |
| P12163_1_F7,12689 K.MVEVDEESK.Q     | 1673.888 | 0.00201  | 3 | 1 | 29.6 | 0 |
| P12163_2_F1,13489 K.MVEVDEESK.Q     | 1673.888 | 0.00439  | 2 | 1 | 42.2 | 0 |
| P12163_2_F1,13496 K.MVEVDEESK.Q     | 1673.888 | 0.00441  | 3 | 1 | 23.6 | 0 |
| P12163_2_F4,12308 K.MVEVDEESK.Q     | 1673.888 | 0.00749  | 2 | 1 | 33.1 | 0 |
| P12163_2_S3,11687 K.MVEVDEESK.Q     | 1673.888 | 0.00201  | 3 | 1 | 26.2 | 0 |
| P12163_2_S3,11873 K.MVEVDEESK.Q     | 1673.888 | 0.00357  | 3 | 1 | 32.8 | 0 |
| P12163_1_F3,11506 K.NQADSVVYQTEK.Q  | 1990.07  | 0.00735  | 3 | 1 | 38.1 | 0 |
| P12163_1_F4,10255 K.NQADSVVYQTEK.Q  | 1990.07  | 0.00887  | 2 | 1 | 49.2 | 0 |
| P12163_1_F4,11424 K.NQADSVVYQTEK.Q  | 1990.07  | 0.00757  | 2 | 1 | 42.9 | 0 |
| P12163_1_F4,13160 K.NQADSVVYQTEK.Q  | 1990.07  | 0.00153  | 2 | 1 | 66.9 | 0 |
| P12163_1_F4,13169 K.NQADSVVYQTEK.Q  | 1990.07  | 0.00528  | 3 | 1 | 40.1 | 0 |
| P12163_1_F4,14137 K.NQADSVVYQTEK.Q  | 1990.07  | 0.01395  | 3 | 1 | 27.6 | 0 |
| P12163_1_F4,23726 K.NQADSVVYQTEK.Q  | 1990.07  | 0.00425  | 2 | 1 | 48.4 | 0 |
| P12163_1_F5,11849 K.NQADSVVYQTEK.Q  | 1990.07  | 0.00438  | 3 | 1 | 43.6 | 0 |
| P12163_1_F5,11869 K.NQADSVVYQTEK.Q  | 1990.07  | 0.00459  | 2 | 1 | 65.5 | 0 |
| P12163_1_F6,12703 K.NQADSVVYQTEK.Q  | 1990.07  | 0.01011  | 3 | 1 | 33.9 | 0 |
| P12163_1_F7,11535 K.NQADSVVYQTEK.Q  | 1990.07  | 0.00315  | 3 | 1 | 35.7 | 0 |
| P12163_1_F7,12105 K.NQADSVVYQTEK.Q  | 1990.07  | 0.00345  | 3 | 1 | 24.3 | 0 |
| P12163_1_F9,12595 K.NQADSVVYQTEK.Q  | 1990.07  | 0.00337  | 2 | 1 | 61.3 | 0 |
| P12163_2_F1,12204 K.NQADSVVYQTEK.Q  | 1990.07  | -0.00067 | 2 | 1 | 56.9 | 0 |
| P12163_2_F1,12232 K.NQADSVVYQTEK.Q  | 1990.07  | 0.00555  | 3 | 1 | 48.1 | 0 |
| P12163_2_F1,12721 K.NQADSVVYQTEK.Q  | 1990.07  | 0.00521  | 2 | 1 | 37.1 | 0 |
| P12163_2_F4,11175 K.NQADSVVYQTEK.Q  | 1990.07  | 0.00377  | 2 | 1 | 28.4 | 0 |
| P12163_2_F9,10637 K.NQADSVVYQTEK.Q  | 1990.07  | 0.00636  | 3 | 1 | 33.6 | 0 |
| P12163_2_F9,11987 K.NQADSVVYQTEK.Q  | 1990.07  | 0.00619  | 2 | 1 | 74.2 | 0 |
| P12163_2_F9,12083 K.NQADSVVYQTEK.Q  | 1990.07  | 0.00972  | 3 | 1 | 40.8 | 0 |
| P12163_2_S5,12036 K.NQADSVVYQTEK.Q  | 1990.07  | 0.0105   | 3 | 1 | 37.5 | 0 |
| P12163_1_F4,22740 K.QFAAEEISAQVLR.K | 1765.975 | 0.00472  | 2 | 1 | 46.5 | 0 |
| P12163_1_F6,21239 K.QFAAEEISAQVLR.K | 1765.975 | 0.00156  | 2 | 1 | 24.5 | 0 |
| P12163_1_F7,20455 K.QFAAEEISAQVLR.K | 1765.975 | 0.00132  | 2 | 1 | 31.9 | 0 |
| P12163_1_S1,15742 K.QFAAEEISAQVLR.K | 1765.975 | 0.00225  | 3 | 1 | 68.7 | 0 |
| P12163_1_S1,15764 K.QFAAEEISAQVLR.K | 1765.975 | 0.00315  | 3 | 1 | 45.7 | 0 |
| P12163_1_S1,20635 K.QFAAEEISAQVLR.K | 1765.975 | -0.0003  | 3 | 1 | 97.9 | 0 |
| P12163_1_S1,20657 K.QFAAEEISAQVLR.K | 1765.975 | 0.00408  | 2 | 1 | 52.8 | 0 |
| P12163_1_S1,20865 K.QFAAEEISAQVLR.K | 1765.975 | 0.00252  | 3 | 1 | 100  | 0 |
| P12163_1_S1,20888 K.QFAAEEISAQVLR.K | 1765.975 | 0.00388  | 2 | 1 | 53.5 | 0 |
| P12163_1_S1,21108 K.QFAAEEISAQVLR.K | 1765.975 | -0.00486 | 3 | 1 | 40.2 | 0 |
| P12163_1_S1,22180 K.QFAAEEISAQVLR.K | 1765.975 | 0.00636  | 3 | 1 | 24.4 | 0 |
| P12163_1_S1,22950 K.QFAAEEISAQVLR.K | 1765.975 | -0.00174 | 3 | 1 | 28.4 | 0 |

|                                        |          |          |   |   |      |   |
|----------------------------------------|----------|----------|---|---|------|---|
| P12163_1_S10,2001:K.QFAAEEISAQVLR.K    | 1765.975 | 0.00213  | 3 | 1 | 45.3 | 0 |
| P12163_2_F9,14815 K.RDEGIDLLK.D        | 1666.995 | -0.00002 | 3 | 1 | 29.1 | 0 |
| P12163_1_F4,10181 K.SLGSFR.L           | 970.5623 | 0.00388  | 3 | 1 | 26.6 | 0 |
| P12163_2_F2,8702 K.SLGSFR.L            | 970.5623 | 0.00382  | 3 | 1 | 22.9 | 0 |
| P12163_2_F2,9071 K.SLGSFR.L            | 970.5623 | 0.004    | 3 | 1 | 26.8 | 0 |
| P12163_1_F2,8388 K.TPVETSLR.D          | 1206.7   | 0.00438  | 3 | 1 | 33.4 | 0 |
| P12163_1_F2,8675 K.TPVETSLR.D          | 1206.7   | 0.00528  | 3 | 1 | 26.6 | 0 |
| P12163_1_F2,9170 K.TPVETSLR.D          | 1206.7   | 0.00285  | 3 | 1 | 29.8 | 0 |
| P12163_1_F2,9413 K.TPVETSLR.D          | 1206.7   | 0.00213  | 3 | 1 | 22.9 | 0 |
| P12163_1_F2,10327 K.TPVETSLR.D         | 1206.7   | 0.00036  | 3 | 1 | 31.4 | 0 |
| P12163_2_F1,8884 K.TPVETSLR.D          | 1206.7   | 0.00291  | 3 | 1 | 29.8 | 0 |
| P12163_1_F5,11378 K.VPAEVK.G           | 1250.793 | 0.00137  | 3 | 1 | 23.8 | 0 |
| P12163_2_F1,11927 K.VPAEVK.G           | 1250.793 | 0.00749  | 3 | 1 | 27.7 | 0 |
| P12163_2_F2,12245 K.VPAEVK.G           | 1250.793 | 0.00626  | 3 | 1 | 25.5 | 0 |
| P12163_1_F3,17285 R.DEGIDLLK.D         | 1510.894 | 0.00454  | 2 | 1 | 36.1 | 0 |
| P12163_1_F3,18676 R.DEGIDLLK.D         | 1510.894 | 0.006    | 2 | 1 | 40.5 | 0 |
| P12163_1_F3,18707 R.DEGIDLLK.D         | 1510.894 | 0.00475  | 3 | 1 | 45.7 | 0 |
| P12163_1_F4,19155 R.DEGIDLLK.D         | 1510.894 | 0.00562  | 3 | 1 | 41.3 | 0 |
| P12163_1_F4,19331 R.DEGIDLLK.D         | 1510.894 | 0.00878  | 2 | 1 | 40.2 | 0 |
| P12163_1_F5,17867 R.DEGIDLLK.D         | 1510.894 | 0.007    | 2 | 1 | 25.5 | 0 |
| P12163_1_F6,18203 R.DEGIDLLK.D         | 1510.894 | 0.00422  | 2 | 1 | 26.1 | 0 |
| P12163_1_F6,18258 R.DEGIDLLK.D         | 1510.894 | 0.00301  | 3 | 1 | 27.1 | 0 |
| P12163_1_F7,16823 R.DEGIDLLK.D         | 1510.894 | 0.00352  | 3 | 1 | 33.8 | 0 |
| P12163_1_F7,16842 R.DEGIDLLK.D         | 1510.894 | 0.00354  | 2 | 1 | 35   | 0 |
| P12163_1_F7,17374 R.DEGIDLLK.D         | 1510.894 | 0.0064   | 3 | 1 | 33.2 | 0 |
| P12163_1_F8,18218 R.DEGIDLLK.D         | 1510.894 | 0.00631  | 3 | 1 | 25   | 0 |
| P12163_2_F4,16454 R.DEGIDLLK.D         | 1510.894 | 0.00154  | 2 | 1 | 36.9 | 0 |
| P12163_2_F4,16482 R.DEGIDLLK.D         | 1510.894 | 0.00127  | 3 | 1 | 35.3 | 0 |
| P12163_2_S3,15205 R.DEGIDLLK.D         | 1510.894 | 0.00104  | 2 | 1 | 33.4 | 0 |
| P12163_2_S5,16847 R.DEGIDLLK.D         | 1510.894 | 0.00247  | 3 | 1 | 31.3 | 0 |
| P12163_1_F6,7789 R.DENGNV.L            | 1383.769 | 0.00328  | 2 | 1 | 24.2 | 0 |
| P12163_1_F4,16332 R.GVPQIEVK.F         | 1477.92  | 0.00545  | 3 | 1 | 26.7 | 0 |
| P12163_1_F4,16575 R.GVPQIEVK.F         | 1477.92  | 0.00415  | 3 | 1 | 27.4 | 0 |
| P12163_2_F1,15614 R.GVPQIEVK.F         | 1477.92  | 0.00442  | 3 | 1 | 30.4 | 0 |
| P12163_2_F4,14119 R.GVPQIEVK.F         | 1477.92  | -0.00125 | 3 | 1 | 26   | 0 |
| P12163_2_S5,14303 R.GVPQIEVK.F         | 1477.92  | 0.00649  | 3 | 1 | 24   | 0 |
| P12163_1_F2,21058 R.IAGLDVLR.I         | 1160.73  | 0.0029   | 3 | 1 | 53.6 | 0 |
| P12163_1_F2,21070 R.IAGLDVLR.I         | 1160.73  | -0.00096 | 2 | 1 | 39.3 | 0 |
| P12163_1_F2,21297 R.IAGLDVLR.I         | 1160.73  | 0.00198  | 2 | 1 | 30.1 | 0 |
| P12163_1_F4,22012 R.IAGLDVLR.I         | 1160.73  | 0.00514  | 2 | 1 | 27.7 | 0 |
| P12163_1_F5,20952 R.IAGLDVLR.I         | 1160.73  | 0.00348  | 2 | 1 | 28.1 | 0 |
| P12163_1_F7,20139 R.IAGLDVLR.I         | 1160.73  | 0.0024   | 2 | 1 | 28.5 | 0 |
| P12163_1_S1,19899 R.IAGLDVLR.I         | 1160.73  | 0.00602  | 2 | 1 | 29.9 | 0 |
| P12163_1_F2,18482 R.IINEPTAASLAYGFEK.I | 2332.301 | 0.00618  | 3 | 1 | 52.7 | 0 |
| P12163_1_F2,18483 R.IINEPTAASLAYGFEK.I | 2332.301 | 0.00472  | 4 | 1 | 34.9 | 0 |
| P12163_1_F2,22022 R.IINEPTAASLAYGFEK.I | 2332.301 | 0.00528  | 3 | 1 | 60.2 | 0 |
| P12163_1_F2,22262 R.IINEPTAASLAYGFEK.I | 2332.301 | -0.00654 | 3 | 1 | 38.9 | 0 |
| P12163_1_F4,23303 R.IINEPTAASLAYGFEK.I | 2332.301 | 0.00459  | 3 | 1 | 43.6 | 0 |
| P12163_1_F5,21469 R.IINEPTAASLAYGFEK.I | 2332.301 | -0.00168 | 3 | 1 | 39.1 | 0 |
| P12163_1_F9,21163 R.IINEPTAASLAYGFEK.I | 2332.301 | 0.00174  | 3 | 1 | 29.3 | 0 |
| P12163_1_S1,17591 R.IINEPTAASLAYGFEK.I | 2332.301 | 0.00736  | 4 | 1 | 47.9 | 0 |

|                   |                       |          |          |   |   |      |   |
|-------------------|-----------------------|----------|----------|---|---|------|---|
| P12163_1_S1,17595 | R.IINEPTAASLAYGF EK.I | 2332.301 | 0.00624  | 3 | 1 | 38.4 | 0 |
| P12163_1_S1,20828 | R.IINEPTAASLAYGF EK.I | 2332.301 | 0.00084  | 4 | 1 | 28.5 | 0 |
| P12163_1_S1,20877 | R.IINEPTAASLAYGF EK.I | 2332.301 | 0.00547  | 2 | 1 | 71.9 | 0 |
| P12163_1_S1,21002 | R.IINEPTAASLAYGF EK.I | 2332.301 | -0.00132 | 3 | 1 | 34.5 | 0 |
| P12163_1_S10,2002 | R.IINEPTAASLAYGF EK.I | 2332.301 | -0.00165 | 3 | 1 | 28   | 0 |
| P12163_2_F6,21528 | R.IINEPTAASLAYGF EK.I | 2332.301 | 0.0039   | 3 | 1 | 56.8 | 0 |
| P12163_1_F3,20924 | R.IPAVQELVK.K         | 1605.02  | 0.00721  | 2 | 1 | 26.5 | 0 |
| P12163_1_F3,20944 | R.IPAVQELVK.K         | 1605.02  | 0.00694  | 3 | 1 | 41.7 | 0 |
| P12163_1_F4,21587 | R.IPAVQELVK.K         | 1605.02  | 0.00178  | 3 | 1 | 40.7 | 0 |
| P12163_1_F4,21597 | R.IPAVQELVK.K         | 1605.02  | 0.00995  | 2 | 1 | 27.2 | 0 |
| P12163_1_F4,21786 | R.IPAVQELVK.K         | 1605.02  | 0.00589  | 3 | 1 | 35.5 | 0 |
| P12163_1_F4,21796 | R.IPAVQELVK.K         | 1605.02  | 0.00611  | 2 | 1 | 37.9 | 0 |
| P12163_1_F4,22009 | R.IPAVQELVK.K         | 1605.02  | 0.00825  | 2 | 1 | 25.1 | 0 |
| P12163_1_F5,20652 | R.IPAVQELVK.K         | 1605.02  | 0.00652  | 3 | 1 | 41.2 | 0 |
| P12163_1_F6,19869 | R.IPAVQELVK.K         | 1605.02  | 0.00187  | 3 | 1 | 45.5 | 0 |
| P12163_1_F6,20166 | R.IPAVQELVK.K         | 1605.02  | 0.0001   | 3 | 1 | 32.7 | 0 |
| P12163_2_F1,21139 | R.IPAVQELVK.K         | 1605.02  | 0.00451  | 3 | 1 | 39.6 | 0 |
| P12163_2_F1,21151 | R.IPAVQELVK.K         | 1605.02  | 0.00709  | 2 | 1 | 26.1 | 0 |
| P12163_2_F1,21388 | R.IPAVQELVK.K         | 1605.02  | 0.00385  | 3 | 1 | 46   | 0 |
| P12163_2_F1,21400 | R.IPAVQELVK.K         | 1605.02  | 0.00621  | 2 | 1 | 31.4 | 0 |
| P12163_2_F1,21613 | R.IPAVQELVK.K         | 1605.02  | 0.00937  | 2 | 1 | 36   | 0 |
| P12163_2_F4,18613 | R.IPAVQELVK.K         | 1605.02  | 0.0007   | 3 | 1 | 41   | 0 |
| P12163_2_F4,18971 | R.IPAVQELVK.K         | 1605.02  | 0.00085  | 3 | 1 | 30.1 | 0 |
| P12163_1_F9,12681 | R.KMVEVDEESK.Q        | 2106.188 | 0.0057   | 3 | 1 | 28   | 0 |
| P12163_1_S1,14262 | R.LDGIPPAPR.G         | 1239.736 | 0.00459  | 3 | 1 | 27.1 | 0 |
| P12163_1_S1,14444 | R.LDGIPPAPR.G         | 1239.736 | 0.00383  | 2 | 1 | 24   | 0 |
| P12163_1_S1,14496 | R.LDGIPPAPR.G         | 1239.736 | 0.00321  | 3 | 1 | 29.5 | 0 |
| P12163_1_S1,14732 | R.LDGIPPAPR.G         | 1239.736 | 0.00348  | 3 | 1 | 25.4 | 0 |
| P12163_1_S1,14970 | R.LDGIPPAPR.G         | 1239.736 | 0.00204  | 3 | 1 | 27.5 | 0 |
| P12163_1_S1,15214 | R.LDGIPPAPR.G         | 1239.736 | 0.00375  | 3 | 1 | 27.5 | 0 |
| P12163_1_S1,15466 | R.LDGIPPAPR.G         | 1239.736 | 0.00429  | 3 | 1 | 28.5 | 0 |
| P12163_1_S1,15736 | R.LDGIPPAPR.G         | 1239.736 | 0.00255  | 3 | 1 | 23.7 | 0 |
| P12163_1_S1,16009 | R.LDGIPPAPR.G         | 1239.736 | 0.00252  | 3 | 1 | 28.5 | 0 |
| P12163_1_S10,837  | R.LDGIPPAPR.G         | 1239.736 | 0.00397  | 2 | 1 | 28.7 | 0 |
| P12163_1_F5,10748 | R.LTETA EK.A          | 1399.825 | 0.00724  | 2 | 1 | 28.8 | 0 |
| P12163_1_F6,11741 | R.LTETA EK.A          | 1399.825 | -0.00083 | 3 | 1 | 22.1 | 0 |
| P12163_2_F1,11207 | R.LTETA EK.A          | 1399.825 | 0.00475  | 3 | 1 | 28.4 | 0 |
| P12163_2_S5,11105 | R.LTETA EK.A          | 1399.825 | 0.00835  | 3 | 1 | 29.3 | 0 |
| P12163_1_F6,16258 | R.LVGQIAK.R           | 1336.877 | 0.00605  | 2 | 1 | 23.9 | 0 |
| P12163_1_F4,11056 | R.MVQEAER.F           | 1166.614 | 0.00665  | 2 | 1 | 32.2 | 0 |
| P12163_2_F1,10018 | R.MVQEAER.F           | 1166.614 | 0.00163  | 2 | 1 | 29.2 | 0 |
| P12163_1_F4,11844 | R.NTTLP TSK.S         | 1469.878 | 0.00451  | 3 | 1 | 23.6 | 0 |
| P12163_2_F1,10953 | R.NTTLP TSK.S         | 1469.878 | 0.00433  | 3 | 1 | 22.4 | 0 |
| P12163_1_F3,15072 | R.QAVVNPENTFFSVK.R    | 2188.222 | 0.00759  | 3 | 1 | 39.1 | 0 |
| P12163_1_F3,17735 | R.QAVVNPENTFFSVK.R    | 2188.222 | 0.00891  | 3 | 1 | 30.8 | 0 |
| P12163_1_F3,18039 | R.QAVVNPENTFFSVK.R    | 2188.222 | 0.00672  | 4 | 1 | 51.6 | 0 |
| P12163_1_F3,18190 | R.QAVVNPENTFFSVK.R    | 2188.222 | 0.00633  | 3 | 1 | 40.1 | 0 |
| P12163_1_F3,18466 | R.QAVVNPENTFFSVK.R    | 2188.222 | 0.00897  | 3 | 1 | 50.2 | 0 |
| P12163_1_F3,19591 | R.QAVVNPENTFFSVK.R    | 2188.222 | 0.00141  | 3 | 1 | 46.3 | 0 |
| P12163_1_F3,21003 | R.QAVVNPENTFFSVK.R    | 2188.222 | 0.01443  | 3 | 1 | 38.2 | 0 |
| P12163_1_F3,21109 | R.QAVVNPENTFFSVK.R    | 2188.222 | 0.00821  | 2 | 1 | 64.3 | 0 |



|                   |                        |          |          |   |   |      |   |
|-------------------|------------------------|----------|----------|---|---|------|---|
| P12163_1_F3,21199 | R.QAVVNPENTFFSVK.R     | 2188.222 | 0.00831  | 3 | 1 | 63.4 | 0 |
| P12163_1_F3,21251 | R.QAVVNPENTFFSVK.R     | 2188.222 | 0.00216  | 4 | 1 | 35.2 | 0 |
| P12163_1_F3,21290 | R.QAVVNPENTFFSVK.R     | 2188.222 | 0.00619  | 2 | 1 | 62.5 | 0 |
| P12163_1_F3,21400 | R.QAVVNPENTFFSVK.R     | 2188.222 | 0.00663  | 3 | 1 | 59   | 0 |
| P12163_1_F4,22027 | R.QAVVNPENTFFSVK.R     | 2188.222 | 0.00705  | 3 | 1 | 51.9 | 0 |
| P12163_1_F5,20339 | R.QAVVNPENTFFSVK.R     | 2188.222 | 0.00522  | 3 | 1 | 41.8 | 0 |
| P12163_1_F6,20256 | R.QAVVNPENTFFSVK.R     | 2188.222 | 0.00228  | 3 | 1 | 58.5 | 0 |
| P12163_1_F6,20589 | R.QAVVNPENTFFSVK.R     | 2188.222 | 0.00435  | 3 | 1 | 31.7 | 0 |
| P12163_1_F6,21169 | R.QAVVNPENTFFSVK.R     | 2188.222 | -0.00039 | 3 | 1 | 24.2 | 0 |
| P12163_1_F7,19832 | R.QAVVNPENTFFSVK.R     | 2188.222 | 0.00075  | 3 | 1 | 54.5 | 0 |
| P12163_1_F9,20216 | R.QAVVNPENTFFSVK.R     | 2188.222 | 0.006    | 3 | 1 | 53.8 | 0 |
| P12163_2_F1,21501 | R.QAVVNPENTFFSVK.R     | 2188.222 | 0.00381  | 3 | 1 | 47   | 0 |
| P12163_2_F1,21526 | R.QAVVNPENTFFSVK.R     | 2188.222 | 0.00495  | 2 | 1 | 37.3 | 0 |
| P12163_2_F1,22052 | R.QAVVNPENTFFSVK.R     | 2188.222 | 0.00519  | 3 | 1 | 33.6 | 0 |
| P12163_2_F4,19287 | R.QAVVNPENTFFSVK.R     | 2188.222 | 0.00594  | 3 | 1 | 22   | 0 |
| P12163_1_F3,12583 | R.TTPSVVAYTK.I ! R.TTI | 1674.989 | 0.00453  | 3 | 1 | 22.1 | 0 |
| P12163_1_F3,14511 | R.TTPSVVAYTK.I ! R.TTI | 1674.989 | 0.00831  | 2 | 1 | 25.8 | 0 |
| P12163_1_F4,13048 | R.TTPSVVAYTK.I ! R.TTI | 1674.989 | 0.00582  | 3 | 1 | 36.6 | 0 |
| P12163_1_F4,14949 | R.TTPSVVAYTK.I ! R.TTI | 1674.989 | 0.00675  | 2 | 1 | 32.4 | 0 |
| P12163_1_F4,14970 | R.TTPSVVAYTK.I ! R.TTI | 1674.989 | 0.00819  | 3 | 1 | 33.8 | 0 |
| P12163_1_F9,12449 | R.TTPSVVAYTK.I ! R.TTI | 1674.989 | 0.00789  | 3 | 1 | 23.4 | 0 |
| P12163_2_F1,12033 | R.TTPSVVAYTK.I ! R.TTI | 1674.989 | 0.00377  | 2 | 1 | 28.6 | 0 |
| P12163_2_F1,13970 | R.TTPSVVAYTK.I ! R.TTI | 1674.989 | 0.00411  | 2 | 1 | 34.9 | 0 |
| P12163_2_F1,13989 | R.TTPSVVAYTK.I ! R.TTI | 1674.989 | 0.00414  | 3 | 1 | 40.3 | 0 |
| P12163_2_F4,12927 | R.TTPSVVAYTK.I ! R.TTI | 1674.989 | 0.00045  | 3 | 1 | 26.4 | 0 |
| P12163_1_F8,21599 | R.VKFEELCSDLLDR.L      | 2232.215 | 0.00782  | 4 | 1 | 44.6 | 0 |
| P12163_2_F6,21266 | R.VKFEELCSDLLDR.L      | 2232.215 | 0.00303  | 2 | 1 | 40.2 | 0 |
| P12163_2_F8_12070 | R.VKFEELCSDLLDR.L      | 2232.215 | 0.00514  | 4 | 1 | 38.8 | 0 |
| P12163_1_F4,21011 | K.AAFEEFNK.M           | 1676.947 | 0.0108   | 3 | 1 | 42.1 | 0 |
| P12163_1_F5,19730 | K.AAFEEFNK.M           | 1676.947 | 0.00446  | 2 | 1 | 49.1 | 0 |
| P12163_1_F5,19771 | K.AAFEEFNK.M           | 1676.947 | 0.00495  | 3 | 1 | 44.9 | 0 |
| P12163_1_F6,225   | K.AAFEEFNK.M           | 1676.947 | 0.00429  | 3 | 1 | 26.9 | 0 |
| P12163_1_F7,18593 | K.AAFEEFNK.M           | 1676.947 | 0.00124  | 2 | 1 | 37.9 | 0 |
| P12163_1_F7,18609 | K.AAFEEFNK.M           | 1676.947 | 0.0021   | 3 | 1 | 39.3 | 0 |
| P12163_2_F1,20355 | K.AAFEEFNK.M           | 1676.947 | 0.00788  | 2 | 1 | 48.6 | 0 |
| P12163_2_F1,20708 | K.AAFEEFNK.M           | 1676.947 | 0.01188  | 3 | 1 | 33.1 | 0 |
| P12163_2_F2,47    | K.AAFEEFNK.M           | 1676.947 | -0.00225 | 3 | 1 | 42.4 | 0 |
| P12163_2_F2,20328 | K.AAFEEFNK.M           | 1676.947 | 0.00473  | 2 | 1 | 42.8 | 0 |
| P12163_2_S5,17976 | K.AAFEEFNK.M           | 1676.947 | 0.00126  | 3 | 1 | 40.5 | 0 |
| P12163_1_S10,9766 | K.APHGLK.L             | 1230.778 | 0.00724  | 3 | 1 | 33.6 | 0 |
| P12163_2_F8_12070 | K.APHGLK.L             | 1230.778 | 0.00757  | 3 | 1 | 31.4 | 0 |
| P12163_2_S5,18500 | K.AVITVKPIVSDPLAVEH    | 2691.679 | 0.00275  | 5 | 1 | 35.9 | 0 |
| P12163_1_F4,25001 | K.DEPWWPVLK.T          | 1778.01  | 0.00298  | 2 | 1 | 24.4 | 0 |
| P12163_2_F4,6007  | K.EHPYPR.R             | 1102.595 | 0.00326  | 3 | 1 | 23.2 | 0 |
| P12163_2_S5,6960  | K.EHPYPR.R             | 1102.595 | 0.00197  | 3 | 1 | 23.8 | 0 |
| P12163_1_F3,16205 | K.EIGGSM*TVEEAIK.Q     | 1988.083 | -0.00524 | 3 | 1 | 40.1 | 0 |
| P12163_1_F2,19158 | K.EM*EPAWGDDPVIK.A     | 2111.094 | 0.00576  | 3 | 1 | 23   | 0 |
| P12163_1_F4,20931 | K.GFPSLEAIDK.L         | 1684.973 | 0.01469  | 2 | 1 | 31.8 | 0 |
| P12163_1_F4,23138 | K.GFPSLEAIDK.L         | 1684.973 | 0.00657  | 3 | 1 | 24.7 | 0 |
| P12163_1_F4,23407 | K.GFPSLEAIDK.L         | 1684.973 | 0.00108  | 3 | 1 | 25   | 0 |
| P12163_1_F6,19444 | K.GFPSLEAIDK.L         | 1684.973 | 0.0009   | 3 | 1 | 28.1 | 0 |

|                   |                   |          |          |   |   |      |   |
|-------------------|-------------------|----------|----------|---|---|------|---|
| P12163_1_F8,19897 | K.GFPSLEAIDK.L    | 1684.973 | 0.00612  | 3 | 1 | 23.3 | 0 |
| P12163_1_S10,1866 | K.GFPSLEAIDK.L    | 1684.973 | 0.00516  | 3 | 1 | 25.7 | 0 |
| P12163_2_F1,20494 | K.GFPSLEAIDK.L    | 1684.973 | 0.00684  | 3 | 1 | 41.2 | 0 |
| P12163_2_F1,20539 | K.GFPSLEAIDK.L    | 1684.973 | 0.01301  | 2 | 1 | 33.1 | 0 |
| P12163_2_F2,81    | K.GFPSLEAIDK.L    | 1684.973 | 0.00855  | 3 | 1 | 31.4 | 0 |
| P12163_2_F4,18102 | K.GFPSLEAIDK.L    | 1684.973 | 0.00144  | 3 | 1 | 23.4 | 0 |
| P12163_1_F5,21256 | K.GVPYSISI.-      | 1139.661 | 0.00418  | 2 | 1 | 52.8 | 0 |
| P12163_2_F2,21781 | K.GVPYSISI.-      | 1139.661 | 0.00252  | 2 | 1 | 45.5 | 0 |
| P12163_1_F2,22568 | K.LFNEGVLPPEIEK.L | 2222.253 | 0.0055   | 3 | 1 | 26.7 | 0 |
| P12163_1_S1,21317 | K.LFNEGVLPPEIEK.L | 2222.253 | 0.00268  | 3 | 1 | 36.1 | 0 |
| P12163_1_S1,21521 | K.LFNEGVLPPEIEK.L | 2222.253 | 0.00079  | 3 | 1 | 34.2 | 0 |
| P12163_1_S1,21633 | K.LFNEGVLPPEIEK.L | 2222.253 | 0.00215  | 4 | 1 | 31.5 | 0 |
| P12163_1_S1,21732 | K.LFNEGVLPPEIEK.L | 2222.253 | 0.00154  | 3 | 1 | 34   | 0 |
| P12163_1_S1,22247 | K.LFNEGVLPPEIEK.L | 2222.253 | 0.00559  | 3 | 1 | 28.9 | 0 |
| P12163_1_S1,22508 | K.LFNEGVLPPEIEK.L | 2222.253 | 0.00808  | 3 | 1 | 31.5 | 0 |
| P12163_2_F6,16068 | K.SDLVRPVLGGK.E   | 1749.084 | 0.00524  | 4 | 1 | 30.5 | 0 |
| P12163_2_F6,19690 | K.SFLEKPEAALLR.C  | 1982.189 | 0.00442  | 2 | 1 | 39.5 | 0 |
| P12163_2_F2,9396  | K.SIANTGK.D       | 1298.789 | 0.00542  | 2 | 1 | 23.9 | 0 |
| P12163_1_S1,13972 | R.AEELNNLQGDGQGER | 1933.952 | 0.00298  | 2 | 1 | 77.4 | 0 |
| P12163_1_S1,14035 | R.AEELNNLQGDGQGER | 1933.952 | -0.0029  | 3 | 1 | 53.6 | 0 |
| P12163_1_S1,14218 | R.AEELNNLQGDGQGER | 1933.952 | 0.00122  | 2 | 1 | 75.1 | 0 |
| P12163_1_S1,14804 | R.AEELNNLQGDGQGER | 1933.952 | 0.00908  | 2 | 1 | 65.3 | 0 |
| P12163_1_S1,15162 | R.AEELNNLQGDGQGER | 1933.952 | -0.00244 | 2 | 1 | 28.8 | 0 |
| P12163_1_F4,21079 | R.DEAFSLLK.T      | 1530.899 | 0.00562  | 2 | 1 | 29.6 | 0 |
| P12163_1_F4,21086 | R.DEAFSLLK.T      | 1530.899 | 0.00892  | 3 | 1 | 26.2 | 0 |
| P12163_1_F4,21299 | R.DEAFSLLK.T      | 1530.899 | 0.00572  | 2 | 1 | 30   | 0 |
| P12163_1_F4,21307 | R.DEAFSLLK.T      | 1530.899 | 0.00472  | 3 | 1 | 39.5 | 0 |
| P12163_1_F4,23064 | R.DEAFSLLK.T      | 1530.899 | 0.00379  | 3 | 1 | 33.6 | 0 |
| P12163_1_F5,20048 | R.DEAFSLLK.T      | 1530.899 | 0.00739  | 3 | 1 | 22.1 | 0 |
| P12163_1_F7,18758 | R.DEAFSLLK.T      | 1530.899 | 0.00282  | 2 | 1 | 24.5 | 0 |
| P12163_2_F1,20479 | R.DEAFSLLK.T      | 1530.899 | 0.0049   | 3 | 1 | 23.9 | 0 |
| P12163_2_F1,20502 | R.DEAFSLLK.T      | 1530.899 | 0.006    | 2 | 1 | 30.8 | 0 |
| P12163_2_F1,20691 | R.DEAFSLLK.T      | 1530.899 | 0.00442  | 3 | 1 | 35.3 | 0 |
| P12163_2_F1,20724 | R.DEAFSLLK.T      | 1530.899 | 0.0057   | 2 | 1 | 30.6 | 0 |
| P12163_2_F2,59    | R.DEAFSLLK.T      | 1530.899 | 0.00427  | 3 | 1 | 24.8 | 0 |
| P12163_2_F4,18350 | R.DEAFSLLK.T      | 1530.899 | 0.00284  | 2 | 1 | 38.2 | 0 |
| P12163_2_S5,17953 | R.DEAFSLLK.T      | 1530.899 | 0.00454  | 3 | 1 | 22.8 | 0 |
| P12163_1_F4,15781 | R.FDNEGLPK.D      | 1527.863 | 0.00162  | 2 | 1 | 37.7 | 0 |
| P12163_1_F4,15987 | R.FDNEGLPK.D      | 1527.863 | 0.0065   | 2 | 1 | 39   | 0 |
| P12163_1_F4,16197 | R.FDNEGLPK.D      | 1527.863 | 0.00874  | 2 | 1 | 33.8 | 0 |
| P12163_1_F5,14885 | R.FDNEGLPK.D      | 1527.863 | 0.00974  | 2 | 1 | 34.1 | 0 |
| P12163_1_F8,14902 | R.FDNEGLPK.D      | 1527.863 | -0.00068 | 2 | 1 | 28.6 | 0 |
| P12163_2_F1,14964 | R.FDNEGLPK.D      | 1527.863 | 0.00954  | 3 | 1 | 24.5 | 0 |
| P12163_2_F1,15009 | R.FDNEGLPK.D      | 1527.863 | 0.00652  | 2 | 1 | 34.5 | 0 |
| P12163_2_F1,15223 | R.FDNEGLPK.D      | 1527.863 | 0.0089   | 2 | 1 | 37.4 | 0 |
| P12163_2_S5,13949 | R.FDNEGLPK.D      | 1527.863 | 0.00074  | 2 | 1 | 25.8 | 0 |
| P12163_1_F4,14463 | R.FETPETLK.R      | 1572.909 | 0.01142  | 3 | 1 | 26.1 | 0 |
| P12163_1_F4,13703 | R.GIAVEDPK.A      | 1436.857 | 0.00667  | 2 | 1 | 26.1 | 0 |
| P12163_1_F4,13761 | R.GIAVEDPK.A      | 1436.857 | 0.00632  | 3 | 1 | 52.2 | 0 |
| P12163_1_F5,12323 | R.GIAVEDPK.A      | 1436.857 | 0.00935  | 2 | 1 | 25.5 | 0 |
| P12163_1_F7,11944 | R.GIAVEDPK.A      | 1436.857 | 0.00056  | 3 | 1 | 31.3 | 0 |

|                   |                        |          |          |   |   |      |   |
|-------------------|------------------------|----------|----------|---|---|------|---|
| P12163_2_F1,12702 | R.GIAVEDPK.A           | 1436.857 | 0.00619  | 2 | 1 | 26.3 | 0 |
| P12163_2_S5,11514 | R.GIAVEDPK.A           | 1436.857 | 0.00344  | 3 | 1 | 39.6 | 0 |
| P12163_2_F6,13585 | R.LRAEELNNLQGDGQG      | 2203.137 | 0.0067   | 3 | 1 | 33.6 | 0 |
| P12163_2_F4,8975  | R.LSAM*HPINR.L ! K.LS. | 1358.752 | 0.00235  | 3 | 1 | 30.2 | 0 |
| P12163_1_F5,13036 | R.LSAMHPINR.L ! K.LSA  | 1342.757 | 0.00469  | 3 | 1 | 24.3 | 0 |
| P12163_2_F4,12983 | R.LSAMHPINR.L ! K.LSA  | 1342.757 | 0.0031   | 3 | 1 | 39   | 0 |
| P12163_1_F3,19796 | R.NGPVNACDSWIQPK.I     | 2307.238 | 0.01042  | 3 | 1 | 28.2 | 0 |
| P12163_1_F3,19826 | R.NGPVNACDSWIQPK.I     | 2307.238 | 0.00597  | 2 | 1 | 44.6 | 0 |
| P12163_2_S3,8036  | R.NSNENLK.N            | 1426.811 | 0.01134  | 3 | 1 | 23.3 | 0 |
| P12163_1_F3,16176 | R.SLFTDDDDGNLK.Y       | 1832.985 | 0.00345  | 2 | 1 | 32   | 0 |
| P12163_1_F3,17938 | R.SLFTDDDDGNLK.Y       | 1832.985 | 0.00479  | 2 | 1 | 46.7 | 0 |
| P12163_1_S1,16333 | R.SLFTDDDDGNLK.Y       | 1832.985 | 0.00629  | 3 | 1 | 27.9 | 0 |
| P12163_2_F2,17287 | R.SLFTDDDDGNLK.Y       | 1832.985 | 0.00279  | 2 | 1 | 39.9 | 0 |
| P12163_1_F7,21966 | R.TGAAIVPYELLKPFSEF    | 3158.823 | 0.00797  | 4 | 1 | 24.8 | 0 |
| P12163_1_F7,13785 | R.THCCVEPYVIATNR.R     | 2023.999 | 0.00269  | 3 | 1 | 35.1 | 0 |
| P12163_1_F8,14350 | R.THCCVEPYVIATNR.R     | 2023.999 | 0.00299  | 3 | 1 | 38.9 | 0 |
| P12163_2_F6,12115 | R.THCCVEPYVIATNR.R     | 2023.999 | 0.00302  | 3 | 1 | 44.2 | 0 |
| P12163_2_F6,13765 | R.THCCVEPYVIATNR.R     | 2023.999 | -0.00118 | 3 | 1 | 40.2 | 0 |
| P12163_1_F4,10311 | R.TNLPNEDQTK.E         | 1767.97  | 0.00572  | 3 | 1 | 29.1 | 0 |
| P12163_2_F1,10397 | R.TNLPNEDQTK.E         | 1767.97  | 0.00204  | 2 | 1 | 41.1 | 0 |
| P12163_2_F1,10436 | R.TNLPNEDQTK.E         | 1767.97  | 0.00527  | 3 | 1 | 41.2 | 0 |
| P12163_1_F9,6860  | R.TVGHAEK.K            | 1349.8   | 0.00631  | 2 | 1 | 34.1 | 0 |
| P12163_1_F9,6875  | R.TVGHAEK.K            | 1349.8   | 0.0063   | 3 | 1 | 24   | 0 |
| P12163_1_F2,15707 | R.YTM*EINALAR.K ! R.Y  | 1501.799 | 0.00517  | 3 | 1 | 46.6 | 0 |
| P12163_1_F4,18090 | K.ALVSELK.Q            | 1367.872 | 0.00637  | 2 | 1 | 31.6 | 0 |
| P12163_1_F4,18204 | K.ALVSELK.Q            | 1367.872 | 0.00392  | 3 | 1 | 27.6 | 0 |
| P12163_1_F5,16839 | K.ALVSELK.Q            | 1367.872 | 0.00965  | 3 | 1 | 25.8 | 0 |
| P12163_1_F5,17177 | K.ALVSELK.Q            | 1367.872 | 0.00593  | 2 | 1 | 29   | 0 |
| P12163_1_F6,23649 | K.ALVSELK.Q            | 1367.872 | 0.00561  | 2 | 1 | 29.6 | 0 |
| P12163_1_F7,16201 | K.ALVSELK.Q            | 1367.872 | 0.00305  | 3 | 1 | 29.8 | 0 |
| P12163_1_F8,16968 | K.ALVSELK.Q            | 1367.872 | 0.00299  | 3 | 1 | 28.4 | 0 |
| P12163_2_F1,17311 | K.ALVSELK.Q            | 1367.872 | 0.00656  | 3 | 1 | 40.1 | 0 |
| P12163_2_F1,17577 | K.ALVSELK.Q            | 1367.872 | 0.00071  | 3 | 1 | 27   | 0 |
| P12163_2_F2,17635 | K.ALVSELK.Q            | 1367.872 | 0.01202  | 3 | 1 | 24.2 | 0 |
| P12163_2_S5,15334 | K.ALVSELK.Q            | 1367.872 | 0.0017   | 3 | 1 | 26.7 | 0 |
| P12163_2_S5,15911 | K.ALVSELK.Q            | 1367.872 | 0.00449  | 3 | 1 | 30.1 | 0 |
| P12163_1_F6,12747 | K.DLHFNK.D             | 1381.805 | 0.0006   | 3 | 1 | 22.8 | 0 |
| P12163_1_S10,1354 | K.DLHFNK.D             | 1381.805 | 0.00405  | 3 | 1 | 24.2 | 0 |
| P12163_2_F8_12070 | K.DLHFNK.D             | 1381.805 | 0.00321  | 3 | 1 | 24.1 | 0 |
| P12163_1_F5,12472 | K.DTTTIVGDGSTQDAVS     | 2303.219 | -0.00008 | 3 | 1 | 40.2 | 0 |
| P12163_2_F1,12950 | K.DTTTIVGDGSTQDAVS     | 2303.219 | 0.00058  | 3 | 1 | 36.5 | 0 |
| P12163_1_F2,9666  | K.ETLDNDEEK.V          | 1700.88  | 0.00667  | 2 | 1 | 40.6 | 0 |
| P12163_1_F3,10218 | K.ETLDNDEEK.V          | 1700.88  | 0.00755  | 2 | 1 | 31.1 | 0 |
| P12163_1_F4,10652 | K.ETLDNDEEK.V          | 1700.88  | 0.00771  | 2 | 1 | 36   | 0 |
| P12163_1_F4,10722 | K.ETLDNDEEK.V          | 1700.88  | 0.00775  | 3 | 1 | 51.6 | 0 |
| P12163_1_F7,9294  | K.ETLDNDEEK.V          | 1700.88  | 0.00229  | 2 | 1 | 29.5 | 0 |
| P12163_1_F7,9332  | K.ETLDNDEEK.V          | 1700.88  | -0.00002 | 3 | 1 | 24.9 | 0 |
| P12163_2_F1,9839  | K.ETLDNDEEK.V          | 1700.88  | 0.00875  | 2 | 1 | 31.9 | 0 |
| P12163_2_S3,8972  | K.ETLDNDEEK.V          | 1700.88  | 0.00189  | 2 | 1 | 29.2 | 0 |
| P12163_1_F2,18709 | K.EVELEDPVENIGAK.L     | 2150.18  | 0.00311  | 3 | 1 | 28.2 | 0 |
| P12163_1_F5,18042 | K.EVELEDPVENIGAK.L     | 2150.18  | 0.00031  | 2 | 1 | 40.2 | 0 |

|                   |                    |          |          |   |   |      |   |
|-------------------|--------------------|----------|----------|---|---|------|---|
| P12163_1_F5,18047 | K.EVELEDPVENIGAK.L | 2150.18  | 0.00368  | 3 | 1 | 40.1 | 0 |
| P12163_1_S1,17583 | K.EVELEDPVENIGAK.L | 2150.18  | 0.00605  | 3 | 1 | 35.4 | 0 |
| P12163_1_S1,17851 | K.EVELEDPVENIGAK.L | 2150.18  | 0.00368  | 3 | 1 | 39.8 | 0 |
| P12163_2_F2,18788 | K.EVELEDPVENIGAK.L | 2150.18  | 0.00077  | 3 | 1 | 25.2 | 0 |
| P12163_2_F4,17418 | K.EVELEDPVENIGAK.L | 2150.18  | 0.00485  | 3 | 1 | 56.8 | 0 |
| P12163_2_F4,17444 | K.EVELEDPVENIGAK.L | 2150.18  | -0.00133 | 2 | 1 | 55   | 0 |
| P12163_1_F4,12465 | K.EVLGNASK.V       | 1425.852 | 0.00779  | 2 | 1 | 31.1 | 0 |
| P12163_1_F5,9118  | K.EVLGNASK.V       | 1425.852 | 0.00517  | 3 | 1 | 29.1 | 0 |
| P12163_1_F5,11002 | K.EVLGNASK.V       | 1425.852 | 0.00823  | 2 | 1 | 29.7 | 0 |
| P12163_1_F5,11007 | K.EVLGNASK.V       | 1425.852 | 0.00922  | 3 | 1 | 36.5 | 0 |
| P12163_1_F6,11970 | K.EVLGNASK.V       | 1425.852 | 0.00628  | 3 | 1 | 22.9 | 0 |
| P12163_1_F6,11988 | K.EVLGNASK.V       | 1425.852 | 0.01047  | 2 | 1 | 31.9 | 0 |
| P12163_1_F8,11189 | K.EVLGNASK.V       | 1425.852 | 0.00373  | 2 | 1 | 28.7 | 0 |
| P12163_1_F8,11199 | K.EVLGNASK.V       | 1425.852 | 0.00352  | 3 | 1 | 32.2 | 0 |
| P12163_2_F1,11557 | K.EVLGNASK.V       | 1425.852 | 0.00451  | 3 | 1 | 33.6 | 0 |
| P12163_2_S5,11243 | K.EVLGNASK.V       | 1425.852 | 0.00649  | 3 | 1 | 22.7 | 0 |
| P12163_1_F4,15416 | K.GVVTLEEGK.S      | 1539.92  | 0.00889  | 3 | 1 | 22.1 | 0 |
| P12163_1_F5,14084 | K.GVVTLEEGK.S      | 1539.92  | 0.01413  | 2 | 1 | 24.8 | 0 |
| P12163_1_F5,14101 | K.GVVTLEEGK.S      | 1539.92  | 0.00811  | 3 | 1 | 27.5 | 0 |
| P12163_1_F6,14915 | K.GVVTLEEGK.S      | 1539.92  | 0.00957  | 2 | 1 | 25.4 | 0 |
| P12163_1_F7,13626 | K.GVVTLEEGK.S      | 1539.92  | 0.00551  | 2 | 1 | 35.8 | 0 |
| P12163_1_F7,13633 | K.GVVTLEEGK.S      | 1539.92  | -0.0008  | 3 | 1 | 34.5 | 0 |
| P12163_2_F1,14319 | K.GVVTLEEGK.S      | 1539.92  | 0.00571  | 3 | 1 | 40.4 | 0 |
| P12163_2_F2,1918  | K.GVVTLEEGK.S      | 1539.92  | 0.00175  | 3 | 1 | 27   | 0 |
| P12163_2_F2,2327  | K.GVVTLEEGK.S      | 1539.92  | 0.00995  | 2 | 1 | 32.1 | 0 |
| P12163_2_F4,13292 | K.GVVTLEEGK.S      | 1539.92  | 0.00431  | 2 | 1 | 34.8 | 0 |
| P12163_2_F4,13318 | K.GVVTLEEGK.S      | 1539.92  | 0.00118  | 3 | 1 | 29.7 | 0 |
| P12163_2_S5,13324 | K.GVVTLEEGK.S      | 1539.92  | 0.00103  | 3 | 1 | 28.7 | 0 |
| P12163_2_S5,13821 | K.GVVTLEEGK.S      | 1539.92  | 0.00391  | 3 | 1 | 36.4 | 0 |
| P12163_1_F2,14820 | K.IVNDGVTVAK.E     | 1623.989 | 0.00068  | 2 | 1 | 30   | 0 |
| P12163_1_F2,14826 | K.IVNDGVTVAK.E     | 1623.989 | 0.00727  | 3 | 1 | 35.7 | 0 |
| P12163_1_F3,12904 | K.IVNDGVTVAK.E     | 1623.989 | 0.00474  | 2 | 1 | 26.5 | 0 |
| P12163_1_F3,15488 | K.IVNDGVTVAK.E     | 1623.989 | 0.00556  | 3 | 1 | 57.5 | 0 |
| P12163_1_F3,15614 | K.IVNDGVTVAK.E     | 1623.989 | 0.0062   | 2 | 1 | 48.7 | 0 |
| P12163_1_F4,13440 | K.IVNDGVTVAK.E     | 1623.989 | 0.00112  | 2 | 1 | 24.8 | 0 |
| P12163_1_F4,15620 | K.IVNDGVTVAK.E     | 1623.989 | 0.0051   | 2 | 1 | 48.6 | 0 |
| P12163_1_F4,15651 | K.IVNDGVTVAK.E     | 1623.989 | 0.00205  | 3 | 1 | 36.7 | 0 |
| P12163_1_F5,14675 | K.IVNDGVTVAK.E     | 1623.989 | 0.0056   | 2 | 1 | 49.9 | 0 |
| P12163_1_F6,14799 | K.IVNDGVTVAK.E     | 1623.989 | 0.00292  | 3 | 1 | 35.8 | 0 |
| P12163_1_F6,15347 | K.IVNDGVTVAK.E     | 1623.989 | 0.0134   | 2 | 1 | 46   | 0 |
| P12163_1_F7,14086 | K.IVNDGVTVAK.E     | 1623.989 | 0.00342  | 2 | 1 | 44.3 | 0 |
| P12163_1_F7,14094 | K.IVNDGVTVAK.E     | 1623.989 | -0.00188 | 3 | 1 | 44.7 | 0 |
| P12163_2_F1,14848 | K.IVNDGVTVAK.E     | 1623.989 | 0.00318  | 2 | 1 | 53.3 | 0 |
| P12163_2_F1,14890 | K.IVNDGVTVAK.E     | 1623.989 | 0.00427  | 3 | 1 | 22.3 | 0 |
| P12163_2_F1,15282 | K.IVNDGVTVAK.E     | 1623.989 | 0.0064   | 3 | 1 | 47.1 | 0 |
| P12163_2_F4,13750 | K.IVNDGVTVAK.E     | 1623.989 | 0.00154  | 3 | 1 | 34.2 | 0 |
| P12163_2_F4,13769 | K.IVNDGVTVAK.E     | 1623.989 | 0.00132  | 2 | 1 | 49.8 | 0 |
| P12163_2_F4,14248 | K.IVNDGVTVAK.E     | 1623.989 | 0.00548  | 2 | 1 | 34.6 | 0 |
| P12163_2_S3,12510 | K.IVNDGVTVAK.E     | 1623.989 | -0.00392 | 3 | 1 | 28   | 0 |
| P12163_1_F2,24204 | K.LADLVGVTLPK.G    | 1791.12  | 0.00123  | 3 | 1 | 26.7 | 0 |
| P12163_1_F3,25374 | K.LADLVGVTLPK.G    | 1791.12  | 0.00483  | 2 | 1 | 64.8 | 0 |

|                   |                      |          |         |   |   |      |   |
|-------------------|----------------------|----------|---------|---|---|------|---|
| P12163_1_F3,25393 | K.LADLVGVTLGPK.G     | 1791.12  | 0.00534 | 3 | 1 | 52.9 | 0 |
| P12163_1_F3,25598 | K.LADLVGVTLGPK.G     | 1791.12  | 0.00551 | 2 | 1 | 53.9 | 0 |
| P12163_1_F3,25613 | K.LADLVGVTLGPK.G     | 1791.12  | 0.00351 | 3 | 1 | 49.1 | 0 |
| P12163_1_F5,24017 | K.LADLVGVTLGPK.G     | 1791.12  | 0.00132 | 3 | 1 | 42.4 | 0 |
| P12163_1_F5,24255 | K.LADLVGVTLGPK.G     | 1791.12  | 0.00456 | 3 | 1 | 40.6 | 0 |
| P12163_1_F7,23197 | K.LADLVGVTLGPK.G     | 1791.12  | 0.00489 | 3 | 1 | 43.5 | 0 |
| P12163_1_F8,24155 | K.LADLVGVTLGPK.G     | 1791.12  | 0.00249 | 3 | 1 | 30.5 | 0 |
| P12163_1_S10,2161 | K.LADLVGVTLGPK.G     | 1791.12  | 0.00792 | 3 | 1 | 36   | 0 |
| P12163_1_F5,10091 | K.LQNGVNK.L          | 1380.842 | 0.00785 | 3 | 1 | 22.1 | 0 |
| P12163_1_F9,15802 | K.LRVEDALNATK.A ! K. | 1838.096 | 0.00779 | 2 | 1 | 41   | 0 |
| P12163_1_S10,1947 | K.LSGGVAVIQVGAQTEI   | 2508.449 | 0.00263 | 3 | 1 | 27.5 | 0 |
| P12163_1_F5,10375 | K.M*AVEYENCK.L       | 1767.887 | 0.00697 | 3 | 1 | 29.5 | 0 |
| P12163_1_F5,13139 | K.M*AVEYENCK.L       | 1767.887 | 0.01291 | 2 | 1 | 29.7 | 0 |
| P12163_1_F9,11151 | K.M*AVEYENCK.L       | 1767.887 | 0.00709 | 3 | 1 | 29   | 0 |
| P12163_2_F1,10743 | K.M*AVEYENCK.L       | 1767.887 | 0.00787 | 2 | 1 | 30.1 | 0 |
| P12163_2_F1,10789 | K.M*AVEYENCK.L       | 1767.887 | 0.00595 | 3 | 1 | 27.3 | 0 |
| P12163_2_F1,13494 | K.M*AVEYENCK.L       | 1767.887 | 0.00995 | 2 | 1 | 29.9 | 0 |
| P12163_2_F8_12070 | K.M*AVEYENCK.L       | 1767.887 | 0.00574 | 3 | 1 | 45.4 | 0 |
| P12163_1_F4,14545 | K.MAVEYENCK.L        | 1751.892 | 0.00552 | 2 | 1 | 44.1 | 0 |
| P12163_1_F5,13110 | K.MAVEYENCK.L        | 1751.892 | 0.00707 | 2 | 1 | 36.4 | 0 |
| P12163_1_F5,13119 | K.MAVEYENCK.L        | 1751.892 | 0.00691 | 3 | 1 | 39   | 0 |
| P12163_1_F9,13793 | K.MAVEYENCK.L        | 1751.892 | 0.00704 | 2 | 1 | 43.5 | 0 |
| P12163_1_S10,1416 | K.MAVEYENCK.L        | 1751.892 | 0.00739 | 3 | 1 | 44.8 | 0 |
| P12163_2_F1,13450 | K.MAVEYENCK.L        | 1751.892 | 0.00526 | 2 | 1 | 42.6 | 0 |
| P12163_2_F1,13498 | K.MAVEYENCK.L        | 1751.892 | 0.00436 | 3 | 1 | 51.9 | 0 |
| P12163_2_F2,13885 | K.MAVEYENCK.L        | 1751.892 | 0.00473 | 2 | 1 | 36.1 | 0 |
| P12163_2_F8_12070 | K.MAVEYENCK.L        | 1751.892 | 0.00491 | 2 | 1 | 47.5 | 0 |
| P12163_2_S5,12811 | K.MAVEYENCK.L        | 1751.892 | 0.00028 | 3 | 1 | 39.7 | 0 |
| P12163_1_F4,12042 | K.NAGVNGSVVSEK.V     | 1769.001 | 0.00525 | 3 | 1 | 47.6 | 0 |
| P12163_1_F5,10693 | K.NAGVNGSVVSEK.V     | 1769.001 | 0.00713 | 2 | 1 | 38.1 | 0 |
| P12163_1_F5,10699 | K.NAGVNGSVVSEK.V     | 1769.001 | 0.00438 | 3 | 1 | 48.6 | 0 |
| P12163_2_F1,11201 | K.NAGVNGSVVSEK.V     | 1769.001 | 0.00639 | 2 | 1 | 52.5 | 0 |
| P12163_1_F4,14925 | K.VGADIVK.R          | 1309.83  | 0.00533 | 2 | 1 | 26.2 | 0 |
| P12163_1_F5,13492 | K.VGADIVK.R          | 1309.83  | 0.00638 | 3 | 1 | 29.1 | 0 |
| P12163_1_F7,13019 | K.VGADIVK.R          | 1309.83  | 0.00137 | 2 | 1 | 25.6 | 0 |
| P12163_1_F7,13679 | K.VGADIVK.R          | 1309.83  | 0.00741 | 2 | 1 | 25.4 | 0 |
| P12163_1_F4,10564 | K.VLSSDNHK.Y         | 1507.869 | 0.00551 | 2 | 1 | 30.5 | 0 |
| P12163_1_F6,10169 | K.VLSSDNHK.Y         | 1507.869 | 0.00815 | 2 | 1 | 30.6 | 0 |
| P12163_1_F6,10197 | K.VLSSDNHK.Y         | 1507.869 | 0.01174 | 3 | 1 | 34   | 0 |
| P12163_1_F9,9960  | K.VLSSDNHK.Y         | 1507.869 | 0.01027 | 2 | 1 | 26.8 | 0 |
| P12163_2_F7,9385  | K.VLSSDNHK.Y         | 1507.869 | 0.00733 | 3 | 1 | 30.3 | 0 |
| P12163_2_F9,9666  | K.VLSSDNHK.Y         | 1507.869 | 0.00711 | 3 | 1 | 23   | 0 |
| P12163_2_S3,9154  | K.VLSSDNHK.Y         | 1507.869 | 0.00382 | 3 | 1 | 24.5 | 0 |
| P12163_2_S5,9587  | K.VLSSDNHK.Y         | 1507.869 | 0.00402 | 3 | 1 | 26.3 | 0 |
| P12163_1_F2,18139 | K.VVAAGANPVLITR.G    | 1584.974 | 0.00286 | 2 | 1 | 27.8 | 0 |
| P12163_1_F3,18712 | K.VVAAGANPVLITR.G    | 1584.974 | -0.0016 | 2 | 1 | 41.6 | 0 |
| P12163_1_S1,15848 | K.VVAAGANPVLITR.G    | 1584.974 | 0.00265 | 3 | 1 | 53.6 | 0 |
| P12163_1_S1,16464 | K.VVAAGANPVLITR.G    | 1584.974 | 0.0066  | 2 | 1 | 36.6 | 0 |
| P12163_1_S1,16480 | K.VVAAGANPVLITR.G    | 1584.974 | 0.00265 | 3 | 1 | 67.4 | 0 |
| P12163_1_S10,31   | K.VVAAGANPVLITR.G    | 1584.974 | 0.00642 | 2 | 1 | 30.4 | 0 |
| P12163_1_S10,57   | K.VVAAGANPVLITR.G    | 1584.974 | 0.00406 | 3 | 1 | 61.3 | 0 |

|                   |                     |          |          |   |   |      |   |
|-------------------|---------------------|----------|----------|---|---|------|---|
| P12163_2_F2,18098 | K.VVAAGANPVLITR.G   | 1584.974 | 0.00058  | 2 | 1 | 26.1 | 0 |
| P12163_1_F4,17825 | R.ALCYPLK.L         | 1472.875 | 0.00476  | 2 | 1 | 26   | 0 |
| P12163_1_F5,16570 | R.ALCYPLK.L         | 1472.875 | 0.00718  | 2 | 1 | 26.1 | 0 |
| P12163_1_F6,17052 | R.ALCYPLK.L         | 1472.875 | 0.00722  | 2 | 1 | 25.7 | 0 |
| P12163_1_F6,17091 | R.ALCYPLK.L         | 1472.875 | 0.00427  | 3 | 1 | 24.9 | 0 |
| P12163_1_F8,16512 | R.ALCYPLK.L         | 1472.875 | 0.00145  | 3 | 1 | 25.4 | 0 |
| P12163_1_F9,16755 | R.ALCYPLK.L         | 1472.875 | 0.00102  | 2 | 1 | 26   | 0 |
| P12163_2_F10,1518 | R.ALCYPLK.L         | 1472.875 | 0.00811  | 3 | 1 | 25.3 | 0 |
| P12163_2_F8_12070 | R.ALCYPLK.L         | 1472.875 | 0.00433  | 3 | 1 | 24.9 | 0 |
| P12163_2_F8_12070 | R.ALCYPLK.L         | 1472.875 | 0.008    | 2 | 1 | 27.1 | 0 |
| P12163_2_F9,15455 | R.ALCYPLK.L         | 1472.875 | 0.00662  | 2 | 1 | 27.5 | 0 |
| P12163_2_F9,15477 | R.ALCYPLK.L         | 1472.875 | 0.007    | 3 | 1 | 23.7 | 0 |
| P12163_1_F7,10772 | R.CCLEHASSVAK.T     | 1869.977 | 0.00582  | 3 | 1 | 29.4 | 0 |
| P12163_2_F6,11007 | R.CCLEHASSVAK.T     | 1869.977 | 0.01395  | 3 | 1 | 26.9 | 0 |
| P12163_2_F6,11034 | R.CCLEHASSVAK.T     | 1869.977 | 0.00642  | 2 | 1 | 43.6 | 0 |
| P12163_2_F7,10450 | R.CCLEHASSVAK.T     | 1869.977 | -0.00114 | 3 | 1 | 25.8 | 0 |
| P12163_2_F7,10478 | R.CCLEHASSVAK.T     | 1869.977 | 0.005    | 2 | 1 | 26.6 | 0 |
| P12163_1_F3,16957 | R.DEVGLALDK.V       | 1567.915 | 0.00369  | 2 | 1 | 41.1 | 0 |
| P12163_1_F3,17061 | R.DEVGLALDK.V       | 1567.915 | 0.00498  | 3 | 1 | 41.2 | 0 |
| P12163_1_F4,17482 | R.DEVGLALDK.V       | 1567.915 | 0.00464  | 3 | 1 | 51.5 | 0 |
| P12163_1_F5,16207 | R.DEVGLALDK.V       | 1567.915 | -0.00349 | 2 | 1 | 24.3 | 0 |
| P12163_1_S1,15434 | R.DEVGLALDK.V       | 1567.915 | 0.00428  | 3 | 1 | 39.7 | 0 |
| P12163_2_S3,13855 | R.DEVGLALDK.V       | 1567.915 | 0.0023   | 3 | 1 | 39.2 | 0 |
| P12163_1_S1,25596 | R.DLINVLEDAIR.G     | 1574.905 | -0.00085 | 3 | 1 | 40.5 | 0 |
| P12163_1_F2,19603 | R.GYISPYFVTDSEK.M   | 2114.127 | 0.00194  | 2 | 1 | 38   | 0 |
| P12163_1_F3,18294 | R.GYISPYFVTDSEK.M   | 2114.127 | 0.01012  | 3 | 1 | 37.9 | 0 |
| P12163_1_F3,20108 | R.GYISPYFVTDSEK.M   | 2114.127 | 0.01069  | 2 | 1 | 46.9 | 0 |
| P12163_1_F3,20111 | R.GYISPYFVTDSEK.M   | 2114.127 | 0.0121   | 3 | 1 | 29.9 | 0 |
| P12163_1_F3,20413 | R.GYISPYFVTDSEK.M   | 2114.127 | 0.01345  | 3 | 1 | 33.6 | 0 |
| P12163_1_F4,20706 | R.GYISPYFVTDSEK.M   | 2114.127 | 0.00709  | 3 | 1 | 36.1 | 0 |
| P12163_1_F7,18691 | R.GYISPYFVTDSEK.M   | 2114.127 | -0.00417 | 2 | 1 | 25.4 | 0 |
| P12163_1_F9,19157 | R.GYISPYFVTDSEK.M   | 2114.127 | -0.00107 | 2 | 1 | 35.6 | 0 |
| P12163_1_F9,19172 | R.GYISPYFVTDSEK.M   | 2114.127 | 0.00763  | 3 | 1 | 38.3 | 0 |
| P12163_1_S10,1815 | R.GYISPYFVTDSEK.M   | 2114.127 | 0.00358  | 3 | 1 | 39.3 | 0 |
| P12163_2_F4,18229 | R.GYISPYFVTDSEK.M   | 2114.127 | 0.00898  | 3 | 1 | 35   | 0 |
| P12163_2_F6,19123 | R.GYISPYFVTDSEK.M   | 2114.127 | 0.00333  | 2 | 1 | 40.7 | 0 |
| P12163_2_F7,17429 | R.GYISPYFVTDSEK.M   | 2114.127 | 0.00331  | 3 | 1 | 42.8 | 0 |
| P12163_1_F9,13923 | R.KGVVTLLEEGK.S     | 1972.221 | 0.00643  | 3 | 1 | 33.3 | 0 |
| P12163_1_S10,1391 | R.KGVVTLLEEGK.S     | 1972.221 | 0.00973  | 3 | 1 | 29.6 | 0 |
| P12163_2_F10,1263 | R.KGVVTLLEEGK.S     | 1972.221 | -0.00248 | 4 | 1 | 37.7 | 0 |
| P12163_1_F8,23819 | R.KSQYLDDIAILTGGTVI | 2571.497 | 0.00502  | 3 | 1 | 32   | 0 |
| P12163_2_F6,23604 | R.KSQYLDDIAILTGGTVI | 2571.497 | 0.00466  | 3 | 1 | 43.7 | 0 |
| P12163_1_F5,12638 | R.NVVLESK.Y         | 1396.862 | 0.00603  | 2 | 1 | 28.9 | 0 |
| P12163_1_F5,12683 | R.NVVLESK.Y         | 1396.862 | 0.00566  | 3 | 1 | 30   | 0 |
| P12163_1_F6,13605 | R.NVVLESK.Y         | 1396.862 | 0.00677  | 2 | 1 | 28.8 | 0 |
| P12163_1_F6,13608 | R.NVVLESK.Y         | 1396.862 | 0.00152  | 3 | 1 | 29.7 | 0 |
| P12163_2_F1,13063 | R.NVVLESK.Y         | 1396.862 | 0.00284  | 3 | 1 | 32   | 0 |
| P12163_2_F2,13548 | R.NVVLESK.Y         | 1396.862 | 0.01287  | 2 | 1 | 27.8 | 0 |
| P12163_2_F2,13599 | R.NVVLESK.Y         | 1396.862 | 0.00437  | 3 | 1 | 25.1 | 0 |
| P12163_2_S5,11943 | R.NVVLESK.Y         | 1396.862 | -0.00118 | 3 | 1 | 33.9 | 0 |
| P12163_2_S5,12631 | R.NVVLESK.Y         | 1396.862 | 0.00413  | 3 | 1 | 26.1 | 0 |

|                                         |          |          |   |   |      |   |
|-----------------------------------------|----------|----------|---|---|------|---|
| P12163_1_F2,17181 R.TLIENAEQDYER.E      | 1784.897 | 0.00294  | 2 | 1 | 40.2 | 0 |
| P12163_1_F4,18161 R.TLIENAEQDYER.E      | 1784.897 | 0.00366  | 2 | 1 | 34.7 | 0 |
| P12163_1_F6,17374 R.TLIENAEQDYER.E      | 1784.897 | 0.00798  | 2 | 1 | 28.8 | 0 |
| P12163_1_F7,16475 R.TLIENAEQDYER.E      | 1784.897 | 0.00806  | 2 | 1 | 34.6 | 0 |
| P12163_1_S1,12058 R.TLIENAEQDYER.E      | 1784.897 | 0.0023   | 3 | 1 | 58.8 | 0 |
| P12163_1_S1,12065 R.TLIENAEQDYER.E      | 1784.897 | 0.00422  | 2 | 1 | 62.6 | 0 |
| P12163_1_S1,17137 R.TLIENAEQDYER.E      | 1784.897 | 0.00434  | 2 | 1 | 50.4 | 0 |
| P12163_1_S1,17232 R.TLIENAEQDYER.E      | 1784.897 | 0.00137  | 3 | 1 | 72.8 | 0 |
| P12163_2_F6,11819 R.TLIENAEQDYER.E      | 1784.897 | 0.00116  | 3 | 1 | 22.8 | 0 |
| P12163_2_F6,16560 R.TLIENAEQDYER.E      | 1784.897 | 0.0039   | 2 | 1 | 29.7 | 0 |
| P12163_2_F6,16756 R.TLIENAEQDYER.E      | 1784.897 | -0.00044 | 2 | 1 | 48.5 | 0 |
| P12163_1_F4,14194 R.VEDALNATK.A ! R.VE  | 1568.91  | 0.00373  | 3 | 1 | 44.3 | 0 |
| P12163_1_F4,14328 R.VEDALNATK.A ! R.VE  | 1568.91  | 0.01025  | 2 | 1 | 28.6 | 0 |
| P12163_1_F4,16508 R.VEDALNATK.A ! R.VE  | 1568.91  | 0.00893  | 2 | 1 | 27.5 | 0 |
| P12163_1_F4,16528 R.VEDALNATK.A ! R.VE  | 1568.91  | 0.00967  | 3 | 1 | 31.2 | 0 |
| P12163_1_F4,16748 R.VEDALNATK.A ! R.VE  | 1568.91  | 0.00559  | 2 | 1 | 34.2 | 0 |
| P12163_1_F5,15268 R.VEDALNATK.A ! R.VE  | 1568.91  | 0.01043  | 2 | 1 | 39.4 | 0 |
| P12163_1_F6,15964 R.VEDALNATK.A ! R.VE  | 1568.91  | 0.00647  | 2 | 1 | 47   | 0 |
| P12163_1_F7,14557 R.VEDALNATK.A ! R.VE  | 1568.91  | 0.00523  | 2 | 1 | 40.4 | 0 |
| P12163_1_F7,15094 R.VEDALNATK.A ! R.VE  | 1568.91  | 0.00689  | 2 | 1 | 33.4 | 0 |
| P12163_2_F1,13031 R.VEDALNATK.A ! R.VE  | 1568.91  | 0.0049   | 3 | 1 | 27.6 | 0 |
| P12163_2_F1,15615 R.VEDALNATK.A ! R.VE  | 1568.91  | 0.00881  | 2 | 1 | 30.6 | 0 |
| P12163_2_F1,15795 R.VEDALNATK.A ! R.VE  | 1568.91  | 0.00592  | 3 | 1 | 32   | 0 |
| P12163_2_F1,15906 R.VEDALNATK.A ! R.VE  | 1568.91  | 0.01109  | 2 | 1 | 46.4 | 0 |
| P12163_2_F2,604 R.VEDALNATK.A ! R.VE    | 1568.91  | 0.00691  | 2 | 1 | 39   | 0 |
| P12163_2_F2,1016 R.VEDALNATK.A ! R.VE   | 1568.91  | 0.00643  | 2 | 1 | 48   | 0 |
| P12163_2_F4,12221 R.VEDALNATK.A ! R.VE  | 1568.91  | 0.00073  | 3 | 1 | 24.8 | 0 |
| P12163_2_F4,14187 R.VEDALNATK.A ! R.VE  | 1568.91  | -0.00019 | 2 | 1 | 41.6 | 0 |
| P12163_2_F4,14200 R.VEDALNATK.A ! R.VE  | 1568.91  | 0.00205  | 3 | 1 | 33   | 0 |
| P12163_2_S3,13492 R.VEDALNATK.A ! R.VE  | 1568.91  | 0.00325  | 3 | 1 | 27   | 0 |
| P12163_2_S5,14941 R.VEDALNATK.A ! R.VE  | 1568.91  | 0.00724  | 3 | 1 | 38.9 | 0 |
| P12163_1_F4,18241 K.AAGEVLALQK.R        | 1607.994 | 0.00703  | 3 | 1 | 31.2 | 0 |
| P12163_1_F4,18252 K.AAGEVLALQK.R        | 1607.994 | 0.00505  | 2 | 1 | 53   | 0 |
| P12163_1_F4,18466 K.AAGEVLALQK.R        | 1607.994 | 0.00604  | 3 | 1 | 58.7 | 0 |
| P12163_1_F5,17109 K.AAGEVLALQK.R        | 1607.994 | 0.01063  | 2 | 1 | 48.4 | 0 |
| P12163_1_F6,17520 K.AAGEVLALQK.R        | 1607.994 | 0.00495  | 2 | 1 | 25.6 | 0 |
| P12163_2_F1,17559 K.AAGEVLALQK.R        | 1607.994 | 0.00658  | 3 | 1 | 42.7 | 0 |
| P12163_2_F1,17560 K.AAGEVLALQK.R        | 1607.994 | 0.00623  | 2 | 1 | 46.6 | 0 |
| P12163_1_F5,14376 K.AMEEIEK.N ! K.AMEEI | 1457.813 | 0.00552  | 2 | 1 | 39.3 | 0 |
| P12163_2_F1,14508 K.AMEEIEK.N ! K.AMEEI | 1457.813 | 0.00772  | 2 | 1 | 39.8 | 0 |
| P12163_2_F1,14514 K.AMEEIEK.N ! K.AMEEI | 1457.813 | 0.00399  | 3 | 1 | 22   | 0 |
| P12163_1_F3,19504 K.DMVVLPYK.D          | 1572.928 | 0.00685  | 2 | 1 | 27.2 | 0 |
| P12163_1_F3,19506 K.DMVVLPYK.D          | 1572.928 | 0.00353  | 3 | 1 | 24.4 | 0 |
| P12163_1_F4,19558 K.DMVVLPYK.D          | 1572.928 | 0.01187  | 3 | 1 | 30.3 | 0 |
| P12163_1_F4,19566 K.DMVVLPYK.D          | 1572.928 | 0.01071  | 2 | 1 | 27.3 | 0 |
| P12163_1_F9,18520 K.DMVVLPYK.D          | 1572.928 | 0.00677  | 2 | 1 | 25.3 | 0 |
| P12163_1_F2,19187 K.DSLLFSR.Y           | 1254.736 | 0.00233  | 3 | 1 | 28   | 0 |
| P12163_1_F7,15322 K.FADEVVSGK.I         | 1559.889 | -0.00621 | 2 | 1 | 33.9 | 0 |
| P12163_2_F1,16455 K.FADEVVSGK.I         | 1559.889 | 0.00591  | 2 | 1 | 33.9 | 0 |
| P12163_2_F1,16481 K.FADEVVSGK.I         | 1559.889 | 0.00354  | 3 | 1 | 22.8 | 0 |
| P12163_2_F4,15000 K.FADEVVSGK.I         | 1559.889 | 0.00129  | 2 | 1 | 40.9 | 0 |

|                    |                     |          |          |   |   |      |   |
|--------------------|---------------------|----------|----------|---|---|------|---|
| P12163_1_F2,9212   | K.GAIANPDEGR.M      | 1303.691 | 0.00173  | 2 | 1 | 35.4 | 0 |
| P12163_1_S1,9268   | K.GAIANPDEGR.M      | 1303.691 | 0.00071  | 2 | 1 | 29.8 | 0 |
| P12163_1_S1,9343   | K.GAIANPDEGR.M      | 1303.691 | -0.00872 | 3 | 1 | 42.5 | 0 |
| P12163_1_S1,9488   | K.GAIANPDEGR.M      | 1303.691 | 0.00359  | 2 | 1 | 31.4 | 0 |
| P12163_2_S3,7891   | K.GAIANPDEGR.M      | 1303.691 | 0.00387  | 2 | 1 | 32.5 | 0 |
| P12163_1_F6,12637  | K.GSTDQHAYIQQLR.E   | 1820.956 | 0.00254  | 2 | 1 | 40.7 | 0 |
| P12163_1_F6,12662  | K.GSTDQHAYIQQLR.E   | 1820.956 | -0.00172 | 3 | 1 | 24.6 | 0 |
| P12163_2_F7,13711  | K.IIAHM*AANDR.A     | 1431.768 | -0.00071 | 3 | 1 | 30.6 | 0 |
| P12163_2_F7,13690  | K.IIAHMAANDR.A      | 1415.773 | 0.00043  | 3 | 1 | 40.1 | 0 |
| P12163_1_F9,10599  | K.IKPPSSPEGR.F      | 1675.995 | 0.00594  | 2 | 1 | 30.8 | 0 |
| P12163_2_F7,9910   | K.IKPPSSPEGR.F      | 1675.995 | 0.00254  | 2 | 1 | 28.6 | 0 |
| P12163_1_F9,15578  | K.KAAGEVLALQK.R     | 2040.294 | 0.01278  | 3 | 1 | 46.4 | 0 |
| P12163_1_S1,13047  | K.SQIETTLD AVR.K    | 1536.853 | 0.0027   | 3 | 1 | 62.6 | 0 |
| P12163_1_S1,17003  | K.SQIETTLD AVR.K    | 1536.853 | 0.0033   | 3 | 1 | 58   | 0 |
| P12163_1_S1,17191  | K.SQIETTLD AVR.K    | 1536.853 | 0.00453  | 2 | 1 | 37.3 | 0 |
| P12163_1_F3,22214  | K.VYLGECNVDGLYA.-   | 1776.878 | 0.00325  | 2 | 1 | 100  | 0 |
| P12163_1_F4,22840  | K.VYLGECNVDGLYA.-   | 1776.878 | 0.00269  | 2 | 1 | 56.4 | 0 |
| P12163_1_F2,9161   | R.ALIAEGSCGSPR.S    | 1521.8   | 0.00238  | 3 | 1 | 32.3 | 0 |
| P12163_1_F2,11063  | R.ALIAEGSCGSPR.S    | 1521.8   | -0.00116 | 3 | 1 | 27.8 | 0 |
| P12163_1_F2,11375  | R.ALIAEGSCGSPR.S    | 1521.8   | 0.00316  | 3 | 1 | 41.3 | 0 |
| P12163_1_F2,13161  | R.ALIAEGSCGSPR.S    | 1521.8   | 0.0019   | 3 | 1 | 38.1 | 0 |
| P12163_2_F1,12881  | R.ALIAEGSCGSPR.S    | 1521.8   | 0.00361  | 2 | 1 | 35.6 | 0 |
| P12163_2_F8_12070  | R.AVGIYASLVNINAYHC  | 2979.651 | 0.00711  | 4 | 1 | 61.2 | 0 |
| P12163_2_F7,14961  | R.CHTPEDIEM*IYK.I   | 2160.093 | 0.00459  | 3 | 1 | 34.4 | 0 |
| P12163_2_F6,16174  | R.CHTPEDIEMIYK.I    | 2144.098 | 0.00333  | 3 | 1 | 34.6 | 0 |
| P12163_2_F6,16193  | R.CHTPEDIEMIYK.I    | 2144.098 | 0.00285  | 2 | 1 | 38.4 | 0 |
| P12163_2_F7,14958  | R.CHTPEDIEMIYK.I    | 2144.098 | 0.0054   | 3 | 1 | 29.6 | 0 |
| P12163_1_F4,16618  | R.EAGLEFAK.Q        | 1472.857 | 0.00418  | 3 | 1 | 25.4 | 0 |
| P12163_1_F5,15453  | R.EAGLEFAK.Q        | 1472.857 | 0.00667  | 2 | 1 | 33.7 | 0 |
| P12163_1_F7,14689  | R.EAGLEFAK.Q        | 1472.857 | 0.00211  | 2 | 1 | 27.9 | 0 |
| P12163_1_F7,14717  | R.EAGLEFAK.Q        | 1472.857 | -0.00203 | 3 | 1 | 27.9 | 0 |
| P12163_2_F1,15690  | R.EAGLEFAK.Q        | 1472.857 | 0.00243  | 2 | 1 | 33   | 0 |
| P12163_2_F1,15730  | R.EAGLEFAK.Q        | 1472.857 | 0.00808  | 3 | 1 | 25.7 | 0 |
| P12163_2_S5,14364  | R.EAGLEFAK.Q        | 1472.857 | -0.00059 | 3 | 1 | 27.2 | 0 |
| P12163_1_F2,15350  | R.EISADLSNTNDVVPK.K | 2210.212 | 0.00579  | 3 | 1 | 33.1 | 0 |
| P12163_1_F2,17110  | R.EISADLSNTNDVVPK.K | 2210.212 | 0.00303  | 2 | 1 | 38   | 0 |
| P12163_1_S1,16238  | R.EISADLSNTNDVVPK.K | 2210.212 | 0.00639  | 2 | 1 | 79   | 0 |
| P12163_1_S1,16248  | R.EISADLSNTNDVVPK.K | 2210.212 | 0.0026   | 4 | 1 | 44.1 | 0 |
| P12163_1_S1,16407  | R.EISADLSNTNDVVPK.K | 2210.212 | 0.00705  | 3 | 1 | 77   | 0 |
| P12163_1_F5,16823  | R.FQAAFK.A          | 1319.793 | 0.00527  | 2 | 1 | 23.9 | 0 |
| P12163_2_F2,17485  | R.FQAAFK.A          | 1319.793 | 0.00677  | 2 | 1 | 24.9 | 0 |
| P12163_2_F9,13582  | R.KFADEVVSGK.I      | 1992.189 | 0.00062  | 3 | 1 | 32.9 | 0 |
| P12163_2_F10,15311 | R.KPELAPNSFLK.S     | 2156.321 | 0.00254  | 4 | 1 | 22.9 | 0 |
| P12163_2_F4,14205  | R.M*VGHYWLR.K       | 1381.735 | 0.00338  | 3 | 1 | 44.7 | 0 |
| P12163_2_F4,16373  | R.MVGHYWLR.K        | 1365.74  | 0.00236  | 3 | 1 | 38.4 | 0 |
| P12163_2_F9,16600  | R.MVGHYWLR.K        | 1365.74  | 0.00365  | 3 | 1 | 55.9 | 0 |
| P12163_1_F5,15034  | R.NGLLEVQK.A        | 1508.926 | 0.00855  | 2 | 1 | 26.7 | 0 |
| P12163_2_F1,15141  | R.NGLLEVQK.A        | 1508.926 | 0.00486  | 3 | 1 | 27.9 | 0 |
| P12163_2_F1,15194  | R.NGLLEVQK.A        | 1508.926 | 0.00639  | 2 | 1 | 28.7 | 0 |
| P12163_2_F1,15360  | R.NGLLEVQK.A        | 1508.926 | 0.00546  | 3 | 1 | 22.6 | 0 |
| P12163_1_S10,1168  | R.SALYANDR.E        | 1213.648 | 0.00359  | 2 | 1 | 30.7 | 0 |



|                   |                    |          |          |   |   |      |   |
|-------------------|--------------------|----------|----------|---|---|------|---|
| P12163_2_F8_1207  | R.SALYANDR.E       | 1213.648 | 0.00401  | 2 | 1 | 28.8 | 0 |
| P12163_1_S1,21846 | R.SVGALVALYER.A    | 1481.863 | 0.00204  | 3 | 1 | 68.8 | 0 |
| P12163_2_F7,19957 | R.SVGALVALYER.A    | 1481.863 | 0.00126  | 2 | 1 | 52.2 | 0 |
| P12163_1_F4,24359 | R.VLAVLNEASCK.E    | 1812.051 | 0.0049   | 2 | 1 | 59   | 0 |
| P12163_1_F4,24360 | R.VLAVLNEASCK.E    | 1812.051 | 0.00624  | 3 | 1 | 50.2 | 0 |
| P12163_1_F4,24648 | R.VLAVLNEASCK.E    | 1812.051 | 0.00516  | 3 | 1 | 61   | 0 |
| P12163_1_F4,24665 | R.VLAVLNEASCK.E    | 1812.051 | 0.00306  | 2 | 1 | 59.4 | 0 |
| P12163_1_F5,22880 | R.VLAVLNEASCK.E    | 1812.051 | 0.00654  | 3 | 1 | 43.6 | 0 |
| P12163_1_F6,22138 | R.VLAVLNEASCK.E    | 1812.051 | 0.00372  | 3 | 1 | 34.6 | 0 |
| P12163_1_F6,22555 | R.VLAVLNEASCK.E    | 1812.051 | 0.00702  | 3 | 1 | 33.2 | 0 |
| P12163_1_F7,21391 | R.VLAVLNEASCK.E    | 1812.051 | 0.00114  | 3 | 1 | 46.5 | 0 |
| P12163_1_F7,21796 | R.VLAVLNEASCK.E    | 1812.051 | 0.00417  | 3 | 1 | 30.5 | 0 |
| P12163_2_F1,23735 | R.VLAVLNEASCK.E    | 1812.051 | 0.00423  | 3 | 1 | 45.8 | 0 |
| P12163_2_F1,23966 | R.VLAVLNEASCK.E    | 1812.051 | 0.00363  | 3 | 1 | 45.2 | 0 |
| P12163_2_F1,23975 | R.VLAVLNEASCK.E    | 1812.051 | 0.00936  | 2 | 1 | 29   | 0 |
| P12163_2_F4,20815 | R.VLAVLNEASCK.E    | 1812.051 | 0.00024  | 3 | 1 | 49.2 | 0 |
| P12163_2_S5,20926 | R.VLAVLNEASCK.E    | 1812.051 | 0.01077  | 3 | 1 | 22.1 | 0 |
| P12163_1_F4,13694 | R.VSQGLTVYGNK.G    | 1774.032 | 0.00296  | 2 | 1 | 25.8 | 0 |
| P12163_1_F4,16187 | R.VSQGLTVYGNK.G    | 1774.032 | 0.00884  | 2 | 1 | 56   | 0 |
| P12163_1_F4,16196 | R.VSQGLTVYGNK.G    | 1774.032 | 0.00627  | 3 | 1 | 50.8 | 0 |
| P12163_2_F1,15358 | R.VSQGLTVYGNK.G    | 1774.032 | 0.00462  | 3 | 1 | 54   | 0 |
| P12163_2_F1,15393 | R.VSQGLTVYGNK.G    | 1774.032 | 0.0047   | 2 | 1 | 52.9 | 0 |
| P12163_2_F9,14329 | R.VSQGLTVYGNK.G    | 1774.032 | 0.00738  | 3 | 1 | 29.3 | 0 |
| P12163_1_F6,20830 | R.YVDWLYQHK.E      | 1860.026 | 0.005    | 3 | 1 | 39.8 | 0 |
| P12163_1_F4,18397 | K.AQISALVDK.G      | 1552.952 | 0.00842  | 3 | 1 | 34.8 | 0 |
| P12163_1_F4,18423 | K.AQISALVDK.G      | 1552.952 | 0.00846  | 2 | 1 | 37.3 | 0 |
| P12163_1_F5,17073 | K.AQISALVDK.G      | 1552.952 | 0.00596  | 3 | 1 | 28.6 | 0 |
| P12163_1_F5,17075 | K.AQISALVDK.G      | 1552.952 | 0.00208  | 2 | 1 | 46.1 | 0 |
| P12163_1_F7,16200 | K.AQISALVDK.G      | 1552.952 | 0.0029   | 3 | 1 | 29.6 | 0 |
| P12163_2_F1,17712 | K.AQISALVDK.G      | 1552.952 | 0.0053   | 3 | 1 | 34.1 | 0 |
| P12163_2_F1,17713 | K.AQISALVDK.G      | 1552.952 | 0.0074   | 2 | 1 | 37.4 | 0 |
| P12163_2_S5,15462 | K.AQISALVDK.G      | 1552.952 | -0.00025 | 3 | 1 | 23.4 | 0 |
| P12163_1_S1,12866 | K.DIELQVTER.F      | 1406.779 | -0.00035 | 3 | 1 | 36.7 | 0 |
| P12163_1_F3,21257 | K.EIADIMLK.E       | 1540.923 | -0.00598 | 3 | 1 | 30.1 | 0 |
| P12163_1_F3,21261 | K.EIADIMLK.E       | 1540.923 | 0.0056   | 2 | 1 | 39.7 | 0 |
| P12163_2_F1,21464 | K.EIADIMLK.E       | 1540.923 | 0.00794  | 3 | 1 | 35.2 | 0 |
| P12163_2_F1,21489 | K.EIADIMLK.E       | 1540.923 | 0.00522  | 2 | 1 | 51.3 | 0 |
| P12163_2_F4,19124 | K.EIADIMLK.E       | 1540.923 | 0.00128  | 3 | 1 | 31.6 | 0 |
| P12163_1_S1,13088 | K.LDPVVGR.Q        | 1059.646 | 0.00326  | 3 | 1 | 26.1 | 0 |
| P12163_1_F7,18006 | K.LIGSPPGYVGYTEGGQ | 2568.361 | -0.00653 | 3 | 1 | 32   | 0 |
| P12163_1_F7,20015 | K.LIGSPPGYVGYTEGGQ | 2568.361 | 0.00586  | 3 | 1 | 84   | 0 |
| P12163_2_F7,11466 | K.MEETLHK.R        | 1495.84  | 0.00331  | 3 | 1 | 22.1 | 0 |
| P12163_1_F3,18754 | K.MPTLEEYGTNLTK.L  | 2105.141 | 0.00721  | 3 | 1 | 26.8 | 0 |
| P12163_1_F3,20240 | K.MPTLEEYGTNLTK.L  | 2105.141 | 0.00156  | 2 | 1 | 48.3 | 0 |
| P12163_1_F4,15720 | K.NNPCLIGEPGVGK.T  | 1963.089 | 0.00694  | 3 | 1 | 35.8 | 0 |
| P12163_2_F1,14845 | K.NNPCLIGEPGVGK.T  | 1963.089 | 0.00499  | 2 | 1 | 37.9 | 0 |
| P12163_1_F9,17374 | K.RVLELSLEEAR.Q    | 1618.943 | 0.00402  | 3 | 1 | 70.2 | 0 |
| P12163_2_F7,15460 | K.RVLELSLEEAR.Q    | 1618.943 | -0.00153 | 3 | 1 | 39.8 | 0 |
| P12163_1_F4,17476 | K.SLVTEELK.Q       | 1526.925 | 0.00644  | 2 | 1 | 39.5 | 0 |
| P12163_1_F7,15404 | K.SLVTEELK.Q       | 1526.925 | -0.00076 | 3 | 1 | 28.1 | 0 |
| P12163_2_S5,14893 | K.SLVTEELK.Q       | 1526.925 | -0.00751 | 3 | 1 | 31.3 | 0 |

|                   |                     |          |          |   |   |      |   |
|-------------------|---------------------|----------|----------|---|---|------|---|
| P12163_1_F5,15362 | K.SMGINLK.D         | 1370.829 | 0.00421  | 3 | 1 | 23.1 | 0 |
| P12163_2_F2,16087 | K.SMGINLK.D         | 1370.829 | 0.00415  | 3 | 1 | 33.4 | 0 |
| P12163_1_F2,11174 | K.TAIAEGLAQR.I      | 1333.774 | 0.00366  | 3 | 1 | 42.6 | 0 |
| P12163_1_F2,15759 | K.TAIAEGLAQR.I      | 1333.774 | 0.0032   | 2 | 1 | 24.4 | 0 |
| P12163_1_F2,20513 | K.VIM*LAQEEAR.R     | 1479.814 | 0.00292  | 2 | 1 | 32.8 | 0 |
| P12163_1_S1,20329 | K.VITLDM*GLLVAGTK.' | 2055.234 | 0.00674  | 3 | 1 | 32.6 | 0 |
| P12163_1_S1,21611 | K.VITLDM*GLLVAGTK.' | 2055.234 | 0.00362  | 3 | 1 | 22.9 | 0 |
| P12163_1_S1,5657  | K.VSTDESDR.L        | 1212.601 | 0.003    | 3 | 1 | 32.7 | 0 |
| P12163_1_S1,6132  | K.VSTDESDR.L        | 1212.601 | 0.0036   | 3 | 1 | 27.3 | 0 |
| P12163_1_S1,7216  | K.VSTDESDR.L        | 1212.601 | 0.00583  | 2 | 1 | 30.6 | 0 |
| P12163_1_S1,7397  | K.VSTDESDR.L        | 1212.601 | 0.00437  | 2 | 1 | 29.1 | 0 |
| P12163_2_F6,17762 | R.GELQCIGATTLDEYRK  | 2462.317 | 0.00829  | 3 | 1 | 40.5 | 0 |
| P12163_1_F9,8938  | R.HAQLPEEAR.E       | 1354.738 | 0.00484  | 2 | 1 | 31.1 | 0 |
| P12163_1_F9,8950  | R.HAQLPEEAR.E       | 1354.738 | 0.00046  | 3 | 1 | 47.1 | 0 |
| P12163_2_F7,8454  | R.HAQLPEEAR.E       | 1354.738 | 0.00229  | 3 | 1 | 43.5 | 0 |
| P12163_2_F7,8457  | R.HAQLPEEAR.E       | 1354.738 | 0.00252  | 2 | 1 | 31.4 | 0 |
| P12163_2_F9,9072  | R.HAQLPEEAR.E       | 1354.738 | 0.00262  | 3 | 1 | 49.3 | 0 |
| P12163_1_F2,14421 | R.IASGDVPDTIEGK.K   | 1910.069 | 0.00304  | 2 | 1 | 27.7 | 0 |
| P12163_1_F2,14451 | R.IASGDVPDTIEGK.K   | 1910.069 | 0.00493  | 3 | 1 | 29.7 | 0 |
| P12163_1_F2,16204 | R.IASGDVPDTIEGK.K   | 1910.069 | 0.0088   | 2 | 1 | 27.1 | 0 |
| P12163_1_F2,16385 | R.IASGDVPDTIEGK.K   | 1910.069 | 0.00541  | 3 | 1 | 22.5 | 0 |
| P12163_1_S1,15472 | R.IASGDVPDTIEGK.K   | 1910.069 | 0.01157  | 2 | 1 | 43.3 | 0 |
| P12163_1_S1,15580 | R.IASGDVPDTIEGK.K   | 1910.069 | 0.0061   | 3 | 1 | 35.4 | 0 |
| P12163_1_F3,20499 | R.IGFDLDYDEK.D      | 1822.968 | 0.00673  | 2 | 1 | 38.3 | 0 |
| P12163_1_S1,22691 | R.LDEMIVFR.Q        | 1326.739 | 0.0015   | 3 | 1 | 65.9 | 0 |
| P12163_1_S1,22813 | R.LDEMIVFR.Q        | 1326.739 | 0.00325  | 2 | 1 | 26.8 | 0 |
| P12163_1_S1,20304 | R.LDMSEFMER.H       | 1461.702 | 0.00094  | 2 | 1 | 26.6 | 0 |
| P12163_1_F4,19008 | R.LLEDSM*AEK.M      | 1659.908 | -0.00603 | 3 | 1 | 36.2 | 0 |
| P12163_1_F2,13177 | R.M*VGESTEAVGAGVG   | 2475.261 | 0.0037   | 3 | 1 | 33.4 | 0 |
| P12163_1_F3,12215 | R.M*VGESTEAVGAGVG   | 2475.261 | 0.00655  | 3 | 1 | 59.5 | 0 |
| P12163_1_F2,13241 | R.MVGESTEAVGAGVGC   | 2459.266 | 0.00517  | 3 | 1 | 77.9 | 0 |
| P12163_1_F2,14288 | R.MVGESTEAVGAGVGC   | 2459.266 | 0.0013   | 3 | 1 | 75.7 | 0 |
| P12163_2_F6,21430 | R.RPYTVVLFDEIEK.A   | 2217.274 | 0.00362  | 3 | 1 | 22.1 | 0 |
| P12163_2_F7,19300 | R.RPYTVVLFDEIEK.A   | 2217.274 | 0.00512  | 3 | 1 | 42.5 | 0 |
| P12163_1_F4,14061 | R.VIGQDEAVK.A       | 1566.931 | 0.00746  | 2 | 1 | 35.6 | 0 |
| P12163_1_F4,14110 | R.VIGQDEAVK.A       | 1566.931 | 0.00287  | 3 | 1 | 31.5 | 0 |
| P12163_1_F7,12318 | R.VIGQDEAVK.A       | 1566.931 | -0.00022 | 3 | 1 | 26.6 | 0 |
| P12163_2_F1,13072 | R.VIGQDEAVK.A       | 1566.931 | 0.00508  | 2 | 1 | 34.9 | 0 |
| P12163_2_F1,13082 | R.VIGQDEAVK.A       | 1566.931 | 0.00332  | 3 | 1 | 29.1 | 0 |
| P12163_1_F2,17198 | R.VLELSLEEAR.Q      | 1462.842 | 0.00285  | 3 | 1 | 40.8 | 0 |
| P12163_1_S1,20988 | R.VLELSLEEAR.Q      | 1462.842 | 0.00195  | 3 | 1 | 58.7 | 0 |
| P12163_1_S1,21039 | R.VLELSLEEAR.Q      | 1462.842 | 0.00299  | 2 | 1 | 39.6 | 0 |
| P12163_1_S1,18354 | R.VLENLGADPSNIR.T   | 1701.944 | 0.00116  | 3 | 1 | 47.5 | 0 |
| P12163_1_S1,18540 | R.VLENLGADPSNIR.T   | 1701.944 | 0.00354  | 2 | 1 | 42.9 | 0 |
| P12163_1_S1,18602 | R.VLENLGADPSNIR.T   | 1701.944 | 0.00422  | 3 | 1 | 50   | 0 |
| P12163_1_F6,21699 | K.ALVPASLIAHNAGVFI  | 2881.661 | 0.0025   | 4 | 1 | 28.2 | 0 |
| P12163_1_F4,18509 | K.ASEWTTGYNAMTDK.'  | 2183.09  | 0.00537  | 2 | 1 | 65.2 | 0 |
| P12163_2_F1,17758 | K.ASEWTTGYNAMTDK.'  | 2183.09  | 0.0053   | 3 | 1 | 45.5 | 0 |
| P12163_1_S1,16205 | K.DIAFDQISR.A       | 1368.742 | 0.00441  | 3 | 1 | 57.1 | 0 |
| P12163_1_S1,16253 | K.DIAFDQISR.A       | 1368.742 | 0.0032   | 2 | 1 | 33.4 | 0 |
| P12163_1_F3,22868 | K.DIIPLLEK.T        | 1548.982 | 0.00662  | 3 | 1 | 36.5 | 0 |

|                                         |          |          |   |   |      |   |
|-----------------------------------------|----------|----------|---|---|------|---|
| P12163_1_F3,23114 K.DIIPLEK.T           | 1548.982 | 0.00589  | 2 | 1 | 25.8 | 0 |
| P12163_1_F3,23147 K.DIIPLEK.T           | 1548.982 | 0.00614  | 3 | 1 | 25.1 | 0 |
| P12163_1_F5,22271 K.DIIPLEK.T           | 1548.982 | 0.00455  | 3 | 1 | 32.8 | 0 |
| P12163_1_F6,21631 K.DIIPLEK.T           | 1548.982 | 0.00059  | 3 | 1 | 34.3 | 0 |
| P12163_1_F7,21214 K.DIIPLEK.T           | 1548.982 | 0.00866  | 3 | 1 | 28.8 | 0 |
| P12163_1_S10,2018 K.DIIPLEK.T           | 1548.982 | 0.00665  | 3 | 1 | 28.3 | 0 |
| P12163_2_F1,23134 K.DIIPLEK.T           | 1548.982 | 0.00653  | 2 | 1 | 27.7 | 0 |
| P12163_2_F1,23158 K.DIIPLEK.T           | 1548.982 | 0.00212  | 3 | 1 | 34.3 | 0 |
| P12163_2_F4,20652 K.DIIPLEK.T           | 1548.982 | 0.00507  | 2 | 1 | 23.9 | 0 |
| P12163_2_S3,18122 K.DIIPLEK.T           | 1548.982 | 0.00185  | 3 | 1 | 31.2 | 0 |
| P12163_1_F9,9919 K.DKLEDADER.L          | 1698.912 | 0.00334  | 2 | 1 | 37.5 | 0 |
| P12163_1_F2,10234 K.DSTTHIADAASK.D      | 1801.016 | 0.00782  | 3 | 1 | 35.4 | 0 |
| P12163_1_F2,12553 K.DSTTHIADAASK.D      | 1801.016 | 0.00506  | 3 | 1 | 33.2 | 0 |
| P12163_1_F2,14081 K.DSTTHIADAASK.D      | 1801.016 | -0.00457 | 3 | 1 | 39.6 | 0 |
| P12163_1_F2,15577 K.DSTTHIADAASK.D      | 1801.016 | -0.00215 | 2 | 1 | 52.1 | 0 |
| P12163_1_F2,15678 K.DSTTHIADAASK.D      | 1801.016 | 0.00575  | 3 | 1 | 36.4 | 0 |
| P12163_1_F3,16095 K.DSTTHIADAASK.D      | 1801.016 | -0.00085 | 3 | 1 | 22.9 | 0 |
| P12163_2_F4,14748 K.DSTTHIADAASK.D      | 1801.016 | -0.00418 | 3 | 1 | 23.5 | 0 |
| P12163_1_F8,16843 K.DSTTHIADAASKDEIQA   | 2513.367 | 0.00412  | 2 | 1 | 30.6 | 0 |
| P12163_1_F2,10955 K.ELAETDSVYDSEK.L     | 2094.07  | -0.00399 | 3 | 1 | 22.6 | 0 |
| P12163_1_F2,12305 K.ELAETDSVYDSEK.L     | 2094.07  | 0.0028   | 2 | 1 | 27.2 | 0 |
| P12163_1_F2,12313 K.ELAETDSVYDSEK.L     | 2094.07  | 0.00786  | 3 | 1 | 32.5 | 0 |
| P12163_1_F2,13182 K.ELAETDSVYDSEK.L     | 2094.07  | 0.00663  | 3 | 1 | 39   | 0 |
| P12163_1_F2,14653 K.ELAETDSVYDSEK.L     | 2094.07  | 0.00252  | 2 | 1 | 50.8 | 0 |
| P12163_1_F3,12949 K.ELAETDSVYDSEK.L     | 2094.07  | 0.004    | 2 | 1 | 28.4 | 0 |
| P12163_1_F3,13629 K.ELAETDSVYDSEK.L     | 2094.07  | 0.01116  | 3 | 1 | 36.4 | 0 |
| P12163_1_F3,15158 K.ELAETDSVYDSEK.L     | 2094.07  | 0.0043   | 2 | 1 | 54   | 0 |
| P12163_1_F3,15191 K.ELAETDSVYDSEK.L     | 2094.07  | 0.00633  | 3 | 1 | 56.4 | 0 |
| P12163_1_F6,14567 K.ELAETDSVYDSEK.L     | 2094.07  | 0.00243  | 3 | 1 | 50.1 | 0 |
| P12163_2_F2,14662 K.ELAETDSVYDSEK.L     | 2094.07  | 0.00372  | 2 | 1 | 36   | 0 |
| P12163_1_F2,10456 K.LEDADER.L           | 1151.585 | 0.00283  | 2 | 1 | 28.7 | 0 |
| P12163_1_F2,23643 K.LGLLSVTSGANPVSLK    | 2164.316 | 0.00344  | 3 | 1 | 61.4 | 0 |
| P12163_1_F3,22871 K.LGLLSVTSGANPVSLK    | 2164.316 | 0.00584  | 3 | 1 | 49.3 | 0 |
| P12163_1_F3,24705 K.LGLLSVTSGANPVSLK    | 2164.316 | 0.00503  | 3 | 1 | 43.2 | 0 |
| P12163_1_F3,24750 K.LGLLSVTSGANPVSLK    | 2164.316 | 0.00391  | 2 | 1 | 59.9 | 0 |
| P12163_1_F3,24805 K.LGLLSVTSGANPVSLK    | 2164.316 | 0.00621  | 4 | 1 | 26.5 | 0 |
| P12163_1_F3,24945 K.LGLLSVTSGANPVSLK    | 2164.316 | 0.0008   | 3 | 1 | 30   | 0 |
| P12163_1_F2,22324 K.LIVEFENAR.V         | 1394.794 | 0.00331  | 3 | 1 | 35.4 | 0 |
| P12163_1_F2,22457 K.LIVEFENAR.V         | 1394.794 | 0.00054  | 2 | 1 | 32.4 | 0 |
| P12163_1_F6,21726 K.LIVEFENAR.V         | 1394.794 | 0.00228  | 2 | 1 | 31   | 0 |
| P12163_1_S1,19996 K.LSDAVGLTLGPR.G      | 1502.884 | 0.00448  | 2 | 1 | 24.1 | 0 |
| P12163_1_S1,20187 K.LSDAVGLTLGPR.G      | 1502.884 | 0.00331  | 3 | 1 | 73.1 | 0 |
| P12163_2_F2,21034 K.LSDAVGLTLGPR.G      | 1502.884 | 0.00158  | 2 | 1 | 33.9 | 0 |
| P12163_1_F4,17840 K.LSGGVAVIK.V ! K.LSC | 1451.941 | 0.00685  | 2 | 1 | 36.2 | 0 |
| P12163_1_F4,17849 K.LSGGVAVIK.V ! K.LSC | 1451.941 | 0.00546  | 3 | 1 | 29.5 | 0 |
| P12163_1_F4,18755 K.LSGGVAVIK.V ! K.LSC | 1451.941 | 0.00627  | 3 | 1 | 29.5 | 0 |
| P12163_1_F4,18793 K.LSGGVAVIK.V ! K.LSC | 1451.941 | 0.00573  | 2 | 1 | 36.3 | 0 |
| P12163_1_F5,16593 K.LSGGVAVIK.V ! K.LSC | 1451.941 | 0.00381  | 2 | 1 | 33   | 0 |
| P12163_1_F6,17094 K.LSGGVAVIK.V ! K.LSC | 1451.941 | 0.0066   | 3 | 1 | 25.3 | 0 |
| P12163_1_F7,15767 K.LSGGVAVIK.V ! K.LSC | 1451.941 | 0.00323  | 2 | 1 | 24.7 | 0 |
| P12163_1_F7,15810 K.LSGGVAVIK.V ! K.LSC | 1451.941 | 0.00276  | 3 | 1 | 32.1 | 0 |

|                   |                       |          |          |   |   |      |   |
|-------------------|-----------------------|----------|----------|---|---|------|---|
| P12163_1_F7,16269 | K.LSGGVAVIK.V ! K.LSC | 1451.941 | 0.00321  | 3 | 1 | 25.8 | 0 |
| P12163_1_F8,17074 | K.LSGGVAVIK.V ! K.LSC | 1451.941 | 0.00288  | 3 | 1 | 34.2 | 0 |
| P12163_1_F9,16894 | K.LSGGVAVIK.V ! K.LSC | 1451.941 | 0.00606  | 3 | 1 | 33.7 | 0 |
| P12163_2_F1,16989 | K.LSGGVAVIK.V ! K.LSC | 1451.941 | 0.00463  | 2 | 1 | 27.1 | 0 |
| P12163_2_F1,17994 | K.LSGGVAVIK.V ! K.LSC | 1451.941 | 0.00413  | 2 | 1 | 33.8 | 0 |
| P12163_2_F2,356   | K.LSGGVAVIK.V ! K.LSC | 1451.941 | 0.00372  | 3 | 1 | 27.9 | 0 |
| P12163_2_F2,835   | K.LSGGVAVIK.V ! K.LSC | 1451.941 | 0.00492  | 3 | 1 | 35.2 | 0 |
| P12163_2_F2,864   | K.LSGGVAVIK.V ! K.LSC | 1451.941 | 0.00453  | 2 | 1 | 37.9 | 0 |
| P12163_2_F2,1030  | K.LSGGVAVIK.V ! K.LSC | 1451.941 | 0.00414  | 3 | 1 | 33.4 | 0 |
| P12163_2_F2,1058  | K.LSGGVAVIK.V ! K.LSC | 1451.941 | 0.00323  | 2 | 1 | 37.1 | 0 |
| P12163_2_F2,1221  | K.LSGGVAVIK.V ! K.LSC | 1451.941 | 0.0039   | 3 | 1 | 31.6 | 0 |
| P12163_2_F2,1252  | K.LSGGVAVIK.V ! K.LSC | 1451.941 | 0.00427  | 2 | 1 | 39.5 | 0 |
| P12163_2_F2,1417  | K.LSGGVAVIK.V ! K.LSC | 1451.941 | 0.00498  | 3 | 1 | 29.2 | 0 |
| P12163_2_F2,1500  | K.LSGGVAVIK.V ! K.LSC | 1451.941 | 0.00493  | 2 | 1 | 24.3 | 0 |
| P12163_2_F2,1603  | K.LSGGVAVIK.V ! K.LSC | 1451.941 | 0.00693  | 3 | 1 | 29.1 | 0 |
| P12163_2_F2,1801  | K.LSGGVAVIK.V ! K.LSC | 1451.941 | 0.00441  | 3 | 1 | 28.2 | 0 |
| P12163_2_F2,1909  | K.LSGGVAVIK.V ! K.LSC | 1451.941 | 0.00331  | 2 | 1 | 29.3 | 0 |
| P12163_2_F2,1994  | K.LSGGVAVIK.V ! K.LSC | 1451.941 | 0.00531  | 3 | 1 | 32.3 | 0 |
| P12163_2_F2,2097  | K.LSGGVAVIK.V ! K.LSC | 1451.941 | 0.00349  | 2 | 1 | 38.1 | 0 |
| P12163_2_F2,2189  | K.LSGGVAVIK.V ! K.LSC | 1451.941 | 0.00324  | 3 | 1 | 24.9 | 0 |
| P12163_2_F4,15464 | K.LSGGVAVIK.V ! K.LSC | 1451.941 | -0.00073 | 2 | 1 | 24.6 | 0 |
| P12163_2_F4,15934 | K.LSGGVAVIK.V ! K.LSC | 1451.941 | 0.0063   | 3 | 1 | 24.1 | 0 |
| P12163_2_F9,15243 | K.LSGGVAVIK.V ! K.LSC | 1451.941 | 0.00042  | 3 | 1 | 22.6 | 0 |
| P12163_2_S5,15426 | K.LSGGVAVIK.V ! K.LSC | 1451.941 | 0.0042   | 3 | 1 | 27.3 | 0 |
| P12163_1_F8,10917 | K.TNDSAGDGTASVL/      | 1940.983 | -0.00125 | 3 | 1 | 23.3 | 0 |
| P12163_1_F6,18513 | K.TVHGLVEELEK.R       | 1862.084 | 0.00226  | 3 | 1 | 26.2 | 0 |
| P12163_1_S10,1769 | K.TVHGLVEELEK.R       | 1862.084 | 0.00112  | 3 | 1 | 25.9 | 0 |
| P12163_1_S10,1769 | K.TVHGLVEELEK.R       | 1862.084 | 0.00393  | 4 | 1 | 29.1 | 0 |
| P12163_2_F6,13945 | K.TVHGLVEELEK.R       | 1862.084 | 0.00007  | 3 | 1 | 46   | 0 |
| P12163_2_F6,17851 | K.TVHGLVEELEK.R       | 1862.084 | 0.00358  | 3 | 1 | 46   | 0 |
| P12163_2_F6,17937 | K.TVHGLVEELEK.R       | 1862.084 | 0.00381  | 4 | 1 | 24.8 | 0 |
| P12163_2_F6,18244 | K.TVHGLVEELEK.R       | 1862.084 | 0.00859  | 3 | 1 | 22.9 | 0 |
| P12163_2_F7,12896 | K.TVHGLVEELEK.R       | 1862.084 | 0.00424  | 3 | 1 | 31.9 | 0 |
| P12163_2_F7,15978 | K.TVHGLVEELEK.R       | 1862.084 | 0.00613  | 3 | 1 | 44.2 | 0 |
| P12163_2_F7,16161 | K.TVHGLVEELEK.R       | 1862.084 | 0.00304  | 3 | 1 | 39.3 | 0 |
| P12163_2_F8_12070 | K.TVHGLVEELEK.R       | 1862.084 | 0.0049   | 3 | 1 | 26.6 | 0 |
| P12163_1_F5,12878 | K.VGAATETELED.R.K     | 1594.823 | 0.00813  | 2 | 1 | 25.1 | 0 |
| P12163_1_S1,9927  | K.VGAATETELED.R.K     | 1594.823 | 0.00409  | 4 | 1 | 27.9 | 0 |
| P12163_1_S1,10858 | K.VGAATETELED.R.K     | 1594.823 | 0.00225  | 3 | 1 | 28.5 | 0 |
| P12163_1_S1,11031 | K.VGAATETELED.R.K     | 1594.823 | 0.00219  | 2 | 1 | 26.3 | 0 |
| P12163_1_S1,11075 | K.VGAATETELED.R.K     | 1594.823 | -0.00057 | 3 | 1 | 23.7 | 0 |
| P12163_1_S1,14006 | K.VGAATETELED.R.K     | 1594.823 | 0.00411  | 3 | 1 | 46.7 | 0 |
| P12163_1_S1,14079 | K.VGAATETELED.R.K     | 1594.823 | -0.00025 | 2 | 1 | 44.2 | 0 |
| P12163_1_S1,14447 | K.VGAATETELED.R.K     | 1594.823 | 0.00557  | 2 | 1 | 39.9 | 0 |
| P12163_1_S1,15451 | K.VGAATETELED.R.K     | 1594.823 | -0.00135 | 2 | 1 | 25   | 0 |
| P12163_2_F2,13642 | K.VGAATETELED.R.K     | 1594.823 | 0.00205  | 2 | 1 | 38.1 | 0 |
| P12163_1_F8,13848 | K.VGAATETELED.R.K.L   | 2027.123 | 0.00464  | 2 | 1 | 29.5 | 0 |
| P12163_1_S1,10329 | K.VVNDGVTIAR.A        | 1347.79  | 0.00311  | 3 | 1 | 25.3 | 0 |
| P12163_1_S1,13185 | K.VVNDGVTIAR.A        | 1347.79  | 0.00506  | 2 | 1 | 26.6 | 0 |
| P12163_1_S1,13208 | K.VVNDGVTIAR.A        | 1347.79  | -0.00073 | 3 | 1 | 82   | 0 |
| P12163_1_F2,17201 | K.YENM*LQAGVIDPAK.    | 2173.178 | 0.00766  | 3 | 1 | 32.9 | 0 |

|                   |                     |          |          |   |   |      |   |
|-------------------|---------------------|----------|----------|---|---|------|---|
| P12163_1_F3,17732 | K.YENM*LQAGVIDPAK.  | 2173.178 | 0.01021  | 3 | 1 | 50.3 | 0 |
| P12163_1_F3,17745 | K.YENM*LQAGVIDPAK.  | 2173.178 | 0.00066  | 2 | 1 | 37.5 | 0 |
| P12163_1_F3,20918 | K.YENMLQAGVIDPAK.V  | 2157.183 | 0.00781  | 3 | 1 | 61.5 | 0 |
| P12163_1_F3,20919 | K.YENMLQAGVIDPAK.V  | 2157.183 | 0.00792  | 2 | 1 | 73.9 | 0 |
| P12163_2_F7,18242 | K.YENMLQAGVIDPAK.V  | 2157.183 | 0.00532  | 3 | 1 | 54.6 | 0 |
| P12163_1_F4,10863 | R.AAM*QAGIDK.L      | 1528.861 | 0.00585  | 3 | 1 | 28   | 0 |
| P12163_1_F5,9485  | R.AAM*QAGIDK.L      | 1528.861 | 0.00791  | 2 | 1 | 35   | 0 |
| P12163_2_F1,10004 | R.AAM*QAGIDK.L      | 1528.861 | 0.00198  | 3 | 1 | 33.3 | 0 |
| P12163_2_F1,10025 | R.AAM*QAGIDK.L      | 1528.861 | 0.00639  | 2 | 1 | 34   | 0 |
| P12163_2_S5,9242  | R.AAM*QAGIDK.L      | 1528.861 | 0.00306  | 3 | 1 | 27.8 | 0 |
| P12163_1_F4,13549 | R.AAMQAGIDK.L       | 1512.866 | 0.00531  | 3 | 1 | 26.2 | 0 |
| P12163_1_F4,13553 | R.AAMQAGIDK.L       | 1512.866 | 0.00525  | 2 | 1 | 36.8 | 0 |
| P12163_1_F5,12102 | R.AAMQAGIDK.L       | 1512.866 | 0.00669  | 2 | 1 | 37   | 0 |
| P12163_1_F5,12132 | R.AAMQAGIDK.L       | 1512.866 | 0.01179  | 3 | 1 | 44.2 | 0 |
| P12163_1_F7,11827 | R.AAMQAGIDK.L       | 1512.866 | 0.00207  | 3 | 1 | 30.3 | 0 |
| P12163_2_F1,12543 | R.AAMQAGIDK.L       | 1512.866 | 0.00667  | 2 | 1 | 40.2 | 0 |
| P12163_2_F1,12591 | R.AAMQAGIDK.L       | 1512.866 | 0.00294  | 3 | 1 | 36.5 | 0 |
| P12163_2_S5,11537 | R.AAMQAGIDK.L       | 1512.866 | 0.0012   | 3 | 1 | 24.3 | 0 |
| P12163_2_S5,11575 | R.AAMQAGIDK.L       | 1512.866 | 0.00069  | 2 | 1 | 26.5 | 0 |
| P12163_1_F6,23170 | R.AIELADPM*ENAGAALI | 2075.111 | 0.0044   | 2 | 1 | 34   | 0 |
| P12163_1_F3,24338 | R.AIELADPMENAGAALI  | 2059.116 | 0.0104   | 2 | 1 | 29.1 | 0 |
| P12163_2_S5,21321 | R.AIELADPMENAGAALI  | 2059.116 | 0.00328  | 3 | 1 | 53.2 | 0 |
| P12163_1_F4,20835 | R.GILNVAAIK.A       | 1506.983 | 0.0042   | 2 | 1 | 47.7 | 0 |
| P12163_1_F4,20859 | R.GILNVAAIK.A       | 1506.983 | 0.00325  | 3 | 1 | 47.3 | 0 |
| P12163_1_F4,23097 | R.GILNVAAIK.A       | 1506.983 | 0.00508  | 3 | 1 | 43.3 | 0 |
| P12163_1_F4,23384 | R.GILNVAAIK.A       | 1506.983 | 0.00094  | 3 | 1 | 29.7 | 0 |
| P12163_1_F4,23430 | R.GILNVAAIK.A       | 1506.983 | 0.0045   | 2 | 1 | 47.1 | 0 |
| P12163_1_F5,19691 | R.GILNVAAIK.A       | 1506.983 | 0.00588  | 2 | 1 | 51.3 | 0 |
| P12163_1_F5,19707 | R.GILNVAAIK.A       | 1506.983 | 0.00475  | 3 | 1 | 33.1 | 0 |
| P12163_1_F6,19746 | R.GILNVAAIK.A       | 1506.983 | 0.00718  | 3 | 1 | 39.7 | 0 |
| P12163_1_F6,19759 | R.GILNVAAIK.A       | 1506.983 | 0.00376  | 2 | 1 | 51.1 | 0 |
| P12163_1_F7,18479 | R.GILNVAAIK.A       | 1506.983 | -0.00038 | 3 | 1 | 43.7 | 0 |
| P12163_1_F7,18500 | R.GILNVAAIK.A       | 1506.983 | 0.00122  | 2 | 1 | 56.1 | 0 |
| P12163_1_F7,18930 | R.GILNVAAIK.A       | 1506.983 | 0.00364  | 3 | 1 | 47.9 | 0 |
| P12163_1_F7,18959 | R.GILNVAAIK.A       | 1506.983 | 0.00424  | 2 | 1 | 45.1 | 0 |
| P12163_1_F8,19919 | R.GILNVAAIK.A       | 1506.983 | 0.00547  | 3 | 1 | 37.1 | 0 |
| P12163_2_F1,20257 | R.GILNVAAIK.A       | 1506.983 | 0.00622  | 3 | 1 | 47.3 | 0 |
| P12163_2_F1,20292 | R.GILNVAAIK.A       | 1506.983 | 0.00784  | 2 | 1 | 55.4 | 0 |
| P12163_2_F1,20608 | R.GILNVAAIK.A       | 1506.983 | 0.00511  | 3 | 1 | 24.6 | 0 |
| P12163_2_F2,548   | R.GILNVAAIK.A       | 1506.983 | 0.00553  | 3 | 1 | 45.9 | 0 |
| P12163_2_F4,18091 | R.GILNVAAIK.A       | 1506.983 | 0.00314  | 2 | 1 | 40   | 0 |
| P12163_2_F4,18118 | R.GILNVAAIK.A       | 1506.983 | 0.0016   | 3 | 1 | 35.7 | 0 |
| P12163_2_F4,18578 | R.GILNVAAIK.A       | 1506.983 | -0.00208 | 2 | 1 | 44.8 | 0 |
| P12163_2_S5,17372 | R.GILNVAAIK.A       | 1506.983 | 0.00055  | 3 | 1 | 47.8 | 0 |
| P12163_2_S5,17394 | R.GILNVAAIK.A       | 1506.983 | 0.00416  | 2 | 1 | 36   | 0 |
| P12163_2_S5,17870 | R.GILNVAAIK.A       | 1506.983 | 0.00337  | 3 | 1 | 45.4 | 0 |
| P12163_1_F3,18270 | R.GYISPQFVTNPEK.L   | 2088.159 | 0.00515  | 2 | 1 | 70.2 | 0 |
| P12163_1_F3,18469 | R.GYISPQFVTNPEK.L   | 2088.159 | 0.00589  | 3 | 1 | 22.9 | 0 |
| P12163_1_F4,18712 | R.GYISPQFVTNPEK.L   | 2088.159 | 0.00526  | 3 | 1 | 36.8 | 0 |
| P12163_1_F4,18723 | R.GYISPQFVTNPEK.L   | 2088.159 | 0.00417  | 2 | 1 | 56.2 | 0 |
| P12163_1_F6,17476 | R.GYISPQFVTNPEK.L   | 2088.159 | -0.00399 | 2 | 1 | 39.2 | 0 |

|                                      |          |          |   |   |      |   |
|--------------------------------------|----------|----------|---|---|------|---|
| P12163_1_F6,17903 R.GYISPPQFVTNPEK.L | 2088.159 | 0.00051  | 2 | 1 | 36.9 | 0 |
| P12163_1_F9,17302 R.GYISPPQFVTNPEK.L | 2088.159 | 0.00964  | 3 | 1 | 30.4 | 0 |
| P12163_1_F9,17303 R.GYISPPQFVTNPEK.L | 2088.159 | 0.00141  | 2 | 1 | 44.3 | 0 |
| P12163_1_S10,1657 R.GYISPPQFVTNPEK.L | 2088.159 | -0.00176 | 3 | 1 | 33.5 | 0 |
| P12163_2_F1,18021 R.GYISPPQFVTNPEK.L | 2088.159 | 0.00313  | 2 | 1 | 52.3 | 0 |
| P12163_2_F1,18135 R.GYISPPQFVTNPEK.L | 2088.159 | 0.00289  | 3 | 1 | 46.2 | 0 |
| P12163_2_F4,16275 R.GYISPPQFVTNPEK.L | 2088.159 | -0.00221 | 2 | 1 | 32.5 | 0 |
| P12163_2_F4,16313 R.GYISPPQFVTNPEK.L | 2088.159 | -0.0017  | 3 | 1 | 30.2 | 0 |
| P12163_2_F4,16618 R.GYISPPQFVTNPEK.L | 2088.159 | 0.00334  | 3 | 1 | 32.4 | 0 |
| P12163_2_F4,16647 R.GYISPPQFVTNPEK.L | 2088.159 | 0.00031  | 2 | 1 | 34.5 | 0 |
| P12163_2_F7,15497 R.GYISPPQFVTNPEK.L | 2088.159 | 0.00664  | 3 | 1 | 41.4 | 0 |
| P12163_2_F7,15505 R.GYISPPQFVTNPEK.L | 2088.159 | 0.00155  | 2 | 1 | 49.6 | 0 |
| P12163_2_F9,16189 R.GYISPPQFVTNPEK.L | 2088.159 | 0.00547  | 3 | 1 | 38.4 | 0 |
| P12163_1_F4,16805 R.LGADIVQK.A       | 1451.904 | 0.00493  | 2 | 1 | 38.7 | 0 |
| P12163_1_F5,15520 R.LGADIVQK.A       | 1451.904 | 0.00731  | 2 | 1 | 31.5 | 0 |
| P12163_1_F7,14733 R.LGADIVQK.A       | 1451.904 | 0.00097  | 2 | 1 | 31.1 | 0 |
| P12163_2_F1,15962 R.LGADIVQK.A       | 1451.904 | 0.00671  | 2 | 1 | 31.9 | 0 |
| P12163_2_F1,15978 R.LGADIVQK.A       | 1451.904 | 0.00504  | 3 | 1 | 27.6 | 0 |
| P12163_2_F4,14414 R.LGADIVQK.A       | 1451.904 | 0.00203  | 2 | 1 | 30.8 | 0 |
| P12163_1_F2,17068 R.NVVLDEFGSPK.V    | 1813.032 | 0.00621  | 2 | 1 | 24.1 | 0 |
| P12163_1_F3,18500 R.NVVLDEFGSPK.V    | 1813.032 | 0.00339  | 2 | 1 | 43.7 | 0 |
| P12163_1_F3,18582 R.NVVLDEFGSPK.V    | 1813.032 | 0.00647  | 3 | 1 | 52.5 | 0 |
| P12163_1_F3,19548 R.NVVLDEFGSPK.V    | 1813.032 | 0.00499  | 2 | 1 | 54.8 | 0 |
| P12163_1_F4,18941 R.NVVLDEFGSPK.V    | 1813.032 | 0.00739  | 2 | 1 | 34.3 | 0 |
| P12163_1_F4,18977 R.NVVLDEFGSPK.V    | 1813.032 | 0.00584  | 3 | 1 | 46.4 | 0 |
| P12163_1_F4,20081 R.NVVLDEFGSPK.V    | 1813.032 | 0.01157  | 3 | 1 | 51.4 | 0 |
| P12163_1_F4,20091 R.NVVLDEFGSPK.V    | 1813.032 | 0.00549  | 2 | 1 | 46.2 | 0 |
| P12163_1_F4,20394 R.NVVLDEFGSPK.V    | 1813.032 | 0.0075   | 3 | 1 | 67.1 | 0 |
| P12163_1_F4,23431 R.NVVLDEFGSPK.V    | 1813.032 | 0.00435  | 3 | 1 | 40.9 | 0 |
| P12163_1_F5,18870 R.NVVLDEFGSPK.V    | 1813.032 | 0.00279  | 2 | 1 | 48.4 | 0 |
| P12163_1_F5,18931 R.NVVLDEFGSPK.V    | 1813.032 | 0.00201  | 3 | 1 | 61.4 | 0 |
| P12163_1_F6,18528 R.NVVLDEFGSPK.V    | 1813.032 | 0.00473  | 3 | 1 | 26.6 | 0 |
| P12163_1_F6,18631 R.NVVLDEFGSPK.V    | 1813.032 | 0.00441  | 2 | 1 | 39   | 0 |
| P12163_1_F6,19013 R.NVVLDEFGSPK.V    | 1813.032 | 0.00179  | 3 | 1 | 30.9 | 0 |
| P12163_1_F6,19062 R.NVVLDEFGSPK.V    | 1813.032 | 0.00739  | 2 | 1 | 37.6 | 0 |
| P12163_1_F7,17798 R.NVVLDEFGSPK.V    | 1813.032 | 0.00257  | 3 | 1 | 54.5 | 0 |
| P12163_2_F1,18102 R.NVVLDEFGSPK.V    | 1813.032 | 0.00417  | 3 | 1 | 44.8 | 0 |
| P12163_2_F1,19561 R.NVVLDEFGSPK.V    | 1813.032 | 0.00503  | 3 | 1 | 48   | 0 |
| P12163_2_F1,19580 R.NVVLDEFGSPK.V    | 1813.032 | 0.00689  | 2 | 1 | 42.1 | 0 |
| P12163_2_F4,17227 R.NVVLDEFGSPK.V    | 1813.032 | 0.00584  | 3 | 1 | 22.6 | 0 |
| P12163_2_F4,17439 R.NVVLDEFGSPK.V    | 1813.032 | -0.00231 | 3 | 1 | 27.7 | 0 |
| P12163_2_F4,17766 R.NVVLDEFGSPK.V    | 1813.032 | 0.00597  | 3 | 1 | 31.3 | 0 |
| P12163_2_S3,15863 R.NVVLDEFGSPK.V    | 1813.032 | 0.00147  | 3 | 1 | 27   | 0 |
| P12163_2_S5,17594 R.NVVLDEFGSPK.V    | 1813.032 | 0.00399  | 3 | 1 | 62   | 0 |
| P12163_1_F4,14471 R.VLVTDQK.I        | 1410.878 | 0.01096  | 2 | 1 | 31.1 | 0 |
| P12163_1_F4,14472 R.VLVTDQK.I        | 1410.878 | 0.01154  | 3 | 1 | 33.2 | 0 |
| P12163_2_F1,13414 R.VLVTDQK.I        | 1410.878 | 0.0063   | 2 | 1 | 30.8 | 0 |
| P12163_2_F1,13420 R.VLVTDQK.I        | 1410.878 | 0.00584  | 3 | 1 | 33.3 | 0 |
| P12163_1_S10,7077 K.AAHGLR.L         | 928.563  | 0.00313  | 3 | 1 | 25.7 | 0 |
| P12163_1_F6,17308 K.ALGIDDPDAAAM*HV  | 2171.107 | 0.00491  | 3 | 1 | 69.6 | 0 |
| P12163_1_F6,18973 K.ALGIDDPDAAAM*HV  | 2171.107 | 0.00254  | 3 | 1 | 102  | 0 |

|                   |                    |          |          |   |   |      |   |
|-------------------|--------------------|----------|----------|---|---|------|---|
| P12163_1_F6,19025 | K.ALGIDDPDAAAM*HV  | 2171.107 | -0.00093 | 2 | 1 | 35.5 | 0 |
| P12163_1_F6,19276 | K.ALGIDDPDAAAM*HV  | 2171.107 | 0.00653  | 3 | 1 | 28.8 | 0 |
| P12163_2_F4,16082 | K.ALGIDDPDAAAM*HV  | 2171.107 | -0.0001  | 3 | 1 | 96.4 | 0 |
| P12163_1_F5,18848 | K.ALGIDDPDAAAMHVE  | 2155.112 | 0.00167  | 3 | 1 | 68   | 0 |
| P12163_1_F6,18958 | K.ALGIDDPDAAAMHVE  | 2155.112 | 0.00365  | 3 | 1 | 95.7 | 0 |
| P12163_1_F6,19000 | K.ALGIDDPDAAAMHVE  | 2155.112 | 0.00138  | 2 | 1 | 71.2 | 0 |
| P12163_2_F4,17744 | K.ALGIDDPDAAAMHVE  | 2155.112 | 0.00662  | 3 | 1 | 84.1 | 0 |
| P12163_1_F6,13679 | K.ASEIHHEEIYR.Q    | 1550.812 | 0.00255  | 3 | 1 | 30.2 | 0 |
| P12163_2_F6,12879 | K.ASEIHHEEIYR.Q    | 1550.812 | 0.00339  | 3 | 1 | 38.4 | 0 |
| P12163_2_F6,12900 | K.ASEIHHEEIYR.Q    | 1550.812 | 0.00653  | 2 | 1 | 25.9 | 0 |
| P12163_2_F7,12320 | K.ASEIHHEEIYR.Q    | 1550.812 | 0.00033  | 3 | 1 | 37.4 | 0 |
| P12163_1_F2,15072 | K.DAISSGVEGYDGEVK. | 2134.112 | 0.0063   | 3 | 1 | 72.5 | 0 |
| P12163_1_S1,9133  | K.DDLPER.D         | 1048.558 | 0.00325  | 2 | 1 | 24.9 | 0 |
| P12163_2_F6,10837 | K.EIVDVHR.G        | 1171.674 | 0.00315  | 3 | 1 | 50.5 | 0 |
| P12163_2_F6,10853 | K.EIVDVHR.G        | 1171.674 | 0.00162  | 2 | 1 | 33   | 0 |
| P12163_1_F3,21745 | K.GVAQVVEELDK.V    | 1795.042 | 0.00547  | 2 | 1 | 72.1 | 0 |
| P12163_1_F3,21754 | K.GVAQVVEELDK.V    | 1795.042 | 0.00422  | 3 | 1 | 54.9 | 0 |
| P12163_1_F4,22557 | K.GVAQVVEELDK.V    | 1795.042 | 0.00674  | 3 | 1 | 53.3 | 0 |
| P12163_1_F4,22562 | K.GVAQVVEELDK.V    | 1795.042 | 0.00785  | 2 | 1 | 71.9 | 0 |
| P12163_1_F6,20679 | K.GVAQVVEELDK.V    | 1795.042 | -0.00013 | 3 | 1 | 54.2 | 0 |
| P12163_2_F1,21982 | K.GVAQVVEELDK.V    | 1795.042 | 0.00998  | 3 | 1 | 46.3 | 0 |
| P12163_2_F1,22019 | K.GVAQVVEELDK.V    | 1795.042 | 0.00735  | 2 | 1 | 52.3 | 0 |
| P12163_1_F3,18819 | K.IPADLSINAEK.A    | 1779.047 | 0.00588  | 2 | 1 | 54.1 | 0 |
| P12163_1_F4,20350 | K.IPFGASITTK.K     | 1642.999 | 0.00342  | 3 | 1 | 25.5 | 0 |
| P12163_1_F4,20351 | K.IPFGASITTK.K     | 1642.999 | 0.00627  | 2 | 1 | 29.7 | 0 |
| P12163_1_F4,23524 | K.M*AAAIETAVAQGK.L | 1885.067 | 0.00786  | 3 | 1 | 51.9 | 0 |
| P12163_1_F4,23555 | K.MAAAIETAVAQGK.L  | 1869.072 | 0.00435  | 3 | 1 | 53.9 | 0 |
| P12163_1_F4,23562 | K.MAAAIETAVAQGK.L  | 1869.072 | 0.00429  | 2 | 1 | 74.2 | 0 |
| P12163_1_F4,23852 | K.MAAAIETAVAQGK.L  | 1869.072 | 0.01776  | 3 | 1 | 36   | 0 |
| P12163_1_F6,21600 | K.MAAAIETAVAQGK.L  | 1869.072 | 0.00201  | 3 | 1 | 43.6 | 0 |
| P12163_1_F4,15855 | K.QVGLPSEYAQK.I    | 1828.042 | -0.00143 | 3 | 1 | 32.6 | 0 |
| P12163_2_F1,15052 | K.QVGLPSEYAQK.I    | 1828.042 | 0.00547  | 3 | 1 | 32.1 | 0 |
| P12163_2_F1,15061 | K.QVGLPSEYAQK.I    | 1828.042 | 0.00741  | 2 | 1 | 30.5 | 0 |
| P12163_1_S1,15887 | K.VTDSQVEIAIR.D    | 1534.874 | 0.00329  | 2 | 1 | 53   | 0 |
| P12163_1_S1,15891 | K.VTDSQVEIAIR.D    | 1534.874 | 0.00068  | 3 | 1 | 60.9 | 0 |
| P12163_1_F2,13211 | R.AYVTDSLSGGR.M    | 1429.759 | 0.00055  | 3 | 1 | 29.3 | 0 |
| P12163_1_F2,14380 | R.AYVTDSLSGGR.M    | 1429.759 | 0.00497  | 2 | 1 | 24.6 | 0 |
| P12163_1_F9,14446 | R.AYVTDSLSGGR.M    | 1429.759 | 0.00185  | 2 | 1 | 34.3 | 0 |
| P12163_1_S1,10193 | R.AYVTDSLSGGR.M    | 1429.759 | 0.00343  | 3 | 1 | 23.3 | 0 |
| P12163_1_S1,14154 | R.AYVTDSLSGGR.M    | 1429.759 | 0.00521  | 2 | 1 | 29   | 0 |
| P12163_2_F9,13782 | R.AYVTDSLSGGR.M    | 1429.759 | 0.01113  | 2 | 1 | 24.5 | 0 |
| P12163_1_F8,11633 | R.DVDAEHIVR.L      | 1357.738 | 0.00375  | 3 | 1 | 35.8 | 0 |
| P12163_1_F8,11653 | R.DVDAEHIVR.L      | 1357.738 | 0.00339  | 2 | 1 | 36   | 0 |
| P12163_1_F9,11758 | R.DVDAEHIVR.L      | 1357.738 | 0.00699  | 3 | 1 | 24.7 | 0 |
| P12163_2_F6,11428 | R.DVDAEHIVR.L      | 1357.738 | 0.00165  | 3 | 1 | 69.5 | 0 |
| P12163_1_F4,15080 | R.EAAMSIASK.A      | 1515.866 | 0.00606  | 2 | 1 | 36.9 | 0 |
| P12163_1_F5,13704 | R.EAAMSIASK.A      | 1515.866 | 0.01012  | 2 | 1 | 27.3 | 0 |
| P12163_2_F1,13968 | R.EAAMSIASK.A      | 1515.866 | 0.00466  | 3 | 1 | 42.6 | 0 |
| P12163_1_F3,14762 | R.EDIEAIASK.Y      | 1583.91  | 0.00536  | 3 | 1 | 35.6 | 0 |
| P12163_1_F3,16352 | R.EDIEAIASK.Y      | 1583.91  | 0.00431  | 3 | 1 | 36.4 | 0 |
| P12163_1_F4,16848 | R.EDIEAIASK.Y      | 1583.91  | 0.01148  | 2 | 1 | 44.7 | 0 |

|                   |                       |          |          |   |   |      |   |
|-------------------|-----------------------|----------|----------|---|---|------|---|
| P12163_1_F4,16860 | R.EDIEAIASK.Y         | 1583.91  | 0.01325  | 3 | 1 | 31.5 | 0 |
| P12163_1_F2,19641 | R.ESEAIIVDVTSK.V      | 1899.089 | 0.00298  | 3 | 1 | 47.3 | 0 |
| P12163_1_S1,19045 | R.ESEAIIVDVTSK.V      | 1899.089 | -0.00044 | 3 | 1 | 26   | 0 |
| P12163_1_F6,19930 | R.FVTSVLPPGGEDLRGD    | 2738.482 | 0.00585  | 3 | 1 | 27.4 | 0 |
| P12163_1_F8,18735 | R.GVGPVSLVGGFEFDGDI   | 2297.271 | 0.00435  | 2 | 1 | 41   | 0 |
| P12163_2_F6,18296 | R.GVGPVSLVGGFEFDGDI   | 2297.271 | -0.00237 | 2 | 1 | 31.3 | 0 |
| P12163_1_F4,16740 | R.IEQLNEVQK.Q         | 1709.005 | 0.00241  | 3 | 1 | 23.5 | 0 |
| P12163_1_F4,16828 | R.IEQLNEVQK.Q         | 1709.005 | 0.00484  | 2 | 1 | 39.9 | 0 |
| P12163_2_F1,15913 | R.IEQLNEVQK.Q         | 1709.005 | 0.00484  | 2 | 1 | 40.4 | 0 |
| P12163_2_F1,15914 | R.IEQLNEVQK.Q         | 1709.005 | 0.00328  | 3 | 1 | 38.5 | 0 |
| P12163_1_F2,17338 | R.LGQAVSGGALEAADS     | 2082.165 | 0.00314  | 2 | 1 | 62.6 | 0 |
| P12163_1_F3,17829 | R.LGQAVSGGALEAADS     | 2082.165 | 0.00496  | 2 | 1 | 81.5 | 0 |
| P12163_1_F6,14630 | R.LHDYVADCNDPGAVK     | 2282.17  | 0.00604  | 3 | 1 | 56.8 | 0 |
| P12163_1_F6,14657 | R.LHDYVADCNDPGAVK     | 2282.17  | 0.00619  | 4 | 1 | 47   | 0 |
| P12163_1_F6,14682 | R.LHDYVADCNDPGAVK     | 2282.17  | 0.00502  | 2 | 1 | 24.5 | 0 |
| P12163_1_F7,13892 | R.LHDYVADCNDPGAVK     | 2282.17  | 0.00133  | 3 | 1 | 47.7 | 0 |
| P12163_1_F8,14494 | R.LHDYVADCNDPGAVK     | 2282.17  | 0.00376  | 2 | 1 | 24.8 | 0 |
| P12163_1_F8,14526 | R.LHDYVADCNDPGAVK     | 2282.17  | 0.00484  | 3 | 1 | 49.2 | 0 |
| P12163_1_S1,24102 | R.LSDALAEDLFR.E       | 1553.848 | 0.00718  | 2 | 1 | 41.5 | 0 |
| P12163_1_S1,24159 | R.LSDALAEDLFR.E       | 1553.848 | 0.00233  | 3 | 1 | 49.5 | 0 |
| P12163_1_S1,24298 | R.LSDALAEDLFR.E       | 1553.848 | 0.01004  | 2 | 1 | 25.3 | 0 |
| P12163_1_F3,23157 | R.QGVVSSLNDLLACDK.    | 2227.221 | 0.01014  | 3 | 1 | 64.2 | 0 |
| P12163_1_F3,17529 | R.QQAEVILADGQLTK.A    | 2122.233 | 0.00425  | 3 | 1 | 71.1 | 0 |
| P12163_1_F3,18696 | R.QQAEVILADGQLTK.A    | 2122.233 | 0.00427  | 2 | 1 | 79.2 | 0 |
| P12163_1_F9,11538 | R.VVHELAR.N           | 1127.684 | 0.00249  | 3 | 1 | 24.8 | 0 |
| P12163_2_F7,10698 | R.VVHELAR.N           | 1127.684 | 0.00438  | 3 | 1 | 38.4 | 0 |
| P12163_2_F10,9222 | K.AGYTGK.V ! K.AGYTC  | 1204.715 | 0.00586  | 2 | 1 | 25.3 | 0 |
| P12163_1_F2,21762 | K.AVSNVNAIIGPALAGK    | 2103.275 | 0.00526  | 3 | 1 | 52.3 | 0 |
| P12163_1_F2,21817 | K.AVSNVNAIIGPALAGK    | 2103.275 | 0.00742  | 4 | 1 | 30.5 | 0 |
| P12163_1_F3,22396 | K.AVSNVNAIIGPALAGK    | 2103.275 | 0.00397  | 3 | 1 | 66.1 | 0 |
| P12163_1_F3,22429 | K.AVSNVNAIIGPALAGK    | 2103.275 | 0.00668  | 2 | 1 | 80.4 | 0 |
| P12163_1_F3,22630 | K.AVSNVNAIIGPALAGK    | 2103.275 | 0.01126  | 3 | 1 | 43.7 | 0 |
| P12163_1_F5,21402 | K.AVSNVNAIIGPALAGK    | 2103.275 | 0.00244  | 3 | 1 | 32.5 | 0 |
| P12163_1_F4,6309  | K.EENNDGSQK.I ! K.EEN | 1628.834 | 0.00585  | 2 | 1 | 27   | 0 |
| P12163_1_F5,5479  | K.EENNDGSQK.I ! K.EEN | 1628.834 | 0.00855  | 2 | 1 | 39.3 | 0 |
| P12163_2_F1,5648  | K.EENNDGSQK.I ! K.EEN | 1628.834 | 0.00707  | 2 | 1 | 29.9 | 0 |
| P12163_1_F3,19268 | K.EGLELLNTAIAK.A      | 1880.131 | 0.00659  | 3 | 1 | 39.8 | 0 |
| P12163_1_F3,19275 | K.EGLELLNTAIAK.A      | 1880.131 | 0.00418  | 2 | 1 | 49   | 0 |
| P12163_1_F3,22664 | K.EGLELLNTAIAK.A      | 1880.131 | 0.00482  | 2 | 1 | 64.9 | 0 |
| P12163_1_F3,22668 | K.EGLELLNTAIAK.A      | 1880.131 | 0.00536  | 3 | 1 | 53.2 | 0 |
| P12163_1_F4,23475 | K.EGLELLNTAIAK.A      | 1880.131 | 0.00047  | 3 | 1 | 33.2 | 0 |
| P12163_1_F5,22006 | K.EGLELLNTAIAK.A      | 1880.131 | 0.00599  | 3 | 1 | 32.3 | 0 |
| P12163_1_F5,22029 | K.EGLELLNTAIAK.A      | 1880.131 | -0.00208 | 2 | 1 | 39.9 | 0 |
| P12163_1_F6,21476 | K.EGLELLNTAIAK.A      | 1880.131 | 0.0017   | 3 | 1 | 40.4 | 0 |
| P12163_1_S10,2012 | K.EGLELLNTAIAK.A      | 1880.131 | 0.00497  | 3 | 1 | 24.1 | 0 |
| P12163_2_S3,18097 | K.EGLELLNTAIAK.A      | 1880.131 | -0.00424 | 3 | 1 | 24.3 | 0 |
| P12163_1_F5,10822 | K.HIAELSGNK.N         | 1576.927 | 0.00522  | 2 | 1 | 25.7 | 0 |
| P12163_1_F7,10685 | K.HIAELSGNK.N         | 1576.927 | 0.00084  | 3 | 1 | 36   | 0 |
| P12163_1_F9,11702 | K.HIAELSGNK.N         | 1576.927 | 0.0066   | 3 | 1 | 45.3 | 0 |
| P12163_1_F9,11703 | K.HIAELSGNK.N         | 1576.927 | 0.00734  | 2 | 1 | 24.1 | 0 |
| P12163_1_S10,1208 | K.HIAELSGNK.N         | 1576.927 | 0.00561  | 3 | 1 | 46.2 | 0 |



|                   |                     |          |          |   |   |      |   |
|-------------------|---------------------|----------|----------|---|---|------|---|
| P12163_1_S10,1215 | K.HIAELSGNK.N       | 1576.927 | 0.00725  | 4 | 1 | 29.8 | 0 |
| P12163_2_F4,10811 | K.HIAELSGNK.N       | 1576.927 | 0.00678  | 3 | 1 | 28   | 0 |
| P12163_2_F8_12070 | K.HIAELSGNK.N       | 1576.927 | 0.00506  | 2 | 1 | 33.9 | 0 |
| P12163_2_F8_12070 | K.HIAELSGNK.N       | 1576.927 | 0.00505  | 4 | 1 | 49.6 | 0 |
| P12163_1_F5,12851 | K.ISGDALK.D         | 1311.809 | 0.00827  | 3 | 1 | 25.3 | 0 |
| P12163_1_F6,13782 | K.ISGDALK.D         | 1311.809 | 0.00536  | 2 | 1 | 24.6 | 0 |
| P12163_2_F1,13164 | K.ISGDALK.D         | 1311.809 | 0.00572  | 2 | 1 | 25.2 | 0 |
| P12163_1_F8,15362 | K.KYGQDATNVGDEGGF   | 3364.754 | 0.01007  | 4 | 1 | 38.7 | 0 |
| P12163_1_S1,22239 | K.LAM*QEFM*ILPVGAS  | 2509.365 | 0.00411  | 3 | 1 | 40.4 | 0 |
| P12163_1_F3,26161 | K.LGANAILAVSLAVCK.. | 2108.272 | 0.00785  | 3 | 1 | 27.6 | 0 |
| P12163_1_F4,13961 | K.LTSEVGEK.V        | 1470.862 | 0.00533  | 3 | 1 | 35.2 | 0 |
| P12163_1_F4,13984 | K.LTSEVGEK.V        | 1470.862 | 0.00738  | 2 | 1 | 35.4 | 0 |
| P12163_1_F5,12534 | K.LTSEVGEK.V        | 1470.862 | 0.00868  | 2 | 1 | 35.2 | 0 |
| P12163_1_F5,12557 | K.LTSEVGEK.V        | 1470.862 | 0.00794  | 3 | 1 | 29.1 | 0 |
| P12163_1_F7,12159 | K.LTSEVGEK.V        | 1470.862 | 0.00444  | 2 | 1 | 31.9 | 0 |
| P12163_2_S5,11881 | K.LTSEVGEK.V        | 1470.862 | 0.00131  | 3 | 1 | 32.3 | 0 |
| P12163_1_F4,12675 | K.M*GVEVYHHLK.A     | 1837.025 | 0.00501  | 4 | 1 | 27.3 | 0 |
| P12163_1_F6,12204 | K.M*GVEVYHHLK.A     | 1837.025 | 0.00569  | 4 | 1 | 24   | 0 |
| P12163_1_F4,15213 | K.MGVEVYHHLK.A      | 1821.03  | 0.00594  | 2 | 1 | 43.4 | 0 |
| P12163_1_F4,15219 | K.MGVEVYHHLK.A      | 1821.03  | 0.00277  | 4 | 1 | 29.9 | 0 |
| P12163_1_F4,15241 | K.MGVEVYHHLK.A      | 1821.03  | 0.00555  | 3 | 1 | 29.2 | 0 |
| P12163_1_F6,14916 | K.MGVEVYHHLK.A      | 1821.03  | -0.0006  | 2 | 1 | 39.7 | 0 |
| P12163_2_F6,14143 | K.MGVEVYHHLK.A      | 1821.03  | 0.00663  | 3 | 1 | 33.6 | 0 |
| P12163_2_F6,14151 | K.MGVEVYHHLK.A      | 1821.03  | 0.00457  | 4 | 1 | 30   | 0 |
| P12163_2_S3,13288 | K.MGVEVYHHLK.A      | 1821.03  | 0.00813  | 4 | 1 | 26.4 | 0 |
| P12163_1_F7,21878 | K.NLVLPVPAFNVINGGS  | 2726.556 | 0.00604  | 3 | 1 | 61.1 | 0 |
| P12163_1_F7,21937 | K.NLVLPVPAFNVINGGS  | 2726.556 | 0.00683  | 4 | 1 | 38.4 | 0 |
| P12163_2_F9,20019 | K.NLVLPVPAFNVINGGS  | 2726.556 | 0.00047  | 4 | 1 | 28.6 | 0 |
| P12163_2_S5,20504 | K.NLVLPVPAFNVINGGS  | 2726.556 | 0.00515  | 4 | 1 | 34.5 | 0 |
| P12163_2_S5,20506 | K.NLVLPVPAFNVINGGS  | 2726.556 | 0.00478  | 3 | 1 | 26.5 | 0 |
| P12163_2_S5,20572 | K.NLVLPVPAFNVINGGS  | 2726.556 | 0.01282  | 5 | 1 | 35   | 0 |
| P12163_2_S5,20712 | K.NLVLPVPAFNVINGGS  | 2726.556 | 0.01051  | 4 | 1 | 37   | 0 |
| P12163_1_F9,10519 | K.QAGWGVM*ASHR.S    | 1519.774 | 0.00131  | 3 | 1 | 45.3 | 0 |
| P12163_2_F7,9886  | K.QAGWGVM*ASHR.S    | 1519.774 | 0.00683  | 3 | 1 | 55.4 | 0 |
| P12163_1_F9,13685 | K.QAGWGVMASHR.S     | 1503.779 | 0.00239  | 3 | 1 | 43.6 | 0 |
| P12163_1_F5,16320 | K.TCNALLK.V         | 1540.934 | 0.00671  | 3 | 1 | 36.7 | 0 |
| P12163_1_F5,16324 | K.TCNALLK.V         | 1540.934 | 0.00742  | 2 | 1 | 34.6 | 0 |
| P12163_2_F1,16701 | K.TCNALLK.V         | 1540.934 | 0.00338  | 3 | 1 | 37.1 | 0 |
| P12163_2_F2,1127  | K.TCNALLK.V         | 1540.934 | 0.00659  | 3 | 1 | 25.2 | 0 |
| P12163_2_F2,17075 | K.TCNALLK.V         | 1540.934 | 0.00604  | 2 | 1 | 28.3 | 0 |
| P12163_2_F2,17084 | K.TCNALLK.V         | 1540.934 | 0.00413  | 3 | 1 | 26.8 | 0 |
| P12163_2_F2,17405 | K.TCNALLK.V         | 1540.934 | 0.00956  | 2 | 1 | 25.1 | 0 |
| P12163_1_F4,4881  | K.TGAPCR.S          | 965.514  | 0.00357  | 3 | 1 | 29.3 | 0 |
| P12163_2_F1,4291  | K.TGAPCR.S          | 965.514  | 0.00159  | 3 | 1 | 27   | 0 |
| P12163_2_F1,17133 | K.TYDLNFK.E         | 1508.857 | 0.00707  | 3 | 1 | 25.4 | 0 |
| P12163_1_F8,20433 | K.VNQIGSVTESIEAVR.M | 1906.055 | -0.00207 | 2 | 1 | 27.8 | 0 |
| P12163_1_S1,14656 | K.VNQIGSVTESIEAVR.M | 1906.055 | 0.00454  | 3 | 1 | 26.5 | 0 |
| P12163_1_S1,14910 | K.VNQIGSVTESIEAVR.M | 1906.055 | 0.00394  | 3 | 1 | 76.4 | 0 |
| P12163_1_S1,15159 | K.VNQIGSVTESIEAVR.M | 1906.055 | 0.00373  | 3 | 1 | 55.2 | 0 |
| P12163_1_S1,19454 | K.VNQIGSVTESIEAVR.M | 1906.055 | 0.00607  | 3 | 1 | 37   | 0 |
| P12163_1_S1,19466 | K.VNQIGSVTESIEAVR.M | 1906.055 | 0.00063  | 2 | 1 | 44.4 | 0 |

|                    |                     |          |          |   |   |      |   |
|--------------------|---------------------|----------|----------|---|---|------|---|
| P12163_1_S1,19721  | K.VNQIGSVTESIEAVR.M | 1906.055 | 0.00154  | 3 | 1 | 92.8 | 0 |
| P12163_1_S1,19730  | K.VNQIGSVTESIEAVR.M | 1906.055 | 0.00513  | 2 | 1 | 66.9 | 0 |
| P12163_1_F2,21387  | K.VQIVGDDLLVTNPK.R  | 2119.258 | 0.00816  | 3 | 1 | 39.5 | 0 |
| P12163_1_F2,21499  | K.VQIVGDDLLVTNPK.R  | 2119.258 | 0.00314  | 2 | 1 | 70.6 | 0 |
| P12163_1_F2,21622  | K.VQIVGDDLLVTNPK.R  | 2119.258 | 0.00912  | 3 | 1 | 48   | 0 |
| P12163_1_F4,22832  | K.VQIVGDDLLVTNPK.R  | 2119.258 | 0.00984  | 3 | 1 | 29.4 | 0 |
| P12163_1_F5,21014  | K.VQIVGDDLLVTNPK.R  | 2119.258 | 0.00435  | 3 | 1 | 37.4 | 0 |
| P12163_1_F5,21062  | K.VQIVGDDLLVTNPK.R  | 2119.258 | -0.0007  | 2 | 1 | 28   | 0 |
| P12163_1_F5,21408  | K.VQIVGDDLLVTNPK.R  | 2119.258 | 0.01095  | 3 | 1 | 29.3 | 0 |
| P12163_1_F6,21224  | K.VQIVGDDLLVTNPK.R  | 2119.258 | -0.00228 | 3 | 1 | 28.4 | 0 |
| P12163_1_F7,20393  | K.VQIVGDDLLVTNPK.R  | 2119.258 | 0.00762  | 3 | 1 | 27.1 | 0 |
| P12163_1_S1,19482  | K.VQIVGDDLLVTNPK.R  | 2119.258 | 0.00453  | 3 | 1 | 46.4 | 0 |
| P12163_1_S1,20025  | K.VQIVGDDLLVTNPK.R  | 2119.258 | 0.00474  | 2 | 1 | 78.1 | 0 |
| P12163_1_S1,20135  | K.VQIVGDDLLVTNPK.R  | 2119.258 | 0.00402  | 4 | 1 | 47.3 | 0 |
| P12163_1_S1,20225  | K.VQIVGDDLLVTNPK.R  | 2119.258 | 0.00402  | 3 | 1 | 60.6 | 0 |
| P12163_2_F2,21542  | K.VQIVGDDLLVTNPK.R  | 2119.258 | -0.00036 | 3 | 1 | 39   | 0 |
| P12163_2_F4,19892  | K.VQIVGDDLLVTNPK.R  | 2119.258 | 0.00939  | 3 | 1 | 35.1 | 0 |
| P12163_2_F4,15359  | K.YGQDATNVGDEGGFA   | 2932.453 | 0.01345  | 3 | 1 | 23.5 | 0 |
| P12163_1_F4,17483  | M.AITITAVK.A        | 1424.93  | 0.00579  | 2 | 1 | 34.9 | 0 |
| P12163_1_F4,17515  | M.AITITAVK.A        | 1424.93  | 0.00598  | 3 | 1 | 38.2 | 0 |
| P12163_1_F7,15329  | M.AITITAVK.A        | 1424.93  | -0.0047  | 3 | 1 | 44.4 | 0 |
| P12163_2_F1,16685  | M.AITITAVK.A        | 1424.93  | 0.00568  | 3 | 1 | 40.5 | 0 |
| P12163_2_F1,16712  | M.AITITAVK.A        | 1424.93  | 0.00693  | 2 | 1 | 36.8 | 0 |
| P12163_2_F2,2270   | M.AITITAVK.A        | 1424.93  | -0.00026 | 3 | 1 | 25.5 | 0 |
| P12163_2_F2,2415   | M.AITITAVK.A        | 1424.93  | 0.00039  | 2 | 1 | 42.6 | 0 |
| P12163_2_F2,2446   | M.AITITAVK.A        | 1424.93  | 0.00514  | 3 | 1 | 36.8 | 0 |
| P12163_2_F2,2596   | M.AITITAVK.A        | 1424.93  | 0.00051  | 2 | 1 | 29.1 | 0 |
| P12163_2_F2,2616   | M.AITITAVK.A        | 1424.93  | 0.00142  | 3 | 1 | 22.7 | 0 |
| P12163_2_F2,2773   | M.AITITAVK.A        | 1424.93  | 0.00415  | 3 | 1 | 32.1 | 0 |
| P12163_2_S5,14465  | M.AITITAVK.A        | 1424.93  | -0.00461 | 3 | 1 | 22.8 | 0 |
| P12163_1_F8,22191  | R.AAVPSGASTGIYEALE  | 2109.149 | 0.00587  | 3 | 1 | 52.5 | 0 |
| P12163_1_F4,12824  | R.DGGSDYLK.G        | 1519.821 | 0.00924  | 2 | 1 | 27   | 0 |
| P12163_1_F4,12853  | R.DGGSDYLK.G        | 1519.821 | 0.00901  | 3 | 1 | 29.7 | 0 |
| P12163_1_F9,12328  | R.DGGSDYLK.G        | 1519.821 | 0.00936  | 2 | 1 | 32.9 | 0 |
| P12163_2_F8_12070  | R.DGGSDYLK.G        | 1519.821 | 0.00656  | 2 | 1 | 39.3 | 0 |
| P12163_1_F7,12793  | R.GNPTVEVDVTTSDGH'  | 2158.104 | 0.00573  | 3 | 1 | 72.4 | 0 |
| P12163_1_F7,13020  | R.GNPTVEVDVTTSDGH'  | 2158.104 | 0.01317  | 3 | 1 | 39.4 | 0 |
| P12163_2_F10,1219' | R.GNPTVEVDVTTSDGH'  | 2158.104 | 0.00414  | 3 | 1 | 63.9 | 0 |
| P12163_2_F4,12374  | R.GNPTVEVDVTTSDGH'  | 2158.104 | 0.00276  | 3 | 1 | 55.3 | 0 |
| P12163_2_S5,12297  | R.GNPTVEVDVTTSDGH'  | 2158.104 | 0.00135  | 3 | 1 | 24.4 | 0 |
| P12163_2_S5,12343  | R.GNPTVEVDVTTSDGH'  | 2158.104 | 0.00058  | 2 | 1 | 75   | 0 |
| P12163_1_F2,20570  | R.IEEELGAEAVYAGAK.I | 2158.185 | 0.00376  | 2 | 1 | 81.3 | 0 |
| P12163_1_F2,20593  | R.IEEELGAEAVYAGAK.I | 2158.185 | 0.00447  | 3 | 1 | 37.3 | 0 |
| P12163_1_F3,21153  | R.IEEELGAEAVYAGAK.I | 2158.185 | 0.00658  | 2 | 1 | 92.6 | 0 |
| P12163_1_F3,21208  | R.IEEELGAEAVYAGAK.I | 2158.185 | 0.00537  | 3 | 1 | 36.6 | 0 |
| P12163_1_F7,19544  | R.IEEELGAEAVYAGAK.I | 2158.185 | 0.00696  | 3 | 1 | 33   | 0 |
| P12163_1_F8,20513  | R.IEEELGAEAVYAGAK.I | 2158.185 | 0.00111  | 3 | 1 | 38.9 | 0 |
| P12163_2_F6,20143  | R.IEEELGAEAVYAGAK.I | 2158.185 | 0.00291  | 3 | 1 | 39.3 | 0 |
| P12163_1_F7,13295  | K.AAGHETIVLAGAEYGS  | 2237.146 | -0.00366 | 3 | 1 | 27   | 0 |
| P12163_1_F7,14495  | K.AAGHETIVLAGAEYGS  | 2237.146 | 0.00378  | 2 | 1 | 47.3 | 0 |
| P12163_1_F8,15127  | K.AAGHETIVLAGAEYGS  | 2237.146 | -0.00333 | 3 | 1 | 49.2 | 0 |

|                   |                         |          |          |   |   |      |   |
|-------------------|-------------------------|----------|----------|---|---|------|---|
| P12163_2_F10,1403 | K.AAGHETIVLAGAEYGS      | 2237.146 | 0.00261  | 3 | 1 | 64.1 | 0 |
| P12163_2_F4,14131 | K.AAGHETIVLAGAEYGS      | 2237.146 | 0.00177  | 3 | 1 | 43.2 | 0 |
| P12163_2_S5,14270 | K.AAGHETIVLAGAEYGS      | 2237.146 | 0.00399  | 3 | 1 | 63.8 | 0 |
| P12163_2_F6,17379 | K.ADWHACLENQVGFK.I      | 2283.18  | 0.00489  | 4 | 1 | 25.9 | 0 |
| P12163_1_S1,23608 | K.FFSLPALNDPR.I         | 1580.874 | 0.00185  | 3 | 1 | 46.3 | 0 |
| P12163_1_S1,23631 | K.FFSLPALNDPR.I         | 1580.874 | 0.00359  | 2 | 1 | 57.9 | 0 |
| P12163_1_F6,16590 | K.FSFHGQPAELK.H         | 1869.048 | 0.00682  | 3 | 1 | 23.2 | 0 |
| P12163_2_F6,15944 | K.FSFHGQPAELK.H         | 1869.048 | 0.00589  | 3 | 1 | 27.8 | 0 |
| P12163_2_F6,15948 | K.FSFHGQPAELK.H         | 1869.048 | 0.00292  | 2 | 1 | 38.3 | 0 |
| P12163_2_F1,16390 | K.GPM*LLGVK.A           | 1438.891 | 0.00565  | 3 | 1 | 24   | 0 |
| P12163_1_F4,19495 | K.GPMLLGVK.A            | 1422.896 | 0.00937  | 2 | 1 | 33.4 | 0 |
| P12163_1_F4,19501 | K.GPMLLGVK.A            | 1422.896 | 0.00907  | 3 | 1 | 38.2 | 0 |
| P12163_1_F5,18415 | K.GPMLLGVK.A            | 1422.896 | 0.00418  | 3 | 1 | 28.7 | 0 |
| P12163_1_F7,17285 | K.GPMLLGVK.A            | 1422.896 | 0.00562  | 3 | 1 | 29.4 | 0 |
| P12163_1_S10,8561 | K.HGVVVGK.F             | 1204.762 | 0.00783  | 3 | 1 | 24.9 | 0 |
| P12163_2_F1,19654 | K.IASMAPENAFK.G         | 1786.998 | 0.0043   | 3 | 1 | 31.2 | 0 |
| P12163_2_F1,19671 | K.IASMAPENAFK.G         | 1786.998 | 0.00494  | 2 | 1 | 36.5 | 0 |
| P12163_2_F1,19709 | K.IIDWENTSPK.Q          | 1811.016 | 0.0055   | 2 | 1 | 45.2 | 0 |
| P12163_2_F1,19735 | K.IIDWENTSPK.Q          | 1811.016 | 0.00503  | 3 | 1 | 35   | 0 |
| P12163_2_F1,21213 | K.ILLESAIR.N ! R.ILLES/ | 1218.772 | 0.00386  | 2 | 1 | 24.5 | 0 |
| P12163_1_F4,17461 | K.LLNGEVGPK.T           | 1534.941 | 0.00706  | 2 | 1 | 32   | 0 |
| P12163_1_F4,17471 | K.LLNGEVGPK.T           | 1534.941 | 0.00476  | 3 | 1 | 38.3 | 0 |
| P12163_1_F5,16162 | K.LLNGEVGPK.T           | 1534.941 | 0.00746  | 2 | 1 | 37.6 | 0 |
| P12163_1_F5,16182 | K.LLNGEVGPK.T           | 1534.941 | 0.00515  | 3 | 1 | 36.2 | 0 |
| P12163_1_F6,16731 | K.LLNGEVGPK.T           | 1534.941 | 0.01202  | 2 | 1 | 26.8 | 0 |
| P12163_1_F7,15384 | K.LLNGEVGPK.T           | 1534.941 | 0.00192  | 2 | 1 | 31.9 | 0 |
| P12163_2_F1,16641 | K.LLNGEVGPK.T           | 1534.941 | 0.00408  | 2 | 1 | 31.7 | 0 |
| P12163_1_F2,23674 | K.LYVFDAAM*R.Y          | 1405.745 | 0.0034   | 2 | 1 | 27.1 | 0 |
| P12163_1_S1,16649 | K.MFVDYNEPEQER.S        | 1860.874 | -0.00065 | 3 | 1 | 52.5 | 0 |
| P12163_2_F6,12798 | K.NMTMEPPGPHGVK.D       | 2003.066 | 0.00781  | 3 | 1 | 32.2 | 0 |
| P12163_2_F6,16182 | K.QVEIPFKPAR.V          | 1793.089 | 0.00682  | 2 | 1 | 25.6 | 0 |
| P12163_2_F6,16262 | K.QVEIPFKPAR.V          | 1793.089 | 0.0048   | 3 | 1 | 38.4 | 0 |
| P12163_2_F7,14980 | K.QVEIPFKPAR.V          | 1793.089 | 0.00531  | 3 | 1 | 38.2 | 0 |
| P12163_1_F4,13574 | K.STYEAITK.G            | 1520.878 | 0.01182  | 2 | 1 | 39.1 | 0 |
| P12163_1_F4,13587 | K.STYEAITK.G            | 1520.878 | 0.00608  | 3 | 1 | 36.3 | 0 |
| P12163_1_F5,12147 | K.STYEAITK.G            | 1520.878 | 0.01061  | 3 | 1 | 31.6 | 0 |
| P12163_1_F9,13025 | K.STYEAITK.G            | 1520.878 | 0.00516  | 2 | 1 | 26.9 | 0 |
| P12163_1_F9,13054 | K.STYEAITK.G            | 1520.878 | 0.00425  | 3 | 1 | 24.8 | 0 |
| P12163_2_F1,12527 | K.STYEAITK.G            | 1520.878 | 0.01038  | 2 | 1 | 31.7 | 0 |
| P12163_2_F1,12528 | K.STYEAITK.G            | 1520.878 | 0.00566  | 3 | 1 | 36   | 0 |
| P12163_2_S5,11779 | K.STYEAITK.G            | 1520.878 | 0.00047  | 3 | 1 | 28   | 0 |
| P12163_1_F3,12729 | K.TSLAPGSGVVTK.Y        | 1725.037 | 0.00679  | 3 | 1 | 28.7 | 0 |
| P12163_1_F3,14623 | K.TSLAPGSGVVTK.Y        | 1725.037 | 0.00595  | 2 | 1 | 49.3 | 0 |
| P12163_1_F4,13159 | K.TSLAPGSGVVTK.Y        | 1725.037 | 0.00391  | 3 | 1 | 40.9 | 0 |
| P12163_1_F4,13214 | K.TSLAPGSGVVTK.Y        | 1725.037 | 0.00617  | 2 | 1 | 41.1 | 0 |
| P12163_1_F4,14929 | K.TSLAPGSGVVTK.Y        | 1725.037 | 0.00037  | 2 | 1 | 40.9 | 0 |
| P12163_2_F1,14052 | K.TSLAPGSGVVTK.Y        | 1725.037 | 0.0052   | 3 | 1 | 54.1 | 0 |
| P12163_2_F7,11544 | K.TVHIPTGEK.L           | 1589.947 | 0.0001   | 3 | 1 | 25.9 | 0 |
| P12163_1_F7,15133 | K.VSEIRPGQDITVTTDTC     | 2525.403 | 0.00461  | 4 | 1 | 23.2 | 0 |
| P12163_1_F7,15152 | K.VSEIRPGQDITVTTDTC     | 2525.403 | 0.00691  | 3 | 1 | 22.3 | 0 |
| P12163_2_S5,14499 | K.VSEIRPGQDITVTTDTC     | 2525.403 | 0.00496  | 3 | 1 | 42.7 | 0 |

|                   |                        |          |          |   |   |      |   |
|-------------------|------------------------|----------|----------|---|---|------|---|
| P12163_1_F5,14187 | K.YLQQSGLQK.Y          | 1672.984 | 0.00374  | 2 | 1 | 41   | 0 |
| P12163_2_F1,14380 | K.YLQQSGLQK.Y          | 1672.984 | 0.00409  | 2 | 1 | 40.9 | 0 |
| P12163_2_F2,14963 | K.YLQQSGLQK.Y          | 1672.984 | 0.005    | 2 | 1 | 37.2 | 0 |
| P12163_2_F2,14973 | K.YLQQSGLQK.Y          | 1672.984 | 0.00682  | 3 | 1 | 22.5 | 0 |
| P12163_1_F2,16800 | R.IAAPVLER.F           | 1172.73  | 0.0026   | 2 | 1 | 28.6 | 0 |
| P12163_1_F5,12044 | R.NCDNFQVTK.D          | 1733.91  | 0.01492  | 2 | 1 | 42.3 | 0 |
| P12163_2_F1,12449 | R.NCDNFQVTK.D          | 1733.91  | 0.00654  | 2 | 1 | 29.7 | 0 |
| P12163_2_F1,12460 | R.NCDNFQVTK.D          | 1733.91  | 0.00371  | 3 | 1 | 27.4 | 0 |
| P12163_1_S10,8185 | R.RGNDEVMAR.G          | 1351.705 | 0.0094   | 3 | 1 | 35.6 | 0 |
| P12163_1_S10,8197 | R.RGNDEVMAR.G          | 1351.705 | 0.00945  | 2 | 1 | 35.8 | 0 |
| P12163_2_F8_12070 | R.RGNDEVMAR.G          | 1351.705 | 0.00379  | 2 | 1 | 32.8 | 0 |
| P12163_1_F9,8784  | R.VHPLTR.A             | 1026.636 | 0.00112  | 3 | 1 | 22.2 | 0 |
| P12163_1_S10,9421 | R.VHPLTR.A             | 1026.636 | 0.00382  | 3 | 1 | 24.8 | 0 |
| P12163_2_F10,8793 | R.VHPLTR.A             | 1026.636 | 0.00223  | 3 | 1 | 24.3 | 0 |
| P12163_1_F9,16724 | R.YTINLPNK.V           | 1570.941 | 0.00485  | 2 | 1 | 26.9 | 0 |
| P12163_2_F1,17100 | R.YTINLPNK.V           | 1570.941 | 0.0063   | 3 | 1 | 22.2 | 0 |
| P12163_1_F5,21256 | K.GVPYSISI.-           | 1139.661 | 0.00418  | 2 | 1 | 52.8 | 0 |
| P12163_2_F2,21781 | K.GVPYSISI.-           | 1139.661 | 0.00252  | 2 | 1 | 45.5 | 0 |
| P12163_1_F9,20324 | K.HEPWVPLK.T           | 1800.042 | 0.00586  | 3 | 1 | 27.2 | 0 |
| P12163_2_F9,19367 | K.HEPWVPLK.T           | 1800.042 | 0.00388  | 3 | 1 | 30.8 | 0 |
| P12163_1_S1,24641 | K.LM*ELEGIIDAR.N       | 1579.867 | 0.0024   | 3 | 1 | 27   | 0 |
| P12163_1_S1,24760 | K.LM*ELEGIIDAR.N       | 1579.867 | 0.00413  | 2 | 1 | 43.7 | 0 |
| P12163_1_S1,24816 | K.LM*ELEGIIDAR.N       | 1579.867 | 0.00294  | 3 | 1 | 76.5 | 0 |
| P12163_1_S1,24941 | K.LM*ELEGIIDAR.N       | 1579.867 | 0.00405  | 2 | 1 | 30.5 | 0 |
| P12163_1_S1,25002 | K.LM*ELEGIIDAR.N       | 1579.867 | 0.00498  | 3 | 1 | 60.4 | 0 |
| P12163_1_F2,18986 | K.LYLPSQTPDGLK.R       | 1940.131 | -0.00073 | 3 | 1 | 42.8 | 0 |
| P12163_1_F3,19575 | K.LYLPSQTPDGLK.R       | 1940.131 | 0.00709  | 2 | 1 | 39.6 | 0 |
| P12163_2_F7,16994 | K.LYLPSQTPDGLK.R       | 1940.131 | 0.00433  | 2 | 1 | 37.2 | 0 |
| P12163_1_F5,14236 | K.QLTFSAK.T            | 1402.851 | 0.01111  | 2 | 1 | 26.9 | 0 |
| P12163_1_S10,1325 | K.REGNFYVPR.D          | 1441.785 | 0.00309  | 3 | 1 | 28   | 0 |
| P12163_1_F3,28998 | K.SLLELVSAELDPK.T      | 2135.278 | 0.0047   | 3 | 1 | 35   | 0 |
| P12163_1_F3,10291 | K.STIQDYAR.K           | 1257.674 | 0.00283  | 3 | 1 | 37   | 0 |
| P12163_1_F3,12287 | K.STIQDYAR.K           | 1257.674 | 0.00368  | 2 | 1 | 24.2 | 0 |
| P12163_1_F7,22147 | K.STLDPEIYGPPESAITTI   | 3011.628 | 0.00251  | 3 | 1 | 38.7 | 0 |
| P12163_1_F3,19172 | K.YSMEFSSVAYDK.Q       | 2035.03  | 0.01019  | 2 | 1 | 44.1 | 0 |
| P12163_1_F4,19766 | K.YSMEFSSVAYDK.Q       | 2035.03  | 0.00288  | 3 | 1 | 43.6 | 0 |
| P12163_1_F4,19772 | K.YSMEFSSVAYDK.Q       | 2035.03  | 0.00817  | 2 | 1 | 39.6 | 0 |
| P12163_2_F9,17425 | K.YSMEFSSVAYDK.Q       | 2035.03  | 0.00996  | 3 | 1 | 31   | 0 |
| P12163_1_F2,14975 | R.AEELTILR.G           | 1248.746 | -0.00018 | 3 | 1 | 23.3 | 0 |
| P12163_1_F4,11765 | R.CDTDQFSEK.R          | 1737.857 | 0.00431  | 2 | 1 | 36.8 | 0 |
| P12163_2_F1,10993 | R.CDTDQFSEK.R          | 1737.857 | 0.00871  | 2 | 1 | 39   | 0 |
| P12163_1_F4,15098 | R.DEAFSEVK.Q           | 1532.842 | 0.00621  | 2 | 1 | 40   | 0 |
| P12163_1_F4,15169 | R.DEAFSEVK.Q           | 1532.842 | 0.00552  | 3 | 1 | 33.1 | 0 |
| P12163_1_F5,13870 | R.DEAFSEVK.Q           | 1532.842 | 0.00564  | 3 | 1 | 36   | 0 |
| P12163_1_F3,7756  | R.DEEFSR.N ! R.DEEFSR. | 1086.537 | 0.00423  | 3 | 1 | 24.7 | 0 |
| P12163_1_F2,17904 | R.EDPVINAAFEK.F        | 1841.026 | 0.00407  | 3 | 1 | 44.7 | 0 |
| P12163_1_F3,18384 | R.EDPVINAAFEK.F        | 1841.026 | 0.01193  | 3 | 1 | 40.9 | 0 |
| P12163_1_F3,18397 | R.EDPVINAAFEK.F        | 1841.026 | 0.00408  | 2 | 1 | 43.7 | 0 |
| P12163_1_F6,17582 | R.EDPVINAAFEK.F        | 1841.026 | -0.00025 | 3 | 1 | 41.7 | 0 |
| P12163_1_S10,1499 | R.EGNFYVPR.D           | 1285.684 | 0.00328  | 2 | 1 | 25.3 | 0 |
| P12163_1_F7,14099 | R.GLAVEDPSAPHGLK.L     | 1999.143 | 0.00399  | 3 | 1 | 45.5 | 0 |

|                   |                        |          |          |   |   |      |   |
|-------------------|------------------------|----------|----------|---|---|------|---|
| P12163_1_F8,14720 | R.GLAVEDPSAPHGLK.L     | 1999.143 | 0.00294  | 3 | 1 | 50.8 | 0 |
| P12163_1_F8,14733 | R.GLAVEDPSAPHGLK.L     | 1999.143 | 0.00377  | 2 | 1 | 61.5 | 0 |
| P12163_1_F8,14750 | R.GLAVEDPSAPHGLK.L     | 1999.143 | 0.00553  | 4 | 1 | 37.5 | 0 |
| P12163_2_F6,14198 | R.GLAVEDPSAPHGLK.L     | 1999.143 | 0.00189  | 3 | 1 | 40.7 | 0 |
| P12163_2_F6,14206 | R.GLAVEDPSAPHGLK.L     | 1999.143 | 0.00861  | 2 | 1 | 41.7 | 0 |
| P12163_2_S5,13651 | R.GLAVEDPSAPHGLK.L     | 1999.143 | 0.00365  | 4 | 1 | 29.1 | 0 |
| P12163_1_F4,24470 | R.LITEWPLK.S           | 1607.998 | -0.00163 | 3 | 1 | 22.3 | 0 |
| P12163_2_F1,23774 | R.LITEWPLK.S           | 1607.998 | 0.00138  | 2 | 1 | 31.7 | 0 |
| P12163_2_F1,23847 | R.LITEWPLK.S           | 1607.998 | 0.00455  | 3 | 1 | 22.1 | 0 |
| P12163_1_F9,16960 | R.LLDPHFR.Y            | 1201.699 | 0.00343  | 3 | 1 | 39.1 | 0 |
| P12163_1_F9,17232 | R.LLDPHFR.Y            | 1201.699 | 0.00142  | 3 | 1 | 26.7 | 0 |
| P12163_1_F9,18124 | R.LLDPHFR.Y            | 1201.699 | 0.00541  | 3 | 1 | 23.7 | 0 |
| P12163_2_F7,15187 | R.LLDPHFR.Y            | 1201.699 | 0.0037   | 3 | 1 | 31.5 | 0 |
| P12163_1_F2,22001 | R.QALVNADGHISSFSPG     | 2441.35  | 0.00333  | 3 | 1 | 68.6 | 0 |
| P12163_1_F6,13238 | R.QLSVM*HPIYR.L        | 1563.862 | 0.00189  | 3 | 1 | 33.6 | 0 |
| P12163_1_F6,16087 | R.QLSVMHPIYR.L         | 1547.867 | 0.00171  | 3 | 1 | 41   | 0 |
| P12163_1_F6,16104 | R.QLSVMHPIYR.L         | 1547.867 | 0.00112  | 2 | 1 | 30.7 | 0 |
| P12163_1_F8,15978 | R.QLSVMHPIYR.L         | 1547.867 | 0.00321  | 3 | 1 | 67.7 | 0 |
| P12163_2_F6,15403 | R.QLSVMHPIYR.L         | 1547.867 | 0.00312  | 3 | 1 | 48.9 | 0 |
| P12163_2_F6,15427 | R.QLSVMHPIYR.L         | 1547.867 | -0.00028 | 2 | 1 | 30.2 | 0 |
| P12163_2_S3,13965 | R.QLSVMHPIYR.L         | 1547.867 | 0.003    | 3 | 1 | 28.9 | 0 |
| P12163_2_S5,14981 | R.QLSVMHPIYR.L         | 1547.867 | 0.00156  | 3 | 1 | 25.6 | 0 |
| P12163_1_F2,19210 | R.QTLAGLNYPYSIR.L      | 1636.932 | 0.00359  | 2 | 1 | 30.5 | 0 |
| P12163_1_F7,12268 | R.THCCTEPYVIATNR.Q     | 2025.979 | 0.00654  | 3 | 1 | 38.5 | 0 |
| P12163_2_F9,12114 | R.THCCTEPYVIATNR.Q     | 2025.979 | -0.00111 | 3 | 1 | 35.5 | 0 |
| P12163_1_F9,17088 | R.YRAEELTILR.G         | 1567.911 | 0.00835  | 2 | 1 | 36.2 | 0 |
| P12163_1_F9,17090 | R.YRAEELTILR.G         | 1567.911 | 0.00403  | 3 | 1 | 37.4 | 0 |
| P12163_1_F3,13379 | K.AVSISEPTSETK.S       | 1857.042 | 0.00917  | 2 | 1 | 53   | 0 |
| P12163_1_F3,13412 | K.AVSISEPTSETK.S       | 1857.042 | 0.00274  | 3 | 1 | 27.2 | 0 |
| P12163_1_F2,17070 | K.AYFEEYDYR.V          | 1559.732 | 0.00795  | 2 | 1 | 33.3 | 0 |
| P12163_1_F3,17558 | K.AYFEEYDYR.V          | 1559.732 | 0.00733  | 2 | 1 | 26   | 0 |
| P12163_1_F9,16865 | K.AYFEEYDYR.V          | 1559.732 | 0.00229  | 2 | 1 | 28   | 0 |
| P12163_1_F3,12720 | K.EIVGTVDGVK.I         | 1624.973 | 0.00311  | 2 | 1 | 24.1 | 0 |
| P12163_1_F8,17710 | K.INHVNEVVESEVPLE:     | 2627.45  | 0.00494  | 3 | 1 | 41.5 | 0 |
| P12163_2_S5,16096 | K.INHVNEVVESEVPLE:     | 2627.45  | 0.00527  | 3 | 1 | 48.7 | 0 |
| P12163_1_F7,15614 | K.ISNAEVTLEAEEGHR.F    | 1959.008 | 0.00583  | 3 | 1 | 40.9 | 0 |
| P12163_1_F8,16332 | K.ISNAEVTLEAEEGHR.F    | 1959.008 | 0.00094  | 3 | 1 | 32.6 | 0 |
| P12163_2_S5,15622 | K.ISNAEVTLEAEEGHR.F    | 1959.008 | 0.00415  | 3 | 1 | 32   | 0 |
| P12163_1_F4,18650 | K.LEDQIALGK.R          | 1594.962 | 0.00666  | 2 | 1 | 45.8 | 0 |
| P12163_1_F4,18667 | K.LEDQIALGK.R          | 1594.962 | 0.00401  | 3 | 1 | 35.8 | 0 |
| P12163_1_F2,19598 | K.LGENGSSM*AGFDIQN     | 2448.265 | 0.00522  | 3 | 1 | 30.1 | 0 |
| P12163_2_F7,10727 | K.LHTAESAEVSK.I        | 1780.006 | 0.00523  | 3 | 1 | 45.3 | 0 |
| P12163_1_F2,10586 | K.NFESPTNEDAR.T        | 1583.76  | 0.00194  | 2 | 1 | 32   | 0 |
| P12163_1_F5,11611 | K.NLGLGDNNSK.I         | 1768.965 | 0.0145   | 2 | 1 | 32.2 | 0 |
| P12163_1_F4,20659 | K.SATINSIFGEEK.T ! K.S | 1904.058 | 0.00532  | 3 | 1 | 43.2 | 0 |
| P12163_1_F4,20688 | K.SATINSIFGEEK.T ! K.S | 1904.058 | 0.00563  | 2 | 1 | 62.2 | 0 |
| P12163_2_F1,20044 | K.SATINSIFGEEK.T ! K.S | 1904.058 | -0.0011  | 2 | 1 | 52.8 | 0 |
| P12163_2_F1,7223  | K.SSGVEQGVNR.K         | 1336.712 | 0.00213  | 2 | 1 | 33.3 | 0 |
| P12163_1_F7,14179 | K.TSIHAFEPGTTSVK.E     | 2083.164 | 0.00504  | 3 | 1 | 29.6 | 0 |
| P12163_1_F3,16849 | K.VILDEGSVK.Q          | 1567.952 | 0.00334  | 2 | 1 | 40.6 | 0 |
| P12163_1_F4,17347 | K.VILDEGSVK.Q          | 1567.952 | 0.00504  | 3 | 1 | 30   | 0 |

|                   |                     |          |          |   |   |      |   |
|-------------------|---------------------|----------|----------|---|---|------|---|
| P12163_1_S1,21022 | R.DLNDLPLLR.S       | 1372.81  | 0.00177  | 3 | 1 | 49.1 | 0 |
| P12163_1_F3,19472 | R.FPAAVTVQVTK.D     | 1769.078 | 0.00556  | 3 | 1 | 34.3 | 0 |
| P12163_1_F3,19496 | R.FPAAVTVQVTK.D     | 1769.078 | 0.00712  | 2 | 1 | 38.3 | 0 |
| P12163_1_F3,14470 | R.LATGGETETNLSEEEK  | 2316.203 | 0.00791  | 3 | 1 | 28.3 | 0 |
| P12163_1_F7,13450 | R.LENEQTIVSAHSEK.L  | 2193.197 | 0.00522  | 3 | 1 | 49.1 | 0 |
| P12163_1_F6,21249 | R.LGYSPEDSLVGQVLHF  | 2074.123 | 0.0028   | 3 | 1 | 46.5 | 0 |
| P12163_1_F7,20379 | R.LGYSPEDSLVGQVLHF  | 2074.123 | 0.00235  | 3 | 1 | 87.7 | 0 |
| P12163_2_F10,1879 | R.LGYSPEDSLVGQVLHF  | 2074.123 | 0.00421  | 3 | 1 | 67.6 | 0 |
| P12163_2_S5,19802 | R.LGYSPEDSLVGQVLHF  | 2074.123 | 0.00475  | 3 | 1 | 74   | 0 |
| P12163_1_F6,21396 | R.LM*NPSLM*NPVSLVE  | 2615.305 | 0.00391  | 3 | 1 | 28.6 | 0 |
| P12163_1_F6,23070 | R.LM*NPSLM*NPVSLVE  | 2615.305 | -0.00008 | 3 | 1 | 50.2 | 0 |
| P12163_1_F6,21340 | R.LM*NPSLMNPVSLVEN  | 2599.31  | 0.00328  | 3 | 1 | 53.9 | 0 |
| P12163_1_F2,17789 | R.LMLVGSTGTIR.S     | 1451.856 | 0.00045  | 3 | 1 | 32.1 | 0 |
| P12163_1_F6,20698 | R.LMNPSLM*NPVSLVEN  | 2599.31  | 0.00103  | 3 | 1 | 43.9 | 0 |
| P12163_1_F6,23051 | R.LMNPSLM*NPVSLVEN  | 2599.31  | -0.00959 | 3 | 1 | 29.4 | 0 |
| P12163_1_F3,19437 | R.QTGQLFSLDAAK.T    | 1887.08  | 0.01247  | 3 | 1 | 22.2 | 0 |
| P12163_1_F7,17509 | R.SHVVQQSIGQAVGDLI  | 1998.103 | 0.00515  | 3 | 1 | 29.8 | 0 |
| P12163_2_F1,16212 | R.VIDTPGLK.S        | 1450.909 | 0.00491  | 2 | 1 | 26   | 0 |
| P12163_1_F4,11134 | K.AHSLGLR.V         | 1057.642 | 0.0057   | 3 | 1 | 26.8 | 0 |
| P12163_1_S10,1118 | K.AHSLGLR.V         | 1057.642 | 0.00325  | 2 | 1 | 25.4 | 0 |
| P12163_2_F8_12070 | K.AHSLGLR.V         | 1057.642 | 0.003    | 3 | 1 | 27.1 | 0 |
| P12163_1_F4,15984 | K.CISYAESHDAQAIVGDK | 2401.228 | 0.00824  | 3 | 1 | 40.3 | 0 |
| P12163_1_F6,15300 | K.CISYAESHDAQAIVGDK | 2401.228 | 0.00626  | 3 | 1 | 26.2 | 0 |
| P12163_1_F7,14407 | K.CISYAESHDAQAIVGDK | 2401.228 | 0.00347  | 3 | 1 | 28.6 | 0 |
| P12163_1_F8,15084 | K.CISYAESHDAQAIVGDK | 2401.228 | 0.0059   | 3 | 1 | 44.5 | 0 |
| P12163_2_F4,14088 | K.CISYAESHDAQAIVGDK | 2401.228 | 0.00101  | 3 | 1 | 44.5 | 0 |
| P12163_2_F6,14569 | K.CISYAESHDAQAIVGDK | 2401.228 | 0.00404  | 3 | 1 | 44.6 | 0 |
| P12163_2_F6,14590 | K.CISYAESHDAQAIVGDK | 2401.228 | 0.00606  | 4 | 1 | 27.9 | 0 |
| P12163_2_F8_12070 | K.CISYAESHDAQAIVGDK | 2401.228 | 0.0104   | 3 | 1 | 36.5 | 0 |
| P12163_2_F8_12070 | K.CISYAESHDAQAIVGDK | 2401.228 | 0.00774  | 4 | 1 | 26.8 | 0 |
| P12163_1_F5,13985 | K.DEEWSMK.E         | 1532.787 | 0.00601  | 2 | 1 | 25.8 | 0 |
| P12163_1_F2,10640 | K.EISQSLTNR.R       | 1351.748 | 0.00523  | 3 | 1 | 29.4 | 0 |
| P12163_1_F2,12561 | K.EISQSLTNR.R       | 1351.748 | 0.00356  | 2 | 1 | 25   | 0 |
| P12163_1_F3,11073 | K.EISQSLTNR.R       | 1351.748 | 0.00221  | 3 | 1 | 44.9 | 0 |
| P12163_1_F9,12702 | K.EISQSLTNR.R       | 1351.748 | 0.00052  | 2 | 1 | 24.4 | 0 |
| P12163_1_S10,1940 | K.GYLEFGFNR.E       | 1406.737 | 0.0003   | 3 | 1 | 23.8 | 0 |
| P12163_2_F8_12070 | K.GYLEFGFNR.E       | 1406.737 | 0.00183  | 3 | 1 | 33.5 | 0 |
| P12163_2_F8_12070 | K.GYLEFGFNR.E       | 1406.737 | 0.00336  | 2 | 1 | 29.8 | 0 |
| P12163_1_F9,11737 | K.HDGVFIDR.I        | 1262.679 | 0.00301  | 3 | 1 | 40.4 | 0 |
| P12163_1_F9,11802 | K.HDGVFIDR.I        | 1262.679 | 0.00285  | 2 | 1 | 25.5 | 0 |
| P12163_1_S10,1235 | K.HDGVFIDR.I        | 1262.679 | 0.00313  | 3 | 1 | 25.4 | 0 |
| P12163_2_F6,11815 | K.HDGVFIDR.I        | 1262.679 | 0.00277  | 3 | 1 | 36.3 | 0 |
| P12163_2_F9,11212 | K.HDGVFIDR.I        | 1262.679 | 0.00466  | 3 | 1 | 28.4 | 0 |
| P12163_1_F7,12902 | K.HEGGLEEFAK.G      | 1724.943 | 0.00145  | 3 | 1 | 32.8 | 0 |
| P12163_1_F9,13855 | K.HEGGLEEFAK.G      | 1724.943 | 0.00625  | 3 | 1 | 41.3 | 0 |
| P12163_1_F9,13861 | K.HEGGLEEFAK.G      | 1724.943 | 0.00623  | 2 | 1 | 37.2 | 0 |
| P12163_2_F9,13250 | K.HEGGLEEFAK.G      | 1724.943 | 0.00724  | 3 | 1 | 38.3 | 0 |
| P12163_2_F9,13310 | K.HEGGLEEFAK.G      | 1724.943 | 0.00426  | 4 | 1 | 27.3 | 0 |
| P12163_1_F3,11221 | K.QIVSSTNEEDK.V     | 1858.001 | 0.00027  | 2 | 1 | 27.8 | 0 |
| P12163_1_F4,11620 | K.QIVSSTNEEDK.V     | 1858.001 | 0.00491  | 2 | 1 | 46.6 | 0 |
| P12163_1_F4,11639 | K.QIVSSTNEEDK.V     | 1858.001 | 0.00439  | 3 | 1 | 59.6 | 0 |

|                   |                        |          |          |   |   |      |   |
|-------------------|------------------------|----------|----------|---|---|------|---|
| P12163_2_F1,10815 | K.QIVSSTNEEDK.V        | 1858.001 | 0.00621  | 2 | 1 | 45.1 | 0 |
| P12163_1_F7,17309 | K.QIVSSTNEEDKVIVFEF    | 2601.434 | 0.00338  | 3 | 1 | 27.4 | 0 |
| P12163_1_F8,18052 | K.QIVSSTNEEDKVIVFEF    | 2601.434 | 0.00472  | 4 | 1 | 39.6 | 0 |
| P12163_2_S5,16714 | K.QIVSSTNEEDKVIVFEF    | 2601.434 | 0.00416  | 3 | 1 | 29.5 | 0 |
| P12163_2_S5,16732 | K.QIVSSTNEEDKVIVFEF    | 2601.434 | 0.00504  | 4 | 1 | 41.1 | 0 |
| P12163_2_S5,16787 | K.QIVSSTNEEDKVIVFEF    | 2601.434 | 0.00641  | 2 | 1 | 47.9 | 0 |
| P12163_1_F3,18832 | K.VIVFER.G ! R.VIVFER. | 1066.656 | 0.0016   | 2 | 1 | 29.2 | 0 |
| P12163_2_F1,18396 | K.VIVFER.G ! R.VIVFER. | 1066.656 | 0.00272  | 2 | 1 | 26.1 | 0 |
| P12163_2_F2,204   | K.VIVFER.G ! R.VIVFER. | 1066.656 | 0.00284  | 2 | 1 | 28.9 | 0 |
| P12163_1_F2,7904  | K.YATVDSSR.F           | 1202.632 | 0.00395  | 3 | 1 | 33.8 | 0 |
| P12163_1_F3,7955  | K.YATVDSSR.F           | 1202.632 | 0.00357  | 2 | 1 | 24.2 | 0 |
| P12163_1_F3,7958  | K.YATVDSSR.F           | 1202.632 | 0.00296  | 3 | 1 | 39   | 0 |
| P12163_1_F2,11421 | R.EDGGIVYR.E           | 1212.653 | 0.00337  | 2 | 1 | 30   | 0 |
| P12163_1_F3,11833 | R.EDGGIVYR.E           | 1212.653 | 0.00295  | 2 | 1 | 28.3 | 0 |
| P12163_1_F4,12125 | R.EDGGIVYR.E           | 1212.653 | 0.00549  | 2 | 1 | 25   | 0 |
| P12163_1_S1,11169 | R.EDGGIVYR.E           | 1212.653 | 0.00129  | 2 | 1 | 29.2 | 0 |
| P12163_2_F9,11156 | R.EDGGIVYR.E           | 1212.653 | 0.00343  | 2 | 1 | 40.7 | 0 |
| P12163_1_S1,16798 | R.EFADDVLPR.I          | 1365.732 | 0.00605  | 3 | 1 | 54.5 | 0 |
| P12163_1_S1,16843 | R.EFADDVLPR.I          | 1365.732 | 0.00179  | 2 | 1 | 34.8 | 0 |
| P12163_1_S1,17017 | R.EFADDVLPR.I          | 1365.732 | 0.00443  | 3 | 1 | 73.1 | 0 |
| P12163_1_S1,17067 | R.EFADDVLPR.I          | 1365.732 | 0.00339  | 2 | 1 | 35   | 0 |
| P12163_1_F5,12872 | R.EGNEWSYEK.C          | 1749.89  | 0.00563  | 2 | 1 | 24.8 | 0 |
| P12163_2_F1,13219 | R.EGNEWSYEK.C          | 1749.89  | 0.00347  | 2 | 1 | 32.3 | 0 |
| P12163_2_F2,13652 | R.EGNEWSYEK.C          | 1749.89  | 0.00785  | 2 | 1 | 36.7 | 0 |
| P12163_2_F2,13664 | R.EGNEWSYEK.C          | 1749.89  | 0.00761  | 3 | 1 | 28.2 | 0 |
| P12163_1_F8,21088 | R.FGAPYDGVYWDPPPSI     | 2257.087 | 0.00201  | 2 | 1 | 28.2 | 0 |
| P12163_2_F6,20757 | R.FGAPYDGVYWDPPPSI     | 2257.087 | 0.00239  | 2 | 1 | 35.7 | 0 |
| P12163_1_F7,11061 | R.GITLHK.M             | 1276.82  | 0.00199  | 3 | 1 | 23.2 | 0 |
| P12163_1_F9,12256 | R.GITLHK.M             | 1276.82  | 0.00466  | 3 | 1 | 28.3 | 0 |
| P12163_2_F4,11329 | R.GITLHK.M             | 1276.82  | 0.00649  | 3 | 1 | 30.1 | 0 |
| P12163_2_F8_12070 | R.GITLHK.M             | 1276.82  | 0.00952  | 3 | 1 | 27.9 | 0 |
| P12163_2_F9,11331 | R.GITLHK.M             | 1276.82  | 0.0076   | 3 | 1 | 27.7 | 0 |
| P12163_1_F5,20218 | R.IPAWIK.Y             | 1335.861 | 0.00674  | 3 | 1 | 24.1 | 0 |
| P12163_1_F7,11657 | R.IYEAHVGM*SSSEPR.V    | 1882.927 | 0.00185  | 3 | 1 | 26.6 | 0 |
| P12163_1_F7,13615 | R.IYEAHVGM*SSSEPR.V    | 1882.927 | 0.00053  | 3 | 1 | 23.2 | 0 |
| P12163_1_F8,12192 | R.IYEAHVGM*SSSEPR.V    | 1882.927 | 0.00206  | 3 | 1 | 27.4 | 0 |
| P12163_2_F4,11288 | R.IYEAHVGM*SSSEPR.V    | 1882.927 | 0.00557  | 3 | 1 | 29.1 | 0 |
| P12163_2_F6,11916 | R.IYEAHVGM*SSSEPR.V    | 1882.927 | -0.0019  | 3 | 1 | 29.4 | 0 |
| P12163_1_F4,14830 | R.IYEAHVGMSSSEPR.V     | 1866.932 | 0.00137  | 2 | 1 | 43   | 0 |
| P12163_1_F6,14374 | R.IYEAHVGMSSSEPR.V     | 1866.932 | -0.00053 | 2 | 1 | 25.1 | 0 |
| P12163_1_F7,13624 | R.IYEAHVGMSSSEPR.V     | 1866.932 | 0.00561  | 2 | 1 | 37.8 | 0 |
| P12163_2_F4,13202 | R.IYEAHVGMSSSEPR.V     | 1866.932 | 0.00463  | 2 | 1 | 47.1 | 0 |
| P12163_2_F4,13205 | R.IYEAHVGMSSSEPR.V     | 1866.932 | 0.00152  | 3 | 1 | 30.8 | 0 |
| P12163_2_F6,13640 | R.IYEAHVGMSSSEPR.V     | 1866.932 | -0.00181 | 2 | 1 | 46.4 | 0 |
| P12163_2_F6,13649 | R.IYEAHVGMSSSEPR.V     | 1866.932 | 0.00227  | 3 | 1 | 42.5 | 0 |
| P12163_2_F9,13353 | R.IYEAHVGMSSSEPR.V     | 1866.932 | 0.00446  | 3 | 1 | 38.6 | 0 |
| P12163_1_S1,13955 | R.LAM*AIPDR.W          | 1206.682 | 0.0022   | 2 | 1 | 24.8 | 0 |
| P12163_1_F6,15852 | R.RQWNLVDADHLR.Y       | 1826.993 | 0.0041   | 4 | 1 | 39.1 | 0 |
| P12163_1_F4,10303 | R.SGTPEDLK.Y           | 1454.831 | -0.00003 | 3 | 1 | 22.6 | 0 |
| P12163_1_F8,10559 | R.SGTPEDLK.Y           | 1454.831 | 0.00117  | 2 | 1 | 34.7 | 0 |
| P12163_2_F1,10830 | R.SGTPEDLK.Y           | 1454.831 | 0.00759  | 3 | 1 | 30.3 | 0 |

|                                          |          |          |   |   |      |   |
|------------------------------------------|----------|----------|---|---|------|---|
| P12163_1_F8,11047 R.VEESQEGHNNSEPVN\     | 2689.364 | 0.00993  | 3 | 1 | 35.8 | 0 |
| P12163_1_F6,18173 R.VGHNIDHFTSPEGIPG\    | 3627.799 | 0.00381  | 4 | 1 | 23.7 | 0 |
| P12163_2_F6,17701 R.VGHNIDHFTSPEGIPG\    | 3627.799 | 0.00085  | 4 | 1 | 25.2 | 0 |
| P12163_1_S1,15677 K.ADLVNNLGTIAR.S       | 1560.901 | 0.0024   | 3 | 1 | 41.2 | 0 |
| P12163_1_S1,15932 K.ADLVNNLGTIAR.S       | 1560.901 | -0.00255 | 3 | 1 | 41.6 | 0 |
| P12163_1_S1,18650 K.ADLVNNLGTIAR.S       | 1560.901 | 0.0055   | 2 | 1 | 28.9 | 0 |
| P12163_1_S1,18878 K.ADLVNNLGTIAR.S       | 1560.901 | -0.0034  | 2 | 1 | 40.5 | 0 |
| P12163_1_S1,19114 K.ADLVNNLGTIAR.S       | 1560.901 | 0.00182  | 2 | 1 | 36.1 | 0 |
| P12163_1_F4,21560 K.AILFVPK.R            | 1395.918 | 0.00574  | 3 | 1 | 42.1 | 0 |
| P12163_1_F4,21583 K.AILFVPK.R            | 1395.918 | 0.00778  | 2 | 1 | 31.5 | 0 |
| P12163_1_F4,23061 K.AILFVPK.R            | 1395.918 | 0.00224  | 2 | 1 | 31.2 | 0 |
| P12163_1_F4,23098 K.AILFVPK.R            | 1395.918 | 0.00601  | 3 | 1 | 33.4 | 0 |
| P12163_1_F5,20549 K.AILFVPK.R            | 1395.918 | 0.0048   | 2 | 1 | 29.9 | 0 |
| P12163_2_F1,20890 K.AILFVPK.R            | 1395.918 | 0.00511  | 3 | 1 | 33.3 | 0 |
| P12163_2_F1,21097 K.AILFVPK.R            | 1395.918 | 0.00696  | 2 | 1 | 32   | 0 |
| P12163_2_F1,21126 K.AILFVPK.R            | 1395.918 | 0.00616  | 3 | 1 | 31   | 0 |
| P12163_2_F2,14 K.AILFVPK.R               | 1395.918 | 0.0054   | 2 | 1 | 25.9 | 0 |
| P12163_1_F4,14725 K.AVENSPFLEK.L         | 1741.994 | -0.00158 | 3 | 1 | 23.7 | 0 |
| P12163_1_F4,25617 K.CIELFQEIAENK.E       | 2102.141 | 0.00483  | 3 | 1 | 48.2 | 0 |
| P12163_1_F2,16944 K.EDQLEYLEER.R         | 1627.812 | -0.00283 | 2 | 1 | 29.8 | 0 |
| P12163_1_F9,16746 K.EDQLEYLEER.R         | 1627.812 | 0.00919  | 2 | 1 | 43.2 | 0 |
| P12163_1_S1,16825 K.EDQLEYLEER.R         | 1627.812 | 0.00677  | 2 | 1 | 45.5 | 0 |
| P12163_2_F2,16794 K.EDQLEYLEER.R         | 1627.812 | -0.00059 | 2 | 1 | 33.3 | 0 |
| P12163_1_F5,16301 K.EEYAAFYK.S           | 1628.878 | 0.00586  | 3 | 1 | 27.4 | 0 |
| P12163_2_F1,16598 K.EEYAAFYK.S           | 1628.878 | 0.00366  | 3 | 1 | 29.5 | 0 |
| P12163_2_F1,16609 K.EEYAAFYK.S           | 1628.878 | 0.00431  | 2 | 1 | 27.9 | 0 |
| P12163_2_F8_12070 K.EEYAAFYK.S           | 1628.878 | 0.00832  | 3 | 1 | 28   | 0 |
| P12163_1_F3,15944 K.EGQNDIYYITGESK.K     | 2225.155 | 0.00412  | 3 | 1 | 35.3 | 0 |
| P12163_1_F3,17440 K.EGQNDIYYITGESK.K     | 2225.155 | 0.00589  | 3 | 1 | 36   | 0 |
| P12163_1_F6,16605 K.EVSHEWSLVNK.Q        | 1936.075 | 0.00487  | 3 | 1 | 26   | 0 |
| P12163_1_F9,16272 K.EVSHEWSLVNK.Q        | 1936.075 | 0.00421  | 2 | 1 | 29.2 | 0 |
| P12163_1_F5,17774 K.FYESFSK.N            | 1515.83  | 0.0107   | 2 | 1 | 29.1 | 0 |
| P12163_1_F5,17785 K.FYESFSK.N            | 1515.83  | 0.00606  | 3 | 1 | 24.6 | 0 |
| P12163_2_F1,18220 K.FYESFSK.N            | 1515.83  | 0.00471  | 3 | 1 | 25.4 | 0 |
| P12163_2_F1,18226 K.FYESFSK.N            | 1515.83  | 0.00662  | 2 | 1 | 29.8 | 0 |
| P12163_2_F2,18461 K.FYESFSK.N            | 1515.83  | 0.00546  | 2 | 1 | 25.8 | 0 |
| P12163_2_F2,18464 K.FYESFSK.N            | 1515.83  | 0.0033   | 3 | 1 | 22.7 | 0 |
| P12163_2_F8_12070 K.FYESFSK.N            | 1515.83  | 0.00526  | 2 | 1 | 28.7 | 0 |
| P12163_1_F6,17743 K.HFSVEGQLEFK.A        | 1929.069 | 0.0011   | 3 | 1 | 22.7 | 0 |
| P12163_1_F9,16071 K.ITLHLK.V ! K.ITLHLK. | 1332.882 | 0.00619  | 3 | 1 | 29.9 | 0 |
| P12163_1_F7,22524 K.LDAQPELFIHIIPDK.T    | 2357.369 | 0.00457  | 3 | 1 | 39.2 | 0 |
| P12163_1_F7,22779 K.LDAQPELFIHIIPDK.T    | 2357.369 | 0.00925  | 3 | 1 | 36.6 | 0 |
| P12163_2_F7,10460 K.LGIHEDSTNK.T         | 1721.964 | 0.00494  | 2 | 1 | 27.9 | 0 |
| P12163_2_F7,10509 K.LGIHEDSTNK.T         | 1721.964 | 0.00546  | 3 | 1 | 25.6 | 0 |
| P12163_1_F9,19910 K.RAPFDLFDTR.K ! R.RA  | 1541.838 | 0.00235  | 3 | 1 | 40   | 0 |
| P12163_2_F6,19841 K.RAPFDLFDTR.K ! R.RA  | 1541.838 | 0.00109  | 3 | 1 | 32.8 | 0 |
| P12163_2_F7,18080 K.RAPFDLFDTR.K ! R.RA  | 1541.838 | -0.00002 | 3 | 1 | 41.1 | 0 |
| P12163_1_F8,18713 K.SLTNDWEEHLAVK.H      | 2150.17  | 0.00298  | 2 | 1 | 52.2 | 0 |
| P12163_1_F8,18724 K.SLTNDWEEHLAVK.H      | 2150.17  | 0.0081   | 3 | 1 | 41.2 | 0 |
| P12163_2_F6,18216 K.SLTNDWEEHLAVK.H      | 2150.17  | 0.00462  | 3 | 1 | 42   | 0 |
| P12163_2_F6,18252 K.SLTNDWEEHLAVK.H      | 2150.17  | 0.00244  | 2 | 1 | 52.2 | 0 |



|                    |                      |          |          |   |   |      |   |
|--------------------|----------------------|----------|----------|---|---|------|---|
| P12163_1_F3,20048  | K.TNNTLSIIDSGIGMTK.L | 2273.263 | 0.00524  | 3 | 1 | 33.6 | 0 |
| P12163_1_F3,20489  | K.TNNTLSIIDSGIGMTK.L | 2273.263 | 0.00575  | 3 | 1 | 41.5 | 0 |
| P12163_1_F3,22178  | K.TNNTLSIIDSGIGMTK.L | 2273.263 | 0.00851  | 3 | 1 | 49.6 | 0 |
| P12163_2_F1,13314  | K.VIVTAK.H           | 1238.829 | 0.00236  | 3 | 1 | 24   | 0 |
| P12163_1_S1,20491  | R.APFDLFDTR.K        | 1385.737 | 0.00241  | 3 | 1 | 28.1 | 0 |
| P12163_1_S1,22182  | R.APFDLFDTR.K        | 1385.737 | 0.00298  | 2 | 1 | 42.3 | 0 |
| P12163_1_F4,14810  | R.DNSMAGYMSSK.K      | 1798.892 | 0.00697  | 3 | 1 | 44.1 | 0 |
| P12163_1_F4,14821  | R.DNSMAGYMSSK.K      | 1798.892 | 0.00319  | 2 | 1 | 62.1 | 0 |
| P12163_1_S1,7677   | R.DTSGEPLGR.G        | 1235.653 | 0.00316  | 3 | 1 | 32.5 | 0 |
| P12163_1_F2,15902  | R.ELISNSSDALDK.I     | 1900.048 | 0.0047   | 3 | 1 | 40.5 | 0 |
| P12163_1_F3,14259  | R.ELISNSSDALDK.I     | 1900.048 | 0.00259  | 2 | 1 | 44.1 | 0 |
| P12163_1_F3,14319  | R.ELISNSSDALDK.I     | 1900.048 | 0.00539  | 3 | 1 | 30   | 0 |
| P12163_1_F3,14581  | R.ELISNSSDALDK.I     | 1900.048 | 0.00555  | 2 | 1 | 37.5 | 0 |
| P12163_1_F3,16381  | R.ELISNSSDALDK.I     | 1900.048 | 0.00691  | 2 | 1 | 58.1 | 0 |
| P12163_1_F6,15715  | R.ELISNSSDALDK.I     | 1900.048 | -0.00055 | 3 | 1 | 46.2 | 0 |
| P12163_1_F6,15961  | R.ELISNSSDALDK.I     | 1900.048 | 0.00107  | 3 | 1 | 41.3 | 0 |
| P12163_2_F2,15969  | R.ELISNSSDALDK.I     | 1900.048 | 0.00515  | 3 | 1 | 22   | 0 |
| P12163_1_F5,8327   | R.ETLQQNK.I          | 1468.858 | 0.00396  | 2 | 1 | 25.5 | 0 |
| P12163_2_F2,9394   | R.ETLQQNK.I          | 1468.858 | 0.00682  | 2 | 1 | 27.2 | 0 |
| P12163_1_F5,16750  | R.FESLTDK.S          | 1447.825 | 0.00725  | 2 | 1 | 25.5 | 0 |
| P12163_2_F1,17201  | R.FESLTDK.S          | 1447.825 | 0.00583  | 2 | 1 | 25.5 | 0 |
| P12163_2_F1,17233  | R.FESLTDK.S          | 1447.825 | 0.00501  | 3 | 1 | 28.6 | 0 |
| P12163_1_F7,16938  | K.AANIFETGYK.L       | 1721.968 | 0.00179  | 3 | 1 | 26.9 | 0 |
| P12163_2_F9,16900  | K.AANIFETGYK.L       | 1721.968 | 0.00321  | 2 | 1 | 27.1 | 0 |
| P12163_1_F7,18754  | K.AHLPSANEAIVIPTQVT  | 2829.608 | 0.00467  | 4 | 1 | 49.2 | 0 |
| P12163_1_F8,19762  | K.AHLPSANEAIVIPTQVT  | 2829.608 | 0.01033  | 3 | 1 | 48.4 | 0 |
| P12163_2_F10,16988 | K.AHLPSANEAIVIPTQVT  | 2829.608 | 0.00099  | 4 | 1 | 27.4 | 0 |
| P12163_2_S5,17655  | K.AHLPSANEAIVIPTQVT  | 2829.608 | 0.00541  | 3 | 1 | 55.9 | 0 |
| P12163_2_S5,17730  | K.AHLPSANEAIVIPTQVT  | 2829.608 | 0.00359  | 4 | 1 | 35.5 | 0 |
| P12163_1_F3,20936  | K.AVFSPLIEK.Y        | 1611.993 | 0.00284  | 3 | 1 | 46   | 0 |
| P12163_1_F3,20937  | K.AVFSPLIEK.Y        | 1611.993 | 0.00502  | 2 | 1 | 29.8 | 0 |
| P12163_1_F4,21558  | K.AVFSPLIEK.Y        | 1611.993 | 0.00632  | 3 | 1 | 34.7 | 0 |
| P12163_1_F6,19826  | K.AVFSPLIEK.Y        | 1611.993 | 0.0016   | 2 | 1 | 25.6 | 0 |
| P12163_2_F1,21027  | K.AVFSPLIEK.Y        | 1611.993 | 0.00706  | 2 | 1 | 29.7 | 0 |
| P12163_2_F1,21044  | K.AVFSPLIEK.Y        | 1611.993 | 0.00455  | 3 | 1 | 34.1 | 0 |
| P12163_2_F4,18635  | K.AVFSPLIEK.Y        | 1611.993 | 0.00082  | 2 | 1 | 35.4 | 0 |
| P12163_1_S1,23362  | K.DLSFVQLNQLIGR.K    | 1807.038 | 0.00592  | 3 | 1 | 75.1 | 0 |
| P12163_1_F2,16241  | K.EDLAELAR.A         | 1220.679 | 0.00355  | 2 | 1 | 36.6 | 0 |
| P12163_1_S1,15992  | K.EDLAELAR.A         | 1220.679 | 0.00421  | 2 | 1 | 38.4 | 0 |
| P12163_1_F3,25154  | K.EFADVLEAIK.D       | 1743.015 | 0.00509  | 3 | 1 | 49.5 | 0 |
| P12163_1_F4,26067  | K.EFADVLEAIK.D       | 1743.015 | 0.00509  | 2 | 1 | 56.6 | 0 |
| P12163_1_F4,26108  | K.EFADVLEAIK.D       | 1743.015 | 0.00755  | 3 | 1 | 35.3 | 0 |
| P12163_2_F6,23282  | K.EFADVLEAIKDR.G     | 2014.143 | 0.00354  | 2 | 1 | 52.2 | 0 |
| P12163_2_F6,23311  | K.EFADVLEAIKDR.G     | 2014.143 | 0.00532  | 3 | 1 | 31.1 | 0 |
| P12163_2_S5,19304  | K.HISNVWLWDR.V       | 1629.88  | 0.00142  | 3 | 1 | 56.2 | 0 |
| P12163_1_F5,10444  | K.QFVSQSK.A          | 1431.842 | 0.00288  | 3 | 1 | 29.4 | 0 |
| P12163_2_F2,11270  | K.QFVSQSK.A          | 1431.842 | -0.00048 | 3 | 1 | 24.9 | 0 |
| P12163_1_S1,20111  | K.TGGISVYPFTSSIR.G   | 1788.98  | -0.00007 | 2 | 1 | 31.6 | 0 |
| P12163_1_F7,20852  | K.VDQDWAGISSSLEEIR.I | 2265.178 | 0.00305  | 3 | 1 | 35.8 | 0 |
| P12163_1_F3,27099  | K.WIYDMNPFEPK.Y      | 2161.161 | 0.00672  | 2 | 1 | 35.2 | 0 |
| P12163_1_F7,15217  | K.YILNNPHCVTVEM*QF   | 2908.479 | 0.00451  | 3 | 1 | 31.6 | 0 |

|                   |                    |          |         |   |   |      |   |
|-------------------|--------------------|----------|---------|---|---|------|---|
| P12163_1_F7,17025 | K.YILNNPHCVTVEM*QF | 2908.479 | 0.01064 | 4 | 1 | 27.1 | 0 |
| P12163_2_S5,14716 | K.YILNNPHCVTVEM*QF | 2908.479 | 0.00984 | 4 | 1 | 22.8 | 0 |
| P12163_2_S5,14734 | K.YILNNPHCVTVEM*QF | 2908.479 | 0.00865 | 3 | 1 | 28.1 | 0 |
| P12163_1_F7,16978 | K.YILNNPHCVTVEMQPI | 2892.484 | 0.00229 | 3 | 1 | 33.8 | 0 |
| P12163_1_F7,17006 | K.YILNNPHCVTVEMQPI | 2892.484 | 0.00656 | 4 | 1 | 30   | 0 |
| P12163_1_S10,1693 | K.YILNNPHCVTVEMQPI | 2892.484 | 0.00596 | 4 | 1 | 29.8 | 0 |
| P12163_2_F10,1588 | K.YILNNPHCVTVEMQPI | 2892.484 | 0.01028 | 3 | 1 | 24.2 | 0 |
| P12163_2_S5,16331 | K.YILNNPHCVTVEMQPI | 2892.484 | 0.00254 | 3 | 1 | 37.4 | 0 |
| P12163_1_F5,18181 | R.ANLFEVK.K        | 1428.867 | 0.00524 | 3 | 1 | 35.2 | 0 |
| P12163_2_F2,18830 | R.ANLFEVK.K        | 1428.867 | 0.00287 | 2 | 1 | 28.6 | 0 |
| P12163_2_F2,18860 | R.ANLFEVK.K        | 1428.867 | 0.00578 | 3 | 1 | 33   | 0 |
| P12163_1_F3,6766  | R.ATEELR.L         | 1022.578 | 0.00029 | 3 | 1 | 22.6 | 0 |
| P12163_2_F1,6432  | R.ATEELR.L         | 1022.578 | 0.00131 | 3 | 1 | 22.1 | 0 |
| P12163_1_F3,17369 | R.EGCLINMTADGK.N   | 1917.003 | 0.00661 | 2 | 1 | 48.9 | 0 |
| P12163_1_F4,17863 | R.EGCLINMTADGK.N   | 1917.003 | 0.01045 | 3 | 1 | 33   | 0 |
| P12163_1_F4,17916 | R.EGCLINMTADGK.N   | 1917.003 | 0.01315 | 2 | 1 | 32.7 | 0 |
| P12163_1_F2,16259 | R.ELEM*DDDTLTK.A   | 1933.988 | 0.00814 | 3 | 1 | 42.5 | 0 |
| P12163_1_F2,16248 | R.ELEMDDDTLTK.A    | 1917.994 | 0.00676 | 3 | 1 | 32.5 | 0 |
| P12163_1_S1,14649 | R.ELEMDDDTLTK.A    | 1917.994 | 0.00904 | 3 | 1 | 39.1 | 0 |
| P12163_1_S1,15752 | R.ELEMDDDTLTK.A    | 1917.994 | 0.00706 | 3 | 1 | 47   | 0 |
| P12163_1_F4,6633  | R.GSGHGIAAAR.M     | 1200.675 | 0.00337 | 2 | 1 | 42.9 | 0 |
| P12163_2_F4,5864  | R.GSGHGIAAAR.M     | 1200.675 | 0.0014  | 3 | 1 | 34.1 | 0 |
| P12163_2_S5,13266 | R.GVAVAVASPDDVDA   | 2492.356 | 0.00661 | 3 | 1 | 56.2 | 0 |
| P12163_1_F9,14428 | R.HLLGITEEER.Q     | 1500.832 | 0.00736 | 3 | 1 | 50.6 | 0 |
| P12163_1_F9,14448 | R.HLLGITEEER.Q     | 1500.832 | 0.00198 | 2 | 1 | 24.7 | 0 |
| P12163_2_F7,12995 | R.HLLGITEEER.Q     | 1500.832 | 0.00046 | 3 | 1 | 62   | 0 |
| P12163_1_F9,15003 | R.REEILSTSLK.D     | 1784.074 | 0.00649 | 3 | 1 | 30.6 | 0 |
| P12163_2_F9,13936 | R.REEILSTSLK.D     | 1784.074 | 0.00581 | 3 | 1 | 35   | 0 |
| P12163_1_F3,12905 | R.SVPSLSLR.D       | 1162.71  | 0.00382 | 3 | 1 | 31.4 | 0 |
| P12163_1_F3,16856 | R.VPTEVG DINGVK.V  | 1836.069 | 0.00217 | 2 | 1 | 41.1 | 0 |
| P12163_1_F3,16896 | R.VPTEVG DINGVK.V  | 1836.069 | 0.00576 | 3 | 1 | 23   | 0 |
| P12163_1_F9,7356  | K.AAQDHMK.N        | 1408.783 | 0.00727 | 3 | 1 | 25.7 | 0 |
| P12163_1_F4,17512 | K.ALETYQEGLK.H     | 1760.005 | 0.00529 | 2 | 1 | 33.5 | 0 |
| P12163_2_F1,16550 | K.ALETYQEGLK.H     | 1760.005 | 0.00271 | 2 | 1 | 48.8 | 0 |
| P12163_2_F9,7631  | K.ALTEHR.N         | 1030.595 | 0.00026 | 3 | 1 | 28.8 | 0 |
| P12163_2_F9,7844  | K.ALTEHR.N         | 1030.595 | 0.00107 | 3 | 1 | 33.9 | 0 |
| P12163_1_F2,18462 | K.CIELDPTFSK.G     | 1817.993 | 0.00531 | 3 | 1 | 24.5 | 0 |
| P12163_1_F2,18476 | K.CIELDPTFSK.G     | 1817.993 | 0.00367 | 2 | 1 | 26.8 | 0 |
| P12163_1_F3,19032 | K.CIELDPTFSK.G     | 1817.993 | 0.01064 | 2 | 1 | 39.8 | 0 |
| P12163_1_F3,19035 | K.CIELDPTFSK.G     | 1817.993 | 0.009   | 3 | 1 | 27   | 0 |
| P12163_1_F3,15245 | K.DYEPAIETFQK.A    | 1949.048 | 0.00373 | 3 | 1 | 29.9 | 0 |
| P12163_1_F3,18136 | K.DYEPAIETFQK.A    | 1949.048 | 0.00477 | 2 | 1 | 44.3 | 0 |
| P12163_1_F3,18181 | K.DYEPAIETFQK.A    | 1949.048 | 0.00511 | 3 | 1 | 30   | 0 |
| P12163_1_F5,8055  | K.EAGNAAYK.K       | 1431.805 | 0.00332 | 2 | 1 | 36.1 | 0 |
| P12163_2_F2,8984  | K.EAGNAAYK.K       | 1431.805 | 0.0054  | 2 | 1 | 37.7 | 0 |
| P12163_1_F3,18244 | K.ELEQQEIFDPK.I    | 1984.085 | 0.00324 | 2 | 1 | 44.4 | 0 |
| P12163_1_F3,18293 | K.ELEQQEIFDPK.I    | 1984.085 | 0.00678 | 3 | 1 | 63   | 0 |
| P12163_1_F4,24070 | K.GAIQFFLK.E       | 1531.946 | 0.00315 | 2 | 1 | 41.5 | 0 |
| P12163_1_F2,16726 | K.GLDIDPNNEALK.S   | 1907.069 | 0.00582 | 2 | 1 | 47.5 | 0 |
| P12163_1_S1,12405 | K.GNAAFSSGDYEA     | 1818.892 | -0.0034 | 3 | 1 | 69.6 | 0 |
| P12163_1_S1,14517 | K.GNAAFSSGDYEA     | 1818.892 | 0.0063  | 2 | 1 | 50.2 | 0 |

|                   |                     |          |          |   |   |      |   |
|-------------------|---------------------|----------|----------|---|---|------|---|
| P12163_1_S1,14524 | K.GNAAFSSGDYEA AVR  | 1818.892 | 0.00839  | 3 | 1 | 62.9 | 0 |
| P12163_1_F8,13272 | K.HDPQNQELLDGVR.R   | 1824.951 | 0.002    | 3 | 1 | 48.7 | 0 |
| P12163_2_F6,12765 | K.HDPQNQELLDGVR.R   | 1824.951 | 0.00455  | 3 | 1 | 59   | 0 |
| P12163_2_F1,8395  | K.IADEER.E          | 1036.558 | 0.00228  | 2 | 1 | 23.9 | 0 |
| P12163_1_F4,19153 | K.LGAM*PEGLK.D      | 1539.902 | 0.0011   | 3 | 1 | 22.3 | 0 |
| P12163_1_F4,19156 | K.LGAMPEGLK.D       | 1523.908 | 0.00619  | 2 | 1 | 25.2 | 0 |
| P12163_1_F4,19165 | K.LGAMPEGLK.D       | 1523.908 | 0.00582  | 3 | 1 | 23.4 | 0 |
| P12163_2_F1,18391 | K.LGAMPEGLK.D       | 1523.908 | 0.00425  | 2 | 1 | 25.7 | 0 |
| P12163_1_F2,17348 | K.LINAGIVQM*R.-     | 1434.84  | 0.00082  | 3 | 1 | 45.1 | 0 |
| P12163_1_F2,20177 | K.LINAGIVQM*R.-     | 1434.84  | 0.00259  | 3 | 1 | 60.6 | 0 |
| P12163_1_S1,8807  | K.LTADPTTR.S        | 1178.668 | 0.00332  | 3 | 1 | 30   | 0 |
| P12163_1_S1,9295  | K.LTADPTTR.S        | 1178.668 | -0.00484 | 3 | 1 | 35.1 | 0 |
| P12163_1_F8,18711 | K.YPEAIQHYTESLR.R   | 1910.991 | 0.00385  | 3 | 1 | 47.6 | 0 |
| P12163_2_F4,17436 | K.YPEAIQHYTESLR.R   | 1910.991 | 0.00112  | 3 | 1 | 30.1 | 0 |
| P12163_2_F6,18177 | K.YPEAIQHYTESLR.R   | 1910.991 | 0.00733  | 3 | 1 | 22.9 | 0 |
| P12163_1_F5,18605 | R.AAVYLEMGK.Y       | 1589.918 | 0.01493  | 2 | 1 | 42.6 | 0 |
| P12163_1_F9,18364 | R.AAVYLEMGK.Y       | 1589.918 | 0.00743  | 3 | 1 | 23.7 | 0 |
| P12163_2_F9,17335 | R.AAVYLEMGK.Y       | 1589.918 | 0.00368  | 3 | 1 | 36.3 | 0 |
| P12163_2_F2,11013 | R.CVQQINK.A         | 1497.867 | 0.00218  | 2 | 1 | 24.2 | 0 |
| P12163_2_F2,11046 | R.CVQQINK.A         | 1497.867 | 0.00605  | 3 | 1 | 23.5 | 0 |
| P12163_1_F9,20213 | R.KGAIQFFLK.E       | 1964.246 | 0.01401  | 3 | 1 | 37.9 | 0 |
| P12163_2_F9,19167 | R.KGAIQFFLK.E       | 1964.246 | 0.00711  | 3 | 1 | 38.8 | 0 |
| P12163_2_F1,18475 | R.NPNNLNLYLK.D      | 1811.063 | 0.00631  | 3 | 1 | 51   | 0 |
| P12163_2_F1,18492 | R.NPNNLNLYLK.D      | 1811.063 | 0.00311  | 2 | 1 | 28   | 0 |
| P12163_2_F2,18709 | R.NPNNLNLYLK.D      | 1811.063 | 0.00382  | 3 | 1 | 51.5 | 0 |
| P12163_1_F3,18568 | R.QVLVDFQENPK.A     | 1925.095 | 0.00439  | 2 | 1 | 57.9 | 0 |
| P12163_1_F9,15395 | R.SYLDQDDFR.N       | 1462.712 | 0.00154  | 2 | 1 | 25.6 | 0 |
| P12163_1_S1,15475 | R.SYLDQDDFR.N       | 1462.712 | 0.00664  | 2 | 1 | 28.5 | 0 |
| P12163_2_F9,15023 | R.SYLDQDDFR.N       | 1462.712 | 0.00414  | 2 | 1 | 24.7 | 0 |
| P12163_1_F3,29286 | R.VMQALGVLLNVK.F    | 1893.182 | 0.00784  | 3 | 1 | 25.1 | 0 |
| P12163_1_F4,23919 | K.AFLDIGFK.I        | 1518.914 | 0.00358  | 3 | 1 | 36.4 | 0 |
| P12163_2_F1,23332 | K.AFLDIGFK.I        | 1518.914 | 0.00812  | 2 | 1 | 24.1 | 0 |
| P12163_1_F3,23448 | K.AGLAASLTSQVLVEK.  | 2095.258 | 0.00375  | 3 | 1 | 42.9 | 0 |
| P12163_1_F9,11879 | K.AIGHPLAK.Y        | 1414.899 | 0.00569  | 3 | 1 | 27.3 | 0 |
| P12163_1_F9,11884 | K.AIGHPLAK.Y        | 1414.899 | 0.00426  | 2 | 1 | 33.9 | 0 |
| P12163_2_F7,10994 | K.AIGHPLAK.Y        | 1414.899 | 0.00646  | 2 | 1 | 33.8 | 0 |
| P12163_2_F2,10462 | K.AQIAAGQK.L        | 1394.858 | 0.00326  | 2 | 1 | 34.9 | 0 |
| P12163_2_F2,10470 | K.AQIAAGQK.L        | 1394.858 | 0.00449  | 3 | 1 | 34.6 | 0 |
| P12163_1_F4,16598 | K.EEFEAICK.A        | 1633.872 | 0.00591  | 2 | 1 | 31.6 | 0 |
| P12163_2_F1,13977 | K.ELSIEQPK.G        | 1551.92  | 0.00471  | 2 | 1 | 29.1 | 0 |
| P12163_1_S1,20184 | K.FQGCDVLLGPEMR.S   | 1825.924 | 0.00237  | 3 | 1 | 42.1 | 0 |
| P12163_1_S1,20203 | K.FQGCDVLLGPEMR.S   | 1825.924 | 0.00644  | 2 | 1 | 50.3 | 0 |
| P12163_1_F8,18976 | K.KTPASFEPSIDYVVTK. | 2694.548 | 0.01398  | 3 | 1 | 49.3 | 0 |
| P12163_1_S1,20860 | K.LSVGYSLDQIPNDITK. | 2371.333 | 0.00044  | 3 | 1 | 41.4 | 0 |
| P12163_1_F5,14315 | K.QIAFATK.S         | 1386.856 | 0.00305  | 3 | 1 | 31.5 | 0 |
| P12163_2_F2,15076 | K.QIAFATK.S         | 1386.856 | 0.01151  | 2 | 1 | 24.8 | 0 |
| P12163_1_F4,16636 | K.SEADALAIK.E       | 1596.942 | 0.00566  | 3 | 1 | 34.4 | 0 |
| P12163_2_F1,15788 | K.SEADALAIK.E       | 1596.942 | -0.00231 | 2 | 1 | 40.2 | 0 |
| P12163_2_F1,15814 | K.SEADALAIK.E       | 1596.942 | 0.0041   | 3 | 1 | 30.6 | 0 |
| P12163_1_F4,19087 | K.SLNDLGFTK.E       | 1602.931 | 0.0055   | 2 | 1 | 43.5 | 0 |
| P12163_1_F4,19090 | K.SLNDLGFTK.E       | 1602.931 | 0.00662  | 3 | 1 | 45.9 | 0 |

|                   |                     |          |          |   |   |      |   |
|-------------------|---------------------|----------|----------|---|---|------|---|
| P12163_2_F1,18350 | K.SLNDLGFTK.E       | 1602.931 | 0.00653  | 3 | 1 | 45.3 | 0 |
| P12163_2_F1,18360 | K.SLNDLGFTK.E       | 1602.931 | 0.00672  | 2 | 1 | 45.7 | 0 |
| P12163_1_F2,8412  | K.SVGEAM*ALGR.T     | 1310.704 | 0.00349  | 3 | 1 | 28   | 0 |
| P12163_1_F2,15413 | K.SVGEAMALGR.T      | 1294.709 | 0.00248  | 2 | 1 | 36.5 | 0 |
| P12163_1_S1,19379 | K.TPASFEPSIDYVVTK.I | 2262.248 | 0.00973  | 3 | 1 | 42   | 0 |
| P12163_1_F8,20740 | K.VDEIHELSEFIDK.W   | 2053.143 | 0.00668  | 3 | 1 | 28.3 | 0 |
| P12163_1_F8,20779 | K.VDEIHELSEFIDK.W   | 2053.143 | 0.00008  | 2 | 1 | 47.5 | 0 |
| P12163_2_F6,20329 | K.VDEIHELSEFIDK.W   | 2053.143 | 0.00707  | 3 | 1 | 29.9 | 0 |
| P12163_1_F2,18983 | K.VLILGGGPNR.I      | 1299.805 | 0.00217  | 2 | 1 | 28.5 | 0 |
| P12163_1_F5,17019 | K.YAALVMSGK.S       | 1547.908 | 0.00738  | 3 | 1 | 22.4 | 0 |
| P12163_1_F5,19055 | K.YAALVMSGK.S       | 1547.908 | 0.00579  | 3 | 1 | 33.7 | 0 |
| P12163_1_F5,19126 | K.YAALVMSGK.S       | 1547.908 | 0.00189  | 2 | 1 | 24.7 | 0 |
| P12163_2_F2,19695 | K.YAALVMSGK.S       | 1547.908 | 0.00405  | 3 | 1 | 33.2 | 0 |
| P12163_2_F2,19723 | K.YAALVMSGK.S       | 1547.908 | -0.00071 | 2 | 1 | 37.7 | 0 |
| P12163_1_F4,19249 | K.YGVELIGAK.L       | 1557.946 | 0.00643  | 2 | 1 | 45.1 | 0 |
| P12163_1_F9,17737 | K.YGVELIGAK.L       | 1557.946 | 0.00707  | 2 | 1 | 38   | 0 |
| P12163_2_F1,18466 | K.YGVELIGAK.L       | 1557.946 | 0.00591  | 2 | 1 | 41.6 | 0 |
| P12163_2_F1,18467 | K.YGVELIGAK.L       | 1557.946 | 0.00013  | 3 | 1 | 38.9 | 0 |
| P12163_1_S1,12796 | R.LPSASGDGLVR.I     | 1375.785 | 0.00273  | 3 | 1 | 53.1 | 0 |
| P12163_1_F4,22105 | R.LSLGVIPSYK.R      | 1685.046 | -0.0017  | 2 | 1 | 28.2 | 0 |
| P12163_1_F4,22107 | R.LSLGVIPSYK.R      | 1685.046 | 0.00791  | 3 | 1 | 33.2 | 0 |
| P12163_2_F1,21677 | R.LSLGVIPSYK.R      | 1685.046 | 0.00368  | 2 | 1 | 27.3 | 0 |
| P12163_2_F1,21771 | R.LSLGVIPSYK.R      | 1685.046 | 0.00299  | 3 | 1 | 29.7 | 0 |
| P12163_1_F5,21738 | R.MQAIYAAMK.K       | 1634.922 | 0.00534  | 3 | 1 | 37.7 | 0 |
| P12163_1_F5,21754 | R.MQAIYAAMK.K       | 1634.922 | 0.00468  | 2 | 1 | 57.1 | 0 |
| P12163_2_F2,22013 | R.MQAIYAAMK.K       | 1634.922 | 0.00219  | 3 | 1 | 36.6 | 0 |
| P12163_2_F1,19381 | R.SLECGFSGWGCSNVK.  | 2296.131 | 0.01875  | 3 | 1 | 52.3 | 0 |
| P12163_1_F5,14431 | R.TFQESFQK.A        | 1622.9   | 0.0099   | 2 | 1 | 26.9 | 0 |
| P12163_1_F4,10454 | K.APEAPPK.E         | 1317.799 | 0.01129  | 2 | 1 | 29.8 | 0 |
| P12163_2_F1,9629  | K.APEAPPK.E         | 1317.799 | -0.00079 | 2 | 1 | 30.6 | 0 |
| P12163_1_F4,13072 | K.EAAAEEQVVK.A      | 1681.958 | 0.01323  | 3 | 1 | 30.6 | 0 |
| P12163_1_F4,13093 | K.EAAAEEQVVK.A      | 1681.958 | 0.0116   | 2 | 1 | 53.7 | 0 |
| P12163_2_F1,12110 | K.EAAAEEQVVK.A      | 1681.958 | -0.0005  | 2 | 1 | 50.9 | 0 |
| P12163_1_F2,9584  | K.EAEVAAPSDEQTK.D   | 1983.049 | 0.01188  | 3 | 1 | 37.1 | 0 |
| P12163_1_F2,10769 | K.EAEVAAPSDEQTK.D   | 1983.049 | -0.00606 | 2 | 1 | 42.2 | 0 |
| P12163_1_F4,11631 | K.EAEVPPEK.V        | 1506.862 | 0.00953  | 2 | 1 | 26.1 | 0 |
| P12163_1_F4,11914 | K.EAEVPPEK.V        | 1506.862 | 0.01013  | 2 | 1 | 24.7 | 0 |
| P12163_1_F2,16161 | K.EESNVVGGELPDPQK.K | 2149.16  | 0.00341  | 2 | 1 | 45   | 0 |
| P12163_1_F7,18065 | K.EGHPVCYNVFGFQNI   | 2533.275 | 0.0074   | 3 | 1 | 37.1 | 0 |
| P12163_1_F8,18886 | K.EGHPVCYNVFGFQNI   | 2533.275 | 0.0113   | 3 | 1 | 43.9 | 0 |
| P12163_1_F8,18891 | K.EGHPVCYNVFGFQNI   | 2533.275 | 0.00494  | 4 | 1 | 30.3 | 0 |
| P12163_2_F6,18419 | K.EGHPVCYNVFGFQNI   | 2533.275 | 0.0001   | 4 | 1 | 29.5 | 0 |
| P12163_2_F6,18452 | K.EGHPVCYNVFGFQNI   | 2533.275 | 0.00233  | 3 | 1 | 45.5 | 0 |
| P12163_1_F6,13638 | K.ELYHNNFSDDEK.R    | 2119.055 | 0.00949  | 3 | 1 | 22.3 | 0 |
| P12163_1_F8,12428 | K.EQAPAPVPEPEAPEKR  | 2353.297 | 0.0024   | 3 | 1 | 35.9 | 0 |
| P12163_2_S5,11371 | K.EQAPAPVPEPEAPEKR  | 2353.297 | 0.00087  | 3 | 1 | 29.9 | 0 |
| P12163_1_F8,13701 | K.HEFTAPPPPPPAK.E   | 2162.222 | 0.00929  | 3 | 1 | 28.5 | 0 |
| P12163_2_F6,13248 | K.HEFTAPPPPPPAK.E   | 2162.222 | 0.00071  | 3 | 1 | 34.7 | 0 |
| P12163_1_F9,11728 | K.KPAVEVESK.A       | 1899.168 | 0.01522  | 3 | 1 | 28.7 | 0 |
| P12163_1_F4,20085 | K.QLIQDALNK.H       | 1651     | 0.00544  | 3 | 1 | 34.3 | 0 |
| P12163_1_F4,20107 | K.QLIQDALNK.H       | 1651     | 0.00775  | 2 | 1 | 35   | 0 |

|                   |                     |          |          |   |   |      |   |
|-------------------|---------------------|----------|----------|---|---|------|---|
| P12163_1_F5,18852 | K.QLIQDALNK.H       | 1651     | 0.00393  | 2 | 1 | 38.5 | 0 |
| P12163_2_F1,19512 | K.QLIQDALNK.H       | 1651     | 0.00262  | 3 | 1 | 44.6 | 0 |
| P12163_2_F1,19517 | K.QLIQDALNK.H       | 1651     | 0.00895  | 2 | 1 | 46.1 | 0 |
| P12163_1_S1,17699 | K.VAPTDEPVICDTFK.I  | 2200.178 | 0.0113   | 3 | 1 | 36.2 | 0 |
| P12163_1_S1,17718 | K.VAPTDEPVICDTFK.I  | 2200.178 | 0.00909  | 2 | 1 | 68.2 | 0 |
| P12163_1_F2,11118 | K.VATVDEDGAK.T      | 1612.9   | 0.00782  | 2 | 1 | 45.6 | 0 |
| P12163_1_F3,12071 | K.VATVDEDGAK.T      | 1612.9   | 0.01044  | 2 | 1 | 48.3 | 0 |
| P12163_1_F4,12580 | K.VATVDEDGAK.T      | 1612.9   | 0.0123   | 3 | 1 | 44.8 | 0 |
| P12163_1_F9,16423 | K.VVFMHGVDK.E       | 1639.945 | 0.00152  | 2 | 1 | 33.3 | 0 |
| P12163_2_F7,14769 | K.VVFMHGVDK.E       | 1639.945 | 0.00292  | 3 | 1 | 23.1 | 0 |
| P12163_1_F3,17205 | K.VVLTIDNQSSK.K     | 1812.069 | 0.0105   | 2 | 1 | 40.5 | 0 |
| P12163_1_F3,17237 | K.VVLTIDNQSSK.K     | 1812.069 | 0.0094   | 3 | 1 | 42.7 | 0 |
| P12163_1_F8,18737 | K.YIAPEQVPVQYGGLSR  | 2081.133 | 0.00359  | 2 | 1 | 25.4 | 0 |
| P12163_2_F6,18348 | K.YIAPEQVPVQYGGLSR  | 2081.133 | 0.00007  | 2 | 1 | 45.2 | 0 |
| P12163_2_S5,17025 | K.YIAPEQVPVQYGGLSR  | 2081.133 | 0.00189  | 2 | 1 | 28.7 | 0 |
| P12163_1_S1,16267 | K.YTVEIPVTER.S      | 1510.842 | 0.00522  | 3 | 1 | 34.9 | 0 |
| P12163_1_F7,15942 | R.EGEQEFTTTDPVTEVV  | 3303.809 | 0.01143  | 4 | 1 | 21.9 | 0 |
| P12163_1_F6,21697 | R.IATNQAVHLLQDNYPE  | 2603.388 | 0.00619  | 3 | 1 | 26.4 | 0 |
| P12163_2_F8_12070 | R.IATNQAVHLLQDNYPE  | 2603.388 | 0.00178  | 3 | 1 | 29.1 | 0 |
| P12163_1_F8,14659 | R.KVAPTDEPVICDTFK.I | 2632.478 | 0.01113  | 4 | 1 | 30   | 0 |
| P12163_1_F2,19343 | R.M*ISPFLTQR.T      | 1412.787 | 0.00649  | 3 | 1 | 23.1 | 0 |
| P12163_1_F4,17229 | R.SDTILLK.F         | 1397.882 | 0.00693  | 2 | 1 | 27   | 0 |
| P12163_2_F1,16395 | R.SDTILLK.F         | 1397.882 | 0.00169  | 2 | 1 | 26.4 | 0 |
| P12163_1_F3,20470 | R.SILVWELR.V        | 1319.799 | 0.00228  | 3 | 1 | 34.1 | 0 |
| P12163_1_F3,23982 | R.SILVWELR.V        | 1319.799 | 0.00344  | 2 | 1 | 32.3 | 0 |
| P12163_1_F7,21667 | K.AQLPGTTQDHLQIFNII | 2774.566 | 0.00156  | 3 | 1 | 26.7 | 0 |
| P12163_1_S1,18709 | K.EAAELAAESPQGLLR.  | 1859.018 | 0.00511  | 2 | 1 | 36.5 | 0 |
| P12163_1_S1,18717 | K.EAAELAAESPQGLLR.  | 1859.018 | 0.004    | 3 | 1 | 54.2 | 0 |
| P12163_1_F9,10937 | K.HELLEM*R.R        | 1247.672 | 0.00073  | 3 | 1 | 29.5 | 0 |
| P12163_1_F9,14123 | K.HELLEM*R.R        | 1247.672 | 0.0055   | 3 | 1 | 30.1 | 0 |
| P12163_1_F4,19658 | K.LAVTLVK.L         | 1351.913 | 0.0108   | 2 | 1 | 24.8 | 0 |
| P12163_2_F1,19095 | K.LAVTLVK.L         | 1351.913 | 0.00564  | 2 | 1 | 24.4 | 0 |
| P12163_2_F10,1632 | K.LHVIELGAQPGKPSFTI | 2734.638 | 0.00689  | 4 | 1 | 30.9 | 0 |
| P12163_2_F2,17744 | K.NFLMEAK.L         | 1460.839 | 0.01239  | 2 | 1 | 24.3 | 0 |
| P12163_1_F3,13111 | K.QFQGAVDAAR.K      | 1366.738 | 0.00315  | 2 | 1 | 31.9 | 0 |
| P12163_2_F2,13132 | K.QSIALSK.K         | 1354.851 | 0.00563  | 2 | 1 | 26.7 | 0 |
| P12163_1_F8,15300 | K.RDPTLAVVAYR.R     | 1564.911 | -0.00058 | 3 | 1 | 57.4 | 0 |
| P12163_2_F6,14717 | K.RDPTLAVVAYR.R     | 1564.911 | 0.00053  | 3 | 1 | 57.1 | 0 |
| P12163_2_F6,14749 | K.RDPTLAVVAYR.R     | 1564.911 | 0.00125  | 2 | 1 | 35.9 | 0 |
| P12163_2_F1,12462 | K.SFNAGQVTSK.L      | 1646.932 | 0.00035  | 2 | 1 | 34.7 | 0 |
| P12163_1_F4,13300 | K.SPEQVSAAVK.A      | 1623.953 | 0.00069  | 2 | 1 | 33.3 | 0 |
| P12163_2_F1,12392 | K.SPEQVSAAVK.A      | 1623.953 | 0.00327  | 2 | 1 | 35.6 | 0 |
| P12163_2_F1,12397 | K.SPEQVSAAVK.A      | 1623.953 | 0.00857  | 3 | 1 | 31.4 | 0 |
| P12163_1_F5,13116 | K.YIEAAAK.T         | 1373.825 | 0.00948  | 3 | 1 | 26.7 | 0 |
| P12163_2_F1,13471 | K.YIEAAAK.T         | 1373.825 | 0.00441  | 2 | 1 | 25.8 | 0 |
| P12163_1_F7,15803 | R.AAEDADVYHDLVR.Y   | 1777.902 | 0.00174  | 3 | 1 | 49.4 | 0 |
| P12163_1_F7,15814 | R.AAEDADVYHDLVR.Y   | 1777.902 | 0.00737  | 2 | 1 | 35.2 | 0 |
| P12163_1_F8,16527 | R.AAEDADVYHDLVR.Y   | 1777.902 | 0.00288  | 3 | 1 | 42.4 | 0 |
| P12163_2_F8_12070 | R.AAEDADVYHDLVR.Y   | 1777.902 | 0.00426  | 3 | 1 | 53.1 | 0 |
| P12163_2_S5,15818 | R.AAEDADVYHDLVR.Y   | 1777.902 | 0.00885  | 3 | 1 | 51.1 | 0 |
| P12163_2_F6,17818 | R.ALQHYTELPDIK.R    | 2036.164 | 0.00242  | 3 | 1 | 38.7 | 0 |

|                   |                      |          |          |   |   |      |   |
|-------------------|----------------------|----------|----------|---|---|------|---|
| P12163_1_F5,13367 | R.ESNFYDPEK.T        | 1736.895 | 0.01261  | 2 | 1 | 24.3 | 0 |
| P12163_2_F1,13571 | R.ESNFYDPEK.T        | 1736.895 | 0.00405  | 2 | 1 | 26.2 | 0 |
| P12163_1_F4,23658 | R.FQELFAQTK.Y        | 1719.989 | 0.00447  | 2 | 1 | 38.3 | 0 |
| P12163_1_F5,22216 | R.FQELFAQTK.Y        | 1719.989 | 0.00401  | 3 | 1 | 27.2 | 0 |
| P12163_2_F1,23038 | R.FQELFAQTK.Y        | 1719.989 | 0.00469  | 2 | 1 | 64.3 | 0 |
| P12163_1_S1,15492 | R.GNLPGAENLVVQR.F    | 1670.949 | -0.00053 | 2 | 1 | 35.1 | 0 |
| P12163_1_S1,15525 | R.GNLPGAENLVVQR.F    | 1670.949 | 0.00007  | 3 | 1 | 71   | 0 |
| P12163_2_F2,15448 | R.IAQLCEK.A          | 1469.861 | 0.0048   | 2 | 1 | 26.5 | 0 |
| P12163_1_F5,11551 | R.LVVNQNK.K          | 1422.889 | 0.00995  | 2 | 1 | 28.5 | 0 |
| P12163_1_S1,21584 | R.QLIDQVVSTALPESK.S  | 2236.301 | 0.01458  | 3 | 1 | 28.5 | 0 |
| P12163_1_F8,18479 | R.SQALEAHAASFAQFK.   | 2214.213 | 0.00842  | 4 | 1 | 29.6 | 0 |
| P12163_2_F1,16982 | R.TANLTNNQIINYK.C    | 2115.202 | 0.00522  | 2 | 1 | 47.8 | 0 |
| P12163_2_F2,18816 | R.VAAYIYK.K          | 1435.877 | 0.00386  | 3 | 1 | 26.7 | 0 |
| P12163_1_F8,14270 | K.ALPTYTPESP AEATR.N | 1908.002 | 0.00239  | 3 | 1 | 44.5 | 0 |
| P12163_1_F8,15721 | K.ALPTYTPESP AEATR.N | 1908.002 | 0.00293  | 2 | 1 | 57   | 0 |
| P12163_1_F8,15759 | K.ALPTYTPESP AEATR.N | 1908.002 | 0.00257  | 3 | 1 | 35.9 | 0 |
| P12163_2_F6,15236 | K.ALPTYTPESP AEATR.N | 1908.002 | 0.00211  | 2 | 1 | 57.2 | 0 |
| P12163_2_F6,15310 | K.ALPTYTPESP AEATR.N | 1908.002 | 0.00281  | 3 | 1 | 26.6 | 0 |
| P12163_2_F8_12070 | K.ANSGHPGLPMGCAPM    | 3014.441 | 0.00593  | 4 | 1 | 32.8 | 0 |
| P12163_1_F3,12133 | K.ANSYSVHGSALGAK.E   | 1970.092 | 0.00674  | 3 | 1 | 34.5 | 0 |
| P12163_1_F4,12621 | K.ANSYSVHGSALGAK.E   | 1970.092 | 0.00413  | 3 | 1 | 43.9 | 0 |
| P12163_1_F4,12631 | K.ANSYSVHGSALGAK.E   | 1970.092 | 0.00104  | 2 | 1 | 41   | 0 |
| P12163_2_F2,11973 | K.ANSYSVHGSALGAK.E   | 1970.092 | 0.00155  | 3 | 1 | 39.8 | 0 |
| P12163_2_F2,11981 | K.ANSYSVHGSALGAK.E   | 1970.092 | -0.00035 | 4 | 1 | 30.7 | 0 |
| P12163_2_F2,11988 | K.ANSYSVHGSALGAK.E   | 1970.092 | 0.0026   | 2 | 1 | 68.9 | 0 |
| P12163_2_S3,10902 | K.ANSYSVHGSALGAK.E   | 1970.092 | 0.00269  | 3 | 1 | 41.8 | 0 |
| P12163_2_S3,10910 | K.ANSYSVHGSALGAK.E   | 1970.092 | 0.00085  | 4 | 1 | 23.8 | 0 |
| P12163_2_S5,11571 | K.ANSYSVHGSALGAK.E   | 1970.092 | 0.00449  | 3 | 1 | 28.4 | 0 |
| P12163_2_F6,13842 | K.AVTDKPTLIR.V       | 1722.073 | 0.00644  | 2 | 1 | 28.1 | 0 |
| P12163_2_F6,23514 | K.AVTDKPTLIR.V       | 1722.073 | 0.00298  | 2 | 1 | 29.3 | 0 |
| P12163_1_F3,23460 | K.EFGITAEAVITAAK.E   | 2029.179 | 0.00798  | 3 | 1 | 31.1 | 0 |
| P12163_1_F3,16436 | K.ESVLPAAVSAR.V      | 1403.816 | 0.00111  | 2 | 1 | 25.1 | 0 |
| P12163_1_S1,13037 | K.ESVLPAAVSAR.V      | 1403.816 | 0.00162  | 3 | 1 | 40.1 | 0 |
| P12163_1_S1,14815 | K.ESVLPAAVSAR.V      | 1403.816 | 0.00469  | 2 | 1 | 39.5 | 0 |
| P12163_1_S1,14825 | K.ESVLPAAVSAR.V      | 1403.816 | 0.00249  | 3 | 1 | 45   | 0 |
| P12163_1_S1,15040 | K.ESVLPAAVSAR.V      | 1403.816 | 0.00173  | 2 | 1 | 40.4 | 0 |
| P12163_1_S1,15048 | K.ESVLPAAVSAR.V      | 1403.816 | 0.00663  | 3 | 1 | 76   | 0 |
| P12163_1_S1,15444 | K.ESVLPAAVSAR.V      | 1403.816 | -0.01109 | 2 | 1 | 38.5 | 0 |
| P12163_1_S1,15530 | K.ESVLPAAVSAR.V      | 1403.816 | 0.00249  | 3 | 1 | 64   | 0 |
| P12163_1_S1,15817 | K.ESVLPAAVSAR.V      | 1403.816 | 0.00341  | 2 | 1 | 36.9 | 0 |
| P12163_1_S10,130  | K.ESVLPAAVSAR.V      | 1403.816 | 0.00144  | 3 | 1 | 25   | 0 |
| P12163_1_S10,250  | K.ESVLPAAVSAR.V      | 1403.816 | 0.00357  | 2 | 1 | 46.6 | 0 |
| P12163_1_S10,336  | K.ESVLPAAVSAR.V      | 1403.816 | 0.00237  | 3 | 1 | 31   | 0 |
| P12163_2_S3,12983 | K.ESVLPAAVSAR.V      | 1403.816 | 0.00291  | 2 | 1 | 26.4 | 0 |
| P12163_1_F5,14167 | K.FAEYEK.K           | 1394.778 | 0.00568  | 3 | 1 | 22.1 | 0 |
| P12163_1_S10,1515 | K.FAEYEK.K           | 1394.778 | 0.00414  | 2 | 1 | 25.3 | 0 |
| P12163_2_F2,14842 | K.FAEYEK.K           | 1394.778 | 0.00628  | 3 | 1 | 23.6 | 0 |
| P12163_2_S5,13909 | K.FAEYEK.K           | 1394.778 | 0.00055  | 3 | 1 | 22.6 | 0 |
| P12163_1_F7,15353 | K.LPHLAGTSIDGVEK.G   | 2045.185 | 0.00477  | 3 | 1 | 26.4 | 0 |
| P12163_1_F7,16281 | K.LPHLAGTSIDGVEK.G   | 2045.185 | 0.00603  | 3 | 1 | 47.9 | 0 |
| P12163_1_F7,16688 | K.LPHLAGTSIDGVEK.G   | 2045.185 | -0.00486 | 3 | 1 | 46.8 | 0 |

|                   |                    |          |         |   |   |      |   |
|-------------------|--------------------|----------|---------|---|---|------|---|
| P12163_1_F7,16727 | K.LPHLAGTSIDGVEK.G | 2045.185 | 0.00614 | 2 | 1 | 34.4 | 0 |
| P12163_1_F7,16779 | K.LPHLAGTSIDGVEK.G | 2045.185 | 0.00511 | 4 | 1 | 34.2 | 0 |
| P12163_1_F8,121   | K.LPHLAGTSIDGVEK.G | 2045.185 | 0.00057 | 3 | 1 | 38.8 | 0 |
| P12163_1_F8,17020 | K.LPHLAGTSIDGVEK.G | 2045.185 | 0.00171 | 3 | 1 | 31.9 | 0 |
| P12163_1_F8,17530 | K.LPHLAGTSIDGVEK.G | 2045.185 | 0.00698 | 2 | 1 | 40.4 | 0 |
| P12163_1_F8,17546 | K.LPHLAGTSIDGVEK.G | 2045.185 | 0.00804 | 3 | 1 | 67.2 | 0 |
| P12163_2_F10,1556 | K.LPHLAGTSIDGVEK.G | 2045.185 | 0.00753 | 3 | 1 | 69.8 | 0 |
| P12163_2_F6,17044 | K.LPHLAGTSIDGVEK.G | 2045.185 | 0.00504 | 3 | 1 | 66.6 | 0 |
| P12163_2_F6,17091 | K.LPHLAGTSIDGVEK.G | 2045.185 | 0.00286 | 2 | 1 | 72.6 | 0 |
| P12163_2_F8_12070 | K.LPHLAGTSIDGVEK.G | 2045.185 | 0.0045  | 3 | 1 | 63.6 | 0 |
| P12163_2_F8_12070 | K.LPHLAGTSIDGVEK.G | 2045.185 | 0.00498 | 3 | 1 | 69.2 | 0 |
| P12163_2_F1,18714 | K.MFGDFQK.D        | 1480.808 | 0.00606 | 2 | 1 | 25.1 | 0 |
| P12163_2_F1,18747 | K.MFGDFQK.D        | 1480.808 | 0.00488 | 3 | 1 | 26   | 0 |
| P12163_2_F2,19131 | K.MFGDFQK.D        | 1480.808 | 0.00804 | 2 | 1 | 25.4 | 0 |
| P12163_1_F3,8545  | K.NGNTGYDDIR.A     | 1428.702 | 0.00288 | 3 | 1 | 29   | 0 |
| P12163_1_F3,10082 | K.NGNTGYDDIR.A     | 1428.702 | 0.00959 | 2 | 1 | 28.3 | 0 |
| P12163_1_F3,10303 | K.NGNTGYDDIR.A     | 1428.702 | 0.00483 | 2 | 1 | 35.9 | 0 |
| P12163_1_S10,1105 | K.NGNTGYDDIR.A     | 1428.702 | 0.0041  | 2 | 1 | 34.7 | 0 |
| P12163_2_F1,9561  | K.NGNTGYDDIR.A     | 1428.702 | 0.00973 | 2 | 1 | 35.9 | 0 |
| P12163_1_F7,20926 | K.NLGWPYEPFHVPEDVI | 2535.349 | 0.00761 | 3 | 1 | 37.8 | 0 |
| P12163_1_F8,21895 | K.NLGWPYEPFHVPEDVI | 2535.349 | 0.00539 | 3 | 1 | 46.9 | 0 |
| P12163_1_F9,21185 | K.NLGWPYEPFHVPEDVI | 2535.349 | 0.00686 | 3 | 1 | 27.2 | 0 |
| P12163_1_F6,15154 | K.RPSILALSR.Q      | 1316.832 | 0.00007 | 3 | 1 | 24.6 | 0 |
| P12163_1_F9,13158 | K.RPSILALSR.Q      | 1316.832 | 0.00295 | 3 | 1 | 24.3 | 0 |
| P12163_1_F9,15197 | K.RPSILALSR.Q      | 1316.832 | 0.00217 | 3 | 1 | 55   | 0 |
| P12163_1_F9,15739 | K.RPSILALSR.Q      | 1316.832 | 0.00229 | 3 | 1 | 26.5 | 0 |
| P12163_1_F9,16004 | K.RPSILALSR.Q      | 1316.832 | 0.00568 | 3 | 1 | 28.5 | 0 |
| P12163_1_F9,16232 | K.RPSILALSR.Q      | 1316.832 | 0.00268 | 3 | 1 | 54.4 | 0 |
| P12163_1_F9,16847 | K.RPSILALSR.Q      | 1316.832 | 0.00367 | 3 | 1 | 54.3 | 0 |
| P12163_1_F9,17239 | K.RPSILALSR.Q      | 1316.832 | 0.00301 | 3 | 1 | 51.5 | 0 |
| P12163_1_F9,17870 | K.RPSILALSR.Q      | 1316.832 | 0.00295 | 3 | 1 | 35.5 | 0 |
| P12163_1_F9,18394 | K.RPSILALSR.Q      | 1316.832 | 0.00208 | 3 | 1 | 46   | 0 |
| P12163_1_F9,20036 | K.RPSILALSR.Q      | 1316.832 | 0.00253 | 3 | 1 | 59.9 | 0 |
| P12163_1_S10,1511 | K.RPSILALSR.Q      | 1316.832 | 0.00142 | 3 | 1 | 38.1 | 0 |
| P12163_1_S10,1531 | K.RPSILALSR.Q      | 1316.832 | 0.00289 | 3 | 1 | 45.7 | 0 |
| P12163_2_F10,1403 | K.RPSILALSR.Q      | 1316.832 | 0.00319 | 3 | 1 | 25.1 | 0 |
| P12163_2_F6,14341 | K.RPSILALSR.Q      | 1316.832 | 0.0019  | 3 | 1 | 26.8 | 0 |
| P12163_2_F8_12070 | K.RPSILALSR.Q      | 1316.832 | 0.00256 | 3 | 1 | 28.7 | 0 |
| P12163_2_F8_12070 | K.RPSILALSR.Q      | 1316.832 | 0.00217 | 3 | 1 | 54.9 | 0 |
| P12163_1_F4,15535 | K.SISSGQLPAGWEK.A  | 1968.101 | 0.00767 | 2 | 1 | 40.4 | 0 |
| P12163_1_F4,15924 | K.SISSGQLPAGWEK.A  | 1968.101 | 0.01277 | 3 | 1 | 23.5 | 0 |
| P12163_1_F4,16162 | K.SISSGQLPAGWEK.A  | 1968.101 | 0.01028 | 3 | 1 | 33.6 | 0 |
| P12163_1_F4,16211 | K.SISSGQLPAGWEK.A  | 1968.101 | 0.00245 | 2 | 1 | 33.3 | 0 |
| P12163_1_F4,18100 | K.SISSGQLPAGWEK.A  | 1968.101 | 0.00803 | 3 | 1 | 44.5 | 0 |
| P12163_1_F4,18108 | K.SISSGQLPAGWEK.A  | 1968.101 | 0.00783 | 2 | 1 | 71.4 | 0 |
| P12163_1_F4,18621 | K.SISSGQLPAGWEK.A  | 1968.101 | 0.0086  | 3 | 1 | 26.8 | 0 |
| P12163_1_F5,16897 | K.SISSGQLPAGWEK.A  | 1968.101 | 0.00375 | 2 | 1 | 87.3 | 0 |
| P12163_1_F6,17328 | K.SISSGQLPAGWEK.A  | 1968.101 | 0.0137  | 3 | 1 | 30.3 | 0 |
| P12163_1_F9,17019 | K.SISSGQLPAGWEK.A  | 1968.101 | 0.00615 | 2 | 1 | 80.6 | 0 |
| P12163_2_F1,14478 | K.SISSGQLPAGWEK.A  | 1968.101 | 0.00134 | 3 | 1 | 28.5 | 0 |
| P12163_2_F1,14504 | K.SISSGQLPAGWEK.A  | 1968.101 | 0.00909 | 2 | 1 | 42.7 | 0 |

|                   |                    |          |          |   |   |      |   |
|-------------------|--------------------|----------|----------|---|---|------|---|
| P12163_2_F1,17399 | K.SISSGQLPAGWEK.A  | 1968.101 | 0.00281  | 3 | 1 | 46   | 0 |
| P12163_2_F1,17401 | K.SISSGQLPAGWEK.A  | 1968.101 | 0.00261  | 2 | 1 | 76.2 | 0 |
| P12163_2_F1,18264 | K.SISSGQLPAGWEK.A  | 1968.101 | 0.00601  | 2 | 1 | 65   | 0 |
| P12163_2_F4,15742 | K.SISSGQLPAGWEK.A  | 1968.101 | 0.00257  | 3 | 1 | 58.1 | 0 |
| P12163_2_F9,15944 | K.SISSGQLPAGWEK.A  | 1968.101 | 0.01937  | 3 | 1 | 49.3 | 0 |
| P12163_1_F4,16718 | K.YPEEAAEFK.S      | 1691.91  | 0.00869  | 3 | 1 | 24.9 | 0 |
| P12163_1_F7,14716 | K.YPEEAAEFK.S      | 1691.91  | 0.00221  | 3 | 1 | 25.9 | 0 |
| P12163_1_F9,15622 | K.YPEEAAEFK.S      | 1691.91  | 0.00485  | 3 | 1 | 26.8 | 0 |
| P12163_2_F1,15741 | K.YPEEAAEFK.S      | 1691.91  | 0.00306  | 2 | 1 | 24   | 0 |
| P12163_2_F1,15764 | K.YPEEAAEFK.S      | 1691.91  | 0.00356  | 3 | 1 | 30   | 0 |
| P12163_2_F9,14986 | K.YPEEAAEFK.S      | 1691.91  | 0.01799  | 3 | 1 | 28.8 | 0 |
| P12163_1_F7,20237 | R.AM*PNILM*LRPADGN | 2873.511 | 0.0128   | 4 | 1 | 33.6 | 0 |
| P12163_1_F6,21050 | R.AM*PNILMLRPADGNE | 2857.516 | 0.00404  | 4 | 1 | 35.6 | 0 |
| P12163_1_F6,20118 | R.AMPNILM*LRPADGNE | 2857.516 | 0.00152  | 4 | 1 | 45.1 | 0 |
| P12163_1_F7,19296 | R.AMPNILM*LRPADGNE | 2857.516 | 0.006    | 4 | 1 | 31   | 0 |
| P12163_1_F6,21049 | R.AMPNILMLRPADGNE  | 2841.521 | 0.00672  | 4 | 1 | 39.6 | 0 |
| P12163_1_F7,20254 | R.AMPNILMLRPADGNE  | 2841.521 | 0.00828  | 4 | 1 | 25.6 | 0 |
| P12163_1_F7,20261 | R.AMPNILMLRPADGNE  | 2841.521 | 0.00394  | 3 | 1 | 24.1 | 0 |
| P12163_2_S5,19513 | R.AMPNILMLRPADGNE  | 2841.521 | 0.00284  | 4 | 1 | 34.8 | 0 |
| P12163_1_F4,13075 | R.FGASAPAGK.I      | 1413.831 | 0.01093  | 3 | 1 | 23.7 | 0 |
| P12163_1_F4,13133 | R.FGASAPAGK.I      | 1413.831 | 0.00641  | 2 | 1 | 44.2 | 0 |
| P12163_1_F5,11702 | R.FGASAPAGK.I      | 1413.831 | 0.00646  | 3 | 1 | 39.5 | 0 |
| P12163_1_F5,11758 | R.FGASAPAGK.I      | 1413.831 | 0.00915  | 2 | 1 | 40.1 | 0 |
| P12163_1_F6,12617 | R.FGASAPAGK.I      | 1413.831 | 0.00609  | 2 | 1 | 42.1 | 0 |
| P12163_1_F7,11267 | R.FGASAPAGK.I      | 1413.831 | 0.00157  | 3 | 1 | 25.4 | 0 |
| P12163_1_F7,11309 | R.FGASAPAGK.I      | 1413.831 | 0.00277  | 2 | 1 | 26.9 | 0 |
| P12163_1_F7,11973 | R.FGASAPAGK.I      | 1413.831 | 0.00919  | 3 | 1 | 23.9 | 0 |
| P12163_1_F8,11780 | R.FGASAPAGK.I      | 1413.831 | -0.00047 | 3 | 1 | 26.5 | 0 |
| P12163_2_F1,12065 | R.FGASAPAGK.I      | 1413.831 | 0.00481  | 3 | 1 | 25.2 | 0 |
| P12163_2_F1,12185 | R.FGASAPAGK.I      | 1413.831 | 0.00649  | 2 | 1 | 44.1 | 0 |
| P12163_2_F1,12519 | R.FGASAPAGK.I      | 1413.831 | 0.00725  | 2 | 1 | 29.4 | 0 |
| P12163_2_F1,12629 | R.FGASAPAGK.I      | 1413.831 | 0.00439  | 3 | 1 | 26.2 | 0 |
| P12163_2_F1,12951 | R.FGASAPAGK.I      | 1413.831 | -0.01265 | 3 | 1 | 23.7 | 0 |
| P12163_2_F2,12496 | R.FGASAPAGK.I      | 1413.831 | 0.00205  | 2 | 1 | 24.6 | 0 |
| P12163_2_S5,10934 | R.FGASAPAGK.I      | 1413.831 | 0.00016  | 3 | 1 | 22   | 0 |
| P12163_2_S5,11184 | R.FGASAPAGK.I      | 1413.831 | 0.00148  | 3 | 1 | 27.9 | 0 |
| P12163_1_F3,19646 | R.FLAVDAVEK.A      | 1599.957 | 0.00706  | 2 | 1 | 52   | 0 |
| P12163_1_F3,19680 | R.FLAVDAVEK.A      | 1599.957 | 0.00408  | 3 | 1 | 46.4 | 0 |
| P12163_1_F3,20687 | R.FLAVDAVEK.A      | 1599.957 | 0.00642  | 3 | 1 | 41.8 | 0 |
| P12163_1_F3,20698 | R.FLAVDAVEK.A      | 1599.957 | 0.00532  | 2 | 1 | 51.6 | 0 |
| P12163_1_F4,21122 | R.FLAVDAVEK.A      | 1599.957 | 0.0119   | 2 | 1 | 47.8 | 0 |
| P12163_1_F4,21123 | R.FLAVDAVEK.A      | 1599.957 | 0.00612  | 3 | 1 | 39.2 | 0 |
| P12163_1_F4,21348 | R.FLAVDAVEK.A      | 1599.957 | 0.0071   | 2 | 1 | 51.8 | 0 |
| P12163_1_F4,21364 | R.FLAVDAVEK.A      | 1599.957 | 0.0003   | 3 | 1 | 50.8 | 0 |
| P12163_1_F4,23036 | R.FLAVDAVEK.A      | 1599.957 | 0.00752  | 2 | 1 | 51.4 | 0 |
| P12163_1_F4,23294 | R.FLAVDAVEK.A      | 1599.957 | 0.00597  | 3 | 1 | 41.9 | 0 |
| P12163_1_F4,23302 | R.FLAVDAVEK.A      | 1599.957 | 0.00584  | 2 | 1 | 36.9 | 0 |
| P12163_1_F5,20026 | R.FLAVDAVEK.A      | 1599.957 | 0.00808  | 2 | 1 | 53.5 | 0 |
| P12163_1_F5,20050 | R.FLAVDAVEK.A      | 1599.957 | 0.00348  | 3 | 1 | 41.8 | 0 |
| P12163_1_F6,19638 | R.FLAVDAVEK.A      | 1599.957 | -0.0001  | 2 | 1 | 40.8 | 0 |
| P12163_1_F6,19663 | R.FLAVDAVEK.A      | 1599.957 | 0.00165  | 3 | 1 | 28.3 | 0 |



|                                      |          |          |   |   |      |   |
|--------------------------------------|----------|----------|---|---|------|---|
| P12163_1_F6,20081 R.FLAVDAVEK.A      | 1599.957 | 0.0073   | 2 | 1 | 41.8 | 0 |
| P12163_1_F6,20087 R.FLAVDAVEK.A      | 1599.957 | 0.00549  | 3 | 1 | 40.4 | 0 |
| P12163_1_F7,18637 R.FLAVDAVEK.A      | 1599.957 | 0.00126  | 3 | 1 | 44.4 | 0 |
| P12163_1_F7,18825 R.FLAVDAVEK.A      | 1599.957 | 0.00376  | 2 | 1 | 51.7 | 0 |
| P12163_1_F7,19268 R.FLAVDAVEK.A      | 1599.957 | 0.00669  | 3 | 1 | 42   | 0 |
| P12163_1_F9,19664 R.FLAVDAVEK.A      | 1599.957 | 0.00418  | 2 | 1 | 32.6 | 0 |
| P12163_1_S10,1883 R.FLAVDAVEK.A      | 1599.957 | 0.00543  | 3 | 1 | 49.6 | 0 |
| P12163_2_F1,20513 R.FLAVDAVEK.A      | 1599.957 | 0.00312  | 3 | 1 | 34.5 | 0 |
| P12163_2_F1,20521 R.FLAVDAVEK.A      | 1599.957 | 0.0053   | 2 | 1 | 48   | 0 |
| P12163_2_F1,20732 R.FLAVDAVEK.A      | 1599.957 | 0.00456  | 3 | 1 | 40.3 | 0 |
| P12163_2_F1,20742 R.FLAVDAVEK.A      | 1599.957 | 0.00728  | 2 | 1 | 51.6 | 0 |
| P12163_2_F2,49 R.FLAVDAVEK.A         | 1599.957 | 0.00492  | 3 | 1 | 41.9 | 0 |
| P12163_2_F4,18196 R.FLAVDAVEK.A      | 1599.957 | 0.00154  | 2 | 1 | 36.8 | 0 |
| P12163_2_F4,18232 R.FLAVDAVEK.A      | 1599.957 | 0.00042  | 3 | 1 | 39   | 0 |
| P12163_2_F4,18419 R.FLAVDAVEK.A      | 1599.957 | 0.00228  | 2 | 1 | 48.8 | 0 |
| P12163_2_F4,18820 R.FLAVDAVEK.A      | 1599.957 | 0.0058   | 2 | 1 | 52.4 | 0 |
| P12163_2_S5,18477 R.FLAVDAVEK.A      | 1599.957 | 0.0063   | 3 | 1 | 28.2 | 0 |
| P12163_2_S5,18495 R.FLAVDAVEK.A      | 1599.957 | 0.0036   | 2 | 1 | 48.2 | 0 |
| P12163_2_F10,1504 R.HVAEGATLEAEWNAK  | 2234.203 | 0.00184  | 4 | 1 | 61   | 0 |
| P12163_2_F7,12094 R.HVAEGATLEAEWNAK  | 2234.203 | 0.00248  | 4 | 1 | 22.7 | 0 |
| P12163_2_F7,14614 R.HVAEGATLEAEWNAK  | 2234.203 | 0.00331  | 3 | 1 | 55.2 | 0 |
| P12163_2_F7,14674 R.HVAEGATLEAEWNAK  | 2234.203 | 0.00392  | 4 | 1 | 59.4 | 0 |
| P12163_1_F4,15092 R.NLSQTCLNALAK.T   | 1941.105 | 0.0065   | 2 | 1 | 26.1 | 0 |
| P12163_1_F4,15497 R.NLSQTCLNALAK.T   | 1941.105 | 0.00516  | 2 | 1 | 38.6 | 0 |
| P12163_1_F4,15521 R.NLSQTCLNALAK.T   | 1941.105 | 0.00329  | 3 | 1 | 42.7 | 0 |
| P12163_1_F4,17937 R.NLSQTCLNALAK.T   | 1941.105 | 0.00698  | 2 | 1 | 70.6 | 0 |
| P12163_1_F4,17948 R.NLSQTCLNALAK.T   | 1941.105 | 0.00596  | 3 | 1 | 48   | 0 |
| P12163_1_F4,18290 R.NLSQTCLNALAK.T   | 1941.105 | 0.00977  | 3 | 1 | 43.1 | 0 |
| P12163_1_F4,18325 R.NLSQTCLNALAK.T   | 1941.105 | 0.00946  | 2 | 1 | 56.3 | 0 |
| P12163_1_F4,18550 R.NLSQTCLNALAK.T   | 1941.105 | 0.01169  | 3 | 1 | 29.2 | 0 |
| P12163_1_F5,16718 R.NLSQTCLNALAK.T   | 1941.105 | 0.0048   | 2 | 1 | 53.9 | 0 |
| P12163_1_F5,16728 R.NLSQTCLNALAK.T   | 1941.105 | 0.00698  | 3 | 1 | 27.6 | 0 |
| P12163_1_F7,15865 R.NLSQTCLNALAK.T   | 1941.105 | 0.00371  | 3 | 1 | 24.1 | 0 |
| P12163_1_F7,16365 R.NLSQTCLNALAK.T   | 1941.105 | 0.01064  | 2 | 1 | 24.6 | 0 |
| P12163_1_F9,16868 R.NLSQTCLNALAK.T   | 1941.105 | 0.00143  | 3 | 1 | 38.4 | 0 |
| P12163_1_F9,16915 R.NLSQTCLNALAK.T   | 1941.105 | 0.00526  | 2 | 1 | 73.5 | 0 |
| P12163_2_F1,17197 R.NLSQTCLNALAK.T   | 1941.105 | 0.00238  | 2 | 1 | 69.8 | 0 |
| P12163_2_F1,17219 R.NLSQTCLNALAK.T   | 1941.105 | 0.00695  | 3 | 1 | 38.2 | 0 |
| P12163_2_F1,17469 R.NLSQTCLNALAK.T   | 1941.105 | 0.00263  | 3 | 1 | 42.4 | 0 |
| P12163_2_F1,18393 R.NLSQTCLNALAK.T   | 1941.105 | 0.00602  | 2 | 1 | 33.5 | 0 |
| P12163_2_F1,18404 R.NLSQTCLNALAK.T   | 1941.105 | 0.00416  | 3 | 1 | 39.5 | 0 |
| P12163_2_F2,92 R.NLSQTCLNALAK.T      | 1941.105 | 0.00206  | 3 | 1 | 48.6 | 0 |
| P12163_2_F2,1347 R.NLSQTCLNALAK.T    | 1941.105 | 0.00506  | 3 | 1 | 26.6 | 0 |
| P12163_2_F2,17559 R.NLSQTCLNALAK.T   | 1941.105 | 0.00124  | 2 | 1 | 45.4 | 0 |
| P12163_2_F4,15560 R.NLSQTCLNALAK.T   | 1941.105 | 0.00143  | 3 | 1 | 23.8 | 0 |
| P12163_2_F9,15679 R.NLSQTCLNALAK.T   | 1941.105 | 0.00725  | 3 | 1 | 37.8 | 0 |
| P12163_2_S5,15806 R.NLSQTCLNALAK.T   | 1941.105 | -0.01039 | 3 | 1 | 27.8 | 0 |
| P12163_2_F10,1431 R.QKLPFLAGTSIDGVEK | 2605.544 | 0.01173  | 3 | 1 | 45.6 | 0 |
| P12163_1_F4,20995 R.VSIEAGSTFGWEK.I  | 2019.101 | 0.00025  | 2 | 1 | 59.8 | 0 |
| P12163_1_F4,21001 R.VSIEAGSTFGWEK.I  | 2019.101 | 0.0069   | 3 | 1 | 47.1 | 0 |
| P12163_1_F3,14821 R.VTTTIGFGSPNK.A   | 1830.058 | 0.00495  | 3 | 1 | 22.4 | 0 |

|                                    |          |          |   |   |      |   |
|------------------------------------|----------|----------|---|---|------|---|
| P12163_1_F3,15530 R.VTTTIGFGSPNK.A | 1830.058 | 0.00324  | 3 | 1 | 23.3 | 0 |
| P12163_1_F3,15535 R.VTTTIGFGSPNK.A | 1830.058 | 0.00309  | 3 | 1 | 22.2 | 0 |
| P12163_1_F4,15159 R.VTTTIGFGSPNK.A | 1830.058 | -0.00131 | 2 | 1 | 27.9 | 0 |
| P12163_1_F4,15162 R.VTTTIGFGSPNK.A | 1830.058 | 0.00756  | 3 | 1 | 26.8 | 0 |
| P12163_1_F4,15492 R.VTTTIGFGSPNK.A | 1830.058 | 0.00192  | 3 | 1 | 42.1 | 0 |
| P12163_1_F4,15534 R.VTTTIGFGSPNK.A | 1830.058 | 0.00317  | 2 | 1 | 46.8 | 0 |
| P12163_1_F4,16079 R.VTTTIGFGSPNK.A | 1830.058 | 0.00486  | 3 | 1 | 29.4 | 0 |
| P12163_1_F4,17962 R.VTTTIGFGSPNK.A | 1830.058 | 0.00685  | 2 | 1 | 59.4 | 0 |
| P12163_1_F5,16485 R.VTTTIGFGSPNK.A | 1830.058 | -0.00051 | 2 | 1 | 58.5 | 0 |
| P12163_1_F6,16563 R.VTTTIGFGSPNK.A | 1830.058 | -0.00055 | 2 | 1 | 63   | 0 |
| P12163_1_F6,16570 R.VTTTIGFGSPNK.A | 1830.058 | 0.00189  | 3 | 1 | 44.1 | 0 |
| P12163_1_F6,16995 R.VTTTIGFGSPNK.A | 1830.058 | 0.00471  | 2 | 1 | 55.6 | 0 |
| P12163_1_F7,15686 R.VTTTIGFGSPNK.A | 1830.058 | 0.00865  | 2 | 1 | 26.5 | 0 |
| P12163_1_F7,16133 R.VTTTIGFGSPNK.A | 1830.058 | 0.00399  | 2 | 1 | 43.3 | 0 |
| P12163_1_F9,16758 R.VTTTIGFGSPNK.A | 1830.058 | 0.00207  | 2 | 1 | 63.2 | 0 |
| P12163_1_F9,16763 R.VTTTIGFGSPNK.A | 1830.058 | -0.00027 | 3 | 1 | 41.2 | 0 |
| P12163_1_S10,1613 R.VTTTIGFGSPNK.A | 1830.058 | 0.00561  | 3 | 1 | 48.6 | 0 |
| P12163_2_F1,14553 R.VTTTIGFGSPNK.A | 1830.058 | 0.0051   | 3 | 1 | 27.1 | 0 |
| P12163_2_F1,14573 R.VTTTIGFGSPNK.A | 1830.058 | 0.00055  | 2 | 1 | 46.6 | 0 |
| P12163_2_F1,16906 R.VTTTIGFGSPNK.A | 1830.058 | 0.01117  | 2 | 1 | 37.1 | 0 |
| P12163_2_F1,17168 R.VTTTIGFGSPNK.A | 1830.058 | 0.00247  | 2 | 1 | 42.6 | 0 |
| P12163_2_F1,17428 R.VTTTIGFGSPNK.A | 1830.058 | 0.01361  | 2 | 1 | 25.1 | 0 |
| P12163_2_F2,890 R.VTTTIGFGSPNK.A   | 1830.058 | 0.00555  | 3 | 1 | 38.7 | 0 |
| P12163_2_F2,922 R.VTTTIGFGSPNK.A   | 1830.058 | 0.00435  | 2 | 1 | 64.1 | 0 |
| P12163_2_F2,1112 R.VTTTIGFGSPNK.A  | 1830.058 | 0.00585  | 3 | 1 | 42.4 | 0 |
| P12163_2_F2,1122 R.VTTTIGFGSPNK.A  | 1830.058 | 0.00461  | 2 | 1 | 63.5 | 0 |
| P12163_2_F2,1323 R.VTTTIGFGSPNK.A  | 1830.058 | 0.00533  | 2 | 1 | 37.1 | 0 |
| P12163_2_F2,1502 R.VTTTIGFGSPNK.A  | 1830.058 | 0.00621  | 3 | 1 | 38   | 0 |
| P12163_2_F2,1508 R.VTTTIGFGSPNK.A  | 1830.058 | 0.00549  | 2 | 1 | 62.1 | 0 |
| P12163_2_F2,1686 R.VTTTIGFGSPNK.A  | 1830.058 | 0.00486  | 3 | 1 | 42.6 | 0 |
| P12163_2_F2,1699 R.VTTTIGFGSPNK.A  | 1830.058 | 0.00455  | 2 | 1 | 70.3 | 0 |
| P12163_2_F2,2100 R.VTTTIGFGSPNK.A  | 1830.058 | 0.00527  | 2 | 1 | 58.7 | 0 |
| P12163_2_F2,2293 R.VTTTIGFGSPNK.A  | 1830.058 | 0.00443  | 2 | 1 | 28.6 | 0 |
| P12163_2_F4,15332 R.VTTTIGFGSPNK.A | 1830.058 | -0.00499 | 2 | 1 | 26   | 0 |
| P12163_2_F4,15383 R.VTTTIGFGSPNK.A | 1830.058 | 0.00204  | 3 | 1 | 52.8 | 0 |
| P12163_2_F4,15799 R.VTTTIGFGSPNK.A | 1830.058 | 0.00597  | 2 | 1 | 57   | 0 |
| P12163_2_F9,15353 R.VTTTIGFGSPNK.A | 1830.058 | 0.00624  | 3 | 1 | 49.6 | 0 |
| P12163_2_S5,15475 R.VTTTIGFGSPNK.A | 1830.058 | 0.00282  | 3 | 1 | 35.3 | 0 |
| P12163_1_S1,15677 K.ADLVNNLGTIAR.S | 1560.901 | 0.0024   | 3 | 1 | 41.2 | 0 |
| P12163_1_S1,15932 K.ADLVNNLGTIAR.S | 1560.901 | -0.00255 | 3 | 1 | 41.6 | 0 |
| P12163_1_S1,18650 K.ADLVNNLGTIAR.S | 1560.901 | 0.0055   | 2 | 1 | 28.9 | 0 |
| P12163_1_S1,18878 K.ADLVNNLGTIAR.S | 1560.901 | -0.0034  | 2 | 1 | 40.5 | 0 |
| P12163_1_S1,19114 K.ADLVNNLGTIAR.S | 1560.901 | 0.00182  | 2 | 1 | 36.1 | 0 |
| P12163_1_F2,12527 K.AVENSPFLER.L   | 1465.795 | 0.00461  | 3 | 1 | 36.5 | 0 |
| P12163_1_F2,16492 K.AVENSPFLER.L   | 1465.795 | 0.00423  | 2 | 1 | 44.5 | 0 |
| P12163_1_F4,22914 K.CIEMFNEIAENK.E | 2106.082 | 0.00666  | 3 | 1 | 47.9 | 0 |
| P12163_1_F4,22948 K.CIEMFNEIAENK.E | 2106.082 | 0.00428  | 2 | 1 | 25.1 | 0 |
| P12163_1_F9,17151 K.DIYYITGESR.K   | 1520.79  | 0.00271  | 2 | 1 | 32.6 | 0 |
| P12163_1_S1,15468 K.DIYYITGESR.K   | 1520.79  | 0.00244  | 3 | 1 | 27.1 | 0 |
| P12163_1_S1,17060 K.DIYYITGESR.K   | 1520.79  | 0.00451  | 2 | 1 | 35.2 | 0 |
| P12163_2_F7,15328 K.DIYYITGESR.K   | 1520.79  | 0.00325  | 2 | 1 | 30.6 | 0 |

|                   |                       |          |          |   |   |      |   |
|-------------------|-----------------------|----------|----------|---|---|------|---|
| P12163_1_S1,12359 | K.EDQCEYLEER.R        | 1674.758 | 0.00384  | 2 | 1 | 63   | 0 |
| P12163_1_S1,12384 | K.EDQCEYLEER.R        | 1674.758 | 0.00226  | 3 | 1 | 48.1 | 0 |
| P12163_1_F5,15691 | K.EEYASFYK.S          | 1644.873 | 0.00763  | 2 | 1 | 23.9 | 0 |
| P12163_1_F5,15704 | K.EEYASFYK.S          | 1644.873 | 0.00426  | 3 | 1 | 31.6 | 0 |
| P12163_1_F9,15863 | K.EEYASFYK.S          | 1644.873 | 0.00549  | 2 | 1 | 31   | 0 |
| P12163_2_F8_12070 | K.EEYASFYK.S          | 1644.873 | 0.00462  | 3 | 1 | 33.7 | 0 |
| P12163_1_F9,17085 | K.EVTHEWQLINK.Q       | 2005.133 | 0.00511  | 3 | 1 | 46.4 | 0 |
| P12163_1_F9,17087 | K.EVTHEWQLINK.Q       | 2005.133 | -0.00478 | 2 | 1 | 51.6 | 0 |
| P12163_2_F7,15254 | K.EVTHEWQLINK.Q       | 2005.133 | -0.0019  | 2 | 1 | 59.1 | 0 |
| P12163_2_F7,15262 | K.EVTHEWQLINK.Q       | 2005.133 | 0.00394  | 3 | 1 | 43.8 | 0 |
| P12163_2_F9,16369 | K.EVTHEWQLINK.Q       | 2005.133 | 0.00892  | 3 | 1 | 32.3 | 0 |
| P12163_1_F5,19326 | K.FYDAFSK.N           | 1485.82  | 0.00722  | 2 | 1 | 25.2 | 0 |
| P12163_2_F1,19877 | K.FYDAFSK.N           | 1485.82  | 0.0069   | 2 | 1 | 24   | 0 |
| P12163_2_F8_12070 | K.FYDAFSK.N           | 1485.82  | 0.0066   | 2 | 1 | 25   | 0 |
| P12163_1_F6,17743 | K.HFSVEGQLEFK.A       | 1929.069 | 0.0011   | 3 | 1 | 22.7 | 0 |
| P12163_1_F4,25399 | K.ITLFLK.E            | 1342.892 | 0.00753  | 2 | 1 | 25.4 | 0 |
| P12163_1_F5,23617 | K.ITLFLK.E            | 1342.892 | 0.00729  | 2 | 1 | 25.1 | 0 |
| P12163_2_F1,24654 | K.ITLFLK.E            | 1342.892 | 0.00501  | 2 | 1 | 26.3 | 0 |
| P12163_1_F4,12196 | K.LEEDEEEK.K          | 1628.847 | 0.00595  | 2 | 1 | 35.1 | 0 |
| P12163_1_F9,9762  | K.LGIHEDSQNR.A        | 1472.776 | -0.00032 | 2 | 1 | 32.1 | 0 |
| P12163_1_F9,9785  | K.LGIHEDSQNR.A        | 1472.776 | 0.00454  | 3 | 1 | 33   | 0 |
| P12163_2_F7,9192  | K.LGIHEDSQNR.A        | 1472.776 | 0.00334  | 3 | 1 | 26   | 0 |
| P12163_2_S5,9602  | K.LGIHEDSQNR.A        | 1472.776 | 0.00202  | 2 | 1 | 28.5 | 0 |
| P12163_1_F9,19910 | K.RAPFDLFDTR.K ! R.RA | 1541.838 | 0.00235  | 3 | 1 | 40   | 0 |
| P12163_2_F6,19841 | K.RAPFDLFDTR.K ! R.RA | 1541.838 | 0.00109  | 3 | 1 | 32.8 | 0 |
| P12163_2_F7,18080 | K.RAPFDLFDTR.K ! R.RA | 1541.838 | -0.00002 | 3 | 1 | 41.1 | 0 |
| P12163_1_F5,14036 | K.SFENLCK.T           | 1505.824 | 0.00814  | 2 | 1 | 42.2 | 0 |
| P12163_1_F5,14063 | K.SFENLCK.T           | 1505.824 | 0.00391  | 3 | 1 | 29.8 | 0 |
| P12163_2_F2,14713 | K.SFENLCK.T           | 1505.824 | 0.01244  | 2 | 1 | 24.1 | 0 |
| P12163_2_F2,14744 | K.SFENLCK.T           | 1505.824 | 0.00592  | 3 | 1 | 34.3 | 0 |
| P12163_2_F2,14943 | K.SFENLCK.T           | 1505.824 | 0.00802  | 2 | 1 | 25.4 | 0 |
| P12163_2_F1,9434  | K.SGDEM*TSLK.D        | 1591.846 | 0.00757  | 2 | 1 | 31.2 | 0 |
| P12163_1_F4,13654 | K.SGDEMTSLK.D         | 1575.851 | 0.00571  | 2 | 1 | 24.6 | 0 |
| P12163_1_F5,12256 | K.SGDEMTSLK.D         | 1575.851 | 0.00793  | 2 | 1 | 34   | 0 |
| P12163_2_F1,12597 | K.SGDEMTSLK.D         | 1575.851 | 0.00747  | 2 | 1 | 24.5 | 0 |
| P12163_2_F6,17910 | K.SLTNDWEDHLAVK.H     | 2136.155 | -0.00098 | 2 | 1 | 49.6 | 0 |
| P12163_2_F6,17974 | K.SLTNDWEDHLAVK.H     | 2136.155 | 0.00447  | 3 | 1 | 43.4 | 0 |
| P12163_1_F3,17787 | K.TLSIIDSGVGMTK.A     | 1930.114 | 0.00426  | 3 | 1 | 24.7 | 0 |
| P12163_1_F3,20960 | K.TLSIIDSGVGMTK.A     | 1930.114 | 0.00482  | 2 | 1 | 30.2 | 0 |
| P12163_1_S1,20491 | R.APFDLFDTR.K         | 1385.737 | 0.00241  | 3 | 1 | 28.1 | 0 |
| P12163_1_S1,22182 | R.APFDLFDTR.K         | 1385.737 | 0.00298  | 2 | 1 | 42.3 | 0 |
| P12163_1_F4,14614 | R.DSSMSSYMSSK.K       | 1817.887 | 0.00689  | 2 | 1 | 45.3 | 0 |
| P12163_2_F1,13553 | R.DSSMSSYMSSK.K       | 1817.887 | -0.00071 | 2 | 1 | 32.4 | 0 |
| P12163_1_S1,9519  | R.DVSGEPLGR.G         | 1233.674 | 0.00335  | 3 | 1 | 25.8 | 0 |
| P12163_1_F2,15902 | R.ELISNSSDALDK.I      | 1900.048 | 0.0047   | 3 | 1 | 40.5 | 0 |
| P12163_1_F3,14259 | R.ELISNSSDALDK.I      | 1900.048 | 0.00259  | 2 | 1 | 44.1 | 0 |
| P12163_1_F3,14319 | R.ELISNSSDALDK.I      | 1900.048 | 0.00539  | 3 | 1 | 30   | 0 |
| P12163_1_F3,14581 | R.ELISNSSDALDK.I      | 1900.048 | 0.00555  | 2 | 1 | 37.5 | 0 |
| P12163_1_F3,16381 | R.ELISNSSDALDK.I      | 1900.048 | 0.00691  | 2 | 1 | 58.1 | 0 |
| P12163_1_F6,15715 | R.ELISNSSDALDK.I      | 1900.048 | -0.00055 | 3 | 1 | 46.2 | 0 |
| P12163_1_F6,15961 | R.ELISNSSDALDK.I      | 1900.048 | 0.00107  | 3 | 1 | 41.3 | 0 |

|                                         |          |          |   |   |      |   |
|-----------------------------------------|----------|----------|---|---|------|---|
| P12163_2_F2,15969 R.ELISNSSDALDK.I      | 1900.048 | 0.00515  | 3 | 1 | 22   | 0 |
| P12163_1_F5,8327 R.ETLQQNK.I            | 1468.858 | 0.00396  | 2 | 1 | 25.5 | 0 |
| P12163_2_F2,9394 R.ETLQQNK.I            | 1468.858 | 0.00682  | 2 | 1 | 27.2 | 0 |
| P12163_1_S1,15677 K.ADLVNNLGTIAR.S      | 1560.901 | 0.0024   | 3 | 1 | 41.2 | 0 |
| P12163_1_S1,15932 K.ADLVNNLGTIAR.S      | 1560.901 | -0.00255 | 3 | 1 | 41.6 | 0 |
| P12163_1_S1,18650 K.ADLVNNLGTIAR.S      | 1560.901 | 0.0055   | 2 | 1 | 28.9 | 0 |
| P12163_1_S1,18878 K.ADLVNNLGTIAR.S      | 1560.901 | -0.0034  | 2 | 1 | 40.5 | 0 |
| P12163_1_S1,19114 K.ADLVNNLGTIAR.S      | 1560.901 | 0.00182  | 2 | 1 | 36.1 | 0 |
| P12163_1_F2,12527 K.AVENSPFLER.L        | 1465.795 | 0.00461  | 3 | 1 | 36.5 | 0 |
| P12163_1_F2,16492 K.AVENSPFLER.L        | 1465.795 | 0.00423  | 2 | 1 | 44.5 | 0 |
| P12163_1_F4,20000 K.AVLFVPK.R           | 1381.903 | 0.0068   | 2 | 1 | 30.6 | 0 |
| P12163_1_F4,20051 K.AVLFVPK.R           | 1381.903 | 0.00871  | 3 | 1 | 24.5 | 0 |
| P12163_2_F1,19493 K.AVLFVPK.R           | 1381.903 | 0.00337  | 3 | 1 | 26.2 | 0 |
| P12163_1_F4,22914 K.CIEMFNEIAENK.E      | 2106.082 | 0.00666  | 3 | 1 | 47.9 | 0 |
| P12163_1_F4,22948 K.CIEMFNEIAENK.E      | 2106.082 | 0.00428  | 2 | 1 | 25.1 | 0 |
| P12163_1_F3,18026 K.DIYYITGESK.K        | 1796.989 | 0.00417  | 2 | 1 | 42.6 | 0 |
| P12163_1_F4,18577 K.DIYYITGESK.K        | 1796.989 | 0.00525  | 2 | 1 | 43.5 | 0 |
| P12163_1_F4,18582 K.DIYYITGESK.K        | 1796.989 | 0.00603  | 3 | 1 | 41.8 | 0 |
| P12163_2_F9,16447 K.DIYYITGESK.K        | 1796.989 | 0.00659  | 2 | 1 | 28.2 | 0 |
| P12163_1_F2,16944 K.EDQLEYLEER.R        | 1627.812 | -0.00283 | 2 | 1 | 29.8 | 0 |
| P12163_1_F9,16746 K.EDQLEYLEER.R        | 1627.812 | 0.00919  | 2 | 1 | 43.2 | 0 |
| P12163_1_S1,16825 K.EDQLEYLEER.R        | 1627.812 | 0.00677  | 2 | 1 | 45.5 | 0 |
| P12163_2_F2,16794 K.EDQLEYLEER.R        | 1627.812 | -0.00059 | 2 | 1 | 33.3 | 0 |
| P12163_1_F5,15691 K.EEYASFYK.S          | 1644.873 | 0.00763  | 2 | 1 | 23.9 | 0 |
| P12163_1_F5,15704 K.EEYASFYK.S          | 1644.873 | 0.00426  | 3 | 1 | 31.6 | 0 |
| P12163_1_F9,15863 K.EEYASFYK.S          | 1644.873 | 0.00549  | 2 | 1 | 31   | 0 |
| P12163_2_F8_12070 K.EEYASFYK.S          | 1644.873 | 0.00462  | 3 | 1 | 33.7 | 0 |
| P12163_1_F9,17037 K.EVSHEWQLINK.Q       | 1991.117 | 0.0024   | 2 | 1 | 53.2 | 0 |
| P12163_2_F9,16277 K.EVSHEWQLINK.Q       | 1991.117 | 0.00657  | 3 | 1 | 23.8 | 0 |
| P12163_1_F5,19326 K.FYDAFSK.N           | 1485.82  | 0.00722  | 2 | 1 | 25.2 | 0 |
| P12163_2_F1,19877 K.FYDAFSK.N           | 1485.82  | 0.0069   | 2 | 1 | 24   | 0 |
| P12163_2_F8_12070 K.FYDAFSK.N           | 1485.82  | 0.0066   | 2 | 1 | 25   | 0 |
| P12163_1_F6,17743 K.HFSVEGQLEFK.A       | 1929.069 | 0.0011   | 3 | 1 | 22.7 | 0 |
| P12163_1_F9,9762 K.LGIHEDSQNR.A         | 1472.776 | -0.00032 | 2 | 1 | 32.1 | 0 |
| P12163_1_F9,9785 K.LGIHEDSQNR.A         | 1472.776 | 0.00454  | 3 | 1 | 33   | 0 |
| P12163_2_F7,9192 K.LGIHEDSQNR.A         | 1472.776 | 0.00334  | 3 | 1 | 26   | 0 |
| P12163_2_S5,9602 K.LGIHEDSQNR.A         | 1472.776 | 0.00202  | 2 | 1 | 28.5 | 0 |
| P12163_1_F9,19910 K.RAPFDLFDTR.K ! R.RA | 1541.838 | 0.00235  | 3 | 1 | 40   | 0 |
| P12163_2_F6,19841 K.RAPFDLFDTR.K ! R.RA | 1541.838 | 0.00109  | 3 | 1 | 32.8 | 0 |
| P12163_2_F7,18080 K.RAPFDLFDTR.K ! R.RA | 1541.838 | -0.00002 | 3 | 1 | 41.1 | 0 |
| P12163_1_F5,14036 K.SFENLCK.T           | 1505.824 | 0.00814  | 2 | 1 | 42.2 | 0 |
| P12163_1_F5,14063 K.SFENLCK.T           | 1505.824 | 0.00391  | 3 | 1 | 29.8 | 0 |
| P12163_2_F2,14713 K.SFENLCK.T           | 1505.824 | 0.01244  | 2 | 1 | 24.1 | 0 |
| P12163_2_F2,14744 K.SFENLCK.T           | 1505.824 | 0.00592  | 3 | 1 | 34.3 | 0 |
| P12163_2_F2,14943 K.SFENLCK.T           | 1505.824 | 0.00802  | 2 | 1 | 25.4 | 0 |
| P12163_2_F6,17910 K.SLTNDWEDHLAVK.H     | 2136.155 | -0.00098 | 2 | 1 | 49.6 | 0 |
| P12163_2_F6,17974 K.SLTNDWEDHLAVK.H     | 2136.155 | 0.00447  | 3 | 1 | 43.4 | 0 |
| P12163_1_F4,15375 K.SSEELTSK.D          | 1601.921 | 0.00305  | 2 | 1 | 31.1 | 0 |
| P12163_2_F1,14317 K.SSEELTSK.D          | 1601.921 | 0.00693  | 2 | 1 | 33.7 | 0 |
| P12163_1_F2,20353 K.TLTIVDSGIGM*TK.A    | 1960.124 | 0.00565  | 3 | 1 | 40.6 | 0 |
| P12163_1_S1,20491 R.APFDLFDTR.K         | 1385.737 | 0.00241  | 3 | 1 | 28.1 | 0 |

|                   |                     |          |          |   |   |      |   |
|-------------------|---------------------|----------|----------|---|---|------|---|
| P12163_1_S1,22182 | R.APFDLFDTR.K       | 1385.737 | 0.00298  | 2 | 1 | 42.3 | 0 |
| P12163_2_F1,13547 | R.DNSMSSYMSSK.K     | 1844.898 | -0.00372 | 2 | 1 | 26.3 | 0 |
| P12163_1_S1,9519  | R.DVSGEPLGR.G       | 1233.674 | 0.00335  | 3 | 1 | 25.8 | 0 |
| P12163_1_F2,15902 | R.ELISNSSDALDK.I    | 1900.048 | 0.0047   | 3 | 1 | 40.5 | 0 |
| P12163_1_F3,14259 | R.ELISNSSDALDK.I    | 1900.048 | 0.00259  | 2 | 1 | 44.1 | 0 |
| P12163_1_F3,14319 | R.ELISNSSDALDK.I    | 1900.048 | 0.00539  | 3 | 1 | 30   | 0 |
| P12163_1_F3,14581 | R.ELISNSSDALDK.I    | 1900.048 | 0.00555  | 2 | 1 | 37.5 | 0 |
| P12163_1_F3,16381 | R.ELISNSSDALDK.I    | 1900.048 | 0.00691  | 2 | 1 | 58.1 | 0 |
| P12163_1_F6,15715 | R.ELISNSSDALDK.I    | 1900.048 | -0.00055 | 3 | 1 | 46.2 | 0 |
| P12163_1_F6,15961 | R.ELISNSSDALDK.I    | 1900.048 | 0.00107  | 3 | 1 | 41.3 | 0 |
| P12163_2_F2,15969 | R.ELISNSSDALDK.I    | 1900.048 | 0.00515  | 3 | 1 | 22   | 0 |
| P12163_2_F2,11588 | R.EMLQQNK.I         | 1498.851 | 0.00874  | 3 | 1 | 26.5 | 0 |
| P12163_1_F5,16750 | R.FESLTDK.S         | 1447.825 | 0.00725  | 2 | 1 | 25.5 | 0 |
| P12163_2_F1,17201 | R.FESLTDK.S         | 1447.825 | 0.00583  | 2 | 1 | 25.5 | 0 |
| P12163_2_F1,17233 | R.FESLTDK.S         | 1447.825 | 0.00501  | 3 | 1 | 28.6 | 0 |
| P12163_1_F8,9944  | K.ETGIEQRPDGVVCR.W  | 1919.991 | 0.00051  | 4 | 1 | 24.1 | 0 |
| P12163_1_F8,11227 | K.ETGIEQRPDGVVCR.W  | 1919.991 | 0.00382  | 2 | 1 | 41.1 | 0 |
| P12163_2_F6,11067 | K.ETGIEQRPDGVVCR.W  | 1919.991 | 0.00268  | 2 | 1 | 24.8 | 0 |
| P12163_2_F6,20436 | K.FWEAADELGHK.E     | 1911.022 | 0.00399  | 3 | 1 | 59.4 | 0 |
| P12163_2_F6,20473 | K.FWEAADELGHK.E     | 1911.022 | 0.00409  | 2 | 1 | 56.1 | 0 |
| P12163_2_F1,16996 | K.ILDVSK.E          | 1282.819 | 0.0093   | 3 | 1 | 23.5 | 0 |
| P12163_1_F2,5264  | K.NGESSGTAEVSR.F    | 1497.745 | 0.00071  | 3 | 1 | 22.6 | 0 |
| P12163_1_F2,6416  | K.NGESSGTAEVSR.F    | 1497.745 | 0.00298  | 2 | 1 | 42.5 | 0 |
| P12163_2_F1,10577 | K.NGNGDEWQEK.W      | 1784.902 | 0.00649  | 2 | 1 | 33.5 | 0 |
| P12163_1_F2,6438  | K.NSENGTAEVPER.D    | 1693.829 | 0.00357  | 3 | 1 | 25.6 | 0 |
| P12163_1_F2,6915  | K.NSENGTAEVPER.D    | 1693.829 | 0.00135  | 3 | 1 | 32.5 | 0 |
| P12163_1_F4,18047 | K.NSESSGAAEISPFVK.N | 2131.149 | 0.00197  | 2 | 1 | 75   | 0 |
| P12163_2_F1,17268 | K.NSESSGAAEISPFVK.N | 2131.149 | 0.00712  | 3 | 1 | 44.5 | 0 |
| P12163_2_F1,17299 | K.NSESSGAAEISPFVK.N | 2131.149 | 0.00135  | 2 | 1 | 77.3 | 0 |
| P12163_2_F2,17180 | K.QGETWWAGK.Y       | 1670.911 | 0.00414  | 2 | 1 | 23.9 | 0 |
| P12163_2_S5,16865 | K.SSSGELWDTHEQQETV  | 2672.217 | 0.01051  | 3 | 1 | 63.7 | 0 |
| P12163_1_F2,16702 | K.SSVYTPVNPVVEK.A   | 2124.216 | 0.00432  | 2 | 1 | 52.5 | 0 |
| P12163_2_F6,16392 | K.SSVYTPVNPVVEK.A   | 2124.216 | 0.00172  | 2 | 1 | 35.1 | 0 |
| P12163_1_F2,11959 | K.VDELATR.G         | 1107.631 | 0.0022   | 3 | 1 | 23.3 | 0 |
| P12163_2_F4,15685 | K.WCSIDPNTQLDAGHA   | 2833.353 | -0.00004 | 4 | 1 | 35.5 | 0 |
| P12163_2_F4,15698 | K.WCSIDPNTQLDAGHA   | 2833.353 | -0.00129 | 5 | 1 | 36.4 | 0 |
| P12163_2_F4,15721 | K.WCSIDPNTQLDAGHA   | 2833.353 | 0.00072  | 3 | 1 | 98.6 | 0 |
| P12163_1_F3,13965 | R.AAAAIAAAR.A       | 1089.668 | 0.0032   | 2 | 1 | 25.9 | 0 |
| P12163_2_F2,14493 | R.AILEEK.N          | 1310.814 | 0.00295  | 2 | 1 | 23.9 | 0 |
| P12163_2_F2,14510 | R.AILEEK.N          | 1310.814 | 0.00375  | 3 | 1 | 26.1 | 0 |
| P12163_2_F1,11176 | R.CEGDGWSK.W        | 1546.778 | 0.00554  | 2 | 1 | 29.1 | 0 |
| P12163_2_F10,1897 | R.DLGALFSAHAAEAAH.  | 2516.372 | 0.00551  | 4 | 1 | 62.2 | 0 |
| P12163_2_F8_1207C | R.DLGALFSAHAAEAAH.  | 2516.372 | 0.00511  | 4 | 1 | 56.2 | 0 |
| P12163_2_F8_1207C | R.DLGALFSAHAAEAAH.  | 2516.372 | 0.0081   | 3 | 1 | 33.8 | 0 |
| P12163_1_F5,12492 | R.DLQMAEK.S         | 1442.813 | 0.00896  | 3 | 1 | 29   | 0 |
| P12163_1_S1,18828 | R.DSSGALSAGIFVPR.S  | 1680.922 | 0.00554  | 2 | 1 | 52.9 | 0 |
| P12163_1_S1,18840 | R.DSSGALSAGIFVPR.S  | 1680.922 | 0.00459  | 3 | 1 | 60.5 | 0 |
| P12163_1_F2,6429  | R.GINPDGSR.W        | 1119.606 | 0.00178  | 3 | 1 | 22.7 | 0 |
| P12163_1_F4,18310 | R.GVSADEALEWQEK.F   | 2070.096 | 0.0138   | 3 | 1 | 48   | 0 |
| P12163_1_F4,18331 | R.GVSADEALEWQEK.F   | 2070.096 | -0.00027 | 2 | 1 | 46.4 | 0 |
| P12163_1_S10,1659 | R.KPSEFQEEPFEIQDK.R | 2763.497 | 0.00593  | 4 | 1 | 22.8 | 0 |

|                   |                     |          |          |   |   |      |   |
|-------------------|---------------------|----------|----------|---|---|------|---|
| P12163_2_F6,16868 | R.KPSEFQEEPFEIQDK.R | 2763.497 | 0.01293  | 3 | 1 | 53.4 | 0 |
| P12163_2_F6,16900 | R.KPSEFQEEPFEIQDK.R | 2763.497 | 0.01205  | 4 | 1 | 40.8 | 0 |
| P12163_1_F2,23516 | R.SVDILPIPFESK.L    | 1953.152 | 0.00523  | 2 | 1 | 38.9 | 0 |
| P12163_1_F2,23524 | R.SVDILPIPFESK.L    | 1953.152 | 0.00579  | 3 | 1 | 29.3 | 0 |
| P12163_1_F5,23325 | R.SVDILPIPFESK.L    | 1953.152 | 0.00303  | 3 | 1 | 28.5 | 0 |
| P12163_1_S1,20381 | R.SVDILPIPFESK.L    | 1953.152 | 0.00666  | 3 | 1 | 34   | 0 |
| P12163_1_S1,20397 | R.SVDILPIPFESK.L    | 1953.152 | 0.00644  | 4 | 1 | 40.3 | 0 |
| P12163_1_S1,20871 | R.SVDILPIPFESK.L    | 1953.152 | 0.00855  | 3 | 1 | 35.7 | 0 |
| P12163_1_S1,22149 | R.SVDILPIPFESK.L    | 1953.152 | 0.01083  | 3 | 1 | 24.4 | 0 |
| P12163_1_F3,18795 | K.CTYSGVNLSSETFPK.N | 2340.2   | 0.00682  | 3 | 1 | 48   | 0 |
| P12163_1_F4,20599 | K.DFDEFIAK.H        | 1592.878 | 0.00511  | 3 | 1 | 28.2 | 0 |
| P12163_1_F4,20623 | K.DFDEFIAK.H        | 1592.878 | 0.0051   | 2 | 1 | 34.8 | 0 |
| P12163_1_S1,9541  | K.EENELADQGT.PR.S   | 1662.824 | 0.00527  | 3 | 1 | 25.3 | 0 |
| P12163_1_S1,10733 | K.EENELADQGT.PR.S   | 1662.824 | 0.01001  | 2 | 1 | 28   | 0 |
| P12163_1_F4,17115 | K.EYFELSNSQSK.E     | 1852.99  | 0.0119   | 2 | 1 | 24.1 | 0 |
| P12163_1_F3,25714 | K.FFSPPILNTTYIK.N   | 2149.252 | 0.00601  | 3 | 1 | 25.5 | 0 |
| P12163_1_F7,18282 | K.GDVSLPHYLEQSDFR.I | 2067.045 | 0.00025  | 3 | 1 | 24.3 | 0 |
| P12163_1_F8,19083 | K.GDVSLPHYLEQSDFR.I | 2067.045 | 0.00202  | 2 | 1 | 31.8 | 0 |
| P12163_1_F8,19104 | K.GDVSLPHYLEQSDFR.I | 2067.045 | 0.00346  | 3 | 1 | 32.3 | 0 |
| P12163_2_S5,17877 | K.GDVSLPHYLEQSDFR.I | 2067.045 | 0.00241  | 3 | 1 | 32.6 | 0 |
| P12163_2_F4,8977  | K.HEFHRLR.F         | 1142.637 | 0.0033   | 3 | 1 | 27   | 0 |
| P12163_1_F5,13310 | K.LSDYTNAK.T        | 1519.858 | 0.00636  | 2 | 1 | 25.3 | 0 |
| P12163_1_F5,17039 | K.NNYFFATEK.L       | 1741.937 | 0.0035   | 2 | 1 | 37.6 | 0 |
| P12163_1_F5,17063 | K.NNYFFATEK.L       | 1741.937 | 0.0057   | 3 | 1 | 34.6 | 0 |
| P12163_1_S10,1709 | K.NNYFFATEK.L       | 1741.937 | 0.00363  | 3 | 1 | 33.4 | 0 |
| P12163_2_F2,17738 | K.NNYFFATEK.L       | 1741.937 | -0.00219 | 3 | 1 | 33.4 | 0 |
| P12163_2_F8_12070 | K.NNYFFATEK.L       | 1741.937 | 0.00348  | 3 | 1 | 32.9 | 0 |
| P12163_2_F2,17358 | K.NQLIQLK.F         | 1464.936 | 0.00593  | 2 | 1 | 27.4 | 0 |
| P12163_2_F2,17377 | K.NQLIQLK.F         | 1464.936 | 0.00472  | 3 | 1 | 27.8 | 0 |
| P12163_2_F2,11660 | K.QAEGWDK.R         | 1441.79  | 0.00289  | 2 | 1 | 24.9 | 0 |
| P12163_2_F7,17166 | K.QHFHEADLLR.N      | 1579.853 | 0.00061  | 3 | 1 | 35   | 0 |
| P12163_1_F3,20626 | K.QVILGSVLSNQE.K.D  | 2023.201 | 0.00339  | 3 | 1 | 47.8 | 0 |
| P12163_2_F1,20757 | K.QVILGSVLSNQE.K.D  | 2023.201 | 0.00534  | 3 | 1 | 51.9 | 0 |
| P12163_2_F2,20370 | K.SYLFLK.F          | 1378.855 | 0.00569  | 3 | 1 | 23.7 | 0 |
| P12163_2_F8_12070 | K.TVIWKPVQANAHSPLI  | 2800.608 | 0.01699  | 4 | 1 | 22.5 | 0 |
| P12163_1_F3,23569 | R.GEMSLPILITK.K     | 1810.097 | 0.00654  | 2 | 1 | 37.1 | 0 |
| P12163_1_F3,23604 | R.GEMSLPILITK.K     | 1810.097 | 0.00362  | 3 | 1 | 39.3 | 0 |
| P12163_1_F4,20540 | R.IPSPIFTK.K        | 1510.945 | 0.00465  | 2 | 1 | 26.4 | 0 |
| P12163_1_F4,20559 | R.IPSPIFTK.K        | 1510.945 | 0.00462  | 3 | 1 | 24.1 | 0 |
| P12163_1_F8,14901 | R.LVVAVDHQTK.G      | 1718.042 | 0.00744  | 2 | 1 | 35.3 | 0 |
| P12163_1_F8,14922 | R.LVVAVDHQTK.G      | 1718.042 | 0.00515  | 3 | 1 | 28.2 | 0 |
| P12163_1_F4,24721 | R.SFFEPIFK.E        | 1622.94  | 0.00559  | 2 | 1 | 28.4 | 0 |
| P12163_2_F2,12861 | R.SLVQVNNK.E        | 1509.921 | 0.00938  | 2 | 1 | 43.5 | 0 |
| P12163_2_F2,10037 | R.TQLCNDK.T         | 1486.814 | 0.00788  | 2 | 1 | 24.6 | 0 |
| P12163_1_F4,10942 | R.VHMYPR.L          | 1106.608 | 0.00731  | 3 | 1 | 30.9 | 0 |
| P12163_1_F9,19450 | K.AAPGGSFILLHGCAHN  | 3708.905 | 0.00288  | 4 | 1 | 22.6 | 0 |
| P12163_1_F3,15351 | K.AEMEMMAGR.I       | 1329.627 | 0.00258  | 2 | 1 | 25.6 | 0 |
| P12163_1_F5,5708  | K.AQSDNM*TNK.W      | 1632.847 | 0.0013   | 2 | 1 | 27.4 | 0 |
| P12163_1_F4,8787  | K.AQSDNMTNK.W       | 1616.852 | 0.00718  | 2 | 1 | 31.6 | 0 |
| P12163_1_F5,7656  | K.AQSDNMTNK.W       | 1616.852 | 0.008    | 2 | 1 | 38.5 | 0 |
| P12163_2_F1,8172  | K.AQSDNMTNK.W       | 1616.852 | 0.0053   | 2 | 1 | 40.9 | 0 |

|                   |                       |          |          |   |   |      |   |
|-------------------|-----------------------|----------|----------|---|---|------|---|
| P12163_2_F2,8529  | K.AQSDNMTNK.W         | 1616.852 | 0.00446  | 2 | 1 | 39   | 0 |
| P12163_1_F3,14679 | K.DIPDVEGDK.A ! K.DIP | 1595.874 | 0.00691  | 2 | 1 | 35.9 | 0 |
| P12163_1_F2,23746 | K.EYLPIEGLAAFNK.V     | 2073.184 | 0.00274  | 2 | 1 | 48.2 | 0 |
| P12163_1_F2,23918 | K.EYLPIEGLAAFNK.V     | 2073.184 | 0.01052  | 3 | 1 | 37.6 | 0 |
| P12163_1_F3,24782 | K.EYLPIEGLAAFNK.V     | 2073.184 | 0.00659  | 3 | 1 | 42.6 | 0 |
| P12163_1_F3,24796 | K.EYLPIEGLAAFNK.V     | 2073.184 | 0.01008  | 2 | 1 | 46.9 | 0 |
| P12163_1_F5,23786 | K.EYLPIEGLAAFNK.V     | 2073.184 | 0.0074   | 3 | 1 | 40.4 | 0 |
| P12163_1_F6,23326 | K.EYLPIEGLAAFNK.V     | 2073.184 | 0.00278  | 3 | 1 | 33.7 | 0 |
| P12163_1_F7,22762 | K.EYLPIEGLAAFNK.V     | 2073.184 | 0.00689  | 3 | 1 | 45.8 | 0 |
| P12163_2_F8_12070 | K.EYLPIEGLAAFNK.V     | 2073.184 | -0.00031 | 3 | 1 | 29.1 | 0 |
| P12163_1_F4,19448 | K.IADVIQEK.N          | 1523.925 | 0.00739  | 2 | 1 | 35.8 | 0 |
| P12163_1_F5,18261 | K.IADVIQEK.N          | 1523.925 | 0.00917  | 2 | 1 | 32.4 | 0 |
| P12163_1_F6,18524 | K.IADVIQEK.N          | 1523.925 | 0.00437  | 2 | 1 | 32   | 0 |
| P12163_1_F7,17162 | K.IADVIQEK.N          | 1523.925 | 0.00193  | 2 | 1 | 28.8 | 0 |
| P12163_1_F8,18515 | K.IADVIQEK.N          | 1523.925 | 0.00599  | 2 | 1 | 33.5 | 0 |
| P12163_2_F1,18634 | K.IADVIQEK.N          | 1523.925 | 0.00879  | 3 | 1 | 29.7 | 0 |
| P12163_2_F1,18679 | K.IADVIQEK.N          | 1523.925 | 0.00795  | 2 | 1 | 34   | 0 |
| P12163_2_F4,16770 | K.IADVIQEK.N          | 1523.925 | 0.00255  | 2 | 1 | 31.1 | 0 |
| P12163_2_F4,16779 | K.IADVIQEK.N          | 1523.925 | 0.00063  | 3 | 1 | 22.7 | 0 |
| P12163_2_S5,16538 | K.IADVIQEK.N          | 1523.925 | 0.00072  | 3 | 1 | 26   | 0 |
| P12163_2_S5,17091 | K.IADVIQEK.N          | 1523.925 | 0.00665  | 2 | 1 | 26.5 | 0 |
| P12163_2_S5,17092 | K.IADVIQEK.N          | 1523.925 | 0.00597  | 3 | 1 | 31.1 | 0 |
| P12163_1_F9,17259 | K.INLGVGAYR.D ! K.LNI | 1266.747 | -0.00395 | 2 | 1 | 33.1 | 0 |
| P12163_1_F9,14424 | K.KAENMLER.G          | 1711.998 | 0.00711  | 3 | 1 | 29.8 | 0 |
| P12163_1_F3,19306 | K.LFDSLSAK.D          | 1488.888 | 0.0118   | 2 | 1 | 25.3 | 0 |
| P12163_1_F4,21559 | K.LFDSLSAK.D          | 1488.888 | 0.00625  | 3 | 1 | 32.5 | 0 |
| P12163_1_F4,21595 | K.LFDSLSAK.D          | 1488.888 | 0.00898  | 2 | 1 | 30.8 | 0 |
| P12163_1_F4,23037 | K.LFDSLSAK.D          | 1488.888 | 0.00516  | 2 | 1 | 30.5 | 0 |
| P12163_1_F4,23087 | K.LFDSLSAK.D          | 1488.888 | 0.00319  | 3 | 1 | 25.4 | 0 |
| P12163_1_F5,20394 | K.LFDSLSAK.D          | 1488.888 | 0.00836  | 2 | 1 | 31.1 | 0 |
| P12163_1_F6,437   | K.LFDSLSAK.D          | 1488.888 | 0.00784  | 3 | 1 | 22   | 0 |
| P12163_1_F6,20257 | K.LFDSLSAK.D          | 1488.888 | 0.00494  | 2 | 1 | 33   | 0 |
| P12163_1_F6,20286 | K.LFDSLSAK.D          | 1488.888 | 0.00328  | 3 | 1 | 25.7 | 0 |
| P12163_1_F7,19002 | K.LFDSLSAK.D          | 1488.888 | 0.00216  | 2 | 1 | 26   | 0 |
| P12163_1_F7,19013 | K.LFDSLSAK.D          | 1488.888 | 0.00112  | 3 | 1 | 22.8 | 0 |
| P12163_1_F7,19491 | K.LFDSLSAK.D          | 1488.888 | 0.00648  | 2 | 1 | 27.8 | 0 |
| P12163_1_F9,19794 | K.LFDSLSAK.D          | 1488.888 | 0.00902  | 2 | 1 | 28.3 | 0 |
| P12163_2_F1,20678 | K.LFDSLSAK.D          | 1488.888 | 0.00625  | 3 | 1 | 32   | 0 |
| P12163_2_F1,20690 | K.LFDSLSAK.D          | 1488.888 | 0.00748  | 2 | 1 | 30.8 | 0 |
| P12163_2_F1,20940 | K.LFDSLSAK.D          | 1488.888 | 0.00697  | 3 | 1 | 30.1 | 0 |
| P12163_2_F1,20945 | K.LFDSLSAK.D          | 1488.888 | 0.00928  | 2 | 1 | 29.8 | 0 |
| P12163_2_F2,18    | K.LFDSLSAK.D          | 1488.888 | 0.00451  | 3 | 1 | 32.1 | 0 |
| P12163_2_F4,18575 | K.LFDSLSAK.D          | 1488.888 | 0.00022  | 2 | 1 | 24.1 | 0 |
| P12163_2_S5,18370 | K.LFDSLSAK.D          | 1488.888 | 0.00217  | 3 | 1 | 22.5 | 0 |
| P12163_2_S5,18953 | K.LFDSLSAK.D          | 1488.888 | 0.00556  | 3 | 1 | 22.9 | 0 |
| P12163_1_F2,13739 | K.NIFNDAR.V           | 1153.627 | 0.00303  | 2 | 1 | 39.5 | 0 |
| P12163_2_F1,13931 | K.NIFNDAR.V           | 1153.627 | 0.00255  | 2 | 1 | 26   | 0 |
| P12163_1_F4,15369 | K.NLGLYAER.I          | 1239.7   | 0.0028   | 2 | 1 | 34.4 | 0 |
| P12163_1_F5,14100 | K.NLGLYAER.I          | 1239.7   | 0.00404  | 2 | 1 | 29.8 | 0 |
| P12163_1_F9,14601 | K.NLGLYAER.I          | 1239.7   | 0.00228  | 2 | 1 | 31.1 | 0 |
| P12163_2_F1,14205 | K.NLGLYAER.I          | 1239.7   | 0.00424  | 2 | 1 | 24.7 | 0 |

|                   |                    |          |          |   |   |      |   |
|-------------------|--------------------|----------|----------|---|---|------|---|
| P12163_2_F8_12070 | K.NLGLYAER.I       | 1239.7   | 0.00236  | 2 | 1 | 29.5 | 0 |
| P12163_1_F6,17415 | K.VLISSPTWGNHK.N   | 1947.127 | 0.00603  | 3 | 1 | 57.6 | 0 |
| P12163_1_F8,17176 | K.VLISSPTWGNHK.N   | 1947.127 | 0.00822  | 3 | 1 | 44.5 | 0 |
| P12163_2_F6,16557 | K.VLISSPTWGNHK.N   | 1947.127 | 0.00582  | 2 | 1 | 43.7 | 0 |
| P12163_2_S5,16012 | K.VLISSPTWGNHK.N   | 1947.127 | 0.00537  | 3 | 1 | 29   | 0 |
| P12163_1_F2,24005 | K.VTAELLFGADNSVLK. | 2185.269 | 0.00766  | 3 | 1 | 22.5 | 0 |
| P12163_1_F3,17182 | R.GM*ELLVAQSYSK.N  | 1950.083 | 0.00711  | 2 | 1 | 27.8 | 0 |
| P12163_1_F4,21309 | R.GM*ELLVAQSYSK.N  | 1950.083 | 0.00943  | 3 | 1 | 43.8 | 0 |
| P12163_1_F3,18128 | R.GMELLVAQSYSK.N   | 1934.088 | 0.00066  | 2 | 1 | 36   | 0 |
| P12163_1_F3,19447 | R.GMELLVAQSYSK.N   | 1934.088 | 0.00182  | 2 | 1 | 41.8 | 0 |
| P12163_1_F3,20686 | R.GMELLVAQSYSK.N   | 1934.088 | 0.00855  | 2 | 1 | 69.5 | 0 |
| P12163_1_F3,20795 | R.GMELLVAQSYSK.N   | 1934.088 | 0.00883  | 3 | 1 | 30.6 | 0 |
| P12163_1_F4,21283 | R.GMELLVAQSYSK.N   | 1934.088 | 0.00904  | 3 | 1 | 41.2 | 0 |
| P12163_1_F4,21287 | R.GMELLVAQSYSK.N   | 1934.088 | 0.00807  | 2 | 1 | 44.8 | 0 |
| P12163_1_F6,19702 | R.GMELLVAQSYSK.N   | 1934.088 | 0.00427  | 3 | 1 | 30.2 | 0 |
| P12163_1_F6,19760 | R.GMELLVAQSYSK.N   | 1934.088 | -0.00109 | 2 | 1 | 36.8 | 0 |
| P12163_1_F9,19687 | R.GMELLVAQSYSK.N   | 1934.088 | 0.00106  | 3 | 1 | 29.6 | 0 |
| P12163_2_F1,20762 | R.GMELLVAQSYSK.N   | 1934.088 | 0.0061   | 3 | 1 | 28.9 | 0 |
| P12163_2_F4,18499 | R.GMELLVAQSYSK.N   | 1934.088 | 0.00073  | 3 | 1 | 40.2 | 0 |
| P12163_2_F7,17994 | R.GMELLVAQSYSK.N   | 1934.088 | -0.00344 | 3 | 1 | 37.6 | 0 |
| P12163_2_F7,18040 | R.GMELLVAQSYSK.N   | 1934.088 | -0.005   | 2 | 1 | 30.9 | 0 |
| P12163_1_F8,19123 | R.IGAMNVVCSSDLAAF  | 1954.999 | 0.00002  | 2 | 1 | 49.5 | 0 |
| P12163_2_F6,18700 | R.IGAMNVVCSSDLAAF  | 1954.999 | 0.00372  | 2 | 1 | 45.4 | 0 |
| P12163_1_F3,22643 | R.ISLAGLSLAK.C     | 1581.02  | 0.00877  | 2 | 1 | 51.5 | 0 |
| P12163_1_F4,19332 | R.ISLAGLSLAK.C     | 1581.02  | 0.00569  | 3 | 1 | 25.5 | 0 |
| P12163_1_F4,23277 | R.ISLAGLSLAK.C     | 1581.02  | 0.00311  | 3 | 1 | 48   | 0 |
| P12163_1_F4,23292 | R.ISLAGLSLAK.C     | 1581.02  | 0.00557  | 2 | 1 | 50.4 | 0 |
| P12163_1_F4,23548 | R.ISLAGLSLAK.C     | 1581.02  | 0.00227  | 3 | 1 | 45.3 | 0 |
| P12163_1_F4,23554 | R.ISLAGLSLAK.C     | 1581.02  | 0.00589  | 2 | 1 | 42.5 | 0 |
| P12163_1_F5,21919 | R.ISLAGLSLAK.C     | 1581.02  | 0.00545  | 3 | 1 | 34.2 | 0 |
| P12163_1_F6,21272 | R.ISLAGLSLAK.C     | 1581.02  | 0.00158  | 3 | 1 | 30.2 | 0 |
| P12163_1_F6,21334 | R.ISLAGLSLAK.C     | 1581.02  | 0.00195  | 2 | 1 | 37.1 | 0 |
| P12163_1_F6,21704 | R.ISLAGLSLAK.C     | 1581.02  | 0.00206  | 3 | 1 | 40   | 0 |
| P12163_1_F7,20444 | R.ISLAGLSLAK.C     | 1581.02  | 0.00071  | 3 | 1 | 36.1 | 0 |
| P12163_1_F7,20895 | R.ISLAGLSLAK.C     | 1581.02  | 0.00703  | 2 | 1 | 38.4 | 0 |
| P12163_1_F9,21172 | R.ISLAGLSLAK.C     | 1581.02  | 0.00617  | 3 | 1 | 37.5 | 0 |
| P12163_2_F1,22768 | R.ISLAGLSLAK.C     | 1581.02  | 0.00278  | 3 | 1 | 36.9 | 0 |
| P12163_2_F1,22784 | R.ISLAGLSLAK.C     | 1581.02  | 0.00697  | 2 | 1 | 52.1 | 0 |
| P12163_2_F4,19927 | R.ISLAGLSLAK.C     | 1581.02  | 0.00299  | 3 | 1 | 25.9 | 0 |
| P12163_2_F4,20368 | R.ISLAGLSLAK.C     | 1581.02  | 0.00391  | 2 | 1 | 29.2 | 0 |
| P12163_2_F4,20371 | R.ISLAGLSLAK.C     | 1581.02  | 0.00077  | 3 | 1 | 42.4 | 0 |
| P12163_2_F9,19591 | R.ISLAGLSLAK.C     | 1581.02  | 0.00263  | 3 | 1 | 38.4 | 0 |
| P12163_2_S5,19337 | R.ISLAGLSLAK.C     | 1581.02  | 0.00284  | 3 | 1 | 48.5 | 0 |
| P12163_1_F2,20851 | R.LAAALIER.Y       | 1160.73  | 0.00171  | 2 | 1 | 33.4 | 0 |
| P12163_1_F3,21118 | R.LAAALIER.Y       | 1160.73  | 0.00699  | 2 | 1 | 35.9 | 0 |
| P12163_1_F3,21295 | R.LAAALIER.Y       | 1160.73  | 0.00331  | 2 | 1 | 41   | 0 |
| P12163_2_F1,21292 | R.LAAALIER.Y       | 1160.73  | 0.00547  | 2 | 1 | 36.9 | 0 |
| P12163_2_F2,5     | R.LAAALIER.Y       | 1160.73  | 0.00257  | 2 | 1 | 25.5 | 0 |
| P12163_1_F4,21716 | R.QIGM*FSFTGLNK.A  | 1967.088 | -0.00835 | 3 | 1 | 45   | 0 |
| P12163_1_F4,21720 | R.QIGM*FSFTGLNK.A  | 1967.088 | -0.01196 | 2 | 1 | 24   | 0 |
| P12163_1_F4,24363 | R.QIGM*FSFTGLNK.A  | 1967.088 | 0.00665  | 3 | 1 | 48.4 | 0 |



|                   |                    |          |          |   |   |      |   |
|-------------------|--------------------|----------|----------|---|---|------|---|
| P12163_1_F6,20058 | R.QIGM*FSFTGLNK.A  | 1967.088 | 0.00212  | 3 | 1 | 50.5 | 0 |
| P12163_2_F1,21141 | R.QIGM*FSFTGLNK.A  | 1967.088 | 0.00173  | 3 | 1 | 32.9 | 0 |
| P12163_2_F9,18751 | R.QIGM*FSFTGLNK.A  | 1967.088 | 0.01241  | 3 | 1 | 45.8 | 0 |
| P12163_1_F3,23491 | R.QIGMFSFTGLNK.A   | 1951.093 | 0.00965  | 3 | 1 | 53.2 | 0 |
| P12163_1_F3,23519 | R.QIGMFSFTGLNK.A   | 1951.093 | 0.00354  | 2 | 1 | 47.3 | 0 |
| P12163_1_F4,24237 | R.QIGMFSFTGLNK.A   | 1951.093 | 0.00524  | 3 | 1 | 62.6 | 0 |
| P12163_1_F4,24250 | R.QIGMFSFTGLNK.A   | 1951.093 | 0.00322  | 2 | 1 | 54.9 | 0 |
| P12163_1_F6,22066 | R.QIGMFSFTGLNK.A   | 1951.093 | 0.00737  | 3 | 1 | 39.6 | 0 |
| P12163_2_F9,20601 | R.QIGMFSFTGLNK.A   | 1951.093 | 0.00581  | 3 | 1 | 25.3 | 0 |
| P12163_1_F2,22320 | R.TEELQPYVLDVVK.K  | 2141.231 | 0.00527  | 3 | 1 | 40.1 | 0 |
| P12163_1_F8,22272 | R.TEELQPYVLDVVK.K  | 2141.231 | 0.00194  | 3 | 1 | 30.8 | 0 |
| P12163_1_S1,18672 | R.TEELQPYVLDVVK.K  | 2141.231 | 0.00653  | 3 | 1 | 37.4 | 0 |
| P12163_1_S1,18752 | R.TEELQPYVLDVVK.K  | 2141.231 | 0.002    | 2 | 1 | 30.9 | 0 |
| P12163_1_S1,21115 | R.TEELQPYVLDVVK.K  | 2141.231 | 0.0077   | 2 | 1 | 53.8 | 0 |
| P12163_1_S1,21120 | R.TEELQPYVLDVVK.K  | 2141.231 | 0.00629  | 3 | 1 | 61.5 | 0 |
| P12163_1_F2,12652 | R.VATVQGLSGTGSLR.L | 1649.949 | 0.00085  | 3 | 1 | 48.3 | 0 |
| P12163_1_F2,13029 | R.VATVQGLSGTGSLR.L | 1649.949 | -0.00011 | 3 | 1 | 33.6 | 0 |
| P12163_1_F2,15112 | R.VATVQGLSGTGSLR.L | 1649.949 | 0.00049  | 3 | 1 | 42.1 | 0 |
| P12163_1_S1,9887  | R.VATVQGLSGTGSLR.L | 1649.949 | 0.00104  | 4 | 1 | 27.3 | 0 |
| P12163_1_S1,10327 | R.VATVQGLSGTGSLR.L | 1649.949 | 0.00457  | 3 | 1 | 33.9 | 0 |
| P12163_1_S1,10742 | R.VATVQGLSGTGSLR.L | 1649.949 | 0.00304  | 3 | 1 | 46.5 | 0 |
| P12163_1_S1,12121 | R.VATVQGLSGTGSLR.L | 1649.949 | 0.00373  | 3 | 1 | 45.8 | 0 |
| P12163_1_S1,12446 | R.VATVQGLSGTGSLR.L | 1649.949 | -0.00161 | 3 | 1 | 32.3 | 0 |
| P12163_1_S1,14145 | R.VATVQGLSGTGSLR.L | 1649.949 | 0.00346  | 3 | 1 | 65.6 | 0 |
| P12163_1_S1,14163 | R.VATVQGLSGTGSLR.L | 1649.949 | 0.00867  | 2 | 1 | 31.6 | 0 |
| P12163_1_S1,14372 | R.VATVQGLSGTGSLR.L | 1649.949 | 0.00085  | 3 | 1 | 55   | 0 |
| P12163_1_S1,14393 | R.VATVQGLSGTGSLR.L | 1649.949 | -0.00119 | 2 | 1 | 38.1 | 0 |
| P12163_1_S1,14611 | R.VATVQGLSGTGSLR.L | 1649.949 | 0.00322  | 3 | 1 | 49.5 | 0 |
| P12163_1_S1,15479 | R.VATVQGLSGTGSLR.L | 1649.949 | 0.00043  | 3 | 1 | 37.8 | 0 |
| P12163_1_S1,16034 | R.VATVQGLSGTGSLR.L | 1649.949 | 0.00385  | 2 | 1 | 46.2 | 0 |
| P12163_1_S1,16035 | R.VATVQGLSGTGSLR.L | 1649.949 | 0.0025   | 3 | 1 | 47.3 | 0 |
| P12163_1_S10,86   | R.VATVQGLSGTGSLR.L | 1649.949 | 0.00291  | 2 | 1 | 32   | 0 |
| P12163_2_F6,16492 | R.VATVQGLSGTGSLR.L | 1649.949 | -0.00019 | 2 | 1 | 31.9 | 0 |
| P12163_2_F7,15205 | R.VATVQGLSGTGSLR.L | 1649.949 | 0.00153  | 2 | 1 | 25   | 0 |
| P12163_1_S10,1468 | R.YFPGAK.V         | 1290.767 | 0.00654  | 3 | 1 | 22.9 | 0 |
| P12163_1_F5,18535 | K.AVVTVPAYFNDSQR.T | 1870.996 | -0.00144 | 2 | 1 | 30.4 | 0 |
| P12163_1_F5,18571 | K.AVVTVPAYFNDSQR.T | 1870.996 | 0.00056  | 3 | 1 | 23.3 | 0 |
| P12163_1_F8,19195 | K.AVVTVPAYFNDSQR.T | 1870.996 | -0.0014  | 2 | 1 | 27.9 | 0 |
| P12163_1_F8,19447 | K.AVVTVPAYFNDSQR.T | 1870.996 | 0.00268  | 2 | 1 | 41   | 0 |
| P12163_2_F2,19244 | K.AVVTVPAYFNDSQR.T | 1870.996 | 0.00119  | 3 | 1 | 25.5 | 0 |
| P12163_2_F6,18422 | K.AVVTVPAYFNDSQR.T | 1870.996 | 0.00028  | 2 | 1 | 38.9 | 0 |
| P12163_2_F6,18794 | K.AVVTVPAYFNDSQR.T | 1870.996 | 0.00306  | 2 | 1 | 24.3 | 0 |
| P12163_2_F6,18833 | K.AVVTVPAYFNDSQR.T | 1870.996 | 0.00707  | 3 | 1 | 30.5 | 0 |
| P12163_2_F6,18858 | K.AVVTVPAYFNDSQR.T | 1870.996 | 0.01403  | 3 | 1 | 29.4 | 0 |
| P12163_2_F6,18894 | K.AVVTVPAYFNDSQR.T | 1870.996 | 0.01346  | 3 | 1 | 28.5 | 0 |
| P12163_2_F1,9591  | K.DSISEESTQK.M     | 1731.922 | 0.0047   | 2 | 1 | 43   | 0 |
| P12163_2_F1,9592  | K.DSISEESTQK.M     | 1731.922 | 0.00268  | 3 | 1 | 26.2 | 0 |
| P12163_1_F9,11023 | K.HIETTLTR.A       | 1274.737 | -0.00234 | 3 | 1 | 29   | 0 |
| P12163_2_F7,7441  | K.HIETTLTR.A       | 1274.737 | 0.00141  | 3 | 1 | 23.9 | 0 |
| P12163_2_F7,8810  | K.HIETTLTR.A       | 1274.737 | 0.00189  | 3 | 1 | 36.2 | 0 |
| P12163_2_F7,10268 | K.HIETTLTR.A       | 1274.737 | 0.00345  | 3 | 1 | 30.1 | 0 |

|                   |                      |          |          |   |   |      |   |
|-------------------|----------------------|----------|----------|---|---|------|---|
| P12163_1_F7,15423 | K.KQDITITGASTLPSDEV  | 2668.461 | -0.00377 | 3 | 1 | 54.4 | 0 |
| P12163_1_F8,16121 | K.KQDITITGASTLPSDEV  | 2668.461 | 0.00162  | 4 | 1 | 41.6 | 0 |
| P12163_1_F8,16238 | K.KQDITITGASTLPSDEV  | 2668.461 | 0.00526  | 3 | 1 | 56.1 | 0 |
| P12163_2_S5,14829 | K.KQDITITGASTLPSDEV  | 2668.461 | 0.00364  | 3 | 1 | 73.3 | 0 |
| P12163_1_F4,15425 | K.LDCPAIGK.Q         | 1481.861 | 0.00485  | 2 | 1 | 29.5 | 0 |
| P12163_1_F4,15426 | K.LDCPAIGK.Q         | 1481.861 | 0.00778  | 3 | 1 | 36   | 0 |
| P12163_2_F1,14405 | K.LDCPAIGK.Q         | 1481.861 | -0.00055 | 2 | 1 | 29   | 0 |
| P12163_1_F4,9272  | K.M*SEVDDESK.Q       | 1663.83  | 0.00835  | 2 | 1 | 26.5 | 0 |
| P12163_1_F4,12641 | K.M*SEVDDESK.Q       | 1663.83  | 0.00911  | 2 | 1 | 30.6 | 0 |
| P12163_1_F4,12559 | K.MSEVDDESK.Q        | 1647.836 | 0.01335  | 2 | 1 | 24.6 | 0 |
| P12163_1_F4,12934 | K.NQADSLVYQTEK.Q     | 2004.086 | 0.00771  | 3 | 1 | 42.3 | 0 |
| P12163_1_F4,14802 | K.NQADSLVYQTEK.Q     | 2004.086 | 0.00545  | 2 | 1 | 52.4 | 0 |
| P12163_1_F4,14807 | K.NQADSLVYQTEK.Q     | 2004.086 | 0.00636  | 3 | 1 | 50.7 | 0 |
| P12163_2_F1,13795 | K.NQADSLVYQTEK.Q     | 2004.086 | 0.00525  | 3 | 1 | 51.1 | 0 |
| P12163_2_F1,13801 | K.NQADSLVYQTEK.Q     | 2004.086 | 0.00377  | 2 | 1 | 54.6 | 0 |
| P12163_2_F4,12822 | K.NQADSLVYQTEK.Q     | 2004.086 | 0.0015   | 3 | 1 | 34.4 | 0 |
| P12163_1_F4,22740 | K.QFAAEEISAQVLR.K    | 1765.975 | 0.00472  | 2 | 1 | 46.5 | 0 |
| P12163_1_F6,21239 | K.QFAAEEISAQVLR.K    | 1765.975 | 0.00156  | 2 | 1 | 24.5 | 0 |
| P12163_1_F7,20455 | K.QFAAEEISAQVLR.K    | 1765.975 | 0.00132  | 2 | 1 | 31.9 | 0 |
| P12163_1_S1,15742 | K.QFAAEEISAQVLR.K    | 1765.975 | 0.00225  | 3 | 1 | 68.7 | 0 |
| P12163_1_S1,15764 | K.QFAAEEISAQVLR.K    | 1765.975 | 0.00315  | 3 | 1 | 45.7 | 0 |
| P12163_1_S1,20635 | K.QFAAEEISAQVLR.K    | 1765.975 | -0.0003  | 3 | 1 | 97.9 | 0 |
| P12163_1_S1,20657 | K.QFAAEEISAQVLR.K    | 1765.975 | 0.00408  | 2 | 1 | 52.8 | 0 |
| P12163_1_S1,20865 | K.QFAAEEISAQVLR.K    | 1765.975 | 0.00252  | 3 | 1 | 100  | 0 |
| P12163_1_S1,20888 | K.QFAAEEISAQVLR.K    | 1765.975 | 0.00388  | 2 | 1 | 53.5 | 0 |
| P12163_1_S1,21108 | K.QFAAEEISAQVLR.K    | 1765.975 | -0.00486 | 3 | 1 | 40.2 | 0 |
| P12163_1_S1,22180 | K.QFAAEEISAQVLR.K    | 1765.975 | 0.00636  | 3 | 1 | 24.4 | 0 |
| P12163_1_S1,22950 | K.QFAAEEISAQVLR.K    | 1765.975 | -0.00174 | 3 | 1 | 28.4 | 0 |
| P12163_1_S10,2001 | K.QFAAEEISAQVLR.K    | 1765.975 | 0.00213  | 3 | 1 | 45.3 | 0 |
| P12163_1_F4,10181 | K.SLGSFR.L           | 970.5623 | 0.00388  | 3 | 1 | 26.6 | 0 |
| P12163_2_F2,8702  | K.SLGSFR.L           | 970.5623 | 0.00382  | 3 | 1 | 22.9 | 0 |
| P12163_2_F2,9071  | K.SLGSFR.L           | 970.5623 | 0.004    | 3 | 1 | 26.8 | 0 |
| P12163_1_F3,17395 | R.DEGVLLNDK.Q        | 1709.989 | 0.00214  | 2 | 1 | 38   | 0 |
| P12163_1_F3,17420 | R.DEGVLLNDK.Q        | 1709.989 | 0.00986  | 3 | 1 | 26.7 | 0 |
| P12163_1_F5,16660 | R.DEGVLLNDK.Q        | 1709.989 | 0.0039   | 2 | 1 | 39.8 | 0 |
| P12163_2_S3,14307 | R.DEGVLLNDK.Q        | 1709.989 | 0.00215  | 3 | 1 | 27.6 | 0 |
| P12163_1_F6,7789  | R.DENGNVK.L          | 1383.769 | 0.00328  | 2 | 1 | 24.2 | 0 |
| P12163_1_F4,16332 | R.GVPQIEVK.F         | 1477.92  | 0.00545  | 3 | 1 | 26.7 | 0 |
| P12163_1_F4,16575 | R.GVPQIEVK.F         | 1477.92  | 0.00415  | 3 | 1 | 27.4 | 0 |
| P12163_2_F1,15614 | R.GVPQIEVK.F         | 1477.92  | 0.00442  | 3 | 1 | 30.4 | 0 |
| P12163_2_F4,14119 | R.GVPQIEVK.F         | 1477.92  | -0.00125 | 3 | 1 | 26   | 0 |
| P12163_2_S5,14303 | R.GVPQIEVK.F         | 1477.92  | 0.00649  | 3 | 1 | 24   | 0 |
| P12163_1_F2,21229 | R.IAGLEVLR.I         | 1174.746 | 0.0027   | 2 | 1 | 29.5 | 0 |
| P12163_2_F1,21537 | R.IAGLEVLR.I         | 1174.746 | 0.00432  | 2 | 1 | 29.4 | 0 |
| P12163_1_F8,22018 | R.IINEPTAASLAYGFER.I | 2056.102 | 0.00325  | 2 | 1 | 25.4 | 0 |
| P12163_1_F3,20924 | R.IPAVQELVK.K        | 1605.02  | 0.00721  | 2 | 1 | 26.5 | 0 |
| P12163_1_F3,20944 | R.IPAVQELVK.K        | 1605.02  | 0.00694  | 3 | 1 | 41.7 | 0 |
| P12163_1_F4,21587 | R.IPAVQELVK.K        | 1605.02  | 0.00178  | 3 | 1 | 40.7 | 0 |
| P12163_1_F4,21597 | R.IPAVQELVK.K        | 1605.02  | 0.00995  | 2 | 1 | 27.2 | 0 |
| P12163_1_F4,21786 | R.IPAVQELVK.K        | 1605.02  | 0.00589  | 3 | 1 | 35.5 | 0 |
| P12163_1_F4,21796 | R.IPAVQELVK.K        | 1605.02  | 0.00611  | 2 | 1 | 37.9 | 0 |

|                                          |          |          |   |   |      |   |
|------------------------------------------|----------|----------|---|---|------|---|
| P12163_1_F4,22009 R.IPAVQELVK.K          | 1605.02  | 0.00825  | 2 | 1 | 25.1 | 0 |
| P12163_1_F5,20652 R.IPAVQELVK.K          | 1605.02  | 0.00652  | 3 | 1 | 41.2 | 0 |
| P12163_1_F6,19869 R.IPAVQELVK.K          | 1605.02  | 0.00187  | 3 | 1 | 45.5 | 0 |
| P12163_1_F6,20166 R.IPAVQELVK.K          | 1605.02  | 0.0001   | 3 | 1 | 32.7 | 0 |
| P12163_2_F1,21139 R.IPAVQELVK.K          | 1605.02  | 0.00451  | 3 | 1 | 39.6 | 0 |
| P12163_2_F1,21151 R.IPAVQELVK.K          | 1605.02  | 0.00709  | 2 | 1 | 26.1 | 0 |
| P12163_2_F1,21388 R.IPAVQELVK.K          | 1605.02  | 0.00385  | 3 | 1 | 46   | 0 |
| P12163_2_F1,21400 R.IPAVQELVK.K          | 1605.02  | 0.00621  | 2 | 1 | 31.4 | 0 |
| P12163_2_F1,21613 R.IPAVQELVK.K          | 1605.02  | 0.00937  | 2 | 1 | 36   | 0 |
| P12163_2_F4,18613 R.IPAVQELVK.K          | 1605.02  | 0.0007   | 3 | 1 | 41   | 0 |
| P12163_2_F4,18971 R.IPAVQELVK.K          | 1605.02  | 0.00085  | 3 | 1 | 30.1 | 0 |
| P12163_1_S1,14262 R.LDGIPPAPR.G          | 1239.736 | 0.00459  | 3 | 1 | 27.1 | 0 |
| P12163_1_S1,14444 R.LDGIPPAPR.G          | 1239.736 | 0.00383  | 2 | 1 | 24   | 0 |
| P12163_1_S1,14496 R.LDGIPPAPR.G          | 1239.736 | 0.00321  | 3 | 1 | 29.5 | 0 |
| P12163_1_S1,14732 R.LDGIPPAPR.G          | 1239.736 | 0.00348  | 3 | 1 | 25.4 | 0 |
| P12163_1_S1,14970 R.LDGIPPAPR.G          | 1239.736 | 0.00204  | 3 | 1 | 27.5 | 0 |
| P12163_1_S1,15214 R.LDGIPPAPR.G          | 1239.736 | 0.00375  | 3 | 1 | 27.5 | 0 |
| P12163_1_S1,15466 R.LDGIPPAPR.G          | 1239.736 | 0.00429  | 3 | 1 | 28.5 | 0 |
| P12163_1_S1,15736 R.LDGIPPAPR.G          | 1239.736 | 0.00255  | 3 | 1 | 23.7 | 0 |
| P12163_1_S1,16009 R.LDGIPPAPR.G          | 1239.736 | 0.00252  | 3 | 1 | 28.5 | 0 |
| P12163_1_S10,837 R.LDGIPPAPR.G           | 1239.736 | 0.00397  | 2 | 1 | 28.7 | 0 |
| P12163_2_F1,12050 R.LTEAAEK.A            | 1369.815 | 0.00549  | 2 | 1 | 24.2 | 0 |
| P12163_1_F6,16258 R.LVGQIAK.R            | 1336.877 | 0.00605  | 2 | 1 | 23.9 | 0 |
| P12163_1_F4,11844 R.NTTLPSTK.S           | 1469.878 | 0.00451  | 3 | 1 | 23.6 | 0 |
| P12163_2_F1,10953 R.NTTLPSTK.S           | 1469.878 | 0.00433  | 3 | 1 | 22.4 | 0 |
| P12163_1_F3,15072 R.QAVVNPENTFFSVK.R     | 2188.222 | 0.00759  | 3 | 1 | 39.1 | 0 |
| P12163_1_F3,17735 R.QAVVNPENTFFSVK.R     | 2188.222 | 0.00891  | 3 | 1 | 30.8 | 0 |
| P12163_1_F3,18039 R.QAVVNPENTFFSVK.R     | 2188.222 | 0.00672  | 4 | 1 | 51.6 | 0 |
| P12163_1_F3,18190 R.QAVVNPENTFFSVK.R     | 2188.222 | 0.00633  | 3 | 1 | 40.1 | 0 |
| P12163_1_F3,18466 R.QAVVNPENTFFSVK.R     | 2188.222 | 0.00897  | 3 | 1 | 50.2 | 0 |
| P12163_1_F3,19591 R.QAVVNPENTFFSVK.R     | 2188.222 | 0.00141  | 3 | 1 | 46.3 | 0 |
| P12163_1_F3,21003 R.QAVVNPENTFFSVK.R     | 2188.222 | 0.01443  | 3 | 1 | 38.2 | 0 |
| P12163_1_F3,21109 R.QAVVNPENTFFSVK.R     | 2188.222 | 0.00821  | 2 | 1 | 64.3 | 0 |
| P12163_1_F3,21199 R.QAVVNPENTFFSVK.R     | 2188.222 | 0.00831  | 3 | 1 | 63.4 | 0 |
| P12163_1_F3,21251 R.QAVVNPENTFFSVK.R     | 2188.222 | 0.00216  | 4 | 1 | 35.2 | 0 |
| P12163_1_F3,21290 R.QAVVNPENTFFSVK.R     | 2188.222 | 0.00619  | 2 | 1 | 62.5 | 0 |
| P12163_1_F3,21400 R.QAVVNPENTFFSVK.R     | 2188.222 | 0.00663  | 3 | 1 | 59   | 0 |
| P12163_1_F4,22027 R.QAVVNPENTFFSVK.R     | 2188.222 | 0.00705  | 3 | 1 | 51.9 | 0 |
| P12163_1_F5,20339 R.QAVVNPENTFFSVK.R     | 2188.222 | 0.00522  | 3 | 1 | 41.8 | 0 |
| P12163_1_F6,20256 R.QAVVNPENTFFSVK.R     | 2188.222 | 0.00228  | 3 | 1 | 58.5 | 0 |
| P12163_1_F6,20589 R.QAVVNPENTFFSVK.R     | 2188.222 | 0.00435  | 3 | 1 | 31.7 | 0 |
| P12163_1_F6,21169 R.QAVVNPENTFFSVK.R     | 2188.222 | -0.00039 | 3 | 1 | 24.2 | 0 |
| P12163_1_F7,19832 R.QAVVNPENTFFSVK.R     | 2188.222 | 0.00075  | 3 | 1 | 54.5 | 0 |
| P12163_1_F9,20216 R.QAVVNPENTFFSVK.R     | 2188.222 | 0.006    | 3 | 1 | 53.8 | 0 |
| P12163_2_F1,21501 R.QAVVNPENTFFSVK.R     | 2188.222 | 0.00381  | 3 | 1 | 47   | 0 |
| P12163_2_F1,21526 R.QAVVNPENTFFSVK.R     | 2188.222 | 0.00495  | 2 | 1 | 37.3 | 0 |
| P12163_2_F1,22052 R.QAVVNPENTFFSVK.R     | 2188.222 | 0.00519  | 3 | 1 | 33.6 | 0 |
| P12163_2_F4,19287 R.QAVVNPENTFFSVK.R     | 2188.222 | 0.00594  | 3 | 1 | 22   | 0 |
| P12163_1_F3,12583 R.TTPSVVAYTK.I ! R.TTI | 1674.989 | 0.00453  | 3 | 1 | 22.1 | 0 |
| P12163_1_F3,14511 R.TTPSVVAYTK.I ! R.TTI | 1674.989 | 0.00831  | 2 | 1 | 25.8 | 0 |
| P12163_1_F4,13048 R.TTPSVVAYTK.I ! R.TTI | 1674.989 | 0.00582  | 3 | 1 | 36.6 | 0 |

|                   |                        |          |          |   |   |      |   |
|-------------------|------------------------|----------|----------|---|---|------|---|
| P12163_1_F4,14949 | R.TTPSVVAYTK.I ! R.TTI | 1674.989 | 0.00675  | 2 | 1 | 32.4 | 0 |
| P12163_1_F4,14970 | R.TTPSVVAYTK.I ! R.TTI | 1674.989 | 0.00819  | 3 | 1 | 33.8 | 0 |
| P12163_1_F9,12449 | R.TTPSVVAYTK.I ! R.TTI | 1674.989 | 0.00789  | 3 | 1 | 23.4 | 0 |
| P12163_2_F1,12033 | R.TTPSVVAYTK.I ! R.TTI | 1674.989 | 0.00377  | 2 | 1 | 28.6 | 0 |
| P12163_2_F1,13970 | R.TTPSVVAYTK.I ! R.TTI | 1674.989 | 0.00411  | 2 | 1 | 34.9 | 0 |
| P12163_2_F1,13989 | R.TTPSVVAYTK.I ! R.TTI | 1674.989 | 0.00414  | 3 | 1 | 40.3 | 0 |
| P12163_2_F4,12927 | R.TTPSVVAYTK.I ! R.TTI | 1674.989 | 0.00045  | 3 | 1 | 26.4 | 0 |
| P12163_1_F5,7555  | K.AM*ANDVSGK.S         | 1516.825 | 0.00871  | 2 | 1 | 27.8 | 0 |
| P12163_1_F4,11542 | K.AMANDVSGK.S          | 1500.83  | 0.00626  | 2 | 1 | 25.7 | 0 |
| P12163_1_F4,11579 | K.AMANDVSGK.S          | 1500.83  | 0.00589  | 3 | 1 | 25.6 | 0 |
| P12163_1_F5,10156 | K.AMANDVSGK.S          | 1500.83  | 0.00825  | 2 | 1 | 25.9 | 0 |
| P12163_1_F6,11179 | K.AMANDVSGK.S          | 1500.83  | 0.00185  | 2 | 1 | 27.7 | 0 |
| P12163_2_F1,10636 | K.AMANDVSGK.S          | 1500.83  | 0.0049   | 2 | 1 | 28   | 0 |
| P12163_2_F1,10639 | K.AMANDVSGK.S          | 1500.83  | 0.0025   | 3 | 1 | 25.2 | 0 |
| P12163_2_S5,13079 | K.EINESFEK.E           | 1603.879 | 0.00031  | 3 | 1 | 27.9 | 0 |
| P12163_1_F4,17327 | K.FEEYGYAGNNVK.Q       | 1999.038 | 0.00644  | 2 | 1 | 65.4 | 0 |
| P12163_1_F9,16265 | K.FEEYGYAGNNVK.Q       | 1999.038 | -0.00088 | 2 | 1 | 24.7 | 0 |
| P12163_1_F9,16293 | K.FEEYGYAGNNVK.Q       | 1999.038 | 0.00687  | 3 | 1 | 28.4 | 0 |
| P12163_2_F1,16423 | K.FEEYGYAGNNVK.Q       | 1999.038 | 0.00422  | 2 | 1 | 50.5 | 0 |
| P12163_1_F3,10480 | K.GDTETVASPSTIK.N      | 1914.064 | 0.00409  | 3 | 1 | 31.5 | 0 |
| P12163_1_F3,10539 | K.GDTETVASPSTIK.N      | 1914.064 | 0.00885  | 2 | 1 | 32.4 | 0 |
| P12163_1_F3,10800 | K.GDTETVASPSTIK.N      | 1914.064 | 0.00592  | 3 | 1 | 26.2 | 0 |
| P12163_1_F3,11294 | K.GDTETVASPSTIK.N      | 1914.064 | 0.00751  | 3 | 1 | 24.5 | 0 |
| P12163_1_F3,12909 | K.GDTETVASPSTIK.N      | 1914.064 | 0.00796  | 3 | 1 | 35.1 | 0 |
| P12163_1_F3,12929 | K.GDTETVASPSTIK.N      | 1914.064 | 0.00597  | 2 | 1 | 83.1 | 0 |
| P12163_1_S1,12434 | K.GSVQELQQSTAEFR.S     | 1883.976 | 0.00716  | 3 | 1 | 50.7 | 0 |
| P12163_1_S1,12723 | K.GSVQELQQSTAEFR.S     | 1883.976 | 0.01047  | 3 | 1 | 38.4 | 0 |
| P12163_1_S1,16594 | K.GSVQELQQSTAEFR.S     | 1883.976 | 0.00538  | 2 | 1 | 45.4 | 0 |
| P12163_1_S1,16609 | K.GSVQELQQSTAEFR.S     | 1883.976 | 0.00437  | 3 | 1 | 62.5 | 0 |
| P12163_1_S10,37   | K.GSVQELQQSTAEFR.S     | 1883.976 | -0.00156 | 2 | 1 | 44.8 | 0 |
| P12163_1_F6,17961 | K.IDKFEEYGYAGNNVK.     | 2659.449 | 0.00687  | 3 | 1 | 33.4 | 0 |
| P12163_1_F9,17700 | K.IDKFEEYGYAGNNVK.     | 2659.449 | 0.01243  | 4 | 1 | 28.6 | 0 |
| P12163_2_F7,16017 | K.IDKFEEYGYAGNNVK.     | 2659.449 | 0.00739  | 4 | 1 | 28.2 | 0 |
| P12163_2_S5,15274 | K.NVEQSEKPLLLGEDSS     | 3058.582 | 0.0068   | 4 | 1 | 30.9 | 0 |
| P12163_1_F7,16956 | K.NVEQSEKPLLLGEDSS     | 3042.587 | 0.00595  | 3 | 1 | 26   | 0 |
| P12163_1_F7,17020 | K.NVEQSEKPLLLGEDSS     | 3042.587 | 0.0066   | 4 | 1 | 50   | 0 |
| P12163_2_S5,16574 | K.NVEQSEKPLLLGEDSS     | 3042.587 | 0.00475  | 3 | 1 | 25.7 | 0 |
| P12163_1_F3,7605  | K.QDDLQR.E             | 1078.579 | 0.0033   | 2 | 1 | 27.5 | 0 |
| P12163_1_F2,10250 | K.QFSVDQTVSR.A         | 1470.785 | 0.00194  | 3 | 1 | 27.3 | 0 |
| P12163_1_S1,9131  | K.QFSVDQTVSR.A         | 1470.785 | 0.00245  | 3 | 1 | 33.8 | 0 |
| P12163_1_S1,10322 | K.QFSVDQTVSR.A         | 1470.785 | 0.00236  | 3 | 1 | 36.9 | 0 |
| P12163_1_S1,12798 | K.QFSVDQTVSR.A         | 1470.785 | 0.00332  | 3 | 1 | 30   | 0 |
| P12163_1_S1,12824 | K.QFSVDQTVSR.A         | 1470.785 | 0.00463  | 2 | 1 | 35.8 | 0 |
| P12163_1_F4,15264 | K.VEISYEK.E            | 1475.857 | 0.00177  | 2 | 1 | 25.1 | 0 |
| P12163_2_F8_12070 | K.VEISYEK.E            | 1475.857 | 0.00282  | 3 | 1 | 21.9 | 0 |
| P12163_1_F8,18500 | K.VIEADV KPGDLCIR.R    | 2193.252 | 0.0038   | 2 | 1 | 50.1 | 0 |
| P12163_2_F6,18055 | K.VIEADV KPGDLCIR.R    | 2193.252 | 0.00425  | 2 | 1 | 44.1 | 0 |
| P12163_1_F4,22931 | R.AAIESEM*EILSK.L      | 1945.077 | 0.00264  | 3 | 1 | 24.6 | 0 |
| P12163_1_F3,20526 | R.AAIESEMEILSK.L       | 1929.082 | 0.00951  | 3 | 1 | 37   | 0 |
| P12163_1_F3,20538 | R.AAIESEMEILSK.L       | 1929.082 | 0.01116  | 3 | 1 | 39.4 | 0 |
| P12163_1_F3,22191 | R.AAIESEMEILSK.L       | 1929.082 | 0.01338  | 3 | 1 | 57.3 | 0 |

|                   |                    |          |          |   |   |      |   |
|-------------------|--------------------|----------|----------|---|---|------|---|
| P12163_1_F3,22202 | R.AAIESEMEILSK.L   | 1929.082 | 0.01535  | 2 | 1 | 66.2 | 0 |
| P12163_1_F4,21199 | R.AAIESEMEILSK.L   | 1929.082 | 0.0108   | 3 | 1 | 30.6 | 0 |
| P12163_1_F4,22869 | R.AAIESEMEILSK.L   | 1929.082 | 0.00711  | 2 | 1 | 33.1 | 0 |
| P12163_1_F4,22959 | R.AAIESEMEILSK.L   | 1929.082 | 0.00513  | 3 | 1 | 53.5 | 0 |
| P12163_1_F6,21021 | R.AAIESEMEILSK.L   | 1929.082 | 0.00696  | 3 | 1 | 48.4 | 0 |
| P12163_2_F1,22326 | R.AAIESEMEILSK.L   | 1929.082 | 0.00681  | 3 | 1 | 26.8 | 0 |
| P12163_2_F1,22366 | R.AAIESEMEILSK.L   | 1929.082 | 0.00117  | 2 | 1 | 26.2 | 0 |
| P12163_2_F4,19696 | R.AAIESEMEILSK.L   | 1929.082 | 0.00018  | 3 | 1 | 30   | 0 |
| P12163_1_F5,12382 | R.AQSLVDK.L        | 1368.831 | 0.01175  | 2 | 1 | 25.3 | 0 |
| P12163_2_F1,12756 | R.AQSLVDK.L        | 1368.831 | 0.00742  | 3 | 1 | 24.8 | 0 |
| P12163_2_F2,13266 | R.AQSLVDK.L        | 1368.831 | 0.00803  | 2 | 1 | 25.3 | 0 |
| P12163_1_F5,12177 | R.AWAEDEAK.R       | 1527.826 | 0.00979  | 2 | 1 | 29.7 | 0 |
| P12163_1_F5,12232 | R.AWAEDEAK.R       | 1527.826 | 0.00565  | 3 | 1 | 32.2 | 0 |
| P12163_2_F2,12887 | R.AWAEDEAK.R       | 1527.826 | 0.01207  | 2 | 1 | 37.9 | 0 |
| P12163_2_F2,12897 | R.AWAEDEAK.R       | 1527.826 | 0.00784  | 3 | 1 | 31.4 | 0 |
| P12163_1_F6,16832 | R.EQM*EPLTAAQDVSIV | 2732.438 | 0.00578  | 4 | 1 | 24   | 0 |
| P12163_1_F6,17126 | R.EQM*EPLTAAQDVSIV | 2732.438 | 0.00694  | 3 | 1 | 39.5 | 0 |
| P12163_1_F6,17156 | R.EQM*EPLTAAQDVSIV | 2732.438 | 0.00562  | 4 | 1 | 25.1 | 0 |
| P12163_2_F4,15941 | R.EQM*EPLTAAQDVSIV | 2732.438 | 0.00505  | 3 | 1 | 38.5 | 0 |
| P12163_2_F4,17762 | R.EQM*EPLTAAQDVSIV | 2732.438 | 0.0043   | 3 | 1 | 53.3 | 0 |
| P12163_1_F6,16825 | R.EQMEPLTAAQDVSIVP | 2716.444 | 0.00894  | 4 | 1 | 29.9 | 0 |
| P12163_1_F6,18854 | R.EQMEPLTAAQDVSIVP | 2716.444 | 0.01264  | 3 | 1 | 38.5 | 0 |
| P12163_1_F6,18979 | R.EQMEPLTAAQDVSIVP | 2716.444 | 0.00546  | 4 | 1 | 56.2 | 0 |
| P12163_1_F7,18075 | R.EQMEPLTAAQDVSIVP | 2716.444 | 0.00676  | 3 | 1 | 32   | 0 |
| P12163_2_F4,15623 | R.EQMEPLTAAQDVSIVP | 2716.444 | -0.00155 | 3 | 1 | 22.5 | 0 |
| P12163_2_F4,17664 | R.EQMEPLTAAQDVSIVP | 2716.444 | 0.0057   | 4 | 1 | 48.2 | 0 |
| P12163_2_F8_12070 | R.EQMEPLTAAQDVSIVP | 2716.444 | 0.00814  | 3 | 1 | 22   | 0 |
| P12163_2_S5,17287 | R.EQMEPLTAAQDVSIVP | 2716.444 | 0.00482  | 4 | 1 | 22.1 | 0 |
| P12163_1_F3,19629 | R.EVEEQLESLM*SNK.V | 2160.131 | -0.00251 | 3 | 1 | 37.1 | 0 |
| P12163_1_F3,23908 | R.EVEEQLESLM*SNK.V | 2160.131 | 0.00901  | 3 | 1 | 57.6 | 0 |
| P12163_1_F4,24694 | R.EVEEQLESLM*SNK.V | 2160.131 | 0.00751  | 3 | 1 | 49   | 0 |
| P12163_1_F6,22569 | R.EVEEQLESLM*SNK.V | 2160.131 | 0.00022  | 3 | 1 | 36   | 0 |
| P12163_1_F3,22771 | R.EVEEQLESLMSNK.V  | 2144.136 | 0.0037   | 3 | 1 | 39.9 | 0 |
| P12163_1_F3,23809 | R.EVEEQLESLMSNK.V  | 2144.136 | 0.00589  | 3 | 1 | 49.2 | 0 |
| P12163_1_F3,24040 | R.EVEEQLESLMSNK.V  | 2144.136 | 0.00592  | 3 | 1 | 54.4 | 0 |
| P12163_2_F8_12070 | R.IEAESAENAVSEHSA  | 2991.573 | 0.00462  | 4 | 1 | 72.6 | 0 |
| P12163_1_F2,18133 | R.LQYELEVER.K      | 1482.811 | 0.00311  | 2 | 1 | 35.4 | 0 |
| P12163_1_F3,18632 | R.LQYELEVER.K      | 1482.811 | 0.00355  | 2 | 1 | 26.8 | 0 |
| P12163_2_F1,18388 | R.LQYELEVER.K      | 1482.811 | 0.00307  | 2 | 1 | 26.1 | 0 |
| P12163_2_F1,17558 | R.QDLVSWK.M        | 1483.873 | 0.001    | 3 | 1 | 27.7 | 0 |
| P12163_1_F5,10603 | R.QLPEANK.K        | 1407.842 | 0.00258  | 3 | 1 | 32.8 | 0 |
| P12163_1_F6,10395 | R.SNLTEGAK.R       | 1427.831 | 0.00653  | 2 | 1 | 31.5 | 0 |
| P12163_2_F2,10195 | R.SNLTEGAK.R       | 1427.831 | 0.00836  | 3 | 1 | 35.6 | 0 |
| P12163_2_F2,10258 | R.SNLTEGAK.R       | 1427.831 | 0.00879  | 2 | 1 | 29.9 | 0 |
| P12163_1_F6,12822 | K.AGEDADSLGLTGHER. | 1831.909 | 0.00625  | 3 | 1 | 44   | 0 |
| P12163_1_F6,12840 | K.AGEDADSLGLTGHER. | 1831.909 | 0.00263  | 2 | 1 | 31   | 0 |
| P12163_1_F8,10126 | K.AGEDADSLGLTGHER. | 1831.909 | 0.00346  | 3 | 1 | 30.9 | 0 |
| P12163_1_F8,11186 | K.AGEDADSLGLTGHER. | 1831.909 | 0.00289  | 3 | 1 | 53.9 | 0 |
| P12163_1_F8,12616 | K.AGEDADSLGLTGHER. | 1831.909 | 0.00091  | 2 | 1 | 32.1 | 0 |
| P12163_1_F8,12620 | K.AGEDADSLGLTGHER. | 1831.909 | 0.00364  | 3 | 1 | 48.1 | 0 |
| P12163_2_F6,12212 | K.AGEDADSLGLTGHER. | 1831.909 | -0.0002  | 3 | 1 | 98.4 | 0 |

|                   |                           |          |          |   |   |      |   |
|-------------------|---------------------------|----------|----------|---|---|------|---|
| P12163_2_F6,12215 | K.AGEDADSLGLTGBHER.       | 1831.909 | -0.00083 | 2 | 1 | 42.5 | 0 |
| P12163_2_S5,10963 | K.AGEDADSLGLTGBHER.       | 1831.909 | 0.00433  | 3 | 1 | 37.3 | 0 |
| P12163_2_S5,12296 | K.AGEDADSLGLTGBHER.       | 1831.909 | 0.00232  | 3 | 1 | 62   | 0 |
| P12163_1_F6,16590 | K.FSFHGQPAELK.H           | 1869.048 | 0.00682  | 3 | 1 | 23.2 | 0 |
| P12163_2_F6,15944 | K.FSFHGQPAELK.H           | 1869.048 | 0.00589  | 3 | 1 | 27.8 | 0 |
| P12163_2_F6,15948 | K.FSFHGQPAELK.H           | 1869.048 | 0.00292  | 2 | 1 | 38.3 | 0 |
| P12163_1_S1,20805 | K.FYSLPALNDPR.I           | 1596.869 | 0.00309  | 2 | 1 | 25.4 | 0 |
| P12163_1_S1,20917 | K.FYSLPALNDPR.I           | 1596.869 | 0.00181  | 3 | 1 | 40.9 | 0 |
| P12163_2_F7,19069 | K.FYSLPALNDPR.I           | 1596.869 | 0.00265  | 2 | 1 | 27.8 | 0 |
| P12163_1_F4,18016 | K.GNPTWNQLSVPASK.L        | 2107.176 | 0.00653  | 3 | 1 | 51.1 | 0 |
| P12163_1_F4,18029 | K.GNPTWNQLSVPASK.L        | 2107.176 | 0.00384  | 2 | 1 | 56.8 | 0 |
| P12163_2_F1,16390 | K.GPM*LLGVK.A             | 1438.891 | 0.00565  | 3 | 1 | 24   | 0 |
| P12163_1_F4,19495 | K.GPMLLGVK.A              | 1422.896 | 0.00937  | 2 | 1 | 33.4 | 0 |
| P12163_1_F4,19501 | K.GPMLLGVK.A              | 1422.896 | 0.00907  | 3 | 1 | 38.2 | 0 |
| P12163_1_F5,18415 | K.GPMLLGVK.A              | 1422.896 | 0.00418  | 3 | 1 | 28.7 | 0 |
| P12163_1_F7,17285 | K.GPMLLGVK.A              | 1422.896 | 0.00562  | 3 | 1 | 29.4 | 0 |
| P12163_1_S10,8561 | K.HGVVVGK.F               | 1204.762 | 0.00783  | 3 | 1 | 24.9 | 0 |
| P12163_1_F4,20426 | K.IIDWENSAPK.Q            | 1781.005 | 0.00744  | 2 | 1 | 40.1 | 0 |
| P12163_2_F1,19823 | K.IIDWENSAPK.Q            | 1781.005 | 0.00512  | 2 | 1 | 40.3 | 0 |
| P12163_2_F1,21213 | K.IILLESAIR.N ! R.IILLES/ | 1218.772 | 0.00386  | 2 | 1 | 24.5 | 0 |
| P12163_1_F7,15043 | K.ISEIRPGQDVTVTDDSC       | 2511.387 | 0.0076   | 4 | 1 | 24.5 | 0 |
| P12163_1_F4,17461 | K.LLNGEVGP.K.T            | 1534.941 | 0.00706  | 2 | 1 | 32   | 0 |
| P12163_1_F4,17471 | K.LLNGEVGP.K.T            | 1534.941 | 0.00476  | 3 | 1 | 38.3 | 0 |
| P12163_1_F5,16162 | K.LLNGEVGP.K.T            | 1534.941 | 0.00746  | 2 | 1 | 37.6 | 0 |
| P12163_1_F5,16182 | K.LLNGEVGP.K.T            | 1534.941 | 0.00515  | 3 | 1 | 36.2 | 0 |
| P12163_1_F6,16731 | K.LLNGEVGP.K.T            | 1534.941 | 0.01202  | 2 | 1 | 26.8 | 0 |
| P12163_1_F7,15384 | K.LLNGEVGP.K.T            | 1534.941 | 0.00192  | 2 | 1 | 31.9 | 0 |
| P12163_2_F1,16641 | K.LLNGEVGP.K.T            | 1534.941 | 0.00408  | 2 | 1 | 31.7 | 0 |
| P12163_1_F4,23542 | K.LSVFDAAM*K.Y            | 1605.913 | 0.01172  | 2 | 1 | 26.6 | 0 |
| P12163_2_F1,22910 | K.LSVFDAAMK.Y             | 1589.918 | 0.00624  | 2 | 1 | 47.8 | 0 |
| P12163_2_F1,22920 | K.LSVFDAAMK.Y             | 1589.918 | 0.00478  | 3 | 1 | 41   | 0 |
| P12163_2_F6,16182 | K.QVEIPFKPAR.V            | 1793.089 | 0.00682  | 2 | 1 | 25.6 | 0 |
| P12163_2_F6,16262 | K.QVEIPFKPAR.V            | 1793.089 | 0.0048   | 3 | 1 | 38.4 | 0 |
| P12163_2_F7,14980 | K.QVEIPFKPAR.V            | 1793.089 | 0.00531  | 3 | 1 | 38.2 | 0 |
| P12163_1_F4,13574 | K.STYEAITK.G              | 1520.878 | 0.01182  | 2 | 1 | 39.1 | 0 |
| P12163_1_F4,13587 | K.STYEAITK.G              | 1520.878 | 0.00608  | 3 | 1 | 36.3 | 0 |
| P12163_1_F5,12147 | K.STYEAITK.G              | 1520.878 | 0.01061  | 3 | 1 | 31.6 | 0 |
| P12163_1_F9,13025 | K.STYEAITK.G              | 1520.878 | 0.00516  | 2 | 1 | 26.9 | 0 |
| P12163_1_F9,13054 | K.STYEAITK.G              | 1520.878 | 0.00425  | 3 | 1 | 24.8 | 0 |
| P12163_2_F1,12527 | K.STYEAITK.G              | 1520.878 | 0.01038  | 2 | 1 | 31.7 | 0 |
| P12163_2_F1,12528 | K.STYEAITK.G              | 1520.878 | 0.00566  | 3 | 1 | 36   | 0 |
| P12163_2_S5,11779 | K.STYEAITK.G              | 1520.878 | 0.00047  | 3 | 1 | 28   | 0 |
| P12163_1_F3,12729 | K.TSLAPGSGVVTK.Y          | 1725.037 | 0.00679  | 3 | 1 | 28.7 | 0 |
| P12163_1_F3,14623 | K.TSLAPGSGVVTK.Y          | 1725.037 | 0.00595  | 2 | 1 | 49.3 | 0 |
| P12163_1_F4,13159 | K.TSLAPGSGVVTK.Y          | 1725.037 | 0.00391  | 3 | 1 | 40.9 | 0 |
| P12163_1_F4,13214 | K.TSLAPGSGVVTK.Y          | 1725.037 | 0.00617  | 2 | 1 | 41.1 | 0 |
| P12163_1_F4,14929 | K.TSLAPGSGVVTK.Y          | 1725.037 | 0.00037  | 2 | 1 | 40.9 | 0 |
| P12163_2_F1,14052 | K.TSLAPGSGVVTK.Y          | 1725.037 | 0.0052   | 3 | 1 | 54.1 | 0 |
| P12163_1_F9,9105  | K.TVHVPTGEK.L             | 1575.931 | 0.00655  | 3 | 1 | 22   | 0 |
| P12163_1_F4,18887 | K.YLLQSGLQK.Y             | 1658.01  | 0.00653  | 3 | 1 | 34.7 | 0 |
| P12163_1_F4,18888 | K.YLLQSGLQK.Y             | 1658.01  | 0.00761  | 2 | 1 | 34.1 | 0 |

|                   |                       |          |          |   |   |      |   |
|-------------------|-----------------------|----------|----------|---|---|------|---|
| P12163_1_F5,17588 | K.YLLQSGLQK.Y         | 1658.01  | 0.00284  | 3 | 1 | 32.5 | 0 |
| P12163_1_F9,17412 | K.YLLQSGLQK.Y         | 1658.01  | 0.00548  | 3 | 1 | 32.1 | 0 |
| P12163_1_F9,17441 | K.YLLQSGLQK.Y         | 1658.01  | 0.00061  | 2 | 1 | 38.4 | 0 |
| P12163_2_F1,18115 | K.YLLQSGLQK.Y         | 1658.01  | 0.00353  | 3 | 1 | 32.8 | 0 |
| P12163_2_F1,18130 | K.YLLQSGLQK.Y         | 1658.01  | 0.00421  | 2 | 1 | 33.4 | 0 |
| P12163_2_F2,18372 | K.YLLQSGLQK.Y         | 1658.01  | 0.00151  | 2 | 1 | 30.5 | 0 |
| P12163_2_F8_12070 | K.YLLQSGLQK.Y         | 1658.01  | -0.00067 | 3 | 1 | 33   | 0 |
| P12163_2_F9,16499 | K.YLLQSGLQK.Y         | 1658.01  | 0.00194  | 3 | 1 | 30.1 | 0 |
| P12163_1_F4,20797 | R.FSIDLPSK.I          | 1514.904 | 0.00582  | 2 | 1 | 44.6 | 0 |
| P12163_2_F1,20250 | R.FSIDLPSK.I          | 1514.904 | 0.00626  | 2 | 1 | 38.7 | 0 |
| P12163_1_F5,11557 | R.NCDNFQVK.K          | 1632.862 | 0.01121  | 2 | 1 | 29.6 | 0 |
| P12163_2_F2,12334 | R.NCDNFQVK.K          | 1632.862 | 0.0066   | 2 | 1 | 25.4 | 0 |
| P12163_1_S10,8185 | R.RGNDEVMAR.G         | 1351.705 | 0.0094   | 3 | 1 | 35.6 | 0 |
| P12163_1_S10,8197 | R.RGNDEVMAR.G         | 1351.705 | 0.00945  | 2 | 1 | 35.8 | 0 |
| P12163_2_F8_12070 | R.RGNDEVMAR.G         | 1351.705 | 0.00379  | 2 | 1 | 32.8 | 0 |
| P12163_1_F3,24473 | R.SNLVGM*GIPLCFK.A    | 2173.233 | -0.00024 | 3 | 1 | 36.3 | 0 |
| P12163_1_F3,24477 | R.SNLVGM*GIPLCFK.A    | 2173.233 | 0.00332  | 2 | 1 | 32.2 | 0 |
| P12163_1_F3,24493 | R.SNLVGMGIPLCFK.A     | 2157.238 | 0.00555  | 3 | 1 | 41   | 0 |
| P12163_1_F3,26349 | R.SNLVGMGIPLCFK.A     | 2157.238 | 0.00885  | 3 | 1 | 43.8 | 0 |
| P12163_1_F9,8784  | R.VHPLTR.A            | 1026.636 | 0.00112  | 3 | 1 | 22.2 | 0 |
| P12163_1_S10,9421 | R.VHPLTR.A            | 1026.636 | 0.00382  | 3 | 1 | 24.8 | 0 |
| P12163_2_F10,8793 | R.VHPLTR.A            | 1026.636 | 0.00223  | 3 | 1 | 24.3 | 0 |
| P12163_1_S1,21915 | K.AAVEEGIVPGGGVALI    | 2493.454 | 0.00888  | 3 | 1 | 60.8 | 0 |
| P12163_1_S1,21957 | K.AAVEEGIVPGGGVALI    | 2493.454 | 0.00331  | 4 | 1 | 33.6 | 0 |
| P12163_1_F8,21015 | K.CELEDPLILVHEK.K     | 2203.225 | 0.00232  | 3 | 1 | 25.1 | 0 |
| P12163_2_F6,20541 | K.CELEDPLILVHEK.K     | 2203.225 | 0.00172  | 3 | 1 | 33.9 | 0 |
| P12163_2_S5,19119 | K.CELEDPLILVHEK.K     | 2203.225 | 0.00502  | 3 | 1 | 38.6 | 0 |
| P12163_1_F4,11375 | K.DGVTVAK.S           | 1297.794 | 0.0015   | 2 | 1 | 24.1 | 0 |
| P12163_2_F6,12853 | K.EGVITHDGK.T         | 1676.979 | 0.00138  | 3 | 1 | 30   | 0 |
| P12163_2_F7,12288 | K.EGVITHDGK.T         | 1676.979 | 0.00081  | 3 | 1 | 36.8 | 0 |
| P12163_1_F3,19089 | K.GVEELADAVK.V        | 1638.952 | 0.006    | 2 | 1 | 58.7 | 0 |
| P12163_1_F4,19380 | K.GVEELADAVK.V        | 1638.952 | 0.00562  | 3 | 1 | 43.4 | 0 |
| P12163_1_F4,19421 | K.GVEELADAVK.V        | 1638.952 | 0.00866  | 2 | 1 | 57.7 | 0 |
| P12163_1_F4,13621 | K.IGGASEAEVGEK.K      | 1754.974 | 0.00887  | 3 | 1 | 38.1 | 0 |
| P12163_1_F4,13661 | K.IGGASEAEVGEK.K      | 1754.974 | 0.00827  | 2 | 1 | 51.7 | 0 |
| P12163_2_F1,12664 | K.IGGASEAEVGEK.K      | 1754.974 | 0.00367  | 2 | 1 | 46.2 | 0 |
| P12163_2_F1,12703 | K.IGGASEAEVGEK.K      | 1754.974 | 0.00668  | 3 | 1 | 35.3 | 0 |
| P12163_1_F4,24885 | K.IGVQIIQNALK.T       | 1805.147 | 0.00961  | 2 | 1 | 46.1 | 0 |
| P12163_1_F4,24892 | K.IGVQIIQNALK.T       | 1805.147 | 0.00518  | 3 | 1 | 39.5 | 0 |
| P12163_1_F2,15127 | K.ISNLTAVVR.V         | 1276.789 | 0.00393  | 3 | 1 | 23.3 | 0 |
| P12163_2_F1,19274 | K.ISNLTAVVR.V         | 1276.789 | 0.0039   | 2 | 1 | 29.8 | 0 |
| P12163_1_S1,17380 | K.LLEQDNTDLGYDAAK     | 2274.207 | 0.0088   | 3 | 1 | 67.4 | 0 |
| P12163_1_F4,17840 | K.LSGGVAVIK.V ! K.LSC | 1451.941 | 0.00685  | 2 | 1 | 36.2 | 0 |
| P12163_1_F4,17849 | K.LSGGVAVIK.V ! K.LSC | 1451.941 | 0.00546  | 3 | 1 | 29.5 | 0 |
| P12163_1_F4,18755 | K.LSGGVAVIK.V ! K.LSC | 1451.941 | 0.00627  | 3 | 1 | 29.5 | 0 |
| P12163_1_F4,18793 | K.LSGGVAVIK.V ! K.LSC | 1451.941 | 0.00573  | 2 | 1 | 36.3 | 0 |
| P12163_1_F5,16593 | K.LSGGVAVIK.V ! K.LSC | 1451.941 | 0.00381  | 2 | 1 | 33   | 0 |
| P12163_1_F6,17094 | K.LSGGVAVIK.V ! K.LSC | 1451.941 | 0.0066   | 3 | 1 | 25.3 | 0 |
| P12163_1_F7,15767 | K.LSGGVAVIK.V ! K.LSC | 1451.941 | 0.00323  | 2 | 1 | 24.7 | 0 |
| P12163_1_F7,15810 | K.LSGGVAVIK.V ! K.LSC | 1451.941 | 0.00276  | 3 | 1 | 32.1 | 0 |
| P12163_1_F7,16269 | K.LSGGVAVIK.V ! K.LSC | 1451.941 | 0.00321  | 3 | 1 | 25.8 | 0 |

|                   |                       |          |          |   |   |      |   |
|-------------------|-----------------------|----------|----------|---|---|------|---|
| P12163_1_F8,17074 | K.LSGGVAVIK.V ! K.LSC | 1451.941 | 0.00288  | 3 | 1 | 34.2 | 0 |
| P12163_1_F9,16894 | K.LSGGVAVIK.V ! K.LSC | 1451.941 | 0.00606  | 3 | 1 | 33.7 | 0 |
| P12163_2_F1,16989 | K.LSGGVAVIK.V ! K.LSC | 1451.941 | 0.00463  | 2 | 1 | 27.1 | 0 |
| P12163_2_F1,17994 | K.LSGGVAVIK.V ! K.LSC | 1451.941 | 0.00413  | 2 | 1 | 33.8 | 0 |
| P12163_2_F2,356   | K.LSGGVAVIK.V ! K.LSC | 1451.941 | 0.00372  | 3 | 1 | 27.9 | 0 |
| P12163_2_F2,835   | K.LSGGVAVIK.V ! K.LSC | 1451.941 | 0.00492  | 3 | 1 | 35.2 | 0 |
| P12163_2_F2,864   | K.LSGGVAVIK.V ! K.LSC | 1451.941 | 0.00453  | 2 | 1 | 37.9 | 0 |
| P12163_2_F2,1030  | K.LSGGVAVIK.V ! K.LSC | 1451.941 | 0.00414  | 3 | 1 | 33.4 | 0 |
| P12163_2_F2,1058  | K.LSGGVAVIK.V ! K.LSC | 1451.941 | 0.00323  | 2 | 1 | 37.1 | 0 |
| P12163_2_F2,1221  | K.LSGGVAVIK.V ! K.LSC | 1451.941 | 0.0039   | 3 | 1 | 31.6 | 0 |
| P12163_2_F2,1252  | K.LSGGVAVIK.V ! K.LSC | 1451.941 | 0.00427  | 2 | 1 | 39.5 | 0 |
| P12163_2_F2,1417  | K.LSGGVAVIK.V ! K.LSC | 1451.941 | 0.00498  | 3 | 1 | 29.2 | 0 |
| P12163_2_F2,1500  | K.LSGGVAVIK.V ! K.LSC | 1451.941 | 0.00493  | 2 | 1 | 24.3 | 0 |
| P12163_2_F2,1603  | K.LSGGVAVIK.V ! K.LSC | 1451.941 | 0.00693  | 3 | 1 | 29.1 | 0 |
| P12163_2_F2,1801  | K.LSGGVAVIK.V ! K.LSC | 1451.941 | 0.00441  | 3 | 1 | 28.2 | 0 |
| P12163_2_F2,1909  | K.LSGGVAVIK.V ! K.LSC | 1451.941 | 0.00331  | 2 | 1 | 29.3 | 0 |
| P12163_2_F2,1994  | K.LSGGVAVIK.V ! K.LSC | 1451.941 | 0.00531  | 3 | 1 | 32.3 | 0 |
| P12163_2_F2,2097  | K.LSGGVAVIK.V ! K.LSC | 1451.941 | 0.00349  | 2 | 1 | 38.1 | 0 |
| P12163_2_F2,2189  | K.LSGGVAVIK.V ! K.LSC | 1451.941 | 0.00324  | 3 | 1 | 24.9 | 0 |
| P12163_2_F4,15464 | K.LSGGVAVIK.V ! K.LSC | 1451.941 | -0.00073 | 2 | 1 | 24.6 | 0 |
| P12163_2_F4,15934 | K.LSGGVAVIK.V ! K.LSC | 1451.941 | 0.0063   | 3 | 1 | 24.1 | 0 |
| P12163_2_F9,15243 | K.LSGGVAVIK.V ! K.LSC | 1451.941 | 0.00042  | 3 | 1 | 22.6 | 0 |
| P12163_2_S5,15426 | K.LSGGVAVIK.V ! K.LSC | 1451.941 | 0.0042   | 3 | 1 | 27.3 | 0 |
| P12163_1_F5,14503 | K.LSTANFDQK.I         | 1631.921 | 0.0073   | 2 | 1 | 37.4 | 0 |
| P12163_1_F5,14724 | K.NIGASLVK.Q          | 1409.894 | 0.0088   | 2 | 1 | 29.4 | 0 |
| P12163_1_F5,14743 | K.NIGASLVK.Q          | 1409.894 | 0.00155  | 3 | 1 | 38.6 | 0 |
| P12163_2_F2,15519 | K.NIGASLVK.Q          | 1409.894 | 0.00136  | 2 | 1 | 28.2 | 0 |
| P12163_2_F2,15547 | K.NIGASLVK.Q          | 1409.894 | -0.00011 | 3 | 1 | 38.5 | 0 |
| P12163_1_F4,18948 | K.SGIIDPLK.V          | 1450.909 | 0.00912  | 2 | 1 | 35.4 | 0 |
| P12163_1_F2,13795 | K.SVAAGMNAMDRLR.R     | 1539.792 | -0.00696 | 3 | 1 | 41.7 | 0 |
| P12163_1_F2,17528 | K.SVAAGMNAMDRLR.R     | 1539.792 | 0.00671  | 2 | 1 | 30.9 | 0 |
| P12163_1_F3,24486 | K.TLYNELEVVEGMK.L     | 2133.172 | 0.01227  | 3 | 1 | 42.2 | 0 |
| P12163_1_F7,16533 | K.TPVHTIAANAGVEGA\    | 2498.455 | 0.00392  | 3 | 1 | 25.3 | 0 |
| P12163_1_F4,18420 | K.VNLDMLGTCK.K        | 1758.97  | 0.01302  | 3 | 1 | 33.2 | 0 |
| P12163_2_F1,19475 | K.VNLDMLGTCK.K        | 1758.97  | 0.00447  | 3 | 1 | 40.6 | 0 |
| P12163_2_F1,19535 | K.VNLDMLGTCK.K        | 1758.97  | 0.01189  | 2 | 1 | 25.2 | 0 |
| P12163_1_F4,21117 | R.GYISPYFITNQK.N      | 2039.142 | 0.00551  | 3 | 1 | 31.7 | 0 |
| P12163_1_F4,21126 | R.GYISPYFITNQK.N      | 2039.142 | 0.01324  | 2 | 1 | 39.1 | 0 |
| P12163_2_F1,20638 | R.GYISPYFITNQK.N      | 2039.142 | 0.00086  | 3 | 1 | 40   | 0 |
| P12163_2_F1,17864 | R.NVVIEQSWGAPK.V      | 1936.111 | 0.00559  | 3 | 1 | 32.8 | 0 |
| P12163_1_F4,12820 | R.SAIENSTSDYDK.E      | 1937.991 | 0.00465  | 2 | 1 | 26.2 | 0 |
| P12163_1_F4,24095 | R.VLELALK.R           | 1393.924 | 0.00685  | 2 | 1 | 30.9 | 0 |
| P12163_1_F4,24100 | R.VLELALK.R           | 1393.924 | 0.00833  | 3 | 1 | 23.9 | 0 |
| P12163_1_F5,22658 | R.VLELALK.R           | 1393.924 | 0.00833  | 2 | 1 | 32.1 | 0 |
| P12163_1_F5,22671 | R.VLELALK.R           | 1393.924 | 0.01064  | 3 | 1 | 23.4 | 0 |
| P12163_2_F1,23517 | R.VLELALK.R           | 1393.924 | 0.00367  | 2 | 1 | 30.9 | 0 |
| P12163_2_F1,23538 | R.VLELALK.R           | 1393.924 | 0.00446  | 3 | 1 | 23.4 | 0 |
| P12163_2_F1,23746 | R.VLELALK.R           | 1393.924 | 0.00517  | 2 | 1 | 30.5 | 0 |
| P12163_2_F1,11597 | K.EVDGIK.V ! K.EVDGLI | 1268.767 | 0.00441  | 3 | 1 | 23.8 | 0 |
| P12163_1_F4,15788 | K.GGTLISYEGK.V        | 1632.942 | 0.00252  | 2 | 1 | 38.7 | 0 |
| P12163_1_F4,15828 | K.GGTLISYEGK.V        | 1632.942 | -0.00403 | 3 | 1 | 29.3 | 0 |



|                   |                     |          |          |   |   |      |   |
|-------------------|---------------------|----------|----------|---|---|------|---|
| P12163_1_F4,15988 | K.GGTLISYEGK.V      | 1632.942 | 0.00658  | 2 | 1 | 38.1 | 0 |
| P12163_1_F4,16206 | K.GGTLISYEGK.V      | 1632.942 | 0.00754  | 2 | 1 | 36   | 0 |
| P12163_1_F5,14815 | K.GGTLISYEGK.V      | 1632.942 | -0.00082 | 2 | 1 | 31.8 | 0 |
| P12163_1_F7,14170 | K.GGTLISYEGK.V      | 1632.942 | 0.00482  | 3 | 1 | 32.3 | 0 |
| P12163_2_F1,14764 | K.GGTLISYEGK.V      | 1632.942 | -0.00538 | 2 | 1 | 32   | 0 |
| P12163_2_F1,14818 | K.GGTLISYEGK.V      | 1632.942 | 0.00419  | 3 | 1 | 38.1 | 0 |
| P12163_2_F1,14980 | K.GGTLISYEGK.V      | 1632.942 | 0.00946  | 2 | 1 | 36.3 | 0 |
| P12163_2_F1,15263 | K.GGTLISYEGK.V      | 1632.942 | 0.01014  | 2 | 1 | 28.8 | 0 |
| P12163_2_F9,14423 | K.GGTLISYEGK.V      | 1632.942 | 0.00576  | 2 | 1 | 38.9 | 0 |
| P12163_2_S5,14000 | K.GGTLISYEGK.V      | 1632.942 | -0.00203 | 3 | 1 | 23   | 0 |
| P12163_1_F4,26557 | K.IFNNTNLWVNLK.A    | 2084.211 | 0.00427  | 3 | 1 | 44.1 | 0 |
| P12163_1_F9,18979 | K.ILNHLIQNK.N       | 1701.063 | 0.00299  | 2 | 1 | 49.8 | 0 |
| P12163_2_F9,17738 | K.ILNHLIQNK.N       | 1701.063 | 0.00488  | 3 | 1 | 22.2 | 0 |
| P12163_2_F9,17930 | K.ILNHLIQNK.N       | 1701.063 | 0.00587  | 3 | 1 | 24.3 | 0 |
| P12163_1_F4,23039 | K.LDALISQGK.E       | 1552.952 | 0.00554  | 2 | 1 | 32.6 | 0 |
| P12163_2_F1,21026 | K.LDALISQGK.E       | 1552.952 | 0.01028  | 3 | 1 | 23.9 | 0 |
| P12163_2_F1,21031 | K.LDALISQGK.E       | 1552.952 | 0.00764  | 2 | 1 | 37.2 | 0 |
| P12163_1_F2,19944 | K.LEIPDGAVLENK.E    | 1906.111 | 0.00562  | 2 | 1 | 48.1 | 0 |
| P12163_1_F2,19951 | K.LEIPDGAVLENK.E    | 1906.111 | 0.00961  | 3 | 1 | 45.3 | 0 |
| P12163_1_S1,18888 | K.LEIPDGAVLENK.E    | 1906.111 | 0.00073  | 3 | 1 | 24.3 | 0 |
| P12163_2_F2,20126 | K.LEIPDGAVLENK.E    | 1906.111 | -0.00935 | 3 | 1 | 33.6 | 0 |
| P12163_1_F7,21281 | K.LLEIAQVPDEHVNEFK  | 2489.386 | 0.00442  | 4 | 1 | 45.5 | 0 |
| P12163_1_F7,21359 | K.LLEIAQVPDEHVNEFK  | 2489.386 | 0.00141  | 2 | 1 | 39.3 | 0 |
| P12163_1_F7,21473 | K.LLEIAQVPDEHVNEFK  | 2489.386 | 0.00398  | 3 | 1 | 44.4 | 0 |
| P12163_2_S5,20491 | K.LLEIAQVPDEHVNEFK  | 2489.386 | 0.00833  | 3 | 1 | 29.5 | 0 |
| P12163_2_S5,20548 | K.LLEIAQVPDEHVNEFK  | 2489.386 | 0.00386  | 4 | 1 | 35.4 | 0 |
| P12163_1_F4,16948 | K.LNGGLGTTMGCTGPK   | 2072.109 | 0.00407  | 2 | 1 | 49.5 | 0 |
| P12163_1_F4,16954 | K.LNGGLGTTMGCTGPK   | 2072.109 | 0.00687  | 3 | 1 | 43.1 | 0 |
| P12163_2_F1,16149 | K.LNGGLGTTMGCTGPK   | 2072.109 | 0.00447  | 3 | 1 | 57   | 0 |
| P12163_2_F1,16158 | K.LNGGLGTTMGCTGPK   | 2072.109 | 0.00417  | 2 | 1 | 72   | 0 |
| P12163_1_F4,18890 | K.MEIPNPK.E         | 1549.923 | 0.00966  | 3 | 1 | 26.4 | 0 |
| P12163_2_F1,18149 | K.MEIPNPK.E         | 1549.923 | 0.00445  | 2 | 1 | 28.2 | 0 |
| P12163_2_F1,18169 | K.MEIPNPK.E         | 1549.923 | 0.00237  | 3 | 1 | 23.3 | 0 |
| P12163_1_F4,12482 | K.NEYCM*EVTPK.T     | 1894.95  | 0.00423  | 2 | 1 | 25.2 | 0 |
| P12163_1_F4,14844 | K.NEYCM*EVTPK.T     | 1878.955 | 0.00733  | 2 | 1 | 29   | 0 |
| P12163_1_F4,14865 | K.NEYCM*EVTPK.T     | 1878.955 | 0.00468  | 3 | 1 | 39.2 | 0 |
| P12163_2_F1,13838 | K.NEYCM*EVTPK.T     | 1878.955 | 0.00137  | 2 | 1 | 35.5 | 0 |
| P12163_1_F3,19812 | K.NPANPTIELGPEFK.K  | 2135.196 | 0.00245  | 2 | 1 | 65.7 | 0 |
| P12163_1_F4,13777 | K.SAVAGLNQISENEK.N  | 2068.149 | 0.00744  | 3 | 1 | 35.3 | 0 |
| P12163_1_F4,16452 | K.SAVAGLNQISENEK.N  | 2068.149 | 0.00351  | 3 | 1 | 27.8 | 0 |
| P12163_1_F4,16480 | K.SAVAGLNQISENEK.N  | 2068.149 | 0.00091  | 2 | 1 | 75.3 | 0 |
| P12163_2_F1,15632 | K.SAVAGLNQISENEK.N  | 2068.149 | -0.00189 | 2 | 1 | 67   | 0 |
| P12163_2_F4,14263 | K.SAVAGLNQISENEK.N  | 2068.149 | -0.00675 | 3 | 1 | 26.9 | 0 |
| P12163_1_F3,21590 | K.SIPSIHEDSLK.V     | 1923.162 | 0.00172  | 3 | 1 | 38.3 | 0 |
| P12163_1_F3,24226 | K.SIPSIHEDSLK.V     | 1923.162 | 0.0064   | 3 | 1 | 30.7 | 0 |
| P12163_1_F5,23076 | K.SIPSIHEDSLK.V     | 1923.162 | 0.00253  | 3 | 1 | 27.4 | 0 |
| P12163_1_S1,21087 | K.SIPSIHEDSLK.V     | 1923.162 | -0.00059 | 3 | 1 | 38.8 | 0 |
| P12163_1_F6,14222 | K.SNVEIHTFNQSQYPR.L | 2124.078 | 0.00006  | 2 | 1 | 35.9 | 0 |
| P12163_1_S1,16323 | K.VLQLETAAGAAIR.F   | 1616.964 | 0.00207  | 3 | 1 | 25.8 | 0 |
| P12163_1_S1,21328 | K.VLQLETAAGAAIR.F   | 1616.964 | -0.00555 | 2 | 1 | 44.6 | 0 |
| P12163_1_F7,22636 | K.YGCNVPLLLM*NSFN1  | 3050.517 | 0.00362  | 3 | 1 | 35.2 | 0 |

|                   |                       |          |          |   |   |      |   |
|-------------------|-----------------------|----------|----------|---|---|------|---|
| P12163_1_F7,22677 | K.YGCNVPLLLMNSFNTI    | 3034.522 | 0.00402  | 4 | 1 | 29.9 | 0 |
| P12163_1_F7,22693 | K.YGCNVPLLLMNSFNTI    | 3034.522 | 0.00077  | 3 | 1 | 22.1 | 0 |
| P12163_1_F6,16277 | R.FFDHAIGCNVHR.S      | 1776.891 | 0.00125  | 3 | 1 | 29.2 | 0 |
| P12163_1_F6,16358 | R.FFDHAIGCNVHR.S      | 1776.891 | 0.00225  | 4 | 1 | 43.1 | 0 |
| P12163_2_F6,15479 | R.FFDHAIGCNVHR.S      | 1776.891 | 0.00392  | 3 | 1 | 22.8 | 0 |
| P12163_2_F6,15525 | R.FFDHAIGCNVHR.S      | 1776.891 | 0.00265  | 4 | 1 | 40.6 | 0 |
| P12163_2_F6,15536 | R.FFDHAIGCNVHR.S      | 1776.891 | 0.00182  | 2 | 1 | 46.1 | 0 |
| P12163_2_F8_12070 | R.KNPANPTIELGPEFK.K   | 2567.496 | -0.00346 | 4 | 1 | 32.4 | 0 |
| P12163_1_F2,21411 | R.LCADDVPLPCK.G       | 2043.086 | 0.00555  | 2 | 1 | 27.2 | 0 |
| P12163_1_F2,21468 | R.LCADDVPLPCK.G       | 2043.086 | 0.00327  | 3 | 1 | 37.2 | 0 |
| P12163_1_F3,22054 | R.LCADDVPLPCK.G       | 2043.086 | 0.01194  | 3 | 1 | 28.2 | 0 |
| P12163_1_F3,22055 | R.LCADDVPLPCK.G       | 2043.086 | 0.01031  | 2 | 1 | 34   | 0 |
| P12163_2_F4,19928 | R.LCADDVPLPCK.G       | 2043.086 | 0.00924  | 3 | 1 | 30.6 | 0 |
| P12163_2_F1,17359 | R.LVEADALK.M          | 1466.904 | -0.00137 | 3 | 1 | 34.4 | 0 |
| P12163_2_F4,15668 | R.LVEADALK.M          | 1466.904 | 0.00362  | 2 | 1 | 35.7 | 0 |
| P12163_2_F4,15677 | R.LVEADALK.M          | 1466.904 | 0.00295  | 3 | 1 | 34.8 | 0 |
| P12163_2_F6,15956 | R.YLSGEAQHVEWSK.I     | 2142.144 | 0.00741  | 2 | 1 | 55.6 | 0 |
| P12163_2_F6,15993 | R.YLSGEAQHVEWSK.I     | 2142.144 | 0.0062   | 3 | 1 | 27.4 | 0 |
| P12163_1_F3,9518  | K.EAGVAVAR.V          | 1076.637 | 0.00267  | 2 | 1 | 24.9 | 0 |
| P12163_2_F1,9078  | K.EAGVAVAR.V          | 1076.637 | 0.00453  | 2 | 1 | 28.2 | 0 |
| P12163_1_F4,10872 | K.EVEEAEGK.V          | 1498.821 | 0.00819  | 3 | 1 | 24.7 | 0 |
| P12163_2_F1,10040 | K.EVEEAEGK.V          | 1498.821 | 0.00738  | 2 | 1 | 34.7 | 0 |
| P12163_1_F2,15379 | K.LDPVIGR.D           | 1073.662 | 0.00271  | 2 | 1 | 26   | 0 |
| P12163_1_S1,14477 | K.LDPVIGR.D           | 1073.662 | 0.00422  | 3 | 1 | 39.7 | 0 |
| P12163_1_S1,14594 | K.LDPVIGR.D           | 1073.662 | 0.00351  | 2 | 1 | 24.4 | 0 |
| P12163_1_F3,16737 | K.NNPVIIGEPGVGK.T ! f | 1902.127 | 0.00297  | 3 | 1 | 31.1 | 0 |
| P12163_1_F3,16751 | K.NNPVIIGEPGVGK.T ! f | 1902.127 | 0.00722  | 2 | 1 | 48.9 | 0 |
| P12163_1_F4,17243 | K.NNPVIIGEPGVGK.T ! f | 1902.127 | 0.00414  | 3 | 1 | 50.9 | 0 |
| P12163_1_F4,17252 | K.NNPVIIGEPGVGK.T ! f | 1902.127 | 0.0091   | 2 | 1 | 42.6 | 0 |
| P12163_1_F5,16038 | K.NNPVIIGEPGVGK.T ! f | 1902.127 | 0.0046   | 2 | 1 | 42.6 | 0 |
| P12163_1_F6,16044 | K.NNPVIIGEPGVGK.T ! f | 1902.127 | 0.00396  | 2 | 1 | 27.9 | 0 |
| P12163_1_F6,16047 | K.NNPVIIGEPGVGK.T ! f | 1902.127 | -0.00045 | 3 | 1 | 50.9 | 0 |
| P12163_1_F6,16533 | K.NNPVIIGEPGVGK.T ! f | 1902.127 | 0.00396  | 2 | 1 | 24.1 | 0 |
| P12163_2_F1,16460 | K.NNPVIIGEPGVGK.T ! f | 1902.127 | 0.0069   | 3 | 1 | 68.8 | 0 |
| P12163_2_F1,16482 | K.NNPVIIGEPGVGK.T ! f | 1902.127 | 0.0034   | 2 | 1 | 61   | 0 |
| P12163_2_F2,429   | K.NNPVIIGEPGVGK.T ! f | 1902.127 | 0.00675  | 3 | 1 | 30.1 | 0 |
| P12163_2_F4,14921 | K.NNPVIIGEPGVGK.T ! f | 1902.127 | -0.00324 | 3 | 1 | 33.4 | 0 |
| P12163_2_F4,14959 | K.NNPVIIGEPGVGK.T ! f | 1902.127 | -0.00354 | 2 | 1 | 40.7 | 0 |
| P12163_1_F2,11368 | K.TAVVEGLAQR.I        | 1347.79  | 0.00264  | 3 | 1 | 24.7 | 0 |
| P12163_1_F2,16738 | K.TAVVEGLAQR.I        | 1347.79  | 0.00447  | 3 | 1 | 30.7 | 0 |
| P12163_1_F2,16950 | K.VESASGDTTFQALK.T    | 2062.128 | 0.00908  | 3 | 1 | 27.7 | 0 |
| P12163_1_F2,5559  | K.YEGHHGVR.I          | 1258.659 | 0.00371  | 3 | 1 | 29.3 | 0 |
| P12163_1_F3,5561  | K.YEGHHGVR.I          | 1258.659 | 0.00098  | 3 | 1 | 25   | 0 |
| P12163_2_F2,5837  | K.YEGHHGVR.I          | 1258.659 | 0.00605  | 3 | 1 | 25.7 | 0 |
| P12163_2_F4,5176  | K.YEGHHGVR.I          | 1258.659 | 0.00656  | 3 | 1 | 28.5 | 0 |
| P12163_1_F7,20621 | R.AGLGRPQQPTGSFLFL    | 2893.651 | -0.00437 | 3 | 1 | 22.7 | 0 |
| P12163_1_F2,17783 | R.ALVVAAQLSAR.Y       | 1402.868 | 0.00289  | 3 | 1 | 52.5 | 0 |
| P12163_1_S1,20020 | R.ALVVAAQLSAR.Y       | 1402.868 | 0.00241  | 3 | 1 | 56.2 | 0 |
| P12163_1_F4,13310 | R.DLVEQAGK.L          | 1467.863 | 0.00682  | 2 | 1 | 36.5 | 0 |
| P12163_1_F4,13362 | R.DLVEQAGK.L          | 1467.863 | 0.00663  | 3 | 1 | 29.2 | 0 |
| P12163_2_F1,12327 | R.DLVEQAGK.L          | 1467.863 | 0.00618  | 2 | 1 | 35.6 | 0 |

|                    |                     |          |          |   |   |      |   |
|--------------------|---------------------|----------|----------|---|---|------|---|
| P12163_2_F1,12387  | R.DLVEQAGK.L        | 1467.863 | 0.00531  | 3 | 1 | 23.8 | 0 |
| P12163_1_F2,14791  | R.DQVLQEV.R         | 1290.732 | 0.00198  | 2 | 1 | 24   | 0 |
| P12163_1_S1,23673  | R.EELLFALQEAER.R    | 1751.948 | 0.00222  | 2 | 1 | 49   | 0 |
| P12163_1_S1,23679  | R.EELLFALQEAER.R    | 1751.948 | 0.00239  | 3 | 1 | 72.1 | 0 |
| P12163_1_S1,23882  | R.EELLFALQEAER.R    | 1751.948 | 0.00188  | 2 | 1 | 48.1 | 0 |
| P12163_1_S1,23886  | R.EELLFALQEAER.R    | 1751.948 | 0.00356  | 3 | 1 | 50.1 | 0 |
| P12163_1_S1,14003  | R.GDVPSNLADVR.L     | 1446.785 | 0.00546  | 2 | 1 | 40.5 | 0 |
| P12163_2_S5,13370  | R.IDMSEYM*EQHSVSR.I | 2031.942 | -0.00111 | 3 | 1 | 29.5 | 0 |
| P12163_1_F8,17162  | R.IDMSEYMEQHSVSR.L  | 2015.947 | 0.00393  | 3 | 1 | 40.8 | 0 |
| P12163_2_F4,16114  | R.IDMSEYMEQHSVSR.L  | 2015.947 | 0.00276  | 3 | 1 | 40   | 0 |
| P12163_2_F8_12070  | R.IDMSEYMEQHSVSR.L  | 2015.947 | 0.00258  | 3 | 1 | 32.5 | 0 |
| P12163_2_S5,16280  | R.IDMSEYMEQHSVSR.L  | 2015.947 | 0.00303  | 3 | 1 | 41   | 0 |
| P12163_1_F5,24826  | R.LDEIVVFDPLSHEQLR. | 2214.207 | 0.00284  | 3 | 1 | 36.6 | 0 |
| P12163_1_F2,22467  | R.LIALDM*GALVAGAK.  | 1967.182 | 0.00155  | 3 | 1 | 38.8 | 0 |
| P12163_1_F3,27100  | R.LIALDMGALVAGAK.Y  | 1951.187 | 0.01232  | 3 | 1 | 26.7 | 0 |
| P12163_1_F5,17901  | R.LIGAPPGYVGHEEGGQ  | 2554.357 | 0.00162  | 3 | 1 | 37.3 | 0 |
| P12163_1_S10,17088 | R.LIGAPPGYVGHEEGGQ  | 2554.357 | 0.00405  | 3 | 1 | 44.8 | 0 |
| P12163_1_S10,17288 | R.LIGAPPGYVGHEEGGQ  | 2554.357 | 0.00399  | 3 | 1 | 25.2 | 0 |
| P12163_2_F8_12070  | R.LIGAPPGYVGHEEGGQ  | 2554.357 | 0.00075  | 3 | 1 | 26.8 | 0 |
| P12163_2_F8_12070  | R.LIGAPPGYVGHEEGGQ  | 2554.357 | -0.00066 | 4 | 1 | 48.5 | 0 |
| P12163_1_F3,19517  | R.LIGLAER.L         | 1075.678 | 0.002    | 2 | 1 | 23.9 | 0 |
| P12163_1_F6,20028  | R.RPYSVVLDFDEVEK.A  | 2189.243 | 0.00477  | 3 | 1 | 30.7 | 0 |
| P12163_2_F6,19686  | R.RPYSVVLDFDEVEK.A  | 2189.243 | 0.00219  | 3 | 1 | 48.5 | 0 |
| P12163_2_F7,17881  | R.RPYSVVLDFDEVEK.A  | 2189.243 | 0.00411  | 3 | 1 | 28   | 0 |
| P12163_1_F4,9751   | R.RYDLAR.A          | 1097.637 | 0.00625  | 3 | 1 | 28.6 | 0 |
| P12163_2_F2,15825  | R.VFNQAMK.K         | 1445.839 | 0.00172  | 2 | 1 | 25.5 | 0 |
| P12163_2_F2,15924  | R.VFNQAMK.K         | 1445.839 | 0.00306  | 3 | 1 | 24.2 | 0 |
| P12163_2_F2,16044  | R.VFNQAMK.K         | 1445.839 | 0.0062   | 2 | 1 | 24.9 | 0 |
| P12163_1_S1,17152  | K.AQALGDTSSLEFMR.G  | 1829.937 | 0.00255  | 3 | 1 | 59.8 | 0 |
| P12163_1_S1,19443  | K.AQALGDTSSLEFMR.G  | 1829.937 | 0.00259  | 2 | 1 | 64   | 0 |
| P12163_1_S1,19447  | K.AQALGDTSSLEFMR.G  | 1829.937 | 0.00357  | 3 | 1 | 44.5 | 0 |
| P12163_1_F4,8830   | K.EAPDTSGEK.F       | 1541.827 | 0.00734  | 3 | 1 | 28.4 | 0 |
| P12163_2_F1,7997   | K.EAPDTSGEK.F       | 1541.827 | 0.00671  | 3 | 1 | 29   | 0 |
| P12163_2_S5,13785  | K.EDLELGDEDEVKER.E  | 2284.176 | 0.00622  | 3 | 1 | 42.3 | 0 |
| P12163_1_S1,17484  | K.EELVDCLGTIAQSGTSI | 2416.285 | 0.00681  | 3 | 1 | 38   | 0 |
| P12163_1_S1,20440  | K.EELVDCLGTIAQSGTSI | 2416.285 | 0.0117   | 3 | 1 | 33.5 | 0 |
| P12163_1_S1,20861  | K.EELVDCLGTIAQSGTSI | 2416.285 | 0.00685  | 4 | 1 | 24.4 | 0 |
| P12163_1_S1,21466  | K.EELVDCLGTIAQSGTSI | 2416.285 | 0.01533  | 3 | 1 | 29.3 | 0 |
| P12163_1_S1,21677  | K.EELVDCLGTIAQSGTSI | 2416.285 | 0.01755  | 3 | 1 | 53.3 | 0 |
| P12163_1_S1,21697  | K.EELVDCLGTIAQSGTSI | 2416.285 | 0.00909  | 4 | 1 | 26.8 | 0 |
| P12163_2_F9,14093  | K.FEYQAEVSR.L       | 1432.737 | 0.00388  | 2 | 1 | 25.6 | 0 |
| P12163_2_F6,11543  | K.LGCVEDSGNHK.R     | 1823.953 | 0.00518  | 3 | 1 | 37   | 0 |
| P12163_2_F7,10990  | K.LGCVEDSGNHK.R     | 1823.953 | 0.0092   | 3 | 1 | 30.4 | 0 |
| P12163_1_F4,6788   | K.NAPDSTDAK.R       | 1526.827 | 0.00438  | 3 | 1 | 24.1 | 0 |
| P12163_2_F1,7333   | K.NAPDSTDAK.R       | 1526.827 | 0.00346  | 2 | 1 | 28.7 | 0 |
| P12163_1_F3,25242  | K.NYSQFVSFPIYTWQEK  | 2645.386 | 0.00552  | 3 | 1 | 48.4 | 0 |
| P12163_1_F3,19811  | K.QNAIYYLATDSLK.S   | 2108.185 | 0.00278  | 3 | 1 | 46.7 | 0 |
| P12163_1_F3,23038  | K.QNAIYYLATDSLK.S   | 2108.185 | 0.00341  | 3 | 1 | 43.8 | 0 |
| P12163_1_F4,23837  | K.QNAIYYLATDSLK.S   | 2108.185 | 0.00578  | 3 | 1 | 43.4 | 0 |
| P12163_1_F4,23862  | K.QNAIYYLATDSLK.S   | 2108.185 | 0.00082  | 2 | 1 | 71.4 | 0 |
| P12163_1_F4,24073  | K.QNAIYYLATDSLK.S   | 2108.185 | 0.00446  | 3 | 1 | 46   | 0 |

|                   |                      |          |          |   |   |      |   |
|-------------------|----------------------|----------|----------|---|---|------|---|
| P12163_2_F1,23342 | K.QNAIYYLATDSLK.S    | 2108.185 | 0.00632  | 3 | 1 | 40.1 | 0 |
| P12163_2_F7,19861 | K.QNAIYYLATDSLK.S    | 2108.185 | 0.00596  | 3 | 1 | 43.9 | 0 |
| P12163_2_F9,20435 | K.QNAIYYLATDSLK.S    | 2108.185 | 0.00575  | 3 | 1 | 48.9 | 0 |
| P12163_1_S1,20396 | K.QYVWEAEADSSSYVIF   | 2207.092 | 0.00409  | 3 | 1 | 62   | 0 |
| P12163_1_S10,1530 | K.RLAPLLR.F          | 1142.767 | 0.00472  | 3 | 1 | 29.3 | 0 |
| P12163_2_F1,15660 | K.SAPFLEK.L          | 1399.84  | 0.00003  | 3 | 1 | 25.8 | 0 |
| P12163_1_F3,14313 | R.ELVSNASDALDK.L     | 1870.038 | 0.00051  | 2 | 1 | 43   | 0 |
| P12163_1_F3,14318 | R.ELVSNASDALDK.L     | 1870.038 | 0.0084   | 3 | 1 | 46.3 | 0 |
| P12163_1_F3,15042 | R.ELVSNASDALDK.L     | 1870.038 | 0.02085  | 3 | 1 | 23.6 | 0 |
| P12163_1_F3,15087 | R.ELVSNASDALDK.L     | 1870.038 | 0.00061  | 2 | 1 | 26.7 | 0 |
| P12163_1_F3,17085 | R.ELVSNASDALDK.L     | 1870.038 | 0.00711  | 2 | 1 | 50.3 | 0 |
| P12163_1_F6,16475 | R.ELVSNASDALDK.L     | 1870.038 | -0.00024 | 3 | 1 | 51.7 | 0 |
| P12163_2_F2,16989 | R.ELVSNASDALDK.L     | 1870.038 | 0.00108  | 3 | 1 | 26.5 | 0 |
| P12163_1_F4,20630 | R.GTQITLYLK.E        | 1645.014 | 0.00264  | 3 | 1 | 28.3 | 0 |
| P12163_2_S5,15928 | R.IKPDPENGTITITDTGIC | 3130.743 | -0.00017 | 4 | 1 | 42.5 | 0 |
| P12163_1_F7,18030 | R.IKPDPENGTITITDTGIC | 3114.748 | 0.01442  | 3 | 1 | 61.5 | 0 |
| P12163_1_F8,19851 | R.ILEINPDHPIVK.D     | 1996.205 | 0.00493  | 2 | 1 | 49.3 | 0 |
| P12163_1_F8,20023 | R.ILEINPDHPIVK.D     | 1996.205 | 0.00474  | 3 | 1 | 33.8 | 0 |
| P12163_2_F6,19507 | R.ILEINPDHPIVK.D     | 1996.205 | 0.00499  | 2 | 1 | 51.8 | 0 |
| P12163_2_F9,17399 | R.ILEINPDHPIVK.D     | 1996.205 | 0.00159  | 3 | 1 | 23.9 | 0 |
| P12163_2_S5,17972 | R.ILEINPDHPIVK.D     | 1996.205 | 0.006    | 3 | 1 | 26.3 | 0 |
| P12163_2_F7,16984 | R.KTFDMIQDISQSENK.E  | 2696.469 | 0.00855  | 3 | 1 | 44.8 | 0 |
| P12163_1_F3,17533 | R.LSSSPCVLVSGK.F     | 1842.061 | 0.00417  | 2 | 1 | 52.4 | 0 |
| P12163_1_F4,18044 | R.LSSSPCVLVSGK.F     | 1842.061 | 0.00577  | 2 | 1 | 40.9 | 0 |
| P12163_2_F1,17271 | R.LSSSPCVLVSGK.F     | 1842.061 | 0.00387  | 2 | 1 | 34.2 | 0 |
| P12163_1_F7,16098 | R.RILEINPDHPIVK.D    | 2152.306 | 0.00801  | 4 | 1 | 27.5 | 0 |
| P12163_2_F10,1504 | R.RILEINPDHPIVK.D    | 2152.306 | 0.00557  | 4 | 1 | 30.5 | 0 |
| P12163_1_S1,20275 | R.SVLYIPGM*GPLNNEE   | 2840.515 | 0.00715  | 3 | 1 | 32.4 | 0 |
| P12163_1_S1,21523 | R.SVLYIPGMGPLNNEE    | 2840.515 | -0.00695 | 3 | 1 | 23.4 | 0 |
| P12163_1_S1,22677 | R.SVLYIPGMGPLNNEE    | 2824.52  | 0.00973  | 3 | 1 | 51.8 | 0 |
| P12163_1_S10,1886 | R.YLSFVK.G           | 1364.84  | 0.0068   | 3 | 1 | 23.3 | 0 |
| P12163_1_F3,17366 | K.ASGSSTSNAIQSALPDI  | 2355.298 | -0.00371 | 3 | 1 | 28.6 | 0 |
| P12163_1_F3,19289 | K.ASGSSTSNAIQSALPDI  | 2355.298 | 0.00292  | 3 | 1 | 65.9 | 0 |
| P12163_1_F3,17353 | K.DALAAM*EVLK.D      | 1684.976 | 0.00363  | 2 | 1 | 33.6 | 0 |
| P12163_1_F3,21924 | K.DALAAMEVLK.D       | 1668.981 | 0.00867  | 2 | 1 | 26.9 | 0 |
| P12163_1_F3,22139 | K.DALAAMEVLK.D       | 1668.981 | 0.00757  | 2 | 1 | 47.6 | 0 |
| P12163_1_F3,22152 | K.DALAAMEVLK.D       | 1668.981 | 0.00525  | 3 | 1 | 41   | 0 |
| P12163_1_F4,22761 | K.DALAAMEVLK.D       | 1668.981 | 0.00435  | 3 | 1 | 40.1 | 0 |
| P12163_1_F4,12319 | K.DDSAGPLDK.W        | 1525.832 | 0.0091   | 2 | 1 | 28.7 | 0 |
| P12163_1_F2,11012 | K.DQSSSSGDIQIEGEEK.S | 2317.162 | -0.00401 | 3 | 1 | 26.1 | 0 |
| P12163_1_F2,12528 | K.DQSSSSGDIQIEGEEK.S | 2317.162 | 0.00646  | 3 | 1 | 61.9 | 0 |
| P12163_2_F1,9228  | K.EVDAAGCK.I         | 1457.788 | 0.00116  | 3 | 1 | 28.6 | 0 |
| P12163_1_F8,20787 | K.IAAWDANFVTPHK.R    | 2078.164 | -0.00065 | 2 | 1 | 45.7 | 0 |
| P12163_1_F8,20791 | K.IAAWDANFVTPHK.R    | 2078.164 | 0.00365  | 3 | 1 | 60   | 0 |
| P12163_2_F6,20342 | K.IAAWDANFVTPHK.R    | 2078.164 | 0.00773  | 3 | 1 | 47.1 | 0 |
| P12163_1_F3,19084 | K.LGLPVPEK.L         | 1460.93  | 0.00281  | 2 | 1 | 27.5 | 0 |
| P12163_1_F3,19409 | K.NFADIVNQNVVQK.L    | 2097.191 | 0.00389  | 2 | 1 | 69.8 | 0 |
| P12163_1_F3,19435 | K.NFADIVNQNVVQK.L    | 2097.191 | 0.00664  | 3 | 1 | 51.8 | 0 |
| P12163_1_F4,20039 | K.NFADIVNQNVVQK.L    | 2097.191 | 0.00829  | 3 | 1 | 29.9 | 0 |
| P12163_1_F4,20048 | K.NFADIVNQNVVQK.L    | 2097.191 | 0.00349  | 2 | 1 | 65.4 | 0 |
| P12163_2_F1,19568 | K.NFADIVNQNVVQK.L    | 2097.191 | 0.00645  | 2 | 1 | 42.8 | 0 |

|                   |                     |          |          |   |   |      |   |
|-------------------|---------------------|----------|----------|---|---|------|---|
| P12163_1_F8,18028 | K.QEVQVHSGFLSAYDSV  | 2226.146 | 0.00225  | 3 | 1 | 48.5 | 0 |
| P12163_1_S1,22845 | K.QGAIFVTMYNFGSPR.' | 1992.031 | 0.0048   | 3 | 1 | 51.3 | 0 |
| P12163_1_F3,13453 | K.SENGAVVSDMPSK.M   | 1929.021 | 0.00916  | 3 | 1 | 23.8 | 0 |
| P12163_1_F4,12759 | K.SFDEIQEEK.K       | 1732.921 | 0.00064  | 2 | 1 | 28.6 | 0 |
| P12163_1_F4,15389 | K.SFDEIQEEK.K       | 1732.921 | 0.00664  | 2 | 1 | 52.4 | 0 |
| P12163_1_F4,19417 | K.SFNDAYILK.D       | 1678.962 | 0.00832  | 2 | 1 | 36.1 | 0 |
| P12163_1_F4,19475 | K.SFNDAYILK.D       | 1678.962 | 0.00758  | 3 | 1 | 32.5 | 0 |
| P12163_1_F5,18449 | K.SFNDAYILK.D       | 1678.962 | 0.00707  | 3 | 1 | 22.6 | 0 |
| P12163_1_F9,18214 | K.SFNDAYILK.D       | 1678.962 | 0.00682  | 2 | 1 | 39.4 | 0 |
| P12163_2_F1,18727 | K.SFNDAYILK.D       | 1678.962 | 0.00894  | 2 | 1 | 49.4 | 0 |
| P12163_2_F1,18754 | K.SFNDAYILK.D       | 1678.962 | 0.00515  | 3 | 1 | 32   | 0 |
| P12163_2_F9,17118 | K.SFNDAYILK.D       | 1678.962 | 0.00632  | 3 | 1 | 22.6 | 0 |
| P12163_1_F7,12621 | K.SSNEESNVEEIYTHK.A | 2374.198 | 0.00578  | 4 | 1 | 23.8 | 0 |
| P12163_2_F4,13662 | K.SSNEESNVEEIYTHK.A | 2374.198 | 0.00935  | 3 | 1 | 26.1 | 0 |
| P12163_1_F5,8142  | R.AGLQSQK.I         | 1339.815 | 0.00165  | 2 | 1 | 30.9 | 0 |
| P12163_2_F2,8997  | R.AGLQSQK.I         | 1339.815 | 0.00597  | 2 | 1 | 31.2 | 0 |
| P12163_1_S1,15881 | R.DIIPTVPR.L        | 1214.741 | 0.00625  | 3 | 1 | 25.8 | 0 |
| P12163_1_F3,20933 | R.EIYDGQLFIK.L      | 1834.057 | 0.00767  | 3 | 1 | 47   | 0 |
| P12163_1_F9,19960 | R.EIYDGQLFIK.L      | 1834.057 | 0.00372  | 2 | 1 | 34.9 | 0 |
| P12163_2_F1,21083 | R.EIYDGQLFIK.L      | 1834.057 | 0.01178  | 2 | 1 | 50.8 | 0 |
| P12163_2_F9,18685 | R.EIYDGQLFIK.L      | 1834.057 | 0.01142  | 2 | 1 | 30   | 0 |
| P12163_2_F9,18696 | R.EIYDGQLFIK.L      | 1834.057 | 0.00665  | 3 | 1 | 36.8 | 0 |
| P12163_2_F1,16563 | R.FADVYNEK.V        | 1593.873 | 0.00687  | 3 | 1 | 23.4 | 0 |
| P12163_2_F1,16566 | R.FADVYNEK.V        | 1593.873 | 0.00576  | 2 | 1 | 35.9 | 0 |
| P12163_2_F2,11480 | R.GTEQTSWK.D        | 1544.853 | 0.00559  | 2 | 1 | 34   | 0 |
| P12163_1_F4,23492 | R.QFVDYAFGQLK.S     | 1924.079 | 0.0045   | 3 | 1 | 42.1 | 0 |
| P12163_1_F3,15890 | R.SIDGSMLDEK.K      | 1702.914 | 0.00348  | 2 | 1 | 35.7 | 0 |
| P12163_1_F4,16407 | R.SIDGSMLDEK.K      | 1702.914 | 0.00436  | 2 | 1 | 32.7 | 0 |
| P12163_2_F1,8460  | K.AEDEQVK.K         | 1426.8   | 0.00764  | 2 | 1 | 27.1 | 0 |
| P12163_1_F7,11571 | K.ATAGDTHLGGEDFDN   | 1979.936 | 0.00221  | 3 | 1 | 31.1 | 0 |
| P12163_1_F8,9335  | K.ATAGDTHLGGEDFDN   | 1979.936 | 0.00154  | 4 | 1 | 32.9 | 0 |
| P12163_1_F8,10350 | K.ATAGDTHLGGEDFDN   | 1979.936 | 0.00474  | 4 | 1 | 44.7 | 0 |
| P12163_1_F8,10358 | K.ATAGDTHLGGEDFDN   | 1979.936 | 0.00495  | 2 | 1 | 39   | 0 |
| P12163_1_F8,10594 | K.ATAGDTHLGGEDFDN   | 1979.936 | 0.00784  | 3 | 1 | 35.8 | 0 |
| P12163_1_F8,10598 | K.ATAGDTHLGGEDFDN   | 1979.936 | 0.00085  | 2 | 1 | 45.7 | 0 |
| P12163_1_F8,10606 | K.ATAGDTHLGGEDFDN   | 1979.936 | 0.0029   | 4 | 1 | 38.9 | 0 |
| P12163_1_F8,12056 | K.ATAGDTHLGGEDFDN   | 1979.936 | 0.00302  | 3 | 1 | 55.8 | 0 |
| P12163_1_F8,12232 | K.ATAGDTHLGGEDFDN   | 1979.936 | 0.00173  | 2 | 1 | 44.6 | 0 |
| P12163_2_F9,11279 | K.ATAGDTHLGGEDFDN   | 1979.936 | 0.00163  | 3 | 1 | 61.8 | 0 |
| P12163_2_S5,9391  | K.ATAGDTHLGGEDFDN   | 1979.936 | 0.00354  | 4 | 1 | 35.8 | 0 |
| P12163_2_S5,10362 | K.ATAGDTHLGGEDFDN   | 1979.936 | 0.00242  | 4 | 1 | 55.1 | 0 |
| P12163_2_S5,10365 | K.ATAGDTHLGGEDFDN   | 1979.936 | 0.00311  | 3 | 1 | 39.6 | 0 |
| P12163_2_S5,10368 | K.ATAGDTHLGGEDFDN   | 1979.936 | 0.01013  | 2 | 1 | 35   | 0 |
| P12163_2_S5,10564 | K.ATAGDTHLGGEDFDN   | 1979.936 | 0.00286  | 4 | 1 | 37.9 | 0 |
| P12163_2_S5,11889 | K.ATAGDTHLGGEDFDN   | 1979.936 | 0.0021   | 4 | 1 | 49.3 | 0 |
| P12163_2_S5,11953 | K.ATAGDTHLGGEDFDN   | 1979.936 | -0.00161 | 3 | 1 | 41   | 0 |
| P12163_1_F5,11319 | K.CMEPVEK.C         | 1500.801 | 0.00642  | 2 | 1 | 25.4 | 0 |
| P12163_1_S1,14893 | K.DAGAIAGLNVM*R.I   | 1507.82  | 0.00185  | 3 | 1 | 74.5 | 0 |
| P12163_1_S1,17881 | K.DAGAIAGLNVMR.I    | 1491.825 | 0.0041   | 3 | 1 | 44.6 | 0 |
| P12163_1_F4,23312 | K.DNNLLGTFELK.G     | 1872.069 | 0.00604  | 2 | 1 | 50.3 | 0 |
| P12163_1_F4,23511 | K.DNNLLGTFELK.G     | 1872.069 | -0.00285 | 3 | 1 | 21.9 | 0 |

|                   |                        |          |          |   |   |      |   |
|-------------------|------------------------|----------|----------|---|---|------|---|
| P12163_1_F5,21942 | K.DNNLLGTFELK.G        | 1872.069 | 0.00492  | 3 | 1 | 24.6 | 0 |
| P12163_2_F1,22778 | K.DNNLLGTFELK.G        | 1872.069 | 0.00759  | 3 | 1 | 61.9 | 0 |
| P12163_2_F1,22812 | K.DNNLLGTFELK.G        | 1872.069 | 0.00634  | 2 | 1 | 47.4 | 0 |
| P12163_1_F7,17180 | K.EIAEAYLGHAVK.N       | 1909.1   | 0.00661  | 3 | 1 | 35.4 | 0 |
| P12163_1_F8,17972 | K.EIAEAYLGHAVK.N       | 1909.1   | 0.0022   | 3 | 1 | 51.1 | 0 |
| P12163_1_F8,17987 | K.EIAEAYLGHAVK.N       | 1909.1   | 0.00116  | 2 | 1 | 78   | 0 |
| P12163_2_F6,17471 | K.EIAEAYLGHAVK.N       | 1909.1   | 0.0016   | 2 | 1 | 87.3 | 0 |
| P12163_2_F6,17479 | K.EIAEAYLGHAVK.N       | 1909.1   | 0.00375  | 3 | 1 | 39.1 | 0 |
| P12163_1_F2,19591 | K.ELEGICNPIIAK.M ! K.F | 1965.13  | 0.00303  | 3 | 1 | 28.3 | 0 |
| P12163_1_F3,20189 | K.ELEGICNPIIAK.M ! K.F | 1965.13  | 0.00643  | 2 | 1 | 57.2 | 0 |
| P12163_1_F3,20297 | K.ELEGICNPIIAK.M ! K.F | 1965.13  | 0.00384  | 3 | 1 | 54.2 | 0 |
| P12163_1_F3,20530 | K.ELEGICNPIIAK.M ! K.F | 1965.13  | 0.00767  | 2 | 1 | 70.2 | 0 |
| P12163_1_F3,20577 | K.ELEGICNPIIAK.M ! K.F | 1965.13  | 0.00741  | 3 | 1 | 42   | 0 |
| P12163_1_F6,19161 | K.ELEGICNPIIAK.M ! K.F | 1965.13  | 0.00165  | 3 | 1 | 25.6 | 0 |
| P12163_1_F6,19175 | K.ELEGICNPIIAK.M ! K.F | 1965.13  | 0.00273  | 2 | 1 | 27   | 0 |
| P12163_1_F6,19628 | K.ELEGICNPIIAK.M ! K.F | 1965.13  | -0.00357 | 3 | 1 | 29.8 | 0 |
| P12163_2_F4,18689 | K.ELEGICNPIIAK.M ! K.F | 1965.13  | 0.00795  | 3 | 1 | 25.5 | 0 |
| P12163_2_F9,16996 | K.LENYAYSMR.N          | 1450.73  | 0.00379  | 2 | 1 | 29.4 | 0 |
| P12163_1_F4,12357 | K.MVQEAEK.Y ! R.MVQI   | 1442.813 | 0.00599  | 2 | 1 | 28.1 | 0 |
| P12163_1_F5,10859 | K.MVQEAEK.Y ! R.MVQI   | 1442.813 | 0.00519  | 2 | 1 | 26.8 | 0 |
| P12163_1_F5,10908 | K.MVQEAEK.Y ! R.MVQI   | 1442.813 | 0.00899  | 3 | 1 | 35.2 | 0 |
| P12163_1_F6,11909 | K.MVQEAEK.Y ! R.MVQI   | 1442.813 | 0.00945  | 2 | 1 | 30.4 | 0 |
| P12163_2_F1,11370 | K.MVQEAEK.Y ! R.MVQI   | 1442.813 | 0.00503  | 2 | 1 | 27.8 | 0 |
| P12163_2_F1,11390 | K.MVQEAEK.Y ! R.MVQI   | 1442.813 | 0.00722  | 3 | 1 | 39.8 | 0 |
| P12163_1_F8,18778 | K.NAVVTVPAYFNDSQR      | 1985.039 | -0.00348 | 2 | 1 | 30.4 | 0 |
| P12163_1_F8,18854 | K.NAVVTVPAYFNDSQR      | 1985.039 | 0.00299  | 3 | 1 | 33.4 | 0 |
| P12163_1_S1,17806 | K.NAVVTVPAYFNDSQR      | 1985.039 | 0.01346  | 2 | 1 | 36.9 | 0 |
| P12163_1_S1,17812 | K.NAVVTVPAYFNDSQR      | 1985.039 | 0.00257  | 3 | 1 | 27.2 | 0 |
| P12163_2_F6,18372 | K.NAVVTVPAYFNDSQR      | 1985.039 | 0.00464  | 2 | 1 | 47.4 | 0 |
| P12163_2_F6,18440 | K.NAVVTVPAYFNDSQR      | 1985.039 | -0.00088 | 3 | 1 | 39.9 | 0 |
| P12163_1_F4,13156 | K.NQITITNDK.G          | 1654.958 | 0.00175  | 2 | 1 | 37.3 | 0 |
| P12163_1_F5,11708 | K.NQITITNDK.G          | 1654.958 | 0.00741  | 2 | 1 | 34.1 | 0 |
| P12163_1_F5,11726 | K.NQITITNDK.G          | 1654.958 | 0.00599  | 3 | 1 | 38.1 | 0 |
| P12163_2_F1,12162 | K.NQITITNDK.G          | 1654.958 | 0.00311  | 2 | 1 | 25.6 | 0 |
| P12163_2_S5,11124 | K.NQITITNDK.G          | 1654.958 | 0.0023   | 3 | 1 | 34.8 | 0 |
| P12163_1_F3,11816 | K.NQVAM*NPQNTVFDA      | 2301.212 | 0.01034  | 3 | 1 | 34.5 | 0 |
| P12163_1_F3,13799 | K.NQVAMNPQNTVFDAK      | 2285.217 | 0.00603  | 3 | 1 | 48   | 0 |
| P12163_1_F3,17207 | K.NQVAMNPQNTVFDAK      | 2285.217 | 0.00519  | 3 | 1 | 54.1 | 0 |
| P12163_1_F3,17213 | K.NQVAMNPQNTVFDAK      | 2285.217 | 0.01319  | 2 | 1 | 32.5 | 0 |
| P12163_2_F7,18832 | K.RFSPEEISSMVLTK.M     | 2232.252 | 0.00054  | 3 | 1 | 33.8 | 0 |
| P12163_1_F6,15213 | K.SQVHDIVLVGGSTR.I     | 1771.997 | 0.00155  | 2 | 1 | 38.4 | 0 |
| P12163_1_F8,15024 | K.SQVHDIVLVGGSTR.I     | 1771.997 | 0.00447  | 2 | 1 | 50.3 | 0 |
| P12163_1_F8,15047 | K.SQVHDIVLVGGSTR.I     | 1771.997 | 0.0025   | 3 | 1 | 45.3 | 0 |
| P12163_2_F6,14465 | K.SQVHDIVLVGGSTR.I     | 1771.997 | -0.00007 | 3 | 1 | 45.4 | 0 |
| P12163_1_S1,23194 | R.FEELNM*DLFR.K        | 1633.82  | 0.00103  | 3 | 1 | 40.2 | 0 |
| P12163_1_S1,23396 | R.FEELNM*DLFR.K        | 1633.82  | 0.00348  | 2 | 1 | 42.5 | 0 |
| P12163_1_S1,23417 | R.FEELNM*DLFR.K        | 1633.82  | 0.00235  | 3 | 1 | 57.6 | 0 |
| P12163_1_F2,23638 | R.FSPEEISSM*VLTK.M     | 2092.146 | 0.00239  | 3 | 1 | 27.9 | 0 |
| P12163_1_F2,22404 | R.IINEPTAAAIAAYGLDK.I  | 2268.306 | 0.00735  | 3 | 1 | 45.2 | 0 |
| P12163_1_F4,23908 | R.IINEPTAAAIAAYGLDK.I  | 2268.306 | 0.00405  | 3 | 1 | 59.2 | 0 |
| P12163_1_F5,22034 | R.IINEPTAAAIAAYGLDK.I  | 2268.306 | 0.00048  | 3 | 1 | 35.6 | 0 |

|                   |                        |          |          |   |   |      |   |
|-------------------|------------------------|----------|----------|---|---|------|---|
| P12163_1_F8,22408 | R.IINEPTAAAIAAYGLDK.I  | 2268.306 | 0.00681  | 3 | 1 | 49.7 | 0 |
| P12163_1_S1,21321 | R.IINEPTAAAIAAYGLDK.I  | 2268.306 | 0.00492  | 3 | 1 | 53.3 | 0 |
| P12163_1_S1,21346 | R.IINEPTAAAIAAYGLDK.I  | 2268.306 | -0.00297 | 2 | 1 | 75.2 | 0 |
| P12163_1_S1,21375 | R.IINEPTAAAIAAYGLDK.I  | 2268.306 | 0.00752  | 4 | 1 | 61   | 0 |
| P12163_1_S1,21490 | R.IINEPTAAAIAAYGLDK.I  | 2268.306 | 0.0003   | 3 | 1 | 54.8 | 0 |
| P12163_1_S10,2039 | R.IINEPTAAAIAAYGLDK.I  | 2268.306 | 0.00414  | 3 | 1 | 22.1 | 0 |
| P12163_1_F8,21453 | R.LVNHFVAEFR.R         | 1535.864 | 0.00198  | 3 | 1 | 24.2 | 0 |
| P12163_2_F10,1917 | R.LVNHFVAEFR.R         | 1535.864 | -0.00531 | 3 | 1 | 27.3 | 0 |
| P12163_2_F6,21030 | R.LVNHFVAEFR.R         | 1535.864 | 0.00042  | 3 | 1 | 59   | 0 |
| P12163_2_F6,21148 | R.LVNHFVAEFR.R         | 1535.864 | 0.00371  | 2 | 1 | 25.8 | 0 |
| P12163_2_F7,19163 | R.LVNHFVAEFR.R         | 1535.864 | 0.0018   | 3 | 1 | 45.7 | 0 |
| P12163_1_F8,14527 | R.TTPSYVAFTDTER.L      | 1791.907 | 0.00344  | 3 | 1 | 24.1 | 0 |
| P12163_1_F8,14585 | R.TTPSYVAFTDTER.L      | 1791.907 | 0.00829  | 2 | 1 | 31.6 | 0 |
| P12163_1_F8,16589 | R.TTPSYVAFTDTER.L      | 1791.907 | 0.00553  | 2 | 1 | 47.8 | 0 |
| P12163_2_F6,16074 | R.TTPSYVAFTDTER.L      | 1791.907 | 0.00237  | 2 | 1 | 58   | 0 |
| P12163_1_S1,14498 | R.VEIIANDQGNR.I ! R.VI | 1532.833 | 0.00335  | 2 | 1 | 30.8 | 0 |
| P12163_1_S1,14657 | R.VEIIANDQGNR.I ! R.VI | 1532.833 | 0.00328  | 3 | 1 | 71.6 | 0 |
| P12163_1_S1,14739 | R.VEIIANDQGNR.I ! R.VI | 1532.833 | 0.00397  | 2 | 1 | 33.7 | 0 |
| P12163_1_S1,14901 | R.VEIIANDQGNR.I ! R.VI | 1532.833 | 0.00187  | 3 | 1 | 69.2 | 0 |
| P12163_1_S1,14978 | R.VEIIANDQGNR.I ! R.VI | 1532.833 | 0.00507  | 2 | 1 | 32   | 0 |
| P12163_1_S10,199  | R.VEIIANDQGNR.I ! R.VI | 1532.833 | 0.00184  | 3 | 1 | 35.4 | 0 |
| P12163_1_S10,276  | R.VEIIANDQGNR.I ! R.VI | 1532.833 | 0.00555  | 2 | 1 | 29.8 | 0 |
| P12163_1_F3,13701 | K.ADDCIGPEVEK.L        | 1840.957 | 0.0075   | 3 | 1 | 35.1 | 0 |
| P12163_1_F3,13838 | K.ADDCIGPEVEK.L        | 1840.957 | 0.00876  | 2 | 1 | 50.6 | 0 |
| P12163_1_F3,14165 | K.ADDCIGPEVEK.L        | 1840.957 | 0.00809  | 2 | 1 | 26.4 | 0 |
| P12163_1_F2,22301 | K.ELDYLVGAVSSPK.R      | 1986.137 | 0.00448  | 3 | 1 | 38.2 | 0 |
| P12163_1_F2,22463 | K.ELDYLVGAVSSPK.R      | 1986.137 | 0.00489  | 2 | 1 | 63.7 | 0 |
| P12163_1_F2,22500 | K.ELDYLVGAVSSPK.R      | 1986.137 | 0.00271  | 3 | 1 | 45.9 | 0 |
| P12163_1_F3,22905 | K.ELDYLVGAVSSPK.R      | 1986.137 | 0.0067   | 3 | 1 | 39.4 | 0 |
| P12163_1_F3,23139 | K.ELDYLVGAVSSPK.R      | 1986.137 | 0.01745  | 2 | 1 | 54.9 | 0 |
| P12163_1_F3,23252 | K.ELDYLVGAVSSPK.R      | 1986.137 | 0.00178  | 3 | 1 | 44.9 | 0 |
| P12163_1_F5,22151 | K.ELDYLVGAVSSPK.R      | 1986.137 | 0.0013   | 3 | 1 | 47.2 | 0 |
| P12163_2_F6,22094 | K.ELDYLVGAVSSPK.R      | 1986.137 | 0.00244  | 3 | 1 | 48.6 | 0 |
| P12163_2_F7,19972 | K.ELDYLVGAVSSPK.R      | 1986.137 | 0.00265  | 3 | 1 | 29.4 | 0 |
| P12163_1_F4,12676 | K.FAPDANSK.V           | 1457.821 | 0.00651  | 3 | 1 | 21.9 | 0 |
| P12163_1_F4,12697 | K.FAPDANSK.V           | 1457.821 | 0.00671  | 2 | 1 | 28.3 | 0 |
| P12163_1_F3,18027 | K.FAVGTEAIAK.K         | 1614.967 | 0.00636  | 2 | 1 | 37.2 | 0 |
| P12163_1_F3,18071 | K.FAVGTEAIAK.K         | 1614.967 | 0.00321  | 3 | 1 | 51.2 | 0 |
| P12163_1_F4,18475 | K.FAVGTEAIAK.K         | 1614.967 | 0.00932  | 2 | 1 | 33.6 | 0 |
| P12163_1_F4,18494 | K.FAVGTEAIAK.K         | 1614.967 | 0.01065  | 3 | 1 | 33.6 | 0 |
| P12163_1_F5,17253 | K.FAVGTEAIAK.K         | 1614.967 | 0.00612  | 3 | 1 | 30.2 | 0 |
| P12163_1_F5,17266 | K.FAVGTEAIAK.K         | 1614.967 | 0.00524  | 2 | 1 | 47.8 | 0 |
| P12163_1_F6,17224 | K.FAVGTEAIAK.K         | 1614.967 | 0.00303  | 3 | 1 | 35.9 | 0 |
| P12163_2_F1,17792 | K.FAVGTEAIAK.K         | 1614.967 | 0.00524  | 2 | 1 | 49.7 | 0 |
| P12163_2_F1,17817 | K.FAVGTEAIAK.K         | 1614.967 | 0.0066   | 3 | 1 | 46.9 | 0 |
| P12163_2_F1,18084 | K.FAVGTEAIAK.K         | 1614.967 | 0.00292  | 2 | 1 | 32.4 | 0 |
| P12163_2_F4,15849 | K.FAVGTEAIAK.K         | 1614.967 | 0.00114  | 3 | 1 | 35.6 | 0 |
| P12163_2_F4,15875 | K.FAVGTEAIAK.K         | 1614.967 | 0.0013   | 2 | 1 | 32.1 | 0 |
| P12163_1_F2,17770 | K.FSLAPLVPR.L          | 1303.804 | 0.00457  | 3 | 1 | 30.7 | 0 |
| P12163_1_F2,22618 | K.FSLAPLVPR.L          | 1303.804 | 0.00284  | 2 | 1 | 25.8 | 0 |
| P12163_1_F2,22634 | K.FSLAPLVPR.L          | 1303.804 | 0.00265  | 3 | 1 | 22.1 | 0 |

|                    |                     |          |          |   |   |      |   |
|--------------------|---------------------|----------|----------|---|---|------|---|
| P12163_1_S1,16510  | K.FSLAPLVPR.L       | 1303.804 | 0.00442  | 3 | 1 | 43.3 | 0 |
| P12163_1_S1,21208  | K.FSLAPLVPR.L       | 1303.804 | 0.00166  | 3 | 1 | 46.6 | 0 |
| P12163_1_F2,23316  | K.GVNLLLPSDVVIADK.I | 2161.305 | 0.00053  | 3 | 1 | 22.7 | 0 |
| P12163_1_F3,24343  | K.GVNLLLPSDVVIADK.I | 2161.305 | 0.00095  | 3 | 1 | 44.1 | 0 |
| P12163_1_F5,23098  | K.GVNLLLPSDVVIADK.I | 2161.305 | 0.00116  | 3 | 1 | 43   | 0 |
| P12163_1_F7,22300  | K.GVNLLLPSDVVIADK.I | 2161.305 | 0.00665  | 3 | 1 | 31.3 | 0 |
| P12163_1_S1,21820  | K.GVNLLLPSDVVIADK.I | 2161.305 | 0.00482  | 3 | 1 | 53.2 | 0 |
| P12163_1_S1,21836  | K.GVNLLLPSDVVIADK.I | 2161.305 | 0.00295  | 4 | 1 | 52.2 | 0 |
| P12163_1_S1,21849  | K.GVNLLLPSDVVIADK.I | 2161.305 | 0.00554  | 2 | 1 | 32.8 | 0 |
| P12163_1_S1,22080  | K.GVNLLLPSDVVIADK.I | 2161.305 | 0.00425  | 3 | 1 | 36.5 | 0 |
| P12163_1_S10,20750 | K.GVNLLLPSDVVIADK.I | 2161.305 | 0.01151  | 3 | 1 | 26.8 | 0 |
| P12163_1_F2,16437  | K.GVTTHIGGGDSVAAVE  | 2182.254 | 0.00519  | 3 | 1 | 52.8 | 0 |
| P12163_1_F2,18546  | K.GVTTHIGGGDSVAAVE  | 2182.254 | 0.0054   | 3 | 1 | 52.9 | 0 |
| P12163_1_F2,18639  | K.GVTTHIGGGDSVAAVE  | 2182.254 | 0.00535  | 2 | 1 | 72.6 | 0 |
| P12163_1_F3,19208  | K.GVTTHIGGGDSVAAVE  | 2182.254 | 0.00801  | 3 | 1 | 43.6 | 0 |
| P12163_1_F5,18050  | K.GVTTHIGGGDSVAAVE  | 2182.254 | 0.00501  | 3 | 1 | 73   | 0 |
| P12163_1_F7,17774  | K.GVTTHIGGGDSVAAVE  | 2182.254 | -0.00243 | 3 | 1 | 46   | 0 |
| P12163_1_S1,14256  | K.GVTTHIGGGDSVAAVE  | 2182.254 | 0.01662  | 3 | 1 | 27.6 | 0 |
| P12163_1_S1,17262  | K.GVTTHIGGGDSVAAVE  | 2182.254 | 0.00435  | 3 | 1 | 84.6 | 0 |
| P12163_1_S1,17305  | K.GVTTHIGGGDSVAAVE  | 2182.254 | 0.00519  | 2 | 1 | 102  | 0 |
| P12163_1_S1,17309  | K.GVTTHIGGGDSVAAVE  | 2182.254 | 0.00587  | 4 | 1 | 94.9 | 0 |
| P12163_1_S1,17551  | K.GVTTHIGGGDSVAAVE  | 2182.254 | 0.00696  | 3 | 1 | 74.6 | 0 |
| P12163_1_S10,17310 | K.GVTTHIGGGDSVAAVE  | 2182.254 | 0.00528  | 3 | 1 | 74.8 | 0 |
| P12163_1_F9,9808   | K.HLIQNGAK.V        | 1488.911 | 0.00393  | 3 | 1 | 33.2 | 0 |
| P12163_1_F6,16504  | K.LADLSGK.G         | 1311.809 | 0.00424  | 2 | 1 | 31.3 | 0 |
| P12163_1_F7,23912  | K.LASLADLYVNDAFGT.  | 2238.182 | 0.00345  | 3 | 1 | 22.7 | 0 |
| P12163_1_F3,25809  | K.LDLATTLAK.A       | 1667.056 | 0.00428  | 3 | 1 | 29.5 | 0 |
| P12163_1_F9,15934  | K.RPFAAIVGGSK.V     | 1711.047 | 0.00382  | 3 | 1 | 22   | 0 |
| P12163_1_S10,15830 | K.RPFAAIVGGSK.V     | 1711.047 | 0.00631  | 3 | 1 | 35.2 | 0 |
| P12163_2_F10,14720 | K.RPFAAIVGGSK.V     | 1711.047 | 0.00787  | 3 | 1 | 28.3 | 0 |
| P12163_2_F8_12070  | K.RPFAAIVGGSK.V     | 1711.047 | 0.00706  | 3 | 1 | 25.2 | 0 |
| P12163_2_F8_12070  | K.RPFAAIVGGSK.V     | 1711.047 | 0.00532  | 3 | 1 | 33.7 | 0 |
| P12163_1_F3,16237  | K.SVGELSGADLK.G     | 1683.974 | 0.00403  | 2 | 1 | 32.1 | 0 |
| P12163_1_F4,13971  | K.SVGELSGADLK.G     | 1683.974 | 0.00591  | 3 | 1 | 26.8 | 0 |
| P12163_1_F4,14638  | K.SVGELSGADLK.G     | 1683.974 | 0.00612  | 3 | 1 | 40   | 0 |
| P12163_1_F4,16750  | K.SVGELSGADLK.G     | 1683.974 | 0.00367  | 2 | 1 | 59.7 | 0 |
| P12163_1_F4,16802  | K.SVGELSGADLK.G     | 1683.974 | 0.00588  | 3 | 1 | 51.7 | 0 |
| P12163_1_F5,15486  | K.SVGELSGADLK.G     | 1683.974 | 0.00893  | 2 | 1 | 43.7 | 0 |
| P12163_1_F7,14779  | K.SVGELSGADLK.G     | 1683.974 | 0.00078  | 3 | 1 | 34.4 | 0 |
| P12163_2_F1,12760  | K.SVGELSGADLK.G     | 1683.974 | 0.00624  | 3 | 1 | 37.3 | 0 |
| P12163_2_F1,15873  | K.SVGELSGADLK.G     | 1683.974 | 0.00684  | 3 | 1 | 58.4 | 0 |
| P12163_2_F1,15881  | K.SVGELSGADLK.G     | 1683.974 | 0.00511  | 2 | 1 | 59.5 | 0 |
| P12163_2_F2,673    | K.SVGELSGADLK.G     | 1683.974 | 0.00225  | 3 | 1 | 33   | 0 |
| P12163_2_F4,14393  | K.SVGELSGADLK.G     | 1683.974 | 0.00381  | 2 | 1 | 30.9 | 0 |
| P12163_1_F4,12946  | K.TFNEALDTTK.T      | 1747.969 | 0.00879  | 3 | 1 | 35.9 | 0 |
| P12163_1_F4,14277  | K.TFNEALDTTK.T      | 1747.969 | 0.00552  | 3 | 1 | 41.2 | 0 |
| P12163_1_F4,16244  | K.TFNEALDTTK.T      | 1747.969 | 0.00369  | 3 | 1 | 28.1 | 0 |
| P12163_1_F5,14979  | K.TFNEALDTTK.T      | 1747.969 | 0.00881  | 2 | 1 | 51.2 | 0 |
| P12163_1_F7,14337  | K.TFNEALDTTK.T      | 1747.969 | 0.00385  | 2 | 1 | 27.5 | 0 |
| P12163_2_F1,15384  | K.TFNEALDTTK.T      | 1747.969 | 0.01095  | 3 | 1 | 25.5 | 0 |
| P12163_2_F1,15394  | K.TFNEALDTTK.T      | 1747.969 | 0.00647  | 2 | 1 | 55.4 | 0 |



|                    |                       |          |          |   |   |      |   |
|--------------------|-----------------------|----------|----------|---|---|------|---|
| P12163_1_F4,15095  | K.VILSSHLGRP.K        | 1815.142 | 0.00772  | 2 | 1 | 29.9 | 0 |
| P12163_1_F6,14702  | K.VILSSHLGRP.K        | 1815.142 | 0.00798  | 3 | 1 | 22.2 | 0 |
| P12163_2_F6,21768  | K.YLKPSVAGFLLQK.E     | 2376.478 | 0.00547  | 3 | 1 | 34.3 | 0 |
| P12163_1_F4,14637  | R.AAVPTIK.H ! R.AAVPT | 1307.851 | 0.00683  | 3 | 1 | 28   | 0 |
| P12163_1_F5,13135  | R.AAVPTIK.H ! R.AAVPT | 1307.851 | 0.00884  | 3 | 1 | 29.6 | 0 |
| P12163_2_F1,13618  | R.AAVPTIK.H ! R.AAVPT | 1307.851 | 0.00683  | 3 | 1 | 28.6 | 0 |
| P12163_2_F2,3791   | R.AAVPTIK.H ! R.AAVPT | 1307.851 | 0.01148  | 3 | 1 | 27.9 | 0 |
| P12163_2_S5,12124  | R.AAVPTIK.H ! R.AAVPT | 1307.851 | 0.00107  | 3 | 1 | 27.9 | 0 |
| P12163_1_F6,8430   | R.AHASTEGVTK.Y        | 1608.917 | 0.01051  | 2 | 1 | 38.1 | 0 |
| P12163_1_F6,8434   | R.AHASTEGVTK.Y        | 1608.917 | 0.00424  | 3 | 1 | 37.1 | 0 |
| P12163_2_F7,7619   | R.AHASTEGVTK.Y        | 1608.917 | 0.00442  | 3 | 1 | 50.7 | 0 |
| P12163_2_S5,8088   | R.AHASTEGVTK.Y        | 1608.917 | 0.00574  | 3 | 1 | 44.1 | 0 |
| P12163_2_S5,8187   | R.AHASTEGVTK.Y        | 1608.917 | 0.0033   | 4 | 1 | 44.3 | 0 |
| P12163_2_F8_12070  | R.FYKEEEK.N           | 1885.083 | 0.01154  | 2 | 1 | 29   | 0 |
| P12163_1_F3,26432  | R.LSELLGIQVVK.A       | 1807.151 | 0.00576  | 3 | 1 | 38.4 | 0 |
| P12163_1_F4,27273  | R.LSELLGIQVVK.A       | 1807.151 | 0.00555  | 3 | 1 | 31.6 | 0 |
| P12163_1_F8,13032  | K.DEVQNVGVHVDK.K      | 1947.076 | 0.00793  | 3 | 1 | 39.2 | 0 |
| P12163_1_F8,13110  | K.DEVQNVGVHVDK.K      | 1947.076 | 0.00372  | 2 | 1 | 69.6 | 0 |
| P12163_1_F7,11866  | K.DEVQNVGVHVDK.K.R    | 2379.376 | 0.01447  | 4 | 1 | 32.4 | 0 |
| P12163_1_F3,14614  | K.DEYGEGELVDK.I       | 1861.964 | 0.00695  | 2 | 1 | 38.4 | 0 |
| P12163_1_F6,16519  | K.EAGLKDEVQNVGVHV     | 2749.561 | 0.00425  | 3 | 1 | 28.7 | 0 |
| P12163_1_F8,17279  | K.EAGLKDEVQNVGVHV     | 2749.561 | 0.00538  | 4 | 1 | 27.7 | 0 |
| P12163_2_F10,15410 | K.EAGLKDEVQNVGVHV     | 2749.561 | 0.00976  | 5 | 1 | 29   | 0 |
| P12163_1_F8,19950  | K.GLLYLGM*GVSGGEE     | 1986.027 | 0.00154  | 2 | 1 | 36.5 | 0 |
| P12163_2_F6,19414  | K.GLLYLGM*GVSGGEE     | 1986.027 | 0.00176  | 2 | 1 | 41.1 | 0 |
| P12163_1_F3,23306  | K.GWNLNFGELAR.I       | 1580.849 | 0.00329  | 2 | 1 | 33.8 | 0 |
| P12163_2_F1,23357  | K.GWNLNFGELAR.I       | 1580.849 | 0.00425  | 2 | 1 | 39.5 | 0 |
| P12163_1_F2,21690  | K.ICSYAQGM*NLIR.A !   | 1745.898 | 0.00184  | 3 | 1 | 32.9 | 0 |
| P12163_2_F1,18407  | K.ICSYAQGM*NLIR.A !   | 1745.898 | 0.00632  | 2 | 1 | 25.6 | 0 |
| P12163_1_S10,1298  | K.RLIDDVR.Q           | 1190.716 | 0.00352  | 3 | 1 | 33.2 | 0 |
| P12163_2_F8_12070  | K.RLIDDVR.Q           | 1190.716 | 0.00127  | 3 | 1 | 37.1 | 0 |
| P12163_1_F8,19424  | K.VAAQVDDGPCVTYIG     | 3048.556 | 0.0073   | 3 | 1 | 85.6 | 0 |
| P12163_1_S1,18237  | K.VAAQVDDGPCVTYIG     | 3048.556 | 0.00424  | 3 | 1 | 85.8 | 0 |
| P12163_1_F9,14434  | R.ARLPANLVQAQR.D      | 1640.986 | 0.00371  | 3 | 1 | 33.9 | 0 |
| P12163_2_F8_12070  | R.ARLPANLVQAQR.D      | 1640.986 | 0.00146  | 3 | 1 | 28.8 | 0 |
| P12163_1_F3,16741  | R.AVFLDR.I            | 1024.609 | 0.00173  | 2 | 1 | 26.8 | 0 |
| P12163_2_F6,16904  | R.DFVLSIQRPR.S        | 1534.901 | 0.00293  | 3 | 1 | 24.3 | 0 |
| P12163_1_F6,14991  | R.DLFGAHTYER.I        | 1512.775 | 0.00182  | 3 | 1 | 47.5 | 0 |
| P12163_1_F9,14647  | R.DLFGAHTYER.I        | 1512.775 | 0.00014  | 3 | 1 | 33.8 | 0 |
| P12163_2_F4,13764  | R.DLFGAHTYER.I        | 1512.775 | 0.00449  | 3 | 1 | 37.5 | 0 |
| P12163_2_F6,14171  | R.DLFGAHTYER.I        | 1512.775 | 0.00401  | 3 | 1 | 48.8 | 0 |
| P12163_2_F7,13229  | R.DLFGAHTYER.I        | 1512.775 | 0.00083  | 3 | 1 | 49.1 | 0 |
| P12163_2_F7,13455  | R.DLFGAHTYER.I        | 1512.775 | 0.00149  | 3 | 1 | 30.3 | 0 |
| P12163_1_F6,14764  | R.EGQLPLTGHYTPR.D     | 1772.96  | 0.00306  | 3 | 1 | 36.7 | 0 |
| P12163_1_F7,12326  | R.EGQLPLTGHYTPR.D     | 1772.96  | 0.00297  | 3 | 1 | 31.1 | 0 |
| P12163_1_F7,14030  | R.EGQLPLTGHYTPR.D     | 1772.96  | 0.00237  | 3 | 1 | 49.8 | 0 |
| P12163_1_F8,14662  | R.EGQLPLTGHYTPR.D     | 1772.96  | 0.00237  | 3 | 1 | 53.2 | 0 |
| P12163_2_F6,14123  | R.EGQLPLTGHYTPR.D     | 1772.96  | 0.00163  | 2 | 1 | 29.4 | 0 |
| P12163_2_F9,13526  | R.EGQLPLTGHYTPR.D     | 1772.96  | -0.00058 | 3 | 1 | 45.4 | 0 |
| P12163_2_S3,12873  | R.EGQLPLTGHYTPR.D     | 1772.96  | 0.00302  | 3 | 1 | 35.3 | 0 |
| P12163_1_F6,16471  | R.HGPSLM*PGGSFEAYN    | 2267.118 | 0.00747  | 3 | 1 | 36.8 | 0 |

|                   |                       |          |          |   |   |      |   |
|-------------------|-----------------------|----------|----------|---|---|------|---|
| P12163_1_F7,15599 | R.HGPSLM*PGGSFEAYN    | 2267.118 | 0.00087  | 3 | 1 | 54.2 | 0 |
| P12163_1_F7,17448 | R.HGPSLM*PGGSFEAYN    | 2267.118 | 0.0003   | 3 | 1 | 41.5 | 0 |
| P12163_2_F10,1507 | R.HGPSLM*PGGSFEAYN    | 2267.118 | -0.00132 | 3 | 1 | 24.4 | 0 |
| P12163_2_F6,17725 | R.HGPSLM*PGGSFEAYN    | 2267.118 | 0.0057   | 3 | 1 | 59.6 | 0 |
| P12163_1_F6,18293 | R.HGPSLMPGGSFEAYN     | 2251.123 | 0.00312  | 3 | 1 | 41   | 0 |
| P12163_1_F7,17409 | R.HGPSLMPGGSFEAYN     | 2251.123 | 0.00765  | 3 | 1 | 45.6 | 0 |
| P12163_1_F8,18182 | R.HGPSLMPGGSFEAYN     | 2251.123 | 0.00345  | 3 | 1 | 50.2 | 0 |
| P12163_2_F10,1643 | R.HGPSLMPGGSFEAYN     | 2251.123 | 0.01245  | 3 | 1 | 23   | 0 |
| P12163_2_F6,17708 | R.HGPSLMPGGSFEAYN     | 2251.123 | 0.00414  | 3 | 1 | 34.7 | 0 |
| P12163_1_F5,7343  | R.IHEASQK.G           | 1420.837 | 0.00231  | 3 | 1 | 26.9 | 0 |
| P12163_1_S10,9002 | R.IHEASQK.G           | 1420.837 | 0.00798  | 3 | 1 | 32   | 0 |
| P12163_1_S10,9208 | R.IHEASQK.G           | 1420.837 | 0.00711  | 3 | 1 | 24.8 | 0 |
| P12163_2_F8_1207  | R.IHEASQK.G           | 1420.837 | 0.00549  | 3 | 1 | 32.7 | 0 |
| P12163_1_F2,15655 | R.LIDDVR.Q ! K.LIDDVR | 1034.615 | 0.00216  | 2 | 1 | 26.7 | 0 |
| P12163_1_F3,16355 | R.LIDDVR.Q ! K.LIDDVR | 1034.615 | 0.0016   | 2 | 1 | 36.5 | 0 |
| P12163_1_S1,14090 | R.LIDDVR.Q ! K.LIDDVR | 1034.615 | 0.00218  | 2 | 1 | 35.5 | 0 |
| P12163_1_F2,16574 | R.LPANLVQAQR.D        | 1413.848 | 0.00372  | 3 | 1 | 22.9 | 0 |
| P12163_1_F2,16815 | R.LPANLVQAQR.D        | 1413.848 | 0.00343  | 2 | 1 | 25.5 | 0 |
| P12163_1_S1,15559 | R.LPANLVQAQR.D        | 1413.848 | 0.00063  | 3 | 1 | 53.7 | 0 |
| P12163_1_F5,11592 | R.QALYASK.I           | 1388.836 | 0.00874  | 2 | 1 | 30.2 | 0 |
| P12163_1_F5,11663 | R.QALYASK.I           | 1388.836 | 0.00755  | 3 | 1 | 33.6 | 0 |
| P12163_1_F6,12559 | R.QALYASK.I           | 1388.836 | 0.00528  | 2 | 1 | 26.3 | 0 |
| P12163_1_S10,1296 | R.QALYASK.I           | 1388.836 | 0.00581  | 3 | 1 | 26.6 | 0 |
| P12163_2_F2,12380 | R.QALYASK.I           | 1388.836 | 0.00652  | 2 | 1 | 29.9 | 0 |
| P12163_2_F2,12384 | R.QALYASK.I           | 1388.836 | 0.00686  | 3 | 1 | 30   | 0 |
| P12163_2_F8_1207  | R.QALYASK.I           | 1388.836 | 0.00676  | 2 | 1 | 30.4 | 0 |
| P12163_1_F4,20176 | R.SVILVK.A            | 1379.945 | 0.00419  | 3 | 1 | 23.9 | 0 |
| P12163_1_F4,20204 | R.SVILVK.A            | 1379.945 | 0.00436  | 2 | 1 | 33.3 | 0 |
| P12163_1_F4,20444 | R.SVILVK.A            | 1379.945 | 0.00617  | 3 | 1 | 24.6 | 0 |
| P12163_2_F1,19742 | R.SVILVK.A            | 1379.945 | 0.00584  | 3 | 1 | 26.8 | 0 |
| P12163_2_F1,19762 | R.SVILVK.A            | 1379.945 | 0.00538  | 2 | 1 | 34.7 | 0 |
| P12163_2_F1,20012 | R.SVILVK.A            | 1379.945 | -0.0032  | 2 | 1 | 26   | 0 |
| P12163_2_F4,17816 | R.SVILVK.A            | 1379.945 | 0.00191  | 3 | 1 | 26.9 | 0 |
| P12163_2_F1,6891  | K.DPSGAK.V            | 1182.694 | 0.00091  | 3 | 1 | 26.7 | 0 |
| P12163_1_F5,14587 | K.EVSSYLK.K           | 1433.846 | 0.01118  | 2 | 1 | 24.6 | 0 |
| P12163_2_F1,14639 | K.EVSSYLK.K           | 1433.846 | 0.0115   | 2 | 1 | 30.2 | 0 |
| P12163_2_F1,14650 | K.EVSSYLK.K           | 1433.846 | 0.00492  | 3 | 1 | 23.7 | 0 |
| P12163_2_F2,15372 | K.EVSSYLK.K           | 1433.846 | 0.00562  | 2 | 1 | 30.1 | 0 |
| P12163_2_F8_1207  | K.EVSSYLK.K           | 1433.846 | 0.00459  | 3 | 1 | 25.3 | 0 |
| P12163_1_S1,13053 | K.IGGIGTVPVGR.V       | 1329.816 | 0.00272  | 3 | 1 | 35   | 0 |
| P12163_1_S1,15806 | K.IGGIGTVPVGR.V       | 1329.816 | 0.00299  | 3 | 1 | 50.3 | 0 |
| P12163_1_S1,16020 | K.IGGIGTVPVGR.V       | 1329.816 | 0.004    | 2 | 1 | 34.8 | 0 |
| P12163_1_S1,23690 | K.LDFLLSNAAR.F        | 1494.858 | 0.00104  | 3 | 1 | 52   | 0 |
| P12163_1_S1,23750 | K.LDFLLSNAAR.F        | 1494.858 | 0.00352  | 2 | 1 | 39.6 | 0 |
| P12163_1_S1,23896 | K.LDFLLSNAAR.F        | 1494.858 | 0.00272  | 3 | 1 | 68.9 | 0 |
| P12163_1_S1,23954 | K.LDFLLSNAAR.F        | 1494.858 | 0.00382  | 2 | 1 | 39.3 | 0 |
| P12163_2_F2,11403 | K.QMICCCNK.M          | 1721.842 | 0.00714  | 2 | 1 | 29.4 | 0 |
| P12163_1_F4,10642 | K.SFIGTTR.R           | 1085.626 | 0.00378  | 3 | 1 | 27.2 | 0 |
| P12163_1_F3,26990 | K.SFPADLVLEQLK.A      | 2081.247 | 0.00584  | 3 | 1 | 39.9 | 0 |
| P12163_2_S3,11488 | K.STTGHLIYK.L         | 1729.01  | 0.00463  | 3 | 1 | 31.3 | 0 |
| P12163_2_S5,12215 | K.STTGHLIYK.L         | 1729.01  | 0.00507  | 2 | 1 | 28.4 | 0 |

|                    |                       |          |          |   |   |      |   |
|--------------------|-----------------------|----------|----------|---|---|------|---|
| P12163_1_F4,21367  | K.YCCQINGFSSLNLTK.L   | 2413.246 | 0.00194  | 3 | 1 | 45.2 | 0 |
| P12163_1_F6,12423  | K.YYCTVIDAPGHR.D      | 1755.879 | 0.00383  | 4 | 1 | 22.6 | 0 |
| P12163_1_F7,14645  | K.YYCTVIDAPGHR.D      | 1755.879 | 0.0032   | 3 | 1 | 39.4 | 0 |
| P12163_1_F8,15318  | K.YYCTVIDAPGHR.D      | 1755.879 | 0.00347  | 3 | 1 | 35.4 | 0 |
| P12163_1_F8,15337  | K.YYCTVIDAPGHR.D      | 1755.879 | 0.01186  | 2 | 1 | 34.7 | 0 |
| P12163_2_F6,14776  | K.YYCTVIDAPGHR.D      | 1755.879 | 0.01322  | 2 | 1 | 35.8 | 0 |
| P12163_2_F9,14517  | K.YYCTVIDAPGHR.D      | 1755.879 | 0.00266  | 3 | 1 | 40.1 | 0 |
| P12163_2_S3,13753  | K.YYCTVIDAPGHR.D      | 1755.879 | 0.00275  | 3 | 1 | 38.4 | 0 |
| P12163_2_S5,14626  | K.YYCTVIDAPGHR.D      | 1755.879 | 0.00167  | 3 | 1 | 24   | 0 |
| P12163_1_S1,12316  | R.AAPSSLAVTANESPNR    | 1889.003 | 0.0013   | 2 | 1 | 38.8 | 0 |
| P12163_1_F8,10779  | R.CQGGANAGHTIYNAE     | 2356.192 | 0.00415  | 3 | 1 | 25   | 0 |
| P12163_1_F4,12766  | R.GIGPAYSSK.V         | 1487.868 | 0.00618  | 2 | 1 | 26.5 | 0 |
| P12163_1_F5,11274  | R.GIGPAYSSK.V         | 1487.868 | 0.00765  | 3 | 1 | 26.1 | 0 |
| P12163_1_S10,12310 | R.GIGPAYSSK.V         | 1487.868 | 0.00738  | 3 | 1 | 26.7 | 0 |
| P12163_2_F8_12070  | R.GIGPAYSSK.V         | 1487.868 | -0.00018 | 3 | 1 | 28.8 | 0 |
| P12163_2_F8_12070  | R.GIGPAYSSK.V         | 1487.868 | 0.0061   | 2 | 1 | 34.7 | 0 |
| P12163_1_F5,8390   | R.GYVASNSK.D          | 1433.821 | 0.00221  | 2 | 1 | 27.8 | 0 |
| P12163_1_S10,10000 | R.GYVASNSK.D          | 1433.821 | 0.00625  | 2 | 1 | 27.7 | 0 |
| P12163_1_F9,12352  | R.HMDTFPQK.L          | 1611.877 | 0.00748  | 2 | 1 | 24.3 | 0 |
| P12163_2_F9,11621  | R.HMDTFPQK.L          | 1611.877 | 0.00741  | 3 | 1 | 28.7 | 0 |
| P12163_1_F4,19769  | R.LPLQDVYK.I          | 1583.962 | 0.01294  | 2 | 1 | 29.6 | 0 |
| P12163_1_F4,19960  | R.LPLQDVYK.I          | 1583.962 | 0.00988  | 2 | 1 | 29.3 | 0 |
| P12163_1_F9,18573  | R.LPLQDVYK.I          | 1583.962 | 0.00766  | 2 | 1 | 25.6 | 0 |
| P12163_2_F1,19232  | R.LPLQDVYK.I          | 1583.962 | 0.00594  | 2 | 1 | 27.5 | 0 |
| P12163_2_F1,19251  | R.LPLQDVYK.I          | 1583.962 | 0.00828  | 3 | 1 | 26.4 | 0 |
| P12163_2_F1,19432  | R.LPLQDVYK.I          | 1583.962 | 0.00882  | 2 | 1 | 27.3 | 0 |
| P12163_2_F1,19651  | R.LPLQDVYK.I          | 1583.962 | 0.0055   | 2 | 1 | 27.3 | 0 |
| P12163_1_F4,15684  | R.QTVAVGVIK.S ! R.QTV | 1522.978 | 0.00495  | 2 | 1 | 50   | 0 |
| P12163_1_F4,15687  | R.QTVAVGVIK.S ! R.QTV | 1522.978 | 0.00277  | 3 | 1 | 40.1 | 0 |
| P12163_1_F7,14182  | R.QTVAVGVIK.S ! R.QTV | 1522.978 | 0.00286  | 3 | 1 | 41.9 | 0 |
| P12163_1_F7,14194  | R.QTVAVGVIK.S ! R.QTV | 1522.978 | 0.00483  | 2 | 1 | 24.1 | 0 |
| P12163_2_F1,14780  | R.QTVAVGVIK.S ! R.QTV | 1522.978 | 0.01093  | 2 | 1 | 32.4 | 0 |
| P12163_2_F1,14786  | R.QTVAVGVIK.S ! R.QTV | 1522.978 | 0.01153  | 3 | 1 | 40.7 | 0 |
| P12163_1_F5,16409  | R.STNLDWYK.G          | 1634.9   | 0.00839  | 2 | 1 | 29.7 | 0 |
| P12163_2_F1,16778  | R.STNLDWYK.G          | 1634.9   | 0.00543  | 2 | 1 | 41.9 | 0 |
| P12163_2_F2,17076  | R.STNLDWYK.G          | 1634.9   | 0.00583  | 2 | 1 | 39.8 | 0 |
| P12163_2_F2,17156  | R.STNLDWYK.G          | 1634.9   | 0.00448  | 3 | 1 | 25   | 0 |
| P12163_1_F7,17658  | R.VGSGFPFTEILGQGGD    | 2241.193 | 0.00112  | 4 | 1 | 48.3 | 0 |
| P12163_1_F7,17690  | R.VGSGFPFTEILGQGGD    | 2241.193 | 0.00239  | 3 | 1 | 43.4 | 0 |
| P12163_1_F7,19414  | R.VGSGFPFTEILGQGGD    | 2241.193 | 0.00245  | 3 | 1 | 71.8 | 0 |
| P12163_1_F8,20488  | R.VGSGFPFTEILGQGGD    | 2241.193 | 0.00638  | 3 | 1 | 30.3 | 0 |
| P12163_2_F4,19002  | R.VGSGFPFTEILGQGGD    | 2241.193 | -0.00094 | 3 | 1 | 23.5 | 0 |
| P12163_2_S5,18707  | R.VGSGFPFTEILGQGGD    | 2241.193 | 0.00016  | 4 | 1 | 25.7 | 0 |
| P12163_2_S5,18713  | R.VGSGFPFTEILGQGGD    | 2241.193 | 0.0038   | 3 | 1 | 67.1 | 0 |
| P12163_1_F3,24084  | R.VVGDIGVVK.A         | 1607.035 | 0.00533  | 3 | 1 | 43.6 | 0 |
| P12163_1_F3,24313  | R.VVGDIGVVK.A         | 1607.035 | 0.0059   | 2 | 1 | 58.6 | 0 |
| P12163_1_S1,8419   | K.CATITPDEAR.V        | 1437.731 | -0.00132 | 3 | 1 | 30.5 | 0 |
| P12163_1_S1,10490  | K.CATITPDEAR.V        | 1437.731 | 0.00381  | 3 | 1 | 82   | 0 |
| P12163_1_F3,24362  | K.DIFQEVYEANWK.S      | 2150.138 | 0.00607  | 3 | 1 | 45.2 | 0 |
| P12163_1_F6,18866  | K.DLALIIHGSK.M ! K.DL | 1675.036 | 0.00589  | 3 | 1 | 28.5 | 0 |
| P12163_1_F6,18919  | K.DLALIIHGSK.M ! K.DL | 1675.036 | 0.00754  | 2 | 1 | 32.4 | 0 |

|                   |                       |          |          |   |   |      |   |
|-------------------|-----------------------|----------|----------|---|---|------|---|
| P12163_2_F6,18431 | K.DLALIIHGSK.M ! K.DL | 1675.036 | 0.00178  | 3 | 1 | 42.2 | 0 |
| P12163_1_F6,19797 | K.FEAAGIWYEHR.L       | 1682.859 | 0.00171  | 3 | 1 | 33.5 | 0 |
| P12163_2_F6,19211 | K.FEAAGIWYEHR.L       | 1682.859 | 0.0027   | 3 | 1 | 28.9 | 0 |
| P12163_1_F9,18612 | K.KWPLYLSTK.N         | 2048.267 | 0.01307  | 3 | 1 | 30.1 | 0 |
| P12163_2_F9,17580 | K.KWPLYLSTK.N         | 2048.267 | 0.00248  | 3 | 1 | 32.8 | 0 |
| P12163_1_F3,16245 | K.LEAACVGTVESGK.M     | 1929.057 | 0.00706  | 3 | 1 | 46.9 | 0 |
| P12163_1_F3,16247 | K.LEAACVGTVESGK.M     | 1929.057 | 0.00877  | 2 | 1 | 52.9 | 0 |
| P12163_1_F3,19937 | K.LVFPVEGK.D          | 1496.93  | 0.00973  | 2 | 1 | 25.9 | 0 |
| P12163_1_F3,19951 | K.LVFPVEGK.D          | 1496.93  | 0.00438  | 3 | 1 | 31.8 | 0 |
| P12163_1_F5,15191 | K.SEGGYVWACK.N        | 1764.92  | 0.00358  | 2 | 1 | 39.2 | 0 |
| P12163_1_F6,11911 | K.TIEAEAAHGTVTR.H !   | 1659.897 | 0.00126  | 3 | 1 | 24.2 | 0 |
| P12163_1_F7,7463  | K.TIEAEAAHGTVTR.H !   | 1659.897 | 0.00228  | 3 | 1 | 32.3 | 0 |
| P12163_1_F7,10909 | K.TIEAEAAHGTVTR.H !   | 1659.897 | 0.00198  | 3 | 1 | 42.2 | 0 |
| P12163_1_F7,11225 | K.TIEAEAAHGTVTR.H !   | 1659.897 | 0.00036  | 3 | 1 | 32.2 | 0 |
| P12163_1_F8,7716  | K.TIEAEAAHGTVTR.H !   | 1659.897 | 0.003    | 3 | 1 | 37.8 | 0 |
| P12163_1_F8,11355 | K.TIEAEAAHGTVTR.H !   | 1659.897 | 0.00534  | 3 | 1 | 36.8 | 0 |
| P12163_2_F6,7635  | K.TIEAEAAHGTVTR.H !   | 1659.897 | 0.00177  | 3 | 1 | 31.8 | 0 |
| P12163_2_F6,8008  | K.TIEAEAAHGTVTR.H !   | 1659.897 | 0.00231  | 3 | 1 | 36.1 | 0 |
| P12163_2_F6,11169 | K.TIEAEAAHGTVTR.H !   | 1659.897 | 0.00225  | 3 | 1 | 53.3 | 0 |
| P12163_2_F6,11196 | K.TIEAEAAHGTVTR.H !   | 1659.897 | -0.00213 | 2 | 1 | 27.8 | 0 |
| P12163_2_F6,11481 | K.TIEAEAAHGTVTR.H !   | 1659.897 | 0.00225  | 3 | 1 | 52.8 | 0 |
| P12163_1_F3,17087 | K.VTVESAEATLK.Y       | 1756.031 | 0.0072   | 3 | 1 | 32   | 0 |
| P12163_1_F3,17128 | K.VTVESAEATLK.Y       | 1756.031 | -0.0027  | 2 | 1 | 52.2 | 0 |
| P12163_2_F1,16767 | K.VTVESAEATLK.Y       | 1756.031 | 0        | 3 | 1 | 22.2 | 0 |
| P12163_2_F1,22501 | K.WPLYLSTK.N          | 1615.967 | 0.00513  | 3 | 1 | 26.3 | 0 |
| P12163_1_S10,1407 | K.YNVAIK.C            | 1315.819 | 0.00485  | 3 | 1 | 25.2 | 0 |
| P12163_2_F2,14319 | K.YNVAIK.C            | 1315.819 | 0.00587  | 3 | 1 | 22.3 | 0 |
| P12163_1_F4,17196 | R.AFAEASM*NTAYQK.K    | 2056.063 | 0.00932  | 3 | 1 | 32.9 | 0 |
| P12163_1_F4,17194 | R.AFAEASMNTAYQK.K     | 2040.068 | 0.00833  | 3 | 1 | 51.2 | 0 |
| P12163_1_F4,17206 | R.AFAEASMNTAYQK.K     | 2040.068 | 0.00371  | 2 | 1 | 65.2 | 0 |
| P12163_2_F1,16357 | R.AFAEASMNTAYQK.K     | 2040.068 | 0.01835  | 3 | 1 | 28   | 0 |
| P12163_2_F1,16409 | R.AFAEASMNTAYQK.K     | 2040.068 | 0.01301  | 2 | 1 | 57.3 | 0 |
| P12163_1_F3,12940 | R.ATDTVIQGPBK.L       | 1694.99  | 0.0058   | 3 | 1 | 24.3 | 0 |
| P12163_1_F3,12968 | R.ATDTVIQGPBK.L       | 1694.99  | 0.00627  | 2 | 1 | 36.5 | 0 |
| P12163_1_F4,13511 | R.ATDTVIQGPBK.L       | 1694.99  | 0.00509  | 2 | 1 | 42.8 | 0 |
| P12163_2_S5,15581 | R.DATDDKVTVESAEATI    | 2705.497 | -0.00113 | 3 | 1 | 37.5 | 0 |
| P12163_1_F4,14531 | R.EPIICK.N            | 1367.818 | 0.01134  | 3 | 1 | 22.7 | 0 |
| P12163_2_S5,9795  | R.HAFGDQYR.A          | 1297.659 | 0.00302  | 3 | 1 | 34.1 | 0 |
| P12163_1_F3,27915 | R.LIDDM*VAYAIK.S ! R. | 1876.071 | 0.00822  | 3 | 1 | 38.5 | 0 |
| P12163_1_F3,26913 | R.LIDDMVAYAIK.S ! R.L | 1860.076 | 0.00567  | 3 | 1 | 39.8 | 0 |
| P12163_1_F3,27973 | R.LIDDMVAYAIK.S ! R.L | 1860.076 | 0.00441  | 3 | 1 | 25.1 | 0 |
| P12163_1_F4,22587 | R.LLDFTEK.L           | 1473.877 | 0.00567  | 2 | 1 | 25.6 | 0 |
| P12163_1_F3,15656 | R.NILNGTVFR.E         | 1337.784 | 0.00247  | 3 | 1 | 28.4 | 0 |
| P12163_1_F3,11607 | K.AIVYDNNSR.Q         | 1355.722 | 0.00526  | 2 | 1 | 26.7 | 0 |
| P12163_1_F9,11547 | K.AIVYDNNSR.Q         | 1355.722 | 0.00164  | 2 | 1 | 24.1 | 0 |
| P12163_1_F5,9563  | K.ASEDASLK.L          | 1428.815 | 0.00486  | 3 | 1 | 26.1 | 0 |
| P12163_1_F6,9923  | K.ATTVSHTYSK.E        | 1702.958 | 0.00434  | 2 | 1 | 40.7 | 0 |
| P12163_2_S5,9395  | K.ATTVSHTYSK.E        | 1702.958 | 0.00022  | 3 | 1 | 31.5 | 0 |
| P12163_1_F2,10739 | K.DGLSIVAR.L          | 1134.678 | 0.00089  | 3 | 1 | 30.5 | 0 |
| P12163_1_F2,14538 | K.DGLSIVAR.L          | 1134.678 | 0.00234  | 2 | 1 | 35.9 | 0 |
| P12163_1_F2,14772 | K.DGLSIVAR.L          | 1134.678 | 0.00282  | 2 | 1 | 30.7 | 0 |

|                   |                      |          |          |   |   |      |   |
|-------------------|----------------------|----------|----------|---|---|------|---|
| P12163_1_F3,12142 | K.EGSGTPVSGEYGGPTK   | 2131.113 | 0.0134   | 3 | 1 | 50.5 | 0 |
| P12163_1_F7,13196 | K.EVAGDPAIAPHLHK.F   | 2063.186 | 0.00975  | 3 | 1 | 33.5 | 0 |
| P12163_1_F7,13210 | K.EVAGDPAIAPHLHK.F   | 2063.186 | 0.00649  | 4 | 1 | 30.4 | 0 |
| P12163_1_F8,13754 | K.EVAGDPAIAPHLHK.F   | 2063.186 | 0.00269  | 4 | 1 | 34   | 0 |
| P12163_1_F8,13797 | K.EVAGDPAIAPHLHK.F   | 2063.186 | 0.00504  | 3 | 1 | 43.7 | 0 |
| P12163_2_F10,1260 | K.EVAGDPAIAPHLHK.F   | 2063.186 | 0.00473  | 3 | 1 | 33   | 0 |
| P12163_1_S1,20282 | K.FIPVSYTSENLEVEGK.R | 2291.274 | 0.01384  | 3 | 1 | 62.9 | 0 |
| P12163_1_S10,1187 | K.HLNLNK.S           | 1346.836 | 0.00654  | 3 | 1 | 27.9 | 0 |
| P12163_2_F8_12070 | K.HLNLNK.S           | 1346.836 | 0.00666  | 3 | 1 | 26.6 | 0 |
| P12163_2_S3,7791  | K.QSSSLAHAK.E        | 1536.895 | 0.00589  | 3 | 1 | 25.4 | 0 |
| P12163_1_F3,9122  | K.SSQVVGNGSVGR.I     | 1450.792 | 0.00314  | 2 | 1 | 26.8 | 0 |
| P12163_2_F10,1674 | K.TGGLYDTVFDVDHDK    | 2575.325 | 0.00904  | 4 | 1 | 29.5 | 0 |
| P12163_2_F4,17212 | K.TGGLYDTVFDVDHDK    | 2575.325 | 0.0084   | 4 | 1 | 33.8 | 0 |
| P12163_2_F9,14292 | R.AISAYYDGR.E        | 1319.69  | 0.00624  | 2 | 1 | 30.4 | 0 |
| P12163_1_F5,18891 | R.EWLNSLCK.T         | 1657.919 | 0.00294  | 2 | 1 | 30.7 | 0 |
| P12163_2_F1,18873 | R.IDDVFEK.E          | 1601.899 | 0.00949  | 2 | 1 | 30.4 | 0 |
| P12163_1_F8,12757 | R.IEAEHAAIEADR.A     | 1628.854 | 0.00171  | 3 | 1 | 39.6 | 0 |
| P12163_1_F8,12763 | R.IEAEHAAIEADR.A     | 1628.854 | 0.00053  | 2 | 1 | 26   | 0 |
| P12163_2_F6,12315 | R.IEAEHAAIEADR.A     | 1628.854 | 0.00165  | 3 | 1 | 45.4 | 0 |
| P12163_2_F4,19887 | R.IQNDFVNLANELHSSH   | 2484.253 | 0.00116  | 4 | 1 | 26.2 | 0 |
| P12163_1_F3,19336 | R.LADENFLR.Q         | 1281.71  | 0.00266  | 2 | 1 | 25   | 0 |
| P12163_1_F6,10790 | R.RIEAEHAAIEADR.A    | 1784.956 | 0.00819  | 3 | 1 | 44.9 | 0 |
| P12163_2_F1,18760 | R.TGDWVYAK.V         | 1749.906 | 0.00158  | 2 | 1 | 26.1 | 0 |
| P12163_1_F7,16279 | R.TVQDLNHNVDIILPK.Y  | 2327.354 | 0.00545  | 3 | 1 | 29.3 | 0 |
| P12163_1_F7,18552 | R.TVQDLNHNVDIILPK.Y  | 2327.354 | 0.0063   | 4 | 1 | 24   | 0 |
| P12163_1_F8,19515 | R.TVQDLNHNVDIILPK.Y  | 2327.354 | 0.00947  | 3 | 1 | 24   | 0 |
| P12163_1_F8,19567 | R.TVQDLNHNVDIILPK.Y  | 2327.354 | 0.00322  | 4 | 1 | 22.8 | 0 |
| P12163_2_S5,17691 | R.TVQDLNHNVDIILPK.Y  | 2327.354 | 0.00677  | 3 | 1 | 42.9 | 0 |
| P12163_1_F4,11211 | K.AQAETGEIK.G        | 1554.895 | 0.00691  | 2 | 1 | 24.7 | 0 |
| P12163_1_F4,11254 | K.AQAETGEIK.G        | 1554.895 | 0.00465  | 3 | 1 | 51.8 | 0 |
| P12163_1_F5,7974  | K.AQAETGEIK.G        | 1554.895 | 0.00261  | 3 | 1 | 31.4 | 0 |
| P12163_1_F5,9786  | K.AQAETGEIK.G        | 1554.895 | 0.00721  | 2 | 1 | 38.9 | 0 |
| P12163_1_F5,9796  | K.AQAETGEIK.G        | 1554.895 | 0.00774  | 3 | 1 | 42.6 | 0 |
| P12163_1_F8,10103 | K.AQAETGEIK.G        | 1554.895 | 0.00075  | 2 | 1 | 28.7 | 0 |
| P12163_2_F1,10317 | K.AQAETGEIK.G        | 1554.895 | 0.00583  | 2 | 1 | 36.7 | 0 |
| P12163_2_F1,10462 | K.AQAETGEIK.G        | 1554.895 | 0.00513  | 3 | 1 | 55.5 | 0 |
| P12163_2_F2,10723 | K.AQAETGEIK.G        | 1554.895 | 0.00533  | 2 | 1 | 35.8 | 0 |
| P12163_2_S5,9619  | K.AQAETGEIK.G        | 1554.895 | -0.00075 | 3 | 1 | 43.8 | 0 |
| P12163_1_F8,12166 | K.ASVGFK.A           | 1216.751 | 0.00075  | 3 | 1 | 23.8 | 0 |
| P12163_2_F6,11868 | K.ASVGFK.A           | 1216.751 | 0.00165  | 3 | 1 | 21.9 | 0 |
| P12163_1_S1,9960  | K.DDENVNSQPFM*R.W    | 1771.822 | 0.00624  | 3 | 1 | 29.3 | 0 |
| P12163_1_S1,11345 | K.DDENVNSQPFM*R.W    | 1771.822 | 0.0041   | 3 | 1 | 40.1 | 0 |
| P12163_1_S1,11543 | K.DDENVNSQPFMR.W     | 1755.827 | 0.0042   | 3 | 1 | 32.5 | 0 |
| P12163_1_S1,13426 | K.DDENVNSQPFMR.W     | 1755.827 | 0.00369  | 2 | 1 | 37.1 | 0 |
| P12163_1_S1,13458 | K.DDENVNSQPFMR.W     | 1755.827 | 0.00351  | 3 | 1 | 66.4 | 0 |
| P12163_1_S1,13674 | K.DDENVNSQPFMR.W     | 1755.827 | 0.00417  | 2 | 1 | 26.8 | 0 |
| P12163_1_F2,18796 | K.DTDILAAFR.V        | 1325.737 | 0.00689  | 3 | 1 | 26   | 0 |
| P12163_1_F2,21865 | K.DTDILAAFR.V        | 1325.737 | -0.00317 | 2 | 1 | 28.8 | 0 |
| P12163_1_F5,21201 | K.DTDILAAFR.V        | 1325.737 | 0.00051  | 2 | 1 | 31.7 | 0 |
| P12163_1_F5,21745 | K.DTDILAAFR.V        | 1325.737 | 0.00647  | 2 | 1 | 32.6 | 0 |
| P12163_1_S1,18186 | K.DTDILAAFR.V        | 1325.737 | 0.00275  | 3 | 1 | 36.2 | 0 |

|                   |                   |          |          |   |   |      |   |
|-------------------|-------------------|----------|----------|---|---|------|---|
| P12163_1_S1,18194 | K.DTDILAAFR.V     | 1325.737 | 0.00061  | 2 | 1 | 27.8 | 0 |
| P12163_1_S1,21111 | K.DTDILAAFR.V     | 1325.737 | 0.00485  | 3 | 1 | 47.3 | 0 |
| P12163_1_S1,21217 | K.DTDILAAFR.V     | 1325.737 | 0.00273  | 2 | 1 | 45.5 | 0 |
| P12163_2_F4,20156 | K.DTDILAAFR.V     | 1325.737 | 0.00441  | 2 | 1 | 37.2 | 0 |
| P12163_1_F6,13621 | K.GHYLNATAGTCEEM* | 2419.221 | 0.0041   | 3 | 1 | 37.7 | 0 |
| P12163_1_F6,13913 | K.GHYLNATAGTCEEM* | 2419.221 | 0.00593  | 3 | 1 | 73.7 | 0 |
| P12163_1_F6,15696 | K.GHYLNATAGTCEEM* | 2419.221 | 0.00431  | 3 | 1 | 72.8 | 0 |
| P12163_1_F6,15713 | K.GHYLNATAGTCEEM* | 2419.221 | 0.00814  | 4 | 1 | 39.5 | 0 |
| P12163_1_F7,13228 | K.GHYLNATAGTCEEM* | 2419.221 | 0.00836  | 3 | 1 | 37.8 | 0 |
| P12163_1_F7,13265 | K.GHYLNATAGTCEEM* | 2419.221 | 0.01066  | 4 | 1 | 26.8 | 0 |
| P12163_1_F7,14913 | K.GHYLNATAGTCEEM* | 2419.221 | 0.00587  | 3 | 1 | 55.2 | 0 |
| P12163_1_F8,13809 | K.GHYLNATAGTCEEM* | 2419.221 | 0.01568  | 3 | 1 | 24.3 | 0 |
| P12163_2_F6,13294 | K.GHYLNATAGTCEEM* | 2419.221 | -0.00046 | 3 | 1 | 68   | 0 |
| P12163_2_F6,15015 | K.GHYLNATAGTCEEM* | 2419.221 | 0.00214  | 4 | 1 | 55.9 | 0 |
| P12163_2_F6,15049 | K.GHYLNATAGTCEEM* | 2419.221 | 0.00713  | 3 | 1 | 79.4 | 0 |
| P12163_1_F6,13842 | K.GHYLNATAGTCEEML | 2403.226 | 0.00563  | 3 | 1 | 51.8 | 0 |
| P12163_1_F6,15695 | K.GHYLNATAGTCEEML | 2403.226 | 0.0056   | 3 | 1 | 71.9 | 0 |
| P12163_1_F6,15697 | K.GHYLNATAGTCEEML | 2403.226 | 0.00422  | 4 | 1 | 52.5 | 0 |
| P12163_1_F8,15577 | K.GHYLNATAGTCEEML | 2403.226 | 0.00626  | 3 | 1 | 71.1 | 0 |
| P12163_2_F6,15002 | K.GHYLNATAGTCEEML | 2403.226 | 0.00443  | 3 | 1 | 72.7 | 0 |
| P12163_2_F6,15021 | K.GHYLNATAGTCEEML | 2403.226 | 0.00206  | 4 | 1 | 39.9 | 0 |
| P12163_2_F6,15026 | K.GHYLNATAGTCEEML | 2403.226 | 0.00605  | 2 | 1 | 42.6 | 0 |
| P12163_2_F7,12351 | K.GHYLNATAGTCEEML | 2403.226 | 0.0113   | 4 | 1 | 22.5 | 0 |
| P12163_2_F7,13835 | K.GHYLNATAGTCEEML | 2403.226 | 0.00452  | 3 | 1 | 63.7 | 0 |
| P12163_2_F2,14178 | K.LGLSAK.N        | 1196.782 | 0.00696  | 3 | 1 | 22   | 0 |
| P12163_1_F2,18879 | K.LTYYPDPDYVTK.D  | 1972.089 | 0.00274  | 2 | 1 | 50.8 | 0 |
| P12163_1_F2,18885 | K.LTYYPDPDYVTK.D  | 1972.089 | -0.00208 | 3 | 1 | 31.8 | 0 |
| P12163_1_F3,16748 | K.LTYYPDPDYVTK.D  | 1972.089 | 0.00532  | 2 | 1 | 26.4 | 0 |
| P12163_1_F3,19408 | K.LTYYPDPDYVTK.D  | 1972.089 | 0.00454  | 2 | 1 | 44   | 0 |
| P12163_1_F3,19418 | K.LTYYPDPDYVTK.D  | 1972.089 | 0.00452  | 3 | 1 | 34.7 | 0 |
| P12163_1_F5,18386 | K.LTYYPDPDYVTK.D  | 1972.089 | 0.00284  | 2 | 1 | 25.3 | 0 |
| P12163_1_F5,18772 | K.LTYYPDPDYVTK.D  | 1972.089 | 0.00676  | 2 | 1 | 31.2 | 0 |
| P12163_1_F7,18028 | K.LTYYPDPDYVTK.D  | 1972.089 | 0.00671  | 3 | 1 | 35.4 | 0 |
| P12163_1_F7,18035 | K.LTYYPDPDYVTK.D  | 1972.089 | 0.00296  | 2 | 1 | 53.5 | 0 |
| P12163_1_S10,1762 | K.LTYYPDPDYVTK.D  | 1972.089 | 0.00497  | 3 | 1 | 29.9 | 0 |
| P12163_2_F4,17643 | K.LTYYPDPDYVTK.D  | 1972.089 | 0.00266  | 2 | 1 | 46   | 0 |
| P12163_2_F4,17648 | K.LTYYPDPDYVTK.D  | 1972.089 | 0.0038   | 3 | 1 | 34.9 | 0 |
| P12163_2_F6,18466 | K.LTYYPDPDYVTK.D  | 1972.089 | 0.00476  | 2 | 1 | 46   | 0 |
| P12163_2_F6,18477 | K.LTYYPDPDYVTK.D  | 1972.089 | 0.00353  | 3 | 1 | 35.8 | 0 |
| P12163_2_F7,16841 | K.LTYYPDPDYVTK.D  | 1972.089 | 0.00572  | 2 | 1 | 58.9 | 0 |
| P12163_2_F7,16858 | K.LTYYPDPDYVTK.D  | 1972.089 | 0.00944  | 3 | 1 | 26.3 | 0 |
| P12163_2_F7,17047 | K.LTYYPDPDYVTK.D  | 1972.089 | 0.00788  | 2 | 1 | 43.7 | 0 |
| P12163_1_F4,4796  | K.NHGM*HFR.V      | 1218.61  | 0.00451  | 3 | 1 | 31.1 | 0 |
| P12163_1_F4,7807  | K.NHGM*HFR.V      | 1218.61  | 0.00466  | 3 | 1 | 34.7 | 0 |
| P12163_1_F4,7820  | K.NHGMHFR.V       | 1202.615 | 0.00175  | 3 | 1 | 42.9 | 0 |
| P12163_2_S3,7316  | K.NHGMHFR.V       | 1202.615 | 0.00244  | 4 | 1 | 36.8 | 0 |
| P12163_2_S3,7423  | K.NHGMHFR.V       | 1202.615 | -0.00059 | 3 | 1 | 39.6 | 0 |
| P12163_1_F8,10161 | K.RAVFAR.E        | 1023.636 | 0.00645  | 3 | 1 | 27.5 | 0 |
| P12163_1_F6,14275 | K.TFQGPPHGIQVER.D | 1769.96  | 0.00086  | 3 | 1 | 25   | 0 |
| P12163_1_F7,13488 | K.TFQGPPHGIQVER.D | 1769.96  | 0.0032   | 3 | 1 | 46.6 | 0 |
| P12163_1_F7,13494 | K.TFQGPPHGIQVER.D | 1769.96  | 0.00006  | 2 | 1 | 28.7 | 0 |

|                                     |          |          |   |   |      |   |
|-------------------------------------|----------|----------|---|---|------|---|
| P12163_1_F8,11819 K.TFQGPPHGIQVER.D | 1769.96  | -0.00436 | 3 | 1 | 51.2 | 0 |
| P12163_1_F8,11841 K.TFQGPPHGIQVER.D | 1769.96  | 0.00263  | 4 | 1 | 41.1 | 0 |
| P12163_1_F8,14037 K.TFQGPPHGIQVER.D | 1769.96  | 0.00138  | 2 | 1 | 49   | 0 |
| P12163_1_F8,14043 K.TFQGPPHGIQVER.D | 1769.96  | 0.00227  | 3 | 1 | 58.3 | 0 |
| P12163_1_F8,17431 K.TFQGPPHGIQVER.D | 1769.96  | 0.00188  | 3 | 1 | 24.7 | 0 |
| P12163_1_F8,17634 K.TFQGPPHGIQVER.D | 1769.96  | 0.00272  | 3 | 1 | 41.5 | 0 |
| P12163_1_F8,18390 K.TFQGPPHGIQVER.D | 1769.96  | 0.00293  | 3 | 1 | 27.5 | 0 |
| P12163_1_F8,19840 K.TFQGPPHGIQVER.D | 1769.96  | -0.004   | 3 | 1 | 30.7 | 0 |
| P12163_1_F8,20075 K.TFQGPPHGIQVER.D | 1769.96  | 0.0044   | 3 | 1 | 25.5 | 0 |
| P12163_1_F8,20326 K.TFQGPPHGIQVER.D | 1769.96  | 0.00266  | 3 | 1 | 55.5 | 0 |
| P12163_1_F9,13954 K.TFQGPPHGIQVER.D | 1769.96  | 0.00203  | 3 | 1 | 23.6 | 0 |
| P12163_2_F6,11556 K.TFQGPPHGIQVER.D | 1769.96  | -0.00025 | 3 | 1 | 31   | 0 |
| P12163_2_F6,11571 K.TFQGPPHGIQVER.D | 1769.96  | 0.00103  | 4 | 1 | 43.6 | 0 |
| P12163_2_F6,21031 K.TFQGPPHGIQVER.D | 1769.96  | 0.00218  | 3 | 1 | 23.3 | 0 |
| P12163_2_F6,21612 K.TFQGPPHGIQVER.D | 1769.96  | 0.00041  | 3 | 1 | 26.2 | 0 |
| P12163_2_F6,23513 K.TFQGPPHGIQVER.D | 1769.96  | 0.00305  | 3 | 1 | 26.4 | 0 |
| P12163_2_F6,24211 K.TFQGPPHGIQVER.D | 1769.96  | 0.00149  | 3 | 1 | 42.2 | 0 |
| P12163_2_F6,24705 K.TFQGPPHGIQVER.D | 1769.96  | 0.00065  | 3 | 1 | 38.9 | 0 |
| P12163_2_F6,24862 K.TFQGPPHGIQVER.D | 1769.96  | 0.00209  | 3 | 1 | 24.7 | 0 |
| P12163_1_F3,23238 K.WSPELAAACEVWK.S | 2155.147 | 0.00299  | 2 | 1 | 46.3 | 0 |
| P12163_1_F3,23299 K.WSPELAAACEVWK.S | 2155.147 | 0.00615  | 3 | 1 | 49.3 | 0 |
| P12163_1_F4,23994 K.WSPELAAACEVWK.S | 2155.147 | 0.00545  | 3 | 1 | 41.2 | 0 |
| P12163_1_F7,10862 R.AM*HAVIDR.Q     | 1232.672 | 0.00108  | 3 | 1 | 33.6 | 0 |
| P12163_1_F9,7498 R.AM*HAVIDR.Q      | 1232.672 | 0.00283  | 2 | 1 | 28.6 | 0 |
| P12163_1_F9,11601 R.AM*HAVIDR.Q     | 1232.672 | 0.00399  | 3 | 1 | 24   | 0 |
| P12163_2_F7,10803 R.AM*HAVIDR.Q     | 1232.672 | 0.00342  | 3 | 1 | 39.6 | 0 |
| P12163_2_F7,10809 R.AM*HAVIDR.Q     | 1232.672 | 0.00217  | 2 | 1 | 27.2 | 0 |
| P12163_1_F7,10900 R.AMHAVIDR.Q      | 1216.677 | -0.00006 | 3 | 1 | 26.7 | 0 |
| P12163_1_F9,11576 R.AMHAVIDR.Q      | 1216.677 | 0.00373  | 2 | 1 | 29.1 | 0 |
| P12163_1_F9,11760 R.AMHAVIDR.Q      | 1216.677 | 0.003    | 3 | 1 | 46.3 | 0 |
| P12163_2_F10,1083 R.AMHAVIDR.Q      | 1216.677 | -0.00126 | 3 | 1 | 31   | 0 |
| P12163_2_F7,10750 R.AMHAVIDR.Q      | 1216.677 | 0.00267  | 2 | 1 | 30.5 | 0 |
| P12163_1_F5,14113 R.DNGLLLHIHR.A    | 1491.87  | 0.00252  | 3 | 1 | 35.8 | 0 |
| P12163_1_F6,15041 R.DNGLLLHIHR.A    | 1491.87  | 0.00095  | 3 | 1 | 45.4 | 0 |
| P12163_1_F6,15043 R.DNGLLLHIHR.A    | 1491.87  | 0.00161  | 4 | 1 | 38   | 0 |
| P12163_1_F6,15053 R.DNGLLLHIHR.A    | 1491.87  | 0.0036   | 2 | 1 | 48   | 0 |
| P12163_1_F6,15304 R.DNGLLLHIHR.A    | 1491.87  | 0.00153  | 3 | 1 | 51.1 | 0 |
| P12163_1_F6,22250 R.DNGLLLHIHR.A    | 1491.87  | 0.00237  | 3 | 1 | 28.7 | 0 |
| P12163_1_F6,22514 R.DNGLLLHIHR.A    | 1491.87  | 0.0032   | 3 | 1 | 35.3 | 0 |
| P12163_1_F6,22725 R.DNGLLLHIHR.A    | 1491.87  | -0.01066 | 3 | 1 | 34.8 | 0 |
| P12163_1_F6,22955 R.DNGLLLHIHR.A    | 1491.87  | 0.00615  | 3 | 1 | 26.5 | 0 |
| P12163_1_F6,24403 R.DNGLLLHIHR.A    | 1491.87  | 0.00147  | 3 | 1 | 30.4 | 0 |
| P12163_1_F7,14302 R.DNGLLLHIHR.A    | 1491.87  | 0.0032   | 3 | 1 | 26.5 | 0 |
| P12163_2_F4,13462 R.DNGLLLHIHR.A    | 1491.87  | -0.00019 | 4 | 1 | 32.5 | 0 |
| P12163_2_F4,13860 R.DNGLLLHIHR.A    | 1491.87  | 0.00345  | 3 | 1 | 36.3 | 0 |
| P12163_2_F6,14215 R.DNGLLLHIHR.A    | 1491.87  | 0.00288  | 3 | 1 | 41.3 | 0 |
| P12163_2_F6,14220 R.DNGLLLHIHR.A    | 1491.87  | 0.00145  | 4 | 1 | 49.6 | 0 |
| P12163_2_F6,14227 R.DNGLLLHIHR.A    | 1491.87  | 0.00337  | 4 | 1 | 55.5 | 0 |
| P12163_2_F6,14242 R.DNGLLLHIHR.A    | 1491.87  | 0.00272  | 2 | 1 | 48.1 | 0 |
| P12163_2_F6,14483 R.DNGLLLHIHR.A    | 1491.87  | 0.00381  | 4 | 1 | 23.1 | 0 |
| P12163_2_F6,14579 R.DNGLLLHIHR.A    | 1491.87  | 0.00018  | 3 | 1 | 29.6 | 0 |

|                   |                   |          |          |   |   |      |   |
|-------------------|-------------------|----------|----------|---|---|------|---|
| P12163_2_F6,23058 | R.DNGLLLHIHR.A    | 1491.87  | 0.00185  | 3 | 1 | 32.6 | 0 |
| P12163_2_F7,13299 | R.DNGLLLHIHR.A    | 1491.87  | 0.00374  | 3 | 1 | 47.7 | 0 |
| P12163_2_F7,13312 | R.DNGLLLHIHR.A    | 1491.87  | -0.00547 | 4 | 1 | 37.1 | 0 |
| P12163_1_F7,22788 | R.FLFCAEALYK.A    | 1870.039 | -0.00232 | 3 | 1 | 30.5 | 0 |
| P12163_1_F5,14504 | R.GGLDFTK.D       | 1345.794 | 0.0108   | 3 | 1 | 25.8 | 0 |
| P12163_1_F5,14576 | R.GGLDFTK.D       | 1345.794 | 0.00782  | 2 | 1 | 28.7 | 0 |
| P12163_2_F1,14594 | R.GGLDFTK.D       | 1345.794 | 0.0065   | 2 | 1 | 26.3 | 0 |
| P12163_2_F1,14621 | R.GGLDFTK.D       | 1345.794 | 0.00486  | 3 | 1 | 23.5 | 0 |
| P12163_2_S5,13710 | R.GGLDFTK.D       | 1345.794 | -0.00771 | 3 | 1 | 25.7 | 0 |
| P12163_1_F8,16534 | R.GGLDFTKDDENVNSQ | 2794.393 | 0.01155  | 3 | 1 | 36   | 0 |
| P12163_2_S5,15499 | R.GGLDFTKDDENVNSQ | 2794.393 | 0.01259  | 4 | 1 | 27.3 | 0 |
| P12163_2_S5,15507 | R.GGLDFTKDDENVNSQ | 2794.393 | 0.0027   | 3 | 1 | 28.5 | 0 |
| P12163_2_S5,16797 | R.GGLDFTKDDENVNSQ | 2778.398 | 0.00643  | 4 | 1 | 43.3 | 0 |
| P12163_1_F4,14458 | R.IPPAYTK.T       | 1397.861 | 0.01364  | 3 | 1 | 27   | 0 |
| P12163_1_F4,14721 | R.IPPAYTK.T       | 1397.861 | 0.00524  | 3 | 1 | 41.8 | 0 |
| P12163_1_F5,13205 | R.IPPAYTK.T       | 1397.861 | 0.01067  | 3 | 1 | 25.8 | 0 |
| P12163_1_F9,13858 | R.IPPAYTK.T       | 1397.861 | 0.01091  | 3 | 1 | 24   | 0 |
| P12163_2_F1,13643 | R.IPPAYTK.T       | 1397.861 | 0.00668  | 3 | 1 | 37   | 0 |
| P12163_2_F1,13926 | R.IPPAYTK.T       | 1397.861 | 0.00302  | 3 | 1 | 25.7 | 0 |
| P12163_2_F9,12677 | R.IPPAYTK.T       | 1397.861 | 0.00446  | 3 | 1 | 26.1 | 0 |
| P12163_2_S5,12250 | R.IPPAYTK.T       | 1397.861 | 0.00158  | 3 | 1 | 26.6 | 0 |
| P12163_1_F4,13249 | R.LSGGDHIHAGTVVGK | 2056.176 | 0.00792  | 3 | 1 | 24.5 | 0 |
| P12163_1_F4,13298 | R.LSGGDHIHAGTVVGK | 2056.176 | 0.00464  | 2 | 1 | 54.7 | 0 |
| P12163_1_F6,12797 | R.LSGGDHIHAGTVVGK | 2056.176 | 0.00972  | 3 | 1 | 37.1 | 0 |
| P12163_1_F7,10443 | R.LSGGDHIHAGTVVGK | 2056.176 | 0.00777  | 3 | 1 | 23.3 | 0 |
| P12163_1_F7,12170 | R.LSGGDHIHAGTVVGK | 2056.176 | 0.00452  | 2 | 1 | 43.2 | 0 |
| P12163_2_F10,1186 | R.LSGGDHIHAGTVVGK | 2056.176 | 0.00429  | 3 | 1 | 32.8 | 0 |
| P12163_2_F4,11808 | R.LSGGDHIHAGTVVGK | 2056.176 | 0.00326  | 2 | 1 | 47.7 | 0 |
| P12163_2_F4,11921 | R.LSGGDHIHAGTVVGK | 2056.176 | 0.00315  | 3 | 1 | 36.7 | 0 |
| P12163_2_F4,12652 | R.LSGGDHIHAGTVVGK | 2056.176 | 0.0042   | 3 | 1 | 31.2 | 0 |
| P12163_2_F4,23710 | R.LSGGDHIHAGTVVGK | 2056.176 | 0.00432  | 3 | 1 | 40.3 | 0 |
| P12163_2_F8_12070 | R.LSGGDHIHAGTVVGK | 2056.176 | 0.00615  | 3 | 1 | 38.5 | 0 |
| P12163_2_S3,11261 | R.LSGGDHIHAGTVVGK | 2056.176 | 0.00606  | 3 | 1 | 32.3 | 0 |
| P12163_1_F2,15163 | R.VALEACVQAR.N    | 1420.788 | 0.00398  | 2 | 1 | 25.6 | 0 |
| P12163_2_F7,5789  | K.AEDDEHK.K       | 1451.759 | 0.00358  | 3 | 1 | 25   | 0 |
| P12163_1_F7,11571 | K.ATAGDTHLGGEDFDN | 1979.936 | 0.00221  | 3 | 1 | 31.1 | 0 |
| P12163_1_F8,9335  | K.ATAGDTHLGGEDFDN | 1979.936 | 0.00154  | 4 | 1 | 32.9 | 0 |
| P12163_1_F8,10350 | K.ATAGDTHLGGEDFDN | 1979.936 | 0.00474  | 4 | 1 | 44.7 | 0 |
| P12163_1_F8,10358 | K.ATAGDTHLGGEDFDN | 1979.936 | 0.00495  | 2 | 1 | 39   | 0 |
| P12163_1_F8,10594 | K.ATAGDTHLGGEDFDN | 1979.936 | 0.00784  | 3 | 1 | 35.8 | 0 |
| P12163_1_F8,10598 | K.ATAGDTHLGGEDFDN | 1979.936 | 0.00085  | 2 | 1 | 45.7 | 0 |
| P12163_1_F8,10606 | K.ATAGDTHLGGEDFDN | 1979.936 | 0.0029   | 4 | 1 | 38.9 | 0 |
| P12163_1_F8,12056 | K.ATAGDTHLGGEDFDN | 1979.936 | 0.00302  | 3 | 1 | 55.8 | 0 |
| P12163_1_F8,12232 | K.ATAGDTHLGGEDFDN | 1979.936 | 0.00173  | 2 | 1 | 44.6 | 0 |
| P12163_2_F9,11279 | K.ATAGDTHLGGEDFDN | 1979.936 | 0.00163  | 3 | 1 | 61.8 | 0 |
| P12163_2_S5,9391  | K.ATAGDTHLGGEDFDN | 1979.936 | 0.00354  | 4 | 1 | 35.8 | 0 |
| P12163_2_S5,10362 | K.ATAGDTHLGGEDFDN | 1979.936 | 0.00242  | 4 | 1 | 55.1 | 0 |
| P12163_2_S5,10365 | K.ATAGDTHLGGEDFDN | 1979.936 | 0.00311  | 3 | 1 | 39.6 | 0 |
| P12163_2_S5,10368 | K.ATAGDTHLGGEDFDN | 1979.936 | 0.01013  | 2 | 1 | 35   | 0 |
| P12163_2_S5,10564 | K.ATAGDTHLGGEDFDN | 1979.936 | 0.00286  | 4 | 1 | 37.9 | 0 |
| P12163_2_S5,11889 | K.ATAGDTHLGGEDFDN | 1979.936 | 0.0021   | 4 | 1 | 49.3 | 0 |



|                   |                        |          |          |   |   |      |   |
|-------------------|------------------------|----------|----------|---|---|------|---|
| P12163_2_S5,11953 | K.ATAGDTHLGGEDFDN      | 1979.936 | -0.00161 | 3 | 1 | 41   | 0 |
| P12163_1_F5,11319 | K.CMEPVEK.C            | 1500.801 | 0.00642  | 2 | 1 | 25.4 | 0 |
| P12163_1_S1,15598 | K.DAGVISGLNVM*R.I      | 1551.847 | 0.00494  | 3 | 1 | 41   | 0 |
| P12163_1_S1,15610 | K.DAGVISGLNVM*R.I      | 1551.847 | 0.00586  | 2 | 1 | 40   | 0 |
| P12163_1_S1,18405 | K.DAGVISGLNVMR.I       | 1535.852 | 0.00202  | 2 | 1 | 39.3 | 0 |
| P12163_1_S1,18420 | K.DAGVISGLNVMR.I       | 1535.852 | -0.00484 | 3 | 1 | 50.9 | 0 |
| P12163_1_F3,19020 | K.EIAEAYLGTTIK.N       | 1917.115 | 0.00194  | 2 | 1 | 43.6 | 0 |
| P12163_1_F3,20551 | K.EIAEAYLGTTIK.N       | 1917.115 | 0.0035   | 2 | 1 | 62.2 | 0 |
| P12163_1_F3,20570 | K.EIAEAYLGTTIK.N       | 1917.115 | 0.00445  | 3 | 1 | 48.6 | 0 |
| P12163_1_F2,19591 | K.ELEGICNPIIAK.M ! K.F | 1965.13  | 0.00303  | 3 | 1 | 28.3 | 0 |
| P12163_1_F3,20189 | K.ELEGICNPIIAK.M ! K.F | 1965.13  | 0.00643  | 2 | 1 | 57.2 | 0 |
| P12163_1_F3,20297 | K.ELEGICNPIIAK.M ! K.F | 1965.13  | 0.00384  | 3 | 1 | 54.2 | 0 |
| P12163_1_F3,20530 | K.ELEGICNPIIAK.M ! K.F | 1965.13  | 0.00767  | 2 | 1 | 70.2 | 0 |
| P12163_1_F3,20577 | K.ELEGICNPIIAK.M ! K.F | 1965.13  | 0.00741  | 3 | 1 | 42   | 0 |
| P12163_1_F6,19161 | K.ELEGICNPIIAK.M ! K.F | 1965.13  | 0.00165  | 3 | 1 | 25.6 | 0 |
| P12163_1_F6,19175 | K.ELEGICNPIIAK.M ! K.F | 1965.13  | 0.00273  | 2 | 1 | 27   | 0 |
| P12163_1_F6,19628 | K.ELEGICNPIIAK.M ! K.F | 1965.13  | -0.00357 | 3 | 1 | 29.8 | 0 |
| P12163_2_F4,18689 | K.ELEGICNPIIAK.M ! K.F | 1965.13  | 0.00795  | 3 | 1 | 25.5 | 0 |
| P12163_1_F4,12357 | K.MVQEAEK.Y ! R.MVQI   | 1442.813 | 0.00599  | 2 | 1 | 28.1 | 0 |
| P12163_1_F5,10859 | K.MVQEAEK.Y ! R.MVQI   | 1442.813 | 0.00519  | 2 | 1 | 26.8 | 0 |
| P12163_1_F5,10908 | K.MVQEAEK.Y ! R.MVQI   | 1442.813 | 0.00899  | 3 | 1 | 35.2 | 0 |
| P12163_1_F6,11909 | K.MVQEAEK.Y ! R.MVQI   | 1442.813 | 0.00945  | 2 | 1 | 30.4 | 0 |
| P12163_2_F1,11370 | K.MVQEAEK.Y ! R.MVQI   | 1442.813 | 0.00503  | 2 | 1 | 27.8 | 0 |
| P12163_2_F1,11390 | K.MVQEAEK.Y ! R.MVQI   | 1442.813 | 0.00722  | 3 | 1 | 39.8 | 0 |
| P12163_1_F3,17989 | K.NALENYAYNMR.N        | 1662.821 | 0.00301  | 2 | 1 | 33.4 | 0 |
| P12163_1_F9,17110 | K.NALENYAYNMR.N        | 1662.821 | -0.00229 | 2 | 1 | 36.7 | 0 |
| P12163_2_F1,17641 | K.NALENYAYNMR.N        | 1662.821 | 0.00091  | 2 | 1 | 31.7 | 0 |
| P12163_2_F9,16815 | K.NALENYAYNMR.N        | 1662.821 | 0.00245  | 2 | 1 | 38.5 | 0 |
| P12163_2_F9,16832 | K.NALENYAYNMR.N        | 1662.821 | 0.00103  | 3 | 1 | 34   | 0 |
| P12163_1_F8,18778 | K.NAVVTVPAYFNDSQR      | 1985.039 | -0.00348 | 2 | 1 | 30.4 | 0 |
| P12163_1_F8,18854 | K.NAVVTVPAYFNDSQR      | 1985.039 | 0.00299  | 3 | 1 | 33.4 | 0 |
| P12163_1_S1,17806 | K.NAVVTVPAYFNDSQR      | 1985.039 | 0.01346  | 2 | 1 | 36.9 | 0 |
| P12163_1_S1,17812 | K.NAVVTVPAYFNDSQR      | 1985.039 | 0.00257  | 3 | 1 | 27.2 | 0 |
| P12163_2_F6,18372 | K.NAVVTVPAYFNDSQR      | 1985.039 | 0.00464  | 2 | 1 | 47.4 | 0 |
| P12163_2_F6,18440 | K.NAVVTVPAYFNDSQR      | 1985.039 | -0.00088 | 3 | 1 | 39.9 | 0 |
| P12163_1_F3,12540 | K.NQVAM*NPTNTVFDA      | 2274.201 | 0.00524  | 3 | 1 | 58   | 0 |
| P12163_1_F3,15916 | K.NQVAM*NPTNTVFDA      | 2274.201 | 0.00051  | 2 | 1 | 33.5 | 0 |
| P12163_1_F3,15954 | K.NQVAM*NPTNTVFDA      | 2274.201 | 0.00734  | 3 | 1 | 61.1 | 0 |
| P12163_1_F3,17841 | K.NQVAM*NPTNTVFDA      | 2274.201 | 0.00563  | 3 | 1 | 30.2 | 0 |
| P12163_1_F3,14508 | K.NQVAMNPTNTVFDAK      | 2258.206 | 0.01079  | 3 | 1 | 49.6 | 0 |
| P12163_1_F3,14558 | K.NQVAMNPTNTVFDAK      | 2258.206 | 0.01558  | 2 | 1 | 34.2 | 0 |
| P12163_1_F3,17827 | K.NQVAMNPTNTVFDAK      | 2258.206 | 0.00496  | 2 | 1 | 47.3 | 0 |
| P12163_1_F3,17835 | K.NQVAMNPTNTVFDAK      | 2258.206 | 0.00581  | 3 | 1 | 56.6 | 0 |
| P12163_2_F1,17715 | K.NQVAMNPTNTVFDAK      | 2258.206 | 0.0086   | 3 | 1 | 31.2 | 0 |
| P12163_2_F1,17732 | K.NQVAMNPTNTVFDAK      | 2258.206 | 0.0022   | 2 | 1 | 39.1 | 0 |
| P12163_1_F3,20743 | K.QFSAEEISSM*VLNK.M    | 2207.184 | 0.00394  | 3 | 1 | 45.6 | 0 |
| P12163_1_F3,23482 | K.QFSAEEISSM*VLNK.M    | 2207.184 | 0.00427  | 3 | 1 | 53.2 | 0 |
| P12163_1_F3,23457 | K.QFSAEEISSMVLNK.M     | 2191.189 | 0.00049  | 3 | 1 | 47.2 | 0 |
| P12163_1_F3,23551 | K.QFSAEEISSMVLNK.M     | 2191.189 | 0.00434  | 2 | 1 | 93.5 | 0 |
| P12163_1_F4,24318 | K.QFSAEEISSMVLNK.M     | 2191.189 | 0.00259  | 3 | 1 | 29.9 | 0 |
| P12163_1_F4,14347 | K.SSVHDVVLVGGSTR.I     | 1716.955 | 0.00968  | 3 | 1 | 41.2 | 0 |

|                   |                        |          |          |   |   |      |   |
|-------------------|------------------------|----------|----------|---|---|------|---|
| P12163_1_F4,14348 | K.SSVHDTVVLVGGSTR.I    | 1716.955 | 0.00904  | 2 | 1 | 63.8 | 0 |
| P12163_1_F6,13771 | K.SSVHDTVVLVGGSTR.I    | 1716.955 | 0.00268  | 2 | 1 | 40.6 | 0 |
| P12163_1_F7,13090 | K.SSVHDTVVLVGGSTR.I    | 1716.955 | 0.00387  | 3 | 1 | 28   | 0 |
| P12163_2_F6,13064 | K.SSVHDTVVLVGGSTR.I    | 1716.955 | 0.0003   | 3 | 1 | 30.2 | 0 |
| P12163_2_F9,12613 | K.SSVHDTVVLVGGSTR.I    | 1716.955 | 0.03138  | 2 | 1 | 24.2 | 0 |
| P12163_1_F8,19068 | K.VIAGAGDKPM*IVVNY     | 2603.536 | 0.01255  | 3 | 1 | 25.8 | 0 |
| P12163_1_F8,19135 | K.VIAGAGDKPMIVVNYI     | 2587.541 | 0.00811  | 3 | 1 | 23.3 | 0 |
| P12163_1_S1,23194 | R.FEELNM*DLFR.K        | 1633.82  | 0.00103  | 3 | 1 | 40.2 | 0 |
| P12163_1_S1,23396 | R.FEELNM*DLFR.K        | 1633.82  | 0.00348  | 2 | 1 | 42.5 | 0 |
| P12163_1_S1,23417 | R.FEELNM*DLFR.K        | 1633.82  | 0.00235  | 3 | 1 | 57.6 | 0 |
| P12163_1_F3,13070 | R.FSDPSVQSDM*K.L       | 1864.957 | 0.00613  | 2 | 1 | 29   | 0 |
| P12163_1_F2,22404 | R.IINEPTAAAIAAYGLDK.I  | 2268.306 | 0.00735  | 3 | 1 | 45.2 | 0 |
| P12163_1_F4,23908 | R.IINEPTAAAIAAYGLDK.I  | 2268.306 | 0.00405  | 3 | 1 | 59.2 | 0 |
| P12163_1_F5,22034 | R.IINEPTAAAIAAYGLDK.I  | 2268.306 | 0.00048  | 3 | 1 | 35.6 | 0 |
| P12163_1_F8,22408 | R.IINEPTAAAIAAYGLDK.I  | 2268.306 | 0.00681  | 3 | 1 | 49.7 | 0 |
| P12163_1_S1,21321 | R.IINEPTAAAIAAYGLDK.I  | 2268.306 | 0.00492  | 3 | 1 | 53.3 | 0 |
| P12163_1_S1,21346 | R.IINEPTAAAIAAYGLDK.I  | 2268.306 | -0.00297 | 2 | 1 | 75.2 | 0 |
| P12163_1_S1,21375 | R.IINEPTAAAIAAYGLDK.I  | 2268.306 | 0.00752  | 4 | 1 | 61   | 0 |
| P12163_1_S1,21490 | R.IINEPTAAAIAAYGLDK.I  | 2268.306 | 0.0003   | 3 | 1 | 54.8 | 0 |
| P12163_1_S10,2039 | R.IINEPTAAAIAAYGLDK.I  | 2268.306 | 0.00414  | 3 | 1 | 22.1 | 0 |
| P12163_1_F9,17016 | R.M*VNHFVQEFK.R        | 1903.036 | 0.00793  | 2 | 1 | 24.1 | 0 |
| P12163_1_F9,19653 | R.M*VNHFVQEFK.R        | 1903.036 | 0.00674  | 3 | 1 | 24.3 | 0 |
| P12163_1_F9,20038 | R.M*VNHFVQEFK.R        | 1903.036 | 0.00752  | 3 | 1 | 26.5 | 0 |
| P12163_2_F7,15183 | R.M*VNHFVQEFK.R        | 1903.036 | 0.00599  | 3 | 1 | 42   | 0 |
| P12163_2_F9,19029 | R.MVNHFVQEFK.R         | 1887.041 | 0.01061  | 3 | 1 | 33   | 0 |
| P12163_2_F9,19097 | R.MVNHFVQEFK.R         | 1887.041 | 0.00653  | 3 | 1 | 33   | 0 |
| P12163_1_F8,14527 | R.TTPSYVAFTDTER.L      | 1791.907 | 0.00344  | 3 | 1 | 24.1 | 0 |
| P12163_1_F8,14585 | R.TTPSYVAFTDTER.L      | 1791.907 | 0.00829  | 2 | 1 | 31.6 | 0 |
| P12163_1_F8,16589 | R.TTPSYVAFTDTER.L      | 1791.907 | 0.00553  | 2 | 1 | 47.8 | 0 |
| P12163_2_F6,16074 | R.TTPSYVAFTDTER.L      | 1791.907 | 0.00237  | 2 | 1 | 58   | 0 |
| P12163_1_S1,14498 | R.VEIIANDQGNR.I ! R.VI | 1532.833 | 0.00335  | 2 | 1 | 30.8 | 0 |
| P12163_1_S1,14657 | R.VEIIANDQGNR.I ! R.VI | 1532.833 | 0.00328  | 3 | 1 | 71.6 | 0 |
| P12163_1_S1,14739 | R.VEIIANDQGNR.I ! R.VI | 1532.833 | 0.00397  | 2 | 1 | 33.7 | 0 |
| P12163_1_S1,14901 | R.VEIIANDQGNR.I ! R.VI | 1532.833 | 0.00187  | 3 | 1 | 69.2 | 0 |
| P12163_1_S1,14978 | R.VEIIANDQGNR.I ! R.VI | 1532.833 | 0.00507  | 2 | 1 | 32   | 0 |
| P12163_1_S10,199  | R.VEIIANDQGNR.I ! R.VI | 1532.833 | 0.00184  | 3 | 1 | 35.4 | 0 |
| P12163_1_S10,276  | R.VEIIANDQGNR.I ! R.VI | 1532.833 | 0.00555  | 2 | 1 | 29.8 | 0 |
| P12163_1_F5,10730 | K.AAEALTNAEK.I         | 1625.932 | 0.00619  | 2 | 1 | 24.4 | 0 |
| P12163_1_F5,13303 | K.AAEALTNAEK.I         | 1625.932 | 0.00817  | 2 | 1 | 46.9 | 0 |
| P12163_1_F5,13312 | K.AAEALTNAEK.I         | 1625.932 | 0.00372  | 3 | 1 | 28.6 | 0 |
| P12163_1_F6,14194 | K.AAEALTNAEK.I         | 1625.932 | 0.00961  | 2 | 1 | 35.8 | 0 |
| P12163_1_F7,12969 | K.AAEALTNAEK.I         | 1625.932 | -0.00279 | 2 | 1 | 27.4 | 0 |
| P12163_1_F7,13108 | K.AAEALTNAEK.I         | 1625.932 | -0.00102 | 3 | 1 | 27.8 | 0 |
| P12163_2_F1,13613 | K.AAEALTNAEK.I         | 1625.932 | 0.00439  | 2 | 1 | 53.7 | 0 |
| P12163_2_F2,2580  | K.AAEALTNAEK.I         | 1625.932 | 0.00711  | 3 | 1 | 31.7 | 0 |
| P12163_2_F2,3074  | K.AAEALTNAEK.I         | 1625.932 | 0.00924  | 3 | 1 | 31.4 | 0 |
| P12163_2_F2,14122 | K.AAEALTNAEK.I         | 1625.932 | 0.00606  | 3 | 1 | 24.1 | 0 |
| P12163_2_F2,14141 | K.AAEALTNAEK.I         | 1625.932 | 0.00783  | 2 | 1 | 50.4 | 0 |
| P12163_2_S5,12988 | K.AAEALTNAEK.I         | 1625.932 | 0.00174  | 3 | 1 | 43.6 | 0 |
| P12163_1_F4,18165 | K.AFATYVQAK.R          | 1606.941 | 0.0045   | 2 | 1 | 44.3 | 0 |
| P12163_1_F5,16815 | K.AFATYVQAK.R          | 1606.941 | 0.00428  | 2 | 1 | 45.8 | 0 |

|                   |                     |          |          |   |   |      |   |
|-------------------|---------------------|----------|----------|---|---|------|---|
| P12163_1_F5,16841 | K.AFATYVQAK.R       | 1606.941 | 0.00473  | 3 | 1 | 38.9 | 0 |
| P12163_1_F9,16955 | K.AFATYVQAK.R       | 1606.941 | 0.00182  | 2 | 1 | 31.4 | 0 |
| P12163_2_F1,17215 | K.AFATYVQAK.R       | 1606.941 | 0.01328  | 3 | 1 | 32.9 | 0 |
| P12163_2_F1,17225 | K.AFATYVQAK.R       | 1606.941 | 0.0087   | 2 | 1 | 52.8 | 0 |
| P12163_2_F2,17645 | K.AFATYVQAK.R       | 1606.941 | 0.00618  | 2 | 1 | 56.1 | 0 |
| P12163_2_F9,16147 | K.AFATYVQAK.R       | 1606.941 | 0.0051   | 2 | 1 | 46.4 | 0 |
| P12163_2_F9,16190 | K.AFATYVQAK.R       | 1606.941 | 0.00386  | 3 | 1 | 29   | 0 |
| P12163_1_F2,13935 | K.AFFATAQSVR.D      | 1401.779 | 0.00213  | 3 | 1 | 29.4 | 0 |
| P12163_1_F2,14832 | K.AFFATAQSVR.D      | 1401.779 | 0.00378  | 3 | 1 | 28.9 | 0 |
| P12163_1_F3,14612 | K.AFFATAQSVR.D      | 1401.779 | 0.0027   | 3 | 1 | 25.4 | 0 |
| P12163_1_F3,15362 | K.AFFATAQSVR.D      | 1401.779 | -0.00192 | 3 | 1 | 35.4 | 0 |
| P12163_2_F1,18227 | K.AFFATAQSVR.D      | 1401.779 | 0.00237  | 2 | 1 | 25.1 | 0 |
| P12163_1_F2,20955 | K.AVAYDIPIPGYK.T    | 1915.115 | 0.00114  | 2 | 1 | 29.3 | 0 |
| P12163_1_F2,20988 | K.AVAYDIPIPGYK.T    | 1915.115 | 0.00543  | 3 | 1 | 45.8 | 0 |
| P12163_1_F3,21516 | K.AVAYDIPIPGYK.T    | 1915.115 | -0.00188 | 2 | 1 | 63   | 0 |
| P12163_1_F3,21522 | K.AVAYDIPIPGYK.T    | 1915.115 | 0.00129  | 3 | 1 | 38.1 | 0 |
| P12163_1_F4,22283 | K.AVAYDIPIPGYK.T    | 1915.115 | -0.00345 | 3 | 1 | 39.9 | 0 |
| P12163_1_F4,22285 | K.AVAYDIPIPGYK.T    | 1915.115 | 0.00168  | 2 | 1 | 56.7 | 0 |
| P12163_1_F6,20428 | K.AVAYDIPIPGYK.T    | 1915.115 | 0.00216  | 3 | 1 | 30.3 | 0 |
| P12163_1_F7,19991 | K.AVAYDIPIPGYK.T    | 1915.115 | -0.00504 | 3 | 1 | 37.4 | 0 |
| P12163_1_F8,21013 | K.AVAYDIPIPGYK.T    | 1915.115 | 0.00804  | 3 | 1 | 40.7 | 0 |
| P12163_1_F8,21030 | K.AVAYDIPIPGYK.T    | 1915.115 | 0.00134  | 2 | 1 | 33.3 | 0 |
| P12163_2_F4,19540 | K.AVAYDIPIPGYK.T    | 1915.115 | 0.00597  | 3 | 1 | 39.6 | 0 |
| P12163_2_F6,20575 | K.AVAYDIPIPGYK.T    | 1915.115 | 0.00024  | 2 | 1 | 50.3 | 0 |
| P12163_2_F6,20592 | K.AVAYDIPIPGYK.T    | 1915.115 | 0.00309  | 3 | 1 | 35.6 | 0 |
| P12163_2_F7,18616 | K.AVAYDIPIPGYK.T    | 1915.115 | 0.00226  | 2 | 1 | 38.1 | 0 |
| P12163_2_F8_12070 | K.AVAYDIPIPGYK.T    | 1915.115 | -0.00054 | 3 | 1 | 25.8 | 0 |
| P12163_1_F4,18625 | K.DFPSYLECQEK.V     | 2024.025 | 0.00694  | 2 | 1 | 66.3 | 0 |
| P12163_1_F4,18634 | K.DFPSYLECQEK.V     | 2024.025 | 0.0046   | 3 | 1 | 31.2 | 0 |
| P12163_1_F4,19009 | K.DFPSYLECQEK.V     | 2024.025 | -0.011   | 3 | 1 | 24.6 | 0 |
| P12163_1_F9,17207 | K.DFPSYLECQEK.V     | 2024.025 | -0.00113 | 3 | 1 | 26.4 | 0 |
| P12163_2_F1,17904 | K.DFPSYLECQEK.V     | 2024.025 | 0.0005   | 2 | 1 | 41.4 | 0 |
| P12163_2_F1,17935 | K.DFPSYLECQEK.V     | 2024.025 | 0.00655  | 3 | 1 | 35.7 | 0 |
| P12163_2_F9,16532 | K.DFPSYLECQEK.V     | 2024.025 | 0.00628  | 3 | 1 | 23   | 0 |
| P12163_1_F4,15525 | K.EAWNITQR.T        | 1321.717 | 0.00081  | 2 | 1 | 29.5 | 0 |
| P12163_1_F4,18450 | K.FADNEDLQSQFR.A    | 1773.871 | 0.00319  | 2 | 1 | 28.9 | 0 |
| P12163_1_S1,14852 | K.FADNEDLQSQFR.A    | 1773.871 | 0.00077  | 3 | 1 | 50.6 | 0 |
| P12163_1_S1,17085 | K.FADNEDLQSQFR.A    | 1773.871 | 0.00317  | 3 | 1 | 66.6 | 0 |
| P12163_1_F8,22490 | K.ICYILYPGDESVEGK.V | 2351.241 | 0.00497  | 3 | 1 | 28.7 | 0 |
| P12163_1_S1,21630 | K.ICYILYPGDESVEGK.V | 2351.241 | 0.00445  | 2 | 1 | 30.6 | 0 |
| P12163_1_S1,21668 | K.ICYILYPGDESVEGK.V | 2351.241 | 0.01247  | 3 | 1 | 53.7 | 0 |
| P12163_2_F6,22160 | K.ICYILYPGDESVEGK.V | 2351.241 | 0.00476  | 3 | 1 | 33.5 | 0 |
| P12163_1_F3,10642 | K.IVPGSDGK.S        | 1380.831 | 0.00843  | 2 | 1 | 24   | 0 |
| P12163_1_F4,13043 | K.IVPGSDGK.S        | 1380.831 | 0.00674  | 3 | 1 | 22.4 | 0 |
| P12163_2_F1,12070 | K.IVPGSDGK.S        | 1380.831 | 0.00479  | 3 | 1 | 26   | 0 |
| P12163_2_F4,10840 | K.IVPGSDGK.S        | 1380.831 | 0.00279  | 2 | 1 | 26   | 0 |
| P12163_1_F8,21492 | K.QQYTLCSASLQDIIAR. | 2171.143 | 0.00031  | 2 | 1 | 70.8 | 0 |
| P12163_2_F8_12070 | K.SHWIGGEDIK.A      | 1749.974 | 0.00536  | 3 | 1 | 24.2 | 0 |
| P12163_1_F3,11389 | K.VDEAYCDQK.R       | 1735.878 | 0.00572  | 2 | 1 | 37.3 | 0 |
| P12163_1_F4,12335 | K.VDEAYCDQK.R       | 1735.878 | 0.00496  | 2 | 1 | 30   | 0 |
| P12163_1_F5,11045 | K.VDEAYCDQK.R       | 1735.878 | 0.0063   | 2 | 1 | 38.5 | 0 |

|                   |                       |          |          |   |   |      |   |
|-------------------|-----------------------|----------|----------|---|---|------|---|
| P12163_1_F9,11696 | K.VDEAYCDQK.R         | 1735.878 | 0.00276  | 2 | 1 | 36.3 | 0 |
| P12163_2_F1,11379 | K.VDEAYCDQK.R         | 1735.878 | 0.00316  | 2 | 1 | 33.2 | 0 |
| P12163_2_F8,12070 | K.VDEAYCDQK.R         | 1735.878 | 0.00854  | 2 | 1 | 28.9 | 0 |
| P12163_2_F9,11383 | K.VDEAYCDQK.R         | 1735.878 | 0.00388  | 2 | 1 | 32.7 | 0 |
| P12163_1_F6,3681  | K.VVSFIK.E            | 1300.845 | 0.00642  | 2 | 1 | 24.4 | 0 |
| P12163_1_F9,11567 | R.AHEIAGLR.K          | 1170.69  | 0.00302  | 3 | 1 | 31.8 | 0 |
| P12163_1_F9,11587 | R.AHEIAGLR.K          | 1170.69  | 0.0029   | 2 | 1 | 30.7 | 0 |
| P12163_2_F9,11273 | R.AHEIAGLR.K          | 1170.69  | 0.0029   | 3 | 1 | 36.9 | 0 |
| P12163_1_F4,12499 | R.MSIM*NTAGSSK.F      | 1750.929 | 0.00336  | 2 | 1 | 33.2 | 0 |
| P12163_2_F1,11567 | R.MSIM*NTAGSSK.F      | 1750.929 | 0.00722  | 2 | 1 | 37.5 | 0 |
| P12163_1_F4,16261 | R.MSIMNTAGSSK.F       | 1734.934 | 0.01058  | 3 | 1 | 29.1 | 0 |
| P12163_1_F4,16315 | R.MSIMNTAGSSK.F       | 1734.934 | 0.00766  | 2 | 1 | 43.9 | 0 |
| P12163_1_F5,15008 | R.MSIMNTAGSSK.F       | 1734.934 | 0.00982  | 2 | 1 | 38   | 0 |
| P12163_2_F1,15092 | R.MSIMNTAGSSK.F       | 1734.934 | 0.00803  | 3 | 1 | 33.5 | 0 |
| P12163_2_F1,15290 | R.MSIMNTAGSSK.F       | 1734.934 | 0.0123   | 2 | 1 | 54.2 | 0 |
| P12163_2_F1,15300 | R.MSIMNTAGSSK.F       | 1734.934 | 0.01055  | 3 | 1 | 32.3 | 0 |
| P12163_1_F4,13170 | R.NDVSYPVK.F          | 1529.878 | 0.00616  | 2 | 1 | 36.2 | 0 |
| P12163_1_F5,11727 | R.NDVSYPVK.F          | 1529.878 | 0.00447  | 2 | 1 | 27.3 | 0 |
| P12163_1_F6,12694 | R.NDVSYPVK.F          | 1529.878 | -0.00131 | 2 | 1 | 26.4 | 0 |
| P12163_1_F7,11418 | R.NDVSYPVK.F          | 1529.878 | 0.00074  | 2 | 1 | 31.4 | 0 |
| P12163_1_F8,11962 | R.NDVSYPVK.F          | 1529.878 | 0.00094  | 2 | 1 | 27.4 | 0 |
| P12163_2_F1,12215 | R.NDVSYPVK.F          | 1529.878 | 0.00572  | 2 | 1 | 29.9 | 0 |
| P12163_1_S1,22783 | R.QEVGEENFFLFGAR.A    | 1946.991 | 0.00109  | 3 | 1 | 43.5 | 0 |
| P12163_1_S1,22990 | R.QEVGEENFFLFGAR.A    | 1946.991 | 0.00319  | 3 | 1 | 57   | 0 |
| P12163_1_S1,23222 | R.QEVGEENFFLFGAR.A    | 1946.991 | 0.00994  | 3 | 1 | 39.1 | 0 |
| P12163_1_F4,18851 | R.SGANVNWEEFPEK.V     | 2115.097 | 0.00358  | 2 | 1 | 55.3 | 0 |
| P12163_2_F1,18123 | R.SGANVNWEEFPEK.V     | 2115.097 | 0.00484  | 2 | 1 | 65.2 | 0 |
| P12163_1_F7,16876 | R.TVAYTNHTVLPEALEK    | 2394.349 | 0.00513  | 3 | 1 | 47   | 0 |
| P12163_2_F10,1565 | R.TVAYTNHTVLPEALEK    | 2394.349 | 0.00483  | 3 | 1 | 26.9 | 0 |
| P12163_2_F10,1567 | R.TVAYTNHTVLPEALEK    | 2394.349 | 0.00723  | 4 | 1 | 27.5 | 0 |
| P12163_2_F10,1584 | R.TVAYTNHTVLPEALEK    | 2394.349 | 0.00738  | 3 | 1 | 32.7 | 0 |
| P12163_2_S5,16154 | R.TVAYTNHTVLPEALEK    | 2394.349 | 0.00431  | 4 | 1 | 26.4 | 0 |
| P12163_2_S5,16169 | R.TVAYTNHTVLPEALEK    | 2394.349 | 0.00285  | 3 | 1 | 32.5 | 0 |
| P12163_1_F4,22879 | K.AFELLEK.L           | 1457.882 | 0.00491  | 2 | 1 | 30.5 | 0 |
| P12163_1_F5,21349 | K.AFELLEK.L           | 1457.882 | 0.00681  | 2 | 1 | 26.2 | 0 |
| P12163_1_F6,21358 | K.AFELLEK.L           | 1457.882 | 0.00547  | 2 | 1 | 28   | 0 |
| P12163_2_F1,22277 | K.AFELLEK.L           | 1457.882 | 0.00428  | 3 | 1 | 33.9 | 0 |
| P12163_2_F2,21823 | K.AFELLEK.L           | 1457.882 | 0.00647  | 3 | 1 | 26.2 | 0 |
| P12163_1_F3,4722  | K.AVQDTGR.R           | 1050.585 | 0.00315  | 3 | 1 | 22.4 | 0 |
| P12163_1_F3,9906  | K.DTPELR.S ! K.DTPELR | 1034.578 | 0.00333  | 2 | 1 | 23.9 | 0 |
| P12163_2_F6,16297 | K.EAVLNGVSLEDDKR.E    | 2153.202 | 0.00695  | 3 | 1 | 29.8 | 0 |
| P12163_2_F6,16300 | K.EAVLNGVSLEDDKR.E    | 2153.202 | 0.00153  | 2 | 1 | 44.2 | 0 |
| P12163_1_F5,17681 | K.FSENVLDATK.K        | 1731.974 | 0.00075  | 2 | 1 | 28.9 | 0 |
| P12163_2_F1,18233 | K.FSENVLDATK.K        | 1731.974 | 0.00612  | 3 | 1 | 41.3 | 0 |
| P12163_1_F6,15752 | K.HYQTGESLPEDVYLK.    | 2387.27  | 0.00057  | 3 | 1 | 36.7 | 0 |
| P12163_1_F6,17098 | K.HYQTGESLPEDVYLK.    | 2387.27  | 0.0057   | 3 | 1 | 55   | 0 |
| P12163_1_F6,17112 | K.HYQTGESLPEDVYLK.    | 2387.27  | 0.00541  | 4 | 1 | 37.1 | 0 |
| P12163_1_F7,16213 | K.HYQTGESLPEDVYLK.    | 2387.27  | 0.00409  | 4 | 1 | 28.8 | 0 |
| P12163_2_F4,15880 | K.HYQTGESLPEDVYLK.    | 2387.27  | 0.00333  | 4 | 1 | 41   | 0 |
| P12163_2_F9,15814 | K.HYQTGESLPEDVYLK.    | 2387.27  | 0.00477  | 4 | 1 | 30.3 | 0 |
| P12163_2_F9,15822 | K.HYQTGESLPEDVYLK.    | 2387.27  | 0.00924  | 3 | 1 | 24.4 | 0 |

|                   |                      |          |          |   |   |      |   |
|-------------------|----------------------|----------|----------|---|---|------|---|
| P12163_2_S3,14858 | K.HYQTGESLPEDVYLK.   | 2387.27  | 0.00162  | 3 | 1 | 26.2 | 0 |
| P12163_1_F5,15450 | K.IEQELEK.L          | 1496.878 | 0.00447  | 2 | 1 | 27.9 | 0 |
| P12163_1_F5,15495 | K.IEQELEK.L          | 1496.878 | 0.00649  | 3 | 1 | 25.2 | 0 |
| P12163_1_F6,16165 | K.IEQELEK.L          | 1496.878 | 0.00349  | 2 | 1 | 27.9 | 0 |
| P12163_2_F1,15731 | K.IEQELEK.L          | 1496.878 | 0.01033  | 2 | 1 | 27.1 | 0 |
| P12163_2_F1,15772 | K.IEQELEK.L          | 1496.878 | 0.00661  | 3 | 1 | 25.1 | 0 |
| P12163_2_F4,15430 | K.LVEPLEK.I          | 1435.898 | 0.00121  | 2 | 1 | 28.7 | 0 |
| P12163_2_F1,8455  | K.M*ATVVDK.A         | 1288.739 | 0.00557  | 3 | 1 | 24.7 | 0 |
| P12163_2_F1,11540 | K.MATVVDK.A          | 1272.744 | 0.00401  | 3 | 1 | 29.4 | 0 |
| P12163_1_F4,17372 | K.NYAEVSM*AM*K.M     | 1783.918 | 0.01503  | 3 | 1 | 36.1 | 0 |
| P12163_1_F4,14628 | K.NYAEVSMAM*K.M      | 1767.923 | 0.00798  | 3 | 1 | 41.9 | 0 |
| P12163_1_F4,14631 | K.NYAEVSMAM*K.M      | 1767.923 | 0.00783  | 2 | 1 | 41.3 | 0 |
| P12163_1_F4,17338 | K.NYAEVSMAMK.M       | 1751.928 | 0.00549  | 3 | 1 | 52.1 | 0 |
| P12163_1_F5,16078 | K.NYAEVSMAMK.M       | 1751.928 | 0.00747  | 2 | 1 | 41.8 | 0 |
| P12163_1_F9,16297 | K.NYAEVSMAMK.M       | 1751.928 | 0.01065  | 3 | 1 | 29.2 | 0 |
| P12163_2_F1,16444 | K.NYAEVSMAMK.M       | 1751.928 | 0.00897  | 3 | 1 | 49.9 | 0 |
| P12163_2_F1,16471 | K.NYAEVSMAMK.M       | 1751.928 | 0.00469  | 2 | 1 | 53.6 | 0 |
| P12163_2_F8_12070 | K.NYAEVSMAMK.M       | 1751.928 | 0.00792  | 3 | 1 | 40.1 | 0 |
| P12163_1_S1,20033 | K.QLESDDLDELER.T     | 1650.849 | 0.00762  | 3 | 1 | 26.5 | 0 |
| P12163_1_S1,20173 | K.QLESDDLDELER.T     | 1650.849 | 0.00213  | 2 | 1 | 39.4 | 0 |
| P12163_1_S1,20427 | K.QLESDDLDELER.T     | 1650.849 | 0.00399  | 2 | 1 | 42.1 | 0 |
| P12163_1_F2,22460 | K.VM*DGLFNLA.K.T     | 1731.992 | 0.0045   | 3 | 1 | 33   | 0 |
| P12163_1_F4,21612 | K.VM*DGLFNLA.K.T     | 1731.992 | 0.00282  | 3 | 1 | 26.9 | 0 |
| P12163_1_F4,21637 | K.VM*DGLFNLA.K.T     | 1731.992 | 0.00728  | 2 | 1 | 45.4 | 0 |
| P12163_1_F4,25903 | K.VM*DGLFNLA.K.T     | 1731.992 | 0.00576  | 2 | 1 | 40.2 | 0 |
| P12163_1_F4,26204 | K.VM*DGLFNLA.K.T     | 1731.992 | 0.00801  | 3 | 1 | 26.4 | 0 |
| P12163_1_F5,24048 | K.VM*DGLFNLA.K.T     | 1731.992 | 0.00234  | 3 | 1 | 25   | 0 |
| P12163_1_F6,23506 | K.VM*DGLFNLA.K.T     | 1731.992 | 0.0006   | 3 | 1 | 31.9 | 0 |
| P12163_1_F7,22700 | K.VM*DGLFNLA.K.T     | 1731.992 | 0.0027   | 3 | 1 | 35.9 | 0 |
| P12163_2_F1,25150 | K.VM*DGLFNLA.K.T     | 1731.992 | 0.00663  | 3 | 1 | 35.2 | 0 |
| P12163_1_F3,25103 | K.VMDGLFNLA.K.T      | 1715.997 | 0.00181  | 3 | 1 | 23.1 | 0 |
| P12163_1_F3,25122 | K.VMDGLFNLA.K.T      | 1715.997 | 0.00632  | 2 | 1 | 61.2 | 0 |
| P12163_1_F4,25955 | K.VMDGLFNLA.K.T      | 1715.997 | 0.00436  | 2 | 1 | 38.6 | 0 |
| P12163_1_F4,25964 | K.VMDGLFNLA.K.T      | 1715.997 | 0.00445  | 3 | 1 | 32.1 | 0 |
| P12163_2_F1,25136 | K.VMDGLFNLA.K.T      | 1715.997 | 0.00511  | 3 | 1 | 26.7 | 0 |
| P12163_1_F7,21089 | K.YEINEEELRPYFSLPK.V | 2635.423 | 0.00509  | 4 | 1 | 23.2 | 0 |
| P12163_1_F4,14995 | R.DTLM*SIAK.H        | 1502.871 | 0.00339  | 3 | 1 | 30   | 0 |
| P12163_1_F4,18508 | R.DTLMSIAK.H         | 1486.876 | 0.00379  | 3 | 1 | 35.2 | 0 |
| P12163_2_F1,17763 | R.DTLMSIAK.H         | 1486.876 | 0.00766  | 2 | 1 | 37.6 | 0 |
| P12163_1_F8,13113 | R.GREPSPEPLLR.H      | 1554.89  | 0.00119  | 3 | 1 | 49   | 0 |
| P12163_2_F7,12010 | R.GREPSPEPLLR.H      | 1554.89  | 0.00263  | 3 | 1 | 39.1 | 0 |
| P12163_1_S10,1374 | R.HNGLLSTAASA.-      | 1345.738 | 0.0041   | 2 | 1 | 31.8 | 0 |
| P12163_2_S3,12128 | R.HNGLLSTAASA.-      | 1345.738 | 0.0043   | 2 | 1 | 47.1 | 0 |
| P12163_1_F4,15274 | R.IVESQIK.E          | 1424.893 | 0.00534  | 2 | 1 | 23.9 | 0 |
| P12163_1_F4,15276 | R.IVESQIK.E          | 1424.893 | 0.00544  | 3 | 1 | 29.6 | 0 |
| P12163_1_F5,13930 | R.IVESQIK.E          | 1424.893 | 0.00562  | 3 | 1 | 22.1 | 0 |
| P12163_2_F1,14160 | R.IVESQIK.E          | 1424.893 | 0.0058   | 3 | 1 | 28.4 | 0 |
| P12163_2_F9,18329 | R.LPVAHMVCNQTTPVGV   | 3303.762 | -0.00022 | 4 | 1 | 22.7 | 0 |
| P12163_1_F3,11175 | R.SAIEEVQPEK.V       | 1737.984 | 0.00545  | 3 | 1 | 29.4 | 0 |
| P12163_1_F3,13522 | R.SAIEEVQPEK.V       | 1737.984 | 0.00215  | 2 | 1 | 44.4 | 0 |
| P12163_1_F3,13542 | R.SAIEEVQPEK.V       | 1737.984 | 0.00455  | 3 | 1 | 27.7 | 0 |

|                   |                     |          |          |   |   |      |   |
|-------------------|---------------------|----------|----------|---|---|------|---|
| P12163_1_F4,11585 | R.SAIEEVQPEK.V      | 1737.984 | 0.00383  | 2 | 1 | 24.5 | 0 |
| P12163_1_F4,14052 | R.SAIEEVQPEK.V      | 1737.984 | -0.00214 | 3 | 1 | 28.1 | 0 |
| P12163_1_F4,14054 | R.SAIEEVQPEK.V      | 1737.984 | 0.00509  | 2 | 1 | 42.1 | 0 |
| P12163_1_F5,12753 | R.SAIEEVQPEK.V      | 1737.984 | 0.00731  | 2 | 1 | 48.6 | 0 |
| P12163_1_F7,12406 | R.SAIEEVQPEK.V      | 1737.984 | 0.0023   | 3 | 1 | 27.5 | 0 |
| P12163_2_F1,13142 | R.SAIEEVQPEK.V      | 1737.984 | 0.00639  | 2 | 1 | 46   | 0 |
| P12163_2_F1,13205 | R.SAIEEVQPEK.V      | 1737.984 | 0.00515  | 3 | 1 | 35.6 | 0 |
| P12163_2_F4,12041 | R.SAIEEVQPEK.V      | 1737.984 | -0.00325 | 2 | 1 | 29   | 0 |
| P12163_2_F1,7718  | K.ATEAATK.S         | 1299.773 | 0.00233  | 3 | 1 | 22.3 | 0 |
| P12163_1_F3,15465 | K.DVNGSLLVSSSSSK.E  | 1988.112 | 0.00578  | 2 | 1 | 40.1 | 0 |
| P12163_1_F4,20218 | K.EFPILSK.L         | 1441.887 | 0.00724  | 3 | 1 | 32.5 | 0 |
| P12163_1_F4,20369 | K.EFPILSK.L         | 1441.887 | 0.00627  | 2 | 1 | 27.4 | 0 |
| P12163_1_F4,20481 | K.EFPILSK.L         | 1441.887 | 0.01153  | 3 | 1 | 24.8 | 0 |
| P12163_2_F1,19554 | K.EFPILSK.L         | 1441.887 | 0.00635  | 2 | 1 | 25.4 | 0 |
| P12163_2_F1,19798 | K.EFPILSK.L         | 1441.887 | 0.00593  | 2 | 1 | 27.5 | 0 |
| P12163_2_F1,19898 | K.EFPILSK.L         | 1441.887 | 0.00361  | 3 | 1 | 30.3 | 0 |
| P12163_1_F3,14459 | K.EGLVDVR.A         | 1091.636 | 0.00341  | 2 | 1 | 30.4 | 0 |
| P12163_1_F8,21411 | K.ELIEEELHGLSVEK.A  | 2233.254 | 0.00539  | 3 | 1 | 34.7 | 0 |
| P12163_1_F4,20162 | K.FSANLEEIEK.I      | 1788     | 0.00482  | 3 | 1 | 33.9 | 0 |
| P12163_1_F4,20212 | K.FSANLEEIEK.I      | 1788     | 0.00451  | 2 | 1 | 50.3 | 0 |
| P12163_1_F5,18897 | K.FSANLEEIEK.I      | 1788     | 0.00333  | 2 | 1 | 27.8 | 0 |
| P12163_1_F4,25730 | K.LFLATVIK.Q        | 1512.997 | 0.00672  | 2 | 1 | 38.2 | 0 |
| P12163_2_F1,25001 | K.LFLATVIK.Q        | 1512.997 | 0.0078   | 2 | 1 | 37.8 | 0 |
| P12163_2_F4,10035 | K.LLHPHMR.Y         | 1207.703 | 0.00242  | 3 | 1 | 37.1 | 0 |
| P12163_1_F4,22825 | K.LYNSGFLLK.D       | 1663.004 | 0.00039  | 2 | 1 | 31.8 | 0 |
| P12163_1_F4,22851 | K.LYNSGFLLK.D       | 1663.004 | 0.00389  | 3 | 1 | 40.1 | 0 |
| P12163_1_F5,21481 | K.LYNSGFLLK.D       | 1663.004 | -0.00004 | 3 | 1 | 35.2 | 0 |
| P12163_2_F1,22293 | K.LYNSGFLLK.D       | 1663.004 | 0.00513  | 2 | 1 | 35.2 | 0 |
| P12163_2_F1,22309 | K.LYNSGFLLK.D       | 1663.004 | 0.0041   | 3 | 1 | 23.3 | 0 |
| P12163_2_F9,19608 | K.LYNSGFLLK.D       | 1663.004 | 0.00032  | 3 | 1 | 23.4 | 0 |
| P12163_1_F3,15993 | K.NQAYLPSQTPAGIK.D  | 2096.196 | 0.01012  | 2 | 1 | 28.8 | 0 |
| P12163_1_F4,16428 | K.NQAYLPSQTPAGIK.D  | 2096.196 | 0.00563  | 3 | 1 | 38.6 | 0 |
| P12163_1_F4,16435 | K.NQAYLPSQTPAGIK.D  | 2096.196 | 0.00824  | 2 | 1 | 35.5 | 0 |
| P12163_2_F1,15658 | K.NQAYLPSQTPAGIK.D  | 2096.196 | 0.00204  | 2 | 1 | 42.6 | 0 |
| P12163_1_F2,8796  | K.TDPLCESR.I        | 1281.641 | 0.00105  | 3 | 1 | 28.6 | 0 |
| P12163_1_S1,9142  | K.TDPLCESR.I        | 1281.641 | 0.00222  | 3 | 1 | 46.5 | 0 |
| P12163_1_F2,11621 | K.YETPAVIR.R        | 1252.72  | 0.0033   | 3 | 1 | 23   | 0 |
| P12163_1_F4,16621 | R.DETFEEIK.Q        | 1618.878 | 0.00692  | 3 | 1 | 31.9 | 0 |
| P12163_2_F1,15760 | R.DETFEEIK.Q        | 1618.878 | 0.00629  | 3 | 1 | 27.8 | 0 |
| P12163_2_F1,15781 | R.DETFEEIK.Q        | 1618.878 | 0.00914  | 2 | 1 | 34.7 | 0 |
| P12163_1_F7,12995 | R.IEKPHPVYVPR.D     | 1943.169 | 0.00807  | 4 | 1 | 29   | 0 |
| P12163_1_F3,23653 | R.QTLAGVNPVNIEFLK.F | 2251.327 | 0.00683  | 3 | 1 | 64.3 | 0 |
| P12163_1_F3,23688 | R.QTLAGVNPVNIEFLK.F | 2251.327 | 0.00723  | 2 | 1 | 64.3 | 0 |
| P12163_1_F9,14976 | R.REDLLSIR.G        | 1305.779 | 0.00438  | 3 | 1 | 43.1 | 0 |
| P12163_1_F5,18340 | R.TVFFYNK.A         | 1526.883 | 0.00838  | 2 | 1 | 26.6 | 0 |
| P12163_2_F2,18945 | R.TVFFYNK.A         | 1526.883 | 0.00354  | 3 | 1 | 23.7 | 0 |
| P12163_1_F4,19043 | R.YAMELSSAAYK.S     | 1841.993 | 0.00921  | 2 | 1 | 49.6 | 0 |
| P12163_1_F4,19060 | R.YAMELSSAAYK.S     | 1841.993 | 0.00698  | 3 | 1 | 36.7 | 0 |
| P12163_1_F9,17597 | R.YAMELSSAAYK.S     | 1841.993 | 0.00928  | 3 | 1 | 34.2 | 0 |
| P12163_2_F1,18290 | R.YAMELSSAAYK.S     | 1841.993 | 0.00293  | 2 | 1 | 42.8 | 0 |
| P12163_2_F1,18299 | R.YAMELSSAAYK.S     | 1841.993 | 0.0055   | 3 | 1 | 34.2 | 0 |

|                   |                       |          |          |   |   |      |   |
|-------------------|-----------------------|----------|----------|---|---|------|---|
| P12163_2_F9,16873 | R.YAMELSSAAYK.S       | 1841.993 | 0.00493  | 3 | 1 | 32   | 0 |
| P12163_2_F9,16913 | R.YAMELSSAAYK.S       | 1841.993 | 0.00397  | 2 | 1 | 27   | 0 |
| P12163_1_F2,16733 | R.YTLEINALAR.Q        | 1467.847 | 0.00315  | 3 | 1 | 22.1 | 0 |
| P12163_1_F6,15142 | K.APHDLYESYYNTNK.A    | 2323.181 | 0.0077   | 3 | 1 | 36.5 | 0 |
| P12163_2_F4,13931 | K.APHDLYESYYNTNK.A    | 2323.181 | 0.00284  | 3 | 1 | 33.2 | 0 |
| P12163_2_F6,14435 | K.APHDLYESYYNTNK.A    | 2323.181 | 0.00572  | 3 | 1 | 25.8 | 0 |
| P12163_1_F4,20721 | K.AVLFVPPK.A          | 1478.955 | 0.00685  | 3 | 1 | 30.6 | 0 |
| P12163_1_F4,20739 | K.AVLFVPPK.A          | 1478.955 | 0.00725  | 2 | 1 | 30.8 | 0 |
| P12163_2_F1,20149 | K.AVLFVPPK.A          | 1478.955 | 0.00241  | 3 | 1 | 27.2 | 0 |
| P12163_1_F3,20436 | K.DIFYITGANK.E        | 1750     | 0.00157  | 2 | 1 | 37.5 | 0 |
| P12163_1_F4,20971 | K.DIFYITGANK.E        | 1750     | 0.00296  | 2 | 1 | 30.6 | 0 |
| P12163_1_F9,19361 | K.DIFYITGANK.E        | 1750     | 0.00458  | 2 | 1 | 51.7 | 0 |
| P12163_2_F9,18165 | K.DIFYITGANK.E        | 1750     | 0.00608  | 3 | 1 | 30.8 | 0 |
| P12163_1_F4,12707 | K.EVTEEEYAK.F         | 1705.91  | 0.01063  | 2 | 1 | 45.2 | 0 |
| P12163_1_F4,12718 | K.EVTEEEYAK.F         | 1705.91  | 0.00809  | 3 | 1 | 30.4 | 0 |
| P12163_2_F1,11767 | K.EVTEEEYAK.F         | 1705.91  | 0.00711  | 2 | 1 | 43.6 | 0 |
| P12163_2_F4,14812 | K.FYHSLVK.D           | 1501.899 | 0.00592  | 2 | 1 | 27.5 | 0 |
| P12163_2_S5,15087 | K.FYHSLVK.D           | 1501.899 | 0.0021   | 3 | 1 | 24.6 | 0 |
| P12163_1_F4,14794 | K.GALASENVDDVK.V      | 1826.012 | 0.00552  | 3 | 1 | 54.1 | 0 |
| P12163_1_F2,11665 | K.IAEEDPDESTGK.D      | 1898.98  | 0.00488  | 2 | 1 | 26.9 | 0 |
| P12163_1_F4,19134 | K.LEIQIK.L            | 1351.877 | 0.00176  | 3 | 1 | 22.6 | 0 |
| P12163_1_S1,19667 | K.LGIIEDAANR.N        | 1375.785 | 0.00416  | 2 | 1 | 33.3 | 0 |
| P12163_1_S1,17577 | K.LTSLDQYISR.M        | 1499.837 | 0.00098  | 3 | 1 | 41.9 | 0 |
| P12163_1_S1,20668 | K.LTSLDQYISR.M        | 1499.837 | 0.00422  | 2 | 1 | 26.1 | 0 |
| P12163_2_F1,12570 | K.SGTSAFVEK.M         | 1533.873 | 0.00343  | 2 | 1 | 39.5 | 0 |
| P12163_2_F2,12923 | K.SGTSAFVEK.M         | 1533.873 | 0.00417  | 2 | 1 | 30.8 | 0 |
| P12163_1_F3,14896 | R.DEAGEYLEESK.L       | 1877.959 | 0.00472  | 2 | 1 | 54.9 | 0 |
| P12163_1_F3,18382 | R.ELISNASDALDK.L ! R. | 1884.053 | 0.00752  | 3 | 1 | 60.2 | 0 |
| P12163_1_F3,18387 | R.ELISNASDALDK.L ! R. | 1884.053 | 0.01143  | 2 | 1 | 55.5 | 0 |
| P12163_1_F6,13001 | R.EMLQQHSSLK.T        | 1809.015 | 0.00392  | 2 | 1 | 34.6 | 0 |
| P12163_1_F5,20456 | R.FLSLTDK.E           | 1431.867 | 0.00997  | 2 | 1 | 25.5 | 0 |
| P12163_1_F3,12347 | R.IMQSQTLSDASK.Q      | 1917.057 | 0.00819  | 3 | 1 | 23.5 | 0 |
| P12163_1_F3,15431 | R.IMQSQTLSDASK.Q      | 1917.057 | 0.00591  | 3 | 1 | 37.4 | 0 |
| P12163_1_F2,13861 | R.LDNTPCVVVTSK.Y      | 1941.094 | 0.00558  | 3 | 1 | 22.5 | 0 |
| P12163_1_F2,16083 | R.LDNTPCVVVTSK.Y      | 1941.094 | 0.00385  | 2 | 1 | 36.1 | 0 |
| P12163_1_F2,16101 | R.LDNTPCVVVTSK.Y      | 1941.094 | 0.00669  | 3 | 1 | 23.5 | 0 |
| P12163_2_F2,13711 | R.NIGTLAK.S ! K.NLGTL | 1324.841 | 0.00592  | 3 | 1 | 25.6 | 0 |
| P12163_1_S1,24420 | R.VFISDEFDELLPK.Y     | 2160.205 | 0.00714  | 3 | 1 | 48.8 | 0 |
| P12163_1_S1,18242 | K.DLQDDFM*GGAEIHK.S   | 2176.142 | -0.00432 | 3 | 1 | 36.9 | 0 |
| P12163_1_S1,18303 | K.DLQDDFM*GGAEIHK.S   | 2176.142 | 0.00651  | 3 | 1 | 41   | 0 |
| P12163_1_S1,20559 | K.DLQDDFMGGAEIHK.S    | 2160.147 | 0.00234  | 3 | 1 | 60.6 | 0 |
| P12163_1_F4,21237 | K.DSVVAGFQWASK.E      | 1903.053 | 0.00965  | 3 | 1 | 36.4 | 0 |
| P12163_1_F2,12482 | K.EGALAEENMR.G        | 1423.715 | 0.00406  | 2 | 1 | 37   | 0 |
| P12163_1_F3,12731 | K.EGALAEENMR.G        | 1423.715 | 0.00604  | 2 | 1 | 27.5 | 0 |
| P12163_1_F3,24569 | K.EQMTPLSEFEDKL.-     | 2175.146 | 0.00451  | 3 | 1 | 38.8 | 0 |
| P12163_1_F3,24570 | K.EQMTPLSEFEDKL.-     | 2175.146 | 0.00124  | 2 | 1 | 31.1 | 0 |
| P12163_2_F7,8632  | K.EVDAHPIR.A          | 1240.695 | 0.00285  | 3 | 1 | 36.4 | 0 |
| P12163_1_F3,15723 | K.FSVSPVVR.V          | 1194.715 | 0.0064   | 3 | 1 | 43.1 | 0 |
| P12163_2_F1,16832 | K.FSVSPVVR.V          | 1194.715 | 0.00287  | 2 | 1 | 26.4 | 0 |
| P12163_1_F4,18836 | K.GVQYLNEIK.D         | 1671.989 | 0.00775  | 3 | 1 | 24.8 | 0 |
| P12163_1_F5,17539 | K.GVQYLNEIK.D         | 1671.989 | 0.00303  | 2 | 1 | 37.9 | 0 |

|                    |                     |          |          |   |   |      |   |
|--------------------|---------------------|----------|----------|---|---|------|---|
| P12163_2_F8,12070  | K.GVQYLNEIK.D       | 1671.989 | 0.00625  | 3 | 1 | 27.2 | 0 |
| P12163_1_F4,24230  | K.ILSEFGWDK.D       | 1832.005 | 0.00656  | 2 | 1 | 25.4 | 0 |
| P12163_2_F2,10081  | K.NATLTNEK.E        | 1498.868 | 0.00808  | 2 | 1 | 29.3 | 0 |
| P12163_2_F2,10126  | K.NATLTNEK.E        | 1498.868 | 0.00823  | 3 | 1 | 22.1 | 0 |
| P12163_2_F2,6979   | K.NTGSATCK.R        | 1446.783 | 0.00492  | 2 | 1 | 26.2 | 0 |
| P12163_2_F2,6980   | K.NTGSATCK.R        | 1446.783 | 0.00365  | 3 | 1 | 27.1 | 0 |
| P12163_1_F2,12684  | K.SDPVVSFR.E        | 1210.673 | 0.00177  | 3 | 1 | 35.2 | 0 |
| P12163_1_F4,14704  | K.VASDLPK.L         | 1337.825 | 0.0029   | 2 | 1 | 24.1 | 0 |
| P12163_1_F7,18874  | K.YRVENLYEGPLDDQY   | 2703.368 | -0.00109 | 3 | 1 | 56.7 | 0 |
| P12163_1_F2,10726  | R.GGGQVIPTAR.R      | 1259.737 | -0.00231 | 2 | 1 | 24.3 | 0 |
| P12163_2_F10,16380 | R.GHVFEEMQRPGTPLYT  | 2724.475 | 0.00603  | 4 | 1 | 23.3 | 0 |
| P12163_1_F4,15336  | R.IM*GPNYVPGEK.K    | 1829.009 | 0.00927  | 2 | 1 | 24.4 | 0 |
| P12163_1_F4,17686  | R.IMGPNYVPGEK.K     | 1813.014 | 0.00763  | 3 | 1 | 23.6 | 0 |
| P12163_2_F1,16859  | R.IMGPNYVPGEK.K     | 1813.014 | 0.00077  | 2 | 1 | 26.8 | 0 |
| P12163_2_F1,16883  | R.IMGPNYVPGEK.K     | 1813.014 | 0.00604  | 3 | 1 | 36.7 | 0 |
| P12163_1_F3,24629  | R.LWGENFFDPATK.K    | 2033.095 | 0.01263  | 3 | 1 | 22.7 | 0 |
| P12163_1_F3,24630  | R.LWGENFFDPATK.K    | 2033.095 | 0.00249  | 2 | 1 | 29.3 | 0 |
| P12163_1_F2,20101  | R.NCDPNGPLM*LYVSK.  | 2232.161 | 0.00308  | 3 | 1 | 26.1 | 0 |
| P12163_1_F3,20611  | R.NCDPNGPLMLYVSK.M  | 2216.166 | 0.00588  | 3 | 1 | 24   | 0 |
| P12163_1_F6,13457  | R.NMSVIAHVDHGK.S    | 1916.063 | 0.00983  | 4 | 1 | 33.6 | 0 |
| P12163_1_F7,12772  | R.NMSVIAHVDHGK.S    | 1916.063 | 0.00539  | 4 | 1 | 28.4 | 0 |
| P12163_1_S1,15358  | K.AEFTASVPLTR.I     | 1495.842 | 0.00513  | 3 | 1 | 37.4 | 0 |
| P12163_1_F2,12182  | K.ALGIPENSVR.T      | 1359.79  | 0.00326  | 3 | 1 | 23.5 | 0 |
| P12163_1_S1,13572  | K.DASPQEVLVIR.K     | 1530.879 | 0.00233  | 3 | 1 | 35   | 0 |
| P12163_1_S1,16443  | K.DASPQEVLVIR.K     | 1530.879 | 0.00417  | 2 | 1 | 34.1 | 0 |
| P12163_2_S5,12830  | K.DIYVVQTRPQH.-     | 1756.965 | -0.00272 | 3 | 1 | 23.8 | 0 |
| P12163_1_F2,18648  | K.FGCPQDVEGCLVGK.D  | 2174.119 | 0.00241  | 3 | 1 | 40.9 | 0 |
| P12163_1_F3,19195  | K.FGCPQDVEGCLVGK.D  | 2174.119 | 0.00876  | 2 | 1 | 45.9 | 0 |
| P12163_1_F3,19210  | K.FGCPQDVEGCLVGK.D  | 2174.119 | 0.00838  | 3 | 1 | 46.1 | 0 |
| P12163_2_F9,16861  | K.GGAHWLAENVELK.N   | 2032.144 | 0.00608  | 3 | 1 | 48.8 | 0 |
| P12163_2_F1,11412  | K.GGESIEYK.F        | 1490.831 | 0.00555  | 2 | 1 | 32.3 | 0 |
| P12163_2_F7,15360  | K.IHPCLPSFK.A       | 1706.987 | 0.00421  | 3 | 1 | 23.6 | 0 |
| P12163_1_F2,17380  | K.VVFTCEDDEK.V      | 1949.015 | 0.0051   | 3 | 1 | 36.3 | 0 |
| P12163_1_F3,17871  | K.VVFTCEDDEK.V      | 1949.015 | 0.0054   | 2 | 1 | 40   | 0 |
| P12163_2_F1,20943  | R.AGIIFQVSK.L       | 1570.978 | 0.00116  | 2 | 1 | 30.9 | 0 |
| P12163_1_S1,18595  | R.ELIVENLQSDER.L    | 1748.933 | 0.00609  | 2 | 1 | 25.1 | 0 |
| P12163_1_F4,22897  | R.FLNALETK.G        | 1543.93  | 0.00719  | 2 | 1 | 39.2 | 0 |
| P12163_1_F5,21543  | R.FLNALETK.G        | 1543.93  | -0.00235 | 2 | 1 | 25.5 | 0 |
| P12163_1_F5,21571  | R.FLNALETK.G        | 1543.93  | 0.00345  | 3 | 1 | 34.9 | 0 |
| P12163_2_F1,22380  | R.FLNALETK.G        | 1543.93  | 0.00581  | 2 | 1 | 34.3 | 0 |
| P12163_2_F1,22402  | R.FLNALETK.G        | 1543.93  | 0.00429  | 3 | 1 | 31   | 0 |
| P12163_2_S3,11314  | R.GVHVSSFSASK.A     | 1713.974 | 0.00438  | 3 | 1 | 34   | 0 |
| P12163_1_F8,19453  | R.IFPANAHLIVR.S     | 1554.942 | 0.00313  | 3 | 1 | 58.4 | 0 |
| P12163_1_F4,19429  | R.LASLSAVSEK.V      | 1612.973 | 0.00632  | 2 | 1 | 41   | 0 |
| P12163_1_F6,20271  | R.LEASSTCVNLNPYITHC | 3329.704 | 0.00973  | 4 | 1 | 50.4 | 0 |
| P12163_1_F6,20281  | R.LEASSTCVNLNPYITHC | 3329.704 | 0.00114  | 3 | 1 | 34.3 | 0 |
| P12163_1_F2,21455  | R.NAGPEDLVATEAM*L   | 2254.221 | 0.00855  | 3 | 1 | 35.8 | 0 |
| P12163_1_S1,20528  | R.NAGPEDLVATEAMLA   | 2238.226 | 0.00342  | 3 | 1 | 32   | 0 |
| P12163_1_S1,7020   | R.NDASDAAIAR.R      | 1307.686 | 0.00702  | 3 | 1 | 23.7 | 0 |
| P12163_1_F5,7388   | R.QAAGVSQK.D        | 1396.837 | 0.00896  | 2 | 1 | 26.7 | 0 |
| P12163_2_F2,8262   | R.QAAGVSQK.D        | 1396.837 | 0.00682  | 2 | 1 | 29.4 | 0 |



|                   |                    |          |          |   |   |      |   |
|-------------------|--------------------|----------|----------|---|---|------|---|
| P12163_1_F9,12708 | K.DGVPHLTK.V       | 1474.884 | 0.0027   | 3 | 1 | 23.2 | 0 |
| P12163_2_F6,12162 | K.DGVPHLTK.V       | 1474.884 | 0.00096  | 3 | 1 | 27.5 | 0 |
| P12163_1_F3,19242 | K.FASAISESGEIK.V   | 1847.037 | 0.01108  | 2 | 1 | 24   | 0 |
| P12163_1_F4,15392 | K.FASAISESGEIK.V   | 1847.037 | 0.00466  | 2 | 1 | 25.5 | 0 |
| P12163_1_F4,17257 | K.FASAISESGEIK.V   | 1847.037 | 0.00514  | 2 | 1 | 32.6 | 0 |
| P12163_1_F4,19574 | K.FASAISESGEIK.V   | 1847.037 | 0.00926  | 2 | 1 | 42.6 | 0 |
| P12163_1_F4,19601 | K.FASAISESGEIK.V   | 1847.037 | 0.00797  | 3 | 1 | 60   | 0 |
| P12163_1_F4,19762 | K.FASAISESGEIK.V   | 1847.037 | 0.01162  | 2 | 1 | 63.2 | 0 |
| P12163_1_F4,19805 | K.FASAISESGEIK.V   | 1847.037 | 0.00497  | 3 | 1 | 59   | 0 |
| P12163_1_F4,19986 | K.FASAISESGEIK.V   | 1847.037 | 0.00782  | 2 | 1 | 43.8 | 0 |
| P12163_1_F5,18467 | K.FASAISESGEIK.V   | 1847.037 | 0.00498  | 2 | 1 | 55.6 | 0 |
| P12163_1_F5,18507 | K.FASAISESGEIK.V   | 1847.037 | 0.00569  | 3 | 1 | 47.2 | 0 |
| P12163_1_F6,18313 | K.FASAISESGEIK.V   | 1847.037 | 0.00221  | 3 | 1 | 32.8 | 0 |
| P12163_1_F6,18698 | K.FASAISESGEIK.V   | 1847.037 | 0.00356  | 2 | 1 | 35.7 | 0 |
| P12163_1_F7,17376 | K.FASAISESGEIK.V   | 1847.037 | 0.0074   | 3 | 1 | 30.8 | 0 |
| P12163_1_F9,18251 | K.FASAISESGEIK.V   | 1847.037 | 0.00863  | 3 | 1 | 49.5 | 0 |
| P12163_1_F9,18289 | K.FASAISESGEIK.V   | 1847.037 | 0.01036  | 2 | 1 | 33.9 | 0 |
| P12163_1_S10,1791 | K.FASAISESGEIK.V   | 1847.037 | 0.00479  | 3 | 1 | 40.8 | 0 |
| P12163_2_F1,18932 | K.FASAISESGEIK.V   | 1847.037 | -0.00204 | 2 | 1 | 38.3 | 0 |
| P12163_2_F1,19143 | K.FASAISESGEIK.V   | 1847.037 | 0.00636  | 2 | 1 | 60   | 0 |
| P12163_2_F4,16997 | K.FASAISESGEIK.V   | 1847.037 | -0.00412 | 3 | 1 | 32.1 | 0 |
| P12163_2_F4,17059 | K.FASAISESGEIK.V   | 1847.037 | 0.00096  | 2 | 1 | 49.9 | 0 |
| P12163_2_F9,17221 | K.FASAISESGEIK.V   | 1847.037 | 0.00221  | 3 | 1 | 61   | 0 |
| P12163_1_F5,12558 | K.GLGM*HVIAHDPYAP/ | 2140.091 | 0.00447  | 3 | 1 | 35.6 | 0 |
| P12163_1_S10,1350 | K.GLGM*HVIAHDPYAP/ | 2140.091 | 0.00378  | 3 | 1 | 32.4 | 0 |
| P12163_1_S10,1351 | K.GLGM*HVIAHDPYAP/ | 2140.091 | 0.00231  | 4 | 1 | 39.7 | 0 |
| P12163_2_F10,1273 | K.GLGM*HVIAHDPYAP/ | 2140.091 | 0.00345  | 3 | 1 | 48.8 | 0 |
| P12163_2_F10,1420 | K.GLGM*HVIAHDPYAP/ | 2140.091 | -0.00013 | 4 | 1 | 39.2 | 0 |
| P12163_2_F4,12408 | K.GLGM*HVIAHDPYAP/ | 2140.091 | 0.00372  | 3 | 1 | 38   | 0 |
| P12163_2_S5,12704 | K.GLGM*HVIAHDPYAP/ | 2140.091 | 0.00343  | 4 | 1 | 40.8 | 0 |
| P12163_2_S5,14555 | K.GLGM*HVIAHDPYAP/ | 2140.091 | 0.00405  | 3 | 1 | 37.8 | 0 |
| P12163_1_F5,14921 | K.GLGMHVIAHDPYAPA  | 2124.096 | 0.00719  | 4 | 1 | 27.9 | 0 |
| P12163_1_F8,15420 | K.GLGMHVIAHDPYAPA  | 2124.096 | 0.00387  | 3 | 1 | 29.8 | 0 |
| P12163_1_F8,15445 | K.GLGMHVIAHDPYAPA  | 2124.096 | -0.00091 | 2 | 1 | 42   | 0 |
| P12163_1_F8,15452 | K.GLGMHVIAHDPYAPA  | 2124.096 | 0.00199  | 4 | 1 | 38.3 | 0 |
| P12163_1_S10,1520 | K.GLGMHVIAHDPYAPA  | 2124.096 | 0.00057  | 3 | 1 | 33   | 0 |
| P12163_1_S10,1522 | K.GLGMHVIAHDPYAPA  | 2124.096 | 0.00011  | 4 | 1 | 32.9 | 0 |
| P12163_1_S10,1540 | K.GLGMHVIAHDPYAPA  | 2124.096 | 0.00237  | 3 | 1 | 34.4 | 0 |
| P12163_2_F10,1414 | K.GLGMHVIAHDPYAPA  | 2124.096 | 0.00443  | 4 | 1 | 39.7 | 0 |
| P12163_2_F10,1417 | K.GLGMHVIAHDPYAPA  | 2124.096 | 0.00369  | 3 | 1 | 43   | 0 |
| P12163_2_F10,1423 | K.GLGMHVIAHDPYAPA  | 2124.096 | -0.00167 | 2 | 1 | 50.5 | 0 |
| P12163_2_F4,14427 | K.GLGMHVIAHDPYAPA  | 2124.096 | -0.00189 | 4 | 1 | 27.9 | 0 |
| P12163_2_F4,14466 | K.GLGMHVIAHDPYAPA  | 2124.096 | 0.00288  | 3 | 1 | 39.6 | 0 |
| P12163_2_S5,14485 | K.GLGMHVIAHDPYAPA  | 2124.096 | 0.00235  | 4 | 1 | 26.7 | 0 |
| P12163_2_S5,14486 | K.GLGMHVIAHDPYAPA  | 2124.096 | 0.00291  | 3 | 1 | 40.5 | 0 |
| P12163_2_S5,14534 | K.GLGMHVIAHDPYAPA  | 2124.096 | -0.00029 | 2 | 1 | 70.1 | 0 |
| P12163_1_F8,11617 | K.HAVM*AIGVDEQPR.K | 1742.916 | -0.00155 | 2 | 1 | 24.9 | 0 |
| P12163_1_F8,11627 | K.HAVM*AIGVDEQPR.K | 1742.916 | 0.00205  | 3 | 1 | 45.4 | 0 |
| P12163_1_F8,14177 | K.HAVM*AIGVDEQPR.K | 1742.916 | 0.00238  | 3 | 1 | 52.4 | 0 |
| P12163_1_F8,14197 | K.HAVM*AIGVDEQPR.K | 1742.916 | 0.00461  | 2 | 1 | 38.9 | 0 |
| P12163_1_F8,17635 | K.HAVM*AIGVDEQPR.K | 1742.916 | 0.00343  | 3 | 1 | 25.9 | 0 |

|                   |                    |          |          |   |   |      |   |
|-------------------|--------------------|----------|----------|---|---|------|---|
| P12163_1_F8,19289 | K.HAVM*AIGVDEQPR.K | 1742.916 | 0.0022   | 3 | 1 | 24.3 | 0 |
| P12163_1_F8,20225 | K.HAVM*AIGVDEQPR.K | 1742.916 | -0.00515 | 3 | 1 | 31.9 | 0 |
| P12163_1_F8,20249 | K.HAVM*AIGVDEQPR.K | 1742.916 | -0.00425 | 3 | 1 | 23.9 | 0 |
| P12163_2_F6,11453 | K.HAVM*AIGVDEQPR.K | 1742.916 | 0.00697  | 3 | 1 | 63.5 | 0 |
| P12163_2_F6,13683 | K.HAVM*AIGVDEQPR.K | 1742.916 | 0.00457  | 3 | 1 | 66.1 | 0 |
| P12163_2_F6,13687 | K.HAVM*AIGVDEQPR.K | 1742.916 | 0.00441  | 2 | 1 | 50.3 | 0 |
| P12163_2_F6,26404 | K.HAVM*AIGVDEQPR.K | 1742.916 | 0.00844  | 3 | 1 | 29.8 | 0 |
| P12163_1_F8,14175 | K.HAVMAIGVDEQPR.K  | 1726.921 | 0.00183  | 2 | 1 | 63.6 | 0 |
| P12163_2_F6,13597 | K.HAVMAIGVDEQPR.K  | 1726.921 | 0.00475  | 3 | 1 | 51.4 | 0 |
| P12163_2_F6,13614 | K.HAVMAIGVDEQPR.K  | 1726.921 | 0.00307  | 2 | 1 | 52.4 | 0 |
| P12163_1_F6,7310  | K.LVQHER.V         | 1085.637 | 0.00108  | 3 | 1 | 22.1 | 0 |
| P12163_1_F9,7333  | K.LVQHER.V         | 1085.637 | 0.00375  | 3 | 1 | 33.7 | 0 |
| P12163_1_S10,8321 | K.LVQHER.V         | 1085.637 | 0.00345  | 3 | 1 | 34.3 | 0 |
| P12163_2_F9,7726  | K.LVQHER.V         | 1085.637 | 0.00243  | 3 | 1 | 33.2 | 0 |
| P12163_1_F5,21639 | K.TLAVLGFGK.V      | 1513.956 | 0.00209  | 3 | 1 | 25.5 | 0 |
| P12163_1_F5,21643 | K.TLAVLGFGK.V      | 1513.956 | 0.00794  | 2 | 1 | 38.5 | 0 |
| P12163_1_F6,21563 | K.TLAVLGFGK.V      | 1513.956 | 0.00398  | 3 | 1 | 30.4 | 0 |
| P12163_1_F7,20262 | K.TLAVLGFGK.V      | 1513.956 | 0.00068  | 3 | 1 | 33.4 | 0 |
| P12163_2_F1,22449 | K.TLAVLGFGK.V      | 1513.956 | 0.0065   | 2 | 1 | 42.9 | 0 |
| P12163_2_F1,22511 | K.TLAVLGFGK.V      | 1513.956 | 0.0065   | 3 | 1 | 49.6 | 0 |
| P12163_2_S5,19325 | K.TLAVLGFGK.V      | 1513.956 | 0.00092  | 3 | 1 | 41.6 | 0 |
| P12163_2_S5,19794 | K.TLAVLGFGK.V      | 1513.956 | 0.00584  | 3 | 1 | 37.7 | 0 |
| P12163_2_F1,8530  | K.VGSEVAR.R        | 1021.594 | 0.0025   | 2 | 1 | 24.5 | 0 |
| P12163_1_F4,15390 | K.VLNDETFGK.M      | 1630.926 | 0.0077   | 2 | 1 | 30.7 | 0 |
| P12163_1_F4,17636 | K.VLNDETFGK.M      | 1630.926 | 0.0025   | 2 | 1 | 32.6 | 0 |
| P12163_1_F4,17935 | K.VLNDETFGK.M      | 1630.926 | 0.00822  | 2 | 1 | 37.1 | 0 |
| P12163_1_F4,17940 | K.VLNDETFGK.M      | 1630.926 | 0.00851  | 3 | 1 | 40.3 | 0 |
| P12163_1_F7,15567 | K.VLNDETFGK.M      | 1630.926 | 0.00078  | 2 | 1 | 44.3 | 0 |
| P12163_1_F7,15580 | K.VLNDETFGK.M      | 1630.926 | -0.00014 | 3 | 1 | 35.6 | 0 |
| P12163_2_F1,16819 | K.VLNDETFGK.M      | 1630.926 | 0.00578  | 2 | 1 | 49.4 | 0 |
| P12163_2_F1,16820 | K.VLNDETFGK.M      | 1630.926 | 0.00556  | 3 | 1 | 44.2 | 0 |
| P12163_2_F2,111   | K.VLNDETFGK.M      | 1630.926 | 0.00856  | 3 | 1 | 38.8 | 0 |
| P12163_2_F2,340   | K.VLNDETFGK.M      | 1630.926 | 0.00268  | 3 | 1 | 29.1 | 0 |
| P12163_2_F2,613   | K.VLNDETFGK.M      | 1630.926 | 0.00588  | 2 | 1 | 30.1 | 0 |
| P12163_2_F2,748   | K.VLNDETFGK.M      | 1630.926 | 0.00361  | 3 | 1 | 40.9 | 0 |
| P12163_2_F2,836   | K.VLNDETFGK.M      | 1630.926 | 0.00672  | 2 | 1 | 32   | 0 |
| P12163_2_F2,1060  | K.VLNDETFGK.M      | 1630.926 | 0.00546  | 2 | 1 | 28.4 | 0 |
| P12163_2_F2,1108  | K.VLNDETFGK.M      | 1630.926 | 0.00446  | 3 | 1 | 26.4 | 0 |
| P12163_2_F2,1456  | K.VLNDETFGK.M      | 1630.926 | -0.00131 | 3 | 1 | 29.4 | 0 |
| P12163_2_F2,1631  | K.VLNDETFGK.M      | 1630.926 | 0.00234  | 2 | 1 | 27.3 | 0 |
| P12163_2_F2,2459  | K.VLNDETFGK.M      | 1630.926 | 0.01108  | 3 | 1 | 31.8 | 0 |
| P12163_2_F4,15194 | K.VLNDETFGK.M      | 1630.926 | -0.00041 | 3 | 1 | 28   | 0 |
| P12163_2_F4,15206 | K.VLNDETFGK.M      | 1630.926 | 0.00314  | 2 | 1 | 44.6 | 0 |
| P12163_1_F4,7963  | K.VSYASSR.A        | 1073.589 | 0.00544  | 3 | 1 | 25.3 | 0 |
| P12163_2_F1,7103  | K.VSYASSR.A        | 1073.589 | 0.00574  | 3 | 1 | 26.1 | 0 |
| P12163_1_F4,18924 | K.YVGVSLVGK.T      | 1529.951 | 0.00644  | 2 | 1 | 39.4 | 0 |
| P12163_1_F4,18929 | K.YVGVSLVGK.T      | 1529.951 | 0.00602  | 3 | 1 | 29.7 | 0 |
| P12163_1_F5,17669 | K.YVGVSLVGK.T      | 1529.951 | 0.00827  | 3 | 1 | 29.3 | 0 |
| P12163_1_F5,17688 | K.YVGVSLVGK.T      | 1529.951 | 0.00844  | 2 | 1 | 37.9 | 0 |
| P12163_1_F6,17604 | K.YVGVSLVGK.T      | 1529.951 | 0.0027   | 2 | 1 | 26.3 | 0 |
| P12163_1_F6,18041 | K.YVGVSLVGK.T      | 1529.951 | 0.00574  | 2 | 1 | 29   | 0 |

|                   |                    |          |          |   |   |      |   |
|-------------------|--------------------|----------|----------|---|---|------|---|
| P12163_1_F6,18050 | K.YVGVSLVGK.T      | 1529.951 | 0.0053   | 3 | 1 | 28.7 | 0 |
| P12163_1_F7,16723 | K.YVGVSLVGK.T      | 1529.951 | 0.00234  | 2 | 1 | 30.6 | 0 |
| P12163_1_F7,17191 | K.YVGVSLVGK.T      | 1529.951 | 0.00988  | 2 | 1 | 38.4 | 0 |
| P12163_1_F7,17201 | K.YVGVSLVGK.T      | 1529.951 | 0.00059  | 3 | 1 | 27.4 | 0 |
| P12163_1_F8,17996 | K.YVGVSLVGK.T      | 1529.951 | 0.00218  | 3 | 1 | 33.4 | 0 |
| P12163_1_F9,17475 | K.YVGVSLVGK.T      | 1529.951 | 0.00386  | 3 | 1 | 26   | 0 |
| P12163_1_F9,17500 | K.YVGVSLVGK.T      | 1529.951 | 0.0052   | 2 | 1 | 39.8 | 0 |
| P12163_1_S10,1699 | K.YVGVSLVGK.T      | 1529.951 | 0.00194  | 3 | 1 | 23   | 0 |
| P12163_2_F1,18199 | K.YVGVSLVGK.T      | 1529.951 | 0.00692  | 3 | 1 | 37.2 | 0 |
| P12163_2_F1,18200 | K.YVGVSLVGK.T      | 1529.951 | 0.0048   | 2 | 1 | 39.3 | 0 |
| P12163_2_F4,16306 | K.YVGVSLVGK.T      | 1529.951 | 0.00158  | 3 | 1 | 26.7 | 0 |
| P12163_2_F4,16356 | K.YVGVSLVGK.T      | 1529.951 | 0.00412  | 2 | 1 | 35.4 | 0 |
| P12163_2_F8_12070 | K.YVGVSLVGK.T      | 1529.951 | 0.01038  | 2 | 1 | 26   | 0 |
| P12163_2_F8_12070 | K.YVGVSLVGK.T      | 1529.951 | 0.00542  | 3 | 1 | 27.1 | 0 |
| P12163_2_F9,16239 | K.YVGVSLVGK.T      | 1529.951 | 0.01036  | 2 | 1 | 38.8 | 0 |
| P12163_2_F9,16273 | K.YVGVSLVGK.T      | 1529.951 | 0.00554  | 3 | 1 | 42.5 | 0 |
| P12163_1_F4,6235  | R.ALDSGR.V         | 922.5259 | 0.00487  | 3 | 1 | 27.5 | 0 |
| P12163_2_F1,5584  | R.ALDSGR.V         | 922.5259 | 0.00313  | 3 | 1 | 22.2 | 0 |
| P12163_1_S1,9060  | R.APDDLDR.L        | 1206.627 | 0.00364  | 3 | 1 | 27.6 | 0 |
| P12163_1_S1,10216 | R.APDDLDR.L        | 1206.627 | 0.00169  | 2 | 1 | 24.2 | 0 |
| P12163_1_F2,10333 | R.DVFESSAGR.L      | 1271.653 | 0.00064  | 3 | 1 | 30.6 | 0 |
| P12163_1_F2,10644 | R.DVFESSAGR.L      | 1271.653 | 0.00519  | 3 | 1 | 32.5 | 0 |
| P12163_1_F2,12603 | R.DVFESSAGR.L      | 1271.653 | -0.00014 | 2 | 1 | 31.9 | 0 |
| P12163_1_S1,10579 | R.DVFESSAGR.L      | 1271.653 | 0.00679  | 3 | 1 | 28.1 | 0 |
| P12163_1_S1,12600 | R.DVFESSAGR.L      | 1271.653 | 0.00766  | 2 | 1 | 33.1 | 0 |
| P12163_1_F4,17907 | R.GGVIDEEALVR.A    | 1461.821 | 0.00924  | 2 | 1 | 34.1 | 0 |
| P12163_1_F5,15933 | R.GGVIDEEALVR.A    | 1461.821 | 0.00272  | 2 | 1 | 29.6 | 0 |
| P12163_1_F6,17109 | R.GGVIDEEALVR.A    | 1461.821 | 0.00466  | 2 | 1 | 36.9 | 0 |
| P12163_1_S1,16081 | R.GGVIDEEALVR.A    | 1461.821 | 0.00388  | 2 | 1 | 52.4 | 0 |
| P12163_1_S1,16090 | R.GGVIDEEALVR.A    | 1461.821 | 0.01271  | 3 | 1 | 65.2 | 0 |
| P12163_1_S10,18   | R.GGVIDEEALVR.A    | 1461.821 | 0.00768  | 2 | 1 | 28.1 | 0 |
| P12163_2_F2,16722 | R.GGVIDEEALVR.A    | 1461.821 | 0.00188  | 2 | 1 | 32.8 | 0 |
| P12163_2_F4,15848 | R.GGVIDEEALVR.A    | 1461.821 | 0.00012  | 2 | 1 | 49.4 | 0 |
| P12163_1_F7,11599 | R.KHAVM*AIGVDEQPR. | 2175.216 | 0.00051  | 3 | 1 | 38.6 | 0 |
| P12163_1_F7,13280 | R.KHAVM*AIGVDEQPR. | 2175.216 | 0.00683  | 4 | 1 | 27.9 | 0 |
| P12163_1_F7,13290 | R.KHAVM*AIGVDEQPR. | 2175.216 | 0.00474  | 3 | 1 | 51.6 | 0 |
| P12163_1_F6,14031 | R.KHAVMAIGVDEQPR.K | 2159.221 | 0.00787  | 4 | 1 | 31.8 | 0 |
| P12163_1_F7,13368 | R.KHAVMAIGVDEQPR.K | 2159.221 | 0.00487  | 4 | 1 | 33.5 | 0 |
| P12163_1_F3,18835 | R.LAVQLVAGGSGVK.T  | 1807.126 | 0.00532  | 3 | 1 | 42.9 | 0 |
| P12163_1_F3,20438 | R.LAVQLVAGGSGVK.T  | 1807.126 | 0.0049   | 3 | 1 | 62   | 0 |
| P12163_1_F3,20439 | R.LAVQLVAGGSGVK.T  | 1807.126 | 0.00452  | 2 | 1 | 65.8 | 0 |
| P12163_1_F4,19190 | R.LAVQLVAGGSGVK.T  | 1807.126 | -0.00038 | 3 | 1 | 25.2 | 0 |
| P12163_1_F4,19251 | R.LAVQLVAGGSGVK.T  | 1807.126 | 0.00848  | 2 | 1 | 38.2 | 0 |
| P12163_1_F4,20857 | R.LAVQLVAGGSGVK.T  | 1807.126 | 0.00352  | 3 | 1 | 56.1 | 0 |
| P12163_1_F4,20867 | R.LAVQLVAGGSGVK.T  | 1807.126 | 0.0008   | 2 | 1 | 63.2 | 0 |
| P12163_1_F4,23026 | R.LAVQLVAGGSGVK.T  | 1807.126 | 0.0088   | 3 | 1 | 44.1 | 0 |
| P12163_1_F4,23054 | R.LAVQLVAGGSGVK.T  | 1807.126 | 0.00476  | 2 | 1 | 55   | 0 |
| P12163_1_F4,23356 | R.LAVQLVAGGSGVK.T  | 1807.126 | 0.00691  | 3 | 1 | 37.9 | 0 |
| P12163_1_F5,19704 | R.LAVQLVAGGSGVK.T  | 1807.126 | 0.00292  | 3 | 1 | 43.8 | 0 |
| P12163_1_F5,19735 | R.LAVQLVAGGSGVK.T  | 1807.126 | 0.00334  | 2 | 1 | 31   | 0 |
| P12163_1_F6,19374 | R.LAVQLVAGGSGVK.T  | 1807.126 | -0.00062 | 3 | 1 | 50.1 | 0 |

|                    |                    |          |          |   |   |      |   |
|--------------------|--------------------|----------|----------|---|---|------|---|
| P12163_1_F6,19435  | R.LAVQLVAGGSGVK.T  | 1807.126 | -0.00186 | 2 | 1 | 32.2 | 0 |
| P12163_1_F6,19769  | R.LAVQLVAGGSGVK.T  | 1807.126 | 0.00319  | 3 | 1 | 43.3 | 0 |
| P12163_1_F7,18960  | R.LAVQLVAGGSGVK.T  | 1807.126 | 0.0055   | 3 | 1 | 28.2 | 0 |
| P12163_1_F9,19469  | R.LAVQLVAGGSGVK.T  | 1807.126 | 0.00532  | 3 | 1 | 31.7 | 0 |
| P12163_2_F1,18528  | R.LAVQLVAGGSGVK.T  | 1807.126 | 0.00724  | 3 | 1 | 31.7 | 0 |
| P12163_2_F1,20381  | R.LAVQLVAGGSGVK.T  | 1807.126 | 0.0098   | 2 | 1 | 66.6 | 0 |
| P12163_2_F1,20395  | R.LAVQLVAGGSGVK.T  | 1807.126 | 0.00712  | 3 | 1 | 45.7 | 0 |
| P12163_2_F1,20604  | R.LAVQLVAGGSGVK.T  | 1807.126 | 0.00026  | 2 | 1 | 48.3 | 0 |
| P12163_2_F1,20618  | R.LAVQLVAGGSGVK.T  | 1807.126 | 0.00196  | 3 | 1 | 43.9 | 0 |
| P12163_2_F4,18184  | R.LAVQLVAGGSGVK.T  | 1807.126 | 0.00181  | 3 | 1 | 47.2 | 0 |
| P12163_2_F4,18212  | R.LAVQLVAGGSGVK.T  | 1807.126 | 0.00342  | 2 | 1 | 41.6 | 0 |
| P12163_2_F4,18541  | R.LAVQLVAGGSGVK.T  | 1807.126 | 0.00094  | 3 | 1 | 46.9 | 0 |
| P12163_1_F3,10238  | R.NVAQADASVK.A     | 1610.932 | 0.00543  | 2 | 1 | 43.9 | 0 |
| P12163_1_F4,9450   | R.NVAQADASVK.A     | 1610.932 | 0.00773  | 2 | 1 | 26.1 | 0 |
| P12163_1_F4,11420  | R.NVAQADASVK.A     | 1610.932 | 0.00981  | 2 | 1 | 40.4 | 0 |
| P12163_1_F4,23731  | R.NVAQADASVK.A     | 1610.932 | 0.00305  | 2 | 1 | 30.6 | 0 |
| P12163_1_F4,23835  | R.NVAQADASVK.A     | 1610.932 | 0.00643  | 3 | 1 | 23.3 | 0 |
| P12163_1_F4,24452  | R.NVAQADASVK.A     | 1610.932 | 0.00295  | 3 | 1 | 24.3 | 0 |
| P12163_1_F4,24567  | R.NVAQADASVK.A     | 1610.932 | 0.00731  | 2 | 1 | 26.3 | 0 |
| P12163_1_F5,10134  | R.NVAQADASVK.A     | 1610.932 | 0.00707  | 2 | 1 | 44.1 | 0 |
| P12163_1_F7,9993   | R.NVAQADASVK.A     | 1610.932 | 0.0055   | 3 | 1 | 38.7 | 0 |
| P12163_2_F1,10612  | R.NVAQADASVK.A     | 1610.932 | 0.00499  | 3 | 1 | 42.7 | 0 |
| P12163_2_F1,10725  | R.NVAQADASVK.A     | 1610.932 | 0.00601  | 2 | 1 | 51.9 | 0 |
| P12163_2_F1,11007  | R.NVAQADASVK.A     | 1610.932 | 0.01085  | 2 | 1 | 35.6 | 0 |
| P12163_2_F1,11985  | R.NVAQADASVK.A     | 1610.932 | 0.00481  | 2 | 1 | 40.7 | 0 |
| P12163_2_S5,9784   | R.NVAQADASVK.A     | 1610.932 | 0.00256  | 3 | 1 | 47   | 0 |
| P12163_1_F4,12201  | R.QVDQPGM*IGK.V    | 1696.951 | 0.00485  | 3 | 1 | 29.7 | 0 |
| P12163_1_F4,12240  | R.QVDQPGM*IGK.V    | 1696.951 | 0.00622  | 2 | 1 | 29.6 | 0 |
| P12163_1_F4,14070  | R.QVDQPGM*IGK.V    | 1696.951 | 0.01116  | 2 | 1 | 24.8 | 0 |
| P12163_2_F1,11342  | R.QVDQPGM*IGK.V    | 1696.951 | 0.00716  | 3 | 1 | 28.4 | 0 |
| P12163_1_F3,13557  | R.QVDQPGMIGK.V     | 1680.956 | 0.0043   | 2 | 1 | 36.5 | 0 |
| P12163_1_F4,14030  | R.QVDQPGMIGK.V     | 1680.956 | 0.00458  | 2 | 1 | 35.1 | 0 |
| P12163_1_F4,14076  | R.QVDQPGMIGK.V     | 1680.956 | 0.00758  | 3 | 1 | 36.4 | 0 |
| P12163_1_F5,12734  | R.QVDQPGMIGK.V     | 1680.956 | 0.00838  | 2 | 1 | 31.4 | 0 |
| P12163_2_F1,13094  | R.QVDQPGMIGK.V     | 1680.956 | 0.00773  | 3 | 1 | 24.8 | 0 |
| P12163_2_F4,12003  | R.QVDQPGMIGK.V     | 1680.956 | 0.00152  | 3 | 1 | 27.7 | 0 |
| P12163_1_F3,26923  | K.AELLYNVIDGSNGFYK | 2411.307 | 0.00428  | 3 | 1 | 35.8 | 0 |
| P12163_2_F1,16700  | K.AQSELYNWR.G      | 1470.764 | 0.00254  | 2 | 1 | 28.3 | 0 |
| P12163_1_F4,14713  | K.DLLGNAQDK.T      | 1581.906 | 0.00221  | 3 | 1 | 24.4 | 0 |
| P12163_1_F5,13323  | K.DLLGNAQDK.T      | 1581.906 | 0.0064   | 2 | 1 | 31.9 | 0 |
| P12163_2_F1,13666  | K.DLLGNAQDK.T      | 1581.906 | 0.00568  | 2 | 1 | 30.5 | 0 |
| P12163_2_F1,13702  | K.DLLGNAQDK.T      | 1581.906 | 0.00455  | 3 | 1 | 49.4 | 0 |
| P12163_2_F4,12560  | K.DLLGNAQDK.T      | 1581.906 | 0.00196  | 2 | 1 | 24.1 | 0 |
| P12163_2_S5,13298  | K.DLLGNAQDK.T      | 1581.906 | 0.00533  | 3 | 1 | 23.7 | 0 |
| P12163_1_S10,1045' | K.EYPSAK.N         | 1302.751 | 0.00711  | 3 | 1 | 29.6 | 0 |
| P12163_2_F1,9392   | K.EYPSAK.N         | 1302.751 | 0.00444  | 3 | 1 | 30.3 | 0 |
| P12163_1_F4,20850  | K.FCNPQVIWSGK.A    | 1944.062 | 0.00565  | 3 | 1 | 26.6 | 0 |
| P12163_1_F4,20932  | K.FCNPQVIWSGK.A    | 1944.062 | 0.00678  | 2 | 1 | 43.5 | 0 |
| P12163_1_F5,19673  | K.FCNPQVIWSGK.A    | 1944.062 | 0.00709  | 3 | 1 | 30.3 | 0 |
| P12163_2_F1,20261  | K.FCNPQVIWSGK.A    | 1944.062 | 0.00463  | 3 | 1 | 31.8 | 0 |
| P12163_2_F1,20287  | K.FCNPQVIWSGK.A    | 1944.062 | 0.0052   | 2 | 1 | 36.6 | 0 |

|                   |                     |          |          |   |   |      |   |
|-------------------|---------------------|----------|----------|---|---|------|---|
| P12163_1_F2,19997 | K.IPNFDALEQNPDAK.Y  | 2180.181 | 0.00702  | 3 | 1 | 55.5 | 0 |
| P12163_1_F2,20045 | K.IPNFDALEQNPDAK.Y  | 2180.181 | 0.00842  | 4 | 1 | 29.3 | 0 |
| P12163_1_F2,20116 | K.IPNFDALEQNPDAK.Y  | 2180.181 | 0.00498  | 2 | 1 | 69.2 | 0 |
| P12163_1_S1,19083 | K.IPNFDALEQNPDAK.Y  | 2180.181 | 0.00882  | 4 | 1 | 43.9 | 0 |
| P12163_1_S1,19127 | K.IPNFDALEQNPDAK.Y  | 2180.181 | 0.00196  | 2 | 1 | 46   | 0 |
| P12163_1_S1,19287 | K.IPNFDALEQNPDAK.Y  | 2180.181 | 0.01134  | 3 | 1 | 26.6 | 0 |
| P12163_2_F2,20198 | K.IPNFDALEQNPDAK.Y  | 2180.181 | 0.00117  | 3 | 1 | 23.7 | 0 |
| P12163_2_F4,18678 | K.IPNFDALEQNPDAK.Y  | 2180.181 | 0.0033   | 3 | 1 | 36.3 | 0 |
| P12163_1_F7,16508 | K.NSTGILVADM*SSNFC  | 3122.607 | -0.0015  | 3 | 1 | 27   | 0 |
| P12163_1_F7,19609 | K.NSTGILVADM*SSNFC  | 3122.607 | 0.00599  | 4 | 1 | 48.3 | 0 |
| P12163_1_F7,19619 | K.NSTGILVADM*SSNFC  | 3122.607 | 0.00081  | 3 | 1 | 29.8 | 0 |
| P12163_2_S5,15848 | K.NSTGILVADM*SSNFC  | 3122.607 | 0.01031  | 4 | 1 | 52.5 | 0 |
| P12163_1_F7,19616 | K.NSTGILVADMSSNFC   | 3106.612 | 0.00516  | 3 | 1 | 58   | 0 |
| P12163_1_F7,19679 | K.NSTGILVADMSSNFC   | 3106.612 | 0.00907  | 4 | 1 | 39.2 | 0 |
| P12163_1_S1,17607 | K.NVGPSGVTIVIVR.K   | 1614.984 | -0.00098 | 3 | 1 | 72.6 | 0 |
| P12163_1_S1,17921 | K.NVGPSGVTIVIVR.K   | 1614.984 | 0.00172  | 3 | 1 | 47.2 | 0 |
| P12163_1_F3,15886 | K.SDLEAEFVK.E       | 1645.926 | 0.00755  | 3 | 1 | 51.3 | 0 |
| P12163_1_F3,18450 | K.SDLEAEFVK.E       | 1645.926 | 0.00209  | 2 | 1 | 39.4 | 0 |
| P12163_1_F4,16034 | K.SDLEAEFVK.E       | 1645.926 | 0.01478  | 3 | 1 | 38.3 | 0 |
| P12163_1_F4,16284 | K.SDLEAEFVK.E       | 1645.926 | 0.00359  | 3 | 1 | 35.9 | 0 |
| P12163_1_F4,18998 | K.SDLEAEFVK.E       | 1645.926 | 0.0101   | 3 | 1 | 54.1 | 0 |
| P12163_1_F6,18043 | K.SDLEAEFVK.E       | 1645.926 | 0.00662  | 3 | 1 | 40.7 | 0 |
| P12163_1_F6,18058 | K.SDLEAEFVK.E       | 1645.926 | 0.00599  | 2 | 1 | 35.6 | 0 |
| P12163_1_F7,16535 | K.SDLEAEFVK.E       | 1645.926 | -0.00061 | 3 | 1 | 38.3 | 0 |
| P12163_1_F8,17994 | K.SDLEAEFVK.E       | 1645.926 | 0.00788  | 3 | 1 | 27.2 | 0 |
| P12163_2_F1,18268 | K.SDLEAEFVK.E       | 1645.926 | 0.00607  | 2 | 1 | 47.5 | 0 |
| P12163_2_F4,16386 | K.SDLEAEFVK.E       | 1645.926 | 0.0017   | 3 | 1 | 39.1 | 0 |
| P12163_2_F4,16394 | K.SDLEAEFVK.E       | 1645.926 | 0.00239  | 2 | 1 | 35.9 | 0 |
| P12163_2_F4,15769 | K.TPVMLDYK.I        | 1574.907 | -0.00143 | 3 | 1 | 22.2 | 0 |
| P12163_2_F9,16002 | K.TPVMLDYK.I        | 1574.907 | 0.00418  | 3 | 1 | 33.6 | 0 |
| P12163_2_F4,17316 | K.YLHICANETIHGVEFK. | 2539.359 | 0.00305  | 4 | 1 | 22.2 | 0 |
| P12163_2_F7,18187 | R.ASIYNAM*PLAGVEK.I | 2088.162 | 0.00323  | 3 | 1 | 53.5 | 0 |
| P12163_2_F7,18229 | R.ASIYNAM*PLAGVEK.I | 2088.162 | 0.00263  | 2 | 1 | 30.7 | 0 |
| P12163_1_F3,20863 | R.ASIYNAMPLAGVEK.L  | 2072.167 | 0.00605  | 3 | 1 | 60.4 | 0 |
| P12163_1_F3,20879 | R.ASIYNAMPLAGVEK.L  | 2072.167 | 0.00341  | 2 | 1 | 78.8 | 0 |
| P12163_1_F6,19924 | R.ASIYNAMPLAGVEK.L  | 2072.167 | 0.002    | 3 | 1 | 42.2 | 0 |
| P12163_2_F4,19086 | R.ASIYNAMPLAGVEK.L  | 2072.167 | 0.00608  | 3 | 1 | 42.7 | 0 |
| P12163_2_F7,18209 | R.ASIYNAMPLAGVEK.L  | 2072.167 | 0.00173  | 3 | 1 | 48.8 | 0 |
| P12163_1_F4,19756 | R.FGVIYAGAQK.N      | 1661.983 | 0.01131  | 2 | 1 | 40.2 | 0 |
| P12163_1_F4,19936 | R.FGVIYAGAQK.N      | 1661.983 | 0.00857  | 3 | 1 | 43.8 | 0 |
| P12163_1_F4,19945 | R.FGVIYAGAQK.N      | 1661.983 | 0.00751  | 2 | 1 | 43   | 0 |
| P12163_1_F4,20167 | R.FGVIYAGAQK.N      | 1661.983 | 0.00572  | 3 | 1 | 43   | 0 |
| P12163_1_F4,20193 | R.FGVIYAGAQK.N      | 1661.983 | 0.00429  | 2 | 1 | 42.6 | 0 |
| P12163_1_F5,19001 | R.FGVIYAGAQK.N      | 1661.983 | 0.00602  | 3 | 1 | 41.6 | 0 |
| P12163_1_F5,19015 | R.FGVIYAGAQK.N      | 1661.983 | 0.00429  | 2 | 1 | 43.1 | 0 |
| P12163_1_F6,19132 | R.FGVIYAGAQK.N      | 1661.983 | 0.00299  | 3 | 1 | 34.3 | 0 |
| P12163_1_F7,17858 | R.FGVIYAGAQK.N      | 1661.983 | 0.00206  | 3 | 1 | 39.2 | 0 |
| P12163_1_F9,18646 | R.FGVIYAGAQK.N      | 1661.983 | 0.00611  | 3 | 1 | 41.6 | 0 |
| P12163_1_F9,18660 | R.FGVIYAGAQK.N      | 1661.983 | 0.00141  | 2 | 1 | 50   | 0 |
| P12163_2_F1,19107 | R.FGVIYAGAQK.N      | 1661.983 | 0.00721  | 2 | 1 | 33   | 0 |
| P12163_2_F1,19112 | R.FGVIYAGAQK.N      | 1661.983 | 0.00833  | 3 | 1 | 32.5 | 0 |

|                   |                    |          |          |   |   |      |   |
|-------------------|--------------------|----------|----------|---|---|------|---|
| P12163_2_F1,19293 | R.FGVIYAGAQK.N     | 1661.983 | 0.00817  | 2 | 1 | 42.7 | 0 |
| P12163_2_F1,19298 | R.FGVIYAGAQK.N     | 1661.983 | 0.00458  | 3 | 1 | 37.8 | 0 |
| P12163_2_F1,19499 | R.FGVIYAGAQK.N     | 1661.983 | 0.00545  | 3 | 1 | 29.6 | 0 |
| P12163_2_F1,19574 | R.FGVIYAGAQK.N     | 1661.983 | 0.00539  | 2 | 1 | 42.7 | 0 |
| P12163_2_F1,19753 | R.FGVIYAGAQK.N     | 1661.983 | 0.00575  | 3 | 1 | 54.2 | 0 |
| P12163_2_F4,16961 | R.FGVIYAGAQK.N     | 1661.983 | -0.00184 | 3 | 1 | 23.3 | 0 |
| P12163_2_F4,17463 | R.FGVIYAGAQK.N     | 1661.983 | 0.00041  | 3 | 1 | 29.9 | 0 |
| P12163_2_F9,17397 | R.FGVIYAGAQK.N     | 1661.983 | 0.00449  | 3 | 1 | 25.6 | 0 |
| P12163_2_F9,17458 | R.FGVIYAGAQK.N     | 1661.983 | 0.00249  | 2 | 1 | 30.6 | 0 |
| P12163_2_S5,16704 | R.FGVIYAGAQK.N     | 1661.983 | 0.00089  | 3 | 1 | 26.6 | 0 |
| P12163_2_F6,5512  | R.GSGM*SVM*EM*SHR. | 1660.739 | -0.00096 | 3 | 1 | 24.7 | 0 |
| P12163_2_F6,7893  | R.GSGM*SVM*EMSHR.C | 1644.745 | 0.00189  | 3 | 1 | 40.2 | 0 |
| P12163_2_F6,12877 | R.GSGM*SVMEM*SHR.C | 1644.745 | -0.00417 | 3 | 1 | 44.8 | 0 |
| P12163_2_F6,12878 | R.GSGMSVM*EMSHR.G  | 1628.75  | 0.0039   | 3 | 1 | 36.7 | 0 |
| P12163_1_F8,10889 | R.GSGMSVMEM*SHR.G  | 1628.75  | 0.0015   | 3 | 1 | 30.6 | 0 |
| P12163_1_F6,13630 | R.GSGMSVMEMSHR.G   | 1612.755 | 0.00114  | 3 | 1 | 26.1 | 0 |
| P12163_1_F8,13460 | R.GSGMSVMEMSHR.G   | 1612.755 | 0.00201  | 3 | 1 | 34.9 | 0 |
| P12163_1_F8,13498 | R.GSGMSVMEMSHR.G   | 1612.755 | 0.00248  | 2 | 1 | 34.8 | 0 |
| P12163_2_F6,10995 | R.GSGMSVMEMSHR.G   | 1612.755 | 0.00651  | 4 | 1 | 34.2 | 0 |
| P12163_1_F9,14093 | R.KDLLGNAQDK.T     | 2014.206 | 0.00994  | 3 | 1 | 28.5 | 0 |
| P12163_1_F4,21724 | R.SFM*NVPFTLEK.S   | 1937.066 | 0.00929  | 3 | 1 | 24.6 | 0 |
| P12163_1_F4,24477 | R.SFM*NVPFTLEK.S   | 1937.066 | 0.00821  | 3 | 1 | 26.8 | 0 |
| P12163_1_F4,24491 | R.SFM*NVPFTLEK.S   | 1937.066 | 0.00632  | 2 | 1 | 26.8 | 0 |
| P12163_1_F5,22888 | R.SFM*NVPFTLEK.S   | 1937.066 | 0.00755  | 3 | 1 | 30.7 | 0 |
| P12163_1_F6,22622 | R.SFM*NVPFTLEK.S   | 1937.066 | 0.00899  | 3 | 1 | 24   | 0 |
| P12163_2_F1,21105 | R.SFM*NVPFTLEK.S   | 1937.066 | 0.00092  | 3 | 1 | 32.9 | 0 |
| P12163_2_F4,20883 | R.SFM*NVPFTLEK.S   | 1937.066 | 0.00095  | 3 | 1 | 31.5 | 0 |
| P12163_1_F3,20520 | R.SFMNVPFTLEK.S    | 1921.071 | 0.00581  | 3 | 1 | 22.9 | 0 |
| P12163_1_F3,20904 | R.SFMNVPFTLEK.S    | 1921.071 | 0.00767  | 3 | 1 | 37.7 | 0 |
| P12163_1_F3,20921 | R.SFMNVPFTLEK.S    | 1921.071 | 0.00626  | 2 | 1 | 35.8 | 0 |
| P12163_1_F3,23633 | R.SFMNVPFTLEK.S    | 1921.071 | 0.00806  | 3 | 1 | 37.8 | 0 |
| P12163_1_F3,23637 | R.SFMNVPFTLEK.S    | 1921.071 | 0.00598  | 2 | 1 | 36.3 | 0 |
| P12163_1_F4,21172 | R.SFMNVPFTLEK.S    | 1921.071 | 0.00605  | 3 | 1 | 25.6 | 0 |
| P12163_1_F4,24577 | R.SFMNVPFTLEK.S    | 1921.071 | 0.00581  | 3 | 1 | 31.7 | 0 |
| P12163_2_F1,23849 | R.SFMNVPFTLEK.S    | 1921.071 | 0.00458  | 2 | 1 | 39.6 | 0 |
| P12163_1_F2,5623  | R.TAAQIQSGQEDR.V   | 1607.829 | 0.00235  | 3 | 1 | 33.7 | 0 |
| P12163_1_F2,5676  | R.TAAQIQSGQEDR.V   | 1607.829 | 0.0004   | 2 | 1 | 38.6 | 0 |
| P12163_1_F2,6543  | R.TAAQIQSGQEDR.V   | 1607.829 | 0.00172  | 3 | 1 | 36   | 0 |
| P12163_1_F2,7345  | R.TAAQIQSGQEDR.V   | 1607.829 | 0.0043   | 3 | 1 | 37   | 0 |
| P12163_1_F2,8651  | R.TAAQIQSGQEDR.V   | 1607.829 | 0.00466  | 2 | 1 | 47.4 | 0 |
| P12163_1_F3,8881  | R.TAAQIQSGQEDR.V   | 1607.829 | 0.00312  | 2 | 1 | 55.3 | 0 |
| P12163_1_F4,9416  | R.TAAQIQSGQEDR.V   | 1607.829 | 0.00588  | 2 | 1 | 47.3 | 0 |
| P12163_1_S1,6964  | R.TAAQIQSGQEDR.V   | 1607.829 | 0.00478  | 3 | 1 | 38.2 | 0 |
| P12163_1_S1,9017  | R.TAAQIQSGQEDR.V   | 1607.829 | 0.00196  | 3 | 1 | 45.3 | 0 |
| P12163_1_S1,9045  | R.TAAQIQSGQEDR.V   | 1607.829 | 0.0036   | 2 | 1 | 73.7 | 0 |
| P12163_1_F3,22493 | R.VFNFAAGPANLPEK.V | 2083.18  | 0.00493  | 2 | 1 | 50.2 | 0 |
| P12163_1_F3,22501 | R.VFNFAAGPANLPEK.V | 2083.18  | 0.00593  | 3 | 1 | 56.2 | 0 |
| P12163_1_F3,22583 | R.VFNFAAGPANLPEK.V | 2083.18  | 0.00618  | 4 | 1 | 46.9 | 0 |
| P12163_1_F4,23267 | R.VFNFAAGPANLPEK.V | 2083.18  | 0.00806  | 3 | 1 | 46   | 0 |
| P12163_1_F4,23273 | R.VFNFAAGPANLPEK.V | 2083.18  | 0.00425  | 2 | 1 | 24.1 | 0 |
| P12163_1_F5,21805 | R.VFNFAAGPANLPEK.V | 2083.18  | 0.00602  | 3 | 1 | 25.9 | 0 |

|                                        |          |          |   |   |      |   |
|----------------------------------------|----------|----------|---|---|------|---|
| P12163_1_F6,21310 R.VFNFAAGPANLPEK.V   | 2083.18  | -0.00079 | 3 | 1 | 49.3 | 0 |
| P12163_1_F6,21316 R.VFNFAAGPANLPEK.V   | 2083.18  | 0.00141  | 2 | 1 | 27.6 | 0 |
| P12163_1_F6,21645 R.VFNFAAGPANLPEK.V   | 2083.18  | -0.00064 | 3 | 1 | 35.4 | 0 |
| P12163_2_F4,20253 R.VFNFAAGPANLPEK.V   | 2083.18  | 0.00356  | 3 | 1 | 23.9 | 0 |
| P12163_2_F10,9222 K.AGYTGK.V ! K.AGYTC | 1204.715 | 0.00586  | 2 | 1 | 25.3 | 0 |
| P12163_1_F5,14208 K.GVLNAVK.N          | 1308.846 | 0.00619  | 2 | 1 | 35.3 | 0 |
| P12163_1_F7,14252 K.GVLNAVK.N          | 1308.846 | 0.00613  | 2 | 1 | 30.6 | 0 |
| P12163_1_F8,14363 K.GVLNAVK.N          | 1308.846 | 0.0009   | 3 | 1 | 28.4 | 0 |
| P12163_2_F2,15039 K.GVLNAVK.N          | 1308.846 | -0.00066 | 3 | 1 | 26.3 | 0 |
| P12163_2_F2,15278 K.GVLNAVK.N          | 1308.846 | 0.00725  | 2 | 1 | 32.7 | 0 |
| P12163_1_F5,14018 K.GVPLYK.H           | 1284.814 | 0.00426  | 3 | 1 | 22.5 | 0 |
| P12163_1_F6,11510 K.HIQELSGTK.E        | 1620.953 | 0.00887  | 2 | 1 | 26.3 | 0 |
| P12163_1_F6,11512 K.HIQELSGTK.E        | 1620.953 | 0.009    | 3 | 1 | 41.4 | 0 |
| P12163_1_F9,11347 K.HIQELSGTK.E        | 1620.953 | 0.01329  | 3 | 1 | 37   | 0 |
| P12163_1_F9,11393 K.HIQELSGTK.E        | 1620.953 | 0.00719  | 2 | 1 | 35.6 | 0 |
| P12163_1_F9,11635 K.HIQELSGTK.E        | 1620.953 | 0.00516  | 3 | 1 | 26.2 | 0 |
| P12163_1_S10,1189 K.HIQELSGTK.E        | 1620.953 | 0.00711  | 3 | 1 | 28.7 | 0 |
| P12163_2_F7,10595 K.HIQELSGTK.E        | 1620.953 | 0.01023  | 3 | 1 | 40.3 | 0 |
| P12163_2_F8_12070 K.HIQELSGTK.E        | 1620.953 | 0.00657  | 3 | 1 | 49.6 | 0 |
| P12163_2_F9,9426 K.HIQELSGTK.E         | 1620.953 | 0.00315  | 3 | 1 | 34.5 | 0 |
| P12163_2_F9,10853 K.HIQELSGTK.E        | 1620.953 | 0.00516  | 4 | 1 | 26.2 | 0 |
| P12163_2_F9,10879 K.HIQELSGTK.E        | 1620.953 | 0.00834  | 3 | 1 | 36.9 | 0 |
| P12163_2_S5,10970 K.HIQELSGTK.E        | 1620.953 | 0.00525  | 3 | 1 | 35.3 | 0 |
| P12163_1_F4,18746 K.NINDILGPK.L        | 1591.963 | 0.00648  | 2 | 1 | 36.2 | 0 |
| P12163_1_F4,18756 K.NINDILGPK.L        | 1591.963 | 0.00653  | 3 | 1 | 29.6 | 0 |
| P12163_1_F5,17438 K.NINDILGPK.L        | 1591.963 | 0.00482  | 2 | 1 | 36   | 0 |
| P12163_1_F5,17617 K.NINDILGPK.L        | 1591.963 | -0.00211 | 3 | 1 | 33.7 | 0 |
| P12163_1_F5,17704 K.NINDILGPK.L        | 1591.963 | 0.00492  | 2 | 1 | 35.1 | 0 |
| P12163_2_F1,17996 K.NINDILGPK.L        | 1591.963 | 0.00734  | 2 | 1 | 36.1 | 0 |
| P12163_2_F1,18029 K.NINDILGPK.L        | 1591.963 | 0.00563  | 3 | 1 | 33.8 | 0 |
| P12163_2_S5,15884 K.NINDILGPK.L        | 1591.963 | 0.0071   | 3 | 1 | 22.9 | 0 |
| P12163_2_S5,16410 K.NINDILGPK.L        | 1591.963 | 0.00977  | 3 | 1 | 28.1 | 0 |
| P12163_1_F8,18331 K.QPNDGAHVLSAQSLG    | 2621.414 | 0.00578  | 3 | 1 | 51.9 | 0 |
| P12163_2_F10,1648 K.QPNDGAHVLSAQSLG    | 2621.414 | 0.00665  | 3 | 1 | 62.6 | 0 |
| P12163_2_F10,1650 K.QPNDGAHVLSAQSLG    | 2621.414 | 0.00369  | 4 | 1 | 32.1 | 0 |
| P12163_2_S5,17059 K.QPNDGAHVLSAQSLG    | 2621.414 | 0.01313  | 3 | 1 | 49.3 | 0 |
| P12163_2_S5,17084 K.QPNDGAHVLSAQSLG    | 2621.414 | 0.00333  | 4 | 1 | 25.4 | 0 |
| P12163_1_F9,14998 K.SAGWGVMSHR.S       | 1490.784 | 0.00102  | 3 | 1 | 24.6 | 0 |
| P12163_2_F4,14153 K.SAGWGVMSHR.S       | 1490.784 | 0.00333  | 3 | 1 | 30.9 | 0 |
| P12163_1_F5,15179 K.SCNGLLK.V          | 1512.903 | 0.0071   | 2 | 1 | 33.9 | 0 |
| P12163_2_F2,16068 K.SCNGLLK.V          | 1512.903 | 0.00626  | 2 | 1 | 37.3 | 0 |
| P12163_1_F4,4881 K.TGAPCR.S            | 965.514  | 0.00357  | 3 | 1 | 29.3 | 0 |
| P12163_2_F1,4291 K.TGAPCR.S            | 965.514  | 0.00159  | 3 | 1 | 27   | 0 |
| P12163_1_F2,18538 K.VNQIGTVTESIQAALD   | 2482.397 | 0.0111   | 3 | 1 | 35   | 0 |
| P12163_1_F2,24494 K.VNQIGTVTESIQAALD   | 2482.397 | 0.01086  | 3 | 1 | 24.8 | 0 |
| P12163_1_F5,16578 K.YDLNFK.K           | 1407.809 | 0.00482  | 3 | 1 | 23.9 | 0 |
| P12163_1_F6,17086 K.YDLNFK.K           | 1407.809 | 0.00788  | 2 | 1 | 24.2 | 0 |
| P12163_1_S10,1660 K.YDLNFK.K           | 1407.809 | 0.00383  | 3 | 1 | 23.8 | 0 |
| P12163_1_F8,15112 K.YGQDACNVGDEGGFA    | 2687.206 | 0.00194  | 3 | 1 | 93.7 | 0 |
| P12163_1_F8,15115 K.YGQDACNVGDEGGFA    | 2687.206 | 0.0002   | 2 | 1 | 60.6 | 0 |
| P12163_2_F6,14623 K.YGQDACNVGDEGGFA    | 2687.206 | -0.0013  | 3 | 1 | 68.4 | 0 |

|                   |                     |          |          |   |   |      |   |
|-------------------|---------------------|----------|----------|---|---|------|---|
| P12163_2_F6,14631 | K.YGQDACNVGDEGGFA   | 2687.206 | 0.00162  | 2 | 1 | 51.9 | 0 |
| P12163_2_F2,6737  | R.AGAGAK.G          | 1082.678 | 0.00348  | 3 | 1 | 30.9 | 0 |
| P12163_1_S1,19857 | R.DQAEVDAIM*LEIDGT  | 2583.343 | 0.01856  | 3 | 1 | 58.4 | 0 |
| P12163_1_S1,22661 | R.DQAEVDAIMLEIDGTP  | 2567.348 | 0.01103  | 3 | 1 | 57.2 | 0 |
| P12163_1_F2,19877 | R.EGLVLLTDAIEK.A    | 1909.147 | 0.00802  | 3 | 1 | 39.5 | 0 |
| P12163_1_F2,24156 | R.EGLVLLTDAIEK.A    | 1909.147 | 0.00409  | 3 | 1 | 47.9 | 0 |
| P12163_1_F3,20395 | R.EGLVLLTDAIEK.A    | 1909.147 | -0.00067 | 2 | 1 | 40   | 0 |
| P12163_1_F3,25394 | R.EGLVLLTDAIEK.A    | 1909.147 | 0.00595  | 3 | 1 | 52.3 | 0 |
| P12163_1_F3,25395 | R.EGLVLLTDAIEK.A    | 1909.147 | 0.00563  | 2 | 1 | 46.3 | 0 |
| P12163_1_F3,25606 | R.EGLVLLTDAIEK.A    | 1909.147 | 0.00319  | 3 | 1 | 35.9 | 0 |
| P12163_1_F4,26297 | R.EGLVLLTDAIEK.A    | 1909.147 | 0.00448  | 3 | 1 | 34.1 | 0 |
| P12163_1_F5,24022 | R.EGLVLLTDAIEK.A    | 1909.147 | 0.00397  | 3 | 1 | 45.7 | 0 |
| P12163_1_F7,23235 | R.EGLVLLTDAIEK.A    | 1909.147 | 0.00217  | 3 | 1 | 26.8 | 0 |
| P12163_2_F4,16010 | R.IEEELGNVR.Y       | 1362.753 | -0.00008 | 2 | 1 | 24.1 | 0 |
| P12163_2_F6,15302 | R.M*GSEVYHILK.G     | 1801.014 | 0.00397  | 3 | 1 | 22   | 0 |
| P12163_2_F6,18316 | R.M*GSEVYHILK.G     | 1801.014 | 0.00835  | 3 | 1 | 22.2 | 0 |
| P12163_2_S3,13968 | R.M*GSEVYHILK.G     | 1801.014 | 0.00781  | 3 | 1 | 24.2 | 0 |
| P12163_1_F6,18801 | R.MGSEVYHILK.G      | 1785.019 | 0.00166  | 3 | 1 | 22.3 | 0 |
| P12163_1_F6,18828 | R.MGSEVYHILK.G      | 1785.019 | 0.00347  | 2 | 1 | 34.8 | 0 |
| P12163_2_F6,18305 | R.MGSEVYHILK.G      | 1785.019 | 0.0028   | 3 | 1 | 22.1 | 0 |
| P12163_2_S3,16336 | R.MGSEVYHILK.G      | 1785.019 | 0.00517  | 3 | 1 | 26.6 | 0 |
| P12163_1_F4,12192 | R.YAGQDFR.S         | 1160.6   | 0.00264  | 2 | 1 | 24   | 0 |
| P12163_1_F4,22006 | K.GYLFPLDK.K        | 1560.925 | 0.01151  | 2 | 1 | 27.7 | 0 |
| P12163_1_F4,22077 | K.GYLFPLDK.K        | 1560.925 | 0.00709  | 3 | 1 | 31.8 | 0 |
| P12163_1_F4,22235 | K.GYLFPLDK.K        | 1560.925 | 0.00769  | 2 | 1 | 40.3 | 0 |
| P12163_1_F9,20413 | K.GYLFPLDK.K        | 1560.925 | 0.00649  | 2 | 1 | 25.2 | 0 |
| P12163_2_F1,21551 | K.GYLFPLDK.K        | 1560.925 | 0.00625  | 2 | 1 | 24.3 | 0 |
| P12163_2_F8_12070 | K.GYLFPLDK.K        | 1560.925 | 0.00645  | 2 | 1 | 25.3 | 0 |
| P12163_2_F9,19141 | K.GYLFPLDK.K        | 1560.925 | 0.00211  | 3 | 1 | 26.1 | 0 |
| P12163_1_F4,25255 | K.IATFWIDSGK.L      | 1746.005 | 0.00673  | 3 | 1 | 33.7 | 0 |
| P12163_2_F1,24526 | K.IATFWIDSGK.L      | 1746.005 | 0.00556  | 2 | 1 | 39.7 | 0 |
| P12163_1_F6,19560 | K.IGGYLPGVHYIR.D    | 1648.948 | 0.00233  | 3 | 1 | 26.5 | 0 |
| P12163_1_F8,19658 | K.IGGYLPGVHYIR.D    | 1648.948 | 0.00209  | 3 | 1 | 24.8 | 0 |
| P12163_2_F6,19114 | K.IGGYLPGVHYIR.D    | 1648.948 | -0.00193 | 3 | 1 | 31.6 | 0 |
| P12163_2_S5,18176 | K.IGGYLPGVHYIR.D    | 1648.948 | 0.00035  | 3 | 1 | 40.2 | 0 |
| P12163_1_F6,22065 | K.LDTTIIFPENHLLQR.L | 2114.191 | 0.00295  | 3 | 1 | 50.5 | 0 |
| P12163_1_F7,21304 | K.LDTTIIFPENHLLQR.L | 2114.191 | 0.00145  | 3 | 1 | 35.5 | 0 |
| P12163_1_F7,21532 | K.LDTTIIFPENHLLQR.L | 2114.191 | -0.00101 | 3 | 1 | 23.2 | 0 |
| P12163_2_S5,20411 | K.LDTTIIFPENHLLQR.L | 2114.191 | 0.00124  | 3 | 1 | 54.9 | 0 |
| P12163_1_S1,21051 | K.LQQASSVEEAEIAR.A  | 1948.065 | 0.00364  | 3 | 1 | 78   | 0 |
| P12163_1_F2,6639  | K.NLEAGSDGR.V       | 1222.633 | 0.00277  | 3 | 1 | 29.1 | 0 |
| P12163_1_F3,6720  | K.NLEAGSDGR.V       | 1222.633 | 0.00118  | 3 | 1 | 23.3 | 0 |
| P12163_1_F4,13699 | K.QLITNSGK.L        | 1569.942 | 0.00164  | 2 | 1 | 35.2 | 0 |
| P12163_1_F5,12217 | K.QLITNSGK.L        | 1569.942 | 0.0062   | 2 | 1 | 32.8 | 0 |
| P12163_2_F1,12619 | K.QLITNSGK.L        | 1569.942 | -0.00216 | 2 | 1 | 31.5 | 0 |
| P12163_1_S1,12590 | K.YGSLIVATGCTASR.F  | 1759.931 | 0.00314  | 3 | 1 | 25.4 | 0 |
| P12163_1_S1,14894 | K.YGSLIVATGCTASR.F  | 1759.931 | 0.00104  | 3 | 1 | 34.6 | 0 |
| P12163_1_S1,15381 | K.YGSLIVATGCTASR.F  | 1759.931 | 0.0062   | 3 | 1 | 52.1 | 0 |
| P12163_1_S1,15718 | K.YGSLIVATGCTASR.F  | 1759.931 | 0.00797  | 3 | 1 | 34.3 | 0 |
| P12163_1_S1,16979 | K.YGSLIVATGCTASR.F  | 1759.931 | 0.00347  | 2 | 1 | 28.5 | 0 |
| P12163_1_S1,16989 | K.YGSLIVATGCTASR.F  | 1759.931 | 0.00266  | 3 | 1 | 51.2 | 0 |



|                   |                      |          |          |   |   |      |   |
|-------------------|----------------------|----------|----------|---|---|------|---|
| P12163_2_F6,17320 | K.YGSLIVATGCTASR.F   | 1759.931 | 0.00649  | 2 | 1 | 25.3 | 0 |
| P12163_1_S1,22583 | R.DVADADALISSLEK.A   | 2055.143 | 0.00735  | 3 | 1 | 36.7 | 0 |
| P12163_1_S1,22645 | R.DVADADALISSLEK.A   | 2055.143 | 0.00634  | 2 | 1 | 36.3 | 0 |
| P12163_1_F8,18554 | R.EFVIVGGGNAAGYAA    | 1855.997 | 0.00332  | 2 | 1 | 39.1 | 0 |
| P12163_1_F8,18579 | R.EFVIVGGGNAAGYAA    | 1855.997 | 0.00272  | 3 | 1 | 53.7 | 0 |
| P12163_1_S1,17653 | R.EFVIVGGGNAAGYAA    | 1855.997 | 0.00624  | 2 | 1 | 42.1 | 0 |
| P12163_1_S1,17659 | R.EFVIVGGGNAAGYAA    | 1855.997 | 0.00143  | 3 | 1 | 56.4 | 0 |
| P12163_2_F6,18081 | R.EFVIVGGGNAAGYAA    | 1855.997 | 0.00622  | 2 | 1 | 50.5 | 0 |
| P12163_2_F6,18108 | R.EFVIVGGGNAAGYAA    | 1855.997 | 0.00515  | 3 | 1 | 61   | 0 |
| P12163_1_F2,18920 | R.LFTPSLAQR.Y        | 1336.789 | 0.00226  | 2 | 1 | 27.4 | 0 |
| P12163_1_F6,15540 | R.LPGFHTCVGSGER.Q    | 1777.896 | 0.0009   | 3 | 1 | 58.3 | 0 |
| P12163_1_F8,15339 | R.LPGFHTCVGSGER.Q    | 1777.896 | 0.00033  | 3 | 1 | 31   | 0 |
| P12163_1_F8,15361 | R.LPGFHTCVGSGER.Q    | 1777.896 | 0.00686  | 2 | 1 | 38   | 0 |
| P12163_2_F6,14757 | R.LPGFHTCVGSGER.Q    | 1777.896 | 0.00774  | 3 | 1 | 58.1 | 0 |
| P12163_2_F6,14774 | R.LPGFHTCVGSGER.Q    | 1777.896 | 0.00838  | 2 | 1 | 42.1 | 0 |
| P12163_2_F4,7204  | R.QSAQHCIK.A         | 1579.883 | -0.00282 | 3 | 1 | 32.7 | 0 |
| P12163_1_F5,12058 | R.SQPFVDK.A          | 1428.831 | 0.00956  | 3 | 1 | 25.7 | 0 |
| P12163_2_F6,11977 | R.TFVEHGM*ADGR.L     | 1539.753 | 0.00199  | 3 | 1 | 33   | 0 |
| P12163_2_F6,11993 | R.TFVEHGM*ADGR.L     | 1539.753 | 0.00553  | 2 | 1 | 34.3 | 0 |
| P12163_2_F6,11988 | R.TFVEHGMADGR.L      | 1523.758 | 0.00175  | 3 | 1 | 47.7 | 0 |
| P12163_2_F6,11999 | R.TFVEHGMADGR.L      | 1523.758 | 0.00723  | 2 | 1 | 34.8 | 0 |
| P12163_1_F5,5140  | R.VEHVDHAR.Q ! R.VEH | 1266.686 | 0.00352  | 3 | 1 | 27.1 | 0 |
| P12163_1_F5,5150  | R.VEHVDHAR.Q ! R.VEH | 1266.686 | 0.00162  | 2 | 1 | 35.7 | 0 |
| P12163_2_S5,6262  | R.VEHVDHAR.Q ! R.VEH | 1266.686 | 0.00241  | 3 | 1 | 29   | 0 |
| P12163_2_S5,6300  | R.VEHVDHAR.Q ! R.VEH | 1266.686 | 0.00362  | 2 | 1 | 32.7 | 0 |
| P12163_1_F3,14594 | R.VFEYEGSPR.K        | 1387.716 | 0.004    | 3 | 1 | 28.1 | 0 |
| P12163_1_F5,15016 | R.YEQLYQQNGVK.F      | 1978.085 | 0.00335  | 2 | 1 | 53.4 | 0 |
| P12163_2_F1,15369 | R.YEQLYQQNGVK.F      | 1978.085 | 0.01197  | 2 | 1 | 62.5 | 0 |
| P12163_2_F8_12070 | R.YEQLYQQNGVK.F      | 1978.085 | 0.00991  | 3 | 1 | 42.6 | 0 |
| P12163_1_F2,18413 | K.DIVDAALDECAK.S     | 1928.025 | 0.00678  | 2 | 1 | 33.6 | 0 |
| P12163_1_F2,18540 | K.DIVDAALDECAK.S     | 1928.025 | 0.00253  | 3 | 1 | 31.5 | 0 |
| P12163_1_S1,17742 | K.DIVDAALDECAK.S     | 1928.025 | 0.00692  | 2 | 1 | 53.1 | 0 |
| P12163_2_F4,17262 | K.DIVDAALDECAK.S     | 1928.025 | 0.00715  | 3 | 1 | 40.6 | 0 |
| P12163_1_S1,16335 | K.GGITNICYNCLDR.N    | 1859.905 | 0.01634  | 2 | 1 | 23.9 | 0 |
| P12163_1_F3,17867 | K.GVEIEGECGYLCIK.S   | 2322.193 | 0.0052   | 3 | 1 | 39.7 | 0 |
| P12163_1_F3,19374 | K.GVEIEGECGYLCIK.S   | 2322.193 | 0.00535  | 3 | 1 | 61.4 | 0 |
| P12163_2_F4,15735 | K.GVLHTTGGMVHTA1     | 2529.374 | 0.00235  | 4 | 1 | 34.5 | 0 |
| P12163_2_F4,15743 | K.GVLHTTGGMVHTA1     | 2529.374 | 0.00287  | 3 | 1 | 35.3 | 0 |
| P12163_1_S1,22304 | K.VTIFYTAPTLVR.S     | 1684.994 | 0.00537  | 3 | 1 | 33.6 | 0 |
| P12163_2_F6,23165 | K.VTIFYTAPTLVR.S     | 1684.994 | 0.00274  | 2 | 1 | 26.6 | 0 |
| P12163_2_F1,14368 | K.VVITSNAVK.R        | 1538.973 | 0.00308  | 3 | 1 | 26.6 | 0 |
| P12163_2_F1,14398 | K.VVITSNAVK.R        | 1538.973 | 0.00721  | 2 | 1 | 45.4 | 0 |
| P12163_2_S5,12899 | K.VVITSNAVK.R        | 1538.973 | 0.00263  | 3 | 1 | 45.7 | 0 |
| P12163_1_S10,1766 | K.YLEMYK.R           | 1454.817 | 0.00705  | 2 | 1 | 25.2 | 0 |
| P12163_1_F3,8447  | R.DGNEYVTR.Y         | 1257.638 | 0.00275  | 3 | 1 | 33.8 | 0 |
| P12163_1_F3,23599 | R.DIWWQDVVPK.Y       | 1894.068 | 0.00429  | 3 | 1 | 35.3 | 0 |
| P12163_1_F3,23605 | R.DIWWQDVVPK.Y       | 1894.068 | 0.00644  | 2 | 1 | 47   | 0 |
| P12163_1_F4,24337 | R.DIWWQDVVPK.Y       | 1894.068 | 0.01464  | 2 | 1 | 42.1 | 0 |
| P12163_1_F4,24397 | R.DIWWQDVVPK.Y       | 1894.068 | 0.00642  | 3 | 1 | 37.3 | 0 |
| P12163_1_F6,22121 | R.IGAVHSVVFAGFSSES1  | 2366.277 | 0.00237  | 3 | 1 | 39.1 | 0 |
| P12163_1_F7,21302 | R.IGAVHSVVFAGFSSES1  | 2366.277 | 0.00591  | 3 | 1 | 34.4 | 0 |

|                   |                      |          |          |   |   |      |   |
|-------------------|----------------------|----------|----------|---|---|------|---|
| P12163_1_F4,14702 | R.NIEAGLGDK.V        | 1524.884 | 0.00519  | 2 | 1 | 27.1 | 0 |
| P12163_1_F5,13352 | R.NIEAGLGDK.V        | 1524.884 | 0.00873  | 2 | 1 | 30.6 | 0 |
| P12163_1_F6,14210 | R.NIEAGLGDK.V        | 1524.884 | 0.00507  | 3 | 1 | 27.1 | 0 |
| P12163_1_F7,12950 | R.NIEAGLGDK.V        | 1524.884 | 0.0027   | 3 | 1 | 28.2 | 0 |
| P12163_2_F1,13680 | R.NIEAGLGDK.V        | 1524.884 | 0.00499  | 2 | 1 | 32   | 0 |
| P12163_2_F1,13694 | R.NIEAGLGDK.V        | 1524.884 | 0.00576  | 3 | 1 | 35.3 | 0 |
| P12163_2_S5,12727 | R.NIEAGLGDK.V        | 1524.884 | 0.00078  | 3 | 1 | 24.7 | 0 |
| P12163_2_F1,13784 | R.QALVPSPQK.Y        | 1575.968 | 0.00619  | 3 | 1 | 22.1 | 0 |
| P12163_2_F2,3098  | R.QALVPSPQK.Y        | 1575.968 | 0.00364  | 3 | 1 | 22.2 | 0 |
| P12163_1_F5,16999 | R.SWDIVDK.Y          | 1470.841 | 0.01383  | 2 | 1 | 26.2 | 0 |
| P12163_2_F1,17534 | R.SWDIVDK.Y          | 1470.841 | 0.00621  | 2 | 1 | 27.4 | 0 |
| P12163_1_F5,5549  | R.TLYGDHER.Y         | 1294.669 | 0.00154  | 3 | 1 | 34.7 | 0 |
| P12163_1_F9,6241  | R.TLYGDHER.Y         | 1294.669 | 0.00142  | 3 | 1 | 25.9 | 0 |
| P12163_2_F9,7091  | R.TLYGDHER.Y         | 1294.669 | 0.00259  | 3 | 1 | 30.3 | 0 |
| P12163_2_F9,8981  | R.TLYGDHER.Y         | 1294.669 | 0.00375  | 2 | 1 | 30.5 | 0 |
| P12163_2_S5,6962  | R.TLYGDHER.Y         | 1294.669 | 0.0046   | 3 | 1 | 22.7 | 0 |
| P12163_2_S5,8970  | R.TLYGDHER.Y         | 1294.669 | 0.00322  | 3 | 1 | 24.6 | 0 |
| P12163_1_F2,12704 | R.VCSENLDVR.K        | 1395.72  | 0.00299  | 2 | 1 | 32.6 | 0 |
| P12163_1_F3,10990 | R.VCSENLDVR.K        | 1395.72  | 0.0042   | 3 | 1 | 31.8 | 0 |
| P12163_1_F3,13091 | R.VCSENLDVR.K        | 1395.72  | 0.00427  | 2 | 1 | 42.3 | 0 |
| P12163_2_F4,12021 | R.VCSENLDVR.K        | 1395.72  | 0.00113  | 2 | 1 | 30.5 | 0 |
| P12163_1_F6,15455 | R.VDDVINVSCHR.I      | 1514.823 | 0.00388  | 2 | 1 | 39.7 | 0 |
| P12163_1_F6,15462 | R.VDDVINVSCHR.I      | 1514.823 | 0.00248  | 3 | 1 | 54.1 | 0 |
| P12163_1_F8,15350 | R.VDDVINVSCHR.I      | 1514.823 | 0.00353  | 3 | 1 | 51.5 | 0 |
| P12163_1_F8,15374 | R.VDDVINVSCHR.I      | 1514.823 | 0.00412  | 2 | 1 | 32.6 | 0 |
| P12163_2_F4,13734 | R.VDDVINVSCHR.I      | 1514.823 | 0.00437  | 3 | 1 | 23   | 0 |
| P12163_2_F6,14784 | R.VDDVINVSCHR.I      | 1514.823 | 0.00268  | 2 | 1 | 33.5 | 0 |
| P12163_2_F6,14795 | R.VDDVINVSCHR.I      | 1514.823 | 0.00221  | 3 | 1 | 53.4 | 0 |
| P12163_2_F6,20921 | R.VDDVINVSCHR.I      | 1514.823 | 0.0017   | 3 | 1 | 52.8 | 0 |
| P12163_2_F6,21181 | R.VDDVINVSCHR.I      | 1514.823 | 0.0035   | 3 | 1 | 22.9 | 0 |
| P12163_2_F6,21408 | R.VDDVINVSCHR.I      | 1514.823 | 0.00218  | 3 | 1 | 22.4 | 0 |
| P12163_1_S1,21008 | R.VLGSVGEPIPSAWR.V   | 1886.044 | 0.00383  | 3 | 1 | 50.2 | 0 |
| P12163_1_S1,21018 | R.VLGSVGEPIPSAWR.V   | 1886.044 | 0.00465  | 2 | 1 | 32.5 | 0 |
| P12163_1_F7,21145 | R.YETTYFKPFGYYFTG    | 3164.528 | -0.00099 | 3 | 1 | 40.3 | 0 |
| P12163_2_S5,16606 | K.AIVGANAFAHESGIHQ   | 2774.487 | 0.00662  | 4 | 1 | 60.5 | 0 |
| P12163_2_S5,16622 | K.AIVGANAFAHESGIHQ   | 2774.487 | 0.0025   | 3 | 1 | 51.6 | 0 |
| P12163_1_F4,19502 | K.AVDLIVK.E          | 1365.893 | 0.00566  | 3 | 1 | 34.5 | 0 |
| P12163_1_F7,17250 | K.AVDLIVK.E          | 1365.893 | -0.00001 | 3 | 1 | 26.4 | 0 |
| P12163_2_F1,18798 | K.AVDLIVK.E          | 1365.893 | 0.0056   | 3 | 1 | 34.4 | 0 |
| P12163_2_F1,18804 | K.AVDLIVK.E          | 1365.893 | 0.00507  | 2 | 1 | 33   | 0 |
| P12163_2_S5,16263 | K.AVDLIVK.E          | 1365.893 | 0.00014  | 3 | 1 | 24.3 | 0 |
| P12163_1_S10,1554 | K.AYIGALNK.M         | 1457.894 | 0.00327  | 3 | 1 | 38.6 | 0 |
| P12163_2_F10,1455 | K.AYIGALNK.M         | 1457.894 | 0.00675  | 3 | 1 | 33.5 | 0 |
| P12163_1_F2,12775 | K.EDFEAVR.T          | 1169.61  | 0.00216  | 2 | 1 | 29.8 | 0 |
| P12163_1_F8,21394 | K.GTYEIIISPEDIGLER.S | 1996.054 | -0.00388 | 2 | 1 | 27.5 | 0 |
| P12163_1_S1,21625 | K.LGVDIIEAGFPAASK.E  | 2096.221 | 0.00622  | 3 | 1 | 45.2 | 0 |
| P12163_1_S1,21880 | K.LGVDIIEAGFPAASK.E  | 2096.221 | 0.0064   | 3 | 1 | 48.8 | 0 |
| P12163_1_S1,22495 | K.LGVDIIEAGFPAASK.E  | 2096.221 | 0.00658  | 3 | 1 | 37.8 | 0 |
| P12163_1_S1,22527 | K.LGVDIIEAGFPAASK.E  | 2096.221 | 0.00572  | 4 | 1 | 33.3 | 0 |
| P12163_1_S1,22577 | K.LGVDIIEAGFPAASK.E  | 2096.221 | 0.00054  | 2 | 1 | 61   | 0 |
| P12163_1_S1,22710 | K.LGVDIIEAGFPAASK.E  | 2096.221 | 0.00628  | 3 | 1 | 50.5 | 0 |

|                   |                     |          |          |   |   |      |   |
|-------------------|---------------------|----------|----------|---|---|------|---|
| P12163_1_S1,20041 | K.LLDM*QVTCGLGLS1   | 2632.451 | 0.00051  | 3 | 1 | 64.4 | 0 |
| P12163_1_F6,14422 | K.LM*DANGEEHVACST   | 3133.503 | 0.00831  | 3 | 1 | 32.2 | 0 |
| P12163_2_S5,13493 | K.LM*DANGEEHVACST   | 3133.503 | 0.00037  | 4 | 1 | 25.9 | 0 |
| P12163_2_S5,14876 | K.LMDANGEEHVACSTG   | 3117.508 | 0.00649  | 4 | 1 | 46.1 | 0 |
| P12163_2_S5,13382 | K.M*VEEYTGHLHVQPHK  | 2292.227 | 0.00454  | 4 | 1 | 26.9 | 0 |
| P12163_1_F5,15917 | K.MVEEYTGHLHVQPHK./ | 2276.232 | 0.00071  | 4 | 1 | 29.5 | 0 |
| P12163_1_F5,15926 | K.MVEEYTGHLHVQPHK./ | 2276.232 | 0.01351  | 3 | 1 | 23.3 | 0 |
| P12163_1_F8,16266 | K.MVEEYTGHLHVQPHK./ | 2276.232 | 0.00535  | 4 | 1 | 27.3 | 0 |
| P12163_2_S5,15560 | K.MVEEYTGHLHVQPHK./ | 2276.232 | 0.00567  | 4 | 1 | 51.2 | 0 |
| P12163_1_F5,14521 | K.TAWEAVK.Y         | 1412.836 | 0.00871  | 2 | 1 | 24   | 0 |
| P12163_2_F2,12215 | K.TAWEAVK.Y         | 1412.836 | 0.00385  | 3 | 1 | 28.4 | 0 |
| P12163_1_F3,24305 | R.AGNASLEEVVM*AFK.  | 2090.141 | 0.00806  | 3 | 1 | 50.5 | 0 |
| P12163_1_F3,25663 | R.AGNASLEEVVM*AFK.  | 2090.141 | 0.00233  | 3 | 1 | 47.3 | 0 |
| P12163_1_F4,26552 | R.AGNASLEEVVM*AFK.  | 2090.141 | 0.00734  | 3 | 1 | 35.6 | 0 |
| P12163_1_F3,25647 | R.AGNASLEEVVMAFK.C  | 2074.146 | 0.00269  | 3 | 1 | 38.7 | 0 |
| P12163_1_F3,25674 | R.AGNASLEEVVMAFK.C  | 2074.146 | 0.00337  | 2 | 1 | 48.6 | 0 |
| P12163_1_F3,10788 | R.DGEQSPGATLTSK.E   | 1899.028 | 0.00355  | 3 | 1 | 26.3 | 0 |
| P12163_1_F3,11979 | R.DGEQSPGATLTSK.E   | 1899.028 | 0.00586  | 3 | 1 | 28.1 | 0 |
| P12163_1_F7,17659 | R.GEHILGGLYTGINTR.H | 1905.05  | 0.002    | 3 | 1 | 33.3 | 0 |
| P12163_1_F8,18452 | R.GEHILGGLYTGINTR.H | 1905.05  | -0.00007 | 3 | 1 | 27.4 | 0 |
| P12163_2_F6,17966 | R.GEHILGGLYTGINTR.H | 1905.05  | 0.00406  | 2 | 1 | 32.4 | 0 |
| P12163_2_F6,18015 | R.GEHILGGLYTGINTR.H | 1905.05  | 0.00617  | 3 | 1 | 46.7 | 0 |
| P12163_1_F9,9130  | R.HIVM*ASK.M        | 1409.839 | 0.00732  | 3 | 1 | 32.4 | 0 |
| P12163_1_F9,11326 | R.HIVM*ASK.M        | 1409.839 | 0.00444  | 3 | 1 | 25   | 0 |
| P12163_2_F9,8920  | R.HIVM*ASK.M        | 1409.839 | 0.00603  | 3 | 1 | 26.3 | 0 |
| P12163_1_F9,11282 | R.HIVMASK.M         | 1393.845 | 0.00663  | 3 | 1 | 29.3 | 0 |
| P12163_2_F4,10354 | R.HIVMASK.M         | 1393.845 | 0.00579  | 3 | 1 | 31.8 | 0 |
| P12163_2_F8_12070 | R.HIVMASK.M         | 1393.845 | 0.00927  | 3 | 1 | 30.9 | 0 |
| P12163_2_F9,10568 | R.HIVMASK.M         | 1393.845 | 0.00537  | 3 | 1 | 39.3 | 0 |
| P12163_2_F4,15608 | R.IHTFIATSGIHMEHK.L | 2330.29  | 0.00669  | 4 | 1 | 25.4 | 0 |
| P12163_2_F4,15621 | R.IHTFIATSGIHMEHK.L | 2330.29  | 0.0039   | 5 | 1 | 29.5 | 0 |
| P12163_1_S1,16298 | R.QVEVTINGIGER.A    | 1618.907 | 0.00425  | 2 | 1 | 36   | 0 |
| P12163_1_F4,16381 | R.SSEAGIVL GK.L     | 1568.947 | -0.00196 | 3 | 1 | 26.1 | 0 |
| P12163_1_F4,16392 | R.SSEAGIVL GK.L     | 1568.947 | 0.0032   | 2 | 1 | 31.7 | 0 |
| P12163_2_F1,15578 | R.SSEAGIVL GK.L     | 1568.947 | 0.00404  | 3 | 1 | 31.6 | 0 |
| P12163_2_F1,15591 | R.SSEAGIVL GK.L     | 1568.947 | -0.00494 | 2 | 1 | 33.8 | 0 |
| P12163_1_F2,14899 | R.VFDTTLR.D         | 1155.668 | 0.0009   | 3 | 1 | 28.1 | 0 |
| P12163_1_F3,15545 | R.VFDTTLR.D         | 1155.668 | 0.00432  | 3 | 1 | 24.2 | 0 |
| P12163_2_F1,8752  | K.CLGGPER.T         | 1092.577 | 0.00025  | 2 | 1 | 26.4 | 0 |
| P12163_1_F4,11696 | K.DALAEGDK.I        | 1426.8   | 0.00534  | 3 | 1 | 28.1 | 0 |
| P12163_2_F1,10812 | K.DALAEGDK.I        | 1426.8   | 0.00825  | 3 | 1 | 25.2 | 0 |
| P12163_1_S1,17185 | K.FEDPAEGEPALVAK.F  | 2081.137 | 0.00798  | 3 | 1 | 51.5 | 0 |
| P12163_1_S1,17229 | K.FEDPAEGEPALVAK.F  | 2081.137 | 0.00945  | 2 | 1 | 50.1 | 0 |
| P12163_1_F5,14240 | K.ITLETAK.L         | 1383.867 | 0.00527  | 2 | 1 | 26.2 | 0 |
| P12163_2_F1,14407 | K.ITLETAK.L         | 1383.867 | -0.00043 | 2 | 1 | 26.1 | 0 |
| P12163_1_F4,19873 | K.ITYT LIK.H        | 1459.934 | 0.00204  | 2 | 1 | 30.5 | 0 |
| P12163_1_F4,19884 | K.ITYT LIK.H        | 1459.934 | 0.00868  | 3 | 1 | 25.4 | 0 |
| P12163_1_F4,20074 | K.ITYT LIK.H        | 1459.934 | 0.0029   | 2 | 1 | 27   | 0 |
| P12163_1_F4,20188 | K.ITYT LIK.H        | 1459.934 | 0.00916  | 3 | 1 | 23.7 | 0 |
| P12163_1_F9,18844 | K.ITYT LIK.H        | 1459.934 | 0.00415  | 3 | 1 | 28.9 | 0 |
| P12163_2_F1,19275 | K.ITYT LIK.H        | 1459.934 | -0.00204 | 2 | 1 | 27   | 0 |

|                   |                     |          |          |   |   |      |   |
|-------------------|---------------------|----------|----------|---|---|------|---|
| P12163_2_F1,19299 | K.ITYTLIK.H         | 1459.934 | 0.00187  | 3 | 1 | 26.8 | 0 |
| P12163_2_F9,17323 | K.ITYTLIK.H         | 1459.934 | 0.00262  | 3 | 1 | 29.3 | 0 |
| P12163_2_F9,17334 | K.ITYTLIK.H         | 1459.934 | 0.00506  | 2 | 1 | 25.8 | 0 |
| P12163_2_F6,14399 | K.KLHEDLTAGFR.A     | 1895.096 | 0.0041   | 4 | 1 | 31.8 | 0 |
| P12163_1_S1,14237 | K.LAADTPLLGTQR.V    | 1559.906 | 0.00316  | 3 | 1 | 36.6 | 0 |
| P12163_1_S1,14261 | K.LAADTPLLGTQR.V    | 1559.906 | 0.00258  | 2 | 1 | 29.6 | 0 |
| P12163_1_S1,17352 | K.LAADTPLLGTQR.V    | 1559.906 | 0.004    | 3 | 1 | 45.2 | 0 |
| P12163_1_S1,18017 | K.LAADTPLLGTQR.V    | 1559.906 | 0.00542  | 2 | 1 | 37.9 | 0 |
| P12163_1_F9,16216 | K.LHEDLTAGFR.A      | 1462.796 | 0.00397  | 3 | 1 | 30.5 | 0 |
| P12163_2_F6,15864 | K.LHEDLTAGFR.A      | 1462.796 | 0.00205  | 3 | 1 | 35.6 | 0 |
| P12163_2_F7,14635 | K.LHEDLTAGFR.A      | 1462.796 | -0.00983 | 3 | 1 | 29.6 | 0 |
| P12163_1_F4,13436 | K.TVISQALSK.Y       | 1554.967 | 0.00723  | 3 | 1 | 25.8 | 0 |
| P12163_1_F3,18129 | K.VTYVAPAGQYSLK.D   | 2005.158 | 0.00428  | 2 | 1 | 45.9 | 0 |
| P12163_1_F3,18159 | K.VTYVAPAGQYSLK.D   | 2005.158 | 0.00595  | 3 | 1 | 64.4 | 0 |
| P12163_2_F6,17237 | K.VTYVAPAGQYSLK.D   | 2005.158 | 0.00262  | 2 | 1 | 25.4 | 0 |
| P12163_2_F6,17259 | K.VTYVAPAGQYSLK.D   | 2005.158 | -0.00143 | 3 | 1 | 51.2 | 0 |
| P12163_1_S1,14093 | K.YSNSDTVYVVGCGER   | 2009.954 | 0.00495  | 2 | 1 | 63   | 0 |
| P12163_1_S1,14104 | K.YSNSDTVYVVGCGER   | 2009.954 | 0.01812  | 3 | 1 | 45.3 | 0 |
| P12163_2_F6,14148 | K.YSNSDTVYVVGCGER   | 2009.954 | 0.00411  | 2 | 1 | 47.5 | 0 |
| P12163_2_F7,13408 | K.YSNSDTVYVVGCGER   | 2009.954 | 0.00189  | 2 | 1 | 53.5 | 0 |
| P12163_1_S1,23275 | R.EDDLNEIVQLVGK.D   | 2080.175 | 0.00996  | 3 | 1 | 43.4 | 0 |
| P12163_1_S1,23515 | R.EDDLNEIVQLVGK.D   | 2080.175 | 0.00877  | 3 | 1 | 35.4 | 0 |
| P12163_1_S1,23732 | R.EDDLNEIVQLVGK.D   | 2080.175 | 0.02236  | 3 | 1 | 29.8 | 0 |
| P12163_1_F2,18073 | R.EDYLAQNAFTPYDK.F  | 2283.175 | 0.00902  | 3 | 1 | 28.7 | 0 |
| P12163_1_F2,19238 | R.EDYLAQNAFTPYDK.F  | 2283.175 | 0.00665  | 2 | 1 | 69.1 | 0 |
| P12163_1_F2,19240 | R.EDYLAQNAFTPYDK.F  | 2283.175 | 0.00737  | 3 | 1 | 46.3 | 0 |
| P12163_1_F8,20773 | R.LAEMPADSGYPAYLA.  | 2100.074 | 0.00407  | 2 | 1 | 46.8 | 0 |
| P12163_2_S5,19113 | R.LAEMPADSGYPAYLA.  | 2100.074 | 0.00353  | 3 | 1 | 43.1 | 0 |
| P12163_2_S5,19128 | R.LAEMPADSGYPAYLA.  | 2100.074 | 0.00187  | 2 | 1 | 28   | 0 |
| P12163_1_S10,1833 | R.LASFYER.A         | 1189.652 | 0.00488  | 2 | 1 | 26.5 | 0 |
| P12163_1_F7,19790 | R.NIIHFYNLANQAVEK.C | 2382.339 | 0.00088  | 3 | 1 | 32.9 | 0 |
| P12163_1_F8,20756 | R.NIIHFYNLANQAVEK.C | 2382.339 | 0.00601  | 3 | 1 | 33.2 | 0 |
| P12163_1_F8,20774 | R.NIIHFYNLANQAVEK.C | 2382.339 | 0.00751  | 4 | 1 | 26.4 | 0 |
| P12163_2_F6,20351 | R.NIIHFYNLANQAVEK.C | 2382.339 | -0.00836 | 3 | 1 | 35   | 0 |
| P12163_1_S1,15097 | R.TTLVANTSMPVAAR.   | 1850.011 | 0.00435  | 2 | 1 | 37   | 0 |
| P12163_1_F8,20014 | R.VGHDNLIGEIR.L     | 1639.943 | 0.00238  | 3 | 1 | 28.5 | 0 |
| P12163_1_F8,20040 | R.VGHDNLIGEIR.L     | 1639.943 | 0.00296  | 2 | 1 | 34   | 0 |
| P12163_1_F9,19542 | R.VGHDNLIGEIR.L     | 1639.943 | 0.00745  | 3 | 1 | 38.4 | 0 |
| P12163_2_F6,19484 | R.VGHDNLIGEIR.L     | 1639.943 | 0.00013  | 3 | 1 | 47.6 | 0 |
| P12163_2_F6,19485 | R.VGHDNLIGEIR.L     | 1639.943 | 0.00372  | 2 | 1 | 29   | 0 |
| P12163_2_F8_12070 | R.VGHDNLIGEIR.L     | 1639.943 | -0.00143 | 3 | 1 | 22.1 | 0 |
| P12163_2_S5,9042  | K.AEDHLSK.L         | 1407.805 | 0.00517  | 3 | 1 | 27.2 | 0 |
| P12163_2_S5,9069  | K.AEDHLSK.L         | 1407.805 | 0.00493  | 2 | 1 | 24.4 | 0 |
| P12163_2_F9,12857 | K.DREEIAEIEK.M      | 1840.027 | 0.0038   | 2 | 1 | 35.5 | 0 |
| P12163_1_S1,20246 | K.EELVDAAFNER.F     | 1596.817 | 0.00143  | 3 | 1 | 48.2 | 0 |
| P12163_1_S1,20497 | K.EELVDAAFNER.F     | 1596.817 | 0.00209  | 3 | 1 | 54.4 | 0 |
| P12163_1_F9,15540 | K.GHLLMLNDR.I       | 1372.767 | 0.00434  | 3 | 1 | 30.7 | 0 |
| P12163_2_F9,14604 | K.GHLLMLNDR.I       | 1372.767 | 0.00104  | 3 | 1 | 27.6 | 0 |
| P12163_2_F6,17051 | K.M*GITQCTIAHALEK.T | 2197.193 | 0.01553  | 3 | 1 | 34.3 | 0 |
| P12163_2_F6,19349 | K.M*GITQCTIAHALEK.T | 2197.193 | 0.00989  | 3 | 1 | 33.7 | 0 |
| P12163_1_F8,19789 | K.MGITQCTIAHALEK.T  | 2181.198 | 0.0101   | 3 | 1 | 45.7 | 0 |

|                   |                     |          |          |   |   |      |   |
|-------------------|---------------------|----------|----------|---|---|------|---|
| P12163_1_F8,19791 | K.MGITQCTIAHALEK.T  | 2181.198 | 0.00595  | 4 | 1 | 29.7 | 0 |
| P12163_2_F6,19319 | K.MGITQCTIAHALEK.T  | 2181.198 | 0.00992  | 3 | 1 | 40.9 | 0 |
| P12163_1_S10,1403 | K.MHELMK.T          | 1396.79  | 0.00929  | 3 | 1 | 28   | 0 |
| P12163_1_F4,14605 | K.NM*TGLVECYGK.N    | 1895.982 | 0.01075  | 3 | 1 | 27.1 | 0 |
| P12163_2_F1,13586 | K.NM*TGLVECYGK.N    | 1895.982 | 0.00414  | 2 | 1 | 29.9 | 0 |
| P12163_1_F4,18132 | K.NMTGLVECYGK.N     | 1879.987 | -0.0016  | 2 | 1 | 28.8 | 0 |
| P12163_1_F4,18146 | K.NMTGLVECYGK.N     | 1879.987 | 0.00613  | 3 | 1 | 40.8 | 0 |
| P12163_2_S5,19151 | K.NTVGQYESHTAFTLPC  | 2458.267 | 0.00118  | 3 | 1 | 46.6 | 0 |
| P12163_2_F7,10483 | K.SVPLASENQH.-      | 1385.733 | 0.00336  | 2 | 1 | 24.7 | 0 |
| P12163_1_F4,19184 | R.DGPFSEVIK.S       | 1599.92  | 0.00661  | 3 | 1 | 26.2 | 0 |
| P12163_2_F1,18431 | R.DGPFSEVIK.S       | 1599.92  | 0.0069   | 2 | 1 | 25.1 | 0 |
| P12163_1_F5,12812 | R.LQSSLSK.A         | 1370.846 | 0.00835  | 3 | 1 | 24   | 0 |
| P12163_1_F2,22214 | R.NELVLLSR.Y        | 1334.794 | 0.00322  | 2 | 1 | 34.2 | 0 |
| P12163_2_F1,22950 | R.NELVLLSR.Y        | 1334.794 | 0.00308  | 2 | 1 | 31.5 | 0 |
| P12163_1_F5,13393 | R.QGLDISPK.I        | 1465.883 | 0.00912  | 2 | 1 | 28.7 | 0 |
| P12163_2_F1,13747 | R.QGLDISPK.I        | 1465.883 | 0.004    | 3 | 1 | 25.9 | 0 |
| P12163_1_F3,17842 | R.SSSINGVQFLNR.H    | 1682.913 | -0.00074 | 2 | 1 | 42.1 | 0 |
| P12163_1_F6,13011 | R.VEDTLVHR.N        | 1359.753 | 0.00272  | 3 | 1 | 51.5 | 0 |
| P12163_2_F6,12356 | R.VEDTLVHR.N        | 1359.753 | 0.00485  | 3 | 1 | 40.6 | 0 |
| P12163_2_F7,11818 | R.VEDTLVHR.N        | 1359.753 | 0.00314  | 3 | 1 | 39.3 | 0 |
| P12163_2_S3,9061  | R.VSGTEHTHILR.V     | 1553.87  | 0.00625  | 3 | 1 | 58.2 | 0 |
| P12163_1_F8,18653 | R.VVHGIDVFDPK.F     | 1834.068 | 0.00211  | 2 | 1 | 51.7 | 0 |
| P12163_2_F6,18164 | R.VVHGIDVFDPK.F     | 1834.068 | -0.00249 | 2 | 1 | 46.8 | 0 |
| P12163_2_F6,18174 | R.VVHGIDVFDPK.F     | 1834.068 | 0.00542  | 3 | 1 | 40.2 | 0 |
| P12163_2_F6,18448 | R.VVHGIDVFDPK.F     | 1834.068 | 0.00617  | 3 | 1 | 22.2 | 0 |
| P12163_1_S10,1269 | R.YIADTK.G          | 1318.783 | 0.00708  | 3 | 1 | 25.4 | 0 |
| P12163_1_F2,18151 | K.EFEMALQDR.V       | 1442.725 | 0.0036   | 2 | 1 | 31.9 | 0 |
| P12163_2_F7,14860 | K.FDHIDIAEK.Q       | 1695.953 | 0.00281  | 3 | 1 | 23.5 | 0 |
| P12163_1_F9,15388 | K.ILGHSFDR.S        | 1248.7   | 0.00419  | 3 | 1 | 39   | 0 |
| P12163_1_S10,1568 | K.ILGHSFDR.S        | 1248.7   | 0.00209  | 3 | 1 | 27.2 | 0 |
| P12163_2_F9,14607 | K.ILGHSFDR.S        | 1248.7   | 0.00593  | 3 | 1 | 23.4 | 0 |
| P12163_1_F2,19756 | K.NAVEAYVYDM*R.N    | 1650.81  | 0.00228  | 3 | 1 | 52.9 | 0 |
| P12163_1_F2,19806 | K.NAVEAYVYDM*R.N    | 1650.81  | 0.00311  | 2 | 1 | 35.6 | 0 |
| P12163_1_F5,11463 | K.NSISQIK.R         | 1397.857 | 0.00847  | 3 | 1 | 26.5 | 0 |
| P12163_1_F3,9293  | K.QGDPIEER.Y        | 1247.653 | 0.00142  | 2 | 1 | 39.2 | 0 |
| P12163_1_F8,19698 | K.RDEFEQISAPILER.V  | 2007.081 | 0.00341  | 2 | 1 | 38.2 | 0 |
| P12163_1_F6,22271 | K.SLPFAVTEGPDGYPLIH | 2344.26  | -0.00045 | 3 | 1 | 61.7 | 0 |
| P12163_1_F7,21420 | K.SLPFAVTEGPDGYPLIH | 2344.26  | 0.00387  | 3 | 1 | 44.5 | 0 |
| P12163_2_F10,1970 | K.SLPFAVTEGPDGYPLIH | 2344.26  | -0.00267 | 3 | 1 | 40.7 | 0 |
| P12163_2_F10,1988 | K.SLPFAVTEGPDGYPLIH | 2344.26  | 0.00153  | 3 | 1 | 26.5 | 0 |
| P12163_1_S1,20597 | K.VLSANPEAPLNIECLM  | 2781.462 | 0.00862  | 3 | 1 | 45.4 | 0 |
| P12163_1_F9,16045 | K.YQDFVTDSEER.E     | 1563.759 | 0.00453  | 2 | 1 | 26   | 0 |
| P12163_1_S1,16175 | K.YQDFVTDSEER.E     | 1563.759 | 0.00291  | 2 | 1 | 28.1 | 0 |
| P12163_1_F7,20662 | R.AVIDAATIAGLHPLR.L | 1822.085 | 0.00261  | 3 | 1 | 87.9 | 0 |
| P12163_1_F7,20677 | R.AVIDAATIAGLHPLR.L | 1822.085 | 0.00215  | 2 | 1 | 62.5 | 0 |
| P12163_2_S5,19764 | R.AVIDAATIAGLHPLR.L | 1822.085 | 0.00267  | 3 | 1 | 63.4 | 0 |
| P12163_2_S5,19981 | R.AVIDAATIAGLHPLR.L | 1822.085 | 0.00279  | 3 | 1 | 43.5 | 0 |
| P12163_2_F6,22289 | R.DFDEVLQHFQFAAK.F  | 2175.169 | 0.00597  | 3 | 1 | 42.3 | 0 |
| P12163_2_F8_1207  | R.DFDEVLQHFQFAAK.F  | 2175.169 | -0.00137 | 4 | 1 | 22.6 | 0 |
| P12163_2_F8_1207  | R.DFDEVLQHFQFAAK.F  | 2175.169 | 0.00072  | 3 | 1 | 38.6 | 0 |
| P12163_2_F1,11630 | R.EAALSSDPK.F       | 1525.868 | 0.00694  | 2 | 1 | 26.6 | 0 |

|                   |                      |          |          |   |   |      |   |
|-------------------|----------------------|----------|----------|---|---|------|---|
| P12163_1_F3,18301 | R.ETPSIVCFGDK.Q      | 1860.999 | 0.00824  | 2 | 1 | 33.9 | 0 |
| P12163_1_F3,18311 | R.ETPSIVCFGDK.Q      | 1860.999 | 0.00608  | 3 | 1 | 28.3 | 0 |
| P12163_1_F3,15069 | R.FIGTAGAASSTMNPK.N  | 2061.126 | 0.00863  | 3 | 1 | 24   | 0 |
| P12163_2_F1,17141 | R.FIGTAGAASSTMNPK.N  | 2061.126 | 0.00872  | 3 | 1 | 51.6 | 0 |
| P12163_1_F3,21755 | R.GCALQCAILSPTFK.V   | 2174.192 | 0.00999  | 3 | 1 | 35.2 | 0 |
| P12163_1_F4,22426 | R.GCALQCAILSPTFK.V   | 2174.192 | 0.00984  | 3 | 1 | 26.3 | 0 |
| P12163_1_F4,22493 | R.GCALQCAILSPTFK.V   | 2174.192 | 0.00933  | 3 | 1 | 39   | 0 |
| P12163_2_F1,21948 | R.GCALQCAILSPTFK.V   | 2174.192 | 0.00729  | 3 | 1 | 41.9 | 0 |
| P12163_1_F2,7649  | R.TM*NASECVAR.G      | 1458.698 | 0.00667  | 3 | 1 | 25.7 | 0 |
| P12163_2_F1,17054 | R.VPAIHK.I           | 1248.85  | 0.0101   | 3 | 1 | 26.9 | 0 |
| P12163_2_F7,9711  | K.GVM*LTHK.N ! K.GVM | 1409.839 | 0.00724  | 3 | 1 | 28.1 | 0 |
| P12163_1_F9,12113 | K.GVMLTHK.N ! K.GVM  | 1393.845 | 0.00432  | 2 | 1 | 28.3 | 0 |
| P12163_1_F4,18023 | K.IQSAIGISK.A        | 1524.957 | 0.00776  | 3 | 1 | 45.5 | 0 |
| P12163_1_S1,14682 | K.IVDAETNEVLPAGSK.C  | 2151.212 | 0.00775  | 4 | 1 | 30.2 | 0 |
| P12163_1_S1,15685 | K.IVDAETNEVLPAGSK.C  | 2151.212 | 0.00612  | 3 | 1 | 59.8 | 0 |
| P12163_1_S1,16442 | K.IVDAETNEVLPAGSK.C  | 2151.212 | 0.00581  | 3 | 1 | 46.1 | 0 |
| P12163_1_S1,16471 | K.IVDAETNEVLPAGSK.C  | 2151.212 | 0.0033   | 2 | 1 | 29.3 | 0 |
| P12163_1_F2,18268 | K.LSLFSDNSCR.W       | 1502.757 | 0.00332  | 3 | 1 | 22.3 | 0 |
| P12163_1_F9,13609 | K.NLLHQIR.S          | 1197.737 | 0.00215  | 3 | 1 | 38.5 | 0 |
| P12163_2_F8_12070 | K.NLLHQIR.S          | 1197.737 | 0.00197  | 3 | 1 | 29.7 | 0 |
| P12163_1_F3,11402 | K.QIFTSSAAR.R        | 1284.721 | 0.00256  | 3 | 1 | 30.8 | 0 |
| P12163_1_F2,19177 | K.TISLLYGELR.K       | 1468.868 | 0.00519  | 3 | 1 | 34.1 | 0 |
| P12163_1_F8,19338 | K.VQVGYGLTESSPVIAA   | 2051.144 | -0.00146 | 2 | 1 | 43.6 | 0 |
| P12163_1_F7,17419 | K.YGDSIAVIDPYHDPPSF  | 2482.307 | -0.0005  | 3 | 1 | 42.8 | 0 |
| P12163_1_S10,1738 | K.YGDSIAVIDPYHDPPSF  | 2482.307 | 0.00657  | 4 | 1 | 28.8 | 0 |
| P12163_1_F3,19120 | R.ACGYFIFSR.G        | 1424.73  | 0.00502  | 3 | 1 | 31.5 | 0 |
| P12163_1_F2,16853 | R.CGGVLVLEGR.A       | 1363.767 | 0.00248  | 2 | 1 | 40.9 | 0 |
| P12163_1_S1,20444 | R.GIELMYTAVR.N       | 1456.813 | 0.00399  | 2 | 1 | 27   | 0 |
| P12163_1_S1,20476 | R.GIELMYTAVR.N       | 1456.813 | 0.00619  | 3 | 1 | 55.5 | 0 |
| P12163_1_F5,15837 | R.IAETLCSK.A         | 1529.882 | 0.01023  | 2 | 1 | 35.9 | 0 |
| P12163_1_F5,15856 | R.IAETLCSK.A         | 1529.882 | 0.00595  | 3 | 1 | 28.3 | 0 |
| P12163_2_F1,16239 | R.IAETLCSK.A         | 1529.882 | 0.00575  | 2 | 1 | 37.5 | 0 |
| P12163_1_F4,23576 | R.ISFAYTAFK.R        | 1655.962 | 0.00738  | 3 | 1 | 30.6 | 0 |
| P12163_1_F4,23593 | R.ISFAYTAFK.R        | 1655.962 | 0.00268  | 2 | 1 | 41.9 | 0 |
| P12163_1_F5,22112 | R.ISFAYTAFK.R        | 1655.962 | 0.00402  | 3 | 1 | 27.4 | 0 |
| P12163_2_F9,20108 | R.ISFAYTAFK.R        | 1655.962 | 0.00552  | 3 | 1 | 30.3 | 0 |
| P12163_1_F2,18427 | R.IYEGFCLTR.N        | 1462.767 | -0.00285 | 3 | 1 | 22   | 0 |
| P12163_1_F3,18974 | R.IYEGFCLTR.N        | 1462.767 | 0.0018   | 3 | 1 | 25.8 | 0 |
| P12163_1_F7,17303 | R.LSIVHADASELSK.E    | 1978.143 | 0.0031   | 3 | 1 | 38.5 | 0 |
| P12163_1_F8,18140 | R.LSIVHADASELSK.E    | 1978.143 | 0.0061   | 3 | 1 | 43.3 | 0 |
| P12163_1_S1,13828 | R.QIVVIGQDQR.R       | 1459.853 | -0.00129 | 3 | 1 | 76.9 | 0 |
| P12163_1_S1,13852 | R.QIVVIGQDQR.R       | 1459.853 | 0.00148  | 2 | 1 | 43.9 | 0 |
| P12163_1_F2,18549 | R.SLYDIVPAENGDK.F    | 2029.106 | 0.00097  | 2 | 1 | 30.6 | 0 |
| P12163_1_F2,18561 | R.SLYDIVPAENGDK.F    | 2029.106 | 0.01258  | 3 | 1 | 28   | 0 |
| P12163_1_S1,7648  | K.AGSTDDVNVER.D      | 1466.739 | 0.00384  | 3 | 1 | 24.1 | 0 |
| P12163_1_S1,7858  | K.AGSTDDVNVER.D      | 1466.739 | 0.00225  | 3 | 1 | 47   | 0 |
| P12163_1_F5,11863 | K.AQMNALK.A          | 1383.824 | 0.00885  | 2 | 1 | 24.3 | 0 |
| P12163_2_F2,12705 | K.AQMNALK.A          | 1383.824 | 0.00387  | 3 | 1 | 22.2 | 0 |
| P12163_1_F2,15116 | K.ATMALSLEEAR.L      | 1437.804 | 0.00511  | 3 | 1 | 59.6 | 0 |
| P12163_1_F4,11939 | K.EAEVEAEK.S         | 1512.837 | 0.01332  | 2 | 1 | 36.2 | 0 |
| P12163_1_F5,10575 | K.EAEVEAEK.S         | 1512.837 | 0.00462  | 3 | 1 | 24.9 | 0 |

|                   |                    |          |          |   |   |      |   |
|-------------------|--------------------|----------|----------|---|---|------|---|
| P12163_1_F5,10612 | K.EAEVEAEK.S       | 1512.837 | 0.01006  | 2 | 1 | 37.1 | 0 |
| P12163_2_F1,11071 | K.EAEVEAEK.S       | 1512.837 | 0.0061   | 2 | 1 | 39.4 | 0 |
| P12163_1_S1,13479 | K.ECQANLANCETELR.R | 2011.948 | 0.00395  | 3 | 1 | 62.1 | 0 |
| P12163_1_F2,21478 | K.ELEVAQLNSTM*FEEK | 2392.253 | 0.00862  | 3 | 1 | 48.1 | 0 |
| P12163_1_F3,27887 | K.GGVGFQAIAEALGVA. | 2266.338 | 0.00631  | 3 | 1 | 30.9 | 0 |
| P12163_1_S1,24613 | K.LPASEIAATINEFR.T | 1836.017 | 0.00428  | 3 | 1 | 35.5 | 0 |
| P12163_1_S1,24792 | K.LPASEIAATINEFR.T | 1836.017 | 0.00242  | 3 | 1 | 44.7 | 0 |
| P12163_1_S1,10384 | K.QEDDYPEGSTEDDAK. | 2307.072 | 0.00625  | 3 | 1 | 33.3 | 0 |
| P12163_1_S1,11457 | K.SLSNSSVDISER.I   | 1597.833 | 0.00288  | 3 | 1 | 39   | 0 |
| P12163_1_S1,15050 | R.ACAAAITLDTPGANYF | 1969.011 | 0.00439  | 3 | 1 | 43.8 | 0 |
| P12163_1_S1,16397 | R.ACAAAITLDTPGANYF | 1969.011 | 0.00423  | 2 | 1 | 38.2 | 0 |
| P12163_1_S1,16413 | R.ACAAAITLDTPGANYF | 1969.011 | 0.00145  | 3 | 1 | 70.2 | 0 |
| P12163_1_F6,13944 | R.AHDIDHGLNLEK.A   | 1970.092 | 0.00869  | 3 | 1 | 38.9 | 0 |
| P12163_2_F1,19955 | R.ELLMNAMK.E       | 1557.895 | 0.00495  | 2 | 1 | 31.7 | 0 |
| P12163_1_F9,9170  | R.FEQHDVR.S        | 1234.648 | 0.00398  | 2 | 1 | 31   | 0 |
| P12163_2_F9,9357  | R.FEQHDVR.S        | 1234.648 | 0.00562  | 3 | 1 | 32.6 | 0 |
| P12163_1_F4,5330  | R.HVHGTK.A         | 1286.779 | 0.00537  | 3 | 1 | 28   | 0 |
| P12163_1_F5,13309 | R.LNEVAEK.A        | 1410.841 | 0.01105  | 2 | 1 | 29.3 | 0 |
| P12163_1_F5,13353 | R.LNEVAEK.A        | 1410.841 | 0.00812  | 3 | 1 | 26.4 | 0 |
| P12163_2_F1,13698 | R.LNEVAEK.A        | 1410.841 | 0.00758  | 3 | 1 | 23.9 | 0 |
| P12163_2_F1,13725 | R.LNEVAEK.A        | 1410.841 | 0.01059  | 2 | 1 | 29.9 | 0 |
| P12163_2_F2,14100 | R.LNEVAEK.A        | 1410.841 | 0.01055  | 2 | 1 | 24.9 | 0 |
| P12163_1_F3,25494 | R.LQVAIESLQDVK.Q   | 1951.168 | 0.00589  | 3 | 1 | 47.1 | 0 |
| P12163_1_F3,25528 | R.LQVAIESLQDVK.Q   | 1951.168 | 0.00042  | 2 | 1 | 52.3 | 0 |
| P12163_2_F2,18418 | R.TVWALSK.Y        | 1412.872 | 0.0043   | 3 | 1 | 25.4 | 0 |
| P12163_2_F2,13698 | K.CLVMNSK.L        | 1459.822 | -0.00028 | 2 | 1 | 27.9 | 0 |
| P12163_1_F3,11173 | K.DTSVDVHVNSGNQGT  | 2346.159 | -0.0036  | 3 | 1 | 22.8 | 0 |
| P12163_1_F4,9471  | K.DTSVDVHVNSGNQGT  | 2346.159 | 0.00408  | 3 | 1 | 46.6 | 0 |
| P12163_1_F4,10232 | K.DTSVDVHVNSGNQGT  | 2346.159 | 0.00186  | 3 | 1 | 36.3 | 0 |
| P12163_1_F4,10250 | K.DTSVDVHVNSGNQGT  | 2346.159 | 0.0018   | 4 | 1 | 31.5 | 0 |
| P12163_1_F4,10269 | K.DTSVDVHVNSGNQGT  | 2346.159 | 0.00189  | 2 | 1 | 55.9 | 0 |
| P12163_1_F4,10548 | K.DTSVDVHVNSGNQGT  | 2346.159 | -0.00076 | 4 | 1 | 30.9 | 0 |
| P12163_1_F4,10554 | K.DTSVDVHVNSGNQGT  | 2346.159 | 0.00279  | 2 | 1 | 54.1 | 0 |
| P12163_1_F4,11534 | K.DTSVDVHVNSGNQGT  | 2346.159 | 0.00411  | 3 | 1 | 58.8 | 0 |
| P12163_1_F4,11539 | K.DTSVDVHVNSGNQGT  | 2346.159 | 0.00471  | 2 | 1 | 41.2 | 0 |
| P12163_1_F4,11841 | K.DTSVDVHVNSGNQGT  | 2346.159 | 0.00138  | 3 | 1 | 38.7 | 0 |
| P12163_1_F4,23991 | K.DTSVDVHVNSGNQGT  | 2346.159 | 0.00861  | 3 | 1 | 28.7 | 0 |
| P12163_1_F4,24645 | K.DTSVDVHVNSGNQGT  | 2346.159 | 0.0072   | 3 | 1 | 32.4 | 0 |
| P12163_1_F5,10283 | K.DTSVDVHVNSGNQGT  | 2346.159 | -0.00009 | 2 | 1 | 89.4 | 0 |
| P12163_1_F5,10288 | K.DTSVDVHVNSGNQGT  | 2346.159 | 0.00333  | 3 | 1 | 63   | 0 |
| P12163_1_F6,9180  | K.DTSVDVHVNSGNQGT  | 2346.159 | -0.00471 | 3 | 1 | 24.1 | 0 |
| P12163_1_F6,9960  | K.DTSVDVHVNSGNQGT  | 2346.159 | 0.0072   | 4 | 1 | 39.1 | 0 |
| P12163_1_F6,11071 | K.DTSVDVHVNSGNQGT  | 2346.159 | 0.00201  | 2 | 1 | 55.4 | 0 |
| P12163_1_F6,11236 | K.DTSVDVHVNSGNQGT  | 2346.159 | 0.00414  | 3 | 1 | 62.5 | 0 |
| P12163_1_F7,8003  | K.DTSVDVHVNSGNQGT  | 2346.159 | 0.00584  | 4 | 1 | 29.1 | 0 |
| P12163_1_F7,8339  | K.DTSVDVHVNSGNQGT  | 2346.159 | 0.00676  | 4 | 1 | 29.2 | 0 |
| P12163_1_F7,8387  | K.DTSVDVHVNSGNQGT  | 2346.159 | 0.00516  | 3 | 1 | 24.5 | 0 |
| P12163_1_F7,8640  | K.DTSVDVHVNSGNQGT  | 2346.159 | 0.00867  | 3 | 1 | 30.5 | 0 |
| P12163_1_F7,8800  | K.DTSVDVHVNSGNQGT  | 2346.159 | 0.00928  | 4 | 1 | 34.7 | 0 |
| P12163_1_F7,8952  | K.DTSVDVHVNSGNQGT  | 2346.159 | 0.0099   | 3 | 1 | 25.7 | 0 |
| P12163_1_F7,9039  | K.DTSVDVHVNSGNQGT  | 2346.159 | 0.01212  | 4 | 1 | 45.6 | 0 |

|                   |                   |          |          |   |   |      |   |
|-------------------|-------------------|----------|----------|---|---|------|---|
| P12163_1_F7,9183  | K.DTSVDVHVNSGNQGT | 2346.159 | 0.0078   | 3 | 1 | 52.1 | 0 |
| P12163_1_F7,9396  | K.DTSVDVHVNSGNQGT | 2346.159 | 0.00927  | 3 | 1 | 32.6 | 0 |
| P12163_1_F7,9535  | K.DTSVDVHVNSGNQGT | 2346.159 | 0.00047  | 2 | 1 | 55   | 0 |
| P12163_1_F7,9545  | K.DTSVDVHVNSGNQGT | 2346.159 | 0.00292  | 4 | 1 | 41.2 | 0 |
| P12163_1_F7,9596  | K.DTSVDVHVNSGNQGT | 2346.159 | 0.00486  | 3 | 1 | 44.8 | 0 |
| P12163_1_F7,10508 | K.DTSVDVHVNSGNQGT | 2346.159 | 0.00093  | 2 | 1 | 89.3 | 0 |
| P12163_1_F7,10529 | K.DTSVDVHVNSGNQGT | 2346.159 | 0.00216  | 4 | 1 | 50.6 | 0 |
| P12163_1_F7,10720 | K.DTSVDVHVNSGNQGT | 2346.159 | 0.00381  | 3 | 1 | 67.9 | 0 |
| P12163_1_F7,10734 | K.DTSVDVHVNSGNQGT | 2346.159 | 0.00163  | 2 | 1 | 91.1 | 0 |
| P12163_1_F7,11745 | K.DTSVDVHVNSGNQGT | 2346.159 | 0.00528  | 3 | 1 | 52.2 | 0 |
| P12163_1_F7,11981 | K.DTSVDVHVNSGNQGT | 2346.159 | 0.00456  | 3 | 1 | 44.5 | 0 |
| P12163_1_F7,12437 | K.DTSVDVHVNSGNQGT | 2346.159 | 0.00504  | 3 | 1 | 28.5 | 0 |
| P12163_1_F7,12672 | K.DTSVDVHVNSGNQGT | 2346.159 | 0.01341  | 3 | 1 | 24.7 | 0 |
| P12163_1_F7,12898 | K.DTSVDVHVNSGNQGT | 2346.159 | 0.003    | 3 | 1 | 31.2 | 0 |
| P12163_1_F8,12    | K.DTSVDVHVNSGNQGT | 2346.159 | 0.00126  | 3 | 1 | 24.5 | 0 |
| P12163_1_F8,393   | K.DTSVDVHVNSGNQGT | 2346.159 | 0.00198  | 3 | 1 | 46.6 | 0 |
| P12163_1_F8,571   | K.DTSVDVHVNSGNQGT | 2346.159 | 0.00666  | 3 | 1 | 25.8 | 0 |
| P12163_1_F8,748   | K.DTSVDVHVNSGNQGT | 2346.159 | 0.00243  | 3 | 1 | 48.3 | 0 |
| P12163_1_F8,1953  | K.DTSVDVHVNSGNQGT | 2346.159 | 0.00294  | 3 | 1 | 23.2 | 0 |
| P12163_1_F8,8555  | K.DTSVDVHVNSGNQGT | 2346.159 | 0.00752  | 4 | 1 | 25.7 | 0 |
| P12163_1_F8,9813  | K.DTSVDVHVNSGNQGT | 2346.159 | 0.00047  | 2 | 1 | 27.9 | 0 |
| P12163_1_F8,9852  | K.DTSVDVHVNSGNQGT | 2346.159 | 0.00252  | 3 | 1 | 50.3 | 0 |
| P12163_1_F8,10883 | K.DTSVDVHVNSGNQGT | 2346.159 | 0.00309  | 3 | 1 | 50.1 | 0 |
| P12163_1_F8,10885 | K.DTSVDVHVNSGNQGT | 2346.159 | 0.00357  | 2 | 1 | 38.3 | 0 |
| P12163_1_F8,11124 | K.DTSVDVHVNSGNQGT | 2346.159 | 0.00342  | 3 | 1 | 65.6 | 0 |
| P12163_1_F8,23676 | K.DTSVDVHVNSGNQGT | 2346.159 | -0.00208 | 4 | 1 | 26.8 | 0 |
| P12163_1_F8,24113 | K.DTSVDVHVNSGNQGT | 2346.159 | 0.001    | 4 | 1 | 24   | 0 |
| P12163_1_F9,9225  | K.DTSVDVHVNSGNQGT | 2346.159 | 0.01164  | 4 | 1 | 27.6 | 0 |
| P12163_1_F9,9477  | K.DTSVDVHVNSGNQGT | 2346.159 | 0.00876  | 3 | 1 | 49.3 | 0 |
| P12163_1_F9,9500  | K.DTSVDVHVNSGNQGT | 2346.159 | 0.00288  | 4 | 1 | 25.7 | 0 |
| P12163_1_F9,9948  | K.DTSVDVHVNSGNQGT | 2346.159 | 0.00453  | 3 | 1 | 30.3 | 0 |
| P12163_1_F9,10534 | K.DTSVDVHVNSGNQGT | 2346.159 | 0.00138  | 3 | 1 | 53.3 | 0 |
| P12163_1_F9,10543 | K.DTSVDVHVNSGNQGT | 2346.159 | -0.00123 | 2 | 1 | 24.1 | 0 |
| P12163_1_F9,11038 | K.DTSVDVHVNSGNQGT | 2346.159 | -0.00165 | 2 | 1 | 80.9 | 0 |
| P12163_1_F9,11099 | K.DTSVDVHVNSGNQGT | 2346.159 | 0.00168  | 3 | 1 | 55.6 | 0 |
| P12163_1_S10,1034 | K.DTSVDVHVNSGNQGT | 2346.159 | 0.00324  | 3 | 1 | 35.5 | 0 |
| P12163_1_S10,1144 | K.DTSVDVHVNSGNQGT | 2346.159 | 0.01011  | 3 | 1 | 63.3 | 0 |
| P12163_2_F10,8374 | K.DTSVDVHVNSGNQGT | 2346.159 | 0.00096  | 4 | 1 | 24.5 | 0 |
| P12163_2_F10,8570 | K.DTSVDVHVNSGNQGT | 2346.159 | 0.01396  | 4 | 1 | 31.9 | 0 |
| P12163_2_F10,8775 | K.DTSVDVHVNSGNQGT | 2346.159 | 0.00988  | 4 | 1 | 37.4 | 0 |
| P12163_2_F10,9216 | K.DTSVDVHVNSGNQGT | 2346.159 | 0.01344  | 4 | 1 | 37   | 0 |
| P12163_2_F10,9617 | K.DTSVDVHVNSGNQGT | 2346.159 | 0.01124  | 4 | 1 | 40.9 | 0 |
| P12163_2_F10,9620 | K.DTSVDVHVNSGNQGT | 2346.159 | 0.00888  | 3 | 1 | 51.9 | 0 |
| P12163_2_F10,9633 | K.DTSVDVHVNSGNQGT | 2346.159 | 0.00103  | 2 | 1 | 68.1 | 0 |
| P12163_2_F10,1042 | K.DTSVDVHVNSGNQGT | 2346.159 | 0.00969  | 2 | 1 | 79.1 | 0 |
| P12163_2_F10,1047 | K.DTSVDVHVNSGNQGT | 2346.159 | 0.00168  | 4 | 1 | 56.8 | 0 |
| P12163_2_F10,1061 | K.DTSVDVHVNSGNQGT | 2346.159 | 0.00233  | 2 | 1 | 104  | 0 |
| P12163_2_F10,1064 | K.DTSVDVHVNSGNQGT | 2346.159 | 0.00432  | 3 | 1 | 72.2 | 0 |
| P12163_2_F10,1241 | K.DTSVDVHVNSGNQGT | 2346.159 | 0.01332  | 3 | 1 | 43.9 | 0 |
| P12163_2_F4,7577  | K.DTSVDVHVNSGNQGT | 2346.159 | 0.00267  | 3 | 1 | 37.6 | 0 |
| P12163_2_F4,7596  | K.DTSVDVHVNSGNQGT | 2346.159 | 0.003    | 4 | 1 | 23.9 | 0 |



|                   |                   |          |          |   |   |      |   |
|-------------------|-------------------|----------|----------|---|---|------|---|
| P12163_2_F4,7949  | K.DTSVDVHVNSGNQGT | 2346.159 | 0.00528  | 3 | 1 | 35   | 0 |
| P12163_2_F4,8303  | K.DTSVDVHVNSGNQGT | 2346.159 | -0.0087  | 3 | 1 | 31.5 | 0 |
| P12163_2_F4,8355  | K.DTSVDVHVNSGNQGT | 2346.159 | -0.00516 | 4 | 1 | 40.5 | 0 |
| P12163_2_F4,8663  | K.DTSVDVHVNSGNQGT | 2346.159 | 0.001    | 4 | 1 | 35.5 | 0 |
| P12163_2_F4,8691  | K.DTSVDVHVNSGNQGT | 2346.159 | 0.00157  | 2 | 1 | 25.3 | 0 |
| P12163_2_F4,8788  | K.DTSVDVHVNSGNQGT | 2346.159 | 0.00759  | 3 | 1 | 32.5 | 0 |
| P12163_2_F4,9020  | K.DTSVDVHVNSGNQGT | 2346.159 | 0.01077  | 3 | 1 | 43.8 | 0 |
| P12163_2_F4,9106  | K.DTSVDVHVNSGNQGT | 2346.159 | -0.00008 | 4 | 1 | 46.9 | 0 |
| P12163_2_F4,9136  | K.DTSVDVHVNSGNQGT | 2346.159 | -0.00117 | 2 | 1 | 25.4 | 0 |
| P12163_2_F4,9267  | K.DTSVDVHVNSGNQGT | 2346.159 | 0.01026  | 3 | 1 | 55.8 | 0 |
| P12163_2_F4,10139 | K.DTSVDVHVNSGNQGT | 2346.159 | 0.00519  | 3 | 1 | 66.8 | 0 |
| P12163_2_F4,10279 | K.DTSVDVHVNSGNQGT | 2346.159 | 0.00261  | 2 | 1 | 95.3 | 0 |
| P12163_2_F4,10349 | K.DTSVDVHVNSGNQGT | 2346.159 | -0.00033 | 3 | 1 | 60.3 | 0 |
| P12163_2_F6,9635  | K.DTSVDVHVNSGNQGT | 2346.159 | 0.0086   | 4 | 1 | 23.2 | 0 |
| P12163_2_F6,9878  | K.DTSVDVHVNSGNQGT | 2346.159 | 0.00844  | 4 | 1 | 36.7 | 0 |
| P12163_2_F6,9881  | K.DTSVDVHVNSGNQGT | 2346.159 | 0.01026  | 3 | 1 | 31.9 | 0 |
| P12163_2_F6,10883 | K.DTSVDVHVNSGNQGT | 2346.159 | 0.0042   | 3 | 1 | 60.7 | 0 |
| P12163_2_F7,8765  | K.DTSVDVHVNSGNQGT | 2346.159 | 0.00444  | 4 | 1 | 40.5 | 0 |
| P12163_2_F7,8944  | K.DTSVDVHVNSGNQGT | 2346.159 | 0.00921  | 3 | 1 | 23.5 | 0 |
| P12163_2_F7,9008  | K.DTSVDVHVNSGNQGT | 2346.159 | 0.00636  | 4 | 1 | 24.6 | 0 |
| P12163_2_F7,9180  | K.DTSVDVHVNSGNQGT | 2346.159 | 0.00627  | 3 | 1 | 28   | 0 |
| P12163_2_F7,9395  | K.DTSVDVHVNSGNQGT | 2346.159 | 0.00512  | 4 | 1 | 24.5 | 0 |
| P12163_2_F7,9957  | K.DTSVDVHVNSGNQGT | 2346.159 | -0.00033 | 3 | 1 | 31.3 | 0 |
| P12163_2_F8_12070 | K.DTSVDVHVNSGNQGT | 2346.159 | 0.007    | 4 | 1 | 27.5 | 0 |
| P12163_2_F9,10452 | K.DTSVDVHVNSGNQGT | 2346.159 | 0.00585  | 3 | 1 | 27.7 | 0 |
| P12163_2_S5,8102  | K.DTSVDVHVNSGNQGT | 2346.159 | 0.00108  | 3 | 1 | 36.5 | 0 |
| P12163_2_S5,8523  | K.DTSVDVHVNSGNQGT | 2346.159 | 0.00333  | 3 | 1 | 31.5 | 0 |
| P12163_2_S5,8548  | K.DTSVDVHVNSGNQGT | 2346.159 | 0.00336  | 4 | 1 | 31.5 | 0 |
| P12163_2_S5,8734  | K.DTSVDVHVNSGNQGT | 2346.159 | 0.00408  | 3 | 1 | 37.5 | 0 |
| P12163_2_S5,8962  | K.DTSVDVHVNSGNQGT | 2346.159 | 0.01976  | 4 | 1 | 35.8 | 0 |
| P12163_2_S5,8963  | K.DTSVDVHVNSGNQGT | 2346.159 | 0.01422  | 3 | 1 | 32.8 | 0 |
| P12163_2_S5,9201  | K.DTSVDVHVNSGNQGT | 2346.159 | 0.01728  | 3 | 1 | 22.5 | 0 |
| P12163_2_S5,9465  | K.DTSVDVHVNSGNQGT | 2346.159 | 0.0036   | 3 | 1 | 58.7 | 0 |
| P12163_2_S5,9499  | K.DTSVDVHVNSGNQGT | 2346.159 | 0.003    | 4 | 1 | 43.6 | 0 |
| P12163_2_S5,9590  | K.DTSVDVHVNSGNQGT | 2346.159 | 0.00861  | 2 | 1 | 56   | 0 |
| P12163_2_S5,9673  | K.DTSVDVHVNSGNQGT | 2346.159 | 0.0024   | 3 | 1 | 67.4 | 0 |
| P12163_2_S5,9715  | K.DTSVDVHVNSGNQGT | 2346.159 | 0.00992  | 4 | 1 | 39   | 0 |
| P12163_2_S5,10427 | K.DTSVDVHVNSGNQGT | 2346.159 | 0.00364  | 4 | 1 | 37.9 | 0 |
| P12163_2_S5,10595 | K.DTSVDVHVNSGNQGT | 2346.159 | -0.00135 | 2 | 1 | 105  | 0 |
| P12163_2_S5,10621 | K.DTSVDVHVNSGNQGT | 2346.159 | 0.00426  | 3 | 1 | 74.1 | 0 |
| P12163_2_S5,11601 | K.DTSVDVHVNSGNQGT | 2346.159 | -0.00069 | 3 | 1 | 29.8 | 0 |
| P12163_2_S5,11833 | K.DTSVDVHVNSGNQGT | 2346.159 | -0.00261 | 3 | 1 | 32   | 0 |
| P12163_2_S5,12062 | K.DTSVDVHVNSGNQGT | 2346.159 | 0.0042   | 3 | 1 | 23.1 | 0 |
| P12163_2_S5,12308 | K.DTSVDVHVNSGNQGT | 2346.159 | 0.00804  | 3 | 1 | 28.2 | 0 |
| P12163_1_F5,9068  | K.EEENEIK.M       | 1498.821 | 0.00656  | 2 | 1 | 25.4 | 0 |
| P12163_1_F5,9087  | K.EEENEIK.M       | 1498.821 | 0.00293  | 3 | 1 | 22.2 | 0 |
| P12163_1_F5,9282  | K.EEENEIK.M       | 1498.821 | 0.00782  | 2 | 1 | 28.4 | 0 |
| P12163_1_F8,9390  | K.EEENEIK.M       | 1498.821 | 0.00056  | 3 | 1 | 24.9 | 0 |
| P12163_2_F1,9517  | K.EEENEIK.M       | 1498.821 | 0.0029   | 3 | 1 | 33.2 | 0 |
| P12163_2_F1,9523  | K.EEENEIK.M       | 1498.821 | 0.00518  | 2 | 1 | 28.4 | 0 |
| P12163_2_F1,9774  | K.EEENEIK.M       | 1498.821 | 0.00832  | 2 | 1 | 28.6 | 0 |

|                   |                |          |          |   |   |      |   |
|-------------------|----------------|----------|----------|---|---|------|---|
| P12163_2_F2,9997  | K.EEENEIK.M    | 1498.821 | 0.00125  | 3 | 1 | 22.3 | 0 |
| P12163_2_S5,9194  | K.EEENEIK.M    | 1498.821 | 0.00239  | 3 | 1 | 25.9 | 0 |
| P12163_2_S5,9913  | K.EEENEIK.M    | 1498.821 | 0.00503  | 3 | 1 | 29.9 | 0 |
| P12163_1_F3,20993 | K.NGVLYISIPK.T | 1712.057 | -0.00064 | 2 | 1 | 41.8 | 0 |
| P12163_1_F4,17576 | K.NGVLYISIPK.T | 1712.057 | 0.00734  | 3 | 1 | 25.4 | 0 |
| P12163_1_F4,17608 | K.NGVLYISIPK.T | 1712.057 | 0.00486  | 2 | 1 | 24.8 | 0 |
| P12163_1_F4,20522 | K.NGVLYISIPK.T | 1712.057 | 0.0066   | 2 | 1 | 36.5 | 0 |
| P12163_1_F4,21663 | K.NGVLYISIPK.T | 1712.057 | 0.00548  | 3 | 1 | 40.4 | 0 |
| P12163_1_F4,21669 | K.NGVLYISIPK.T | 1712.057 | 0.0068   | 2 | 1 | 39.2 | 0 |
| P12163_1_F4,21858 | K.NGVLYISIPK.T | 1712.057 | 0.00248  | 2 | 1 | 50.5 | 0 |
| P12163_1_F4,21916 | K.NGVLYISIPK.T | 1712.057 | 0.0005   | 3 | 1 | 40.3 | 0 |
| P12163_1_F4,22063 | K.NGVLYISIPK.T | 1712.057 | 0.00438  | 2 | 1 | 45   | 0 |
| P12163_1_F4,22122 | K.NGVLYISIPK.T | 1712.057 | 0.00431  | 3 | 1 | 37   | 0 |
| P12163_1_F4,22305 | K.NGVLYISIPK.T | 1712.057 | 0.00766  | 2 | 1 | 37.9 | 0 |
| P12163_1_F4,22651 | K.NGVLYISIPK.T | 1712.057 | 0.00842  | 3 | 1 | 28.3 | 0 |
| P12163_1_F4,22905 | K.NGVLYISIPK.T | 1712.057 | 0.0026   | 3 | 1 | 34.4 | 0 |
| P12163_1_F4,23490 | K.NGVLYISIPK.T | 1712.057 | 0.00732  | 2 | 1 | 31.7 | 0 |
| P12163_1_F4,23816 | K.NGVLYISIPK.T | 1712.057 | 0.00498  | 2 | 1 | 46.8 | 0 |
| P12163_1_F4,23839 | K.NGVLYISIPK.T | 1712.057 | 0.00656  | 3 | 1 | 25.4 | 0 |
| P12163_1_F4,24058 | K.NGVLYISIPK.T | 1712.057 | 0.00588  | 2 | 1 | 39.9 | 0 |
| P12163_1_F4,24084 | K.NGVLYISIPK.T | 1712.057 | 0.00725  | 3 | 1 | 29.5 | 0 |
| P12163_1_F4,24308 | K.NGVLYISIPK.T | 1712.057 | 0.00318  | 2 | 1 | 33.6 | 0 |
| P12163_1_F4,24372 | K.NGVLYISIPK.T | 1712.057 | 0.00797  | 3 | 1 | 31.9 | 0 |
| P12163_1_F4,24599 | K.NGVLYISIPK.T | 1712.057 | 0.00774  | 2 | 1 | 29.3 | 0 |
| P12163_1_F4,26328 | K.NGVLYISIPK.T | 1712.057 | 0.008    | 3 | 1 | 26.7 | 0 |
| P12163_1_F4,26748 | K.NGVLYISIPK.T | 1712.057 | -0.00256 | 3 | 1 | 30.1 | 0 |
| P12163_1_F4,26965 | K.NGVLYISIPK.T | 1712.057 | 0.00554  | 3 | 1 | 30.9 | 0 |
| P12163_1_F4,28723 | K.NGVLYISIPK.T | 1712.057 | 0.00812  | 3 | 1 | 22.6 | 0 |
| P12163_1_F4,29617 | K.NGVLYISIPK.T | 1712.057 | 0.00812  | 3 | 1 | 21.9 | 0 |
| P12163_1_F4,30049 | K.NGVLYISIPK.T | 1712.057 | 0.00743  | 3 | 1 | 27.8 | 0 |
| P12163_1_F4,31636 | K.NGVLYISIPK.T | 1712.057 | 0.00542  | 3 | 1 | 31.4 | 0 |
| P12163_1_F5,20321 | K.NGVLYISIPK.T | 1712.057 | 0.0186   | 2 | 1 | 34.9 | 0 |
| P12163_1_F5,20358 | K.NGVLYISIPK.T | 1712.057 | 0.00554  | 3 | 1 | 27.9 | 0 |
| P12163_1_F5,20661 | K.NGVLYISIPK.T | 1712.057 | 0.01536  | 2 | 1 | 36.9 | 0 |
| P12163_1_F5,20681 | K.NGVLYISIPK.T | 1712.057 | 0.01049  | 3 | 1 | 26.5 | 0 |
| P12163_1_F5,20923 | K.NGVLYISIPK.T | 1712.057 | 0.0105   | 2 | 1 | 35.1 | 0 |
| P12163_1_F6,20145 | K.NGVLYISIPK.T | 1712.057 | 0.00178  | 2 | 1 | 47   | 0 |
| P12163_1_F6,20146 | K.NGVLYISIPK.T | 1712.057 | 0.00077  | 3 | 1 | 28.8 | 0 |
| P12163_1_F6,20446 | K.NGVLYISIPK.T | 1712.057 | -0.00262 | 3 | 1 | 31.2 | 0 |
| P12163_1_F6,20796 | K.NGVLYISIPK.T | 1712.057 | 0.00996  | 2 | 1 | 27.2 | 0 |
| P12163_1_F7,19323 | K.NGVLYISIPK.T | 1712.057 | 0.00416  | 3 | 1 | 29.2 | 0 |
| P12163_1_F7,19331 | K.NGVLYISIPK.T | 1712.057 | 0.00628  | 2 | 1 | 46   | 0 |
| P12163_1_F7,19786 | K.NGVLYISIPK.T | 1712.057 | 0.00479  | 3 | 1 | 28.7 | 0 |
| P12163_1_F8,20738 | K.NGVLYISIPK.T | 1712.057 | 0.01271  | 3 | 1 | 26.2 | 0 |
| P12163_1_F8,20749 | K.NGVLYISIPK.T | 1712.057 | 0.00914  | 2 | 1 | 26.3 | 0 |
| P12163_1_F9,20115 | K.NGVLYISIPK.T | 1712.057 | 0.00826  | 2 | 1 | 45.5 | 0 |
| P12163_1_F9,20306 | K.NGVLYISIPK.T | 1712.057 | 0.00419  | 3 | 1 | 30.6 | 0 |
| P12163_1_F9,20319 | K.NGVLYISIPK.T | 1712.057 | 0.00702  | 2 | 1 | 43.7 | 0 |
| P12163_1_F9,20703 | K.NGVLYISIPK.T | 1712.057 | 0.01052  | 3 | 1 | 26.3 | 0 |
| P12163_1_F9,20745 | K.NGVLYISIPK.T | 1712.057 | 0.01086  | 2 | 1 | 31.1 | 0 |
| P12163_1_F9,21234 | K.NGVLYISIPK.T | 1712.057 | 0.01019  | 3 | 1 | 29.2 | 0 |

|                                  |          |          |   |   |      |   |
|----------------------------------|----------|----------|---|---|------|---|
| P12163_1_F9,21598 K.NGVLYISIPK.T | 1712.057 | 0.00842  | 3 | 1 | 36.4 | 0 |
| P12163_1_S10,1902 K.NGVLYISIPK.T | 1712.057 | 0.00968  | 2 | 1 | 48.7 | 0 |
| P12163_1_S10,1906 K.NGVLYISIPK.T | 1712.057 | 0.00605  | 3 | 1 | 30.3 | 0 |
| P12163_2_F1,16743 K.NGVLYISIPK.T | 1712.057 | 0.00332  | 3 | 1 | 31.5 | 0 |
| P12163_2_F1,19948 K.NGVLYISIPK.T | 1712.057 | 0.0051   | 2 | 1 | 36   | 0 |
| P12163_2_F1,21203 K.NGVLYISIPK.T | 1712.057 | 0.00398  | 3 | 1 | 32.2 | 0 |
| P12163_2_F1,21204 K.NGVLYISIPK.T | 1712.057 | 0.00774  | 2 | 1 | 39.2 | 0 |
| P12163_2_F1,21436 K.NGVLYISIPK.T | 1712.057 | 0.00484  | 2 | 1 | 42.5 | 0 |
| P12163_2_F1,21629 K.NGVLYISIPK.T | 1712.057 | 0.00026  | 3 | 1 | 33.5 | 0 |
| P12163_2_F1,21665 K.NGVLYISIPK.T | 1712.057 | 0.00588  | 2 | 1 | 39.2 | 0 |
| P12163_2_F1,21872 K.NGVLYISIPK.T | 1712.057 | 0.00446  | 3 | 1 | 22   | 0 |
| P12163_2_F1,22157 K.NGVLYISIPK.T | 1712.057 | 0.01384  | 2 | 1 | 28   | 0 |
| P12163_2_F1,22416 K.NGVLYISIPK.T | 1712.057 | 0.00119  | 3 | 1 | 27.6 | 0 |
| P12163_2_F1,22825 K.NGVLYISIPK.T | 1712.057 | 0.00532  | 2 | 1 | 42.5 | 0 |
| P12163_2_F1,23215 K.NGVLYISIPK.T | 1712.057 | 0.01382  | 2 | 1 | 29.4 | 0 |
| P12163_2_F1,23323 K.NGVLYISIPK.T | 1712.057 | 0.00323  | 3 | 1 | 25.7 | 0 |
| P12163_2_F1,23688 K.NGVLYISIPK.T | 1712.057 | 0.00474  | 2 | 1 | 30.2 | 0 |
| P12163_2_F1,23930 K.NGVLYISIPK.T | 1712.057 | 0.00926  | 2 | 1 | 27   | 0 |
| P12163_2_F1,24102 K.NGVLYISIPK.T | 1712.057 | 0.00395  | 3 | 1 | 28.5 | 0 |
| P12163_2_F1,24173 K.NGVLYISIPK.T | 1712.057 | 0.0008   | 2 | 1 | 24.2 | 0 |
| P12163_2_F1,24330 K.NGVLYISIPK.T | 1712.057 | 0.002    | 3 | 1 | 24   | 0 |
| P12163_2_F1,24553 K.NGVLYISIPK.T | 1712.057 | 0.0002   | 3 | 1 | 23.1 | 0 |
| P12163_2_F1,24986 K.NGVLYISIPK.T | 1712.057 | -0.0031  | 3 | 1 | 26.3 | 0 |
| P12163_2_F1,26059 K.NGVLYISIPK.T | 1712.057 | 0.00755  | 3 | 1 | 24.7 | 0 |
| P12163_2_F1,26375 K.NGVLYISIPK.T | 1712.057 | 0.00437  | 3 | 1 | 25   | 0 |
| P12163_2_F1,26807 K.NGVLYISIPK.T | 1712.057 | 0.00317  | 3 | 1 | 22.9 | 0 |
| P12163_2_F1,27221 K.NGVLYISIPK.T | 1712.057 | 0.00503  | 3 | 1 | 24.3 | 0 |
| P12163_2_F1,27361 K.NGVLYISIPK.T | 1712.057 | 0.00242  | 3 | 1 | 30.2 | 0 |
| P12163_2_F1,27646 K.NGVLYISIPK.T | 1712.057 | 0.00215  | 3 | 1 | 22.7 | 0 |
| P12163_2_F10,1746 K.NGVLYISIPK.T | 1712.057 | 0.00362  | 3 | 1 | 28.7 | 0 |
| P12163_2_F10,1749 K.NGVLYISIPK.T | 1712.057 | 0.0017   | 2 | 1 | 40.6 | 0 |
| P12163_2_F10,1792 K.NGVLYISIPK.T | 1712.057 | 0.01118  | 2 | 1 | 46.6 | 0 |
| P12163_2_F10,1795 K.NGVLYISIPK.T | 1712.057 | 0.01265  | 3 | 1 | 27.1 | 0 |
| P12163_2_F2,20885 K.NGVLYISIPK.T | 1712.057 | 0.0085   | 2 | 1 | 49.3 | 0 |
| P12163_2_F4,18900 K.NGVLYISIPK.T | 1712.057 | -0.00304 | 3 | 1 | 22.5 | 0 |
| P12163_2_F4,18909 K.NGVLYISIPK.T | 1712.057 | 0.00252  | 2 | 1 | 50.8 | 0 |
| P12163_2_F4,18976 K.NGVLYISIPK.T | 1712.057 | -0.00388 | 3 | 1 | 23.8 | 0 |
| P12163_2_F4,19101 K.NGVLYISIPK.T | 1712.057 | 0.00114  | 2 | 1 | 45.7 | 0 |
| P12163_2_F4,19191 K.NGVLYISIPK.T | 1712.057 | -0.00166 | 3 | 1 | 36.3 | 0 |
| P12163_2_F4,19312 K.NGVLYISIPK.T | 1712.057 | 0.00568  | 2 | 1 | 39   | 0 |
| P12163_2_F4,19402 K.NGVLYISIPK.T | 1712.057 | 0.00692  | 3 | 1 | 28.3 | 0 |
| P12163_2_F6,20340 K.NGVLYISIPK.T | 1712.057 | 0.01361  | 3 | 1 | 24.1 | 0 |
| P12163_2_F6,20360 K.NGVLYISIPK.T | 1712.057 | 0.01182  | 2 | 1 | 29   | 0 |
| P12163_2_F7,18379 K.NGVLYISIPK.T | 1712.057 | 0.00176  | 3 | 1 | 24.1 | 0 |
| P12163_2_F8_12070 K.NGVLYISIPK.T | 1712.057 | 0.00654  | 2 | 1 | 47.3 | 0 |
| P12163_2_F8_12070 K.NGVLYISIPK.T | 1712.057 | 0.0056   | 3 | 1 | 36   | 0 |
| P12163_2_F9,16989 K.NGVLYISIPK.T | 1712.057 | 0.00677  | 3 | 1 | 27   | 0 |
| P12163_2_F9,18442 K.NGVLYISIPK.T | 1712.057 | 0.00368  | 3 | 1 | 22.4 | 0 |
| P12163_2_F9,18447 K.NGVLYISIPK.T | 1712.057 | 0.00628  | 2 | 1 | 47.7 | 0 |
| P12163_2_F9,18470 K.NGVLYISIPK.T | 1712.057 | 0.00349  | 4 | 1 | 36   | 0 |
| P12163_2_F9,18642 K.NGVLYISIPK.T | 1712.057 | 0.00606  | 2 | 1 | 48.6 | 0 |

|                                   |          |          |   |   |      |   |
|-----------------------------------|----------|----------|---|---|------|---|
| P12163_2_F9,18657 K.NGVLYISIPK.T  | 1712.057 | 0.00554  | 3 | 1 | 36.1 | 0 |
| P12163_2_F9,18859 K.NGVLYISIPK.T  | 1712.057 | 0.00522  | 2 | 1 | 46.3 | 0 |
| P12163_2_F9,18873 K.NGVLYISIPK.T  | 1712.057 | 0.00413  | 3 | 1 | 29.7 | 0 |
| P12163_2_F9,19294 K.NGVLYISIPK.T  | 1712.057 | 0.00338  | 3 | 1 | 25.8 | 0 |
| P12163_2_F9,19501 K.NGVLYISIPK.T  | 1712.057 | 0.00959  | 3 | 1 | 30.2 | 0 |
| P12163_2_F9,19714 K.NGVLYISIPK.T  | 1712.057 | 0.00251  | 3 | 1 | 28.9 | 0 |
| P12163_2_F9,19934 K.NGVLYISIPK.T  | 1712.057 | 0.00617  | 3 | 1 | 27.4 | 0 |
| P12163_2_F9,20599 K.NGVLYISIPK.T  | 1712.057 | 0.00305  | 3 | 1 | 30.6 | 0 |
| P12163_2_F9,21134 K.NGVLYISIPK.T  | 1712.057 | 0.00659  | 3 | 1 | 27.1 | 0 |
| P12163_2_S3,16897 K.NGVLYISIPK.T  | 1712.057 | -0.00187 | 3 | 1 | 25.6 | 0 |
| P12163_2_S5,18740 K.NGVLYISIPK.T  | 1712.057 | 0.00929  | 3 | 1 | 26.1 | 0 |
| P12163_2_S5,18745 K.NGVLYISIPK.T  | 1712.057 | 0.00646  | 2 | 1 | 32.7 | 0 |
| P12163_1_S1,23077 K.VIDVQIL.-     | 1103.698 | 0.00039  | 2 | 1 | 41.3 | 0 |
| P12163_2_F8_12070 K.VIDVQIL.-     | 1103.698 | 0.00063  | 2 | 1 | 24.3 | 0 |
| P12163_2_S3,19778 K.VIDVQIL.-     | 1103.698 | 0.00137  | 2 | 1 | 26.6 | 0 |
| P12163_2_S5,21801 K.VIDVQIL.-     | 1103.698 | 0.00301  | 2 | 1 | 27.1 | 0 |
| P12163_1_F2,17303 K.VSVEDEVLVIK.G | 1838.109 | 0.00391  | 3 | 1 | 35.5 | 0 |
| P12163_1_F2,19561 K.VSVEDEVLVIK.G | 1838.109 | 0.00778  | 3 | 1 | 44.9 | 0 |
| P12163_1_F2,20034 K.VSVEDEVLVIK.G | 1838.109 | 0.0088   | 2 | 1 | 57.2 | 0 |
| P12163_1_F2,20162 K.VSVEDEVLVIK.G | 1838.109 | -0.00707 | 3 | 1 | 29   | 0 |
| P12163_1_F2,20722 K.VSVEDEVLVIK.G | 1838.109 | 0.00385  | 3 | 1 | 32.9 | 0 |
| P12163_1_F2,20742 K.VSVEDEVLVIK.G | 1838.109 | 0.0046   | 2 | 1 | 60.5 | 0 |
| P12163_1_F2,20951 K.VSVEDEVLVIK.G | 1838.109 | 0.00643  | 3 | 1 | 45.3 | 0 |
| P12163_1_F2,21004 K.VSVEDEVLVIK.G | 1838.109 | 0.00294  | 2 | 1 | 30.2 | 0 |
| P12163_1_F2,21174 K.VSVEDEVLVIK.G | 1838.109 | 0.0037   | 3 | 1 | 45.3 | 0 |
| P12163_1_F2,21263 K.VSVEDEVLVIK.G | 1838.109 | 0.00184  | 2 | 1 | 51.3 | 0 |
| P12163_1_F2,21417 K.VSVEDEVLVIK.G | 1838.109 | -0.0011  | 3 | 1 | 28.9 | 0 |
| P12163_1_F3,17766 K.VSVEDEVLVIK.G | 1838.109 | 0.01168  | 3 | 1 | 28.1 | 0 |
| P12163_1_F3,17794 K.VSVEDEVLVIK.G | 1838.109 | 0.0052   | 2 | 1 | 38.6 | 0 |
| P12163_1_F3,17811 K.VSVEDEVLVIK.G | 1838.109 | 0.00445  | 4 | 1 | 31.3 | 0 |
| P12163_1_F3,20974 K.VSVEDEVLVIK.G | 1838.109 | 0.01294  | 2 | 1 | 50.2 | 0 |
| P12163_1_F3,20979 K.VSVEDEVLVIK.G | 1838.109 | 0.01774  | 3 | 1 | 43.7 | 0 |
| P12163_1_F3,21532 K.VSVEDEVLVIK.G | 1838.109 | 0.00524  | 2 | 1 | 52.2 | 0 |
| P12163_1_F3,21539 K.VSVEDEVLVIK.G | 1838.109 | 0.0055   | 3 | 1 | 55.2 | 0 |
| P12163_1_F3,21768 K.VSVEDEVLVIK.G | 1838.109 | 0.00442  | 3 | 1 | 45.2 | 0 |
| P12163_1_F3,21784 K.VSVEDEVLVIK.G | 1838.109 | 0.00544  | 2 | 1 | 58.1 | 0 |
| P12163_1_F3,21992 K.VSVEDEVLVIK.G | 1838.109 | 0.00742  | 3 | 1 | 42.4 | 0 |
| P12163_1_F3,22006 K.VSVEDEVLVIK.G | 1838.109 | 0.00518  | 2 | 1 | 61.9 | 0 |
| P12163_1_F3,22200 K.VSVEDEVLVIK.G | 1838.109 | 0.0079   | 3 | 1 | 45.2 | 0 |
| P12163_1_F3,22213 K.VSVEDEVLVIK.G | 1838.109 | 0.00628  | 2 | 1 | 59.6 | 0 |
| P12163_1_F3,22437 K.VSVEDEVLVIK.G | 1838.109 | 0.00478  | 3 | 1 | 45.1 | 0 |
| P12163_1_F3,22447 K.VSVEDEVLVIK.G | 1838.109 | 0.00564  | 2 | 1 | 64.8 | 0 |
| P12163_1_F3,22680 K.VSVEDEVLVIK.G | 1838.109 | 0.00625  | 3 | 1 | 45.2 | 0 |
| P12163_1_F3,22687 K.VSVEDEVLVIK.G | 1838.109 | 0.00608  | 2 | 1 | 59.8 | 0 |
| P12163_1_F3,22931 K.VSVEDEVLVIK.G | 1838.109 | -0.00048 | 2 | 1 | 67.1 | 0 |
| P12163_1_F3,23231 K.VSVEDEVLVIK.G | 1838.109 | 0.00314  | 2 | 1 | 40.1 | 0 |
| P12163_1_F3,23265 K.VSVEDEVLVIK.G | 1838.109 | 0.0037   | 3 | 1 | 34   | 0 |
| P12163_1_F3,23472 K.VSVEDEVLVIK.G | 1838.109 | 0.01494  | 2 | 1 | 43.8 | 0 |
| P12163_1_F3,23525 K.VSVEDEVLVIK.G | 1838.109 | 0.00316  | 3 | 1 | 45   | 0 |
| P12163_1_F3,23776 K.VSVEDEVLVIK.G | 1838.109 | 0.00247  | 3 | 1 | 31   | 0 |
| P12163_1_F3,23777 K.VSVEDEVLVIK.G | 1838.109 | 0.00358  | 2 | 1 | 48.7 | 0 |

|                                    |          |         |   |   |      |   |
|------------------------------------|----------|---------|---|---|------|---|
| P12163_1_F3,24005 K.VSVEDEV LVIK.G | 1838.109 | 0.00589 | 3 | 1 | 36   | 0 |
| P12163_1_F3,24011 K.VSVEDEV LVIK.G | 1838.109 | 0.00514 | 2 | 1 | 71.1 | 0 |
| P12163_1_F3,24248 K.VSVEDEV LVIK.G | 1838.109 | 0.00649 | 3 | 1 | 42.3 | 0 |
| P12163_1_F3,24262 K.VSVEDEV LVIK.G | 1838.109 | 0.00514 | 2 | 1 | 46.8 | 0 |
| P12163_1_F3,24492 K.VSVEDEV LVIK.G | 1838.109 | 0.00568 | 3 | 1 | 45.2 | 0 |
| P12163_1_F3,24501 K.VSVEDEV LVIK.G | 1838.109 | 0.00538 | 2 | 1 | 63.7 | 0 |
| P12163_1_F3,24723 K.VSVEDEV LVIK.G | 1838.109 | 0.01696 | 3 | 1 | 31.1 | 0 |
| P12163_1_F3,24749 K.VSVEDEV LVIK.G | 1838.109 | 0.00374 | 2 | 1 | 69.7 | 0 |
| P12163_1_F3,24964 K.VSVEDEV LVIK.G | 1838.109 | 0.00568 | 3 | 1 | 38.2 | 0 |
| P12163_1_F3,24989 K.VSVEDEV LVIK.G | 1838.109 | 0.00584 | 2 | 1 | 39.1 | 0 |
| P12163_1_F3,25197 K.VSVEDEV LVIK.G | 1838.109 | 0.00436 | 3 | 1 | 28.4 | 0 |
| P12163_1_F3,25220 K.VSVEDEV LVIK.G | 1838.109 | 0.00258 | 2 | 1 | 44.1 | 0 |
| P12163_1_F3,25464 K.VSVEDEV LVIK.G | 1838.109 | 0.00466 | 2 | 1 | 42.2 | 0 |
| P12163_1_F3,25531 K.VSVEDEV LVIK.G | 1838.109 | 0.00841 | 3 | 1 | 39.7 | 0 |
| P12163_1_F3,25695 K.VSVEDEV LVIK.G | 1838.109 | 0.00252 | 2 | 1 | 38.5 | 0 |
| P12163_1_F3,25746 K.VSVEDEV LVIK.G | 1838.109 | 0.00682 | 3 | 1 | 35.9 | 0 |
| P12163_1_F3,25904 K.VSVEDEV LVIK.G | 1838.109 | 0.00362 | 2 | 1 | 44.2 | 0 |
| P12163_1_F3,25959 K.VSVEDEV LVIK.G | 1838.109 | 0.00457 | 3 | 1 | 46.8 | 0 |
| P12163_1_F3,26130 K.VSVEDEV LVIK.G | 1838.109 | 0.01666 | 2 | 1 | 54.1 | 0 |
| P12163_1_F3,26733 K.VSVEDEV LVIK.G | 1838.109 | 0.00703 | 3 | 1 | 36   | 0 |
| P12163_1_F3,26735 K.VSVEDEV LVIK.G | 1838.109 | 0.00522 | 2 | 1 | 37.4 | 0 |
| P12163_1_F3,26921 K.VSVEDEV LVIK.G | 1838.109 | 0.00565 | 3 | 1 | 45.4 | 0 |
| P12163_1_F3,27129 K.VSVEDEV LVIK.G | 1838.109 | 0.00733 | 3 | 1 | 39.5 | 0 |
| P12163_1_F3,27153 K.VSVEDEV LVIK.G | 1838.109 | 0.00676 | 2 | 1 | 30.2 | 0 |
| P12163_1_F3,27301 K.VSVEDEV LVIK.G | 1838.109 | 0.00574 | 3 | 1 | 32.7 | 0 |
| P12163_1_F3,27475 K.VSVEDEV LVIK.G | 1838.109 | 0.0055  | 3 | 1 | 32.7 | 0 |
| P12163_1_F3,27516 K.VSVEDEV LVIK.G | 1838.109 | 0.00362 | 2 | 1 | 40.1 | 0 |
| P12163_1_F3,27661 K.VSVEDEV LVIK.G | 1838.109 | 0.0088  | 3 | 1 | 29.5 | 0 |
| P12163_1_F3,27694 K.VSVEDEV LVIK.G | 1838.109 | 0.00722 | 2 | 1 | 44.5 | 0 |
| P12163_1_F3,27856 K.VSVEDEV LVIK.G | 1838.109 | 0.00682 | 2 | 1 | 64.1 | 0 |
| P12163_1_F3,27981 K.VSVEDEV LVIK.G | 1838.109 | 0.00616 | 3 | 1 | 32.4 | 0 |
| P12163_1_F3,28021 K.VSVEDEV LVIK.G | 1838.109 | 0.00446 | 2 | 1 | 41.9 | 0 |
| P12163_1_F3,28139 K.VSVEDEV LVIK.G | 1838.109 | 0.00448 | 3 | 1 | 27.5 | 0 |
| P12163_1_F3,28181 K.VSVEDEV LVIK.G | 1838.109 | 0.00402 | 2 | 1 | 29.1 | 0 |
| P12163_1_F3,28293 K.VSVEDEV LVIK.G | 1838.109 | 0.007   | 3 | 1 | 40.7 | 0 |
| P12163_1_F3,28650 K.VSVEDEV LVIK.G | 1838.109 | 0.00811 | 3 | 1 | 36.7 | 0 |
| P12163_1_F3,28674 K.VSVEDEV LVIK.G | 1838.109 | 0.00656 | 2 | 1 | 50.9 | 0 |
| P12163_1_F3,28803 K.VSVEDEV LVIK.G | 1838.109 | 0.00676 | 3 | 1 | 32.7 | 0 |
| P12163_1_F3,28948 K.VSVEDEV LVIK.G | 1838.109 | 0.00508 | 3 | 1 | 29.8 | 0 |
| P12163_1_F3,29100 K.VSVEDEV LVIK.G | 1838.109 | 0.00862 | 3 | 1 | 38   | 0 |
| P12163_1_F3,29246 K.VSVEDEV LVIK.G | 1838.109 | 0.00934 | 3 | 1 | 36   | 0 |
| P12163_1_F3,29384 K.VSVEDEV LVIK.G | 1838.109 | 0.00631 | 3 | 1 | 32.6 | 0 |
| P12163_1_F3,29523 K.VSVEDEV LVIK.G | 1838.109 | 0.00532 | 3 | 1 | 32   | 0 |
| P12163_1_F3,29664 K.VSVEDEV LVIK.G | 1838.109 | 0.00781 | 3 | 1 | 33.8 | 0 |
| P12163_1_F3,29804 K.VSVEDEV LVIK.G | 1838.109 | 0.00568 | 3 | 1 | 35.8 | 0 |
| P12163_1_F3,29946 K.VSVEDEV LVIK.G | 1838.109 | 0.00631 | 3 | 1 | 29.5 | 0 |
| P12163_1_F3,30086 K.VSVEDEV LVIK.G | 1838.109 | 0.00688 | 3 | 1 | 39.4 | 0 |
| P12163_1_F3,30221 K.VSVEDEV LVIK.G | 1838.109 | 0.00331 | 3 | 1 | 32.3 | 0 |
| P12163_1_F3,30359 K.VSVEDEV LVIK.G | 1838.109 | 0.00421 | 3 | 1 | 37.9 | 0 |
| P12163_1_F3,30496 K.VSVEDEV LVIK.G | 1838.109 | 0.00451 | 3 | 1 | 35.2 | 0 |
| P12163_1_F3,30626 K.VSVEDEV LVIK.G | 1838.109 | 0.00388 | 3 | 1 | 28.2 | 0 |

|                                   |          |          |   |   |      |   |
|-----------------------------------|----------|----------|---|---|------|---|
| P12163_1_F3,30772 K.VSVEDEVLVIK.G | 1838.109 | 0.00481  | 3 | 1 | 32.7 | 0 |
| P12163_1_F3,30906 K.VSVEDEVLVIK.G | 1838.109 | 0.0085   | 3 | 1 | 24.5 | 0 |
| P12163_1_F3,31039 K.VSVEDEVLVIK.G | 1838.109 | 0.00559  | 3 | 1 | 35.4 | 0 |
| P12163_1_F3,31170 K.VSVEDEVLVIK.G | 1838.109 | 0.00181  | 3 | 1 | 32   | 0 |
| P12163_1_F3,31311 K.VSVEDEVLVIK.G | 1838.109 | 0.00595  | 3 | 1 | 35.6 | 0 |
| P12163_1_F3,31443 K.VSVEDEVLVIK.G | 1838.109 | 0.00376  | 3 | 1 | 28.3 | 0 |
| P12163_1_F3,31573 K.VSVEDEVLVIK.G | 1838.109 | 0.007    | 3 | 1 | 34.1 | 0 |
| P12163_1_F3,31882 K.VSVEDEVLVIK.G | 1838.109 | 0.00718  | 3 | 1 | 39.7 | 0 |
| P12163_1_F3,32028 K.VSVEDEVLVIK.G | 1838.109 | 0.00979  | 3 | 1 | 33.3 | 0 |
| P12163_1_F3,32158 K.VSVEDEVLVIK.G | 1838.109 | 0.00622  | 3 | 1 | 33   | 0 |
| P12163_1_F3,32287 K.VSVEDEVLVIK.G | 1838.109 | 0.00445  | 3 | 1 | 34.9 | 0 |
| P12163_1_F3,32449 K.VSVEDEVLVIK.G | 1838.109 | 0.00703  | 3 | 1 | 29.3 | 0 |
| P12163_1_F3,32583 K.VSVEDEVLVIK.G | 1838.109 | 0.00427  | 3 | 1 | 34.2 | 0 |
| P12163_1_F3,32824 K.VSVEDEVLVIK.G | 1838.109 | 0.00571  | 3 | 1 | 29.6 | 0 |
| P12163_1_F3,32965 K.VSVEDEVLVIK.G | 1838.109 | 0.00796  | 3 | 1 | 32.7 | 0 |
| P12163_1_F3,33094 K.VSVEDEVLVIK.G | 1838.109 | 0.00862  | 3 | 1 | 31.5 | 0 |
| P12163_1_F3,33306 K.VSVEDEVLVIK.G | 1838.109 | 0.00286  | 3 | 1 | 25.4 | 0 |
| P12163_1_F3,33467 K.VSVEDEVLVIK.G | 1838.109 | 0.00295  | 3 | 1 | 29.6 | 0 |
| P12163_1_F3,33871 K.VSVEDEVLVIK.G | 1838.109 | 0.00553  | 3 | 1 | 33   | 0 |
| P12163_1_F4,21898 K.VSVEDEVLVIK.G | 1838.109 | 0.00067  | 3 | 1 | 31.4 | 0 |
| P12163_1_F4,21908 K.VSVEDEVLVIK.G | 1838.109 | 0.00238  | 2 | 1 | 59.4 | 0 |
| P12163_1_F4,22212 K.VSVEDEVLVIK.G | 1838.109 | 0.00594  | 2 | 1 | 51.9 | 0 |
| P12163_1_F4,22282 K.VSVEDEVLVIK.G | 1838.109 | 0.00397  | 3 | 1 | 35.6 | 0 |
| P12163_1_F4,22496 K.VSVEDEVLVIK.G | 1838.109 | 0.00528  | 2 | 1 | 49.4 | 0 |
| P12163_1_F4,22756 K.VSVEDEVLVIK.G | 1838.109 | 0.00244  | 2 | 1 | 34   | 0 |
| P12163_1_F4,23285 K.VSVEDEVLVIK.G | 1838.109 | 0.00604  | 3 | 1 | 30.7 | 0 |
| P12163_1_F5,18937 K.VSVEDEVLVIK.G | 1838.109 | 0.00076  | 2 | 1 | 67.8 | 0 |
| P12163_1_F5,18989 K.VSVEDEVLVIK.G | 1838.109 | 0.00169  | 3 | 1 | 43.8 | 0 |
| P12163_1_F5,19469 K.VSVEDEVLVIK.G | 1838.109 | 0.0058   | 2 | 1 | 68.5 | 0 |
| P12163_1_F5,19517 K.VSVEDEVLVIK.G | 1838.109 | 0.0034   | 3 | 1 | 22.7 | 0 |
| P12163_1_F5,20151 K.VSVEDEVLVIK.G | 1838.109 | 0.00152  | 2 | 1 | 64.7 | 0 |
| P12163_1_F5,20161 K.VSVEDEVLVIK.G | 1838.109 | 0.00403  | 3 | 1 | 43.4 | 0 |
| P12163_1_F5,20480 K.VSVEDEVLVIK.G | 1838.109 | 0.0094   | 3 | 1 | 35.3 | 0 |
| P12163_1_F5,20502 K.VSVEDEVLVIK.G | 1838.109 | 0.00784  | 2 | 1 | 39.7 | 0 |
| P12163_1_F5,20763 K.VSVEDEVLVIK.G | 1838.109 | 0.00547  | 3 | 1 | 36.2 | 0 |
| P12163_1_F5,20802 K.VSVEDEVLVIK.G | 1838.109 | 0.00638  | 2 | 1 | 59.7 | 0 |
| P12163_1_F5,20973 K.VSVEDEVLVIK.G | 1838.109 | 0.00088  | 3 | 1 | 31.2 | 0 |
| P12163_1_F5,21019 K.VSVEDEVLVIK.G | 1838.109 | 0.00374  | 2 | 1 | 46.1 | 0 |
| P12163_1_F5,21209 K.VSVEDEVLVIK.G | 1838.109 | 0.0058   | 3 | 1 | 25.5 | 0 |
| P12163_1_F5,21895 K.VSVEDEVLVIK.G | 1838.109 | 0.00313  | 3 | 1 | 28.5 | 0 |
| P12163_1_F5,22446 K.VSVEDEVLVIK.G | 1838.109 | 0.00061  | 3 | 1 | 30.9 | 0 |
| P12163_1_F5,22694 K.VSVEDEVLVIK.G | 1838.109 | 0.00307  | 3 | 1 | 25.6 | 0 |
| P12163_1_F5,23307 K.VSVEDEVLVIK.G | 1838.109 | 0.0052   | 3 | 1 | 35.1 | 0 |
| P12163_1_F5,23513 K.VSVEDEVLVIK.G | 1838.109 | 0.00367  | 3 | 1 | 37.8 | 0 |
| P12163_1_F6,188 K.VSVEDEVLVIK.G   | 1838.109 | -0.00028 | 2 | 1 | 37.9 | 0 |
| P12163_1_F6,19537 K.VSVEDEVLVIK.G | 1838.109 | 0.00616  | 2 | 1 | 29.2 | 0 |
| P12163_1_F6,20116 K.VSVEDEVLVIK.G | 1838.109 | 0.00136  | 2 | 1 | 49.6 | 0 |
| P12163_1_F6,20122 K.VSVEDEVLVIK.G | 1838.109 | 0.00421  | 3 | 1 | 45.1 | 0 |
| P12163_1_F6,20322 K.VSVEDEVLVIK.G | 1838.109 | 0.00322  | 2 | 1 | 61.8 | 0 |
| P12163_1_F6,20331 K.VSVEDEVLVIK.G | 1838.109 | 0.00451  | 3 | 1 | 45.2 | 0 |
| P12163_1_F6,20550 K.VSVEDEVLVIK.G | 1838.109 | 0.00586  | 2 | 1 | 59.9 | 0 |

|                                   |          |          |   |   |      |   |
|-----------------------------------|----------|----------|---|---|------|---|
| P12163_1_F6,20558 K.VSVEDEVLVIK.G | 1838.109 | 0.00502  | 3 | 1 | 36.2 | 0 |
| P12163_1_F6,20806 K.VSVEDEVLVIK.G | 1838.109 | 0.00276  | 2 | 1 | 64.7 | 0 |
| P12163_1_F6,21140 K.VSVEDEVLVIK.G | 1838.109 | -0.00071 | 3 | 1 | 36.1 | 0 |
| P12163_1_F6,21378 K.VSVEDEVLVIK.G | 1838.109 | 0.00238  | 3 | 1 | 34.3 | 0 |
| P12163_1_F7,18695 K.VSVEDEVLVIK.G | 1838.109 | 0.00398  | 2 | 1 | 59.3 | 0 |
| P12163_1_F7,19352 K.VSVEDEVLVIK.G | 1838.109 | 0.00238  | 3 | 1 | 45.1 | 0 |
| P12163_1_F7,19376 K.VSVEDEVLVIK.G | 1838.109 | 0.00314  | 2 | 1 | 49.7 | 0 |
| P12163_1_F7,19727 K.VSVEDEVLVIK.G | 1838.109 | 0.0082   | 3 | 1 | 36.3 | 0 |
| P12163_1_F7,19781 K.VSVEDEVLVIK.G | 1838.109 | 0.0056   | 2 | 1 | 51.7 | 0 |
| P12163_1_F7,19970 K.VSVEDEVLVIK.G | 1838.109 | 0.00349  | 3 | 1 | 33   | 0 |
| P12163_1_F7,20426 K.VSVEDEVLVIK.G | 1838.109 | 0.00757  | 3 | 1 | 31.1 | 0 |
| P12163_1_F7,20707 K.VSVEDEVLVIK.G | 1838.109 | 0.00844  | 3 | 1 | 26.2 | 0 |
| P12163_1_F8,19964 K.VSVEDEVLVIK.G | 1838.109 | -0.00078 | 2 | 1 | 47.5 | 0 |
| P12163_1_F8,19967 K.VSVEDEVLVIK.G | 1838.109 | 0.00043  | 3 | 1 | 35.6 | 0 |
| P12163_1_F8,20414 K.VSVEDEVLVIK.G | 1838.109 | -0.00371 | 3 | 1 | 27.7 | 0 |
| P12163_1_F8,20767 K.VSVEDEVLVIK.G | 1838.109 | 0.00595  | 3 | 1 | 36   | 0 |
| P12163_1_F8,20802 K.VSVEDEVLVIK.G | 1838.109 | 0.00546  | 2 | 1 | 52.4 | 0 |
| P12163_1_F9,19830 K.VSVEDEVLVIK.G | 1838.109 | 0.00349  | 3 | 1 | 29.2 | 0 |
| P12163_1_F9,20134 K.VSVEDEVLVIK.G | 1838.109 | 0.00202  | 3 | 1 | 33.2 | 0 |
| P12163_1_F9,20177 K.VSVEDEVLVIK.G | 1838.109 | 0.00518  | 2 | 1 | 64.6 | 0 |
| P12163_1_F9,20337 K.VSVEDEVLVIK.G | 1838.109 | 0.00355  | 3 | 1 | 30.6 | 0 |
| P12163_1_S1,15441 K.VSVEDEVLVIK.G | 1838.109 | 0.01072  | 3 | 1 | 36.8 | 0 |
| P12163_1_S1,15495 K.VSVEDEVLVIK.G | 1838.109 | 0.00629  | 4 | 1 | 21.9 | 0 |
| P12163_1_S1,18308 K.VSVEDEVLVIK.G | 1838.109 | 0.0064   | 3 | 1 | 44.8 | 0 |
| P12163_1_S1,18311 K.VSVEDEVLVIK.G | 1838.109 | 0.0021   | 2 | 1 | 66.2 | 0 |
| P12163_1_S1,18421 K.VSVEDEVLVIK.G | 1838.109 | 0.00365  | 4 | 1 | 41.4 | 0 |
| P12163_1_S1,18571 K.VSVEDEVLVIK.G | 1838.109 | 0.00613  | 3 | 1 | 42.8 | 0 |
| P12163_1_S1,18588 K.VSVEDEVLVIK.G | 1838.109 | 0.00704  | 2 | 1 | 54.8 | 0 |
| P12163_1_S1,19021 K.VSVEDEVLVIK.G | 1838.109 | 0.00898  | 3 | 1 | 41.5 | 0 |
| P12163_1_S1,19559 K.VSVEDEVLVIK.G | 1838.109 | 0.00694  | 3 | 1 | 33.6 | 0 |
| P12163_1_S1,19591 K.VSVEDEVLVIK.G | 1838.109 | 0.0052   | 2 | 1 | 28.4 | 0 |
| P12163_1_S10,1826 K.VSVEDEVLVIK.G | 1838.109 | 0.00295  | 3 | 1 | 28.8 | 0 |
| P12163_1_S10,1873 K.VSVEDEVLVIK.G | 1838.109 | 0.00319  | 3 | 1 | 30.8 | 0 |
| P12163_1_S10,1923 K.VSVEDEVLVIK.G | 1838.109 | 0.00481  | 3 | 1 | 47.5 | 0 |
| P12163_2_F1,19760 K.VSVEDEVLVIK.G | 1838.109 | -0.00536 | 3 | 1 | 33.8 | 0 |
| P12163_2_F1,19766 K.VSVEDEVLVIK.G | 1838.109 | -0.00224 | 2 | 1 | 46   | 0 |
| P12163_2_F1,21145 K.VSVEDEVLVIK.G | 1838.109 | 0.01036  | 2 | 1 | 25.1 | 0 |
| P12163_2_F1,21504 K.VSVEDEVLVIK.G | 1838.109 | -0.00448 | 2 | 1 | 50.5 | 0 |
| P12163_2_F1,21509 K.VSVEDEVLVIK.G | 1838.109 | -0.00431 | 3 | 1 | 22.5 | 0 |
| P12163_2_F10,1763 K.VSVEDEVLVIK.G | 1838.109 | -0.00131 | 3 | 1 | 23   | 0 |
| P12163_2_F2,20735 K.VSVEDEVLVIK.G | 1838.109 | 0.00286  | 3 | 1 | 22.3 | 0 |
| P12163_2_F2,20961 K.VSVEDEVLVIK.G | 1838.109 | 0.00396  | 2 | 1 | 50.7 | 0 |
| P12163_2_F2,20979 K.VSVEDEVLVIK.G | 1838.109 | 0.00514  | 3 | 1 | 32.9 | 0 |
| P12163_2_F2,21187 K.VSVEDEVLVIK.G | 1838.109 | 0.00098  | 2 | 1 | 27.1 | 0 |
| P12163_2_F2,21270 K.VSVEDEVLVIK.G | 1838.109 | 0.00442  | 3 | 1 | 32.8 | 0 |
| P12163_2_F4,18299 K.VSVEDEVLVIK.G | 1838.109 | 0.00652  | 2 | 1 | 66.5 | 0 |
| P12163_2_F4,18312 K.VSVEDEVLVIK.G | 1838.109 | 0.00787  | 3 | 1 | 35   | 0 |
| P12163_2_F4,19292 K.VSVEDEVLVIK.G | 1838.109 | 0.00462  | 2 | 1 | 69   | 0 |
| P12163_2_F4,19309 K.VSVEDEVLVIK.G | 1838.109 | 0.00484  | 3 | 1 | 36   | 0 |
| P12163_2_F6,19512 K.VSVEDEVLVIK.G | 1838.109 | 0.00118  | 3 | 1 | 25.6 | 0 |
| P12163_2_F6,20371 K.VSVEDEVLVIK.G | 1838.109 | 0.00361  | 3 | 1 | 42.3 | 0 |

|                   |                     |          |          |   |   |      |   |
|-------------------|---------------------|----------|----------|---|---|------|---|
| P12163_2_F7,18431 | K.VSVEDEVLVIK.G     | 1838.109 | 0.00508  | 3 | 1 | 30.5 | 0 |
| P12163_2_F7,18463 | K.VSVEDEVLVIK.G     | 1838.109 | 0.00338  | 2 | 1 | 46.9 | 0 |
| P12163_2_F8,12070 | K.VSVEDEVLVIK.G     | 1838.109 | 0.00289  | 3 | 1 | 38.3 | 0 |
| P12163_2_F9,18719 | K.VSVEDEVLVIK.G     | 1838.109 | 0.0056   | 2 | 1 | 38.4 | 0 |
| P12163_2_S5,17991 | K.VSVEDEVLVIK.G     | 1838.109 | 0.00229  | 3 | 1 | 28.5 | 0 |
| P12163_2_S5,18883 | K.VSVEDEVLVIK.G     | 1838.109 | 0.00428  | 2 | 1 | 59.1 | 0 |
| P12163_1_F8,18814 | K.VSVEDEVLVIKGEHR.  | 2317.334 | 0.00195  | 3 | 1 | 36   | 0 |
| P12163_1_F8,18822 | K.VSVEDEVLVIKGEHR.  | 2317.334 | 0.00249  | 4 | 1 | 41.7 | 0 |
| P12163_2_F10,1703 | K.VSVEDEVLVIKGEHR.  | 2317.334 | 0.00435  | 3 | 1 | 39.8 | 0 |
| P12163_1_F2,9278  | R.AEEAGGASFSSYDTR.I | 1851.866 | 0.00428  | 3 | 1 | 31.4 | 0 |
| P12163_1_F2,9787  | R.AEEAGGASFSSYDTR.I | 1851.866 | 0.00003  | 3 | 1 | 38.7 | 0 |
| P12163_1_F2,10380 | R.AEEAGGASFSSYDTR.I | 1851.866 | 0.00435  | 3 | 1 | 46.5 | 0 |
| P12163_1_F2,10407 | R.AEEAGGASFSSYDTR.I | 1851.866 | 0.00221  | 2 | 1 | 31.2 | 0 |
| P12163_1_F2,10647 | R.AEEAGGASFSSYDTR.I | 1851.866 | 0.00122  | 3 | 1 | 35.3 | 0 |
| P12163_1_F2,11090 | R.AEEAGGASFSSYDTR.I | 1851.866 | 0.00021  | 3 | 1 | 57.3 | 0 |
| P12163_1_F2,11777 | R.AEEAGGASFSSYDTR.I | 1851.866 | 0.00678  | 3 | 1 | 68.9 | 0 |
| P12163_1_F2,12308 | R.AEEAGGASFSSYDTR.I | 1851.866 | 0.00396  | 3 | 1 | 77.8 | 0 |
| P12163_1_F2,12310 | R.AEEAGGASFSSYDTR.I | 1851.866 | 0.00409  | 2 | 1 | 35.5 | 0 |
| P12163_1_F2,13244 | R.AEEAGGASFSSYDTR.I | 1851.866 | -0.00117 | 3 | 1 | 84.3 | 0 |
| P12163_1_F2,13422 | R.AEEAGGASFSSYDTR.I | 1851.866 | 0.00437  | 2 | 1 | 38.1 | 0 |
| P12163_1_F2,17353 | R.AEEAGGASFSSYDTR.I | 1851.866 | -0.01237 | 2 | 1 | 24.4 | 0 |
| P12163_1_F3,8833  | R.AEEAGGASFSSYDTR.I | 1851.866 | 0.00093  | 3 | 1 | 24.1 | 0 |
| P12163_1_F3,9449  | R.AEEAGGASFSSYDTR.I | 1851.866 | 0.00315  | 3 | 1 | 52.8 | 0 |
| P12163_1_F3,10641 | R.AEEAGGASFSSYDTR.I | 1851.866 | 0.00347  | 3 | 1 | 56.6 | 0 |
| P12163_1_F3,10652 | R.AEEAGGASFSSYDTR.I | 1851.866 | 0.00215  | 2 | 1 | 30.7 | 0 |
| P12163_1_F3,12584 | R.AEEAGGASFSSYDTR.I | 1851.866 | 0.0036   | 3 | 1 | 59   | 0 |
| P12163_1_F3,13556 | R.AEEAGGASFSSYDTR.I | 1851.866 | 0.00195  | 2 | 1 | 61   | 0 |
| P12163_1_F3,13632 | R.AEEAGGASFSSYDTR.I | 1851.866 | 0.00383  | 3 | 1 | 57.5 | 0 |
| P12163_1_F4,9937  | R.AEEAGGASFSSYDTR.I | 1851.866 | 0.00476  | 3 | 1 | 44.9 | 0 |
| P12163_1_F4,9951  | R.AEEAGGASFSSYDTR.I | 1851.866 | 0.00297  | 2 | 1 | 36.5 | 0 |
| P12163_1_F4,10418 | R.AEEAGGASFSSYDTR.I | 1851.866 | 0.00716  | 3 | 1 | 35.2 | 0 |
| P12163_1_F4,10464 | R.AEEAGGASFSSYDTR.I | 1851.866 | 0.00491  | 2 | 1 | 44.7 | 0 |
| P12163_1_F4,11071 | R.AEEAGGASFSSYDTR.I | 1851.866 | 0.01076  | 3 | 1 | 39.3 | 0 |
| P12163_1_F4,11077 | R.AEEAGGASFSSYDTR.I | 1851.866 | 0.01381  | 2 | 1 | 39.1 | 0 |
| P12163_1_F4,11775 | R.AEEAGGASFSSYDTR.I | 1851.866 | -0.00091 | 2 | 1 | 41.1 | 0 |
| P12163_1_F4,11795 | R.AEEAGGASFSSYDTR.I | 1851.866 | 0.00252  | 3 | 1 | 49   | 0 |
| P12163_1_F4,12576 | R.AEEAGGASFSSYDTR.I | 1851.866 | 0.00512  | 3 | 1 | 45.9 | 0 |
| P12163_1_F4,12623 | R.AEEAGGASFSSYDTR.I | 1851.866 | 0.00809  | 2 | 1 | 48.9 | 0 |
| P12163_1_F4,13083 | R.AEEAGGASFSSYDTR.I | 1851.866 | 0.00536  | 3 | 1 | 53.5 | 0 |
| P12163_1_F4,13095 | R.AEEAGGASFSSYDTR.I | 1851.866 | 0.00117  | 2 | 1 | 62.9 | 0 |
| P12163_1_F4,13528 | R.AEEAGGASFSSYDTR.I | 1851.866 | -0.00019 | 2 | 1 | 34.2 | 0 |
| P12163_1_F4,13844 | R.AEEAGGASFSSYDTR.I | 1851.866 | -0.00149 | 2 | 1 | 34.2 | 0 |
| P12163_1_F4,14095 | R.AEEAGGASFSSYDTR.I | 1851.866 | 0.00425  | 2 | 1 | 68.1 | 0 |
| P12163_1_F4,14098 | R.AEEAGGASFSSYDTR.I | 1851.866 | 0.00536  | 3 | 1 | 74.4 | 0 |
| P12163_1_F4,23711 | R.AEEAGGASFSSYDTR.I | 1851.866 | 0.00392  | 3 | 1 | 35.1 | 0 |
| P12163_1_F5,9204  | R.AEEAGGASFSSYDTR.I | 1851.866 | -0.00333 | 2 | 1 | 33.4 | 0 |
| P12163_1_F5,9209  | R.AEEAGGASFSSYDTR.I | 1851.866 | 0.0039   | 3 | 1 | 46.9 | 0 |
| P12163_1_F5,9698  | R.AEEAGGASFSSYDTR.I | 1851.866 | -0.00007 | 2 | 1 | 41.5 | 0 |
| P12163_1_F5,9859  | R.AEEAGGASFSSYDTR.I | 1851.866 | 0.00203  | 3 | 1 | 31.7 | 0 |
| P12163_1_F5,10486 | R.AEEAGGASFSSYDTR.I | 1851.866 | 0.00191  | 2 | 1 | 25.5 | 0 |
| P12163_1_F5,10662 | R.AEEAGGASFSSYDTR.I | 1851.866 | -0.00004 | 3 | 1 | 49   | 0 |



|                   |                     |          |          |   |   |      |   |
|-------------------|---------------------|----------|----------|---|---|------|---|
| P12163_1_F5,11137 | R.AEEAGGASFSSYDTR.I | 1851.866 | 0.00239  | 3 | 1 | 53.5 | 0 |
| P12163_1_F5,11160 | R.AEEAGGASFSSYDTR.I | 1851.866 | 0.00001  | 2 | 1 | 64.2 | 0 |
| P12163_1_F5,11671 | R.AEEAGGASFSSYDTR.I | 1851.866 | -0.00111 | 2 | 1 | 38.1 | 0 |
| P12163_1_F5,11715 | R.AEEAGGASFSSYDTR.I | 1851.866 | 0.00387  | 3 | 1 | 65   | 0 |
| P12163_1_F5,12106 | R.AEEAGGASFSSYDTR.I | 1851.866 | 0.00231  | 2 | 1 | 47.7 | 0 |
| P12163_1_F5,12139 | R.AEEAGGASFSSYDTR.I | 1851.866 | 0.0027   | 3 | 1 | 67.2 | 0 |
| P12163_1_F5,12793 | R.AEEAGGASFSSYDTR.I | 1851.866 | 0.00175  | 2 | 1 | 74.1 | 0 |
| P12163_1_F6,9615  | R.AEEAGGASFSSYDTR.I | 1851.866 | -0.00675 | 3 | 1 | 32.6 | 0 |
| P12163_1_F6,10122 | R.AEEAGGASFSSYDTR.I | 1851.866 | 0.0039   | 3 | 1 | 44   | 0 |
| P12163_1_F6,10721 | R.AEEAGGASFSSYDTR.I | 1851.866 | 0.00797  | 3 | 1 | 49.8 | 0 |
| P12163_1_F6,10736 | R.AEEAGGASFSSYDTR.I | 1851.866 | 0.01149  | 2 | 1 | 37.9 | 0 |
| P12163_1_F6,11396 | R.AEEAGGASFSSYDTR.I | 1851.866 | 0.00167  | 3 | 1 | 26.1 | 0 |
| P12163_1_F6,11418 | R.AEEAGGASFSSYDTR.I | 1851.866 | -0.00009 | 2 | 1 | 53.5 | 0 |
| P12163_1_F6,12125 | R.AEEAGGASFSSYDTR.I | 1851.866 | 0.00351  | 3 | 1 | 54.3 | 0 |
| P12163_1_F6,12143 | R.AEEAGGASFSSYDTR.I | 1851.866 | 0.00155  | 2 | 1 | 25.1 | 0 |
| P12163_1_F6,12605 | R.AEEAGGASFSSYDTR.I | 1851.866 | 0.00444  | 3 | 1 | 61.4 | 0 |
| P12163_1_F6,12630 | R.AEEAGGASFSSYDTR.I | 1851.866 | 0.00095  | 2 | 1 | 56.1 | 0 |
| P12163_1_F6,12938 | R.AEEAGGASFSSYDTR.I | 1851.866 | -0.00135 | 3 | 1 | 27.5 | 0 |
| P12163_1_F6,12991 | R.AEEAGGASFSSYDTR.I | 1851.866 | 0.00447  | 2 | 1 | 25.7 | 0 |
| P12163_1_F6,13298 | R.AEEAGGASFSSYDTR.I | 1851.866 | 0.00399  | 2 | 1 | 33.2 | 0 |
| P12163_1_F6,13522 | R.AEEAGGASFSSYDTR.I | 1851.866 | 0.00231  | 2 | 1 | 66.4 | 0 |
| P12163_1_F6,13530 | R.AEEAGGASFSSYDTR.I | 1851.866 | 0.0044   | 3 | 1 | 55.8 | 0 |
| P12163_1_F6,13760 | R.AEEAGGASFSSYDTR.I | 1851.866 | 0.00453  | 2 | 1 | 51.4 | 0 |
| P12163_1_F7,9224  | R.AEEAGGASFSSYDTR.I | 1851.866 | -0.0009  | 3 | 1 | 28.5 | 0 |
| P12163_1_F7,9703  | R.AEEAGGASFSSYDTR.I | 1851.866 | -0.00423 | 3 | 1 | 33.4 | 0 |
| P12163_1_F7,10205 | R.AEEAGGASFSSYDTR.I | 1851.866 | 0.00252  | 3 | 1 | 36.9 | 0 |
| P12163_1_F7,10251 | R.AEEAGGASFSSYDTR.I | 1851.866 | 0.00231  | 2 | 1 | 27.5 | 0 |
| P12163_1_F7,10798 | R.AEEAGGASFSSYDTR.I | 1851.866 | 0.00041  | 3 | 1 | 34.5 | 0 |
| P12163_1_F7,11469 | R.AEEAGGASFSSYDTR.I | 1851.866 | 0.0014   | 3 | 1 | 52.4 | 0 |
| P12163_1_F7,11976 | R.AEEAGGASFSSYDTR.I | 1851.866 | -0.00153 | 3 | 1 | 43.5 | 0 |
| P12163_1_F7,12359 | R.AEEAGGASFSSYDTR.I | 1851.866 | 0.00246  | 3 | 1 | 43.7 | 0 |
| P12163_1_F7,12844 | R.AEEAGGASFSSYDTR.I | 1851.866 | 0.00261  | 3 | 1 | 49.4 | 0 |
| P12163_1_F7,12878 | R.AEEAGGASFSSYDTR.I | 1851.866 | 0.00311  | 2 | 1 | 74.2 | 0 |
| P12163_1_F8,9387  | R.AEEAGGASFSSYDTR.I | 1851.866 | 0.00081  | 3 | 1 | 33.1 | 0 |
| P12163_1_F8,10300 | R.AEEAGGASFSSYDTR.I | 1851.866 | 0.0023   | 3 | 1 | 35.8 | 0 |
| P12163_1_F8,10540 | R.AEEAGGASFSSYDTR.I | 1851.866 | 0.00311  | 3 | 1 | 69.9 | 0 |
| P12163_1_F8,10577 | R.AEEAGGASFSSYDTR.I | 1851.866 | 0.00283  | 2 | 1 | 44.1 | 0 |
| P12163_1_F8,11125 | R.AEEAGGASFSSYDTR.I | 1851.866 | 0.00338  | 3 | 1 | 29.7 | 0 |
| P12163_1_F8,11220 | R.AEEAGGASFSSYDTR.I | 1851.866 | 0.00407  | 2 | 1 | 56.5 | 0 |
| P12163_1_F8,11566 | R.AEEAGGASFSSYDTR.I | 1851.866 | 0.00815  | 3 | 1 | 22.8 | 0 |
| P12163_1_F8,11821 | R.AEEAGGASFSSYDTR.I | 1851.866 | 0.00219  | 3 | 1 | 74   | 0 |
| P12163_1_F8,11823 | R.AEEAGGASFSSYDTR.I | 1851.866 | 0.00129  | 2 | 1 | 34.6 | 0 |
| P12163_1_F8,12402 | R.AEEAGGASFSSYDTR.I | 1851.866 | -0.00193 | 2 | 1 | 63.7 | 0 |
| P12163_1_F8,12407 | R.AEEAGGASFSSYDTR.I | 1851.866 | -0.0004  | 3 | 1 | 75.4 | 0 |
| P12163_1_F8,12658 | R.AEEAGGASFSSYDTR.I | 1851.866 | 0.00227  | 2 | 1 | 53   | 0 |
| P12163_1_F8,12670 | R.AEEAGGASFSSYDTR.I | 1851.866 | 0.00363  | 3 | 1 | 43.2 | 0 |
| P12163_1_F8,12892 | R.AEEAGGASFSSYDTR.I | 1851.866 | 0.00157  | 2 | 1 | 76.6 | 0 |
| P12163_1_F8,12901 | R.AEEAGGASFSSYDTR.I | 1851.866 | 0.00018  | 3 | 1 | 63   | 0 |
| P12163_1_F8,13156 | R.AEEAGGASFSSYDTR.I | 1851.866 | 0.00361  | 2 | 1 | 26.6 | 0 |
| P12163_1_F8,13338 | R.AEEAGGASFSSYDTR.I | 1851.866 | 0.0036   | 3 | 1 | 40.5 | 0 |
| P12163_1_F8,13415 | R.AEEAGGASFSSYDTR.I | 1851.866 | 0.00189  | 2 | 1 | 71.7 | 0 |

|                   |                     |          |          |   |   |      |   |
|-------------------|---------------------|----------|----------|---|---|------|---|
| P12163_1_F8,15185 | R.AEEAGGASFSSYDTR.I | 1851.866 | -0.01197 | 3 | 1 | 45.8 | 0 |
| P12163_1_F9,9324  | R.AEEAGGASFSSYDTR.I | 1851.866 | 0.00399  | 3 | 1 | 33.3 | 0 |
| P12163_1_F9,10505 | R.AEEAGGASFSSYDTR.I | 1851.866 | 0.00273  | 2 | 1 | 33.4 | 0 |
| P12163_1_F9,10555 | R.AEEAGGASFSSYDTR.I | 1851.866 | 0.0021   | 3 | 1 | 57   | 0 |
| P12163_1_F9,11240 | R.AEEAGGASFSSYDTR.I | 1851.866 | 0.00199  | 2 | 1 | 34.8 | 0 |
| P12163_1_F9,11952 | R.AEEAGGASFSSYDTR.I | 1851.866 | 0.00786  | 3 | 1 | 49.2 | 0 |
| P12163_1_F9,11967 | R.AEEAGGASFSSYDTR.I | 1851.866 | 0.00663  | 2 | 1 | 24.9 | 0 |
| P12163_1_F9,12402 | R.AEEAGGASFSSYDTR.I | 1851.866 | 0.00579  | 2 | 1 | 60.2 | 0 |
| P12163_1_F9,12423 | R.AEEAGGASFSSYDTR.I | 1851.866 | 0.00234  | 3 | 1 | 38.7 | 0 |
| P12163_1_F9,12967 | R.AEEAGGASFSSYDTR.I | 1851.866 | 0.00039  | 2 | 1 | 30.9 | 0 |
| P12163_1_F9,13417 | R.AEEAGGASFSSYDTR.I | 1851.866 | 0.00071  | 2 | 1 | 70   | 0 |
| P12163_1_F9,13429 | R.AEEAGGASFSSYDTR.I | 1851.866 | 0.00255  | 3 | 1 | 47.4 | 0 |
| P12163_1_S1,8072  | R.AEEAGGASFSSYDTR.I | 1851.866 | 0.00216  | 3 | 1 | 22.5 | 0 |
| P12163_1_S1,8080  | R.AEEAGGASFSSYDTR.I | 1851.866 | 0.00206  | 4 | 1 | 21.9 | 0 |
| P12163_1_S1,8291  | R.AEEAGGASFSSYDTR.I | 1851.866 | 0.00099  | 3 | 1 | 36.6 | 0 |
| P12163_1_S1,9062  | R.AEEAGGASFSSYDTR.I | 1851.866 | 0.00548  | 3 | 1 | 42.3 | 0 |
| P12163_1_S1,9102  | R.AEEAGGASFSSYDTR.I | 1851.866 | 0.0019   | 4 | 1 | 35.1 | 0 |
| P12163_1_S1,9333  | R.AEEAGGASFSSYDTR.I | 1851.866 | -0.00514 | 4 | 1 | 33.8 | 0 |
| P12163_1_S1,9615  | R.AEEAGGASFSSYDTR.I | 1851.866 | 0.00383  | 3 | 1 | 68.8 | 0 |
| P12163_1_S1,9690  | R.AEEAGGASFSSYDTR.I | 1851.866 | 0.00362  | 4 | 1 | 51.4 | 0 |
| P12163_1_S1,9695  | R.AEEAGGASFSSYDTR.I | 1851.866 | 0.00302  | 4 | 1 | 54   | 0 |
| P12163_1_S1,9824  | R.AEEAGGASFSSYDTR.I | 1851.866 | -0.00015 | 3 | 1 | 58.2 | 0 |
| P12163_1_S1,9906  | R.AEEAGGASFSSYDTR.I | 1851.866 | 0.00174  | 4 | 1 | 58.2 | 0 |
| P12163_1_S1,10035 | R.AEEAGGASFSSYDTR.I | 1851.866 | 0.00453  | 3 | 1 | 80.7 | 0 |
| P12163_1_S1,10132 | R.AEEAGGASFSSYDTR.I | 1851.866 | 0.00186  | 4 | 1 | 49   | 0 |
| P12163_1_S1,10292 | R.AEEAGGASFSSYDTR.I | 1851.866 | -0.00112 | 3 | 1 | 84.4 | 0 |
| P12163_1_S1,10354 | R.AEEAGGASFSSYDTR.I | 1851.866 | -0.00118 | 4 | 1 | 38.2 | 0 |
| P12163_1_S1,10528 | R.AEEAGGASFSSYDTR.I | 1851.866 | 0.00458  | 3 | 1 | 72.2 | 0 |
| P12163_1_S1,10649 | R.AEEAGGASFSSYDTR.I | 1851.866 | 0.00762  | 4 | 1 | 39.1 | 0 |
| P12163_1_S1,10670 | R.AEEAGGASFSSYDTR.I | 1851.866 | 0.00266  | 4 | 1 | 34.2 | 0 |
| P12163_1_S1,10880 | R.AEEAGGASFSSYDTR.I | 1851.866 | 0.00297  | 2 | 1 | 60.9 | 0 |
| P12163_1_S1,10907 | R.AEEAGGASFSSYDTR.I | 1851.866 | -0.00204 | 3 | 1 | 82.3 | 0 |
| P12163_1_S1,10939 | R.AEEAGGASFSSYDTR.I | 1851.866 | 0.0019   | 4 | 1 | 44.4 | 0 |
| P12163_1_S1,11099 | R.AEEAGGASFSSYDTR.I | 1851.866 | -0.00397 | 2 | 1 | 30.5 | 0 |
| P12163_1_S1,11134 | R.AEEAGGASFSSYDTR.I | 1851.866 | 0.00086  | 3 | 1 | 81.8 | 0 |
| P12163_1_S1,11520 | R.AEEAGGASFSSYDTR.I | 1851.866 | -0.0006  | 3 | 1 | 74.6 | 0 |
| P12163_1_S1,11769 | R.AEEAGGASFSSYDTR.I | 1851.866 | 0.003    | 3 | 1 | 68.1 | 0 |
| P12163_1_S1,11908 | R.AEEAGGASFSSYDTR.I | 1851.866 | -0.00437 | 2 | 1 | 30   | 0 |
| P12163_1_S1,12021 | R.AEEAGGASFSSYDTR.I | 1851.866 | 0.0014   | 3 | 1 | 94.4 | 0 |
| P12163_1_S1,12059 | R.AEEAGGASFSSYDTR.I | 1851.866 | 0.00682  | 4 | 1 | 55.5 | 0 |
| P12163_1_S1,12156 | R.AEEAGGASFSSYDTR.I | 1851.866 | 0.00293  | 2 | 1 | 55   | 0 |
| P12163_1_S1,12267 | R.AEEAGGASFSSYDTR.I | 1851.866 | 0.00365  | 3 | 1 | 96.9 | 0 |
| P12163_1_S1,12340 | R.AEEAGGASFSSYDTR.I | 1851.866 | 0.00218  | 4 | 1 | 26.3 | 0 |
| P12163_1_S1,12397 | R.AEEAGGASFSSYDTR.I | 1851.866 | 0.00471  | 2 | 1 | 70.4 | 0 |
| P12163_1_S1,12501 | R.AEEAGGASFSSYDTR.I | 1851.866 | -0.00094 | 3 | 1 | 91.8 | 0 |
| P12163_1_S1,12624 | R.AEEAGGASFSSYDTR.I | 1851.866 | 0.00391  | 2 | 1 | 75.5 | 0 |
| P12163_1_S1,12749 | R.AEEAGGASFSSYDTR.I | 1851.866 | 0.00261  | 3 | 1 | 94.3 | 0 |
| P12163_1_S1,13007 | R.AEEAGGASFSSYDTR.I | 1851.866 | 0.0023   | 3 | 1 | 114  | 0 |
| P12163_1_S1,13135 | R.AEEAGGASFSSYDTR.I | 1851.866 | -0.00151 | 2 | 1 | 75.6 | 0 |
| P12163_1_S1,13238 | R.AEEAGGASFSSYDTR.I | 1851.866 | -0.00258 | 3 | 1 | 102  | 0 |
| P12163_1_S1,13329 | R.AEEAGGASFSSYDTR.I | 1851.866 | -0.00109 | 2 | 1 | 77.6 | 0 |

|                   |                     |          |          |   |   |      |   |
|-------------------|---------------------|----------|----------|---|---|------|---|
| P12163_1_S1,13439 | R.AEEAGGASFSSYDTR.I | 1851.866 | 0.00005  | 3 | 1 | 105  | 0 |
| P12163_1_S1,13550 | R.AEEAGGASFSSYDTR.I | 1851.866 | 0.00239  | 2 | 1 | 76.1 | 0 |
| P12163_1_S1,13693 | R.AEEAGGASFSSYDTR.I | 1851.866 | 0.00111  | 3 | 1 | 105  | 0 |
| P12163_1_S1,13753 | R.AEEAGGASFSSYDTR.I | 1851.866 | -0.00118 | 4 | 1 | 27.6 | 0 |
| P12163_1_S1,13826 | R.AEEAGGASFSSYDTR.I | 1851.866 | 0.00497  | 2 | 1 | 72.7 | 0 |
| P12163_1_S1,13943 | R.AEEAGGASFSSYDTR.I | 1851.866 | 0.00338  | 3 | 1 | 105  | 0 |
| P12163_1_S1,14064 | R.AEEAGGASFSSYDTR.I | 1851.866 | 0.00697  | 2 | 1 | 77.3 | 0 |
| P12163_1_S1,14160 | R.AEEAGGASFSSYDTR.I | 1851.866 | 0.00194  | 3 | 1 | 109  | 0 |
| P12163_1_S1,14314 | R.AEEAGGASFSSYDTR.I | 1851.866 | 0.00285  | 2 | 1 | 69.3 | 0 |
| P12163_1_S1,14545 | R.AEEAGGASFSSYDTR.I | 1851.866 | 0.00329  | 2 | 1 | 47.1 | 0 |
| P12163_1_S1,14578 | R.AEEAGGASFSSYDTR.I | 1851.866 | 0.00297  | 3 | 1 | 73.5 | 0 |
| P12163_1_S1,14790 | R.AEEAGGASFSSYDTR.I | 1851.866 | 0.00209  | 2 | 1 | 70.3 | 0 |
| P12163_1_S1,14824 | R.AEEAGGASFSSYDTR.I | 1851.866 | 0.00275  | 3 | 1 | 114  | 0 |
| P12163_1_S1,15021 | R.AEEAGGASFSSYDTR.I | 1851.866 | 0.00445  | 2 | 1 | 34.4 | 0 |
| P12163_1_S1,15055 | R.AEEAGGASFSSYDTR.I | 1851.866 | 0.00309  | 3 | 1 | 82.3 | 0 |
| P12163_1_S1,15285 | R.AEEAGGASFSSYDTR.I | 1851.866 | 0.00293  | 2 | 1 | 61.6 | 0 |
| P12163_1_S1,15314 | R.AEEAGGASFSSYDTR.I | 1851.866 | 0.0027   | 3 | 1 | 85.6 | 0 |
| P12163_1_S1,15543 | R.AEEAGGASFSSYDTR.I | 1851.866 | 0.00441  | 2 | 1 | 58.1 | 0 |
| P12163_1_S1,15566 | R.AEEAGGASFSSYDTR.I | 1851.866 | 0.00239  | 3 | 1 | 105  | 0 |
| P12163_1_S1,15810 | R.AEEAGGASFSSYDTR.I | 1851.866 | 0.00297  | 2 | 1 | 65.7 | 0 |
| P12163_1_S1,15926 | R.AEEAGGASFSSYDTR.I | 1851.866 | 0.00293  | 3 | 1 | 71.7 | 0 |
| P12163_1_S1,16457 | R.AEEAGGASFSSYDTR.I | 1851.866 | 0.00369  | 3 | 1 | 62.5 | 0 |
| P12163_1_S1,16515 | R.AEEAGGASFSSYDTR.I | 1851.866 | 0.00661  | 2 | 1 | 34.1 | 0 |
| P12163_1_S1,16871 | R.AEEAGGASFSSYDTR.I | 1851.866 | 0.00644  | 3 | 1 | 86.8 | 0 |
| P12163_1_S1,16901 | R.AEEAGGASFSSYDTR.I | 1851.866 | 0.00691  | 2 | 1 | 36.7 | 0 |
| P12163_1_S1,17100 | R.AEEAGGASFSSYDTR.I | 1851.866 | 0.00381  | 3 | 1 | 61.6 | 0 |
| P12163_1_S1,17357 | R.AEEAGGASFSSYDTR.I | 1851.866 | 0.00455  | 3 | 1 | 85.1 | 0 |
| P12163_1_S1,17608 | R.AEEAGGASFSSYDTR.I | 1851.866 | 0.003    | 3 | 1 | 104  | 0 |
| P12163_1_S1,17648 | R.AEEAGGASFSSYDTR.I | 1851.866 | 0.00845  | 2 | 1 | 45.8 | 0 |
| P12163_1_S1,17869 | R.AEEAGGASFSSYDTR.I | 1851.866 | 0.00228  | 3 | 1 | 50.5 | 0 |
| P12163_1_S1,17902 | R.AEEAGGASFSSYDTR.I | 1851.866 | 0.00671  | 2 | 1 | 36.3 | 0 |
| P12163_1_S1,18136 | R.AEEAGGASFSSYDTR.I | 1851.866 | 0.00057  | 3 | 1 | 43   | 0 |
| P12163_1_S1,18152 | R.AEEAGGASFSSYDTR.I | 1851.866 | -0.00365 | 2 | 1 | 35.8 | 0 |
| P12163_1_S1,18477 | R.AEEAGGASFSSYDTR.I | 1851.866 | 0.00091  | 2 | 1 | 36.7 | 0 |
| P12163_1_S1,18575 | R.AEEAGGASFSSYDTR.I | 1851.866 | 0.00405  | 3 | 1 | 36.5 | 0 |
| P12163_1_S1,18727 | R.AEEAGGASFSSYDTR.I | 1851.866 | 0.00583  | 2 | 1 | 29.5 | 0 |
| P12163_1_S1,18937 | R.AEEAGGASFSSYDTR.I | 1851.866 | 0.00059  | 3 | 1 | 42.2 | 0 |
| P12163_1_S1,18969 | R.AEEAGGASFSSYDTR.I | 1851.866 | 0.00795  | 2 | 1 | 34   | 0 |
| P12163_1_S1,19183 | R.AEEAGGASFSSYDTR.I | 1851.866 | 0.00174  | 3 | 1 | 69.7 | 0 |
| P12163_1_S1,19446 | R.AEEAGGASFSSYDTR.I | 1851.866 | 0.00419  | 3 | 1 | 36   | 0 |
| P12163_1_S1,20146 | R.AEEAGGASFSSYDTR.I | 1851.866 | 0.00354  | 3 | 1 | 43.4 | 0 |
| P12163_1_S1,20395 | R.AEEAGGASFSSYDTR.I | 1851.866 | 0.00374  | 3 | 1 | 43.8 | 0 |
| P12163_1_S1,20410 | R.AEEAGGASFSSYDTR.I | 1851.866 | 0.00453  | 3 | 1 | 48.1 | 0 |
| P12163_1_S1,20637 | R.AEEAGGASFSSYDTR.I | 1851.866 | -0.0004  | 3 | 1 | 51.6 | 0 |
| P12163_1_S1,20879 | R.AEEAGGASFSSYDTR.I | 1851.866 | 0.00518  | 3 | 1 | 68.2 | 0 |
| P12163_1_S1,21131 | R.AEEAGGASFSSYDTR.I | 1851.866 | 0.0014   | 3 | 1 | 76   | 0 |
| P12163_1_S1,21387 | R.AEEAGGASFSSYDTR.I | 1851.866 | 0.00482  | 3 | 1 | 56.5 | 0 |
| P12163_1_S1,21600 | R.AEEAGGASFSSYDTR.I | 1851.866 | 0.00216  | 3 | 1 | 54.9 | 0 |
| P12163_1_S1,21840 | R.AEEAGGASFSSYDTR.I | 1851.866 | 0.00419  | 3 | 1 | 71.7 | 0 |
| P12163_1_S1,21952 | R.AEEAGGASFSSYDTR.I | 1851.866 | 0.00265  | 2 | 1 | 32   | 0 |
| P12163_1_S1,22085 | R.AEEAGGASFSSYDTR.I | 1851.866 | 0.0044   | 3 | 1 | 68.5 | 0 |

|                   |                     |          |          |   |   |      |   |
|-------------------|---------------------|----------|----------|---|---|------|---|
| P12163_1_S1,22306 | R.AEEAGGASFSSYDTR.I | 1851.866 | 0.00401  | 3 | 1 | 81   | 0 |
| P12163_1_S1,22529 | R.AEEAGGASFSSYDTR.I | 1851.866 | 0.00219  | 3 | 1 | 57.9 | 0 |
| P12163_1_S1,22696 | R.AEEAGGASFSSYDTR.I | 1851.866 | 0.00275  | 2 | 1 | 32.7 | 0 |
| P12163_1_S1,22739 | R.AEEAGGASFSSYDTR.I | 1851.866 | 0.00221  | 3 | 1 | 61.7 | 0 |
| P12163_1_S1,22949 | R.AEEAGGASFSSYDTR.I | 1851.866 | 0.00396  | 3 | 1 | 91.8 | 0 |
| P12163_1_S1,23173 | R.AEEAGGASFSSYDTR.I | 1851.866 | 0.00333  | 3 | 1 | 91.9 | 0 |
| P12163_1_S1,23399 | R.AEEAGGASFSSYDTR.I | 1851.866 | 0.00333  | 3 | 1 | 85.1 | 0 |
| P12163_1_S1,23610 | R.AEEAGGASFSSYDTR.I | 1851.866 | 0.0039   | 3 | 1 | 77.6 | 0 |
| P12163_1_S1,23819 | R.AEEAGGASFSSYDTR.I | 1851.866 | 0.00392  | 3 | 1 | 115  | 0 |
| P12163_1_S1,24034 | R.AEEAGGASFSSYDTR.I | 1851.866 | 0.00261  | 3 | 1 | 86.3 | 0 |
| P12163_1_S1,24234 | R.AEEAGGASFSSYDTR.I | 1851.866 | 0.00374  | 3 | 1 | 109  | 0 |
| P12163_1_S1,24433 | R.AEEAGGASFSSYDTR.I | 1851.866 | 0.00293  | 3 | 1 | 87.9 | 0 |
| P12163_1_S1,24616 | R.AEEAGGASFSSYDTR.I | 1851.866 | 0.00327  | 3 | 1 | 92.2 | 0 |
| P12163_1_S1,24795 | R.AEEAGGASFSSYDTR.I | 1851.866 | 0.00309  | 3 | 1 | 78.7 | 0 |
| P12163_1_S1,24981 | R.AEEAGGASFSSYDTR.I | 1851.866 | 0.0036   | 3 | 1 | 77.1 | 0 |
| P12163_1_S1,25148 | R.AEEAGGASFSSYDTR.I | 1851.866 | 0.00338  | 3 | 1 | 91.3 | 0 |
| P12163_1_S1,25313 | R.AEEAGGASFSSYDTR.I | 1851.866 | 0.0032   | 3 | 1 | 92.2 | 0 |
| P12163_1_S1,25476 | R.AEEAGGASFSSYDTR.I | 1851.866 | 0.0027   | 3 | 1 | 94.2 | 0 |
| P12163_1_S1,25632 | R.AEEAGGASFSSYDTR.I | 1851.866 | 0.00248  | 3 | 1 | 70.1 | 0 |
| P12163_1_S1,25785 | R.AEEAGGASFSSYDTR.I | 1851.866 | 0.00414  | 3 | 1 | 77.3 | 0 |
| P12163_1_S1,25930 | R.AEEAGGASFSSYDTR.I | 1851.866 | 0.00329  | 3 | 1 | 80.1 | 0 |
| P12163_1_S1,26096 | R.AEEAGGASFSSYDTR.I | 1851.866 | 0.00458  | 3 | 1 | 46.4 | 0 |
| P12163_1_S1,26245 | R.AEEAGGASFSSYDTR.I | 1851.866 | 0.00381  | 3 | 1 | 75.2 | 0 |
| P12163_1_S1,26389 | R.AEEAGGASFSSYDTR.I | 1851.866 | 0.00297  | 3 | 1 | 72.1 | 0 |
| P12163_1_S1,26531 | R.AEEAGGASFSSYDTR.I | 1851.866 | 0.00365  | 3 | 1 | 101  | 0 |
| P12163_1_S1,26672 | R.AEEAGGASFSSYDTR.I | 1851.866 | 0.00306  | 3 | 1 | 71   | 0 |
| P12163_1_S1,26814 | R.AEEAGGASFSSYDTR.I | 1851.866 | 0.00383  | 3 | 1 | 64.2 | 0 |
| P12163_1_S1,26950 | R.AEEAGGASFSSYDTR.I | 1851.866 | 0.00311  | 3 | 1 | 58.7 | 0 |
| P12163_1_S1,27087 | R.AEEAGGASFSSYDTR.I | 1851.866 | 0.00374  | 3 | 1 | 74.4 | 0 |
| P12163_1_S1,27234 | R.AEEAGGASFSSYDTR.I | 1851.866 | 0.00408  | 3 | 1 | 102  | 0 |
| P12163_1_S1,27385 | R.AEEAGGASFSSYDTR.I | 1851.866 | 0.00315  | 3 | 1 | 63.7 | 0 |
| P12163_1_S1,27529 | R.AEEAGGASFSSYDTR.I | 1851.866 | 0.00318  | 3 | 1 | 84.1 | 0 |
| P12163_1_S1,27676 | R.AEEAGGASFSSYDTR.I | 1851.866 | 0.00309  | 3 | 1 | 70.4 | 0 |
| P12163_1_S1,27815 | R.AEEAGGASFSSYDTR.I | 1851.866 | 0.00392  | 3 | 1 | 80.6 | 0 |
| P12163_1_S1,27957 | R.AEEAGGASFSSYDTR.I | 1851.866 | 0.00237  | 3 | 1 | 71.4 | 0 |
| P12163_1_S1,28096 | R.AEEAGGASFSSYDTR.I | 1851.866 | -0.00204 | 3 | 1 | 57.4 | 0 |
| P12163_1_S1,28234 | R.AEEAGGASFSSYDTR.I | 1851.866 | 0.00329  | 3 | 1 | 74.9 | 0 |
| P12163_1_S1,28373 | R.AEEAGGASFSSYDTR.I | 1851.866 | 0.00399  | 3 | 1 | 89.4 | 0 |
| P12163_1_S1,28514 | R.AEEAGGASFSSYDTR.I | 1851.866 | 0.00351  | 3 | 1 | 58.8 | 0 |
| P12163_1_S1,28654 | R.AEEAGGASFSSYDTR.I | 1851.866 | 0.00311  | 3 | 1 | 71.4 | 0 |
| P12163_1_S1,28792 | R.AEEAGGASFSSYDTR.I | 1851.866 | 0.00365  | 3 | 1 | 90.4 | 0 |
| P12163_1_S1,28928 | R.AEEAGGASFSSYDTR.I | 1851.866 | 0.00342  | 3 | 1 | 67.2 | 0 |
| P12163_1_S1,29066 | R.AEEAGGASFSSYDTR.I | 1851.866 | 0.0036   | 3 | 1 | 80.9 | 0 |
| P12163_1_S1,29205 | R.AEEAGGASFSSYDTR.I | 1851.866 | 0.00387  | 3 | 1 | 78.2 | 0 |
| P12163_1_S1,29340 | R.AEEAGGASFSSYDTR.I | 1851.866 | 0.00228  | 3 | 1 | 61.5 | 0 |
| P12163_1_S1,29477 | R.AEEAGGASFSSYDTR.I | 1851.866 | 0.00351  | 3 | 1 | 77.9 | 0 |
| P12163_1_S1,29615 | R.AEEAGGASFSSYDTR.I | 1851.866 | 0.00426  | 3 | 1 | 87.8 | 0 |
| P12163_1_S1,29752 | R.AEEAGGASFSSYDTR.I | 1851.866 | 0.00437  | 3 | 1 | 74.9 | 0 |
| P12163_1_S1,29889 | R.AEEAGGASFSSYDTR.I | 1851.866 | 0.00383  | 3 | 1 | 84.8 | 0 |
| P12163_1_S1,30028 | R.AEEAGGASFSSYDTR.I | 1851.866 | 0.00455  | 3 | 1 | 83   | 0 |
| P12163_1_S1,30173 | R.AEEAGGASFSSYDTR.I | 1851.866 | 0.0023   | 3 | 1 | 59.6 | 0 |

|                   |              |          |          |   |   |      |   |
|-------------------|--------------|----------|----------|---|---|------|---|
| P12163_1_S1,30211 | R.AEEAGGASFS | 1851.866 | 0.00378  | 3 | 1 | 77.1 | 0 |
| P12163_1_S1,30354 | R.AEEAGGASFS | 1851.866 | 0.00221  | 3 | 1 | 83.6 | 0 |
| P12163_1_S1,30363 | R.AEEAGGASFS | 1851.866 | 0.00462  | 3 | 1 | 74.9 | 0 |
| P12163_1_S1,30507 | R.AEEAGGASFS | 1851.866 | 0.00342  | 3 | 1 | 59.3 | 0 |
| P12163_1_S1,30644 | R.AEEAGGASFS | 1851.866 | 0.00324  | 3 | 1 | 64.7 | 0 |
| P12163_1_S1,30785 | R.AEEAGGASFS | 1851.866 | 0.005    | 3 | 1 | 65   | 0 |
| P12163_1_S1,30929 | R.AEEAGGASFS | 1851.866 | 0.00234  | 3 | 1 | 68.1 | 0 |
| P12163_1_S1,31208 | R.AEEAGGASFS | 1851.866 | 0.00234  | 3 | 1 | 84.2 | 0 |
| P12163_1_S1,31352 | R.AEEAGGASFS | 1851.866 | 0.00275  | 3 | 1 | 63.8 | 0 |
| P12163_1_S1,31497 | R.AEEAGGASFS | 1851.866 | 0.00338  | 3 | 1 | 93.1 | 0 |
| P12163_1_S1,31640 | R.AEEAGGASFS | 1851.866 | 0.00144  | 3 | 1 | 70.6 | 0 |
| P12163_1_S1,31788 | R.AEEAGGASFS | 1851.866 | 0.00225  | 3 | 1 | 74.5 | 0 |
| P12163_1_S1,31928 | R.AEEAGGASFS | 1851.866 | 0.00174  | 3 | 1 | 43.1 | 0 |
| P12163_1_S10,51   | R.AEEAGGASFS | 1851.866 | 0.00464  | 3 | 1 | 33.8 | 0 |
| P12163_1_S10,148  | R.AEEAGGASFS | 1851.866 | 0.00239  | 2 | 1 | 37.8 | 0 |
| P12163_1_S10,295  | R.AEEAGGASFS | 1851.866 | 0.00473  | 3 | 1 | 91   | 0 |
| P12163_1_S10,2889 | R.AEEAGGASFS | 1851.866 | 0.00431  | 3 | 1 | 28.8 | 0 |
| P12163_1_S10,3070 | R.AEEAGGASFS | 1851.866 | 0.00435  | 3 | 1 | 59.5 | 0 |
| P12163_1_S10,4322 | R.AEEAGGASFS | 1851.866 | 0.00644  | 3 | 1 | 58.5 | 0 |
| P12163_1_S10,4623 | R.AEEAGGASFS | 1851.866 | 0.00225  | 3 | 1 | 21.9 | 0 |
| P12163_1_S10,4772 | R.AEEAGGASFS | 1851.866 | 0.00336  | 3 | 1 | 23.9 | 0 |
| P12163_1_S10,4917 | R.AEEAGGASFS | 1851.866 | 0.00525  | 3 | 1 | 39.3 | 0 |
| P12163_1_S10,5088 | R.AEEAGGASFS | 1851.866 | 0.00414  | 3 | 1 | 24.7 | 0 |
| P12163_1_S10,5265 | R.AEEAGGASFS | 1851.866 | 0.00342  | 3 | 1 | 36.4 | 0 |
| P12163_1_S10,5458 | R.AEEAGGASFS | 1851.866 | 0.00671  | 3 | 1 | 57.3 | 0 |
| P12163_1_S10,5657 | R.AEEAGGASFS | 1851.866 | 0.00183  | 3 | 1 | 55.6 | 0 |
| P12163_1_S10,5851 | R.AEEAGGASFS | 1851.866 | 0.00138  | 3 | 1 | 30.8 | 0 |
| P12163_1_S10,6040 | R.AEEAGGASFS | 1851.866 | 0.00135  | 3 | 1 | 46.7 | 0 |
| P12163_1_S10,1042 | R.AEEAGGASFS | 1851.866 | 0.00338  | 3 | 1 | 35.4 | 0 |
| P12163_1_S10,1090 | R.AEEAGGASFS | 1851.866 | 0.00743  | 3 | 1 | 55.6 | 0 |
| P12163_1_S10,1120 | R.AEEAGGASFS | 1851.866 | -0.00256 | 3 | 1 | 33.7 | 0 |
| P12163_1_S10,1143 | R.AEEAGGASFS | 1851.866 | 0.00854  | 3 | 1 | 29.7 | 0 |
| P12163_1_S10,1165 | R.AEEAGGASFS | 1851.866 | 0.00471  | 3 | 1 | 24.9 | 0 |
| P12163_1_S10,1190 | R.AEEAGGASFS | 1851.866 | 0.00396  | 3 | 1 | 22.1 | 0 |
| P12163_1_S10,1211 | R.AEEAGGASFS | 1851.866 | 0.00626  | 3 | 1 | 59.8 | 0 |
| P12163_1_S10,1233 | R.AEEAGGASFS | 1851.866 | 0.00252  | 3 | 1 | 57.8 | 0 |
| P12163_1_S10,1280 | R.AEEAGGASFS | 1851.866 | 0.00458  | 3 | 1 | 47.8 | 0 |
| P12163_1_S10,1310 | R.AEEAGGASFS | 1851.866 | 0.00261  | 3 | 1 | 31.9 | 0 |
| P12163_1_S10,1335 | R.AEEAGGASFS | 1851.866 | 0.00521  | 3 | 1 | 46.3 | 0 |
| P12163_1_S10,1356 | R.AEEAGGASFS | 1851.866 | 0.00288  | 3 | 1 | 105  | 0 |
| P12163_1_S10,1357 | R.AEEAGGASFS | 1851.866 | 0.00201  | 2 | 1 | 70.3 | 0 |
| P12163_1_S10,1394 | R.AEEAGGASFS | 1851.866 | 0        | 3 | 1 | 52.9 | 0 |
| P12163_1_S10,1400 | R.AEEAGGASFS | 1851.866 | 0.00433  | 2 | 1 | 79.2 | 0 |
| P12163_1_S10,1415 | R.AEEAGGASFS | 1851.866 | 0.0023   | 3 | 1 | 52.9 | 0 |
| P12163_1_S10,2826 | R.AEEAGGASFS | 1851.866 | -0.00177 | 3 | 1 | 30.6 | 0 |
| P12163_1_S10,2839 | R.AEEAGGASFS | 1851.866 | 0.003    | 3 | 1 | 53.3 | 0 |
| P12163_1_S10,2853 | R.AEEAGGASFS | 1851.866 | 0.00122  | 3 | 1 | 28.2 | 0 |
| P12163_1_S10,2867 | R.AEEAGGASFS | 1851.866 | 0.00534  | 3 | 1 | 62.1 | 0 |
| P12163_1_S10,2882 | R.AEEAGGASFS | 1851.866 | 0.0014   | 3 | 1 | 39.3 | 0 |
| P12163_1_S10,2896 | R.AEEAGGASFS | 1851.866 | 0.00324  | 3 | 1 | 65.3 | 0 |
| P12163_1_S10,2910 | R.AEEAGGASFS | 1851.866 | 0.00257  | 3 | 1 | 78.8 | 0 |

|                   |                     |          |          |   |   |      |   |
|-------------------|---------------------|----------|----------|---|---|------|---|
| P12163_1_S10,2924 | R.AEEAGGASFSSYDTR.I | 1851.866 | 0.00327  | 3 | 1 | 54.5 | 0 |
| P12163_2_F1,11991 | R.AEEAGGASFSSYDTR.I | 1851.866 | 0.00843  | 2 | 1 | 28.2 | 0 |
| P12163_2_F1,12483 | R.AEEAGGASFSSYDTR.I | 1851.866 | -0.00197 | 2 | 1 | 44.3 | 0 |
| P12163_2_F1,12504 | R.AEEAGGASFSSYDTR.I | 1851.866 | -0.00114 | 3 | 1 | 36.7 | 0 |
| P12163_2_F1,13091 | R.AEEAGGASFSSYDTR.I | 1851.866 | 0.00115  | 2 | 1 | 59.2 | 0 |
| P12163_2_F10,1015 | R.AEEAGGASFSSYDTR.I | 1851.866 | -0.00045 | 3 | 1 | 55.3 | 0 |
| P12163_2_F10,1057 | R.AEEAGGASFSSYDTR.I | 1851.866 | 0.00491  | 3 | 1 | 52.2 | 0 |
| P12163_2_F10,1124 | R.AEEAGGASFSSYDTR.I | 1851.866 | 0.00597  | 3 | 1 | 54.7 | 0 |
| P12163_2_F10,1145 | R.AEEAGGASFSSYDTR.I | 1851.866 | 0.00239  | 3 | 1 | 62.2 | 0 |
| P12163_2_F10,1195 | R.AEEAGGASFSSYDTR.I | 1851.866 | 0.01265  | 3 | 1 | 47.9 | 0 |
| P12163_2_F10,1196 | R.AEEAGGASFSSYDTR.I | 1851.866 | 0.01056  | 3 | 1 | 33.2 | 0 |
| P12163_2_F10,1242 | R.AEEAGGASFSSYDTR.I | 1851.866 | 0.00539  | 3 | 1 | 45.9 | 0 |
| P12163_2_F10,1257 | R.AEEAGGASFSSYDTR.I | 1851.866 | 0.00135  | 2 | 1 | 35.7 | 0 |
| P12163_2_F10,1305 | R.AEEAGGASFSSYDTR.I | 1851.866 | 0.00479  | 2 | 1 | 43   | 0 |
| P12163_2_F10,1306 | R.AEEAGGASFSSYDTR.I | 1851.866 | 0.00401  | 3 | 1 | 87.2 | 0 |
| P12163_2_F2,9934  | R.AEEAGGASFSSYDTR.I | 1851.866 | 0.00989  | 3 | 1 | 41.6 | 0 |
| P12163_2_F2,10721 | R.AEEAGGASFSSYDTR.I | 1851.866 | 0.00374  | 3 | 1 | 31.9 | 0 |
| P12163_2_F2,11436 | R.AEEAGGASFSSYDTR.I | 1851.866 | -0.00253 | 2 | 1 | 25.6 | 0 |
| P12163_2_F2,11838 | R.AEEAGGASFSSYDTR.I | 1851.866 | 0.00239  | 3 | 1 | 42.9 | 0 |
| P12163_2_F2,11849 | R.AEEAGGASFSSYDTR.I | 1851.866 | 0.00127  | 2 | 1 | 74   | 0 |
| P12163_2_F2,12680 | R.AEEAGGASFSSYDTR.I | 1851.866 | -0.00483 | 2 | 1 | 26.8 | 0 |
| P12163_2_F2,12874 | R.AEEAGGASFSSYDTR.I | 1851.866 | 0.003    | 3 | 1 | 65.6 | 0 |
| P12163_2_F2,12926 | R.AEEAGGASFSSYDTR.I | 1851.866 | -0.00005 | 2 | 1 | 76.9 | 0 |
| P12163_2_F2,13559 | R.AEEAGGASFSSYDTR.I | 1851.866 | 0.00607  | 2 | 1 | 57.3 | 0 |
| P12163_2_F4,8687  | R.AEEAGGASFSSYDTR.I | 1851.866 | -0.00288 | 3 | 1 | 38.9 | 0 |
| P12163_2_F4,9175  | R.AEEAGGASFSSYDTR.I | 1851.866 | -0.00283 | 3 | 1 | 37.5 | 0 |
| P12163_2_F4,9731  | R.AEEAGGASFSSYDTR.I | 1851.866 | 0.0014   | 3 | 1 | 43.7 | 0 |
| P12163_2_F4,9742  | R.AEEAGGASFSSYDTR.I | 1851.866 | 0.00125  | 2 | 1 | 44.1 | 0 |
| P12163_2_F4,10344 | R.AEEAGGASFSSYDTR.I | 1851.866 | -0.00072 | 3 | 1 | 39.1 | 0 |
| P12163_2_F4,10359 | R.AEEAGGASFSSYDTR.I | 1851.866 | 0.00385  | 2 | 1 | 42.7 | 0 |
| P12163_2_F4,11039 | R.AEEAGGASFSSYDTR.I | 1851.866 | 0.00086  | 3 | 1 | 35.7 | 0 |
| P12163_2_F4,11535 | R.AEEAGGASFSSYDTR.I | 1851.866 | 0.00216  | 3 | 1 | 26.9 | 0 |
| P12163_2_F4,11779 | R.AEEAGGASFSSYDTR.I | 1851.866 | 0.00086  | 3 | 1 | 24.2 | 0 |
| P12163_2_F4,11936 | R.AEEAGGASFSSYDTR.I | 1851.866 | 0.00023  | 2 | 1 | 44.9 | 0 |
| P12163_2_F4,12438 | R.AEEAGGASFSSYDTR.I | 1851.866 | 0.00507  | 3 | 1 | 38.1 | 0 |
| P12163_2_F4,12615 | R.AEEAGGASFSSYDTR.I | 1851.866 | 0.00617  | 2 | 1 | 43.1 | 0 |
| P12163_2_F6,7642  | R.AEEAGGASFSSYDTR.I | 1851.866 | 0.0039   | 3 | 1 | 31   | 0 |
| P12163_2_F6,9236  | R.AEEAGGASFSSYDTR.I | 1851.866 | 0.00669  | 3 | 1 | 40.1 | 0 |
| P12163_2_F6,9259  | R.AEEAGGASFSSYDTR.I | 1851.866 | 0.0009   | 4 | 1 | 36.1 | 0 |
| P12163_2_F6,9396  | R.AEEAGGASFSSYDTR.I | 1851.866 | -0.00055 | 2 | 1 | 29.7 | 0 |
| P12163_2_F6,9455  | R.AEEAGGASFSSYDTR.I | 1851.866 | 0.00288  | 3 | 1 | 31.9 | 0 |
| P12163_2_F6,9852  | R.AEEAGGASFSSYDTR.I | 1851.866 | 0.00087  | 2 | 1 | 61.2 | 0 |
| P12163_2_F6,9895  | R.AEEAGGASFSSYDTR.I | 1851.866 | 0.00297  | 3 | 1 | 44.4 | 0 |
| P12163_2_F6,10123 | R.AEEAGGASFSSYDTR.I | 1851.866 | 0.00221  | 3 | 1 | 55.7 | 0 |
| P12163_2_F6,10321 | R.AEEAGGASFSSYDTR.I | 1851.866 | 0.00219  | 2 | 1 | 74.9 | 0 |
| P12163_2_F6,10346 | R.AEEAGGASFSSYDTR.I | 1851.866 | 0.00275  | 3 | 1 | 67   | 0 |
| P12163_2_F6,10444 | R.AEEAGGASFSSYDTR.I | 1851.866 | 0.00314  | 4 | 1 | 35   | 0 |
| P12163_2_F6,10551 | R.AEEAGGASFSSYDTR.I | 1851.866 | 0.00191  | 2 | 1 | 44.5 | 0 |
| P12163_2_F6,10577 | R.AEEAGGASFSSYDTR.I | 1851.866 | 0.00419  | 3 | 1 | 62.2 | 0 |
| P12163_2_F6,10910 | R.AEEAGGASFSSYDTR.I | 1851.866 | 0.00144  | 3 | 1 | 26.7 | 0 |
| P12163_2_F6,11024 | R.AEEAGGASFSSYDTR.I | 1851.866 | 0.00213  | 2 | 1 | 63.7 | 0 |

|                   |                     |          |          |   |   |      |   |
|-------------------|---------------------|----------|----------|---|---|------|---|
| P12163_2_F6,11147 | R.AEEAGGASFSSYDTR.I | 1851.866 | 0.00437  | 3 | 1 | 48.7 | 0 |
| P12163_2_F6,11391 | R.AEEAGGASFSSYDTR.I | 1851.866 | 0.00153  | 3 | 1 | 63.8 | 0 |
| P12163_2_F6,11566 | R.AEEAGGASFSSYDTR.I | 1851.866 | 0.00341  | 2 | 1 | 27   | 0 |
| P12163_2_F6,11632 | R.AEEAGGASFSSYDTR.I | 1851.866 | -0.00099 | 3 | 1 | 95.6 | 0 |
| P12163_2_F6,11860 | R.AEEAGGASFSSYDTR.I | 1851.866 | 0.00207  | 3 | 1 | 53.8 | 0 |
| P12163_2_F6,12094 | R.AEEAGGASFSSYDTR.I | 1851.866 | 0.00309  | 3 | 1 | 75.3 | 0 |
| P12163_2_F6,12262 | R.AEEAGGASFSSYDTR.I | 1851.866 | 0.00393  | 2 | 1 | 65   | 0 |
| P12163_2_F6,12311 | R.AEEAGGASFSSYDTR.I | 1851.866 | 0.00266  | 3 | 1 | 76.2 | 0 |
| P12163_2_F6,12492 | R.AEEAGGASFSSYDTR.I | 1851.866 | 0.00229  | 2 | 1 | 84.4 | 0 |
| P12163_2_F6,12569 | R.AEEAGGASFSSYDTR.I | 1851.866 | 0.00342  | 3 | 1 | 58   | 0 |
| P12163_2_F6,12732 | R.AEEAGGASFSSYDTR.I | 1851.866 | 0.00291  | 2 | 1 | 69.5 | 0 |
| P12163_2_F6,12965 | R.AEEAGGASFSSYDTR.I | 1851.866 | 0.00377  | 2 | 1 | 72.5 | 0 |
| P12163_2_F6,13019 | R.AEEAGGASFSSYDTR.I | 1851.866 | 0.00095  | 3 | 1 | 80.8 | 0 |
| P12163_2_F6,13161 | R.AEEAGGASFSSYDTR.I | 1851.866 | 0.00237  | 2 | 1 | 78.7 | 0 |
| P12163_2_F6,13351 | R.AEEAGGASFSSYDTR.I | 1851.866 | -0.00112 | 3 | 1 | 44   | 0 |
| P12163_2_F6,13581 | R.AEEAGGASFSSYDTR.I | 1851.866 | 0.00212  | 3 | 1 | 35.2 | 0 |
| P12163_2_F6,13679 | R.AEEAGGASFSSYDTR.I | 1851.866 | -0.00137 | 2 | 1 | 63.6 | 0 |
| P12163_2_F6,13820 | R.AEEAGGASFSSYDTR.I | 1851.866 | 0.00543  | 3 | 1 | 53.7 | 0 |
| P12163_2_F6,14101 | R.AEEAGGASFSSYDTR.I | 1851.866 | -0.00007 | 2 | 1 | 53.1 | 0 |
| P12163_2_F6,14108 | R.AEEAGGASFSSYDTR.I | 1851.866 | -0.00231 | 3 | 1 | 37.9 | 0 |
| P12163_2_F6,14340 | R.AEEAGGASFSSYDTR.I | 1851.866 | -0.00639 | 2 | 1 | 35   | 0 |
| P12163_2_F6,14609 | R.AEEAGGASFSSYDTR.I | 1851.866 | -0.00193 | 2 | 1 | 31   | 0 |
| P12163_2_F6,14614 | R.AEEAGGASFSSYDTR.I | 1851.866 | -0.00958 | 3 | 1 | 41.4 | 0 |
| P12163_2_F6,15814 | R.AEEAGGASFSSYDTR.I | 1851.866 | 0.00617  | 2 | 1 | 25.5 | 0 |
| P12163_2_F6,21280 | R.AEEAGGASFSSYDTR.I | 1851.866 | 0.00198  | 3 | 1 | 22.6 | 0 |
| P12163_2_F6,21400 | R.AEEAGGASFSSYDTR.I | 1851.866 | 0.00179  | 2 | 1 | 31.7 | 0 |
| P12163_2_F6,21627 | R.AEEAGGASFSSYDTR.I | 1851.866 | 0.00121  | 2 | 1 | 50   | 0 |
| P12163_2_F6,22710 | R.AEEAGGASFSSYDTR.I | 1851.866 | 0.00275  | 3 | 1 | 23.5 | 0 |
| P12163_2_F6,22920 | R.AEEAGGASFSSYDTR.I | 1851.866 | -0.00069 | 3 | 1 | 45.1 | 0 |
| P12163_2_F6,23731 | R.AEEAGGASFSSYDTR.I | 1851.866 | 0.00419  | 3 | 1 | 47.9 | 0 |
| P12163_2_F6,24283 | R.AEEAGGASFSSYDTR.I | 1851.866 | 0.00084  | 3 | 1 | 38.5 | 0 |
| P12163_2_F6,24623 | R.AEEAGGASFSSYDTR.I | 1851.866 | 0.00147  | 3 | 1 | 45.2 | 0 |
| P12163_2_F6,24770 | R.AEEAGGASFSSYDTR.I | 1851.866 | 0.00626  | 3 | 1 | 31   | 0 |
| P12163_2_F7,8769  | R.AEEAGGASFSSYDTR.I | 1851.866 | 0.00725  | 3 | 1 | 35.8 | 0 |
| P12163_2_F7,8813  | R.AEEAGGASFSSYDTR.I | 1851.866 | 0.00375  | 2 | 1 | 46.2 | 0 |
| P12163_2_F7,9227  | R.AEEAGGASFSSYDTR.I | 1851.866 | 0.00701  | 3 | 1 | 29.6 | 0 |
| P12163_2_F7,9777  | R.AEEAGGASFSSYDTR.I | 1851.866 | -0.0009  | 3 | 1 | 40.5 | 0 |
| P12163_2_F7,11040 | R.AEEAGGASFSSYDTR.I | 1851.866 | 0.01275  | 2 | 1 | 30   | 0 |
| P12163_2_F7,11064 | R.AEEAGGASFSSYDTR.I | 1851.866 | 0.00806  | 3 | 1 | 84.4 | 0 |
| P12163_2_F7,11279 | R.AEEAGGASFSSYDTR.I | 1851.866 | -0.00049 | 3 | 1 | 46.4 | 0 |
| P12163_2_F7,11515 | R.AEEAGGASFSSYDTR.I | 1851.866 | 0.00243  | 2 | 1 | 66.6 | 0 |
| P12163_2_F7,11542 | R.AEEAGGASFSSYDTR.I | 1851.866 | 0.00135  | 3 | 1 | 81   | 0 |
| P12163_2_F7,11754 | R.AEEAGGASFSSYDTR.I | 1851.866 | 0.00252  | 3 | 1 | 44.5 | 0 |
| P12163_2_F7,12193 | R.AEEAGGASFSSYDTR.I | 1851.866 | 0.00207  | 3 | 1 | 93.6 | 0 |
| P12163_2_F8_1207C | R.AEEAGGASFSSYDTR.I | 1851.866 | 0.00212  | 3 | 1 | 50   | 0 |
| P12163_2_F8_1207C | R.AEEAGGASFSSYDTR.I | 1851.866 | 0.00315  | 3 | 1 | 56.2 | 0 |
| P12163_2_F8_1207C | R.AEEAGGASFSSYDTR.I | 1851.866 | 0.00329  | 3 | 1 | 50.2 | 0 |
| P12163_2_F8_1207C | R.AEEAGGASFSSYDTR.I | 1851.866 | 0.0039   | 3 | 1 | 45.6 | 0 |
| P12163_2_F8_1207C | R.AEEAGGASFSSYDTR.I | 1851.866 | 0.00115  | 2 | 1 | 56.6 | 0 |
| P12163_2_F8_1207C | R.AEEAGGASFSSYDTR.I | 1851.866 | 0.00126  | 3 | 1 | 62.4 | 0 |
| P12163_2_F8_1207C | R.AEEAGGASFSSYDTR.I | 1851.866 | 0.00387  | 3 | 1 | 44.7 | 0 |

|                   |                     |          |          |   |   |      |   |
|-------------------|---------------------|----------|----------|---|---|------|---|
| P12163_2_F8_12070 | R.AEEAGGASFSSYDTR.I | 1851.866 | 0.00345  | 2 | 1 | 80.6 | 0 |
| P12163_2_F9,12403 | R.AEEAGGASFSSYDTR.I | 1851.866 | 0.00408  | 3 | 1 | 34.4 | 0 |
| P12163_2_F9,12427 | R.AEEAGGASFSSYDTR.I | 1851.866 | 0.00623  | 2 | 1 | 25.2 | 0 |
| P12163_2_F9,13103 | R.AEEAGGASFSSYDTR.I | 1851.866 | 0.00779  | 3 | 1 | 43.1 | 0 |
| P12163_2_S3,11814 | R.AEEAGGASFSSYDTR.I | 1851.866 | 0.00329  | 3 | 1 | 62.7 | 0 |
| P12163_2_S3,12368 | R.AEEAGGASFSSYDTR.I | 1851.866 | 0.00561  | 3 | 1 | 35.2 | 0 |
| P12163_2_S3,12372 | R.AEEAGGASFSSYDTR.I | 1851.866 | 0.00445  | 2 | 1 | 28.1 | 0 |
| P12163_2_S5,11252 | R.AEEAGGASFSSYDTR.I | 1851.866 | 0.00318  | 3 | 1 | 28.7 | 0 |
| P12163_2_S5,11981 | R.AEEAGGASFSSYDTR.I | 1851.866 | 0.00311  | 3 | 1 | 44.5 | 0 |
| P12163_2_S5,12545 | R.AEEAGGASFSSYDTR.I | 1851.866 | -0.00645 | 2 | 1 | 33.9 | 0 |
| P12163_2_S5,13142 | R.AEEAGGASFSSYDTR.I | 1851.866 | -0.00007 | 2 | 1 | 35.7 | 0 |
| P12163_2_S5,13155 | R.AEEAGGASFSSYDTR.I | 1851.866 | 0.00009  | 3 | 1 | 48.6 | 0 |
| P12163_1_F4,5365  | R.AGGGGQVR.T        | 1005.574 | 0.00009  | 2 | 1 | 23.9 | 0 |
| P12163_1_F4,25587 | R.AGGGGQVR.T        | 1005.574 | 0.00271  | 2 | 1 | 25.1 | 0 |
| P12163_1_F4,27106 | R.AGGGGQVR.T        | 1005.574 | 0.00365  | 2 | 1 | 27.8 | 0 |
| P12163_1_F4,27557 | R.AGGGGQVR.T        | 1005.574 | 0.00335  | 2 | 1 | 24.4 | 0 |
| P12163_1_F4,28094 | R.AGGGGQVR.T        | 1005.574 | 0.00319  | 2 | 1 | 25.2 | 0 |
| P12163_1_F9,4645  | R.AGGGGQVR.T        | 1005.574 | 0.00053  | 2 | 1 | 24.2 | 0 |
| P12163_1_F4,6896  | R.AQAGGENK.D        | 1382.785 | 0.00825  | 2 | 1 | 24.5 | 0 |
| P12163_1_F5,5854  | R.AQAGGENK.D        | 1382.785 | 0.00507  | 3 | 1 | 40.5 | 0 |
| P12163_1_F6,23891 | R.AQAGGENK.D        | 1382.785 | 0.00225  | 2 | 1 | 25   | 0 |
| P12163_1_F8,6089  | R.AQAGGENK.D        | 1382.785 | 0.00174  | 3 | 1 | 34.5 | 0 |
| P12163_1_F8,6702  | R.AQAGGENK.D        | 1382.785 | 0.00251  | 2 | 1 | 24.6 | 0 |
| P12163_2_F1,6189  | R.AQAGGENK.D        | 1382.785 | 0.00567  | 2 | 1 | 24.9 | 0 |
| P12163_2_F1,6267  | R.AQAGGENK.D        | 1382.785 | 0.00567  | 3 | 1 | 24.7 | 0 |
| P12163_2_F2,6761  | R.AQAGGENK.D        | 1382.785 | 0.0051   | 3 | 1 | 40.8 | 0 |
| P12163_2_F6,5971  | R.AQAGGENK.D        | 1382.785 | 0.00036  | 3 | 1 | 34.7 | 0 |
| P12163_2_S5,6194  | R.AQAGGENK.D        | 1382.785 | 0.00015  | 3 | 1 | 30.6 | 0 |
| P12163_2_S5,6938  | R.AQAGGENK.D        | 1382.785 | 0.01668  | 3 | 1 | 29.7 | 0 |
| P12163_1_F4,15359 | R.FDM*PGLSK.E       | 1518.845 | 0.00408  | 3 | 1 | 30.3 | 0 |
| P12163_1_F4,15518 | R.FDM*PGLSK.E       | 1518.845 | 0.0045   | 2 | 1 | 29   | 0 |
| P12163_1_F4,15807 | R.FDM*PGLSK.E       | 1518.845 | 0.00202  | 2 | 1 | 28.7 | 0 |
| P12163_1_F4,15921 | R.FDM*PGLSK.E       | 1518.845 | 0.01257  | 3 | 1 | 28.2 | 0 |
| P12163_1_F4,17145 | R.FDM*PGLSK.E       | 1518.845 | 0.00976  | 2 | 1 | 28.3 | 0 |
| P12163_1_F4,17230 | R.FDM*PGLSK.E       | 1518.845 | 0.00273  | 3 | 1 | 25.5 | 0 |
| P12163_1_F4,17494 | R.FDM*PGLSK.E       | 1518.845 | 0.00438  | 3 | 1 | 22.5 | 0 |
| P12163_1_F4,17944 | R.FDM*PGLSK.E       | 1518.845 | 0.00758  | 2 | 1 | 28.7 | 0 |
| P12163_1_F4,18385 | R.FDM*PGLSK.E       | 1518.845 | 0.0138   | 3 | 1 | 24.2 | 0 |
| P12163_1_F4,19004 | R.FDM*PGLSK.E       | 1518.845 | 0.00582  | 3 | 1 | 27.8 | 0 |
| P12163_1_F4,19074 | R.FDM*PGLSK.E       | 1518.845 | 0.00676  | 2 | 1 | 24.6 | 0 |
| P12163_1_F4,19653 | R.FDM*PGLSK.E       | 1518.845 | 0.01464  | 3 | 1 | 29.6 | 0 |
| P12163_1_F4,19675 | R.FDM*PGLSK.E       | 1518.845 | 0.01776  | 2 | 1 | 28.7 | 0 |
| P12163_1_F4,19845 | R.FDM*PGLSK.E       | 1518.845 | 0.01203  | 3 | 1 | 30.6 | 0 |
| P12163_1_F4,19854 | R.FDM*PGLSK.E       | 1518.845 | 0.0115   | 2 | 1 | 28.8 | 0 |
| P12163_1_F4,20046 | R.FDM*PGLSK.E       | 1518.845 | 0.01134  | 3 | 1 | 30.7 | 0 |
| P12163_1_F4,20061 | R.FDM*PGLSK.E       | 1518.845 | 0.0138   | 2 | 1 | 28.9 | 0 |
| P12163_1_F4,20302 | R.FDM*PGLSK.E       | 1518.845 | 0.00724  | 2 | 1 | 28.6 | 0 |
| P12163_1_F4,20565 | R.FDM*PGLSK.E       | 1518.845 | 0.00512  | 2 | 1 | 28.3 | 0 |
| P12163_1_F4,23101 | R.FDM*PGLSK.E       | 1518.845 | 0.00801  | 3 | 1 | 23.4 | 0 |
| P12163_1_F4,23287 | R.FDM*PGLSK.E       | 1518.845 | 0.00844  | 2 | 1 | 28.8 | 0 |
| P12163_1_F4,23547 | R.FDM*PGLSK.E       | 1518.845 | 0.00758  | 2 | 1 | 28.6 | 0 |



|                   |               |          |         |   |   |      |   |
|-------------------|---------------|----------|---------|---|---|------|---|
| P12163_1_F4,23681 | R.FDM*PGLSK.E | 1518.845 | 0.00507 | 3 | 1 | 33.7 | 0 |
| P12163_1_F4,23818 | R.FDM*PGLSK.E | 1518.845 | 0.00544 | 2 | 1 | 28.8 | 0 |
| P12163_1_F4,24179 | R.FDM*PGLSK.E | 1518.845 | 0.00808 | 2 | 1 | 28.7 | 0 |
| P12163_1_F4,24180 | R.FDM*PGLSK.E | 1518.845 | 0.00582 | 3 | 1 | 33.7 | 0 |
| P12163_1_F4,24461 | R.FDM*PGLSK.E | 1518.845 | 0.00576 | 3 | 1 | 30.6 | 0 |
| P12163_1_F4,24464 | R.FDM*PGLSK.E | 1518.845 | 0.00704 | 2 | 1 | 28.9 | 0 |
| P12163_1_F4,25196 | R.FDM*PGLSK.E | 1518.845 | 0.00255 | 3 | 1 | 26   | 0 |
| P12163_1_F4,25689 | R.FDM*PGLSK.E | 1518.845 | 0.00555 | 3 | 1 | 27.8 | 0 |
| P12163_1_F4,25708 | R.FDM*PGLSK.E | 1518.845 | 0.00486 | 2 | 1 | 28.8 | 0 |
| P12163_1_F4,25949 | R.FDM*PGLSK.E | 1518.845 | 0.00826 | 2 | 1 | 24   | 0 |
| P12163_1_F4,26413 | R.FDM*PGLSK.E | 1518.845 | 0.0071  | 2 | 1 | 30.1 | 0 |
| P12163_1_F4,26824 | R.FDM*PGLSK.E | 1518.845 | 0.00615 | 3 | 1 | 28   | 0 |
| P12163_1_F5,14178 | R.FDM*PGLSK.E | 1518.845 | 0.00588 | 3 | 1 | 29   | 0 |
| P12163_1_F5,14280 | R.FDM*PGLSK.E | 1518.845 | 0.00746 | 2 | 1 | 28.8 | 0 |
| P12163_1_F5,17072 | R.FDM*PGLSK.E | 1518.845 | 0.00705 | 3 | 1 | 25.4 | 0 |
| P12163_1_F5,18704 | R.FDM*PGLSK.E | 1518.845 | 0.00768 | 3 | 1 | 26.8 | 0 |
| P12163_1_F5,18887 | R.FDM*PGLSK.E | 1518.845 | 0.00606 | 2 | 1 | 28.4 | 0 |
| P12163_1_F6,782   | R.FDM*PGLSK.E | 1518.845 | 0.00756 | 3 | 1 | 22.5 | 0 |
| P12163_1_F6,14932 | R.FDM*PGLSK.E | 1518.845 | 0.0074  | 2 | 1 | 27.5 | 0 |
| P12163_1_F6,18977 | R.FDM*PGLSK.E | 1518.845 | 0.00806 | 2 | 1 | 28.8 | 0 |
| P12163_1_F6,22220 | R.FDM*PGLSK.E | 1518.845 | 0.0061  | 2 | 1 | 28.8 | 0 |
| P12163_1_F7,14156 | R.FDM*PGLSK.E | 1518.845 | 0.00627 | 3 | 1 | 23.2 | 0 |
| P12163_1_F7,14169 | R.FDM*PGLSK.E | 1518.845 | 0.0061  | 2 | 1 | 29.9 | 0 |
| P12163_1_F7,17522 | R.FDM*PGLSK.E | 1518.845 | 0.00294 | 3 | 1 | 28.8 | 0 |
| P12163_1_F7,17707 | R.FDM*PGLSK.E | 1518.845 | 0.00438 | 2 | 1 | 27.2 | 0 |
| P12163_1_F7,17732 | R.FDM*PGLSK.E | 1518.845 | 0.00195 | 3 | 1 | 34.8 | 0 |
| P12163_1_F7,18123 | R.FDM*PGLSK.E | 1518.845 | 0.00597 | 3 | 1 | 28.2 | 0 |
| P12163_1_F7,18157 | R.FDM*PGLSK.E | 1518.845 | 0.00672 | 2 | 1 | 28.8 | 0 |
| P12163_1_F8,228   | R.FDM*PGLSK.E | 1518.845 | 0.00328 | 2 | 1 | 26.7 | 0 |
| P12163_1_F8,230   | R.FDM*PGLSK.E | 1518.845 | 0.00207 | 3 | 1 | 23.1 | 0 |
| P12163_1_F8,438   | R.FDM*PGLSK.E | 1518.845 | 0.00252 | 3 | 1 | 22.1 | 0 |
| P12163_1_F8,593   | R.FDM*PGLSK.E | 1518.845 | 0.00346 | 2 | 1 | 25.6 | 0 |
| P12163_1_F8,618   | R.FDM*PGLSK.E | 1518.845 | 0.00264 | 3 | 1 | 25   | 0 |
| P12163_1_F8,18517 | R.FDM*PGLSK.E | 1518.845 | 0.00147 | 3 | 1 | 31.1 | 0 |
| P12163_1_F8,19941 | R.FDM*PGLSK.E | 1518.845 | 0.00513 | 3 | 1 | 25.4 | 0 |
| P12163_1_F9,18470 | R.FDM*PGLSK.E | 1518.845 | 0.00526 | 2 | 1 | 24.8 | 0 |
| P12163_1_F9,18946 | R.FDM*PGLSK.E | 1518.845 | 0.00561 | 3 | 1 | 26.3 | 0 |
| P12163_1_S10,1804 | R.FDM*PGLSK.E | 1518.845 | 0.00726 | 3 | 1 | 25.8 | 0 |
| P12163_2_F1,14301 | R.FDM*PGLSK.E | 1518.845 | 0.01035 | 3 | 1 | 26.8 | 0 |
| P12163_2_F1,14426 | R.FDM*PGLSK.E | 1518.845 | 0.0059  | 2 | 1 | 28.9 | 0 |
| P12163_2_F1,14907 | R.FDM*PGLSK.E | 1518.845 | 0.00766 | 2 | 1 | 28.8 | 0 |
| P12163_2_F1,15113 | R.FDM*PGLSK.E | 1518.845 | 0.00672 | 2 | 1 | 28.6 | 0 |
| P12163_2_F1,15283 | R.FDM*PGLSK.E | 1518.845 | 0.00699 | 3 | 1 | 23.2 | 0 |
| P12163_2_F1,16731 | R.FDM*PGLSK.E | 1518.845 | 0.00726 | 2 | 1 | 26.4 | 0 |
| P12163_2_F1,18989 | R.FDM*PGLSK.E | 1518.845 | 0.00921 | 3 | 1 | 29.3 | 0 |
| P12163_2_F1,19091 | R.FDM*PGLSK.E | 1518.845 | 0.0132  | 2 | 1 | 28.6 | 0 |
| P12163_2_F1,19190 | R.FDM*PGLSK.E | 1518.845 | 0.01239 | 3 | 1 | 30.1 | 0 |
| P12163_2_F1,19288 | R.FDM*PGLSK.E | 1518.845 | 0.01074 | 2 | 1 | 28.2 | 0 |
| P12163_2_F1,19924 | R.FDM*PGLSK.E | 1518.845 | 0.00702 | 3 | 1 | 31.7 | 0 |
| P12163_2_F1,24757 | R.FDM*PGLSK.E | 1518.845 | 0.00132 | 3 | 1 | 33.9 | 0 |
| P12163_2_F1,25006 | R.FDM*PGLSK.E | 1518.845 | 0.00126 | 3 | 1 | 34.1 | 0 |

|                   |               |          |          |   |   |      |   |
|-------------------|---------------|----------|----------|---|---|------|---|
| P12163_2_F1,25645 | R.FDM*PGLSK.E | 1518.845 | 0.0075   | 3 | 1 | 22.5 | 0 |
| P12163_2_F1,25838 | R.FDM*PGLSK.E | 1518.845 | 0.00657  | 3 | 1 | 29.5 | 0 |
| P12163_2_F1,26011 | R.FDM*PGLSK.E | 1518.845 | 0.00051  | 3 | 1 | 28   | 0 |
| P12163_2_F1,26333 | R.FDM*PGLSK.E | 1518.845 | 0.00582  | 3 | 1 | 24.7 | 0 |
| P12163_2_F1,26916 | R.FDM*PGLSK.E | 1518.845 | 0.00123  | 3 | 1 | 26   | 0 |
| P12163_2_F1,27327 | R.FDM*PGLSK.E | 1518.845 | 0.00222  | 3 | 1 | 26.7 | 0 |
| P12163_2_F2,50    | R.FDM*PGLSK.E | 1518.845 | 0.00754  | 2 | 1 | 28.5 | 0 |
| P12163_2_F2,70    | R.FDM*PGLSK.E | 1518.845 | 0.00777  | 3 | 1 | 24   | 0 |
| P12163_2_F2,272   | R.FDM*PGLSK.E | 1518.845 | 0.00654  | 2 | 1 | 28.6 | 0 |
| P12163_2_F2,665   | R.FDM*PGLSK.E | 1518.845 | 0.00626  | 2 | 1 | 28.7 | 0 |
| P12163_2_F2,869   | R.FDM*PGLSK.E | 1518.845 | 0.00772  | 2 | 1 | 29.8 | 0 |
| P12163_2_F2,1064  | R.FDM*PGLSK.E | 1518.845 | 0.00632  | 2 | 1 | 30.8 | 0 |
| P12163_2_F2,1257  | R.FDM*PGLSK.E | 1518.845 | 0.00664  | 2 | 1 | 30.4 | 0 |
| P12163_2_F2,1445  | R.FDM*PGLSK.E | 1518.845 | 0.00756  | 2 | 1 | 30   | 0 |
| P12163_2_F2,1625  | R.FDM*PGLSK.E | 1518.845 | 0.00676  | 2 | 1 | 28.5 | 0 |
| P12163_2_F2,1642  | R.FDM*PGLSK.E | 1518.845 | 0.00558  | 3 | 1 | 26.8 | 0 |
| P12163_2_F2,1812  | R.FDM*PGLSK.E | 1518.845 | 0.00658  | 2 | 1 | 28.6 | 0 |
| P12163_2_F2,2004  | R.FDM*PGLSK.E | 1518.845 | 0.0065   | 2 | 1 | 27.4 | 0 |
| P12163_2_F2,2374  | R.FDM*PGLSK.E | 1518.845 | 0.00654  | 2 | 1 | 31.3 | 0 |
| P12163_2_F2,3683  | R.FDM*PGLSK.E | 1518.845 | 0.00726  | 2 | 1 | 28.7 | 0 |
| P12163_2_F2,3770  | R.FDM*PGLSK.E | 1518.845 | 0.00543  | 3 | 1 | 28.3 | 0 |
| P12163_2_F4,13265 | R.FDM*PGLSK.E | 1518.845 | 0.00072  | 3 | 1 | 22.8 | 0 |
| P12163_2_F4,13477 | R.FDM*PGLSK.E | 1518.845 | 0.00186  | 2 | 1 | 28   | 0 |
| P12163_2_F4,15796 | R.FDM*PGLSK.E | 1518.845 | 0.00111  | 3 | 1 | 28.1 | 0 |
| P12163_2_F4,17105 | R.FDM*PGLSK.E | 1518.845 | 0        | 3 | 1 | 22.7 | 0 |
| P12163_2_F4,17331 | R.FDM*PGLSK.E | 1518.845 | 0.00183  | 3 | 1 | 28.3 | 0 |
| P12163_2_F4,17347 | R.FDM*PGLSK.E | 1518.845 | 0.0008   | 2 | 1 | 26   | 0 |
| P12163_2_F4,23403 | R.FDM*PGLSK.E | 1518.845 | -0.00051 | 3 | 1 | 24.1 | 0 |
| P12163_2_F6,14360 | R.FDM*PGLSK.E | 1518.845 | 0.00093  | 3 | 1 | 23.5 | 0 |
| P12163_2_F6,18525 | R.FDM*PGLSK.E | 1518.845 | 0.00536  | 2 | 1 | 26.6 | 0 |
| P12163_2_F9,13720 | R.FDM*PGLSK.E | 1518.845 | 0.00474  | 3 | 1 | 26.5 | 0 |
| P12163_2_S3,12444 | R.FDM*PGLSK.E | 1518.845 | -0.00018 | 3 | 1 | 24.8 | 0 |
| P12163_2_S5,12508 | R.FDM*PGLSK.E | 1518.845 | 0.00639  | 3 | 1 | 23   | 0 |
| P12163_2_S5,13220 | R.FDM*PGLSK.E | 1518.845 | 0.00207  | 3 | 1 | 25.8 | 0 |
| P12163_2_S5,13843 | R.FDM*PGLSK.E | 1518.845 | 0.00688  | 2 | 1 | 28.7 | 0 |
| P12163_2_S5,17057 | R.FDM*PGLSK.E | 1518.845 | 0.00156  | 2 | 1 | 26.9 | 0 |
| P12163_1_F3,17901 | R.FDMPGLSK.E  | 1502.85  | 0.0022   | 3 | 1 | 26.7 | 0 |
| P12163_1_F4,19700 | R.FDMPGLSK.E  | 1502.85  | 0.00223  | 3 | 1 | 27.8 | 0 |
| P12163_1_F4,20087 | R.FDMPGLSK.E  | 1502.85  | 0.00286  | 3 | 1 | 27.4 | 0 |
| P12163_1_F7,16436 | R.FDMPGLSK.E  | 1502.85  | 0.00274  | 3 | 1 | 30.1 | 0 |
| P12163_1_F7,17716 | R.FDMPGLSK.E  | 1502.85  | 0.00142  | 3 | 1 | 28   | 0 |
| P12163_1_F9,17532 | R.FDMPGLSK.E  | 1502.85  | -0.00011 | 3 | 1 | 23.4 | 0 |
| P12163_1_F9,18650 | R.FDMPGLSK.E  | 1502.85  | 0.00274  | 3 | 1 | 26.1 | 0 |
| P12163_2_F1,19126 | R.FDMPGLSK.E  | 1502.85  | 0.0028   | 2 | 1 | 25.1 | 0 |
| P12163_2_F1,19425 | R.FDMPGLSK.E  | 1502.85  | 0.00139  | 3 | 1 | 27.2 | 0 |
| P12163_2_F1,19645 | R.FDMPGLSK.E  | 1502.85  | 0.00091  | 3 | 1 | 27.2 | 0 |
| P12163_2_F1,24048 | R.FDMPGLSK.E  | 1502.85  | 0.00253  | 3 | 1 | 24.5 | 0 |
| P12163_2_F4,16008 | R.FDMPGLSK.E  | 1502.85  | 0.00097  | 3 | 1 | 27   | 0 |
| P12163_2_F4,17123 | R.FDMPGLSK.E  | 1502.85  | 0.00088  | 3 | 1 | 24.8 | 0 |
| P12163_2_F4,17324 | R.FDMPGLSK.E  | 1502.85  | 0.00102  | 2 | 1 | 25.3 | 0 |
| P12163_2_F4,17329 | R.FDMPGLSK.E  | 1502.85  | -0.0002  | 3 | 1 | 28   | 0 |

|                                |          |          |   |   |      |   |
|--------------------------------|----------|----------|---|---|------|---|
| P12163_2_F4,17536 R.FDMPGLSK.E | 1502.85  | -0.00008 | 2 | 1 | 28.5 | 0 |
| P12163_2_F9,17388 R.FDMPGLSK.E | 1502.85  | 0.00118  | 3 | 1 | 28.9 | 0 |
| P12163_2_S3,14791 R.FDMPGLSK.E | 1502.85  | -0.00122 | 3 | 1 | 28   | 0 |
| P12163_2_S3,14991 R.FDMPGLSK.E | 1502.85  | 0.00118  | 3 | 1 | 25.4 | 0 |
| P12163_2_S3,15862 R.FDMPGLSK.E | 1502.85  | 0.00194  | 2 | 1 | 24.1 | 0 |
| P12163_2_S3,15879 R.FDMPGLSK.E | 1502.85  | 0.00136  | 3 | 1 | 26.3 | 0 |
| P12163_2_S5,16878 R.FDMPGLSK.E | 1502.85  | 0.00088  | 3 | 1 | 27.6 | 0 |
| P12163_2_S5,17095 R.FDMPGLSK.E | 1502.85  | 0.00142  | 3 | 1 | 29.1 | 0 |
| P12163_1_F3,20856 R.KVIDVQIL.- | 1535.998 | 0.0041   | 2 | 1 | 29.4 | 0 |
| P12163_1_F4,20882 R.KVIDVQIL.- | 1535.998 | 0.01028  | 2 | 1 | 37.4 | 0 |
| P12163_1_F4,20898 R.KVIDVQIL.- | 1535.998 | 0.0102   | 3 | 1 | 34.5 | 0 |
| P12163_1_F4,21447 R.KVIDVQIL.- | 1535.998 | 0.00818  | 2 | 1 | 34   | 0 |
| P12163_1_F4,21876 R.KVIDVQIL.- | 1535.998 | 0.0039   | 2 | 1 | 33.5 | 0 |
| P12163_1_F4,22094 R.KVIDVQIL.- | 1535.998 | 0.00294  | 2 | 1 | 38.2 | 0 |
| P12163_1_F4,22346 R.KVIDVQIL.- | 1535.998 | 0.00622  | 2 | 1 | 36.4 | 0 |
| P12163_1_F4,22584 R.KVIDVQIL.- | 1535.998 | 0.00694  | 2 | 1 | 32.4 | 0 |
| P12163_1_F5,19784 R.KVIDVQIL.- | 1535.998 | 0.00786  | 2 | 1 | 37   | 0 |
| P12163_1_F5,20406 R.KVIDVQIL.- | 1535.998 | 0.00876  | 2 | 1 | 39   | 0 |
| P12163_1_F5,20972 R.KVIDVQIL.- | 1535.998 | 0.00498  | 2 | 1 | 38.3 | 0 |
| P12163_1_F5,21200 R.KVIDVQIL.- | 1535.998 | 0.00752  | 2 | 1 | 35.5 | 0 |
| P12163_1_F5,21892 R.KVIDVQIL.- | 1535.998 | 0.00398  | 2 | 1 | 33.4 | 0 |
| P12163_1_F5,22486 R.KVIDVQIL.- | 1535.998 | 0.00944  | 2 | 1 | 38   | 0 |
| P12163_1_F5,22696 R.KVIDVQIL.- | 1535.998 | 0.0068   | 2 | 1 | 40   | 0 |
| P12163_1_F5,23350 R.KVIDVQIL.- | 1535.998 | 0.0076   | 2 | 1 | 38.2 | 0 |
| P12163_1_F5,23540 R.KVIDVQIL.- | 1535.998 | 0.00632  | 2 | 1 | 36.3 | 0 |
| P12163_1_F6,189 R.KVIDVQIL.-   | 1535.998 | 0.00945  | 3 | 1 | 28.4 | 0 |
| P12163_1_F6,316 R.KVIDVQIL.-   | 1535.998 | 0.0077   | 2 | 1 | 31.1 | 0 |
| P12163_1_F6,3782 R.KVIDVQIL.-  | 1535.998 | 0.00942  | 2 | 1 | 37.8 | 0 |
| P12163_1_F6,20787 R.KVIDVQIL.- | 1535.998 | 0.0072   | 2 | 1 | 36.9 | 0 |
| P12163_1_F6,21126 R.KVIDVQIL.- | 1535.998 | 0.00464  | 2 | 1 | 40.3 | 0 |
| P12163_1_F7,18553 R.KVIDVQIL.- | 1535.998 | 0.00016  | 2 | 1 | 37.1 | 0 |
| P12163_1_F7,19615 R.KVIDVQIL.- | 1535.998 | 0.00362  | 2 | 1 | 34.7 | 0 |
| P12163_1_F7,19814 R.KVIDVQIL.- | 1535.998 | 0.00351  | 3 | 1 | 29.1 | 0 |
| P12163_1_F7,19828 R.KVIDVQIL.- | 1535.998 | 0.00352  | 2 | 1 | 32.8 | 0 |
| P12163_1_F7,20045 R.KVIDVQIL.- | 1535.998 | 0.00486  | 2 | 1 | 38.3 | 0 |
| P12163_1_F7,20476 R.KVIDVQIL.- | 1535.998 | 0.00244  | 2 | 1 | 35.7 | 0 |
| P12163_1_F7,20719 R.KVIDVQIL.- | 1535.998 | 0.00094  | 2 | 1 | 31.3 | 0 |
| P12163_1_F7,20962 R.KVIDVQIL.- | 1535.998 | 0.0042   | 2 | 1 | 29.1 | 0 |
| P12163_1_S10,1921 R.KVIDVQIL.- | 1535.998 | 0.0082   | 2 | 1 | 47.7 | 0 |
| P12163_2_F1,20299 R.KVIDVQIL.- | 1535.998 | 0.00674  | 2 | 1 | 29.9 | 0 |
| P12163_2_F1,20324 R.KVIDVQIL.- | 1535.998 | 0.00276  | 3 | 1 | 32.4 | 0 |
| P12163_2_F1,21091 R.KVIDVQIL.- | 1535.998 | 0.00508  | 2 | 1 | 35.6 | 0 |
| P12163_2_F1,21508 R.KVIDVQIL.- | 1535.998 | 0.0021   | 2 | 1 | 33.3 | 0 |
| P12163_2_F1,21738 R.KVIDVQIL.- | 1535.998 | 0.00566  | 2 | 1 | 38   | 0 |
| P12163_2_F1,21979 R.KVIDVQIL.- | 1535.998 | 0.00542  | 2 | 1 | 38   | 0 |
| P12163_2_F2,20928 R.KVIDVQIL.- | 1535.998 | 0.00168  | 2 | 1 | 29.2 | 0 |
| P12163_2_F2,21373 R.KVIDVQIL.- | 1535.998 | 0.0005   | 2 | 1 | 32.3 | 0 |
| P12163_2_F2,21585 R.KVIDVQIL.- | 1535.998 | 0.00634  | 2 | 1 | 35.9 | 0 |
| P12163_2_F2,21791 R.KVIDVQIL.- | 1535.998 | 0.0075   | 2 | 1 | 32   | 0 |
| P12163_2_F4,18201 R.KVIDVQIL.- | 1535.998 | 0.00087  | 3 | 1 | 34.9 | 0 |
| P12163_2_F4,19216 R.KVIDVQIL.- | 1535.998 | 0.00162  | 2 | 1 | 33.7 | 0 |

|                                    |          |          |   |   |      |   |
|------------------------------------|----------|----------|---|---|------|---|
| P12163_2_F4,19529 R.KVIDVQIL.-     | 1535.998 | 0.00242  | 2 | 1 | 29.5 | 0 |
| P12163_2_F9,17825 R.KVIDVQIL.-     | 1535.998 | -0.00012 | 3 | 1 | 41.2 | 0 |
| P12163_2_S5,17603 R.KVIDVQIL.-     | 1535.998 | 0.00063  | 3 | 1 | 35.3 | 0 |
| P12163_2_S5,18491 R.KVIDVQIL.-     | 1535.998 | 0.00093  | 3 | 1 | 27.7 | 0 |
| P12163_2_S5,18502 R.KVIDVQIL.-     | 1535.998 | 0.00276  | 2 | 1 | 34   | 0 |
| P12163_2_S5,18714 R.KVIDVQIL.-     | 1535.998 | 0.00048  | 3 | 1 | 38.6 | 0 |
| P12163_2_S5,18737 R.KVIDVQIL.-     | 1535.998 | 0.00212  | 2 | 1 | 37.6 | 0 |
| P12163_2_S5,18940 R.KVIDVQIL.-     | 1535.998 | 0.00018  | 3 | 1 | 33.6 | 0 |
| P12163_2_S5,18968 R.KVIDVQIL.-     | 1535.998 | 0.00352  | 2 | 1 | 36.3 | 0 |
| P12163_2_S5,19184 R.KVIDVQIL.-     | 1535.998 | 0.0042   | 3 | 1 | 30.2 | 0 |
| P12163_1_F2,16634 R.LLEDTM*AFPGR.S | 1569.825 | 0.00135  | 3 | 1 | 28.1 | 0 |
| P12163_1_F2,18781 R.LLEDTM*AFPGR.S | 1569.825 | 0.0024   | 3 | 1 | 35.5 | 0 |
| P12163_1_F2,22248 R.LLEDTM*AFPGR.S | 1569.825 | 0.00339  | 2 | 1 | 31.7 | 0 |
| P12163_1_F2,22458 R.LLEDTM*AFPGR.S | 1569.825 | 0.00381  | 2 | 1 | 30.1 | 0 |
| P12163_1_F4,23952 R.LLEDTM*AFPGR.S | 1569.825 | 0.00331  | 2 | 1 | 36.1 | 0 |
| P12163_1_F4,24201 R.LLEDTM*AFPGR.S | 1569.825 | 0.00393  | 2 | 1 | 30.6 | 0 |
| P12163_1_F5,19087 R.LLEDTM*AFPGR.S | 1569.825 | 0.00297  | 2 | 1 | 31.6 | 0 |
| P12163_1_F5,19571 R.LLEDTM*AFPGR.S | 1569.825 | 0.00447  | 2 | 1 | 26.1 | 0 |
| P12163_1_F5,21809 R.LLEDTM*AFPGR.S | 1569.825 | 0.00231  | 2 | 1 | 27.8 | 0 |
| P12163_1_F6,21924 R.LLEDTM*AFPGR.S | 1569.825 | 0.00671  | 2 | 1 | 26.8 | 0 |
| P12163_1_F6,22225 R.LLEDTM*AFPGR.S | 1569.825 | 0.00483  | 2 | 1 | 31.3 | 0 |
| P12163_1_F7,15992 R.LLEDTM*AFPGR.S | 1569.825 | 0.00012  | 3 | 1 | 34.7 | 0 |
| P12163_1_F7,21373 R.LLEDTM*AFPGR.S | 1569.825 | 0.00315  | 2 | 1 | 26.1 | 0 |
| P12163_1_F8,16789 R.LLEDTM*AFPGR.S | 1569.825 | 0.00573  | 3 | 1 | 22.5 | 0 |
| P12163_1_F8,17287 R.LLEDTM*AFPGR.S | 1569.825 | 0.00231  | 2 | 1 | 31.8 | 0 |
| P12163_1_F8,17489 R.LLEDTM*AFPGR.S | 1569.825 | 0.00329  | 2 | 1 | 35.8 | 0 |
| P12163_1_F8,17687 R.LLEDTM*AFPGR.S | 1569.825 | 0.00017  | 2 | 1 | 24.9 | 0 |
| P12163_1_F8,18812 R.LLEDTM*AFPGR.S | 1569.825 | 0.00228  | 3 | 1 | 23.1 | 0 |
| P12163_1_F8,22201 R.LLEDTM*AFPGR.S | 1569.825 | 0.00379  | 2 | 1 | 35.7 | 0 |
| P12163_1_F8,22277 R.LLEDTM*AFPGR.S | 1569.825 | 0.00375  | 3 | 1 | 37.1 | 0 |
| P12163_1_S1,15728 R.LLEDTM*AFPGR.S | 1569.825 | 0.00078  | 3 | 1 | 27.8 | 0 |
| P12163_1_S1,16146 R.LLEDTM*AFPGR.S | 1569.825 | -0.00234 | 3 | 1 | 36.7 | 0 |
| P12163_1_S1,16406 R.LLEDTM*AFPGR.S | 1569.825 | 0.00474  | 3 | 1 | 38.1 | 0 |
| P12163_1_S1,16931 R.LLEDTM*AFPGR.S | 1569.825 | 0.00282  | 3 | 1 | 46.8 | 0 |
| P12163_1_S1,17847 R.LLEDTM*AFPGR.S | 1569.825 | 0.00237  | 3 | 1 | 33.5 | 0 |
| P12163_1_S1,18094 R.LLEDTM*AFPGR.S | 1569.825 | 0.01185  | 3 | 1 | 33.5 | 0 |
| P12163_1_S1,18324 R.LLEDTM*AFPGR.S | 1569.825 | 0.00417  | 3 | 1 | 38.3 | 0 |
| P12163_1_S1,18669 R.LLEDTM*AFPGR.S | 1569.825 | 0.00057  | 3 | 1 | 81.9 | 0 |
| P12163_1_S1,18892 R.LLEDTM*AFPGR.S | 1569.825 | -0.00024 | 3 | 1 | 71.3 | 0 |
| P12163_1_S1,19067 R.LLEDTM*AFPGR.S | 1569.825 | -0.00023 | 2 | 1 | 30   | 0 |
| P12163_1_S1,19129 R.LLEDTM*AFPGR.S | 1569.825 | 0.00021  | 3 | 1 | 75.2 | 0 |
| P12163_1_S1,19323 R.LLEDTM*AFPGR.S | 1569.825 | 0.00421  | 2 | 1 | 29.2 | 0 |
| P12163_1_S1,19376 R.LLEDTM*AFPGR.S | 1569.825 | 0.00192  | 3 | 1 | 47.6 | 0 |
| P12163_1_S1,19774 R.LLEDTM*AFPGR.S | 1569.825 | 0.00174  | 3 | 1 | 53.6 | 0 |
| P12163_1_S1,19984 R.LLEDTM*AFPGR.S | 1569.825 | 0.00216  | 3 | 1 | 70.6 | 0 |
| P12163_1_S1,20257 R.LLEDTM*AFPGR.S | 1569.825 | 0.00102  | 3 | 1 | 52.4 | 0 |
| P12163_1_S1,20686 R.LLEDTM*AFPGR.S | 1569.825 | 0.00252  | 3 | 1 | 39.2 | 0 |
| P12163_1_S1,20922 R.LLEDTM*AFPGR.S | 1569.825 | -0.00726 | 3 | 1 | 31.4 | 0 |
| P12163_1_S1,21195 R.LLEDTM*AFPGR.S | 1569.825 | 0.00891  | 2 | 1 | 26.3 | 0 |
| P12163_1_S1,21367 R.LLEDTM*AFPGR.S | 1569.825 | 0.01115  | 2 | 1 | 35.9 | 0 |
| P12163_1_S1,21545 R.LLEDTM*AFPGR.S | 1569.825 | 0.01065  | 2 | 1 | 35.7 | 0 |

|                   |                  |          |          |   |   |      |   |
|-------------------|------------------|----------|----------|---|---|------|---|
| P12163_1_S1,21636 | R.LLEDTM*AFPGR.S | 1569.825 | 0.0072   | 3 | 1 | 57.4 | 0 |
| P12163_1_S1,21938 | R.LLEDTM*AFPGR.S | 1569.825 | 0.00876  | 3 | 1 | 25   | 0 |
| P12163_1_S1,22279 | R.LLEDTM*AFPGR.S | 1569.825 | 0.00375  | 3 | 1 | 41.7 | 0 |
| P12163_1_S1,23047 | R.LLEDTM*AFPGR.S | 1569.825 | 0.00612  | 3 | 1 | 26.1 | 0 |
| P12163_1_S1,23267 | R.LLEDTM*AFPGR.S | 1569.825 | -0.00143 | 2 | 1 | 27.6 | 0 |
| P12163_1_S1,23277 | R.LLEDTM*AFPGR.S | 1569.825 | 0.00126  | 3 | 1 | 47.5 | 0 |
| P12163_1_S1,23499 | R.LLEDTM*AFPGR.S | 1569.825 | 0.00186  | 3 | 1 | 39.4 | 0 |
| P12163_1_S1,24456 | R.LLEDTM*AFPGR.S | 1569.825 | 0.00273  | 3 | 1 | 34.3 | 0 |
| P12163_1_S1,24652 | R.LLEDTM*AFPGR.S | 1569.825 | 0.00339  | 3 | 1 | 35.9 | 0 |
| P12163_1_S1,24827 | R.LLEDTM*AFPGR.S | 1569.825 | 0.00378  | 3 | 1 | 40.1 | 0 |
| P12163_1_S1,25016 | R.LLEDTM*AFPGR.S | 1569.825 | 0.00435  | 3 | 1 | 34.9 | 0 |
| P12163_1_S1,25183 | R.LLEDTM*AFPGR.S | 1569.825 | 0.00483  | 3 | 1 | 40.5 | 0 |
| P12163_1_S1,25350 | R.LLEDTM*AFPGR.S | 1569.825 | 0.00351  | 3 | 1 | 30.8 | 0 |
| P12163_1_S1,25518 | R.LLEDTM*AFPGR.S | 1569.825 | 0.00147  | 3 | 1 | 46.5 | 0 |
| P12163_1_S1,25715 | R.LLEDTM*AFPGR.S | 1569.825 | 0.00324  | 3 | 1 | 35.2 | 0 |
| P12163_1_S1,25888 | R.LLEDTM*AFPGR.S | 1569.825 | 0.00501  | 3 | 1 | 27.3 | 0 |
| P12163_1_S1,26060 | R.LLEDTM*AFPGR.S | 1569.825 | 0.00282  | 3 | 1 | 23   | 0 |
| P12163_1_S1,26209 | R.LLEDTM*AFPGR.S | 1569.825 | 0.00054  | 3 | 1 | 32.1 | 0 |
| P12163_1_S1,26355 | R.LLEDTM*AFPGR.S | 1569.825 | 0.00351  | 3 | 1 | 21.9 | 0 |
| P12163_1_S1,26497 | R.LLEDTM*AFPGR.S | 1569.825 | 0.00471  | 3 | 1 | 22.8 | 0 |
| P12163_1_S1,26659 | R.LLEDTM*AFPGR.S | 1569.825 | -0.00024 | 3 | 1 | 21.9 | 0 |
| P12163_1_S1,27036 | R.LLEDTM*AFPGR.S | 1569.825 | 0.00243  | 3 | 1 | 27.4 | 0 |
| P12163_1_S1,27199 | R.LLEDTM*AFPGR.S | 1569.825 | 0.00084  | 3 | 1 | 34.8 | 0 |
| P12163_1_S1,28529 | R.LLEDTM*AFPGR.S | 1569.825 | 0.0015   | 3 | 1 | 24.3 | 0 |
| P12163_1_S1,29109 | R.LLEDTM*AFPGR.S | 1569.825 | 0.00054  | 3 | 1 | 26.3 | 0 |
| P12163_1_S1,29697 | R.LLEDTM*AFPGR.S | 1569.825 | 0.00402  | 3 | 1 | 22.1 | 0 |
| P12163_1_S1,30904 | R.LLEDTM*AFPGR.S | 1569.825 | 0.00627  | 3 | 1 | 26.7 | 0 |
| P12163_1_S1,31205 | R.LLEDTM*AFPGR.S | 1569.825 | 0.0039   | 3 | 1 | 29.6 | 0 |
| P12163_1_S1,31366 | R.LLEDTM*AFPGR.S | 1569.825 | 0.00471  | 3 | 1 | 44.5 | 0 |
| P12163_1_S1,31514 | R.LLEDTM*AFPGR.S | 1569.825 | 0.00216  | 3 | 1 | 24   | 0 |
| P12163_1_S1,31672 | R.LLEDTM*AFPGR.S | 1569.825 | 0.00099  | 3 | 1 | 44.1 | 0 |
| P12163_1_S1,31970 | R.LLEDTM*AFPGR.S | 1569.825 | 0.00612  | 3 | 1 | 22.5 | 0 |
| P12163_1_S10,5    | R.LLEDTM*AFPGR.S | 1569.825 | 0.00511  | 2 | 1 | 34.7 | 0 |
| P12163_1_S10,7    | R.LLEDTM*AFPGR.S | 1569.825 | 0.00387  | 3 | 1 | 43.9 | 0 |
| P12163_1_S10,237  | R.LLEDTM*AFPGR.S | 1569.825 | 0.00399  | 3 | 1 | 59.4 | 0 |
| P12163_1_S10,443  | R.LLEDTM*AFPGR.S | 1569.825 | 0.00339  | 3 | 1 | 56.3 | 0 |
| P12163_1_S10,444  | R.LLEDTM*AFPGR.S | 1569.825 | 0.00411  | 2 | 1 | 40.6 | 0 |
| P12163_1_S10,610  | R.LLEDTM*AFPGR.S | 1569.825 | 0.00453  | 3 | 1 | 40.1 | 0 |
| P12163_1_S10,1132 | R.LLEDTM*AFPGR.S | 1569.825 | 0.00303  | 3 | 1 | 28.2 | 0 |
| P12163_1_S10,3730 | R.LLEDTM*AFPGR.S | 1569.825 | -0.00069 | 3 | 1 | 55.6 | 0 |
| P12163_1_S10,1854 | R.LLEDTM*AFPGR.S | 1569.825 | 0.00123  | 3 | 1 | 31.2 | 0 |
| P12163_1_S10,1866 | R.LLEDTM*AFPGR.S | 1569.825 | 0.00403  | 2 | 1 | 35.3 | 0 |
| P12163_2_F1,19796 | R.LLEDTM*AFPGR.S | 1569.825 | 0.00113  | 2 | 1 | 27.8 | 0 |
| P12163_2_F1,22715 | R.LLEDTM*AFPGR.S | 1569.825 | 0.00219  | 2 | 1 | 28.5 | 0 |
| P12163_2_F4,15646 | R.LLEDTM*AFPGR.S | 1569.825 | 0.00213  | 3 | 1 | 27.1 | 0 |
| P12163_2_F4,18492 | R.LLEDTM*AFPGR.S | 1569.825 | 0.00331  | 2 | 1 | 35.5 | 0 |
| P12163_2_F6,14274 | R.LLEDTM*AFPGR.S | 1569.825 | 0.00024  | 3 | 1 | 47.1 | 0 |
| P12163_2_F6,16642 | R.LLEDTM*AFPGR.S | 1569.825 | 0.00493  | 2 | 1 | 25.9 | 0 |
| P12163_2_F6,16852 | R.LLEDTM*AFPGR.S | 1569.825 | 0.00423  | 2 | 1 | 30.9 | 0 |
| P12163_2_F6,21844 | R.LLEDTM*AFPGR.S | 1569.825 | 0.00475  | 2 | 1 | 31.9 | 0 |
| P12163_1_F3,22987 | R.LLEDTMAFPGR.S  | 1553.83  | 0.01621  | 2 | 1 | 24   | 0 |

|                   |                 |         |          |   |   |      |   |
|-------------------|-----------------|---------|----------|---|---|------|---|
| P12163_1_F3,23239 | R.LLEDTMAFPGR.S | 1553.83 | 0.00761  | 2 | 1 | 38.9 | 0 |
| P12163_1_F4,19463 | R.LLEDTMAFPGR.S | 1553.83 | 0.00099  | 3 | 1 | 37.9 | 0 |
| P12163_1_F4,19489 | R.LLEDTMAFPGR.S | 1553.83 | 0.00387  | 2 | 1 | 31.4 | 0 |
| P12163_1_F4,23655 | R.LLEDTMAFPGR.S | 1553.83 | 0.00653  | 2 | 1 | 24.9 | 0 |
| P12163_1_F4,23915 | R.LLEDTMAFPGR.S | 1553.83 | 0.00333  | 2 | 1 | 52.2 | 0 |
| P12163_1_F5,18634 | R.LLEDTMAFPGR.S | 1553.83 | 0.00141  | 3 | 1 | 28.6 | 0 |
| P12163_1_F5,20365 | R.LLEDTMAFPGR.S | 1553.83 | 0.00175  | 2 | 1 | 27.7 | 0 |
| P12163_1_F5,22004 | R.LLEDTMAFPGR.S | 1553.83 | 0.00207  | 2 | 1 | 52.3 | 0 |
| P12163_1_F5,22268 | R.LLEDTMAFPGR.S | 1553.83 | 0.00175  | 2 | 1 | 51.4 | 0 |
| P12163_1_F5,22491 | R.LLEDTMAFPGR.S | 1553.83 | 0.00495  | 2 | 1 | 24   | 0 |
| P12163_1_F5,22707 | R.LLEDTMAFPGR.S | 1553.83 | 0.00031  | 2 | 1 | 29.4 | 0 |
| P12163_1_F5,23295 | R.LLEDTMAFPGR.S | 1553.83 | 0.00465  | 2 | 1 | 30.2 | 0 |
| P12163_1_F6,18821 | R.LLEDTMAFPGR.S | 1553.83 | 0.00267  | 3 | 1 | 26.8 | 0 |
| P12163_1_F8,17289 | R.LLEDTMAFPGR.S | 1553.83 | -0.00315 | 2 | 1 | 36.8 | 0 |
| P12163_1_F8,17704 | R.LLEDTMAFPGR.S | 1553.83 | 0.00325  | 2 | 1 | 39.7 | 0 |
| P12163_1_F8,18784 | R.LLEDTMAFPGR.S | 1553.83 | 0.00174  | 3 | 1 | 38.1 | 0 |
| P12163_1_F8,22248 | R.LLEDTMAFPGR.S | 1553.83 | 0.00311  | 2 | 1 | 52.4 | 0 |
| P12163_1_F8,22320 | R.LLEDTMAFPGR.S | 1553.83 | 0.00135  | 3 | 1 | 56.3 | 0 |
| P12163_1_F9,21439 | R.LLEDTMAFPGR.S | 1553.83 | 0.00283  | 2 | 1 | 51.6 | 0 |
| P12163_1_S1,17821 | R.LLEDTMAFPGR.S | 1553.83 | 0.01131  | 3 | 1 | 35.9 | 0 |
| P12163_1_S1,17884 | R.LLEDTMAFPGR.S | 1553.83 | 0.00361  | 2 | 1 | 26.2 | 0 |
| P12163_1_S1,17934 | R.LLEDTMAFPGR.S | 1553.83 | 0.0041   | 4 | 1 | 35.6 | 0 |
| P12163_1_S1,18130 | R.LLEDTMAFPGR.S | 1553.83 | 0.00475  | 2 | 1 | 44.8 | 0 |
| P12163_1_S1,18183 | R.LLEDTMAFPGR.S | 1553.83 | 0.00563  | 4 | 1 | 39.6 | 0 |
| P12163_1_S1,18227 | R.LLEDTMAFPGR.S | 1553.83 | -0.00324 | 3 | 1 | 46.5 | 0 |
| P12163_1_S1,20658 | R.LLEDTMAFPGR.S | 1553.83 | 0.00495  | 2 | 1 | 37.4 | 0 |
| P12163_1_S1,21065 | R.LLEDTMAFPGR.S | 1553.83 | 0.00433  | 2 | 1 | 38.2 | 0 |
| P12163_1_S1,21094 | R.LLEDTMAFPGR.S | 1553.83 | 0.00246  | 3 | 1 | 41.5 | 0 |
| P12163_1_S1,21301 | R.LLEDTMAFPGR.S | 1553.83 | -0.00159 | 3 | 1 | 72.1 | 0 |
| P12163_1_S1,21471 | R.LLEDTMAFPGR.S | 1553.83 | -0.00285 | 3 | 1 | 65.9 | 0 |
| P12163_1_S1,21632 | R.LLEDTMAFPGR.S | 1553.83 | -0.00061 | 2 | 1 | 52.5 | 0 |
| P12163_1_S1,21661 | R.LLEDTMAFPGR.S | 1553.83 | -0.00138 | 3 | 1 | 63.4 | 0 |
| P12163_1_S1,21872 | R.LLEDTMAFPGR.S | 1553.83 | 0.00351  | 2 | 1 | 52.5 | 0 |
| P12163_1_S1,21904 | R.LLEDTMAFPGR.S | 1553.83 | 0.00201  | 3 | 1 | 50.7 | 0 |
| P12163_1_S1,22113 | R.LLEDTMAFPGR.S | 1553.83 | 0.00445  | 2 | 1 | 52.6 | 0 |
| P12163_1_S1,22335 | R.LLEDTMAFPGR.S | 1553.83 | 0.00325  | 2 | 1 | 47.9 | 0 |
| P12163_1_S1,22557 | R.LLEDTMAFPGR.S | 1553.83 | 0.00389  | 2 | 1 | 48.4 | 0 |
| P12163_1_S1,22771 | R.LLEDTMAFPGR.S | 1553.83 | 0.00417  | 2 | 1 | 43.2 | 0 |
| P12163_1_S1,22976 | R.LLEDTMAFPGR.S | 1553.83 | 0.00499  | 2 | 1 | 30.2 | 0 |
| P12163_1_S1,23204 | R.LLEDTMAFPGR.S | 1553.83 | 0.00621  | 2 | 1 | 53.4 | 0 |
| P12163_1_S1,23696 | R.LLEDTMAFPGR.S | 1553.83 | 0.00405  | 2 | 1 | 47.5 | 0 |
| P12163_1_S1,23901 | R.LLEDTMAFPGR.S | 1553.83 | 0.00671  | 2 | 1 | 40.9 | 0 |
| P12163_1_S1,24680 | R.LLEDTMAFPGR.S | 1553.83 | 0.00377  | 2 | 1 | 31.5 | 0 |
| P12163_1_S1,24855 | R.LLEDTMAFPGR.S | 1553.83 | 0.00423  | 2 | 1 | 32.4 | 0 |
| P12163_1_S1,25034 | R.LLEDTMAFPGR.S | 1553.83 | 0.00387  | 2 | 1 | 38.3 | 0 |
| P12163_1_S1,25201 | R.LLEDTMAFPGR.S | 1553.83 | 0.00329  | 2 | 1 | 31   | 0 |
| P12163_1_S1,25365 | R.LLEDTMAFPGR.S | 1553.83 | 0.00419  | 2 | 1 | 35.9 | 0 |
| P12163_1_S1,25524 | R.LLEDTMAFPGR.S | 1553.83 | 0.00605  | 2 | 1 | 27.7 | 0 |
| P12163_1_S1,25678 | R.LLEDTMAFPGR.S | 1553.83 | 0.00427  | 2 | 1 | 28.3 | 0 |
| P12163_1_S1,25829 | R.LLEDTMAFPGR.S | 1553.83 | 0.00353  | 2 | 1 | 28.2 | 0 |
| P12163_1_S1,27226 | R.LLEDTMAFPGR.S | 1553.83 | 0.00267  | 2 | 1 | 33.6 | 0 |

|                                   |          |          |   |   |      |   |
|-----------------------------------|----------|----------|---|---|------|---|
| P12163_1_S1,30875 R.LLEDTMAFPGR.S | 1553.83  | 0.00371  | 2 | 1 | 25.5 | 0 |
| P12163_1_S10,8 R.LLEDTMAFPGR.S    | 1553.83  | 0.00625  | 2 | 1 | 50.4 | 0 |
| P12163_1_S10,2047 R.LLEDTMAFPGR.S | 1553.83  | 0.00417  | 2 | 1 | 54.4 | 0 |
| P12163_1_S10,2051 R.LLEDTMAFPGR.S | 1553.83  | 0.00207  | 3 | 1 | 37.8 | 0 |
| P12163_1_S10,2062 R.LLEDTMAFPGR.S | 1553.83  | 0.00401  | 2 | 1 | 31   | 0 |
| P12163_2_F1,22854 R.LLEDTMAFPGR.S | 1553.83  | 0.00055  | 2 | 1 | 50.4 | 0 |
| P12163_2_F1,23259 R.LLEDTMAFPGR.S | 1553.83  | 0.00187  | 2 | 1 | 38   | 0 |
| P12163_2_F10,1957 R.LLEDTMAFPGR.S | 1553.83  | 0.00161  | 2 | 1 | 32.7 | 0 |
| P12163_2_F2,18819 R.LLEDTMAFPGR.S | 1553.83  | 0.00129  | 3 | 1 | 27.7 | 0 |
| P12163_2_F2,22160 R.LLEDTMAFPGR.S | 1553.83  | 0.00147  | 2 | 1 | 44.4 | 0 |
| P12163_2_F2,22559 R.LLEDTMAFPGR.S | 1553.83  | 0.00209  | 2 | 1 | 31.7 | 0 |
| P12163_2_F4,17520 R.LLEDTMAFPGR.S | 1553.83  | 0.00276  | 3 | 1 | 32.2 | 0 |
| P12163_2_F6,14230 R.LLEDTMAFPGR.S | 1553.83  | -0.00027 | 3 | 1 | 28.6 | 0 |
| P12163_2_F6,16845 R.LLEDTMAFPGR.S | 1553.83  | 0.00203  | 2 | 1 | 27.9 | 0 |
| P12163_2_F6,18294 R.LLEDTMAFPGR.S | 1553.83  | 0.00024  | 3 | 1 | 33.4 | 0 |
| P12163_2_F6,21910 R.LLEDTMAFPGR.S | 1553.83  | 0.00305  | 2 | 1 | 36.7 | 0 |
| P12163_2_F9,20341 R.LLEDTMAFPGR.S | 1553.83  | 0.00407  | 2 | 1 | 28   | 0 |
| P12163_2_S5,20477 R.LLEDTMAFPGR.S | 1553.83  | 0.00115  | 2 | 1 | 31.2 | 0 |
| P12163_2_S5,20680 R.LLEDTMAFPGR.S | 1553.83  | 0.00345  | 2 | 1 | 49.4 | 0 |
| P12163_1_F2,14926 R.LQLPDNCEK.D   | 1724.946 | 0.0012   | 2 | 1 | 36.3 | 0 |
| P12163_1_F3,15708 R.LQLPDNCEK.D   | 1724.946 | 0.00968  | 3 | 1 | 33.8 | 0 |
| P12163_1_F3,15764 R.LQLPDNCEK.D   | 1724.946 | 0.00596  | 2 | 1 | 34.2 | 0 |
| P12163_1_F4,15585 R.LQLPDNCEK.D   | 1724.946 | 0.0083   | 2 | 1 | 33.7 | 0 |
| P12163_1_F4,15586 R.LQLPDNCEK.D   | 1724.946 | 0.00875  | 3 | 1 | 46.2 | 0 |
| P12163_1_F4,15806 R.LQLPDNCEK.D   | 1724.946 | 0.00041  | 3 | 1 | 46.4 | 0 |
| P12163_1_F4,16005 R.LQLPDNCEK.D   | 1724.946 | 0.00284  | 3 | 1 | 44.8 | 0 |
| P12163_1_F4,16164 R.LQLPDNCEK.D   | 1724.946 | 0.00148  | 2 | 1 | 33.9 | 0 |
| P12163_1_F4,16269 R.LQLPDNCEK.D   | 1724.946 | 0.00764  | 3 | 1 | 41.4 | 0 |
| P12163_1_F4,16525 R.LQLPDNCEK.D   | 1724.946 | 0.01136  | 3 | 1 | 24   | 0 |
| P12163_1_F4,17004 R.LQLPDNCEK.D   | 1724.946 | 0.01586  | 3 | 1 | 29   | 0 |
| P12163_1_F4,17357 R.LQLPDNCEK.D   | 1724.946 | 0.00732  | 2 | 1 | 32   | 0 |
| P12163_1_F4,17592 R.LQLPDNCEK.D   | 1724.946 | 0.00503  | 3 | 1 | 46.3 | 0 |
| P12163_1_F4,17891 R.LQLPDNCEK.D   | 1724.946 | 0.00714  | 2 | 1 | 30.1 | 0 |
| P12163_1_F4,17960 R.LQLPDNCEK.D   | 1724.946 | 0.00605  | 3 | 1 | 38.3 | 0 |
| P12163_1_F4,18175 R.LQLPDNCEK.D   | 1724.946 | 0.00756  | 2 | 1 | 24.7 | 0 |
| P12163_1_F4,18619 R.LQLPDNCEK.D   | 1724.946 | 0.00719  | 3 | 1 | 22   | 0 |
| P12163_1_F4,18934 R.LQLPDNCEK.D   | 1724.946 | 0.00356  | 3 | 1 | 28.1 | 0 |
| P12163_1_F4,18950 R.LQLPDNCEK.D   | 1724.946 | 0.00752  | 2 | 1 | 29.8 | 0 |
| P12163_1_F4,19626 R.LQLPDNCEK.D   | 1724.946 | 0.01076  | 2 | 1 | 31.5 | 0 |
| P12163_1_F4,19812 R.LQLPDNCEK.D   | 1724.946 | 0.0118   | 2 | 1 | 25   | 0 |
| P12163_1_F4,22954 R.LQLPDNCEK.D   | 1724.946 | 0.0056   | 2 | 1 | 26.1 | 0 |
| P12163_1_F4,23228 R.LQLPDNCEK.D   | 1724.946 | 0.00656  | 3 | 1 | 36.4 | 0 |
| P12163_1_F4,23246 R.LQLPDNCEK.D   | 1724.946 | 0.0056   | 2 | 1 | 29.3 | 0 |
| P12163_1_F4,23667 R.LQLPDNCEK.D   | 1724.946 | 0.00527  | 3 | 1 | 38.3 | 0 |
| P12163_1_F4,24357 R.LQLPDNCEK.D   | 1724.946 | 0.00761  | 3 | 1 | 27.8 | 0 |
| P12163_1_F5,14568 R.LQLPDNCEK.D   | 1724.946 | 0.01542  | 2 | 1 | 31.3 | 0 |
| P12163_1_F5,14674 R.LQLPDNCEK.D   | 1724.946 | 0.00074  | 3 | 1 | 43.8 | 0 |
| P12163_1_F5,14786 R.LQLPDNCEK.D   | 1724.946 | 0.00628  | 2 | 1 | 32.1 | 0 |
| P12163_1_F5,15019 R.LQLPDNCEK.D   | 1724.946 | 0.00946  | 2 | 1 | 40.2 | 0 |
| P12163_1_F5,16086 R.LQLPDNCEK.D   | 1724.946 | 0.00344  | 2 | 1 | 29.8 | 0 |
| P12163_1_F5,16339 R.LQLPDNCEK.D   | 1724.946 | 0.00796  | 2 | 1 | 29.9 | 0 |

|                                 |          |         |   |   |      |   |
|---------------------------------|----------|---------|---|---|------|---|
| P12163_1_F5,16572 R.LQLPDNCEK.D | 1724.946 | 0.00526 | 2 | 1 | 29.9 | 0 |
| P12163_1_F5,17139 R.LQLPDNCEK.D | 1724.946 | 0.00728 | 2 | 1 | 38.7 | 0 |
| P12163_1_F5,17406 R.LQLPDNCEK.D | 1724.946 | 0.01022 | 2 | 1 | 29.6 | 0 |
| P12163_1_F6,15071 R.LQLPDNCEK.D | 1724.946 | 0.00336 | 2 | 1 | 39.8 | 0 |
| P12163_1_F6,15357 R.LQLPDNCEK.D | 1724.946 | 0.00698 | 3 | 1 | 24   | 0 |
| P12163_1_F6,15570 R.LQLPDNCEK.D | 1724.946 | 0.00844 | 2 | 1 | 29.9 | 0 |
| P12163_1_F7,14004 R.LQLPDNCEK.D | 1724.946 | 0.0097  | 2 | 1 | 24.1 | 0 |
| P12163_1_F7,14017 R.LQLPDNCEK.D | 1724.946 | 0.00251 | 3 | 1 | 35.8 | 0 |
| P12163_1_F7,14152 R.LQLPDNCEK.D | 1724.946 | 0.00836 | 4 | 1 | 24.3 | 0 |
| P12163_1_F7,14221 R.LQLPDNCEK.D | 1724.946 | 0.00185 | 3 | 1 | 46.4 | 0 |
| P12163_1_F7,14255 R.LQLPDNCEK.D | 1724.946 | 0.00238 | 2 | 1 | 39.8 | 0 |
| P12163_1_F7,14588 R.LQLPDNCEK.D | 1724.946 | 0.00449 | 3 | 1 | 37.2 | 0 |
| P12163_1_F8,17 R.LQLPDNCEK.D    | 1724.946 | 0.00116 | 3 | 1 | 30.6 | 0 |
| P12163_1_F8,206 R.LQLPDNCEK.D   | 1724.946 | 0.0022  | 2 | 1 | 32.4 | 0 |
| P12163_1_F8,301 R.LQLPDNCEK.D   | 1724.946 | 0.00257 | 3 | 1 | 37.7 | 0 |
| P12163_1_F8,395 R.LQLPDNCEK.D   | 1724.946 | 0.00194 | 2 | 1 | 33.9 | 0 |
| P12163_1_F8,14845 R.LQLPDNCEK.D | 1724.946 | 0.00188 | 3 | 1 | 39.1 | 0 |
| P12163_1_F8,15277 R.LQLPDNCEK.D | 1724.946 | 0.00224 | 3 | 1 | 35.1 | 0 |
| P12163_1_F9,15179 R.LQLPDNCEK.D | 1724.946 | 0.00582 | 2 | 1 | 30.9 | 0 |
| P12163_2_F1,14682 R.LQLPDNCEK.D | 1724.946 | 0.00671 | 3 | 1 | 43.6 | 0 |
| P12163_2_F1,14924 R.LQLPDNCEK.D | 1724.946 | 0.0002  | 3 | 1 | 41.5 | 0 |
| P12163_2_F1,15027 R.LQLPDNCEK.D | 1724.946 | 0.0072  | 4 | 1 | 23.6 | 0 |
| P12163_2_F1,15029 R.LQLPDNCEK.D | 1724.946 | 0.00268 | 2 | 1 | 33.8 | 0 |
| P12163_2_F1,15251 R.LQLPDNCEK.D | 1724.946 | 0.00316 | 4 | 1 | 25.9 | 0 |
| P12163_2_F1,15314 R.LQLPDNCEK.D | 1724.946 | 0.00227 | 3 | 1 | 43.7 | 0 |
| P12163_2_F1,15318 R.LQLPDNCEK.D | 1724.946 | 0.00408 | 2 | 1 | 32.1 | 0 |
| P12163_2_F1,15637 R.LQLPDNCEK.D | 1724.946 | 0.01889 | 3 | 1 | 27.1 | 0 |
| P12163_2_F1,16182 R.LQLPDNCEK.D | 1724.946 | 0.00404 | 3 | 1 | 25.3 | 0 |
| P12163_2_F1,16399 R.LQLPDNCEK.D | 1724.946 | 0.00684 | 2 | 1 | 31.6 | 0 |
| P12163_2_F1,16452 R.LQLPDNCEK.D | 1724.946 | 0.00212 | 3 | 1 | 36.9 | 0 |
| P12163_2_F1,16668 R.LQLPDNCEK.D | 1724.946 | 0.00702 | 2 | 1 | 32   | 0 |
| P12163_2_F1,16764 R.LQLPDNCEK.D | 1724.946 | 0.00485 | 3 | 1 | 43.6 | 0 |
| P12163_2_F1,17239 R.LQLPDNCEK.D | 1724.946 | 0.01126 | 2 | 1 | 27.9 | 0 |
| P12163_2_F1,17510 R.LQLPDNCEK.D | 1724.946 | 0.00404 | 2 | 1 | 39.2 | 0 |
| P12163_2_F1,24522 R.LQLPDNCEK.D | 1724.946 | 0.00442 | 2 | 1 | 24.4 | 0 |
| P12163_2_F1,26283 R.LQLPDNCEK.D | 1724.946 | 0.00326 | 3 | 1 | 24.9 | 0 |
| P12163_2_F1,26709 R.LQLPDNCEK.D | 1724.946 | 0.00624 | 2 | 1 | 30   | 0 |
| P12163_2_F2,290 R.LQLPDNCEK.D   | 1724.946 | 0.00596 | 2 | 1 | 33.8 | 0 |
| P12163_2_F2,367 R.LQLPDNCEK.D   | 1724.946 | 0.00518 | 3 | 1 | 35.4 | 0 |
| P12163_2_F2,484 R.LQLPDNCEK.D   | 1724.946 | 0.00548 | 2 | 1 | 30.7 | 0 |
| P12163_2_F2,556 R.LQLPDNCEK.D   | 1724.946 | 0.00464 | 3 | 1 | 37   | 0 |
| P12163_2_F2,685 R.LQLPDNCEK.D   | 1724.946 | 0.00554 | 2 | 1 | 35.3 | 0 |
| P12163_2_F2,764 R.LQLPDNCEK.D   | 1724.946 | 0.00497 | 3 | 1 | 35.8 | 0 |
| P12163_2_F2,889 R.LQLPDNCEK.D   | 1724.946 | 0.00546 | 2 | 1 | 33.7 | 0 |
| P12163_2_F2,953 R.LQLPDNCEK.D   | 1724.946 | 0.00533 | 3 | 1 | 39.3 | 0 |
| P12163_2_F2,1087 R.LQLPDNCEK.D  | 1724.946 | 0.00604 | 2 | 1 | 35.2 | 0 |
| P12163_2_F2,1150 R.LQLPDNCEK.D  | 1724.946 | 0.00554 | 3 | 1 | 37.4 | 0 |
| P12163_2_F2,1287 R.LQLPDNCEK.D  | 1724.946 | 0.00632 | 2 | 1 | 33.8 | 0 |
| P12163_2_F2,1346 R.LQLPDNCEK.D  | 1724.946 | 0.00554 | 3 | 1 | 41.4 | 0 |
| P12163_2_F2,1468 R.LQLPDNCEK.D  | 1724.946 | 0.00586 | 2 | 1 | 32.3 | 0 |
| P12163_2_F2,1537 R.LQLPDNCEK.D  | 1724.946 | 0.00482 | 3 | 1 | 43.7 | 0 |



|                   |               |          |          |   |   |      |   |
|-------------------|---------------|----------|----------|---|---|------|---|
| P12163_2_F2,1662  | R.LQLPDNCEK.D | 1724.946 | 0.00628  | 2 | 1 | 33.7 | 0 |
| P12163_2_F2,1737  | R.LQLPDNCEK.D | 1724.946 | 0.00479  | 3 | 1 | 35.9 | 0 |
| P12163_2_F2,1869  | R.LQLPDNCEK.D | 1724.946 | 0.00664  | 2 | 1 | 33.8 | 0 |
| P12163_2_F2,1930  | R.LQLPDNCEK.D | 1724.946 | 0.00581  | 3 | 1 | 37.5 | 0 |
| P12163_2_F2,2067  | R.LQLPDNCEK.D | 1724.946 | 0.00558  | 2 | 1 | 35.6 | 0 |
| P12163_2_F2,2127  | R.LQLPDNCEK.D | 1724.946 | 0.00536  | 3 | 1 | 40.9 | 0 |
| P12163_2_F2,2258  | R.LQLPDNCEK.D | 1724.946 | 0.00548  | 2 | 1 | 32.4 | 0 |
| P12163_2_F2,2318  | R.LQLPDNCEK.D | 1724.946 | 0.00587  | 3 | 1 | 34   | 0 |
| P12163_2_F2,2607  | R.LQLPDNCEK.D | 1724.946 | 0.00602  | 2 | 1 | 34   | 0 |
| P12163_2_F2,2670  | R.LQLPDNCEK.D | 1724.946 | 0.00479  | 3 | 1 | 31   | 0 |
| P12163_2_F2,2829  | R.LQLPDNCEK.D | 1724.946 | 0.00389  | 3 | 1 | 29.2 | 0 |
| P12163_2_F2,15010 | R.LQLPDNCEK.D | 1724.946 | -0.00252 | 2 | 1 | 37.5 | 0 |
| P12163_2_F2,15406 | R.LQLPDNCEK.D | 1724.946 | 0.0092   | 2 | 1 | 25.8 | 0 |
| P12163_2_F2,15609 | R.LQLPDNCEK.D | 1724.946 | 0.00422  | 2 | 1 | 35.3 | 0 |
| P12163_2_F4,13651 | R.LQLPDNCEK.D | 1724.946 | 0.0099   | 2 | 1 | 26.1 | 0 |
| P12163_2_F4,13659 | R.LQLPDNCEK.D | 1724.946 | 0.00137  | 3 | 1 | 22.2 | 0 |
| P12163_2_F4,13887 | R.LQLPDNCEK.D | 1724.946 | 0.00288  | 2 | 1 | 40.4 | 0 |
| P12163_2_F4,13925 | R.LQLPDNCEK.D | 1724.946 | 0.00107  | 3 | 1 | 36.2 | 0 |
| P12163_2_F4,23446 | R.LQLPDNCEK.D | 1724.946 | 0.0014   | 2 | 1 | 33.4 | 0 |
| P12163_2_S3,12786 | R.LQLPDNCEK.D | 1724.946 | 0.0029   | 3 | 1 | 31.1 | 0 |
| P12163_2_S3,12969 | R.LQLPDNCEK.D | 1724.946 | 0.00122  | 3 | 1 | 31.2 | 0 |
| P12163_2_S3,13362 | R.LQLPDNCEK.D | 1724.946 | 0.00629  | 3 | 1 | 34.9 | 0 |
| P12163_2_S5,13505 | R.LQLPDNCEK.D | 1724.946 | 0.0014   | 3 | 1 | 38.2 | 0 |
| P12163_2_S5,13726 | R.LQLPDNCEK.D | 1724.946 | -0.00004 | 3 | 1 | 46.6 | 0 |
| P12163_2_S5,13747 | R.LQLPDNCEK.D | 1724.946 | 0.0033   | 2 | 1 | 40.7 | 0 |
| P12163_2_S5,14163 | R.LQLPDNCEK.D | 1724.946 | 0.00602  | 3 | 1 | 46.5 | 0 |
| P12163_2_S5,14182 | R.LQLPDNCEK.D | 1724.946 | 0.00726  | 2 | 1 | 32.2 | 0 |
| P12163_2_S5,14247 | R.LQLPDNCEK.D | 1724.946 | 0.00748  | 4 | 1 | 27.3 | 0 |
| P12163_1_S1,8279  | R.QM*LDTMDR.L | 1329.644 | -0.00122 | 3 | 1 | 25.3 | 0 |
| P12163_1_S1,8479  | R.QM*LDTMDR.L | 1329.644 | 0.00178  | 3 | 1 | 24.4 | 0 |
| P12163_1_S1,10182 | R.QM*LDTMDR.L | 1329.644 | 0.00507  | 2 | 1 | 34.2 | 0 |
| P12163_1_S1,10896 | R.QM*LDTMDR.L | 1329.644 | 0.00253  | 3 | 1 | 41.4 | 0 |
| P12163_1_F2,8785  | R.QMLDTM*DR.L | 1329.644 | 0.00487  | 3 | 1 | 24.3 | 0 |
| P12163_1_F2,9016  | R.QMLDTM*DR.L | 1329.644 | -0.00275 | 3 | 1 | 25.6 | 0 |
| P12163_1_F2,9258  | R.QMLDTM*DR.L | 1329.644 | 0.00322  | 3 | 1 | 26.8 | 0 |
| P12163_1_F2,9497  | R.QMLDTM*DR.L | 1329.644 | 0.00121  | 3 | 1 | 25.1 | 0 |
| P12163_1_S1,9252  | R.QMLDTM*DR.L | 1329.644 | 0.00121  | 3 | 1 | 27.7 | 0 |
| P12163_1_S1,11112 | R.QMLDTM*DR.L | 1329.644 | 0.00325  | 3 | 1 | 42.6 | 0 |
| P12163_1_S1,11207 | R.QMLDTM*DR.L | 1329.644 | 0.00151  | 2 | 1 | 23.9 | 0 |
| P12163_1_F2,10281 | R.QMLDTMDR.L  | 1313.649 | 0.00214  | 3 | 1 | 34.6 | 0 |
| P12163_1_F2,10966 | R.QMLDTMDR.L  | 1313.649 | -0.00305 | 3 | 1 | 34.6 | 0 |
| P12163_1_F2,11185 | R.QMLDTMDR.L  | 1313.649 | 0.00208  | 3 | 1 | 34.6 | 0 |
| P12163_1_F2,11435 | R.QMLDTMDR.L  | 1313.649 | 0.00253  | 3 | 1 | 34.5 | 0 |
| P12163_1_F2,11942 | R.QMLDTMDR.L  | 1313.649 | 0.00239  | 3 | 1 | 33.5 | 0 |
| P12163_1_F2,12360 | R.QMLDTMDR.L  | 1313.649 | 0.00073  | 3 | 1 | 29.3 | 0 |
| P12163_1_F2,12608 | R.QMLDTMDR.L  | 1313.649 | 0.00302  | 3 | 1 | 31.9 | 0 |
| P12163_1_F2,12885 | R.QMLDTMDR.L  | 1313.649 | 0.00248  | 3 | 1 | 26.1 | 0 |
| P12163_1_F2,14258 | R.QMLDTMDR.L  | 1313.649 | 0.00034  | 3 | 1 | 28.7 | 0 |
| P12163_1_F3,11142 | R.QMLDTMDR.L  | 1313.649 | 0.00358  | 3 | 1 | 25   | 0 |
| P12163_1_F4,11604 | R.QMLDTMDR.L  | 1313.649 | 0.00284  | 3 | 1 | 22.9 | 0 |
| P12163_1_F6,10730 | R.QMLDTMDR.L  | 1313.649 | 0.00388  | 3 | 1 | 26.4 | 0 |

|                                       |          |          |   |   |      |   |
|---------------------------------------|----------|----------|---|---|------|---|
| P12163_1_F6,14094 R.QMLDTMDR.L        | 1313.649 | 0.00173  | 2 | 1 | 26.3 | 0 |
| P12163_1_S1,10638 R.QMLDTMDR.L        | 1313.649 | 0.00424  | 3 | 1 | 22.2 | 0 |
| P12163_1_S1,10859 R.QMLDTMDR.L        | 1313.649 | 0.00313  | 3 | 1 | 29.2 | 0 |
| P12163_1_S1,11081 R.QMLDTMDR.L        | 1313.649 | -0.0023  | 3 | 1 | 34.7 | 0 |
| P12163_1_S1,11293 R.QMLDTMDR.L        | 1313.649 | 0.00356  | 3 | 1 | 35.8 | 0 |
| P12163_1_S1,11523 R.QMLDTMDR.L        | 1313.649 | 0.0023   | 3 | 1 | 25.5 | 0 |
| P12163_1_S1,13213 R.QMLDTMDR.L        | 1313.649 | 0.005    | 3 | 1 | 42.9 | 0 |
| P12163_1_S1,13255 R.QMLDTMDR.L        | 1313.649 | 0.00213  | 2 | 1 | 35.2 | 0 |
| P12163_1_S1,14071 R.QMLDTMDR.L        | 1313.649 | 0.00349  | 3 | 1 | 43.1 | 0 |
| P12163_2_F4,10153 R.QMLDTMDR.L        | 1313.649 | 0.00221  | 3 | 1 | 34.3 | 0 |
| P12163_2_S3,9861 R.QMLDTMDR.L         | 1313.649 | 0.00181  | 3 | 1 | 24.6 | 0 |
| P12163_2_S3,12576 R.QMLDTMDR.L        | 1313.649 | 0.00113  | 2 | 1 | 26.4 | 0 |
| P12163_2_S3,12628 R.QMLDTMDR.L        | 1313.649 | 0.00158  | 3 | 1 | 31.3 | 0 |
| P12163_2_S3,12769 R.QMLDTMDR.L        | 1313.649 | 0.00121  | 2 | 1 | 35.6 | 0 |
| P12163_2_S3,13148 R.QMLDTMDR.L        | 1313.649 | 0.00437  | 2 | 1 | 23.9 | 0 |
| P12163_1_F7,19277 R.RTALDISPFGLM*DPSF | 2441.28  | 0.00033  | 3 | 1 | 42.2 | 0 |
| P12163_1_F7,19303 R.RTALDISPFGLM*DPSF | 2441.28  | 0.0018   | 4 | 1 | 37.6 | 0 |
| P12163_1_F7,20176 R.RTALDISPFGLM*DPSF | 2441.28  | 0.00108  | 3 | 1 | 27.6 | 0 |
| P12163_1_F7,20537 R.RTALDISPFGLM*DPSF | 2441.28  | 0.00164  | 4 | 1 | 37.4 | 0 |
| P12163_1_F7,20615 R.RTALDISPFGLM*DPSF | 2441.28  | 0.00378  | 3 | 1 | 36.1 | 0 |
| P12163_1_F7,20788 R.RTALDISPFGLM*DPSF | 2441.28  | 0.00384  | 4 | 1 | 31   | 0 |
| P12163_1_F7,21041 R.RTALDISPFGLM*DPSF | 2441.28  | 0.00171  | 3 | 1 | 42.6 | 0 |
| P12163_1_F7,21095 R.RTALDISPFGLM*DPSF | 2441.28  | 0.00092  | 4 | 1 | 34.2 | 0 |
| P12163_1_F7,21223 R.RTALDISPFGLM*DPSF | 2441.28  | 0.00288  | 3 | 1 | 40.3 | 0 |
| P12163_1_F7,21440 R.RTALDISPFGLM*DPSF | 2441.28  | 0.00363  | 3 | 1 | 36.3 | 0 |
| P12163_1_F7,21452 R.RTALDISPFGLM*DPSF | 2441.28  | -0.00328 | 4 | 1 | 27.6 | 0 |
| P12163_1_F7,21651 R.RTALDISPFGLM*DPSF | 2441.28  | 0.00444  | 3 | 1 | 28.7 | 0 |
| P12163_1_F7,21849 R.RTALDISPFGLM*DPSF | 2441.28  | 0.0021   | 3 | 1 | 30.5 | 0 |
| P12163_1_F7,22237 R.RTALDISPFGLM*DPSF | 2441.28  | 0.00246  | 3 | 1 | 38.4 | 0 |
| P12163_1_F7,22429 R.RTALDISPFGLM*DPSF | 2441.28  | 0.00396  | 3 | 1 | 39.8 | 0 |
| P12163_1_F7,22638 R.RTALDISPFGLM*DPSF | 2441.28  | 0.00651  | 3 | 1 | 28.2 | 0 |
| P12163_1_F7,22836 R.RTALDISPFGLM*DPSF | 2441.28  | 0.00444  | 3 | 1 | 44   | 0 |
| P12163_1_F7,23018 R.RTALDISPFGLM*DPSF | 2441.28  | 0.00267  | 3 | 1 | 33.4 | 0 |
| P12163_1_F7,23191 R.RTALDISPFGLM*DPSF | 2441.28  | 0.01131  | 3 | 1 | 35   | 0 |
| P12163_1_F7,23373 R.RTALDISPFGLM*DPSF | 2441.28  | -0.0009  | 3 | 1 | 49.8 | 0 |
| P12163_1_F7,23540 R.RTALDISPFGLM*DPSF | 2441.28  | 0.00321  | 3 | 1 | 30.2 | 0 |
| P12163_1_F7,23717 R.RTALDISPFGLM*DPSF | 2441.28  | 0.00369  | 3 | 1 | 36.8 | 0 |
| P12163_1_F7,23890 R.RTALDISPFGLM*DPSF | 2441.28  | 0.00279  | 3 | 1 | 28.9 | 0 |
| P12163_1_F7,24342 R.RTALDISPFGLM*DPSF | 2441.28  | 0.00291  | 3 | 1 | 28   | 0 |
| P12163_1_F7,24807 R.RTALDISPFGLM*DPSF | 2441.28  | 0.00282  | 3 | 1 | 29.1 | 0 |
| P12163_1_F8,22118 R.RTALDISPFGLM*DPSF | 2441.28  | 0.0042   | 3 | 1 | 34.8 | 0 |
| P12163_2_S5,18610 R.RTALDISPFGLM*DPSF | 2441.28  | 0.00276  | 4 | 1 | 41.1 | 0 |
| P12163_2_S5,18653 R.RTALDISPFGLM*DPSF | 2441.28  | 0.00102  | 3 | 1 | 63.1 | 0 |
| P12163_2_S5,19721 R.RTALDISPFGLM*DPSF | 2441.28  | 0.00704  | 4 | 1 | 29.6 | 0 |
| P12163_2_S5,19771 R.RTALDISPFGLM*DPSF | 2441.28  | 0.0048   | 3 | 1 | 30.8 | 0 |
| P12163_2_S5,20171 R.RTALDISPFGLM*DPSF | 2441.28  | 0.00102  | 3 | 1 | 37.1 | 0 |
| P12163_2_S5,20218 R.RTALDISPFGLM*DPSF | 2441.28  | 0.00196  | 4 | 1 | 35.6 | 0 |
| P12163_2_S5,20360 R.RTALDISPFGLM*DPSF | 2441.28  | 0.00264  | 3 | 1 | 65.3 | 0 |
| P12163_1_F7,21512 R.RTALDISPFGLMDPSFF | 2425.285 | 0.00412  | 3 | 1 | 49.3 | 0 |
| P12163_1_F7,21523 R.RTALDISPFGLMDPSFF | 2425.285 | 0.00252  | 4 | 1 | 29.2 | 0 |
| P12163_1_F7,22370 R.RTALDISPFGLMDPSFF | 2425.285 | 0.00487  | 3 | 1 | 36.4 | 0 |

|                    |                     |          |          |   |   |      |   |
|--------------------|---------------------|----------|----------|---|---|------|---|
| P12163_1_F7,23121  | R.RTALDISPFGLMDPSFF | 2425.285 | 0.00292  | 4 | 1 | 36.3 | 0 |
| P12163_1_F7,23149  | R.RTALDISPFGLMDPSFF | 2425.285 | 0.00226  | 3 | 1 | 52.4 | 0 |
| P12163_2_S5,20753  | R.RTALDISPFGLMDPSFF | 2425.285 | 0.00076  | 3 | 1 | 28.6 | 0 |
| P12163_2_S5,22105  | R.RTALDISPFGLMDPSFF | 2425.285 | 0.00223  | 3 | 1 | 38.1 | 0 |
| P12163_1_F3,22471  | R.TALDISPFGLM*DPSFP | 2285.179 | 0.00426  | 3 | 1 | 56.7 | 0 |
| P12163_1_F3,23558  | R.TALDISPFGLM*DPSFP | 2285.179 | 0.0042   | 3 | 1 | 39   | 0 |
| P12163_1_F3,24631  | R.TALDISPFGLM*DPSFP | 2285.179 | 0.00036  | 2 | 1 | 37   | 0 |
| P12163_1_F3,26807  | R.TALDISPFGLM*DPSFP | 2285.179 | -0.00261 | 3 | 1 | 45.6 | 0 |
| P12163_1_F3,27025  | R.TALDISPFGLM*DPSFP | 2285.179 | 0.00243  | 3 | 1 | 50.1 | 0 |
| P12163_1_F6,23391  | R.TALDISPFGLM*DPSFP | 2285.179 | -0.0002  | 2 | 1 | 37.7 | 0 |
| P12163_1_F6,23392  | R.TALDISPFGLM*DPSFP | 2285.179 | 0.00069  | 3 | 1 | 59.5 | 0 |
| P12163_1_F7,21024  | R.TALDISPFGLM*DPSFP | 2285.179 | -0.00012 | 3 | 1 | 37.7 | 0 |
| P12163_1_F7,21925  | R.TALDISPFGLM*DPSFP | 2285.179 | 0.01197  | 3 | 1 | 35.7 | 0 |
| P12163_1_F7,22541  | R.TALDISPFGLM*DPSFP | 2285.179 | -0.00214 | 2 | 1 | 40.9 | 0 |
| P12163_1_F7,24518  | R.TALDISPFGLM*DPSFP | 2285.179 | 0.00222  | 3 | 1 | 64.6 | 0 |
| P12163_2_S5,21430  | R.TALDISPFGLM*DPSFP | 2285.179 | 0.00183  | 3 | 1 | 23.1 | 0 |
| P12163_1_F3,24961  | R.TALDISPFGLMDPSFPT | 2269.184 | 0.00672  | 3 | 1 | 42.8 | 0 |
| P12163_1_F3,25195  | R.TALDISPFGLMDPSFPT | 2269.184 | 0.00147  | 3 | 1 | 47.8 | 0 |
| P12163_1_F3,25891  | R.TALDISPFGLMDPSFPT | 2269.184 | 0.00786  | 3 | 1 | 36.3 | 0 |
| P12163_1_F3,26155  | R.TALDISPFGLMDPSFPT | 2269.184 | 0.00474  | 3 | 1 | 45.2 | 0 |
| P12163_1_F3,26787  | R.TALDISPFGLMDPSFPT | 2269.184 | 0.01209  | 3 | 1 | 32.1 | 0 |
| P12163_1_F3,27024  | R.TALDISPFGLMDPSFPT | 2269.184 | 0.00237  | 3 | 1 | 48.5 | 0 |
| P12163_1_F7,23027  | R.TALDISPFGLMDPSFPT | 2269.184 | 0.00252  | 3 | 1 | 34.2 | 0 |
| P12163_1_F5,10128  | K.ANSLAQLGK.Y       | 1509.921 | 0.00617  | 2 | 1 | 26.4 | 0 |
| P12163_1_F5,14601  | K.ANSLAQLGK.Y       | 1509.921 | 0.00911  | 2 | 1 | 29.6 | 0 |
| P12163_1_F5,14620  | K.ANSLAQLGK.Y       | 1509.921 | 0.00878  | 3 | 1 | 34   | 0 |
| P12163_1_F5,14827  | K.ANSLAQLGK.Y       | 1509.921 | 0.00581  | 2 | 1 | 52.5 | 0 |
| P12163_1_F5,14836  | K.ANSLAQLGK.Y       | 1509.921 | 0.00065  | 3 | 1 | 42.1 | 0 |
| P12163_1_F5,16085  | K.ANSLAQLGK.Y       | 1509.921 | 0.00254  | 3 | 1 | 31.8 | 0 |
| P12163_1_F5,16231  | K.ANSLAQLGK.Y       | 1509.921 | 0.00829  | 2 | 1 | 42.2 | 0 |
| P12163_1_F5,16337  | K.ANSLAQLGK.Y       | 1509.921 | 0.00815  | 3 | 1 | 39.1 | 0 |
| P12163_1_F5,16515  | K.ANSLAQLGK.Y       | 1509.921 | 0.00799  | 2 | 1 | 37.7 | 0 |
| P12163_1_F5,16586  | K.ANSLAQLGK.Y       | 1509.921 | 0.00503  | 3 | 1 | 34   | 0 |
| P12163_1_F5,17147  | K.ANSLAQLGK.Y       | 1509.921 | 0.00527  | 2 | 1 | 44.9 | 0 |
| P12163_1_F5,17174  | K.ANSLAQLGK.Y       | 1509.921 | 0.00782  | 3 | 1 | 29.4 | 0 |
| P12163_1_F5,17404  | K.ANSLAQLGK.Y       | 1509.921 | 0.00713  | 2 | 1 | 25.2 | 0 |
| P12163_1_F5,17423  | K.ANSLAQLGK.Y       | 1509.921 | 0.00557  | 3 | 1 | 23.4 | 0 |
| P12163_1_F5,17818  | K.ANSLAQLGK.Y       | 1509.921 | 0.00825  | 2 | 1 | 33.3 | 0 |
| P12163_1_F6,251    | K.ANSLAQLGK.Y       | 1509.921 | 0.00512  | 3 | 1 | 38.4 | 0 |
| P12163_1_F6,721    | K.ANSLAQLGK.Y       | 1509.921 | 0.0056   | 3 | 1 | 30   | 0 |
| P12163_1_F6,3763   | K.ANSLAQLGK.Y       | 1509.921 | 0.00755  | 3 | 1 | 27.8 | 0 |
| P12163_1_F6,15434  | K.ANSLAQLGK.Y       | 1509.921 | 0.00923  | 3 | 1 | 34.3 | 0 |
| P12163_1_F7,14644  | K.ANSLAQLGK.Y       | 1509.921 | 0.00713  | 3 | 1 | 36.1 | 0 |
| P12163_1_F7,14692  | K.ANSLAQLGK.Y       | 1509.921 | 0.00693  | 2 | 1 | 41.3 | 0 |
| P12163_1_F8,10581  | K.ANSLAQLGK.Y       | 1509.921 | 0.00227  | 3 | 1 | 22.1 | 0 |
| P12163_1_F8,14574  | K.ANSLAQLGK.Y       | 1509.921 | 0.00194  | 3 | 1 | 31.4 | 0 |
| P12163_1_F8,14588  | K.ANSLAQLGK.Y       | 1509.921 | 0.00391  | 2 | 1 | 36.9 | 0 |
| P12163_1_F8,14821  | K.ANSLAQLGK.Y       | 1509.921 | 0.00185  | 3 | 1 | 47.1 | 0 |
| P12163_1_F8,14843  | K.ANSLAQLGK.Y       | 1509.921 | 0.00145  | 2 | 1 | 49.6 | 0 |
| P12163_1_F8,15386  | K.ANSLAQLGK.Y       | 1509.921 | 0.00693  | 2 | 1 | 49.3 | 0 |
| P12163_1_S10,1500' | K.ANSLAQLGK.Y       | 1509.921 | 0.00203  | 3 | 1 | 22.3 | 0 |

|                   |                   |          |          |   |   |      |   |
|-------------------|-------------------|----------|----------|---|---|------|---|
| P12163_2_F1,14779 | K.ANSLAQLGK.Y     | 1509.921 | 0.00717  | 2 | 1 | 40.8 | 0 |
| P12163_2_F1,14793 | K.ANSLAQLGK.Y     | 1509.921 | 0.00482  | 3 | 1 | 34.1 | 0 |
| P12163_2_F1,14985 | K.ANSLAQLGK.Y     | 1509.921 | 0.00343  | 2 | 1 | 36.9 | 0 |
| P12163_2_F10,1409 | K.ANSLAQLGK.Y     | 1509.921 | -0.00046 | 3 | 1 | 33.7 | 0 |
| P12163_2_F10,1410 | K.ANSLAQLGK.Y     | 1509.921 | 0.00445  | 2 | 1 | 38.6 | 0 |
| P12163_2_F2,591   | K.ANSLAQLGK.Y     | 1509.921 | 0.00119  | 2 | 1 | 27.4 | 0 |
| P12163_2_F2,773   | K.ANSLAQLGK.Y     | 1509.921 | 0.00347  | 3 | 1 | 22.7 | 0 |
| P12163_2_F2,1183  | K.ANSLAQLGK.Y     | 1509.921 | 0.00326  | 3 | 1 | 28.5 | 0 |
| P12163_2_F2,2479  | K.ANSLAQLGK.Y     | 1509.921 | 0.00326  | 3 | 1 | 23.1 | 0 |
| P12163_2_F2,11028 | K.ANSLAQLGK.Y     | 1509.921 | 0.00455  | 3 | 1 | 22.1 | 0 |
| P12163_2_F2,11029 | K.ANSLAQLGK.Y     | 1509.921 | 0.00459  | 2 | 1 | 30.4 | 0 |
| P12163_2_F2,15404 | K.ANSLAQLGK.Y     | 1509.921 | 0.00989  | 2 | 1 | 52.9 | 0 |
| P12163_2_F2,15416 | K.ANSLAQLGK.Y     | 1509.921 | 0.01001  | 3 | 1 | 37.2 | 0 |
| P12163_2_F2,15619 | K.ANSLAQLGK.Y     | 1509.921 | 0.00561  | 2 | 1 | 52.3 | 0 |
| P12163_2_F2,15661 | K.ANSLAQLGK.Y     | 1509.921 | 0.00131  | 3 | 1 | 43.9 | 0 |
| P12163_2_F2,15844 | K.ANSLAQLGK.Y     | 1509.921 | 0.00645  | 2 | 1 | 53.7 | 0 |
| P12163_2_F2,15903 | K.ANSLAQLGK.Y     | 1509.921 | 0.00299  | 3 | 1 | 41.4 | 0 |
| P12163_2_F2,16123 | K.ANSLAQLGK.Y     | 1509.921 | 0.00645  | 2 | 1 | 27.7 | 0 |
| P12163_2_F2,16175 | K.ANSLAQLGK.Y     | 1509.921 | 0.01106  | 3 | 1 | 33.4 | 0 |
| P12163_2_F4,94    | K.ANSLAQLGK.Y     | 1509.921 | 0.00437  | 3 | 1 | 28.3 | 0 |
| P12163_2_F4,253   | K.ANSLAQLGK.Y     | 1509.921 | 0.00542  | 3 | 1 | 42.2 | 0 |
| P12163_2_F4,274   | K.ANSLAQLGK.Y     | 1509.921 | 0.00489  | 2 | 1 | 40.2 | 0 |
| P12163_2_F4,432   | K.ANSLAQLGK.Y     | 1509.921 | 0.0041   | 3 | 1 | 38.9 | 0 |
| P12163_2_F4,14347 | K.ANSLAQLGK.Y     | 1509.921 | 0.00521  | 3 | 1 | 37.6 | 0 |
| P12163_2_F4,14389 | K.ANSLAQLGK.Y     | 1509.921 | 0.00381  | 2 | 1 | 40   | 0 |
| P12163_2_S5,13556 | K.ANSLAQLGK.Y     | 1509.921 | 0.00152  | 3 | 1 | 30.1 | 0 |
| P12163_2_S5,13734 | K.ANSLAQLGK.Y     | 1509.921 | 0.00175  | 2 | 1 | 30.1 | 0 |
| P12163_2_S5,13814 | K.ANSLAQLGK.Y     | 1509.921 | 0.002    | 3 | 1 | 47.8 | 0 |
| P12163_2_S5,14344 | K.ANSLAQLGK.Y     | 1509.921 | 0.01082  | 3 | 1 | 22.4 | 0 |
| P12163_2_S5,14353 | K.ANSLAQLGK.Y     | 1509.921 | 0.00763  | 2 | 1 | 33.9 | 0 |
| P12163_1_F4,12170 | K.ASPETIAK.Y      | 1424.857 | 0.00593  | 2 | 1 | 28.7 | 0 |
| P12163_1_F4,23729 | K.ASPETIAK.Y      | 1424.857 | 0.00729  | 2 | 1 | 25.6 | 0 |
| P12163_1_F4,27991 | K.ASPETIAK.Y      | 1424.857 | 0.00405  | 2 | 1 | 25.4 | 0 |
| P12163_1_F5,10768 | K.ASPETIAK.Y      | 1424.857 | 0.00993  | 2 | 1 | 28.4 | 0 |
| P12163_1_F7,10428 | K.ASPETIAK.Y      | 1424.857 | 0.00153  | 2 | 1 | 30.6 | 0 |
| P12163_2_F1,11200 | K.ASPETIAK.Y      | 1424.857 | 0.00681  | 2 | 1 | 28.4 | 0 |
| P12163_2_F1,11777 | K.ASPETIAK.Y      | 1424.857 | 0.00543  | 2 | 1 | 24.4 | 0 |
| P12163_2_F1,12056 | K.ASPETIAK.Y      | 1424.857 | 0.00717  | 2 | 1 | 24.2 | 0 |
| P12163_2_F6,11327 | K.ASPETIAK.Y      | 1424.857 | -0.00044 | 3 | 1 | 23.7 | 0 |
| P12163_2_S5,10266 | K.ASPETIAK.Y      | 1424.857 | 0.00154  | 3 | 1 | 22.8 | 0 |
| P12163_2_S5,10716 | K.ASPETIAK.Y      | 1424.857 | 0.00595  | 3 | 1 | 25.2 | 0 |
| P12163_1_F4,13149 | K.EASWGLAR.Y      | 1193.658 | 0.00326  | 3 | 1 | 27.6 | 0 |
| P12163_2_F1,12005 | K.EASWGLAR.Y      | 1193.658 | 0.00434  | 3 | 1 | 30.4 | 0 |
| P12163_1_F3,23444 | K.GLVPLPGSNNESWCQ | 2731.377 | 0.00516  | 3 | 1 | 50.8 | 0 |
| P12163_1_F3,7158  | K.TIASPGR.G       | 1005.599 | 0.00381  | 3 | 1 | 31.5 | 0 |
| P12163_1_F3,7972  | K.TIASPGR.G       | 1005.599 | 0.00399  | 3 | 1 | 22.3 | 0 |
| P12163_1_F3,8846  | K.TIASPGR.G       | 1005.599 | 0.00396  | 3 | 1 | 30.2 | 0 |
| P12163_1_F4,6379  | K.TIASPGR.G       | 1005.599 | 0.00396  | 3 | 1 | 27   | 0 |
| P12163_2_F1,5602  | K.TIASPGR.G       | 1005.599 | 0.00318  | 3 | 1 | 30.6 | 0 |
| P12163_2_F1,5847  | K.TIASPGR.G       | 1005.599 | 0.00378  | 3 | 1 | 30   | 0 |
| P12163_2_F1,6671  | K.TIASPGR.G       | 1005.599 | 0.00147  | 3 | 1 | 37.2 | 0 |

|                   |                     |          |          |   |   |      |   |
|-------------------|---------------------|----------|----------|---|---|------|---|
| P12163_2_F1,6929  | K.TIASPGR.G         | 1005.599 | 0.00216  | 3 | 1 | 30.4 | 0 |
| P12163_2_F1,8013  | K.TIASPGR.G         | 1005.599 | 0.00477  | 3 | 1 | 26.4 | 0 |
| P12163_2_F7,9808  | K.TWQGRPENTEEAAQK.S | 2224.193 | 0.00022  | 2 | 1 | 25.9 | 0 |
| P12163_1_F3,10030 | K.YSAEGESEEA.K      | 1807.917 | 0.00707  | 2 | 1 | 31.2 | 0 |
| P12163_1_F4,10410 | K.YSAEGESEEA.K      | 1807.917 | 0.0076   | 3 | 1 | 56.8 | 0 |
| P12163_1_F4,10589 | K.YSAEGESEEA.K      | 1807.917 | 0.00656  | 2 | 1 | 60   | 0 |
| P12163_1_F5,9215  | K.YSAEGESEEA.K      | 1807.917 | 0.00769  | 2 | 1 | 56.7 | 0 |
| P12163_1_F6,10126 | K.YSAEGESEEA.K      | 1807.917 | 0.0072   | 2 | 1 | 55.7 | 0 |
| P12163_1_F6,10156 | K.YSAEGESEEA.K      | 1807.917 | 0.0061   | 3 | 1 | 37.1 | 0 |
| P12163_1_F7,9138  | K.YSAEGESEEA.K      | 1807.917 | 0.00028  | 2 | 1 | 31.2 | 0 |
| P12163_1_F7,9147  | K.YSAEGESEEA.K      | 1807.917 | -0.00371 | 3 | 1 | 39.5 | 0 |
| P12163_1_F7,9658  | K.YSAEGESEEA.K      | 1807.917 | 0.00589  | 2 | 1 | 51.3 | 0 |
| P12163_1_F8,9935  | K.YSAEGESEEA.K      | 1807.917 | 0.00276  | 2 | 1 | 38.3 | 0 |
| P12163_1_F9,9760  | K.YSAEGESEEA.K      | 1807.917 | 0.00655  | 3 | 1 | 61   | 0 |
| P12163_1_F9,9765  | K.YSAEGESEEA.K      | 1807.917 | 0.0056   | 2 | 1 | 57.1 | 0 |
| P12163_1_S10,1080 | K.YSAEGESEEA.K      | 1807.917 | 0.01774  | 3 | 1 | 60   | 0 |
| P12163_2_F1,7972  | K.YSAEGESEEA.K      | 1807.917 | 0.00784  | 3 | 1 | 39.9 | 0 |
| P12163_2_F1,9709  | K.YSAEGESEEA.K      | 1807.917 | 0.00667  | 3 | 1 | 58.5 | 0 |
| P12163_2_F1,9715  | K.YSAEGESEEA.K      | 1807.917 | 0.00751  | 2 | 1 | 53.8 | 0 |
| P12163_2_F4,8751  | K.YSAEGESEEA.K      | 1807.917 | -0.00455 | 3 | 1 | 49.2 | 0 |
| P12163_2_F4,8752  | K.YSAEGESEEA.K      | 1807.917 | -0.00704 | 2 | 1 | 59.9 | 0 |
| P12163_2_F8_12070 | K.YSAEGESEEA.K      | 1807.917 | 0.00763  | 3 | 1 | 61.5 | 0 |
| P12163_2_F9,10009 | K.YSAEGESEEA.K      | 1807.917 | 0.0006   | 2 | 1 | 43.7 | 0 |
| P12163_2_F10,1019 | K.YSAEGESEEA.K.G    | 2240.217 | 0.009    | 4 | 1 | 28.4 | 0 |
| P12163_1_F5,16650 | K.YTLTM*LK.R        | 1493.886 | 0.00428  | 3 | 1 | 27.7 | 0 |
| P12163_1_F6,17045 | K.YTLTM*LK.R        | 1493.886 | 0.00044  | 3 | 1 | 28.8 | 0 |
| P12163_1_S10,1636 | K.YTLTM*LK.R        | 1493.886 | 0.0047   | 3 | 1 | 23.4 | 0 |
| P12163_2_F1,16904 | K.YTLTM*LK.R        | 1493.886 | 0.00671  | 3 | 1 | 22.9 | 0 |
| P12163_2_F8_12070 | K.YTLTM*LK.R        | 1493.886 | 0.00797  | 3 | 1 | 26.2 | 0 |
| P12163_2_F9,15640 | K.YTLTM*LK.R        | 1493.886 | 0.00767  | 3 | 1 | 22.4 | 0 |
| P12163_2_F9,17564 | K.YTLTM*LK.R        | 1493.886 | 0.00185  | 3 | 1 | 21.9 | 0 |
| P12163_2_S5,15163 | K.YTLTM*LK.R        | 1493.886 | 0.0026   | 3 | 1 | 23.8 | 0 |
| P12163_1_F3,19932 | K.YTLTMLK.R         | 1477.891 | 0.00779  | 3 | 1 | 29.2 | 0 |
| P12163_1_F4,19823 | K.YTLTMLK.R         | 1477.891 | -0.00136 | 2 | 1 | 28.6 | 0 |
| P12163_1_F4,19826 | K.YTLTMLK.R         | 1477.891 | 0.00251  | 3 | 1 | 27.3 | 0 |
| P12163_1_F4,20016 | K.YTLTMLK.R         | 1477.891 | 0.00204  | 2 | 1 | 30.4 | 0 |
| P12163_1_F4,20023 | K.YTLTMLK.R         | 1477.891 | 0.00386  | 3 | 1 | 35.8 | 0 |
| P12163_1_F4,20255 | K.YTLTMLK.R         | 1477.891 | 0.00488  | 2 | 1 | 30.4 | 0 |
| P12163_1_F4,20267 | K.YTLTMLK.R         | 1477.891 | 0.00452  | 3 | 1 | 27.5 | 0 |
| P12163_1_F5,19040 | K.YTLTMLK.R         | 1477.891 | 0.0026   | 3 | 1 | 26.9 | 0 |
| P12163_1_F5,19045 | K.YTLTMLK.R         | 1477.891 | 0.00436  | 2 | 1 | 27.9 | 0 |
| P12163_1_F5,19279 | K.YTLTMLK.R         | 1477.891 | 0.00542  | 3 | 1 | 27.3 | 0 |
| P12163_1_F5,19335 | K.YTLTMLK.R         | 1477.891 | 0.0073   | 2 | 1 | 26.7 | 0 |
| P12163_1_F6,19228 | K.YTLTMLK.R         | 1477.891 | 0.0065   | 3 | 1 | 27.5 | 0 |
| P12163_1_F7,17907 | K.YTLTMLK.R         | 1477.891 | -0.00076 | 3 | 1 | 22.1 | 0 |
| P12163_1_F7,17930 | K.YTLTMLK.R         | 1477.891 | 0.0033   | 2 | 1 | 26.8 | 0 |
| P12163_1_F7,18422 | K.YTLTMLK.R         | 1477.891 | 0.00678  | 2 | 1 | 27.1 | 0 |
| P12163_1_F8,18781 | K.YTLTMLK.R         | 1477.891 | 0.00104  | 3 | 1 | 23.2 | 0 |
| P12163_1_F8,19286 | K.YTLTMLK.R         | 1477.891 | 0.00622  | 2 | 1 | 26.2 | 0 |
| P12163_1_F8,19322 | K.YTLTMLK.R         | 1477.891 | 0.00428  | 3 | 1 | 25.9 | 0 |
| P12163_1_F9,18734 | K.YTLTMLK.R         | 1477.891 | 0.0044   | 3 | 1 | 27.2 | 0 |

|                                  |          |          |   |   |      |   |
|----------------------------------|----------|----------|---|---|------|---|
| P12163_1_F9,18745 K.YTLTMLK.R    | 1477.891 | 0.00666  | 2 | 1 | 28.5 | 0 |
| P12163_1_S10,1820 K.YTLTMLK.R    | 1477.891 | 0.00455  | 3 | 1 | 23   | 0 |
| P12163_2_F1,19198 K.YTLTMLK.R    | 1477.891 | 0.00102  | 2 | 1 | 28.3 | 0 |
| P12163_2_F1,19387 K.YTLTMLK.R    | 1477.891 | 0.00142  | 2 | 1 | 28.9 | 0 |
| P12163_2_F1,19624 K.YTLTMLK.R    | 1477.891 | 0.00215  | 3 | 1 | 29.2 | 0 |
| P12163_2_F1,19873 K.YTLTMLK.R    | 1477.891 | 0.00254  | 3 | 1 | 28.9 | 0 |
| P12163_2_F2,19890 K.YTLTMLK.R    | 1477.891 | 0.00668  | 2 | 1 | 27.6 | 0 |
| P12163_2_F4,17579 K.YTLTMLK.R    | 1477.891 | 0.00053  | 3 | 1 | 25.8 | 0 |
| P12163_2_F8_12070 K.YTLTMLK.R    | 1477.891 | 0.00215  | 3 | 1 | 25.2 | 0 |
| P12163_2_F8_12070 K.YTLTMLK.R    | 1477.891 | 0.0053   | 3 | 1 | 23.7 | 0 |
| P12163_2_F9,17555 K.YTLTMLK.R    | 1477.891 | 0.00446  | 3 | 1 | 27.7 | 0 |
| P12163_2_F9,17569 K.YTLTMLK.R    | 1477.891 | 0.00428  | 2 | 1 | 27.8 | 0 |
| P12163_2_F9,17759 K.YTLTMLK.R    | 1477.891 | 0.0041   | 3 | 1 | 25.3 | 0 |
| P12163_2_F9,17770 K.YTLTMLK.R    | 1477.891 | 0.00442  | 2 | 1 | 25.4 | 0 |
| P12163_2_S5,17285 K.YTLTMLK.R    | 1477.891 | 0.00002  | 3 | 1 | 26.2 | 0 |
| P12163_2_S5,17806 K.YTLTMLK.R    | 1477.891 | 0.00446  | 3 | 1 | 27.8 | 0 |
| P12163_2_S5,17830 K.YTLTMLK.R    | 1477.891 | 0.00456  | 2 | 1 | 26.7 | 0 |
| P12163_1_F4,17209 R.AGAYTEELVK.T | 1688.968 | 0.00542  | 3 | 1 | 41.4 | 0 |
| P12163_1_F4,15808 R.ALQNTVLK.T   | 1494.946 | 0.003    | 2 | 1 | 28.2 | 0 |
| P12163_1_F4,15847 R.ALQNTVLK.T   | 1494.946 | 0.00407  | 3 | 1 | 33.7 | 0 |
| P12163_1_F4,16006 R.ALQNTVLK.T   | 1494.946 | 0.00628  | 2 | 1 | 40.4 | 0 |
| P12163_1_F4,16049 R.ALQNTVLK.T   | 1494.946 | 0.0059   | 3 | 1 | 36.6 | 0 |
| P12163_1_F4,16232 R.ALQNTVLK.T   | 1494.946 | 0.00484  | 2 | 1 | 41.1 | 0 |
| P12163_1_F5,10799 R.ALQNTVLK.T   | 1494.946 | 0.00428  | 3 | 1 | 24.1 | 0 |
| P12163_1_F5,14789 R.ALQNTVLK.T   | 1494.946 | 0.00108  | 2 | 1 | 30.2 | 0 |
| P12163_1_F5,14807 R.ALQNTVLK.T   | 1494.946 | 0.00101  | 3 | 1 | 37   | 0 |
| P12163_1_F5,15026 R.ALQNTVLK.T   | 1494.946 | 0.0053   | 2 | 1 | 31   | 0 |
| P12163_1_F5,15096 R.ALQNTVLK.T   | 1494.946 | 0.00608  | 3 | 1 | 36.9 | 0 |
| P12163_1_F5,16123 R.ALQNTVLK.T   | 1494.946 | 0.00554  | 2 | 1 | 27.2 | 0 |
| P12163_1_F5,16253 R.ALQNTVLK.T   | 1494.946 | 0.00485  | 3 | 1 | 24.1 | 0 |
| P12163_1_F5,16376 R.ALQNTVLK.T   | 1494.946 | 0.00558  | 2 | 1 | 29.5 | 0 |
| P12163_1_F5,17125 R.ALQNTVLK.T   | 1494.946 | 0.0044   | 2 | 1 | 26.4 | 0 |
| P12163_1_F5,17418 R.ALQNTVLK.T   | 1494.946 | 0.00496  | 2 | 1 | 28.5 | 0 |
| P12163_1_F6,4176 R.ALQNTVLK.T    | 1494.946 | 0.00596  | 2 | 1 | 40.5 | 0 |
| P12163_1_F6,15633 R.ALQNTVLK.T   | 1494.946 | 0.00506  | 2 | 1 | 29.8 | 0 |
| P12163_1_F7,14333 R.ALQNTVLK.T   | 1494.946 | 0.00316  | 2 | 1 | 32.1 | 0 |
| P12163_1_F7,14340 R.ALQNTVLK.T   | 1494.946 | 0.00194  | 3 | 1 | 34.3 | 0 |
| P12163_1_F7,14832 R.ALQNTVLK.T   | 1494.946 | 0.0051   | 2 | 1 | 30   | 0 |
| P12163_1_F7,14980 R.ALQNTVLK.T   | 1494.946 | 0.00752  | 3 | 1 | 23.4 | 0 |
| P12163_1_F8,15023 R.ALQNTVLK.T   | 1494.946 | 0.00536  | 2 | 1 | 29.8 | 0 |
| P12163_1_F8,15049 R.ALQNTVLK.T   | 1494.946 | -0.00256 | 3 | 1 | 36.8 | 0 |
| P12163_1_F8,15597 R.ALQNTVLK.T   | 1494.946 | 0.00574  | 2 | 1 | 27.5 | 0 |
| P12163_1_F8,15628 R.ALQNTVLK.T   | 1494.946 | 0.00812  | 3 | 1 | 32.4 | 0 |
| P12163_2_F1,14855 R.ALQNTVLK.T   | 1494.946 | 0.00506  | 3 | 1 | 32.9 | 0 |
| P12163_2_F1,15040 R.ALQNTVLK.T   | 1494.946 | 0.00532  | 2 | 1 | 40.2 | 0 |
| P12163_2_F1,15077 R.ALQNTVLK.T   | 1494.946 | 0.00584  | 3 | 1 | 37   | 0 |
| P12163_2_F1,15265 R.ALQNTVLK.T   | 1494.946 | 0.00754  | 2 | 1 | 39.5 | 0 |
| P12163_2_F1,15474 R.ALQNTVLK.T   | 1494.946 | 0.00506  | 3 | 1 | 34.3 | 0 |
| P12163_2_F1,15504 R.ALQNTVLK.T   | 1494.946 | 0.0051   | 2 | 1 | 39.6 | 0 |
| P12163_2_F2,15622 R.ALQNTVLK.T   | 1494.946 | 0.0048   | 2 | 1 | 38.1 | 0 |
| P12163_2_F2,15651 R.ALQNTVLK.T   | 1494.946 | 0.00167  | 3 | 1 | 47.1 | 0 |

|                   |                     |          |          |   |   |      |   |
|-------------------|---------------------|----------|----------|---|---|------|---|
| P12163_2_F2,15858 | R.ALQNTVLK.T        | 1494.946 | 0.00454  | 2 | 1 | 40   | 0 |
| P12163_2_F2,15908 | R.ALQNTVLK.T        | 1494.946 | 0.00296  | 3 | 1 | 47.2 | 0 |
| P12163_2_F2,16083 | R.ALQNTVLK.T        | 1494.946 | 0.00486  | 2 | 1 | 39.9 | 0 |
| P12163_2_F2,16222 | R.ALQNTVLK.T        | 1494.946 | 0.00545  | 3 | 1 | 36.8 | 0 |
| P12163_2_F2,16460 | R.ALQNTVLK.T        | 1494.946 | 0.00551  | 3 | 1 | 36.4 | 0 |
| P12163_2_F4,249   | R.ALQNTVLK.T        | 1494.946 | 0.00414  | 2 | 1 | 33.8 | 0 |
| P12163_2_F4,263   | R.ALQNTVLK.T        | 1494.946 | 0.00392  | 3 | 1 | 27.7 | 0 |
| P12163_2_F4,437   | R.ALQNTVLK.T        | 1494.946 | 0.00527  | 3 | 1 | 28.1 | 0 |
| P12163_2_S5,13699 | R.ALQNTVLK.T        | 1494.946 | 0.00575  | 3 | 1 | 46.9 | 0 |
| P12163_2_S5,13749 | R.ALQNTVLK.T        | 1494.946 | 0.00164  | 2 | 1 | 31.9 | 0 |
| P12163_2_S5,13935 | R.ALQNTVLK.T        | 1494.946 | 0.00023  | 3 | 1 | 34.9 | 0 |
| P12163_2_S5,14307 | R.ALQNTVLK.T        | 1494.946 | 0.00308  | 3 | 1 | 34.2 | 0 |
| P12163_1_F2,15473 | R.GILAIIDESNATCGK.R | 2057.116 | 0.0064   | 3 | 1 | 56   | 0 |
| P12163_1_F3,13966 | R.GILAIIDESNATCGK.R | 2057.116 | 0.00394  | 3 | 1 | 28.6 | 0 |
| P12163_1_F3,14023 | R.GILAIIDESNATCGK.R | 2057.116 | 0.00413  | 2 | 1 | 27.9 | 0 |
| P12163_1_F3,15638 | R.GILAIIDESNATCGK.R | 2057.116 | 0.00293  | 2 | 1 | 46.7 | 0 |
| P12163_1_F3,16039 | R.GILAIIDESNATCGK.R | 2057.116 | 0.00419  | 2 | 1 | 41.6 | 0 |
| P12163_1_F3,16078 | R.GILAIIDESNATCGK.R | 2057.116 | 0.00673  | 3 | 1 | 47.6 | 0 |
| P12163_1_F3,16313 | R.GILAIIDESNATCGK.R | 2057.116 | 0.01563  | 2 | 1 | 25.6 | 0 |
| P12163_1_F3,16346 | R.GILAIIDESNATCGK.R | 2057.116 | 0.01798  | 3 | 1 | 53   | 0 |
| P12163_1_F3,17650 | R.GILAIIDESNATCGK.R | 2057.116 | 0.00621  | 2 | 1 | 76.1 | 0 |
| P12163_1_F3,17664 | R.GILAIIDESNATCGK.R | 2057.116 | 0.00397  | 3 | 1 | 85   | 0 |
| P12163_1_F3,18470 | R.GILAIIDESNATCGK.R | 2057.116 | 0.00365  | 2 | 1 | 65.6 | 0 |
| P12163_1_F3,18786 | R.GILAIIDESNATCGK.R | 2057.116 | 0.01087  | 2 | 1 | 37.7 | 0 |
| P12163_1_F3,18906 | R.GILAIIDESNATCGK.R | 2057.116 | 0.01015  | 3 | 1 | 81.1 | 0 |
| P12163_1_F3,19074 | R.GILAIIDESNATCGK.R | 2057.116 | 0.00613  | 2 | 1 | 65.6 | 0 |
| P12163_1_F4,16328 | R.GILAIIDESNATCGK.R | 2057.116 | 0.00673  | 3 | 1 | 66.8 | 0 |
| P12163_1_F4,18140 | R.GILAIIDESNATCGK.R | 2057.116 | 0.01021  | 3 | 1 | 72.8 | 0 |
| P12163_1_F4,18194 | R.GILAIIDESNATCGK.R | 2057.116 | 0.00637  | 2 | 1 | 59.1 | 0 |
| P12163_1_F5,16914 | R.GILAIIDESNATCGK.R | 2057.116 | 0.00829  | 2 | 1 | 66.4 | 0 |
| P12163_1_F6,15133 | R.GILAIIDESNATCGK.R | 2057.116 | -0.0017  | 3 | 1 | 31.3 | 0 |
| P12163_1_F6,15397 | R.GILAIIDESNATCGK.R | 2057.116 | 0.00442  | 3 | 1 | 58.7 | 0 |
| P12163_1_F6,15751 | R.GILAIIDESNATCGK.R | 2057.116 | 0.00469  | 3 | 1 | 25.7 | 0 |
| P12163_1_F6,16890 | R.GILAIIDESNATCGK.R | 2057.116 | 0.00292  | 3 | 1 | 58.5 | 0 |
| P12163_1_F6,17357 | R.GILAIIDESNATCGK.R | 2057.116 | 0.01373  | 2 | 1 | 33.6 | 0 |
| P12163_1_F7,14947 | R.GILAIIDESNATCGK.R | 2057.116 | 0.007    | 3 | 1 | 34.7 | 0 |
| P12163_1_F7,14959 | R.GILAIIDESNATCGK.R | 2057.116 | 0.00305  | 2 | 1 | 30.9 | 0 |
| P12163_1_F7,16522 | R.GILAIIDESNATCGK.R | 2057.116 | 0.0061   | 3 | 1 | 74   | 0 |
| P12163_1_F7,16560 | R.GILAIIDESNATCGK.R | 2057.116 | 0.00199  | 2 | 1 | 49.6 | 0 |
| P12163_1_F8,17221 | R.GILAIIDESNATCGK.R | 2057.116 | 0.00339  | 2 | 1 | 49.4 | 0 |
| P12163_1_S1,16127 | R.GILAIIDESNATCGK.R | 2057.116 | 0.00916  | 3 | 1 | 46   | 0 |
| P12163_1_S10,1530 | R.GILAIIDESNATCGK.R | 2057.116 | 0.00664  | 3 | 1 | 38.9 | 0 |
| P12163_1_S10,1657 | R.GILAIIDESNATCGK.R | 2057.116 | 0.00691  | 3 | 1 | 54   | 0 |
| P12163_2_F2,17183 | R.GILAIIDESNATCGK.R | 2057.116 | -0.00139 | 2 | 1 | 61.2 | 0 |
| P12163_2_F2,17739 | R.GILAIIDESNATCGK.R | 2057.116 | 0.01131  | 2 | 1 | 27.5 | 0 |
| P12163_2_F4,14593 | R.GILAIIDESNATCGK.R | 2057.116 | 0.00451  | 3 | 1 | 41.3 | 0 |
| P12163_2_F4,14646 | R.GILAIIDESNATCGK.R | 2057.116 | 0.00439  | 2 | 1 | 30.2 | 0 |
| P12163_2_F4,16140 | R.GILAIIDESNATCGK.R | 2057.116 | 0.00341  | 2 | 1 | 70.2 | 0 |
| P12163_2_S3,13269 | R.GILAIIDESNATCGK.R | 2057.116 | 0.00178  | 3 | 1 | 47.6 | 0 |
| P12163_2_S3,14472 | R.GILAIIDESNATCGK.R | 2057.116 | 0.00226  | 3 | 1 | 73.5 | 0 |
| P12163_1_F2,18497 | R.LASIGLDNTETNR.Q   | 1707.918 | 0.00419  | 2 | 1 | 26.3 | 0 |

|                                       |          |          |   |   |      |   |
|---------------------------------------|----------|----------|---|---|------|---|
| P12163_1_F3,19104 R.LASIGLDNTETNR.Q   | 1707.918 | 0.00378  | 2 | 1 | 30.6 | 0 |
| P12163_1_F4,19454 R.LASIGLDNTETNR.Q   | 1707.918 | 0.00344  | 2 | 1 | 51.1 | 0 |
| P12163_1_F5,17271 R.LASIGLDNTETNR.Q   | 1707.918 | 0.00254  | 2 | 1 | 39.9 | 0 |
| P12163_1_S1,10459 R.LASIGLDNTETNR.Q   | 1707.918 | 0.00246  | 3 | 1 | 25.3 | 0 |
| P12163_1_S1,11490 R.LASIGLDNTETNR.Q   | 1707.918 | 0.00033  | 3 | 1 | 25   | 0 |
| P12163_1_S1,12101 R.LASIGLDNTETNR.Q   | 1707.918 | 0.00795  | 3 | 1 | 26.8 | 0 |
| P12163_1_S1,13223 R.LASIGLDNTETNR.Q   | 1707.918 | 0.00352  | 2 | 1 | 46.9 | 0 |
| P12163_1_S1,14123 R.LASIGLDNTETNR.Q   | 1707.918 | 0.00267  | 3 | 1 | 35.6 | 0 |
| P12163_1_S1,15160 R.LASIGLDNTETNR.Q   | 1707.918 | 0.0024   | 3 | 1 | 38   | 0 |
| P12163_1_S1,15663 R.LASIGLDNTETNR.Q   | 1707.918 | 0.00095  | 2 | 1 | 25.9 | 0 |
| P12163_1_S1,15722 R.LASIGLDNTETNR.Q   | 1707.918 | 0.0015   | 4 | 1 | 23.5 | 0 |
| P12163_1_S1,15747 R.LASIGLDNTETNR.Q   | 1707.918 | -0.00318 | 3 | 1 | 52.8 | 0 |
| P12163_1_S1,16212 R.LASIGLDNTETNR.Q   | 1707.918 | 0.00114  | 2 | 1 | 46.7 | 0 |
| P12163_1_S1,16275 R.LASIGLDNTETNR.Q   | 1707.918 | 0.00634  | 4 | 1 | 39.5 | 0 |
| P12163_1_S1,16399 R.LASIGLDNTETNR.Q   | 1707.918 | 0.00387  | 3 | 1 | 52.7 | 0 |
| P12163_1_S1,16934 R.LASIGLDNTETNR.Q   | 1707.918 | 0.00327  | 3 | 1 | 42.7 | 0 |
| P12163_1_S1,17712 R.LASIGLDNTETNR.Q   | 1707.918 | 0.00342  | 3 | 1 | 78.4 | 0 |
| P12163_1_S1,17753 R.LASIGLDNTETNR.Q   | 1707.918 | 0.00388  | 2 | 1 | 50.5 | 0 |
| P12163_1_S1,17962 R.LASIGLDNTETNR.Q   | 1707.918 | 0.00351  | 3 | 1 | 94.1 | 0 |
| P12163_1_S1,18004 R.LASIGLDNTETNR.Q   | 1707.918 | 0.00437  | 2 | 1 | 59.7 | 0 |
| P12163_1_S10,16 R.LASIGLDNTETNR.Q     | 1707.918 | 0.00321  | 3 | 1 | 68   | 0 |
| P12163_1_S10,245 R.LASIGLDNTETNR.Q    | 1707.918 | 0.00435  | 3 | 1 | 54.3 | 0 |
| P12163_1_S10,1773 R.LASIGLDNTETNR.Q   | 1707.918 | 0.00768  | 3 | 1 | 31.1 | 0 |
| P12163_2_F2,17999 R.LASIGLDNTETNR.Q   | 1707.918 | 0.00038  | 2 | 1 | 26.9 | 0 |
| P12163_2_F2,18068 R.LASIGLDNTETNR.Q   | 1707.918 | -0.00126 | 3 | 1 | 50.8 | 0 |
| P12163_2_F4,17246 R.LASIGLDNTETNR.Q   | 1707.918 | 0        | 2 | 1 | 45.6 | 0 |
| P12163_1_S10,1147 R.STEYK.Q           | 1398.772 | 0.00907  | 3 | 1 | 22.5 | 0 |
| P12163_1_F4,13892 R.TLEVAEK.V         | 1397.846 | 0.00486  | 2 | 1 | 31.1 | 0 |
| P12163_1_F4,13966 R.TLEVAEK.V         | 1397.846 | 0.0051   | 3 | 1 | 29.8 | 0 |
| P12163_1_F5,12436 R.TLEVAEK.V         | 1397.846 | 0.00792  | 2 | 1 | 28   | 0 |
| P12163_1_F6,13437 R.TLEVAEK.V         | 1397.846 | 0.00924  | 3 | 1 | 27.4 | 0 |
| P12163_1_F7,12085 R.TLEVAEK.V         | 1397.846 | 0.00081  | 3 | 1 | 27.4 | 0 |
| P12163_1_F8,12669 R.TLEVAEK.V         | 1397.846 | -0.00111 | 3 | 1 | 24.6 | 0 |
| P12163_2_F1,12862 R.TLEVAEK.V         | 1397.846 | 0.00504  | 3 | 1 | 35.8 | 0 |
| P12163_2_F1,13019 R.TLEVAEK.V         | 1397.846 | 0.00632  | 2 | 1 | 30.8 | 0 |
| P12163_2_S5,9447 R.TLEVAEK.V          | 1397.846 | 0.00144  | 3 | 1 | 24.1 | 0 |
| P12163_2_S5,11683 R.TLEVAEK.V         | 1397.846 | 0.00237  | 3 | 1 | 24.5 | 0 |
| P12163_2_S5,12431 R.TLEVAEK.V         | 1397.846 | 0.00658  | 2 | 1 | 28.3 | 0 |
| P12163_1_F2,14447 R.TVVSIPCGPSALAVK.E | 2107.241 | 0.00518  | 4 | 1 | 25.6 | 0 |
| P12163_1_F2,16301 R.TVVSIPCGPSALAVK.E | 2107.241 | 0.00258  | 3 | 1 | 28.6 | 0 |
| P12163_1_F2,16544 R.TVVSIPCGPSALAVK.E | 2107.241 | 0.00398  | 4 | 1 | 23.8 | 0 |
| P12163_1_F2,17381 R.TVVSIPCGPSALAVK.E | 2107.241 | 0.00615  | 3 | 1 | 38.3 | 0 |
| P12163_1_F2,17685 R.TVVSIPCGPSALAVK.E | 2107.241 | -0.00186 | 3 | 1 | 49.3 | 0 |
| P12163_1_F2,17719 R.TVVSIPCGPSALAVK.E | 2107.241 | 0.00498  | 4 | 1 | 38.3 | 0 |
| P12163_1_F2,17969 R.TVVSIPCGPSALAVK.E | 2107.241 | 0.00528  | 3 | 1 | 42.8 | 0 |
| P12163_1_F2,18113 R.TVVSIPCGPSALAVK.E | 2107.241 | 0.0064   | 2 | 1 | 28.8 | 0 |
| P12163_1_F2,19556 R.TVVSIPCGPSALAVK.E | 2107.241 | 0.00747  | 3 | 1 | 51.4 | 0 |
| P12163_1_F2,19573 R.TVVSIPCGPSALAVK.E | 2107.241 | 0.00398  | 2 | 1 | 49.8 | 0 |
| P12163_1_F2,19584 R.TVVSIPCGPSALAVK.E | 2107.241 | 0.00462  | 4 | 1 | 41.1 | 0 |
| P12163_1_F2,19812 R.TVVSIPCGPSALAVK.E | 2107.241 | 0.00627  | 3 | 1 | 47.5 | 0 |
| P12163_1_F2,20088 R.TVVSIPCGPSALAVK.E | 2107.241 | 0.00582  | 3 | 1 | 45.1 | 0 |



|                    |                     |          |          |   |   |      |   |
|--------------------|---------------------|----------|----------|---|---|------|---|
| P12163_1_F3,18214  | R.TVVSIPCGPSALAVK.E | 2107.241 | 0.00744  | 3 | 1 | 31.8 | 0 |
| P12163_1_F3,18215  | R.TVVSIPCGPSALAVK.E | 2107.241 | 0.00714  | 4 | 1 | 25.9 | 0 |
| P12163_1_F3,20286  | R.TVVSIPCGPSALAVK.E | 2107.241 | 0.00924  | 3 | 1 | 42.8 | 0 |
| P12163_1_F3,20295  | R.TVVSIPCGPSALAVK.E | 2107.241 | 0.0052   | 2 | 1 | 39.4 | 0 |
| P12163_1_F4,217    | R.TVVSIPCGPSALAVK.E | 2107.241 | 0.00333  | 3 | 1 | 28.5 | 0 |
| P12163_1_F4,1054   | R.TVVSIPCGPSALAVK.E | 2107.241 | 0.00423  | 3 | 1 | 43.1 | 0 |
| P12163_1_F4,1217   | R.TVVSIPCGPSALAVK.E | 2107.241 | 0.00294  | 3 | 1 | 28.6 | 0 |
| P12163_1_F4,18701  | R.TVVSIPCGPSALAVK.E | 2107.241 | 0.00528  | 3 | 1 | 50.8 | 0 |
| P12163_1_F4,20789  | R.TVVSIPCGPSALAVK.E | 2107.241 | -0.00291 | 3 | 1 | 50.7 | 0 |
| P12163_1_F4,20872  | R.TVVSIPCGPSALAVK.E | 2107.241 | 0.0052   | 2 | 1 | 31.8 | 0 |
| P12163_1_F5,19119  | R.TVVSIPCGPSALAVK.E | 2107.241 | 0.00165  | 3 | 1 | 41.4 | 0 |
| P12163_1_F5,19147  | R.TVVSIPCGPSALAVK.E | 2107.241 | -0.00246 | 2 | 1 | 40.1 | 0 |
| P12163_1_F5,19573  | R.TVVSIPCGPSALAVK.E | 2107.241 | -0.0016  | 2 | 1 | 25.1 | 0 |
| P12163_1_F6,17788  | R.TVVSIPCGPSALAVK.E | 2107.241 | 0.00438  | 3 | 1 | 38.1 | 0 |
| P12163_1_F6,19289  | R.TVVSIPCGPSALAVK.E | 2107.241 | 0.00159  | 3 | 1 | 47.6 | 0 |
| P12163_1_F6,19598  | R.TVVSIPCGPSALAVK.E | 2107.241 | 0.00435  | 3 | 1 | 47.4 | 0 |
| P12163_1_F7,16922  | R.TVVSIPCGPSALAVK.E | 2107.241 | 0.00447  | 3 | 1 | 32.9 | 0 |
| P12163_1_F7,18779  | R.TVVSIPCGPSALAVK.E | 2107.241 | 0.00288  | 3 | 1 | 45.6 | 0 |
| P12163_1_F8,17812  | R.TVVSIPCGPSALAVK.E | 2107.241 | 0.00846  | 3 | 1 | 33.2 | 0 |
| P12163_1_F9,19327  | R.TVVSIPCGPSALAVK.E | 2107.241 | 0.00798  | 3 | 1 | 37.2 | 0 |
| P12163_1_S1,18058  | R.TVVSIPCGPSALAVK.E | 2107.241 | 0.00552  | 3 | 1 | 55.9 | 0 |
| P12163_1_S1,18088  | R.TVVSIPCGPSALAVK.E | 2107.241 | 0.01373  | 4 | 1 | 50.6 | 0 |
| P12163_1_S1,18095  | R.TVVSIPCGPSALAVK.E | 2107.241 | 0.00224  | 2 | 1 | 60.1 | 0 |
| P12163_1_S10,17930 | R.TVVSIPCGPSALAVK.E | 2107.241 | 0.00366  | 3 | 1 | 30.1 | 0 |
| P12163_2_F2,19882  | R.TVVSIPCGPSALAVK.E | 2107.241 | 0.00621  | 3 | 1 | 41.7 | 0 |
| P12163_2_F4,18388  | R.TVVSIPCGPSALAVK.E | 2107.241 | 0.00318  | 3 | 1 | 47.4 | 0 |
| P12163_1_F4,27266  | R.YAAISQDNGLVPIVEPI | 3377.789 | -0.00312 | 3 | 1 | 70   | 0 |
| P12163_1_F2,17816  | K.AQDFVCGLPPR.I     | 1563.825 | 0.00438  | 2 | 1 | 28.5 | 0 |
| P12163_1_F2,18060  | K.AQDFVCGLPPR.I     | 1563.825 | 0.00408  | 2 | 1 | 40.5 | 0 |
| P12163_1_S1,16603  | K.AQDFVCGLPPR.I     | 1563.825 | 0.00652  | 2 | 1 | 27.7 | 0 |
| P12163_1_S1,16795  | K.AQDFVCGLPPR.I     | 1563.825 | 0.00012  | 3 | 1 | 51.4 | 0 |
| P12163_1_S1,16999  | K.AQDFVCGLPPR.I     | 1563.825 | 0.00437  | 3 | 1 | 55.7 | 0 |
| P12163_1_S1,17011  | K.AQDFVCGLPPR.I     | 1563.825 | 0.0038   | 2 | 1 | 29.7 | 0 |
| P12163_1_S1,17241  | K.AQDFVCGLPPR.I     | 1563.825 | -0.00103 | 3 | 1 | 40.5 | 0 |
| P12163_1_S1,17252  | K.AQDFVCGLPPR.I     | 1563.825 | 0.00344  | 2 | 1 | 34.6 | 0 |
| P12163_1_S1,17499  | K.AQDFVCGLPPR.I     | 1563.825 | 0.00458  | 2 | 1 | 30.9 | 0 |
| P12163_1_S1,17596  | K.AQDFVCGLPPR.I     | 1563.825 | 0.00372  | 3 | 1 | 49   | 0 |
| P12163_1_S1,17763  | K.AQDFVCGLPPR.I     | 1563.825 | 0.00432  | 2 | 1 | 32   | 0 |
| P12163_1_F7,12581  | K.ISM*PAHLM*YDGR.D  | 1726.856 | 0.00227  | 3 | 1 | 28.3 | 0 |
| P12163_2_F6,12673  | K.ISM*PAHLM*YDGR.D  | 1726.856 | 0.00161  | 3 | 1 | 23.2 | 0 |
| P12163_1_F7,14523  | K.ISM*PAHLMYDGR.D   | 1710.861 | -0.00117 | 3 | 1 | 28.7 | 0 |
| P12163_1_F8,15173  | K.ISM*PAHLMYDGR.D   | 1710.861 | 0.00891  | 3 | 1 | 43.6 | 0 |
| P12163_2_F6,14700  | K.ISM*PAHLMYDGR.D   | 1710.861 | -0.00132 | 3 | 1 | 51.3 | 0 |
| P12163_1_F6,16449  | K.ISMPAHLM*YDGR.D   | 1710.861 | 0.00153  | 3 | 1 | 25.9 | 0 |
| P12163_1_F7,15605  | K.ISMPAHLM*YDGR.D   | 1710.861 | 0.00144  | 3 | 1 | 41.7 | 0 |
| P12163_1_F8,16367  | K.ISMPAHLM*YDGR.D   | 1710.861 | 0.00345  | 3 | 1 | 38.2 | 0 |
| P12163_1_F8,18364  | K.ISMPAHLM*YDGR.D   | 1710.861 | 0.003    | 3 | 1 | 26.6 | 0 |
| P12163_2_F9,15149  | K.ISMPAHLM*YDGR.D   | 1710.861 | 0.00387  | 3 | 1 | 36.6 | 0 |
| P12163_1_F6,18412  | K.ISMPAHLMYDGR.D    | 1694.866 | 0.00054  | 3 | 1 | 37.6 | 0 |
| P12163_1_F7,17429  | K.ISMPAHLMYDGR.D    | 1694.866 | -0.00051 | 3 | 1 | 24.6 | 0 |
| P12163_1_F7,17575  | K.ISMPAHLMYDGR.D    | 1694.866 | 0.00265  | 2 | 1 | 28.4 | 0 |

|                   |                       |          |          |   |   |      |   |
|-------------------|-----------------------|----------|----------|---|---|------|---|
| P12163_1_F8,18351 | K.ISMPAHLMYDGR.D      | 1694.866 | 0.00072  | 3 | 1 | 40.8 | 0 |
| P12163_2_F6,17859 | K.ISMPAHLMYDGR.D      | 1694.866 | -0.00201 | 3 | 1 | 45.1 | 0 |
| P12163_2_F6,17876 | K.ISMPAHLMYDGR.D      | 1694.866 | 0.00357  | 2 | 1 | 31.1 | 0 |
| P12163_2_F9,16834 | K.ISMPAHLMYDGR.D      | 1694.866 | 0.00288  | 3 | 1 | 35.6 | 0 |
| P12163_2_S3,15812 | K.ISMPAHLMYDGR.D      | 1694.866 | 0.00183  | 3 | 1 | 40.1 | 0 |
| P12163_2_S5,16838 | K.ISMPAHLMYDGR.D      | 1694.866 | 0.00291  | 3 | 1 | 47.1 | 0 |
| P12163_2_S5,17060 | K.ISMPAHLMYDGR.D      | 1694.866 | 0.00249  | 3 | 1 | 36.2 | 0 |
| P12163_1_F3,21269 | K.LAQICGIIASDEK.R     | 2026.146 | 0.00608  | 3 | 1 | 48.7 | 0 |
| P12163_1_F3,21376 | K.LAQICGIIASDEK.R     | 2026.146 | -0.00009 | 2 | 1 | 36.5 | 0 |
| P12163_1_F3,21477 | K.LAQICGIIASDEK.R     | 2026.146 | 0.00671  | 3 | 1 | 32.8 | 0 |
| P12163_1_F3,23202 | K.LAQICGIIASDEK.R     | 2026.146 | 0.00535  | 2 | 1 | 62   | 0 |
| P12163_1_F3,23209 | K.LAQICGIIASDEK.R     | 2026.146 | 0.00851  | 3 | 1 | 68.7 | 0 |
| P12163_1_F3,23523 | K.LAQICGIIASDEK.R     | 2026.146 | -0.00159 | 2 | 1 | 24.4 | 0 |
| P12163_1_F4,24034 | K.LAQICGIIASDEK.R     | 2026.146 | 0.00728  | 3 | 1 | 58.8 | 0 |
| P12163_1_F4,24037 | K.LAQICGIIASDEK.R     | 2026.146 | 0.00421  | 2 | 1 | 47.4 | 0 |
| P12163_1_F6,21842 | K.LAQICGIIASDEK.R     | 2026.146 | 0.00179  | 3 | 1 | 46.5 | 0 |
| P12163_1_F7,21468 | K.LAQICGIIASDEK.R     | 2026.146 | 0.01091  | 3 | 1 | 27.4 | 0 |
| P12163_1_S1,20644 | K.LAQICGIIASDEK.R     | 2026.146 | 0.00332  | 3 | 1 | 48.5 | 0 |
| P12163_1_F8,21389 | K.LAQICGIIASDEKR.H    | 2182.247 | 0.00565  | 4 | 1 | 37.1 | 0 |
| P12163_1_F8,21439 | K.LAQICGIIASDEKR.H    | 2182.247 | 0.00662  | 3 | 1 | 39.8 | 0 |
| P12163_2_F6,19163 | K.LAQICGIIASDEKR.H    | 2182.247 | 0.00465  | 4 | 1 | 31.7 | 0 |
| P12163_2_F6,21029 | K.LAQICGIIASDEKR.H    | 2182.247 | 0.00104  | 3 | 1 | 29.7 | 0 |
| P12163_1_F2,11407 | K.LTGLSGEGR.K         | 1193.679 | 0.00386  | 3 | 1 | 26.5 | 0 |
| P12163_1_F2,11830 | K.LTGLSGEGR.K         | 1193.679 | 0.00017  | 3 | 1 | 32   | 0 |
| P12163_1_F2,12082 | K.LTGLSGEGR.K         | 1193.679 | 0.0029   | 3 | 1 | 42.4 | 0 |
| P12163_1_F3,11764 | K.LTGLSGEGR.K         | 1193.679 | 0.00398  | 3 | 1 | 35.4 | 0 |
| P12163_1_F3,12029 | K.LTGLSGEGR.K         | 1193.679 | 0.00362  | 3 | 1 | 29.5 | 0 |
| P12163_1_F3,12291 | K.LTGLSGEGR.K         | 1193.679 | 0.0041   | 3 | 1 | 52.5 | 0 |
| P12163_1_F3,12343 | K.LTGLSGEGR.K         | 1193.679 | 0.0041   | 2 | 1 | 26.3 | 0 |
| P12163_1_F3,12580 | K.LTGLSGEGR.K         | 1193.679 | 0.00506  | 3 | 1 | 51.6 | 0 |
| P12163_1_F3,14263 | K.LTGLSGEGR.K         | 1193.679 | 0.00252  | 2 | 1 | 30.5 | 0 |
| P12163_2_F1,11701 | K.LTGLSGEGR.K         | 1193.679 | 0.00137  | 3 | 1 | 41.8 | 0 |
| P12163_1_S1,24872 | K.QASAVPFSWVFR.E      | 1755.948 | 0.00355  | 3 | 1 | 34   | 0 |
| P12163_2_F8_12070 | K.SLEGWAEENILVHLKF    | 3103.792 | 0.01198  | 4 | 1 | 41   | 0 |
| P12163_1_F3,15471 | K.TIQYLIGSGM*DPK.T    | 2047.135 | 0.00513  | 3 | 1 | 35.8 | 0 |
| P12163_1_F3,20152 | K.TIQYLIGSGM*DPK.T    | 2047.135 | 0.00384  | 3 | 1 | 37.7 | 0 |
| P12163_1_F3,20167 | K.TIQYLIGSGM*DPK.T    | 2047.135 | 0.00307  | 2 | 1 | 54   | 0 |
| P12163_1_F3,22413 | K.TIQYLIGSGM*DPK.T    | 2047.135 | 0.00727  | 2 | 1 | 38   | 0 |
| P12163_1_F4,23173 | K.TIQYLIGSGM*DPK.T    | 2047.135 | 0.00435  | 3 | 1 | 41   | 0 |
| P12163_2_F7,19301 | K.TIQYLIGSGM*DPK.T    | 2047.135 | 0.0051   | 3 | 1 | 43.7 | 0 |
| P12163_1_F3,17644 | K.TIQYLIGSGMDPK.T     | 2031.14  | 0.00501  | 3 | 1 | 42.2 | 0 |
| P12163_1_F3,22359 | K.TIQYLIGSGMDPK.T     | 2031.14  | 0.00126  | 3 | 1 | 36   | 0 |
| P12163_1_F3,22384 | K.TIQYLIGSGMDPK.T     | 2031.14  | 0.00318  | 2 | 1 | 39.1 | 0 |
| P12163_1_F4,15627 | K.YLYLSGR.V           | 1175.673 | 0.00021  | 3 | 1 | 22.1 | 0 |
| P12163_1_F5,10069 | R.ATFISHGNTAR.L ! R.A | 1478.802 | 0.0023   | 3 | 1 | 43.8 | 0 |
| P12163_1_F9,9236  | R.ATFISHGNTAR.L ! R.A | 1478.802 | 0.00263  | 3 | 1 | 24.4 | 0 |
| P12163_2_F10,9962 | R.ATFISHGNTAR.L ! R.A | 1478.802 | -0.00205 | 3 | 1 | 30.7 | 0 |
| P12163_2_F4,8682  | R.ATFISHGNTAR.L ! R.A | 1478.802 | -0.00607 | 3 | 1 | 45.3 | 0 |
| P12163_2_F4,10236 | R.ATFISHGNTAR.L ! R.A | 1478.802 | 0.00236  | 3 | 1 | 56   | 0 |
| P12163_2_F7,6679  | R.ATFISHGNTAR.L ! R.A | 1478.802 | 0.0026   | 4 | 1 | 44.1 | 0 |
| P12163_2_F7,8668  | R.ATFISHGNTAR.L ! R.A | 1478.802 | -0.0001  | 3 | 1 | 30.8 | 0 |

|                   |                       |          |          |   |   |      |   |
|-------------------|-----------------------|----------|----------|---|---|------|---|
| P12163_2_F7,10328 | R.ATFISHGNTAR.L ! R.A | 1478.802 | 0.00302  | 3 | 1 | 24.1 | 0 |
| P12163_2_F1,10937 | R.AWTAEENR.H          | 1280.654 | 0.00378  | 2 | 1 | 25.8 | 0 |
| P12163_1_F6,19576 | R.DDNLF EFHFSTVAQR.L  | 1982.987 | -0.00212 | 3 | 1 | 26.8 | 0 |
| P12163_1_F6,19602 | R.DDNLF EFHFSTVAQR.L  | 1982.987 | 0.00141  | 2 | 1 | 37.3 | 0 |
| P12163_1_F7,16359 | R.DDNLF EFHFSTVAQR.L  | 1982.987 | -0.0004  | 4 | 1 | 22.5 | 0 |
| P12163_1_F7,16698 | R.DDNLF EFHFSTVAQR.L  | 1982.987 | 0.00437  | 3 | 1 | 24   | 0 |
| P12163_1_F7,18722 | R.DDNLF EFHFSTVAQR.L  | 1982.987 | 0.00203  | 3 | 1 | 58.3 | 0 |
| P12163_1_F7,18730 | R.DDNLF EFHFSTVAQR.L  | 1982.987 | 0.00179  | 2 | 1 | 73.4 | 0 |
| P12163_1_F8,19647 | R.DDNLF EFHFSTVAQR.L  | 1982.987 | 0.00191  | 3 | 1 | 40.7 | 0 |
| P12163_1_S10,1883 | R.DDNLF EFHFSTVAQR.L  | 1982.987 | 0.00376  | 3 | 1 | 33.5 | 0 |
| P12163_2_F8_1207C | R.DDNLF EFHFSTVAQR.L  | 1982.987 | 0.00317  | 3 | 1 | 39.4 | 0 |
| P12163_2_F9,18278 | R.DDNLF EFHFSTVAQR.L  | 1982.987 | 0.00304  | 3 | 1 | 41.3 | 0 |
| P12163_2_S5,18168 | R.DDNLF EFHFSTVAQR.L  | 1982.987 | 0.00511  | 3 | 1 | 30   | 0 |
| P12163_2_S5,18527 | R.DDNLF EFHFSTVAQR.L  | 1982.987 | 0.00001  | 2 | 1 | 46   | 0 |
| P12163_1_F7,9385  | R.EVHVQVTHSM*PQQK     | 2272.233 | 0.00831  | 3 | 1 | 26.9 | 0 |
| P12163_1_F7,9393  | R.EVHVQVTHSM*PQQK     | 2272.233 | 0.00555  | 4 | 1 | 48.3 | 0 |
| P12163_1_F7,11137 | R.EVHVQVTHSM*PQQK     | 2272.233 | 0.00585  | 3 | 1 | 30.1 | 0 |
| P12163_1_F7,11141 | R.EVHVQVTHSM*PQQK     | 2272.233 | 0.00543  | 4 | 1 | 41.9 | 0 |
| P12163_1_F8,9683  | R.EVHVQVTHSM*PQQK     | 2272.233 | 0.01032  | 3 | 1 | 27   | 0 |
| P12163_1_F8,9745  | R.EVHVQVTHSM*PQQK     | 2272.233 | 0.00583  | 4 | 1 | 36.6 | 0 |
| P12163_1_F8,11564 | R.EVHVQVTHSM*PQQK     | 2272.233 | 0.01014  | 3 | 1 | 34.9 | 0 |
| P12163_2_F10,9457 | R.EVHVQVTHSM*PQQK     | 2272.233 | 0.00127  | 4 | 1 | 36.3 | 0 |
| P12163_1_F7,11122 | R.EVHVQVTHSM*PQQK.I   | 2256.238 | 0.00219  | 4 | 1 | 29.9 | 0 |
| P12163_1_F7,11138 | R.EVHVQVTHSM*PQQK.I   | 2256.238 | 0.00651  | 3 | 1 | 41.7 | 0 |
| P12163_1_F8,11528 | R.EVHVQVTHSM*PQQK.I   | 2256.238 | 0.00786  | 3 | 1 | 46.1 | 0 |
| P12163_2_F10,1088 | R.EVHVQVTHSM*PQQK.I   | 2256.238 | 0.00287  | 4 | 1 | 42.9 | 0 |
| P12163_2_F10,1090 | R.EVHVQVTHSM*PQQK.I   | 2256.238 | 0.00717  | 3 | 1 | 42.4 | 0 |
| P12163_2_F4,10804 | R.EVHVQVTHSM*PQQK.I   | 2256.238 | 0.00307  | 4 | 1 | 25.6 | 0 |
| P12163_1_F3,7862  | R.HETAYTK.I           | 1457.821 | 0.00645  | 3 | 1 | 46.1 | 0 |
| P12163_1_F4,8291  | R.HETAYTK.I           | 1457.821 | 0.00639  | 3 | 1 | 29.8 | 0 |
| P12163_1_F5,6763  | R.HETAYTK.I           | 1457.821 | 0.00525  | 3 | 1 | 41   | 0 |
| P12163_2_S5,8054  | R.HETAYTK.I           | 1457.821 | 0.00654  | 3 | 1 | 27.4 | 0 |
| P12163_1_F6,10889 | R.HGDLLNK.Y           | 1404.842 | 0.00746  | 3 | 1 | 42.9 | 0 |
| P12163_1_F7,10344 | R.HGDLLNK.Y           | 1404.842 | 0.00047  | 3 | 1 | 34   | 0 |
| P12163_1_S10,1178 | R.HGDLLNK.Y           | 1404.842 | 0.00554  | 3 | 1 | 31.2 | 0 |
| P12163_1_S10,1200 | R.HGDLLNK.Y           | 1404.842 | 0.00467  | 3 | 1 | 29.7 | 0 |
| P12163_2_F6,10839 | R.HGDLLNK.Y           | 1404.842 | 0.00083  | 3 | 1 | 28.2 | 0 |
| P12163_2_F8_1207C | R.HGDLLNK.Y           | 1404.842 | 0.00323  | 3 | 1 | 32.1 | 0 |
| P12163_2_F8_1207C | R.HGDLLNK.Y           | 1404.842 | 0.00554  | 3 | 1 | 30.4 | 0 |
| P12163_2_F6,15976 | R.KAQDFVCGLPPI        | 1996.126 | 0.00494  | 3 | 1 | 30.6 | 0 |
| P12163_2_F7,14526 | R.KAQDFVCGLPPI        | 1996.126 | 0.00587  | 3 | 1 | 29.4 | 0 |
| P12163_2_F7,14528 | R.KAQDFVCGLPPI        | 1996.126 | 0.0002   | 2 | 1 | 29.8 | 0 |
| P12163_2_F7,14678 | R.KAQDFVCGLPPI        | 1996.126 | 0.00783  | 4 | 1 | 32.2 | 0 |
| P12163_2_F7,14874 | R.KAQDFVCGLPPI        | 1996.126 | 0.00203  | 4 | 1 | 31.6 | 0 |
| P12163_1_F6,15465 | R.LGVYTAK.D           | 1359.846 | 0.00473  | 2 | 1 | 26.5 | 0 |
| P12163_1_S10,1503 | R.LGVYTAK.D           | 1359.846 | 0.00871  | 2 | 1 | 25.3 | 0 |
| P12163_2_F1,14701 | R.LGVYTAK.D           | 1359.846 | 0.00569  | 3 | 1 | 24   | 0 |
| P12163_1_F3,20033 | K.AVLVGESIVK.Q        | 1623.03  | 0.00386  | 2 | 1 | 26   | 0 |
| P12163_1_F3,20034 | K.AVLVGESIVK.Q        | 1623.03  | 0.00461  | 3 | 1 | 29.5 | 0 |
| P12163_1_F4,20560 | K.AVLVGESIVK.Q        | 1623.03  | 0.0074   | 2 | 1 | 51.8 | 0 |
| P12163_1_F4,20578 | K.AVLVGESIVK.Q        | 1623.03  | 0.00464  | 3 | 1 | 47.6 | 0 |

|                   |                   |          |          |   |   |      |   |
|-------------------|-------------------|----------|----------|---|---|------|---|
| P12163_1_F4,20870 | K.AVLVGESIVK.Q    | 1623.03  | 0.0059   | 3 | 1 | 41.1 | 0 |
| P12163_1_F4,20948 | K.AVLVGESIVK.Q    | 1623.03  | 0.00448  | 2 | 1 | 57.8 | 0 |
| P12163_1_F5,19295 | K.AVLVGESIVK.Q    | 1623.03  | 0.00647  | 3 | 1 | 31.6 | 0 |
| P12163_1_F5,19302 | K.AVLVGESIVK.Q    | 1623.03  | 0.00774  | 2 | 1 | 43   | 0 |
| P12163_1_F6,18893 | K.AVLVGESIVK.Q    | 1623.03  | 0.00116  | 3 | 1 | 23.3 | 0 |
| P12163_1_F6,18905 | K.AVLVGESIVK.Q    | 1623.03  | 0.00206  | 2 | 1 | 32.1 | 0 |
| P12163_1_F6,19408 | K.AVLVGESIVK.Q    | 1623.03  | 0.00767  | 3 | 1 | 44.6 | 0 |
| P12163_1_F7,18577 | K.AVLVGESIVK.Q    | 1623.03  | 0.00602  | 3 | 1 | 39.5 | 0 |
| P12163_1_S10,1817 | K.AVLVGESIVK.Q    | 1623.03  | 0.00773  | 3 | 1 | 47.3 | 0 |
| P12163_2_F1,19978 | K.AVLVGESIVK.Q    | 1623.03  | 0.00791  | 3 | 1 | 31.7 | 0 |
| P12163_2_F1,19984 | K.AVLVGESIVK.Q    | 1623.03  | 0.00496  | 2 | 1 | 52.3 | 0 |
| P12163_2_F1,20244 | K.AVLVGESIVK.Q    | 1623.03  | 0.00422  | 3 | 1 | 41.4 | 0 |
| P12163_2_F4,17642 | K.AVLVGESIVK.Q    | 1623.03  | 0.00146  | 3 | 1 | 57.7 | 0 |
| P12163_2_F4,17680 | K.AVLVGESIVK.Q    | 1623.03  | 0.00162  | 2 | 1 | 57.9 | 0 |
| P12163_2_F4,17856 | K.AVLVGESIVK.Q    | 1623.03  | 0.00062  | 3 | 1 | 40   | 0 |
| P12163_2_F4,18161 | K.AVLVGESIVK.Q    | 1623.03  | 0.00464  | 3 | 1 | 46.7 | 0 |
| P12163_2_F4,18178 | K.AVLVGESIVK.Q    | 1623.03  | 0.00562  | 2 | 1 | 54.6 | 0 |
| P12163_1_F5,14478 | K.CPLLCK.E        | 1398.806 | 0.0074   | 3 | 1 | 22   | 0 |
| P12163_2_F1,14598 | K.CPLLCK.E        | 1398.806 | 0.00665  | 3 | 1 | 22.8 | 0 |
| P12163_1_F5,14338 | K.DVEVTQLK.Q      | 1539.92  | 0.00279  | 2 | 1 | 24.6 | 0 |
| P12163_2_F1,14513 | K.DVEVTQLK.Q      | 1539.92  | 0.00734  | 2 | 1 | 36.9 | 0 |
| P12163_1_F3,17062 | K.GGAACLSILTDEK.Y | 1943.073 | 0.00199  | 3 | 1 | 26.7 | 0 |
| P12163_1_F3,17100 | K.GGAACLSILTDEK.Y | 1943.073 | 0.00621  | 2 | 1 | 33.2 | 0 |
| P12163_1_F3,19305 | K.GGAACLSILTDEK.Y | 1943.073 | 0.00653  | 2 | 1 | 76.1 | 0 |
| P12163_1_F3,19335 | K.GGAACLSILTDEK.Y | 1943.073 | 0.00451  | 3 | 1 | 54.2 | 0 |
| P12163_1_F4,17526 | K.GGAACLSILTDEK.Y | 1943.073 | 0.00496  | 3 | 1 | 27.1 | 0 |
| P12163_1_F4,19729 | K.GGAACLSILTDEK.Y | 1943.073 | 0.01141  | 3 | 1 | 24.7 | 0 |
| P12163_1_F4,19730 | K.GGAACLSILTDEK.Y | 1943.073 | 0.01033  | 2 | 1 | 64.4 | 0 |
| P12163_1_F4,19939 | K.GGAACLSILTDEK.Y | 1943.073 | 0.00643  | 3 | 1 | 56.8 | 0 |
| P12163_1_F5,18570 | K.GGAACLSILTDEK.Y | 1943.073 | 0.00376  | 3 | 1 | 22.1 | 0 |
| P12163_1_F5,18625 | K.GGAACLSILTDEK.Y | 1943.073 | 0.01179  | 2 | 1 | 45   | 0 |
| P12163_1_F6,18478 | K.GGAACLSILTDEK.Y | 1943.073 | 0.00814  | 3 | 1 | 25.7 | 0 |
| P12163_1_F6,18811 | K.GGAACLSILTDEK.Y | 1943.073 | 0.01039  | 3 | 1 | 23   | 0 |
| P12163_1_F7,17533 | K.GGAACLSILTDEK.Y | 1943.073 | 0.00541  | 3 | 1 | 43.4 | 0 |
| P12163_2_F1,19167 | K.GGAACLSILTDEK.Y | 1943.073 | 0.00484  | 3 | 1 | 36.4 | 0 |
| P12163_2_F1,19370 | K.GGAACLSILTDEK.Y | 1943.073 | 0.00757  | 3 | 1 | 42.4 | 0 |
| P12163_2_F1,19392 | K.GGAACLSILTDEK.Y | 1943.073 | 0.00713  | 2 | 1 | 79.9 | 0 |
| P12163_2_F1,19585 | K.GGAACLSILTDEK.Y | 1943.073 | 0.00412  | 3 | 1 | 37.5 | 0 |
| P12163_2_F4,17119 | K.GGAACLSILTDEK.Y | 1943.073 | -0.00227 | 3 | 1 | 36.8 | 0 |
| P12163_2_F4,17522 | K.GGAACLSILTDEK.Y | 1943.073 | 0.01117  | 3 | 1 | 31.7 | 0 |
| P12163_1_F4,20949 | K.GITGLFGK.D      | 1400.872 | 0.00744  | 3 | 1 | 30.2 | 0 |
| P12163_1_F4,21059 | K.GITGLFGK.D      | 1400.872 | 0.0063   | 2 | 1 | 30   | 0 |
| P12163_1_F4,23405 | K.GITGLFGK.D      | 1400.872 | 0.00642  | 2 | 1 | 25.9 | 0 |
| P12163_1_F5,19808 | K.GITGLFGK.D      | 1400.872 | 0.00596  | 2 | 1 | 28.7 | 0 |
| P12163_1_F5,19810 | K.GITGLFGK.D      | 1400.872 | 0.0069   | 3 | 1 | 35.6 | 0 |
| P12163_1_F5,22558 | K.GITGLFGK.D      | 1400.872 | 0.00466  | 2 | 1 | 28.9 | 0 |
| P12163_1_F6,19875 | K.GITGLFGK.D      | 1400.872 | 0.0061   | 2 | 1 | 28.4 | 0 |
| P12163_1_F6,19877 | K.GITGLFGK.D      | 1400.872 | 0.0012   | 3 | 1 | 23.8 | 0 |
| P12163_1_F7,19080 | K.GITGLFGK.D      | 1400.872 | 0.00645  | 3 | 1 | 23.9 | 0 |
| P12163_1_F8,19540 | K.GITGLFGK.D      | 1400.872 | 0.00066  | 3 | 1 | 25   | 0 |
| P12163_2_F1,20420 | K.GITGLFGK.D      | 1400.872 | 0.00562  | 2 | 1 | 29.9 | 0 |

|                   |                    |          |          |   |   |      |   |
|-------------------|--------------------|----------|----------|---|---|------|---|
| P12163_2_F1,20458 | K.GITGLFGK.D       | 1400.872 | 0.00021  | 3 | 1 | 24.4 | 0 |
| P12163_2_F2,20427 | K.GITGLFGK.D       | 1400.872 | 0.00544  | 2 | 1 | 27   | 0 |
| P12163_2_S5,17958 | K.GITGLFGK.D       | 1400.872 | 0.00093  | 3 | 1 | 27.3 | 0 |
| P12163_1_F3,13263 | K.GSFENLEAVR.S     | 1425.764 | 0.00427  | 2 | 1 | 24.7 | 0 |
| P12163_1_F3,16860 | K.GSFENLEAVR.S     | 1425.764 | 0.00345  | 2 | 1 | 29.2 | 0 |
| P12163_2_F4,14738 | K.GSFENLEAVR.S     | 1425.764 | 0.00437  | 2 | 1 | 26.6 | 0 |
| P12163_1_F4,14634 | K.LLEGER.G         | 1020.599 | 0.00319  | 2 | 1 | 24.8 | 0 |
| P12163_2_F1,13277 | K.LLEGER.G         | 1020.599 | -0.00079 | 2 | 1 | 26.8 | 0 |
| P12163_1_F7,19156 | K.M*LGLTALVEVHDER. | 1903.026 | 0.00205  | 3 | 1 | 65.3 | 0 |
| P12163_1_F7,22280 | K.M*LGLTALVEVHDER. | 1903.026 | 0.00559  | 3 | 1 | 59.6 | 0 |
| P12163_1_F7,22342 | K.MLGLTALVEVHDER.E | 1887.031 | 0.00559  | 3 | 1 | 70.8 | 0 |
| P12163_1_F2,9985  | K.NALDNAPPAR.D     | 1342.738 | 0.00304  | 2 | 1 | 32.7 | 0 |
| P12163_1_F3,10251 | K.NALDNAPPAR.D     | 1342.738 | 0.00624  | 2 | 1 | 25.3 | 0 |
| P12163_1_F8,6170  | K.QDDPGK.G         | 1267.71  | 0.00373  | 2 | 1 | 28.1 | 0 |
| P12163_1_F2,22937 | R.DFIGALM*AANQR.T  | 1626.857 | -0.002   | 3 | 1 | 51.6 | 0 |
| P12163_1_S1,19130 | R.DFIGALM*AANQR.T  | 1626.857 | 0.00259  | 3 | 1 | 56.3 | 0 |
| P12163_1_S1,19385 | R.DFIGALM*AANQR.T  | 1626.857 | 0.00265  | 3 | 1 | 58.5 | 0 |
| P12163_1_S1,22241 | R.DFIGALM*AANQR.T  | 1626.857 | 0.00496  | 3 | 1 | 52.8 | 0 |
| P12163_1_S1,22212 | R.DFIGALMAANQR.T   | 1610.863 | 0.00283  | 3 | 1 | 40.5 | 0 |
| P12163_1_S1,22266 | R.DFIGALMAANQR.T   | 1610.863 | 0.00754  | 2 | 1 | 42.7 | 0 |
| P12163_1_S1,22449 | R.DFIGALMAANQR.T   | 1610.863 | 0.00088  | 3 | 1 | 29.5 | 0 |
| P12163_1_F8,20316 | R.GILREDFDPVEIAR.S | 1934.065 | 0.00496  | 3 | 1 | 29.3 | 0 |
| P12163_1_F8,20341 | R.GILREDFDPVEIAR.S | 1934.065 | 0.00367  | 2 | 1 | 29.3 | 0 |
| P12163_1_F3,6524  | R.IQNEGNTPR.N      | 1332.717 | 0.00232  | 2 | 1 | 25.2 | 0 |
| P12163_1_S10,2117 | R.NILEEIVWHK.D     | 1889.11  | 0.00089  | 3 | 1 | 47   | 0 |
| P12163_2_F6,23118 | R.NILEEIVWHK.D     | 1889.11  | 0.00527  | 4 | 1 | 22.5 | 0 |
| P12163_2_F6,23281 | R.NILEEIVWHK.D     | 1889.11  | 0.00521  | 3 | 1 | 49.7 | 0 |
| P12163_2_F8_1207  | R.NILEEIVWHK.D     | 1889.11  | 0.00251  | 3 | 1 | 34.1 | 0 |
| P12163_2_F8_1207  | R.NILEEIVWHK.D     | 1889.11  | -0.00009 | 4 | 1 | 27.3 | 0 |
| P12163_2_F8_1207  | R.NILEEIVWHK.D     | 1889.11  | -0.00007 | 3 | 1 | 50.3 | 0 |
| P12163_2_F8_1207  | R.NILEEIVWHK.D     | 1889.11  | 0.00797  | 3 | 1 | 54.7 | 0 |
| P12163_2_F9,21377 | R.NILEEIVWHK.D     | 1889.11  | 0.0098   | 3 | 1 | 32   | 0 |
| P12163_1_F3,17341 | R.NLETFEVDISNTK.K  | 2118.154 | 0.00617  | 3 | 1 | 32.4 | 0 |
| P12163_1_F3,19194 | R.NLETFEVDISNTK.K  | 2118.154 | 0.01061  | 2 | 1 | 38.8 | 0 |
| P12163_1_F3,21088 | R.NLETFEVDISNTK.K  | 2118.154 | 0.00247  | 2 | 1 | 51.9 | 0 |
| P12163_1_F3,21205 | R.NLETFEVDISNTK.K  | 2118.154 | 0.0059   | 3 | 1 | 57.1 | 0 |
| P12163_1_F6,20077 | R.NLETFEVDISNTK.K  | 2118.154 | 0.00479  | 3 | 1 | 59.1 | 0 |
| P12163_1_F7,18483 | R.RPPTGPPLHYVGPQFI | 2270.25  | 0.00381  | 3 | 1 | 38.8 | 0 |
| P12163_2_F4,18097 | R.RPPTGPPLHYVGPQFI | 2270.25  | 0.00153  | 4 | 1 | 26.3 | 0 |
| P12163_1_F3,20636 | R.TGLPALIAEVK.K    | 1720.083 | 0.00787  | 2 | 1 | 41.4 | 0 |
| P12163_1_F3,20652 | R.TGLPALIAEVK.K    | 1720.083 | 0.00259  | 3 | 1 | 37.8 | 0 |
| P12163_1_F3,23549 | R.TGLPALIAEVK.K    | 1720.083 | 0.00421  | 3 | 1 | 23   | 0 |
| P12163_1_F3,23618 | R.TGLPALIAEVK.K    | 1720.083 | 0.00965  | 2 | 1 | 43.3 | 0 |
| P12163_1_F3,23794 | R.TGLPALIAEVK.K    | 1720.083 | 0.00568  | 3 | 1 | 46.2 | 0 |
| P12163_1_F3,24038 | R.TGLPALIAEVK.K    | 1720.083 | 0.00568  | 3 | 1 | 29.2 | 0 |
| P12163_1_F4,21296 | R.TGLPALIAEVK.K    | 1720.083 | 0.00643  | 3 | 1 | 31.5 | 0 |
| P12163_1_F5,22833 | R.TGLPALIAEVK.K    | 1720.083 | 0.00403  | 3 | 1 | 23.6 | 0 |
| P12163_1_F6,22100 | R.TGLPALIAEVK.K    | 1720.083 | 0.00202  | 3 | 1 | 27.7 | 0 |
| P12163_1_F7,21776 | R.TGLPALIAEVK.K    | 1720.083 | 0.0043   | 3 | 1 | 28.1 | 0 |
| P12163_2_F1,23852 | R.TGLPALIAEVK.K    | 1720.083 | 0.00523  | 3 | 1 | 32.5 | 0 |
| P12163_2_F4,21136 | R.TGLPALIAEVK.K    | 1720.083 | 0.00613  | 3 | 1 | 24.6 | 0 |

|                   |                     |          |          |   |   |      |   |
|-------------------|---------------------|----------|----------|---|---|------|---|
| P12163_1_F4,20530 | K.AVEM*FIDEK.I      | 1705.929 | 0.0085   | 2 | 1 | 36.6 | 0 |
| P12163_1_F4,22752 | K.AVEM*FIDEK.I      | 1705.929 | 0.00655  | 3 | 1 | 39.5 | 0 |
| P12163_1_F4,22898 | K.AVEM*FIDEK.I      | 1705.929 | 0.00736  | 2 | 1 | 39.3 | 0 |
| P12163_1_F7,20036 | K.AVEM*FIDEK.I      | 1705.929 | 0.00712  | 3 | 1 | 25.3 | 0 |
| P12163_2_F1,19968 | K.AVEM*FIDEK.I      | 1705.929 | 0.00542  | 2 | 1 | 26.6 | 0 |
| P12163_2_F4,17793 | K.AVEM*FIDEK.I      | 1705.929 | 0.00451  | 3 | 1 | 22.4 | 0 |
| P12163_1_F3,20632 | K.AVEMFIDEK.I       | 1689.934 | 0.00702  | 2 | 1 | 36.4 | 0 |
| P12163_1_F3,21897 | K.AVEMFIDEK.I       | 1689.934 | 0.00556  | 2 | 1 | 35.3 | 0 |
| P12163_1_F4,22696 | K.AVEMFIDEK.I       | 1689.934 | 0.00564  | 2 | 1 | 49.9 | 0 |
| P12163_1_F4,22764 | K.AVEMFIDEK.I       | 1689.934 | 0.00406  | 3 | 1 | 45.1 | 0 |
| P12163_1_F4,22953 | K.AVEMFIDEK.I       | 1689.934 | 0.00818  | 2 | 1 | 46.4 | 0 |
| P12163_1_F5,21441 | K.AVEMFIDEK.I       | 1689.934 | 0.00895  | 3 | 1 | 22   | 0 |
| P12163_1_F7,20061 | K.AVEMFIDEK.I       | 1689.934 | 0.00082  | 3 | 1 | 33.8 | 0 |
| P12163_2_F1,22227 | K.AVEMFIDEK.I       | 1689.934 | 0.00379  | 3 | 1 | 46.7 | 0 |
| P12163_2_F4,19507 | K.AVEMFIDEK.I       | 1689.934 | -0.00035 | 3 | 1 | 30.7 | 0 |
| P12163_1_F6,20726 | K.EALANVEEKPEILAGE  | 3144.736 | 0.00652  | 4 | 1 | 24.5 | 0 |
| P12163_1_F6,20842 | K.EALANVEEKPEILAGE  | 3144.736 | 0.00169  | 3 | 1 | 55.5 | 0 |
| P12163_1_F7,19881 | K.ETLIAGGPFVLPLAHK. | 2271.368 | 0.00303  | 3 | 1 | 24.3 | 0 |
| P12163_1_F7,22273 | K.ETLIAGGPFVLPLAHK. | 2271.368 | 0.006    | 3 | 1 | 29.8 | 0 |
| P12163_1_F7,22277 | K.ETLIAGGPFVLPLAHK. | 2271.368 | 0.00677  | 4 | 1 | 30.8 | 0 |
| P12163_1_F7,22296 | K.ETLIAGGPFVLPLAHK. | 2271.368 | 0.0047   | 2 | 1 | 55.9 | 0 |
| P12163_1_F7,22476 | K.ETLIAGGPFVLPLAHK. | 2271.368 | 0.00601  | 4 | 1 | 25.7 | 0 |
| P12163_1_F7,22488 | K.ETLIAGGPFVLPLAHK. | 2271.368 | 0.00738  | 3 | 1 | 29   | 0 |
| P12163_2_S5,18846 | K.ETLIAGGPFVLPLAHK. | 2271.368 | 0.00229  | 4 | 1 | 27.2 | 0 |
| P12163_2_S5,21041 | K.ETLIAGGPFVLPLAHK. | 2271.368 | 0.00362  | 4 | 1 | 40.6 | 0 |
| P12163_2_S5,21165 | K.ETLIAGGPFVLPLAHK. | 2271.368 | 0.00675  | 3 | 1 | 54.5 | 0 |
| P12163_2_S5,21332 | K.ETLIAGGPFVLPLAHK. | 2271.368 | 0.00465  | 3 | 1 | 23.4 | 0 |
| P12163_2_F8_12070 | K.HPNWSMGK.K        | 1564.851 | 0.00718  | 3 | 1 | 27.8 | 0 |
| P12163_1_F4,26232 | K.IGYLDIFK.V        | 1576.956 | 0.0066   | 3 | 1 | 23.6 | 0 |
| P12163_1_F5,24281 | K.IGYLDIFK.V        | 1576.956 | 0.01038  | 3 | 1 | 22.9 | 0 |
| P12163_1_F7,22979 | K.IGYLDIFK.V        | 1576.956 | 0.00353  | 2 | 1 | 35.4 | 0 |
| P12163_1_F7,23013 | K.IGYLDIFK.V        | 1576.956 | 0.00195  | 3 | 1 | 25.8 | 0 |
| P12163_1_F9,22881 | K.IGYLDIFK.V        | 1576.956 | 0.00765  | 2 | 1 | 27   | 0 |
| P12163_2_F9,21768 | K.IGYLDIFK.V        | 1576.956 | 0.00645  | 3 | 1 | 27.1 | 0 |
| P12163_1_F3,17411 | K.ITVDSATLFNK.G     | 1817.063 | 0.00493  | 2 | 1 | 23.9 | 0 |
| P12163_1_F3,20476 | K.ITVDSATLFNK.G     | 1817.063 | -0.00341 | 3 | 1 | 37.3 | 0 |
| P12163_1_F3,20510 | K.ITVDSATLFNK.G     | 1817.063 | 0.00679  | 2 | 1 | 56.2 | 0 |
| P12163_1_F6,19456 | K.ITVDSATLFNK.G     | 1817.063 | 0.00058  | 3 | 1 | 39.7 | 0 |
| P12163_2_F4,18628 | K.ITVDSATLFNK.G     | 1817.063 | 0.0001   | 3 | 1 | 34.5 | 0 |
| P12163_1_F2,17773 | K.LGSLTFVAPDTAK.Y   | 1928.131 | 0.00681  | 3 | 1 | 29.7 | 0 |
| P12163_1_F2,18630 | K.LGSLTFVAPDTAK.Y   | 1928.131 | 0.006    | 3 | 1 | 25.3 | 0 |
| P12163_1_F2,19794 | K.LGSLTFVAPDTAK.Y   | 1928.131 | 0.00954  | 3 | 1 | 29.9 | 0 |
| P12163_1_F2,21570 | K.LGSLTFVAPDTAK.Y   | 1928.131 | 0.00542  | 2 | 1 | 67   | 0 |
| P12163_1_F2,21598 | K.LGSLTFVAPDTAK.Y   | 1928.131 | 0.00294  | 3 | 1 | 50.4 | 0 |
| P12163_1_F3,22154 | K.LGSLTFVAPDTAK.Y   | 1928.131 | 0.00729  | 3 | 1 | 42.4 | 0 |
| P12163_1_F5,21100 | K.LGSLTFVAPDTAK.Y   | 1928.131 | 0.00306  | 3 | 1 | 33.5 | 0 |
| P12163_2_F4,20046 | K.LGSLTFVAPDTAK.Y   | 1928.131 | 0.00174  | 3 | 1 | 25.5 | 0 |
| P12163_1_F4,16978 | K.VVELTCDK.H        | 1571.892 | 0.00678  | 2 | 1 | 29.6 | 0 |
| P12163_1_F5,15729 | K.VVELTCDK.H        | 1571.892 | 0.00733  | 3 | 1 | 23.3 | 0 |
| P12163_2_F1,16156 | K.VVELTCDK.H        | 1571.892 | 0.00558  | 2 | 1 | 27.1 | 0 |
| P12163_2_F4,14630 | K.VVELTCDK.H        | 1571.892 | 0.00248  | 2 | 1 | 50.4 | 0 |

|                   |                    |          |          |   |   |      |   |
|-------------------|--------------------|----------|----------|---|---|------|---|
| P12163_1_S1,16787 | K.YPSVNLAYAAGR.A   | 1585.864 | 0.00333  | 3 | 1 | 56.6 | 0 |
| P12163_1_S1,16853 | K.YPSVNLAYAAGR.A   | 1585.864 | 0.00369  | 2 | 1 | 33.7 | 0 |
| P12163_2_F7,15357 | K.YPSVNLAYAAGR.A   | 1585.864 | -0.00189 | 2 | 1 | 47.3 | 0 |
| P12163_1_F4,13841 | R.AGGTM*TGVLSAANEI | 2031.1   | 0.00724  | 3 | 1 | 32.3 | 0 |
| P12163_1_F4,17602 | R.AGGTM*TGVLSAANEI | 2031.1   | 0.00329  | 2 | 1 | 26.6 | 0 |
| P12163_1_F4,17612 | R.AGGTM*TGVLSAANEI | 2031.1   | 0.00583  | 3 | 1 | 41   | 0 |
| P12163_2_F1,12932 | R.AGGTM*TGVLSAANEI | 2031.1   | 0.00385  | 3 | 1 | 33.8 | 0 |
| P12163_2_F1,12968 | R.AGGTM*TGVLSAANEI | 2031.1   | 0.00283  | 2 | 1 | 47.4 | 0 |
| P12163_2_F2,605   | R.AGGTM*TGVLSAANEI | 2031.1   | 0.00826  | 3 | 1 | 34.7 | 0 |
| P12163_2_F2,1066  | R.AGGTM*TGVLSAANEI | 2031.1   | 0.00385  | 3 | 1 | 23.2 | 0 |
| P12163_1_F4,13781 | R.AGGTMTGVLSAANEK  | 2015.105 | 0.00904  | 3 | 1 | 31.3 | 0 |
| P12163_1_F4,17668 | R.AGGTMTGVLSAANEK  | 2015.105 | 0.00469  | 2 | 1 | 97.4 | 0 |
| P12163_2_F1,16780 | R.AGGTMTGVLSAANEK  | 2015.105 | 0.00295  | 3 | 1 | 42.2 | 0 |
| P12163_2_F2,653   | R.AGGTMTGVLSAANEK  | 2015.105 | 0.00478  | 3 | 1 | 29.5 | 0 |
| P12163_2_F2,865   | R.AGGTMTGVLSAANEK  | 2015.105 | 0.00838  | 3 | 1 | 40.5 | 0 |
| P12163_2_F2,1065  | R.AGGTMTGVLSAANEK  | 2015.105 | 0.00217  | 3 | 1 | 40.7 | 0 |
| P12163_2_F2,1532  | R.AGGTMTGVLSAANEK  | 2015.105 | 0.00598  | 3 | 1 | 31.5 | 0 |
| P12163_2_F2,1770  | R.AGGTMTGVLSAANEK  | 2015.105 | 0.00571  | 3 | 1 | 27   | 0 |
| P12163_2_F2,2154  | R.AGGTMTGVLSAANEK  | 2015.105 | 0.00793  | 3 | 1 | 29.2 | 0 |
| P12163_2_F2,2439  | R.AGGTMTGVLSAANEK  | 2015.105 | 0.00433  | 3 | 1 | 27.8 | 0 |
| P12163_1_F3,9276  | R.AVTETFR.K        | 1127.636 | 0.00411  | 3 | 1 | 31.8 | 0 |
| P12163_1_F3,13309 | R.AVTETFR.K        | 1127.636 | 0.00307  | 2 | 1 | 24   | 0 |
| P12163_1_F2,14105 | R.EYAAGLQFSSGR.S   | 1589.822 | 0.01036  | 3 | 1 | 38.8 | 0 |
| P12163_1_F2,14524 | R.EYAAGLQFSSGR.S   | 1589.822 | 0.00427  | 3 | 1 | 36.2 | 0 |
| P12163_1_F2,16140 | R.EYAAGLQFSSGR.S   | 1589.822 | 0.00351  | 2 | 1 | 50.6 | 0 |
| P12163_1_F9,16106 | R.EYAAGLQFSSGR.S   | 1589.822 | 0.00467  | 2 | 1 | 35.6 | 0 |
| P12163_2_F9,15419 | R.EYAAGLQFSSGR.S   | 1589.822 | 0.00049  | 3 | 1 | 22.4 | 0 |
| P12163_1_F2,16930 | R.IILTASGGAFR.D    | 1409.842 | 0.00088  | 3 | 1 | 28.7 | 0 |
| P12163_1_F2,17485 | R.IILTASGGAFR.D    | 1409.842 | 0.00313  | 3 | 1 | 64.5 | 0 |
| P12163_1_F3,20957 | R.IYCSELTWPR.L     | 1628.841 | 0.00327  | 2 | 1 | 34.7 | 0 |
| P12163_1_F4,19672 | R.NESLLDEIK.E      | 1668.963 | 0.01122  | 2 | 1 | 35.1 | 0 |
| P12163_1_F4,19704 | R.NESLLDEIK.E      | 1668.963 | 0.01587  | 3 | 1 | 27.2 | 0 |
| P12163_1_F4,19853 | R.NESLLDEIK.E      | 1668.963 | 0.00982  | 2 | 1 | 39   | 0 |
| P12163_1_F4,19888 | R.NESLLDEIK.E      | 1668.963 | 0.00705  | 3 | 1 | 36   | 0 |
| P12163_1_F4,20054 | R.NESLLDEIK.E      | 1668.963 | 0.00786  | 2 | 1 | 41.5 | 0 |
| P12163_1_F4,20148 | R.NESLLDEIK.E      | 1668.963 | 0.00582  | 3 | 1 | 42.5 | 0 |
| P12163_1_F5,18740 | R.NESLLDEIK.E      | 1668.963 | 0.01401  | 3 | 1 | 37.3 | 0 |
| P12163_1_F5,18744 | R.NESLLDEIK.E      | 1668.963 | 0.00146  | 2 | 1 | 31.8 | 0 |
| P12163_1_F7,17650 | R.NESLLDEIK.E      | 1668.963 | -0.00099 | 3 | 1 | 37.6 | 0 |
| P12163_1_S10,1810 | R.NESLLDEIK.E      | 1668.963 | 0.00414  | 3 | 1 | 34.4 | 0 |
| P12163_2_F1,19018 | R.NESLLDEIK.E      | 1668.963 | 0.00464  | 2 | 1 | 33   | 0 |
| P12163_2_F1,19165 | R.NESLLDEIK.E      | 1668.963 | 0.00234  | 3 | 1 | 26.3 | 0 |
| P12163_2_F1,19213 | R.NESLLDEIK.E      | 1668.963 | 0.00426  | 2 | 1 | 40.5 | 0 |
| P12163_2_F1,19362 | R.NESLLDEIK.E      | 1668.963 | 0.00789  | 3 | 1 | 42   | 0 |
| P12163_2_F1,19410 | R.NESLLDEIK.E      | 1668.963 | 0.00662  | 2 | 1 | 45.9 | 0 |
| P12163_2_F1,19590 | R.NESLLDEIK.E      | 1668.963 | 0.00582  | 3 | 1 | 42.3 | 0 |
| P12163_2_F1,19626 | R.NESLLDEIK.E      | 1668.963 | 0.00126  | 2 | 1 | 42.2 | 0 |
| P12163_2_S5,17181 | R.NESLLDEIK.E      | 1668.963 | 0.00186  | 3 | 1 | 32.8 | 0 |
| P12163_2_S5,17632 | R.NESLLDEIK.E      | 1668.963 | 0.00894  | 3 | 1 | 29.2 | 0 |
| P12163_1_F9,16957 | R.RIILTASGGAFR.D   | 1565.943 | 0.00391  | 3 | 1 | 61.2 | 0 |
| P12163_2_F8_12070 | R.RIILTASGGAFR.D   | 1565.943 | 0.00037  | 3 | 1 | 35.6 | 0 |

|                                       |          |          |   |   |      |   |
|---------------------------------------|----------|----------|---|---|------|---|
| P12163_1_S1,23651 R.VVALAAGSNITLLADQ  | 2391.443 | -0.00213 | 4 | 1 | 51.4 | 0 |
| P12163_1_S1,23758 R.VVALAAGSNITLLADQ  | 2391.443 | 0.00666  | 3 | 1 | 50.3 | 0 |
| P12163_1_F3,12702 K.AMVDVAR.E         | 1065.603 | 0.00336  | 2 | 1 | 24.7 | 0 |
| P12163_2_F1,12180 K.AMVDVAR.E         | 1065.603 | 0.00152  | 2 | 1 | 29.6 | 0 |
| P12163_1_F4,12592 K.ASGACQLVVK.D      | 1640.961 | 0.00482  | 3 | 1 | 33.3 | 0 |
| P12163_1_F4,14823 K.ASGACQLVVK.D      | 1640.961 | 0.00544  | 2 | 1 | 46.3 | 0 |
| P12163_1_F4,14824 K.ASGACQLVVK.D      | 1640.961 | 0.00401  | 3 | 1 | 39.8 | 0 |
| P12163_1_F5,13482 K.ASGACQLVVK.D      | 1640.961 | 0.008    | 2 | 1 | 46.5 | 0 |
| P12163_1_F6,14306 K.ASGACQLVVK.D      | 1640.961 | 0.00818  | 2 | 1 | 47.4 | 0 |
| P12163_1_F7,13036 K.ASGACQLVVK.D      | 1640.961 | 0.00563  | 3 | 1 | 39   | 0 |
| P12163_1_F7,13044 K.ASGACQLVVK.D      | 1640.961 | 0.0026   | 2 | 1 | 25.5 | 0 |
| P12163_2_F1,13808 K.ASGACQLVVK.D      | 1640.961 | 0.00612  | 2 | 1 | 46.6 | 0 |
| P12163_2_F1,13809 K.ASGACQLVVK.D      | 1640.961 | 0.00425  | 3 | 1 | 39.6 | 0 |
| P12163_2_F2,2913 K.ASGACQLVVK.D       | 1640.961 | 0.00422  | 3 | 1 | 24.4 | 0 |
| P12163_2_F2,3092 K.ASGACQLVVK.D       | 1640.961 | 0.00374  | 3 | 1 | 31.4 | 0 |
| P12163_2_S5,12541 K.ASGACQLVVK.D      | 1640.961 | 0.00227  | 3 | 1 | 39.9 | 0 |
| P12163_2_S5,13150 K.ASGACQLVVK.D      | 1640.961 | 0.00584  | 3 | 1 | 31.2 | 0 |
| P12163_1_F5,13123 K.DSLALK.Y          | 1254.788 | 0.00666  | 3 | 1 | 24.3 | 0 |
| P12163_2_F1,13499 K.DSLALK.Y          | 1254.788 | 0.00522  | 3 | 1 | 26.5 | 0 |
| P12163_2_S5,12183 K.DSLALK.Y          | 1254.788 | -0.00072 | 3 | 1 | 25.6 | 0 |
| P12163_1_F3,15454 K.ELDGLEEK.A        | 1540.868 | 0.00949  | 2 | 1 | 41.4 | 0 |
| P12163_1_F4,15557 K.ELDGLEEK.A        | 1540.868 | 0.00975  | 2 | 1 | 34.6 | 0 |
| P12163_1_F4,15652 K.ELDGLEEK.A        | 1540.868 | 0.00456  | 3 | 1 | 22.2 | 0 |
| P12163_1_F7,13991 K.ELDGLEEK.A        | 1540.868 | 0.00161  | 2 | 1 | 25.9 | 0 |
| P12163_2_F1,14604 K.ELDGLEEK.A        | 1540.868 | 0.00701  | 2 | 1 | 33.8 | 0 |
| P12163_2_F4,13528 K.ELDGLEEK.A        | 1540.868 | 0.00371  | 2 | 1 | 25.2 | 0 |
| P12163_2_S3,13100 K.ELDGLEEK.A        | 1540.868 | 0.00144  | 3 | 1 | 24.3 | 0 |
| P12163_1_F4,8081 K.GSVSVTGR.T         | 1066.616 | 0.00585  | 3 | 1 | 29.4 | 0 |
| P12163_1_S10,9125 K.GSVSVTGR.T        | 1066.616 | 0.00381  | 2 | 1 | 29   | 0 |
| P12163_2_F1,7221 K.GSVSVTGR.T         | 1066.616 | 0.00426  | 3 | 1 | 45.9 | 0 |
| P12163_2_F1,8099 K.GSVSVTGR.T         | 1066.616 | 0.00035  | 2 | 1 | 29.3 | 0 |
| P12163_2_F1,8152 K.GSVSVTGR.T         | 1066.616 | 0.00205  | 2 | 1 | 35.6 | 0 |
| P12163_1_F8,11470 K.HNVPVPVTK.K       | 1598.984 | 0.00266  | 3 | 1 | 30.6 | 0 |
| P12163_1_F9,12161 K.HNVPVPVTK.K       | 1598.984 | 0.00817  | 4 | 1 | 26.3 | 0 |
| P12163_2_F7,11168 K.HNVPVPVTK.K       | 1598.984 | 0.00248  | 3 | 1 | 33.9 | 0 |
| P12163_1_S1,25940 K.LSPASLLAELNEIGGR. | 1944.107 | 0.00583  | 3 | 1 | 28.3 | 0 |
| P12163_1_F4,10621 K.TTTGSVTLK.L       | 1515.92  | 0.00816  | 2 | 1 | 27.9 | 0 |
| P12163_1_F4,13069 K.TTTGSVTLK.L       | 1515.92  | 0.006    | 2 | 1 | 47.3 | 0 |
| P12163_1_F9,12538 K.TTTGSVTLK.L       | 1515.92  | 0.00064  | 2 | 1 | 25.9 | 0 |
| P12163_2_F1,12085 K.TTTGSVTLK.L       | 1515.92  | 0.00738  | 3 | 1 | 32.9 | 0 |
| P12163_2_F1,12089 K.TTTGSVTLK.L       | 1515.92  | 0.00504  | 2 | 1 | 43.1 | 0 |
| P12163_1_F6,18496 K.YAELVYAGR.W       | 1345.742 | 0.00211  | 2 | 1 | 24.2 | 0 |
| P12163_1_F4,12074 R.AGAIYER.K         | 1083.61  | 0.00235  | 2 | 1 | 28.2 | 0 |
| P12163_1_S10,1216 R.AGAIYER.K         | 1083.61  | 0.00343  | 2 | 1 | 24.2 | 0 |
| P12163_2_F1,11082 R.AGAIYER.K         | 1083.61  | 0.00309  | 2 | 1 | 26   | 0 |
| P12163_2_F8,12070 R.AGAIYER.K         | 1083.61  | 0.00255  | 2 | 1 | 27.4 | 0 |
| P12163_1_F3,13109 R.EDAIEYAK.K        | 1546.857 | 0.00929  | 2 | 1 | 33.3 | 0 |
| P12163_1_F4,14888 R.EDAIEYAK.K        | 1546.857 | 0.00989  | 2 | 1 | 37.8 | 0 |
| P12163_1_F4,14946 R.EDAIEYAK.K        | 1546.857 | 0.00548  | 3 | 1 | 30.2 | 0 |
| P12163_1_F7,13237 R.EDAIEYAK.K        | 1546.857 | 0.00729  | 2 | 1 | 24.3 | 0 |
| P12163_1_F7,13771 R.EDAIEYAK.K        | 1546.857 | 0.01303  | 2 | 1 | 33.9 | 0 |



|                    |                     |          |          |   |   |      |   |
|--------------------|---------------------|----------|----------|---|---|------|---|
| P12163_2_F1,13900  | R.EDAIEYAK.K        | 1546.857 | 0.00631  | 2 | 1 | 38.1 | 0 |
| P12163_2_F1,13922  | R.EDAIEYAK.K        | 1546.857 | 0.00428  | 3 | 1 | 31.7 | 0 |
| P12163_2_F4,12464  | R.EDAIEYAK.K        | 1546.857 | 0.00773  | 3 | 1 | 26.5 | 0 |
| P12163_2_F4,12842  | R.EDAIEYAK.K        | 1546.857 | 0.00307  | 2 | 1 | 24.4 | 0 |
| P12163_2_F9,13534  | R.EDAIEYAK.K        | 1546.857 | 0.00825  | 2 | 1 | 35   | 0 |
| P12163_1_S1,17463  | R.ENYGCEVVCFTADVG   | 2754.369 | -0.00318 | 4 | 1 | 45.3 | 0 |
| P12163_1_S1,17475  | R.ENYGCEVVCFTADVG   | 2754.369 | 0.00468  | 3 | 1 | 39.5 | 0 |
| P12163_1_F3,18320  | R.ESIDAFM*ENITK.T   | 2022.067 | 0.00549  | 2 | 1 | 35   | 0 |
| P12163_1_F6,17554  | R.ESIDAFM*ENITK.T   | 2022.067 | 0.00401  | 3 | 1 | 22.3 | 0 |
| P12163_1_F6,21903  | R.ESIDAFM*ENITK.T   | 2022.067 | -0.00001 | 3 | 1 | 40.7 | 0 |
| P12163_1_F3,21716  | R.ESIDAFMENITK.T    | 2006.072 | 0.00234  | 2 | 1 | 58.1 | 0 |
| P12163_1_F3,23223  | R.ESIDAFMENITK.T    | 2006.072 | 0.00074  | 3 | 1 | 43   | 0 |
| P12163_1_F3,23224  | R.ESIDAFMENITK.T    | 2006.072 | 0.004    | 2 | 1 | 71   | 0 |
| P12163_1_F3,23469  | R.ESIDAFMENITK.T    | 2006.072 | 0.00803  | 3 | 1 | 23.7 | 0 |
| P12163_1_F4,24044  | R.ESIDAFMENITK.T    | 2006.072 | 0.00152  | 3 | 1 | 36.9 | 0 |
| P12163_1_F4,24062  | R.ESIDAFMENITK.T    | 2006.072 | 0.00808  | 2 | 1 | 69.8 | 0 |
| P12163_1_F5,22555  | R.ESIDAFMENITK.T    | 2006.072 | 0.00464  | 3 | 1 | 25.9 | 0 |
| P12163_1_F6,21848  | R.ESIDAFMENITK.T    | 2006.072 | 0.00104  | 3 | 1 | 36   | 0 |
| P12163_2_F1,10558  | R.ETMQVK.D          | 1343.781 | 0.00124  | 3 | 1 | 26.1 | 0 |
| P12163_1_F4,9854   | R.EVESAPK.S         | 1367.799 | 0.00216  | 3 | 1 | 26.4 | 0 |
| P12163_1_F7,8556   | R.EVESAPK.S         | 1367.799 | 0.00018  | 3 | 1 | 24.6 | 0 |
| P12163_1_F8,8769   | R.EVESAPK.S         | 1367.799 | 0.00117  | 3 | 1 | 27.3 | 0 |
| P12163_2_F1,8973   | R.EVESAPK.S         | 1367.799 | 0.00423  | 3 | 1 | 32.6 | 0 |
| P12163_2_F1,9234   | R.EVESAPK.S         | 1367.799 | 0.0105   | 3 | 1 | 27.5 | 0 |
| P12163_2_S5,8424   | R.EVESAPK.S         | 1367.799 | 0.0021   | 3 | 1 | 25.5 | 0 |
| P12163_1_F8,9802   | R.EVGADAVAHGCTGK.() | 1980.043 | 0.00717  | 3 | 1 | 32   | 0 |
| P12163_1_F8,9984   | R.EVGADAVAHGCTGK.() | 1980.043 | 0.00398  | 4 | 1 | 22.4 | 0 |
| P12163_1_F8,10827  | R.EVGADAVAHGCTGK.() | 1980.043 | -0.00287 | 2 | 1 | 43.3 | 0 |
| P12163_1_F8,10852  | R.EVGADAVAHGCTGK.() | 1980.043 | 0.00422  | 4 | 1 | 29.1 | 0 |
| P12163_1_F8,11013  | R.EVGADAVAHGCTGK.() | 1980.043 | 0.00528  | 3 | 1 | 28.9 | 0 |
| P12163_1_F8,21437  | R.EVGADAVAHGCTGK.() | 1980.043 | 0.00552  | 3 | 1 | 36.6 | 0 |
| P12163_1_F9,10893  | R.EVGADAVAHGCTGK.() | 1980.043 | 0.00849  | 3 | 1 | 43.1 | 0 |
| P12163_1_S10,10827 | R.EVGADAVAHGCTGK.() | 1980.043 | 0.00963  | 3 | 1 | 40.9 | 0 |
| P12163_1_S10,1149  | R.EVGADAVAHGCTGK.() | 1980.043 | 0.00852  | 3 | 1 | 31.4 | 0 |
| P12163_2_F6,9716   | R.EVGADAVAHGCTGK.() | 1980.043 | 0.00624  | 3 | 1 | 40.4 | 0 |
| P12163_2_F6,9808   | R.EVGADAVAHGCTGK.() | 1980.043 | 0.00466  | 4 | 1 | 25.8 | 0 |
| P12163_2_F6,10664  | R.EVGADAVAHGCTGK.() | 1980.043 | 0.00463  | 2 | 1 | 50.7 | 0 |
| P12163_2_F6,10691  | R.EVGADAVAHGCTGK.() | 1980.043 | 0.0047   | 4 | 1 | 40.6 | 0 |
| P12163_2_F6,10838  | R.EVGADAVAHGCTGK.() | 1980.043 | 0.00843  | 3 | 1 | 52.7 | 0 |
| P12163_1_F7,20509  | R.QDISSFESGQIYDQAD/ | 2722.326 | 0.01143  | 3 | 1 | 53.1 | 0 |
| P12163_1_F3,22426  | K.DGPGAPGGQSWTVQV   | 2392.287 | 0.00363  | 2 | 1 | 30.1 | 0 |
| P12163_1_F3,22446  | K.DGPGAPGGQSWTVQV   | 2392.287 | 0.00607  | 3 | 1 | 49.1 | 0 |
| P12163_1_F6,21198  | K.DGPGAPGGQSWTVQV   | 2392.287 | 0.00346  | 3 | 1 | 26.2 | 0 |
| P12163_1_F5,7675   | K.DYAEAHAK.L        | 1512.827 | 0.01091  | 2 | 1 | 38.2 | 0 |
| P12163_1_F6,8865   | K.DYAEAHAK.L        | 1512.827 | 0.00643  | 3 | 1 | 24.1 | 0 |
| P12163_1_F6,8869   | K.DYAEAHAK.L        | 1512.827 | 0.00619  | 2 | 1 | 36.4 | 0 |
| P12163_1_F7,7985   | K.DYAEAHAK.L        | 1512.827 | 0.00887  | 2 | 1 | 28.5 | 0 |
| P12163_1_F9,8456   | K.DYAEAHAK.L        | 1512.827 | 0.00859  | 2 | 1 | 41.3 | 0 |
| P12163_1_F9,8477   | K.DYAEAHAK.L        | 1512.827 | 0.00268  | 3 | 1 | 44.3 | 0 |
| P12163_1_S10,9473  | K.DYAEAHAK.L        | 1512.827 | 0.00481  | 3 | 1 | 32.1 | 0 |
| P12163_2_F7,8076   | K.DYAEAHAK.L        | 1512.827 | 0.00547  | 3 | 1 | 43.7 | 0 |

|                   |                       |          |          |   |   |      |   |
|-------------------|-----------------------|----------|----------|---|---|------|---|
| P12163_2_F7,8122  | K.DYAEAHAK.L          | 1512.827 | 0.00553  | 2 | 1 | 40.3 | 0 |
| P12163_2_F9,8781  | K.DYAEAHAK.L          | 1512.827 | 0.00535  | 3 | 1 | 28.9 | 0 |
| P12163_2_S5,8696  | K.DYAEAHAK.L          | 1512.827 | 0.00802  | 3 | 1 | 45.4 | 0 |
| P12163_2_S5,8759  | K.DYAEAHAK.L          | 1512.827 | 0.00659  | 2 | 1 | 38.4 | 0 |
| P12163_1_F6,15904 | K.EIVALSGAHTVGR.S     | 1613.928 | 0.00193  | 3 | 1 | 24.2 | 0 |
| P12163_1_F7,12357 | K.EIVALSGAHTVGR.S     | 1613.928 | 0.00193  | 4 | 1 | 31.7 | 0 |
| P12163_1_F7,13190 | K.EIVALSGAHTVGR.S     | 1613.928 | 0.00238  | 3 | 1 | 37.6 | 0 |
| P12163_1_F7,15011 | K.EIVALSGAHTVGR.S     | 1613.928 | 0.00475  | 3 | 1 | 24.9 | 0 |
| P12163_1_F7,15031 | K.EIVALSGAHTVGR.S     | 1613.928 | 0.00212  | 2 | 1 | 30.8 | 0 |
| P12163_1_F8,12832 | K.EIVALSGAHTVGR.S     | 1613.928 | 0.00187  | 3 | 1 | 26.6 | 0 |
| P12163_1_F8,12871 | K.EIVALSGAHTVGR.S     | 1613.928 | 0.00405  | 4 | 1 | 36.8 | 0 |
| P12163_1_F8,13712 | K.EIVALSGAHTVGR.S     | 1613.928 | 0.00118  | 3 | 1 | 30   | 0 |
| P12163_1_F8,15732 | K.EIVALSGAHTVGR.S     | 1613.928 | 0.00295  | 3 | 1 | 38.5 | 0 |
| P12163_1_F8,15733 | K.EIVALSGAHTVGR.S     | 1613.928 | -0.00152 | 2 | 1 | 25.8 | 0 |
| P12163_2_F6,15195 | K.EIVALSGAHTVGR.S     | 1613.928 | 0.00434  | 2 | 1 | 38.5 | 0 |
| P12163_2_F8_12070 | K.EIVALSGAHTVGR.S     | 1613.928 | 0.00505  | 3 | 1 | 46.1 | 0 |
| P12163_2_F9,14569 | K.EIVALSGAHTVGR.S     | 1613.928 | 0.00259  | 3 | 1 | 33.4 | 0 |
| P12163_1_F5,16906 | K.FDNSYFK.N ! K.FDNSY | 1528.826 | 0.00791  | 2 | 1 | 25.5 | 0 |
| P12163_2_F1,17244 | K.FDNSYFK.N ! K.FDNSY | 1528.826 | 0.00777  | 2 | 1 | 24.2 | 0 |
| P12163_2_F8_12070 | K.FDNSYFK.N ! K.FDNSY | 1528.826 | 0.00705  | 2 | 1 | 24.3 | 0 |
| P12163_1_F8,14176 | K.HAANAGLVNALK.L      | 1787.075 | 0.00375  | 3 | 1 | 26.6 | 0 |
| P12163_1_F9,14439 | K.HAANAGLVNALK.L      | 1787.075 | 0.00624  | 3 | 1 | 53.5 | 0 |
| P12163_1_F9,14444 | K.HAANAGLVNALK.L      | 1787.075 | 0.00403  | 4 | 1 | 32   | 0 |
| P12163_1_F9,14449 | K.HAANAGLVNALK.L      | 1787.075 | 0.00788  | 2 | 1 | 62.7 | 0 |
| P12163_1_S10,1445 | K.HAANAGLVNALK.L      | 1787.075 | 0.0072   | 3 | 1 | 40.9 | 0 |
| P12163_2_F9,13380 | K.HAANAGLVNALK.L      | 1787.075 | 0.00621  | 3 | 1 | 31.1 | 0 |
| P12163_2_F9,13412 | K.HAANAGLVNALK.L      | 1787.075 | 0.00699  | 4 | 1 | 34.6 | 0 |
| P12163_2_F9,13441 | K.HAANAGLVNALK.L      | 1787.075 | 0.0066   | 2 | 1 | 61   | 0 |
| P12163_1_F5,13749 | K.LSNLGAK.F           | 1310.825 | 0.0071   | 2 | 1 | 32.7 | 0 |
| P12163_1_F5,13762 | K.LSNLGAK.F           | 1310.825 | 0.00413  | 3 | 1 | 39.3 | 0 |
| P12163_1_F5,13350 | K.SELSEAMK.Q          | 1502.834 | 0.00755  | 3 | 1 | 29.8 | 0 |
| P12163_1_F6,13134 | K.STFCHPILVR.L        | 1533.851 | 0.00085  | 3 | 1 | 32.7 | 0 |
| P12163_1_F8,15431 | K.STFCHPILVR.L        | 1533.851 | 0.00235  | 3 | 1 | 47.6 | 0 |
| P12163_2_F4,14361 | K.STFCHPILVR.L        | 1533.851 | 0.00208  | 3 | 1 | 34   | 0 |
| P12163_2_S5,14386 | K.STFCHPILVR.L        | 1533.851 | 0.0028   | 3 | 1 | 44.6 | 0 |
| P12163_1_F4,18928 | K.YAEDQEAFK.D         | 1855.969 | 0.00599  | 3 | 1 | 44.4 | 0 |
| P12163_1_F4,19078 | K.YAEDQEAFK.D         | 1855.969 | 0.00523  | 2 | 1 | 42.7 | 0 |
| P12163_1_F5,17625 | K.YAEDQEAFK.D         | 1855.969 | 0.00147  | 2 | 1 | 54.1 | 0 |
| P12163_1_F7,16675 | K.YAEDQEAFK.D         | 1855.969 | 0.00391  | 2 | 1 | 39.1 | 0 |
| P12163_1_F9,17337 | K.YAEDQEAFK.D         | 1855.969 | 0.00177  | 2 | 1 | 47.4 | 0 |
| P12163_2_F9,16878 | K.YAEDQEAFK.D         | 1855.969 | 0.00794  | 3 | 1 | 43.5 | 0 |
| P12163_2_F9,16879 | K.YAEDQEAFK.D         | 1855.969 | 0.00295  | 2 | 1 | 47.3 | 0 |
| P12163_2_S5,17109 | K.YAEDQEAFK.D         | 1855.969 | 0.00329  | 3 | 1 | 30.9 | 0 |
| P12163_2_F6,14577 | R.AEYEA VGGSPDTPLR.S  | 1865.955 | -0.00235 | 2 | 1 | 39.6 | 0 |
| P12163_1_F5,6441  | R.GGANASLR.F          | 1049.6   | 0.0011   | 2 | 1 | 26.9 | 0 |
| P12163_1_F6,14686 | R.LGWHDAGTYDK.N       | 1870.991 | 0.00213  | 3 | 1 | 23.9 | 0 |
| P12163_1_F9,14491 | R.LGWHDAGTYDK.N       | 1870.991 | 0.00702  | 3 | 1 | 24.5 | 0 |
| P12163_2_F7,13199 | R.LGWHDAGTYDK.N       | 1870.991 | 0.00666  | 3 | 1 | 34.7 | 0 |
| P12163_1_F7,12101 | R.LPAAGPPSPAHLR.N     | 1716.97  | -0.00116 | 3 | 1 | 28.4 | 0 |
| P12163_1_F7,13817 | R.LPAAGPPSPAHLR.N     | 1716.97  | 0.00112  | 3 | 1 | 46.6 | 0 |
| P12163_1_F7,13903 | R.LPAAGPPSPAHLR.N     | 1716.97  | 0.0024   | 2 | 1 | 28.5 | 0 |

|                   |                    |          |          |   |   |      |   |
|-------------------|--------------------|----------|----------|---|---|------|---|
| P12163_1_F8,19    | R.LPAAGPPSPAHLR.N  | 1716.97  | 0.00145  | 3 | 1 | 27.5 | 0 |
| P12163_1_F8,241   | R.LPAAGPPSPAHLR.N  | 1716.97  | -0.00125 | 3 | 1 | 26.7 | 0 |
| P12163_1_F8,421   | R.LPAAGPPSPAHLR.N  | 1716.97  | 0.00109  | 3 | 1 | 28.5 | 0 |
| P12163_1_F8,12580 | R.LPAAGPPSPAHLR.N  | 1716.97  | 0.00316  | 3 | 1 | 25.4 | 0 |
| P12163_1_F8,14466 | R.LPAAGPPSPAHLR.N  | 1716.97  | -0.00014 | 3 | 1 | 42.3 | 0 |
| P12163_1_F8,14488 | R.LPAAGPPSPAHLR.N  | 1716.97  | 0.00228  | 2 | 1 | 24.1 | 0 |
| P12163_2_F6,13981 | R.LPAAGPPSPAHLR.N  | 1716.97  | 0.00406  | 3 | 1 | 38.2 | 0 |
| P12163_2_F8_12070 | R.LPAAGPPSPAHLR.N  | 1716.97  | 0.00391  | 3 | 1 | 28.6 | 0 |
| P12163_2_S5,13118 | R.LPAAGPPSPAHLR.N  | 1716.97  | 0.00319  | 3 | 1 | 47.3 | 0 |
| P12163_2_S5,13205 | R.LPAAGPPSPAHLR.N  | 1716.97  | 0.00051  | 4 | 1 | 45.2 | 0 |
| P12163_2_S5,13335 | R.LPAAGPPSPAHLR.N  | 1716.97  | 0.00265  | 3 | 1 | 77.2 | 0 |
| P12163_1_S10,1623 | R.M*GLNDKEIVALSGAH | 2592.439 | 0.00798  | 4 | 1 | 47.3 | 0 |
| P12163_2_F10,1637 | R.M*GLNDKEIVALSGAH | 2592.439 | 0.0093   | 4 | 1 | 55.8 | 0 |
| P12163_2_S5,15586 | R.M*GLNDKEIVALSGAH | 2592.439 | 0.00286  | 4 | 1 | 39.4 | 0 |
| P12163_1_S10,1755 | R.MGLNDKEIVALSGAH  | 2576.444 | 0.00702  | 4 | 1 | 43   | 0 |
| P12163_2_F10,1634 | R.MGLNDKEIVALSGAH  | 2576.444 | 0.00826  | 4 | 1 | 53.7 | 0 |
| P12163_1_F7,23926 | R.RDEDLLVLPTDAVLFE | 3027.65  | 0.00371  | 3 | 1 | 59.7 | 0 |
| P12163_1_F7,23999 | R.RDEDLLVLPTDAVLFE | 3027.65  | 0.00412  | 4 | 1 | 33   | 0 |
| P12163_1_F8,6199  | R.RGGANASLR.F      | 1205.702 | 0.00861  | 3 | 1 | 32   | 0 |
| P12163_2_F10,6739 | R.RGGANASLR.F      | 1205.702 | 0.00681  | 3 | 1 | 37.7 | 0 |
| P12163_2_F8_12070 | R.RGGANASLR.F      | 1205.702 | 0.00651  | 3 | 1 | 40.9 | 0 |
| P12163_1_F6,15557 | R.VDVSQPEQCPEEGRLP | 3256.632 | 0.00257  | 4 | 1 | 57.6 | 0 |
| P12163_1_F9,15281 | R.VDVSQPEQCPEEGRLP | 3256.632 | -0.00131 | 4 | 1 | 48.1 | 0 |
| P12163_2_F6,14942 | R.VDVSQPEQCPEEGRLP | 3256.632 | 0.00353  | 4 | 1 | 47   | 0 |
| P12163_2_F7,14029 | R.VDVSQPEQCPEEGRLP | 3256.632 | 0.00225  | 4 | 1 | 43.7 | 0 |
| P12163_2_F9,14112 | R.VDVSQPEQCPEEGRLP | 3256.632 | 0.00365  | 4 | 1 | 34   | 0 |
| P12163_2_F1,9088  | K.AADEAVK.I        | 1311.773 | 0.00665  | 2 | 1 | 35.2 | 0 |
| P12163_2_F1,9100  | K.AADEAVK.I        | 1311.773 | 0.00218  | 3 | 1 | 25.1 | 0 |
| P12163_1_F8,18780 | K.ALEYEDFDKFDR.V   | 2156.112 | 0.00612  | 2 | 1 | 33.7 | 0 |
| P12163_1_F2,9255  | K.GVDAQIASGGGR.M   | 1391.754 | 0.00156  | 3 | 1 | 26   | 0 |
| P12163_1_F2,10539 | K.GVDAQIASGGGR.M   | 1391.754 | 0.00572  | 2 | 1 | 33.2 | 0 |
| P12163_1_S1,10567 | K.GVDAQIASGGGR.M   | 1391.754 | 0.00358  | 2 | 1 | 27.1 | 0 |
| P12163_1_F3,21858 | K.IIIDAIEK.V       | 1522.966 | 0.00897  | 2 | 1 | 50.6 | 0 |
| P12163_1_F3,21883 | K.IIIDAIEK.V       | 1522.966 | 0.00583  | 3 | 1 | 28.9 | 0 |
| P12163_1_F4,22766 | K.IIIDAIEK.V       | 1522.966 | 0.00487  | 2 | 1 | 36.9 | 0 |
| P12163_1_F4,22924 | K.IIIDAIEK.V       | 1522.966 | 0.00799  | 3 | 1 | 32.6 | 0 |
| P12163_1_F6,21094 | K.IIIDAIEK.V       | 1522.966 | 0.00406  | 3 | 1 | 23.1 | 0 |
| P12163_2_F1,22310 | K.IIIDAIEK.V       | 1522.966 | 0.00623  | 2 | 1 | 42.1 | 0 |
| P12163_1_F7,17683 | K.LPSHYLVSPPEIDR.T | 1927.059 | 0.00463  | 3 | 1 | 34   | 0 |
| P12163_1_F7,17700 | K.LPSHYLVSPPEIDR.T | 1927.059 | 0.00264  | 2 | 1 | 32   | 0 |
| P12163_1_F8,18646 | K.LPSHYLVSPPEIDR.T | 1927.059 | 0.00259  | 3 | 1 | 33.5 | 0 |
| P12163_2_F10,1646 | K.LPSHYLVSPPEIDR.T | 1927.059 | 0.00337  | 3 | 1 | 40.2 | 0 |
| P12163_2_F4,17360 | K.LPSHYLVSPPEIDR.T | 1927.059 | 0.00448  | 3 | 1 | 27.8 | 0 |
| P12163_2_S5,17017 | K.LPSHYLVSPPEIDR.T | 1927.059 | 0.00256  | 3 | 1 | 44.9 | 0 |
| P12163_1_F3,23164 | K.LVDLALASGK.I     | 1594.999 | 0.00945  | 2 | 1 | 44.8 | 0 |
| P12163_1_F3,23211 | K.LVDLALASGK.I     | 1594.999 | 0.00656  | 3 | 1 | 37.2 | 0 |
| P12163_1_F4,23945 | K.LVDLALASGK.I     | 1594.999 | 0.00605  | 3 | 1 | 30.6 | 0 |
| P12163_1_F4,23946 | K.LVDLALASGK.I     | 1594.999 | 0.00791  | 2 | 1 | 46.9 | 0 |
| P12163_2_F1,23380 | K.LVDLALASGK.I     | 1594.999 | 0.0044   | 3 | 1 | 30.6 | 0 |
| P12163_2_F1,23381 | K.LVDLALASGK.I     | 1594.999 | 0.00521  | 2 | 1 | 48.3 | 0 |
| P12163_1_F7,17478 | K.VGGIYLVLTADHGNAE | 2613.38  | 0.00488  | 3 | 1 | 28.3 | 0 |

|                   |                    |          |         |   |   |      |   |
|-------------------|--------------------|----------|---------|---|---|------|---|
| P12163_1_F7,18772 | K.VGGIYLV TADHGNAE | 2613.38  | 0.00944 | 3 | 1 | 37.1 | 0 |
| P12163_1_F7,18731 | K.VGGIYLV TADHGNAE | 2597.385 | 0.0083  | 3 | 1 | 46.6 | 0 |
| P12163_2_F10,1727 | K.VGGIYLV TADHGNAE | 2597.385 | 0.00146 | 3 | 1 | 46.5 | 0 |
| P12163_2_S5,18005 | K.VGGIYLV TADHGNAE | 2597.385 | 0.00605 | 3 | 1 | 24.2 | 0 |
| P12163_2_S5,18047 | K.VGGIYLV TADHGNAE | 2597.385 | 0.00996 | 4 | 1 | 32.5 | 0 |
| P12163_1_F7,17200 | K.YNCIHVADTPTM*DSF | 2523.247 | 0.01813 | 3 | 1 | 27   | 0 |
| P12163_2_F6,15608 | K.YNCIHVADTPTM*DSF | 2523.247 | 0.0045  | 3 | 1 | 26.5 | 0 |
| P12163_1_F8,17973 | K.YNCIHVADTPTMDSFk | 2507.252 | 0.00598 | 3 | 1 | 55.1 | 0 |
| P12163_1_F8,18001 | K.YNCIHVADTPTMDSFk | 2507.252 | 0.0019  | 4 | 1 | 37.7 | 0 |
| P12163_1_F8,16720 | R.GWDAQVLGEAPHK.F  | 2016.112 | 0.00668 | 3 | 1 | 60.4 | 0 |
| P12163_1_F8,16761 | R.GWDAQVLGEAPHK.F  | 2016.112 | 0.00249 | 2 | 1 | 62.2 | 0 |
| P12163_2_F6,16168 | R.GWDAQVLGEAPHK.F  | 2016.112 | 0.00275 | 3 | 1 | 52.8 | 0 |
| P12163_1_F5,14857 | R.IFAQGAK.L        | 1342.83  | 0.00608 | 2 | 1 | 27.1 | 0 |
| P12163_1_F5,14926 | R.IFAQGAK.L        | 1342.83  | 0.00037 | 3 | 1 | 28   | 0 |
| P12163_2_F2,15590 | R.IFAQGAK.L        | 1342.83  | 0.00326 | 2 | 1 | 26.8 | 0 |
| P12163_2_F2,15638 | R.IFAQGAK.L        | 1342.83  | 0.001   | 3 | 1 | 32.3 | 0 |
| P12163_1_F3,25961 | R.LDQLQLLLK.G      | 1692.088 | 0.00346 | 3 | 1 | 36.4 | 0 |
| P12163_1_F3,25968 | R.LDQLQLLLK.G      | 1692.088 | 0.00424 | 2 | 1 | 55.4 | 0 |
| P12163_1_F4,26862 | R.LDQLQLLLK.G      | 1692.088 | 0.00671 | 2 | 1 | 49   | 0 |
| P12163_1_F9,16569 | R.LHILTDGR.D       | 1228.731 | 0.00462 | 3 | 1 | 31.7 | 0 |
| P12163_1_F9,16840 | R.LHILTDGR.D       | 1228.731 | 0.00441 | 3 | 1 | 30.2 | 0 |
| P12163_2_F6,15572 | R.LHILTDGR.D       | 1228.731 | 0.00288 | 3 | 1 | 29.9 | 0 |
| P12163_2_F7,14945 | R.LHILTDGR.D       | 1228.731 | 0.00549 | 3 | 1 | 28.8 | 0 |
| P12163_2_F1,18059 | R.MVMLAK.A         | 1300.794 | 0.00405 | 3 | 1 | 22.1 | 0 |
| P12163_1_F4,13675 | R.TFACSETVK.F      | 1650.898 | 0.00337 | 3 | 1 | 27.2 | 0 |
| P12163_1_F4,13684 | R.TFACSETVK.F      | 1650.898 | 0.00709 | 2 | 1 | 27.5 | 0 |
| P12163_1_F5,12211 | R.TFACSETVK.F      | 1650.898 | 0.01094 | 2 | 1 | 31.8 | 0 |
| P12163_1_F5,12249 | R.TFACSETVK.F      | 1650.898 | 0.00766 | 3 | 1 | 43.9 | 0 |
| P12163_1_F6,12219 | R.TSGEYLVHNGVR.T   | 1635.876 | 0.00382 | 3 | 1 | 50.4 | 0 |
| P12163_2_F6,9726  | R.TSGEYLVHNGVR.T   | 1635.876 | 0.00249 | 3 | 1 | 26.5 | 0 |
| P12163_2_F6,11727 | R.TSGEYLVHNGVR.T   | 1635.876 | 0.00654 | 3 | 1 | 34.3 | 0 |
| P12163_1_F3,20267 | R.YAGMLQYDGELK.L   | 1996.067 | 0.01168 | 2 | 1 | 49.7 | 0 |
| P12163_1_F3,20288 | R.YAGMLQYDGELK.L   | 1996.067 | 0.00633 | 3 | 1 | 47.9 | 0 |
| P12163_1_F4,20853 | R.YAGMLQYDGELK.L   | 1996.067 | 0.00806 | 3 | 1 | 52.8 | 0 |
| P12163_1_F4,20858 | R.YAGMLQYDGELK.L   | 1996.067 | 0.00086 | 2 | 1 | 49.7 | 0 |
| P12163_1_F9,19312 | R.YAGMLQYDGELK.L   | 1996.067 | 0.00417 | 3 | 1 | 37.7 | 0 |
| P12163_2_F9,18252 | R.YAGMLQYDGELK.L   | 1996.067 | 0.00851 | 3 | 1 | 37.7 | 0 |
| P12163_1_F4,18600 | R.YENDWDVVK.R      | 1775.942 | 0.0092  | 3 | 1 | 34.1 | 0 |
| P12163_2_F1,17755 | R.YENDWDVVK.R      | 1775.942 | 0.00351 | 2 | 1 | 32.2 | 0 |
| P12163_1_F4,19246 | K.EVDVVEWK.G       | 1611.92  | 0.00508 | 3 | 1 | 34.4 | 0 |
| P12163_2_F1,18481 | K.EVDVVEWK.G       | 1611.92  | 0.00749 | 2 | 1 | 39.4 | 0 |
| P12163_1_F5,16657 | K.FQNSILK.K        | 1457.894 | 0.00331 | 3 | 1 | 28.2 | 0 |
| P12163_1_F5,16679 | K.FQNSILK.K        | 1457.894 | 0.00664 | 2 | 1 | 28.6 | 0 |
| P12163_1_F8,16654 | K.FQNSILK.K        | 1457.894 | 0.00695 | 3 | 1 | 28.5 | 0 |
| P12163_2_F2,17383 | K.FQNSILK.K        | 1457.894 | 0.00356 | 2 | 1 | 24.7 | 0 |
| P12163_2_F2,17389 | K.FQNSILK.K        | 1457.894 | 0.00268 | 3 | 1 | 26.1 | 0 |
| P12163_1_F3,18780 | K.GDILAVGVTEK.D    | 1710.026 | 0.00527 | 3 | 1 | 45.1 | 0 |
| P12163_1_F3,18959 | K.GDILAVGVTEK.D    | 1710.026 | 0.00366 | 2 | 1 | 55.9 | 0 |
| P12163_1_F6,17738 | K.GDILAVGVTEK.D    | 1710.026 | 0.00311 | 3 | 1 | 31.3 | 0 |
| P12163_1_F4,19061 | K.GLTFDSGGYNIK.T   | 1880.037 | 0.00614 | 2 | 1 | 45.6 | 0 |
| P12163_1_F4,19107 | K.GLTFDSGGYNIK.T   | 1880.037 | 0.00696 | 3 | 1 | 62.5 | 0 |

|                   |                       |          |          |   |   |      |   |
|-------------------|-----------------------|----------|----------|---|---|------|---|
| P12163_1_F9,17698 | K.GLTFDSGGYNIK.T      | 1880.037 | 0.0078   | 3 | 1 | 62.8 | 0 |
| P12163_2_F1,18331 | K.GLTFDSGGYNIK.T      | 1880.037 | 0.00538  | 2 | 1 | 42.7 | 0 |
| P12163_2_F1,18351 | K.GLTFDSGGYNIK.T      | 1880.037 | 0.00693  | 3 | 1 | 51.2 | 0 |
| P12163_2_F9,16833 | K.GLTFDSGGYNIK.T      | 1880.037 | 0.00324  | 3 | 1 | 58.3 | 0 |
| P12163_1_F9,15442 | K.RVGLIGLQASASR.A     | 1617.97  | -0.00027 | 3 | 1 | 31.7 | 0 |
| P12163_1_S1,7983  | K.SGVADM*VNTGGR.Q     | 1483.748 | 0.00405  | 3 | 1 | 44.4 | 0 |
| P12163_1_S1,8325  | K.SGVADM*VNTGGR.Q     | 1483.748 | -0.00684 | 3 | 1 | 24.4 | 0 |
| P12163_1_S1,8539  | K.SGVADM*VNTGGR.Q     | 1483.748 | 0.00552  | 3 | 1 | 23.1 | 0 |
| P12163_1_S1,11480 | K.SGVADM*VNTGGR.Q     | 1483.748 | -0.00054 | 3 | 1 | 34.8 | 0 |
| P12163_1_F2,13273 | K.SGVADMVNTGGR.Q      | 1467.753 | 0.00113  | 2 | 1 | 29.6 | 0 |
| P12163_1_S1,11878 | K.SGVADMVNTGGR.Q      | 1467.753 | 0.00553  | 3 | 1 | 24   | 0 |
| P12163_1_S1,12991 | K.SGVADMVNTGGR.Q      | 1467.753 | 0.00153  | 2 | 1 | 32.5 | 0 |
| P12163_1_F2,21138 | K.SVDIIGLGTGPELEK.K   | 2136.237 | 0.00362  | 3 | 1 | 41.1 | 0 |
| P12163_1_S1,19814 | K.SVDIIGLGTGPELEK.K   | 2136.237 | 0.00404  | 2 | 1 | 68.5 | 0 |
| P12163_1_S1,19816 | K.SVDIIGLGTGPELEK.K   | 2136.237 | 0.00899  | 3 | 1 | 55.8 | 0 |
| P12163_2_F1,18212 | K.TGPGCLIENMK.Y       | 1827.992 | 0.00554  | 2 | 1 | 39.5 | 0 |
| P12163_1_S1,8593  | K.TIEVNNTDAEGR.L      | 1622.829 | 0.00169  | 3 | 1 | 23.9 | 0 |
| P12163_1_F8,21487 | K.VQWM*HIDIAGPVWSI    | 2520.353 | 0.00103  | 3 | 1 | 27.6 | 0 |
| P12163_1_F3,19759 | K.YDMGGAAAVLGAAG      | 1903.057 | 0.0041   | 2 | 1 | 84.4 | 0 |
| P12163_1_F3,19773 | K.YDMGGAAAVLGAAG      | 1903.057 | 0.00513  | 3 | 1 | 55.1 | 0 |
| P12163_1_S1,21843 | R.ELVNSPANVLTAVLA     | 2760.56  | 0.00854  | 4 | 1 | 68.7 | 0 |
| P12163_1_S1,21893 | R.ELVNSPANVLTAVLA     | 2760.56  | 0.007    | 3 | 1 | 73.3 | 0 |
| P12163_2_F1,15072 | R.LPGIGSK.R           | 1279.819 | 0.00865  | 3 | 1 | 23.3 | 0 |
| P12163_1_S1,24188 | R.LTLADALIYACNQGVI    | 2473.358 | 0.00733  | 3 | 1 | 46.1 | 0 |
| P12163_1_F3,24506 | R.MPLEESYWEMMK.S      | 2182.084 | 0.00795  | 3 | 1 | 30.9 | 0 |
| P12163_1_F4,11691 | R.SLGESVAAAAA.A       | 1611.953 | 0.0032   | 2 | 1 | 26.9 | 0 |
| P12163_1_F4,15147 | R.SLGESVAAAAA.A       | 1611.953 | 0.00528  | 2 | 1 | 48.9 | 0 |
| P12163_2_F1,14046 | R.SLGESVAAAAA.A       | 1611.953 | 0.00577  | 3 | 1 | 52.2 | 0 |
| P12163_2_F1,14048 | R.SLGESVAAAAA.A       | 1611.953 | 0.00276  | 2 | 1 | 49   | 0 |
| P12163_1_F2,17863 | R.VGLIGLQASASR.A      | 1461.869 | 0.00126  | 3 | 1 | 34.1 | 0 |
| P12163_1_F2,19547 | R.VGLIGLQASASR.A      | 1461.869 | 0.0017   | 2 | 1 | 25   | 0 |
| P12163_1_F2,19620 | R.VGLIGLQASASR.A      | 1461.869 | 0.00066  | 3 | 1 | 54.2 | 0 |
| P12163_1_S1,18544 | R.VGLIGLQASASR.A      | 1461.869 | 0.01107  | 3 | 1 | 33.6 | 0 |
| P12163_1_S1,18655 | R.VGLIGLQASASR.A      | 1461.869 | 0.00432  | 2 | 1 | 32.7 | 0 |
| P12163_1_S1,18799 | R.VGLIGLQASASR.A      | 1461.869 | 0.00639  | 3 | 1 | 52.7 | 0 |
| P12163_1_F3,12393 | K.ATNELVLR.L ! R.ATNI | 1219.731 | 0.00181  | 3 | 1 | 32.1 | 0 |
| P12163_2_F1,14196 | K.ATNELVLR.L ! R.ATNI | 1219.731 | 0.00389  | 2 | 1 | 26.6 | 0 |
| P12163_1_S1,17758 | K.ELVENLSVLR.F        | 1475.873 | 0.00063  | 3 | 1 | 23.5 | 0 |
| P12163_1_S1,20471 | K.ELVENLSVLR.F        | 1475.873 | -0.00201 | 3 | 1 | 29   | 0 |
| P12163_1_S1,20474 | K.ELVENLSVLR.F        | 1475.873 | 0.00232  | 2 | 1 | 26.1 | 0 |
| P12163_1_F3,13767 | K.GGVSYPAYTDDK.T      | 1880.985 | 0.00257  | 2 | 1 | 40.4 | 0 |
| P12163_1_F4,14282 | K.GGVSYPAYTDDK.T      | 1880.985 | 0.00495  | 2 | 1 | 45.9 | 0 |
| P12163_1_F9,18507 | K.HFTIFGYAR.S         | 1415.774 | 0.00541  | 3 | 1 | 22.2 | 0 |
| P12163_2_F4,17657 | K.HFTIFGYAR.S         | 1415.774 | 0.00391  | 3 | 1 | 29.7 | 0 |
| P12163_1_S1,17518 | K.IIPEYYPYGSR.G       | 1661.884 | -0.00348 | 3 | 1 | 41   | 0 |
| P12163_2_F6,17666 | K.IIPEYYPYGSR.G       | 1661.884 | 0.00183  | 3 | 1 | 41   | 0 |
| P12163_1_F9,9447  | K.LM*AHEGGR.V         | 1190.625 | 0.00437  | 3 | 1 | 35.7 | 0 |
| P12163_1_F9,9401  | K.LMAHEGGR.V          | 1174.63  | 0.00402  | 3 | 1 | 27.1 | 0 |
| P12163_1_F2,14939 | K.NETPLNELNER.L       | 1632.849 | 0.00139  | 2 | 1 | 29.9 | 0 |
| P12163_2_F4,16038 | R.CFYHSGQYDSQENFA/    | 2888.377 | 0.007    | 4 | 1 | 31.9 | 0 |
| P12163_2_F4,16046 | R.CFYHSGQYDSQENFA/    | 2888.377 | 0.00531  | 3 | 1 | 48   | 0 |

|                   |                         |          |          |   |   |      |   |
|-------------------|-------------------------|----------|----------|---|---|------|---|
| P12163_1_F4,10061 | R.DSESSAAMTK.S          | 1634.852 | 0.00641  | 2 | 1 | 26.3 | 0 |
| P12163_2_F1,9158  | R.DSESSAAMTK.S          | 1634.852 | 0.01107  | 2 | 1 | 30.6 | 0 |
| P12163_2_F6,12027 | R.GPVGAHYLAAR.Y         | 1415.806 | 0.00088  | 3 | 1 | 32.8 | 0 |
| P12163_2_F7,11446 | R.GPVGAHYLAAR.Y         | 1415.806 | 0.00421  | 3 | 1 | 37.3 | 0 |
| P12163_2_S5,11860 | R.GPVGAHYLAAR.Y         | 1415.806 | 0.00509  | 3 | 1 | 33   | 0 |
| P12163_1_F5,10327 | R.HVPGNLYNR.N           | 1373.759 | 0.00358  | 3 | 1 | 25.3 | 0 |
| P12163_1_F9,11238 | R.HVPGNLYNR.N           | 1373.759 | 0.00415  | 3 | 1 | 26.2 | 0 |
| P12163_2_F4,10302 | R.HVPGNLYNR.N           | 1373.759 | 0.00232  | 3 | 1 | 26.5 | 0 |
| P12163_1_F5,14523 | R.IDHYLGK.E             | 1453.862 | 0.00756  | 3 | 1 | 24.1 | 0 |
| P12163_1_F6,15310 | R.IDHYLGK.E             | 1453.862 | 0.0057   | 2 | 1 | 25.8 | 0 |
| P12163_1_F6,15324 | R.IDHYLGK.E             | 1453.862 | 0.00696  | 3 | 1 | 35.4 | 0 |
| P12163_2_F9,14321 | R.IDHYLGK.E             | 1453.862 | 0.0033   | 3 | 1 | 25.7 | 0 |
| P12163_2_S5,14430 | R.IDHYLGK.E             | 1453.862 | 0.00453  | 3 | 1 | 35.6 | 0 |
| P12163_1_F3,19747 | R.LEDVVTGQYK.S          | 1760.005 | 0.00272  | 2 | 1 | 34.1 | 0 |
| P12163_1_F4,20314 | R.LEDVVTGQYK.S          | 1760.005 | 0.00542  | 2 | 1 | 43.3 | 0 |
| P12163_1_F4,20334 | R.LEDVVTGQYK.S          | 1760.005 | 0.00537  | 3 | 1 | 37.4 | 0 |
| P12163_1_F9,18684 | R.LEDVVTGQYK.S          | 1760.005 | 0.00384  | 2 | 1 | 50.7 | 0 |
| P12163_2_F1,19722 | R.LEDVVTGQYK.S          | 1760.005 | 0.0039   | 3 | 1 | 38.9 | 0 |
| P12163_1_F2,23564 | R.LLLDAIEGER.R          | 1432.831 | 0.00357  | 2 | 1 | 31   | 0 |
| P12163_1_S1,22675 | R.LLLDAIEGER.R          | 1432.831 | 0.00211  | 2 | 1 | 30.6 | 0 |
| P12163_1_S1,22740 | R.LLLDAIEGER.R          | 1432.831 | 0.00009  | 3 | 1 | 47.5 | 0 |
| P12163_1_S1,22894 | R.LLLDAIEGER.R          | 1432.831 | 0.00373  | 2 | 1 | 46.8 | 0 |
| P12163_1_S1,22962 | R.LLLDAIEGER.R          | 1432.831 | 0.00282  | 3 | 1 | 61.2 | 0 |
| P12163_1_S1,23106 | R.LLLDAIEGER.R          | 1432.831 | 0.00279  | 2 | 1 | 45.1 | 0 |
| P12163_2_F4,9959  | R.SHLNLHYAAR.Y          | 1485.823 | -0.00168 | 4 | 1 | 29.5 | 0 |
| P12163_1_F3,18234 | R.VQPDEAIYLK.I          | 1784.041 | 0.00208  | 2 | 1 | 30.8 | 0 |
| P12163_1_F4,25879 | R.WDGVPFML*K.A          | 1716.96  | 0.00867  | 3 | 1 | 25.8 | 0 |
| P12163_1_F2,6486  | K.APVEETR.K             | 1105.615 | 0.00366  | 3 | 1 | 32.3 | 0 |
| P12163_1_F2,8033  | K.APVEETR.K             | 1105.615 | 0.00448  | 2 | 1 | 26.6 | 0 |
| P12163_1_F2,13124 | K.AYELGVATR.L           | 1283.726 | 0.00277  | 3 | 1 | 34.4 | 0 |
| P12163_2_S5,12102 | K.DSLQHFK.K             | 1482.852 | 0.00615  | 3 | 1 | 38.2 | 0 |
| P12163_1_F5,14925 | K.GLAFTEK.E             | 1373.825 | 0.00294  | 3 | 1 | 27.9 | 0 |
| P12163_2_F1,14844 | K.GLAFTEK.E             | 1373.825 | 0.00742  | 2 | 1 | 25.9 | 0 |
| P12163_2_F2,15632 | K.GLAFTEK.E             | 1373.825 | 0.00552  | 2 | 1 | 27.2 | 0 |
| P12163_2_F2,15636 | K.GLAFTEK.E             | 1373.825 | 0.01104  | 3 | 1 | 24.6 | 0 |
| P12163_1_F2,22102 | K.GLIYPPFSNIR.K         | 1580.91  | 0.00214  | 3 | 1 | 28.1 | 0 |
| P12163_1_F5,22987 | K.IIEVLK.R ! K.ILEVLK.† | 1322.887 | 0.00646  | 2 | 1 | 31.5 | 0 |
| P12163_2_F1,17414 | K.ISANIAANVAAK.A        | 1751.063 | 0.00397  | 2 | 1 | 64.3 | 0 |
| P12163_1_F8,15402 | K.LIGGTAEHR.F           | 1370.806 | 0.0034   | 3 | 1 | 48.9 | 0 |
| P12163_2_F6,14765 | K.LIGGTAEHR.F           | 1370.806 | 0.00262  | 3 | 1 | 56.8 | 0 |
| P12163_2_F6,14791 | K.LIGGTAEHR.F           | 1370.806 | 0.00592  | 2 | 1 | 24   | 0 |
| P12163_1_F4,13831 | K.QVTEENFEK.G           | 1731.937 | 0.00599  | 2 | 1 | 39.1 | 0 |
| P12163_1_F4,13851 | K.QVTEENFEK.G           | 1731.937 | 0.00615  | 3 | 1 | 47.2 | 0 |
| P12163_1_F5,12560 | K.QVTEENFEK.G           | 1731.937 | 0.01821  | 2 | 1 | 34.3 | 0 |
| P12163_2_F1,12911 | K.QVTEENFEK.G           | 1731.937 | 0.00871  | 2 | 1 | 35.4 | 0 |
| P12163_1_F8,14840 | K.STVEGGVEDVYGEDR       | 1915.919 | 0.00363  | 2 | 1 | 33.7 | 0 |
| P12163_1_F3,21774 | K.YVAMMELEER.N          | 1574.786 | 0.00515  | 2 | 1 | 27.5 | 0 |
| P12163_1_S1,23318 | R.AIFASGSPFPFEYNGK      | 2455.275 | 0.00643  | 4 | 1 | 33.3 | 0 |
| P12163_1_F5,7616  | R.DAHYLR.G              | 1078.595 | 0.00146  | 3 | 1 | 22.8 | 0 |
| P12163_1_S10,9764 | R.DAHYLR.G              | 1078.595 | 0.00278  | 3 | 1 | 28.8 | 0 |
| P12163_2_F4,8031  | R.DAHYLR.G              | 1078.595 | 0.00242  | 3 | 1 | 36   | 0 |

|                   |                      |          |          |   |   |      |   |
|-------------------|----------------------|----------|----------|---|---|------|---|
| P12163_1_F2,17631 | R.DGASVLDFDSK.S      | 1761.948 | 0.00975  | 2 | 1 | 44.4 | 0 |
| P12163_1_F2,17697 | R.DGASVLDFDSK.S      | 1761.948 | 0.00588  | 3 | 1 | 47.7 | 0 |
| P12163_1_F3,18174 | R.DGASVLDFDSK.S      | 1761.948 | 0.00654  | 2 | 1 | 54.3 | 0 |
| P12163_1_F2,21613 | R.GLLPPAVISQQLQEK.K  | 2229.343 | 0.00309  | 3 | 1 | 24.4 | 0 |
| P12163_1_S1,21512 | R.ILGLGDLGCQGM*GIP'  | 2409.345 | 0.00501  | 3 | 1 | 61.3 | 0 |
| P12163_1_S1,23058 | R.ILGLGDLGCQGMGIPV   | 2393.35  | 0.01315  | 4 | 1 | 40   | 0 |
| P12163_1_S1,23069 | R.ILGLGDLGCQGMGIPV   | 2393.35  | 0.00855  | 3 | 1 | 66.7 | 0 |
| P12163_2_F6,21325 | R.VHDDM*LLAASEALA    | 2208.215 | 0.00288  | 4 | 1 | 25.8 | 0 |
| P12163_1_F8,21644 | R.VHDDMLLAASEALAK    | 2192.22  | 0.00677  | 4 | 1 | 30.6 | 0 |
| P12163_1_F8,21707 | R.VHDDMLLAASEALAK    | 2192.22  | 0.00606  | 3 | 1 | 41.4 | 0 |
| P12163_2_F6,21320 | R.VHDDMLLAASEALAK    | 2192.22  | 0.00304  | 4 | 1 | 27.3 | 0 |
| P12163_1_S1,20549 | K.AGINVIQIDEAALR.E   | 1787.033 | 0.00451  | 2 | 1 | 47.5 | 0 |
| P12163_1_S1,20569 | K.AGINVIQIDEAALR.E   | 1787.033 | 0.00211  | 3 | 1 | 45.3 | 0 |
| P12163_1_S1,16154 | K.DEGFFSANAAAQASR.   | 1845.903 | 0.00311  | 3 | 1 | 86.3 | 0 |
| P12163_1_S1,16190 | K.DEGFFSANAAAQASR.   | 1845.903 | 0.00274  | 2 | 1 | 56.6 | 0 |
| P12163_2_F1,24913 | K.FALESFWDGK.S       | 1807.984 | 0.0044   | 3 | 1 | 28.7 | 0 |
| P12163_2_S3,11181 | K.FSYASHK.A          | 1447.815 | 0.00315  | 3 | 1 | 29.3 | 0 |
| P12163_1_F2,20917 | K.GVTAYGFDLVR.G      | 1501.832 | 0.00193  | 2 | 1 | 26.2 | 0 |
| P12163_1_F4,18969 | K.ISEEEYVASIK.E      | 1876.052 | 0.00698  | 2 | 1 | 41.4 | 0 |
| P12163_2_F1,18282 | K.ISEEEYVASIK.E      | 1876.052 | 0.00706  | 2 | 1 | 35.1 | 0 |
| P12163_2_F1,9928  | K.SSAEDLQK.V         | 1485.837 | 0.00637  | 2 | 1 | 36.8 | 0 |
| P12163_1_F5,20887 | K.SWLAFAAQK.V        | 1629.957 | 0.0053   | 3 | 1 | 33.2 | 0 |
| P12163_2_F2,21278 | K.SWLAFAAQK.V        | 1629.957 | 0.00812  | 3 | 1 | 34.7 | 0 |
| P12163_2_F2,21288 | K.SWLAFAAQK.V        | 1629.957 | 0.0045   | 2 | 1 | 32.6 | 0 |
| P12163_1_F4,18122 | K.VVEVNALAK.A        | 1550.973 | 0.00674  | 2 | 1 | 46.3 | 0 |
| P12163_1_F4,18123 | K.VVEVNALAK.A        | 1550.973 | 0.0051   | 3 | 1 | 33.2 | 0 |
| P12163_2_F1,17394 | K.VVEVNALAK.A        | 1550.973 | -0.0044  | 2 | 1 | 41.4 | 0 |
| P12163_1_F7,15849 | K.YGAGIGPGVYDIHSPR   | 1963.034 | 0.01199  | 3 | 1 | 46.1 | 0 |
| P12163_1_F8,16548 | K.YGAGIGPGVYDIHSPR   | 1963.034 | 0.00161  | 3 | 1 | 67.2 | 0 |
| P12163_1_F8,16568 | K.YGAGIGPGVYDIHSPR   | 1963.034 | 0.0008   | 2 | 1 | 30.3 | 0 |
| P12163_2_F6,16077 | K.YGAGIGPGVYDIHSPR   | 1963.034 | 0.00008  | 2 | 1 | 38.2 | 0 |
| P12163_2_F6,16081 | K.YGAGIGPGVYDIHSPR   | 1963.034 | 0.00149  | 3 | 1 | 72.3 | 0 |
| P12163_2_F8_12070 | K.YGAGIGPGVYDIHSPR   | 1963.034 | 0.00311  | 3 | 1 | 37.6 | 0 |
| P12163_2_S5,15526 | K.YGAGIGPGVYDIHSPR   | 1963.034 | 0.00287  | 3 | 1 | 67.6 | 0 |
| P12163_1_F9,20521 | K.YLFAGVVDGR.N       | 1400.784 | 0.00377  | 2 | 1 | 38   | 0 |
| P12163_1_S1,20473 | K.YLFAGVVDGR.N       | 1400.784 | 0.00317  | 2 | 1 | 41.2 | 0 |
| P12163_1_F4,5993  | R.ATNVSAR.L          | 1022.59  | -0.00304 | 3 | 1 | 26.8 | 0 |
| P12163_1_F8,15796 | R.CVKPPIYGDVSRPK.A   | 2641.563 | 0.00777  | 3 | 1 | 22.7 | 0 |
| P12163_2_F1,14641 | R.GLEGVVGK.D         | 1366.851 | 0.00646  | 3 | 1 | 25.4 | 0 |
| P12163_1_F4,13898 | R.GNASVPAMEMTK.W     | 1843.987 | 0.00788  | 3 | 1 | 48.5 | 0 |
| P12163_1_S1,13998 | R.IPSTEEIADR.I       | 1434.774 | 0.005    | 2 | 1 | 26.8 | 0 |
| P12163_2_F2,11099 | R.TQLASAK.-          | 1326.82  | 0.0072   | 2 | 1 | 34.7 | 0 |
| P12163_1_F3,12871 | K.ASSSSSSTAIADPEGIK. | 2216.187 | 0.00464  | 3 | 1 | 28.4 | 0 |
| P12163_1_F3,14289 | K.ASSSSSSTAIADPEGIK. | 2216.187 | 0.00563  | 3 | 1 | 48.8 | 0 |
| P12163_1_F3,14314 | K.ASSSSSSTAIADPEGIK. | 2216.187 | 0.00516  | 2 | 1 | 74.3 | 0 |
| P12163_1_F4,17282 | K.EAAQIIK.I          | 1493.951 | 0.00576  | 3 | 1 | 25.9 | 0 |
| P12163_1_F4,17293 | K.EAAQIIK.I          | 1493.951 | 0.00547  | 2 | 1 | 33.2 | 0 |
| P12163_2_F1,16470 | K.EAAQIIK.I          | 1493.951 | 0.00475  | 2 | 1 | 27.5 | 0 |
| P12163_2_F1,16480 | K.EAAQIIK.I          | 1493.951 | 0.00534  | 3 | 1 | 27.6 | 0 |
| P12163_2_F2,2451  | K.EAAQIIK.I          | 1493.951 | 0.00743  | 2 | 1 | 30.7 | 0 |
| P12163_2_F2,2933  | K.EAAQIIK.I          | 1493.951 | 0.00047  | 2 | 1 | 30.9 | 0 |

|                   |                     |          |          |   |   |      |   |
|-------------------|---------------------|----------|----------|---|---|------|---|
| P12163_2_F2,3288  | K.EAAQIIIK.I        | 1493.951 | 0.00192  | 3 | 1 | 32.1 | 0 |
| P12163_2_S5,14487 | K.EAAQIIIK.I        | 1493.951 | 0.00913  | 2 | 1 | 24.8 | 0 |
| P12163_2_S5,14511 | K.EAAQIIIK.I        | 1493.951 | 0.00144  | 3 | 1 | 28   | 0 |
| P12163_1_F4,21009 | K.FFGNLM*DAGK.L     | 1723.93  | 0.00408  | 3 | 1 | 24.5 | 0 |
| P12163_1_F4,24663 | K.FFGNLM*DAGK.L     | 1723.93  | 0.00306  | 3 | 1 | 30.9 | 0 |
| P12163_2_F1,20282 | K.FFGNLM*DAGK.L     | 1723.93  | 0.01153  | 2 | 1 | 33.8 | 0 |
| P12163_2_F1,20394 | K.FFGNLM*DAGK.L     | 1723.93  | 0.00699  | 3 | 1 | 33.6 | 0 |
| P12163_1_F4,24500 | K.FFGNLM DAGK.L     | 1707.935 | 0.00261  | 2 | 1 | 61.2 | 0 |
| P12163_2_F1,23810 | K.FFGNLM DAGK.L     | 1707.935 | 0.00717  | 3 | 1 | 28   | 0 |
| P12163_1_F2,13738 | K.FNYSSGQPAPESITDK. | 2349.218 | 0.00642  | 3 | 1 | 39.8 | 0 |
| P12163_1_F2,14530 | K.FNYSSGQPAPESITDK. | 2349.218 | 0.00291  | 3 | 1 | 30.3 | 0 |
| P12163_1_F2,15947 | K.FNYSSGQPAPESITDK. | 2349.218 | 0.00297  | 3 | 1 | 44.9 | 0 |
| P12163_1_F2,15972 | K.FNYSSGQPAPESITDK. | 2349.218 | -0.0001  | 2 | 1 | 36.3 | 0 |
| P12163_1_F2,16195 | K.FNYSSGQPAPESITDK. | 2349.218 | 0.00807  | 3 | 1 | 29.9 | 0 |
| P12163_1_F3,14088 | K.FNYSSGQPAPESITDK. | 2349.218 | 0.0066   | 3 | 1 | 38.7 | 0 |
| P12163_1_F3,15054 | K.FNYSSGQPAPESITDK. | 2349.218 | 0.00621  | 3 | 1 | 34.1 | 0 |
| P12163_1_F3,16517 | K.FNYSSGQPAPESITDK. | 2349.218 | 0.00459  | 3 | 1 | 58.9 | 0 |
| P12163_1_F3,16518 | K.FNYSSGQPAPESITDK. | 2349.218 | 0.00404  | 2 | 1 | 36.1 | 0 |
| P12163_1_F5,10923 | K.IAAGNGVGK.I       | 1394.858 | 0.00957  | 3 | 1 | 30.7 | 0 |
| P12163_2_F1,11476 | K.IAAGNGVGK.I       | 1394.858 | 0.00483  | 3 | 1 | 27.4 | 0 |
| P12163_1_F4,19038 | K.IYGNTLSISEIK.M    | 1946.142 | 0.00495  | 3 | 1 | 31.7 | 0 |
| P12163_1_F4,21374 | K.IYGNTLSISEIK.M    | 1946.142 | 0.00321  | 2 | 1 | 73.6 | 0 |
| P12163_1_F4,21524 | K.IYGNTLSISEIK.M    | 1946.142 | 0.00762  | 3 | 1 | 64.2 | 0 |
| P12163_1_F4,23049 | K.IYGNTLSISEIK.M    | 1946.142 | 0.00096  | 3 | 1 | 34.4 | 0 |
| P12163_1_F6,19805 | K.IYGNTLSISEIK.M    | 1946.142 | 0.00027  | 3 | 1 | 46.7 | 0 |
| P12163_1_F9,19774 | K.IYGNTLSISEIK.M    | 1946.142 | 0.00441  | 2 | 1 | 40.9 | 0 |
| P12163_2_F1,20886 | K.IYGNTLSISEIK.M    | 1946.142 | 0.00153  | 2 | 1 | 48.4 | 0 |
| P12163_2_F7,18057 | K.IYGNTLSISEIK.M    | 1946.142 | -0.00075 | 3 | 1 | 27.4 | 0 |
| P12163_2_F9,18344 | K.IYGNTLSISEIK.M    | 1946.142 | 0.00423  | 3 | 1 | 35.7 | 0 |
| P12163_2_F9,18381 | K.IYGNTLSISEIK.M    | 1946.142 | 0.00507  | 2 | 1 | 31.4 | 0 |
| P12163_1_F3,20586 | K.LISVSDVVK.A       | 1567.988 | 0.00528  | 3 | 1 | 42.8 | 0 |
| P12163_1_F3,20595 | K.LISVSDVVK.A       | 1567.988 | 0.00509  | 2 | 1 | 48.6 | 0 |
| P12163_1_F5,19916 | K.LISVSDVVK.A       | 1567.988 | 0.00811  | 2 | 1 | 38.3 | 0 |
| P12163_1_F5,19927 | K.LISVSDVVK.A       | 1567.988 | 0.0048   | 3 | 1 | 31.5 | 0 |
| P12163_1_F6,19310 | K.LISVSDVVK.A       | 1567.988 | 0.00225  | 3 | 1 | 40.1 | 0 |
| P12163_1_F6,19542 | K.LISVSDVVK.A       | 1567.988 | 0.00066  | 3 | 1 | 40.8 | 0 |
| P12163_1_F6,19572 | K.LISVSDVVK.A       | 1567.988 | 0.00197  | 2 | 1 | 35.6 | 0 |
| P12163_1_F6,19932 | K.LISVSDVVK.A       | 1567.988 | 0.00135  | 2 | 1 | 39.7 | 0 |
| P12163_1_F7,19127 | K.LISVSDVVK.A       | 1567.988 | 0.00569  | 2 | 1 | 25   | 0 |
| P12163_1_F7,19131 | K.LISVSDVVK.A       | 1567.988 | 0.00069  | 3 | 1 | 29.3 | 0 |
| P12163_1_F9,19566 | K.LISVSDVVK.A       | 1567.988 | 0.00659  | 2 | 1 | 43.7 | 0 |
| P12163_1_F9,19573 | K.LISVSDVVK.A       | 1567.988 | 0.00894  | 3 | 1 | 31.3 | 0 |
| P12163_1_S10,1849 | K.LISVSDVVK.A       | 1567.988 | 0.00513  | 3 | 1 | 36.1 | 0 |
| P12163_2_F1,20623 | K.LISVSDVVK.A       | 1567.988 | 0.00501  | 3 | 1 | 44   | 0 |
| P12163_2_F1,20689 | K.LISVSDVVK.A       | 1567.988 | 0.00677  | 2 | 1 | 46.4 | 0 |
| P12163_2_F4,18144 | K.LISVSDVVK.A       | 1567.988 | 0.00159  | 3 | 1 | 25.9 | 0 |
| P12163_2_F4,18705 | K.LISVSDVVK.A       | 1567.988 | 0.00711  | 3 | 1 | 36.1 | 0 |
| P12163_2_F4,18716 | K.LISVSDVVK.A       | 1567.988 | 0.00623  | 2 | 1 | 39.1 | 0 |
| P12163_2_F9,17917 | K.LISVSDVVK.A       | 1567.988 | 0.00315  | 3 | 1 | 42.4 | 0 |
| P12163_2_F9,17921 | K.LISVSDVVK.A       | 1567.988 | 0.00809  | 2 | 1 | 41.9 | 0 |
| P12163_2_S5,18130 | K.LISVSDVVK.A       | 1567.988 | 0.00687  | 3 | 1 | 30.3 | 0 |



|                   |                       |          |          |   |   |      |   |
|-------------------|-----------------------|----------|----------|---|---|------|---|
| P12163_1_F3,26813 | K.LPFFEVPTGWK.F       | 1929.109 | 0.00417  | 3 | 1 | 27.1 | 0 |
| P12163_1_F6,16001 | K.LSVCGEESFGTGSDHII   | 2155.039 | 0.00021  | 3 | 1 | 59.5 | 0 |
| P12163_1_F7,13829 | K.LSVCGEESFGTGSDHII   | 2155.039 | 0.00606  | 3 | 1 | 36.4 | 0 |
| P12163_2_F4,14814 | K.LSVCGEESFGTGSDHII   | 2155.039 | 0.00213  | 3 | 1 | 55.8 | 0 |
| P12163_2_S5,15057 | K.LSVCGEESFGTGSDHII   | 2155.039 | 0.00564  | 3 | 1 | 57.3 | 0 |
| P12163_1_F9,11060 | K.NGHLVLGGDGR.Y       | 1398.776 | -0.00345 | 2 | 1 | 37.4 | 0 |
| P12163_1_F9,11062 | K.NGHLVLGGDGR.Y       | 1398.776 | 0.00206  | 3 | 1 | 42.2 | 0 |
| P12163_2_F6,11149 | K.NGHLVLGGDGR.Y       | 1398.776 | 0.00297  | 2 | 1 | 30.7 | 0 |
| P12163_2_F6,11152 | K.NGHLVLGGDGR.Y       | 1398.776 | 0.0026   | 3 | 1 | 23.9 | 0 |
| P12163_2_F7,10309 | K.NGHLVLGGDGR.Y       | 1398.776 | 0.00191  | 2 | 1 | 32.7 | 0 |
| P12163_2_F7,10344 | K.NGHLVLGGDGR.Y       | 1398.776 | 0.00221  | 3 | 1 | 49.9 | 0 |
| P12163_1_S1,14960 | R.FVFTDGSR.I          | 1232.658 | 0.0036   | 3 | 1 | 37.3 | 0 |
| P12163_1_F2,19847 | R.IYIEQFEPDVSK.H      | 2076.147 | 0.00571  | 3 | 1 | 24.1 | 0 |
| P12163_1_F2,20808 | R.IYIEQFEPDVSK.H      | 2076.147 | 0.00619  | 3 | 1 | 45.8 | 0 |
| P12163_1_F3,21445 | R.IYIEQFEPDVSK.H      | 2076.147 | 0.00323  | 2 | 1 | 31.9 | 0 |
| P12163_1_F5,20384 | R.IYIEQFEPDVSK.H      | 2076.147 | 0.00514  | 3 | 1 | 25.8 | 0 |
| P12163_1_F5,20776 | R.IYIEQFEPDVSK.H      | 2076.147 | 0.00409  | 3 | 1 | 25.6 | 0 |
| P12163_1_F7,19876 | R.IYIEQFEPDVSK.H      | 2076.147 | 0.00655  | 3 | 1 | 39.2 | 0 |
| P12163_1_S1,19913 | R.IYIEQFEPDVSK.H      | 2076.147 | 0.00652  | 3 | 1 | 38.1 | 0 |
| P12163_1_S1,19936 | R.IYIEQFEPDVSK.H      | 2076.147 | 0.00551  | 2 | 1 | 35.5 | 0 |
| P12163_2_F4,19358 | R.IYIEQFEPDVSK.H      | 2076.147 | 0.00439  | 3 | 1 | 44.8 | 0 |
| P12163_2_F7,18481 | R.IYIEQFEPDVSK.H      | 2076.147 | 0.00622  | 3 | 1 | 41.9 | 0 |
| P12163_1_F2,8212  | R.LSGTGSAGATVR.I      | 1380.775 | 0.00242  | 2 | 1 | 24.8 | 0 |
| P12163_1_F3,6145  | R.LSGTGSAGATVR.I      | 1380.775 | 0.00301  | 3 | 1 | 32   | 0 |
| P12163_1_F3,6474  | R.LSGTGSAGATVR.I      | 1380.775 | 0.00325  | 3 | 1 | 30.8 | 0 |
| P12163_1_F3,6699  | R.LSGTGSAGATVR.I      | 1380.775 | 0.00265  | 3 | 1 | 34.5 | 0 |
| P12163_1_F3,7049  | R.LSGTGSAGATVR.I      | 1380.775 | 0.00058  | 3 | 1 | 38.3 | 0 |
| P12163_1_F3,8343  | R.LSGTGSAGATVR.I      | 1380.775 | 0.0025   | 3 | 1 | 56.2 | 0 |
| P12163_1_F3,8794  | R.LSGTGSAGATVR.I      | 1380.775 | 0.00241  | 3 | 1 | 63.7 | 0 |
| P12163_1_F3,9038  | R.LSGTGSAGATVR.I      | 1380.775 | 0.00244  | 3 | 1 | 58.6 | 0 |
| P12163_1_F3,11043 | R.LSGTGSAGATVR.I      | 1380.775 | 0.00466  | 2 | 1 | 51.5 | 0 |
| P12163_2_F1,7747  | R.LSGTGSAGATVR.I      | 1380.775 | 0.00415  | 3 | 1 | 34.9 | 0 |
| P12163_2_F1,7995  | R.LSGTGSAGATVR.I      | 1380.775 | 0.00566  | 2 | 1 | 26.5 | 0 |
| P12163_2_F1,8043  | R.LSGTGSAGATVR.I      | 1380.775 | 0.00286  | 3 | 1 | 37   | 0 |
| P12163_2_F1,10490 | R.LSGTGSAGATVR.I      | 1380.775 | 0.00372  | 2 | 1 | 48.6 | 0 |
| P12163_2_F4,10054 | R.LSGTGSAGATVR.I      | 1380.775 | 0.00374  | 2 | 1 | 31.8 | 0 |
| P12163_2_F8_12070 | R.LSGTGSAGATVR.I      | 1380.775 | 0.00454  | 2 | 1 | 25.4 | 0 |
| P12163_2_F1,14714 | R.NMILGK.G ! R.NMILGF | 1283.797 | 0.00506  | 3 | 1 | 24.2 | 0 |
| P12163_1_F2,9504  | R.SMPTSGALDR.V        | 1338.699 | 0.00217  | 3 | 1 | 35.4 | 0 |
| P12163_1_F2,11437 | R.SMPTSGALDR.V        | 1338.699 | 0.00178  | 3 | 1 | 33.5 | 0 |
| P12163_1_F2,11976 | R.SMPTSGALDR.V        | 1338.699 | 0.00398  | 2 | 1 | 26.8 | 0 |
| P12163_1_F3,10925 | R.YDYEECESEGANK.M     | 2202.012 | 0.00593  | 3 | 1 | 29.4 | 0 |
| P12163_1_F3,12093 | R.YDYEECESEGANK.M     | 2202.012 | 0.00668  | 3 | 1 | 43.2 | 0 |
| P12163_1_F3,12108 | R.YDYEECESEGANK.M     | 2202.012 | 0.00688  | 2 | 1 | 56.4 | 0 |
| P12163_1_F4,12520 | R.YDYEECESEGANK.M     | 2202.012 | 0.00346  | 2 | 1 | 61.5 | 0 |
| P12163_1_F4,12541 | R.YDYEECESEGANK.M     | 2202.012 | 0.00653  | 3 | 1 | 49.4 | 0 |
| P12163_1_F6,12050 | R.YDYEECESEGANK.M     | 2202.012 | 0.00194  | 3 | 1 | 25.4 | 0 |
| P12163_1_F9,11959 | R.YDYEECESEGANK.M     | 2202.012 | 0.00593  | 3 | 1 | 43.3 | 0 |
| P12163_1_S10,1279 | R.YDYEECESEGANK.M     | 2202.012 | 0.00611  | 3 | 1 | 35.3 | 0 |
| P12163_2_F9,11963 | R.YDYEECESEGANK.M     | 2202.012 | 0.00581  | 3 | 1 | 57.7 | 0 |
| P12163_2_S3,10831 | R.YDYEECESEGANK.M     | 2202.012 | 0.00419  | 3 | 1 | 47.1 | 0 |

|                    |                      |          |          |   |   |      |   |
|--------------------|----------------------|----------|----------|---|---|------|---|
| P12163_1_F4,17059  | K.AQINATLNQYK.N      | 1872.08  | 0.0071   | 2 | 1 | 52.5 | 0 |
| P12163_1_F5,15712  | K.AQINATLNQYK.N      | 1872.08  | 0.0068   | 3 | 1 | 60   | 0 |
| P12163_1_F7,14873  | K.AQINATLNQYK.N      | 1872.08  | 0.00224  | 3 | 1 | 29.5 | 0 |
| P12163_1_F9,15989  | K.AQINATLNQYK.N      | 1872.08  | 0.00785  | 3 | 1 | 48.5 | 0 |
| P12163_1_F9,16007  | K.AQINATLNQYK.N      | 1872.08  | 0.00546  | 2 | 1 | 63.6 | 0 |
| P12163_1_S10,15910 | K.AQINATLNQYK.N      | 1872.08  | 0.01064  | 3 | 1 | 25.2 | 0 |
| P12163_2_F1,16139  | K.AQINATLNQYK.N      | 1872.08  | 0.00144  | 2 | 1 | 63.5 | 0 |
| P12163_2_F1,16197  | K.AQINATLNQYK.N      | 1872.08  | 0.0041   | 3 | 1 | 58.7 | 0 |
| P12163_2_F2,16496  | K.AQINATLNQYK.N      | 1872.08  | 0.00851  | 3 | 1 | 47.4 | 0 |
| P12163_2_F2,16505  | K.AQINATLNQYK.N      | 1872.08  | 0.00628  | 2 | 1 | 53.9 | 0 |
| P12163_2_F8_12070  | K.AQINATLNQYK.N      | 1872.08  | 0.0059   | 3 | 1 | 34.6 | 0 |
| P12163_2_F9,15215  | K.AQINATLNQYK.N      | 1872.08  | 0.00539  | 3 | 1 | 53   | 0 |
| P12163_2_F9,14064  | K.AYNDEDLIR.I        | 1412.732 | 0.00245  | 2 | 1 | 29.5 | 0 |
| P12163_1_F4,9506   | K.DTSGDYEK.M         | 1522.785 | 0.00877  | 2 | 1 | 41.4 | 0 |
| P12163_1_F4,9522   | K.DTSGDYEK.M         | 1522.785 | 0.01368  | 3 | 1 | 24.9 | 0 |
| P12163_2_F4,7791   | K.DTSGDYEK.M         | 1522.785 | -0.00051 | 2 | 1 | 29.1 | 0 |
| P12163_2_F8_12070  | K.DTSGDYEK.M         | 1522.785 | 0.00611  | 2 | 1 | 38.9 | 0 |
| P12163_1_F2,11360  | K.ELTNDFER.V         | 1327.68  | 0.00423  | 3 | 1 | 24.2 | 0 |
| P12163_1_F3,11645  | K.ELTNDFER.V         | 1327.68  | 0.00474  | 3 | 1 | 24.7 | 0 |
| P12163_1_F3,14856  | K.ELTNDFER.V         | 1327.68  | 0.00512  | 2 | 1 | 23.9 | 0 |
| P12163_1_S1,24637  | K.LLLPLVTAYR.Y       | 1462.93  | 0.00158  | 3 | 1 | 32.3 | 0 |
| P12163_1_S1,24812  | K.LLLPLVTAYR.Y       | 1462.93  | 0.00278  | 3 | 1 | 50.5 | 0 |
| P12163_1_S1,24824  | K.LLLPLVTAYR.Y       | 1462.93  | 0.00393  | 2 | 1 | 27.2 | 0 |
| P12163_1_S1,16496  | K.NVYGNDIDQDLEADPI   | 2414.23  | 0.01215  | 3 | 1 | 32.8 | 0 |
| P12163_1_F9,4704   | K.QAYHAR.Y ! R.QAYH/ | 1049.579 | 0.00037  | 3 | 1 | 29.8 | 0 |
| P12163_2_S3,5067   | K.QAYHAR.Y ! R.QAYH/ | 1049.579 | 0.0001   | 3 | 1 | 22.2 | 0 |
| P12163_1_F2,5742   | K.QGTDEGALTR.V       | 1351.712 | 0.00447  | 4 | 1 | 27.6 | 0 |
| P12163_1_F2,6715   | K.QGTDEGALTR.V       | 1351.712 | 0.00361  | 3 | 1 | 38.5 | 0 |
| P12163_1_F2,7385   | K.QGTDEGALTR.V       | 1351.712 | 0.00373  | 3 | 1 | 40.5 | 0 |
| P12163_1_F2,7502   | K.QGTDEGALTR.V       | 1351.712 | 0.00518  | 2 | 1 | 31.8 | 0 |
| P12163_1_F2,8654   | K.QGTDEGALTR.V       | 1351.712 | 0.00588  | 2 | 1 | 28.1 | 0 |
| P12163_1_S1,7195   | K.QGTDEGALTR.V       | 1351.712 | 0.00325  | 3 | 1 | 46   | 0 |
| P12163_1_S1,7815   | K.QGTDEGALTR.V       | 1351.712 | 0.00505  | 3 | 1 | 39   | 0 |
| P12163_2_F6,16556  | K.SLDKELTNDFER.V     | 2075.123 | 0.004    | 2 | 1 | 32.5 | 0 |
| P12163_1_F6,15523  | K.SLEEDVGYHTNGDFR.   | 2042.972 | 0.00471  | 3 | 1 | 27.1 | 0 |
| P12163_1_F7,11916  | K.SLEEDVGYHTNGDFR.   | 2042.972 | 0.00414  | 3 | 1 | 36.7 | 0 |
| P12163_1_F7,14630  | K.SLEEDVGYHTNGDFR.   | 2042.972 | -0.00125 | 2 | 1 | 34.2 | 0 |
| P12163_1_F8,15307  | K.SLEEDVGYHTNGDFR.   | 2042.972 | 0.00145  | 2 | 1 | 30   | 0 |
| P12163_2_F6,14811  | K.SLEEDVGYHTNGDFR.   | 2042.972 | -0.00066 | 3 | 1 | 31.7 | 0 |
| P12163_2_F9,14788  | K.SLEEDVGYHTNGDFR.   | 2042.972 | 0.00321  | 3 | 1 | 23.9 | 0 |
| P12163_1_F5,12202  | R.AEVDLK.V           | 1282.783 | 0.01089  | 3 | 1 | 26.1 | 0 |
| P12163_2_F1,12605  | R.AEVDLK.V           | 1282.783 | 0.00426  | 3 | 1 | 27.6 | 0 |
| P12163_2_S5,11418  | R.AEVDLK.V           | 1282.783 | 0.00168  | 3 | 1 | 25.1 | 0 |
| P12163_1_F4,15071  | R.DAFLANEATK.R       | 1687.947 | 0.0084   | 3 | 1 | 41.4 | 0 |
| P12163_1_F4,15148  | R.DAFLANEATK.R       | 1687.947 | 0.00614  | 2 | 1 | 34   | 0 |
| P12163_1_F4,16585  | R.DAFLANEATK.R       | 1687.947 | 0.00678  | 3 | 1 | 28.2 | 0 |
| P12163_1_F4,17072  | R.DAFLANEATK.R       | 1687.947 | 0.01068  | 2 | 1 | 40.7 | 0 |
| P12163_1_F5,15350  | R.DAFLANEATK.R       | 1687.947 | 0.00178  | 2 | 1 | 44.1 | 0 |
| P12163_1_F5,15407  | R.DAFLANEATK.R       | 1687.947 | 0.00039  | 3 | 1 | 37.9 | 0 |
| P12163_1_F7,14391  | R.DAFLANEATK.R       | 1687.947 | 0.00885  | 3 | 1 | 33.9 | 0 |
| P12163_1_F7,14663  | R.DAFLANEATK.R       | 1687.947 | -0.00078 | 2 | 1 | 43.3 | 0 |

|                   |                       |          |          |   |   |      |   |
|-------------------|-----------------------|----------|----------|---|---|------|---|
| P12163_1_F7,15179 | R.DAFLANEATK.R        | 1687.947 | 0.00972  | 3 | 1 | 22   | 0 |
| P12163_2_F1,13925 | R.DAFLANEATK.R        | 1687.947 | 0.00306  | 3 | 1 | 30.3 | 0 |
| P12163_2_F1,16133 | R.DAFLANEATK.R        | 1687.947 | 0.00138  | 2 | 1 | 41   | 0 |
| P12163_2_F1,16191 | R.DAFLANEATK.R        | 1687.947 | 0.0018   | 3 | 1 | 23.7 | 0 |
| P12163_2_F2,321   | R.DAFLANEATK.R        | 1687.947 | 0.00276  | 3 | 1 | 37.7 | 0 |
| P12163_2_F2,965   | R.DAFLANEATK.R        | 1687.947 | 0.00369  | 3 | 1 | 38.6 | 0 |
| P12163_2_F4,14069 | R.DAFLANEATK.R        | 1687.947 | -0.00246 | 2 | 1 | 33.1 | 0 |
| P12163_2_F4,14307 | R.DAFLANEATK.R        | 1687.947 | -0.00574 | 2 | 1 | 34.1 | 0 |
| P12163_2_F4,14336 | R.DAFLANEATK.R        | 1687.947 | 0.00915  | 3 | 1 | 38.4 | 0 |
| P12163_1_F2,23040 | R.M*LLALIGHGDA.- ! K. | 1430.798 | 0.0033   | 2 | 1 | 25.3 | 0 |
| P12163_1_F2,25508 | R.M*LLALIGHGDA.- ! K. | 1430.798 | 0.00397  | 2 | 1 | 25.6 | 0 |
| P12163_1_S1,22064 | R.M*LLALIGHGDA.- ! K. | 1430.798 | 0.00439  | 3 | 1 | 28.1 | 0 |
| P12163_1_S1,25174 | R.MLLALIGHGDA.- ! K.M | 1414.803 | 0.00479  | 2 | 1 | 47.2 | 0 |
| P12163_1_F3,18956 | R.QTYADTYGEDLLK.S     | 2125.127 | 0.00876  | 3 | 1 | 67.7 | 0 |
| P12163_1_F3,18957 | R.QTYADTYGEDLLK.S     | 2125.127 | 0.00518  | 2 | 1 | 67.3 | 0 |
| P12163_1_F3,19041 | R.QTYADTYGEDLLK.S     | 2125.127 | -0.04026 | 3 | 1 | 30.2 | 0 |
| P12163_1_F9,18157 | R.QTYADTYGEDLLK.S     | 2125.127 | 0.00837  | 3 | 1 | 44.9 | 0 |
| P12163_2_F6,18017 | R.QTYADTYGEDLLK.S     | 2125.127 | 0.00339  | 3 | 1 | 28   | 0 |
| P12163_2_F8_12070 | R.RNSVPLDR.A          | 1260.733 | 0.0014   | 3 | 1 | 39.7 | 0 |
| P12163_1_F2,17663 | R.YEGDEVNITLAK.S      | 1960.085 | 0.0049   | 2 | 1 | 26.3 | 0 |
| P12163_1_F3,18168 | R.YEGDEVNITLAK.S      | 1960.085 | 0.01248  | 3 | 1 | 37.2 | 0 |
| P12163_1_F6,17354 | R.YEGDEVNITLAK.S      | 1960.085 | 0.00447  | 3 | 1 | 27.4 | 0 |
| P12163_1_F6,17393 | R.YEGDEVNITLAK.S      | 1960.085 | 0.00056  | 2 | 1 | 45.3 | 0 |
| P12163_1_F3,15808 | K.ASFLSEYR.F          | 1276.684 | 0.003    | 3 | 1 | 31.9 | 0 |
| P12163_1_F5,10131 | K.EFGENAK.V           | 1402.779 | 0.00329  | 3 | 1 | 41.3 | 0 |
| P12163_2_F2,10960 | K.EFGENAK.V           | 1402.779 | -0.00079 | 3 | 1 | 34.4 | 0 |
| P12163_2_S5,10199 | K.EFGENAK.V           | 1402.779 | 0.00296  | 3 | 1 | 22.8 | 0 |
| P12163_1_F5,22536 | K.IVIIPDHYIFTSDER.A   | 2122.149 | 0.00172  | 3 | 1 | 28.1 | 0 |
| P12163_1_F6,20900 | K.IVIIPDHYIFTSDER.A   | 2122.149 | 0.0055   | 3 | 1 | 34.1 | 0 |
| P12163_1_F6,22118 | K.IVIIPDHYIFTSDER.A   | 2122.149 | 0.00433  | 3 | 1 | 29.2 | 0 |
| P12163_1_F6,22149 | K.IVIIPDHYIFTSDER.A   | 2122.149 | 0.00555  | 2 | 1 | 36.7 | 0 |
| P12163_1_F6,22343 | K.IVIIPDHYIFTSDER.A   | 2122.149 | -0.00605 | 3 | 1 | 22.5 | 0 |
| P12163_1_F7,21427 | K.IVIIPDHYIFTSDER.A   | 2122.149 | -0.00047 | 3 | 1 | 31.8 | 0 |
| P12163_1_S10,2039 | K.IVIIPDHYIFTSDER.A   | 2122.149 | -0.00056 | 4 | 1 | 24.8 | 0 |
| P12163_1_S10,2049 | K.IVIIPDHYIFTSDER.A   | 2122.149 | 0.00328  | 3 | 1 | 27.3 | 0 |
| P12163_2_F10,1821 | K.IVIIPDHYIFTSDER.A   | 2122.149 | 0.00541  | 3 | 1 | 40.3 | 0 |
| P12163_2_F10,1888 | K.IVIIPDHYIFTSDER.A   | 2122.149 | 0.00397  | 3 | 1 | 27.7 | 0 |
| P12163_2_F10,1935 | K.IVIIPDHYIFTSDER.A   | 2122.149 | 0.00301  | 3 | 1 | 34.6 | 0 |
| P12163_2_F10,1939 | K.IVIIPDHYIFTSDER.A   | 2122.149 | 0.00132  | 4 | 1 | 32.4 | 0 |
| P12163_2_F10,1939 | K.IVIIPDHYIFTSDER.A   | 2122.149 | -0.00073 | 2 | 1 | 46.3 | 0 |
| P12163_2_F10,1953 | K.IVIIPDHYIFTSDER.A   | 2122.149 | 0.00322  | 3 | 1 | 48   | 0 |
| P12163_2_F10,1970 | K.IVIIPDHYIFTSDER.A   | 2122.149 | 0.00574  | 3 | 1 | 34.4 | 0 |
| P12163_2_F4,20796 | K.IVIIPDHYIFTSDER.A   | 2122.149 | 0.00313  | 3 | 1 | 31.8 | 0 |
| P12163_2_F8_12070 | K.IVIIPDHYIFTSDER.A   | 2122.149 | -0.00038 | 3 | 1 | 39.6 | 0 |
| P12163_2_S5,20488 | K.IVIIPDHYIFTSDER.A   | 2122.149 | 0.00439  | 3 | 1 | 30.2 | 0 |
| P12163_2_F4,13678 | K.LEPLVAKPHSPDNR.A    | 2181.26  | 0.00435  | 4 | 1 | 23.3 | 0 |
| P12163_1_F5,12861 | K.NAMTLTEK.I          | 1515.866 | 0.00758  | 3 | 1 | 33.9 | 0 |
| P12163_2_F1,13236 | K.NAMTLTEK.I          | 1515.866 | 0.00058  | 2 | 1 | 28.5 | 0 |
| P12163_2_F2,13677 | K.NAMTLTEK.I          | 1515.866 | 0.01078  | 2 | 1 | 29   | 0 |
| P12163_2_F2,13687 | K.NAMTLTEK.I          | 1515.866 | 0.00839  | 3 | 1 | 28.3 | 0 |
| P12163_1_F3,15129 | K.NGVVPADGTTFK.Y      | 1814.027 | 0.00412  | 2 | 1 | 36.4 | 0 |

|                   |                    |          |          |   |   |      |   |
|-------------------|--------------------|----------|----------|---|---|------|---|
| P12163_1_F3,15157 | K.NGVVPADGTTFK.Y   | 1814.027 | 0.00215  | 3 | 1 | 42.1 | 0 |
| P12163_1_F2,13788 | K.SMEFVGTTVER.L    | 1559.804 | -0.00165 | 3 | 1 | 37.3 | 0 |
| P12163_1_S1,12793 | K.SMEFVGTTVER.L    | 1559.804 | 0.00267  | 3 | 1 | 22.5 | 0 |
| P12163_1_S1,13287 | K.SMEFVGTTVER.L    | 1559.804 | -0.00087 | 3 | 1 | 37.7 | 0 |
| P12163_1_S1,13298 | K.SMEFVGTTVER.L    | 1559.804 | 0.00282  | 3 | 1 | 36.6 | 0 |
| P12163_1_F4,18913 | K.TEDFLAAAK.V      | 1573.905 | 0.00894  | 2 | 1 | 33.7 | 0 |
| P12163_1_F2,15003 | K.TSLPYEPVYSDEK.A  | 2136.132 | 0.00836  | 3 | 1 | 23   | 0 |
| P12163_1_F2,16794 | K.TSLPYEPVYSDEK.A  | 2136.132 | 0.00291  | 2 | 1 | 53.4 | 0 |
| P12163_1_F3,17317 | K.TSLPYEPVYSDEK.A  | 2136.132 | 0.01007  | 3 | 1 | 49.8 | 0 |
| P12163_2_F6,16367 | K.TSLPYEPVYSDEK.A  | 2136.132 | 0.00455  | 2 | 1 | 44.3 | 0 |
| P12163_2_F6,16376 | K.TSLPYEPVYSDEK.A  | 2136.132 | -0.00595 | 3 | 1 | 39.6 | 0 |
| P12163_1_F5,16431 | K.VFLASGK.K        | 1329.835 | 0.00566  | 3 | 1 | 23.1 | 0 |
| P12163_2_F2,17222 | K.VFLASGK.K        | 1329.835 | 0.00521  | 3 | 1 | 33.8 | 0 |
| P12163_2_S5,15125 | K.VFLASGK.K        | 1329.835 | -0.00826 | 3 | 1 | 22   | 0 |
| P12163_1_F3,21035 | K.VPTFLVPATQK.V    | 1809.109 | 0.00345  | 3 | 1 | 40.1 | 0 |
| P12163_1_F3,21086 | K.VPTFLVPATQK.V    | 1809.109 | 0.00659  | 2 | 1 | 38.8 | 0 |
| P12163_1_F4,13829 | R.DFCM*EQNIK.Y     | 1808.913 | -0.00212 | 2 | 1 | 31.6 | 0 |
| P12163_1_F4,16782 | R.DFCM*EQNIK.Y     | 1808.913 | 0.00828  | 2 | 1 | 28   | 0 |
| P12163_1_F4,16814 | R.DFCM*EQNIK.Y     | 1808.913 | 0.01046  | 3 | 1 | 31.6 | 0 |
| P12163_1_F5,12513 | R.DFCM*EQNIK.Y     | 1808.913 | 0.00278  | 2 | 1 | 47.3 | 0 |
| P12163_1_F4,16779 | R.DFCMEQNIK.Y      | 1792.918 | 0.00845  | 3 | 1 | 34.1 | 0 |
| P12163_1_F4,16789 | R.DFCMEQNIK.Y      | 1792.918 | 0.00648  | 2 | 1 | 27.2 | 0 |
| P12163_1_F5,15468 | R.DFCMEQNIK.Y      | 1792.918 | 0.00796  | 2 | 1 | 42.9 | 0 |
| P12163_2_F1,15848 | R.DFCMEQNIK.Y      | 1792.918 | 0.004    | 2 | 1 | 55.7 | 0 |
| P12163_1_S1,21721 | R.FVLDGEM*PDYLLAK. | 2235.219 | 0.00612  | 2 | 1 | 36.9 | 0 |
| P12163_1_S1,21752 | R.FVLDGEM*PDYLLAK. | 2235.219 | 0.00763  | 3 | 1 | 54.8 | 0 |
| P12163_1_S1,23770 | R.FVLDGEMPDYLLAK.D | 2219.224 | 0.00467  | 3 | 1 | 27.9 | 0 |
| P12163_1_S1,12134 | R.M*NEPMVCVSTTNR.N | 1858.876 | 0.0025   | 2 | 1 | 24.1 | 0 |
| P12163_1_S1,12339 | R.MNEPM*VCVSTTNR.N | 1858.876 | 0.00366  | 3 | 1 | 40.5 | 0 |
| P12163_1_S1,13057 | R.MNEPMVCVSTTNR.N  | 1842.881 | -0.00288 | 3 | 1 | 34.7 | 0 |
| P12163_1_S1,14362 | R.MNEPMVCVSTTNR.N  | 1842.881 | 0.00666  | 2 | 1 | 37   | 0 |
| P12163_1_F3,16884 | R.MTLCNM*VVEAGGK.I | 2034.064 | 0.00352  | 3 | 1 | 35   | 0 |
| P12163_1_F3,20511 | R.MTLCNMVVEAGGK.N  | 2018.069 | 0.01378  | 3 | 1 | 46.5 | 0 |
| P12163_1_F4,21200 | R.MTLCNMVVEAGGK.N  | 2018.069 | 0.00928  | 3 | 1 | 43.1 | 0 |
| P12163_1_F4,14346 | R.VYIGSCTGGK.T     | 1649.914 | 0.01945  | 2 | 1 | 28.3 | 0 |
| P12163_1_F4,14403 | R.VYIGSCTGGK.T     | 1649.914 | 0.01542  | 3 | 1 | 37   | 0 |
| P12163_1_F5,12908 | R.VYIGSCTGGK.T     | 1649.914 | 0.00907  | 2 | 1 | 37.2 | 0 |
| P12163_1_F5,12927 | R.VYIGSCTGGK.T     | 1649.914 | 0.0066   | 3 | 1 | 33.6 | 0 |
| P12163_1_F9,13767 | R.VYIGSCTGGK.T     | 1649.914 | 0.00891  | 2 | 1 | 35.1 | 0 |
| P12163_1_S10,1373 | R.VYIGSCTGGK.T     | 1649.914 | 0.00954  | 3 | 1 | 34   | 0 |
| P12163_2_F1,13324 | R.VYIGSCTGGK.T     | 1649.914 | 0.00515  | 2 | 1 | 30.1 | 0 |
| P12163_2_F10,1281 | R.VYIGSCTGGK.T     | 1649.914 | 0.00591  | 3 | 1 | 23.6 | 0 |
| P12163_2_F8,12070 | R.VYIGSCTGGK.T     | 1649.914 | 0.00951  | 3 | 1 | 22.1 | 0 |
| P12163_2_S5,12379 | R.VYIGSCTGGK.T     | 1649.914 | -0.00342 | 3 | 1 | 32.6 | 0 |
| P12163_1_F4,16290 | K.AEVVSLDEK.E      | 1597.926 | 0.00563  | 2 | 1 | 25.6 | 0 |
| P12163_1_F4,16459 | K.AEVVSLDEK.E      | 1597.926 | 0.00677  | 3 | 1 | 42.1 | 0 |
| P12163_1_F7,14078 | K.AEVVSLDEK.E      | 1597.926 | 0.00386  | 3 | 1 | 22.2 | 0 |
| P12163_1_F7,14082 | K.AEVVSLDEK.E      | 1597.926 | 0.00937  | 2 | 1 | 33.3 | 0 |
| P12163_1_F7,14348 | K.AEVVSLDEK.E      | 1597.926 | 0.00475  | 2 | 1 | 29.9 | 0 |
| P12163_1_F7,14393 | K.AEVVSLDEK.E      | 1597.926 | 0.00365  | 3 | 1 | 31.6 | 0 |
| P12163_2_F1,15459 | K.AEVVSLDEK.E      | 1597.926 | 0.00703  | 2 | 1 | 32.6 | 0 |

|                   |                     |          |          |   |   |      |   |
|-------------------|---------------------|----------|----------|---|---|------|---|
| P12163_2_F1,15564 | K.AEVVSLDEK.E       | 1597.926 | 0.0059   | 3 | 1 | 38.7 | 0 |
| P12163_2_F4,13728 | K.AEVVSLDEK.E       | 1597.926 | -0.00076 | 3 | 1 | 32.6 | 0 |
| P12163_2_F4,14051 | K.AEVVSLDEK.E       | 1597.926 | 0.00047  | 2 | 1 | 35.8 | 0 |
| P12163_1_F3,22462 | K.ALDDTLYAFCK.S     | 1925.03  | 0.00638  | 2 | 1 | 70.8 | 0 |
| P12163_1_F3,22482 | K.ALDDTLYAFCK.S     | 1925.03  | 0.00578  | 3 | 1 | 52.8 | 0 |
| P12163_1_F6,21257 | K.ALDDTLYAFCK.S     | 1925.03  | 0.00254  | 3 | 1 | 35.4 | 0 |
| P12163_2_F7,19310 | K.ALDDTLYAFCK.S     | 1925.03  | 0.00932  | 3 | 1 | 41.5 | 0 |
| P12163_2_F7,19311 | K.ALDDTLYAFCK.S     | 1925.03  | 0.00112  | 2 | 1 | 53.3 | 0 |
| P12163_1_S1,16537 | K.GPLGNCVFTGDYDR.K  | 1874.901 | 0.00233  | 3 | 1 | 42   | 0 |
| P12163_2_F6,16453 | K.GPLGNCVFTGDYDR.K  | 1874.901 | 0.00287  | 3 | 1 | 24.4 | 0 |
| P12163_2_F6,17742 | K.GPLGNCVFTGDYDR.K  | 1874.901 | 0.00026  | 2 | 1 | 60.1 | 0 |
| P12163_1_F8,20781 | K.KVLVVTNNTVAPLYL   | 2799.711 | 0.00785  | 3 | 1 | 62.8 | 0 |
| P12163_1_F4,15188 | K.SIMAVDK.K         | 1371.813 | 0.00313  | 2 | 1 | 32.2 | 0 |
| P12163_1_F5,13787 | K.SIMAVDK.K         | 1371.813 | 0.00333  | 3 | 1 | 26   | 0 |
| P12163_1_F5,13798 | K.SIMAVDK.K         | 1371.813 | 0.00671  | 2 | 1 | 32.4 | 0 |
| P12163_2_F1,14120 | K.SIMAVDK.K         | 1371.813 | 0.00617  | 2 | 1 | 32.2 | 0 |
| P12163_2_F1,14124 | K.SIMAVDK.K         | 1371.813 | 0.0054   | 3 | 1 | 33.1 | 0 |
| P12163_1_F8,5283  | K.TGINHR.L          | 1001.579 | 0.00116  | 3 | 1 | 23.2 | 0 |
| P12163_1_S10,5756 | K.TGINHR.L          | 1001.579 | 0.00116  | 3 | 1 | 27   | 0 |
| P12163_1_S10,6599 | K.TGINHR.L          | 1001.579 | 0.00218  | 3 | 1 | 34   | 0 |
| P12163_2_F10,6008 | K.TGINHR.L          | 1001.579 | 0.00272  | 3 | 1 | 29.7 | 0 |
| P12163_2_F8_12070 | K.TGINHR.L          | 1001.579 | 0.00305  | 3 | 1 | 26.7 | 0 |
| P12163_1_S1,13892 | K.VADGLLR.L         | 1047.646 | 0.00206  | 2 | 1 | 26.9 | 0 |
| P12163_1_S1,19362 | K.VLVVTNNTVAPLYLD   | 2367.411 | 0.0044   | 4 | 1 | 33.6 | 0 |
| P12163_1_S1,19394 | K.VLVVTNNTVAPLYLD   | 2367.411 | 0.00939  | 3 | 1 | 35.3 | 0 |
| P12163_1_S1,21698 | K.VLVVTNNTVAPLYLD   | 2367.411 | 0.007    | 4 | 1 | 34.6 | 0 |
| P12163_1_F2,9776  | K.VTDALTR.G         | 1079.636 | 0.00588  | 3 | 1 | 24.7 | 0 |
| P12163_1_F2,11496 | K.VTDALTR.G         | 1079.636 | 0.00171  | 3 | 1 | 23.3 | 0 |
| P12163_1_F3,11994 | K.VTDALTR.G         | 1079.636 | 0.00342  | 3 | 1 | 35.2 | 0 |
| P12163_2_F6,19075 | R.DAEFFFEWQEONM*HK  | 2463.186 | 0.00731  | 3 | 1 | 24.7 | 0 |
| P12163_1_F8,19446 | R.DAEFFFEWQEONMHK.I | 2447.191 | 0.00683  | 3 | 1 | 58.1 | 0 |
| P12163_2_F6,19052 | R.DAEFFFEWQEONMHK.I | 2447.191 | 0.00455  | 3 | 1 | 43.4 | 0 |
| P12163_1_F2,18890 | R.DPSAFAYA.IK.R     | 1690.962 | 0.00113  | 3 | 1 | 43.8 | 0 |
| P12163_1_F3,19557 | R.DPSAFAYA.IK.R     | 1690.962 | 0.00431  | 3 | 1 | 25   | 0 |
| P12163_1_F3,21807 | R.ELASGLAEVIK.Y     | 1738.057 | 0.00541  | 3 | 1 | 44.9 | 0 |
| P12163_1_F3,21826 | R.ELASGLAEVIK.Y     | 1738.057 | 0.00252  | 2 | 1 | 52.7 | 0 |
| P12163_1_F3,22021 | R.ELASGLAEVIK.Y     | 1738.057 | 0.01039  | 3 | 1 | 52.3 | 0 |
| P12163_1_F3,22061 | R.ELASGLAEVIK.Y     | 1738.057 | 0.01122  | 2 | 1 | 72.3 | 0 |
| P12163_1_F4,22565 | R.ELASGLAEVIK.Y     | 1738.057 | 0.00487  | 3 | 1 | 31.1 | 0 |
| P12163_1_F4,22580 | R.ELASGLAEVIK.Y     | 1738.057 | 0.00638  | 2 | 1 | 29   | 0 |
| P12163_2_F1,22088 | R.ELASGLAEVIK.Y     | 1738.057 | 0.00619  | 3 | 1 | 37.4 | 0 |
| P12163_2_F4,19790 | R.ELASGLAEVIK.Y     | 1738.057 | 0.00187  | 3 | 1 | 28.3 | 0 |
| P12163_1_F2,19417 | R.GNPNVSVENVILPDGE  | 2666.425 | 0.00244  | 3 | 1 | 50   | 0 |
| P12163_1_F8,19604 | R.GNPNVSVENVILPDGE  | 2666.425 | 0.0064   | 3 | 1 | 39.7 | 0 |
| P12163_1_S1,18339 | R.GNPNVSVENVILPDGE  | 2666.425 | 0.00259  | 3 | 1 | 54.3 | 0 |
| P12163_1_S1,18379 | R.GNPNVSVENVILPDGE  | 2666.425 | 0.00736  | 4 | 1 | 57   | 0 |
| P12163_1_S1,18538 | R.GNPNVSVENVILPDGE  | 2666.425 | 0.0083   | 2 | 1 | 44.7 | 0 |
| P12163_1_S1,18658 | R.GNPNVSVENVILPDGE  | 2666.425 | 0.01096  | 3 | 1 | 50.1 | 0 |
| P12163_1_F3,23897 | R.LGWIDDSIVK.R      | 1754.031 | 0.0057   | 2 | 1 | 40   | 0 |
| P12163_1_F4,24649 | R.LGWIDDSIVK.R      | 1754.031 | 0.00366  | 2 | 1 | 48.2 | 0 |
| P12163_1_F4,24654 | R.LGWIDDSIVK.R      | 1754.031 | 0.00305  | 3 | 1 | 40.9 | 0 |

|                   |                     |          |          |   |   |      |   |
|-------------------|---------------------|----------|----------|---|---|------|---|
| P12163_1_F6,23228 | R.SYPIYIGSGLLDHPDLL | 2737.538 | 0.00006  | 3 | 1 | 53.7 | 0 |
| P12163_1_F9,14256 | R.VHNILQQAK.L       | 1659.016 | 0.00541  | 3 | 1 | 52   | 0 |
| P12163_1_F9,14267 | R.VHNILQQAK.L       | 1659.016 | 0.00557  | 2 | 1 | 37.7 | 0 |
| P12163_1_S10,1442 | R.VHNILQQAK.L       | 1659.016 | 0.00856  | 3 | 1 | 30.1 | 0 |
| P12163_2_F9,13424 | R.VHNILQQAK.L       | 1659.016 | 0.00975  | 2 | 1 | 37   | 0 |
| P12163_2_F9,13430 | R.VHNILQQAK.L       | 1659.016 | 0.00502  | 3 | 1 | 56.6 | 0 |
| P12163_2_F1,13282 | K.AEEIYEK.T         | 1489.836 | 0.00142  | 2 | 1 | 25.3 | 0 |
| P12163_2_F1,13294 | K.AEEIYEK.T         | 1489.836 | 0.00012  | 3 | 1 | 22.4 | 0 |
| P12163_2_F8_12070 | K.AEEIYEK.T         | 1489.836 | 0.00998  | 2 | 1 | 26   | 0 |
| P12163_2_F8_12070 | K.AEEIYEK.T         | 1489.836 | 0.00576  | 3 | 1 | 32.5 | 0 |
| P12163_1_F8,16970 | K.DIIMVDHMK.K       | 1709.954 | 0.00509  | 3 | 1 | 38.2 | 0 |
| P12163_1_F8,16985 | K.DIIMVDHMK.K       | 1709.954 | 0.01026  | 2 | 1 | 34.5 | 0 |
| P12163_2_F6,16375 | K.DIIMVDHMK.K       | 1709.954 | -0.00475 | 3 | 1 | 38.5 | 0 |
| P12163_1_S1,13641 | K.DLSQADFGR.L       | 1312.68  | 0.00293  | 3 | 1 | 45.9 | 0 |
| P12163_1_F7,16047 | K.EQADYISVSADGPYKF  | 2917.53  | 0.00653  | 4 | 1 | 27.8 | 0 |
| P12163_1_F7,16074 | K.EQADYISVSADGPYKF  | 2917.53  | -0.00317 | 3 | 1 | 27.6 | 0 |
| P12163_2_F10,1531 | K.EQADYISVSADGPYKF  | 2917.53  | 0.00856  | 3 | 1 | 39.8 | 0 |
| P12163_2_F10,1536 | K.EQADYISVSADGPYKF  | 2917.53  | 0.00593  | 4 | 1 | 38.4 | 0 |
| P12163_2_F4,15681 | K.EQADYISVSADGPYKF  | 2917.53  | 0.00547  | 3 | 1 | 45   | 0 |
| P12163_2_S3,14677 | K.EQADYISVSADGPYKF  | 2917.53  | 0.00745  | 4 | 1 | 31.2 | 0 |
| P12163_2_S5,15731 | K.EQADYISVSADGPYKF  | 2917.53  | 0.00305  | 4 | 1 | 37.4 | 0 |
| P12163_1_F5,9904  | K.GCAAALK.Q         | 1298.771 | 0.00826  | 2 | 1 | 26.6 | 0 |
| P12163_2_F2,10728 | K.GCAAALK.Q         | 1298.771 | 0.00892  | 3 | 1 | 24.4 | 0 |
| P12163_1_F4,22451 | K.GETLQEYWWCTEK.A   | 2338.163 | 0.00679  | 3 | 1 | 40.4 | 0 |
| P12163_2_F1,21919 | K.GETLQEYWWCTEK.A   | 2338.163 | 0.00631  | 3 | 1 | 34.9 | 0 |
| P12163_2_F9,19866 | K.GETLQEYWWCTEK.A   | 2338.163 | 0.01072  | 3 | 1 | 29   | 0 |
| P12163_1_F9,16314 | K.VAALHLGK.L        | 1416.915 | 0.00781  | 2 | 1 | 38.1 | 0 |
| P12163_1_F9,16998 | K.VAALHLGK.L        | 1416.915 | 0.00739  | 2 | 1 | 30   | 0 |
| P12163_1_F9,17241 | K.VAALHLGK.L        | 1416.915 | 0.00577  | 3 | 1 | 25.6 | 0 |
| P12163_2_F7,14734 | K.VAALHLGK.L        | 1416.915 | 0.00202  | 3 | 1 | 28.7 | 0 |
| P12163_2_F9,15051 | K.VAALHLGK.L        | 1416.915 | 0.00483  | 2 | 1 | 26.1 | 0 |
| P12163_2_F9,15241 | K.VAALHLGK.L        | 1416.915 | 0.00526  | 3 | 1 | 33.4 | 0 |
| P12163_1_F3,17422 | K.VAVVCGYGDVGK.G    | 1832.02  | 0.00582  | 3 | 1 | 60.8 | 0 |
| P12163_1_F3,17453 | K.VAVVCGYGDVGK.G    | 1832.02  | 0.00481  | 2 | 1 | 63.7 | 0 |
| P12163_1_F9,16876 | K.VAVVCGYGDVGK.G    | 1832.02  | 0.00111  | 2 | 1 | 28.4 | 0 |
| P12163_1_F4,18320 | K.VYVLPK.H          | 1326.861 | 0.00258  | 3 | 1 | 27.3 | 0 |
| P12163_1_F4,17121 | R.AEFGPSQPFK.G      | 1715.958 | 0.00664  | 3 | 1 | 39.3 | 0 |
| P12163_1_F5,15878 | R.AEFGPSQPFK.G      | 1715.958 | 0.01101  | 2 | 1 | 26   | 0 |
| P12163_2_F1,16256 | R.AEFGPSQPFK.G      | 1715.958 | 0.00435  | 2 | 1 | 32.2 | 0 |
| P12163_2_F2,199   | R.AEFGPSQPFK.G      | 1715.958 | 0.01318  | 3 | 1 | 31.2 | 0 |
| P12163_1_F4,15595 | R.ATDVMIAGK.V       | 1513.887 | 0.00593  | 2 | 1 | 45.3 | 0 |
| P12163_2_F1,14630 | R.ATDVMIAGK.V       | 1513.887 | 0.00887  | 2 | 1 | 47   | 0 |
| P12163_2_F1,14658 | R.ATDVMIAGK.V       | 1513.887 | 0.00518  | 3 | 1 | 29.7 | 0 |
| P12163_2_F4,13552 | R.ATDVMIAGK.V       | 1513.887 | -0.0006  | 3 | 1 | 22.4 | 0 |
| P12163_1_F5,19044 | R.DSASVFAWK.G       | 1618.905 | 0.00715  | 2 | 1 | 49.4 | 0 |
| P12163_1_F5,19059 | R.DSASVFAWK.G       | 1618.905 | 0.00606  | 3 | 1 | 40.2 | 0 |
| P12163_2_F1,19133 | R.DSASVFAWK.G       | 1618.905 | 0.00805  | 2 | 1 | 38.6 | 0 |
| P12163_2_F1,19160 | R.DSASVFAWK.G       | 1618.905 | 0.00876  | 3 | 1 | 37.1 | 0 |
| P12163_2_F1,19334 | R.DSASVFAWK.G       | 1618.905 | 0.00527  | 2 | 1 | 44.9 | 0 |
| P12163_1_F9,14026 | R.HSLPDGLM*R.A      | 1345.72  | 0.00225  | 3 | 1 | 28.3 | 0 |
| P12163_2_F7,12563 | R.HSLPDGLM*R.A      | 1345.72  | 0.00288  | 3 | 1 | 26.2 | 0 |

|                                        |          |          |   |   |      |   |
|----------------------------------------|----------|----------|---|---|------|---|
| P12163_2_F9,13075 R.HSLPDGLM*R.A       | 1345.72  | 0.00291  | 3 | 1 | 23.6 | 0 |
| P12163_1_F9,13967 R.HSLPDGLMR.A        | 1329.725 | 0.00228  | 3 | 1 | 37.5 | 0 |
| P12163_2_F9,13045 R.HSLPDGLMR.A        | 1329.725 | 0.00243  | 3 | 1 | 35.7 | 0 |
| P12163_1_F9,12564 R.ITIKPQTDR.W        | 1680.026 | 0.00707  | 2 | 1 | 32.2 | 0 |
| P12163_1_F3,15293 R.LVGVSEETTTGVK.R    | 1928.116 | 0.00705  | 3 | 1 | 36.7 | 0 |
| P12163_1_F3,15653 R.LVGVSEETTTGVK.R    | 1928.116 | 0.00414  | 2 | 1 | 29   | 0 |
| P12163_1_F3,16975 R.LVGVSEETTTGVK.R    | 1928.116 | 0.00468  | 2 | 1 | 60.2 | 0 |
| P12163_1_F3,17113 R.LVGVSEETTTGVK.R    | 1928.116 | 0.00432  | 3 | 1 | 45.1 | 0 |
| P12163_1_F7,18439 R.WCSCNIFSTQDHAAA/   | 2483.186 | 0.00483  | 3 | 1 | 66.4 | 0 |
| P12163_1_F4,18795 K.EVMSVITK.I         | 1514.907 | 0.00433  | 2 | 1 | 33   | 0 |
| P12163_2_F1,17980 K.EVMSVITK.I         | 1514.907 | 0.00757  | 3 | 1 | 39.4 | 0 |
| P12163_1_F8,18700 K.KYAFVDVSPEETLQK.S  | 2666.517 | 0.00546  | 3 | 1 | 35.8 | 0 |
| P12163_1_F9,15228 K.LM*LQNPEYR.K       | 1483.788 | 0.00271  | 2 | 1 | 27.2 | 0 |
| P12163_1_F3,15616 K.LMEDPQVQK.M        | 1695.956 | 0.00445  | 2 | 1 | 34.9 | 0 |
| P12163_1_F3,15645 K.LMEDPQVQK.M        | 1695.956 | 0.0048   | 3 | 1 | 22   | 0 |
| P12163_1_F4,15951 K.LMEDPQVQK.M        | 1695.956 | -0.00411 | 2 | 1 | 26.4 | 0 |
| P12163_1_F3,17436 K.LMLQNPEYR.K        | 1467.793 | 0.00129  | 2 | 1 | 26.6 | 0 |
| P12163_1_F9,16923 K.LMLQNPEYR.K        | 1467.793 | 0.00309  | 2 | 1 | 27.9 | 0 |
| P12163_2_F1,17017 K.LMLQNPEYR.K        | 1467.793 | 0.00413  | 2 | 1 | 26.1 | 0 |
| P12163_2_F9,15971 K.LMLQNPEYR.K        | 1467.793 | 0.00325  | 2 | 1 | 28.2 | 0 |
| P12163_1_S1,19003 K.M*MANPEIALGFQSPR   | 1982.014 | 0.00101  | 3 | 1 | 46   | 0 |
| P12163_1_S1,19552 K.MMANPEIALGFQSPR.   | 1966.019 | 0.00107  | 3 | 1 | 39.2 | 0 |
| P12163_1_S1,21068 K.MMANPEIALGFQSPR.   | 1966.019 | 0.0056   | 3 | 1 | 37.3 | 0 |
| P12163_1_S1,18914 K.MVYPSLPEEMR.N      | 1655.844 | 0.00651  | 2 | 1 | 27.9 | 0 |
| P12163_1_F5,15584 K.NFDLNSAEVK.Q       | 1744.969 | 0.00295  | 2 | 1 | 39.9 | 0 |
| P12163_2_F1,16093 K.NFDLNSAEVK.Q       | 1744.969 | 0.00404  | 3 | 1 | 43.6 | 0 |
| P12163_2_F1,16137 K.NFDLNSAEVK.Q       | 1744.969 | 0.00515  | 2 | 1 | 47   | 0 |
| P12163_1_F2,21151 K.QQFEQIGLTPEEVITK.I | 2468.386 | 0.00603  | 3 | 1 | 57.6 | 0 |
| P12163_1_S1,17805 K.QQFEQIGLTPEEVITK.I | 2468.386 | 0.00023  | 3 | 1 | 42.7 | 0 |
| P12163_1_S1,17811 K.QQFEQIGLTPEEVITK.I | 2468.386 | 0.0003   | 4 | 1 | 27.3 | 0 |
| P12163_1_S1,19940 K.QQFEQIGLTPEEVITK.I | 2468.386 | 0.00513  | 3 | 1 | 58.7 | 0 |
| P12163_1_S1,19973 K.QQFEQIGLTPEEVITK.I | 2468.386 | 0.00554  | 4 | 1 | 45.8 | 0 |
| P12163_1_S1,20024 K.QQFEQIGLTPEEVITK.I | 2468.386 | 0.00165  | 2 | 1 | 64.7 | 0 |
| P12163_1_F5,14809 K.QYAMQQALK.G        | 1688.961 | 0.00493  | 2 | 1 | 40.5 | 0 |
| P12163_2_F2,15616 K.QYAMQQALK.G        | 1688.961 | 0.00165  | 2 | 1 | 49.6 | 0 |
| P12163_2_F2,15625 K.QYAMQQALK.G        | 1688.961 | 0.00458  | 3 | 1 | 39.3 | 0 |
| P12163_1_F4,17757 K.SSFDNFEDVK.E       | 1795.932 | 0.00855  | 2 | 1 | 38.6 | 0 |
| P12163_1_F4,17762 K.SSFDNFEDVK.E       | 1795.932 | 0.00982  | 3 | 1 | 40.6 | 0 |
| P12163_2_F1,16929 K.SSFDNFEDVK.E       | 1795.932 | 0.00983  | 2 | 1 | 37.6 | 0 |
| P12163_2_F1,16968 K.SSFDNFEDVK.E       | 1795.932 | 0.00563  | 3 | 1 | 50.2 | 0 |
| P12163_1_F2,13509 K.VEAATATDVEGK.K     | 1799.001 | 0.00607  | 2 | 1 | 52.3 | 0 |
| P12163_1_F2,13573 K.VEAATATDVEGK.K     | 1799.001 | 0.00692  | 3 | 1 | 51.2 | 0 |
| P12163_1_F3,13950 K.VEAATATDVEGK.K     | 1799.001 | 0.00735  | 2 | 1 | 65   | 0 |
| P12163_1_S1,19316 K.YAFVDVSPEETLQK.S   | 2234.216 | 0.00579  | 4 | 1 | 44.1 | 0 |
| P12163_1_S1,19398 K.YAFVDVSPEETLQK.S   | 2234.216 | 0.00258  | 2 | 1 | 45   | 0 |
| P12163_1_S1,19457 K.YAFVDVSPEETLQK.S   | 2234.216 | 0.00445  | 3 | 1 | 42   | 0 |
| P12163_2_F6,19991 K.YAFVDVSPEETLQK.S   | 2234.216 | 0.00568  | 2 | 1 | 55.5 | 0 |
| P12163_1_F3,21268 R.FLTVDTLEK.L        | 1673.993 | 0.00919  | 2 | 1 | 44.7 | 0 |
| P12163_1_F3,21276 R.FLTVDTLEK.L        | 1673.993 | 0.00141  | 3 | 1 | 30.5 | 0 |
| P12163_1_F3,21470 R.FLTVDTLEK.L        | 1673.993 | 0.00681  | 2 | 1 | 42.3 | 0 |
| P12163_1_F3,21479 R.FLTVDTLEK.L        | 1673.993 | 0.00528  | 3 | 1 | 22.1 | 0 |

|                   |                    |          |          |   |   |      |   |
|-------------------|--------------------|----------|----------|---|---|------|---|
| P12163_1_F4,22084 | R.FLTVDTLEK.L      | 1673.993 | 0.00343  | 2 | 1 | 36.9 | 0 |
| P12163_1_F4,22278 | R.FLTVDTLEK.L      | 1673.993 | 0.0048   | 3 | 1 | 45.1 | 0 |
| P12163_1_F4,22340 | R.FLTVDTLEK.L      | 1673.993 | 0.00487  | 2 | 1 | 49   | 0 |
| P12163_1_F6,20450 | R.FLTVDTLEK.L      | 1673.993 | 0.00237  | 3 | 1 | 42.9 | 0 |
| P12163_2_F1,21760 | R.FLTVDTLEK.L      | 1673.993 | 0.00144  | 3 | 1 | 29.4 | 0 |
| P12163_2_F1,21832 | R.FLTVDTLEK.L      | 1673.993 | 0.00047  | 2 | 1 | 36.4 | 0 |
| P12163_1_F3,17515 | R.FTMDIPATK.V      | 1631.929 | 0.00428  | 3 | 1 | 22.1 | 0 |
| P12163_2_F2,12200 | R.NPASFK.L         | 1271.757 | 0.0047   | 3 | 1 | 24.1 | 0 |
| P12163_1_F3,23068 | R.VQAAIMECSQNPM*NI | 2571.355 | 0.00538  | 3 | 1 | 57.5 | 0 |
| P12163_1_F3,23036 | R.VQAAIMECSQNPMNII | 2555.36  | 0.0065   | 3 | 1 | 61.7 | 0 |
| P12163_1_F3,23066 | R.VQAAIMECSQNPMNII | 2555.36  | 0.00716  | 4 | 1 | 39.4 | 0 |
| P12163_2_F7,15366 | K.AHGGFSVFAGVGER.T | 1694.892 | -0.00323 | 3 | 1 | 37.2 | 0 |
| P12163_1_S1,13712 | K.CALVYGQM*NEPPGA  | 1982.973 | -0.00515 | 3 | 1 | 22.2 | 0 |
| P12163_1_S1,15840 | K.CALVYGQMNEPPGAR  | 1966.978 | 0.00477  | 2 | 1 | 33.9 | 0 |
| P12163_1_S1,16076 | K.CALVYGQMNEPPGAR  | 1966.978 | 0.00472  | 3 | 1 | 60   | 0 |
| P12163_1_S1,16110 | K.CALVYGQMNEPPGAR  | 1966.978 | -0.00307 | 2 | 1 | 32   | 0 |
| P12163_1_F3,21080 | K.ESIASFQGVLDGK.Y  | 1959.101 | 0.0045   | 3 | 1 | 39.5 | 0 |
| P12163_1_F3,21100 | K.ESIASFQGVLDGK.Y  | 1959.101 | 0.00709  | 2 | 1 | 45.3 | 0 |
| P12163_1_F3,21265 | K.ESIASFQGVLDGK.Y  | 1959.101 | 0.00258  | 3 | 1 | 41.9 | 0 |
| P12163_1_F4,21648 | K.IGLFGGAGVGK.T    | 1583.973 | 0.01162  | 3 | 1 | 29.2 | 0 |
| P12163_1_F7,19404 | K.IGLFGGAGVGK.T    | 1583.973 | 0.00832  | 3 | 1 | 27.6 | 0 |
| P12163_2_F4,18381 | K.IGLFGGAGVGK.T    | 1583.973 | -0.00962 | 3 | 1 | 26.9 | 0 |
| P12163_2_F1,16427 | K.ITDEFTGK.G       | 1518.862 | 0.00962  | 2 | 1 | 24.4 | 0 |
| P12163_1_F4,12567 | K.TEHYLPIHR.E      | 1469.817 | 0.00535  | 4 | 1 | 27.4 | 0 |
| P12163_1_F6,12091 | K.TEHYLPIHR.E      | 1469.817 | 0.00367  | 4 | 1 | 23.7 | 0 |
| P12163_1_F6,12153 | K.TEHYLPIHR.E      | 1469.817 | 0.00466  | 2 | 1 | 26.6 | 0 |
| P12163_2_F6,11659 | K.TEHYLPIHR.E      | 1469.817 | 0.00391  | 4 | 1 | 27.4 | 0 |
| P12163_2_F6,11664 | K.TEHYLPIHR.E      | 1469.817 | 0.0022   | 3 | 1 | 33.3 | 0 |
| P12163_2_S3,10840 | K.TEHYLPIHR.E      | 1469.817 | 0.00268  | 3 | 1 | 22.1 | 0 |
| P12163_1_F8,22905 | K.VVDLLAPYQR.G     | 1477.868 | -0.0006  | 2 | 1 | 30.5 | 0 |
| P12163_1_S1,22115 | K.VVDLLAPYQR.G     | 1477.868 | 0.0026   | 3 | 1 | 62.9 | 0 |
| P12163_1_S1,22158 | K.VVDLLAPYQR.G     | 1477.868 | 0.00452  | 2 | 1 | 29.9 | 0 |
| P12163_1_S10,1088 | R.EGNDLYR.E        | 1170.606 | 0.0063   | 2 | 1 | 24   | 0 |
| P12163_1_F4,14920 | R.EM*IESGVIK.L     | 1629.934 | 0.0052   | 3 | 1 | 23.2 | 0 |
| P12163_1_F4,17324 | R.EMIESGVIK.L      | 1613.939 | 0.00844  | 3 | 1 | 42.5 | 0 |
| P12163_2_F1,16469 | R.EMIESGVIK.L      | 1613.939 | 0.00376  | 3 | 1 | 28.8 | 0 |
| P12163_2_F1,16511 | R.EMIESGVIK.L      | 1613.939 | 0.00374  | 2 | 1 | 34.2 | 0 |
| P12163_1_S1,22057 | R.FTQANSEVSALLGR.I | 1796.981 | 0.00212  | 3 | 1 | 98.5 | 0 |
| P12163_1_F2,22065 | R.IM*NVIGEPIDEK.G  | 1982.109 | 0.0039   | 3 | 1 | 40.6 | 0 |
| P12163_1_F3,22769 | R.IMNVIGEPIDEK.G   | 1966.114 | 0.0093   | 3 | 1 | 41   | 0 |
| P12163_1_F7,20934 | R.IPSAVGYQPTLATDLG | 2490.351 | 0.00266  | 3 | 1 | 34.7 | 0 |
| P12163_1_F7,18583 | R.LVLEVAQHM*GEGVV  | 1957.084 | -0.00353 | 2 | 1 | 27.5 | 0 |
| P12163_1_F7,18641 | R.LVLEVAQHM*GEGVV  | 1957.084 | 0.00213  | 3 | 1 | 61.5 | 0 |
| P12163_1_F7,22990 | R.LVLEVAQHM*GEGVV  | 1957.084 | 0.00401  | 2 | 1 | 30.9 | 0 |
| P12163_1_F7,23002 | R.LVLEVAQHM*GEGVV  | 1957.084 | 0.00288  | 3 | 1 | 55.4 | 0 |
| P12163_2_S5,17931 | R.LVLEVAQHM*GEGVV  | 1957.084 | 0.0012   | 3 | 1 | 51.9 | 0 |
| P12163_1_F7,22995 | R.LVLEVAQHMGEVVR   | 1941.089 | 0.0009   | 3 | 1 | 58.2 | 0 |
| P12163_1_F7,23127 | R.LVLEVAQHMGEVVR   | 1941.089 | 0.00245  | 2 | 1 | 56.9 | 0 |
| P12163_1_F7,23170 | R.LVLEVAQHMGEVVR   | 1941.089 | 0.0069   | 3 | 1 | 71.5 | 0 |
| P12163_1_F8,23934 | R.LVLEVAQHMGEVVR   | 1941.089 | 0.00243  | 3 | 1 | 26.3 | 0 |
| P12163_2_S5,21890 | R.LVLEVAQHMGEVVR   | 1941.089 | 0.00201  | 3 | 1 | 43.9 | 0 |



|                   |                       |          |          |   |   |      |   |
|-------------------|-----------------------|----------|----------|---|---|------|---|
| P12163_2_S5,22038 | R.LVLEVAQHMGEVVR      | 1941.089 | 0.00159  | 3 | 1 | 59.6 | 0 |
| P12163_2_S5,22189 | R.LVLEVAQHMGEVVR      | 1941.089 | 0.00219  | 3 | 1 | 62.6 | 0 |
| P12163_1_F7,21606 | R.QISELGIYPAVDPLDST   | 2365.255 | 0.00571  | 2 | 1 | 59.2 | 0 |
| P12163_1_S1,10942 | R.TIAM*DGTEGLVR.G     | 1582.841 | -0.00046 | 3 | 1 | 39.2 | 0 |
| P12163_1_S1,13681 | R.TIAMDGTEGLVR.G      | 1566.846 | 0.00332  | 3 | 1 | 51.1 | 0 |
| P12163_1_S1,16291 | R.TIAMDGTEGLVR.G      | 1566.846 | 0.00702  | 2 | 1 | 39.8 | 0 |
| P12163_1_F8,20643 | R.VGLTGLTVAEHFR.D     | 1703.975 | 0.00308  | 3 | 1 | 56   | 0 |
| P12163_2_F6,20228 | R.VGLTGLTVAEHFR.D     | 1703.975 | 0.00134  | 3 | 1 | 59.6 | 0 |
| P12163_2_F6,20235 | R.VGLTGLTVAEHFR.D     | 1703.975 | 0.00151  | 2 | 1 | 54.2 | 0 |
| P12163_1_S1,13174 | K.DESFGDFTNR.M        | 1491.702 | 0.00394  | 3 | 1 | 32.6 | 0 |
| P12163_1_S1,15491 | K.DESFGDFTNR.M        | 1491.702 | 0.00034  | 3 | 1 | 46   | 0 |
| P12163_1_F4,20847 | K.EDILYAVK.A          | 1558.93  | 0.00422  | 2 | 1 | 36.6 | 0 |
| P12163_1_F4,20965 | K.EDILYAVK.A          | 1558.93  | 0.00572  | 3 | 1 | 32.9 | 0 |
| P12163_2_F1,20352 | K.EDILYAVK.A          | 1558.93  | 0.00044  | 3 | 1 | 26.8 | 0 |
| P12163_1_F3,17511 | K.ETYEAVDELAK.L       | 1876.016 | 0.00478  | 2 | 1 | 52   | 0 |
| P12163_1_F4,19828 | K.IQELVEK.E ! K.LQELV | 1466.904 | 0.00352  | 2 | 1 | 27.1 | 0 |
| P12163_1_F4,19883 | K.IQELVEK.E ! K.LQELV | 1466.904 | 0.00469  | 3 | 1 | 26.3 | 0 |
| P12163_1_F5,19012 | K.IQELVEK.E ! K.LQELV | 1466.904 | 0.0048   | 2 | 1 | 25.3 | 0 |
| P12163_2_F1,19134 | K.IQELVEK.E ! K.LQELV | 1466.904 | 0.00056  | 2 | 1 | 35   | 0 |
| P12163_2_F1,19179 | K.IQELVEK.E ! K.LQELV | 1466.904 | 0.00454  | 3 | 1 | 25   | 0 |
| P12163_2_F1,19325 | K.IQELVEK.E ! K.LQELV | 1466.904 | 0.00378  | 2 | 1 | 30.4 | 0 |
| P12163_2_F1,19542 | K.IQELVEK.E ! K.LQELV | 1466.904 | 0.00508  | 2 | 1 | 35.8 | 0 |
| P12163_1_F8,21263 | K.LFADKETYEAVDLAI     | 2754.533 | 0.00751  | 3 | 1 | 29.9 | 0 |
| P12163_1_F8,16477 | K.NAHQLAIEVIR.N       | 1567.922 | -0.00158 | 3 | 1 | 31.5 | 0 |
| P12163_2_F6,15893 | K.NAHQLAIEVIR.N       | 1567.922 | 0.00091  | 3 | 1 | 36   | 0 |
| P12163_2_F6,15914 | K.NAHQLAIEVIR.N       | 1567.922 | 0.00379  | 2 | 1 | 49.2 | 0 |
| P12163_2_F6,16145 | K.NAHQLAIEVIR.N       | 1567.922 | 0.00199  | 3 | 1 | 39.4 | 0 |
| P12163_2_F7,14620 | K.NAHQLAIEVIR.N       | 1567.922 | 0.00091  | 3 | 1 | 29.7 | 0 |
| P12163_1_F8,23431 | K.RPITTALAQAAGLLPR.   | 1995.238 | 0.0013   | 3 | 1 | 25.9 | 0 |
| P12163_2_F4,16440 | K.SHLGWHEQGDGGLFC     | 2852.359 | -0.00068 | 4 | 1 | 34.5 | 0 |
| P12163_2_F1,22842 | K.YLISSWGIEK.F        | 1804.046 | 0.00314  | 2 | 1 | 38.4 | 0 |
| P12163_2_F9,20107 | K.YLISSWGIEK.F        | 1804.046 | 0.01159  | 3 | 1 | 31.2 | 0 |
| P12163_1_F4,19923 | R.GIPDILK.R           | 1363.877 | 0.00847  | 3 | 1 | 22.8 | 0 |
| P12163_1_F4,20064 | R.GIPDILK.R           | 1363.877 | 0.00685  | 2 | 1 | 31.7 | 0 |
| P12163_1_S1,19595 | R.ITPNQNIILCDIR.K     | 1874.047 | -0.00287 | 2 | 1 | 37.3 | 0 |
| P12163_1_S1,19601 | R.ITPNQNIILCDIR.K     | 1874.047 | 0.00259  | 3 | 1 | 54   | 0 |
| P12163_2_F1,18179 | R.LGEQLGYVPK.E        | 1712.02  | 0.00496  | 2 | 1 | 37   | 0 |
| P12163_2_F9,16293 | R.LGEQLGYVPK.E        | 1712.02  | 0.00355  | 3 | 1 | 46.4 | 0 |
| P12163_1_F6,20506 | R.NDNSHGTFNFPDSPEPI   | 3007.449 | 0.00688  | 3 | 1 | 24.1 | 0 |
| P12163_1_S1,16636 | R.NVLAPPAPLVR.K       | 1450.905 | 0.00765  | 2 | 1 | 31.6 | 0 |
| P12163_1_S1,16661 | R.NVLAPPAPLVR.K       | 1450.905 | -0.00248 | 3 | 1 | 26.3 | 0 |
| P12163_1_S1,16667 | R.NVLAPPAPLVR.K       | 1450.905 | 0.004    | 3 | 1 | 24.2 | 0 |
| P12163_1_F5,19756 | R.QLPEWEFK.S          | 1684.952 | 0.00524  | 3 | 1 | 23.3 | 0 |
| P12163_1_F4,16017 | R.SVVEQYYGK.K         | 1680.942 | 0.00911  | 3 | 1 | 29.9 | 0 |
| P12163_1_F9,15046 | R.SVVEQYYGK.K         | 1680.942 | 0.00622  | 2 | 1 | 40.8 | 0 |
| P12163_2_F1,15094 | R.SVVEQYYGK.K         | 1680.942 | 0.00695  | 3 | 1 | 31.4 | 0 |
| P12163_2_F9,14501 | R.SVVEQYYGK.K         | 1680.942 | 0.00848  | 3 | 1 | 27.8 | 0 |
| P12163_2_F9,14529 | R.SVVEQYYGK.K         | 1680.942 | 0.0058   | 2 | 1 | 39.5 | 0 |
| P12163_1_F3,7839  | K.DPVTFR.F ! K.DPVTFR | 988.5729 | 0.00558  | 3 | 1 | 25   | 0 |
| P12163_1_S10,1755 | K.DYNIYFK.G           | 1570.873 | 0.00765  | 2 | 1 | 26.7 | 0 |
| P12163_2_F8_12070 | K.DYNIYFK.G           | 1570.873 | 0.00801  | 2 | 1 | 25.8 | 0 |

|                   |                       |          |          |   |   |      |   |
|-------------------|-----------------------|----------|----------|---|---|------|---|
| P12163_1_F4,18555 | K.ENTLTPEYFK.G        | 1850.016 | -0.00198 | 2 | 1 | 38.7 | 0 |
| P12163_1_F4,18569 | K.ENTLTPEYFK.G        | 1850.016 | 0.00674  | 3 | 1 | 34.5 | 0 |
| P12163_1_F9,17203 | K.ENTLTPEYFK.G        | 1850.016 | 0.00418  | 2 | 1 | 35.3 | 0 |
| P12163_2_F1,17778 | K.ENTLTPEYFK.G        | 1850.016 | 0.00502  | 2 | 1 | 56.2 | 0 |
| P12163_2_F1,17807 | K.ENTLTPEYFK.G        | 1850.016 | 0.00647  | 3 | 1 | 41.1 | 0 |
| P12163_2_F9,16399 | K.ENTLTPEYFK.G        | 1850.016 | -0.00361 | 3 | 1 | 33.7 | 0 |
| P12163_1_F4,21076 | K.FFEPEIK.G           | 1517.882 | 0.00807  | 2 | 1 | 32.6 | 0 |
| P12163_1_F5,20015 | K.FFEPEIK.G           | 1517.882 | 0.01011  | 2 | 1 | 31.1 | 0 |
| P12163_2_F1,20498 | K.FFEPEIK.G           | 1517.882 | 0.00673  | 2 | 1 | 31.1 | 0 |
| P12163_1_F3,25952 | K.FVEFLVEK.L          | 1618.966 | -0.00164 | 3 | 1 | 30.3 | 0 |
| P12163_2_F6,19451 | K.GDSPEMVEYLGMR.N     | 1787.861 | 0.00489  | 2 | 1 | 29.7 | 0 |
| P12163_2_F2,10484 | K.GSVGLQNGK.L         | 1467.874 | 0.00014  | 2 | 1 | 36.7 | 0 |
| P12163_2_F2,10518 | K.GSVGLQNGK.L         | 1467.874 | 0.00719  | 3 | 1 | 37.8 | 0 |
| P12163_1_F2,14614 | K.GVVSTANNGGFTSIR.1   | 1783.96  | 0.00454  | 3 | 1 | 44.2 | 0 |
| P12163_1_F2,15487 | K.GVVSTANNGGFTSIR.1   | 1783.96  | 0.00386  | 2 | 1 | 60.8 | 0 |
| P12163_1_S1,14951 | K.GVVSTANNGGFTSIR.1   | 1783.96  | 0.00133  | 3 | 1 | 61.3 | 0 |
| P12163_1_F4,23420 | K.LLFGFEENSLK.E       | 1905.094 | 0.00589  | 3 | 1 | 35.7 | 0 |
| P12163_1_F4,25972 | K.LLFGFEENSLK.E       | 1905.094 | 0.00766  | 3 | 1 | 47.5 | 0 |
| P12163_2_F1,25153 | K.LLFGFEENSLK.E       | 1905.094 | 0.00979  | 3 | 1 | 24.6 | 0 |
| P12163_1_F3,23871 | K.VINAVSVIVGPK.E      | 1804.152 | 0.00281  | 3 | 1 | 52.7 | 0 |
| P12163_1_F3,23885 | K.VINAVSVIVGPK.E      | 1804.152 | 0.00764  | 2 | 1 | 50.7 | 0 |
| P12163_1_F5,23119 | K.VINAVSVIVGPK.E      | 1804.152 | 0.00119  | 3 | 1 | 22.9 | 0 |
| P12163_1_F2,23637 | R.ICVAALESFALDK.T     | 2142.209 | 0.00739  | 3 | 1 | 49.5 | 0 |
| P12163_1_F3,22639 | R.ICVAALESFALDK.T     | 2142.209 | 0.00808  | 3 | 1 | 33.9 | 0 |
| P12163_1_S1,18839 | R.NFAEPEDLSAYDGLK.1   | 2277.186 | 0.00891  | 2 | 1 | 68.6 | 0 |
| P12163_2_F2,16054 | R.NLINAVK.G           | 1379.883 | 0.00608  | 2 | 1 | 27.8 | 0 |
| P12163_2_F2,16066 | R.NLINAVK.G           | 1379.883 | 0.00594  | 3 | 1 | 34.6 | 0 |
| P12163_2_F2,16287 | R.NLINAVK.G           | 1379.883 | 0.0059   | 2 | 1 | 24.8 | 0 |
| P12163_2_F4,277   | R.NLINAVK.G           | 1379.883 | 0.0029   | 2 | 1 | 30.1 | 0 |
| P12163_1_F9,15305 | R.RVVDILR.N           | 1174.757 | 0.00455  | 3 | 1 | 34.9 | 0 |
| P12163_2_F9,14143 | R.RVVDILR.N           | 1174.757 | 0.00209  | 3 | 1 | 33.9 | 0 |
| P12163_1_F4,16964 | R.TGGENGAPTGLFK.G     | 1857.033 | 0.00324  | 2 | 1 | 30.8 | 0 |
| P12163_1_F4,16969 | R.TGGENGAPTGLFK.G     | 1857.033 | 0.00792  | 3 | 1 | 28.2 | 0 |
| P12163_2_F1,16072 | R.TGGENGAPTGLFK.G     | 1857.033 | 0.00297  | 3 | 1 | 26.4 | 0 |
| P12163_1_F2,19628 | R.VVDILR.N ! K.VVDILR | 1018.656 | 0.00308  | 2 | 1 | 24.2 | 0 |
| P12163_1_F4,17343 | K.AVEEVLK.K           | 1395.867 | 0.00485  | 2 | 1 | 26.2 | 0 |
| P12163_2_F1,16464 | K.AVEEVLK.K           | 1395.867 | 0.00278  | 3 | 1 | 24.1 | 0 |
| P12163_2_F1,15920 | K.EAFLEK.F            | 1344.798 | 0.00631  | 2 | 1 | 26.1 | 0 |
| P12163_1_S1,18573 | K.EETLELM*NQEYTSDI1   | 2680.385 | 0.01192  | 3 | 1 | 28   | 0 |
| P12163_1_S1,21844 | K.EETLELMNQEYTSDI1    | 2664.39  | 0.00788  | 3 | 1 | 56.8 | 0 |
| P12163_1_S1,21950 | K.EETLELMNQEYTSDI1    | 2664.39  | 0.00654  | 4 | 1 | 34.8 | 0 |
| P12163_1_F4,20169 | K.ENGFYTWGNVK.V       | 2052.065 | 0.0058   | 3 | 1 | 32   | 0 |
| P12163_2_F1,19523 | K.ENGFYTWGNVK.V       | 2052.065 | 0.00301  | 3 | 1 | 33.3 | 0 |
| P12163_1_F6,14770 | K.GDYTSIIHGK.Y        | 1698.963 | 0.00637  | 3 | 1 | 32.2 | 0 |
| P12163_1_F6,14778 | K.GDYTSIIHGK.Y        | 1698.963 | 0.00436  | 2 | 1 | 28.6 | 0 |
| P12163_1_F8,21986 | K.IWITNEIHNPTVVK.R    | 2400.386 | 0.00488  | 3 | 1 | 40.8 | 0 |
| P12163_2_F7,11824 | K.LM*HGELVEK.E        | 1679.961 | 0.00495  | 3 | 1 | 39.8 | 0 |
| P12163_2_F7,13727 | K.LM*HGELVEK.E        | 1679.961 | -0.00111 | 3 | 1 | 35.5 | 0 |
| P12163_1_F9,15134 | K.LMHGELVEK.E         | 1663.966 | 0.00346  | 3 | 1 | 23.2 | 0 |
| P12163_1_F9,15188 | K.LMHGELVEK.E         | 1663.966 | 0.00225  | 2 | 1 | 42.6 | 0 |
| P12163_1_F2,18930 | K.NVQIVDTTCPWVSK.V    | 2255.231 | 0.00546  | 3 | 1 | 49   | 0 |

|                   |                     |          |          |   |   |      |   |
|-------------------|---------------------|----------|----------|---|---|------|---|
| P12163_1_F5,13920 | K.QFDVVNK.G         | 1457.857 | 0.00728  | 2 | 1 | 26.5 | 0 |
| P12163_1_F3,15620 | K.SPSSAAAIGAEFDAK.L | 2030.101 | 0.01005  | 3 | 1 | 28.3 | 0 |
| P12163_1_F3,17894 | K.SPSSAAAIGAEFDAK.L | 2030.101 | 0.00287  | 2 | 1 | 56.5 | 0 |
| P12163_1_F3,17904 | K.SPSSAAAIGAEFDAK.L | 2030.101 | 0.00567  | 3 | 1 | 58.7 | 0 |
| P12163_1_F4,17791 | K.VGIANQTTM*IK.G    | 1800.051 | -0.00362 | 2 | 1 | 25.6 | 0 |
| P12163_1_F4,17758 | K.VGIANQTTMIK.G     | 1784.056 | 0.00367  | 3 | 1 | 41   | 0 |
| P12163_1_F4,17784 | K.VGIANQTTMIK.G     | 1784.056 | 0.0041   | 2 | 1 | 54.5 | 0 |
| P12163_2_F1,16981 | K.VGIANQTTMIK.G     | 1784.056 | 0.00676  | 3 | 1 | 45.1 | 0 |
| P12163_2_F1,17021 | K.VGIANQTTMIK.G     | 1784.056 | 0.0061   | 2 | 1 | 49.3 | 0 |
| P12163_2_F2,17150 | K.VWTSVEK.H         | 1456.862 | 0.00334  | 2 | 1 | 24.1 | 0 |
| P12163_1_F7,13849 | K.YSHEETVATASFAGK.  | 2206.16  | 0.00489  | 4 | 1 | 27.5 | 0 |
| P12163_1_F7,13855 | K.YSHEETVATASFAGK.  | 2206.16  | 0.00324  | 3 | 1 | 37.7 | 0 |
| P12163_2_F4,13537 | K.YSHEETVATASFAGK.  | 2206.16  | 0.00105  | 3 | 1 | 37.1 | 0 |
| P12163_2_F6,13943 | K.YSHEETVATASFAGK.  | 2206.16  | -0.00102 | 3 | 1 | 23.7 | 0 |
| P12163_1_F2,15001 | R.AVQIAYEAR.K       | 1324.753 | 0.00773  | 2 | 1 | 42.3 | 0 |
| P12163_1_F9,15081 | R.AVQIAYEAR.K       | 1324.753 | -0.00019 | 2 | 1 | 37.7 | 0 |
| P12163_2_F1,14617 | R.AVQIAYEAR.K       | 1324.753 | 0.00299  | 2 | 1 | 38.1 | 0 |
| P12163_1_F4,21065 | R.GIPSYWIDSEK.R     | 1903.042 | 0.00591  | 2 | 1 | 26   | 0 |
| P12163_2_F1,20569 | R.GIPSYWIDSEK.R     | 1903.042 | 0.00653  | 2 | 1 | 25.6 | 0 |
| P12163_2_F1,20575 | R.GIPSYWIDSEK.R     | 1903.042 | 0.00871  | 3 | 1 | 25.3 | 0 |
| P12163_1_S1,19983 | R.LEEMAVQNIPVEEGK.I | 2294.252 | 0.00433  | 3 | 1 | 32.5 | 0 |
| P12163_1_S1,20043 | R.LEEMAVQNIPVEEGK.I | 2294.252 | 0.00946  | 4 | 1 | 63.4 | 0 |
| P12163_1_F3,25051 | K.DAISSAFDAFNSWSK.I | 2254.16  | 0.00177  | 3 | 1 | 55.5 | 0 |
| P12163_1_F3,13463 | K.EAVGEVDYGAK.F     | 1745.953 | 0.00567  | 2 | 1 | 61.2 | 0 |
| P12163_1_F4,14027 | K.EAVGEVDYGAK.F     | 1745.953 | 0.00827  | 2 | 1 | 28.4 | 0 |
| P12163_1_F5,17911 | K.FADAFSK.A         | 1393.794 | 0.00566  | 3 | 1 | 22.4 | 0 |
| P12163_2_F1,18353 | K.FADAFSK.A         | 1393.794 | 0.00515  | 3 | 1 | 25.7 | 0 |
| P12163_2_F1,18420 | K.FADAFSK.A         | 1393.794 | 0.0055   | 2 | 1 | 29   | 0 |
| P12163_1_F4,24455 | K.FIEFYAEEAK.R      | 1855.01  | 0.00792  | 3 | 1 | 21.9 | 0 |
| P12163_1_F4,24492 | K.FIEFYAEEAK.R      | 1855.01  | 0.00337  | 2 | 1 | 54.6 | 0 |
| P12163_2_F9,21133 | K.FIEFYAEEAK.R      | 1855.01  | 0.00405  | 3 | 1 | 41   | 0 |
| P12163_1_F4,17341 | K.ITFTGSTAVGK.K     | 1690     | 0.00456  | 2 | 1 | 32.5 | 0 |
| P12163_2_F1,16493 | K.ITFTGSTAVGK.K     | 1690     | 0.00304  | 2 | 1 | 45   | 0 |
| P12163_2_F1,16530 | K.ITFTGSTAVGK.K     | 1690     | 0.00557  | 3 | 1 | 29.2 | 0 |
| P12163_1_F4,16476 | K.LMAGAAGTVK.K      | 1526.918 | 0.00606  | 2 | 1 | 45.8 | 0 |
| P12163_1_F4,16535 | K.LMAGAAGTVK.K      | 1526.918 | 0.00665  | 3 | 1 | 48.4 | 0 |
| P12163_2_F1,15669 | K.LMAGAAGTVK.K      | 1526.918 | -0.00004 | 3 | 1 | 50.3 | 0 |
| P12163_1_F8,18716 | K.RVYGDIIIPATLPDR.R | 1890.075 | 0.00231  | 3 | 1 | 30.7 | 0 |
| P12163_1_F7,16202 | K.TLEVHNPATGEVIANV  | 2908.512 | 0.00476  | 3 | 1 | 38.4 | 0 |
| P12163_1_F7,17846 | K.TLEVHNPATGEVIANV  | 2908.512 | 0.00893  | 3 | 1 | 53.5 | 0 |
| P12163_1_F7,17822 | K.TLEVHNPATGEVIANV  | 2892.517 | 0.00698  | 4 | 1 | 46.5 | 0 |
| P12163_1_F7,17865 | K.TLEVHNPATGEVIANV  | 2892.517 | 0.00551  | 3 | 1 | 56.1 | 0 |
| P12163_2_S5,17265 | K.TLEVHNPATGEVIANV  | 2892.517 | 0.00642  | 4 | 1 | 53   | 0 |
| P12163_1_F2,22654 | K.VETFVEDAVSK.G     | 1832.026 | 0.00205  | 2 | 1 | 59.9 | 0 |
| P12163_1_F3,23267 | K.VETFVEDAVSK.G     | 1832.026 | 0.00297  | 2 | 1 | 45.8 | 0 |
| P12163_1_F3,23288 | K.VETFVEDAVSK.G     | 1832.026 | 0.00773  | 3 | 1 | 52.9 | 0 |
| P12163_1_F2,20161 | K.VGDGFEGGVVQGPLIN  | 2294.296 | 0.00571  | 3 | 1 | 44.3 | 0 |
| P12163_1_S1,19010 | K.VGDGFEGGVVQGPLIN  | 2294.296 | 0.00472  | 3 | 1 | 57.4 | 0 |
| P12163_1_S1,19012 | K.VGDGFEGGVVQGPLIN  | 2294.296 | 0.00665  | 4 | 1 | 36.1 | 0 |
| P12163_1_S1,19057 | K.VGDGFEGGVVQGPLIN  | 2294.296 | 0.0005   | 2 | 1 | 80   | 0 |
| P12163_1_F5,18175 | K.WIDAYDGK.T        | 1575.863 | 0.01696  | 2 | 1 | 25.7 | 0 |

|                                        |          |          |   |   |      |   |
|----------------------------------------|----------|----------|---|---|------|---|
| P12163_2_F1,18514 K.WIDAYDGK.T         | 1575.863 | 0.00818  | 2 | 1 | 24.8 | 0 |
| P12163_1_F3,23116 K.YGMDEFLEIK.Y       | 1852.997 | 0.00628  | 3 | 1 | 29.6 | 0 |
| P12163_1_S1,24605 R.EEVFGPVAPLLCFK.T   | 2214.245 | 0.00632  | 3 | 1 | 37.1 | 0 |
| P12163_1_S1,24782 R.EEVFGPVAPLLCFK.T   | 2214.245 | 0.00764  | 3 | 1 | 34.8 | 0 |
| P12163_2_F1,6389 R.NSQTCVCANR.V        | 1570.737 | 0.00035  | 2 | 1 | 35   | 0 |
| P12163_2_F1,18147 R.VLVQEGIYEK.F       | 1786.057 | 0.00476  | 3 | 1 | 33.2 | 0 |
| P12163_2_F1,18150 R.VLVQEGIYEK.F       | 1786.057 | 0.00306  | 2 | 1 | 39.1 | 0 |
| P12163_2_F9,16426 R.VLVQEGIYEK.F       | 1786.057 | 0.00308  | 3 | 1 | 41.4 | 0 |
| P12163_1_F8,21372 R.VYGDIIPATLPDR.R    | 1733.974 | -0.003   | 2 | 1 | 25.7 | 0 |
| P12163_1_F9,15364 K.DVLVHLR.E          | 1155.715 | 0.00303  | 3 | 1 | 48.3 | 0 |
| P12163_1_F9,15735 K.DVLVHLR.E          | 1155.715 | 0.00408  | 3 | 1 | 36   | 0 |
| P12163_1_F9,16005 K.DVLVHLR.E          | 1155.715 | 0.00153  | 3 | 1 | 39   | 0 |
| P12163_1_S10,1527 K.DVLVHLR.E          | 1155.715 | 0.00468  | 3 | 1 | 51   | 0 |
| P12163_1_F2,14173 K.DVVQALR.A          | 1104.668 | 0.00332  | 2 | 1 | 27.9 | 0 |
| P12163_1_F2,14348 K.DVVQALR.A          | 1104.668 | 0.0025   | 2 | 1 | 25   | 0 |
| P12163_1_F8,21162 K.FFQGTDVHCILCPR.N   | 2054.025 | 0.00234  | 3 | 1 | 46.9 | 0 |
| P12163_2_F6,20755 K.FFQGTDVHCILCPR.N   | 2054.025 | 0.0018   | 3 | 1 | 28.3 | 0 |
| P12163_2_F6,20772 K.FFQGTDVHCILCPR.N   | 2054.025 | 0.0033   | 2 | 1 | 25.2 | 0 |
| P12163_2_S5,19602 K.FFQGTDVHCILCPR.N   | 2054.025 | 0.00198  | 3 | 1 | 36.7 | 0 |
| P12163_1_F3,8429 K.GIM*EDPR.N          | 1137.588 | 0.00094  | 2 | 1 | 27.9 | 0 |
| P12163_1_F3,11773 K.GIMEDPR.N          | 1121.593 | 0.00408  | 2 | 1 | 36.6 | 0 |
| P12163_1_F5,18906 K.LLGGGLGK.G         | 1265.84  | 0.00788  | 3 | 1 | 27.3 | 0 |
| P12163_2_F1,19097 K.LLGGGLGK.G         | 1265.84  | 0.00587  | 3 | 1 | 22.3 | 0 |
| P12163_2_F1,20748 K.LQYFDVTK.D         | 1621.941 | 0.0061   | 2 | 1 | 34.5 | 0 |
| P12163_1_F5,11865 R.AGLVSGK.D          | 1239.788 | 0.00466  | 2 | 1 | 32.7 | 0 |
| P12163_2_F2,12794 R.AGLVSGK.D          | 1239.788 | 0.00802  | 2 | 1 | 31.7 | 0 |
| P12163_1_F8,11768 R.DGLMATHDEETEK.F    | 2084.043 | 0.00997  | 3 | 1 | 26   | 0 |
| P12163_1_F8,11804 R.DGLMATHDEETEK.F    | 2084.043 | 0.00287  | 2 | 1 | 28.4 | 0 |
| P12163_2_F6,11576 R.DGLMATHDEETEK.F    | 2084.043 | 0.00619  | 3 | 1 | 30.4 | 0 |
| P12163_2_F4,15888 R.DTEIAMGGYQPYHLS1   | 2243.107 | 0.0041   | 3 | 1 | 31.3 | 0 |
| P12163_2_S5,11098 R.EPWHDIHSR.L        | 1480.76  | -0.00118 | 3 | 1 | 26.8 | 0 |
| P12163_2_S5,18202 R.FMIYVHAK.M ! R.FMI | 1616.944 | 0.00063  | 3 | 1 | 28.4 | 0 |
| P12163_1_S10,1073 R.GQIHGFR.M          | 1118.637 | 0.00578  | 3 | 1 | 24.8 | 0 |
| P12163_2_F10,1004 R.GQIHGFR.M          | 1118.637 | 0.00467  | 3 | 1 | 22.2 | 0 |
| P12163_1_F3,24906 R.NYLTFCLGNR.E       | 1708.878 | 0.00061  | 2 | 1 | 23.9 | 0 |
| P12163_1_F6,13740 R.SIQDAYIHAIR.R      | 1590.89  | 0.00188  | 3 | 1 | 26.3 | 0 |
| P12163_1_F6,16616 R.SIQDAYIHAIR.R      | 1590.89  | 0.00227  | 3 | 1 | 48   | 0 |
| P12163_1_F6,16669 R.SIQDAYIHAIR.R      | 1590.89  | 0.00416  | 2 | 1 | 35.5 | 0 |
| P12163_1_F8,16482 R.SIQDAYIHAIR.R      | 1590.89  | 0.00029  | 3 | 1 | 43.7 | 0 |
| P12163_2_F6,15931 R.SIQDAYIHAIR.R      | 1590.89  | 0.00101  | 3 | 1 | 52.5 | 0 |
| P12163_2_F9,15536 R.SIQDAYIHAIR.R      | 1590.89  | 0.00509  | 3 | 1 | 39.3 | 0 |
| P12163_1_F6,15830 R.TLDTAHHDDFHQPNI    | 3085.559 | 0.00711  | 4 | 1 | 56.8 | 0 |
| P12163_1_F6,20273 R.YDTPFHSLFR.T       | 1586.827 | 0.00076  | 3 | 1 | 39.4 | 0 |
| P12163_2_F6,19954 R.YDTPFHSLFR.T       | 1586.827 | 0.00082  | 3 | 1 | 39.4 | 0 |
| P12163_1_F5,10429 K.AMGMQEK.F          | 1402.764 | 0.01012  | 2 | 1 | 25.7 | 0 |
| P12163_1_F4,11418 K.DVDPNVK.G          | 1394.81  | 0.00795  | 2 | 1 | 29.4 | 0 |
| P12163_2_F1,10635 K.DVDPNVK.G          | 1394.81  | 0.00483  | 2 | 1 | 28.8 | 0 |
| P12163_1_F2,14649 K.ELSEQTSFSNFR.S     | 1748.876 | 0.00223  | 3 | 1 | 22.6 | 0 |
| P12163_1_F2,17148 K.ELSEQTSFSNFR.S     | 1748.876 | 0.00291  | 2 | 1 | 55.8 | 0 |
| P12163_1_F8,17874 K.ESSTKPPDAALNVMIQ   | 2741.563 | 0.01061  | 4 | 1 | 24.2 | 0 |
| P12163_1_F6,12825 K.EVDHEFSEAAK.A      | 1869.98  | 0.00572  | 3 | 1 | 35.4 | 0 |

|                   |                        |          |          |   |   |      |   |
|-------------------|------------------------|----------|----------|---|---|------|---|
| P12163_2_F6,12182 | K.EVDHEFSEAAK.A        | 1869.98  | 0.00437  | 3 | 1 | 25   | 0 |
| P12163_2_F6,12247 | K.EVDHEFSEAAK.A        | 1869.98  | 0.00616  | 2 | 1 | 46.5 | 0 |
| P12163_1_S10,1425 | K.FVELHGDR.A           | 1276.695 | 0.00325  | 3 | 1 | 30.7 | 0 |
| P12163_2_F9,17162 | K.HEELMAEISEATK.S      | 2096.115 | 0.00837  | 3 | 1 | 35.2 | 0 |
| P12163_1_F2,20473 | K.IGGFQEGIPIDPK.K      | 1979.142 | 0.00298  | 3 | 1 | 32.5 | 0 |
| P12163_1_F3,20917 | K.IGGFQEGIPIDPK.K      | 1979.142 | 0.00676  | 3 | 1 | 35.9 | 0 |
| P12163_1_F4,21432 | K.IQALEQQIK.Q          | 1679.031 | 0.00453  | 3 | 1 | 34.5 | 0 |
| P12163_1_F5,20270 | K.IQALEQQIK.Q          | 1679.031 | 0.00777  | 3 | 1 | 34.4 | 0 |
| P12163_1_F5,20284 | K.IQALEQQIK.Q          | 1679.031 | 0.00878  | 2 | 1 | 43.3 | 0 |
| P12163_2_F1,20914 | K.IQALEQQIK.Q          | 1679.031 | -0.01188 | 2 | 1 | 24.2 | 0 |
| P12163_2_F1,20937 | K.IQALEQQIK.Q          | 1679.031 | -0.00654 | 3 | 1 | 23.5 | 0 |
| P12163_2_F2,20844 | K.IQALEQQIK.Q          | 1679.031 | -0.00114 | 2 | 1 | 34   | 0 |
| P12163_1_F4,17681 | K.M*DTQELLK.H          | 1601.903 | 0.01105  | 2 | 1 | 26.6 | 0 |
| P12163_2_F1,16772 | K.MDTQELLK.H           | 1585.908 | 0.00719  | 2 | 1 | 33.2 | 0 |
| P12163_1_F4,16921 | K.MENLNEEINK.K         | 1841.989 | 0.00235  | 3 | 1 | 22.7 | 0 |
| P12163_1_F4,16923 | K.MENLNEEINK.K         | 1841.989 | 0.00798  | 2 | 1 | 40.5 | 0 |
| P12163_1_F5,15632 | K.MENLNEEINK.K         | 1841.989 | 0.00938  | 2 | 1 | 41.4 | 0 |
| P12163_2_F1,16042 | K.MENLNEEINK.K         | 1841.989 | 0.00322  | 2 | 1 | 57.3 | 0 |
| P12163_1_F3,18897 | K.NEFNQGLASAPNYASI     | 2432.303 | 0.00645  | 2 | 1 | 53.4 | 0 |
| P12163_1_F3,18995 | K.NEFNQGLASAPNYASI     | 2432.303 | 0.00846  | 3 | 1 | 31.2 | 0 |
| P12163_1_F8,15725 | K.SEELGQGEAIAHNLR.1    | 1928.014 | -0.00142 | 3 | 1 | 42.3 | 0 |
| P12163_1_F8,15841 | K.SEELGQGEAIAHNLR.1    | 1928.014 | 0.00031  | 2 | 1 | 49.8 | 0 |
| P12163_2_F6,15218 | K.SEELGQGEAIAHNLR.1    | 1928.014 | 0.00095  | 3 | 1 | 45.8 | 0 |
| P12163_1_F2,21610 | R.DQLM*DPILM*DK.I      | 1959.039 | 0.00759  | 3 | 1 | 42.3 | 0 |
| P12163_1_S1,20582 | R.DQLMDPILMDK.I        | 1927.049 | 0.01437  | 3 | 1 | 30.7 | 0 |
| P12163_1_F4,17485 | R.LSEAVNSSELK.E        | 1785.021 | -0.00104 | 2 | 1 | 37   | 0 |
| P12163_1_F4,17516 | R.LSEAVNSSELK.E        | 1785.021 | 0.00826  | 3 | 1 | 36.2 | 0 |
| P12163_1_F3,13880 | R.VEINVGANR.S          | 1275.732 | 0.00252  | 2 | 1 | 25.3 | 0 |
| P12163_1_F7,14473 | K.CVAYAESHQALVGD       | 2371.217 | 0.00956  | 3 | 1 | 36.8 | 0 |
| P12163_2_F6,14582 | K.CVAYAESHQALVGD       | 2371.217 | 0.0077   | 3 | 1 | 29.8 | 0 |
| P12163_1_F5,19236 | K.DSIPAWIK.F           | 1537.92  | -0.00084 | 3 | 1 | 23.6 | 0 |
| P12163_1_S1,19979 | K.EFDASPLIITASEK.V     | 2129.195 | 0.00807  | 3 | 1 | 45.5 | 0 |
| P12163_1_S1,20049 | K.EFDASPLIITASEK.V     | 2129.195 | 0.00167  | 2 | 1 | 73.7 | 0 |
| P12163_1_F7,20508 | K.FSVQAPGEIPYNGIYYI    | 3250.64  | 0.00678  | 3 | 1 | 28.2 | 0 |
| P12163_1_F6,14607 | K.IHMDTPSGIK.D         | 1706.972 | 0.00401  | 3 | 1 | 28.8 | 0 |
| P12163_1_S1,22880 | K.IVLDSDYPLFGGYK.R     | 2195.221 | 0.00716  | 3 | 1 | 43.6 | 0 |
| P12163_1_F3,18832 | K.VIVFER.G ! R.VIVFER. | 1066.656 | 0.0016   | 2 | 1 | 29.2 | 0 |
| P12163_2_F1,18396 | K.VIVFER.G ! R.VIVFER. | 1066.656 | 0.00272  | 2 | 1 | 26.1 | 0 |
| P12163_2_F2,204   | K.VIVFER.G ! R.VIVFER. | 1066.656 | 0.00284  | 2 | 1 | 28.9 | 0 |
| P12163_2_S3,14260 | K.YGFM TSEHQYVSR.K     | 1908.922 | 0.00639  | 3 | 1 | 38   | 0 |
| P12163_1_F6,13705 | K.YVFQHPQPK.K          | 1752.005 | 0.00919  | 2 | 1 | 32.9 | 0 |
| P12163_1_F6,13731 | K.YVFQHPQPK.K          | 1752.005 | 0.00593  | 3 | 1 | 30.1 | 0 |
| P12163_1_F9,12070 | R.AMQHLEEK.Y           | 1593.888 | 0.01101  | 3 | 1 | 28.6 | 0 |
| P12163_1_F9,12071 | R.AMQHLEEK.Y           | 1593.888 | 0.00701  | 2 | 1 | 37.4 | 0 |
| P12163_2_F9,11631 | R.AMQHLEEK.Y           | 1593.888 | 0.00015  | 2 | 1 | 27.9 | 0 |
| P12163_2_F6,20265 | R.FDLGDADYLR.Y         | 1488.764 | 0.00391  | 2 | 1 | 29.2 | 0 |
| P12163_2_F8_12070 | R.GIALHK.M             | 1246.809 | 0.0132   | 3 | 1 | 28.9 | 0 |
| P12163_1_F3,19636 | R.LPNGQFVPGNNFSYDK     | 2405.271 | 0.00705  | 3 | 1 | 31.4 | 0 |
| P12163_1_F3,19656 | R.LPNGQFVPGNNFSYDK     | 2405.271 | 0.00494  | 2 | 1 | 24.4 | 0 |
| P12163_1_F9,17276 | R.RFDLGDADYLR.Y        | 1644.865 | 0.00167  | 3 | 1 | 46.4 | 0 |
| P12163_1_F3,8209  | R.SDTGITYR.E           | 1216.647 | 0.00348  | 3 | 1 | 24.2 | 0 |

|                   |                     |          |          |   |   |      |   |
|-------------------|---------------------|----------|----------|---|---|------|---|
| P12163_1_F3,8630  | R.SDTGITYR.E        | 1216.647 | 0.00288  | 3 | 1 | 39   | 0 |
| P12163_1_S10,1121 | R.SDTGITYR.E        | 1216.647 | 0.00322  | 2 | 1 | 24.3 | 0 |
| P12163_1_F5,20343 | R.SIPPPGAGQNIYEIDPN | 2662.425 | 0.00348  | 3 | 1 | 40.6 | 0 |
| P12163_1_F5,20616 | R.SIPPPGAGQNIYEIDPN | 2662.425 | 0.00582  | 3 | 1 | 51.1 | 0 |
| P12163_2_F4,19105 | R.SIPPPGAGQNIYEIDPN | 2662.425 | -0.00318 | 3 | 1 | 25.3 | 0 |
| P12163_2_F8_12070 | R.SIPPPGAGQNIYEIDPN | 2662.425 | 0.01239  | 3 | 1 | 48.2 | 0 |
| P12163_1_F2,13277 | K.DAEEPDEADFK.E     | 1873.928 | 0.00679  | 2 | 1 | 39.9 | 0 |
| P12163_1_S1,15800 | K.DYYYADLGNER.F     | 1682.796 | 0.00738  | 2 | 1 | 24.7 | 0 |
| P12163_1_S1,15836 | K.DYYYADLGNER.F     | 1682.796 | 0.00246  | 3 | 1 | 24.2 | 0 |
| P12163_2_F6,18726 | K.GGEIHLNDPLAIK.L   | 2056.201 | 0.003    | 4 | 1 | 22.7 | 0 |
| P12163_1_F4,18561 | K.NIECAIIDK.A       | 1683.956 | 0.00881  | 2 | 1 | 24.4 | 0 |
| P12163_2_F1,17767 | K.NIECAIIDK.A       | 1683.956 | 0.00847  | 2 | 1 | 33.4 | 0 |
| P12163_1_F2,4201  | K.SNTGEGGEQPSR.M    | 1522.74  | 0.00401  | 3 | 1 | 38.4 | 0 |
| P12163_1_F3,4121  | K.SNTGEGGEQPSR.M    | 1522.74  | 0.00527  | 3 | 1 | 54.2 | 0 |
| P12163_1_F3,5246  | K.SNTGEGGEQPSR.M    | 1522.74  | 0.00646  | 2 | 1 | 34.1 | 0 |
| P12163_2_F1,4932  | K.SNTGEGGEQPSR.M    | 1522.74  | 0.00516  | 2 | 1 | 31   | 0 |
| P12163_1_F4,18631 | K.VAAAQEAAEDAVK.D   | 1881.054 | -0.0006  | 3 | 1 | 43.4 | 0 |
| P12163_2_F1,17940 | K.VAAAQEAAEDAVK.D   | 1881.054 | 0.00684  | 3 | 1 | 33.3 | 0 |
| P12163_1_F8,16678 | R.AVGTMLSHEVTK.R    | 1881.072 | 0.00483  | 3 | 1 | 32.5 | 0 |
| P12163_2_F6,16167 | R.AVGTMLSHEVTK.R    | 1881.072 | 0.00411  | 3 | 1 | 32.1 | 0 |
| P12163_2_F7,10918 | R.ESLNLEHGGA.K.D    | 1762.991 | -0.00054 | 3 | 1 | 30.4 | 0 |
| P12163_2_F2,11323 | R.GNSVAAAYK.E       | 1417.826 | -0.00198 | 3 | 1 | 29.2 | 0 |
| P12163_1_S1,21777 | R.IGLIVESAEPR.E     | 1487.873 | 0.00135  | 3 | 1 | 33.3 | 0 |
| P12163_1_S1,21816 | R.IGLIVESAEPR.E     | 1487.873 | 0.00192  | 2 | 1 | 31.9 | 0 |
| P12163_1_S1,22033 | R.IGLIVESAEPR.E     | 1487.873 | 0.00303  | 3 | 1 | 51.1 | 0 |
| P12163_1_S1,22066 | R.IGLIVESAEPR.E     | 1487.873 | 0.0051   | 2 | 1 | 29.9 | 0 |
| P12163_1_F8,15944 | R.ILGHNGEINTLR.G    | 1640.939 | 0.00318  | 3 | 1 | 22.2 | 0 |
| P12163_2_F6,15398 | R.ILGHNGEINTLR.G    | 1640.939 | 0.00324  | 2 | 1 | 35.9 | 0 |
| P12163_1_F3,17699 | R.IVVDDEALK.Q       | 1609.962 | 0.0075   | 2 | 1 | 49.8 | 0 |
| P12163_1_S1,21239 | R.LLETNNFPEFTGR.V   | 1841.97  | 0.00793  | 2 | 1 | 31.6 | 0 |
| P12163_1_F6,11388 | R.VDYGHQEVAAK.F     | 1825.006 | 0.00277  | 2 | 1 | 53.8 | 0 |
| P12163_1_F4,18586 | R.VNLMAEEGVK.F      | 1697.972 | 0.00667  | 2 | 1 | 29.1 | 0 |
| P12163_2_F1,17781 | R.VNLMAEEGVK.F      | 1697.972 | 0.00961  | 2 | 1 | 37.6 | 0 |
| P12163_2_F4,17993 | R.YHLVGLPADTIHIK.L  | 2185.295 | 0.00079  | 3 | 1 | 47.1 | 0 |
| P12163_2_F4,18004 | R.YHLVGLPADTIHIK.L  | 2185.295 | 0.00405  | 4 | 1 | 44.5 | 0 |
| P12163_1_S1,12420 | K.DEAYFSSNAAAQASR.  | 1891.909 | 0.0025   | 3 | 1 | 34.9 | 0 |
| P12163_1_F4,16869 | K.EVVAELK.A         | 1395.867 | 0.00599  | 3 | 1 | 30.4 | 0 |
| P12163_1_F4,16888 | K.EVVAELK.A         | 1395.867 | 0.00903  | 2 | 1 | 28.9 | 0 |
| P12163_2_F1,16027 | K.EVVAELK.A         | 1395.867 | 0.00643  | 2 | 1 | 28.9 | 0 |
| P12163_2_F1,16063 | K.EVVAELK.A         | 1395.867 | 0.00785  | 3 | 1 | 28.8 | 0 |
| P12163_2_F1,24913 | K.FALESFWDGK.S      | 1807.984 | 0.0044   | 3 | 1 | 28.7 | 0 |
| P12163_1_S1,22728 | K.GVTGFGFDLIR.G     | 1485.837 | 0.00274  | 3 | 1 | 50.2 | 0 |
| P12163_1_F5,15718 | K.SEQDFYLK.W        | 1637.899 | 0.00041  | 2 | 1 | 38.2 | 0 |
| P12163_1_S1,18567 | K.SSADELQNVAADLR.A  | 1792.934 | 0.00669  | 3 | 1 | 42.6 | 0 |
| P12163_1_S1,18572 | K.SSADELQNVAADLR.A  | 1792.934 | 0.00614  | 2 | 1 | 58.3 | 0 |
| P12163_1_F5,20887 | K.SWLAFAAQK.V       | 1629.957 | 0.0053   | 3 | 1 | 33.2 | 0 |
| P12163_2_F2,21278 | K.SWLAFAAQK.V       | 1629.957 | 0.00812  | 3 | 1 | 34.7 | 0 |
| P12163_2_F2,21288 | K.SWLAFAAQK.V       | 1629.957 | 0.0045   | 2 | 1 | 32.6 | 0 |
| P12163_1_F4,18122 | K.VVEVNALAK.A       | 1550.973 | 0.00674  | 2 | 1 | 46.3 | 0 |
| P12163_1_F4,18123 | K.VVEVNALAK.A       | 1550.973 | 0.0051   | 3 | 1 | 33.2 | 0 |
| P12163_2_F1,17394 | K.VVEVNALAK.A       | 1550.973 | -0.0044  | 2 | 1 | 41.4 | 0 |

|                    |                     |          |          |   |   |      |   |
|--------------------|---------------------|----------|----------|---|---|------|---|
| P12163_1_S10,1533  | K.WAVHSFR.I         | 1206.669 | -0.00066 | 3 | 1 | 29.3 | 0 |
| P12163_1_F7,15995  | K.YCAGIGPGVYDIHSPR  | 2066.043 | 0.00216  | 3 | 1 | 54.2 | 0 |
| P12163_1_F8,16695  | K.YCAGIGPGVYDIHSPR  | 2066.043 | 0.004    | 3 | 1 | 53.6 | 0 |
| P12163_2_S5,15651  | K.YCAGIGPGVYDIHSPR  | 2066.043 | 0.01012  | 3 | 1 | 62.4 | 0 |
| P12163_1_F9,20521  | K.YL FAGVVDGR.N     | 1400.784 | 0.00377  | 2 | 1 | 38   | 0 |
| P12163_1_S1,20473  | K.YL FAGVVDGR.N     | 1400.784 | 0.00317  | 2 | 1 | 41.2 | 0 |
| P12163_1_F4,5993   | R.ATNVSAR.L         | 1022.59  | -0.00304 | 3 | 1 | 26.8 | 0 |
| P12163_1_F8,15796  | R.CVKPPIIYGDVSRPK.A | 2641.563 | 0.00777  | 3 | 1 | 22.7 | 0 |
| P12163_1_F4,13898  | R.GNASVPAMEMTK.W    | 1843.987 | 0.00788  | 3 | 1 | 48.5 | 0 |
| P12163_1_S1,13998  | R.IPSTEEIADR.I      | 1434.774 | 0.005    | 2 | 1 | 26.8 | 0 |
| P12163_2_F2,11099  | R.TQLASAK.-         | 1326.82  | 0.0072   | 2 | 1 | 34.7 | 0 |
| P12163_1_S1,18242  | K.DLQDDFM*GGAEIHK.S | 2176.142 | -0.00432 | 3 | 1 | 36.9 | 0 |
| P12163_1_S1,18303  | K.DLQDDFM*GGAEIHK.S | 2176.142 | 0.00651  | 3 | 1 | 41   | 0 |
| P12163_1_S1,20559  | K.DLQDDFMGGAEIHK.S  | 2160.147 | 0.00234  | 3 | 1 | 60.6 | 0 |
| P12163_1_F4,21237  | K.DSVVAGFQWASK.E    | 1903.053 | 0.00965  | 3 | 1 | 36.4 | 0 |
| P12163_1_F2,12482  | K.EGALAEENMR.G      | 1423.715 | 0.00406  | 2 | 1 | 37   | 0 |
| P12163_1_F3,12731  | K.EGALAEENMR.G      | 1423.715 | 0.00604  | 2 | 1 | 27.5 | 0 |
| P12163_2_F7,8632   | K.EVDAHPIR.A        | 1240.695 | 0.00285  | 3 | 1 | 36.4 | 0 |
| P12163_1_F3,15723  | K.FSVSPVVR.V        | 1194.715 | 0.0064   | 3 | 1 | 43.1 | 0 |
| P12163_2_F1,16832  | K.FSVSPVVR.V        | 1194.715 | 0.00287  | 2 | 1 | 26.4 | 0 |
| P12163_1_F4,18836  | K.GVQYLNEIK.D       | 1671.989 | 0.00775  | 3 | 1 | 24.8 | 0 |
| P12163_1_F5,17539  | K.GVQYLNEIK.D       | 1671.989 | 0.00303  | 2 | 1 | 37.9 | 0 |
| P12163_2_F8_12070  | K.GVQYLNEIK.D       | 1671.989 | 0.00625  | 3 | 1 | 27.2 | 0 |
| P12163_1_F4,24230  | K.ILSEEFGWDK.D      | 1832.005 | 0.00656  | 2 | 1 | 25.4 | 0 |
| P12163_2_F2,10081  | K.NATLTNEK.E        | 1498.868 | 0.00808  | 2 | 1 | 29.3 | 0 |
| P12163_2_F2,10126  | K.NATLTNEK.E        | 1498.868 | 0.00823  | 3 | 1 | 22.1 | 0 |
| P12163_1_F2,12684  | K.SDPVVSFR.E        | 1210.673 | 0.00177  | 3 | 1 | 35.2 | 0 |
| P12163_1_F4,14704  | K.VASDLPK.L         | 1337.825 | 0.0029   | 2 | 1 | 24.1 | 0 |
| P12163_1_F2,10726  | R.GGGQVIPTAR.R      | 1259.737 | -0.00231 | 2 | 1 | 24.3 | 0 |
| P12163_2_F10,16380 | R.GHVFEEMQRPGTPLYT  | 2724.475 | 0.00603  | 4 | 1 | 23.3 | 0 |
| P12163_1_F4,15336  | R.IM*GPNYVPGEK.K    | 1829.009 | 0.00927  | 2 | 1 | 24.4 | 0 |
| P12163_1_F4,17686  | R.IMGPNYVPGEK.K     | 1813.014 | 0.00763  | 3 | 1 | 23.6 | 0 |
| P12163_2_F1,16859  | R.IMGPNYVPGEK.K     | 1813.014 | 0.00077  | 2 | 1 | 26.8 | 0 |
| P12163_2_F1,16883  | R.IMGPNYVPGEK.K     | 1813.014 | 0.00604  | 3 | 1 | 36.7 | 0 |
| P12163_1_F2,21210  | R.NCDPEGPLM*LYVSK.I | 2247.161 | 0.01304  | 3 | 1 | 22.4 | 0 |
| P12163_1_F6,13457  | R.NMSVIAHVDHGK.S    | 1916.063 | 0.00983  | 4 | 1 | 33.6 | 0 |
| P12163_1_F7,12772  | R.NMSVIAHVDHGK.S    | 1916.063 | 0.00539  | 4 | 1 | 28.4 | 0 |
| P12163_2_F1,4315   | R.QDEAER.G          | 1051.532 | 0.00468  | 2 | 1 | 29.7 | 0 |
| P12163_2_F1,20508  | K.ASFFPAMTK.I       | 1607.908 | 0.0068   | 2 | 1 | 35.5 | 0 |
| P12163_1_F7,19219  | K.CVGEPMTHLESIASSA  | 2248.137 | 0.00527  | 3 | 1 | 46.4 | 0 |
| P12163_1_F4,14584  | K.GNDVTCVIK.N       | 1613.914 | 0.00593  | 2 | 1 | 32.3 | 0 |
| P12163_1_F5,13192  | K.GNDVTCVIK.N       | 1613.914 | 0.01249  | 2 | 1 | 30.9 | 0 |
| P12163_2_F1,13606  | K.GNDVTCVIK.N       | 1613.914 | 0.00425  | 2 | 1 | 29.4 | 0 |
| P12163_2_F1,13626  | K.GNDVTCVIK.N       | 1613.914 | 0.00741  | 3 | 1 | 27.4 | 0 |
| P12163_2_F2,11705  | K.ICAEAEK.V         | 1428.798 | 0.00369  | 3 | 1 | 22.5 | 0 |
| P12163_1_S1,22978  | K.IDFLSLSYTR.H      | 1518.847 | 0.00628  | 2 | 1 | 28   | 0 |
| P12163_1_F4,17710  | K.IVGTLGPK.S        | 1392.903 | 0.00586  | 3 | 1 | 23.5 | 0 |
| P12163_2_F1,16823  | K.IVGTLGPK.S        | 1392.903 | 0.00502  | 2 | 1 | 25.6 | 0 |
| P12163_2_F1,16855  | K.IVGTLGPK.S        | 1392.903 | 0.00427  | 3 | 1 | 33.5 | 0 |
| P12163_1_F3,21763  | K.LGDLSTQIFAK.I     | 1929.127 | 0.0169   | 2 | 1 | 41.4 | 0 |
| P12163_1_F7,20826  | K.NTATLAGSLFTLHASQ  | 2205.229 | -0.00044 | 3 | 1 | 23.7 | 0 |

|                    |                     |          |          |   |   |      |   |
|--------------------|---------------------|----------|----------|---|---|------|---|
| P12163_2_F9,9758   | K.VALDHGK.A         | 1347.82  | 0.00382  | 3 | 1 | 28.8 | 0 |
| P12163_2_F1,21830  | K.VFNQDLYFK.K       | 1782.005 | 0.00553  | 3 | 1 | 30.4 | 0 |
| P12163_1_F7,21515  | K.YRPTMPVLSVVIPR.L  | 1932.141 | -0.00237 | 3 | 1 | 37.4 | 0 |
| P12163_1_S1,17587  | R.GLYPVETISIVGK.I   | 1984.194 | 0.00213  | 3 | 1 | 23.3 | 0 |
| P12163_1_S1,20283  | R.GLYPVETISIVGK.I   | 1984.194 | 0.00735  | 3 | 1 | 47.4 | 0 |
| P12163_1_F3,18373  | R.GNLGIDLPEK.V      | 1761.037 | 0.0068   | 2 | 1 | 33.3 | 0 |
| P12163_1_F3,18733  | R.GNLGIDLPEK.V      | 1761.037 | 0.01249  | 2 | 1 | 33.4 | 0 |
| P12163_2_F8,12070  | R.HAEDVR.Q          | 1030.558 | 0.00195  | 3 | 1 | 26.8 | 0 |
| P12163_1_F6,11141  | R.HPAESTNATNESVLK.V | 2206.192 | 0.00643  | 3 | 1 | 29.1 | 0 |
| P12163_1_F4,18052  | R.SVDVISGCLK.A      | 1685.972 | 0.00984  | 3 | 1 | 38.1 | 0 |
| P12163_2_F1,17295  | R.SVDVISGCLK.A      | 1685.972 | 0.00234  | 2 | 1 | 46.6 | 0 |
| P12163_1_F2,15247  | K.ALVDSEFYGTDR.G    | 1547.801 | -0.00095 | 3 | 1 | 35.5 | 0 |
| P12163_1_F2,17560  | K.ALVDSEFYGTDR.G    | 1547.801 | 0.00128  | 3 | 1 | 46.3 | 0 |
| P12163_1_F2,19148  | K.ALVDSEFYGTDR.G    | 1547.801 | 0.00438  | 2 | 1 | 25.4 | 0 |
| P12163_1_F5,17077  | K.ALVDSEFYGTDR.G    | 1547.801 | -0.00001 | 3 | 1 | 25.8 | 0 |
| P12163_1_F6,17676  | K.ALVDSEFYGTDR.G    | 1547.801 | 0.00206  | 3 | 1 | 32.5 | 0 |
| P12163_1_F6,18982  | K.ALVDSEFYGTDR.G    | 1547.801 | 0.00476  | 2 | 1 | 34   | 0 |
| P12163_1_F8,18956  | K.ALVDSEFYGTDR.G    | 1547.801 | 0.00528  | 2 | 1 | 30.9 | 0 |
| P12163_1_F9,17202  | K.ALVDSEFYGTDR.G    | 1547.801 | 0.0039   | 2 | 1 | 28.2 | 0 |
| P12163_1_F9,18610  | K.ALVDSEFYGTDR.G    | 1547.801 | 0.00156  | 2 | 1 | 25.1 | 0 |
| P12163_1_S1,13086  | K.ALVDSEFYGTDR.G    | 1547.801 | 0.00309  | 4 | 1 | 23.1 | 0 |
| P12163_1_S1,13098  | K.ALVDSEFYGTDR.G    | 1547.801 | 0.0039   | 2 | 1 | 23.9 | 0 |
| P12163_1_S1,13104  | K.ALVDSEFYGTDR.G    | 1547.801 | 0.00242  | 3 | 1 | 26.6 | 0 |
| P12163_1_S1,14917  | K.ALVDSEFYGTDR.G    | 1547.801 | 0.0008   | 3 | 1 | 48   | 0 |
| P12163_1_S1,15148  | K.ALVDSEFYGTDR.G    | 1547.801 | 0.00293  | 3 | 1 | 41.7 | 0 |
| P12163_1_S1,15835  | K.ALVDSEFYGTDR.G    | 1547.801 | 0.00257  | 3 | 1 | 25.7 | 0 |
| P12163_1_S1,16734  | K.ALVDSEFYGTDR.G    | 1547.801 | 0.00497  | 3 | 1 | 41.4 | 0 |
| P12163_1_S1,16761  | K.ALVDSEFYGTDR.G    | 1547.801 | 0.00696  | 2 | 1 | 40   | 0 |
| P12163_1_S1,16919  | K.ALVDSEFYGTDR.G    | 1547.801 | 0.00251  | 3 | 1 | 48.7 | 0 |
| P12163_1_S1,16955  | K.ALVDSEFYGTDR.G    | 1547.801 | 0.00358  | 2 | 1 | 36.2 | 0 |
| P12163_1_S1,17165  | K.ALVDSEFYGTDR.G    | 1547.801 | -0.00217 | 3 | 1 | 44.8 | 0 |
| P12163_1_S1,17190  | K.ALVDSEFYGTDR.G    | 1547.801 | 0.00444  | 2 | 1 | 37.9 | 0 |
| P12163_1_S1,17423  | K.ALVDSEFYGTDR.G    | 1547.801 | 0.00242  | 3 | 1 | 45.6 | 0 |
| P12163_1_S1,17443  | K.ALVDSEFYGTDR.G    | 1547.801 | 0.00404  | 2 | 1 | 41   | 0 |
| P12163_1_S1,18364  | K.ALVDSEFYGTDR.G    | 1547.801 | 0.00378  | 2 | 1 | 45.6 | 0 |
| P12163_1_S1,18386  | K.ALVDSEFYGTDR.G    | 1547.801 | 0.00257  | 3 | 1 | 46.2 | 0 |
| P12163_1_S1,18607  | K.ALVDSEFYGTDR.G    | 1547.801 | -0.0011  | 2 | 1 | 45.7 | 0 |
| P12163_1_S1,18626  | K.ALVDSEFYGTDR.G    | 1547.801 | 0.00011  | 3 | 1 | 46.2 | 0 |
| P12163_1_S1,18861  | K.ALVDSEFYGTDR.G    | 1547.801 | -0.00202 | 2 | 1 | 36.6 | 0 |
| P12163_1_S1,26170  | K.ALVDSEFYGTDR.G    | 1547.801 | -0.00122 | 3 | 1 | 27.2 | 0 |
| P12163_1_S10,17188 | K.ALVDSEFYGTDR.G    | 1547.801 | 0.00344  | 3 | 1 | 30.6 | 0 |
| P12163_1_S10,18420 | K.ALVDSEFYGTDR.G    | 1547.801 | 0.00134  | 2 | 1 | 30   | 0 |
| P12163_2_F2,17823  | K.ALVDSEFYGTDR.G    | 1547.801 | 0.00041  | 3 | 1 | 24   | 0 |
| P12163_2_F2,17855  | K.ALVDSEFYGTDR.G    | 1547.801 | 0.0026   | 2 | 1 | 28   | 0 |
| P12163_2_F4,16368  | K.ALVDSEFYGTDR.G    | 1547.801 | 0.00212  | 3 | 1 | 31.7 | 0 |
| P12163_2_F6,16270  | K.ALVDSEFYGTDR.G    | 1547.801 | 0.00352  | 2 | 1 | 30.6 | 0 |
| P12163_2_F6,16607  | K.ALVDSEFYGTDR.G    | 1547.801 | 0.00534  | 2 | 1 | 28.9 | 0 |
| P12163_2_F6,18465  | K.ALVDSEFYGTDR.G    | 1547.801 | 0.00496  | 2 | 1 | 39.1 | 0 |
| P12163_2_F7,15321  | K.ALVDSEFYGTDR.G    | 1547.801 | 0.00107  | 3 | 1 | 52.1 | 0 |
| P12163_2_F7,16638  | K.ALVDSEFYGTDR.G    | 1547.801 | 0.00755  | 3 | 1 | 26.7 | 0 |
| P12163_2_F7,16712  | K.ALVDSEFYGTDR.G    | 1547.801 | 0.0037   | 2 | 1 | 45.5 | 0 |



|                   |                     |          |          |   |   |      |   |
|-------------------|---------------------|----------|----------|---|---|------|---|
| P12163_1_F2,14070 | K.EEGGALAVAEESPK.I  | 2124.128 | 0.00018  | 2 | 1 | 55.5 | 0 |
| P12163_1_F2,14104 | K.EEGGALAVAEESPK.I  | 2124.128 | 0.01245  | 3 | 1 | 57.8 | 0 |
| P12163_1_F2,15398 | K.EEGGALAVAEESPK.I  | 2124.128 | 0.00345  | 3 | 1 | 43   | 0 |
| P12163_1_F2,15593 | K.EEGGALAVAEESPK.I  | 2124.128 | 0.00366  | 2 | 1 | 84.5 | 0 |
| P12163_1_F2,15660 | K.EEGGALAVAEESPK.I  | 2124.128 | 0.00411  | 3 | 1 | 50.5 | 0 |
| P12163_1_F3,16019 | K.EEGGALAVAEESPK.I  | 2124.128 | 0.00344  | 2 | 1 | 90.1 | 0 |
| P12163_1_F3,16032 | K.EEGGALAVAEESPK.I  | 2124.128 | 0.00282  | 3 | 1 | 66.2 | 0 |
| P12163_1_F4,16546 | K.EEGGALAVAEESPK.I  | 2124.128 | 0.00081  | 3 | 1 | 42.5 | 0 |
| P12163_1_F5,14811 | K.EEGGALAVAEESPK.I  | 2124.128 | -0.00086 | 2 | 1 | 57.3 | 0 |
| P12163_1_F6,15373 | K.EEGGALAVAEESPK.I  | 2124.128 | 0.00294  | 3 | 1 | 39.6 | 0 |
| P12163_1_F6,15448 | K.EEGGALAVAEESPK.I  | 2124.128 | -0.00376 | 2 | 1 | 47.5 | 0 |
| P12163_1_F6,15790 | K.EEGGALAVAEESPK.I  | 2124.128 | 0.00072  | 3 | 1 | 28.4 | 0 |
| P12163_1_F8,15658 | K.EEGGALAVAEESPK.I  | 2124.128 | 0.00276  | 3 | 1 | 34.3 | 0 |
| P12163_2_F2,15578 | K.EEGGALAVAEESPK.I  | 2124.128 | 0.00012  | 3 | 1 | 50.4 | 0 |
| P12163_2_F4,14690 | K.EEGGALAVAEESPK.I  | 2124.128 | 0.00741  | 3 | 1 | 33.1 | 0 |
| P12163_1_F2,20712 | K.EGSPLLM*P.-       | 1163.628 | 0.0014   | 2 | 1 | 32.2 | 0 |
| P12163_1_F5,20595 | K.EGSPLLM*P.-       | 1147.633 | 0.00512  | 2 | 1 | 28.6 | 0 |
| P12163_2_F2,21086 | K.EGSPLLM*P.-       | 1147.633 | 0.00326  | 2 | 1 | 36.9 | 0 |
| P12163_1_S10,1464 | K.EKEEGGALAVAEESF   | 2685.471 | 0.00405  | 4 | 1 | 37.3 | 0 |
| P12163_2_F8_12070 | K.EKEEGGALAVAEESF   | 2685.471 | 0.00413  | 4 | 1 | 30.3 | 0 |
| P12163_1_F2,15131 | K.EVTEIDNLK.K       | 1668.963 | 0.00742  | 3 | 1 | 44.9 | 0 |
| P12163_1_F3,15018 | K.EVTEIDNLK.K       | 1668.963 | 0.00332  | 2 | 1 | 40.2 | 0 |
| P12163_1_F3,16913 | K.EVTEIDNLK.K       | 1668.963 | 0.00445  | 3 | 1 | 38.7 | 0 |
| P12163_1_F3,17106 | K.EVTEIDNLK.K       | 1668.963 | 0.00672  | 2 | 1 | 35.4 | 0 |
| P12163_1_F4,17391 | K.EVTEIDNLK.K       | 1668.963 | 0.00616  | 2 | 1 | 45.2 | 0 |
| P12163_1_F4,17416 | K.EVTEIDNLK.K       | 1668.963 | 0.00649  | 3 | 1 | 52.3 | 0 |
| P12163_1_F5,16166 | K.EVTEIDNLK.K       | 1668.963 | 0.00402  | 2 | 1 | 23.9 | 0 |
| P12163_1_F6,16235 | K.EVTEIDNLK.K       | 1668.963 | 0.00106  | 3 | 1 | 44   | 0 |
| P12163_1_F6,16673 | K.EVTEIDNLK.K       | 1668.963 | 0.007    | 2 | 1 | 44.7 | 0 |
| P12163_1_F6,16715 | K.EVTEIDNLK.K       | 1668.963 | 0.00577  | 3 | 1 | 43.1 | 0 |
| P12163_1_F7,15323 | K.EVTEIDNLK.K       | 1668.963 | 0.00181  | 3 | 1 | 41   | 0 |
| P12163_1_F7,15370 | K.EVTEIDNLK.K       | 1668.963 | 0.00198  | 2 | 1 | 45.1 | 0 |
| P12163_1_F7,15813 | K.EVTEIDNLK.K       | 1668.963 | 0.00658  | 3 | 1 | 35.7 | 0 |
| P12163_1_F7,15850 | K.EVTEIDNLK.K       | 1668.963 | 0.00578  | 2 | 1 | 37.3 | 0 |
| P12163_2_F1,16753 | K.EVTEIDNLK.K       | 1668.963 | 0.00938  | 2 | 1 | 48   | 0 |
| P12163_2_F1,16754 | K.EVTEIDNLK.K       | 1668.963 | 0.00997  | 3 | 1 | 41.1 | 0 |
| P12163_2_F4,15044 | K.EVTEIDNLK.K       | 1668.963 | 0.00192  | 2 | 1 | 42.6 | 0 |
| P12163_2_F7,14899 | K.EVTEIDNLK.K       | 1668.963 | 0.00202  | 3 | 1 | 22   | 0 |
| P12163_1_F9,15282 | K.EVTEIDNLKK.A      | 2101.263 | 0.00516  | 2 | 1 | 38.2 | 0 |
| P12163_2_F8_12070 | K.EVTEIDNLKK.A      | 2101.263 | 0.00857  | 4 | 1 | 31.3 | 0 |
| P12163_1_F2,11928 | K.GILSSVQDTASSVAK.T | 2071.185 | 0.00487  | 4 | 1 | 26.4 | 0 |
| P12163_1_F2,12967 | K.GILSSVQDTASSVAK.T | 2071.185 | 0.00374  | 3 | 1 | 34.8 | 0 |
| P12163_1_F2,12971 | K.GILSSVQDTASSVAK.T | 2071.185 | 0.00291  | 4 | 1 | 31.6 | 0 |
| P12163_1_F2,14075 | K.GILSSVQDTASSVAK.T | 2071.185 | 0.01143  | 3 | 1 | 64.2 | 0 |
| P12163_1_F2,14667 | K.GILSSVQDTASSVAK.T | 2071.185 | 0.01451  | 3 | 1 | 24.7 | 0 |
| P12163_1_F2,14864 | K.GILSSVQDTASSVAK.T | 2071.185 | 0.0005   | 2 | 1 | 43.2 | 0 |
| P12163_1_F2,14914 | K.GILSSVQDTASSVAK.T | 2071.185 | 0.00419  | 4 | 1 | 41.9 | 0 |
| P12163_1_F2,14998 | K.GILSSVQDTASSVAK.T | 2071.185 | 0.00299  | 3 | 1 | 42.3 | 0 |
| P12163_1_F2,15919 | K.GILSSVQDTASSVAK.T | 2071.185 | 0.00535  | 4 | 1 | 34   | 0 |
| P12163_1_F2,16404 | K.GILSSVQDTASSVAK.T | 2071.185 | 0.00228  | 2 | 1 | 67.1 | 0 |
| P12163_1_F2,16646 | K.GILSSVQDTASSVAK.T | 2071.185 | 0.0101   | 3 | 1 | 33   | 0 |

|                   |                     |          |         |   |   |      |   |
|-------------------|---------------------|----------|---------|---|---|------|---|
| P12163_1_F2,16671 | K.GILSSVQDTASSVAK.T | 2071.185 | 0.00262 | 2 | 1 | 27.2 | 0 |
| P12163_1_F2,16745 | K.GILSSVQDTASSVAK.T | 2071.185 | 0.00507 | 4 | 1 | 46   | 0 |
| P12163_1_F2,18110 | K.GILSSVQDTASSVAK.T | 2071.185 | 0.01458 | 3 | 1 | 51   | 0 |
| P12163_1_F2,19374 | K.GILSSVQDTASSVAK.T | 2071.185 | 0.00226 | 2 | 1 | 76.5 | 0 |
| P12163_1_F2,21257 | K.GILSSVQDTASSVAK.T | 2071.185 | 0.00864 | 3 | 1 | 46.7 | 0 |
| P12163_1_F3,12211 | K.GILSSVQDTASSVAK.T | 2071.185 | 0.00695 | 3 | 1 | 29.1 | 0 |
| P12163_1_F3,13369 | K.GILSSVQDTASSVAK.T | 2071.185 | 0.00554 | 3 | 1 | 43.9 | 0 |
| P12163_1_F3,13957 | K.GILSSVQDTASSVAK.T | 2071.185 | 0.00689 | 3 | 1 | 41.9 | 0 |
| P12163_1_F3,13996 | K.GILSSVQDTASSVAK.T | 2071.185 | 0.02099 | 4 | 1 | 35.3 | 0 |
| P12163_1_F3,14440 | K.GILSSVQDTASSVAK.T | 2071.185 | 0.00434 | 2 | 1 | 34.8 | 0 |
| P12163_1_F3,14580 | K.GILSSVQDTASSVAK.T | 2071.185 | 0.00839 | 3 | 1 | 53.7 | 0 |
| P12163_1_F3,15304 | K.GILSSVQDTASSVAK.T | 2071.185 | 0.00918 | 3 | 1 | 35.2 | 0 |
| P12163_1_F3,15322 | K.GILSSVQDTASSVAK.T | 2071.185 | 0.00308 | 2 | 1 | 47.6 | 0 |
| P12163_1_F3,16387 | K.GILSSVQDTASSVAK.T | 2071.185 | 0.01484 | 2 | 1 | 57.5 | 0 |
| P12163_1_F3,16456 | K.GILSSVQDTASSVAK.T | 2071.185 | 0.00379 | 4 | 1 | 28.6 | 0 |
| P12163_1_F3,16922 | K.GILSSVQDTASSVAK.T | 2071.185 | 0.0036  | 2 | 1 | 64.1 | 0 |
| P12163_1_F4,255   | K.GILSSVQDTASSVAK.T | 2071.185 | 0.00803 | 3 | 1 | 50.4 | 0 |
| P12163_1_F4,809   | K.GILSSVQDTASSVAK.T | 2071.185 | 0.00623 | 3 | 1 | 34.5 | 0 |
| P12163_1_F4,20553 | K.GILSSVQDTASSVAK.T | 2071.185 | 0.00752 | 3 | 1 | 37.8 | 0 |
| P12163_1_F5,19028 | K.GILSSVQDTASSVAK.T | 2071.185 | 0.00369 | 3 | 1 | 40.5 | 0 |
| P12163_1_F6,15254 | K.GILSSVQDTASSVAK.T | 2071.185 | 0.00812 | 3 | 1 | 35.8 | 0 |
| P12163_1_F6,18978 | K.GILSSVQDTASSVAK.T | 2071.185 | 0.00279 | 3 | 1 | 61.2 | 0 |
| P12163_1_F6,22206 | K.GILSSVQDTASSVAK.T | 2071.185 | 0.00261 | 3 | 1 | 46.8 | 0 |
| P12163_1_F7,14484 | K.GILSSVQDTASSVAK.T | 2071.185 | 0.00045 | 3 | 1 | 37.5 | 0 |
| P12163_1_F7,15797 | K.GILSSVQDTASSVAK.T | 2071.185 | 0.00167 | 3 | 1 | 22.8 | 0 |
| P12163_1_F7,18376 | K.GILSSVQDTASSVAK.T | 2071.185 | 0.00275 | 3 | 1 | 49.7 | 0 |
| P12163_1_F7,18419 | K.GILSSVQDTASSVAK.T | 2071.185 | 0.01168 | 2 | 1 | 30.5 | 0 |
| P12163_1_F8,15142 | K.GILSSVQDTASSVAK.T | 2071.185 | 0.00414 | 3 | 1 | 36.8 | 0 |
| P12163_1_S1,15417 | K.GILSSVQDTASSVAK.T | 2071.185 | 0.00434 | 3 | 1 | 51.4 | 0 |
| P12163_1_S10,1814 | K.GILSSVQDTASSVAK.T | 2071.185 | 0.0068  | 3 | 1 | 41.6 | 0 |
| P12163_2_F4,18016 | K.GILSSVQDTASSVAK.T | 2071.185 | 0.00262 | 2 | 1 | 75.6 | 0 |
| P12163_2_F6,14608 | K.GILSSVQDTASSVAK.T | 2071.185 | 0.00522 | 3 | 1 | 40.7 | 0 |
| P12163_2_S5,17808 | K.GILSSVQDTASSVAK.T | 2071.185 | 0.00725 | 3 | 1 | 51.8 | 0 |
| P12163_1_F4,21051 | K.IDLSPFK.G         | 1427.872 | 0.006   | 3 | 1 | 23.1 | 0 |
| P12163_1_F4,21291 | K.IDLSPFK.G         | 1427.872 | 0.00519 | 3 | 1 | 35   | 0 |
| P12163_1_F4,23288 | K.IDLSPFK.G         | 1427.872 | 0.0045  | 3 | 1 | 24.2 | 0 |
| P12163_1_F4,23556 | K.IDLSPFK.G         | 1427.872 | 0.00895 | 3 | 1 | 23.9 | 0 |
| P12163_1_F4,24778 | K.IDLSPFK.G         | 1427.872 | 0.00361 | 2 | 1 | 31.8 | 0 |
| P12163_1_F5,20155 | K.IDLSPFK.G         | 1427.872 | 0.00427 | 3 | 1 | 27.1 | 0 |
| P12163_1_F5,22298 | K.IDLSPFK.G         | 1427.872 | 0.00697 | 3 | 1 | 27.4 | 0 |
| P12163_1_F5,22517 | K.IDLSPFK.G         | 1427.872 | 0.00933 | 3 | 1 | 25.2 | 0 |
| P12163_1_F5,23303 | K.IDLSPFK.G         | 1427.872 | 0.00909 | 3 | 1 | 27.4 | 0 |
| P12163_1_F6,99    | K.IDLSPFK.G         | 1427.872 | 0.00599 | 2 | 1 | 27.9 | 0 |
| P12163_1_F6,104   | K.IDLSPFK.G         | 1427.872 | 0.00486 | 3 | 1 | 24.4 | 0 |
| P12163_1_F6,306   | K.IDLSPFK.G         | 1427.872 | 0.0072  | 3 | 1 | 25.6 | 0 |
| P12163_1_F6,575   | K.IDLSPFK.G         | 1427.872 | 0.00423 | 3 | 1 | 22.4 | 0 |
| P12163_1_F6,19967 | K.IDLSPFK.G         | 1427.872 | 0.0042  | 3 | 1 | 25.9 | 0 |
| P12163_1_F6,21161 | K.IDLSPFK.G         | 1427.872 | 0.00906 | 3 | 1 | 27.5 | 0 |
| P12163_1_F6,21211 | K.IDLSPFK.G         | 1427.872 | 0.00651 | 2 | 1 | 24.2 | 0 |
| P12163_1_F7,18744 | K.IDLSPFK.G         | 1427.872 | 0.00225 | 3 | 1 | 27.9 | 0 |
| P12163_1_F7,18778 | K.IDLSPFK.G         | 1427.872 | 0.00309 | 2 | 1 | 23.9 | 0 |

|                                      |          |          |   |   |      |   |
|--------------------------------------|----------|----------|---|---|------|---|
| P12163_1_F7,20423 K.IDLSPFK.G        | 1427.872 | 0.00618  | 3 | 1 | 23.7 | 0 |
| P12163_1_F8,19496 K.IDLSPFK.G        | 1427.872 | 0.00094  | 3 | 1 | 25.6 | 0 |
| P12163_1_F8,19748 K.IDLSPFK.G        | 1427.872 | 0.00114  | 3 | 1 | 26   | 0 |
| P12163_1_F9,19544 K.IDLSPFK.G        | 1427.872 | 0.00429  | 3 | 1 | 24.8 | 0 |
| P12163_1_S10,1873 K.IDLSPFK.G        | 1427.872 | 0.00918  | 3 | 1 | 24.9 | 0 |
| P12163_2_F1,20447 K.IDLSPFK.G        | 1427.872 | 0.00765  | 3 | 1 | 22.7 | 0 |
| P12163_2_F1,20657 K.IDLSPFK.G        | 1427.872 | 0.00324  | 3 | 1 | 26   | 0 |
| P12163_2_F2,16 K.IDLSPFK.G           | 1427.872 | 0.0058   | 3 | 1 | 26   | 0 |
| P12163_2_F2,749 K.IDLSPFK.G          | 1427.872 | 0.00796  | 3 | 1 | 25.8 | 0 |
| P12163_2_F2,20175 K.IDLSPFK.G        | 1427.872 | 0.00189  | 3 | 1 | 22.4 | 0 |
| P12163_2_F4,18124 K.IDLSPFK.G        | 1427.872 | -0.00068 | 3 | 1 | 25.7 | 0 |
| P12163_2_F4,18341 K.IDLSPFK.G        | 1427.872 | 0.00233  | 2 | 1 | 23.9 | 0 |
| P12163_2_F4,18349 K.IDLSPFK.G        | 1427.872 | 0.00132  | 3 | 1 | 26.1 | 0 |
| P12163_2_S5,18468 K.IDLSPFK.G        | 1427.872 | 0.00582  | 3 | 1 | 32.3 | 0 |
| P12163_1_F2,17736 K.NPTPAPTEALTLLNAK | 2259.317 | -0.00154 | 2 | 1 | 24.1 | 0 |
| P12163_1_F2,17853 K.NPTPAPTEALTLLNAK | 2259.317 | 0.00257  | 3 | 1 | 35.8 | 0 |
| P12163_1_F2,18217 K.NPTPAPTEALTLLNAK | 2259.317 | 0.00818  | 3 | 1 | 38.4 | 0 |
| P12163_1_F2,21566 K.NPTPAPTEALTLLNAK | 2259.317 | 0.00677  | 3 | 1 | 25.1 | 0 |
| P12163_1_F2,21619 K.NPTPAPTEALTLLNAK | 2259.317 | 0.00394  | 2 | 1 | 49.2 | 0 |
| P12163_1_F2,21627 K.NPTPAPTEALTLLNAK | 2259.317 | 0.00599  | 4 | 1 | 43.6 | 0 |
| P12163_1_F2,21869 K.NPTPAPTEALTLLNAK | 2259.317 | 0.00881  | 3 | 1 | 41.7 | 0 |
| P12163_1_F2,22077 K.NPTPAPTEALTLLNAK | 2259.317 | 0.00908  | 3 | 1 | 48.5 | 0 |
| P12163_1_F3,22318 K.NPTPAPTEALTLLNAK | 2259.317 | 0.00548  | 3 | 1 | 61.7 | 0 |
| P12163_1_F3,22340 K.NPTPAPTEALTLLNAK | 2259.317 | 0.0025   | 2 | 1 | 29.8 | 0 |
| P12163_1_F4,1123 K.NPTPAPTEALTLLNAK  | 2259.317 | 0.00587  | 3 | 1 | 23   | 0 |
| P12163_1_F4,23122 K.NPTPAPTEALTLLNAK | 2259.317 | 0.00143  | 3 | 1 | 42.4 | 0 |
| P12163_1_F5,21164 K.NPTPAPTEALTLLNAK | 2259.317 | 0.00248  | 3 | 1 | 44.2 | 0 |
| P12163_1_F5,21195 K.NPTPAPTEALTLLNAK | 2259.317 | 0.00044  | 2 | 1 | 32.3 | 0 |
| P12163_1_F5,21397 K.NPTPAPTEALTLLNAK | 2259.317 | 0.00095  | 3 | 1 | 49.8 | 0 |
| P12163_1_F5,22388 K.NPTPAPTEALTLLNAK | 2259.317 | 0.00224  | 3 | 1 | 23.8 | 0 |
| P12163_1_F5,22710 K.NPTPAPTEALTLLNAK | 2259.317 | 0.00344  | 3 | 1 | 50.3 | 0 |
| P12163_1_F6,205 K.NPTPAPTEALTLLNAK   | 2259.317 | 0.0011   | 3 | 1 | 26.3 | 0 |
| P12163_1_F6,21175 K.NPTPAPTEALTLLNAK | 2259.317 | 0.00458  | 3 | 1 | 58.3 | 0 |
| P12163_1_F6,21485 K.NPTPAPTEALTLLNAK | 2259.317 | 0.00512  | 3 | 1 | 64   | 0 |
| P12163_1_F7,20590 K.NPTPAPTEALTLLNAK | 2259.317 | 0.00104  | 3 | 1 | 61.4 | 0 |
| P12163_1_F8,21667 K.NPTPAPTEALTLLNAK | 2259.317 | -0.00163 | 3 | 1 | 38.3 | 0 |
| P12163_1_F8,21709 K.NPTPAPTEALTLLNAK | 2259.317 | 0.0022   | 2 | 1 | 25   | 0 |
| P12163_1_S1,16392 K.NPTPAPTEALTLLNAK | 2259.317 | 0.00471  | 4 | 1 | 27.4 | 0 |
| P12163_1_S1,16430 K.NPTPAPTEALTLLNAK | 2259.317 | 0.00372  | 2 | 1 | 32   | 0 |
| P12163_1_S1,16513 K.NPTPAPTEALTLLNAK | 2259.317 | 0.01619  | 3 | 1 | 32.8 | 0 |
| P12163_1_S1,17045 K.NPTPAPTEALTLLNAK | 2259.317 | 0.00535  | 4 | 1 | 35.3 | 0 |
| P12163_1_S1,17192 K.NPTPAPTEALTLLNAK | 2259.317 | 0.00617  | 3 | 1 | 34.5 | 0 |
| P12163_1_S1,20057 K.NPTPAPTEALTLLNAK | 2259.317 | 0.00251  | 4 | 1 | 65.7 | 0 |
| P12163_1_S1,20105 K.NPTPAPTEALTLLNAK | 2259.317 | 0.00378  | 2 | 1 | 76.4 | 0 |
| P12163_1_S1,20359 K.NPTPAPTEALTLLNAK | 2259.317 | 0.00139  | 4 | 1 | 73.7 | 0 |
| P12163_1_S1,20393 K.NPTPAPTEALTLLNAK | 2259.317 | 0.00914  | 3 | 1 | 43.9 | 0 |
| P12163_1_S1,20627 K.NPTPAPTEALTLLNAK | 2259.317 | 0.00767  | 3 | 1 | 37.8 | 0 |
| P12163_1_S1,20955 K.NPTPAPTEALTLLNAK | 2259.317 | 0.01013  | 3 | 1 | 28.3 | 0 |
| P12163_1_S1,24726 K.NPTPAPTEALTLLNAK | 2259.317 | 0.00437  | 3 | 1 | 24.1 | 0 |
| P12163_1_S1,24914 K.NPTPAPTEALTLLNAK | 2259.317 | 0.00641  | 3 | 1 | 24.5 | 0 |
| P12163_1_S1,25092 K.NPTPAPTEALTLLNAK | 2259.317 | 0.00341  | 3 | 1 | 29.9 | 0 |

|                   |                    |          |          |   |   |      |   |
|-------------------|--------------------|----------|----------|---|---|------|---|
| P12163_1_S1,25453 | K.NPTPAPTEALTLLNAK | 2259.317 | 0.00944  | 3 | 1 | 31.7 | 0 |
| P12163_1_S1,25723 | K.NPTPAPTEALTLLNAK | 2259.317 | 0.00995  | 3 | 1 | 30.2 | 0 |
| P12163_1_S1,25878 | K.NPTPAPTEALTLLNAK | 2259.317 | 0.00407  | 3 | 1 | 34.5 | 0 |
| P12163_1_S10,1950 | K.NPTPAPTEALTLLNAK | 2259.317 | 0.0062   | 3 | 1 | 31.1 | 0 |
| P12163_1_S10,1968 | K.NPTPAPTEALTLLNAK | 2259.317 | 0.00266  | 3 | 1 | 24.3 | 0 |
| P12163_2_F1,22581 | K.NPTPAPTEALTLLNAK | 2259.317 | 0.00527  | 3 | 1 | 51.2 | 0 |
| P12163_2_F2,21676 | K.NPTPAPTEALTLLNAK | 2259.317 | -0.00058 | 3 | 1 | 66.7 | 0 |
| P12163_2_F4,20091 | K.NPTPAPTEALTLLNAK | 2259.317 | 0.00668  | 3 | 1 | 37.8 | 0 |
| P12163_2_S3,17791 | K.NPTPAPTEALTLLNAK | 2259.317 | 0.00713  | 3 | 1 | 45   | 0 |
| P12163_2_S5,18708 | K.NPTPAPTEALTLLNAK | 2259.317 | 0.00701  | 3 | 1 | 41.3 | 0 |
| P12163_2_S5,19430 | K.NPTPAPTEALTLLNAK | 2259.317 | -0.01903 | 3 | 1 | 37.6 | 0 |
| P12163_1_F3,13637 | K.TISSQPPLK.F      | 1578.967 | 0.00358  | 2 | 1 | 40.7 | 0 |
| P12163_1_F4,12635 | K.TISSQPPLK.F      | 1578.967 | 0.00558  | 2 | 1 | 28.5 | 0 |
| P12163_1_F4,14066 | K.TISSQPPLK.F      | 1578.967 | 0.00651  | 3 | 1 | 26.2 | 0 |
| P12163_1_F4,14287 | K.TISSQPPLK.F      | 1578.967 | 0.00468  | 2 | 1 | 31.1 | 0 |
| P12163_1_F4,15964 | K.TISSQPPLK.F      | 1578.967 | 0.01312  | 2 | 1 | 35.8 | 0 |
| P12163_1_F4,16169 | K.TISSQPPLK.F      | 1578.967 | 0.00394  | 2 | 1 | 28.9 | 0 |
| P12163_1_F4,16604 | K.TISSQPPLK.F      | 1578.967 | 0.0058   | 2 | 1 | 26.2 | 0 |
| P12163_1_F4,17048 | K.TISSQPPLK.F      | 1578.967 | 0.00816  | 2 | 1 | 39   | 0 |
| P12163_1_F4,17524 | K.TISSQPPLK.F      | 1578.967 | 0.00322  | 2 | 1 | 27.1 | 0 |
| P12163_1_F4,17934 | K.TISSQPPLK.F      | 1578.967 | 0.0059   | 2 | 1 | 39.4 | 0 |
| P12163_1_F4,23222 | K.TISSQPPLK.F      | 1578.967 | 0.00474  | 3 | 1 | 24.5 | 0 |
| P12163_1_F4,23674 | K.TISSQPPLK.F      | 1578.967 | 0.00698  | 2 | 1 | 37.5 | 0 |
| P12163_1_F4,24193 | K.TISSQPPLK.F      | 1578.967 | 0.00768  | 2 | 1 | 39.5 | 0 |
| P12163_1_F4,24442 | K.TISSQPPLK.F      | 1578.967 | -0.00747 | 3 | 1 | 22.8 | 0 |
| P12163_1_F4,25662 | K.TISSQPPLK.F      | 1578.967 | 0.00108  | 2 | 1 | 30.2 | 0 |
| P12163_1_F5,12681 | K.TISSQPPLK.F      | 1578.967 | 0.01002  | 2 | 1 | 29.4 | 0 |
| P12163_1_F6,12969 | K.TISSQPPLK.F      | 1578.967 | 0.00216  | 3 | 1 | 24.3 | 0 |
| P12163_1_F6,13004 | K.TISSQPPLK.F      | 1578.967 | 0.00244  | 2 | 1 | 40.3 | 0 |
| P12163_1_F6,13547 | K.TISSQPPLK.F      | 1578.967 | 0.0063   | 2 | 1 | 40.5 | 0 |
| P12163_1_F7,12325 | K.TISSQPPLK.F      | 1578.967 | 0.00332  | 2 | 1 | 37.1 | 0 |
| P12163_1_F8,13499 | K.TISSQPPLK.F      | 1578.967 | 0.00522  | 2 | 1 | 31.2 | 0 |
| P12163_1_F9,13537 | K.TISSQPPLK.F      | 1578.967 | 0.00938  | 2 | 1 | 28.7 | 0 |
| P12163_1_F9,13570 | K.TISSQPPLK.F      | 1578.967 | 0.00993  | 3 | 1 | 22.8 | 0 |
| P12163_2_F1,13049 | K.TISSQPPLK.F      | 1578.967 | 0.00766  | 2 | 1 | 28.1 | 0 |
| P12163_2_F1,13093 | K.TISSQPPLK.F      | 1578.967 | 0.00699  | 3 | 1 | 28.8 | 0 |
| P12163_2_F1,13337 | K.TISSQPPLK.F      | 1578.967 | 0.00706  | 2 | 1 | 40.1 | 0 |
| P12163_2_F1,13566 | K.TISSQPPLK.F      | 1578.967 | 0.00584  | 2 | 1 | 39.4 | 0 |
| P12163_2_F2,3705  | K.TISSQPPLK.F      | 1578.967 | 0.00408  | 3 | 1 | 30.8 | 0 |
| P12163_2_F2,3817  | K.TISSQPPLK.F      | 1578.967 | 0.00544  | 2 | 1 | 33.5 | 0 |
| P12163_2_F2,13610 | K.TISSQPPLK.F      | 1578.967 | 0.01222  | 2 | 1 | 39.7 | 0 |
| P12163_2_F4,12022 | K.TISSQPPLK.F      | 1578.967 | 0.00164  | 2 | 1 | 24   | 0 |
| P12163_2_F4,12580 | K.TISSQPPLK.F      | 1578.967 | 0.00588  | 2 | 1 | 40.4 | 0 |
| P12163_2_F8_12070 | K.TISSQPPLK.F      | 1578.967 | 0.00918  | 2 | 1 | 32.6 | 0 |
| P12163_2_F9,12149 | K.TISSQPPLK.F      | 1578.967 | 0.00507  | 3 | 1 | 33.1 | 0 |
| P12163_2_S5,11585 | K.TISSQPPLK.F      | 1578.967 | 0.00153  | 3 | 1 | 22   | 0 |
| P12163_2_S5,11587 | K.TISSQPPLK.F      | 1578.967 | 0.00008  | 2 | 1 | 32.5 | 0 |
| P12163_2_S5,12312 | K.TISSQPPLK.F      | 1578.967 | 0.00856  | 2 | 1 | 34.2 | 0 |
| P12163_1_F4,14267 | R.AADDDEWGPEK.E    | 1840.917 | 0.00831  | 2 | 1 | 50.3 | 0 |
| P12163_1_F4,14278 | R.AADDDEWGPEK.E    | 1840.917 | 0.00455  | 3 | 1 | 36.5 | 0 |
| P12163_1_F3,19551 | R.ADAGSVFVFIK.E    | 1762.036 | 0.0052   | 3 | 1 | 23.8 | 0 |

|                    |                     |          |          |   |   |      |   |
|--------------------|---------------------|----------|----------|---|---|------|---|
| P12163_1_F3,19820  | R.ADAGSVFVFIK.E     | 1762.036 | 0.00622  | 3 | 1 | 23.2 | 0 |
| P12163_1_F3,23318  | R.ADAGSVFVFIK.E     | 1762.036 | 0.00277  | 2 | 1 | 59.8 | 0 |
| P12163_1_F3,23373  | R.ADAGSVFVFIK.E     | 1762.036 | 0.00049  | 3 | 1 | 54.7 | 0 |
| P12163_1_F3,23563  | R.ADAGSVFVFIK.E     | 1762.036 | 0.00609  | 2 | 1 | 67.7 | 0 |
| P12163_1_F3,23607  | R.ADAGSVFVFIK.E     | 1762.036 | 0.00412  | 3 | 1 | 53.3 | 0 |
| P12163_1_F3,23804  | R.ADAGSVFVFIK.E     | 1762.036 | 0.00477  | 2 | 1 | 60   | 0 |
| P12163_1_F3,24036  | R.ADAGSVFVFIK.E     | 1762.036 | 0.00387  | 2 | 1 | 57.2 | 0 |
| P12163_1_F3,24161  | R.ADAGSVFVFIK.E     | 1762.036 | 0.00331  | 3 | 1 | 48.2 | 0 |
| P12163_1_F3,24319  | R.ADAGSVFVFIK.E     | 1762.036 | 0.00667  | 2 | 1 | 55.7 | 0 |
| P12163_1_F3,24415  | R.ADAGSVFVFIK.E     | 1762.036 | 0.00574  | 3 | 1 | 44.7 | 0 |
| P12163_1_F3,24644  | R.ADAGSVFVFIK.E     | 1762.036 | 0.004    | 3 | 1 | 44.6 | 0 |
| P12163_1_F3,24890  | R.ADAGSVFVFIK.E     | 1762.036 | 0.00286  | 3 | 1 | 31.5 | 0 |
| P12163_1_F3,25151  | R.ADAGSVFVFIK.E     | 1762.036 | 0.00097  | 3 | 1 | 24   | 0 |
| P12163_1_F3,25794  | R.ADAGSVFVFIK.E     | 1762.036 | 0.00031  | 3 | 1 | 30.3 | 0 |
| P12163_1_F3,26120  | R.ADAGSVFVFIK.E     | 1762.036 | 0.00547  | 3 | 1 | 28.9 | 0 |
| P12163_1_F3,26751  | R.ADAGSVFVFIK.E     | 1762.036 | 0.00817  | 3 | 1 | 37.5 | 0 |
| P12163_1_F3,26972  | R.ADAGSVFVFIK.E     | 1762.036 | 0.00262  | 3 | 1 | 22   | 0 |
| P12163_1_F4,24223  | R.ADAGSVFVFIK.E     | 1762.036 | 0.00679  | 3 | 1 | 53.2 | 0 |
| P12163_1_F4,24227  | R.ADAGSVFVFIK.E     | 1762.036 | 0.00611  | 2 | 1 | 58.8 | 0 |
| P12163_1_F5,22662  | R.ADAGSVFVFIK.E     | 1762.036 | 0.00802  | 3 | 1 | 39.1 | 0 |
| P12163_1_F6,21930  | R.ADAGSVFVFIK.E     | 1762.036 | 0.00229  | 3 | 1 | 45.6 | 0 |
| P12163_1_F6,21940  | R.ADAGSVFVFIK.E     | 1762.036 | 0.00243  | 2 | 1 | 40.9 | 0 |
| P12163_1_F6,22154  | R.ADAGSVFVFIK.E     | 1762.036 | 0.0019   | 3 | 1 | 42.9 | 0 |
| P12163_1_F6,22377  | R.ADAGSVFVFIK.E     | 1762.036 | 0.00748  | 3 | 1 | 44.7 | 0 |
| P12163_1_F7,18206  | R.ADAGSVFVFIK.E     | 1762.036 | 0.00388  | 3 | 1 | 21.9 | 0 |
| P12163_1_F7,21240  | R.ADAGSVFVFIK.E     | 1762.036 | -0.0014  | 3 | 1 | 24.7 | 0 |
| P12163_1_F7,21601  | R.ADAGSVFVFIK.E     | 1762.036 | 0.00889  | 3 | 1 | 39.3 | 0 |
| P12163_1_F7,21609  | R.ADAGSVFVFIK.E     | 1762.036 | 0.00663  | 2 | 1 | 59.7 | 0 |
| P12163_1_F9,21777  | R.ADAGSVFVFIK.E     | 1762.036 | 0.00406  | 3 | 1 | 43.6 | 0 |
| P12163_1_S1,21713  | R.ADAGSVFVFIK.E     | 1762.036 | 0.00604  | 3 | 1 | 34.7 | 0 |
| P12163_1_S10,2052' | R.ADAGSVFVFIK.E     | 1762.036 | 0.00571  | 3 | 1 | 25.8 | 0 |
| P12163_2_F1,23668  | R.ADAGSVFVFIK.E     | 1762.036 | 0.00405  | 2 | 1 | 71.5 | 0 |
| P12163_2_F1,23681  | R.ADAGSVFVFIK.E     | 1762.036 | 0.0052   | 3 | 1 | 42.7 | 0 |
| P12163_2_F2,22605  | R.ADAGSVFVFIK.E     | 1762.036 | 0.00148  | 3 | 1 | 33.9 | 0 |
| P12163_2_F4,20695  | R.ADAGSVFVFIK.E     | 1762.036 | -0.00149 | 3 | 1 | 22.7 | 0 |
| P12163_2_F4,20989  | R.ADAGSVFVFIK.E     | 1762.036 | 0.00397  | 3 | 1 | 46.2 | 0 |
| P12163_2_F9,20448  | R.ADAGSVFVFIK.E     | 1762.036 | 0.00463  | 3 | 1 | 34.3 | 0 |
| P12163_2_S3,18493  | R.ADAGSVFVFIK.E     | 1762.036 | -0.00119 | 3 | 1 | 22.4 | 0 |
| P12163_1_F3,28319  | R.AEIVELITQLEAK.N   | 2065.236 | 0.00431  | 3 | 1 | 35.1 | 0 |
| P12163_1_F3,28510  | R.AEIVELITQLEAK.N   | 2065.236 | 0.00371  | 2 | 1 | 50.6 | 0 |
| P12163_1_F3,28575  | R.AEIVELITQLEAK.N   | 2065.236 | 0.00566  | 3 | 1 | 53.9 | 0 |
| P12163_1_F3,28795  | R.AEIVELITQLEAK.N   | 2065.236 | 0.01484  | 3 | 1 | 37.3 | 0 |
| P12163_1_F3,29087  | R.AEIVELITQLEAK.N   | 2065.236 | 0.00353  | 3 | 1 | 24.3 | 0 |
| P12163_1_F3,29252  | R.AEIVELITQLEAK.N   | 2065.236 | 0.00641  | 3 | 1 | 33.6 | 0 |
| P12163_1_F3,29601  | R.AEIVELITQLEAK.N   | 2065.236 | 0.00362  | 3 | 1 | 30.3 | 0 |
| P12163_1_F4,29111  | R.AEIVELITQLEAK.N   | 2065.236 | 0.00596  | 3 | 1 | 31.8 | 0 |
| P12163_1_F6,26421  | R.AEIVELITQLEAK.N   | 2065.236 | 0.00209  | 3 | 1 | 41.1 | 0 |
| P12163_1_F2,16458  | R.FAGPLATTSISTNAK.F | 2087.196 | 0.00318  | 3 | 1 | 24.1 | 0 |
| P12163_1_F2,18559  | R.FAGPLATTSISTNAK.F | 2087.196 | 0.00081  | 3 | 1 | 47.9 | 0 |
| P12163_1_F3,14576  | R.FAGPLATTSISTNAK.F | 2087.196 | 0.00811  | 4 | 1 | 23.5 | 0 |
| P12163_1_F3,14607  | R.FAGPLATTSISTNAK.F | 2087.196 | 0.00699  | 3 | 1 | 28.1 | 0 |

|                   |                     |          |          |   |   |      |   |
|-------------------|---------------------|----------|----------|---|---|------|---|
| P12163_1_F3,15176 | R.FAGPLATTSISTNAK.F | 2087.196 | 0.00375  | 3 | 1 | 27.5 | 0 |
| P12163_1_F3,16212 | R.FAGPLATTSISTNAK.F | 2087.196 | 0.00756  | 3 | 1 | 35.9 | 0 |
| P12163_1_F3,16235 | R.FAGPLATTSISTNAK.F | 2087.196 | 0.0026   | 2 | 1 | 61   | 0 |
| P12163_1_F3,16465 | R.FAGPLATTSISTNAK.F | 2087.196 | 0.00642  | 3 | 1 | 46.4 | 0 |
| P12163_1_F3,16887 | R.FAGPLATTSISTNAK.F | 2087.196 | 0.00292  | 2 | 1 | 52.5 | 0 |
| P12163_1_F3,17140 | R.FAGPLATTSISTNAK.F | 2087.196 | 0.00232  | 2 | 1 | 46.3 | 0 |
| P12163_1_F3,17259 | R.FAGPLATTSISTNAK.F | 2087.196 | 0.00825  | 3 | 1 | 42.6 | 0 |
| P12163_1_F3,17403 | R.FAGPLATTSISTNAK.F | 2087.196 | 0.00432  | 2 | 1 | 53.1 | 0 |
| P12163_1_F3,17572 | R.FAGPLATTSISTNAK.F | 2087.196 | 0.00504  | 3 | 1 | 46.1 | 0 |
| P12163_1_F3,19025 | R.FAGPLATTSISTNAK.F | 2087.196 | 0.00564  | 3 | 1 | 29.8 | 0 |
| P12163_1_F3,19072 | R.FAGPLATTSISTNAK.F | 2087.196 | 0.00442  | 2 | 1 | 78.5 | 0 |
| P12163_1_F3,19311 | R.FAGPLATTSISTNAK.F | 2087.196 | 0.0072   | 3 | 1 | 67.3 | 0 |
| P12163_1_F3,19342 | R.FAGPLATTSISTNAK.F | 2087.196 | 0.00118  | 2 | 1 | 75.4 | 0 |
| P12163_1_F5,16154 | R.FAGPLATTSISTNAK.F | 2087.196 | 0.00912  | 3 | 1 | 27.9 | 0 |
| P12163_1_F5,16652 | R.FAGPLATTSISTNAK.F | 2087.196 | 0.00693  | 3 | 1 | 35   | 0 |
| P12163_1_F5,17959 | R.FAGPLATTSISTNAK.F | 2087.196 | 0.00134  | 2 | 1 | 32.3 | 0 |
| P12163_1_F5,18326 | R.FAGPLATTSISTNAK.F | 2087.196 | 0.01488  | 3 | 1 | 50.5 | 0 |
| P12163_1_F6,16831 | R.FAGPLATTSISTNAK.F | 2087.196 | 0.00198  | 3 | 1 | 34   | 0 |
| P12163_1_F6,18072 | R.FAGPLATTSISTNAK.F | 2087.196 | 0.00522  | 3 | 1 | 34.8 | 0 |
| P12163_1_F6,18301 | R.FAGPLATTSISTNAK.F | 2087.196 | -0.00123 | 3 | 1 | 50.6 | 0 |
| P12163_1_F6,18545 | R.FAGPLATTSISTNAK.F | 2087.196 | 0.00291  | 3 | 1 | 23.6 | 0 |
| P12163_1_F6,22272 | R.FAGPLATTSISTNAK.F | 2087.196 | 0.00096  | 3 | 1 | 26.1 | 0 |
| P12163_1_F7,17753 | R.FAGPLATTSISTNAK.F | 2087.196 | 0.00336  | 3 | 1 | 65.5 | 0 |
| P12163_1_F8,18582 | R.FAGPLATTSISTNAK.F | 2087.196 | 0.00716  | 2 | 1 | 49.5 | 0 |
| P12163_1_S10,1735 | R.FAGPLATTSISTNAK.F | 2087.196 | 0.00516  | 3 | 1 | 39.6 | 0 |
| P12163_2_F1,16568 | R.FAGPLATTSISTNAK.F | 2087.196 | 0.00681  | 3 | 1 | 22.2 | 0 |
| P12163_2_F1,18840 | R.FAGPLATTSISTNAK.F | 2087.196 | 0.01359  | 3 | 1 | 47.6 | 0 |
| P12163_2_F1,18874 | R.FAGPLATTSISTNAK.F | 2087.196 | 0.00386  | 2 | 1 | 64.8 | 0 |
| P12163_2_F1,19099 | R.FAGPLATTSISTNAK.F | 2087.196 | 0.00846  | 3 | 1 | 65.5 | 0 |
| P12163_2_F1,19118 | R.FAGPLATTSISTNAK.F | 2087.196 | 0.0107   | 2 | 1 | 93.4 | 0 |
| P12163_2_F4,17069 | R.FAGPLATTSISTNAK.F | 2087.196 | 0.00054  | 3 | 1 | 64.9 | 0 |
| P12163_2_F4,17335 | R.FAGPLATTSISTNAK.F | 2087.196 | 0.00558  | 3 | 1 | 63   | 0 |
| P12163_2_F4,17350 | R.FAGPLATTSISTNAK.F | 2087.196 | 0.00452  | 2 | 1 | 33.5 | 0 |
| P12163_2_F6,18109 | R.FAGPLATTSISTNAK.F | 2087.196 | 0        | 3 | 1 | 54.4 | 0 |
| P12163_2_F6,18198 | R.FAGPLATTSISTNAK.F | 2087.196 | 0.00434  | 2 | 1 | 55.3 | 0 |
| P12163_2_F8_12070 | R.FAGPLATTSISTNAK.F | 2087.196 | 0.01239  | 3 | 1 | 37.4 | 0 |
| P12163_2_S3,15263 | R.FAGPLATTSISTNAK.F | 2087.196 | 0.00156  | 3 | 1 | 36.3 | 0 |
| P12163_1_F3,5433  | R.GLNATSETR.A       | 1252.68  | 0.00385  | 3 | 1 | 30.2 | 0 |
| P12163_1_F3,5633  | R.GLNATSETR.A       | 1252.68  | 0.00361  | 3 | 1 | 24.3 | 0 |
| P12163_1_F3,6823  | R.GLNATSETR.A       | 1252.68  | 0.00076  | 3 | 1 | 29.6 | 0 |
| P12163_1_F3,7047  | R.GLNATSETR.A       | 1252.68  | 0.00139  | 3 | 1 | 34.5 | 0 |
| P12163_1_F3,7140  | R.GLNATSETR.A       | 1252.68  | 0.00133  | 2 | 1 | 24.7 | 0 |
| P12163_1_F3,7506  | R.GLNATSETR.A       | 1252.68  | 0.00295  | 3 | 1 | 24.8 | 0 |
| P12163_1_F3,8652  | R.GLNATSETR.A       | 1252.68  | 0.00313  | 3 | 1 | 25.5 | 0 |
| P12163_1_F3,8831  | R.GLNATSETR.A       | 1252.68  | 0.00013  | 2 | 1 | 30.1 | 0 |
| P12163_1_F3,8889  | R.GLNATSETR.A       | 1252.68  | 0.00241  | 3 | 1 | 30.2 | 0 |
| P12163_1_F3,9069  | R.GLNATSETR.A       | 1252.68  | 0.00243  | 2 | 1 | 32   | 0 |
| P12163_1_F3,9819  | R.GLNATSETR.A       | 1252.68  | 0.00425  | 2 | 1 | 29.5 | 0 |
| P12163_1_F4,9184  | R.GLNATSETR.A       | 1252.68  | 0.00317  | 2 | 1 | 26.2 | 0 |
| P12163_1_F7,6002  | R.GLNATSETR.A       | 1252.68  | -0.00086 | 3 | 1 | 22.9 | 0 |
| P12163_2_F1,6398  | R.GLNATSETR.A       | 1252.68  | 0.00037  | 3 | 1 | 23.9 | 0 |

|                   |                        |          |          |   |   |      |   |
|-------------------|------------------------|----------|----------|---|---|------|---|
| P12163_2_F1,6692  | R.GLNATSETR.A          | 1252.68  | 0.00259  | 3 | 1 | 29.3 | 0 |
| P12163_2_F1,8446  | R.GLNATSETR.A          | 1252.68  | 0.00179  | 2 | 1 | 33.3 | 0 |
| P12163_2_F1,8686  | R.GLNATSETR.A          | 1252.68  | 0.00451  | 2 | 1 | 32.9 | 0 |
| P12163_2_F1,9590  | R.GLNATSETR.A          | 1252.68  | 0.00207  | 2 | 1 | 32.7 | 0 |
| P12163_2_F4,8020  | R.GLNATSETR.A          | 1252.68  | 0.00089  | 2 | 1 | 26.3 | 0 |
| P12163_1_F3,22005 | K.AFGMELLR.K           | 1240.702 | 0.0023   | 2 | 1 | 30.3 | 0 |
| P12163_1_F3,21394 | K.FELLER.G ! K.FELLER. | 1110.646 | 0.00149  | 2 | 1 | 29.2 | 0 |
| P12163_1_F4,22123 | K.FELLER.G ! K.FELLER. | 1110.646 | 0.00217  | 2 | 1 | 30.3 | 0 |
| P12163_2_F1,21494 | K.FELLER.G ! K.FELLER. | 1110.646 | 0.00209  | 2 | 1 | 27.2 | 0 |
| P12163_1_F4,17802 | K.FYTECLGM*K.L ! R.FY  | 1772.917 | 0.00416  | 3 | 1 | 40.7 | 0 |
| P12163_1_F5,16540 | K.FYTECLGM*K.L ! R.FY  | 1772.917 | 0.00551  | 2 | 1 | 29.9 | 0 |
| P12163_1_F5,18642 | K.FYTECLGM*K.L ! R.FY  | 1772.917 | 0.00746  | 3 | 1 | 25.5 | 0 |
| P12163_1_F9,16749 | K.FYTECLGM*K.L ! R.FY  | 1772.917 | 0.00681  | 2 | 1 | 29.6 | 0 |
| P12163_2_F1,16917 | K.FYTECLGM*K.L ! R.FY  | 1772.917 | 0.00632  | 3 | 1 | 35.4 | 0 |
| P12163_2_F8_12070 | K.FYTECLGM*K.L ! R.FY  | 1772.917 | 0.00395  | 3 | 1 | 38.6 | 0 |
| P12163_2_F8_12070 | K.FYTECLGM*K.L ! R.FY  | 1772.917 | 0.00683  | 3 | 1 | 23.2 | 0 |
| P12163_2_F9,15888 | K.FYTECLGM*K.L ! R.FY  | 1772.917 | 0.00656  | 3 | 1 | 38.4 | 0 |
| P12163_2_F9,17487 | K.FYTECLGM*K.L ! R.FY  | 1772.917 | 0.00746  | 3 | 1 | 41.3 | 0 |
| P12163_1_F4,19484 | K.FYTECLGMK.L ! R.FY   | 1756.922 | 0.00882  | 3 | 1 | 30.3 | 0 |
| P12163_1_F4,19589 | K.FYTECLGMK.L ! R.FY   | 1756.922 | 0.01355  | 2 | 1 | 39.5 | 0 |
| P12163_1_F4,19691 | K.FYTECLGMK.L ! R.FY   | 1756.922 | 0.00849  | 3 | 1 | 30.9 | 0 |
| P12163_1_F4,19771 | K.FYTECLGMK.L ! R.FY   | 1756.922 | 0.00917  | 2 | 1 | 38.6 | 0 |
| P12163_1_F4,19872 | K.FYTECLGMK.L ! R.FY   | 1756.922 | 0.00576  | 3 | 1 | 30.3 | 0 |
| P12163_1_F4,19959 | K.FYTECLGMK.L ! R.FY   | 1756.922 | 0.00839  | 2 | 1 | 40.5 | 0 |
| P12163_1_F4,20158 | K.FYTECLGMK.L ! R.FY   | 1756.922 | 0.00756  | 3 | 1 | 25.5 | 0 |
| P12163_1_F5,18583 | K.FYTECLGMK.L ! R.FY   | 1756.922 | 0.00941  | 3 | 1 | 25.2 | 0 |
| P12163_1_F6,18823 | K.FYTECLGMK.L ! R.FY   | 1756.922 | 0.01364  | 3 | 1 | 28.2 | 0 |
| P12163_1_F7,17567 | K.FYTECLGMK.L ! R.FY   | 1756.922 | 0.00138  | 3 | 1 | 27.6 | 0 |
| P12163_1_F9,18344 | K.FYTECLGMK.L ! R.FY   | 1756.922 | 0.0054   | 3 | 1 | 30.8 | 0 |
| P12163_1_F9,18377 | K.FYTECLGMK.L ! R.FY   | 1756.922 | 0.00599  | 2 | 1 | 36.4 | 0 |
| P12163_2_F1,18826 | K.FYTECLGMK.L ! R.FY   | 1756.922 | 0.00869  | 3 | 1 | 28.4 | 0 |
| P12163_2_F1,18827 | K.FYTECLGMK.L ! R.FY   | 1756.922 | 0.00685  | 2 | 1 | 40   | 0 |
| P12163_2_F1,19067 | K.FYTECLGMK.L ! R.FY   | 1756.922 | 0.00644  | 3 | 1 | 30.9 | 0 |
| P12163_2_F1,19070 | K.FYTECLGMK.L ! R.FY   | 1756.922 | 0.00751  | 2 | 1 | 40.2 | 0 |
| P12163_2_F1,19257 | K.FYTECLGMK.L ! R.FY   | 1756.922 | 0.00552  | 3 | 1 | 30.6 | 0 |
| P12163_2_F1,19280 | K.FYTECLGMK.L ! R.FY   | 1756.922 | 0.00899  | 2 | 1 | 30.7 | 0 |
| P12163_2_F8_12070 | K.FYTECLGMK.L ! R.FY   | 1756.922 | 0.00805  | 2 | 1 | 25.1 | 0 |
| P12163_2_F9,17438 | K.FYTECLGMK.L ! R.FY   | 1756.922 | 0.00739  | 2 | 1 | 41   | 0 |
| P12163_2_F9,17489 | K.FYTECLGMK.L ! R.FY   | 1756.922 | 0.00684  | 3 | 1 | 24.2 | 0 |
| P12163_2_S5,17186 | K.FYTECLGMK.L ! R.FY   | 1756.922 | 0.00135  | 3 | 1 | 28.7 | 0 |
| P12163_1_F2,18181 | K.GGNTVIAFIEDPDGYK     | 2304.233 | 0.00531  | 3 | 1 | 48.9 | 0 |
| P12163_1_F2,23101 | K.GGNTVIAFIEDPDGYK     | 2304.233 | 0.0057   | 3 | 1 | 51.4 | 0 |
| P12163_1_F8,22999 | K.GGNTVIAFIEDPDGYK     | 2304.233 | 0.00525  | 3 | 1 | 35.2 | 0 |
| P12163_1_S1,17411 | K.GGNTVIAFIEDPDGYK     | 2304.233 | 0.00452  | 4 | 1 | 30.9 | 0 |
| P12163_1_S1,22536 | K.GGNTVIAFIEDPDGYK     | 2304.233 | -0.00038 | 2 | 1 | 73.9 | 0 |
| P12163_1_S1,22542 | K.GGNTVIAFIEDPDGYK     | 2304.233 | 0.00351  | 4 | 1 | 45.7 | 0 |
| P12163_1_S1,22666 | K.GGNTVIAFIEDPDGYK     | 2304.233 | 0.00693  | 3 | 1 | 45.1 | 0 |
| P12163_1_F2,16829 | K.GNAYAQIAIGTDDVYF     | 2307.244 | 0.0053   | 3 | 1 | 24.7 | 0 |
| P12163_1_F3,17297 | K.GNAYAQIAIGTDDVYF     | 2307.244 | 0.0036   | 2 | 1 | 42.8 | 0 |
| P12163_1_F3,19117 | K.GNAYAQIAIGTDDVYF     | 2307.244 | 0.00779  | 3 | 1 | 60.6 | 0 |
| P12163_1_F3,19216 | K.GNAYAQIAIGTDDVYF     | 2307.244 | 0.00114  | 2 | 1 | 82.9 | 0 |

|                   |                       |          |          |   |   |      |   |
|-------------------|-----------------------|----------|----------|---|---|------|---|
| P12163_1_F3,19397 | K.GNAYAQIAIGTDDVYF    | 2307.244 | 0.00644  | 3 | 1 | 27.1 | 0 |
| P12163_1_F6,18353 | K.GNAYAQIAIGTDDVYF    | 2307.244 | 0.00278  | 3 | 1 | 41.9 | 0 |
| P12163_1_F8,18625 | K.GNAYAQIAIGTDDVYF    | 2307.244 | 0.00476  | 3 | 1 | 32.2 | 0 |
| P12163_2_F6,16358 | K.GNAYAQIAIGTDDVYF    | 2307.244 | 0.00818  | 3 | 1 | 33.4 | 0 |
| P12163_2_F6,18196 | K.GNAYAQIAIGTDDVYF    | 2307.244 | -0.01036 | 3 | 1 | 29.2 | 0 |
| P12163_2_F6,18234 | K.GNAYAQIAIGTDDVYF    | 2307.244 | -0.00818 | 2 | 1 | 45.2 | 0 |
| P12163_2_F7,16671 | K.GNAYAQIAIGTDDVYF    | 2307.244 | -0.00064 | 3 | 1 | 56.3 | 0 |
| P12163_2_F8_12070 | K.GNAYAQIAIGTDDVYF    | 2307.244 | 0.00584  | 3 | 1 | 24   | 0 |
| P12163_1_F3,20876 | K.ITACLDPDGWK.T ! K.I | 1884.015 | 0.00686  | 2 | 1 | 39.7 | 0 |
| P12163_1_F3,20903 | K.ITACLDPDGWK.T ! K.I | 1884.015 | 0.00327  | 3 | 1 | 46.3 | 0 |
| P12163_1_F4,21590 | K.ITACLDPDGWK.T ! K.I | 1884.015 | 0.01034  | 2 | 1 | 40.1 | 0 |
| P12163_1_F4,16634 | K.TVELIK.A ! R.TVELLK | 1310.85  | 0.00644  | 2 | 1 | 24.4 | 0 |
| P12163_1_F5,15405 | K.TVELIK.A ! R.TVELLK | 1310.85  | 0.00458  | 2 | 1 | 24.4 | 0 |
| P12163_2_F1,15590 | K.TVELIK.A ! R.TVELLK | 1310.85  | 0.00536  | 2 | 1 | 24.3 | 0 |
| P12163_1_F2,21903 | K.TVFVDNVDFLK.E       | 1905.094 | -0.00006 | 3 | 1 | 25.8 | 0 |
| P12163_1_F2,22659 | K.TVFVDNVDFLK.E       | 1905.094 | 0.00744  | 3 | 1 | 41.8 | 0 |
| P12163_1_F3,20536 | K.TVFVDNVDFLK.E       | 1905.094 | 0.00681  | 3 | 1 | 36.4 | 0 |
| P12163_1_F3,23392 | K.TVFVDNVDFLK.E       | 1905.094 | 0.00329  | 2 | 1 | 75   | 0 |
| P12163_1_F3,23409 | K.TVFVDNVDFLK.E       | 1905.094 | 0.00789  | 3 | 1 | 55   | 0 |
| P12163_1_F3,23631 | K.TVFVDNVDFLK.E       | 1905.094 | 0.00565  | 2 | 1 | 75.3 | 0 |
| P12163_1_F3,23642 | K.TVFVDNVDFLK.E       | 1905.094 | 0.00567  | 3 | 1 | 57.6 | 0 |
| P12163_1_F4,24307 | K.TVFVDNVDFLK.E       | 1905.094 | 0.00315  | 2 | 1 | 49   | 0 |
| P12163_1_F5,22251 | K.TVFVDNVDFLK.E       | 1905.094 | 0.00255  | 3 | 1 | 28   | 0 |
| P12163_1_F5,22484 | K.TVFVDNVDFLK.E       | 1905.094 | 0.00054  | 3 | 1 | 25.6 | 0 |
| P12163_1_F5,22698 | K.TVFVDNVDFLK.E       | 1905.094 | 0.00435  | 3 | 1 | 46.1 | 0 |
| P12163_1_F6,21837 | K.TVFVDNVDFLK.E       | 1905.094 | -0.00126 | 3 | 1 | 39.7 | 0 |
| P12163_1_F6,21885 | K.TVFVDNVDFLK.E       | 1905.094 | -0.00137 | 2 | 1 | 58.9 | 0 |
| P12163_1_F6,22040 | K.TVFVDNVDFLK.E       | 1905.094 | -0.00066 | 3 | 1 | 33.4 | 0 |
| P12163_1_F7,21627 | K.TVFVDNVDFLK.E       | 1905.094 | 0.00348  | 3 | 1 | 32.4 | 0 |
| P12163_1_S1,20729 | K.TVFVDNVDFLK.E       | 1905.094 | 0.00663  | 3 | 1 | 56.8 | 0 |
| P12163_1_S1,20793 | K.TVFVDNVDFLK.E       | 1905.094 | 0.00387  | 2 | 1 | 39.9 | 0 |
| P12163_1_F7,19173 | K.YDIGTGFGHFGIAVDD    | 2590.376 | 0.00087  | 3 | 1 | 31.3 | 0 |
| P12163_1_F7,20886 | K.YDIGTGFGHFGIAVDD    | 2590.376 | 0.00432  | 4 | 1 | 25.2 | 0 |
| P12163_1_F3,15410 | K.YTIAM*M*GYGPEDK.    | 2116.055 | 0.00744  | 3 | 1 | 31.2 | 0 |
| P12163_2_F7,17675 | K.YTIAM*M*GYGPEDK.    | 2116.055 | 0.00822  | 3 | 1 | 46.4 | 0 |
| P12163_1_F3,18005 | K.YTIAM*M*GYGPEDK.N   | 2100.06  | 0.00507  | 3 | 1 | 58.8 | 0 |
| P12163_2_F7,17677 | K.YTIAM*M*GYGPEDK.N   | 2100.06  | 0.00732  | 3 | 1 | 44.6 | 0 |
| P12163_1_F3,17976 | K.YTIAMM*GYGPEDK.N    | 2100.06  | 0.00321  | 2 | 1 | 52.4 | 0 |
| P12163_1_F3,20385 | K.YTIAMM*GYGPEDK.N    | 2100.06  | 0.01173  | 3 | 1 | 42.2 | 0 |
| P12163_1_F3,20408 | K.YTIAMM*GYGPEDK.N    | 2100.06  | 0.00447  | 2 | 1 | 51.2 | 0 |
| P12163_1_F3,20363 | K.YTIAMM*GYGPEDK.N    | 2084.065 | 0.00751  | 3 | 1 | 51.8 | 0 |
| P12163_1_F3,20365 | K.YTIAMM*GYGPEDK.N    | 2084.065 | 0.00447  | 2 | 1 | 70.4 | 0 |
| P12163_1_F6,19416 | K.YTIAMM*GYGPEDK.N    | 2084.065 | 0.00241  | 3 | 1 | 31.9 | 0 |
| P12163_1_F9,19440 | K.YTIAMM*GYGPEDK.N    | 2084.065 | 0.00339  | 2 | 1 | 26.3 | 0 |
| P12163_2_F7,17697 | K.YTIAMM*GYGPEDK.N    | 2084.065 | 0.00009  | 2 | 1 | 32.7 | 0 |
| P12163_1_F3,16385 | R.EPGPLPGINTK.I       | 1731.026 | 0.00728  | 2 | 1 | 29.2 | 0 |
| P12163_1_F3,16406 | R.EPGPLPGINTK.I       | 1731.026 | 0.00706  | 3 | 1 | 42.5 | 0 |
| P12163_1_F3,16742 | R.EPGPLPGINTK.I       | 1731.026 | 0.0058   | 3 | 1 | 26.4 | 0 |
| P12163_1_F3,17151 | R.EPGPLPGINTK.I       | 1731.026 | 0.00475  | 3 | 1 | 30.6 | 0 |
| P12163_1_F3,17186 | R.EPGPLPGINTK.I       | 1731.026 | 0.00696  | 2 | 1 | 28.6 | 0 |
| P12163_1_F3,17690 | R.EPGPLPGINTK.I       | 1731.026 | 0.01036  | 2 | 1 | 37.7 | 0 |



|                   |                        |          |          |   |   |      |   |
|-------------------|------------------------|----------|----------|---|---|------|---|
| P12163_1_F4,16907 | R.EPGPLPGINTK.I        | 1731.026 | 0.00409  | 3 | 1 | 33.2 | 0 |
| P12163_1_F5,15589 | R.EPGPLPGINTK.I        | 1731.026 | 0.0054   | 2 | 1 | 33.5 | 0 |
| P12163_1_F6,15664 | R.EPGPLPGINTK.I        | 1731.026 | 0.00148  | 3 | 1 | 24.9 | 0 |
| P12163_2_F1,16055 | R.EPGPLPGINTK.I        | 1731.026 | 0.00818  | 2 | 1 | 33.7 | 0 |
| P12163_2_F4,14558 | R.EPGPLPGINTK.I        | 1731.026 | 0.00151  | 3 | 1 | 25.4 | 0 |
| P12163_2_F4,14582 | R.EPGPLPGINTK.I        | 1731.026 | 0        | 2 | 1 | 27.8 | 0 |
| P12163_2_S3,13251 | R.EPGPLPGINTK.I        | 1731.026 | -0.00287 | 3 | 1 | 34.6 | 0 |
| P12163_2_F1,9192  | R.EPGPVK.G             | 1234.762 | 0.00276  | 3 | 1 | 23.8 | 0 |
| P12163_2_F1,9767  | R.EPGPVK.G             | 1234.762 | 0.00642  | 3 | 1 | 26.9 | 0 |
| P12163_2_S5,8461  | R.EPGPVK.G             | 1234.762 | 0.00102  | 3 | 1 | 26.2 | 0 |
| P12163_1_S1,17533 | R.GPTPEPLCQVMLR.V      | 1801.961 | 0.00431  | 3 | 1 | 48.2 | 0 |
| P12163_1_S1,18749 | R.GPTPEPLCQVMLR.V      | 1801.961 | 0.00908  | 2 | 1 | 25.6 | 0 |
| P12163_1_S1,18757 | R.GPTPEPLCQVMLR.V      | 1801.961 | 0.00356  | 3 | 1 | 45.1 | 0 |
| P12163_1_S1,18966 | R.GPTPEPLCQVMLR.V      | 1801.961 | 0.00608  | 3 | 1 | 48.4 | 0 |
| P12163_1_F5,11148 | R.M*LHV VYR.V          | 1237.703 | 0.00188  | 3 | 1 | 25.7 | 0 |
| P12163_1_F9,12145 | R.M*LHV VYR.V          | 1237.703 | 0.00138  | 3 | 1 | 26   | 0 |
| P12163_1_F9,15306 | R.M*LHV VYR.V          | 1237.703 | 0.00552  | 3 | 1 | 25.9 | 0 |
| P12163_1_S10,1538 | R.M*LHV VYR.V          | 1237.703 | 0.0053   | 3 | 1 | 23.7 | 0 |
| P12163_2_F4,11177 | R.M*LHV VYR.V          | 1237.703 | 0.0044   | 3 | 1 | 28.4 | 0 |
| P12163_2_F4,14461 | R.M*LHV VYR.V          | 1237.703 | 0.00372  | 3 | 1 | 24.1 | 0 |
| P12163_2_F9,14317 | R.M*LHV VYR.V          | 1237.703 | 0.00165  | 3 | 1 | 23.3 | 0 |
| P12163_1_F9,15291 | R.MLHV VYR.V           | 1221.708 | 0.00285  | 3 | 1 | 35.1 | 0 |
| P12163_2_F10,1396 | R.MLHV VYR.V           | 1221.708 | 0.00042  | 3 | 1 | 22.1 | 0 |
| P12163_2_F4,14426 | R.MLHV VYR.V           | 1221.708 | 0.00501  | 3 | 1 | 31   | 0 |
| P12163_2_F7,13894 | R.MLHV VYR.V           | 1221.708 | 0.00225  | 3 | 1 | 25.4 | 0 |
| P12163_2_F9,14286 | R.MLHV VYR.V           | 1221.708 | 0.00243  | 3 | 1 | 31.7 | 0 |
| P12163_2_F9,14499 | R.MLHV VYR.V           | 1221.708 | 0.00267  | 3 | 1 | 32   | 0 |
| P12163_1_F5,15677 | R.SINFYEK.A ! R.SINFYE | 1508.857 | 0.00849  | 2 | 1 | 42.9 | 0 |
| P12163_1_F7,15421 | R.SINFYEK.A ! R.SINFYE | 1508.857 | 0.00661  | 2 | 1 | 24.5 | 0 |
| P12163_1_F9,15952 | R.SINFYEK.A ! R.SINFYE | 1508.857 | 0.00585  | 2 | 1 | 31.3 | 0 |
| P12163_1_S10,1588 | R.SINFYEK.A ! R.SINFYE | 1508.857 | 0.00706  | 3 | 1 | 27.7 | 0 |
| P12163_2_F2,16426 | R.SINFYEK.A ! R.SINFYE | 1508.857 | 0.00508  | 3 | 1 | 26   | 0 |
| P12163_2_F2,16589 | R.SINFYEK.A ! R.SINFYE | 1508.857 | 0.00591  | 2 | 1 | 29.6 | 0 |
| P12163_2_S5,14745 | R.SINFYEK.A ! R.SINFYE | 1508.857 | -0.00029 | 3 | 1 | 25.2 | 0 |
| P12163_2_F7,6136  | K.AEDEEHK.K            | 1465.774 | 0.00422  | 2 | 1 | 26.2 | 0 |
| P12163_1_F7,11571 | K.ATAGDTHLGGEDFDN      | 1979.936 | 0.00221  | 3 | 1 | 31.1 | 0 |
| P12163_1_F8,9335  | K.ATAGDTHLGGEDFDN      | 1979.936 | 0.00154  | 4 | 1 | 32.9 | 0 |
| P12163_1_F8,10350 | K.ATAGDTHLGGEDFDN      | 1979.936 | 0.00474  | 4 | 1 | 44.7 | 0 |
| P12163_1_F8,10358 | K.ATAGDTHLGGEDFDN      | 1979.936 | 0.00495  | 2 | 1 | 39   | 0 |
| P12163_1_F8,10594 | K.ATAGDTHLGGEDFDN      | 1979.936 | 0.00784  | 3 | 1 | 35.8 | 0 |
| P12163_1_F8,10598 | K.ATAGDTHLGGEDFDN      | 1979.936 | 0.00085  | 2 | 1 | 45.7 | 0 |
| P12163_1_F8,10606 | K.ATAGDTHLGGEDFDN      | 1979.936 | 0.0029   | 4 | 1 | 38.9 | 0 |
| P12163_1_F8,12056 | K.ATAGDTHLGGEDFDN      | 1979.936 | 0.00302  | 3 | 1 | 55.8 | 0 |
| P12163_1_F8,12232 | K.ATAGDTHLGGEDFDN      | 1979.936 | 0.00173  | 2 | 1 | 44.6 | 0 |
| P12163_2_F9,11279 | K.ATAGDTHLGGEDFDN      | 1979.936 | 0.00163  | 3 | 1 | 61.8 | 0 |
| P12163_2_S5,9391  | K.ATAGDTHLGGEDFDN      | 1979.936 | 0.00354  | 4 | 1 | 35.8 | 0 |
| P12163_2_S5,10362 | K.ATAGDTHLGGEDFDN      | 1979.936 | 0.00242  | 4 | 1 | 55.1 | 0 |
| P12163_2_S5,10365 | K.ATAGDTHLGGEDFDN      | 1979.936 | 0.00311  | 3 | 1 | 39.6 | 0 |
| P12163_2_S5,10368 | K.ATAGDTHLGGEDFDN      | 1979.936 | 0.01013  | 2 | 1 | 35   | 0 |
| P12163_2_S5,10564 | K.ATAGDTHLGGEDFDN      | 1979.936 | 0.00286  | 4 | 1 | 37.9 | 0 |
| P12163_2_S5,11889 | K.ATAGDTHLGGEDFDN      | 1979.936 | 0.0021   | 4 | 1 | 49.3 | 0 |

|                   |                       |          |          |   |   |      |   |
|-------------------|-----------------------|----------|----------|---|---|------|---|
| P12163_2_S5,11953 | K.ATAGDTHLGGEDFDN     | 1979.936 | -0.00161 | 3 | 1 | 41   | 0 |
| P12163_1_F5,11319 | K.CMEPVEK.C           | 1500.801 | 0.00642  | 2 | 1 | 25.4 | 0 |
| P12163_1_S1,19382 | K.DAGVIAGLNVMR.I      | 1519.857 | 0.00158  | 3 | 1 | 52.4 | 0 |
| P12163_1_S1,19420 | K.DAGVIAGLNVMR.I      | 1519.857 | 0.00348  | 2 | 1 | 42.7 | 0 |
| P12163_1_F3,20353 | K.ELESICNPIIAK.M      | 1995.14  | 0.00225  | 2 | 1 | 69.9 | 0 |
| P12163_1_F3,20364 | K.ELESICNPIIAK.M      | 1995.14  | 0.00408  | 3 | 1 | 58   | 0 |
| P12163_1_F4,12357 | K.MVQEAEK.Y ! R.MVQI  | 1442.813 | 0.00599  | 2 | 1 | 28.1 | 0 |
| P12163_1_F5,10859 | K.MVQEAEK.Y ! R.MVQI  | 1442.813 | 0.00519  | 2 | 1 | 26.8 | 0 |
| P12163_1_F5,10908 | K.MVQEAEK.Y ! R.MVQI  | 1442.813 | 0.00899  | 3 | 1 | 35.2 | 0 |
| P12163_1_F6,11909 | K.MVQEAEK.Y ! R.MVQI  | 1442.813 | 0.00945  | 2 | 1 | 30.4 | 0 |
| P12163_2_F1,11370 | K.MVQEAEK.Y ! R.MVQI  | 1442.813 | 0.00503  | 2 | 1 | 27.8 | 0 |
| P12163_2_F1,11390 | K.MVQEAEK.Y ! R.MVQI  | 1442.813 | 0.00722  | 3 | 1 | 39.8 | 0 |
| P12163_1_F3,17989 | K.NALENYAYNMR.N       | 1662.821 | 0.00301  | 2 | 1 | 33.4 | 0 |
| P12163_1_F9,17110 | K.NALENYAYNMR.N       | 1662.821 | -0.00229 | 2 | 1 | 36.7 | 0 |
| P12163_2_F1,17641 | K.NALENYAYNMR.N       | 1662.821 | 0.00091  | 2 | 1 | 31.7 | 0 |
| P12163_2_F9,16815 | K.NALENYAYNMR.N       | 1662.821 | 0.00245  | 2 | 1 | 38.5 | 0 |
| P12163_2_F9,16832 | K.NALENYAYNMR.N       | 1662.821 | 0.00103  | 3 | 1 | 34   | 0 |
| P12163_1_F8,18778 | K.NAVVTVPAYFNDSQR     | 1985.039 | -0.00348 | 2 | 1 | 30.4 | 0 |
| P12163_1_F8,18854 | K.NAVVTVPAYFNDSQR     | 1985.039 | 0.00299  | 3 | 1 | 33.4 | 0 |
| P12163_1_S1,17806 | K.NAVVTVPAYFNDSQR     | 1985.039 | 0.01346  | 2 | 1 | 36.9 | 0 |
| P12163_1_S1,17812 | K.NAVVTVPAYFNDSQR     | 1985.039 | 0.00257  | 3 | 1 | 27.2 | 0 |
| P12163_2_F6,18372 | K.NAVVTVPAYFNDSQR     | 1985.039 | 0.00464  | 2 | 1 | 47.4 | 0 |
| P12163_2_F6,18440 | K.NAVVTVPAYFNDSQR     | 1985.039 | -0.00088 | 3 | 1 | 39.9 | 0 |
| P12163_1_F3,12540 | K.NQVAM*NPTNTVFDA     | 2274.201 | 0.00524  | 3 | 1 | 58   | 0 |
| P12163_1_F3,15916 | K.NQVAM*NPTNTVFDA     | 2274.201 | 0.00051  | 2 | 1 | 33.5 | 0 |
| P12163_1_F3,15954 | K.NQVAM*NPTNTVFDA     | 2274.201 | 0.00734  | 3 | 1 | 61.1 | 0 |
| P12163_1_F3,17841 | K.NQVAM*NPTNTVFDA     | 2274.201 | 0.00563  | 3 | 1 | 30.2 | 0 |
| P12163_1_F3,14508 | K.NQVAMNPTNTVFDAK     | 2258.206 | 0.01079  | 3 | 1 | 49.6 | 0 |
| P12163_1_F3,14558 | K.NQVAMNPTNTVFDAK     | 2258.206 | 0.01558  | 2 | 1 | 34.2 | 0 |
| P12163_1_F3,17827 | K.NQVAMNPTNTVFDAK     | 2258.206 | 0.00496  | 2 | 1 | 47.3 | 0 |
| P12163_1_F3,17835 | K.NQVAMNPTNTVFDAK     | 2258.206 | 0.00581  | 3 | 1 | 56.6 | 0 |
| P12163_2_F1,17715 | K.NQVAMNPTNTVFDAK     | 2258.206 | 0.0086   | 3 | 1 | 31.2 | 0 |
| P12163_2_F1,17732 | K.NQVAMNPTNTVFDAK     | 2258.206 | 0.0022   | 2 | 1 | 39.1 | 0 |
| P12163_1_F3,25377 | K.QFAAEEISSMVLIK.M    | 2174.235 | 0.00592  | 3 | 1 | 49.2 | 0 |
| P12163_1_F7,13495 | K.STVHDVVLVGGSTR.I    | 1730.97  | 0.00262  | 3 | 1 | 31.4 | 0 |
| P12163_1_F7,13515 | K.STVHDVVLVGGSTR.I    | 1730.97  | 0.00321  | 2 | 1 | 55.8 | 0 |
| P12163_1_F8,14064 | K.STVHDVVLVGGSTR.I    | 1730.97  | 0.00271  | 3 | 1 | 25.2 | 0 |
| P12163_1_F8,14080 | K.STVHDVVLVGGSTR.I    | 1730.97  | 0.00279  | 2 | 1 | 53.7 | 0 |
| P12163_1_S1,23194 | R.FEELNM*DLFR.K       | 1633.82  | 0.00103  | 3 | 1 | 40.2 | 0 |
| P12163_1_S1,23396 | R.FEELNM*DLFR.K       | 1633.82  | 0.00348  | 2 | 1 | 42.5 | 0 |
| P12163_1_S1,23417 | R.FEELNM*DLFR.K       | 1633.82  | 0.00235  | 3 | 1 | 57.6 | 0 |
| P12163_1_F2,22404 | R.IINEPTAAAIAAYGLDK.I | 2268.306 | 0.00735  | 3 | 1 | 45.2 | 0 |
| P12163_1_F4,23908 | R.IINEPTAAAIAAYGLDK.I | 2268.306 | 0.00405  | 3 | 1 | 59.2 | 0 |
| P12163_1_F5,22034 | R.IINEPTAAAIAAYGLDK.I | 2268.306 | 0.00048  | 3 | 1 | 35.6 | 0 |
| P12163_1_F8,22408 | R.IINEPTAAAIAAYGLDK.I | 2268.306 | 0.00681  | 3 | 1 | 49.7 | 0 |
| P12163_1_S1,21321 | R.IINEPTAAAIAAYGLDK.I | 2268.306 | 0.00492  | 3 | 1 | 53.3 | 0 |
| P12163_1_S1,21346 | R.IINEPTAAAIAAYGLDK.I | 2268.306 | -0.00297 | 2 | 1 | 75.2 | 0 |
| P12163_1_S1,21375 | R.IINEPTAAAIAAYGLDK.I | 2268.306 | 0.00752  | 4 | 1 | 61   | 0 |
| P12163_1_S1,21490 | R.IINEPTAAAIAAYGLDK.I | 2268.306 | 0.0003   | 3 | 1 | 54.8 | 0 |
| P12163_1_S10,2039 | R.IINEPTAAAIAAYGLDK.I | 2268.306 | 0.00414  | 3 | 1 | 22.1 | 0 |
| P12163_1_F9,17016 | R.M*VNHFVQEFK.R       | 1903.036 | 0.00793  | 2 | 1 | 24.1 | 0 |

|                   |                        |          |          |   |   |      |   |
|-------------------|------------------------|----------|----------|---|---|------|---|
| P12163_1_F9,19653 | R.M*VNHFVQEFK.R        | 1903.036 | 0.00674  | 3 | 1 | 24.3 | 0 |
| P12163_1_F9,20038 | R.M*VNHFVQEFK.R        | 1903.036 | 0.00752  | 3 | 1 | 26.5 | 0 |
| P12163_2_F7,15183 | R.M*VNHFVQEFK.R        | 1903.036 | 0.00599  | 3 | 1 | 42   | 0 |
| P12163_2_F9,19029 | R.MVNHFVQEFK.R         | 1887.041 | 0.01061  | 3 | 1 | 33   | 0 |
| P12163_2_F9,19097 | R.MVNHFVQEFK.R         | 1887.041 | 0.00653  | 3 | 1 | 33   | 0 |
| P12163_1_S1,14498 | R.VEIIANDQGNR.I ! R.VI | 1532.833 | 0.00335  | 2 | 1 | 30.8 | 0 |
| P12163_1_S1,14657 | R.VEIIANDQGNR.I ! R.VI | 1532.833 | 0.00328  | 3 | 1 | 71.6 | 0 |
| P12163_1_S1,14739 | R.VEIIANDQGNR.I ! R.VI | 1532.833 | 0.00397  | 2 | 1 | 33.7 | 0 |
| P12163_1_S1,14901 | R.VEIIANDQGNR.I ! R.VI | 1532.833 | 0.00187  | 3 | 1 | 69.2 | 0 |
| P12163_1_S1,14978 | R.VEIIANDQGNR.I ! R.VI | 1532.833 | 0.00507  | 2 | 1 | 32   | 0 |
| P12163_1_S10,199  | R.VEIIANDQGNR.I ! R.VI | 1532.833 | 0.00184  | 3 | 1 | 35.4 | 0 |
| P12163_1_S10,276  | R.VEIIANDQGNR.I ! R.VI | 1532.833 | 0.00555  | 2 | 1 | 29.8 | 0 |
| P12163_1_F9,10048 | K.HEQELQAPQK.I         | 1816.017 | 0.00471  | 2 | 1 | 40.3 | 0 |
| P12163_2_F9,9877  | K.HEQELQAPQK.I         | 1816.017 | 0.00983  | 3 | 1 | 25.3 | 0 |
| P12163_1_F2,23628 | K.LADELGFPVM*IK.A      | 1957.129 | 0.00359  | 3 | 1 | 28.3 | 0 |
| P12163_1_F3,24618 | K.LADELGFPVM*IK.A      | 1957.129 | -0.00211 | 3 | 1 | 36.1 | 0 |
| P12163_1_F3,24620 | K.LADELGFPVM*IK.A      | 1957.129 | -0.00071 | 2 | 1 | 26.3 | 0 |
| P12163_1_F3,26146 | K.LADELGFPVM*IK.A      | 1957.129 | 0.0023   | 3 | 1 | 37.6 | 0 |
| P12163_1_F3,26108 | K.LADELGFPVMIK.A       | 1941.134 | 0.01235  | 3 | 1 | 26.9 | 0 |
| P12163_1_F3,26113 | K.LADELGFPVMIK.A       | 1941.134 | 0.00507  | 2 | 1 | 43.7 | 0 |
| P12163_1_F3,25336 | K.LILDVEDFK.N          | 1700.009 | 0.00519  | 3 | 1 | 37.7 | 0 |
| P12163_1_F3,25342 | K.LILDVEDFK.N          | 1700.009 | 0.00831  | 2 | 1 | 53.8 | 0 |
| P12163_1_F8,14619 | K.QEDIVLQGHSIECR.I     | 1988.017 | 0.0048   | 3 | 1 | 31.9 | 0 |
| P12163_1_F8,14648 | K.QEDIVLQGHSIECR.I     | 1988.017 | -0.00146 | 2 | 1 | 39.8 | 0 |
| P12163_2_F6,14116 | K.QEDIVLQGHSIECR.I     | 1988.017 | 0.00534  | 3 | 1 | 31.5 | 0 |
| P12163_2_S5,13930 | K.QEDIVLQGHSIECR.I     | 1988.017 | 0.00408  | 3 | 1 | 28.1 | 0 |
| P12163_1_F3,16915 | K.SEAAAAFGNDGVYLE      | 2250.186 | 0.00339  | 3 | 1 | 40.9 | 0 |
| P12163_1_F3,16983 | K.SEAAAAFGNDGVYLE      | 2250.186 | 0.0016   | 2 | 1 | 38.4 | 0 |
| P12163_1_F3,19247 | K.SEAAAAFGNDGVYLE      | 2250.186 | 0.00561  | 3 | 1 | 63.3 | 0 |
| P12163_1_F3,19288 | K.SEAAAAFGNDGVYLE      | 2250.186 | 0.00288  | 2 | 1 | 73.5 | 0 |
| P12163_1_F6,18403 | K.SEAAAAFGNDGVYLE      | 2250.186 | 0.00549  | 3 | 1 | 28.7 | 0 |
| P12163_1_S1,17597 | K.SEAAAAFGNDGVYLE      | 2250.186 | 0.00483  | 3 | 1 | 63.2 | 0 |
| P12163_2_F6,18373 | K.SEAAAAFGNDGVYLE      | 2250.186 | 0.00066  | 2 | 1 | 64.1 | 0 |
| P12163_2_F6,18416 | K.SEAAAAFGNDGVYLE      | 2250.186 | 0.00546  | 3 | 1 | 39.2 | 0 |
| P12163_1_F3,18355 | K.VDTAFIPK.H           | 1498.909 | 0.00393  | 2 | 1 | 30   | 0 |
| P12163_1_F7,16570 | K.VDTAFIPK.H           | 1498.909 | -0.00014 | 3 | 1 | 26.5 | 0 |
| P12163_2_F4,16177 | K.VDTAFIPK.H           | 1498.909 | 0.00043  | 3 | 1 | 29.2 | 0 |
| P12163_2_F4,16271 | K.VDTAFIPK.H           | 1498.909 | 0.00189  | 2 | 1 | 29.3 | 0 |
| P12163_1_F5,14337 | K.YGNVVHFGER.D         | 1481.78  | 0.00589  | 3 | 1 | 28.5 | 0 |
| P12163_1_F6,15182 | K.YGNVVHFGER.D         | 1481.78  | -0.00359 | 3 | 1 | 40.2 | 0 |
| P12163_1_F6,15193 | K.YGNVVHFGER.D         | 1481.78  | 0.0025   | 2 | 1 | 27.1 | 0 |
| P12163_1_F9,14810 | K.YGNVVHFGER.D         | 1481.78  | 0.00205  | 3 | 1 | 29.6 | 0 |
| P12163_1_F9,14824 | K.YGNVVHFGER.D         | 1481.78  | 0.00348  | 2 | 1 | 31.3 | 0 |
| P12163_2_F4,13968 | K.YGNVVHFGER.D         | 1481.78  | 0.00232  | 3 | 1 | 31.6 | 0 |
| P12163_2_F7,13517 | K.YGNVVHFGER.D         | 1481.78  | 0.0028   | 3 | 1 | 23.5 | 0 |
| P12163_2_F7,13578 | K.YGNVVHFGER.D         | 1481.78  | 0.00262  | 2 | 1 | 28.1 | 0 |
| P12163_2_F9,14180 | K.YGNVVHFGER.D         | 1481.78  | 0.00043  | 3 | 1 | 31.2 | 0 |
| P12163_2_F9,14221 | K.YGNVVHFGER.D         | 1481.78  | 0.0024   | 2 | 1 | 35.1 | 0 |
| P12163_2_S5,14469 | K.YGNVVHFGER.D         | 1481.78  | 0.00265  | 3 | 1 | 25.8 | 0 |
| P12163_1_F6,20254 | R.ALNDTIITGVPTTIEYH    | 2594.465 | 0.00635  | 3 | 1 | 36.5 | 0 |
| P12163_1_S10,1871 | R.ALNDTIITGVPTTIEYH    | 2594.465 | 0.0098   | 3 | 1 | 22   | 0 |

|                    |                     |          |          |   |   |      |   |
|--------------------|---------------------|----------|----------|---|---|------|---|
| P12163_2_F10,1762  | R.ALNDTIITGVPTTIEYH | 2594.465 | 0.00542  | 3 | 1 | 57.1 | 0 |
| P12163_2_F10,1774  | R.ALNDTIITGVPTTIEYH | 2594.465 | -0.01274 | 4 | 1 | 40.8 | 0 |
| P12163_1_F6,17525  | R.EHGINFIGPNPDSIR.I | 1970.04  | 0.01222  | 3 | 1 | 29.2 | 0 |
| P12163_1_F8,14963  | R.EHGINFIGPNPDSIR.I | 1970.04  | 0.00427  | 3 | 1 | 57.8 | 0 |
| P12163_1_F8,17163  | R.EHGINFIGPNPDSIR.I | 1970.04  | 0.00103  | 3 | 1 | 35   | 0 |
| P12163_1_F8,17180  | R.EHGINFIGPNPDSIR.I | 1970.04  | 0.00696  | 2 | 1 | 49.6 | 0 |
| P12163_2_F6,14357  | R.EHGINFIGPNPDSIR.I | 1970.04  | 0.00339  | 4 | 1 | 38.9 | 0 |
| P12163_2_F6,14388  | R.EHGINFIGPNPDSIR.I | 1970.04  | 0.00343  | 3 | 1 | 35.8 | 0 |
| P12163_2_F6,16558  | R.EHGINFIGPNPDSIR.I | 1970.04  | -0.0029  | 3 | 1 | 44.5 | 0 |
| P12163_2_F6,16580  | R.EHGINFIGPNPDSIR.I | 1970.04  | -0.00006 | 2 | 1 | 33.2 | 0 |
| P12163_2_F6,16760  | R.EHGINFIGPNPDSIR.I | 1970.04  | 0.00472  | 3 | 1 | 63   | 0 |
| P12163_2_F6,16770  | R.EHGINFIGPNPDSIR.I | 1970.04  | -0.00006 | 2 | 1 | 46.9 | 0 |
| P12163_2_F6,17065  | R.EHGINFIGPNPDSIR.I | 1970.04  | -0.00029 | 3 | 1 | 29.3 | 0 |
| P12163_2_F1,18496  | R.GSFYFM*EMNTR.I    | 1702.787 | 0.00255  | 2 | 1 | 30.9 | 0 |
| P12163_1_F3,19579  | R.GSFYFMEMNTR.I     | 1686.792 | 0.00289  | 3 | 1 | 30   | 0 |
| P12163_1_F3,21280  | R.GSFYFMEMNTR.I     | 1686.792 | 0.00551  | 2 | 1 | 38.9 | 0 |
| P12163_1_F8,17694  | R.HIEFQVLADK.Y      | 1808.053 | 0.0039   | 3 | 1 | 28   | 0 |
| P12163_1_F9,17483  | R.HIEFQVLADK.Y      | 1808.053 | 0.00459  | 3 | 1 | 35.5 | 0 |
| P12163_1_F9,17506  | R.HIEFQVLADK.Y      | 1808.053 | 0.00236  | 4 | 1 | 28.8 | 0 |
| P12163_1_F9,17511  | R.HIEFQVLADK.Y      | 1808.053 | 0.00493  | 2 | 1 | 59.3 | 0 |
| P12163_1_F9,17701  | R.HIEFQVLADK.Y      | 1808.053 | 0.00405  | 3 | 1 | 32   | 0 |
| P12163_1_S10,1730  | R.HIEFQVLADK.Y      | 1808.053 | 0.00738  | 3 | 1 | 26.4 | 0 |
| P12163_2_F7,15522  | R.HIEFQVLADK.Y      | 1808.053 | -0.00096 | 3 | 1 | 41.6 | 0 |
| P12163_2_F9,16565  | R.HIEFQVLADK.Y      | 1808.053 | 0.00676  | 4 | 1 | 23.3 | 0 |
| P12163_2_F9,16580  | R.HIEFQVLADK.Y      | 1808.053 | 0.0075   | 3 | 1 | 46.9 | 0 |
| P12163_1_F5,16801  | R.INAEDPFK.N        | 1541.878 | 0.00904  | 2 | 1 | 26.1 | 0 |
| P12163_2_F1,17062  | R.INAEDPFK.N        | 1541.878 | 0.00552  | 2 | 1 | 25.5 | 0 |
| P12163_2_F1,17106  | R.INAEDPFK.N        | 1541.878 | 0.00441  | 3 | 1 | 25.2 | 0 |
| P12163_2_S5,15600  | R.INAEDPFK.N        | 1541.878 | -0.0003  | 3 | 1 | 29.9 | 0 |
| P12163_1_S1,22566  | R.ITAYLPAGGPFVR.M   | 1665.963 | 0.00116  | 2 | 1 | 26.6 | 0 |
| P12163_1_S1,22699  | R.ITAYLPAGGPFVR.M   | 1665.963 | 0.00198  | 3 | 1 | 34.7 | 0 |
| P12163_2_F6,23280  | R.ITAYLPAGGPFVR.M   | 1665.963 | 0.00144  | 3 | 1 | 23.4 | 0 |
| P12163_1_F8,19523  | R.TAHEMGIPCVAVYSTI  | 2600.367 | 0.00217  | 3 | 1 | 36.1 | 0 |
| P12163_1_F8,19536  | R.TAHEMGIPCVAVYSTI  | 2600.367 | 0.00346  | 4 | 1 | 22.1 | 0 |
| P12163_2_F10,14010 | R.YKQEDIVLQGHSECR.  | 2583.381 | 0.01296  | 3 | 1 | 46.7 | 0 |
| P12163_1_F3,21890  | K.AAWEELIDR.V       | 1406.758 | 0.0032   | 2 | 1 | 45.4 | 0 |
| P12163_1_F5,16688  | K.ATVPVWAK.M        | 1479.914 | 0.00656  | 3 | 1 | 24.8 | 0 |
| P12163_2_F2,17458  | K.ATVPVWAK.M        | 1479.914 | 0.00245  | 3 | 1 | 24.9 | 0 |
| P12163_2_F2,17495  | K.ATVPVWAK.M        | 1479.914 | 0.00803  | 2 | 1 | 28.8 | 0 |
| P12163_1_F8,14121  | K.AVHPIALGK.V       | 1513.967 | 0.00484  | 3 | 1 | 24.7 | 0 |
| P12163_2_F10,1226  | K.AVHPIALGK.V       | 1513.967 | 0.00064  | 3 | 1 | 24.3 | 0 |
| P12163_2_F6,13524  | K.AVHPIALGK.V       | 1513.967 | 0.00544  | 3 | 1 | 27.2 | 0 |
| P12163_2_F7,12576  | K.AVHPIALGK.V       | 1513.967 | 0.00433  | 3 | 1 | 36.2 | 0 |
| P12163_2_F1,17443  | K.DWTGDGFVK.E       | 1632.884 | 0.00272  | 3 | 1 | 28.3 | 0 |
| P12163_1_F6,15873  | K.M*HNFSSIEDFR.G    | 1702.816 | 0.00308  | 3 | 1 | 25.3 | 0 |
| P12163_1_F6,17848  | K.M*HNFSSIEDFR.G    | 1702.816 | 0.0035   | 3 | 1 | 36.7 | 0 |
| P12163_1_F9,15486  | K.M*HNFSSIEDFR.G    | 1702.816 | 0.00263  | 3 | 1 | 43.9 | 0 |
| P12163_1_F9,17191  | K.M*HNFSSIEDFR.G    | 1702.816 | 0.00068  | 3 | 1 | 30.6 | 0 |
| P12163_1_S10,1600  | K.M*HNFSSIEDFR.G    | 1702.816 | 0.00353  | 3 | 1 | 25.6 | 0 |
| P12163_2_F7,13950  | K.M*HNFSSIEDFR.G    | 1702.816 | 0.00095  | 3 | 1 | 51.6 | 0 |
| P12163_2_F7,15287  | K.M*HNFSSIEDFR.G    | 1702.816 | 0.00224  | 3 | 1 | 51.6 | 0 |

|                   |                     |          |          |   |   |      |   |
|-------------------|---------------------|----------|----------|---|---|------|---|
| P12163_2_F9,15155 | K.M*HNFSSIEDFR.G    | 1702.816 | 0.00191  | 3 | 1 | 28.4 | 0 |
| P12163_1_F2,10293 | K.MGAAVGQDCR.L      | 1368.667 | 0.00245  | 2 | 1 | 37   | 0 |
| P12163_1_F3,10558 | K.MGAAVGQDCR.L      | 1368.667 | 0.00439  | 2 | 1 | 37.4 | 0 |
| P12163_1_F6,17837 | K.MHNFSSIEDFR.G     | 1686.821 | 0.0063   | 3 | 1 | 36.1 | 0 |
| P12163_1_F9,17152 | K.MHNFSSIEDFR.G     | 1686.821 | 0.0066   | 3 | 1 | 45.9 | 0 |
| P12163_1_F9,17170 | K.MHNFSSIEDFR.G     | 1686.821 | -0.00738 | 2 | 1 | 41.6 | 0 |
| P12163_2_F7,15285 | K.MHNFSSIEDFR.G     | 1686.821 | 0.00054  | 3 | 1 | 42.5 | 0 |
| P12163_2_F9,16807 | K.MHNFSSIEDFR.G     | 1686.821 | 0.00069  | 3 | 1 | 25.5 | 0 |
| P12163_2_S5,17018 | K.MHNFSSIEDFR.G     | 1686.821 | 0.0054   | 3 | 1 | 45.2 | 0 |
| P12163_1_F8,13471 | K.TLRPEPCVEGYSTPGG  | 2866.432 | 0.0067   | 4 | 1 | 26.5 | 0 |
| P12163_1_F8,14944 | K.TLRPEPCVEGYSTPGG  | 2866.432 | 0.00465  | 3 | 1 | 30.1 | 0 |
| P12163_1_F8,14957 | K.TLRPEPCVEGYSTPGG  | 2866.432 | 0.00718  | 4 | 1 | 29.9 | 0 |
| P12163_2_F10,1277 | K.TLRPEPCVEGYSTPGG  | 2866.432 | 0.0065   | 4 | 1 | 35.9 | 0 |
| P12163_2_F10,1385 | K.TLRPEPCVEGYSTPGG  | 2866.432 | 0.00534  | 3 | 1 | 41.1 | 0 |
| P12163_1_F4,14025 | K.TVSLDAAK.V        | 1412.857 | 0.0059   | 3 | 1 | 25.5 | 0 |
| P12163_2_F1,13003 | K.TVSLDAAK.V        | 1412.857 | 0.00212  | 3 | 1 | 24.5 | 0 |
| P12163_2_F1,13016 | K.TVSLDAAK.V        | 1412.857 | 0.00477  | 2 | 1 | 31.1 | 0 |
| P12163_1_F3,12977 | K.VINVTPR.Y         | 1102.689 | 0.00454  | 3 | 1 | 24.9 | 0 |
| P12163_2_F4,295   | K.VM*SIAM           | 1272.781 | 0.0076   | 3 | 1 | 24.7 | 0 |
| P12163_2_F1,15233 | K.VMSIAM            | 1256.786 | 0.00454  | 3 | 1 | 24.8 | 0 |
| P12163_1_F3,20905 | R.AFDEGWGAVVAK.T    | 1858.032 | 0.00402  | 3 | 1 | 37.5 | 0 |
| P12163_1_F4,21579 | R.AFDEGWGAVVAK.T    | 1858.032 | 0.00795  | 3 | 1 | 37.1 | 0 |
| P12163_1_F4,21608 | R.AFDEGWGAVVAK.T    | 1858.032 | -0.00016 | 2 | 1 | 32.2 | 0 |
| P12163_1_F4,21779 | R.AFDEGWGAVVAK.T    | 1858.032 | 0.0054   | 3 | 1 | 44   | 0 |
| P12163_1_F4,21835 | R.AFDEGWGAVVAK.T    | 1858.032 | 0.01138  | 2 | 1 | 61.7 | 0 |
| P12163_1_F6,20093 | R.AFDEGWGAVVAK.T    | 1858.032 | -0.00237 | 3 | 1 | 27.7 | 0 |
| P12163_2_F1,21110 | R.AFDEGWGAVVAK.T    | 1858.032 | -0.00114 | 3 | 1 | 33.3 | 0 |
| P12163_1_F7,14878 | R.GASIEYFTTHTELVR.M | 2028.07  | 0.00093  | 3 | 1 | 43.9 | 0 |
| P12163_1_F7,19356 | R.GASIEYFTTHTELVR.M | 2028.07  | 0.00183  | 3 | 1 | 54.7 | 0 |
| P12163_1_F7,19391 | R.GASIEYFTTHTELVR.M | 2028.07  | 0.00202  | 2 | 1 | 73.1 | 0 |
| P12163_1_F8,20311 | R.GASIEYFTTHTELVR.M | 2028.07  | 0.00405  | 3 | 1 | 57.8 | 0 |
| P12163_2_F10,1435 | R.GASIEYFTTHTELVR.M | 2028.07  | 0.00432  | 3 | 1 | 24.8 | 0 |
| P12163_2_F10,1625 | R.GASIEYFTTHTELVR.M | 2028.07  | 0.00411  | 3 | 1 | 23.8 | 0 |
| P12163_2_F10,1807 | R.GASIEYFTTHTELVR.M | 2028.07  | 0.00462  | 3 | 1 | 34.7 | 0 |
| P12163_2_F10,1825 | R.GASIEYFTTHTELVR.M | 2028.07  | 0.00351  | 3 | 1 | 79.7 | 0 |
| P12163_2_F4,18890 | R.GASIEYFTTHTELVR.M | 2028.07  | 0.0048   | 3 | 1 | 44.2 | 0 |
| P12163_1_F3,23242 | R.ILIASIM*EEYNK.A   | 2048.156 | 0.01281  | 3 | 1 | 32.2 | 0 |
| P12163_1_F3,23253 | R.ILIASIM*EEYNK.A   | 2048.156 | 0.00587  | 2 | 1 | 27.3 | 0 |
| P12163_1_F3,26507 | R.ILIASIM*EEYNK.A   | 2048.156 | 0.00483  | 3 | 1 | 43.8 | 0 |
| P12163_1_F3,26471 | R.ILIASIMEEYNK.A    | 2032.161 | 0.00309  | 3 | 1 | 37.7 | 0 |
| P12163_1_F3,10198 | R.M*QAEAIQQR.K      | 1451.758 | 0.00394  | 2 | 1 | 32.3 | 0 |
| P12163_1_F3,10463 | R.M*QAEAIQQR.K      | 1451.758 | 0.00404  | 2 | 1 | 26.9 | 0 |
| P12163_2_F1,6969  | R.M*QAEAIQQR.K      | 1451.758 | 0.0019   | 2 | 1 | 26.8 | 0 |
| P12163_1_F5,20747 | R.VEETGIDAIEVNFSCPH | 2807.328 | 0.00689  | 3 | 1 | 69.2 | 0 |
| P12163_1_F6,20629 | R.VEETGIDAIEVNFSCPH | 2807.328 | -0.00294 | 3 | 1 | 57.7 | 0 |
| P12163_1_F6,21327 | R.VEETGIDAIEVNFSCPH | 2807.328 | 0.00077  | 3 | 1 | 75   | 0 |
| P12163_1_F6,21323 | R.VEETGIDAIEVNFSCPH | 2791.333 | -0.00021 | 3 | 1 | 88.5 | 0 |
| P12163_1_F3,21855 | K.ELDYLVGAVSNPK.K   | 2013.148 | 0.00524  | 3 | 1 | 27.9 | 0 |
| P12163_1_F3,23084 | K.ELDYLVGAVSNPK.K   | 2013.148 | 0.00575  | 3 | 1 | 40.8 | 0 |
| P12163_1_F3,23126 | K.ELDYLVGAVSNPK.K   | 2013.148 | 0.0038   | 2 | 1 | 72.6 | 0 |
| P12163_1_F3,23433 | K.ELDYLVGAVSNPK.K   | 2013.148 | 0.01568  | 3 | 1 | 36.4 | 0 |

|                    |                        |          |          |   |   |      |   |
|--------------------|------------------------|----------|----------|---|---|------|---|
| P12163_2_F7,19975  | K.ELDYLVGAVSNPK.K      | 2013.148 | 0.0059   | 3 | 1 | 30.6 | 0 |
| P12163_2_F1,11503  | K.FAADANSK.V           | 1431.805 | 0.00586  | 3 | 1 | 24.2 | 0 |
| P12163_1_F4,16934  | K.FAAGTEAIAK.K         | 1586.936 | 0.0021   | 3 | 1 | 47.6 | 0 |
| P12163_1_F5,15733  | K.FAAGTEAIAK.K         | 1586.936 | 0.00147  | 2 | 1 | 46.2 | 0 |
| P12163_2_F1,16081  | K.FAAGTEAIAK.K         | 1586.936 | 0.00305  | 2 | 1 | 48.8 | 0 |
| P12163_2_F1,16102  | K.FAAGTEAIAK.K         | 1586.936 | 0.00531  | 3 | 1 | 49.1 | 0 |
| P12163_2_F4,14627  | K.FAAGTEAIAK.K         | 1586.936 | 0.00225  | 3 | 1 | 35.1 | 0 |
| P12163_2_F7,19277  | K.FLKPSVAGFLM*QK.E     | 2394.435 | 0.01504  | 3 | 1 | 23.2 | 0 |
| P12163_1_F2,16437  | K.GVTTHGGGDSVAAVE      | 2182.254 | 0.00519  | 3 | 1 | 52.8 | 0 |
| P12163_1_F2,18546  | K.GVTTHGGGDSVAAVE      | 2182.254 | 0.0054   | 3 | 1 | 52.9 | 0 |
| P12163_1_F2,18639  | K.GVTTHGGGDSVAAVE      | 2182.254 | 0.00535  | 2 | 1 | 72.6 | 0 |
| P12163_1_F3,19208  | K.GVTTHGGGDSVAAVE      | 2182.254 | 0.00801  | 3 | 1 | 43.6 | 0 |
| P12163_1_F5,18050  | K.GVTTHGGGDSVAAVE      | 2182.254 | 0.00501  | 3 | 1 | 73   | 0 |
| P12163_1_F7,17774  | K.GVTTHGGGDSVAAVE      | 2182.254 | -0.00243 | 3 | 1 | 46   | 0 |
| P12163_1_S1,14256  | K.GVTTHGGGDSVAAVE      | 2182.254 | 0.01662  | 3 | 1 | 27.6 | 0 |
| P12163_1_S1,17262  | K.GVTTHGGGDSVAAVE      | 2182.254 | 0.00435  | 3 | 1 | 84.6 | 0 |
| P12163_1_S1,17305  | K.GVTTHGGGDSVAAVE      | 2182.254 | 0.00519  | 2 | 1 | 102  | 0 |
| P12163_1_S1,17309  | K.GVTTHGGGDSVAAVE      | 2182.254 | 0.00587  | 4 | 1 | 94.9 | 0 |
| P12163_1_S1,17551  | K.GVTTHGGGDSVAAVE      | 2182.254 | 0.00696  | 3 | 1 | 74.6 | 0 |
| P12163_1_S10,17310 | K.GVTTHGGGDSVAAVE      | 2182.254 | 0.00528  | 3 | 1 | 74.8 | 0 |
| P12163_2_F9,15639  | K.KPFAAIVGGSK.V        | 1987.247 | 0.00771  | 3 | 1 | 32.3 | 0 |
| P12163_2_F1,16877  | K.LAELSGK.G            | 1325.825 | 0.00509  | 3 | 1 | 22   | 0 |
| P12163_2_F2,17308  | K.LAELSGK.G            | 1325.825 | 0.00782  | 2 | 1 | 24.4 | 0 |
| P12163_1_F4,13577  | K.M*ANDCIGEEVEK.M      | 2018.998 | 0.00569  | 3 | 1 | 32.5 | 0 |
| P12163_1_F7,16915  | K.M*SHISTGGGASLELLI    | 2411.306 | 0.00865  | 3 | 1 | 26.3 | 0 |
| P12163_1_F3,15037  | K.MANDCIGEEVEK.M       | 2003.003 | 0.01478  | 2 | 1 | 24.5 | 0 |
| P12163_1_F3,15061  | K.MANDCIGEEVEK.M       | 2003.003 | 0.00659  | 3 | 1 | 26   | 0 |
| P12163_1_F4,15445  | K.MANDCIGEEVEK.M       | 2003.003 | 0.0011   | 2 | 1 | 43.3 | 0 |
| P12163_1_F4,13194  | K.SFSEALDTTK.T         | 1706.942 | 0.00589  | 3 | 1 | 33.1 | 0 |
| P12163_1_F4,14939  | K.SFSEALDTTK.T         | 1706.942 | 0.00619  | 3 | 1 | 23.1 | 0 |
| P12163_1_F4,16898  | K.SFSEALDTTK.T         | 1706.942 | 0.00502  | 3 | 1 | 32.1 | 0 |
| P12163_1_F4,16913  | K.SFSEALDTTK.T         | 1706.942 | 0.00772  | 2 | 1 | 41.7 | 0 |
| P12163_2_F1,16116  | K.SFSEALDTTK.T         | 1706.942 | 0.00346  | 3 | 1 | 42.7 | 0 |
| P12163_1_F4,15095  | K.VILSSHLGRPK.G        | 1815.142 | 0.00772  | 2 | 1 | 29.9 | 0 |
| P12163_1_F6,14702  | K.VILSSHLGRPK.G        | 1815.142 | 0.00798  | 3 | 1 | 22.2 | 0 |
| P12163_2_F4,9456   | K.YLM*GHGAK.V          | 1500.845 | 0.00414  | 3 | 1 | 29.8 | 0 |
| P12163_1_F5,11469  | K.YLMGHGAK.V           | 1484.85  | 0.00669  | 3 | 1 | 30.3 | 0 |
| P12163_2_F4,11512  | K.YLMGHGAK.V           | 1484.85  | 0.00468  | 3 | 1 | 26.2 | 0 |
| P12163_1_F4,14637  | R.AAVPTIK.H ! R.AAVPTI | 1307.851 | 0.00683  | 3 | 1 | 28   | 0 |
| P12163_1_F5,13135  | R.AAVPTIK.H ! R.AAVPTI | 1307.851 | 0.00884  | 3 | 1 | 29.6 | 0 |
| P12163_2_F1,13618  | R.AAVPTIK.H ! R.AAVPTI | 1307.851 | 0.00683  | 3 | 1 | 28.6 | 0 |
| P12163_2_F2,3791   | R.AAVPTIK.H ! R.AAVPTI | 1307.851 | 0.01148  | 3 | 1 | 27.9 | 0 |
| P12163_2_S5,12124  | R.AAVPTIK.H ! R.AAVPTI | 1307.851 | 0.00107  | 3 | 1 | 27.9 | 0 |
| P12163_1_F6,8324   | R.AHASTEGVAK.F         | 1578.906 | 0.00425  | 3 | 1 | 50.6 | 0 |
| P12163_1_F6,8354   | R.AHASTEGVAK.F         | 1578.906 | 0.00212  | 2 | 1 | 50.3 | 0 |
| P12163_1_F9,7890   | R.AHASTEGVAK.F         | 1578.906 | 0.00626  | 3 | 1 | 22.6 | 0 |
| P12163_2_F7,7492   | R.AHASTEGVAK.F         | 1578.906 | 0.00632  | 3 | 1 | 23.1 | 0 |
| P12163_2_F7,7505   | R.AHASTEGVAK.F         | 1578.906 | 0.00446  | 2 | 1 | 25.4 | 0 |
| P12163_2_S5,7984   | R.AHASTEGVAK.F         | 1578.906 | 0.00394  | 2 | 1 | 34.4 | 0 |
| P12163_2_S5,7994   | R.AHASTEGVAK.F         | 1578.906 | 0.00509  | 3 | 1 | 54.9 | 0 |
| P12163_1_F4,26114  | R.ISELLGVEVK.M         | 1695.051 | 0.00377  | 3 | 1 | 35.6 | 0 |

|                                         |          |          |   |   |      |   |
|-----------------------------------------|----------|----------|---|---|------|---|
| P12163_1_F6,23641 R.LSELLGVEVK.M        | 1695.051 | -0.00295 | 3 | 1 | 23.5 | 0 |
| P12163_2_F1,25226 R.LSELLGVEVK.M        | 1695.051 | 0.00839  | 3 | 1 | 25.5 | 0 |
| P12163_1_F2,15147 K.AQDYVCGLPAR.I       | 1553.805 | 0.00493  | 2 | 1 | 31.8 | 0 |
| P12163_1_S1,14767 K.AQDYVCGLPAR.I       | 1553.805 | 0.00271  | 2 | 1 | 27.9 | 0 |
| P12163_1_S10,7826 K.EHGDMK.L            | 1324.714 | 0.00558  | 3 | 1 | 26.1 | 0 |
| P12163_1_F7,12581 K.ISM*PAHLM*YDGR.D    | 1726.856 | 0.00227  | 3 | 1 | 28.3 | 0 |
| P12163_2_F6,12673 K.ISM*PAHLM*YDGR.D    | 1726.856 | 0.00161  | 3 | 1 | 23.2 | 0 |
| P12163_1_F7,14523 K.ISM*PAHLMYDGR.D     | 1710.861 | -0.00117 | 3 | 1 | 28.7 | 0 |
| P12163_1_F8,15173 K.ISM*PAHLMYDGR.D     | 1710.861 | 0.00891  | 3 | 1 | 43.6 | 0 |
| P12163_2_F6,14700 K.ISM*PAHLMYDGR.D     | 1710.861 | -0.00132 | 3 | 1 | 51.3 | 0 |
| P12163_1_F6,16449 K.ISMPAHLM*YDGR.D     | 1710.861 | 0.00153  | 3 | 1 | 25.9 | 0 |
| P12163_1_F7,15605 K.ISMPAHLM*YDGR.D     | 1710.861 | 0.00144  | 3 | 1 | 41.7 | 0 |
| P12163_1_F8,16367 K.ISMPAHLM*YDGR.D     | 1710.861 | 0.00345  | 3 | 1 | 38.2 | 0 |
| P12163_1_F8,18364 K.ISMPAHLM*YDGR.D     | 1710.861 | 0.003    | 3 | 1 | 26.6 | 0 |
| P12163_2_F9,15149 K.ISMPAHLM*YDGR.D     | 1710.861 | 0.00387  | 3 | 1 | 36.6 | 0 |
| P12163_1_F6,18412 K.ISMPAHLMYDGR.D      | 1694.866 | 0.00054  | 3 | 1 | 37.6 | 0 |
| P12163_1_F7,17429 K.ISMPAHLMYDGR.D      | 1694.866 | -0.00051 | 3 | 1 | 24.6 | 0 |
| P12163_1_F7,17575 K.ISMPAHLMYDGR.D      | 1694.866 | 0.00265  | 2 | 1 | 28.4 | 0 |
| P12163_1_F8,18351 K.ISMPAHLMYDGR.D      | 1694.866 | 0.00072  | 3 | 1 | 40.8 | 0 |
| P12163_2_F6,17859 K.ISMPAHLMYDGR.D      | 1694.866 | -0.00201 | 3 | 1 | 45.1 | 0 |
| P12163_2_F6,17876 K.ISMPAHLMYDGR.D      | 1694.866 | 0.00357  | 2 | 1 | 31.1 | 0 |
| P12163_2_F9,16834 K.ISMPAHLMYDGR.D      | 1694.866 | 0.00288  | 3 | 1 | 35.6 | 0 |
| P12163_2_S3,15812 K.ISMPAHLMYDGR.D      | 1694.866 | 0.00183  | 3 | 1 | 40.1 | 0 |
| P12163_2_S5,16838 K.ISMPAHLMYDGR.D      | 1694.866 | 0.00291  | 3 | 1 | 47.1 | 0 |
| P12163_2_S5,17060 K.ISMPAHLMYDGR.D      | 1694.866 | 0.00249  | 3 | 1 | 36.2 | 0 |
| P12163_1_F3,19696 K.LAQICGTIASDEK.R     | 2014.11  | 0.00873  | 3 | 1 | 49.8 | 0 |
| P12163_1_F8,18079 K.LAQICGTIASDEKR.H    | 2170.211 | 0.00415  | 3 | 1 | 32   | 0 |
| P12163_2_F6,17573 K.LAQICGTIASDEKR.H    | 2170.211 | 0.00472  | 3 | 1 | 34.4 | 0 |
| P12163_1_F4,15081 K.LTGLSGEGQK.A        | 1597.937 | 0.00499  | 2 | 1 | 30   | 0 |
| P12163_2_F1,14029 K.LTGLSGEGQK.A        | 1597.937 | 0.00097  | 2 | 1 | 34.3 | 0 |
| P12163_2_F1,14081 K.LTGLSGEGQK.A        | 1597.937 | 0.00068  | 3 | 1 | 28.5 | 0 |
| P12163_1_S1,18784 K.TIQYLIGSGM*DPR.T    | 1770.936 | 0.00058  | 3 | 1 | 31.3 | 0 |
| P12163_1_F4,15627 K.YLYLSGR.V           | 1175.673 | 0.00021  | 3 | 1 | 22.1 | 0 |
| P12163_1_F5,10069 R.ATFISHGNTAR.L ! R.A | 1478.802 | 0.0023   | 3 | 1 | 43.8 | 0 |
| P12163_1_F9,9236 R.ATFISHGNTAR.L ! R.A  | 1478.802 | 0.00263  | 3 | 1 | 24.4 | 0 |
| P12163_2_F10,9962 R.ATFISHGNTAR.L ! R.A | 1478.802 | -0.00205 | 3 | 1 | 30.7 | 0 |
| P12163_2_F4,8682 R.ATFISHGNTAR.L ! R.A  | 1478.802 | -0.00607 | 3 | 1 | 45.3 | 0 |
| P12163_2_F4,10236 R.ATFISHGNTAR.L ! R.A | 1478.802 | 0.00236  | 3 | 1 | 56   | 0 |
| P12163_2_F7,6679 R.ATFISHGNTAR.L ! R.A  | 1478.802 | 0.0026   | 4 | 1 | 44.1 | 0 |
| P12163_2_F7,8668 R.ATFISHGNTAR.L ! R.A  | 1478.802 | -0.0001  | 3 | 1 | 30.8 | 0 |
| P12163_2_F7,10328 R.ATFISHGNTAR.L ! R.A | 1478.802 | 0.00302  | 3 | 1 | 24.1 | 0 |
| P12163_2_F1,10937 R.AWTAEENR.H          | 1280.654 | 0.00378  | 2 | 1 | 25.8 | 0 |
| P12163_1_F7,19207 R.DDNLFEHFSAVAQR.L    | 1952.977 | 0.00258  | 3 | 1 | 31.9 | 0 |
| P12163_1_F8,10527 R.EVHVQVTHSM*PPQK.    | 2241.227 | 0.00286  | 4 | 1 | 29.8 | 0 |
| P12163_1_F3,7862 R.HETAYTK.I            | 1457.821 | 0.00645  | 3 | 1 | 46.1 | 0 |
| P12163_1_F4,8291 R.HETAYTK.I            | 1457.821 | 0.00639  | 3 | 1 | 29.8 | 0 |
| P12163_1_F5,6763 R.HETAYTK.I            | 1457.821 | 0.00525  | 3 | 1 | 41   | 0 |
| P12163_2_S5,8054 R.HETAYTK.I            | 1457.821 | 0.00654  | 3 | 1 | 27.4 | 0 |
| P12163_1_F6,10889 R.HGDLLNK.Y           | 1404.842 | 0.00746  | 3 | 1 | 42.9 | 0 |
| P12163_1_F7,10344 R.HGDLLNK.Y           | 1404.842 | 0.00047  | 3 | 1 | 34   | 0 |
| P12163_1_S10,1178 R.HGDLLNK.Y           | 1404.842 | 0.00554  | 3 | 1 | 31.2 | 0 |

|                                        |          |          |   |   |      |   |
|----------------------------------------|----------|----------|---|---|------|---|
| P12163_1_S10,1200.R.HGDLLNK.Y          | 1404.842 | 0.00467  | 3 | 1 | 29.7 | 0 |
| P12163_2_F6,10839 R.HGDLLNK.Y          | 1404.842 | 0.00083  | 3 | 1 | 28.2 | 0 |
| P12163_2_F8_12070R.HGDLLNK.Y           | 1404.842 | 0.00323  | 3 | 1 | 32.1 | 0 |
| P12163_2_F8_12070R.HGDLLNK.Y           | 1404.842 | 0.00554  | 3 | 1 | 30.4 | 0 |
| P12163_1_F6,15465 R.LGVYTAK.D          | 1359.846 | 0.00473  | 2 | 1 | 26.5 | 0 |
| P12163_1_S10,1503 R.LGVYTAK.D          | 1359.846 | 0.00871  | 2 | 1 | 25.3 | 0 |
| P12163_2_F1,14701 R.LGVYTAK.D          | 1359.846 | 0.00569  | 3 | 1 | 24   | 0 |
| P12163_1_F2,19991 K.EFPALDTSALDK.F     | 1915.063 | 0.01028  | 3 | 1 | 59.7 | 0 |
| P12163_1_F2,20005 K.EFPALDTSALDK.F     | 1915.063 | 0.00589  | 2 | 1 | 56.4 | 0 |
| P12163_1_F5,19481 K.EFPALDTSALDK.F     | 1915.063 | -0.00633 | 2 | 1 | 28.4 | 0 |
| P12163_1_S1,18989 K.EFPALDTSALDK.F     | 1915.063 | 0.00635  | 3 | 1 | 57.4 | 0 |
| P12163_1_S1,19032 K.EFPALDTSALDK.F     | 1915.063 | 0.01091  | 2 | 1 | 35.4 | 0 |
| P12163_1_S1,19118 K.EFPALDTSALDK.F     | 1915.063 | 0.00842  | 4 | 1 | 30.8 | 0 |
| P12163_1_S1,19241 K.EFPALDTSALDK.F     | 1915.063 | 0.00686  | 3 | 1 | 25.1 | 0 |
| P12163_2_F4,18675 K.EFPALDTSALDK.F     | 1915.063 | 0.01109  | 3 | 1 | 30.3 | 0 |
| P12163_2_F6,20322 K.ENHWLDDGAYLMVK     | 2299.2   | 0.00519  | 3 | 1 | 45.6 | 0 |
| P12163_1_F4,20528 K.FM*VEGLTNSEK.Q     | 1879.009 | 0.00378  | 3 | 1 | 28.6 | 0 |
| P12163_2_F1,17290 K.FM*VEGLTNSEK.Q     | 1879.009 | 0.01275  | 3 | 1 | 29.1 | 0 |
| P12163_1_F4,20500 K.FMVEGLTNSEK.Q      | 1863.014 | 0.00549  | 3 | 1 | 58.9 | 0 |
| P12163_2_F1,19855 K.FMVEGLTNSEK.Q      | 1863.014 | 0.00645  | 3 | 1 | 46.4 | 0 |
| P12163_1_F9,10404 K.IDQNHSDLK.G        | 1677.938 | 0.00391  | 2 | 1 | 29.9 | 0 |
| P12163_1_F3,10197 K.ISIGHDSR.V         | 1188.664 | 0.00271  | 3 | 1 | 41.5 | 0 |
| P12163_2_F2,9428 K.ISIGHDSR.V          | 1188.664 | 0.00316  | 3 | 1 | 30.4 | 0 |
| P12163_2_S5,9792 K.ISIGHDSR.V          | 1188.664 | 0.00415  | 3 | 1 | 28.2 | 0 |
| P12163_1_F4,21036 K.LGLAVAAATK.E       | 1522.978 | 0.00537  | 3 | 1 | 32.5 | 0 |
| P12163_1_F4,21070 K.LGLAVAAATK.E       | 1522.978 | 0.00796  | 2 | 1 | 50.3 | 0 |
| P12163_1_F4,21284 K.LGLAVAAATK.E       | 1522.978 | 0.00684  | 3 | 1 | 47.5 | 0 |
| P12163_1_F4,21304 K.LGLAVAAATK.E       | 1522.978 | 0.00612  | 2 | 1 | 53.4 | 0 |
| P12163_1_F4,23035 K.LGLAVAAATK.E       | 1522.978 | 0.01992  | 2 | 1 | 44.9 | 0 |
| P12163_1_F6,19611 K.LGLAVAAATK.E       | 1522.978 | 0.00417  | 3 | 1 | 31.5 | 0 |
| P12163_2_F1,20440 K.LGLAVAAATK.E       | 1522.978 | 0.00603  | 3 | 1 | 33   | 0 |
| P12163_2_F1,20451 K.LGLAVAAATK.E       | 1522.978 | 0.0054   | 2 | 1 | 47.8 | 0 |
| P12163_2_F1,20652 K.LGLAVAAATK.E       | 1522.978 | 0.0063   | 3 | 1 | 47   | 0 |
| P12163_2_F1,20671 K.LGLAVAAATK.E       | 1522.978 | 0.00686  | 2 | 1 | 50.3 | 0 |
| P12163_2_F4,18315 K.LGLAVAAATK.E       | 1522.978 | 0.00384  | 2 | 1 | 26.6 | 0 |
| P12163_1_F2,15786 K.NVIDEAIR.L         | 1233.71  | 0.00372  | 2 | 1 | 29.5 | 0 |
| P12163_2_F1,15631 K.NVIDEAIR.L         | 1233.71  | 0.00322  | 2 | 1 | 25.4 | 0 |
| P12163_1_F6,20535 K.TSGSQFLEPDGM*FPN   | 3181.572 | -0.00347 | 3 | 1 | 23   | 0 |
| P12163_1_F6,20568 K.TSGSQFLEPDGM*FPN   | 3181.572 | 0.00765  | 4 | 1 | 22.1 | 0 |
| P12163_1_F6,20574 K.TSGSQFLEPDGMFPNH   | 3165.577 | 0.00559  | 3 | 1 | 33.5 | 0 |
| P12163_1_F4,18866 K.VLEPLGAK.T         | 1434.914 | 0.00636  | 3 | 1 | 28.2 | 0 |
| P12163_2_F1,18028 K.VLEPLGAK.T         | 1434.914 | 0.00748  | 2 | 1 | 24.5 | 0 |
| P12163_1_F4,15300 R.DYGEAVLK.H         | 1502.867 | 0.00536  | 3 | 1 | 32.4 | 0 |
| P12163_1_F7,13587 R.DYGEAVLK.H         | 1502.867 | 0.00059  | 3 | 1 | 37.3 | 0 |
| P12163_1_F9,14578 R.DYGEAVLK.H         | 1502.867 | 0.00374  | 3 | 1 | 34.8 | 0 |
| P12163_2_F1,14176 R.DYGEAVLK.H         | 1502.867 | 0.00329  | 3 | 1 | 35   | 0 |
| P12163_2_F8_12070R.LNSIGEESH LAIETSGH  | 2771.515 | 0.00339  | 4 | 1 | 30.7 | 0 |
| P12163_2_S5,16924 R.LNSIGEESH LAIETSGH | 2771.515 | 0.00463  | 4 | 1 | 35.4 | 0 |
| P12163_1_F6,21696 R.LSLHDPVLPLNIEAPSR  | 2175.244 | -0.00081 | 3 | 1 | 36   | 0 |
| P12163_1_F8,22080 R.LSLHDPVLPLNIEAPSR  | 2175.244 | 0.00459  | 3 | 1 | 37.8 | 0 |
| P12163_2_F10,18770R.LSLHDPVLPLNIEAPSR  | 2175.244 | 0.00738  | 3 | 1 | 24.4 | 0 |



|                   |                       |          |          |   |   |      |   |
|-------------------|-----------------------|----------|----------|---|---|------|---|
| P12163_2_S5,19905 | R.LSLHDPVLP LNIEAPSR  | 2175.244 | 0.00468  | 3 | 1 | 31.3 | 0 |
| P12163_1_F2,5725  | R.SAAVDSTGR.E         | 1167.627 | 0.00018  | 2 | 1 | 24.5 | 0 |
| P12163_1_S1,14653 | R.VSAQM*LQDAVSR.G     | 1624.863 | 0.00403  | 2 | 1 | 39.5 | 0 |
| P12163_1_S1,14964 | R.VSAQM*LQDAVSR.G     | 1624.863 | 0.00687  | 3 | 1 | 37.4 | 0 |
| P12163_1_S1,17413 | R.VSAQMLQDAVSR.G      | 1608.868 | -0.00087 | 3 | 1 | 49.9 | 0 |
| P12163_1_S1,17856 | R.VSAQMLQDAVSR.G      | 1608.868 | 0.00123  | 2 | 1 | 45.6 | 0 |
| P12163_1_S1,17895 | R.VSAQMLQDAVSR.G      | 1608.868 | 0.00252  | 3 | 1 | 63.1 | 0 |
| P12163_2_F1,24224 | R.VSGSGGWFLLR.L       | 1482.837 | 0.00207  | 2 | 1 | 31.3 | 0 |
| P12163_1_S1,13850 | K.EVALLTDGR.F         | 1277.737 | 0.00008  | 3 | 1 | 32.2 | 0 |
| P12163_1_S1,14141 | K.EVALLTDGR.F         | 1277.737 | 0.0023   | 3 | 1 | 38.5 | 0 |
| P12163_1_S1,16669 | K.EVALLTDGR.F         | 1277.737 | 0.00265  | 2 | 1 | 24.4 | 0 |
| P12163_1_S1,16848 | K.EVALLTDGR.F         | 1277.737 | 0.00133  | 2 | 1 | 34.5 | 0 |
| P12163_2_F4,16426 | K.EVALLTDGR.F         | 1277.737 | 0.00175  | 2 | 1 | 28.3 | 0 |
| P12163_2_S3,6484  | K.GEGPK.A ! R.GEGPK.G | 1095.662 | 0.0092   | 3 | 1 | 22.9 | 0 |
| P12163_2_F1,16422 | K.GMCFSLQSR.D         | 1389.692 | 0.00291  | 2 | 1 | 29.9 | 0 |
| P12163_1_F2,12115 | K.IGGTPAVIR.Y         | 1187.741 | 0.00205  | 3 | 1 | 36   | 0 |
| P12163_1_F3,12430 | K.IGGTPAVIR.Y         | 1187.741 | 0.00313  | 3 | 1 | 31.1 | 0 |
| P12163_1_F2,13526 | K.NMPGTIMAMGR.L       | 1482.753 | 0.00348  | 3 | 1 | 36.2 | 0 |
| P12163_1_F6,19858 | K.TFPHLSEGQDIIRPLSN   | 2870.635 | 0.00446  | 4 | 1 | 29.5 | 0 |
| P12163_1_F9,9190  | K.TGHIQVLR.G          | 1227.747 | 0.00212  | 3 | 1 | 40.2 | 0 |
| P12163_1_F9,9239  | K.TGHIQVLR.G          | 1227.747 | 0.00355  | 4 | 1 | 26   | 0 |
| P12163_1_F9,11664 | K.TGHIQVLR.G          | 1227.747 | 0.00509  | 3 | 1 | 46   | 0 |
| P12163_1_S10,1182 | K.TGHIQVLR.G          | 1227.747 | 0.00206  | 3 | 1 | 40.4 | 0 |
| P12163_2_F4,10697 | K.TGHIQVLR.G          | 1227.747 | 0.00257  | 3 | 1 | 43.7 | 0 |
| P12163_2_F2,10311 | K.TLAENAK.T           | 1354.815 | 0.00631  | 3 | 1 | 37.4 | 0 |
| P12163_2_F2,10944 | K.TLAENAK.T           | 1354.815 | 0.00786  | 2 | 1 | 26.7 | 0 |
| P12163_1_F8,22068 | K.VSDEVPFLADLKPSGK    | 2614.522 | 0.00613  | 4 | 1 | 23.4 | 0 |
| P12163_2_F8_12070 | K.VSDEVPFLADLKPSGK    | 2614.522 | 0.00061  | 4 | 1 | 32.1 | 0 |
| P12163_2_F6,11025 | K.YVM*EDVHK.I         | 1644.888 | 0.00501  | 3 | 1 | 22.9 | 0 |
| P12163_2_F6,13403 | K.YVM*EDVHK.I         | 1644.888 | 0.00354  | 3 | 1 | 29.4 | 0 |
| P12163_1_F6,14090 | K.YVMEDVHK.I          | 1628.893 | 0.00459  | 3 | 1 | 32.6 | 0 |
| P12163_2_F6,13404 | K.YVMEDVHK.I          | 1628.893 | 0.00306  | 3 | 1 | 32.3 | 0 |
| P12163_2_F6,13426 | K.YVMEDVHK.I          | 1628.893 | 0.00638  | 2 | 1 | 35.4 | 0 |
| P12163_1_F3,19499 | R.FNTIGVSDAISM*GTK.   | 2165.173 | 0.01111  | 3 | 1 | 54.8 | 0 |
| P12163_1_F3,17231 | R.FNTIGVSDAISMGTK.C   | 2149.178 | 0.00499  | 3 | 1 | 24.5 | 0 |
| P12163_1_F3,18619 | R.FNTIGVSDAISMGTK.C   | 2149.178 | 0.00637  | 3 | 1 | 30.8 | 0 |
| P12163_1_F3,20044 | R.FNTIGVSDAISMGTK.C   | 2149.178 | 0.00784  | 3 | 1 | 47   | 0 |
| P12163_1_F3,21429 | R.FNTIGVSDAISMGTK.C   | 2149.178 | 0.00802  | 3 | 1 | 53.2 | 0 |
| P12163_1_F3,21461 | R.FNTIGVSDAISMGTK.C   | 2149.178 | 0.00449  | 2 | 1 | 82.1 | 0 |
| P12163_1_F4,10617 | R.GNLAPEGSVAK.I       | 1650.963 | 0.00747  | 3 | 1 | 29.3 | 0 |
| P12163_1_F4,10629 | R.GNLAPEGSVAK.I       | 1650.963 | 0.00765  | 2 | 1 | 27.6 | 0 |
| P12163_1_F4,12899 | R.GNLAPEGSVAK.I       | 1650.963 | 0.00453  | 2 | 1 | 36   | 0 |
| P12163_1_F4,12911 | R.GNLAPEGSVAK.I       | 1650.963 | 0.00651  | 3 | 1 | 44   | 0 |
| P12163_1_F4,24446 | R.GNLAPEGSVAK.I       | 1650.963 | -0.00834 | 3 | 1 | 23.2 | 0 |
| P12163_1_F5,11578 | R.GNLAPEGSVAK.I       | 1650.963 | 0.00407  | 2 | 1 | 43.4 | 0 |
| P12163_1_F7,11216 | R.GNLAPEGSVAK.I       | 1650.963 | 0.0009   | 3 | 1 | 41.6 | 0 |
| P12163_2_F1,11994 | R.GNLAPEGSVAK.I       | 1650.963 | 0.00871  | 2 | 1 | 33.6 | 0 |
| P12163_2_F1,12022 | R.GNLAPEGSVAK.I       | 1650.963 | 0.00491  | 3 | 1 | 49.7 | 0 |
| P12163_2_S5,10635 | R.GNLAPEGSVAK.I       | 1650.963 | 0.00171  | 3 | 1 | 28.7 | 0 |
| P12163_2_S5,10863 | R.GNLAPEGSVAK.I       | 1650.963 | -0.00189 | 3 | 1 | 27.4 | 0 |
| P12163_1_F2,14192 | R.GVEEAGM*VGFR.F      | 1471.752 | 0.01278  | 2 | 1 | 34.9 | 0 |

|                   |                      |          |          |   |   |      |   |
|-------------------|----------------------|----------|----------|---|---|------|---|
| P12163_1_F2,16825 | R.GVEEAGM*VGFR.F     | 1471.752 | 0.00315  | 3 | 1 | 62.8 | 0 |
| P12163_1_F3,17264 | R.GVEEAGMVGFR.F      | 1455.757 | 0.0018   | 2 | 1 | 31.4 | 0 |
| P12163_1_S1,16306 | R.GVEEAGMVGFR.F      | 1455.757 | 0.00388  | 2 | 1 | 29.4 | 0 |
| P12163_2_F2,13329 | R.LSEAVK.R           | 1254.788 | 0.00759  | 3 | 1 | 24.4 | 0 |
| P12163_1_F8,15821 | R.RIDVQLTDEEMEER.R   | 2067.033 | 0.00238  | 3 | 1 | 46.1 | 0 |
| P12163_1_F8,15828 | R.RIDVQLTDEEMEER.R   | 2067.033 | -0.00042 | 2 | 1 | 39.3 | 0 |
| P12163_2_F6,15325 | R.RIDVQLTDEEMEER.R   | 2067.033 | 0.0055   | 3 | 1 | 51.5 | 0 |
| P12163_2_F6,15327 | R.RIDVQLTDEEMEER.R   | 2067.033 | 0.00284  | 2 | 1 | 53.3 | 0 |
| P12163_1_F2,6693  | K.DATSEAIR.D         | 1166.632 | 0.0027   | 3 | 1 | 23.9 | 0 |
| P12163_1_F5,7719  | K.HAATLSK.G          | 1335.82  | 0.00237  | 3 | 1 | 30.6 | 0 |
| P12163_1_S10,9334 | K.HAATLSK.G          | 1335.82  | 0.00681  | 3 | 1 | 38   | 0 |
| P12163_2_F8_12070 | K.HAATLSK.G          | 1335.82  | 0.00711  | 3 | 1 | 32.6 | 0 |
| P12163_1_F4,20938 | K.INNAVGQALLAK.R     | 1820.121 | 0.00681  | 3 | 1 | 46   | 0 |
| P12163_1_F4,20944 | K.INNAVGQALLAK.R     | 1820.121 | 0.01145  | 2 | 1 | 52.6 | 0 |
| P12163_1_F4,23090 | K.INNAVGQALLAK.R     | 1820.121 | 0.00684  | 3 | 1 | 43.4 | 0 |
| P12163_1_F5,19764 | K.INNAVGQALLAK.R     | 1820.121 | 0.01101  | 3 | 1 | 25.4 | 0 |
| P12163_2_F1,20382 | K.INNAVGQALLAK.R     | 1820.121 | 0.00705  | 3 | 1 | 39.9 | 0 |
| P12163_2_F1,20411 | K.INNAVGQALLAK.R     | 1820.121 | 0.00241  | 2 | 1 | 55.7 | 0 |
| P12163_2_F1,20736 | K.INNAVGQALLAK.R     | 1820.121 | 0.0024   | 3 | 1 | 37.8 | 0 |
| P12163_2_F2,104   | K.INNAVGQALLAK.R     | 1820.121 | 0.00729  | 3 | 1 | 29.5 | 0 |
| P12163_1_F7,22421 | K.LADDRDFQEELSGILR   | 2181.145 | 0.00287  | 3 | 1 | 36.1 | 0 |
| P12163_1_F7,22443 | K.LADDRDFQEELSGILR   | 2181.145 | 0.00118  | 2 | 1 | 31.2 | 0 |
| P12163_1_F8,23420 | K.LADDRDFQEELSGILR   | 2181.145 | 0.00185  | 3 | 1 | 34.2 | 0 |
| P12163_1_F4,15599 | K.LCPTLADGTK.V       | 1683.956 | 0.00114  | 2 | 1 | 31.8 | 0 |
| P12163_1_F3,14516 | K.VVVNFSGR.G         | 1181.694 | 0.0042   | 3 | 1 | 41.9 | 0 |
| P12163_1_S1,20529 | R.AEYYNVTDDDEALEAFI  | 2486.255 | 0.0146   | 3 | 1 | 61.3 | 0 |
| P12163_1_S1,20576 | R.AEYYNVTDDDEALEAFI  | 2486.255 | 0.01148  | 4 | 1 | 58.6 | 0 |
| P12163_2_F6,20746 | R.AEYYNVTDDDEALEAFI  | 2486.255 | 0.00863  | 3 | 1 | 68   | 0 |
| P12163_2_F6,20758 | R.AEYYNVTDDDEALEAFI  | 2486.255 | 0.00649  | 2 | 1 | 30.8 | 0 |
| P12163_2_S5,18572 | R.AEYYNVTDDDEALEAFI  | 2642.356 | 0.00939  | 3 | 1 | 47   | 0 |
| P12163_1_F6,10068 | R.AVHSGTATLK.D       | 1592.958 | 0.00811  | 3 | 1 | 31   | 0 |
| P12163_1_F9,7912  | R.AVHSGTATLK.D       | 1592.958 | 0.00655  | 3 | 1 | 23.8 | 0 |
| P12163_1_F9,9820  | R.AVHSGTATLK.D       | 1592.958 | 0.00514  | 3 | 1 | 49.8 | 0 |
| P12163_2_F7,9247  | R.AVHSGTATLK.D       | 1592.958 | 0.00577  | 3 | 1 | 41.1 | 0 |
| P12163_2_S5,9390  | R.AVHSGTATLK.D       | 1592.958 | 0.00517  | 3 | 1 | 35.3 | 0 |
| P12163_1_F9,14802 | R.DFHAVIGK.E         | 1494.889 | 0.00388  | 3 | 1 | 31.1 | 0 |
| P12163_2_F7,13538 | R.DFHAVIGK.E         | 1494.889 | 0.00478  | 3 | 1 | 32.9 | 0 |
| P12163_2_F7,13569 | R.DFHAVIGK.E         | 1494.889 | 0.00493  | 2 | 1 | 36.8 | 0 |
| P12163_2_F9,13753 | R.DFHAVIGK.E         | 1494.889 | 0.00811  | 3 | 1 | 24.8 | 0 |
| P12163_1_F3,12480 | R.DPVVPM*EAK.K       | 1609.908 | 0.00372  | 2 | 1 | 28.1 | 0 |
| P12163_1_F3,15378 | R.DPVVPM*EAK.K       | 1609.908 | 0.00466  | 2 | 1 | 25.2 | 0 |
| P12163_1_F3,15311 | R.DPVVPM*EAK.K       | 1593.913 | 0.0001   | 2 | 1 | 25   | 0 |
| P12163_1_F3,15317 | R.DPVVPM*EAK.K       | 1593.913 | 0.01291  | 3 | 1 | 23.2 | 0 |
| P12163_1_F6,8178  | R.EDLNHTGAHK.I       | 1729.944 | -0.00938 | 2 | 1 | 48.8 | 0 |
| P12163_2_F6,7772  | R.EDLNHTGAHK.I       | 1729.944 | 0.00338  | 3 | 1 | 29.8 | 0 |
| P12163_2_F6,7782  | R.EDLNHTGAHK.I       | 1729.944 | 0.00407  | 4 | 1 | 25.6 | 0 |
| P12163_1_F6,15608 | R.IIAETGAGQHGVATAT   | 2287.213 | 0.00288  | 3 | 1 | 69.1 | 0 |
| P12163_1_F7,14877 | R.IIAETGAGQHGVATAT   | 2287.213 | 0.00216  | 3 | 1 | 56.6 | 0 |
| P12163_1_F2,22759 | R.LIGVEAAGFGLDMSGK.I | 2042.174 | 0.00407  | 2 | 1 | 44.7 | 0 |
| P12163_1_F2,22796 | R.LIGVEAAGFGLDMSGK.I | 2042.174 | 0.00515  | 3 | 1 | 56.3 | 0 |
| P12163_1_S1,21761 | R.LIGVEAAGFGLDMSGK.I | 2042.174 | 0.00485  | 3 | 1 | 57.2 | 0 |

|                   |                     |          |          |   |   |      |   |
|-------------------|---------------------|----------|----------|---|---|------|---|
| P12163_1_S1,21827 | R.LIGVEAAGFGLDSGK.I | 2042.174 | 0.00682  | 4 | 1 | 41.3 | 0 |
| P12163_1_S1,21835 | R.LIGVEAAGFGLDSGK.I | 2042.174 | 0.00407  | 2 | 1 | 52.3 | 0 |
| P12163_1_S1,22072 | R.LIGVEAAGFGLDSGK.I | 2042.174 | 0.0008   | 3 | 1 | 44.3 | 0 |
| P12163_1_S10,1032 | R.LTEHYR.R          | 1122.621 | 0.00366  | 3 | 1 | 26.2 | 0 |
| P12163_2_F4,8790  | R.LTEHYR.R          | 1122.621 | -0.00021 | 3 | 1 | 25.5 | 0 |
| P12163_1_F9,11272 | K.DTPFTDQHK.A       | 1696.911 | 0.00962  | 3 | 1 | 32.7 | 0 |
| P12163_2_F6,11111 | K.DTPFTDQHK.A       | 1696.911 | 0.00567  | 2 | 1 | 27.9 | 0 |
| P12163_1_F3,5327  | K.DTPGAPR.Q         | 1017.563 | 0.00571  | 3 | 1 | 29.9 | 0 |
| P12163_2_F1,5023  | K.DTPGAPR.Q         | 1017.563 | 0.00106  | 3 | 1 | 24.1 | 0 |
| P12163_1_S1,18164 | K.FDPTFYPR.F        | 1346.705 | 0.00269  | 3 | 1 | 31.3 | 0 |
| P12163_1_F4,19536 | K.LLDACINPK.E       | 1651.966 | 0.01181  | 2 | 1 | 38.1 | 0 |
| P12163_1_F4,19618 | K.LLDACINPK.E       | 1651.966 | 0.00699  | 3 | 1 | 41.2 | 0 |
| P12163_1_F5,18457 | K.LLDACINPK.E       | 1651.966 | 0.00457  | 2 | 1 | 36.9 | 0 |
| P12163_1_F5,18498 | K.LLDACINPK.E       | 1651.966 | 0.00576  | 3 | 1 | 32.1 | 0 |
| P12163_1_F6,18694 | K.LLDACINPK.E       | 1651.966 | -0.00171 | 2 | 1 | 42.3 | 0 |
| P12163_1_S10,1760 | K.LLDACINPK.E       | 1651.966 | 0.01008  | 3 | 1 | 26.7 | 0 |
| P12163_2_F1,18772 | K.LLDACINPK.E       | 1651.966 | 0.00427  | 3 | 1 | 46.5 | 0 |
| P12163_2_F1,18822 | K.LLDACINPK.E       | 1651.966 | 0.00503  | 2 | 1 | 38   | 0 |
| P12163_2_F4,16969 | K.LLDACINPK.E       | 1651.966 | -0.00441 | 3 | 1 | 27.2 | 0 |
| P12163_2_S5,17077 | K.LLDACINPK.E       | 1651.966 | -0.00279 | 3 | 1 | 41   | 0 |
| P12163_1_F6,19600 | K.NPFAPTLHFNYR.Y    | 1780.944 | 0.00532  | 3 | 1 | 41.2 | 0 |
| P12163_1_F8,19703 | K.NPFAPTLHFNYR.Y    | 1780.944 | 0.0013   | 3 | 1 | 30.6 | 0 |
| P12163_1_F8,19940 | K.NPFAPTLHFNYR.Y    | 1780.944 | 0.00397  | 3 | 1 | 33.9 | 0 |
| P12163_2_F6,19171 | K.NPFAPTLHFNYR.Y    | 1780.944 | 0.00253  | 3 | 1 | 27.8 | 0 |
| P12163_2_F6,19399 | K.NPFAPTLHFNYR.Y    | 1780.944 | 0.00178  | 3 | 1 | 40.1 | 0 |
| P12163_2_S5,18320 | K.NPFAPTLHFNYR.Y    | 1780.944 | 0.00448  | 3 | 1 | 64.4 | 0 |
| P12163_2_F6,16244 | K.SACDKFDPTFYPR.F   | 2212.132 | 0.00208  | 2 | 1 | 30.3 | 0 |
| P12163_2_F1,5532  | K.TDGGGK.F          | 1142.663 | 0.00571  | 3 | 1 | 26.7 | 0 |
| P12163_1_F7,22606 | K.TGGRIESILVSLPLTAR | 2087.249 | 0.00251  | 3 | 1 | 27.5 | 0 |
| P12163_2_F8_12070 | K.WCDDYFYIK.H       | 1917.967 | 0.01169  | 3 | 1 | 29   | 0 |
| P12163_1_F3,10492 | R.DAQDSVCQAIEK.T    | 1972.027 | 0.00775  | 3 | 1 | 29.7 | 0 |
| P12163_1_F3,14181 | R.DAQDSVCQAIEK.T    | 1972.027 | 0.0082   | 3 | 1 | 45.5 | 0 |
| P12163_1_F3,14224 | R.DAQDSVCQAIEK.T    | 1972.027 | 0.00639  | 2 | 1 | 67.5 | 0 |
| P12163_1_F3,14433 | R.DAQDSVCQAIEK.T    | 1972.027 | 0.00988  | 3 | 1 | 25.1 | 0 |
| P12163_1_F4,14718 | R.DAQDSVCQAIEK.T    | 1972.027 | 0.00205  | 2 | 1 | 57   | 0 |
| P12163_2_F6,5916  | R.ESDDKESSSSASSVR.. | 2266.125 | 0.00673  | 3 | 1 | 28.8 | 0 |
| P12163_2_F6,5946  | R.ESDDKESSSSASSVR.. | 2266.125 | 0.00483  | 4 | 1 | 33.8 | 0 |
| P12163_2_F2,15153 | R.GTTFGLK.T         | 1331.814 | 0.00421  | 2 | 1 | 27   | 0 |
| P12163_1_F4,21112 | R.VLQDGAIWEK.A      | 1767.026 | 0.00676  | 2 | 1 | 44.3 | 0 |
| P12163_1_F4,21121 | R.VLQDGAIWEK.A      | 1767.026 | 0.00733  | 3 | 1 | 38.4 | 0 |
| P12163_1_F4,23083 | R.VLQDGAIWEK.A      | 1767.026 | -0.0027  | 2 | 1 | 40.7 | 0 |
| P12163_1_F7,18742 | R.VLQDGAIWEK.A      | 1767.026 | -0.00023 | 3 | 1 | 36.8 | 0 |
| P12163_2_F1,20543 | R.VLQDGAIWEK.A      | 1767.026 | 0.00604  | 3 | 1 | 39   | 0 |
| P12163_2_F1,20577 | R.VLQDGAIWEK.A      | 1767.026 | 0.00596  | 2 | 1 | 36.8 | 0 |
| P12163_2_F4,18271 | R.VLQDGAIWEK.A      | 1767.026 | -0.00176 | 3 | 1 | 30.4 | 0 |
| P12163_2_S5,12200 | R.WEYDHNPKE         | 1696.89  | 0.0052   | 3 | 1 | 24.3 | 0 |
| P12163_1_F4,15502 | R.YFETDAPK.D        | 1578.862 | 0.00809  | 3 | 1 | 28.5 | 0 |
| P12163_1_F5,14323 | R.YFETDAPK.D        | 1578.862 | 0.00788  | 2 | 1 | 24.8 | 0 |
| P12163_1_F7,13868 | R.YFETDAPK.D        | 1578.862 | 0.00467  | 3 | 1 | 25.4 | 0 |
| P12163_1_F9,14826 | R.YFETDAPK.D        | 1578.862 | 0.00839  | 3 | 1 | 25.2 | 0 |
| P12163_2_F1,14354 | R.YFETDAPK.D        | 1578.862 | 0.00779  | 3 | 1 | 31.8 | 0 |

|                   |                        |          |          |   |   |      |   |
|-------------------|------------------------|----------|----------|---|---|------|---|
| P12163_2_F8,1207  | R.YFETDAPK.D           | 1578.862 | 0.00884  | 3 | 1 | 30.9 | 0 |
| P12163_1_S1,9041  | K.CATITPDETR.M         | 1467.741 | 0.00337  | 3 | 1 | 32.4 | 0 |
| P12163_1_S1,10214 | K.CATITPDETR.M         | 1467.741 | 0.00438  | 2 | 1 | 33.3 | 0 |
| P12163_1_S1,10257 | K.CATITPDETR.M         | 1467.741 | 0.00463  | 3 | 1 | 27.7 | 0 |
| P12163_1_F8,18692 | K.DLAILVHGPK.V         | 1671.041 | 0.00669  | 3 | 1 | 39.9 | 0 |
| P12163_1_F8,18725 | K.DLAILVHGPK.V         | 1671.041 | 0.00545  | 2 | 1 | 43.6 | 0 |
| P12163_1_F8,18944 | K.DLAILVHGPK.V         | 1671.041 | 0.00351  | 3 | 1 | 29   | 0 |
| P12163_1_F8,19552 | K.DLAILVHGPK.V         | 1671.041 | 0.00747  | 3 | 1 | 25.3 | 0 |
| P12163_1_F9,18334 | K.DLAILVHGPK.V         | 1671.041 | 0.00135  | 3 | 1 | 29.4 | 0 |
| P12163_2_F6,18163 | K.DLAILVHGPK.V         | 1671.041 | 0.003    | 3 | 1 | 29.7 | 0 |
| P12163_2_F6,18206 | K.DLAILVHGPK.V         | 1671.041 | 0.00863  | 2 | 1 | 44.4 | 0 |
| P12163_2_F6,18425 | K.DLAILVHGPK.V         | 1671.041 | 0.00144  | 3 | 1 | 35.2 | 0 |
| P12163_1_F9,18612 | K.KWPLYLSTK.N          | 2048.267 | 0.01307  | 3 | 1 | 30.1 | 0 |
| P12163_2_F9,17580 | K.KWPLYLSTK.N          | 2048.267 | 0.00248  | 3 | 1 | 32.8 | 0 |
| P12163_1_F3,18411 | K.LEAACIEAVETGK.M      | 1999.099 | 0.0079   | 3 | 1 | 42.3 | 0 |
| P12163_1_F3,18431 | K.LEAACIEAVETGK.M      | 1999.099 | 0.00519  | 2 | 1 | 41   | 0 |
| P12163_1_F3,19535 | K.LEAACIEAVETGK.M      | 1999.099 | 0.00829  | 3 | 1 | 44   | 0 |
| P12163_1_F3,19562 | K.LEAACIEAVETGK.M      | 1999.099 | 0.00319  | 2 | 1 | 64.8 | 0 |
| P12163_1_F4,20191 | K.LEAACIEAVETGK.M      | 1999.099 | 0.00466  | 3 | 1 | 41.1 | 0 |
| P12163_1_F4,20201 | K.LEAACIEAVETGK.M      | 1999.099 | 0.00645  | 2 | 1 | 45.8 | 0 |
| P12163_1_F5,15191 | K.SEGGYVWACK.N         | 1764.92  | 0.00358  | 2 | 1 | 39.2 | 0 |
| P12163_1_F6,11911 | K.TIEAEAAHGTVTR.H !    | 1659.897 | 0.00126  | 3 | 1 | 24.2 | 0 |
| P12163_1_F7,7463  | K.TIEAEAAHGTVTR.H !    | 1659.897 | 0.00228  | 3 | 1 | 32.3 | 0 |
| P12163_1_F7,10909 | K.TIEAEAAHGTVTR.H !    | 1659.897 | 0.00198  | 3 | 1 | 42.2 | 0 |
| P12163_1_F7,11225 | K.TIEAEAAHGTVTR.H !    | 1659.897 | 0.00036  | 3 | 1 | 32.2 | 0 |
| P12163_1_F8,7716  | K.TIEAEAAHGTVTR.H !    | 1659.897 | 0.003    | 3 | 1 | 37.8 | 0 |
| P12163_1_F8,11355 | K.TIEAEAAHGTVTR.H !    | 1659.897 | 0.00534  | 3 | 1 | 36.8 | 0 |
| P12163_2_F6,7635  | K.TIEAEAAHGTVTR.H !    | 1659.897 | 0.00177  | 3 | 1 | 31.8 | 0 |
| P12163_2_F6,8008  | K.TIEAEAAHGTVTR.H !    | 1659.897 | 0.00231  | 3 | 1 | 36.1 | 0 |
| P12163_2_F6,11169 | K.TIEAEAAHGTVTR.H !    | 1659.897 | 0.00225  | 3 | 1 | 53.3 | 0 |
| P12163_2_F6,11196 | K.TIEAEAAHGTVTR.H !    | 1659.897 | -0.00213 | 2 | 1 | 27.8 | 0 |
| P12163_2_F6,11481 | K.TIEAEAAHGTVTR.H !    | 1659.897 | 0.00225  | 3 | 1 | 52.8 | 0 |
| P12163_1_F3,17087 | K.VTVESAEATLK.Y        | 1756.031 | 0.0072   | 3 | 1 | 32   | 0 |
| P12163_1_F3,17128 | K.VTVESAEATLK.Y        | 1756.031 | -0.0027  | 2 | 1 | 52.2 | 0 |
| P12163_2_F1,16767 | K.VTVESAEATLK.Y        | 1756.031 | 0        | 3 | 1 | 22.2 | 0 |
| P12163_2_F1,22501 | K.WPLYLSTK.N           | 1615.967 | 0.00513  | 3 | 1 | 26.3 | 0 |
| P12163_1_S10,1407 | K.YNVAIK.C             | 1315.819 | 0.00485  | 3 | 1 | 25.2 | 0 |
| P12163_2_F2,14319 | K.YNVAIK.C             | 1315.819 | 0.00587  | 3 | 1 | 22.3 | 0 |
| P12163_1_F4,22301 | R.AFAESSM*SLAFSK.K     | 2000.062 | 0.00848  | 3 | 1 | 29.8 | 0 |
| P12163_2_S5,15581 | R.DATDDKVTVESAEATI     | 2705.497 | -0.00113 | 3 | 1 | 37.5 | 0 |
| P12163_2_S5,9795  | R.HAFGDQYR.A           | 1297.659 | 0.00302  | 3 | 1 | 34.1 | 0 |
| P12163_1_F3,27915 | R.LIDDM*VAYAIAK.S ! R. | 1876.071 | 0.00822  | 3 | 1 | 38.5 | 0 |
| P12163_1_F3,26913 | R.LIDDMVAYAIAK.S ! R.L | 1860.076 | 0.00567  | 3 | 1 | 39.8 | 0 |
| P12163_1_F3,27973 | R.LIDDMVAYAIAK.S ! R.L | 1860.076 | 0.00441  | 3 | 1 | 25.1 | 0 |
| P12163_1_F9,18401 | R.LLHFVQK.L            | 1492.946 | 0.00588  | 2 | 1 | 24.2 | 0 |
| P12163_2_F9,17151 | R.LLHFVQK.L            | 1492.946 | 0.00566  | 2 | 1 | 26.9 | 0 |
| P12163_1_F3,15656 | R.NILNGTVFR.E          | 1337.784 | 0.00247  | 3 | 1 | 28.4 | 0 |
| P12163_1_F4,11122 | K.EDSSDCQFK.T ! K.EDS  | 1723.842 | 0.01354  | 2 | 1 | 43.6 | 0 |
| P12163_1_F2,19708 | K.ELAVIVVR.G           | 1202.777 | 0.00113  | 2 | 1 | 28.1 | 0 |
| P12163_1_F9,13241 | K.ENICHIVK.A           | 1620.935 | 0.00609  | 2 | 1 | 37.4 | 0 |
| P12163_2_F9,12280 | K.ENICHIVK.A           | 1620.935 | 0.00481  | 2 | 1 | 39.5 | 0 |

|                   |                      |          |          |   |   |      |   |
|-------------------|----------------------|----------|----------|---|---|------|---|
| P12163_1_F8,15744 | K.ISELATDVAHK.A      | 1792.042 | 0.00386  | 4 | 1 | 29.1 | 0 |
| P12163_1_F8,18855 | K.ISELATDVAHK.A      | 1792.042 | 0.00821  | 2 | 1 | 48.1 | 0 |
| P12163_1_F8,19147 | K.ISELATDVAHK.A      | 1792.042 | 0.00559  | 3 | 1 | 23.5 | 0 |
| P12163_2_F6,18401 | K.ISELATDVAHK.A      | 1792.042 | 0.00472  | 3 | 1 | 43.4 | 0 |
| P12163_2_F6,18456 | K.ISELATDVAHK.A      | 1792.042 | 0.00454  | 4 | 1 | 30.9 | 0 |
| P12163_2_F6,18481 | K.ISELATDVAHK.A      | 1792.042 | 0.00481  | 2 | 1 | 54.7 | 0 |
| P12163_2_F6,18748 | K.ISELATDVAHK.A      | 1792.042 | 0.00505  | 3 | 1 | 60.1 | 0 |
| P12163_2_F9,17624 | K.ISELATDVAHK.A      | 1792.042 | 0.00436  | 3 | 1 | 29.9 | 0 |
| P12163_1_F4,12585 | K.LEQQGVDCQPK.A ! K. | 1910.026 | 0.00727  | 2 | 1 | 49   | 0 |
| P12163_2_F1,11671 | K.LEQQGVDCQPK.A ! K. | 1910.026 | 0.00491  | 2 | 1 | 49.1 | 0 |
| P12163_2_F1,18573 | K.QFGYPLM*VK.S       | 1706.976 | -0.00089 | 2 | 1 | 29   | 0 |
| P12163_1_F4,21345 | K.QFGYPLMVK.S        | 1690.981 | 0.00843  | 2 | 1 | 24.6 | 0 |
| P12163_1_F4,21365 | K.QFGYPLMVK.S        | 1690.981 | 0.00408  | 3 | 1 | 28.4 | 0 |
| P12163_2_F9,18386 | K.QFGYPLMVK.S        | 1690.981 | 0.00534  | 3 | 1 | 22.6 | 0 |
| P12163_1_F7,19038 | K.SILCYPVVETIHK.E    | 2167.24  | 0.0058   | 3 | 1 | 50.5 | 0 |
| P12163_1_F8,17146 | K.SILCYPVVETIHK.E    | 2167.24  | 0.00526  | 3 | 1 | 25.1 | 0 |
| P12163_1_F8,20006 | K.SILCYPVVETIHK.E    | 2167.24  | 0.00832  | 3 | 1 | 38.8 | 0 |
| P12163_2_F10,1734 | K.SILCYPVVETIHK.E    | 2167.24  | 0.01006  | 3 | 1 | 35.9 | 0 |
| P12163_2_F6,19650 | K.SILCYPVVETIHK.E    | 2167.24  | 0.00616  | 3 | 1 | 26.9 | 0 |
| P12163_2_S5,18102 | K.SILCYPVVETIHK.E    | 2167.24  | 0.00559  | 3 | 1 | 56.6 | 0 |
| P12163_1_F2,20348 | R.AVVGLPLGDPSM*K.T   | 1908.108 | 0.00459  | 3 | 1 | 52.9 | 0 |
| P12163_1_S1,17319 | R.AVVGLPLGDPSM*K.T   | 1908.108 | 0.00372  | 3 | 1 | 42.4 | 0 |
| P12163_1_S1,18756 | R.AVVGLPLGDPSMK.T    | 1892.114 | 0.00747  | 3 | 1 | 59.1 | 0 |
| P12163_1_S1,18760 | R.AVVGLPLGDPSMK.T    | 1892.114 | 0.00874  | 2 | 1 | 31   | 0 |
| P12163_1_F3,4472  | R.DSNETSPAR.K        | 1280.638 | 0.00214  | 3 | 1 | 27.9 | 0 |
| P12163_2_F1,5095  | R.DSNETSPAR.K        | 1280.638 | -0.00308 | 2 | 1 | 29.3 | 0 |
| P12163_1_F6,20891 | R.GFYLAHQIIGK.A      | 1855.105 | 0.00327  | 2 | 1 | 49   | 0 |
| P12163_2_F7,18636 | R.GFYLAHQIIGK.A      | 1855.105 | 0.00421  | 2 | 1 | 42.9 | 0 |
| P12163_2_S5,19520 | R.GFYLAHQIIGK.A      | 1855.105 | 0.00508  | 3 | 1 | 38.1 | 0 |
| P12163_1_S10,1399 | R.GLYVEK.W           | 1316.803 | 0.00572  | 3 | 1 | 26.1 | 0 |
| P12163_2_F2,13981 | R.GLYVEK.W           | 1316.803 | 0.00556  | 3 | 1 | 25.8 | 0 |
| P12163_1_S1,23013 | R.IGHIMGSDSDLPVMK.D  | 2184.223 | 0.00615  | 3 | 1 | 50.2 | 0 |
| P12163_1_F4,8632  | R.IVSAHR.T           | 986.6048 | 0.00367  | 3 | 1 | 25.4 | 0 |
| P12163_1_F4,19188 | R.M*LCQAASQLAIK.V    | 1958.102 | 0.00207  | 3 | 1 | 40.7 | 0 |
| P12163_1_F4,22352 | R.M*LCQAASQLAIK.V    | 1958.102 | 0.00516  | 3 | 1 | 41   | 0 |
| P12163_2_F1,18377 | R.M*LCQAASQLAIK.V    | 1958.102 | 0.00894  | 3 | 1 | 34.2 | 0 |
| P12163_2_F1,21941 | R.M*LCQAASQLAIK.V    | 1958.102 | 0.00744  | 3 | 1 | 35   | 0 |
| P12163_1_F4,22315 | R.MLCQAASQLAIK.V     | 1942.107 | 0.00505  | 3 | 1 | 39.4 | 0 |
| P12163_1_F4,22326 | R.MLCQAASQLAIK.V     | 1942.107 | -0.00504 | 2 | 1 | 26   | 0 |
| P12163_1_F4,22551 | R.MLCQAASQLAIK.V     | 1942.107 | 0.00196  | 3 | 1 | 44.4 | 0 |
| P12163_2_F1,21788 | R.MLCQAASQLAIK.V     | 1942.107 | -0.0041  | 3 | 1 | 30.2 | 0 |
| P12163_2_F4,17247 | R.TPDLMFSYASSAHER.(  | 2015.98  | 0.00227  | 3 | 1 | 38.7 | 0 |
| P12163_1_F2,16192 | K.DFVVLASR.L         | 1210.71  | 0.00344  | 3 | 1 | 26.8 | 0 |
| P12163_1_F2,18273 | K.DFVVLASR.L         | 1210.71  | 0.00238  | 2 | 1 | 25.6 | 0 |
| P12163_1_S1,15634 | K.DFVVLASR.L         | 1210.71  | 0.00308  | 3 | 1 | 25.4 | 0 |
| P12163_1_S1,17343 | K.DFVVLASR.L         | 1210.71  | 0.00302  | 3 | 1 | 31.5 | 0 |
| P12163_1_F2,22649 | K.EGEM*LFGYQPFATK.I  | 2242.167 | 0.00386  | 3 | 1 | 31.2 | 0 |
| P12163_2_F6,15029 | K.HVLWSNGPETENPTV(   | 2587.372 | 0.00288  | 3 | 1 | 38   | 0 |
| P12163_2_F1,22765 | K.ILFPNMVK.W         | 1569.965 | 0.00263  | 3 | 1 | 27.3 | 0 |
| P12163_2_F7,12660 | K.LHM*QLAEEIR.S      | 1559.852 | -0.00214 | 3 | 1 | 28.8 | 0 |
| P12163_2_F7,15242 | K.LHM*QLAEEIR.S      | 1559.852 | 0.00131  | 3 | 1 | 42.5 | 0 |

|                   |                     |          |          |   |   |      |   |
|-------------------|---------------------|----------|----------|---|---|------|---|
| P12163_2_F6,16541 | K.LHMQLAEEIR.S      | 1543.857 | 0.00666  | 3 | 1 | 60.8 | 0 |
| P12163_2_F6,16561 | K.LHMQLAEEIR.S      | 1543.857 | 0.00687  | 2 | 1 | 29.3 | 0 |
| P12163_1_S1,18367 | K.LVEEPLLR.T        | 1272.783 | 0.00397  | 2 | 1 | 26.3 | 0 |
| P12163_1_S1,18404 | K.LVEEPLLR.T        | 1272.783 | 0.0013   | 3 | 1 | 32.7 | 0 |
| P12163_1_F3,19050 | K.SAIGSSVTLTSLK.R   | 1872.126 | 0.00214  | 3 | 1 | 25.1 | 0 |
| P12163_1_F3,19077 | K.SAIGSSVTLTSLK.R   | 1872.126 | 0.00057  | 2 | 1 | 56.8 | 0 |
| P12163_1_F4,17320 | K.SAIGSSVTLTSLK.R   | 1872.126 | 0.00598  | 3 | 1 | 32.4 | 0 |
| P12163_1_F4,18062 | K.SAIGSSVTLTSLK.R   | 1872.126 | 0.00274  | 3 | 1 | 28.5 | 0 |
| P12163_1_F4,19451 | K.SAIGSSVTLTSLK.R   | 1872.126 | 0.00841  | 3 | 1 | 32.9 | 0 |
| P12163_2_F1,16466 | K.SAIGSSVTLTSLK.R   | 1872.126 | 0.00247  | 3 | 1 | 22.5 | 0 |
| P12163_2_F1,19006 | K.SAIGSSVTLTSLK.R   | 1872.126 | 0.00871  | 3 | 1 | 45.1 | 0 |
| P12163_2_F1,19103 | K.SAIGSSVTLTSLK.R   | 1872.126 | 0.00733  | 2 | 1 | 60.4 | 0 |
| P12163_1_F3,21122 | K.SFPVLFDVSK.V      | 1747.025 | 0.01155  | 3 | 1 | 35.6 | 0 |
| P12163_1_F3,23927 | K.SFPVLFDVSK.V      | 1747.025 | 0.00555  | 3 | 1 | 50   | 0 |
| P12163_1_F3,24054 | K.SFPVLFDVSK.V      | 1747.025 | 0.00474  | 2 | 1 | 50.3 | 0 |
| P12163_1_F5,23141 | K.SFPVLFDVSK.V      | 1747.025 | 0.00414  | 3 | 1 | 26.9 | 0 |
| P12163_1_F2,13932 | K.SVVEVLR.M         | 1268.752 | 0.0028   | 3 | 1 | 27.1 | 0 |
| P12163_1_F9,19266 | K.SVVEVLR.M         | 1268.752 | 0.00263  | 2 | 1 | 26   | 0 |
| P12163_2_F1,20102 | K.SVVEVLR.M         | 1268.752 | 0.00251  | 2 | 1 | 26.1 | 0 |
| P12163_1_F3,22097 | K.VTMAGMEQMPLMK.S   | 2075.098 | 0.00914  | 3 | 1 | 40.6 | 0 |
| P12163_1_F3,22116 | K.VTMAGMEQMPLMK.S   | 2075.098 | 0.00883  | 2 | 1 | 35.2 | 0 |
| P12163_1_F7,17597 | R.DLISSHEASFEVK.E   | 2183.217 | 0.0027   | 3 | 1 | 36   | 0 |
| P12163_1_F8,18425 | R.DLISSHEASFEVK.E   | 2183.217 | 0.00282  | 3 | 1 | 26.4 | 0 |
| P12163_1_F5,12105 | R.FVGEK.M ! R.FVGEK | 1373.788 | 0.00821  | 3 | 1 | 30.8 | 0 |
| P12163_2_F1,12538 | R.FVGEK.M ! R.FVGEK | 1373.788 | 0.00872  | 3 | 1 | 32.7 | 0 |
| P12163_2_F6,20760 | R.KIPGSYGLPYLGPIK.D | 2515.541 | 0.01292  | 4 | 1 | 30   | 0 |
| P12163_1_F7,19361 | R.VLSYLDPSEPNHAK.L  | 2178.201 | 0.00713  | 3 | 1 | 24.2 | 0 |
| P12163_2_F6,19811 | R.VLSYLDPSEPNHAK.L  | 2178.201 | 0.00434  | 2 | 1 | 51.8 | 0 |
| P12163_1_F3,19068 | R.YDSFDIQVGK.S      | 1779.974 | 0.00754  | 2 | 1 | 41.7 | 0 |
| P12163_1_F3,19081 | R.YDSFDIQVGK.S      | 1779.974 | 0.00614  | 3 | 1 | 30   | 0 |
| P12163_1_F9,18177 | R.YDSFDIQVGK.S      | 1779.974 | 0.00215  | 3 | 1 | 23   | 0 |
| P12163_1_F9,18191 | R.YDSFDIQVGK.S      | 1779.974 | 0.00544  | 2 | 1 | 25.7 | 0 |
| P12163_2_F9,17117 | R.YDSFDIQVGK.S      | 1779.974 | 0.012    | 2 | 1 | 40.5 | 0 |
| P12163_1_F4,15825 | K.GSVPIGIGK.N       | 1435.909 | 0.00175  | 2 | 1 | 32.4 | 0 |
| P12163_1_F4,16026 | K.GSVPIGIGK.N       | 1435.909 | 0.00689  | 2 | 1 | 35   | 0 |
| P12163_1_F7,14225 | K.GSVPIGIGK.N       | 1435.909 | -0.00001 | 3 | 1 | 35.3 | 0 |
| P12163_2_F1,15001 | K.GSVPIGIGK.N       | 1435.909 | 0.00555  | 2 | 1 | 33.6 | 0 |
| P12163_2_F1,15046 | K.GSVPIGIGK.N       | 1435.909 | 0.00749  | 3 | 1 | 40.4 | 0 |
| P12163_1_F3,8251  | K.IDEGR.I           | 1022.542 | 0.00198  | 2 | 1 | 27.9 | 0 |
| P12163_1_F3,10330 | K.IHHSVGLR.S        | 1321.801 | 0.00477  | 3 | 1 | 25.2 | 0 |
| P12163_1_F3,10374 | K.IHHSVGLR.S        | 1321.801 | 0.00485  | 4 | 1 | 28   | 0 |
| P12163_1_S1,10100 | K.IVNSDSVQEAAR.E    | 1592.855 | 0.00408  | 3 | 1 | 60.5 | 0 |
| P12163_1_S1,12376 | K.IVNSDSVQEAAR.E    | 1592.855 | 0.00162  | 2 | 1 | 24.5 | 0 |
| P12163_1_S1,12416 | K.IVNSDSVQEAAR.E    | 1592.855 | 0.00315  | 3 | 1 | 94.9 | 0 |
| P12163_1_S1,23393 | K.IYVLTQFNSASLNR.H  | 1930.07  | 0.00164  | 3 | 1 | 42.4 | 0 |
| P12163_1_S1,23603 | K.IYVLTQFNSASLNR.H  | 1930.07  | 0.00317  | 3 | 1 | 48.4 | 0 |
| P12163_1_F8,19187 | K.KPIPDFSFYDR.S     | 1993.1   | 0.00295  | 3 | 1 | 24.3 | 0 |
| P12163_1_S1,9035  | K.NSQTCLDPEASR.S    | 1681.812 | 0.00418  | 3 | 1 | 51.3 | 0 |
| P12163_1_S1,10266 | K.NSQTCLDPEASR.S    | 1681.812 | 0.00543  | 2 | 1 | 26.5 | 0 |
| P12163_1_S1,10285 | K.NSQTCLDPEASR.S    | 1681.812 | 0.00415  | 3 | 1 | 45.8 | 0 |
| P12163_1_F4,19345 | K.SGIVTHIK.D        | 1438.945 | -0.00381 | 2 | 1 | 32.7 | 0 |

|                   |                      |          |          |   |   |      |   |
|-------------------|----------------------|----------|----------|---|---|------|---|
| P12163_1_F4,19347 | K.SGIVTIIK.D         | 1438.945 | -0.00204 | 3 | 1 | 30   | 0 |
| P12163_2_F1,18621 | K.SGIVTIIK.D         | 1438.945 | 0.00837  | 3 | 1 | 31.7 | 0 |
| P12163_2_F1,18639 | K.SGIVTIIK.D         | 1438.945 | 0.01257  | 2 | 1 | 44.6 | 0 |
| P12163_1_F5,15875 | R.ATAFGLM*K.I        | 1462.855 | 0.00322  | 3 | 1 | 28.4 | 0 |
| P12163_1_F5,18554 | R.ATAFGLMK.I         | 1446.86  | 0.00382  | 2 | 1 | 36.4 | 0 |
| P12163_2_F1,18858 | R.ATAFGLMK.I         | 1446.86  | 0.00274  | 2 | 1 | 39   | 0 |
| P12163_2_F1,18868 | R.ATAFGLMK.I         | 1446.86  | 0.00721  | 3 | 1 | 29.4 | 0 |
| P12163_1_S10,1120 | R.AYASNMG*GGYK.N     | 1685.878 | 0.00711  | 3 | 1 | 30.1 | 0 |
| P12163_2_F2,10515 | R.AYASNMG*GGYK.N     | 1685.878 | 0.00828  | 2 | 1 | 44.1 | 0 |
| P12163_1_F5,12476 | R.AYASNMG*GGYK.N     | 1669.883 | 0.00456  | 2 | 1 | 39.9 | 0 |
| P12163_1_S10,1370 | R.AYASNMG*GGYK.N     | 1669.883 | 0.00429  | 3 | 1 | 22.1 | 0 |
| P12163_2_F2,13246 | R.AYASNMG*GGYK.N     | 1669.883 | 0.00489  | 2 | 1 | 40.2 | 0 |
| P12163_1_F7,18753 | R.DKFPGANDFGSEVIPG   | 2990.55  | 0.00181  | 3 | 1 | 46.9 | 0 |
| P12163_2_S5,17979 | R.DKFPGANDFGSEVIPG   | 2990.55  | 0.00764  | 4 | 1 | 42.5 | 0 |
| P12163_1_F7,19799 | R.DKFPGANDFGSEVIPG   | 2974.555 | -0.00029 | 3 | 1 | 45.4 | 0 |
| P12163_1_F9,11157 | R.FIQAHR.E           | 1075.631 | 0.00432  | 3 | 1 | 36.9 | 0 |
| P12163_1_S1,19040 | R.LIDIPVSNCLNSNISK.I | 2395.347 | 0.00536  | 4 | 1 | 22.3 | 0 |
| P12163_1_S1,20408 | R.LIDIPVSNCLNSNISK.I | 2395.347 | 0.00716  | 4 | 1 | 46.3 | 0 |
| P12163_1_F2,9827  | R.SAPIYTQPR.Y        | 1336.753 | -0.00327 | 3 | 1 | 34.9 | 0 |
| P12163_1_S1,22103 | R.SVLGILGGGAGTR.L    | 1574.953 | 0.00085  | 3 | 1 | 35.8 | 0 |
| P12163_1_S1,23636 | R.SVLGILGGGAGTR.L    | 1574.953 | 0.00094  | 3 | 1 | 58.7 | 0 |
| P12163_1_F7,17897 | K.DSSAHTVFEISEGLR.K  | 1952.003 | 0.00472  | 3 | 1 | 38.3 | 0 |
| P12163_1_F7,17938 | K.DSSAHTVFEISEGLR.K  | 1952.003 | -0.00341 | 2 | 1 | 26.6 | 0 |
| P12163_1_F8,18695 | K.DSSAHTVFEISEGLR.K  | 1952.003 | 0.00199  | 3 | 1 | 34.6 | 0 |
| P12163_1_F8,18720 | K.DSSAHTVFEISEGLR.K  | 1952.003 | 0.00119  | 2 | 1 | 33.6 | 0 |
| P12163_2_S5,17695 | K.DSSAHTVFEISEGLR.K  | 1952.003 | 0.0016   | 3 | 1 | 49.6 | 0 |
| P12163_1_S1,9645  | K.EIDSLPSR.V         | 1220.679 | 0.00378  | 3 | 1 | 36.7 | 0 |
| P12163_1_S1,12565 | K.EIDSLPSR.V         | 1220.679 | -0.00343 | 2 | 1 | 28.9 | 0 |
| P12163_1_F3,20557 | K.LEEGYYVMNPVK.A     | 2050.114 | 0.00615  | 2 | 1 | 56.8 | 0 |
| P12163_1_F9,21043 | K.LLHDLLTK.K         | 1560.993 | 0.00572  | 2 | 1 | 25.6 | 0 |
| P12163_1_F9,21166 | K.LLHDLLTK.K         | 1560.993 | 0.00623  | 3 | 1 | 32.5 | 0 |
| P12163_2_F7,19284 | K.LLHDLLTK.K         | 1560.993 | 0.00302  | 2 | 1 | 37.4 | 0 |
| P12163_2_F7,19494 | K.LLHDLLTK.K         | 1560.993 | 0.00707  | 2 | 1 | 37.2 | 0 |
| P12163_2_F7,19515 | K.LLHDLLTK.K         | 1560.993 | 0.00464  | 3 | 1 | 31.2 | 0 |
| P12163_2_F1,12461 | K.MPDNSMPK.E         | 1527.812 | 0.00117  | 3 | 1 | 22.6 | 0 |
| P12163_2_F1,13326 | K.NIMENCMGNAR.A      | 1613.75  | 0.00228  | 2 | 1 | 28   | 0 |
| P12163_1_F8,19141 | K.NYVDMDEYPVTTTELQ   | 2391.144 | 0.00398  | 2 | 1 | 53.3 | 0 |
| P12163_1_F4,10456 | K.SINVSGHK.Y         | 1449.863 | 0.01105  | 3 | 1 | 39.1 | 0 |
| P12163_2_F4,9194  | K.SINVSGHK.Y         | 1449.863 | 0.00478  | 3 | 1 | 42.5 | 0 |
| P12163_2_F4,9205  | K.SINVSGHK.Y         | 1449.863 | 0.00781  | 2 | 1 | 29.9 | 0 |
| P12163_2_S3,9103  | K.SINVSGHK.Y         | 1449.863 | 0.00742  | 3 | 1 | 37.9 | 0 |
| P12163_1_S1,9461  | M.VISTTETDSR.E       | 1412.753 | 0.00217  | 3 | 1 | 36.3 | 0 |
| P12163_1_S1,11263 | M.VISTTETDSR.E       | 1412.753 | 0.00425  | 2 | 1 | 29.2 | 0 |
| P12163_1_F2,12677 | R.EILNSTFASR.Y       | 1441.795 | 0.00263  | 3 | 1 | 37.2 | 0 |
| P12163_1_F2,16036 | R.EILNSTFASR.Y       | 1441.795 | -0.00067 | 3 | 1 | 31.9 | 0 |
| P12163_1_F2,5778  | R.ETQEEVTR.H         | 1295.674 | 0.00258  | 2 | 1 | 28.1 | 0 |
| P12163_2_F1,20443 | R.FEILSK.D           | 1344.835 | 0.00507  | 3 | 1 | 22.4 | 0 |
| P12163_2_F1,16895 | R.LGFEGYK.N          | 1421.825 | 0.00126  | 3 | 1 | 22.2 | 0 |
| P12163_2_F7,20927 | R.LISHIEVLK.E        | 1789.104 | 0.00733  | 3 | 1 | 34.8 | 0 |
| P12163_2_F8_1207C | R.LISHIEVLK.E        | 1789.104 | 0.00664  | 3 | 1 | 27   | 0 |
| P12163_2_F8_1207C | R.LISHIEVLK.E        | 1789.104 | -0.00107 | 3 | 1 | 28.7 | 0 |

|                   |                      |          |          |   |   |      |   |
|-------------------|----------------------|----------|----------|---|---|------|---|
| P12163_1_F4,21050 | R.YFEVELK.E          | 1535.893 | 0.00757  | 2 | 1 | 23.9 | 0 |
| P12163_1_F4,21064 | R.YFEVELK.E          | 1535.893 | 0.00576  | 3 | 1 | 23.9 | 0 |
| P12163_1_F5,19895 | R.YFEVELK.E          | 1535.893 | 0.00777  | 2 | 1 | 24.6 | 0 |
| P12163_1_F7,18732 | R.YFEVELK.E          | 1535.893 | 0.00199  | 2 | 1 | 24.5 | 0 |
| P12163_1_F9,19552 | R.YFEVELK.E          | 1535.893 | 0.00713  | 2 | 1 | 33   | 0 |
| P12163_1_F3,13553 | K.ANITENFTR.Q        | 1369.738 | 0.00158  | 3 | 1 | 23.2 | 0 |
| P12163_1_F3,22818 | K.ELETLATCGM*FEK.V   | 2153.108 | 0.01042  | 3 | 1 | 60.2 | 0 |
| P12163_1_F3,18147 | K.ELETLATCGMFEK.V    | 2137.113 | 0.0076   | 3 | 1 | 30.7 | 0 |
| P12163_1_F3,20450 | K.ELETLATCGMFEK.V    | 2137.113 | 0.00835  | 3 | 1 | 26.5 | 0 |
| P12163_1_F3,22760 | K.ELETLATCGMFEK.V    | 2137.113 | 0.00553  | 3 | 1 | 54.1 | 0 |
| P12163_1_F3,22788 | K.ELETLATCGMFEK.V    | 2137.113 | 0.00739  | 2 | 1 | 52.1 | 0 |
| P12163_1_F2,17104 | K.FVNGAIVGER.N       | 1365.779 | 0.00293  | 2 | 1 | 42.4 | 0 |
| P12163_1_F7,19967 | K.LEYVHPYLDGVYNPR.   | 2139.118 | -0.001   | 3 | 1 | 33.3 | 0 |
| P12163_1_F7,20021 | K.LEYVHPYLDGVYNPR.   | 2139.118 | -0.00371 | 2 | 1 | 26   | 0 |
| P12163_1_F3,20103 | K.LGNVVEGNTQLAVVK    | 2149.28  | 0.00727  | 3 | 1 | 60.1 | 0 |
| P12163_1_F3,20131 | K.LGNVVEGNTQLAVVK    | 2149.28  | -0.00155 | 2 | 1 | 73.1 | 0 |
| P12163_1_F4,19084 | K.NEGGIIVEIK.L       | 1680.015 | 0.00731  | 3 | 1 | 29.4 | 0 |
| P12163_1_F7,16777 | K.NEGGIIVEIK.L       | 1680.015 | 0.00236  | 3 | 1 | 38.2 | 0 |
| P12163_2_F1,18316 | K.NEGGIIVEIK.L       | 1680.015 | 0.02123  | 3 | 1 | 22   | 0 |
| P12163_2_F4,16405 | K.NEGGIIVEIK.L       | 1680.015 | 0.01199  | 3 | 1 | 30.4 | 0 |
| P12163_2_F10,1393 | K.NTHVYAFVEHGNDLG    | 2583.341 | 0.00674  | 4 | 1 | 31.2 | 0 |
| P12163_2_F4,13820 | K.NTHVYAFVEHGNDLG    | 2583.341 | 0.00894  | 4 | 1 | 43.5 | 0 |
| P12163_1_F8,19370 | R.AEYAVDHNTGTGALF    | 2173.098 | -0.00374 | 2 | 1 | 32.8 | 0 |
| P12163_2_F10,1736 | R.AEYAVDHNTGTGALF    | 2173.098 | 0.00027  | 3 | 1 | 25.8 | 0 |
| P12163_2_F4,18053 | R.AEYAVDHNTGTGALF    | 2173.098 | 0.00108  | 2 | 1 | 29.3 | 0 |
| P12163_2_S5,18154 | R.AEYAVDHNTGTGALF    | 2173.098 | -0.00336 | 3 | 1 | 24.6 | 0 |
| P12163_1_F2,5913  | R.DESSHISPHGQR.V     | 1653.825 | 0.00642  | 3 | 1 | 31.4 | 0 |
| P12163_1_F7,22077 | R.KLSPVFTGGPGVDEVP   | 2947.65  | 0.0021   | 3 | 1 | 34.1 | 0 |
| P12163_1_F7,22099 | R.KLSPVFTGGPGVDEVP   | 2947.65  | 0.00291  | 4 | 1 | 35.2 | 0 |
| P12163_2_S3,8369  | R.M*GHGSSYGVGAK.L    | 1774.937 | 0.00797  | 3 | 1 | 22.7 | 0 |
| P12163_2_F1,20995 | R.MAFLQGNITR.D       | 1454.809 | 0.0071   | 2 | 1 | 29.7 | 0 |
| P12163_2_S3,9873  | R.MGHGSSYGVGAK.L     | 1758.942 | 0.00584  | 3 | 1 | 32.1 | 0 |
| P12163_1_F7,20992 | R.NINSLSLFSNIEVNPRPI | 2894.583 | 0.00572  | 4 | 1 | 49.8 | 0 |
| P12163_1_F3,18776 | R.NVFQVDQQLGIGSK.F   | 2070.18  | 0.008    | 3 | 1 | 45   | 0 |
| P12163_1_F3,18783 | R.NVFQVDQQLGIGSK.F   | 2070.18  | -0.00181 | 2 | 1 | 24.7 | 0 |
| P12163_1_F3,20356 | R.NVFQVDQQLGIGSK.F   | 2070.18  | 0.01601  | 3 | 1 | 23.1 | 0 |
| P12163_1_F6,19192 | R.NVFQVDQQLGIGSK.F   | 2070.18  | -0.00253 | 3 | 1 | 29.6 | 0 |
| P12163_1_F5,16249 | R.QGNVFNIEAGK.Q      | 1785.011 | 0.00465  | 2 | 1 | 39.3 | 0 |
| P12163_2_F1,16630 | R.QGNVFNIEAGK.Q      | 1785.011 | -0.00229 | 2 | 1 | 34.7 | 0 |
| P12163_2_F1,16650 | R.QGNVFNIEAGK.Q      | 1785.011 | 0.0039   | 3 | 1 | 44.2 | 0 |
| P12163_2_F6,10077 | K.DQNGHSDLEEGIR.R    | 1773.867 | 0.00241  | 3 | 1 | 32.3 | 0 |
| P12163_1_F4,12799 | K.EQTELVQK.S         | 1582.926 | 0.00808  | 2 | 1 | 31.7 | 0 |
| P12163_1_F4,12823 | K.EQTELVQK.S         | 1582.926 | 0.00768  | 3 | 1 | 28.2 | 0 |
| P12163_2_S3,8842  | K.QYYSHDVDR.T        | 1486.723 | 0.00947  | 3 | 1 | 36.7 | 0 |
| P12163_2_S5,9305  | K.QYYSHDVDR.T        | 1486.723 | 0.00575  | 3 | 1 | 28.2 | 0 |
| P12163_1_F7,16095 | K.SNLSEFDDVQGHPGFI   | 2500.256 | 0.00798  | 3 | 1 | 23.5 | 0 |
| P12163_1_F8,16779 | K.SNLSEFDDVQGHPGFI   | 2500.256 | 0.00864  | 3 | 1 | 51.6 | 0 |
| P12163_1_F8,16842 | K.SNLSEFDDVQGHPGFI   | 2500.256 | 0.00867  | 4 | 1 | 25.5 | 0 |
| P12163_2_F6,16279 | K.SNLSEFDDVQGHPGFI   | 2500.256 | 0.01242  | 3 | 1 | 39.7 | 0 |
| P12163_1_F4,23505 | K.VNTILNEEFM*ASK.D   | 2120.152 | 0.00653  | 3 | 1 | 43.7 | 0 |
| P12163_1_F4,23529 | K.VNTILNEEFM*ASK.D   | 2120.152 | 0.00269  | 2 | 1 | 46.2 | 0 |



|                   |                     |          |          |   |   |      |   |
|-------------------|---------------------|----------|----------|---|---|------|---|
| P12163_1_F3,22792 | K.VNTILNEEFMASK.D   | 2104.157 | 0.01097  | 3 | 1 | 32.4 | 0 |
| P12163_1_F4,23476 | K.VNTILNEEFMASK.D   | 2104.157 | 0.00497  | 3 | 1 | 42.4 | 0 |
| P12163_1_F7,18678 | R.AADLGVESIVIGM*PHI | 1985.079 | 0.00197  | 3 | 1 | 44.7 | 0 |
| P12163_1_F7,20689 | R.AADLGVESIVIGM*PHI | 1985.079 | -0.00457 | 2 | 1 | 45.5 | 0 |
| P12163_2_S5,17858 | R.AADLGVESIVIGM*PHI | 1985.079 | 0.00266  | 3 | 1 | 58.6 | 0 |
| P12163_1_F6,21550 | R.AADLGVESIVIGMPHR  | 1969.084 | 0.00623  | 3 | 1 | 52.1 | 0 |
| P12163_1_F7,20676 | R.AADLGVESIVIGMPHR  | 1969.084 | 0.00404  | 3 | 1 | 66.3 | 0 |
| P12163_2_S5,19874 | R.AADLGVESIVIGMPHR  | 1969.084 | 0.00086  | 3 | 1 | 65.6 | 0 |
| P12163_2_F6,15691 | R.FGHNEIDEPSFTQPK.M | 2354.224 | 0.00192  | 2 | 1 | 40   | 0 |
| P12163_1_F3,23424 | R.FGLEGGETLIPGMK.E  | 2057.156 | 0.01019  | 3 | 1 | 40.3 | 0 |
| P12163_1_F3,23458 | R.FGLEGGETLIPGMK.E  | 2057.156 | 0.00865  | 2 | 1 | 59.1 | 0 |
| P12163_1_F4,8975  | R.HSVLHDQETGEK.Y    | 1988.066 | 0.00787  | 3 | 1 | 36   | 0 |
| P12163_1_F6,8728  | R.HSVLHDQETGEK.Y    | 1988.066 | 0.01305  | 4 | 1 | 30.6 | 0 |
| P12163_1_F6,8780  | R.HSVLHDQETGEK.Y    | 1988.066 | 0.01186  | 3 | 1 | 25.9 | 0 |
| P12163_1_F3,27518 | R.LIWSTQFENFLATK.W  | 2306.3   | -0.00147 | 3 | 1 | 24.5 | 0 |
| P12163_2_F1,21916 | R.LNVLGNVVR.K       | 1287.805 | 0.00265  | 2 | 1 | 24.3 | 0 |
| P12163_2_F1,22173 | R.LNVLGNVVR.K       | 1287.805 | 0.00217  | 2 | 1 | 33.1 | 0 |
| P12163_1_F3,10185 | R.LSGQDVER.G        | 1207.658 | 0.00256  | 2 | 1 | 24.4 | 0 |
| P12163_1_F8,19399 | R.MAGFLSENRPVQTLR.  | 2023.106 | 0.00378  | 3 | 1 | 22.8 | 0 |
| P12163_1_F2,10567 | R.SASDVAICR.V       | 1282.673 | 0.00099  | 2 | 1 | 25.7 | 0 |
| P12163_2_F1,10645 | R.SSQYCTDVAK.A      | 1766.92  | 0.00464  | 2 | 1 | 53.8 | 0 |
| P12163_1_F2,21471 | K.DGVLYITIPK.A      | 1727.056 | 0.00118  | 2 | 1 | 29.1 | 0 |
| P12163_1_F2,21517 | K.DGVLYITIPK.A      | 1727.056 | 0.00267  | 3 | 1 | 26.6 | 0 |
| P12163_1_F3,18195 | K.DGVLYITIPK.A      | 1727.056 | 0.00398  | 2 | 1 | 29.4 | 0 |
| P12163_1_F3,18213 | K.DGVLYITIPK.A      | 1727.056 | 0.00447  | 3 | 1 | 25.8 | 0 |
| P12163_1_F3,21908 | K.DGVLYITIPK.A      | 1727.056 | 0.00339  | 3 | 1 | 26.6 | 0 |
| P12163_1_F3,21914 | K.DGVLYITIPK.A      | 1727.056 | 0.00634  | 2 | 1 | 47.9 | 0 |
| P12163_1_F3,22114 | K.DGVLYITIPK.A      | 1727.056 | 0.00354  | 2 | 1 | 59.1 | 0 |
| P12163_1_F3,22286 | K.DGVLYITIPK.A      | 1727.056 | 0.00315  | 3 | 1 | 27.3 | 0 |
| P12163_1_F3,22351 | K.DGVLYITIPK.A      | 1727.056 | 0.00654  | 2 | 1 | 47.7 | 0 |
| P12163_1_F3,22594 | K.DGVLYITIPK.A      | 1727.056 | 0.00034  | 2 | 1 | 37.4 | 0 |
| P12163_1_F3,22838 | K.DGVLYITIPK.A      | 1727.056 | 0.00758  | 2 | 1 | 38.7 | 0 |
| P12163_1_F3,23122 | K.DGVLYITIPK.A      | 1727.056 | 0.00892  | 2 | 1 | 42.7 | 0 |
| P12163_1_F3,23133 | K.DGVLYITIPK.A      | 1727.056 | 0.00204  | 3 | 1 | 22.6 | 0 |
| P12163_1_F3,23389 | K.DGVLYITIPK.A      | 1727.056 | -0.00456 | 2 | 1 | 30.5 | 0 |
| P12163_1_F3,23560 | K.DGVLYITIPK.A      | 1727.056 | -0.00201 | 3 | 1 | 24.2 | 0 |
| P12163_1_F3,23654 | K.DGVLYITIPK.A      | 1727.056 | 0.00974  | 2 | 1 | 34.4 | 0 |
| P12163_1_F3,23884 | K.DGVLYITIPK.A      | 1727.056 | -0.00002 | 2 | 1 | 28   | 0 |
| P12163_1_F4,22843 | K.DGVLYITIPK.A      | 1727.056 | 0.0069   | 2 | 1 | 48.5 | 0 |
| P12163_1_F4,22872 | K.DGVLYITIPK.A      | 1727.056 | 0.00612  | 3 | 1 | 25.6 | 0 |
| P12163_1_F5,21022 | K.DGVLYITIPK.A      | 1727.056 | 0.01048  | 2 | 1 | 34.4 | 0 |
| P12163_1_F5,21471 | K.DGVLYITIPK.A      | 1727.056 | 0.00483  | 3 | 1 | 28.9 | 0 |
| P12163_1_F5,21577 | K.DGVLYITIPK.A      | 1727.056 | 0.00632  | 2 | 1 | 35.8 | 0 |
| P12163_1_F5,22711 | K.DGVLYITIPK.A      | 1727.056 | 0.00246  | 2 | 1 | 37.2 | 0 |
| P12163_1_F5,23299 | K.DGVLYITIPK.A      | 1727.056 | 0.00616  | 2 | 1 | 28.2 | 0 |
| P12163_1_F6,20853 | K.DGVLYITIPK.A      | 1727.056 | -0.00003 | 3 | 1 | 27.4 | 0 |
| P12163_1_F6,20884 | K.DGVLYITIPK.A      | 1727.056 | 0.0044   | 2 | 1 | 46.8 | 0 |
| P12163_1_F6,21077 | K.DGVLYITIPK.A      | 1727.056 | -0.0039  | 3 | 1 | 24.5 | 0 |
| P12163_1_F6,21221 | K.DGVLYITIPK.A      | 1727.056 | -0.0005  | 2 | 1 | 45   | 0 |
| P12163_1_F6,21314 | K.DGVLYITIPK.A      | 1727.056 | 0.00279  | 3 | 1 | 23   | 0 |
| P12163_1_F7,20448 | K.DGVLYITIPK.A      | 1727.056 | 0.00294  | 3 | 1 | 22.9 | 0 |

|                                      |          |          |   |   |      |   |
|--------------------------------------|----------|----------|---|---|------|---|
| P12163_1_F8,21456 K.DGVLYITIPK.A     | 1727.056 | 0.00228  | 3 | 1 | 27.2 | 0 |
| P12163_1_F8,21484 K.DGVLYITIPK.A     | 1727.056 | 0.00622  | 2 | 1 | 47.2 | 0 |
| P12163_1_F9,20844 K.DGVLYITIPK.A     | 1727.056 | 0.00708  | 2 | 1 | 53.6 | 0 |
| P12163_1_S1,20123 K.DGVLYITIPK.A     | 1727.056 | 0.00888  | 2 | 1 | 34.3 | 0 |
| P12163_2_F1,22381 K.DGVLYITIPK.A     | 1727.056 | 0.00512  | 2 | 1 | 35.9 | 0 |
| P12163_2_F10,1802.K.DGVLYITIPK.A     | 1727.056 | 0.00249  | 3 | 1 | 25.3 | 0 |
| P12163_2_F10,1806.K.DGVLYITIPK.A     | 1727.056 | 0.00684  | 2 | 1 | 34.3 | 0 |
| P12163_2_F2,21417 K.DGVLYITIPK.A     | 1727.056 | 0.00126  | 2 | 1 | 41.9 | 0 |
| P12163_2_F2,21424 K.DGVLYITIPK.A     | 1727.056 | -0.00366 | 3 | 1 | 24.7 | 0 |
| P12163_2_F4,19924 K.DGVLYITIPK.A     | 1727.056 | 0.00342  | 3 | 1 | 24.9 | 0 |
| P12163_2_F6,21092 K.DGVLYITIPK.A     | 1727.056 | 0.00432  | 2 | 1 | 33.1 | 0 |
| P12163_2_F7,19015 K.DGVLYITIPK.A     | 1727.056 | 0.00332  | 2 | 1 | 47.8 | 0 |
| P12163_2_F7,19021 K.DGVLYITIPK.A     | 1727.056 | 0.0114   | 3 | 1 | 22.6 | 0 |
| P12163_2_F7,19218 K.DGVLYITIPK.A     | 1727.056 | 0.0056   | 2 | 1 | 39.9 | 0 |
| P12163_2_F9,19196 K.DGVLYITIPK.A     | 1727.056 | 0.01362  | 3 | 1 | 27.3 | 0 |
| P12163_2_F9,19199 K.DGVLYITIPK.A     | 1727.056 | 0.00672  | 2 | 1 | 25.3 | 0 |
| P12163_2_S3,17369 K.DGVLYITIPK.A     | 1727.056 | 0.00189  | 3 | 1 | 22.2 | 0 |
| P12163_2_S5,19501 K.DGVLYITIPK.A     | 1727.056 | 0.00336  | 3 | 1 | 23.2 | 0 |
| P12163_1_F5,11609 K.IQAEVK.D         | 1295.814 | 0.00704  | 3 | 1 | 24.2 | 0 |
| P12163_1_F6,12656 K.IQAEVK.D         | 1295.814 | 0.00635  | 3 | 1 | 30   | 0 |
| P12163_2_F2,12576 K.IQAEVK.D         | 1295.814 | 0.0044   | 3 | 1 | 24.2 | 0 |
| P12163_2_S5,10969 K.IQAEVK.D         | 1295.814 | 0.00236  | 3 | 1 | 24.2 | 0 |
| P12163_2_S5,11751 K.IQAEVK.D         | 1295.814 | 0.00437  | 3 | 1 | 24.6 | 0 |
| P12163_2_F7,15441 K.IRLDVPGM*SR.N    | 1463.831 | -0.00026 | 3 | 1 | 30.8 | 0 |
| P12163_1_F9,17322 K.IRLDVPGMSR.N     | 1447.836 | 0.00415  | 3 | 1 | 30.3 | 0 |
| P12163_2_F7,15440 K.IRLDVPGMSR.N     | 1447.836 | -0.00125 | 3 | 1 | 32.8 | 0 |
| P12163_2_F10,1629 K.VRVEESMLVIK.A    | 1911.156 | 0.00327  | 3 | 1 | 27.6 | 0 |
| P12163_2_F6,18365 K.VRVEESMLVIK.A    | 1911.156 | 0.00408  | 3 | 1 | 27.5 | 0 |
| P12163_2_F7,16442 K.VRVEESMLVIK.A    | 1911.156 | 0.00282  | 3 | 1 | 28.2 | 0 |
| P12163_1_F4,22460 R.AAPVSSPGIWDSFPAA | 2033.076 | 0.00262  | 2 | 1 | 36   | 0 |
| P12163_1_F4,22533 R.AAPVSSPGIWDSFPAA | 2033.076 | 0.00087  | 3 | 1 | 65.1 | 0 |
| P12163_1_F8,21511 R.AAPVSSPGIWDSFPAA | 2033.076 | 0.00056  | 2 | 1 | 33.5 | 0 |
| P12163_1_F8,21567 R.AAPVSSPGIWDSFPAA | 2033.076 | 0.00153  | 3 | 1 | 47.5 | 0 |
| P12163_2_F1,21963 R.AAPVSSPGIWDSFPAA | 2033.076 | -0.00219 | 3 | 1 | 48.5 | 0 |
| P12163_2_F4,19997 R.AAPVSSPGIWDSFPAA | 2033.076 | -0.00039 | 3 | 1 | 38.6 | 0 |
| P12163_2_F6,21184 R.AAPVSSPGIWDSFPAA | 2033.076 | 0.0004   | 2 | 1 | 42.4 | 0 |
| P12163_2_F6,21218 R.AAPVSSPGIWDSFPAA | 2033.076 | 0.00138  | 3 | 1 | 46.1 | 0 |
| P12163_2_S5,19894 R.AAPVSSPGIWDSFPAA | 2033.076 | 0.00336  | 3 | 1 | 62.8 | 0 |
| P12163_1_F5,8028 R.ETENDYK.I         | 1506.79  | 0.00725  | 3 | 1 | 34.6 | 0 |
| P12163_1_F6,9278 R.ETENDYK.I         | 1506.79  | -0.00001 | 3 | 1 | 22   | 0 |
| P12163_2_F1,8503 R.ETENDYK.I         | 1506.79  | 0.00371  | 3 | 1 | 32.5 | 0 |
| P12163_2_S5,9230 R.ETENDYK.I         | 1506.79  | 0.00647  | 3 | 1 | 34.5 | 0 |
| P12163_1_F2,9828 R.GSLDHLQR.S        | 1229.69  | 0.00288  | 3 | 1 | 28.9 | 0 |
| P12163_1_F3,9975 R.GSLDHLQR.S        | 1229.69  | 0.00504  | 3 | 1 | 28.6 | 0 |
| P12163_1_F4,10440 R.GSLDHLQR.S       | 1229.69  | 0.00495  | 3 | 1 | 48.9 | 0 |
| P12163_1_F5,5957 R.GSLDHLQR.S        | 1229.69  | 0.00513  | 3 | 1 | 29.9 | 0 |
| P12163_1_F5,7895 R.GSLDHLQR.S        | 1229.69  | 0.00423  | 3 | 1 | 39.4 | 0 |
| P12163_1_F5,8556 R.GSLDHLQR.S        | 1229.69  | 0.00228  | 3 | 1 | 52.5 | 0 |
| P12163_1_F6,9289 R.GSLDHLQR.S        | 1229.69  | 0.00012  | 3 | 1 | 39.1 | 0 |
| P12163_1_F6,10077 R.GSLDHLQR.S       | 1229.69  | 0.00465  | 3 | 1 | 41.6 | 0 |
| P12163_1_F7,9017 R.GSLDHLQR.S        | 1229.69  | 0.00213  | 3 | 1 | 41.4 | 0 |

|                   |                 |          |          |   |   |      |   |
|-------------------|-----------------|----------|----------|---|---|------|---|
| P12163_1_F7,9668  | R.GSLDHLQR.S    | 1229.69  | 0.00378  | 3 | 1 | 42.8 | 0 |
| P12163_1_F8,9915  | R.GSLDHLQR.S    | 1229.69  | 0.00027  | 3 | 1 | 50.9 | 0 |
| P12163_1_F9,8919  | R.GSLDHLQR.S    | 1229.69  | 0.00294  | 3 | 1 | 42.8 | 0 |
| P12163_1_F9,9798  | R.GSLDHLQR.S    | 1229.69  | -0.00015 | 2 | 1 | 30.5 | 0 |
| P12163_1_F9,9865  | R.GSLDHLQR.S    | 1229.69  | 0.00099  | 3 | 1 | 52.9 | 0 |
| P12163_1_F9,11007 | R.GSLDHLQR.S    | 1229.69  | 0.00024  | 3 | 1 | 26.2 | 0 |
| P12163_1_F9,11289 | R.GSLDHLQR.S    | 1229.69  | 0.0036   | 3 | 1 | 54.4 | 0 |
| P12163_1_F9,11632 | R.GSLDHLQR.S    | 1229.69  | 0.00342  | 3 | 1 | 51.9 | 0 |
| P12163_1_F9,11894 | R.GSLDHLQR.S    | 1229.69  | 0.00435  | 3 | 1 | 33.9 | 0 |
| P12163_1_F9,12200 | R.GSLDHLQR.S    | 1229.69  | 0.00333  | 3 | 1 | 52.1 | 0 |
| P12163_1_F9,12746 | R.GSLDHLQR.S    | 1229.69  | -0.00099 | 3 | 1 | 46.2 | 0 |
| P12163_1_F9,13270 | R.GSLDHLQR.S    | 1229.69  | 0.00243  | 3 | 1 | 57   | 0 |
| P12163_1_F9,13518 | R.GSLDHLQR.S    | 1229.69  | 0.00468  | 3 | 1 | 39   | 0 |
| P12163_1_S10,1058 | R.GSLDHLQR.S    | 1229.69  | 0.00315  | 3 | 1 | 30.4 | 0 |
| P12163_2_F10,9934 | R.GSLDHLQR.S    | 1229.69  | 0.00216  | 3 | 1 | 34.8 | 0 |
| P12163_2_F4,8389  | R.GSLDHLQR.S    | 1229.69  | -0.00149 | 2 | 1 | 26.1 | 0 |
| P12163_2_F4,8402  | R.GSLDHLQR.S    | 1229.69  | -0.00117 | 3 | 1 | 42.4 | 0 |
| P12163_2_F4,9142  | R.GSLDHLQR.S    | 1229.69  | 0.00204  | 3 | 1 | 46.8 | 0 |
| P12163_2_F7,8442  | R.GSLDHLQR.S    | 1229.69  | 0.00246  | 3 | 1 | 39.3 | 0 |
| P12163_2_F7,9315  | R.GSLDHLQR.S    | 1229.69  | 0.00327  | 3 | 1 | 52.9 | 0 |
| P12163_2_F8_12070 | R.GSLDHLQR.S    | 1229.69  | 0.00426  | 3 | 1 | 35.8 | 0 |
| P12163_2_F9,9651  | R.GSLDHLQR.S    | 1229.69  | 0.00279  | 3 | 1 | 53   | 0 |
| P12163_2_F9,9854  | R.GSLDHLQR.S    | 1229.69  | 0.00333  | 3 | 1 | 53   | 0 |
| P12163_2_F9,9857  | R.GSLDHLQR.S    | 1229.69  | 0.00501  | 2 | 1 | 31.8 | 0 |
| P12163_2_F9,10090 | R.GSLDHLQR.S    | 1229.69  | 0.00393  | 3 | 1 | 38.1 | 0 |
| P12163_2_S3,8615  | R.GSLDHLQR.S    | 1229.69  | 0.00003  | 3 | 1 | 35.2 | 0 |
| P12163_2_S3,9169  | R.GSLDHLQR.S    | 1229.69  | 0.00438  | 3 | 1 | 43.5 | 0 |
| P12163_2_S5,7095  | R.GSLDHLQR.S    | 1229.69  | 0.00062  | 4 | 1 | 22.2 | 0 |
| P12163_2_S5,8930  | R.GSLDHLQR.S    | 1229.69  | 0.00318  | 3 | 1 | 31   | 0 |
| P12163_2_S5,9133  | R.GSLDHLQR.S    | 1229.69  | -0.00298 | 4 | 1 | 35.6 | 0 |
| P12163_2_S5,9143  | R.GSLDHLQR.S    | 1229.69  | 0.00039  | 3 | 1 | 39.7 | 0 |
| P12163_2_S5,9593  | R.GSLDHLQR.S    | 1229.69  | 0.00282  | 3 | 1 | 36.6 | 0 |
| P12163_2_S5,9708  | R.GSLDHLQR.S    | 1229.69  | 0.00197  | 2 | 1 | 32.3 | 0 |
| P12163_2_S5,9807  | R.GSLDHLQR.S    | 1229.69  | -0.0006  | 3 | 1 | 53.1 | 0 |
| P12163_2_S5,10016 | R.GSLDHLQR.S    | 1229.69  | 0.00297  | 3 | 1 | 38.7 | 0 |
| P12163_2_S5,10237 | R.GSLDHLQR.S    | 1229.69  | 0.00336  | 3 | 1 | 25.6 | 0 |
| P12163_1_F2,19639 | R.IALPDNVEFEK.I | 1883.073 | 0.00608  | 3 | 1 | 31.4 | 0 |
| P12163_1_F2,20020 | R.IALPDNVEFEK.I | 1883.073 | 0.00728  | 3 | 1 | 29.7 | 0 |
| P12163_1_F2,20021 | R.IALPDNVEFEK.I | 1883.073 | 0.00621  | 2 | 1 | 27.2 | 0 |
| P12163_1_F2,20275 | R.IALPDNVEFEK.I | 1883.073 | 0.0038   | 3 | 1 | 34.1 | 0 |
| P12163_1_F3,20537 | R.IALPDNVEFEK.I | 1883.073 | 0.00653  | 3 | 1 | 29.6 | 0 |
| P12163_1_F3,20787 | R.IALPDNVEFEK.I | 1883.073 | 0.00059  | 3 | 1 | 38.4 | 0 |
| P12163_1_F3,20808 | R.IALPDNVEFEK.I | 1883.073 | 0.00589  | 2 | 1 | 39.8 | 0 |
| P12163_1_F4,222   | R.IALPDNVEFEK.I | 1883.073 | 0.00308  | 3 | 1 | 31.5 | 0 |
| P12163_1_F4,21211 | R.IALPDNVEFEK.I | 1883.073 | 0.00785  | 3 | 1 | 30.3 | 0 |
| P12163_1_F4,21218 | R.IALPDNVEFEK.I | 1883.073 | 0.00435  | 2 | 1 | 43.9 | 0 |
| P12163_1_F5,19544 | R.IALPDNVEFEK.I | 1883.073 | -0.00085 | 3 | 1 | 30.5 | 0 |
| P12163_1_F5,19550 | R.IALPDNVEFEK.I | 1883.073 | 0.00327  | 2 | 1 | 34   | 0 |
| P12163_1_F5,19971 | R.IALPDNVEFEK.I | 1883.073 | 0.00529  | 2 | 1 | 33.4 | 0 |
| P12163_1_F6,19579 | R.IALPDNVEFEK.I | 1883.073 | 0.0056   | 3 | 1 | 26.3 | 0 |
| P12163_1_F6,19976 | R.IALPDNVEFEK.I | 1883.073 | 0.00323  | 3 | 1 | 27.8 | 0 |

|                   |                    |          |          |   |   |      |   |
|-------------------|--------------------|----------|----------|---|---|------|---|
| P12163_1_F6,20008 | R.IALPDNVEFEK.I    | 1883.073 | 0.00565  | 2 | 1 | 30.4 | 0 |
| P12163_1_F6,21243 | R.IALPDNVEFEK.I    | 1883.073 | 0.00224  | 3 | 1 | 25.5 | 0 |
| P12163_1_F7,19155 | R.IALPDNVEFEK.I    | 1883.073 | 0.00687  | 2 | 1 | 33.9 | 0 |
| P12163_1_F8,20129 | R.IALPDNVEFEK.I    | 1883.073 | 0.00827  | 3 | 1 | 29.4 | 0 |
| P12163_1_F9,19619 | R.IALPDNVEFEK.I    | 1883.073 | 0.00707  | 2 | 1 | 28   | 0 |
| P12163_1_F9,19637 | R.IALPDNVEFEK.I    | 1883.073 | 0.00593  | 3 | 1 | 29.2 | 0 |
| P12163_1_S1,18481 | R.IALPDNVEFEK.I    | 1883.073 | 0.00793  | 2 | 1 | 28.3 | 0 |
| P12163_1_S1,18525 | R.IALPDNVEFEK.I    | 1883.073 | 0.0059   | 4 | 1 | 36.8 | 0 |
| P12163_1_S10,1831 | R.IALPDNVEFEK.I    | 1883.073 | 0.00533  | 3 | 1 | 23   | 0 |
| P12163_2_F2,20195 | R.IALPDNVEFEK.I    | 1883.073 | 0.00227  | 3 | 1 | 28.7 | 0 |
| P12163_2_F4,18817 | R.IALPDNVEFEK.I    | 1883.073 | 0.00497  | 3 | 1 | 32.2 | 0 |
| P12163_2_S5,18258 | R.IALPDNVEFEK.I    | 1883.073 | 0.00374  | 3 | 1 | 23.6 | 0 |
| P12163_1_F7,23298 | R.IM*EDPFAYGVTWPSQ | 2474.196 | 0.0047   | 3 | 1 | 36.8 | 0 |
| P12163_2_S5,20885 | R.IM*EDPFAYGVTWPSQ | 2474.196 | 0.0032   | 3 | 1 | 34.1 | 0 |
| P12163_1_F3,25536 | R.IMEDPFAYGVTWPSQC | 2458.201 | 0.00135  | 3 | 1 | 50.4 | 0 |
| P12163_1_F2,14537 | R.LDVPGM*SR.N      | 1194.645 | 0.00371  | 3 | 1 | 26.4 | 0 |
| P12163_1_F2,14419 | R.LDVPGMSR.N       | 1178.65  | 0.00308  | 3 | 1 | 25.1 | 0 |
| P12163_1_F2,14661 | R.LDVPGMSR.N       | 1178.65  | 0.00341  | 3 | 1 | 27   | 0 |
| P12163_1_F2,16042 | R.LDVPGMSR.N       | 1178.65  | 0.00458  | 3 | 1 | 22   | 0 |
| P12163_1_F3,15057 | R.LDVPGMSR.N       | 1178.65  | 0.00374  | 3 | 1 | 24.7 | 0 |
| P12163_1_F6,14521 | R.LDVPGMSR.N       | 1178.65  | 0.00212  | 3 | 1 | 22.8 | 0 |
| P12163_1_F7,15438 | R.NEANTDGSTVEEEEEV | 3312.435 | 0.01256  | 3 | 1 | 55.4 | 0 |
| P12163_1_F5,4922  | R.SSLNQSQPK.K      | 1596.917 | 0.00611  | 3 | 1 | 26.1 | 0 |
| P12163_1_F5,6642  | R.SSLNQSQPK.K      | 1596.917 | 0.00764  | 2 | 1 | 30.5 | 0 |
| P12163_1_F5,7763  | R.SSLNQSQPK.K      | 1596.917 | -0.00018 | 2 | 1 | 35.2 | 0 |
| P12163_1_F5,7893  | R.SSLNQSQPK.K      | 1596.917 | 0.0032   | 3 | 1 | 48.9 | 0 |
| P12163_1_F5,8013  | R.SSLNQSQPK.K      | 1596.917 | 0.0047   | 2 | 1 | 30.2 | 0 |
| P12163_1_F5,8127  | R.SSLNQSQPK.K      | 1596.917 | 0.00434  | 3 | 1 | 28.4 | 0 |
| P12163_1_F5,8589  | R.SSLNQSQPK.K      | 1596.917 | 0.00233  | 3 | 1 | 34.2 | 0 |
| P12163_1_F5,9486  | R.SSLNQSQPK.K      | 1596.917 | 0.0094   | 2 | 1 | 32.9 | 0 |
| P12163_1_F5,16603 | R.SSLNQSQPK.K      | 1596.917 | 0.00464  | 2 | 1 | 28.1 | 0 |
| P12163_1_F5,17460 | R.SSLNQSQPK.K      | 1596.917 | 0.008    | 2 | 1 | 25.3 | 0 |
| P12163_1_F6,7955  | R.SSLNQSQPK.K      | 1596.917 | 0.01157  | 3 | 1 | 35.6 | 0 |
| P12163_1_F6,8988  | R.SSLNQSQPK.K      | 1596.917 | 0.00484  | 2 | 1 | 28.6 | 0 |
| P12163_1_F6,9062  | R.SSLNQSQPK.K      | 1596.917 | 0.00773  | 3 | 1 | 45.8 | 0 |
| P12163_1_F7,8619  | R.SSLNQSQPK.K      | 1596.917 | 0.00728  | 3 | 1 | 34.7 | 0 |
| P12163_1_F9,8669  | R.SSLNQSQPK.K      | 1596.917 | 0.00576  | 2 | 1 | 31.8 | 0 |
| P12163_1_S10,8439 | R.SSLNQSQPK.K      | 1596.917 | 0.00533  | 3 | 1 | 28.8 | 0 |
| P12163_1_S10,9339 | R.SSLNQSQPK.K      | 1596.917 | 0.00497  | 3 | 1 | 46.4 | 0 |
| P12163_2_F1,8459  | R.SSLNQSQPK.K      | 1596.917 | 0.00494  | 3 | 1 | 38.2 | 0 |
| P12163_2_F10,7997 | R.SSLNQSQPK.K      | 1596.917 | 0.00761  | 3 | 1 | 22.7 | 0 |
| P12163_2_F10,8997 | R.SSLNQSQPK.K      | 1596.917 | 0.00482  | 3 | 1 | 46.1 | 0 |
| P12163_2_F2,7417  | R.SSLNQSQPK.K      | 1596.917 | 0.00524  | 3 | 1 | 28.2 | 0 |
| P12163_2_F2,7821  | R.SSLNQSQPK.K      | 1596.917 | 0.00834  | 2 | 1 | 26.2 | 0 |
| P12163_2_F2,8242  | R.SSLNQSQPK.K      | 1596.917 | 0.00572  | 3 | 1 | 24.7 | 0 |
| P12163_2_F2,8640  | R.SSLNQSQPK.K      | 1596.917 | 0.00842  | 3 | 1 | 48.3 | 0 |
| P12163_2_F2,8647  | R.SSLNQSQPK.K      | 1596.917 | 0.00722  | 2 | 1 | 39.3 | 0 |
| P12163_2_F2,8881  | R.SSLNQSQPK.K      | 1596.917 | 0.00726  | 2 | 1 | 30.8 | 0 |
| P12163_2_F2,9027  | R.SSLNQSQPK.K      | 1596.917 | 0.00578  | 3 | 1 | 31.8 | 0 |
| P12163_2_F2,9290  | R.SSLNQSQPK.K      | 1596.917 | 0.00542  | 3 | 1 | 38.8 | 0 |
| P12163_2_F2,9562  | R.SSLNQSQPK.K      | 1596.917 | 0.00948  | 2 | 1 | 39   | 0 |

|                   |                        |          |          |   |   |      |   |
|-------------------|------------------------|----------|----------|---|---|------|---|
| P12163_2_F2,9862  | R.SSLNQSQPK.K          | 1596.917 | 0.00264  | 2 | 1 | 35.6 | 0 |
| P12163_2_F2,10046 | R.SSLNQSQPK.K          | 1596.917 | 0.01032  | 2 | 1 | 38.5 | 0 |
| P12163_2_F4,8205  | R.SSLNQSQPK.K          | 1596.917 | -0.00372 | 2 | 1 | 29.7 | 0 |
| P12163_2_F6,8108  | R.SSLNQSQPK.K          | 1596.917 | -0.00043 | 3 | 1 | 38.9 | 0 |
| P12163_2_S3,8225  | R.SSLNQSQPK.K          | 1596.917 | -0.00006 | 2 | 1 | 27.3 | 0 |
| P12163_2_S5,7035  | R.SSLNQSQPK.K          | 1596.917 | 0.00203  | 3 | 1 | 29.6 | 0 |
| P12163_2_S5,8016  | R.SSLNQSQPK.K          | 1596.917 | 0.00101  | 3 | 1 | 44.2 | 0 |
| P12163_2_S5,8161  | R.SSLNQSQPK.K          | 1596.917 | 0.0029   | 2 | 1 | 39.3 | 0 |
| P12163_2_S5,8219  | R.SSLNQSQPK.K          | 1596.917 | 0.00095  | 3 | 1 | 43.2 | 0 |
| P12163_2_S5,8658  | R.SSLNQSQPK.K          | 1596.917 | 0.0062   | 3 | 1 | 44.1 | 0 |
| P12163_2_S5,19036 | R.SSLNQSQPK.K          | 1596.917 | 0.00209  | 3 | 1 | 30.8 | 0 |
| P12163_1_F2,6516  | R.TVQQM*M*ETM*ER.I     | 1735.797 | 0.00092  | 3 | 1 | 28.3 | 0 |
| P12163_1_F2,6741  | R.TVQQM*M*ETM*ER.I     | 1735.797 | 0.00194  | 3 | 1 | 30.5 | 0 |
| P12163_1_F2,6959  | R.TVQQM*M*ETM*ER.I     | 1735.797 | 0.0029   | 3 | 1 | 26.4 | 0 |
| P12163_1_F2,9111  | R.TVQQM*M*ETM*ER.I     | 1735.797 | 0.00128  | 3 | 1 | 26.9 | 0 |
| P12163_1_F2,9349  | R.TVQQM*M*ETM*ER.I     | 1735.797 | 0.00446  | 3 | 1 | 28.5 | 0 |
| P12163_1_F2,9712  | R.TVQQM*M*ETM*ER.I     | 1735.797 | -0.00544 | 3 | 1 | 26.6 | 0 |
| P12163_1_F2,10471 | R.TVQQM*M*ETM*ER.I     | 1735.797 | 0.0026   | 3 | 1 | 28.7 | 0 |
| P12163_1_F2,12977 | R.TVQQM*M*ETM*ER.I     | 1735.797 | 0.00308  | 3 | 1 | 24.3 | 0 |
| P12163_1_F2,15388 | R.TVQQM*M*ETM*ER.I     | 1735.797 | 0.00575  | 3 | 1 | 31.2 | 0 |
| P12163_1_F2,15642 | R.TVQQM*M*ETM*ER.I     | 1735.797 | 0.00287  | 3 | 1 | 30.3 | 0 |
| P12163_1_F2,16330 | R.TVQQM*M*ETM*ER.I     | 1735.797 | 0.00437  | 3 | 1 | 26.7 | 0 |
| P12163_1_F2,16586 | R.TVQQM*M*ETM*ER.I     | 1735.797 | 0.00236  | 3 | 1 | 24.6 | 0 |
| P12163_1_F2,16867 | R.TVQQM*M*ETM*ER.I     | 1735.797 | 0.00287  | 3 | 1 | 26.2 | 0 |
| P12163_1_F2,17413 | R.TVQQM*M*ETM*ER.I     | 1735.797 | 0.00548  | 3 | 1 | 22.5 | 0 |
| P12163_1_F2,18530 | R.TVQQM*M*ETM*ER.I     | 1735.797 | 0.00299  | 3 | 1 | 25.8 | 0 |
| P12163_1_F2,19184 | R.TVQQM*M*ETM*ER.I     | 1735.797 | 0.00227  | 3 | 1 | 22.9 | 0 |
| P12163_1_F2,19658 | R.TVQQM*M*ETM*ER.I     | 1735.797 | 0.00029  | 3 | 1 | 22.4 | 0 |
| P12163_1_F2,19901 | R.TVQQM*M*ETM*ER.I     | 1735.797 | 0.00122  | 3 | 1 | 27.8 | 0 |
| P12163_1_F2,20830 | R.TVQQM*M*ETM*ER.I     | 1735.797 | 0.00173  | 3 | 1 | 38.5 | 0 |
| P12163_1_S1,7405  | R.TVQQM*M*ETM*ER.I     | 1735.797 | 0.00437  | 3 | 1 | 33.8 | 0 |
| P12163_1_F2,9226  | R.TVQQM*M*ETM*ER.I !   | 1719.802 | 0.00318  | 3 | 1 | 23.1 | 0 |
| P12163_1_F2,9459  | R.TVQQM*M*ETM*ER.I !   | 1719.802 | 0.00303  | 3 | 1 | 28.4 | 0 |
| P12163_1_F2,9698  | R.TVQQM*M*ETM*ER.I !   | 1719.802 | -0.00153 | 3 | 1 | 28.3 | 0 |
| P12163_1_F2,15172 | R.TVQQM*M*ETM*ER.I !   | 1719.802 | 0.00492  | 3 | 1 | 26.9 | 0 |
| P12163_1_F2,15464 | R.TVQQM*M*ETM*ER.I !   | 1719.802 | 0.00171  | 3 | 1 | 28   | 0 |
| P12163_1_F2,20864 | R.TVQQM*M*ETM*ER.I !   | 1719.802 | 0.00177  | 3 | 1 | 36.7 | 0 |
| P12163_1_S1,7209  | R.TVQQM*M*ETM*ER.I !   | 1719.802 | 0.00585  | 3 | 1 | 43.9 | 0 |
| P12163_1_S1,10882 | R.TVQQM*M*ETM*ER.I !   | 1719.802 | -0.00339 | 3 | 1 | 29.1 | 0 |
| P12163_1_S1,12694 | R.TVQQM*M*ETM*ER.I !   | 1719.802 | 0.00201  | 3 | 1 | 26.6 | 0 |
| P12163_1_F2,9094  | R.TVQQM*M*ETM*ER.I ! R | 1703.807 | 0.00195  | 3 | 1 | 26.1 | 0 |
| P12163_1_F2,10982 | R.TVQQM*M*ETM*ER.I ! R | 1703.807 | -0.00192 | 3 | 1 | 24.4 | 0 |
| P12163_1_F2,14638 | R.TVQQM*M*ETM*ER.I ! R | 1703.807 | 0.00307  | 2 | 1 | 42.9 | 0 |
| P12163_1_S1,11375 | R.TVQQM*M*ETM*ER.I ! R | 1703.807 | -0.00006 | 3 | 1 | 27.4 | 0 |
| P12163_1_S1,14742 | R.TVQQM*M*ETM*ER.I ! R | 1703.807 | 0.00075  | 3 | 1 | 24.1 | 0 |
| P12163_1_S1,14846 | R.TVQQM*M*ETM*ER.I ! R | 1703.807 | 0.00417  | 2 | 1 | 37.1 | 0 |
| P12163_1_F2,10808 | R.TVQQM*M*ETM*ER.I !   | 1719.802 | -0.00431 | 2 | 1 | 24.5 | 0 |
| P12163_1_F2,15544 | R.TVQQM*M*ETM*ER.I !   | 1719.802 | 0.00273  | 2 | 1 | 27.4 | 0 |
| P12163_1_F2,21044 | R.TVQQM*M*ETM*ER.I !   | 1719.802 | 0.00425  | 2 | 1 | 28.3 | 0 |
| P12163_1_F2,21345 | R.TVQQM*M*ETM*ER.I !   | 1719.802 | 0.00321  | 2 | 1 | 27   | 0 |
| P12163_1_S1,7388  | R.TVQQM*M*ETM*ER.I !   | 1719.802 | 0.00339  | 3 | 1 | 29.3 | 0 |

|                   |                     |          |          |   |   |      |   |
|-------------------|---------------------|----------|----------|---|---|------|---|
| P12163_1_S1,9551  | R.TVQQMM*ETM*ER.I!  | 1719.802 | 0.00324  | 3 | 1 | 30.8 | 0 |
| P12163_1_F2,9569  | R.TVQQMM*ETMER.I! F | 1703.807 | 0.00285  | 3 | 1 | 26.9 | 0 |
| P12163_1_F2,10426 | R.TVQQMM*ETMER.I! F | 1703.807 | 0.00312  | 3 | 1 | 30.9 | 0 |
| P12163_1_F2,10681 | R.TVQQMM*ETMER.I! F | 1703.807 | 0.00366  | 3 | 1 | 31.1 | 0 |
| P12163_1_F2,11040 | R.TVQQMM*ETMER.I! F | 1703.807 | 0.00417  | 2 | 1 | 24.9 | 0 |
| P12163_1_F2,11275 | R.TVQQMM*ETMER.I! F | 1703.807 | 0.00123  | 3 | 1 | 25.6 | 0 |
| P12163_1_F2,12876 | R.TVQQMM*ETMER.I! F | 1703.807 | 0.00579  | 3 | 1 | 29.8 | 0 |
| P12163_1_F2,12964 | R.TVQQMM*ETMER.I! F | 1703.807 | 0.00349  | 2 | 1 | 26   | 0 |
| P12163_1_F2,13141 | R.TVQQMM*ETMER.I! F | 1703.807 | 0.00072  | 3 | 1 | 24.4 | 0 |
| P12163_1_F2,13403 | R.TVQQMM*ETMER.I! F | 1703.807 | 0.00135  | 3 | 1 | 26.4 | 0 |
| P12163_1_F2,13747 | R.TVQQMM*ETMER.I! F | 1703.807 | 0.00276  | 3 | 1 | 29.1 | 0 |
| P12163_1_F2,14312 | R.TVQQMM*ETMER.I! F | 1703.807 | 0.00762  | 3 | 1 | 26.7 | 0 |
| P12163_1_F2,15614 | R.TVQQMM*ETMER.I! F | 1703.807 | 0.00252  | 3 | 1 | 23.2 | 0 |
| P12163_1_F2,16019 | R.TVQQMM*ETMER.I! F | 1703.807 | 0.00379  | 2 | 1 | 33.6 | 0 |
| P12163_1_F2,17870 | R.TVQQMM*ETMER.I! F | 1703.807 | 0.00195  | 3 | 1 | 23.4 | 0 |
| P12163_1_F2,20887 | R.TVQQMM*ETMER.I! F | 1703.807 | 0.0033   | 3 | 1 | 23.1 | 0 |
| P12163_1_F2,21065 | R.TVQQMM*ETMER.I! F | 1703.807 | 0.00279  | 2 | 1 | 38.8 | 0 |
| P12163_1_S1,9604  | R.TVQQMM*ETMER.I! F | 1703.807 | 0.00267  | 3 | 1 | 34.8 | 0 |
| P12163_1_S1,12711 | R.TVQQMM*ETMER.I! F | 1703.807 | 0.00327  | 3 | 1 | 26   | 0 |
| P12163_1_S1,15588 | R.TVQQMM*ETMER.I! F | 1703.807 | 0.0036   | 3 | 1 | 28.9 | 0 |
| P12163_1_F2,9337  | R.TVQQMMETM*ER.I! F | 1703.807 | 0.00363  | 3 | 1 | 25.3 | 0 |
| P12163_1_F2,9382  | R.TVQQMMETM*ER.I! F | 1703.807 | 0.00387  | 2 | 1 | 40.3 | 0 |
| P12163_1_F2,15481 | R.TVQQMMETM*ER.I! F | 1703.807 | 0.00291  | 2 | 1 | 36.5 | 0 |
| P12163_1_F2,20843 | R.TVQQMMETM*ER.I! F | 1703.807 | 0.00395  | 2 | 1 | 32.5 | 0 |
| P12163_1_F4,21993 | R.TVQQMMETM*ER.I! F | 1703.807 | 0.00423  | 2 | 1 | 39.8 | 0 |
| P12163_1_F2,9185  | R.TVQQMMETMER.I! R. | 1687.812 | 0.00132  | 3 | 1 | 28.2 | 0 |
| P12163_1_F2,12761 | R.TVQQMMETMER.I! R. | 1687.812 | 0.00451  | 2 | 1 | 36.3 | 0 |
| P12163_1_F2,12889 | R.TVQQMMETMER.I! R. | 1687.812 | -0.00306 | 3 | 1 | 37.8 | 0 |
| P12163_1_F2,13024 | R.TVQQMMETMER.I! R. | 1687.812 | 0.00325  | 2 | 1 | 54.1 | 0 |
| P12163_1_F2,13150 | R.TVQQMMETMER.I! R. | 1687.812 | 0.00144  | 3 | 1 | 33.6 | 0 |
| P12163_1_F2,13284 | R.TVQQMMETMER.I! R. | 1687.812 | 0.00333  | 2 | 1 | 35.9 | 0 |
| P12163_1_F2,13412 | R.TVQQMMETMER.I! R. | 1687.812 | 0.00477  | 3 | 1 | 36.3 | 0 |
| P12163_1_F2,13693 | R.TVQQMMETMER.I! R. | 1687.812 | 0.00168  | 3 | 1 | 37.9 | 0 |
| P12163_1_F2,13855 | R.TVQQMMETMER.I! R. | 1687.812 | 0.00753  | 2 | 1 | 30.2 | 0 |
| P12163_1_F2,14048 | R.TVQQMMETMER.I! R. | 1687.812 | 0.00945  | 3 | 1 | 35   | 0 |
| P12163_1_F2,14261 | R.TVQQMMETMER.I! R. | 1687.812 | -0.00117 | 3 | 1 | 28.6 | 0 |
| P12163_1_F2,14329 | R.TVQQMMETMER.I! R. | 1687.812 | 0.01143  | 2 | 1 | 32.5 | 0 |
| P12163_1_F2,14465 | R.TVQQMMETMER.I! R. | 1687.812 | -0.00129 | 3 | 1 | 35.6 | 0 |
| P12163_1_F2,14714 | R.TVQQMMETMER.I! R. | 1687.812 | 0.00165  | 3 | 1 | 26.7 | 0 |
| P12163_1_F2,14950 | R.TVQQMMETMER.I! R. | 1687.812 | -0.00033 | 3 | 1 | 25.5 | 0 |
| P12163_1_F2,15034 | R.TVQQMMETMER.I! R. | 1687.812 | 0.00197  | 2 | 1 | 28.1 | 0 |
| P12163_1_F2,15284 | R.TVQQMMETMER.I! R. | 1687.812 | 0.00201  | 2 | 1 | 25.6 | 0 |
| P12163_1_F2,15310 | R.TVQQMMETMER.I! R. | 1687.812 | 0.00288  | 3 | 1 | 39.8 | 0 |
| P12163_1_F2,15534 | R.TVQQMMETMER.I! R. | 1687.812 | 0.00367  | 2 | 1 | 51.1 | 0 |
| P12163_1_F2,15558 | R.TVQQMMETMER.I! R. | 1687.812 | -0.00123 | 3 | 1 | 40.6 | 0 |
| P12163_1_F2,20904 | R.TVQQMMETMER.I! R. | 1687.812 | 0.00225  | 3 | 1 | 38.4 | 0 |
| P12163_1_F2,20969 | R.TVQQMMETMER.I! R. | 1687.812 | -0.00295 | 2 | 1 | 46.1 | 0 |
| P12163_1_F2,21346 | R.TVQQMMETMER.I! R. | 1687.812 | 0.00375  | 2 | 1 | 36.1 | 0 |
| P12163_1_F3,13138 | R.TVQQMMETMER.I! R. | 1687.812 | 0.00431  | 2 | 1 | 25   | 0 |
| P12163_1_F4,21978 | R.TVQQMMETMER.I! R. | 1687.812 | -0.00109 | 2 | 1 | 36.4 | 0 |
| P12163_1_F5,12153 | R.TVQQMMETMER.I! R. | 1687.812 | 0.00349  | 2 | 1 | 24.2 | 0 |

|                   |                     |          |          |   |   |      |   |
|-------------------|---------------------|----------|----------|---|---|------|---|
| P12163_1_F5,20385 | R.TVQQMMETMER.I! R. | 1687.812 | 0.00473  | 2 | 1 | 26   | 0 |
| P12163_1_F8,20786 | R.TVQQMMETMER.I! R. | 1687.812 | 0.00329  | 2 | 1 | 35.1 | 0 |
| P12163_1_S1,9452  | R.TVQQMMETMER.I! R. | 1687.812 | 0.00123  | 3 | 1 | 23.7 | 0 |
| P12163_1_S1,15436 | R.TVQQMMETMER.I! R. | 1687.812 | 0.00243  | 3 | 1 | 26   | 0 |
| P12163_1_S1,20678 | R.TVQQMMETMER.I! R. | 1687.812 | -0.00033 | 3 | 1 | 45.7 | 0 |
| P12163_1_S1,20754 | R.TVQQMMETMER.I! R. | 1687.812 | 0.00371  | 2 | 1 | 46.7 | 0 |
| P12163_2_F1,21155 | R.TVQQMMETMER.I! R. | 1687.812 | 0.00689  | 2 | 1 | 29.5 | 0 |
| P12163_1_F2,18934 | R.VEESM*LVIK.A      | 1671.981 | 0.00562  | 3 | 1 | 43.8 | 0 |
| P12163_1_F3,17192 | R.VEESM*LVIK.A      | 1671.981 | 0.00325  | 3 | 1 | 38.2 | 0 |
| P12163_1_F4,17667 | R.VEESM*LVIK.A      | 1671.981 | 0.00569  | 2 | 1 | 27.3 | 0 |
| P12163_1_F4,17697 | R.VEESM*LVIK.A      | 1671.981 | 0.0049   | 3 | 1 | 31   | 0 |
| P12163_1_F4,20428 | R.VEESM*LVIK.A      | 1671.981 | 0.01396  | 3 | 1 | 27.8 | 0 |
| P12163_1_F4,20880 | R.VEESM*LVIK.A      | 1671.981 | 0.00961  | 3 | 1 | 41.9 | 0 |
| P12163_1_F4,20907 | R.VEESM*LVIK.A      | 1671.981 | 0.00873  | 2 | 1 | 31.4 | 0 |
| P12163_1_F4,21110 | R.VEESM*LVIK.A      | 1671.981 | 0.00493  | 3 | 1 | 39.6 | 0 |
| P12163_1_F4,23028 | R.VEESM*LVIK.A      | 1671.981 | 0.01083  | 2 | 1 | 36.4 | 0 |
| P12163_1_F4,23266 | R.VEESM*LVIK.A      | 1671.981 | 0.00499  | 3 | 1 | 31.1 | 0 |
| P12163_1_F4,23293 | R.VEESM*LVIK.A      | 1671.981 | 0.00527  | 2 | 1 | 27.7 | 0 |
| P12163_1_F4,23568 | R.VEESM*LVIK.A      | 1671.981 | 0.00667  | 2 | 1 | 33.5 | 0 |
| P12163_1_F5,16413 | R.VEESM*LVIK.A      | 1671.981 | 0.01047  | 2 | 1 | 24.1 | 0 |
| P12163_1_F6,16464 | R.VEESM*LVIK.A      | 1671.981 | 0.0013   | 3 | 1 | 30.3 | 0 |
| P12163_1_F6,16958 | R.VEESM*LVIK.A      | 1671.981 | 0.00511  | 3 | 1 | 27.3 | 0 |
| P12163_1_F6,19454 | R.VEESM*LVIK.A      | 1671.981 | 0.00166  | 3 | 1 | 35.1 | 0 |
| P12163_1_F6,19895 | R.VEESM*LVIK.A      | 1671.981 | 0.00469  | 3 | 1 | 33.1 | 0 |
| P12163_1_F6,21384 | R.VEESM*LVIK.A      | 1671.981 | 0.00364  | 3 | 1 | 33.3 | 0 |
| P12163_1_F7,15615 | R.VEESM*LVIK.A      | 1671.981 | 0.00184  | 3 | 1 | 33   | 0 |
| P12163_1_F7,16094 | R.VEESM*LVIK.A      | 1671.981 | 0.00046  | 3 | 1 | 30.2 | 0 |
| P12163_1_F7,18511 | R.VEESM*LVIK.A      | 1671.981 | -0.00188 | 3 | 1 | 28.8 | 0 |
| P12163_1_F7,20431 | R.VEESM*LVIK.A      | 1671.981 | 0.01222  | 3 | 1 | 25.7 | 0 |
| P12163_1_F8,82    | R.VEESM*LVIK.A      | 1671.981 | 0.0031   | 3 | 1 | 27   | 0 |
| P12163_1_F8,19970 | R.VEESM*LVIK.A      | 1671.981 | 0.00292  | 3 | 1 | 46.2 | 0 |
| P12163_1_F9,16759 | R.VEESM*LVIK.A      | 1671.981 | 0.00508  | 3 | 1 | 31.5 | 0 |
| P12163_1_S10,1609 | R.VEESM*LVIK.A      | 1671.981 | 0.0043   | 3 | 1 | 34.6 | 0 |
| P12163_2_F1,20356 | R.VEESM*LVIK.A      | 1671.981 | 0.00765  | 2 | 1 | 29.3 | 0 |
| P12163_2_F2,41    | R.VEESM*LVIK.A      | 1671.981 | 0.00301  | 3 | 1 | 27.7 | 0 |
| P12163_2_F2,805   | R.VEESM*LVIK.A      | 1671.981 | 0.00635  | 2 | 1 | 36.2 | 0 |
| P12163_2_F2,1003  | R.VEESM*LVIK.A      | 1671.981 | 0.00705  | 2 | 1 | 27.2 | 0 |
| P12163_2_F2,1205  | R.VEESM*LVIK.A      | 1671.981 | 0.00523  | 2 | 1 | 38.6 | 0 |
| P12163_2_F2,1587  | R.VEESM*LVIK.A      | 1671.981 | 0.00583  | 2 | 1 | 36.2 | 0 |
| P12163_2_F2,1788  | R.VEESM*LVIK.A      | 1671.981 | 0.00487  | 2 | 1 | 30.5 | 0 |
| P12163_2_F2,2166  | R.VEESM*LVIK.A      | 1671.981 | 0.00539  | 2 | 1 | 39.7 | 0 |
| P12163_2_F2,2206  | R.VEESM*LVIK.A      | 1671.981 | 0.00658  | 3 | 1 | 28.4 | 0 |
| P12163_2_F2,2358  | R.VEESM*LVIK.A      | 1671.981 | 0.00747  | 2 | 1 | 28.1 | 0 |
| P12163_2_F2,2392  | R.VEESM*LVIK.A      | 1671.981 | 0.00694  | 3 | 1 | 41.4 | 0 |
| P12163_2_F4,15209 | R.VEESM*LVIK.A      | 1671.981 | -0.00269 | 3 | 1 | 23.5 | 0 |
| P12163_2_F4,15723 | R.VEESM*LVIK.A      | 1671.981 | 0.0034   | 3 | 1 | 22.3 | 0 |
| P12163_2_F4,18127 | R.VEESM*LVIK.A      | 1671.981 | 0.00181  | 3 | 1 | 39.7 | 0 |
| P12163_2_F4,18642 | R.VEESM*LVIK.A      | 1671.981 | 0.00376  | 3 | 1 | 33   | 0 |
| P12163_2_F4,19080 | R.VEESM*LVIK.A      | 1671.981 | 0.00598  | 3 | 1 | 23.9 | 0 |
| P12163_2_F6,19477 | R.VEESM*LVIK.A      | 1671.981 | 0.00562  | 3 | 1 | 32.9 | 0 |
| P12163_2_S3,13889 | R.VEESM*LVIK.A      | 1671.981 | 0.00058  | 3 | 1 | 26.3 | 0 |

|                                   |          |          |   |   |      |   |
|-----------------------------------|----------|----------|---|---|------|---|
| P12163_1_F3,16776 R.VEESMLVIK.A   | 1655.986 | 0.00495  | 2 | 1 | 25.3 | 0 |
| P12163_1_F3,20449 R.VEESMLVIK.A   | 1655.986 | 0.00265  | 3 | 1 | 35.2 | 0 |
| P12163_1_F3,20456 R.VEESMLVIK.A   | 1655.986 | 0.00369  | 2 | 1 | 45.4 | 0 |
| P12163_1_F3,20711 R.VEESMLVIK.A   | 1655.986 | 0.0055   | 3 | 1 | 35.3 | 0 |
| P12163_1_F3,20713 R.VEESMLVIK.A   | 1655.986 | 0.00465  | 2 | 1 | 45.7 | 0 |
| P12163_1_F4,17136 R.VEESMLVIK.A   | 1655.986 | 0.00646  | 3 | 1 | 23.6 | 0 |
| P12163_1_F4,17204 R.VEESMLVIK.A   | 1655.986 | 0.00459  | 2 | 1 | 25.1 | 0 |
| P12163_1_F4,20860 R.VEESMLVIK.A   | 1655.986 | 0.00765  | 2 | 1 | 44.9 | 0 |
| P12163_1_F4,21091 R.VEESMLVIK.A   | 1655.986 | 0.00661  | 2 | 1 | 47.7 | 0 |
| P12163_1_F4,21100 R.VEESMLVIK.A   | 1655.986 | 0.00577  | 3 | 1 | 35.3 | 0 |
| P12163_1_F4,21320 R.VEESMLVIK.A   | 1655.986 | 0.00209  | 2 | 1 | 43.9 | 0 |
| P12163_1_F4,21349 R.VEESMLVIK.A   | 1655.986 | 0.007    | 3 | 1 | 33.9 | 0 |
| P12163_1_F4,22745 R.VEESMLVIK.A   | 1655.986 | 0.00454  | 3 | 1 | 22.3 | 0 |
| P12163_1_F4,23048 R.VEESMLVIK.A   | 1655.986 | 0.00484  | 3 | 1 | 29.7 | 0 |
| P12163_1_F4,23058 R.VEESMLVIK.A   | 1655.986 | 0.00631  | 2 | 1 | 45.3 | 0 |
| P12163_1_F4,23309 R.VEESMLVIK.A   | 1655.986 | 0.00715  | 3 | 1 | 35.4 | 0 |
| P12163_1_F4,23325 R.VEESMLVIK.A   | 1655.986 | 0.00709  | 2 | 1 | 43.9 | 0 |
| P12163_1_F5,19737 R.VEESMLVIK.A   | 1655.986 | 0.00021  | 2 | 1 | 54.3 | 0 |
| P12163_1_F5,19757 R.VEESMLVIK.A   | 1655.986 | 0.00505  | 3 | 1 | 33.3 | 0 |
| P12163_1_F5,22714 R.VEESMLVIK.A   | 1655.986 | 0.00259  | 3 | 1 | 30.8 | 0 |
| P12163_1_F6,19368 R.VEESMLVIK.A   | 1655.986 | 0.00179  | 2 | 1 | 41.5 | 0 |
| P12163_1_F6,19776 R.VEESMLVIK.A   | 1655.986 | 0.00121  | 3 | 1 | 30.1 | 0 |
| P12163_1_F6,19785 R.VEESMLVIK.A   | 1655.986 | 0.00573  | 2 | 1 | 48.8 | 0 |
| P12163_1_F7,18502 R.VEESMLVIK.A   | 1655.986 | -0.00974 | 3 | 1 | 23.9 | 0 |
| P12163_1_F7,18523 R.VEESMLVIK.A   | 1655.986 | 0.00187  | 2 | 1 | 37.2 | 0 |
| P12163_1_F7,18949 R.VEESMLVIK.A   | 1655.986 | 0.00736  | 3 | 1 | 25.5 | 0 |
| P12163_1_F7,18987 R.VEESMLVIK.A   | 1655.986 | 0.00365  | 2 | 1 | 51.8 | 0 |
| P12163_1_F8,19901 R.VEESMLVIK.A   | 1655.986 | 0.00652  | 3 | 1 | 39.8 | 0 |
| P12163_1_F9,19388 R.VEESMLVIK.A   | 1655.986 | 0.0076   | 3 | 1 | 40.2 | 0 |
| P12163_1_F9,19420 R.VEESMLVIK.A   | 1655.986 | 0.00881  | 2 | 1 | 45.6 | 0 |
| P12163_1_S10,1855: R.VEESMLVIK.A  | 1655.986 | 0.00538  | 3 | 1 | 39.5 | 0 |
| P12163_2_F1,16259 R.VEESMLVIK.A   | 1655.986 | 0.00367  | 2 | 1 | 24.7 | 0 |
| P12163_2_F1,20252 R.VEESMLVIK.A   | 1655.986 | 0.00352  | 3 | 1 | 46.6 | 0 |
| P12163_2_F1,20258 R.VEESMLVIK.A   | 1655.986 | 0.00491  | 2 | 1 | 45.1 | 0 |
| P12163_2_F1,20493 R.VEESMLVIK.A   | 1655.986 | 0.00619  | 2 | 1 | 47.5 | 0 |
| P12163_2_F1,20505 R.VEESMLVIK.A   | 1655.986 | 0.00541  | 3 | 1 | 45.5 | 0 |
| P12163_2_F1,20733 R.VEESMLVIK.A   | 1655.986 | 0.00361  | 3 | 1 | 24   | 0 |
| P12163_2_F1,20734 R.VEESMLVIK.A   | 1655.986 | 0.00343  | 2 | 1 | 43.5 | 0 |
| P12163_2_F1,25276 R.VEESMLVIK.A   | 1655.986 | 0.00229  | 3 | 1 | 23.8 | 0 |
| P12163_2_F2,72 R.VEESMLVIK.A      | 1655.986 | 0.00427  | 3 | 1 | 33.7 | 0 |
| P12163_2_F2,78 R.VEESMLVIK.A      | 1655.986 | 0.00243  | 2 | 1 | 59.1 | 0 |
| P12163_2_F4,18164 R.VEESMLVIK.A   | 1655.986 | 0.00265  | 2 | 1 | 43.8 | 0 |
| P12163_2_F4,18298 R.VEESMLVIK.A   | 1655.986 | -0.00122 | 3 | 1 | 34.4 | 0 |
| P12163_2_F4,18529 R.VEESMLVIK.A   | 1655.986 | 0.00571  | 3 | 1 | 37.1 | 0 |
| P12163_2_F4,18530 R.VEESMLVIK.A   | 1655.986 | 0.00251  | 2 | 1 | 32.2 | 0 |
| P12163_2_F6,19402 R.VEESMLVIK.A   | 1655.986 | 0.00316  | 3 | 1 | 41.8 | 0 |
| P12163_2_F6,19465 R.VEESMLVIK.A   | 1655.986 | 0.00093  | 2 | 1 | 45.6 | 0 |
| P12163_2_F7,13316 R.VEESMLVIK.A   | 1655.986 | -0.00401 | 3 | 1 | 28.3 | 0 |
| P12163_2_F9,18028 R.VEESMLVIK.A   | 1655.986 | 0.00733  | 2 | 1 | 47.4 | 0 |
| P12163_2_S3,16353 R.VEESMLVIK.A   | 1655.986 | 0.00148  | 3 | 1 | 29.3 | 0 |
| P12163_1_F4,11362 K.ANSEATLGTYK.G | 1762.979 | 0.00455  | 3 | 1 | 35.3 | 0 |



|                   |                    |          |          |   |   |      |   |
|-------------------|--------------------|----------|----------|---|---|------|---|
| P12163_1_F4,13861 | K.ANSEATLGTYK.G    | 1762.979 | 0.00673  | 2 | 1 | 53.5 | 0 |
| P12163_1_F4,13904 | K.ANSEATLGTYK.G    | 1762.979 | 0.0068   | 3 | 1 | 66.1 | 0 |
| P12163_1_F5,12508 | K.ANSEATLGTYK.G    | 1762.979 | 0.00803  | 2 | 1 | 55.1 | 0 |
| P12163_1_F5,12539 | K.ANSEATLGTYK.G    | 1762.979 | 0.00995  | 3 | 1 | 65.8 | 0 |
| P12163_1_F9,13335 | K.ANSEATLGTYK.G    | 1762.979 | 0.01905  | 2 | 1 | 47.7 | 0 |
| P12163_2_F1,10507 | K.ANSEATLGTYK.G    | 1762.979 | 0.00428  | 3 | 1 | 32.5 | 0 |
| P12163_2_F1,12855 | K.ANSEATLGTYK.G    | 1762.979 | 0.00497  | 2 | 1 | 57.3 | 0 |
| P12163_2_F1,12877 | K.ANSEATLGTYK.G    | 1762.979 | 0.00698  | 3 | 1 | 66   | 0 |
| P12163_2_F9,10521 | K.ANSEATLGTYK.G    | 1762.979 | -0.00052 | 3 | 1 | 27.8 | 0 |
| P12163_2_F9,12669 | K.ANSEATLGTYK.G    | 1762.979 | 0.00151  | 2 | 1 | 43.9 | 0 |
| P12163_2_S5,12132 | K.ANSEATLGTYK.G    | 1762.979 | 0.0008   | 3 | 1 | 43.5 | 0 |
| P12163_2_F1,16655 | K.AQAFLVR.C        | 1179.715 | 0.00258  | 2 | 1 | 30.9 | 0 |
| P12163_1_F3,6447  | K.CADVTER.V        | 1154.578 | 0.0042   | 3 | 1 | 22.9 | 0 |
| P12163_1_F3,7944  | K.CADVTER.V        | 1154.578 | 0.00115  | 2 | 1 | 29.9 | 0 |
| P12163_1_F4,17371 | K.EGGVLPGIK.V      | 1477.92  | 0.00655  | 3 | 1 | 33.3 | 0 |
| P12163_1_F4,17619 | K.EGGVLPGIK.V      | 1477.92  | 0.00731  | 2 | 1 | 35.1 | 0 |
| P12163_1_F5,16152 | K.EGGVLPGIK.V      | 1477.92  | 0.00989  | 2 | 1 | 25.5 | 0 |
| P12163_1_F6,16708 | K.EGGVLPGIK.V      | 1477.92  | 0.00491  | 3 | 1 | 26.9 | 0 |
| P12163_1_F7,15349 | K.EGGVLPGIK.V      | 1477.92  | 0.00295  | 3 | 1 | 25.1 | 0 |
| P12163_1_F7,15365 | K.EGGVLPGIK.V      | 1477.92  | 0.00429  | 2 | 1 | 27.8 | 0 |
| P12163_2_F2,190   | K.EGGVLPGIK.V      | 1477.92  | 0.00421  | 3 | 1 | 25.1 | 0 |
| P12163_2_F2,1573  | K.EGGVLPGIK.V      | 1477.92  | 0.00317  | 2 | 1 | 29.3 | 0 |
| P12163_2_F2,1688  | K.EGGVLPGIK.V      | 1477.92  | 0.00403  | 3 | 1 | 32.8 | 0 |
| P12163_2_F2,1787  | K.EGGVLPGIK.V      | 1477.92  | 0.00479  | 2 | 1 | 28.1 | 0 |
| P12163_2_F2,2553  | K.EGGVLPGIK.V      | 1477.92  | 0.00646  | 3 | 1 | 24   | 0 |
| P12163_2_S5,14568 | K.EGGVLPGIK.V      | 1477.92  | 0.00055  | 3 | 1 | 22.3 | 0 |
| P12163_1_F7,14626 | K.GDAQLGEGAAESLHV  | 2190.197 | 0.00512  | 3 | 1 | 76.3 | 0 |
| P12163_1_F7,14657 | K.GDAQLGEGAAESLHV  | 2190.197 | 0.00477  | 2 | 1 | 79.7 | 0 |
| P12163_1_F8,15376 | K.GDAQLGEGAAESLHV  | 2190.197 | 0.00577  | 2 | 1 | 83.1 | 0 |
| P12163_2_F6,14876 | K.GDAQLGEGAAESLHV  | 2190.197 | 0.00333  | 2 | 1 | 84.1 | 0 |
| P12163_1_F2,12699 | K.GILAADESTGTIGK.R | 1941.111 | -0.00201 | 3 | 1 | 24.1 | 0 |
| P12163_1_F2,14457 | K.GILAADESTGTIGK.R | 1941.111 | 0.00252  | 3 | 1 | 54.9 | 0 |
| P12163_1_F2,14458 | K.GILAADESTGTIGK.R | 1941.111 | 0.00309  | 2 | 1 | 43.7 | 0 |
| P12163_1_F3,14899 | K.GILAADESTGTIGK.R | 1941.111 | 0.00684  | 3 | 1 | 57.6 | 0 |
| P12163_1_F3,14915 | K.GILAADESTGTIGK.R | 1941.111 | 0.00656  | 2 | 1 | 43.9 | 0 |
| P12163_1_F3,16918 | K.GILAADESTGTIGK.R | 1941.111 | 0.00564  | 3 | 1 | 74.7 | 0 |
| P12163_1_F3,16980 | K.GILAADESTGTIGK.R | 1941.111 | 0.00479  | 2 | 1 | 75.1 | 0 |
| P12163_1_F6,16249 | K.GILAADESTGTIGK.R | 1941.111 | 0.00168  | 2 | 1 | 30.4 | 0 |
| P12163_2_F2,16508 | K.GILAADESTGTIGK.R | 1941.111 | 0.00229  | 2 | 1 | 41.9 | 0 |
| P12163_2_F2,16519 | K.GILAADESTGTIGK.R | 1941.111 | 0.00153  | 3 | 1 | 44.7 | 0 |
| P12163_1_F4,13263 | K.NAAYIGTPGK.G     | 1599.931 | 0.01272  | 2 | 1 | 25.5 | 0 |
| P12163_1_F5,11908 | K.NAAYIGTPGK.G     | 1599.931 | 0.00924  | 2 | 1 | 35.5 | 0 |
| P12163_1_F9,12718 | K.NAAYIGTPGK.G     | 1599.931 | 0.00432  | 2 | 1 | 31.1 | 0 |
| P12163_1_F9,12773 | K.NAAYIGTPGK.G     | 1599.931 | 0.00595  | 3 | 1 | 32.1 | 0 |
| P12163_1_S10,1269 | K.NAAYIGTPGK.G     | 1599.931 | 0.00343  | 3 | 1 | 38   | 0 |
| P12163_2_F1,12283 | K.NAAYIGTPGK.G     | 1599.931 | 0.00576  | 2 | 1 | 34.9 | 0 |
| P12163_2_F1,12311 | K.NAAYIGTPGK.G     | 1599.931 | 0.00634  | 3 | 1 | 24   | 0 |
| P12163_2_F10,1186 | K.NAAYIGTPGK.G     | 1599.931 | 0.01204  | 3 | 1 | 37   | 0 |
| P12163_2_F8_1207  | K.NAAYIGTPGK.G     | 1599.931 | -0.00107 | 3 | 1 | 31.8 | 0 |
| P12163_1_F7,14902 | K.VTPDVIAEHTVR.A   | 1640.927 | 0.00212  | 3 | 1 | 38.6 | 0 |
| P12163_1_F8,12429 | K.VTPDVIAEHTVR.A   | 1640.927 | 0.00225  | 4 | 1 | 25.6 | 0 |

|                    |                      |          |          |   |   |      |   |
|--------------------|----------------------|----------|----------|---|---|------|---|
| P12163_1_F8,12433  | K.VTPDVIAEHTVR.A     | 1640.927 | -0.00049 | 3 | 1 | 43.7 | 0 |
| P12163_1_F8,13752  | K.VTPDVIAEHTVR.A     | 1640.927 | -0.00172 | 3 | 1 | 24.9 | 0 |
| P12163_1_F8,13784  | K.VTPDVIAEHTVR.A     | 1640.927 | 0.00333  | 4 | 1 | 35.2 | 0 |
| P12163_1_F8,15538  | K.VTPDVIAEHTVR.A     | 1640.927 | -0.00022 | 3 | 1 | 39.9 | 0 |
| P12163_1_F8,18290  | K.VTPDVIAEHTVR.A     | 1640.927 | 0.00128  | 3 | 1 | 52   | 0 |
| P12163_2_F6,15054  | K.VTPDVIAEHTVR.A     | 1640.927 | 0.00035  | 3 | 1 | 49   | 0 |
| P12163_2_F6,15346  | K.VTPDVIAEHTVR.A     | 1640.927 | -0.00205 | 3 | 1 | 33.7 | 0 |
| P12163_2_S5,11495  | K.VTPDVIAEHTVR.A     | 1640.927 | 0.00185  | 3 | 1 | 42.8 | 0 |
| P12163_2_S5,14259  | K.VTPDVIAEHTVR.A     | 1640.927 | 0.00185  | 3 | 1 | 62.3 | 0 |
| P12163_1_F4,17708  | K.YADELIK.N          | 1459.862 | 0.00524  | 2 | 1 | 28.8 | 0 |
| P12163_1_F6,16974  | K.YADELIK.N          | 1459.862 | 0.00702  | 2 | 1 | 25.3 | 0 |
| P12163_1_F9,16667  | K.YADELIK.N          | 1459.862 | 0.00693  | 3 | 1 | 23.2 | 0 |
| P12163_1_F9,16679  | K.YADELIK.N          | 1459.862 | 0.0041   | 2 | 1 | 29   | 0 |
| P12163_2_F1,16791  | K.YADELIK.N          | 1459.862 | 0.00324  | 2 | 1 | 28.8 | 0 |
| P12163_2_F8_12070  | K.YADELIK.N          | 1459.862 | 0.00662  | 2 | 1 | 28   | 0 |
| P12163_2_F8_12070  | K.YADELIK.N          | 1459.862 | 0.00555  | 3 | 1 | 22   | 0 |
| P12163_2_S5,15299  | K.YADELIK.N          | 1459.862 | 0.00006  | 3 | 1 | 23.9 | 0 |
| P12163_1_F5,12014  | R.ALQSTLK.I ! R.ALQQ | 1496.926 | 0.00689  | 2 | 1 | 37.5 | 0 |
| P12163_1_F5,12061  | R.ALQSTLK.I ! R.ALQQ | 1496.926 | 0.00816  | 3 | 1 | 30   | 0 |
| P12163_1_F6,13006  | R.ALQSTLK.I ! R.ALQQ | 1496.926 | 0.00259  | 2 | 1 | 25.4 | 0 |
| P12163_2_F1,12521  | R.ALQSTLK.I ! R.ALQQ | 1496.926 | -0.00377 | 2 | 1 | 29.4 | 0 |
| P12163_2_F1,12549  | R.ALQSTLK.I ! R.ALQQ | 1496.926 | 0.00015  | 3 | 1 | 34.8 | 0 |
| P12163_2_F2,12860  | R.ALQSTLK.I ! R.ALQQ | 1496.926 | 0.00564  | 3 | 1 | 24.4 | 0 |
| P12163_2_F2,12867  | R.ALQSTLK.I ! R.ALQQ | 1496.926 | 0.00689  | 2 | 1 | 26   | 0 |
| P12163_2_F2,13585  | R.ALQSTLK.I ! R.ALQQ | 1496.926 | 0.00617  | 2 | 1 | 27.4 | 0 |
| P12163_2_S5,11620  | R.ALQSTLK.I ! R.ALQQ | 1496.926 | 0.0003   | 3 | 1 | 28.7 | 0 |
| P12163_1_S1,13633  | R.LSSINVENVEANR.R    | 1748.944 | 0.00343  | 3 | 1 | 26.4 | 0 |
| P12163_1_S1,17051  | R.LSSINVENVEANR.R    | 1748.944 | 0.00322  | 3 | 1 | 54.7 | 0 |
| P12163_1_S1,17056  | R.LSSINVENVEANR.R    | 1748.944 | 0.00018  | 2 | 1 | 48.4 | 0 |
| P12163_1_F8,16331  | R.LSSINVENVEANRR.A   | 1905.045 | 0.001    | 3 | 1 | 37.2 | 0 |
| P12163_1_F5,15069  | R.NLNAM*NQLK.T       | 1669.951 | 0.00703  | 2 | 1 | 33.7 | 0 |
| P12163_1_F5,15115  | R.NLNAM*NQLK.T       | 1669.951 | 0.00724  | 3 | 1 | 36.6 | 0 |
| P12163_2_F2,12002  | R.NLNAM*NQLK.T       | 1669.951 | 0.00623  | 2 | 1 | 24   | 0 |
| P12163_1_F5,15038  | R.NLNAMNQLK.T        | 1653.957 | 0.00701  | 2 | 1 | 31.2 | 0 |
| P12163_1_F5,15068  | R.NLNAMNQLK.T        | 1653.957 | 0.00535  | 3 | 1 | 31.1 | 0 |
| P12163_1_F6,15735  | R.NLNAMNQLK.T        | 1653.957 | 0.00535  | 2 | 1 | 35   | 0 |
| P12163_1_F6,15736  | R.NLNAMNQLK.T        | 1653.957 | 0.00727  | 3 | 1 | 23   | 0 |
| P12163_2_F2,15820  | R.NLNAMNQLK.T        | 1653.957 | 0.00413  | 2 | 1 | 36.6 | 0 |
| P12163_2_F2,15918  | R.NLNAMNQLK.T        | 1653.957 | 0.0019   | 3 | 1 | 28.9 | 0 |
| P12163_2_F2,16073  | R.NLNAMNQLK.T        | 1653.957 | 0.00121  | 2 | 1 | 37   | 0 |
| P12163_2_F2,16303  | R.NLNAMNQLK.T        | 1653.957 | 0.00733  | 2 | 1 | 43   | 0 |
| P12163_2_S5,14094  | R.NLNAMNQLK.T        | 1653.957 | 0.00085  | 3 | 1 | 29.4 | 0 |
| P12163_1_F5,15255  | R.VLAACYK.A          | 1432.844 | 0.00506  | 3 | 1 | 25.5 | 0 |
| P12163_1_F5,15259  | R.VLAACYK.A          | 1432.844 | 0.00647  | 2 | 1 | 32.6 | 0 |
| P12163_1_F8,15216  | R.VLAACYK.A          | 1432.844 | 0.00211  | 2 | 1 | 26.7 | 0 |
| P12163_1_F9,15546  | R.VLAACYK.A          | 1432.844 | 0.01151  | 2 | 1 | 28.8 | 0 |
| P12163_1_F9,15601  | R.VLAACYK.A          | 1432.844 | 0.00662  | 3 | 1 | 32.8 | 0 |
| P12163_1_S10,1539  | R.VLAACYK.A          | 1432.844 | 0.00569  | 3 | 1 | 31   | 0 |
| P12163_1_S10,15410 | R.VLAACYK.A          | 1432.844 | 0.00693  | 2 | 1 | 26.8 | 0 |
| P12163_2_F10,1442  | R.VLAACYK.A          | 1432.844 | 0.00935  | 3 | 1 | 25.3 | 0 |
| P12163_2_F2,15785  | R.VLAACYK.A          | 1432.844 | 0.00321  | 2 | 1 | 28.3 | 0 |

|                                          |          |          |   |   |      |   |
|------------------------------------------|----------|----------|---|---|------|---|
| P12163_2_F2,15972 R.VLAACYK.A            | 1432.844 | 0.00257  | 3 | 1 | 31.5 | 0 |
| P12163_2_F2,16006 R.VLAACYK.A            | 1432.844 | 0.00501  | 2 | 1 | 32.9 | 0 |
| P12163_2_F8_12070 R.VLAACYK.A            | 1432.844 | 0.00803  | 2 | 1 | 30.9 | 0 |
| P12163_2_F8_12070 R.VLAACYK.A            | 1432.844 | 0.00608  | 3 | 1 | 33.2 | 0 |
| P12163_1_F3,22005 K.AFGMELLR.K           | 1240.702 | 0.0023   | 2 | 1 | 30.3 | 0 |
| P12163_1_F3,21394 K.FELLER.G ! K.FELLER. | 1110.646 | 0.00149  | 2 | 1 | 29.2 | 0 |
| P12163_1_F4,22123 K.FELLER.G ! K.FELLER. | 1110.646 | 0.00217  | 2 | 1 | 30.3 | 0 |
| P12163_2_F1,21494 K.FELLER.G ! K.FELLER. | 1110.646 | 0.00209  | 2 | 1 | 27.2 | 0 |
| P12163_1_F4,17802 K.FYTECLGM*K.L ! R.FY  | 1772.917 | 0.00416  | 3 | 1 | 40.7 | 0 |
| P12163_1_F5,16540 K.FYTECLGM*K.L ! R.FY  | 1772.917 | 0.00551  | 2 | 1 | 29.9 | 0 |
| P12163_1_F5,18642 K.FYTECLGM*K.L ! R.FY  | 1772.917 | 0.00746  | 3 | 1 | 25.5 | 0 |
| P12163_1_F9,16749 K.FYTECLGM*K.L ! R.FY  | 1772.917 | 0.00681  | 2 | 1 | 29.6 | 0 |
| P12163_2_F1,16917 K.FYTECLGM*K.L ! R.FY  | 1772.917 | 0.00632  | 3 | 1 | 35.4 | 0 |
| P12163_2_F8_12070 K.FYTECLGM*K.L ! R.FY  | 1772.917 | 0.00395  | 3 | 1 | 38.6 | 0 |
| P12163_2_F8_12070 K.FYTECLGM*K.L ! R.FY  | 1772.917 | 0.00683  | 3 | 1 | 23.2 | 0 |
| P12163_2_F9,15888 K.FYTECLGM*K.L ! R.FY  | 1772.917 | 0.00656  | 3 | 1 | 38.4 | 0 |
| P12163_2_F9,17487 K.FYTECLGM*K.L ! R.FY  | 1772.917 | 0.00746  | 3 | 1 | 41.3 | 0 |
| P12163_1_F4,19484 K.FYTECLGMK.L ! R.FY   | 1756.922 | 0.00882  | 3 | 1 | 30.3 | 0 |
| P12163_1_F4,19589 K.FYTECLGMK.L ! R.FY   | 1756.922 | 0.01355  | 2 | 1 | 39.5 | 0 |
| P12163_1_F4,19691 K.FYTECLGMK.L ! R.FY   | 1756.922 | 0.00849  | 3 | 1 | 30.9 | 0 |
| P12163_1_F4,19771 K.FYTECLGMK.L ! R.FY   | 1756.922 | 0.00917  | 2 | 1 | 38.6 | 0 |
| P12163_1_F4,19872 K.FYTECLGMK.L ! R.FY   | 1756.922 | 0.00576  | 3 | 1 | 30.3 | 0 |
| P12163_1_F4,19959 K.FYTECLGMK.L ! R.FY   | 1756.922 | 0.00839  | 2 | 1 | 40.5 | 0 |
| P12163_1_F4,20158 K.FYTECLGMK.L ! R.FY   | 1756.922 | 0.00756  | 3 | 1 | 25.5 | 0 |
| P12163_1_F5,18583 K.FYTECLGMK.L ! R.FY   | 1756.922 | 0.00941  | 3 | 1 | 25.2 | 0 |
| P12163_1_F6,18823 K.FYTECLGMK.L ! R.FY   | 1756.922 | 0.01364  | 3 | 1 | 28.2 | 0 |
| P12163_1_F7,17567 K.FYTECLGMK.L ! R.FY   | 1756.922 | 0.00138  | 3 | 1 | 27.6 | 0 |
| P12163_1_F9,18344 K.FYTECLGMK.L ! R.FY   | 1756.922 | 0.0054   | 3 | 1 | 30.8 | 0 |
| P12163_1_F9,18377 K.FYTECLGMK.L ! R.FY   | 1756.922 | 0.00599  | 2 | 1 | 36.4 | 0 |
| P12163_2_F1,18826 K.FYTECLGMK.L ! R.FY   | 1756.922 | 0.00869  | 3 | 1 | 28.4 | 0 |
| P12163_2_F1,18827 K.FYTECLGMK.L ! R.FY   | 1756.922 | 0.00685  | 2 | 1 | 40   | 0 |
| P12163_2_F1,19067 K.FYTECLGMK.L ! R.FY   | 1756.922 | 0.00644  | 3 | 1 | 30.9 | 0 |
| P12163_2_F1,19070 K.FYTECLGMK.L ! R.FY   | 1756.922 | 0.00751  | 2 | 1 | 40.2 | 0 |
| P12163_2_F1,19257 K.FYTECLGMK.L ! R.FY   | 1756.922 | 0.00552  | 3 | 1 | 30.6 | 0 |
| P12163_2_F1,19280 K.FYTECLGMK.L ! R.FY   | 1756.922 | 0.00899  | 2 | 1 | 30.7 | 0 |
| P12163_2_F8_12070 K.FYTECLGMK.L ! R.FY   | 1756.922 | 0.00805  | 2 | 1 | 25.1 | 0 |
| P12163_2_F9,17438 K.FYTECLGMK.L ! R.FY   | 1756.922 | 0.00739  | 2 | 1 | 41   | 0 |
| P12163_2_F9,17489 K.FYTECLGMK.L ! R.FY   | 1756.922 | 0.00684  | 3 | 1 | 24.2 | 0 |
| P12163_2_S5,17186 K.FYTECLGMK.L ! R.FY   | 1756.922 | 0.00135  | 3 | 1 | 28.7 | 0 |
| P12163_1_F2,18181 K.GGNTVIAFIEDPDGYK     | 2304.233 | 0.00531  | 3 | 1 | 48.9 | 0 |
| P12163_1_F2,23101 K.GGNTVIAFIEDPDGYK     | 2304.233 | 0.0057   | 3 | 1 | 51.4 | 0 |
| P12163_1_F8,22999 K.GGNTVIAFIEDPDGYK     | 2304.233 | 0.00525  | 3 | 1 | 35.2 | 0 |
| P12163_1_S1,17411 K.GGNTVIAFIEDPDGYK     | 2304.233 | 0.00452  | 4 | 1 | 30.9 | 0 |
| P12163_1_S1,22536 K.GGNTVIAFIEDPDGYK     | 2304.233 | -0.00038 | 2 | 1 | 73.9 | 0 |
| P12163_1_S1,22542 K.GGNTVIAFIEDPDGYK     | 2304.233 | 0.00351  | 4 | 1 | 45.7 | 0 |
| P12163_1_S1,22666 K.GGNTVIAFIEDPDGYK     | 2304.233 | 0.00693  | 3 | 1 | 45.1 | 0 |
| P12163_1_F3,20876 K.ITACLDPDGWK.T ! K.I  | 1884.015 | 0.00686  | 2 | 1 | 39.7 | 0 |
| P12163_1_F3,20903 K.ITACLDPDGWK.T ! K.I  | 1884.015 | 0.00327  | 3 | 1 | 46.3 | 0 |
| P12163_1_F4,21590 K.ITACLDPDGWK.T ! K.I  | 1884.015 | 0.01034  | 2 | 1 | 40.1 | 0 |
| P12163_1_F8,18666 K.NAVLELTYNHGVTEY      | 2574.366 | 0.00396  | 3 | 1 | 28.3 | 0 |
| P12163_2_F10,1667 K.NAVLELTYNHGVTEY      | 2574.366 | 0.0042   | 3 | 1 | 44.3 | 0 |

|                   |                    |          |          |   |   |      |   |
|-------------------|--------------------|----------|----------|---|---|------|---|
| P12163_2_F4,17440 | K.NAVLELTYNHGVTEY  | 2574.366 | 0.00048  | 3 | 1 | 25.5 | 0 |
| P12163_1_F3,25124 | K.SVFDNLDLFLK.E    | 1905.094 | 0.00718  | 2 | 1 | 52.6 | 0 |
| P12163_1_S1,22237 | K.SVFDNLDLFLK.E    | 1905.094 | 0.0004   | 3 | 1 | 47.4 | 0 |
| P12163_1_F7,21226 | K.YDIGTGFGHFGIAVED | 2604.392 | 0.00258  | 3 | 1 | 31.9 | 0 |
| P12163_1_F3,17527 | K.YTIAVM*GYGPEDK.N | 2068.088 | 0.01313  | 2 | 1 | 40.5 | 0 |
| P12163_1_F3,20064 | K.YTIAVMGYGPEDK.N  | 2052.093 | 0.0194   | 3 | 1 | 50.5 | 0 |
| P12163_1_S10,1622 | R.AINFYK.K         | 1363.819 | 0.00656  | 3 | 1 | 22.9 | 0 |
| P12163_1_F3,16385 | R.EPGPLPGINTK.I    | 1731.026 | 0.00728  | 2 | 1 | 29.2 | 0 |
| P12163_1_F3,16406 | R.EPGPLPGINTK.I    | 1731.026 | 0.00706  | 3 | 1 | 42.5 | 0 |
| P12163_1_F3,16742 | R.EPGPLPGINTK.I    | 1731.026 | 0.0058   | 3 | 1 | 26.4 | 0 |
| P12163_1_F3,17151 | R.EPGPLPGINTK.I    | 1731.026 | 0.00475  | 3 | 1 | 30.6 | 0 |
| P12163_1_F3,17186 | R.EPGPLPGINTK.I    | 1731.026 | 0.00696  | 2 | 1 | 28.6 | 0 |
| P12163_1_F3,17690 | R.EPGPLPGINTK.I    | 1731.026 | 0.01036  | 2 | 1 | 37.7 | 0 |
| P12163_1_F4,16907 | R.EPGPLPGINTK.I    | 1731.026 | 0.00409  | 3 | 1 | 33.2 | 0 |
| P12163_1_F5,15589 | R.EPGPLPGINTK.I    | 1731.026 | 0.0054   | 2 | 1 | 33.5 | 0 |
| P12163_1_F6,15664 | R.EPGPLPGINTK.I    | 1731.026 | 0.00148  | 3 | 1 | 24.9 | 0 |
| P12163_2_F1,16055 | R.EPGPLPGINTK.I    | 1731.026 | 0.00818  | 2 | 1 | 33.7 | 0 |
| P12163_2_F4,14558 | R.EPGPLPGINTK.I    | 1731.026 | 0.00151  | 3 | 1 | 25.4 | 0 |
| P12163_2_F4,14582 | R.EPGPLPGINTK.I    | 1731.026 | 0        | 2 | 1 | 27.8 | 0 |
| P12163_2_S3,13251 | R.EPGPLPGINTK.I    | 1731.026 | -0.00287 | 3 | 1 | 34.6 | 0 |
| P12163_2_F1,9192  | R.EPGPVK.G         | 1234.762 | 0.00276  | 3 | 1 | 23.8 | 0 |
| P12163_2_F1,9767  | R.EPGPVK.G         | 1234.762 | 0.00642  | 3 | 1 | 26.9 | 0 |
| P12163_2_S5,8461  | R.EPGPVK.G         | 1234.762 | 0.00102  | 3 | 1 | 26.2 | 0 |
| P12163_1_S1,17533 | R.GPTPEPLCQVMLR.V  | 1801.961 | 0.00431  | 3 | 1 | 48.2 | 0 |
| P12163_1_S1,18749 | R.GPTPEPLCQVMLR.V  | 1801.961 | 0.00908  | 2 | 1 | 25.6 | 0 |
| P12163_1_S1,18757 | R.GPTPEPLCQVMLR.V  | 1801.961 | 0.00356  | 3 | 1 | 45.1 | 0 |
| P12163_1_S1,18966 | R.GPTPEPLCQVMLR.V  | 1801.961 | 0.00608  | 3 | 1 | 48.4 | 0 |
| P12163_1_F5,11148 | R.M*LHV VYR.V      | 1237.703 | 0.00188  | 3 | 1 | 25.7 | 0 |
| P12163_1_F9,12145 | R.M*LHV VYR.V      | 1237.703 | 0.00138  | 3 | 1 | 26   | 0 |
| P12163_1_F9,15306 | R.M*LHV VYR.V      | 1237.703 | 0.00552  | 3 | 1 | 25.9 | 0 |
| P12163_1_S10,1538 | R.M*LHV VYR.V      | 1237.703 | 0.0053   | 3 | 1 | 23.7 | 0 |
| P12163_2_F4,11177 | R.M*LHV VYR.V      | 1237.703 | 0.0044   | 3 | 1 | 28.4 | 0 |
| P12163_2_F4,14461 | R.M*LHV VYR.V      | 1237.703 | 0.00372  | 3 | 1 | 24.1 | 0 |
| P12163_2_F9,14317 | R.M*LHV VYR.V      | 1237.703 | 0.00165  | 3 | 1 | 23.3 | 0 |
| P12163_1_F9,15291 | R.MLHV VYR.V       | 1221.708 | 0.00285  | 3 | 1 | 35.1 | 0 |
| P12163_2_F10,1396 | R.MLHV VYR.V       | 1221.708 | 0.00042  | 3 | 1 | 22.1 | 0 |
| P12163_2_F4,14426 | R.MLHV VYR.V       | 1221.708 | 0.00501  | 3 | 1 | 31   | 0 |
| P12163_2_F7,13894 | R.MLHV VYR.V       | 1221.708 | 0.00225  | 3 | 1 | 25.4 | 0 |
| P12163_2_F9,14286 | R.MLHV VYR.V       | 1221.708 | 0.00243  | 3 | 1 | 31.7 | 0 |
| P12163_2_F9,14499 | R.MLHV VYR.V       | 1221.708 | 0.00267  | 3 | 1 | 32   | 0 |
| P12163_1_S1,16280 | K.EPYTATIVSVER.V   | 1668.911 | 0.00177  | 3 | 1 | 71.8 | 0 |
| P12163_2_F6,16532 | K.EPYTATIVSVER.V   | 1668.911 | -0.00198 | 2 | 1 | 29.6 | 0 |
| P12163_1_F4,17377 | K.GM*MPGIQETLK.R   | 1829.012 | 0.00442  | 2 | 1 | 29.5 | 0 |
| P12163_1_F4,17380 | K.GM*MPGIQETLK.R   | 1829.012 | 0.01415  | 3 | 1 | 36.7 | 0 |
| P12163_2_F1,16561 | K.GM*MPGIQETLK.R   | 1829.012 | 0.0078   | 2 | 1 | 37.4 | 0 |
| P12163_2_F1,16567 | K.GM*MPGIQETLK.R   | 1829.012 | 0.00584  | 3 | 1 | 34.7 | 0 |
| P12163_1_F4,19323 | K.GMM*PGIQETLK.R   | 1829.012 | 0.0068   | 3 | 1 | 30.3 | 0 |
| P12163_1_F4,19324 | K.GMM*PGIQETLK.R   | 1829.012 | 0.00478  | 2 | 1 | 34.5 | 0 |
| P12163_1_F3,18961 | K.GMMPGIQETLK.R    | 1813.017 | 0.00822  | 2 | 1 | 51.5 | 0 |
| P12163_1_F4,19297 | K.GMMPGIQETLK.R    | 1813.017 | 0.003    | 2 | 1 | 55.9 | 0 |
| P12163_2_F1,18593 | K.GMMPGIQETLK.R    | 1813.017 | 0.00502  | 2 | 1 | 46.8 | 0 |

|                   |                  |          |          |   |   |      |   |
|-------------------|------------------|----------|----------|---|---|------|---|
| P12163_2_F4,16835 | K.GMMPGIQETLK.R  | 1813.017 | 0.00014  | 3 | 1 | 21.9 | 0 |
| P12163_1_F3,17837 | K.IEEYSDEIFK.R   | 1881.01  | 0.00954  | 3 | 1 | 23.1 | 0 |
| P12163_1_F3,17843 | K.IEEYSDEIFK.R   | 1881.01  | 0.01139  | 2 | 1 | 27.7 | 0 |
| P12163_1_F3,21982 | K.IEEYSDEIFK.R   | 1881.01  | 0.00569  | 2 | 1 | 36.8 | 0 |
| P12163_1_F3,22026 | K.IEEYSDEIFK.R   | 1881.01  | 0.00669  | 3 | 1 | 30.3 | 0 |
| P12163_1_F3,22183 | K.IEEYSDEIFK.R   | 1881.01  | 0.00489  | 2 | 1 | 47   | 0 |
| P12163_1_F4,22683 | K.IEEYSDEIFK.R   | 1881.01  | 0.00905  | 2 | 1 | 36.7 | 0 |
| P12163_1_F4,22702 | K.IEEYSDEIFK.R   | 1881.01  | 0.00576  | 3 | 1 | 26.5 | 0 |
| P12163_1_F9,20658 | K.IEEYSDEIFK.R   | 1881.01  | 0.01131  | 3 | 1 | 41.6 | 0 |
| P12163_2_F7,18964 | K.IEEYSDEIFK.R   | 1881.01  | 0.01193  | 2 | 1 | 39.8 | 0 |
| P12163_2_F7,18983 | K.IEEYSDEIFK.R   | 1881.01  | 0.01938  | 3 | 1 | 28.8 | 0 |
| P12163_2_F9,19843 | K.IEEYSDEIFK.R   | 1881.01  | 0.0072   | 3 | 1 | 42.2 | 0 |
| P12163_1_F4,6956  | K.KPGNPHNVR.L    | 1626.965 | 0.00738  | 4 | 1 | 26.2 | 0 |
| P12163_1_F5,11488 | K.MYVQDK.I       | 1391.781 | 0.00716  | 2 | 1 | 24.9 | 0 |
| P12163_2_F2,12239 | K.MYVQDK.I       | 1391.781 | 0.00562  | 2 | 1 | 26.7 | 0 |
| P12163_1_S10,1740 | K.QWHVEVY.-      | 1264.663 | 0.0035   | 2 | 1 | 30.2 | 0 |
| P12163_1_S1,17845 | K.VAVSPLELEER.S  | 1545.879 | 0.00051  | 3 | 1 | 51.7 | 0 |
| P12163_1_S1,17888 | K.VAVSPLELEER.S  | 1545.879 | 0.00379  | 2 | 1 | 42.8 | 0 |
| P12163_1_S1,18142 | K.VAVSPLELEER.S  | 1545.879 | 0.00953  | 2 | 1 | 25.5 | 0 |
| P12163_2_F2,18910 | K.VAVSPLELEER.S  | 1545.879 | 0.00033  | 2 | 1 | 23.9 | 0 |
| P12163_2_F4,17783 | K.VAVSPLELEER.S  | 1545.879 | 0.00184  | 2 | 1 | 26.8 | 0 |
| P12163_1_F4,16089 | K.VLITGPSGK.I    | 1479.935 | 0.00722  | 2 | 1 | 32.5 | 0 |
| P12163_1_F4,16094 | K.VLITGPSGK.I    | 1479.935 | 0.0066   | 3 | 1 | 27.1 | 0 |
| P12163_1_F7,14559 | K.VLITGPSGK.I    | 1479.935 | 0.00282  | 3 | 1 | 29.7 | 0 |
| P12163_2_F1,15155 | K.VLITGPSGK.I    | 1479.935 | 0.00465  | 3 | 1 | 29   | 0 |
| P12163_2_F1,15373 | K.VLITGPSGK.I    | 1479.935 | 0.00456  | 3 | 1 | 30   | 0 |
| P12163_1_F2,18157 | K.YLQDYDPNFR.Y   | 1634.812 | 0.00039  | 3 | 1 | 37.2 | 0 |
| P12163_1_F2,18298 | K.YLQDYDPNFR.Y   | 1634.812 | 0.00302  | 2 | 1 | 38.2 | 0 |
| P12163_1_F9,17551 | K.YLQDYDPNFR.Y   | 1634.812 | 0.00426  | 2 | 1 | 30.9 | 0 |
| P12163_1_S1,17339 | K.YLQDYDPNFR.Y   | 1634.812 | 0.00116  | 2 | 1 | 36.7 | 0 |
| P12163_1_S1,17835 | K.YLQDYDPNFR.Y   | 1634.812 | 0.00384  | 2 | 1 | 27.6 | 0 |
| P12163_1_S1,17886 | K.YLQDYDPNFR.Y   | 1634.812 | -0.00105 | 3 | 1 | 26.6 | 0 |
| P12163_2_F4,16880 | K.YLQDYDPNFR.Y   | 1634.812 | 0.0045   | 2 | 1 | 24.8 | 0 |
| P12163_2_F7,15828 | K.YLQDYDPNFR.Y   | 1634.812 | 0.0011   | 2 | 1 | 33.9 | 0 |
| P12163_2_F9,17077 | K.YLQDYDPNFR.Y   | 1634.812 | 0.00524  | 2 | 1 | 36.4 | 0 |
| P12163_2_F9,17127 | K.YLQDYDPNFR.Y   | 1634.812 | 0.00495  | 3 | 1 | 24   | 0 |
| P12163_2_F9,17277 | K.YLQDYDPNFR.Y   | 1634.812 | 0.00392  | 2 | 1 | 35.6 | 0 |
| P12163_1_F3,14301 | R.AVYYDPESGK.E   | 1736.931 | 0.00966  | 2 | 1 | 39   | 0 |
| P12163_1_F7,18735 | R.LDGGAHYFCGLK.G | 2059.125 | 0.00565  | 3 | 1 | 24.9 | 0 |
| P12163_1_F8,19650 | R.LDGGAHYFCGLK.G | 2059.125 | 0.00105  | 2 | 1 | 26.8 | 0 |
| P12163_1_F8,19673 | R.LDGGAHYFCGLK.G | 2059.125 | 0.00373  | 3 | 1 | 29.6 | 0 |
| P12163_2_F6,19193 | R.LDGGAHYFCGLK.G | 2059.125 | 0.00568  | 3 | 1 | 29.8 | 0 |
| P12163_2_F6,19218 | R.LDGGAHYFCGLK.G | 2059.125 | -0.00033 | 2 | 1 | 34.5 | 0 |
| P12163_1_F3,11385 | R.LYSIASTR.Y     | 1214.705 | 0.00323  | 3 | 1 | 34.9 | 0 |
| P12163_1_F3,14744 | R.LYSIASTR.Y     | 1214.705 | 0.0041   | 3 | 1 | 23.5 | 0 |
| P12163_1_F3,15093 | R.LYSIASTR.Y     | 1214.705 | 0.00386  | 3 | 1 | 35.5 | 0 |
| P12163_1_F4,18652 | R.M*FMESVPTYK.F  | 1856.975 | 0.00528  | 2 | 1 | 30   | 0 |
| P12163_1_F4,21083 | R.M*FMESVPTYK.F  | 1856.975 | 0.00554  | 2 | 1 | 25   | 0 |
| P12163_1_F4,21132 | R.M*FMESVPTYK.F  | 1856.975 | 0.00383  | 3 | 1 | 24.9 | 0 |
| P12163_2_F1,17929 | R.M*FMESVPTYK.F  | 1856.975 | 0.00716  | 2 | 1 | 30.2 | 0 |
| P12163_2_F1,17946 | R.M*FMESVPTYK.F  | 1856.975 | 0.00722  | 3 | 1 | 28.4 | 0 |

|                                       |          |          |   |   |      |   |
|---------------------------------------|----------|----------|---|---|------|---|
| P12163_1_F3,20521 R.MFMESVPTYK.F      | 1840.98  | 0.00728  | 3 | 1 | 29.2 | 0 |
| P12163_1_F3,20522 R.MFMESVPTYK.F      | 1840.98  | 0.00304  | 2 | 1 | 27.9 | 0 |
| P12163_2_F1,20537 R.MFMESVPTYK.F      | 1840.98  | 0.00665  | 3 | 1 | 23   | 0 |
| P12163_2_F1,20586 R.MFMESVPTYK.F      | 1840.98  | 0.00803  | 3 | 1 | 26.8 | 0 |
| P12163_2_F7,17824 R.MFMESVPTYK.F      | 1840.98  | -0.00052 | 3 | 1 | 25.5 | 0 |
| P12163_1_S10,1371 R.YGDSFDGK.T        | 1496.784 | 0.00503  | 3 | 1 | 32.7 | 0 |
| P12163_2_F1,12592 R.YGDSFDGK.T        | 1496.784 | 0.00415  | 2 | 1 | 23.9 | 0 |
| P12163_2_F1,12635 R.YGDSFDGK.T        | 1496.784 | 0.00479  | 3 | 1 | 43.2 | 0 |
| P12163_1_F4,11708 K.CEGCVD AVK.Q      | 1645.85  | 0.00293  | 2 | 1 | 31.9 | 0 |
| P12163_1_F5,10380 K.CEGCVD AVK.Q      | 1645.85  | 0.00853  | 2 | 1 | 40.7 | 0 |
| P12163_2_F1,10827 K.CEGCVD AVK.Q      | 1645.85  | 0.00833  | 2 | 1 | 33.8 | 0 |
| P12163_2_F1,10844 K.CEGCVD AVK.Q      | 1645.85  | 0.01047  | 3 | 1 | 26.1 | 0 |
| P12163_1_S1,15378 K.EPLGDLGT VVADEK.G | 2051.148 | 0.00633  | 3 | 1 | 23.1 | 0 |
| P12163_1_S1,19340 K.EPLGDLGT VVADEK.G | 2051.148 | 0.00522  | 3 | 1 | 43.9 | 0 |
| P12163_1_F5,17928 K.GEAFFSGVK.E       | 1549.883 | 0.00384  | 3 | 1 | 37   | 0 |
| P12163_1_F5,18160 K.GEAFFSGVK.E       | 1549.883 | 0.00489  | 2 | 1 | 40.1 | 0 |
| P12163_1_F6,18338 K.GEAFFSGVK.E       | 1549.883 | -0.00073 | 2 | 1 | 38   | 0 |
| P12163_2_F1,18389 K.GEAFFSGVK.E       | 1549.883 | 0.01025  | 2 | 1 | 34   | 0 |
| P12163_2_F1,18399 K.GEAFFSGVK.E       | 1549.883 | 0.00576  | 3 | 1 | 31.9 | 0 |
| P12163_2_F2,18668 K.GEAFFSGVK.E       | 1549.883 | 0.00552  | 3 | 1 | 41.2 | 0 |
| P12163_2_S5,16565 K.GEAFFSGVK.E       | 1549.883 | 0.00075  | 3 | 1 | 29.3 | 0 |
| P12163_1_F4,1062 K.GPDVFGVVR.L        | 1249.721 | 0.0033   | 2 | 1 | 24.3 | 0 |
| P12163_1_F9,19225 K.HGWSINEFGDLTK.G   | 2112.133 | 0.00585  | 3 | 1 | 45.6 | 0 |
| P12163_1_F9,19231 K.HGWSINEFGDLTK.G   | 2112.133 | 0.00409  | 2 | 1 | 37.4 | 0 |
| P12163_1_F9,19243 K.HGWSINEFGDLTK.G   | 2112.133 | 0.00498  | 4 | 1 | 29.9 | 0 |
| P12163_2_F9,18183 K.HGWSINEFGDLTK.G   | 2112.133 | 0.00732  | 3 | 1 | 53.1 | 0 |
| P12163_1_F4,16271 K.LQTVTGVK.N        | 1453.92  | 0.00552  | 2 | 1 | 24.9 | 0 |
| P12163_1_F4,16301 K.LQTVTGVK.N        | 1453.92  | 0.00279  | 3 | 1 | 32   | 0 |
| P12163_1_F4,16526 K.LQTVTGVK.N        | 1453.92  | 0.00264  | 2 | 1 | 36.9 | 0 |
| P12163_1_F5,15147 K.LQTVTGVK.N        | 1453.92  | 0.00216  | 3 | 1 | 25.8 | 0 |
| P12163_1_F5,15168 K.LQTVTGVK.N        | 1453.92  | 0.0038   | 2 | 1 | 36.9 | 0 |
| P12163_1_F7,14570 K.LQTVTGVK.N        | 1453.92  | 0.00333  | 3 | 1 | 31.9 | 0 |
| P12163_2_F1,15274 K.LQTVTGVK.N        | 1453.92  | 0.00606  | 3 | 1 | 35.8 | 0 |
| P12163_2_F1,15279 K.LQTVTGVK.N        | 1453.92  | 0.00442  | 2 | 1 | 32.5 | 0 |
| P12163_2_F1,15533 K.LQTVTGVK.N        | 1453.92  | 0.00393  | 3 | 1 | 37.8 | 0 |
| P12163_2_F1,15605 K.LQTVTGVK.N        | 1453.92  | 0.00206  | 2 | 1 | 31.1 | 0 |
| P12163_2_F2,15986 K.LQTVTGVK.N        | 1453.92  | 0.00744  | 3 | 1 | 33.8 | 0 |
| P12163_2_F2,15988 K.LQTVTGVK.N        | 1453.92  | 0.00512  | 2 | 1 | 31   | 0 |
| P12163_1_S1,15792 K.NVEVDLSNQVVR.I    | 1675.928 | 0.00682  | 2 | 1 | 35.3 | 0 |
| P12163_1_S1,15794 K.NVEVDLSNQVVR.I    | 1675.928 | -0.00078 | 3 | 1 | 55.2 | 0 |
| P12163_1_S1,16072 K.NVEVDLSNQVVR.I    | 1675.928 | 0.00322  | 2 | 1 | 29.7 | 0 |
| P12163_1_S10,103 K.NVEVDLSNQVVR.I     | 1675.928 | 0.0039   | 2 | 1 | 28.7 | 0 |
| P12163_1_S1,8945 K.SDSGVTAAVIAR.S     | 1450.817 | 0.00463  | 4 | 1 | 25   | 0 |
| P12163_1_S1,9263 K.SDSGVTAAVIAR.S     | 1450.817 | 0.00251  | 3 | 1 | 36.7 | 0 |
| P12163_1_S1,10328 K.SDSGVTAAVIAR.S    | 1450.817 | 0.00386  | 3 | 1 | 48   | 0 |
| P12163_1_S1,10650 K.SDSGVTAAVIAR.S    | 1450.817 | -0.00001 | 3 | 1 | 30.2 | 0 |
| P12163_1_S1,10918 K.SDSGVTAAVIAR.S    | 1450.817 | -0.00067 | 3 | 1 | 27   | 0 |
| P12163_1_S1,12832 K.SDSGVTAAVIAR.S    | 1450.817 | 0.0011   | 3 | 1 | 65.3 | 0 |
| P12163_1_S1,13022 K.SDSGVTAAVIAR.S    | 1450.817 | 0.00193  | 2 | 1 | 29.8 | 0 |
| P12163_1_S1,10249 K.TMTEALEQTGR.K     | 1540.794 | 0.00681  | 3 | 1 | 42.2 | 0 |
| P12163_1_S1,10478 K.TMTEALEQTGR.K     | 1540.794 | 0.00306  | 3 | 1 | 43.1 | 0 |

|                   |                  |          |          |   |   |      |   |
|-------------------|------------------|----------|----------|---|---|------|---|
| P12163_1_F3,19088 | R.IEANFSGLSPGK.H | 1828.042 | 0.00383  | 2 | 1 | 54.1 | 0 |
| P12163_1_F4,18511 | R.IEANFSGLSPGK.H | 1828.042 | 0.0085   | 3 | 1 | 52.2 | 0 |
| P12163_1_F4,18513 | R.IEANFSGLSPGK.H | 1828.042 | 0.00353  | 2 | 1 | 30.2 | 0 |
| P12163_1_F4,19399 | R.IEANFSGLSPGK.H | 1828.042 | 0.00491  | 2 | 1 | 49.1 | 0 |
| P12163_1_F4,19413 | R.IEANFSGLSPGK.H | 1828.042 | 0.0067   | 3 | 1 | 51.7 | 0 |
| P12163_1_F4,19646 | R.IEANFSGLSPGK.H | 1828.042 | 0.01015  | 2 | 1 | 51.5 | 0 |
| P12163_1_F4,19678 | R.IEANFSGLSPGK.H | 1828.042 | 0.00883  | 3 | 1 | 45.7 | 0 |
| P12163_2_F1,18778 | R.IEANFSGLSPGK.H | 1828.042 | 0.00597  | 2 | 1 | 46   | 0 |
| P12163_2_F1,18828 | R.IEANFSGLSPGK.H | 1828.042 | 0.00571  | 3 | 1 | 47.8 | 0 |
| P12163_2_F1,19054 | R.IEANFSGLSPGK.H | 1828.042 | 0.00147  | 2 | 1 | 56.3 | 0 |
| P12163_1_F5,17877 | R.ILGSSPLK.T     | 1422.914 | 0.00624  | 3 | 1 | 30.6 | 0 |
| P12163_2_F1,18390 | R.ILGSSPLK.T     | 1422.914 | 0.00513  | 3 | 1 | 30.9 | 0 |
| P12163_1_F2,19006 | R.LAQVNM*ELAR.I  | 1464.815 | 0.00206  | 2 | 1 | 27.8 | 0 |
| P12163_1_F5,9611  | R.SAGVGGENYK.K   | 1532.853 | 0.00424  | 3 | 1 | 56.8 | 0 |
| P12163_1_F6,10591 | R.SAGVGGENYK.K   | 1532.853 | 0.00128  | 2 | 1 | 41   | 0 |
| P12163_1_S10,1107 | R.SAGVGGENYK.K   | 1532.853 | 0.0073   | 2 | 1 | 40.2 | 0 |
| P12163_2_F2,8550  | R.SAGVGGENYK.K   | 1532.853 | 0.00014  | 2 | 1 | 31.6 | 0 |
| P12163_2_F2,10449 | R.SAGVGGENYK.K   | 1532.853 | 0.00283  | 3 | 1 | 60.1 | 0 |
| P12163_2_F2,10558 | R.SAGVGGENYK.K   | 1532.853 | 0.00202  | 2 | 1 | 46.5 | 0 |
| P12163_2_F8_1207  | R.SAGVGGENYK.K   | 1532.853 | 0.00722  | 2 | 1 | 38.7 | 0 |
| P12163_1_F3,12628 | R.SIVVYGTEDEK.S  | 1718.978 | 0.00349  | 2 | 1 | 35.3 | 0 |
| P12163_1_F3,15628 | R.SIVVYGTEDEK.S  | 1718.978 | -0.00365 | 2 | 1 | 35.1 | 0 |
| P12163_1_F3,15681 | R.SIVVYGTEDEK.S  | 1718.978 | 0.00367  | 3 | 1 | 31.2 | 0 |
| P12163_1_F4,13094 | R.SIVVYGTEDEK.S  | 1718.978 | 0.00844  | 3 | 1 | 24   | 0 |
| P12163_1_F4,13734 | R.SIVVYGTEDEK.S  | 1718.978 | 0.00319  | 3 | 1 | 22.2 | 0 |
| P12163_1_F4,13737 | R.SIVVYGTEDEK.S  | 1718.978 | 0.00455  | 2 | 1 | 24.2 | 0 |
| P12163_2_F9,12256 | R.SIVVYGTEDEK.S  | 1718.978 | 0.00115  | 3 | 1 | 23.1 | 0 |
| P12163_1_S10,1126 | K.AAHMLK.Y       | 1278.781 | 0.00625  | 3 | 1 | 22   | 0 |
| P12163_2_F8_1207  | K.AAHMLK.Y       | 1278.781 | 0.00523  | 3 | 1 | 30   | 0 |
| P12163_1_F6,17814 | K.AVHEVIGFYK.E   | 1771.036 | 0.0042   | 3 | 1 | 28.2 | 0 |
| P12163_1_F7,16941 | K.AVHEVIGFYK.E   | 1771.036 | 0.0039   | 3 | 1 | 38   | 0 |
| P12163_1_F7,16942 | K.AVHEVIGFYK.E   | 1771.036 | -0.00173 | 2 | 1 | 36.1 | 0 |
| P12163_2_F6,17188 | K.AVHEVIGFYK.E   | 1771.036 | 0.00265  | 2 | 1 | 39.6 | 0 |
| P12163_2_F6,17223 | K.AVHEVIGFYK.E   | 1771.036 | 0.0045   | 3 | 1 | 45.7 | 0 |
| P12163_2_F7,15286 | K.AVHEVIGFYK.E   | 1771.036 | 0.00657  | 3 | 1 | 35   | 0 |
| P12163_2_F9,16463 | K.AVHEVIGFYK.E   | 1771.036 | 0.00585  | 3 | 1 | 33.2 | 0 |
| P12163_1_F3,23679 | K.ELFSDGFPPVAK.D | 1931.11  | 0.00292  | 2 | 1 | 43.7 | 0 |
| P12163_1_F3,23705 | K.ELFSDGFPPVAK.D | 1931.11  | 0.00769  | 3 | 1 | 34.3 | 0 |
| P12163_1_F5,22950 | K.ELFSDGFPPVAK.D | 1931.11  | 0.00781  | 3 | 1 | 31.6 | 0 |
| P12163_1_F6,22161 | K.ELFSDGFPPVAK.D | 1931.11  | 0.00163  | 3 | 1 | 22.1 | 0 |
| P12163_1_F6,22386 | K.ELFSDGFPPVAK.D | 1931.11  | 0.02524  | 3 | 1 | 34.1 | 0 |
| P12163_1_F3,14261 | K.EVAIETSSFSK.Y  | 1806.01  | 0.01406  | 2 | 1 | 30.1 | 0 |
| P12163_1_F3,14659 | K.EVAIETSSFSK.Y  | 1806.01  | 0.00388  | 2 | 1 | 37.3 | 0 |
| P12163_1_F3,16921 | K.EVAIETSSFSK.Y  | 1806.01  | 0.00524  | 2 | 1 | 52.2 | 0 |
| P12163_1_F3,16943 | K.EVAIETSSFSK.Y  | 1806.01  | 0.00563  | 3 | 1 | 45.5 | 0 |
| P12163_1_F4,17470 | K.EVAIETSSFSK.Y  | 1806.01  | 0.00764  | 3 | 1 | 39.5 | 0 |
| P12163_1_S1,22453 | K.LQAGYLFPEIAR.R | 1681.958 | 0.00171  | 3 | 1 | 39   | 0 |
| P12163_1_S1,22590 | K.LQAGYLFPEIAR.R | 1681.958 | 0.00407  | 2 | 1 | 36.5 | 0 |
| P12163_1_S1,22669 | K.LQAGYLFPEIAR.R | 1681.958 | 0.00327  | 3 | 1 | 59.4 | 0 |
| P12163_1_S1,20957 | K.NAPYVWVQFPGR.S | 1737.938 | 0.00287  | 3 | 1 | 46.1 | 0 |
| P12163_2_F7,19483 | K.NAPYVWVQFPGR.S | 1737.938 | 0.0044   | 3 | 1 | 27.2 | 0 |

|                   |                       |          |          |   |   |      |   |
|-------------------|-----------------------|----------|----------|---|---|------|---|
| P12163_1_F7,17081 | K.THVVTTTPGSGFGPGGE   | 2277.193 | 0.00134  | 3 | 1 | 70.7 | 0 |
| P12163_1_F8,17825 | K.THVVTTTPGSGFGPGGE   | 2277.193 | 0.00128  | 3 | 1 | 71.2 | 0 |
| P12163_1_F8,17849 | K.THVVTTTPGSGFGPGGE   | 2277.193 | -0.00076 | 2 | 1 | 55.7 | 0 |
| P12163_1_F8,18087 | K.THVVTTTPGSGFGPGGE   | 2277.193 | 0.00464  | 3 | 1 | 44.1 | 0 |
| P12163_2_F10,1594 | K.THVVTTTPGSGFGPGGE   | 2277.193 | 0.00449  | 3 | 1 | 77.1 | 0 |
| P12163_2_F6,15538 | K.THVVTTTPGSGFGPGGE   | 2277.193 | 0.00635  | 3 | 1 | 55.3 | 0 |
| P12163_2_F6,15566 | K.THVVTTTPGSGFGPGGE   | 2277.193 | 0.00319  | 4 | 1 | 42.3 | 0 |
| P12163_2_F6,17302 | K.THVVTTTPGSGFGPGGE   | 2277.193 | 0.00425  | 3 | 1 | 54.8 | 0 |
| P12163_2_F6,17330 | K.THVVTTTPGSGFGPGGE   | 2277.193 | -0.00262 | 2 | 1 | 29.1 | 0 |
| P12163_2_F6,20129 | K.THVVTTTPGSGFGPGGE   | 2277.193 | 0.00644  | 3 | 1 | 39.5 | 0 |
| P12163_2_S5,16519 | K.THVVTTTPGSGFGPGGE   | 2277.193 | 0.00572  | 3 | 1 | 77.5 | 0 |
| P12163_1_F4,19026 | R.AAIASFYK.D          | 1579.93  | 0.01374  | 3 | 1 | 27.4 | 0 |
| P12163_1_F4,19031 | R.AAIASFYK.D          | 1579.93  | 0.00819  | 2 | 1 | 24.7 | 0 |
| P12163_1_F5,17753 | R.AAIASFYK.D          | 1579.93  | 0.00725  | 2 | 1 | 28.4 | 0 |
| P12163_1_F5,17784 | R.AAIASFYK.D          | 1579.93  | 0.00594  | 3 | 1 | 27.7 | 0 |
| P12163_1_F7,16838 | R.AAIASFYK.D          | 1579.93  | -0.00441 | 3 | 1 | 32.7 | 0 |
| P12163_1_F9,17544 | R.AAIASFYK.D          | 1579.93  | 0.00468  | 3 | 1 | 38   | 0 |
| P12163_2_F1,18276 | R.AAIASFYK.D          | 1579.93  | 0.00354  | 3 | 1 | 32.7 | 0 |
| P12163_2_F1,18284 | R.AAIASFYK.D          | 1579.93  | 0.00435  | 2 | 1 | 24.9 | 0 |
| P12163_2_F2,18491 | R.AAIASFYK.D          | 1579.93  | -0.00441 | 2 | 1 | 28.2 | 0 |
| P12163_2_F9,16567 | R.AAIASFYK.D          | 1579.93  | 0.00318  | 3 | 1 | 33.6 | 0 |
| P12163_2_F9,16782 | R.AAIASFYK.D          | 1579.93  | 0.00606  | 3 | 1 | 26.2 | 0 |
| P12163_1_F5,12315 | R.GNVLEACK.R          | 1498.851 | 0.01089  | 3 | 1 | 24.8 | 0 |
| P12163_1_F6,13296 | R.GNVLEACK.R          | 1498.851 | 0.00541  | 2 | 1 | 27.5 | 0 |
| P12163_2_F1,12691 | R.GNVLEACK.R          | 1498.851 | 0.0054   | 3 | 1 | 23   | 0 |
| P12163_2_F1,12696 | R.GNVLEACK.R          | 1498.851 | 0.00563  | 2 | 1 | 35.2 | 0 |
| P12163_2_F2,13091 | R.GNVLEACK.R          | 1498.851 | 0.00523  | 2 | 1 | 35   | 0 |
| P12163_1_F4,22239 | R.LGWTVIPK.E          | 1521.961 | 0.00392  | 3 | 1 | 28.6 | 0 |
| P12163_1_F4,22456 | R.LGWTVIPK.E          | 1521.961 | 0.00664  | 2 | 1 | 28.3 | 0 |
| P12163_2_F1,21810 | R.LGWTVIPK.E          | 1521.961 | 0.00616  | 2 | 1 | 27   | 0 |
| P12163_2_F1,20452 | R.SIFEIPGAK.E         | 1569.946 | 0.00641  | 2 | 1 | 33.2 | 0 |
| P12163_2_F1,20473 | R.SIFEIPGAK.E         | 1569.946 | 0.00619  | 3 | 1 | 35.1 | 0 |
| P12163_2_F2,38    | R.SIFEIPGAK.E         | 1569.946 | 0.00475  | 3 | 1 | 24   | 0 |
| P12163_1_F3,26300 | R.SSWDFVSEILK.K       | 1919.073 | 0.00487  | 3 | 1 | 27.8 | 0 |
| P12163_1_F8,15470 | R.SYALSTQEGYSGYGAI    | 3099.584 | 0.005    | 4 | 1 | 35.5 | 0 |
| P12163_2_F10,1336 | R.SYALSTQEGYSGYGAI    | 3099.584 | 0.0086   | 4 | 1 | 33.5 | 0 |
| P12163_2_F10,1441 | R.SYALSTQEGYSGYGAI    | 3099.584 | 0.00761  | 4 | 1 | 48.2 | 0 |
| P12163_2_F10,1441 | R.SYALSTQEGYSGYGAI    | 3099.584 | -0.00084 | 3 | 1 | 30   | 0 |
| P12163_2_F6,15046 | R.SYALSTQEGYSGYGAI    | 3099.584 | 0.00309  | 3 | 1 | 43.9 | 0 |
| P12163_2_S5,14649 | R.SYALSTQEGYSGYGAI    | 3099.584 | 0.00909  | 4 | 1 | 48.3 | 0 |
| P12163_1_F4,11669 | R.VSAFGHR.E ! R.VSAFC | 1077.611 | 0.00741  | 3 | 1 | 31.4 | 0 |
| P12163_1_F3,13271 | K.DMAFTASPGTK.G       | 1733.935 | 0.00816  | 3 | 1 | 30.1 | 0 |
| P12163_1_F3,15048 | K.DMAFTASPGTK.G       | 1733.935 | 0.00926  | 2 | 1 | 40.1 | 0 |
| P12163_1_F4,13724 | K.DMAFTASPGTK.G       | 1733.935 | 0.00578  | 2 | 1 | 25   | 0 |
| P12163_2_F1,14307 | K.DMAFTASPGTK.G       | 1733.935 | 0.00507  | 3 | 1 | 32.5 | 0 |
| P12163_2_F1,14308 | K.DMAFTASPGTK.G       | 1733.935 | 0.00574  | 2 | 1 | 52.4 | 0 |
| P12163_1_F2,16331 | K.ENLYATSLEFR.L       | 1646.869 | 0.00026  | 3 | 1 | 31   | 0 |
| P12163_1_F2,17508 | K.ENLYATSLEFR.L       | 1646.869 | 0.00403  | 2 | 1 | 35.9 | 0 |
| P12163_1_F2,19631 | K.ENLYATSLEFR.L       | 1646.869 | 0.00009  | 2 | 1 | 37.2 | 0 |
| P12163_1_F2,19691 | K.ENLYATSLEFR.L       | 1646.869 | -0.00127 | 3 | 1 | 52.6 | 0 |
| P12163_1_S1,19247 | K.ENLYATSLEFR.L       | 1646.869 | 0.0014   | 3 | 1 | 37.5 | 0 |



|                   |                      |          |          |   |   |      |   |
|-------------------|----------------------|----------|----------|---|---|------|---|
| P12163_2_F7,17388 | K.ENLYATSLEFR.L      | 1646.869 | 0.00607  | 2 | 1 | 48.5 | 0 |
| P12163_1_F5,10701 | K.HLPGYM*K.M         | 1469.839 | 0.00681  | 3 | 1 | 28.1 | 0 |
| P12163_2_F4,10784 | K.HLPGYM*K.M         | 1469.839 | 0.00444  | 3 | 1 | 25.4 | 0 |
| P12163_2_F8_12070 | K.HLPGYM*K.M         | 1469.839 | 0.0051   | 3 | 1 | 22.9 | 0 |
| P12163_1_S10,1361 | K.HLPGYMK.M          | 1453.845 | 0.00462  | 3 | 1 | 22.2 | 0 |
| P12163_2_F4,12255 | K.HLPGYMK.M          | 1453.845 | 0.00444  | 3 | 1 | 23.1 | 0 |
| P12163_2_F8_12070 | K.HLPGYMK.M          | 1453.845 | 0.00474  | 3 | 1 | 29.6 | 0 |
| P12163_1_F3,25651 | K.LEFNTLQAIYQEELK.L  | 2447.364 | 0.00451  | 3 | 1 | 43   | 0 |
| P12163_1_F9,18744 | K.NHLLLELAK.L        | 1659.041 | 0.00384  | 3 | 1 | 51.8 | 0 |
| P12163_1_F9,18765 | K.NHLLLELAK.L        | 1659.041 | 0.0047   | 2 | 1 | 46.9 | 0 |
| P12163_1_F9,18803 | K.NHLLLELAK.L        | 1659.041 | 0.00468  | 4 | 1 | 30.6 | 0 |
| P12163_1_F9,18954 | K.NHLLLELAK.L        | 1659.041 | 0.00282  | 3 | 1 | 43.9 | 0 |
| P12163_1_S10,1823 | K.NHLLLELAK.L        | 1659.041 | 0.00273  | 3 | 1 | 39.2 | 0 |
| P12163_2_F8_12070 | K.NHLLLELAK.L        | 1659.041 | 0.00681  | 3 | 1 | 52.4 | 0 |
| P12163_2_F9,17520 | K.NHLLLELAK.L        | 1659.041 | 0.00828  | 4 | 1 | 31.7 | 0 |
| P12163_2_F9,17578 | K.NHLLLELAK.L        | 1659.041 | 0.00501  | 3 | 1 | 52.6 | 0 |
| P12163_2_F9,17612 | K.NHLLLELAK.L        | 1659.041 | 0.0074   | 2 | 1 | 44.9 | 0 |
| P12163_2_F9,17809 | K.NHLLLELAK.L        | 1659.041 | 0.00606  | 3 | 1 | 52.7 | 0 |
| P12163_1_F3,24416 | K.QQDFDMLLSIK.N      | 1946.088 | 0.00576  | 3 | 1 | 40.3 | 0 |
| P12163_1_F3,24520 | K.QQDFDMLLSIK.N      | 1946.088 | 0.00775  | 2 | 1 | 38.7 | 0 |
| P12163_2_F10,1478 | K.SIQCYMHETGASEEVA   | 2272.064 | 0.00122  | 3 | 1 | 41   | 0 |
| P12163_2_F4,14608 | K.SIQCYMHETGASEEVA   | 2272.064 | 0.00164  | 3 | 1 | 34.9 | 0 |
| P12163_1_F2,13257 | K.YDNLTVD.R          | 1299.685 | 0.00431  | 2 | 1 | 28.7 | 0 |
| P12163_2_F7,19257 | R.ALELPLHWK.V        | 1715.046 | 0.0026   | 3 | 1 | 32.3 | 0 |
| P12163_2_F8_12070 | R.ALELPLHWK.V        | 1715.046 | 0.00614  | 3 | 1 | 25.4 | 0 |
| P12163_2_F7,15406 | R.KENLYATSLEFR.L     | 2079.169 | -0.00626 | 3 | 1 | 38.2 | 0 |
| P12163_1_F7,20047 | R.LGLAYHFEPEIR.N     | 1748.964 | 0.0039   | 3 | 1 | 57.4 | 0 |
| P12163_1_F7,20052 | R.LGLAYHFEPEIR.N     | 1748.964 | 0.00269  | 2 | 1 | 49.5 | 0 |
| P12163_1_F8,21049 | R.LGLAYHFEPEIR.N     | 1748.964 | 0.00079  | 2 | 1 | 24   | 0 |
| P12163_2_F10,1850 | R.LGLAYHFEPEIR.N     | 1748.964 | 0.00045  | 3 | 1 | 22.6 | 0 |
| P12163_1_F4,5719  | R.NIHNHNK.D          | 1484.854 | 0.00388  | 4 | 1 | 40.3 | 0 |
| P12163_1_F4,5761  | R.NIHNHNK.D          | 1484.854 | -0.00175 | 3 | 1 | 33.6 | 0 |
| P12163_2_F4,5084  | R.NIHNHNK.D          | 1484.854 | -0.00055 | 3 | 1 | 35.7 | 0 |
| P12163_1_F6,18442 | R.QHGYPVSQEVFSGFK.L  | 2318.239 | 0.00405  | 3 | 1 | 40.1 | 0 |
| P12163_1_F7,17607 | R.QHGYPVSQEVFSGFK.L  | 2318.239 | 0.00921  | 3 | 1 | 50.8 | 0 |
| P12163_1_F7,17610 | R.QHGYPVSQEVFSGFK.L  | 2318.239 | 0.00724  | 4 | 1 | 37.3 | 0 |
| P12163_2_F6,17883 | R.QHGYPVSQEVFSGFK.L  | 2318.239 | 0.00351  | 3 | 1 | 24.8 | 0 |
| P12163_2_F6,17936 | R.QHGYPVSQEVFSGFK.L  | 2318.239 | 0.00516  | 4 | 1 | 27   | 0 |
| P12163_2_F7,16034 | R.QHGYPVSQEVFSGFK.L  | 2318.239 | -0.0027  | 3 | 1 | 54.5 | 0 |
| P12163_1_F4,21378 | R.WDINYALK.H         | 1630.941 | 0.00051  | 2 | 1 | 33.8 | 0 |
| P12163_1_F5,20138 | R.WDINYALK.H         | 1630.941 | 0.00348  | 3 | 1 | 31.9 | 0 |
| P12163_1_S10,1908 | R.WDINYALK.H         | 1630.941 | 0.00768  | 3 | 1 | 22.5 | 0 |
| P12163_2_F1,20826 | R.WDINYALK.H         | 1630.941 | 0.00816  | 3 | 1 | 32.7 | 0 |
| P12163_2_F1,20905 | R.WDINYALK.H         | 1630.941 | 0.00815  | 2 | 1 | 42.2 | 0 |
| P12163_2_F8_12070 | R.WDINYALK.H         | 1630.941 | 0.0033   | 3 | 1 | 26.2 | 0 |
| P12163_1_F8,16020 | K.AGHPTFVLVR.E       | 1400.832 | 0.0024   | 3 | 1 | 26.1 | 0 |
| P12163_2_F6,15432 | K.AGHPTFVLVR.E       | 1400.832 | 0.00258  | 3 | 1 | 31   | 0 |
| P12163_1_F2,7035  | K.AVDDPR.T           | 976.5365 | 0.00178  | 2 | 1 | 26.1 | 0 |
| P12163_2_F1,6810  | K.AVDDPR.T           | 976.5365 | 0.00264  | 2 | 1 | 32   | 0 |
| P12163_1_F3,16236 | K.EDDIGTYTIK.A       | 1762.968 | 0.01439  | 2 | 1 | 32   | 0 |
| P12163_1_F4,18399 | K.EYVSEEQLL.N ! R.EY | 1846.042 | 0.00872  | 2 | 1 | 53.1 | 0 |

|                   |                       |          |          |   |   |      |   |
|-------------------|-----------------------|----------|----------|---|---|------|---|
| P12163_1_F4,18412 | K.EYVSEEQLLK.N ! R.EY | 1846.042 | 0.00857  | 3 | 1 | 45.8 | 0 |
| P12163_1_F9,17086 | K.EYVSEEQLLK.N ! R.EY | 1846.042 | -0.00286 | 3 | 1 | 25.5 | 0 |
| P12163_2_F9,16197 | K.EYVSEEQLLK.N ! R.EY | 1846.042 | 0.00728  | 3 | 1 | 41.1 | 0 |
| P12163_1_F4,19473 | K.FIVEASVK.A          | 1500.925 | 0.00598  | 3 | 1 | 39.2 | 0 |
| P12163_1_F4,19481 | K.FIVEASVK.A          | 1500.925 | 0.00679  | 2 | 1 | 31.3 | 0 |
| P12163_2_F1,18739 | K.FIVEASVK.A          | 1500.925 | 0.00505  | 2 | 1 | 27.4 | 0 |
| P12163_2_F4,16957 | K.FIVEASVK.A          | 1500.925 | -0.00149 | 3 | 1 | 31   | 0 |
| P12163_1_F5,11499 | K.GVQTNFK.I           | 1401.831 | 0.00836  | 2 | 1 | 28.1 | 0 |
| P12163_2_F2,12251 | K.GVQTNFK.I           | 1401.831 | 0.00692  | 2 | 1 | 28.3 | 0 |
| P12163_2_F2,12252 | K.GVQTNFK.I           | 1401.831 | 0.00585  | 3 | 1 | 26.4 | 0 |
| P12163_1_F8,21764 | K.IEPSFGVEASQLYPDVI   | 2487.359 | 0.00198  | 3 | 1 | 56.6 | 0 |
| P12163_1_S1,20629 | K.IEPSFGVEASQLYPDVI   | 2487.359 | 0.00543  | 4 | 1 | 25.4 | 0 |
| P12163_1_S1,20673 | K.IEPSFGVEASQLYPDVI   | 2487.359 | 0.00504  | 3 | 1 | 70.5 | 0 |
| P12163_1_F3,19865 | K.ILSIGGTGYIGK.F      | 1787.089 | 0.00183  | 3 | 1 | 33.7 | 0 |
| P12163_1_F3,21576 | K.ILSIGGTGYIGK.F      | 1787.089 | 0.00668  | 2 | 1 | 49.1 | 0 |
| P12163_1_F3,21636 | K.ILSIGGTGYIGK.F      | 1787.089 | 0.00756  | 3 | 1 | 45.6 | 0 |
| P12163_1_F8,10580 | K.NIQEAAPPHK.V        | 1712.99  | 0.00492  | 3 | 1 | 23.1 | 0 |
| P12163_1_F8,10697 | K.NIQEAAPPHK.V        | 1712.99  | 0.00124  | 2 | 1 | 27.3 | 0 |
| P12163_2_F6,10479 | K.NIQEAAPPHK.V        | 1712.99  | 0.00478  | 2 | 1 | 52.7 | 0 |
| P12163_2_F6,10573 | K.NIQEAAPPHK.V        | 1712.99  | 0.00609  | 3 | 1 | 50.3 | 0 |
| P12163_1_F9,17128 | K.SQLLDHFK.N ! K.SQLI | 1595.937 | 0.00443  | 3 | 1 | 32.5 | 0 |
| P12163_1_F9,17162 | K.SQLLDHFK.N ! K.SQLI | 1595.937 | 0.0037   | 2 | 1 | 32.3 | 0 |
| P12163_1_F9,17345 | K.SQLLDHFK.N ! K.SQLI | 1595.937 | 0.00677  | 3 | 1 | 26.4 | 0 |
| P12163_2_F9,16416 | K.SQLLDHFK.N ! K.SQLI | 1595.937 | 0.00413  | 3 | 1 | 30.3 | 0 |
| P12163_2_F9,16522 | K.SQLLDHFK.N ! K.SQLI | 1595.937 | 0.01083  | 4 | 1 | 23.1 | 0 |
| P12163_2_F9,16595 | K.SQLLDHFK.N ! K.SQLI | 1595.937 | 0.00812  | 2 | 1 | 38   | 0 |
| P12163_2_F9,16634 | K.SQLLDHFK.N ! K.SQLI | 1595.937 | 0.00632  | 3 | 1 | 45.3 | 0 |
| P12163_1_F5,9600  | K.STYDVK.A            | 1320.762 | 0.00888  | 3 | 1 | 25.7 | 0 |
| P12163_1_F2,18084 | K.VVIFGDGNPK.A        | 1653.978 | 0.0084   | 2 | 1 | 26.1 | 0 |
| P12163_1_F4,19358 | K.VVIFGDGNPK.A        | 1653.978 | 0.00742  | 2 | 1 | 33.8 | 0 |
| P12163_2_F1,18557 | K.VVIFGDGNPK.A        | 1653.978 | 0.00434  | 2 | 1 | 32.1 | 0 |
| P12163_2_F1,18562 | K.VVIFGDGNPK.A        | 1653.978 | 0.0046   | 3 | 1 | 55.3 | 0 |
| P12163_2_F4,16714 | K.VVIFGDGNPK.A        | 1653.978 | 0.00196  | 3 | 1 | 24   | 0 |
| P12163_1_F4,9783  | R.ESTVSGPSK.S         | 1499.853 | 0.00881  | 3 | 1 | 22.3 | 0 |
| P12163_1_F4,9798  | R.ESTVSGPSK.S         | 1499.853 | 0.00634  | 2 | 1 | 28.7 | 0 |
| P12163_1_F5,8300  | R.ESTVSGPSK.S         | 1499.853 | 0.00526  | 2 | 1 | 25.3 | 0 |
| P12163_1_F9,9668  | R.VHGAVEPTK.S         | 1545.921 | 0.00557  | 3 | 1 | 45.6 | 0 |
| P12163_2_F9,9138  | R.VHGAVEPTK.S         | 1545.921 | 0.0059   | 3 | 1 | 42.8 | 0 |
| P12163_2_F9,9228  | R.VHGAVEPTK.S         | 1545.921 | 0.00654  | 2 | 1 | 24.4 | 0 |
| P12163_2_F4,8193  | K.AHASMLAK.Q          | 1452.845 | 0.00343  | 3 | 1 | 22.7 | 0 |
| P12163_1_F5,10001 | K.AHASMLAK.Q          | 1436.85  | 0.0125   | 2 | 1 | 24.3 | 0 |
| P12163_2_F4,10087 | K.AHASMLAK.Q          | 1436.85  | 0.00482  | 3 | 1 | 34.7 | 0 |
| P12163_1_F4,15622 | K.AVALCVSK.E          | 1455.881 | -0.00049 | 2 | 1 | 35.5 | 0 |
| P12163_1_F4,15634 | K.AVALCVSK.E          | 1455.881 | 0.00342  | 3 | 1 | 33.7 | 0 |
| P12163_1_F7,14022 | K.AVALCVSK.E          | 1455.881 | 0.00021  | 3 | 1 | 25.2 | 0 |
| P12163_2_F1,14733 | K.AVALCVSK.E          | 1455.881 | 0.00942  | 3 | 1 | 33.8 | 0 |
| P12163_2_F1,14737 | K.AVALCVSK.E          | 1455.881 | 0.00633  | 2 | 1 | 35.3 | 0 |
| P12163_2_F1,16602 | K.FTESISYDK.A         | 1697.921 | 0.01123  | 2 | 1 | 31.3 | 0 |
| P12163_2_F9,15571 | K.FTESISYDK.A         | 1697.921 | 0.00626  | 3 | 1 | 33.5 | 0 |
| P12163_2_F9,15577 | K.FTESISYDK.A         | 1697.921 | 0.01155  | 2 | 1 | 29.4 | 0 |
| P12163_1_S10,8253 | K.HDIM*GSK.A          | 1411.782 | 0.00776  | 3 | 1 | 34.6 | 0 |

|                   |                     |          |          |   |   |      |   |
|-------------------|---------------------|----------|----------|---|---|------|---|
| P12163_2_S5,7526  | K.HDIM*GSK.A        | 1411.782 | 0.00629  | 3 | 1 | 28.4 | 0 |
| P12163_1_F5,9297  | K.HDIMGSK.A         | 1395.787 | 0.00545  | 3 | 1 | 23.6 | 0 |
| P12163_1_S10,1090 | K.HDIMGSK.A         | 1395.787 | 0.00911  | 3 | 1 | 41.4 | 0 |
| P12163_2_S5,10048 | K.HDIMGSK.A         | 1395.787 | 0.00266  | 3 | 1 | 36   | 0 |
| P12163_2_F4,18117 | K.LALKNEGLIVPGYTHL  | 2630.56  | -0.00041 | 4 | 1 | 30.2 | 0 |
| P12163_1_F7,14835 | K.NEGLIVPGYTHLQR.A  | 1901.055 | 0.00252  | 4 | 1 | 23.3 | 0 |
| P12163_1_F7,16217 | K.NEGLIVPGYTHLQR.A  | 1901.055 | 0.00161  | 3 | 1 | 45.6 | 0 |
| P12163_1_F8,16932 | K.NEGLIVPGYTHLQR.A  | 1901.055 | 0.00165  | 2 | 1 | 37.1 | 0 |
| P12163_2_F6,16340 | K.NEGLIVPGYTHLQR.A  | 1901.055 | 0.00116  | 3 | 1 | 27.9 | 0 |
| P12163_2_F6,16361 | K.NEGLIVPGYTHLQR.A  | 1901.055 | 0.0016   | 2 | 1 | 44.6 | 0 |
| P12163_2_F8_12070 | K.NEGLIVPGYTHLQR.A  | 1901.055 | 0.00539  | 3 | 1 | 24.6 | 0 |
| P12163_1_S1,16449 | K.NPDPMELVR.G       | 1374.735 | 0.00388  | 2 | 1 | 32.9 | 0 |
| P12163_1_F4,13806 | K.QGLISDSKD.N       | 1570.89  | 0.00583  | 2 | 1 | 45   | 0 |
| P12163_1_F5,12364 | K.QGLISDSKD.N       | 1570.89  | 0.01409  | 2 | 1 | 37.8 | 0 |
| P12163_2_F1,12823 | K.QGLISDSKD.N       | 1570.89  | 0.00467  | 2 | 1 | 44   | 0 |
| P12163_1_F2,11536 | R.DAIDTIVR.S        | 1206.7   | -0.00123 | 3 | 1 | 33.2 | 0 |
| P12163_1_S1,11249 | R.DAIDTIVR.S        | 1206.7   | 0.00249  | 3 | 1 | 24.2 | 0 |
| P12163_1_F3,13867 | R.FEESVTDAVEK.F     | 1862     | 0.00518  | 2 | 1 | 30.5 | 0 |
| P12163_1_F3,15047 | R.FEESVTDAVEK.F     | 1862     | 0.00656  | 2 | 1 | 29.2 | 0 |
| P12163_1_F3,18675 | R.FEESVTDAVEK.F     | 1862     | 0.00394  | 2 | 1 | 39.1 | 0 |
| P12163_1_F4,19441 | R.LQVALVK.L         | 1378.924 | 0.00534  | 2 | 1 | 33.8 | 0 |
| P12163_1_F4,19442 | R.LQVALVK.L         | 1378.924 | 0.00274  | 3 | 1 | 32.8 | 0 |
| P12163_1_F5,18342 | R.LQVALVK.L         | 1378.924 | 0.00706  | 3 | 1 | 30.8 | 0 |
| P12163_2_F1,18748 | R.LQVALVK.L         | 1378.924 | 0.00421  | 3 | 1 | 31   | 0 |
| P12163_2_F1,18762 | R.LQVALVK.L         | 1378.924 | 0.00766  | 2 | 1 | 34.1 | 0 |
| P12163_2_F2,19085 | R.LQVALVK.L         | 1378.924 | 0.00793  | 3 | 1 | 30.9 | 0 |
| P12163_1_F2,14655 | R.NDQVLTDFR.L       | 1411.748 | 0.00152  | 3 | 1 | 22.7 | 0 |
| P12163_1_S1,14350 | R.NDQVLTDFR.L       | 1411.748 | -0.00343 | 3 | 1 | 34.3 | 0 |
| P12163_1_S1,16139 | R.NDQVLTDFR.L       | 1411.748 | 0.00319  | 2 | 1 | 41.4 | 0 |
| P12163_1_F2,10043 | R.NSIDAVSDR.D       | 1280.675 | 0.00339  | 2 | 1 | 29.3 | 0 |
| P12163_1_F9,8429  | R.TSHDIVGK.A        | 1464.863 | 0.01052  | 3 | 1 | 22.3 | 0 |
| P12163_1_F2,16425 | K.EDYGSLVDDEYGK.E   | 2098.044 | 0.00692  | 2 | 1 | 24.6 | 0 |
| P12163_1_F2,16468 | K.EDYGSLVDDEYGK.E   | 2098.044 | 0.00903  | 3 | 1 | 51.5 | 0 |
| P12163_1_S1,16150 | K.EDYGSLVDDEYGK.E   | 2098.044 | 0.00388  | 2 | 1 | 40.8 | 0 |
| P12163_1_S1,16255 | K.EDYGSLVDDEYGK.E   | 2098.044 | 0.0087   | 3 | 1 | 46.9 | 0 |
| P12163_1_F4,20575 | K.FVAPCYM*NK.I      | 1916.986 | 0.00475  | 3 | 1 | 34.9 | 0 |
| P12163_1_F4,20545 | K.FVAPCYM*NK.I      | 1900.991 | 0.01147  | 2 | 1 | 28.8 | 0 |
| P12163_2_F9,17913 | K.FVAPCYM*NK.I      | 1900.991 | 0.0091   | 3 | 1 | 23.5 | 0 |
| P12163_1_S1,12996 | K.ITFTPTQADR.L      | 1453.795 | -0.00325 | 3 | 1 | 28.4 | 0 |
| P12163_1_S1,14702 | K.ITFTPTQADR.L      | 1453.795 | 0.0026   | 3 | 1 | 42.7 | 0 |
| P12163_1_F6,16722 | K.LESSGHWGFAGANDG   | 2176.047 | 0.00902  | 3 | 1 | 23.1 | 0 |
| P12163_2_F6,15990 | K.LESSGHWGFAGANDG   | 2176.047 | 0.00668  | 3 | 1 | 22   | 0 |
| P12163_1_F4,14957 | K.LMEGSEDVNK.E      | 1729.925 | 0.01273  | 2 | 1 | 28   | 0 |
| P12163_2_F1,13959 | K.LMEGSEDVNK.E      | 1729.925 | 0.00539  | 2 | 1 | 46.2 | 0 |
| P12163_1_F4,17216 | K.LPVVGDK.K         | 1335.846 | 0.00898  | 3 | 1 | 26.2 | 0 |
| P12163_2_F1,16319 | K.LPVVGDK.K         | 1335.846 | 0.00489  | 2 | 1 | 30.9 | 0 |
| P12163_1_F2,16848 | K.VYDGDM*IVLQGQEK   | 2219.184 | 0.00568  | 3 | 1 | 27.4 | 0 |
| P12163_1_S1,18453 | K.VYDGDM*IVLQGQEK.I | 2203.189 | 0.01021  | 3 | 1 | 35.1 | 0 |
| P12163_2_F1,19087 | K.WVAFDDK.C         | 1488.831 | 0.00368  | 3 | 1 | 24.8 | 0 |
| P12163_2_F1,19100 | K.WVAFDDK.C         | 1488.831 | 0.00121  | 2 | 1 | 25.8 | 0 |
| P12163_2_F2,19572 | K.WVAFDDK.C         | 1488.831 | 0.00643  | 2 | 1 | 29.3 | 0 |

|                   |                    |          |          |   |   |      |   |
|-------------------|--------------------|----------|----------|---|---|------|---|
| P12163_1_F9,14821 | R.AKPLPFK.L        | 1713.119 | 0.01134  | 3 | 1 | 28.8 | 0 |
| P12163_2_F8_12070 | R.AKPLPFK.L        | 1713.119 | 0.01246  | 4 | 1 | 22.9 | 0 |
| P12163_1_F4,22992 | R.DLVLWFDNNSNK.W   | 2073.122 | 0.0073   | 3 | 1 | 22.7 | 0 |
| P12163_1_F4,24882 | R.DLVLWFDNNSNK.W   | 2073.122 | 0.00788  | 2 | 1 | 40.2 | 0 |
| P12163_1_F4,24883 | R.DLVLWFDNNSNK.W   | 2073.122 | 0.00697  | 3 | 1 | 50.4 | 0 |
| P12163_1_F4,13628 | R.EAYSAFQTGQK.F    | 1837.99  | 0.00685  | 3 | 1 | 41.5 | 0 |
| P12163_1_F4,13642 | R.EAYSAFQTGQK.F    | 1837.99  | 0.00756  | 2 | 1 | 30.3 | 0 |
| P12163_1_F4,14812 | R.EAYSAFQTGQK.F    | 1837.99  | 0.0014   | 2 | 1 | 70.8 | 0 |
| P12163_1_F4,14820 | R.EAYSAFQTGQK.F    | 1837.99  | 0.00655  | 3 | 1 | 33.5 | 0 |
| P12163_1_F9,14074 | R.EAYSAFQTGQK.F    | 1837.99  | 0.0055   | 3 | 1 | 38.7 | 0 |
| P12163_1_F9,14083 | R.EAYSAFQTGQK.F    | 1837.99  | 0.00852  | 2 | 1 | 32   | 0 |
| P12163_2_F1,12505 | R.EAYSAFQTGQK.F    | 1837.99  | 0.00277  | 3 | 1 | 23.9 | 0 |
| P12163_2_F1,13772 | R.EAYSAFQTGQK.F    | 1837.99  | 0.00598  | 2 | 1 | 58.9 | 0 |
| P12163_2_F8_12070 | R.EAYSAFQTGQK.F    | 1837.99  | 0.00757  | 3 | 1 | 25.7 | 0 |
| P12163_1_F9,12379 | R.FEQHTLK.C        | 1510.884 | 0.00757  | 2 | 1 | 30.3 | 0 |
| P12163_2_F9,11622 | R.FEQHTLK.C        | 1510.884 | 0.00929  | 2 | 1 | 30.5 | 0 |
| P12163_2_F9,11644 | R.FEQHTLK.C        | 1510.884 | 0.00617  | 3 | 1 | 21.9 | 0 |
| P12163_1_S1,10435 | R.IPQAASEGPEAR.A   | 1529.822 | 0.00164  | 3 | 1 | 36.1 | 0 |
| P12163_1_S1,10669 | R.IPQAASEGPEAR.A   | 1529.822 | 0.00425  | 3 | 1 | 37.3 | 0 |
| P12163_1_S1,11814 | R.IPQAASEGPEAR.A   | 1529.822 | 0.0032   | 3 | 1 | 50.9 | 0 |
| P12163_1_S1,11928 | R.IPQAASEGPEAR.A   | 1529.822 | 0.00468  | 2 | 1 | 46.8 | 0 |
| P12163_2_F1,6192  | R.SIVCSAR.N        | 1096.609 | 0.0032   | 3 | 1 | 23.6 | 0 |
| P12163_1_F3,16785 | K.AEEAAAGSDGLAGFQ  | 2130.129 | 0.00606  | 3 | 1 | 74   | 0 |
| P12163_1_F3,16802 | K.AEEAAAGSDGLAGFQ  | 2130.129 | 0.00717  | 2 | 1 | 89.5 | 0 |
| P12163_1_S1,22327 | K.ANFLAADDQPPLIPEI | 2494.38  | 0.00646  | 3 | 1 | 46.2 | 0 |
| P12163_1_S1,22355 | K.ANFLAADDQPPLIPEI | 2494.38  | 0.01013  | 4 | 1 | 36.8 | 0 |
| P12163_1_F5,12608 | K.CEAAPGCGEWK.R    | 1872.919 | 0.01091  | 2 | 1 | 32.1 | 0 |
| P12163_2_F1,12942 | K.CEAAPGCGEWK.R    | 1872.919 | 0.00163  | 2 | 1 | 40.6 | 0 |
| P12163_1_S1,20260 | K.EFDNESPYMIM*FGPD | 2544.225 | 0.00596  | 3 | 1 | 29.1 | 0 |
| P12163_1_S1,22968 | K.EFDNESPYMIMFGPDK | 2528.23  | 0.00755  | 3 | 1 | 32.4 | 0 |
| P12163_1_S1,23022 | K.EFDNESPYMIMFGPDK | 2528.23  | 0.00603  | 4 | 1 | 46.1 | 0 |
| P12163_1_F3,18790 | K.ELDEPLSLK.D      | 1651.973 | 0.00992  | 2 | 1 | 27.9 | 0 |
| P12163_1_F3,18805 | K.ELDEPLSLK.D      | 1651.973 | 0.00445  | 3 | 1 | 28.1 | 0 |
| P12163_1_F4,19240 | K.ELDEPLSLK.D      | 1651.973 | 0.00748  | 2 | 1 | 37.6 | 0 |
| P12163_1_F4,19259 | K.ELDEPLSLK.D      | 1651.973 | 0.00523  | 3 | 1 | 28.6 | 0 |
| P12163_1_F4,8486  | K.ETEAAESSSSK.Q    | 1733.901 | 0.01018  | 2 | 1 | 46.9 | 0 |
| P12163_1_F4,8487  | K.ETEAAESSSSK.Q    | 1733.901 | 0.00952  | 3 | 1 | 22.2 | 0 |
| P12163_2_F1,7668  | K.ETEAAESSSSK.Q    | 1733.901 | 0.00008  | 2 | 1 | 32.5 | 0 |
| P12163_1_F4,22408 | K.IIDVIEK.G        | 1437.914 | 0.00764  | 2 | 1 | 33.2 | 0 |
| P12163_1_F4,23019 | K.IIDVIEK.G        | 1437.914 | 0.00636  | 2 | 1 | 31   | 0 |
| P12163_2_F1,21778 | K.IIDVIEK.G        | 1437.914 | 0.00598  | 2 | 1 | 28.6 | 0 |
| P12163_1_F5,19355 | K.LTHVYTAILKPDNELR | 2491.449 | 0.00273  | 3 | 1 | 39.9 | 0 |
| P12163_1_F8,19521 | K.LTHVYTAILKPDNELR | 2491.449 | 0.00345  | 3 | 1 | 23.1 | 0 |
| P12163_1_S10,1834 | K.LTHVYTAILKPDNELR | 2491.449 | 0.00873  | 3 | 1 | 28.5 | 0 |
| P12163_1_S10,1835 | K.LTHVYTAILKPDNELR | 2491.449 | 0.00692  | 4 | 1 | 24.4 | 0 |
| P12163_2_F10,1717 | K.LTHVYTAILKPDNELR | 2491.449 | 0.0057   | 3 | 1 | 55.2 | 0 |
| P12163_2_F10,1720 | K.LTHVYTAILKPDNELR | 2491.449 | 0.00392  | 4 | 1 | 30.7 | 0 |
| P12163_2_S5,17960 | K.LTHVYTAILKPDNELR | 2491.449 | 0.0042   | 4 | 1 | 23.4 | 0 |
| P12163_2_S5,17974 | K.LTHVYTAILKPDNELR | 2491.449 | 0.0042   | 3 | 1 | 42.6 | 0 |
| P12163_1_F4,11387 | K.NPPSVPSDK.L      | 1548.884 | 0.00689  | 3 | 1 | 47.3 | 0 |
| P12163_2_F1,10564 | K.NPPSVPSDK.L      | 1548.884 | -0.00008 | 3 | 1 | 24.6 | 0 |

|                   |                     |          |          |   |   |      |   |
|-------------------|---------------------|----------|----------|---|---|------|---|
| P12163_2_F4,15303 | K.SEGHEDYGLLVGEPAI  | 2309.223 | 0.00561  | 3 | 1 | 27.8 | 0 |
| P12163_1_F4,12754 | K.SGEYIEHHLK.N      | 1821.011 | 0.01148  | 3 | 1 | 25.5 | 0 |
| P12163_1_F6,12349 | K.SGEYIEHHLK.N      | 1821.011 | 0.00668  | 3 | 1 | 24   | 0 |
| P12163_2_F9,16024 | K.VHFILK.H          | 1364.887 | 0.00303  | 3 | 1 | 29.3 | 0 |
| P12163_2_F9,16242 | K.VHFILK.H          | 1364.887 | 0.00495  | 3 | 1 | 26.4 | 0 |
| P12163_1_F3,16530 | R.ILIDGEEK.Q        | 1524.909 | 0.0073   | 2 | 1 | 25.5 | 0 |
| P12163_2_F4,15060 | R.ILIDGEEK.Q        | 1524.909 | -0.00022 | 2 | 1 | 25.8 | 0 |
| P12163_1_F4,18903 | R.LQNGLECGGAYLK.Y   | 2031.115 | 0.00211  | 3 | 1 | 53.2 | 0 |
| P12163_1_F4,18907 | R.LQNGLECGGAYLK.Y   | 2031.115 | 0.00487  | 2 | 1 | 65.3 | 0 |
| P12163_2_F1,18188 | R.LQNGLECGGAYLK.Y   | 2031.115 | 0.00069  | 2 | 1 | 43.6 | 0 |
| P12163_2_F1,18228 | R.LQNGLECGGAYLK.Y   | 2031.115 | 0.0034   | 3 | 1 | 53.1 | 0 |
| P12163_1_F2,11681 | K.GASVIYEEVR.R      | 1426.784 | 0.0058   | 3 | 1 | 33.3 | 0 |
| P12163_1_F9,16462 | K.GASVIYEEVR.R      | 1426.784 | 0.00186  | 2 | 1 | 36.2 | 0 |
| P12163_2_F1,16587 | K.GASVIYEEVR.R      | 1426.784 | 0.00394  | 2 | 1 | 27.2 | 0 |
| P12163_1_F9,10020 | K.GVNDIHK.R         | 1390.826 | 0.00626  | 3 | 1 | 34.8 | 0 |
| P12163_2_F9,9749  | K.GVNDIHK.R         | 1390.826 | 0.00077  | 3 | 1 | 22.2 | 0 |
| P12163_1_S1,17687 | K.IPDISTEDNLVK.K    | 1952.116 | 0.00717  | 3 | 1 | 33.4 | 0 |
| P12163_1_S1,17756 | K.IPDISTEDNLVK.K    | 1952.116 | 0.00437  | 2 | 1 | 44.7 | 0 |
| P12163_1_S1,10209 | K.IVDSIQDR.G        | 1249.705 | 0.00166  | 3 | 1 | 25.2 | 0 |
| P12163_1_S1,14985 | K.IVDSIQDR.G        | 1249.705 | 0.00461  | 2 | 1 | 35.4 | 0 |
| P12163_1_F4,14965 | K.NTIALTPK.G        | 1465.92  | 0.00019  | 2 | 1 | 24.1 | 0 |
| P12163_1_F5,6211  | K.QHHVVITDR.M       | 1408.796 | 0.00576  | 3 | 1 | 22.6 | 0 |
| P12163_1_F5,6235  | K.QHHVVITDR.M       | 1408.796 | 0.00223  | 2 | 1 | 36.8 | 0 |
| P12163_1_F6,7328  | K.QHHVVITDR.M       | 1408.796 | 0.00425  | 2 | 1 | 29.8 | 0 |
| P12163_2_S5,7242  | K.QHHVVITDR.M       | 1408.796 | 0.00206  | 4 | 1 | 59.1 | 0 |
| P12163_1_F7,15723 | K.QYFVHVDDTVPQK.V   | 2184.191 | 0.00726  | 3 | 1 | 30   | 0 |
| P12163_1_F7,15741 | K.QYFVHVDDTVPQK.V   | 2184.191 | 0.00437  | 2 | 1 | 28.4 | 0 |
| P12163_2_F6,16008 | K.QYFVHVDDTVPQK.V   | 2184.191 | 0.01083  | 3 | 1 | 22.5 | 0 |
| P12163_1_S1,15067 | K.SFGFDTAVEEAQR.A ! | 1760.876 | 0.00324  | 3 | 1 | 49.7 | 0 |
| P12163_1_S1,15953 | K.SFGFDTAVEEAQR.A ! | 1760.876 | 0.00249  | 3 | 1 | 45.8 | 0 |
| P12163_1_S1,17931 | K.SFGFDTAVEEAQR.A ! | 1760.876 | 0.00443  | 2 | 1 | 68.6 | 0 |
| P12163_1_S1,17970 | K.SFGFDTAVEEAQR.A ! | 1760.876 | 0.00135  | 3 | 1 | 89   | 0 |
| P12163_1_F4,17842 | K.VVVAGIPK.T        | 1390.924 | 0.00675  | 2 | 1 | 30.8 | 0 |
| P12163_1_F4,17844 | K.VVVAGIPK.T        | 1390.924 | 0.00657  | 3 | 1 | 30.2 | 0 |
| P12163_2_F1,17029 | K.VVVAGIPK.T        | 1390.924 | 0.00547  | 2 | 1 | 32   | 0 |
| P12163_2_F1,17034 | K.VVVAGIPK.T        | 1390.924 | 0.00294  | 3 | 1 | 37.7 | 0 |
| P12163_2_F2,1104  | K.VVVAGIPK.T        | 1390.924 | 0.00323  | 2 | 1 | 36.2 | 0 |
| P12163_1_S1,19345 | K.YIDPTYMIR.A       | 1475.787 | 0.00236  | 3 | 1 | 30.4 | 0 |
| P12163_1_F8,17228 | R.AINAAHVEAESSENCI  | 2720.45  | 0.00574  | 4 | 1 | 40.7 | 0 |
| P12163_1_F8,17255 | R.AINAAHVEAESSENCI  | 2720.45  | 0.00611  | 3 | 1 | 75.4 | 0 |
| P12163_2_F6,16781 | R.AINAAHVEAESSENCI  | 2720.45  | 0.00878  | 3 | 1 | 57.1 | 0 |
| P12163_1_F3,16809 | R.GINQVYIIGDGTQK.C  | 2171.228 | 0.00568  | 3 | 1 | 42.6 | 0 |
| P12163_1_F3,18341 | R.GINQVYIIGDGTQK.C  | 2171.228 | 0.00674  | 2 | 1 | 63.5 | 0 |
| P12163_2_F2,17919 | R.GINQVYIIGDGTQK.C  | 2171.228 | 0.00583  | 3 | 1 | 22.4 | 0 |
| P12163_2_F10,6941 | R.GTHFR.R           | 921.5208 | -0.00426 | 3 | 1 | 25.9 | 0 |
| P12163_2_F9,6857  | R.GTHFR.R           | 921.5208 | 0.00159  | 3 | 1 | 23.8 | 0 |
| P12163_1_F5,6071  | R.SATQQDASGNK.L     | 1714.918 | 0.00832  | 2 | 1 | 46.2 | 0 |
| P12163_2_F1,6382  | R.SATQQDASGNK.L     | 1714.918 | 0.00578  | 2 | 1 | 49.1 | 0 |
| P12163_2_F1,6386  | R.SATQQDASGNK.L     | 1714.918 | 0.00501  | 3 | 1 | 31.4 | 0 |
| P12163_2_S3,15762 | K.DSEILDDVGDHVVYFV  | 2707.305 | 0.00385  | 4 | 1 | 39.6 | 0 |
| P12163_2_S3,15769 | K.DSEILDDVGDHVVYFV  | 2707.305 | -0.00071 | 5 | 1 | 29.4 | 0 |

|                   |                    |          |          |   |   |      |   |
|-------------------|--------------------|----------|----------|---|---|------|---|
| P12163_1_F4,15202 | K.EVPIQSVK.E       | 1507.93  | 0.00721  | 2 | 1 | 28.9 | 0 |
| P12163_1_F3,8634  | K.GDQYDVR.E        | 1156.59  | 0.00491  | 2 | 1 | 28.1 | 0 |
| P12163_1_F4,21572 | K.GFDM*DLIK.L      | 1562.871 | 0.00797  | 2 | 1 | 25.8 | 0 |
| P12163_2_F1,21050 | K.GFDMDLIK.L       | 1546.876 | 0.00561  | 2 | 1 | 34.6 | 0 |
| P12163_1_S10,8839 | K.KPTEGK.A         | 1571.988 | 0.00441  | 4 | 1 | 34.9 | 0 |
| P12163_2_F8_12070 | K.KPTEGK.A         | 1571.988 | 0.00497  | 4 | 1 | 29   | 0 |
| P12163_1_F9,15381 | K.RVIACL DVR.A     | 1405.825 | 0.0055   | 3 | 1 | 35.8 | 0 |
| P12163_1_F2,13464 | K.SGDVGLSVLR.R     | 1306.763 | 0.00261  | 3 | 1 | 42.3 | 0 |
| P12163_1_F2,14148 | K.SGDVGLSVLR.R     | 1306.763 | 0.00672  | 3 | 1 | 48.8 | 0 |
| P12163_1_F2,14151 | K.SGDVGLSVLR.R     | 1306.763 | -0.01045 | 2 | 1 | 24.8 | 0 |
| P12163_1_F2,17098 | K.SGDVGLSVLR.R     | 1306.763 | 0.00453  | 2 | 1 | 44.4 | 0 |
| P12163_1_F3,12374 | K.SSLEQISR.V       | 1223.69  | 0.00352  | 2 | 1 | 26.6 | 0 |
| P12163_1_F6,19126 | K.TNASAALAAGIFHR.K | 1703.949 | 0.00186  | 3 | 1 | 38.5 | 0 |
| P12163_1_F8,16505 | K.TNASAALAAGIFHR.K | 1703.949 | 0.00195  | 4 | 1 | 41.8 | 0 |
| P12163_1_F8,19101 | K.TNASAALAAGIFHR.K | 1703.949 | 0.00243  | 3 | 1 | 48   | 0 |
| P12163_2_F6,15920 | K.TNASAALAAGIFHR.K | 1703.949 | 0.00363  | 4 | 1 | 41.7 | 0 |
| P12163_2_F6,15937 | K.TNASAALAAGIFHR.K | 1703.949 | 0.00075  | 3 | 1 | 52.7 | 0 |
| P12163_2_F6,18671 | K.TNASAALAAGIFHR.K | 1703.949 | 0.00309  | 3 | 1 | 51.9 | 0 |
| P12163_2_F6,18674 | K.TNASAALAAGIFHR.K | 1703.949 | -0.00008 | 2 | 1 | 55.2 | 0 |
| P12163_2_S5,17855 | K.TNASAALAAGIFHR.K | 1703.949 | 0.00543  | 3 | 1 | 31.6 | 0 |
| P12163_1_F6,12017 | R.GNVHAVQFHPEK.S   | 1971.102 | 0.01301  | 3 | 1 | 24.1 | 0 |
| P12163_1_F7,11393 | R.GNVHAVQFHPEK.S   | 1971.102 | 0.00446  | 4 | 1 | 37.9 | 0 |
| P12163_2_F8_12070 | R.GNVHAVQFHPEK.S   | 1971.102 | 0.00438  | 4 | 1 | 29.5 | 0 |
| P12163_2_F9,11188 | R.GNVHAVQFHPEK.S   | 1971.102 | 0.01296  | 3 | 1 | 34.6 | 0 |
| P12163_2_F9,11243 | R.GNVHAVQFHPEK.S   | 1971.102 | 0.00662  | 3 | 1 | 33.5 | 0 |
| P12163_1_F9,15293 | R.HLGF GIK.D       | 1379.862 | 0.00398  | 3 | 1 | 40.1 | 0 |
| P12163_1_S10,1518 | R.HLGF GIK.D       | 1379.862 | 0.00716  | 3 | 1 | 36   | 0 |
| P12163_2_F9,14241 | R.HLGF GIK.D       | 1379.862 | 0.0029   | 3 | 1 | 28.1 | 0 |
| P12163_1_F3,23518 | R.VPQIGW NALQITK.D | 2076.243 | 0.00514  | 3 | 1 | 36.7 | 0 |
| P12163_2_F6,17706 | R.VYGNQAVVVSIDPR.R | 1821.017 | -0.00073 | 2 | 1 | 45.8 | 0 |
| P12163_1_F7,16077 | R.VYITHPNDVEFK.A   | 2070.148 | 0.0073   | 3 | 1 | 42.8 | 0 |
| P12163_1_F7,16089 | R.VYITHPNDVEFK.A   | 2070.148 | 0.00305  | 2 | 1 | 50   | 0 |
| P12163_1_F8,16764 | R.VYITHPNDVEFK.A   | 2070.148 | -0.00319 | 2 | 1 | 36.5 | 0 |
| P12163_2_F6,16228 | R.VYITHPNDVEFK.A   | 2070.148 | 0.00478  | 3 | 1 | 39.1 | 0 |
| P12163_2_F6,16230 | R.VYITHPNDVEFK.A   | 2070.148 | 0.00057  | 2 | 1 | 36.1 | 0 |
| P12163_2_F2,14803 | K.AAQLGLK.T        | 1308.846 | 0.00796  | 3 | 1 | 25.6 | 0 |
| P12163_1_S1,20183 | K.AEEDGVACVEFLAGK  | 2203.152 | 0.00333  | 3 | 1 | 42.3 | 0 |
| P12163_1_F3,16956 | K.AIDDAEGIVK.I     | 1638.952 | 0.00788  | 2 | 1 | 46.2 | 0 |
| P12163_1_F4,17527 | K.AIDDAEGIVK.I     | 1638.952 | 0.0064   | 3 | 1 | 36.9 | 0 |
| P12163_1_F4,17532 | K.AIDDAEGIVK.I     | 1638.952 | 0.00582  | 2 | 1 | 47.4 | 0 |
| P12163_2_F10,1354 | K.EAAMATHDKPIHI.-  | 2042.131 | 0.00164  | 4 | 1 | 29.2 | 0 |
| P12163_2_F10,1354 | K.EAAMATHDKPIHI.-  | 2042.131 | 0.00617  | 3 | 1 | 28.9 | 0 |
| P12163_1_S1,17938 | K.FSSVEVDLPAM*M*AC | 2293.203 | 0.01127  | 3 | 1 | 27.2 | 0 |
| P12163_1_F3,15915 | K.LTLEPAAGGEK.T    | 1693.994 | 0.00757  | 3 | 1 | 46.3 | 0 |
| P12163_1_F3,14857 | K.NIIIATGSDVK.S    | 1739.052 | 0.00585  | 3 | 1 | 30.7 | 0 |
| P12163_1_F3,17200 | K.NIIIATGSDVK.S    | 1739.052 | 0.0027   | 3 | 1 | 36.4 | 0 |
| P12163_1_F4,17715 | K.NIIIATGSDVK.S    | 1739.052 | 0.01062  | 3 | 1 | 55.6 | 0 |
| P12163_1_F4,17750 | K.NIIIATGSDVK.S    | 1739.052 | 0.00579  | 2 | 1 | 44.1 | 0 |
| P12163_1_F6,16557 | K.NIIIATGSDVK.S    | 1739.052 | 0.00162  | 3 | 1 | 33.6 | 0 |
| P12163_2_F1,16900 | K.NIIIATGSDVK.S    | 1739.052 | 0.00552  | 3 | 1 | 51.4 | 0 |
| P12163_2_F1,16950 | K.NIIIATGSDVK.S    | 1739.052 | 0.00629  | 2 | 1 | 38.6 | 0 |

|                   |                     |          |          |   |   |      |   |
|-------------------|---------------------|----------|----------|---|---|------|---|
| P12163_2_F4,15320 | K.NIIATGSDVK.S      | 1739.052 | -0.00195 | 3 | 1 | 43.6 | 0 |
| P12163_1_F3,16166 | K.SLPGITIDEK.R      | 1680.999 | 0.00589  | 2 | 1 | 31.3 | 0 |
| P12163_1_F3,18605 | K.SLPGITIDEK.R      | 1680.999 | 0.00815  | 3 | 1 | 41.8 | 0 |
| P12163_1_F3,18618 | K.SLPGITIDEK.R      | 1680.999 | 0.00695  | 2 | 1 | 32.7 | 0 |
| P12163_1_F7,15877 | K.VPGVVYTHPEVASVG   | 2247.296 | 0.00487  | 3 | 1 | 41.1 | 0 |
| P12163_1_F8,16673 | K.VPGVVYTHPEVASVG   | 2247.296 | 0.0091   | 3 | 1 | 26.4 | 0 |
| P12163_1_S10,1574 | K.VPGVVYTHPEVASVG   | 2247.296 | 0.00889  | 3 | 1 | 34.7 | 0 |
| P12163_2_F10,1472 | K.VPGVVYTHPEVASVG   | 2247.296 | 0.00682  | 3 | 1 | 45.5 | 0 |
| P12163_2_S5,15068 | K.VPGVVYTHPEVASVG   | 2247.296 | -0.00038 | 3 | 1 | 23.6 | 0 |
| P12163_1_F2,15755 | K.VVGVDLSGDGVK.L    | 1753.032 | 0.01058  | 3 | 1 | 29.6 | 0 |
| P12163_1_F2,17482 | K.VVGVDLSGDGVK.L    | 1753.032 | 0.01253  | 3 | 1 | 47.5 | 0 |
| P12163_1_F2,17489 | K.VVGVDLSGDGVK.L    | 1753.032 | 0.00528  | 2 | 1 | 46.9 | 0 |
| P12163_1_S1,16446 | K.VVGVDLSGDGVK.L    | 1753.032 | 0.00344  | 3 | 1 | 74.2 | 0 |
| P12163_1_F3,16966 | R.GALGGTCLNVGCIPSK  | 2212.204 | 0.0083   | 3 | 1 | 38.9 | 0 |
| P12163_1_F3,18606 | R.GALGGTCLNVGCIPSK  | 2212.204 | 0.00208  | 2 | 1 | 75.7 | 0 |
| P12163_2_F1,20385 | R.GIEGLFK.K         | 1371.846 | 0.00606  | 2 | 1 | 27.3 | 0 |
| P12163_2_F1,20389 | R.GIEGLFK.K         | 1371.846 | 0.00413  | 3 | 1 | 30   | 0 |
| P12163_1_F3,17456 | R.TPFTAGLGLDK.I     | 1728.015 | 0.00824  | 2 | 1 | 32.4 | 0 |
| P12163_2_F1,20551 | R.TPFTAGLGLDK.I     | 1728.015 | 0.00317  | 3 | 1 | 27.1 | 0 |
| P12163_1_F4,12402 | R.VCHAHPTMSEALK.E   | 2089.114 | 0.00333  | 3 | 1 | 26.1 | 0 |
| P12163_1_F7,22209 | K.EVEDILGEHAILFK.E  | 2221.269 | 0.00474  | 3 | 1 | 38.8 | 0 |
| P12163_2_S5,21428 | K.EVEDILGEHAILFK.E  | 2221.269 | 0.00078  | 4 | 1 | 25.3 | 0 |
| P12163_1_F3,8377  | K.GGIHDHVGGGFHR.Y   | 1649.856 | -0.00095 | 3 | 1 | 25.5 | 0 |
| P12163_1_F3,8424  | K.GGIHDHVGGGFHR.Y   | 1649.856 | 0.00302  | 4 | 1 | 46.3 | 0 |
| P12163_1_F4,8881  | K.GGIHDHVGGGFHR.Y   | 1649.856 | 0.00118  | 4 | 1 | 24.5 | 0 |
| P12163_2_S3,8008  | K.GGIHDHVGGGFHR.Y   | 1649.856 | 0.00274  | 4 | 1 | 44.8 | 0 |
| P12163_2_S3,8018  | K.GGIHDHVGGGFHR.Y   | 1649.856 | 0.00475  | 3 | 1 | 25   | 0 |
| P12163_1_F6,10846 | K.HVVVLVGHK.S       | 1496.952 | 0.01328  | 4 | 1 | 37.6 | 0 |
| P12163_1_F6,10855 | K.HVVVLVGHK.S       | 1496.952 | 0.0117   | 3 | 1 | 55.3 | 0 |
| P12163_2_F7,9949  | K.HVVVLVGHK.S       | 1496.952 | 0.0084   | 4 | 1 | 27.7 | 0 |
| P12163_2_F7,9968  | K.HVVVLVGHK.S       | 1496.952 | 0.00291  | 3 | 1 | 53.4 | 0 |
| P12163_2_S5,10021 | K.HVVVLVGHK.S       | 1496.952 | 0.00556  | 4 | 1 | 39.8 | 0 |
| P12163_2_S5,10070 | K.HVVVLVGHK.S       | 1496.952 | 0.00885  | 3 | 1 | 36.7 | 0 |
| P12163_1_S1,17377 | K.LPDELPQNALR.L     | 1569.89  | 0.00325  | 3 | 1 | 28.7 | 0 |
| P12163_1_F3,19113 | K.NVLIELNDSSASASK.L | 2156.202 | 0.00702  | 3 | 1 | 52.4 | 0 |
| P12163_2_F1,6253  | K.SGEASEGQK.M       | 1500.811 | 0.00532  | 3 | 1 | 35.8 | 0 |
| P12163_2_F2,6888  | K.SGEASEGQK.M       | 1500.811 | 0.0083   | 2 | 1 | 26.9 | 0 |
| P12163_1_F9,20191 | K.YLNILGECR.R       | 1441.777 | 0.00613  | 2 | 1 | 31.2 | 0 |
| P12163_2_F1,21294 | K.YLNILGECR.R       | 1441.777 | 0.00453  | 2 | 1 | 32.3 | 0 |
| P12163_2_F2,16977 | R.FGGFGSAPK.F       | 1475.847 | 0.00655  | 3 | 1 | 22   | 0 |
| P12163_2_S3,7549  | R.HLYDEQTHR.L       | 1502.765 | -0.00043 | 4 | 1 | 25.6 | 0 |
| P12163_1_F5,19036 | R.LASIVAGSK.S       | 1453.92  | 0.00341  | 2 | 1 | 27.4 | 0 |
| P12163_2_F1,19096 | R.LASIVAGSK.S       | 1453.92  | 0.00309  | 2 | 1 | 36   | 0 |
| P12163_2_F1,19110 | R.LASIVAGSK.S       | 1453.92  | 0.00855  | 3 | 1 | 42.8 | 0 |
| P12163_2_F1,14053 | R.LCAEQLSK.S        | 1556.893 | 0.00725  | 2 | 1 | 27.1 | 0 |
| P12163_1_F8,15976 | R.QNAEHSLAVFETR.L   | 1805.945 | -0.00093 | 3 | 1 | 35.1 | 0 |
| P12163_1_F8,16022 | R.QNAEHSLAVFETR.L   | 1805.945 | 0.00283  | 2 | 1 | 58.2 | 0 |
| P12163_2_F6,15408 | R.QNAEHSLAVFETR.L   | 1805.945 | 0.00123  | 3 | 1 | 39.6 | 0 |
| P12163_2_F6,15424 | R.QNAEHSLAVFETR.L   | 1805.945 | 0.00503  | 2 | 1 | 55   | 0 |
| P12163_2_S5,15851 | R.VKEDHDGAEPGNSV    | 2930.579 | -0.00543 | 4 | 1 | 28.2 | 0 |
| P12163_2_S5,15272 | R.WHVPHF EK.M       | 1687.953 | 0.00764  | 4 | 1 | 27.7 | 0 |

|                   |                     |          |          |   |   |      |   |
|-------------------|---------------------|----------|----------|---|---|------|---|
| P12163_1_S1,13886 | K.AVTLCVEDR.D       | 1366.73  | 0.00477  | 2 | 1 | 45.2 | 0 |
| P12163_2_F9,13613 | K.EIHSLLR.Q         | 1171.71  | 0.00288  | 3 | 1 | 30.7 | 0 |
| P12163_2_F6,23801 | K.LLAHLVEVEM*NK.R   | 2020.172 | 0.00106  | 3 | 1 | 29.4 | 0 |
| P12163_1_F4,25602 | K.LTLFDLTK.Q        | 1558.966 | 0.00666  | 2 | 1 | 40.4 | 0 |
| P12163_2_F1,24825 | K.LTLFDLTK.Q        | 1558.966 | 0.00532  | 2 | 1 | 33.1 | 0 |
| P12163_2_F1,24865 | K.LTLFDLTK.Q        | 1558.966 | 0.00424  | 3 | 1 | 27.4 | 0 |
| P12163_1_F3,19961 | K.NQFVETNVGFDTICK.V | 2380.243 | 0.00574  | 3 | 1 | 86.6 | 0 |
| P12163_1_F3,27383 | K.STLLGFLGGSEGLFAQ  | 2333.332 | 0.00322  | 3 | 1 | 53.8 | 0 |
| P12163_1_F2,20042 | K.VNSQLISNVCTDALSA  | 2557.375 | 0.00512  | 3 | 1 | 77.2 | 0 |
| P12163_1_F7,16527 | K.VPDAQIITEHPAIR.V  | 1864.059 | -0.00625 | 2 | 1 | 26.7 | 0 |
| P12163_1_F7,16532 | K.VPDAQIITEHPAIR.V  | 1864.059 | 0.00032  | 3 | 1 | 54.3 | 0 |
| P12163_1_F8,85    | K.VPDAQIITEHPAIR.V  | 1864.059 | -0.00244 | 3 | 1 | 35.4 | 0 |
| P12163_2_S5,15737 | K.VPDAQIITEHPAIR.V  | 1864.059 | -0.00577 | 3 | 1 | 54.3 | 0 |
| P12163_2_S5,15778 | K.VPDAQIITEHPAIR.V  | 1864.059 | 0.00014  | 4 | 1 | 26.2 | 0 |
| P12163_1_F2,20405 | K.VVGVPVTLNGDLK.N   | 1919.179 | 0.00623  | 3 | 1 | 36.4 | 0 |
| P12163_1_F2,20422 | K.VVGVPVTLNGDLK.N   | 1919.179 | 0.00799  | 2 | 1 | 26.1 | 0 |
| P12163_1_F3,19560 | R.CGAAPITSMMTVK.R   | 1975.063 | 0.01102  | 3 | 1 | 22.5 | 0 |
| P12163_2_F1,19595 | R.CGAAPITSMMTVK.R   | 1975.063 | 0.004    | 3 | 1 | 30.7 | 0 |
| P12163_1_F3,14464 | R.ELSLQQLR.S        | 1347.79  | 0.00275  | 3 | 1 | 40.9 | 0 |
| P12163_1_F2,23604 | R.FLLDDLVR.N        | 1358.762 | 0.00291  | 2 | 1 | 29.3 | 0 |
| P12163_1_F3,15167 | R.NPGPVQFDGPGADAK   | 2078.113 | 0.00543  | 3 | 1 | 44.5 | 0 |
| P12163_1_F6,13333 | R.VEFGDSTTTADPADTH  | 2411.163 | -0.00185 | 3 | 1 | 26.8 | 0 |
| P12163_1_F6,14608 | R.VEFGDSTTTADPADTH  | 2411.163 | -0.00224 | 3 | 1 | 48.2 | 0 |
| P12163_1_F6,14689 | R.VEFGDSTTTADPADTH  | 2411.163 | -0.00187 | 2 | 1 | 24.7 | 0 |
| P12163_2_F10,1344 | R.VEFGDSTTTADPADTH  | 2411.163 | 0.00307  | 3 | 1 | 49.8 | 0 |
| P12163_2_F4,13568 | R.VEFGDSTTTADPADTH  | 2411.163 | 0.00346  | 3 | 1 | 78.7 | 0 |
| P12163_2_S3,12826 | R.VEFGDSTTTADPADTH  | 2411.163 | -0.00413 | 3 | 1 | 52.8 | 0 |
| P12163_1_F9,13786 | K.EHILLAR.Q         | 1155.715 | 0.00618  | 3 | 1 | 24.7 | 0 |
| P12163_2_F9,12895 | K.EHILLAR.Q         | 1155.715 | 0.00264  | 3 | 1 | 31.1 | 0 |
| P12163_1_S1,20738 | K.FPGDEIPIR.G       | 1460.841 | 0.00348  | 3 | 1 | 39.9 | 0 |
| P12163_2_F4,12943 | K.LHVNVGTIGHVDHGK   | 2191.256 | 0.00465  | 5 | 1 | 22.3 | 0 |
| P12163_2_F4,12950 | K.LHVNVGTIGHVDHGK   | 2191.256 | 0.00291  | 4 | 1 | 43.5 | 0 |
| P12163_2_F4,12979 | K.LHVNVGTIGHVDHGK   | 2191.256 | -0.00531 | 3 | 1 | 46.6 | 0 |
| P12163_1_F4,17245 | K.TTLTAAITK.V       | 1527.957 | 0.00468  | 3 | 1 | 28.4 | 0 |
| P12163_2_F1,18465 | K.TTVTGVEMFK.K      | 1720.976 | 0.00757  | 3 | 1 | 23.2 | 0 |
| P12163_2_F1,18494 | K.TTVTGVEMFK.K      | 1720.976 | 0.00238  | 2 | 1 | 42.5 | 0 |
| P12163_1_F4,21494 | K.VELLGDVK.M        | 1480.919 | 0.00445  | 3 | 1 | 23.6 | 0 |
| P12163_1_F4,21537 | K.VELLGDVK.M        | 1480.919 | 0.00823  | 2 | 1 | 38.8 | 0 |
| P12163_2_F1,21045 | K.VELLGDVK.M        | 1480.919 | 0.00069  | 2 | 1 | 37.8 | 0 |
| P12163_2_F1,21066 | K.VELLGDVK.M        | 1480.919 | 0.00109  | 3 | 1 | 33.2 | 0 |
| P12163_2_F2,13380 | K.VLAEEGK.A         | 1353.82  | 0.00522  | 2 | 1 | 26.6 | 0 |
| P12163_2_F1,21120 | R.ELLSFYK.F         | 1507.898 | 0.00591  | 3 | 1 | 23   | 0 |
| P12163_1_S1,17932 | R.GEAGDNVGLLLR.G    | 1517.859 | 0.00039  | 2 | 1 | 40.4 | 0 |
| P12163_1_S1,17988 | R.GEAGDNVGLLLR.G    | 1517.859 | -0.0014  | 3 | 1 | 47.5 | 0 |
| P12163_1_F8,16537 | R.GITIATAHVEYETAK.R | 2212.243 | 0.00638  | 4 | 1 | 30.1 | 0 |
| P12163_2_F10,1509 | R.GITIATAHVEYETAK.R | 2212.243 | -0.00186 | 4 | 1 | 24.2 | 0 |
| P12163_1_F5,10528 | R.GSATSALQGK.N      | 1527.895 | 0.00988  | 2 | 1 | 33.1 | 0 |
| P12163_1_F2,10182 | R.HYAHVDCPGHADYVK   | 2377.197 | 0.00784  | 3 | 1 | 45.9 | 0 |
| P12163_1_F3,10373 | R.HYAHVDCPGHADYVK   | 2377.197 | 0.00901  | 3 | 1 | 24   | 0 |
| P12163_2_F2,10303 | R.HYAHVDCPGHADYVK   | 2377.197 | 0.00538  | 3 | 1 | 41.3 | 0 |
| P12163_2_F2,10326 | R.HYAHVDCPGHADYVK   | 2377.197 | 0.00593  | 4 | 1 | 34.3 | 0 |



|                   |                    |          |          |   |   |      |   |
|-------------------|--------------------|----------|----------|---|---|------|---|
| P12163_2_S3,9628  | R.HYAHVDCPGHADYVFK | 2377.197 | 0.00605  | 4 | 1 | 37.4 | 0 |
| P12163_1_F3,25023 | R.QVGVPSLVCFLNK.V  | 2069.204 | 0.00556  | 3 | 1 | 43.9 | 0 |
| P12163_1_F4,12989 | R.TVGAGVVSK.A      | 1425.889 | 0.00681  | 2 | 1 | 36.5 | 0 |
| P12163_1_S1,18703 | K.AGEFFSSALTSAAAQC | 2046.056 | 0.00162  | 3 | 1 | 54.1 | 0 |
| P12163_1_S1,18716 | K.AGEFFSSALTSAAAQC | 2046.056 | 0.00471  | 3 | 1 | 52.9 | 0 |
| P12163_1_S1,21401 | K.AGEFFSSALTSAAAQC | 2046.056 | 0.0126   | 3 | 1 | 71.8 | 0 |
| P12163_1_S1,21440 | K.AGEFFSSALTSAAAQC | 2046.056 | -0.00548 | 2 | 1 | 75.9 | 0 |
| P12163_1_F5,17081 | K.AGILSSVK.S       | 1382.883 | 0.008    | 2 | 1 | 32.5 | 0 |
| P12163_1_F3,22554 | K.CLVGEGWSPVFATK.C | 2159.178 | 0.00813  | 3 | 1 | 24.8 | 0 |
| P12163_1_S10,1537 | K.FYEGDGYK.F       | 1586.831 | 0.00801  | 3 | 1 | 24.7 | 0 |
| P12163_1_S1,24379 | K.LGDLEAELVEINANGI | 2408.313 | 0.00745  | 3 | 1 | 25.5 | 0 |
| P12163_1_F2,10301 | K.QAQAISEVSGR.L    | 1449.796 | 0.00284  | 3 | 1 | 39.8 | 0 |
| P12163_1_F2,11915 | K.QAQAISEVSGR.L    | 1449.796 | 0.00492  | 2 | 1 | 37.1 | 0 |
| P12163_1_F8,13437 | K.TTIDAGLLHR.G     | 1400.816 | 0.0032   | 3 | 1 | 40.1 | 0 |
| P12163_1_F8,13681 | K.TTIDAGLLHR.G     | 1400.816 | 0.00353  | 3 | 1 | 53   | 0 |
| P12163_1_F8,15175 | K.TTIDAGLLHR.G     | 1400.816 | 0.00221  | 3 | 1 | 50.4 | 0 |
| P12163_2_F6,14643 | K.TTIDAGLLHR.G     | 1400.816 | 0.00149  | 3 | 1 | 57.4 | 0 |
| P12163_2_F6,14667 | K.TTIDAGLLHR.G     | 1400.816 | 0.00124  | 2 | 1 | 32.2 | 0 |
| P12163_2_F6,14997 | K.TTIDAGLLHR.G     | 1400.816 | 0.00218  | 3 | 1 | 25.4 | 0 |
| P12163_1_F7,22274 | R.AAFDSNSQVGAIFQVL | 2641.456 | 0.0006   | 3 | 1 | 39.9 | 0 |
| P12163_1_F3,12595 | R.ADNNTDDLEVK.L    | 1841.97  | 0.008    | 3 | 1 | 42.8 | 0 |
| P12163_1_F6,12683 | R.AHSELVEYK.L      | 1683.953 | 0.00715  | 3 | 1 | 36.2 | 0 |
| P12163_1_F9,12498 | R.AHSELVEYK.L      | 1683.953 | 0.00882  | 2 | 1 | 31.2 | 0 |
| P12163_2_F9,11952 | R.AHSELVEYK.L      | 1683.953 | 0.00816  | 3 | 1 | 26.2 | 0 |
| P12163_1_F6,19451 | R.DTYPFQVDPVWHGSR  | 2037.013 | 0.00438  | 3 | 1 | 26.7 | 0 |
| P12163_1_S10,1786 | R.LHWVEFQNK.F      | 1809.027 | 0.01085  | 3 | 1 | 31.2 | 0 |
| P12163_2_F8_12070 | R.LHWVEFQNK.F      | 1809.027 | -0.00007 | 3 | 1 | 43.8 | 0 |
| P12163_1_F4,24173 | R.SELPFLNSLK.M     | 1756.046 | 0.00814  | 2 | 1 | 33.9 | 0 |
| P12163_2_F1,18446 | R.YPFNEEFDK.Q      | 1796.931 | 0.00546  | 2 | 1 | 31.9 | 0 |
| P12163_1_F8,21264 | K.ALEDLNWDHSFVR.E  | 1905.976 | 0.00156  | 3 | 1 | 43.5 | 0 |
| P12163_1_F5,14247 | K.ALMNSVNP.K.Y     | 1581.924 | 0.00856  | 2 | 1 | 35.7 | 0 |
| P12163_2_F2,15026 | K.ALMNSVNP.K.Y     | 1581.924 | 0.00912  | 2 | 1 | 46.2 | 0 |
| P12163_1_F4,21274 | K.AVLLDIGK.E       | 1436.93  | 0.00881  | 2 | 1 | 38.2 | 0 |
| P12163_1_F4,21305 | K.AVLLDIGK.E       | 1436.93  | 0.0088   | 3 | 1 | 24.9 | 0 |
| P12163_1_F7,18712 | K.AVLLDIGK.E       | 1436.93  | 0.00025  | 3 | 1 | 33.2 | 0 |
| P12163_2_F1,20713 | K.AVLLDIGK.E       | 1436.93  | 0.01013  | 2 | 1 | 45.4 | 0 |
| P12163_2_F1,20718 | K.AVLLDIGK.E       | 1436.93  | 0.00574  | 3 | 1 | 26.2 | 0 |
| P12163_2_F1,20957 | K.AVLLDIGK.E       | 1436.93  | 0.00475  | 3 | 1 | 27.4 | 0 |
| P12163_2_F1,20962 | K.AVLLDIGK.E       | 1436.93  | 0.00662  | 2 | 1 | 37.8 | 0 |
| P12163_1_F3,12617 | K.EANYVMER.Y       | 1315.662 | 0.00332  | 2 | 1 | 30.5 | 0 |
| P12163_1_F3,23687 | K.FMDEYQAIMTK.K    | 1985.033 | 0.00359  | 3 | 1 | 34.1 | 0 |
| P12163_1_F4,19370 | K.LLNNMAVDK.V      | 1625.95  | 0.00764  | 3 | 1 | 39.4 | 0 |
| P12163_1_F6,17948 | K.SESLSFSTGDEDHSVV | 2962.474 | 0.0116   | 3 | 1 | 46.2 | 0 |
| P12163_1_F2,17284 | K.VDYTNFFR.A       | 1365.71  | 0.00062  | 3 | 1 | 26.1 | 0 |
| P12163_1_F3,22690 | K.YAAWAVEVAER.T    | 1568.837 | 0.00176  | 2 | 1 | 27.1 | 0 |
| P12163_1_F3,26537 | R.AITLGEILNLK.S    | 1793.136 | 0.0054   | 3 | 1 | 38.4 | 0 |
| P12163_1_F5,14938 | R.DMFYDGNPK.E      | 1694.867 | 0.00824  | 2 | 1 | 31.9 | 0 |
| P12163_1_F9,12956 | R.EVLHACYTK.V      | 1728.956 | 0.0073   | 3 | 1 | 23.7 | 0 |
| P12163_1_F9,12961 | R.EVLHACYTK.V      | 1728.956 | 0.0108   | 2 | 1 | 25.7 | 0 |
| P12163_2_F6,12416 | R.EVLHACYTK.V      | 1728.956 | 0.00436  | 3 | 1 | 24.6 | 0 |
| P12163_2_F7,11827 | R.EVLHACYTK.V      | 1728.956 | 0.01752  | 2 | 1 | 24.5 | 0 |

|                   |                     |          |          |   |   |      |   |
|-------------------|---------------------|----------|----------|---|---|------|---|
| P12163_1_F2,22023 | R.FADGLAVLR.S       | 1265.752 | 0.00211  | 2 | 1 | 30.7 | 0 |
| P12163_1_S10,1038 | R.HIENMNK.S         | 1493.835 | 0.00657  | 3 | 1 | 36.4 | 0 |
| P12163_1_S1,20549 | K.AGINVIQIDEAALR.E  | 1787.033 | 0.00451  | 2 | 1 | 47.5 | 0 |
| P12163_1_S1,20569 | K.AGINVIQIDEAALR.E  | 1787.033 | 0.00211  | 3 | 1 | 45.3 | 0 |
| P12163_1_S1,16154 | K.DEGFFSANAAAQASR.  | 1845.903 | 0.00311  | 3 | 1 | 86.3 | 0 |
| P12163_1_S1,16190 | K.DEGFFSANAAAQASR.  | 1845.903 | 0.00274  | 2 | 1 | 56.6 | 0 |
| P12163_2_F1,24913 | K.FALESFWDGK.S      | 1807.984 | 0.0044   | 3 | 1 | 28.7 | 0 |
| P12163_2_S3,11181 | K.FSYASHK.A         | 1447.815 | 0.00315  | 3 | 1 | 29.3 | 0 |
| P12163_1_F2,20917 | K.GVTAYGFDLVR.G     | 1501.832 | 0.00193  | 2 | 1 | 26.2 | 0 |
| P12163_1_F4,18969 | K.ISEEEYVASIK.E     | 1876.052 | 0.00698  | 2 | 1 | 41.4 | 0 |
| P12163_2_F1,18282 | K.ISEEEYVASIK.E     | 1876.052 | 0.00706  | 2 | 1 | 35.1 | 0 |
| P12163_2_F2,12006 | K.QMSEAGIK.Y        | 1471.84  | -0.00014 | 2 | 1 | 25.3 | 0 |
| P12163_2_F2,12040 | K.QMSEAGIK.Y        | 1471.84  | 0.00376  | 3 | 1 | 26.5 | 0 |
| P12163_2_F1,9928  | K.SSAEDLQK.V        | 1485.837 | 0.00637  | 2 | 1 | 36.8 | 0 |
| P12163_1_F5,20887 | K.SWLAFAAQK.V       | 1629.957 | 0.0053   | 3 | 1 | 33.2 | 0 |
| P12163_2_F2,21278 | K.SWLAFAAQK.V       | 1629.957 | 0.00812  | 3 | 1 | 34.7 | 0 |
| P12163_2_F2,21288 | K.SWLAFAAQK.V       | 1629.957 | 0.0045   | 2 | 1 | 32.6 | 0 |
| P12163_1_F4,18122 | K.VVEVNALAK.A       | 1550.973 | 0.00674  | 2 | 1 | 46.3 | 0 |
| P12163_1_F4,18123 | K.VVEVNALAK.A       | 1550.973 | 0.0051   | 3 | 1 | 33.2 | 0 |
| P12163_2_F1,17394 | K.VVEVNALAK.A       | 1550.973 | -0.0044  | 2 | 1 | 41.4 | 0 |
| P12163_1_F9,20521 | K.YLFAGVVDGR.N      | 1400.784 | 0.00377  | 2 | 1 | 38   | 0 |
| P12163_1_S1,20473 | K.YLFAGVVDGR.N      | 1400.784 | 0.00317  | 2 | 1 | 41.2 | 0 |
| P12163_1_F4,5993  | R.ATNVSAR.L         | 1022.59  | -0.00304 | 3 | 1 | 26.8 | 0 |
| P12163_1_F8,15796 | R.CVKPPIYGDVSRPK.A  | 2641.563 | 0.00777  | 3 | 1 | 22.7 | 0 |
| P12163_2_F1,14641 | R.GLEGVVGK.D        | 1366.851 | 0.00646  | 3 | 1 | 25.4 | 0 |
| P12163_1_F4,18880 | K.ATVESILK.R        | 1468.919 | 0.0026   | 3 | 1 | 29.9 | 0 |
| P12163_2_F1,18065 | K.ATVESILK.R        | 1468.919 | 0.00704  | 3 | 1 | 30.1 | 0 |
| P12163_1_F7,15295 | K.DRLPADIEVTESPEPNS | 2529.31  | 0.00466  | 3 | 1 | 31.6 | 0 |
| P12163_1_F3,21637 | K.EFLENQTENITNVIK.Q | 2400.323 | 0.008    | 3 | 1 | 24.7 | 0 |
| P12163_1_F4,18925 | K.EVENSIAELK.Q      | 1740     | 0.00065  | 2 | 1 | 38.3 | 0 |
| P12163_2_F1,18173 | K.EVENSIAELK.Q      | 1740     | 0.01461  | 2 | 1 | 27.1 | 0 |
| P12163_1_F5,14409 | K.FSEM*EK.N         | 1394.745 | -0.02459 | 3 | 1 | 22.3 | 0 |
| P12163_1_S10,1537 | K.FSEM*EK.N         | 1394.745 | -0.02765 | 3 | 1 | 22.9 | 0 |
| P12163_2_F7,12836 | K.GFHFDTEGDGK.V     | 1875.933 | 0.0076   | 3 | 1 | 38.4 | 0 |
| P12163_1_F4,18893 | K.LNEQQLAALSSPK.A   | 2007.169 | 0.00282  | 2 | 1 | 65.2 | 0 |
| P12163_1_F4,21034 | K.QNLAVGDIFK.R      | 1713.016 | -0.00032 | 2 | 1 | 32.5 | 0 |
| P12163_2_F1,20522 | K.QNLAVGDIFK.R      | 1713.016 | 0.0031   | 3 | 1 | 42.8 | 0 |
| P12163_1_F3,19647 | R.ENLQFSTEDLVK.E    | 2031.122 | 0.00148  | 2 | 1 | 53.4 | 0 |
| P12163_1_F3,23647 | R.EQVIDILEGAK.V     | 1823.073 | 0.00407  | 3 | 1 | 33.2 | 0 |
| P12163_1_F3,23672 | R.EQVIDILEGAK.V     | 1823.073 | 0.00539  | 2 | 1 | 57.9 | 0 |
| P12163_1_F2,10978 | R.GVQAQFTVECR.E     | 1598.826 | -0.00357 | 3 | 1 | 21.9 | 0 |
| P12163_1_F3,18697 | R.LSVEVPEAVCK.D     | 1839.051 | 0.00912  | 2 | 1 | 53.6 | 0 |
| P12163_1_F3,18708 | R.LSVEVPEAVCK.D     | 1839.051 | 0.00286  | 3 | 1 | 30.8 | 0 |
| P12163_1_F3,22195 | R.QLYGAQLLQMAGMI    | 2288.271 | 0.00401  | 3 | 1 | 49.3 | 0 |
| P12163_1_F5,20994 | R.VLNELMK.Q         | 1454.886 | 0.00304  | 3 | 1 | 25.6 | 0 |
| P12163_2_F1,21648 | R.VLNELMK.Q         | 1454.886 | 0.00541  | 3 | 1 | 23.3 | 0 |
| P12163_2_F9,11005 | K.AIHDQNFTGK.V      | 1738.97  | 0.00593  | 3 | 1 | 25.7 | 0 |
| P12163_1_F9,15787 | K.FYVQQVGDQK.V      | 1820.016 | 0.00624  | 3 | 1 | 30.9 | 0 |
| P12163_1_S1,24240 | K.GEASPFLAELLR.L    | 1606.911 | 0.00445  | 2 | 1 | 60.4 | 0 |
| P12163_1_S1,24264 | K.GEASPFLAELLR.L    | 1606.911 | 0.00335  | 3 | 1 | 41.9 | 0 |
| P12163_1_S1,8038  | K.GPAGEESVGATETR.I  | 1664.839 | 0.00404  | 3 | 1 | 28.3 | 0 |

|                   |                      |          |          |   |   |      |   |
|-------------------|----------------------|----------|----------|---|---|------|---|
| P12163_1_S1,8445  | K.GPAGEESVGATETR.I   | 1664.839 | -0.00247 | 3 | 1 | 40.3 | 0 |
| P12163_1_S1,9417  | K.GPAGEESVGATETR.I   | 1664.839 | 0.00251  | 3 | 1 | 45.8 | 0 |
| P12163_1_F3,24099 | K.NVAMLVVSEGWAK.V    | 2012.146 | 0.00607  | 3 | 1 | 27.6 | 0 |
| P12163_1_F4,24949 | K.NVAMLVVSEGWAK.V    | 2012.146 | 0.00208  | 3 | 1 | 21.9 | 0 |
| P12163_1_F2,10015 | K.VPGAAEASIR.N       | 1274.737 | 0.00433  | 3 | 1 | 39.2 | 0 |
| P12163_1_F2,15828 | K.VVVEAAPVAAGAK.G    | 1790.1   | 0.00918  | 3 | 1 | 29.5 | 0 |
| P12163_1_F3,22652 | K.VVVTEILGGGK.F      | 1680.052 | 0.00593  | 3 | 1 | 36.5 | 0 |
| P12163_1_F3,22658 | K.VVVTEILGGGK.F      | 1680.052 | 0.00605  | 2 | 1 | 58.1 | 0 |
| P12163_1_F8,16807 | R.IPDSHLLQAQEK.S     | 1988.127 | 0.00411  | 2 | 1 | 28.5 | 0 |
| P12163_2_F1,17956 | R.IVLEGVDK.F         | 1480.919 | 0.00509  | 2 | 1 | 27.7 | 0 |
| P12163_1_F8,14878 | R.KVVVEAAPVAAGAK.G   | 2222.4   | 0.0123   | 3 | 1 | 36.4 | 0 |
| P12163_1_F5,15716 | R.QAALENLEK.F        | 1623.953 | 0.00911  | 3 | 1 | 31.3 | 0 |
| P12163_1_F5,15725 | R.QAALENLEK.F        | 1623.953 | 0.00632  | 2 | 1 | 48.8 | 0 |
| P12163_2_F2,16473 | R.QAALENLEK.F        | 1623.953 | 0.01104  | 2 | 1 | 35.2 | 0 |
| P12163_1_F3,27574 | R.TNVAVILLEAGLAK.L   | 2020.263 | 0.00732  | 3 | 1 | 28   | 0 |
| P12163_1_S1,16211 | R.VDYAVPNIGR.E       | 1407.79  | 0.00273  | 2 | 1 | 26.2 | 0 |
| P12163_1_F6,8010  | K.DHSELSVNDSHR.R     | 1699.83  | 0.00218  | 3 | 1 | 43   | 0 |
| P12163_1_F3,26017 | K.LLYSFLDGSSTGK.E    | 2083.153 | 0.00684  | 3 | 1 | 50.6 | 0 |
| P12163_2_F1,11820 | K.QLIETER.S          | 1192.684 | 0.00009  | 2 | 1 | 30   | 0 |
| P12163_1_F4,21137 | K.SVYEAACLK.S        | 1762.003 | 0.01232  | 2 | 1 | 39.3 | 0 |
| P12163_2_F1,20602 | K.SVYEAACLK.S        | 1762.003 | 0.00492  | 2 | 1 | 54   | 0 |
| P12163_2_F9,18355 | K.SVYEAACLK.S        | 1762.003 | 0.00986  | 3 | 1 | 44.9 | 0 |
| P12163_1_F4,19166 | K.TLSLIDSTK.S        | 1585.962 | 0.00354  | 2 | 1 | 24   | 0 |
| P12163_1_F4,21703 | K.VVFLNK.S           | 1426.924 | 0.00611  | 2 | 1 | 30.2 | 0 |
| P12163_2_F1,21265 | K.VVFLNK.S           | 1426.924 | 0.00123  | 3 | 1 | 32.1 | 0 |
| P12163_2_F1,24084 | R.ALFLIAER.V         | 1236.762 | 0.00042  | 2 | 1 | 37.6 | 0 |
| P12163_2_F1,15368 | R.EIEEAMQK.D         | 1585.872 | 0.00168  | 3 | 1 | 26.6 | 0 |
| P12163_2_F10,1810 | R.HPDGQYICYLPSPILK.I | 2509.373 | 0.00417  | 3 | 1 | 21.9 | 0 |
| P12163_1_F8,20003 | R.IQHDIIGPALLDTQK.L  | 2270.333 | 0.00295  | 4 | 1 | 26.2 | 0 |
| P12163_1_F8,20042 | R.IQHDIIGPALLDTQK.L  | 2270.333 | 0.00552  | 3 | 1 | 36.8 | 0 |
| P12163_2_F6,19582 | R.IQHDIIGPALLDTQK.L  | 2270.333 | 0.00357  | 3 | 1 | 49.4 | 0 |
| P12163_1_F3,22813 | R.LSEIQDELSNVQEK.I   | 2240.223 | -0.00719 | 3 | 1 | 42   | 0 |
| P12163_1_F2,14800 | R.LTEEFVPR.A         | 1294.731 | 0.00458  | 3 | 1 | 27.9 | 0 |
| P12163_1_F3,27016 | R.SVLEAIDVIK.K       | 1808.135 | 0.0052   | 3 | 1 | 39   | 0 |
| P12163_1_F3,27030 | R.SVLEAIDVIK.K       | 1808.135 | 0.00544  | 2 | 1 | 75.3 | 0 |
| P12163_1_F3,18337 | R.VIEDFSASSTSK.M     | 1879.027 | 0.00274  | 3 | 1 | 45.9 | 0 |
| P12163_1_F3,22445 | K.AAVAQAALAYQLYQF    | 2217.285 | 0.00621  | 3 | 1 | 61.8 | 0 |
| P12163_1_F3,22455 | K.AAVAQAALAYQLYQF    | 2217.285 | 0.00223  | 2 | 1 | 95.2 | 0 |
| P12163_1_F3,22686 | K.AAVAQAALAYQLYQF    | 2217.285 | 0.00534  | 3 | 1 | 59.2 | 0 |
| P12163_1_F4,23204 | K.AAVAQAALAYQLYQF    | 2217.285 | -0.00035 | 2 | 1 | 64.7 | 0 |
| P12163_1_F5,21517 | K.AAVAQAALAYQLYQF    | 2217.285 | 0.00165  | 3 | 1 | 31.9 | 0 |
| P12163_1_F6,21176 | K.AAVAQAALAYQLYQF    | 2217.285 | 0.00045  | 3 | 1 | 41.4 | 0 |
| P12163_1_F6,21538 | K.AAVAQAALAYQLYQF    | 2217.285 | 0.00939  | 3 | 1 | 32.4 | 0 |
| P12163_2_F7,19536 | K.AAVAQAALAYQLYQF    | 2217.285 | 0.00576  | 3 | 1 | 53.7 | 0 |
| P12163_1_F2,11656 | K.AISSSNAYNDQFR.E    | 1776.882 | 0.00159  | 3 | 1 | 48.5 | 0 |
| P12163_1_F2,13649 | K.AISSSNAYNDQFR.E    | 1776.882 | -0.00804 | 3 | 1 | 38   | 0 |
| P12163_1_F2,13753 | K.AISSSNAYNDQFR.E    | 1776.882 | 0.00035  | 2 | 1 | 51   | 0 |
| P12163_1_F5,13246 | K.AISSSNAYNDQFR.E    | 1776.882 | 0.00465  | 2 | 1 | 38.6 | 0 |
| P12163_1_F8,13882 | K.AISSSNAYNDQFR.E    | 1776.882 | 0.00321  | 2 | 1 | 34.7 | 0 |
| P12163_1_F9,11858 | K.AISSSNAYNDQFR.E    | 1776.882 | 0.00111  | 3 | 1 | 24.3 | 0 |
| P12163_1_S1,13673 | K.AISSSNAYNDQFR.E    | 1776.882 | 0.00395  | 2 | 1 | 44.7 | 0 |

|                   |                    |          |          |   |   |      |   |
|-------------------|--------------------|----------|----------|---|---|------|---|
| P12163_2_F1,13518 | K.AISSSNAYNDQFR.E  | 1776.882 | 0.00129  | 2 | 1 | 42.1 | 0 |
| P12163_2_S5,13497 | K.AISSSNAYNDQFR.E  | 1776.882 | 0.00399  | 2 | 1 | 26.1 | 0 |
| P12163_1_F4,10829 | K.DIQDACK.L        | 1457.788 | 0.00739  | 2 | 1 | 25.6 | 0 |
| P12163_1_F4,10859 | K.DIQDACK.L        | 1457.788 | 0.00809  | 3 | 1 | 37.5 | 0 |
| P12163_1_F5,9459  | K.DIQDACK.L        | 1457.788 | 0.01133  | 2 | 1 | 24.9 | 0 |
| P12163_1_F5,9477  | K.DIQDACK.L        | 1457.788 | 0.0068   | 3 | 1 | 26.5 | 0 |
| P12163_1_F6,10484 | K.DIQDACK.L        | 1457.788 | 0.00806  | 3 | 1 | 25.3 | 0 |
| P12163_1_F7,9965  | K.DIQDACK.L        | 1457.788 | 0.00087  | 2 | 1 | 26.3 | 0 |
| P12163_1_F8,9611  | K.DIQDACK.L        | 1457.788 | 0.00056  | 3 | 1 | 22.6 | 0 |
| P12163_2_F1,9974  | K.DIQDACK.L        | 1457.788 | 0.00599  | 2 | 1 | 25.8 | 0 |
| P12163_2_F1,9991  | K.DIQDACK.L        | 1457.788 | 0.0053   | 3 | 1 | 36.7 | 0 |
| P12163_2_F1,10232 | K.DIQDACK.L        | 1457.788 | 0.00797  | 2 | 1 | 26.9 | 0 |
| P12163_2_S5,9379  | K.DIQDACK.L        | 1457.788 | 0.00017  | 3 | 1 | 22.6 | 0 |
| P12163_1_F2,15687 | K.IGTPEALDLR.G     | 1388.805 | 0.00123  | 3 | 1 | 38.6 | 0 |
| P12163_1_S1,14918 | K.IGTPEALDLR.G     | 1388.805 | 0.00258  | 3 | 1 | 54   | 0 |
| P12163_1_S1,14979 | K.IGTPEALDLR.G     | 1388.805 | 0.00035  | 2 | 1 | 27.9 | 0 |
| P12163_1_S1,15144 | K.IGTPEALDLR.G     | 1388.805 | 0.0018   | 3 | 1 | 57   | 0 |
| P12163_1_S1,15447 | K.IGTPEALDLR.G     | 1388.805 | -0.00465 | 3 | 1 | 56.6 | 0 |
| P12163_1_S1,15821 | K.IGTPEALDLR.G     | 1388.805 | 0.00222  | 3 | 1 | 53.2 | 0 |
| P12163_1_S1,17286 | K.IGTPEALDLR.G     | 1388.805 | 0.00201  | 3 | 1 | 37.2 | 0 |
| P12163_1_S1,17534 | K.IGTPEALDLR.G     | 1388.805 | 0.00066  | 3 | 1 | 31.7 | 0 |
| P12163_1_S10,307  | K.IGTPEALDLR.G     | 1388.805 | 0.0021   | 3 | 1 | 23.9 | 0 |
| P12163_2_F4,17117 | K.IGTPEALDLR.G     | 1388.805 | 0.00429  | 2 | 1 | 25.2 | 0 |
| P12163_1_F2,16058 | K.IPATAPCVPSIK.E   | 1862.103 | 0.00959  | 3 | 1 | 31   | 0 |
| P12163_1_F2,17920 | K.IPATAPCVPSIK.E   | 1862.103 | 0.00449  | 3 | 1 | 35.1 | 0 |
| P12163_1_F3,16873 | K.IPATAPCVPSIK.E   | 1862.103 | 0.00689  | 3 | 1 | 27.2 | 0 |
| P12163_1_F3,17136 | K.IPATAPCVPSIK.E   | 1862.103 | -0.00016 | 3 | 1 | 25.1 | 0 |
| P12163_1_F3,18520 | K.IPATAPCVPSIK.E   | 1862.103 | 0.00653  | 2 | 1 | 34.3 | 0 |
| P12163_1_F3,18525 | K.IPATAPCVPSIK.E   | 1862.103 | 0.0044   | 3 | 1 | 39.4 | 0 |
| P12163_1_F3,18991 | K.IPATAPCVPSIK.E   | 1862.103 | 0.00757  | 2 | 1 | 33.3 | 0 |
| P12163_1_F5,17836 | K.IPATAPCVPSIK.E   | 1862.103 | 0.00295  | 2 | 1 | 35.4 | 0 |
| P12163_1_F6,18102 | K.IPATAPCVPSIK.E   | 1862.103 | 0.00716  | 3 | 1 | 30.6 | 0 |
| P12163_2_F4,16916 | K.IPATAPCVPSIK.E   | 1862.103 | 0.00578  | 3 | 1 | 31.7 | 0 |
| P12163_1_F3,28033 | K.NPAYPDTLYVAPLIGP | 4347.191 | -0.00101 | 4 | 1 | 30.4 | 0 |
| P12163_1_F3,28042 | K.NPAYPDTLYVAPLIGP | 4331.196 | 0.00143  | 3 | 1 | 58.3 | 0 |
| P12163_1_F3,20832 | K.SFDSLLDTLQEK.A   | 2004.111 | 0.00561  | 2 | 1 | 41.3 | 0 |
| P12163_1_F3,20844 | K.SFDSLLDTLQEK.A   | 2004.111 | 0.0029   | 4 | 1 | 26.3 | 0 |
| P12163_1_F3,24459 | K.SFDSLLDTLQEK.A   | 2004.111 | 0.00588  | 3 | 1 | 42.6 | 0 |
| P12163_1_F3,24689 | K.SFDSLLDTLQEK.A   | 2004.111 | 0.00491  | 2 | 1 | 69   | 0 |
| P12163_1_F3,24851 | K.SFDSLLDTLQEK.A   | 2004.111 | 0.00384  | 3 | 1 | 39.2 | 0 |
| P12163_1_F3,24965 | K.SFDSLLDTLQEK.A   | 2004.111 | 0.00531  | 2 | 1 | 30.5 | 0 |
| P12163_1_F5,23610 | K.SFDSLLDTLQEK.A   | 2004.111 | 0.00765  | 3 | 1 | 24.2 | 0 |
| P12163_1_F6,20024 | K.SFDSLLDTLQEK.A   | 2004.111 | 0.00258  | 3 | 1 | 35   | 0 |
| P12163_1_F6,23035 | K.SFDSLLDTLQEK.A   | 2004.111 | 0.00126  | 3 | 1 | 26.4 | 0 |
| P12163_1_F7,22479 | K.SFDSLLDTLQEK.A   | 2004.111 | 0.00264  | 3 | 1 | 32.7 | 0 |
| P12163_1_F5,10313 | R.ELVQSGK.D        | 1368.831 | 0.00535  | 3 | 1 | 25.2 | 0 |
| P12163_1_F4,14992 | R.GVTSNPAIFQK.A    | 1770.037 | 0.00444  | 3 | 1 | 27.7 | 0 |
| P12163_1_F4,15012 | R.GVTSNPAIFQK.A    | 1770.037 | 0.00163  | 2 | 1 | 33.3 | 0 |
| P12163_1_F4,15287 | R.GVTSNPAIFQK.A    | 1770.037 | 0.00609  | 3 | 1 | 40.9 | 0 |
| P12163_1_F4,15291 | R.GVTSNPAIFQK.A    | 1770.037 | 0.00505  | 2 | 1 | 45.9 | 0 |
| P12163_1_F4,16819 | R.GVTSNPAIFQK.A    | 1770.037 | 0.00319  | 2 | 1 | 47.6 | 0 |

|                   |                   |          |          |   |   |      |   |
|-------------------|-------------------|----------|----------|---|---|------|---|
| P12163_1_F4,16851 | R.GVTSNPAIFQK.A   | 1770.037 | 0.00729  | 3 | 1 | 56.5 | 0 |
| P12163_1_F4,17180 | R.GVTSNPAIFQK.A   | 1770.037 | 0.00777  | 3 | 1 | 31.1 | 0 |
| P12163_1_F4,17190 | R.GVTSNPAIFQK.A   | 1770.037 | 0.00437  | 2 | 1 | 24.3 | 0 |
| P12163_1_F4,17440 | R.GVTSNPAIFQK.A   | 1770.037 | 0.00381  | 3 | 1 | 47.8 | 0 |
| P12163_1_F4,17445 | R.GVTSNPAIFQK.A   | 1770.037 | 0.00925  | 2 | 1 | 50.4 | 0 |
| P12163_1_F4,17776 | R.GVTSNPAIFQK.A   | 1770.037 | 0.00091  | 2 | 1 | 24.5 | 0 |
| P12163_1_F5,15597 | R.GVTSNPAIFQK.A   | 1770.037 | 0.00777  | 2 | 1 | 50.3 | 0 |
| P12163_1_F6,15639 | R.GVTSNPAIFQK.A   | 1770.037 | -0.00036 | 3 | 1 | 35.7 | 0 |
| P12163_1_F6,15669 | R.GVTSNPAIFQK.A   | 1770.037 | -0.01073 | 2 | 1 | 31.4 | 0 |
| P12163_1_F6,16180 | R.GVTSNPAIFQK.A   | 1770.037 | 0.01205  | 2 | 1 | 28.6 | 0 |
| P12163_1_F6,16192 | R.GVTSNPAIFQK.A   | 1770.037 | 0.00546  | 3 | 1 | 34.9 | 0 |
| P12163_1_F7,14842 | R.GVTSNPAIFQK.A   | 1770.037 | 0.00285  | 3 | 1 | 40.6 | 0 |
| P12163_1_F7,14844 | R.GVTSNPAIFQK.A   | 1770.037 | 0.00135  | 2 | 1 | 44.4 | 0 |
| P12163_1_F7,15331 | R.GVTSNPAIFQK.A   | 1770.037 | 0.00501  | 3 | 1 | 22.5 | 0 |
| P12163_1_F7,15415 | R.GVTSNPAIFQK.A   | 1770.037 | 0.00473  | 2 | 1 | 49.6 | 0 |
| P12163_1_F8,16078 | R.GVTSNPAIFQK.A   | 1770.037 | 0.00672  | 3 | 1 | 31.1 | 0 |
| P12163_1_F9,15975 | R.GVTSNPAIFQK.A   | 1770.037 | 0.00177  | 2 | 1 | 58.9 | 0 |
| P12163_2_F1,13927 | R.GVTSNPAIFQK.A   | 1770.037 | 0.00357  | 3 | 1 | 27   | 0 |
| P12163_2_F1,13948 | R.GVTSNPAIFQK.A   | 1770.037 | -0.00251 | 2 | 1 | 42   | 0 |
| P12163_2_F1,15995 | R.GVTSNPAIFQK.A   | 1770.037 | 0.00287  | 2 | 1 | 47.9 | 0 |
| P12163_2_F1,16025 | R.GVTSNPAIFQK.A   | 1770.037 | 0.00693  | 3 | 1 | 47.5 | 0 |
| P12163_2_F1,16268 | R.GVTSNPAIFQK.A   | 1770.037 | 0.00481  | 2 | 1 | 35.6 | 0 |
| P12163_2_F1,16285 | R.GVTSNPAIFQK.A   | 1770.037 | 0.00591  | 3 | 1 | 22.1 | 0 |
| P12163_2_F1,16611 | R.GVTSNPAIFQK.A   | 1770.037 | 0.01037  | 2 | 1 | 49.1 | 0 |
| P12163_2_F2,91    | R.GVTSNPAIFQK.A   | 1770.037 | 0.00615  | 3 | 1 | 32.4 | 0 |
| P12163_2_F2,311   | R.GVTSNPAIFQK.A   | 1770.037 | 0.00426  | 3 | 1 | 27.2 | 0 |
| P12163_2_F2,499   | R.GVTSNPAIFQK.A   | 1770.037 | 0.00462  | 3 | 1 | 39.3 | 0 |
| P12163_2_F2,723   | R.GVTSNPAIFQK.A   | 1770.037 | 0.0057   | 3 | 1 | 22.8 | 0 |
| P12163_2_F2,947   | R.GVTSNPAIFQK.A   | 1770.037 | 0.00498  | 3 | 1 | 32.9 | 0 |
| P12163_2_F2,1404  | R.GVTSNPAIFQK.A   | 1770.037 | 0.00246  | 3 | 1 | 22   | 0 |
| P12163_2_F2,1802  | R.GVTSNPAIFQK.A   | 1770.037 | 0.00543  | 3 | 1 | 27.2 | 0 |
| P12163_2_F2,2589  | R.GVTSNPAIFQK.A   | 1770.037 | 0.00411  | 3 | 1 | 28.3 | 0 |
| P12163_2_F4,14524 | R.GVTSNPAIFQK.A   | 1770.037 | 0.00069  | 3 | 1 | 44.7 | 0 |
| P12163_2_F4,14527 | R.GVTSNPAIFQK.A   | 1770.037 | 0.00081  | 2 | 1 | 47.1 | 0 |
| P12163_2_F4,15027 | R.GVTSNPAIFQK.A   | 1770.037 | 0.00279  | 3 | 1 | 31.6 | 0 |
| P12163_2_F9,14772 | R.GVTSNPAIFQK.A   | 1770.037 | 0.00603  | 2 | 1 | 29.9 | 0 |
| P12163_2_S5,14292 | R.GVTSNPAIFQK.A   | 1770.037 | 0.00411  | 3 | 1 | 37.2 | 0 |
| P12163_2_S5,14826 | R.GVTSNPAIFQK.A   | 1770.037 | 0.0042   | 3 | 1 | 34.1 | 0 |
| P12163_2_S5,14849 | R.GVTSNPAIFQK.A   | 1770.037 | 0.00461  | 2 | 1 | 43.5 | 0 |
| P12163_1_F2,10724 | R.LADDTQGTVEAAK.W | 1927.059 | -0.00243 | 2 | 1 | 30.2 | 0 |
| P12163_1_F2,11166 | R.LADDTQGTVEAAK.W | 1927.059 | 0.00108  | 3 | 1 | 31   | 0 |
| P12163_1_F2,13857 | R.LADDTQGTVEAAK.W | 1927.059 | -0.00005 | 2 | 1 | 64.3 | 0 |
| P12163_1_F3,11029 | R.LADDTQGTVEAAK.W | 1927.059 | 0.00114  | 3 | 1 | 27   | 0 |
| P12163_1_F3,14155 | R.LADDTQGTVEAAK.W | 1927.059 | 0.00771  | 3 | 1 | 58.1 | 0 |
| P12163_1_F3,14175 | R.LADDTQGTVEAAK.W | 1927.059 | 0.00463  | 2 | 1 | 87.1 | 0 |
| P12163_1_F6,13584 | R.LADDTQGTVEAAK.W | 1927.059 | 0.00534  | 3 | 1 | 52.8 | 0 |
| P12163_2_F2,13623 | R.LADDTQGTVEAAK.W | 1927.059 | 0.00594  | 3 | 1 | 41.9 | 0 |
| P12163_2_F2,13635 | R.LADDTQGTVEAAK.W | 1927.059 | 0.00805  | 2 | 1 | 46.5 | 0 |
| P12163_2_F4,12978 | R.LADDTQGTVEAAK.W | 1927.059 | 0.00561  | 3 | 1 | 51.1 | 0 |
| P12163_1_F4,21870 | R.LLWASTSVK.N     | 1612.988 | 0.00391  | 2 | 1 | 36.2 | 0 |
| P12163_1_F4,21871 | R.LLWASTSVK.N     | 1612.988 | 0.00812  | 3 | 1 | 24.5 | 0 |

|                                       |          |          |   |   |      |   |
|---------------------------------------|----------|----------|---|---|------|---|
| P12163_1_F4,22076 R.LLWASTSVK.N       | 1612.988 | 0.00731  | 2 | 1 | 28.9 | 0 |
| P12163_1_F5,20807 R.LLWASTSVK.N       | 1612.988 | 0.00644  | 3 | 1 | 26.6 | 0 |
| P12163_2_F1,21412 R.LLWASTSVK.N       | 1612.988 | 0.00317  | 2 | 1 | 28.5 | 0 |
| P12163_2_F1,21420 R.LLWASTSVK.N       | 1612.988 | 0.00698  | 3 | 1 | 28.2 | 0 |
| P12163_2_F1,21624 R.LLWASTSVK.N       | 1612.988 | 0.00741  | 2 | 1 | 35.4 | 0 |
| P12163_2_F2,21390 R.LLWASTSVK.N       | 1612.988 | 0.0041   | 3 | 1 | 28.5 | 0 |
| P12163_2_F2,21450 R.LLWASTSVK.N       | 1612.988 | 0.00681  | 2 | 1 | 32.8 | 0 |
| P12163_2_S5,18877 R.LLWASTSVK.N       | 1612.988 | 0.00014  | 3 | 1 | 33.8 | 0 |
| P12163_1_F4,18392 R.VDTLIDK.M         | 1411.862 | 0.00813  | 2 | 1 | 29.6 | 0 |
| P12163_1_F4,18657 R.VDTLIDK.M         | 1411.862 | 0.00499  | 2 | 1 | 30   | 0 |
| P12163_1_F4,18715 R.VDTLIDK.M         | 1411.862 | 0.00546  | 3 | 1 | 27.8 | 0 |
| P12163_1_F5,17216 R.VDTLIDK.M         | 1411.862 | 0.00231  | 3 | 1 | 23.7 | 0 |
| P12163_1_F6,17660 R.VDTLIDK.M         | 1411.862 | 0.0033   | 3 | 1 | 25.7 | 0 |
| P12163_1_F7,16065 R.VDTLIDK.M         | 1411.862 | 0.00209  | 2 | 1 | 28.3 | 0 |
| P12163_1_F7,16294 R.VDTLIDK.M         | 1411.862 | 0.00033  | 3 | 1 | 24.2 | 0 |
| P12163_1_F7,16786 R.VDTLIDK.M         | 1411.862 | 0.00837  | 2 | 1 | 29.7 | 0 |
| P12163_2_F1,17722 R.VDTLIDK.M         | 1411.862 | 0.00853  | 2 | 1 | 29.3 | 0 |
| P12163_2_F1,17748 R.VDTLIDK.M         | 1411.862 | 0.00681  | 3 | 1 | 38.3 | 0 |
| P12163_2_F1,17986 R.VDTLIDK.M         | 1411.862 | 0.00639  | 2 | 1 | 29.3 | 0 |
| P12163_2_F1,18014 R.VDTLIDK.M         | 1411.862 | 0.00393  | 3 | 1 | 29.9 | 0 |
| P12163_2_F4,15727 R.VDTLIDK.M         | 1411.862 | 0.00095  | 2 | 1 | 28.4 | 0 |
| P12163_2_S5,16194 R.VDTLIDK.M         | 1411.862 | 0.00763  | 2 | 1 | 28.3 | 0 |
| P12163_1_S1,13117 R.VTSVASFFVSR.V     | 1503.847 | 0.00066  | 3 | 1 | 36.4 | 0 |
| P12163_1_S1,17324 R.VTSVASFFVSR.V     | 1503.847 | 0.00378  | 3 | 1 | 32.1 | 0 |
| P12163_1_S1,22461 R.VTSVASFFVSR.V     | 1503.847 | 0.00468  | 3 | 1 | 40.7 | 0 |
| P12163_1_S1,23028 R.VTSVASFFVSR.V     | 1503.847 | 0.00078  | 3 | 1 | 68.6 | 0 |
| P12163_1_S1,23043 R.VTSVASFFVSR.V     | 1503.847 | 0.00241  | 2 | 1 | 38.1 | 0 |
| P12163_1_S1,23252 R.VTSVASFFVSR.V     | 1503.847 | 0.00213  | 3 | 1 | 60.1 | 0 |
| P12163_1_S1,23265 R.VTSVASFFVSR.V     | 1503.847 | 0.00409  | 2 | 1 | 34.3 | 0 |
| P12163_1_F2,20488 K.AGVAALGLGYAGGEV   | 2227.291 | 0.00268  | 3 | 1 | 57.6 | 0 |
| P12163_1_F2,20539 K.AGVAALGLGYAGGEV   | 2227.291 | 0.00519  | 2 | 1 | 101  | 0 |
| P12163_1_F2,20751 K.AGVAALGLGYAGGEV   | 2227.291 | 0.00103  | 3 | 1 | 43.2 | 0 |
| P12163_1_F7,19577 K.AGVAALGLGYAGGEV   | 2227.291 | -0.00179 | 3 | 1 | 51.1 | 0 |
| P12163_1_S1,19237 K.AGVAALGLGYAGGEV   | 2227.291 | 0.00712  | 3 | 1 | 66.5 | 0 |
| P12163_1_S1,19521 K.AGVAALGLGYAGGEV   | 2227.291 | 0.00388  | 3 | 1 | 93.5 | 0 |
| P12163_1_S10,1894 K.AGVAALGLGYAGGEV   | 2227.291 | 0.00607  | 3 | 1 | 88   | 0 |
| P12163_2_F6,20170 K.AGVAALGLGYAGGEV   | 2227.291 | 0.00353  | 2 | 1 | 49.9 | 0 |
| P12163_2_S3,17197 K.AGVAALGLGYAGGEV   | 2227.291 | 0.00556  | 3 | 1 | 23   | 0 |
| P12163_1_F2,23789 K.GLLTLRPGVLV.-     | 1441.941 | 0.00276  | 2 | 1 | 27   | 0 |
| P12163_1_S10,1075 K.HFVAACNK.I        | 1554.867 | 0.01065  | 3 | 1 | 53   | 0 |
| P12163_1_S10,1077 K.HFVAACNK.I        | 1554.867 | 0.01237  | 4 | 1 | 31.8 | 0 |
| P12163_2_F10,1009 K.HFVAACNK.I        | 1554.867 | 0.0095   | 3 | 1 | 51.7 | 0 |
| P12163_2_F8_12070 K.HFVAACNK.I        | 1554.867 | 0.00617  | 3 | 1 | 42.4 | 0 |
| P12163_1_F2,9004 K.IENSESLCR.Y        | 1411.715 | -0.00363 | 3 | 1 | 32.6 | 0 |
| P12163_1_F3,9121 K.IENSESLCR.Y        | 1411.715 | 0.00069  | 3 | 1 | 30   | 0 |
| P12163_2_F1,11686 K.IENSESLCR.Y       | 1411.715 | 0.0037   | 2 | 1 | 30   | 0 |
| P12163_1_F3,16736 K.IQSQFTSGASSISQK.A | 2177.202 | 0.00231  | 3 | 1 | 55.4 | 0 |
| P12163_1_F4,14906 K.IQSQFTSGASSISQK.A | 2177.202 | 0.01049  | 2 | 1 | 34.9 | 0 |
| P12163_1_F4,15085 K.IQSQFTSGASSISQK.A | 2177.202 | 0.00882  | 3 | 1 | 34.1 | 0 |
| P12163_1_F4,17198 K.IQSQFTSGASSISQK.A | 2177.202 | 0.00893  | 2 | 1 | 72.4 | 0 |
| P12163_1_F4,17441 K.IQSQFTSGASSISQK.A | 2177.202 | 0.00714  | 3 | 1 | 36.5 | 0 |

|                   |                     |          |          |   |   |      |   |
|-------------------|---------------------|----------|----------|---|---|------|---|
| P12163_1_F4,17459 | K.IQSQFTSGASSISQK.A | 2177.202 | -0.00283 | 2 | 1 | 26.4 | 0 |
| P12163_1_F6,16060 | K.IQSQFTSGASSISQK.A | 2177.202 | -0.0087  | 3 | 1 | 52.5 | 0 |
| P12163_1_F9,16215 | K.IQSQFTSGASSISQK.A | 2177.202 | 0.01998  | 3 | 1 | 44.4 | 0 |
| P12163_2_F1,16459 | K.IQSQFTSGASSISQK.A | 2177.202 | 0.00281  | 2 | 1 | 67.3 | 0 |
| P12163_2_F1,16619 | K.IQSQFTSGASSISQK.A | 2177.202 | 0.00582  | 3 | 1 | 38.1 | 0 |
| P12163_2_F2,416   | K.IQSQFTSGASSISQK.A | 2177.202 | 0.00183  | 3 | 1 | 29.4 | 0 |
| P12163_2_F9,15312 | K.IQSQFTSGASSISQK.A | 2177.202 | 0.00909  | 3 | 1 | 50.4 | 0 |
| P12163_1_F8,18881 | K.LKEENGLSYTPDQILV  | 3188.793 | 0.0222   | 3 | 1 | 42.1 | 0 |
| P12163_1_F4,14911 | K.SFGELEGVK.M       | 1573.905 | 0.00561  | 3 | 1 | 22.6 | 0 |
| P12163_1_F4,17994 | K.SFGELEGVK.M       | 1573.905 | 0.00721  | 2 | 1 | 50.1 | 0 |
| P12163_1_F5,13587 | K.SFGELEGVK.M       | 1573.905 | 0.00633  | 3 | 1 | 22   | 0 |
| P12163_1_F5,16746 | K.SFGELEGVK.M       | 1573.905 | 0.00717  | 2 | 1 | 50.1 | 0 |
| P12163_1_F5,16789 | K.SFGELEGVK.M       | 1573.905 | 0.00687  | 3 | 1 | 58.9 | 0 |
| P12163_1_F6,17236 | K.SFGELEGVK.M       | 1573.905 | 0.00552  | 3 | 1 | 46.9 | 0 |
| P12163_1_F6,17254 | K.SFGELEGVK.M       | 1573.905 | 0.00401  | 2 | 1 | 41.9 | 0 |
| P12163_1_F7,15878 | K.SFGELEGVK.M       | 1573.905 | -0.00157 | 2 | 1 | 33.2 | 0 |
| P12163_1_F7,16398 | K.SFGELEGVK.M       | 1573.905 | 0.00495  | 3 | 1 | 22.4 | 0 |
| P12163_1_F8,16658 | K.SFGELEGVK.M       | 1573.905 | 0.00114  | 3 | 1 | 34.1 | 0 |
| P12163_2_F1,17178 | K.SFGELEGVK.M       | 1573.905 | 0.00552  | 3 | 1 | 58.5 | 0 |
| P12163_2_F1,17212 | K.SFGELEGVK.M       | 1573.905 | 0.00801  | 2 | 1 | 49.9 | 0 |
| P12163_2_S5,15554 | K.SFGELEGVK.M       | 1573.905 | 0.00198  | 3 | 1 | 32.6 | 0 |
| P12163_1_F4,22465 | R.ISENFLLDPK.V      | 1784.041 | 0.00772  | 2 | 1 | 45.3 | 0 |
| P12163_1_F4,22482 | R.ISENFLLDPK.V      | 1784.041 | 0.00742  | 3 | 1 | 42.7 | 0 |
| P12163_1_F4,22720 | R.ISENFLLDPK.V      | 1784.041 | 0.00628  | 2 | 1 | 47.5 | 0 |
| P12163_1_F4,22977 | R.ISENFLLDPK.V      | 1784.041 | 0.00094  | 2 | 1 | 32.7 | 0 |
| P12163_1_F5,21047 | R.ISENFLLDPK.V      | 1784.041 | 0.01204  | 2 | 1 | 36.5 | 0 |
| P12163_1_F5,21088 | R.ISENFLLDPK.V      | 1784.041 | 0.00799  | 3 | 1 | 29.1 | 0 |
| P12163_1_F6,20487 | R.ISENFLLDPK.V      | 1784.041 | -0.00452 | 2 | 1 | 29.9 | 0 |
| P12163_1_F6,20531 | R.ISENFLLDPK.V      | 1784.041 | 0.00382  | 3 | 1 | 32.4 | 0 |
| P12163_1_F6,20925 | R.ISENFLLDPK.V      | 1784.041 | 0.01266  | 2 | 1 | 37   | 0 |
| P12163_1_F6,20982 | R.ISENFLLDPK.V      | 1784.041 | 0.00568  | 3 | 1 | 25.9 | 0 |
| P12163_1_F7,19724 | R.ISENFLLDPK.V      | 1784.041 | 0.00727  | 3 | 1 | 23.9 | 0 |
| P12163_1_F7,20141 | R.ISENFLLDPK.V      | 1784.041 | 0.00384  | 2 | 1 | 25.2 | 0 |
| P12163_1_S10,1952 | R.ISENFLLDPK.V      | 1784.041 | 0.00898  | 3 | 1 | 25.6 | 0 |
| P12163_2_F1,22028 | R.ISENFLLDPK.V      | 1784.041 | 0.00586  | 2 | 1 | 45   | 0 |
| P12163_2_F4,19237 | R.ISENFLLDPK.V      | 1784.041 | 0.00186  | 2 | 1 | 24.9 | 0 |
| P12163_2_F4,19260 | R.ISENFLLDPK.V      | 1784.041 | 0.00403  | 3 | 1 | 26.3 | 0 |
| P12163_2_F9,19153 | R.ISENFLLDPK.V      | 1784.041 | 0.00988  | 2 | 1 | 32.7 | 0 |
| P12163_2_S5,19392 | R.ISENFLLDPK.V      | 1784.041 | 0.00868  | 3 | 1 | 26.8 | 0 |
| P12163_1_F4,18041 | R.LGYIAGPK.H        | 1426.888 | 0.00578  | 2 | 1 | 27.3 | 0 |
| P12163_1_F9,16977 | R.LGYIAGPK.H        | 1426.888 | 0.00806  | 2 | 1 | 24   | 0 |
| P12163_1_F9,17021 | R.LGYIAGPK.H        | 1426.888 | 0.00523  | 3 | 1 | 30   | 0 |
| P12163_1_S10,1643 | R.LGYIAGPK.H        | 1426.888 | 0.01156  | 3 | 1 | 27.4 | 0 |
| P12163_2_F1,17199 | R.LGYIAGPK.H        | 1426.888 | 0.00847  | 3 | 1 | 27.2 | 0 |
| P12163_2_F8_1207  | R.LGYIAGPK.H        | 1426.888 | 0.00442  | 3 | 1 | 28.4 | 0 |
| P12163_2_F9,15682 | R.LGYIAGPK.H        | 1426.888 | 0.00559  | 3 | 1 | 28.4 | 0 |
| P12163_1_F2,20902 | R.LLILCSPSNPTGSVYPK | 2454.389 | -0.00185 | 3 | 1 | 36.3 | 0 |
| P12163_1_F2,22715 | R.LLILCSPSNPTGSVYPK | 2454.389 | 0.00349  | 3 | 1 | 28   | 0 |
| P12163_1_F5,22471 | R.LLILCSPSNPTGSVYPK | 2454.389 | -0.00119 | 3 | 1 | 41.1 | 0 |
| P12163_1_S1,19617 | R.LLILCSPSNPTGSVYPK | 2454.389 | 0.00328  | 3 | 1 | 34.1 | 0 |
| P12163_1_S1,19875 | R.LLILCSPSNPTGSVYPK | 2454.389 | 0.00586  | 3 | 1 | 53.5 | 0 |

|                   |                     |          |          |   |   |      |   |
|-------------------|---------------------|----------|----------|---|---|------|---|
| P12163_1_S1,21462 | R.LLILCSPSNPTGSVYPK | 2454.389 | 0.01162  | 3 | 1 | 54.7 | 0 |
| P12163_1_S1,21485 | R.LLILCSPSNPTGSVYPK | 2454.389 | 0.00196  | 4 | 1 | 54.5 | 0 |
| P12163_1_S1,21506 | R.LLILCSPSNPTGSVYPK | 2454.389 | 0.0057   | 2 | 1 | 43.3 | 0 |
| P12163_1_S1,21656 | R.LLILCSPSNPTGSVYPK | 2454.389 | 0.00808  | 3 | 1 | 56   | 0 |
| P12163_2_F6,20470 | R.LLILCSPSNPTGSVYPK | 2454.389 | 0.01162  | 3 | 1 | 30.2 | 0 |
| P12163_1_F9,7957  | R.SAICHK.L          | 1323.766 | 0.00625  | 3 | 1 | 24.7 | 0 |
| P12163_1_F9,7959  | R.SAICHK.L          | 1323.766 | 0.00815  | 2 | 1 | 26.2 | 0 |
| P12163_2_F4,7496  | R.SAICHK.L          | 1323.766 | 0.00157  | 3 | 1 | 28.9 | 0 |
| P12163_1_F4,17250 | R.TLTVNGFSK.A       | 1574.936 | 0.00376  | 2 | 1 | 27   | 0 |
| P12163_2_F1,16389 | R.TLTVNGFSK.A       | 1574.936 | 0.0025   | 2 | 1 | 28.1 | 0 |
| P12163_1_F2,11894 | R.YTPNAGTLELR.S     | 1538.848 | 0.00134  | 3 | 1 | 22.8 | 0 |
| P12163_1_F2,13367 | R.YTPNAGTLELR.S     | 1538.848 | 0.00272  | 3 | 1 | 45.3 | 0 |
| P12163_1_F2,14822 | R.YTPNAGTLELR.S     | 1538.848 | 0.00215  | 3 | 1 | 57.9 | 0 |
| P12163_1_F2,16350 | R.YTPNAGTLELR.S     | 1538.848 | 0.00329  | 2 | 1 | 29   | 0 |
| P12163_1_F2,16395 | R.YTPNAGTLELR.S     | 1538.848 | 0.00161  | 3 | 1 | 32.6 | 0 |
| P12163_1_S1,12988 | R.YTPNAGTLELR.S     | 1538.848 | 0.00077  | 3 | 1 | 47.6 | 0 |
| P12163_1_S1,14470 | R.YTPNAGTLELR.S     | 1538.848 | 0.00011  | 3 | 1 | 30.2 | 0 |
| P12163_1_S1,15785 | R.YTPNAGTLELR.S     | 1538.848 | 0.00149  | 3 | 1 | 50.1 | 0 |
| P12163_2_F7,12382 | R.YTPNAGTLELR.S     | 1538.848 | 0.00065  | 3 | 1 | 33.8 | 0 |
| P12163_2_F2,21598 | K.FFVGGNWK.C        | 1562.894 | 0.00488  | 3 | 1 | 22.2 | 0 |
| P12163_1_F3,18622 | K.GGAFTGEISVEQLK.D  | 2044.153 | 0.00359  | 2 | 1 | 33.1 | 0 |
| P12163_1_F4,20625 | K.GGAFTGEISVEQLK.D  | 2044.153 | 0.00429  | 2 | 1 | 87.8 | 0 |
| P12163_1_F6,19050 | K.GGAFTGEISVEQLK.D  | 2044.153 | 0.00163  | 2 | 1 | 50.3 | 0 |
| P12163_1_F6,19058 | K.GGAFTGEISVEQLK.D  | 2044.153 | 0.00229  | 3 | 1 | 51.3 | 0 |
| P12163_1_F2,15217 | K.GPEFATIVNSVTSK.K  | 2058.169 | 0.00119  | 3 | 1 | 22.8 | 0 |
| P12163_1_F2,21935 | K.GPEFATIVNSVTSK.K  | 2058.169 | 0.00269  | 3 | 1 | 42.7 | 0 |
| P12163_1_F3,21989 | K.GPEFATIVNSVTSK.K  | 2058.169 | 0.00755  | 3 | 1 | 45.4 | 0 |
| P12163_1_F3,22192 | K.GPEFATIVNSVTSK.K  | 2058.169 | 0.00653  | 3 | 1 | 38.5 | 0 |
| P12163_1_F3,22609 | K.GPEFATIVNSVTSK.K  | 2058.169 | 0.00607  | 2 | 1 | 73.2 | 0 |
| P12163_1_F3,22744 | K.GPEFATIVNSVTSK.K  | 2058.169 | 0.0074   | 3 | 1 | 63   | 0 |
| P12163_1_F5,21516 | K.GPEFATIVNSVTSK.K  | 2058.169 | 0.00116  | 3 | 1 | 42.8 | 0 |
| P12163_1_F6,21270 | K.GPEFATIVNSVTSK.K  | 2058.169 | 0.00143  | 3 | 1 | 36.4 | 0 |
| P12163_1_F6,21652 | K.GPEFATIVNSVTSK.K  | 2058.169 | 0.00836  | 3 | 1 | 41.7 | 0 |
| P12163_1_F7,20909 | K.GPEFATIVNSVTSK.K  | 2058.169 | 0.00827  | 3 | 1 | 37.4 | 0 |
| P12163_1_F4,17797 | K.LVSDLNDAK.L       | 1582.926 | 0.00468  | 3 | 1 | 53.4 | 0 |
| P12163_1_F4,17868 | K.LVSDLNDAK.L       | 1582.926 | 0.00712  | 2 | 1 | 48   | 0 |
| P12163_1_F5,16496 | K.LVSDLNDAK.L       | 1582.926 | 0.00516  | 2 | 1 | 45.9 | 0 |
| P12163_2_F1,16845 | K.LVSDLNDAK.L       | 1582.926 | 0.0049   | 2 | 1 | 47.9 | 0 |
| P12163_2_F1,16964 | K.LVSDLNDAK.L       | 1582.926 | 0.00459  | 3 | 1 | 31.5 | 0 |
| P12163_2_F2,179   | K.LVSDLNDAK.L       | 1582.926 | 0.01149  | 3 | 1 | 21.9 | 0 |
| P12163_2_F2,602   | K.LVSDLNDAK.L       | 1582.926 | 0.00402  | 3 | 1 | 26.5 | 0 |
| P12163_2_F2,809   | K.LVSDLNDAK.L       | 1582.926 | 0.0086   | 2 | 1 | 29   | 0 |
| P12163_2_F2,1017  | K.LVSDLNDAK.L       | 1582.926 | 0.00357  | 3 | 1 | 23.9 | 0 |
| P12163_2_F4,15203 | K.LVSDLNDAK.L       | 1582.926 | -0.00084 | 3 | 1 | 32.1 | 0 |
| P12163_2_S3,14169 | K.LVSDLNDAK.L       | 1582.926 | 0.00264  | 3 | 1 | 36.6 | 0 |
| P12163_1_F4,10359 | K.NSVSADVATK.T      | 1599.916 | 0.00366  | 3 | 1 | 36.6 | 0 |
| P12163_1_F5,10335 | K.NSVSADVATK.T      | 1599.916 | 0.00626  | 2 | 1 | 41.9 | 0 |
| P12163_2_F1,10820 | K.NSVSADVATK.T      | 1599.916 | 0.00579  | 3 | 1 | 48.6 | 0 |
| P12163_2_F1,10912 | K.NSVSADVATK.T      | 1599.916 | 0.0052   | 2 | 1 | 41.3 | 0 |
| P12163_1_F2,21977 | K.QEDIDGFLVGGASLK.( | 2157.201 | 0.00646  | 3 | 1 | 61.8 | 0 |
| P12163_1_F5,21440 | K.QEDIDGFLVGGASLK.( | 2157.201 | 0.00961  | 3 | 1 | 30.9 | 0 |



|                   |                    |          |          |   |   |      |   |
|-------------------|--------------------|----------|----------|---|---|------|---|
| P12163_1_F6,21377 | K.QEDIDGFLVGGASLK. | 2157.201 | -0.00044 | 3 | 1 | 23.7 | 0 |
| P12163_1_S1,19108 | K.QEDIDGFLVGGASLK. | 2157.201 | 0.00517  | 3 | 1 | 49.9 | 0 |
| P12163_1_S1,20961 | K.QEDIDGFLVGGASLK. | 2157.201 | 0.00304  | 2 | 1 | 58.3 | 0 |
| P12163_1_S1,20993 | K.QEDIDGFLVGGASLK. | 2157.201 | 0.00706  | 3 | 1 | 51.3 | 0 |
| P12163_1_S10,2015 | K.QEDIDGFLVGGASLK. | 2157.201 | 0.00646  | 3 | 1 | 38.2 | 0 |
| P12163_1_F4,21483 | K.TFDVCFQQLK.A     | 1894.035 | 0.01013  | 2 | 1 | 30.5 | 0 |
| P12163_1_F4,21500 | K.TFDVCFQQLK.A     | 1894.035 | 0.00771  | 3 | 1 | 40.4 | 0 |
| P12163_1_F4,23024 | K.TFDVCFQQLK.A     | 1894.035 | 0.01103  | 2 | 1 | 33.2 | 0 |
| P12163_1_F5,20313 | K.TFDVCFQQLK.A     | 1894.035 | 0.01383  | 3 | 1 | 22   | 0 |
| P12163_1_F7,19055 | K.TFDVCFQQLK.A     | 1894.035 | 0.00435  | 3 | 1 | 27.9 | 0 |
| P12163_2_F1,20991 | K.TFDVCFQQLK.A     | 1894.035 | 0.00459  | 3 | 1 | 29.6 | 0 |
| P12163_2_F4,18624 | K.TFDVCFQQLK.A     | 1894.035 | 0.00359  | 2 | 1 | 23.9 | 0 |
| P12163_1_F7,10880 | K.VATPEQAQEVHAAALR | 1924.055 | 0.00076  | 3 | 1 | 43.3 | 0 |
| P12163_1_F7,10904 | K.VATPEQAQEVHAAALR | 1924.055 | -0.00005 | 4 | 1 | 41.5 | 0 |
| P12163_1_F7,10920 | K.VATPEQAQEVHAAALR | 1924.055 | 0.00467  | 4 | 1 | 51.5 | 0 |
| P12163_1_F7,11093 | K.VATPEQAQEVHAAALR | 1924.055 | 0.00133  | 3 | 1 | 47.1 | 0 |
| P12163_1_F7,13487 | K.VATPEQAQEVHAAALR | 1924.055 | 0.0025   | 3 | 1 | 51.1 | 0 |
| P12163_1_F7,13506 | K.VATPEQAQEVHAAALR | 1924.055 | 0.001    | 2 | 1 | 47   | 0 |
| P12163_1_F8,2     | K.VATPEQAQEVHAAALR | 1924.055 | 0.00247  | 3 | 1 | 68   | 0 |
| P12163_1_F8,199   | K.VATPEQAQEVHAAALR | 1924.055 | 0.00445  | 3 | 1 | 52   | 0 |
| P12163_1_F8,385   | K.VATPEQAQEVHAAALR | 1924.055 | 0.00244  | 3 | 1 | 80.3 | 0 |
| P12163_1_F8,558   | K.VATPEQAQEVHAAALR | 1924.055 | 0.00208  | 3 | 1 | 56.1 | 0 |
| P12163_1_F8,737   | K.VATPEQAQEVHAAALR | 1924.055 | 0.00277  | 3 | 1 | 62.2 | 0 |
| P12163_1_F8,888   | K.VATPEQAQEVHAAALR | 1924.055 | 0.0061   | 3 | 1 | 32   | 0 |
| P12163_1_F8,11399 | K.VATPEQAQEVHAAALR | 1924.055 | 0.00046  | 3 | 1 | 26.8 | 0 |
| P12163_1_F8,14097 | K.VATPEQAQEVHAAALR | 1924.055 | 0.00178  | 3 | 1 | 31   | 0 |
| P12163_1_F9,13727 | K.VATPEQAQEVHAAALR | 1924.055 | 0.00304  | 3 | 1 | 53.1 | 0 |
| P12163_2_S5,10775 | K.VATPEQAQEVHAAALR | 1924.055 | -0.00301 | 4 | 1 | 40.4 | 0 |
| P12163_2_S5,11001 | K.VATPEQAQEVHAAALR | 1924.055 | 0.00383  | 4 | 1 | 33.7 | 0 |
| P12163_2_S5,13268 | K.VATPEQAQEVHAAALR | 1924.055 | -0.00104 | 3 | 1 | 97.5 | 0 |
| P12163_2_S5,13386 | K.VATPEQAQEVHAAALR | 1924.055 | 0.00271  | 4 | 1 | 44.9 | 0 |
| P12163_2_S5,13446 | K.VATPEQAQEVHAAALR | 1924.055 | 0.00178  | 2 | 1 | 37.2 | 0 |
| P12163_2_S5,13475 | K.VATPEQAQEVHAAALR | 1924.055 | 0.00388  | 3 | 1 | 94.9 | 0 |
| P12163_1_F9,16491 | K.WVVLGHSER.R      | 1386.78  | 0.00307  | 3 | 1 | 31   | 0 |
| P12163_2_F7,14826 | K.WVVLGHSER.R      | 1386.78  | -0.00359 | 3 | 1 | 30.8 | 0 |
| P12163_2_F9,15620 | K.WVVLGHSER.R      | 1386.78  | 0.00376  | 3 | 1 | 29.9 | 0 |
| P12163_2_F9,15691 | K.WVVLGHSER.R      | 1386.78  | 0.00202  | 2 | 1 | 30.9 | 0 |
| P12163_2_F9,15835 | K.WVVLGHSER.R      | 1386.78  | 0.00457  | 3 | 1 | 37.2 | 0 |
| P12163_1_F8,15330 | R.HVIGEDDQFIGK.K   | 1966.085 | 0.0025   | 3 | 1 | 28.6 | 0 |
| P12163_1_S10,1468 | R.HVIGEDDQFIGK.K   | 1966.085 | 0.00129  | 4 | 1 | 39.1 | 0 |
| P12163_2_F10,1370 | R.HVIGEDDQFIGK.K   | 1966.085 | -0.00039 | 4 | 1 | 26.7 | 0 |
| P12163_2_F10,1371 | R.HVIGEDDQFIGK.K   | 1966.085 | 0.00352  | 3 | 1 | 43.4 | 0 |
| P12163_2_F6,14723 | R.HVIGEDDQFIGK.K   | 1966.085 | 0.00173  | 4 | 1 | 28.8 | 0 |
| P12163_2_F6,14871 | R.HVIGEDDQFIGK.K   | 1966.085 | 0.00475  | 3 | 1 | 52.3 | 0 |
| P12163_2_F6,14873 | R.HVIGEDDQFIGK.K   | 1966.085 | 0.00062  | 2 | 1 | 55.8 | 0 |
| P12163_2_F6,21351 | R.HVIGEDDQFIGK.K   | 1966.085 | 0.01189  | 3 | 1 | 29.4 | 0 |
| P12163_2_F7,13774 | R.HVIGEDDQFIGK.K   | 1966.085 | -0.00278 | 2 | 1 | 31.7 | 0 |
| P12163_1_F3,20194 | R.IEIAAQNSWVGK.G   | 1924.111 | 0.00703  | 2 | 1 | 65.5 | 0 |
| P12163_1_F4,20646 | R.IEIAAQNSWVGK.G   | 1924.111 | 0.00635  | 3 | 1 | 52.5 | 0 |
| P12163_1_F4,20660 | R.IEIAAQNSWVGK.G   | 1924.111 | 0.00421  | 2 | 1 | 63   | 0 |
| P12163_2_F1,20077 | R.IEIAAQNSWVGK.G   | 1924.111 | 0.00453  | 3 | 1 | 49.1 | 0 |

|                    |                    |          |          |   |   |      |   |
|--------------------|--------------------|----------|----------|---|---|------|---|
| P12163_2_F1,20093  | R.IEIAAQNSWVGK.G   | 1924.111 | 0.00029  | 2 | 1 | 53.3 | 0 |
| P12163_2_F4,17764  | R.IEIAAQNSWVGK.G   | 1924.111 | 0.00318  | 3 | 1 | 46.9 | 0 |
| P12163_1_F3,15409  | R.IYGGSVNGSNCAELA  | 2361.269 | 0.00217  | 3 | 1 | 44.2 | 0 |
| P12163_1_F3,16135  | R.IYGGSVNGSNCAELA  | 2361.269 | -0.00131 | 3 | 1 | 24   | 0 |
| P12163_1_F3,17635  | R.IYGGSVNGSNCAELA  | 2361.269 | -0.00479 | 3 | 1 | 63.6 | 0 |
| P12163_1_F3,17697  | R.IYGGSVNGSNCAELA  | 2361.269 | 0.00556  | 2 | 1 | 98.1 | 0 |
| P12163_1_F6,13922  | R.RHVIGEDDQFIGK.K  | 2122.186 | 0.0079   | 3 | 1 | 35.2 | 0 |
| P12163_2_F7,12399  | R.RHVIGEDDQFIGK.K  | 2122.186 | 0.00439  | 3 | 1 | 34.1 | 0 |
| P12163_2_S5,13119  | R.RHVIGEDDQFIGK.K  | 2122.186 | 0.00481  | 3 | 1 | 37.7 | 0 |
| P12163_1_F8,18865  | K.DAISLADRDEFIVR.G | 1924.044 | 0.00105  | 2 | 1 | 56.8 | 0 |
| P12163_1_F8,18879  | K.DAISLADRDEFIVR.G | 1924.044 | -0.00219 | 3 | 1 | 31.9 | 0 |
| P12163_1_F9,18546  | K.DAISLADRDEFIVR.G | 1924.044 | 0.00198  | 3 | 1 | 29.6 | 0 |
| P12163_1_F9,18550  | K.DAISLADRDEFIVR.G | 1924.044 | -0.00003 | 2 | 1 | 29.6 | 0 |
| P12163_2_S5,17470  | K.DAISLADRDEFIVR.G | 1924.044 | 0.00288  | 3 | 1 | 29.3 | 0 |
| P12163_2_S5,17504  | K.DAISLADRDEFIVR.G | 1924.044 | 0.00405  | 2 | 1 | 66.5 | 0 |
| P12163_1_F3,17432  | K.EGLPAFPM*GK.I    | 1670.94  | 0.00417  | 3 | 1 | 23.5 | 0 |
| P12163_1_F3,17461  | K.EGLPAFPM*GK.I    | 1670.94  | 0.00561  | 2 | 1 | 25.9 | 0 |
| P12163_1_F4,20492  | K.EGLPAFPM*GK.I    | 1670.94  | 0.01025  | 2 | 1 | 25.8 | 0 |
| P12163_2_F4,17674  | K.EGLPAFPM*GK.I    | 1670.94  | 0.00183  | 3 | 1 | 22.5 | 0 |
| P12163_1_F3,19899  | K.EGLPAFPMGK.I     | 1654.945 | 0.01238  | 2 | 1 | 33.7 | 0 |
| P12163_1_F5,19190  | K.EGLPAFPMGK.I     | 1654.945 | 0.00328  | 2 | 1 | 29.1 | 0 |
| P12163_1_F5,19199  | K.EGLPAFPMGK.I     | 1654.945 | 0.00228  | 3 | 1 | 26.1 | 0 |
| P12163_1_F6,18869  | K.EGLPAFPMGK.I     | 1654.945 | 0.00159  | 3 | 1 | 23.7 | 0 |
| P12163_2_F1,19891  | K.EGLPAFPMGK.I     | 1654.945 | 0.0138   | 3 | 1 | 22   | 0 |
| P12163_2_F1,20134  | K.EGLPAFPMGK.I     | 1654.945 | 0.00578  | 2 | 1 | 31.7 | 0 |
| P12163_2_F4,17632  | K.EGLPAFPMGK.I     | 1654.945 | 0.00474  | 3 | 1 | 23.4 | 0 |
| P12163_1_F6,13779  | K.EINGAGINSSFAVHQD | 2390.2   | 0.00363  | 3 | 1 | 53.2 | 0 |
| P12163_1_F6,14593  | K.EINGAGINSSFAVHQD | 2390.2   | 0.00726  | 3 | 1 | 65.8 | 0 |
| P12163_1_F6,15944  | K.EINGAGINSSFAVHQD | 2390.2   | 0.01194  | 3 | 1 | 83.4 | 0 |
| P12163_1_F7,13845  | K.EINGAGINSSFAVHQD | 2390.2   | 0.00246  | 3 | 1 | 50.9 | 0 |
| P12163_1_F7,15188  | K.EINGAGINSSFAVHQD | 2390.2   | 0.00495  | 3 | 1 | 94.9 | 0 |
| P12163_1_F7,15219  | K.EINGAGINSSFAVHQD | 2390.2   | -0.01319 | 2 | 1 | 32   | 0 |
| P12163_1_F7,15414  | K.EINGAGINSSFAVHQD | 2390.2   | 0.00783  | 3 | 1 | 50.5 | 0 |
| P12163_1_F8,14498  | K.EINGAGINSSFAVHQD | 2390.2   | 0.00594  | 3 | 1 | 32.3 | 0 |
| P12163_1_F8,15883  | K.EINGAGINSSFAVHQD | 2390.2   | 0.00495  | 3 | 1 | 80.6 | 0 |
| P12163_1_F8,15931  | K.EINGAGINSSFAVHQD | 2390.2   | -0.00041 | 2 | 1 | 42   | 0 |
| P12163_1_F9,15766  | K.EINGAGINSSFAVHQD | 2390.2   | 0.00531  | 3 | 1 | 28.5 | 0 |
| P12163_2_F10,13511 | K.EINGAGINSSFAVHQD | 2390.2   | 0.00533  | 4 | 1 | 61.7 | 0 |
| P12163_2_F10,13531 | K.EINGAGINSSFAVHQD | 2390.2   | 0.0072   | 3 | 1 | 64   | 0 |
| P12163_2_F10,14481 | K.EINGAGINSSFAVHQD | 2390.2   | 0.00204  | 3 | 1 | 83.2 | 0 |
| P12163_2_F10,14671 | K.EINGAGINSSFAVHQD | 2390.2   | 0.0093   | 3 | 1 | 91.6 | 0 |
| P12163_2_F4,13512  | K.EINGAGINSSFAVHQD | 2390.2   | 0.00348  | 3 | 1 | 74.8 | 0 |
| P12163_2_F4,14828  | K.EINGAGINSSFAVHQD | 2390.2   | 0.0057   | 3 | 1 | 66.3 | 0 |
| P12163_2_S5,13704  | K.EINGAGINSSFAVHQD | 2390.2   | -0.01495 | 4 | 1 | 52.4 | 0 |
| P12163_2_S5,13705  | K.EINGAGINSSFAVHQD | 2390.2   | -0.00984 | 3 | 1 | 31.9 | 0 |
| P12163_2_S5,14902  | K.EINGAGINSSFAVHQD | 2390.2   | 0.00441  | 3 | 1 | 54.5 | 0 |
| P12163_2_S5,14919  | K.EINGAGINSSFAVHQD | 2390.2   | 0.00253  | 4 | 1 | 67.3 | 0 |
| P12163_1_F4,18243  | K.NISVIAVCPK.G     | 1709.024 | 0.00642  | 3 | 1 | 40   | 0 |
| P12163_1_F4,18248  | K.NISVIAVCPK.G     | 1709.024 | 0.01007  | 2 | 1 | 47.6 | 0 |
| P12163_1_F4,18480  | K.NISVIAVCPK.G     | 1709.024 | 0.00579  | 3 | 1 | 36.1 | 0 |
| P12163_1_F4,18525  | K.NISVIAVCPK.G     | 1709.024 | 0.00613  | 2 | 1 | 51.6 | 0 |

|                                          |          |          |   |   |      |   |
|------------------------------------------|----------|----------|---|---|------|---|
| P12163_1_F5,17003 K.NISVIAVCPK.G         | 1709.024 | 0.00354  | 3 | 1 | 26.8 | 0 |
| P12163_1_F5,17014 K.NISVIAVCPK.G         | 1709.024 | 0.00395  | 2 | 1 | 39   | 0 |
| P12163_1_F7,16051 K.NISVIAVCPK.G         | 1709.024 | 0.00564  | 3 | 1 | 31.3 | 0 |
| P12163_1_F7,16606 K.NISVIAVCPK.G         | 1709.024 | 0.00666  | 3 | 1 | 35.2 | 0 |
| P12163_2_F1,17648 K.NISVIAVCPK.G         | 1709.024 | 0.00643  | 2 | 1 | 50.8 | 0 |
| P12163_2_F1,17681 K.NISVIAVCPK.G         | 1709.024 | 0.00666  | 3 | 1 | 45.5 | 0 |
| P12163_2_F4,15757 K.NISVIAVCPK.G         | 1709.024 | 0.00245  | 2 | 1 | 30.1 | 0 |
| P12163_2_F4,15794 K.NISVIAVCPK.G         | 1709.024 | -0.00252 | 3 | 1 | 25.6 | 0 |
| P12163_2_F4,16302 K.NISVIAVCPK.G         | 1709.024 | 0.00715  | 2 | 1 | 46.9 | 0 |
| P12163_1_F3,16441 K.NTVECITGIISK.I       | 1943.109 | 0.00565  | 4 | 1 | 25.6 | 0 |
| P12163_1_F3,16474 K.NTVECITGIISK.I       | 1943.109 | 0.00208  | 2 | 1 | 45.9 | 0 |
| P12163_1_F3,20236 K.NTVECITGIISK.I       | 1943.109 | 0.00353  | 3 | 1 | 56   | 0 |
| P12163_1_F3,20621 K.NTVECITGIISK.I       | 1943.109 | 0.00654  | 2 | 1 | 61   | 0 |
| P12163_1_F4,21226 K.NTVECITGIISK.I       | 1943.109 | 0.00638  | 3 | 1 | 48.3 | 0 |
| P12163_1_F4,21236 K.NTVECITGIISK.I       | 1943.109 | 0.00642  | 2 | 1 | 62.4 | 0 |
| P12163_1_F5,20042 K.NTVECITGIISK.I       | 1943.109 | 0.0013   | 2 | 1 | 46.1 | 0 |
| P12163_1_F5,20080 K.NTVECITGIISK.I       | 1943.109 | 0.00491  | 3 | 1 | 32.9 | 0 |
| P12163_1_F6,20037 K.NTVECITGIISK.I       | 1943.109 | 0.00548  | 3 | 1 | 44   | 0 |
| P12163_1_F6,20041 K.NTVECITGIISK.I       | 1943.109 | -0.00224 | 2 | 1 | 55.9 | 0 |
| P12163_1_F6,21127 K.NTVECITGIISK.I       | 1943.109 | 0.00029  | 3 | 1 | 28.7 | 0 |
| P12163_1_F8,20158 K.NTVECITGIISK.I       | 1943.109 | 0.00038  | 3 | 1 | 29.3 | 0 |
| P12163_2_F1,20743 K.NTVECITGIISK.I       | 1943.109 | 0.00995  | 3 | 1 | 47   | 0 |
| P12163_2_F1,20797 K.NTVECITGIISK.I       | 1943.109 | 0.00392  | 2 | 1 | 77.9 | 0 |
| P12163_2_F4,18486 K.NTVECITGIISK.I       | 1943.109 | -0.00592 | 3 | 1 | 34   | 0 |
| P12163_2_F4,18759 K.NTVECITGIISK.I       | 1943.109 | 0.00179  | 3 | 1 | 44.2 | 0 |
| P12163_2_S3,16728 K.NTVECITGIISK.I       | 1943.109 | 0.00422  | 3 | 1 | 43.2 | 0 |
| P12163_1_F5,12128 K.SDIVVK.V             | 1268.803 | 0.01028  | 2 | 1 | 30.9 | 0 |
| P12163_2_F1,12611 K.SDIVVK.V             | 1268.803 | 0.00674  | 2 | 1 | 31.1 | 0 |
| P12163_2_F1,14716 R.DEFIVR.G             | 1082.615 | 0.00406  | 2 | 1 | 23.9 | 0 |
| P12163_1_F6,11251 R.DSLAEAK.S            | 1341.783 | 0.00421  | 3 | 1 | 22.4 | 0 |
| P12163_1_F8,10459 R.DSLAEAK.S            | 1341.783 | 0.00133  | 3 | 1 | 23.9 | 0 |
| P12163_2_F1,10713 R.DSLAEAK.S            | 1341.783 | 0.00263  | 3 | 1 | 24.8 | 0 |
| P12163_2_S5,10025 R.DSLAEAK.S            | 1341.783 | 0.0074   | 3 | 1 | 24.7 | 0 |
| P12163_1_F3,16084 R.FTENGMS*SEDLAYK.N    | 2129.068 | 0.00503  | 2 | 1 | 49.3 | 0 |
| P12163_1_F3,18439 R.FTENGMS*SEDLAYK.N    | 2113.073 | 0.00539  | 2 | 1 | 58.4 | 0 |
| P12163_1_S1,12194 R.GVSFM*VDNCSTTAR..    | 1864.883 | 0.001    | 3 | 1 | 52.9 | 0 |
| P12163_1_S1,13455 R.GVSFM*VDNCSTTAR..    | 1864.883 | 0.00542  | 2 | 1 | 51.2 | 0 |
| P12163_1_S1,13477 R.GVSFM*VDNCSTTAR..    | 1864.883 | 0.01069  | 3 | 1 | 74.4 | 0 |
| P12163_1_S1,13707 R.GVSFM*VDNCSTTAR..    | 1864.883 | 0.00224  | 2 | 1 | 31.4 | 0 |
| P12163_1_S1,13727 R.GVSFM*VDNCSTTAR..    | 1864.883 | 0.00196  | 3 | 1 | 55.6 | 0 |
| P12163_1_S1,14343 R.GVSFM*VDNCSTTAR.L    | 1848.889 | 0.00151  | 3 | 1 | 64.8 | 0 |
| P12163_1_S1,15977 R.GVSFM*VDNCSTTAR.L    | 1848.889 | 0.0001   | 2 | 1 | 53.9 | 0 |
| P12163_1_S1,15993 R.GVSFM*VDNCSTTAR.L    | 1848.889 | 0.00358  | 3 | 1 | 64.1 | 0 |
| P12163_2_F6,16158 R.GVSFM*VDNCSTTAR.L    | 1848.889 | 0.00754  | 2 | 1 | 60   | 0 |
| P12163_1_F9,15455 R.RFTENGMS*SEDLAYK.N   | 2269.174 | 0.01302  | 3 | 1 | 44.8 | 0 |
| P12163_2_F9,14981 R.RFTENGMS*SEDLAYK.N   | 2269.174 | 0.00747  | 3 | 1 | 37.9 | 0 |
| P12163_1_F3,12385 R.SDIFGER.G ! R.SDIFGE | 1127.6   | 0.00279  | 3 | 1 | 22.2 | 0 |
| P12163_1_F3,15292 R.SDIFGER.G ! R.SDIFGE | 1127.6   | 0.0025   | 2 | 1 | 27.9 | 0 |
| P12163_1_F3,8658 R.SVVLAGR.R             | 1005.636 | 0.00243  | 3 | 1 | 35   | 0 |
| P12163_2_F1,8147 R.SVVLAGR.R             | 1005.636 | 0.00498  | 3 | 1 | 43.5 | 0 |
| P12163_1_F4,15344 K.DLTVVAK.E            | 1353.856 | 0.00786  | 3 | 1 | 30.2 | 0 |

|                   |                     |          |         |   |   |      |   |
|-------------------|---------------------|----------|---------|---|---|------|---|
| P12163_1_F4,15415 | K.DLTVVAK.E         | 1353.856 | 0.00787 | 2 | 1 | 31.7 | 0 |
| P12163_1_F4,17183 | K.DLTVVAK.E         | 1353.856 | 0.00661 | 2 | 1 | 27.2 | 0 |
| P12163_1_F5,14120 | K.DLTVVAK.E         | 1353.856 | 0.00315 | 3 | 1 | 29.2 | 0 |
| P12163_1_F5,14122 | K.DLTVVAK.E         | 1353.856 | 0.00641 | 2 | 1 | 28.2 | 0 |
| P12163_1_F6,14906 | K.DLTVVAK.E         | 1353.856 | 0.00669 | 2 | 1 | 27.5 | 0 |
| P12163_1_F7,13551 | K.DLTVVAK.E         | 1353.856 | 0.00018 | 3 | 1 | 32.2 | 0 |
| P12163_2_F1,14292 | K.DLTVVAK.E         | 1353.856 | 0.00495 | 3 | 1 | 29.3 | 0 |
| P12163_2_F2,1950  | K.DLTVVAK.E         | 1353.856 | 0.00545 | 2 | 1 | 29.1 | 0 |
| P12163_2_F2,2105  | K.DLTVVAK.E         | 1353.856 | 0.00687 | 3 | 1 | 23   | 0 |
| P12163_2_F2,2147  | K.DLTVVAK.E         | 1353.856 | 0.00359 | 2 | 1 | 24   | 0 |
| P12163_2_F2,2299  | K.DLTVVAK.E         | 1353.856 | 0.006   | 3 | 1 | 29.7 | 0 |
| P12163_2_F4,13229 | K.DLTVVAK.E         | 1353.856 | 0.00006 | 3 | 1 | 27.1 | 0 |
| P12163_2_F4,13257 | K.DLTVVAK.E         | 1353.856 | 0.00171 | 2 | 1 | 28.7 | 0 |
| P12163_2_F1,9996  | K.ELSEDGK.K         | 1385.773 | 0.00385 | 3 | 1 | 26.1 | 0 |
| P12163_1_F5,11623 | K.ESEEAWK.Q         | 1486.8   | 0.00698 | 2 | 1 | 24.9 | 0 |
| P12163_1_F5,11648 | K.ESEEAWK.Q         | 1486.8   | 0.00947 | 3 | 1 | 24.7 | 0 |
| P12163_2_F2,12298 | K.ESEEAWK.Q         | 1486.8   | 0.00572 | 2 | 1 | 26.4 | 0 |
| P12163_2_F2,12331 | K.ESEEAWK.Q         | 1486.8   | 0.01172 | 3 | 1 | 33.3 | 0 |
| P12163_2_F2,12514 | K.ESEEAWK.Q         | 1486.8   | 0.00734 | 2 | 1 | 25.1 | 0 |
| P12163_1_F4,11489 | K.ETAEQLK.I         | 1426.836 | 0.00235 | 2 | 1 | 25.5 | 0 |
| P12163_1_F5,10139 | K.ETAEQLK.I         | 1426.836 | 0.00781 | 2 | 1 | 29.1 | 0 |
| P12163_1_F8,10295 | K.ETAEQLK.I         | 1426.836 | 0.00393 | 2 | 1 | 25.6 | 0 |
| P12163_1_F8,10321 | K.ETAEQLK.I         | 1426.836 | 0.0053  | 3 | 1 | 24.6 | 0 |
| P12163_2_F1,10682 | K.ETAEQLK.I         | 1426.836 | 0.00621 | 2 | 1 | 26.3 | 0 |
| P12163_1_S1,24387 | K.GQAAIATIIFLR.E    | 1577.968 | 0.00335 | 3 | 1 | 62.2 | 0 |
| P12163_1_F3,16364 | K.M*QSVSQEAYEYISK.I | 2287.174 | 0.0101  | 3 | 1 | 42.4 | 0 |
| P12163_1_F3,17474 | K.M*QSVSQEAYEYISK.I | 2287.174 | 0.01244 | 3 | 1 | 36.8 | 0 |
| P12163_1_F3,17504 | K.M*QSVSQEAYEYISK.I | 2287.174 | 0.0012  | 2 | 1 | 57.6 | 0 |
| P12163_1_F9,16852 | K.M*QSVSQEAYEYISK.I | 2287.174 | 0.00326 | 3 | 1 | 29.7 | 0 |
| P12163_2_F7,17960 | K.M*QSVSQEAYEYISK.I | 2287.174 | 0.00212 | 3 | 1 | 43.1 | 0 |
| P12163_1_F3,14334 | K.MQSVSQEAYEYISK.R  | 2271.179 | 0.00161 | 3 | 1 | 22.1 | 0 |
| P12163_1_F3,15618 | K.MQSVSQEAYEYISK.R  | 2271.179 | 0.0068  | 3 | 1 | 30.6 | 0 |
| P12163_1_F3,19905 | K.MQSVSQEAYEYISK.R  | 2271.179 | 0.00695 | 3 | 1 | 55   | 0 |
| P12163_1_F3,20682 | K.MQSVSQEAYEYISK.R  | 2271.179 | 0.00932 | 3 | 1 | 51.1 | 0 |
| P12163_1_F3,20706 | K.MQSVSQEAYEYISK.R  | 2271.179 | 0.0053  | 2 | 1 | 84.5 | 0 |
| P12163_1_F4,21388 | K.MQSVSQEAYEYISK.R  | 2271.179 | 0.00647 | 3 | 1 | 42.9 | 0 |
| P12163_1_F4,21438 | K.MQSVSQEAYEYISK.R  | 2271.179 | 0.00646 | 2 | 1 | 61.3 | 0 |
| P12163_1_F6,19559 | K.MQSVSQEAYEYISK.R  | 2271.179 | 0.00308 | 3 | 1 | 40.5 | 0 |
| P12163_1_F6,19808 | K.MQSVSQEAYEYISK.R  | 2271.179 | 0.0014  | 3 | 1 | 41.4 | 0 |
| P12163_2_F7,17972 | K.MQSVSQEAYEYISK.R  | 2271.179 | 0.00098 | 3 | 1 | 54.2 | 0 |
| P12163_2_F9,19099 | K.MQSVSQEAYEYISK.R  | 2271.179 | 0.00557 | 3 | 1 | 49.4 | 0 |
| P12163_1_F4,11195 | K.QLLAAFR.E         | 1110.657 | 0.00505 | 3 | 1 | 34   | 0 |
| P12163_1_F4,15612 | K.QLLAAFR.E         | 1110.657 | 0.00099 | 2 | 1 | 24.9 | 0 |
| P12163_2_F1,14489 | K.QLLAAFR.E         | 1110.657 | 0.00433 | 2 | 1 | 25.2 | 0 |
| P12163_2_F2,1896  | K.QLLAAFR.E         | 1110.657 | 0.00139 | 2 | 1 | 24.1 | 0 |
| P12163_1_F4,9940  | K.SSEESSEIK.A       | 1603.863 | 0.0073  | 2 | 1 | 38   | 0 |
| P12163_1_F5,8362  | K.SSEESSEIK.A       | 1603.863 | 0.00708 | 2 | 1 | 47.2 | 0 |
| P12163_1_F8,8772  | K.SSEESSEIK.A       | 1603.863 | 0.00152 | 2 | 1 | 27.3 | 0 |
| P12163_2_F1,7319  | K.SSEESSEIK.A       | 1603.863 | 0.0089  | 3 | 1 | 22.2 | 0 |
| P12163_1_F4,13980 | K.TSPVALK.G         | 1323.846 | 0.00542 | 3 | 1 | 25.5 | 0 |
| P12163_2_F1,12906 | K.TSPVALK.G         | 1323.846 | 0.00493 | 2 | 1 | 30.6 | 0 |

|                                        |          |          |   |   |      |   |
|----------------------------------------|----------|----------|---|---|------|---|
| P12163_2_S5,11530 K.TSPVALK.G          | 1323.846 | 0.00104  | 3 | 1 | 22.5 | 0 |
| P12163_1_F3,11903 K.YLTEATENNPEVK.E    | 2116.138 | 0.00623  | 3 | 1 | 22.7 | 0 |
| P12163_1_F3,13303 K.YLTEATENNPEVK.E    | 2116.138 | 0.00676  | 2 | 1 | 32.6 | 0 |
| P12163_1_F3,13403 K.YLTEATENNPEVK.E    | 2116.138 | 0.00497  | 3 | 1 | 23   | 0 |
| P12163_1_F3,13795 K.YLTEATENNPEVK.E    | 2116.138 | 0.00494  | 2 | 1 | 28.7 | 0 |
| P12163_1_F3,13822 K.YLTEATENNPEVK.E    | 2116.138 | 0.00683  | 4 | 1 | 23.5 | 0 |
| P12163_1_F3,16361 K.YLTEATENNPEVK.E    | 2116.138 | 0.00266  | 3 | 1 | 43.1 | 0 |
| P12163_1_F3,16380 K.YLTEATENNPEVK.E    | 2116.138 | 0.00218  | 2 | 1 | 61.8 | 0 |
| P12163_1_F4,16875 K.YLTEATENNPEVK.E    | 2116.138 | 0.00695  | 3 | 1 | 23.4 | 0 |
| P12163_1_F4,16885 K.YLTEATENNPEVK.E    | 2116.138 | 0.0045   | 2 | 1 | 65.6 | 0 |
| P12163_1_F5,15689 K.YLTEATENNPEVK.E    | 2116.138 | 0.0109   | 2 | 1 | 31.3 | 0 |
| P12163_1_F9,15831 K.YLTEATENNPEVK.E    | 2116.138 | 0.01091  | 3 | 1 | 32   | 0 |
| P12163_2_F1,16046 K.YLTEATENNPEVK.E    | 2116.138 | 0.00968  | 3 | 1 | 35.5 | 0 |
| P12163_2_F1,16059 K.YLTEATENNPEVK.E    | 2116.138 | 0.00352  | 2 | 1 | 45.2 | 0 |
| P12163_2_F7,14560 K.YLTEATENNPEVK.E    | 2116.138 | 0.00286  | 2 | 1 | 69.7 | 0 |
| P12163_2_F7,14629 K.YLTEATENNPEVK.E    | 2116.138 | 0.00128  | 3 | 1 | 40.5 | 0 |
| P12163_2_F9,15230 K.YLTEATENNPEVK.E    | 2116.138 | 0.00626  | 3 | 1 | 36.4 | 0 |
| P12163_2_F9,15236 K.YLTEATENNPEVK.E    | 2116.138 | 0.00376  | 2 | 1 | 30.5 | 0 |
| P12163_1_F5,14082 R.ATAILK.E           | 1224.814 | 0.00317  | 3 | 1 | 22.1 | 0 |
| P12163_1_F5,11210 R.ITVENK.W           | 1311.809 | 0.00584  | 3 | 1 | 22   | 0 |
| P12163_2_F1,11749 R.ITVENK.W           | 1311.809 | 0.00533  | 3 | 1 | 22.7 | 0 |
| P12163_2_F1,8086 R.KGSDM*EYGTEN.-      | 1854.9   | -0.00037 | 2 | 1 | 29.6 | 0 |
| P12163_1_F5,9683 R.KGSDMEYGTEN.-       | 1838.905 | 0.00853  | 2 | 1 | 30.1 | 0 |
| P12163_1_S10,1127 R.KGSDMEYGTEN.-      | 1838.905 | 0.0052   | 3 | 1 | 28.5 | 0 |
| P12163_1_F7,11571 K.ATAGDTHLGGEDFDN    | 1979.936 | 0.00221  | 3 | 1 | 31.1 | 0 |
| P12163_1_F8,9335 K.ATAGDTHLGGEDFDN     | 1979.936 | 0.00154  | 4 | 1 | 32.9 | 0 |
| P12163_1_F8,10350 K.ATAGDTHLGGEDFDN    | 1979.936 | 0.00474  | 4 | 1 | 44.7 | 0 |
| P12163_1_F8,10358 K.ATAGDTHLGGEDFDN    | 1979.936 | 0.00495  | 2 | 1 | 39   | 0 |
| P12163_1_F8,10594 K.ATAGDTHLGGEDFDN    | 1979.936 | 0.00784  | 3 | 1 | 35.8 | 0 |
| P12163_1_F8,10598 K.ATAGDTHLGGEDFDN    | 1979.936 | 0.00085  | 2 | 1 | 45.7 | 0 |
| P12163_1_F8,10606 K.ATAGDTHLGGEDFDN    | 1979.936 | 0.0029   | 4 | 1 | 38.9 | 0 |
| P12163_1_F8,12056 K.ATAGDTHLGGEDFDN    | 1979.936 | 0.00302  | 3 | 1 | 55.8 | 0 |
| P12163_1_F8,12232 K.ATAGDTHLGGEDFDN    | 1979.936 | 0.00173  | 2 | 1 | 44.6 | 0 |
| P12163_2_F9,11279 K.ATAGDTHLGGEDFDN    | 1979.936 | 0.00163  | 3 | 1 | 61.8 | 0 |
| P12163_2_S5,9391 K.ATAGDTHLGGEDFDN     | 1979.936 | 0.00354  | 4 | 1 | 35.8 | 0 |
| P12163_2_S5,10362 K.ATAGDTHLGGEDFDN    | 1979.936 | 0.00242  | 4 | 1 | 55.1 | 0 |
| P12163_2_S5,10365 K.ATAGDTHLGGEDFDN    | 1979.936 | 0.00311  | 3 | 1 | 39.6 | 0 |
| P12163_2_S5,10368 K.ATAGDTHLGGEDFDN    | 1979.936 | 0.01013  | 2 | 1 | 35   | 0 |
| P12163_2_S5,10564 K.ATAGDTHLGGEDFDN    | 1979.936 | 0.00286  | 4 | 1 | 37.9 | 0 |
| P12163_2_S5,11889 K.ATAGDTHLGGEDFDN    | 1979.936 | 0.0021   | 4 | 1 | 49.3 | 0 |
| P12163_2_S5,11953 K.ATAGDTHLGGEDFDN    | 1979.936 | -0.00161 | 3 | 1 | 41   | 0 |
| P12163_1_F5,11319 K.CMEPVEK.C          | 1500.801 | 0.00642  | 2 | 1 | 25.4 | 0 |
| P12163_1_S1,19382 K.DAGVIAGLNVMR.I     | 1519.857 | 0.00158  | 3 | 1 | 52.4 | 0 |
| P12163_1_S1,19420 K.DAGVIAGLNVMR.I     | 1519.857 | 0.00348  | 2 | 1 | 42.7 | 0 |
| P12163_1_F3,20353 K.ELESICNPIIAK.M     | 1995.14  | 0.00225  | 2 | 1 | 69.9 | 0 |
| P12163_1_F3,20364 K.ELESICNPIIAK.M     | 1995.14  | 0.00408  | 3 | 1 | 58   | 0 |
| P12163_1_F4,12357 K.MVQEAEK.Y ! R.MVQI | 1442.813 | 0.00599  | 2 | 1 | 28.1 | 0 |
| P12163_1_F5,10859 K.MVQEAEK.Y ! R.MVQI | 1442.813 | 0.00519  | 2 | 1 | 26.8 | 0 |
| P12163_1_F5,10908 K.MVQEAEK.Y ! R.MVQI | 1442.813 | 0.00899  | 3 | 1 | 35.2 | 0 |
| P12163_1_F6,11909 K.MVQEAEK.Y ! R.MVQI | 1442.813 | 0.00945  | 2 | 1 | 30.4 | 0 |
| P12163_2_F1,11370 K.MVQEAEK.Y ! R.MVQI | 1442.813 | 0.00503  | 2 | 1 | 27.8 | 0 |

|                   |                        |          |          |   |   |      |   |
|-------------------|------------------------|----------|----------|---|---|------|---|
| P12163_2_F1,11390 | K.MVQEAEK.Y ! R.MVQI   | 1442.813 | 0.00722  | 3 | 1 | 39.8 | 0 |
| P12163_1_F3,17989 | K.NALENYAYNMR.N        | 1662.821 | 0.00301  | 2 | 1 | 33.4 | 0 |
| P12163_1_F9,17110 | K.NALENYAYNMR.N        | 1662.821 | -0.00229 | 2 | 1 | 36.7 | 0 |
| P12163_2_F1,17641 | K.NALENYAYNMR.N        | 1662.821 | 0.00091  | 2 | 1 | 31.7 | 0 |
| P12163_2_F9,16815 | K.NALENYAYNMR.N        | 1662.821 | 0.00245  | 2 | 1 | 38.5 | 0 |
| P12163_2_F9,16832 | K.NALENYAYNMR.N        | 1662.821 | 0.00103  | 3 | 1 | 34   | 0 |
| P12163_1_F8,18778 | K.NAVVTVPAYFNDSQR      | 1985.039 | -0.00348 | 2 | 1 | 30.4 | 0 |
| P12163_1_F8,18854 | K.NAVVTVPAYFNDSQR      | 1985.039 | 0.00299  | 3 | 1 | 33.4 | 0 |
| P12163_1_S1,17806 | K.NAVVTVPAYFNDSQR      | 1985.039 | 0.01346  | 2 | 1 | 36.9 | 0 |
| P12163_1_S1,17812 | K.NAVVTVPAYFNDSQR      | 1985.039 | 0.00257  | 3 | 1 | 27.2 | 0 |
| P12163_2_F6,18372 | K.NAVVTVPAYFNDSQR      | 1985.039 | 0.00464  | 2 | 1 | 47.4 | 0 |
| P12163_2_F6,18440 | K.NAVVTVPAYFNDSQR      | 1985.039 | -0.00088 | 3 | 1 | 39.9 | 0 |
| P12163_1_F7,13495 | K.STVHDVVLVGGSTR.I     | 1730.97  | 0.00262  | 3 | 1 | 31.4 | 0 |
| P12163_1_F7,13515 | K.STVHDVVLVGGSTR.I     | 1730.97  | 0.00321  | 2 | 1 | 55.8 | 0 |
| P12163_1_F8,14064 | K.STVHDVVLVGGSTR.I     | 1730.97  | 0.00271  | 3 | 1 | 25.2 | 0 |
| P12163_1_F8,14080 | K.STVHDVVLVGGSTR.I     | 1730.97  | 0.00279  | 2 | 1 | 53.7 | 0 |
| P12163_1_S1,23194 | R.FEELNM*DLFR.K        | 1633.82  | 0.00103  | 3 | 1 | 40.2 | 0 |
| P12163_1_S1,23396 | R.FEELNM*DLFR.K        | 1633.82  | 0.00348  | 2 | 1 | 42.5 | 0 |
| P12163_1_S1,23417 | R.FEELNM*DLFR.K        | 1633.82  | 0.00235  | 3 | 1 | 57.6 | 0 |
| P12163_1_F2,22404 | R.IINEPTAAAIAAYGLDK.I  | 2268.306 | 0.00735  | 3 | 1 | 45.2 | 0 |
| P12163_1_F4,23908 | R.IINEPTAAAIAAYGLDK.I  | 2268.306 | 0.00405  | 3 | 1 | 59.2 | 0 |
| P12163_1_F5,22034 | R.IINEPTAAAIAAYGLDK.I  | 2268.306 | 0.00048  | 3 | 1 | 35.6 | 0 |
| P12163_1_F8,22408 | R.IINEPTAAAIAAYGLDK.I  | 2268.306 | 0.00681  | 3 | 1 | 49.7 | 0 |
| P12163_1_S1,21321 | R.IINEPTAAAIAAYGLDK.I  | 2268.306 | 0.00492  | 3 | 1 | 53.3 | 0 |
| P12163_1_S1,21346 | R.IINEPTAAAIAAYGLDK.I  | 2268.306 | -0.00297 | 2 | 1 | 75.2 | 0 |
| P12163_1_S1,21375 | R.IINEPTAAAIAAYGLDK.I  | 2268.306 | 0.00752  | 4 | 1 | 61   | 0 |
| P12163_1_S1,21490 | R.IINEPTAAAIAAYGLDK.I  | 2268.306 | 0.0003   | 3 | 1 | 54.8 | 0 |
| P12163_1_S10,2039 | R.IINEPTAAAIAAYGLDK.I  | 2268.306 | 0.00414  | 3 | 1 | 22.1 | 0 |
| P12163_1_F9,17016 | R.M*VNHFVQEFK.R        | 1903.036 | 0.00793  | 2 | 1 | 24.1 | 0 |
| P12163_1_F9,19653 | R.M*VNHFVQEFK.R        | 1903.036 | 0.00674  | 3 | 1 | 24.3 | 0 |
| P12163_1_F9,20038 | R.M*VNHFVQEFK.R        | 1903.036 | 0.00752  | 3 | 1 | 26.5 | 0 |
| P12163_2_F7,15183 | R.M*VNHFVQEFK.R        | 1903.036 | 0.00599  | 3 | 1 | 42   | 0 |
| P12163_2_F9,19029 | R.MVNHFVQEFK.R         | 1887.041 | 0.01061  | 3 | 1 | 33   | 0 |
| P12163_2_F9,19097 | R.MVNHFVQEFK.R         | 1887.041 | 0.00653  | 3 | 1 | 33   | 0 |
| P12163_1_F8,14527 | R.TTPSYVAFTDTER.L      | 1791.907 | 0.00344  | 3 | 1 | 24.1 | 0 |
| P12163_1_F8,14585 | R.TTPSYVAFTDTER.L      | 1791.907 | 0.00829  | 2 | 1 | 31.6 | 0 |
| P12163_1_F8,16589 | R.TTPSYVAFTDTER.L      | 1791.907 | 0.00553  | 2 | 1 | 47.8 | 0 |
| P12163_2_F6,16074 | R.TTPSYVAFTDTER.L      | 1791.907 | 0.00237  | 2 | 1 | 58   | 0 |
| P12163_1_S1,14498 | R.VEIIANDQGNR.I ! R.VI | 1532.833 | 0.00335  | 2 | 1 | 30.8 | 0 |
| P12163_1_S1,14657 | R.VEIIANDQGNR.I ! R.VI | 1532.833 | 0.00328  | 3 | 1 | 71.6 | 0 |
| P12163_1_S1,14739 | R.VEIIANDQGNR.I ! R.VI | 1532.833 | 0.00397  | 2 | 1 | 33.7 | 0 |
| P12163_1_S1,14901 | R.VEIIANDQGNR.I ! R.VI | 1532.833 | 0.00187  | 3 | 1 | 69.2 | 0 |
| P12163_1_S1,14978 | R.VEIIANDQGNR.I ! R.VI | 1532.833 | 0.00507  | 2 | 1 | 32   | 0 |
| P12163_1_S10,199  | R.VEIIANDQGNR.I ! R.VI | 1532.833 | 0.00184  | 3 | 1 | 35.4 | 0 |
| P12163_1_S10,276  | R.VEIIANDQGNR.I ! R.VI | 1532.833 | 0.00555  | 2 | 1 | 29.8 | 0 |
| P12163_1_F7,11571 | K.ATAGDTHLGGEDFDN      | 1979.936 | 0.00221  | 3 | 1 | 31.1 | 0 |
| P12163_1_F8,9335  | K.ATAGDTHLGGEDFDN      | 1979.936 | 0.00154  | 4 | 1 | 32.9 | 0 |
| P12163_1_F8,10350 | K.ATAGDTHLGGEDFDN      | 1979.936 | 0.00474  | 4 | 1 | 44.7 | 0 |
| P12163_1_F8,10358 | K.ATAGDTHLGGEDFDN      | 1979.936 | 0.00495  | 2 | 1 | 39   | 0 |
| P12163_1_F8,10594 | K.ATAGDTHLGGEDFDN      | 1979.936 | 0.00784  | 3 | 1 | 35.8 | 0 |
| P12163_1_F8,10598 | K.ATAGDTHLGGEDFDN      | 1979.936 | 0.00085  | 2 | 1 | 45.7 | 0 |

|                   |                       |          |          |   |   |      |   |
|-------------------|-----------------------|----------|----------|---|---|------|---|
| P12163_1_F8,10606 | K.ATAGDTHLGGEDFDN     | 1979.936 | 0.0029   | 4 | 1 | 38.9 | 0 |
| P12163_1_F8,12056 | K.ATAGDTHLGGEDFDN     | 1979.936 | 0.00302  | 3 | 1 | 55.8 | 0 |
| P12163_1_F8,12232 | K.ATAGDTHLGGEDFDN     | 1979.936 | 0.00173  | 2 | 1 | 44.6 | 0 |
| P12163_2_F9,11279 | K.ATAGDTHLGGEDFDN     | 1979.936 | 0.00163  | 3 | 1 | 61.8 | 0 |
| P12163_2_S5,9391  | K.ATAGDTHLGGEDFDN     | 1979.936 | 0.00354  | 4 | 1 | 35.8 | 0 |
| P12163_2_S5,10362 | K.ATAGDTHLGGEDFDN     | 1979.936 | 0.00242  | 4 | 1 | 55.1 | 0 |
| P12163_2_S5,10365 | K.ATAGDTHLGGEDFDN     | 1979.936 | 0.00311  | 3 | 1 | 39.6 | 0 |
| P12163_2_S5,10368 | K.ATAGDTHLGGEDFDN     | 1979.936 | 0.01013  | 2 | 1 | 35   | 0 |
| P12163_2_S5,10564 | K.ATAGDTHLGGEDFDN     | 1979.936 | 0.00286  | 4 | 1 | 37.9 | 0 |
| P12163_2_S5,11889 | K.ATAGDTHLGGEDFDN     | 1979.936 | 0.0021   | 4 | 1 | 49.3 | 0 |
| P12163_2_S5,11953 | K.ATAGDTHLGGEDFDN     | 1979.936 | -0.00161 | 3 | 1 | 41   | 0 |
| P12163_1_F5,11319 | K.CMEPVEK.C           | 1500.801 | 0.00642  | 2 | 1 | 25.4 | 0 |
| P12163_1_S1,19382 | K.DAGVIAGLNVMR.I      | 1519.857 | 0.00158  | 3 | 1 | 52.4 | 0 |
| P12163_1_S1,19420 | K.DAGVIAGLNVMR.I      | 1519.857 | 0.00348  | 2 | 1 | 42.7 | 0 |
| P12163_1_F3,20353 | K.ELESICNPIIAK.M      | 1995.14  | 0.00225  | 2 | 1 | 69.9 | 0 |
| P12163_1_F3,20364 | K.ELESICNPIIAK.M      | 1995.14  | 0.00408  | 3 | 1 | 58   | 0 |
| P12163_1_F4,12357 | K.MVQEAEK.Y ! R.MVQI  | 1442.813 | 0.00599  | 2 | 1 | 28.1 | 0 |
| P12163_1_F5,10859 | K.MVQEAEK.Y ! R.MVQI  | 1442.813 | 0.00519  | 2 | 1 | 26.8 | 0 |
| P12163_1_F5,10908 | K.MVQEAEK.Y ! R.MVQI  | 1442.813 | 0.00899  | 3 | 1 | 35.2 | 0 |
| P12163_1_F6,11909 | K.MVQEAEK.Y ! R.MVQI  | 1442.813 | 0.00945  | 2 | 1 | 30.4 | 0 |
| P12163_2_F1,11370 | K.MVQEAEK.Y ! R.MVQI  | 1442.813 | 0.00503  | 2 | 1 | 27.8 | 0 |
| P12163_2_F1,11390 | K.MVQEAEK.Y ! R.MVQI  | 1442.813 | 0.00722  | 3 | 1 | 39.8 | 0 |
| P12163_1_F3,17989 | K.NALENYAYNMR.N       | 1662.821 | 0.00301  | 2 | 1 | 33.4 | 0 |
| P12163_1_F9,17110 | K.NALENYAYNMR.N       | 1662.821 | -0.00229 | 2 | 1 | 36.7 | 0 |
| P12163_2_F1,17641 | K.NALENYAYNMR.N       | 1662.821 | 0.00091  | 2 | 1 | 31.7 | 0 |
| P12163_2_F9,16815 | K.NALENYAYNMR.N       | 1662.821 | 0.00245  | 2 | 1 | 38.5 | 0 |
| P12163_2_F9,16832 | K.NALENYAYNMR.N       | 1662.821 | 0.00103  | 3 | 1 | 34   | 0 |
| P12163_1_F8,18778 | K.NAVVTVPAYFNDSQR     | 1985.039 | -0.00348 | 2 | 1 | 30.4 | 0 |
| P12163_1_F8,18854 | K.NAVVTVPAYFNDSQR     | 1985.039 | 0.00299  | 3 | 1 | 33.4 | 0 |
| P12163_1_S1,17806 | K.NAVVTVPAYFNDSQR     | 1985.039 | 0.01346  | 2 | 1 | 36.9 | 0 |
| P12163_1_S1,17812 | K.NAVVTVPAYFNDSQR     | 1985.039 | 0.00257  | 3 | 1 | 27.2 | 0 |
| P12163_2_F6,18372 | K.NAVVTVPAYFNDSQR     | 1985.039 | 0.00464  | 2 | 1 | 47.4 | 0 |
| P12163_2_F6,18440 | K.NAVVTVPAYFNDSQR     | 1985.039 | -0.00088 | 3 | 1 | 39.9 | 0 |
| P12163_1_F3,25377 | K.QFAAEEISSMVLIK.M    | 2174.235 | 0.00592  | 3 | 1 | 49.2 | 0 |
| P12163_1_F4,14347 | K.SSVHDVVLVGGSTR.I    | 1716.955 | 0.00968  | 3 | 1 | 41.2 | 0 |
| P12163_1_F4,14348 | K.SSVHDVVLVGGSTR.I    | 1716.955 | 0.00904  | 2 | 1 | 63.8 | 0 |
| P12163_1_F6,13771 | K.SSVHDVVLVGGSTR.I    | 1716.955 | 0.00268  | 2 | 1 | 40.6 | 0 |
| P12163_1_F7,13090 | K.SSVHDVVLVGGSTR.I    | 1716.955 | 0.00387  | 3 | 1 | 28   | 0 |
| P12163_2_F6,13064 | K.SSVHDVVLVGGSTR.I    | 1716.955 | 0.0003   | 3 | 1 | 30.2 | 0 |
| P12163_2_F9,12613 | K.SSVHDVVLVGGSTR.I    | 1716.955 | 0.03138  | 2 | 1 | 24.2 | 0 |
| P12163_1_S1,23194 | R.FEELNM*DLFR.K       | 1633.82  | 0.00103  | 3 | 1 | 40.2 | 0 |
| P12163_1_S1,23396 | R.FEELNM*DLFR.K       | 1633.82  | 0.00348  | 2 | 1 | 42.5 | 0 |
| P12163_1_S1,23417 | R.FEELNM*DLFR.K       | 1633.82  | 0.00235  | 3 | 1 | 57.6 | 0 |
| P12163_1_F2,22404 | R.IINEPTAAAIAAYGLDK.I | 2268.306 | 0.00735  | 3 | 1 | 45.2 | 0 |
| P12163_1_F4,23908 | R.IINEPTAAAIAAYGLDK.I | 2268.306 | 0.00405  | 3 | 1 | 59.2 | 0 |
| P12163_1_F5,22034 | R.IINEPTAAAIAAYGLDK.I | 2268.306 | 0.00048  | 3 | 1 | 35.6 | 0 |
| P12163_1_F8,22408 | R.IINEPTAAAIAAYGLDK.I | 2268.306 | 0.00681  | 3 | 1 | 49.7 | 0 |
| P12163_1_S1,21321 | R.IINEPTAAAIAAYGLDK.I | 2268.306 | 0.00492  | 3 | 1 | 53.3 | 0 |
| P12163_1_S1,21346 | R.IINEPTAAAIAAYGLDK.I | 2268.306 | -0.00297 | 2 | 1 | 75.2 | 0 |
| P12163_1_S1,21375 | R.IINEPTAAAIAAYGLDK.I | 2268.306 | 0.00752  | 4 | 1 | 61   | 0 |
| P12163_1_S1,21490 | R.IINEPTAAAIAAYGLDK.I | 2268.306 | 0.0003   | 3 | 1 | 54.8 | 0 |

|                    |                        |          |          |   |   |      |   |
|--------------------|------------------------|----------|----------|---|---|------|---|
| P12163_1_S10,2039  | R.IINEPTAAAIAYGLDK.I   | 2268.306 | 0.00414  | 3 | 1 | 22.1 | 0 |
| P12163_1_F9,17016  | R.M*VNHFVQEFK.R        | 1903.036 | 0.00793  | 2 | 1 | 24.1 | 0 |
| P12163_1_F9,19653  | R.M*VNHFVQEFK.R        | 1903.036 | 0.00674  | 3 | 1 | 24.3 | 0 |
| P12163_1_F9,20038  | R.M*VNHFVQEFK.R        | 1903.036 | 0.00752  | 3 | 1 | 26.5 | 0 |
| P12163_2_F7,15183  | R.M*VNHFVQEFK.R        | 1903.036 | 0.00599  | 3 | 1 | 42   | 0 |
| P12163_2_F9,19029  | R.MVNHFVQEFK.R         | 1887.041 | 0.01061  | 3 | 1 | 33   | 0 |
| P12163_2_F9,19097  | R.MVNHFVQEFK.R         | 1887.041 | 0.00653  | 3 | 1 | 33   | 0 |
| P12163_1_S1,14498  | R.VEIIANDQGNR.I ! R.VI | 1532.833 | 0.00335  | 2 | 1 | 30.8 | 0 |
| P12163_1_S1,14657  | R.VEIIANDQGNR.I ! R.VI | 1532.833 | 0.00328  | 3 | 1 | 71.6 | 0 |
| P12163_1_S1,14739  | R.VEIIANDQGNR.I ! R.VI | 1532.833 | 0.00397  | 2 | 1 | 33.7 | 0 |
| P12163_1_S1,14901  | R.VEIIANDQGNR.I ! R.VI | 1532.833 | 0.00187  | 3 | 1 | 69.2 | 0 |
| P12163_1_S1,14978  | R.VEIIANDQGNR.I ! R.VI | 1532.833 | 0.00507  | 2 | 1 | 32   | 0 |
| P12163_1_S10,199   | R.VEIIANDQGNR.I ! R.VI | 1532.833 | 0.00184  | 3 | 1 | 35.4 | 0 |
| P12163_1_S10,276   | R.VEIIANDQGNR.I ! R.VI | 1532.833 | 0.00555  | 2 | 1 | 29.8 | 0 |
| P12163_1_S10,1566  | K.AAFYVVK.S            | 1421.825 | 0.00836  | 2 | 1 | 25.2 | 0 |
| P12163_2_F1,15724  | K.AAFYVVK.S            | 1421.825 | 0.00366  | 3 | 1 | 31.6 | 0 |
| P12163_2_F1,15813  | K.AAFYVVK.S            | 1421.825 | 0.00622  | 2 | 1 | 28.6 | 0 |
| P12163_2_F8,12070  | K.AAFYVVK.S            | 1421.825 | 0.00663  | 3 | 1 | 22.7 | 0 |
| P12163_1_F3,7935   | K.GNQDDQFR.R           | 1411.687 | 0.00279  | 2 | 1 | 45   | 0 |
| P12163_1_F4,8363   | K.GNQDDQFR.R           | 1411.687 | 0.00405  | 2 | 1 | 32.5 | 0 |
| P12163_2_F1,7420   | K.GNQDDQFR.R           | 1411.687 | 0.00373  | 2 | 1 | 27.6 | 0 |
| P12163_1_F5,5601   | K.HTNPCGVASR.D         | 1402.716 | 0.00394  | 3 | 1 | 36.3 | 0 |
| P12163_1_F9,4872   | K.HTNPCGVASR.D         | 1402.716 | 0.00646  | 3 | 1 | 24.5 | 0 |
| P12163_2_F4,5821   | K.HTNPCGVASR.D         | 1402.716 | -0.00185 | 3 | 1 | 29.2 | 0 |
| P12163_2_F9,5792   | K.HTNPCGVASR.D         | 1402.716 | 0.00199  | 3 | 1 | 24.7 | 0 |
| P12163_1_F3,10248  | K.NNCMLGM*GSGQPNR      | 1855.851 | 0.00333  | 2 | 1 | 30.2 | 0 |
| P12163_2_F1,9857   | K.NNCMLGM*GSGQPNR      | 1855.851 | -0.00019 | 2 | 1 | 26.2 | 0 |
| P12163_2_F1,12698  | K.NNCMLGM*GSGQPNR      | 1839.857 | 0.00101  | 2 | 1 | 53.1 | 0 |
| P12163_1_F4,18865  | K.QALISLSDK.K          | 1582.962 | 0.00674  | 2 | 1 | 33.5 | 0 |
| P12163_1_F5,17426  | K.QALISLSDK.K          | 1582.962 | 0.00329  | 3 | 1 | 22.1 | 0 |
| P12163_2_F1,18077  | K.QALISLSDK.K          | 1582.962 | 0.00404  | 3 | 1 | 36.6 | 0 |
| P12163_1_F8,13705  | K.SLAEVNAGGIATAIQH     | 2482.399 | 0.00518  | 4 | 1 | 44.2 | 0 |
| P12163_1_F8,15443  | K.SLAEVNAGGIATAIQH     | 2482.399 | 0.00654  | 4 | 1 | 41.1 | 0 |
| P12163_1_F8,17839  | K.SLAEVNAGGIATAIQH     | 2482.399 | 0.00598  | 4 | 1 | 61   | 0 |
| P12163_1_F8,18150  | K.SLAEVNAGGIATAIQH     | 2482.399 | 0.0151   | 4 | 1 | 52.7 | 0 |
| P12163_1_S10,17121 | K.SLAEVNAGGIATAIQH     | 2482.399 | 0.00618  | 4 | 1 | 48.2 | 0 |
| P12163_2_F10,1278  | K.SLAEVNAGGIATAIQH     | 2482.399 | 0.0051   | 4 | 1 | 34.6 | 0 |
| P12163_2_F10,14391 | K.SLAEVNAGGIATAIQH     | 2482.399 | 0.00266  | 4 | 1 | 51.8 | 0 |
| P12163_2_F10,14471 | K.SLAEVNAGGIATAIQH     | 2482.399 | 0.00244  | 5 | 1 | 56.3 | 0 |
| P12163_2_F10,16021 | K.SLAEVNAGGIATAIQH     | 2482.399 | 0.0141   | 4 | 1 | 55.8 | 0 |
| P12163_2_F10,16071 | K.SLAEVNAGGIATAIQH     | 2482.399 | 0.00532  | 3 | 1 | 85.8 | 0 |
| P12163_2_F4,16616  | K.SLAEVNAGGIATAIQH     | 2482.399 | 0.00362  | 4 | 1 | 69.6 | 0 |
| P12163_1_F4,15368  | K.SNAIVIAK.N ! K.SNAIV | 1423.909 | 0.00696  | 2 | 1 | 31   | 0 |
| P12163_2_F1,14299  | K.SNAIVIAK.N ! K.SNAIV | 1423.909 | 0.00452  | 2 | 1 | 31.4 | 0 |
| P12163_2_F1,14314  | K.SNAIVIAK.N ! K.SNAIV | 1423.909 | 0.00425  | 3 | 1 | 29   | 0 |
| P12163_1_F6,12352  | K.TLHPNIHGGILAR.R      | 1703.002 | 0.00205  | 4 | 1 | 43.8 | 0 |
| P12163_1_F6,14215  | K.TLHPNIHGGILAR.R      | 1703.002 | 0.00233  | 4 | 1 | 39.2 | 0 |
| P12163_1_F6,14230  | K.TLHPNIHGGILAR.R      | 1703.002 | 0.00255  | 3 | 1 | 26.3 | 0 |
| P12163_1_F7,11669  | K.TLHPNIHGGILAR.R      | 1703.002 | 0.00361  | 4 | 1 | 36.4 | 0 |
| P12163_1_F7,13510  | K.TLHPNIHGGILAR.R      | 1703.002 | 0.00293  | 4 | 1 | 54.9 | 0 |
| P12163_1_F8,357    | K.TLHPNIHGGILAR.R      | 1703.002 | 0.00253  | 4 | 1 | 47   | 0 |



|                   |                    |          |          |   |   |      |   |
|-------------------|--------------------|----------|----------|---|---|------|---|
| P12163_1_F8,365   | K.TLHPNIHGGILAR.R  | 1703.002 | 0.00096  | 3 | 1 | 25.5 | 0 |
| P12163_2_F6,11863 | K.TLHPNIHGGILAR.R  | 1703.002 | 0.00189  | 4 | 1 | 35.3 | 0 |
| P12163_2_F7,12552 | K.TLHPNIHGGILAR.R  | 1703.002 | 0.00461  | 4 | 1 | 43.6 | 0 |
| P12163_2_F9,12869 | K.TLHPNIHGGILAR.R  | 1703.002 | 0.00217  | 4 | 1 | 43.7 | 0 |
| P12163_2_S5,13128 | K.TLHPNIHGGILAR.R  | 1703.002 | 0.00313  | 4 | 1 | 45.5 | 0 |
| P12163_1_S1,20911 | K.YGVALLLTSVR.H    | 1495.915 | 0.00176  | 3 | 1 | 37.3 | 0 |
| P12163_1_S1,23977 | K.YGVALLLTSVR.H    | 1495.915 | 0.00218  | 3 | 1 | 35.5 | 0 |
| P12163_1_F3,18772 | R.DDILEAYK.L       | 1574.889 | 0.00962  | 2 | 1 | 32.3 | 0 |
| P12163_1_F4,19223 | R.DDILEAYK.L       | 1574.889 | 0.0047   | 3 | 1 | 36.2 | 0 |
| P12163_1_F4,19236 | R.DDILEAYK.L       | 1574.889 | 0.00558  | 2 | 1 | 47.5 | 0 |
| P12163_1_F5,18083 | R.DDILEAYK.L       | 1574.889 | 0.01048  | 2 | 1 | 35.6 | 0 |
| P12163_1_F7,16833 | R.DDILEAYK.L       | 1574.889 | -0.00118 | 3 | 1 | 31.5 | 0 |
| P12163_1_F9,17723 | R.DDILEAYK.L       | 1574.889 | 0.01006  | 2 | 1 | 34.4 | 0 |
| P12163_1_F9,17765 | R.DDILEAYK.L       | 1574.889 | 0.00509  | 3 | 1 | 35.6 | 0 |
| P12163_2_F9,17046 | R.DDILEAYK.L       | 1574.889 | 0.00377  | 3 | 1 | 28.3 | 0 |
| P12163_1_F4,10441 | R.DGDAIDCCNK.Y     | 1775.851 | 0.01108  | 2 | 1 | 38.3 | 0 |
| P12163_1_F2,4327  | R.SPTDGETR.M       | 1166.595 | 0.0027   | 3 | 1 | 26.7 | 0 |
| P12163_2_S5,7867  | R.YGENPHQK.A       | 1580.864 | 0.00731  | 3 | 1 | 23   | 0 |
| P12163_1_F7,20723 | K.ATDSPLPTVPGYDVAC | 2593.47  | 0.00414  | 3 | 1 | 39   | 0 |
| P12163_2_S5,19405 | K.ATDSPLPTVPGYDVAC | 2593.47  | 0.00285  | 3 | 1 | 25   | 0 |
| P12163_1_F3,23507 | K.AWLIGEYGGVDVLK.  | 2178.205 | 0.00178  | 3 | 1 | 48.7 | 0 |
| P12163_1_F3,23514 | K.AWLIGEYGGVDVLK.  | 2178.205 | 0.00188  | 2 | 1 | 35.6 | 0 |
| P12163_1_F4,24316 | K.AWLIGEYGGVDVLK.  | 2178.205 | 0.00658  | 3 | 1 | 59.8 | 0 |
| P12163_1_F4,16348 | K.DNFEDLPEK.F      | 1714.911 | 0.00481  | 3 | 1 | 34.2 | 0 |
| P12163_1_F2,13878 | K.EGDEVYGDINEK.A   | 1976.007 | 0.00595  | 2 | 1 | 41.9 | 0 |
| P12163_1_F4,17283 | K.LNPYLESGK.V      | 1628.947 | 0.00844  | 2 | 1 | 28.4 | 0 |
| P12163_1_F5,15901 | K.LNPYLESGK.V      | 1628.947 | 0.00618  | 3 | 1 | 26   | 0 |
| P12163_1_F7,15017 | K.LNPYLESGK.V      | 1628.947 | 0.00501  | 3 | 1 | 21.9 | 0 |
| P12163_2_F9,15219 | K.LNPYLESGK.V      | 1628.947 | 0.00744  | 2 | 1 | 36.6 | 0 |
| P12163_2_F9,15229 | K.LNPYLESGK.V      | 1628.947 | 0.009    | 3 | 1 | 29.1 | 0 |
| P12163_1_F8,19375 | K.QFGSLAEYTAVEER.L | 1903.97  | 0.00175  | 2 | 1 | 36.7 | 0 |
| P12163_1_F8,19419 | K.QFGSLAEYTAVEER.L | 1903.97  | 0.00267  | 3 | 1 | 28.6 | 0 |
| P12163_1_S1,14583 | K.QFGSLAEYTAVEER.L | 1903.97  | 0.00498  | 3 | 1 | 43   | 0 |
| P12163_1_S1,15928 | K.QFGSLAEYTAVEER.L | 1903.97  | 0.00576  | 3 | 1 | 51.6 | 0 |
| P12163_1_S1,18646 | K.QFGSLAEYTAVEER.L | 1903.97  | 0.00691  | 2 | 1 | 49.2 | 0 |
| P12163_1_S1,18666 | K.QFGSLAEYTAVEER.L | 1903.97  | 0.00162  | 3 | 1 | 62.1 | 0 |
| P12163_1_S1,18890 | K.QFGSLAEYTAVEER.L | 1903.97  | -0.00117 | 2 | 1 | 38.1 | 0 |
| P12163_2_F6,18877 | K.QFGSLAEYTAVEER.L | 1903.97  | -0.00033 | 2 | 1 | 36.6 | 0 |
| P12163_1_F4,14825 | K.VGTVPSEM.K.A     | 1555.897 | 0.00607  | 3 | 1 | 26.2 | 0 |
| P12163_2_F1,13832 | K.VGTVPSEM.K.A     | 1555.897 | 0.00436  | 3 | 1 | 26.1 | 0 |
| P12163_1_F2,18592 | K.VVAAALNPVDGK.R   | 1762.068 | 0.00569  | 3 | 1 | 31.7 | 0 |
| P12163_1_F2,18620 | K.VVAAALNPVDGK.R   | 1762.068 | 0.00834  | 2 | 1 | 45.8 | 0 |
| P12163_1_F2,19533 | K.VVAAALNPVDGK.R   | 1762.068 | -0.00169 | 3 | 1 | 30.9 | 0 |
| P12163_1_F3,20045 | K.VVAAALNPVDGK.R   | 1762.068 | -0.00016 | 2 | 1 | 41   | 0 |
| P12163_1_F3,20085 | K.VVAAALNPVDGK.R   | 1762.068 | 0.00533  | 3 | 1 | 52.5 | 0 |
| P12163_1_F3,20343 | K.VVAAALNPVDGK.R   | 1762.068 | 0.00524  | 2 | 1 | 57.5 | 0 |
| P12163_1_F3,20371 | K.VVAAALNPVDGK.R   | 1762.068 | 0.00392  | 3 | 1 | 48.9 | 0 |
| P12163_1_F6,19061 | K.VVAAALNPVDGK.R   | 1762.068 | 0.008    | 3 | 1 | 28.3 | 0 |
| P12163_1_F6,19532 | K.VVAAALNPVDGK.R   | 1762.068 | 0.00209  | 3 | 1 | 34.2 | 0 |
| P12163_1_S1,17350 | K.VVAAALNPVDGK.R   | 1762.068 | 0.01478  | 3 | 1 | 48   | 0 |
| P12163_2_F2,19616 | K.VVAAALNPVDGK.R   | 1762.068 | -0.0004  | 3 | 1 | 39.8 | 0 |

|                   |                       |          |          |   |   |      |   |
|-------------------|-----------------------|----------|----------|---|---|------|---|
| P12163_2_F4,18239 | K.VVAAALNPVDGK.R      | 1762.068 | 0.00476  | 3 | 1 | 42.1 | 0 |
| P12163_1_F4,15273 | R.EDQVLIK.V ! K.EDQVI | 1452.888 | 0.0073   | 2 | 1 | 28.3 | 0 |
| P12163_2_F4,13161 | R.EDQVLIK.V ! K.EDQVI | 1452.888 | 0.00294  | 2 | 1 | 26.7 | 0 |
| P12163_1_F3,18596 | R.FVVTSTNGEVLK.K      | 1801.068 | 0.00302  | 2 | 1 | 32.9 | 0 |
| P12163_1_F4,19066 | R.FVVTSTNGEVLK.K      | 1801.068 | 0.00616  | 2 | 1 | 58.6 | 0 |
| P12163_2_F1,18312 | R.FVVTSTNGEVLK.K      | 1801.068 | 0.00588  | 2 | 1 | 50   | 0 |
| P12163_2_F1,18368 | R.FVVTSTNGEVLK.K      | 1801.068 | 0.0054   | 3 | 1 | 51.3 | 0 |
| P12163_2_F4,16500 | R.FVVTSTNGEVLK.K      | 1801.068 | -0.00048 | 3 | 1 | 32.2 | 0 |
| P12163_2_F9,16401 | R.FVVTSTNGEVLK.K      | 1801.068 | 0.00684  | 3 | 1 | 41   | 0 |
| P12163_1_F3,17276 | R.SLGADLAIDYTK.E ! K  | 1875.068 | 0.00503  | 3 | 1 | 24.7 | 0 |
| P12163_1_F3,17314 | R.SLGADLAIDYTK.E ! K  | 1875.068 | 0.00527  | 2 | 1 | 26.1 | 0 |
| P12163_1_F3,18413 | R.SLGADLAIDYTK.E ! K  | 1875.068 | 0.00401  | 2 | 1 | 54.7 | 0 |
| P12163_1_F3,18424 | R.SLGADLAIDYTK.E ! K  | 1875.068 | 0.00386  | 3 | 1 | 54.1 | 0 |
| P12163_1_F3,19779 | R.SLGADLAIDYTK.E ! K  | 1875.068 | -0.00285 | 2 | 1 | 56.8 | 0 |
| P12163_1_F3,19856 | R.SLGADLAIDYTK.E ! K  | 1875.068 | 0.00836  | 3 | 1 | 52.4 | 0 |
| P12163_2_F2,10936 | R.TGFSAGK.S           | 1275.752 | 0.00639  | 3 | 1 | 25.9 | 0 |
| P12163_1_F3,5372  | R.VAATSSSTR.N         | 1096.626 | 0.00374  | 3 | 1 | 36.7 | 0 |
| P12163_2_F1,4758  | R.VAATSSSTR.N         | 1096.626 | 0.00239  | 3 | 1 | 24.5 | 0 |
| P12163_2_F1,5053  | R.VAATSSSTR.N         | 1096.626 | 0.0017   | 3 | 1 | 27.8 | 0 |
| P12163_1_F2,22694 | K.ADFGSVM*DVLK.K      | 1805.993 | 0.00374  | 3 | 1 | 34   | 0 |
| P12163_1_F6,21918 | K.ADFGSVM*DVLK.K      | 1805.993 | -0.00205 | 3 | 1 | 22.7 | 0 |
| P12163_1_F3,23385 | K.ADFGSVMDVLK.K       | 1789.998 | 0.00677  | 2 | 1 | 52.4 | 0 |
| P12163_1_F3,23405 | K.ADFGSVMDVLK.K       | 1789.998 | 0.0116   | 3 | 1 | 47.4 | 0 |
| P12163_1_F3,14655 | K.ALFDSR.V            | 1012.573 | 0.00249  | 2 | 1 | 24.6 | 0 |
| P12163_1_F4,15154 | K.ALFDSR.V            | 1012.573 | 0.00161  | 2 | 1 | 24.4 | 0 |
| P12163_1_F4,22552 | K.EFLQM*NDLWVK.H      | 2047.114 | 0.00734  | 3 | 1 | 28.4 | 0 |
| P12163_1_F4,25464 | K.EFLQM*NDLWVK.H      | 2047.114 | 0.00761  | 3 | 1 | 25.9 | 0 |
| P12163_1_F4,25432 | K.EFLQMNDLWVK.H       | 2031.119 | 0.00947  | 3 | 1 | 26.1 | 0 |
| P12163_1_F2,14892 | K.ELGLVDR.I           | 1105.652 | 0.00483  | 2 | 1 | 24.3 | 0 |
| P12163_1_F2,15115 | K.ELGLVDR.I           | 1105.652 | 0.00271  | 2 | 1 | 26.9 | 0 |
| P12163_2_F2,13719 | K.GFQMCK.E            | 1378.743 | 0.00805  | 2 | 1 | 25.7 | 0 |
| P12163_2_F2,13742 | K.GFQMCK.E            | 1378.743 | 0.00791  | 3 | 1 | 25.2 | 0 |
| P12163_2_S5,13301 | K.HYDGAYWK.A          | 1647.874 | 0.00298  | 3 | 1 | 25.4 | 0 |
| P12163_1_F6,12279 | K.IDYHSQNIK.D         | 1725.974 | -0.00324 | 2 | 1 | 24   | 0 |
| P12163_1_F9,12187 | K.IDYHSQNIK.D         | 1725.974 | 0.00768  | 3 | 1 | 34.9 | 0 |
| P12163_1_F9,12189 | K.IDYHSQNIK.D         | 1725.974 | 0.00686  | 2 | 1 | 27.5 | 0 |
| P12163_2_F7,11265 | K.IDYHSQNIK.D         | 1725.974 | 0.00483  | 3 | 1 | 36   | 0 |
| P12163_2_F1,20236 | K.TTWPYGSVWSK.K       | 1977.069 | 0.00348  | 3 | 1 | 22.7 | 0 |
| P12163_2_F1,20239 | K.TTWPYGSVWSK.K       | 1977.069 | 0.00435  | 2 | 1 | 44.5 | 0 |
| P12163_1_F6,11211 | K.TVVVSTAHLK.F ! R.   | 1720.058 | 0.00657  | 3 | 1 | 22   | 0 |
| P12163_1_F6,14192 | K.TVVVSTAHLK.F ! R.   | 1720.058 | 0.0096   | 3 | 1 | 31.3 | 0 |
| P12163_1_F6,14217 | K.TVVVSTAHLK.F ! R.   | 1720.058 | 0.00554  | 2 | 1 | 49.4 | 0 |
| P12163_1_F8,14089 | K.TVVVSTAHLK.F ! R.   | 1720.058 | 0.00723  | 3 | 1 | 43.7 | 0 |
| P12163_1_F8,14120 | K.TVVVSTAHLK.F ! R.   | 1720.058 | 0.0103   | 2 | 1 | 39.7 | 0 |
| P12163_2_F6,13562 | K.TVVVSTAHLK.F ! R.   | 1720.058 | 0.00468  | 2 | 1 | 50   | 0 |
| P12163_2_F6,13594 | K.TVVVSTAHLK.F ! R.   | 1720.058 | 0.003    | 3 | 1 | 44.3 | 0 |
| P12163_2_S5,13000 | K.TVVVSTAHLK.F ! R.   | 1720.058 | 0.00444  | 3 | 1 | 28.9 | 0 |
| P12163_1_F4,15799 | R.LANPPVSVK.A         | 1532.962 | 0.0014   | 2 | 1 | 28.2 | 0 |
| P12163_1_F4,15891 | R.LANPPVSVK.A         | 1532.962 | 0.00382  | 3 | 1 | 36.1 | 0 |
| P12163_1_F4,15996 | R.LANPPVSVK.A         | 1532.962 | 0.0081   | 2 | 1 | 25.4 | 0 |
| P12163_1_F4,16093 | R.LANPPVSVK.A         | 1532.962 | 0.00874  | 3 | 1 | 26.1 | 0 |

|                   |                   |          |          |   |   |      |   |
|-------------------|-------------------|----------|----------|---|---|------|---|
| P12163_1_F4,16216 | R.LANPPVSVK.A     | 1532.962 | 0.00824  | 2 | 1 | 32.5 | 0 |
| P12163_2_F1,15035 | R.LANPPVSVK.A     | 1532.962 | 0.00366  | 2 | 1 | 27   | 0 |
| P12163_2_F1,15114 | R.LANPPVSVK.A     | 1532.962 | 0.00582  | 3 | 1 | 30.8 | 0 |
| P12163_2_F1,15298 | R.LANPPVSVK.A     | 1532.962 | 0.00464  | 2 | 1 | 27.6 | 0 |
| P12163_2_F1,15326 | R.LANPPVSVK.A     | 1532.962 | 0.00393  | 3 | 1 | 32.3 | 0 |
| P12163_1_F2,22376 | R.LVCAQAANANPLYLY | 2580.41  | 0.00488  | 3 | 1 | 53.9 | 0 |
| P12163_1_F3,23041 | R.LVCAQAANANPLYLY | 2580.41  | 0.00419  | 3 | 1 | 56   | 0 |
| P12163_1_F3,23085 | R.LVCAQAANANPLYLY | 2580.41  | 0.00288  | 4 | 1 | 50.8 | 0 |
| P12163_2_F4,7597  | R.NVIHCHK.F       | 1456.884 | 0.0067   | 2 | 1 | 26.5 | 0 |
| P12163_1_F7,15255 | R.SQSGLLDVQHDM*G  | 2380.275 | 0.0058   | 3 | 1 | 25.9 | 0 |
| P12163_1_F8,15958 | R.SQSGLLDVQHDM*G  | 2380.275 | 0.00088  | 3 | 1 | 37.8 | 0 |
| P12163_1_F8,15979 | R.SQSGLLDVQHDM*G  | 2380.275 | 0.00512  | 4 | 1 | 24.4 | 0 |
| P12163_1_F8,19260 | R.SQSGLLDVQHDMGA  | 2364.28  | 0.0035   | 3 | 1 | 63.3 | 0 |
| P12163_1_F8,19308 | R.SQSGLLDVQHDMGA  | 2364.28  | 0.00433  | 2 | 1 | 39.9 | 0 |
| P12163_2_S5,17926 | R.SQSGLLDVQHDMGA  | 2364.28  | 0.00756  | 4 | 1 | 36.6 | 0 |
| P12163_2_S5,17945 | R.SQSGLLDVQHDMGA  | 2364.28  | 0.00677  | 3 | 1 | 48.5 | 0 |
| P12163_1_F4,10475 | K.ASAASEAIEK.V    | 1584.905 | 0.0086   | 2 | 1 | 36.8 | 0 |
| P12163_1_F4,13607 | K.ASAASEAIEK.V    | 1584.905 | 0.00488  | 2 | 1 | 47.4 | 0 |
| P12163_1_F5,12142 | K.ASAASEAIEK.V    | 1584.905 | 0.00709  | 3 | 1 | 32.1 | 0 |
| P12163_1_F7,11443 | K.ASAASEAIEK.V    | 1584.905 | 0.00139  | 3 | 1 | 27.3 | 0 |
| P12163_1_F7,11756 | K.ASAASEAIEK.V    | 1584.905 | -0.00098 | 3 | 1 | 29.7 | 0 |
| P12163_2_F1,12451 | K.ASAASEAIEK.V    | 1584.905 | 0.00704  | 2 | 1 | 51.4 | 0 |
| P12163_2_F1,12465 | K.ASAASEAIEK.V    | 1584.905 | 0.00364  | 3 | 1 | 38.4 | 0 |
| P12163_1_F2,14715 | K.DGLVVYDYGK.G    | 1573.905 | 0.00736  | 2 | 1 | 31.8 | 0 |
| P12163_1_F3,15937 | K.DGLVVYDYGK.G    | 1573.905 | 0.00456  | 2 | 1 | 27.3 | 0 |
| P12163_1_F3,16005 | K.DGLVVYDYGK.G    | 1573.905 | 0.00544  | 3 | 1 | 24.8 | 0 |
| P12163_1_F4,16509 | K.DGLVVYDYGK.G    | 1573.905 | 0.00046  | 3 | 1 | 30.1 | 0 |
| P12163_1_F9,15539 | K.DGLVVYDYGK.G    | 1573.905 | 0.00242  | 2 | 1 | 35.2 | 0 |
| P12163_2_F9,14648 | K.DGLVVYDYGK.G    | 1573.905 | 0.0019   | 3 | 1 | 31.1 | 0 |
| P12163_1_F7,20556 | K.EPVVSDWLHANLR.E | 1939.07  | 0.00289  | 3 | 1 | 39.1 | 0 |
| P12163_2_F10,1889 | K.EPVVSDWLHANLR.E | 1939.07  | 0.00052  | 3 | 1 | 23.4 | 0 |
| P12163_2_S5,19882 | K.EPVVSDWLHANLR.E | 1939.07  | 0.00319  | 3 | 1 | 85.8 | 0 |
| P12163_1_F8,23006 | K.FQPHLIWTLEQVK.R | 2247.311 | 0.00666  | 3 | 1 | 34.7 | 0 |
| P12163_2_F6,22732 | K.FQPHLIWTLEQVK.R | 2247.311 | 0.00456  | 3 | 1 | 25.7 | 0 |
| P12163_1_F3,13228 | K.VYQGQVVGPTTFQTK | 2261.275 | 0.00322  | 3 | 1 | 24.5 | 0 |
| P12163_1_F3,14805 | K.VYQGQVVGPTTFQTK | 2261.275 | 0.00259  | 3 | 1 | 36.3 | 0 |
| P12163_1_F3,16383 | K.VYQGQVVGPTTFQTK | 2261.275 | 0.0073   | 3 | 1 | 36.2 | 0 |
| P12163_1_F3,16686 | K.VYQGQVVGPTTFQTK | 2261.275 | 0.00559  | 3 | 1 | 48.5 | 0 |
| P12163_1_F3,17717 | K.VYQGQVVGPTTFQTK | 2261.275 | 0.0085   | 3 | 1 | 64   | 0 |
| P12163_1_F3,17744 | K.VYQGQVVGPTTFQTK | 2261.275 | -0.00112 | 2 | 1 | 43.2 | 0 |
| P12163_1_F3,15180 | R.ADYSTLSVSPK.E   | 1776     | -0.00126 | 2 | 1 | 52.9 | 0 |
| P12163_1_F3,15215 | R.ADYSTLSVSPK.E   | 1776     | -0.00265 | 3 | 1 | 55.2 | 0 |
| P12163_1_F2,16210 | R.ASGYDVESASGDAIL | 2278.202 | 0.00877  | 3 | 1 | 54.5 | 0 |
| P12163_1_S1,14225 | R.ASGYDVESASGDAIL | 2278.202 | 0.00508  | 3 | 1 | 48.6 | 0 |
| P12163_1_S10,1593 | R.ASGYDVESASGDAIL | 2278.202 | 0.00178  | 3 | 1 | 45.2 | 0 |
| P12163_2_F6,15880 | R.ASGYDVESASGDAIL | 2278.202 | 0.0079   | 3 | 1 | 48   | 0 |
| P12163_2_F6,15932 | R.ASGYDVESASGDAIL | 2278.202 | 0.00621  | 2 | 1 | 66.6 | 0 |
| P12163_1_F4,12814 | R.FDGDAPEPR.K     | 1307.653 | 0.00256  | 2 | 1 | 28.8 | 0 |
| P12163_1_S1,11863 | R.FDGDAPEPR.K     | 1307.653 | 0.00532  | 2 | 1 | 41.1 | 0 |
| P12163_1_S1,11956 | R.FDGDAPEPR.K     | 1307.653 | 0.00298  | 3 | 1 | 43.1 | 0 |
| P12163_1_S1,17057 | R.NIEEGTYQLVDAR.S | 1811.944 | 0.00566  | 2 | 1 | 34.8 | 0 |

|                                      |          |          |   |   |      |   |
|--------------------------------------|----------|----------|---|---|------|---|
| P12163_1_S1,17062 R.NIEEGTYQLVDAR.S  | 1811.944 | 0.00527  | 3 | 1 | 49.9 | 0 |
| P12163_2_F6,16997 R.NIEEGTYQLVDAR.S  | 1811.944 | 0.01084  | 2 | 1 | 30.5 | 0 |
| P12163_2_F7,12170 R.RADYSTLSVSPK.E   | 1932.101 | 0.00722  | 3 | 1 | 31.7 | 0 |
| P12163_2_F9,12417 R.RADYSTLSVSPK.E   | 1932.101 | 0.00845  | 3 | 1 | 32.7 | 0 |
| P12163_2_S5,12642 R.RADYSTLSVSPK.E   | 1932.101 | 0.0068   | 3 | 1 | 32.3 | 0 |
| P12163_2_F4,6845 R.SGHVPGSK.C        | 1376.811 | -0.00073 | 3 | 1 | 24.9 | 0 |
| P12163_1_S10,10710 R.VFGHDR.V        | 1034.568 | -0.00056 | 3 | 1 | 29.4 | 0 |
| P12163_1_S10,10910 R.VFGHDR.V        | 1034.568 | 0.00469  | 3 | 1 | 27.7 | 0 |
| P12163_2_F8_12070 R.VFGHDR.V         | 1034.568 | 0.00286  | 3 | 1 | 23.2 | 0 |
| P12163_1_F2,23091 R.VWVLDGGLPR.W     | 1415.831 | 0.00338  | 2 | 1 | 26.9 | 0 |
| P12163_1_S1,17287 K.ASEIVLQPIR.E     | 1429.868 | 0.00004  | 3 | 1 | 50.1 | 0 |
| P12163_1_S1,17470 K.ASEIVLQPIR.E     | 1429.868 | 0.0043   | 2 | 1 | 42.4 | 0 |
| P12163_1_F4,21179 K.FAEVLEK.M        | 1443.867 | 0.00617  | 3 | 1 | 22.4 | 0 |
| P12163_1_F4,21316 K.FAEVLEK.M        | 1443.867 | 0.00783  | 2 | 1 | 34.1 | 0 |
| P12163_1_F5,20071 K.FAEVLEK.M        | 1443.867 | 0.01103  | 3 | 1 | 24.1 | 0 |
| P12163_1_F5,20200 K.FAEVLEK.M        | 1443.867 | 0.00755  | 2 | 1 | 25.7 | 0 |
| P12163_1_F7,18819 K.FAEVLEK.M        | 1443.867 | 0.0023   | 3 | 1 | 28.1 | 0 |
| P12163_2_F1,20524 K.FAEVLEK.M        | 1443.867 | 0.00734  | 3 | 1 | 30.6 | 0 |
| P12163_2_F1,20616 K.FAEVLEK.M        | 1443.867 | 0.01195  | 2 | 1 | 25.3 | 0 |
| P12163_1_F8,19516 K.LGATVEEGPDYCVITP | 2683.411 | 0.00338  | 3 | 1 | 44.2 | 0 |
| P12163_1_F3,22891 K.LGLNVEEDFAM*K.R  | 1990.078 | 0.00928  | 3 | 1 | 38.5 | 0 |
| P12163_1_F6,14635 K.VAAIDTYDDHR.M    | 1579.802 | 0.00199  | 3 | 1 | 29.6 | 0 |
| P12163_1_F8,14485 K.VAAIDTYDDHR.M    | 1579.802 | 0.00556  | 3 | 1 | 31.1 | 0 |
| P12163_1_F8,14549 K.VAAIDTYDDHR.M    | 1579.802 | 0.00405  | 2 | 1 | 44.5 | 0 |
| P12163_2_S5,13879 K.VAAIDTYDDHR.M    | 1579.802 | 0.00094  | 3 | 1 | 53   | 0 |
| P12163_2_S5,13883 K.VAAIDTYDDHR.M    | 1579.802 | -0.00049 | 2 | 1 | 28.1 | 0 |
| P12163_2_S5,14098 K.VAAIDTYDDHR.M    | 1579.802 | 0.00235  | 3 | 1 | 68.1 | 0 |
| P12163_2_S5,14108 K.VAAIDTYDDHR.M    | 1579.802 | 0.00649  | 2 | 1 | 27.4 | 0 |
| P12163_1_S1,16880 K.VTWTENSVTVTGPPR. | 1948.044 | 0.0028   | 2 | 1 | 49   | 0 |
| P12163_1_S1,16941 K.VTWTENSVTVTGPPR. | 1948.044 | 0.00337  | 3 | 1 | 60   | 0 |
| P12163_1_F2,22042 R.AIVEGCGGLFPLAK.Q | 2040.177 | 0.00793  | 3 | 1 | 40.2 | 0 |
| P12163_1_F2,22067 R.AIVEGCGGLFPLAK.Q | 2040.177 | 0.00202  | 2 | 1 | 35.2 | 0 |
| P12163_1_F3,22700 R.AIVEGCGGLFPLAK.Q | 2040.177 | 0.01198  | 2 | 1 | 49.2 | 0 |
| P12163_1_F3,22718 R.AIVEGCGGLFPLAK.Q | 2040.177 | 0.00685  | 3 | 1 | 48   | 0 |
| P12163_1_F4,23501 R.AIVEGCGGLFPLAK.Q | 2040.177 | 0.00544  | 3 | 1 | 27   | 0 |
| P12163_1_F5,21640 R.AIVEGCGGLFPLAK.Q | 2040.177 | 0.0015   | 2 | 1 | 24.5 | 0 |
| P12163_1_F5,21662 R.AIVEGCGGLFPLAK.Q | 2040.177 | 0.00142  | 3 | 1 | 34.4 | 0 |
| P12163_2_F2,22045 R.AIVEGCGGLFPLAK.Q | 2040.177 | 0.00058  | 3 | 1 | 30.7 | 0 |
| P12163_2_F1,12955 R.AVDVNMNK.M       | 1498.851 | 0.00672  | 3 | 1 | 32.3 | 0 |
| P12163_2_F1,12964 R.AVDVNMNK.M       | 1498.851 | 0.00373  | 2 | 1 | 34.8 | 0 |
| P12163_1_F3,14921 R.EISGTVTLPGSK.S   | 1797.058 | 0.00542  | 2 | 1 | 36.3 | 0 |
| P12163_1_F3,16644 R.EISGTVTLPGSK.S   | 1797.058 | 0.00088  | 2 | 1 | 34.1 | 0 |
| P12163_1_F8,18303 R.ERPIGDLVTGLK.Q   | 1906.158 | 0.00367  | 3 | 1 | 29.9 | 0 |
| P12163_2_F6,17703 R.ERPIGDLVTGLK.Q   | 1906.158 | 0.00385  | 3 | 1 | 22.5 | 0 |
| P12163_2_F6,17728 R.ERPIGDLVTGLK.Q   | 1906.158 | 0.00662  | 2 | 1 | 34.6 | 0 |
| P12163_2_F6,18241 R.ERPIGDLVTGLK.Q   | 1906.158 | 0.00676  | 3 | 1 | 25.8 | 0 |
| P12163_1_F5,17299 R.FFIQGGQK.Y       | 1532.905 | 0.00464  | 2 | 1 | 31.2 | 0 |
| P12163_2_F2,18037 R.FFIQGGQK.Y       | 1532.905 | 0.00374  | 3 | 1 | 28.5 | 0 |
| P12163_2_F2,18167 R.FFIQGGQK.Y       | 1532.905 | 0.00596  | 2 | 1 | 25.9 | 0 |
| P12163_1_F8,20817 R.FGVFVEHGDSWDR.F  | 1854.908 | 0.00296  | 3 | 1 | 24.4 | 0 |
| P12163_2_F6,20386 R.FGVFVEHGDSWDR.F  | 1854.908 | 0.00167  | 3 | 1 | 32   | 0 |

|                   |                       |          |          |   |   |      |   |
|-------------------|-----------------------|----------|----------|---|---|------|---|
| P12163_2_F6,20416 | R.FGVFVEHGDSWDR.F     | 1854.908 | 0.00511  | 2 | 1 | 37.9 | 0 |
| P12163_1_F2,17639 | R.M*IAICTELR.K        | 1426.77  | 0.0053   | 3 | 1 | 21.9 | 0 |
| P12163_1_F7,21321 | K.AAVAWEAGKPLVIEE'    | 3343.939 | 0.00589  | 3 | 1 | 50.4 | 0 |
| P12163_1_S1,19522 | K.AFDLM*LSGESIR.C     | 1658.872 | 0.00461  | 3 | 1 | 33.4 | 0 |
| P12163_1_S1,22887 | K.AFDLMLSGESIR.C      | 1642.878 | 0.00578  | 2 | 1 | 36   | 0 |
| P12163_1_S1,22977 | K.AFDLMLSGESIR.C      | 1642.878 | 0.00221  | 3 | 1 | 36.6 | 0 |
| P12163_1_S1,23099 | K.AFDLMLSGESIR.C      | 1642.878 | 0.0023   | 2 | 1 | 33.9 | 0 |
| P12163_1_F7,13530 | K.ECPHCHSEESNM*CDI    | 2494.052 | 0.00045  | 4 | 1 | 23.7 | 0 |
| P12163_1_F7,13538 | K.ECPHCHSEESNMCDLI    | 2478.057 | 0.00955  | 3 | 1 | 21.9 | 0 |
| P12163_2_F4,13095 | K.ECPHCHSEESNMCDLI    | 2478.057 | 0.0037   | 3 | 1 | 39.5 | 0 |
| P12163_2_F1,13328 | K.EMEIEK.S ! K.EMELEK | 1386.776 | 0.00385  | 3 | 1 | 27.1 | 0 |
| P12163_1_F4,23063 | K.FGVTEFVNPK.D        | 1746.005 | 0.00698  | 3 | 1 | 45.3 | 0 |
| P12163_1_F4,23397 | K.FGVTEFVNPK.D        | 1746.005 | 0.00292  | 2 | 1 | 35.2 | 0 |
| P12163_2_F1,20600 | K.FGVTEFVNPK.D        | 1746.005 | 0.00557  | 3 | 1 | 44.9 | 0 |
| P12163_2_F1,20645 | K.FGVTEFVNPK.D        | 1746.005 | 0.00968  | 2 | 1 | 37.1 | 0 |
| P12163_2_F2,27    | K.FGVTEFVNPK.D        | 1746.005 | 0.00608  | 3 | 1 | 51.4 | 0 |
| P12163_1_F8,20269 | K.FITHAVPFSEINK.A     | 2111.211 | 0.00467  | 3 | 1 | 24.3 | 0 |
| P12163_2_F6,19825 | K.FITHAVPFSEINK.A     | 2111.211 | 0.0029   | 3 | 1 | 34.6 | 0 |
| P12163_1_F3,12665 | K.GQTPLFPR.I          | 1219.71  | 0.00393  | 3 | 1 | 28.3 | 0 |
| P12163_1_F3,12927 | K.GQTPLFPR.I          | 1219.71  | 0.00255  | 3 | 1 | 27   | 0 |
| P12163_1_F3,15952 | K.GQTPLFPR.I          | 1219.71  | 0.00645  | 2 | 1 | 27   | 0 |
| P12163_1_F4,13036 | K.GQTPLFPR.I          | 1219.71  | 0.00441  | 3 | 1 | 28.9 | 0 |
| P12163_2_F1,11929 | K.GQTPLFPR.I          | 1219.71  | 0.00453  | 3 | 1 | 31   | 0 |
| P12163_1_F4,16676 | K.INPAAPLDK.V         | 1546.941 | 0.00147  | 3 | 1 | 30.4 | 0 |
| P12163_2_F1,15822 | K.INPAAPLDK.V         | 1546.941 | 0.00366  | 3 | 1 | 23.5 | 0 |
| P12163_2_F2,557   | K.INPAAPLDK.V         | 1546.941 | 0.00282  | 3 | 1 | 30   | 0 |
| P12163_2_F4,14256 | K.INPAAPLDK.V         | 1546.941 | -0.00288 | 3 | 1 | 27.8 | 0 |
| P12163_1_F9,17168 | K.KFGVTEFVNPK.D       | 2178.305 | 0.00701  | 4 | 1 | 28   | 0 |
| P12163_2_F9,16335 | K.KFGVTEFVNPK.D       | 2178.305 | 0.01394  | 3 | 1 | 32.1 | 0 |
| P12163_1_F9,14137 | K.THPM*NLLNER.T       | 1544.816 | 0.00451  | 3 | 1 | 27.7 | 0 |
| P12163_2_F7,10650 | K.THPM*NLLNER.T       | 1544.816 | 0.00277  | 3 | 1 | 30.3 | 0 |
| P12163_2_F7,12673 | K.THPM*NLLNER.T       | 1544.816 | 0.00136  | 3 | 1 | 37.6 | 0 |
| P12163_1_F9,14112 | K.THPMNLLNER.T        | 1528.821 | 0.00562  | 3 | 1 | 26.6 | 0 |
| P12163_2_F7,12732 | K.THPMNLLNER.T        | 1528.821 | 0.00688  | 3 | 1 | 49.6 | 0 |
| P12163_1_F2,9733  | R.GVM*INDGQSR.F       | 1396.716 | 0.00264  | 3 | 1 | 28.7 | 0 |
| P12163_1_S1,16414 | R.IIGVDLNPSR.F        | 1387.821 | -0.00016 | 3 | 1 | 35.5 | 0 |
| P12163_1_S1,18149 | R.IIGVDLNPSR.F        | 1387.821 | 0.00245  | 3 | 1 | 76.3 | 0 |
| P12163_1_S1,18175 | R.IIGVDLNPSR.F        | 1387.821 | 0.0042   | 2 | 1 | 24.3 | 0 |
| P12163_1_F3,15895 | R.SDLPSVVEK.Y         | 1581.931 | 0.00646  | 3 | 1 | 31.5 | 0 |
| P12163_1_F4,16302 | R.SDLPSVVEK.Y         | 1581.931 | 0.0029   | 2 | 1 | 26.4 | 0 |
| P12163_1_F4,16322 | R.SDLPSVVEK.Y         | 1581.931 | 0.00475  | 3 | 1 | 31.4 | 0 |
| P12163_2_F1,15493 | R.SDLPSVVEK.Y         | 1581.931 | 0.00097  | 3 | 1 | 31.1 | 0 |
| P12163_2_F1,15505 | R.SDLPSVVEK.Y         | 1581.931 | 0.00488  | 2 | 1 | 32   | 0 |
| P12163_1_F4,17675 | K.AMMSLPATK.G         | 1557.895 | 0.00899  | 3 | 1 | 37.6 | 0 |
| P12163_2_F1,16826 | K.AMMSLPATK.G         | 1557.895 | 0.00368  | 3 | 1 | 29.2 | 0 |
| P12163_2_F1,16830 | K.AMMSLPATK.G         | 1557.895 | 0.00553  | 2 | 1 | 30.7 | 0 |
| P12163_1_F2,9982  | K.ETELIAR.G           | 1135.662 | 0.00382  | 3 | 1 | 23.6 | 0 |
| P12163_1_F3,10120 | K.ETELIAR.G           | 1135.662 | 0.00379  | 3 | 1 | 24.6 | 0 |
| P12163_1_F5,19742 | K.IYSGVSEGVTGTPIHV    | 2978.553 | 0.00107  | 4 | 1 | 26.4 | 0 |
| P12163_1_F5,21151 | K.IYSGVSEGVTGTPIHV    | 2978.553 | -0.00088 | 3 | 1 | 59.3 | 0 |
| P12163_2_F8_12070 | K.IYSGVSEGVTGTPIHV    | 2978.553 | -0.00163 | 3 | 1 | 39   | 0 |

|                   |                      |          |          |   |   |      |   |
|-------------------|----------------------|----------|----------|---|---|------|---|
| P12163_2_F8_12070 | K.IYSGVSEGVTTGTPIHV  | 2978.553 | -0.01201 | 4 | 1 | 34.5 | 0 |
| P12163_2_F1,16741 | K.LEAELAK.A          | 1381.851 | 0.00272  | 3 | 1 | 32.1 | 0 |
| P12163_1_F2,21643 | K.M*IAAIDAVR.V       | 1279.735 | 0.00289  | 2 | 1 | 29.1 | 0 |
| P12163_1_F9,11264 | R.CPDPEYAEK.M        | 1716.872 | 0.00981  | 2 | 1 | 38.7 | 0 |
| P12163_1_S1,13618 | R.GDSVGGVVTTCIVR.N   | 1622.884 | 0.00354  | 3 | 1 | 23.6 | 0 |
| P12163_1_S1,17590 | R.GDSVGGVVTTCIVR.N   | 1622.884 | 0.00679  | 2 | 1 | 44.2 | 0 |
| P12163_1_F4,17801 | R.GLGSPVFDK.L        | 1527.899 | 0.00385  | 2 | 1 | 30.8 | 0 |
| P12163_2_F1,16948 | R.GLGSPVFDK.L        | 1527.899 | 0.00673  | 2 | 1 | 38.1 | 0 |
| P12163_2_F1,16998 | R.GLGSPVFDK.L        | 1527.899 | 0.00586  | 3 | 1 | 30.1 | 0 |
| P12163_1_F9,8818  | R.HDPCVVPR.A         | 1283.683 | 0.00165  | 3 | 1 | 30.3 | 0 |
| P12163_2_F7,8386  | R.HDPCVVPR.A         | 1283.683 | 0.00222  | 3 | 1 | 26.8 | 0 |
| P12163_1_S1,14503 | R.SGGIQGGISNGEIIINM* | 2023.054 | 0.00746  | 3 | 1 | 44.6 | 0 |
| P12163_1_S1,17013 | R.SGGIQGGISNGEIIINMR | 2007.059 | 0.00263  | 3 | 1 | 84.4 | 0 |
| P12163_1_S1,17026 | R.SGGIQGGISNGEIIINMR | 2007.059 | -0.00307 | 2 | 1 | 63   | 0 |
| P12163_1_F4,12221 | R.VAPGAVAK.K         | 1320.846 | 0.00489  | 3 | 1 | 23.3 | 0 |
| P12163_1_F4,23691 | R.VAPGAVAK.K         | 1320.846 | 0.01347  | 2 | 1 | 25   | 0 |
| P12163_2_F1,11422 | R.VAPGAVAK.K         | 1320.846 | 0.00435  | 3 | 1 | 23.3 | 0 |
| P12163_2_S5,9949  | R.VAPGAVAK.K         | 1320.846 | 0.00006  | 3 | 1 | 26.4 | 0 |
| P12163_1_F8,17178 | R.VRGDSVGGVVTTCIVR.  | 1878.053 | -0.00217 | 3 | 1 | 44.5 | 0 |
| P12163_1_F6,15892 | R.VTTFGESHGGGVGCIII  | 2577.249 | 0.0056   | 3 | 1 | 64.8 | 0 |
| P12163_1_F6,17012 | R.VTTFGESHGGGVGCIII  | 2577.249 | 0.00365  | 3 | 1 | 41.2 | 0 |
| P12163_1_F6,17564 | R.VTTFGESHGGGVGCIII  | 2577.249 | 0.00125  | 3 | 1 | 35.2 | 0 |
| P12163_1_F6,18115 | R.VTTFGESHGGGVGCIII  | 2577.249 | 0.00083  | 3 | 1 | 74.8 | 0 |
| P12163_1_F6,18161 | R.VTTFGESHGGGVGCIII  | 2577.249 | 0.00433  | 2 | 1 | 45.9 | 0 |
| P12163_1_F6,22295 | R.VTTFGESHGGGVGCIII  | 2577.249 | 0.0038   | 3 | 1 | 41.8 | 0 |
| P12163_1_F7,17288 | R.VTTFGESHGGGVGCIII  | 2577.249 | 0.00377  | 3 | 1 | 81.2 | 0 |
| P12163_1_F8,18122 | R.VTTFGESHGGGVGCIII  | 2577.249 | 0.00032  | 3 | 1 | 40.4 | 0 |
| P12163_2_F10,1619 | R.VTTFGESHGGGVGCIII  | 2577.249 | 0.00164  | 3 | 1 | 66.6 | 0 |
| P12163_2_S5,16119 | R.VTTFGESHGGGVGCIII  | 2577.249 | 0.00182  | 3 | 1 | 25.9 | 0 |
| P12163_2_S5,16730 | R.VTTFGESHGGGVGCIII  | 2577.249 | 0.00281  | 3 | 1 | 60   | 0 |
| P12163_2_S5,16751 | R.VTTFGESHGGGVGCIII  | 2577.249 | 0.00308  | 4 | 1 | 23.2 | 0 |
| P12163_1_F4,14749 | K.ALAENEGLAK.L       | 1810.017 | 0.00076  | 2 | 1 | 52.4 | 0 |
| P12163_1_F7,13078 | K.ALAENEGLAK.L       | 1810.017 | 0.00399  | 3 | 1 | 46.8 | 0 |
| P12163_2_F1,13773 | K.ALAENEGLAK.L       | 1810.017 | 0.00116  | 2 | 1 | 67.3 | 0 |
| P12163_2_F1,13777 | K.ALAENEGLAK.L       | 1810.017 | 0.00825  | 3 | 1 | 35.4 | 0 |
| P12163_2_F4,12763 | K.ALAENEGLAK.L       | 1810.017 | 0.00399  | 3 | 1 | 42.5 | 0 |
| P12163_1_F6,15318 | K.ALGLQVHAAGYDR.Q    | 1674.923 | 0.00366  | 2 | 1 | 34.2 | 0 |
| P12163_1_F7,14522 | K.ALGLQVHAAGYDR.Q    | 1674.923 | 0.00254  | 2 | 1 | 32.8 | 0 |
| P12163_1_F8,15247 | K.ALGLQVHAAGYDR.Q    | 1674.923 | 0.00992  | 2 | 1 | 31   | 0 |
| P12163_2_F6,14657 | K.ALGLQVHAAGYDR.Q    | 1674.923 | 0.00342  | 3 | 1 | 35.2 | 0 |
| P12163_2_F9,13964 | K.ALGLQVHAAGYDR.Q    | 1674.923 | 0.00369  | 3 | 1 | 22   | 0 |
| P12163_2_F9,13969 | K.ALGLQVHAAGYDR.Q    | 1674.923 | 0.00256  | 2 | 1 | 25   | 0 |
| P12163_1_F8,18571 | K.DGKPVTIELIDAK.T    | 2311.4   | 0.00813  | 4 | 1 | 26.2 | 0 |
| P12163_1_S10,1708 | K.DGKPVTIELIDAK.T    | 2311.4   | 0.00793  | 4 | 1 | 24.1 | 0 |
| P12163_2_F6,17915 | K.DGKPVTIELIDAK.T    | 2311.4   | 0.00348  | 2 | 1 | 25.2 | 0 |
| P12163_1_F9,14067 | K.DHASNPVSEPVAV.-    | 1625.844 | 0.00372  | 2 | 1 | 53.2 | 0 |
| P12163_1_S1,19054 | K.DIIIATGSVPFVVK.G   | 2065.252 | 0.00111  | 4 | 1 | 34.5 | 0 |
| P12163_1_S1,19077 | K.DIIIATGSVPFVVK.G   | 2065.252 | 0.0059   | 3 | 1 | 25   | 0 |
| P12163_1_S1,21070 | K.DIIIATGSVPFVVK.G   | 2065.252 | -0.00322 | 2 | 1 | 44.2 | 0 |
| P12163_1_S1,21084 | K.DIIIATGSVPFVVK.G   | 2065.252 | 0.00635  | 4 | 1 | 60.6 | 0 |
| P12163_1_S1,21093 | K.DIIIATGSVPFVVK.G   | 2065.252 | 0.0047   | 3 | 1 | 41   | 0 |

|                   |                         |          |         |   |   |      |   |
|-------------------|-------------------------|----------|---------|---|---|------|---|
| P12163_2_F1,15823 | K.EGFEVSVAK.T           | 1573.905 | 0.00642 | 3 | 1 | 28.7 | 0 |
| P12163_2_F1,15851 | K.EGFEVSVAK.T           | 1573.905 | 0.00863 | 2 | 1 | 36   | 0 |
| P12163_2_F1,16525 | K.FGTDNIVTAK.D          | 1673.968 | 0.00419 | 3 | 1 | 31.4 | 0 |
| P12163_1_F4,12450 | K.GIEVDGK.T             | 1325.788 | 0.00784 | 2 | 1 | 32.7 | 0 |
| P12163_1_F4,13085 | K.GIEVDGK.T             | 1325.788 | 0.005   | 3 | 1 | 27.7 | 0 |
| P12163_2_F1,12047 | K.GIEVDGK.T             | 1325.788 | 0.00806 | 3 | 1 | 31.9 | 0 |
| P12163_1_F6,16293 | K.IDYHTGVFATK.I         | 1860.048 | 0.00611 | 3 | 1 | 27.4 | 0 |
| P12163_2_F6,15594 | K.IDYHTGVFATK.I         | 1860.048 | 0.00641 | 3 | 1 | 31.8 | 0 |
| P12163_1_F6,13222 | K.TVITSDHALK.L          | 1693.01  | 0.00556 | 3 | 1 | 30.4 | 0 |
| P12163_1_F6,13231 | K.TVITSDHALK.L          | 1693.01  | 0.00613 | 2 | 1 | 42.2 | 0 |
| P12163_1_F8,13123 | K.TVITSDHALK.L          | 1693.01  | 0.00559 | 2 | 1 | 34.1 | 0 |
| P12163_1_F7,13402 | K.VKDHASNPVSEPVAV.      | 2157.212 | 0.00707 | 3 | 1 | 28.4 | 0 |
| P12163_2_F2,8725  | R.NNLTNSM*K.A           | 1545.851 | 0.00731 | 2 | 1 | 25.5 | 0 |
| P12163_1_F5,10930 | R.NNLTNSMK.A            | 1529.857 | 0.01159 | 2 | 1 | 27.4 | 0 |
| P12163_1_F5,10941 | R.NNLTNSMK.A            | 1529.857 | 0.01106 | 3 | 1 | 28.1 | 0 |
| P12163_2_F2,11762 | R.NNLTNSMK.A            | 1529.857 | 0.00731 | 3 | 1 | 31.3 | 0 |
| P12163_2_F6,10523 | R.QGVADHANNLATK.I       | 1947.087 | 0.00275 | 3 | 1 | 30.6 | 0 |
| P12163_2_F7,9199  | R.QGVADHANNLATK.I       | 1947.087 | 0.00531 | 4 | 1 | 31.7 | 0 |
| P12163_2_F7,9976  | R.QGVADHANNLATK.I       | 1947.087 | 0.00308 | 3 | 1 | 30.4 | 0 |
| P12163_2_F7,18857 | K.ACELGLEVKPWIK.T       | 2455.451 | 0.0129  | 3 | 1 | 21.9 | 0 |
| P12163_2_F7,18892 | K.ACELGLEVKPWIK.T       | 2455.451 | 0.00951 | 4 | 1 | 22.2 | 0 |
| P12163_1_F4,14223 | K.ATYEAITK.G            | 1504.883 | 0.00348 | 2 | 1 | 29.5 | 0 |
| P12163_1_F4,14225 | K.ATYEAITK.G            | 1504.883 | 0.00695 | 3 | 1 | 35.7 | 0 |
| P12163_2_F1,16390 | K.GPM*LLGVK.A           | 1438.891 | 0.00565 | 3 | 1 | 24   | 0 |
| P12163_1_F4,19495 | K.GPMLLGVK.A            | 1422.896 | 0.00937 | 2 | 1 | 33.4 | 0 |
| P12163_1_F4,19501 | K.GPMLLGVK.A            | 1422.896 | 0.00907 | 3 | 1 | 38.2 | 0 |
| P12163_1_F5,18415 | K.GPMLLGVK.A            | 1422.896 | 0.00418 | 3 | 1 | 28.7 | 0 |
| P12163_1_F7,17285 | K.GPMLLGVK.A            | 1422.896 | 0.00562 | 3 | 1 | 29.4 | 0 |
| P12163_1_F4,20747 | K.IIDWETTSPK.Q          | 1798.021 | 0.00914 | 2 | 1 | 40   | 0 |
| P12163_2_F1,20155 | K.IIDWETTSPK.Q          | 1798.021 | -0.0068 | 2 | 1 | 29.1 | 0 |
| P12163_2_F1,21213 | K.ILLESAIR.N ! R.ILLES/ | 1218.772 | 0.00386 | 2 | 1 | 24.5 | 0 |
| P12163_1_F4,17461 | K.LLNGEVGPK.T           | 1534.941 | 0.00706 | 2 | 1 | 32   | 0 |
| P12163_1_F4,17471 | K.LLNGEVGPK.T           | 1534.941 | 0.00476 | 3 | 1 | 38.3 | 0 |
| P12163_1_F5,16162 | K.LLNGEVGPK.T           | 1534.941 | 0.00746 | 2 | 1 | 37.6 | 0 |
| P12163_1_F5,16182 | K.LLNGEVGPK.T           | 1534.941 | 0.00515 | 3 | 1 | 36.2 | 0 |
| P12163_1_F6,16731 | K.LLNGEVGPK.T           | 1534.941 | 0.01202 | 2 | 1 | 26.8 | 0 |
| P12163_1_F7,15384 | K.LLNGEVGPK.T           | 1534.941 | 0.00192 | 2 | 1 | 31.9 | 0 |
| P12163_2_F1,16641 | K.LLNGEVGPK.T           | 1534.941 | 0.00408 | 2 | 1 | 31.7 | 0 |
| P12163_2_F6,16182 | K.QVEIPFKPAR.V          | 1793.089 | 0.00682 | 2 | 1 | 25.6 | 0 |
| P12163_2_F6,16262 | K.QVEIPFKPAR.V          | 1793.089 | 0.0048  | 3 | 1 | 38.4 | 0 |
| P12163_2_F7,14980 | K.QVEIPFKPAR.V          | 1793.089 | 0.00531 | 3 | 1 | 38.2 | 0 |
| P12163_1_F4,21639 | K.SVLPDMFK.A            | 1544.897 | 0.01139 | 2 | 1 | 30   | 0 |
| P12163_1_F4,21647 | K.SVLPDMFK.A            | 1544.897 | 0.00598 | 3 | 1 | 35.7 | 0 |
| P12163_2_F1,21192 | K.SVLPDMFK.A            | 1544.897 | 0.00729 | 2 | 1 | 27   | 0 |
| P12163_2_F1,21193 | K.SVLPDMFK.A            | 1544.897 | 0.00763 | 3 | 1 | 35.5 | 0 |
| P12163_1_F3,12729 | K.TSLAPGSGVVTK.Y        | 1725.037 | 0.00679 | 3 | 1 | 28.7 | 0 |
| P12163_1_F3,14623 | K.TSLAPGSGVVTK.Y        | 1725.037 | 0.00595 | 2 | 1 | 49.3 | 0 |
| P12163_1_F4,13159 | K.TSLAPGSGVVTK.Y        | 1725.037 | 0.00391 | 3 | 1 | 40.9 | 0 |
| P12163_1_F4,13214 | K.TSLAPGSGVVTK.Y        | 1725.037 | 0.00617 | 2 | 1 | 41.1 | 0 |
| P12163_1_F4,14929 | K.TSLAPGSGVVTK.Y        | 1725.037 | 0.00037 | 2 | 1 | 40.9 | 0 |
| P12163_2_F1,14052 | K.TSLAPGSGVVTK.Y        | 1725.037 | 0.0052  | 3 | 1 | 54.1 | 0 |

|                   |                       |          |          |   |   |      |   |
|-------------------|-----------------------|----------|----------|---|---|------|---|
| P12163_2_F2,14845 | K.YLQNSGLQK.Y         | 1658.969 | 0.00493  | 2 | 1 | 34.8 | 0 |
| P12163_1_F8,19122 | R.DIWPSSEEVAVHVVQK.   | 2332.276 | -0.00204 | 3 | 1 | 40.7 | 0 |
| P12163_2_F1,12915 | R.NCDEFQVK.S          | 1647.862 | 0.00774  | 2 | 1 | 29.1 | 0 |
| P12163_1_F9,8784  | R.VHPLTR.A            | 1026.636 | 0.00112  | 3 | 1 | 22.2 | 0 |
| P12163_1_S10,9421 | R.VHPLTR.A            | 1026.636 | 0.00382  | 3 | 1 | 24.8 | 0 |
| P12163_2_F10,8793 | R.VHPLTR.A            | 1026.636 | 0.00223  | 3 | 1 | 24.3 | 0 |
| P12163_1_F3,18711 | K.ADGFLYCEDVK.V       | 1924.993 | 0.00769  | 2 | 1 | 38.9 | 0 |
| P12163_1_F4,19180 | K.ADGFLYCEDVK.V       | 1924.993 | 0.00139  | 2 | 1 | 28.8 | 0 |
| P12163_1_F9,16360 | K.ILEHLR.K            | 1084.678 | 0.00418  | 3 | 1 | 34.1 | 0 |
| P12163_1_F9,16587 | K.ILEHLR.K            | 1084.678 | 0.0037   | 3 | 1 | 31.9 | 0 |
| P12163_1_F9,16841 | K.ILEHLR.K            | 1084.678 | 0.0043   | 3 | 1 | 32   | 0 |
| P12163_1_S10,1633 | K.ILEHLR.K            | 1084.678 | 0.00661  | 3 | 1 | 23.6 | 0 |
| P12163_1_S10,1653 | K.ILEHLR.K            | 1084.678 | 0.00472  | 3 | 1 | 30.3 | 0 |
| P12163_2_F8_12070 | K.ILEHLR.K            | 1084.678 | 0.00331  | 3 | 1 | 33.9 | 0 |
| P12163_2_F9,15567 | K.ILEHLR.K            | 1084.678 | 0.00424  | 3 | 1 | 30.2 | 0 |
| P12163_2_F9,15470 | K.KADGFLYCEDVK.V      | 2357.294 | 0.00894  | 3 | 1 | 53.5 | 0 |
| P12163_2_F9,15544 | K.KADGFLYCEDVK.V      | 2357.294 | 0.0026   | 4 | 1 | 31.3 | 0 |
| P12163_1_S1,18030 | K.LGCGAVLVSGNELR.L    | 1748.963 | 0.00336  | 2 | 1 | 57.9 | 0 |
| P12163_1_S1,18038 | K.LGCGAVLVSGNELR.L    | 1748.963 | 0.00307  | 3 | 1 | 61   | 0 |
| P12163_1_F8,17801 | K.MRPPEYWVEEDGSVS     | 2517.29  | 0.01238  | 3 | 1 | 32.7 | 0 |
| P12163_2_F6,17300 | K.MRPPEYWVEEDGSVS     | 2517.29  | 0.01787  | 3 | 1 | 37.8 | 0 |
| P12163_1_F3,26370 | K.QALEGLNSIIGYAIK.A   | 2198.3   | 0.00502  | 3 | 1 | 62.2 | 0 |
| P12163_1_F3,20025 | K.VQDVMETVEK.R        | 1785.988 | 0.00299  | 2 | 1 | 47.2 | 0 |
| P12163_1_F3,20032 | K.VQDVMETVEK.R        | 1785.988 | 0.00558  | 3 | 1 | 30.6 | 0 |
| P12163_1_F4,20579 | K.VQDVMETVEK.R        | 1785.988 | 0.01003  | 2 | 1 | 37.2 | 0 |
| P12163_1_F4,20587 | K.VQDVMETVEK.R        | 1785.988 | 0.01047  | 3 | 1 | 35.2 | 0 |
| P12163_1_F4,13108 | R.AGFDPTK.C           | 1343.778 | 0.00216  | 2 | 1 | 30   | 0 |
| P12163_1_F3,22846 | R.DAAVLMVNYIDK.I      | 1960.103 | 0.00954  | 3 | 1 | 32.5 | 0 |
| P12163_1_F3,22858 | R.DAAVLMVNYIDK.I      | 1960.103 | -0.00179 | 2 | 1 | 63.4 | 0 |
| P12163_1_F9,10083 | R.HGETFEDNMR.F        | 1539.716 | 0.00125  | 3 | 1 | 23.5 | 0 |
| P12163_1_F7,15157 | R.INPDVDPQVHPYVATC    | 2572.398 | 0.00216  | 3 | 1 | 39.6 | 0 |
| P12163_1_F7,15187 | R.INPDVDPQVHPYVATC    | 2572.398 | 0.0039   | 4 | 1 | 23.8 | 0 |
| P12163_1_S10,1512 | R.INPDVDPQVHPYVATC    | 2572.398 | 0.00561  | 3 | 1 | 31   | 0 |
| P12163_1_S10,1513 | R.INPDVDPQVHPYVATC    | 2572.398 | 0.00382  | 4 | 1 | 30.6 | 0 |
| P12163_2_F10,1414 | R.INPDVDPQVHPYVATC    | 2572.398 | 0.00286  | 4 | 1 | 25.9 | 0 |
| P12163_2_S5,14433 | R.INPDVDPQVHPYVATC    | 2572.398 | 0.00492  | 3 | 1 | 39.7 | 0 |
| P12163_2_S5,14440 | R.INPDVDPQVHPYVATC    | 2572.398 | 0.00442  | 4 | 1 | 26.8 | 0 |
| P12163_1_F3,11312 | R.NLIDTVR.E           | 1134.678 | 0.00356  | 3 | 1 | 39.8 | 0 |
| P12163_1_F2,19548 | R.NLNLIIEPGR.S        | 1442.863 | 0.00336  | 2 | 1 | 30.7 | 0 |
| P12163_1_S1,18387 | R.NLNLIIEPGR.S        | 1442.863 | 0.00311  | 3 | 1 | 60.6 | 0 |
| P12163_1_F3,13177 | K.AGAPVDETIK.T        | 1608.942 | 0.0072   | 2 | 1 | 35.5 | 0 |
| P12163_1_F4,13686 | K.AGAPVDETIK.T        | 1608.942 | 0.00898  | 2 | 1 | 39.6 | 0 |
| P12163_2_F1,12739 | K.AGAPVDETIK.T        | 1608.942 | 0.00706  | 2 | 1 | 29.7 | 0 |
| P12163_1_F3,14005 | K.GDGYLVDK.V          | 1474.836 | 0.0015   | 2 | 1 | 26.7 | 0 |
| P12163_1_F4,14659 | K.GDGYLVDK.V          | 1474.836 | 0.00769  | 2 | 1 | 32.2 | 0 |
| P12163_1_F2,21690 | K.ICSYAQGM*NLIR.A ! H | 1745.898 | 0.00184  | 3 | 1 | 32.9 | 0 |
| P12163_2_F1,18407 | K.ICSYAQGM*NLIR.A ! H | 1745.898 | 0.00632  | 2 | 1 | 25.6 | 0 |
| P12163_1_F4,13715 | K.SGGFGVQSNQAVDK.C    | 2002.081 | 0.00518  | 3 | 1 | 50.4 | 0 |
| P12163_1_F4,13745 | K.SGGFGVQSNQAVDK.C    | 2002.081 | 0.00627  | 2 | 1 | 60.1 | 0 |
| P12163_2_F1,12725 | K.SGGFGVQSNQAVDK.C    | 2002.081 | 0.00536  | 3 | 1 | 36.9 | 0 |
| P12163_1_F2,11377 | K.VDETVER.A           | 1151.621 | 0.00302  | 2 | 1 | 36.2 | 0 |



|                   |                         |          |          |   |   |      |   |
|-------------------|-------------------------|----------|----------|---|---|------|---|
| P12163_1_S1,11539 | K.VDETVER.A             | 1151.621 | 0.00298  | 2 | 1 | 36.6 | 0 |
| P12163_1_S1,11872 | K.VDETVER.A             | 1151.621 | 0.00194  | 2 | 1 | 25.9 | 0 |
| P12163_1_F4,25394 | K.YIEDILLK.V            | 1614.993 | 0.00873  | 2 | 1 | 44.9 | 0 |
| P12163_2_F9,21440 | K.YIEDILLK.V            | 1614.993 | 0.0074   | 3 | 1 | 24.3 | 0 |
| P12163_1_F3,16741 | R.AVFLDR.I              | 1024.609 | 0.00173  | 2 | 1 | 26.8 | 0 |
| P12163_1_F6,13291 | R.DYFGAHTYER.I ! R.DY   | 1562.754 | 0.00126  | 3 | 1 | 24.2 | 0 |
| P12163_2_S3,12278 | R.DYFGAHTYER.I ! R.DY   | 1562.754 | 0.00015  | 3 | 1 | 28.6 | 0 |
| P12163_1_F2,15655 | R.LIDDVR.Q ! K.LIDDVR   | 1034.615 | 0.00216  | 2 | 1 | 26.7 | 0 |
| P12163_1_F3,16355 | R.LIDDVR.Q ! K.LIDDVR   | 1034.615 | 0.0016   | 2 | 1 | 36.5 | 0 |
| P12163_1_S1,14090 | R.LIDDVR.Q ! K.LIDDVR   | 1034.615 | 0.00218  | 2 | 1 | 35.5 | 0 |
| P12163_1_F2,16574 | R.LPANLVQAQR.D          | 1413.848 | 0.00372  | 3 | 1 | 22.9 | 0 |
| P12163_1_F2,16815 | R.LPANLVQAQR.D          | 1413.848 | 0.00343  | 2 | 1 | 25.5 | 0 |
| P12163_1_S1,15559 | R.LPANLVQAQR.D          | 1413.848 | 0.00063  | 3 | 1 | 53.7 | 0 |
| P12163_1_F2,23614 | R.NADLANLLVDPEFAK.      | 2238.259 | 0.00578  | 3 | 1 | 34   | 0 |
| P12163_1_F5,11592 | R.QALYASK.I             | 1388.836 | 0.00874  | 2 | 1 | 30.2 | 0 |
| P12163_1_F5,11663 | R.QALYASK.I             | 1388.836 | 0.00755  | 3 | 1 | 33.6 | 0 |
| P12163_1_F6,12559 | R.QALYASK.I             | 1388.836 | 0.00528  | 2 | 1 | 26.3 | 0 |
| P12163_1_S10,1296 | R.QALYASK.I             | 1388.836 | 0.00581  | 3 | 1 | 26.6 | 0 |
| P12163_2_F2,12380 | R.QALYASK.I             | 1388.836 | 0.00652  | 2 | 1 | 29.9 | 0 |
| P12163_2_F2,12384 | R.QALYASK.I             | 1388.836 | 0.00686  | 3 | 1 | 30   | 0 |
| P12163_2_F8_1207  | R.QALYASK.I             | 1388.836 | 0.00676  | 2 | 1 | 30.4 | 0 |
| P12163_1_F4,25764 | R.VIIM*LVK.A            | 1439.948 | 0.0088   | 3 | 1 | 28.5 | 0 |
| P12163_1_S1,15042 | K.DEISDALER.I           | 1351.701 | 0.00534  | 2 | 1 | 25.2 | 0 |
| P12163_1_F3,17256 | K.GCLLVGPPGTGK.T        | 1764.03  | 0.00195  | 2 | 1 | 28.7 | 0 |
| P12163_1_F4,17640 | K.GCLLVGPPGTGK.T        | 1764.03  | 0.00515  | 2 | 1 | 45.8 | 0 |
| P12163_1_F4,17662 | K.GCLLVGPPGTGK.T        | 1764.03  | 0.00624  | 3 | 1 | 27.7 | 0 |
| P12163_2_F1,16896 | K.GCLLVGPPGTGK.T        | 1764.03  | 0.00828  | 3 | 1 | 32   | 0 |
| P12163_1_S1,20069 | K.IGQVAIGGPGGNPFLG      | 2879.566 | 0.012    | 3 | 1 | 51.6 | 0 |
| P12163_1_F9,12604 | K.ILQVHSR.G             | 1156.71  | 0.00203  | 3 | 1 | 32.5 | 0 |
| P12163_2_F9,11575 | K.ILQVHSR.G             | 1156.71  | -0.00421 | 3 | 1 | 40.1 | 0 |
| P12163_1_F3,27480 | K.LELQEVVDFLK.N         | 1941.152 | 0.0015   | 3 | 1 | 39.3 | 0 |
| P12163_2_F1,9927  | K.NAVVSDEK.K            | 1469.842 | 0.00658  | 2 | 1 | 25   | 0 |
| P12163_1_F8,18265 | K.QIITTHIDILHK.L        | 2040.243 | 0.0038   | 4 | 1 | 27.5 | 0 |
| P12163_1_F8,18304 | K.QIITTHIDILHK.L        | 2040.243 | 0.00283  | 3 | 1 | 46.9 | 0 |
| P12163_2_F10,1602 | K.QIITTHIDILHK.L        | 2040.243 | 0.00456  | 4 | 1 | 40.4 | 0 |
| P12163_2_F10,1603 | K.QIITTHIDILHK.L        | 2040.243 | 0.00766  | 3 | 1 | 53.8 | 0 |
| P12163_1_F5,13008 | K.YTALGAK.I             | 1331.814 | 0.00923  | 3 | 1 | 30.8 | 0 |
| P12163_2_F2,13797 | K.YTALGAK.I             | 1331.814 | 0.00494  | 2 | 1 | 24.1 | 0 |
| P12163_1_F4,8230  | R.GAGLGGGNDER.E         | 1306.665 | 0.00356  | 2 | 1 | 31.7 | 0 |
| P12163_2_F1,7385  | R.GAGLGGGNDER.E         | 1306.665 | 0.00236  | 2 | 1 | 63   | 0 |
| P12163_1_S1,18984 | R.GQAGGLTFFAPSEER.I     | 1870.96  | 0.00443  | 2 | 1 | 48   | 0 |
| P12163_1_S1,18995 | R.GQAGGLTFFAPSEER.I     | 1870.96  | 0.00269  | 3 | 1 | 51.4 | 0 |
| P12163_1_F4,25052 | R.IAQLIIEK.I ! K.LAQLLI | 1535.998 | 0.00487  | 2 | 1 | 38.3 | 0 |
| P12163_1_F7,21957 | R.IAQLIIEK.I ! K.LAQLLI | 1535.998 | -0.00369 | 3 | 1 | 25.3 | 0 |
| P12163_2_F1,24351 | R.IAQLIIEK.I ! K.LAQLLI | 1535.998 | 0.00369  | 3 | 1 | 23.7 | 0 |
| P12163_2_S5,20984 | R.IAQLIIEK.I ! K.LAQLLI | 1535.998 | -0.00207 | 3 | 1 | 23.4 | 0 |
| P12163_1_F3,12982 | R.LESGLYSR.S            | 1228.684 | 0.00579  | 3 | 1 | 44.4 | 0 |
| P12163_1_F3,13603 | R.LESGLYSR.S            | 1228.684 | 0.00105  | 3 | 1 | 27.4 | 0 |
| P12163_1_F5,20861 | R.YSEFLNAVK.K           | 1678.962 | 0.0084   | 2 | 1 | 39.4 | 0 |
| P12163_1_F5,20900 | R.YSEFLNAVK.K           | 1678.962 | 0.00719  | 3 | 1 | 30.1 | 0 |
| P12163_2_F1,21654 | R.YSEFLNAVK.K           | 1678.962 | 0.00356  | 3 | 1 | 29.6 | 0 |

|                    |                       |          |          |   |   |      |   |
|--------------------|-----------------------|----------|----------|---|---|------|---|
| P12163_2_F1,21670  | R.YSEFLNAVK.K         | 1678.962 | 0.0051   | 2 | 1 | 41.5 | 0 |
| P12163_2_F8_12070  | R.YSEFLNAVK.K         | 1678.962 | 0.00695  | 3 | 1 | 30.5 | 0 |
| P12163_2_F8_12070  | R.YSEFLNAVK.K         | 1678.962 | 0.0076   | 2 | 1 | 38.4 | 0 |
| P12163_1_S1,18313  | K.DAGHAGLNVAR.I       | 1473.869 | -0.00134 | 3 | 1 | 36.6 | 0 |
| P12163_1_F8,19621  | K.DAVVTVPAYFNDAQR     | 1970.028 | 0.00381  | 2 | 1 | 27.9 | 0 |
| P12163_1_F8,19642  | K.DAVVTVPAYFNDAQR     | 1970.028 | 0.00685  | 3 | 1 | 24.6 | 0 |
| P12163_1_F4,14436  | K.EAEFEAEEDK.K ! R.EA | 1804.906 | 0.01389  | 2 | 1 | 36.7 | 0 |
| P12163_1_F8,20884  | K.IKDAVVTVPAYFNDAQ    | 2515.413 | 0.00714  | 3 | 1 | 49.6 | 0 |
| P12163_1_F8,10737  | K.NGHVEIANDQGNR.I     | 1840.957 | 0.00627  | 2 | 1 | 31.5 | 0 |
| P12163_1_F8,10748  | K.NGHVEIANDQGNR.I     | 1840.957 | 0.00406  | 3 | 1 | 38.4 | 0 |
| P12163_2_F6,10562  | K.NGHVEIANDQGNR.I     | 1840.957 | -0.00023 | 2 | 1 | 43.6 | 0 |
| P12163_2_F6,10567  | K.NGHVEIANDQGNR.I     | 1840.957 | 0.0025   | 3 | 1 | 41.9 | 0 |
| P12163_1_F3,7073   | K.NQAAVNPDR.T         | 1288.691 | 0.00488  | 2 | 1 | 24.5 | 0 |
| P12163_1_F4,7589   | K.NQAAVNPDR.T         | 1288.691 | 0.00522  | 2 | 1 | 38.8 | 0 |
| P12163_1_S1,17260  | K.NQIDEIVLVGGSTR.I    | 1805.007 | 0.00272  | 3 | 1 | 27.1 | 0 |
| P12163_1_S1,18597  | K.NQIDEIVLVGGSTR.I    | 1805.007 | 0.00846  | 2 | 1 | 42.7 | 0 |
| P12163_1_S1,18608  | K.NQIDEIVLVGGSTR.I    | 1805.007 | 0.00401  | 3 | 1 | 47.7 | 0 |
| P12163_1_S1,23276  | K.VFSPEEISAM*ILTK.M   | 2189.235 | 0.00731  | 3 | 1 | 33.2 | 0 |
| P12163_1_F2,22404  | R.IINEPTAAAIAAYGLDK.I | 2268.306 | 0.00735  | 3 | 1 | 45.2 | 0 |
| P12163_1_F4,23908  | R.IINEPTAAAIAAYGLDK.I | 2268.306 | 0.00405  | 3 | 1 | 59.2 | 0 |
| P12163_1_F5,22034  | R.IINEPTAAAIAAYGLDK.I | 2268.306 | 0.00048  | 3 | 1 | 35.6 | 0 |
| P12163_1_F8,22408  | R.IINEPTAAAIAAYGLDK.I | 2268.306 | 0.00681  | 3 | 1 | 49.7 | 0 |
| P12163_1_S1,21321  | R.IINEPTAAAIAAYGLDK.I | 2268.306 | 0.00492  | 3 | 1 | 53.3 | 0 |
| P12163_1_S1,21346  | R.IINEPTAAAIAAYGLDK.I | 2268.306 | -0.00297 | 2 | 1 | 75.2 | 0 |
| P12163_1_S1,21375  | R.IINEPTAAAIAAYGLDK.I | 2268.306 | 0.00752  | 4 | 1 | 61   | 0 |
| P12163_1_S1,21490  | R.IINEPTAAAIAAYGLDK.I | 2268.306 | 0.0003   | 3 | 1 | 54.8 | 0 |
| P12163_1_S10,20391 | R.IINEPTAAAIAAYGLDK.I | 2268.306 | 0.00414  | 3 | 1 | 22.1 | 0 |
| P12163_1_S1,21055  | R.ITPSWVAFTDSER.L     | 1812.943 | 0.00584  | 2 | 1 | 42.6 | 0 |
| P12163_1_F2,12006  | R.LSQEEIDR.M          | 1293.695 | 0.00416  | 2 | 1 | 24.6 | 0 |
| P12163_1_F4,21105  | R.NSLETYVYNMK.N       | 1970.051 | 0.01024  | 2 | 1 | 55.2 | 0 |
| P12163_1_F4,21150  | R.NSLETYVYNMK.N       | 1970.051 | 0.00769  | 3 | 1 | 48   | 0 |
| P12163_2_F1,20530  | R.NSLETYVYNMK.N       | 1970.051 | 0.00736  | 3 | 1 | 27.6 | 0 |
| P12163_1_F5,17500  | R.TIFDVK.R            | 1330.819 | 0.00764  | 2 | 1 | 32.9 | 0 |
| P12163_1_F5,17524  | R.TIFDVK.R            | 1330.819 | 0.0059   | 3 | 1 | 23.8 | 0 |
| P12163_2_F1,18011  | R.TIFDVK.R            | 1330.819 | 0.0053   | 2 | 1 | 32.5 | 0 |
| P12163_1_S1,18313  | K.DAGHAGLNVAR.I       | 1473.869 | -0.00134 | 3 | 1 | 36.6 | 0 |
| P12163_1_F8,19621  | K.DAVVTVPAYFNDAQR     | 1970.028 | 0.00381  | 2 | 1 | 27.9 | 0 |
| P12163_1_F8,19642  | K.DAVVTVPAYFNDAQR     | 1970.028 | 0.00685  | 3 | 1 | 24.6 | 0 |
| P12163_1_F4,14436  | K.EAEFEAEEDK.K ! R.EA | 1804.906 | 0.01389  | 2 | 1 | 36.7 | 0 |
| P12163_1_F3,16392  | K.EVEAVCNPVIK.Q ! K.E | 1866.061 | 0.00588  | 2 | 1 | 57.4 | 0 |
| P12163_2_F4,16465  | K.GINPDEAVAHGAAVQ     | 3257.686 | 0.00307  | 4 | 1 | 35.6 | 0 |
| P12163_1_F8,20884  | K.IKDAVVTVPAYFNDAQ    | 2515.413 | 0.00714  | 3 | 1 | 49.6 | 0 |
| P12163_1_F4,9045   | K.NQAALNAER.T         | 1290.707 | 0.00553  | 2 | 1 | 34.9 | 0 |
| P12163_1_F4,26680  | R.FEELNM*DLFK.K       | 1910.019 | 0.00144  | 3 | 1 | 34.7 | 0 |
| P12163_1_F3,25837  | R.FEELNMDLDFK.K       | 1894.024 | 0.0085   | 2 | 1 | 63.3 | 0 |
| P12163_1_F2,22404  | R.IINEPTAAAIAAYGLDK.I | 2268.306 | 0.00735  | 3 | 1 | 45.2 | 0 |
| P12163_1_F4,23908  | R.IINEPTAAAIAAYGLDK.I | 2268.306 | 0.00405  | 3 | 1 | 59.2 | 0 |
| P12163_1_F5,22034  | R.IINEPTAAAIAAYGLDK.I | 2268.306 | 0.00048  | 3 | 1 | 35.6 | 0 |
| P12163_1_F8,22408  | R.IINEPTAAAIAAYGLDK.I | 2268.306 | 0.00681  | 3 | 1 | 49.7 | 0 |
| P12163_1_S1,21321  | R.IINEPTAAAIAAYGLDK.I | 2268.306 | 0.00492  | 3 | 1 | 53.3 | 0 |
| P12163_1_S1,21346  | R.IINEPTAAAIAAYGLDK.I | 2268.306 | -0.00297 | 2 | 1 | 75.2 | 0 |

|                   |                        |          |          |   |   |      |   |
|-------------------|------------------------|----------|----------|---|---|------|---|
| P12163_1_S1,21375 | R.IINEPTAAAIAAYGLDK.I  | 2268.306 | 0.00752  | 4 | 1 | 61   | 0 |
| P12163_1_S1,21490 | R.IINEPTAAAIAAYGLDK.I  | 2268.306 | 0.0003   | 3 | 1 | 54.8 | 0 |
| P12163_1_S10,2039 | R.IINEPTAAAIAAYGLDK.I  | 2268.306 | 0.00414  | 3 | 1 | 22.1 | 0 |
| P12163_1_F2,12006 | R.LSQEEDR.M            | 1293.695 | 0.00416  | 2 | 1 | 24.6 | 0 |
| P12163_1_F5,17500 | R.TIFDVK.R             | 1330.819 | 0.00764  | 2 | 1 | 32.9 | 0 |
| P12163_1_F5,17524 | R.TIFDVK.R             | 1330.819 | 0.0059   | 3 | 1 | 23.8 | 0 |
| P12163_2_F1,18011 | R.TIFDVK.R             | 1330.819 | 0.0053   | 2 | 1 | 32.5 | 0 |
| P12163_1_S1,14498 | R.VEIIANDQGNR.I ! R.VI | 1532.833 | 0.00335  | 2 | 1 | 30.8 | 0 |
| P12163_1_S1,14657 | R.VEIIANDQGNR.I ! R.VI | 1532.833 | 0.00328  | 3 | 1 | 71.6 | 0 |
| P12163_1_S1,14739 | R.VEIIANDQGNR.I ! R.VI | 1532.833 | 0.00397  | 2 | 1 | 33.7 | 0 |
| P12163_1_S1,14901 | R.VEIIANDQGNR.I ! R.VI | 1532.833 | 0.00187  | 3 | 1 | 69.2 | 0 |
| P12163_1_S1,14978 | R.VEIIANDQGNR.I ! R.VI | 1532.833 | 0.00507  | 2 | 1 | 32   | 0 |
| P12163_1_S10,199  | R.VEIIANDQGNR.I ! R.VI | 1532.833 | 0.00184  | 3 | 1 | 35.4 | 0 |
| P12163_1_S10,276  | R.VEIIANDQGNR.I ! R.VI | 1532.833 | 0.00555  | 2 | 1 | 29.8 | 0 |
| P12163_2_F1,23795 | R.VMDYFIK.L            | 1523.875 | 0.00386  | 2 | 1 | 28.9 | 0 |
| P12163_1_F4,11054 | K.ADISDEEQK.E          | 1642.874 | 0.01221  | 2 | 1 | 32.6 | 0 |
| P12163_2_F1,21230 | K.FLGDFK.Q             | 1334.793 | 0.00561  | 3 | 1 | 22.6 | 0 |
| P12163_1_F3,20467 | K.GLIAAEYAGVEVK.L      | 1928.131 | 0.00123  | 3 | 1 | 63.4 | 0 |
| P12163_1_F3,20487 | K.GLIAAEYAGVEVK.L      | 1928.131 | 0.00013  | 2 | 1 | 78.1 | 0 |
| P12163_1_F4,21140 | K.GLIAAEYAGVEVK.L      | 1928.131 | 0.00321  | 3 | 1 | 58.4 | 0 |
| P12163_1_F4,21152 | K.GLIAAEYAGVEVK.L      | 1928.131 | 0.00717  | 2 | 1 | 51   | 0 |
| P12163_1_F4,20495 | K.LAENFEM*GVTNK.S      | 1977.057 | 0.009    | 3 | 1 | 33.4 | 0 |
| P12163_1_F3,19921 | K.LAENFEMGVTNK.S       | 1961.062 | 0.00411  | 2 | 1 | 36.1 | 0 |
| P12163_1_F4,20436 | K.LAENFEMGVTNK.S       | 1961.062 | 0.00221  | 2 | 1 | 44.8 | 0 |
| P12163_1_F4,20439 | K.LAENFEMGVTNK.S       | 1961.062 | 0.00705  | 3 | 1 | 45.1 | 0 |
| P12163_2_F1,19871 | K.LAENFEMGVTNK.S       | 1961.062 | 0.00405  | 3 | 1 | 47.4 | 0 |
| P12163_2_F1,19883 | K.LAENFEMGVTNK.S       | 1961.062 | 0.00581  | 2 | 1 | 31.1 | 0 |
| P12163_2_F1,21454 | K.MILDDWK.R            | 1528.865 | 0.01014  | 2 | 1 | 26.1 | 0 |
| P12163_2_F1,21458 | K.MILDDWK.R            | 1528.865 | 0.00805  | 3 | 1 | 25.7 | 0 |
| P12163_2_F1,21093 | K.MLIIGNEPPYK.V        | 1883.092 | 0.00388  | 3 | 1 | 28.8 | 0 |
| P12163_1_F3,21246 | K.NPLDLLPPSK.M         | 1702.036 | 0.00514  | 3 | 1 | 25.6 | 0 |
| P12163_1_F3,21281 | K.NPLDLLPPSK.M         | 1702.036 | 0.00288  | 2 | 1 | 36.8 | 0 |
| P12163_1_F3,21436 | K.NPLDLLPPSK.M         | 1702.036 | 0.00334  | 3 | 1 | 23.4 | 0 |
| P12163_1_F6,20343 | K.NPLDLLPPSK.M         | 1702.036 | -0.00173 | 3 | 1 | 32.9 | 0 |
| P12163_1_F3,12021 | K.QAESVPAVQSAK.K       | 1823.048 | 0.00208  | 2 | 1 | 39.1 | 0 |
| P12163_1_F3,12026 | K.QAESVPAVQSAK.K       | 1823.048 | 0.00395  | 3 | 1 | 25.3 | 0 |
| P12163_2_F1,11743 | K.QAESVPAVQSAK.K       | 1823.048 | 0.00443  | 3 | 1 | 46.2 | 0 |
| P12163_1_F5,14610 | K.SPEFLK.M             | 1328.803 | 0.00547  | 3 | 1 | 24.8 | 0 |
| P12163_1_F6,16754 | K.TFTSEFPHER.Y         | 1653.854 | 0.00101  | 3 | 1 | 30.3 | 0 |
| P12163_2_F6,16027 | K.TFTSEFPHER.Y         | 1653.854 | 0.00041  | 3 | 1 | 34.8 | 0 |
| P12163_2_F6,16050 | K.TFTSEFPHER.Y         | 1653.854 | -0.0015  | 2 | 1 | 24   | 0 |
| P12163_1_F3,19567 | K.YNDENTVSFVTLNK.V     | 2252.202 | 0.00169  | 2 | 1 | 34.6 | 0 |
| P12163_1_F7,20744 | R.VNQMIEDHEPFEAL       | 2893.486 | 0.00439  | 4 | 1 | 28   | 0 |
| P12163_1_F5,19957 | R.YFWTVANQPK.I         | 1862.042 | -0.00231 | 3 | 1 | 23.8 | 0 |
| P12163_2_F1,20540 | R.YFWTVANQPK.I         | 1862.042 | 0.0024   | 3 | 1 | 25.2 | 0 |
| P12163_2_F1,20556 | R.YFWTVANQPK.I         | 1862.042 | 0.01639  | 2 | 1 | 32.4 | 0 |
| P12163_2_F4,19551 | K.EPATEFVSFTNSFHGR.    | 2130.056 | 0.00117  | 3 | 1 | 68.1 | 0 |
| P12163_1_F5,11097 | K.EVMEAEK.K            | 1443.797 | 0.01248  | 2 | 1 | 37.8 | 0 |
| P12163_1_F4,20884 | K.ISNPAFLASVSK.K       | 1842.094 | 0.0059   | 3 | 1 | 35.9 | 0 |
| P12163_1_F4,20901 | K.ISNPAFLASVSK.K       | 1842.094 | 0.00438  | 2 | 1 | 52.6 | 0 |
| P12163_1_F6,19335 | K.ISNPAFLASVSK.K       | 1842.094 | -0.00202 | 3 | 1 | 28.6 | 0 |

|                   |                     |          |         |   |   |      |   |
|-------------------|---------------------|----------|---------|---|---|------|---|
| P12163_2_F1,20386 | K.ISNPAFLASVSK.K    | 1842.094 | 0.0035  | 3 | 1 | 36.3 | 0 |
| P12163_2_F1,20400 | K.ISNPAFLASVSK.K    | 1842.094 | 0.00274 | 2 | 1 | 52.1 | 0 |
| P12163_1_F3,13583 | K.LLVGTYNR.A        | 1239.736 | 0.00381 | 3 | 1 | 28.3 | 0 |
| P12163_1_F9,13981 | K.RLVACSFADR.V      | 1498.81  | 0.0108  | 3 | 1 | 34.4 | 0 |
| P12163_1_F8,20816 | K.TAAVFVEPIQGEGGIY: | 2646.46  | 0.01175 | 3 | 1 | 70.3 | 0 |
| P12163_1_S1,19396 | K.TAAVFVEPIQGEGGIY: | 2646.46  | 0.00659 | 3 | 1 | 73   | 0 |
| P12163_1_F3,15323 | R.APVVLASGK.G       | 1449.925 | 0.00884 | 3 | 1 | 39.4 | 0 |
| P12163_1_F3,15325 | R.APVVLASGK.G       | 1449.925 | 0.00709 | 2 | 1 | 34.8 | 0 |
| P12163_1_F4,13836 | R.APVVLASGK.G       | 1449.925 | 0.00374 | 3 | 1 | 28.9 | 0 |
| P12163_1_F6,14577 | R.APVVLASGK.G       | 1449.925 | 0.00089 | 3 | 1 | 24.4 | 0 |
| P12163_2_F1,14543 | R.APVVLASGK.G       | 1449.925 | 0.00206 | 3 | 1 | 40.8 | 0 |
| P12163_2_F1,14560 | R.APVVLASGK.G       | 1449.925 | 0.00485 | 2 | 1 | 51.9 | 0 |
| P12163_2_F4,13484 | R.APVVLASGK.G       | 1449.925 | 0.00071 | 2 | 1 | 40.1 | 0 |
| P12163_1_F3,17646 | R.DSGLLVLTAGK.G     | 1682.031 | 0.00294 | 2 | 1 | 27.4 | 0 |
| P12163_1_F3,17651 | R.DSGLLVLTAGK.G     | 1682.031 | 0.0167  | 3 | 1 | 22.9 | 0 |
| P12163_1_F4,7649  | R.GSAGGLGR.N        | 978.5634 | 0.00208 | 2 | 1 | 26   | 0 |
| P12163_1_F5,4773  | R.HSNPDSK.E         | 1392.769 | 0.00432 | 3 | 1 | 44.9 | 0 |
| P12163_1_S10,6502 | R.HSNPDSK.E         | 1392.769 | 0.00606 | 3 | 1 | 30.6 | 0 |
| P12163_2_F8_12070 | R.HSNPDSK.E         | 1392.769 | 0.00522 | 3 | 1 | 27.9 | 0 |
| P12163_1_F2,12978 | R.LVACSFADR.V       | 1342.709 | 0.00279 | 3 | 1 | 27.6 | 0 |
| P12163_1_F2,17012 | R.LVACSFADR.V       | 1342.709 | 0.003   | 2 | 1 | 23.9 | 0 |
| P12163_1_F4,18608 | R.TMGALALTSK.E      | 1600.955 | 0.00453 | 2 | 1 | 33.6 | 0 |
| P12163_2_F1,17818 | R.TMGALALTSK.E      | 1600.955 | 0.00581 | 2 | 1 | 45.8 | 0 |
| P12163_1_F3,17497 | R.VFFSNTGTEANEAAIK  | 2307.244 | 0.00428 | 3 | 1 | 40.8 | 0 |
| P12163_1_F3,19503 | R.VFFSNTGTEANEAAIK  | 2307.244 | 0.00364 | 2 | 1 | 92.5 | 0 |
| P12163_1_F2,18312 | K.AVVQVFEGTSGIDNK.. | 2172.212 | 0.01053 | 3 | 1 | 31.4 | 0 |
| P12163_1_F2,18385 | K.AVVQVFEGTSGIDNK.. | 2172.212 | 0.00568 | 4 | 1 | 33   | 0 |
| P12163_1_F2,18417 | K.AVVQVFEGTSGIDNK.. | 2172.212 | 0.00754 | 2 | 1 | 47.8 | 0 |
| P12163_1_F2,19221 | K.AVVQVFEGTSGIDNK.. | 2172.212 | 0.00705 | 3 | 1 | 36.4 | 0 |
| P12163_1_F2,20517 | K.AVVQVFEGTSGIDNK.. | 2172.212 | 0.0195  | 3 | 1 | 41.2 | 0 |
| P12163_1_F2,20565 | K.AVVQVFEGTSGIDNK.. | 2172.212 | 0.01647 | 2 | 1 | 60.1 | 0 |
| P12163_1_F2,21336 | K.AVVQVFEGTSGIDNK.. | 2172.212 | 0.01338 | 3 | 1 | 42.3 | 0 |
| P12163_1_F3,20125 | K.FTTVQFTGEVLK.T    | 1978.147 | 0.00738 | 3 | 1 | 24.5 | 0 |
| P12163_1_F3,22090 | K.FTTVQFTGEVLK.T    | 1978.147 | 0.00867 | 3 | 1 | 38.6 | 0 |
| P12163_1_F2,13893 | K.FVAQGAYDSR.N      | 1417.738 | 0.00619 | 2 | 1 | 46.2 | 0 |
| P12163_1_F3,9099  | K.SAIGEGMTR.R       | 1225.651 | 0.00714 | 3 | 1 | 23   | 0 |
| P12163_1_F3,9725  | K.SAIGEGMTR.R       | 1225.651 | 0.00453 | 3 | 1 | 32.1 | 0 |
| P12163_2_F1,10870 | K.SAIGEGMTR.R       | 1225.651 | 0.00276 | 2 | 1 | 24   | 0 |
| P12163_1_F3,10155 | K.TLDQYYSR.D        | 1349.7   | 0.00407 | 3 | 1 | 22.1 | 0 |
| P12163_1_S1,16046 | K.TPVSLDMLGR.I      | 1392.782 | 0.00817 | 3 | 1 | 22.7 | 0 |
| P12163_1_F2,11471 | R.DFEENGSMER.V      | 1517.684 | 0.00272 | 2 | 1 | 54.8 | 0 |
| P12163_1_F8,16261 | R.DHSDVSNQLYANYAIC  | 2503.304 | 0.00812 | 3 | 1 | 52.5 | 0 |
| P12163_1_F8,16288 | R.DHSDVSNQLYANYAIC  | 2503.304 | 0.01023 | 4 | 1 | 37.1 | 0 |
| P12163_1_F4,14919 | R.GQVLEVDGEK.A      | 1681.958 | 0.00745 | 2 | 1 | 52.7 | 0 |
| P12163_1_F4,14938 | R.GQVLEVDGEK.A      | 1681.958 | 0.00954 | 3 | 1 | 47.4 | 0 |
| P12163_1_F3,18687 | R.IALTTAEYLAYECGK.I | 2311.246 | 0.0076  | 3 | 1 | 22   | 0 |
| P12163_1_F3,24102 | R.IALTTAEYLAYECGK.I | 2311.246 | 0.01858 | 3 | 1 | 35.1 | 0 |
| P12163_1_F6,15361 | R.RDHSVSNQLYANYA    | 2659.405 | 0.00858 | 3 | 1 | 38.9 | 0 |
| P12163_1_F9,12081 | R.RGQVLEVDGEK.A     | 1838.059 | 0.00675 | 2 | 1 | 31.1 | 0 |
| P12163_2_F9,11305 | R.RGQVLEVDGEK.A     | 1838.059 | 0.00493 | 3 | 1 | 31.6 | 0 |
| P12163_1_F2,22817 | R.TVTGVAGPLVILDK.V  | 1991.236 | 0.00611 | 3 | 1 | 47.7 | 0 |

|                   |                       |          |          |   |   |      |   |
|-------------------|-----------------------|----------|----------|---|---|------|---|
| P12163_1_S1,19370 | R.TVTGVAGPLVILDK.V    | 1991.236 | 0.00689  | 3 | 1 | 32.7 | 0 |
| P12163_1_S1,19402 | R.TVTGVAGPLVILDK.V    | 1991.236 | 0.00615  | 4 | 1 | 31.2 | 0 |
| P12163_1_S1,21273 | R.TVTGVAGPLVILDK.V    | 1991.236 | 0.01085  | 3 | 1 | 44.4 | 0 |
| P12163_1_S1,21443 | R.TVTGVAGPLVILDK.V    | 1991.236 | 0.01322  | 3 | 1 | 61.3 | 0 |
| P12163_1_F5,11905 | K.AFEEAEK.N           | 1431.794 | 0.00409  | 3 | 1 | 31.8 | 0 |
| P12163_1_F5,11910 | K.AFEEAEK.N           | 1431.794 | 0.00981  | 2 | 1 | 29.1 | 0 |
| P12163_2_F1,12320 | K.AFEEAEK.N           | 1431.794 | 0.01127  | 2 | 1 | 28.5 | 0 |
| P12163_2_F2,12698 | K.AFEEAEK.N           | 1431.794 | 0.00903  | 2 | 1 | 28.5 | 0 |
| P12163_1_F3,18218 | K.AIANECQANFISVK.G    | 2173.19  | 0.00723  | 2 | 1 | 59.3 | 0 |
| P12163_2_F9,13423 | K.AVHFEESMK.Y         | 1685.914 | 0.00822  | 3 | 1 | 27.3 | 0 |
| P12163_1_F4,19515 | K.GILLYGPPGSGK.T      | 1767.062 | 0.01203  | 2 | 1 | 48.2 | 0 |
| P12163_1_F4,19533 | K.GILLYGPPGSGK.T      | 1767.062 | 0.00928  | 3 | 1 | 43.5 | 0 |
| P12163_2_F1,18888 | K.GILLYGPPGSGK.T      | 1767.062 | 0.00757  | 3 | 1 | 41.5 | 0 |
| P12163_2_F1,18927 | K.GILLYGPPGSGK.T      | 1767.062 | 0.00739  | 2 | 1 | 40.6 | 0 |
| P12163_1_F9,18079 | K.GVLFYGPFGCGK.T ! R  | 1860.03  | 0.00453  | 2 | 1 | 34.8 | 0 |
| P12163_1_F9,18101 | K.GVLFYGPFGCGK.T ! R  | 1860.03  | 0.00489  | 3 | 1 | 41   | 0 |
| P12163_2_F1,18690 | K.GVLFYGPFGCGK.T ! R  | 1860.03  | 0.00531  | 3 | 1 | 24.8 | 0 |
| P12163_2_F1,18750 | K.GVLFYGPFGCGK.T ! R  | 1860.03  | -0.00101 | 2 | 1 | 39.1 | 0 |
| P12163_1_F3,12437 | K.LAGESESNLR.K        | 1379.743 | 0.00456  | 2 | 1 | 26.6 | 0 |
| P12163_2_F1,11960 | K.LAGESESNLR.K        | 1379.743 | 0.0015   | 2 | 1 | 24.3 | 0 |
| P12163_1_S1,25017 | K.NAPSIIFIDEIDSIAPK.R | 2451.395 | 0.01195  | 3 | 1 | 33.2 | 0 |
| P12163_1_S1,17762 | R.DFSTAILER.K         | 1355.747 | 0.00383  | 2 | 1 | 39.4 | 0 |
| P12163_1_F7,14558 | R.EDENRLDEVGYYDDVG    | 2341.121 | 0.00468  | 3 | 1 | 27.4 | 0 |
| P12163_2_S5,14587 | R.EDENRLDEVGYYDDVG    | 2341.121 | 0.00567  | 3 | 1 | 34.1 | 0 |
| P12163_1_F7,14823 | R.ELQETVQYPVEHPEK.I   | 2434.307 | 0.01214  | 3 | 1 | 48.7 | 0 |
| P12163_2_F10,1428 | R.ELQETVQYPVEHPEK.I   | 2434.307 | 0.00254  | 3 | 1 | 34   | 0 |
| P12163_2_S5,14529 | R.ELQETVQYPVEHPEK.I   | 2434.307 | 0.00521  | 3 | 1 | 61.8 | 0 |
| P12163_2_S5,14556 | R.ELQETVQYPVEHPEK.I   | 2434.307 | 0.0074   | 4 | 1 | 40.7 | 0 |
| P12163_1_S1,19169 | R.ELVELPLR.H          | 1272.783 | 0.00465  | 2 | 1 | 27.7 | 0 |
| P12163_1_S1,19177 | R.ELVELPLR.H          | 1272.783 | 0.00577  | 3 | 1 | 41   | 0 |
| P12163_1_F2,7128  | R.GSSVGDAGGAADR.V     | 1423.708 | 0.0022   | 2 | 1 | 36.2 | 0 |
| P12163_1_F2,7309  | R.SVSDADIR.K          | 1166.632 | 0.00323  | 2 | 1 | 24.8 | 0 |
| P12163_1_F5,11905 | K.AFEEAEK.N           | 1431.794 | 0.00409  | 3 | 1 | 31.8 | 0 |
| P12163_1_F5,11910 | K.AFEEAEK.N           | 1431.794 | 0.00981  | 2 | 1 | 29.1 | 0 |
| P12163_2_F1,12320 | K.AFEEAEK.N           | 1431.794 | 0.01127  | 2 | 1 | 28.5 | 0 |
| P12163_2_F2,12698 | K.AFEEAEK.N           | 1431.794 | 0.00903  | 2 | 1 | 28.5 | 0 |
| P12163_1_F3,18218 | K.AIANECQANFISVK.G    | 2173.19  | 0.00723  | 2 | 1 | 59.3 | 0 |
| P12163_2_F9,13423 | K.AVHFEESMK.Y         | 1685.914 | 0.00822  | 3 | 1 | 27.3 | 0 |
| P12163_1_F4,19515 | K.GILLYGPPGSGK.T      | 1767.062 | 0.01203  | 2 | 1 | 48.2 | 0 |
| P12163_1_F4,19533 | K.GILLYGPPGSGK.T      | 1767.062 | 0.00928  | 3 | 1 | 43.5 | 0 |
| P12163_2_F1,18888 | K.GILLYGPPGSGK.T      | 1767.062 | 0.00757  | 3 | 1 | 41.5 | 0 |
| P12163_2_F1,18927 | K.GILLYGPPGSGK.T      | 1767.062 | 0.00739  | 2 | 1 | 40.6 | 0 |
| P12163_1_F9,18079 | K.GVLFYGPFGCGK.T ! R  | 1860.03  | 0.00453  | 2 | 1 | 34.8 | 0 |
| P12163_1_F9,18101 | K.GVLFYGPFGCGK.T ! R  | 1860.03  | 0.00489  | 3 | 1 | 41   | 0 |
| P12163_2_F1,18690 | K.GVLFYGPFGCGK.T ! R  | 1860.03  | 0.00531  | 3 | 1 | 24.8 | 0 |
| P12163_2_F1,18750 | K.GVLFYGPFGCGK.T ! R  | 1860.03  | -0.00101 | 2 | 1 | 39.1 | 0 |
| P12163_1_S1,16319 | K.LAEDVDLER.V         | 1363.737 | 0.00563  | 2 | 1 | 30.9 | 0 |
| P12163_1_F3,12437 | K.LAGESESNLR.K        | 1379.743 | 0.00456  | 2 | 1 | 26.6 | 0 |
| P12163_2_F1,11960 | K.LAGESESNLR.K        | 1379.743 | 0.0015   | 2 | 1 | 24.3 | 0 |
| P12163_1_S1,25017 | K.NAPSIIFIDEIDSIAPK.R | 2451.395 | 0.01195  | 3 | 1 | 33.2 | 0 |
| P12163_1_F7,14823 | R.ELQETVQYPVEHPEK.I   | 2434.307 | 0.01214  | 3 | 1 | 48.7 | 0 |

|                                         |          |          |   |   |      |   |
|-----------------------------------------|----------|----------|---|---|------|---|
| P12163_2_F10,1428.R.ELQETVQYPVEHPEK.I   | 2434.307 | 0.00254  | 3 | 1 | 34   | 0 |
| P12163_2_S5,14529 R.ELQETVQYPVEHPEK.I   | 2434.307 | 0.00521  | 3 | 1 | 61.8 | 0 |
| P12163_2_S5,14556 R.ELQETVQYPVEHPEK.I   | 2434.307 | 0.0074   | 4 | 1 | 40.7 | 0 |
| P12163_1_S1,19169 R.ELVELPLR.H          | 1272.783 | 0.00465  | 2 | 1 | 27.7 | 0 |
| P12163_1_S1,19177 R.ELVELPLR.H          | 1272.783 | 0.00577  | 3 | 1 | 41   | 0 |
| P12163_1_F2,4022 R.GSSTGDAGGAADR.V      | 1425.687 | 0.00279  | 3 | 1 | 36.5 | 0 |
| P12163_1_F7,16796 R.LGDVVSVHPCPDVK.Y    | 2130.184 | 0.01355  | 3 | 1 | 22.1 | 0 |
| P12163_1_F2,7309 R.SVSDADIR.K           | 1166.632 | 0.00323  | 2 | 1 | 24.8 | 0 |
| P12163_2_F2,18259 K.ALAYSCLS.-          | 1188.624 | 0.00264  | 2 | 1 | 29.1 | 0 |
| P12163_1_F7,11037 K.AQASALEQHAAPNCK     | 2204.17  | 0.01173  | 3 | 1 | 26.7 | 0 |
| P12163_1_F7,11112 K.AQASALEQHAAPNCK     | 2204.17  | 0.00314  | 4 | 1 | 32   | 0 |
| P12163_1_F8,8609 K.AQASALEQHAAPNCK      | 2204.17  | 0.00381  | 3 | 1 | 29.6 | 0 |
| P12163_1_F8,11415 K.AQASALEQHAAPNCK     | 2204.17  | 0.00699  | 3 | 1 | 47.1 | 0 |
| P12163_2_F6,11204 K.AQASALEQHAAPNCK     | 2204.17  | 0.00387  | 3 | 1 | 42.8 | 0 |
| P12163_2_F6,11206 K.AQASALEQHAAPNCK     | 2204.17  | -0.00222 | 4 | 1 | 44.4 | 0 |
| P12163_2_F1,16608 K.EFAPSIPAK.N         | 1567.93  | 0.00525  | 3 | 1 | 31   | 0 |
| P12163_1_F9,17750 K.KLDLTAEEELSEEK.A    | 2417.39  | 0.01192  | 4 | 1 | 33.3 | 0 |
| P12163_1_F3,20345 K.LDLTAEEELSEEK.A     | 1985.09  | 0.01011  | 3 | 1 | 44.1 | 0 |
| P12163_2_F1,16015 K.LNVQVSDVK.N         | 1609.973 | 0.0059   | 3 | 1 | 50.7 | 0 |
| P12163_1_F7,18082 K.LSSALSAASSACDHIR.   | 1950.002 | 0.00228  | 3 | 1 | 41.8 | 0 |
| P12163_1_F8,18897 K.LSSALSAASSACDHIR.   | 1950.002 | 0.00408  | 3 | 1 | 50.2 | 0 |
| P12163_2_F6,18506 K.LSSALSAASSACDHIR.   | 1950.002 | 0.00372  | 3 | 1 | 39.5 | 0 |
| P12163_1_F3,25488 K.M*ELVDAAFPLIK.G     | 1971.144 | 0.00617  | 3 | 1 | 43.6 | 0 |
| P12163_1_F3,26303 K.M*ELVDAAFPLIK.G     | 1971.144 | 0.00453  | 3 | 1 | 36.1 | 0 |
| P12163_1_F3,27688 K.M*ELVDAAFPLIK.G     | 1971.144 | 0.00369  | 3 | 1 | 32.4 | 0 |
| P12163_1_F3,28312 K.M*ELVDAAFPLIK.G     | 1971.144 | 0.00113  | 3 | 1 | 39.5 | 0 |
| P12163_1_F3,27646 K.MELVDAAFPLIK.G      | 1955.15  | 0.00963  | 3 | 1 | 41.4 | 0 |
| P12163_1_F3,27807 K.MELVDAAFPLIK.G      | 1955.15  | 0.00666  | 3 | 1 | 24.2 | 0 |
| P12163_1_F3,11295 K.NITCLTR.L           | 1181.661 | 0.00371  | 3 | 1 | 32.1 | 0 |
| P12163_1_F5,12575 K.NVSIYK.A            | 1331.814 | 0.00794  | 3 | 1 | 23.9 | 0 |
| P12163_1_S1,19406 K.VLVVANPANTNALILK    | 2258.406 | -0.00189 | 4 | 1 | 29.3 | 0 |
| P12163_1_S1,21147 K.VLVVANPANTNALILK    | 2258.406 | 0.00795  | 3 | 1 | 54.2 | 0 |
| P12163_1_S1,21159 K.VLVVANPANTNALILK    | 2258.406 | 0.00171  | 4 | 1 | 43   | 0 |
| P12163_2_F1,14054 R.ALGQISEK.L          | 1453.883 | 0.00604  | 2 | 1 | 33   | 0 |
| P12163_2_F2,12791 R.GAAIHK.A ! R.GAALLK | 1180.787 | 0.00564  | 3 | 1 | 22.1 | 0 |
| P12163_1_F4,15009 K.AMGADNVDDIK.S       | 1756.936 | 0.01022  | 2 | 1 | 60.4 | 0 |
| P12163_1_F8,20707 K.AVITVPAYFNDAQR.Q    | 1869.017 | 0.00056  | 2 | 1 | 31.5 | 0 |
| P12163_2_F1,15399 K.EMQMVSYSK.I         | 1623.869 | 0.00025  | 2 | 1 | 27   | 0 |
| P12163_1_F3,8383 K.EQQITIR.S            | 1191.7   | 0.00356  | 3 | 1 | 24.8 | 0 |
| P12163_1_F3,17016 K.GELLVGTPAK.R        | 1592.983 | 0.00941  | 2 | 1 | 42.5 | 0 |
| P12163_1_F4,17488 K.GELLVGTPAK.R        | 1592.983 | 0.00575  | 3 | 1 | 28.6 | 0 |
| P12163_1_F4,17507 K.GELLVGTPAK.R        | 1592.983 | 0.00799  | 2 | 1 | 42.1 | 0 |
| P12163_2_F1,16651 K.GELLVGTPAK.R        | 1592.983 | 0.00332  | 3 | 1 | 30.6 | 0 |
| P12163_2_F1,16659 K.GELLVGTPAK.R        | 1592.983 | 0.00395  | 2 | 1 | 45.1 | 0 |
| P12163_1_F9,13121 K.HLNITLTR.S          | 1271.774 | -0.00064 | 3 | 1 | 23   | 0 |
| P12163_1_F9,14538 K.HLNITLTR.S          | 1271.774 | 0.00275  | 3 | 1 | 34.3 | 0 |
| P12163_2_F7,13155 K.HLNITLTR.S          | 1271.774 | 0.00221  | 3 | 1 | 26   | 0 |
| P12163_2_F9,13493 K.HLNITLTR.S          | 1271.774 | 0.00632  | 3 | 1 | 24.8 | 0 |
| P12163_1_F3,14447 K.SQVFSTAADNQTQVG     | 2402.314 | 0.00732  | 3 | 1 | 23.2 | 0 |
| P12163_1_F3,17114 K.SQVFSTAADNQTQVG     | 2402.314 | 0.00627  | 3 | 1 | 71.6 | 0 |
| P12163_1_F3,19529 R.IINEPTAASLSYGMNNI   | 2431.311 | 0.00415  | 3 | 1 | 57.8 | 0 |

|                   |                       |          |          |   |   |      |   |
|-------------------|-----------------------|----------|----------|---|---|------|---|
| P12163_1_F4,16652 | R.NQADTTIYSIEK.S      | 1991.091 | 0.00468  | 3 | 1 | 26   | 0 |
| P12163_1_F4,16691 | R.NQADTTIYSIEK.S      | 1991.091 | 0.00453  | 2 | 1 | 42.3 | 0 |
| P12163_2_F1,15827 | R.NQADTTIYSIEK.S      | 1991.091 | 0.00583  | 2 | 1 | 31.2 | 0 |
| P12163_1_F3,15306 | R.QAVTNPTNTLFGTK.R    | 2100.191 | 0.00086  | 3 | 1 | 32.7 | 0 |
| P12163_2_F1,18126 | R.QAVTNPTNTLFGTK.R    | 2100.191 | -0.00111 | 2 | 1 | 33.5 | 0 |
| P12163_1_F4,12438 | R.SSGGLSEDEIEK.M      | 1858.985 | 0.00986  | 3 | 1 | 23.7 | 0 |
| P12163_1_F4,13913 | R.SSGGLSEDEIEK.M      | 1858.985 | 0.0046   | 2 | 1 | 53.4 | 0 |
| P12163_2_F1,12958 | R.SSGGLSEDEIEK.M      | 1858.985 | -0.016   | 2 | 1 | 33.6 | 0 |
| P12163_1_F4,15141 | R.TEGIDLSK.D          | 1470.862 | 0.00954  | 2 | 1 | 23.9 | 0 |
| P12163_1_F4,14413 | R.TTPSVVAFNQK.G       | 1800.048 | 0.01616  | 3 | 1 | 33.4 | 0 |
| P12163_1_F3,24842 | K.AELWVGYISENGDVY     | 2451.302 | 0.00464  | 3 | 1 | 42.2 | 0 |
| P12163_1_F3,11817 | K.AGDEPSDITPK.E       | 1737.948 | 0.00625  | 2 | 1 | 39.7 | 0 |
| P12163_1_F3,11886 | K.AGDEPSDITPK.E       | 1737.948 | 0.0047   | 3 | 1 | 39.6 | 0 |
| P12163_1_F8,21631 | K.ENGLPVALVEYEGEQI    | 2448.246 | 0.00394  | 3 | 1 | 42.2 | 0 |
| P12163_1_S1,20511 | K.GELFFVTDR.K         | 1387.752 | 0.00324  | 2 | 1 | 38.4 | 0 |
| P12163_1_F9,4199  | K.SHGGPTSEAR.G        | 1302.67  | 0.00593  | 3 | 1 | 27.3 | 0 |
| P12163_2_F9,5321  | K.SHGGPTSEAR.G        | 1302.67  | 0.00287  | 3 | 1 | 24.8 | 0 |
| P12163_2_S5,5170  | K.SHGGPTSEAR.G        | 1302.67  | -0.00085 | 3 | 1 | 35.2 | 0 |
| P12163_1_F4,18655 | K.SPINFVDK.F          | 1527.899 | -0.00144 | 3 | 1 | 27.8 | 0 |
| P12163_1_F4,18659 | K.SPINFVDK.F          | 1527.899 | 0.00627  | 2 | 1 | 29.5 | 0 |
| P12163_2_F1,17924 | K.SPINFVDK.F          | 1527.899 | 0.00139  | 2 | 1 | 28.9 | 0 |
| P12163_1_F3,16400 | K.SPLTADVVS GASK.R    | 1840.064 | 0.00346  | 3 | 1 | 31.7 | 0 |
| P12163_1_F3,16434 | K.SPLTADVVS GASK.R    | 1840.064 | 0.00478  | 2 | 1 | 47.1 | 0 |
| P12163_1_S1,21679 | K.VLVSGSDFYAFPR.M     | 1761.948 | 0.0042   | 2 | 1 | 26.5 | 0 |
| P12163_1_F9,11075 | K.VTLDDHK.L           | 1435.836 | 0.00348  | 3 | 1 | 22.7 | 0 |
| P12163_1_F4,18881 | K.VVWSSSPDTLK.Y       | 1827.047 | -0.00084 | 2 | 1 | 31.3 | 0 |
| P12163_2_F1,18127 | K.VVWSSSPDTLK.Y       | 1827.047 | 0.00282  | 2 | 1 | 41.8 | 0 |
| P12163_2_F7,8876  | R.LGGTAVDGHGR.L       | 1343.733 | 0.00327  | 3 | 1 | 39.9 | 0 |
| P12163_2_F7,8907  | R.LGGTAVDGHGR.L       | 1343.733 | 0.00384  | 2 | 1 | 31.9 | 0 |
| P12163_1_F3,10669 | R.TTAQEYGGGAFR.I      | 1561.791 | 0.00445  | 3 | 1 | 28.8 | 0 |
| P12163_2_F1,12452 | R.TTAQEYGGGAFR.I      | 1561.791 | 0.00339  | 2 | 1 | 36.2 | 0 |
| P12163_1_F7,21382 | R.VVGHFDVADEIPIK.I    | 2260.316 | 0.00709  | 3 | 1 | 59.2 | 0 |
| P12163_1_F7,21411 | R.VVGHFDVADEIPIK.I    | 2260.316 | 0.00226  | 4 | 1 | 30   | 0 |
| P12163_2_S5,20293 | R.VVGHFDVADEIPIK.I    | 2260.316 | 0.0049   | 4 | 1 | 27.1 | 0 |
| P12163_2_S5,20295 | R.VVGHFDVADEIPIK.I    | 2260.316 | 0.00439  | 3 | 1 | 44.1 | 0 |
| P12163_1_S1,24693 | K.EYLPVGLVDFNK.L      | 2115.231 | 0.00881  | 3 | 1 | 22.8 | 0 |
| P12163_1_F9,17259 | K.INLGVGAYR.D ! K.LNI | 1266.747 | -0.00395 | 2 | 1 | 33.1 | 0 |
| P12163_1_F3,20289 | K.LILGADSPAIK.D       | 1706.067 | 0.0029   | 3 | 1 | 54.8 | 0 |
| P12163_1_F3,20290 | K.LILGADSPAIK.D       | 1706.067 | 0.007    | 2 | 1 | 43.1 | 0 |
| P12163_2_F4,16348 | K.TVPHLTDIAHAAVTR.I   | 1906.081 | 0.00759  | 3 | 1 | 32.3 | 0 |
| P12163_1_F4,25691 | K.VFTLAGLSVK.T ! K.VI | 1643.035 | 0.00832  | 2 | 1 | 50.4 | 0 |
| P12163_2_F1,24928 | K.VFTLAGLSVK.T ! K.VI | 1643.035 | 0.00451  | 3 | 1 | 31   | 0 |
| P12163_2_F1,24938 | K.VFTLAGLSVK.T ! K.VI | 1643.035 | 0.00574  | 2 | 1 | 55.1 | 0 |
| P12163_1_S1,19196 | R.APEDPILGVTVAYNK.I   | 2195.253 | 0.00507  | 3 | 1 | 59.4 | 0 |
| P12163_1_S1,25150 | R.GLNFQGLLEDLR.A      | 1678.943 | 0.00174  | 3 | 1 | 44   | 0 |
| P12163_1_F4,17780 | R.ISMAGLSSK.T         | 1501.887 | 0.01054  | 3 | 1 | 26.6 | 0 |
| P12163_2_F1,16874 | R.ISMAGLSSK.T         | 1501.887 | 0.00209  | 2 | 1 | 34.2 | 0 |
| P12163_2_F1,16878 | R.ISMAGLSSK.T         | 1501.887 | 0.00352  | 3 | 1 | 29.3 | 0 |
| P12163_2_F7,13118 | R.KAEQLLVNDQSR.V      | 2009.16  | 0.00476  | 3 | 1 | 32.9 | 0 |
| P12163_1_F2,18803 | R.QQLFDALSAR.G        | 1452.811 | 0.00079  | 3 | 1 | 27.9 | 0 |
| P12163_1_F2,21303 | R.QQLFDALSAR.G        | 1452.811 | 0.00382  | 2 | 1 | 28.7 | 0 |

|                                         |          |          |   |   |      |   |
|-----------------------------------------|----------|----------|---|---|------|---|
| P12163_1_F3,18056 R.VGAEFLAR.H          | 1166.683 | 0.0034   | 2 | 1 | 25.3 | 0 |
| P12163_1_F3,18321 R.VGAEFLAR.H          | 1166.683 | 0.00435  | 2 | 1 | 24.2 | 0 |
| P12163_2_F1,17585 R.VGAEFLAR.H          | 1166.683 | 0.00422  | 2 | 1 | 24   | 0 |
| P12163_1_F4,20251 R.VGALSIVCK.T         | 1554.95  | 0.01239  | 2 | 1 | 27   | 0 |
| P12163_1_F4,20280 R.VGALSIVCK.T         | 1554.95  | 0.00764  | 3 | 1 | 34.6 | 0 |
| P12163_2_F1,19755 R.VGALSIVCK.T         | 1554.95  | 0.005    | 3 | 1 | 35.1 | 0 |
| P12163_1_S1,11924 R.VTTVQCLSGTGSLR.V    | 1782.969 | 0.0037   | 3 | 1 | 36.7 | 0 |
| P12163_1_S1,14185 R.VTTVQCLSGTGSLR.V    | 1782.969 | 0.00586  | 3 | 1 | 34.7 | 0 |
| P12163_1_S1,16122 R.VTTVQCLSGTGSLR.V    | 1782.969 | 0.00619  | 2 | 1 | 26.2 | 0 |
| P12163_2_F7,6714 K.AGTHGIVSPR.A         | 1298.748 | 0.00074  | 3 | 1 | 25.1 | 0 |
| P12163_2_F7,6750 K.AGTHGIVSPR.A         | 1298.748 | 0.00332  | 4 | 1 | 35.6 | 0 |
| P12163_1_F2,16501 K.DGIDLVPDSDK.A       | 1781.974 | 0.00758  | 2 | 1 | 25.8 | 0 |
| P12163_1_S1,15797 K.DGIDLVPDSDK.A       | 1781.974 | -0.00168 | 2 | 1 | 30.1 | 0 |
| P12163_1_F3,26546 K.GPFVDEAIQLLK.D      | 1938.152 | 0.0063   | 3 | 1 | 49.4 | 0 |
| P12163_1_F3,26580 K.GPFVDEAIQLLK.D      | 1938.152 | 0.00599  | 2 | 1 | 26   | 0 |
| P12163_1_S10,1687 K.LHGPDMM*GASILLIHK.  | 2226.289 | 0.00782  | 4 | 1 | 29.3 | 0 |
| P12163_2_F10,1573 K.LHGPDMM*GASILLIHK.  | 2226.289 | 0.00514  | 4 | 1 | 25.6 | 0 |
| P12163_1_F8,19820 K.LHGPDMM*GASILLIHK.A | 2210.294 | 0.0073   | 4 | 1 | 32.1 | 0 |
| P12163_2_F10,1725 K.LHGPDMM*GASILLIHK.A | 2210.294 | 0.00206  | 4 | 1 | 32.2 | 0 |
| P12163_1_F6,14780 K.LLESGHVYR.C         | 1377.779 | 0.00449  | 3 | 1 | 36   | 0 |
| P12163_2_F7,12984 K.LLESGHVYR.C         | 1377.779 | 0.0062   | 3 | 1 | 45.4 | 0 |
| P12163_2_S3,13138 K.LLESGHVYR.C         | 1377.779 | 0.0026   | 3 | 1 | 48   | 0 |
| P12163_2_F1,15438 K.WATATDAEVQK.E       | 1828.006 | -0.00625 | 2 | 1 | 27.3 | 0 |
| P12163_1_F5,13541 R.CFCSNEELEK.M        | 1923.94  | 0.00621  | 2 | 1 | 39   | 0 |
| P12163_2_F1,13755 R.CFCSNEELEK.M        | 1923.94  | 0.00647  | 2 | 1 | 51.1 | 0 |
| P12163_2_F1,9939 R.DTLTSSEGK.S          | 1545.858 | 0.00552  | 2 | 1 | 29.1 | 0 |
| P12163_1_F6,15172 R.FAPSPTGNLHVGGAR.    | 1784.971 | -0.00433 | 3 | 1 | 30.2 | 0 |
| P12163_2_F7,13623 R.FAPSPTGNLHVGGAR.    | 1784.971 | -0.00124 | 3 | 1 | 50.8 | 0 |
| P12163_1_F9,9492 R.HGATSVGQFR.E         | 1363.738 | 0.00507  | 3 | 1 | 31.1 | 0 |
| P12163_2_F4,8869 R.HGATSVGQFR.E         | 1363.738 | -0.00039 | 3 | 1 | 40.6 | 0 |
| P12163_1_S1,10819 R.IEDTDLER.S          | 1294.679 | 0.00297  | 3 | 1 | 26.8 | 0 |
| P12163_1_F5,18237 R.QVDWEALK.K          | 1596.921 | 0.01567  | 2 | 1 | 31.2 | 0 |
| P12163_2_F1,18605 R.QVDWEALK.K          | 1596.921 | 0.00825  | 3 | 1 | 29.9 | 0 |
| P12163_2_F1,15416 R.VLITGK.T ! R.VLLTGK | 1238.829 | 0.0102   | 2 | 1 | 24.7 | 0 |
| P12163_1_F8,12676 K.AHGPTVSSINPVNNQK    | 2271.267 | 0.00905  | 3 | 1 | 27.8 | 0 |
| P12163_1_S1,22991 K.EELFAPVLYVM*K.F     | 2063.171 | 0.00448  | 3 | 1 | 27.1 | 0 |
| P12163_2_F1,20899 K.FQTFEEAVK.I         | 1706.957 | 0.0067   | 2 | 1 | 46.5 | 0 |
| P12163_1_F8,13385 K.GTLLGPLHTPESR.K     | 1681.954 | 0.00248  | 3 | 1 | 34   | 0 |
| P12163_2_F6,16070 K.GTLLGPLHTPESR.K     | 1681.954 | 0.00521  | 3 | 1 | 46.7 | 0 |
| P12163_1_S1,19495 K.INNSVPQGLSSSIFTR.S  | 2024.108 | 0.00434  | 3 | 1 | 40.4 | 0 |
| P12163_1_S1,19508 K.INNSVPQGLSSSIFTR.S  | 2024.108 | -0.00019 | 2 | 1 | 27.2 | 0 |
| P12163_1_F4,24229 K.IWMELPAPK.R         | 1692.997 | 0.00667  | 2 | 1 | 36   | 0 |
| P12163_1_F4,24248 K.IWMELPAPK.R         | 1692.997 | 0.0098   | 3 | 1 | 33.2 | 0 |
| P12163_2_F1,23667 K.IWMELPAPK.R         | 1692.997 | 0.00446  | 3 | 1 | 32.9 | 0 |
| P12163_1_F2,21302 K.LVSEVFER.N          | 1282.731 | 0.00389  | 2 | 1 | 30.7 | 0 |
| P12163_1_F8,12931 K.VGLM*VQQTIVHQR.F    | 1715.953 | -0.00036 | 3 | 1 | 27.4 | 0 |
| P12163_2_F6,12488 K.VGLM*VQQTIVHQR.F    | 1715.953 | 0.00132  | 3 | 1 | 41.3 | 0 |
| P12163_2_F6,16325 K.VGLMVQQTIVHQR.F     | 1699.958 | -0.00009 | 3 | 1 | 47.6 | 0 |
| P12163_2_F1,11247 R.EAGSDSWK.Q          | 1487.795 | 0.00701  | 2 | 1 | 23.9 | 0 |
| P12163_1_F4,22037 R.LLSIEMGK.I          | 1498.912 | 0.0065   | 3 | 1 | 24   | 0 |
| P12163_2_F1,21608 R.LLSIEMGK.I          | 1498.912 | 0.00278  | 2 | 1 | 32.9 | 0 |



|                   |                      |          |          |   |   |      |   |
|-------------------|----------------------|----------|----------|---|---|------|---|
| P12163_1_F3,13341 | R.QIGDALR.E          | 1076.637 | 0.00243  | 2 | 1 | 24.4 | 0 |
| P12163_2_F1,16012 | R.SPENIFK.W          | 1442.846 | 0.00478  | 3 | 1 | 25.2 | 0 |
| P12163_1_F2,20213 | R.SVLFAAVGTAGQR.C    | 1580.906 | 0.00144  | 3 | 1 | 29.7 | 0 |
| P12163_1_S1,17087 | R.SVLFAAVGTAGQR.C    | 1580.906 | 0.00147  | 3 | 1 | 33.2 | 0 |
| P12163_1_S1,19148 | R.SVLFAAVGTAGQR.C    | 1580.906 | 0.00222  | 3 | 1 | 70.2 | 0 |
| P12163_1_S1,19403 | R.SVLFAAVGTAGQR.C    | 1580.906 | -0.00489 | 3 | 1 | 27.1 | 0 |
| P12163_1_F2,8881  | K.EVGEETFR.I         | 1270.658 | 0.00303  | 3 | 1 | 24.9 | 0 |
| P12163_2_F8,12070 | K.IIGVEPYDANAMALSL   | 2597.345 | 0.00032  | 4 | 1 | 26.5 | 0 |
| P12163_1_F3,19372 | K.NVVAITSGANMNFDK    | 2189.184 | 0.00642  | 3 | 1 | 69.6 | 0 |
| P12163_1_F3,26086 | K.QFCELLGPM*NITEFK.  | 2451.287 | 0.00763  | 3 | 1 | 35.6 | 0 |
| P12163_1_F3,26054 | K.QFCELLGPMNITEFK.Y  | 2435.292 | 0.00908  | 3 | 1 | 34.8 | 0 |
| P12163_2_F1,16890 | K.TYNLTQSDLVK.D      | 1890.079 | 0.00126  | 2 | 1 | 40.9 | 0 |
| P12163_1_S1,22480 | K.VYDVAIESPLQFAPK.I  | 2285.3   | 0.00519  | 3 | 1 | 59.8 | 0 |
| P12163_2_F1,13836 | R.DAICASIK.D         | 1485.855 | 0.0091   | 2 | 1 | 26.8 | 0 |
| P12163_1_F3,21459 | R.EDLQPVFSFK.L       | 1818.026 | 0.0074   | 2 | 1 | 31.1 | 0 |
| P12163_1_F3,21469 | R.EDLQPVFSFK.L       | 1818.026 | -0.00049 | 3 | 1 | 33.1 | 0 |
| P12163_1_F7,9415  | R.ETTLHSQSPPPPTAR.K  | 1923.024 | 0.0045   | 3 | 1 | 41.2 | 0 |
| P12163_2_F2,13829 | R.GAYNMMSK.L         | 1509.801 | 0.0063   | 2 | 1 | 35.4 | 0 |
| P12163_1_F2,20379 | R.QQEAUFATVM*PEQSC   | 2608.354 | 0.00423  | 3 | 1 | 34.8 | 0 |
| P12163_1_F2,22060 | R.SILEPAGALALAGAK.A  | 1990.216 | 0.00328  | 3 | 1 | 45   | 0 |
| P12163_1_F8,19805 | R.VMLDHSVGGFADGVA.V  | 2223.242 | -0.00142 | 3 | 1 | 53.9 | 0 |
| P12163_1_F4,13364 | K.AAAVVAPK.Y         | 1334.862 | 0.01013  | 2 | 1 | 38.9 | 0 |
| P12163_1_F7,19866 | K.EKPSIGM*VIAVGP GPI | 2889.56  | 0.00817  | 4 | 1 | 56.9 | 0 |
| P12163_1_F7,20026 | K.EKPSIGM*VIAVGP GPI | 2889.56  | 0.0077   | 3 | 1 | 70.9 | 0 |
| P12163_1_F7,20106 | K.EKPSIGM*VIAVGP GPI | 2889.56  | 0.01045  | 4 | 1 | 35.7 | 0 |
| P12163_2_S5,17411 | K.EKPSIGM*VIAVGP GPI | 2889.56  | 0.00473  | 4 | 1 | 46.3 | 0 |
| P12163_2_S5,17447 | K.EKPSIGM*VIAVGP GPI | 2889.56  | 0.0014   | 3 | 1 | 55.3 | 0 |
| P12163_1_F7,19874 | K.EKPSIGMVIAVGP GPLI | 2873.565 | 0.00569  | 3 | 1 | 60.7 | 0 |
| P12163_1_F7,19897 | K.EKPSIGMVIAVGP GPLI | 2873.565 | 0.00305  | 4 | 1 | 55.5 | 0 |
| P12163_1_F7,20006 | K.EKPSIGMVIAVGP GPLI | 2873.565 | 0.00088  | 2 | 1 | 26.9 | 0 |
| P12163_1_F2,10510 | K.GSDGTNYIALR.A      | 1470.785 | 0.00098  | 3 | 1 | 30.6 | 0 |
| P12163_1_F2,12431 | K.GSDGTNYIALR.A      | 1470.785 | 0.00364  | 2 | 1 | 34.8 | 0 |
| P12163_1_F2,12473 | K.GSDGTNYIALR.A      | 1470.785 | 0.0023   | 3 | 1 | 38.2 | 0 |
| P12163_1_F2,12749 | K.GSDGTNYIALR.A      | 1470.785 | 0.00218  | 3 | 1 | 41.3 | 0 |
| P12163_1_F2,14640 | K.GSDGTNYIALR.A      | 1470.785 | 0.0058   | 2 | 1 | 33   | 0 |
| P12163_1_F2,14880 | K.GSDGTNYIALR.A      | 1470.785 | 0.0029   | 2 | 1 | 32.5 | 0 |
| P12163_1_F9,12516 | K.GSDGTNYIALR.A      | 1470.785 | 0.00299  | 3 | 1 | 29   | 0 |
| P12163_1_S1,12204 | K.GSDGTNYIALR.A      | 1470.785 | 0.00281  | 3 | 1 | 34.2 | 0 |
| P12163_1_S1,12529 | K.GSDGTNYIALR.A      | 1470.785 | 0.00053  | 3 | 1 | 30.2 | 0 |
| P12163_2_F4,13809 | K.GSDGTNYIALR.A      | 1470.785 | 0.00366  | 2 | 1 | 33.3 | 0 |
| P12163_2_F7,11531 | K.GSDGTNYIALR.A      | 1470.785 | -0.00004 | 3 | 1 | 28.5 | 0 |
| P12163_2_F9,11700 | K.GSDGTNYIALR.A      | 1470.785 | 0.00878  | 3 | 1 | 35.6 | 0 |
| P12163_1_F8,15825 | K.LDISVKPGTQVIYSK.Y  | 2560.548 | 0.00629  | 5 | 1 | 23.1 | 0 |
| P12163_1_F6,17749 | K.TDGGIFLPSTAQTKPQ.  | 3569.994 | 0.01291  | 4 | 1 | 35.3 | 0 |
| P12163_1_F6,18048 | K.TDGGIFLPSTAQTKPQ.  | 3569.994 | 0.01019  | 4 | 1 | 29.9 | 0 |
| P12163_1_F2,21723 | K.VAEAEETTAGG LLLTE  | 2498.381 | -0.00319 | 3 | 1 | 49.7 | 0 |
| P12163_1_F3,22320 | K.VAEAEETTAGG LLLTE  | 2498.381 | 0.00176  | 3 | 1 | 66.8 | 0 |
| P12163_1_F5,21125 | K.VAEAEETTAGG LLLTE  | 2498.381 | -0.00223 | 3 | 1 | 79.7 | 0 |
| P12163_1_F7,20609 | K.VAEAEETTAGG LLLTE  | 2498.381 | 0.00434  | 3 | 1 | 22.1 | 0 |
| P12163_1_F8,21623 | K.VAEAEETTAGG LLLTE  | 2498.381 | 0.00191  | 3 | 1 | 41.2 | 0 |
| P12163_1_S1,15771 | K.VAEAEETTAGG LLLTE  | 2498.381 | 0.0044   | 3 | 1 | 47.4 | 0 |

|                   |                     |          |          |   |   |      |   |
|-------------------|---------------------|----------|----------|---|---|------|---|
| P12163_1_S1,15779 | K.VAEAEETTAGGLLLTE  | 2498.381 | 0.00317  | 5 | 1 | 22.3 | 0 |
| P12163_1_S1,16241 | K.VAEAEETTAGGLLLTE  | 2498.381 | 0.00491  | 4 | 1 | 31.5 | 0 |
| P12163_1_S1,16928 | K.VAEAEETTAGGLLLTE  | 2498.381 | 0.00761  | 3 | 1 | 22.3 | 0 |
| P12163_1_S1,17435 | K.VAEAEETTAGGLLLTE  | 2498.381 | 0.00413  | 3 | 1 | 36.3 | 0 |
| P12163_1_S1,17487 | K.VAEAEETTAGGLLLTE  | 2498.381 | 0.00413  | 2 | 1 | 42.2 | 0 |
| P12163_1_S1,19066 | K.VAEAEETTAGGLLLTE  | 2498.381 | 0.00764  | 3 | 1 | 78.2 | 0 |
| P12163_1_S1,19078 | K.VAEAEETTAGGLLLTE  | 2498.381 | 0.00651  | 4 | 1 | 35.4 | 0 |
| P12163_1_S1,19133 | K.VAEAEETTAGGLLLTE  | 2498.381 | 0.00629  | 2 | 1 | 27.7 | 0 |
| P12163_1_S1,19821 | K.VAEAEETTAGGLLLTE  | 2498.381 | 0.00811  | 4 | 1 | 49.8 | 0 |
| P12163_1_S1,20026 | K.VAEAEETTAGGLLLTE  | 2498.381 | -0.00175 | 3 | 1 | 47.7 | 0 |
| P12163_1_S1,20849 | K.VAEAEETTAGGLLLTE  | 2498.381 | -0.00037 | 3 | 1 | 51.4 | 0 |
| P12163_1_S1,20878 | K.VAEAEETTAGGLLLTE  | 2498.381 | 0.00267  | 4 | 1 | 56.2 | 0 |
| P12163_1_S1,20963 | K.VAEAEETTAGGLLLTE  | 2498.381 | 0.00553  | 2 | 1 | 128  | 0 |
| P12163_1_S1,23996 | K.VAEAEETTAGGLLLTE  | 2498.381 | 0.00518  | 3 | 1 | 47   | 0 |
| P12163_1_S1,24236 | K.VAEAEETTAGGLLLTE  | 2498.381 | 0.00713  | 3 | 1 | 39.2 | 0 |
| P12163_1_S1,24467 | K.VAEAEETTAGGLLLTE  | 2498.381 | 0.00584  | 3 | 1 | 52.9 | 0 |
| P12163_1_S1,24819 | K.VAEAEETTAGGLLLTE  | 2498.381 | 0.00407  | 3 | 1 | 28.8 | 0 |
| P12163_1_S1,25019 | K.VAEAEETTAGGLLLTE  | 2498.381 | 0.00389  | 3 | 1 | 27.9 | 0 |
| P12163_1_S1,25227 | K.VAEAEETTAGGLLLTE  | 2498.381 | 0.00485  | 3 | 1 | 33.7 | 0 |
| P12163_1_S1,25488 | K.VAEAEETTAGGLLLTE  | 2498.381 | 0.00674  | 3 | 1 | 34.9 | 0 |
| P12163_1_S1,25687 | K.VAEAEETTAGGLLLTE  | 2498.381 | 0.00641  | 3 | 1 | 29.2 | 0 |
| P12163_1_S1,26065 | K.VAEAEETTAGGLLLTE  | 2498.381 | 0.00638  | 3 | 1 | 33.2 | 0 |
| P12163_1_S1,26231 | K.VAEAEETTAGGLLLTE  | 2498.381 | 0.00188  | 3 | 1 | 27.7 | 0 |
| P12163_1_S1,31044 | K.VAEAEETTAGGLLLTE  | 2498.381 | 0.00206  | 3 | 1 | 22.1 | 0 |
| P12163_1_S1,31200 | K.VAEAEETTAGGLLLTE  | 2498.381 | 0.00662  | 3 | 1 | 33.4 | 0 |
| P12163_1_S10,1980 | K.VAEAEETTAGGLLLTE  | 2498.381 | 0.00575  | 3 | 1 | 21.9 | 0 |
| P12163_1_S10,2003 | K.VAEAEETTAGGLLLTE  | 2498.381 | 0.00641  | 3 | 1 | 80.6 | 0 |
| P12163_1_S10,2006 | K.VAEAEETTAGGLLLTE  | 2498.381 | 0.00311  | 4 | 1 | 43.9 | 0 |
| P12163_2_F1,22187 | K.VAEAEETTAGGLLLTE  | 2498.381 | 0.00011  | 3 | 1 | 72.8 | 0 |
| P12163_2_F2,12729 | K.YAGNDFK.G         | 1422.784 | 0.00643  | 3 | 1 | 26.8 | 0 |
| P12163_1_F7,17519 | K.YAGTELEFNGANHLIL  | 2222.187 | 0.001    | 4 | 1 | 63.4 | 0 |
| P12163_1_F7,19421 | K.YAGTELEFNGANHLIL  | 2222.187 | 0.00227  | 3 | 1 | 93.4 | 0 |
| P12163_1_F7,19454 | K.YAGTELEFNGANHLIL  | 2222.187 | 0.00033  | 2 | 1 | 25.6 | 0 |
| P12163_1_F6,14527 | K.YTSIKPLGDR.V      | 1758.037 | 0.00679  | 2 | 1 | 47.3 | 0 |
| P12163_2_F7,12879 | K.YTSIKPLGDR.V      | 1758.037 | 0.01039  | 2 | 1 | 30.7 | 0 |
| P12163_1_F5,23201 | R.ASEVM*AVLS.-      | 1226.66  | 0.00403  | 2 | 1 | 30.3 | 0 |
| P12163_2_F1,24191 | R.ASEVM*AVLS.-      | 1226.66  | 0.00245  | 2 | 1 | 26.5 | 0 |
| P12163_1_F3,24087 | R.ASEVMAVLS.-       | 1210.665 | 0.00215  | 2 | 1 | 36.7 | 0 |
| P12163_2_F1,24176 | R.ASEVMAVLS.-       | 1210.665 | 0.00279  | 2 | 1 | 35.1 | 0 |
| P12163_2_F1,22569 | R.EDDVVGILETDEIK.D  | 2183.19  | 0.00109  | 3 | 1 | 35.5 | 0 |
| P12163_1_F8,16873 | R.KPLSIAPGNTVM*YSK  | 2534.478 | 0.00838  | 3 | 1 | 26.9 | 0 |
| P12163_2_F6,15067 | R.KPLSIAPGNTVM*YSK  | 2534.478 | 0.0059   | 4 | 1 | 24.7 | 0 |
| P12163_2_F6,15298 | R.KPLSIAPGNTVM*YSK  | 2534.478 | 0.02209  | 3 | 1 | 22.2 | 0 |
| P12163_2_F6,16429 | R.KPLSIAPGNTVM*YSK  | 2534.478 | 0.01063  | 3 | 1 | 27.1 | 0 |
| P12163_1_F8,14986 | R.KPLSIAPGNTVMYSK.N | 2518.483 | 0.00925  | 3 | 1 | 25.8 | 0 |
| P12163_1_F8,16994 | R.KPLSIAPGNTVMYSK.N | 2518.483 | 0.01289  | 3 | 1 | 44.7 | 0 |
| P12163_2_F6,15140 | R.KPLSIAPGNTVMYSK.N | 2518.483 | 0.00182  | 4 | 1 | 32.9 | 0 |
| P12163_2_F6,16472 | R.KPLSIAPGNTVMYSK.N | 2518.483 | 0.00544  | 3 | 1 | 51.5 | 0 |
| P12163_2_F8_12070 | R.KPLSIAPGNTVMYSK.N | 2518.483 | 0.00034  | 3 | 1 | 47.6 | 0 |
| P12163_1_F9,9304  | K.AAAHLK.G          | 1218.778 | 0.00546  | 3 | 1 | 29.8 | 0 |
| P12163_1_S10,9788 | K.AAAHLK.G          | 1218.778 | 0.00378  | 3 | 1 | 28.7 | 0 |

|                   |                       |          |          |   |   |      |   |
|-------------------|-----------------------|----------|----------|---|---|------|---|
| P12163_2_F8_12070 | K.AAAHLK.G            | 1218.778 | 0.00725  | 2 | 1 | 24.6 | 0 |
| P12163_1_F6,14423 | K.AGIALSK.K ! K.AGIAL | 1267.819 | 0.00437  | 3 | 1 | 28.4 | 0 |
| P12163_1_F8,13591 | K.AGIALSK.K ! K.AGIAL | 1267.819 | 0.00227  | 3 | 1 | 23   | 0 |
| P12163_2_F1,13882 | K.AGIALSK.K ! K.AGIAL | 1267.819 | 0.00497  | 3 | 1 | 27.1 | 0 |
| P12163_2_F2,2245  | K.AGIALSK.K ! K.AGIAL | 1267.819 | 0.00674  | 3 | 1 | 24   | 0 |
| P12163_2_F2,2599  | K.AGIALSK.K ! K.AGIAL | 1267.819 | 0.00338  | 2 | 1 | 31.1 | 0 |
| P12163_2_F2,2800  | K.AGIALSK.K ! K.AGIAL | 1267.819 | 0.00452  | 3 | 1 | 24.8 | 0 |
| P12163_2_F2,2929  | K.AGIALSK.K ! K.AGIAL | 1267.819 | 0.00503  | 2 | 1 | 26.1 | 0 |
| P12163_2_F2,2980  | K.AGIALSK.K ! K.AGIAL | 1267.819 | 0.00407  | 3 | 1 | 31.3 | 0 |
| P12163_2_F2,3108  | K.AGIALSK.K ! K.AGIAL | 1267.819 | 0.00571  | 2 | 1 | 26.5 | 0 |
| P12163_2_F2,3157  | K.AGIALSK.K ! K.AGIAL | 1267.819 | 0.00809  | 3 | 1 | 26.4 | 0 |
| P12163_2_F2,3784  | K.AGIALSK.K ! K.AGIAL | 1267.819 | 0.00755  | 3 | 1 | 22.2 | 0 |
| P12163_2_F2,3808  | K.AGIALSK.K ! K.AGIAL | 1267.819 | 0.00366  | 2 | 1 | 35.7 | 0 |
| P12163_2_F2,14378 | K.AGIALSK.K ! K.AGIAL | 1267.819 | 0.00695  | 3 | 1 | 26.9 | 0 |
| P12163_2_F2,14419 | K.AGIALSK.K ! K.AGIAL | 1267.819 | 0.00762  | 2 | 1 | 26.6 | 0 |
| P12163_2_S5,12371 | K.AGIALSK.K ! K.AGIAL | 1267.819 | 0.00098  | 3 | 1 | 26.6 | 0 |
| P12163_2_S5,13231 | K.AGIALSK.K ! K.AGIAL | 1267.819 | 0.00461  | 3 | 1 | 28.1 | 0 |
| P12163_1_F4,13296 | K.DASYDEIK.A          | 1548.837 | 0.00467  | 3 | 1 | 27.3 | 0 |
| P12163_1_F4,13335 | K.DASYDEIK.A          | 1548.837 | 0.00757  | 2 | 1 | 28.7 | 0 |
| P12163_1_S10,1314 | K.DASYDEIK.A          | 1548.837 | 0.00677  | 3 | 1 | 25.3 | 0 |
| P12163_2_F1,12267 | K.DASYDEIK.A          | 1548.837 | 0.00371  | 2 | 1 | 23.9 | 0 |
| P12163_2_F4,11182 | K.DASYDEIK.A          | 1548.837 | 0.00051  | 2 | 1 | 28.5 | 0 |
| P12163_2_F8_12070 | K.DASYDEIK.A          | 1548.837 | 0.00767  | 3 | 1 | 27   | 0 |
| P12163_2_F9,12228 | K.DASYDEIK.A          | 1548.837 | 0.00429  | 2 | 1 | 25.4 | 0 |
| P12163_1_F9,13886 | K.KVIISAPSK.D         | 1855.214 | 0.00848  | 3 | 1 | 29   | 0 |
| P12163_1_F3,11768 | K.LTGM*AFR.V          | 1115.618 | 0.00465  | 3 | 1 | 27.5 | 0 |
| P12163_1_F3,15690 | K.LTGM*AFR.V          | 1115.618 | 0.00489  | 3 | 1 | 29.1 | 0 |
| P12163_1_F3,15646 | K.LTGMAFR.V           | 1099.624 | 0.00336  | 3 | 1 | 31.5 | 0 |
| P12163_1_F8,22902 | K.TLLFGKPVTVFGVR.1    | 2271.369 | 0.00227  | 2 | 1 | 40.1 | 0 |
| P12163_1_F5,6100  | K.TVDGPSSK.D          | 1398.805 | 0.0058   | 3 | 1 | 22.7 | 0 |
| P12163_2_F1,6499  | K.TVDGPSSK.D          | 1398.805 | 0.00366  | 3 | 1 | 27.9 | 0 |
| P12163_2_F4,13840 | K.VIISAPSK.D          | 1422.914 | 0.00444  | 3 | 1 | 23.3 | 0 |
| P12163_2_F4,13845 | K.VIISAPSK.D          | 1422.914 | -0.00012 | 2 | 1 | 31.1 | 0 |
| P12163_1_F4,18491 | K.VLPALNGK.L          | 1419.914 | 0.00943  | 2 | 1 | 27.7 | 0 |
| P12163_1_F4,18753 | K.VLPALNGK.L          | 1419.914 | 0.00745  | 2 | 1 | 29.7 | 0 |
| P12163_1_F4,18763 | K.VLPALNGK.L          | 1419.914 | 0.00579  | 3 | 1 | 34.1 | 0 |
| P12163_1_F3,14456 | R.AASFNIIPSSTGAAK.A   | 2043.169 | 0.00567  | 3 | 1 | 28.8 | 0 |
| P12163_1_F3,16589 | R.AASFNIIPSSTGAAK.A   | 2043.169 | 0.00585  | 3 | 1 | 40   | 0 |
| P12163_1_F3,17279 | R.AASFNIIPSSTGAAK.A   | 2043.169 | 0.00774  | 3 | 1 | 22.7 | 0 |
| P12163_1_F3,17545 | R.AASFNIIPSSTGAAK.A   | 2043.169 | 0.00519  | 3 | 1 | 42.3 | 0 |
| P12163_1_F3,17553 | R.AASFNIIPSSTGAAK.A   | 2043.169 | 0.00095  | 2 | 1 | 38.6 | 0 |
| P12163_1_F3,19350 | R.AASFNIIPSSTGAAK.A   | 2043.169 | 0.00387  | 2 | 1 | 56.7 | 0 |
| P12163_1_F3,19706 | R.AASFNIIPSSTGAAK.A   | 2043.169 | -0.00225 | 3 | 1 | 29.3 | 0 |
| P12163_1_F6,18354 | R.AASFNIIPSSTGAAK.A   | 2043.169 | -0.00192 | 3 | 1 | 56.9 | 0 |
| P12163_1_F6,18837 | R.AASFNIIPSSTGAAK.A   | 2043.169 | 0.00399  | 3 | 1 | 32.7 | 0 |
| P12163_2_F1,19345 | R.AASFNIIPSSTGAAK.A   | 2043.169 | -0.00079 | 2 | 1 | 37.6 | 0 |
| P12163_2_F1,19404 | R.AASFNIIPSSTGAAK.A   | 2043.169 | 0.00402  | 3 | 1 | 44.2 | 0 |
| P12163_2_F4,17594 | R.AASFNIIPSSTGAAK.A   | 2043.169 | 0.00348  | 3 | 1 | 37.5 | 0 |
| P12163_2_F7,16678 | R.AASFNIIPSSTGAAK.A   | 2043.169 | 0.01158  | 3 | 1 | 44.4 | 0 |
| P12163_2_S3,15455 | R.AASFNIIPSSTGAAK.A   | 2043.169 | 0.00414  | 3 | 1 | 29.6 | 0 |
| P12163_1_F5,15104 | R.SSIFDAK.A           | 1375.804 | 0.00563  | 3 | 1 | 26.5 | 0 |

|                                      |          |          |   |   |      |   |
|--------------------------------------|----------|----------|---|---|------|---|
| P12163_1_F5,15244 R.SSIFDAK.A        | 1375.804 | 0.00682  | 2 | 1 | 29.2 | 0 |
| P12163_1_F5,15341 R.SSIFDAK.A        | 1375.804 | 0.00626  | 3 | 1 | 27.2 | 0 |
| P12163_1_F6,15886 R.SSIFDAK.A        | 1375.804 | 0.00758  | 2 | 1 | 27.6 | 0 |
| P12163_1_F7,15102 R.SSIFDAK.A        | 1375.804 | 0.00394  | 2 | 1 | 26.2 | 0 |
| P12163_1_F8,15164 R.SSIFDAK.A        | 1375.804 | 0.00368  | 3 | 1 | 28.3 | 0 |
| P12163_2_F1,15096 R.SSIFDAK.A        | 1375.804 | 0.00644  | 3 | 1 | 28.6 | 0 |
| P12163_2_F1,15296 R.SSIFDAK.A        | 1375.804 | 0.00706  | 2 | 1 | 28.6 | 0 |
| P12163_2_F1,15305 R.SSIFDAK.A        | 1375.804 | 0.00575  | 3 | 1 | 24.7 | 0 |
| P12163_2_F1,15530 R.SSIFDAK.A        | 1375.804 | 0.0044   | 2 | 1 | 27.7 | 0 |
| P12163_2_F2,15863 R.SSIFDAK.A        | 1375.804 | 0.00134  | 3 | 1 | 36.5 | 0 |
| P12163_2_F2,15866 R.SSIFDAK.A        | 1375.804 | 0.00482  | 2 | 1 | 28.9 | 0 |
| P12163_2_F8_12070 R.SSIFDAK.A        | 1375.804 | 0.00378  | 2 | 1 | 27.6 | 0 |
| P12163_2_S5,14318 R.SSIFDAK.A        | 1375.804 | 0.00308  | 3 | 1 | 26.5 | 0 |
| P12163_1_F7,19433 R.VVDLIVHM*SK.T    | 1765.05  | 0.00816  | 3 | 1 | 23.9 | 0 |
| P12163_1_F7,22824 R.VVDLIVHM*SK.T    | 1765.05  | 0.00516  | 3 | 1 | 26.7 | 0 |
| P12163_2_F6,19965 R.VVDLIVHM*SK.T    | 1765.05  | 0.00768  | 3 | 1 | 26.4 | 0 |
| P12163_1_F7,22942 R.VVDLIVHMSK.T     | 1749.055 | 0.01402  | 2 | 1 | 42.1 | 0 |
| P12163_1_F7,22969 R.VVDLIVHMSK.T     | 1749.055 | 0.00615  | 3 | 1 | 28.4 | 0 |
| P12163_1_F8,20949 R.VVDLIVHMSK.T     | 1749.055 | 0.00336  | 3 | 1 | 26.7 | 0 |
| P12163_1_F5,10040 K.ADAGEEGLK.L      | 1497.837 | 0.01307  | 2 | 1 | 35.4 | 0 |
| P12163_2_F1,10583 K.ADAGEEGLK.L      | 1497.837 | 0.00434  | 3 | 1 | 58.7 | 0 |
| P12163_2_F1,10595 K.ADAGEEGLK.L      | 1497.837 | 0.00651  | 2 | 1 | 47.6 | 0 |
| P12163_1_F5,6601 K.APSDGK.W          | 1182.694 | 0.00472  | 3 | 1 | 38   | 0 |
| P12163_2_F1,7088 K.APSDGK.W          | 1182.694 | 0.00613  | 2 | 1 | 24.7 | 0 |
| P12163_1_F4,20106 K.GTLNEVIDM*K.T    | 1743.977 | 0.0101   | 3 | 1 | 44.5 | 0 |
| P12163_1_F7,17693 K.GTLNEVIDM*K.T    | 1743.977 | -0.00172 | 3 | 1 | 35.5 | 0 |
| P12163_2_F1,16713 K.GTLNEVIDM*K.T    | 1743.977 | 0.00683  | 3 | 1 | 38.7 | 0 |
| P12163_1_F4,15342 K.GTLNEVIDMK.T     | 1727.982 | 0.01199  | 3 | 1 | 23.4 | 0 |
| P12163_1_F4,20071 K.GTLNEVIDMK.T     | 1727.982 | 0.00269  | 3 | 1 | 26.8 | 0 |
| P12163_1_F4,20099 K.GTLNEVIDMK.T     | 1727.982 | 0.00074  | 2 | 1 | 47.5 | 0 |
| P12163_1_F6,18593 K.GTLNEVIDMK.T     | 1727.982 | 0.00041  | 3 | 1 | 26.8 | 0 |
| P12163_1_F7,17669 K.GTLNEVIDMK.T     | 1727.982 | -0.00205 | 3 | 1 | 32.2 | 0 |
| P12163_2_F1,19516 K.GTLNEVIDMK.T     | 1727.982 | 0.00719  | 3 | 1 | 37.4 | 0 |
| P12163_2_F1,19525 K.GTLNEVIDMK.T     | 1727.982 | 0.00182  | 2 | 1 | 47.7 | 0 |
| P12163_2_F4,17287 K.GTLNEVIDMK.T     | 1727.982 | 0.00017  | 3 | 1 | 34.3 | 0 |
| P12163_2_F4,17301 K.GTLNEVIDMK.T     | 1727.982 | -0.00184 | 2 | 1 | 28.1 | 0 |
| P12163_1_F6,19736 K.IESLNLLHR.A      | 1398.837 | 0.00313  | 3 | 1 | 35.7 | 0 |
| P12163_1_F8,15765 K.IESLNLLHR.A      | 1398.837 | 0.00316  | 3 | 1 | 33.9 | 0 |
| P12163_1_F8,19763 K.IESLNLLHR.A      | 1398.837 | 0.00316  | 3 | 1 | 72.1 | 0 |
| P12163_1_F8,19990 K.IESLNLLHR.A      | 1398.837 | 0.00367  | 3 | 1 | 65.1 | 0 |
| P12163_1_F9,19294 K.IESLNLLHR.A      | 1398.837 | 0.0037   | 3 | 1 | 50.8 | 0 |
| P12163_1_S10,1805 K.IESLNLLHR.A      | 1398.837 | -0.00092 | 3 | 1 | 27   | 0 |
| P12163_1_S10,1867 K.IESLNLLHR.A      | 1398.837 | 0.0061   | 3 | 1 | 27.7 | 0 |
| P12163_2_F6,15176 K.IESLNLLHR.A      | 1398.837 | 0.00235  | 3 | 1 | 33.8 | 0 |
| P12163_2_F6,19201 K.IESLNLLHR.A      | 1398.837 | 0.00241  | 3 | 1 | 66.5 | 0 |
| P12163_2_F6,19224 K.IESLNLLHR.A      | 1398.837 | 0.00206  | 2 | 1 | 38.9 | 0 |
| P12163_2_F6,19428 K.IESLNLLHR.A      | 1398.837 | 0.00178  | 3 | 1 | 72.6 | 0 |
| P12163_2_F6,19683 K.IESLNLLHR.A      | 1398.837 | 0.00184  | 3 | 1 | 38.3 | 0 |
| P12163_1_F7,21948 K.VTFPLVWTNTCCSHPL | 2555.284 | 0.0037   | 3 | 1 | 58.9 | 0 |
| P12163_1_F3,20930 K.YELLQQR.S        | 1366.8   | 0.00228  | 2 | 1 | 23.9 | 0 |
| P12163_2_F9,18876 K.YELLQQR.S        | 1366.8   | 0.0016   | 3 | 1 | 25   | 0 |

|                   |                       |          |         |   |   |      |   |
|-------------------|-----------------------|----------|---------|---|---|------|---|
| P12163_2_F9,19065 | K.YELLQQR.S           | 1366.8   | 0.00424 | 2 | 1 | 24.3 | 0 |
| P12163_2_F9,19089 | K.YELLQQR.S           | 1366.8   | 0.00227 | 3 | 1 | 40.9 | 0 |
| P12163_1_F9,12620 | K.YNCHLMEK.I          | 1702.886 | 0.00277 | 2 | 1 | 25.4 | 0 |
| P12163_2_S5,12285 | K.YNCHLMEK.I          | 1702.886 | 0.0074  | 3 | 1 | 26.5 | 0 |
| P12163_1_F4,24881 | R.AFSVFLFNSK.Y        | 1768.025 | 0.00323 | 3 | 1 | 28.8 | 0 |
| P12163_1_F4,26595 | R.AFSVFLFNSK.Y        | 1768.025 | 0.005   | 2 | 1 | 54.7 | 0 |
| P12163_1_F5,24521 | R.AFSVFLFNSK.Y        | 1768.025 | 0.00344 | 3 | 1 | 39.2 | 0 |
| P12163_1_F7,23211 | R.AFSVFLFNSK.Y        | 1768.025 | 0.00281 | 3 | 1 | 27.8 | 0 |
| P12163_1_F7,23488 | R.AFSVFLFNSK.Y        | 1768.025 | 0.00428 | 3 | 1 | 27.8 | 0 |
| P12163_2_F1,24171 | R.AFSVFLFNSK.Y        | 1768.025 | 0.0041  | 3 | 1 | 32.3 | 0 |
| P12163_2_F1,25642 | R.AFSVFLFNSK.Y        | 1768.025 | 0.00533 | 3 | 1 | 28.9 | 0 |
| P12163_2_S5,22079 | R.AFSVFLFNSK.Y        | 1768.025 | 0.00518 | 3 | 1 | 22.9 | 0 |
| P12163_1_F8,16236 | R.DVSVNPNPDEVAEYK.    | 2284.192 | 0.00445 | 2 | 1 | 56.4 | 0 |
| P12163_1_S1,15139 | R.DVSVNPNPDEVAEYK.    | 2284.192 | 0.00363 | 4 | 1 | 37.8 | 0 |
| P12163_1_S1,15319 | R.DVSVNPNPDEVAEYK.    | 2284.192 | 0.00453 | 2 | 1 | 71.5 | 0 |
| P12163_1_S1,15373 | R.DVSVNPNPDEVAEYK.    | 2284.192 | 0.00766 | 3 | 1 | 53.9 | 0 |
| P12163_1_S10,1565 | R.DVSVNPNPDEVAEYK.    | 2284.192 | 0.00826 | 3 | 1 | 24.5 | 0 |
| P12163_2_F4,15180 | R.DVSVNPNPDEVAEYK.    | 2284.192 | 0.00931 | 3 | 1 | 42.5 | 0 |
| P12163_2_F6,15803 | R.DVSVNPNPDEVAEYK.    | 2284.192 | 0.00023 | 2 | 1 | 34   | 0 |
| P12163_1_F2,18780 | R.ESELIEENALGVR.N     | 1762.949 | 0.00193 | 2 | 1 | 44.4 | 0 |
| P12163_1_S1,15146 | R.ESELIEENALGVR.N     | 1762.949 | 0.00105 | 3 | 1 | 64.7 | 0 |
| P12163_1_S1,18059 | R.ESELIEENALGVR.N     | 1762.949 | 0.00213 | 3 | 1 | 83   | 0 |
| P12163_1_S1,18065 | R.ESELIEENALGVR.N     | 1762.949 | 0.00461 | 2 | 1 | 55   | 0 |
| P12163_1_S1,18304 | R.ESELIEENALGVR.N     | 1762.949 | 0.00869 | 2 | 1 | 32.7 | 0 |
| P12163_1_F3,25552 | R.LVVDNFLFK.W         | 1703.035 | 0.00127 | 3 | 1 | 34.8 | 0 |
| P12163_1_F3,25645 | R.LVVDNFLFK.W         | 1703.035 | 0.00294 | 2 | 1 | 39.1 | 0 |
| P12163_1_F4,26268 | R.LVVDNFLFK.W         | 1703.035 | 0.00382 | 3 | 1 | 32.8 | 0 |
| P12163_1_F5,24311 | R.LVVDNFLFK.W         | 1703.035 | 0.00748 | 3 | 1 | 31.1 | 0 |
| P12163_1_F7,23264 | R.LVVDNFLFK.W         | 1703.035 | 0.00595 | 3 | 1 | 29   | 0 |
| P12163_1_S10,2176 | R.LVVDNFLFK.W         | 1703.035 | 0.00199 | 3 | 1 | 22.4 | 0 |
| P12163_2_F1,25440 | R.LVVDNFLFK.W         | 1703.035 | 0.00598 | 3 | 1 | 30.8 | 0 |
| P12163_1_F9,7911  | R.VVGHENK.Y           | 1390.826 | 0.00317 | 3 | 1 | 28.6 | 0 |
| P12163_2_F8_1207  | R.VVGHENK.Y           | 1390.826 | 0.01136 | 3 | 1 | 29.7 | 0 |
| P12163_1_F9,9304  | K.AAAHLK.G            | 1218.778 | 0.00546 | 3 | 1 | 29.8 | 0 |
| P12163_1_S10,9788 | K.AAAHLK.G            | 1218.778 | 0.00378 | 3 | 1 | 28.7 | 0 |
| P12163_2_F8_1207  | K.AAAHLK.G            | 1218.778 | 0.00725 | 2 | 1 | 24.6 | 0 |
| P12163_1_F6,14423 | K.AGIALSK.K ! K.AGIAL | 1267.819 | 0.00437 | 3 | 1 | 28.4 | 0 |
| P12163_1_F8,13591 | K.AGIALSK.K ! K.AGIAL | 1267.819 | 0.00227 | 3 | 1 | 23   | 0 |
| P12163_2_F1,13882 | K.AGIALSK.K ! K.AGIAL | 1267.819 | 0.00497 | 3 | 1 | 27.1 | 0 |
| P12163_2_F2,2245  | K.AGIALSK.K ! K.AGIAL | 1267.819 | 0.00674 | 3 | 1 | 24   | 0 |
| P12163_2_F2,2599  | K.AGIALSK.K ! K.AGIAL | 1267.819 | 0.00338 | 2 | 1 | 31.1 | 0 |
| P12163_2_F2,2800  | K.AGIALSK.K ! K.AGIAL | 1267.819 | 0.00452 | 3 | 1 | 24.8 | 0 |
| P12163_2_F2,2929  | K.AGIALSK.K ! K.AGIAL | 1267.819 | 0.00503 | 2 | 1 | 26.1 | 0 |
| P12163_2_F2,2980  | K.AGIALSK.K ! K.AGIAL | 1267.819 | 0.00407 | 3 | 1 | 31.3 | 0 |
| P12163_2_F2,3108  | K.AGIALSK.K ! K.AGIAL | 1267.819 | 0.00571 | 2 | 1 | 26.5 | 0 |
| P12163_2_F2,3157  | K.AGIALSK.K ! K.AGIAL | 1267.819 | 0.00809 | 3 | 1 | 26.4 | 0 |
| P12163_2_F2,3784  | K.AGIALSK.K ! K.AGIAL | 1267.819 | 0.00755 | 3 | 1 | 22.2 | 0 |
| P12163_2_F2,3808  | K.AGIALSK.K ! K.AGIAL | 1267.819 | 0.00366 | 2 | 1 | 35.7 | 0 |
| P12163_2_F2,14378 | K.AGIALSK.K ! K.AGIAL | 1267.819 | 0.00695 | 3 | 1 | 26.9 | 0 |
| P12163_2_F2,14419 | K.AGIALSK.K ! K.AGIAL | 1267.819 | 0.00762 | 2 | 1 | 26.6 | 0 |
| P12163_2_S5,12371 | K.AGIALSK.K ! K.AGIAL | 1267.819 | 0.00098 | 3 | 1 | 26.6 | 0 |

|                   |                       |          |          |   |   |      |   |
|-------------------|-----------------------|----------|----------|---|---|------|---|
| P12163_2_S5,13231 | K.AGIALSK.K ! K.AGIAL | 1267.819 | 0.00461  | 3 | 1 | 28.1 | 0 |
| P12163_1_F3,19789 | K.DAPMFVVGVNEK.E      | 1914.061 | 0.00738  | 3 | 1 | 44.8 | 0 |
| P12163_1_F4,14454 | K.EATYEEIK.N          | 1590.883 | 0.01601  | 2 | 1 | 33.3 | 0 |
| P12163_1_F7,19653 | K.EYKPELDIRVSNASCTTI  | 3606.927 | 0.00025  | 3 | 1 | 44.1 | 0 |
| P12163_1_F5,8020  | K.TVDGPSMK.D          | 1442.813 | 0.00311  | 3 | 1 | 27.1 | 0 |
| P12163_2_F1,10964 | K.TVDGPSMK.D          | 1442.813 | 0.00491  | 3 | 1 | 29.3 | 0 |
| P12163_1_F4,18491 | K.VLPALNGK.L          | 1419.914 | 0.00943  | 2 | 1 | 27.7 | 0 |
| P12163_1_F4,18753 | K.VLPALNGK.L          | 1419.914 | 0.00745  | 2 | 1 | 29.7 | 0 |
| P12163_1_F4,18763 | K.VLPALNGK.L          | 1419.914 | 0.00579  | 3 | 1 | 34.1 | 0 |
| P12163_1_F3,14796 | K.VVISAPSK.D          | 1408.898 | 0.00048  | 3 | 1 | 23.8 | 0 |
| P12163_1_F4,15218 | K.VVISAPSK.D          | 1408.898 | 0.00243  | 3 | 1 | 25.6 | 0 |
| P12163_2_F1,14152 | K.VVISAPSK.D          | 1408.898 | 0.00693  | 3 | 1 | 24.6 | 0 |
| P12163_1_F3,14456 | R.AASFNIIPSSTGAAK.A   | 2043.169 | 0.00567  | 3 | 1 | 28.8 | 0 |
| P12163_1_F3,16589 | R.AASFNIIPSSTGAAK.A   | 2043.169 | 0.00585  | 3 | 1 | 40   | 0 |
| P12163_1_F3,17279 | R.AASFNIIPSSTGAAK.A   | 2043.169 | 0.00774  | 3 | 1 | 22.7 | 0 |
| P12163_1_F3,17545 | R.AASFNIIPSSTGAAK.A   | 2043.169 | 0.00519  | 3 | 1 | 42.3 | 0 |
| P12163_1_F3,17553 | R.AASFNIIPSSTGAAK.A   | 2043.169 | 0.00095  | 2 | 1 | 38.6 | 0 |
| P12163_1_F3,19350 | R.AASFNIIPSSTGAAK.A   | 2043.169 | 0.00387  | 2 | 1 | 56.7 | 0 |
| P12163_1_F3,19706 | R.AASFNIIPSSTGAAK.A   | 2043.169 | -0.00225 | 3 | 1 | 29.3 | 0 |
| P12163_1_F6,18354 | R.AASFNIIPSSTGAAK.A   | 2043.169 | -0.00192 | 3 | 1 | 56.9 | 0 |
| P12163_1_F6,18837 | R.AASFNIIPSSTGAAK.A   | 2043.169 | 0.00399  | 3 | 1 | 32.7 | 0 |
| P12163_2_F1,19345 | R.AASFNIIPSSTGAAK.A   | 2043.169 | -0.00079 | 2 | 1 | 37.6 | 0 |
| P12163_2_F1,19404 | R.AASFNIIPSSTGAAK.A   | 2043.169 | 0.00402  | 3 | 1 | 44.2 | 0 |
| P12163_2_F4,17594 | R.AASFNIIPSSTGAAK.A   | 2043.169 | 0.00348  | 3 | 1 | 37.5 | 0 |
| P12163_2_F7,16678 | R.AASFNIIPSSTGAAK.A   | 2043.169 | 0.01158  | 3 | 1 | 44.4 | 0 |
| P12163_2_S3,15455 | R.AASFNIIPSSTGAAK.A   | 2043.169 | 0.00414  | 3 | 1 | 29.6 | 0 |
| P12163_1_F4,18628 | R.NPEEIPWAK.T         | 1691.958 | 0.00682  | 3 | 1 | 22.4 | 0 |
| P12163_2_F1,17839 | R.NPEEIPWAK.T         | 1691.958 | 0.0071   | 2 | 1 | 28   | 0 |
| P12163_2_F1,17870 | R.NPEEIPWAK.T         | 1691.958 | 0.00622  | 3 | 1 | 29.5 | 0 |
| P12163_1_F5,15104 | R.SSIFDAK.A           | 1375.804 | 0.00563  | 3 | 1 | 26.5 | 0 |
| P12163_1_F5,15244 | R.SSIFDAK.A           | 1375.804 | 0.00682  | 2 | 1 | 29.2 | 0 |
| P12163_1_F5,15341 | R.SSIFDAK.A           | 1375.804 | 0.00626  | 3 | 1 | 27.2 | 0 |
| P12163_1_F6,15886 | R.SSIFDAK.A           | 1375.804 | 0.00758  | 2 | 1 | 27.6 | 0 |
| P12163_1_F7,15102 | R.SSIFDAK.A           | 1375.804 | 0.00394  | 2 | 1 | 26.2 | 0 |
| P12163_1_F8,15164 | R.SSIFDAK.A           | 1375.804 | 0.00368  | 3 | 1 | 28.3 | 0 |
| P12163_2_F1,15096 | R.SSIFDAK.A           | 1375.804 | 0.00644  | 3 | 1 | 28.6 | 0 |
| P12163_2_F1,15296 | R.SSIFDAK.A           | 1375.804 | 0.00706  | 2 | 1 | 28.6 | 0 |
| P12163_2_F1,15305 | R.SSIFDAK.A           | 1375.804 | 0.00575  | 3 | 1 | 24.7 | 0 |
| P12163_2_F1,15530 | R.SSIFDAK.A           | 1375.804 | 0.0044   | 2 | 1 | 27.7 | 0 |
| P12163_2_F2,15863 | R.SSIFDAK.A           | 1375.804 | 0.00134  | 3 | 1 | 36.5 | 0 |
| P12163_2_F2,15866 | R.SSIFDAK.A           | 1375.804 | 0.00482  | 2 | 1 | 28.9 | 0 |
| P12163_2_F8_12070 | R.SSIFDAK.A           | 1375.804 | 0.00378  | 2 | 1 | 27.6 | 0 |
| P12163_2_S5,14318 | R.SSIFDAK.A           | 1375.804 | 0.00308  | 3 | 1 | 26.5 | 0 |
| P12163_2_F6,22323 | R.VIDLIVHM*AK.T       | 1763.071 | 0.00498  | 3 | 1 | 28.2 | 0 |
| P12163_2_F6,25333 | R.VIDLIVHM*AK.T       | 1763.071 | 0.00354  | 3 | 1 | 28.1 | 0 |
| P12163_2_F6,25252 | R.VIDLIVHMAK.T        | 1747.076 | 0.0021   | 3 | 1 | 39.4 | 0 |
| P12163_1_S1,19084 | K.DSTLIMQLLR.D        | 1493.866 | -0.00037 | 3 | 1 | 24   | 0 |
| P12163_1_F4,19260 | K.EAAESTLLAYK.S       | 1804.031 | 0.00523  | 2 | 1 | 49.7 | 0 |
| P12163_1_F4,19275 | K.EAAESTLLAYK.S       | 1804.031 | 0.00819  | 3 | 1 | 39.3 | 0 |
| P12163_1_F9,17946 | K.EAAESTLLAYK.S       | 1804.031 | 0.00276  | 3 | 1 | 22.4 | 0 |
| P12163_2_F1,18655 | K.EAAESTLLAYK.S       | 1804.031 | 0.00845  | 2 | 1 | 56.5 | 0 |

|                   |                          |          |          |   |   |      |   |
|-------------------|--------------------------|----------|----------|---|---|------|---|
| P12163_2_F1,18674 | K.EAAESTLLAYK.S          | 1804.031 | 0.00759  | 3 | 1 | 39.3 | 0 |
| P12163_2_F4,16730 | K.EAAESTLLAYK.S          | 1804.031 | -0.00345 | 3 | 1 | 25.3 | 0 |
| P12163_2_F1,14375 | K.IENELSK.I              | 1440.852 | 0.00599  | 2 | 1 | 25.7 | 0 |
| P12163_2_F1,9483  | K.LAEQAER.Y ! R.LAEQ,    | 1120.626 | 0.00298  | 2 | 1 | 24.7 | 0 |
| P12163_1_F6,19395 | K.SAQDIALAELAPTHPIF      | 2107.181 | 0.00214  | 3 | 1 | 49.1 | 0 |
| P12163_1_F7,16534 | K.SAQDIALAELAPTHPIF      | 2107.181 | 0.00376  | 3 | 1 | 67.7 | 0 |
| P12163_1_F7,17968 | K.SAQDIALAELAPTHPIF      | 2107.181 | 0.00095  | 4 | 1 | 23.8 | 0 |
| P12163_1_F7,18522 | K.SAQDIALAELAPTHPIF      | 2107.181 | -0.00023 | 3 | 1 | 63.7 | 0 |
| P12163_1_F7,18528 | K.SAQDIALAELAPTHPIF      | 2107.181 | 0.0025   | 2 | 1 | 72   | 0 |
| P12163_1_F8,47    | K.SAQDIALAELAPTHPIF      | 2107.181 | 0.00673  | 3 | 1 | 34.5 | 0 |
| P12163_1_F8,19491 | K.SAQDIALAELAPTHPIF      | 2107.181 | 0.00244  | 3 | 1 | 46.5 | 0 |
| P12163_2_F10,1706 | K.SAQDIALAELAPTHPIF      | 2107.181 | 0.00586  | 3 | 1 | 29.7 | 0 |
| P12163_2_S5,15820 | K.SAQDIALAELAPTHPIF      | 2107.181 | -0.00117 | 4 | 1 | 33.5 | 0 |
| P12163_2_S5,15834 | K.SAQDIALAELAPTHPIF      | 2107.181 | 0.00151  | 3 | 1 | 54.2 | 0 |
| P12163_2_S5,17709 | K.SAQDIALAELAPTHPIF      | 2107.181 | -0.00044 | 2 | 1 | 53.8 | 0 |
| P12163_2_S5,17821 | K.SAQDIALAELAPTHPIF      | 2107.181 | 0.00304  | 3 | 1 | 52.2 | 0 |
| P12163_1_F4,13882 | R.EENVYMAK.L ! R.EEN     | 1591.861 | 0.00598  | 3 | 1 | 30   | 0 |
| P12163_1_F5,12428 | R.EENVYMAK.L ! R.EEN     | 1591.861 | 0.00856  | 2 | 1 | 35.6 | 0 |
| P12163_1_F5,12489 | R.EENVYMAK.L ! R.EEN     | 1591.861 | 0.01225  | 3 | 1 | 24.7 | 0 |
| P12163_2_F1,12743 | R.EENVYMAK.L ! R.EEN     | 1591.861 | 0.00684  | 2 | 1 | 31.1 | 0 |
| P12163_1_F6,11508 | R.GNEDHVSVIK.E           | 1705.969 | 0.0091   | 2 | 1 | 41.4 | 0 |
| P12163_2_F6,11122 | R.GNEDHVSVIK.E           | 1705.969 | 0.00402  | 2 | 1 | 41.4 | 0 |
| P12163_1_F4,20959 | R.IISSIEQK.E ! R.ILSSIEQ | 1525.941 | 0.01597  | 2 | 1 | 28   | 0 |
| P12163_1_F5,18516 | R.IISSIEQK.E ! R.ILSSIEQ | 1525.941 | 0.00793  | 2 | 1 | 32.8 | 0 |
| P12163_1_F5,19572 | R.IISSIEQK.E ! R.ILSSIEQ | 1525.941 | 0.00666  | 3 | 1 | 29.6 | 0 |
| P12163_1_F5,19600 | R.IISSIEQK.E ! R.ILSSIEQ | 1525.941 | 0.00717  | 2 | 1 | 38.4 | 0 |
| P12163_2_F1,20030 | R.IISSIEQK.E ! R.ILSSIEQ | 1525.941 | 0.00227  | 2 | 1 | 27.6 | 0 |
| P12163_2_F1,20062 | R.IISSIEQK.E ! R.ILSSIEQ | 1525.941 | 0.00678  | 3 | 1 | 21.9 | 0 |
| P12163_2_F9,16813 | R.KEAAESTLLAYK.S         | 2236.332 | 0.0045   | 3 | 1 | 32   | 0 |
| P12163_1_F4,19313 | R.NLLSVAYK.N             | 1515.935 | 0.00473  | 2 | 1 | 24.7 | 0 |
| P12163_1_F5,18080 | R.NLLSVAYK.N             | 1515.935 | 0.00697  | 2 | 1 | 39.6 | 0 |
| P12163_1_F5,18081 | R.NLLSVAYK.N             | 1515.935 | 0.00381  | 3 | 1 | 34.8 | 0 |
| P12163_1_F6,18423 | R.NLLSVAYK.N             | 1515.935 | 0.01068  | 3 | 1 | 31.8 | 0 |
| P12163_1_F9,17887 | R.NLLSVAYK.N             | 1515.935 | 0.006    | 3 | 1 | 24.6 | 0 |
| P12163_2_F1,18587 | R.NLLSVAYK.N             | 1515.935 | 0.00633  | 2 | 1 | 42.2 | 0 |
| P12163_2_F1,18588 | R.NLLSVAYK.N             | 1515.935 | 0.00501  | 3 | 1 | 35.5 | 0 |
| P12163_2_F2,18787 | R.NLLSVAYK.N             | 1515.935 | 0.00681  | 3 | 1 | 28.1 | 0 |
| P12163_2_F2,18808 | R.NLLSVAYK.N             | 1515.935 | 0.00629  | 2 | 1 | 32.4 | 0 |
| P12163_2_F8_12070 | R.NLLSVAYK.N             | 1515.935 | 0.00594  | 3 | 1 | 30.9 | 0 |
| P12163_2_S5,16404 | R.NLLSVAYK.N             | 1515.935 | 0.00054  | 3 | 1 | 31.7 | 0 |
| P12163_1_F4,20324 | R.YEEMVEFM*EK.V          | 1958.97  | -0.00298 | 3 | 1 | 24.3 | 0 |
| P12163_1_F4,25316 | R.YEEMVEFMEK.V           | 1942.975 | 0.00462  | 2 | 1 | 54.3 | 0 |
| P12163_2_F9,21690 | R.YEEMVEFMEK.V           | 1942.975 | 0.00542  | 3 | 1 | 24.9 | 0 |
| P12163_1_S10,1839 | R.YLAEFK.V ! R.YLAEFK    | 1378.819 | 0.0079   | 3 | 1 | 24   | 0 |
| P12163_2_F8_12070 | R.YLAEFK.V ! R.YLAEFK    | 1378.819 | 0.00689  | 3 | 1 | 22.1 | 0 |
| P12163_2_F8_12070 | R.YLAEFK.V ! R.YLAEFK    | 1378.819 | 0.0056   | 3 | 1 | 22.9 | 0 |
| P12163_2_F1,7468  | K.DPTGAK.V               | 1196.709 | 0.00381  | 3 | 1 | 22.1 | 0 |
| P12163_1_F5,14587 | K.EVSSYLK.K              | 1433.846 | 0.01118  | 2 | 1 | 24.6 | 0 |
| P12163_2_F1,14639 | K.EVSSYLK.K              | 1433.846 | 0.0115   | 2 | 1 | 30.2 | 0 |
| P12163_2_F1,14650 | K.EVSSYLK.K              | 1433.846 | 0.00492  | 3 | 1 | 23.7 | 0 |
| P12163_2_F2,15372 | K.EVSSYLK.K              | 1433.846 | 0.00562  | 2 | 1 | 30.1 | 0 |

|                    |                       |          |          |   |   |      |   |
|--------------------|-----------------------|----------|----------|---|---|------|---|
| P12163_2_F8_12070  | K.EVSSYLK.K           | 1433.846 | 0.00459  | 3 | 1 | 25.3 | 0 |
| P12163_1_S1,13053  | K.IGGIGTVPVGR.V       | 1329.816 | 0.00272  | 3 | 1 | 35   | 0 |
| P12163_1_S1,15806  | K.IGGIGTVPVGR.V       | 1329.816 | 0.00299  | 3 | 1 | 50.3 | 0 |
| P12163_1_S1,16020  | K.IGGIGTVPVGR.V       | 1329.816 | 0.004    | 2 | 1 | 34.8 | 0 |
| P12163_1_F6,20438  | K.M*IPTKPM*VVETFSD'   | 2918.562 | 0.00644  | 3 | 1 | 30.6 | 0 |
| P12163_1_F6,22877  | K.M*IPTKPM*VVETFSD'   | 2918.562 | 0.00721  | 4 | 1 | 37.5 | 0 |
| P12163_1_F6,22835  | K.M*IPTKPMVVETFSDY    | 2902.567 | 0.00182  | 3 | 1 | 23   | 0 |
| P12163_1_F6,22871  | K.M*IPTKPMVVETFSDY    | 2902.567 | 0.00633  | 4 | 1 | 25.7 | 0 |
| P12163_1_F6,21623  | K.MIPTKPM*VVETFSDY    | 2902.567 | 0.00278  | 3 | 1 | 25.6 | 0 |
| P12163_1_F6,22887  | K.MIPTKPMVVETFSDYP    | 2886.572 | 0.00613  | 4 | 1 | 26.7 | 0 |
| P12163_2_F2,11403  | K.QMICCCNK.M          | 1721.842 | 0.00714  | 2 | 1 | 29.4 | 0 |
| P12163_2_S3,11488  | K.STTTGHLYK.L         | 1729.01  | 0.00463  | 3 | 1 | 31.3 | 0 |
| P12163_2_S5,12215  | K.STTTGHLYK.L         | 1729.01  | 0.00507  | 2 | 1 | 28.4 | 0 |
| P12163_2_F10,14800 | K.THINIVVIGHVDSGK.S   | 2197.291 | 0.00857  | 4 | 1 | 50.7 | 0 |
| P12163_1_F6,12423  | K.YYCTVIDAPGHR.D      | 1755.879 | 0.00383  | 4 | 1 | 22.6 | 0 |
| P12163_1_F7,14645  | K.YYCTVIDAPGHR.D      | 1755.879 | 0.0032   | 3 | 1 | 39.4 | 0 |
| P12163_1_F8,15318  | K.YYCTVIDAPGHR.D      | 1755.879 | 0.00347  | 3 | 1 | 35.4 | 0 |
| P12163_1_F8,15337  | K.YYCTVIDAPGHR.D      | 1755.879 | 0.01186  | 2 | 1 | 34.7 | 0 |
| P12163_2_F6,14776  | K.YYCTVIDAPGHR.D      | 1755.879 | 0.01322  | 2 | 1 | 35.8 | 0 |
| P12163_2_F9,14517  | K.YYCTVIDAPGHR.D      | 1755.879 | 0.00266  | 3 | 1 | 40.1 | 0 |
| P12163_2_S3,13753  | K.YYCTVIDAPGHR.D      | 1755.879 | 0.00275  | 3 | 1 | 38.4 | 0 |
| P12163_2_S5,14626  | K.YYCTVIDAPGHR.D      | 1755.879 | 0.00167  | 3 | 1 | 24   | 0 |
| P12163_1_F5,8286   | R.GFVASNSK.D          | 1417.826 | 0.00205  | 3 | 1 | 22.5 | 0 |
| P12163_1_F6,11569  | R.GFVASNSK.D          | 1417.826 | 0.00253  | 2 | 1 | 27.3 | 0 |
| P12163_1_F8,10800  | R.GFVASNSK.D          | 1417.826 | 0.00239  | 2 | 1 | 31.9 | 0 |
| P12163_1_F4,19769  | R.LPLQDVYK.I          | 1583.962 | 0.01294  | 2 | 1 | 29.6 | 0 |
| P12163_1_F4,19960  | R.LPLQDVYK.I          | 1583.962 | 0.00988  | 2 | 1 | 29.3 | 0 |
| P12163_1_F9,18573  | R.LPLQDVYK.I          | 1583.962 | 0.00766  | 2 | 1 | 25.6 | 0 |
| P12163_2_F1,19232  | R.LPLQDVYK.I          | 1583.962 | 0.00594  | 2 | 1 | 27.5 | 0 |
| P12163_2_F1,19251  | R.LPLQDVYK.I          | 1583.962 | 0.00828  | 3 | 1 | 26.4 | 0 |
| P12163_2_F1,19432  | R.LPLQDVYK.I          | 1583.962 | 0.00882  | 2 | 1 | 27.3 | 0 |
| P12163_2_F1,19651  | R.LPLQDVYK.I          | 1583.962 | 0.0055   | 2 | 1 | 27.3 | 0 |
| P12163_1_F4,15684  | R.QTVAVGVIK.S ! R.QTV | 1522.978 | 0.00495  | 2 | 1 | 50   | 0 |
| P12163_1_F4,15687  | R.QTVAVGVIK.S ! R.QTV | 1522.978 | 0.00277  | 3 | 1 | 40.1 | 0 |
| P12163_1_F7,14182  | R.QTVAVGVIK.S ! R.QTV | 1522.978 | 0.00286  | 3 | 1 | 41.9 | 0 |
| P12163_1_F7,14194  | R.QTVAVGVIK.S ! R.QTV | 1522.978 | 0.00483  | 2 | 1 | 24.1 | 0 |
| P12163_2_F1,14780  | R.QTVAVGVIK.S ! R.QTV | 1522.978 | 0.01093  | 2 | 1 | 32.4 | 0 |
| P12163_2_F1,14786  | R.QTVAVGVIK.S ! R.QTV | 1522.978 | 0.01153  | 3 | 1 | 40.7 | 0 |
| P12163_1_F5,16409  | R.STNLDWYK.G          | 1634.9   | 0.00839  | 2 | 1 | 29.7 | 0 |
| P12163_2_F1,16778  | R.STNLDWYK.G          | 1634.9   | 0.00543  | 2 | 1 | 41.9 | 0 |
| P12163_2_F2,17076  | R.STNLDWYK.G          | 1634.9   | 0.00583  | 2 | 1 | 39.8 | 0 |
| P12163_2_F2,17156  | R.STNLDWYK.G          | 1634.9   | 0.00448  | 3 | 1 | 25   | 0 |
| P12163_1_F3,17963  | K.ALQIPEYPNK.A        | 1781.042 | 0.00562  | 2 | 1 | 55.7 | 0 |
| P12163_1_F3,17971  | K.ALQIPEYPNK.A        | 1781.042 | 0.00159  | 3 | 1 | 31.3 | 0 |
| P12163_1_F4,18471  | K.ALQIPEYPNK.A        | 1781.042 | 0.00704  | 2 | 1 | 34.9 | 0 |
| P12163_1_F4,18591  | K.ALQIPEYPNK.A        | 1781.042 | 0.00519  | 3 | 1 | 40.6 | 0 |
| P12163_1_F6,17221  | K.ALQIPEYPNK.A        | 1781.042 | -0.00627 | 3 | 1 | 29.2 | 0 |
| P12163_2_F1,17821  | K.ALQIPEYPNK.A        | 1781.042 | 0.00682  | 2 | 1 | 47.3 | 0 |
| P12163_2_F1,17875  | K.ALQIPEYPNK.A        | 1781.042 | 0.00624  | 3 | 1 | 44.6 | 0 |
| P12163_2_F9,16051  | K.ALQIPEYPNK.A        | 1781.042 | -0.00165 | 3 | 1 | 27.8 | 0 |
| P12163_1_F5,10029  | K.APSGLK.T            | 1180.751 | 0.00626  | 3 | 1 | 31   | 0 |



|                   |                      |          |          |   |   |      |   |
|-------------------|----------------------|----------|----------|---|---|------|---|
| P12163_1_F4,17984 | K.GVANPLGIK.V ! R.GV | 1476.936 | 0.00597  | 2 | 1 | 37.9 | 0 |
| P12163_2_F1,17047 | K.GVANPLGIK.V ! R.GV | 1476.936 | 0.00662  | 2 | 1 | 38.9 | 0 |
| P12163_2_F1,17095 | K.GVANPLGIK.V ! R.GV | 1476.936 | 0.00575  | 3 | 1 | 44   | 0 |
| P12163_2_F2,1227  | K.GVANPLGIK.V ! R.GV | 1476.936 | 0.01526  | 3 | 1 | 27.3 | 0 |
| P12163_2_S5,15311 | K.GVANPLGIK.V ! R.GV | 1476.936 | -0.0046  | 3 | 1 | 31.7 | 0 |
| P12163_1_F9,15584 | K.LPHLIR.A           | 1052.688 | 0.00363  | 3 | 1 | 29.9 | 0 |
| P12163_1_F9,16999 | K.LPHLIR.A           | 1052.688 | 0.003    | 3 | 1 | 25.5 | 0 |
| P12163_1_S10,1536 | K.LPHLIR.A           | 1052.688 | 0.00438  | 3 | 1 | 23.7 | 0 |
| P12163_2_F1,12799 | R.AFATGGYAAM*QR.V    | 1563.789 | 0.00256  | 3 | 1 | 25.2 | 0 |
| P12163_1_F2,13174 | R.AFATGGYAAMQR.V     | 1547.794 | 0.00187  | 3 | 1 | 52.5 | 0 |
| P12163_1_F2,15591 | R.AFATGGYAAMQR.V     | 1547.794 | 0.00525  | 2 | 1 | 35.5 | 0 |
| P12163_1_F2,21489 | R.AYSQSVATLNLLR.A    | 1739.996 | 0.003    | 2 | 1 | 40.9 | 0 |
| P12163_1_S1,20592 | R.AYSQSVATLNLLR.A    | 1739.996 | -0.00085 | 3 | 1 | 25.2 | 0 |
| P12163_1_S1,20616 | R.AYSQSVATLNLLR.A    | 1739.996 | 0.00028  | 2 | 1 | 39.7 | 0 |
| P12163_1_F9,9471  | R.IPDPHR.M           | 1038.6   | 0.00241  | 3 | 1 | 30.9 | 0 |
| P12163_2_F7,8922  | R.IPDPHR.M           | 1038.6   | 0.00361  | 3 | 1 | 32.7 | 0 |
| P12163_1_F3,23867 | R.LIVILNPK.N         | 1518.024 | 0.00198  | 3 | 1 | 24.6 | 0 |
| P12163_1_F4,24758 | R.LIVILNPK.N         | 1518.024 | 0.00525  | 3 | 1 | 33.4 | 0 |
| P12163_1_F6,22455 | R.LIVILNPK.N         | 1518.024 | 0.00066  | 3 | 1 | 26.1 | 0 |
| P12163_2_F1,24108 | R.LIVILNPK.N         | 1518.024 | 0.00351  | 3 | 1 | 30.9 | 0 |
| P12163_2_F1,24111 | R.LIVILNPK.N         | 1518.024 | 0.00638  | 2 | 1 | 32.7 | 0 |
| P12163_2_F4,21077 | R.LIVILNPK.N         | 1518.024 | 0.0006   | 3 | 1 | 25.1 | 0 |
| P12163_2_F4,21112 | R.LIVILNPK.N         | 1518.024 | 0.00146  | 2 | 1 | 24   | 0 |
| P12163_2_F4,21399 | R.LIVILNPK.N         | 1518.024 | 0.00216  | 3 | 1 | 24.4 | 0 |
| P12163_1_F7,19873 | R.NAGQIVTWVSDPM*H    | 2692.434 | 0.00054  | 3 | 1 | 30.1 | 0 |
| P12163_1_F7,19922 | R.NAGQIVTWVSDPMHG    | 2676.439 | 0.00055  | 3 | 1 | 32.8 | 0 |
| P12163_2_S5,19281 | R.NAGQIVTWVSDPMHG    | 2676.439 | 0.00231  | 4 | 1 | 26.8 | 0 |
| P12163_1_F8,16922 | R.QLDGAHVEFLR.G      | 1588.875 | 0.0038   | 2 | 1 | 41.4 | 0 |
| P12163_2_F6,16305 | R.QLDGAHVEFLR.G      | 1588.875 | 0.00045  | 3 | 1 | 47.8 | 0 |
| P12163_2_F6,16341 | R.QLDGAHVEFLR.G      | 1588.875 | 0.00236  | 2 | 1 | 38.2 | 0 |
| P12163_2_F8_12070 | R.QLDGAHVEFLR.G      | 1588.875 | -0.00078 | 3 | 1 | 24.8 | 0 |
| P12163_2_S5,15789 | R.QLDGAHVEFLR.G      | 1588.875 | -0.0018  | 3 | 1 | 52   | 0 |
| P12163_1_F7,16970 | R.VAHWNLDFTDHSEQG    | 2331.106 | 0.00124  | 3 | 1 | 51.8 | 0 |
| P12163_1_F7,16984 | R.VAHWNLDFTDHSEQG    | 2331.106 | 0.00071  | 4 | 1 | 25.2 | 0 |
| P12163_2_F10,1617 | R.VAHWNLDFTDHSEQG    | 2331.106 | 0.00283  | 3 | 1 | 27.9 | 0 |
| P12163_2_F10,1617 | R.VAHWNLDFTDHSEQG    | 2331.106 | 0.00239  | 4 | 1 | 37.1 | 0 |
| P12163_1_F4,5753  | R.YHTHCDPR.L         | 1389.664 | 0.00037  | 2 | 1 | 27.4 | 0 |
| P12163_2_F2,5773  | R.YHTHCDPR.L         | 1389.664 | 0.00285  | 2 | 1 | 30.6 | 0 |
| P12163_1_F2,18924 | K.AAIDVVCNPLGK.S     | 1865.077 | 0.01044  | 3 | 1 | 38.8 | 0 |
| P12163_1_F2,18953 | K.AAIDVVCNPLGK.S     | 1865.077 | 0.00551  | 2 | 1 | 27.2 | 0 |
| P12163_1_F3,19519 | K.AAIDVVCNPLGK.S     | 1865.077 | 0.00421  | 2 | 1 | 52.6 | 0 |
| P12163_1_F3,19569 | K.AAIDVVCNPLGK.S     | 1865.077 | 0.00534  | 3 | 1 | 58.2 | 0 |
| P12163_1_F6,18595 | K.AAIDVVCNPLGK.S     | 1865.077 | 0.00091  | 2 | 1 | 34.4 | 0 |
| P12163_2_F6,15558 | K.AEAAASASADGQPLL    | 3023.678 | -0.00189 | 3 | 1 | 43.7 | 0 |
| P12163_1_F3,16781 | K.DVLVVTAK.G         | 1452.925 | 0.00347  | 3 | 1 | 28.6 | 0 |
| P12163_1_F3,16784 | K.DVLVVTAK.G         | 1452.925 | 0.00703  | 2 | 1 | 39.1 | 0 |
| P12163_1_F3,17152 | K.DVLVVTAK.G         | 1452.925 | 0.00629  | 3 | 1 | 35.5 | 0 |
| P12163_1_F4,17268 | K.DVLVVTAK.G         | 1452.925 | 0.0039   | 3 | 1 | 33.6 | 0 |
| P12163_2_F1,16419 | K.DVLVVTAK.G         | 1452.925 | 0.00426  | 3 | 1 | 22.7 | 0 |
| P12163_2_S3,13358 | K.DVLVVTAK.G         | 1452.925 | 0.00233  | 3 | 1 | 40.8 | 0 |
| P12163_1_F2,17504 | K.EM*AYIPLDEDTK.V    | 2049.067 | 0.00647  | 3 | 1 | 24.8 | 0 |

|                   |                   |          |          |   |   |      |   |
|-------------------|-------------------|----------|----------|---|---|------|---|
| P12163_1_F2,19026 | K.EM*AYIPLDEDTK.V | 2049.067 | 0.00644  | 3 | 1 | 26.4 | 0 |
| P12163_1_S1,15938 | K.EM*AYIPLDEDTK.V | 2049.067 | 0.00476  | 2 | 1 | 24.3 | 0 |
| P12163_1_S1,18080 | K.EMAYIPLDEDTK.V  | 2033.072 | 0.00662  | 3 | 1 | 39.9 | 0 |
| P12163_1_S1,18100 | K.EMAYIPLDEDTK.V  | 2033.072 | 0.0064   | 2 | 1 | 52.5 | 0 |
| P12163_2_F6,18662 | K.EMAYIPLDEDTK.V  | 2033.072 | 0.01134  | 2 | 1 | 36.8 | 0 |
| P12163_2_F2,19087 | K.FGWGVAAK.I      | 1443.857 | 0.00472  | 2 | 1 | 28.7 | 0 |
| P12163_1_F3,22977 | K.GSSAEIIPFLK.T   | 1770.062 | 0.00602  | 2 | 1 | 38.4 | 0 |
| P12163_1_F4,23755 | K.GSSAEIIPFLK.T   | 1770.062 | 0.00702  | 2 | 1 | 52.8 | 0 |
| P12163_2_F1,23189 | K.GSSAEIIPFLK.T   | 1770.062 | 0.00371  | 3 | 1 | 38.3 | 0 |
| P12163_1_F3,27056 | K.LFGIEFATFK.K    | 1781.046 | 0.00424  | 3 | 1 | 40.1 | 0 |
| P12163_1_F4,27840 | K.LFGIEFATFK.K    | 1781.046 | 0.00613  | 3 | 1 | 38.7 | 0 |
| P12163_1_F2,23891 | K.LLNILGPR.F      | 1199.778 | 0.00223  | 2 | 1 | 24.6 | 0 |
| P12163_1_F5,15925 | K.MGMTMESLK.F     | 1504.832 | 0.00731  | 3 | 1 | 23.4 | 0 |
| P12163_1_F5,15932 | K.MGMTMESLK.F     | 1504.832 | 0.00938  | 2 | 1 | 28.3 | 0 |
| P12163_2_F1,16283 | K.MGMTMESLK.F     | 1504.832 | 0.00662  | 3 | 1 | 27.8 | 0 |
| P12163_2_F2,16719 | K.MGMTMESLK.F     | 1504.832 | 0.00934  | 2 | 1 | 29   | 0 |
| P12163_1_F3,21771 | K.NLPGVDGWAVSLK.G | 2021.164 | 0.01134  | 3 | 1 | 47.6 | 0 |
| P12163_1_F3,21869 | K.NLPGVDGWAVSLK.G | 2021.164 | 0.0073   | 2 | 1 | 25.8 | 0 |
| P12163_1_F4,22520 | K.NLPGVDGWAVSLK.G | 2021.164 | 0.00675  | 3 | 1 | 43.3 | 0 |
| P12163_1_F4,19954 | K.YSLFDPCK.E      | 1637.882 | 0.00725  | 2 | 1 | 29.5 | 0 |
| P12163_1_F4,20194 | K.YSLFDPCK.E      | 1637.882 | 0.00707  | 2 | 1 | 28.2 | 0 |
| P12163_1_F4,20274 | K.YSLFDPCK.E      | 1637.882 | 0.00752  | 3 | 1 | 23.6 | 0 |
| P12163_1_F9,18740 | K.YSLFDPCK.E      | 1637.882 | 0.00521  | 3 | 1 | 24.8 | 0 |
| P12163_1_S10,1848 | K.YSLFDPCK.E      | 1637.882 | 0.00782  | 3 | 1 | 30.7 | 0 |
| P12163_2_F1,19240 | K.YSLFDPCK.E      | 1637.882 | 0.01197  | 2 | 1 | 24.7 | 0 |
| P12163_2_F1,19294 | K.YSLFDPCK.E      | 1637.882 | 0.00584  | 3 | 1 | 26   | 0 |
| P12163_2_F1,19439 | K.YSLFDPCK.E      | 1637.882 | 0.00785  | 2 | 1 | 28.1 | 0 |
| P12163_2_F1,19658 | K.YSLFDPCK.E      | 1637.882 | 0.00607  | 2 | 1 | 27.9 | 0 |
| P12163_1_F2,15214 | R.SLDTQFTALR.Q    | 1455.811 | 0.00377  | 3 | 1 | 43   | 0 |
| P12163_1_F2,15808 | R.SLDTQFTALR.Q    | 1455.811 | 0.0059   | 3 | 1 | 38.8 | 0 |
| P12163_1_S1,15342 | R.SLDTQFTALR.Q    | 1455.811 | 0.00023  | 3 | 1 | 27.3 | 0 |
| P12163_1_S1,17335 | R.SLDTQFTALR.Q    | 1455.811 | 0.00338  | 3 | 1 | 46.7 | 0 |
| P12163_1_F3,18268 | K.ALNVVGGDLAK.M   | 1665.016 | 0.00106  | 2 | 1 | 51.6 | 0 |
| P12163_1_F3,18279 | K.ALNVVGGDLAK.M   | 1665.016 | 0.00463  | 3 | 1 | 47.8 | 0 |
| P12163_1_F4,18824 | K.ALNVVGGDLAK.M   | 1665.016 | 0.00846  | 2 | 1 | 62.1 | 0 |
| P12163_1_F4,18864 | K.ALNVVGGDLAK.M   | 1665.016 | 0.00544  | 3 | 1 | 61.9 | 0 |
| P12163_1_F5,17532 | K.ALNVVGGDLAK.M   | 1665.016 | 0.01195  | 3 | 1 | 43.1 | 0 |
| P12163_1_F5,17563 | K.ALNVVGGDLAK.M   | 1665.016 | 0.00798  | 2 | 1 | 36.2 | 0 |
| P12163_2_F1,18061 | K.ALNVVGGDLAK.M   | 1665.016 | 0.00752  | 2 | 1 | 46.9 | 0 |
| P12163_2_F1,18121 | K.ALNVVGGDLAK.M   | 1665.016 | 0.00727  | 3 | 1 | 64.4 | 0 |
| P12163_2_F4,16273 | K.ALNVVGGDLAK.M   | 1665.016 | 0.00124  | 3 | 1 | 32   | 0 |
| P12163_2_F4,16671 | K.ALNVVGGDLAK.M   | 1665.016 | -0.0014  | 3 | 1 | 29.3 | 0 |
| P12163_2_F4,12476 | K.AYNYIHK.Y       | 1516.873 | 0.00542  | 3 | 1 | 36.9 | 0 |
| P12163_2_F4,12488 | K.AYNYIHK.Y       | 1516.873 | 0.00618  | 2 | 1 | 30.5 | 0 |
| P12163_2_S5,13021 | K.AYNYIHK.Y       | 1516.873 | 0.00347  | 3 | 1 | 31.8 | 0 |
| P12163_1_F4,9795  | K.ESAISPDEK.Y     | 1583.874 | 0.00578  | 2 | 1 | 25.3 | 0 |
| P12163_1_F4,11815 | K.ESAISPDEK.Y     | 1583.874 | 0.00536  | 2 | 1 | 26.1 | 0 |
| P12163_1_F4,11871 | K.ESAISPDEK.Y     | 1583.874 | 0.00568  | 3 | 1 | 31.3 | 0 |
| P12163_1_F3,9648  | K.LENSELR.L       | 1164.653 | 0.00492  | 3 | 1 | 31.3 | 0 |
| P12163_1_F9,15630 | K.RGEDPALSLVSK.A  | 1880.106 | -0.00088 | 3 | 1 | 30.4 | 0 |
| P12163_1_F9,15671 | K.RGEDPALSLVSK.A  | 1880.106 | 0.00409  | 2 | 1 | 31.2 | 0 |

|                                          |          |          |   |   |      |   |
|------------------------------------------|----------|----------|---|---|------|---|
| P12163_2_F10,1400' K.RGEDPALSLVSK.A      | 1880.106 | 0.00434  | 3 | 1 | 32.6 | 0 |
| P12163_2_F7,14093 K.RGEDPALSLVSK.A       | 1880.106 | -0.00814 | 3 | 1 | 35   | 0 |
| P12163_2_F8_12070 K.VHDLLK.L             | 1332.846 | 0.00633  | 3 | 1 | 29.8 | 0 |
| P12163_1_F2,17666 R.GEDPALSLVSK.A        | 1724.005 | 0.00312  | 2 | 1 | 28.6 | 0 |
| P12163_1_F2,17670 R.GEDPALSLVSK.A        | 1724.005 | 0.00497  | 3 | 1 | 33   | 0 |
| P12163_1_F6,16452 R.LAYDTHGIIR.K         | 1462.832 | 0.00512  | 2 | 1 | 34.6 | 0 |
| P12163_1_F6,16523 R.LAYDTHGIIR.K         | 1462.832 | 0.00248  | 3 | 1 | 51.8 | 0 |
| P12163_1_F8,13594 R.LAYDTHGIIR.K         | 1462.832 | 0.00137  | 3 | 1 | 23.7 | 0 |
| P12163_1_F8,16281 R.LAYDTHGIIR.K         | 1462.832 | 0.00206  | 3 | 1 | 53.2 | 0 |
| P12163_1_F9,16132 R.LAYDTHGIIR.K         | 1462.832 | 0.00353  | 3 | 1 | 45.2 | 0 |
| P12163_2_F10,1447 R.LAYDTHGIIR.K         | 1462.832 | 0.00188  | 3 | 1 | 31.3 | 0 |
| P12163_2_F6,15720 R.LAYDTHGIIR.K         | 1462.832 | 0.00248  | 3 | 1 | 50.4 | 0 |
| P12163_2_F6,16148 R.LAYDTHGIIR.K         | 1462.832 | 0.00026  | 3 | 1 | 42.4 | 0 |
| P12163_2_F6,20619 R.LAYDTHGIIR.K         | 1462.832 | -0.0037  | 3 | 1 | 29.9 | 0 |
| P12163_2_F6,20846 R.LAYDTHGIIR.K         | 1462.832 | -0.0004  | 3 | 1 | 49.6 | 0 |
| P12163_1_F5,21368 R.LSCFFNK.A            | 1523.85  | 0.00698  | 2 | 1 | 26.7 | 0 |
| P12163_1_S1,20648 R.LSPQSAAMYNFTEEEL     | 2667.38  | 0.00866  | 3 | 1 | 29.8 | 0 |
| P12163_1_S1,20669 R.LSPQSAAMYNFTEEEL     | 2667.38  | 0.01073  | 3 | 1 | 33.7 | 0 |
| P12163_1_S1,20695 R.LSPQSAAMYNFTEEEL     | 2667.38  | 0.008    | 4 | 1 | 36.6 | 0 |
| P12163_1_F3,15271 R.NAVDM*ALADSSCCK      | 2166.045 | 0.00557  | 3 | 1 | 41   | 0 |
| P12163_1_F3,14295 R.NAVDMALADSSCCK.I     | 2150.05  | 0.0068   | 3 | 1 | 39.5 | 0 |
| P12163_1_F3,15456 R.NAVDMALADSSCCK.I     | 2150.05  | 0.01118  | 3 | 1 | 22.8 | 0 |
| P12163_1_F3,16877 R.NAVDMALADSSCCK.I     | 2150.05  | 0.00602  | 2 | 1 | 45.9 | 0 |
| P12163_1_F3,16897 R.NAVDMALADSSCCK.I     | 2150.05  | 0.00851  | 3 | 1 | 55.1 | 0 |
| P12163_1_F2,9791 R.VSTEVDAR.L            | 1180.647 | 0.00347  | 2 | 1 | 27.6 | 0 |
| P12163_1_F2,10830 K.AGFAGDDAPR.A         | 1280.654 | -0.00217 | 2 | 1 | 48.1 | 0 |
| P12163_1_F3,10024 K.DAYVGDEAQSK.R        | 1790.938 | 0.00469  | 2 | 1 | 38.1 | 0 |
| P12163_1_F3,11353 K.DAYVGDEAQSK.R        | 1790.938 | 0.00709  | 2 | 1 | 49.5 | 0 |
| P12163_1_F4,11889 K.DAYVGDEAQSK.R        | 1790.938 | 0.00657  | 3 | 1 | 49.8 | 0 |
| P12163_1_F4,11897 K.DAYVGDEAQSK.R        | 1790.938 | 0.00725  | 2 | 1 | 51.3 | 0 |
| P12163_1_F9,11224 K.DAYVGDEAQSK.R        | 1790.938 | 0.00867  | 2 | 1 | 46   | 0 |
| P12163_1_F9,11234 K.DAYVGDEAQSK.R        | 1790.938 | 0.00411  | 3 | 1 | 37.6 | 0 |
| P12163_1_F3,15889 K.EITALAPSSM*K.I ! R.E | 1772.008 | 0.00352  | 2 | 1 | 27.6 | 0 |
| P12163_1_F3,15905 K.EITALAPSSM*K.I ! R.E | 1772.008 | 0.00533  | 3 | 1 | 28.8 | 0 |
| P12163_1_F3,18111 K.EITALAPSSMK.I ! R.EI | 1756.013 | 0.00926  | 2 | 1 | 29   | 0 |
| P12163_1_F3,18164 K.EITALAPSSMK.I ! R.EI | 1756.013 | 0.00566  | 3 | 1 | 48.2 | 0 |
| P12163_1_F4,18691 K.EITALAPSSMK.I ! R.EI | 1756.013 | 0.00059  | 3 | 1 | 39.2 | 0 |
| P12163_1_F4,18713 K.EITALAPSSMK.I ! R.EI | 1756.013 | -0.00198 | 2 | 1 | 35.4 | 0 |
| P12163_1_F6,17407 K.EITALAPSSMK.I ! R.EI | 1756.013 | 0.00551  | 3 | 1 | 34.2 | 0 |
| P12163_2_F1,17957 K.EITALAPSSMK.I ! R.EI | 1756.013 | 0.00556  | 2 | 1 | 32.7 | 0 |
| P12163_2_F4,16193 K.EITALAPSSMK.I ! R.EI | 1756.013 | -0.00106 | 3 | 1 | 23.2 | 0 |
| P12163_1_F6,11765 K.GEYDESGPSIVHR.K      | 1749.871 | 0.00214  | 3 | 1 | 72.6 | 0 |
| P12163_1_F7,11170 K.GEYDESGPSIVHR.K      | 1749.871 | -0.0007  | 3 | 1 | 33.7 | 0 |
| P12163_1_F8,11585 K.GEYDESGPSIVHR.K      | 1749.871 | 0.00371  | 3 | 1 | 44.1 | 0 |
| P12163_2_F6,11384 K.GEYDESGPSIVHR.K      | 1749.871 | 0.00121  | 2 | 1 | 46.2 | 0 |
| P12163_1_F8,20717 K.NYELPDGQIITIGAER.I   | 2093.118 | -0.00723 | 2 | 1 | 52.6 | 0 |
| P12163_2_F2,7621 K.SSSSVEK.N             | 1331.763 | 0.00541  | 2 | 1 | 27.6 | 0 |
| P12163_1_F8,18239 K.YPIEHGIVSNWDDM*E     | 2557.285 | 0.01088  | 3 | 1 | 23.6 | 0 |
| P12163_1_F8,19866 K.YPIEHGIVSNWDDMEF     | 2541.29  | 0.00746  | 3 | 1 | 43.2 | 0 |
| P12163_1_F3,18572 R.DLTDALMK.I           | 1514.871 | 0.0072   | 3 | 1 | 27   | 0 |
| P12163_1_F3,18594 R.DLTDALMK.I           | 1514.871 | 0.00582  | 2 | 1 | 45.6 | 0 |

|                    |                     |          |          |   |   |      |   |
|--------------------|---------------------|----------|----------|---|---|------|---|
| P12163_1_F4,19125  | R.DLTDALMK.I        | 1514.871 | 0.00804  | 2 | 1 | 45.7 | 0 |
| P12163_1_F4,19127  | R.DLTDALMK.I        | 1514.871 | 0.00714  | 3 | 1 | 24.6 | 0 |
| P12163_2_F2,18362  | R.GILTLK.Y          | 1252.845 | 0.01049  | 3 | 1 | 24.7 | 0 |
| P12163_1_F2,15885  | R.GYMFTTTAER.E      | 1480.741 | 0.00489  | 2 | 1 | 27   | 0 |
| P12163_1_F9,10832  | R.HTGVVM*VGMGQK.D   | 1768.966 | 0.00474  | 3 | 1 | 37.8 | 0 |
| P12163_1_F9,12476  | R.HTGVVM*VGMGQK.D   | 1768.966 | 0.00468  | 3 | 1 | 26.2 | 0 |
| P12163_2_F9,11611  | R.HTGVVM*VGMGQK.D   | 1768.966 | -0.00204 | 3 | 1 | 32.8 | 0 |
| P12163_2_F9,9362   | R.HTGVVMVGM*GQK.D   | 1768.966 | 0.00462  | 3 | 1 | 30.4 | 0 |
| P12163_1_F9,12458  | R.HTGVVMVGMGQK.D    | 1752.971 | 0.0048   | 3 | 1 | 33.7 | 0 |
| P12163_1_F9,12464  | R.HTGVVMVGMGQK.D    | 1752.971 | 0.00666  | 2 | 1 | 43.4 | 0 |
| P12163_2_F9,11573  | R.HTGVVMVGMGQK.D    | 1752.971 | -0.00741 | 3 | 1 | 52.2 | 0 |
| P12163_1_F6,17635  | R.VAPEEHPVLLTEAPLN  | 2562.475 | 0.0064   | 3 | 1 | 31.9 | 0 |
| P12163_1_F6,18724  | R.VAPEEHPVLLTEAPLN  | 2562.475 | 0.00334  | 3 | 1 | 27.1 | 0 |
| P12163_2_F4,17600  | R.VAPEEHPVLLTEAPLN  | 2562.475 | 0.0013   | 3 | 1 | 23.6 | 0 |
| P12163_2_S5,16756  | R.VAPEEHPVLLTEAPLN  | 2562.475 | 0.00576  | 4 | 1 | 22.5 | 0 |
| P12163_2_S5,16796  | R.VAPEEHPVLLTEAPLN  | 2562.475 | 0.00586  | 3 | 1 | 53   | 0 |
| P12163_1_F2,8485   | K.DDVAVGR.I         | 1035.574 | 0.0014   | 2 | 1 | 25.5 | 0 |
| P12163_1_F4,19162  | K.FGPIAVEK.G        | 1468.898 | 0.0033   | 3 | 1 | 35.3 | 0 |
| P12163_1_F4,19202  | K.FGPIAVEK.G        | 1468.898 | 0.0049   | 2 | 1 | 28.2 | 0 |
| P12163_1_F5,17926  | K.FGPIAVEK.G        | 1468.898 | 0.00297  | 3 | 1 | 33.9 | 0 |
| P12163_1_F5,21321  | K.GALIANPNCSTIICLM* | 2814.473 | -0.00387 | 3 | 1 | 30   | 0 |
| P12163_1_S1,12313  | K.GSIVVDNSSAFR.M    | 1555.838 | 0.00343  | 3 | 1 | 42.4 | 0 |
| P12163_1_S1,12683  | K.GSIVVDNSSAFR.M    | 1555.838 | 0.0004   | 3 | 1 | 28.9 | 0 |
| P12163_1_S1,15333  | K.GSIVVDNSSAFR.M    | 1555.838 | 0.00372  | 2 | 1 | 50.3 | 0 |
| P12163_1_S1,15377  | K.GSIVVDNSSAFR.M    | 1555.838 | 0.00256  | 3 | 1 | 58.2 | 0 |
| P12163_1_S1,13652  | K.NAPGVVVIDDR.A     | 1458.822 | 0.00373  | 3 | 1 | 60.1 | 0 |
| P12163_2_F4,13888  | K.NAPGVVVIDDR.A     | 1458.822 | 0.00465  | 2 | 1 | 24.3 | 0 |
| P12163_2_F1,13812  | K.QLSFQDK.A         | 1473.852 | 0.00504  | 3 | 1 | 28.6 | 0 |
| P12163_1_F5,16001  | R.AHAESVNLQFEKPLDE  | 2878.515 | 0.00528  | 3 | 1 | 46.6 | 0 |
| P12163_1_F8,15222  | R.AHAESVNLQFEKPLDE  | 2878.515 | 0.00411  | 5 | 1 | 28.5 | 0 |
| P12163_1_F8,16344  | R.AHAESVNLQFEKPLDE  | 2878.515 | 0.00926  | 5 | 1 | 24   | 0 |
| P12163_1_S10,15800 | R.AHAESVNLQFEKPLDE  | 2878.515 | 0.00988  | 4 | 1 | 25.6 | 0 |
| P12163_1_S10,16240 | R.AHAESVNLQFEKPLDE  | 2878.515 | 0.0256   | 4 | 1 | 22.5 | 0 |
| P12163_2_F10,13940 | R.AHAESVNLQFEKPLDE  | 2878.515 | 0.0172   | 4 | 1 | 30.9 | 0 |
| P12163_2_F10,14650 | R.AHAESVNLQFEKPLDE  | 2878.515 | -0.00084 | 4 | 1 | 32.2 | 0 |
| P12163_2_F10,14840 | R.AHAESVNLQFEKPLDE  | 2878.515 | 0.0054   | 3 | 1 | 23.7 | 0 |
| P12163_2_F10,14880 | R.AHAESVNLQFEKPLDE  | 2878.515 | 0.00526  | 5 | 1 | 32.4 | 0 |
| P12163_2_F10,15210 | R.AHAESVNLQFEKPLDE  | 2878.515 | 0.0284   | 4 | 1 | 26.6 | 0 |
| P12163_2_F4,15318  | R.AHAESVNLQFEKPLDE  | 2878.515 | 0.00423  | 3 | 1 | 37.8 | 0 |
| P12163_1_F6,16317  | R.ASNHFPTPLEVSNK.D  | 2149.186 | 0.00491  | 3 | 1 | 46.2 | 0 |
| P12163_1_F6,16369  | R.ASNHFPTPLEVSNK.D  | 2149.186 | 0.0057   | 2 | 1 | 34.6 | 0 |
| P12163_2_F6,15634  | R.ASNHFPTPLEVSNK.D  | 2149.186 | 0.01142  | 3 | 1 | 27.6 | 0 |
| P12163_1_F5,16198  | R.ASNHFPTPLEVSNKDD  | 2861.537 | 0.00758  | 3 | 1 | 43   | 0 |
| P12163_2_S5,15420  | R.ASNHFPTPLEVSNKDD  | 2861.537 | 0.00543  | 4 | 1 | 32.5 | 0 |
| P12163_1_F5,19070  | R.DVSQDGNHGLDIFVCC  | 2535.22  | 0.00621  | 3 | 1 | 33.9 | 0 |
| P12163_1_F6,18974  | R.DVSQDGNHGLDIFVCC  | 2535.22  | 0.0042   | 3 | 1 | 41.7 | 0 |
| P12163_1_F6,19004  | R.DVSQDGNHGLDIFVCC  | 2535.22  | 0.00274  | 2 | 1 | 60.7 | 0 |
| P12163_1_F6,19044  | R.DVSQDGNHGLDIFVCC  | 2535.22  | 0.00196  | 4 | 1 | 47.4 | 0 |
| P12163_1_F6,19187  | R.DVSQDGNHGLDIFVCC  | 2535.22  | 0.0054   | 3 | 1 | 39.3 | 0 |
| P12163_1_F7,18148  | R.DVSQDGNHGLDIFVCC  | 2535.22  | 0.00792  | 3 | 1 | 33   | 0 |
| P12163_1_F8,19045  | R.DVSQDGNHGLDIFVCC  | 2535.22  | 0.00246  | 3 | 1 | 37.4 | 0 |

|                   |                      |          |          |   |   |      |   |
|-------------------|----------------------|----------|----------|---|---|------|---|
| P12163_2_F10,1712 | R.DVSQDGNHGLDIFVCC   | 2535.22  | 0.00426  | 3 | 1 | 28.2 | 0 |
| P12163_2_F2,19704 | R.DVSQDGNHGLDIFVCC   | 2535.22  | 0.00489  | 3 | 1 | 33.9 | 0 |
| P12163_2_F4,17717 | R.DVSQDGNHGLDIFVCC   | 2535.22  | 0.00183  | 3 | 1 | 40.1 | 0 |
| P12163_2_F4,17931 | R.DVSQDGNHGLDIFVCC   | 2535.22  | 0.00906  | 3 | 1 | 28.7 | 0 |
| P12163_2_F10,1601 | R.RDVSQDGNHGLDIFVC   | 2691.321 | 0.00168  | 3 | 1 | 32   | 0 |
| P12163_1_F3,9458  | R.VTATCIR.V          | 1124.64  | 0.0032   | 3 | 1 | 24.3 | 0 |
| P12163_2_F1,8979  | R.VTATCIR.V          | 1124.64  | 0.00605  | 3 | 1 | 26.4 | 0 |
| P12163_1_F7,16273 | K.DIVVLSGGHTLGR.C    | 1627.943 | -0.00017 | 3 | 1 | 48.8 | 0 |
| P12163_1_F8,17004 | K.DIVVLSGGHTLGR.C    | 1627.943 | 0.00184  | 3 | 1 | 47.4 | 0 |
| P12163_1_F8,17011 | K.DIVVLSGGHTLGR.C    | 1627.943 | 0.00527  | 2 | 1 | 24.3 | 0 |
| P12163_2_F6,16420 | K.DIVVLSGGHTLGR.C    | 1627.943 | 0.00184  | 3 | 1 | 36.4 | 0 |
| P12163_2_F6,16433 | K.DIVVLSGGHTLGR.C    | 1627.943 | 0.00315  | 2 | 1 | 24.4 | 0 |
| P12163_1_F3,19589 | K.EGLLQLPSDK.A       | 1708.01  | 0.00586  | 2 | 1 | 34.4 | 0 |
| P12163_1_F3,19605 | K.EGLLQLPSDK.A       | 1708.01  | 0.00149  | 3 | 1 | 34   | 0 |
| P12163_1_F4,20195 | K.EGLLQLPSDK.A       | 1708.01  | 0.0041   | 2 | 1 | 25.3 | 0 |
| P12163_1_F4,20207 | K.EGLLQLPSDK.A       | 1708.01  | 0.00848  | 3 | 1 | 30.2 | 0 |
| P12163_1_F5,18927 | K.EGLLQLPSDK.A       | 1708.01  | -0.00112 | 2 | 1 | 33.1 | 0 |
| P12163_1_F5,18934 | K.EGLLQLPSDK.A       | 1708.01  | 0.00059  | 3 | 1 | 24.8 | 0 |
| P12163_1_F6,19088 | K.EGLLQLPSDK.A       | 1708.01  | 0.0017   | 3 | 1 | 26.4 | 0 |
| P12163_2_F1,19664 | K.EGLLQLPSDK.A       | 1708.01  | 0.00854  | 3 | 1 | 24.3 | 0 |
| P12163_2_F1,19674 | K.EGLLQLPSDK.A       | 1708.01  | 0.00546  | 2 | 1 | 32.3 | 0 |
| P12163_2_S3,15544 | K.EGLLQLPSDK.A       | 1708.01  | 0.00122  | 3 | 1 | 22.5 | 0 |
| P12163_1_F4,5469  | K.GSDHLR.D           | 988.5477 | 0.00306  | 3 | 1 | 22.1 | 0 |
| P12163_1_S10,6682 | K.GSDHLR.D           | 988.5477 | 0.00471  | 3 | 1 | 25.5 | 0 |
| P12163_2_F8_12070 | K.HCAPIILR.L         | 1283.756 | 0.00305  | 3 | 1 | 23.5 | 0 |
| P12163_1_F5,22813 | K.LSELGFADAE.-       | 1355.7   | 0.00358  | 2 | 1 | 31.5 | 0 |
| P12163_1_F2,4890  | K.SDPPPEGR.L         | 1158.606 | 0.00357  | 3 | 1 | 22.1 | 0 |
| P12163_1_F3,11314 | K.TGGPFGTIR.H        | 1209.689 | 0.00273  | 3 | 1 | 44.3 | 0 |
| P12163_1_F3,13047 | K.TGGPFGTIR.H        | 1209.689 | 0.00212  | 3 | 1 | 43.9 | 0 |
| P12163_1_F4,11624 | K.TGGPFGTIR.H        | 1209.689 | 0.00432  | 3 | 1 | 29.9 | 0 |
| P12163_2_F1,10730 | K.TGGPFGTIR.H        | 1209.689 | 0.00405  | 3 | 1 | 46.5 | 0 |
| P12163_2_F1,12291 | K.TGGPFGTIR.H        | 1209.689 | 0.00273  | 3 | 1 | 33.3 | 0 |
| P12163_1_S10,1141 | K.VSDEYQK.A          | 1476.815 | 0.01171  | 2 | 1 | 26.3 | 0 |
| P12163_1_F7,20210 | K.YAADEDAVFADYAEA    | 2607.319 | 0.00673  | 3 | 1 | 83.3 | 0 |
| P12163_1_F7,20229 | K.YAADEDAVFADYAEA    | 2607.319 | 0.00259  | 4 | 1 | 51.3 | 0 |
| P12163_2_F10,1915 | K.YAADEDAVFADYAEA    | 2607.319 | 0.00515  | 4 | 1 | 41.7 | 0 |
| P12163_2_S5,20043 | K.YAADEDAVFADYAEA    | 2607.319 | 0.00862  | 3 | 1 | 29.7 | 0 |
| P12163_2_F6,13691 | R.DVFGHM*GLSDK.D     | 1829.968 | 0.00697  | 3 | 1 | 23.5 | 0 |
| P12163_2_F7,15245 | R.DVFGHM*GLSDK.D     | 1829.968 | 0.0052   | 3 | 1 | 24   | 0 |
| P12163_1_F7,15030 | R.HPDELAHEANGLDIA    | 2275.173 | 0.0067   | 3 | 1 | 38.6 | 0 |
| P12163_1_F7,15040 | R.HPDELAHEANGLDIA    | 2275.173 | 0.00283  | 4 | 1 | 78.2 | 0 |
| P12163_1_F8,15685 | R.HPDELAHEANGLDIA    | 2275.173 | 0.00087  | 4 | 1 | 79.5 | 0 |
| P12163_1_F8,15777 | R.HPDELAHEANGLDIA    | 2275.173 | 0.00248  | 2 | 1 | 26.8 | 0 |
| P12163_2_F10,1440 | R.HPDELAHEANGLDIA    | 2275.173 | 0.00019  | 4 | 1 | 29.1 | 0 |
| P12163_2_F10,1441 | R.HPDELAHEANGLDIA    | 2275.173 | 0.00328  | 3 | 1 | 37.9 | 0 |
| P12163_2_F10,1446 | R.HPDELAHEANGLDIA    | 2275.173 | -0.0008  | 2 | 1 | 31.9 | 0 |
| P12163_2_F10,1461 | R.HPDELAHEANGLDIA    | 2275.173 | 0.00523  | 3 | 1 | 38.6 | 0 |
| P12163_1_F6,15853 | R.LAWHSAGTYDVNTK.    | 2171.171 | 0.00392  | 3 | 1 | 33.1 | 0 |
| P12163_2_F6,15188 | R.LAWHSAGTYDVNTK.    | 2171.171 | 0.00392  | 3 | 1 | 53.2 | 0 |
| P12163_1_F3,24221 | K.ALAVFALR.D ! K.ALA | 1164.741 | 0.00214  | 2 | 1 | 26.9 | 0 |
| P12163_1_F7,20781 | K.AYPNCEAVPCEQFDT/   | 2907.323 | -0.00101 | 3 | 1 | 34.8 | 0 |

|                   |                      |          |          |   |   |      |   |
|-------------------|----------------------|----------|----------|---|---|------|---|
| P12163_1_F3,16223 | K.EFATFLR.V          | 1187.673 | 0.00416  | 3 | 1 | 24.2 | 0 |
| P12163_1_F4,20240 | K.YVSFEQLK.D         | 1621.941 | 0.00289  | 2 | 1 | 37.6 | 0 |
| P12163_1_F4,20245 | K.YVSFEQLK.D         | 1621.941 | 0.00517  | 3 | 1 | 30   | 0 |
| P12163_1_F5,18933 | K.YVSFEQLK.D         | 1621.941 | 0.00017  | 2 | 1 | 28.9 | 0 |
| P12163_1_F7,17695 | K.YVSFEQLK.D         | 1621.941 | -0.00719 | 3 | 1 | 25.2 | 0 |
| P12163_1_F9,18644 | K.YVSFEQLK.D         | 1621.941 | 0.00971  | 2 | 1 | 28.5 | 0 |
| P12163_1_S10,1828 | K.YVSFEQLK.D         | 1621.941 | 0.00868  | 3 | 1 | 32.9 | 0 |
| P12163_2_F1,19640 | K.YVSFEQLK.D         | 1621.941 | 0.00364  | 3 | 1 | 26.3 | 0 |
| P12163_2_F9,17766 | K.YVSFEQLK.D         | 1621.941 | 0.00417  | 2 | 1 | 29   | 0 |
| P12163_2_F9,17803 | K.YVSFEQLK.D         | 1621.941 | 0.00265  | 3 | 1 | 28.2 | 0 |
| P12163_1_F7,18373 | R.AVLPIENSLGGSIIHR.N | 1867.07  | 0.00158  | 3 | 1 | 52.1 | 0 |
| P12163_2_F10,1684 | R.AVLPIENSLGGSIIHR.N | 1867.07  | 0.00119  | 3 | 1 | 62.6 | 0 |
| P12163_2_S5,17556 | R.AVLPIENSLGGSIIHR.N | 1867.07  | -0.00094 | 3 | 1 | 53.9 | 0 |
| P12163_1_F3,8194  | R.EAVDDTAGAAK.Y      | 1655.906 | 0.00527  | 3 | 1 | 24.8 | 0 |
| P12163_1_F3,8197  | R.EAVDDTAGAAK.Y      | 1655.906 | 0.00286  | 2 | 1 | 29   | 0 |
| P12163_1_F3,23124 | R.FLMLAR.E           | 1054.638 | 0.00302  | 2 | 1 | 31.5 | 0 |
| P12163_1_F4,10299 | R.GAYSESAAEK.A       | 1620.869 | 0.00286  | 2 | 1 | 29.8 | 0 |
| P12163_1_F5,8947  | R.GAYSESAAEK.A       | 1620.869 | 0.00476  | 2 | 1 | 46.4 | 0 |
| P12163_1_F9,9692  | R.GAYSESAAEK.A       | 1620.869 | 0.00612  | 2 | 1 | 38.5 | 0 |
| P12163_2_F1,9316  | R.GAYSESAAEK.A       | 1620.869 | 0.00498  | 2 | 1 | 50   | 0 |
| P12163_2_F1,9336  | R.GAYSESAAEK.A       | 1620.869 | 0.0057   | 3 | 1 | 49.2 | 0 |
| P12163_2_F8_12070 | R.GAYSESAAEK.A       | 1620.869 | 0.00024  | 3 | 1 | 39.4 | 0 |
| P12163_2_S5,9097  | R.GAYSESAAEK.A       | 1620.869 | 0.00066  | 3 | 1 | 32.9 | 0 |
| P12163_1_F7,12593 | R.HCLLANPGVK.V       | 1717.004 | 0.00257  | 3 | 1 | 34.1 | 0 |
| P12163_1_F9,13618 | R.HCLLANPGVK.V       | 1717.004 | 0.00701  | 3 | 1 | 33.3 | 0 |
| P12163_2_F9,12475 | R.HCLLANPGVK.V       | 1717.004 | 0.0062   | 4 | 1 | 24.6 | 0 |
| P12163_1_F9,15785 | R.LHIVGEVK.F         | 1502.951 | 0.00091  | 3 | 1 | 25   | 0 |
| P12163_1_F9,15859 | R.LHIVGEVK.F         | 1502.951 | 0.00706  | 2 | 1 | 26.4 | 0 |
| P12163_2_F7,14228 | R.LHIVGEVK.F         | 1502.951 | 0.00232  | 3 | 1 | 39   | 0 |
| P12163_2_F9,14581 | R.LHIVGEVK.F         | 1502.951 | 0.007    | 3 | 1 | 32.7 | 0 |
| P12163_2_F9,14675 | R.LHIVGEVK.F         | 1502.951 | 0.00771  | 4 | 1 | 36.5 | 0 |
| P12163_2_F9,14786 | R.LHIVGEVK.F         | 1502.951 | 0.00463  | 3 | 1 | 40.8 | 0 |
| P12163_1_F4,10582 | R.SSDDNSGFGK.Y       | 1621.828 | 0.00441  | 2 | 1 | 40   | 0 |
| P12163_1_F5,9264  | R.SSDDNSGFGK.Y       | 1621.828 | 0.00223  | 2 | 1 | 35   | 0 |
| P12163_2_F1,9680  | R.SSDDNSGFGK.Y       | 1621.828 | 0.00919  | 2 | 1 | 38.9 | 0 |
| P12163_1_F8,15612 | R.VLSHPQALAQCENTLT   | 2518.391 | 0.00502  | 3 | 1 | 30   | 0 |
| P12163_1_F8,15623 | R.VLSHPQALAQCENTLT   | 2518.391 | 0.00576  | 4 | 1 | 25.5 | 0 |
| P12163_2_F6,15076 | R.VLSHPQALAQCENTLT   | 2518.391 | 0.00388  | 3 | 1 | 32   | 0 |
| P12163_2_F6,16220 | R.VLSHPQALAQCENTLT   | 2518.391 | 0.00232  | 3 | 1 | 55.4 | 0 |
| P12163_1_F9,9791  | K.HAQSPFEK.V         | 1551.874 | 0.00499  | 3 | 1 | 52.8 | 0 |
| P12163_1_F9,9800  | K.HAQSPFEK.V         | 1551.874 | 0.00381  | 2 | 1 | 31.5 | 0 |
| P12163_1_S10,1044 | K.HAQSPFEK.V         | 1551.874 | 0.00616  | 3 | 1 | 51.6 | 0 |
| P12163_2_F8_12070 | K.HAQSPFEK.V         | 1551.874 | 0.00497  | 2 | 1 | 25.5 | 0 |
| P12163_2_S5,9521  | K.HAQSPFEK.V         | 1551.874 | 0.01441  | 3 | 1 | 37.3 | 0 |
| P12163_1_F3,25363 | K.ILDMASITLNK.N      | 1827.087 | 0.00481  | 3 | 1 | 45.6 | 0 |
| P12163_1_F2,19214 | K.LIAGASAYPR.D       | 1435.857 | 0.00035  | 3 | 1 | 28.5 | 0 |
| P12163_1_F9,16948 | K.TAILFRPK.L         | 1553.999 | 0.00635  | 2 | 1 | 34.2 | 0 |
| P12163_1_F7,12892 | K.YCDVVTTTTHK.S      | 1933.031 | 0.01404  | 3 | 1 | 32.4 | 0 |
| P12163_2_F9,12752 | K.YCDVVTTTTHK.S      | 1933.031 | 0.00537  | 3 | 1 | 24   | 0 |
| P12163_1_F4,21308 | R.ALAAFNLDENK.W      | 1814.027 | 0.0046   | 2 | 1 | 60.3 | 0 |
| P12163_1_F4,21325 | R.ALAAFNLDENK.W      | 1814.027 | 0.00988  | 3 | 1 | 58.7 | 0 |

|                   |                      |          |          |   |   |      |   |
|-------------------|----------------------|----------|----------|---|---|------|---|
| P12163_1_F5,20146 | R.ALAAFNLDENK.W      | 1814.027 | 0.00612  | 2 | 1 | 29.6 | 0 |
| P12163_2_F1,20768 | R.ALAAFNLDENK.W      | 1814.027 | 0.00952  | 3 | 1 | 33.9 | 0 |
| P12163_2_F1,20773 | R.ALAAFNLDENK.W      | 1814.027 | 0.00512  | 2 | 1 | 60   | 0 |
| P12163_1_F3,19998 | R.AVMEAVGSLTNK.Y     | 1988.076 | 0.00477  | 3 | 1 | 29.3 | 0 |
| P12163_1_F3,20041 | R.AVMEAVGSLTNK.Y     | 1988.076 | 0.00346  | 2 | 1 | 54.9 | 0 |
| P12163_1_F3,13717 | R.DFDYPR.M           | 1116.563 | 0.00299  | 2 | 1 | 27.3 | 0 |
| P12163_2_F2,18042 | R.GGM*IFFK.K         | 1423.823 | 0.00474  | 3 | 1 | 26.8 | 0 |
| P12163_1_F3,10041 | R.IGSPAMTTR.G        | 1237.688 | 0.00904  | 3 | 1 | 32.1 | 0 |
| P12163_1_F3,10459 | R.IGSPAMTTR.G        | 1237.688 | 0.00175  | 3 | 1 | 28   | 0 |
| P12163_1_F4,19506 | R.LVELGYK.L          | 1429.887 | 0.00505  | 2 | 1 | 24.5 | 0 |
| P12163_1_F5,18705 | R.LVELGYK.L          | 1429.887 | 0.00933  | 3 | 1 | 23.4 | 0 |
| P12163_1_F9,18372 | R.LVELGYK.L          | 1429.887 | 0.0082   | 3 | 1 | 22.6 | 0 |
| P12163_2_F1,18892 | R.LVELGYK.L          | 1429.887 | 0.00438  | 3 | 1 | 32.8 | 0 |
| P12163_2_F1,18911 | R.LVELGYK.L          | 1429.887 | 0.00559  | 2 | 1 | 31.4 | 0 |
| P12163_2_F8_12070 | R.LVELGYK.L          | 1429.887 | 0.00985  | 3 | 1 | 24.5 | 0 |
| P12163_2_F9,17224 | R.LVELGYK.L          | 1429.887 | 0.00611  | 2 | 1 | 25.2 | 0 |
| P12163_2_F9,17263 | R.LVELGYK.L          | 1429.887 | 0.00456  | 3 | 1 | 27.6 | 0 |
| P12163_1_S1,17865 | R.VSGTSIYFESM*PYR.L  | 1956.968 | -0.00231 | 2 | 1 | 25.6 | 0 |
| P12163_1_S1,20145 | R.VSGTSIYFESMPYR.L   | 1940.973 | 0.00331  | 2 | 1 | 43.5 | 0 |
| P12163_1_S1,20147 | R.VSGTSIYFESMPYR.L   | 1940.973 | 0.0041   | 3 | 1 | 36.7 | 0 |
| P12163_1_F5,15130 | K.ALCEIAK.D          | 1412.839 | 0.00589  | 2 | 1 | 27.1 | 0 |
| P12163_1_F3,19425 | K.ANEDLSFLSM*K.L     | 1879.009 | 0.00422  | 3 | 1 | 22.9 | 0 |
| P12163_1_F4,22156 | K.ANEDLSFLSMK.L      | 1863.014 | 0.00722  | 3 | 1 | 33.7 | 0 |
| P12163_1_F4,22179 | K.ANEDLSFLSMK.L      | 1863.014 | 0.00485  | 2 | 1 | 46.5 | 0 |
| P12163_2_F1,21688 | K.ANEDLSFLSMK.L      | 1863.014 | 0.00782  | 3 | 1 | 33.1 | 0 |
| P12163_1_F4,21991 | K.AVEYFLK.Q          | 1477.887 | 0.00651  | 2 | 1 | 25.8 | 0 |
| P12163_1_F4,22287 | K.AVEYFLK.Q          | 1477.887 | 0.00375  | 3 | 1 | 22   | 0 |
| P12163_1_F5,20886 | K.AVEYFLK.Q          | 1477.887 | 0.00767  | 2 | 1 | 30.4 | 0 |
| P12163_1_F5,20890 | K.AVEYFLK.Q          | 1477.887 | 0.00514  | 3 | 1 | 23.5 | 0 |
| P12163_1_F9,20390 | K.AVEYFLK.Q          | 1477.887 | 0.00783  | 2 | 1 | 33.7 | 0 |
| P12163_1_F9,20436 | K.AVEYFLK.Q          | 1477.887 | 0.00886  | 3 | 1 | 23.6 | 0 |
| P12163_2_F1,21507 | K.AVEYFLK.Q          | 1477.887 | 0.00706  | 3 | 1 | 23.5 | 0 |
| P12163_2_F1,21731 | K.AVEYFLK.Q          | 1477.887 | 0.00303  | 3 | 1 | 23.4 | 0 |
| P12163_2_F9,19421 | K.AVEYFLK.Q          | 1477.887 | 0.00307  | 3 | 1 | 36.6 | 0 |
| P12163_1_F5,9980  | K.CQSQPEIAK.V        | 1668.92  | 0.00559  | 2 | 1 | 33.1 | 0 |
| P12163_1_S1,19016 | K.IPEVTEVPSFSEEAK.S  | 2270.238 | 0.00639  | 3 | 1 | 33.1 | 0 |
| P12163_2_F2,14360 | K.SALQGIAK.L         | 1395.878 | 0.01004  | 2 | 1 | 38.6 | 0 |
| P12163_2_F2,14369 | K.SALQGIAK.L         | 1395.878 | 0.00912  | 3 | 1 | 34.3 | 0 |
| P12163_1_F2,16670 | K.VNPIDFENSEGNL GK.A | 2241.197 | 0.01022  | 3 | 1 | 29.1 | 0 |
| P12163_1_F2,18490 | K.VNPIDFENSEGNL GK.A | 2241.197 | 0.00782  | 3 | 1 | 57.6 | 0 |
| P12163_1_F2,18523 | K.VNPIDFENSEGNL GK.A | 2241.197 | 0.00481  | 2 | 1 | 34.8 | 0 |
| P12163_1_S1,12329 | R.DLTDSTVLR.N        | 1323.742 | 0.0025   | 3 | 1 | 38.6 | 0 |
| P12163_1_S1,14249 | R.DLTDSTVLR.N        | 1323.742 | 0.00494  | 2 | 1 | 25.4 | 0 |
| P12163_1_S1,22963 | R.EFIIGLELPEEAK.A    | 2096.21  | 0.00468  | 3 | 1 | 25.1 | 0 |
| P12163_1_F6,16892 | R.NM*GGGLGHSLLAYK    | 2042.131 | 0.00243  | 3 | 1 | 22.8 | 0 |
| P12163_1_F3,17698 | R.QEISQVEIMGK.F      | 1870.056 | 0.0039   | 3 | 1 | 31   | 0 |
| P12163_1_F3,17719 | R.QEISQVEIMGK.F      | 1870.056 | 0.00444  | 2 | 1 | 60.6 | 0 |
| P12163_1_F4,18153 | R.QEISQVEIMGK.F      | 1870.056 | 0.00651  | 3 | 1 | 34.3 | 0 |
| P12163_1_F4,18155 | R.QEISQVEIMGK.F      | 1870.056 | 0.00762  | 2 | 1 | 39.3 | 0 |
| P12163_2_F1,17481 | R.QEISQVEIMGK.F      | 1870.056 | 0.00198  | 2 | 1 | 30.9 | 0 |
| P12163_2_F7,9891  | R.THGQPASPTTLGK.E    | 1903.086 | 0.00361  | 3 | 1 | 38.6 | 0 |

|                   |                       |          |          |   |   |      |   |
|-------------------|-----------------------|----------|----------|---|---|------|---|
| P12163_2_F2,12237 | K.GAGANILR.A          | 1075.652 | 0.00003  | 2 | 1 | 31.8 | 0 |
| P12163_1_F3,19731 | K.LLIQNQDEMIK.S ! K.L | 1953.13  | 0.00615  | 3 | 1 | 59   | 0 |
| P12163_1_F3,19732 | K.LLIQNQDEMIK.S ! K.L | 1953.13  | 0.00683  | 2 | 1 | 62   | 0 |
| P12163_1_F4,20317 | K.LLIQNQDEMIK.S ! K.L | 1953.13  | 0.00642  | 3 | 1 | 41.7 | 0 |
| P12163_1_F4,20322 | K.LLIQNQDEMIK.S ! K.L | 1953.13  | 0.00451  | 2 | 1 | 58.2 | 0 |
| P12163_2_F1,19749 | K.LLIQNQDEMIK.S ! K.L | 1953.13  | -0.00123 | 2 | 1 | 43.5 | 0 |
| P12163_1_F4,26727 | K.LQLVLF GK.K         | 1525.993 | 0.00606  | 3 | 1 | 27.6 | 0 |
| P12163_2_F1,25809 | K.LQLVLF GK.K         | 1525.993 | -0.0034  | 2 | 1 | 33.9 | 0 |
| P12163_1_F3,13436 | K.SDGIAGLYR.G         | 1255.695 | 0.00443  | 3 | 1 | 34   | 0 |
| P12163_1_F3,15985 | K.SDGIAGLYR.G         | 1255.695 | 0.0043   | 2 | 1 | 36.4 | 0 |
| P12163_2_F1,14975 | K.SDGIAGLYR.G         | 1255.695 | 0.00222  | 2 | 1 | 32.6 | 0 |
| P12163_2_F6,18306 | K.SSLHAFQEIIK.N       | 1881.105 | 0.00254  | 3 | 1 | 33.3 | 0 |
| P12163_1_F3,7546  | K.TAAAPIER.V          | 1132.663 | 0.00467  | 3 | 1 | 24.1 | 0 |
| P12163_2_F1,7258  | K.TAAAPIER.V          | 1132.663 | 0.00158  | 3 | 1 | 36.3 | 0 |
| P12163_1_F3,17825 | R.AVAGAGVLAGYDK.L     | 1800.048 | 0.00604  | 2 | 1 | 46.4 | 0 |
| P12163_1_F3,17873 | R.AVAGAGVLAGYDK.L     | 1800.048 | 0.00003  | 3 | 1 | 66.5 | 0 |
| P12163_1_F4,18370 | R.AVAGAGVLAGYDK.L     | 1800.048 | 0.01191  | 3 | 1 | 48.5 | 0 |
| P12163_2_F1,17653 | R.AVAGAGVLAGYDK.L     | 1800.048 | 0.00591  | 3 | 1 | 39   | 0 |
| P12163_2_F1,17664 | R.AVAGAGVLAGYDK.L     | 1800.048 | -0.00202 | 2 | 1 | 61.2 | 0 |
| P12163_1_F4,9963  | R.GNTANVIR.Y          | 1148.669 | 0.00474  | 2 | 1 | 28.1 | 0 |
| P12163_1_F9,10277 | R.LSHPYK.G            | 1352.815 | 0.00257  | 3 | 1 | 24.2 | 0 |
| P12163_1_F4,13526 | R.M*MMMTSGEAVK.Y      | 1708.889 | 0.01005  | 3 | 1 | 26.4 | 0 |
| P12163_1_F4,15758 | R.MMMTSGEAVK.Y        | 1692.894 | 0.00391  | 2 | 1 | 32.2 | 0 |
| P12163_2_F1,14787 | R.MMMTSGEAVK.Y        | 1692.894 | 0.00417  | 2 | 1 | 33.4 | 0 |
| P12163_2_F1,14837 | R.MMMTSGEAVK.Y        | 1692.894 | 0.00151  | 3 | 1 | 22.4 | 0 |
| P12163_1_F4,21481 | R.QFENGLIDVYK.K       | 1805.042 | 0.00807  | 2 | 1 | 50.5 | 0 |
| P12163_1_F4,21511 | R.QFENGLIDVYK.K       | 1805.042 | 0.00936  | 3 | 1 | 26.6 | 0 |
| P12163_2_F1,21029 | R.QFENGLIDVYK.K       | 1805.042 | 0.00517  | 2 | 1 | 50   | 0 |
| P12163_2_F1,21032 | R.QFENGLIDVYK.K       | 1805.042 | 0.00477  | 3 | 1 | 39.3 | 0 |
| P12163_1_F3,25553 | R.YFPTQALNFAFK.D      | 2055.152 | 0.00688  | 3 | 1 | 43.5 | 0 |
| P12163_1_F4,21931 | K.AVAIMLDTK.G         | 1569.949 | 0.00578  | 2 | 1 | 37   | 0 |
| P12163_1_F4,21949 | K.AVAIMLDTK.G         | 1569.949 | 0.00258  | 3 | 1 | 40.9 | 0 |
| P12163_2_F1,21482 | K.AVAIMLDTK.G         | 1569.949 | 0.00422  | 2 | 1 | 50.7 | 0 |
| P12163_2_F1,21502 | K.AVAIMLDTK.G         | 1569.949 | 0.00204  | 3 | 1 | 47   | 0 |
| P12163_1_F2,15774 | K.CIVVDGGELK.S        | 1697.972 | 0.00018  | 3 | 1 | 37.4 | 0 |
| P12163_1_F3,16924 | K.CIVVDGGELK.S        | 1697.972 | -0.00198 | 2 | 1 | 40.9 | 0 |
| P12163_1_F4,17429 | K.CIVVDGGELK.S        | 1697.972 | 0.00396  | 2 | 1 | 43.6 | 0 |
| P12163_1_F4,19925 | K.EGQEFNFTIK.R        | 1821     | 0.00348  | 2 | 1 | 30.5 | 0 |
| P12163_1_F4,20134 | K.EGQEFNFTIK.R        | 1821     | 0.00324  | 2 | 1 | 34.4 | 0 |
| P12163_1_F4,20152 | K.EGQEFNFTIK.R        | 1821     | 0.00803  | 3 | 1 | 32   | 0 |
| P12163_2_F1,19371 | K.EGQEFNFTIK.R        | 1821     | 0.00754  | 2 | 1 | 34.7 | 0 |
| P12163_2_F1,19467 | K.EGQEFNFTIK.R        | 1821     | 0.00632  | 3 | 1 | 22.2 | 0 |
| P12163_1_F5,11692 | K.EYNSQFEDK.A         | 1767.901 | 0.00714  | 2 | 1 | 43.9 | 0 |
| P12163_1_S10,1306 | K.EYNSQFEDK.A         | 1767.901 | 0.00657  | 3 | 1 | 27   | 0 |
| P12163_2_F8_12070 | K.EYNSQFEDK.A         | 1767.901 | 0.00936  | 2 | 1 | 34.6 | 0 |
| P12163_1_S1,14383 | K.IVCTIGPSTSSR.E      | 1581.857 | 0.00407  | 2 | 1 | 31.6 | 0 |
| P12163_1_S1,14395 | K.IVCTIGPSTSSR.E      | 1581.857 | 0.00031  | 3 | 1 | 39.4 | 0 |
| P12163_1_F2,15024 | K.LAEEGMNVAR.L        | 1393.741 | 0.00548  | 2 | 1 | 27.9 | 0 |
| P12163_1_F6,14451 | K.SCNADIHVIVK.I       | 1864.057 | 0.00351  | 2 | 1 | 29.1 | 0 |
| P12163_1_F8,14329 | K.SCNADIHVIVK.I       | 1864.057 | 0.00195  | 2 | 1 | 40.5 | 0 |
| P12163_2_F1,15924 | K.TIDLVK.E            | 1296.835 | 0.00478  | 2 | 1 | 24.8 | 0 |



|                   |                      |          |          |   |   |      |   |
|-------------------|----------------------|----------|----------|---|---|------|---|
| P12163_2_F7,9703  | K.VM*HTVALR.T        | 1246.724 | -0.0014  | 3 | 1 | 22.9 | 0 |
| P12163_2_F7,12504 | K.VMHTVALR.T         | 1230.729 | 0.00269  | 3 | 1 | 40.5 | 0 |
| P12163_1_F8,12182 | R.EGADAVM*LSGETAHG   | 2197.138 | 0.01191  | 3 | 1 | 30.2 | 0 |
| P12163_1_F7,13452 | R.EGADAVMLSGETAHG    | 2181.143 | 0.00693  | 3 | 1 | 28.9 | 0 |
| P12163_1_F8,13996 | R.EGADAVMLSGETAHG    | 2181.143 | 0.00545  | 2 | 1 | 61   | 0 |
| P12163_2_F6,13501 | R.EGADAVMLSGETAHG    | 2181.143 | 0.00591  | 3 | 1 | 57.2 | 0 |
| P12163_1_F3,18833 | R.SGDVPQPIILK.E      | 1775.089 | 0.0065   | 2 | 1 | 51.9 | 0 |
| P12163_1_S10,1742 | R.TESSLPVSITPPTQFSAI | 2635.455 | 0.00439  | 4 | 1 | 38.6 | 0 |
| P12163_1_F2,21084 | K.ADAEIAENGFSM*LDK   | 2235.142 | 0.00075  | 3 | 1 | 53.4 | 0 |
| P12163_1_F4,18002 | K.CGTSALTFESVK.S     | 1908.036 | 0.01339  | 2 | 1 | 30   | 0 |
| P12163_1_F4,18025 | K.CGTSALTFESVK.S     | 1908.036 | 0.00487  | 3 | 1 | 45.4 | 0 |
| P12163_2_F1,17251 | K.CGTSALTFESVK.S     | 1908.036 | 0.00325  | 2 | 1 | 65.7 | 0 |
| P12163_2_F1,17256 | K.CGTSALTFESVK.S     | 1908.036 | 0.00421  | 3 | 1 | 49   | 0 |
| P12163_2_F1,23056 | K.CVFNFLSK.S         | 1622.918 | 0.00554  | 2 | 1 | 40.9 | 0 |
| P12163_1_F5,17211 | K.GFAMDTLK.R         | 1490.85  | 0.00778  | 3 | 1 | 32.5 | 0 |
| P12163_1_F5,17252 | K.GFAMDTLK.R         | 1490.85  | 0.00634  | 2 | 1 | 25.3 | 0 |
| P12163_1_F9,14242 | K.LHNFVEK.E          | 1494.889 | 0.00716  | 3 | 1 | 32.1 | 0 |
| P12163_1_F9,14272 | K.LHNFVEK.E          | 1494.889 | 0.00459  | 2 | 1 | 29.2 | 0 |
| P12163_2_F8_1207  | K.LHNFVEK.E          | 1494.889 | 0.00815  | 3 | 1 | 31.1 | 0 |
| P12163_1_F2,22894 | K.LINAIASDTTGLQAK.L  | 2124.248 | 0.00713  | 3 | 1 | 73.4 | 0 |
| P12163_1_F3,23850 | K.NILVGDFM*PSVK.F    | 1944.108 | 0.00954  | 3 | 1 | 43.2 | 0 |
| P12163_1_F3,23873 | K.NILVGDFM*PSVK.F    | 1944.108 | 0.00268  | 2 | 1 | 29.4 | 0 |
| P12163_1_F3,23903 | K.NILVGDFMPSVK.F     | 1928.114 | 0.00672  | 3 | 1 | 52   | 0 |
| P12163_1_F3,23923 | K.NILVGDFMPSVK.F     | 1928.114 | 0.00438  | 2 | 1 | 49.5 | 0 |
| P12163_1_F4,20233 | K.VFDDAESFK.A        | 1665.894 | 0.00819  | 2 | 1 | 33.2 | 0 |
| P12163_1_F4,15577 | R.GQDEFGLTK.E        | 1602.895 | 0.01221  | 3 | 1 | 26.3 | 0 |
| P12163_1_F5,14483 | R.GQDEFGLTK.E        | 1602.895 | 0.00612  | 2 | 1 | 31.3 | 0 |
| P12163_2_F1,14542 | R.GQDEFGLTK.E        | 1602.895 | 0.00819  | 3 | 1 | 41   | 0 |
| P12163_2_F1,14595 | R.GQDEFGLTK.E        | 1602.895 | 0.00494  | 2 | 1 | 30.6 | 0 |
| P12163_1_S1,19584 | R.LNPPVPLQFAR.A      | 1555.926 | 0.00246  | 3 | 1 | 36   | 0 |
| P12163_1_F3,17601 | R.VSAYLDTSEPK.H      | 1818.01  | 0.01024  | 2 | 1 | 56.3 | 0 |
| P12163_1_F4,18053 | R.VSAYLDTSEPK.H      | 1818.01  | 0.0094   | 2 | 1 | 48.3 | 0 |
| P12163_1_F9,17028 | R.VSAYLDTSEPK.H      | 1818.01  | 0.00334  | 2 | 1 | 39.1 | 0 |
| P12163_2_F1,17281 | R.VSAYLDTSEPK.H      | 1818.01  | -0.00452 | 2 | 1 | 45   | 0 |
| P12163_1_F3,17352 | R.YESITGNSSSITAVEK.A | 2294.234 | 0.00446  | 3 | 1 | 69.1 | 0 |
| P12163_1_F6,19797 | K.FEAAGIWYEHR.L      | 1682.859 | 0.00171  | 3 | 1 | 33.5 | 0 |
| P12163_2_F6,19211 | K.FEAAGIWYEHR.L      | 1682.859 | 0.0027   | 3 | 1 | 28.9 | 0 |
| P12163_1_F9,18612 | K.KWPLYLSTK.N        | 2048.267 | 0.01307  | 3 | 1 | 30.1 | 0 |
| P12163_2_F9,17580 | K.KWPLYLSTK.N        | 2048.267 | 0.00248  | 3 | 1 | 32.8 | 0 |
| P12163_1_F5,15191 | K.SEGGYVWACK.N       | 1764.92  | 0.00358  | 2 | 1 | 39.2 | 0 |
| P12163_1_F6,11911 | K.TIEAEAAHGTVTR.H !  | 1659.897 | 0.00126  | 3 | 1 | 24.2 | 0 |
| P12163_1_F7,7463  | K.TIEAEAAHGTVTR.H !  | 1659.897 | 0.00228  | 3 | 1 | 32.3 | 0 |
| P12163_1_F7,10909 | K.TIEAEAAHGTVTR.H !  | 1659.897 | 0.00198  | 3 | 1 | 42.2 | 0 |
| P12163_1_F7,11225 | K.TIEAEAAHGTVTR.H !  | 1659.897 | 0.00036  | 3 | 1 | 32.2 | 0 |
| P12163_1_F8,7716  | K.TIEAEAAHGTVTR.H !  | 1659.897 | 0.003    | 3 | 1 | 37.8 | 0 |
| P12163_1_F8,11355 | K.TIEAEAAHGTVTR.H !  | 1659.897 | 0.00534  | 3 | 1 | 36.8 | 0 |
| P12163_2_F6,7635  | K.TIEAEAAHGTVTR.H !  | 1659.897 | 0.00177  | 3 | 1 | 31.8 | 0 |
| P12163_2_F6,8008  | K.TIEAEAAHGTVTR.H !  | 1659.897 | 0.00231  | 3 | 1 | 36.1 | 0 |
| P12163_2_F6,11169 | K.TIEAEAAHGTVTR.H !  | 1659.897 | 0.00225  | 3 | 1 | 53.3 | 0 |
| P12163_2_F6,11196 | K.TIEAEAAHGTVTR.H !  | 1659.897 | -0.00213 | 2 | 1 | 27.8 | 0 |
| P12163_2_F6,11481 | K.TIEAEAAHGTVTR.H !  | 1659.897 | 0.00225  | 3 | 1 | 52.8 | 0 |

|                   |                         |          |          |   |   |      |   |
|-------------------|-------------------------|----------|----------|---|---|------|---|
| P12163_2_F1,22501 | K.WPLYLSTK.N            | 1615.967 | 0.00513  | 3 | 1 | 26.3 | 0 |
| P12163_1_S10,1407 | K.YNVAIK.C              | 1315.819 | 0.00485  | 3 | 1 | 25.2 | 0 |
| P12163_2_F2,14319 | K.YNVAIK.C              | 1315.819 | 0.00587  | 3 | 1 | 22.3 | 0 |
| P12163_1_F3,13257 | R.ATDAVIQPGK.L          | 1664.979 | 0.00832  | 2 | 1 | 44.3 | 0 |
| P12163_1_F4,14531 | R.EPIICK.N              | 1367.818 | 0.01134  | 3 | 1 | 22.7 | 0 |
| P12163_2_S5,9795  | R.HAFGDQYR.A            | 1297.659 | 0.00302  | 3 | 1 | 34.1 | 0 |
| P12163_1_F3,27915 | R.LIDDM*VAYAIK.S ! R.   | 1876.071 | 0.00822  | 3 | 1 | 38.5 | 0 |
| P12163_1_F3,26913 | R.LIDDMVAYAIK.S ! R.L   | 1860.076 | 0.00567  | 3 | 1 | 39.8 | 0 |
| P12163_1_F3,27973 | R.LIDDMVAYAIK.S ! R.L   | 1860.076 | 0.00441  | 3 | 1 | 25.1 | 0 |
| P12163_1_F4,22587 | R.LLDFTEK.L             | 1473.877 | 0.00567  | 2 | 1 | 25.6 | 0 |
| P12163_1_F3,15656 | R.NILNGTVFR.E           | 1337.784 | 0.00247  | 3 | 1 | 28.4 | 0 |
| P12163_1_F4,21512 | K.AIIWSGEELGAK.F        | 1882.089 | 0.00486  | 3 | 1 | 38.5 | 0 |
| P12163_2_F1,21016 | K.AIIWSGEELGAK.F        | 1882.089 | 0.00406  | 2 | 1 | 64.3 | 0 |
| P12163_1_F5,19287 | K.DTITGETLCDADHPILI     | 2473.255 | 0.0018   | 3 | 1 | 83.1 | 0 |
| P12163_1_F5,19318 | K.DTITGETLCDADHPILI     | 2473.255 | -0.00021 | 2 | 1 | 51.1 | 0 |
| P12163_1_F6,19392 | K.DTITGETLCDADHPILI     | 2473.255 | 0.00111  | 3 | 1 | 41.4 | 0 |
| P12163_1_F2,20465 | K.FAYEDIPADLQK.M        | 2018.105 | 0.00604  | 3 | 1 | 26.4 | 0 |
| P12163_1_F8,19139 | K.FDVVPQHIQNQLAAK.      | 2316.328 | 0.00151  | 3 | 1 | 41.2 | 0 |
| P12163_1_F8,19199 | K.FDVVPQHIQNQLAAK.      | 2316.328 | 0.00443  | 4 | 1 | 26.3 | 0 |
| P12163_2_F6,18716 | K.FDVVPQHIQNQLAAK.      | 2316.328 | 0.00442  | 3 | 1 | 39.9 | 0 |
| P12163_2_F1,17032 | K.GVVDLVK.M             | 1337.861 | 0.00806  | 3 | 1 | 25.1 | 0 |
| P12163_1_F6,16694 | K.LAQEDPSFHFSR.D        | 1737.886 | -0.00111 | 3 | 1 | 21.9 | 0 |
| P12163_2_F6,16025 | K.LAQEDPSFHFSR.D        | 1737.886 | 0.00006  | 3 | 1 | 33.2 | 0 |
| P12163_2_F6,16036 | K.LAQEDPSFHFSR.D        | 1737.886 | -0.00313 | 2 | 1 | 25.8 | 0 |
| P12163_1_F3,29095 | K.VALAGDIIALAGLK.D      | 1933.231 | 0.00583  | 3 | 1 | 40.1 | 0 |
| P12163_1_F2,14242 | K.VEANVGAPQVNYR.E       | 1720.928 | 0.00352  | 2 | 1 | 27.3 | 0 |
| P12163_1_F2,19783 | R.AASDDEPFAGLAFK.I      | 2047.096 | 0.00995  | 3 | 1 | 38.8 | 0 |
| P12163_1_F4,22616 | R.ASYIMQLAK.F           | 1632.96  | 0.0065   | 3 | 1 | 35.9 | 0 |
| P12163_1_F5,21267 | R.ASYIMQLAK.F           | 1632.96  | 0.00425  | 3 | 1 | 31.6 | 0 |
| P12163_2_F1,22085 | R.ASYIMQLAK.F           | 1632.96  | 0.00488  | 3 | 1 | 32.4 | 0 |
| P12163_2_F1,22124 | R.ASYIMQLAK.F           | 1632.96  | 0.00466  | 2 | 1 | 45.9 | 0 |
| P12163_2_F9,19516 | R.ASYIMQLAK.F           | 1632.96  | -0.00007 | 3 | 1 | 36.1 | 0 |
| P12163_1_F3,18107 | R.M*DFPDPVIK.V          | 1685.939 | 0.00863  | 2 | 1 | 27.3 | 0 |
| P12163_1_F3,20665 | R.MDFPDPVIK.V           | 1669.944 | 0.00815  | 2 | 1 | 29.2 | 0 |
| P12163_1_F3,20688 | R.MDFPDPVIK.V           | 1669.944 | 0.00562  | 3 | 1 | 29.3 | 0 |
| P12163_1_F8,17106 | R.NIGIMAHIDAGK.T        | 1848.062 | 0.00571  | 3 | 1 | 25.2 | 0 |
| P12163_2_F6,16511 | R.NIGIMAHIDAGK.T        | 1848.062 | 0.00409  | 3 | 1 | 37.9 | 0 |
| P12163_1_F3,26994 | K.ECILSGLLSVDGLK.V      | 2112.219 | 0.00605  | 3 | 1 | 26.9 | 0 |
| P12163_1_F4,24375 | K.SPLM*GIFEK.R ! K.SPLI | 1645.944 | 0.01013  | 3 | 1 | 23.9 | 0 |
| P12163_1_F4,24361 | K.SPLMGIFEK.R ! K.SPLI  | 1629.949 | 0.00714  | 3 | 1 | 34.1 | 0 |
| P12163_1_F4,24370 | K.SPLMGIFEK.R ! K.SPLI  | 1629.949 | 0.00912  | 2 | 1 | 35.4 | 0 |
| P12163_2_F1,23752 | K.SPLMGIFEK.R ! K.SPLI  | 1629.949 | 0.00375  | 3 | 1 | 34.9 | 0 |
| P12163_1_F9,9848  | K.THEGMDLTR.V           | 1363.694 | 0.00262  | 3 | 1 | 27   | 0 |
| P12163_2_F7,9324  | K.THEGMDLTR.V           | 1363.694 | 0.00181  | 3 | 1 | 29.1 | 0 |
| P12163_1_F4,14522 | K.VEFDEEGK.V            | 1560.837 | 0.01281  | 2 | 1 | 28   | 0 |
| P12163_1_F9,11756 | K.VLHM*DR.N             | 1090.598 | 0.00596  | 3 | 1 | 27.9 | 0 |
| P12163_2_F9,11130 | K.VLHM*DR.N             | 1090.598 | 0.00185  | 3 | 1 | 26.5 | 0 |
| P12163_1_S10,1213 | K.VLHMDR.N              | 1074.603 | 0.00488  | 3 | 1 | 24.8 | 0 |
| P12163_1_F3,16636 | K.VVCDPSYLPNK.V         | 1900.046 | 0.0065   | 2 | 1 | 29.9 | 0 |
| P12163_1_F3,13573 | K.VVGVTSGETAK.C         | 1785.021 | 0.00761  | 3 | 1 | 45.5 | 0 |
| P12163_1_F3,13575 | K.VVGVTSGETAK.C         | 1785.021 | 0.00601  | 2 | 1 | 51.8 | 0 |

|                   |                       |          |          |   |   |      |   |
|-------------------|-----------------------|----------|----------|---|---|------|---|
| P12163_2_F8_12070 | K.YGLDDNTIDFIGHALA    | 2445.283 | 0.00036  | 4 | 1 | 24.4 | 0 |
| P12163_1_F4,18027 | R.DYNVDM*IPK.F        | 1718.924 | 0.00905  | 2 | 1 | 26.4 | 0 |
| P12163_1_F4,17975 | R.DYNVDMIPK.F         | 1702.929 | 0.00966  | 2 | 1 | 35.2 | 0 |
| P12163_2_F1,17254 | R.DYNVDMIPK.F         | 1702.929 | 0.0101   | 2 | 1 | 31.5 | 0 |
| P12163_2_F6,8524  | R.GNEQPPAHLGSSR.D     | 1653.861 | -0.00305 | 3 | 1 | 30   | 0 |
| P12163_1_F8,14837 | R.VLIHTDVTK.Y         | 1634.01  | 0.00509  | 3 | 1 | 31.8 | 0 |
| P12163_1_F8,14879 | R.VLIHTDVTK.Y         | 1634.01  | 0.00754  | 2 | 1 | 37.4 | 0 |
| P12163_1_F3,18458 | R.YLNEPALDTVK.R       | 1871.073 | 0.00253  | 2 | 1 | 44.8 | 0 |
| P12163_1_F3,18481 | R.YLNEPALDTVK.R       | 1871.073 | 0.00365  | 3 | 1 | 42.9 | 0 |
| P12163_1_F4,18970 | R.YLNEPALDTVK.R       | 1871.073 | 0.01037  | 2 | 1 | 30.3 | 0 |
| P12163_1_F9,17477 | R.YLNEPALDTVK.R       | 1871.073 | 0.00842  | 3 | 1 | 36.8 | 0 |
| P12163_2_F1,18266 | R.YLNEPALDTVK.R       | 1871.073 | 0.00567  | 2 | 1 | 25   | 0 |
| P12163_2_F9,19629 | K.DGFSWWIHR.I         | 1507.775 | 0.00212  | 3 | 1 | 24.7 | 0 |
| P12163_1_F2,5870  | K.NPHLPHNHER.N        | 1554.819 | 0.00377  | 4 | 1 | 30.6 | 0 |
| P12163_1_F3,5829  | K.NPHLPHNHER.N        | 1554.819 | 0.00309  | 4 | 1 | 22.1 | 0 |
| P12163_2_F2,5973  | K.NPHLPHNHER.N        | 1554.819 | 0.00485  | 4 | 1 | 38.5 | 0 |
| P12163_1_F9,12988 | K.SQLENFHK.D          | 1610.911 | 0.00756  | 3 | 1 | 37.4 | 0 |
| P12163_1_F6,18017 | R.AGVLLHPTSFR.G       | 1501.879 | 0.00353  | 3 | 1 | 26   | 0 |
| P12163_2_S3,15415 | R.AGVLLHPTSFR.G       | 1501.879 | 0.0044   | 3 | 1 | 21.9 | 0 |
| P12163_2_S5,16545 | R.AGVLLHPTSFR.G       | 1501.879 | 0.00176  | 3 | 1 | 26.3 | 0 |
| P12163_1_F2,13824 | R.DLLSTYGR.L          | 1228.684 | 0.00272  | 3 | 1 | 37.1 | 0 |
| P12163_1_F2,17462 | R.DLYDEFR.I           | 1261.637 | 0.00341  | 2 | 1 | 34.1 | 0 |
| P12163_2_F9,16700 | R.DLYDEFR.I           | 1261.637 | 0.00317  | 2 | 1 | 36.3 | 0 |
| P12163_1_F3,23475 | R.GFAGFWAVPSEAK.V     | 1975.09  | 0.00328  | 3 | 1 | 32.7 | 0 |
| P12163_1_F4,24244 | R.GFAGFWAVPSEAK.V     | 1975.09  | 0.00553  | 3 | 1 | 22.6 | 0 |
| P12163_1_F4,24297 | R.GFAGFWAVPSEAK.V     | 1975.09  | 0.00569  | 2 | 1 | 27.7 | 0 |
| P12163_1_S1,20867 | R.GPYGIGDFGAEAFR.F    | 1760.891 | 0.00523  | 2 | 1 | 56.7 | 0 |
| P12163_1_S1,20921 | R.GPYGIGDFGAEAFR.F    | 1760.891 | 0.00196  | 3 | 1 | 78.6 | 0 |
| P12163_1_F2,15467 | R.LIQSDGELK.S         | 1610.957 | 0.00094  | 2 | 1 | 24.4 | 0 |
| P12163_1_F4,16927 | R.LIQSDGELK.S         | 1610.957 | 0.0054   | 2 | 1 | 28.6 | 0 |
| P12163_2_F1,16194 | R.LIQSDGELK.S         | 1610.957 | 0.00558  | 2 | 1 | 27.2 | 0 |
| P12163_1_F7,9944  | R.NQVVYTGTHDNTIR.     | 2037.03  | -0.00002 | 4 | 1 | 32.7 | 0 |
| P12163_1_F7,11076 | R.NQVVYTGTHDNTIR.     | 2037.03  | 0.00236  | 3 | 1 | 42.5 | 0 |
| P12163_1_F7,11089 | R.NQVVYTGTHDNTIR.     | 2037.03  | -0.00711 | 2 | 1 | 29.3 | 0 |
| P12163_2_F9,11108 | R.NQVVYTGTHDNTIR.     | 2037.03  | 0.0047   | 3 | 1 | 50.9 | 0 |
| P12163_2_F2,17080 | R.SWWDTSK.N           | 1517.821 | 0.00851  | 2 | 1 | 25.4 | 0 |
| P12163_2_F1,21682 | R.VNFAAVADLK.D        | 1655.994 | 0.00629  | 3 | 1 | 46.2 | 0 |
| P12163_2_F1,21710 | R.VNFAAVADLK.D        | 1655.994 | 0.01023  | 2 | 1 | 49.7 | 0 |
| P12163_2_F1,18837 | K.IESIDSLK.N          | 1512.909 | 0.00686  | 2 | 1 | 31.8 | 0 |
| P12163_1_F5,11649 | K.IGPDVK.C ! R.LGPDVK | 1236.777 | 0.00703  | 3 | 1 | 25.9 | 0 |
| P12163_2_F1,12190 | K.IGPDVK.C ! R.LGPDVK | 1236.777 | 0.00127  | 3 | 1 | 24.2 | 0 |
| P12163_1_F9,14399 | K.SAEVINHLK.S         | 1618.974 | 0.00564  | 3 | 1 | 34.8 | 0 |
| P12163_1_F9,14410 | K.SAEVINHLK.S         | 1618.974 | 0.00863  | 2 | 1 | 51.3 | 0 |
| P12163_2_F7,13044 | K.SAEVINHLK.S         | 1618.974 | 0.00297  | 3 | 1 | 30.6 | 0 |
| P12163_2_F9,13565 | K.SAEVINHLK.S         | 1618.974 | 0.00603  | 3 | 1 | 26.3 | 0 |
| P12163_2_F9,13598 | K.SAEVINHLK.S         | 1618.974 | 0.00661  | 2 | 1 | 36.2 | 0 |
| P12163_1_S1,19006 | R.ADALM*LSGESAMGQ     | 2492.262 | 0.00829  | 3 | 1 | 52.1 | 0 |
| P12163_1_S1,21398 | R.ADALMLSGESAMGQF     | 2476.267 | 0.01733  | 3 | 1 | 57.3 | 0 |
| P12163_1_S1,11166 | R.AEVADVSEAVR.Q       | 1449.785 | 0.00103  | 3 | 1 | 25   | 0 |
| P12163_1_S1,14169 | R.AEVADVSEAVR.Q       | 1449.785 | 0.00895  | 2 | 1 | 30.9 | 0 |
| P12163_1_S1,14229 | R.AEVADVSEAVR.Q       | 1449.785 | 0.0124   | 3 | 1 | 59.2 | 0 |

|                   |                     |          |         |   |   |      |   |
|-------------------|---------------------|----------|---------|---|---|------|---|
| P12163_1_S1,14390 | R.AEVADVSEAVR.Q     | 1449.785 | 0.00855 | 2 | 1 | 40.6 | 0 |
| P12163_1_S1,14456 | R.AEVADVSEAVR.Q     | 1449.785 | 0.00592 | 3 | 1 | 44   | 0 |
| P12163_2_F7,9305  | R.AFDSRPER.T        | 1378.738 | 0.00173 | 3 | 1 | 22.2 | 0 |
| P12163_1_F8,19713 | R.CRPDCPIFAFTSTTSVR | 2319.153 | 0.00632 | 3 | 1 | 26.1 | 0 |
| P12163_1_S1,17107 | R.CTDPGLLLPR.A      | 1445.809 | 0.00372 | 3 | 1 | 32.3 | 0 |
| P12163_1_S1,17345 | R.CTDPGLLLPR.A      | 1445.809 | 0.00087 | 2 | 1 | 29.3 | 0 |
| P12163_1_F3,16058 | R.DSDIAVIAK.I       | 1539.92  | 0.00579 | 3 | 1 | 33.5 | 0 |
| P12163_1_S1,17020 | R.GDLGAQIPLEQVPSAQ  | 2487.403 | 0.00829 | 3 | 1 | 41.9 | 0 |
| P12163_1_S1,17076 | R.GDLGAQIPLEQVPSAQ  | 2487.403 | 0.00667 | 4 | 1 | 45.7 | 0 |
| P12163_1_F4,18676 | R.NAMLPTISPK.D      | 1679.997 | 0.00636 | 2 | 1 | 36   | 0 |
| P12163_2_F1,17937 | R.NAMLPTISPK.D      | 1679.997 | 0.00428 | 2 | 1 | 35.5 | 0 |
| P12163_1_S1,16964 | R.TITVNYDGAEDVK.V   | 2180.17  | 0.01277 | 3 | 1 | 27.3 | 0 |
| P12163_1_F4,15057 | K.CEVVDGGELK.S      | 1713.93  | 0.01053 | 3 | 1 | 38.6 | 0 |
| P12163_1_F3,25572 | K.DNVIAIMLDTK.G     | 1841.066 | 0.00772 | 2 | 1 | 56.4 | 0 |
| P12163_1_F3,25650 | K.DNVIAIMLDTK.G     | 1841.066 | 0.00796 | 3 | 1 | 37.2 | 0 |
| P12163_1_S1,15962 | K.EGEEVALLQSGR.Q    | 1591.859 | 0.0089  | 3 | 1 | 50.2 | 0 |
| P12163_1_S10,9382 | K.EYNAQSK.D         | 1447.8   | 0.0112  | 2 | 1 | 27.2 | 0 |
| P12163_1_S1,13000 | K.IVCTIGPSTNTR.E    | 1622.884 | 0.00381 | 3 | 1 | 40.5 | 0 |
| P12163_1_S1,14411 | K.IVCTIGPSTNTR.E    | 1622.884 | -0.0012 | 2 | 1 | 26.2 | 0 |
| P12163_1_F4,16690 | K.SATLPSITEK.D      | 1654.984 | 0.0066  | 3 | 1 | 37.9 | 0 |
| P12163_1_F4,16720 | K.SATLPSITEK.D      | 1654.984 | 0.00567 | 2 | 1 | 34.7 | 0 |
| P12163_2_F1,15893 | K.SATLPSITEK.D      | 1654.984 | 0.00323 | 2 | 1 | 28.1 | 0 |
| P12163_2_F1,15899 | K.SATLPSITEK.D      | 1654.984 | 0.01197 | 3 | 1 | 27   | 0 |
| P12163_1_F8,14664 | K.SCGADIHVIVK.I     | 1807.036 | 0.00351 | 2 | 1 | 42.4 | 0 |
| P12163_2_F6,14091 | K.SCGADIHVIVK.I     | 1807.036 | 0.00575 | 3 | 1 | 22.5 | 0 |
| P12163_2_F6,14098 | K.SCGADIHVIVK.I     | 1807.036 | 0.00319 | 2 | 1 | 24.3 | 0 |
| P12163_1_F3,23506 | K.VDFYAVSFVK.D      | 1783.025 | 0.00884 | 2 | 1 | 45.1 | 0 |
| P12163_1_F4,24302 | K.VDFYAVSFVK.D      | 1783.025 | 0.00066 | 2 | 1 | 24.4 | 0 |
| P12163_2_F7,12487 | K.VM*HTVSLR.T       | 1262.719 | 0.00388 | 3 | 1 | 28   | 0 |
| P12163_1_F9,13816 | K.VMHTVSLR.T        | 1246.724 | 0.00535 | 3 | 1 | 30.1 | 0 |
| P12163_2_F4,12802 | K.VMHTVSLR.T        | 1246.724 | 0.00469 | 3 | 1 | 31   | 0 |
| P12163_1_F8,12182 | R.EGADAVM*LSGETAHG  | 2197.138 | 0.01191 | 3 | 1 | 30.2 | 0 |
| P12163_1_F7,13452 | R.EGADAVMLSGETAHG   | 2181.143 | 0.00693 | 3 | 1 | 28.9 | 0 |
| P12163_1_F8,13996 | R.EGADAVMLSGETAHG   | 2181.143 | 0.00545 | 2 | 1 | 61   | 0 |
| P12163_2_F6,13501 | R.EGADAVMLSGETAHG   | 2181.143 | 0.00591 | 3 | 1 | 57.2 | 0 |
| P12163_1_S1,19111 | R.TEATITGGAMPPNLGQ  | 2512.369 | 0.00798 | 3 | 1 | 38.3 | 0 |
| P12163_1_F7,15811 | R.VEPEVVPVSPEDVPKR  | 2384.365 | 0.00645 | 3 | 1 | 36.7 | 0 |
| P12163_1_F3,22141 | K.ALNAMNLDMDIK.Y    | 1957.071 | 0.00171 | 2 | 1 | 39.9 | 0 |
| P12163_1_F2,14758 | K.CVLIEGSGPR.A      | 1391.762 | 0.00314 | 2 | 1 | 23.9 | 0 |
| P12163_1_F4,20851 | K.GAPFSLCLTQK.Y     | 1830.04  | 0.00718 | 3 | 1 | 32.5 | 0 |
| P12163_2_F1,20326 | K.GAPFSLCLTQK.Y     | 1830.04  | 0.00948 | 2 | 1 | 50.8 | 0 |
| P12163_2_F1,20328 | K.GAPFSLCLTQK.Y     | 1830.04  | 0.00481 | 3 | 1 | 37.6 | 0 |
| P12163_2_F10,1372 | K.GNVHPNGVAVITLDRI  | 2395.403 | 0.00271 | 3 | 1 | 30.6 | 0 |
| P12163_2_F10,1376 | K.GNVHPNGVAVITLDRI  | 2395.403 | 0.0034  | 4 | 1 | 23.7 | 0 |
| P12163_1_F4,15343 | K.GVVAEIQK.D        | 1451.904 | 0.00657 | 2 | 1 | 50.9 | 0 |
| P12163_2_F1,14335 | K.GVVAEIQK.D        | 1451.904 | 0.00457 | 2 | 1 | 50.9 | 0 |
| P12163_1_S1,20255 | K.SFLDEWESDPR.V     | 1684.812 | 0.00429 | 2 | 1 | 50.3 | 0 |
| P12163_1_F3,23155 | K.VFTAESLICK.I      | 1939.082 | 0.00734 | 3 | 1 | 39.5 | 0 |
| P12163_1_F4,23954 | K.VFTAESLICK.I      | 1939.082 | 0.0086  | 2 | 1 | 34.9 | 0 |
| P12163_1_F3,13806 | K.YSSDPEGEAPLK.L    | 1901.011 | 0.00608 | 2 | 1 | 42.2 | 0 |
| P12163_1_F3,13839 | K.YSSDPEGEAPLK.L    | 1901.011 | 0.01026 | 3 | 1 | 33.7 | 0 |

|                    |                      |          |          |   |   |      |   |
|--------------------|----------------------|----------|----------|---|---|------|---|
| P12163_1_F9,13670  | K.YSSDPEGEAPLK.L     | 1901.011 | 0.0022   | 2 | 1 | 35.7 | 0 |
| P12163_1_F4,18330  | R.AFCAGMDIK.G        | 1620.87  | 0.00214  | 2 | 1 | 31   | 0 |
| P12163_1_F5,17030  | R.AFCAGMDIK.G        | 1620.87  | 0.00958  | 2 | 1 | 42.5 | 0 |
| P12163_1_F5,17040  | R.AFCAGMDIK.G        | 1620.87  | 0.01011  | 3 | 1 | 39.2 | 0 |
| P12163_2_F1,17543  | R.AFCAGMDIK.G        | 1620.87  | 0.00388  | 2 | 1 | 42.6 | 0 |
| P12163_2_F1,17579  | R.AFCAGMDIK.G        | 1620.87  | 0.00516  | 3 | 1 | 27.1 | 0 |
| P12163_1_F5,12466  | R.NTPLVPK.V          | 1376.872 | 0.00583  | 3 | 1 | 27.3 | 0 |
| P12163_1_F4,19366  | R.QIHEELK.K          | 1480.919 | 0.00858  | 2 | 1 | 24.2 | 0 |
| P12163_2_F1,18614  | R.QIHEELK.K          | 1480.919 | 0.01016  | 2 | 1 | 29.6 | 0 |
| P12163_1_F3,23708  | R.TFATMAAAGAEFVK     | 2152.157 | 0.00687  | 3 | 1 | 50.9 | 0 |
| P12163_1_F4,22626  | K.AIAELLK.N          | 1365.893 | 0.00854  | 3 | 1 | 23   | 0 |
| P12163_1_F4,22902  | K.AIAELLK.N          | 1365.893 | 0.00431  | 3 | 1 | 24.4 | 0 |
| P12163_1_F5,21404  | K.AIAELLK.N          | 1365.893 | 0.0053   | 3 | 1 | 23.5 | 0 |
| P12163_2_F1,22074  | K.AIAELLK.N          | 1365.893 | 0.00527  | 3 | 1 | 25.2 | 0 |
| P12163_2_F1,22179  | K.AIAELLK.N          | 1365.893 | 0.00511  | 2 | 1 | 29.6 | 0 |
| P12163_2_F1,22336  | K.AIAELLK.N          | 1365.893 | 0.00491  | 3 | 1 | 25.7 | 0 |
| P12163_2_F2,21890  | K.AIAELLK.N          | 1365.893 | 0.00632  | 3 | 1 | 23.8 | 0 |
| P12163_1_S1,23466  | K.ANEDVAVTSLNLANN    | 2642.461 | 0.0018   | 3 | 1 | 63   | 0 |
| P12163_1_S1,23966  | K.ANEDVAVTSLNLANN    | 2642.461 | 0.00709  | 4 | 1 | 31.5 | 0 |
| P12163_2_F1,18016  | K.DLVYEMSEK.E        | 1721.924 | 0.00568  | 2 | 1 | 38.3 | 0 |
| P12163_2_F1,15441  | K.FGQSALTDK.D        | 1645.937 | 0.00379  | 2 | 1 | 36.1 | 0 |
| P12163_1_F9,14025  | K.FHGNINTLK.L        | 1651.974 | 0.00779  | 3 | 1 | 52.1 | 0 |
| P12163_2_F8_12070  | K.FHGNINTLK.L        | 1651.974 | 0.00695  | 3 | 1 | 32.2 | 0 |
| P12163_1_F6,17340  | K.GAFHVAEYIK.N       | 1743.005 | 0.00606  | 3 | 1 | 24.8 | 0 |
| P12163_2_F6,16533  | K.GAFHVAEYIK.N       | 1743.005 | 0.00507  | 3 | 1 | 24.8 | 0 |
| P12163_1_F4,8485   | K.GASAIAR.V          | 949.5732 | 0.00328  | 2 | 1 | 25   | 0 |
| P12163_1_F3,22964  | K.LAVLDIGNNSISAK.G   | 2023.201 | 0.00466  | 3 | 1 | 47.8 | 0 |
| P12163_1_F3,22969  | K.LAVLDIGNNSISAK.G   | 2023.201 | 0.00593  | 2 | 1 | 41.8 | 0 |
| P12163_1_F3,18390  | K.TLNLSGNPIGDEGVK.C  | 2122.196 | 0.00315  | 2 | 1 | 42.2 | 0 |
| P12163_1_F6,13687  | R.ELHLHGNSIGDEGIR.A  | 1951.03  | 0.00279  | 3 | 1 | 38.5 | 0 |
| P12163_1_F3,11672  | R.QSQSDNALTTAPVK.Q   | 2068.149 | 0.00765  | 3 | 1 | 25   | 0 |
| P12163_1_F3,12353  | R.QSQSDNALTTAPVK.Q   | 2068.149 | 0.00447  | 3 | 1 | 30.5 | 0 |
| P12163_1_F3,13056  | R.QSQSDNALTTAPVK.Q   | 2068.149 | 0.0066   | 3 | 1 | 43.8 | 0 |
| P12163_1_F8,16397  | R.TITTIDLGNNIHSK.G   | 2192.249 | 0.00535  | 3 | 1 | 57.4 | 0 |
| P12163_1_F5,14166  | K.AGVIAYK.I          | 1329.835 | 0.00708  | 2 | 1 | 28.8 | 0 |
| P12163_1_F5,14190  | K.AGVIAYK.I          | 1329.835 | 0.00469  | 3 | 1 | 27.1 | 0 |
| P12163_2_F2,14956  | K.AGVIAYK.I          | 1329.835 | 0.0017   | 2 | 1 | 29.4 | 0 |
| P12163_2_F2,14977  | K.AGVIAYK.I          | 1329.835 | -0.0023  | 3 | 1 | 27.3 | 0 |
| P12163_2_F10,13570 | K.DVQVMNEGPGHIPMH    | 2397.263 | 0.00478  | 4 | 1 | 25.5 | 0 |
| P12163_1_F9,11660  | K.EHLGLPNR.D         | 1239.711 | 0.00561  | 3 | 1 | 23.4 | 0 |
| P12163_2_F9,11039  | K.EHLGLPNR.D         | 1239.711 | 0.00462  | 3 | 1 | 30.3 | 0 |
| P12163_2_F6,16876  | K.GHPLAQTWDDALSK.A   | 2147.171 | 0.0014   | 3 | 1 | 47.8 | 0 |
| P12163_2_F6,15938  | K.HLELEPM*IVGR.N     | 1613.899 | 0.00115  | 3 | 1 | 33.6 | 0 |
| P12163_1_F8,18638  | K.HLELEPMIVGR.N      | 1597.904 | -0.00155 | 3 | 1 | 53.3 | 0 |
| P12163_2_F6,18106  | K.HLELEPMIVGR.N      | 1597.904 | -0.00359 | 3 | 1 | 38.1 | 0 |
| P12163_1_F7,22555  | K.HTADPASPDFLPLPSFI  | 3109.591 | 0.00334  | 3 | 1 | 40.1 | 0 |
| P12163_1_S1,17802  | K.QGVITEEMLYCATR.E   | 1974.993 | 0.00833  | 3 | 1 | 67.8 | 0 |
| P12163_1_S1,20207  | K.QGVITEEMLYCATR.E   | 1974.993 | 0.00421  | 2 | 1 | 36.3 | 0 |
| P12163_1_S1,20208  | K.QGVITEEMLYCATR.E   | 1974.993 | 0.00086  | 3 | 1 | 90.4 | 0 |
| P12163_1_F2,20518  | K.VNANIGNSAVASSIEI   | 2702.446 | 0.00281  | 3 | 1 | 58.4 | 0 |
| P12163_1_S10,16780 | R.EITHEESGHILQVPFR.F | 2196.171 | 0.00429  | 3 | 1 | 56.7 | 0 |

|                   |                      |          |          |   |   |      |   |
|-------------------|----------------------|----------|----------|---|---|------|---|
| P12163_2_F4,16291 | R.EITHEESGHILQVPFR.F | 2196.171 | 0.00171  | 2 | 1 | 58.2 | 0 |
| P12163_1_F2,4355  | R.HIHETRE            | 1096.616 | 0.00266  | 3 | 1 | 31.9 | 0 |
| P12163_1_F8,17970 | R.IHLSGDEPNFDTYDTS   | 2964.428 | 0.00841  | 3 | 1 | 65.6 | 0 |
| P12163_2_F10,1611 | R.IHLSGDEPNFDTYDTS   | 2964.428 | -0.0017  | 3 | 1 | 76.2 | 0 |
| P12163_1_F2,21611 | R.NSAVPVGTVPPIYQALE  | 2394.385 | 0.0072   | 3 | 1 | 45.6 | 0 |
| P12163_1_S1,20155 | R.NSAVPVGTVPPIYQALE  | 2394.385 | 0.01305  | 3 | 1 | 46   | 0 |
| P12163_2_F7,10132 | K.DHLQVGDTVR.S       | 1443.786 | 0.00222  | 3 | 1 | 28.8 | 0 |
| P12163_1_F4,24091 | K.FEELFPK.F          | 1517.882 | 0.00545  | 2 | 1 | 26.1 | 0 |
| P12163_2_F1,23490 | K.FEELFPK.F          | 1517.882 | 0.00564  | 3 | 1 | 22.5 | 0 |
| P12163_2_F1,23561 | K.FEELFPK.F          | 1517.882 | 0.00567  | 2 | 1 | 24.5 | 0 |
| P12163_1_F9,16713 | K.IPGLHNPLR.V        | 1320.805 | -0.00215 | 3 | 1 | 49.6 | 0 |
| P12163_2_F7,15016 | K.IPGLHNPLR.V        | 1320.805 | 0.00382  | 3 | 1 | 52.1 | 0 |
| P12163_1_S1,22353 | K.LLPDILR.Y          | 1240.793 | 0.00278  | 3 | 1 | 43.7 | 0 |
| P12163_1_S1,22482 | K.LLPDILR.Y          | 1240.793 | 0.00269  | 2 | 1 | 26.5 | 0 |
| P12163_1_F2,6943  | R.EGVPATAAAR.-       | 1246.706 | 0.00333  | 3 | 1 | 29.1 | 0 |
| P12163_1_F2,9169  | R.EGVPATAAAR.-       | 1246.706 | 0.00253  | 2 | 1 | 24.1 | 0 |
| P12163_2_F2,11899 | R.GGEWATGK.I         | 1413.795 | 0.00605  | 2 | 1 | 32.5 | 0 |
| P12163_2_F2,11919 | R.GGEWATGK.I         | 1413.795 | -0.00246 | 3 | 1 | 30.9 | 0 |
| P12163_1_F5,13734 | R.GNYSEIQMAK.A       | 1748.946 | 0.00453  | 2 | 1 | 38.1 | 0 |
| P12163_2_F1,13955 | R.GNYSEIQMAK.A       | 1748.946 | -0.00125 | 2 | 1 | 46.1 | 0 |
| P12163_1_F7,16262 | R.KPQTMVDPAGTVVGL    | 2810.481 | -0.00011 | 3 | 1 | 51.6 | 0 |
| P12163_1_F6,19481 | R.TVVATPTQTRPWIDPT   | 2719.56  | 0.00394  | 4 | 1 | 26.8 | 0 |
| P12163_1_F3,14569 | R.VGANVFTPR.F        | 1264.732 | 0.01088  | 3 | 1 | 30   | 0 |
| P12163_1_F3,16273 | R.VGANVFTPR.F        | 1264.732 | 0.00276  | 2 | 1 | 24.4 | 0 |
| P12163_1_F3,8389  | R.VQESSLER.V         | 1251.685 | 0.00139  | 3 | 1 | 26.5 | 0 |
| P12163_1_F5,15843 | R.YGIQLAK.G          | 1400.872 | 0.00407  | 2 | 1 | 26   | 0 |
| P12163_2_F8_12070 | K.AFSHM*LNLANLAEI    | 2598.376 | 0.00182  | 4 | 1 | 27.1 | 0 |
| P12163_2_S5,16346 | K.DITPDDKQELDEALQR   | 2494.324 | 0.0059   | 4 | 1 | 33.4 | 0 |
| P12163_2_F1,20412 | K.DLWSFGEK.L         | 1589.878 | 0.01303  | 3 | 1 | 27.6 | 0 |
| P12163_1_F8,19696 | K.GLLLQIAGHK.D       | 1658.057 | 0.00595  | 3 | 1 | 50   | 0 |
| P12163_2_F6,19080 | K.GLLLQIAGHK.D       | 1658.057 | 0.00421  | 3 | 1 | 51.8 | 0 |
| P12163_2_F6,19083 | K.GLLLQIAGHK.D       | 1658.057 | 0.00637  | 2 | 1 | 37.7 | 0 |
| P12163_1_F3,26975 | K.IAALYDQLLVSK.D     | 1942.183 | -0.00102 | 3 | 1 | 40.3 | 0 |
| P12163_1_F3,26999 | K.IAALYDQLLVSK.D     | 1942.183 | 0.00303  | 2 | 1 | 64.9 | 0 |
| P12163_1_S1,24359 | K.LIEYDALLDR.F       | 1637.942 | 0.00291  | 2 | 1 | 26.6 | 0 |
| P12163_1_F3,23730 | K.SPEEIFDALK.N       | 1756.994 | 0.00747  | 2 | 1 | 24.2 | 0 |
| P12163_1_F3,23765 | K.SPEEIFDALK.N       | 1756.994 | 0.00549  | 3 | 1 | 34.7 | 0 |
| P12163_1_F9,10116 | R.ADVLR.S            | 1014.6   | 0.00361  | 3 | 1 | 34.1 | 0 |
| P12163_2_F9,9761  | R.ADVLR.S            | 1014.6   | -0.00101 | 3 | 1 | 39.6 | 0 |
| P12163_1_F3,20217 | R.DLLEGPYLK.Q ! K.DI | 1771.01  | 0.00961  | 3 | 1 | 36.1 | 0 |
| P12163_1_S1,16215 | R.LATPELEYGR.M       | 1452.8   | 0.01063  | 3 | 1 | 50.6 | 0 |
| P12163_1_F5,16659 | R.NCLAQLYAK.D        | 1688.961 | 0.00523  | 2 | 1 | 41.7 | 0 |
| P12163_1_F5,16686 | R.NCLAQLYAK.D        | 1688.961 | 0.0029   | 3 | 1 | 29.1 | 0 |
| P12163_2_F2,17428 | R.NCLAQLYAK.D        | 1688.961 | 0.00649  | 2 | 1 | 27.1 | 0 |
| P12163_2_F2,17451 | R.NCLAQLYAK.D        | 1688.961 | 0.00551  | 3 | 1 | 43.1 | 0 |
| P12163_2_F1,10714 | R.VNYEETK.G          | 1490.831 | 0.00227  | 2 | 1 | 28.2 | 0 |
| P12163_2_F1,20572 | K.DWVAACLVK.L        | 1669.956 | 0.01361  | 3 | 1 | 35.6 | 0 |
| P12163_2_F1,20578 | K.DWVAACLVK.L        | 1669.956 | 0.01328  | 2 | 1 | 24.2 | 0 |
| P12163_1_F3,22046 | K.EAAGGVLANLALS.S    | 1922.153 | 0.00918  | 2 | 1 | 43.3 | 0 |
| P12163_1_S1,24299 | K.IANTDILPLLIK.S     | 1932.235 | -0.00356 | 3 | 1 | 27.3 | 0 |
| P12163_1_F3,19834 | K.NLDISESLMEK.T      | 1887.035 | 0.00536  | 3 | 1 | 58.9 | 0 |

|                    |                       |          |          |   |   |      |   |
|--------------------|-----------------------|----------|----------|---|---|------|---|
| P12163_1_F3,19851  | K.NLDISESLMEK.T       | 1887.035 | 0.00121  | 2 | 1 | 52.1 | 0 |
| P12163_1_F6,18518  | K.SNHNILVEAGVIPK.L    | 2099.243 | 0.00311  | 3 | 1 | 42.2 | 0 |
| P12163_1_F8,18246  | R.AAESIADISINEHM*R.M  | 1977.001 | 0.00355  | 3 | 1 | 32.4 | 0 |
| P12163_1_F8,18210  | R.AAESIADISINEHMR.M   | 1961.006 | 0.00628  | 3 | 1 | 74.8 | 0 |
| P12163_1_F8,18214  | R.AAESIADISINEHMR.M   | 1961.006 | -0.00149 | 2 | 1 | 51.9 | 0 |
| P12163_1_F3,22011  | R.AVASEGGIFPLVK.L     | 1896.141 | -0.00405 | 3 | 1 | 24.2 | 0 |
| P12163_2_F1,22455  | R.AVASEGGIFPLVK.L     | 1896.141 | 0.00633  | 3 | 1 | 38.8 | 0 |
| P12163_2_F1,21127  | R.EQAVEALWK.Y         | 1681.973 | 0.01148  | 3 | 1 | 33.9 | 0 |
| P12163_1_S1,14778  | R.IGAIESEDGR.K        | 1350.717 | 0.00711  | 2 | 1 | 29.2 | 0 |
| P12163_2_F7,11246  | R.LATTHALER.L         | 1315.764 | 0.00303  | 3 | 1 | 39.5 | 0 |
| P12163_1_S1,15044  | R.SESSAACEAAAGLLR.S   | 1796.911 | 0.00809  | 3 | 1 | 48.2 | 0 |
| P12163_1_S1,17267  | R.SESSAACEAAAGLLR.S   | 1796.911 | 0.00554  | 2 | 1 | 64.2 | 0 |
| P12163_1_S1,17285  | R.SESSAACEAAAGLLR.S   | 1796.911 | 0.00305  | 3 | 1 | 52.8 | 0 |
| P12163_1_F3,12490  | R.SISSINVYR.D         | 1342.763 | 0.0006   | 3 | 1 | 25.4 | 0 |
| P12163_1_F4,19304  | K.ADFEMLEK.K          | 1590.866 | 0.00906  | 2 | 1 | 39   | 0 |
| P12163_2_F2,15837  | K.AMEWGEPK.V          | 1555.84  | 0.00346  | 2 | 1 | 23.9 | 0 |
| P12163_2_F1,11846  | K.CADSDEWK.G          | 1618.799 | 0.00836  | 2 | 1 | 25.7 | 0 |
| P12163_1_F2,20587  | K.EANANLDEVVALAK.I    | 2065.175 | 0.00355  | 3 | 1 | 29.9 | 0 |
| P12163_1_F6,20244  | K.HQYDWDAAATAANFLI    | 2083.03  | 0.00414  | 3 | 1 | 40.6 | 0 |
| P12163_2_F6,20002  | K.HQYDWDAAATAANFLI    | 2083.03  | 0.00678  | 3 | 1 | 31.2 | 0 |
| P12163_2_F7,19708  | K.LGVDFWCFHDR.D       | 1755.858 | 0.00117  | 3 | 1 | 25.5 | 0 |
| P12163_1_F3,23888  | K.WYNPEEVILGK.K       | 1956.105 | 0.01064  | 3 | 1 | 31.4 | 0 |
| P12163_1_F4,24632  | K.WYNPEEVILGK.K       | 1956.105 | 0.00353  | 3 | 1 | 24.9 | 0 |
| P12163_2_F8_12070  | K.YGLINDFK.L          | 1577.915 | 0.00525  | 3 | 1 | 26.9 | 0 |
| P12163_1_F5,18309  | R.ANFEFIDK.L          | 1591.894 | 0.01069  | 2 | 1 | 33.4 | 0 |
| P12163_1_F5,18336  | R.ANFEFIDK.L          | 1591.894 | 0.00796  | 3 | 1 | 28   | 0 |
| P12163_1_F2,13844  | R.DIAPDGETLK.E        | 1666.947 | 0.00368  | 2 | 1 | 28.4 | 0 |
| P12163_1_F3,14280  | R.DIAPDGETLK.E        | 1666.947 | 0.00334  | 2 | 1 | 27.2 | 0 |
| P12163_1_S1,17754  | R.EGYQSLNNTDMGR.E     | 1787.89  | 0.00472  | 2 | 1 | 57.2 | 0 |
| P12163_1_S1,17757  | R.EGYQSLNNTDMGR.E     | 1787.89  | 0.00027  | 3 | 1 | 54.6 | 0 |
| P12163_1_F4,17271  | R.YQSFSEIGQK.I        | 1910.012 | 0.00637  | 2 | 1 | 48.7 | 0 |
| P12163_1_F4,17289  | R.YQSFSEIGQK.I        | 1910.012 | 0.00869  | 3 | 1 | 35.3 | 0 |
| P12163_2_F1,16453  | R.YQSFSEIGQK.I        | 1910.012 | 0.00631  | 2 | 1 | 42.9 | 0 |
| P12163_2_F4,7645   | K.APQNTPVAHAGTTTD'    | 2415.243 | 0.0079   | 4 | 1 | 38.1 | 0 |
| P12163_1_S10,8220  | K.EHGVGAQDK.G         | 1548.859 | 0.01366  | 3 | 1 | 43.9 | 0 |
| P12163_1_F6,12379  | K.GEETPGSQSHSAPVG     | 2671.286 | 0.0028   | 3 | 1 | 25.4 | 0 |
| P12163_2_F10,11711 | K.GEETPGSQSHSAPVG     | 2671.286 | 0.00682  | 3 | 1 | 26.7 | 0 |
| P12163_2_F4,11381  | K.GEETPGSQSHSAPVG     | 2671.286 | 0.00109  | 3 | 1 | 26.8 | 0 |
| P12163_1_F3,18820  | K.GGEEAGISPTLSSFEEK.I | 2217.186 | 0.00907  | 3 | 1 | 57.8 | 0 |
| P12163_1_F3,18868  | K.GGEEAGISPTLSSFEEK.I | 2217.186 | 0.0075   | 2 | 1 | 46.1 | 0 |
| P12163_1_F4,12404  | K.IPGTTNTGSEK.E       | 1712.964 | 0.00572  | 2 | 1 | 32.3 | 0 |
| P12163_2_F1,11550  | K.IPGTTNTGSEK.E       | 1712.964 | 0.00364  | 2 | 1 | 43.7 | 0 |
| P12163_1_F3,15447  | K.ISSATPAIAAK.A       | 1638.005 | 0.01067  | 2 | 1 | 45.5 | 0 |
| P12163_2_F9,7966   | K.LRPGEDR.A           | 1275.696 | 0.00338  | 3 | 1 | 29.7 | 0 |
| P12163_1_S1,6407   | K.STGTTEATGQSGVNAC    | 1897.952 | 0.00321  | 3 | 1 | 30.2 | 0 |
| P12163_1_S1,6628   | K.STGTTEATGQSGVNAC    | 1897.952 | 0.00495  | 3 | 1 | 67.4 | 0 |
| P12163_2_F10,1546  | K.STSSRPVTEVVSDALH    | 2259.199 | 0.00007  | 4 | 1 | 28.4 | 0 |
| P12163_1_F2,19117  | K.VNVGLTSVVDEAPK.A    | 2036.185 | 0.00655  | 3 | 1 | 72.6 | 0 |
| P12163_1_F2,7514   | K.VTESEEVAR.R         | 1323.706 | 0.00491  | 3 | 1 | 38.9 | 0 |
| P12163_1_S1,23703  | R.ALSQVITEALR.K       | 1504.9   | 0.00317  | 3 | 1 | 47.8 | 0 |
| P12163_1_S1,23871  | R.ALSQVITEALR.K       | 1504.9   | 0.00171  | 2 | 1 | 38.1 | 0 |

|                   |                     |          |          |   |   |      |   |
|-------------------|---------------------|----------|----------|---|---|------|---|
| P12163_1_S1,23919 | R.ALSQVITEALR.K     | 1504.9   | 0.00263  | 3 | 1 | 49.7 | 0 |
| P12163_1_F4,12084 | K.AFDQQGNPTK.A      | 1713.938 | 0.00958  | 2 | 1 | 32.5 | 0 |
| P12163_1_F5,10670 | K.AFDQQGNPTK.A      | 1713.938 | 0.00412  | 2 | 1 | 45.8 | 0 |
| P12163_2_F1,11133 | K.AFDQQGNPTK.A      | 1713.938 | 0.00152  | 2 | 1 | 48.8 | 0 |
| P12163_1_F4,25500 | K.DLM*LQLLNK.Q      | 1712.024 | 0.01075  | 3 | 1 | 34.1 | 0 |
| P12163_1_F5,19113 | K.FADFQGQLK.G       | 1661.947 | 0.01215  | 2 | 1 | 43.6 | 0 |
| P12163_2_F9,14166 | K.GILFHEK.L         | 1451.883 | 0.00644  | 2 | 1 | 29.3 | 0 |
| P12163_1_F8,14125 | K.LSHGEVQAFGTPR.R   | 1702.918 | 0.00187  | 3 | 1 | 45.2 | 0 |
| P12163_2_F6,13598 | K.LSHGEVQAFGTPR.R   | 1702.918 | -0.00145 | 2 | 1 | 38.5 | 0 |
| P12163_1_F2,20588 | K.QDFDFEESR.S       | 1637.775 | 0.00312  | 2 | 1 | 29.1 | 0 |
| P12163_1_S1,20162 | K.QDFDFEESR.S       | 1637.775 | 0.00633  | 2 | 1 | 29.2 | 0 |
| P12163_1_S1,20217 | K.QDFDFEESR.S       | 1637.775 | 0.00109  | 3 | 1 | 58.1 | 0 |
| P12163_1_F2,15720 | K.VQNAESYAGVM*R.N   | 1644.832 | 0.00476  | 2 | 1 | 35.9 | 0 |
| P12163_1_F3,14131 | R.GFVGVTER.A        | 1168.663 | 0.0029   | 2 | 1 | 28.4 | 0 |
| P12163_1_F3,27526 | R.ISYGLVQILIEK.D    | 1984.23  | 0.00468  | 3 | 1 | 32.6 | 0 |
| P12163_2_F2,18472 | R.QCAQLWLK.T        | 1654.956 | 0.00341  | 2 | 1 | 29   | 0 |
| P12163_2_F8_12070 | R.RLEQFLVDK.G       | 1756.058 | 0.00756  | 3 | 1 | 27.8 | 0 |
| P12163_1_F2,20666 | R.YAVPIDSLVTK.A     | 1814.088 | -0.0004  | 3 | 1 | 41.6 | 0 |
| P12163_1_F3,21000 | R.YAVPIDSLVTK.A     | 1814.088 | -0.00148 | 3 | 1 | 54.3 | 0 |
| P12163_1_F3,18122 | K.GSNELPPVEELK.V    | 1920.09  | 0.00426  | 2 | 1 | 25.2 | 0 |
| P12163_1_F3,24274 | K.NELGAPIEQFFK.T    | 2001.126 | 0.0049   | 3 | 1 | 31   | 0 |
| P12163_1_F2,14496 | K.QQQQSGTQLVEQIR.K  | 1947.056 | 0.00477  | 2 | 1 | 49.3 | 0 |
| P12163_1_F4,19062 | K.QVINVAGLAK.K      | 1621.026 | 0.0059   | 3 | 1 | 37.3 | 0 |
| P12163_1_F4,19081 | K.QVINVAGLAK.K      | 1621.026 | 0.00694  | 2 | 1 | 59.7 | 0 |
| P12163_2_F1,18358 | K.QVINVAGLAK.K      | 1621.026 | 0.0071   | 2 | 1 | 57.5 | 0 |
| P12163_2_F1,18371 | K.QVINVAGLAK.K      | 1621.026 | 0.0053   | 3 | 1 | 45.8 | 0 |
| P12163_2_F9,18067 | K.RLFDIDLR.N        | 1351.8   | -0.00017 | 3 | 1 | 44.2 | 0 |
| P12163_1_S10,1511 | K.TFEDRPIAAASLGQVH  | 2172.183 | 0.00037  | 4 | 1 | 25.6 | 0 |
| P12163_2_F10,1409 | K.TFEDRPIAAASLGQVH  | 2172.183 | 0.00125  | 4 | 1 | 38.3 | 0 |
| P12163_1_F3,24455 | K.VAAPYAQELLDLK.Q   | 2039.2   | 0.00574  | 3 | 1 | 44.6 | 0 |
| P12163_1_F3,24466 | K.VAAPYAQELLDLK.Q   | 2039.2   | 0.00538  | 2 | 1 | 32.2 | 0 |
| P12163_1_F3,23197 | K.VLTLEYVPGVK.I     | 1826.125 | 0.00192  | 2 | 1 | 54.2 | 0 |
| P12163_1_F4,19063 | R.EFVDELAK.L        | 1558.894 | 0.01129  | 3 | 1 | 27.8 | 0 |
| P12163_2_F1,18310 | R.EFVDELAK.L        | 1558.894 | 0.00664  | 3 | 1 | 25.5 | 0 |
| P12163_1_F3,23276 | R.ESVLQLGPTFIK.L    | 1940.168 | -0.00134 | 2 | 1 | 34.5 | 0 |
| P12163_2_F1,18243 | R.ILFDNAK.W         | 1428.867 | 0.00483  | 2 | 1 | 25.4 | 0 |
| P12163_2_F1,15837 | R.VPAFSPEK.A        | 1482.878 | 0.0088   | 3 | 1 | 21.9 | 0 |
| P12163_1_S1,18291 | K.DDIEPFLR.W        | 1308.71  | 0.00548  | 2 | 1 | 27.1 | 0 |
| P12163_1_F2,13338 | K.DPSINQPTIGK.V     | 1778.027 | 0.00712  | 3 | 1 | 24.4 | 0 |
| P12163_1_F3,24793 | K.GVADFLQEVTSK.K    | 1902.079 | 0.01008  | 3 | 1 | 43.7 | 0 |
| P12163_1_F3,24810 | K.GVADFLQEVTSK.K    | 1902.079 | 0.00251  | 2 | 1 | 51.5 | 0 |
| P12163_2_F6,13698 | K.HEVDVSNLAVQDK.K   | 2062.139 | -0.00189 | 3 | 1 | 34.8 | 0 |
| P12163_1_F7,17476 | K.ITYCGHELNEFVPQR.T | 2167.091 | 0.0074   | 3 | 1 | 34.5 | 0 |
| P12163_1_F6,10912 | K.SQAHPASLVK.E      | 1645.985 | 0.0128   | 3 | 1 | 21.9 | 0 |
| P12163_1_F3,5710  | K.TEGVGEDR.L        | 1166.595 | 0.00401  | 2 | 1 | 33.6 | 0 |
| P12163_1_F4,15331 | K.TGGYIEGDIK.I      | 1660.937 | 0.00722  | 2 | 1 | 31   | 0 |
| P12163_2_F1,24387 | K.TTLM*LALAGK.L     | 1643.002 | -0.0036  | 3 | 1 | 26.3 | 0 |
| P12163_1_S1,22245 | K.TTLMDVLAGR.K      | 1380.782 | 0.00404  | 2 | 1 | 38.6 | 0 |
| P12163_1_F4,25086 | K.TTLMLALAGK.L      | 1627.007 | 0.01011  | 3 | 1 | 22.8 | 0 |
| P12163_2_F1,24371 | K.TTLMLALAGK.L      | 1627.007 | -0.00111 | 3 | 1 | 25.8 | 0 |
| P12163_2_F1,24403 | K.TTLMLALAGK.L      | 1627.007 | 0.00081  | 2 | 1 | 50.1 | 0 |



|                   |                      |          |          |   |   |      |   |
|-------------------|----------------------|----------|----------|---|---|------|---|
| P12163_2_F1,5895  | R.GGQSISSGSR.R       | 1239.659 | 0.00333  | 2 | 1 | 33.1 | 0 |
| P12163_1_F3,22766 | R.MTLLLGPPGAGK.T! -. | 1763.071 | 0.00862  | 2 | 1 | 37.5 | 0 |
| P12163_1_F3,22782 | R.MTLLLGPPGAGK.T! -. | 1763.071 | 0.00918  | 3 | 1 | 36.8 | 0 |
| P12163_2_F1,23085 | R.MTLLLGPPGAGK.T! -. | 1763.071 | 0.00332  | 2 | 1 | 26.8 | 0 |
| P12163_2_F1,8605  | K.DTAAGVDSK.H        | 1471.821 | -0.00412 | 2 | 1 | 33   | 0 |
| P12163_2_F1,24642 | K.ILAEANTLLK.L       | 1694.067 | 0.00649  | 3 | 1 | 32.4 | 0 |
| P12163_1_F9,6788  | K.RGETSGELNER.L      | 1551.803 | 0.00398  | 3 | 1 | 33.1 | 0 |
| P12163_1_F4,23585 | K.SATINSIFDEVK.F     | 1932.09  | 0.00638  | 2 | 1 | 55.7 | 0 |
| P12163_1_F4,23597 | K.SATINSIFDEVK.F     | 1932.09  | 0.01792  | 3 | 1 | 34.8 | 0 |
| P12163_1_F2,19071 | R.AYFDELEYR.E        | 1509.753 | 0.00345  | 2 | 1 | 25.9 | 0 |
| P12163_1_F7,18081 | R.LGQTPHNVVVAQVLY    | 2098.207 | 0.00002  | 3 | 1 | 31.2 | 0 |
| P12163_1_F2,20091 | R.LGVSELGAGVENEIQK   | 2251.275 | 0.00777  | 3 | 1 | 57.7 | 0 |
| P12163_2_F2,13032 | R.MNAELQK.N          | 1441.829 | 0.00573  | 2 | 1 | 26.4 | 0 |
| P12163_1_S1,16465 | R.SDVAYGGSLEAQLR.D   | 1769.933 | -0.00049 | 3 | 1 | 27.4 | 0 |
| P12163_1_S1,10713 | R.SSTQVTGECNVQPSPQ   | 2939.499 | 0.01043  | 3 | 1 | 28.3 | 0 |
| P12163_1_S1,11544 | R.VVMTGGAMTSR.S      | 1413.75  | 0.00781  | 3 | 1 | 21.9 | 0 |
| P12163_1_F9,6137  | R.VVQHPR.V           | 1039.631 | 0.00346  | 3 | 1 | 26.8 | 0 |
| P12163_2_F9,6587  | R.VVQHPR.V           | 1039.631 | 0.00067  | 3 | 1 | 22.4 | 0 |
| P12163_1_F9,17470 | K.DHDWELFDR.L        | 1536.738 | 0.00081  | 3 | 1 | 25.3 | 0 |
| P12163_1_F8,18495 | K.DQPLVSVFSHR.E      | 1588.875 | -0.00151 | 3 | 1 | 54.5 | 0 |
| P12163_2_F1,21616 | K.EIVNIFK.I          | 1470.914 | 0.00432  | 3 | 1 | 23.3 | 0 |
| P12163_1_F6,16488 | K.HFELLIHR.Q         | 1368.805 | 0.00343  | 3 | 1 | 30   | 0 |
| P12163_2_F7,14392 | K.HFELLIHR.Q         | 1368.805 | 0.00187  | 3 | 1 | 25.9 | 0 |
| P12163_1_F3,24255 | K.IPIEVGGFLK.Q       | 1681.051 | 0.00583  | 3 | 1 | 30.4 | 0 |
| P12163_1_F4,23600 | K.ISESFLLDPK.E       | 1791.015 | 0.00288  | 2 | 1 | 25.9 | 0 |
| P12163_1_F4,23614 | K.ISESFLLDPK.E       | 1791.015 | 0.00738  | 3 | 1 | 31.1 | 0 |
| P12163_2_F1,22269 | K.QFLNEVFNSR.N       | 1557.833 | 0.00395  | 2 | 1 | 25.1 | 0 |
| P12163_1_F3,17302 | K.VDPALIAPNK.L       | 1646.01  | 0.00605  | 2 | 1 | 33.1 | 0 |
| P12163_2_F6,10015 | R.DQIGNDTLNHR.T      | 1586.819 | 0.00179  | 3 | 1 | 27.3 | 0 |
| P12163_1_F9,19396 | R.FSHLFLR.N          | 1223.72  | 0.00402  | 3 | 1 | 30.5 | 0 |
| P12163_1_F3,28344 | R.LIVSLLYLPK.G       | 1767.16  | 0.00512  | 3 | 1 | 27.2 | 0 |
| P12163_1_F5,20550 | R.SSLISSFYK.A        | 1639.951 | 0.00791  | 2 | 1 | 24.6 | 0 |
| P12163_1_F6,18319 | K.DTLEFHGWGK.H       | 1740.953 | 0.00277  | 3 | 1 | 22.7 | 0 |
| P12163_1_F9,17617 | K.DTLEFHGWGK.H       | 1740.953 | 0.00526  | 3 | 1 | 22.3 | 0 |
| P12163_1_F9,17635 | K.DTLEFHGWGK.H       | 1740.953 | 0.00651  | 2 | 1 | 36.7 | 0 |
| P12163_1_F9,17822 | K.DTLEFHGWGK.H       | 1740.953 | 0.00613  | 3 | 1 | 26.8 | 0 |
| P12163_2_F7,15657 | K.DTLEFHGWGK.H       | 1740.953 | 0.00403  | 3 | 1 | 36.6 | 0 |
| P12163_2_F9,16991 | K.DTLEFHGWGK.H       | 1740.953 | 0.00517  | 3 | 1 | 22.8 | 0 |
| P12163_2_F9,17000 | K.DTLEFHGWGK.H       | 1740.953 | 0.00885  | 2 | 1 | 25.2 | 0 |
| P12163_1_F4,20484 | K.LVSWESVSK.R        | 1642.962 | 0.00744  | 2 | 1 | 45.2 | 0 |
| P12163_1_F4,20499 | K.LVSWESVSK.R        | 1642.962 | 0.00075  | 3 | 1 | 49.7 | 0 |
| P12163_1_F5,19215 | K.LVSWESVSK.R        | 1642.962 | 0.00018  | 3 | 1 | 42.2 | 0 |
| P12163_1_F6,19334 | K.LVSWESVSK.R        | 1642.962 | 0.00318  | 3 | 1 | 35.8 | 0 |
| P12163_1_F7,18052 | K.LVSWESVSK.R        | 1642.962 | 0.00723  | 3 | 1 | 42.1 | 0 |
| P12163_1_F9,18893 | K.LVSWESVSK.R        | 1642.962 | 0.00363  | 3 | 1 | 32.1 | 0 |
| P12163_1_S10,1842 | K.LVSWESVSK.R        | 1642.962 | 0.00189  | 3 | 1 | 29.4 | 0 |
| P12163_2_F1,19865 | K.LVSWESVSK.R        | 1642.962 | 0.0042   | 2 | 1 | 38.3 | 0 |
| P12163_2_F1,20015 | K.LVSWESVSK.R        | 1642.962 | 0.00993  | 3 | 1 | 39.7 | 0 |
| P12163_2_F4,17624 | K.LVSWESVSK.R        | 1642.962 | 0.00042  | 3 | 1 | 29.7 | 0 |
| P12163_2_F4,17666 | K.LVSWESVSK.R        | 1642.962 | 0.00088  | 2 | 1 | 25.3 | 0 |
| P12163_2_S5,17314 | K.LVSWESVSK.R        | 1642.962 | 0.00153  | 3 | 1 | 39.3 | 0 |

|                   |                    |          |          |   |   |      |   |
|-------------------|--------------------|----------|----------|---|---|------|---|
| P12163_2_S5,18049 | K.LVSWESVSK.R      | 1642.962 | 0.00498  | 3 | 1 | 42.3 | 0 |
| P12163_1_F2,14587 | K.QIVGTELGDGK.S    | 1725     | 0.00517  | 3 | 1 | 53.8 | 0 |
| P12163_1_F3,13339 | K.QIVGTELGDGK.S    | 1725     | 0.00667  | 3 | 1 | 26.8 | 0 |
| P12163_1_F3,13345 | K.QIVGTELGDGK.S    | 1725     | 0.00749  | 2 | 1 | 24.7 | 0 |
| P12163_1_F3,13617 | K.QIVGTELGDGK.S    | 1725     | 0.00541  | 3 | 1 | 26.7 | 0 |
| P12163_1_F3,15347 | K.QIVGTELGDGK.S    | 1725     | 0.00019  | 2 | 1 | 33.4 | 0 |
| P12163_1_F3,15358 | K.QIVGTELGDGK.S    | 1725     | 0.00484  | 3 | 1 | 55.3 | 0 |
| P12163_1_F4,13849 | K.QIVGTELGDGK.S    | 1725     | 0.0061   | 3 | 1 | 33   | 0 |
| P12163_1_F5,14553 | K.QIVGTELGDGK.S    | 1725     | -0.00433 | 2 | 1 | 26.7 | 0 |
| P12163_1_F6,14738 | K.QIVGTELGDGK.S    | 1725     | 0.00094  | 3 | 1 | 44.7 | 0 |
| P12163_1_S1,13962 | K.QIVGTELGDGK.S    | 1725     | 0.00646  | 3 | 1 | 53.8 | 0 |
| P12163_2_S3,11294 | K.QIVGTELGDGK.S    | 1725     | 0.00262  | 3 | 1 | 27.4 | 0 |
| P12163_2_S3,12705 | K.QIVGTELGDGK.S    | 1725     | -0.00437 | 3 | 1 | 32.9 | 0 |
| P12163_1_F3,16829 | K.SLEDVVIASYNK.G   | 1946.105 | 0.00637  | 4 | 1 | 24.8 | 0 |
| P12163_1_F3,16832 | K.SLEDVVIASYNK.G   | 1946.105 | 0.00544  | 2 | 1 | 43.7 | 0 |
| P12163_1_F3,17672 | K.SLEDVVIASYNK.G   | 1946.105 | 0.00734  | 2 | 1 | 43.1 | 0 |
| P12163_1_F3,20466 | K.SLEDVVIASYNK.G   | 1946.105 | 0.00492  | 2 | 1 | 65.2 | 0 |
| P12163_1_F4,21181 | K.SLEDVVIASYNK.G   | 1946.105 | 0.00766  | 3 | 1 | 50.1 | 0 |
| P12163_1_F6,19558 | K.SLEDVVIASYNK.G   | 1946.105 | 0.00292  | 3 | 1 | 32.8 | 0 |
| P12163_1_F6,19605 | K.SLEDVVIASYNK.G   | 1946.105 | -0.00122 | 2 | 1 | 68.7 | 0 |
| P12163_1_F6,19987 | K.SLEDVVIASYNK.G   | 1946.105 | 0.00418  | 3 | 1 | 26.5 | 0 |
| P12163_1_F6,19989 | K.SLEDVVIASYNK.G   | 1946.105 | -0.00172 | 2 | 1 | 25   | 0 |
| P12163_1_F7,19121 | K.SLEDVVIASYNK.G   | 1946.105 | 0.00328  | 3 | 1 | 34.3 | 0 |
| P12163_1_F8,20084 | K.SLEDVVIASYNK.G   | 1946.105 | 0.00508  | 3 | 1 | 26.6 | 0 |
| P12163_1_F9,19553 | K.SLEDVVIASYNK.G   | 1946.105 | -0.00206 | 3 | 1 | 37.2 | 0 |
| P12163_1_S10,1894 | K.SLEDVVIASYNK.G   | 1946.105 | 0.00832  | 3 | 1 | 23.8 | 0 |
| P12163_2_F4,18669 | K.SLEDVVIASYNK.G   | 1946.105 | 0.00787  | 3 | 1 | 34.2 | 0 |
| P12163_2_F7,17837 | K.SLEDVVIASYNK.G   | 1946.105 | 0.00523  | 3 | 1 | 41.4 | 0 |
| P12163_2_S3,16877 | K.SLEDVVIASYNK.G   | 1946.105 | -0.00239 | 3 | 1 | 25   | 0 |
| P12163_1_F6,17177 | K.SLLVVK.T         | 1266.861 | 0.00306  | 2 | 1 | 26.8 | 0 |
| P12163_1_F6,17210 | K.SLLVVK.T         | 1266.861 | 0.00948  | 3 | 1 | 27.4 | 0 |
| P12163_1_F8,16566 | K.SLLVVK.T         | 1266.861 | 0.003    | 2 | 1 | 24.9 | 0 |
| P12163_2_F1,17003 | K.SLLVVK.T         | 1266.861 | 0.00288  | 3 | 1 | 38   | 0 |
| P12163_2_F2,351   | K.SLLVVK.T         | 1266.861 | 0.00381  | 3 | 1 | 27.6 | 0 |
| P12163_2_F2,849   | K.SLLVVK.T         | 1266.861 | 0.00494  | 2 | 1 | 24.2 | 0 |
| P12163_2_F2,1793  | K.SLLVVK.T         | 1266.861 | 0.00579  | 3 | 1 | 27   | 0 |
| P12163_2_F2,17539 | K.SLLVVK.T         | 1266.861 | 0.00564  | 2 | 1 | 27.2 | 0 |
| P12163_2_F2,17558 | K.SLLVVK.T         | 1266.861 | 0.00546  | 3 | 1 | 34.8 | 0 |
| P12163_2_F2,17795 | K.SLLVVK.T         | 1266.861 | 0.00405  | 3 | 1 | 21.9 | 0 |
| P12163_2_F8_12070 | K.SLLVVK.T         | 1266.861 | 0.00639  | 3 | 1 | 22.6 | 0 |
| P12163_2_S5,15480 | K.SLLVVK.T         | 1266.861 | 0.00321  | 3 | 1 | 24.4 | 0 |
| P12163_1_F2,15347 | R.ADVANAVNPLPSEK.D | 2033.149 | 0.00382  | 2 | 1 | 50   | 0 |
| P12163_1_F2,15503 | R.ADVANAVNPLPSEK.D | 2033.149 | 0.00337  | 3 | 1 | 29.3 | 0 |
| P12163_1_F2,15957 | R.ADVANAVNPLPSEK.D | 2033.149 | 0.00679  | 3 | 1 | 47.8 | 0 |
| P12163_1_F2,16073 | R.ADVANAVNPLPSEK.D | 2033.149 | 0.00463  | 4 | 1 | 46.8 | 0 |
| P12163_1_F2,16211 | R.ADVANAVNPLPSEK.D | 2033.149 | 0.00293  | 2 | 1 | 69   | 0 |
| P12163_1_F2,16383 | R.ADVANAVNPLPSEK.D | 2033.149 | 0.00337  | 3 | 1 | 42.6 | 0 |
| P12163_1_F2,16470 | R.ADVANAVNPLPSEK.D | 2033.149 | 0.00473  | 2 | 1 | 55.6 | 0 |
| P12163_1_F3,16459 | R.ADVANAVNPLPSEK.D | 2033.149 | 0.00268  | 3 | 1 | 26.9 | 0 |
| P12163_1_F3,16590 | R.ADVANAVNPLPSEK.D | 2033.149 | 0.00436  | 2 | 1 | 61.2 | 0 |
| P12163_1_F3,16774 | R.ADVANAVNPLPSEK.D | 2033.149 | -0.00005 | 3 | 1 | 35.4 | 0 |

|                   |                         |          |          |   |   |      |   |
|-------------------|-------------------------|----------|----------|---|---|------|---|
| P12163_1_F3,17138 | R.ADVANAVNPLPSEK.D      | 2033.149 | 0.01671  | 2 | 1 | 27.1 | 0 |
| P12163_1_F5,15439 | R.ADVANAVNPLPSEK.D      | 2033.149 | -0.00644 | 2 | 1 | 66.8 | 0 |
| P12163_1_F5,15889 | R.ADVANAVNPLPSEK.D      | 2033.149 | 0.00526  | 2 | 1 | 53.7 | 0 |
| P12163_1_F8,16300 | R.ADVANAVNPLPSEK.D      | 2033.149 | -0.00143 | 3 | 1 | 23.1 | 0 |
| P12163_2_F2,16003 | R.ADVANAVNPLPSEK.D      | 2033.149 | 0.00104  | 2 | 1 | 66.5 | 0 |
| P12163_2_F2,16249 | R.ADVANAVNPLPSEK.D      | 2033.149 | -0.00314 | 2 | 1 | 62.4 | 0 |
| P12163_2_F4,15192 | R.ADVANAVNPLPSEK.D      | 2033.149 | 0.00328  | 2 | 1 | 53.7 | 0 |
| P12163_1_F8,15149 | R.ADVANAVNPLPSEKDI      | 2580.476 | 0.0059   | 3 | 1 | 43.8 | 0 |
| P12163_1_F8,15391 | R.ADVANAVNPLPSEKDI      | 2580.476 | 0.01338  | 4 | 1 | 28.4 | 0 |
| P12163_1_S10,1458 | R.ADVANAVNPLPSEKDI      | 2580.476 | 0.00558  | 4 | 1 | 29.4 | 0 |
| P12163_2_F6,15345 | R.ADVANAVNPLPSEKDI      | 2580.476 | 0.01289  | 3 | 1 | 27.5 | 0 |
| P12163_2_F6,20565 | R.ADVANAVNPLPSEKDI      | 2580.476 | 0.00308  | 3 | 1 | 31.3 | 0 |
| P12163_2_F6,21212 | R.ADVANAVNPLPSEKDI      | 2580.476 | 0.00053  | 3 | 1 | 41.3 | 0 |
| P12163_1_F5,12944 | R.AYVDNLNK.Q            | 1544.889 | 0.00758  | 2 | 1 | 40.4 | 0 |
| P12163_1_F5,13183 | R.AYVDNLNK.Q            | 1544.889 | 0.0045   | 2 | 1 | 38.3 | 0 |
| P12163_1_F6,13821 | R.AYVDNLNK.Q            | 1544.889 | 0.00491  | 2 | 1 | 54.3 | 0 |
| P12163_1_F7,13152 | R.AYVDNLNK.Q            | 1544.889 | 0.00581  | 2 | 1 | 37.4 | 0 |
| P12163_1_F7,13163 | R.AYVDNLNK.Q            | 1544.889 | 0.00645  | 3 | 1 | 28.2 | 0 |
| P12163_1_F8,13094 | R.AYVDNLNK.Q            | 1544.889 | 0.00192  | 2 | 1 | 32.1 | 0 |
| P12163_1_F8,13096 | R.AYVDNLNK.Q            | 1544.889 | -0.00111 | 3 | 1 | 32.2 | 0 |
| P12163_1_S10,1382 | R.AYVDNLNK.Q            | 1544.889 | 0.008    | 2 | 1 | 38.7 | 0 |
| P12163_2_F1,12472 | R.AYVDNLNK.Q            | 1544.889 | 0.00688  | 2 | 1 | 25   | 0 |
| P12163_2_F1,13407 | R.AYVDNLNK.Q            | 1544.889 | 0.00489  | 3 | 1 | 37.4 | 0 |
| P12163_2_F1,13560 | R.AYVDNLNK.Q            | 1544.889 | 0.0027   | 2 | 1 | 39.5 | 0 |
| P12163_2_F2,13790 | R.AYVDNLNK.Q            | 1544.889 | 0.00784  | 2 | 1 | 39.7 | 0 |
| P12163_2_F2,13803 | R.AYVDNLNK.Q            | 1544.889 | 0.00561  | 3 | 1 | 41.9 | 0 |
| P12163_2_F8_12070 | R.AYVDNLNK.Q            | 1544.889 | 0.00438  | 3 | 1 | 36.4 | 0 |
| P12163_2_S5,12388 | R.AYVDNLNK.Q            | 1544.889 | 0.00195  | 3 | 1 | 36.3 | 0 |
| P12163_2_S5,12432 | R.AYVDNLNK.Q            | 1544.889 | 0.00311  | 2 | 1 | 35.5 | 0 |
| P12163_2_S5,12643 | R.AYVDNLNK.Q            | 1544.889 | -0.00174 | 3 | 1 | 34.2 | 0 |
| P12163_2_S5,13041 | R.AYVDNLNK.Q            | 1544.889 | 0.00534  | 3 | 1 | 42.9 | 0 |
| P12163_1_F5,15564 | R.DFGSF EK.F            | 1437.783 | 0.0071   | 2 | 1 | 27.2 | 0 |
| P12163_1_F6,16146 | R.DFGSF EK.F            | 1437.783 | 0.00722  | 2 | 1 | 28.3 | 0 |
| P12163_2_F1,15793 | R.DFGSF EK.F            | 1437.783 | 0.00425  | 3 | 1 | 28   | 0 |
| P12163_2_F1,15796 | R.DFGSF EK.F            | 1437.783 | 0.00696  | 2 | 1 | 25.4 | 0 |
| P12163_1_F5,22526 | R.FLEEFK.S ! K.FLEEFK.. | 1420.83  | 0.00492  | 2 | 1 | 26   | 0 |
| P12163_1_F5,22753 | R.FLEEFK.S ! K.FLEEFK.. | 1420.83  | 0.00394  | 2 | 1 | 26.6 | 0 |
| P12163_1_F6,21627 | R.FLEEFK.S ! K.FLEEFK.. | 1420.83  | 0.00616  | 2 | 1 | 25.1 | 0 |
| P12163_1_F7,20836 | R.FLEEFK.S ! K.FLEEFK.. | 1420.83  | 0.0043   | 2 | 1 | 27.4 | 0 |
| P12163_2_F1,22438 | R.FLEEFK.S ! K.FLEEFK.. | 1420.83  | 0.00622  | 2 | 1 | 24.3 | 0 |
| P12163_2_F2,21999 | R.FLEEFK.S ! K.FLEEFK.. | 1420.83  | 0.00652  | 2 | 1 | 24.5 | 0 |
| P12163_2_S5,19995 | R.FLEEFK.S ! K.FLEEFK.. | 1420.83  | 0.00072  | 3 | 1 | 25.1 | 0 |
| P12163_1_F6,17997 | R.RPDYISVFM*DK.L        | 1995.083 | 0.00207  | 3 | 1 | 41.3 | 0 |
| P12163_1_F6,20168 | R.RPDYISVFM*DK.L        | 1995.083 | 0.00714  | 3 | 1 | 38.1 | 0 |
| P12163_1_F9,17312 | R.RPDYISVFM*DK.L        | 1995.083 | 0.01152  | 3 | 1 | 27.1 | 0 |
| P12163_1_F9,17498 | R.RPDYISVFM*DK.L        | 1995.083 | 0.00702  | 3 | 1 | 28.7 | 0 |
| P12163_1_F9,19720 | R.RPDYISVFM*DK.L        | 1995.083 | 0.00534  | 3 | 1 | 30.4 | 0 |
| P12163_1_F9,19957 | R.RPDYISVFM*DK.L        | 1995.083 | 0.00414  | 3 | 1 | 29.7 | 0 |
| P12163_2_F6,17370 | R.RPDYISVFM*DK.L        | 1995.083 | 0.00933  | 3 | 1 | 29.3 | 0 |
| P12163_2_F6,19872 | R.RPDYISVFM*DK.L        | 1995.083 | 0.00576  | 3 | 1 | 35.5 | 0 |
| P12163_2_F7,15408 | R.RPDYISVFM*DK.L        | 1995.083 | 0.00369  | 3 | 1 | 38.3 | 0 |

|                                      |          |          |   |   |      |   |
|--------------------------------------|----------|----------|---|---|------|---|
| P12163_2_F7,18030 R.RPDYISVFM*DK.L   | 1995.083 | 0.00268  | 4 | 1 | 23.1 | 0 |
| P12163_2_F7,18059 R.RPDYISVFM*DK.L   | 1995.083 | 0.00774  | 3 | 1 | 37.7 | 0 |
| P12163_2_F7,18258 R.RPDYISVFM*DK.L   | 1995.083 | 0.00492  | 3 | 1 | 29.6 | 0 |
| P12163_1_F6,20149 R.RPDYISVFM*DK.L   | 1979.088 | 0.00378  | 3 | 1 | 39.4 | 0 |
| P12163_1_F9,19693 R.RPDYISVFM*DK.L   | 1979.088 | 0.00648  | 3 | 1 | 32.6 | 0 |
| P12163_1_S10,1897 R.RPDYISVFM*DK.L   | 1979.088 | 0.00285  | 3 | 1 | 22.4 | 0 |
| P12163_2_F10,1785 R.RPDYISVFM*DK.L   | 1979.088 | 0.00513  | 3 | 1 | 24   | 0 |
| P12163_2_F6,19850 R.RPDYISVFM*DK.L   | 1979.088 | 0.00519  | 3 | 1 | 47.1 | 0 |
| P12163_2_F7,18087 R.RPDYISVFM*DK.L   | 1979.088 | -0.0018  | 3 | 1 | 33.9 | 0 |
| P12163_2_F7,18099 R.RPDYISVFM*DK.L   | 1979.088 | 0.00351  | 2 | 1 | 34.4 | 0 |
| P12163_2_F9,18968 R.RPDYISVFM*DK.L   | 1979.088 | 0.00756  | 3 | 1 | 31.8 | 0 |
| P12163_1_F3,17432 K.EGLPAFPM*GK.I    | 1670.94  | 0.00417  | 3 | 1 | 23.5 | 0 |
| P12163_1_F3,17461 K.EGLPAFPM*GK.I    | 1670.94  | 0.00561  | 2 | 1 | 25.9 | 0 |
| P12163_1_F4,20492 K.EGLPAFPM*GK.I    | 1670.94  | 0.01025  | 2 | 1 | 25.8 | 0 |
| P12163_2_F4,17674 K.EGLPAFPM*GK.I    | 1670.94  | 0.00183  | 3 | 1 | 22.5 | 0 |
| P12163_1_F3,19899 K.EGLPAFPM*GK.I    | 1654.945 | 0.01238  | 2 | 1 | 33.7 | 0 |
| P12163_1_F5,19190 K.EGLPAFPM*GK.I    | 1654.945 | 0.00328  | 2 | 1 | 29.1 | 0 |
| P12163_1_F5,19199 K.EGLPAFPM*GK.I    | 1654.945 | 0.00228  | 3 | 1 | 26.1 | 0 |
| P12163_1_F6,18869 K.EGLPAFPM*GK.I    | 1654.945 | 0.00159  | 3 | 1 | 23.7 | 0 |
| P12163_2_F1,19891 K.EGLPAFPM*GK.I    | 1654.945 | 0.0138   | 3 | 1 | 22   | 0 |
| P12163_2_F1,20134 K.EGLPAFPM*GK.I    | 1654.945 | 0.00578  | 2 | 1 | 31.7 | 0 |
| P12163_2_F4,17632 K.EGLPAFPM*GK.I    | 1654.945 | 0.00474  | 3 | 1 | 23.4 | 0 |
| P12163_1_F6,13779 K.EINGAGINSSFAVHQD | 2390.2   | 0.00363  | 3 | 1 | 53.2 | 0 |
| P12163_1_F6,14593 K.EINGAGINSSFAVHQD | 2390.2   | 0.00726  | 3 | 1 | 65.8 | 0 |
| P12163_1_F6,15944 K.EINGAGINSSFAVHQD | 2390.2   | 0.01194  | 3 | 1 | 83.4 | 0 |
| P12163_1_F7,13845 K.EINGAGINSSFAVHQD | 2390.2   | 0.00246  | 3 | 1 | 50.9 | 0 |
| P12163_1_F7,15188 K.EINGAGINSSFAVHQD | 2390.2   | 0.00495  | 3 | 1 | 94.9 | 0 |
| P12163_1_F7,15219 K.EINGAGINSSFAVHQD | 2390.2   | -0.01319 | 2 | 1 | 32   | 0 |
| P12163_1_F7,15414 K.EINGAGINSSFAVHQD | 2390.2   | 0.00783  | 3 | 1 | 50.5 | 0 |
| P12163_1_F8,14498 K.EINGAGINSSFAVHQD | 2390.2   | 0.00594  | 3 | 1 | 32.3 | 0 |
| P12163_1_F8,15883 K.EINGAGINSSFAVHQD | 2390.2   | 0.00495  | 3 | 1 | 80.6 | 0 |
| P12163_1_F8,15931 K.EINGAGINSSFAVHQD | 2390.2   | -0.00041 | 2 | 1 | 42   | 0 |
| P12163_1_F9,15766 K.EINGAGINSSFAVHQD | 2390.2   | 0.00531  | 3 | 1 | 28.5 | 0 |
| P12163_2_F10,1351 K.EINGAGINSSFAVHQD | 2390.2   | 0.00533  | 4 | 1 | 61.7 | 0 |
| P12163_2_F10,1353 K.EINGAGINSSFAVHQD | 2390.2   | 0.0072   | 3 | 1 | 64   | 0 |
| P12163_2_F10,1448 K.EINGAGINSSFAVHQD | 2390.2   | 0.00204  | 3 | 1 | 83.2 | 0 |
| P12163_2_F10,1467 K.EINGAGINSSFAVHQD | 2390.2   | 0.0093   | 3 | 1 | 91.6 | 0 |
| P12163_2_F4,13512 K.EINGAGINSSFAVHQD | 2390.2   | 0.00348  | 3 | 1 | 74.8 | 0 |
| P12163_2_F4,14828 K.EINGAGINSSFAVHQD | 2390.2   | 0.0057   | 3 | 1 | 66.3 | 0 |
| P12163_2_S5,13704 K.EINGAGINSSFAVHQD | 2390.2   | -0.01495 | 4 | 1 | 52.4 | 0 |
| P12163_2_S5,13705 K.EINGAGINSSFAVHQD | 2390.2   | -0.00984 | 3 | 1 | 31.9 | 0 |
| P12163_2_S5,14902 K.EINGAGINSSFAVHQD | 2390.2   | 0.00441  | 3 | 1 | 54.5 | 0 |
| P12163_2_S5,14919 K.EINGAGINSSFAVHQD | 2390.2   | 0.00253  | 4 | 1 | 67.3 | 0 |
| P12163_1_F4,18072 K.NIGVIAVCPK.G     | 1679.013 | 0.00546  | 3 | 1 | 34.4 | 0 |
| P12163_1_F4,18077 K.NIGVIAVCPK.G     | 1679.013 | 0.00611  | 2 | 1 | 41.1 | 0 |
| P12163_1_F4,18323 K.NIGVIAVCPK.G     | 1679.013 | 0.00789  | 3 | 1 | 48.6 | 0 |
| P12163_1_F4,18329 K.NIGVIAVCPK.G     | 1679.013 | 0.01207  | 2 | 1 | 30.8 | 0 |
| P12163_1_F5,16865 K.NIGVIAVCPK.G     | 1679.013 | 0.00623  | 2 | 1 | 38   | 0 |
| P12163_1_F5,16881 K.NIGVIAVCPK.G     | 1679.013 | 0.00681  | 3 | 1 | 44.2 | 0 |
| P12163_1_F6,17306 K.NIGVIAVCPK.G     | 1679.013 | 0.00711  | 2 | 1 | 41.1 | 0 |
| P12163_1_F7,16041 K.NIGVIAVCPK.G     | 1679.013 | -0.00051 | 3 | 1 | 31   | 0 |

|                                          |          |          |   |   |      |   |
|------------------------------------------|----------|----------|---|---|------|---|
| P12163_1_F7,16454 K.NIGVIAVCPK.G         | 1679.013 | 0.00063  | 3 | 1 | 31.9 | 0 |
| P12163_1_S10,1613 K.NIGVIAVCPK.G         | 1679.013 | 0.00384  | 3 | 1 | 33.1 | 0 |
| P12163_2_F1,17381 K.NIGVIAVCPK.G         | 1679.013 | 0.00153  | 3 | 1 | 36.9 | 0 |
| P12163_2_F1,17390 K.NIGVIAVCPK.G         | 1679.013 | 0.00501  | 2 | 1 | 41.2 | 0 |
| P12163_2_F1,17640 K.NIGVIAVCPK.G         | 1679.013 | 0.00531  | 2 | 1 | 35.8 | 0 |
| P12163_2_F4,15629 K.NIGVIAVCPK.G         | 1679.013 | -0.00141 | 3 | 1 | 35.8 | 0 |
| P12163_2_F4,15633 K.NIGVIAVCPK.G         | 1679.013 | 0.00249  | 2 | 1 | 26.7 | 0 |
| P12163_2_F4,15954 K.NIGVIAVCPK.G         | 1679.013 | -0.00357 | 3 | 1 | 24.7 | 0 |
| P12163_2_F4,16182 K.NIGVIAVCPK.G         | 1679.013 | 0.00486  | 3 | 1 | 28.3 | 0 |
| P12163_1_F3,16441 K.NTVECITGIISK.I       | 1943.109 | 0.00565  | 4 | 1 | 25.6 | 0 |
| P12163_1_F3,16474 K.NTVECITGIISK.I       | 1943.109 | 0.00208  | 2 | 1 | 45.9 | 0 |
| P12163_1_F3,20236 K.NTVECITGIISK.I       | 1943.109 | 0.00353  | 3 | 1 | 56   | 0 |
| P12163_1_F3,20621 K.NTVECITGIISK.I       | 1943.109 | 0.00654  | 2 | 1 | 61   | 0 |
| P12163_1_F4,21226 K.NTVECITGIISK.I       | 1943.109 | 0.00638  | 3 | 1 | 48.3 | 0 |
| P12163_1_F4,21236 K.NTVECITGIISK.I       | 1943.109 | 0.00642  | 2 | 1 | 62.4 | 0 |
| P12163_1_F5,20042 K.NTVECITGIISK.I       | 1943.109 | 0.0013   | 2 | 1 | 46.1 | 0 |
| P12163_1_F5,20080 K.NTVECITGIISK.I       | 1943.109 | 0.00491  | 3 | 1 | 32.9 | 0 |
| P12163_1_F6,20037 K.NTVECITGIISK.I       | 1943.109 | 0.00548  | 3 | 1 | 44   | 0 |
| P12163_1_F6,20041 K.NTVECITGIISK.I       | 1943.109 | -0.00224 | 2 | 1 | 55.9 | 0 |
| P12163_1_F6,21127 K.NTVECITGIISK.I       | 1943.109 | 0.00029  | 3 | 1 | 28.7 | 0 |
| P12163_1_F8,20158 K.NTVECITGIISK.I       | 1943.109 | 0.00038  | 3 | 1 | 29.3 | 0 |
| P12163_2_F1,20743 K.NTVECITGIISK.I       | 1943.109 | 0.00995  | 3 | 1 | 47   | 0 |
| P12163_2_F1,20797 K.NTVECITGIISK.I       | 1943.109 | 0.00392  | 2 | 1 | 77.9 | 0 |
| P12163_2_F4,18486 K.NTVECITGIISK.I       | 1943.109 | -0.00592 | 3 | 1 | 34   | 0 |
| P12163_2_F4,18759 K.NTVECITGIISK.I       | 1943.109 | 0.00179  | 3 | 1 | 44.2 | 0 |
| P12163_2_S3,16728 K.NTVECITGIISK.I       | 1943.109 | 0.00422  | 3 | 1 | 43.2 | 0 |
| P12163_1_F5,12128 K.SDIVVK.V             | 1268.803 | 0.01028  | 2 | 1 | 30.9 | 0 |
| P12163_2_F1,12611 K.SDIVVK.V             | 1268.803 | 0.00674  | 2 | 1 | 31.1 | 0 |
| P12163_1_F6,11251 R.DSLAEAK.S            | 1341.783 | 0.00421  | 3 | 1 | 22.4 | 0 |
| P12163_1_F8,10459 R.DSLAEAK.S            | 1341.783 | 0.00133  | 3 | 1 | 23.9 | 0 |
| P12163_2_F1,10713 R.DSLAEAK.S            | 1341.783 | 0.00263  | 3 | 1 | 24.8 | 0 |
| P12163_2_S5,10025 R.DSLAEAK.S            | 1341.783 | 0.0074   | 3 | 1 | 24.7 | 0 |
| P12163_1_F3,17950 R.FTENGMNEDLAYK.N      | 2140.084 | 0.0144   | 3 | 1 | 39.1 | 0 |
| P12163_1_F3,18010 R.FTENGMNEDLAYK.N      | 2140.084 | 0.003    | 2 | 1 | 64.9 | 0 |
| P12163_1_S1,12194 R.GVSFM*VDNCSTTAR..    | 1864.883 | 0.001    | 3 | 1 | 52.9 | 0 |
| P12163_1_S1,13455 R.GVSFM*VDNCSTTAR..    | 1864.883 | 0.00542  | 2 | 1 | 51.2 | 0 |
| P12163_1_S1,13477 R.GVSFM*VDNCSTTAR..    | 1864.883 | 0.01069  | 3 | 1 | 74.4 | 0 |
| P12163_1_S1,13707 R.GVSFM*VDNCSTTAR..    | 1864.883 | 0.00224  | 2 | 1 | 31.4 | 0 |
| P12163_1_S1,13727 R.GVSFM*VDNCSTTAR..    | 1864.883 | 0.00196  | 3 | 1 | 55.6 | 0 |
| P12163_1_S1,14343 R.GVSFMVDNCSTTAR.L     | 1848.889 | 0.00151  | 3 | 1 | 64.8 | 0 |
| P12163_1_S1,15977 R.GVSFMVDNCSTTAR.L     | 1848.889 | 0.0001   | 2 | 1 | 53.9 | 0 |
| P12163_1_S1,15993 R.GVSFMVDNCSTTAR.L     | 1848.889 | 0.00358  | 3 | 1 | 64.1 | 0 |
| P12163_2_F6,16158 R.GVSFMVDNCSTTAR.L     | 1848.889 | 0.00754  | 2 | 1 | 60   | 0 |
| P12163_2_F9,12906 R.RFTENGM*NEDLAYK.     | 2312.18  | 0.01077  | 3 | 1 | 30   | 0 |
| P12163_2_F9,14580 R.RFTENGMNEDLAYK.N     | 2296.185 | 0.00972  | 3 | 1 | 43.1 | 0 |
| P12163_1_F3,12385 R.SDIFGER.G ! R.SDIFGE | 1127.6   | 0.00279  | 3 | 1 | 22.2 | 0 |
| P12163_1_F3,15292 R.SDIFGER.G ! R.SDIFGE | 1127.6   | 0.0025   | 2 | 1 | 27.9 | 0 |
| P12163_1_F3,8658 R.SVVLAGR.R             | 1005.636 | 0.00243  | 3 | 1 | 35   | 0 |
| P12163_2_F1,8147 R.SVVLAGR.R             | 1005.636 | 0.00498  | 3 | 1 | 43.5 | 0 |
| P12163_1_F4,25190 K.AAEIEALLK.S          | 1565.972 | 0.00726  | 3 | 1 | 35.4 | 0 |
| P12163_1_F4,25197 K.AAEIEALLK.S          | 1565.972 | 0.00003  | 2 | 1 | 47.9 | 0 |

|                   |                     |          |          |   |   |      |   |
|-------------------|---------------------|----------|----------|---|---|------|---|
| P12163_1_F4,25435 | K.AAEIEALLK.S       | 1565.972 | 0.00599  | 2 | 1 | 46.9 | 0 |
| P12163_1_F4,25542 | K.AAEIEALLK.S       | 1565.972 | 0.0048   | 3 | 1 | 29.8 | 0 |
| P12163_1_F5,23457 | K.AAEIEALLK.S       | 1565.972 | 0.00501  | 2 | 1 | 48.4 | 0 |
| P12163_1_F5,23467 | K.AAEIEALLK.S       | 1565.972 | 0.00705  | 3 | 1 | 36.1 | 0 |
| P12163_1_F5,23647 | K.AAEIEALLK.S       | 1565.972 | 0.00799  | 2 | 1 | 53.3 | 0 |
| P12163_1_F5,23657 | K.AAEIEALLK.S       | 1565.972 | 0.00681  | 3 | 1 | 46.5 | 0 |
| P12163_1_F7,21803 | K.AAEIEALLK.S       | 1565.972 | 0.00261  | 3 | 1 | 39   | 0 |
| P12163_1_F7,22105 | K.AAEIEALLK.S       | 1565.972 | 0.00132  | 3 | 1 | 33.9 | 0 |
| P12163_1_F7,22402 | K.AAEIEALLK.S       | 1565.972 | 0.00597  | 3 | 1 | 42.8 | 0 |
| P12163_2_F1,24466 | K.AAEIEALLK.S       | 1565.972 | 0.00301  | 2 | 1 | 48.7 | 0 |
| P12163_2_F1,24485 | K.AAEIEALLK.S       | 1565.972 | 0.00576  | 3 | 1 | 34.8 | 0 |
| P12163_2_F1,24686 | K.AAEIEALLK.S       | 1565.972 | 0.00649  | 2 | 1 | 53.2 | 0 |
| P12163_2_F1,24703 | K.AAEIEALLK.S       | 1565.972 | 0.00621  | 3 | 1 | 34.9 | 0 |
| P12163_2_S5,21048 | K.AAEIEALLK.S       | 1565.972 | 0.00066  | 3 | 1 | 23.8 | 0 |
| P12163_1_F3,10569 | K.EALASNDDTK.A      | 1671.901 | -0.0012  | 2 | 1 | 29.5 | 0 |
| P12163_1_F4,9988  | K.EALASNDDTK.A      | 1671.901 | 0.00788  | 2 | 1 | 27.9 | 0 |
| P12163_1_F4,10039 | K.EALASNDDTK.A      | 1671.901 | 0.00798  | 3 | 1 | 28   | 0 |
| P12163_1_F4,10304 | K.EALASNDDTK.A      | 1671.901 | 0.00666  | 2 | 1 | 29.5 | 0 |
| P12163_1_F4,11247 | K.EALASNDDTK.A      | 1671.901 | 0.00888  | 2 | 1 | 41.1 | 0 |
| P12163_1_F7,9492  | K.EALASNDDTK.A      | 1671.901 | 0.0006   | 2 | 1 | 30.8 | 0 |
| P12163_2_F1,10394 | K.EALASNDDTK.A      | 1671.901 | 0.00752  | 2 | 1 | 36.2 | 0 |
| P12163_2_F1,10401 | K.EALASNDDTK.A      | 1671.901 | 0.00567  | 3 | 1 | 25.8 | 0 |
| P12163_2_F4,9410  | K.EALASNDDTK.A      | 1671.901 | -0.00116 | 2 | 1 | 28.5 | 0 |
| P12163_1_F5,14886 | K.INNSYQSIYK.Q      | 1838.027 | 0.00562  | 2 | 1 | 54.8 | 0 |
| P12163_1_F5,14911 | K.INNSYQSIYK.Q      | 1838.027 | 0.00631  | 3 | 1 | 44.6 | 0 |
| P12163_1_S10,1527 | K.INNSYQSIYK.Q      | 1838.027 | 0.00775  | 3 | 1 | 25.5 | 0 |
| P12163_2_F1,15356 | K.INNSYQSIYK.Q      | 1838.027 | 0.00348  | 2 | 1 | 51.8 | 0 |
| P12163_2_F10,1434 | K.INNSYQSIYK.Q      | 1838.027 | 0.0019   | 3 | 1 | 41.7 | 0 |
| P12163_2_F2,15635 | K.INNSYQSIYK.Q      | 1838.027 | 0.0091   | 2 | 1 | 50.1 | 0 |
| P12163_2_F2,15680 | K.INNSYQSIYK.Q      | 1838.027 | 0.00448  | 3 | 1 | 38.6 | 0 |
| P12163_2_F4,14384 | K.INNSYQSIYK.Q      | 1838.027 | 0.00538  | 3 | 1 | 22.4 | 0 |
| P12163_2_F8,12070 | K.INNSYQSIYK.Q      | 1838.027 | 0.00904  | 3 | 1 | 37.6 | 0 |
| P12163_2_F2,11024 | K.SFEDEK.I          | 1362.736 | 0.00605  | 3 | 1 | 26.2 | 0 |
| P12163_1_F5,7990  | K.VQTEGEEK.I        | 1527.847 | 0.00398  | 2 | 1 | 34.7 | 0 |
| P12163_1_F5,8009  | K.VQTEGEEK.I        | 1527.847 | 0.0052   | 3 | 1 | 23   | 0 |
| P12163_2_F1,8504  | K.VQTEGEEK.I        | 1527.847 | 0.0073   | 2 | 1 | 34.9 | 0 |
| P12163_2_F1,8613  | K.VQTEGEEK.I        | 1527.847 | 0.00538  | 3 | 1 | 29.1 | 0 |
| P12163_2_S5,8301  | K.VQTEGEEK.I        | 1527.847 | 0.00298  | 3 | 1 | 31.1 | 0 |
| P12163_1_S1,14963 | K.VVNLSEELSAER.A    | 1649.901 | 0.004    | 3 | 1 | 37.9 | 0 |
| P12163_1_S1,16766 | K.VVNLSEELSAER.A    | 1649.901 | 0.00295  | 3 | 1 | 57.6 | 0 |
| P12163_1_S1,16967 | K.VVNLSEELSAER.A    | 1649.901 | -0.00005 | 3 | 1 | 56.1 | 0 |
| P12163_1_S1,19519 | K.VVNLSEELSAER.A    | 1649.901 | 0.00394  | 2 | 1 | 58   | 0 |
| P12163_1_F7,20348 | R.EDSTEFDEGVIIIEFRK | 2651.366 | 0.00611  | 3 | 1 | 31.9 | 0 |
| P12163_1_F2,16095 | R.ISADFDNFR.K       | 1388.711 | 0.00082  | 3 | 1 | 30.2 | 0 |
| P12163_1_F3,19788 | R.ISADFDNFR.K       | 1388.711 | 0.00386  | 2 | 1 | 27.3 | 0 |
| P12163_1_F6,18687 | R.ISADFDNFR.K       | 1388.711 | 0.00476  | 2 | 1 | 29.7 | 0 |
| P12163_2_F4,17892 | R.ISADFDNFR.K       | 1388.711 | 0.00296  | 2 | 1 | 25.1 | 0 |
| P12163_2_F6,15242 | R.KVVNLSEELSAER.A   | 2082.201 | 0.00558  | 4 | 1 | 34.7 | 0 |
| P12163_2_F6,17209 | R.KVVNLSEELSAER.A   | 2082.201 | 0.00274  | 2 | 1 | 38.4 | 0 |
| P12163_2_F6,17211 | R.KVVNLSEELSAER.A   | 2082.201 | 0.00312  | 3 | 1 | 35.8 | 0 |
| P12163_1_S1,26242 | R.LLQVLDNFER.A      | 1550.884 | 0.00481  | 2 | 1 | 32.3 | 0 |

|                   |                     |          |          |   |   |      |   |
|-------------------|---------------------|----------|----------|---|---|------|---|
| P12163_1_S1,17939 | R.LSLVTNAQGEVM*ER.  | 1866.99  | 0.00288  | 3 | 1 | 43.4 | 0 |
| P12163_1_S1,18124 | R.LSLVTNAQGEVM*ER.  | 1866.99  | 0.003    | 2 | 1 | 54.8 | 0 |
| P12163_1_S1,18178 | R.LSLVTNAQGEVM*ER.  | 1866.99  | 0.00363  | 3 | 1 | 53.9 | 0 |
| P12163_1_S1,19359 | R.LSLVTNAQGEVMER.L  | 1850.995 | 0.00192  | 2 | 1 | 33.8 | 0 |
| P12163_1_S1,19471 | R.LSLVTNAQGEVMER.L  | 1850.995 | 0.00357  | 3 | 1 | 75.9 | 0 |
| P12163_1_S1,19632 | R.LSLVTNAQGEVMER.L  | 1850.995 | 0.0032   | 2 | 1 | 69.6 | 0 |
| P12163_1_S1,19749 | R.LSLVTNAQGEVMER.L  | 1850.995 | 0.00337  | 3 | 1 | 64.7 | 0 |
| P12163_1_S1,19837 | R.LSLVTNAQGEVMER.L  | 1850.995 | 0.0043   | 2 | 1 | 46.3 | 0 |
| P12163_2_F4,6807  | K.ASAHMK.G          | 1252.729 | -0.00488 | 3 | 1 | 23.5 | 0 |
| P12163_1_F5,10369 | K.GASYEDVK.A        | 1476.815 | 0.00953  | 3 | 1 | 33.7 | 0 |
| P12163_1_S10,1177 | K.GASYEDVK.A        | 1476.815 | 0.00533  | 3 | 1 | 36.3 | 0 |
| P12163_2_F1,10764 | K.GASYEDVK.A        | 1476.815 | 0.00749  | 2 | 1 | 33.6 | 0 |
| P12163_2_F1,10784 | K.GASYEDVK.A        | 1476.815 | 0.0071   | 3 | 1 | 46.4 | 0 |
| P12163_1_F7,20495 | K.GILGYTDEDVVSNDV   | 2462.199 | 0.00505  | 3 | 1 | 22.5 | 0 |
| P12163_1_F7,20512 | K.GILGYTDEDVVSNDV   | 2462.199 | 0.00104  | 2 | 1 | 27   | 0 |
| P12163_1_F3,11768 | K.LTGM*AFR.V        | 1115.618 | 0.00465  | 3 | 1 | 27.5 | 0 |
| P12163_1_F3,15690 | K.LTGM*AFR.V        | 1115.618 | 0.00489  | 3 | 1 | 29.1 | 0 |
| P12163_1_F3,15646 | K.LTGMAFR.V         | 1099.624 | 0.00336  | 3 | 1 | 31.5 | 0 |
| P12163_1_F5,8020  | K.TVDGPSMK.D        | 1442.813 | 0.00311  | 3 | 1 | 27.1 | 0 |
| P12163_2_F1,10964 | K.TVDGPSMK.D        | 1442.813 | 0.00491  | 3 | 1 | 29.3 | 0 |
| P12163_1_F4,18363 | K.VLPDLNGK.L        | 1463.904 | 0.00799  | 2 | 1 | 41.1 | 0 |
| P12163_1_F5,17208 | K.VLPDLNGK.L        | 1463.904 | 0.00989  | 2 | 1 | 28.5 | 0 |
| P12163_1_F7,16285 | K.VLPDLNGK.L        | 1463.904 | -0.00045 | 3 | 1 | 25.1 | 0 |
| P12163_1_F5,11321 | K.YASEGLK.G         | 1462.836 | 0.00347  | 3 | 1 | 41.4 | 0 |
| P12163_2_F2,12045 | K.YASEGLK.G         | 1462.836 | 0.00371  | 3 | 1 | 36.4 | 0 |
| P12163_2_F8_12070 | K.YASEGLK.G         | 1462.836 | 0.00735  | 2 | 1 | 25.4 | 0 |
| P12163_2_F8_12070 | K.YASEGLK.G         | 1462.836 | -0.00016 | 3 | 1 | 33.5 | 0 |
| P12163_2_S5,11094 | K.YASEGLK.G         | 1462.836 | -0.00016 | 3 | 1 | 24.8 | 0 |
| P12163_1_F4,13685 | K.YDSTHGVPK.G       | 1661.911 | 0.00801  | 2 | 1 | 33.4 | 0 |
| P12163_1_F6,13152 | K.YDSTHGVPK.G       | 1661.911 | 0.00563  | 3 | 1 | 27.4 | 0 |
| P12163_1_F6,13159 | K.YDSTHGVPK.G       | 1661.911 | 0.00749  | 2 | 1 | 47   | 0 |
| P12163_1_F9,13090 | K.YDSTHGVPK.G       | 1661.911 | 0.01441  | 2 | 1 | 30.2 | 0 |
| P12163_2_F7,11909 | K.YDSTHGVPK.G       | 1661.911 | 0.00296  | 3 | 1 | 42.6 | 0 |
| P12163_2_F7,11911 | K.YDSTHGVPK.G       | 1661.911 | 0.00423  | 2 | 1 | 40.3 | 0 |
| P12163_1_F3,11981 | R.GASQNIIPSSTGAAK.A | 2010.144 | 0.00473  | 3 | 1 | 29   | 0 |
| P12163_1_F3,13781 | R.GASQNIIPSSTGAAK.A | 2010.144 | 0.00434  | 3 | 1 | 48.9 | 0 |
| P12163_1_F3,13792 | R.GASQNIIPSSTGAAK.A | 2010.144 | 0.00413  | 2 | 1 | 63.7 | 0 |
| P12163_1_F4,12536 | R.GASQNIIPSSTGAAK.A | 2010.144 | 0.00313  | 2 | 1 | 36.9 | 0 |
| P12163_1_F4,14266 | R.GASQNIIPSSTGAAK.A | 2010.144 | 0.00674  | 3 | 1 | 47   | 0 |
| P12163_1_F4,14336 | R.GASQNIIPSSTGAAK.A | 2010.144 | 0.01255  | 2 | 1 | 69.6 | 0 |
| P12163_1_F6,13245 | R.GASQNIIPSSTGAAK.A | 2010.144 | 0.00221  | 3 | 1 | 28.9 | 0 |
| P12163_1_F9,13673 | R.GASQNIIPSSTGAAK.A | 2010.144 | 0.01418  | 3 | 1 | 22.9 | 0 |
| P12163_2_F1,13300 | R.GASQNIIPSSTGAAK.A | 2010.144 | 0.00326  | 3 | 1 | 53.8 | 0 |
| P12163_2_F1,13303 | R.GASQNIIPSSTGAAK.A | 2010.144 | 0.00093  | 2 | 1 | 56   | 0 |
| P12163_2_F2,3669  | R.GASQNIIPSSTGAAK.A | 2010.144 | 0.00347  | 3 | 1 | 24.5 | 0 |
| P12163_2_F4,12292 | R.GASQNIIPSSTGAAK.A | 2010.144 | 0.00245  | 3 | 1 | 44.1 | 0 |
| P12163_1_F5,15104 | R.SSIFDAK.A         | 1375.804 | 0.00563  | 3 | 1 | 26.5 | 0 |
| P12163_1_F5,15244 | R.SSIFDAK.A         | 1375.804 | 0.00682  | 2 | 1 | 29.2 | 0 |
| P12163_1_F5,15341 | R.SSIFDAK.A         | 1375.804 | 0.00626  | 3 | 1 | 27.2 | 0 |
| P12163_1_F6,15886 | R.SSIFDAK.A         | 1375.804 | 0.00758  | 2 | 1 | 27.6 | 0 |
| P12163_1_F7,15102 | R.SSIFDAK.A         | 1375.804 | 0.00394  | 2 | 1 | 26.2 | 0 |

|                   |                   |          |          |   |   |      |   |
|-------------------|-------------------|----------|----------|---|---|------|---|
| P12163_1_F8,15164 | R.SSIFDAK.A       | 1375.804 | 0.00368  | 3 | 1 | 28.3 | 0 |
| P12163_2_F1,15096 | R.SSIFDAK.A       | 1375.804 | 0.00644  | 3 | 1 | 28.6 | 0 |
| P12163_2_F1,15296 | R.SSIFDAK.A       | 1375.804 | 0.00706  | 2 | 1 | 28.6 | 0 |
| P12163_2_F1,15305 | R.SSIFDAK.A       | 1375.804 | 0.00575  | 3 | 1 | 24.7 | 0 |
| P12163_2_F1,15530 | R.SSIFDAK.A       | 1375.804 | 0.0044   | 2 | 1 | 27.7 | 0 |
| P12163_2_F2,15863 | R.SSIFDAK.A       | 1375.804 | 0.00134  | 3 | 1 | 36.5 | 0 |
| P12163_2_F2,15866 | R.SSIFDAK.A       | 1375.804 | 0.00482  | 2 | 1 | 28.9 | 0 |
| P12163_2_F8_12070 | R.SSIFDAK.A       | 1375.804 | 0.00378  | 2 | 1 | 27.6 | 0 |
| P12163_2_S5,14318 | R.SSIFDAK.A       | 1375.804 | 0.00308  | 3 | 1 | 26.5 | 0 |
| P12163_1_F7,23896 | R.VLDLIEHM*ALVAAH | 1966.073 | 0.00264  | 3 | 1 | 35.9 | 0 |
| P12163_1_F7,24055 | R.VLDLIEHM*ALVAAH | 1966.073 | 0.00261  | 3 | 1 | 40.2 | 0 |
| P12163_1_F7,14482 | K.AAAM*ALVQHPVVNA | 2391.31  | 0.00214  | 3 | 1 | 46.8 | 0 |
| P12163_1_F8,15199 | K.AAAM*ALVQHPVVNA | 2391.31  | 0.00395  | 4 | 1 | 47.1 | 0 |
| P12163_1_F8,15209 | K.AAAM*ALVQHPVVNA | 2391.31  | 0.00523  | 3 | 1 | 47.8 | 0 |
| P12163_2_F6,14668 | K.AAAM*ALVQHPVVNA | 2391.31  | 0.01228  | 3 | 1 | 31.1 | 0 |
| P12163_2_F6,14693 | K.AAAM*ALVQHPVVNA | 2391.31  | 0.00327  | 4 | 1 | 38.6 | 0 |
| P12163_2_S5,13899 | K.AAAM*ALVQHPVVNA | 2391.31  | 0.00603  | 4 | 1 | 34.5 | 0 |
| P12163_1_F7,16889 | K.AAAMALVQHPVVNA  | 2375.315 | 0.00694  | 3 | 1 | 52   | 0 |
| P12163_1_F7,16911 | K.AAAMALVQHPVVNA  | 2375.315 | 0.00183  | 4 | 1 | 33   | 0 |
| P12163_1_F8,17783 | K.AAAMALVQHPVVNA  | 2375.315 | 0.00571  | 4 | 1 | 25   | 0 |
| P12163_1_F8,17787 | K.AAAMALVQHPVVNA  | 2375.315 | 0.00541  | 3 | 1 | 59.1 | 0 |
| P12163_2_F6,17258 | K.AAAMALVQHPVVNA  | 2375.315 | 0.00232  | 3 | 1 | 59.9 | 0 |
| P12163_2_S5,16082 | K.AAAMALVQHPVVNA  | 2375.315 | 0.00187  | 4 | 1 | 37.9 | 0 |
| P12163_2_S5,16086 | K.AAAMALVQHPVVNA  | 2375.315 | 0.00385  | 3 | 1 | 35.1 | 0 |
| P12163_1_F4,11808 | K.AAGIAPSK.S      | 1322.825 | 0.0071   | 3 | 1 | 27.1 | 0 |
| P12163_1_F7,10236 | K.AAGIAPSK.S      | 1322.825 | 0.00167  | 3 | 1 | 30.8 | 0 |
| P12163_2_F1,10951 | K.AAGIAPSK.S      | 1322.825 | 0.00562  | 2 | 1 | 25.9 | 0 |
| P12163_2_F4,13082 | K.AASAGAAAPASHPVT | 3173.741 | 0.00508  | 4 | 1 | 22   | 0 |
| P12163_2_F4,14413 | K.AASAGAAAPASHPVT | 3173.741 | 0.0034   | 4 | 1 | 36.3 | 0 |
| P12163_2_F4,14467 | K.AASAGAAAPASHPVT | 3173.741 | 0.00016  | 3 | 1 | 51.3 | 0 |
| P12163_1_F4,16858 | K.GVTM*TALLAK.A   | 1628.987 | 0.003    | 3 | 1 | 22.3 | 0 |
| P12163_1_F6,19816 | K.GVTM*TALLAK.A   | 1628.987 | -0.00063 | 3 | 1 | 26.6 | 0 |
| P12163_1_F7,19003 | K.GVTM*TALLAK.A   | 1628.987 | -0.0006  | 3 | 1 | 32.4 | 0 |
| P12163_1_F7,19446 | K.GVTM*TALLAK.A   | 1628.987 | 0.00531  | 3 | 1 | 23.8 | 0 |
| P12163_1_F4,21445 | K.GVTMTALLAK.A    | 1612.992 | 0.0069   | 3 | 1 | 28.4 | 0 |
| P12163_2_F1,20941 | K.GVTMTALLAK.A    | 1612.992 | 0.00563  | 2 | 1 | 59.7 | 0 |
| P12163_2_F1,20946 | K.GVTMTALLAK.A    | 1612.992 | 0.00414  | 3 | 1 | 25.4 | 0 |
| P12163_2_F1,23783 | K.LDLYLLSQK.W     | 1701.041 | 0.00582  | 3 | 1 | 30.6 | 0 |
| P12163_2_F1,23792 | K.LDLYLLSQK.W     | 1701.041 | 0.00729  | 2 | 1 | 36.9 | 0 |
| P12163_2_F9,20615 | K.LDLYLLSQK.W     | 1701.041 | 0.00759  | 3 | 1 | 30.9 | 0 |
| P12163_1_F8,15315 | K.M*LVNVTADHR.I   | 1475.794 | 0.0035   | 3 | 1 | 33   | 0 |
| P12163_2_F6,11884 | K.M*LVNVTADHR.I   | 1475.794 | 0.00143  | 3 | 1 | 38.8 | 0 |
| P12163_2_F6,14696 | K.M*LVNVTADHR.I   | 1475.794 | 0.00161  | 3 | 1 | 30.6 | 0 |
| P12163_1_F8,15302 | K.MLVNVTADHR.I    | 1459.799 | 0.00885  | 2 | 1 | 24.2 | 0 |
| P12163_1_F8,15447 | K.MLVNVTADHR.I    | 1459.799 | 0.00248  | 3 | 1 | 48.7 | 0 |
| P12163_2_F6,14714 | K.MLVNVTADHR.I    | 1459.799 | 0.00441  | 2 | 1 | 26.7 | 0 |
| P12163_2_F6,14780 | K.MLVNVTADHR.I    | 1459.799 | -0.00027 | 3 | 1 | 62.6 | 0 |
| P12163_1_S1,18675 | K.NM*IESLSVPTFR.V | 1713.915 | 0.00467  | 3 | 1 | 51.3 | 0 |
| P12163_1_S1,19082 | K.NMIESLSVPTFR.V  | 1697.92  | 0.0041   | 3 | 1 | 35.8 | 0 |
| P12163_1_S1,21184 | K.NMIESLSVPTFR.V  | 1697.92  | 0.00249  | 2 | 1 | 26.3 | 0 |
| P12163_1_S1,21212 | K.NMIESLSVPTFR.V  | 1697.92  | 0.00242  | 3 | 1 | 57.8 | 0 |



|                   |                       |          |          |   |   |      |   |
|-------------------|-----------------------|----------|----------|---|---|------|---|
| P12163_1_F4,12914 | K.TVATPYAK.K          | 1458.878 | 0.00712  | 2 | 1 | 25.1 | 0 |
| P12163_1_F9,12371 | K.TVATPYAK.K          | 1458.878 | 0.00366  | 2 | 1 | 30   | 0 |
| P12163_1_F2,7067  | K.VAESAPSGPR.K        | 1274.701 | 0.00249  | 3 | 1 | 29.2 | 0 |
| P12163_1_F2,8378  | K.VAESAPSGPR.K        | 1274.701 | 0.00261  | 3 | 1 | 36.1 | 0 |
| P12163_1_S1,18408 | R.EIFM*PALSSTMTEGK.   | 2266.192 | 0.0102   | 3 | 1 | 35   | 0 |
| P12163_1_S1,21256 | R.EIFMPALSSTMTEGK.I   | 2250.197 | -0.00357 | 3 | 1 | 46.7 | 0 |
| P12163_1_S1,21418 | R.EIFMPALSSTMTEGK.I   | 2250.197 | -0.0012  | 3 | 1 | 66.9 | 0 |
| P12163_1_F3,14363 | R.ITPEDVEK.A          | 1538.889 | 0.00292  | 3 | 1 | 35   | 0 |
| P12163_1_F4,14814 | R.ITPEDVEK.A          | 1538.889 | 0.00544  | 2 | 1 | 27.3 | 0 |
| P12163_2_S3,11910 | R.ITPEDVEK.A          | 1538.889 | 0.00825  | 3 | 1 | 32.9 | 0 |
| P12163_1_F3,13271 | K.DMAFTASPGTK.G       | 1733.935 | 0.00816  | 3 | 1 | 30.1 | 0 |
| P12163_1_F3,15048 | K.DMAFTASPGTK.G       | 1733.935 | 0.00926  | 2 | 1 | 40.1 | 0 |
| P12163_1_F4,13724 | K.DMAFTASPGTK.G       | 1733.935 | 0.00578  | 2 | 1 | 25   | 0 |
| P12163_2_F1,14307 | K.DMAFTASPGTK.G       | 1733.935 | 0.00507  | 3 | 1 | 32.5 | 0 |
| P12163_2_F1,14308 | K.DMAFTASPGTK.G       | 1733.935 | 0.00574  | 2 | 1 | 52.4 | 0 |
| P12163_1_F5,9436  | K.DTGIGEK.L ! K.DTGLC | 1327.768 | 0.01078  | 2 | 1 | 24.4 | 0 |
| P12163_2_F1,9982  | K.DTGIGEK.L ! K.DTGLC | 1327.768 | 0.00634  | 2 | 1 | 28   | 0 |
| P12163_2_F1,9987  | K.DTGIGEK.L ! K.DTGLC | 1327.768 | 0.00585  | 3 | 1 | 23.6 | 0 |
| P12163_1_F5,10701 | K.HLPGYM*K.M          | 1469.839 | 0.00681  | 3 | 1 | 28.1 | 0 |
| P12163_2_F4,10784 | K.HLPGYM*K.M          | 1469.839 | 0.00444  | 3 | 1 | 25.4 | 0 |
| P12163_2_F8_12070 | K.HLPGYM*K.M          | 1469.839 | 0.0051   | 3 | 1 | 22.9 | 0 |
| P12163_1_S10,1361 | K.HLPGYMK.M           | 1453.845 | 0.00462  | 3 | 1 | 22.2 | 0 |
| P12163_2_F4,12255 | K.HLPGYMK.M           | 1453.845 | 0.00444  | 3 | 1 | 23.1 | 0 |
| P12163_2_F8_12070 | K.HLPGYMK.M           | 1453.845 | 0.00474  | 3 | 1 | 29.6 | 0 |
| P12163_1_F3,25651 | K.LEFNTLQAIYQEELK.L   | 2447.364 | 0.00451  | 3 | 1 | 43   | 0 |
| P12163_1_F9,18744 | K.NHLLLELAK.L         | 1659.041 | 0.00384  | 3 | 1 | 51.8 | 0 |
| P12163_1_F9,18765 | K.NHLLLELAK.L         | 1659.041 | 0.0047   | 2 | 1 | 46.9 | 0 |
| P12163_1_F9,18803 | K.NHLLLELAK.L         | 1659.041 | 0.00468  | 4 | 1 | 30.6 | 0 |
| P12163_1_F9,18954 | K.NHLLLELAK.L         | 1659.041 | 0.00282  | 3 | 1 | 43.9 | 0 |
| P12163_1_S10,1823 | K.NHLLLELAK.L         | 1659.041 | 0.00273  | 3 | 1 | 39.2 | 0 |
| P12163_2_F8_12070 | K.NHLLLELAK.L         | 1659.041 | 0.00681  | 3 | 1 | 52.4 | 0 |
| P12163_2_F9,17520 | K.NHLLLELAK.L         | 1659.041 | 0.00828  | 4 | 1 | 31.7 | 0 |
| P12163_2_F9,17578 | K.NHLLLELAK.L         | 1659.041 | 0.00501  | 3 | 1 | 52.6 | 0 |
| P12163_2_F9,17612 | K.NHLLLELAK.L         | 1659.041 | 0.0074   | 2 | 1 | 44.9 | 0 |
| P12163_2_F9,17809 | K.NHLLLELAK.L         | 1659.041 | 0.00606  | 3 | 1 | 52.7 | 0 |
| P12163_1_F3,24416 | K.QQDFDMLLSIK.N       | 1946.088 | 0.00576  | 3 | 1 | 40.3 | 0 |
| P12163_1_F3,24520 | K.QQDFDMLLSIK.N       | 1946.088 | 0.00775  | 2 | 1 | 38.7 | 0 |
| P12163_2_F10,1478 | K.SIQCYMHETGASEEVA    | 2272.064 | 0.00122  | 3 | 1 | 41   | 0 |
| P12163_2_F4,14608 | K.SIQCYMHETGASEEVA    | 2272.064 | 0.00164  | 3 | 1 | 34.9 | 0 |
| P12163_1_F2,13257 | K.YDNLTVD.R           | 1299.685 | 0.00431  | 2 | 1 | 28.7 | 0 |
| P12163_2_F7,19257 | R.ALELPLHWK.V         | 1715.046 | 0.0026   | 3 | 1 | 32.3 | 0 |
| P12163_2_F8_12070 | R.ALELPLHWK.V         | 1715.046 | 0.00614  | 3 | 1 | 25.4 | 0 |
| P12163_1_F6,18442 | R.QHGYPVSQEVFSGFK.L   | 2318.239 | 0.00405  | 3 | 1 | 40.1 | 0 |
| P12163_1_F7,17607 | R.QHGYPVSQEVFSGFK.L   | 2318.239 | 0.00921  | 3 | 1 | 50.8 | 0 |
| P12163_1_F7,17610 | R.QHGYPVSQEVFSGFK.L   | 2318.239 | 0.00724  | 4 | 1 | 37.3 | 0 |
| P12163_2_F6,17883 | R.QHGYPVSQEVFSGFK.L   | 2318.239 | 0.00351  | 3 | 1 | 24.8 | 0 |
| P12163_2_F6,17936 | R.QHGYPVSQEVFSGFK.L   | 2318.239 | 0.00516  | 4 | 1 | 27   | 0 |
| P12163_2_F7,16034 | R.QHGYPVSQEVFSGFK.L   | 2318.239 | -0.0027  | 3 | 1 | 54.5 | 0 |
| P12163_1_F4,21378 | R.WDINYALK.H          | 1630.941 | 0.00051  | 2 | 1 | 33.8 | 0 |
| P12163_1_F5,20138 | R.WDINYALK.H          | 1630.941 | 0.00348  | 3 | 1 | 31.9 | 0 |
| P12163_1_S10,1908 | R.WDINYALK.H          | 1630.941 | 0.00768  | 3 | 1 | 22.5 | 0 |

|                   |                     |          |          |   |   |      |   |
|-------------------|---------------------|----------|----------|---|---|------|---|
| P12163_2_F1,20826 | R.WDINYALK.H        | 1630.941 | 0.00816  | 3 | 1 | 32.7 | 0 |
| P12163_2_F1,20905 | R.WDINYALK.H        | 1630.941 | 0.00815  | 2 | 1 | 42.2 | 0 |
| P12163_2_F8,12070 | R.WDINYALK.H        | 1630.941 | 0.0033   | 3 | 1 | 26.2 | 0 |
| P12163_1_F3,14269 | K.EAQSVPAALYK.K     | 1985.116 | 0.00687  | 3 | 1 | 30.5 | 0 |
| P12163_1_F3,16976 | K.EAQSVPAALYK.K     | 1985.116 | 0.00506  | 2 | 1 | 50   | 0 |
| P12163_1_F3,17051 | K.EAQSVPAALYK.K     | 1985.116 | 0.00861  | 3 | 1 | 58.1 | 0 |
| P12163_2_F6,16123 | K.EAQSVPAALYK.K     | 1985.116 | 0.00213  | 3 | 1 | 32.3 | 0 |
| P12163_1_F2,21238 | K.GAM*VSIIGLDSDK.V  | 1930.078 | 0.00599  | 3 | 1 | 50.6 | 0 |
| P12163_1_F3,18908 | K.GAM*VSIIGLDSDK.V  | 1930.078 | 0.00299  | 2 | 1 | 33.2 | 0 |
| P12163_1_F3,20275 | K.GAMVSIIGLDSDK.V   | 1914.083 | 0.00435  | 3 | 1 | 38.1 | 0 |
| P12163_1_F3,21770 | K.GAMVSIIGLDSDK.V   | 1914.083 | 0.02076  | 3 | 1 | 30.4 | 0 |
| P12163_1_F3,21782 | K.GAMVSIIGLDSDK.V   | 1914.083 | 0.01171  | 2 | 1 | 68.4 | 0 |
| P12163_1_F5,12940 | K.GIEAVEAK.A        | 1424.857 | 0.01249  | 3 | 1 | 35.5 | 0 |
| P12163_1_F7,12514 | K.GIEAVEAK.A        | 1424.857 | 0.00412  | 3 | 1 | 34.1 | 0 |
| P12163_2_F1,13310 | K.GIEAVEAK.A        | 1424.857 | 0.00495  | 2 | 1 | 30.1 | 0 |
| P12163_2_F1,13313 | K.GIEAVEAK.A        | 1424.857 | 0.00121  | 3 | 1 | 35.4 | 0 |
| P12163_2_S5,12288 | K.GIEAVEAK.A        | 1424.857 | 0.00367  | 3 | 1 | 31.2 | 0 |
| P12163_1_F5,10044 | K.SYELGPGK.V        | 1458.841 | 0.01198  | 3 | 1 | 23.9 | 0 |
| P12163_1_F5,12063 | K.SYELGPGK.V        | 1458.841 | 0.0025   | 3 | 1 | 28.2 | 0 |
| P12163_1_F5,18107 | K.VIAGIVK.R         | 1307.887 | 0.0053   | 3 | 1 | 24.6 | 0 |
| P12163_1_F7,17126 | K.VIAGIVK.R         | 1307.887 | 0.00071  | 3 | 1 | 25.7 | 0 |
| P12163_1_F3,22814 | K.VQIANYLCPGNYAVSC  | 2618.422 | 0.01129  | 3 | 1 | 53.7 | 0 |
| P12163_1_S1,16312 | K.VQQLCDAANQEVD     | 2584.277 | 0.01154  | 3 | 1 | 58   | 0 |
| P12163_1_F4,14548 | R.GAAM*QEADA        | 1757.931 | 0.01163  | 3 | 1 | 35.6 | 0 |
| P12163_1_F4,14479 | R.GAAMQEADA         | 1741.936 | 0.01382  | 3 | 1 | 44.2 | 0 |
| P12163_1_F4,14509 | R.GAAMQEADA         | 1741.936 | 0.00913  | 2 | 1 | 76.8 | 0 |
| P12163_2_F1,13447 | R.GAAMQEADA         | 1741.936 | -0.00205 | 3 | 1 | 40.1 | 0 |
| P12163_2_F1,13453 | R.GAAMQEADA         | 1741.936 | 0.00187  | 2 | 1 | 74.5 | 0 |
| P12163_1_F6,21491 | R.LAVAGAFHTGFM*EP   | 2181.143 | 0.00058  | 3 | 1 | 23.5 | 0 |
| P12163_1_F6,21515 | R.LAVAGAFHTGFM      | 2165.148 | 0.00124  | 3 | 1 | 57.7 | 0 |
| P12163_1_F6,21529 | R.LAVAGAFHTGFM      | 2165.148 | -0.00205 | 2 | 1 | 50.9 | 0 |
| P12163_1_S1,19845 | R.LEAALAAATQINTPR.M | 1773.017 | 0.00797  | 3 | 1 | 48.4 | 0 |
| P12163_1_S1,20090 | R.LEAALAAATQINTPR.M | 1773.017 | 0.00482  | 3 | 1 | 22.2 | 0 |
| P12163_1_S1,21413 | R.LEAALAAATQINTPR.M | 1773.017 | 0.00305  | 3 | 1 | 66.5 | 0 |
| P12163_1_S1,21452 | R.LEAALAAATQINTPR.M | 1773.017 | 0.01681  | 2 | 1 | 35.8 | 0 |
| P12163_1_S1,21599 | R.LEAALAAATQINTPR.M | 1773.017 | 0.00215  | 3 | 1 | 99   | 0 |
| P12163_1_S1,21639 | R.LEAALAAATQINTPR.M | 1773.017 | 0.00529  | 2 | 1 | 53.9 | 0 |
| P12163_1_F6,15909 | R.M*PVISNVDAQPHADF  | 2684.454 | 0.00423  | 3 | 1 | 39.7 | 0 |
| P12163_1_F6,18224 | R.M*PVISNVDAQPHADF  | 2684.454 | 0.00279  | 3 | 1 | 39.9 | 0 |
| P12163_1_F6,18234 | R.M*PVISNVDAQPHADF  | 2684.454 | 0.00416  | 4 | 1 | 33.2 | 0 |
| P12163_2_F4,14774 | R.M*PVISNVDAQPHADF  | 2684.454 | 0.00353  | 3 | 1 | 37.7 | 0 |
| P12163_2_F4,17047 | R.M*PVISNVDAQPHADF  | 2684.454 | 0.00808  | 4 | 1 | 30.7 | 0 |
| P12163_1_F6,18174 | R.MPVISNVDAQPHADPE  | 2668.459 | 0.01347  | 3 | 1 | 40.4 | 0 |
| P12163_1_F6,18189 | R.MPVISNVDAQPHADPE  | 2668.459 | 0.00872  | 4 | 1 | 26.8 | 0 |
| P12163_2_F4,16996 | R.MPVISNVDAQPHADPE  | 2668.459 | -0.00084 | 4 | 1 | 24.1 | 0 |
| P12163_1_F8,16020 | K.AGHPTFVLVR.E      | 1400.832 | 0.0024   | 3 | 1 | 26.1 | 0 |
| P12163_2_F6,15432 | K.AGHPTFVLVR.E      | 1400.832 | 0.00258  | 3 | 1 | 31   | 0 |
| P12163_1_F2,7035  | K.AVDDPR.T          | 976.5365 | 0.00178  | 2 | 1 | 26.1 | 0 |
| P12163_2_F1,6810  | K.AVDDPR.T          | 976.5365 | 0.00264  | 2 | 1 | 32   | 0 |
| P12163_1_F3,16236 | K.EDDIGTYTIK.A      | 1762.968 | 0.01439  | 2 | 1 | 32   | 0 |
| P12163_1_F4,19473 | K.FIVEASVK.A        | 1500.925 | 0.00598  | 3 | 1 | 39.2 | 0 |

|                   |                       |          |          |   |   |      |   |
|-------------------|-----------------------|----------|----------|---|---|------|---|
| P12163_1_F4,19481 | K.FIVEASVK.A          | 1500.925 | 0.00679  | 2 | 1 | 31.3 | 0 |
| P12163_2_F1,18739 | K.FIVEASVK.A          | 1500.925 | 0.00505  | 2 | 1 | 27.4 | 0 |
| P12163_2_F4,16957 | K.FIVEASVK.A          | 1500.925 | -0.00149 | 3 | 1 | 31   | 0 |
| P12163_1_F3,21916 | K.IFIGGTGYIGK.F       | 1847.125 | 0.0072   | 3 | 1 | 28.6 | 0 |
| P12163_1_F3,24358 | K.IFIGGTGYIGK.F       | 1847.125 | 0.00231  | 3 | 1 | 49.1 | 0 |
| P12163_1_F3,24366 | K.IFIGGTGYIGK.F       | 1847.125 | 0.00831  | 2 | 1 | 40.2 | 0 |
| P12163_1_F7,24233 | K.QVDVVISTVGHLLGI     | 2616.518 | 0.00252  | 4 | 1 | 45.5 | 0 |
| P12163_1_F9,17128 | K.SQLLDHFK.N ! K.SQLI | 1595.937 | 0.00443  | 3 | 1 | 32.5 | 0 |
| P12163_1_F9,17162 | K.SQLLDHFK.N ! K.SQLI | 1595.937 | 0.0037   | 2 | 1 | 32.3 | 0 |
| P12163_1_F9,17345 | K.SQLLDHFK.N ! K.SQLI | 1595.937 | 0.00677  | 3 | 1 | 26.4 | 0 |
| P12163_2_F9,16416 | K.SQLLDHFK.N ! K.SQLI | 1595.937 | 0.00413  | 3 | 1 | 30.3 | 0 |
| P12163_2_F9,16522 | K.SQLLDHFK.N ! K.SQLI | 1595.937 | 0.01083  | 4 | 1 | 23.1 | 0 |
| P12163_2_F9,16595 | K.SQLLDHFK.N ! K.SQLI | 1595.937 | 0.00812  | 2 | 1 | 38   | 0 |
| P12163_2_F9,16634 | K.SQLLDHFK.N ! K.SQLI | 1595.937 | 0.00632  | 3 | 1 | 45.3 | 0 |
| P12163_1_F2,16621 | K.VVILGDGNPK.E ! K.V  | 1619.994 | 0.00916  | 3 | 1 | 42.4 | 0 |
| P12163_1_F2,16631 | K.VVILGDGNPK.E ! K.V  | 1619.994 | 0.00786  | 2 | 1 | 32   | 0 |
| P12163_1_F4,17955 | K.VVILGDGNPK.E ! K.V  | 1619.994 | 0.00196  | 2 | 1 | 32.7 | 0 |
| P12163_1_F6,16784 | K.VVILGDGNPK.E ! K.V  | 1619.994 | -0.00209 | 3 | 1 | 31   | 0 |
| P12163_1_F7,15901 | K.VVILGDGNPK.E ! K.V  | 1619.994 | 0.00328  | 3 | 1 | 31.7 | 0 |
| P12163_1_F7,15910 | K.VVILGDGNPK.E ! K.V  | 1619.994 | 0.0033   | 2 | 1 | 46.1 | 0 |
| P12163_1_S1,15560 | K.VVILGDGNPK.E ! K.V  | 1619.994 | 0.00523  | 3 | 1 | 22.5 | 0 |
| P12163_2_F1,17152 | K.VVILGDGNPK.E ! K.V  | 1619.994 | 0.00384  | 2 | 1 | 29   | 0 |
| P12163_2_F1,17180 | K.VVILGDGNPK.E ! K.V  | 1619.994 | 0.00676  | 3 | 1 | 27.6 | 0 |
| P12163_2_F2,141   | K.VVILGDGNPK.E ! K.V  | 1619.994 | 0.00366  | 2 | 1 | 46   | 0 |
| P12163_2_F4,15347 | K.VVILGDGNPK.E ! K.V  | 1619.994 | 0.00415  | 3 | 1 | 28.2 | 0 |
| P12163_2_F4,15580 | K.VVILGDGNPK.E ! K.V  | 1619.994 | -0.00228 | 2 | 1 | 41.6 | 0 |
| P12163_2_F4,15582 | K.VVILGDGNPK.E ! K.V  | 1619.994 | -0.00728 | 3 | 1 | 44.8 | 0 |
| P12163_2_F1,11313 | R.ESTLSAPSK.S         | 1527.884 | 0.0044   | 2 | 1 | 25.7 | 0 |
| P12163_1_F9,10429 | R.VHAVEPAK.S          | 1458.889 | 0.0047   | 3 | 1 | 35.3 | 0 |
| P12163_2_F9,9774  | R.VHAVEPAK.S          | 1458.889 | 0.0029   | 3 | 1 | 47.4 | 0 |
| P12163_2_F9,9777  | R.VHAVEPAK.S          | 1458.889 | 0.00279  | 2 | 1 | 29.7 | 0 |
| P12163_2_F9,9892  | R.VHAVEPAK.S          | 1458.889 | 0.00478  | 4 | 1 | 29.3 | 0 |
| P12163_1_F3,18830 | R.VYVPEEQVLK.N        | 1812.073 | 0.00839  | 2 | 1 | 37.2 | 0 |
| P12163_1_F3,18851 | R.VYVPEEQVLK.N        | 1812.073 | 0.00283  | 3 | 1 | 30.9 | 0 |
| P12163_1_F6,18725 | K.AYEAATAAAAASELPP1   | 2341.245 | 0.00096  | 3 | 1 | 60.1 | 0 |
| P12163_1_F6,18956 | K.AYEAATAAAAASELPP1   | 2341.245 | 0.00193  | 3 | 1 | 53.9 | 0 |
| P12163_1_F7,17780 | K.AYEAATAAAAASELPP1   | 2341.245 | -0.00396 | 3 | 1 | 33.5 | 0 |
| P12163_1_F7,17908 | K.AYEAATAAAAASELPP1   | 2341.245 | 0.00088  | 2 | 1 | 75.2 | 0 |
| P12163_1_F7,18008 | K.AYEAATAAAAASELPP1   | 2341.245 | 0.00438  | 3 | 1 | 86.7 | 0 |
| P12163_1_F7,18227 | K.AYEAATAAAAASELPP1   | 2341.245 | 0.00211  | 3 | 1 | 87.7 | 0 |
| P12163_1_F8,76    | K.AYEAATAAAAASELPP1   | 2341.245 | 0.00603  | 3 | 1 | 52.8 | 0 |
| P12163_1_S10,1787 | K.AYEAATAAAAASELPP1   | 2341.245 | 0.00096  | 3 | 1 | 23.5 | 0 |
| P12163_2_F10,1671 | K.AYEAATAAAAASELPP1   | 2341.245 | 0.01498  | 3 | 1 | 67.8 | 0 |
| P12163_2_F10,1693 | K.AYEAATAAAAASELPP1   | 2341.245 | 0.00454  | 3 | 1 | 29.8 | 0 |
| P12163_2_S5,12742 | K.AYEAATAAAAASELPP1   | 2341.245 | 0.00075  | 4 | 1 | 31.7 | 0 |
| P12163_2_S5,17230 | K.AYEAATAAAAASELPP1   | 2341.245 | 0.00546  | 3 | 1 | 65.5 | 0 |
| P12163_2_S5,17451 | K.AYEAATAAAAASELPP1   | 2341.245 | 0.00222  | 3 | 1 | 73.8 | 0 |
| P12163_2_S5,17664 | K.AYEAATAAAAASELPP1   | 2341.245 | 0.00486  | 3 | 1 | 62.1 | 0 |
| P12163_2_S5,17951 | K.AYEAATAAAAASELPP1   | 2341.245 | 0.00139  | 3 | 1 | 56.8 | 0 |
| P12163_1_S1,19084 | K.DSTLIMQLLR.D        | 1493.866 | -0.00037 | 3 | 1 | 24   | 0 |
| P12163_1_F9,8957  | K.EAADHSLK.A          | 1478.842 | 0.00758  | 2 | 1 | 31.2 | 0 |

|                   |                          |          |          |   |   |      |   |
|-------------------|--------------------------|----------|----------|---|---|------|---|
| P12163_2_F9,9013  | K.EAADHSLK.A             | 1478.842 | 0.00692  | 2 | 1 | 35.1 | 0 |
| P12163_2_F9,9028  | K.EAADHSLK.A             | 1478.842 | 0.00648  | 3 | 1 | 27.3 | 0 |
| P12163_2_S3,7010  | K.GNEQNVK.R              | 1396.8   | 0.00561  | 2 | 1 | 27.4 | 0 |
| P12163_2_F1,9483  | K.LAEQAER.Y ! R.LAEQ,    | 1120.626 | 0.00298  | 2 | 1 | 24.7 | 0 |
| P12163_1_F3,8049  | R.EHHVYLAR.L             | 1328.738 | 0.00362  | 3 | 1 | 36.7 | 0 |
| P12163_1_F3,8052  | R.EHHVYLAR.L             | 1328.738 | 0.00481  | 4 | 1 | 27.3 | 0 |
| P12163_2_S5,8146  | R.EHHVYLAR.L             | 1328.738 | 0.00281  | 4 | 1 | 29.4 | 0 |
| P12163_1_F4,20959 | R.IISSIEQK.E ! R.ILSSIEQ | 1525.941 | 0.01597  | 2 | 1 | 28   | 0 |
| P12163_1_F5,18516 | R.IISSIEQK.E ! R.ILSSIEQ | 1525.941 | 0.00793  | 2 | 1 | 32.8 | 0 |
| P12163_1_F5,19572 | R.IISSIEQK.E ! R.ILSSIEQ | 1525.941 | 0.00666  | 3 | 1 | 29.6 | 0 |
| P12163_1_F5,19600 | R.IISSIEQK.E ! R.ILSSIEQ | 1525.941 | 0.00717  | 2 | 1 | 38.4 | 0 |
| P12163_2_F1,20030 | R.IISSIEQK.E ! R.ILSSIEQ | 1525.941 | 0.00227  | 2 | 1 | 27.6 | 0 |
| P12163_2_F1,20062 | R.IISSIEQK.E ! R.ILSSIEQ | 1525.941 | 0.00678  | 3 | 1 | 21.9 | 0 |
| P12163_1_F5,14698 | R.NLVSVMGYK.N            | 1487.904 | 0.00341  | 2 | 1 | 26.9 | 0 |
| P12163_1_F9,15275 | R.NLVSVMGYK.N            | 1487.904 | 0.00667  | 2 | 1 | 28.7 | 0 |
| P12163_2_F2,15532 | R.NLVSVMGYK.N            | 1487.904 | 0.00185  | 2 | 1 | 27.4 | 0 |
| P12163_1_F4,14815 | R.VEDELAK.I              | 1411.825 | 0.00546  | 2 | 1 | 28.7 | 0 |
| P12163_1_F4,20211 | R.YDEMVEAMK.K            | 1723.885 | 0.00739  | 2 | 1 | 45.1 | 0 |
| P12163_1_F4,20239 | R.YDEMVEAMK.K            | 1723.885 | 0.0066   | 3 | 1 | 42.4 | 0 |
| P12163_2_F9,18032 | R.YDEMVEAMK.K            | 1723.885 | 0.00348  | 3 | 1 | 28.1 | 0 |
| P12163_1_S10,1839 | R.YLAEFK.V ! R.YLAEFK    | 1378.819 | 0.0079   | 3 | 1 | 24   | 0 |
| P12163_2_F8_1207  | R.YLAEFK.V ! R.YLAEFK    | 1378.819 | 0.00689  | 3 | 1 | 22.1 | 0 |
| P12163_2_F8_1207  | R.YLAEFK.V ! R.YLAEFK    | 1378.819 | 0.0056   | 3 | 1 | 22.9 | 0 |
| P12163_1_F7,15210 | K.AEDHDVPVTPDEIVK.I      | 2272.228 | 0.00999  | 3 | 1 | 34.1 | 0 |
| P12163_1_F7,15256 | K.AEDHDVPVTPDEIVK.I      | 2272.228 | 0.00872  | 2 | 1 | 31.9 | 0 |
| P12163_1_F8,15935 | K.AEDHDVPVTPDEIVK.I      | 2272.228 | 0.00514  | 2 | 1 | 35   | 0 |
| P12163_1_F8,15940 | K.AEDHDVPVTPDEIVK.I      | 2272.228 | -0.00513 | 3 | 1 | 38   | 0 |
| P12163_1_F8,15957 | K.AEDHDVPVTPDEIVK.I      | 2272.228 | 0.00675  | 3 | 1 | 48.7 | 0 |
| P12163_1_F8,16012 | K.AEDHDVPVTPDEIVK.I      | 2272.228 | 0.00487  | 4 | 1 | 29   | 0 |
| P12163_2_S5,14518 | K.AEDHDVPVTPDEIVK.I      | 2272.228 | 0.00199  | 4 | 1 | 29.4 | 0 |
| P12163_2_S5,14598 | K.AEDHDVPVTPDEIVK.I      | 2272.228 | 0.01086  | 3 | 1 | 47.7 | 0 |
| P12163_1_S1,21178 | K.CSVIPVEFVVR.G          | 1608.908 | -0.00085 | 2 | 1 | 28   | 0 |
| P12163_1_F9,6234  | K.EPIHDR.I               | 1070.59  | 0.00356  | 3 | 1 | 27.7 | 0 |
| P12163_1_S10,7410 | K.EPIHDR.I               | 1070.59  | -0.00109 | 3 | 1 | 39.4 | 0 |
| P12163_2_F8_1207  | K.EPIHDR.I               | 1070.59  | 0.00242  | 3 | 1 | 36.9 | 0 |
| P12163_1_F3,18435 | K.LPANILTPTTK.A          | 1777.104 | 0.00672  | 3 | 1 | 25   | 0 |
| P12163_1_F3,20089 | K.LPANILTPTTK.A          | 1777.104 | 0.00512  | 2 | 1 | 47.6 | 0 |
| P12163_1_F3,20096 | K.LPANILTPTTK.A          | 1777.104 | 0.00612  | 3 | 1 | 41   | 0 |
| P12163_1_F5,17696 | K.SSDDSILLIDEVHTPDS      | 2390.199 | 0.00244  | 3 | 1 | 35.4 | 0 |
| P12163_1_F5,19273 | K.SSDDSILLIDEVHTPDS      | 2390.199 | 0.0028   | 3 | 1 | 52.7 | 0 |
| P12163_1_F5,19308 | K.SSDDSILLIDEVHTPDS      | 2390.199 | -0.00137 | 2 | 1 | 61   | 0 |
| P12163_1_F6,18032 | K.SSDDSILLIDEVHTPDS      | 2390.199 | 0.00673  | 3 | 1 | 28.4 | 0 |
| P12163_1_F6,19369 | K.SSDDSILLIDEVHTPDS      | 2390.199 | 0.00286  | 3 | 1 | 56   | 0 |
| P12163_1_F6,19376 | K.SSDDSILLIDEVHTPDS      | 2390.199 | -0.00237 | 2 | 1 | 27.6 | 0 |
| P12163_1_S10,1829 | K.SSDDSILLIDEVHTPDS      | 2390.199 | 0.00211  | 3 | 1 | 31.9 | 0 |
| P12163_2_F10,1718 | K.SSDDSILLIDEVHTPDS      | 2390.199 | 0.00004  | 3 | 1 | 56.7 | 0 |
| P12163_1_F3,16483 | R.FQSGLEPENVDK.E         | 1971.064 | 0.00707  | 2 | 1 | 42.2 | 0 |
| P12163_1_F4,16990 | R.FQSGLEPENVDK.E         | 1971.064 | 0.00483  | 3 | 1 | 28.2 | 0 |
| P12163_1_F4,16991 | R.FQSGLEPENVDK.E         | 1971.064 | 0.00505  | 2 | 1 | 46   | 0 |
| P12163_1_F4,25386 | R.ILASIPFK.G             | 1496.966 | 0.00755  | 2 | 1 | 28   | 0 |
| P12163_2_F1,24690 | R.ILASIPFK.G             | 1496.966 | 0.00903  | 3 | 1 | 23.9 | 0 |

|                    |                          |          |          |   |   |      |   |
|--------------------|--------------------------|----------|----------|---|---|------|---|
| P12163_1_F4,18063  | R.NYCGNALPDGLVK.N        | 2029.1   | 0.00145  | 2 | 1 | 27.6 | 0 |
| P12163_2_F1,17437  | R.NYCGNALPDGLVK.N        | 2029.1   | 0.0022   | 3 | 1 | 28.6 | 0 |
| P12163_2_F1,17438  | R.NYCGNALPDGLVK.N        | 2029.1   | 0.00019  | 2 | 1 | 39.2 | 0 |
| P12163_1_F7,16597  | R.VASEHGLILVDTK.Y        | 1990.179 | 0.00983  | 3 | 1 | 29.1 | 0 |
| P12163_1_F8,17224  | R.VASEHGLILVDTK.Y        | 1990.179 | 0.00855  | 2 | 1 | 35.2 | 0 |
| P12163_1_F8,17241  | R.VASEHGLILVDTK.Y        | 1990.179 | 0.00617  | 3 | 1 | 23.3 | 0 |
| P12163_2_F6,16599  | R.VASEHGLILVDTK.Y        | 1990.179 | 0.00605  | 3 | 1 | 34.9 | 0 |
| P12163_2_F8_12070  | R.VASEHGLILVDTK.Y        | 1990.179 | 0.00518  | 3 | 1 | 28.7 | 0 |
| P12163_2_F9,15758  | R.VASEHGLILVDTK.Y        | 1990.179 | 0.0077   | 3 | 1 | 31.9 | 0 |
| P12163_1_F3,26840  | R.YIFLYEAITK.S           | 1869.098 | 0.00324  | 3 | 1 | 29   | 0 |
| P12163_2_S5,15561  | R.YWIAHSYEER.F           | 1657.828 | -0.00004 | 3 | 1 | 27.3 | 0 |
| P12163_1_F7,15774  | K.AAQDIANAELAPTHPI       | 2092.145 | -0.00148 | 2 | 1 | 34.8 | 0 |
| P12163_1_F7,15776  | K.AAQDIANAELAPTHPI       | 2092.145 | 0.00293  | 3 | 1 | 63.3 | 0 |
| P12163_1_F8,104    | K.AAQDIANAELAPTHPI       | 2092.145 | 0.00143  | 3 | 1 | 26.9 | 0 |
| P12163_2_S5,15434  | K.AAQDIANAELAPTHPI       | 2092.145 | 0.00413  | 3 | 1 | 83.3 | 0 |
| P12163_1_S1,19084  | K.DSTLIMQLLR.D           | 1493.866 | -0.00037 | 3 | 1 | 24   | 0 |
| P12163_2_F1,15381  | K.EAAESTLTAYK.A          | 1791.995 | 0.00377  | 3 | 1 | 45.6 | 0 |
| P12163_2_F1,9483   | K.LAEQAER.Y ! R.LAEQ     | 1120.626 | 0.00298  | 2 | 1 | 24.7 | 0 |
| P12163_1_F4,13882  | R.EENVYMAK.L ! R.EEN     | 1591.861 | 0.00598  | 3 | 1 | 30   | 0 |
| P12163_1_F5,12428  | R.EENVYMAK.L ! R.EEN     | 1591.861 | 0.00856  | 2 | 1 | 35.6 | 0 |
| P12163_1_F5,12489  | R.EENVYMAK.L ! R.EEN     | 1591.861 | 0.01225  | 3 | 1 | 24.7 | 0 |
| P12163_2_F1,12743  | R.EENVYMAK.L ! R.EEN     | 1591.861 | 0.00684  | 2 | 1 | 31.1 | 0 |
| P12163_1_F6,8198   | R.GNEDHVSTIR.D           | 1431.749 | -0.00676 | 2 | 1 | 34.4 | 0 |
| P12163_2_F7,7385   | R.GNEDHVSTIR.D           | 1431.749 | 0.00055  | 3 | 1 | 22.1 | 0 |
| P12163_2_S5,8118   | R.GNEDHVSTIR.D           | 1431.749 | 0.00232  | 3 | 1 | 37.5 | 0 |
| P12163_1_F4,20959  | R.IISSIEQK.E ! R.ILSSIEQ | 1525.941 | 0.01597  | 2 | 1 | 28   | 0 |
| P12163_1_F5,18516  | R.IISSIEQK.E ! R.ILSSIEQ | 1525.941 | 0.00793  | 2 | 1 | 32.8 | 0 |
| P12163_1_F5,19572  | R.IISSIEQK.E ! R.ILSSIEQ | 1525.941 | 0.00666  | 3 | 1 | 29.6 | 0 |
| P12163_1_F5,19600  | R.IISSIEQK.E ! R.ILSSIEQ | 1525.941 | 0.00717  | 2 | 1 | 38.4 | 0 |
| P12163_2_F1,20030  | R.IISSIEQK.E ! R.ILSSIEQ | 1525.941 | 0.00227  | 2 | 1 | 27.6 | 0 |
| P12163_2_F1,20062  | R.IISSIEQK.E ! R.ILSSIEQ | 1525.941 | 0.00678  | 3 | 1 | 21.9 | 0 |
| P12163_1_F9,15662  | R.KEAAESTLTAYK.A         | 2224.295 | 0.00287  | 4 | 1 | 28.7 | 0 |
| P12163_1_F4,19313  | R.NLLSVAYK.N             | 1515.935 | 0.00473  | 2 | 1 | 24.7 | 0 |
| P12163_1_F5,18080  | R.NLLSVAYK.N             | 1515.935 | 0.00697  | 2 | 1 | 39.6 | 0 |
| P12163_1_F5,18081  | R.NLLSVAYK.N             | 1515.935 | 0.00381  | 3 | 1 | 34.8 | 0 |
| P12163_1_F6,18423  | R.NLLSVAYK.N             | 1515.935 | 0.01068  | 3 | 1 | 31.8 | 0 |
| P12163_1_F9,17887  | R.NLLSVAYK.N             | 1515.935 | 0.006    | 3 | 1 | 24.6 | 0 |
| P12163_2_F1,18587  | R.NLLSVAYK.N             | 1515.935 | 0.00633  | 2 | 1 | 42.2 | 0 |
| P12163_2_F1,18588  | R.NLLSVAYK.N             | 1515.935 | 0.00501  | 3 | 1 | 35.5 | 0 |
| P12163_2_F2,18787  | R.NLLSVAYK.N             | 1515.935 | 0.00681  | 3 | 1 | 28.1 | 0 |
| P12163_2_F2,18808  | R.NLLSVAYK.N             | 1515.935 | 0.00629  | 2 | 1 | 32.4 | 0 |
| P12163_2_F8_12070  | R.NLLSVAYK.N             | 1515.935 | 0.00594  | 3 | 1 | 30.9 | 0 |
| P12163_2_S5,16404  | R.NLLSVAYK.N             | 1515.935 | 0.00054  | 3 | 1 | 31.7 | 0 |
| P12163_1_F4,20324  | R.YEEMVEFM*EK.V          | 1958.97  | -0.00298 | 3 | 1 | 24.3 | 0 |
| P12163_1_F4,25316  | R.YEEMVEFMEK.V           | 1942.975 | 0.00462  | 2 | 1 | 54.3 | 0 |
| P12163_2_F9,21690  | R.YEEMVEFMEK.V           | 1942.975 | 0.00542  | 3 | 1 | 24.9 | 0 |
| P12163_1_S10,18390 | R.YLAEFK.V ! R.YLAEFK    | 1378.819 | 0.0079   | 3 | 1 | 24   | 0 |
| P12163_2_F8_12070  | R.YLAEFK.V ! R.YLAEFK    | 1378.819 | 0.00689  | 3 | 1 | 22.1 | 0 |
| P12163_2_F8_12070  | R.YLAEFK.V ! R.YLAEFK    | 1378.819 | 0.0056   | 3 | 1 | 22.9 | 0 |
| P12163_1_F8,16020  | K.AGHPTFVLVR.E           | 1400.832 | 0.0024   | 3 | 1 | 26.1 | 0 |
| P12163_2_F6,15432  | K.AGHPTFVLVR.E           | 1400.832 | 0.00258  | 3 | 1 | 31   | 0 |

|                   |                       |          |          |   |   |      |   |
|-------------------|-----------------------|----------|----------|---|---|------|---|
| P12163_1_F2,7035  | K.AVDDPR.T            | 976.5365 | 0.00178  | 2 | 1 | 26.1 | 0 |
| P12163_2_F1,6810  | K.AVDDPR.T            | 976.5365 | 0.00264  | 2 | 1 | 32   | 0 |
| P12163_1_F3,16236 | K.EDDIGTYTIK.A        | 1762.968 | 0.01439  | 2 | 1 | 32   | 0 |
| P12163_1_F4,18399 | K.EYVSEEQLLK.N ! R.EY | 1846.042 | 0.00872  | 2 | 1 | 53.1 | 0 |
| P12163_1_F4,18412 | K.EYVSEEQLLK.N ! R.EY | 1846.042 | 0.00857  | 3 | 1 | 45.8 | 0 |
| P12163_1_F9,17086 | K.EYVSEEQLLK.N ! R.EY | 1846.042 | -0.00286 | 3 | 1 | 25.5 | 0 |
| P12163_2_F9,16197 | K.EYVSEEQLLK.N ! R.EY | 1846.042 | 0.00728  | 3 | 1 | 41.1 | 0 |
| P12163_1_F5,11499 | K.GVQTNFK.I           | 1401.831 | 0.00836  | 2 | 1 | 28.1 | 0 |
| P12163_2_F2,12251 | K.GVQTNFK.I           | 1401.831 | 0.00692  | 2 | 1 | 28.3 | 0 |
| P12163_2_F2,12252 | K.GVQTNFK.I           | 1401.831 | 0.00585  | 3 | 1 | 26.4 | 0 |
| P12163_1_F3,21916 | K.ILFIGGTGYIGK.F      | 1847.125 | 0.0072   | 3 | 1 | 28.6 | 0 |
| P12163_1_F3,24358 | K.ILFIGGTGYIGK.F      | 1847.125 | 0.00231  | 3 | 1 | 49.1 | 0 |
| P12163_1_F3,24366 | K.ILFIGGTGYIGK.F      | 1847.125 | 0.00831  | 2 | 1 | 40.2 | 0 |
| P12163_1_F8,10580 | K.NIQEAAPPHK.V        | 1712.99  | 0.00492  | 3 | 1 | 23.1 | 0 |
| P12163_1_F8,10697 | K.NIQEAAPPHK.V        | 1712.99  | 0.00124  | 2 | 1 | 27.3 | 0 |
| P12163_2_F6,10479 | K.NIQEAAPPHK.V        | 1712.99  | 0.00478  | 2 | 1 | 52.7 | 0 |
| P12163_2_F6,10573 | K.NIQEAAPPHK.V        | 1712.99  | 0.00609  | 3 | 1 | 50.3 | 0 |
| P12163_1_F9,17128 | K.SQLLDHFK.N ! K.SQLI | 1595.937 | 0.00443  | 3 | 1 | 32.5 | 0 |
| P12163_1_F9,17162 | K.SQLLDHFK.N ! K.SQLI | 1595.937 | 0.0037   | 2 | 1 | 32.3 | 0 |
| P12163_1_F9,17345 | K.SQLLDHFK.N ! K.SQLI | 1595.937 | 0.00677  | 3 | 1 | 26.4 | 0 |
| P12163_2_F9,16416 | K.SQLLDHFK.N ! K.SQLI | 1595.937 | 0.00413  | 3 | 1 | 30.3 | 0 |
| P12163_2_F9,16522 | K.SQLLDHFK.N ! K.SQLI | 1595.937 | 0.01083  | 4 | 1 | 23.1 | 0 |
| P12163_2_F9,16595 | K.SQLLDHFK.N ! K.SQLI | 1595.937 | 0.00812  | 2 | 1 | 38   | 0 |
| P12163_2_F9,16634 | K.SQLLDHFK.N ! K.SQLI | 1595.937 | 0.00632  | 3 | 1 | 45.3 | 0 |
| P12163_1_F5,9600  | K.STYDVK.A            | 1320.762 | 0.00888  | 3 | 1 | 25.7 | 0 |
| P12163_1_F2,18084 | K.VVIFGDGNPK.A        | 1653.978 | 0.0084   | 2 | 1 | 26.1 | 0 |
| P12163_1_F4,19358 | K.VVIFGDGNPK.A        | 1653.978 | 0.00742  | 2 | 1 | 33.8 | 0 |
| P12163_2_F1,18557 | K.VVIFGDGNPK.A        | 1653.978 | 0.00434  | 2 | 1 | 32.1 | 0 |
| P12163_2_F1,18562 | K.VVIFGDGNPK.A        | 1653.978 | 0.0046   | 3 | 1 | 55.3 | 0 |
| P12163_2_F4,16714 | K.VVIFGDGNPK.A        | 1653.978 | 0.00196  | 3 | 1 | 24   | 0 |
| P12163_1_F3,12577 | R.VEGAVEPTK.S         | 1537.905 | 0.00627  | 2 | 1 | 28.7 | 0 |
| P12163_1_F4,13046 | R.VEGAVEPTK.S         | 1537.905 | 0.00273  | 2 | 1 | 31.2 | 0 |
| P12163_2_F1,12137 | R.VEGAVEPTK.S         | 1537.905 | 0.00259  | 2 | 1 | 33.1 | 0 |
| P12163_1_F4,14302 | K.EGPPTFEQPK.M        | 1737.963 | 0.00627  | 3 | 1 | 29.3 | 0 |
| P12163_1_F4,14305 | K.EGPPTFEQPK.M        | 1737.963 | 0.00561  | 2 | 1 | 34.4 | 0 |
| P12163_1_F4,21454 | K.NFLNLPNVK.V         | 1667.01  | 0.00232  | 2 | 1 | 28.4 | 0 |
| P12163_1_F5,20193 | K.NFLNLPNVK.V         | 1667.01  | 0.00854  | 2 | 1 | 30.9 | 0 |
| P12163_1_F5,20206 | K.NFLNLPNVK.V         | 1667.01  | 0.00417  | 3 | 1 | 38.2 | 0 |
| P12163_2_F1,20936 | K.NFLNLPNVK.V         | 1667.01  | 0.00093  | 3 | 1 | 28.8 | 0 |
| P12163_2_F2,20779 | K.NFLNLPNVK.V         | 1667.01  | 0.0123   | 2 | 1 | 31.5 | 0 |
| P12163_2_S5,18224 | K.NFLNLPNVK.V         | 1667.01  | 0.00102  | 3 | 1 | 28.6 | 0 |
| P12163_1_F4,18518 | K.SFQCELVFAK.M        | 1837.014 | 0.00329  | 3 | 1 | 33.7 | 0 |
| P12163_1_F4,18564 | K.SFQCELVFAK.M        | 1837.014 | 0.00299  | 2 | 1 | 26.3 | 0 |
| P12163_1_F4,21020 | K.SFQCELVFAK.M        | 1837.014 | 0.00347  | 2 | 1 | 24.6 | 0 |
| P12163_1_F4,23073 | K.SFQCELVFAK.M        | 1837.014 | 0.00347  | 3 | 1 | 26.9 | 0 |
| P12163_1_F7,18654 | K.SFQCELVFAK.M        | 1837.014 | -0.0001  | 3 | 1 | 27.8 | 0 |
| P12163_2_F1,20510 | K.SFQCELVFAK.M        | 1837.014 | 0.00434  | 3 | 1 | 33.8 | 0 |
| P12163_2_F1,20516 | K.SFQCELVFAK.M        | 1837.014 | 0.00447  | 2 | 1 | 36.1 | 0 |
| P12163_1_F3,27916 | K.VPLILGIWGGK.G       | 1761.125 | 0.00231  | 3 | 1 | 34.6 | 0 |
| P12163_2_S5,14722 | K.VPVEGCTDPAAANYI     | 2405.171 | 0.00301  | 3 | 1 | 26.8 | 0 |
| P12163_1_F6,14401 | K.VVVHITK.N           | 1403.919 | 0.00204  | 3 | 1 | 22   | 0 |

|                   |                      |          |          |   |   |      |   |
|-------------------|----------------------|----------|----------|---|---|------|---|
| P12163_1_F6,14445 | K.VVVHITK.N          | 1403.919 | 0.00517  | 2 | 1 | 28.6 | 0 |
| P12163_2_F7,12733 | K.VVVHITK.N          | 1403.919 | 0.00971  | 2 | 1 | 30.9 | 0 |
| P12163_1_F3,20954 | K.WISEVGIER.I        | 1392.779 | 0.00424  | 2 | 1 | 26.2 | 0 |
| P12163_2_F1,21025 | K.WISEVGIER.I        | 1392.779 | 0.00414  | 2 | 1 | 27.5 | 0 |
| P12163_1_F2,18810 | K.YLSEAALGDANDDAIF   | 2274.207 | 0.00246  | 2 | 1 | 51   | 0 |
| P12163_1_S1,18056 | K.YLSEAALGDANDDAIF   | 2274.207 | 0.00599  | 3 | 1 | 85.6 | 0 |
| P12163_1_S1,18091 | K.YLSEAALGDANDDAIF   | 2274.207 | 0.00188  | 2 | 1 | 53.2 | 0 |
| P12163_2_F6,18415 | K.YLSEAALGDANDDAIF   | 2274.207 | 0.00443  | 3 | 1 | 35.9 | 0 |
| P12163_2_F7,16880 | K.YLSEAALGDANDDAIF   | 2274.207 | 0.0059   | 3 | 1 | 62   | 0 |
| P12163_2_F7,16885 | K.YLSEAALGDANDDAIF   | 2274.207 | 0.00338  | 2 | 1 | 43.7 | 0 |
| P12163_1_F3,17181 | R.IGVCSGIFR.T        | 1312.735 | 0.00048  | 3 | 1 | 44.6 | 0 |
| P12163_1_F4,13425 | R.M*LVQE QENVK.R     | 1842.025 | 0.0065   | 2 | 1 | 29.8 | 0 |
| P12163_2_F1,12532 | R.M*LVQE QENVK.R     | 1842.025 | 0.00624  | 2 | 1 | 37.6 | 0 |
| P12163_2_F1,14608 | R.MLVQE QENVK.R      | 1826.03  | 0.00804  | 2 | 1 | 56.7 | 0 |
| P12163_1_F9,11491 | R.VYDDEVR.K          | 1199.621 | 0.00332  | 2 | 1 | 24.6 | 0 |
| P12163_1_S10,1227 | R.VYDDEVR.K          | 1199.621 | 0.00568  | 2 | 1 | 24.2 | 0 |
| P12163_2_F9,11203 | R.VYDDEVR.K          | 1199.621 | 0.00462  | 2 | 1 | 24.2 | 0 |
| P12163_1_F3,17947 | K.ANVVVASVEDK.L      | 1739.016 | 0.00661  | 3 | 1 | 36.4 | 0 |
| P12163_1_F3,17981 | K.ANVVVASVEDK.L      | 1739.016 | 0.00525  | 2 | 1 | 47.2 | 0 |
| P12163_1_F4,18493 | K.ANVVVASVEDK.L      | 1739.016 | 0.00337  | 2 | 1 | 43.4 | 0 |
| P12163_1_F4,18507 | K.ANVVVASVEDK.L      | 1739.016 | 0.00751  | 3 | 1 | 55.4 | 0 |
| P12163_2_F1,17744 | K.ANVVVASVEDK.L      | 1739.016 | 0.00403  | 2 | 1 | 37.3 | 0 |
| P12163_2_F1,17765 | K.ANVVVASVEDK.L      | 1739.016 | 0.00958  | 3 | 1 | 49.2 | 0 |
| P12163_2_F1,15626 | K.ATAFPAMCNK.L       | 1718.918 | 0.0102   | 2 | 1 | 35.5 | 0 |
| P12163_1_F8,14572 | K.ERADEVSGPLVMR.A    | 1762.942 | 0.00142  | 3 | 1 | 29.6 | 0 |
| P12163_1_F3,20493 | K.ESDVLESIVK.K       | 1727.005 | 0.00835  | 2 | 1 | 42.8 | 0 |
| P12163_2_F8_12070 | K.ESNRPYGAICASPALV   | 3200.771 | 0.0043   | 5 | 1 | 32.1 | 0 |
| P12163_2_F8_12070 | K.ESNRPYGAICASPALV   | 3200.771 | 0.00702  | 4 | 1 | 45.4 | 0 |
| P12163_2_F8_12070 | K.ESNRPYGAICASPALV   | 3200.771 | 0.00326  | 3 | 1 | 31.6 | 0 |
| P12163_2_F9,18701 | K.ESNRPYGAICASPALV   | 3200.771 | 0.00582  | 4 | 1 | 33.5 | 0 |
| P12163_1_F3,11905 | K.LSDQSEIENR.V       | 1494.77  | 0.00121  | 2 | 1 | 41   | 0 |
| P12163_1_S1,9365  | K.LSDQSEIENR.V       | 1494.77  | -0.00331 | 2 | 1 | 26.2 | 0 |
| P12163_1_S1,10053 | K.LSDQSEIENR.V       | 1494.77  | 0.00322  | 3 | 1 | 35.4 | 0 |
| P12163_1_S1,11616 | K.LSDQSEIENR.V       | 1494.77  | 0.00373  | 2 | 1 | 33.9 | 0 |
| P12163_1_S1,11745 | K.LSDQSEIENR.V       | 1494.77  | 0.0034   | 3 | 1 | 37.5 | 0 |
| P12163_1_S1,11870 | K.LSDQSEIENR.V       | 1494.77  | 0.00347  | 2 | 1 | 49.5 | 0 |
| P12163_1_F2,23575 | K.LVADVLIDEAAK.L     | 1865.12  | 0.0042   | 3 | 1 | 46.7 | 0 |
| P12163_1_F3,24585 | K.LVADVLIDEAAK.L     | 1865.12  | 0.0075   | 3 | 1 | 29.7 | 0 |
| P12163_1_F5,23365 | K.LVADVLIDEAAK.L     | 1865.12  | 0.00093  | 3 | 1 | 35.6 | 0 |
| P12163_1_S1,22683 | K.LVADVLIDEAAK.L     | 1865.12  | 0.00426  | 3 | 1 | 47.2 | 0 |
| P12163_1_S1,22917 | K.LVADVLIDEAAK.L     | 1865.12  | 0.00657  | 3 | 1 | 44.4 | 0 |
| P12163_1_S1,13289 | R.ADEVSGPLVM*R.A ! K | 1493.794 | 0.00616  | 3 | 1 | 34.7 | 0 |
| P12163_1_S1,15847 | R.ADEVSGPLVMR.A ! K. | 1477.799 | 0.00112  | 3 | 1 | 42.7 | 0 |
| P12163_1_F3,10805 | R.SGADVTVASVEK.Q     | 1771.006 | 0.00319  | 2 | 1 | 28.1 | 0 |
| P12163_1_F3,12179 | R.SGADVTVASVEK.Q     | 1771.006 | 0.00063  | 2 | 1 | 45.5 | 0 |
| P12163_1_F3,13819 | R.SGADVTVASVEK.Q     | 1771.006 | 0.00503  | 2 | 1 | 60.4 | 0 |
| P12163_1_F4,14300 | R.SGADVTVASVEK.Q     | 1771.006 | 0.00445  | 2 | 1 | 40.9 | 0 |
| P12163_2_S3,11444 | R.SGADVTVASVEK.Q     | 1771.006 | 0.00271  | 3 | 1 | 34.5 | 0 |
| P12163_1_F9,9070  | R.VDACHGVK.I         | 1493.835 | 0.00278  | 2 | 1 | 26.7 | 0 |
| P12163_1_F9,9111  | R.VDACHGVK.I         | 1493.835 | 0.00509  | 3 | 1 | 29.9 | 0 |
| P12163_1_S1,14763 | R.VVVDGNLITSR.G      | 1476.869 | 0.00403  | 3 | 1 | 40.8 | 0 |

|                                        |          |         |   |   |      |   |
|----------------------------------------|----------|---------|---|---|------|---|
| P12163_1_S1,15254 R.VVVDGNLITSR.G      | 1476.869 | 0.00115 | 3 | 1 | 26.1 | 0 |
| P12163_1_F4,17340 K.EAVFGVEK.E         | 1486.873 | 0.00518 | 2 | 1 | 36.8 | 0 |
| P12163_1_F4,17390 K.EAVFGVEK.E         | 1486.873 | 0.00505 | 3 | 1 | 32.2 | 0 |
| P12163_1_F5,16059 K.EAVFGVEK.E         | 1486.873 | 0.01189 | 3 | 1 | 31.2 | 0 |
| P12163_2_F1,16450 K.EAVFGVEK.E         | 1486.873 | 0.00457 | 3 | 1 | 24.3 | 0 |
| P12163_2_F1,16479 K.EAVFGVEK.E         | 1486.873 | 0.0045  | 2 | 1 | 36.6 | 0 |
| P12163_2_F2,1742 K.EAVFGVEK.E          | 1486.873 | 0.00058 | 3 | 1 | 24.3 | 0 |
| P12163_1_F7,17601 K.EISNAYEVLSDDDEKR.S | 2376.25  | 0.00686 | 3 | 1 | 28.7 | 0 |
| P12163_1_F8,18289 K.EISNAYEVLSDDDEKR.S | 2376.25  | 0.0056  | 3 | 1 | 31.1 | 0 |
| P12163_2_S5,17583 K.EISNAYEVLSDDDEKR.S | 2376.25  | 0.00602 | 3 | 1 | 50.9 | 0 |
| P12163_1_F5,14362 K.GVPVLNK.S          | 1334.862 | 0.00679 | 3 | 1 | 33.8 | 0 |
| P12163_2_F1,14605 K.GVPVLNK.S          | 1334.862 | 0.00373 | 3 | 1 | 25.3 | 0 |
| P12163_1_F2,17412 K.IPAGTQPNTTLVM*AK   | 2166.241 | 0.00428 | 3 | 1 | 26.8 | 0 |
| P12163_1_S1,10835 K.IPAGVDTESR.L       | 1348.737 | 0.00143 | 3 | 1 | 39.9 | 0 |
| P12163_1_F3,24586 K.LIEELADLSK.G       | 1739.041 | 0.00398 | 3 | 1 | 33   | 0 |
| P12163_1_F3,26856 K.LIEELADLSK.G       | 1739.041 | 0.0025  | 3 | 1 | 42.3 | 0 |
| P12163_1_F3,26902 K.LIEELADLSK.G       | 1739.041 | 0.00819 | 2 | 1 | 62.4 | 0 |
| P12163_1_F3,27054 K.LIEELADLSK.G       | 1739.041 | 0.00677 | 3 | 1 | 38.3 | 0 |
| P12163_1_F4,27866 K.LIEELADLSK.G       | 1739.041 | 0.00506 | 3 | 1 | 42.5 | 0 |
| P12163_1_F4,27879 K.LIEELADLSK.G       | 1739.041 | 0.00805 | 2 | 1 | 57.6 | 0 |
| P12163_1_F3,27600 K.VSYIDAILGTTIK.V    | 2002.204 | 0.00603 | 3 | 1 | 39.2 | 0 |
| P12163_1_F3,27619 K.VSYIDAILGTTIK.V    | 2002.204 | 0.00362 | 2 | 1 | 44.8 | 0 |
| P12163_1_S10,1286 K.YGEAGLK.G          | 1345.794 | 0.00846 | 3 | 1 | 31.4 | 0 |
| P12163_2_F2,12379 K.YGEAGLK.G          | 1345.794 | 0.00785 | 2 | 1 | 24.7 | 0 |
| P12163_2_F8_12070 K.YGEAGLK.G          | 1345.794 | 0.00679 | 2 | 1 | 25.1 | 0 |
| P12163_1_F4,13629 R.DGTNILYTCK.V       | 1792.972 | 0.00851 | 3 | 1 | 21.9 | 0 |
| P12163_1_F4,16174 R.DGTNILYTCK.V       | 1792.972 | 0.00719 | 3 | 1 | 33.9 | 0 |
| P12163_1_F4,16194 R.DGTNILYTCK.V       | 1792.972 | 0.00923 | 2 | 1 | 26.7 | 0 |
| P12163_1_F9,20256 R.KLIEELADLSK.G      | 2171.341 | 0.00896 | 4 | 1 | 32.4 | 0 |
| P12163_2_F10,1985 R.KLIEELADLSK.G      | 2171.341 | 0.00284 | 4 | 1 | 36.1 | 0 |
| P12163_2_F9,19227 R.KLIEELADLSK.G      | 2171.341 | 0.00493 | 4 | 1 | 30.1 | 0 |
| P12163_2_F9,20733 R.KLIEELADLSK.G      | 2171.341 | 0.00556 | 3 | 1 | 43.6 | 0 |
| P12163_2_F9,20963 R.KLIEELADLSK.G      | 2171.341 | 0.00661 | 4 | 1 | 35.9 | 0 |
| P12163_1_F7,15111 R.VQVEIPK.R          | 1420.898 | 0.00351 | 3 | 1 | 25.3 | 0 |
| P12163_1_F4,10239 K.AITGSTSSK.E        | 1459.858 | 0.00694 | 2 | 1 | 32.6 | 0 |
| P12163_1_F5,8624 K.AITGSTSSK.E         | 1459.858 | 0.00964 | 2 | 1 | 33.2 | 0 |
| P12163_2_F1,9368 K.AITGSTSSK.E         | 1459.858 | 0.00264 | 3 | 1 | 41   | 0 |
| P12163_1_F6,17154 K.DGHVNYYVQVDDAP.S   | 2676.317 | 0.00354 | 3 | 1 | 50.6 | 0 |
| P12163_1_F8,17055 K.DGHVNYYVQVDDAP.S   | 2676.317 | 0.01281 | 3 | 1 | 49.3 | 0 |
| P12163_2_F10,1538 K.DGHVNYYVQVDDAP.S   | 2676.317 | 0.00966 | 3 | 1 | 28.5 | 0 |
| P12163_1_F5,21635 K.EQGLWILK.R         | 1594.978 | 0.00378 | 2 | 1 | 28.9 | 0 |
| P12163_2_F1,22407 K.EQGLWILK.R         | 1594.978 | 0.0117  | 2 | 1 | 33.9 | 0 |
| P12163_2_F1,7900 K.ETSDSSEVK.E         | 1589.848 | 0.00309 | 3 | 1 | 25.1 | 0 |
| P12163_1_S1,15402 K.SATADILTGLR.K      | 1421.827 | 0.00158 | 3 | 1 | 46.5 | 0 |
| P12163_1_S1,15874 K.SATADILTGLR.K      | 1421.827 | 0.002   | 3 | 1 | 54.5 | 0 |
| P12163_1_S1,15910 K.SATADILTGLR.K      | 1421.827 | 0.00368 | 2 | 1 | 35.4 | 0 |
| P12163_1_S1,18648 K.SATADILTGLR.K      | 1421.827 | 0.00272 | 2 | 1 | 46   | 0 |
| P12163_1_S1,18657 K.SATADILTGLR.K      | 1421.827 | 0.00281 | 3 | 1 | 104  | 0 |
| P12163_1_F6,12856 K.TYDDIQHIR.A        | 1464.775 | 0.00329 | 3 | 1 | 39.1 | 0 |
| P12163_1_F9,12678 K.TYDDIQHIR.A        | 1464.775 | 0.00593 | 3 | 1 | 39.2 | 0 |
| P12163_2_F6,12260 K.TYDDIQHIR.A        | 1464.775 | 0.00071 | 3 | 1 | 47.6 | 0 |



|                   |                         |          |          |   |   |      |   |
|-------------------|-------------------------|----------|----------|---|---|------|---|
| P12163_2_F7,9440  | K.TYDDIQHIR.A           | 1464.775 | 0.0053   | 2 | 1 | 24.6 | 0 |
| P12163_2_F7,9477  | K.TYDDIQHIR.A           | 1464.775 | 0.00179  | 3 | 1 | 51.6 | 0 |
| P12163_2_F7,11669 | K.TYDDIQHIR.A           | 1464.775 | 0.00443  | 3 | 1 | 49.2 | 0 |
| P12163_1_F4,16530 | K.YELVTSPNK.D           | 1658.957 | 0.0051   | 2 | 1 | 29.5 | 0 |
| P12163_1_F4,16559 | K.YELVTSPNK.D           | 1658.957 | 0.00584  | 3 | 1 | 30.5 | 0 |
| P12163_1_F9,15589 | K.YELVTSPNK.D           | 1658.957 | 0.00646  | 2 | 1 | 26.3 | 0 |
| P12163_2_F1,15647 | K.YELVTSPNK.D           | 1658.957 | 0.00208  | 2 | 1 | 33   | 0 |
| P12163_1_F4,18705 | K.YIVDGEWTCNK.Y         | 1993.031 | 0.00549  | 3 | 1 | 50.8 | 0 |
| P12163_1_F4,18707 | K.YIVDGEWTCNK.Y         | 1993.031 | 0.00697  | 2 | 1 | 41   | 0 |
| P12163_2_F1,17948 | K.YIVDGEWTCNK.Y         | 1993.031 | 0.01033  | 2 | 1 | 31.4 | 0 |
| P12163_2_F1,17981 | K.YIVDGEWTCNK.Y         | 1993.031 | 0.00645  | 3 | 1 | 45.8 | 0 |
| P12163_1_S1,19660 | R.DFDAFDLR.M            | 1302.663 | 0.00596  | 2 | 1 | 34.3 | 0 |
| P12163_1_F2,18528 | R.LTSDDFDLTK.D          | 1762.968 | 0.00521  | 2 | 1 | 34.6 | 0 |
| P12163_2_S3,11328 | R.NGGVTYVHCTAGLGR       | 1865.959 | 0.00465  | 3 | 1 | 34.8 | 0 |
| P12163_2_S5,12018 | R.NGGVTYVHCTAGLGR       | 1865.959 | 0.00459  | 3 | 1 | 24.2 | 0 |
| P12163_2_F6,11915 | K.DVVTHSM*APEK.V ! F    | 1837.994 | 0.00682  | 3 | 1 | 28.1 | 0 |
| P12163_2_F6,11941 | K.DVVTHSM*APEK.V ! F    | 1837.994 | 0.00716  | 2 | 1 | 43.7 | 0 |
| P12163_1_F8,12224 | K.DVVTHSMAPEK.V ! R.    | 1821.999 | 0.00382  | 3 | 1 | 29.3 | 0 |
| P12163_1_S10,7826 | K.EHGDMK.L              | 1324.714 | 0.00558  | 3 | 1 | 26.1 | 0 |
| P12163_1_F3,21627 | K.LAQICGVIASDEK.R       | 2012.131 | 0.00059  | 3 | 1 | 53.7 | 0 |
| P12163_1_F3,21651 | K.LAQICGVIASDEK.R       | 2012.131 | 0.00569  | 2 | 1 | 65.3 | 0 |
| P12163_1_F4,22401 | K.LAQICGVIASDEK.R       | 2012.131 | 0.00341  | 3 | 1 | 32.2 | 0 |
| P12163_2_F6,19496 | K.LAQICGVIASDEKR.H      | 2168.232 | 0.01049  | 3 | 1 | 29.5 | 0 |
| P12163_1_F5,10069 | R.ATFISHGNTAR.L ! R.A   | 1478.802 | 0.0023   | 3 | 1 | 43.8 | 0 |
| P12163_1_F9,9236  | R.ATFISHGNTAR.L ! R.A   | 1478.802 | 0.00263  | 3 | 1 | 24.4 | 0 |
| P12163_2_F10,9962 | R.ATFISHGNTAR.L ! R.A   | 1478.802 | -0.00205 | 3 | 1 | 30.7 | 0 |
| P12163_2_F4,8682  | R.ATFISHGNTAR.L ! R.A   | 1478.802 | -0.00607 | 3 | 1 | 45.3 | 0 |
| P12163_2_F4,10236 | R.ATFISHGNTAR.L ! R.A   | 1478.802 | 0.00236  | 3 | 1 | 56   | 0 |
| P12163_2_F7,6679  | R.ATFISHGNTAR.L ! R.A   | 1478.802 | 0.0026   | 4 | 1 | 44.1 | 0 |
| P12163_2_F7,8668  | R.ATFISHGNTAR.L ! R.A   | 1478.802 | -0.0001  | 3 | 1 | 30.8 | 0 |
| P12163_2_F7,10328 | R.ATFISHGNTAR.L ! R.A   | 1478.802 | 0.00302  | 3 | 1 | 24.1 | 0 |
| P12163_2_F1,10937 | R.AWTAENR.H             | 1280.654 | 0.00378  | 2 | 1 | 25.8 | 0 |
| P12163_1_F2,15390 | R.DFVCGLPSR.I           | 1354.709 | 0.00409  | 3 | 1 | 32.4 | 0 |
| P12163_1_F5,9764  | R.HELAYTK.I             | 1469.857 | 0.00685  | 3 | 1 | 32.9 | 0 |
| P12163_2_S5,10435 | R.HELAYTK.I             | 1469.857 | 0.00637  | 3 | 1 | 44.9 | 0 |
| P12163_1_F6,10889 | R.HGDLLNK.Y             | 1404.842 | 0.00746  | 3 | 1 | 42.9 | 0 |
| P12163_1_F7,10344 | R.HGDLLNK.Y             | 1404.842 | 0.00047  | 3 | 1 | 34   | 0 |
| P12163_1_S10,1178 | R.HGDLLNK.Y             | 1404.842 | 0.00554  | 3 | 1 | 31.2 | 0 |
| P12163_1_S10,1200 | R.HGDLLNK.Y             | 1404.842 | 0.00467  | 3 | 1 | 29.7 | 0 |
| P12163_2_F6,10839 | R.HGDLLNK.Y             | 1404.842 | 0.00083  | 3 | 1 | 28.2 | 0 |
| P12163_2_F8_12070 | R.HGDLLNK.Y             | 1404.842 | 0.00323  | 3 | 1 | 32.1 | 0 |
| P12163_2_F8_12070 | R.HGDLLNK.Y             | 1404.842 | 0.00554  | 3 | 1 | 30.4 | 0 |
| P12163_1_F6,15465 | R.LGVYTAK.D             | 1359.846 | 0.00473  | 2 | 1 | 26.5 | 0 |
| P12163_1_S10,1503 | R.LGVYTAK.D             | 1359.846 | 0.00871  | 2 | 1 | 25.3 | 0 |
| P12163_2_F1,14701 | R.LGVYTAK.D             | 1359.846 | 0.00569  | 3 | 1 | 24   | 0 |
| P12163_1_F3,14479 | R.SIQYLIR.S ! K.SIQYLIR | 1196.73  | 0.00151  | 3 | 1 | 23.5 | 0 |
| P12163_2_F1,16315 | K.DIPVMPK.G             | 1407.849 | 0.00564  | 3 | 1 | 36.7 | 0 |
| P12163_2_F7,17287 | K.EDLVGYLASGCKPK.E      | 2449.389 | 0.00876  | 4 | 1 | 24.8 | 0 |
| P12163_1_S1,20221 | K.ETGFLNEVAEVVR.T       | 1766.959 | 0.00325  | 3 | 1 | 27.3 | 0 |
| P12163_1_S1,23597 | K.ETGFLNEVAEVVR.T       | 1766.959 | -0.00155 | 3 | 1 | 31.6 | 0 |
| P12163_1_S1,23602 | K.ETGFLNEVAEVVR.T       | 1766.959 | 0.0037   | 2 | 1 | 26.7 | 0 |

|                   |                      |          |          |   |   |      |   |
|-------------------|----------------------|----------|----------|---|---|------|---|
| P12163_1_S1,23808 | K.ETGFLNEVAEVVR.T    | 1766.959 | 0.00199  | 3 | 1 | 39.4 | 0 |
| P12163_2_F6,21593 | K.FGFEFGTLHPM*K.Y    | 2035.093 | 0.00771  | 3 | 1 | 23.3 | 0 |
| P12163_1_F6,18158 | K.LLDM*YHGK.W        | 1600.898 | 0.0057   | 3 | 1 | 24.6 | 0 |
| P12163_1_F6,18077 | K.LLDMYHGK.W         | 1584.903 | 0.00939  | 2 | 1 | 28   | 0 |
| P12163_1_F9,17445 | K.LLDMYHGK.W         | 1584.903 | 0.00579  | 3 | 1 | 22.1 | 0 |
| P12163_2_F6,17409 | K.LLDMYHGK.W         | 1584.903 | 0.00642  | 3 | 1 | 29   | 0 |
| P12163_2_F6,17452 | K.LLDMYHGK.W         | 1584.903 | 0.00201  | 2 | 1 | 33.5 | 0 |
| P12163_1_S1,21959 | K.VGSLGLDMM*FR.T ! k | 1545.807 | 0.0004   | 3 | 1 | 37.4 | 0 |
| P12163_1_F3,20574 | K.VM*EGDYIIGLK.Q     | 1862.055 | -0.00173 | 2 | 1 | 40.2 | 0 |
| P12163_1_F3,22773 | K.VM*EGDYIIGLK.Q     | 1862.055 | 0.00883  | 2 | 1 | 28.3 | 0 |
| P12163_2_F7,19644 | K.VM*EGDYIIGLK.Q     | 1862.055 | 0.00735  | 3 | 1 | 26   | 0 |
| P12163_1_F3,22703 | K.VMEGDYIIGLK.Q      | 1846.06  | 0.00432  | 3 | 1 | 22.1 | 0 |
| P12163_1_F3,22704 | K.VMEGDYIIGLK.Q      | 1846.06  | 0.00691  | 2 | 1 | 50.4 | 0 |
| P12163_2_F7,19629 | K.VMEGDYIIGLK.Q      | 1846.06  | 0.00753  | 3 | 1 | 23.5 | 0 |
| P12163_1_F2,14805 | K.YIDCAGMSFR.D       | 1523.729 | 0.00058  | 3 | 1 | 29.6 | 0 |
| P12163_1_F7,11072 | R.HVAQDVLK.L         | 1517.926 | 0.00386  | 3 | 1 | 25.8 | 0 |
| P12163_1_F9,12160 | R.HVAQDVLK.L         | 1517.926 | 0.00422  | 3 | 1 | 43.4 | 0 |
| P12163_1_F9,12188 | R.HVAQDVLK.L         | 1517.926 | 0.0066   | 2 | 1 | 40.1 | 0 |
| P12163_1_S10,1237 | R.HVAQDVLK.L         | 1517.926 | 0.00758  | 3 | 1 | 35.8 | 0 |
| P12163_2_F8_1207C | R.HVAQDVLK.L         | 1517.926 | 0.00326  | 3 | 1 | 43.9 | 0 |
| P12163_2_F9,11277 | R.HVAQDVLK.L         | 1517.926 | 0.00482  | 3 | 1 | 34.8 | 0 |
| P12163_2_F9,11360 | R.HVAQDVLK.L         | 1517.926 | 0.00619  | 4 | 1 | 29.2 | 0 |
| P12163_1_F9,11464 | R.SHIWTDTDNR.A       | 1662.814 | 0.00377  | 3 | 1 | 23.5 | 0 |
| P12163_1_F5,7543  | R.TGVTPAEK.L         | 1410.841 | 0.00809  | 3 | 1 | 30.6 | 0 |
| P12163_2_F1,8120  | R.TGVTPAEK.L         | 1410.841 | 0.00491  | 3 | 1 | 34.6 | 0 |
| P12163_2_F1,9548  | R.TGVTPAEK.L         | 1410.841 | 0.00482  | 3 | 1 | 30.1 | 0 |
| P12163_1_F5,15237 | K.AGVFYDK.V          | 1407.809 | 0.00312  | 3 | 1 | 22.1 | 0 |
| P12163_1_F5,15303 | K.AGVFYDK.V          | 1407.809 | 0.0069   | 2 | 1 | 29.5 | 0 |
| P12163_1_S10,1568 | K.AGVFYDK.V          | 1407.809 | 0.00588  | 2 | 1 | 24.7 | 0 |
| P12163_1_S10,1578 | K.AGVFYDK.V          | 1407.809 | 0.00312  | 3 | 1 | 24.9 | 0 |
| P12163_2_F1,15228 | K.AGVFYDK.V          | 1407.809 | 0.00498  | 3 | 1 | 23.3 | 0 |
| P12163_2_F1,15483 | K.AGVFYDK.V          | 1407.809 | 0.00549  | 3 | 1 | 26.3 | 0 |
| P12163_2_F2,16056 | K.AGVFYDK.V          | 1407.809 | 0.00525  | 3 | 1 | 30.7 | 0 |
| P12163_2_F8_1207C | K.AGVFYDK.V          | 1407.809 | 0.00696  | 2 | 1 | 29   | 0 |
| P12163_1_F3,11062 | K.ALNAVASR.N         | 1105.663 | 0.00446  | 3 | 1 | 28   | 0 |
| P12163_1_S1,21106 | K.DVIFDDYLR.K        | 1459.773 | 0.00306  | 2 | 1 | 31.5 | 0 |
| P12163_1_S1,21130 | K.DVIFDDYLR.K        | 1459.773 | 0.00356  | 3 | 1 | 38.5 | 0 |
| P12163_2_F7,19352 | K.DVIFDDYLR.K        | 1459.773 | 0.00208  | 2 | 1 | 25.5 | 0 |
| P12163_1_F4,15044 | K.GDGDYELVK.D        | 1603.879 | 0.00843  | 2 | 1 | 33.9 | 0 |
| P12163_1_F4,15089 | K.GDGDYELVK.D        | 1603.879 | 0.00916  | 3 | 1 | 26.8 | 0 |
| P12163_1_F4,22571 | K.LAAGEVLGPDQPIALK   | 2200.316 | -0.00417 | 3 | 1 | 47   | 0 |
| P12163_1_S1,19682 | K.LAAGEVLGPDQPIALK   | 2200.316 | 0.00104  | 2 | 1 | 77.9 | 0 |
| P12163_1_S1,19698 | K.LAAGEVLGPDQPIALK   | 2200.316 | 0.00331  | 4 | 1 | 66   | 0 |
| P12163_1_S1,19856 | K.LAAGEVLGPDQPIALK   | 2200.316 | 0.00832  | 3 | 1 | 50.1 | 0 |
| P12163_1_F4,12962 | K.NAPSIPAK.N         | 1405.862 | 0.00533  | 2 | 1 | 25.1 | 0 |
| P12163_1_F4,16059 | K.TEQELLAEK.K        | 1668.963 | -0.00002 | 2 | 1 | 47   | 0 |
| P12163_1_F4,16083 | K.TEQELLAEK.K        | 1668.963 | 0.00753  | 3 | 1 | 31.3 | 0 |
| P12163_1_F5,14769 | K.TEQELLAEK.K        | 1668.963 | 0.00898  | 2 | 1 | 41.8 | 0 |
| P12163_1_F7,14097 | K.TEQELLAEK.K        | 1668.963 | 0.00483  | 3 | 1 | 22.3 | 0 |
| P12163_2_F1,15161 | K.TEQELLAEK.K        | 1668.963 | -0.001   | 2 | 1 | 35.1 | 0 |
| P12163_2_F1,15184 | K.TEQELLAEK.K        | 1668.963 | 0.0039   | 3 | 1 | 28.6 | 0 |

|                   |                     |          |          |   |   |      |   |
|-------------------|---------------------|----------|----------|---|---|------|---|
| P12163_1_S1,20586 | K.VIVVGNPCNTNALICL  | 2493.414 | 0.00095  | 3 | 1 | 26.5 | 0 |
| P12163_1_F3,23386 | K.WLEEGFTETIQK.R    | 2089.143 | 0.0056   | 3 | 1 | 49.4 | 0 |
| P12163_1_F3,23487 | K.WLEEGFTETIQK.R    | 2089.143 | 0.00084  | 2 | 1 | 51.8 | 0 |
| P12163_1_F5,15982 | R.INGLPVK.E         | 1348.877 | 0.00561  | 2 | 1 | 28.7 | 0 |
| P12163_1_F3,19269 | R.SSAASTSVSIVDAMK.S | 2062.131 | 0.00764  | 3 | 1 | 46.6 | 0 |
| P12163_1_F3,19291 | R.SSAASTSVSIVDAMK.S | 2062.131 | 0.00089  | 2 | 1 | 91.8 | 0 |
| P12163_1_S1,17279 | K.FGSAISDIGDIR.V    | 1554.843 | 0.00747  | 3 | 1 | 28.5 | 0 |
| P12163_1_F7,14758 | K.GLGM*NVIAHDPYQA.  | 2148.081 | 0.00223  | 3 | 1 | 43.6 | 0 |
| P12163_2_S5,14646 | K.GLGM*NVIAHDPYQA.  | 2148.081 | 0.00697  | 3 | 1 | 27.6 | 0 |
| P12163_2_S5,16603 | K.GLGM*NVIAHDPYQA.  | 2148.081 | -0.00188 | 3 | 1 | 25.8 | 0 |
| P12163_1_F7,16973 | K.GLGMNVIAHDPYQA    | 2132.086 | 0.00511  | 3 | 1 | 46.2 | 0 |
| P12163_2_S5,16546 | K.GLGMNVIAHDPYQA    | 2132.086 | 0.00382  | 3 | 1 | 42.8 | 0 |
| P12163_2_S5,16627 | K.GLGMNVIAHDPYQA    | 2132.086 | 0.00196  | 2 | 1 | 27.1 | 0 |
| P12163_1_F3,22898 | K.LGEAGLDLLK.N      | 1637.009 | 0.00506  | 3 | 1 | 38.5 | 0 |
| P12163_1_F3,22916 | K.LGEAGLDLLK.N      | 1637.009 | 0.00525  | 2 | 1 | 47.3 | 0 |
| P12163_2_F1,23064 | K.LGEAGLDLLK.N      | 1637.009 | 0.00656  | 3 | 1 | 37.3 | 0 |
| P12163_2_F1,23075 | K.LGEAGLDLLK.N      | 1637.009 | 0.00593  | 2 | 1 | 49.4 | 0 |
| P12163_1_F3,24786 | K.LGGLAVQLVAGGSGV   | 2034.253 | -0.00004 | 2 | 1 | 53.8 | 0 |
| P12163_1_F3,24818 | K.LGGLAVQLVAGGSGV   | 2034.253 | 0.00514  | 3 | 1 | 56.7 | 0 |
| P12163_1_F4,23254 | K.M*FNDEAFFK.M      | 1772.914 | 0.00704  | 2 | 1 | 24.9 | 0 |
| P12163_1_F4,23256 | K.MFNDEAFFK.M       | 1756.919 | 0.007    | 3 | 1 | 34.7 | 0 |
| P12163_2_F1,22714 | K.MFNDEAFFK.M       | 1756.919 | 0.01243  | 3 | 1 | 34.4 | 0 |
| P12163_1_S1,18382 | K.NFANVDCSYNLSPEEL  | 2869.396 | 0.00714  | 3 | 1 | 69.9 | 0 |
| P12163_1_F4,18982 | K.YVGVSLVCK.T       | 1632.96  | 0.00444  | 3 | 1 | 34.9 | 0 |
| P12163_1_F9,17493 | K.YVGVSLVCK.T       | 1632.96  | 0.00549  | 3 | 1 | 32.6 | 0 |
| P12163_1_F9,17537 | K.YVGVSLVCK.T       | 1632.96  | 0.00721  | 2 | 1 | 36.2 | 0 |
| P12163_1_S1,14898 | R.GGVVDEEALVR.A     | 1447.806 | 0.00204  | 2 | 1 | 50.4 | 0 |
| P12163_1_S1,14950 | R.GGVVDEEALVR.A     | 1447.806 | 0.00116  | 3 | 1 | 68.8 | 0 |
| P12163_1_S1,8421  | R.GPDDLDR.L         | 1192.611 | -0.00125 | 3 | 1 | 27.1 | 0 |
| P12163_1_S1,8641  | R.GPDDLDR.L         | 1192.611 | 0.00292  | 3 | 1 | 25.7 | 0 |
| P12163_1_F4,12891 | R.NIAQADASVK.A      | 1624.948 | 0.00519  | 2 | 1 | 41.9 | 0 |
| P12163_1_F4,12901 | R.NIAQADASVK.A      | 1624.948 | 0.00202  | 3 | 1 | 47   | 0 |
| P12163_2_F1,11957 | R.NIAQADASVK.A      | 1624.948 | 0.01077  | 2 | 1 | 39.2 | 0 |
| P12163_1_F3,14434 | R.QVDQPGIIGK.V      | 1663     | 0.00242  | 2 | 1 | 37.9 | 0 |
| P12163_1_F4,14901 | R.QVDQPGIIGK.V      | 1663     | 0.00694  | 2 | 1 | 39.9 | 0 |
| P12163_2_F1,13961 | R.QVDQPGIIGK.V      | 1663     | 0.00628  | 2 | 1 | 38.6 | 0 |
| P12163_1_F8,10605 | K.DQNEHSDLEEGIR.R   | 1845.888 | 0.00424  | 3 | 1 | 22.5 | 0 |
| P12163_1_F8,10612 | K.DQNEHSDLEEGIR.R   | 1845.888 | 0.00286  | 2 | 1 | 30.5 | 0 |
| P12163_2_F6,10431 | K.DQNEHSDLEEGIR.R   | 1845.888 | 0.00504  | 2 | 1 | 35.3 | 0 |
| P12163_1_F9,10211 | K.HSASDIAICR.V      | 1433.747 | 0.00391  | 3 | 1 | 36.9 | 0 |
| P12163_2_F9,9894  | K.HSASDIAICR.V      | 1433.747 | 0.00304  | 3 | 1 | 31.2 | 0 |
| P12163_1_F7,16095 | K.SNLSEFDDVQGHGPF   | 2500.256 | 0.00798  | 3 | 1 | 23.5 | 0 |
| P12163_1_F8,16779 | K.SNLSEFDDVQGHGPF   | 2500.256 | 0.00864  | 3 | 1 | 51.6 | 0 |
| P12163_1_F8,16842 | K.SNLSEFDDVQGHGPF   | 2500.256 | 0.00867  | 4 | 1 | 25.5 | 0 |
| P12163_2_F6,16279 | K.SNLSEFDDVQGHGPF   | 2500.256 | 0.01242  | 3 | 1 | 39.7 | 0 |
| P12163_1_F7,18678 | R.AADLGVESIVIGM*PH  | 1985.079 | 0.00197  | 3 | 1 | 44.7 | 0 |
| P12163_1_F7,20689 | R.AADLGVESIVIGM*PH  | 1985.079 | -0.00457 | 2 | 1 | 45.5 | 0 |
| P12163_2_S5,17858 | R.AADLGVESIVIGM*PH  | 1985.079 | 0.00266  | 3 | 1 | 58.6 | 0 |
| P12163_1_F6,21550 | R.AADLGVESIVIGMPHR  | 1969.084 | 0.00623  | 3 | 1 | 52.1 | 0 |
| P12163_1_F7,20676 | R.AADLGVESIVIGMPHR  | 1969.084 | 0.00404  | 3 | 1 | 66.3 | 0 |
| P12163_2_S5,19874 | R.AADLGVESIVIGMPHR  | 1969.084 | 0.00086  | 3 | 1 | 65.6 | 0 |

|                   |                      |          |          |   |   |      |   |
|-------------------|----------------------|----------|----------|---|---|------|---|
| P12163_1_F8,16398 | R.APSAASATGFYQVHVI   | 2242.244 | 0.00958  | 3 | 1 | 27.4 | 0 |
| P12163_2_F6,15691 | R.FGHNEIDEPSFTQPK.M  | 2354.224 | 0.00192  | 2 | 1 | 40   | 0 |
| P12163_1_F3,23424 | R.FGLEGGETLIPGMK.E   | 2057.156 | 0.01019  | 3 | 1 | 40.3 | 0 |
| P12163_1_F3,23458 | R.FGLEGGETLIPGMK.E   | 2057.156 | 0.00865  | 2 | 1 | 59.1 | 0 |
| P12163_1_F4,21351 | R.ILSEEFVASK.D       | 1731.015 | 0.00827  | 2 | 1 | 47.3 | 0 |
| P12163_2_F1,20787 | R.ILSEEFVASK.D       | 1731.015 | 0.00362  | 3 | 1 | 23.3 | 0 |
| P12163_2_F1,20799 | R.ILSEEFVASK.D       | 1731.015 | 0.00377  | 2 | 1 | 45.1 | 0 |
| P12163_2_F1,21916 | R.LNVLGNVVR.K        | 1287.805 | 0.00265  | 2 | 1 | 24.3 | 0 |
| P12163_2_F1,22173 | R.LNVLGNVVR.K        | 1287.805 | 0.00217  | 2 | 1 | 33.1 | 0 |
| P12163_1_F3,10185 | R.LSGQDVER.G         | 1207.658 | 0.00256  | 2 | 1 | 24.4 | 0 |
| P12163_2_F1,10645 | R.SSQYCTDVAK.A       | 1766.92  | 0.00464  | 2 | 1 | 53.8 | 0 |
| P12163_1_F5,11905 | K.AFEEAEK.N          | 1431.794 | 0.00409  | 3 | 1 | 31.8 | 0 |
| P12163_1_F5,11910 | K.AFEEAEK.N          | 1431.794 | 0.00981  | 2 | 1 | 29.1 | 0 |
| P12163_2_F1,12320 | K.AFEEAEK.N          | 1431.794 | 0.01127  | 2 | 1 | 28.5 | 0 |
| P12163_2_F2,12698 | K.AFEEAEK.N          | 1431.794 | 0.00903  | 2 | 1 | 28.5 | 0 |
| P12163_1_F3,18218 | K.AIANECQANFISVK.G   | 2173.19  | 0.00723  | 2 | 1 | 59.3 | 0 |
| P12163_1_F4,19515 | K.GILLYGPPGSGK.T     | 1767.062 | 0.01203  | 2 | 1 | 48.2 | 0 |
| P12163_1_F4,19533 | K.GILLYGPPGSGK.T     | 1767.062 | 0.00928  | 3 | 1 | 43.5 | 0 |
| P12163_2_F1,18888 | K.GILLYGPPGSGK.T     | 1767.062 | 0.00757  | 3 | 1 | 41.5 | 0 |
| P12163_2_F1,18927 | K.GILLYGPPGSGK.T     | 1767.062 | 0.00739  | 2 | 1 | 40.6 | 0 |
| P12163_1_F9,18079 | K.GVLFYGPFGCGK.T ! R | 1860.03  | 0.00453  | 2 | 1 | 34.8 | 0 |
| P12163_1_F9,18101 | K.GVLFYGPFGCGK.T ! R | 1860.03  | 0.00489  | 3 | 1 | 41   | 0 |
| P12163_2_F1,18690 | K.GVLFYGPFGCGK.T ! R | 1860.03  | 0.00531  | 3 | 1 | 24.8 | 0 |
| P12163_2_F1,18750 | K.GVLFYGPFGCGK.T ! R | 1860.03  | -0.00101 | 2 | 1 | 39.1 | 0 |
| P12163_1_F3,12437 | K.LAGESESNLR.K       | 1379.743 | 0.00456  | 2 | 1 | 26.6 | 0 |
| P12163_2_F1,11960 | K.LAGESESNLR.K       | 1379.743 | 0.0015   | 2 | 1 | 24.3 | 0 |
| P12163_1_S1,25017 | K.NAPSIIFIDEIDSAPK.R | 2451.395 | 0.01195  | 3 | 1 | 33.2 | 0 |
| P12163_1_F7,14849 | R.EDEDLDEVGYYDDVG    | 2342.105 | 0.00491  | 3 | 1 | 36.8 | 0 |
| P12163_2_F4,14500 | R.EDEDLDEVGYYDDVG    | 2342.105 | 0.00308  | 3 | 1 | 38   | 0 |
| P12163_1_F7,14823 | R.ELQETVQYPVEHPEK.I  | 2434.307 | 0.01214  | 3 | 1 | 48.7 | 0 |
| P12163_2_F10,1428 | R.ELQETVQYPVEHPEK.I  | 2434.307 | 0.00254  | 3 | 1 | 34   | 0 |
| P12163_2_S5,14529 | R.ELQETVQYPVEHPEK.I  | 2434.307 | 0.00521  | 3 | 1 | 61.8 | 0 |
| P12163_2_S5,14556 | R.ELQETVQYPVEHPEK.I  | 2434.307 | 0.0074   | 4 | 1 | 40.7 | 0 |
| P12163_1_S1,19169 | R.ELVELPLR.H         | 1272.783 | 0.00465  | 2 | 1 | 27.7 | 0 |
| P12163_1_S1,19177 | R.ELVELPLR.H         | 1272.783 | 0.00577  | 3 | 1 | 41   | 0 |
| P12163_1_F2,7128  | R.GSSVGDAGGAADR.V    | 1423.708 | 0.0022   | 2 | 1 | 36.2 | 0 |
| P12163_1_F2,7309  | R.SVSDADIR.K         | 1166.632 | 0.00323  | 2 | 1 | 24.8 | 0 |
| P12163_1_F6,14407 | K.AYDYIHAK.S         | 1588.894 | 0.01134  | 2 | 1 | 36.3 | 0 |
| P12163_1_F6,14440 | K.AYDYIHAK.S         | 1588.894 | 0.00399  | 3 | 1 | 32.4 | 0 |
| P12163_1_F3,12369 | K.DTGVSVFR.L         | 1184.658 | 0.00285  | 3 | 1 | 24   | 0 |
| P12163_1_F3,14954 | K.DTGVSVFR.L         | 1184.658 | 0.00128  | 2 | 1 | 24.5 | 0 |
| P12163_1_F2,19589 | K.FGLVAVDR.A         | 1180.699 | 0.0026   | 2 | 1 | 42.4 | 0 |
| P12163_1_F7,13204 | K.VTAWHNVPHPEER.L    | 1875.977 | 0.00301  | 4 | 1 | 22.3 | 0 |
| P12163_2_F9,12995 | K.VTAWHNVPHPEER.L    | 1875.977 | 0.00196  | 4 | 1 | 43.5 | 0 |
| P12163_2_F9,13033 | K.VTAWHNVPHPEER.L    | 1875.977 | 0.0052   | 3 | 1 | 41.1 | 0 |
| P12163_2_F8_12070 | K.YIEVDEGEEVSGENEV   | 3605.734 | 0.00457  | 4 | 1 | 45.8 | 0 |
| P12163_1_F5,20162 | R.AWSELQLAAK.Q       | 1725.015 | 0.00491  | 2 | 1 | 47.6 | 0 |
| P12163_1_F5,20185 | R.AWSELQLAAK.Q       | 1725.015 | 0.00511  | 3 | 1 | 31.2 | 0 |
| P12163_2_F1,20812 | R.AWSELQLAAK.Q       | 1725.015 | 0.00058  | 3 | 1 | 29.4 | 0 |
| P12163_2_F1,20815 | R.AWSELQLAAK.Q       | 1725.015 | 0.00345  | 2 | 1 | 40.8 | 0 |
| P12163_2_F2,20721 | R.AWSELQLAAK.Q       | 1725.015 | 0.00478  | 3 | 1 | 32.2 | 0 |

|                   |                    |          |         |   |   |      |   |
|-------------------|--------------------|----------|---------|---|---|------|---|
| P12163_1_F7,18293 | R.FGHYQM*EGLQDPLSF | 2098.033 | 0.00104 | 3 | 1 | 39.3 | 0 |
| P12163_1_F8,16954 | R.FGHYQM*EGLQDPLSF | 2098.033 | 0.00644 | 3 | 1 | 27   | 0 |
| P12163_1_F8,19176 | R.FGHYQM*EGLQDPLSF | 2098.033 | 0.00272 | 3 | 1 | 34.3 | 0 |
| P12163_1_F7,18267 | R.FGHYQMEGLQDPLSR. | 2082.038 | 0.0035  | 3 | 1 | 32.3 | 0 |
| P12163_2_F6,18663 | R.FGHYQMEGLQDPLSR. | 2082.038 | 0.00464 | 3 | 1 | 53.4 | 0 |
| P12163_2_F6,18691 | R.FGHYQMEGLQDPLSR. | 2082.038 | 0.00353 | 2 | 1 | 36   | 0 |
| P12163_1_F3,22938 | R.FWSDPDIELK.L     | 1858.021 | 0.00584 | 2 | 1 | 32.5 | 0 |
| P12163_1_F3,22948 | R.FWSDPDIELK.L     | 1858.021 | 0.00724 | 3 | 1 | 24.6 | 0 |
| P12163_1_F2,19116 | R.GVYDPGLFR.V      | 1327.731 | 0.00176 | 2 | 1 | 26   | 0 |
| P12163_1_F3,18547 | R.IMPAPVINGLK.E    | 1777.05  | 0.00529 | 2 | 1 | 32.2 | 0 |
| P12163_2_S5,11301 | R.VLHQFHER.Y       | 1369.764 | 0.00255 | 3 | 1 | 32.8 | 0 |
| P12163_1_F3,17057 | K.AADVADLVGK.V     | 1623.953 | 0.00849 | 2 | 1 | 47.5 | 0 |
| P12163_1_F3,17070 | K.AADVADLVGK.V     | 1623.953 | 0.00805 | 3 | 1 | 35   | 0 |
| P12163_1_F3,17332 | K.AADVADLVGK.V     | 1623.953 | 0.01089 | 2 | 1 | 39   | 0 |
| P12163_2_F2,16607 | K.AADVADLVGK.V     | 1623.953 | 0.00207 | 3 | 1 | 26.2 | 0 |
| P12163_1_F2,20692 | K.AAVIGDTIGDPLK.D  | 1878.116 | 0.00493 | 3 | 1 | 52.3 | 0 |
| P12163_1_F2,20719 | K.AAVIGDTIGDPLK.D  | 1878.116 | 0.00321 | 2 | 1 | 23.9 | 0 |
| P12163_1_F5,7975  | K.GQACTYDQK.M      | 1806.926 | 0.00679 | 2 | 1 | 52.8 | 0 |
| P12163_1_F5,7995  | K.GQACTYDQK.M      | 1806.926 | 0.00831 | 3 | 1 | 30.9 | 0 |
| P12163_2_F1,8431  | K.GQACTYDQK.M      | 1806.926 | 0.00431 | 2 | 1 | 49.3 | 0 |
| P12163_2_F8_12070 | K.GQACTYDQK.M      | 1806.926 | 0.00333 | 3 | 1 | 22.5 | 0 |
| P12163_1_F9,6115  | K.GSEPHK.A         | 1262.731 | 0.00784 | 3 | 1 | 23.7 | 0 |
| P12163_1_F4,14040 | K.ISTDASIK.E       | 1442.867 | 0.00977 | 2 | 1 | 39.8 | 0 |
| P12163_2_F1,13074 | K.ISTDASIK.E       | 1442.867 | 0.0074  | 3 | 1 | 29.4 | 0 |
| P12163_1_F5,10988 | K.SVGSAAALK.M      | 1340.836 | 0.01071 | 2 | 1 | 39.4 | 0 |
| P12163_2_F2,11809 | K.SVGSAAALK.M      | 1340.836 | 0.00573 | 2 | 1 | 28.3 | 0 |
| P12163_1_F6,10885 | K.YIEAGASEHAR.T    | 1507.781 | 0.00614 | 3 | 1 | 28.4 | 0 |
| P12163_1_F2,18624 | R.AGITTVDVLTTPK.V  | 1823.11  | 0.00738 | 3 | 1 | 56.6 | 0 |
| P12163_1_F2,18633 | R.AGITTVDVLTTPK.V  | 1823.11  | 0.00411 | 2 | 1 | 39.8 | 0 |
| P12163_1_F3,19201 | R.AGITTVDVLTTPK.V  | 1823.11  | 0.00252 | 3 | 1 | 43.8 | 0 |
| P12163_1_S1,9652  | R.NIPEDDPR.N       | 1259.653 | 0.00434 | 2 | 1 | 28.6 | 0 |
| P12163_1_S1,11426 | R.TDALDAAGNTTAAIGF | 2098.16  | 0.00349 | 4 | 1 | 23.2 | 0 |
| P12163_1_S1,13508 | R.TDALDAAGNTTAAIGF | 2098.16  | 0.01032 | 3 | 1 | 34.7 | 0 |
| P12163_1_S1,13531 | R.TDALDAAGNTTAAIGF | 2098.16  | 0.00789 | 4 | 1 | 44.1 | 0 |
| P12163_1_S1,15595 | R.TDALDAAGNTTAAIGF | 2098.16  | 0.00609 | 3 | 1 | 71.6 | 0 |
| P12163_1_F5,12615 | R.VGGGIYTK.A       | 1402.851 | 0.00836 | 2 | 1 | 28.4 | 0 |
| P12163_1_F3,17057 | K.AADVADLVGK.V     | 1623.953 | 0.00849 | 2 | 1 | 47.5 | 0 |
| P12163_1_F3,17070 | K.AADVADLVGK.V     | 1623.953 | 0.00805 | 3 | 1 | 35   | 0 |
| P12163_1_F3,17332 | K.AADVADLVGK.V     | 1623.953 | 0.01089 | 2 | 1 | 39   | 0 |
| P12163_2_F2,16607 | K.AADVADLVGK.V     | 1623.953 | 0.00207 | 3 | 1 | 26.2 | 0 |
| P12163_1_F2,20692 | K.AAVIGDTIGDPLK.D  | 1878.116 | 0.00493 | 3 | 1 | 52.3 | 0 |
| P12163_1_F2,20719 | K.AAVIGDTIGDPLK.D  | 1878.116 | 0.00321 | 2 | 1 | 23.9 | 0 |
| P12163_1_F4,14040 | K.ISTDASIK.E       | 1442.867 | 0.00977 | 2 | 1 | 39.8 | 0 |
| P12163_2_F1,13074 | K.ISTDASIK.E       | 1442.867 | 0.0074  | 3 | 1 | 29.4 | 0 |
| P12163_1_F5,15794 | K.SQACTYDPFK.M     | 1824.941 | 0.01162 | 2 | 1 | 31.8 | 0 |
| P12163_1_F5,10988 | K.SVGSAAALK.M      | 1340.836 | 0.01071 | 2 | 1 | 39.4 | 0 |
| P12163_2_F2,11809 | K.SVGSAAALK.M      | 1340.836 | 0.00573 | 2 | 1 | 28.3 | 0 |
| P12163_1_F6,10885 | K.YIEAGASEHAR.T    | 1507.781 | 0.00614 | 3 | 1 | 28.4 | 0 |
| P12163_1_F3,19392 | R.AAISTVDVLTTPK.V  | 1823.11  | 0.00708 | 2 | 1 | 58.4 | 0 |
| P12163_1_F4,7524  | R.DASGNSPGAGGGK.N  | 1682.892 | 0.01032 | 3 | 1 | 35   | 0 |
| P12163_1_F5,6344  | R.DASGNSPGAGGGK.N  | 1682.892 | 0.00836 | 2 | 1 | 58.5 | 0 |

|                   |                     |          |          |   |   |      |   |
|-------------------|---------------------|----------|----------|---|---|------|---|
| P12163_2_F1,6685  | R.DASGNSPGAGGGK.N   | 1682.892 | 0.00267  | 3 | 1 | 42.9 | 0 |
| P12163_1_S1,9652  | R.NIPEDDPR.N        | 1259.653 | 0.00434  | 2 | 1 | 28.6 | 0 |
| P12163_1_S1,11426 | R.TDALDAAGNTTAAIGI  | 2098.16  | 0.00349  | 4 | 1 | 23.2 | 0 |
| P12163_1_S1,13508 | R.TDALDAAGNTTAAIGI  | 2098.16  | 0.01032  | 3 | 1 | 34.7 | 0 |
| P12163_1_S1,13531 | R.TDALDAAGNTTAAIGI  | 2098.16  | 0.00789  | 4 | 1 | 44.1 | 0 |
| P12163_1_S1,15595 | R.TDALDAAGNTTAAIGI  | 2098.16  | 0.00609  | 3 | 1 | 71.6 | 0 |
| P12163_1_F5,12615 | R.VGGGIYTK.A        | 1402.851 | 0.00836  | 2 | 1 | 28.4 | 0 |
| P12163_1_F8,13868 | K.ETLVCHDDSATPIK.A  | 2194.163 | 0.00461  | 3 | 1 | 48.4 | 0 |
| P12163_2_S5,12955 | K.ETLVCHDDSATPIK.A  | 2194.163 | 0.00815  | 3 | 1 | 33.7 | 0 |
| P12163_1_F7,15903 | K.GSPNIEM*DEHTFLVN  | 2179.075 | 0.00312  | 3 | 1 | 28.6 | 0 |
| P12163_1_F7,17156 | K.GSPNIEM*DEHTFLVN  | 2179.075 | 0.00384  | 3 | 1 | 63   | 0 |
| P12163_1_F7,17147 | K.GSPNIEMDEHTFLVNR  | 2163.081 | 0.00145  | 3 | 1 | 62.7 | 0 |
| P12163_2_S5,16919 | K.GSPNIEMDEHTFLVNR  | 2163.081 | 0.00313  | 3 | 1 | 72.1 | 0 |
| P12163_1_S1,19920 | K.QQLQSIASLASLTR.E  | 1907.086 | 0.01556  | 3 | 1 | 25   | 0 |
| P12163_1_S1,22466 | K.QQLQSIASLASLTR.E  | 1907.086 | 0.00173  | 3 | 1 | 94.4 | 0 |
| P12163_1_F8,15608 | K.TIDELHSLQK.K      | 1792.042 | 0.00529  | 3 | 1 | 23   | 0 |
| P12163_1_F8,15632 | K.TIDELHSLQK.K      | 1792.042 | 0.00393  | 2 | 1 | 49.8 | 0 |
| P12163_2_F6,15072 | K.TIDELHSLQK.K      | 1792.042 | 0.0046   | 3 | 1 | 27.8 | 0 |
| P12163_2_F6,15075 | K.TIDELHSLQK.K      | 1792.042 | 0.00203  | 2 | 1 | 56   | 0 |
| P12163_2_S5,7157  | K.TTLSTDHNR.Y       | 1348.712 | 0.00224  | 3 | 1 | 37.8 | 0 |
| P12163_1_F7,22035 | K.VFVNDQFLNWDPEHR   | 2220.114 | 0.00335  | 3 | 1 | 67.4 | 0 |
| P12163_1_F5,18001 | K.YAAMLAEK.M        | 1504.865 | 0.00689  | 2 | 1 | 26.5 | 0 |
| P12163_2_F7,17132 | R.AAYPIEYIPNAK.I    | 1958.121 | 0.00966  | 2 | 1 | 38.7 | 0 |
| P12163_2_F7,17138 | R.AAYPIEYIPNAK.I    | 1958.121 | 0.00705  | 3 | 1 | 31.5 | 0 |
| P12163_1_F7,22087 | R.IIDAIHSGTLLEASYTK | 2440.391 | 0.004    | 3 | 1 | 23.1 | 0 |
| P12163_1_F5,7630  | R.IQTNNNNK.E        | 1553.886 | 0.0067   | 2 | 1 | 27.6 | 0 |
| P12163_2_F2,8494  | R.IQTNNNNK.E        | 1553.886 | 0.00666  | 2 | 1 | 27.1 | 0 |
| P12163_1_F4,11569 | R.STPSTPIK.S        | 1438.873 | 0.00468  | 2 | 1 | 26.8 | 0 |
| P12163_1_F2,13369 | K.ANASGADLVEIR.L    | 1519.838 | 0.0031   | 3 | 1 | 50.6 | 0 |
| P12163_1_S1,12784 | K.ANASGADLVEIR.L    | 1519.838 | 0.00382  | 3 | 1 | 46.3 | 0 |
| P12163_1_S1,14966 | K.ANASGADLVEIR.L    | 1519.838 | -0.00587 | 3 | 1 | 51   | 0 |
| P12163_1_S1,14974 | K.ANASGADLVEIR.L    | 1519.838 | 0.00265  | 2 | 1 | 38.3 | 0 |
| P12163_1_F3,12496 | K.CCDEVDPAK.S       | 1800.908 | 0.00327  | 2 | 1 | 38.2 | 0 |
| P12163_1_F4,13096 | K.CCDEVDPAK.S       | 1800.908 | 0.00357  | 2 | 1 | 47.2 | 0 |
| P12163_1_S1,22860 | K.DLLDLYNFR.Q       | 1472.805 | 0.00303  | 3 | 1 | 37.8 | 0 |
| P12163_1_F3,24525 | K.LFVVIGAGGAGK.A    | 1697.057 | 0.00894  | 3 | 1 | 30.1 | 0 |
| P12163_2_F1,24538 | K.LFVVIGAGGAGK.A    | 1697.057 | 0.00617  | 2 | 1 | 33.4 | 0 |
| P12163_2_F1,24561 | K.LFVVIGAGGAGK.A    | 1697.057 | 0.00357  | 3 | 1 | 62.3 | 0 |
| P12163_2_F1,15540 | K.MVVDMGK.A         | 1387.79  | 0.00327  | 2 | 1 | 25.8 | 0 |
| P12163_1_S1,20773 | K.NPTLICVPIMGESVDK. | 2381.303 | 0.00318  | 3 | 1 | 61.1 | 0 |
| P12163_2_F1,17978 | K.SIGAVNCIIR.R      | 1406.809 | 0.00418  | 2 | 1 | 30.6 | 0 |
| P12163_1_F4,19931 | K.SPILYNEAFK.S      | 1790.031 | 0.00785  | 3 | 1 | 25.4 | 0 |
| P12163_2_F9,17366 | K.SPILYNEAFK.S      | 1790.031 | 0.00326  | 3 | 1 | 33.7 | 0 |
| P12163_1_F4,14909 | K.VDETPIPK.H        | 1506.899 | 0.00503  | 3 | 1 | 37   | 0 |
| P12163_1_F4,14912 | K.VDETPIPK.H        | 1506.899 | 0.00622  | 2 | 1 | 38.9 | 0 |
| P12163_2_F1,13946 | K.VDETPIPK.H        | 1506.899 | 0.00542  | 2 | 1 | 27.7 | 0 |
| P12163_1_F4,15520 | R.IQASGADIVK.F      | 1609.973 | 0.00457  | 2 | 1 | 49.7 | 0 |
| P12163_2_F1,14571 | R.IQASGADIVK.F      | 1609.973 | 0.00364  | 3 | 1 | 54.4 | 0 |
| P12163_2_F1,18415 | R.LNVSGGVSSALAGK.L  | 1868.106 | 0.007    | 3 | 1 | 61.2 | 0 |
| P12163_1_F3,16889 | K.GLDVIQQAQSGTGK.T  | 2010.144 | 0.00414  | 2 | 1 | 71.8 | 0 |
| P12163_1_F3,16955 | K.GLDVIQQAQSGTGK.T  | 2010.144 | 0.00461  | 3 | 1 | 56.3 | 0 |

|                   |                       |          |          |   |   |      |   |
|-------------------|-----------------------|----------|----------|---|---|------|---|
| P12163_1_F5,16219 | K.QFYVNVEK.E          | 1634.936 | 0.00232  | 2 | 1 | 30.8 | 0 |
| P12163_1_F9,16143 | K.RDELTLEGIK.Q        | 1782.058 | 0.00668  | 3 | 1 | 41.2 | 0 |
| P12163_2_F9,15208 | K.RDELTLEGIK.Q        | 1782.058 | 0.00797  | 3 | 1 | 40.4 | 0 |
| P12163_1_F9,9428  | K.VHACVGGTSVR.E       | 1446.779 | 0.00397  | 3 | 1 | 29.5 | 0 |
| P12163_2_F4,8806  | K.VHACVGGTSVR.E       | 1446.779 | -0.00044 | 3 | 1 | 32.3 | 0 |
| P12163_1_F4,20424 | R.ALGDYLGVK.V         | 1543.93  | 0.00489  | 2 | 1 | 47.3 | 0 |
| P12163_1_F4,20432 | R.ALGDYLGVK.V         | 1543.93  | 0.01204  | 3 | 1 | 24.2 | 0 |
| P12163_2_F1,19806 | R.ALGDYLGVK.V         | 1543.93  | 0.00525  | 2 | 1 | 47.6 | 0 |
| P12163_2_F1,19815 | R.ALGDYLGVK.V         | 1543.93  | 0.00466  | 3 | 1 | 24.3 | 0 |
| P12163_2_F9,17694 | R.ALGDYLGVK.V         | 1543.93  | 0.00325  | 2 | 1 | 37.1 | 0 |
| P12163_2_F9,17760 | R.ALGDYLGVK.V         | 1543.93  | 0.00646  | 3 | 1 | 26.9 | 0 |
| P12163_1_F4,19120 | R.DELTLEGIK.Q         | 1625.957 | 0.0048   | 2 | 1 | 45.9 | 0 |
| P12163_1_F4,7583  | R.DHTVSATHGDMQNT      | 2088.967 | 0.01115  | 3 | 1 | 26.9 | 0 |
| P12163_1_F5,13818 | R.ELAQQIEK.E ! R.ELAQ | 1566.931 | 0.00899  | 2 | 1 | 37.3 | 0 |
| P12163_1_F5,13853 | R.ELAQQIEK.E ! R.ELAQ | 1566.931 | 0.00404  | 3 | 1 | 24   | 0 |
| P12163_2_F6,17410 | R.GIYAYGFEKPSAIQQR.   | 2436.35  | 0.00113  | 3 | 1 | 25.4 | 0 |
| P12163_1_F7,18976 | R.ILQAGVHVVVGTPGR.    | 1807.086 | 0.01215  | 3 | 1 | 63.6 | 0 |
| P12163_2_F8_12070 | R.KVDWLTDK.M          | 1917.157 | 0.01044  | 3 | 1 | 34   | 0 |
| P12163_1_F4,21437 | K.AEVLVLASGK.D        | 1594.999 | 0.00533  | 2 | 1 | 46.8 | 0 |
| P12163_1_F4,21486 | K.AEVLVLASGK.D        | 1594.999 | 0.00389  | 3 | 1 | 40.4 | 0 |
| P12163_2_F1,20901 | K.AEVLVLASGK.D        | 1594.999 | 0.00621  | 2 | 1 | 40.2 | 0 |
| P12163_1_F3,14057 | K.DNMLPSEDEAK.R       | 1856.952 | 0.00972  | 2 | 1 | 34.5 | 0 |
| P12163_1_F4,14478 | K.DYLDAAK.E           | 1403.799 | 0.01021  | 2 | 1 | 27.4 | 0 |
| P12163_1_S10,1865 | K.NIMVHGIAHPEIFLGR.   | 2108.174 | 0.00212  | 4 | 1 | 25.2 | 0 |
| P12163_2_F10,1750 | K.NIMVHGIAHPEIFLGR.   | 2108.174 | 0.00116  | 4 | 1 | 30   | 0 |
| P12163_1_F6,14413 | K.SHVLLYPGGAR.E       | 1473.848 | 0.00167  | 3 | 1 | 38.6 | 0 |
| P12163_2_F7,12708 | K.SHVLLYPGGAR.E       | 1473.848 | -0.00509 | 3 | 1 | 40.4 | 0 |
| P12163_2_S5,13418 | K.SHVLLYPGGAR.E       | 1473.848 | 0.00079  | 3 | 1 | 35.4 | 0 |
| P12163_1_F3,18310 | R.AVYGDEVPTFK.L       | 1834.021 | 0.00137  | 2 | 1 | 51   | 0 |
| P12163_1_F9,16214 | R.CLHIPVYDR.T         | 1476.793 | 0.00413  | 3 | 1 | 30.8 | 0 |
| P12163_1_S1,23534 | R.GEVANQALFFPGLLPK    | 2309.348 | 0.00178  | 3 | 1 | 32.7 | 0 |
| P12163_1_S1,23539 | R.GEVANQALFFPGLLPK    | 2309.348 | 0.00532  | 4 | 1 | 33.4 | 0 |
| P12163_1_F3,16841 | R.LNNSLQNCIVR.N       | 1634.895 | 0.00448  | 2 | 1 | 43.6 | 0 |
| P12163_1_F3,24124 | R.LSVMSDIIPK.D        | 1711.028 | 0.00424  | 2 | 1 | 39   | 0 |
| P12163_1_F3,24157 | R.LSVMSDIIPK.D        | 1711.028 | 0.00509  | 3 | 1 | 33.3 | 0 |
| P12163_1_F3,24969 | R.SQLQPLFPILK.A       | 1892.183 | -0.00135 | 2 | 1 | 33.4 | 0 |
| P12163_1_F3,24980 | R.SQLQPLFPILK.A       | 1892.183 | 0.00368  | 3 | 1 | 27.5 | 0 |
| P12163_2_F1,25080 | R.SQLQPLFPILK.A       | 1892.183 | 0.00623  | 3 | 1 | 33.7 | 0 |
| P12163_1_F6,14624 | K.AHGGVSVFGGVGER.T    | 1632.876 | -0.00047 | 3 | 1 | 29.5 | 0 |
| P12163_2_F6,13875 | K.AHGGVSVFGGVGER.T    | 1632.876 | 0.00148  | 3 | 1 | 38.4 | 0 |
| P12163_2_F1,15645 | K.ATNLEMESNLK.K       | 1858.02  | 0.00549  | 2 | 1 | 34.5 | 0 |
| P12163_1_F3,12254 | K.ESGVINDQNLSESK.V    | 2128.134 | 0.00572  | 3 | 1 | 29.2 | 0 |
| P12163_1_F7,22257 | K.GRDTVDPINVTCEVC     | 2930.506 | 0.0087   | 3 | 1 | 34.7 | 0 |
| P12163_1_F4,21648 | K.IGLFGGAGVGK.T       | 1583.973 | 0.01162  | 3 | 1 | 29.2 | 0 |
| P12163_1_F7,19404 | K.IGLFGGAGVGK.T       | 1583.973 | 0.00832  | 3 | 1 | 27.6 | 0 |
| P12163_2_F4,18381 | K.IGLFGGAGVGK.T       | 1583.973 | -0.00962 | 3 | 1 | 26.9 | 0 |
| P12163_1_S1,15750 | K.SAPAFIQLDTR.L       | 1522.853 | -0.00521 | 3 | 1 | 40.8 | 0 |
| P12163_1_S1,16247 | K.SAPAFIQLDTR.L       | 1522.853 | 0.00232  | 3 | 1 | 33.1 | 0 |
| P12163_1_S1,17795 | K.SAPAFIQLDTR.L       | 1522.853 | -0.00413 | 3 | 1 | 45.6 | 0 |
| P12163_1_S1,17798 | K.SAPAFIQLDTR.L       | 1522.853 | 0.00719  | 2 | 1 | 44   | 0 |
| P12163_1_S1,18944 | K.VALVYGMNEPPGAR      | 1906.016 | -0.0033  | 3 | 1 | 34.9 | 0 |

|                   |                     |          |          |   |   |      |   |
|-------------------|---------------------|----------|----------|---|---|------|---|
| P12163_1_S1,22597 | K.VVDLLAPYR.R       | 1349.809 | 0.00314  | 2 | 1 | 24.1 | 0 |
| P12163_1_S1,22625 | K.VVDLLAPYR.R       | 1349.809 | 0.0016   | 3 | 1 | 38.7 | 0 |
| P12163_1_S1,23951 | R.FVQAGSEVSALLGR.M  | 1737.98  | 0.00058  | 3 | 1 | 40   | 0 |
| P12163_1_F3,17344 | R.INPTTSGPGVSAFANK. | 2169.212 | 0.01154  | 3 | 1 | 37.2 | 0 |
| P12163_1_F4,24570 | R.LSIFETGIK.V       | 1615.988 | 0.00576  | 2 | 1 | 30.3 | 0 |
| P12163_1_F4,24612 | R.LSIFETGIK.V       | 1615.988 | 0.00208  | 3 | 1 | 38.9 | 0 |
| P12163_2_F1,23912 | R.LSIFETGIK.V       | 1615.988 | 0.00547  | 3 | 1 | 46   | 0 |
| P12163_2_F6,12687 | K.ATQDVFPDHK.E      | 1765.969 | -0.00009 | 3 | 1 | 25.9 | 0 |
| P12163_1_F3,18834 | K.CDVIASGIVNAAK.Q   | 1926.094 | 0.0028   | 3 | 1 | 33.3 | 0 |
| P12163_1_F3,18876 | K.CDVIASGIVNAAK.Q   | 1926.094 | 0.00733  | 3 | 1 | 27.4 | 0 |
| P12163_1_F4,14598 | K.GGTSIEDLAEK.Y     | 1727.964 | 0.00788  | 3 | 1 | 22.6 | 0 |
| P12163_1_F9,11444 | K.GGVHIVK.K         | 1317.846 | 0.00814  | 2 | 1 | 32.8 | 0 |
| P12163_1_F3,17175 | K.GLAVASVDEVK.K     | 1696.01  | 0.0056   | 2 | 1 | 55.2 | 0 |
| P12163_1_F3,17193 | K.GLAVASVDEVK.K     | 1696.01  | 0.00841  | 3 | 1 | 35.4 | 0 |
| P12163_1_F2,18534 | K.LNFDDNAAFR.Q      | 1486.759 | 0.00413  | 2 | 1 | 25.2 | 0 |
| P12163_1_F4,13176 | K.QLVAADAK.L        | 1423.873 | 0.00548  | 2 | 1 | 27.6 | 0 |
| P12163_1_F4,15835 | K.VVDGLAPK.V        | 1406.883 | 0.00558  | 2 | 1 | 30.1 | 0 |
| P12163_1_F4,15910 | K.VVDGLAPK.V        | 1406.883 | 0.00677  | 3 | 1 | 29.5 | 0 |
| P12163_2_F1,14953 | K.VVDGLAPK.V        | 1406.883 | 0.00626  | 2 | 1 | 31.6 | 0 |
| P12163_1_F4,12884 | R.LEGTNVDQ GK.R     | 1668.938 | 0.00878  | 3 | 1 | 26.8 | 0 |
| P12163_2_F1,11873 | R.LEGTNVDQ GK.R     | 1668.938 | 0.00101  | 2 | 1 | 32.3 | 0 |
| P12163_1_F7,15409 | R.LNIHEYQGAELM*AK.  | 2241.216 | 0.00896  | 3 | 1 | 25   | 0 |
| P12163_1_F8,16090 | R.LNIHEYQGAELM*AK.  | 2241.216 | 0.00257  | 3 | 1 | 39.6 | 0 |
| P12163_1_F8,17904 | R.LNIHEYQGAELM*AK.  | 2241.216 | 0.00107  | 3 | 1 | 25.3 | 0 |
| P12163_2_F6,17391 | R.LNIHEYQGAELM*AK.  | 2241.216 | 0.00494  | 3 | 1 | 45   | 0 |
| P12163_1_F5,11735 | R.NDAIEQVK.K        | 1524.884 | 0.00905  | 2 | 1 | 35   | 0 |
| P12163_2_F9,10302 | K.HEEVVEQVK.K       | 1704.974 | 0.00508  | 2 | 1 | 41.8 | 0 |
| P12163_2_F9,10315 | K.HEEVVEQVK.K       | 1704.974 | 0.00322  | 3 | 1 | 51.3 | 0 |
| P12163_2_F1,10934 | K.NLENPDPK.F        | 1534.868 | 0.00402  | 2 | 1 | 25.2 | 0 |
| P12163_1_F6,20950 | K.SLLLLHIDGTSPVAEDI | 2284.245 | 0.00353  | 3 | 1 | 39.3 | 0 |
| P12163_1_F5,10391 | R.EQTTYAK.V         | 1611.884 | 0.01274  | 2 | 1 | 24.8 | 0 |
| P12163_1_F3,14672 | R.IDSVDASTVK.R      | 1642.947 | 0.00839  | 2 | 1 | 25.3 | 0 |
| P12163_1_F3,14721 | R.IDSVDASTVK.R      | 1642.947 | 0.00495  | 3 | 1 | 32.6 | 0 |
| P12163_1_F4,17510 | R.MVIAASGAVK.H      | 1554.95  | 0.00873  | 3 | 1 | 61.7 | 0 |
| P12163_1_F4,17525 | R.MVIAASGAVK.H      | 1554.95  | 0.00822  | 2 | 1 | 45.6 | 0 |
| P12163_2_F1,16669 | R.MVIAASGAVK.H      | 1554.95  | 0.00168  | 3 | 1 | 50.5 | 0 |
| P12163_2_F1,16670 | R.MVIAASGAVK.H      | 1554.95  | 0.00368  | 2 | 1 | 45.7 | 0 |
| P12163_2_F9,20840 | R.RIPFAELFAR.I      | 1523.9   | 0.00324  | 3 | 1 | 40.3 | 0 |
| P12163_1_F4,17462 | R.TILGPAQNIK.T      | 1663.036 | 0.00712  | 2 | 1 | 25.4 | 0 |
| P12163_2_F1,16621 | R.TILGPAQNIK.T      | 1663.036 | 0.0038   | 2 | 1 | 24.4 | 0 |
| P12163_1_F4,13470 | R.VATESNLAAK.T      | 1611.953 | 0.00692  | 2 | 1 | 30.4 | 0 |
| P12163_1_F5,12121 | R.VATESNLAAK.T      | 1611.953 | 0.00464  | 2 | 1 | 27.7 | 0 |
| P12163_2_F1,12526 | R.VATESNLAAK.T      | 1611.953 | 0.00412  | 2 | 1 | 41.1 | 0 |
| P12163_1_F3,26527 | R.VGINEIAESMMAFNTN  | 2640.362 | 0.00513  | 3 | 1 | 37.9 | 0 |
| P12163_1_F2,9105  | R.VSEADVTR.A        | 1180.647 | 0.00636  | 3 | 1 | 32.6 | 0 |
| P12163_1_S10,1369 | K.FHDVGMK.I         | 1441.808 | 0.00672  | 3 | 1 | 31.3 | 0 |
| P12163_2_F8_12070 | K.FHDVGMK.I         | 1441.808 | 0.00138  | 3 | 1 | 25.7 | 0 |
| P12163_1_F7,20544 | K.HLEGFYEELPIVK.E   | 2182.237 | 0.00322  | 3 | 1 | 23.3 | 0 |
| P12163_1_F8,19645 | K.ILGDVVLNHR.C      | 1439.864 | 0.00294  | 3 | 1 | 57.6 | 0 |
| P12163_1_F8,19759 | K.ILGDVVLNHR.C      | 1439.864 | 0.00327  | 2 | 1 | 33.7 | 0 |
| P12163_1_F8,19914 | K.ILGDVVLNHR.C      | 1439.864 | 0.00576  | 3 | 1 | 53.7 | 0 |



|                   |                     |          |          |   |   |      |   |
|-------------------|---------------------|----------|----------|---|---|------|---|
| P12163_2_F6,19062 | K.ILGDVVLNHR.C      | 1439.864 | 0.00246  | 3 | 1 | 62.2 | 0 |
| P12163_2_F6,19303 | K.ILGDVVLNHR.C      | 1439.864 | 0.00498  | 3 | 1 | 26.6 | 0 |
| P12163_1_F7,22496 | K.ISPGTGTGFEILCQGFN | 3073.566 | 0.00105  | 3 | 1 | 27.7 | 0 |
| P12163_1_F3,19803 | K.LAEGDVFDQVK.I     | 1829.026 | 0.00859  | 2 | 1 | 56.4 | 0 |
| P12163_1_F3,19819 | K.LAEGDVFDQVK.I     | 1829.026 | 0.00152  | 3 | 1 | 32.4 | 0 |
| P12163_2_F2,18538 | K.LNENTWLK.C        | 1625.947 | 0.00742  | 3 | 1 | 31.3 | 0 |
| P12163_2_F10,1327 | K.SSGDNFHAAPNIDHSQ  | 2518.201 | 0.00411  | 4 | 1 | 26.4 | 0 |
| P12163_2_F4,13172 | K.SSGDNFHAAPNIDHSQ  | 2518.201 | -0.00161 | 4 | 1 | 32   | 0 |
| P12163_1_F3,25125 | K.STFGLWPGALGQLSK.  | 2170.248 | 0.01052  | 3 | 1 | 23.9 | 0 |
| P12163_1_F3,25127 | K.STFGLWPGALGQLSK.  | 2170.248 | 0.00038  | 3 | 1 | 33.8 | 0 |
| P12163_1_F8,12487 | R.AVVADDPHFQGR.G    | 1615.849 | 0.0018   | 3 | 1 | 33.7 | 0 |
| P12163_1_F3,20262 | R.DVYAAIIDEK.V      | 1744.994 | 0.00747  | 3 | 1 | 32.7 | 0 |
| P12163_1_F7,22993 | R.TSAPTFEAAVELEES   | 3290.792 | 0.00788  | 4 | 1 | 32.6 | 0 |
| P12163_2_F8_12070 | K.DGCSHGK.G         | 1368.715 | 0.00384  | 3 | 1 | 31.8 | 0 |
| P12163_2_F1,25510 | K.ELLSFFR.Q         | 1215.704 | 0.00245  | 2 | 1 | 31.7 | 0 |
| P12163_1_F4,13723 | K.EVDDAIK.A         | 1468.847 | 0.01497  | 2 | 1 | 37.9 | 0 |
| P12163_1_S1,16639 | K.GYGVVEVFGADR.K    | 1473.764 | 0.00532  | 2 | 1 | 36.3 | 0 |
| P12163_1_F8,20174 | K.LILAHDLATEK.E     | 1832.11  | 0.00488  | 2 | 1 | 30.6 | 0 |
| P12163_2_F6,19738 | K.LILAHDLATEK.E     | 1832.11  | 0.00358  | 2 | 1 | 27.5 | 0 |
| P12163_1_S1,19628 | K.NGPMILEMDTYR.Y    | 1743.871 | 0.00344  | 3 | 1 | 57.3 | 0 |
| P12163_1_F3,18662 | K.VDGM DALAVK.Q     | 1626.934 | 0.00801  | 3 | 1 | 42.9 | 0 |
| P12163_1_F9,11621 | R.DHCTFLGR.G        | 1309.662 | 0.00577  | 3 | 1 | 21.9 | 0 |
| P12163_1_F9,12419 | R.KEVDDAIK.A        | 1901.147 | 0.01431  | 2 | 1 | 30.5 | 0 |
| P12163_1_F4,20440 | R.MEIAADS LYK.A     | 1748.971 | 0.00928  | 3 | 1 | 48.8 | 0 |
| P12163_1_F4,20558 | R.MEIAADS LYK.A     | 1748.971 | 0.01171  | 2 | 1 | 34.7 | 0 |
| P12163_2_F1,19845 | R.MEIAADS LYK.A     | 1748.971 | 0.0058   | 2 | 1 | 36.6 | 0 |
| P12163_2_F1,19861 | R.MEIAADS LYK.A     | 1748.971 | 0.00412  | 3 | 1 | 42.2 | 0 |
| P12163_2_F9,15309 | R.RMEIAADS LYK.A    | 1905.072 | 0.00503  | 3 | 1 | 30.6 | 0 |
| P12163_2_F9,15345 | R.RMEIAADS LYK.A    | 1905.072 | 0.00291  | 4 | 1 | 28.7 | 0 |
| P12163_2_F1,8108  | K.GGGESSYYSR.W      | 1366.654 | 0.0057   | 2 | 1 | 26.5 | 0 |
| P12163_1_F7,15502 | K.HASGPVVDCE SCLVGI | 2160.084 | 0.00404  | 3 | 1 | 56.9 | 0 |
| P12163_2_F8_12070 | K.HASGPVVDCE SCLVGI | 2160.084 | 0.00377  | 3 | 1 | 22.5 | 0 |
| P12163_1_F4,22417 | K.SCSIQNVTDYFVK.I   | 2169.147 | 0.00746  | 3 | 1 | 31.6 | 0 |
| P12163_2_F1,21813 | K.SCSIQNVTDYFVK.I   | 2169.147 | 0.00467  | 3 | 1 | 33   | 0 |
| P12163_1_F3,24737 | R.AAGIDSLVFLTK.S    | 1843.115 | 0.01288  | 3 | 1 | 34.4 | 0 |
| P12163_1_F3,24741 | R.AAGIDSLVFLTK.S    | 1843.115 | 0.00574  | 2 | 1 | 35.5 | 0 |
| P12163_1_F9,9748  | R.ATHNEQLVK.E       | 1647.964 | 0.00684  | 3 | 1 | 33.3 | 0 |
| P12163_2_S5,12825 | R.LLHYEGGSR.T       | 1392.754 | 0.00163  | 3 | 1 | 22.1 | 0 |
| P12163_1_F9,13805 | R.LPHVIR.T          | 1038.673 | 0.00428  | 3 | 1 | 28.1 | 0 |
| P12163_1_F3,5253  | R.NSHYPQHPR.W       | 1439.745 | 0.00373  | 4 | 1 | 32.4 | 0 |
| P12163_2_F2,5711  | R.NSHYPQHPR.W       | 1439.745 | 0.00213  | 4 | 1 | 34.4 | 0 |
| P12163_1_F4,16550 | R.VDMSSLTK.L        | 1488.855 | 0.00334  | 2 | 1 | 29.5 | 0 |
| P12163_1_F4,16565 | R.VDMSSLTK.L        | 1488.855 | 0.00333  | 3 | 1 | 24.9 | 0 |
| P12163_1_F2,9648  | R.VVYDGTPR.V        | 1210.673 | 0.003    | 3 | 1 | 29.4 | 0 |
| P12163_2_F2,18437 | R.WVTFQNK.E         | 1530.889 | 0.00525  | 2 | 1 | 31.3 | 0 |
| P12163_2_F9,5990  | K.AQPHSVSR.S        | 1313.723 | 0.00273  | 3 | 1 | 22.6 | 0 |
| P12163_1_F3,21672 | K.DLETEALTALK.A     | 1812.057 | 0.00603  | 3 | 1 | 29.9 | 0 |
| P12163_2_F1,17266 | K.LNISLER.G         | 1148.694 | 0.00331  | 2 | 1 | 37.6 | 0 |
| P12163_2_F1,10718 | R.ANSALTVR.E        | 1135.674 | 0.00018  | 2 | 1 | 33.3 | 0 |
| P12163_2_F6,7795  | R.EVQEDVHR.I        | 1315.691 | 0.00405  | 3 | 1 | 48.1 | 0 |
| P12163_1_F3,14091 | R.GQIDSIFR.I        | 1239.7   | 0.0034   | 3 | 1 | 23.5 | 0 |

|                   |                       |          |          |   |   |      |   |
|-------------------|-----------------------|----------|----------|---|---|------|---|
| P12163_2_F8_1207  | C.R.LEYAFNDK.Q        | 1607.889 | 0.005    | 3 | 1 | 22.2 | 0 |
| P12163_1_S1,21502 | R.LQVAEAEVNNISIR.F    | 1860.049 | 0.00049  | 3 | 1 | 55.5 | 0 |
| P12163_1_S1,21589 | R.LQVAEAEVNNISIR.F    | 1860.049 | 0.00898  | 2 | 1 | 28.4 | 0 |
| P12163_1_S1,21708 | R.LQVAEAEVNNISIR.F    | 1860.049 | 0.00451  | 3 | 1 | 71.8 | 0 |
| P12163_1_F8,10717 | R.TPGTHVHGNQPDNSSI    | 2392.227 | 0.00099  | 4 | 1 | 25.7 | 0 |
| P12163_1_F2,13796 | R.VDSPLGPLR.L         | 1257.747 | 0.00235  | 3 | 1 | 36.3 | 0 |
| P12163_1_F2,17310 | R.VDSPLGPLR.L         | 1257.747 | 0.00252  | 2 | 1 | 27.8 | 0 |
| P12163_1_S1,21550 | R.VLISEVLVR.N         | 1331.856 | 0.00365  | 2 | 1 | 36.2 | 0 |
| P12163_1_S1,21768 | R.VLISEVLVR.N         | 1331.856 | 0.00367  | 2 | 1 | 33   | 0 |
| P12163_1_F4,14826 | K.ANSQISNLEDEK.A      | 1956.049 | 0.00532  | 2 | 1 | 65.6 | 0 |
| P12163_1_F7,20213 | K.ASEELQNVSHELEATA    | 2431.2   | 0.00143  | 3 | 1 | 42.2 | 0 |
| P12163_1_F4,18776 | K.EAAIVSLEK.D         | 1567.951 | 0.01233  | 2 | 1 | 33.5 | 0 |
| P12163_2_F1,18031 | K.EAAIVSLEK.D         | 1567.951 | 0.00421  | 2 | 1 | 35.6 | 0 |
| P12163_2_F1,18066 | K.EAAIVSLEK.D         | 1567.951 | 0.00885  | 3 | 1 | 28.9 | 0 |
| P12163_2_F1,15698 | K.ELQALEK.Q ! R.ELQAI | 1438.873 | 0.00481  | 2 | 1 | 27   | 0 |
| P12163_1_F9,16556 | K.KLEEELASAK.G        | 2030.226 | 0.01085  | 3 | 1 | 30.6 | 0 |
| P12163_1_S1,19199 | K.LELTLDEACENR.A      | 1766.89  | 0.00355  | 3 | 1 | 52.6 | 0 |
| P12163_1_F4,10844 | K.LSSENETASNAK.R      | 1858.997 | -0.00104 | 2 | 1 | 43.1 | 0 |
| P12163_1_F2,10434 | K.TLVNDENPR.K         | 1361.733 | 0.00472  | 2 | 1 | 24.5 | 0 |
| P12163_1_F3,7912  | K.TLVNDENPR.K         | 1361.733 | 0.00065  | 3 | 1 | 44.2 | 0 |
| P12163_2_F6,19454 | K.YELQITQETLETTR.N    | 2029.075 | -0.00225 | 2 | 1 | 35.2 | 0 |
| P12163_1_F3,15865 | R.ASSLLVER.D          | 1178.705 | 0.00242  | 2 | 1 | 24.8 | 0 |
| P12163_1_F2,22260 | R.IEIDSLQTSLLK.F      | 1968.184 | 0.00261  | 3 | 1 | 37.5 | 0 |
| P12163_1_F3,15784 | K.EVDEQMINVQNK.N ! I  | 2055.1   | 0.005    | 2 | 1 | 71.2 | 0 |
| P12163_2_F10,1891 | K.FWEVICDEHGIDHTGK    | 2551.286 | 0.00143  | 4 | 1 | 29.9 | 0 |
| P12163_2_F10,1913 | K.FWEVICDEHGIDHTGK    | 2551.286 | 0.00415  | 4 | 1 | 22.7 | 0 |
| P12163_1_S1,23245 | K.LAVNLIPFPR.L        | 1443.899 | 0.00187  | 3 | 1 | 36.6 | 0 |
| P12163_1_S1,12322 | K.YSGSDQLQLER.I       | 1586.796 | 0.00941  | 3 | 1 | 55.2 | 0 |
| P12163_1_F8,15536 | R.EILHIQGGQCGNQIGAI   | 2431.334 | 0.0044   | 3 | 1 | 52.2 | 0 |
| P12163_1_F2,15019 | R.FPQQLNSDLR.K        | 1450.796 | 0.00178  | 3 | 1 | 40.8 | 0 |
| P12163_1_F3,16568 | R.INVYYNEASGGR.Y      | 1646.844 | 0.00801  | 2 | 1 | 28.8 | 0 |
| P12163_1_F8,22050 | R.KLAVNLIPFPR.L       | 1876.199 | 0.00927  | 3 | 1 | 27.8 | 0 |
| P12163_2_F6,21707 | R.KLAVNLIPFPR.L       | 1876.199 | 0.00288  | 3 | 1 | 34   | 0 |
| P12163_1_F8,24105 | R.LHFFM*VGFAPLTSR.C   | 1943.051 | 0.00513  | 3 | 1 | 43.6 | 0 |
| P12163_1_F3,26332 | R.MMLTFSVFPSPK.V      | 1993.111 | 0.00817  | 3 | 1 | 44.8 | 0 |
| P12163_1_F3,17068 | R.YLTASAMFR.G         | 1363.735 | 0.00428  | 3 | 1 | 38.5 | 0 |
| P12163_1_F2,16701 | K.AGDEQLNVFR.F        | 1452.775 | 0.00492  | 2 | 1 | 37   | 0 |
| P12163_2_F1,8290  | K.AVTDGQTK.W          | 1427.831 | 0.00396  | 2 | 1 | 31.6 | 0 |
| P12163_1_F5,18964 | K.ELGLAFK.G           | 1385.861 | 0.00238  | 2 | 1 | 26.5 | 0 |
| P12163_1_F3,14123 | K.EYGITAPDTK.N        | 1702.947 | 0.00598  | 2 | 1 | 26.2 | 0 |
| P12163_1_F3,17665 | K.IDITGTSIGK.R        | 1612.973 | 0.01231  | 2 | 1 | 30.9 | 0 |
| P12163_1_S1,23740 | K.LPFAAAQIGQAFR.N     | 1693.969 | -0.0001  | 3 | 1 | 33   | 0 |
| P12163_1_F4,23471 | K.NVVEALEAM*NEK.E     | 1971.068 | -0.00035 | 3 | 1 | 23   | 0 |
| P12163_1_F4,23512 | K.NVVEALEAMNEK.E      | 1955.073 | 0.00799  | 3 | 1 | 33.3 | 0 |
| P12163_1_F2,8919  | K.QSAVDAQGNAVR.A      | 1519.813 | 0.00412  | 2 | 1 | 32.8 | 0 |
| P12163_1_F3,22615 | R.FPPLVAPIK.C         | 1590.024 | 0.00473  | 3 | 1 | 29   | 0 |
| P12163_1_F3,18895 | R.GVAGLYDYGPPGCAV     | 2232.194 | 0.00774  | 3 | 1 | 55.5 | 0 |
| P12163_1_F3,19703 | R.VSLDEAASVIK.A       | 1740.036 | 0.00082  | 3 | 1 | 31.5 | 0 |
| P12163_1_F7,19105 | K.ETPEGHFIM*LDVPGV    | 2393.299 | 0.0093   | 3 | 1 | 35.9 | 0 |
| P12163_1_F7,19106 | K.ETPEGHFIM*LDVPGV    | 2393.299 | 0.00299  | 4 | 1 | 22.9 | 0 |
| P12163_1_F7,19139 | K.ETPEGHFIM*LDVPGV    | 2393.299 | 0.00036  | 2 | 1 | 48.1 | 0 |

|                   |                    |          |          |   |   |      |   |
|-------------------|--------------------|----------|----------|---|---|------|---|
| P12163_1_F7,20284 | K.ETPEGHFIM*LDVPGV | 2393.299 | 0.00599  | 4 | 1 | 23.3 | 0 |
| P12163_1_F7,20299 | K.ETPEGHFIM*LDVPGV | 2393.299 | 0.00681  | 3 | 1 | 32.4 | 0 |
| P12163_1_F7,20513 | K.ETPEGHFIM*LDVPGV | 2393.299 | 0.00503  | 4 | 1 | 22.5 | 0 |
| P12163_1_F8,20072 | K.ETPEGHFIM*LDVPGV | 2393.299 | 0.00717  | 3 | 1 | 36   | 0 |
| P12163_1_F8,21315 | K.ETPEGHFIM*LDVPGV | 2393.299 | 0.00924  | 3 | 1 | 31.7 | 0 |
| P12163_2_F10,1752 | K.ETPEGHFIM*LDVPGV | 2393.299 | 0.00948  | 3 | 1 | 22.3 | 0 |
| P12163_2_F10,1852 | K.ETPEGHFIM*LDVPGV | 2393.299 | 0.00403  | 4 | 1 | 23.4 | 0 |
| P12163_2_S5,16848 | K.ETPEGHFIM*LDVPGV | 2393.299 | -0.00114 | 3 | 1 | 28.9 | 0 |
| P12163_2_S5,18371 | K.ETPEGHFIM*LDVPGV | 2393.299 | -0.00352 | 2 | 1 | 43.2 | 0 |
| P12163_2_S5,19490 | K.ETPEGHFIM*LDVPGV | 2393.299 | 0.00873  | 3 | 1 | 37   | 0 |
| P12163_1_F8,21324 | K.ETPEGHFIMLDVPGVK | 2377.305 | 0.00362  | 2 | 1 | 73.8 | 0 |
| P12163_1_S10,1965 | K.ETPEGHFIMLDVPGVK | 2377.305 | 0.00143  | 4 | 1 | 24   | 0 |
| P12163_2_F10,1848 | K.ETPEGHFIMLDVPGVK | 2377.305 | 0.00294  | 3 | 1 | 24.9 | 0 |
| P12163_2_F10,1851 | K.ETPEGHFIMLDVPGVK | 2377.305 | 0.00419  | 4 | 1 | 22.2 | 0 |
| P12163_2_F9,18964 | K.ETPEGHFIMLDVPGVK | 2377.305 | -0.00149 | 4 | 1 | 25.8 | 0 |
| P12163_2_F9,18977 | K.ETPEGHFIMLDVPGVK | 2377.305 | 0.00337  | 3 | 1 | 35.9 | 0 |
| P12163_2_S5,19476 | K.ETPEGHFIMLDVPGVK | 2377.305 | 0.00054  | 3 | 1 | 30.5 | 0 |
| P12163_2_S5,19675 | K.ETPEGHFIMLDVPGVK | 2377.305 | 0.00491  | 4 | 1 | 23.5 | 0 |
| P12163_1_F3,11391 | K.IEVEENR.V        | 1192.647 | -0.00055 | 2 | 1 | 36   | 0 |
| P12163_1_F4,11796 | K.IEVEENR.V        | 1192.647 | 0.00309  | 2 | 1 | 34   | 0 |
| P12163_1_F7,10022 | K.IEVEENR.V        | 1192.647 | 0.00229  | 2 | 1 | 34.9 | 0 |
| P12163_2_F4,9597  | K.IEVEENR.V        | 1192.647 | 0.00253  | 2 | 1 | 34.9 | 0 |
| P12163_2_F4,10314 | K.IEVEENR.V        | 1192.647 | 0.00651  | 2 | 1 | 31.4 | 0 |
| P12163_1_F3,19949 | K.LENGVLTLSLK.K    | 1795.115 | 0.00406  | 2 | 1 | 26.9 | 0 |
| P12163_1_F3,19993 | K.LENGVLTLSLK.K    | 1795.115 | 0.00099  | 3 | 1 | 41.7 | 0 |
| P12163_1_F3,23208 | K.LENGVLTLSLK.K    | 1795.115 | 0.00471  | 3 | 1 | 49.2 | 0 |
| P12163_1_F6,21801 | K.LENGVLTLSLK.K    | 1795.115 | 0.01044  | 3 | 1 | 42.8 | 0 |
| P12163_2_F1,23474 | K.LENGVLTLSLK.K    | 1795.115 | 0.00398  | 2 | 1 | 46.7 | 0 |
| P12163_2_F1,23500 | K.LENGVLTLSLK.K    | 1795.115 | 0.00303  | 3 | 1 | 33.9 | 0 |
| P12163_1_F5,17051 | K.LPDNVDLDSVQAK.L  | 2022.133 | 0.00245  | 2 | 1 | 28.4 | 0 |
| P12163_1_F5,17206 | K.LPDNVDLDSVQAK.L  | 2022.133 | 0.00287  | 3 | 1 | 33.2 | 0 |
| P12163_1_S1,14659 | K.LPDNVDLDSVQAK.L  | 2022.133 | 0.00531  | 4 | 1 | 25.9 | 0 |
| P12163_1_S1,14706 | K.LPDNVDLDSVQAK.L  | 2022.133 | 0.00704  | 3 | 1 | 42.4 | 0 |
| P12163_1_S1,16682 | K.LPDNVDLDSVQAK.L  | 2022.133 | 0.00656  | 3 | 1 | 39.4 | 0 |
| P12163_1_S1,16698 | K.LPDNVDLDSVQAK.L  | 2022.133 | 0.01215  | 2 | 1 | 39.7 | 0 |
| P12163_1_S1,16780 | K.LPDNVDLDSVQAK.L  | 2022.133 | 0.00191  | 4 | 1 | 36.1 | 0 |
| P12163_1_S1,16860 | K.LPDNVDLDSVQAK.L  | 2022.133 | 0.00647  | 3 | 1 | 41.2 | 0 |
| P12163_1_S1,16879 | K.LPDNVDLDSVQAK.L  | 2022.133 | 0.01623  | 2 | 1 | 39.5 | 0 |
| P12163_2_F4,16688 | K.LPDNVDLDSVQAK.L  | 2022.133 | 0.00548  | 3 | 1 | 32.6 | 0 |
| P12163_2_F1,13857 | K.LSPDQIK.G        | 1408.862 | 0.00549  | 2 | 1 | 24.8 | 0 |
| P12163_1_F9,15353 | R.DELKIEVEENR.V    | 1982.101 | 0.00053  | 2 | 1 | 37.3 | 0 |
| P12163_2_F6,15045 | R.DELKIEVEENR.V    | 1982.101 | -0.00303 | 2 | 1 | 33.6 | 0 |
| P12163_2_F7,13892 | R.DELKIEVEENR.V    | 1982.101 | 0.00399  | 2 | 1 | 35.4 | 0 |
| P12163_1_S1,10217 | R.DETM*ALSPAR.V    | 1410.72  | 0.00613  | 3 | 1 | 29.5 | 0 |
| P12163_1_S1,10196 | R.DETMALSPAR.V     | 1394.725 | 0.01033  | 3 | 1 | 27.2 | 0 |
| P12163_1_S1,11290 | R.DETMALSPAR.V     | 1394.725 | 0.00298  | 3 | 1 | 36.7 | 0 |
| P12163_1_S1,12722 | R.DETMALSPAR.V     | 1394.725 | 0.00414  | 2 | 1 | 33.6 | 0 |
| P12163_1_F2,20523 | R.SLLSDLWTER.L     | 1523.837 | 0.00206  | 3 | 1 | 32.7 | 0 |
| P12163_1_F2,22476 | R.SLLSDLWTER.L     | 1523.837 | 0.00323  | 3 | 1 | 35.7 | 0 |
| P12163_1_S1,23155 | R.VLEQIPFELER.D    | 1676.952 | 0.00312  | 2 | 1 | 28.4 | 0 |
| P12163_1_S1,23162 | R.VLEQIPFELER.D    | 1676.952 | 0.00305  | 3 | 1 | 36.8 | 0 |

|                   |                    |          |          |   |   |      |   |
|-------------------|--------------------|----------|----------|---|---|------|---|
| P12163_1_S1,23385 | R.VLEQIPFELER.D    | 1676.952 | 0.00384  | 2 | 1 | 37.7 | 0 |
| P12163_1_S1,23391 | R.VLEQIPFELER.D    | 1676.952 | 0.00128  | 3 | 1 | 57.8 | 0 |
| P12163_1_S1,23604 | R.VLEQIPFELER.D    | 1676.952 | 0.00371  | 3 | 1 | 44.7 | 0 |
| P12163_1_S1,23611 | R.VLEQIPFELER.D    | 1676.952 | 0.00494  | 2 | 1 | 41.5 | 0 |
| P12163_1_F2,13031 | R.VVGIAGGEDETAK.L  | 1854.043 | 0.00582  | 3 | 1 | 50.6 | 0 |
| P12163_1_F2,13129 | R.VVGIAGGEDETAK.L  | 1854.043 | 0.00652  | 2 | 1 | 31.7 | 0 |
| P12163_1_F2,14625 | R.VVGIAGGEDETAK.L  | 1854.043 | 0.0054   | 2 | 1 | 66.3 | 0 |
| P12163_1_F2,14906 | R.VVGIAGGEDETAK.L  | 1854.043 | 0.00328  | 2 | 1 | 40.8 | 0 |
| P12163_1_F3,13525 | R.VVGIAGGEDETAK.L  | 1854.043 | 0.00747  | 3 | 1 | 48.4 | 0 |
| P12163_1_F3,13528 | R.VVGIAGGEDETAK.L  | 1854.043 | 0.0054   | 2 | 1 | 30.3 | 0 |
| P12163_1_F3,15220 | R.VVGIAGGEDETAK.L  | 1854.043 | 0.00648  | 2 | 1 | 72.2 | 0 |
| P12163_1_F5,14264 | R.VVGIAGGEDETAK.L  | 1854.043 | 0.00332  | 2 | 1 | 49.2 | 0 |
| P12163_1_F6,14529 | R.VVGIAGGEDETAK.L  | 1854.043 | 0.00424  | 2 | 1 | 30.2 | 0 |
| P12163_2_F2,14443 | R.VVGIAGGEDETAK.L  | 1854.043 | 0.00502  | 2 | 1 | 62.4 | 0 |
| P12163_2_F4,13941 | R.VVGIAGGEDETAK.L  | 1854.043 | 0.00496  | 2 | 1 | 39.5 | 0 |
| P12163_1_F2,7423  | K.AALES DTR.V      | 1166.632 | 0.00336  | 3 | 1 | 38   | 0 |
| P12163_1_F2,9543  | K.AALES DTR.V      | 1166.632 | 0.00349  | 2 | 1 | 24   | 0 |
| P12163_1_F3,7626  | K.AALES DTR.V      | 1166.632 | 0.00354  | 3 | 1 | 32.6 | 0 |
| P12163_1_F3,7911  | K.AALES DTR.V      | 1166.632 | 0.00201  | 3 | 1 | 27.6 | 0 |
| P12163_1_F3,7984  | K.AALES DTR.V      | 1166.632 | 0.00539  | 2 | 1 | 26   | 0 |
| P12163_1_F7,8453  | K.AALES DTR.V      | 1166.632 | 0.00161  | 2 | 1 | 29.3 | 0 |
| P12163_2_F1,9255  | K.AALES DTR.V      | 1166.632 | 0.00751  | 2 | 1 | 24.5 | 0 |
| P12163_2_F4,7908  | K.AALES DTR.V      | 1166.632 | 0.00277  | 2 | 1 | 31.4 | 0 |
| P12163_1_F4,16270 | K.DLDIPTDK.H       | 1524.873 | 0.00348  | 3 | 1 | 26.6 | 0 |
| P12163_1_F8,13674 | K.DLDIPTDKH.-      | 1661.932 | 0.00134  | 3 | 1 | 32.8 | 0 |
| P12163_1_F8,13912 | K.DLDIPTDKH.-      | 1661.932 | 0.00617  | 3 | 1 | 39.2 | 0 |
| P12163_2_S5,12868 | K.DLDIPTDKH.-      | 1661.932 | 0.00551  | 3 | 1 | 36.1 | 0 |
| P12163_1_F2,22546 | K.IYPLDAIYDK.L     | 1819.046 | 0.00267  | 3 | 1 | 22.3 | 0 |
| P12163_1_F9,21622 | K.IYPLDAIYDK.L     | 1819.046 | 0.00651  | 3 | 1 | 26   | 0 |
| P12163_1_F3,17337 | K.LEDVPEDVK.S      | 1651.936 | 0.00355  | 3 | 1 | 34.7 | 0 |
| P12163_1_F4,14608 | K.WTVQECAESVK.Q    | 1945.031 | 0.00906  | 3 | 1 | 21.9 | 0 |
| P12163_1_F4,17130 | K.WTVQECAESVK.Q    | 1945.031 | 0.00501  | 2 | 1 | 42.5 | 0 |
| P12163_1_F4,17149 | K.WTVQECAESVK.Q    | 1945.031 | 0.00402  | 3 | 1 | 53.1 | 0 |
| P12163_2_F1,16199 | K.WTVQECAESVK.Q    | 1945.031 | 0.00649  | 2 | 1 | 53.5 | 0 |
| P12163_2_F1,16317 | K.WTVQECAESVK.Q    | 1945.031 | 0.00546  | 3 | 1 | 50.8 | 0 |
| P12163_1_F8,22929 | R.AFIAGVADDNGYGWA  | 2447.318 | 0.01121  | 3 | 1 | 40.3 | 0 |
| P12163_1_F3,16057 | R.IIPGYGGGM*SSAK.A | 1862.03  | 0.00405  | 3 | 1 | 42.8 | 0 |
| P12163_1_F3,16090 | R.IIPGYGGGM*SSAK.A | 1862.03  | 0.00262  | 2 | 1 | 30.8 | 0 |
| P12163_1_F9,15575 | R.IIPGYGGGM*SSAK.A | 1862.03  | -0.00429 | 3 | 1 | 24.5 | 0 |
| P12163_1_F3,15877 | R.IIPGYGGGMSSAK.A  | 1846.035 | 0.0072   | 3 | 1 | 23.3 | 0 |
| P12163_1_F3,17731 | R.IIPGYGGGMSSAK.A  | 1846.035 | 0.01017  | 3 | 1 | 27.9 | 0 |
| P12163_1_F3,17793 | R.IIPGYGGGMSSAK.A  | 1846.035 | 0.00514  | 2 | 1 | 46.6 | 0 |
| P12163_1_F4,18167 | R.IIPGYGGGMSSAK.A  | 1846.035 | -0.00076 | 2 | 1 | 46.2 | 0 |
| P12163_1_F4,18172 | R.IIPGYGGGMSSAK.A  | 1846.035 | 0.00642  | 3 | 1 | 57.9 | 0 |
| P12163_1_F6,17023 | R.IIPGYGGGMSSAK.A  | 1846.035 | 0.00102  | 3 | 1 | 29.6 | 0 |
| P12163_2_F1,17483 | R.IIPGYGGGMSSAK.A  | 1846.035 | 0.00234  | 2 | 1 | 56   | 0 |
| P12163_2_F7,15276 | R.IIPGYGGGMSSAK.A  | 1846.035 | 0.00822  | 3 | 1 | 26.6 | 0 |
| P12163_2_F9,15857 | R.IIPGYGGGMSSAK.A  | 1846.035 | 0.00468  | 3 | 1 | 54.6 | 0 |
| P12163_1_S1,17863 | R.VLPDGSLM*EITK.I  | 1927.103 | 0.00583  | 3 | 1 | 48.6 | 0 |
| P12163_1_S1,17906 | R.VLPDGSLM*EITK.I  | 1927.103 | 0.00637  | 2 | 1 | 33.5 | 0 |
| P12163_1_S1,20036 | R.VLPDGSLM*EITK.I  | 1927.103 | 0.01036  | 3 | 1 | 21.9 | 0 |

|                   |                    |          |          |   |   |      |   |
|-------------------|--------------------|----------|----------|---|---|------|---|
| P12163_1_F4,22637 | R.VLPDGSLMEITK.I   | 1911.108 | 0.00622  | 3 | 1 | 36.4 | 0 |
| P12163_1_F5,20892 | R.VLPDGSLMEITK.I   | 1911.108 | 0.00423  | 2 | 1 | 45.6 | 0 |
| P12163_1_F5,21272 | R.VLPDGSLMEITK.I   | 1911.108 | 0.00658  | 3 | 1 | 35   | 0 |
| P12163_1_S1,17046 | R.VLPDGSLMEITK.I   | 1911.108 | 0.00862  | 3 | 1 | 25.1 | 0 |
| P12163_1_S1,17106 | R.VLPDGSLMEITK.I   | 1911.108 | 0.00758  | 4 | 1 | 29.3 | 0 |
| P12163_1_S1,18651 | R.VLPDGSLMEITK.I   | 1911.108 | 0.00784  | 3 | 1 | 35.6 | 0 |
| P12163_1_S1,19942 | R.VLPDGSLMEITK.I   | 1911.108 | 0.00634  | 3 | 1 | 27.9 | 0 |
| P12163_1_S1,19991 | R.VLPDGSLMEITK.I   | 1911.108 | 0.00646  | 4 | 1 | 27.2 | 0 |
| P12163_1_S1,20015 | R.VLPDGSLMEITK.I   | 1911.108 | 0.00589  | 2 | 1 | 46.8 | 0 |
| P12163_1_S1,20196 | R.VLPDGSLMEITK.I   | 1911.108 | 0.00934  | 3 | 1 | 39.1 | 0 |
| P12163_1_S10,1943 | R.VLPDGSLMEITK.I   | 1911.108 | 0.0052   | 3 | 1 | 23.6 | 0 |
| P12163_2_F1,21650 | R.VLPDGSLMEITK.I   | 1911.108 | -0.00467 | 3 | 1 | 34.3 | 0 |
| P12163_2_F4,19810 | R.VLPDGSLMEITK.I   | 1911.108 | 0.00661  | 3 | 1 | 42.3 | 0 |
| P12163_1_F2,14777 | R.VNAISAGPLR.S     | 1301.784 | 0.00149  | 3 | 1 | 22.6 | 0 |
| P12163_1_F2,16430 | R.VNAISAGPLR.S     | 1301.784 | 0.00323  | 2 | 1 | 38.1 | 0 |
| P12163_1_F3,15259 | R.VNAISAGPLR.S     | 1301.784 | 0.00008  | 3 | 1 | 52.2 | 0 |
| P12163_1_F3,16930 | R.VNAISAGPLR.S     | 1301.784 | 0.00383  | 2 | 1 | 29.2 | 0 |
| P12163_1_F3,17179 | R.VNAISAGPLR.S     | 1301.784 | 0.00293  | 2 | 1 | 24.6 | 0 |
| P12163_1_F6,15739 | R.VNAISAGPLR.S     | 1301.784 | 0.00103  | 2 | 1 | 28.6 | 0 |
| P12163_1_F6,16737 | R.VNAISAGPLR.S     | 1301.784 | 0.00157  | 2 | 1 | 25.9 | 0 |
| P12163_2_F2,877   | R.VNAISAGPLR.S     | 1301.784 | 0.00289  | 2 | 1 | 29.1 | 0 |
| P12163_2_F2,1072  | R.VNAISAGPLR.S     | 1301.784 | 0.00291  | 2 | 1 | 32.5 | 0 |
| P12163_2_F2,1265  | R.VNAISAGPLR.S     | 1301.784 | 0.00323  | 2 | 1 | 27.7 | 0 |
| P12163_2_F2,1449  | R.VNAISAGPLR.S     | 1301.784 | 0.00325  | 2 | 1 | 28.9 | 0 |
| P12163_2_F2,1628  | R.VNAISAGPLR.S     | 1301.784 | 0.00225  | 2 | 1 | 29.5 | 0 |
| P12163_2_F2,1817  | R.VNAISAGPLR.S     | 1301.784 | 0.00351  | 2 | 1 | 30   | 0 |
| P12163_2_F2,2005  | R.VNAISAGPLR.S     | 1301.784 | 0.00241  | 2 | 1 | 25.9 | 0 |
| P12163_2_F2,2192  | R.VNAISAGPLR.S     | 1301.784 | 0.00195  | 2 | 1 | 31.2 | 0 |
| P12163_2_F2,2373  | R.VNAISAGPLR.S     | 1301.784 | 0.00279  | 2 | 1 | 30.4 | 0 |
| P12163_2_F2,2547  | R.VNAISAGPLR.S     | 1301.784 | 0.00273  | 2 | 1 | 26.7 | 0 |
| P12163_1_F2,16012 | K.AGSGVATLGLPDSPG\ | 2231.286 | 0.00689  | 3 | 1 | 27.5 | 0 |
| P12163_1_F2,17166 | K.AGSGVATLGLPDSPG\ | 2231.286 | 0.00647  | 3 | 1 | 50.1 | 0 |
| P12163_1_F2,17425 | K.AGSGVATLGLPDSPG\ | 2231.286 | 0.00344  | 3 | 1 | 41.9 | 0 |
| P12163_1_F2,18756 | K.AGSGVATLGLPDSPG\ | 2231.286 | 0.0026   | 3 | 1 | 63.9 | 0 |
| P12163_1_F2,18789 | K.AGSGVATLGLPDSPG\ | 2231.286 | 0.00678  | 4 | 1 | 29.7 | 0 |
| P12163_1_F2,18841 | K.AGSGVATLGLPDSPG\ | 2231.286 | 0.00339  | 2 | 1 | 66.9 | 0 |
| P12163_1_F3,19416 | K.AGSGVATLGLPDSPG\ | 2231.286 | 0.00101  | 3 | 1 | 38.1 | 0 |
| P12163_1_F4,936   | K.AGSGVATLGLPDSPG\ | 2231.286 | 0.00257  | 3 | 1 | 24.1 | 0 |
| P12163_1_S1,15965 | K.AGSGVATLGLPDSPG\ | 2231.286 | 0.00596  | 3 | 1 | 51.1 | 0 |
| P12163_1_S1,16330 | K.AGSGVATLGLPDSPG\ | 2231.286 | 0.00755  | 3 | 1 | 44.9 | 0 |
| P12163_1_S1,17389 | K.AGSGVATLGLPDSPG\ | 2231.286 | 0.00167  | 3 | 1 | 40.4 | 0 |
| P12163_1_S1,17421 | K.AGSGVATLGLPDSPG\ | 2231.286 | 0.00278  | 4 | 1 | 49.9 | 0 |
| P12163_1_S1,17444 | K.AGSGVATLGLPDSPG\ | 2231.286 | 0.00331  | 2 | 1 | 81.4 | 0 |
| P12163_2_F2,19032 | K.AGSGVATLGLPDSPG\ | 2231.286 | 0.00197  | 3 | 1 | 67.5 | 0 |
| P12163_2_F6,18486 | K.AGSGVATLGLPDSPG\ | 2231.286 | 0.00701  | 3 | 1 | 41.2 | 0 |
| P12163_1_S1,10251 | K.ELM*PGGVNSPVR.A  | 1575.847 | 0.00773  | 3 | 1 | 23.1 | 0 |
| P12163_1_S1,12551 | K.ELM*PGGVNSPVR.A  | 1575.847 | -0.00103 | 3 | 1 | 38.9 | 0 |
| P12163_1_S1,12517 | K.ELMPGGVNSPVR.A   | 1559.852 | 0.00266  | 3 | 1 | 36.1 | 0 |
| P12163_1_S1,15202 | K.ELMPGGVNSPVR.A   | 1559.852 | 0.00329  | 3 | 1 | 30.9 | 0 |
| P12163_1_F4,15859 | K.EPGTYEYLNK.I     | 1821.984 | 0.00854  | 3 | 1 | 24.6 | 0 |
| P12163_2_F9,14300 | K.EPGTYEYLNK.I     | 1821.984 | 0.00509  | 3 | 1 | 25   | 0 |

|                   |                     |          |          |   |   |      |   |
|-------------------|---------------------|----------|----------|---|---|------|---|
| P12163_1_F4,18099 | K.FEGCYHGHADPFLVK.  | 2385.227 | 0.0073   | 4 | 1 | 22.4 | 0 |
| P12163_1_F7,16553 | K.FEGCYHGHADPFLVK.  | 2385.227 | 0.00486  | 3 | 1 | 27.9 | 0 |
| P12163_2_F4,16061 | K.FEGCYHGHADPFLVK.  | 2385.227 | 0.00294  | 3 | 1 | 36.6 | 0 |
| P12163_1_F6,19789 | K.IIGGGLPVGAYGGR.R  | 1590.927 | 0.00478  | 2 | 1 | 25.2 | 0 |
| P12163_1_S1,18518 | K.IIGGGLPVGAYGGR.R  | 1590.927 | 0.00077  | 3 | 1 | 42.6 | 0 |
| P12163_1_S1,18754 | K.IIGGGLPVGAYGGR.R  | 1590.927 | 0.009    | 2 | 1 | 33.3 | 0 |
| P12163_1_F2,17688 | K.ITGELTQGIIDAGK.K  | 2024.185 | -0.00022 | 3 | 1 | 44.7 | 0 |
| P12163_1_F2,17714 | K.ITGELTQGIIDAGK.K  | 2024.185 | 0.00522  | 4 | 1 | 22.2 | 0 |
| P12163_1_F2,18292 | K.ITGELTQGIIDAGK.K  | 2024.185 | 0.00383  | 3 | 1 | 30.4 | 0 |
| P12163_1_F2,21953 | K.ITGELTQGIIDAGK.K  | 2024.185 | 0.00104  | 3 | 1 | 30.7 | 0 |
| P12163_1_F2,22027 | K.ITGELTQGIIDAGK.K  | 2024.185 | 0.00231  | 2 | 1 | 69.7 | 0 |
| P12163_1_F2,22196 | K.ITGELTQGIIDAGK.K  | 2024.185 | 0.00581  | 3 | 1 | 57.4 | 0 |
| P12163_1_F3,22674 | K.ITGELTQGIIDAGK.K  | 2024.185 | -0.00203 | 2 | 1 | 50.5 | 0 |
| P12163_1_F3,22681 | K.ITGELTQGIIDAGK.K  | 2024.185 | 0.00488  | 3 | 1 | 46.3 | 0 |
| P12163_1_F5,21421 | K.ITGELTQGIIDAGK.K  | 2024.185 | 0.0071   | 3 | 1 | 49.4 | 0 |
| P12163_1_S1,21175 | K.ITGELTQGIIDAGK.K  | 2024.185 | 0.01397  | 3 | 1 | 47.4 | 0 |
| P12163_1_F4,14615 | K.NSEEFNVAK.E       | 1716.938 | 0.0048   | 2 | 1 | 45.1 | 0 |
| P12163_1_F4,14630 | K.NSEEFNVAK.E       | 1716.938 | 0.00488  | 3 | 1 | 41.5 | 0 |
| P12163_1_F5,13127 | K.NSEEFNVAK.E       | 1716.938 | 0.00658  | 2 | 1 | 48.8 | 0 |
| P12163_1_F5,13128 | K.NSEEFNVAK.E       | 1716.938 | 0.00752  | 3 | 1 | 31.1 | 0 |
| P12163_1_F5,13603 | K.NSEEFNVAK.E       | 1716.938 | 0.0061   | 2 | 1 | 24.8 | 0 |
| P12163_2_F1,13493 | K.NSEEFNVAK.E       | 1716.938 | 0.00416  | 3 | 1 | 31.6 | 0 |
| P12163_2_F1,13501 | K.NSEEFNVAK.E       | 1716.938 | 0.00424  | 2 | 1 | 54.7 | 0 |
| P12163_1_F2,17417 | K.SVGGQPIVFDVSVK.G  | 1941.127 | 0.0019   | 2 | 1 | 33   | 0 |
| P12163_1_F2,17445 | K.SVGGQPIVFDVSVK.G  | 1941.127 | 0.00809  | 3 | 1 | 35.5 | 0 |
| P12163_1_F3,16626 | K.SVGGQPIVFDVSVK.G  | 1941.127 | 0.00518  | 3 | 1 | 36.3 | 0 |
| P12163_1_F3,16637 | K.SVGGQPIVFDVSVK.G  | 1941.127 | 0.00825  | 2 | 1 | 42.8 | 0 |
| P12163_1_F3,16651 | K.SVGGQPIVFDVSVK.G  | 1941.127 | 0.00657  | 4 | 1 | 38.1 | 0 |
| P12163_1_F3,18735 | K.SVGGQPIVFDVSVK.G  | 1941.127 | 0.00539  | 3 | 1 | 57.4 | 0 |
| P12163_1_F3,18800 | K.SVGGQPIVFDVSVK.G  | 1941.127 | 0.0055   | 2 | 1 | 74.1 | 0 |
| P12163_1_F5,18014 | K.SVGGQPIVFDVSVK.G  | 1941.127 | 0.00246  | 2 | 1 | 39.3 | 0 |
| P12163_1_F6,17924 | K.SVGGQPIVFDVSVK.G  | 1941.127 | 0.00116  | 2 | 1 | 26.9 | 0 |
| P12163_2_F2,18319 | K.SVGGQPIVFDVSVK.G  | 1941.127 | 0.00213  | 2 | 1 | 25.5 | 0 |
| P12163_2_F4,17057 | K.SVGGQPIVFDVSVK.G  | 1941.127 | 0.00389  | 3 | 1 | 41.7 | 0 |
| P12163_2_S3,15048 | K.SVGGQPIVFDVSVK.G  | 1941.127 | 0.00416  | 3 | 1 | 42.8 | 0 |
| P12163_1_S1,13160 | R.FVNSGTEACM*GVL.R. | 1860.925 | 0.00735  | 3 | 1 | 43.9 | 0 |
| P12163_1_S1,15661 | R.FVNSGTEACM*GVL.R. | 1860.925 | 0.00411  | 3 | 1 | 73.2 | 0 |
| P12163_1_S1,13728 | R.FVNSGTEACMGVL.R.L | 1844.93  | 0.0006   | 3 | 1 | 41.1 | 0 |
| P12163_1_S1,15674 | R.FVNSGTEACMGVL.R.L | 1844.93  | 0.00639  | 3 | 1 | 61   | 0 |
| P12163_1_S1,17900 | R.FVNSGTEACMGVL.R.L | 1844.93  | 0.0033   | 3 | 1 | 95.7 | 0 |
| P12163_2_F7,14501 | R.LKEPGTYEYLNK.I    | 2367.369 | 0.00567  | 3 | 1 | 28.8 | 0 |
| P12163_1_F3,25252 | K.ANVLEASMFWR.K     | 1627.857 | 0.00244  | 2 | 1 | 25.8 | 0 |
| P12163_1_F3,17920 | K.AVLDTLDK.G        | 1482.899 | 0.0026   | 3 | 1 | 30.2 | 0 |
| P12163_1_F4,18484 | K.AVLDTLDK.G        | 1482.899 | 0.0059   | 2 | 1 | 39   | 0 |
| P12163_1_F4,18485 | K.AVLDTLDK.G        | 1482.899 | 0.00377  | 3 | 1 | 45.8 | 0 |
| P12163_1_F6,17563 | K.AVLDTLDK.G        | 1482.899 | 0.00706  | 2 | 1 | 24.9 | 0 |
| P12163_1_F7,16191 | K.AVLDTLDK.G        | 1482.899 | -0.00088 | 3 | 1 | 35.2 | 0 |
| P12163_1_F7,16211 | K.AVLDTLDK.G        | 1482.899 | 0.00202  | 2 | 1 | 36.2 | 0 |
| P12163_2_F4,15827 | K.AVLDTLDK.G        | 1482.899 | 0.00168  | 2 | 1 | 25.4 | 0 |
| P12163_2_S3,14694 | K.AVLDTLDK.G        | 1482.899 | 0.00443  | 3 | 1 | 30.8 | 0 |
| P12163_1_F6,16333 | K.HLKPETGLLQIR.E    | 2013.243 | 0.00244  | 4 | 1 | 26.8 | 0 |

|                   |                    |          |          |   |   |      |   |
|-------------------|--------------------|----------|----------|---|---|------|---|
| P12163_1_F7,15470 | K.HLKPETGLLQIR.E   | 2013.243 | 0.00424  | 4 | 1 | 26.2 | 0 |
| P12163_1_F8,16208 | K.HLKPETGLLQIR.E   | 2013.243 | 0.00148  | 4 | 1 | 24.3 | 0 |
| P12163_2_F8_12070 | K.HLKPETGLLQIR.E   | 2013.243 | 0.00448  | 4 | 1 | 23.6 | 0 |
| P12163_2_F9,14869 | K.HLKPETGLLQIR.E   | 2013.243 | 0.00732  | 4 | 1 | 24.9 | 0 |
| P12163_2_F2,12907 | K.LCSVDK.A         | 1329.766 | 0.00943  | 3 | 1 | 23.8 | 0 |
| P12163_1_F3,16649 | K.LVGCQEM*GEEVLK.S | 2116.124 | 0.00573  | 3 | 1 | 50.6 | 0 |
| P12163_1_F3,16658 | K.LVGCQEM*GEEVLK.S | 2116.124 | 0.00162  | 2 | 1 | 49.3 | 0 |
| P12163_1_F3,19103 | K.LVGCQEM*GEEVLK.S | 2116.124 | 0.01701  | 3 | 1 | 33.2 | 0 |
| P12163_1_F3,19060 | K.LVGCQEMGEEVLK.S  | 2100.129 | 0.00417  | 3 | 1 | 40.2 | 0 |
| P12163_1_F6,18254 | K.LVGCQEMGEEVLK.S  | 2100.129 | 0.00222  | 3 | 1 | 29.5 | 0 |
| P12163_2_F4,17349 | K.LVGCQEMGEEVLK.S  | 2100.129 | 0.00774  | 3 | 1 | 43   | 0 |
| P12163_1_F3,21732 | K.QSDAVLLGAIGGYK.W | 2000.164 | 0.00499  | 3 | 1 | 46.4 | 0 |
| P12163_1_F3,21753 | K.QSDAVLLGAIGGYK.W | 2000.164 | 0.00465  | 2 | 1 | 65.9 | 0 |
| P12163_1_F4,22469 | K.QSDAVLLGAIGGYK.W | 2000.164 | 0.00637  | 3 | 1 | 31   | 0 |
| P12163_1_F4,22513 | K.QSDAVLLGAIGGYK.W | 2000.164 | 0.00507  | 2 | 1 | 74.5 | 0 |
| P12163_1_F6,20732 | K.QSDAVLLGAIGGYK.W | 2000.164 | 0.00262  | 3 | 1 | 26.1 | 0 |
| P12163_1_F6,21028 | K.QSDAVLLGAIGGYK.W | 2000.164 | 0.00358  | 3 | 1 | 34.3 | 0 |
| P12163_1_F9,20567 | K.QSDAVLLGAIGGYK.W | 2000.164 | 0.00445  | 3 | 1 | 26.5 | 0 |
| P12163_2_F1,21966 | K.QSDAVLLGAIGGYK.W | 2000.164 | 0.00568  | 3 | 1 | 22.1 | 0 |
| P12163_2_F4,19725 | K.QSDAVLLGAIGGYK.W | 2000.164 | 0.00811  | 3 | 1 | 42.1 | 0 |
| P12163_2_F6,20837 | K.QSDAVLLGAIGGYK.W | 2000.164 | 0.00569  | 2 | 1 | 31.9 | 0 |
| P12163_2_F6,20866 | K.QSDAVLLGAIGGYK.W | 2000.164 | -0.00308 | 3 | 1 | 34.5 | 0 |
| P12163_2_F7,18788 | K.QSDAVLLGAIGGYK.W | 2000.164 | 0.00409  | 2 | 1 | 54.7 | 0 |
| P12163_2_F7,18799 | K.QSDAVLLGAIGGYK.W | 2000.164 | 0.00454  | 3 | 1 | 48.7 | 0 |
| P12163_2_F9,19356 | K.QSDAVLLGAIGGYK.W | 2000.164 | 0.00274  | 3 | 1 | 29.7 | 0 |
| P12163_1_F6,11348 | K.YGLGEEHAAK.R     | 1682.932 | 0.00695  | 3 | 1 | 23.7 | 0 |
| P12163_1_F6,11358 | K.YGLGEEHAAK.R     | 1682.932 | 0.00696  | 2 | 1 | 41.9 | 0 |
| P12163_1_F7,10703 | K.YGLGEEHAAK.R     | 1682.932 | 0.00842  | 3 | 1 | 22.8 | 0 |
| P12163_1_F8,11228 | K.YGLGEEHAAK.R     | 1682.932 | 0.00803  | 3 | 1 | 24.2 | 0 |
| P12163_2_F6,10964 | K.YGLGEEHAAK.R     | 1682.932 | 0.00539  | 3 | 1 | 27.7 | 0 |
| P12163_2_F6,10972 | K.YGLGEEHAAK.R     | 1682.932 | 0.00602  | 2 | 1 | 35.6 | 0 |
| P12163_2_F7,10428 | K.YGLGEEHAAK.R     | 1682.932 | 0.00899  | 3 | 1 | 29.2 | 0 |
| P12163_2_F9,10871 | K.YGLGEEHAAK.R     | 1682.932 | 0.00323  | 3 | 1 | 29.8 | 0 |
| P12163_2_F6,17246 | R.ELTGGIYFGKPR.G   | 1946.132 | 0.0046   | 2 | 1 | 24.7 | 0 |
| P12163_2_F6,17249 | R.ELTGGIYFGKPR.G   | 1946.132 | 0.00156  | 3 | 1 | 46.7 | 0 |
| P12163_2_F7,15359 | R.ELTGGIYFGKPR.G   | 1946.132 | 0.00556  | 2 | 1 | 31   | 0 |
| P12163_1_F4,10680 | R.TGDIYSAGTK.L     | 1620.905 | 0.00646  | 2 | 1 | 34.9 | 0 |
| P12163_1_F4,11219 | R.TGDIYSAGTK.L     | 1620.905 | 0.00492  | 2 | 1 | 33.4 | 0 |
| P12163_1_F4,11228 | R.TGDIYSAGTK.L     | 1620.905 | 0.00543  | 3 | 1 | 36.5 | 0 |
| P12163_1_F4,13011 | R.TGDIYSAGTK.L     | 1620.905 | 0.00668  | 2 | 1 | 41.1 | 0 |
| P12163_1_F4,13025 | R.TGDIYSAGTK.L     | 1620.905 | 0.00624  | 3 | 1 | 38.7 | 0 |
| P12163_1_F9,12401 | R.TGDIYSAGTK.L     | 1620.905 | 0.00796  | 2 | 1 | 48.2 | 0 |
| P12163_2_F1,9830  | R.TGDIYSAGTK.L     | 1620.905 | 0.00626  | 2 | 1 | 29.1 | 0 |
| P12163_2_F1,12042 | R.TGDIYSAGTK.L     | 1620.905 | 0.00576  | 3 | 1 | 40   | 0 |
| P12163_2_F9,9869  | R.TGDIYSAGTK.L     | 1620.905 | 0.00339  | 3 | 1 | 22.6 | 0 |
| P12163_1_F3,10504 | R.VAFETAR.K        | 1097.626 | 0.00266  | 3 | 1 | 27.3 | 0 |
| P12163_1_F3,10748 | R.VAFETAR.K        | 1097.626 | 0.00386  | 3 | 1 | 30.3 | 0 |
| P12163_1_F4,4468  | K.ASSASPNR.L       | 1093.59  | 0.00277  | 3 | 1 | 39.3 | 0 |
| P12163_1_F4,18218 | K.ENGPFIIGGK.V     | 1639.963 | 0.00511  | 2 | 1 | 40.6 | 0 |
| P12163_1_F4,18334 | K.ENGPFIIGGK.V     | 1639.963 | 0.01384  | 3 | 1 | 28.7 | 0 |
| P12163_2_F1,17501 | K.ENGPFIIGGK.V     | 1639.963 | 0.00551  | 2 | 1 | 45.8 | 0 |

|                   |                     |          |          |   |   |      |   |
|-------------------|---------------------|----------|----------|---|---|------|---|
| P12163_2_F1,17502 | K.ENGPFIIGGK.V      | 1639.963 | 0.00466  | 3 | 1 | 35   | 0 |
| P12163_1_F6,14067 | K.HLPYDM*K.L        | 1527.845 | 0.00626  | 3 | 1 | 24.2 | 0 |
| P12163_2_F7,12510 | K.HLPYDM*K.L        | 1527.845 | 0.00551  | 3 | 1 | 27.3 | 0 |
| P12163_2_F7,12497 | K.HLPYDMK.L         | 1511.85  | 0.00438  | 3 | 1 | 29.1 | 0 |
| P12163_2_F8_12070 | K.LVDLGKPEWFLK.I    | 2471.479 | -0.00063 | 4 | 1 | 24.3 | 0 |
| P12163_1_F8,18315 | K.NWSVPDSLPHVK.S    | 1987.122 | 0.00447  | 3 | 1 | 29.8 | 0 |
| P12163_1_F8,18362 | K.NWSVPDSLPHVK.S    | 1987.122 | 0.00001  | 2 | 1 | 50.3 | 0 |
| P12163_2_F6,17867 | K.NWSVPDSLPHVK.S    | 1987.122 | -0.00005 | 2 | 1 | 41.8 | 0 |
| P12163_1_F3,20963 | K.TIFSM*DSFIK.T     | 1813.003 | 0.0052   | 2 | 1 | 37   | 0 |
| P12163_1_F4,21529 | K.TIFSM*DSFIK.T     | 1813.003 | -0.00028 | 2 | 1 | 35   | 0 |
| P12163_1_F4,25277 | K.TIFSM*DSFIK.T     | 1813.003 | 0.00706  | 3 | 1 | 35.8 | 0 |
| P12163_1_F4,25366 | K.TIFSM*DSFIK.T     | 1813.003 | 0.00504  | 2 | 1 | 41   | 0 |
| P12163_2_F1,21082 | K.TIFSM*DSFIK.T     | 1813.003 | 0.01278  | 2 | 1 | 24.4 | 0 |
| P12163_2_F1,21086 | K.TIFSM*DSFIK.T     | 1813.003 | 0.00328  | 3 | 1 | 35.5 | 0 |
| P12163_2_F1,24571 | K.TIFSM*DSFIK.T     | 1813.003 | 0.01024  | 3 | 1 | 31.8 | 0 |
| P12163_1_F3,24497 | K.TIFSMDSFIK.T      | 1797.008 | 0.0047   | 2 | 1 | 35.1 | 0 |
| P12163_1_F3,24505 | K.TIFSMDSFIK.T      | 1797.008 | 0.00346  | 3 | 1 | 48.5 | 0 |
| P12163_1_F4,25279 | K.TIFSMDSFIK.T      | 1797.008 | 0.00349  | 3 | 1 | 38.6 | 0 |
| P12163_1_F4,25299 | K.TIFSMDSFIK.T      | 1797.008 | 0.00094  | 2 | 1 | 35.8 | 0 |
| P12163_1_F6,23001 | K.TIFSMDSFIK.T      | 1797.008 | 0.00298  | 3 | 1 | 29.4 | 0 |
| P12163_2_F1,24581 | K.TIFSMDSFIK.T      | 1797.008 | 0.00568  | 3 | 1 | 52.4 | 0 |
| P12163_2_F1,24587 | K.TIFSMDSFIK.T      | 1797.008 | 0.0055   | 2 | 1 | 38.9 | 0 |
| P12163_1_F3,15542 | K.VSAADLSLGPK.F     | 1666     | 0.00434  | 2 | 1 | 51.5 | 0 |
| P12163_1_F3,17916 | K.VSAADLSLGPK.F     | 1666     | 0.00512  | 3 | 1 | 46.6 | 0 |
| P12163_1_F5,17212 | K.VSAADLSLGPK.F     | 1666     | 0.00787  | 2 | 1 | 43.5 | 0 |
| P12163_1_F6,17053 | K.VSAADLSLGPK.F     | 1666     | 0.00311  | 3 | 1 | 37.4 | 0 |
| P12163_1_F6,17586 | K.VSAADLSLGPK.F     | 1666     | -0.00136 | 3 | 1 | 24.9 | 0 |
| P12163_2_F1,17785 | K.VSAADLSLGPK.F     | 1666     | 0.0069   | 2 | 1 | 58.4 | 0 |
| P12163_2_F4,15912 | K.VSAADLSLGPK.F     | 1666     | 0.0026   | 3 | 1 | 29   | 0 |
| P12163_2_F9,15851 | K.VSAADLSLGPK.F     | 1666     | -0.00268 | 3 | 1 | 30.5 | 0 |
| P12163_2_S5,15938 | K.VSAADLSLGPK.F     | 1666     | 0.00011  | 3 | 1 | 31.3 | 0 |
| P12163_1_S1,22558 | K.WLPDSDVITQSLEEK.V | 2368.286 | 0.0091   | 3 | 1 | 41   | 0 |
| P12163_1_F9,19815 | R.ALPDVIVGWRPK.V    | 2074.227 | 0.00796  | 3 | 1 | 24.5 | 0 |
| P12163_2_F6,19919 | R.ALPDVIVGWRPK.V    | 2074.227 | 0.01333  | 3 | 1 | 37   | 0 |
| P12163_2_F6,19961 | R.ALPDVIVGWRPK.V    | 2074.227 | 0.00397  | 2 | 1 | 57.5 | 0 |
| P12163_2_F6,19967 | R.ALPDVIVGWRPK.V    | 2074.227 | 0.00156  | 4 | 1 | 42.4 | 0 |
| P12163_1_F4,22013 | R.VLLTIEEK.H        | 1552.977 | 0.00086  | 3 | 1 | 30.1 | 0 |
| P12163_1_F4,22161 | R.VLLTIEEK.H        | 1552.977 | 0.00737  | 2 | 1 | 27.6 | 0 |
| P12163_1_F4,22243 | R.VLLTIEEK.H        | 1552.977 | 0.0038   | 3 | 1 | 38.2 | 0 |
| P12163_1_F4,22423 | R.VLLTIEEK.H        | 1552.977 | 0.00595  | 2 | 1 | 28.5 | 0 |
| P12163_1_F5,21065 | R.VLLTIEEK.H        | 1552.977 | 0.00809  | 2 | 1 | 38.7 | 0 |
| P12163_1_F7,19756 | R.VLLTIEEK.H        | 1552.977 | -0.00082 | 3 | 1 | 27.8 | 0 |
| P12163_2_F1,21783 | R.VLLTIEEK.H        | 1552.977 | 0.00551  | 2 | 1 | 35.9 | 0 |
| P12163_2_F1,21821 | R.VLLTIEEK.H        | 1552.977 | 0.00356  | 3 | 1 | 40.2 | 0 |
| P12163_1_F4,17038 | K.AAAENTMLSYK.A     | 1806.988 | 0.00634  | 2 | 1 | 30.1 | 0 |
| P12163_1_F4,17077 | K.AAAENTMLSYK.A     | 1806.988 | 0.01514  | 3 | 1 | 26.3 | 0 |
| P12163_2_F1,16146 | K.AAAENTMLSYK.A     | 1806.988 | -0.00006 | 2 | 1 | 35.5 | 0 |
| P12163_2_F1,16162 | K.AAAENTMLSYK.A     | 1806.988 | 0.00818  | 3 | 1 | 24   | 0 |
| P12163_1_F6,19168 | K.AAQDIALTDLAPTHPII | 2107.181 | -0.00222 | 3 | 1 | 72.3 | 0 |
| P12163_1_F7,16325 | K.AAQDIALTDLAPTHPII | 2107.181 | 0.00281  | 4 | 1 | 24.6 | 0 |
| P12163_1_F7,18287 | K.AAQDIALTDLAPTHPII | 2107.181 | 0.00249  | 3 | 1 | 80.9 | 0 |



|                    |                          |          |          |   |   |      |   |
|--------------------|--------------------------|----------|----------|---|---|------|---|
| P12163_1_F7,18297  | K.AAQDIALTDLAPTHPII      | 2107.181 | -0.00317 | 2 | 1 | 74.4 | 0 |
| P12163_1_F7,20425  | K.AAQDIALTDLAPTHPII      | 2107.181 | 0.00117  | 3 | 1 | 44   | 0 |
| P12163_2_S5,17349  | K.AAQDIALTDLAPTHPII      | 2107.181 | 0.00645  | 3 | 1 | 81.1 | 0 |
| P12163_2_S5,17393  | K.AAQDIALTDLAPTHPII      | 2107.181 | 0.00176  | 4 | 1 | 34.4 | 0 |
| P12163_1_S1,19084  | K.DSTLIMQLLR.D           | 1493.866 | -0.00037 | 3 | 1 | 24   | 0 |
| P12163_2_F1,9483   | K.LAEQAER.Y ! R.LAEQ     | 1120.626 | 0.00298  | 2 | 1 | 24.7 | 0 |
| P12163_1_F7,17394  | K.LLDSHLVPSATAGESK       | 2233.265 | 0.00513  | 3 | 1 | 40.8 | 0 |
| P12163_1_F8,18174  | K.LLDSHLVPSATAGESK       | 2233.265 | 0.0069   | 3 | 1 | 40.7 | 0 |
| P12163_1_F8,18231  | K.LLDSHLVPSATAGESK       | 2233.265 | -0.00124 | 2 | 1 | 40   | 0 |
| P12163_2_F10,1603  | K.LLDSHLVPSATAGESK       | 2233.265 | 0.00429  | 3 | 1 | 44.7 | 0 |
| P12163_2_F6,17767  | K.LLDSHLVPSATAGESK       | 2233.265 | 0.00486  | 3 | 1 | 44.9 | 0 |
| P12163_2_S5,16615  | K.LLDSHLVPSATAGESK       | 2233.265 | -0.00122 | 3 | 1 | 39.5 | 0 |
| P12163_2_S5,16687  | K.LLDSHLVPSATAGESK       | 2233.265 | 0.00265  | 4 | 1 | 26.1 | 0 |
| P12163_1_F3,22304  | K.VESELSDVCGSILK.L       | 2144.173 | 0.00785  | 3 | 1 | 50.7 | 0 |
| P12163_1_F4,17544  | R.EQYVYLAK.L             | 1621.941 | 0.00753  | 3 | 1 | 27.6 | 0 |
| P12163_1_F4,17567  | R.EQYVYLAK.L             | 1621.941 | 0.00467  | 2 | 1 | 49.3 | 0 |
| P12163_1_F9,16551  | R.EQYVYLAK.L             | 1621.941 | 0.00621  | 2 | 1 | 35.7 | 0 |
| P12163_2_F1,16678  | R.EQYVYLAK.L             | 1621.941 | 0.00493  | 2 | 1 | 39.9 | 0 |
| P12163_2_F1,16689  | R.EQYVYLAK.L             | 1621.941 | 0.00648  | 3 | 1 | 29.7 | 0 |
| P12163_1_F4,20959  | R.IISSIEQK.E ! R.ILSSIEQ | 1525.941 | 0.01597  | 2 | 1 | 28   | 0 |
| P12163_1_F5,18516  | R.IISSIEQK.E ! R.ILSSIEQ | 1525.941 | 0.00793  | 2 | 1 | 32.8 | 0 |
| P12163_1_F5,19572  | R.IISSIEQK.E ! R.ILSSIEQ | 1525.941 | 0.00666  | 3 | 1 | 29.6 | 0 |
| P12163_1_F5,19600  | R.IISSIEQK.E ! R.ILSSIEQ | 1525.941 | 0.00717  | 2 | 1 | 38.4 | 0 |
| P12163_2_F1,20030  | R.IISSIEQK.E ! R.ILSSIEQ | 1525.941 | 0.00227  | 2 | 1 | 27.6 | 0 |
| P12163_2_F1,20062  | R.IISSIEQK.E ! R.ILSSIEQ | 1525.941 | 0.00678  | 3 | 1 | 21.9 | 0 |
| P12163_1_F4,19313  | R.NLLSVAYK.N             | 1515.935 | 0.00473  | 2 | 1 | 24.7 | 0 |
| P12163_1_F5,18080  | R.NLLSVAYK.N             | 1515.935 | 0.00697  | 2 | 1 | 39.6 | 0 |
| P12163_1_F5,18081  | R.NLLSVAYK.N             | 1515.935 | 0.00381  | 3 | 1 | 34.8 | 0 |
| P12163_1_F6,18423  | R.NLLSVAYK.N             | 1515.935 | 0.01068  | 3 | 1 | 31.8 | 0 |
| P12163_1_F9,17887  | R.NLLSVAYK.N             | 1515.935 | 0.006    | 3 | 1 | 24.6 | 0 |
| P12163_2_F1,18587  | R.NLLSVAYK.N             | 1515.935 | 0.00633  | 2 | 1 | 42.2 | 0 |
| P12163_2_F1,18588  | R.NLLSVAYK.N             | 1515.935 | 0.00501  | 3 | 1 | 35.5 | 0 |
| P12163_2_F2,18787  | R.NLLSVAYK.N             | 1515.935 | 0.00681  | 3 | 1 | 28.1 | 0 |
| P12163_2_F2,18808  | R.NLLSVAYK.N             | 1515.935 | 0.00629  | 2 | 1 | 32.4 | 0 |
| P12163_2_F8_12070  | R.NLLSVAYK.N             | 1515.935 | 0.00594  | 3 | 1 | 30.9 | 0 |
| P12163_2_S5,16404  | R.NLLSVAYK.N             | 1515.935 | 0.00054  | 3 | 1 | 31.7 | 0 |
| P12163_1_S10,18390 | R.YLAEFK.V ! R.YLAEFK    | 1378.819 | 0.0079   | 3 | 1 | 24   | 0 |
| P12163_2_F8_12070  | R.YLAEFK.V ! R.YLAEFK    | 1378.819 | 0.00689  | 3 | 1 | 22.1 | 0 |
| P12163_2_F8_12070  | R.YLAEFK.V ! R.YLAEFK    | 1378.819 | 0.0056   | 3 | 1 | 22.9 | 0 |
| P12163_1_S1,11497  | K.AGAGSATLSM*AYAA        | 1788.922 | 0.00519  | 3 | 1 | 42.3 | 0 |
| P12163_1_S1,14745  | K.AGAGSATLSM*AYAA        | 1788.922 | -0.00144 | 3 | 1 | 69   | 0 |
| P12163_1_S1,13332  | K.AGAGSATLSMAYAAA        | 1772.927 | -0.00407 | 3 | 1 | 44.7 | 0 |
| P12163_1_S1,16975  | K.AGAGSATLSMAYAAA        | 1772.927 | 0.00418  | 3 | 1 | 54.9 | 0 |
| P12163_1_S1,16988  | K.AGAGSATLSMAYAAA        | 1772.927 | 0.00196  | 2 | 1 | 53.5 | 0 |
| P12163_2_F7,16560  | K.ALEALKPELK.A           | 2024.288 | 0.00387  | 2 | 1 | 27.4 | 0 |
| P12163_2_F7,16844  | K.ALEALKPELK.A           | 2024.288 | 0.00996  | 4 | 1 | 22.3 | 0 |
| P12163_1_F5,12380  | K.GVAFAQK.Q              | 1328.815 | 0.0088   | 3 | 1 | 39.5 | 0 |
| P12163_1_F6,13376  | K.GVAFAQK.Q              | 1328.815 | 0.00603  | 2 | 1 | 31.3 | 0 |
| P12163_1_F8,12647  | K.GVAFAQK.Q              | 1328.815 | -0.00001 | 2 | 1 | 30.1 | 0 |
| P12163_2_F2,13166  | K.GVAFAQK.Q              | 1328.815 | 0.00559  | 2 | 1 | 26.1 | 0 |
| P12163_2_F2,11204  | K.GVYDPK.K               | 1286.756 | 0.01155  | 3 | 1 | 26.5 | 0 |

|                   |                   |          |          |   |   |      |   |
|-------------------|-------------------|----------|----------|---|---|------|---|
| P12163_2_F8_12070 | K.GVYDPK.K        | 1286.756 | 0.00501  | 3 | 1 | 37.8 | 0 |
| P12163_1_F4,25772 | K.LFGVTTLDVVR.A   | 1523.91  | 0.00205  | 2 | 1 | 30.9 | 0 |
| P12163_1_S1,19465 | K.LFGVTTLDVVR.A   | 1523.91  | 0.00221  | 3 | 1 | 24.3 | 0 |
| P12163_1_S1,20850 | K.LFGVTTLDVVR.A   | 1523.91  | 0.00089  | 3 | 1 | 30.9 | 0 |
| P12163_1_S1,22819 | K.LFGVTTLDVVR.A   | 1523.91  | 0.00372  | 2 | 1 | 38.5 | 0 |
| P12163_1_S1,22985 | K.LFGVTTLDVVR.A   | 1523.91  | 0.00215  | 3 | 1 | 74.4 | 0 |
| P12163_1_S1,23027 | K.LFGVTTLDVVR.A   | 1523.91  | 0.00418  | 2 | 1 | 36.6 | 0 |
| P12163_1_F7,23303 | K.M*SPLVSALHLYDVM | 2557.398 | -0.00042 | 4 | 1 | 22.8 | 0 |
| P12163_1_F5,12326 | R.ANTFVAQK.K      | 1486.884 | 0.01143  | 2 | 1 | 32.6 | 0 |
| P12163_1_F6,13342 | R.ANTFVAQK.K      | 1486.884 | 0.00875  | 3 | 1 | 28.7 | 0 |
| P12163_2_F2,13154 | R.ANTFVAQK.K      | 1486.884 | 0.00989  | 2 | 1 | 30.7 | 0 |
| P12163_2_F2,13582 | R.ANTFVAQK.K      | 1486.884 | 0.01001  | 2 | 1 | 32.7 | 0 |
| P12163_2_F2,14776 | R.ANTFVAQK.K      | 1486.884 | 0.01387  | 2 | 1 | 37.3 | 0 |
| P12163_1_F3,22222 | R.DDLFNINANIVK.T  | 1984.132 | 0.00494  | 2 | 1 | 78.5 | 0 |
| P12163_1_F3,22230 | R.DDLFNINANIVK.T  | 1984.132 | 0.0094   | 3 | 1 | 62.8 | 0 |
| P12163_1_F4,22927 | R.DDLFNINANIVK.T  | 1984.132 | 0.0036   | 2 | 1 | 28.9 | 0 |
| P12163_1_F6,20924 | R.DDLFNINANIVK.T  | 1984.132 | 0.00244  | 3 | 1 | 40.3 | 0 |
| P12163_1_F3,11769 | R.FVESSLR.A       | 1141.652 | 0.0033   | 3 | 1 | 25.8 | 0 |
| P12163_1_F3,13164 | R.FVESSLR.A       | 1141.652 | 0.00231  | 3 | 1 | 32.4 | 0 |
| P12163_1_F3,12289 | R.IQNAGTEVVEAK.A  | 1867.074 | 0.00564  | 3 | 1 | 29.3 | 0 |
| P12163_1_F3,15353 | R.IQNAGTEVVEAK.A  | 1867.074 | 0.00592  | 2 | 1 | 44.1 | 0 |
| P12163_1_F3,15373 | R.IQNAGTEVVEAK.A  | 1867.074 | 0.00627  | 3 | 1 | 56.1 | 0 |
| P12163_1_F4,12837 | R.IQNAGTEVVEAK.A  | 1867.074 | 0.00476  | 2 | 1 | 29.2 | 0 |
| P12163_1_F4,12841 | R.IQNAGTEVVEAK.A  | 1867.074 | 0.00825  | 3 | 1 | 30.8 | 0 |
| P12163_1_F4,15932 | R.IQNAGTEVVEAK.A  | 1867.074 | 0.00638  | 2 | 1 | 49.1 | 0 |
| P12163_1_F4,15934 | R.IQNAGTEVVEAK.A  | 1867.074 | 0.00129  | 3 | 1 | 61.9 | 0 |
| P12163_1_F4,16159 | R.IQNAGTEVVEAK.A  | 1867.074 | 0.01125  | 3 | 1 | 45.7 | 0 |
| P12163_2_F1,15105 | R.IQNAGTEVVEAK.A  | 1867.074 | 0.00312  | 2 | 1 | 45.1 | 0 |
| P12163_2_F1,15124 | R.IQNAGTEVVEAK.A  | 1867.074 | 0.00807  | 3 | 1 | 70.8 | 0 |
| P12163_2_F4,14165 | R.IQNAGTEVVEAK.A  | 1867.074 | 0.0024   | 3 | 1 | 25   | 0 |
| P12163_1_S1,20510 | K.ALFDIPVAR.T     | 1305.783 | 0.00364  | 2 | 1 | 33.4 | 0 |
| P12163_1_S1,20553 | K.ALFDIPVAR.T     | 1305.783 | 0.00288  | 3 | 1 | 54.8 | 0 |
| P12163_1_F4,7905  | K.ESTQVEASK.K     | 1586.885 | 0.00557  | 2 | 1 | 29   | 0 |
| P12163_1_F4,7907  | K.ESTQVEASK.K     | 1586.885 | 0.00702  | 3 | 1 | 30.9 | 0 |
| P12163_1_F4,9565  | K.ESTQVEASK.K     | 1586.885 | 0.00315  | 2 | 1 | 39   | 0 |
| P12163_1_F4,9639  | K.ESTQVEASK.K     | 1586.885 | 0.00531  | 3 | 1 | 23.6 | 0 |
| P12163_1_F5,8225  | K.ESTQVEASK.K     | 1586.885 | 0.00605  | 2 | 1 | 34.7 | 0 |
| P12163_2_F1,8732  | K.ESTQVEASK.K     | 1586.885 | 0.00787  | 2 | 1 | 37.5 | 0 |
| P12163_1_F4,19022 | K.FM*GNPSIEAAIK.L | 1902.061 | -0.0001  | 2 | 1 | 42.9 | 0 |
| P12163_1_F4,19049 | K.FM*GNPSIEAAIK.L | 1902.061 | 0.00507  | 3 | 1 | 50.1 | 0 |
| P12163_1_F4,21399 | K.FM*GNPSIEAAIK.L | 1902.061 | 0.00792  | 2 | 1 | 33.7 | 0 |
| P12163_1_F4,23040 | K.FM*GNPSIEAAIK.L | 1902.061 | 0.00267  | 3 | 1 | 53   | 0 |
| P12163_2_F1,18321 | K.FM*GNPSIEAAIK.L | 1902.061 | 0.00561  | 3 | 1 | 39   | 0 |
| P12163_2_F1,18339 | K.FM*GNPSIEAAIK.L | 1902.061 | 0.00296  | 2 | 1 | 34.4 | 0 |
| P12163_2_F2,30    | K.FM*GNPSIEAAIK.L | 1902.061 | 0.00573  | 3 | 1 | 24.5 | 0 |
| P12163_1_F4,21387 | K.FMGNPSIEAAIK.L  | 1886.067 | 0.0049   | 2 | 1 | 57.6 | 0 |
| P12163_1_F4,21480 | K.FMGNPSIEAAIK.L  | 1886.067 | -0.00375 | 3 | 1 | 50.2 | 0 |
| P12163_1_F4,23052 | K.FMGNPSIEAAIK.L  | 1886.067 | 0.0029   | 2 | 1 | 37.8 | 0 |
| P12163_1_F4,23059 | K.FMGNPSIEAAIK.L  | 1886.067 | 0.00672  | 3 | 1 | 35.7 | 0 |
| P12163_2_F1,20973 | K.FMGNPSIEAAIK.L  | 1886.067 | 0.00792  | 2 | 1 | 65.8 | 0 |
| P12163_1_F4,11274 | K.QACVVQPK.A      | 1537.898 | 0.00981  | 2 | 1 | 28.5 | 0 |

|                   |                        |          |          |   |   |      |   |
|-------------------|------------------------|----------|----------|---|---|------|---|
| P12163_1_F5,9878  | K.QACVVQPK.A           | 1537.898 | 0.00655  | 2 | 1 | 31.1 | 0 |
| P12163_2_F1,10467 | K.QACVVQPK.A           | 1537.898 | 0.00629  | 2 | 1 | 30.9 | 0 |
| P12163_2_F2,10758 | K.QACVVQPK.A           | 1537.898 | 0.01051  | 2 | 1 | 30.3 | 0 |
| P12163_1_F3,23047 | R.DVVVWFM*EEK.T        | 1906.024 | 0.00723  | 3 | 1 | 28.7 | 0 |
| P12163_1_F3,25983 | R.DVVVWFM*EEK.T        | 1906.024 | 0.00546  | 3 | 1 | 37.5 | 0 |
| P12163_1_F4,26911 | R.DVVVWFM*EEK.T        | 1906.024 | 0.00624  | 3 | 1 | 34.1 | 0 |
| P12163_1_F3,25951 | R.DVVVWFMEEK.T         | 1890.029 | 0.00657  | 3 | 1 | 31.4 | 0 |
| P12163_1_F3,25969 | R.DVVVWFMEEK.T         | 1890.029 | 0.00287  | 2 | 1 | 40.6 | 0 |
| P12163_1_F3,26183 | R.DVVVWFMEEK.T         | 1890.029 | 0.0099   | 3 | 1 | 26.8 | 0 |
| P12163_1_F2,9636  | R.ESTDNPIM*R.L         | 1382.689 | 0.00314  | 3 | 1 | 33.2 | 0 |
| P12163_1_F2,9645  | R.ESTDNPIMR.L          | 1366.694 | 0.00542  | 3 | 1 | 25.8 | 0 |
| P12163_1_F2,22746 | R.FGDGGIFIGNLR.K       | 1569.869 | -0.00414 | 2 | 1 | 28.4 | 0 |
| P12163_1_F2,22760 | R.FGDGGIFIGNLR.K       | 1569.869 | 0.00271  | 3 | 1 | 40   | 0 |
| P12163_1_S1,21944 | R.FGDGGIFIGNLR.K       | 1569.869 | 0.00253  | 3 | 1 | 23.3 | 0 |
| P12163_1_F4,11849 | R.GGEEIPAK.D           | 1408.826 | 0.00544  | 2 | 1 | 39.3 | 0 |
| P12163_1_F7,15314 | R.GGEEIPAKDEITPLGDN    | 2519.356 | 0.00308  | 3 | 1 | 39.3 | 0 |
| P12163_1_F8,16017 | R.GGEEIPAKDEITPLGDN    | 2519.356 | 0.00389  | 4 | 1 | 33   | 0 |
| P12163_2_S5,14749 | R.GGEEIPAKDEITPLGDN    | 2519.356 | 0.00734  | 3 | 1 | 27.7 | 0 |
| P12163_2_F9,18131 | R.RFGDGGIFIGNLR.K      | 1725.97  | 0.00266  | 3 | 1 | 28   | 0 |
| P12163_1_F3,19633 | K.AFGAELVLTDSAK.G      | 1930.111 | 0.00231  | 3 | 1 | 34.9 | 0 |
| P12163_1_F3,19674 | K.AFGAELVLTDSAK.G      | 1930.111 | 0.00589  | 2 | 1 | 54.2 | 0 |
| P12163_1_F3,21518 | K.AFGAELVLTDSAK.G      | 1930.111 | 0.00555  | 3 | 1 | 65.6 | 0 |
| P12163_1_F3,21534 | K.AFGAELVLTDSAK.G      | 1930.111 | 0.00373  | 2 | 1 | 71.7 | 0 |
| P12163_1_F4,22430 | K.AFGAELVLTDSAK.G      | 1930.111 | 0.00243  | 3 | 1 | 44.6 | 0 |
| P12163_1_F6,20591 | K.AFGAELVLTDSAK.G      | 1930.111 | 0.00138  | 3 | 1 | 35.4 | 0 |
| P12163_1_F5,12334 | K.GCVANIAAK.L          | 1511.882 | 0.00702  | 2 | 1 | 41.8 | 0 |
| P12163_1_F5,12383 | K.GCVANIAAK.L          | 1511.882 | 0.01157  | 3 | 1 | 37.9 | 0 |
| P12163_1_F8,12540 | K.GCVANIAAK.L          | 1511.882 | -0.00066 | 2 | 1 | 26.1 | 0 |
| P12163_2_F1,12834 | K.GCVANIAAK.L          | 1511.882 | 0.01488  | 2 | 1 | 46.4 | 0 |
| P12163_2_F2,13218 | K.GCVANIAAK.L          | 1511.882 | 0.00995  | 3 | 1 | 30.6 | 0 |
| P12163_1_F4,14398 | K.GLITPGK.S ! K.GLITPC | 1293.835 | 0.0147   | 2 | 1 | 23.9 | 0 |
| P12163_1_F7,16960 | K.IHYETTGPEIWEDTR.G    | 2151.066 | 0.00211  | 3 | 1 | 59.7 | 0 |
| P12163_1_F8,16125 | K.IHYETTGPEIWEDTR.G    | 2151.066 | 0.00199  | 3 | 1 | 45   | 0 |
| P12163_1_F8,16126 | K.IHYETTGPEIWEDTR.G    | 2151.066 | 0.00103  | 4 | 1 | 24.8 | 0 |
| P12163_1_F8,17686 | K.IHYETTGPEIWEDTR.G    | 2151.066 | 0.00376  | 3 | 1 | 93.6 | 0 |
| P12163_1_F8,17698 | K.IHYETTGPEIWEDTR.G    | 2151.066 | 0.00316  | 2 | 1 | 29.6 | 0 |
| P12163_2_F6,15571 | K.IHYETTGPEIWEDTR.G    | 2151.066 | 0.00397  | 3 | 1 | 29.8 | 0 |
| P12163_2_F6,17193 | K.IHYETTGPEIWEDTR.G    | 2151.066 | 0.00457  | 3 | 1 | 88.6 | 0 |
| P12163_2_F6,17201 | K.IHYETTGPEIWEDTR.G    | 2151.066 | 0.00138  | 2 | 1 | 57.3 | 0 |
| P12163_2_F9,16588 | K.IHYETTGPEIWEDTR.G    | 2151.066 | 0.00364  | 3 | 1 | 51.9 | 0 |
| P12163_2_S5,16814 | K.IHYETTGPEIWEDTR.G    | 2151.066 | 0.00355  | 3 | 1 | 84.3 | 0 |
| P12163_1_F2,20181 | K.IQGIGAGFVPR.N        | 1418.842 | 0.00065  | 2 | 1 | 36.6 | 0 |
| P12163_1_F2,20222 | K.IQGIGAGFVPR.N        | 1418.842 | 0.00228  | 3 | 1 | 52.5 | 0 |
| P12163_1_F4,21376 | K.IQGIGAGFVPR.N        | 1418.842 | 0.00345  | 2 | 1 | 31.5 | 0 |
| P12163_1_F3,16520 | K.LEIM*EPCCSVK.D       | 1990.027 | 0.00481  | 2 | 1 | 25.1 | 0 |
| P12163_2_F1,19827 | K.LEIMEPCCSVK.D        | 1974.032 | 0.00567  | 3 | 1 | 31.9 | 0 |
| P12163_2_F1,19843 | K.LEIMEPCCSVK.D        | 1974.032 | 0.00401  | 2 | 1 | 30.5 | 0 |
| P12163_1_S1,26238 | K.LIAVVFPSFGER.Y       | 1638.952 | 0.00135  | 3 | 1 | 30.3 | 0 |
| P12163_1_F3,20204 | K.TPM*VYLNTIVK.G       | 1903.118 | 0.00165  | 3 | 1 | 26.8 | 0 |
| P12163_1_F3,19238 | K.TPMVYLNTIVK.G        | 1887.123 | 0.00531  | 2 | 1 | 27   | 0 |
| P12163_1_F3,23154 | K.TPMVYLNTIVK.G        | 1887.123 | 0.00252  | 3 | 1 | 31.5 | 0 |

|                   |                      |          |          |   |   |      |   |
|-------------------|----------------------|----------|----------|---|---|------|---|
| P12163_1_F3,23167 | K.TPMVYLNTIVK.G      | 1887.123 | 0.00551  | 2 | 1 | 51.9 | 0 |
| P12163_1_F3,23176 | K.TPMVYLNTIVK.G      | 1887.123 | 0.00498  | 3 | 1 | 34.9 | 0 |
| P12163_1_F3,18583 | R.IGFSM*IADAEQK.G    | 1934.051 | 0.00029  | 3 | 1 | 58.4 | 0 |
| P12163_1_F3,21886 | R.IGFSMIADAEQK.G     | 1918.056 | 0.00446  | 2 | 1 | 32.1 | 0 |
| P12163_1_F3,21987 | R.IGFSMIADAEQK.G     | 1918.056 | 0.00639  | 3 | 1 | 72.8 | 0 |
| P12163_1_F4,22695 | R.IGFSMIADAEQK.G     | 1918.056 | 0.00585  | 3 | 1 | 60.3 | 0 |
| P12163_1_F6,20798 | R.IGFSMIADAEQK.G     | 1918.056 | 0.00417  | 3 | 1 | 42.8 | 0 |
| P12163_2_F7,17772 | R.YLSSVLFQSIR.E      | 1616.931 | 0.00164  | 3 | 1 | 52.1 | 0 |
| P12163_1_F3,17947 | K.ANVVVASVEDK.L      | 1739.016 | 0.00661  | 3 | 1 | 36.4 | 0 |
| P12163_1_F3,17981 | K.ANVVVASVEDK.L      | 1739.016 | 0.00525  | 2 | 1 | 47.2 | 0 |
| P12163_1_F4,18493 | K.ANVVVASVEDK.L      | 1739.016 | 0.00337  | 2 | 1 | 43.4 | 0 |
| P12163_1_F4,18507 | K.ANVVVASVEDK.L      | 1739.016 | 0.00751  | 3 | 1 | 55.4 | 0 |
| P12163_2_F1,17744 | K.ANVVVASVEDK.L      | 1739.016 | 0.00403  | 2 | 1 | 37.3 | 0 |
| P12163_2_F1,17765 | K.ANVVVASVEDK.L      | 1739.016 | 0.00958  | 3 | 1 | 49.2 | 0 |
| P12163_2_F1,15626 | K.ATAFPAMCNK.L       | 1718.918 | 0.0102   | 2 | 1 | 35.5 | 0 |
| P12163_1_F4,21258 | K.ESEVLESIVK.K       | 1741.02  | 0.00679  | 2 | 1 | 61.7 | 0 |
| P12163_1_F4,21294 | K.ESEVLESIVK.K       | 1741.02  | 0.00493  | 3 | 1 | 35.9 | 0 |
| P12163_1_F5,20123 | K.ESEVLESIVK.K       | 1741.02  | 0.00599  | 2 | 1 | 32.6 | 0 |
| P12163_2_F1,20745 | K.ESEVLESIVK.K       | 1741.02  | 0.00395  | 2 | 1 | 48.9 | 0 |
| P12163_2_F1,20767 | K.ESEVLESIVK.K       | 1741.02  | 0.00463  | 3 | 1 | 44.6 | 0 |
| P12163_2_F8_12070 | K.ESNRPYGAICASPALV   | 3200.771 | 0.0043   | 5 | 1 | 32.1 | 0 |
| P12163_2_F8_12070 | K.ESNRPYGAICASPALV   | 3200.771 | 0.00702  | 4 | 1 | 45.4 | 0 |
| P12163_2_F8_12070 | K.ESNRPYGAICASPALV   | 3200.771 | 0.00326  | 3 | 1 | 31.6 | 0 |
| P12163_2_F9,18701 | K.ESNRPYGAICASPALV   | 3200.771 | 0.00582  | 4 | 1 | 33.5 | 0 |
| P12163_1_F3,11905 | K.LSDQSEIENR.V       | 1494.77  | 0.00121  | 2 | 1 | 41   | 0 |
| P12163_1_S1,9365  | K.LSDQSEIENR.V       | 1494.77  | -0.00331 | 2 | 1 | 26.2 | 0 |
| P12163_1_S1,10053 | K.LSDQSEIENR.V       | 1494.77  | 0.00322  | 3 | 1 | 35.4 | 0 |
| P12163_1_S1,11616 | K.LSDQSEIENR.V       | 1494.77  | 0.00373  | 2 | 1 | 33.9 | 0 |
| P12163_1_S1,11745 | K.LSDQSEIENR.V       | 1494.77  | 0.0034   | 3 | 1 | 37.5 | 0 |
| P12163_1_S1,11870 | K.LSDQSEIENR.V       | 1494.77  | 0.00347  | 2 | 1 | 49.5 | 0 |
| P12163_1_F3,25029 | K.LVADM*LIDEAAK.L    | 1913.087 | 0.004    | 3 | 1 | 32.4 | 0 |
| P12163_1_F3,25028 | K.LVADMLIDEAAK.L     | 1897.092 | 0.00446  | 2 | 1 | 25.6 | 0 |
| P12163_1_S1,13289 | R.ADEVSGPLVM*R.A ! K | 1493.794 | 0.00616  | 3 | 1 | 34.7 | 0 |
| P12163_1_S1,15847 | R.ADEVSGPLVMR.A ! K. | 1477.799 | 0.00112  | 3 | 1 | 42.7 | 0 |
| P12163_1_F3,10805 | R.SGADVTVASVEK.Q     | 1771.006 | 0.00319  | 2 | 1 | 28.1 | 0 |
| P12163_1_F3,12179 | R.SGADVTVASVEK.Q     | 1771.006 | 0.00063  | 2 | 1 | 45.5 | 0 |
| P12163_1_F3,13819 | R.SGADVTVASVEK.Q     | 1771.006 | 0.00503  | 2 | 1 | 60.4 | 0 |
| P12163_1_F4,14300 | R.SGADVTVASVEK.Q     | 1771.006 | 0.00445  | 2 | 1 | 40.9 | 0 |
| P12163_2_S3,11444 | R.SGADVTVASVEK.Q     | 1771.006 | 0.00271  | 3 | 1 | 34.5 | 0 |
| P12163_1_F9,9070  | R.VDACHGVK.I         | 1493.835 | 0.00278  | 2 | 1 | 26.7 | 0 |
| P12163_1_F9,9111  | R.VDACHGVK.I         | 1493.835 | 0.00509  | 3 | 1 | 29.9 | 0 |
| P12163_1_S1,14763 | R.VVVDGNLITSR.G      | 1476.869 | 0.00403  | 3 | 1 | 40.8 | 0 |
| P12163_1_S1,15254 | R.VVVDGNLITSR.G      | 1476.869 | 0.00115  | 3 | 1 | 26.1 | 0 |
| P12163_1_F3,17161 | K.ALVDPDGALK.D       | 1606.962 | 0.00786  | 2 | 1 | 37.7 | 0 |
| P12163_1_F3,17180 | K.ALVDPDGALK.D       | 1606.962 | 0.00285  | 3 | 1 | 50.4 | 0 |
| P12163_1_F2,18066 | K.GGEIGELDFR.F       | 1396.737 | 0.00318  | 2 | 1 | 30.7 | 0 |
| P12163_1_F8,16158 | K.GLFPPEPEHYR.G      | 1645.864 | 0.00349  | 3 | 1 | 22.5 | 0 |
| P12163_1_F8,16425 | K.GLFPPEPEHYR.G      | 1645.864 | 0.00325  | 3 | 1 | 21.9 | 0 |
| P12163_2_F6,15365 | K.GLFPPEPEHYR.G      | 1645.864 | 0.0028   | 3 | 1 | 31.5 | 0 |
| P12163_2_F6,15457 | K.GLFPPEPEHYR.G      | 1645.864 | 0.00603  | 2 | 1 | 26.8 | 0 |
| P12163_2_F6,15616 | K.GLFPPEPEHYR.G      | 1645.864 | 0.00511  | 3 | 1 | 28.5 | 0 |

|                   |                      |          |          |   |   |      |   |
|-------------------|----------------------|----------|----------|---|---|------|---|
| P12163_2_F6,15865 | K.GLFPPEPEHYR.G      | 1645.864 | 0.00211  | 3 | 1 | 36.1 | 0 |
| P12163_1_S1,15464 | K.GSPDVYLSGPIR.K     | 1564.864 | 0.00248  | 3 | 1 | 48.6 | 0 |
| P12163_1_F4,20869 | K.NFFLAGSYTK.Q       | 1755.989 | 0.00647  | 3 | 1 | 29   | 0 |
| P12163_1_F5,19701 | K.NFFLAGSYTK.Q       | 1755.989 | 0.00909  | 2 | 1 | 31.3 | 0 |
| P12163_2_F1,20251 | K.NFFLAGSYTK.Q       | 1755.989 | 0.00647  | 3 | 1 | 32.7 | 0 |
| P12163_2_F1,20262 | K.NFFLAGSYTK.Q       | 1755.989 | 0.00667  | 2 | 1 | 40.1 | 0 |
| P12163_1_F4,9725  | K.SASGETYVR.G        | 1273.669 | 0.00282  | 2 | 1 | 26.1 | 0 |
| P12163_2_F1,8648  | K.SASGETYVR.G        | 1273.669 | 0.0034   | 2 | 1 | 28.2 | 0 |
| P12163_1_S1,19056 | K.VVQADAYVAACDVPC    | 2384.31  | 0.01765  | 3 | 1 | 65.8 | 0 |
| P12163_1_F5,16882 | R.AFLSTNQLK.T        | 1629.978 | 0.01143  | 2 | 1 | 26.1 | 0 |
| P12163_1_F5,16920 | R.AFLSTNQLK.T        | 1629.978 | 0.00568  | 3 | 1 | 43.8 | 0 |
| P12163_2_F1,17392 | R.AFLSTNQLK.T        | 1629.978 | 0.00307  | 2 | 1 | 29   | 0 |
| P12163_2_F2,17751 | R.AFLSTNQLK.T        | 1629.978 | 0.00496  | 3 | 1 | 35.4 | 0 |
| P12163_1_F8,19160 | R.FPIGAPLHGIR.A      | 1481.889 | 0.00275  | 3 | 1 | 49   | 0 |
| P12163_2_F6,18712 | R.FPIGAPLHGIR.A      | 1481.889 | 0.00242  | 3 | 1 | 52.5 | 0 |
| P12163_2_F6,18740 | R.FPIGAPLHGIR.A      | 1481.889 | 0.00222  | 2 | 1 | 25.6 | 0 |
| P12163_2_F6,18992 | R.FPIGAPLHGIR.A      | 1481.889 | -0.0007  | 3 | 1 | 48.1 | 0 |
| P12163_1_F3,23216 | R.NAIALALSPVVK.A ! R | 1804.152 | 0.00542  | 3 | 1 | 37.9 | 0 |
| P12163_1_F3,23225 | R.NAIALALSPVVK.A ! R | 1804.152 | 0.00351  | 2 | 1 | 53.4 | 0 |
| P12163_1_F4,23973 | R.NAIALALSPVVK.A ! R | 1804.152 | 0.00245  | 2 | 1 | 45.9 | 0 |
| P12163_1_F4,24020 | R.NAIALALSPVVK.A ! R | 1804.152 | 0.01118  | 3 | 1 | 47.5 | 0 |
| P12163_2_F1,23421 | R.NAIALALSPVVK.A ! R | 1804.152 | 0.00254  | 3 | 1 | 34.3 | 0 |
| P12163_2_F1,23478 | R.NAIALALSPVVK.A ! R | 1804.152 | 0.00511  | 2 | 1 | 63.2 | 0 |
| P12163_2_F4,20850 | R.NAIALALSPVVK.A ! R | 1804.152 | 0.00173  | 3 | 1 | 30.5 | 0 |
| P12163_1_F3,6795  | K.AAVDAR.K           | 906.531  | 0.00352  | 2 | 1 | 26.4 | 0 |
| P12163_2_F1,6496  | K.AAVDAR.K           | 906.531  | 0.00278  | 2 | 1 | 26.7 | 0 |
| P12163_1_F3,21468 | K.AFCEISPLVPK.M      | 1869.076 | 0.00972  | 3 | 1 | 42.5 | 0 |
| P12163_1_F6,20504 | K.AFCEISPLVPK.M      | 1869.076 | 0.00306  | 3 | 1 | 26.7 | 0 |
| P12163_1_F6,20538 | K.AFCEISPLVPK.M      | 1869.076 | 0.00262  | 2 | 1 | 30.3 | 0 |
| P12163_2_F1,21863 | K.AFCEISPLVPK.M      | 1869.076 | 0.00576  | 3 | 1 | 33.9 | 0 |
| P12163_2_F1,21870 | K.AFCEISPLVPK.M      | 1869.076 | 0.0067   | 2 | 1 | 46.1 | 0 |
| P12163_1_F3,19231 | K.ELLNDAAEEVGGK.L    | 1953.075 | 0.00679  | 3 | 1 | 49.5 | 0 |
| P12163_1_F6,18459 | K.ELLNDAAEEVGGK.L    | 1953.075 | 0.00058  | 3 | 1 | 41.9 | 0 |
| P12163_1_F3,15847 | K.ETLGFNTYEEEEK.H    | 2231.133 | 0.00622  | 3 | 1 | 30.3 | 0 |
| P12163_1_F3,18560 | K.ETLGFNTYEEEEK.H    | 2231.133 | -0.00041 | 3 | 1 | 39.7 | 0 |
| P12163_1_F3,18584 | K.ETLGFNTYEEEEK.H    | 2231.133 | 0.00844  | 2 | 1 | 53.7 | 0 |
| P12163_1_F5,16770 | K.M*ANMLEGGGK.T      | 1631.87  | 0.00841  | 3 | 1 | 23.5 | 0 |
| P12163_1_F5,16756 | K.MANMLEGGGK.T       | 1615.876 | 0.00517  | 3 | 1 | 26.1 | 0 |
| P12163_2_F1,17053 | K.MANMLEGGGK.T       | 1615.876 | 0.0112   | 2 | 1 | 38.5 | 0 |
| P12163_1_S1,24354 | K.TPILNPLELEELGFK.L  | 2321.358 | 0.00698  | 3 | 1 | 56.1 | 0 |
| P12163_1_F7,18262 | R.AM*QDALTAIK.G      | 1685.972 | 0.00054  | 3 | 1 | 22.4 | 0 |
| P12163_1_F4,20598 | R.AMQDALTAIK.G       | 1669.977 | 0.00318  | 3 | 1 | 46.2 | 0 |
| P12163_1_F4,20617 | R.AMQDALTAIK.G       | 1669.977 | 0.00749  | 2 | 1 | 42.7 | 0 |
| P12163_2_F1,19920 | R.AMQDALTAIK.G       | 1669.977 | 0.00882  | 3 | 1 | 45.6 | 0 |
| P12163_2_F1,20075 | R.AMQDALTAIK.G       | 1669.977 | 0.00485  | 2 | 1 | 42.2 | 0 |
| P12163_1_F2,21003 | R.IPSPGSM*PSFEEIK.E  | 2143.156 | 0.00945  | 3 | 1 | 41.3 | 0 |
| P12163_1_F2,20974 | R.IPSPGSMPSFEEIK.E   | 2127.162 | 0.00456  | 3 | 1 | 30.1 | 0 |
| P12163_1_F2,13503 | R.QALSLEESLR.R       | 1449.821 | 0.00122  | 3 | 1 | 25.2 | 0 |
| P12163_1_F3,13881 | R.QALSLEESLR.R       | 1449.821 | 0.00595  | 3 | 1 | 22.6 | 0 |
| P12163_1_F3,14189 | R.QALSLEESLR.R       | 1449.821 | 0.00248  | 3 | 1 | 57.5 | 0 |
| P12163_1_F3,18394 | R.QALSLEESLR.R       | 1449.821 | 0.00405  | 2 | 1 | 27.8 | 0 |

|                   |                      |          |          |   |   |      |   |
|-------------------|----------------------|----------|----------|---|---|------|---|
| P12163_1_F6,21345 | R.QILELPGVHQGPACFD   | 2859.565 | -0.00077 | 4 | 1 | 28.9 | 0 |
| P12163_1_F6,21346 | R.QILELPGVHQGPACFD   | 2859.565 | -0.00065 | 3 | 1 | 39.4 | 0 |
| P12163_1_F7,20471 | R.QILELPGVHQGPACFD   | 2859.565 | -0.00029 | 4 | 1 | 30.5 | 0 |
| P12163_1_F7,20502 | R.QILELPGVHQGPACFD   | 2859.565 | -0.00296 | 3 | 1 | 28.6 | 0 |
| P12163_2_S5,19508 | R.QILELPGVHQGPACFD   | 2859.565 | 0.00503  | 4 | 1 | 24.8 | 0 |
| P12163_1_F4,20881 | K.DLVDYLK.H          | 1473.877 | 0.01255  | 2 | 1 | 25   | 0 |
| P12163_1_F4,20899 | K.DLVDYLK.H          | 1473.877 | 0.01047  | 3 | 1 | 22.9 | 0 |
| P12163_1_F4,23453 | K.DLVDYLK.H          | 1473.877 | 0.01123  | 2 | 1 | 25.3 | 0 |
| P12163_1_F5,19788 | K.DLVDYLK.H          | 1473.877 | 0.00366  | 3 | 1 | 23.2 | 0 |
| P12163_1_F9,19382 | K.DLVDYLK.H          | 1473.877 | 0.00769  | 2 | 1 | 24.8 | 0 |
| P12163_2_F1,20300 | K.DLVDYLK.H          | 1473.877 | 0.00543  | 2 | 1 | 36.3 | 0 |
| P12163_2_F9,18277 | K.DLVDYLK.H          | 1473.877 | 0.00389  | 2 | 1 | 25.9 | 0 |
| P12163_1_F4,17647 | K.EAANLLAEK.K        | 1566.931 | 0.00663  | 2 | 1 | 41.2 | 0 |
| P12163_1_F5,16300 | K.EAANLLAEK.K        | 1566.931 | 0.00553  | 2 | 1 | 40.4 | 0 |
| P12163_1_F5,16304 | K.EAANLLAEK.K        | 1566.931 | 0.0072   | 3 | 1 | 34.5 | 0 |
| P12163_1_F7,18191 | K.HLAESEGGVLLPSGC    | 2364.319 | -0.00137 | 3 | 1 | 25.1 | 0 |
| P12163_1_F7,18244 | K.HLAESEGGVLLPSGC    | 2364.319 | 0.00178  | 4 | 1 | 43.7 | 0 |
| P12163_1_F7,19138 | K.HLAESEGGVLLPSGC    | 2364.319 | -0.00314 | 3 | 1 | 47.7 | 0 |
| P12163_1_F7,19181 | K.HLAESEGGVLLPSGC    | 2364.319 | -0.00218 | 4 | 1 | 38.1 | 0 |
| P12163_1_F8,20157 | K.HLAESEGGVLLPSGC    | 2364.319 | -0.00776 | 3 | 1 | 32.9 | 0 |
| P12163_2_F10,1738 | K.HLAESEGGVLLPSGC    | 2364.319 | 0.00415  | 3 | 1 | 32.1 | 0 |
| P12163_2_S5,18189 | K.HLAESEGGVLLPSGC    | 2364.319 | 0.00162  | 4 | 1 | 30.8 | 0 |
| P12163_1_F4,25034 | K.LLSYCFLK.A         | 1651.97  | 0.00547  | 3 | 1 | 23.6 | 0 |
| P12163_1_F4,25039 | K.LLSYCFLK.A         | 1651.97  | 0.00714  | 2 | 1 | 33.9 | 0 |
| P12163_2_F1,24328 | K.LLSYCFLK.A         | 1651.97  | 0.00286  | 3 | 1 | 23   | 0 |
| P12163_2_F9,21037 | K.LLSYCFLK.A         | 1651.97  | 0.00505  | 3 | 1 | 27.1 | 0 |
| P12163_1_S1,11853 | K.VAM*ETASQIAGIR.L   | 1666.91  | -0.00032 | 3 | 1 | 43.4 | 0 |
| P12163_1_S1,19460 | K.VAMETASQIAGIR.L    | 1650.915 | 0.00403  | 2 | 1 | 48.1 | 0 |
| P12163_1_S1,19500 | K.VAMETASQIAGIR.L    | 1650.915 | 0.00394  | 3 | 1 | 75.3 | 0 |
| P12163_1_S1,15249 | R.ADSIVNDAEFIR.V     | 1653.875 | 0.00379  | 3 | 1 | 68   | 0 |
| P12163_1_F4,13398 | R.EVAVGK.E           | 1309.83  | 0.00733  | 2 | 1 | 29.8 | 0 |
| P12163_1_F4,13460 | R.EVAVGK.E           | 1309.83  | 0.00677  | 3 | 1 | 27.4 | 0 |
| P12163_2_F1,12437 | R.EVAVGK.E           | 1309.83  | 0.00735  | 2 | 1 | 27.5 | 0 |
| P12163_1_S1,18120 | R.FPQDVEIVR.E        | 1406.794 | 0.00187  | 3 | 1 | 30.3 | 0 |
| P12163_1_F5,14238 | R.GPTESSGWINK.A      | 1783.98  | 0.01038  | 2 | 1 | 34.1 | 0 |
| P12163_2_F1,14286 | R.GPTESSGWINK.A      | 1783.98  | 0.00734  | 2 | 1 | 25.9 | 0 |
| P12163_2_F6,21164 | R.LWITNEYM*HSGLR.D   | 1940     | 0.00013  | 3 | 1 | 34.9 | 0 |
| P12163_1_F4,14153 | K.ELIDEGK.V          | 1411.825 | 0.00529  | 3 | 1 | 24.9 | 0 |
| P12163_1_F8,24277 | K.HGLTPVQLALGFVR.D   | 1812.08  | 0.00217  | 3 | 1 | 46.5 | 0 |
| P12163_2_F6,24215 | K.HGLTPVQLALGFVR.D   | 1812.08  | -0.00746 | 3 | 1 | 49.1 | 0 |
| P12163_1_F4,25954 | K.TDLYIASWLK.S       | 1818.062 | 0.00557  | 3 | 1 | 30.5 | 0 |
| P12163_1_F4,15580 | K.VIIATK.V           | 1252.845 | 0.00653  | 3 | 1 | 23   | 0 |
| P12163_1_F2,13491 | K.VSGYSEQSSFLR.D     | 1663.859 | 0.00028  | 3 | 1 | 34.8 | 0 |
| P12163_1_F2,14239 | K.VSGYSEQSSFLR.D     | 1663.859 | 0.00841  | 3 | 1 | 53.8 | 0 |
| P12163_1_F2,15826 | K.YLDINSEAAR.K       | 1455.774 | 0.00544  | 2 | 1 | 25.6 | 0 |
| P12163_1_S1,15465 | K.YLDINSEAAR.K       | 1455.774 | 0.00631  | 3 | 1 | 67.3 | 0 |
| P12163_1_F7,16640 | R.CRFEVDLVEVCHPK.N   | 2396.267 | 0.00438  | 4 | 1 | 30.4 | 0 |
| P12163_1_F7,16656 | R.CRFEVDLVEVCHPK.N   | 2396.267 | 0.00807  | 3 | 1 | 33.5 | 0 |
| P12163_1_F8,20694 | R.DRPFMTSSIIIGATSVEQ | 2688.485 | 0.00502  | 3 | 1 | 44.3 | 0 |
| P12163_1_F8,19737 | R.FEVDLVEVCHPK.N     | 2080.136 | 0.00412  | 2 | 1 | 72.7 | 0 |
| P12163_1_F8,19752 | R.FEVDLVEVCHPK.N     | 2080.136 | 0.00538  | 4 | 1 | 25.9 | 0 |

|                   |                     |          |          |   |   |      |   |
|-------------------|---------------------|----------|----------|---|---|------|---|
| P12163_1_F8,19850 | R.FEVDLVEVCHPK.N    | 2080.136 | 0.00422  | 3 | 1 | 44.9 | 0 |
| P12163_1_F9,19326 | R.FEVDLVEVCHPK.N    | 2080.136 | 0.00521  | 3 | 1 | 41.7 | 0 |
| P12163_1_S10,1835 | R.FEVDLVEVCHPK.N    | 2080.136 | 0.0062   | 3 | 1 | 36.8 | 0 |
| P12163_2_F6,19231 | R.FEVDLVEVCHPK.N    | 2080.136 | 0.02018  | 3 | 1 | 26.3 | 0 |
| P12163_2_F6,19272 | R.FEVDLVEVCHPK.N    | 2080.136 | 0.00515  | 2 | 1 | 70.1 | 0 |
| P12163_2_F6,19313 | R.FEVDLVEVCHPK.N    | 2080.136 | 0.00454  | 4 | 1 | 24.2 | 0 |
| P12163_2_F6,19464 | R.FEVDLVEVCHPK.N    | 2080.136 | 0.00998  | 3 | 1 | 37.7 | 0 |
| P12163_2_F8_12070 | R.FEVDLVEVCHPK.N    | 2080.136 | 0.00254  | 3 | 1 | 30   | 0 |
| P12163_2_F8_12070 | R.FEVDLVEVCHPK.N    | 2080.136 | 0.00142  | 4 | 1 | 26.2 | 0 |
| P12163_2_S5,18232 | R.FEVDLVEVCHPK.N    | 2080.136 | 0.00572  | 3 | 1 | 41.2 | 0 |
| P12163_2_S5,18246 | R.FEVDLVEVCHPK.N    | 2080.136 | 0.00238  | 4 | 1 | 25   | 0 |
| P12163_1_F5,11922 | R.VDAANIK.E         | 1338.82  | 0.00718  | 2 | 1 | 29.8 | 0 |
| P12163_1_F5,11931 | R.VDAANIK.E         | 1338.82  | 0.00956  | 3 | 1 | 24.2 | 0 |
| P12163_1_F6,12871 | R.VDAANIK.E         | 1338.82  | 0.007    | 2 | 1 | 29.8 | 0 |
| P12163_2_F1,12395 | R.VDAANIK.E         | 1338.82  | 0.00502  | 2 | 1 | 27.2 | 0 |
| P12163_2_F2,12839 | R.VDAANIK.E         | 1338.82  | 0.00724  | 2 | 1 | 27.5 | 0 |
| P12163_1_F7,22332 | K.CITLRPPDFAIPVEELK | 2606.484 | 0.00514  | 3 | 1 | 23   | 0 |
| P12163_1_F3,14326 | K.DAAIQAIR.D        | 1161.689 | 0.00272  | 2 | 1 | 36.2 | 0 |
| P12163_2_F1,13709 | K.DAAIQAIR.D        | 1161.689 | 0.0027   | 2 | 1 | 28.3 | 0 |
| P12163_1_F2,13339 | K.DSGLEVDPEK.E      | 1696.921 | 0.00254  | 2 | 1 | 30.7 | 0 |
| P12163_1_F3,13775 | K.DSGLEVDPEK.E      | 1696.921 | 0.00696  | 2 | 1 | 39.6 | 0 |
| P12163_1_F7,23459 | K.EVGVVAIPTSVFYLN   | 2742.517 | 0.00804  | 3 | 1 | 25.5 | 0 |
| P12163_1_F8,21881 | K.HGAINLGQGFPNFDGF  | 2738.451 | 0.00615  | 3 | 1 | 28.1 | 0 |
| P12163_2_F6,21638 | K.HGAINLGQGFPNFDGF  | 2738.451 | 0.00437  | 4 | 1 | 38.2 | 0 |
| P12163_2_F2,20925 | K.TFSLTGWK.I        | 1547.904 | 0.00575  | 2 | 1 | 29.7 | 0 |
| P12163_1_F4,12869 | K.TNLQPQQVAK.R      | 1735.032 | 0.01252  | 2 | 1 | 25.7 | 0 |
| P12163_1_F4,12875 | K.TNLQPQQVAK.R      | 1735.032 | 0.00731  | 3 | 1 | 26.9 | 0 |
| P12163_2_F1,11979 | K.TNLQPQQVAK.R      | 1735.032 | 0.00794  | 2 | 1 | 30.6 | 0 |
| P12163_2_F1,12015 | K.TNLQPQQVAK.R      | 1735.032 | 0.00371  | 3 | 1 | 27.5 | 0 |
| P12163_1_F8,11038 | R.AILM*NTPHNPTGK.M  | 2018.131 | 0.00474  | 4 | 1 | 23.5 | 0 |
| P12163_1_F8,13283 | R.AILM*NTPHNPTGK.M  | 2018.131 | 0.00336  | 3 | 1 | 29.9 | 0 |
| P12163_2_F6,10841 | R.AILM*NTPHNPTGK.M  | 2018.131 | 0.0045   | 3 | 1 | 25.5 | 0 |
| P12163_1_F8,12827 | R.AILMNTPHNPTGK.M   | 2002.136 | 0.00414  | 3 | 1 | 31.2 | 0 |
| P12163_1_F8,14982 | R.AILMNTPHNPTGK.M   | 2002.136 | 0.00627  | 3 | 1 | 56.1 | 0 |
| P12163_1_F8,15022 | R.AILMNTPHNPTGK.M   | 2002.136 | 0.00777  | 2 | 1 | 61.4 | 0 |
| P12163_2_F6,14412 | R.AILMNTPHNPTGK.M   | 2002.136 | 0.00228  | 3 | 1 | 36.5 | 0 |
| P12163_2_F9,16669 | R.APETYEEELK.R      | 1851     | 0.00073  | 3 | 1 | 33.5 | 0 |
| P12163_1_F6,14562 | R.GHGVPEFNSAIASR.F  | 1745.924 | 0.00279  | 3 | 1 | 32.4 | 0 |
| P12163_1_F8,14419 | R.GHGVPEFNSAIASR.F  | 1745.924 | 0.00669  | 3 | 1 | 27.1 | 0 |
| P12163_1_F8,14429 | R.GHGVPEFNSAIASR.F  | 1745.924 | 0.0036   | 3 | 1 | 36.9 | 0 |
| P12163_1_F8,14440 | R.GHGVPEFNSAIASR.F  | 1745.924 | 0.00103  | 2 | 1 | 25.8 | 0 |
| P12163_2_F6,13879 | R.GHGVPEFNSAIASR.F  | 1745.924 | -0.00417 | 2 | 1 | 49.9 | 0 |
| P12163_2_F6,13908 | R.GHGVPEFNSAIASR.F  | 1745.924 | 0.00246  | 3 | 1 | 55.2 | 0 |
| P12163_1_F8,14300 | K.EAVAPYERPALSK.A   | 2039.174 | 0.00598  | 2 | 1 | 27.3 | 0 |
| P12163_2_F2,10452 | K.GQFAENK.G         | 1401.795 | 0.00871  | 2 | 1 | 25.4 | 0 |
| P12163_2_F2,10477 | K.GQFAENK.G         | 1401.795 | 0.00796  | 3 | 1 | 30.4 | 0 |
| P12163_1_F5,14075 | K.NEGLSFASK.I       | 1560.884 | 0.00985  | 2 | 1 | 48.6 | 0 |
| P12163_1_F5,14146 | K.NEGLSFASK.I       | 1560.884 | 0.00558  | 3 | 1 | 38.1 | 0 |
| P12163_1_F4,13357 | K.TIMATEGGK.T       | 1515.866 | 0.00969  | 2 | 1 | 29.9 | 0 |
| P12163_2_F1,12317 | K.TIMATEGGK.T       | 1515.866 | 0.00757  | 2 | 1 | 41.5 | 0 |
| P12163_1_F2,22398 | K.VGVFLESPTPEENK.   | 2213.227 | 0.00444  | 3 | 1 | 29.4 | 0 |

|                   |                   |           |          |          |   |   |      |   |
|-------------------|-------------------|-----------|----------|----------|---|---|------|---|
| P12163_1_F2,22487 | K.VVGVFLES        | GTPEENK.L | 2213.227 | 0.00135  | 2 | 1 | 32.1 | 0 |
| P12163_1_F2,22733 | K.VVGVFLES        | GTPEENK.L | 2213.227 | 0.01839  | 3 | 1 | 26.4 | 0 |
| P12163_1_F5,22184 | K.VVGVFLES        | GTPEENK.L | 2213.227 | -0.00138 | 3 | 1 | 41.5 | 0 |
| P12163_1_S1,21569 | K.VVGVFLES        | GTPEENK.L | 2213.227 | 0.00273  | 3 | 1 | 59.1 | 0 |
| P12163_1_S1,21658 | K.VVGVFLES        | GTPEENK.L | 2213.227 | 0.00206  | 4 | 1 | 24.1 | 0 |
| P12163_1_S1,21792 | K.VVGVFLES        | GTPEENK.L | 2213.227 | 0.00423  | 3 | 1 | 40.1 | 0 |
| P12163_1_F4,10834 | R.EIDDADK.L       |           | 1413.768 | 0.00451  | 2 | 1 | 32.7 | 0 |
| P12163_1_F6,17756 | R.LPGFHVCV        | GSGGER.L  | 1775.916 | 0.00373  | 3 | 1 | 26.6 | 0 |
| P12163_1_F8,17519 | R.LPGFHVCV        | GSGGER.L  | 1775.916 | 0.00613  | 3 | 1 | 57.7 | 0 |
| P12163_2_F6,17006 | R.LPGFHVCV        | GSGGER.L  | 1775.916 | 0.00646  | 3 | 1 | 68.8 | 0 |
| P12163_1_F2,18335 | R.LTDFGVEG        | ADAK.N    | 1831.006 | 0.00349  | 2 | 1 | 52.3 | 0 |
| P12163_1_F3,18854 | R.LTDFGVEG        | ADAK.N    | 1831.006 | 0.00229  | 2 | 1 | 48.9 | 0 |
| P12163_1_F2,4841  | R.RVEHVDHAR       | .K        | 1422.787 | 0.00385  | 3 | 1 | 39.1 | 0 |
| P12163_1_F3,4765  | R.RVEHVDHAR       | .K        | 1422.787 | 0.00313  | 3 | 1 | 39.4 | 0 |
| P12163_2_S3,4948  | R.RVEHVDHAR       | .K        | 1422.787 | 0.00337  | 3 | 1 | 39   | 0 |
| P12163_1_F5,5140  | R.VEHVDHAR.Q !    | R.VEH     | 1266.686 | 0.00352  | 3 | 1 | 27.1 | 0 |
| P12163_1_F5,5150  | R.VEHVDHAR.Q !    | R.VEH     | 1266.686 | 0.00162  | 2 | 1 | 35.7 | 0 |
| P12163_2_S5,6262  | R.VEHVDHAR.Q !    | R.VEH     | 1266.686 | 0.00241  | 3 | 1 | 29   | 0 |
| P12163_2_S5,6300  | R.VEHVDHAR.Q !    | R.VEH     | 1266.686 | 0.00362  | 2 | 1 | 32.7 | 0 |
| P12163_2_F2,12237 | K.GAGANILR        | .A        | 1075.652 | 0.00003  | 2 | 1 | 31.8 | 0 |
| P12163_1_F3,19731 | K.LLIQNQDEMIK     | .S ! K.L  | 1953.13  | 0.00615  | 3 | 1 | 59   | 0 |
| P12163_1_F3,19732 | K.LLIQNQDEMIK     | .S ! K.L  | 1953.13  | 0.00683  | 2 | 1 | 62   | 0 |
| P12163_1_F4,20317 | K.LLIQNQDEMIK     | .S ! K.L  | 1953.13  | 0.00642  | 3 | 1 | 41.7 | 0 |
| P12163_1_F4,20322 | K.LLIQNQDEMIK     | .S ! K.L  | 1953.13  | 0.00451  | 2 | 1 | 58.2 | 0 |
| P12163_2_F1,19749 | K.LLIQNQDEMIK     | .S ! K.L  | 1953.13  | -0.00123 | 2 | 1 | 43.5 | 0 |
| P12163_1_F4,26235 | K.LQLIVFGK        | .K        | 1525.993 | 0.00567  | 3 | 1 | 27.3 | 0 |
| P12163_1_F3,13436 | K.SDGIAGLYR       | .G        | 1255.695 | 0.00443  | 3 | 1 | 34   | 0 |
| P12163_1_F3,15985 | K.SDGIAGLYR       | .G        | 1255.695 | 0.0043   | 2 | 1 | 36.4 | 0 |
| P12163_2_F1,14975 | K.SDGIAGLYR       | .G        | 1255.695 | 0.00222  | 2 | 1 | 32.6 | 0 |
| P12163_1_F3,22957 | K.SSLDAFSQILK     | .N        | 1817.063 | 0.00509  | 3 | 1 | 35.2 | 0 |
| P12163_1_F4,23745 | K.SSLDAFSQILK     | .N        | 1817.063 | 0.00932  | 3 | 1 | 46.4 | 0 |
| P12163_1_F4,23749 | K.SSLDAFSQILK     | .N        | 1817.063 | 0.00699  | 2 | 1 | 70   | 0 |
| P12163_1_F3,7546  | K.TAAAPIER        | .V        | 1132.663 | 0.00467  | 3 | 1 | 24.1 | 0 |
| P12163_2_F1,7258  | K.TAAAPIER        | .V        | 1132.663 | 0.00158  | 3 | 1 | 36.3 | 0 |
| P12163_1_F3,17825 | R.AVAGAGVLAGYDK   | .L        | 1800.048 | 0.00604  | 2 | 1 | 46.4 | 0 |
| P12163_1_F3,17873 | R.AVAGAGVLAGYDK   | .L        | 1800.048 | 0.00003  | 3 | 1 | 66.5 | 0 |
| P12163_1_F4,18370 | R.AVAGAGVLAGYDK   | .L        | 1800.048 | 0.01191  | 3 | 1 | 48.5 | 0 |
| P12163_2_F1,17653 | R.AVAGAGVLAGYDK   | .L        | 1800.048 | 0.00591  | 3 | 1 | 39   | 0 |
| P12163_2_F1,17664 | R.AVAGAGVLAGYDK   | .L        | 1800.048 | -0.00202 | 2 | 1 | 61.2 | 0 |
| P12163_1_F4,9963  | R.GNTANVIR        | .Y        | 1148.669 | 0.00474  | 2 | 1 | 28.1 | 0 |
| P12163_1_F4,13526 | R.M*MMTSGEAVK     | .Y        | 1708.889 | 0.01005  | 3 | 1 | 26.4 | 0 |
| P12163_1_F4,15758 | R.MMMTSGEAVK      | .Y        | 1692.894 | 0.00391  | 2 | 1 | 32.2 | 0 |
| P12163_2_F1,14787 | R.MMMTSGEAVK      | .Y        | 1692.894 | 0.00417  | 2 | 1 | 33.4 | 0 |
| P12163_2_F1,14837 | R.MMMTSGEAVK      | .Y        | 1692.894 | 0.00151  | 3 | 1 | 22.4 | 0 |
| P12163_1_F3,25553 | R.YFPTQALNFAFK    | .D        | 2055.152 | 0.00688  | 3 | 1 | 43.5 | 0 |
| P12163_1_F6,11883 | K.ILHPVKEDR       | .M        | 1715.042 | 0.0038   | 3 | 1 | 29.3 | 0 |
| P12163_1_F4,15281 | K.LQSSVIQK        | .D        | 1510.941 | 0.00503  | 3 | 1 | 23.7 | 0 |
| P12163_2_F1,14227 | K.LQSSVIQK        | .D        | 1510.941 | 0.00824  | 3 | 1 | 27   | 0 |
| P12163_2_F1,21831 | K.SSSGYTEWFLSK    | .E        | 2000.058 | 0.00561  | 3 | 1 | 22.9 | 0 |
| P12163_1_F5,21234 | K.VAAGQPADFEYEVFD |           | 2685.273 | 0.00046  | 3 | 1 | 45.9 | 0 |
| P12163_2_F8_12070 | K.VAAGQPADFEYEVFD |           | 2685.273 | 0.00322  | 3 | 1 | 57.2 | 0 |



|                   |                       |          |          |   |   |      |   |
|-------------------|-----------------------|----------|----------|---|---|------|---|
| P12163_1_F6,14810 | R.HSPVGILHSIQR.D      | 1647.96  | 0.00141  | 3 | 1 | 37.9 | 0 |
| P12163_1_F6,14883 | R.HSPVGILHSIQR.D      | 1647.96  | 0.00262  | 4 | 1 | 30.9 | 0 |
| P12163_2_S3,13039 | R.HSPVGILHSIQR.D      | 1647.96  | -0.00006 | 3 | 1 | 26.8 | 0 |
| P12163_1_F4,23875 | R.LNDLFLK.C           | 1470.914 | 0.00322  | 2 | 1 | 32.1 | 0 |
| P12163_1_F5,22439 | R.LNDLFLK.C           | 1470.914 | 0.00528  | 2 | 1 | 26   | 0 |
| P12163_1_F5,22448 | R.LNDLFLK.C           | 1470.914 | 0.0063   | 3 | 1 | 24.2 | 0 |
| P12163_2_F1,23270 | R.LNDLFLK.C           | 1470.914 | 0.00372  | 2 | 1 | 25.4 | 0 |
| P12163_2_F7,15383 | R.SRPLMTDILR.V        | 1505.877 | -0.00105 | 3 | 1 | 28.8 | 0 |
| P12163_1_F5,10872 | R.VHGIHDPLR.V         | 1347.78  | 0.00335  | 3 | 1 | 44.1 | 0 |
| P12163_1_F5,10899 | R.VHGIHDPLR.V         | 1347.78  | 0.00583  | 4 | 1 | 29.7 | 0 |
| P12163_1_F6,11953 | R.VHGIHDPLR.V         | 1347.78  | 0.00692  | 3 | 1 | 30.5 | 0 |
| P12163_1_F6,11955 | R.VHGIHDPLR.V         | 1347.78  | 0.00727  | 4 | 1 | 22.5 | 0 |
| P12163_2_F7,10943 | R.VHGIHDPLR.V         | 1347.78  | 0.00991  | 4 | 1 | 27.2 | 0 |
| P12163_2_F7,10977 | R.VHGIHDPLR.V         | 1347.78  | 0.00375  | 4 | 1 | 30.6 | 0 |
| P12163_2_F7,10982 | R.VHGIHDPLR.V         | 1347.78  | 0.00341  | 3 | 1 | 38.7 | 0 |
| P12163_2_S5,11363 | R.VHGIHDPLR.V         | 1347.78  | 0.00435  | 4 | 1 | 27.5 | 0 |
| P12163_2_S5,11448 | R.VHGIHDPLR.V         | 1347.78  | 0.00392  | 3 | 1 | 56.3 | 0 |
| P12163_1_F5,10974 | R.VHVSALER.V          | 1214.716 | 0.00412  | 3 | 1 | 23.8 | 0 |
| P12163_1_F7,17704 | R.VVGVEHNTEGESFVLV    | 2175.171 | 0.0033   | 3 | 1 | 52   | 0 |
| P12163_1_F7,17739 | R.VVGVEHNTEGESFVLV    | 2175.171 | 0.00138  | 2 | 1 | 40   | 0 |
| P12163_1_F3,14005 | K.GDGYLVDK.V          | 1474.836 | 0.0015   | 2 | 1 | 26.7 | 0 |
| P12163_1_F4,14659 | K.GDGYLVDK.V          | 1474.836 | 0.00769  | 2 | 1 | 32.2 | 0 |
| P12163_1_F9,18173 | K.HIEDILLK.V          | 1588.988 | 0.00188  | 2 | 1 | 34.4 | 0 |
| P12163_1_F2,21690 | K.ICSYAQGM*NLIR.A ! I | 1745.898 | 0.00184  | 3 | 1 | 32.9 | 0 |
| P12163_2_F1,18407 | K.ICSYAQGM*NLIR.A ! I | 1745.898 | 0.00632  | 2 | 1 | 25.6 | 0 |
| P12163_1_S1,14617 | K.VAAQVPDSGPCVTYV     | 2356.279 | 0.00904  | 3 | 1 | 23.8 | 0 |
| P12163_1_S1,15532 | K.VAAQVPDSGPCVTYV     | 2356.279 | 0.00427  | 3 | 1 | 78.2 | 0 |
| P12163_1_F2,11377 | K.VDETVER.A           | 1151.621 | 0.00302  | 2 | 1 | 36.2 | 0 |
| P12163_1_S1,11539 | K.VDETVER.A           | 1151.621 | 0.00298  | 2 | 1 | 36.6 | 0 |
| P12163_1_S1,11872 | K.VDETVER.A           | 1151.621 | 0.00194  | 2 | 1 | 25.9 | 0 |
| P12163_1_F6,13291 | R.DYFGAHTYER.I ! R.DY | 1562.754 | 0.00126  | 3 | 1 | 24.2 | 0 |
| P12163_2_S3,12278 | R.DYFGAHTYER.I ! R.DY | 1562.754 | 0.00015  | 3 | 1 | 28.6 | 0 |
| P12163_1_F2,15655 | R.LIDDVR.Q ! K.LIDDVR | 1034.615 | 0.00216  | 2 | 1 | 26.7 | 0 |
| P12163_1_F3,16355 | R.LIDDVR.Q ! K.LIDDVR | 1034.615 | 0.0016   | 2 | 1 | 36.5 | 0 |
| P12163_1_S1,14090 | R.LIDDVR.Q ! K.LIDDVR | 1034.615 | 0.00218  | 2 | 1 | 35.5 | 0 |
| P12163_1_F2,16574 | R.LPANLVQAQR.D        | 1413.848 | 0.00372  | 3 | 1 | 22.9 | 0 |
| P12163_1_F2,16815 | R.LPANLVQAQR.D        | 1413.848 | 0.00343  | 2 | 1 | 25.5 | 0 |
| P12163_1_S1,15559 | R.LPANLVQAQR.D        | 1413.848 | 0.00063  | 3 | 1 | 53.7 | 0 |
| P12163_1_F5,11592 | R.QALYASK.I           | 1388.836 | 0.00874  | 2 | 1 | 30.2 | 0 |
| P12163_1_F5,11663 | R.QALYASK.I           | 1388.836 | 0.00755  | 3 | 1 | 33.6 | 0 |
| P12163_1_F6,12559 | R.QALYASK.I           | 1388.836 | 0.00528  | 2 | 1 | 26.3 | 0 |
| P12163_1_S10,1296 | R.QALYASK.I           | 1388.836 | 0.00581  | 3 | 1 | 26.6 | 0 |
| P12163_2_F2,12380 | R.QALYASK.I           | 1388.836 | 0.00652  | 2 | 1 | 29.9 | 0 |
| P12163_2_F2,12384 | R.QALYASK.I           | 1388.836 | 0.00686  | 3 | 1 | 30   | 0 |
| P12163_2_F8_12070 | R.QALYASK.I           | 1388.836 | 0.00676  | 2 | 1 | 30.4 | 0 |
| P12163_1_F4,25764 | R.VIIM*LVK.A          | 1439.948 | 0.0088   | 3 | 1 | 28.5 | 0 |
| P12163_1_F3,19723 | K.LSEGYVMDPAK.A       | 1981.056 | 0.0106   | 2 | 1 | 48   | 0 |
| P12163_1_F8,19141 | K.NYVDMDEYPVTTELQ     | 2391.144 | 0.00398  | 2 | 1 | 53.3 | 0 |
| P12163_1_F6,19064 | K.RHDEFEVAELLR.R      | 1817.981 | 0.00676  | 3 | 1 | 38.9 | 0 |
| P12163_2_F7,16518 | K.RHDEFEVAELLR.R      | 1817.981 | 0.00514  | 3 | 1 | 59.5 | 0 |
| P12163_2_S5,18034 | K.RHDEFEVAELLR.R      | 1817.981 | 0.00199  | 3 | 1 | 33.3 | 0 |

|                   |                    |          |          |   |   |      |   |
|-------------------|--------------------|----------|----------|---|---|------|---|
| P12163_1_F4,10456 | K.SINVSCHK.Y       | 1449.863 | 0.01105  | 3 | 1 | 39.1 | 0 |
| P12163_2_F4,9194  | K.SINVSCHK.Y       | 1449.863 | 0.00478  | 3 | 1 | 42.5 | 0 |
| P12163_2_F4,9205  | K.SINVSCHK.Y       | 1449.863 | 0.00781  | 2 | 1 | 29.9 | 0 |
| P12163_2_S3,9103  | K.SINVSCHK.Y       | 1449.863 | 0.00742  | 3 | 1 | 37.9 | 0 |
| P12163_1_F8,19077 | K.VLHELDSLPSK.V    | 1846.089 | 0.00143  | 3 | 1 | 22.6 | 0 |
| P12163_1_F8,19124 | K.VLHELDSLPSK.V    | 1846.089 | 0.00424  | 2 | 1 | 46.7 | 0 |
| P12163_2_F6,18630 | K.VLHELDSLPSK.V    | 1846.089 | 0.00587  | 3 | 1 | 36.3 | 0 |
| P12163_2_F6,18650 | K.VLHELDSLPSK.V    | 1846.089 | 0.01236  | 2 | 1 | 53.1 | 0 |
| P12163_2_F2,17253 | R.FNIVSK.D         | 1315.819 | 0.00438  | 2 | 1 | 25.7 | 0 |
| P12163_1_F3,18574 | R.FTMPENSIPK.E     | 1771.987 | -0.00154 | 2 | 1 | 33.3 | 0 |
| P12163_2_F1,18289 | R.FTMPENSIPK.E     | 1771.987 | 0.00362  | 2 | 1 | 33.8 | 0 |
| P12163_1_F8,20716 | R.HDEFEVAELLR.R    | 1661.88  | 0.00223  | 3 | 1 | 56.5 | 0 |
| P12163_2_F6,20252 | R.HDEFEVAELLR.R    | 1661.88  | 0.00244  | 3 | 1 | 47.5 | 0 |
| P12163_2_F6,20253 | R.HDEFEVAELLR.R    | 1661.88  | 0.00658  | 2 | 1 | 25.3 | 0 |
| P12163_1_F8,15155 | R.NVMENCHENAMVLK.  | 2297.166 | 0.01757  | 3 | 1 | 23.1 | 0 |
| P12163_2_F6,14645 | R.NVMENCHENAMVLK.  | 2297.166 | 0.01505  | 3 | 1 | 30.2 | 0 |
| P12163_1_F4,21050 | R.YFEVELK.E        | 1535.893 | 0.00757  | 2 | 1 | 23.9 | 0 |
| P12163_1_F4,21064 | R.YFEVELK.E        | 1535.893 | 0.00576  | 3 | 1 | 23.9 | 0 |
| P12163_1_F5,19895 | R.YFEVELK.E        | 1535.893 | 0.00777  | 2 | 1 | 24.6 | 0 |
| P12163_1_F7,18732 | R.YFEVELK.E        | 1535.893 | 0.00199  | 2 | 1 | 24.5 | 0 |
| P12163_1_F9,19552 | R.YFEVELK.E        | 1535.893 | 0.00713  | 2 | 1 | 33   | 0 |
| P12163_2_F1,15920 | K.EAFLEK.F         | 1344.798 | 0.00631  | 2 | 1 | 26.1 | 0 |
| P12163_1_F6,14770 | K.GDYTSIIHGK.Y     | 1698.963 | 0.00637  | 3 | 1 | 32.2 | 0 |
| P12163_1_F6,14778 | K.GDYTSIIHGK.Y     | 1698.963 | 0.00436  | 2 | 1 | 28.6 | 0 |
| P12163_2_F7,11824 | K.LM*HGELVEK.E     | 1679.961 | 0.00495  | 3 | 1 | 39.8 | 0 |
| P12163_2_F7,13727 | K.LM*HGELVEK.E     | 1679.961 | -0.00111 | 3 | 1 | 35.5 | 0 |
| P12163_1_F9,15134 | K.LMHGELVEK.E      | 1663.966 | 0.00346  | 3 | 1 | 23.2 | 0 |
| P12163_1_F9,15188 | K.LMHGELVEK.E      | 1663.966 | 0.00225  | 2 | 1 | 42.6 | 0 |
| P12163_1_F2,18930 | K.NVQIVDTTCPWVSK.V | 2255.231 | 0.00546  | 3 | 1 | 49   | 0 |
| P12163_1_F5,13920 | K.QFDVVNK.G        | 1457.857 | 0.00728  | 2 | 1 | 26.5 | 0 |
| P12163_1_F4,17791 | K.VGIANQTTM*IK.G   | 1800.051 | -0.00362 | 2 | 1 | 25.6 | 0 |
| P12163_1_F4,17758 | K.VGIANQTTMIK.G    | 1784.056 | 0.00367  | 3 | 1 | 41   | 0 |
| P12163_1_F4,17784 | K.VGIANQTTMIK.G    | 1784.056 | 0.0041   | 2 | 1 | 54.5 | 0 |
| P12163_2_F1,16981 | K.VGIANQTTMIK.G    | 1784.056 | 0.00676  | 3 | 1 | 45.1 | 0 |
| P12163_2_F1,17021 | K.VGIANQTTMIK.G    | 1784.056 | 0.0061   | 2 | 1 | 49.3 | 0 |
| P12163_2_F2,17486 | K.VWTTVEK.H        | 1470.878 | 0.00496  | 2 | 1 | 24.9 | 0 |
| P12163_1_F7,13849 | K.YSHEETVATASFAGK. | 2206.16  | 0.00489  | 4 | 1 | 27.5 | 0 |
| P12163_1_F7,13855 | K.YSHEETVATASFAGK. | 2206.16  | 0.00324  | 3 | 1 | 37.7 | 0 |
| P12163_2_F4,13537 | K.YSHEETVATASFAGK. | 2206.16  | 0.00105  | 3 | 1 | 37.1 | 0 |
| P12163_2_F6,13943 | K.YSHEETVATASFAGK. | 2206.16  | -0.00102 | 3 | 1 | 23.7 | 0 |
| P12163_1_F2,15001 | R.AVQIAYEAR.K      | 1324.753 | 0.00773  | 2 | 1 | 42.3 | 0 |
| P12163_1_F9,15081 | R.AVQIAYEAR.K      | 1324.753 | -0.00019 | 2 | 1 | 37.7 | 0 |
| P12163_2_F1,14617 | R.AVQIAYEAR.K      | 1324.753 | 0.00299  | 2 | 1 | 38.1 | 0 |
| P12163_1_F4,21065 | R.GIPSYWIDSEK.R    | 1903.042 | 0.00591  | 2 | 1 | 26   | 0 |
| P12163_2_F1,20569 | R.GIPSYWIDSEK.R    | 1903.042 | 0.00653  | 2 | 1 | 25.6 | 0 |
| P12163_2_F1,20575 | R.GIPSYWIDSEK.R    | 1903.042 | 0.00871  | 3 | 1 | 25.3 | 0 |
| P12163_1_S1,21648 | K.LDLLLLSDAAAR.F   | 1461.858 | -0.00046 | 3 | 1 | 26.4 | 0 |
| P12163_1_S1,24037 | K.LDLLLLSDAAAR.F   | 1461.858 | 0.00323  | 3 | 1 | 32.2 | 0 |
| P12163_1_S1,24082 | K.LDLLLLSDAAAR.F   | 1461.858 | 0.00342  | 2 | 1 | 50.4 | 0 |
| P12163_1_S1,24241 | K.LDLLLLSDAAAR.F   | 1461.858 | 0.00302  | 3 | 1 | 56.9 | 0 |
| P12163_1_S1,24279 | K.LDLLLLSDAAAR.F   | 1461.858 | 0.00354  | 2 | 1 | 50.5 | 0 |

|                    |                    |          |          |   |   |      |   |
|--------------------|--------------------|----------|----------|---|---|------|---|
| P12163_1_S1,24441  | K.LDLLLLSDAAAR.F   | 1461.858 | 0.00281  | 3 | 1 | 28   | 0 |
| P12163_1_S1,24476  | K.LDLLLLSDAAAR.F   | 1461.858 | 0.00478  | 2 | 1 | 25.4 | 0 |
| P12163_1_F4,10642  | K.SFIGTTR.R        | 1085.626 | 0.00378  | 3 | 1 | 27.2 | 0 |
| P12163_1_F3,27751  | K.SFPADLLLLLEQLK.V | 2095.262 | 0.00503  | 3 | 1 | 37.2 | 0 |
| P12163_1_F2,13447  | K.YTPDVLR.E        | 1167.667 | 0.00425  | 3 | 1 | 24.5 | 0 |
| P12163_1_F4,25136  | R.CGWLDVVALK.Y     | 1769.024 | 0.00568  | 3 | 1 | 25.4 | 0 |
| P12163_2_F1,24455  | R.CGWLDVVALK.Y     | 1769.024 | 0.00487  | 2 | 1 | 43.6 | 0 |
| P12163_1_F8,10779  | R.CQGGANAGHTIYNAE  | 2356.192 | 0.00415  | 3 | 1 | 25   | 0 |
| P12163_1_F4,12766  | R.GIGPAYSSK.V      | 1487.868 | 0.00618  | 2 | 1 | 26.5 | 0 |
| P12163_1_F5,11274  | R.GIGPAYSSK.V      | 1487.868 | 0.00765  | 3 | 1 | 26.1 | 0 |
| P12163_1_S10,12310 | R.GIGPAYSSK.V      | 1487.868 | 0.00738  | 3 | 1 | 26.7 | 0 |
| P12163_2_F8_12070  | R.GIGPAYSSK.V      | 1487.868 | -0.00018 | 3 | 1 | 28.8 | 0 |
| P12163_2_F8_12070  | R.GIGPAYSSK.V      | 1487.868 | 0.0061   | 2 | 1 | 34.7 | 0 |
| P12163_1_F9,12352  | R.HMDTFPQK.L       | 1611.877 | 0.00748  | 2 | 1 | 24.3 | 0 |
| P12163_2_F9,11621  | R.HMDTFPQK.L       | 1611.877 | 0.00741  | 3 | 1 | 28.7 | 0 |
| P12163_1_F5,12150  | R.NYSDLPK.G        | 1444.826 | 0.00872  | 2 | 1 | 26.4 | 0 |
| P12163_2_F2,12894  | R.NYSDLPK.G        | 1444.826 | 0.00626  | 2 | 1 | 24.4 | 0 |
| P12163_2_F2,12914  | R.NYSDLPK.G        | 1444.826 | 0.0032   | 3 | 1 | 24.6 | 0 |
| P12163_1_F3,24084  | R.VVGD LIGVVK.A    | 1607.035 | 0.00533  | 3 | 1 | 43.6 | 0 |
| P12163_1_F3,24313  | R.VVGD LIGVVK.A    | 1607.035 | 0.0059   | 2 | 1 | 58.6 | 0 |
| P12163_1_F2,17428  | K.CDIVVVNTPLTEK.T  | 2096.188 | 0.00725  | 3 | 1 | 43.8 | 0 |
| P12163_1_F2,18994  | K.CDIVVVNTPLTEK.T  | 2096.188 | 0.00617  | 3 | 1 | 48.8 | 0 |
| P12163_1_F2,19030  | K.CDIVVVNTPLTEK.T  | 2096.188 | 0.00521  | 2 | 1 | 42.9 | 0 |
| P12163_1_S1,17743  | K.CDIVVVNTPLTEK.T  | 2096.188 | 0.00479  | 3 | 1 | 45.4 | 0 |
| P12163_1_F2,22755  | K.FEEDLDTM*LPK.C   | 1962.035 | 0.00757  | 3 | 1 | 24   | 0 |
| P12163_1_F3,20098  | K.GEDFPVQNYIVK.A   | 2017.121 | 0.0032   | 2 | 1 | 43.8 | 0 |
| P12163_1_F3,20185  | K.GEDFPVQNYIVK.A   | 2017.121 | 0.00536  | 3 | 1 | 30.5 | 0 |
| P12163_1_F6,11486  | K.GHQYIVTDDK.E     | 1783.98  | 0.00672  | 3 | 1 | 25.6 | 0 |
| P12163_2_F7,10578  | K.GHQYIVTDDK.E     | 1783.98  | 0.0075   | 3 | 1 | 35   | 0 |
| P12163_1_S1,20495  | K.GNEYASMNPNFLGCV  | 2706.238 | 0.00448  | 3 | 1 | 36.7 | 0 |
| P12163_1_F2,14231  | K.GVLIVNNAR.G      | 1259.774 | 0.0037   | 2 | 1 | 27.1 | 0 |
| P12163_1_F4,22413  | K.IVGVFYK.G        | 1433.898 | 0.00652  | 3 | 1 | 22.9 | 0 |
| P12163_1_F4,22441  | K.IVGVFYK.G        | 1433.898 | 0.00682  | 2 | 1 | 30.1 | 0 |
| P12163_1_F5,21177  | K.IVGVFYK.G        | 1433.898 | 0.00486  | 2 | 1 | 32.7 | 0 |
| P12163_1_F9,20638  | K.IVGVFYK.G        | 1433.898 | 0.00826  | 3 | 1 | 26.6 | 0 |
| P12163_2_F1,21918  | K.IVGVFYK.G        | 1433.898 | 0.00498  | 2 | 1 | 29.9 | 0 |
| P12163_1_F3,6256   | K.TVGTVGCGR.I      | 1210.652 | 0.00851  | 3 | 1 | 30.4 | 0 |
| P12163_2_F1,5964   | K.TVGTVGCGR.I      | 1210.652 | 0.00218  | 2 | 1 | 24.5 | 0 |
| P12163_2_F1,5969   | K.TVGTVGCGR.I      | 1210.652 | 0.00372  | 3 | 1 | 25.3 | 0 |
| P12163_1_F5,12941  | R.AYDLEGK.T        | 1403.799 | 0.00906  | 3 | 1 | 25.6 | 0 |
| P12163_2_F1,13318  | R.AYDLEGK.T        | 1403.799 | 0.00252  | 3 | 1 | 22.1 | 0 |
| P12163_1_F4,18704  | R.LKPFNCNLLYHDR.V  | 2298.264 | 0.00754  | 4 | 1 | 40.3 | 0 |
| P12163_2_S3,15410  | R.LKPFNCNLLYHDR.V  | 2298.264 | 0.00366  | 4 | 1 | 31.5 | 0 |
| P12163_1_F8,17103  | K.LIDLHEVR.D       | 1298.773 | 0.00236  | 3 | 1 | 40.6 | 0 |
| P12163_2_F6,16435  | K.LIDLHEVR.D       | 1298.773 | 0.00281  | 3 | 1 | 43.7 | 0 |
| P12163_1_F5,18685  | K.LMQQLYK.L        | 1531.913 | 0.00609  | 2 | 1 | 28.1 | 0 |
| P12163_2_F2,19325  | K.LMQQLYK.L        | 1531.913 | 0.00571  | 2 | 1 | 36.5 | 0 |
| P12163_2_F2,19364  | K.LMQQLYK.L        | 1531.913 | 0.00651  | 3 | 1 | 22.4 | 0 |
| P12163_1_F8,18202  | R.DLTHLPFAER.E     | 1502.827 | 0.00179  | 3 | 1 | 40.9 | 0 |
| P12163_2_F6,17693  | R.DLTHLPFAER.E     | 1502.827 | 0.00122  | 3 | 1 | 38.3 | 0 |
| P12163_1_F3,21843  | R.GYNIESLAVGLNK.D  | 1986.148 | 0.01525  | 3 | 1 | 24   | 0 |

|                   |                     |          |          |   |   |      |   |
|-------------------|---------------------|----------|----------|---|---|------|---|
| P12163_1_F4,22461 | R.GYNIESLAVGLNK.D   | 1986.148 | 0.00326  | 2 | 1 | 43   | 0 |
| P12163_1_F7,16787 | R.GYNIQSLAVGHAETEC  | 2306.204 | 0.0052   | 3 | 1 | 71.7 | 0 |
| P12163_1_F8,17644 | R.GYNIQSLAVGHAETEC  | 2306.204 | -0.00167 | 3 | 1 | 46.3 | 0 |
| P12163_2_F10,1592 | R.GYNIQSLAVGHAETEC  | 2306.204 | 0.00562  | 3 | 1 | 56.6 | 0 |
| P12163_2_F4,16409 | R.GYNIQSLAVGHAETEC  | 2306.204 | 0.00565  | 3 | 1 | 46.7 | 0 |
| P12163_2_S5,16462 | R.GYNIQSLAVGHAETEC  | 2306.204 | 0.00472  | 3 | 1 | 70.2 | 0 |
| P12163_1_F8,18485 | R.HTISVFGDES GMINR. | 2066.064 | 0.00774  | 2 | 1 | 37.5 | 0 |
| P12163_2_F6,18082 | R.HTISVFGDES GMINR. | 2066.064 | 0.00875  | 3 | 1 | 41.1 | 0 |
| P12163_1_S1,13856 | R.ITTVVPATDESISK.L  | 2069.195 | -0.00078 | 3 | 1 | 29.8 | 0 |
| P12163_1_S1,16530 | R.ITTVVPATDESISK.L  | 2069.195 | 0.00669  | 3 | 1 | 37.1 | 0 |
| P12163_1_S1,16602 | R.ITTVVPATDESISK.L  | 2069.195 | 0.00939  | 2 | 1 | 38.5 | 0 |
| P12163_1_S1,20336 | R.LLEPYGICEVAR.T    | 1723.935 | 0.00353  | 2 | 1 | 29.5 | 0 |
| P12163_1_S1,20374 | R.LLEPYGICEVAR.T    | 1723.935 | -0.00655 | 3 | 1 | 31.4 | 0 |
| P12163_2_F6,23067 | R.RDVLDIATIFR.A     | 1622.953 | 0.00308  | 2 | 1 | 43.8 | 0 |
| P12163_2_F9,17645 | R.RGYNIESLAVGLNK.D  | 2142.249 | 0.00604  | 3 | 1 | 30   | 0 |
| P12163_1_F4,18387 | K.ADEFVLK.K         | 1429.851 | 0.01381  | 2 | 1 | 26   | 0 |
| P12163_1_F4,18646 | K.ADEFVLK.K         | 1429.851 | 0.01001  | 2 | 1 | 29.4 | 0 |
| P12163_2_F1,17749 | K.ADEFVLK.K         | 1429.851 | 0.00512  | 3 | 1 | 24.4 | 0 |
| P12163_1_F8,22928 | K.DVLVEFYAPWCGHCK   | 2489.257 | 0.00657  | 3 | 1 | 52.7 | 0 |
| P12163_1_F4,11936 | K.EFVAASGDEK.K      | 1660.9   | 0.00433  | 2 | 1 | 35.1 | 0 |
| P12163_1_F4,13860 | K.EFVAASGDEK.K      | 1660.9   | 0.00635  | 2 | 1 | 42.6 | 0 |
| P12163_1_F4,13925 | K.EFVAASGDEK.K      | 1660.9   | 0.0082   | 3 | 1 | 45.7 | 0 |
| P12163_2_F1,12838 | K.EFVAASGDEK.K      | 1660.9   | 0.00793  | 2 | 1 | 37.9 | 0 |
| P12163_2_F1,14372 | K.SVLIGK.V          | 1224.814 | -0.00006 | 3 | 1 | 26.8 | 0 |
| P12163_1_F9,7422  | K.VDCDEHK.S         | 1510.778 | 0.00887  | 3 | 1 | 34.1 | 0 |
| P12163_1_F3,23759 | K.YGVQGYPTIQWFPK.G  | 2292.264 | 0.00502  | 3 | 1 | 38.3 | 0 |
| P12163_1_F4,20448 | K.YGVSGFPTLK.F      | 1676.983 | 0.00942  | 3 | 1 | 32.6 | 0 |
| P12163_1_F4,20491 | K.YGVSGFPTLK.F      | 1676.983 | 0.00809  | 2 | 1 | 34.2 | 0 |
| P12163_2_F1,19849 | K.YGVSGFPTLK.F      | 1676.983 | 0.00165  | 3 | 1 | 31.9 | 0 |
| P12163_2_F1,19866 | K.YGVSGFPTLK.F      | 1676.983 | 0.00595  | 2 | 1 | 30.3 | 0 |
| P12163_2_F4,17662 | K.YGVSGFPTLK.F      | 1676.983 | -0.00105 | 3 | 1 | 24.9 | 0 |
| P12163_2_F9,17642 | K.YGVSGFPTLK.F      | 1676.983 | 0.0042   | 3 | 1 | 33.3 | 0 |
| P12163_1_F8,21765 | R.GALVEFYAPWCGHCK   | 2403.22  | 0.00609  | 3 | 1 | 34.8 | 0 |
| P12163_2_F6,21375 | R.GALVEFYAPWCGHCK   | 2403.22  | 0.00378  | 3 | 1 | 38.5 | 0 |
| P12163_1_F2,12675 | R.GVEVLEGSTAR.H     | 1421.79  | 0.00126  | 3 | 1 | 27.1 | 0 |
| P12163_1_S1,12140 | R.GVEVLEGSTAR.H     | 1421.79  | 0.00246  | 3 | 1 | 31   | 0 |
| P12163_1_S1,14244 | R.GVEVLEGSTAR.H     | 1421.79  | 0.00112  | 2 | 1 | 33.9 | 0 |
| P12163_1_F3,18089 | R.STEALAEYVNNEGGT   | 2504.309 | 0.00949  | 3 | 1 | 66.8 | 0 |
| P12163_2_F10,1491 | K.AASELSSHDPVVLAK   | 2229.27  | 0.00748  | 3 | 1 | 53.9 | 0 |
| P12163_2_F10,1495 | K.AASELSSHDPVVLAK   | 2229.27  | 0.00169  | 4 | 1 | 23.8 | 0 |
| P12163_2_F4,15782 | K.AASELSSHDPVVLAK   | 2229.27  | 0.00556  | 3 | 1 | 33.9 | 0 |
| P12163_1_F2,14990 | K.ELASQYEIR.G       | 1412.769 | 0.00445  | 2 | 1 | 28.1 | 0 |
| P12163_1_F5,15530 | K.FFNSPNAK.A        | 1532.868 | 0.01008  | 3 | 1 | 26.4 | 0 |
| P12163_2_F2,16198 | K.FFNSPNAK.A        | 1532.868 | 0.00634  | 2 | 1 | 31.1 | 0 |
| P12163_1_F4,11295 | K.QSGPASAEIK.S      | 1595.921 | 0.006    | 2 | 1 | 26.5 | 0 |
| P12163_1_F5,9811  | K.QSGPASAEIK.S      | 1595.921 | 0.00834  | 2 | 1 | 32.4 | 0 |
| P12163_2_F1,10388 | K.QSGPASAEIK.S      | 1595.921 | 0.0053   | 2 | 1 | 28.8 | 0 |
| P12163_2_F1,10429 | K.QSGPASAEIK.S      | 1595.921 | 0.0026   | 3 | 1 | 31   | 0 |
| P12163_1_F3,15862 | K.SAEDASSFIGEK.K    | 1848.98  | 0.0118   | 2 | 1 | 43.8 | 0 |
| P12163_1_F3,15866 | K.SAEDASSFIGEK.K    | 1848.98  | 0.01031  | 3 | 1 | 26.7 | 0 |
| P12163_1_F3,15884 | K.SAEDASSFIGEK.K    | 1848.98  | 0.00905  | 3 | 1 | 34.9 | 0 |

|                   |                       |          |          |   |   |      |   |
|-------------------|-----------------------|----------|----------|---|---|------|---|
| P12163_1_F3,13015 | K.SEPIPEENNEPVK.V     | 2090.123 | 0.00517  | 2 | 1 | 39.2 | 0 |
| P12163_2_F1,8876  | K.VDANEEANK.E         | 1597.864 | 0.00893  | 2 | 1 | 31.8 | 0 |
| P12163_1_F2,19113 | R.EADGIVEYLK.K        | 1744.994 | 0.00909  | 3 | 1 | 35.5 | 0 |
| P12163_1_F4,21104 | R.EADGIVEYLK.K        | 1744.994 | 0.01431  | 2 | 1 | 39.3 | 0 |
| P12163_1_F4,21124 | R.EADGIVEYLK.K        | 1744.994 | 0.00024  | 3 | 1 | 24.4 | 0 |
| P12163_1_F9,19466 | R.EADGIVEYLK.K        | 1744.994 | 0.0072   | 3 | 1 | 24.1 | 0 |
| P12163_1_S1,18330 | R.EADGIVEYLK.K        | 1744.994 | 0.01545  | 3 | 1 | 24.5 | 0 |
| P12163_1_F2,11009 | R.GESSVTGPVVR.L       | 1391.78  | -0.00052 | 2 | 1 | 29.4 | 0 |
| P12163_2_F6,10958 | R.SDYEFGHTQNAK.L      | 2005.024 | 0.00586  | 3 | 1 | 28.2 | 0 |
| P12163_1_F2,24418 | K.EYLPIVGLAEFNK.L     | 2101.215 | 0.00665  | 3 | 1 | 29.5 | 0 |
| P12163_1_F3,25798 | K.EYLPIVGLAEFNK.L     | 2101.215 | 0.00962  | 3 | 1 | 48.7 | 0 |
| P12163_1_F9,17259 | K.INLGVGAYR.D ! K.LNI | 1266.747 | -0.00395 | 2 | 1 | 33.1 | 0 |
| P12163_1_S1,16125 | K.LILGADSPAIR.E       | 1429.868 | 0.00331  | 3 | 1 | 46.2 | 0 |
| P12163_1_S1,18249 | K.LILGADSPAIR.E       | 1429.868 | 0.00379  | 3 | 1 | 70.3 | 0 |
| P12163_1_F3,5194  | K.TADVAGR.V           | 993.563  | 0.00283  | 2 | 1 | 24.8 | 0 |
| P12163_1_F4,25691 | K.VFTLAGLSVK.T ! K.VI | 1643.035 | 0.00832  | 2 | 1 | 50.4 | 0 |
| P12163_2_F1,24928 | K.VFTLAGLSVK.T ! K.VI | 1643.035 | 0.00451  | 3 | 1 | 31   | 0 |
| P12163_2_F1,24938 | K.VFTLAGLSVK.T ! K.VI | 1643.035 | 0.00574  | 2 | 1 | 55.1 | 0 |
| P12163_1_S1,19196 | R.APEDPILGVTVAYNK.I   | 2195.253 | 0.00507  | 3 | 1 | 59.4 | 0 |
| P12163_1_F4,17780 | R.ISMAGLSSK.T         | 1501.887 | 0.01054  | 3 | 1 | 26.6 | 0 |
| P12163_2_F1,16874 | R.ISMAGLSSK.T         | 1501.887 | 0.00209  | 2 | 1 | 34.2 | 0 |
| P12163_2_F1,16878 | R.ISMAGLSSK.T         | 1501.887 | 0.00352  | 3 | 1 | 29.3 | 0 |
| P12163_1_F3,18056 | R.VGAEFLAR.H          | 1166.683 | 0.0034   | 2 | 1 | 25.3 | 0 |
| P12163_1_F3,18321 | R.VGAEFLAR.H          | 1166.683 | 0.00435  | 2 | 1 | 24.2 | 0 |
| P12163_2_F1,17585 | R.VGAEFLAR.H          | 1166.683 | 0.00422  | 2 | 1 | 24   | 0 |
| P12163_1_F4,20251 | R.VGALSIVCK.T         | 1554.95  | 0.01239  | 2 | 1 | 27   | 0 |
| P12163_1_F4,20280 | R.VGALSIVCK.T         | 1554.95  | 0.00764  | 3 | 1 | 34.6 | 0 |
| P12163_2_F1,19755 | R.VGALSIVCK.T         | 1554.95  | 0.005    | 3 | 1 | 35.1 | 0 |
| P12163_1_S1,11924 | R.VTTVQCLSGTGSLR.V    | 1782.969 | 0.0037   | 3 | 1 | 36.7 | 0 |
| P12163_1_S1,14185 | R.VTTVQCLSGTGSLR.V    | 1782.969 | 0.00586  | 3 | 1 | 34.7 | 0 |
| P12163_1_S1,16122 | R.VTTVQCLSGTGSLR.V    | 1782.969 | 0.00619  | 2 | 1 | 26.2 | 0 |
| P12163_2_S5,15804 | K.ELFGSAEEEEEEERVR.   | 2242.078 | -0.00933 | 3 | 1 | 32.4 | 0 |
| P12163_1_F5,24047 | K.FLDVFAK.E           | 1447.877 | 0.00717  | 2 | 1 | 35.7 | 0 |
| P12163_1_F7,22678 | K.FLDVFAK.E           | 1447.877 | 0.00241  | 2 | 1 | 24.3 | 0 |
| P12163_2_F1,25092 | K.FLDVFAK.E           | 1447.877 | 0.00437  | 3 | 1 | 22.3 | 0 |
| P12163_2_F1,25122 | K.FLDVFAK.E           | 1447.877 | 0.00683  | 2 | 1 | 26.7 | 0 |
| P12163_1_F3,25882 | K.GYETLLDLVDNTK.G     | 2089.164 | 0.00252  | 3 | 1 | 35.4 | 0 |
| P12163_1_F3,27866 | K.IAVIGFGNFGQFLAK.A   | 2190.29  | 0.00624  | 3 | 1 | 35.4 | 0 |
| P12163_1_F4,24271 | K.SSWENLPFMYDK.V      | 2125.088 | 0.00325  | 2 | 1 | 35.6 | 0 |
| P12163_1_F8,13589 | K.YAAGSQFVTHTM*GR     | 1845.922 | 0.00504  | 3 | 1 | 32.8 | 0 |
| P12163_1_F8,16250 | K.YAAGSQFVTHTMGR.V    | 1829.927 | 0.00231  | 3 | 1 | 40.4 | 0 |
| P12163_1_F4,15309 | R.FGVESSPINTK.G       | 1787.016 | 0.00676  | 3 | 1 | 30.2 | 0 |
| P12163_1_F4,17113 | R.FGVESSPINTK.G       | 1787.016 | 0.00637  | 2 | 1 | 44.9 | 0 |
| P12163_1_F4,17114 | R.FGVESSPINTK.G       | 1787.016 | 0.00661  | 3 | 1 | 26.9 | 0 |
| P12163_2_F1,16281 | R.FGVESSPINTK.G       | 1787.016 | 0.00393  | 2 | 1 | 49.8 | 0 |
| P12163_2_F1,16375 | R.FGVESSPINTK.G       | 1787.016 | 0.00709  | 3 | 1 | 24.6 | 0 |
| P12163_1_F4,25384 | R.LEM*AFESIK.Q        | 1691.95  | 0.00442  | 3 | 1 | 38.1 | 0 |
| P12163_2_F1,24634 | R.LEM*AFESIK.Q        | 1691.95  | 0.00508  | 3 | 1 | 25.2 | 0 |
| P12163_1_F4,25431 | R.LEMAFESIK.Q         | 1675.955 | 0.00853  | 3 | 1 | 22.6 | 0 |
| P12163_2_F1,24572 | R.LEMAFESIK.Q         | 1675.955 | 0.00202  | 3 | 1 | 29.4 | 0 |
| P12163_2_F6,16143 | R.MVEM*SCFDHDK.Y ! I  | 2022.954 | 0.00477  | 3 | 1 | 22.5 | 0 |

|                    |                     |          |          |   |   |      |   |
|--------------------|---------------------|----------|----------|---|---|------|---|
| P12163_1_F3,25545  | R.STLFVDVLSVK.E     | 1816.104 | 0.00626  | 2 | 1 | 44.2 | 0 |
| P12163_1_F3,25632  | R.STLFVDVLSVK.E     | 1816.104 | 0.00242  | 3 | 1 | 35.5 | 0 |
| P12163_1_F2,14410  | K.GELDELER.E        | 1264.669 | 0.00315  | 2 | 1 | 42.7 | 0 |
| P12163_2_F6,15742  | K.HIVLENVQNASIK.V   | 2073.228 | 0.0028   | 3 | 1 | 37.3 | 0 |
| P12163_2_F7,14662  | K.HIVLENVQNASIK.V   | 2073.228 | -0.00965 | 3 | 1 | 32.5 | 0 |
| P12163_1_F3,11550  | K.NDLTGLAR.G        | 1163.669 | 0.00484  | 3 | 1 | 24.5 | 0 |
| P12163_1_F4,18168  | K.QFVEEQFAEK.V      | 1863.011 | 0.00234  | 2 | 1 | 35.6 | 0 |
| P12163_1_F4,18261  | K.QFVEEQFAEK.V      | 1863.011 | 0.00947  | 3 | 1 | 48   | 0 |
| P12163_2_F1,17411  | K.QFVEEQFAEK.V      | 1863.011 | -0.00014 | 2 | 1 | 45.3 | 0 |
| P12163_2_F1,17456  | K.QFVEEQFAEK.V      | 1863.011 | 0.00665  | 3 | 1 | 28.5 | 0 |
| P12163_1_F5,12668  | K.YVAGENIK.H        | 1501.883 | 0.00982  | 2 | 1 | 27.8 | 0 |
| P12163_2_F2,13501  | K.YVAGENIK.H        | 1501.883 | 0.0119   | 2 | 1 | 28   | 0 |
| P12163_2_F8_1207C  | K.YVAGENIK.H        | 1501.883 | 0.0052   | 2 | 1 | 26.3 | 0 |
| P12163_1_F4,5945   | R.GGQQVQOCR.A       | 1364.701 | 0.00478  | 2 | 1 | 32   | 0 |
| P12163_2_F1,5227   | R.GGQQVQOCR.A       | 1364.701 | 0.00088  | 2 | 1 | 33.8 | 0 |
| P12163_1_F4,20647  | R.LENTITYIK.G       | 1703.02  | 0.00805  | 2 | 1 | 43   | 0 |
| P12163_1_F4,20671  | R.LENTITYIK.G       | 1703.02  | 0.00812  | 3 | 1 | 38.2 | 0 |
| P12163_2_F1,20039  | R.LENTITYIK.G       | 1703.02  | 0.00121  | 2 | 1 | 45   | 0 |
| P12163_2_F1,20043  | R.LENTITYIK.G       | 1703.02  | 0.00518  | 3 | 1 | 37.6 | 0 |
| P12163_1_S1,23545  | R.LTVVPTVTMLGVMK.S  | 2097.264 | 0.02026  | 3 | 1 | 41.2 | 0 |
| P12163_1_F5,10914  | R.QENIAGVK.I        | 1466.879 | 0.00888  | 2 | 1 | 31.3 | 0 |
| P12163_2_F2,11732  | R.QENIAGVK.I        | 1466.879 | 0.00572  | 2 | 1 | 33.9 | 0 |
| P12163_2_F7,15792  | R.VNALENVVKPR.L     | 1847.132 | 0.0011   | 3 | 1 | 43.1 | 0 |
| P12163_1_S1,23771  | K.GYEVAIVDSLIR.R    | 1638.937 | -0.00121 | 3 | 1 | 54.9 | 0 |
| P12163_1_S1,23990  | K.GYEVAIVDSLIR.R    | 1638.937 | 0.00467  | 3 | 1 | 21.9 | 0 |
| P12163_1_F8,16380  | K.SFEPDAVVHFGEQR.S  | 1921.971 | -0.00121 | 4 | 1 | 48.2 | 0 |
| P12163_1_F8,18273  | K.SFEPDAVVHFGEQR.S  | 1921.971 | 0.00079  | 3 | 1 | 43   | 0 |
| P12163_2_F6,17827  | K.SFEPDAVVHFGEQR.S  | 1921.971 | 0.00283  | 3 | 1 | 29.8 | 0 |
| P12163_2_S5,17056  | K.SFEPDAVVHFGEQR.S  | 1921.971 | 0.00127  | 3 | 1 | 39.3 | 0 |
| P12163_2_S5,17128  | K.SFEPDAVVHFGEQR.S  | 1921.971 | 0.00782  | 2 | 1 | 33.7 | 0 |
| P12163_1_F3,10885  | K.TISVPNPR.V        | 1187.705 | 0.00382  | 3 | 1 | 22.4 | 0 |
| P12163_1_S1,13372  | R.ATDLNQGVVYGVR.T   | 1695.933 | 0.00131  | 3 | 1 | 24   | 0 |
| P12163_1_S1,15375  | R.ATDLNQGVVYGVR.T   | 1695.933 | 0.00356  | 3 | 1 | 48.6 | 0 |
| P12163_2_F6,15709  | R.ATDLNQGVVYGVR.T   | 1695.933 | 0.00367  | 2 | 1 | 39.3 | 0 |
| P12163_1_F8,19381  | R.FCVQAAVGHPLTVYG   | 2355.31  | 0.0069   | 3 | 1 | 46.6 | 0 |
| P12163_1_F8,19402  | R.FCVQAAVGHPLTVYG   | 2355.31  | 0.00012  | 4 | 1 | 52.8 | 0 |
| P12163_1_F4,15959  | R.GYLDIR.D          | 1040.604 | 0.00277  | 2 | 1 | 27.1 | 0 |
| P12163_2_F8_1207C  | R.LFDHQLGLDSLTPIASI | 2552.377 | -0.0004  | 4 | 1 | 36   | 0 |
| P12163_2_S5,20830  | R.LFDHQLGLDSLTPIASI | 2552.377 | 0.00284  | 4 | 1 | 29.1 | 0 |
| P12163_2_S3,7331   | R.SGLHQSSNDPSK.A    | 1864.997 | 0.0116   | 3 | 1 | 36.6 | 0 |
| P12163_1_F8,11615  | R.TDETAMHEELCNR.L   | 1909.869 | 0.00065  | 2 | 1 | 23.9 | 0 |
| P12163_2_F6,11354  | R.TDETAMHEELCNR.L   | 1909.869 | 0.00449  | 3 | 1 | 33.6 | 0 |
| P12163_1_F6,12936  | R.VEAEHYNAK.H       | 1961.022 | 0.01095  | 3 | 1 | 23.9 | 0 |
| P12163_2_F6,12390  | R.VEAEHYNAK.H       | 1961.022 | 0.00321  | 3 | 1 | 28   | 0 |
| P12163_1_S1,17433  | K.ADIEDYLASR.G      | 1456.758 | 0.00211  | 3 | 1 | 29.5 | 0 |
| P12163_1_F6,19884  | K.DVAAPALDYVDIPHSC  | 2284.224 | -0.00063 | 2 | 1 | 31.7 | 0 |
| P12163_1_F6,19901  | K.DVAAPALDYVDIPHSC  | 2284.224 | 0.00225  | 3 | 1 | 56.9 | 0 |
| P12163_1_S10,1855' | K.DVAAPALDYVDIPHSC  | 2284.224 | -0.00042 | 3 | 1 | 44   | 0 |
| P12163_2_F4,18663  | K.DVAAPALDYVDIPHSC  | 2284.224 | 0.0006   | 3 | 1 | 58.7 | 0 |
| P12163_2_F4,18706  | K.DVAAPALDYVDIPHSC  | 2284.224 | 0.00175  | 2 | 1 | 32.4 | 0 |
| P12163_2_F8_1207C  | K.DVAAPALDYVDIPHSC  | 2284.224 | 0.00357  | 3 | 1 | 60.6 | 0 |

|                   |                         |          |          |   |   |      |   |
|-------------------|-------------------------|----------|----------|---|---|------|---|
| P12163_1_F2,12371 | K.DYSPSVSDAGAAPAK.      | 2044.081 | 0.00789  | 3 | 1 | 51   | 0 |
| P12163_1_S1,11900 | K.DYSPSVSDAGAAPAK.      | 2044.081 | 0.00522  | 3 | 1 | 26.1 | 0 |
| P12163_1_F3,10899 | K.EPSPPPPK.Q            | 1553.915 | 0.00669  | 2 | 1 | 36.9 | 0 |
| P12163_1_F2,18200 | K.GLSTIAEEVR.Q          | 1378.784 | 0.00434  | 2 | 1 | 33.9 | 0 |
| P12163_2_F1,18485 | K.GLSTIAEEVR.Q          | 1378.784 | 0.00146  | 2 | 1 | 35.3 | 0 |
| P12163_2_F1,17128 | R.CNSSWADEYIR.Q         | 1704.795 | 0.00793  | 2 | 1 | 46.4 | 0 |
| P12163_1_F4,21430 | R.ISVNDLVIK.A ! R.ISVN  | 1609.014 | 0.00853  | 2 | 1 | 26.6 | 0 |
| P12163_1_F3,14816 | R.LFASPVAR.N            | 1164.704 | 0.00607  | 3 | 1 | 24.7 | 0 |
| P12163_1_F4,14289 | R.NQLNSIQEASAGK.R       | 1968.097 | 0.0039   | 2 | 1 | 62.3 | 0 |
| P12163_1_F4,14309 | R.NQLNSIQEASAGK.R       | 1968.097 | 0.01014  | 3 | 1 | 26.3 | 0 |
| P12163_2_F1,13348 | R.NQLNSIQEASAGK.R       | 1968.097 | 0.00616  | 2 | 1 | 55.9 | 0 |
| P12163_1_F3,23830 | R.VIDGAIGAEWLK.A        | 1880.11  | 0.00606  | 3 | 1 | 42   | 0 |
| P12163_1_F3,23859 | R.VIDGAIGAEWLK.A        | 1880.11  | -0.00546 | 2 | 1 | 31.7 | 0 |
| P12163_1_F2,9618  | K.ETMSGDEFR.A           | 1375.647 | 0.00732  | 3 | 1 | 25.2 | 0 |
| P12163_1_F2,12334 | K.ETMSGDEFR.A           | 1375.647 | 0.00409  | 2 | 1 | 26.4 | 0 |
| P12163_1_F3,16533 | K.GVLLVGPPGTGK.T ! R    | 1703.068 | 0.00632  | 3 | 1 | 32.4 | 0 |
| P12163_1_F3,16556 | K.GVLLVGPPGTGK.T ! R    | 1703.068 | 0.008    | 2 | 1 | 24.2 | 0 |
| P12163_1_F3,18588 | K.GVLLVGPPGTGK.T ! R    | 1703.068 | 0.00462  | 2 | 1 | 41.7 | 0 |
| P12163_1_F3,18600 | K.GVLLVGPPGTGK.T ! R    | 1703.068 | 0.00857  | 3 | 1 | 35.8 | 0 |
| P12163_1_F4,27254 | K.IVEVLLEK.E            | 1550.998 | 0.00806  | 2 | 1 | 44   | 0 |
| P12163_1_F4,27457 | K.IVEVLLEK.E            | 1550.998 | 0.00656  | 2 | 1 | 42.2 | 0 |
| P12163_1_F4,27551 | K.IVEVLLEK.E            | 1550.998 | 0.00676  | 3 | 1 | 29.1 | 0 |
| P12163_1_F4,6056  | K.VHGSNK.K              | 1249.747 | 0.00798  | 3 | 1 | 24.7 | 0 |
| P12163_1_F8,20986 | R.ADILDSALLRPGR.F       | 1700.996 | 0.00207  | 3 | 1 | 23   | 0 |
| P12163_2_S5,19209 | R.ADILDSALLRPGR.F       | 1700.996 | 0.00243  | 3 | 1 | 31.5 | 0 |
| P12163_2_F7,19347 | R.FLEYLDKDR.V           | 1807.021 | 0.00476  | 2 | 1 | 33.6 | 0 |
| P12163_1_F3,6131  | R.GTGIGGGNDER.E         | 1336.676 | 0.00363  | 3 | 1 | 52.6 | 0 |
| P12163_2_F1,7032  | R.GTGIGGGNDER.E         | 1336.676 | 0.00644  | 2 | 1 | 40.9 | 0 |
| P12163_1_S1,16149 | R.QVTVDVDIR.G           | 1445.827 | -0.00193 | 3 | 1 | 71.4 | 0 |
| P12163_1_S1,16189 | R.QVTVDVDIR.G           | 1445.827 | 0.00057  | 2 | 1 | 30.9 | 0 |
| P12163_1_F3,20384 | R.SSGM*GGPGGPGFPL       | 2517.302 | 0.0109   | 3 | 1 | 38.2 | 0 |
| P12163_1_F3,23023 | R.VQLPGLSQELLQK.F       | 2061.253 | 0.00609  | 3 | 1 | 54.7 | 0 |
| P12163_1_F3,23031 | R.VQLPGLSQELLQK.F       | 2061.253 | 0.00277  | 2 | 1 | 24.8 | 0 |
| P12163_2_F1,5976  | K.ECVGNDR.V             | 1153.557 | 0.00195  | 2 | 1 | 27.4 | 0 |
| P12163_1_F5,8914  | K.NPSLNTK.L             | 1381.826 | 0.00803  | 2 | 1 | 25.7 | 0 |
| P12163_2_F2,9836  | K.NPSLNTK.L             | 1381.826 | 0.00423  | 3 | 1 | 25.8 | 0 |
| P12163_1_F2,11534 | K.TPYLPDGR.F            | 1222.673 | 0.00143  | 3 | 1 | 47.4 | 0 |
| P12163_1_S1,11398 | K.TPYLPDGR.F            | 1222.673 | 0.00359  | 3 | 1 | 31.4 | 0 |
| P12163_1_F3,7190  | K.VIGNTGSNSTR.E         | 1409.765 | 0.00143  | 3 | 1 | 38.4 | 0 |
| P12163_1_F3,7797  | K.VIGNTGSNSTR.E         | 1409.765 | -0.00139 | 3 | 1 | 23.4 | 0 |
| P12163_1_S1,22915 | R.AEFVNLVNQIGR.E        | 1663.943 | 0.00193  | 3 | 1 | 61.9 | 0 |
| P12163_1_S1,22982 | R.AEFVNLVNQIGR.E        | 1663.943 | 0.00272  | 2 | 1 | 40.9 | 0 |
| P12163_2_F1,17387 | R.ELMFGGK.N             | 1389.802 | 0.00246  | 3 | 1 | 22.2 | 0 |
| P12163_2_F2,12857 | R.ENFVGEK.D             | 1430.81  | 0.00581  | 2 | 1 | 29   | 0 |
| P12163_2_F2,12880 | R.ENFVGEK.D             | 1430.81  | 0.01037  | 3 | 1 | 24.5 | 0 |
| P12163_1_F4,19511 | R.LITAIK.T ! K.LITAIK.E | 1266.86  | 0.01187  | 3 | 1 | 24.4 | 0 |
| P12163_2_F1,18791 | R.LITAIK.T ! K.LITAIK.E | 1266.86  | 0.00587  | 3 | 1 | 33   | 0 |
| P12163_1_F3,20873 | R.LPYVPLPQEK.R          | 1792.083 | 0.00391  | 2 | 1 | 29.5 | 0 |
| P12163_1_F3,20891 | R.LPYVPLPQEK.R          | 1792.083 | 0.00538  | 3 | 1 | 24.5 | 0 |
| P12163_2_F4,19043 | R.LPYVPLPQEK.R          | 1792.083 | 0.00433  | 3 | 1 | 22.1 | 0 |
| P12163_1_F8,14482 | R.VIHTM*AQSPNLAGVK      | 2190.252 | 0.00483  | 3 | 1 | 39.9 | 0 |

|                   |                       |          |          |   |   |      |   |
|-------------------|-----------------------|----------|----------|---|---|------|---|
| P12163_2_F6,14017 | R.VIHTM*AQSPNLAGVK    | 2190.252 | 0.00282  | 3 | 1 | 25.6 | 0 |
| P12163_2_F6,16272 | R.VIHTM*AQSPNLAGVK    | 2190.252 | -0.00102 | 3 | 1 | 45.5 | 0 |
| P12163_1_F7,15463 | K.EPSEVHLEQIVR.L      | 1739.959 | -0.00078 | 3 | 1 | 50.4 | 0 |
| P12163_1_F8,16162 | K.EPSEVHLEQIVR.L      | 1739.959 | 0.00225  | 3 | 1 | 42.9 | 0 |
| P12163_2_F6,15673 | K.EPSEVHLEQIVR.L      | 1739.959 | 0.00282  | 3 | 1 | 38.8 | 0 |
| P12163_2_S5,15085 | K.EPSEVHLEQIVR.L      | 1739.959 | 0.0021   | 3 | 1 | 27.2 | 0 |
| P12163_1_S1,16421 | K.FAEACGIPGAQVTR.K    | 1780.932 | 0.00629  | 2 | 1 | 24.2 | 0 |
| P12163_1_S1,23014 | K.GADIIVEALER.Q ! K.G | 1489.853 | 0.00269  | 3 | 1 | 33   | 0 |
| P12163_1_S1,23033 | K.GADIIVEALER.Q ! K.G | 1489.853 | 0.00226  | 2 | 1 | 60.2 | 0 |
| P12163_1_F8,19149 | K.IVHIDIDSAEIGK.N     | 2018.174 | 0.0061   | 3 | 1 | 29.6 | 0 |
| P12163_2_F6,18707 | K.IVHIDIDSAEIGK.N     | 2018.174 | 0.00839  | 2 | 1 | 39.9 | 0 |
| P12163_1_F8,17675 | K.KPVLYVGGGCLNSSEI    | 2586.417 | -0.00009 | 3 | 1 | 46.8 | 0 |
| P12163_2_F6,17197 | K.KPVLYVGGGCLNSSEI    | 2586.417 | 0.00249  | 3 | 1 | 41.3 | 0 |
| P12163_2_F1,18300 | K.YPLSFK.T            | 1362.824 | -0.00123 | 3 | 1 | 24.4 | 0 |
| P12163_1_F6,10241 | R.AHTYLGDPSE.R        | 1420.749 | -0.00083 | 3 | 1 | 35   | 0 |
| P12163_1_F6,10249 | R.AHTYLGDPSE.R        | 1420.749 | 0.00603  | 2 | 1 | 24   | 0 |
| P12163_2_F7,9441  | R.AHTYLGDPSE.R        | 1420.749 | 0.0034   | 3 | 1 | 38.8 | 0 |
| P12163_1_F3,12235 | R.FAPDEPR.K           | 1135.605 | 0.00266  | 2 | 1 | 29.5 | 0 |
| P12163_2_F6,14174 | R.HEQGGIFAAEGYAR.S    | 1809.919 | 0.00307  | 3 | 1 | 49.9 | 0 |
| P12163_2_F7,13235 | R.HEQGGIFAAEGYAR.S    | 1809.919 | 0.00232  | 3 | 1 | 26.6 | 0 |
| P12163_1_F8,21196 | R.KGADIIVEALER.Q ! R. | 1922.153 | 0.00358  | 3 | 1 | 36.6 | 0 |
| P12163_2_F6,20839 | R.KGADIIVEALER.Q ! R. | 1922.153 | 0.00184  | 2 | 1 | 42.6 | 0 |
| P12163_2_F2,8664  | K.EQQNGLK.T           | 1424.832 | 0.00904  | 2 | 1 | 26   | 0 |
| P12163_1_F2,22424 | K.GLLDDLGR.E          | 1275.757 | 0.00224  | 2 | 1 | 34.6 | 0 |
| P12163_1_F2,11419 | K.QIVTSDLR.Q          | 1235.726 | 0.00851  | 3 | 1 | 24.1 | 0 |
| P12163_1_F5,15815 | K.QQFPISQYK.R         | 1747     | 0.00354  | 2 | 1 | 32.7 | 0 |
| P12163_2_F2,16616 | K.QQFPISQYK.R         | 1747     | 0.0101   | 2 | 1 | 26.2 | 0 |
| P12163_1_S1,15988 | K.SNGVNVM*VFEADER     | 1886.922 | 0.00372  | 3 | 1 | 28.4 | 0 |
| P12163_2_S3,14350 | K.VLSLSYSHDGK.S       | 1814.027 | 0.00988  | 3 | 1 | 33.2 | 0 |
| P12163_1_F2,21623 | R.DYDSVLEAIEK.M       | 1890.032 | 0.0055   | 3 | 1 | 31.3 | 0 |
| P12163_1_F3,22176 | R.DYDSVLEAIEK.M       | 1890.032 | 0.00434  | 2 | 1 | 54.6 | 0 |
| P12163_1_F3,22201 | R.DYDSVLEAIEK.M       | 1890.032 | 0.00712  | 3 | 1 | 28.9 | 0 |
| P12163_2_F7,19160 | R.DYDSVLEAIEK.M       | 1890.032 | 0.00241  | 3 | 1 | 36.8 | 0 |
| P12163_2_F9,19835 | R.DYDSVLEAIEK.M       | 1890.032 | 0.00016  | 3 | 1 | 27.2 | 0 |
| P12163_1_F9,20176 | R.HSFPELWNLEK.R       | 2008.111 | 0.00707  | 3 | 1 | 34.7 | 0 |
| P12163_2_F9,19190 | R.HSFPELWNLEK.R       | 2008.111 | 0.00579  | 3 | 1 | 33.2 | 0 |
| P12163_1_F2,21986 | R.VAVVGAGVSGLAAAY     | 2041.227 | 0.00708  | 3 | 1 | 30.5 | 0 |
| P12163_1_F3,22569 | R.VAVVGAGVSGLAAAY     | 2041.227 | 0.00057  | 3 | 1 | 55.1 | 0 |
| P12163_1_F3,22683 | R.VAVVGAGVSGLAAAY     | 2041.227 | -0.00838 | 2 | 1 | 50   | 0 |
| P12163_2_F9,16954 | R.YGSVIAGAIK.S        | 1586.973 | 0.00396  | 3 | 1 | 36.5 | 0 |
| P12163_1_F5,11848 | K.AAFDEAEK.K          | 1488.815 | 0.01022  | 2 | 1 | 35   | 0 |
| P12163_2_F1,12159 | K.AAFDEAEK.K          | 1488.815 | 0.00474  | 2 | 1 | 33.6 | 0 |
| P12163_2_F1,12186 | K.AAFDEAEK.K          | 1488.815 | 0.00648  | 3 | 1 | 39.7 | 0 |
| P12163_1_F3,11565 | K.EITDPDAK.K          | 1496.842 | 0.00828  | 3 | 1 | 32.8 | 0 |
| P12163_1_F2,8520  | K.GIQTSEDYR.F         | 1372.701 | 0.00479  | 3 | 1 | 23.3 | 0 |
| P12163_2_F1,16564 | K.LAEETWGK.H          | 1541.878 | 0.01142  | 2 | 1 | 24.7 | 0 |
| P12163_2_F1,16588 | K.LAEETWGK.H          | 1541.878 | 0.00405  | 3 | 1 | 25   | 0 |
| P12163_2_F1,13805 | K.LDCGGGYMK.L         | 1608.833 | 0.00768  | 2 | 1 | 25   | 0 |
| P12163_1_F4,17094 | K.LLSGEVDQK.K         | 1596.942 | 0.01018  | 2 | 1 | 33.9 | 0 |
| P12163_2_F1,16219 | K.LLSGEVDQK.K         | 1596.942 | 0.00532  | 2 | 1 | 27.4 | 0 |
| P12163_2_F1,16241 | K.LLSGEVDQK.K         | 1596.942 | 0.00398  | 3 | 1 | 33.2 | 0 |



|                   |                     |          |          |   |   |      |   |
|-------------------|---------------------|----------|----------|---|---|------|---|
| P12163_1_F3,23367 | K.QSGSLYSDWDLPPK.   | 2314.254 | 0.00045  | 3 | 1 | 33   | 0 |
| P12163_1_F4,24598 | K.YVGIELWQVK.S      | 1843.094 | 0.00303  | 3 | 1 | 37.3 | 0 |
| P12163_1_F4,24616 | K.YVGIELWQVK.S      | 1843.094 | 0.00346  | 2 | 1 | 46.2 | 0 |
| P12163_2_F9,20764 | K.YVGIELWQVK.S      | 1843.094 | 0.00144  | 3 | 1 | 22.9 | 0 |
| P12163_1_F4,22436 | R.FDDGWESQWVK.S     | 2005.028 | 0.0084   | 2 | 1 | 50.2 | 0 |
| P12163_1_F3,24933 | R.FYAISAEFPEFSNK.D  | 2258.195 | 0.01009  | 3 | 1 | 34.1 | 0 |
| P12163_1_F3,26053 | R.FYAISAEFPEFSNK.D  | 2258.195 | 0.00655  | 3 | 1 | 59.3 | 0 |
| P12163_1_S1,17839 | K.FTGVNDPAAQDFVEK.  | 2246.191 | 0.00925  | 2 | 1 | 58.7 | 0 |
| P12163_1_S1,17850 | K.FTGVNDPAAQDFVEK.  | 2246.191 | 0.00502  | 3 | 1 | 66.6 | 0 |
| P12163_1_F8,19365 | K.SCLLVNAPLIHR.A    | 1696.983 | 0.0016   | 3 | 1 | 50   | 0 |
| P12163_1_F8,19390 | K.SCLLVNAPLIHR.A    | 1696.983 | 0.00391  | 2 | 1 | 25.1 | 0 |
| P12163_2_F6,18860 | K.SCLLVNAPLIHR.A    | 1696.983 | 0.00433  | 3 | 1 | 64.6 | 0 |
| P12163_2_F6,18873 | K.SCLLVNAPLIHR.A    | 1696.983 | 0.00109  | 2 | 1 | 33.6 | 0 |
| P12163_2_F1,23837 | K.VFAFVAPK.I        | 1486.924 | 0.00633  | 2 | 1 | 27.5 | 0 |
| P12163_2_F1,15856 | K.YAMTLDGK.I        | 1506.845 | 0.00632  | 3 | 1 | 24.9 | 0 |
| P12163_2_F1,15897 | K.YAMTLDGK.I        | 1506.845 | 0.00508  | 2 | 1 | 30.3 | 0 |
| P12163_1_F3,12773 | R.AEDAAYIR.R        | 1212.653 | 0.00332  | 2 | 1 | 30.1 | 0 |
| P12163_1_F6,18012 | R.DVM*EYFHDR.G      | 1531.715 | 0.0021   | 3 | 1 | 27.1 | 0 |
| P12163_1_F6,18011 | R.DVMEYFHDR.G       | 1515.72  | 0.00114  | 3 | 1 | 25.6 | 0 |
| P12163_2_F6,17397 | R.DVMEYFHDR.G       | 1515.72  | -0.00078 | 3 | 1 | 38.7 | 0 |
| P12163_1_S1,11670 | R.SDAVVVGNTVR.R     | 1477.828 | -0.00098 | 2 | 1 | 26.7 | 0 |
| P12163_2_F1,13590 | R.SDWESVK.I         | 1458.805 | 0.00681  | 2 | 1 | 24   | 0 |
| P12163_2_F6,16986 | R.SQGLQVHVLGEDLQSI  | 2346.324 | 0.00132  | 3 | 1 | 36.2 | 0 |
| P12163_1_F4,22655 | R.VPFSVK.Y          | 1431.882 | 0.00298  | 3 | 1 | 26.8 | 0 |
| P12163_2_F1,22143 | R.VPFSVK.Y          | 1431.882 | 0.00478  | 3 | 1 | 25   | 0 |
| P12163_1_F7,21026 | K.ALESGEFPPLLGINTC  | 2674.466 | 0.00532  | 3 | 1 | 50   | 0 |
| P12163_2_S5,19951 | K.ALESGEFPPLLGINTC  | 2674.466 | 0.00541  | 3 | 1 | 52.7 | 0 |
| P12163_1_F4,21269 | K.EATELFNSISK.D     | 1847.037 | 0.00814  | 2 | 1 | 32.3 | 0 |
| P12163_1_F6,14264 | K.ELNAPFHDSPODK.V   | 1978.049 | 0.00611  | 3 | 1 | 28   | 0 |
| P12163_1_F6,20357 | K.GLASVFESHLK.E     | 1796.053 | 0.01044  | 3 | 1 | 45.2 | 0 |
| P12163_1_F8,20520 | K.GLASVFESHLK.E     | 1796.053 | 0.00714  | 3 | 1 | 26.6 | 0 |
| P12163_2_F6,20083 | K.GLASVFESHLK.E     | 1796.053 | -0.00198 | 3 | 1 | 38.5 | 0 |
| P12163_2_F6,20093 | K.GLASVFESHLK.E     | 1796.053 | 0.00383  | 2 | 1 | 52.6 | 0 |
| P12163_1_F3,23823 | K.LLLEEQDIEGDFK.K   | 2157.19  | 0.00525  | 3 | 1 | 49.6 | 0 |
| P12163_1_F4,15989 | K.LVECVEK.S         | 1484.86  | 0.00788  | 2 | 1 | 24.3 | 0 |
| P12163_2_F1,15011 | K.LVECVEK.S         | 1484.86  | 0.00698  | 2 | 1 | 25.6 | 0 |
| P12163_1_F3,22419 | R.FCGCLLNVMQTTPK.E  | 2277.201 | 0.00621  | 3 | 1 | 26   | 0 |
| P12163_1_F8,19922 | R.GVKPDNVTFTLISCAI  | 2473.369 | 0.00116  | 3 | 1 | 40.9 | 0 |
| P12163_2_F6,19497 | R.GVKPDNVTFTLISCAI  | 2473.369 | 0.00662  | 3 | 1 | 33.7 | 0 |
| P12163_1_F3,21851 | R.IDSNAFSTLIK.L     | 1817.063 | 0.0101   | 3 | 1 | 26.9 | 0 |
| P12163_1_F3,21867 | R.IDSNAFSTLIK.L     | 1817.063 | 0.00483  | 2 | 1 | 50.7 | 0 |
| P12163_1_S1,22460 | R.LFDDMLDR.G        | 1328.682 | 0.00333  | 2 | 1 | 35.4 | 0 |
| P12163_2_F9,16560 | K.KFEVEGYLR.T       | 1749.015 | 0.00755  | 4 | 1 | 48.9 | 0 |
| P12163_2_F6,16215 | K.KLENGEDQESLTILQR  | 2481.377 | 0.0047   | 3 | 1 | 42.4 | 0 |
| P12163_1_F4,19109 | K.LFGTNDDIK.N       | 1630.926 | 0.00628  | 3 | 1 | 27.3 | 0 |
| P12163_1_F9,18533 | K.RLEEALIAQDENK.L   | 2266.25  | 0.00604  | 3 | 1 | 30.4 | 0 |
| P12163_2_F8_12070 | K.RLEEALIAQDENK.L   | 2266.25  | -0.00368 | 3 | 1 | 33.2 | 0 |
| P12163_2_F9,17657 | K.RLEEALIAQDENK.L   | 2266.25  | 0.00571  | 3 | 1 | 31.7 | 0 |
| P12163_1_F7,20046 | K.SYQELEIEDPNDFRPYI | 3058.508 | 0.00468  | 3 | 1 | 46.1 | 0 |
| P12163_1_F7,20057 | K.SYQELEIEDPNDFRPYI | 3058.508 | 0.0001   | 4 | 1 | 32.2 | 0 |
| P12163_2_F1,11575 | R.CGEGEAVIK.R       | 1570.872 | 0.00589  | 2 | 1 | 34.4 | 0 |

|                                       |          |          |   |   |      |   |
|---------------------------------------|----------|----------|---|---|------|---|
| P12163_2_F1,11576 R.CGEGEAVIK.R       | 1570.872 | 0.00589  | 3 | 1 | 30.6 | 0 |
| P12163_1_F5,20216 R.FIMAQIK.F         | 1458.896 | 0.00412  | 2 | 1 | 26.2 | 0 |
| P12163_1_F3,19750 R.LAVAQPQVTDWK.F    | 1964.143 | -0.00489 | 2 | 1 | 40.1 | 0 |
| P12163_1_F3,19767 R.LAVAQPQVTDWK.F    | 1964.143 | 0.00442  | 3 | 1 | 32.7 | 0 |
| P12163_1_F4,24656 R.LEEAEIAQDENK.L    | 2110.149 | 0.00162  | 3 | 1 | 53.8 | 0 |
| P12163_1_F5,18654 R.LLSEMGK.T         | 1385.828 | 0.00848  | 2 | 1 | 26.6 | 0 |
| P12163_2_F1,18885 R.LLSEMGK.T         | 1385.828 | 0.01017  | 2 | 1 | 25.9 | 0 |
| P12163_2_F1,18906 R.LLSEMGK.T         | 1385.828 | 0.0075   | 3 | 1 | 22.9 | 0 |
| P12163_1_F4,14941 K.ELEAVAK.Q         | 1367.835 | 0.00226  | 2 | 1 | 26.3 | 0 |
| P12163_1_F4,14951 K.GATQQVEVQIK.K     | 1809.069 | 0.00487  | 2 | 1 | 68.8 | 0 |
| P12163_2_F1,13985 K.GATQQVEVQIK.K     | 1809.069 | 0.00003  | 2 | 1 | 59.9 | 0 |
| P12163_1_F6,12593 K.GQSACLAQSPQLHK.Q  | 2133.169 | 0.00579  | 3 | 1 | 25.5 | 0 |
| P12163_1_F8,12424 K.GQSACLAQSPQLHK.Q  | 2133.169 | 0.0006   | 3 | 1 | 28.4 | 0 |
| P12163_1_F5,11747 R.AQACGIDVK.T       | 1569.888 | 0.01234  | 2 | 1 | 34.6 | 0 |
| P12163_1_F5,11788 R.AQACGIDVK.T       | 1569.888 | 0.00786  | 3 | 1 | 21.9 | 0 |
| P12163_2_F1,12205 R.AQACGIDVK.T       | 1569.888 | 0.00294  | 2 | 1 | 31   | 0 |
| P12163_1_F2,12622 R.GEEIISGAQR.I      | 1363.748 | 0.00372  | 2 | 1 | 38   | 0 |
| P12163_2_F6,20513 R.IHIPEFLAER.A      | 1528.879 | 0.00199  | 3 | 1 | 25.9 | 0 |
| P12163_1_F5,9932 R.SEAIEK.A           | 1413.804 | 0.00921  | 2 | 1 | 28.6 | 0 |
| P12163_1_F3,13356 R.TLANQGIFR.I       | 1323.769 | 0.00344  | 3 | 1 | 35.3 | 0 |
| P12163_1_F2,17872 R.VFETGPVFR.A       | 1355.762 | 0.00349  | 3 | 1 | 31.4 | 0 |
| P12163_1_F7,15257 R.YGAPPHGGFGVGLER.  | 1817.96  | -0.00163 | 3 | 1 | 31.5 | 0 |
| P12163_1_F8,15913 R.YGAPPHGGFGVGLER.  | 1817.96  | 0.00455  | 3 | 1 | 26.9 | 0 |
| P12163_1_F8,15986 R.YGAPPHGGFGVGLER.  | 1817.96  | -0.00046 | 2 | 1 | 24   | 0 |
| P12163_2_F6,15356 R.YGAPPHGGFGVGLER.  | 1817.96  | -0.00109 | 3 | 1 | 34.4 | 0 |
| P12163_1_F3,24599 K.FLEVAYPYVAK.R     | 1908.109 | 0.00632  | 3 | 1 | 27.1 | 0 |
| P12163_1_F3,24718 K.FLEVAYPYVAK.R     | 1908.109 | 0.01037  | 2 | 1 | 35.1 | 0 |
| P12163_1_S1,19049 K.ISSQTIAAASLGQVYR. | 1969.102 | 0.00172  | 2 | 1 | 29.3 | 0 |
| P12163_1_S1,19065 K.ISSQTIAAASLGQVYR. | 1969.102 | 0.00399  | 3 | 1 | 63   | 0 |
| P12163_1_F3,24010 K.LGCNAELIVDEFGEK.I | 2302.221 | 0.00649  | 3 | 1 | 58.5 | 0 |
| P12163_2_F9,18429 K.RLENLITLAK.E      | 1779.131 | 0.00131  | 3 | 1 | 28.5 | 0 |
| P12163_1_F8,16478 K.VQRPGEPIIYR.D     | 1745.037 | -0.0003  | 3 | 1 | 28.6 | 0 |
| P12163_1_F4,26007 R.LENLITLAK.E       | 1623.03  | 0.00596  | 3 | 1 | 24.2 | 0 |
| P12163_2_F1,25216 R.LENLITLAK.E       | 1623.03  | 0.00503  | 3 | 1 | 36.8 | 0 |
| P12163_1_F2,19449 R.LFFTDEGIR.R       | 1401.768 | 0.00452  | 3 | 1 | 23.6 | 0 |
| P12163_1_F4,24105 R.NLLCNLGPFSFIK.A   | 1984.151 | 0.00886  | 3 | 1 | 48.1 | 0 |
| P12163_1_F4,24110 R.NLLCNLGPFSFIK.A   | 1984.151 | 0.00271  | 2 | 1 | 37.4 | 0 |
| P12163_1_F4,24262 R.QLLLALTEDSK.L     | 1839.105 | 0.00478  | 3 | 1 | 56.5 | 0 |
| P12163_1_F4,24277 R.QLLLALTEDSK.L     | 1839.105 | 0.00284  | 2 | 1 | 43.7 | 0 |
| P12163_2_F1,23663 R.QLLLALTEDSK.L     | 1839.105 | 0.0055   | 3 | 1 | 54.2 | 0 |
| P12163_2_F2,12601 R.SVTGQFNK.L        | 1488.863 | 0.00557  | 3 | 1 | 25.9 | 0 |
| P12163_1_F3,18806 K.EIGVPIDVK.Y       | 1577.972 | 0.00544  | 2 | 1 | 26.9 | 0 |
| P12163_1_S1,15069 K.ELTEMPLSR.K       | 1379.751 | -0.00076 | 3 | 1 | 36.5 | 0 |
| P12163_2_F1,15663 K.FQSDFEK.R         | 1508.82  | 0.00257  | 2 | 1 | 27   | 0 |
| P12163_1_F3,17120 K.GSAVVCVAEGAGQSL   | 2254.269 | 0.00472  | 3 | 1 | 43   | 0 |
| P12163_1_F3,18197 K.GSAVVCVAEGAGQSL   | 2254.269 | 0.01792  | 3 | 1 | 30.2 | 0 |
| P12163_1_F3,21358 K.GSAVVCVAEGAGQSL   | 2254.269 | 0.00625  | 3 | 1 | 55.2 | 0 |
| P12163_1_F9,20655 K.NIVGIPFGYR.G      | 1439.831 | 0.00416  | 2 | 1 | 24.7 | 0 |
| P12163_1_S1,16202 K.TFGFDTAVEEAQR.A   | 1774.891 | 0.00451  | 3 | 1 | 42.1 | 0 |
| P12163_1_F2,20856 K.TIDNDILLMDK.T     | 1899.072 | 0.00631  | 3 | 1 | 27.8 | 0 |
| P12163_1_F2,20874 K.TIDNDILLMDK.T     | 1899.072 | 0.0037   | 2 | 1 | 40.7 | 0 |

|                   |                      |          |          |   |   |      |   |
|-------------------|----------------------|----------|----------|---|---|------|---|
| P12163_1_F4,18256 | K.VAIVGVPK.T         | 1390.924 | 0.0048   | 3 | 1 | 26.5 | 0 |
| P12163_2_F1,17659 | K.VAIVGVPK.T         | 1390.924 | 0.00162  | 3 | 1 | 26   | 0 |
| P12163_2_F1,17666 | K.VAIVGVPK.T         | 1390.924 | 0.00215  | 2 | 1 | 25.2 | 0 |
| P12163_1_S1,19345 | K.YIDPTYMIR.A        | 1475.787 | 0.00236  | 3 | 1 | 30.4 | 0 |
| P12163_2_F8_12070 | R.GINMLFVLGGNGTHA    | 2927.467 | -0.00031 | 4 | 1 | 30   | 0 |
| P12163_2_F6,20714 | K.ALRPYFELTNAVR.I    | 1854.054 | 0.00522  | 3 | 1 | 27   | 0 |
| P12163_1_F7,11775 | K.EDEHEM*EVDTASSG/   | 2695.298 | 0.00748  | 3 | 1 | 27.1 | 0 |
| P12163_1_F8,18678 | K.EIASLMETGAHAR.E    | 1689.889 | 0.00182  | 3 | 1 | 40.2 | 0 |
| P12163_2_F6,18175 | K.EIASLMETGAHAR.E    | 1689.889 | 0.00452  | 3 | 1 | 32.6 | 0 |
| P12163_1_F3,14048 | K.HIAEEDDDEF.-       | 1523.68  | 0.00645  | 2 | 1 | 50.7 | 0 |
| P12163_2_F7,13318 | R.GNLLALHR.I         | 1197.737 | -0.00352 | 3 | 1 | 31.1 | 0 |
| P12163_2_F9,13765 | R.GNLLALHR.I         | 1197.737 | 0.00368  | 3 | 1 | 30.4 | 0 |
| P12163_1_F4,24811 | R.IGDLELFK.S         | 1542.935 | 0.00629  | 2 | 1 | 37.3 | 0 |
| P12163_2_F1,24109 | R.IGDLELFK.S         | 1542.935 | 0.00307  | 3 | 1 | 23.3 | 0 |
| P12163_2_F1,24149 | R.IGDLELFK.S         | 1542.935 | 0.00547  | 2 | 1 | 28.1 | 0 |
| P12163_2_F1,18302 | R.ISLADVAK.K         | 1424.893 | 0.0047   | 2 | 1 | 25.9 | 0 |
| P12163_1_S1,20058 | R.LLLGEIPER.T        | 1343.82  | 0.00538  | 2 | 1 | 27.3 | 0 |
| P12163_1_S1,20106 | R.LLLGEIPER.T        | 1343.82  | 0.00366  | 3 | 1 | 29.6 | 0 |
| P12163_2_F1,24132 | R.LLSYLPK.E          | 1441.924 | 0.00535  | 2 | 1 | 28.9 | 0 |
| P12163_2_F1,9873  | R.QQQEQELAK.H        | 1709.964 | 0.00543  | 2 | 1 | 38.6 | 0 |
| P12163_1_F7,21599 | K.TGDIWHICIEDLPR.S   | 2029.048 | 0.00183  | 3 | 1 | 56.8 | 0 |
| P12163_1_F3,15820 | K.VSLPPPPK.R         | 1539.972 | 0.00798  | 2 | 1 | 34   | 0 |
| P12163_1_S1,22751 | R.FDSSIVLIDPYAK.L    | 2076.184 | 0.00878  | 2 | 1 | 32.7 | 0 |
| P12163_1_S1,22761 | R.FDSSIVLIDPYAK.L    | 2076.184 | 0.00463  | 3 | 1 | 38   | 0 |
| P12163_2_F1,22658 | R.FFSEVIK.F          | 1477.887 | 0.00392  | 3 | 1 | 24.1 | 0 |
| P12163_2_F1,18039 | R.GLYLVGK.F          | 1357.866 | 0.00253  | 3 | 1 | 33.9 | 0 |
| P12163_2_F1,18045 | R.GLYLVGK.F          | 1357.866 | 0.00467  | 2 | 1 | 39.6 | 0 |
| P12163_1_F5,18960 | R.GSYLGLIQK.I        | 1586.973 | 0.00663  | 3 | 1 | 31.3 | 0 |
| P12163_2_S5,9301  | R.HFGDASAK.L         | 1440.806 | 0.00696  | 3 | 1 | 51.8 | 0 |
| P12163_1_F3,11080 | R.ISGSSDLYR.V        | 1301.7   | 0.00425  | 3 | 1 | 34.5 | 0 |
| P12163_1_F4,17843 | R.VSETTLPLK.T        | 1595.983 | 0.00478  | 2 | 1 | 33.6 | 0 |
| P12163_1_S10,1269 | R.YAGGGGGLK.A        | 1484.868 | 0.00755  | 3 | 1 | 24.8 | 0 |
| P12163_1_F7,16079 | K.EGVIQHSTINNLAIGR.! | 2026.135 | 0.00132  | 3 | 1 | 52.2 | 0 |
| P12163_1_F7,16091 | K.EGVIQHSTINNLAIGR.! | 2026.135 | -0.00002 | 2 | 1 | 56.9 | 0 |
| P12163_1_F8,16815 | K.EGVIQHSTINNLAIGR.! | 2026.135 | 0.00162  | 3 | 1 | 34.7 | 0 |
| P12163_1_F8,16822 | K.EGVIQHSTINNLAIGR.! | 2026.135 | 0        | 2 | 1 | 59.4 | 0 |
| P12163_2_F10,1514 | K.EGVIQHSTINNLAIGR.! | 2026.135 | 0.0053   | 2 | 1 | 30.9 | 0 |
| P12163_2_F10,1514 | K.EGVIQHSTINNLAIGR.! | 2026.135 | 0.0039   | 3 | 1 | 52.2 | 0 |
| P12163_2_F4,15766 | K.EGVIQHSTINNLAIGR.! | 2026.135 | -0.00309 | 3 | 1 | 26.9 | 0 |
| P12163_2_F6,16290 | K.EGVIQHSTINNLAIGR.! | 2026.135 | 0.00105  | 3 | 1 | 32.4 | 0 |
| P12163_2_F6,16320 | K.EGVIQHSTINNLAIGR.! | 2026.135 | -0.00196 | 2 | 1 | 81.3 | 0 |
| P12163_2_F8_12070 | K.EGVIQHSTINNLAIGR.! | 2026.135 | 0.009    | 3 | 1 | 26   | 0 |
| P12163_2_S5,15596 | K.EGVIQHSTINNLAIGR.! | 2026.135 | 0.00183  | 3 | 1 | 48.3 | 0 |
| P12163_1_F5,20978 | K.EYFAAI.-           | 1017.556 | 0.00018  | 2 | 1 | 28.4 | 0 |
| P12163_1_F6,20946 | K.EYFAAI.-           | 1017.556 | 0.00284  | 2 | 1 | 24.9 | 0 |
| P12163_2_F2,21413 | K.EYFAAI.-           | 1017.556 | 0.00004  | 2 | 1 | 27.8 | 0 |
| P12163_2_S3,18061 | K.EYFAAI.-           | 1017.556 | 0.004    | 2 | 1 | 28.2 | 0 |
| P12163_2_S5,19765 | K.EYFAAI.-           | 1017.556 | 0.0021   | 2 | 1 | 30.8 | 0 |
| P12163_1_F4,18362 | K.LSDYIGK.K          | 1403.835 | 0.00756  | 3 | 1 | 23.3 | 0 |
| P12163_1_F4,18524 | K.LSDYIGK.K          | 1403.835 | 0.005    | 2 | 1 | 29.6 | 0 |
| P12163_1_F5,17182 | K.LSDYIGK.K          | 1403.835 | 0.00692  | 2 | 1 | 31.4 | 0 |

|                   |                   |          |          |   |   |      |   |
|-------------------|-------------------|----------|----------|---|---|------|---|
| P12163_1_F5,17265 | K.LSDYIGK.K       | 1403.835 | 0.00654  | 3 | 1 | 24.3 | 0 |
| P12163_1_F8,16957 | K.LSDYIGK.K       | 1403.835 | -0.00198 | 2 | 1 | 25.3 | 0 |
| P12163_1_F8,16977 | K.LSDYIGK.K       | 1403.835 | 0.00243  | 3 | 1 | 24.4 | 0 |
| P12163_1_F9,17194 | K.LSDYIGK.K       | 1403.835 | 0.00412  | 2 | 1 | 30.9 | 0 |
| P12163_1_S10,1706 | K.LSDYIGK.K       | 1403.835 | 0.00633  | 3 | 1 | 32.1 | 0 |
| P12163_2_F1,17591 | K.LSDYIGK.K       | 1403.835 | 0.00615  | 3 | 1 | 21.9 | 0 |
| P12163_2_F1,17711 | K.LSDYIGK.K       | 1403.835 | 0.00564  | 2 | 1 | 31.2 | 0 |
| P12163_2_F8_12070 | K.LSDYIGK.K       | 1403.835 | 0.00498  | 3 | 1 | 34.7 | 0 |
| P12163_2_S5,15881 | K.LSDYIGK.K       | 1403.835 | 0.00132  | 3 | 1 | 24.3 | 0 |
| P12163_2_S5,15902 | K.LSDYIGK.K       | 1403.835 | 0.00156  | 2 | 1 | 26.6 | 0 |
| P12163_1_F5,11042 | K.SGGLGDLK.Y      | 1354.815 | 0.00883  | 3 | 1 | 24.2 | 0 |
| P12163_1_F5,13114 | K.SGGLGDLK.Y      | 1354.815 | 0.00889  | 3 | 1 | 34.9 | 0 |
| P12163_1_F6,14091 | K.SGGLGDLK.Y      | 1354.815 | 0.00487  | 3 | 1 | 23.6 | 0 |
| P12163_1_F8,13284 | K.SGGLGDLK.Y      | 1354.815 | 0.00352  | 3 | 1 | 30.9 | 0 |
| P12163_2_F1,11582 | K.SGGLGDLK.Y      | 1354.815 | 0.00694  | 3 | 1 | 23.4 | 0 |
| P12163_2_F1,13521 | K.SGGLGDLK.Y      | 1354.815 | 0.00595  | 3 | 1 | 45.1 | 0 |
| P12163_2_F2,11889 | K.SGGLGDLK.Y      | 1354.815 | 0.0064   | 3 | 1 | 26.1 | 0 |
| P12163_2_F2,13947 | K.SGGLGDLK.Y      | 1354.815 | 0.00751  | 3 | 1 | 47.7 | 0 |
| P12163_2_S5,12574 | K.SGGLGDLK.Y      | 1354.815 | 0.00052  | 3 | 1 | 29.2 | 0 |
| P12163_1_F7,20514 | K.SYGVLPDQGIALR.G | 1806.043 | 0.00582  | 2 | 1 | 31.1 | 0 |
| P12163_1_F8,19561 | K.SYGVLPDQGIALR.G | 1806.043 | 0.00226  | 3 | 1 | 38.2 | 0 |
| P12163_1_F8,21515 | K.SYGVLPDQGIALR.G | 1806.043 | 0.00151  | 3 | 1 | 49.4 | 0 |
| P12163_2_F6,18912 | K.SYGVLPDQGIALR.G | 1806.043 | 0.00196  | 2 | 1 | 32.6 | 0 |
| P12163_2_F6,18962 | K.SYGVLPDQGIALR.G | 1806.043 | 0.00562  | 3 | 1 | 36.8 | 0 |
| P12163_2_F6,19172 | K.SYGVLPDQGIALR.G | 1806.043 | 0.00223  | 3 | 1 | 30.1 | 0 |
| P12163_2_F6,21149 | K.SYGVLPDQGIALR.G | 1806.043 | -0.00242 | 2 | 1 | 50.9 | 0 |
| P12163_2_F6,21155 | K.SYGVLPDQGIALR.G | 1806.043 | 0.00142  | 3 | 1 | 50.5 | 0 |
| P12163_1_F2,21595 | K.YPLIADITK.S     | 1642.004 | -0.00068 | 3 | 1 | 25.1 | 0 |
| P12163_1_F3,21773 | K.YPLIADITK.S     | 1642.004 | 0.00182  | 2 | 1 | 40.3 | 0 |
| P12163_1_F3,21803 | K.YPLIADITK.S     | 1642.004 | 0.00499  | 3 | 1 | 34.3 | 0 |
| P12163_1_F3,21995 | K.YPLIADITK.S     | 1642.004 | 0.0067   | 2 | 1 | 33.1 | 0 |
| P12163_1_F3,22016 | K.YPLIADITK.S     | 1642.004 | 0.00202  | 3 | 1 | 38   | 0 |
| P12163_1_F3,22199 | K.YPLIADITK.S     | 1642.004 | 0.00656  | 2 | 1 | 32.1 | 0 |
| P12163_1_F3,22235 | K.YPLIADITK.S     | 1642.004 | 0.00175  | 3 | 1 | 39.4 | 0 |
| P12163_1_F3,22439 | K.YPLIADITK.S     | 1642.004 | 0.00802  | 2 | 1 | 39.6 | 0 |
| P12163_1_F4,22749 | K.YPLIADITK.S     | 1642.004 | 0.003    | 2 | 1 | 24.2 | 0 |
| P12163_1_F4,22972 | K.YPLIADITK.S     | 1642.004 | 0.0064   | 3 | 1 | 29.8 | 0 |
| P12163_1_F5,21374 | K.YPLIADITK.S     | 1642.004 | 0.00454  | 3 | 1 | 23.7 | 0 |
| P12163_1_F6,20646 | K.YPLIADITK.S     | 1642.004 | -0.00002 | 3 | 1 | 32.6 | 0 |
| P12163_1_F6,20871 | K.YPLIADITK.S     | 1642.004 | 0.00262  | 3 | 1 | 31   | 0 |
| P12163_1_F6,21097 | K.YPLIADITK.S     | 1642.004 | 0.00169  | 3 | 1 | 30.1 | 0 |
| P12163_1_F6,21328 | K.YPLIADITK.S     | 1642.004 | 0.0034   | 3 | 1 | 24.1 | 0 |
| P12163_1_F7,20413 | K.YPLIADITK.S     | 1642.004 | 0.00259  | 3 | 1 | 25.1 | 0 |
| P12163_1_F8,21523 | K.YPLIADITK.S     | 1642.004 | 0.00139  | 3 | 1 | 31.2 | 0 |
| P12163_1_F9,20663 | K.YPLIADITK.S     | 1642.004 | 0.00439  | 3 | 1 | 23.3 | 0 |
| P12163_1_F9,20887 | K.YPLIADITK.S     | 1642.004 | 0.00742  | 2 | 1 | 31.9 | 0 |
| P12163_1_F9,21186 | K.YPLIADITK.S     | 1642.004 | 0.00691  | 3 | 1 | 24.1 | 0 |
| P12163_1_S10,1964 | K.YPLIADITK.S     | 1642.004 | 0.00466  | 3 | 1 | 33.7 | 0 |
| P12163_1_S10,1980 | K.YPLIADITK.S     | 1642.004 | 0.00814  | 3 | 1 | 22   | 0 |
| P12163_1_S10,1997 | K.YPLIADITK.S     | 1642.004 | 0.00652  | 3 | 1 | 33.7 | 0 |
| P12163_2_F1,22343 | K.YPLIADITK.S     | 1642.004 | 0.00313  | 3 | 1 | 23   | 0 |

|                                 |          |          |   |   |      |   |
|---------------------------------|----------|----------|---|---|------|---|
| P12163_2_F10,1837:K.YPLIADITK.S | 1642.004 | 0.00061  | 3 | 1 | 26.5 | 0 |
| P12163_2_F10,1857:K.YPLIADITK.S | 1642.004 | 0.00181  | 3 | 1 | 35.1 | 0 |
| P12163_2_F10,1876:K.YPLIADITK.S | 1642.004 | 0.00913  | 3 | 1 | 28.8 | 0 |
| P12163_2_F4,20078 K.YPLIADITK.S | 1642.004 | 0.00484  | 3 | 1 | 35.1 | 0 |
| P12163_2_F7,19020 K.YPLIADITK.S | 1642.004 | 0.00628  | 2 | 1 | 35.3 | 0 |
| P12163_2_F7,19128 K.YPLIADITK.S | 1642.004 | 0.00319  | 3 | 1 | 37.5 | 0 |
| P12163_2_F7,19222 K.YPLIADITK.S | 1642.004 | 0.006    | 2 | 1 | 35.4 | 0 |
| P12163_2_F7,19338 K.YPLIADITK.S | 1642.004 | 0.00295  | 3 | 1 | 28   | 0 |
| P12163_2_F9,19341 K.YPLIADITK.S | 1642.004 | 0.00382  | 3 | 1 | 32.2 | 0 |
| P12163_2_F9,19416 K.YPLIADITK.S | 1642.004 | 0.00866  | 2 | 1 | 24.2 | 0 |
| P12163_2_F9,19552 K.YPLIADITK.S | 1642.004 | 0.00568  | 3 | 1 | 35.3 | 0 |
| P12163_2_F9,19742 K.YPLIADITK.S | 1642.004 | 0.00712  | 3 | 1 | 35.6 | 0 |
| P12163_2_F9,19833 K.YPLIADITK.S | 1642.004 | 0.00786  | 2 | 1 | 41.6 | 0 |
| P12163_2_F9,19962 K.YPLIADITK.S | 1642.004 | 0.00973  | 3 | 1 | 26.1 | 0 |
| P12163_2_S3,17691 K.YPLIADITK.S | 1642.004 | 0.00121  | 3 | 1 | 24.3 | 0 |
| P12163_2_S3,17874 K.YPLIADITK.S | 1642.004 | -0.0011  | 3 | 1 | 26   | 0 |
| P12163_1_F4,21456 R.GLFIIDK.E   | 1413.893 | 0.00841  | 2 | 1 | 33.3 | 0 |
| P12163_1_F4,21492 R.GLFIIDK.E   | 1413.893 | 0.00413  | 3 | 1 | 26.2 | 0 |
| P12163_1_F4,21713 R.GLFIIDK.E   | 1413.893 | 0.00405  | 2 | 1 | 34.3 | 0 |
| P12163_1_F4,21733 R.GLFIIDK.E   | 1413.893 | 0.00506  | 3 | 1 | 48.6 | 0 |
| P12163_1_F4,21906 R.GLFIIDK.E   | 1413.893 | 0.00561  | 2 | 1 | 33.1 | 0 |
| P12163_1_F4,21932 R.GLFIIDK.E   | 1413.893 | 0.00581  | 3 | 1 | 24.2 | 0 |
| P12163_1_F4,22113 R.GLFIIDK.E   | 1413.893 | 0.00469  | 2 | 1 | 27.9 | 0 |
| P12163_1_F4,22232 R.GLFIIDK.E   | 1413.893 | -0.00256 | 3 | 1 | 23.7 | 0 |
| P12163_1_F4,22368 R.GLFIIDK.E   | 1413.893 | 0.00527  | 2 | 1 | 30.6 | 0 |
| P12163_1_F4,22605 R.GLFIIDK.E   | 1413.893 | 0.00645  | 2 | 1 | 31.4 | 0 |
| P12163_1_F4,22860 R.GLFIIDK.E   | 1413.893 | 0.00101  | 2 | 1 | 24.8 | 0 |
| P12163_1_F5,22709 R.GLFIIDK.E   | 1413.893 | 0.00473  | 2 | 1 | 26.7 | 0 |
| P12163_1_F6,140 R.GLFIIDK.E     | 1413.893 | -0.00309 | 2 | 1 | 32   | 0 |
| P12163_1_F6,359 R.GLFIIDK.E     | 1413.893 | 0.00585  | 2 | 1 | 32.7 | 0 |
| P12163_1_F6,20607 R.GLFIIDK.E   | 1413.893 | 0.00379  | 2 | 1 | 30.3 | 0 |
| P12163_1_F7,19336 R.GLFIIDK.E   | 1413.893 | 0.00231  | 2 | 1 | 32.1 | 0 |
| P12163_1_F7,19349 R.GLFIIDK.E   | 1413.893 | 0.0011   | 3 | 1 | 26.8 | 0 |
| P12163_1_F7,19825 R.GLFIIDK.E   | 1413.893 | 0.00441  | 2 | 1 | 33.4 | 0 |
| P12163_1_F8,20824 R.GLFIIDK.E   | 1413.893 | 0.00377  | 3 | 1 | 26.7 | 0 |
| P12163_1_F8,20840 R.GLFIIDK.E   | 1413.893 | 0.00561  | 2 | 1 | 34.2 | 0 |
| P12163_1_F9,20201 R.GLFIIDK.E   | 1413.893 | 0.00559  | 2 | 1 | 37.3 | 0 |
| P12163_1_F9,20212 R.GLFIIDK.E   | 1413.893 | 0.00188  | 3 | 1 | 26.6 | 0 |
| P12163_1_S10,1924:R.GLFIIDK.E   | 1413.893 | 0.00707  | 3 | 1 | 26.5 | 0 |
| P12163_2_F1,20794 R.GLFIIDK.E   | 1413.893 | 0.00929  | 2 | 1 | 33   | 0 |
| P12163_2_F1,21261 R.GLFIIDK.E   | 1413.893 | 0.00719  | 2 | 1 | 34.1 | 0 |
| P12163_2_F1,21262 R.GLFIIDK.E   | 1413.893 | 0.00539  | 3 | 1 | 33.9 | 0 |
| P12163_2_F1,21475 R.GLFIIDK.E   | 1413.893 | 0.00675  | 2 | 1 | 28.5 | 0 |
| P12163_2_F1,21698 R.GLFIIDK.E   | 1413.893 | 0.00539  | 2 | 1 | 29.3 | 0 |
| P12163_2_F1,21763 R.GLFIIDK.E   | 1413.893 | 0.00515  | 3 | 1 | 25.5 | 0 |
| P12163_2_F1,21934 R.GLFIIDK.E   | 1413.893 | 0.00507  | 2 | 1 | 26.8 | 0 |
| P12163_2_F2,21277 R.GLFIIDK.E   | 1413.893 | 0.00343  | 2 | 1 | 29.9 | 0 |
| P12163_2_F4,18943 R.GLFIIDK.E   | 1413.893 | 0.00083  | 3 | 1 | 26.2 | 0 |
| P12163_2_F4,19374 R.GLFIIDK.E   | 1413.893 | 0.00345  | 2 | 1 | 30.7 | 0 |
| P12163_2_S5,18469 R.GLFIIDK.E   | 1413.893 | 0.0008   | 3 | 1 | 21.9 | 0 |
| P12163_2_S5,19038 R.GLFIIDK.E   | 1413.893 | 0.00428  | 3 | 1 | 23.8 | 0 |

|                   |                      |          |          |   |   |      |   |
|-------------------|----------------------|----------|----------|---|---|------|---|
| P12163_2_F8_1207  | R.GLFIIDKEGVIIQHSTIN | 3116.804 | 0.00097  | 4 | 1 | 27.7 | 0 |
| P12163_1_F2,7068  | R.SVDETLR.T          | 1123.626 | 0.00319  | 3 | 1 | 25.2 | 0 |
| P12163_1_F2,7270  | R.SVDETLR.T          | 1123.626 | 0.00316  | 3 | 1 | 23   | 0 |
| P12163_1_F2,7499  | R.SVDETLR.T          | 1123.626 | 0.00286  | 3 | 1 | 28.6 | 0 |
| P12163_1_F2,10665 | R.SVDETLR.T          | 1123.626 | 0.00162  | 2 | 1 | 31.3 | 0 |
| P12163_1_F2,10668 | R.SVDETLR.T          | 1123.626 | 0.00362  | 2 | 1 | 31.4 | 0 |
| P12163_1_F3,7204  | R.SVDETLR.T          | 1123.626 | 0.004    | 3 | 1 | 23.6 | 0 |
| P12163_1_F3,10917 | R.SVDETLR.T          | 1123.626 | 0.00406  | 2 | 1 | 28.9 | 0 |
| P12163_1_F3,9889  | K.AVAAAETGSAAEEK.Q   | 1842.006 | 0.00455  | 3 | 1 | 39.8 | 0 |
| P12163_1_F3,9922  | K.AVAAAETGSAAEEK.Q   | 1842.006 | 0.00514  | 2 | 1 | 34   | 0 |
| P12163_1_F3,10130 | K.AVAAAETGSAAEEK.Q   | 1842.006 | 0.00422  | 3 | 1 | 61.8 | 0 |
| P12163_1_F3,10165 | K.AVAAAETGSAAEEK.Q   | 1842.006 | 0.00314  | 2 | 1 | 36.8 | 0 |
| P12163_1_F3,12008 | K.AVAAAETGSAAEEK.Q   | 1842.006 | 0.00431  | 3 | 1 | 36.6 | 0 |
| P12163_1_F3,12027 | K.AVAAAETGSAAEEK.Q   | 1842.006 | 0.00314  | 2 | 1 | 65.8 | 0 |
| P12163_1_F4,9231  | K.AVAAAETGSAAEEK.Q   | 1842.006 | 0.00653  | 3 | 1 | 27.9 | 0 |
| P12163_1_F4,9844  | K.AVAAAETGSAAEEK.Q   | 1842.006 | 0.00605  | 3 | 1 | 46.2 | 0 |
| P12163_1_F4,10324 | K.AVAAAETGSAAEEK.Q   | 1842.006 | 0.00306  | 2 | 1 | 39.4 | 0 |
| P12163_1_F4,10540 | K.AVAAAETGSAAEEK.Q   | 1842.006 | 0.00866  | 3 | 1 | 59.3 | 0 |
| P12163_1_F4,10591 | K.AVAAAETGSAAEEK.Q   | 1842.006 | 0.00228  | 2 | 1 | 39.6 | 0 |
| P12163_1_F4,12542 | K.AVAAAETGSAAEEK.Q   | 1842.006 | 0.0026   | 2 | 1 | 64.3 | 0 |
| P12163_1_F4,12550 | K.AVAAAETGSAAEEK.Q   | 1842.006 | 0.00575  | 3 | 1 | 66.7 | 0 |
| P12163_1_F4,20471 | K.AVAAAETGSAAEEK.Q   | 1842.006 | 0.00074  | 3 | 1 | 31.1 | 0 |
| P12163_1_F4,23652 | K.AVAAAETGSAAEEK.Q   | 1842.006 | 0.00252  | 2 | 1 | 44   | 0 |
| P12163_1_F4,23787 | K.AVAAAETGSAAEEK.Q   | 1842.006 | 0.00827  | 3 | 1 | 61.6 | 0 |
| P12163_1_F4,24439 | K.AVAAAETGSAAEEK.Q   | 1842.006 | 0.00006  | 2 | 1 | 24.9 | 0 |
| P12163_1_F4,24451 | K.AVAAAETGSAAEEK.Q   | 1842.006 | 0.00818  | 3 | 1 | 54.9 | 0 |
| P12163_1_F5,11253 | K.AVAAAETGSAAEEK.Q   | 1842.006 | 0.0048   | 2 | 1 | 69.4 | 0 |
| P12163_1_F5,11273 | K.AVAAAETGSAAEEK.Q   | 1842.006 | 0.00011  | 3 | 1 | 36.6 | 0 |
| P12163_1_F6,12119 | K.AVAAAETGSAAEEK.Q   | 1842.006 | 0.00148  | 2 | 1 | 32.3 | 0 |
| P12163_1_F7,10953 | K.AVAAAETGSAAEEK.Q   | 1842.006 | -0.00283 | 3 | 1 | 56.8 | 0 |
| P12163_2_F1,9427  | K.AVAAAETGSAAEEK.Q   | 1842.006 | 0.00792  | 2 | 1 | 52.7 | 0 |
| P12163_2_F1,9694  | K.AVAAAETGSAAEEK.Q   | 1842.006 | 0.00908  | 2 | 1 | 27.9 | 0 |
| P12163_2_F1,9716  | K.AVAAAETGSAAEEK.Q   | 1842.006 | 0.00548  | 3 | 1 | 45.8 | 0 |
| P12163_2_F1,11591 | K.AVAAAETGSAAEEK.Q   | 1842.006 | 0.00322  | 2 | 1 | 75   | 0 |
| P12163_2_F1,11602 | K.AVAAAETGSAAEEK.Q   | 1842.006 | 0.00719  | 3 | 1 | 68.8 | 0 |
| P12163_2_F1,11892 | K.AVAAAETGSAAEEK.Q   | 1842.006 | 0.00038  | 2 | 1 | 78.8 | 0 |
| P12163_2_F1,12016 | K.AVAAAETGSAAEEK.Q   | 1842.006 | 0.00566  | 3 | 1 | 41.2 | 0 |
| P12163_2_F1,12166 | K.AVAAAETGSAAEEK.Q   | 1842.006 | 0.00558  | 2 | 1 | 26.5 | 0 |
| P12163_2_F4,10570 | K.AVAAAETGSAAEEK.Q   | 1842.006 | 0.00164  | 3 | 1 | 56.2 | 0 |
| P12163_2_F4,10578 | K.AVAAAETGSAAEEK.Q   | 1842.006 | -0.00162 | 2 | 1 | 78.9 | 0 |
| P12163_2_S3,10678 | K.AVAAAETGSAAEEK.Q   | 1842.006 | 0.00293  | 3 | 1 | 45.4 | 0 |
| P12163_1_F3,7898  | K.GGGGGGGDGS GGFSG   | 2508.144 | 0.00872  | 3 | 1 | 47.8 | 0 |
| P12163_1_F3,9000  | K.GGGGGGGDGS GGFSG   | 2508.144 | 0.00854  | 3 | 1 | 58   | 0 |
| P12163_1_F9,8681  | K.GGGGGGGDGS GGFSG   | 2508.144 | 0.00146  | 3 | 1 | 33.4 | 0 |
| P12163_1_S1,9223  | K.LVDHNDEN.-         | 1259.617 | 0.00585  | 2 | 1 | 29   | 0 |
| P12163_1_F3,11451 | K.SSVVVL.R.C         | 1063.678 | 0.00435  | 3 | 1 | 28.5 | 0 |
| P12163_2_F1,10898 | K.SSVVVL.R.C         | 1063.678 | 0.00375  | 3 | 1 | 31.6 | 0 |
| P12163_2_F2,3081  | K.SSVVVL.R.C         | 1063.678 | 0.00231  | 2 | 1 | 35   | 0 |
| P12163_1_F4,16647 | K.STPEVVK.S          | 1514.904 | 0.00533  | 2 | 1 | 28.6 | 0 |
| P12163_1_F7,14862 | K.STPEVVK.S          | 1514.904 | 0.001    | 3 | 1 | 22.3 | 0 |
| P12163_2_F1,15771 | K.STPEVVK.S          | 1514.904 | 0.00563  | 2 | 1 | 29.2 | 0 |

|                   |                  |          |         |   |   |      |   |
|-------------------|------------------|----------|---------|---|---|------|---|
| P12163_2_F1,16026 | K.STPEVVFK.S     | 1514.904 | 0.00487 | 3 | 1 | 28.8 | 0 |
| P12163_2_F1,16036 | K.STPEVVFK.S     | 1514.904 | 0.00659 | 2 | 1 | 28.7 | 0 |
| P12163_2_F4,14513 | K.STPEVVFK.S     | 1514.904 | 0.00046 | 3 | 1 | 22.2 | 0 |
| P12163_2_S5,14322 | K.STPEVVFK.S     | 1514.904 | 0.00009 | 2 | 1 | 24.3 | 0 |
| P12163_1_F4,23200 | R.LGTFVFK.G      | 1419.882 | 0.00102 | 2 | 1 | 26.4 | 0 |
| P12163_1_F5,21953 | R.LGTFVFK.G      | 1419.882 | 0.00604 | 2 | 1 | 28.8 | 0 |
| P12163_1_F7,20507 | R.LGTFVFK.G      | 1419.882 | 0.00151 | 3 | 1 | 23.7 | 0 |
| P12163_1_S10,2017 | R.LGTFVFK.G      | 1419.882 | 0.00457 | 3 | 1 | 24.2 | 0 |
| P12163_1_F4,8976  | R.M*TGSQSVSADK.A | 1734.915 | 0.01198 | 2 | 1 | 25.7 | 0 |
| P12163_1_F4,9000  | R.M*TGSQSVSADK.A | 1734.915 | 0.00686 | 3 | 1 | 45.5 | 0 |
| P12163_1_F4,11207 | R.M*TGSQSVSADK.A | 1734.915 | 0.00509 | 3 | 1 | 33.5 | 0 |
| P12163_1_F4,11224 | R.M*TGSQSVSADK.A | 1734.915 | 0.00494 | 2 | 1 | 49.8 | 0 |
| P12163_1_F9,8374  | R.M*TGSQSVSADK.A | 1734.915 | 0.00464 | 3 | 1 | 35.4 | 0 |
| P12163_1_F9,10642 | R.M*TGSQSVSADK.A | 1734.915 | 0.00623 | 3 | 1 | 23.3 | 0 |
| P12163_2_F1,10336 | R.M*TGSQSVSADK.A | 1734.915 | 0.00944 | 2 | 1 | 32.8 | 0 |
| P12163_2_F1,10352 | R.M*TGSQSVSADK.A | 1734.915 | 0.0092  | 3 | 1 | 22.1 | 0 |
| P12163_1_F4,9634  | R.MTGSQSVSADK.A  | 1718.92  | 0.00407 | 3 | 1 | 29.8 | 0 |
| P12163_1_F4,9743  | R.MTGSQSVSADK.A  | 1718.92  | 0.00626 | 2 | 1 | 31.9 | 0 |
| P12163_1_F4,11152 | R.MTGSQSVSADK.A  | 1718.92  | 0.00824 | 3 | 1 | 44.4 | 0 |
| P12163_1_F4,11154 | R.MTGSQSVSADK.A  | 1718.92  | 0.01042 | 2 | 1 | 39.6 | 0 |
| P12163_2_F1,8826  | R.MTGSQSVSADK.A  | 1718.92  | 0.00524 | 3 | 1 | 24.1 | 0 |
| P12163_2_F1,10280 | R.MTGSQSVSADK.A  | 1718.92  | 0.00594 | 2 | 1 | 49.2 | 0 |
| P12163_2_F1,10294 | R.MTGSQSVSADK.A  | 1718.92  | 0.00599 | 3 | 1 | 41.6 | 0 |
| P12163_2_F1,11027 | R.MTGSQSVSADK.A  | 1718.92  | 0.00392 | 2 | 1 | 24   | 0 |
| P12163_2_F8_12070 | R.MTGSQSVSADK.A  | 1718.92  | 0.00506 | 3 | 1 | 23.6 | 0 |
| P12163_1_F3,20158 | R.VAADPQFPFK.V   | 1727.994 | 0.006   | 2 | 1 | 30.8 | 0 |
| P12163_1_F3,20212 | R.VAADPQFPFK.V   | 1727.994 | 0.00478 | 3 | 1 | 30   | 0 |
| P12163_1_F3,23583 | R.YQTLNGIEFLAK.S | 2118.242 | 0.00319 | 3 | 1 | 28.2 | 0 |
| P12163_1_F3,26651 | R.YQTLNGIEFLAK.S | 2118.242 | 0.00373 | 2 | 1 | 24.9 | 0 |
| P12163_1_F3,26809 | R.YQTLNGIEFLAK.S | 2118.242 | 0.01279 | 3 | 1 | 42.5 | 0 |
| P12163_1_F3,14215 | K.ASDVPTSLSANK.D | 1798.017 | 0.00471 | 2 | 1 | 30.2 | 0 |
| P12163_1_F4,12855 | K.ASDVPTSLSANK.D | 1798.017 | 0.00507 | 3 | 1 | 36.3 | 0 |
| P12163_1_F4,14642 | K.ASDVPTSLSANK.D | 1798.017 | 0.00483 | 2 | 1 | 40.6 | 0 |
| P12163_1_F4,14658 | K.ASDVPTSLSANK.D | 1798.017 | 0.00876 | 3 | 1 | 49.3 | 0 |
| P12163_2_F1,13732 | K.ASDVPTSLSANK.D | 1798.017 | 0.006   | 3 | 1 | 41.9 | 0 |
| P12163_2_F1,13761 | K.ASDVPTSLSANK.D | 1798.017 | 0.00595 | 2 | 1 | 44.8 | 0 |
| P12163_1_F4,13324 | K.FEHHSVFPAR.T   | 1530.812 | 0.0049  | 4 | 1 | 36   | 0 |
| P12163_1_F4,13326 | K.FEHHSVFPAR.T   | 1530.812 | 0.00183 | 3 | 1 | 31.5 | 0 |
| P12163_1_F4,13338 | K.FEHHSVFPAR.T   | 1530.812 | 0.01009 | 2 | 1 | 25.4 | 0 |
| P12163_2_S3,11618 | K.FEHHSVFPAR.T   | 1530.812 | 0.00243 | 3 | 1 | 26.2 | 0 |
| P12163_1_F4,19752 | K.LNLAEIGPK.F    | 1562.973 | 0.01358 | 2 | 1 | 36.4 | 0 |
| P12163_1_F4,19846 | K.LNLAEIGPK.F    | 1562.973 | 0.01133 | 3 | 1 | 44.1 | 0 |
| P12163_1_F4,19964 | K.LNLAEIGPK.F    | 1562.973 | 0.01256 | 2 | 1 | 38.5 | 0 |
| P12163_1_F4,20047 | K.LNLAEIGPK.F    | 1562.973 | 0.00437 | 3 | 1 | 35   | 0 |
| P12163_1_F4,20180 | K.LNLAEIGPK.F    | 1562.973 | 0.0095  | 2 | 1 | 36.2 | 0 |
| P12163_1_F4,20287 | K.LNLAEIGPK.F    | 1562.973 | 0.00665 | 3 | 1 | 51   | 0 |
| P12163_1_F5,18862 | K.LNLAEIGPK.F    | 1562.973 | 0.00572 | 2 | 1 | 34.7 | 0 |
| P12163_1_F5,18883 | K.LNLAEIGPK.F    | 1562.973 | 0.00272 | 3 | 1 | 45.8 | 0 |
| P12163_1_F7,17556 | K.LNLAEIGPK.F    | 1562.973 | 0.0017  | 3 | 1 | 23.8 | 0 |
| P12163_1_F7,17787 | K.LNLAEIGPK.F    | 1562.973 | 0.00239 | 3 | 1 | 34.7 | 0 |
| P12163_2_F1,19191 | K.LNLAEIGPK.F    | 1562.973 | 0.00994 | 2 | 1 | 40   | 0 |

|                                       |          |          |   |   |      |   |
|---------------------------------------|----------|----------|---|---|------|---|
| P12163_2_F1,19229 K.LNLAEIGPK.F       | 1562.973 | 0.00368  | 3 | 1 | 32.1 | 0 |
| P12163_2_F1,19388 K.LNLAEIGPK.F       | 1562.973 | 0.00916  | 2 | 1 | 36.4 | 0 |
| P12163_2_F1,19428 K.LNLAEIGPK.F       | 1562.973 | 0.00467  | 3 | 1 | 44.3 | 0 |
| P12163_2_F1,19606 K.LNLAEIGPK.F       | 1562.973 | 0.00442  | 2 | 1 | 40.9 | 0 |
| P12163_2_F1,19655 K.LNLAEIGPK.F       | 1562.973 | 0.00518  | 3 | 1 | 50.9 | 0 |
| P12163_1_F3,13704 K.SELDVDGVK.W       | 1569.894 | 0.01121  | 2 | 1 | 36.9 | 0 |
| P12163_1_F4,15122 K.SELDVDGVK.W       | 1569.894 | 0.00683  | 2 | 1 | 43.9 | 0 |
| P12163_1_F7,13360 K.SELDVDGVK.W       | 1569.894 | 0.00179  | 3 | 1 | 23.7 | 0 |
| P12163_2_F1,14062 K.SELDVDGVK.W       | 1569.894 | 0.00074  | 3 | 1 | 29.8 | 0 |
| P12163_2_F1,14068 K.SELDVDGVK.W       | 1569.894 | 0.00349  | 2 | 1 | 41.1 | 0 |
| P12163_1_F3,18477 K.VDMGEPILK.A       | 1609.944 | 0.0134   | 2 | 1 | 26.6 | 0 |
| P12163_1_F3,18487 K.VDMGEPILK.A       | 1609.944 | 0.00791  | 3 | 1 | 43.9 | 0 |
| P12163_1_F6,17535 K.YHGLGNDFILVDNR.N  | 1937.018 | 0.00222  | 3 | 1 | 30   | 0 |
| P12163_1_F6,17581 K.YHGLGNDFILVDNR.N  | 1937.018 | -0.00134 | 4 | 1 | 45.9 | 0 |
| P12163_1_F6,19480 K.YHGLGNDFILVDNR.N  | 1937.018 | 0.00357  | 3 | 1 | 55.9 | 0 |
| P12163_1_F6,19495 K.YHGLGNDFILVDNR.N  | 1937.018 | 0.00145  | 2 | 1 | 39.6 | 0 |
| P12163_1_F8,19566 K.YHGLGNDFILVDNR.N  | 1937.018 | 0.00183  | 2 | 1 | 52.5 | 0 |
| P12163_1_F8,19571 K.YHGLGNDFILVDNR.N  | 1937.018 | 0.00186  | 3 | 1 | 70.2 | 0 |
| P12163_2_F4,17977 K.YHGLGNDFILVDNR.N  | 1937.018 | -0.00135 | 3 | 1 | 30.4 | 0 |
| P12163_2_F4,18244 K.YHGLGNDFILVDNR.N  | 1937.018 | 0.00477  | 3 | 1 | 24.3 | 0 |
| P12163_2_F6,18975 K.YHGLGNDFILVDNR.N  | 1937.018 | 0.00561  | 3 | 1 | 67.4 | 0 |
| P12163_2_F6,18984 K.YHGLGNDFILVDNR.N  | 1937.018 | 0.00777  | 2 | 1 | 53.2 | 0 |
| P12163_2_F9,18072 K.YHGLGNDFILVDNR.N  | 1937.018 | -0.00066 | 3 | 1 | 33   | 0 |
| P12163_2_S5,16344 K.YHGLGNDFILVDNR.N  | 1937.018 | 0.00288  | 3 | 1 | 41.4 | 0 |
| P12163_1_F6,18998 R.ESGFLHFVK.Y       | 1671.968 | 0.00659  | 2 | 1 | 37.3 | 0 |
| P12163_1_F9,18538 R.ESGFLHFVK.Y       | 1671.968 | 0.00161  | 2 | 1 | 29.2 | 0 |
| P12163_2_F6,18509 R.ESGFLHFVK.Y       | 1671.968 | 0.00272  | 3 | 1 | 28.8 | 0 |
| P12163_2_F6,18532 R.ESGFLHFVK.Y       | 1671.968 | 0.00251  | 2 | 1 | 33.5 | 0 |
| P12163_2_F7,16526 R.ESGFLHFVK.Y       | 1671.968 | 0.00585  | 2 | 1 | 39.9 | 0 |
| P12163_1_F4,26429 R.FIAELENLNGK.Q     | 1856.074 | 0.00307  | 2 | 1 | 39   | 0 |
| P12163_1_F4,26471 R.FIAELENLNGK.Q     | 1856.074 | 0.00664  | 3 | 1 | 45.4 | 0 |
| P12163_1_F5,24271 R.FIAELENLNGK.Q     | 1856.074 | 0.01301  | 3 | 1 | 35.8 | 0 |
| P12163_1_F7,22972 R.FIAELENLNGK.Q     | 1856.074 | 0.00178  | 3 | 1 | 40.5 | 0 |
| P12163_2_F1,25345 R.FIAELENLNGK.Q     | 1856.074 | 0.00316  | 3 | 1 | 42.2 | 0 |
| P12163_1_F2,19959 R.TNTEFVEIISPSQLK.M | 2314.311 | 0.00741  | 3 | 1 | 32.6 | 0 |
| P12163_1_F2,21845 R.TNTEFVEIISPSQLK.M | 2314.311 | 0.00609  | 3 | 1 | 50.9 | 0 |
| P12163_1_S1,24852 K.ANNLVFVSGVLGLVPI  | 2522.48  | 0.00743  | 3 | 1 | 35.9 | 0 |
| P12163_1_S1,24886 K.ANNLVFVSGVLGLVPI  | 2522.48  | 0.00869  | 4 | 1 | 22   | 0 |
| P12163_1_F3,17863 K.APAALGPYSQAIK.A   | 1895.121 | 0.00581  | 3 | 1 | 42   | 0 |
| P12163_1_F3,17881 K.APAALGPYSQAIK.A   | 1895.121 | 0.00506  | 2 | 1 | 49.6 | 0 |
| P12163_1_F4,18425 K.APAALGPYSQAIK.A   | 1895.121 | 0.00692  | 3 | 1 | 39.6 | 0 |
| P12163_1_F6,17064 K.APAALGPYSQAIK.A   | 1895.121 | 0.00377  | 3 | 1 | 32   | 0 |
| P12163_1_F6,17147 K.APAALGPYSQAIK.A   | 1895.121 | -0.00076 | 2 | 1 | 28.3 | 0 |
| P12163_1_F6,17580 K.APAALGPYSQAIK.A   | 1895.121 | 0.00329  | 3 | 1 | 23.4 | 0 |
| P12163_1_F8,17438 K.APAALGPYSQAIK.A   | 1895.121 | 0.00587  | 3 | 1 | 33   | 0 |
| P12163_1_S10,1657 K.APAALGPYSQAIK.A   | 1895.121 | 0.00176  | 3 | 1 | 30.5 | 0 |
| P12163_2_F1,17704 K.APAALGPYSQAIK.A   | 1895.121 | 0.00557  | 3 | 1 | 37.1 | 0 |
| P12163_2_F1,17764 K.APAALGPYSQAIK.A   | 1895.121 | 0.00472  | 2 | 1 | 47.3 | 0 |
| P12163_2_F4,15862 K.APAALGPYSQAIK.A   | 1895.121 | 0.00074  | 3 | 1 | 33.9 | 0 |
| P12163_2_F6,16996 K.APAALGPYSQAIK.A   | 1895.121 | 0.01214  | 2 | 1 | 32.3 | 0 |
| P12163_2_F6,17024 K.APAALGPYSQAIK.A   | 1895.121 | 0.00662  | 3 | 1 | 47.8 | 0 |



|                   |                     |          |          |   |   |      |   |
|-------------------|---------------------|----------|----------|---|---|------|---|
| P12163_2_F7,15290 | K.APAALGPYSQAIK.A   | 1895.121 | 0.00132  | 2 | 1 | 63.2 | 0 |
| P12163_2_F7,15326 | K.APAALGPYSQAIK.A   | 1895.121 | 0.002    | 3 | 1 | 46.5 | 0 |
| P12163_1_F4,10783 | K.ASGADYSSVVK.T     | 1691.942 | 0.00825  | 2 | 1 | 30.8 | 0 |
| P12163_1_F4,11788 | K.ASGADYSSVVK.T     | 1691.942 | 0.00423  | 2 | 1 | 29.7 | 0 |
| P12163_1_F4,13566 | K.ASGADYSSVVK.T     | 1691.942 | 0.00507  | 2 | 1 | 56.6 | 0 |
| P12163_1_F4,13576 | K.ASGADYSSVVK.T     | 1691.942 | 0.00557  | 3 | 1 | 45.2 | 0 |
| P12163_1_F4,23689 | K.ASGADYSSVVK.T     | 1691.942 | 0.00458  | 3 | 1 | 22.7 | 0 |
| P12163_1_F5,12240 | K.ASGADYSSVVK.T     | 1691.942 | 0.00517  | 2 | 1 | 43.3 | 0 |
| P12163_1_F7,11899 | K.ASGADYSSVVK.T     | 1691.942 | 0.00182  | 3 | 1 | 35.3 | 0 |
| P12163_1_F9,12999 | K.ASGADYSSVVK.T     | 1691.942 | 0.00255  | 2 | 1 | 25.8 | 0 |
| P12163_1_F9,13112 | K.ASGADYSSVVK.T     | 1691.942 | 0.00506  | 3 | 1 | 27.3 | 0 |
| P12163_2_F1,10822 | K.EAVVTNK.A         | 1368.831 | 0.00619  | 3 | 1 | 29.8 | 0 |
| P12163_1_S1,20423 | K.FVSDTIEDQTEQVLK.N | 2360.281 | 0.00391  | 2 | 1 | 27.8 | 0 |
| P12163_1_S1,20525 | K.FVSDTIEDQTEQVLK.N | 2360.281 | 0.00951  | 3 | 1 | 25.1 | 0 |
| P12163_2_F1,18005 | K.NIGEILK.A         | 1394.883 | 0.00512  | 3 | 1 | 23.2 | 0 |
| P12163_1_F4,23753 | K.TTILLADLK.D       | 1596.019 | 0.00423  | 3 | 1 | 49.9 | 0 |
| P12163_1_F4,23783 | K.TTILLADLK.D       | 1596.019 | 0.00795  | 2 | 1 | 47.2 | 0 |
| P12163_1_F5,22272 | K.TTILLADLK.D       | 1596.019 | 0.00627  | 3 | 1 | 39.2 | 0 |
| P12163_1_F6,21934 | K.TTILLADLK.D       | 1596.019 | 0.003    | 3 | 1 | 38.8 | 0 |
| P12163_1_F7,20803 | K.TTILLADLK.D       | 1596.019 | 0.00264  | 3 | 1 | 39.6 | 0 |
| P12163_1_F7,21253 | K.TTILLADLK.D       | 1596.019 | 0.00432  | 3 | 1 | 38.2 | 0 |
| P12163_1_S10,2024 | K.TTILLADLK.D       | 1596.019 | 0.00645  | 3 | 1 | 24.6 | 0 |
| P12163_2_F1,23149 | K.TTILLADLK.D       | 1596.019 | 0.00552  | 3 | 1 | 43.1 | 0 |
| P12163_2_F4,17177 | K.TTILLADLK.D       | 1596.019 | 0.00072  | 3 | 1 | 23.8 | 0 |
| P12163_2_F4,20657 | K.TTILLADLK.D       | 1596.019 | 0.00615  | 3 | 1 | 34.2 | 0 |
| P12163_2_F4,20663 | K.TTILLADLK.D       | 1596.019 | 0.00287  | 2 | 1 | 35.5 | 0 |
| P12163_2_S5,19889 | K.TTILLADLK.D       | 1596.019 | 0.00318  | 3 | 1 | 38.3 | 0 |
| P12163_2_S5,20382 | K.TTILLADLK.D       | 1596.019 | 0.00876  | 3 | 1 | 28.1 | 0 |
| P12163_1_F4,14731 | K.TVNEIYAK.Y        | 1545.91  | 0.00412  | 2 | 1 | 34   | 0 |
| P12163_1_F6,14259 | K.TVNEIYAK.Y        | 1545.91  | 0.00988  | 2 | 1 | 25.4 | 0 |
| P12163_2_F1,10644 | K.TVNEIYAK.Y        | 1545.91  | -0.00092 | 3 | 1 | 22.2 | 0 |
| P12163_2_F1,13710 | K.TVNEIYAK.Y        | 1545.91  | 0.01048  | 3 | 1 | 32.6 | 0 |
| P12163_1_F5,18347 | R.ATYQVAALPLDAR.V   | 1692.959 | 0.00159  | 2 | 1 | 27.7 | 0 |
| P12163_1_F8,16696 | R.ATYQVAALPLDAR.V   | 1692.959 | -0.00063 | 2 | 1 | 30.8 | 0 |
| P12163_1_F8,18936 | R.ATYQVAALPLDAR.V   | 1692.959 | 0.00353  | 2 | 1 | 66.4 | 0 |
| P12163_1_F8,18966 | R.ATYQVAALPLDAR.V   | 1692.959 | 0.00246  | 3 | 1 | 35.7 | 0 |
| P12163_2_F2,19056 | R.ATYQVAALPLDAR.V   | 1692.959 | -0.00025 | 2 | 1 | 48.5 | 0 |
| P12163_2_F6,16161 | R.ATYQVAALPLDAR.V   | 1692.959 | 0.00063  | 2 | 1 | 39.3 | 0 |
| P12163_2_F6,16166 | R.ATYQVAALPLDAR.V   | 1692.959 | 0.00213  | 3 | 1 | 58.7 | 0 |
| P12163_2_F6,18503 | R.ATYQVAALPLDAR.V   | 1692.959 | 0.00457  | 2 | 1 | 39.3 | 0 |
| P12163_1_F9,14640 | K.EHILLAK.Q         | 1431.914 | 0.00521  | 3 | 1 | 36.8 | 0 |
| P12163_1_F9,14672 | K.EHILLAK.Q         | 1431.914 | 0.00758  | 2 | 1 | 32.2 | 0 |
| P12163_1_F9,14844 | K.EHILLAK.Q         | 1431.914 | 0.005    | 3 | 1 | 36.5 | 0 |
| P12163_1_F9,20064 | K.EHILLAK.Q         | 1431.914 | 0.01007  | 3 | 1 | 26   | 0 |
| P12163_2_F10,1310 | K.EHILLAK.Q         | 1431.914 | 0.00116  | 3 | 1 | 26.2 | 0 |
| P12163_2_F9,13773 | K.EHILLAK.Q         | 1431.914 | 0.00569  | 3 | 1 | 37.1 | 0 |
| P12163_1_F6,12884 | K.KYDEIDAAPEER.A    | 2044.081 | 0.00618  | 3 | 1 | 39.3 | 0 |
| P12163_1_F8,11740 | K.KYDEIDAAPEER.A    | 2044.081 | 0.01176  | 2 | 1 | 32.2 | 0 |
| P12163_1_F8,12727 | K.KYDEIDAAPEER.A    | 2044.081 | 0.00132  | 2 | 1 | 38.8 | 0 |
| P12163_1_F9,12845 | K.KYDEIDAAPEER.A    | 2044.081 | 0.00351  | 3 | 1 | 30.8 | 0 |
| P12163_2_F6,12270 | K.KYDEIDAAPEER.A    | 2044.081 | 0.0009   | 3 | 1 | 30   | 0 |

|                   |                      |          |          |   |   |      |   |
|-------------------|----------------------|----------|----------|---|---|------|---|
| P12163_2_F6,12279 | K.KYDEIDAAPeer.A     | 2044.081 | 0.00542  | 2 | 1 | 41.3 | 0 |
| P12163_1_F3,23963 | K.QVGVPNM*VVFLNK.C   | 2069.204 | 0.00465  | 2 | 1 | 34.6 | 0 |
| P12163_1_F3,23886 | K.QVGVPNMVVFLNK.Q    | 2053.209 | 0.00335  | 2 | 1 | 24.6 | 0 |
| P12163_1_F3,23899 | K.QVGVPNMVVFLNK.Q    | 2053.209 | 0.00518  | 3 | 1 | 34.5 | 0 |
| P12163_1_F2,20474 | K.VGETVDLVGLK.E      | 1738.057 | 0.00494  | 3 | 1 | 38.5 | 0 |
| P12163_1_F3,17757 | K.VGETVDLVGLK.E      | 1738.057 | 0.00741  | 2 | 1 | 30.3 | 0 |
| P12163_1_F3,17883 | K.VGETVDLVGLK.E      | 1738.057 | 0.00425  | 3 | 1 | 23.6 | 0 |
| P12163_1_F3,20886 | K.VGETVDLVGLK.E      | 1738.057 | 0.00653  | 2 | 1 | 69   | 0 |
| P12163_1_F4,21491 | K.VGETVDLVGLK.E      | 1738.057 | 0.0011   | 3 | 1 | 42.2 | 0 |
| P12163_1_F4,21517 | K.VGETVDLVGLK.E      | 1738.057 | -0.00017 | 2 | 1 | 66.6 | 0 |
| P12163_1_F6,19780 | K.VGETVDLVGLK.E      | 1738.057 | 0.00057  | 2 | 1 | 29.4 | 0 |
| P12163_1_F6,19841 | K.VGETVDLVGLK.E      | 1738.057 | -0.00265 | 3 | 1 | 29.4 | 0 |
| P12163_1_F7,19466 | K.VGETVDLVGLK.E      | 1738.057 | 0.00944  | 3 | 1 | 44   | 0 |
| P12163_2_F2,20489 | K.VGETVDLVGLK.E      | 1738.057 | -0.0016  | 3 | 1 | 32.6 | 0 |
| P12163_2_F4,19038 | K.VGETVDLVGLK.E      | 1738.057 | 0.00843  | 2 | 1 | 35.1 | 0 |
| P12163_2_F4,19064 | K.VGETVDLVGLK.E      | 1738.057 | 0.00299  | 3 | 1 | 36.7 | 0 |
| P12163_1_F5,12363 | R.GENQWVDK.I         | 1583.864 | 0.01429  | 2 | 1 | 31.8 | 0 |
| P12163_2_F1,12655 | R.GENQWVDK.I         | 1583.864 | 0.00719  | 2 | 1 | 35.7 | 0 |
| P12163_2_F2,13089 | R.GENQWVDK.I         | 1583.864 | 0.00787  | 2 | 1 | 39   | 0 |
| P12163_1_F8,17660 | R.GITINTATVEYETENR.. | 2115.087 | 0.00448  | 2 | 1 | 42.9 | 0 |
| P12163_2_F6,17210 | R.GITINTATVEYETENR.. | 2115.087 | 0.00124  | 2 | 1 | 51.2 | 0 |
| P12163_2_F6,17218 | R.GITINTATVEYETENR.. | 2115.087 | -0.00119 | 3 | 1 | 37.9 | 0 |
| P12163_1_F2,10182 | R.HYAHVDCPGHADYVf    | 2377.197 | 0.00784  | 3 | 1 | 45.9 | 0 |
| P12163_1_F3,10373 | R.HYAHVDCPGHADYVf    | 2377.197 | 0.00901  | 3 | 1 | 24   | 0 |
| P12163_2_F2,10303 | R.HYAHVDCPGHADYVf    | 2377.197 | 0.00538  | 3 | 1 | 41.3 | 0 |
| P12163_2_F2,10326 | R.HYAHVDCPGHADYVf    | 2377.197 | 0.00593  | 4 | 1 | 34.3 | 0 |
| P12163_2_S3,9628  | R.HYAHVDCPGHADYVf    | 2377.197 | 0.00605  | 4 | 1 | 37.4 | 0 |
| P12163_1_F3,18866 | R.NFTVTGVEM*FQK.T    | 2025.094 | 0.00582  | 3 | 1 | 38.5 | 0 |
| P12163_1_F3,18871 | R.NFTVTGVEM*FQK.T    | 2025.094 | 0.00801  | 2 | 1 | 29.1 | 0 |
| P12163_1_F4,19404 | R.NFTVTGVEM*FQK.T    | 2025.094 | -0.00045 | 2 | 1 | 39.1 | 0 |
| P12163_1_F4,21968 | R.NFTVTGVEM*FQK.T    | 2025.094 | 0.00981  | 3 | 1 | 36.1 | 0 |
| P12163_1_F4,23042 | R.NFTVTGVEM*FQK.T    | 2025.094 | 0.01773  | 3 | 1 | 55.4 | 0 |
| P12163_1_F3,21321 | R.NFTVTGVEMFQK.T     | 2009.099 | 0.00606  | 2 | 1 | 59.4 | 0 |
| P12163_1_F3,21401 | R.NFTVTGVEMFQK.T     | 2009.099 | 0.00603  | 3 | 1 | 61.9 | 0 |
| P12163_1_F4,21960 | R.NFTVTGVEMFQK.T     | 2009.099 | 0.00561  | 3 | 1 | 39.9 | 0 |
| P12163_1_F4,21961 | R.NFTVTGVEMFQK.T     | 2009.099 | 0.00078  | 2 | 1 | 49.9 | 0 |
| P12163_2_F1,21503 | R.NFTVTGVEMFQK.T     | 2009.099 | 0.00846  | 3 | 1 | 38.7 | 0 |
| P12163_2_F1,21528 | R.NFTVTGVEMFQK.T     | 2009.099 | 0.01138  | 2 | 1 | 51.3 | 0 |
| P12163_1_F2,5121  | R.TTDVTGR.V          | 1053.584 | 0.00391  | 3 | 1 | 25.2 | 0 |
| P12163_1_F2,6507  | R.TTDVTGR.V          | 1053.584 | 0.00355  | 3 | 1 | 29.4 | 0 |
| P12163_1_F4,17723 | K.AVNGLLTPK.N        | 1520.962 | 0.00634  | 3 | 1 | 36.5 | 0 |
| P12163_1_F4,17736 | K.AVNGLLTPK.N        | 1520.962 | 0.00548  | 2 | 1 | 27.7 | 0 |
| P12163_2_F1,16834 | K.AVNGLLTPK.N        | 1520.962 | 0.0044   | 2 | 1 | 38.2 | 0 |
| P12163_1_S1,14581 | K.GENLLEM*EPEER.S    | 1765.858 | 0.00686  | 2 | 1 | 27.3 | 0 |
| P12163_1_S1,17217 | K.GENLLEMPEER.S      | 1749.863 | 0.00257  | 2 | 1 | 35.1 | 0 |
| P12163_1_S1,17234 | K.GENLLEMPEER.S      | 1749.863 | 0.00165  | 3 | 1 | 39.6 | 0 |
| P12163_1_F7,18278 | K.GVNLLVNEGEVHAIM    | 2404.348 | -0.00262 | 3 | 1 | 35.9 | 0 |
| P12163_1_F7,18295 | K.GVNLLVNEGEVHAIM    | 2404.348 | 0.00303  | 4 | 1 | 37.4 | 0 |
| P12163_1_F7,20630 | K.GVNLLVNEGEVHAIM    | 2404.348 | 0.01147  | 4 | 1 | 34.5 | 0 |
| P12163_1_F7,20820 | K.GVNLLVNEGEVHAIM    | 2404.348 | 0.00557  | 3 | 1 | 28   | 0 |
| P12163_1_F8,19232 | K.GVNLLVNEGEVHAIM    | 2404.348 | 0.00467  | 4 | 1 | 31.9 | 0 |

|                   |                       |          |          |   |   |      |   |
|-------------------|-----------------------|----------|----------|---|---|------|---|
| P12163_1_F8,21676 | K.GVNLLVNEGEVHAIM     | 2404.348 | 0.00631  | 4 | 1 | 26.4 | 0 |
| P12163_2_S5,17658 | K.GVNLLVNEGEVHAIM     | 2404.348 | 0.00411  | 4 | 1 | 38.3 | 0 |
| P12163_2_S5,17665 | K.GVNLLVNEGEVHAIM     | 2404.348 | -0.00385 | 3 | 1 | 51.7 | 0 |
| P12163_1_F7,20651 | K.GVNLLVNEGEVHAIM     | 2388.353 | 0.00482  | 3 | 1 | 68.1 | 0 |
| P12163_1_F7,20668 | K.GVNLLVNEGEVHAIM     | 2388.353 | 0.00292  | 4 | 1 | 48.9 | 0 |
| P12163_2_S5,19975 | K.GVNLLVNEGEVHAIM     | 2388.353 | 0.00812  | 4 | 1 | 23   | 0 |
| P12163_2_S5,19993 | K.GVNLLVNEGEVHAIM     | 2388.353 | 0.00743  | 3 | 1 | 42   | 0 |
| P12163_1_F6,17358 | K.NSLLM*ITHYR.R       | 1567.857 | 0.00217  | 3 | 1 | 30.8 | 0 |
| P12163_1_F6,18591 | K.NSLLM*ITHYR.R       | 1567.857 | 0.00346  | 3 | 1 | 33.6 | 0 |
| P12163_2_F7,15186 | K.NSLLM*ITHYR.R       | 1567.857 | 0.00091  | 3 | 1 | 32.6 | 0 |
| P12163_2_F7,16001 | K.NSLLM*ITHYR.R       | 1567.857 | 0.00136  | 3 | 1 | 34.7 | 0 |
| P12163_2_S5,16020 | K.NSLLM*ITHYR.R       | 1567.857 | 0.00022  | 3 | 1 | 29.5 | 0 |
| P12163_1_F5,18374 | K.NSLLMITHYR.R        | 1551.862 | 0.00259  | 3 | 1 | 24.6 | 0 |
| P12163_1_F6,18598 | K.NSLLMITHYR.R        | 1551.862 | 0.00316  | 3 | 1 | 55.7 | 0 |
| P12163_2_F4,17326 | K.NSLLMITHYR.R        | 1551.862 | 0.00283  | 3 | 1 | 52.3 | 0 |
| P12163_2_F6,18052 | K.NSLLMITHYR.R        | 1551.862 | -0.00077 | 3 | 1 | 25.8 | 0 |
| P12163_2_F7,16002 | K.NSLLMITHYR.R        | 1551.862 | -0.00083 | 3 | 1 | 31.1 | 0 |
| P12163_2_S5,17290 | K.NSLLMITHYR.R        | 1551.862 | 0.00022  | 3 | 1 | 51.9 | 0 |
| P12163_1_S1,23712 | K.SQPLLQVTGLTAVIAE    | 2463.464 | 0.00623  | 3 | 1 | 73.1 | 0 |
| P12163_1_F5,5582  | K.SSSDGQDEK.S         | 1560.796 | 0.0066   | 2 | 1 | 31   | 0 |
| P12163_2_F1,5720  | K.SSSDGQDEK.S         | 1560.796 | 0.00594  | 2 | 1 | 31.7 | 0 |
| P12163_1_F2,15046 | K.TGDASIATVLEEGGYK    | 2219.202 | 0.00791  | 3 | 1 | 30.4 | 0 |
| P12163_1_F2,18999 | K.TGDASIATVLEEGGYK    | 2219.202 | 0.00638  | 3 | 1 | 40.3 | 0 |
| P12163_1_F2,20870 | K.TGDASIATVLEEGGYK    | 2219.202 | 0.00443  | 3 | 1 | 57.2 | 0 |
| P12163_1_F2,20894 | K.TGDASIATVLEEGGYK    | 2219.202 | 0.00726  | 2 | 1 | 48.9 | 0 |
| P12163_1_F8,20838 | K.TGDASIATVLEEGGYK    | 2219.202 | 0.00671  | 3 | 1 | 50.9 | 0 |
| P12163_2_F6,18441 | K.TGDASIATVLEEGGYK    | 2219.202 | 0.00572  | 3 | 1 | 36.6 | 0 |
| P12163_2_F6,20425 | K.TGDASIATVLEEGGYK    | 2219.202 | 0.00371  | 3 | 1 | 45.4 | 0 |
| P12163_1_F7,18887 | K.VLVGHPDYEVTEGSV'    | 2583.428 | -0.00102 | 3 | 1 | 32.8 | 0 |
| P12163_2_F10,1740 | K.VLVGHPDYEVTEGSV'    | 2583.428 | 0.0051   | 4 | 1 | 30.8 | 0 |
| P12163_2_S5,18127 | K.VLVGHPDYEVTEGSV'    | 2583.428 | 0.0051   | 4 | 1 | 22.9 | 0 |
| P12163_2_S5,18140 | K.VLVGHPDYEVTEGSV'    | 2583.428 | 0.00267  | 3 | 1 | 56.6 | 0 |
| P12163_1_F3,9219  | R.NVNEGFSGGER.K       | 1469.729 | 0.00455  | 3 | 1 | 40.9 | 0 |
| P12163_1_F3,10487 | R.NVNEGFSGGER.K       | 1469.729 | 0.00545  | 2 | 1 | 49.2 | 0 |
| P12163_1_F4,10978 | R.NVNEGFSGGER.K       | 1469.729 | 0.00502  | 2 | 1 | 31.8 | 0 |
| P12163_2_F1,10054 | R.NVNEGFSGGER.K       | 1469.729 | 0.00564  | 2 | 1 | 44.5 | 0 |
| P12163_1_F4,13242 | K.DVELQAK.V           | 1410.841 | 0.00651  | 2 | 1 | 33.2 | 0 |
| P12163_1_F4,13291 | K.DVELQAK.V           | 1410.841 | 0.00568  | 3 | 1 | 33.7 | 0 |
| P12163_1_F5,11810 | K.DVELQAK.V           | 1410.841 | 0.00717  | 2 | 1 | 32.6 | 0 |
| P12163_1_F5,11827 | K.DVELQAK.V           | 1410.841 | 0.00733  | 3 | 1 | 23.3 | 0 |
| P12163_2_F1,12257 | K.DVELQAK.V           | 1410.841 | 0.00631  | 2 | 1 | 33   | 0 |
| P12163_2_F1,12273 | K.DVELQAK.V           | 1410.841 | 0.00496  | 3 | 1 | 30.9 | 0 |
| P12163_1_F4,7216  | K.GCSFHR.I            | 1067.536 | 0.00407  | 3 | 1 | 23.9 | 0 |
| P12163_1_F7,20472 | K.HVGPGVLSM*ANAGP     | 3427.771 | 0.00805  | 4 | 1 | 40   | 0 |
| P12163_1_F7,20485 | K.HVGPGVLSM*ANAGP     | 3427.771 | -0.01271 | 3 | 1 | 22.6 | 0 |
| P12163_1_F7,20467 | K.HVGPGVLSMANAGPN     | 3411.776 | 0.00781  | 4 | 1 | 30.3 | 0 |
| P12163_1_F4,7410  | K.TAENFR.Q ! K.TAENFF | 1041.563 | 0.00249  | 3 | 1 | 33.7 | 0 |
| P12163_2_F2,7039  | K.TAENFR.Q ! K.TAENFF | 1041.563 | 0.00225  | 3 | 1 | 31.4 | 0 |
| P12163_2_F1,14987 | K.TPWLDNR.H           | 1205.658 | 0.00268  | 2 | 1 | 26.8 | 0 |
| P12163_1_F8,20834 | K.VFFDVDIGGKPAGR.I    | 2086.191 | 0.00199  | 2 | 1 | 25.2 | 0 |
| P12163_2_F6,20417 | K.VFFDVDIGGKPAGR.I    | 2086.191 | 0.00172  | 3 | 1 | 26.7 | 0 |

|                   |                    |          |          |   |   |      |   |
|-------------------|--------------------|----------|----------|---|---|------|---|
| P12163_2_F6,20448 | K.VFFDVDIGGKPAGR.I | 2086.191 | 0.00007  | 2 | 1 | 41.2 | 0 |
| P12163_2_F8,12070 | K.VFFDVDIGGKPAGR.I | 2086.191 | -0.00336 | 4 | 1 | 24.7 | 0 |
| P12163_1_F5,9906  | R.ALCTGEK.G        | 1386.787 | 0.00705  | 2 | 1 | 26.7 | 0 |
| P12163_1_F6,10902 | R.ALCTGEK.G        | 1386.787 | 0.01195  | 2 | 1 | 26.2 | 0 |
| P12163_1_F8,10102 | R.ALCTGEK.G        | 1386.787 | 0.00237  | 2 | 1 | 27.1 | 0 |
| P12163_2_F2,10720 | R.ALCTGEK.G        | 1386.787 | 0.00655  | 2 | 1 | 27   | 0 |
| P12163_2_F2,10838 | R.ALCTGEK.G        | 1386.787 | 0.00185  | 3 | 1 | 29.9 | 0 |
| P12163_2_F2,11178 | R.ALCTGEK.G        | 1386.787 | 0.00683  | 2 | 1 | 26.2 | 0 |
| P12163_1_F7,15493 | R.HVVFGHVIDGM*DVV  | 2000.069 | 0.00396  | 4 | 1 | 33.2 | 0 |
| P12163_1_F7,15495 | R.HVVFGHVIDGM*DVV  | 2000.069 | -0.00026 | 3 | 1 | 51.5 | 0 |
| P12163_1_F7,15532 | R.HVVFGHVIDGM*DVV  | 2000.069 | -0.00063 | 2 | 1 | 50.3 | 0 |
| P12163_1_F7,17891 | R.HVVFGHVIDGM*DVV  | 2000.069 | 0.00268  | 4 | 1 | 38.5 | 0 |
| P12163_1_F7,17899 | R.HVVFGHVIDGM*DVV  | 2000.069 | 0.00205  | 3 | 1 | 63.9 | 0 |
| P12163_1_F8,89    | R.HVVFGHVIDGM*DVV  | 2000.069 | -0.00004 | 4 | 1 | 31.2 | 0 |
| P12163_2_F10,1454 | R.HVVFGHVIDGM*DVV  | 2000.069 | 0.00404  | 4 | 1 | 25.2 | 0 |
| P12163_2_F10,1473 | R.HVVFGHVIDGM*DVV  | 2000.069 | 0.00001  | 3 | 1 | 23.1 | 0 |
| P12163_2_F10,1474 | R.HVVFGHVIDGM*DVV  | 2000.069 | 0.00296  | 4 | 1 | 43.7 | 0 |
| P12163_2_F10,1667 | R.HVVFGHVIDGM*DVV  | 2000.069 | 0.00391  | 3 | 1 | 51.4 | 0 |
| P12163_1_F7,17142 | R.HVVFGHVIDGMDVVR  | 1984.074 | 0.00532  | 3 | 1 | 38.1 | 0 |
| P12163_1_F7,17872 | R.HVVFGHVIDGMDVVR  | 1984.074 | 0.00229  | 3 | 1 | 60.9 | 0 |
| P12163_1_F7,17877 | R.HVVFGHVIDGMDVVR  | 1984.074 | 0.00317  | 4 | 1 | 45.9 | 0 |
| P12163_1_F7,17879 | R.HVVFGHVIDGMDVVR  | 1984.074 | -0.00319 | 2 | 1 | 47.4 | 0 |
| P12163_2_F10,1663 | R.HVVFGHVIDGMDVVR  | 1984.074 | 0.00001  | 4 | 1 | 49.5 | 0 |
| P12163_2_F10,1663 | R.HVVFGHVIDGMDVVR  | 1984.074 | 0.0016   | 3 | 1 | 74.9 | 0 |
| P12163_1_F3,27145 | R.IVM*GLFGDVVPK.T  | 1899.123 | 0.00897  | 3 | 1 | 44.5 | 0 |
| P12163_1_F3,27124 | R.IVMGLFGDVVPK.T   | 1883.128 | 0.00129  | 3 | 1 | 33.3 | 0 |
| P12163_1_F3,24544 | K.AGILGNM*QNLVETVI | 2275.258 | -0.0018  | 3 | 1 | 49.8 | 0 |
| P12163_1_F3,21797 | K.AGILGNMQNLYETVK  | 2259.263 | 0.0021   | 3 | 1 | 43   | 0 |
| P12163_1_F3,24530 | K.AGILGNMQNLYETVK  | 2259.263 | 0.00552  | 3 | 1 | 65.3 | 0 |
| P12163_1_F3,24543 | K.AGILGNMQNLYETVK  | 2259.263 | 0.00796  | 2 | 1 | 40.8 | 0 |
| P12163_1_S1,13157 | K.AQM*VVQVEAVR.V   | 1549.867 | 0.00481  | 2 | 1 | 30.9 | 0 |
| P12163_1_S1,13191 | K.AQM*VVQVEAVR.V   | 1549.867 | 0.00421  | 3 | 1 | 28   | 0 |
| P12163_1_S1,17363 | K.AQM*VVQVEAVR.V   | 1533.872 | 0.00718  | 3 | 1 | 55.8 | 0 |
| P12163_1_S1,17457 | K.AQM*VVQVEAVR.V   | 1533.872 | 0.00482  | 2 | 1 | 51.1 | 0 |
| P12163_1_F2,21127 | K.ELAAAEFDGYCEGELI | 2523.29  | 0.00606  | 3 | 1 | 66.1 | 0 |
| P12163_1_S1,20314 | K.ELAAAEFDGYCEGELI | 2523.29  | 0.00588  | 3 | 1 | 44.3 | 0 |
| P12163_1_S10,1963 | K.ELAAAEFDGYCEGELI | 2523.29  | 0.00264  | 3 | 1 | 42.9 | 0 |
| P12163_1_F8,16069 | K.KAQM*VVQVEAVR.V  | 1966.173 | 0.00615  | 3 | 1 | 29.5 | 0 |
| P12163_1_F4,25677 | K.LSLLVTEAYK.D     | 1745.067 | 0.00545  | 3 | 1 | 49.6 | 0 |
| P12163_1_F4,25973 | K.LSLLVTEAYK.D     | 1745.067 | 0.01895  | 3 | 1 | 23.1 | 0 |
| P12163_1_F6,23331 | K.LSLLVTEAYK.D     | 1745.067 | -0.00091 | 3 | 1 | 30.5 | 0 |
| P12163_1_F7,22495 | K.LSLLVTEAYK.D     | 1745.067 | 0.0038   | 3 | 1 | 39.4 | 0 |
| P12163_2_F1,24932 | K.LSLLVTEAYK.D     | 1745.067 | 0.00449  | 3 | 1 | 35.6 | 0 |
| P12163_2_F9,21556 | K.LSLLVTEAYK.D     | 1745.067 | 0.00701  | 3 | 1 | 47.5 | 0 |
| P12163_2_F2,15208 | K.SVLAMK.E         | 1256.786 | 0.00373  | 3 | 1 | 27.8 | 0 |
| P12163_1_F2,9087  | K.VTLSGNQPPVR.T    | 1502.859 | 0.00279  | 3 | 1 | 35.7 | 0 |
| P12163_1_F2,10150 | K.VTLSGNQPPVR.T    | 1502.859 | 0.00288  | 3 | 1 | 49.2 | 0 |
| P12163_1_F2,12220 | K.VTLSGNQPPVR.T    | 1502.859 | 0.00312  | 2 | 1 | 28.1 | 0 |
| P12163_1_F2,13056 | K.VTLSGNQPPVR.T    | 1502.859 | 0.00309  | 3 | 1 | 26.5 | 0 |
| P12163_1_F3,10449 | K.VTLSGNQPPVR.T    | 1502.859 | 0.00381  | 3 | 1 | 38.7 | 0 |
| P12163_2_F1,11942 | K.VTLSGNQPPVR.T    | 1502.859 | 0.00388  | 2 | 1 | 25.4 | 0 |

|                   |                        |          |          |   |   |      |   |
|-------------------|------------------------|----------|----------|---|---|------|---|
| P12163_1_S1,17871 | R.M*SDLAQSLGM*PQGI     | 2602.368 | 0.00956  | 3 | 1 | 54.7 | 0 |
| P12163_1_S1,20439 | R.M*SDLAQSLGMPQGL      | 2586.373 | 0.00596  | 3 | 1 | 42.4 | 0 |
| P12163_1_S1,20502 | R.M*SDLAQSLGMPQGL      | 2586.373 | 0.01052  | 4 | 1 | 33.4 | 0 |
| P12163_1_S1,20845 | R.MSDLAQSLGM*PQGL      | 2586.373 | 0.01184  | 3 | 1 | 37.3 | 0 |
| P12163_1_S1,20910 | R.MSDLAQSLGM*PQGL      | 2586.373 | 0.00712  | 4 | 1 | 72.2 | 0 |
| P12163_1_S1,23303 | R.MSDLAQSLGMPQGLS      | 2570.378 | 0.00822  | 3 | 1 | 49.1 | 0 |
| P12163_1_F3,21556 | R.TEITEAAM*ELGAEK.I    | 2117.126 | 0.00763  | 3 | 1 | 32.3 | 0 |
| P12163_1_F2,20964 | R.TEITEAAMELGAEK.L     | 2101.131 | -0.00038 | 3 | 1 | 49.8 | 0 |
| P12163_1_F3,17445 | R.TEITEAAMELGAEK.L     | 2101.131 | 0.00822  | 4 | 1 | 29.8 | 0 |
| P12163_1_F3,21586 | R.TEITEAAMELGAEK.L     | 2101.131 | 0.00844  | 2 | 1 | 106  | 0 |
| P12163_1_F3,21699 | R.TEITEAAMELGAEK.L     | 2101.131 | 0.00679  | 3 | 1 | 50   | 0 |
| P12163_1_F6,12278 | K.AEYDESGPSIVHR.K      | 1763.887 | 0.00008  | 3 | 1 | 30.4 | 0 |
| P12163_1_F2,10830 | K.AGFAGDDAPR.A         | 1280.654 | -0.00217 | 2 | 1 | 48.1 | 0 |
| P12163_1_F3,10024 | K.DAYVGDEAQSK.R        | 1790.938 | 0.00469  | 2 | 1 | 38.1 | 0 |
| P12163_1_F3,11353 | K.DAYVGDEAQSK.R        | 1790.938 | 0.00709  | 2 | 1 | 49.5 | 0 |
| P12163_1_F4,11889 | K.DAYVGDEAQSK.R        | 1790.938 | 0.00657  | 3 | 1 | 49.8 | 0 |
| P12163_1_F4,11897 | K.DAYVGDEAQSK.R        | 1790.938 | 0.00725  | 2 | 1 | 51.3 | 0 |
| P12163_1_F9,11224 | K.DAYVGDEAQSK.R        | 1790.938 | 0.00867  | 2 | 1 | 46   | 0 |
| P12163_1_F9,11234 | K.DAYVGDEAQSK.R        | 1790.938 | 0.00411  | 3 | 1 | 37.6 | 0 |
| P12163_1_F3,15889 | K.EITALAPSSM*K.I ! R.E | 1772.008 | 0.00352  | 2 | 1 | 27.6 | 0 |
| P12163_1_F3,15905 | K.EITALAPSSM*K.I ! R.E | 1772.008 | 0.00533  | 3 | 1 | 28.8 | 0 |
| P12163_1_F3,18111 | K.EITALAPSSMK.I ! R.EI | 1756.013 | 0.00926  | 2 | 1 | 29   | 0 |
| P12163_1_F3,18164 | K.EITALAPSSMK.I ! R.EI | 1756.013 | 0.00566  | 3 | 1 | 48.2 | 0 |
| P12163_1_F4,18691 | K.EITALAPSSMK.I ! R.EI | 1756.013 | 0.00059  | 3 | 1 | 39.2 | 0 |
| P12163_1_F4,18713 | K.EITALAPSSMK.I ! R.EI | 1756.013 | -0.00198 | 2 | 1 | 35.4 | 0 |
| P12163_1_F6,17407 | K.EITALAPSSMK.I ! R.EI | 1756.013 | 0.00551  | 3 | 1 | 34.2 | 0 |
| P12163_2_F1,17957 | K.EITALAPSSMK.I ! R.EI | 1756.013 | 0.00556  | 2 | 1 | 32.7 | 0 |
| P12163_2_F4,16193 | K.EITALAPSSMK.I ! R.EI | 1756.013 | -0.00106 | 3 | 1 | 23.2 | 0 |
| P12163_1_F8,18239 | K.YPIEHGIVSNWDDM*E     | 2557.285 | 0.01088  | 3 | 1 | 23.6 | 0 |
| P12163_1_F8,19866 | K.YPIEHGIVSNWDDMEF     | 2541.29  | 0.00746  | 3 | 1 | 43.2 | 0 |
| P12163_1_F3,18572 | R.DLTDALMK.I           | 1514.871 | 0.0072   | 3 | 1 | 27   | 0 |
| P12163_1_F3,18594 | R.DLTDALMK.I           | 1514.871 | 0.00582  | 2 | 1 | 45.6 | 0 |
| P12163_1_F4,19125 | R.DLTDALMK.I           | 1514.871 | 0.00804  | 2 | 1 | 45.7 | 0 |
| P12163_1_F4,19127 | R.DLTDALMK.I           | 1514.871 | 0.00714  | 3 | 1 | 24.6 | 0 |
| P12163_2_F2,18362 | R.GILTLK.Y             | 1252.845 | 0.01049  | 3 | 1 | 24.7 | 0 |
| P12163_1_F9,10832 | R.HTGVM*VGMGQK.D       | 1768.966 | 0.00474  | 3 | 1 | 37.8 | 0 |
| P12163_1_F9,12476 | R.HTGVM*VGMGQK.D       | 1768.966 | 0.00468  | 3 | 1 | 26.2 | 0 |
| P12163_2_F9,11611 | R.HTGVM*VGMGQK.D       | 1768.966 | -0.00204 | 3 | 1 | 32.8 | 0 |
| P12163_2_F9,9362  | R.HTGVMVGM*GQK.D       | 1768.966 | 0.00462  | 3 | 1 | 30.4 | 0 |
| P12163_1_F9,12458 | R.HTGVMVGMGQK.D        | 1752.971 | 0.0048   | 3 | 1 | 33.7 | 0 |
| P12163_1_F9,12464 | R.HTGVMVGMGQK.D        | 1752.971 | 0.00666  | 2 | 1 | 43.4 | 0 |
| P12163_2_F9,11573 | R.HTGVMVGMGQK.D        | 1752.971 | -0.00741 | 3 | 1 | 52.2 | 0 |
| P12163_1_F6,17635 | R.VAPEEHPVLLTEAPLN     | 2562.475 | 0.0064   | 3 | 1 | 31.9 | 0 |
| P12163_1_F6,18724 | R.VAPEEHPVLLTEAPLN     | 2562.475 | 0.00334  | 3 | 1 | 27.1 | 0 |
| P12163_2_F4,17600 | R.VAPEEHPVLLTEAPLN     | 2562.475 | 0.0013   | 3 | 1 | 23.6 | 0 |
| P12163_2_S5,16756 | R.VAPEEHPVLLTEAPLN     | 2562.475 | 0.00576  | 4 | 1 | 22.5 | 0 |
| P12163_2_S5,16796 | R.VAPEEHPVLLTEAPLN     | 2562.475 | 0.00586  | 3 | 1 | 53   | 0 |
| P12163_1_F2,10830 | K.AGFAGDDAPR.A         | 1280.654 | -0.00217 | 2 | 1 | 48.1 | 0 |
| P12163_1_F3,10024 | K.DAYVGDEAQSK.R        | 1790.938 | 0.00469  | 2 | 1 | 38.1 | 0 |
| P12163_1_F3,11353 | K.DAYVGDEAQSK.R        | 1790.938 | 0.00709  | 2 | 1 | 49.5 | 0 |
| P12163_1_F4,11889 | K.DAYVGDEAQSK.R        | 1790.938 | 0.00657  | 3 | 1 | 49.8 | 0 |

|                   |                         |          |          |   |   |      |   |
|-------------------|-------------------------|----------|----------|---|---|------|---|
| P12163_1_F4,11897 | K.DAYVVGDEAQS.K.R       | 1790.938 | 0.00725  | 2 | 1 | 51.3 | 0 |
| P12163_1_F9,11224 | K.DAYVVGDEAQS.K.R       | 1790.938 | 0.00867  | 2 | 1 | 46   | 0 |
| P12163_1_F9,11234 | K.DAYVVGDEAQS.K.R       | 1790.938 | 0.00411  | 3 | 1 | 37.6 | 0 |
| P12163_1_F3,15889 | K.EITALAPSSM*K.I ! R.E  | 1772.008 | 0.00352  | 2 | 1 | 27.6 | 0 |
| P12163_1_F3,15905 | K.EITALAPSSM*K.I ! R.E  | 1772.008 | 0.00533  | 3 | 1 | 28.8 | 0 |
| P12163_1_F3,18111 | K.EITALAPSSM.K.I ! R.EI | 1756.013 | 0.00926  | 2 | 1 | 29   | 0 |
| P12163_1_F3,18164 | K.EITALAPSSM.K.I ! R.EI | 1756.013 | 0.00566  | 3 | 1 | 48.2 | 0 |
| P12163_1_F4,18691 | K.EITALAPSSM.K.I ! R.EI | 1756.013 | 0.00059  | 3 | 1 | 39.2 | 0 |
| P12163_1_F4,18713 | K.EITALAPSSM.K.I ! R.EI | 1756.013 | -0.00198 | 2 | 1 | 35.4 | 0 |
| P12163_1_F6,17407 | K.EITALAPSSM.K.I ! R.EI | 1756.013 | 0.00551  | 3 | 1 | 34.2 | 0 |
| P12163_2_F1,17957 | K.EITALAPSSM.K.I ! R.EI | 1756.013 | 0.00556  | 2 | 1 | 32.7 | 0 |
| P12163_2_F4,16193 | K.EITALAPSSM.K.I ! R.EI | 1756.013 | -0.00106 | 3 | 1 | 23.2 | 0 |
| P12163_2_F2,8267  | K.SSSAVEK.S             | 1315.768 | 0.01023  | 2 | 1 | 24   | 0 |
| P12163_1_F8,18239 | K.YPIEHGIVSNWDDM*E      | 2557.285 | 0.01088  | 3 | 1 | 23.6 | 0 |
| P12163_1_F8,19866 | K.YPIEHGIVSNWDDMEK      | 2541.29  | 0.00746  | 3 | 1 | 43.2 | 0 |
| P12163_1_F3,18572 | R.DLTDALMK.I            | 1514.871 | 0.0072   | 3 | 1 | 27   | 0 |
| P12163_1_F3,18594 | R.DLTDALMK.I            | 1514.871 | 0.00582  | 2 | 1 | 45.6 | 0 |
| P12163_1_F4,19125 | R.DLTDALMK.I            | 1514.871 | 0.00804  | 2 | 1 | 45.7 | 0 |
| P12163_1_F4,19127 | R.DLTDALMK.I            | 1514.871 | 0.00714  | 3 | 1 | 24.6 | 0 |
| P12163_2_F2,18362 | R.GILTLK.Y              | 1252.845 | 0.01049  | 3 | 1 | 24.7 | 0 |
| P12163_1_F9,10832 | R.HTGVM*VGMGQK.D        | 1768.966 | 0.00474  | 3 | 1 | 37.8 | 0 |
| P12163_1_F9,12476 | R.HTGVM*VGMGQK.D        | 1768.966 | 0.00468  | 3 | 1 | 26.2 | 0 |
| P12163_2_F9,11611 | R.HTGVM*VGMGQK.D        | 1768.966 | -0.00204 | 3 | 1 | 32.8 | 0 |
| P12163_2_F9,9362  | R.HTGVMVGM*GQK.D        | 1768.966 | 0.00462  | 3 | 1 | 30.4 | 0 |
| P12163_1_F9,12458 | R.HTGVMVGMGQK.D         | 1752.971 | 0.0048   | 3 | 1 | 33.7 | 0 |
| P12163_1_F9,12464 | R.HTGVMVGMGQK.D         | 1752.971 | 0.00666  | 2 | 1 | 43.4 | 0 |
| P12163_2_F9,11573 | R.HTGVMVGMGQK.D         | 1752.971 | -0.00741 | 3 | 1 | 52.2 | 0 |
| P12163_1_F6,17635 | R.VAPEEHPVLLTEAPLN      | 2562.475 | 0.0064   | 3 | 1 | 31.9 | 0 |
| P12163_1_F6,18724 | R.VAPEEHPVLLTEAPLN      | 2562.475 | 0.00334  | 3 | 1 | 27.1 | 0 |
| P12163_2_F4,17600 | R.VAPEEHPVLLTEAPLN      | 2562.475 | 0.0013   | 3 | 1 | 23.6 | 0 |
| P12163_2_S5,16756 | R.VAPEEHPVLLTEAPLN      | 2562.475 | 0.00576  | 4 | 1 | 22.5 | 0 |
| P12163_2_S5,16796 | R.VAPEEHPVLLTEAPLN      | 2562.475 | 0.00586  | 3 | 1 | 53   | 0 |
| P12163_2_F7,6136  | K.AEDEEHK.K             | 1465.774 | 0.00422  | 2 | 1 | 26.2 | 0 |
| P12163_1_F5,11319 | K.CMEPVEK.C             | 1500.801 | 0.00642  | 2 | 1 | 25.4 | 0 |
| P12163_1_F3,19020 | K.EIAEAYLGTTIK.N        | 1917.115 | 0.00194  | 2 | 1 | 43.6 | 0 |
| P12163_1_F3,20551 | K.EIAEAYLGTTIK.N        | 1917.115 | 0.0035   | 2 | 1 | 62.2 | 0 |
| P12163_1_F3,20570 | K.EIAEAYLGTTIK.N        | 1917.115 | 0.00445  | 3 | 1 | 48.6 | 0 |
| P12163_2_F1,11800 | K.LPAADK.Q              | 1222.762 | 0.00268  | 3 | 1 | 22.4 | 0 |
| P12163_1_F3,17989 | K.NALENYAYNMR.N         | 1662.821 | 0.00301  | 2 | 1 | 33.4 | 0 |
| P12163_1_F9,17110 | K.NALENYAYNMR.N         | 1662.821 | -0.00229 | 2 | 1 | 36.7 | 0 |
| P12163_2_F1,17641 | K.NALENYAYNMR.N         | 1662.821 | 0.00091  | 2 | 1 | 31.7 | 0 |
| P12163_2_F9,16815 | K.NALENYAYNMR.N         | 1662.821 | 0.00245  | 2 | 1 | 38.5 | 0 |
| P12163_2_F9,16832 | K.NALENYAYNMR.N         | 1662.821 | 0.00103  | 3 | 1 | 34   | 0 |
| P12163_1_F8,18778 | K.NAVVTVPAYFNDSQR       | 1985.039 | -0.00348 | 2 | 1 | 30.4 | 0 |
| P12163_1_F8,18854 | K.NAVVTVPAYFNDSQR       | 1985.039 | 0.00299  | 3 | 1 | 33.4 | 0 |
| P12163_1_S1,17806 | K.NAVVTVPAYFNDSQR       | 1985.039 | 0.01346  | 2 | 1 | 36.9 | 0 |
| P12163_1_S1,17812 | K.NAVVTVPAYFNDSQR       | 1985.039 | 0.00257  | 3 | 1 | 27.2 | 0 |
| P12163_2_F6,18372 | K.NAVVTVPAYFNDSQR       | 1985.039 | 0.00464  | 2 | 1 | 47.4 | 0 |
| P12163_2_F6,18440 | K.NAVVTVPAYFNDSQR       | 1985.039 | -0.00088 | 3 | 1 | 39.9 | 0 |
| P12163_1_F4,14347 | K.SSVHDVVLVGGSTR.I      | 1716.955 | 0.00968  | 3 | 1 | 41.2 | 0 |
| P12163_1_F4,14348 | K.SSVHDVVLVGGSTR.I      | 1716.955 | 0.00904  | 2 | 1 | 63.8 | 0 |

|                   |                       |          |          |   |   |      |   |
|-------------------|-----------------------|----------|----------|---|---|------|---|
| P12163_1_F6,13771 | K.SSVHDVVLVGGSTR.I    | 1716.955 | 0.00268  | 2 | 1 | 40.6 | 0 |
| P12163_1_F7,13090 | K.SSVHDVVLVGGSTR.I    | 1716.955 | 0.00387  | 3 | 1 | 28   | 0 |
| P12163_2_F6,13064 | K.SSVHDVVLVGGSTR.I    | 1716.955 | 0.0003   | 3 | 1 | 30.2 | 0 |
| P12163_2_F9,12613 | K.SSVHDVVLVGGSTR.I    | 1716.955 | 0.03138  | 2 | 1 | 24.2 | 0 |
| P12163_1_S1,23194 | R.FEELNM*DLFR.K       | 1633.82  | 0.00103  | 3 | 1 | 40.2 | 0 |
| P12163_1_S1,23396 | R.FEELNM*DLFR.K       | 1633.82  | 0.00348  | 2 | 1 | 42.5 | 0 |
| P12163_1_S1,23417 | R.FEELNM*DLFR.K       | 1633.82  | 0.00235  | 3 | 1 | 57.6 | 0 |
| P12163_1_F2,22404 | R.IINEPTAAAIAAYGLDK.I | 2268.306 | 0.00735  | 3 | 1 | 45.2 | 0 |
| P12163_1_F4,23908 | R.IINEPTAAAIAAYGLDK.I | 2268.306 | 0.00405  | 3 | 1 | 59.2 | 0 |
| P12163_1_F5,22034 | R.IINEPTAAAIAAYGLDK.I | 2268.306 | 0.00048  | 3 | 1 | 35.6 | 0 |
| P12163_1_F8,22408 | R.IINEPTAAAIAAYGLDK.I | 2268.306 | 0.00681  | 3 | 1 | 49.7 | 0 |
| P12163_1_S1,21321 | R.IINEPTAAAIAAYGLDK.I | 2268.306 | 0.00492  | 3 | 1 | 53.3 | 0 |
| P12163_1_S1,21346 | R.IINEPTAAAIAAYGLDK.I | 2268.306 | -0.00297 | 2 | 1 | 75.2 | 0 |
| P12163_1_S1,21375 | R.IINEPTAAAIAAYGLDK.I | 2268.306 | 0.00752  | 4 | 1 | 61   | 0 |
| P12163_1_S1,21490 | R.IINEPTAAAIAAYGLDK.I | 2268.306 | 0.0003   | 3 | 1 | 54.8 | 0 |
| P12163_1_S10,2039 | R.IINEPTAAAIAAYGLDK.I | 2268.306 | 0.00414  | 3 | 1 | 22.1 | 0 |
| P12163_1_F5,12765 | K.ATVLANK.R           | 1324.841 | 0.00583  | 2 | 1 | 28.3 | 0 |
| P12163_1_F8,20923 | K.EGIAPINLVVEHELHR.   | 2130.197 | 0.00418  | 3 | 1 | 31.5 | 0 |
| P12163_1_F8,20968 | K.EGIAPINLVVEHELHR.   | 2130.197 | 0.0025   | 4 | 1 | 41.8 | 0 |
| P12163_1_S10,1934 | K.EGIAPINLVVEHELHR.   | 2130.197 | 0.00022  | 4 | 1 | 43.4 | 0 |
| P12163_1_S10,1938 | K.EGIAPINLVVEHELHR.   | 2130.197 | 0.00333  | 3 | 1 | 73.9 | 0 |
| P12163_1_S10,1952 | K.EGIAPINLVVEHELHR.   | 2130.197 | 0.0017   | 4 | 1 | 38.5 | 0 |
| P12163_2_F10,1822 | K.EGIAPINLVVEHELHR.   | 2130.197 | 0.0019   | 4 | 1 | 40.8 | 0 |
| P12163_2_F10,1822 | K.EGIAPINLVVEHELHR.   | 2130.197 | 0.00457  | 3 | 1 | 45.6 | 0 |
| P12163_2_F10,1841 | K.EGIAPINLVVEHELHR.   | 2130.197 | 0.00198  | 4 | 1 | 42.7 | 0 |
| P12163_2_F10,1841 | K.EGIAPINLVVEHELHR.   | 2130.197 | 0.00229  | 3 | 1 | 77.1 | 0 |
| P12163_2_F10,1891 | K.EGIAPINLVVEHELHR.   | 2130.197 | 0.00038  | 4 | 1 | 27.2 | 0 |
| P12163_2_F8_1207  | K.EGIAPINLVVEHELHR.   | 2130.197 | -0.00014 | 4 | 1 | 24.9 | 0 |
| P12163_1_F4,15935 | K.GNVISTPAIK.G        | 1607.994 | -0.00613 | 2 | 1 | 35.8 | 0 |
| P12163_2_F1,15117 | K.GNVISTPAIK.G        | 1607.994 | 0.00903  | 2 | 1 | 34.1 | 0 |
| P12163_2_F1,15339 | K.GNVISTPAIK.G        | 1607.994 | 0.00347  | 2 | 1 | 34.1 | 0 |
| P12163_1_F2,13877 | K.GTILPGITR.K         | 1231.768 | 0.00348  | 3 | 1 | 26.4 | 0 |
| P12163_1_F8,18657 | K.GYSDVLYLDCVHK.R     | 2177.152 | 0.00804  | 2 | 1 | 68.4 | 0 |
| P12163_2_F4,17410 | K.GYSDVLYLDCVHK.R     | 2177.152 | 0.00536  | 3 | 1 | 37.8 | 0 |
| P12163_2_F6,18180 | K.GYSDVLYLDCVHK.R     | 2177.152 | 0.00296  | 3 | 1 | 33.4 | 0 |
| P12163_2_F6,18202 | K.GYSDVLYLDCVHK.R     | 2177.152 | 0.00042  | 2 | 1 | 36.3 | 0 |
| P12163_2_S5,17452 | K.GYSDVLYLDCVHK.R     | 2177.152 | 0.00869  | 3 | 1 | 43.1 | 0 |
| P12163_2_S5,17465 | K.GYSDVLYLDCVHK.R     | 2177.152 | 0.00035  | 4 | 1 | 27.8 | 0 |
| P12163_2_S5,18237 | K.QDGNILLFRPEENAMF    | 2207.154 | 0.00213  | 3 | 1 | 23.5 | 0 |
| P12163_1_F9,18258 | K.TIGNYAAVLK.A        | 1658.01  | 0.00679  | 2 | 1 | 33.4 | 0 |
| P12163_1_F9,18260 | K.TIGNYAAVLK.A        | 1658.01  | 0.00428  | 3 | 1 | 26.3 | 0 |
| P12163_2_F1,18789 | K.TIGNYAAVLK.A        | 1658.01  | -0.00089 | 2 | 1 | 31.3 | 0 |
| P12163_2_F1,19072 | K.TIGNYAAVLK.A        | 1658.01  | 0.00741  | 2 | 1 | 48.5 | 0 |
| P12163_2_F9,17020 | K.TIGNYAAVLK.A        | 1658.01  | 0.00479  | 3 | 1 | 25.4 | 0 |
| P12163_2_F9,17031 | K.TIGNYAAVLK.A        | 1658.01  | 0.00555  | 2 | 1 | 38.7 | 0 |
| P12163_1_F5,8144  | R.ATPGGTGGVK.T ! R.A' | 1452.863 | 0.00021  | 2 | 1 | 36.5 | 0 |
| P12163_2_F1,8811  | R.ATPGGTGGVK.T ! R.A' | 1452.863 | 0.00601  | 2 | 1 | 36.4 | 0 |
| P12163_2_F1,8815  | R.ATPGGTGGVK.T ! R.A' | 1452.863 | 0.00939  | 3 | 1 | 24.7 | 0 |
| P12163_2_F2,9025  | R.ATPGGTGGVK.T ! R.A' | 1452.863 | 0.00783  | 2 | 1 | 36.5 | 0 |
| P12163_1_F3,24151 | R.YLEEVSSCNIFVVK.G    | 2295.251 | 0.00367  | 3 | 1 | 48.5 | 0 |
| P12163_2_F4,12764 | K.AAASGSPSSPSSETSNS   | 3526.823 | -0.0012  | 4 | 1 | 46.5 | 0 |

|                   |                      |          |          |   |   |      |   |
|-------------------|----------------------|----------|----------|---|---|------|---|
| P12163_1_F2,13375 | K.ADIYTLR.K          | 1242.7   | 0.00299  | 3 | 1 | 26.7 | 0 |
| P12163_1_F6,18001 | K.ATALALVQHPVVNSS    | 2127.165 | 0.00224  | 3 | 1 | 37.1 | 0 |
| P12163_1_F7,13433 | K.ATALALVQHPVVNSS    | 2127.165 | 0.00005  | 4 | 1 | 23.9 | 0 |
| P12163_1_F7,17108 | K.ATALALVQHPVVNSS    | 2127.165 | -0.011   | 2 | 1 | 56   | 0 |
| P12163_2_S5,16222 | K.ATALALVQHPVVNSS    | 2127.165 | -0.00331 | 2 | 1 | 56.8 | 0 |
| P12163_1_F4,16858 | K.GVTM*TALLAK.A      | 1628.987 | 0.003    | 3 | 1 | 22.3 | 0 |
| P12163_1_F6,19816 | K.GVTM*TALLAK.A      | 1628.987 | -0.00063 | 3 | 1 | 26.6 | 0 |
| P12163_1_F7,19003 | K.GVTM*TALLAK.A      | 1628.987 | -0.0006  | 3 | 1 | 32.4 | 0 |
| P12163_1_F7,19446 | K.GVTM*TALLAK.A      | 1628.987 | 0.00531  | 3 | 1 | 23.8 | 0 |
| P12163_1_F4,21445 | K.GVTMTALLAK.A       | 1612.992 | 0.0069   | 3 | 1 | 28.4 | 0 |
| P12163_2_F1,20941 | K.GVTMTALLAK.A       | 1612.992 | 0.00563  | 2 | 1 | 59.7 | 0 |
| P12163_2_F1,20946 | K.GVTMTALLAK.A       | 1612.992 | 0.00414  | 3 | 1 | 25.4 | 0 |
| P12163_1_F6,16803 | K.LAEPAAVTVGSVHP     | 2556.424 | 0.00423  | 3 | 1 | 57.4 | 0 |
| P12163_1_F6,16808 | K.LAEPAAVTVGSVHP     | 2556.424 | 0.00469  | 4 | 1 | 22.9 | 0 |
| P12163_2_F10,1482 | K.LAEPAAVTVGSVHP     | 2556.424 | 0.00489  | 3 | 1 | 43.4 | 0 |
| P12163_2_F10,1483 | K.LAEPAAVTVGSVHP     | 2556.424 | 0.00125  | 4 | 1 | 27.7 | 0 |
| P12163_2_F8_12070 | K.LAEPAAVTVGSVHP     | 2556.424 | 0.00396  | 3 | 1 | 29.9 | 0 |
| P12163_2_S5,15131 | K.LAEPAAVTVGSVHP     | 2556.424 | 0.00653  | 4 | 1 | 31.4 | 0 |
| P12163_2_S5,15225 | K.LAEPAAVTVGSVHP     | 2556.424 | 0.01035  | 3 | 1 | 69   | 0 |
| P12163_1_F8,7876  | K.NQM*QVNVTDHR.V     | 1732.87  | 0.00154  | 3 | 1 | 45.1 | 0 |
| P12163_2_F6,7894  | K.NQM*QVNVTDHR.V     | 1732.87  | 0.00226  | 3 | 1 | 35.7 | 0 |
| P12163_2_F6,10437 | K.NQM*QVNVTDHR.V     | 1732.87  | 0.0031   | 3 | 1 | 50   | 0 |
| P12163_2_F6,10445 | K.NQM*QVNVTDHR.V     | 1732.87  | 0.00157  | 2 | 1 | 30.2 | 0 |
| P12163_1_F8,10561 | K.NMQVNVTDHR.V       | 1716.875 | 0.00555  | 2 | 1 | 38.1 | 0 |
| P12163_1_F8,10564 | K.NMQVNVTDHR.V       | 1716.875 | 0.00175  | 3 | 1 | 24.7 | 0 |
| P12163_1_S1,18408 | R.EIFM*PALSSTMTEGK   | 2266.192 | 0.0102   | 3 | 1 | 35   | 0 |
| P12163_1_S1,21256 | R.EIFMPALSSTMTEGK.I  | 2250.197 | -0.00357 | 3 | 1 | 46.7 | 0 |
| P12163_1_S1,21418 | R.EIFMPALSSTMTEGK.I  | 2250.197 | -0.0012  | 3 | 1 | 66.9 | 0 |
| P12163_1_S1,17558 | R.NMVESLAVPTFR.V     | 1667.909 | 0.00308  | 3 | 1 | 45   | 0 |
| P12163_1_S1,20405 | R.NMVESLAVPTFR.V     | 1667.909 | -0.00493 | 2 | 1 | 26.4 | 0 |
| P12163_1_S1,20412 | R.NMVESLAVPTFR.V     | 1667.909 | 0.00533  | 3 | 1 | 27   | 0 |
| P12163_1_F5,9460  | R.VVGSQPK.G          | 1251.788 | 0.01432  | 3 | 1 | 27.1 | 0 |
| P12163_2_F2,10313 | R.VVGSQPK.G          | 1251.788 | 0.00163  | 3 | 1 | 31.9 | 0 |
| P12163_1_F2,14139 | K.AVILQPDR.V         | 1215.736 | 0.00045  | 2 | 1 | 28.2 | 0 |
| P12163_1_S1,13640 | K.AVILQPDR.V         | 1215.736 | 0.00267  | 2 | 1 | 35.6 | 0 |
| P12163_1_F8,15272 | K.AVKPVLVAGPK.M      | 1991.314 | 0.00791  | 3 | 1 | 32   | 0 |
| P12163_2_F10,1983 | K.KDCLCFIEVLVHK.D    | 2573.471 | 0.00898  | 4 | 1 | 42.8 | 0 |
| P12163_1_F3,8961  | K.SNTTAYENYHR.I      | 1659.803 | 0.00281  | 3 | 1 | 35   | 0 |
| P12163_1_F4,9452  | K.SNTTAYENYHR.I      | 1659.803 | 0.00551  | 2 | 1 | 61.6 | 0 |
| P12163_1_F6,9161  | K.SNTTAYENYHR.I      | 1659.803 | -0.00543 | 2 | 1 | 36.6 | 0 |
| P12163_1_F6,9167  | K.SNTTAYENYHR.I      | 1659.803 | -0.00824 | 3 | 1 | 54.7 | 0 |
| P12163_1_F9,8780  | K.SNTTAYENYHR.I      | 1659.803 | 0.00311  | 3 | 1 | 38.5 | 0 |
| P12163_2_F4,8279  | K.SNTTAYENYHR.I      | 1659.803 | -0.00803 | 3 | 1 | 42.3 | 0 |
| P12163_2_F7,8313  | K.SNTTAYENYHR.I      | 1659.803 | 0.00106  | 3 | 1 | 47.7 | 0 |
| P12163_2_S3,8795  | K.SNTTAYENYHR.I      | 1659.803 | 0.00223  | 3 | 1 | 62.3 | 0 |
| P12163_2_S5,9200  | K.SNTTAYENYHR.I      | 1659.803 | 0.00241  | 3 | 1 | 35.6 | 0 |
| P12163_2_F10,1845 | R.ILHHTIGLPDFSQELR.C | 2180.213 | 0.00237  | 4 | 1 | 36   | 0 |
| P12163_2_F10,1847 | R.ILHHTIGLPDFSQELR.C | 2180.213 | 0.00382  | 3 | 1 | 39   | 0 |
| P12163_1_F3,15882 | R.IYVPEGQPPK.C       | 1736.02  | 0.01     | 2 | 1 | 28.5 | 0 |
| P12163_1_F3,15897 | R.IYVPEGQPPK.C       | 1736.02  | 0.0034   | 3 | 1 | 31.5 | 0 |
| P12163_1_F3,16136 | R.IYVPEGQPPK.C       | 1736.02  | 0.00524  | 2 | 1 | 25.5 | 0 |



|                   |                            |          |          |   |   |      |   |
|-------------------|----------------------------|----------|----------|---|---|------|---|
| P12163_1_F4,16395 | R.IYVPEGQPPK.C             | 1736.02  | 0.01438  | 2 | 1 | 30.3 | 0 |
| P12163_1_F4,16450 | R.IYVPEGQPPK.C             | 1736.02  | 0.01414  | 3 | 1 | 41.5 | 0 |
| P12163_1_F9,15488 | R.IYVPEGQPPK.C             | 1736.02  | 0.0126   | 2 | 1 | 24.9 | 0 |
| P12163_1_F9,15503 | R.IYVPEGQPPK.C             | 1736.02  | 0.00835  | 3 | 1 | 41.1 | 0 |
| P12163_2_F1,15534 | R.IYVPEGQPPK.C             | 1736.02  | 0.00562  | 2 | 1 | 33   | 0 |
| P12163_2_F1,15535 | R.IYVPEGQPPK.C             | 1736.02  | 0.00592  | 3 | 1 | 33.4 | 0 |
| P12163_2_F9,14185 | R.IYVPEGQPPK.C             | 1736.02  | 0.00496  | 2 | 1 | 27.4 | 0 |
| P12163_2_F6,20063 | R.VNVLFQHIQK.M             | 1834.116 | 0.00321  | 3 | 1 | 33.5 | 0 |
| P12163_2_F7,18115 | R.VNVLFQHIQK.M             | 1834.116 | 0.00429  | 3 | 1 | 22   | 0 |
| P12163_1_F3,9602  | R.VSAANSRPPNPQ.-           | 1541.834 | 0.00478  | 2 | 1 | 42.5 | 0 |
| P12163_1_F3,9835  | R.VSAANSRPPNPQ.-           | 1541.834 | 0.0043   | 2 | 1 | 26.7 | 0 |
| P12163_2_F1,9306  | R.VSAANSRPPNPQ.-           | 1541.834 | 0.00324  | 2 | 1 | 34.2 | 0 |
| P12163_1_F2,21112 | R.VVIANGPAFGCVLM* <b>k</b> | 2200.244 | 0.00329  | 3 | 1 | 46.8 | 0 |
| P12163_1_F2,22562 | R.VVIANGPAFGCVLM* <b>k</b> | 2200.244 | 0.00608  | 3 | 1 | 47.3 | 0 |
| P12163_1_F6,17528 | K.AYETATTAEEADLPP1         | 2429.261 | 0.01254  | 3 | 1 | 58.5 | 0 |
| P12163_1_F6,17591 | K.AYETATTAEEADLPP1         | 2429.261 | 0.00329  | 2 | 1 | 27.8 | 0 |
| P12163_1_F6,17746 | K.AYETATTAEEADLPP1         | 2429.261 | 0.00102  | 3 | 1 | 62.3 | 0 |
| P12163_1_F7,16661 | K.AYETATTAEEADLPP1         | 2429.261 | 0.00612  | 3 | 1 | 57.7 | 0 |
| P12163_1_F7,16877 | K.AYETATTAEEADLPP1         | 2429.261 | 0.00252  | 3 | 1 | 58.7 | 0 |
| P12163_2_F10,1583 | K.AYETATTAEEADLPP1         | 2429.261 | -0.00087 | 3 | 1 | 71.2 | 0 |
| P12163_2_F10,1605 | K.AYETATTAEEADLPP1         | 2429.261 | 0.00171  | 3 | 1 | 38.2 | 0 |
| P12163_2_S5,16238 | K.AYETATTAEEADLPP1         | 2429.261 | 0.00024  | 3 | 1 | 49.4 | 0 |
| P12163_2_S5,16457 | K.AYETATTAEEADLPP1         | 2429.261 | 0.00075  | 3 | 1 | 48.9 | 0 |
| P12163_1_S1,19084 | K.DSTLIMQLLR.D             | 1493.866 | -0.00037 | 3 | 1 | 24   | 0 |
| P12163_1_F5,6939  | K.GNEVNAK.R                | 1339.779 | 0.00716  | 2 | 1 | 25   | 0 |
| P12163_2_F2,7678  | K.GNEVNAK.R                | 1339.779 | 0.00816  | 2 | 1 | 28.4 | 0 |
| P12163_2_F2,7911  | K.GNEVNAK.R                | 1339.779 | 0.01196  | 2 | 1 | 26.8 | 0 |
| P12163_2_F1,9483  | K.LAEQAER.Y ! R.LAEQ.      | 1120.626 | 0.00298  | 2 | 1 | 24.7 | 0 |
| P12163_1_F5,16310 | R.ENFVYVAK.L               | 1577.915 | 0.00683  | 2 | 1 | 29   | 0 |
| P12163_2_F1,16652 | R.ENFVYVAK.L               | 1577.915 | 0.00899  | 2 | 1 | 29.5 | 0 |
| P12163_1_F4,20959 | R.IISSIEQK.E ! R.ILSSIEQ   | 1525.941 | 0.01597  | 2 | 1 | 28   | 0 |
| P12163_1_F5,18516 | R.IISSIEQK.E ! R.ILSSIEQ   | 1525.941 | 0.00793  | 2 | 1 | 32.8 | 0 |
| P12163_1_F5,19572 | R.IISSIEQK.E ! R.ILSSIEQ   | 1525.941 | 0.00666  | 3 | 1 | 29.6 | 0 |
| P12163_1_F5,19600 | R.IISSIEQK.E ! R.ILSSIEQ   | 1525.941 | 0.00717  | 2 | 1 | 38.4 | 0 |
| P12163_2_F1,20030 | R.IISSIEQK.E ! R.ILSSIEQ   | 1525.941 | 0.00227  | 2 | 1 | 27.6 | 0 |
| P12163_2_F1,20062 | R.IISSIEQK.E ! R.ILSSIEQ   | 1525.941 | 0.00678  | 3 | 1 | 21.9 | 0 |
| P12163_1_F5,17036 | R.NLLSVGYK.N               | 1501.92  | 0.00804  | 3 | 1 | 23.7 | 0 |
| P12163_2_F2,17807 | R.NLLSVGYK.N               | 1501.92  | 0.00851  | 2 | 1 | 26.5 | 0 |
| P12163_2_F2,17830 | R.NLLSVGYK.N               | 1501.92  | 0.00036  | 3 | 1 | 24.9 | 0 |
| P12163_1_F4,19309 | R.YDEMVDAM*K.K ! R.Y       | 1725.865 | 0.00696  | 3 | 1 | 28.5 | 0 |
| P12163_1_F4,19295 | R.YDEMVDAMK.K ! R.Y        | 1709.87  | 0.00636  | 3 | 1 | 23.5 | 0 |
| P12163_2_F9,17466 | R.YDEMVDAMK.K ! R.Y        | 1709.87  | 0.00438  | 3 | 1 | 39.3 | 0 |
| P12163_1_S10,1839 | R.YLAEFK.V ! R.YLAEFK      | 1378.819 | 0.0079   | 3 | 1 | 24   | 0 |
| P12163_2_F8_1207  | R.YLAEFK.V ! R.YLAEFK      | 1378.819 | 0.00689  | 3 | 1 | 22.1 | 0 |
| P12163_2_F8_1207  | R.YLAEFK.V ! R.YLAEFK      | 1378.819 | 0.0056   | 3 | 1 | 22.9 | 0 |
| P12163_1_S1,15234 | K.EAVYGLTEISR.E            | 1541.848 | 0.00083  | 3 | 1 | 30   | 0 |
| P12163_1_S1,17645 | K.EAVYGLTEISR.E            | 1541.848 | 0.00416  | 2 | 1 | 25   | 0 |
| P12163_1_S1,17693 | K.EAVYGLTEISR.E            | 1541.848 | 0.00095  | 3 | 1 | 35   | 0 |
| P12163_1_F4,15957 | K.ISYEHEEFVK.L             | 1889.026 | 0.00794  | 3 | 1 | 27.9 | 0 |
| P12163_1_F4,15976 | K.ISYEHEEFVK.L             | 1889.026 | 0.00858  | 2 | 1 | 36   | 0 |
| P12163_2_F6,14605 | K.ISYEHEEFVK.L             | 1889.026 | 0.00452  | 3 | 1 | 32.6 | 0 |

|                   |                     |          |          |   |   |      |   |
|-------------------|---------------------|----------|----------|---|---|------|---|
| P12163_2_F6,14622 | K.ISYEHEEFVK.L      | 1889.026 | 0.00356  | 2 | 1 | 44.6 | 0 |
| P12163_1_S1,17486 | K.IVDLSADFR.L       | 1339.752 | 0.00256  | 3 | 1 | 27.3 | 0 |
| P12163_1_S1,21253 | K.IVDLSADFR.L       | 1339.752 | 0.00254  | 2 | 1 | 28.1 | 0 |
| P12163_1_S1,21430 | K.IVDLSADFR.L       | 1339.752 | 0.00348  | 2 | 1 | 28   | 0 |
| P12163_1_F5,11128 | K.SLQVEDGK.T        | 1483.858 | 0.00856  | 2 | 1 | 27.7 | 0 |
| P12163_1_F3,29730 | R.AIIISVIDNLVK.G    | 1906.22  | 0.00483  | 3 | 1 | 30.7 | 0 |
| P12163_1_S1,17733 | R.GSNYCLM*NVPDR.I   | 1892.894 | 0.00588  | 3 | 1 | 29.4 | 0 |
| P12163_1_S1,20256 | R.GSNYCLMNVFPDR.I   | 1876.899 | 0.00825  | 3 | 1 | 26.4 | 0 |
| P12163_1_S1,20270 | R.GSNYCLMNVFPDR.I   | 1876.899 | 0.00085  | 2 | 1 | 25.3 | 0 |
| P12163_1_F8,17931 | R.HVPEIEQGLTDVASSK  | 2318.281 | 0.00518  | 3 | 1 | 55.7 | 0 |
| P12163_1_F8,18010 | R.HVPEIEQGLTDVASSK  | 2318.281 | 0.00612  | 4 | 1 | 30.2 | 0 |
| P12163_2_F6,15023 | R.HVPEIEQGLTDVASSK  | 2318.281 | 0.00476  | 4 | 1 | 37   | 0 |
| P12163_2_F6,17351 | R.HVPEIEQGLTDVASSK  | 2318.281 | 0.00437  | 3 | 1 | 48.2 | 0 |
| P12163_2_F6,17425 | R.HVPEIEQGLTDVASSK  | 2318.281 | 0.004    | 4 | 1 | 38   | 0 |
| P12163_1_S1,21406 | R.IGLLGASGYTGAEIVR. | 1881.075 | -0.00093 | 3 | 1 | 66.6 | 0 |
| P12163_1_S1,21422 | R.IGLLGASGYTGAEIVR. | 1881.075 | -0.00099 | 2 | 1 | 33.7 | 0 |
| P12163_1_S1,21587 | R.IGLLGASGYTGAEIVR. | 1881.075 | 0.00105  | 3 | 1 | 64.4 | 0 |
| P12163_1_S1,21609 | R.IGLLGASGYTGAEIVR. | 1881.075 | 0.00303  | 2 | 1 | 33.3 | 0 |
| P12163_1_F4,16616 | R.NIIDAK.S          | 1394.883 | 0.00615  | 3 | 1 | 24.9 | 0 |
| P12163_1_F4,16635 | R.NIIDAK.S          | 1394.883 | 0.00557  | 2 | 1 | 29.6 | 0 |
| P12163_1_F5,15421 | R.NIIDAK.S          | 1394.883 | 0.00425  | 2 | 1 | 29.2 | 0 |
| P12163_2_F1,15765 | R.NIIDAK.S          | 1394.883 | 0.00519  | 2 | 1 | 32.6 | 0 |
| P12163_2_F1,15791 | R.NIIDAK.S          | 1394.883 | 0.00572  | 3 | 1 | 25.5 | 0 |
| P12163_1_F7,11121 | K.AIPLSEDHKPNR.C    | 1985.139 | 0.00408  | 4 | 1 | 22.6 | 0 |
| P12163_1_F9,20534 | K.EHLFENLLK.H       | 1751.031 | 0.00708  | 3 | 1 | 45.8 | 0 |
| P12163_2_F9,19386 | K.EHLFENLLK.H       | 1751.031 | 0.01143  | 3 | 1 | 37   | 0 |
| P12163_2_F9,19587 | K.EHLFENLLK.H       | 1751.031 | 0.00818  | 2 | 1 | 43.7 | 0 |
| P12163_2_F9,19596 | K.EHLFENLLK.H       | 1751.031 | 0.0042   | 3 | 1 | 45.1 | 0 |
| P12163_2_F9,19785 | K.EHLFENLLK.H       | 1751.031 | 0.0054   | 3 | 1 | 41.8 | 0 |
| P12163_1_F9,9933  | K.HPQFM*TDTK.L      | 1728.92  | 0.00964  | 3 | 1 | 37.2 | 0 |
| P12163_1_F9,12311 | K.HPQFMTDTK.L       | 1712.925 | 0.00628  | 3 | 1 | 45.6 | 0 |
| P12163_1_F9,12313 | K.HPQFMTDTK.L       | 1712.925 | 0.0046   | 2 | 1 | 26.7 | 0 |
| P12163_2_F9,11571 | K.HPQFMTDTK.L       | 1712.925 | -0.00275 | 3 | 1 | 41.6 | 0 |
| P12163_1_F2,13925 | K.LTETAFTTR.G       | 1242.7   | 0.00396  | 3 | 1 | 40.4 | 0 |
| P12163_1_F7,16558 | K.TSNVDGQAVCM*FGV   | 2618.203 | 0.00419  | 3 | 1 | 45.1 | 0 |
| P12163_1_F7,19682 | K.TSNVDGQAVCM*FGV   | 2618.203 | 0.00326  | 3 | 1 | 68   | 0 |
| P12163_2_S5,19444 | K.TSNVDGQAVCM*FGV   | 2618.203 | 0.0035   | 3 | 1 | 50.4 | 0 |
| P12163_1_F7,17989 | K.TSNVDGQAVCMFGVF   | 2602.208 | 0.00425  | 3 | 1 | 54.3 | 0 |
| P12163_1_F7,18014 | K.TSNVDGQAVCMFGVF   | 2602.208 | 0.00066  | 4 | 1 | 30.5 | 0 |
| P12163_1_F7,19670 | K.TSNVDGQAVCMFGVF   | 2602.208 | 0.00641  | 3 | 1 | 66.8 | 0 |
| P12163_2_F10,1844 | K.TSNVDGQAVCMFGVF   | 2602.208 | 0.00794  | 3 | 1 | 24.2 | 0 |
| P12163_2_S5,19384 | K.TSNVDGQAVCMFGVF   | 2602.208 | 0.01115  | 3 | 1 | 49.8 | 0 |
| P12163_1_F3,20221 | R.ATMEDFYDIK.T      | 1840.961 | 0.00515  | 2 | 1 | 48.8 | 0 |
| P12163_1_F3,20232 | R.ATMEDFYDIK.T      | 1840.961 | 0.0053   | 3 | 1 | 42   | 0 |
| P12163_1_F4,20731 | R.ATMEDFYDIK.T      | 1840.961 | 0.00823  | 2 | 1 | 39.9 | 0 |
| P12163_1_F4,20740 | R.ATMEDFYDIK.T      | 1840.961 | 0.00704  | 3 | 1 | 34   | 0 |
| P12163_2_F6,11975 | R.FHHVNEDPAEPEVEQE  | 2210.03  | -0.0034  | 2 | 1 | 40.4 | 0 |
| P12163_2_F7,11395 | R.FHHVNEDPAEPEVEQE  | 2210.03  | 0.00172  | 3 | 1 | 36.9 | 0 |
| P12163_1_S1,13854 | R.GSADNITCIVVR.F    | 1608.868 | 0.00589  | 3 | 1 | 27.3 | 0 |
| P12163_1_S1,16197 | R.GSADNITCIVVR.F    | 1608.868 | 0.00571  | 2 | 1 | 27.9 | 0 |
| P12163_1_S1,16232 | R.GSADNITCIVVR.F    | 1608.868 | 0.00433  | 3 | 1 | 70.8 | 0 |

|                                           |          |          |   |   |      |   |
|-------------------------------------------|----------|----------|---|---|------|---|
| P12163_1_S1,10663 R.TGEEPEIAAR.K          | 1376.732 | 0.00367  | 2 | 1 | 27.9 | 0 |
| P12163_2_F6,11915 K.DVVTHSM*APEK.V ! F    | 1837.994 | 0.00682  | 3 | 1 | 28.1 | 0 |
| P12163_2_F6,11941 K.DVVTHSM*APEK.V ! F    | 1837.994 | 0.00716  | 2 | 1 | 43.7 | 0 |
| P12163_1_F8,12224 K.DVVTHSMAPEK.V ! R.    | 1821.999 | 0.00382  | 3 | 1 | 29.3 | 0 |
| P12163_1_F3,19696 K.LAQICGTIASDEK.R       | 2014.11  | 0.00873  | 3 | 1 | 49.8 | 0 |
| P12163_1_F8,18079 K.LAQICGTIASDEKR.H      | 2170.211 | 0.00415  | 3 | 1 | 32   | 0 |
| P12163_2_F6,17573 K.LAQICGTIASDEKR.H      | 2170.211 | 0.00472  | 3 | 1 | 34.4 | 0 |
| P12163_1_F4,15627 K.YLYLSGR.V             | 1175.673 | 0.00021  | 3 | 1 | 22.1 | 0 |
| P12163_1_F5,10069 R.ATFISHGNTAR.L ! R.A   | 1478.802 | 0.0023   | 3 | 1 | 43.8 | 0 |
| P12163_1_F9,9236 R.ATFISHGNTAR.L ! R.A    | 1478.802 | 0.00263  | 3 | 1 | 24.4 | 0 |
| P12163_2_F10,9962 R.ATFISHGNTAR.L ! R.A   | 1478.802 | -0.00205 | 3 | 1 | 30.7 | 0 |
| P12163_2_F4,8682 R.ATFISHGNTAR.L ! R.A    | 1478.802 | -0.00607 | 3 | 1 | 45.3 | 0 |
| P12163_2_F4,10236 R.ATFISHGNTAR.L ! R.A   | 1478.802 | 0.00236  | 3 | 1 | 56   | 0 |
| P12163_2_F7,6679 R.ATFISHGNTAR.L ! R.A    | 1478.802 | 0.0026   | 4 | 1 | 44.1 | 0 |
| P12163_2_F7,8668 R.ATFISHGNTAR.L ! R.A    | 1478.802 | -0.0001  | 3 | 1 | 30.8 | 0 |
| P12163_2_F7,10328 R.ATFISHGNTAR.L ! R.A   | 1478.802 | 0.00302  | 3 | 1 | 24.1 | 0 |
| P12163_2_F1,10937 R.AWTAEENR.H            | 1280.654 | 0.00378  | 2 | 1 | 25.8 | 0 |
| P12163_1_F3,7862 R.HETAYTK.I              | 1457.821 | 0.00645  | 3 | 1 | 46.1 | 0 |
| P12163_1_F4,8291 R.HETAYTK.I              | 1457.821 | 0.00639  | 3 | 1 | 29.8 | 0 |
| P12163_1_F5,6763 R.HETAYTK.I              | 1457.821 | 0.00525  | 3 | 1 | 41   | 0 |
| P12163_2_S5,8054 R.HETAYTK.I              | 1457.821 | 0.00654  | 3 | 1 | 27.4 | 0 |
| P12163_1_F6,10889 R.HGDLLNK.Y             | 1404.842 | 0.00746  | 3 | 1 | 42.9 | 0 |
| P12163_1_F7,10344 R.HGDLLNK.Y             | 1404.842 | 0.00047  | 3 | 1 | 34   | 0 |
| P12163_1_S10,1178.R.HGDLLNK.Y             | 1404.842 | 0.00554  | 3 | 1 | 31.2 | 0 |
| P12163_1_S10,1200.R.HGDLLNK.Y             | 1404.842 | 0.00467  | 3 | 1 | 29.7 | 0 |
| P12163_2_F6,10839 R.HGDLLNK.Y             | 1404.842 | 0.00083  | 3 | 1 | 28.2 | 0 |
| P12163_2_F8_1207C.R.HGDLLNK.Y             | 1404.842 | 0.00323  | 3 | 1 | 32.1 | 0 |
| P12163_2_F8_1207C.R.HGDLLNK.Y             | 1404.842 | 0.00554  | 3 | 1 | 30.4 | 0 |
| P12163_1_F3,14479 R.SIQYLIR.S ! K.SIQYLIR | 1196.73  | 0.00151  | 3 | 1 | 23.5 | 0 |
| P12163_1_F5,13949 K.AQLALQK.G             | 1379.883 | 0.00444  | 3 | 1 | 30.2 | 0 |
| P12163_1_F5,8723 K.AQLDQQK.N              | 1438.847 | 0.00952  | 2 | 1 | 26.4 | 0 |
| P12163_2_F2,9576 K.AQLDQQK.N              | 1438.847 | 0.00468  | 2 | 1 | 28.5 | 0 |
| P12163_1_F3,8709 K.GEEDLAR.E              | 1093.579 | 0.00369  | 2 | 1 | 24.6 | 0 |
| P12163_1_F2,13516 K.NVVNNLVSNTR.L         | 1533.865 | 0.00665  | 2 | 1 | 25.3 | 0 |
| P12163_1_F2,13521 K.NVVNNLVSNTR.L         | 1533.865 | 0.0023   | 3 | 1 | 49.1 | 0 |
| P12163_1_F3,13851 K.NVVNNLVSNTR.L         | 1533.865 | 0.00237  | 2 | 1 | 37.8 | 0 |
| P12163_1_F3,13892 K.NVVNNLVSNTR.L         | 1533.865 | 0.00059  | 3 | 1 | 37.4 | 0 |
| P12163_1_F5,11693 K.SYADNANALK.A          | 1674.927 | 0.00144  | 2 | 1 | 41.5 | 0 |
| P12163_1_S10,1285K.SYADNANALK.A           | 1674.927 | 0.00457  | 3 | 1 | 56.4 | 0 |
| P12163_2_F1,12095 K.SYADNANALK.A          | 1674.927 | 0.01278  | 2 | 1 | 37.6 | 0 |
| P12163_2_F1,12105 K.SYADNANALK.A          | 1674.927 | 0.00616  | 3 | 1 | 40.1 | 0 |
| P12163_2_F8_1207C.K.SYADNANALK.A          | 1674.927 | -0.00053 | 3 | 1 | 33.8 | 0 |
| P12163_1_F3,20222 K.SYANAILSSFEDPEK.I     | 2279.201 | 0.00584  | 3 | 1 | 43.1 | 0 |
| P12163_1_F3,23930 K.SYANAILSSFEDPEK.I     | 2279.201 | 0.00413  | 2 | 1 | 64.8 | 0 |
| P12163_1_F3,24605 K.VSEMLGNVNTSSALS/      | 2592.38  | 0.00238  | 3 | 1 | 35.5 | 0 |
| P12163_1_F2,12239 R.AAASSTNTAFPFR.D       | 1644.865 | -0.00034 | 3 | 1 | 30.5 | 0 |
| P12163_1_F2,14563 R.AAASSTNTAFPFR.D       | 1644.865 | 0.00187  | 3 | 1 | 51.6 | 0 |
| P12163_1_F2,14843 R.AAASSTNTAFPFR.D       | 1644.865 | 0.00286  | 3 | 1 | 47.7 | 0 |
| P12163_1_F2,15140 R.AAASSTNTAFPFR.D       | 1644.865 | 0.00401  | 3 | 1 | 25.4 | 0 |
| P12163_1_F2,17308 R.AAASSTNTAFPFR.D       | 1644.865 | 0.00376  | 3 | 1 | 36.8 | 0 |
| P12163_2_F1,17364 R.AAASSTNTAFPFR.D       | 1644.865 | 0.00242  | 2 | 1 | 33.9 | 0 |

|                   |                       |          |          |   |   |      |   |
|-------------------|-----------------------|----------|----------|---|---|------|---|
| P12163_1_F4,12624 | R.QATAQVLASQK.R       | 1753.043 | 0.00422  | 3 | 1 | 42.2 | 0 |
| P12163_1_F4,14219 | R.QATAQVLASQK.R       | 1753.043 | 0.00644  | 3 | 1 | 34.3 | 0 |
| P12163_1_F4,14274 | R.QATAQVLASQK.R       | 1753.043 | 0.0046   | 2 | 1 | 54.3 | 0 |
| P12163_2_F1,13265 | R.QATAQVLASQK.R       | 1753.043 | -0.00236 | 2 | 1 | 46   | 0 |
| P12163_2_F1,13273 | R.QATAQVLASQK.R       | 1753.043 | 0.00359  | 3 | 1 | 59.8 | 0 |
| P12163_1_F5,15090 | K.IFESTSK.E           | 1419.83  | 0.00664  | 2 | 1 | 29   | 0 |
| P12163_2_F1,15090 | K.IFESTSK.E           | 1419.83  | 0.00446  | 2 | 1 | 26.6 | 0 |
| P12163_1_F7,12302 | K.NLPEAEVK.E          | 1507.894 | 0.0021   | 3 | 1 | 29.8 | 0 |
| P12163_2_F1,13042 | K.NLPEAEVK.E          | 1507.894 | 0.00324  | 3 | 1 | 37.9 | 0 |
| P12163_2_F1,13175 | K.NLPEAEVK.E          | 1507.894 | 0.00288  | 2 | 1 | 26.6 | 0 |
| P12163_1_F8,17170 | K.SDDRDPSSSFQGGESFI   | 2325.069 | 0.0052   | 3 | 1 | 32.3 | 0 |
| P12163_2_S5,15816 | K.SDDRDPSSSFQGGESFI   | 2325.069 | 0.00397  | 3 | 1 | 33.4 | 0 |
| P12163_2_S5,16719 | K.SDDRDPSSSFQGGESFI   | 2325.069 | 0.00379  | 3 | 1 | 53.2 | 0 |
| P12163_1_F5,11282 | K.SQLNNIK.S           | 1424.868 | 0.00461  | 3 | 1 | 22.9 | 0 |
| P12163_2_F2,12095 | K.SQLNNIK.S           | 1424.868 | 0.00137  | 3 | 1 | 32   | 0 |
| P12163_2_S3,10809 | K.SQLNNIK.S           | 1424.868 | 0.01262  | 3 | 1 | 25.3 | 0 |
| P12163_2_S3,11001 | K.SQLNNIK.S           | 1424.868 | 0.00616  | 2 | 1 | 29.6 | 0 |
| P12163_1_F5,7831  | K.YTETSGSGK.K         | 1537.832 | 0.00462  | 2 | 1 | 32.6 | 0 |
| P12163_2_F1,8361  | K.YTETSGSGK.K         | 1537.832 | 0.00766  | 2 | 1 | 28.8 | 0 |
| P12163_1_F4,13976 | R.DGFEVGNADK.I        | 1659.88  | 0.00584  | 2 | 1 | 47.8 | 0 |
| P12163_1_F5,11528 | R.LNSEGGVLK.V         | 1524.921 | 0.00333  | 3 | 1 | 32   | 0 |
| P12163_1_F5,13889 | R.LNSEGGVLK.V         | 1524.921 | 0.00453  | 3 | 1 | 40.3 | 0 |
| P12163_1_F6,14741 | R.LNSEGGVLK.V         | 1524.921 | 0.00525  | 3 | 1 | 32.1 | 0 |
| P12163_2_F1,14216 | R.LNSEGGVLK.V         | 1524.921 | 0.01305  | 3 | 1 | 41.4 | 0 |
| P12163_2_F2,14682 | R.LNSEGGVLK.V         | 1524.921 | 0.00123  | 3 | 1 | 41.5 | 0 |
| P12163_2_F9,16556 | R.LVLPQYK.N           | 1468.935 | 0.00487  | 3 | 1 | 23.1 | 0 |
| P12163_1_S1,17019 | R.TVLQSM*EAVYLN.R.N   | 1843.989 | 0.00026  | 2 | 1 | 32.1 | 0 |
| P12163_1_S1,17034 | R.TVLQSM*EAVYLN.R.N   | 1843.989 | 0.0018   | 3 | 1 | 62.9 | 0 |
| P12163_1_S1,23183 | R.TVLQSM*EAVYLN.R.N   | 1843.989 | 0.00366  | 3 | 1 | 47.5 | 0 |
| P12163_2_F6,23034 | R.TVLQSM*EAVYLN.R.N   | 1843.989 | 0.00144  | 2 | 1 | 33.4 | 0 |
| P12163_1_S1,17310 | R.TVLQSMEAVYLN.R.N    | 1827.994 | 0.00324  | 3 | 1 | 59.9 | 0 |
| P12163_1_S1,23145 | R.TVLQSMEAVYLN.R.N    | 1827.994 | 0.00147  | 3 | 1 | 56.5 | 0 |
| P12163_1_F8,16020 | K.AGHPTFVLVR.E        | 1400.832 | 0.0024   | 3 | 1 | 26.1 | 0 |
| P12163_2_F6,15432 | K.AGHPTFVLVR.E        | 1400.832 | 0.00258  | 3 | 1 | 31   | 0 |
| P12163_1_F2,7035  | K.AVDDPR.T            | 976.5365 | 0.00178  | 2 | 1 | 26.1 | 0 |
| P12163_2_F1,6810  | K.AVDDPR.T            | 976.5365 | 0.00264  | 2 | 1 | 32   | 0 |
| P12163_1_F4,18399 | K.EYVSEEQLL.N ! R.EY  | 1846.042 | 0.00872  | 2 | 1 | 53.1 | 0 |
| P12163_1_F4,18412 | K.EYVSEEQLL.N ! R.EY  | 1846.042 | 0.00857  | 3 | 1 | 45.8 | 0 |
| P12163_1_F9,17086 | K.EYVSEEQLL.N ! R.EY  | 1846.042 | -0.00286 | 3 | 1 | 25.5 | 0 |
| P12163_2_F9,16197 | K.EYVSEEQLL.N ! R.EY  | 1846.042 | 0.00728  | 3 | 1 | 41.1 | 0 |
| P12163_1_F4,19473 | K.FIVEASVK.A          | 1500.925 | 0.00598  | 3 | 1 | 39.2 | 0 |
| P12163_1_F4,19481 | K.FIVEASVK.A          | 1500.925 | 0.00679  | 2 | 1 | 31.3 | 0 |
| P12163_2_F1,18739 | K.FIVEASVK.A          | 1500.925 | 0.00505  | 2 | 1 | 27.4 | 0 |
| P12163_2_F4,16957 | K.FIVEASVK.A          | 1500.925 | -0.00149 | 3 | 1 | 31   | 0 |
| P12163_1_F8,21764 | K.IEPSFGVEASQLYPDVI   | 2487.359 | 0.00198  | 3 | 1 | 56.6 | 0 |
| P12163_1_S1,20629 | K.IEPSFGVEASQLYPDVI   | 2487.359 | 0.00543  | 4 | 1 | 25.4 | 0 |
| P12163_1_S1,20673 | K.IEPSFGVEASQLYPDVI   | 2487.359 | 0.00504  | 3 | 1 | 70.5 | 0 |
| P12163_1_F3,19865 | K.ILSIGGTGYIGK.F      | 1787.089 | 0.00183  | 3 | 1 | 33.7 | 0 |
| P12163_1_F3,21576 | K.ILSIGGTGYIGK.F      | 1787.089 | 0.00668  | 2 | 1 | 49.1 | 0 |
| P12163_1_F3,21636 | K.ILSIGGTGYIGK.F      | 1787.089 | 0.00756  | 3 | 1 | 45.6 | 0 |
| P12163_1_F9,17128 | K.SQLLDHFK.N ! K.SQLI | 1595.937 | 0.00443  | 3 | 1 | 32.5 | 0 |

|                   |                       |          |          |   |   |      |   |
|-------------------|-----------------------|----------|----------|---|---|------|---|
| P12163_1_F9,17162 | K.SQLLDHFK.N ! K.SQLI | 1595.937 | 0.0037   | 2 | 1 | 32.3 | 0 |
| P12163_1_F9,17345 | K.SQLLDHFK.N ! K.SQLI | 1595.937 | 0.00677  | 3 | 1 | 26.4 | 0 |
| P12163_2_F9,16416 | K.SQLLDHFK.N ! K.SQLI | 1595.937 | 0.00413  | 3 | 1 | 30.3 | 0 |
| P12163_2_F9,16522 | K.SQLLDHFK.N ! K.SQLI | 1595.937 | 0.01083  | 4 | 1 | 23.1 | 0 |
| P12163_2_F9,16595 | K.SQLLDHFK.N ! K.SQLI | 1595.937 | 0.00812  | 2 | 1 | 38   | 0 |
| P12163_2_F9,16634 | K.SQLLDHFK.N ! K.SQLI | 1595.937 | 0.00632  | 3 | 1 | 45.3 | 0 |
| P12163_1_F9,8015  | R.AHGAVEPAK.S         | 1487.879 | 0.00529  | 3 | 1 | 28.7 | 0 |
| P12163_2_F1,11313 | R.ESTLSAPSK.S         | 1527.884 | 0.0044   | 2 | 1 | 25.7 | 0 |
| P12163_2_F2,8473  | K.CNGTSEEVK.K         | 1631.852 | 0.00574  | 2 | 1 | 35   | 0 |
| P12163_1_S1,8174  | K.DNVSAEVAASSTR.I     | 1523.797 | 0.00335  | 3 | 1 | 31.9 | 0 |
| P12163_1_S1,9163  | K.DNVSAEVAASSTR.I     | 1523.797 | 0.00551  | 3 | 1 | 38.5 | 0 |
| P12163_1_S1,9856  | K.DNVSAEVAASSTR.I     | 1523.797 | 0.00203  | 3 | 1 | 57.1 | 0 |
| P12163_2_F2,21598 | K.FFVGGNWK.C          | 1562.894 | 0.00488  | 3 | 1 | 22.2 | 0 |
| P12163_1_F7,10686 | K.VATPAQAQEVHAE LR    | 1924.055 | 0.00439  | 4 | 1 | 39.6 | 0 |
| P12163_1_F7,13148 | K.VATPAQAQEVHAE LR    | 1924.055 | 0.00316  | 3 | 1 | 65.6 | 0 |
| P12163_2_S5,10558 | K.VATPAQAQEVHAE LR    | 1924.055 | 0.00623  | 4 | 1 | 63.6 | 0 |
| P12163_2_S5,12835 | K.VATPAQAQEVHAE LR    | 1924.055 | 0.00517  | 3 | 1 | 24.4 | 0 |
| P12163_2_S5,12947 | K.VATPAQAQEVHAE LR    | 1924.055 | 0.00367  | 4 | 1 | 53.3 | 0 |
| P12163_2_S5,13053 | K.VATPAQAQEVHAE LR    | 1924.055 | 0.00367  | 3 | 1 | 84.3 | 0 |
| P12163_1_F3,13546 | K.VAYALSR.G           | 1083.646 | 0.00347  | 3 | 1 | 26.9 | 0 |
| P12163_1_S1,14516 | K.VIACVGETLEQR.E      | 1678.91  | 0.00411  | 3 | 1 | 42.5 | 0 |
| P12163_1_S1,21186 | K.VIACVGETLEQR.E      | 1678.91  | 0.00777  | 3 | 1 | 67.1 | 0 |
| P12163_1_S1,21242 | K.VIACVGETLEQR.E      | 1678.91  | 0.00492  | 2 | 1 | 44.9 | 0 |
| P12163_1_S1,21360 | K.VIACVGETLEQR.E      | 1678.91  | 0.00171  | 3 | 1 | 64.9 | 0 |
| P12163_1_S1,21411 | K.VIACVGETLEQR.E      | 1678.91  | 0.00954  | 2 | 1 | 51.6 | 0 |
| P12163_1_S1,21538 | K.VIACVGETLEQR.E      | 1678.91  | 0.00486  | 3 | 1 | 67.9 | 0 |
| P12163_1_S1,21592 | K.VIACVGETLEQR.E      | 1678.91  | 0.00578  | 2 | 1 | 38.6 | 0 |
| P12163_1_S1,21831 | K.VIACVGETLEQR.E      | 1678.91  | 0.00027  | 3 | 1 | 49.7 | 0 |
| P12163_1_F3,18719 | R.ALLNESNDFVGDK.V     | 2030.101 | -0.0009  | 2 | 1 | 39.3 | 0 |
| P12163_1_F3,12119 | R.ESGSTVAVVAEQTK.A    | 2014.128 | 0.00401  | 3 | 1 | 27   | 0 |
| P12163_1_F3,14095 | R.ESGSTVAVVAEQTK.A    | 2014.128 | 0.00671  | 3 | 1 | 40   | 0 |
| P12163_1_F3,14113 | R.ESGSTVAVVAEQTK.A    | 2014.128 | 0.00453  | 2 | 1 | 58.8 | 0 |
| P12163_1_F6,16221 | R.SDFHVAAQNCWVR.K     | 1893.933 | -0.0008  | 3 | 1 | 26.3 | 0 |
| P12163_2_F6,15497 | R.SDFHVAAQNCWVR.K     | 1893.933 | 0.00217  | 3 | 1 | 28.9 | 0 |
| P12163_2_F6,15509 | R.SDFHVAAQNCWVR.K     | 1893.933 | -0.00073 | 2 | 1 | 38.7 | 0 |
| P12163_1_S10,1802 | K.DSTGIPHILEHSVLCGS   | 2282.186 | 0.00011  | 4 | 1 | 29.4 | 0 |
| P12163_2_F10,1687 | K.DSTGIPHILEHSVLCGS   | 2282.186 | 0.00487  | 3 | 1 | 25   | 0 |
| P12163_2_F4,17542 | K.DSTGIPHILEHSVLCGS   | 2282.186 | 0.00889  | 3 | 1 | 36.8 | 0 |
| P12163_2_F4,17544 | K.DSTGIPHILEHSVLCGS   | 2282.186 | 0.00511  | 4 | 1 | 41.6 | 0 |
| P12163_1_F3,23421 | K.EPFVELLK.G          | 1582.966 | 0.00644  | 3 | 1 | 25   | 0 |
| P12163_2_F1,23703 | K.EPFVELLK.G          | 1582.966 | 0.00642  | 3 | 1 | 25.2 | 0 |
| P12163_1_F5,16554 | K.GVVFNEMK.G          | 1531.876 | 0.00435  | 2 | 1 | 34.4 | 0 |
| P12163_1_F5,16619 | K.GVVFNEMK.G          | 1531.876 | 0.0045   | 3 | 1 | 27.2 | 0 |
| P12163_2_F2,17241 | K.GVVFNEMK.G          | 1531.876 | 0.00173  | 2 | 1 | 25.8 | 0 |
| P12163_1_S1,14131 | K.GVYSQPDNILGR.A      | 1622.88  | 0.0036   | 3 | 1 | 28.1 | 0 |
| P12163_1_S1,15724 | K.GVYSQPDNILGR.A      | 1622.88  | 0.00065  | 2 | 1 | 29.7 | 0 |
| P12163_1_S1,15749 | K.GVYSQPDNILGR.A      | 1622.88  | 0.00384  | 3 | 1 | 67   | 0 |
| P12163_1_F2,10940 | K.TGAEVMSVSND DENK    | 2204.096 | -0.00022 | 3 | 1 | 50.1 | 0 |
| P12163_1_F4,17326 | K.VSEEFIGECK.S        | 1805.956 | 0.01064  | 2 | 1 | 40   | 0 |
| P12163_1_F4,17360 | K.VSEEFIGECK.S        | 1805.956 | 0.00744  | 3 | 1 | 37   | 0 |
| P12163_2_F1,16486 | K.VSEEFIGECK.S        | 1805.956 | 0.00351  | 3 | 1 | 27.7 | 0 |

|                   |                        |          |          |   |   |      |   |
|-------------------|------------------------|----------|----------|---|---|------|---|
| P12163_1_F5,19828 | R.ITFEEFK.N ! K.LTFEEF | 1521.877 | 0.0054   | 3 | 1 | 29.9 | 0 |
| P12163_1_F5,19956 | R.ITFEEFK.N ! K.LTFEEF | 1521.877 | 0.00807  | 2 | 1 | 25   | 0 |
| P12163_2_F1,20346 | R.ITFEEFK.N ! K.LTFEEF | 1521.877 | 0.00267  | 3 | 1 | 25.2 | 0 |
| P12163_2_F6,20344 | R.IWFYGDNDPNER.L       | 1830.86  | -0.00027 | 2 | 1 | 39.8 | 0 |
| P12163_1_F4,10571 | R.TCYPVASTNTK.D        | 1849.994 | 0.00664  | 3 | 1 | 22.2 | 0 |
| P12163_1_F4,12186 | R.TCYPVASTNTK.D        | 1849.994 | 0.00505  | 3 | 1 | 32.2 | 0 |
| P12163_1_F4,12194 | R.TCYPVASTNTK.D        | 1849.994 | 0.00282  | 2 | 1 | 33.8 | 0 |
| P12163_1_F9,11628 | R.TCYPVASTNTK.D        | 1849.994 | 0.00716  | 2 | 1 | 25.5 | 0 |
| P12163_2_F1,11314 | R.TCYPVASTNTK.D        | 1849.994 | 0.00996  | 2 | 1 | 30.1 | 0 |
| P12163_2_F1,11316 | R.TCYPVASTNTK.D        | 1849.994 | 0.00841  | 3 | 1 | 38.5 | 0 |
| P12163_1_F2,9971  | K.GETLEDTIR.T          | 1337.721 | 0.00306  | 3 | 1 | 24.6 | 0 |
| P12163_1_S1,14282 | K.GETLEDTIR.T          | 1337.721 | 0.00133  | 2 | 1 | 25.5 | 0 |
| P12163_1_F6,12413 | K.HAVVLHPLPR.L         | 1442.89  | 0.0017   | 3 | 1 | 37   | 0 |
| P12163_1_F6,12415 | K.HAVVLHPLPR.L         | 1442.89  | 0.00339  | 4 | 1 | 49.7 | 0 |
| P12163_1_F6,22747 | K.HAVVLHPLPR.L         | 1442.89  | 0.00463  | 4 | 1 | 45.5 | 0 |
| P12163_1_F7,11784 | K.HAVVLHPLPR.L         | 1442.89  | 0.00183  | 4 | 1 | 42.8 | 0 |
| P12163_2_F6,11955 | K.HAVVLHPLPR.L         | 1442.89  | 0.00259  | 4 | 1 | 47.6 | 0 |
| P12163_2_F6,11968 | K.HAVVLHPLPR.L         | 1442.89  | 0.00017  | 3 | 1 | 30.9 | 0 |
| P12163_2_F7,11344 | K.HAVVLHPLPR.L         | 1442.89  | 0.00275  | 3 | 1 | 26.8 | 0 |
| P12163_2_F7,11346 | K.HAVVLHPLPR.L         | 1442.89  | 0.00335  | 4 | 1 | 36.5 | 0 |
| P12163_2_S5,11360 | K.HAVVLHPLPR.L         | 1442.89  | 0.00339  | 4 | 1 | 34.2 | 0 |
| P12163_1_F9,11667 | K.HSPGSPILK.G          | 1543.942 | 0.00374  | 3 | 1 | 32.9 | 0 |
| P12163_2_F4,10681 | K.HSPGSPILK.G          | 1543.942 | 0.00998  | 3 | 1 | 40.5 | 0 |
| P12163_2_F9,10713 | K.HSPGSPILK.G          | 1543.942 | 0.00287  | 3 | 1 | 44.7 | 0 |
| P12163_1_F3,21236 | K.IYFVSPGVVK.M         | 1717.051 | 0.00503  | 3 | 1 | 36.8 | 0 |
| P12163_1_F3,21252 | K.IYFVSPGVVK.M         | 1717.051 | 0.00902  | 2 | 1 | 24.9 | 0 |
| P12163_1_F2,19789 | K.VGLVGLDLANGR.T       | 1374.801 | 0.00442  | 2 | 1 | 32.8 | 0 |
| P12163_2_F2,11146 | R.EFSSAAK.G            | 1347.773 | 0.0086   | 3 | 1 | 26.7 | 0 |
| P12163_1_S1,14877 | R.LGGEVLTENAR.E        | 1563.864 | 0.00302  | 2 | 1 | 25.1 | 0 |
| P12163_1_S1,14899 | R.LGGEVLTENAR.E        | 1563.864 | -0.00239 | 3 | 1 | 30.9 | 0 |
| P12163_1_F5,21674 | R.SLAYLLAK.Y           | 1486.945 | 0.00672  | 2 | 1 | 38   | 0 |
| P12163_2_F1,22525 | R.SLAYLLAK.Y           | 1486.945 | 0.00026  | 2 | 1 | 42.1 | 0 |
| P12163_2_F2,22025 | R.SLAYLLAK.Y           | 1486.945 | 0.00496  | 2 | 1 | 43.3 | 0 |
| P12163_1_F2,13133 | R.TDLYEEAR.G           | 1300.669 | 0.00361  | 2 | 1 | 24.9 | 0 |
| P12163_1_F2,10752 | K.EGGDPVLAR.I          | 1217.679 | 0.0008   | 2 | 1 | 37.7 | 0 |
| P12163_2_F4,16173 | K.ITMPAHLMYDGHDP       | 2058.02  | 0.00056  | 4 | 1 | 26.3 | 0 |
| P12163_1_F5,10069 | R.ATFISHGNTAR.L ! R.A  | 1478.802 | 0.0023   | 3 | 1 | 43.8 | 0 |
| P12163_1_F9,9236  | R.ATFISHGNTAR.L ! R.A  | 1478.802 | 0.00263  | 3 | 1 | 24.4 | 0 |
| P12163_2_F10,9962 | R.ATFISHGNTAR.L ! R.A  | 1478.802 | -0.00205 | 3 | 1 | 30.7 | 0 |
| P12163_2_F4,8682  | R.ATFISHGNTAR.L ! R.A  | 1478.802 | -0.00607 | 3 | 1 | 45.3 | 0 |
| P12163_2_F4,10236 | R.ATFISHGNTAR.L ! R.A  | 1478.802 | 0.00236  | 3 | 1 | 56   | 0 |
| P12163_2_F7,6679  | R.ATFISHGNTAR.L ! R.A  | 1478.802 | 0.0026   | 4 | 1 | 44.1 | 0 |
| P12163_2_F7,8668  | R.ATFISHGNTAR.L ! R.A  | 1478.802 | -0.0001  | 3 | 1 | 30.8 | 0 |
| P12163_2_F7,10328 | R.ATFISHGNTAR.L ! R.A  | 1478.802 | 0.00302  | 3 | 1 | 24.1 | 0 |
| P12163_2_F4,4846  | R.HENAYAR.I            | 1164.606 | 0.00331  | 3 | 1 | 23.1 | 0 |
| P12163_1_F4,14928 | R.ICGTIASDEK.R         | 1701.93  | 0.00233  | 2 | 1 | 35.7 | 0 |
| P12163_2_F1,13902 | R.ICGTIASDEK.R         | 1701.93  | 0.00761  | 2 | 1 | 37.6 | 0 |
| P12163_2_F1,13910 | R.ICGTIASDEK.R         | 1701.93  | 0.00679  | 3 | 1 | 27.8 | 0 |
| P12163_2_F6,20777 | R.LFAHFAAVAQR.L        | 1534.88  | 0.00028  | 3 | 1 | 41.1 | 0 |
| P12163_1_F2,16504 | R.LQELADQR.A           | 1276.716 | 0.00221  | 2 | 1 | 25   | 0 |
| P12163_1_F3,16304 | R.SFLYLSGR.V           | 1246.71  | 0.00337  | 3 | 1 | 30.1 | 0 |

|                   |                       |          |         |   |   |      |   |
|-------------------|-----------------------|----------|---------|---|---|------|---|
| P12163_1_F3,17218 | R.SFLYLSGR.V          | 1246.71  | 0.00412 | 3 | 1 | 29.1 | 0 |
| P12163_1_F4,22837 | R.VDM*LMIEK.T         | 1602.905 | 0.00689 | 2 | 1 | 27.9 | 0 |
| P12163_1_F4,22798 | R.VDMLMIEK.T          | 1586.911 | 0.00851 | 2 | 1 | 34   | 0 |
| P12163_1_F4,22923 | R.VDMLMIEK.T          | 1586.911 | 0.00504 | 3 | 1 | 30.4 | 0 |
| P12163_2_F1,22316 | R.VDMLMIEK.T          | 1586.911 | 0.00393 | 3 | 1 | 23.5 | 0 |
| P12163_2_F1,22356 | R.VDMLMIEK.T          | 1586.911 | 0.00419 | 2 | 1 | 34.9 | 0 |
| P12163_1_F3,16203 | K.CLIDDEEAVK.V        | 1799.967 | 0.00586 | 2 | 1 | 52.6 | 0 |
| P12163_2_F10,1932 | K.GFFECTHDISHLTCAD    | 2630.243 | 0.00272 | 4 | 1 | 31.1 | 0 |
| P12163_2_F8_1207  | K.GFFECTHDISHLTCAD    | 2630.243 | 0.00336 | 4 | 1 | 36.4 | 0 |
| P12163_2_F8_1207  | K.GFFECTHDISHLTCAD    | 2630.243 | 0.00448 | 3 | 1 | 32.2 | 0 |
| P12163_1_S10,1291 | K.LAHFAR.E            | 1018.61  | 0.00454 | 3 | 1 | 24.2 | 0 |
| P12163_1_F3,9715  | R.AICDPR.C ! K.ALCDPR | 1035.556 | 0.00545 | 2 | 1 | 29.3 | 0 |
| P12163_1_F6,14944 | R.FSTVIHER.G          | 1292.726 | 0.00468 | 3 | 1 | 48.8 | 0 |
| P12163_1_F9,14558 | R.FSTVIHER.G          | 1292.726 | 0.00456 | 3 | 1 | 57.7 | 0 |
| P12163_2_F4,13693 | R.FSTVIHER.G          | 1292.726 | 0.00204 | 3 | 1 | 43.3 | 0 |
| P12163_2_F9,13763 | R.FSTVIHER.G          | 1292.726 | 0.00141 | 3 | 1 | 35.8 | 0 |
| P12163_2_S5,14057 | R.FSTVIHER.G          | 1292.726 | 0.00351 | 3 | 1 | 32.9 | 0 |
| P12163_1_F7,19539 | R.GPVLLEDYHLVEK.L     | 2120.221 | 0.0079  | 3 | 1 | 33.1 | 0 |
| P12163_1_F8,20502 | R.GPVLLEDYHLVEK.L     | 2120.221 | 0.00454 | 3 | 1 | 36.6 | 0 |
| P12163_2_F10,1797 | R.GPVLLEDYHLVEK.L     | 2120.221 | 0.00361 | 3 | 1 | 30   | 0 |
| P12163_2_F10,1800 | R.GPVLLEDYHLVEK.L     | 2120.221 | 0.00148 | 4 | 1 | 24.8 | 0 |
| P12163_2_S5,18924 | R.GPVLLEDYHLVEK.L     | 2120.221 | 0.00274 | 3 | 1 | 47.3 | 0 |
| P12163_2_S5,18926 | R.GPVLLEDYHLVEK.L     | 2120.221 | 0.00276 | 4 | 1 | 23.4 | 0 |
| P12163_2_F6,19977 | R.HMEGFGVQTFTLVNK     | 2316.263 | 0.00591 | 3 | 1 | 28.5 | 0 |
| P12163_1_F2,15728 | R.IFAYGDTQR.H         | 1374.732 | 0.00912 | 3 | 1 | 29.9 | 0 |
| P12163_1_F3,16171 | R.IFAYGDTQR.H         | 1374.732 | 0.00723 | 3 | 1 | 28.1 | 0 |
| P12163_1_F9,6288  | R.VTHEVR.S            | 1044.61  | 0.00194 | 3 | 1 | 25.3 | 0 |
| P12163_1_S10,7403 | R.VTHEVR.S            | 1044.61  | 0.00584 | 3 | 1 | 23   | 0 |
| P12163_2_F8_1207  | R.VTHEVR.S            | 1044.61  | 0.00437 | 3 | 1 | 30.1 | 0 |
| P12163_1_F4,25631 | K.AIWM*LDPGIK.H       | 1768.029 | 0.0047  | 3 | 1 | 31.3 | 0 |
| P12163_1_F3,24821 | K.AIWMLDPGIK.H        | 1752.034 | 0.00308 | 3 | 1 | 38.4 | 0 |
| P12163_1_F3,14955 | K.CQGLALVNR.F         | 1334.752 | 0.00296 | 2 | 1 | 24.4 | 0 |
| P12163_1_F9,7787  | K.DRDTPISTR.T         | 1364.744 | 0.00409 | 2 | 1 | 33.8 | 0 |
| P12163_1_S1,17796 | K.GVDLSQTPIELK.S      | 1908.126 | 0.00175 | 3 | 1 | 44.2 | 0 |
| P12163_1_F4,15308 | K.LISDAEK.A           | 1383.83  | 0.0079  | 2 | 1 | 28.7 | 0 |
| P12163_1_F9,12793 | K.LQHALPK.G           | 1414.899 | 0.00497 | 3 | 1 | 32   | 0 |
| P12163_1_F9,12823 | K.LQHALPK.G           | 1414.899 | 0.00614 | 2 | 1 | 25.8 | 0 |
| P12163_2_F9,11650 | K.LQHALPK.G           | 1414.899 | 0.00872 | 2 | 1 | 27.4 | 0 |
| P12163_2_F9,11695 | K.LQHALPK.G           | 1414.899 | 0.0059  | 3 | 1 | 32.9 | 0 |
| P12163_1_F7,17176 | K.QSPLAISHEYEVIK.I    | 2222.264 | 0.00482 | 3 | 1 | 25.8 | 0 |
| P12163_1_F8,18034 | K.QSPLAISHEYEVIK.I    | 2222.264 | 0.0059  | 3 | 1 | 31.4 | 0 |
| P12163_2_F10,1605 | K.QSPLAISHEYEVIK.I    | 2222.264 | 0.00317 | 3 | 1 | 26.5 | 0 |
| P12163_2_F10,1608 | K.QSPLAISHEYEVIK.I    | 2222.264 | 0.00174 | 4 | 1 | 25.4 | 0 |
| P12163_2_F6,17527 | K.QSPLAISHEYEVIK.I    | 2222.264 | 0.00104 | 3 | 1 | 35   | 0 |
| P12163_1_F3,8415  | R.FDCSASDR.Q          | 1261.578 | 0.00333 | 3 | 1 | 23.2 | 0 |
| P12163_1_F3,10084 | R.FDCSASDR.Q          | 1261.578 | 0.00312 | 2 | 1 | 27.8 | 0 |
| P12163_1_F4,22747 | R.FNVEEVFK.C          | 1619.925 | 0.00629 | 2 | 1 | 35.8 | 0 |
| P12163_1_F4,22753 | R.FNVEEVFK.C          | 1619.925 | 0.00412 | 3 | 1 | 31.2 | 0 |
| P12163_1_F5,21388 | R.FNVEEVFK.C          | 1619.925 | 0.00709 | 2 | 1 | 26.9 | 0 |
| P12163_2_F1,22194 | R.FNVEEVFK.C          | 1619.925 | 0.00783 | 2 | 1 | 42.9 | 0 |
| P12163_2_F1,22195 | R.FNVEEVFK.C          | 1619.925 | 0.00481 | 3 | 1 | 28.9 | 0 |

|                   |                     |          |          |   |   |      |   |
|-------------------|---------------------|----------|----------|---|---|------|---|
| P12163_1_F4,17596 | K.LFVDDSK.V         | 1431.83  | 0.00803  | 2 | 1 | 29.5 | 0 |
| P12163_2_F1,16682 | K.LFVDDSK.V         | 1431.83  | 0.01199  | 2 | 1 | 29.2 | 0 |
| P12163_2_F1,16711 | K.LFVDDSK.V         | 1431.83  | 0.0062   | 3 | 1 | 24.8 | 0 |
| P12163_1_F3,16702 | K.LTEVDVADK.L       | 1597.926 | 0.00808  | 3 | 1 | 22   | 0 |
| P12163_1_F8,15270 | K.NSAELEGMLNSHLR.I  | 1890.964 | 0.00477  | 3 | 1 | 29   | 0 |
| P12163_2_F6,18386 | K.NSAELEGMLNSHLR.I  | 1890.964 | 0.00441  | 3 | 1 | 53.8 | 0 |
| P12163_1_F8,18790 | K.NSAELEGMLNSHLR.D  | 1874.97  | 0.00249  | 3 | 1 | 45.3 | 0 |
| P12163_2_F6,18342 | K.NSAELEGMLNSHLR.D  | 1874.97  | 0.0042   | 3 | 1 | 50.3 | 0 |
| P12163_1_S1,20889 | K.VSPLLDGFAR.Q      | 1378.8   | 0.00253  | 2 | 1 | 28.6 | 0 |
| P12163_1_F8,16961 | K.VTPDVMDHLK.N      | 1762.998 | 0.00956  | 3 | 1 | 48.5 | 0 |
| P12163_1_F8,16986 | K.VTPDVMDHLK.N      | 1762.998 | 0.00075  | 2 | 1 | 32.1 | 0 |
| P12163_2_F6,16405 | K.VTPDVMDHLK.N      | 1762.998 | 0.00575  | 3 | 1 | 35.5 | 0 |
| P12163_2_F6,16423 | K.VTPDVMDHLK.N      | 1762.998 | 0.00579  | 2 | 1 | 51.9 | 0 |
| P12163_1_F4,22952 | R.FGGVSYLGFEK.L     | 1812.015 | 0.00572  | 3 | 1 | 31.6 | 0 |
| P12163_1_F4,22967 | R.FGGVSYLGFEK.L     | 1812.015 | 0.00678  | 2 | 1 | 48.8 | 0 |
| P12163_2_F1,22418 | R.FGGVSYLGFEK.L     | 1812.015 | 0.0051   | 2 | 1 | 27.2 | 0 |
| P12163_1_F4,24264 | R.IENLLYVK.E        | 1599.993 | 0.00124  | 2 | 1 | 31.2 | 0 |
| P12163_1_F4,24312 | R.IENLLYVK.E        | 1599.993 | 0.00645  | 3 | 1 | 32.7 | 0 |
| P12163_2_F1,23630 | R.IENLLYVK.E        | 1599.993 | -0.00464 | 2 | 1 | 44.8 | 0 |
| P12163_2_F9,20616 | R.IENLLYVK.E        | 1599.993 | 0.00465  | 3 | 1 | 27.9 | 0 |
| P12163_2_F7,8925  | R.TVHFGEPTAR.E      | 1418.769 | 0.00508  | 3 | 1 | 24.2 | 0 |
| P12163_2_F2,17378 | R.YFLQAEK.Q         | 1506.878 | 0.00837  | 2 | 1 | 25.8 | 0 |
| P12163_2_F2,16163 | K.AGMGLIK.H         | 1297.812 | 0.00426  | 3 | 1 | 26   | 0 |
| P12163_1_F4,19477 | K.ALLSQFQEK.Q       | 1671.989 | 0.00845  | 2 | 1 | 43   | 0 |
| P12163_1_F5,18537 | K.ALLSQFQEK.Q       | 1671.989 | 0.00601  | 2 | 1 | 27.7 | 0 |
| P12163_1_F5,18545 | K.ALLSQFQEK.Q       | 1671.989 | 0.00133  | 3 | 1 | 31.3 | 0 |
| P12163_2_F1,18820 | K.ALLSQFQEK.Q       | 1671.989 | 0.00925  | 2 | 1 | 37.5 | 0 |
| P12163_2_F1,18839 | K.ALLSQFQEK.Q       | 1671.989 | 0.00283  | 3 | 1 | 32.3 | 0 |
| P12163_1_S1,18960 | K.NNIAPELYELGGR.G   | 1749.944 | 0.00522  | 3 | 1 | 26.5 | 0 |
| P12163_1_S1,18981 | K.NNIAPELYELGGR.G   | 1749.944 | 0.00331  | 2 | 1 | 33.9 | 0 |
| P12163_1_F8,21146 | R.FGHNINLATNELILR.D | 2029.15  | 0.00204  | 3 | 1 | 56.7 | 0 |
| P12163_2_F6,20739 | R.FGHNINLATNELILR.D | 2029.15  | 0.00852  | 3 | 1 | 42.8 | 0 |
| P12163_2_F6,20762 | R.FGHNINLATNELILR.D | 2029.15  | -0.0062  | 2 | 1 | 38.7 | 0 |
| P12163_1_F4,22852 | R.GPVGAYYLWAK.H     | 1833.052 | 0.0012   | 3 | 1 | 22   | 0 |
| P12163_1_F9,16596 | R.IDHLLGR.N         | 1127.684 | 0.00333  | 3 | 1 | 43.7 | 0 |
| P12163_1_F9,16855 | R.IDHLLGR.N         | 1127.684 | 0.00036  | 3 | 1 | 39.7 | 0 |
| P12163_2_F7,14995 | R.IDHLLGR.N         | 1127.684 | 0.00273  | 3 | 1 | 50.1 | 0 |
| P12163_1_F3,20402 | R.LEPSNVILGQYK.A    | 1969.158 | 0.00379  | 2 | 1 | 57.1 | 0 |
| P12163_1_F2,20043 | R.NLIENLTVLR.F      | 1488.905 | 0.00279  | 3 | 1 | 31.8 | 0 |
| P12163_1_S1,22166 | R.NLIENLTVLR.F      | 1488.905 | -0.00267 | 3 | 1 | 23.9 | 0 |
| P12163_1_F2,15770 | R.SIIASTLTCR.I      | 1425.804 | 0.00089  | 3 | 1 | 38.3 | 0 |
| P12163_1_F2,17973 | R.SIIASTLTCR.I      | 1425.804 | 0.00107  | 3 | 1 | 29.4 | 0 |
| P12163_1_F2,17988 | R.SIIASTLTCR.I      | 1425.804 | 0.00044  | 2 | 1 | 24.9 | 0 |
| P12163_1_F8,24562 | K.IVDAIISHGCFLR.E   | 1805.005 | 0.0031   | 3 | 1 | 28.6 | 0 |
| P12163_1_F2,20097 | K.NVAAILGGGAGTR.L   | 1573.933 | 0.00376  | 3 | 1 | 54.3 | 0 |
| P12163_1_F2,21698 | K.NVAAILGGGAGTR.L   | 1573.933 | 0.00634  | 2 | 1 | 33.1 | 0 |
| P12163_1_F2,21704 | K.NVAAILGGGAGTR.L   | 1573.933 | 0.00466  | 3 | 1 | 35.5 | 0 |
| P12163_1_S1,20517 | K.NVAAILGGGAGTR.L   | 1573.933 | 0.00133  | 3 | 1 | 57.2 | 0 |
| P12163_1_F7,20125 | K.NVENVLILSGDHLYR.I | 2046.128 | 0.00098  | 3 | 1 | 39.2 | 0 |
| P12163_2_F10,1863 | K.NVENVLILSGDHLYR.I | 2046.128 | 0.00203  | 3 | 1 | 37.5 | 0 |
| P12163_2_F4,19619 | K.NVENVLILSGDHLYR.I | 2046.128 | 0.00215  | 3 | 1 | 34.9 | 0 |



|                   |                      |          |          |   |   |      |   |
|-------------------|----------------------|----------|----------|---|---|------|---|
| P12163_2_S5,19596 | K.NVENVLILSGDHLYR.I  | 2046.128 | 0.00284  | 3 | 1 | 33   | 0 |
| P12163_1_F4,15027 | K.VPIGVGQNTK.I       | 1620.989 | 0.01368  | 2 | 1 | 26.1 | 0 |
| P12163_1_F4,15055 | K.VPIGVGQNTK.I       | 1620.989 | 0.00916  | 3 | 1 | 31.8 | 0 |
| P12163_1_F6,12756 | R.ECSVQHSIVGVR.S     | 1674.89  | -0.00119 | 2 | 1 | 49.6 | 0 |
| P12163_1_F8,12609 | R.ECSVQHSIVGVR.S     | 1674.89  | 0.00331  | 2 | 1 | 50.8 | 0 |
| P12163_2_F6,12108 | R.ECSVQHSIVGVR.S     | 1674.89  | 0.00055  | 3 | 1 | 25.4 | 0 |
| P12163_1_F3,17116 | R.LFPLTNR.R          | 1164.704 | 0.00214  | 3 | 1 | 30.4 | 0 |
| P12163_1_F3,20834 | R.MDYTEFLQK.H        | 1782.956 | 0.00499  | 2 | 1 | 32.5 | 0 |
| P12163_1_S1,20542 | R.SSYPLSNDFGSEIIPASV | 2619.413 | 0.00576  | 3 | 1 | 84.2 | 0 |
| P12163_1_S1,21032 | R.TDVLLNLLR.S        | 1360.847 | 0.00078  | 3 | 1 | 34.9 | 0 |
| P12163_1_S1,25043 | R.TDVLLNLLR.S        | 1360.847 | 0.00348  | 2 | 1 | 30.7 | 0 |
| P12163_1_S1,25062 | R.TDVLLNLLR.S        | 1360.847 | 0.00189  | 3 | 1 | 34.9 | 0 |
| P12163_1_S1,19714 | K.AFSDSPIIGEIR.G     | 1608.89  | 0.00128  | 2 | 1 | 38.2 | 0 |
| P12163_1_S1,19787 | K.AFSDSPIIGEIR.G     | 1608.89  | 0.00104  | 3 | 1 | 47.6 | 0 |
| P12163_1_S1,19904 | K.AFSDSPIIGEIR.G     | 1608.89  | 0.00312  | 2 | 1 | 43   | 0 |
| P12163_1_S1,20018 | K.AFSDSPIIGEIR.G     | 1608.89  | 0.00293  | 3 | 1 | 29.8 | 0 |
| P12163_1_F4,25641 | K.ELLEM*FTASK.M      | 1792.997 | 0.00751  | 3 | 1 | 31   | 0 |
| P12163_1_F3,24828 | K.ELLEMFTASK.M       | 1777.003 | 0.00343  | 3 | 1 | 35.1 | 0 |
| P12163_2_F1,22513 | K.NLEDLILK.E         | 1565.972 | 0.00167  | 2 | 1 | 32.2 | 0 |
| P12163_1_F3,17959 | K.VFFTNSGSEANDTQVK   | 2352.229 | 0.01083  | 2 | 1 | 32.4 | 0 |
| P12163_1_F3,17980 | K.VFFTNSGSEANDTQVK   | 2352.229 | 0.00685  | 3 | 1 | 79.3 | 0 |
| P12163_1_F5,12541 | K.VQAVVK.K           | 1251.824 | 0.00899  | 3 | 1 | 23.2 | 0 |
| P12163_2_F2,13416 | K.VQAVVK.K           | 1251.824 | 0.00473  | 3 | 1 | 22.6 | 0 |
| P12163_1_F3,20897 | R.GTGLILGTEFADNK.S   | 2044.153 | 0.00431  | 2 | 1 | 45.5 | 0 |
| P12163_1_F4,19754 | R.LGTMFGCDK.Y        | 1636.865 | 0.01231  | 2 | 1 | 26.5 | 0 |
| P12163_1_F5,18965 | R.LGTMFGCDK.Y        | 1636.865 | 0.00743  | 2 | 1 | 25.9 | 0 |
| P12163_1_F5,18995 | R.LGTMFGCDK.Y        | 1636.865 | 0.00607  | 3 | 1 | 30.4 | 0 |
| P12163_2_F1,19047 | R.LGTMFGCDK.Y        | 1636.865 | -0.00013 | 2 | 1 | 36.9 | 0 |
| P12163_2_F1,19108 | R.LGTMFGCDK.Y        | 1636.865 | 0.00343  | 3 | 1 | 34   | 0 |
| P12163_2_F1,13260 | R.NIVEQVNK.I         | 1551.931 | -0.00064 | 2 | 1 | 36.6 | 0 |
| P12163_1_F6,10131 | R.YAHPGETEEEEYSTR.L  | 1972.919 | 0.00575  | 3 | 1 | 30.8 | 0 |
| P12163_2_F9,10109 | R.YAHPGETEEEEYSTR.L  | 1972.919 | 0.01061  | 3 | 1 | 33.6 | 0 |
| P12163_1_F4,14685 | K.EHNFHFLVTGDVYR.R   | 1890.976 | 0.00212  | 3 | 1 | 29   | 0 |
| P12163_1_F6,14175 | K.EHNFHFLVTGDVYR.R   | 1890.976 | 0.00924  | 4 | 1 | 23.3 | 0 |
| P12163_1_F6,14199 | K.EHNFHFLVTGDVYR.R   | 1890.976 | 0.00515  | 2 | 1 | 50.5 | 0 |
| P12163_2_F6,13444 | K.EHNFHFLVTGDVYR.R   | 1890.976 | -0.00088 | 4 | 1 | 33.5 | 0 |
| P12163_2_F6,13464 | K.EHNFHFLVTGDVYR.R   | 1890.976 | 0.00191  | 3 | 1 | 29   | 0 |
| P12163_1_F2,21951 | K.FDDLCPIVSVK.Q      | 1901.066 | 0.00343  | 3 | 1 | 37.8 | 0 |
| P12163_1_F9,14471 | K.LGMQLHK.R          | 1434.871 | 0.00893  | 3 | 1 | 22.1 | 0 |
| P12163_1_F3,21473 | K.NAIYEYFDSNYPNK.F   | 2346.186 | 0.00533  | 2 | 1 | 32   | 0 |
| P12163_1_F3,21503 | K.NAIYEYFDSNYPNK.F   | 2346.186 | 0.00382  | 3 | 1 | 31.1 | 0 |
| P12163_1_F4,22098 | K.NAIYEYFDSNYPNK.F   | 2346.186 | 0.00213  | 2 | 1 | 32.1 | 0 |
| P12163_1_F9,20215 | K.NAIYEYFDSNYPNK.F   | 2346.186 | 0.01012  | 3 | 1 | 36.6 | 0 |
| P12163_1_F7,16564 | K.QNFDDVLVPADHVS.R   | 2016.045 | 0.00217  | 3 | 1 | 48.7 | 0 |
| P12163_1_F4,20571 | R.FTSQFSQGQLGIK.F    | 2049.159 | 0.00681  | 3 | 1 | 48.3 | 0 |
| P12163_2_F1,20008 | R.FTSQFSQGQLGIK.F    | 2049.159 | 0.00576  | 3 | 1 | 26.8 | 0 |
| P12163_1_S1,17005 | R.GVAGDLVEEVR.L      | 1447.806 | 0.00662  | 2 | 1 | 30.7 | 0 |
| P12163_2_F9,15523 | R.HLFGAVEM*R.W       | 1379.741 | 0.00287  | 3 | 1 | 31.6 | 0 |
| P12163_1_F9,16364 | R.HLFGAVEMR.W        | 1363.746 | 0.00122  | 3 | 1 | 47   | 0 |
| P12163_2_F9,15461 | R.HLFGAVEMR.W        | 1363.746 | 0.00242  | 3 | 1 | 24   | 0 |
| P12163_1_F9,13964 | R.NQHPIGILK.N        | 1628.01  | 0.00016  | 3 | 1 | 27.1 | 0 |

|                   |                      |          |          |   |   |      |   |
|-------------------|----------------------|----------|----------|---|---|------|---|
| P12163_2_F9,12806 | R.NQHPIGILK.N        | 1628.01  | 0.00961  | 3 | 1 | 31.6 | 0 |
| P12163_1_F7,18162 | K.AQVDYEVKPDIVEQIS   | 2597.439 | 0.00624  | 4 | 1 | 36.7 | 0 |
| P12163_2_S5,17490 | K.AQVDYEVKPDIVEQIS   | 2597.439 | 0.00228  | 4 | 1 | 31.6 | 0 |
| P12163_1_F3,19710 | K.CTLQDTLSDLQTK.L    | 2131.152 | 0.01172  | 3 | 1 | 43.6 | 0 |
| P12163_1_F2,20061 | K.GQGGIYFFPER.F      | 1574.827 | 0.00599  | 2 | 1 | 31   | 0 |
| P12163_1_F3,20602 | K.GQGGIYFFPER.F      | 1574.827 | 0.00065  | 2 | 1 | 48.6 | 0 |
| P12163_1_F9,19431 | K.GQGGIYFFPER.F      | 1574.827 | 0.00693  | 2 | 1 | 28.1 | 0 |
| P12163_2_F1,20422 | K.GQGGIYFFPER.F      | 1574.827 | 0.00355  | 2 | 1 | 49.3 | 0 |
| P12163_2_F9,18506 | K.GQGGIYFFPER.F      | 1574.827 | -0.00081 | 2 | 1 | 47.2 | 0 |
| P12163_2_S5,7115  | K.HYGSDGSK.G         | 1458.78  | 0.00721  | 3 | 1 | 31   | 0 |
| P12163_1_F4,22790 | K.LEGLLDTK.S         | 1496.914 | 0.00617  | 3 | 1 | 33   | 0 |
| P12163_2_F1,22242 | K.LEGLLDTK.S         | 1496.914 | 0.00708  | 2 | 1 | 24.2 | 0 |
| P12163_2_F1,22249 | K.LEGLLDTK.S         | 1496.914 | 0.00896  | 3 | 1 | 32   | 0 |
| P12163_2_F1,11758 | R.ATYVAEK.C          | 1389.82  | -0.0033  | 2 | 1 | 24.7 | 0 |
| P12163_1_F5,13009 | R.GFEVEK.L           | 1316.767 | 0.00726  | 3 | 1 | 25.6 | 0 |
| P12163_2_F2,13842 | R.GFEVEK.L           | 1316.767 | 0.00765  | 3 | 1 | 25.3 | 0 |
| P12163_1_F3,19708 | R.INSLLER.N          | 1148.694 | 0.00301  | 2 | 1 | 25.8 | 0 |
| P12163_1_F4,19689 | R.INSLLER.N          | 1148.694 | 0.00785  | 2 | 1 | 24.5 | 0 |
| P12163_1_F5,20258 | R.QLLNLK.D           | 1449.961 | 0.00041  | 3 | 1 | 22.7 | 0 |
| P12163_2_F2,20810 | R.QLLNLK.D           | 1449.961 | 0.01028  | 3 | 1 | 29   | 0 |
| P12163_2_F2,20830 | R.QLLNLK.D           | 1449.961 | 0.00801  | 2 | 1 | 32.4 | 0 |
| P12163_2_F1,17474 | K.ALLNSLQSGSR.L      | 1449.833 | 0.00423  | 2 | 1 | 27.5 | 0 |
| P12163_1_F9,5617  | K.HM*GGSAAAGGSAESG   | 1651.776 | 0.00382  | 3 | 1 | 48   | 0 |
| P12163_2_F7,3848  | K.HM*GGSAAAGGSAESG   | 1651.776 | 0.00096  | 3 | 1 | 22.2 | 0 |
| P12163_2_F7,5527  | K.HM*GGSAAAGGSAESG   | 1651.776 | 0.00271  | 3 | 1 | 65.6 | 0 |
| P12163_2_S3,4691  | K.HM*GGSAAAGGSAESG   | 1651.776 | 0.0028   | 3 | 1 | 60   | 0 |
| P12163_1_F7,24175 | R.DVAKPLDIVSNEIILSSI | 2690.591 | 0.00473  | 3 | 1 | 35.8 | 0 |
| P12163_1_F2,11958 | R.GQIYSVNDAR.Y       | 1426.759 | 0.00301  | 2 | 1 | 49.9 | 0 |
| P12163_1_F3,8980  | R.GQIYSVNDAR.Y       | 1426.759 | -0.0012  | 3 | 1 | 27.7 | 0 |
| P12163_1_F3,12191 | R.GQIYSVNDAR.Y       | 1426.759 | 0.00463  | 2 | 1 | 53.6 | 0 |
| P12163_2_F9,11633 | R.GQIYSVNDAR.Y       | 1426.759 | -0.00223 | 2 | 1 | 26   | 0 |
| P12163_1_F3,25902 | R.IAALVASPFNSSLAK.H  | 2097.253 | 0.00938  | 3 | 1 | 85   | 0 |
| P12163_1_F8,18305 | R.ILSIQPVQVHQR.L     | 1722.033 | 0.00752  | 3 | 1 | 37.6 | 0 |
| P12163_1_F8,18318 | R.ILSIQPVQVHQR.L     | 1722.033 | 0.00349  | 2 | 1 | 39   | 0 |
| P12163_2_F6,17819 | R.ILSIQPVQVHQR.L     | 1722.033 | 0.00077  | 2 | 1 | 30.6 | 0 |
| P12163_2_F6,17850 | R.ILSIQPVQVHQR.L     | 1722.033 | 0.00224  | 3 | 1 | 73   | 0 |
| P12163_1_S1,24971 | R.LVYEANPLSFLAEQAC   | 2515.402 | 0.00764  | 3 | 1 | 26.8 | 0 |
| P12163_1_S1,25001 | R.LVYEANPLSFLAEQAC   | 2515.402 | 0.00666  | 4 | 1 | 33.1 | 0 |
| P12163_1_F2,18625 | R.TLLYGGVAM*NPR.D    | 1611.883 | 0.00343  | 2 | 1 | 29.1 | 0 |
| P12163_1_F2,15485 | R.TLLYGGVAMNPR.D     | 1595.888 | 0.00382  | 3 | 1 | 30.9 | 0 |
| P12163_1_F6,22500 | R.YICSLVADFHR.T      | 1684.878 | 0.00268  | 3 | 1 | 25.4 | 0 |
| P12163_1_F2,12178 | K.IVGNEEVER.S        | 1348.737 | 0.0012   | 2 | 1 | 27.1 | 0 |
| P12163_2_F9,19472 | K.KNALDEFLASK.D      | 2148.279 | 0.00863  | 4 | 1 | 34.1 | 0 |
| P12163_1_F4,22836 | K.NALDEFLASK.D       | 1715.979 | 0.0056   | 3 | 1 | 36.6 | 0 |
| P12163_1_F5,21520 | K.NALDEFLASK.D       | 1715.979 | 0.00383  | 3 | 1 | 27.1 | 0 |
| P12163_2_F1,22260 | K.NALDEFLASK.D       | 1715.979 | -0.00229 | 2 | 1 | 31.9 | 0 |
| P12163_2_F1,22263 | K.NALDEFLASK.D       | 1715.979 | 0.00512  | 3 | 1 | 34.9 | 0 |
| P12163_2_F2,12244 | K.NVLQEK.K           | 1338.82  | 0.00518  | 3 | 1 | 23.4 | 0 |
| P12163_1_F4,23913 | K.QEIAEEVASM*LK.L    | 1972.088 | 0.01118  | 3 | 1 | 40.8 | 0 |
| P12163_2_F1,18567 | R.IGWPTSVPNEK.K      | 1937.095 | 0.00499  | 2 | 1 | 35.4 | 0 |
| P12163_1_S1,16089 | R.NCFLIAGSQSGVAGAC   | 2040.06  | 0.00286  | 3 | 1 | 53.7 | 0 |

|                   |                      |          |          |   |   |      |   |
|-------------------|----------------------|----------|----------|---|---|------|---|
| P12163_1_S1,16114 | R.NCFLIAGSQSGVAGAC   | 2040.06  | 0.0008   | 2 | 1 | 58.1 | 0 |
| P12163_1_F5,17237 | R.QAFNVAFQK.L        | 1660.963 | 0.00883  | 2 | 1 | 46.4 | 0 |
| P12163_1_F5,17246 | R.QAFNVAFQK.L        | 1660.963 | 0.00571  | 3 | 1 | 36.7 | 0 |
| P12163_2_F2,17998 | R.QAFNVAFQK.L        | 1660.963 | 0.00501  | 2 | 1 | 47.3 | 0 |
| P12163_1_F4,21539 | R.SLYGQFVLGK.G       | 1720.025 | 0.00455  | 3 | 1 | 38.1 | 0 |
| P12163_1_F4,21541 | R.SLYGQFVLGK.G       | 1720.025 | 0.00696  | 2 | 1 | 51.1 | 0 |
| P12163_1_F9,19983 | R.SLYGQFVLGK.G       | 1720.025 | 0.00653  | 3 | 1 | 28.7 | 0 |
| P12163_2_F1,21070 | R.SLYGQFVLGK.G       | 1720.025 | 0.00922  | 2 | 1 | 41.7 | 0 |
| P12163_2_F1,21081 | R.SLYGQFVLGK.G       | 1720.025 | 0.00722  | 3 | 1 | 42.7 | 0 |
| P12163_2_F10,1907 | K.DIDAVYLPLPTSMHVK   | 2407.352 | -0.00028 | 3 | 1 | 25.6 | 0 |
| P12163_2_F1,22280 | K.TQLIIDAVK.T        | 1609.014 | 0.00471  | 3 | 1 | 35.1 | 0 |
| P12163_2_F1,22292 | K.TQLIIDAVK.T        | 1609.014 | 0.00609  | 2 | 1 | 48   | 0 |
| P12163_2_F2,16971 | K.WAVSVAQK.K         | 1496.904 | 0.00684  | 3 | 1 | 29.5 | 0 |
| P12163_1_F2,12785 | R.EEEASYFTNTR.C      | 1650.791 | -0.00114 | 3 | 1 | 28.7 | 0 |
| P12163_1_S1,20788 | R.FGIIGAADIAR.K      | 1407.826 | 0.00188  | 3 | 1 | 50.5 | 0 |
| P12163_1_S1,20927 | R.FGIIGAADIAR.K      | 1407.826 | 0.00334  | 2 | 1 | 43.2 | 0 |
| P12163_1_S1,21029 | R.FGIIGAADIAR.K      | 1407.826 | 0.00563  | 3 | 1 | 49.1 | 0 |
| P12163_1_F4,19483 | R.GFEPIEIK.W         | 1540.919 | 0.0067   | 2 | 1 | 36.9 | 0 |
| P12163_1_F4,19491 | R.GFEPIEIK.W         | 1540.919 | 0.0089   | 3 | 1 | 33.3 | 0 |
| P12163_2_F1,18833 | R.GFEPIEIK.W         | 1540.919 | 0.0052   | 2 | 1 | 35.5 | 0 |
| P12163_2_F1,18891 | R.GFEPIEIK.W         | 1540.919 | 0.00593  | 3 | 1 | 34.4 | 0 |
| P12163_2_F4,17073 | R.GFEPIEIK.W         | 1540.919 | -0.00115 | 3 | 1 | 34.6 | 0 |
| P12163_2_F2,16520 | R.LVANIK.N           | 1265.84  | 0.00196  | 3 | 1 | 28.4 | 0 |
| P12163_1_F3,22438 | R.SILWANDYELPK.T     | 2057.153 | 0.00693  | 3 | 1 | 27.6 | 0 |
| P12163_1_F4,23150 | R.SILWANDYELPK.T     | 2057.153 | 0.00277  | 2 | 1 | 45.7 | 0 |
| P12163_2_F7,19370 | R.SILWANDYELPK.T     | 2057.153 | 0.00771  | 3 | 1 | 29.7 | 0 |
| P12163_1_F7,22115 | R.VKPDL DGLGALGDAG   | 2681.487 | 0.00224  | 3 | 1 | 40.8 | 0 |
| P12163_1_F7,22145 | R.VKPDL DGLGALGDAG   | 2681.487 | 0.00564  | 4 | 1 | 43.9 | 0 |
| P12163_1_F5,15169 | K.FSACMQSTVK.E       | 1766.939 | 0.00763  | 2 | 1 | 36.8 | 0 |
| P12163_1_F7,16226 | K.FVATEGEGFHVSPGR.(  | 1893.976 | -0.0003  | 3 | 1 | 73.4 | 0 |
| P12163_1_F7,16239 | K.FVATEGEGFHVSPGR.(  | 1893.976 | 0.00315  | 2 | 1 | 32.4 | 0 |
| P12163_1_S1,20023 | K.M*IISYVDNLPTGDEK.  | 2319.236 | 0.00803  | 3 | 1 | 33   | 0 |
| P12163_1_S1,22232 | K.MIISYVDNLPTGDEK.C  | 2303.241 | 0.00227  | 3 | 1 | 46.1 | 0 |
| P12163_1_F8,21595 | K.SVIALDGG LFEHYTK.F | 2258.264 | 0.00821  | 3 | 1 | 44.9 | 0 |
| P12163_2_F10,1893 | K.SVIALDGG LFEHYTK.F | 2258.264 | 0.00629  | 3 | 1 | 23   | 0 |
| P12163_1_S10,9916 | R.AHAIPK.W           | 1244.793 | 0.01042  | 3 | 1 | 23.8 | 0 |
| P12163_1_F3,24502 | R.LSAAGIVGILK.K      | 1650.077 | 0.0043   | 3 | 1 | 43.9 | 0 |
| P12163_1_F4,25290 | R.LSAAGIVGILK.K      | 1650.077 | 0.00364  | 3 | 1 | 22.8 | 0 |
| P12163_2_F1,24608 | R.LSAAGIVGILK.K      | 1650.077 | 0.00403  | 3 | 1 | 28.4 | 0 |
| P12163_2_F7,19549 | R.LSAAGIVGILK.K.L    | 2082.378 | 0        | 3 | 1 | 31   | 0 |
| P12163_1_F4,14444 | R.QTSIASGDLIK.W      | 1741.032 | 0.01507  | 3 | 1 | 24.1 | 0 |
| P12163_1_F4,16704 | R.QTSIASGDLIK.W      | 1741.032 | 0.00973  | 2 | 1 | 31.2 | 0 |
| P12163_1_F4,16739 | R.QTSIASGDLIK.W      | 1741.032 | 0.00634  | 3 | 1 | 30.7 | 0 |
| P12163_2_F1,15842 | R.QTSIASGDLIK.W      | 1741.032 | 0.00562  | 3 | 1 | 45   | 0 |
| P12163_2_F1,15843 | R.QTSIASGDLIK.W      | 1741.032 | 0.00581  | 2 | 1 | 44.1 | 0 |
| P12163_1_F7,17598 | R.QVADAMTVEMHAGL.    | 2697.38  | 0.00859  | 3 | 1 | 33.1 | 0 |
| P12163_1_F7,17609 | R.QVADAMTVEMHAGL.    | 2697.38  | 0.00644  | 4 | 1 | 39.7 | 0 |
| P12163_2_F6,15676 | K.CGSLITQCLHDAK.V    | 2111.12  | 0.00866  | 3 | 1 | 49.2 | 0 |
| P12163_1_F2,16532 | K.DLVFTTVR.D         | 1254.736 | 0.00266  | 3 | 1 | 29.4 | 0 |
| P12163_2_F6,12994 | R.ACAM*AGLHVLR.L     | 1518.819 | 0.00448  | 3 | 1 | 29.7 | 0 |
| P12163_2_F6,16496 | R.ACAMAGLHVLR.L      | 1502.824 | 0.00142  | 3 | 1 | 76.2 | 0 |

|                   |                    |          |          |   |   |      |   |
|-------------------|--------------------|----------|----------|---|---|------|---|
| P12163_1_F2,19405 | R.ANGNNFVPIIPR.N   | 1615.922 | 0.00345  | 2 | 1 | 40.2 | 0 |
| P12163_1_F2,15695 | R.AYGSTLDLETVQPK.K | 2130.19  | 0.00284  | 3 | 1 | 22.6 | 0 |
| P12163_1_F2,17795 | R.AYGSTLDLETVQPK.K | 2130.19  | 0.00826  | 2 | 1 | 31.6 | 0 |
| P12163_2_F6,17429 | R.AYGSTLDLETVQPK.K | 2130.19  | 0.00518  | 3 | 1 | 31.2 | 0 |
| P12163_1_F4,14047 | R.EEFEEVNQK.V      | 1759.932 | 0.00692  | 2 | 1 | 45.9 | 0 |
| P12163_1_F4,14056 | R.EEFEEVNQK.V      | 1759.932 | 0.00779  | 3 | 1 | 39.5 | 0 |
| P12163_1_F5,12670 | R.EEFEEVNQK.V      | 1759.932 | 0.00792  | 2 | 1 | 24.9 | 0 |
| P12163_2_F1,12997 | R.EEFEEVNQK.V      | 1759.932 | 0.00588  | 2 | 1 | 43.6 | 0 |
| P12163_2_F1,13086 | R.EEFEEVNQK.V      | 1759.932 | 0.00637  | 3 | 1 | 40.4 | 0 |
| P12163_1_F7,17280 | R.LPTVDDGHGWCAEAL  | 2215.087 | 0.00402  | 3 | 1 | 30.9 | 0 |
| P12163_2_F6,10971 | R.VATQDAIHK.L      | 1590.942 | 0.00569  | 2 | 1 | 25.2 | 0 |
| P12163_2_F6,10978 | R.VATQDAIHK.L      | 1590.942 | 0.00336  | 3 | 1 | 29.5 | 0 |
| P12163_1_F6,12249 | R.VTDPVHASK.S      | 1776.011 | 0.00558  | 2 | 1 | 35.4 | 0 |
| P12163_1_F7,11567 | R.VTDPVHASK.S      | 1776.011 | 0.00669  | 3 | 1 | 37.3 | 0 |
| P12163_1_F7,11584 | R.VTDPVHASK.S      | 1776.011 | 0.00552  | 2 | 1 | 37.4 | 0 |
| P12163_1_F5,13885 | K.AEMEALK.G        | 1399.807 | 0.00795  | 3 | 1 | 29.5 | 0 |
| P12163_1_F5,13960 | K.AEMEALK.G        | 1399.807 | 0.00776  | 2 | 1 | 24.9 | 0 |
| P12163_2_F1,14106 | K.AEMEALK.G        | 1399.807 | 0.00357  | 3 | 1 | 33.3 | 0 |
| P12163_2_F2,14656 | K.AEMEALK.G        | 1399.807 | 0.00687  | 3 | 1 | 31.8 | 0 |
| P12163_2_F2,11133 | K.AIQSQYK.S        | 1445.857 | 0.00487  | 2 | 1 | 25.6 | 0 |
| P12163_1_F4,17302 | K.ENSINIYYEK.H     | 1881.021 | 0.00077  | 2 | 1 | 48.2 | 0 |
| P12163_1_F9,16305 | K.ENSINIYYEK.H     | 1881.021 | 0.00579  | 2 | 1 | 31.1 | 0 |
| P12163_2_F1,16446 | K.ENSINIYYEK.H     | 1881.021 | 0.00389  | 2 | 1 | 51.3 | 0 |
| P12163_2_F1,16473 | K.ENSINIYYEK.H     | 1881.021 | 0.00794  | 3 | 1 | 33.1 | 0 |
| P12163_2_F9,16332 | K.FKENSINIYYEK.H   | 2460.39  | 0.00997  | 3 | 1 | 35.2 | 0 |
| P12163_1_F3,16060 | K.MDYNADVMEK.F     | 1823.913 | 0.00201  | 2 | 1 | 42.9 | 0 |
| P12163_1_F7,13476 | K.SHVYSNPDNVTPGIVE | 2275.162 | 0.00264  | 3 | 1 | 36.1 | 0 |
| P12163_1_F7,13516 | K.SHVYSNPDNVTPGIVE | 2275.162 | 0.0003   | 2 | 1 | 42.3 | 0 |
| P12163_2_F4,13102 | K.SHVYSNPDNVTPGIVE | 2275.162 | 0.006    | 3 | 1 | 45.7 | 0 |
| P12163_2_F6,20044 | R.ATIVDWPGLGYSDRPK | 2383.323 | -0.0027  | 3 | 1 | 32.1 | 0 |
| P12163_2_S5,18851 | R.ATIVDWPGLGYSDRPK | 2383.323 | 0.00279  | 3 | 1 | 35   | 0 |
| P12163_1_F3,28587 | R.EEFLQLFADLEGK.L  | 2147.184 | -0.0063  | 3 | 1 | 32   | 0 |
| P12163_1_S1,15604 | R.LVAQDIVQR.V      | 1345.81  | 0.00512  | 3 | 1 | 65.9 | 0 |
| P12163_2_F1,19471 | K.ADTYFQFTK.D      | 1728.942 | 0.00413  | 2 | 1 | 41.1 | 0 |
| P12163_1_S1,10908 | K.DLSVPAETR.V      | 1291.716 | 0.00562  | 3 | 1 | 26.9 | 0 |
| P12163_1_F4,16176 | K.ETLQETLGQ GK.K   | 1812.032 | 0.00843  | 2 | 1 | 42.2 | 0 |
| P12163_1_F4,16215 | K.ETLQETLGQ GK.K   | 1812.032 | 0.00229  | 3 | 1 | 38.9 | 0 |
| P12163_2_F1,15336 | K.ETLQETLGQ GK.K   | 1812.032 | -0.00045 | 2 | 1 | 45   | 0 |
| P12163_2_F1,15372 | K.ETLQETLGQ GK.K   | 1812.032 | -0.00002 | 3 | 1 | 27.4 | 0 |
| P12163_1_F9,18690 | K.HFLVVLAENGR.L    | 1558.901 | 0.00059  | 2 | 1 | 32   | 0 |
| P12163_1_F9,18715 | K.HFLVVLAENGR.L    | 1558.901 | 0.0041   | 3 | 1 | 51.1 | 0 |
| P12163_2_F7,16805 | K.HFLVVLAENGR.L    | 1558.901 | 0.00155  | 3 | 1 | 47.2 | 0 |
| P12163_2_F9,17726 | K.HFLVVLAENGR.L    | 1558.901 | 0.00152  | 3 | 1 | 46.8 | 0 |
| P12163_2_F9,16109 | K.KADTYFQFTK.D     | 2161.242 | 0.00479  | 3 | 1 | 27.9 | 0 |
| P12163_1_F3,25431 | K.VESEILDLVEASK.K  | 2040.168 | 0.01351  | 3 | 1 | 34.3 | 0 |
| P12163_1_F3,27470 | K.VESEILDLVEASK.K  | 2040.168 | 0.00631  | 3 | 1 | 39.4 | 0 |
| P12163_1_F8,19091 | R.FVELTMAHK.G      | 1683.971 | 0.00539  | 3 | 1 | 36.6 | 0 |
| P12163_2_F6,18624 | R.FVELTMAHK.G      | 1683.971 | 0.00368  | 3 | 1 | 35.1 | 0 |
| P12163_1_F5,13072 | R.NLDTIAK.R        | 1382.846 | 0.01125  | 2 | 1 | 26.7 | 0 |
| P12163_1_F4,18344 | R.VNAINEICTQAK.F   | 1969.1   | 0.00668  | 3 | 1 | 44.1 | 0 |
| P12163_1_F4,18361 | R.VNAINEICTQAK.F   | 1969.1   | -0.00486 | 2 | 1 | 26.4 | 0 |

|                   |                     |          |          |   |   |      |   |
|-------------------|---------------------|----------|----------|---|---|------|---|
| P12163_2_F6,10965 | K.GGIGTM*HAPNLANR.  | 1728.912 | 0.00342  | 3 | 1 | 27.2 | 0 |
| P12163_1_F8,14174 | K.GGIGTMHAPNLANR.Y  | 1712.917 | 0.00204  | 3 | 1 | 40.7 | 0 |
| P12163_1_F3,17162 | K.IPQLPADAK.I       | 1560.957 | 0.0038   | 3 | 1 | 26.5 | 0 |
| P12163_2_F1,16811 | K.IPQLPADAK.I       | 1560.957 | 0.0074   | 2 | 1 | 25   | 0 |
| P12163_1_F2,12835 | K.LSEGQLIDGR.L      | 1391.78  | 0.00464  | 3 | 1 | 31.5 | 0 |
| P12163_1_F8,15674 | K.REDAQPLGFVTER.T   | 1951.019 | 0.00383  | 2 | 1 | 34.4 | 0 |
| P12163_1_F8,15693 | K.REDAQPLGFVTER.T   | 1951.019 | 0.00284  | 3 | 1 | 71.3 | 0 |
| P12163_2_F6,15093 | K.REDAQPLGFVTER.T   | 1951.019 | 0.00574  | 3 | 1 | 35.1 | 0 |
| P12163_2_F6,15098 | K.REDAQPLGFVTER.T   | 1951.019 | 0.00299  | 2 | 1 | 40.1 | 0 |
| P12163_1_S1,13606 | K.VLVGPASEEESR.G    | 1576.848 | 0.00201  | 2 | 1 | 26   | 0 |
| P12163_1_S1,13792 | K.VLVGPASEEESR.G    | 1576.848 | -0.00064 | 3 | 1 | 55.8 | 0 |
| P12163_1_S1,13861 | K.VLVGPASEEESR.G    | 1576.848 | 0.00389  | 2 | 1 | 25.9 | 0 |
| P12163_1_F2,17062 | R.FEAPCVLQNNR.E     | 1651.853 | 0.00275  | 3 | 1 | 26   | 0 |
| P12163_2_F1,19756 | R.FGTTGTSPWIK.L     | 1803.026 | 0.00286  | 3 | 1 | 38   | 0 |
| P12163_1_F4,7659  | R.HVIHCK.G          | 1401.824 | 0.00535  | 3 | 1 | 23.3 | 0 |
| P12163_1_F5,6342  | R.HVIHCK.G          | 1401.824 | 0.00403  | 3 | 1 | 25.6 | 0 |
| P12163_2_F4,6635  | R.HVIHCK.G          | 1401.824 | 0.00193  | 3 | 1 | 24.5 | 0 |
| P12163_1_F2,20255 | R.SIDTWVAEYR.K      | 1543.806 | 0.0031   | 2 | 1 | 38.1 | 0 |
| P12163_1_F7,20879 | K.CSHGAAISDLEESQLF' | 2733.324 | 0.00333  | 3 | 1 | 31.5 | 0 |
| P12163_2_F1,17787 | K.VENPIYLK.Y        | 1583.962 | 0.00435  | 2 | 1 | 27   | 0 |
| P12163_1_F3,15795 | K.YLSVEGGNVDSK.K    | 1876.027 | 0.00212  | 2 | 1 | 38.4 | 0 |
| P12163_1_F4,14684 | K.YLSVEGGNVDSK.K    | 1876.027 | 0.00796  | 3 | 1 | 35.4 | 0 |
| P12163_1_F4,16225 | K.YLSVEGGNVDSK.K    | 1876.027 | 0.00603  | 2 | 1 | 37   | 0 |
| P12163_1_F4,16241 | K.YLSVEGGNVDSK.K    | 1876.027 | 0.00076  | 3 | 1 | 40.4 | 0 |
| P12163_2_F9,14540 | K.YLSVEGGNVDSK.K    | 1876.027 | 0.00862  | 3 | 1 | 50.7 | 0 |
| P12163_1_F2,10832 | R.GIDLETAR.K        | 1178.668 | 0.00144  | 3 | 1 | 45.2 | 0 |
| P12163_1_F7,13120 | R.HSYLQNQSLNAAHIK.' | 2332.298 | 0.00363  | 4 | 1 | 29.4 | 0 |
| P12163_1_F9,12800 | R.LVLDHPR.G         | 1153.699 | 0.00184  | 3 | 1 | 43.1 | 0 |
| P12163_1_F9,10167 | R.NQVVSHVK.N        | 1518.921 | 0.00561  | 2 | 1 | 35   | 0 |
| P12163_2_F9,9685  | R.NQVVSHVK.N        | 1518.921 | 0.00486  | 3 | 1 | 55.6 | 0 |
| P12163_1_F2,17123 | R.SLLEPR.A          | 1131.704 | 0.00215  | 2 | 1 | 30   | 0 |
| P12163_1_F3,13895 | R.SLLEPR.A          | 1131.704 | 0.00434  | 3 | 1 | 27.3 | 0 |
| P12163_2_F1,17060 | R.SLLEPR.A          | 1131.704 | 0.00297  | 2 | 1 | 32.3 | 0 |
| P12163_1_S1,9864  | R.YAQQTDAGQLTR.S    | 1655.865 | 0.00212  | 3 | 1 | 44.8 | 0 |
| P12163_1_S1,10095 | R.YAQQTDAGQLTR.S    | 1655.865 | 0.00416  | 3 | 1 | 38.6 | 0 |
| P12163_1_S1,11357 | R.YAQQTDAGQLTR.S    | 1655.865 | 0.00392  | 3 | 1 | 34.8 | 0 |
| P12163_1_F7,13351 | K.ENVAPHLIPHK.T     | 1863.106 | 0.0039   | 3 | 1 | 34.3 | 0 |
| P12163_1_F4,23857 | K.LYQLAEAAQLNNK.I   | 2084.196 | 0.00491  | 3 | 1 | 64.8 | 0 |
| P12163_1_F4,23897 | K.LYQLAEAAQLNNK.I   | 2084.196 | 0.00413  | 2 | 1 | 42.5 | 0 |
| P12163_2_F1,23315 | K.LYQLAEAAQLNNK.I   | 2084.196 | 0.00265  | 2 | 1 | 32.1 | 0 |
| P12163_2_F1,23382 | K.LYQLAEAAQLNNK.I   | 2084.196 | 0.00236  | 3 | 1 | 63.5 | 0 |
| P12163_2_F9,20413 | K.LYQLAEAAQLNNK.I   | 2084.196 | 0.00542  | 3 | 1 | 55   | 0 |
| P12163_1_F5,12715 | K.SQQPVYLK.G        | 1570.941 | 0.01002  | 2 | 1 | 28.9 | 0 |
| P12163_2_F2,13545 | K.SQQPVYLK.G        | 1570.941 | 0.0158   | 2 | 1 | 25.8 | 0 |
| P12163_1_S1,14779 | K.TFTTAETMLNAR.T    | 1659.868 | 0.00482  | 3 | 1 | 25.5 | 0 |
| P12163_1_F3,20175 | R.AILPYSQALEK.F     | 1841.099 | 0.01047  | 3 | 1 | 46.2 | 0 |
| P12163_2_F1,20109 | R.AILPYSQALEK.F     | 1841.099 | -0.00231 | 3 | 1 | 34.5 | 0 |
| P12163_1_S1,11937 | R.DLMSDTR.C         | 1256.609 | 0.00378  | 2 | 1 | 23.9 | 0 |
| P12163_1_F2,22754 | R.FLANVDPIDVAK.S    | 1910.121 | 0.00515  | 3 | 1 | 52.8 | 0 |
| P12163_1_F2,22765 | R.FLANVDPIDVAK.S    | 1910.121 | 0.00833  | 2 | 1 | 26.5 | 0 |
| P12163_2_F4,14395 | R.SVLHVALR.A        | 1198.757 | 0.00365  | 3 | 1 | 27.4 | 0 |

|                   |                         |          |          |   |   |      |   |
|-------------------|-------------------------|----------|----------|---|---|------|---|
| P12163_1_F3,23537 | R.VIPCDFIGVVK.S         | 1855.097 | 0.00271  | 3 | 1 | 28.9 | 0 |
| P12163_1_F3,23550 | R.VIPCDFIGVVK.S         | 1855.097 | 0.00815  | 2 | 1 | 32.6 | 0 |
| P12163_1_F4,15275 | K.ALELCNEEQK.K          | 1841.989 | 0.00502  | 2 | 1 | 51.3 | 0 |
| P12163_1_F4,15293 | K.ALELCNEEQK.K          | 1841.989 | 0.00626  | 3 | 1 | 50.3 | 0 |
| P12163_1_F5,14010 | K.ALELCNEEQK.K          | 1841.989 | 0.00624  | 2 | 1 | 46.2 | 0 |
| P12163_2_F1,14153 | K.ALELCNEEQK.K          | 1841.989 | 0.0021   | 2 | 1 | 44.1 | 0 |
| P12163_1_F4,15642 | K.EVQAVLK.S             | 1394.883 | 0.00394  | 2 | 1 | 33.9 | 0 |
| P12163_1_F9,11552 | K.LVHENYGK.V            | 1567.905 | 0.00605  | 3 | 1 | 36.7 | 0 |
| P12163_1_F7,19015 | K.QELLNDPAFEFDHDSR      | 2237.078 | -0.00148 | 3 | 1 | 49.4 | 0 |
| P12163_1_F7,19135 | K.QELLNDPAFEFDHDSR      | 2237.078 | 0.00572  | 3 | 1 | 53.1 | 0 |
| P12163_1_F6,9468  | K.SIEAHPTK.E            | 1490.879 | -0.00018 | 3 | 1 | 25.6 | 0 |
| P12163_1_S1,20682 | K.VGMIAANDGVLLR.N       | 1632.941 | 0.0026   | 2 | 1 | 48.3 | 0 |
| P12163_1_F3,16154 | K.VGTDIEDYK.C           | 1647.905 | 0.00817  | 2 | 1 | 32.7 | 0 |
| P12163_1_F9,14084 | K.YSLPLHR.R             | 1189.699 | 0.00456  | 3 | 1 | 39.1 | 0 |
| P12163_2_F4,13241 | K.YSLPLHR.R             | 1189.699 | 0.0027   | 3 | 1 | 46.5 | 0 |
| P12163_2_F9,13215 | K.YSLPLHR.R             | 1189.699 | 0.00279  | 3 | 1 | 38.3 | 0 |
| P12163_1_F4,18083 | R.MLDYNVPGGK.L          | 1701.945 | 0.00531  | 3 | 1 | 24   | 0 |
| P12163_2_F1,17335 | R.MLDYNVPGGK.L          | 1701.945 | 0.00391  | 2 | 1 | 37.8 | 0 |
| P12163_2_F1,17342 | R.MLDYNVPGGK.L          | 1701.945 | 0.00612  | 3 | 1 | 29.2 | 0 |
| P12163_1_F5,14446 | K.APLGGLK.K             | 1263.824 | 0.007    | 3 | 1 | 26   | 0 |
| P12163_2_F2,15187 | K.APLGGLK.K             | 1263.824 | 0.00115  | 3 | 1 | 22.6 | 0 |
| P12163_1_F4,25968 | K.EANNFLWPFK.L          | 1874.042 | 0.00392  | 3 | 1 | 27.4 | 0 |
| P12163_2_F1,25119 | K.EANNFLWPFK.L          | 1874.042 | 0.00305  | 3 | 1 | 39   | 0 |
| P12163_1_F3,16514 | K.GGFYVDPEAK.L          | 1690.926 | 0.00768  | 2 | 1 | 34.5 | 0 |
| P12163_1_F5,13562 | R.GINAIDPK.T            | 1435.873 | 0.00664  | 2 | 1 | 23.9 | 0 |
| P12163_1_F3,19593 | R.IALTDNSIIEK.A ! R.IAI | 1825.089 | 0.00338  | 3 | 1 | 41.7 | 0 |
| P12163_2_F2,16506 | R.NEEWALAK.K            | 1568.889 | 0.0068   | 2 | 1 | 31.9 | 0 |
| P12163_1_F9,6825  | R.NHYVEGGDAGNR.E        | 1592.772 | 0.0047   | 3 | 1 | 33.7 | 0 |
| P12163_2_S5,7485  | R.NHYVEGGDAGNR.E        | 1592.772 | 0.00062  | 3 | 1 | 30   | 0 |
| P12163_1_F4,23335 | R.QIFNGVFLK.V           | 1674.02  | 0.00222  | 3 | 1 | 28.6 | 0 |
| P12163_2_F1,22789 | R.QIFNGVFLK.V           | 1674.02  | 0.00618  | 2 | 1 | 51   | 0 |
| P12163_2_F1,22794 | R.QIFNGVFLK.V           | 1674.02  | 0.00372  | 3 | 1 | 33.2 | 0 |
| P12163_1_F3,20272 | R.VEPYVTYGYPNLK.S       | 2151.195 | 0.00245  | 2 | 1 | 55.4 | 0 |
| P12163_2_F6,19286 | R.VEPYVTYGYPNLK.S       | 2151.195 | -0.00247 | 3 | 1 | 35.7 | 0 |
| P12163_2_F6,19337 | R.VEPYVTYGYPNLK.S       | 2151.195 | 0.00333  | 2 | 1 | 43.1 | 0 |
| P12163_1_F3,14795 | K.ALPGDGLSETK.E         | 1695.974 | 0.00822  | 3 | 1 | 30.8 | 0 |
| P12163_1_F3,14806 | K.ALPGDGLSETK.E         | 1695.974 | 0.00211  | 2 | 1 | 25.7 | 0 |
| P12163_2_F6,18432 | K.DAGVVLSYDPNLR.L       | 1722.933 | 0.0015   | 2 | 1 | 26.3 | 0 |
| P12163_1_F8,13855 | K.KAPGGAPANVAVGIAI      | 2057.244 | 0.00661  | 3 | 1 | 39.4 | 0 |
| P12163_2_F6,13391 | K.KAPGGAPANVAVGIAI      | 2057.244 | 0.00487  | 3 | 1 | 42.9 | 0 |
| P12163_1_S1,20370 | K.LLLVTEGPDGCR.Y        | 1633.888 | -0.00423 | 2 | 1 | 25.1 | 0 |
| P12163_1_S1,20404 | K.LLLVTEGPDGCR.Y        | 1633.888 | 0.0029   | 3 | 1 | 45   | 0 |
| P12163_1_S1,20610 | K.LLLVTEGPDGCR.Y        | 1633.888 | 0.00583  | 2 | 1 | 37.8 | 0 |
| P12163_1_S1,20640 | K.LLLVTEGPDGCR.Y        | 1633.888 | 0.00587  | 3 | 1 | 40.4 | 0 |
| P12163_1_F5,7803  | K.SAHIAAAK.A            | 1376.847 | 0.00372  | 3 | 1 | 25.1 | 0 |
| P12163_1_F9,8741  | K.SAHIAAAK.A            | 1376.847 | 0.00783  | 3 | 1 | 25.9 | 0 |
| P12163_2_F4,8216  | K.SAHIAAAK.A            | 1376.847 | -0.00215 | 2 | 1 | 40.2 | 0 |
| P12163_1_S1,19295 | R.EAVLNAIHAPVS.-        | 1524.869 | 0.00076  | 3 | 1 | 45.2 | 0 |
| P12163_1_S1,16181 | R.FANACGALTVM*ER.G      | 1759.877 | 0.00523  | 3 | 1 | 44.5 | 0 |
| P12163_1_S1,14499 | R.GAIPALPTR.E           | 1199.741 | 0.00177  | 3 | 1 | 35.5 | 0 |
| P12163_2_F1,17019 | R.LGGSSAFIGK.V          | 1544.926 | 0.00647  | 3 | 1 | 26.8 | 0 |

|                   |                      |          |          |   |   |      |   |
|-------------------|----------------------|----------|----------|---|---|------|---|
| P12163_1_S1,24187 | K.GFASISEAIEDIR.Q    | 1711.917 | 0.00239  | 3 | 1 | 44.2 | 0 |
| P12163_1_S1,25284 | K.IISIADLIR.Y        | 1317.841 | 0.00415  | 3 | 1 | 22.9 | 0 |
| P12163_1_S1,25291 | K.IISIADLIR.Y        | 1317.841 | 0.00376  | 2 | 1 | 34.8 | 0 |
| P12163_1_F7,19413 | K.TSDFFPNDDDEFDLDRP  | 2767.367 | 0.00957  | 3 | 1 | 33.8 | 0 |
| P12163_1_F2,7988  | K.YGTTTGV SANDR.A    | 1545.781 | 0.00475  | 3 | 1 | 30.6 | 0 |
| P12163_1_F4,17522 | R.CDCGNQLALAMK.Q     | 1989.018 | -0.00168 | 2 | 1 | 25.5 | 0 |
| P12163_1_F2,23745 | R.IPLLTPTM*ENK.R     | 1994.182 | 0.00793  | 3 | 1 | 26.9 | 0 |
| P12163_1_S1,22486 | R.IPLLTPTM ENK.R     | 1978.187 | 0.0052   | 3 | 1 | 32.6 | 0 |
| P12163_2_F6,20308 | R.LELPLM*VNHK.D      | 1818.077 | 0.00817  | 3 | 1 | 29.8 | 0 |
| P12163_1_F8,20728 | R.LELPLMVN HK.D      | 1802.082 | 0.00365  | 3 | 1 | 41.3 | 0 |
| P12163_1_F5,13257 | R.QFAQTENLK.I        | 1686.963 | 0.00965  | 2 | 1 | 32.2 | 0 |
| P12163_2_F2,14022 | R.QFAQTENLK.I        | 1686.963 | 0.00213  | 2 | 1 | 33.1 | 0 |
| P12163_1_F8,15642 | R.VHSECLTGDIFGSAR.C  | 1952.98  | 0.00879  | 3 | 1 | 24.8 | 0 |
| P12163_1_F8,17784 | R.VHSECLTGDIFGSAR.C  | 1952.98  | 0.00519  | 3 | 1 | 83   | 0 |
| P12163_2_F6,17293 | R.VHSECLTGDIFGSAR.C  | 1952.98  | 0.00186  | 3 | 1 | 73.6 | 0 |
| P12163_1_F6,13023 | K.CELGAGHFSK.S       | 1713.92  | 0.00666  | 3 | 1 | 23.4 | 0 |
| P12163_2_F1,23843 | K.FLFIASESK.I        | 1649.972 | 0.00138  | 2 | 1 | 24.6 | 0 |
| P12163_2_F1,23858 | K.FLFIASESK.I        | 1649.972 | 0.00438  | 3 | 1 | 29.2 | 0 |
| P12163_2_F9,18052 | K.KIEDNMFAELK.G      | 2250.293 | 0.01265  | 3 | 1 | 38.3 | 0 |
| P12163_1_F7,15252 | K.LEADQSN DICLYHEK.I | 2443.238 | 0.00358  | 3 | 1 | 40.7 | 0 |
| P12163_1_F5,12175 | K.SYSPVDNVK.A        | 1616.91  | 0.00756  | 2 | 1 | 25.2 | 0 |
| P12163_1_S10,1457 | R.GNHFFITR.R         | 1295.716 | 0.00379  | 3 | 1 | 29.7 | 0 |
| P12163_2_F8_1207  | R.GNHFFITR.R         | 1295.716 | 0.00241  | 3 | 1 | 27.1 | 0 |
| P12163_1_F3,18418 | R.LPAVGEPLK.S        | 1531.967 | 0.00712  | 2 | 1 | 28.1 | 0 |
| P12163_1_F3,18877 | R.SDPEVLAYLK.Q       | 1743.015 | 0.00683  | 3 | 1 | 31.3 | 0 |
| P12163_1_F3,20829 | R.SDPEVLAYLK.Q       | 1743.015 | 0.00753  | 2 | 1 | 37.7 | 0 |
| P12163_1_F8,10915 | R.VVGVDTAASHR.G      | 1415.791 | 0.00609  | 2 | 1 | 27   | 0 |
| P12163_1_F8,10929 | R.VVGVDTAASHR.G      | 1415.791 | 0.00435  | 3 | 1 | 82.2 | 0 |
| P12163_2_F6,10719 | R.VVGVDTAASHR.G      | 1415.791 | 0.00018  | 3 | 1 | 58.6 | 0 |
| P12163_2_F6,10744 | R.VVGVDTAASHR.G      | 1415.791 | 0.00113  | 2 | 1 | 52.5 | 0 |
| P12163_1_F3,19274 | K.ALEECLLR.I         | 1307.729 | 0.00317  | 2 | 1 | 24   | 0 |
| P12163_1_F3,18284 | K.ESGDILSLEEK.F      | 1828.016 | 0.00651  | 3 | 1 | 22.2 | 0 |
| P12163_1_S1,24215 | K.VFVIFGGDTSER.Q     | 1630.874 | 0.00167  | 3 | 1 | 35   | 0 |
| P12163_1_S1,24277 | K.VFVIFGGDTSER.Q     | 1630.874 | 0.00349  | 2 | 1 | 25.2 | 0 |
| P12163_2_F7,13332 | K.VGFSHSNILR.T       | 1433.817 | 0.00165  | 3 | 1 | 32.1 | 0 |
| P12163_1_F2,15959 | K.YNVPFVGTGSR.A      | 1500.811 | 0.00415  | 3 | 1 | 35.9 | 0 |
| P12163_1_F9,12780 | R.AAFTSHLR.N         | 1206.69  | 0.00189  | 3 | 1 | 33   | 0 |
| P12163_2_F9,12131 | R.AAFTSHLR.N         | 1206.69  | 0.0015   | 3 | 1 | 41.6 | 0 |
| P12163_2_F9,12140 | R.AAFTSHLR.N         | 1206.69  | 0.00525  | 3 | 1 | 31.6 | 0 |
| P12163_2_F9,12381 | R.AAFTSHLR.N         | 1206.69  | -0.00045 | 3 | 1 | 25.6 | 0 |
| P12163_2_F8_1207  | R.HSINEWIK.L         | 1634.947 | 0.00358  | 3 | 1 | 25.9 | 0 |
| P12163_2_S5,18447 | R.SVLDHIQGDDLLVR.C   | 1884.049 | -0.00524 | 2 | 1 | 27.8 | 0 |
| P12163_2_S5,18482 | R.SVLDHIQGDDLLVR.C   | 1884.049 | 0.00174  | 3 | 1 | 37.1 | 0 |
| P12163_1_F2,16806 | R.VGLICG GPSAER.G    | 1519.82  | 0.00464  | 2 | 1 | 31.6 | 0 |
| P12163_2_F2,18661 | K.AAFGNVWK.L         | 1500.878 | 0.00392  | 3 | 1 | 31.9 | 0 |
| P12163_2_F2,18691 | K.AAFGNVWK.L         | 1500.878 | 0.00601  | 2 | 1 | 34.2 | 0 |
| P12163_1_S1,16819 | K.DPLVLGVR.V         | 1172.73  | 0.00167  | 2 | 1 | 33.5 | 0 |
| P12163_1_S1,11589 | K.ESELVEAVDR.D       | 1450.769 | 0.00416  | 3 | 1 | 34.6 | 0 |
| P12163_1_S1,16563 | K.ESELVEAVDR.D       | 1450.769 | 0.00354  | 2 | 1 | 41.2 | 0 |
| P12163_1_F9,11872 | K.GFGQLHPR.S         | 1215.69  | 0.00185  | 3 | 1 | 33.7 | 0 |
| P12163_1_S10,1234 | K.GFGQLHPR.S         | 1215.69  | 0.00614  | 3 | 1 | 22.6 | 0 |

|                   |                    |          |          |   |   |      |   |
|-------------------|--------------------|----------|----------|---|---|------|---|
| P12163_2_F9,11292 | K.GFGQLHPR.S       | 1215.69  | 0.00197  | 3 | 1 | 30.3 | 0 |
| P12163_1_F4,8217  | K.GQTVGSFR.K       | 1155.642 | 0.00395  | 3 | 1 | 25.2 | 0 |
| P12163_2_F7,13985 | K.KESELVEAVDR.D    | 1883.069 | -0.01747 | 3 | 1 | 31   | 0 |
| P12163_2_F1,20404 | K.LEQTGGSHIGGTFK.A | 2016.159 | 0.00457  | 2 | 1 | 41   | 0 |
| P12163_1_F2,16283 | R.NLGDEVFER.L      | 1382.722 | 0.00298  | 2 | 1 | 33.7 | 0 |
| P12163_1_F2,16708 | R.TECLIDGELK.G     | 1785.988 | 0.00454  | 2 | 1 | 40.3 | 0 |
| P12163_2_F1,18122 | R.TECLIDGELK.G     | 1785.988 | 0.00828  | 2 | 1 | 23.9 | 0 |
| P12163_1_F4,15211 | K.AGLVTVQGK.I      | 1480.931 | 0.00228  | 2 | 1 | 24.9 | 0 |
| P12163_1_F4,15495 | K.ELAEQIAK.D       | 1509.91  | 0.00136  | 2 | 1 | 38.2 | 0 |
| P12163_2_F1,14494 | K.ELAEQIAK.D       | 1509.91  | 0.00778  | 2 | 1 | 36.9 | 0 |
| P12163_2_F1,14516 | K.ELAEQIAK.D       | 1509.91  | 0.00384  | 3 | 1 | 23.4 | 0 |
| P12163_1_S1,19562 | K.LLVVCQEGLR.S     | 1490.867 | 0.00175  | 3 | 1 | 37.8 | 0 |
| P12163_1_F6,12655 | K.LNSQHDVVK.L      | 1661.979 | 0.00605  | 3 | 1 | 28.5 | 0 |
| P12163_2_F7,11491 | K.LNSQHDVVK.L      | 1661.979 | -0.00452 | 2 | 1 | 36.8 | 0 |
| P12163_2_F7,11500 | K.LNSQHDVVK.L      | 1661.979 | 0.00491  | 3 | 1 | 24.7 | 0 |
| P12163_2_F6,10708 | K.NALAAGADKDEEDSE  | 2356.184 | 0.00904  | 3 | 1 | 37.4 | 0 |
| P12163_2_F4,12064 | K.NTALHYAAGYGR.K   | 1597.839 | -0.00662 | 2 | 1 | 28.5 | 0 |
| P12163_1_F4,14869 | K.QNPEFVQSVK.S     | 1784.016 | 0.00808  | 3 | 1 | 30.4 | 0 |
| P12163_1_F3,6418  | K.SEATSGSVR.D      | 1197.638 | 0.00266  | 2 | 1 | 29.4 | 0 |
| P12163_1_F7,15665 | R.TALHFACGYGEVK.C  | 2061.105 | 0.00756  | 3 | 1 | 38.8 | 0 |
| P12163_2_F9,15371 | R.TALHFACGYGEVK.C  | 2061.105 | 0.00693  | 3 | 1 | 22.5 | 0 |
| P12163_1_F8,19089 | K.ACEDLIFNHLK.Q    | 1968.083 | 0.0059   | 3 | 1 | 36.7 | 0 |
| P12163_2_F6,18622 | K.ACEDLIFNHLK.Q    | 1968.083 | 0.00947  | 3 | 1 | 47.5 | 0 |
| P12163_2_F6,18651 | K.ACEDLIFNHLK.Q    | 1968.083 | 0.00843  | 2 | 1 | 48.6 | 0 |
| P12163_1_F2,20718 | K.DAFIEALR.Q       | 1238.705 | 0.00804  | 2 | 1 | 31.5 | 0 |
| P12163_1_F3,20383 | K.FLDTAVDAAK.R     | 1658.957 | 0.00465  | 3 | 1 | 45.9 | 0 |
| P12163_1_F3,20389 | K.FLDTAVDAAK.R     | 1658.957 | 0.00869  | 2 | 1 | 44.7 | 0 |
| P12163_1_F3,14734 | K.GQVDLVTTETDK.A   | 1813.016 | 0.00716  | 2 | 1 | 50.7 | 0 |
| P12163_1_S1,24740 | K.LLGDILLDR.S      | 1331.82  | 0.00458  | 2 | 1 | 37.1 | 0 |
| P12163_2_F1,14390 | K.SLLATEAGTK.R     | 1598.957 | 0.0042   | 2 | 1 | 41.3 | 0 |
| P12163_1_F4,14078 | K.VSSQTELVK.S      | 1598.957 | 0.01062  | 2 | 1 | 36.2 | 0 |
| P12163_2_F1,13108 | K.VSSQTELVK.S      | 1598.957 | 0.00534  | 2 | 1 | 34.1 | 0 |
| P12163_1_S1,18238 | R.MSGSCALNLCGIACGF | 2030.955 | 0.00357  | 3 | 1 | 29.1 | 0 |
| P12163_1_F9,9518  | R.VAASNPHVK.D      | 1530.921 | 0.00775  | 3 | 1 | 32.1 | 0 |
| P12163_1_F8,19146 | K.ASHVGFGLVLGEDGK  | 2094.18  | -0.00268 | 3 | 1 | 38.7 | 0 |
| P12163_1_F3,18539 | K.AVVDFSSPNIK.E    | 1856.074 | 0.00338  | 2 | 1 | 55.8 | 0 |
| P12163_2_F6,18325 | K.GNTAVYLLYAHARI   | 1752.97  | -0.00377 | 3 | 1 | 32.9 | 0 |
| P12163_1_F4,15224 | K.GPQPVGQAIMK.N    | 1734.019 | -0.00086 | 2 | 1 | 31.6 | 0 |
| P12163_2_F1,14146 | K.GPQPVGQAIMK.N    | 1734.019 | 0.00372  | 2 | 1 | 31.9 | 0 |
| P12163_1_F8,13311 | K.TGSLVLDHADER.A   | 1616.855 | 0.00421  | 3 | 1 | 33   | 0 |
| P12163_1_F4,24239 | K.VFDLALK.A        | 1413.893 | 0.00548  | 3 | 1 | 25.3 | 0 |
| P12163_1_F4,24247 | K.VFDLALK.A        | 1413.893 | 0.00583  | 2 | 1 | 29.9 | 0 |
| P12163_2_F1,23694 | K.VFDLALK.A        | 1413.893 | 0.00597  | 2 | 1 | 32.9 | 0 |
| P12163_1_S1,14992 | R.FYSNCQVVGSAEETS  | 2138.013 | 0.01793  | 2 | 1 | 25.9 | 0 |
| P12163_1_F3,25131 | R.LVDLLDEAK.N      | 1623.978 | 0.00714  | 3 | 1 | 27.3 | 0 |
| P12163_1_F3,25146 | R.LVDLLDEAK.N      | 1623.978 | 0.00802  | 2 | 1 | 52.5 | 0 |
| P12163_1_S1,22351 | R.MLEFSNVEVLR.R    | 1640.898 | 0.00588  | 3 | 1 | 30   | 0 |
| P12163_2_F6,10495 | K.NPANLAQHQANPK.V  | 2011.129 | 0.00372  | 3 | 1 | 24.4 | 0 |
| P12163_1_F5,12413 | K.QFIDQCK.S        | 1546.851 | 0.01057  | 3 | 1 | 22.1 | 0 |
| P12163_2_F2,13241 | K.QFIDQCK.S        | 1546.851 | 0.00875  | 2 | 1 | 33.4 | 0 |
| P12163_1_F4,16866 | K.VAPIIAK.M        | 1319.887 | 0.00241  | 3 | 1 | 31.6 | 0 |



|                    |                         |          |          |   |   |      |   |
|--------------------|-------------------------|----------|----------|---|---|------|---|
| P12163_1_F5,9936   | R.AEAQAAYEK.A           | 1588.879 | 0.00864  | 3 | 1 | 27.7 | 0 |
| P12163_1_S1,15303  | R.DATAALEINPDSAK.G      | 2024.112 | 0.00459  | 2 | 1 | 70.4 | 0 |
| P12163_1_F6,15657  | R.DYLES LHAK.V          | 1683.953 | 0.006    | 3 | 1 | 29.9 | 0 |
| P12163_2_F6,15000  | R.DYLES LHAK.V          | 1683.953 | -0.00058 | 2 | 1 | 28.6 | 0 |
| P12163_2_F1,8325   | R.EAAAEAK.A             | 1297.757 | 0.00598  | 2 | 1 | 26.2 | 0 |
| P12163_2_F1,8329   | R.EAAAEAK.A             | 1297.757 | 0.00707  | 3 | 1 | 23.4 | 0 |
| P12163_2_F2,8617   | R.EAAAEAK.A             | 1297.757 | 0.00412  | 2 | 1 | 28.6 | 0 |
| P12163_2_F8,12070  | R.IEEHR.R ! R.IEEHR.V ! | 987.5524 | 0.00256  | 3 | 1 | 25.2 | 0 |
| P12163_1_S10,1050  | R.RAEQAAYEK.A           | 1744.98  | 0.00684  | 3 | 1 | 27.4 | 0 |
| P12163_1_F4,24292  | K.AQYLLLSSVYK.L         | 1893.131 | 0.00762  | 3 | 1 | 28   | 0 |
| P12163_2_F1,23734  | K.AQYLLLSSVYK.L         | 1893.131 | 0.00008  | 2 | 1 | 37.7 | 0 |
| P12163_2_F1,23770  | K.AQYLLLSSVYK.L         | 1893.131 | 0.00456  | 3 | 1 | 33   | 0 |
| P12163_2_F9,20578  | K.AQYLLLSSVYK.L         | 1893.131 | 0.00231  | 3 | 1 | 37.5 | 0 |
| P12163_2_F6,22220  | K.LADFPTIFHGAGR.K       | 1705.933 | 0.00119  | 3 | 1 | 37.7 | 0 |
| P12163_2_F2,16862  | K.QIVQDWK.T             | 1524.899 | 0.00787  | 2 | 1 | 28.7 | 0 |
| P12163_1_F3,18457  | R.DEITELVK.R ! R.DEITE  | 1554.92  | 0.00471  | 2 | 1 | 27.6 | 0 |
| P12163_1_F4,18963  | R.DEITELVK.R ! R.DEITE  | 1554.92  | 0.00663  | 2 | 1 | 31.5 | 0 |
| P12163_1_F2,22291  | R.EAAAENGSSITNLDAF      | 2459.324 | 0.00409  | 3 | 1 | 48.2 | 0 |
| P12163_1_S1,20503  | R.GIVVPWCDQLR.V         | 1646.899 | 0.00773  | 3 | 1 | 36.9 | 0 |
| P12163_2_S5,15132  | R.KILHAALQSASK.V        | 2179.369 | 0.00684  | 4 | 1 | 29.1 | 0 |
| P12163_1_F9,18127  | R.NGHFPFDLSEK.G         | 1899.022 | 0.00203  | 3 | 1 | 22.8 | 0 |
| P12163_1_F6,12748  | R.TLPNTIPSEHGR.A        | 1625.891 | 0.00217  | 3 | 1 | 26.7 | 0 |
| P12163_1_F7,17046  | K.DEDAFFTDYAASHK.K      | 2225.097 | 0.00797  | 3 | 1 | 61.4 | 0 |
| P12163_2_F6,15866  | K.DIVALSGGHTLGR.A !     | 1599.912 | -0.0068  | 3 | 1 | 48.5 | 0 |
| P12163_1_S10,1416  | K.DSSESPEEGRLPDAAQ      | 2641.312 | 0.00439  | 4 | 1 | 33.6 | 0 |
| P12163_1_F3,26100  | K.FDNSYFVELLK.G         | 1983.105 | 0.00572  | 3 | 1 | 28.8 | 0 |
| P12163_1_F3,25662  | K.LSELGFNPPSLGFK.D      | 2114.211 | 0.00562  | 3 | 1 | 47.2 | 0 |
| P12163_1_F3,22289  | M.VGSIAIDAEYLK.E        | 1887.105 | 0.01918  | 3 | 1 | 27.9 | 0 |
| P12163_2_F8,12070  | R.AHPER.S               | 913.5157 | 0.00225  | 3 | 1 | 29.2 | 0 |
| P12163_1_S10,16710 | R.M*GLSDKDIVALSGGF      | 2551.412 | 0.01     | 4 | 1 | 39.5 | 0 |
| P12163_2_F10,1696  | R.M*GLSDKDIVALSGGF      | 2551.412 | 0.003    | 4 | 1 | 33.8 | 0 |
| P12163_1_F3,6733   | R.TGGPDGSIR.H           | 1163.632 | 0.00394  | 3 | 1 | 26.7 | 0 |
| P12163_1_S1,6886   | R.TGGPDGSIR.H           | 1163.632 | 0.00628  | 3 | 1 | 28.3 | 0 |
| P12163_1_S1,7993   | R.TGGPDGSIR.H           | 1163.632 | 0.00448  | 2 | 1 | 24.6 | 0 |
| P12163_1_F4,25820  | K.AIEM*M*LLSK.S         | 1675.958 | 0.01019  | 3 | 1 | 35.3 | 0 |
| P12163_2_F1,24919  | K.AIEM*MLLSK.S          | 1659.963 | 0.0035   | 3 | 1 | 31.2 | 0 |
| P12163_2_F1,16795  | K.EVNSEYLLK.G           | 1702.984 | -0.0017  | 2 | 1 | 25.4 | 0 |
| P12163_2_F2,14403  | K.GLYTYEK.G             | 1481.846 | 0.00666  | 3 | 1 | 24.8 | 0 |
| P12163_1_F5,21445  | K.IFSELEK.A             | 1473.877 | 0.00896  | 3 | 1 | 26.2 | 0 |
| P12163_1_F5,21450  | K.IFSELEK.A             | 1473.877 | 0.01035  | 2 | 1 | 25.1 | 0 |
| P12163_1_F3,12032  | K.LGSLSEAR.E            | 1136.658 | 0.00578  | 3 | 1 | 25.9 | 0 |
| P12163_1_F8,17697  | K.VPNVTDIGLKPR.G        | 1917.174 | 0.00507  | 3 | 1 | 40.7 | 0 |
| P12163_2_F6,17241  | K.VPNVTDIGLKPR.G        | 1917.174 | 0.00426  | 3 | 1 | 44.8 | 0 |
| P12163_2_F7,17981  | R.GLVHVFFAQR.A          | 1477.858 | -0.00064 | 3 | 1 | 26.1 | 0 |
| P12163_1_F3,27594  | R.SFQSPLVDLLK.S         | 1968.199 | 0.00819  | 3 | 1 | 35.5 | 0 |
| P12163_1_F3,26630  | R.TSAQVILDLMTVGK.I      | 2084.225 | 0.01084  | 3 | 1 | 35.4 | 0 |
| P12163_1_S1,11367  | K.AGALGDTVTVTR.D        | 1464.832 | 0.00251  | 3 | 1 | 41.3 | 0 |
| P12163_1_F3,9459   | K.AISGVQTVR.F           | 1234.742 | 0.00677  | 3 | 1 | 22.3 | 0 |
| P12163_2_F6,15381  | K.GATFTIDCAKPVEDK.I     | 2564.416 | 0.00822  | 3 | 1 | 29.3 | 0 |
| P12163_1_F3,22783  | K.IMDIASLEK.F           | 1627.955 | 0.00852  | 2 | 1 | 50.7 | 0 |
| P12163_1_F4,23552  | K.IMDIASLEK.F           | 1627.955 | 0.00652  | 2 | 1 | 26.5 | 0 |

|                   |                        |          |          |   |   |      |   |
|-------------------|------------------------|----------|----------|---|---|------|---|
| P12163_1_F4,23569 | K.IMDIASLEK.F          | 1627.955 | 0.00712  | 3 | 1 | 25.1 | 0 |
| P12163_1_F3,20082 | K.ITVLSDSNFSK.R        | 1819.042 | 0.00271  | 2 | 1 | 25.9 | 0 |
| P12163_2_F6,15501 | K.LHPLSPEVISR.Q        | 1551.916 | 0.00224  | 3 | 1 | 29.6 | 0 |
| P12163_1_F7,19599 | K.VDLIQENVAINQHEAI     | 2689.48  | 0.0029   | 3 | 1 | 43.7 | 0 |
| P12163_2_F2,6459  | R.GSGGAAGGGAK.G        | 1397.796 | 0.00782  | 2 | 1 | 48.4 | 0 |
| P12163_2_F2,6475  | R.GSGGAAGGGAK.G        | 1397.796 | 0.0048   | 3 | 1 | 47.7 | 0 |
| P12163_1_S1,21017 | R.NFIDPPNMIVIR.S       | 1732.972 | 0.00177  | 3 | 1 | 43.2 | 0 |
| P12163_1_F8,17539 | K.ADGFAGVFPCHK.Y ! f   | 1883.027 | 0.01005  | 3 | 1 | 39.8 | 0 |
| P12163_2_F6,17048 | K.ADGFAGVFPCHK.Y ! f   | 1883.027 | 0.00294  | 3 | 1 | 39.6 | 0 |
| P12163_1_F3,26605 | K.GAPEQILNLVLNK.S      | 2017.227 | 0.00918  | 3 | 1 | 26.4 | 0 |
| P12163_1_F3,19031 | K.MITGDQLAIAK.E        | 1769.045 | 0.01124  | 3 | 1 | 35.5 | 0 |
| P12163_1_F4,24673 | K.NLIEIFAK.G           | 1555.967 | 0.00959  | 3 | 1 | 26.6 | 0 |
| P12163_1_F9,14383 | K.VHAIDK.Y ! R.VHAIII  | 1403.883 | 0.00995  | 3 | 1 | 30.8 | 0 |
| P12163_1_F4,18782 | R.ALNLGVNVK.M          | 1535.973 | 0.01072  | 3 | 1 | 32.1 | 0 |
| P12163_2_F1,18020 | R.ALNLGVNVK.M          | 1535.973 | -0.00017 | 2 | 1 | 35.9 | 0 |
| P12163_1_F8,21320 | R.ANIQEVHFLPFNPTDK.    | 2478.36  | 0.011    | 3 | 1 | 42   | 0 |
| P12163_2_S5,6781  | R.HDSAETIR.R           | 1232.654 | -0.00015 | 3 | 1 | 26.8 | 0 |
| P12163_2_F1,20053 | R.LLEGDPLK.I ! R.LLEGI | 1492.919 | 0.0018   | 2 | 1 | 26.8 | 0 |
| P12163_1_F7,18519 | K.AEGEVILEDVKPIAGQ     | 2519.429 | 0.00427  | 3 | 1 | 32.4 | 0 |
| P12163_1_F7,17253 | K.DPNRPFPTGQAGDAA      | 2689.488 | 0.00603  | 4 | 1 | 29.4 | 0 |
| P12163_2_F6,20677 | K.ELFTHENILGLK.D       | 2022.184 | 0.00498  | 2 | 1 | 45.3 | 0 |
| P12163_1_F4,13512 | K.ENVTVAQVK.Q          | 1595.958 | 0.00877  | 2 | 1 | 29.8 | 0 |
| P12163_1_S1,23863 | K.QSNILEDLETLR.L       | 1734.954 | 0.00391  | 3 | 1 | 50.3 | 0 |
| P12163_1_F2,21689 | K.VVNIPLR.G            | 1227.809 | 0.00362  | 2 | 1 | 25   | 0 |
| P12163_1_F3,22547 | M.VVLAASIVSK.S         | 1595.035 | 0.01013  | 2 | 1 | 43.4 | 0 |
| P12163_1_F3,27088 | R.IEGLLAAFPK.L         | 1667.035 | 0.00637  | 3 | 1 | 29.8 | 0 |
| P12163_1_F4,27902 | R.IEGLLAAFPK.L         | 1667.035 | 0.00676  | 3 | 1 | 28   | 0 |
| P12163_2_F2,20255 | R.TNQFLESLK.A          | 1687.984 | 0.00568  | 3 | 1 | 26.1 | 0 |
| P12163_1_F3,15784 | K.EVDEQMINVQNK.N ! I   | 2055.1   | 0.005    | 2 | 1 | 71.2 | 0 |
| P12163_2_S5,21042 | K.FWEVICDEHGVDPTGF     | 2497.264 | 0.00572  | 4 | 1 | 22.6 | 0 |
| P12163_1_S1,23245 | K.LAVNLIPFPR.L         | 1443.899 | 0.00187  | 3 | 1 | 36.6 | 0 |
| P12163_2_F6,14445 | K.YRGDGVEDLQLER.I      | 1853.966 | 0.00526  | 3 | 1 | 37.2 | 0 |
| P12163_1_F2,15019 | R.FPQQLNSDLR.K         | 1450.796 | 0.00178  | 3 | 1 | 40.8 | 0 |
| P12163_1_F3,16568 | R.INVYYNEASGGR.Y       | 1646.844 | 0.00801  | 2 | 1 | 28.8 | 0 |
| P12163_1_F8,22050 | R.KLAVNLIPFPR.L        | 1876.199 | 0.00927  | 3 | 1 | 27.8 | 0 |
| P12163_2_F6,21707 | R.KLAVNLIPFPR.L        | 1876.199 | 0.00288  | 3 | 1 | 34   | 0 |
| P12163_1_F8,24105 | R.LHFFM*VGFAPLTSR.C    | 1943.051 | 0.00513  | 3 | 1 | 43.6 | 0 |
| P12163_1_F3,17068 | R.YLTASAMFR.G          | 1363.735 | 0.00428  | 3 | 1 | 38.5 | 0 |
| P12163_1_F4,11672 | K.GTQISTQLK.E          | 1583.958 | -0.00005 | 3 | 1 | 22.4 | 0 |
| P12163_1_F4,13865 | K.GTQISTQLK.E          | 1583.958 | 0.00537  | 2 | 1 | 25.2 | 0 |
| P12163_1_F4,13866 | K.GTQISTQLK.E          | 1583.958 | 0.00295  | 3 | 1 | 37.9 | 0 |
| P12163_1_F5,10221 | K.GTQISTQLK.E          | 1583.958 | 0.00706  | 3 | 1 | 22.6 | 0 |
| P12163_1_F5,12401 | K.GTQISTQLK.E          | 1583.958 | 0.01126  | 3 | 1 | 26   | 0 |
| P12163_1_F5,13279 | K.GTQISTQLK.E          | 1583.958 | 0.00527  | 2 | 1 | 30   | 0 |
| P12163_1_F5,13527 | K.GTQISTQLK.E          | 1583.958 | 0.00673  | 2 | 1 | 24.1 | 0 |
| P12163_1_F5,13579 | K.GTQISTQLK.E          | 1583.958 | 0.00508  | 3 | 1 | 22.8 | 0 |
| P12163_1_F6,13326 | K.GTQISTQLK.E          | 1583.958 | 0.00295  | 3 | 1 | 24.4 | 0 |
| P12163_1_F6,13346 | K.GTQISTQLK.E          | 1583.958 | 0.00599  | 2 | 1 | 30.9 | 0 |
| P12163_1_F7,12097 | K.GTQISTQLK.E          | 1583.958 | 0.00167  | 2 | 1 | 26.4 | 0 |
| P12163_1_F7,12120 | K.GTQISTQLK.E          | 1583.958 | 0.0049   | 3 | 1 | 35   | 0 |
| P12163_1_F7,12683 | K.GTQISTQLK.E          | 1583.958 | 0.00514  | 3 | 1 | 22.4 | 0 |

|                                   |          |          |   |   |      |   |
|-----------------------------------|----------|----------|---|---|------|---|
| P12163_1_S10,1316 K.GTQISTQLK.E   | 1583.958 | 0.0061   | 3 | 1 | 29.9 | 0 |
| P12163_2_F1,12811 K.GTQISTQLK.E   | 1583.958 | 0.00685  | 2 | 1 | 33   | 0 |
| P12163_2_F1,13066 K.GTQISTQLK.E   | 1583.958 | 0.00616  | 3 | 1 | 34.6 | 0 |
| P12163_2_F1,13067 K.GTQISTQLK.E   | 1583.958 | 0.00575  | 2 | 1 | 24.4 | 0 |
| P12163_2_F2,13253 K.GTQISTQLK.E   | 1583.958 | 0.00781  | 2 | 1 | 26.4 | 0 |
| P12163_2_F2,13272 K.GTQISTQLK.E   | 1583.958 | 0.00703  | 3 | 1 | 22.4 | 0 |
| P12163_2_F2,13488 K.GTQISTQLK.E   | 1583.958 | 0.00821  | 2 | 1 | 29.5 | 0 |
| P12163_2_F2,13709 K.GTQISTQLK.E   | 1583.958 | 0.00641  | 2 | 1 | 25.6 | 0 |
| P12163_2_F4,12368 K.GTQISTQLK.E   | 1583.958 | 0.00715  | 3 | 1 | 22.7 | 0 |
| P12163_2_F8_12070 K.GTQISTQLK.E   | 1583.958 | 0.00664  | 3 | 1 | 36   | 0 |
| P12163_2_S5,11687 K.GTQISTQLK.E   | 1583.958 | 0.00376  | 3 | 1 | 32.2 | 0 |
| P12163_2_S5,11743 K.GTQISTQLK.E   | 1583.958 | 0.00509  | 2 | 1 | 35.2 | 0 |
| P12163_1_F5,14287 K.INSEYLK.T     | 1474.873 | 0.0055   | 3 | 1 | 34.8 | 0 |
| P12163_1_F5,14514 K.INSEYLK.T     | 1474.873 | 0.00719  | 2 | 1 | 26.3 | 0 |
| P12163_1_S10,1293 K.INSEYLK.T     | 1474.873 | 0.0058   | 3 | 1 | 25.1 | 0 |
| P12163_1_S10,1495 K.INSEYLK.T     | 1474.873 | 0.00418  | 3 | 1 | 35.8 | 0 |
| P12163_1_S10,1497 K.INSEYLK.T     | 1474.873 | 0.00801  | 2 | 1 | 26.2 | 0 |
| P12163_2_F2,15004 K.INSEYLK.T     | 1474.873 | 0.00454  | 3 | 1 | 21.9 | 0 |
| P12163_2_F2,15181 K.INSEYLK.T     | 1474.873 | 0.00561  | 2 | 1 | 27.1 | 0 |
| P12163_2_F2,15284 K.INSEYLK.T     | 1474.873 | 0.00634  | 3 | 1 | 33.2 | 0 |
| P12163_2_F2,15421 K.INSEYLK.T     | 1474.873 | 0.00763  | 2 | 1 | 26.6 | 0 |
| P12163_2_F2,15517 K.INSEYLK.T     | 1474.873 | 0.00316  | 3 | 1 | 24.4 | 0 |
| P12163_2_F2,15665 K.INSEYLK.T     | 1474.873 | 0.00437  | 2 | 1 | 26.4 | 0 |
| P12163_2_F4,14000 K.INSEYLK.T     | 1474.873 | 0.00213  | 2 | 1 | 24.2 | 0 |
| P12163_2_S5,13634 K.INSEYLK.T     | 1474.873 | 0.00106  | 3 | 1 | 36.2 | 0 |
| P12163_1_F6,15202 K.TLEHFYPLAGR.V | 1607.885 | 0.00099  | 3 | 1 | 23.4 | 0 |
| P12163_1_F6,18583 K.TLEHFYPLAGR.V | 1607.885 | 0.00106  | 2 | 1 | 31   | 0 |
| P12163_1_F6,22260 K.TLEHFYPLAGR.V | 1607.885 | 0.00302  | 2 | 1 | 32.4 | 0 |
| P12163_1_F6,22746 K.TLEHFYPLAGR.V | 1607.885 | -0.0005  | 2 | 1 | 30.2 | 0 |
| P12163_1_F7,14435 K.TLEHFYPLAGR.V | 1607.885 | 0.00258  | 3 | 1 | 24.5 | 0 |
| P12163_1_F7,14502 K.TLEHFYPLAGR.V | 1607.885 | 0.00082  | 2 | 1 | 25.7 | 0 |
| P12163_1_F7,17734 K.TLEHFYPLAGR.V | 1607.885 | 0.0007   | 2 | 1 | 24.3 | 0 |
| P12163_1_F8,15159 K.TLEHFYPLAGR.V | 1607.885 | -0.00351 | 3 | 1 | 30.7 | 0 |
| P12163_1_F8,15184 K.TLEHFYPLAGR.V | 1607.885 | 0.00236  | 2 | 1 | 38   | 0 |
| P12163_1_F8,18523 K.TLEHFYPLAGR.V | 1607.885 | 0.00132  | 3 | 1 | 22.1 | 0 |
| P12163_1_F8,18532 K.TLEHFYPLAGR.V | 1607.885 | 0.00274  | 2 | 1 | 30.2 | 0 |
| P12163_1_F8,18802 K.TLEHFYPLAGR.V | 1607.885 | 0.00216  | 3 | 1 | 38.3 | 0 |
| P12163_1_F8,18803 K.TLEHFYPLAGR.V | 1607.885 | 0.00258  | 2 | 1 | 28.4 | 0 |
| P12163_1_F8,19550 K.TLEHFYPLAGR.V | 1607.885 | 0.00039  | 3 | 1 | 22.1 | 0 |
| P12163_2_F4,17126 K.TLEHFYPLAGR.V | 1607.885 | -0.00033 | 3 | 1 | 29.3 | 0 |
| P12163_2_F4,17367 K.TLEHFYPLAGR.V | 1607.885 | 0.00225  | 3 | 1 | 31.5 | 0 |
| P12163_2_F6,14529 K.TLEHFYPLAGR.V | 1607.885 | 0.00222  | 3 | 1 | 36.1 | 0 |
| P12163_2_F6,14532 K.TLEHFYPLAGR.V | 1607.885 | 0.00218  | 2 | 1 | 37   | 0 |
| P12163_2_F6,18016 K.TLEHFYPLAGR.V | 1607.885 | 0.00228  | 3 | 1 | 37.9 | 0 |
| P12163_2_F6,18027 K.TLEHFYPLAGR.V | 1607.885 | 0.0022   | 2 | 1 | 29.4 | 0 |
| P12163_2_F6,18272 K.TLEHFYPLAGR.V | 1607.885 | 0.00009  | 3 | 1 | 42.5 | 0 |
| P12163_2_F9,17198 K.TLEHFYPLAGR.V | 1607.885 | 0.00348  | 3 | 1 | 38.1 | 0 |
| P12163_2_F9,17205 K.TLEHFYPLAGR.V | 1607.885 | 0.00344  | 2 | 1 | 28.4 | 0 |
| P12163_2_S5,17332 K.TLEHFYPLAGR.V | 1607.885 | 0.003    | 3 | 1 | 36.3 | 0 |
| P12163_1_F6,13177 K.TLHGDEGFPK.V  | 1708.948 | 0.00298  | 2 | 1 | 27.2 | 0 |
| P12163_1_F6,13309 K.TLHGDEGFPK.V  | 1708.948 | 0.00421  | 3 | 1 | 40.7 | 0 |

|                                         |          |          |   |   |      |   |
|-----------------------------------------|----------|----------|---|---|------|---|
| P12163_1_F7,12041 K.TLHGDEGFPK.V        | 1708.948 | -0.00302 | 3 | 1 | 41.3 | 0 |
| P12163_1_F7,12098 K.TLHGDEGFPK.V        | 1708.948 | 0.0026   | 2 | 1 | 25.2 | 0 |
| P12163_1_F8,12555 K.TLHGDEGFPK.V        | 1708.948 | 0.00038  | 2 | 1 | 32   | 0 |
| P12163_1_F9,10722 K.TLHGDEGFPK.V        | 1708.948 | 0.01045  | 3 | 1 | 29.4 | 0 |
| P12163_1_F9,10750 K.TLHGDEGFPK.V        | 1708.948 | 0.00494  | 2 | 1 | 24   | 0 |
| P12163_1_F9,11250 K.TLHGDEGFPK.V        | 1708.948 | 0.00598  | 3 | 1 | 29.5 | 0 |
| P12163_1_F9,12976 K.TLHGDEGFPK.V        | 1708.948 | 0.00421  | 3 | 1 | 26.4 | 0 |
| P12163_1_F9,13096 K.TLHGDEGFPK.V        | 1708.948 | 0.00174  | 4 | 1 | 37.6 | 0 |
| P12163_1_F9,13279 K.TLHGDEGFPK.V        | 1708.948 | 0.00684  | 2 | 1 | 49.4 | 0 |
| P12163_1_F9,13294 K.TLHGDEGFPK.V        | 1708.948 | 0.0052   | 3 | 1 | 40.1 | 0 |
| P12163_1_F9,13512 K.TLHGDEGFPK.V        | 1708.948 | 0.00728  | 2 | 1 | 41.1 | 0 |
| P12163_1_F9,13523 K.TLHGDEGFPK.V        | 1708.948 | 0.00517  | 3 | 1 | 32.3 | 0 |
| P12163_1_S10,1139 K.TLHGDEGFPK.V        | 1708.948 | 0.01045  | 3 | 1 | 23.7 | 0 |
| P12163_1_S10,1322 K.TLHGDEGFPK.V        | 1708.948 | 0.00565  | 3 | 1 | 25.5 | 0 |
| P12163_1_S10,1344 K.TLHGDEGFPK.V        | 1708.948 | 0.00835  | 3 | 1 | 50.2 | 0 |
| P12163_2_F10,1181 K.TLHGDEGFPK.V        | 1708.948 | -0.00017 | 3 | 1 | 45.4 | 0 |
| P12163_2_F10,1237 K.TLHGDEGFPK.V        | 1708.948 | 0.0028   | 3 | 1 | 32.7 | 0 |
| P12163_2_F6,12649 K.TLHGDEGFPK.V        | 1708.948 | 0.00442  | 3 | 1 | 38.7 | 0 |
| P12163_2_F6,12725 K.TLHGDEGFPK.V        | 1708.948 | 0.00304  | 2 | 1 | 47.4 | 0 |
| P12163_2_F7,9978 K.TLHGDEGFPK.V         | 1708.948 | 0.01054  | 3 | 1 | 23.7 | 0 |
| P12163_2_F7,10000 K.TLHGDEGFPK.V        | 1708.948 | 0.00666  | 2 | 1 | 24.8 | 0 |
| P12163_2_F7,10212 K.TLHGDEGFPK.V        | 1708.948 | 0.00466  | 3 | 1 | 27.4 | 0 |
| P12163_2_F7,11304 K.TLHGDEGFPK.V        | 1708.948 | 0.00247  | 3 | 1 | 32.7 | 0 |
| P12163_2_F7,11906 K.TLHGDEGFPK.V        | 1708.948 | 0.00536  | 2 | 1 | 37.8 | 0 |
| P12163_2_F7,11958 K.TLHGDEGFPK.V        | 1708.948 | 0.0055   | 4 | 1 | 34.2 | 0 |
| P12163_2_F8_12070 K.TLHGDEGFPK.V        | 1708.948 | 0.00181  | 3 | 1 | 39.9 | 0 |
| P12163_2_F9,12250 K.TLHGDEGFPK.V        | 1708.948 | 0.0067   | 3 | 1 | 40.2 | 0 |
| P12163_2_F9,12496 K.TLHGDEGFPK.V        | 1708.948 | 0.00715  | 3 | 1 | 39.9 | 0 |
| P12163_1_F5,15372 K.VCEYIK.R ! K.VCEYIK | 1419.813 | 0.00465  | 3 | 1 | 31.2 | 0 |
| P12163_1_F5,15548 K.VCEYIK.R ! K.VCEYIK | 1419.813 | 0.00752  | 2 | 1 | 27.5 | 0 |
| P12163_1_F5,16289 K.VCEYIK.R ! K.VCEYIK | 1419.813 | 0.00509  | 2 | 1 | 24.8 | 0 |
| P12163_1_F6,16079 K.VCEYIK.R ! K.VCEYIK | 1419.813 | 0.00819  | 3 | 1 | 23   | 0 |
| P12163_1_F7,15245 K.VCEYIK.R ! K.VCEYIK | 1419.813 | 0.00797  | 2 | 1 | 24.3 | 0 |
| P12163_1_F7,15271 K.VCEYIK.R ! K.VCEYIK | 1419.813 | 0.01146  | 3 | 1 | 22.8 | 0 |
| P12163_1_F8,15534 K.VCEYIK.R ! K.VCEYIK | 1419.813 | 0.00084  | 3 | 1 | 23.9 | 0 |
| P12163_1_S10,1583 K.VCEYIK.R ! K.VCEYIK | 1419.813 | 0.00414  | 3 | 1 | 30.3 | 0 |
| P12163_1_S10,1585 K.VCEYIK.R ! K.VCEYIK | 1419.813 | 0.00811  | 2 | 1 | 27.2 | 0 |
| P12163_2_F2,16076 K.VCEYIK.R ! K.VCEYIK | 1419.813 | 0.00411  | 3 | 1 | 33.2 | 0 |
| P12163_2_F2,16154 K.VCEYIK.R ! K.VCEYIK | 1419.813 | 0.00343  | 2 | 1 | 27.6 | 0 |
| P12163_2_F2,16301 K.VCEYIK.R ! K.VCEYIK | 1419.813 | 0.00459  | 3 | 1 | 28.9 | 0 |
| P12163_2_F2,16386 K.VCEYIK.R ! K.VCEYIK | 1419.813 | 0.00677  | 2 | 1 | 26.8 | 0 |
| P12163_2_F2,16614 K.VCEYIK.R ! K.VCEYIK | 1419.813 | 0.00731  | 2 | 1 | 26.2 | 0 |
| P12163_2_F8_12070 K.VCEYIK.R ! K.VCEYIK | 1419.813 | 0.00495  | 3 | 1 | 23.6 | 0 |
| P12163_2_F8_12070 K.VCEYIK.R ! K.VCEYIK | 1419.813 | 0.00707  | 2 | 1 | 28.2 | 0 |
| P12163_2_S5,15127 K.VCEYIK.R ! K.VCEYIK | 1419.813 | 0.0077   | 2 | 1 | 26.6 | 0 |
| P12163_1_F3,22321 R.DNLIINDYDEGVPYIEI   | 2443.229 | -0.00164 | 2 | 1 | 42.9 | 0 |
| P12163_1_F3,22364 R.DNLIINDYDEGVPYIEI   | 2443.229 | 0.0054   | 3 | 1 | 41.6 | 0 |
| P12163_1_F3,22712 R.DNLIINDYDEGVPYIEI   | 2443.229 | -0.0019  | 2 | 1 | 40.9 | 0 |
| P12163_1_F7,20092 R.DNLIINDYDEGVPYIEI   | 2443.229 | 0.00837  | 3 | 1 | 49.8 | 0 |
| P12163_1_F7,20911 R.DNLIINDYDEGVPYIEI   | 2443.229 | 0.003    | 2 | 1 | 40.2 | 0 |
| P12163_1_F7,20956 R.DNLIINDYDEGVPYIEI   | 2443.229 | 0.01159  | 3 | 1 | 54.6 | 0 |

|                   |                     |          |          |   |   |      |   |
|-------------------|---------------------|----------|----------|---|---|------|---|
| P12163_1_F8,22017 | R.DNLIINDYDEGVPYIET | 2443.229 | 0.00675  | 3 | 1 | 43.2 | 0 |
| P12163_2_S5,19627 | R.DNLIINDYDEGVPYIET | 2443.229 | 0.00331  | 3 | 1 | 40   | 0 |
| P12163_1_F8,17227 | R.FVLHQAVNLR.R      | 1500.895 | 0.00566  | 3 | 1 | 43.8 | 0 |
| P12163_1_F8,17240 | R.FVLHQAVNLR.R      | 1500.895 | 0.00326  | 2 | 1 | 27.6 | 0 |
| P12163_1_F9,17129 | R.FVLHQAVNLR.R      | 1500.895 | 0.00269  | 3 | 1 | 32   | 0 |
| P12163_1_F9,17131 | R.FVLHQAVNLR.R      | 1500.895 | 0.00276  | 2 | 1 | 27.8 | 0 |
| P12163_2_F6,16553 | R.FVLHQAVNLR.R      | 1500.895 | 0.00296  | 3 | 1 | 43.8 | 0 |
| P12163_2_F6,16753 | R.FVLHQAVNLR.R      | 1500.895 | 0.0052   | 2 | 1 | 25.4 | 0 |
| P12163_2_F6,20205 | R.FVLHQAVNLR.R      | 1500.895 | 0.0014   | 3 | 1 | 40.7 | 0 |
| P12163_2_F6,20394 | R.FVLHQAVNLR.R      | 1500.895 | 0.00286  | 2 | 1 | 27.7 | 0 |
| P12163_2_F6,20441 | R.FVLHQAVNLR.R      | 1500.895 | 0.0026   | 3 | 1 | 35.3 | 0 |
| P12163_2_F6,20670 | R.FVLHQAVNLR.R      | 1500.895 | 0.00296  | 3 | 1 | 29.1 | 0 |
| P12163_2_F6,20894 | R.FVLHQAVNLR.R      | 1500.895 | 0.00209  | 3 | 1 | 34.4 | 0 |
| P12163_2_F8_12070 | R.FVLHQAVNLR.R      | 1500.895 | 0.0035   | 3 | 1 | 32.7 | 0 |
| P12163_1_F6,20719 | R.VRDNLIINDYDEGVPY  | 2698.399 | 0.01287  | 3 | 1 | 31.2 | 0 |
| P12163_1_F7,19148 | R.VRDNLIINDYDEGVPY  | 2698.399 | 0.00098  | 4 | 1 | 40.5 | 0 |
| P12163_1_F7,19493 | R.VRDNLIINDYDEGVPY  | 2698.399 | 0.00963  | 3 | 1 | 48   | 0 |
| P12163_1_F7,19969 | R.VRDNLIINDYDEGVPY  | 2698.399 | 0.00333  | 3 | 1 | 61.6 | 0 |
| P12163_1_F7,20184 | R.VRDNLIINDYDEGVPY  | 2698.399 | 0.00438  | 3 | 1 | 59.9 | 0 |
| P12163_1_F8,20948 | R.VRDNLIINDYDEGVPY  | 2698.399 | 0.00036  | 3 | 1 | 34.7 | 0 |
| P12163_2_S5,19466 | R.VRDNLIINDYDEGVPY  | 2698.399 | 0.00273  | 3 | 1 | 65.5 | 0 |
| P12163_1_F5,14287 | K.INSEYLK.T         | 1474.873 | 0.0055   | 3 | 1 | 34.8 | 0 |
| P12163_1_F5,14514 | K.INSEYLK.T         | 1474.873 | 0.00719  | 2 | 1 | 26.3 | 0 |
| P12163_1_S10,1293 | K.INSEYLK.T         | 1474.873 | 0.0058   | 3 | 1 | 25.1 | 0 |
| P12163_1_S10,1495 | K.INSEYLK.T         | 1474.873 | 0.00418  | 3 | 1 | 35.8 | 0 |
| P12163_1_S10,1497 | K.INSEYLK.T         | 1474.873 | 0.00801  | 2 | 1 | 26.2 | 0 |
| P12163_2_F2,15004 | K.INSEYLK.T         | 1474.873 | 0.00454  | 3 | 1 | 21.9 | 0 |
| P12163_2_F2,15181 | K.INSEYLK.T         | 1474.873 | 0.00561  | 2 | 1 | 27.1 | 0 |
| P12163_2_F2,15284 | K.INSEYLK.T         | 1474.873 | 0.00634  | 3 | 1 | 33.2 | 0 |
| P12163_2_F2,15421 | K.INSEYLK.T         | 1474.873 | 0.00763  | 2 | 1 | 26.6 | 0 |
| P12163_2_F2,15517 | K.INSEYLK.T         | 1474.873 | 0.00316  | 3 | 1 | 24.4 | 0 |
| P12163_2_F2,15665 | K.INSEYLK.T         | 1474.873 | 0.00437  | 2 | 1 | 26.4 | 0 |
| P12163_2_F4,14000 | K.INSEYLK.T         | 1474.873 | 0.00213  | 2 | 1 | 24.2 | 0 |
| P12163_2_S5,13634 | K.INSEYLK.T         | 1474.873 | 0.00106  | 3 | 1 | 36.2 | 0 |
| P12163_1_F7,14308 | K.RM*EEVSAHENLEALK  | 2380.275 | 0.0073   | 3 | 1 | 30.8 | 0 |
| P12163_1_F4,15719 | K.RMEEVSAHENLEALK   | 2364.28  | 0.00709  | 3 | 1 | 37.9 | 0 |
| P12163_1_F6,15171 | K.RMEEVSAHENLEALK   | 2364.28  | 0.00562  | 4 | 1 | 27.5 | 0 |
| P12163_1_F7,14299 | K.RMEEVSAHENLEALK   | 2364.28  | 0.00745  | 3 | 1 | 35.7 | 0 |
| P12163_2_F4,13939 | K.RMEEVSAHENLEALK   | 2364.28  | 0.00628  | 3 | 1 | 41   | 0 |
| P12163_2_F9,14224 | K.RMEEVSAHENLEALK   | 2364.28  | 0.00752  | 3 | 1 | 31.9 | 0 |
| P12163_1_F6,13177 | K.TLHGDEGFPK.V      | 1708.948 | 0.00298  | 2 | 1 | 27.2 | 0 |
| P12163_1_F6,13309 | K.TLHGDEGFPK.V      | 1708.948 | 0.00421  | 3 | 1 | 40.7 | 0 |
| P12163_1_F7,12041 | K.TLHGDEGFPK.V      | 1708.948 | -0.00302 | 3 | 1 | 41.3 | 0 |
| P12163_1_F7,12098 | K.TLHGDEGFPK.V      | 1708.948 | 0.0026   | 2 | 1 | 25.2 | 0 |
| P12163_1_F8,12555 | K.TLHGDEGFPK.V      | 1708.948 | 0.00038  | 2 | 1 | 32   | 0 |
| P12163_1_F9,10722 | K.TLHGDEGFPK.V      | 1708.948 | 0.01045  | 3 | 1 | 29.4 | 0 |
| P12163_1_F9,10750 | K.TLHGDEGFPK.V      | 1708.948 | 0.00494  | 2 | 1 | 24   | 0 |
| P12163_1_F9,11250 | K.TLHGDEGFPK.V      | 1708.948 | 0.00598  | 3 | 1 | 29.5 | 0 |
| P12163_1_F9,12976 | K.TLHGDEGFPK.V      | 1708.948 | 0.00421  | 3 | 1 | 26.4 | 0 |
| P12163_1_F9,13096 | K.TLHGDEGFPK.V      | 1708.948 | 0.00174  | 4 | 1 | 37.6 | 0 |
| P12163_1_F9,13279 | K.TLHGDEGFPK.V      | 1708.948 | 0.00684  | 2 | 1 | 49.4 | 0 |

|                   |                       |          |          |   |   |      |   |
|-------------------|-----------------------|----------|----------|---|---|------|---|
| P12163_1_F9,13294 | K.TLHGDEGFPK.V        | 1708.948 | 0.0052   | 3 | 1 | 40.1 | 0 |
| P12163_1_F9,13512 | K.TLHGDEGFPK.V        | 1708.948 | 0.00728  | 2 | 1 | 41.1 | 0 |
| P12163_1_F9,13523 | K.TLHGDEGFPK.V        | 1708.948 | 0.00517  | 3 | 1 | 32.3 | 0 |
| P12163_1_S10,1139 | K.TLHGDEGFPK.V        | 1708.948 | 0.01045  | 3 | 1 | 23.7 | 0 |
| P12163_1_S10,1322 | K.TLHGDEGFPK.V        | 1708.948 | 0.00565  | 3 | 1 | 25.5 | 0 |
| P12163_1_S10,1344 | K.TLHGDEGFPK.V        | 1708.948 | 0.00835  | 3 | 1 | 50.2 | 0 |
| P12163_2_F10,1181 | K.TLHGDEGFPK.V        | 1708.948 | -0.00017 | 3 | 1 | 45.4 | 0 |
| P12163_2_F10,1237 | K.TLHGDEGFPK.V        | 1708.948 | 0.0028   | 3 | 1 | 32.7 | 0 |
| P12163_2_F6,12649 | K.TLHGDEGFPK.V        | 1708.948 | 0.00442  | 3 | 1 | 38.7 | 0 |
| P12163_2_F6,12725 | K.TLHGDEGFPK.V        | 1708.948 | 0.00304  | 2 | 1 | 47.4 | 0 |
| P12163_2_F7,9978  | K.TLHGDEGFPK.V        | 1708.948 | 0.01054  | 3 | 1 | 23.7 | 0 |
| P12163_2_F7,10000 | K.TLHGDEGFPK.V        | 1708.948 | 0.00666  | 2 | 1 | 24.8 | 0 |
| P12163_2_F7,10212 | K.TLHGDEGFPK.V        | 1708.948 | 0.00466  | 3 | 1 | 27.4 | 0 |
| P12163_2_F7,11304 | K.TLHGDEGFPK.V        | 1708.948 | 0.00247  | 3 | 1 | 32.7 | 0 |
| P12163_2_F7,11906 | K.TLHGDEGFPK.V        | 1708.948 | 0.00536  | 2 | 1 | 37.8 | 0 |
| P12163_2_F7,11958 | K.TLHGDEGFPK.V        | 1708.948 | 0.0055   | 4 | 1 | 34.2 | 0 |
| P12163_2_F8_12070 | K.TLHGDEGFPK.V        | 1708.948 | 0.00181  | 3 | 1 | 39.9 | 0 |
| P12163_2_F9,12250 | K.TLHGDEGFPK.V        | 1708.948 | 0.0067   | 3 | 1 | 40.2 | 0 |
| P12163_2_F9,12496 | K.TLHGDEGFPK.V        | 1708.948 | 0.00715  | 3 | 1 | 39.9 | 0 |
| P12163_1_F5,15372 | K.VCEYIK.R ! K.VCEYIK | 1419.813 | 0.00465  | 3 | 1 | 31.2 | 0 |
| P12163_1_F5,15548 | K.VCEYIK.R ! K.VCEYIK | 1419.813 | 0.00752  | 2 | 1 | 27.5 | 0 |
| P12163_1_F5,16289 | K.VCEYIK.R ! K.VCEYIK | 1419.813 | 0.00509  | 2 | 1 | 24.8 | 0 |
| P12163_1_F6,16079 | K.VCEYIK.R ! K.VCEYIK | 1419.813 | 0.00819  | 3 | 1 | 23   | 0 |
| P12163_1_F7,15245 | K.VCEYIK.R ! K.VCEYIK | 1419.813 | 0.00797  | 2 | 1 | 24.3 | 0 |
| P12163_1_F7,15271 | K.VCEYIK.R ! K.VCEYIK | 1419.813 | 0.01146  | 3 | 1 | 22.8 | 0 |
| P12163_1_F8,15534 | K.VCEYIK.R ! K.VCEYIK | 1419.813 | 0.00084  | 3 | 1 | 23.9 | 0 |
| P12163_1_S10,1583 | K.VCEYIK.R ! K.VCEYIK | 1419.813 | 0.00414  | 3 | 1 | 30.3 | 0 |
| P12163_1_S10,1585 | K.VCEYIK.R ! K.VCEYIK | 1419.813 | 0.00811  | 2 | 1 | 27.2 | 0 |
| P12163_2_F2,16076 | K.VCEYIK.R ! K.VCEYIK | 1419.813 | 0.00411  | 3 | 1 | 33.2 | 0 |
| P12163_2_F2,16154 | K.VCEYIK.R ! K.VCEYIK | 1419.813 | 0.00343  | 2 | 1 | 27.6 | 0 |
| P12163_2_F2,16301 | K.VCEYIK.R ! K.VCEYIK | 1419.813 | 0.00459  | 3 | 1 | 28.9 | 0 |
| P12163_2_F2,16386 | K.VCEYIK.R ! K.VCEYIK | 1419.813 | 0.00677  | 2 | 1 | 26.8 | 0 |
| P12163_2_F2,16614 | K.VCEYIK.R ! K.VCEYIK | 1419.813 | 0.00731  | 2 | 1 | 26.2 | 0 |
| P12163_2_F8_12070 | K.VCEYIK.R ! K.VCEYIK | 1419.813 | 0.00495  | 3 | 1 | 23.6 | 0 |
| P12163_2_F8_12070 | K.VCEYIK.R ! K.VCEYIK | 1419.813 | 0.00707  | 2 | 1 | 28.2 | 0 |
| P12163_2_S5,15127 | K.VCEYIK.R ! K.VCEYIK | 1419.813 | 0.0077   | 2 | 1 | 26.6 | 0 |
| P12163_1_F8,17227 | R.FVLHQAVNLR.R        | 1500.895 | 0.00566  | 3 | 1 | 43.8 | 0 |
| P12163_1_F8,17240 | R.FVLHQAVNLR.R        | 1500.895 | 0.00326  | 2 | 1 | 27.6 | 0 |
| P12163_1_F9,17129 | R.FVLHQAVNLR.R        | 1500.895 | 0.00269  | 3 | 1 | 32   | 0 |
| P12163_1_F9,17131 | R.FVLHQAVNLR.R        | 1500.895 | 0.00276  | 2 | 1 | 27.8 | 0 |
| P12163_2_F6,16553 | R.FVLHQAVNLR.R        | 1500.895 | 0.00296  | 3 | 1 | 43.8 | 0 |
| P12163_2_F6,16753 | R.FVLHQAVNLR.R        | 1500.895 | 0.0052   | 2 | 1 | 25.4 | 0 |
| P12163_2_F6,20205 | R.FVLHQAVNLR.R        | 1500.895 | 0.0014   | 3 | 1 | 40.7 | 0 |
| P12163_2_F6,20394 | R.FVLHQAVNLR.R        | 1500.895 | 0.00286  | 2 | 1 | 27.7 | 0 |
| P12163_2_F6,20441 | R.FVLHQAVNLR.R        | 1500.895 | 0.0026   | 3 | 1 | 35.3 | 0 |
| P12163_2_F6,20670 | R.FVLHQAVNLR.R        | 1500.895 | 0.00296  | 3 | 1 | 29.1 | 0 |
| P12163_2_F6,20894 | R.FVLHQAVNLR.R        | 1500.895 | 0.00209  | 3 | 1 | 34.4 | 0 |
| P12163_2_F8_12070 | R.FVLHQAVNLR.R        | 1500.895 | 0.0035   | 3 | 1 | 32.7 | 0 |
| P12163_1_F6,15123 | R.M*EEVSAHENLEALK..   | 2224.174 | 0.00424  | 3 | 1 | 22   | 0 |
| P12163_1_F7,14318 | R.M*EEVSAHENLEALK..   | 2224.174 | 0.0052   | 4 | 1 | 32.6 | 0 |
| P12163_1_F7,16615 | R.M*EEVSAHENLEALK..   | 2224.174 | 0.01834  | 3 | 1 | 42.1 | 0 |

|                   |                     |          |         |   |   |      |   |
|-------------------|---------------------|----------|---------|---|---|------|---|
| P12163_1_F7,16678 | R.M*EEVSAHENLEALK.. | 2224.174 | 0.00536 | 4 | 1 | 32.7 | 0 |
| P12163_1_F8,14918 | R.M*EEVSAHENLEALK.. | 2224.174 | 0.0166  | 3 | 1 | 24.5 | 0 |
| P12163_1_F8,14985 | R.M*EEVSAHENLEALK.. | 2224.174 | 0.00368 | 2 | 1 | 56.5 | 0 |
| P12163_1_F8,17436 | R.M*EEVSAHENLEALK.. | 2224.174 | 0.00985 | 3 | 1 | 47.7 | 0 |
| P12163_2_F10,1402 | R.M*EEVSAHENLEALK.. | 2224.174 | 0.00733 | 3 | 1 | 31.4 | 0 |
| P12163_2_F6,14386 | R.M*EEVSAHENLEALK.. | 2224.174 | 0.00844 | 3 | 1 | 40.8 | 0 |
| P12163_2_F6,16934 | R.M*EEVSAHENLEALK.. | 2224.174 | 0.01186 | 3 | 1 | 55.8 | 0 |
| P12163_2_F9,14153 | R.M*EEVSAHENLEALK.. | 2224.174 | 0.00595 | 3 | 1 | 23.8 | 0 |
| P12163_1_F6,17532 | R.MEEVSAHENLEALK.F  | 2208.179 | 0.00984 | 4 | 1 | 25.1 | 0 |
| P12163_1_F6,17559 | R.MEEVSAHENLEALK.F  | 2208.179 | 0.00721 | 3 | 1 | 35   | 0 |
| P12163_1_F8,17375 | R.MEEVSAHENLEALK.F  | 2208.179 | 0.00565 | 3 | 1 | 44.4 | 0 |
| P12163_1_F8,17443 | R.MEEVSAHENLEALK.F  | 2208.179 | 0.00244 | 2 | 1 | 70.8 | 0 |
| P12163_2_F6,16917 | R.MEEVSAHENLEALK.F  | 2208.179 | 0.00655 | 3 | 1 | 43.1 | 0 |
| P12163_2_F6,16936 | R.MEEVSAHENLEALK.F  | 2208.179 | 0.002   | 2 | 1 | 71.1 | 0 |
| P12163_2_F6,16946 | R.MEEVSAHENLEALK.F  | 2208.179 | 0.00636 | 4 | 1 | 22.7 | 0 |
| P12163_2_F2,7153  | R.SWAANTR.G         | 1109.6   | 0.00374 | 3 | 1 | 22.5 | 0 |
| P12163_1_F3,24646 | R.TEALSAFILK.S      | 1701.041 | 0.00585 | 2 | 1 | 45.1 | 0 |
| P12163_1_F3,24795 | R.TEALSAFILK.S      | 1701.041 | 0.00432 | 3 | 1 | 33.2 | 0 |
| P12163_1_F4,20849 | R.TEALSAFILK.S      | 1701.041 | 0.00683 | 2 | 1 | 25.1 | 0 |
| P12163_1_F4,25405 | R.TEALSAFILK.S      | 1701.041 | 0.00576 | 3 | 1 | 24.9 | 0 |
| P12163_1_F4,25667 | R.TEALSAFILK.S      | 1701.041 | 0.00879 | 3 | 1 | 28.1 | 0 |
| P12163_1_F5,23693 | R.TEALSAFILK.S      | 1701.041 | 0.00723 | 3 | 1 | 36.7 | 0 |
| P12163_1_F6,22749 | R.TEALSAFILK.S      | 1701.041 | 0.00468 | 3 | 1 | 32.8 | 0 |
| P12163_1_F7,21977 | R.TEALSAFILK.S      | 1701.041 | 0.00753 | 3 | 1 | 27.9 | 0 |
| P12163_1_F7,22667 | R.TEALSAFILK.S      | 1701.041 | 0.00723 | 3 | 1 | 39.6 | 0 |
| P12163_1_F7,22676 | R.TEALSAFILK.S      | 1701.041 | 0.00731 | 2 | 1 | 33.8 | 0 |
| P12163_2_F1,24691 | R.TEALSAFILK.S      | 1701.041 | 0.00354 | 3 | 1 | 27.4 | 0 |
| P12163_2_F1,24896 | R.TEALSAFILK.S      | 1701.041 | 0.00408 | 3 | 1 | 30.4 | 0 |
| P12163_2_F1,24917 | R.TEALSAFILK.S      | 1701.041 | 0.00423 | 2 | 1 | 27.6 | 0 |
| P12163_2_F4,21597 | R.TEALSAFILK.S      | 1701.041 | 0.00195 | 3 | 1 | 34.2 | 0 |
| P12163_2_F9,21268 | R.TEALSAFILK.S      | 1701.041 | 0.00249 | 3 | 1 | 24.7 | 0 |
| P12163_2_F8_12070 | K.DLPEVLLGKPVDPHPC  | 3374.945 | 0.00814 | 4 | 1 | 24.3 | 0 |
| P12163_1_F5,25049 | K.LFYTFYLK.G        | 1703.003 | 0.00561 | 3 | 1 | 26.6 | 0 |
| P12163_2_F9,22417 | K.LFYTFYLK.G        | 1703.003 | 0.00714 | 3 | 1 | 26.9 | 0 |
| P12163_2_F9,22553 | K.LFYTFYLK.G        | 1703.003 | 0.00612 | 3 | 1 | 26   | 0 |
| P12163_1_F4,26675 | K.LQQLVFPFK.L       | 1728.067 | 0.00417 | 3 | 1 | 44.9 | 0 |
| P12163_1_F4,26757 | K.LQQLVFPFK.L       | 1728.067 | 0.00649 | 2 | 1 | 42   | 0 |
| P12163_1_F4,26903 | K.LQQLVFPFK.L       | 1728.067 | 0.0051  | 3 | 1 | 47.2 | 0 |
| P12163_1_F7,23227 | K.LQQLVFPFK.L       | 1728.067 | 0.00072 | 3 | 1 | 43.9 | 0 |
| P12163_1_F7,23567 | K.LQQLVFPFK.L       | 1728.067 | 0.00581 | 2 | 1 | 47.8 | 0 |
| P12163_1_F7,23574 | K.LQQLVFPFK.L       | 1728.067 | 0.00339 | 3 | 1 | 40.3 | 0 |
| P12163_1_S10,2203 | K.LQQLVFPFK.L       | 1728.067 | 0.00603 | 3 | 1 | 24.6 | 0 |
| P12163_2_F1,25766 | K.LQQLVFPFK.L       | 1728.067 | 0.00895 | 2 | 1 | 27   | 0 |
| P12163_2_F1,25776 | K.LQQLVFPFK.L       | 1728.067 | 0.00402 | 3 | 1 | 44.6 | 0 |
| P12163_2_F1,25938 | K.LQQLVFPFK.L       | 1728.067 | 0.00673 | 2 | 1 | 33.1 | 0 |
| P12163_2_F1,25948 | K.LQQLVFPFK.L       | 1728.067 | 0.00321 | 3 | 1 | 42.2 | 0 |
| P12163_1_F3,15878 | K.LYTGDLQK.R        | 1545.91  | 0.00663 | 2 | 1 | 24.4 | 0 |
| P12163_1_F4,16465 | K.LYTGDLQK.R        | 1545.91  | 0.00555 | 2 | 1 | 24.1 | 0 |
| P12163_1_F4,16963 | K.LYTGDLQK.R        | 1545.91  | 0.00432 | 3 | 1 | 31.5 | 0 |
| P12163_1_F5,15195 | K.LYTGDLQK.R        | 1545.91  | 0.006   | 3 | 1 | 39   | 0 |
| P12163_1_F6,15848 | K.LYTGDLQK.R        | 1545.91  | 0.00522 | 3 | 1 | 27.4 | 0 |

|                                     |          |          |   |   |      |   |
|-------------------------------------|----------|----------|---|---|------|---|
| P12163_1_F6,15917 K.LYTGDLQK.R      | 1545.91  | 0.00699  | 2 | 1 | 24.3 | 0 |
| P12163_1_F7,15042 K.LYTGDLQK.R      | 1545.91  | 0.00543  | 3 | 1 | 31.8 | 0 |
| P12163_1_F8,15743 K.LYTGDLQK.R      | 1545.91  | 0.00567  | 2 | 1 | 24.5 | 0 |
| P12163_1_F9,15543 K.LYTGDLQK.R      | 1545.91  | 0.00565  | 2 | 1 | 24   | 0 |
| P12163_2_F4,14160 K.LYTGDLQK.R      | 1545.91  | 0.00144  | 3 | 1 | 31.7 | 0 |
| P12163_2_F4,14696 K.LYTGDLQK.R      | 1545.91  | 0.0048   | 3 | 1 | 30   | 0 |
| P12163_1_F5,16153 K.VQELHVYEINER.D  | 1832.981 | -0.00248 | 3 | 1 | 56.2 | 0 |
| P12163_1_F5,16833 K.VQELHVYEINER.D  | 1832.981 | 0.00649  | 3 | 1 | 40.1 | 0 |
| P12163_1_F5,16847 K.VQELHVYEINER.D  | 1832.981 | 0.01253  | 2 | 1 | 51.6 | 0 |
| P12163_1_F6,17207 K.VQELHVYEINER.D  | 1832.981 | 0.00289  | 3 | 1 | 44.7 | 0 |
| P12163_1_F6,17279 K.VQELHVYEINER.D  | 1832.981 | 0.00383  | 2 | 1 | 58.7 | 0 |
| P12163_1_F6,17423 K.VQELHVYEINER.D  | 1832.981 | 0.00454  | 3 | 1 | 54.1 | 0 |
| P12163_1_F6,17429 K.VQELHVYEINER.D  | 1832.981 | 0.00469  | 3 | 1 | 58.9 | 0 |
| P12163_1_F6,17508 K.VQELHVYEINER.D  | 1832.981 | -0.00005 | 2 | 1 | 36.1 | 0 |
| P12163_1_F7,16374 K.VQELHVYEINER.D  | 1832.981 | 0.00088  | 3 | 1 | 46.7 | 0 |
| P12163_1_F7,16449 K.VQELHVYEINER.D  | 1832.981 | 0.00339  | 2 | 1 | 57.3 | 0 |
| P12163_1_F7,16605 K.VQELHVYEINER.D  | 1832.981 | 0.0043   | 3 | 1 | 22.9 | 0 |
| P12163_1_F8,16991 K.VQELHVYEINER.D  | 1832.981 | 0.00352  | 3 | 1 | 28.3 | 0 |
| P12163_1_F8,17003 K.VQELHVYEINER.D  | 1832.981 | 0.00211  | 2 | 1 | 50.6 | 0 |
| P12163_1_F8,17266 K.VQELHVYEINER.D  | 1832.981 | 0.00364  | 3 | 1 | 63   | 0 |
| P12163_1_F9,16934 K.VQELHVYEINER.D  | 1832.981 | -0.00137 | 2 | 1 | 26.4 | 0 |
| P12163_1_F9,16940 K.VQELHVYEINER.D  | 1832.981 | 0.00562  | 3 | 1 | 43.4 | 0 |
| P12163_2_F4,15444 K.VQELHVYEINER.D  | 1832.981 | -0.00035 | 3 | 1 | 49.1 | 0 |
| P12163_2_F4,15447 K.VQELHVYEINER.D  | 1832.981 | -0.00277 | 2 | 1 | 52.5 | 0 |
| P12163_2_F4,16015 K.VQELHVYEINER.D  | 1832.981 | -0.00087 | 2 | 1 | 29.7 | 0 |
| P12163_2_F6,16396 K.VQELHVYEINER.D  | 1832.981 | -0.00245 | 3 | 1 | 41.1 | 0 |
| P12163_2_F6,16412 K.VQELHVYEINER.D  | 1832.981 | 0.00343  | 2 | 1 | 56.5 | 0 |
| P12163_2_F6,16650 K.VQELHVYEINER.D  | 1832.981 | 0.00505  | 3 | 1 | 63.6 | 0 |
| P12163_2_F6,16658 K.VQELHVYEINER.D  | 1832.981 | 0.01207  | 2 | 1 | 68.8 | 0 |
| P12163_2_F6,16907 K.VQELHVYEINER.D  | 1832.981 | 0.00403  | 3 | 1 | 55   | 0 |
| P12163_2_F6,20532 K.VQELHVYEINER.D  | 1832.981 | 0.00363  | 2 | 1 | 37.9 | 0 |
| P12163_2_F6,20867 K.VQELHVYEINER.D  | 1832.981 | 0.0019   | 3 | 1 | 22.2 | 0 |
| P12163_2_F8_12070 K.VQELHVYEINER.D  | 1832.981 | 0.00817  | 3 | 1 | 22   | 0 |
| P12163_2_F9,15947 K.VQELHVYEINER.D  | 1832.981 | 0.00305  | 2 | 1 | 30.5 | 0 |
| P12163_2_F9,16115 K.VQELHVYEINER.D  | 1832.981 | 0.00172  | 3 | 1 | 60.4 | 0 |
| P12163_2_F9,16159 K.VQELHVYEINER.D  | 1832.981 | 0.00337  | 2 | 1 | 66.4 | 0 |
| P12163_2_S5,15528 K.VQELHVYEINER.D  | 1832.981 | 0.00058  | 3 | 1 | 44.3 | 0 |
| P12163_2_S5,16159 K.VQELHVYEINER.D  | 1832.981 | -0.00013 | 2 | 1 | 50.1 | 0 |
| P12163_1_F4,9060 R.GSPAYLR.L        | 1067.615 | 0.00339  | 3 | 1 | 22   | 0 |
| P12163_1_S10,9476 R.GSPAYLR.L       | 1067.615 | 0.00024  | 3 | 1 | 23.8 | 0 |
| P12163_2_F10,8874 R.GSPAYLR.L       | 1067.615 | 0.00324  | 3 | 1 | 25.8 | 0 |
| P12163_2_F10,1077 R.GSPAYLR.L       | 1067.615 | 0.0028   | 2 | 1 | 26.1 | 0 |
| P12163_2_F2,7808 R.GSPAYLR.L        | 1067.615 | 0.00606  | 3 | 1 | 24.7 | 0 |
| P12163_1_F8,19764 R.LSQKPVNSLGDLPFS | 2855.676 | 0.00834  | 3 | 1 | 31.6 | 0 |
| P12163_2_F6,20744 R.LSQKPVNSLGDLPFS | 2855.676 | 0.0201   | 3 | 1 | 22   | 0 |
| P12163_2_F8_12070 R.LSQKPVNSLGDLPFS | 2855.676 | 0.005    | 4 | 1 | 23.8 | 0 |
| P12163_2_F6,7421 R.SQANSSDDPRPTK.V  | 2011.066 | 0.00654  | 3 | 1 | 23.6 | 0 |
| P12163_2_F6,7467 R.SQANSSDDPRPTK.V  | 2011.066 | 0.00491  | 2 | 1 | 26.7 | 0 |
| P12163_1_F2,12199 K.ATEPHAAISNFTN.- | 1676.855 | 0.00093  | 3 | 1 | 22.7 | 0 |
| P12163_1_F2,12435 K.ATEPHAAISNFTN.- | 1676.855 | 0.00252  | 3 | 1 | 23.2 | 0 |
| P12163_1_F2,12776 K.ATEPHAAISNFTN.- | 1676.855 | 0.00024  | 3 | 1 | 29.4 | 0 |



|                                       |          |          |   |   |      |   |
|---------------------------------------|----------|----------|---|---|------|---|
| P12163_1_F2,14237 K.ATEPHAAISNFTN.-   | 1676.855 | -0.00148 | 2 | 1 | 37.8 | 0 |
| P12163_1_F2,14364 K.ATEPHAAISNFTN.-   | 1676.855 | 0.00069  | 3 | 1 | 34.2 | 0 |
| P12163_1_F2,14431 K.ATEPHAAISNFTN.-   | 1676.855 | 0.0027   | 2 | 1 | 55.6 | 0 |
| P12163_1_F2,14672 K.ATEPHAAISNFTN.-   | 1676.855 | 0.00578  | 2 | 1 | 37.7 | 0 |
| P12163_1_F3,14812 K.ATEPHAAISNFTN.-   | 1676.855 | 0.0075   | 2 | 1 | 35.2 | 0 |
| P12163_1_F6,14609 K.ATEPHAAISNFTN.-   | 1676.855 | 0.00466  | 2 | 1 | 32.6 | 0 |
| P12163_1_F9,14358 K.ATEPHAAISNFTN.-   | 1676.855 | 0.00148  | 2 | 1 | 25.9 | 0 |
| P12163_2_F1,14079 K.ATEPHAAISNFTN.-   | 1676.855 | 0.00342  | 2 | 1 | 32.7 | 0 |
| P12163_2_F2,2969 K.ATEPHAAISNFTN.-    | 1676.855 | 0.00334  | 2 | 1 | 29.1 | 0 |
| P12163_2_F4,13084 K.ATEPHAAISNFTN.-   | 1676.855 | -0.00004 | 2 | 1 | 34.4 | 0 |
| P12163_2_F4,13452 K.ATEPHAAISNFTN.-   | 1676.855 | 0.00164  | 2 | 1 | 32   | 0 |
| P12163_2_F6,13998 K.ATEPHAAISNFTN.-   | 1676.855 | 0.0014   | 2 | 1 | 42.3 | 0 |
| P12163_2_F7,13029 K.ATEPHAAISNFTN.-   | 1676.855 | 0.00064  | 2 | 1 | 25   | 0 |
| P12163_2_F7,13217 K.ATEPHAAISNFTN.-   | 1676.855 | 0.00206  | 2 | 1 | 35.6 | 0 |
| P12163_1_F6,6429 K.HEPEK.K            | 1247.72  | 0.00371  | 3 | 1 | 24.2 | 0 |
| P12163_1_S10,7695 K.HEPEK.K           | 1247.72  | 0.00233  | 3 | 1 | 21.9 | 0 |
| P12163_2_F6,5904 K.HEPEK.K            | 1247.72  | 0.00164  | 3 | 1 | 28.2 | 0 |
| P12163_1_F5,25049 K.LFYTFYLK.G        | 1703.003 | 0.00561  | 3 | 1 | 26.6 | 0 |
| P12163_2_F9,22417 K.LFYTFYLK.G        | 1703.003 | 0.00714  | 3 | 1 | 26.9 | 0 |
| P12163_2_F9,22553 K.LFYTFYLK.G        | 1703.003 | 0.00612  | 3 | 1 | 26   | 0 |
| P12163_1_F6,19027 K.LHQIVFPYK.L       | 1753.062 | 0.00267  | 2 | 1 | 32.7 | 0 |
| P12163_1_F6,19087 K.LHQIVFPYK.L       | 1753.062 | 0.00932  | 4 | 1 | 25.4 | 0 |
| P12163_1_F6,19207 K.LHQIVFPYK.L       | 1753.062 | 0.00587  | 3 | 1 | 25.7 | 0 |
| P12163_1_F8,18681 K.LHQIVFPYK.L       | 1753.062 | 0.0014   | 3 | 1 | 30.1 | 0 |
| P12163_1_F9,18600 K.LHQIVFPYK.L       | 1753.062 | 0.00485  | 3 | 1 | 31.1 | 0 |
| P12163_1_F9,18621 K.LHQIVFPYK.L       | 1753.062 | 0.00731  | 2 | 1 | 38.4 | 0 |
| P12163_1_F9,18794 K.LHQIVFPYK.L       | 1753.062 | 0.00239  | 3 | 1 | 27.4 | 0 |
| P12163_1_S10,1815 K.LHQIVFPYK.L       | 1753.062 | 0.00722  | 3 | 1 | 35.1 | 0 |
| P12163_2_F4,17797 K.LHQIVFPYK.L       | 1753.062 | 0.00215  | 3 | 1 | 31.4 | 0 |
| P12163_2_F7,16651 K.LHQIVFPYK.L       | 1753.062 | 0.00293  | 3 | 1 | 35.6 | 0 |
| P12163_2_F7,16723 K.LHQIVFPYK.L       | 1753.062 | 0.00459  | 2 | 1 | 34.6 | 0 |
| P12163_2_F7,16730 K.LHQIVFPYK.L       | 1753.062 | 0.00668  | 4 | 1 | 25.8 | 0 |
| P12163_2_F7,16847 K.LHQIVFPYK.L       | 1753.062 | 0.00233  | 3 | 1 | 51.5 | 0 |
| P12163_2_F7,17045 K.LHQIVFPYK.L       | 1753.062 | 0.00083  | 3 | 1 | 35   | 0 |
| P12163_2_F9,17342 K.LHQIVFPYK.L       | 1753.062 | 0.00647  | 3 | 1 | 27.9 | 0 |
| P12163_2_F9,17561 K.LHQIVFPYK.L       | 1753.062 | 0.00581  | 3 | 1 | 34.7 | 0 |
| P12163_2_S5,17545 K.LHQIVFPYK.L       | 1753.062 | 0.00311  | 3 | 1 | 32.8 | 0 |
| P12163_2_S5,17595 K.LHQIVFPYK.L       | 1753.062 | 0.00632  | 4 | 1 | 26.9 | 0 |
| P12163_2_S5,17605 K.LHQIVFPYK.L       | 1753.062 | 0.00329  | 2 | 1 | 35.5 | 0 |
| P12163_2_S5,17763 K.LHQIVFPYK.L       | 1753.062 | 0.00413  | 3 | 1 | 36.2 | 0 |
| P12163_2_F10,1877 K.LSQKPEHLTIGDLVPF1 | 3049.781 | 0.01261  | 4 | 1 | 22   | 0 |
| P12163_1_F3,15878 K.LYTGDLQK.R        | 1545.91  | 0.00663  | 2 | 1 | 24.4 | 0 |
| P12163_1_F4,16465 K.LYTGDLQK.R        | 1545.91  | 0.00555  | 2 | 1 | 24.1 | 0 |
| P12163_1_F4,16963 K.LYTGDLQK.R        | 1545.91  | 0.00432  | 3 | 1 | 31.5 | 0 |
| P12163_1_F5,15195 K.LYTGDLQK.R        | 1545.91  | 0.006    | 3 | 1 | 39   | 0 |
| P12163_1_F6,15848 K.LYTGDLQK.R        | 1545.91  | 0.00522  | 3 | 1 | 27.4 | 0 |
| P12163_1_F6,15917 K.LYTGDLQK.R        | 1545.91  | 0.00699  | 2 | 1 | 24.3 | 0 |
| P12163_1_F7,15042 K.LYTGDLQK.R        | 1545.91  | 0.00543  | 3 | 1 | 31.8 | 0 |
| P12163_1_F8,15743 K.LYTGDLQK.R        | 1545.91  | 0.00567  | 2 | 1 | 24.5 | 0 |
| P12163_1_F9,15543 K.LYTGDLQK.R        | 1545.91  | 0.00565  | 2 | 1 | 24   | 0 |
| P12163_2_F4,14160 K.LYTGDLQK.R        | 1545.91  | 0.00144  | 3 | 1 | 31.7 | 0 |

|                   |                      |          |          |   |   |      |   |
|-------------------|----------------------|----------|----------|---|---|------|---|
| P12163_2_F4,14696 | K.LYTGDLQK.R         | 1545.91  | 0.0048   | 3 | 1 | 30   | 0 |
| P12163_1_F3,24994 | K.VQELFVYEINER.D     | 1842.99  | 0.00169  | 3 | 1 | 23   | 0 |
| P12163_1_F3,24996 | K.VQELFVYEINER.D     | 1842.99  | -0.00062 | 2 | 1 | 50.8 | 0 |
| P12163_1_F4,25906 | K.VQELFVYEINER.D     | 1842.99  | 0.00157  | 3 | 1 | 25.1 | 0 |
| P12163_1_F7,22884 | K.VQELFVYEINER.D     | 1842.99  | 0.0013   | 3 | 1 | 23.7 | 0 |
| P12163_1_S1,23427 | K.VQELFVYEINER.D     | 1842.99  | -0.00023 | 3 | 1 | 26.1 | 0 |
| P12163_1_S1,23548 | K.VQELFVYEINER.D     | 1842.99  | 0.00414  | 2 | 1 | 57.1 | 0 |
| P12163_1_S1,23642 | K.VQELFVYEINER.D     | 1842.99  | 0.00334  | 3 | 1 | 55.9 | 0 |
| P12163_1_F5,12307 | R.NSPAILK.L          | 1350.856 | 0.00724  | 3 | 1 | 22.3 | 0 |
| P12163_1_F9,13139 | K.DLGATHFK.Y         | 1496.868 | 0.00677  | 2 | 1 | 29.5 | 0 |
| P12163_1_F9,13332 | K.DLGATHFK.Y         | 1496.868 | 0.00473  | 3 | 1 | 30.9 | 0 |
| P12163_1_F3,12751 | K.DSDIPVEQNPK.L      | 1850.012 | 0.00714  | 3 | 1 | 53.8 | 0 |
| P12163_1_F3,12809 | K.DSDIPVEQNPK.L      | 1850.012 | 0.00681  | 2 | 1 | 41.9 | 0 |
| P12163_1_F3,13079 | K.DSDIPVEQNPK.L      | 1850.012 | 0.01687  | 2 | 1 | 36.6 | 0 |
| P12163_1_F4,13215 | K.DSDIPVEQNPK.L      | 1850.012 | 0.00741  | 2 | 1 | 49.6 | 0 |
| P12163_2_F2,12111 | K.DSDIPVEQNPK.L      | 1850.012 | -0.00211 | 2 | 1 | 32.2 | 0 |
| P12163_2_S5,11808 | K.DSDIPVEQNPK.L      | 1850.012 | 0.01467  | 3 | 1 | 43.3 | 0 |
| P12163_1_F3,20253 | K.EAVPEMWSPEMK.S ! 1 | 2042.055 | 0.00851  | 2 | 1 | 33.8 | 0 |
| P12163_1_F5,12671 | K.NSGELALK.F         | 1439.868 | 0.00973  | 3 | 1 | 22.6 | 0 |
| P12163_1_F5,13286 | K.NSGELALK.F         | 1439.868 | 0.00751  | 2 | 1 | 24.7 | 0 |
| P12163_1_F6,13708 | K.NSGELALK.F         | 1439.868 | 0.00681  | 2 | 1 | 30.1 | 0 |
| P12163_2_F2,13504 | K.NSGELALK.F         | 1439.868 | 0.01509  | 2 | 1 | 26.9 | 0 |
| P12163_2_F2,13505 | K.NSGELALK.F         | 1439.868 | 0.01582  | 3 | 1 | 27.3 | 0 |
| P12163_2_F2,13726 | K.NSGELALK.F         | 1439.868 | 0.00556  | 3 | 1 | 26   | 0 |
| P12163_2_F2,13758 | K.NSGELALK.F         | 1439.868 | 0.00925  | 2 | 1 | 25.8 | 0 |
| P12163_1_F3,25719 | K.NSWAEAYDQLAAAIK    | 2259.223 | -0.00479 | 3 | 1 | 31.6 | 0 |
| P12163_1_F4,26534 | K.NSWAEAYDQLAAAIK    | 2259.223 | 0.00621  | 3 | 1 | 43.5 | 0 |
| P12163_1_F4,23636 | K.YALLETIK.E         | 1558.966 | 0.00045  | 2 | 1 | 34.4 | 0 |
| P12163_1_F4,23891 | K.YALLETIK.E         | 1558.966 | 0.00665  | 2 | 1 | 36.9 | 0 |
| P12163_1_F4,23905 | K.YALLETIK.E         | 1558.966 | 0.00415  | 3 | 1 | 27.1 | 0 |
| P12163_1_F4,24135 | K.YALLETIK.E         | 1558.966 | 0.00525  | 2 | 1 | 35.8 | 0 |
| P12163_1_F5,22211 | K.YALLETIK.E         | 1558.966 | 0.00745  | 2 | 1 | 46.9 | 0 |
| P12163_1_F5,22232 | K.YALLETIK.E         | 1558.966 | 0.00502  | 3 | 1 | 25.1 | 0 |
| P12163_1_F5,22445 | K.YALLETIK.E         | 1558.966 | 0.00633  | 2 | 1 | 30.1 | 0 |
| P12163_1_F7,20810 | K.YALLETIK.E         | 1558.966 | 0.00031  | 3 | 1 | 22.3 | 0 |
| P12163_1_F7,20881 | K.YALLETIK.E         | 1558.966 | -0.00035 | 2 | 1 | 28.4 | 0 |
| P12163_1_F9,21488 | K.YALLETIK.E         | 1558.966 | 0.00514  | 3 | 1 | 25.6 | 0 |
| P12163_2_F1,23091 | K.YALLETIK.E         | 1558.966 | 0.00343  | 3 | 1 | 25.3 | 0 |
| P12163_2_F1,23300 | K.YALLETIK.E         | 1558.966 | 0.00547  | 2 | 1 | 36.8 | 0 |
| P12163_2_F1,23336 | K.YALLETIK.E         | 1558.966 | 0.00451  | 3 | 1 | 26.1 | 0 |
| P12163_2_F8_12070 | K.YALLETIK.E         | 1558.966 | 0.00313  | 3 | 1 | 29   | 0 |
| P12163_2_F9,20173 | K.YALLETIK.E         | 1558.966 | 0.00621  | 2 | 1 | 37.2 | 0 |
| P12163_2_F9,20203 | K.YALLETIK.E         | 1558.966 | 0.0049   | 3 | 1 | 26.9 | 0 |
| P12163_2_F9,20360 | K.YALLETIK.E         | 1558.966 | 0.00685  | 2 | 1 | 34.2 | 0 |
| P12163_2_F9,20398 | K.YALLETIK.E         | 1558.966 | 0.0052   | 3 | 1 | 34.9 | 0 |
| P12163_1_F7,17796 | K.YGVLDEHFVTK.Y      | 2045.116 | 0.00096  | 2 | 1 | 45.4 | 0 |
| P12163_1_F8,18581 | K.YGVLDEHFVTK.Y      | 2045.116 | 0.00208  | 2 | 1 | 53.3 | 0 |
| P12163_1_F8,18607 | K.YGVLDEHFVTK.Y      | 2045.116 | 0.0044   | 3 | 1 | 34.8 | 0 |
| P12163_1_F8,18644 | K.YGVLDEHFVTK.Y      | 2045.116 | 0.00953  | 4 | 1 | 29.8 | 0 |
| P12163_2_F6,18143 | K.YGVLDEHFVTK.Y      | 2045.116 | 0.0049   | 2 | 1 | 49.4 | 0 |
| P12163_2_F6,18179 | K.YGVLDEHFVTK.Y      | 2045.116 | 0.00506  | 3 | 1 | 39.7 | 0 |

|                   |                    |          |          |   |   |      |   |
|-------------------|--------------------|----------|----------|---|---|------|---|
| P12163_1_F3,21040 | R.IFEIAPSAK.K      | 1583.962 | 0.00745  | 2 | 1 | 25.2 | 0 |
| P12163_1_F4,21651 | R.IFEIAPSAK.K      | 1583.962 | 0.00301  | 2 | 1 | 24.6 | 0 |
| P12163_1_F5,20592 | R.IFEIAPSAK.K      | 1583.962 | 0.00202  | 3 | 1 | 26.2 | 0 |
| P12163_1_F6,20066 | R.IFEIAPSAK.K      | 1583.962 | -0.00044 | 3 | 1 | 26.4 | 0 |
| P12163_1_F6,20527 | R.IFEIAPSAK.K      | 1583.962 | 0.0073   | 3 | 1 | 28.7 | 0 |
| P12163_1_F7,19186 | R.IFEIAPSAK.K      | 1583.962 | -0.0014  | 3 | 1 | 23.3 | 0 |
| P12163_1_F7,19328 | R.IFEIAPSAK.K      | 1583.962 | 0.00063  | 2 | 1 | 44.3 | 0 |
| P12163_1_F7,19773 | R.IFEIAPSAK.K      | 1583.962 | 0.00394  | 3 | 1 | 33.8 | 0 |
| P12163_1_S10,1913 | R.IFEIAPSAK.K      | 1583.962 | 0.00448  | 3 | 1 | 27.8 | 0 |
| P12163_2_F1,21227 | R.IFEIAPSAK.K      | 1583.962 | -0.00137 | 3 | 1 | 26.2 | 0 |
| P12163_2_F2,21151 | R.IFEIAPSAK.K      | 1583.962 | 0.00315  | 2 | 1 | 25.7 | 0 |
| P12163_2_F4,18883 | R.IFEIAPSAK.K      | 1583.962 | 0.0007   | 3 | 1 | 34.6 | 0 |
| P12163_2_F4,19079 | R.IFEIAPSAK.K      | 1583.962 | -0.00073 | 2 | 1 | 28.6 | 0 |
| P12163_2_F4,19259 | R.IFEIAPSAK.K      | 1583.962 | -0.0002  | 3 | 1 | 26.5 | 0 |
| P12163_2_F4,19282 | R.IFEIAPSAK.K      | 1583.962 | 0.00267  | 2 | 1 | 40   | 0 |
| P12163_2_S5,18428 | R.IFEIAPSAK.K      | 1583.962 | -0.00137 | 3 | 1 | 24.7 | 0 |
| P12163_2_S5,18914 | R.IFEIAPSAK.K      | 1583.962 | 0.0076   | 3 | 1 | 28.7 | 0 |
| P12163_1_F2,12200 | K.EEDTTVPVEK.L     | 1754.963 | 0.01189  | 2 | 1 | 48   | 0 |
| P12163_1_F3,12578 | K.EEDTTVPVEK.L     | 1754.963 | -0.00213 | 2 | 1 | 27.2 | 0 |
| P12163_1_S1,4668  | K.ETA AH.-         | 832.4466 | 0.00345  | 2 | 1 | 24.6 | 0 |
| P12163_1_S10,5526 | K.ETA AH.-         | 832.4466 | 0.00317  | 2 | 1 | 27.3 | 0 |
| P12163_1_F5,11828 | K.KPEDHQVSPPPAAEHP | 3760.991 | 0.01055  | 4 | 1 | 39.3 | 0 |
| P12163_1_F9,14294 | K.KPGFLDK.L        | 1717.078 | 0.00736  | 4 | 1 | 22.5 | 0 |
| P12163_2_F8_12070 | K.KPGFLDK.L        | 1717.078 | 0.00672  | 4 | 1 | 32.9 | 0 |
| P12163_1_F3,9941  | K.LDDVHAPHHQEEAHP  | 2726.374 | 0.00845  | 4 | 1 | 28.4 | 0 |
| P12163_2_S3,9398  | K.LDDVHAPHHQEEAHP  | 2726.374 | 0.01209  | 4 | 1 | 24.7 | 0 |
| P12163_1_F6,12482 | K.SHEYEPSVGTEGAVET | 2428.245 | 0.00575  | 3 | 1 | 53.7 | 0 |
| P12163_1_F7,9533  | K.SHEYEPSVGTEGAVET | 2428.245 | 0.00572  | 3 | 1 | 25.5 | 0 |
| P12163_1_F7,10413 | K.SHEYEPSVGTEGAVET | 2428.245 | 0.00629  | 3 | 1 | 33.4 | 0 |
| P12163_1_F7,10430 | K.SHEYEPSVGTEGAVET | 2428.245 | 0.00644  | 4 | 1 | 28.2 | 0 |
| P12163_1_F7,10622 | K.SHEYEPSVGTEGAVET | 2428.245 | 0.00424  | 4 | 1 | 27   | 0 |
| P12163_1_F7,10632 | K.SHEYEPSVGTEGAVET | 2428.245 | 0.00692  | 3 | 1 | 25.8 | 0 |
| P12163_1_F7,10848 | K.SHEYEPSVGTEGAVET | 2428.245 | 0.00464  | 4 | 1 | 37.2 | 0 |
| P12163_1_F7,11203 | K.SHEYEPSVGTEGAVET | 2428.245 | 0.0072   | 4 | 1 | 22.1 | 0 |
| P12163_1_F7,11808 | K.SHEYEPSVGTEGAVET | 2428.245 | 0.0038   | 4 | 1 | 30.6 | 0 |
| P12163_1_F8,11183 | K.SHEYEPSVGTEGAVET | 2428.245 | 0.00452  | 4 | 1 | 30.6 | 0 |
| P12163_1_F8,12281 | K.SHEYEPSVGTEGAVET | 2428.245 | 0.00047  | 3 | 1 | 76.5 | 0 |
| P12163_2_F4,10419 | K.SHEYEPSVGTEGAVET | 2428.245 | 0.00551  | 3 | 1 | 40.3 | 0 |
| P12163_2_F4,11501 | K.SHEYEPSVGTEGAVET | 2428.245 | 0.00536  | 4 | 1 | 36.4 | 0 |
| P12163_2_F6,10874 | K.SHEYEPSVGTEGAVET | 2428.245 | 0.0035   | 3 | 1 | 49.4 | 0 |
| P12163_2_F8_12070 | K.SHEYEPSVGTEGAVET | 2428.245 | -0.015   | 4 | 1 | 29.5 | 0 |
| P12163_2_F9,11647 | K.SHEYEPSVGTEGAVET | 2428.245 | 0.00947  | 3 | 1 | 65.4 | 0 |
| P12163_1_F6,10661 | K.VHVSEPQPK.V      | 1628.958 | 0.00675  | 2 | 1 | 25.7 | 0 |
| P12163_1_F6,10684 | K.VHVSEPQPK.V      | 1628.958 | 0.00742  | 3 | 1 | 38.4 | 0 |
| P12163_1_F6,10710 | K.VHVSEPQPK.V      | 1628.958 | 0.01162  | 4 | 1 | 28.9 | 0 |
| P12163_1_F7,10187 | K.VHVSEPQPK.V      | 1628.958 | 0.00478  | 3 | 1 | 26.7 | 0 |
| P12163_2_F4,9349  | K.VHVSEPQPK.V      | 1628.958 | 0.00085  | 3 | 1 | 30.4 | 0 |
| P12163_2_F4,9789  | K.VHVSEPQPK.V      | 1628.958 | 0.00868  | 3 | 1 | 31.8 | 0 |
| P12163_2_F6,10328 | K.VHVSEPQPK.V      | 1628.958 | 0.00343  | 3 | 1 | 23.1 | 0 |
| P12163_2_F6,10377 | K.VHVSEPQPK.V      | 1628.958 | 0.00421  | 2 | 1 | 24.3 | 0 |
| P12163_2_F6,10422 | K.VHVSEPQPK.V      | 1628.958 | 0.00298  | 4 | 1 | 22.6 | 0 |

|                   |                     |          |         |   |   |      |   |
|-------------------|---------------------|----------|---------|---|---|------|---|
| P12163_2_F7,9782  | K.VHVSEPQPK.V       | 1628.958 | 0.00094 | 3 | 1 | 24.6 | 0 |
| P12163_2_F7,9811  | K.VHVSEPQPK.V       | 1628.958 | 0.00567 | 2 | 1 | 33.5 | 0 |
| P12163_2_F7,9812  | K.VHVSEPQPK.V       | 1628.958 | 0.00518 | 4 | 1 | 33.1 | 0 |
| P12163_2_F7,10006 | K.VHVSEPQPK.V       | 1628.958 | 0.00355 | 3 | 1 | 29   | 0 |
| P12163_2_S5,9928  | K.VHVSEPQPK.V       | 1628.958 | 0.00589 | 3 | 1 | 22.2 | 0 |
| P12163_1_F4,23825 | R.GM*LDFLKG.K       | 1504.865 | 0.00875 | 2 | 1 | 31.3 | 0 |
| P12163_1_F7,17467 | R.GM*LDFLKG.K       | 1504.865 | 0.0008  | 3 | 1 | 22.7 | 0 |
| P12163_1_F7,20901 | R.GM*LDFLKG.K       | 1504.865 | 0.00056 | 3 | 1 | 25.3 | 0 |
| P12163_1_F7,20944 | R.GM*LDFLKG.K       | 1504.865 | 0.00123 | 2 | 1 | 24.8 | 0 |
| P12163_1_F7,21438 | R.GM*LDFLKG.K       | 1504.865 | 0.00143 | 3 | 1 | 24.8 | 0 |
| P12163_2_F4,20329 | R.GM*LDFLKG.K       | 1504.865 | 0.00308 | 3 | 1 | 22.6 | 0 |
| P12163_1_F4,23763 | R.GMLDFLKG.K        | 1488.87  | 0.0059  | 3 | 1 | 24.5 | 0 |
| P12163_1_F4,23903 | R.GMLDFLKG.K        | 1488.87  | 0.00724 | 2 | 1 | 51   | 0 |
| P12163_1_F7,21305 | R.GMLDFLKG.K        | 1488.87  | 0.0062  | 2 | 1 | 34.4 | 0 |
| P12163_2_F1,23388 | R.GMLDFLKG.K        | 1488.87  | 0.0077  | 2 | 1 | 39.3 | 0 |
| P12163_1_F4,22514 | K.AGTVEIAEVIYNR.E   | 1738.964 | 0.00088 | 2 | 1 | 46.5 | 0 |
| P12163_1_S1,16524 | K.AGTVEIAEVIYNR.E   | 1738.964 | 0.00372 | 3 | 1 | 56.8 | 0 |
| P12163_1_S1,20303 | K.AGTVEIAEVIYNR.E   | 1738.964 | 0.00228 | 3 | 1 | 76.8 | 0 |
| P12163_1_S1,20534 | K.AGTVEIAEVIYNR.E   | 1738.964 | 0.00346 | 2 | 1 | 56.5 | 0 |
| P12163_1_S10,1970 | K.AGTVEIAEVIYNR.E   | 1738.964 | 0.00207 | 3 | 1 | 46.3 | 0 |
| P12163_2_F6,20745 | K.AGTVEIAEVIYNR.E   | 1738.964 | 0.00498 | 2 | 1 | 38.4 | 0 |
| P12163_2_F6,20786 | K.AGTVEIAEVIYNR.E   | 1738.964 | 0.00582 | 3 | 1 | 48.1 | 0 |
| P12163_1_F7,13109 | K.AVEM*FHR.Y        | 1209.635 | 0.00139 | 3 | 1 | 38.7 | 0 |
| P12163_1_F9,10390 | K.AVEM*FHR.Y        | 1209.635 | 0.00331 | 3 | 1 | 42.3 | 0 |
| P12163_1_F9,14108 | K.AVEM*FHR.Y        | 1209.635 | 0.00355 | 3 | 1 | 41   | 0 |
| P12163_2_F7,9792  | K.AVEM*FHR.Y        | 1209.635 | 0.00343 | 3 | 1 | 47   | 0 |
| P12163_2_F7,12698 | K.AVEM*FHR.Y        | 1209.635 | 0.00259 | 3 | 1 | 47.4 | 0 |
| P12163_1_F9,14101 | K.AVEMFHR.Y         | 1193.64  | 0.00346 | 3 | 1 | 47.6 | 0 |
| P12163_1_S10,1450 | K.AVEMFHR.Y         | 1193.64  | 0.00139 | 3 | 1 | 35.9 | 0 |
| P12163_2_F7,12701 | K.AVEMFHR.Y         | 1193.64  | 0.00256 | 3 | 1 | 45.2 | 0 |
| P12163_2_F9,13426 | K.AVEMFHR.Y         | 1193.64  | 0.00424 | 3 | 1 | 47.8 | 0 |
| P12163_1_F7,20896 | K.LAM*LFEK.A        | 1475.875 | 0.0024  | 3 | 1 | 23.8 | 0 |
| P12163_2_F1,25652 | K.LAM*LFEK.A        | 1475.875 | 0.00569 | 2 | 1 | 28.6 | 0 |
| P12163_1_F5,24512 | K.LAMLFEK.A         | 1459.88  | 0.00647 | 2 | 1 | 26.6 | 0 |
| P12163_2_F1,25785 | K.LAMLFEK.A         | 1459.88  | 0.00713 | 2 | 1 | 27.9 | 0 |
| P12163_1_F2,22233 | K.LFVGNLPHYDSEK.L   | 2204.206 | 0.00457 | 3 | 1 | 29.4 | 0 |
| P12163_1_F5,21898 | K.LFVGNLPHYDSEK.L   | 2204.206 | 0.00307 | 3 | 1 | 46.9 | 0 |
| P12163_1_S1,19900 | K.LFVGNLPHYDSEK.L   | 2204.206 | 0.00328 | 3 | 1 | 39   | 0 |
| P12163_1_S1,21155 | K.LFVGNLPHYDSEK.L   | 2204.206 | 0.0073  | 3 | 1 | 47.3 | 0 |
| P12163_1_S1,21183 | K.LFVGNLPHYDSEK.L   | 2204.206 | 0.00796 | 2 | 1 | 63.7 | 0 |
| P12163_1_S1,21210 | K.LFVGNLPHYDSEK.L   | 2204.206 | 0.00559 | 4 | 1 | 40.6 | 0 |
| P12163_2_F6,21912 | K.LFVGNLPHYDSEK.L   | 2204.206 | 0.00403 | 3 | 1 | 26.4 | 0 |
| P12163_1_F3,19957 | R.GFGFVTM*STVEEAEK  | 2256.168 | 0.00828 | 3 | 1 | 53.3 | 0 |
| P12163_1_F3,22580 | R.GFGFVTM*STVEEAEK  | 2256.168 | 0.01581 | 3 | 1 | 52.1 | 0 |
| P12163_1_F3,19252 | R.GFGFVTMSTVEEAEK.. | 2240.173 | 0.00402 | 3 | 1 | 41.7 | 0 |
| P12163_1_F3,22552 | R.GFGFVTMSTVEEAEK.. | 2240.173 | 0.01761 | 3 | 1 | 29.1 | 0 |
| P12163_1_F3,22565 | R.GFGFVTMSTVEEAEK.. | 2240.173 | 0.00628 | 2 | 1 | 71.7 | 0 |
| P12163_1_S1,22048 | R.IYVGNLPEVDNAR.L   | 1950.039 | 0.00378 | 3 | 1 | 29.4 | 0 |
| P12163_1_S1,22049 | R.IYVGNLPEVDNAR.L   | 1950.039 | 0.00357 | 2 | 1 | 24.8 | 0 |
| P12163_2_F6,22525 | R.IYVGNLPEVDNAR.L   | 1950.039 | 0.00173 | 2 | 1 | 40.5 | 0 |
| P12163_1_F6,18199 | R.LEQVFSEHGK.V      | 1782.001 | 0.00594 | 3 | 1 | 29.7 | 0 |

|                                       |          |          |   |   |      |   |
|---------------------------------------|----------|----------|---|---|------|---|
| P12163_1_F6,18357 R.LEQVFSEHGK.V      | 1782.001 | -0.00071 | 2 | 1 | 31.6 | 0 |
| P12163_1_F6,22335 R.LEQVFSEHGK.V      | 1782.001 | 0.01065  | 3 | 1 | 36.5 | 0 |
| P12163_1_F9,17573 R.LEQVFSEHGK.V      | 1782.001 | 0.00597  | 3 | 1 | 27.4 | 0 |
| P12163_2_F10,1622 R.LEQVFSEHGK.V      | 1782.001 | -0.00012 | 3 | 1 | 31.4 | 0 |
| P12163_2_F4,16387 R.LEQVFSEHGK.V      | 1782.001 | 0.0003   | 3 | 1 | 31.4 | 0 |
| P12163_2_F4,16944 R.LEQVFSEHGK.V      | 1782.001 | 0.00516  | 3 | 1 | 39.9 | 0 |
| P12163_2_F6,17574 R.LEQVFSEHGK.V      | 1782.001 | 0.00459  | 3 | 1 | 32.3 | 0 |
| P12163_2_F6,17589 R.LEQVFSEHGK.V      | 1782.001 | -0.00145 | 2 | 1 | 28.5 | 0 |
| P12163_2_F6,20174 R.LEQVFSEHGK.V      | 1782.001 | 0.00402  | 3 | 1 | 34.5 | 0 |
| P12163_1_F4,10661 R.VNVAEDR.Q         | 1106.611 | 0.00402  | 2 | 1 | 29.1 | 0 |
| P12163_1_F5,14869 K.ANITANFK.L        | 1486.884 | 0.00252  | 3 | 1 | 22.7 | 0 |
| P12163_1_F3,20341 K.DAGGFEALVAGK.T    | 1742.99  | 0.00482  | 3 | 1 | 57.8 | 0 |
| P12163_1_F3,20352 K.DAGGFEALVAGK.T    | 1742.99  | 0.00578  | 2 | 1 | 63.6 | 0 |
| P12163_1_F4,20871 K.DAGGFEALVAGK.T    | 1742.99  | 0.01684  | 2 | 1 | 31.7 | 0 |
| P12163_1_F4,20883 K.DAGGFEALVAGK.T    | 1742.99  | 0.01254  | 3 | 1 | 40.9 | 0 |
| P12163_1_F5,19675 K.DAGGFEALVAGK.T    | 1742.99  | 0.00536  | 2 | 1 | 50.2 | 0 |
| P12163_1_F6,19296 K.DAGGFEALVAGK.T    | 1742.99  | 0.00296  | 3 | 1 | 35   | 0 |
| P12163_1_F6,19350 K.DAGGFEALVAGK.T    | 1742.99  | 0.00592  | 2 | 1 | 59.1 | 0 |
| P12163_1_F7,18889 K.DAGGFEALVAGK.T    | 1742.99  | 0.01146  | 3 | 1 | 31.8 | 0 |
| P12163_2_F2,19828 K.DAGGFEALVAGK.T    | 1742.99  | -0.00688 | 2 | 1 | 60.3 | 0 |
| P12163_2_F2,19832 K.DAGGFEALVAGK.T    | 1742.99  | -0.00879 | 3 | 1 | 26.2 | 0 |
| P12163_2_S3,16660 K.DAGGFEALVAGK.T    | 1742.99  | 0.00278  | 3 | 1 | 25.9 | 0 |
| P12163_1_F4,25343 K.ESLLLAFK.D        | 1528.956 | 0.00472  | 2 | 1 | 30.7 | 0 |
| P12163_1_F5,23413 K.ESLLLAFK.D        | 1528.956 | 0.00743  | 2 | 1 | 40.6 | 0 |
| P12163_1_F5,23416 K.ESLLLAFK.D        | 1528.956 | 0.00583  | 3 | 1 | 24.1 | 0 |
| P12163_1_F5,23611 K.ESLLLAFK.D        | 1528.956 | 0.00587  | 2 | 1 | 40.1 | 0 |
| P12163_1_F7,21678 K.ESLLLAFK.D        | 1528.956 | 0.00187  | 2 | 1 | 25.6 | 0 |
| P12163_1_F7,22056 K.ESLLLAFK.D        | 1528.956 | 0.00187  | 3 | 1 | 22.7 | 0 |
| P12163_1_F7,22384 K.ESLLLAFK.D        | 1528.956 | 0.00719  | 2 | 1 | 40.1 | 0 |
| P12163_2_F1,24556 K.ESLLLAFK.D        | 1528.956 | 0.00695  | 2 | 1 | 40.6 | 0 |
| P12163_1_F4,26218 K.LLNLIESK.F        | 1537.977 | 0.00574  | 3 | 1 | 36.5 | 0 |
| P12163_1_F4,26322 K.LLNLIESK.F        | 1537.977 | 0.00781  | 2 | 1 | 40.7 | 0 |
| P12163_1_F5,24244 K.LLNLIESK.F        | 1537.977 | 0.00406  | 3 | 1 | 33.6 | 0 |
| P12163_1_F7,22904 K.LLNLIESK.F        | 1537.977 | -0.00119 | 3 | 1 | 25.8 | 0 |
| P12163_1_F7,23248 K.LLNLIESK.F        | 1537.977 | 0.00241  | 3 | 1 | 22.9 | 0 |
| P12163_2_F1,25490 K.LLNLIESK.F        | 1537.977 | 0.00496  | 3 | 1 | 33.5 | 0 |
| P12163_2_F1,25552 K.LLNLIESK.F        | 1537.977 | 0.00831  | 2 | 1 | 36.3 | 0 |
| P12163_1_S1,7581 K.TTNM*QQIDVNER.I    | 1768.88  | -0.00129 | 3 | 1 | 26.9 | 0 |
| P12163_1_S1,8518 K.TTNM*QQIDVNER.I    | 1768.88  | 0.0027   | 3 | 1 | 28.5 | 0 |
| P12163_1_S1,9875 K.TTNM*QQIDVNER.I    | 1768.88  | 0.00696  | 3 | 1 | 35.1 | 0 |
| P12163_1_S1,10745 K.TTNM*QQIDVNER.I   | 1768.88  | 0.00162  | 3 | 1 | 52.7 | 0 |
| P12163_1_S1,12383 K.TTNM*QQIDVNER.I   | 1768.88  | 0.00054  | 3 | 1 | 35.6 | 0 |
| P12163_1_S1,12390 K.TTNM*QQIDVNER.I   | 1768.88  | 0.00017  | 2 | 1 | 27.3 | 0 |
| P12163_1_F2,10994 K.TTNMQQIDVNER.I    | 1752.885 | 0.00009  | 3 | 1 | 23.2 | 0 |
| P12163_1_F2,12651 K.TTNMQQIDVNER.I    | 1752.885 | 0.00174  | 2 | 1 | 50.9 | 0 |
| P12163_1_S1,10710 K.TTNMQQIDVNER.I    | 1752.885 | 0.00198  | 3 | 1 | 38   | 0 |
| P12163_1_S1,11070 K.TTNMQQIDVNER.I    | 1752.885 | -0.00111 | 3 | 1 | 28.9 | 0 |
| P12163_1_S1,12365 K.TTNMQQIDVNER.I    | 1752.885 | 0.00093  | 3 | 1 | 52.3 | 0 |
| P12163_1_S1,20630 R.FPPTLANLSNM*DVVII | 2383.352 | 0.0008   | 3 | 1 | 28.4 | 0 |
| P12163_1_F2,13799 R.IPLSGTFQR.L       | 1322.773 | 0.003    | 3 | 1 | 29.2 | 0 |
| P12163_1_F3,11970 R.ITGLER.L          | 992.6042 | 0.00345  | 3 | 1 | 26.5 | 0 |

|                   |                       |          |          |   |   |      |   |
|-------------------|-----------------------|----------|----------|---|---|------|---|
| P12163_1_F7,17512 | K.AEQTDFLHISDFDK.A    | 2274.186 | -0.00204 | 4 | 1 | 27.7 | 0 |
| P12163_1_F7,19140 | K.AEQTDFLHISDFDK.A    | 2274.186 | -0.00208 | 4 | 1 | 37.3 | 0 |
| P12163_1_F7,19165 | K.AEQTDFLHISDFDK.A    | 2274.186 | 0.00347  | 2 | 1 | 51.3 | 0 |
| P12163_2_F10,1786 | K.AEQTDFLHISDFDK.A    | 2274.186 | 0.00924  | 3 | 1 | 31.7 | 0 |
| P12163_2_F8_12070 | K.AEQTDFLHISDFDK.A    | 2274.186 | 0.00441  | 3 | 1 | 28.2 | 0 |
| P12163_2_F6,17229 | K.AYFMHCLPAER.G       | 1714.835 | 0.00169  | 3 | 1 | 31   | 0 |
| P12163_1_F8,17732 | K.AYFMHCLPAER.G       | 1698.84  | 0.00211  | 3 | 1 | 35.3 | 0 |
| P12163_1_F8,17764 | K.AYFMHCLPAER.G       | 1698.84  | 0.00665  | 2 | 1 | 26.1 | 0 |
| P12163_2_F6,17220 | K.AYFMHCLPAER.G       | 1698.84  | 0.00349  | 3 | 1 | 45.1 | 0 |
| P12163_2_F6,17277 | K.AYFMHCLPAER.G       | 1698.84  | 0.00254  | 2 | 1 | 29.9 | 0 |
| P12163_2_F2,10672 | K.IAGPK.F ! K.LAGPK.W | 1093.719 | 0.00222  | 3 | 1 | 22.2 | 0 |
| P12163_1_F4,14956 | K.IEITNDPK.E          | 1537.905 | 0.01172  | 2 | 1 | 37.1 | 0 |
| P12163_1_F4,14991 | K.IEITNDPK.E          | 1537.905 | 0.0037   | 3 | 1 | 37.5 | 0 |
| P12163_1_F6,14525 | K.IEITNDPK.E          | 1537.905 | 0.00663  | 2 | 1 | 30.8 | 0 |
| P12163_1_F7,13260 | K.IEITNDPK.E          | 1537.905 | -0.00034 | 2 | 1 | 29.8 | 0 |
| P12163_2_F1,13965 | K.IEITNDPK.E          | 1537.905 | 0.00454  | 2 | 1 | 35   | 0 |
| P12163_2_F1,14013 | K.IEITNDPK.E          | 1537.905 | 0.00346  | 3 | 1 | 39.4 | 0 |
| P12163_2_S5,12701 | K.IEITNDPK.E          | 1537.905 | -0.00506 | 3 | 1 | 36.9 | 0 |
| P12163_1_F3,25241 | K.QAFQGFQVDEFLMK.I    | 2296.226 | 0.00536  | 3 | 1 | 60.4 | 0 |
| P12163_2_F6,18556 | R.M*HAQNAIM*LHALGI    | 1855.982 | 0.00055  | 3 | 1 | 27.5 | 0 |
| P12163_2_F6,22191 | R.M*HAQNAIM*LHALGI    | 1855.982 | 0.00004  | 3 | 1 | 23.4 | 0 |
| P12163_2_F7,20050 | R.M*HAQNAIM*LHALGI    | 1855.982 | 0.00424  | 3 | 1 | 25   | 0 |
| P12163_2_F7,19003 | R.M*HAQNAIMLHALGL     | 1839.987 | 0.00277  | 3 | 1 | 33.1 | 0 |
| P12163_2_F7,20053 | R.MHAQNAIMLHALGL.-    | 1823.993 | 0.00229  | 3 | 1 | 25.2 | 0 |
| P12163_2_F7,20054 | R.MHAQNAIMLHALGL.-    | 1823.993 | -0.00056 | 2 | 1 | 24.6 | 0 |
| P12163_1_F8,20826 | R.VFGHQDILDIAK.Y      | 1964.143 | 0.00739  | 3 | 1 | 33   | 0 |
| P12163_1_F8,20843 | R.VFGHQDILDIAK.Y      | 1964.143 | 0.00424  | 2 | 1 | 62.7 | 0 |
| P12163_1_F9,20278 | R.VFGHQDILDIAK.Y      | 1964.143 | 0.00556  | 3 | 1 | 26.3 | 0 |
| P12163_1_S10,1910 | R.VFGHQDILDIAK.Y      | 1964.143 | 0.00082  | 3 | 1 | 43.9 | 0 |
| P12163_2_F6,20395 | R.VFGHQDILDIAK.Y      | 1964.143 | 0.00955  | 3 | 1 | 33.5 | 0 |
| P12163_2_F6,20415 | R.VFGHQDILDIAK.Y      | 1964.143 | 0.00362  | 2 | 1 | 69.9 | 0 |
| P12163_2_F6,20423 | R.VFGHQDILDIAK.Y      | 1964.143 | 0.00437  | 4 | 1 | 26.2 | 0 |
| P12163_2_F6,20684 | R.VFGHQDILDIAK.Y      | 1964.143 | 0.00007  | 3 | 1 | 26.2 | 0 |
| P12163_2_F8_12070 | R.VFGHQDILDIAK.Y      | 1964.143 | -0.00056 | 3 | 1 | 37.5 | 0 |
| P12163_1_F3,17590 | R.YNDIIMAR.V          | 1299.703 | 0.0038   | 2 | 1 | 24.2 | 0 |
| P12163_2_F9,16142 | R.YNDIIMAR.V          | 1299.703 | 0.00159  | 2 | 1 | 24.4 | 0 |
| P12163_1_F3,17804 | K.DFM*IQGGDFDK.G      | 1896.962 | 0.00985  | 2 | 1 | 39.1 | 0 |
| P12163_1_F3,17808 | K.DFM*IQGGDFDK.G      | 1896.962 | 0.00957  | 3 | 1 | 26.4 | 0 |
| P12163_1_F3,19505 | K.DFM*IQGGDFDK.G      | 1896.962 | 0.00936  | 3 | 1 | 30.2 | 0 |
| P12163_1_F3,19526 | K.DFM*IQGGDFDK.G      | 1896.962 | 0.01097  | 2 | 1 | 36.3 | 0 |
| P12163_1_F3,19455 | K.DFMIQGGDFDK.G       | 1880.967 | 0.01415  | 2 | 1 | 48.8 | 0 |
| P12163_1_F3,19473 | K.DFMIQGGDFDK.G       | 1880.967 | 0.00546  | 3 | 1 | 48.6 | 0 |
| P12163_1_F4,20114 | K.DFMIQGGDFDK.G       | 1880.967 | 0.00921  | 2 | 1 | 64.1 | 0 |
| P12163_1_F4,20115 | K.DFMIQGGDFDK.G       | 1880.967 | 0.00834  | 3 | 1 | 34.6 | 0 |
| P12163_1_F5,18836 | K.DFMIQGGDFDK.G       | 1880.967 | 0.00599  | 2 | 1 | 39.9 | 0 |
| P12163_1_F6,18529 | K.DFMIQGGDFDK.G       | 1880.967 | 0.006    | 3 | 1 | 25.4 | 0 |
| P12163_1_S1,18239 | K.DFMIQGGDFDK.G       | 1880.967 | 0.00885  | 3 | 1 | 35.2 | 0 |
| P12163_1_F2,6539  | K.GSTFHR.V ! K.GSTFHR | 1008.553 | 0.00449  | 3 | 1 | 33.1 | 0 |
| P12163_1_F4,6988  | K.GSTFHR.V ! K.GSTFHR | 1008.553 | 0.00467  | 3 | 1 | 26.4 | 0 |
| P12163_2_S3,6565  | K.GSTFHR.V ! K.GSTFHR | 1008.553 | 0.00554  | 3 | 1 | 29.5 | 0 |
| P12163_1_F4,19363 | K.KVVISDCGELPMSEA.-   | 2243.187 | 0.00877  | 2 | 1 | 36.7 | 0 |

|                   |                    |          |          |   |   |      |   |
|-------------------|--------------------|----------|----------|---|---|------|---|
| P12163_1_S1,9972  | K.LIESQETDR.G      | 1394.743 | 0.00121  | 3 | 1 | 36   | 0 |
| P12163_1_S1,10856 | K.LIESQETDR.G      | 1394.743 | 0.00832  | 3 | 1 | 28   | 0 |
| P12163_1_S1,11076 | K.LIESQETDR.G      | 1394.743 | 0.00121  | 3 | 1 | 29.7 | 0 |
| P12163_1_S1,12502 | K.LIESQETDR.G      | 1394.743 | 0.0037   | 2 | 1 | 35.2 | 0 |
| P12163_1_F6,20579 | K.LSHIGPGVVSM*ANAC | 3627.887 | 0.00538  | 4 | 1 | 23.4 | 0 |
| P12163_1_F5,9906  | R.ALCTGEK.G        | 1386.787 | 0.00705  | 2 | 1 | 26.7 | 0 |
| P12163_1_F6,10902 | R.ALCTGEK.G        | 1386.787 | 0.01195  | 2 | 1 | 26.2 | 0 |
| P12163_1_F8,10102 | R.ALCTGEK.G        | 1386.787 | 0.00237  | 2 | 1 | 27.1 | 0 |
| P12163_2_F2,10720 | R.ALCTGEK.G        | 1386.787 | 0.00655  | 2 | 1 | 27   | 0 |
| P12163_2_F2,10838 | R.ALCTGEK.G        | 1386.787 | 0.00185  | 3 | 1 | 29.9 | 0 |
| P12163_2_F2,11178 | R.ALCTGEK.G        | 1386.787 | 0.00683  | 2 | 1 | 26.2 | 0 |
| P12163_1_F8,19796 | R.HVVFGQVLEGM*DIVI | 2295.299 | 0.00261  | 4 | 1 | 23.6 | 0 |
| P12163_1_F8,19799 | R.HVVFGQVLEGM*DIVI | 2295.299 | 0.00344  | 2 | 1 | 33   | 0 |
| P12163_1_F8,22826 | R.HVVFGQVLEGM*DIVI | 2295.299 | 0.00673  | 4 | 1 | 37.7 | 0 |
| P12163_1_F8,22863 | R.HVVFGQVLEGM*DIVI | 2295.299 | 0.00596  | 3 | 1 | 46.8 | 0 |
| P12163_2_F6,19321 | R.HVVFGQVLEGM*DIVI | 2295.299 | 0.00474  | 2 | 1 | 46.1 | 0 |
| P12163_2_F6,22532 | R.HVVFGQVLEGM*DIVI | 2279.304 | 0.00389  | 3 | 1 | 63.9 | 0 |
| P12163_2_F6,22548 | R.HVVFGQVLEGM*DIVI | 2279.304 | 0.00501  | 4 | 1 | 29.9 | 0 |
| P12163_2_F6,22573 | R.HVVFGQVLEGM*DIVI | 2279.304 | 0.00138  | 2 | 1 | 57.9 | 0 |
| P12163_2_F8,12070 | R.HVVFGQVLEGM*DIVI | 2279.304 | -0.00007 | 4 | 1 | 22.9 | 0 |
| P12163_1_F7,21705 | R.IVIGLYGDDVPQTAEN | 2311.224 | -0.00139 | 2 | 1 | 54.8 | 0 |
| P12163_1_F8,18334 | K.VKPGFDYLEVR.K    | 1931.121 | 0.00389  | 2 | 1 | 26.7 | 0 |
| P12163_1_F9,17929 | K.VKPGFDYLEVR.K    | 1931.121 | -0.00299 | 2 | 1 | 24   | 0 |
| P12163_1_F2,22323 | R.DSIPLVPVPEK.V    | 1915.172 | 0.00403  | 3 | 1 | 31.2 | 0 |
| P12163_1_F2,22332 | R.DSIPLVPVPEK.V    | 1915.172 | 0.00613  | 2 | 1 | 26.5 | 0 |
| P12163_1_F4,23883 | R.DSIPLVPVPEK.V    | 1915.172 | 0.00149  | 2 | 1 | 41.9 | 0 |
| P12163_1_F5,22011 | R.DSIPLVPVPEK.V    | 1915.172 | 0.00118  | 3 | 1 | 26.2 | 0 |
| P12163_1_F5,22012 | R.DSIPLVPVPEK.V    | 1915.172 | 0.00107  | 2 | 1 | 37.9 | 0 |
| P12163_1_F5,22382 | R.DSIPLVPVPEK.V    | 1915.172 | 0.00211  | 2 | 1 | 29.1 | 0 |
| P12163_1_S1,17984 | R.DSIPLVPVPEK.V    | 1915.172 | 0.00638  | 4 | 1 | 26.5 | 0 |
| P12163_1_S1,20433 | R.DSIPLVPVPEK.V    | 1915.172 | 0.00742  | 3 | 1 | 28.9 | 0 |
| P12163_1_S1,20465 | R.DSIPLVPVPEK.V    | 1915.172 | 0.00837  | 2 | 1 | 36   | 0 |
| P12163_1_S1,20513 | R.DSIPLVPVPEK.V    | 1915.172 | 0.00438  | 4 | 1 | 34.8 | 0 |
| P12163_1_S1,20677 | R.DSIPLVPVPEK.V    | 1915.172 | 0.00634  | 3 | 1 | 39   | 0 |
| P12163_1_S1,20707 | R.DSIPLVPVPEK.V    | 1915.172 | 0.01143  | 2 | 1 | 36   | 0 |
| P12163_2_F2,22398 | R.DSIPLVPVPEK.V    | 1915.172 | -0.00047 | 3 | 1 | 29   | 0 |
| P12163_1_S10,1049 | R.EIMHMK.D         | 1379.792 | 0.00586  | 3 | 1 | 32.9 | 0 |
| P12163_2_F9,9520  | R.EIMHMK.D         | 1379.792 | 0.00256  | 3 | 1 | 25.7 | 0 |
| P12163_1_F3,12723 | R.FAMPNTR.V        | 1140.614 | 0.00503  | 3 | 1 | 22.6 | 0 |
| P12163_1_S1,21257 | R.GAEADAMGLLLR.E   | 1520.841 | -0.00907 | 2 | 1 | 56.1 | 0 |
| P12163_1_S1,21265 | R.GAEADAMGLLLR.E   | 1520.841 | 0.00371  | 3 | 1 | 71.1 | 0 |
| P12163_1_S1,21421 | R.GAEADAMGLLLR.E   | 1520.841 | 0.00285  | 2 | 1 | 32.9 | 0 |
| P12163_1_S1,21429 | R.GAEADAMGLLLR.E   | 1520.841 | 0.00737  | 3 | 1 | 52.2 | 0 |
| P12163_1_F3,15788 | R.IISGFTGR.S       | 1154.683 | 0.00286  | 3 | 1 | 42.6 | 0 |
| P12163_1_F3,16782 | R.IISGFTGR.S       | 1154.683 | 0.00313  | 3 | 1 | 37.2 | 0 |
| P12163_1_F3,21471 | R.KFLTPDVPDDEIV.-  | 2096.174 | 0.00745  | 2 | 1 | 34.7 | 0 |
| P12163_1_F3,21476 | R.KFLTPDVPDDEIV.-  | 2096.174 | 0.0024   | 3 | 1 | 34.6 | 0 |
| P12163_1_F5,11700 | R.SFEQVQK.D        | 1473.852 | 0.00832  | 2 | 1 | 27.1 | 0 |
| P12163_1_F6,12638 | R.SFEQVQK.D        | 1473.852 | 0.0047   | 2 | 1 | 24.2 | 0 |
| P12163_2_F1,12155 | R.SFEQVQK.D        | 1473.852 | 0.00345  | 3 | 1 | 22.5 | 0 |
| P12163_2_F2,12495 | R.SFEQVQK.D        | 1473.852 | 0.00792  | 2 | 1 | 29.4 | 0 |

|                   |                       |          |          |   |   |      |   |
|-------------------|-----------------------|----------|----------|---|---|------|---|
| P12163_2_F2,12504 | R.SFEQVQK.D           | 1473.852 | 0.00942  | 3 | 1 | 31.6 | 0 |
| P12163_1_F2,7035  | K.AVDDPR.T            | 976.5365 | 0.00178  | 2 | 1 | 26.1 | 0 |
| P12163_2_F1,6810  | K.AVDDPR.T            | 976.5365 | 0.00264  | 2 | 1 | 32   | 0 |
| P12163_1_F3,16236 | K.EDDIGTYTIK.A        | 1762.968 | 0.01439  | 2 | 1 | 32   | 0 |
| P12163_1_F4,18399 | K.EYVSEEQLLK.N ! R.EY | 1846.042 | 0.00872  | 2 | 1 | 53.1 | 0 |
| P12163_1_F4,18412 | K.EYVSEEQLLK.N ! R.EY | 1846.042 | 0.00857  | 3 | 1 | 45.8 | 0 |
| P12163_1_F9,17086 | K.EYVSEEQLLK.N ! R.EY | 1846.042 | -0.00286 | 3 | 1 | 25.5 | 0 |
| P12163_2_F9,16197 | K.EYVSEEQLLK.N ! R.EY | 1846.042 | 0.00728  | 3 | 1 | 41.1 | 0 |
| P12163_1_F5,11499 | K.GVQTNFK.I           | 1401.831 | 0.00836  | 2 | 1 | 28.1 | 0 |
| P12163_2_F2,12251 | K.GVQTNFK.I           | 1401.831 | 0.00692  | 2 | 1 | 28.3 | 0 |
| P12163_2_F2,12252 | K.GVQTNFK.I           | 1401.831 | 0.00585  | 3 | 1 | 26.4 | 0 |
| P12163_1_F8,21764 | K.IEPSFGVEASQLYPDVI   | 2487.359 | 0.00198  | 3 | 1 | 56.6 | 0 |
| P12163_1_S1,20629 | K.IEPSFGVEASQLYPDVI   | 2487.359 | 0.00543  | 4 | 1 | 25.4 | 0 |
| P12163_1_S1,20673 | K.IEPSFGVEASQLYPDVI   | 2487.359 | 0.00504  | 3 | 1 | 70.5 | 0 |
| P12163_1_F5,9600  | K.STYDVK.A            | 1320.762 | 0.00888  | 3 | 1 | 25.7 | 0 |
| P12163_1_F2,16621 | K.VVILGDGNPK.E ! K.V\ | 1619.994 | 0.00916  | 3 | 1 | 42.4 | 0 |
| P12163_1_F2,16631 | K.VVILGDGNPK.E ! K.V\ | 1619.994 | 0.00786  | 2 | 1 | 32   | 0 |
| P12163_1_F4,17955 | K.VVILGDGNPK.E ! K.V\ | 1619.994 | 0.00196  | 2 | 1 | 32.7 | 0 |
| P12163_1_F6,16784 | K.VVILGDGNPK.E ! K.V\ | 1619.994 | -0.00209 | 3 | 1 | 31   | 0 |
| P12163_1_F7,15901 | K.VVILGDGNPK.E ! K.V\ | 1619.994 | 0.00328  | 3 | 1 | 31.7 | 0 |
| P12163_1_F7,15910 | K.VVILGDGNPK.E ! K.V\ | 1619.994 | 0.0033   | 2 | 1 | 46.1 | 0 |
| P12163_1_S1,15560 | K.VVILGDGNPK.E ! K.V\ | 1619.994 | 0.00523  | 3 | 1 | 22.5 | 0 |
| P12163_2_F1,17152 | K.VVILGDGNPK.E ! K.V\ | 1619.994 | 0.00384  | 2 | 1 | 29   | 0 |
| P12163_2_F1,17180 | K.VVILGDGNPK.E ! K.V\ | 1619.994 | 0.00676  | 3 | 1 | 27.6 | 0 |
| P12163_2_F2,141   | K.VVILGDGNPK.E ! K.V\ | 1619.994 | 0.00366  | 2 | 1 | 46   | 0 |
| P12163_2_F4,15347 | K.VVILGDGNPK.E ! K.V\ | 1619.994 | 0.00415  | 3 | 1 | 28.2 | 0 |
| P12163_2_F4,15580 | K.VVILGDGNPK.E ! K.V\ | 1619.994 | -0.00228 | 2 | 1 | 41.6 | 0 |
| P12163_2_F4,15582 | K.VVILGDGNPK.E ! K.V\ | 1619.994 | -0.00728 | 3 | 1 | 44.8 | 0 |
| P12163_1_F9,9668  | R.VHGAVEPTK.S         | 1545.921 | 0.00557  | 3 | 1 | 45.6 | 0 |
| P12163_2_F9,9138  | R.VHGAVEPTK.S         | 1545.921 | 0.0059   | 3 | 1 | 42.8 | 0 |
| P12163_2_F9,9228  | R.VHGAVEPTK.S         | 1545.921 | 0.00654  | 2 | 1 | 24.4 | 0 |
| P12163_1_F8,16382 | K.DPIEDKPIELR.Y       | 1933.121 | 0.00515  | 3 | 1 | 49.1 | 0 |
| P12163_2_F6,15839 | K.DPIEDKPIELR.Y       | 1933.121 | 0.00505  | 2 | 1 | 28.2 | 0 |
| P12163_2_F9,10888 | R.DILPHR.F            | 1054.631 | 0.00524  | 3 | 1 | 30.3 | 0 |
| P12163_1_F4,23880 | R.ENFFFAGIDK.V        | 1795.984 | 0.00701  | 2 | 1 | 34.9 | 0 |
| P12163_1_F4,24395 | R.ENFFFAGIDK.V        | 1795.984 | 0.00524  | 3 | 1 | 35.6 | 0 |
| P12163_1_F5,22449 | R.ENFFFAGIDK.V        | 1795.984 | 0.00749  | 3 | 1 | 36.6 | 0 |
| P12163_1_F6,22086 | R.ENFFFAGIDK.V        | 1795.984 | 0.0059   | 3 | 1 | 27.4 | 0 |
| P12163_1_F7,20957 | R.ENFFFAGIDK.V        | 1795.984 | 0.00433  | 2 | 1 | 29.4 | 0 |
| P12163_1_F7,20966 | R.ENFFFAGIDK.V        | 1795.984 | 0.0011   | 3 | 1 | 33.7 | 0 |
| P12163_1_F7,21399 | R.ENFFFAGIDK.V        | 1795.984 | 0.00665  | 3 | 1 | 40.1 | 0 |
| P12163_2_F1,23285 | R.ENFFFAGIDK.V        | 1795.984 | 0.00686  | 3 | 1 | 36.5 | 0 |
| P12163_2_F1,23286 | R.ENFFFAGIDK.V        | 1795.984 | 0.00677  | 2 | 1 | 59.9 | 0 |
| P12163_2_F4,20351 | R.ENFFFAGIDK.V        | 1795.984 | 0.0074   | 3 | 1 | 33.6 | 0 |
| P12163_2_S5,20509 | R.ENFFFAGIDK.V        | 1795.984 | 0.00212  | 3 | 1 | 32.9 | 0 |
| P12163_1_S1,24334 | R.FPFLLVDR.V          | 1310.777 | 0.00118  | 3 | 1 | 40.9 | 0 |
| P12163_1_S1,24528 | R.FPFLLVDR.V          | 1310.777 | 0.00214  | 3 | 1 | 42.4 | 0 |
| P12163_1_S1,24607 | R.FPFLLVDR.V          | 1310.777 | 0.00322  | 2 | 1 | 26.4 | 0 |
| P12163_1_F6,17836 | R.FRKPVIAGDTLVMR.M    | 2211.326 | 0.00363  | 4 | 1 | 35.1 | 0 |
| P12163_1_F7,17048 | R.FRKPVIAGDTLVMR.M    | 2211.326 | 0.00335  | 4 | 1 | 28.4 | 0 |
| P12163_2_F6,17298 | R.FRKPVIAGDTLVMR.M    | 2211.326 | 0.00367  | 4 | 1 | 46.9 | 0 |



|                                          |          |          |   |   |      |   |
|------------------------------------------|----------|----------|---|---|------|---|
| P12163_2_F6,14534 R.KPVIAGDTLVM*R.M      | 1924.151 | 0.00621  | 3 | 1 | 26.1 | 0 |
| P12163_2_F6,13570 R.KPVIAGDTLVMR.M       | 1908.156 | 0.00478  | 4 | 1 | 27.9 | 0 |
| P12163_2_F6,16351 R.KPVIAGDTLVMR.M       | 1908.156 | 0.00768  | 3 | 1 | 24.3 | 0 |
| P12163_1_F2,19668 R.VIEYNPGVSAVAIK.N     | 2068.226 | 0.0043   | 2 | 1 | 76   | 0 |
| P12163_1_F2,19674 R.VIEYNPGVSAVAIK.N     | 2068.226 | -0.00086 | 3 | 1 | 50.3 | 0 |
| P12163_2_F2,19862 R.VIEYNPGVSAVAIK.N     | 2068.226 | -0.00713 | 3 | 1 | 22.3 | 0 |
| P12163_2_F4,18385 R.VIEYNPGVSAVAIK.N     | 2068.226 | 0.00427  | 3 | 1 | 40.9 | 0 |
| P12163_2_F6,19295 R.VIEYNPGVSAVAIK.N     | 2068.226 | 0.00219  | 2 | 1 | 55.5 | 0 |
| P12163_2_F6,22434 R.YQAFPTVM*DINQIR.D    | 2016.053 | 0.00108  | 2 | 1 | 25   | 0 |
| P12163_2_F6,22445 R.YQAFPTVMDINQIR.D     | 2000.058 | -0.00344 | 2 | 1 | 23.9 | 0 |
| P12163_1_S1,19084 K.DSTLIMQLLR.D         | 1493.866 | -0.00037 | 3 | 1 | 24   | 0 |
| P12163_1_F3,25974 K.IEAELTEICGGILK.L     | 2154.23  | 0.00582  | 3 | 1 | 36.3 | 0 |
| P12163_2_F1,9483 K.LAEQAER.Y ! R.LAEQ,   | 1120.626 | 0.00298  | 2 | 1 | 24.7 | 0 |
| P12163_1_F3,13323 K.LVPAAAAADSK.V        | 1621.973 | 0.00791  | 3 | 1 | 27.6 | 0 |
| P12163_1_F3,15338 K.LVPAAAAADSK.V        | 1621.973 | 0.00493  | 2 | 1 | 49.9 | 0 |
| P12163_1_F7,12563 K.SAQDIANAELAPTHPII    | 2108.14  | -0.00166 | 3 | 1 | 35.8 | 0 |
| P12163_1_F7,14931 K.SAQDIANAELAPTHPII    | 2108.14  | 0.00218  | 3 | 1 | 47.1 | 0 |
| P12163_1_F7,19342 K.SAQDIANAELAPTHPII    | 2108.14  | -0.02266 | 3 | 1 | 34.7 | 0 |
| P12163_2_S5,12225 K.SAQDIANAELAPTHPII    | 2108.14  | 0.00503  | 3 | 1 | 28.3 | 0 |
| P12163_2_S5,14571 K.SAQDIANAELAPTHPII    | 2108.14  | 0.00296  | 3 | 1 | 66   | 0 |
| P12163_2_S5,14603 K.SAQDIANAELAPTHPII    | 2108.14  | -0.00292 | 2 | 1 | 34   | 0 |
| P12163_1_F4,13882 R.EENVYMAK.L ! R.EEN   | 1591.861 | 0.00598  | 3 | 1 | 30   | 0 |
| P12163_1_F5,12428 R.EENVYMAK.L ! R.EEN   | 1591.861 | 0.00856  | 2 | 1 | 35.6 | 0 |
| P12163_1_F5,12489 R.EENVYMAK.L ! R.EEN   | 1591.861 | 0.01225  | 3 | 1 | 24.7 | 0 |
| P12163_2_F1,12743 R.EENVYMAK.L ! R.EEN   | 1591.861 | 0.00684  | 2 | 1 | 31.1 | 0 |
| P12163_1_F4,19313 R.NLLSVAYK.N           | 1515.935 | 0.00473  | 2 | 1 | 24.7 | 0 |
| P12163_1_F5,18080 R.NLLSVAYK.N           | 1515.935 | 0.00697  | 2 | 1 | 39.6 | 0 |
| P12163_1_F5,18081 R.NLLSVAYK.N           | 1515.935 | 0.00381  | 3 | 1 | 34.8 | 0 |
| P12163_1_F6,18423 R.NLLSVAYK.N           | 1515.935 | 0.01068  | 3 | 1 | 31.8 | 0 |
| P12163_1_F9,17887 R.NLLSVAYK.N           | 1515.935 | 0.006    | 3 | 1 | 24.6 | 0 |
| P12163_2_F1,18587 R.NLLSVAYK.N           | 1515.935 | 0.00633  | 2 | 1 | 42.2 | 0 |
| P12163_2_F1,18588 R.NLLSVAYK.N           | 1515.935 | 0.00501  | 3 | 1 | 35.5 | 0 |
| P12163_2_F2,18787 R.NLLSVAYK.N           | 1515.935 | 0.00681  | 3 | 1 | 28.1 | 0 |
| P12163_2_F2,18808 R.NLLSVAYK.N           | 1515.935 | 0.00629  | 2 | 1 | 32.4 | 0 |
| P12163_2_F8_12070 R.NLLSVAYK.N           | 1515.935 | 0.00594  | 3 | 1 | 30.9 | 0 |
| P12163_2_S5,16404 R.NLLSVAYK.N           | 1515.935 | 0.00054  | 3 | 1 | 31.7 | 0 |
| P12163_1_S10,18390 R.YLAEFK.V ! R.YLAEFK | 1378.819 | 0.0079   | 3 | 1 | 24   | 0 |
| P12163_2_F8_12070 R.YLAEFK.V ! R.YLAEFK  | 1378.819 | 0.00689  | 3 | 1 | 22.1 | 0 |
| P12163_2_F8_12070 R.YLAEFK.V ! R.YLAEFK  | 1378.819 | 0.0056   | 3 | 1 | 22.9 | 0 |
| P12163_1_F4,21734 K.AEFPIFDK.V ! K.AEFPI | 1574.904 | 0.00428  | 2 | 1 | 26.4 | 0 |
| P12163_1_F4,21751 K.AEFPIFDK.V ! K.AEFPI | 1574.904 | -0.00508 | 3 | 1 | 25   | 0 |
| P12163_1_F4,21925 K.AEFPIFDK.V ! K.AEFPI | 1574.904 | 0.00614  | 2 | 1 | 25.2 | 0 |
| P12163_1_F4,22647 K.AEFPIFDK.V ! K.AEFPI | 1574.904 | 0.00794  | 2 | 1 | 29.1 | 0 |
| P12163_1_F4,22984 K.AEFPIFDK.V ! K.AEFPI | 1574.904 | 0.00758  | 3 | 1 | 24.4 | 0 |
| P12163_1_F5,20713 K.AEFPIFDK.V ! K.AEFPI | 1574.904 | 0.00546  | 2 | 1 | 27.1 | 0 |
| P12163_1_F5,20757 K.AEFPIFDK.V ! K.AEFPI | 1574.904 | 0.00521  | 3 | 1 | 23.4 | 0 |
| P12163_1_F6,20663 K.AEFPIFDK.V ! K.AEFPI | 1574.904 | 0.00316  | 2 | 1 | 29.6 | 0 |
| P12163_1_F6,20709 K.AEFPIFDK.V ! K.AEFPI | 1574.904 | 0.00356  | 3 | 1 | 25.1 | 0 |
| P12163_1_F7,19441 K.AEFPIFDK.V ! K.AEFPI | 1574.904 | -0.00217 | 3 | 1 | 22.4 | 0 |
| P12163_2_F1,21277 K.AEFPIFDK.V ! K.AEFPI | 1574.904 | 0.00548  | 2 | 1 | 24.7 | 0 |
| P12163_2_F1,21289 K.AEFPIFDK.V ! K.AEFPI | 1574.904 | 0.0026   | 3 | 1 | 24.9 | 0 |

|                   |                        |          |          |   |   |      |   |
|-------------------|------------------------|----------|----------|---|---|------|---|
| P12163_2_F4,18984 | K.AEFPIFDK.V ! K.AEFPI | 1574.904 | 0.00296  | 2 | 1 | 30.8 | 0 |
| P12163_1_F4,8285  | K.EGNVVER.Y            | 1106.611 | 0.00366  | 2 | 1 | 28.3 | 0 |
| P12163_2_F1,7418  | K.EGNVVER.Y            | 1106.611 | 0.00446  | 2 | 1 | 26.7 | 0 |
| P12163_2_F6,16306 | K.FLVDKEGNVVER.Y       | 2013.159 | 0.00063  | 2 | 1 | 30.2 | 0 |
| P12163_1_F5,17516 | K.GGLFGDSIK.W          | 1501.883 | 0.00871  | 2 | 1 | 32.5 | 0 |
| P12163_1_F5,17552 | K.GGLFGDSIK.W          | 1501.883 | 0.00606  | 3 | 1 | 41.5 | 0 |
| P12163_1_F5,17778 | K.GGLFGDSIK.W          | 1501.883 | 0.00665  | 2 | 1 | 34.9 | 0 |
| P12163_2_F1,18043 | K.GGLFGDSIK.W          | 1501.883 | 0.00785  | 2 | 1 | 44.8 | 0 |
| P12163_2_F1,18051 | K.GGLFGDSIK.W          | 1501.883 | 0.00666  | 3 | 1 | 45.8 | 0 |
| P12163_1_F3,17418 | K.QQDVLSIYK.G          | 1745.989 | 0.00468  | 2 | 1 | 52.3 | 0 |
| P12163_1_F4,17832 | K.QQDVLSIYK.G          | 1745.989 | 0.00668  | 3 | 1 | 44.7 | 0 |
| P12163_1_F6,13290 | K.TSVHDFSVK.D          | 1627.926 | 0.00667  | 2 | 1 | 33   | 0 |
| P12163_1_F2,15410 | K.VDVNGDNAAPLYK.H      | 1984.096 | 0.00419  | 2 | 1 | 66.6 | 0 |
| P12163_1_F3,15981 | K.VDVNGDNAAPLYK.H      | 1984.096 | 0.00167  | 2 | 1 | 66.8 | 0 |
| P12163_1_F3,17891 | R.YAPTTSPLSIEK.D       | 1915.1   | 0.00478  | 2 | 1 | 51.3 | 0 |
| P12163_2_F1,17743 | R.YAPTTSPLSIEK.D       | 1915.1   | 0.0018   | 2 | 1 | 46.3 | 0 |
| P12163_1_F5,4883  | K.ESAGHK.I             | 1236.716 | 0.00602  | 3 | 1 | 23.5 | 0 |
| P12163_1_S10,6663 | K.ESAGHK.I             | 1236.716 | 0.01139  | 3 | 1 | 25.9 | 0 |
| P12163_2_S5,5844  | K.ESAGHK.I             | 1236.716 | 0.00626  | 3 | 1 | 26.7 | 0 |
| P12163_1_F3,24928 | K.ILATLGFNDEK.A        | 1829.063 | 0.00209  | 2 | 1 | 27.1 | 0 |
| P12163_1_F4,25729 | K.ILATLGFNDEK.A        | 1829.063 | 0.0059   | 3 | 1 | 25.5 | 0 |
| P12163_1_F4,25970 | K.ILATLGFNDEK.A        | 1829.063 | 0.00473  | 2 | 1 | 24   | 0 |
| P12163_2_F1,24972 | K.ILATLGFNDEK.A        | 1829.063 | 0.00689  | 2 | 1 | 25.4 | 0 |
| P12163_1_F6,22478 | K.SDLFFFSPERPPLTEQA    | 2569.335 | 0.00274  | 3 | 1 | 30.6 | 0 |
| P12163_1_F3,18986 | K.SINEDTILSFK.-        | 1875.068 | 0.00773  | 3 | 1 | 25.6 | 0 |
| P12163_1_F3,21424 | K.SINEDTILSFK.-        | 1875.068 | 0.01469  | 3 | 1 | 24.1 | 0 |
| P12163_1_F3,21498 | K.SINEDTILSFK.-        | 1875.068 | 0.00621  | 2 | 1 | 54   | 0 |
| P12163_1_F4,22100 | K.SINEDTILSFK.-        | 1875.068 | 0.00703  | 2 | 1 | 55.2 | 0 |
| P12163_1_F4,22190 | K.SINEDTILSFK.-        | 1875.068 | 0.00353  | 3 | 1 | 38.1 | 0 |
| P12163_2_F1,21601 | K.SINEDTILSFK.-        | 1875.068 | 0.00377  | 3 | 1 | 40.4 | 0 |
| P12163_1_F5,21345 | R.ALDWAFNEK.L          | 1701.942 | 0.0049   | 2 | 1 | 37.3 | 0 |
| P12163_1_F5,21422 | R.ALDWAFNEK.L          | 1701.942 | 0.00688  | 3 | 1 | 24.2 | 0 |
| P12163_2_F1,22105 | R.ALDWAFNEK.L          | 1701.942 | 0.00388  | 2 | 1 | 33.4 | 0 |
| P12163_2_F1,22120 | R.ALDWAFNEK.L          | 1701.942 | 0.01099  | 3 | 1 | 30.1 | 0 |
| P12163_2_S5,19712 | R.ALDWAFNEK.L          | 1701.942 | -0.00119 | 3 | 1 | 25.9 | 0 |
| P12163_2_F1,18872 | R.ANGITLFK.V           | 1471.909 | 0.00009  | 3 | 1 | 36.1 | 0 |
| P12163_2_F2,19217 | R.ANGITLFK.V           | 1471.909 | 0.00531  | 3 | 1 | 26.7 | 0 |
| P12163_2_F2,19228 | R.ANGITLFK.V           | 1471.909 | 0.00705  | 2 | 1 | 25.3 | 0 |
| P12163_2_F1,19799 | R.EETLNLLGK.S          | 1624.973 | 0.00674  | 2 | 1 | 24.6 | 0 |
| P12163_1_F2,15781 | R.SFAM*AELEAR.K        | 1444.741 | 0.00454  | 3 | 1 | 38.6 | 0 |
| P12163_1_F2,15742 | R.SFAMAELEAR.K         | 1428.746 | 0.00793  | 3 | 1 | 23.2 | 0 |
| P12163_1_F3,16241 | R.SFAMAELEAR.K         | 1428.746 | 0.00136  | 3 | 1 | 25.9 | 0 |
| P12163_1_F3,19246 | R.SFAMAELEAR.K         | 1428.746 | 0.00376  | 2 | 1 | 42.9 | 0 |
| P12163_2_F1,18743 | R.SFAMAELEAR.K         | 1428.746 | 0.00294  | 2 | 1 | 44.2 | 0 |
| P12163_1_F7,23536 | K.EAFLSLNPFQVPVLE      | 2933.598 | 0.00356  | 4 | 1 | 39.2 | 0 |
| P12163_1_F7,23696 | K.EAFLSLNPFQVPVLE      | 2933.598 | 0.00762  | 3 | 1 | 26.9 | 0 |
| P12163_1_F2,21898 | K.ELEYELVPVDM*K.A      | 2089.135 | 0.00198  | 3 | 1 | 32.5 | 0 |
| P12163_2_F6,21562 | K.ELEYELVPVDM*K.A      | 2089.135 | 0.00327  | 3 | 1 | 30.1 | 0 |
| P12163_1_S1,20730 | K.ELEYELVPVDMK.A       | 2073.14  | 0.00253  | 3 | 1 | 31   | 0 |
| P12163_1_S1,20811 | K.ELEYELVPVDMK.A       | 2073.14  | 0.00161  | 2 | 1 | 48.3 | 0 |
| P12163_1_F2,16862 | K.EVEALQFDPPSSK.L      | 2055.122 | 0.00162  | 2 | 1 | 31.3 | 0 |

|                   |                     |          |          |   |   |      |   |
|-------------------|---------------------|----------|----------|---|---|------|---|
| P12163_1_F2,16897 | K.EVEALQFDPPSSK.L   | 2055.122 | 0.00879  | 3 | 1 | 32.9 | 0 |
| P12163_1_F2,18099 | K.EVEALQFDPPSSK.L   | 2055.122 | 0.0044   | 2 | 1 | 51   | 0 |
| P12163_1_F2,18103 | K.EVEALQFDPPSSK.L   | 2055.122 | 0.00486  | 3 | 1 | 37.6 | 0 |
| P12163_1_F2,20196 | K.ILDVYEAR.L        | 1282.731 | 0.00024  | 2 | 1 | 24.1 | 0 |
| P12163_1_F9,19523 | K.ILDVYEAR.L        | 1282.731 | 0.00214  | 2 | 1 | 26.1 | 0 |
| P12163_1_S1,19622 | K.ILDVYEAR.L        | 1282.731 | 0.00522  | 2 | 1 | 25.7 | 0 |
| P12163_1_F6,12574 | K.VHGSVFSTATQR.V    | 1593.865 | 0.00074  | 3 | 1 | 30.1 | 0 |
| P12163_2_F4,11480 | K.VHGSVFSTATQR.V    | 1593.865 | 0.00161  | 3 | 1 | 56.1 | 0 |
| P12163_2_S5,11991 | K.VHGSVFSTATQR.V    | 1593.865 | 0.002    | 3 | 1 | 31.1 | 0 |
| P12163_2_F7,19142 | K.VLALLKH.-         | 1401.94  | 0.00371  | 3 | 1 | 29.6 | 0 |
| P12163_1_F3,22946 | R.AITQYIAQEFDPK.G   | 2132.185 | 0.00598  | 3 | 1 | 53   | 0 |
| P12163_1_F3,22958 | R.AITQYIAQEFDPK.G   | 2132.185 | 0.00257  | 2 | 1 | 63.1 | 0 |
| P12163_2_F7,19781 | R.AITQYIAQEFDPK.G   | 2132.185 | 0.0049   | 3 | 1 | 22.3 | 0 |
| P12163_1_F4,22480 | R.VFASLYEK.E        | 1564.919 | -0.00288 | 2 | 1 | 26.9 | 0 |
| P12163_1_F5,21188 | R.VFASLYEK.E        | 1564.919 | 0.00758  | 3 | 1 | 22.5 | 0 |
| P12163_2_F1,21725 | R.VFASLYEK.E        | 1564.919 | 0.0056   | 3 | 1 | 40.9 | 0 |
| P12163_2_F1,21965 | R.VFASLYEK.E        | 1564.919 | -0.00001 | 3 | 1 | 32.9 | 0 |
| P12163_2_F8_12070 | R.VFASLYEK.E        | 1564.919 | 0.0062   | 3 | 1 | 25.6 | 0 |
| P12163_2_F8_12070 | R.VFASLYEK.E        | 1564.919 | 0.00326  | 3 | 1 | 33.4 | 0 |
| P12163_2_F9,19556 | R.VFASLYEK.E        | 1564.919 | 0.0011   | 3 | 1 | 27   | 0 |
| P12163_1_F5,12515 | K.EDLDTYSQHPDHMGA   | 2551.271 | 0.00957  | 3 | 1 | 27.4 | 0 |
| P12163_2_F10,1265 | K.EDLDTYSQHPDHMGA   | 2551.271 | 0.00496  | 4 | 1 | 24.7 | 0 |
| P12163_2_F4,12300 | K.EDLDTYSQHPDHMGA   | 2551.271 | 0.00268  | 4 | 1 | 40.8 | 0 |
| P12163_2_F4,12303 | K.EDLDTYSQHPDHMGA   | 2551.271 | 0.00495  | 3 | 1 | 22.2 | 0 |
| P12163_2_S5,12646 | K.EDLDTYSQHPDHMGA   | 2551.271 | 0.00888  | 4 | 1 | 36.6 | 0 |
| P12163_1_F2,17141 | K.EM*EEADSNEELVNLQ  | 2502.249 | 0.0064   | 3 | 1 | 22.9 | 0 |
| P12163_1_S1,15261 | K.EM*EEADSNEELVNLQ  | 2502.249 | 0.00739  | 3 | 1 | 45.2 | 0 |
| P12163_1_S1,16676 | K.EMEEADSNEELVNLQI  | 2486.254 | 0.00451  | 3 | 1 | 58.1 | 0 |
| P12163_1_S1,18783 | K.ESFGGIQQITSGENFSA | 2232.12  | -0.00114 | 3 | 1 | 57.7 | 0 |
| P12163_1_S1,18804 | K.ESFGGIQQITSGENFSA | 2232.12  | 0.00079  | 2 | 1 | 83.9 | 0 |
| P12163_1_F4,18051 | K.ESVLPICK.D        | 1553.918 | 0.01357  | 3 | 1 | 28.9 | 0 |
| P12163_1_F6,23545 | K.GFSIASIAVFK.S     | 1748.057 | -0.00071 | 3 | 1 | 29.8 | 0 |
| P12163_1_F9,16885 | K.NEIYGVIK.G        | 1543.93  | 0.00408  | 3 | 1 | 22.3 | 0 |
| P12163_1_F9,16908 | K.NEIYGVIK.G        | 1543.93  | 0.00403  | 2 | 1 | 31.4 | 0 |
| P12163_2_F1,17179 | K.NEIYGVIK.G        | 1543.93  | 0.00528  | 3 | 1 | 22.3 | 0 |
| P12163_2_F8_12070 | K.NEIYGVIK.G        | 1543.93  | 0.00282  | 3 | 1 | 25   | 0 |
| P12163_2_F8_12070 | K.NEIYGVIK.G        | 1543.93  | 0.00501  | 2 | 1 | 25.1 | 0 |
| P12163_2_S5,15312 | K.NEIYGVIK.G        | 1543.93  | 0.00231  | 3 | 1 | 24.2 | 0 |
| P12163_1_F8,15518 | K.TIEHVVLFK.V       | 1694.046 | 0.00256  | 3 | 1 | 25.8 | 0 |
| P12163_2_F6,14905 | K.TIEHVVLFK.V       | 1694.046 | 0.00508  | 3 | 1 | 36.1 | 0 |
| P12163_2_F6,18355 | K.TIEHVVLFK.V       | 1694.046 | 0.00747  | 2 | 1 | 44.8 | 0 |
| P12163_2_F6,18598 | K.TIEHVVLFK.V       | 1694.046 | 0.00574  | 3 | 1 | 31.2 | 0 |
| P12163_2_F7,16393 | K.TIEHVVLFK.V       | 1694.046 | 0.00361  | 3 | 1 | 25.1 | 0 |
| P12163_2_F8_12070 | K.TIEHVVLFK.V       | 1694.046 | -0.00002 | 3 | 1 | 31   | 0 |
| P12163_1_F9,12480 | R.HLACGPVLR.N       | 1326.762 | 0.00385  | 3 | 1 | 37.2 | 0 |
| P12163_2_F7,11486 | R.HLACGPVLR.N       | 1326.762 | 0.00208  | 3 | 1 | 36   | 0 |
| P12163_2_F9,11411 | R.HLACGPVLR.N       | 1326.762 | 0.00271  | 3 | 1 | 32.1 | 0 |
| P12163_1_F3,28044 | K.IFPSFVNFLK.S      | 1820.093 | 0.00061  | 3 | 1 | 26.8 | 0 |
| P12163_2_F9,18563 | K.KLFALESFQK.T      | 2123.299 | 0.00925  | 3 | 1 | 43.6 | 0 |
| P12163_1_F4,25564 | K.LFALESFQK.T       | 1690.999 | -0.01114 | 3 | 1 | 25.9 | 0 |
| P12163_1_F4,25597 | K.LFALESFQK.T       | 1690.999 | 0.00333  | 2 | 1 | 37.8 | 0 |

|                   |                      |          |          |   |   |      |   |
|-------------------|----------------------|----------|----------|---|---|------|---|
| P12163_1_F5,23788 | K.LFALESFQK.T        | 1690.999 | 0.00038  | 3 | 1 | 28.9 | 0 |
| P12163_1_F7,22417 | K.LFALESFQK.T        | 1690.999 | -0.00163 | 3 | 1 | 27.9 | 0 |
| P12163_2_F1,24812 | K.LFALESFQK.T        | 1690.999 | -0.00169 | 3 | 1 | 23.5 | 0 |
| P12163_1_F4,20662 | K.QYVIAGWAPK.V       | 1741.026 | 0.00374  | 3 | 1 | 34.6 | 0 |
| P12163_1_F4,20683 | K.QYVIAGWAPK.V       | 1741.026 | 0.00122  | 2 | 1 | 55.7 | 0 |
| P12163_2_F1,20058 | K.QYVIAGWAPK.V       | 1741.026 | 0.00232  | 2 | 1 | 33.6 | 0 |
| P12163_2_F1,20068 | K.QYVIAGWAPK.V       | 1741.026 | 0.00431  | 3 | 1 | 29.1 | 0 |
| P12163_2_F6,18859 | K.SKDPNDGTEQALLEEI   | 2799.55  | 0.00746  | 4 | 1 | 31.9 | 0 |
| P12163_1_F9,10725 | K.THGGPFIAGEK.V      | 1721.979 | 0.00765  | 3 | 1 | 36   | 0 |
| P12163_2_F9,11542 | K.THGGPFIAGEK.V      | 1721.979 | -0.00048 | 3 | 1 | 28.5 | 0 |
| P12163_1_F2,19492 | K.VTAVDLSLAPK.L      | 1722.062 | 0.00367  | 3 | 1 | 47.6 | 0 |
| P12163_1_F2,19493 | K.VTAVDLSLAPK.L      | 1722.062 | 0.00591  | 2 | 1 | 42.9 | 0 |
| P12163_1_F3,20124 | K.VTAVDLSLAPK.L      | 1722.062 | 0.0067   | 3 | 1 | 43.3 | 0 |
| P12163_1_F3,20126 | K.VTAVDLSLAPK.L      | 1722.062 | 0.00663  | 2 | 1 | 54   | 0 |
| P12163_2_F2,19676 | K.VTAVDLSLAPK.L      | 1722.062 | -0.00332 | 3 | 1 | 41.7 | 0 |
| P12163_2_F4,18283 | K.VTAVDLSLAPK.L      | 1722.062 | 0.00391  | 3 | 1 | 42.4 | 0 |
| P12163_1_F4,20133 | R.ALLTLEEK.K         | 1524.946 | 0.01898  | 2 | 1 | 24.7 | 0 |
| P12163_1_F4,20213 | R.ALLTLEEK.K         | 1524.946 | 0.00197  | 3 | 1 | 37.8 | 0 |
| P12163_1_F4,20403 | R.ALLTLEEK.K         | 1524.946 | 0.01532  | 2 | 1 | 34.8 | 0 |
| P12163_1_F5,19103 | R.ALLTLEEK.K         | 1524.946 | 0.00134  | 2 | 1 | 30.8 | 0 |
| P12163_1_F5,19224 | R.ALLTLEEK.K         | 1524.946 | -0.00022 | 3 | 1 | 40.5 | 0 |
| P12163_2_F1,19613 | R.ALLTLEEK.K         | 1524.946 | 0.00492  | 2 | 1 | 39.9 | 0 |
| P12163_2_F1,19776 | R.ALLTLEEK.K         | 1524.946 | 0.0032   | 3 | 1 | 38.2 | 0 |
| P12163_1_F3,20346 | K.ANEISVSAAEEFNIEK.I | 2417.266 | 0.00778  | 3 | 1 | 29.5 | 0 |
| P12163_1_F7,16843 | K.DDHHLVESVLESAK.E   | 2187.187 | 0.00743  | 3 | 1 | 44.8 | 0 |
| P12163_1_F7,16884 | K.DDHHLVESVLESAK.E   | 2187.187 | 0.00492  | 4 | 1 | 29.4 | 0 |
| P12163_1_F3,11034 | K.EVLNVSR.D          | 1120.663 | 0.00187  | 3 | 1 | 29.9 | 0 |
| P12163_1_S1,14115 | K.IVCENTLDAR.L       | 1494.789 | 0.00542  | 2 | 1 | 36.5 | 0 |
| P12163_1_F4,20153 | K.LQLVEAEK.K         | 1537.941 | 0.00879  | 3 | 1 | 31.5 | 0 |
| P12163_1_F4,20156 | K.LQLVEAEK.K         | 1537.941 | 0.00247  | 2 | 1 | 35.5 | 0 |
| P12163_1_F5,18808 | K.LQLVEAEK.K         | 1537.941 | 0.00876  | 3 | 1 | 42.3 | 0 |
| P12163_1_F5,18829 | K.LQLVEAEK.K         | 1537.941 | 0.00931  | 2 | 1 | 40.5 | 0 |
| P12163_1_F7,16855 | K.LQLVEAEK.K         | 1537.941 | 0.00732  | 3 | 1 | 24.6 | 0 |
| P12163_1_F7,18174 | K.LQLVEAEK.K         | 1537.941 | 0.0051   | 3 | 1 | 24.7 | 0 |
| P12163_2_F1,19474 | K.LQLVEAEK.K         | 1537.941 | 0.00525  | 2 | 1 | 38.8 | 0 |
| P12163_2_F1,19548 | K.LQLVEAEK.K         | 1537.941 | 0.0057   | 3 | 1 | 31.1 | 0 |
| P12163_2_F1,19706 | K.LQLVEAEK.K         | 1537.941 | 0.00447  | 2 | 1 | 36.9 | 0 |
| P12163_2_F2,19506 | K.LQLVEAEK.K         | 1537.941 | -0.00138 | 3 | 1 | 25.7 | 0 |
| P12163_1_S1,24500 | K.VLQAQDDLVSNM*ME    | 2574.336 | 0.00173  | 4 | 1 | 43.6 | 0 |
| P12163_1_S1,21573 | K.VLQAQDDLVSNNM*E    | 2574.336 | 0.01667  | 3 | 1 | 31.9 | 0 |
| P12163_1_S1,21593 | K.VLQAQDDLVSNNM*E    | 2574.336 | 0.00893  | 4 | 1 | 35   | 0 |
| P12163_1_S1,21800 | K.VLQAQDDLVSNNM*E    | 2574.336 | 0.00983  | 3 | 1 | 69.9 | 0 |
| P12163_1_S1,21877 | K.VLQAQDDLVSNNM*E    | 2574.336 | 0.00741  | 4 | 1 | 51.5 | 0 |
| P12163_1_S1,24469 | K.VLQAQDDLVSNNMME/   | 2558.341 | 0.00661  | 4 | 1 | 45.4 | 0 |
| P12163_1_S1,24597 | K.VLQAQDDLVSNNMME/   | 2558.341 | 0.0092   | 3 | 1 | 51.2 | 0 |
| P12163_1_F4,7069  | R.DHNSYK.K           | 1371.748 | 0.01024  | 3 | 1 | 27.1 | 0 |
| P12163_2_F4,6094  | R.DHNSYK.K           | 1371.748 | 0.0031   | 3 | 1 | 24.1 | 0 |
| P12163_2_F2,16523 | R.KQLVSQVAA.-        | 1551.968 | 0.00409  | 2 | 1 | 44.4 | 0 |
| P12163_1_F5,11101 | K.DCQLSVK.Q          | 1457.824 | 0.0078   | 2 | 1 | 27.1 | 0 |
| P12163_1_F5,11117 | K.DCQLSVK.Q          | 1457.824 | 0.00863  | 3 | 1 | 22.4 | 0 |
| P12163_1_F6,12043 | K.DCQLSVK.Q          | 1457.824 | 0.00672  | 2 | 1 | 25.1 | 0 |

|                    |                     |          |          |   |   |      |   |
|--------------------|---------------------|----------|----------|---|---|------|---|
| P12163_2_F1,11627  | K.DCQLSVK.Q         | 1457.824 | 0.00407  | 3 | 1 | 22.2 | 0 |
| P12163_1_F7,16520  | K.GVLDATHEILER.L    | 1656.922 | 0.00653  | 3 | 1 | 24.2 | 0 |
| P12163_1_F7,17941  | K.GVLDATHEILER.L    | 1656.922 | 0.00491  | 3 | 1 | 53.2 | 0 |
| P12163_1_F8,18714  | K.GVLDATHEILER.L    | 1656.922 | 0.00422  | 3 | 1 | 43.6 | 0 |
| P12163_1_F8,18727  | K.GVLDATHEILER.L    | 1656.922 | 0.00305  | 2 | 1 | 40.7 | 0 |
| P12163_2_S5,13470  | K.GVLDATHEILER.L    | 1656.922 | -0.00559 | 3 | 1 | 24.3 | 0 |
| P12163_2_S5,17464  | K.GVLDATHEILER.L    | 1656.922 | 0.00095  | 3 | 1 | 55.7 | 0 |
| P12163_2_S5,17676  | K.GVLDATHEILER.L    | 1656.922 | 0.00167  | 3 | 1 | 24.6 | 0 |
| P12163_1_F2,20013  | K.YGIFENINSLR.E     | 1629.89  | 0.00061  | 3 | 1 | 27   | 0 |
| P12163_2_F6,16101  | R.ELAQM*PQWTAEKPLI  | 2422.337 | 0.00527  | 3 | 1 | 38.3 | 0 |
| P12163_1_S1,22110  | R.ILSQTSFSGLQGPTVSP | 2861.569 | 0.00482  | 3 | 1 | 72.3 | 0 |
| P12163_1_F9,11675  | R.LEAHLR.A          | 1042.631 | 0.00382  | 3 | 1 | 28.8 | 0 |
| P12163_1_S10,12111 | R.LEAHLR.A          | 1042.631 | 0.00514  | 3 | 1 | 35   | 0 |
| P12163_1_S10,12321 | R.LEAHLR.A          | 1042.631 | 0.00397  | 3 | 1 | 30.6 | 0 |
| P12163_2_F8_12070  | R.LEAHLR.A          | 1042.631 | 0.00412  | 3 | 1 | 33.2 | 0 |
| P12163_1_F4,20674  | R.LSLAIPK.Y         | 1349.898 | 0.00781  | 3 | 1 | 25.5 | 0 |
| P12163_2_F1,20141  | R.LSLAIPK.Y         | 1349.898 | 0.00742  | 3 | 1 | 23.5 | 0 |
| P12163_1_F3,20105  | R.M*AADTLDLLK.D     | 1714.987 | 0.004    | 3 | 1 | 37.7 | 0 |
| P12163_1_F3,20143  | R.M*AADTLDLLK.D     | 1714.987 | 0.00411  | 2 | 1 | 38.8 | 0 |
| P12163_1_F3,22893  | R.M*AADTLDLLK.D     | 1714.987 | 0.01177  | 2 | 1 | 32.4 | 0 |
| P12163_1_F3,22836  | R.MAADTLDLLK.D      | 1698.992 | 0.00917  | 2 | 1 | 38.8 | 0 |
| P12163_1_S1,16209  | K.AIALTVDTPR.L      | 1360.81  | 0.00389  | 2 | 1 | 27.1 | 0 |
| P12163_1_S1,16226  | K.AIALTVDTPR.L      | 1360.81  | 0.00346  | 3 | 1 | 60.6 | 0 |
| P12163_2_F7,15343  | K.GRVPVFLDGGVR.R    | 1575.927 | 0.0025   | 3 | 1 | 30.4 | 0 |
| P12163_1_F8,6042   | K.M*AHPEGECATAR.A   | 1649.768 | 0.0061   | 2 | 1 | 35.5 | 0 |
| P12163_1_F8,6051   | K.M*AHPEGECATAR.A   | 1649.768 | 0.00671  | 3 | 1 | 27.9 | 0 |
| P12163_2_F6,5938   | K.M*AHPEGECATAR.A   | 1649.768 | 0.00191  | 3 | 1 | 41.5 | 0 |
| P12163_1_F8,7906   | K.MAHPEGECATAR.A    | 1633.773 | 0.00476  | 2 | 1 | 27.5 | 0 |
| P12163_2_F6,7838   | K.MAHPEGECATAR.A    | 1633.773 | 0.00144  | 3 | 1 | 38.6 | 0 |
| P12163_1_F4,17846  | K.NYEGLYIGK.M       | 1664.947 | 0.00797  | 2 | 1 | 32.6 | 0 |
| P12163_1_F5,16539  | K.NYEGLYIGK.M       | 1664.947 | 0.0099   | 2 | 1 | 31.7 | 0 |
| P12163_1_F9,16753  | K.NYEGLYIGK.M       | 1664.947 | 0.00378  | 3 | 1 | 23   | 0 |
| P12163_1_F9,16768  | K.NYEGLYIGK.M       | 1664.947 | 0.00924  | 2 | 1 | 36.1 | 0 |
| P12163_2_F1,16970  | K.NYEGLYIGK.M       | 1664.947 | 0.00352  | 2 | 1 | 39.9 | 0 |
| P12163_2_F8_12070  | K.NYEGLYIGK.M       | 1664.947 | 0.00327  | 3 | 1 | 26.5 | 0 |
| P12163_1_F8,21457  | R.FVLPPHLTLK.N      | 1773.125 | 0.00672  | 3 | 1 | 36.3 | 0 |
| P12163_2_F6,20881  | R.FVLPPHLTLK.N      | 1773.125 | 0.00204  | 3 | 1 | 27.8 | 0 |
| P12163_1_F6,13890  | R.NHIVTHWDTPGAVAR   | 1978.056 | 0.00692  | 3 | 1 | 26.1 | 0 |
| P12163_1_F7,13227  | R.NHIVTHWDTPGAVAR   | 1978.056 | 0.00682  | 4 | 1 | 39.2 | 0 |
| P12163_2_F9,12859  | R.NHIVTHWDTPGAVAR   | 1978.056 | 0.00887  | 3 | 1 | 42.4 | 0 |
| P12163_1_F4,14422  | R.NVDAQLVK.R        | 1494.91  | 0.01251  | 3 | 1 | 29.5 | 0 |
| P12163_2_F1,13409  | R.NVDAQLVK.R        | 1494.91  | 0.00779  | 2 | 1 | 36.2 | 0 |
| P12163_2_F1,13415  | R.NVDAQLVK.R        | 1494.91  | 0.0039   | 3 | 1 | 26.6 | 0 |
| P12163_1_S1,19809  | R.VPVLFDGGVR.R      | 1362.805 | 0.01436  | 3 | 1 | 31.3 | 0 |
| P12163_1_F5,8640   | K.AAAAEACK.S        | 1399.782 | 0.01612  | 2 | 1 | 39.5 | 0 |
| P12163_1_F6,9798   | K.AAAAEACK.S        | 1399.782 | 0.01098  | 2 | 1 | 40.6 | 0 |
| P12163_2_F2,9459   | K.AAAAEACK.S        | 1399.782 | 0.00784  | 2 | 1 | 29.4 | 0 |
| P12163_1_F5,8098   | K.AVSEASSK.F        | 1386.805 | 0.00852  | 2 | 1 | 26.1 | 0 |
| P12163_2_F1,8687   | K.AVSEASSK.F        | 1386.805 | 0.00309  | 3 | 1 | 24.9 | 0 |
| P12163_2_F1,8727   | K.AVSEASSK.F        | 1386.805 | 0.00468  | 2 | 1 | 27.3 | 0 |
| P12163_1_F2,11409  | K.EDQPAAEPPKP.-     | 1858.017 | 0.00703  | 3 | 1 | 26.9 | 0 |

|                                         |          |         |   |   |      |   |
|-----------------------------------------|----------|---------|---|---|------|---|
| P12163_1_F3,11766 K.EDQPAAAEPPKP.-      | 1858.017 | 0.00946 | 3 | 1 | 31   | 0 |
| P12163_1_F3,11783 K.EDQPAAAEPPKP.-      | 1858.017 | 0.0083  | 2 | 1 | 47.8 | 0 |
| P12163_1_F4,10010 K.EEAPAGPEK.T         | 1535.852 | 0.00703 | 2 | 1 | 28   | 0 |
| P12163_2_F2,6063 K.HSTAVHK.L            | 1387.827 | 0.00265 | 4 | 1 | 32.5 | 0 |
| P12163_1_F4,25031 K.LLEELVK.I           | 1451.929 | 0.00576 | 2 | 1 | 40.3 | 0 |
| P12163_1_F4,25274 K.LLEELVK.I           | 1451.929 | 0.00752 | 3 | 1 | 27.7 | 0 |
| P12163_1_F4,25278 K.LLEELVK.I           | 1451.929 | 0.00922 | 2 | 1 | 40.4 | 0 |
| P12163_1_F5,23514 K.LLEELVK.I           | 1451.929 | 0.00806 | 3 | 1 | 25.7 | 0 |
| P12163_1_F7,21969 K.LLEELVK.I           | 1451.929 | 0.00377 | 3 | 1 | 22.8 | 0 |
| P12163_1_F7,22062 K.LLEELVK.I           | 1451.929 | 0.00604 | 2 | 1 | 29.6 | 0 |
| P12163_2_F1,24532 K.LLEELVK.I           | 1451.929 | 0.00412 | 2 | 1 | 28.2 | 0 |
| P12163_2_F1,24560 K.LLEELVK.I           | 1451.929 | 0.00269 | 3 | 1 | 22.8 | 0 |
| P12163_1_F4,19638 K.VSTFIVTEEK.A        | 1761.025 | 0.00554 | 2 | 1 | 25.5 | 0 |
| P12163_2_F1,19012 K.VSTFIVTEEK.A        | 1761.025 | 0.01282 | 2 | 1 | 39.4 | 0 |
| P12163_1_F3,22702 K.VVEIYEASSAEIK.T     | 2046.158 | 0.00216 | 3 | 1 | 27.5 | 0 |
| P12163_1_F3,22758 K.VVEIYEASSAEIK.T     | 2046.158 | 0.00369 | 2 | 1 | 75.2 | 0 |
| P12163_1_F3,28047 K.DGVILLWDLAEGK.R     | 2037.184 | 0.00839 | 3 | 1 | 26.6 | 0 |
| P12163_1_F3,28069 K.DGVILLWDLAEGK.R     | 2037.184 | 0.01683 | 2 | 1 | 55.3 | 0 |
| P12163_1_F3,28101 K.DGVILLWDLAEGK.R     | 2037.184 | 0.00638 | 3 | 1 | 45.4 | 0 |
| P12163_1_F5,20222 K.IWDLESK.S           | 1498.873 | 0.00332 | 3 | 1 | 22.7 | 0 |
| P12163_1_F5,20260 K.IWDLESK.S           | 1498.873 | 0.00785 | 2 | 1 | 26.4 | 0 |
| P12163_2_F1,20588 K.IWDLESK.S           | 1498.873 | 0.00713 | 3 | 1 | 22.3 | 0 |
| P12163_2_F1,20595 K.IWDLESK.S           | 1498.873 | 0.00919 | 2 | 1 | 25.8 | 0 |
| P12163_1_F5,19719 K.LWNTLGECK.Y         | 1728.956 | 0.00806 | 2 | 1 | 31.3 | 0 |
| P12163_1_F5,19726 K.LWNTLGECK.Y         | 1728.956 | 0.00538 | 3 | 1 | 28.3 | 0 |
| P12163_2_F1,20224 K.LWNTLGECK.Y         | 1728.956 | 0.00266 | 2 | 1 | 30.3 | 0 |
| P12163_1_F4,10231 K.SEATTATTTIK.K       | 1731.995 | 0.00812 | 3 | 1 | 29.7 | 0 |
| P12163_1_F4,12013 K.SEATTATTTIK.K       | 1731.995 | 0.00704 | 2 | 1 | 53.8 | 0 |
| P12163_1_F4,12069 K.SEATTATTTIK.K       | 1731.995 | 0.00776 | 3 | 1 | 27.6 | 0 |
| P12163_2_F1,11185 K.SEATTATTTIK.K       | 1731.995 | 0.00458 | 2 | 1 | 40.6 | 0 |
| P12163_1_F7,15937 K.YTIQEGDAHTEWVSCY    | 2355.134 | 0.00255 | 3 | 1 | 45.1 | 0 |
| P12163_2_F10,1543 K.YTIQEGDAHTEWVSCY    | 2355.134 | 0.00828 | 3 | 1 | 31   | 0 |
| P12163_2_S5,15835 K.YTIQEGDAHTEWVSCY    | 2355.134 | 0.00396 | 3 | 1 | 34.6 | 0 |
| P12163_1_F6,16826 R.ATLAGHTGYVNTVAV     | 3198.667 | 0.00981 | 4 | 1 | 22.2 | 0 |
| P12163_1_F6,16905 R.ATLAGHTGYVNTVAV     | 3198.667 | 0.0046  | 3 | 1 | 37.7 | 0 |
| P12163_2_F1,22907 R.LWDLAEGK.S          | 1539.899 | 0.00496 | 2 | 1 | 26.3 | 0 |
| P12163_2_F1,22941 R.LWDLAEGK.S          | 1539.899 | 0.00553 | 3 | 1 | 26   | 0 |
| P12163_1_F4,21319 R.YWLCAATEQSIK.I      | 2078.12  | 0.00625 | 3 | 1 | 45.5 | 0 |
| P12163_1_F9,7190 K.CDLAHR.R             | 1075.562 | 0.00491 | 3 | 1 | 27.2 | 0 |
| P12163_2_F9,7791 K.CDLAHR.R             | 1075.562 | 0.00248 | 3 | 1 | 21.9 | 0 |
| P12163_1_F2,20633 K.IQDGVFDVSNESYGIK    | 2379.265 | 0.00707 | 3 | 1 | 49   | 0 |
| P12163_1_S1,19765 K.IQDGVFDVSNESYGIK    | 2379.265 | 0.00581 | 3 | 1 | 51.2 | 0 |
| P12163_1_S1,19808 K.IQDGVFDVSNESYGIK    | 2379.265 | 0.01766 | 4 | 1 | 48.6 | 0 |
| P12163_1_F4,23985 K.SCLLLQFTDK.R        | 1833.04  | 0.00532 | 2 | 1 | 36.1 | 0 |
| P12163_1_F4,18964 K.TAQNVEEAFIK.T ! R.T | 1858.053 | 0.00841 | 3 | 1 | 55.5 | 0 |
| P12163_1_F4,18978 K.TAQNVEEAFIK.T ! R.T | 1858.053 | 0.00557 | 2 | 1 | 44.9 | 0 |
| P12163_2_F1,18203 K.TAQNVEEAFIK.T ! R.T | 1858.053 | 0.00439 | 3 | 1 | 56   | 0 |
| P12163_1_F2,12809 K.VGYGGIPGPSGGR.D     | 1477.806 | 0.00409 | 3 | 1 | 25.3 | 0 |
| P12163_2_F9,13206 K.VGYGGIPGPSGGR.D     | 1477.806 | 0.00457 | 2 | 1 | 29.7 | 0 |
| P12163_2_F7,17235 K.YIIIGDTGVGK.S       | 1744.046 | 0.00361 | 3 | 1 | 36.7 | 0 |
| P12163_1_F3,13720 R.AVSTEEGEQFAK.E      | 1904.022 | 0.00535 | 2 | 1 | 38.5 | 0 |

|                   |                       |          |          |   |   |      |   |
|-------------------|-----------------------|----------|----------|---|---|------|---|
| P12163_1_F3,13732 | R.AVSTEEGEQFAK.E      | 1904.022 | 0.00983  | 3 | 1 | 39.9 | 0 |
| P12163_1_F4,14268 | R.AVSTEEGEQFAK.E      | 1904.022 | 0.00449  | 2 | 1 | 48.6 | 0 |
| P12163_2_F1,13279 | R.AVSTEEGEQFAK.E      | 1904.022 | 0.00639  | 2 | 1 | 46.7 | 0 |
| P12163_1_S1,22502 | R.GAAGALLVYDITR.R     | 1623.937 | 0.00393  | 3 | 1 | 83.1 | 0 |
| P12163_1_S1,22712 | R.GAAGALLVYDITR.R     | 1623.937 | 0.00267  | 3 | 1 | 58.4 | 0 |
| P12163_1_S1,22717 | R.GAAGALLVYDITR.R     | 1623.937 | 0.00379  | 2 | 1 | 32   | 0 |
| P12163_2_F6,22716 | R.GAAGALLVYDITR.R     | 1623.937 | 0.00059  | 2 | 1 | 59.2 | 0 |
| P12163_2_F6,22746 | R.GAAGALLVYDITR.R     | 1623.937 | 0.00069  | 3 | 1 | 33.8 | 0 |
| P12163_1_F4,18603 | K.FYTECFGM*K.L        | 1806.901 | 0.01013  | 3 | 1 | 24.6 | 0 |
| P12163_1_F4,20664 | K.FYTECFGM*K.L        | 1806.901 | 0.00627  | 2 | 1 | 25.6 | 0 |
| P12163_1_F4,20639 | K.FYTECFGMK.L         | 1790.907 | 0.00817  | 2 | 1 | 39.7 | 0 |
| P12163_1_F4,20648 | K.FYTECFGMK.L         | 1790.907 | 0.00899  | 3 | 1 | 36.1 | 0 |
| P12163_2_F1,19987 | K.FYTECFGMK.L         | 1790.907 | 0.00735  | 2 | 1 | 41.1 | 0 |
| P12163_2_F7,12801 | K.GGTTHIAFVK.D        | 1638.979 | 0.00382  | 2 | 1 | 31   | 0 |
| P12163_1_F3,18117 | K.GNAYAQVAISTDDVY     | 2323.239 | 0.00546  | 2 | 1 | 56.5 | 0 |
| P12163_1_F3,23736 | K.ITSFVDPDGWK.T       | 1873.032 | 0.00622  | 3 | 1 | 37.8 | 0 |
| P12163_1_F3,20771 | K.SAEVVNLVTQELGGK     | 2152.243 | 0.0057   | 3 | 1 | 39.9 | 0 |
| P12163_1_F3,25517 | K.SAEVVNLVTQELGGK     | 2152.243 | -0.00164 | 2 | 1 | 86.1 | 0 |
| P12163_1_F2,17455 | K.TVLVDNEDFLK.E       | 1901.084 | 0.00446  | 3 | 1 | 29.9 | 0 |
| P12163_1_F2,20175 | K.TVLVDNEDFLK.E       | 1901.084 | 0.00424  | 2 | 1 | 37.9 | 0 |
| P12163_1_F3,17999 | K.TVLVDNEDFLK.E       | 1901.084 | 0.00382  | 2 | 1 | 33.4 | 0 |
| P12163_2_F1,9192  | R.EPGPVK.G            | 1234.762 | 0.00276  | 3 | 1 | 23.8 | 0 |
| P12163_2_F1,9767  | R.EPGPVK.G            | 1234.762 | 0.00642  | 3 | 1 | 26.9 | 0 |
| P12163_2_S5,8461  | R.EPGPVK.G            | 1234.762 | 0.00102  | 3 | 1 | 26.2 | 0 |
| P12163_1_S1,17533 | R.GPTPEPLCQVMLR.V     | 1801.961 | 0.00431  | 3 | 1 | 48.2 | 0 |
| P12163_1_S1,18749 | R.GPTPEPLCQVMLR.V     | 1801.961 | 0.00908  | 2 | 1 | 25.6 | 0 |
| P12163_1_S1,18757 | R.GPTPEPLCQVMLR.V     | 1801.961 | 0.00356  | 3 | 1 | 45.1 | 0 |
| P12163_1_S1,18966 | R.GPTPEPLCQVMLR.V     | 1801.961 | 0.00608  | 3 | 1 | 48.4 | 0 |
| P12163_1_F4,16361 | K.GSVIELSK.E          | 1440.888 | 0.00166  | 3 | 1 | 37.1 | 0 |
| P12163_1_F4,16542 | K.GSVIELSK.E          | 1440.888 | 0.0066   | 2 | 1 | 37.2 | 0 |
| P12163_2_F1,15428 | K.GSVIELSK.E          | 1440.888 | 0.00236  | 2 | 1 | 35.1 | 0 |
| P12163_2_F1,15488 | K.GSVIELSK.E          | 1440.888 | 0.00457  | 3 | 1 | 33   | 0 |
| P12163_2_S5,13885 | K.GSVIELSK.E          | 1440.888 | 0.00082  | 3 | 1 | 24.1 | 0 |
| P12163_1_F7,19574 | K.NIDVYAFGVYADHDD     | 2549.313 | 0.00144  | 3 | 1 | 81.9 | 0 |
| P12163_1_F5,15550 | K.SVLGLK.N ! R.SVLGLK | 1224.814 | 0.01011  | 3 | 1 | 23.4 | 0 |
| P12163_2_F4,258   | K.SVLGLK.N ! R.SVLGLK | 1224.814 | 0.00819  | 3 | 1 | 22.3 | 0 |
| P12163_1_S1,14606 | K.TGTSFPSVLGGSR.K     | 1569.854 | 0.00184  | 3 | 1 | 22   | 0 |
| P12163_1_F4,15109 | K.YGNM*SVAELK.E       | 1735.951 | 0.00873  | 2 | 1 | 33.4 | 0 |
| P12163_1_F5,16936 | K.YGNMSVAELK.E        | 1719.956 | 0.00483  | 2 | 1 | 45.8 | 0 |
| P12163_1_F9,17066 | K.YGNMSVAELK.E        | 1719.956 | 0.00515  | 3 | 1 | 40.7 | 0 |
| P12163_2_F1,17432 | K.YGNMSVAELK.E        | 1719.956 | 0.00725  | 3 | 1 | 29.9 | 0 |
| P12163_2_F1,17441 | K.YGNMSVAELK.E        | 1719.956 | 0.00711  | 2 | 1 | 56   | 0 |
| P12163_2_F8_12070 | K.YGNMSVAELK.E        | 1719.956 | 0.00713  | 3 | 1 | 30.5 | 0 |
| P12163_2_F9,16549 | R.GHVLWTTIDGK.E       | 1835.064 | 0.00769  | 3 | 1 | 26.9 | 0 |
| P12163_1_F5,19292 | R.LQIYNK.L            | 1499.941 | 0.00594  | 3 | 1 | 32.3 | 0 |
| P12163_1_F5,19389 | R.LQIYNK.L            | 1499.941 | 0.00761  | 2 | 1 | 29.2 | 0 |
| P12163_2_F8_12070 | R.LQIYNK.L            | 1499.941 | 0.00666  | 3 | 1 | 23.2 | 0 |
| P12163_1_F3,12808 | R.SAFEESVGSR.L        | 1372.701 | 0.00355  | 2 | 1 | 28.9 | 0 |
| P12163_2_F10,1571 | K.AYQAASTTAEAEELSPT   | 2418.257 | -0.00193 | 3 | 1 | 38.6 | 0 |
| P12163_1_S1,19084 | K.DSTLIMQLLR.D        | 1493.866 | -0.00037 | 3 | 1 | 24   | 0 |
| P12163_2_F1,9483  | K.LAEQAER.Y ! R.LAEQ  | 1120.626 | 0.00298  | 2 | 1 | 24.7 | 0 |

|                   |                          |          |          |   |   |      |   |
|-------------------|--------------------------|----------|----------|---|---|------|---|
| P12163_2_F2,11659 | R.GNELNVK.R              | 1381.826 | 0.00455  | 2 | 1 | 24.1 | 0 |
| P12163_1_F4,20959 | R.IISSIEQK.E ! R.ILSSIEQ | 1525.941 | 0.01597  | 2 | 1 | 28   | 0 |
| P12163_1_F5,18516 | R.IISSIEQK.E ! R.ILSSIEQ | 1525.941 | 0.00793  | 2 | 1 | 32.8 | 0 |
| P12163_1_F5,19572 | R.IISSIEQK.E ! R.ILSSIEQ | 1525.941 | 0.00666  | 3 | 1 | 29.6 | 0 |
| P12163_1_F5,19600 | R.IISSIEQK.E ! R.ILSSIEQ | 1525.941 | 0.00717  | 2 | 1 | 38.4 | 0 |
| P12163_2_F1,20030 | R.IISSIEQK.E ! R.ILSSIEQ | 1525.941 | 0.00227  | 2 | 1 | 27.6 | 0 |
| P12163_2_F1,20062 | R.IISSIEQK.E ! R.ILSSIEQ | 1525.941 | 0.00678  | 3 | 1 | 21.9 | 0 |
| P12163_1_F5,17036 | R.NLLSVGYK.N             | 1501.92  | 0.00804  | 3 | 1 | 23.7 | 0 |
| P12163_2_F2,17807 | R.NLLSVGYK.N             | 1501.92  | 0.00851  | 2 | 1 | 26.5 | 0 |
| P12163_2_F2,17830 | R.NLLSVGYK.N             | 1501.92  | 0.00036  | 3 | 1 | 24.9 | 0 |
| P12163_1_F4,19309 | R.YDEMVDAM*K.K ! R.Y     | 1725.865 | 0.00696  | 3 | 1 | 28.5 | 0 |
| P12163_1_F4,19295 | R.YDEMVDAMK.K ! R.Y      | 1709.87  | 0.00636  | 3 | 1 | 23.5 | 0 |
| P12163_2_F9,17466 | R.YDEMVDAMK.K ! R.Y      | 1709.87  | 0.00438  | 3 | 1 | 39.3 | 0 |
| P12163_1_S10,1839 | R.YLAEFK.V ! R.YLAEFK    | 1378.819 | 0.0079   | 3 | 1 | 24   | 0 |
| P12163_2_F8_12070 | R.YLAEFK.V ! R.YLAEFK    | 1378.819 | 0.00689  | 3 | 1 | 22.1 | 0 |
| P12163_2_F8_12070 | R.YLAEFK.V ! R.YLAEFK    | 1378.819 | 0.0056   | 3 | 1 | 22.9 | 0 |
| P12163_1_F4,24263 | K.AALEALFAK.T            | 1541.951 | 0.00549  | 2 | 1 | 51.2 | 0 |
| P12163_1_F4,24283 | K.AALEALFAK.T            | 1541.951 | 0.00813  | 3 | 1 | 45   | 0 |
| P12163_1_F5,22721 | K.AALEALFAK.T            | 1541.951 | 0.00277  | 2 | 1 | 26   | 0 |
| P12163_1_F5,22733 | K.AALEALFAK.T            | 1541.951 | 0.00639  | 3 | 1 | 35.5 | 0 |
| P12163_1_F7,21338 | K.AALEALFAK.T            | 1541.951 | 0.00114  | 3 | 1 | 25.6 | 0 |
| P12163_2_F1,23679 | K.AALEALFAK.T            | 1541.951 | 0.00264  | 3 | 1 | 47.7 | 0 |
| P12163_1_F8,12122 | K.ELAGNQGDNM*TFHK        | 2186.112 | 0.00992  | 3 | 1 | 27.6 | 0 |
| P12163_1_F8,14091 | K.ELAGNQGDNMTFHK.I       | 2170.117 | 0.00431  | 3 | 1 | 61.6 | 0 |
| P12163_1_F3,26892 | K.GTSVLEMVAAFEK.A        | 1990.114 | 0.00523  | 3 | 1 | 37.5 | 0 |
| P12163_1_F4,17768 | K.IGCEVYNLGTGK.G         | 1919.052 | 0.01085  | 3 | 1 | 26.4 | 0 |
| P12163_1_F4,19237 | K.IGCEVYNLGTGK.G         | 1919.052 | 0.00593  | 2 | 1 | 47.8 | 0 |
| P12163_1_F4,19257 | K.IGCEVYNLGTGK.G         | 1919.052 | 0.01055  | 3 | 1 | 39.7 | 0 |
| P12163_2_F1,18541 | K.IGCEVYNLGTGK.G         | 1919.052 | 0.00839  | 2 | 1 | 47.4 | 0 |
| P12163_1_F6,20522 | R.DYIHVIDLADGHIAAL       | 2609.466 | 0.00397  | 4 | 1 | 30   | 0 |
| P12163_1_F8,17795 | R.RPELTVFGTDYSTK.D       | 2222.228 | 0.00453  | 3 | 1 | 35.2 | 0 |
| P12163_2_F6,15542 | R.RPELTVFGTDYSTK.D       | 2222.228 | 0.0069   | 3 | 1 | 23.9 | 0 |
| P12163_2_F6,17287 | R.RPELTVFGTDYSTK.D       | 2222.228 | 0.0033   | 3 | 1 | 45.6 | 0 |
| P12163_2_F6,13477 | R.RPGDAEIVYASTGK.A       | 2072.16  | 0.00558  | 3 | 1 | 28.3 | 0 |
| P12163_1_F6,14663 | R.YFNPVGAHPSGK.I         | 1882.043 | 0.00589  | 3 | 1 | 33.4 | 0 |
| P12163_1_F2,6411  | K.APSDEEER.K             | 1236.601 | 0.00278  | 2 | 1 | 38.4 | 0 |
| P12163_1_F9,7336  | K.APSDEEERK.Q            | 1668.901 | 0.0052   | 2 | 1 | 31.4 | 0 |
| P12163_1_S1,21552 | K.IQIFAGDVVPR.K          | 1518.895 | -0.00416 | 2 | 1 | 34.6 | 0 |
| P12163_1_S1,21564 | K.IQIFAGDVVPR.K          | 1518.895 | 0.00063  | 3 | 1 | 61.7 | 0 |
| P12163_1_S1,21766 | K.IQIFAGDVVPR.K          | 1518.895 | 0.0036   | 2 | 1 | 42.7 | 0 |
| P12163_1_S1,21787 | K.IQIFAGDVVPR.K          | 1518.895 | 0.00207  | 3 | 1 | 60.2 | 0 |
| P12163_1_F4,20485 | K.LIDQALEK.G             | 1537.941 | 0.00735  | 2 | 1 | 35.8 | 0 |
| P12163_1_F4,20535 | K.LIDQALEK.G             | 1537.941 | 0.00708  | 3 | 1 | 34.2 | 0 |
| P12163_1_F4,20751 | K.LIDQALEK.G             | 1537.941 | 0.00417  | 2 | 1 | 36.3 | 0 |
| P12163_2_F1,19953 | K.LIDQALEK.G             | 1537.941 | 0.01331  | 2 | 1 | 23.9 | 0 |
| P12163_2_F4,15171 | K.QFIASLHK.R             | 1551.947 | 0.00518  | 3 | 1 | 35.2 | 0 |
| P12163_1_F4,11100 | K.VAVCSTSNEK.A           | 1702.925 | 0.01256  | 2 | 1 | 31.4 | 0 |
| P12163_1_F5,9669  | K.VAVCSTSNEK.A           | 1702.925 | 0.00934  | 2 | 1 | 24.4 | 0 |
| P12163_2_F1,10202 | K.VAVCSTSNEK.A           | 1702.925 | 0.00116  | 2 | 1 | 29.8 | 0 |
| P12163_2_F1,10238 | K.VAVCSTSNEK.A           | 1702.925 | 0.00623  | 3 | 1 | 46.3 | 0 |
| P12163_1_F5,18304 | R.ISFNDFK.E              | 1579.894 | 0.00621  | 2 | 1 | 31.6 | 0 |



|                   |                      |          |          |   |   |      |   |
|-------------------|----------------------|----------|----------|---|---|------|---|
| P12163_1_F5,18331 | R.ISFNDFTK.E         | 1579.894 | 0.00627  | 3 | 1 | 31.7 | 0 |
| P12163_2_F2,13523 | R.M*TAYFNK.T         | 1498.818 | 0.01737  | 2 | 1 | 24.4 | 0 |
| P12163_2_F2,17842 | R.MTAYFNK.T          | 1482.823 | 0.00875  | 2 | 1 | 24.6 | 0 |
| P12163_2_F2,16189 | K.GTAFGGFK.S         | 1392.81  | 0.00086  | 3 | 1 | 30.3 | 0 |
| P12163_2_F2,16255 | K.GTAFGGFK.S         | 1392.81  | 0.00227  | 2 | 1 | 27.6 | 0 |
| P12163_1_F3,15774 | K.IDPQAPLDK.V        | 1604.947 | 0.0065   | 2 | 1 | 28   | 0 |
| P12163_1_F4,20298 | K.NFGVTEFVNPK.D      | 1860.048 | 0.00677  | 3 | 1 | 49.2 | 0 |
| P12163_1_F4,20316 | K.NFGVTEFVNPK.D      | 1860.048 | 0.00994  | 2 | 1 | 57.4 | 0 |
| P12163_2_F1,19737 | K.NFGVTEFVNPK.D      | 1860.048 | 0.00377  | 3 | 1 | 43.8 | 0 |
| P12163_2_F1,19750 | K.NFGVTEFVNPK.D      | 1860.048 | 0.00032  | 2 | 1 | 46.4 | 0 |
| P12163_1_F7,21260 | K.VDEYVTHNM*TLGEIN   | 2558.25  | 0.0047   | 3 | 1 | 25.2 | 0 |
| P12163_1_F7,21273 | K.VDEYVTHNMTLGEINI   | 2542.255 | 0.00482  | 3 | 1 | 23.1 | 0 |
| P12163_1_F9,9772  | R.AALECCHK.G         | 1596.845 | 0.00489  | 3 | 1 | 36.7 | 0 |
| P12163_2_F9,9733  | R.AALECCHK.G         | 1596.845 | 0.00198  | 2 | 1 | 25.6 | 0 |
| P12163_1_F2,7893  | R.GATGAGVM*M*NDR.I   | 1515.72  | 0.00602  | 3 | 1 | 23.4 | 0 |
| P12163_1_F2,9652  | R.GATGAGVM*M*NDR.I   | 1515.72  | 0.00446  | 3 | 1 | 40.4 | 0 |
| P12163_1_F2,9625  | R.GATGAGVM*MNDR.K    | 1499.725 | 0.00125  | 3 | 1 | 24.7 | 0 |
| P12163_1_F2,11844 | R.GATGAGVMMNDR.K     | 1483.73  | 0.00677  | 2 | 1 | 50.6 | 0 |
| P12163_2_F1,20120 | R.SQVPWLVDK.Y        | 1679.994 | 0.00776  | 2 | 1 | 26.8 | 0 |
| P12163_2_F1,20171 | R.SQVPWLVDK.Y        | 1679.994 | 0.0052   | 3 | 1 | 22.9 | 0 |
| P12163_1_F3,20394 | R.VIGIDIDPK.K        | 1577.972 | 0.00172  | 3 | 1 | 23.9 | 0 |
| P12163_1_F3,20403 | R.VIGIDIDPK.K        | 1577.972 | 0.00538  | 2 | 1 | 29.5 | 0 |
| P12163_2_F1,18729 | K.ALDISLK.I          | 1367.872 | 0.00662  | 3 | 1 | 23.8 | 0 |
| P12163_2_F1,18738 | K.ALDISLK.I          | 1367.872 | 0.00725  | 2 | 1 | 30.2 | 0 |
| P12163_1_F6,17922 | K.DNHISAAGGIINAIR.S  | 1826.019 | 0.00088  | 3 | 1 | 43.2 | 0 |
| P12163_1_F7,17820 | K.IGQTGVTYISSGALTHS  | 2527.434 | 0.00362  | 3 | 1 | 42   | 0 |
| P12163_2_F4,17432 | K.IGQTGVTYISSGALTHS  | 2527.434 | 0.00972  | 3 | 1 | 30.3 | 0 |
| P12163_1_F5,22819 | K.WAVLIGGGK.N        | 1508.941 | 0.00774  | 2 | 1 | 43.1 | 0 |
| P12163_2_F1,23695 | K.WAVLIGGGK.N        | 1508.941 | 0.0097   | 2 | 1 | 36.2 | 0 |
| P12163_1_F9,11732 | R.AHSIVIAER.V        | 1299.769 | 0.00474  | 3 | 1 | 24.2 | 0 |
| P12163_2_F7,10860 | R.AHSIVIAER.V        | 1299.769 | 0.00319  | 3 | 1 | 38.1 | 0 |
| P12163_2_F7,10868 | R.AHSIVIAER.V        | 1299.769 | 0.00014  | 2 | 1 | 38.2 | 0 |
| P12163_1_F6,20054 | R.AM*ADLAHPATILETR   | 1930.037 | -0.00043 | 3 | 1 | 31.7 | 0 |
| P12163_1_F7,16550 | R.AM*ADLAHPATILETR   | 1930.037 | 0.00097  | 2 | 1 | 35.8 | 0 |
| P12163_2_S5,15987 | R.AM*ADLAHPATILETR   | 1930.037 | 0.00341  | 3 | 1 | 37.3 | 0 |
| P12163_1_F7,19248 | R.AMADLAHPATILETR.I  | 1914.042 | 0.00345  | 3 | 1 | 63   | 0 |
| P12163_1_F7,19282 | R.AMADLAHPATILETR.I  | 1914.042 | -0.00205 | 2 | 1 | 56.1 | 0 |
| P12163_2_S5,18550 | R.AMADLAHPATILETR.I  | 1914.042 | 0.00345  | 3 | 1 | 29.3 | 0 |
| P12163_1_F8,16155 | R.FETEASGNVTIETVHK.  | 2370.276 | 0.00656  | 3 | 1 | 57.8 | 0 |
| P12163_2_S5,15110 | R.FETEASGNVTIETVHK.  | 2370.276 | 0.00032  | 3 | 1 | 60.2 | 0 |
| P12163_1_F9,14252 | R.KPGFESPAIK.L       | 1986.215 | 0.01349  | 3 | 1 | 32.6 | 0 |
| P12163_1_F3,12976 | K.ADPNDEYLK.L        | 1672.9   | 0.00781  | 2 | 1 | 27.4 | 0 |
| P12163_1_F9,11220 | K.AIAGDTSGDYER.M     | 1558.765 | 0.00882  | 2 | 1 | 29.4 | 0 |
| P12163_2_F7,10442 | K.AIAGDTSGDYER.M     | 1558.765 | 0.00228  | 2 | 1 | 30.4 | 0 |
| P12163_1_S1,24813 | K.LLVPLVSTFR.Y       | 1448.914 | 0.0033   | 3 | 1 | 32.5 | 0 |
| P12163_1_F9,4704  | K.QAYHAR.Y ! R.QAYH/ | 1049.579 | 0.00037  | 3 | 1 | 29.8 | 0 |
| P12163_2_S3,5067  | K.QAYHAR.Y ! R.QAYH/ | 1049.579 | 0.0001   | 3 | 1 | 22.2 | 0 |
| P12163_1_F7,12194 | K.VPTQTPSAAEDAQLF    | 2430.308 | 0.00295  | 4 | 1 | 33.8 | 0 |
| P12163_1_F7,13340 | K.VPTQTPSAAEDAQLF    | 2430.308 | 0.01065  | 3 | 1 | 25   | 0 |
| P12163_2_S5,13160 | K.VPTQTPSAAEDAQLF    | 2430.308 | -0.00173 | 4 | 1 | 26.4 | 0 |
| P12163_1_F4,13105 | R.DAYLANEATK.R       | 1703.942 | 0.00977  | 3 | 1 | 37.5 | 0 |

|                                         |          |          |   |   |      |   |
|-----------------------------------------|----------|----------|---|---|------|---|
| P12163_1_F4,14393 R.DAYLANEATK.R        | 1703.942 | 0.02381  | 3 | 1 | 34.4 | 0 |
| P12163_1_F4,14428 R.DAYLANEATK.R        | 1703.942 | 0.01592  | 2 | 1 | 42.7 | 0 |
| P12163_1_F2,23040 R.M*LLALIGHGDA.- ! K. | 1430.798 | 0.0033   | 2 | 1 | 25.3 | 0 |
| P12163_1_F2,25508 R.M*LLALIGHGDA.- ! K. | 1430.798 | 0.00397  | 2 | 1 | 25.6 | 0 |
| P12163_1_S1,22064 R.M*LLALIGHGDA.- ! K. | 1430.798 | 0.00439  | 3 | 1 | 28.1 | 0 |
| P12163_1_S1,25174 R.MLLALIGHGDA.- ! K.M | 1414.803 | 0.00479  | 2 | 1 | 47.2 | 0 |
| P12163_1_S1,23226 R.SVLLWTLTPAER.D      | 1689.984 | -0.0003  | 3 | 1 | 24   | 0 |
| P12163_1_S1,23242 R.SVLLWTLTPAER.D      | 1689.984 | 0.00386  | 2 | 1 | 34.5 | 0 |
| P12163_1_F4,21693 K.AEVIEDFAK.F         | 1629.931 | 0.00851  | 3 | 1 | 49.1 | 0 |
| P12163_1_F4,21741 K.AEVIEDFAK.F         | 1629.931 | 0.00737  | 2 | 1 | 46.6 | 0 |
| P12163_1_S10,1961'K.AQEQVVAGTMHHLTV     | 2637.372 | 0.00347  | 4 | 1 | 33.9 | 0 |
| P12163_2_F8_12070K.AQEQVVAGTMHHLTV      | 2637.372 | 0.00064  | 4 | 1 | 47.4 | 0 |
| P12163_2_F8_12070K.AQEQVVAGTMHHLTV      | 2637.372 | 0.00708  | 3 | 1 | 64.9 | 0 |
| P12163_1_F3,15564 K.EGTFHLNQMQQDQE.-    | 2008.934 | 0.00485  | 2 | 1 | 30.2 | 0 |
| P12163_1_F4,24106 K.ENALLEFVK.V         | 1670.994 | 0.009    | 3 | 1 | 28.5 | 0 |
| P12163_1_F4,24107 K.ENALLEFVK.V         | 1670.994 | 0.01108  | 2 | 1 | 35.5 | 0 |
| P12163_2_F1,23520 K.ENALLEFVK.V         | 1670.994 | 0.00558  | 2 | 1 | 34.2 | 0 |
| P12163_2_F1,23590 K.ENALLEFVK.V         | 1670.994 | 0.00474  | 3 | 1 | 31   | 0 |
| P12163_1_F7,15401 K.HVGDSPASFTSSDLGV    | 2312.234 | 0.00857  | 3 | 1 | 46.7 | 0 |
| P12163_1_F9,13379 K.LNVEVHK.K           | 1446.889 | 0.00674  | 3 | 1 | 37   | 0 |
| P12163_2_F7,12187 K.LNVEVHK.K           | 1446.889 | 0.00035  | 3 | 1 | 30.5 | 0 |
| P12163_1_F9,13125 R.FAIEEHNK.K          | 1595.9   | 0.00589  | 3 | 1 | 33.9 | 0 |
| P12163_2_F9,12462 R.FAIEEHNK.K          | 1595.9   | 0.00569  | 2 | 1 | 33   | 0 |
| P12163_1_F2,10296 R.GAENSNEIESLAR.F     | 1693.866 | 0.00111  | 3 | 1 | 35.3 | 0 |
| P12163_1_S1,10445 R.GAENSNEIESLAR.F     | 1693.866 | 0.00408  | 3 | 1 | 39   | 0 |
| P12163_1_S1,14246 R.GAENSNEIESLAR.F     | 1693.866 | -0.00014 | 2 | 1 | 55.3 | 0 |
| P12163_1_F4,14876 K.ECNDLSFEEQCK.N      | 2167.026 | 0.00493  | 3 | 1 | 31.6 | 0 |
| P12163_1_F4,14890 K.ECNDLSFEEQCK.N      | 2167.026 | 0.00404  | 2 | 1 | 59.8 | 0 |
| P12163_1_S1,20507 K.FLVFACSDSR.V        | 1505.772 | -0.00017 | 3 | 1 | 24.1 | 0 |
| P12163_1_S1,22129 K.FLVFACSDSR.V        | 1505.772 | 0.00451  | 3 | 1 | 39.1 | 0 |
| P12163_1_F6,13130 K.GAHYDFVNGK.F        | 1715.933 | 0.00988  | 2 | 1 | 27.2 | 0 |
| P12163_1_F9,13031 K.GAHYDFVNGK.F        | 1715.933 | 0.00867  | 3 | 1 | 33.5 | 0 |
| P12163_1_F4,18031 K.NPDLYGALAK.G        | 1669.973 | 0.00491  | 3 | 1 | 30.4 | 0 |
| P12163_1_F9,16903 K.NPDLYGALAK.G        | 1669.973 | 0.00725  | 3 | 1 | 25.5 | 0 |
| P12163_1_F9,16932 K.NPDLYGALAK.G        | 1669.973 | -0.00029 | 2 | 1 | 29.1 | 0 |
| P12163_2_F1,17221 K.NPDLYGALAK.G        | 1669.973 | 0.00671  | 2 | 1 | 29.8 | 0 |
| P12163_2_F9,15747 K.NPDLYGALAK.G        | 1669.973 | 0.01274  | 3 | 1 | 31.7 | 0 |
| P12163_2_F9,15750 K.NPDLYGALAK.G        | 1669.973 | 0.00539  | 2 | 1 | 27.8 | 0 |
| P12163_1_S1,15126 K.QITADLEAAGSR.D      | 1535.833 | 0.0028   | 3 | 1 | 56   | 0 |
| P12163_1_S1,16437 K.QITADLEAAGSR.D      | 1535.833 | 0.00553  | 2 | 1 | 47.3 | 0 |
| P12163_1_F8,18242 K.VENIVVIGHSCCGGIK.   | 2350.283 | 0.01469  | 3 | 1 | 50.3 | 0 |
| P12163_1_F4,18734 R.NIANM*VPPYDQK.K     | 2014.089 | 0.01061  | 3 | 1 | 22.9 | 0 |
| P12163_2_F1,18025 R.NIANMVPPYDQK.K      | 1998.094 | 0.00362  | 2 | 1 | 38.9 | 0 |
| P12163_1_F7,21566 R.VCPSHILNFQPGEAFM    | 2406.236 | 0.00269  | 3 | 1 | 45.7 | 0 |
| P12163_1_F5,15141 K.GAALIYK.E           | 1343.851 | 0.00258  | 2 | 1 | 27.5 | 0 |
| P12163_1_F5,15186 K.GAALIYK.E           | 1343.851 | 0.0043   | 3 | 1 | 31.5 | 0 |
| P12163_2_F2,15839 K.GAALIYK.E           | 1343.851 | -0.00338 | 2 | 1 | 29.6 | 0 |
| P12163_1_S1,15067 K.SFGFDTAVEEAQR.A !   | 1760.876 | 0.00324  | 3 | 1 | 49.7 | 0 |
| P12163_1_S1,15953 K.SFGFDTAVEEAQR.A !   | 1760.876 | 0.00249  | 3 | 1 | 45.8 | 0 |
| P12163_1_S1,17931 K.SFGFDTAVEEAQR.A !   | 1760.876 | 0.00443  | 2 | 1 | 68.6 | 0 |
| P12163_1_S1,17970 K.SFGFDTAVEEAQR.A !   | 1760.876 | 0.00135  | 3 | 1 | 89   | 0 |

|                   |                     |          |          |   |   |      |   |
|-------------------|---------------------|----------|----------|---|---|------|---|
| P12163_2_F2,13070 | K.SQAYAVVK.Q        | 1473.889 | 0.00514  | 2 | 1 | 39.3 | 0 |
| P12163_1_F2,14848 | K.TIDNDIAVIDK.S     | 1825.053 | 0.00542  | 3 | 1 | 25.7 | 0 |
| P12163_1_F2,17977 | K.TIDNDIAVIDK.S     | 1825.053 | 0.00329  | 2 | 1 | 71.9 | 0 |
| P12163_1_F3,18552 | K.TIDNDIAVIDK.S     | 1825.053 | 0.00415  | 2 | 1 | 41   | 0 |
| P12163_1_F7,19398 | R.AINAAHVEVESVENGV  | 2643.493 | 0.00849  | 3 | 1 | 68.4 | 0 |
| P12163_1_F3,16809 | R.GINQVYIIGGDGTQK.C | 2171.228 | 0.00568  | 3 | 1 | 42.6 | 0 |
| P12163_1_F3,18341 | R.GINQVYIIGGDGTQK.C | 2171.228 | 0.00674  | 2 | 1 | 63.5 | 0 |
| P12163_2_F2,17919 | R.GINQVYIIGGDGTQK.C | 2171.228 | 0.00583  | 3 | 1 | 22.4 | 0 |
| P12163_1_F3,19264 | R.GLQVAVAGIPK.T     | 1661.057 | 0.00266  | 3 | 1 | 43.7 | 0 |
| P12163_1_S10,9865 | R.GVHFR.R           | 919.5415 | 0.0014   | 3 | 1 | 22.8 | 0 |
| P12163_2_F10,9264 | R.GVHFR.R           | 919.5415 | 0.00182  | 3 | 1 | 26.6 | 0 |
| P12163_1_F3,14590 | K.DQVEGVIDK.I       | 1610.921 | 0.00844  | 2 | 1 | 41.8 | 0 |
| P12163_1_F4,15017 | K.DQVEGVIDK.I       | 1610.921 | 0.01042  | 2 | 1 | 39.3 | 0 |
| P12163_1_F4,15101 | K.DQVEGVIDK.I       | 1610.921 | 0.00769  | 3 | 1 | 51   | 0 |
| P12163_1_F4,18220 | K.MEIVVSK.D         | 1413.86  | 0.01269  | 2 | 1 | 32.7 | 0 |
| P12163_2_F1,17593 | K.MEIVVSK.D         | 1413.86  | 0.00797  | 2 | 1 | 32.4 | 0 |
| P12163_2_F9,20136 | K.VEAILRPWR.V       | 1443.874 | 0.00215  | 3 | 1 | 25.9 | 0 |
| P12163_1_F4,7605  | R.GFGAQGGSTER.H     | 1370.697 | 0.00391  | 2 | 1 | 60.2 | 0 |
| P12163_1_F4,9390  | R.GFGAQGGSTER.H     | 1370.697 | 0.00611  | 2 | 1 | 32.4 | 0 |
| P12163_2_F1,6736  | R.GFGAQGGSTER.H     | 1370.697 | 0.00445  | 2 | 1 | 23.9 | 0 |
| P12163_1_F3,11166 | R.GVTVSDVR.G        | 1136.658 | 0.00524  | 2 | 1 | 29   | 0 |
| P12163_1_S10,9991 | R.HGGSEFSEDK.F      | 1700.87  | 0.00828  | 3 | 1 | 47.1 | 0 |
| P12163_2_F8_12070 | R.HGGSEFSEDK.F      | 1700.87  | 0.00861  | 3 | 1 | 65.1 | 0 |
| P12163_2_S5,9268  | R.HGGSEFSEDK.F      | 1700.87  | 0.00585  | 3 | 1 | 53   | 0 |
| P12163_1_F4,10811 | R.TGEIGDGK.I        | 1384.789 | 0.00971  | 2 | 1 | 25.7 | 0 |
| P12163_2_F1,9961  | R.TGEIGDGK.I        | 1384.789 | 0.00833  | 2 | 1 | 24.8 | 0 |
| P12163_1_S1,20394 | R.VQQVSSALLNM*GIR.C | 1836.031 | 0.00322  | 3 | 1 | 70.2 | 0 |
| P12163_1_S1,23620 | R.VQQVSSALLNMGIR.G  | 1820.037 | 0.00205  | 3 | 1 | 47.5 | 0 |
| P12163_1_S1,23828 | R.VQQVSSALLNMGIR.G  | 1820.037 | 0.00337  | 3 | 1 | 74.7 | 0 |
| P12163_1_F3,22757 | K.ASTVNQALDAAVSLK   | 2096.217 | 0.00417  | 3 | 1 | 61.1 | 0 |
| P12163_1_F8,21552 | K.ASTVNQALDAAVSLK   | 2839.666 | 0.01558  | 3 | 1 | 44.6 | 0 |
| P12163_1_F3,16099 | K.DAQQQLSEFDQEK.A   | 2174.119 | 0.00297  | 2 | 1 | 61.2 | 0 |
| P12163_1_F4,18688 | K.DLGIEHLEFIHEHK.T  | 2325.281 | 0.00572  | 3 | 1 | 34.4 | 0 |
| P12163_1_F4,18703 | K.DLGIEHLEFIHEHK.T  | 2325.281 | 0.00648  | 4 | 1 | 44.2 | 0 |
| P12163_2_F4,16545 | K.DLGIEHLEFIHEHK.T  | 2325.281 | 0.00468  | 4 | 1 | 53.1 | 0 |
| P12163_2_F4,16546 | K.DLGIEHLEFIHEHK.T  | 2325.281 | 0.00398  | 3 | 1 | 39.5 | 0 |
| P12163_2_F4,16597 | K.DLGIEHLEFIHEHK.T  | 2325.281 | 0.00409  | 2 | 1 | 34   | 0 |
| P12163_2_F1,18838 | K.LLGIEESK.K        | 1496.914 | 0.00972  | 2 | 1 | 25.1 | 0 |
| P12163_2_F1,18846 | K.LLGIEESK.K        | 1496.914 | 0.00409  | 3 | 1 | 27.9 | 0 |
| P12163_2_F2,14071 | K.SYMIQK.A          | 1377.802 | 0.00634  | 2 | 1 | 28.3 | 0 |
| P12163_1_F5,16285 | R.AIAELAK.Y         | 1323.846 | 0.0071   | 2 | 1 | 27   | 0 |
| P12163_1_F5,17024 | R.YSLLAGGK.R        | 1416.867 | 0.00461  | 3 | 1 | 24.6 | 0 |
| P12163_1_F5,17053 | R.YSLLAGGK.R        | 1416.867 | 0.00521  | 2 | 1 | 32.3 | 0 |
| P12163_1_S10,1692 | R.YSLLAGGK.R        | 1416.867 | 0.0065   | 3 | 1 | 27.8 | 0 |
| P12163_2_F2,17791 | R.YSLLAGGK.R        | 1416.867 | -0.00111 | 2 | 1 | 25.3 | 0 |
| P12163_2_F2,17910 | R.YSLLAGGK.R        | 1416.867 | 0.00053  | 3 | 1 | 24   | 0 |
| P12163_1_F7,13438 | K.KLSSLEVAQHGPR.F   | 2030.197 | 0.00591  | 4 | 1 | 40.6 | 0 |
| P12163_1_F6,15854 | K.LSSLEVAQHGPR.F    | 1597.896 | -0.00221 | 3 | 1 | 41.5 | 0 |
| P12163_1_F8,15707 | K.LSSLEVAQHGPR.F    | 1597.896 | 0.00118  | 3 | 1 | 60.4 | 0 |
| P12163_1_F8,15751 | K.LSSLEVAQHGPR.F    | 1597.896 | -0.00031 | 2 | 1 | 38.7 | 0 |
| P12163_2_F6,15132 | K.LSSLEVAQHGPR.F    | 1597.896 | 0.0025   | 3 | 1 | 42.4 | 0 |

|                   |                      |          |          |   |   |      |   |
|-------------------|----------------------|----------|----------|---|---|------|---|
| P12163_1_F3,23513 | K.QSFCHIIYSVENPAFK.K | 2411.289 | 0.00546  | 3 | 1 | 29.9 | 0 |
| P12163_1_F2,12475 | K.TATPELLR.R         | 1204.72  | 0.00387  | 3 | 1 | 22.5 | 0 |
| P12163_1_F3,13013 | R.APTSEAGLAPACK.D    | 1881.036 | 0.00528  | 2 | 1 | 40.6 | 0 |
| P12163_1_F3,13021 | R.APTSEAGLAPACK.D    | 1881.036 | 0.007    | 3 | 1 | 35.5 | 0 |
| P12163_2_S3,10805 | R.APTSEAGLAPACK.D    | 1881.036 | -0.0005  | 3 | 1 | 30.5 | 0 |
| P12163_1_F2,21496 | R.FTGVGQILGADDK.Y    | 2028.159 | 0.00481  | 3 | 1 | 42.7 | 0 |
| P12163_1_F2,21544 | R.FTGVGQILGADDK.Y    | 2028.159 | 0.0043   | 2 | 1 | 52.4 | 0 |
| P12163_1_S1,20332 | R.FTGVGQILGADDK.Y    | 2028.159 | 0.00742  | 3 | 1 | 32.2 | 0 |
| P12163_2_F9,15440 | R.HELMLGNTFR.A       | 1521.815 | 0.00149  | 3 | 1 | 41.2 | 0 |
| P12163_2_F1,13913 | R.TNFAETVK.S         | 1517.878 | 0.00604  | 2 | 1 | 28.7 | 0 |
| P12163_2_F2,14395 | R.TNFAETVK.S         | 1517.878 | 0.00452  | 2 | 1 | 31.2 | 0 |
| P12163_1_F3,21609 | K.EGVYSASVQSTLYQM    | 2470.311 | -0.00281 | 3 | 1 | 62.3 | 0 |
| P12163_2_F7,19927 | K.KVLM*DTFFGPPK.E    | 2308.35  | 0.00086  | 4 | 1 | 39.4 | 0 |
| P12163_2_F7,19890 | K.KVLMDTFFGPPK.E     | 2292.355 | 0.0021   | 4 | 1 | 29   | 0 |
| P12163_2_F7,19895 | K.KVLMDTFFGPPK.E     | 2292.355 | 0.00177  | 3 | 1 | 38.9 | 0 |
| P12163_2_F6,19900 | K.M*PNIHFLPVNLSSK.D  | 2221.262 | -0.00202 | 3 | 1 | 28.2 | 0 |
| P12163_1_F5,9146  | K.NTVYAK.A           | 1303.783 | 0.00843  | 2 | 1 | 24.2 | 0 |
| P12163_1_F3,22300 | K.VLM*DTFFGPPK.E     | 1876.05  | -0.0081  | 3 | 1 | 23.3 | 0 |
| P12163_1_F3,25243 | K.VLM*DTFFGPPK.E     | 1876.05  | 0.00441  | 3 | 1 | 32.8 | 0 |
| P12163_1_F3,20894 | K.VLMDTFFGPPK.E      | 1860.055 | 0.007    | 3 | 1 | 22.6 | 0 |
| P12163_1_F3,25245 | K.VLMDTFFGPPK.E      | 1860.055 | 0.00764  | 2 | 1 | 48.3 | 0 |
| P12163_1_F3,25283 | K.VLMDTFFGPPK.E      | 1860.055 | 0.00274  | 3 | 1 | 37.8 | 0 |
| P12163_1_F6,18721 | R.FHDISLVHLK.M       | 1817.089 | 0.00331  | 3 | 1 | 36   | 0 |
| P12163_1_F6,18764 | R.FHDISLVHLK.M       | 1817.089 | 0.00841  | 4 | 1 | 22   | 0 |
| P12163_1_F7,17878 | R.FHDISLVHLK.M       | 1817.089 | 0.00409  | 3 | 1 | 28.7 | 0 |
| P12163_1_F2,20913 | R.MLATEVTSTWR.Y      | 1598.851 | 0.006    | 2 | 1 | 26.2 | 0 |
| P12163_1_F3,9408  | R.QVTSIVR.I          | 1177.721 | 0.00201  | 3 | 1 | 25.8 | 0 |
| P12163_1_F2,19973 | K.DTFGPILVPSDK.L     | 1897.089 | 0.01297  | 2 | 1 | 28.8 | 0 |
| P12163_1_S1,22823 | K.IASAVAEETSLPFVTAI  | 2585.428 | 0.00603  | 3 | 1 | 32.2 | 0 |
| P12163_1_S1,22998 | K.IASAVAEETSLPFVTAI  | 2585.428 | 0.00431  | 4 | 1 | 35   | 0 |
| P12163_1_S1,23070 | K.IASAVAEETSLPFVTAI  | 2585.428 | 0.00846  | 3 | 1 | 38   | 0 |
| P12163_1_F4,15125 | K.IGYDAAVAK.K        | 1700.979 | 0.00528  | 3 | 1 | 25.3 | 0 |
| P12163_1_F6,8605  | K.IVHPNDHVNR.S       | 1504.829 | 0.00496  | 3 | 1 | 42.7 | 0 |
| P12163_2_F6,8257  | K.IVHPNDHVNR.S       | 1504.829 | 0.00007  | 3 | 1 | 27   | 0 |
| P12163_2_F6,8258  | K.IVHPNDHVNR.S       | 1504.829 | -0.00135 | 4 | 1 | 34.9 | 0 |
| P12163_2_F7,7777  | K.IVHPNDHVNR.S       | 1504.829 | 0.00193  | 4 | 1 | 34.8 | 0 |
| P12163_2_F7,7817  | K.IVHPNDHVNR.S       | 1504.829 | 0.00469  | 3 | 1 | 36.5 | 0 |
| P12163_1_F2,19281 | K.VNM*EYGLDPAIGK.A   | 2031.104 | 0.00513  | 3 | 1 | 30.3 | 0 |
| P12163_1_F9,14636 | R.AAEILGHK.R         | 1446.889 | 0.01107  | 3 | 1 | 40.9 | 0 |
| P12163_2_F7,13265 | R.AAEILGHK.R         | 1446.889 | 0.00006  | 3 | 1 | 40.3 | 0 |
| P12163_2_F2,19667 | R.AFGILK.K           | 1256.819 | 0.00519  | 3 | 1 | 22   | 0 |
| P12163_1_F2,17149 | R.SLQNFDIGGER.E      | 1539.807 | 0.00569  | 2 | 1 | 33.2 | 0 |
| P12163_2_F6,24203 | K.GVLSELFLFHGR.F     | 1678.958 | 0.00331  | 3 | 1 | 50.6 | 0 |
| P12163_1_F4,19108 | K.ISSALYDYQSNK.K     | 1997.08  | 0.00406  | 3 | 1 | 45.2 | 0 |
| P12163_1_F4,19121 | K.ISSALYDYQSNK.K     | 1997.08  | 0.0061   | 2 | 1 | 49.1 | 0 |
| P12163_2_F1,18315 | K.ISSALYDYQSNK.K     | 1997.08  | 0.00401  | 3 | 1 | 38.8 | 0 |
| P12163_2_F1,18342 | K.ISSALYDYQSNK.K     | 1997.08  | -0.00412 | 2 | 1 | 47.6 | 0 |
| P12163_2_F9,16967 | K.ISSALYDYQSNK.K     | 1997.08  | 0.00437  | 3 | 1 | 37.2 | 0 |
| P12163_2_F1,12523 | K.SMESPGPIK.N        | 1553.882 | 0.00841  | 2 | 1 | 26.9 | 0 |
| P12163_1_F2,17375 | K.TVPEGSQAEYLFDK.G   | 2321.212 | -0.00148 | 3 | 1 | 28.1 | 0 |
| P12163_1_F8,22206 | R.DIHNFISDDTFFVK.D   | 2306.228 | 0.00609  | 4 | 1 | 37.5 | 0 |

|                   |                     |          |          |   |   |      |   |
|-------------------|---------------------|----------|----------|---|---|------|---|
| P12163_2_F9,16788 | R.HLWVQCENCYGLNYK   | 2592.295 | 0.00905  | 3 | 1 | 29.9 | 0 |
| P12163_1_F3,20958 | R.MQEGSLSLMQMAK.I   | 2062.095 | 0.00348  | 3 | 1 | 58.5 | 0 |
| P12163_1_F4,17950 | R.VIEQTLNK.T        | 1552.952 | 0.0066   | 2 | 1 | 36.6 | 0 |
| P12163_1_F4,17952 | R.VIEQTLNK.T        | 1552.952 | 0.00119  | 3 | 1 | 34.1 | 0 |
| P12163_2_F1,17108 | R.VIEQTLNK.T        | 1552.952 | 0.01366  | 2 | 1 | 28   | 0 |
| P12163_2_F1,17134 | R.VIEQTLNK.T        | 1552.952 | 0.01091  | 3 | 1 | 33.9 | 0 |
| P12163_1_F2,9053  | K.AYSSGDITPR.M      | 1370.722 | 0.00448  | 3 | 1 | 36.1 | 0 |
| P12163_1_F2,11199 | K.AYSSGDITPR.M      | 1370.722 | 0.0061   | 2 | 1 | 27.6 | 0 |
| P12163_1_F3,24826 | K.MSFFINNNEEDILK.Q  | 2322.226 | 0.00861  | 3 | 1 | 27.9 | 0 |
| P12163_1_F3,5603  | K.QATESTLR.Y        | 1209.674 | 0.00589  | 3 | 1 | 25.7 | 0 |
| P12163_1_S10,1351 | K.QPFFHR.W          | 1135.631 | 0.00355  | 3 | 1 | 24.7 | 0 |
| P12163_1_F5,10746 | K.SATSISAIK.L       | 1485.91  | 0.01228  | 3 | 1 | 24.3 | 0 |
| P12163_1_F5,13234 | K.SATSISAIK.L       | 1485.91  | 0.00511  | 3 | 1 | 23.9 | 0 |
| P12163_2_F2,14052 | K.SATSISAIK.L       | 1485.91  | 0.00037  | 3 | 1 | 27.1 | 0 |
| P12163_2_F2,14082 | K.SATSISAIK.L       | 1485.91  | 0.00218  | 2 | 1 | 42.9 | 0 |
| P12163_1_F2,20378 | K.VQQAIDCLPLSSEK.Q  | 2196.215 | 0.00439  | 3 | 1 | 41.4 | 0 |
| P12163_1_F3,20793 | K.VQQAIDCLPLSSEK.Q  | 2196.215 | 0.00694  | 3 | 1 | 57.2 | 0 |
| P12163_1_F3,20809 | K.VQQAIDCLPLSSEK.Q  | 2196.215 | 0.00599  | 2 | 1 | 52.4 | 0 |
| P12163_2_F2,15489 | R.M*AGFLVK.V        | 1389.838 | 0.00643  | 2 | 1 | 30.2 | 0 |
| P12163_1_F8,22563 | R.MPAALCGVVGFKPTFC  | 2416.345 | 0.00403  | 3 | 1 | 23.3 | 0 |
| P12163_1_F4,17234 | K.DFAGSVANGALK.W    | 1758.001 | 0.00701  | 2 | 1 | 37.3 | 0 |
| P12163_1_F4,17237 | K.DFAGSVANGALK.W    | 1758.001 | 0.0039   | 3 | 1 | 51   | 0 |
| P12163_2_F1,16439 | K.DFAGSVANGALK.W    | 1758.001 | 0.00777  | 3 | 1 | 44.7 | 0 |
| P12163_1_F8,17921 | K.EFELSHLETCEVCTGT  | 2776.374 | 0.00032  | 3 | 1 | 45.4 | 0 |
| P12163_1_F8,19648 | K.EISAAEVLSDDKK.R   | 2480.401 | 0.00746  | 3 | 1 | 32   | 0 |
| P12163_1_S1,12238 | K.TQAATTTTSPEASQVGT | 2585.388 | 0.01044  | 3 | 1 | 53.1 | 0 |
| P12163_1_S1,16106 | K.VPPGVSTGSILR.V    | 1486.889 | 0.00122  | 3 | 1 | 32.2 | 0 |
| P12163_1_F4,15214 | R.AMYDQYGEAGVK.S    | 1940.004 | -0.00025 | 2 | 1 | 62.4 | 0 |
| P12163_1_F4,15262 | R.AMYDQYGEAGVK.S    | 1940.004 | 0.00353  | 3 | 1 | 66.3 | 0 |
| P12163_2_F1,14255 | R.AMYDQYGEAGVK.S    | 1940.004 | 0.01009  | 2 | 1 | 63   | 0 |
| P12163_1_F9,14627 | R.GDHLFTVK.V        | 1524.899 | 0.0053   | 3 | 1 | 28.7 | 0 |
| P12163_2_F9,13755 | R.GDHLFTVK.V        | 1524.899 | 0.00551  | 3 | 1 | 29.9 | 0 |
| P12163_1_S1,9839  | R.VVGEDGAGPR.G      | 1260.685 | 0.00008  | 2 | 1 | 32.3 | 0 |
| P12163_1_S1,9904  | R.VVGEDGAGPR.G      | 1260.685 | 0.00067  | 3 | 1 | 49.2 | 0 |
| P12163_1_S1,19598 | K.ADCFLLVGTQPR.V    | 1680.904 | 0.00139  | 3 | 1 | 37.5 | 0 |
| P12163_1_S1,19625 | K.ADCFLLVGTQPR.V    | 1680.904 | 0.00484  | 2 | 1 | 34.5 | 0 |
| P12163_1_F3,24538 | K.DAIFSTVEIAIK.K    | 1873.089 | 0.00604  | 3 | 1 | 39.6 | 0 |
| P12163_1_F2,20760 | K.TLLEIAEGR.H       | 1305.768 | 0.00389  | 2 | 1 | 24.3 | 0 |
| P12163_1_F3,20662 | R.ANVILPASAFSEK.E   | 1955.142 | 0.01221  | 2 | 1 | 39.4 | 0 |
| P12163_1_F3,20681 | R.ANVILPASAFSEK.E   | 1955.142 | 0.00978  | 3 | 1 | 53.4 | 0 |
| P12163_2_F1,20808 | R.ANVILPASAFSEK.E   | 1955.142 | 0.00901  | 2 | 1 | 33   | 0 |
| P12163_1_F8,16878 | R.EPATLGPSLKPEIK.S  | 2392.458 | 0.01063  | 3 | 1 | 28.1 | 0 |
| P12163_1_S1,18272 | R.LPYDTIGGIR.S      | 1408.81  | 0.00355  | 3 | 1 | 32   | 0 |
| P12163_1_F3,21901 | R.LSDAESMMALK.D     | 1803.98  | 0.00606  | 3 | 1 | 38.9 | 0 |
| P12163_1_F8,14051 | R.TVAPNLLHVDER.E    | 1667.938 | 0.00133  | 3 | 1 | 32.8 | 0 |
| P12163_1_F8,16316 | R.TVAPNLLHVDER.E    | 1667.938 | 0.00223  | 3 | 1 | 61.2 | 0 |
| P12163_2_F6,15794 | R.TVAPNLLHVDER.E    | 1667.938 | 0.00205  | 3 | 1 | 49   | 0 |
| P12163_2_S5,14933 | R.TVAPNLLHVDER.E    | 1667.938 | 0.00145  | 3 | 1 | 38.6 | 0 |
| P12163_1_F4,21238 | K.LSGIVNGIDTK.E     | 1725.037 | 0.00349  | 2 | 1 | 31.9 | 0 |
| P12163_1_F7,22398 | K.LYDPVGGEHFNIFAAC  | 2556.407 | 0.00617  | 3 | 1 | 41   | 0 |
| P12163_1_F7,22408 | K.LYDPVGGEHFNIFAAC  | 2556.407 | 0.00719  | 4 | 1 | 40.2 | 0 |

|                   |                       |          |          |   |   |      |   |
|-------------------|-----------------------|----------|----------|---|---|------|---|
| P12163_1_F3,18286 | K.TGGLGDVAGALPK.A     | 1764.048 | 0.00575  | 3 | 1 | 35   | 0 |
| P12163_1_F3,18291 | K.TGGLGDVAGALPK.A     | 1764.048 | 0.01062  | 2 | 1 | 54.1 | 0 |
| P12163_2_F2,19940 | R.GWVGFSVK.T          | 1487.883 | 0.00801  | 2 | 1 | 27.2 | 0 |
| P12163_2_F2,19961 | R.GWVGFSVK.T          | 1487.883 | 0.00992  | 3 | 1 | 26   | 0 |
| P12163_1_F9,10843 | R.HLGNNIYGGGR.E       | 1461.786 | 0.00205  | 3 | 1 | 38.1 | 0 |
| P12163_1_F6,16703 | R.SLLVIHνιαHQGR.G     | 1762.039 | -0.00065 | 3 | 1 | 36.8 | 0 |
| P12163_1_F7,15898 | R.SLLVIHνιαHQGR.G     | 1762.039 | -0.00064 | 4 | 1 | 22.8 | 0 |
| P12163_2_F9,15333 | R.SLLVIHνιαHQGR.G     | 1762.039 | 0.00199  | 3 | 1 | 22.6 | 0 |
| P12163_1_F4,13525 | R.TAVISSPK.E          | 1410.878 | 0.0059   | 2 | 1 | 32.4 | 0 |
| P12163_1_S10,1718 | R.VMVVAPHYGNYAEPQ     | 2521.281 | 0.00273  | 3 | 1 | 25   | 0 |
| P12163_2_F4,16947 | R.VMVVAPHYGNYAEPQ     | 2521.281 | 0.00078  | 3 | 1 | 22.7 | 0 |
| P12163_2_F1,23194 | K.LFNLPSSPIK.N        | 1724.057 | 0.00539  | 3 | 1 | 32.2 | 0 |
| P12163_1_F2,20371 | K.LLLNCVGPYR.L        | 1508.856 | 0.00089  | 3 | 1 | 33.1 | 0 |
| P12163_2_F7,11802 | K.RGPSEDEVESASF.K.M   | 2146.124 | 0.00288  | 3 | 1 | 36.8 | 0 |
| P12163_2_F6,14591 | R.ARPVIPGPAPLR.G      | 1547.969 | 0.00237  | 3 | 1 | 29.2 | 0 |
| P12163_1_F3,14564 | R.GPSEDEVESASF.K.M    | 1990.022 | 0.01181  | 3 | 1 | 40.8 | 0 |
| P12163_1_F5,22538 | R.IGLWAIK.L ! R.LGLW# | 1408.914 | 0.00734  | 2 | 1 | 29.7 | 0 |
| P12163_1_F5,22554 | R.IGLWAIK.L ! R.LGLW# | 1408.914 | 0.01062  | 3 | 1 | 22.2 | 0 |
| P12163_1_F3,21450 | R.LQENGISFDVISK.S     | 2058.169 | -0.00158 | 3 | 1 | 35.1 | 0 |
| P12163_1_F3,21484 | R.LQENGISFDVISK.S     | 2058.169 | 0.01079  | 2 | 1 | 50.9 | 0 |
| P12163_1_F6,16531 | R.TLSILTENPHGLPGANI   | 2664.389 | -0.00017 | 4 | 1 | 22.7 | 0 |
| P12163_1_F6,19090 | R.TLSILTENPHGLPGANI   | 2664.389 | 0.00203  | 3 | 1 | 40.6 | 0 |
| P12163_2_F4,15322 | R.TLSILTENPHGLPGANI   | 2664.389 | -0.00262 | 3 | 1 | 22.7 | 0 |
| P12163_2_F4,17846 | R.TLSILTENPHGLPGANI   | 2664.389 | -0.00061 | 3 | 1 | 70.6 | 0 |
| P12163_2_F8_12070 | R.TLSILTENPHGLPGANI   | 2664.389 | 0.00332  | 3 | 1 | 25.1 | 0 |
| P12163_1_F4,18533 | K.CVVEIINGPK.S        | 1766.993 | -0.00104 | 2 | 1 | 30.6 | 0 |
| P12163_1_F4,18576 | K.CVVEIINGPK.S        | 1766.993 | 0.00908  | 3 | 1 | 52.5 | 0 |
| P12163_2_F1,17836 | K.CVVEIINGPK.S        | 1766.993 | 0.00944  | 2 | 1 | 43.6 | 0 |
| P12163_1_F6,19725 | K.GLSVTVATPEIAQHQL    | 2513.491 | 0.00592  | 3 | 1 | 31.6 | 0 |
| P12163_1_F7,18850 | K.GLSVTVATPEIAQHQL    | 2513.491 | 0.00391  | 3 | 1 | 80   | 0 |
| P12163_1_F2,13710 | K.LDVGVER.W           | 1091.636 | 0.00415  | 2 | 1 | 30.1 | 0 |
| P12163_1_F4,22433 | K.LVADVFK.I           | 1399.877 | 0.00537  | 2 | 1 | 30   | 0 |
| P12163_1_F4,22673 | K.LVADVFK.I           | 1399.877 | 0.00571  | 2 | 1 | 24.2 | 0 |
| P12163_2_F1,19491 | R.GLVVSWCPQTK.V       | 1883.067 | 0.01114  | 2 | 1 | 25.4 | 0 |
| P12163_2_F1,19564 | R.GLVVSWCPQTK.V       | 1883.067 | 0.00548  | 3 | 1 | 25.7 | 0 |
| P12163_1_F4,27999 | R.ILNDFQNLNK.Q        | 1940.142 | 0.00445  | 3 | 1 | 27.4 | 0 |
| P12163_2_F4,16442 | R.KSDLDHYMETIEK.A     | 2521.373 | 0.00336  | 4 | 1 | 28.1 | 0 |
| P12163_1_F8,16099 | R.LRPSEDFVGNEELEK     | 2427.298 | 0.00565  | 3 | 1 | 26.2 | 0 |
| P12163_2_F6,15788 | R.LRPSEDFVGNEELEK     | 2427.298 | 0.00961  | 2 | 1 | 28.1 | 0 |
| P12163_1_F9,16122 | K.AAHMLSLPK.V         | 1575.95  | 0.00581  | 3 | 1 | 32.2 | 0 |
| P12163_1_F2,12956 | K.DGNYELVTR.E         | 1370.722 | 0.00486  | 2 | 1 | 25.1 | 0 |
| P12163_1_F2,21107 | K.EIQPFVESLSK.C       | 1885.089 | 0.00814  | 3 | 1 | 33.3 | 0 |
| P12163_1_F2,21179 | K.FLENFCGDQVR.F       | 1688.837 | 0.00377  | 2 | 1 | 37.6 | 0 |
| P12163_1_F4,22365 | K.LLFGGEELK.N         | 1613.972 | 0.01008  | 3 | 1 | 35.8 | 0 |
| P12163_2_F1,21890 | K.LLFGGEELK.N         | 1613.972 | 0.0012   | 2 | 1 | 24.7 | 0 |
| P12163_2_F1,21928 | K.LLFGGEELK.N         | 1613.972 | 0.00309  | 3 | 1 | 38.8 | 0 |
| P12163_1_F4,14940 | R.GAGIGTPEAIK.L       | 1621.973 | 0.00573  | 2 | 1 | 49.3 | 0 |
| P12163_1_F4,14972 | R.GAGIGTPEAIK.L       | 1621.973 | 0.00778  | 3 | 1 | 35.6 | 0 |
| P12163_2_F1,13960 | R.GAGIGTPEAIK.L       | 1621.973 | 0.00259  | 2 | 1 | 49.1 | 0 |
| P12163_2_F1,13972 | R.GAGIGTPEAIK.L       | 1621.973 | -0.00929 | 3 | 1 | 23.5 | 0 |
| P12163_1_F7,21816 | R.LLHYCGLPVEDVDFIN    | 2899.512 | 0.00642  | 4 | 1 | 25.4 | 0 |

|                   |                      |          |          |   |   |      |   |
|-------------------|----------------------|----------|----------|---|---|------|---|
| P12163_1_F4,21029 | R.YLLYGDISTK.A       | 1781.03  | 0.01059  | 3 | 1 | 23.7 | 0 |
| P12163_1_F3,18725 | K.IEVEYYGSPVSLK.S    | 2092.179 | 0.00656  | 2 | 1 | 30.4 | 0 |
| P12163_1_F3,18736 | K.IEVEYYGSPVSLK.S    | 2092.179 | 0.00819  | 3 | 1 | 40.2 | 0 |
| P12163_1_F3,20840 | K.IEVEYYGSPVSLK.S    | 2092.179 | 0.00168  | 2 | 1 | 59.3 | 0 |
| P12163_1_F3,20878 | K.IEVEYYGSPVSLK.S    | 2092.179 | 0.00486  | 3 | 1 | 47.7 | 0 |
| P12163_1_F5,10969 | K.LSEDNVK.D          | 1412.82  | 0.00944  | 3 | 1 | 32.4 | 0 |
| P12163_2_F1,12786 | K.LTDEYM*K.K         | 1523.824 | 0.00765  | 2 | 1 | 24.7 | 0 |
| P12163_2_F2,6938  | K.QAEEGK.V           | 1269.726 | 0.00469  | 3 | 1 | 26.8 | 0 |
| P12163_1_F8,20715 | K.SIAQINTPDSSSLLIQPY | 2798.54  | 0.00217  | 3 | 1 | 30.2 | 0 |
| P12163_1_S1,16597 | R.LTLPQLTSER.R       | 1461.858 | -0.00183 | 3 | 1 | 22.3 | 0 |
| P12163_1_S1,18412 | R.LTLPQLTSER.R       | 1461.858 | 0.003    | 2 | 1 | 28.2 | 0 |
| P12163_1_F5,11911 | R.SNPAMLDK.I         | 1483.84  | 0.01074  | 2 | 1 | 26.9 | 0 |
| P12163_2_F1,12382 | R.SNPAMLDK.I         | 1483.84  | 0.0086   | 2 | 1 | 28.7 | 0 |
| P12163_1_F4,9503  | R.TNFNSVR.T          | 1141.627 | 0.00335  | 3 | 1 | 27.2 | 0 |
| P12163_1_S1,19561 | K.LADGLFLESCR.E      | 1584.836 | 0.00306  | 3 | 1 | 37.1 | 0 |
| P12163_1_S1,21213 | K.LADGLFLESCR.E      | 1584.836 | 0.0051   | 3 | 1 | 41.7 | 0 |
| P12163_2_F7,15030 | K.RVPQQVLDSIR.K      | 1614.959 | -0.0006  | 3 | 1 | 56.1 | 0 |
| P12163_2_F7,15046 | K.RVPQQVLDSIR.K      | 1614.959 | 0.00285  | 2 | 1 | 33.8 | 0 |
| P12163_1_S1,14817 | K.TPVGGGVSSLNVQLR.   | 1788.028 | 0.00372  | 3 | 1 | 64.9 | 0 |
| P12163_1_S1,16560 | K.TPVGGGVSSLNVQLR.   | 1788.028 | 0.00483  | 3 | 1 | 42.6 | 0 |
| P12163_1_F9,9956  | K.VTAVHK.A           | 1262.804 | 0.00766  | 3 | 1 | 26.4 | 0 |
| P12163_1_F9,10800 | K.YEVHGMK.R          | 1586.846 | 0.00301  | 2 | 1 | 32.2 | 0 |
| P12163_2_F9,10652 | K.YEVHGMK.R          | 1586.846 | 0.00633  | 2 | 1 | 29.1 | 0 |
| P12163_1_F6,18250 | R.HLQFPSFADR.L       | 1521.812 | 0.00216  | 3 | 1 | 24.8 | 0 |
| P12163_1_F9,17645 | R.HLQFPSFADR.L       | 1521.812 | 0.003    | 3 | 1 | 45.7 | 0 |
| P12163_2_F7,13347 | R.HQNVDIVVIR.E       | 1496.885 | -0.0016  | 3 | 1 | 48   | 0 |
| P12163_1_S1,19590 | R.VPQQVLDSIR.K       | 1458.858 | 0.00425  | 2 | 1 | 30.3 | 0 |
| P12163_2_F6,17487 | K.HILDGELTLDK.I      | 1862.084 | 0.0037   | 3 | 1 | 40   | 0 |
| P12163_1_F9,16762 | K.IFHLDK.V           | 1467.878 | 0.00847  | 3 | 1 | 22.3 | 0 |
| P12163_1_F3,24249 | K.LLPVFEEAAK.S       | 1725.041 | 0.01473  | 3 | 1 | 23.8 | 0 |
| P12163_1_F3,24272 | K.LLPVFEEAAK.S       | 1725.041 | 0.00929  | 2 | 1 | 29.8 | 0 |
| P12163_2_S5,4299  | K.M*DGTTNEHHR.A      | 1517.707 | 0.00212  | 4 | 1 | 24.5 | 0 |
| P12163_2_S5,4471  | K.M*DGTTNEHHR.A      | 1517.707 | 0.00312  | 4 | 1 | 40   | 0 |
| P12163_1_S1,24253 | K.SDGFPTILFFPAGNK.S  | 2219.232 | 0.00668  | 3 | 1 | 26.5 | 0 |
| P12163_1_F4,21158 | K.TFGEDFLEGG.L       | 1750.947 | 0.01125  | 2 | 1 | 41.6 | 0 |
| P12163_1_F4,21178 | K.TFGEDFLEGG.L       | 1750.947 | -0.00045 | 3 | 1 | 24.3 | 0 |
| P12163_1_F3,18501 | R.ENAPSVFESPIK.N     | 1926.079 | 0.00885  | 3 | 1 | 50.5 | 0 |
| P12163_1_F4,18994 | R.ENAPSVFESPIK.N     | 1926.079 | 0.00258  | 3 | 1 | 25.6 | 0 |
| P12163_1_F3,17471 | R.GVDSIVIAK.M        | 1509.946 | 0.00294  | 2 | 1 | 36.3 | 0 |
| P12163_1_F4,18037 | R.GVDSIVIAK.M        | 1509.946 | 0.01136  | 2 | 1 | 34.9 | 0 |
| P12163_2_S5,20444 | K.ALLDDPVFRPLVEK.Y   | 2220.321 | 0.00109  | 4 | 1 | 22.1 | 0 |
| P12163_1_F3,19147 | K.DGLLQLPSDK.A       | 1693.994 | 0.00694  | 2 | 1 | 36.9 | 0 |
| P12163_1_F3,19148 | K.DGLLQLPSDK.A       | 1693.994 | -0.00091 | 3 | 1 | 23.5 | 0 |
| P12163_2_F6,15866 | K.DIVALSGGHTLGR.A !  | 1599.912 | -0.0068  | 3 | 1 | 48.5 | 0 |
| P12163_1_F4,14338 | K.NYPTVSEDYK.K       | 1823.964 | 0.01153  | 2 | 1 | 38.5 | 0 |
| P12163_1_S10,6680 | K.QGNDHLR.Q          | 1143.617 | 0.00191  | 3 | 1 | 36.8 | 0 |
| P12163_1_F7,21227 | K.YAADEDAFFADYAEA    | 2655.319 | 0.00527  | 4 | 1 | 47.3 | 0 |
| P12163_1_F7,21269 | K.YAADEDAFFADYAEA    | 2655.319 | 0.00613  | 3 | 1 | 84.6 | 0 |
| P12163_1_F7,15335 | R.LAAEQAHSANGLDI/    | 2154.157 | 0.00176  | 3 | 1 | 51   | 0 |
| P12163_1_F7,15357 | R.LAAEQAHSANGLDI/    | 2154.157 | 0.00101  | 2 | 1 | 77.3 | 0 |
| P12163_2_S5,14897 | R.LAAEQAHSANGLDI/    | 2154.157 | -0.01691 | 2 | 1 | 60.6 | 0 |

|                    |                     |          |          |   |   |      |   |
|--------------------|---------------------|----------|----------|---|---|------|---|
| P12163_2_S5,14970  | R.LAAEQAHSANGLDI/   | 2154.157 | -0.00217 | 3 | 1 | 28.7 | 0 |
| P12163_1_F4,18710  | R.QVFGAQMGLSDK.D    | 1889.041 | 0.00602  | 3 | 1 | 48.1 | 0 |
| P12163_1_S1,18006  | K.ALLEDPEFR.R       | 1393.763 | 0.0002   | 3 | 1 | 43.2 | 0 |
| P12163_2_F6,15866  | K.DIVALSGGHTLGR.A ! | 1599.912 | -0.0068  | 3 | 1 | 48.5 | 0 |
| P12163_1_F4,22137  | K.IALDFCEEVK.A      | 1832.008 | 0.01112  | 2 | 1 | 38.7 | 0 |
| P12163_1_F4,20746  | K.LSELGFSPGSGSK.S   | 1874.048 | 0.00402  | 3 | 1 | 46.6 | 0 |
| P12163_1_F4,20774  | K.LSELGFSPGSGSK.S   | 1874.048 | 0.00432  | 2 | 1 | 42.3 | 0 |
| P12163_2_F8_12070  | R.AHPER.S           | 913.5157 | 0.00225  | 3 | 1 | 29.2 | 0 |
| P12163_1_F5,6758   | R.DYAASHK.K         | 1399.779 | 0.0095   | 3 | 1 | 25.3 | 0 |
| P12163_1_F9,7605   | R.DYAASHK.K         | 1399.779 | 0.00935  | 3 | 1 | 25.4 | 0 |
| P12163_2_S5,8040   | R.DYAASHK.K         | 1399.779 | 0.00075  | 3 | 1 | 36.7 | 0 |
| P12163_2_F6,15478  | R.LAWHDAGTYDVNTK.   | 2199.165 | 0.00113  | 3 | 1 | 41.6 | 0 |
| P12163_1_S10,16710 | R.M*GLSDKDIVALSGGF  | 2551.412 | 0.01     | 4 | 1 | 39.5 | 0 |
| P12163_2_F10,1696  | R.M*GLSDKDIVALSGGF  | 2551.412 | 0.003    | 4 | 1 | 33.8 | 0 |
| P12163_1_F5,14072  | K.AIAAGLK.A         | 1251.824 | 0.00314  | 3 | 1 | 23.1 | 0 |
| P12163_2_F2,14878  | K.AIAAGLK.A         | 1251.824 | 0.00509  | 2 | 1 | 29.5 | 0 |
| P12163_1_S1,17294  | K.IPGVGEFQCCDR.N    | 1741.83  | 0.00103  | 3 | 1 | 35.2 | 0 |
| P12163_1_F7,18902  | K.M*ILPGM*DLSDEHQP  | 2075.02  | 0.0061   | 3 | 1 | 46.9 | 0 |
| P12163_2_F4,18514  | K.MILPGMDLSDEHQPR.  | 2043.03  | 0.00331  | 3 | 1 | 32.2 | 0 |
| P12163_1_F9,19704  | K.RDGYAAVAEMFAK.N   | 2037.105 | 0.00623  | 3 | 1 | 28.1 | 0 |
| P12163_1_F4,11359  | K.SLDAVR.L          | 964.5729 | 0.00441  | 2 | 1 | 24.9 | 0 |
| P12163_1_F3,25785  | K.TPIQVYQEFCEFSK.S  | 2384.242 | 0.00853  | 3 | 1 | 38.7 | 0 |
| P12163_1_F8,15740  | R.GPHDAPSYDESPNSNS  | 2704.31  | 0.00175  | 3 | 1 | 51.8 | 0 |
| P12163_2_F6,15189  | R.GPHDAPSYDESPNSNS  | 2704.31  | 0.00913  | 3 | 1 | 46.8 | 0 |
| P12163_1_F6,22968  | R.LFVGLPLDTVSDANTV  | 2719.524 | 0.00317  | 3 | 1 | 58.8 | 0 |
| P12163_2_S5,21153  | R.LFVGLPLDTVSDANTV  | 2719.524 | 0.00251  | 4 | 1 | 22.2 | 0 |
| P12163_1_F4,15591  | K.EVIAAVQK.S        | 1465.92  | 0.00888  | 3 | 1 | 31.9 | 0 |
| P12163_2_F1,14640  | K.EVIAAVQK.S        | 1465.92  | 0.00377  | 2 | 1 | 38.6 | 0 |
| P12163_2_F1,10998  | K.QLGSNNALNNAR.A    | 1575.85  | 0.0021   | 2 | 1 | 36.4 | 0 |
| P12163_2_S5,15421  | K.VMLRPASPGTGVIAGC  | 2113.222 | 0.00097  | 3 | 1 | 26.1 | 0 |
| P12163_1_F9,15829  | K.YLTFPHR.S         | 1237.699 | 0.00403  | 3 | 1 | 45.7 | 0 |
| P12163_2_F4,14963  | K.YLTFPHR.S         | 1237.699 | 0.00277  | 3 | 1 | 33.8 | 0 |
| P12163_2_F9,15156  | K.YLTFPHR.S         | 1237.699 | 0.00199  | 3 | 1 | 34.6 | 0 |
| P12163_1_F4,16375  | R.AIVVVGDK.K        | 1408.898 | 0.00514  | 3 | 1 | 28.2 | 0 |
| P12163_1_F4,13788  | R.ATVVAVQK.M        | 1423.909 | 0.00471  | 2 | 1 | 41.9 | 0 |
| P12163_1_F3,26352  | R.IVLEMAGVENALGK.Q  | 2052.198 | 0.00575  | 3 | 1 | 45.4 | 0 |
| P12163_2_F1,16934  | R.NIVTVPMTK.Y       | 1610.976 | 0.00411  | 3 | 1 | 24.4 | 0 |
| P12163_1_F8,13625  | K.APQAAGTIHTDFER.G  | 1817.945 | 0.0025   | 3 | 1 | 33.9 | 0 |
| P12163_1_F8,13665  | K.APQAAGTIHTDFER.G  | 1817.945 | 0.00467  | 2 | 1 | 26.9 | 0 |
| P12163_2_S5,13083  | K.APQAAGTIHTDFER.G  | 1817.945 | 0.00322  | 3 | 1 | 49.6 | 0 |
| P12163_2_F2,15121  | K.AWLQDGK.D         | 1425.831 | -0.00065 | 2 | 1 | 27.6 | 0 |
| P12163_1_F4,13641  | K.ELGSEPAVK.A       | 1537.905 | 0.00876  | 2 | 1 | 37.7 | 0 |
| P12163_2_F9,11696  | K.IEHELQQR.V        | 1388.726 | 0.0074   | 3 | 1 | 22.7 | 0 |
| P12163_1_F3,21706  | K.IGIVGLPNVGK.S     | 1675.073 | -0.00327 | 3 | 1 | 35.6 | 0 |
| P12163_1_F4,20864  | K.STLFNTLTK.L       | 1632.978 | 0.00749  | 2 | 1 | 24.5 | 0 |
| P12163_2_F1,20238  | K.STLFNTLTK.L       | 1632.978 | 0.00425  | 2 | 1 | 45.7 | 0 |
| P12163_2_F6,20897  | R.AVDGIFHVL.R.A     | 1430.842 | 0.00102  | 3 | 1 | 32.2 | 0 |
| P12163_2_F1,18707  | R.GFICAEVMK.F       | 1662.917 | 0.00873  | 3 | 1 | 32.3 | 0 |
| P12163_1_F3,17684  | K.CGLDGSIIYASVEK.A  | 2007.068 | 0.00262  | 3 | 1 | 22.1 | 0 |
| P12163_1_F3,17729  | K.CGLDGSIIYASVEK.A  | 2007.068 | -0.00311 | 2 | 1 | 54.7 | 0 |
| P12163_1_F7,23119  | K.ETLCSGWLASVLITHR  | 2147.158 | -0.00074 | 3 | 1 | 38.7 | 0 |



|                   |                       |          |          |   |   |      |   |
|-------------------|-----------------------|----------|----------|---|---|------|---|
| P12163_1_F6,15485 | K.GLHLITHTIK.R        | 1741.094 | 0.0061   | 3 | 1 | 24.1 | 0 |
| P12163_2_F6,14814 | K.GLHLITHTIK.R        | 1741.094 | 0.00511  | 3 | 1 | 24.9 | 0 |
| P12163_1_S1,20435 | K.VGGLGDVVVTGLAR.A    | 1517.895 | 0.00335  | 2 | 1 | 43.4 | 0 |
| P12163_1_F8,23054 | R.GHTVDIMLPFYECIQK    | 2559.356 | 0.00871  | 3 | 1 | 22.9 | 0 |
| P12163_2_F4,19012 | R.IVLTIHNM*EHYGECR.   | 2192.089 | 0.00419  | 3 | 1 | 34.9 | 0 |
| P12163_2_F4,18997 | R.IVLTIHNMEHYGECR.C   | 2176.094 | 0.00165  | 3 | 1 | 52.6 | 0 |
| P12163_1_F9,4342  | R.TIGHNPER.L          | 1227.675 | 0.00164  | 3 | 1 | 23.7 | 0 |
| P12163_1_F3,18138 | R.YASLEAPAEIEK.D      | 1929.079 | 0.00408  | 2 | 1 | 52   | 0 |
| P12163_2_F1,17117 | K.AAYVAVMQK.V         | 1588.934 | 0.00293  | 3 | 1 | 32.4 | 0 |
| P12163_1_S1,15803 | K.NMAVTQFEPADAR.R     | 1753.884 | 0.00224  | 2 | 1 | 36.8 | 0 |
| P12163_1_S1,15859 | K.NMAVTQFEPADAR.R     | 1753.884 | 0.00291  | 3 | 1 | 37.8 | 0 |
| P12163_2_F1,18215 | R.CFPCWDEPACK.A       | 2077.975 | 0.00144  | 2 | 1 | 29.7 | 0 |
| P12163_1_F4,11317 | R.ETDLSQEK.T          | 1557.858 | 0.00608  | 2 | 1 | 26.5 | 0 |
| P12163_1_F9,17414 | R.FHAFLADR.T          | 1280.705 | 0.00503  | 3 | 1 | 34.1 | 0 |
| P12163_2_F9,16968 | R.FHAFLADR.T          | 1280.705 | 0.00098  | 3 | 1 | 40.9 | 0 |
| P12163_1_F8,24771 | R.GEIFTALALLGHK.E     | 1978.195 | 0.00432  | 3 | 1 | 34   | 0 |
| P12163_1_F9,11027 | R.NEGHLAEAVK.E        | 1675.959 | -0.00305 | 2 | 1 | 39.9 | 0 |
| P12163_2_F9,10575 | R.NEGHLAEAVK.E        | 1675.959 | 0.00948  | 4 | 1 | 23   | 0 |
| P12163_2_F2,12903 | R.SVSFTNK.A           | 1390.815 | 0.00519  | 2 | 1 | 31.2 | 0 |
| P12163_1_F4,23390 | K.EVFEWISNNPK.V       | 1971.08  | 0.00306  | 2 | 1 | 40.3 | 0 |
| P12163_2_F1,22801 | K.EVFEWISNNPK.V       | 1971.08  | 0.00723  | 3 | 1 | 24   | 0 |
| P12163_2_F1,22830 | K.EVFEWISNNPK.V       | 1971.08  | -0.0035  | 2 | 1 | 29.5 | 0 |
| P12163_1_F8,12357 | K.SLVAQDHVTPK.L       | 1803.058 | 0.0088   | 2 | 1 | 59.9 | 0 |
| P12163_2_F6,11990 | K.SLVAQDHVTPK.L       | 1803.058 | 0.00083  | 3 | 1 | 25.9 | 0 |
| P12163_1_F5,19150 | K.TLLNFAK.L           | 1414.888 | 0.00254  | 2 | 1 | 29.5 | 0 |
| P12163_2_S3,13989 | R.ADLHTVSLHFR.L       | 1599.891 | 0.00221  | 3 | 1 | 27.2 | 0 |
| P12163_2_F1,21109 | R.AIDFIYK.E           | 1477.887 | 0.00247  | 2 | 1 | 24.2 | 0 |
| P12163_1_F6,17391 | R.LGVAYHFQK.Q ! R.LG' | 1671.968 | 0.00203  | 2 | 1 | 30.4 | 0 |
| P12163_1_F8,17104 | R.LMDDMQGHEFEQK.R     | 2216.094 | 0.00304  | 3 | 1 | 28.7 | 0 |
| P12163_1_F3,26035 | R.WNIEAVDMLPEYMK.I    | 2347.229 | 0.00682  | 3 | 1 | 47.3 | 0 |
| P12163_1_F4,14434 | K.ASLNGNVLR.Y         | 1247.737 | 0.01032  | 2 | 1 | 26.3 | 0 |
| P12163_1_S1,20943 | K.EFNDNLLSEICR.L      | 1813.906 | 0.0042   | 2 | 1 | 47.7 | 0 |
| P12163_1_S1,20944 | K.EFNDNLLSEICR.L      | 1813.906 | 0.00447  | 3 | 1 | 51.5 | 0 |
| P12163_1_S1,22384 | K.IPLVLMGCGGVGR.Q     | 1632.923 | 0.00266  | 3 | 1 | 27   | 0 |
| P12163_1_S1,12193 | K.SLGYTEPDPR.D        | 1438.748 | 0.00296  | 2 | 1 | 32.9 | 0 |
| P12163_1_F3,22517 | K.SLVVASDIFTK.E       | 1788.073 | -0.00214 | 3 | 1 | 33.5 | 0 |
| P12163_1_F3,22584 | K.SLVVASDIFTK.E       | 1788.073 | -0.00099 | 2 | 1 | 50.9 | 0 |
| P12163_1_F4,16997 | R.CTVGIQELPK.N        | 1753.014 | 0.00569  | 2 | 1 | 29.4 | 0 |
| P12163_2_F6,17346 | R.QLQHIVSCR.S         | 1557.884 | -0.00058 | 3 | 1 | 32.6 | 0 |
| P12163_2_S3,12153 | R.SLHANLGVHLR.V       | 1520.896 | 0.00172  | 4 | 1 | 56   | 0 |
| P12163_2_S5,12984 | R.SLHANLGVHLR.V       | 1520.896 | 0.00668  | 4 | 1 | 27.5 | 0 |
| P12163_1_F2,12989 | K.TVPDAFYCR.R         | 1432.72  | 0.00265  | 3 | 1 | 33.1 | 0 |
| P12163_2_S5,9779  | R.ATGAYSHSQGIK.G      | 1828.017 | 0.00715  | 3 | 1 | 25.2 | 0 |
| P12163_1_F4,14932 | R.CTILPQEDK.I         | 1711.951 | 0.01219  | 2 | 1 | 26.3 | 0 |
| P12163_1_F2,15514 | R.DGILSSLAR.R         | 1235.726 | 0.00472  | 3 | 1 | 26   | 0 |
| P12163_1_S1,9847  | R.DTIAAGIEAR.D        | 1320.742 | 0.00319  | 3 | 1 | 33.5 | 0 |
| P12163_1_S1,13768 | R.DTIAAGIEAR.D        | 1320.742 | 0.00379  | 3 | 1 | 46.5 | 0 |
| P12163_1_F7,18529 | R.EVLALCDHPSILDR.S    | 1942.037 | 0.00463  | 3 | 1 | 49.8 | 0 |
| P12163_2_F10,1714 | R.EVLALCDHPSILDR.S    | 1942.037 | 0.00451  | 3 | 1 | 32.8 | 0 |
| P12163_1_F2,15021 | R.GEIVSIAQR.L         | 1276.753 | 0.0017   | 2 | 1 | 25.5 | 0 |
| P12163_1_S1,17272 | R.SETQGLFSADSIER.A    | 1843.934 | 0.00464  | 2 | 1 | 76.8 | 0 |

|                   |                        |          |          |   |   |      |   |
|-------------------|------------------------|----------|----------|---|---|------|---|
| P12163_1_F4,16914 | K.DALQPVLK.L           | 1491.935 | 0.00915  | 2 | 1 | 24.3 | 0 |
| P12163_1_S1,19433 | K.LLLGPEGEELR.T        | 1529.884 | 0.00255  | 3 | 1 | 49.6 | 0 |
| P12163_1_F4,18517 | K.LNEQVAIESQGLK.V      | 2037.18  | 0.00402  | 3 | 1 | 43.2 | 0 |
| P12163_1_F4,18520 | K.LNEQVAIESQGLK.V      | 2037.18  | 0.00173  | 2 | 1 | 61.5 | 0 |
| P12163_2_F2,7360  | K.SSGSGSVQK.V          | 1444.822 | 0.00558  | 2 | 1 | 31.8 | 0 |
| P12163_2_F1,22541 | K.VLAASYPYFAK.R        | 1838.067 | 0.00605  | 3 | 1 | 22.4 | 0 |
| P12163_1_S1,10925 | R.ADDLQAEAR.A          | 1292.675 | 0.00334  | 2 | 1 | 27.4 | 0 |
| P12163_1_F3,27504 | R.DALVELL呢K.D          | 1656.019 | 0.00279  | 3 | 1 | 25.1 | 0 |
| P12163_1_S1,18085 | R.VYQELNYVQEGQNAR      | 2115.077 | 0.00604  | 3 | 1 | 50.5 | 0 |
| P12163_1_S1,18096 | R.VYQELNYVQEGQNAR      | 2115.077 | 0.00453  | 2 | 1 | 44   | 0 |
| P12163_1_S1,19997 | K.ASDIIDAGPLLDEK.L     | 2065.164 | 0.00625  | 3 | 1 | 37.3 | 0 |
| P12163_1_F9,15340 | K.HEMEFALER.G          | 1465.741 | 0.00448  | 3 | 1 | 46.9 | 0 |
| P12163_2_F9,14820 | K.HEMEFALER.G          | 1465.741 | 0.00304  | 3 | 1 | 27.2 | 0 |
| P12163_1_F3,23290 | K.LPEVLDGQMLK.V        | 1851.087 | 0.0014   | 3 | 1 | 62.6 | 0 |
| P12163_1_F2,22100 | R.DLGSYIPLEK.H         | 1856.099 | 0.00473  | 2 | 1 | 37.9 | 0 |
| P12163_1_F8,19601 | R.IGATEATAVLDHVK.S     | 2033.185 | 0.0075   | 3 | 1 | 55   | 0 |
| P12163_2_F6,19200 | R.IGATEATAVLDHVK.S     | 2033.185 | 0.01122  | 3 | 1 | 40.8 | 0 |
| P12163_1_F8,12312 | R.LTDTVHPENCDEK.I      | 2166.096 | 0.0008   | 2 | 1 | 31.3 | 0 |
| P12163_2_F2,10700 | R.NISSVQQK.E           | 1511.9   | 0.00731  | 2 | 1 | 26.9 | 0 |
| P12163_1_S1,21972 | R.QILQAACETLANASSR     | 2037.07  | 0.00205  | 3 | 1 | 70.4 | 0 |
| P12163_2_F6,13339 | K.AVAESVQHPFR.Y        | 1544.849 | -0.00172 | 3 | 1 | 50   | 0 |
| P12163_2_F6,22851 | K.FEAVIHFGALK.A        | 1840.094 | 0.00555  | 3 | 1 | 23.7 | 0 |
| P12163_1_F3,28548 | K.GISVLEM*VAAFEK.V     | 2018.145 | 0.00312  | 3 | 1 | 48.6 | 0 |
| P12163_1_F3,28560 | K.GISVLEMVAAFEK.V      | 2002.15  | 0.00705  | 3 | 1 | 30.6 | 0 |
| P12163_2_F6,17958 | K.LEFHVGDLR.N          | 1389.779 | 0.00159  | 3 | 1 | 30.7 | 0 |
| P12163_2_F2,11345 | K.NNPMGYQTK.K          | 1660.894 | 0.00598  | 2 | 1 | 35.6 | 0 |
| P12163_2_F10,1840 | K.VVLIDNLHNSVPEAVI     | 2194.213 | 0.00045  | 3 | 1 | 40.6 | 0 |
| P12163_2_F10,1842 | K.VVLIDNLHNSVPEAVI     | 2194.213 | 0.00474  | 3 | 1 | 24.9 | 0 |
| P12163_1_F8,14900 | R.HPELNVYQGQDYPTK.D    | 2269.207 | 0.00376  | 3 | 1 | 30.1 | 0 |
| P12163_1_F2,15723 | R.VGDATAVYAAATDK.A     | 1890.043 | 0.00132  | 3 | 1 | 37.8 | 0 |
| P12163_1_S1,23011 | K.ADVLQALHAL-          | 1354.8   | 0.00385  | 2 | 1 | 31.6 | 0 |
| P12163_1_F5,20357 | K.FIDALK.I ! R.FLDALK. | 1314.824 | 0.00731  | 2 | 1 | 25.3 | 0 |
| P12163_1_F8,17991 | K.FIGGHNDVLAGCISGS     | 2469.302 | 0.00954  | 3 | 1 | 26.4 | 0 |
| P12163_2_F6,17501 | K.FIGGHNDVLAGCISGS     | 2469.302 | 0.00918  | 3 | 1 | 33.8 | 0 |
| P12163_1_F4,22473 | K.NVQLEALADLK.N        | 1822.089 | 0.00699  | 3 | 1 | 36.9 | 0 |
| P12163_1_F4,20786 | K.TAELIDFK.E           | 1544.914 | 0.00402  | 2 | 1 | 25.8 | 0 |
| P12163_2_F1,20173 | K.TAELIDFK.E           | 1544.914 | 0.0028   | 2 | 1 | 29.4 | 0 |
| P12163_1_F2,20647 | K.YGIMDNLVR.F          | 1384.756 | 0.00573  | 2 | 1 | 37.3 | 0 |
| P12163_1_F3,24325 | R.IFIETVLPK.M          | 1668.056 | 0.00732  | 3 | 1 | 46.1 | 0 |
| P12163_1_F3,9229  | R.VQQQNSTALR.M         | 1448.812 | 0.00459  | 2 | 1 | 38   | 0 |
| P12163_1_F3,15784 | K.EVDEQMINVQNK.N ! I   | 2055.1   | 0.005    | 2 | 1 | 71.2 | 0 |
| P12163_1_F7,21368 | K.FWEVVCDEHGIDPTGI     | 2221.065 | 0.00079  | 3 | 1 | 43.5 | 0 |
| P12163_1_S1,23245 | K.LAVNLIPFPR.L         | 1443.899 | 0.00187  | 3 | 1 | 36.6 | 0 |
| P12163_1_F2,15019 | R.FPGQLNSDLR.K         | 1450.796 | 0.00178  | 3 | 1 | 40.8 | 0 |
| P12163_1_F8,22050 | R.KLAVNLIPFPR.L        | 1876.199 | 0.00927  | 3 | 1 | 27.8 | 0 |
| P12163_2_F6,21707 | R.KLAVNLIPFPR.L        | 1876.199 | 0.00288  | 3 | 1 | 34   | 0 |
| P12163_1_F8,24105 | R.LHFFM*VGFAPL呢SR.C    | 1943.051 | 0.00513  | 3 | 1 | 43.6 | 0 |
| P12163_1_F3,26332 | R.MMLTFSVFPSPK.V       | 1993.111 | 0.00817  | 3 | 1 | 44.8 | 0 |
| P12163_1_F3,17068 | R.YLTASAMFR.G          | 1363.735 | 0.00428  | 3 | 1 | 38.5 | 0 |
| P12163_1_S1,17600 | K.EALNLEYQSALSRI       | 1797.965 | 0.00255  | 2 | 1 | 46.6 | 0 |
| P12163_1_F4,15247 | K.LEAESLNTEK.L         | 1741.979 | -0.00265 | 2 | 1 | 29.1 | 0 |

|                   |                      |          |          |   |   |      |   |
|-------------------|----------------------|----------|----------|---|---|------|---|
| P12163_2_F2,14008 | K.LSEQLQNK.K         | 1567.926 | 0.00856  | 2 | 1 | 33.9 | 0 |
| P12163_1_F7,22639 | K.LSIAGELEAELNHR.L   | 1856.018 | 0.00394  | 3 | 1 | 75.2 | 0 |
| P12163_1_F4,16200 | K.LTVENAELNQK.L      | 1867.074 | 0.01286  | 2 | 1 | 24   | 0 |
| P12163_1_F4,22674 | K.QIEGLFLECK.V       | 1845.04  | 0.00698  | 3 | 1 | 30.2 | 0 |
| P12163_1_F4,21193 | K.SLELEVASLGNQK.S    | 1996.153 | 0.00247  | 3 | 1 | 47.4 | 0 |
| P12163_1_F4,23858 | R.ISDLEMLTK.E        | 1657.965 | 0.00816  | 2 | 1 | 31.4 | 0 |
| P12163_1_F7,11604 | K.AAHLALK.A ! K.AAHL | 1331.862 | 0.00147  | 2 | 1 | 36.8 | 0 |
| P12163_1_F7,11622 | K.AAHLALK.A ! K.AAHL | 1331.862 | 0.00176  | 3 | 1 | 28.2 | 0 |
| P12163_1_F9,12597 | K.AAHLALK.A ! K.AAHL | 1331.862 | 0.00713  | 2 | 1 | 38.8 | 0 |
| P12163_1_F9,12601 | K.AAHLALK.A ! K.AAHL | 1331.862 | 0.00599  | 3 | 1 | 33.8 | 0 |
| P12163_1_F9,12819 | K.AAHLALK.A ! K.AAHL | 1331.862 | 0.00679  | 2 | 1 | 33.7 | 0 |
| P12163_1_F9,12828 | K.AAHLALK.A ! K.AAHL | 1331.862 | 0.00311  | 3 | 1 | 30.1 | 0 |
| P12163_1_F9,13255 | K.AAHLALK.A ! K.AAHL | 1331.862 | 0.00143  | 3 | 1 | 33.8 | 0 |
| P12163_1_F9,13256 | K.AAHLALK.A ! K.AAHL | 1331.862 | 0.00307  | 2 | 1 | 33.7 | 0 |
| P12163_1_S10,1265 | K.AAHLALK.A ! K.AAHL | 1331.862 | 0.00633  | 2 | 1 | 33.5 | 0 |
| P12163_1_S10,1270 | K.AAHLALK.A ! K.AAHL | 1331.862 | 0.00128  | 3 | 1 | 26.4 | 0 |
| P12163_1_S10,1277 | K.AAHLALK.A ! K.AAHL | 1331.862 | 0.0005   | 4 | 1 | 23.1 | 0 |
| P12163_2_F10,1105 | K.AAHLALK.A ! K.AAHL | 1331.862 | 0.0014   | 3 | 1 | 25.5 | 0 |
| P12163_2_F10,1174 | K.AAHLALK.A ! K.AAHL | 1331.862 | 0.00506  | 3 | 1 | 25.7 | 0 |
| P12163_2_F10,1175 | K.AAHLALK.A ! K.AAHL | 1331.862 | 0.00569  | 2 | 1 | 31.7 | 0 |
| P12163_2_F8_12070 | K.AAHLALK.A ! K.AAHL | 1331.862 | 0.00074  | 3 | 1 | 28.9 | 0 |
| P12163_2_F8_12070 | K.AAHLALK.A ! K.AAHL | 1331.862 | 0.00536  | 3 | 1 | 26.3 | 0 |
| P12163_2_F8_12070 | K.AAHLALK.A ! K.AAHL | 1331.862 | 0.00507  | 2 | 1 | 32.4 | 0 |
| P12163_2_F9,11529 | K.AAHLALK.A ! K.AAHL | 1331.862 | -0.0015  | 4 | 1 | 37.1 | 0 |
| P12163_2_F9,11661 | K.AAHLALK.A ! K.AAHL | 1331.862 | 0.00155  | 3 | 1 | 33.6 | 0 |
| P12163_1_F4,19234 | K.ALDMNSAEDAIVR.L    | 1708.884 | 0.00735  | 2 | 1 | 30.1 | 0 |
| P12163_1_F5,17505 | K.ALDMNSAEDAIVR.L    | 1708.884 | 0.00373  | 2 | 1 | 31.4 | 0 |
| P12163_1_F8,18254 | K.ALDMNSAEDAIVR.L    | 1708.884 | -0.00003 | 2 | 1 | 27.1 | 0 |
| P12163_2_F1,18073 | K.ALDMNSAEDAIVR.L    | 1708.884 | -0.00427 | 2 | 1 | 27.7 | 0 |
| P12163_2_F2,18238 | K.ALDMNSAEDAIVR.L    | 1708.884 | 0.00981  | 2 | 1 | 24.1 | 0 |
| P12163_2_F4,17093 | K.ALDMNSAEDAIVR.L    | 1708.884 | 0.00011  | 2 | 1 | 35.6 | 0 |
| P12163_2_F6,17792 | K.ALDMNSAEDAIVR.L    | 1708.884 | 0.00093  | 2 | 1 | 26.7 | 0 |
| P12163_1_F6,15918 | K.HAALFTSTIM*SK.L    | 1931.088 | 0.00228  | 3 | 1 | 29.2 | 0 |
| P12163_1_F6,15936 | K.HAALFTSTIM*SK.L    | 1931.088 | -0.00176 | 4 | 1 | 22.7 | 0 |
| P12163_1_F6,18225 | K.HAALFTSTIM*SK.L    | 1931.088 | -0.00009 | 3 | 1 | 30.5 | 0 |
| P12163_1_F6,18244 | K.HAALFTSTIM*SK.L    | 1931.088 | 0.00824  | 4 | 1 | 36.3 | 0 |
| P12163_1_F9,15548 | K.HAALFTSTIM*SK.L    | 1931.088 | 0.0084   | 4 | 1 | 29.3 | 0 |
| P12163_1_F9,15564 | K.HAALFTSTIM*SK.L    | 1931.088 | 0.00615  | 3 | 1 | 38.2 | 0 |
| P12163_1_F9,17624 | K.HAALFTSTIM*SK.L    | 1931.088 | 0.00584  | 4 | 1 | 22.8 | 0 |
| P12163_1_F9,17641 | K.HAALFTSTIM*SK.L    | 1931.088 | 0.01305  | 3 | 1 | 38.5 | 0 |
| P12163_1_F9,17874 | K.HAALFTSTIM*SK.L    | 1931.088 | 0.00244  | 4 | 1 | 30.6 | 0 |
| P12163_1_F9,18486 | K.HAALFTSTIM*SK.L    | 1931.088 | 0.00592  | 4 | 1 | 23.9 | 0 |
| P12163_1_F9,18875 | K.HAALFTSTIM*SK.L    | 1931.088 | 0.00096  | 4 | 1 | 28   | 0 |
| P12163_2_F7,12600 | K.HAALFTSTIM*SK.L    | 1931.088 | 0.00552  | 3 | 1 | 25.2 | 0 |
| P12163_2_F7,13998 | K.HAALFTSTIM*SK.L    | 1931.088 | 0.00655  | 2 | 1 | 36.9 | 0 |
| P12163_2_F7,14881 | K.HAALFTSTIM*SK.L    | 1931.088 | 0.00744  | 4 | 1 | 27.4 | 0 |
| P12163_2_F7,15561 | K.HAALFTSTIM*SK.L    | 1931.088 | -0.00103 | 2 | 1 | 31.6 | 0 |
| P12163_2_F7,15597 | K.HAALFTSTIM*SK.L    | 1931.088 | 0.0024   | 4 | 1 | 32.4 | 0 |
| P12163_2_F9,14602 | K.HAALFTSTIM*SK.L    | 1931.088 | 0.00639  | 3 | 1 | 30.4 | 0 |
| P12163_2_F9,16689 | K.HAALFTSTIM*SK.L    | 1931.088 | 0.00312  | 4 | 1 | 23.5 | 0 |
| P12163_2_S5,14707 | K.HAALFTSTIM*SK.L    | 1931.088 | 0.00681  | 3 | 1 | 42.3 | 0 |

|                                      |          |          |   |   |      |   |
|--------------------------------------|----------|----------|---|---|------|---|
| P12163_1_F6,18253 K.HAALFTSTIMSK.L   | 1915.093 | 0.00457  | 2 | 1 | 30.5 | 0 |
| P12163_1_F9,17604 K.HAALFTSTIMSK.L   | 1915.093 | 0.00828  | 4 | 1 | 23.2 | 0 |
| P12163_1_F9,17613 K.HAALFTSTIMSK.L   | 1915.093 | 0.00903  | 3 | 1 | 36.7 | 0 |
| P12163_1_F9,17622 K.HAALFTSTIMSK.L   | 1915.093 | 0.00801  | 2 | 1 | 55   | 0 |
| P12163_1_S10,1706 K.HAALFTSTIMSK.L   | 1915.093 | 0.00309  | 3 | 1 | 41.3 | 0 |
| P12163_1_S10,1710 K.HAALFTSTIMSK.L   | 1915.093 | 0        | 4 | 1 | 27.4 | 0 |
| P12163_2_F10,1588 K.HAALFTSTIMSK.L   | 1915.093 | 0.0008   | 4 | 1 | 29   | 0 |
| P12163_2_F7,15560 K.HAALFTSTIMSK.L   | 1915.093 | -0.00017 | 2 | 1 | 48.8 | 0 |
| P12163_2_F7,15596 K.HAALFTSTIMSK.L   | 1915.093 | -0.00225 | 3 | 1 | 54.2 | 0 |
| P12163_2_F8_12070 K.HAALFTSTIMSK.L   | 1915.093 | 0.00858  | 3 | 1 | 44.9 | 0 |
| P12163_2_F9,16659 K.HAALFTSTIMSK.L   | 1915.093 | 0.00552  | 3 | 1 | 39.6 | 0 |
| P12163_2_S5,16858 K.HAALFTSTIMSK.L   | 1915.093 | 0.0042   | 3 | 1 | 65   | 0 |
| P12163_2_S5,16896 K.HAALFTSTIMSK.L   | 1915.093 | 0.00011  | 2 | 1 | 26.1 | 0 |
| P12163_1_F2,24508 K.LFNAVAAEDLIVK.G  | 2011.205 | 0.00653  | 3 | 1 | 24.4 | 0 |
| P12163_1_F3,25745 K.LFNAVAAEDLIVK.G  | 2011.205 | 0.00164  | 3 | 1 | 44.9 | 0 |
| P12163_1_F3,25922 K.LFNAVAAEDLIVK.G  | 2011.205 | 0.0044   | 2 | 1 | 86.3 | 0 |
| P12163_1_F3,25982 K.LFNAVAAEDLIVK.G  | 2011.205 | 0.00428  | 3 | 1 | 46.3 | 0 |
| P12163_1_F3,26158 K.LFNAVAAEDLIVK.G  | 2011.205 | 0.00264  | 2 | 1 | 29.2 | 0 |
| P12163_1_F3,26204 K.LFNAVAAEDLIVK.G  | 2011.205 | 0.00623  | 3 | 1 | 52.4 | 0 |
| P12163_1_F3,26576 K.LFNAVAAEDLIVK.G  | 2011.205 | 0.00926  | 3 | 1 | 42.3 | 0 |
| P12163_1_F3,27232 K.LFNAVAAEDLIVK.G  | 2011.205 | 0.00737  | 3 | 1 | 31.1 | 0 |
| P12163_1_F3,27720 K.LFNAVAAEDLIVK.G  | 2011.205 | 0.00029  | 3 | 1 | 27.9 | 0 |
| P12163_1_F3,28621 K.LFNAVAAEDLIVK.G  | 2011.205 | 0.00134  | 3 | 1 | 24.4 | 0 |
| P12163_1_F4,26655 K.LFNAVAAEDLIVK.G  | 2011.205 | -0.01372 | 3 | 1 | 39.1 | 0 |
| P12163_1_F7,23525 K.LFNAVAAEDLIVK.G  | 2011.205 | 0.00224  | 3 | 1 | 40.9 | 0 |
| P12163_1_F8,24425 K.LFNAVAAEDLIVK.G  | 2011.205 | 0.00443  | 3 | 1 | 33.6 | 0 |
| P12163_1_S1,22796 K.LFNAVAAEDLIVK.G  | 2011.205 | -0.00043 | 3 | 1 | 36.9 | 0 |
| P12163_1_S1,23034 K.LFNAVAAEDLIVK.G  | 2011.205 | 0.0059   | 3 | 1 | 47   | 0 |
| P12163_1_F3,15976 K.SIGM*IEEVPGM*K.A | 1931.044 | -0.00231 | 3 | 1 | 31.7 | 0 |
| P12163_2_F6,19860 K.SIGM*IEEVPGM*K.A | 1931.044 | 0.00231  | 3 | 1 | 22.2 | 0 |
| P12163_1_F3,15779 K.SIGM*IEEVPGMK.A  | 1915.049 | 0.00591  | 4 | 1 | 35.6 | 0 |
| P12163_1_F3,15781 K.SIGM*IEEVPGMK.A  | 1915.049 | 0.00748  | 2 | 1 | 31.5 | 0 |
| P12163_1_F3,15524 K.SIGMIEEVPGM*K.A  | 1915.049 | 0.01353  | 3 | 1 | 33.4 | 0 |
| P12163_1_F3,18057 K.SIGMIEEVPGM*K.A  | 1915.049 | 0.01122  | 3 | 1 | 22.5 | 0 |
| P12163_1_F3,18319 K.SIGMIEEVPGM*K.A  | 1915.049 | 0.00612  | 3 | 1 | 45   | 0 |
| P12163_1_F3,18353 K.SIGMIEEVPGM*K.A  | 1915.049 | 0.00596  | 2 | 1 | 27.6 | 0 |
| P12163_1_F3,20720 K.SIGMIEEVPGM*K.A  | 1915.049 | 0.0111   | 3 | 1 | 31.2 | 0 |
| P12163_1_F4,18811 K.SIGMIEEVPGM*K.A  | 1915.049 | 0.00246  | 3 | 1 | 23.3 | 0 |
| P12163_1_F4,21322 K.SIGMIEEVPGM*K.A  | 1915.049 | 0.00348  | 3 | 1 | 38.1 | 0 |
| P12163_1_F4,21335 K.SIGMIEEVPGM*K.A  | 1915.049 | 0.00404  | 2 | 1 | 31.4 | 0 |
| P12163_1_F6,19672 K.SIGMIEEVPGM*K.A  | 1915.049 | 0.00534  | 3 | 1 | 23.6 | 0 |
| P12163_2_F4,16651 K.SIGMIEEVPGM*K.A  | 1915.049 | 0.01632  | 3 | 1 | 29.7 | 0 |
| P12163_1_F3,18038 K.SIGMIEEVPGMK.A   | 1899.054 | 0.00612  | 2 | 1 | 35.1 | 0 |
| P12163_1_F3,18040 K.SIGMIEEVPGMK.A   | 1899.054 | 0.00331  | 4 | 1 | 33.1 | 0 |
| P12163_1_F3,18050 K.SIGMIEEVPGMK.A   | 1899.054 | 0.0003   | 3 | 1 | 25.9 | 0 |
| P12163_1_F5,20081 K.SIGMIEEVPGMK.A   | 1899.054 | 0.00717  | 3 | 1 | 41   | 0 |
| P12163_1_F5,20085 K.SIGMIEEVPGMK.A   | 1899.054 | 0.00692  | 2 | 1 | 33.7 | 0 |
| P12163_1_S10,1878 K.SIGMIEEVPGMK.A   | 1899.054 | 0.00162  | 3 | 1 | 30.1 | 0 |
| P12163_2_F2,20223 K.SIGMIEEVPGMK.A   | 1899.054 | 0.00003  | 3 | 1 | 25.5 | 0 |
| P12163_2_F9,18342 K.SIGMIEEVPGMK.A   | 1899.054 | 0.0066   | 3 | 1 | 31.7 | 0 |
| P12163_1_F4,16824 K.VVVSSCGHDGPFGATC | 2382.27  | 0.00165  | 3 | 1 | 31.2 | 0 |

|                   |                    |          |          |   |   |      |   |
|-------------------|--------------------|----------|----------|---|---|------|---|
| P12163_1_F4,16873 | K.VVVSSCGHDGPFGATC | 2382.27  | 0.00404  | 2 | 1 | 44.1 | 0 |
| P12163_1_F5,15664 | K.VVVSSCGHDGPFGATC | 2382.27  | 0.00678  | 3 | 1 | 31.5 | 0 |
| P12163_1_F6,15842 | K.VVVSSCGHDGPFGATC | 2382.27  | -0.00021 | 3 | 1 | 32.1 | 0 |
| P12163_1_F6,16203 | K.VVVSSCGHDGPFGATC | 2382.27  | 0.00609  | 3 | 1 | 30.4 | 0 |
| P12163_1_F7,13766 | K.VVVSSCGHDGPFGATC | 2382.27  | 0.00039  | 3 | 1 | 32.3 | 0 |
| P12163_2_F10,1436 | K.VVVSSCGHDGPFGATC | 2382.27  | 0.00588  | 3 | 1 | 24.8 | 0 |
| P12163_2_F10,1443 | K.VVVSSCGHDGPFGATC | 2382.27  | 0.00625  | 4 | 1 | 27.3 | 0 |
| P12163_2_F10,1462 | K.VVVSSCGHDGPFGATC | 2382.27  | 0.00537  | 4 | 1 | 27.5 | 0 |
| P12163_2_F10,1469 | K.VVVSSCGHDGPFGATC | 2382.27  | 0.00666  | 3 | 1 | 39.4 | 0 |
| P12163_2_F4,15057 | K.VVVSSCGHDGPFGATC | 2382.27  | 0.00342  | 2 | 1 | 38.8 | 0 |
| P12163_2_F4,15168 | K.VVVSSCGHDGPFGATC | 2382.27  | 0.00615  | 3 | 1 | 31.2 | 0 |
| P12163_2_F4,15256 | K.VVVSSCGHDGPFGATC | 2382.27  | 0.00737  | 4 | 1 | 27.7 | 0 |
| P12163_2_F4,15419 | K.VVVSSCGHDGPFGATC | 2382.27  | 0.00243  | 3 | 1 | 24.3 | 0 |
| P12163_2_F4,15729 | K.VVVSSCGHDGPFGATC | 2382.27  | 0.01236  | 3 | 1 | 31.1 | 0 |
| P12163_2_F6,15512 | K.VVVSSCGHDGPFGATC | 2382.27  | 0.00612  | 3 | 1 | 29.7 | 0 |
| P12163_2_F6,15524 | K.VVVSSCGHDGPFGATC | 2382.27  | 0.00197  | 4 | 1 | 26.8 | 0 |
| P12163_1_F3,17112 | R.M*GPTFGAM*MISGQK | 2096.08  | 0.01467  | 3 | 1 | 24.2 | 0 |
| P12163_1_F3,19549 | R.M*GPTFGAMMISGQK  | 2080.085 | 0.00819  | 3 | 1 | 39.9 | 0 |
| P12163_2_F1,19594 | R.M*GPTFGAMMISGQK  | 2080.085 | 0.00261  | 3 | 1 | 37.9 | 0 |
| P12163_1_F3,21218 | R.MGPTFGAM*MISGQK  | 2080.085 | 0.00435  | 3 | 1 | 25   | 0 |
| P12163_1_F4,22228 | R.MGPTFGAM*MISGQK  | 2080.085 | 0.00867  | 3 | 1 | 23   | 0 |
| P12163_1_F3,21342 | R.MGPTFGAMMISGQK.A | 2064.09  | 0.01963  | 2 | 1 | 39.3 | 0 |
| P12163_1_F4,22230 | R.MGPTFGAMMISGQK.A | 2064.09  | 0.01122  | 3 | 1 | 22.5 | 0 |
| P12163_2_F1,21715 | R.MGPTFGAMMISGQK.A | 2064.09  | 0.00141  | 3 | 1 | 36.9 | 0 |
| P12163_1_F2,19052 | K.ASM*ENGVLTVTVPK  | 2070.172 | 0.00558  | 3 | 1 | 29.4 | 0 |
| P12163_1_F3,17688 | K.ASM*ENGVLTVTVPK  | 2070.172 | 0.0058   | 2 | 1 | 51.3 | 0 |
| P12163_1_F3,17836 | K.ASM*ENGVLTVTVPK  | 2070.172 | 0.00556  | 3 | 1 | 39.1 | 0 |
| P12163_1_F3,19760 | K.ASM*ENGVLTVTVPK  | 2070.172 | 0.00567  | 3 | 1 | 41   | 0 |
| P12163_1_F6,18624 | K.ASM*ENGVLTVTVPK  | 2070.172 | 0.00459  | 3 | 1 | 30.6 | 0 |
| P12163_2_S3,14258 | K.ASM*ENGVLTVTVPK  | 2070.172 | -0.0032  | 3 | 1 | 28.7 | 0 |
| P12163_1_F3,17089 | K.ASMENGVLTVTVPK.V | 2054.178 | 0.0076   | 3 | 1 | 22.9 | 0 |
| P12163_1_F3,17130 | K.ASMENGVLTVTVPK.V | 2054.178 | 0.0046   | 2 | 1 | 56.1 | 0 |
| P12163_1_F3,17408 | K.ASMENGVLTVTVPK.V | 2054.178 | 0.00292  | 3 | 1 | 27   | 0 |
| P12163_1_F3,17444 | K.ASMENGVLTVTVPK.V | 2054.178 | 0.00442  | 2 | 1 | 38.7 | 0 |
| P12163_1_F3,17505 | K.ASMENGVLTVTVPK.V | 2054.178 | 0.00383  | 4 | 1 | 34.2 | 0 |
| P12163_1_F3,19514 | K.ASMENGVLTVTVPK.V | 2054.178 | 0.01582  | 2 | 1 | 49.7 | 0 |
| P12163_1_F3,19787 | K.ASMENGVLTVTVPK.V | 2054.178 | 0.0058   | 3 | 1 | 40.7 | 0 |
| P12163_1_F3,19805 | K.ASMENGVLTVTVPK.V | 2054.178 | 0.00574  | 2 | 1 | 62.5 | 0 |
| P12163_1_F4,20206 | K.ASMENGVLTVTVPK.V | 2054.178 | 0.00817  | 3 | 1 | 35.8 | 0 |
| P12163_1_F5,18443 | K.ASMENGVLTVTVPK.V | 2054.178 | 0.00721  | 3 | 1 | 35.6 | 0 |
| P12163_1_F5,18890 | K.ASMENGVLTVTVPK.V | 2054.178 | 0.0026   | 2 | 1 | 55.9 | 0 |
| P12163_1_F6,18609 | K.ASMENGVLTVTVPK.V | 2054.178 | 0.0073   | 3 | 1 | 44.9 | 0 |
| P12163_1_F6,18643 | K.ASMENGVLTVTVPK.V | 2054.178 | -0.00026 | 2 | 1 | 74   | 0 |
| P12163_1_F6,19012 | K.ASMENGVLTVTVPK.V | 2054.178 | 0.00223  | 3 | 1 | 34.3 | 0 |
| P12163_1_F7,18181 | K.ASMENGVLTVTVPK.V | 2054.178 | 0.00385  | 3 | 1 | 33.8 | 0 |
| P12163_1_F8,19120 | K.ASMENGVLTVTVPK.V | 2054.178 | 0.00625  | 3 | 1 | 36.6 | 0 |
| P12163_2_F1,19689 | K.ASMENGVLTVTVPK.V | 2054.178 | 0.01153  | 3 | 1 | 29.7 | 0 |
| P12163_2_F1,19711 | K.ASMENGVLTVTVPK.V | 2054.178 | 0.00306  | 2 | 1 | 70.6 | 0 |
| P12163_2_F4,17789 | K.ASMENGVLTVTVPK.V | 2054.178 | 0.00406  | 3 | 1 | 33.4 | 0 |
| P12163_2_F4,17801 | K.ASMENGVLTVTVPK.V | 2054.178 | 0.0048   | 2 | 1 | 55   | 0 |
| P12163_2_F7,17055 | K.ASMENGVLTVTVPK.V | 2054.178 | 0.00703  | 3 | 1 | 31.3 | 0 |

|                   |                      |          |          |   |   |      |   |
|-------------------|----------------------|----------|----------|---|---|------|---|
| P12163_2_F7,17056 | K.ASMENGVLTVTPK.V    | 2054.178 | -0.00088 | 2 | 1 | 42.2 | 0 |
| P12163_2_S3,15598 | K.ASMENGVLTVTPK.V    | 2054.178 | 0.00388  | 3 | 1 | 25.5 | 0 |
| P12163_2_F6,13654 | K.EEVKVEVEEGR.I      | 1911.064 | 0.00224  | 2 | 1 | 40.6 | 0 |
| P12163_2_F7,12730 | K.EEVKVEVEEGR.I      | 1911.064 | 0.0118   | 2 | 1 | 35.9 | 0 |
| P12163_2_F7,12986 | K.EEVKVEVEEGR.I      | 1911.064 | 0.00548  | 2 | 1 | 40.8 | 0 |
| P12163_1_F8,11469 | K.ETPQAHVFK.A        | 1664.958 | 0.00339  | 2 | 1 | 24.4 | 0 |
| P12163_1_F9,12031 | K.ETPQAHVFK.A        | 1664.958 | 0.01066  | 3 | 1 | 25   | 0 |
| P12163_1_F9,12041 | K.ETPQAHVFK.A        | 1664.958 | 0.00691  | 2 | 1 | 31   | 0 |
| P12163_1_F9,12485 | K.ETPQAHVFK.A        | 1664.958 | 0.01019  | 2 | 1 | 26.3 | 0 |
| P12163_1_F9,13271 | K.ETPQAHVFK.A        | 1664.958 | 0.00088  | 3 | 1 | 27.6 | 0 |
| P12163_2_F10,1072 | K.ETPQAHVFK.A        | 1664.958 | 0.00064  | 3 | 1 | 22.8 | 0 |
| P12163_2_F10,1092 | K.ETPQAHVFK.A        | 1664.958 | 0.00031  | 3 | 1 | 30   | 0 |
| P12163_2_F7,11099 | K.ETPQAHVFK.A        | 1664.958 | 0.00559  | 2 | 1 | 32.2 | 0 |
| P12163_2_F9,11225 | K.ETPQAHVFK.A        | 1664.958 | 0.00571  | 3 | 1 | 24.6 | 0 |
| P12163_2_F1,9426  | K.VEVEEGR.I          | 1121.61  | 0.00194  | 2 | 1 | 27.5 | 0 |
| P12163_2_F4,8111  | K.VEVEEGR.I          | 1121.61  | 0.002    | 2 | 1 | 35   | 0 |
| P12163_2_F4,9058  | K.VEVEEGR.I          | 1121.61  | 0.00288  | 2 | 1 | 25.7 | 0 |
| P12163_1_F3,7331  | R.ETSQFANAR.I        | 1327.691 | -0.00455 | 2 | 1 | 27.3 | 0 |
| P12163_1_F3,7398  | R.ETSQFANAR.I        | 1327.691 | -0.00635 | 3 | 1 | 30.2 | 0 |
| P12163_1_F3,7740  | R.ETSQFANAR.I        | 1327.691 | 0.00472  | 3 | 1 | 25.1 | 0 |
| P12163_1_F3,10233 | R.ETSQFANAR.I        | 1327.691 | 0.00335  | 2 | 1 | 31.2 | 0 |
| P12163_1_F3,10465 | R.ETSQFANAR.I        | 1327.691 | 0.00431  | 2 | 1 | 25.8 | 0 |
| P12163_1_F4,7722  | R.ETSQFANAR.I        | 1327.691 | 0.00333  | 2 | 1 | 28.9 | 0 |
| P12163_1_F4,7725  | R.ETSQFANAR.I        | 1327.691 | 0.00325  | 3 | 1 | 22.3 | 0 |
| P12163_1_F4,10581 | R.ETSQFANAR.I        | 1327.691 | 0.00389  | 2 | 1 | 29.9 | 0 |
| P12163_1_F3,15212 | R.ILQISGER.S         | 1219.731 | -0.00014 | 3 | 1 | 30.7 | 0 |
| P12163_1_F3,15445 | R.ILQISGER.S         | 1219.731 | 0.00223  | 3 | 1 | 29.3 | 0 |
| P12163_1_F3,17930 | R.ILQISGER.S         | 1219.731 | -0.00087 | 2 | 1 | 28.3 | 0 |
| P12163_1_F3,18316 | R.ILQISGER.S         | 1219.731 | 0.00169  | 2 | 1 | 26.7 | 0 |
| P12163_1_F3,18580 | R.ILQISGER.S         | 1219.731 | 0.00217  | 2 | 1 | 25.5 | 0 |
| P12163_1_F6,17579 | R.ILQISGER.S         | 1219.731 | 0.00255  | 2 | 1 | 24.7 | 0 |
| P12163_1_F9,17205 | R.ILQISGER.S         | 1219.731 | 0.00583  | 2 | 1 | 26   | 0 |
| P12163_2_F1,17472 | R.ILQISGER.S         | 1219.731 | 0.00215  | 2 | 1 | 31.3 | 0 |
| P12163_2_F1,19194 | R.ILQISGER.S         | 1219.731 | 0.00407  | 2 | 1 | 26.4 | 0 |
| P12163_2_F1,20491 | R.ILQISGER.S         | 1219.731 | 0.00235  | 2 | 1 | 26.2 | 0 |
| P12163_2_F2,686   | R.ILQISGER.S         | 1219.731 | 0.00263  | 2 | 1 | 26.4 | 0 |
| P12163_1_F6,11421 | R.LPDNAK.M ! R.LPDNA | 1265.767 | 0.00788  | 3 | 1 | 26.7 | 0 |
| P12163_1_F4,9102  | K.ESSASIQPSK.S       | 1641.927 | 0.00638  | 3 | 1 | 22.7 | 0 |
| P12163_1_F4,9322  | K.ESSASIQPSK.S       | 1641.927 | 0.00568  | 2 | 1 | 26.4 | 0 |
| P12163_1_F5,9311  | K.ESSASIQPSK.S       | 1641.927 | 0.00736  | 2 | 1 | 25.3 | 0 |
| P12163_1_F7,9317  | K.ESSASIQPSK.S       | 1641.927 | 0.00052  | 2 | 1 | 24.1 | 0 |
| P12163_1_F9,10017 | K.ESSASIQPSK.S       | 1641.927 | 0.00734  | 3 | 1 | 24.1 | 0 |
| P12163_1_F9,10025 | K.ESSASIQPSK.S       | 1641.927 | 0.00636  | 2 | 1 | 44.2 | 0 |
| P12163_2_F1,9806  | K.ESSASIQPSK.S       | 1641.927 | 0.00422  | 2 | 1 | 41   | 0 |
| P12163_2_F1,10396 | K.ESSASIQPSK.S       | 1641.927 | 0.015    | 2 | 1 | 27.9 | 0 |
| P12163_2_F1,10693 | K.ESSASIQPSK.S       | 1641.927 | 0.00812  | 2 | 1 | 29.9 | 0 |
| P12163_2_S5,9063  | K.ESSASIQPSK.S       | 1641.927 | 0.00203  | 3 | 1 | 24.7 | 0 |
| P12163_1_F4,16920 | K.GAPSSVFIK.E        | 1513.92  | 0.00208  | 3 | 1 | 22.6 | 0 |
| P12163_1_F5,15778 | K.GAPSSVFIK.E        | 1513.92  | 0.00843  | 2 | 1 | 29.6 | 0 |
| P12163_1_F5,15842 | K.GAPSSVFIK.E        | 1513.92  | 0.0077   | 3 | 1 | 28.6 | 0 |
| P12163_1_F9,16116 | K.GAPSSVFIK.E        | 1513.92  | 0.00284  | 3 | 1 | 22.6 | 0 |

|                    |                      |          |          |   |   |      |   |
|--------------------|----------------------|----------|----------|---|---|------|---|
| P12163_2_F1,16086  | K.GAPSSVFIK.E        | 1513.92  | 0.00765  | 2 | 1 | 28.8 | 0 |
| P12163_2_F1,16293  | K.GAPSSVFIK.E        | 1513.92  | 0.00034  | 3 | 1 | 22.1 | 0 |
| P12163_2_F2,16628  | K.GAPSSVFIK.E        | 1513.92  | 0.00577  | 3 | 1 | 26.3 | 0 |
| P12163_2_F2,16645  | K.GAPSSVFIK.E        | 1513.92  | 0.00723  | 2 | 1 | 32.3 | 0 |
| P12163_1_F2,11073  | K.VDSLGENR.S         | 1193.643 | 0.00176  | 2 | 1 | 25.9 | 0 |
| P12163_1_F3,7977   | K.VDSLGENR.S         | 1193.643 | 0.00338  | 3 | 1 | 37.5 | 0 |
| P12163_1_F6,22266  | R.LEPGYPLIIGGINVPHEI | 2278.286 | -0.00005 | 2 | 1 | 39.6 | 0 |
| P12163_1_F6,22308  | R.LEPGYPLIIGGINVPHEI | 2278.286 | 0.00004  | 4 | 1 | 38.5 | 0 |
| P12163_1_F6,22446  | R.LEPGYPLIIGGINVPHEI | 2278.286 | -0.00176 | 3 | 1 | 50.5 | 0 |
| P12163_1_F7,21476  | R.LEPGYPLIIGGINVPHEI | 2278.286 | 0.00519  | 2 | 1 | 32.9 | 0 |
| P12163_1_F7,21534  | R.LEPGYPLIIGGINVPHEI | 2278.286 | 0.00192  | 4 | 1 | 28.7 | 0 |
| P12163_1_F7,21573  | R.LEPGYPLIIGGINVPHEI | 2278.286 | 0.0037   | 3 | 1 | 69.3 | 0 |
| P12163_1_F7,21827  | R.LEPGYPLIIGGINVPHEI | 2278.286 | 0.00748  | 3 | 1 | 42   | 0 |
| P12163_1_S10,20310 | R.LEPGYPLIIGGINVPHEI | 2278.286 | 0.00406  | 3 | 1 | 48   | 0 |
| P12163_1_S10,2032  | R.LEPGYPLIIGGINVPHEI | 2278.286 | 0.0052   | 4 | 1 | 38.1 | 0 |
| P12163_2_F10,1932  | R.LEPGYPLIIGGINVPHEI | 2278.286 | 0.00406  | 3 | 1 | 53.1 | 0 |
| P12163_2_F10,1934  | R.LEPGYPLIIGGINVPHEI | 2278.286 | 0.00156  | 4 | 1 | 43.1 | 0 |
| P12163_2_F10,1950  | R.LEPGYPLIIGGINVPHEI | 2278.286 | 0.00508  | 3 | 1 | 54.4 | 0 |
| P12163_2_F7,19802  | R.LEPGYPLIIGGINVPHEI | 2278.286 | -0.00131 | 3 | 1 | 33.9 | 0 |
| P12163_2_F8_12070  | R.LEPGYPLIIGGINVPHEI | 2278.286 | 0.00298  | 3 | 1 | 59.7 | 0 |
| P12163_2_F8_12070  | R.LEPGYPLIIGGINVPHEI | 2278.286 | 0.00024  | 4 | 1 | 29.2 | 0 |
| P12163_2_S5,20424  | R.LEPGYPLIIGGINVPHEI | 2278.286 | 0.00376  | 3 | 1 | 58.4 | 0 |
| P12163_2_S5,20456  | R.LEPGYPLIIGGINVPHEI | 2278.286 | 0.0028   | 4 | 1 | 41.8 | 0 |
| P12163_2_S5,20634  | R.LEPGYPLIIGGINVPHEI | 2278.286 | 0.00838  | 3 | 1 | 27   | 0 |
| P12163_2_F6,18511  | R.SIAAHTVILLM*K.K    | 1921.176 | 0.00311  | 3 | 1 | 23.5 | 0 |
| P12163_1_F8,21897  | R.SIAAHTVILLMK.K     | 1905.182 | 0.00728  | 3 | 1 | 22.1 | 0 |
| P12163_1_F3,24431  | R.TNLSELLGADPTVVNL   | 2392.391 | 0.00333  | 3 | 1 | 27.9 | 0 |
| P12163_1_S1,20643  | R.TNLSELLGADPTVVNL   | 2392.391 | 0.0091   | 4 | 1 | 60.4 | 0 |
| P12163_1_S1,22207  | R.TNLSELLGADPTVVNL   | 2392.391 | 0.00594  | 4 | 1 | 57.7 | 0 |
| P12163_1_S1,22231  | R.TNLSELLGADPTVVNL   | 2392.391 | 0.00487  | 2 | 1 | 35.4 | 0 |
| P12163_1_S1,22429  | R.TNLSELLGADPTVVNL   | 2392.391 | 0.00516  | 3 | 1 | 46.8 | 0 |
| P12163_1_F5,11022  | R.VGHGFDLHR.L        | 1341.733 | 0.00504  | 3 | 1 | 31.7 | 0 |
| P12163_1_F5,11076  | R.VGHGFDLHR.L        | 1341.733 | 0.00586  | 4 | 1 | 46   | 0 |
| P12163_1_F6,12171  | R.VGHGFDLHR.L        | 1341.733 | 0.00366  | 3 | 1 | 36.2 | 0 |
| P12163_1_F6,12209  | R.VGHGFDLHR.L        | 1341.733 | 0.00302  | 4 | 1 | 33.7 | 0 |
| P12163_2_F7,11078  | R.VGHGFDLHR.L        | 1341.733 | 0.00135  | 3 | 1 | 47.6 | 0 |
| P12163_2_F7,11079  | R.VGHGFDLHR.L        | 1341.733 | 0.00602  | 2 | 1 | 32.6 | 0 |
| P12163_2_F7,11080  | R.VGHGFDLHR.L        | 1341.733 | 0.00538  | 4 | 1 | 34   | 0 |
| P12163_2_S5,11646  | R.VGHGFDLHR.L        | 1341.733 | 0.00202  | 4 | 1 | 27.9 | 0 |
| P12163_2_S5,11660  | R.VGHGFDLHR.L        | 1341.733 | 0.00336  | 3 | 1 | 31.2 | 0 |
| P12163_2_S5,11877  | R.VGHGFDLHR.L        | 1341.733 | 0.00156  | 3 | 1 | 34.7 | 0 |
| P12163_1_F2,11806  | K.DGVSAGTEIGK.L      | 1641.927 | 0.00287  | 3 | 1 | 32.9 | 0 |
| P12163_1_F3,10826  | K.DGVSAGTEIGK.L      | 1641.927 | 0.00272  | 3 | 1 | 30.2 | 0 |
| P12163_1_F3,10828  | K.DGVSAGTEIGK.L      | 1641.927 | 0.00849  | 2 | 1 | 33.4 | 0 |
| P12163_1_F3,12231  | K.DGVSAGTEIGK.L      | 1641.927 | 0.00215  | 2 | 1 | 54.4 | 0 |
| P12163_1_F3,12262  | K.DGVSAGTEIGK.L      | 1641.927 | 0.00578  | 3 | 1 | 34   | 0 |
| P12163_1_F4,11201  | K.DGVSAGTEIGK.L      | 1641.927 | 0.00857  | 3 | 1 | 23.5 | 0 |
| P12163_1_F4,12893  | K.DGVSAGTEIGK.L      | 1641.927 | 0.00737  | 2 | 1 | 54.9 | 0 |
| P12163_1_F7,11081  | K.DGVSAGTEIGK.L      | 1641.927 | 0.00329  | 3 | 1 | 26.8 | 0 |
| P12163_1_S1,11474  | K.DGVSAGTEIGK.L      | 1641.927 | 0.00464  | 3 | 1 | 37.3 | 0 |
| P12163_1_F4,16387  | K.LVSGLGGSK.L        | 1425.889 | 0.00557  | 2 | 1 | 40.6 | 0 |

|                                          |          |          |   |   |      |   |
|------------------------------------------|----------|----------|---|---|------|---|
| P12163_1_F4,16433 K.LVSGLGGSK.L          | 1425.889 | 0.00561  | 3 | 1 | 35.7 | 0 |
| P12163_1_F6,16063 K.LVSGLGGSK.L          | 1425.889 | 0.00781  | 2 | 1 | 30.7 | 0 |
| P12163_1_F7,14687 K.LVSGLGGSK.L          | 1425.889 | 0.00131  | 2 | 1 | 25.3 | 0 |
| P12163_1_F7,14705 K.LVSGLGGSK.L          | 1425.889 | 0.00366  | 3 | 1 | 39.4 | 0 |
| P12163_2_F1,15343 K.LVSGLGGSK.L          | 1425.889 | 0.00873  | 3 | 1 | 41.7 | 0 |
| P12163_2_F1,15532 K.LVSGLGGSK.L          | 1425.889 | 0.00431  | 2 | 1 | 33.4 | 0 |
| P12163_2_F1,15587 K.LVSGLGGSK.L          | 1425.889 | 0.00396  | 3 | 1 | 33.4 | 0 |
| P12163_2_S5,14052 K.LVSGLGGSK.L          | 1425.889 | -0.00102 | 3 | 1 | 22.1 | 0 |
| P12163_1_F5,11167 K.MVEAASK.S            | 1343.781 | 0.00951  | 3 | 1 | 24.8 | 0 |
| P12163_1_F3,13791 K.SFVVVADESK.L         | 1688.968 | 0.00538  | 3 | 1 | 35.6 | 0 |
| P12163_1_F3,13829 K.SFVVVADESK.L         | 1688.968 | 0.00747  | 2 | 1 | 41.9 | 0 |
| P12163_1_F3,17107 K.SFVVVADESK.L         | 1688.968 | 0.00671  | 2 | 1 | 48.2 | 0 |
| P12163_1_F3,17145 K.SFVVVADESK.L         | 1688.968 | 0.00505  | 3 | 1 | 48   | 0 |
| P12163_1_F4,14288 K.SFVVVADESK.L         | 1688.968 | 0.00541  | 3 | 1 | 27.5 | 0 |
| P12163_1_F6,16427 K.SFVVVADESK.L         | 1688.968 | 0.00446  | 3 | 1 | 38.4 | 0 |
| P12163_1_F6,16437 K.SFVVVADESK.L         | 1688.968 | -0.00097 | 2 | 1 | 61.1 | 0 |
| P12163_2_F1,16799 K.SFVVVADESK.L         | 1688.968 | 0.00399  | 2 | 1 | 57.2 | 0 |
| P12163_2_F1,16852 K.SFVVVADESK.L         | 1688.968 | 0.00514  | 3 | 1 | 28.4 | 0 |
| P12163_2_S3,14015 K.SFVVVADESK.L         | 1688.968 | -0.00212 | 3 | 1 | 23.7 | 0 |
| P12163_2_S5,15520 K.SFVVVADESK.L         | 1688.968 | 0.00547  | 3 | 1 | 31.4 | 0 |
| P12163_1_F3,14938 R.DIVGIPTSK.R          | 1537.941 | 0.00426  | 3 | 1 | 27.3 | 0 |
| P12163_1_F3,14940 R.DIVGIPTSK.R          | 1537.941 | 0.00706  | 2 | 1 | 25.2 | 0 |
| P12163_1_F3,16937 R.DIVGIPTSK.R          | 1537.941 | 0.0062   | 2 | 1 | 29.9 | 0 |
| P12163_1_F3,17194 R.DIVGIPTSK.R          | 1537.941 | 0.00532  | 2 | 1 | 29.1 | 0 |
| P12163_1_F4,17325 R.DIVGIPTSK.R          | 1537.941 | 0.00916  | 2 | 1 | 26.9 | 0 |
| P12163_1_F6,16101 R.DIVGIPTSK.R          | 1537.941 | 0.00111  | 3 | 1 | 24.9 | 0 |
| P12163_1_F6,16138 R.DIVGIPTSK.R          | 1537.941 | 0.00154  | 2 | 1 | 29.2 | 0 |
| P12163_2_S3,13569 R.DIVGIPTSK.R          | 1537.941 | 0.00602  | 2 | 1 | 24.4 | 0 |
| P12163_1_F5,9738 R.ELGCEAK.L             | 1414.782 | 0.00696  | 2 | 1 | 29.9 | 0 |
| P12163_1_F5,9785 R.ELGCEAK.L             | 1414.782 | 0.00564  | 3 | 1 | 35.1 | 0 |
| P12163_2_F1,10333 R.ELGCEAK.L            | 1414.782 | 0.0066   | 3 | 1 | 35.1 | 0 |
| P12163_2_F2,10596 R.ELGCEAK.L            | 1414.782 | 0.00814  | 2 | 1 | 29.3 | 0 |
| P12163_2_F2,10627 R.ELGCEAK.L            | 1414.782 | 0.00804  | 3 | 1 | 24.8 | 0 |
| P12163_2_F1,6527 R.TEEQAK.S              | 1313.752 | 0.00492  | 3 | 1 | 24.8 | 0 |
| P12163_1_F4,21734 K.AEFPIFDK.V ! K.AEFPI | 1574.904 | 0.00428  | 2 | 1 | 26.4 | 0 |
| P12163_1_F4,21751 K.AEFPIFDK.V ! K.AEFPI | 1574.904 | -0.00508 | 3 | 1 | 25   | 0 |
| P12163_1_F4,21925 K.AEFPIFDK.V ! K.AEFPI | 1574.904 | 0.00614  | 2 | 1 | 25.2 | 0 |
| P12163_1_F4,22647 K.AEFPIFDK.V ! K.AEFPI | 1574.904 | 0.00794  | 2 | 1 | 29.1 | 0 |
| P12163_1_F4,22984 K.AEFPIFDK.V ! K.AEFPI | 1574.904 | 0.00758  | 3 | 1 | 24.4 | 0 |
| P12163_1_F5,20713 K.AEFPIFDK.V ! K.AEFPI | 1574.904 | 0.00546  | 2 | 1 | 27.1 | 0 |
| P12163_1_F5,20757 K.AEFPIFDK.V ! K.AEFPI | 1574.904 | 0.00521  | 3 | 1 | 23.4 | 0 |
| P12163_1_F6,20663 K.AEFPIFDK.V ! K.AEFPI | 1574.904 | 0.00316  | 2 | 1 | 29.6 | 0 |
| P12163_1_F6,20709 K.AEFPIFDK.V ! K.AEFPI | 1574.904 | 0.00356  | 3 | 1 | 25.1 | 0 |
| P12163_1_F7,19441 K.AEFPIFDK.V ! K.AEFPI | 1574.904 | -0.00217 | 3 | 1 | 22.4 | 0 |
| P12163_2_F1,21277 K.AEFPIFDK.V ! K.AEFPI | 1574.904 | 0.00548  | 2 | 1 | 24.7 | 0 |
| P12163_2_F1,21289 K.AEFPIFDK.V ! K.AEFPI | 1574.904 | 0.0026   | 3 | 1 | 24.9 | 0 |
| P12163_2_F4,18984 K.AEFPIFDK.V ! K.AEFPI | 1574.904 | 0.00296  | 2 | 1 | 30.8 | 0 |
| P12163_1_F4,13543 K.DVPLSK.F             | 1266.788 | 0.00905  | 3 | 1 | 22.3 | 0 |
| P12163_1_F4,20076 K.SIYDFTVK.D ! K.SLYD  | 1580.914 | 0.00877  | 3 | 1 | 22   | 0 |
| P12163_1_F4,20205 K.SIYDFTVK.D ! K.SLYD  | 1580.914 | 0.00495  | 2 | 1 | 36.1 | 0 |
| P12163_1_F4,20331 K.SIYDFTVK.D ! K.SLYD  | 1580.914 | 0.00514  | 3 | 1 | 25.8 | 0 |



|                   |                       |          |          |   |   |      |   |
|-------------------|-----------------------|----------|----------|---|---|------|---|
| P12163_1_F5,19008 | K.SIYDFTVK.D ! K.SLYD | 1580.914 | 0.00671  | 2 | 1 | 25.3 | 0 |
| P12163_1_F9,18685 | K.SIYDFTVK.D ! K.SLYD | 1580.914 | 0.00927  | 2 | 1 | 28.9 | 0 |
| P12163_2_F1,19705 | K.SIYDFTVK.D ! K.SLYD | 1580.914 | 0.00573  | 2 | 1 | 35.7 | 0 |
| P12163_2_F1,19734 | K.SIYDFTVK.D ! K.SLYD | 1580.914 | 0.00436  | 3 | 1 | 25.7 | 0 |
| P12163_2_F8_12070 | K.SIYDFTVK.D ! K.SLYD | 1580.914 | 0.00742  | 3 | 1 | 24.4 | 0 |
| P12163_1_F4,19425 | K.SSAGGFLGDLVK.W      | 1759.021 | -0.00156 | 3 | 1 | 25   | 0 |
| P12163_1_F4,22297 | K.SSAGGFLGDLVK.W      | 1759.021 | 0.00441  | 3 | 1 | 31.9 | 0 |
| P12163_1_F4,22534 | K.SSAGGFLGDLVK.W      | 1759.021 | 0.00643  | 2 | 1 | 65.5 | 0 |
| P12163_1_F4,22558 | K.SSAGGFLGDLVK.W      | 1759.021 | 0.00516  | 3 | 1 | 47.6 | 0 |
| P12163_1_F6,21016 | K.SSAGGFLGDLVK.W      | 1759.021 | 0.009    | 3 | 1 | 41.7 | 0 |
| P12163_1_F7,19837 | K.SSAGGFLGDLVK.W      | 1759.021 | 0.00219  | 3 | 1 | 43.3 | 0 |
| P12163_1_F7,20251 | K.SSAGGFLGDLVK.W      | 1759.021 | 0.00285  | 3 | 1 | 29.3 | 0 |
| P12163_2_F1,21843 | K.SSAGGFLGDLVK.W      | 1759.021 | 0.00534  | 3 | 1 | 48.5 | 0 |
| P12163_2_F1,22069 | K.SSAGGFLGDLVK.W      | 1759.021 | -0.00607 | 2 | 1 | 31.4 | 0 |
| P12163_2_F4,19395 | K.SSAGGFLGDLVK.W      | 1759.021 | 0.00291  | 3 | 1 | 27   | 0 |
| P12163_2_F9,19295 | K.SSAGGFLGDLVK.W      | 1759.021 | 0.01155  | 3 | 1 | 28   | 0 |
| P12163_2_S5,19593 | K.SSAGGFLGDLVK.W      | 1759.021 | 0.00441  | 3 | 1 | 41.2 | 0 |
| P12163_1_F2,19292 | K.VDVNGPNTAPVYQFL     | 2370.328 | 0.00616  | 3 | 1 | 43.2 | 0 |
| P12163_1_F2,21710 | K.VDVNGPNTAPVYQFL     | 2370.328 | 0.00919  | 3 | 1 | 52.6 | 0 |
| P12163_1_S1,20554 | K.VDVNGPNTAPVYQFL     | 2370.328 | 0.00277  | 3 | 1 | 41.6 | 0 |
| P12163_1_F5,18777 | R.CGLTPSNYSELSHLYE    | 2606.338 | 0.00514  | 3 | 1 | 36.5 | 0 |
| P12163_2_F10,1700 | R.CGLTPSNYSELSHLYE    | 2606.338 | 0.00469  | 3 | 1 | 40.5 | 0 |
| P12163_2_F10,1703 | R.CGLTPSNYSELSHLYE    | 2606.338 | 0.00476  | 4 | 1 | 37.5 | 0 |
| P12163_2_F4,17606 | R.CGLTPSNYSELSHLYE    | 2606.338 | 0.00732  | 4 | 1 | 23.4 | 0 |
| P12163_1_F3,19127 | R.YPPTTSPFQIEK.D      | 2016.126 | 0.00415  | 3 | 1 | 25.8 | 0 |
| P12163_1_F3,19276 | R.YPPTTSPFQIEK.D      | 2016.126 | 0.00631  | 2 | 1 | 48.8 | 0 |
| P12163_2_F7,16544 | R.YPPTTSPFQIEK.D      | 2016.126 | 0.00011  | 2 | 1 | 28.2 | 0 |
| P12163_2_F2,9057  | K.ASSSMAAENK.N        | 1603.857 | 0.00677  | 2 | 1 | 46.8 | 0 |
| P12163_1_F4,7582  | K.DHDDSNIK.L          | 1601.802 | 0.0082   | 2 | 1 | 24.4 | 0 |
| P12163_1_F4,7600  | K.DHDDSNIK.L          | 1601.802 | 0.007    | 3 | 1 | 34.2 | 0 |
| P12163_1_F5,6313  | K.DHDDSNIK.L          | 1601.802 | 0.00868  | 2 | 1 | 25.8 | 0 |
| P12163_1_F5,6323  | K.DHDDSNIK.L          | 1601.802 | 0.00037  | 3 | 1 | 30   | 0 |
| P12163_1_S10,8325 | K.DHDDSNIK.L          | 1601.802 | 0.00622  | 3 | 1 | 33.9 | 0 |
| P12163_2_S5,7417  | K.DHDDSNIK.L          | 1601.802 | 0.0058   | 3 | 1 | 44.2 | 0 |
| P12163_2_S5,7621  | K.DHDDSNIK.L          | 1601.802 | 0.00749  | 4 | 1 | 22.7 | 0 |
| P12163_2_S5,7710  | K.DHDDSNIK.L          | 1601.802 | 0.00547  | 3 | 1 | 34.5 | 0 |
| P12163_1_S1,21774 | K.LVEPPYVDSIEWAK.W    | 2254.258 | -0.00156 | 2 | 1 | 40.5 | 0 |
| P12163_1_S1,21779 | K.LVEPPYVDSIEWAK.W    | 2254.258 | 0.00431  | 3 | 1 | 51.3 | 0 |
| P12163_1_S1,21535 | K.NVQVFDSEEDLAVSLA    | 2472.344 | 0.01514  | 3 | 1 | 65   | 0 |
| P12163_1_F3,17979 | K.SNILATSAATGFPK.F    | 1986.148 | 0.00467  | 3 | 1 | 43.6 | 0 |
| P12163_1_F3,19396 | K.SNILATSAATGFPK.F    | 1986.148 | 0.00076  | 2 | 1 | 67.5 | 0 |
| P12163_1_F3,19451 | K.SNILATSAATGFPK.F    | 1986.148 | 0.00548  | 3 | 1 | 64.3 | 0 |
| P12163_1_F4,17530 | K.SNILATSAATGFPK.F    | 1986.148 | 0.0053   | 3 | 1 | 32   | 0 |
| P12163_1_F4,17595 | K.SNILATSAATGFPK.F    | 1986.148 | 0.00034  | 2 | 1 | 64.3 | 0 |
| P12163_1_F4,18487 | K.SNILATSAATGFPK.F    | 1986.148 | -0.001   | 2 | 1 | 40.1 | 0 |
| P12163_1_F4,19929 | K.SNILATSAATGFPK.F    | 1986.148 | 0.00743  | 3 | 1 | 48.8 | 0 |
| P12163_1_F4,19948 | K.SNILATSAATGFPK.F    | 1986.148 | 0.0083   | 2 | 1 | 63.7 | 0 |
| P12163_1_F4,20143 | K.SNILATSAATGFPK.F    | 1986.148 | 0.00827  | 3 | 1 | 54.2 | 0 |
| P12163_1_F4,20346 | K.SNILATSAATGFPK.F    | 1986.148 | 0.00828  | 2 | 1 | 25.9 | 0 |
| P12163_1_F6,18562 | K.SNILATSAATGFPK.F    | 1986.148 | 0.00152  | 3 | 1 | 50.4 | 0 |
| P12163_2_F1,19420 | K.SNILATSAATGFPK.F    | 1986.148 | 0.00785  | 3 | 1 | 65.8 | 0 |

|                   |                    |          |          |   |   |      |   |
|-------------------|--------------------|----------|----------|---|---|------|---|
| P12163_2_F1,19422 | K.SNILATSAATGFPK.F | 1986.148 | 0.00912  | 2 | 1 | 63.5 | 0 |
| P12163_2_F1,19646 | K.SNILATSAATGFPK.F | 1986.148 | 0.00602  | 3 | 1 | 45.1 | 0 |
| P12163_2_F1,19669 | K.SNILATSAATGFPK.F | 1986.148 | -0.00356 | 2 | 1 | 29.2 | 0 |
| P12163_2_F1,19906 | K.SNILATSAATGFPK.F | 1986.148 | 0.0101   | 3 | 1 | 30.4 | 0 |
| P12163_2_F4,17127 | K.SNILATSAATGFPK.F | 1986.148 | 0.00884  | 3 | 1 | 27   | 0 |
| P12163_2_F4,17345 | K.SNILATSAATGFPK.F | 1986.148 | -0.00031 | 3 | 1 | 52.3 | 0 |
| P12163_2_F4,17608 | K.SNILATSAATGFPK.F | 1986.148 | 0.00473  | 3 | 1 | 42.8 | 0 |
| P12163_1_S10,2064 | K.WHVFVWDER.V      | 1577.817 | 0.00323  | 3 | 1 | 23.7 | 0 |
| P12163_2_F8_12070 | K.WHVFVWDER.V      | 1577.817 | -0.00055 | 3 | 1 | 26.1 | 0 |
| P12163_2_F8_12070 | K.WHVFVWDER.V      | 1577.817 | 0.00224  | 3 | 1 | 42   | 0 |
| P12163_2_F9,20288 | K.WHVFVWDER.V      | 1577.817 | 0.00026  | 3 | 1 | 25.3 | 0 |
| P12163_2_F9,20482 | K.WHVFVWDER.V      | 1577.817 | 0.00359  | 3 | 1 | 43.4 | 0 |
| P12163_1_F7,12676 | K.YTADLSAK.F       | 1476.852 | 0.00127  | 3 | 1 | 24.1 | 0 |
| P12163_1_F7,12722 | K.YTADLSAK.F       | 1476.852 | 0.00221  | 2 | 1 | 39.3 | 0 |
| P12163_1_F9,13794 | K.YTADLSAK.F       | 1476.852 | 0.00597  | 2 | 1 | 28.6 | 0 |
| P12163_1_S10,1394 | K.YTADLSAK.F       | 1476.852 | 0.00601  | 3 | 1 | 33.3 | 0 |
| P12163_2_F8_12070 | K.YTADLSAK.F       | 1476.852 | 0.00472  | 3 | 1 | 23.6 | 0 |
| P12163_2_F8_12070 | K.YTADLSAK.F       | 1476.852 | 0.00599  | 2 | 1 | 32.3 | 0 |
| P12163_2_F9,13047 | K.YTADLSAK.F       | 1476.852 | 0.01055  | 2 | 1 | 36.5 | 0 |
| P12163_2_S5,12565 | K.YTADLSAK.F       | 1476.852 | 0.00211  | 2 | 1 | 32.9 | 0 |
| P12163_1_F4,11726 | K.ATSEGYDVSK.L     | 1664.895 | 0.00842  | 2 | 1 | 57   | 0 |
| P12163_1_F9,11179 | K.ATSEGYDVSK.L     | 1664.895 | 0.0096   | 2 | 1 | 46.9 | 0 |
| P12163_2_F1,10921 | K.ATSEGYDVSK.L     | 1664.895 | 0.0028   | 3 | 1 | 42.5 | 0 |
| P12163_2_F1,10965 | K.ATSEGYDVSK.L     | 1664.895 | 0.00322  | 2 | 1 | 56.6 | 0 |
| P12163_2_F1,11556 | K.EMEVVR.G         | 1066.587 | 0.00121  | 2 | 1 | 28   | 0 |
| P12163_1_F7,10929 | R.ATYTLNEDGTVHVR.N | 1879.982 | 0.00655  | 3 | 1 | 23.4 | 0 |
| P12163_1_F7,12876 | R.ATYTLNEDGTVHVR.N | 1879.982 | 0.00577  | 3 | 1 | 30.5 | 0 |
| P12163_1_F7,13215 | R.ATYTLNEDGTVHVR.N | 1879.982 | 0.00517  | 3 | 1 | 55.5 | 0 |
| P12163_1_F7,13216 | R.ATYTLNEDGTVHVR.N | 1879.982 | 0.00539  | 2 | 1 | 35.9 | 0 |
| P12163_1_F8,11363 | R.ATYTLNEDGTVHVR.N | 1879.982 | 0.00844  | 3 | 1 | 31.7 | 0 |
| P12163_1_F8,11878 | R.ATYTLNEDGTVHVR.N | 1879.982 | 0.00052  | 3 | 1 | 44.6 | 0 |
| P12163_1_F8,11906 | R.ATYTLNEDGTVHVR.N | 1879.982 | 0.00195  | 4 | 1 | 37.8 | 0 |
| P12163_1_F8,13409 | R.ATYTLNEDGTVHVR.N | 1879.982 | 0.00415  | 3 | 1 | 32.2 | 0 |
| P12163_1_F8,13717 | R.ATYTLNEDGTVHVR.N | 1879.982 | 0.00586  | 3 | 1 | 54.8 | 0 |
| P12163_1_F8,13719 | R.ATYTLNEDGTVHVR.N | 1879.982 | 0.00705  | 2 | 1 | 35.3 | 0 |
| P12163_1_S10,1357 | R.ATYTLNEDGTVHVR.N | 1879.982 | 0.00967  | 3 | 1 | 28   | 0 |
| P12163_2_F6,11173 | R.ATYTLNEDGTVHVR.N | 1879.982 | 0.00889  | 3 | 1 | 32.3 | 0 |
| P12163_2_F6,13261 | R.ATYTLNEDGTVHVR.N | 1879.982 | 0.0001   | 3 | 1 | 60.3 | 0 |
| P12163_2_F6,13282 | R.ATYTLNEDGTVHVR.N | 1879.982 | 0.00345  | 2 | 1 | 63   | 0 |
| P12163_2_S5,13173 | R.ATYTLNEDGTVHVR.N | 1879.982 | 0.00391  | 3 | 1 | 50.5 | 0 |
| P12163_1_F7,15997 | R.EPHM*DEAIYNQLVEK | 2440.264 | 0.01016  | 3 | 1 | 29   | 0 |
| P12163_1_F7,17830 | R.EPHM*DEAIYNQLVEK | 2440.264 | 0.01052  | 3 | 1 | 22.8 | 0 |
| P12163_1_F8,16706 | R.EPHM*DEAIYNQLVEK | 2440.264 | 0.00748  | 4 | 1 | 22   | 0 |
| P12163_1_F8,16780 | R.EPHM*DEAIYNQLVEK | 2440.264 | 0.01355  | 3 | 1 | 33.2 | 0 |
| P12163_1_F7,17838 | R.EPHMDEAIYNQLVEK. | 2424.269 | 0.00527  | 3 | 1 | 43   | 0 |
| P12163_1_F7,17839 | R.EPHMDEAIYNQLVEK. | 2424.269 | 0.00181  | 4 | 1 | 26.4 | 0 |
| P12163_1_F8,18614 | R.EPHMDEAIYNQLVEK. | 2424.269 | 0.00959  | 3 | 1 | 50.1 | 0 |
| P12163_1_F8,18648 | R.EPHMDEAIYNQLVEK. | 2424.269 | 0.00869  | 4 | 1 | 44.9 | 0 |
| P12163_1_F8,18672 | R.EPHMDEAIYNQLVEK. | 2424.269 | 0.00655  | 2 | 1 | 44.8 | 0 |
| P12163_2_F6,18217 | R.EPHMDEAIYNQLVEK. | 2424.269 | 0.00203  | 3 | 1 | 48.2 | 0 |
| P12163_1_F5,8985  | R.GSIEGTAYK.A      | 1533.873 | 0.00485  | 3 | 1 | 23.8 | 0 |

|                                        |          |          |   |   |      |   |
|----------------------------------------|----------|----------|---|---|------|---|
| P12163_1_F5,11131 R.GSIEGTAYK.A        | 1533.873 | 0.00678  | 2 | 1 | 26.8 | 0 |
| P12163_1_F5,11267 R.GSIEGTAYK.A        | 1533.873 | 0.00593  | 3 | 1 | 30.7 | 0 |
| P12163_1_F9,11954 R.GSIEGTAYK.A        | 1533.873 | 0.00616  | 2 | 1 | 35.7 | 0 |
| P12163_2_F1,11617 R.GSIEGTAYK.A        | 1533.873 | 0.00392  | 3 | 1 | 63.3 | 0 |
| P12163_2_F2,11952 R.GSIEGTAYK.A        | 1533.873 | 0.00448  | 2 | 1 | 40.7 | 0 |
| P12163_2_F2,11985 R.GSIEGTAYK.A        | 1533.873 | -0.00082 | 3 | 1 | 45.2 | 0 |
| P12163_2_S5,10848 R.GSIEGTAYK.A        | 1533.873 | -0.00535 | 3 | 1 | 30.1 | 0 |
| P12163_1_F5,10583 R.NETWSDGK.R         | 1544.816 | 0.00772  | 2 | 1 | 26.8 | 0 |
| P12163_2_F2,11360 R.NETWSDGK.R         | 1544.816 | 0.00216  | 2 | 1 | 24.1 | 0 |
| P12163_2_F9,20991 R.WYEIASFPSR.N       | 1559.816 | 0.00305  | 2 | 1 | 30.8 | 0 |
| P12163_1_F7,11571 K.ATAGDTHLGGEDFDN    | 1979.936 | 0.00221  | 3 | 1 | 31.1 | 0 |
| P12163_1_F8,9335 K.ATAGDTHLGGEDFDN     | 1979.936 | 0.00154  | 4 | 1 | 32.9 | 0 |
| P12163_1_F8,10350 K.ATAGDTHLGGEDFDN    | 1979.936 | 0.00474  | 4 | 1 | 44.7 | 0 |
| P12163_1_F8,10358 K.ATAGDTHLGGEDFDN    | 1979.936 | 0.00495  | 2 | 1 | 39   | 0 |
| P12163_1_F8,10594 K.ATAGDTHLGGEDFDN    | 1979.936 | 0.00784  | 3 | 1 | 35.8 | 0 |
| P12163_1_F8,10598 K.ATAGDTHLGGEDFDN    | 1979.936 | 0.00085  | 2 | 1 | 45.7 | 0 |
| P12163_1_F8,10606 K.ATAGDTHLGGEDFDN    | 1979.936 | 0.0029   | 4 | 1 | 38.9 | 0 |
| P12163_1_F8,12056 K.ATAGDTHLGGEDFDN    | 1979.936 | 0.00302  | 3 | 1 | 55.8 | 0 |
| P12163_1_F8,12232 K.ATAGDTHLGGEDFDN    | 1979.936 | 0.00173  | 2 | 1 | 44.6 | 0 |
| P12163_2_F9,11279 K.ATAGDTHLGGEDFDN    | 1979.936 | 0.00163  | 3 | 1 | 61.8 | 0 |
| P12163_2_S5,9391 K.ATAGDTHLGGEDFDN     | 1979.936 | 0.00354  | 4 | 1 | 35.8 | 0 |
| P12163_2_S5,10362 K.ATAGDTHLGGEDFDN    | 1979.936 | 0.00242  | 4 | 1 | 55.1 | 0 |
| P12163_2_S5,10365 K.ATAGDTHLGGEDFDN    | 1979.936 | 0.00311  | 3 | 1 | 39.6 | 0 |
| P12163_2_S5,10368 K.ATAGDTHLGGEDFDN    | 1979.936 | 0.01013  | 2 | 1 | 35   | 0 |
| P12163_2_S5,10564 K.ATAGDTHLGGEDFDN    | 1979.936 | 0.00286  | 4 | 1 | 37.9 | 0 |
| P12163_2_S5,11889 K.ATAGDTHLGGEDFDN    | 1979.936 | 0.0021   | 4 | 1 | 49.3 | 0 |
| P12163_2_S5,11953 K.ATAGDTHLGGEDFDN    | 1979.936 | -0.00161 | 3 | 1 | 41   | 0 |
| P12163_1_F5,11319 K.CMEPVEK.C          | 1500.801 | 0.00642  | 2 | 1 | 25.4 | 0 |
| P12163_1_F3,21966 K.EIAEAYLGQALK.N     | 1914.116 | 0.00153  | 3 | 1 | 39.8 | 0 |
| P12163_1_F4,12357 K.MVQEAEK.Y ! R.MVQI | 1442.813 | 0.00599  | 2 | 1 | 28.1 | 0 |
| P12163_1_F5,10859 K.MVQEAEK.Y ! R.MVQI | 1442.813 | 0.00519  | 2 | 1 | 26.8 | 0 |
| P12163_1_F5,10908 K.MVQEAEK.Y ! R.MVQI | 1442.813 | 0.00899  | 3 | 1 | 35.2 | 0 |
| P12163_1_F6,11909 K.MVQEAEK.Y ! R.MVQI | 1442.813 | 0.00945  | 2 | 1 | 30.4 | 0 |
| P12163_2_F1,11370 K.MVQEAEK.Y ! R.MVQI | 1442.813 | 0.00503  | 2 | 1 | 27.8 | 0 |
| P12163_2_F1,11390 K.MVQEAEK.Y ! R.MVQI | 1442.813 | 0.00722  | 3 | 1 | 39.8 | 0 |
| P12163_1_F8,18778 K.NAVVTVPAYFNDSQR    | 1985.039 | -0.00348 | 2 | 1 | 30.4 | 0 |
| P12163_1_F8,18854 K.NAVVTVPAYFNDSQR    | 1985.039 | 0.00299  | 3 | 1 | 33.4 | 0 |
| P12163_1_S1,17806 K.NAVVTVPAYFNDSQR    | 1985.039 | 0.01346  | 2 | 1 | 36.9 | 0 |
| P12163_1_S1,17812 K.NAVVTVPAYFNDSQR    | 1985.039 | 0.00257  | 3 | 1 | 27.2 | 0 |
| P12163_2_F6,18372 K.NAVVTVPAYFNDSQR    | 1985.039 | 0.00464  | 2 | 1 | 47.4 | 0 |
| P12163_2_F6,18440 K.NAVVTVPAYFNDSQR    | 1985.039 | -0.00088 | 3 | 1 | 39.9 | 0 |
| P12163_1_F6,13680 K.SQVHDVVLVGGSTR.I   | 1757.981 | 0.00227  | 2 | 1 | 51.6 | 0 |
| P12163_1_F7,13003 K.SQVHDVVLVGGSTR.I   | 1757.981 | 0.00219  | 2 | 1 | 53.4 | 0 |
| P12163_1_F7,13034 K.SQVHDVVLVGGSTR.I   | 1757.981 | 0.00196  | 3 | 1 | 42.2 | 0 |
| P12163_1_F8,13552 K.SQVHDVVLVGGSTR.I   | 1757.981 | -0.00253 | 2 | 1 | 48.7 | 0 |
| P12163_2_F6,12947 K.SQVHDVVLVGGSTR.I   | 1757.981 | 0.0019   | 3 | 1 | 36.9 | 0 |
| P12163_2_F9,12453 K.SQVHDVVLVGGSTR.I   | 1757.981 | -0.00497 | 3 | 1 | 40.8 | 0 |
| P12163_1_S1,23194 R.FEELNM*DLFR.K      | 1633.82  | 0.00103  | 3 | 1 | 40.2 | 0 |
| P12163_1_S1,23396 R.FEELNM*DLFR.K      | 1633.82  | 0.00348  | 2 | 1 | 42.5 | 0 |
| P12163_1_S1,23417 R.FEELNM*DLFR.K      | 1633.82  | 0.00235  | 3 | 1 | 57.6 | 0 |
| P12163_1_F2,19947 K.AIDLVDAAAK.L       | 1724.005 | 0.00359  | 2 | 1 | 36.2 | 0 |

|                   |                       |          |          |   |   |      |   |
|-------------------|-----------------------|----------|----------|---|---|------|---|
| P12163_1_F2,20129 | K.AIDLVD EAAAK.L      | 1724.005 | 0.00375  | 3 | 1 | 74.9 | 0 |
| P12163_1_F3,20542 | K.AIDLVD EAAAK.L      | 1724.005 | 0.00723  | 2 | 1 | 74   | 0 |
| P12163_1_F3,20556 | K.AIDLVD EAAAK.L      | 1724.005 | 0.00537  | 3 | 1 | 74.9 | 0 |
| P12163_1_F5,19427 | K.AIDLVD EAAAK.L      | 1724.005 | -0.00132 | 3 | 1 | 38.8 | 0 |
| P12163_1_F5,19907 | K.AIDLVD EAAAK.L      | 1724.005 | 0.00438  | 3 | 1 | 61.9 | 0 |
| P12163_1_F5,19911 | K.AIDLVD EAAAK.L      | 1724.005 | 0.00875  | 2 | 1 | 29.1 | 0 |
| P12163_1_F6,19508 | K.AIDLVD EAAAK.L      | 1724.005 | 0.00279  | 3 | 1 | 70.1 | 0 |
| P12163_1_F6,19574 | K.AIDLVD EAAAK.L      | 1724.005 | 0.00327  | 2 | 1 | 36.8 | 0 |
| P12163_1_F6,19917 | K.AIDLVD EAAAK.L      | 1724.005 | 0.00207  | 3 | 1 | 50.4 | 0 |
| P12163_2_F2,19990 | K.AIDLVD EAAAK.L      | 1724.005 | 0.00534  | 3 | 1 | 44   | 0 |
| P12163_2_F2,20017 | K.AIDLVD EAAAK.L      | 1724.005 | 0.00585  | 2 | 1 | 62.9 | 0 |
| P12163_2_F4,18637 | K.AIDLVD EAAAK.L      | 1724.005 | 0.00507  | 3 | 1 | 52.7 | 0 |
| P12163_1_F2,15379 | K.LDPVIGR.D           | 1073.662 | 0.00271  | 2 | 1 | 26   | 0 |
| P12163_1_S1,14477 | K.LDPVIGR.D           | 1073.662 | 0.00422  | 3 | 1 | 39.7 | 0 |
| P12163_1_S1,14594 | K.LDPVIGR.D           | 1073.662 | 0.00351  | 2 | 1 | 24.4 | 0 |
| P12163_1_F9,16299 | K.LEHDLNSLK.Q         | 1676.979 | 0.00516  | 3 | 1 | 23   | 0 |
| P12163_1_F3,16737 | K.NNPVIIGEPGVGK.T ! f | 1902.127 | 0.00297  | 3 | 1 | 31.1 | 0 |
| P12163_1_F3,16751 | K.NNPVIIGEPGVGK.T ! f | 1902.127 | 0.00722  | 2 | 1 | 48.9 | 0 |
| P12163_1_F4,17243 | K.NNPVIIGEPGVGK.T ! f | 1902.127 | 0.00414  | 3 | 1 | 50.9 | 0 |
| P12163_1_F4,17252 | K.NNPVIIGEPGVGK.T ! f | 1902.127 | 0.0091   | 2 | 1 | 42.6 | 0 |
| P12163_1_F5,16038 | K.NNPVIIGEPGVGK.T ! f | 1902.127 | 0.0046   | 2 | 1 | 42.6 | 0 |
| P12163_1_F6,16044 | K.NNPVIIGEPGVGK.T ! f | 1902.127 | 0.00396  | 2 | 1 | 27.9 | 0 |
| P12163_1_F6,16047 | K.NNPVIIGEPGVGK.T ! f | 1902.127 | -0.00045 | 3 | 1 | 50.9 | 0 |
| P12163_1_F6,16533 | K.NNPVIIGEPGVGK.T ! f | 1902.127 | 0.00396  | 2 | 1 | 24.1 | 0 |
| P12163_2_F1,16460 | K.NNPVIIGEPGVGK.T ! f | 1902.127 | 0.0069   | 3 | 1 | 68.8 | 0 |
| P12163_2_F1,16482 | K.NNPVIIGEPGVGK.T ! f | 1902.127 | 0.0034   | 2 | 1 | 61   | 0 |
| P12163_2_F2,429   | K.NNPVIIGEPGVGK.T ! f | 1902.127 | 0.00675  | 3 | 1 | 30.1 | 0 |
| P12163_2_F4,14921 | K.NNPVIIGEPGVGK.T ! f | 1902.127 | -0.00324 | 3 | 1 | 33.4 | 0 |
| P12163_2_F4,14959 | K.NNPVIIGEPGVGK.T ! f | 1902.127 | -0.00354 | 2 | 1 | 40.7 | 0 |
| P12163_1_F2,11174 | K.TAIAEGLAQR.I        | 1333.774 | 0.00366  | 3 | 1 | 42.6 | 0 |
| P12163_1_F2,15759 | K.TAIAEGLAQR.I        | 1333.774 | 0.0032   | 2 | 1 | 24.4 | 0 |
| P12163_1_F3,14695 | R.CIQILSR.R           | 1193.698 | 0.00388  | 3 | 1 | 25.8 | 0 |
| P12163_1_F3,14743 | R.IDM*SEYMEK.H        | 1769.891 | 0.0039   | 2 | 1 | 25.8 | 0 |
| P12163_1_F3,18958 | R.IDMSEYMEK.H         | 1753.896 | 0.00795  | 2 | 1 | 46.5 | 0 |
| P12163_1_F3,18985 | R.IDMSEYMEK.H         | 1753.896 | 0.00558  | 3 | 1 | 27.6 | 0 |
| P12163_2_F9,17158 | R.IDMSEYMEK.H         | 1753.896 | 0.009    | 3 | 1 | 35.3 | 0 |
| P12163_1_F7,17149 | K.ADRDESSPYAAM*LA     | 2601.252 | 0.00495  | 3 | 1 | 42.5 | 0 |
| P12163_1_F7,17100 | K.ADRDESSPYAAMLAA     | 2585.257 | 0.00807  | 3 | 1 | 31.1 | 0 |
| P12163_2_S5,16941 | K.ADRDESSPYAAMLAA     | 2585.257 | 0.00561  | 3 | 1 | 52.1 | 0 |
| P12163_1_F2,13898 | K.EENVTLGPAVR.D       | 1488.832 | 0.00599  | 2 | 1 | 25.2 | 0 |
| P12163_1_S1,13175 | K.EENVTLGPAVR.D       | 1488.832 | 0.00352  | 2 | 1 | 32.8 | 0 |
| P12163_1_S1,13209 | K.EENVTLGPAVR.D       | 1488.832 | 0.00161  | 3 | 1 | 63   | 0 |
| P12163_1_F2,8461  | K.EGIPPDQQR.L         | 1343.722 | 0.00348  | 2 | 1 | 24.7 | 0 |
| P12163_1_F2,8819  | K.EGIPPDQQR.L         | 1343.722 | 0.00186  | 2 | 1 | 31.4 | 0 |
| P12163_1_F2,9402  | K.EGIPPDQQR.L         | 1343.722 | 0.00464  | 2 | 1 | 24.9 | 0 |
| P12163_1_S1,8571  | K.EGIPPDQQR.L         | 1343.722 | 0.00366  | 2 | 1 | 24.2 | 0 |
| P12163_1_S1,8795  | K.EGIPPDQQR.L         | 1343.722 | 0.00362  | 2 | 1 | 28   | 0 |
| P12163_1_S1,9673  | K.EGIPPDQQR.L         | 1343.722 | 0.00446  | 2 | 1 | 27.2 | 0 |
| P12163_1_F8,19012 | K.ELGITALHIK.L        | 1703.068 | 0.0078   | 3 | 1 | 35.7 | 0 |
| P12163_1_F8,19013 | K.ELGITALHIK.L        | 1703.068 | 0.00777  | 2 | 1 | 41.3 | 0 |
| P12163_2_F6,18570 | K.ELGITALHIK.L        | 1703.068 | 0.00671  | 2 | 1 | 30.7 | 0 |

|                   |                     |          |          |   |   |      |   |
|-------------------|---------------------|----------|----------|---|---|------|---|
| P12163_1_F6,17512 | K.ESTLHLVLR.L       | 1371.826 | 0.00506  | 3 | 1 | 32   | 0 |
| P12163_1_F6,17616 | K.ESTLHLVLR.L       | 1371.826 | 0.0033   | 2 | 1 | 38.6 | 0 |
| P12163_1_F8,17242 | K.ESTLHLVLR.L       | 1371.826 | 0.00389  | 3 | 1 | 45.5 | 0 |
| P12163_1_F8,17254 | K.ESTLHLVLR.L       | 1371.826 | 0.00334  | 2 | 1 | 32.5 | 0 |
| P12163_2_F6,16554 | K.ESTLHLVLR.L       | 1371.826 | 0.002    | 3 | 1 | 45.1 | 0 |
| P12163_2_F6,16567 | K.ESTLHLVLR.L       | 1371.826 | 0.00352  | 2 | 1 | 33.2 | 0 |
| P12163_2_F6,17041 | K.ESTLHLVLR.L       | 1371.826 | -0.00094 | 3 | 1 | 39.1 | 0 |
| P12163_2_F6,20405 | K.ESTLHLVLR.L       | 1371.826 | 0.00074  | 3 | 1 | 35.7 | 0 |
| P12163_2_F6,20850 | K.ESTLHLVLR.L       | 1371.826 | 0.00263  | 3 | 1 | 25.3 | 0 |
| P12163_2_F7,15271 | K.ESTLHLVLR.L       | 1371.826 | 0.00359  | 3 | 1 | 42.5 | 0 |
| P12163_1_F2,7835  | K.TPGPGAQSALR.A     | 1358.769 | 0.00266  | 3 | 1 | 27.6 | 0 |
| P12163_1_F2,8741  | K.TPGPGAQSALR.A     | 1358.769 | 0.00518  | 3 | 1 | 28.2 | 0 |
| P12163_1_F3,8969  | K.TPGPGAQSALR.A     | 1358.769 | 0.00494  | 3 | 1 | 39.3 | 0 |
| P12163_1_F4,13534 | R.TLADYNIQK.E       | 1673.968 | 0.00907  | 2 | 1 | 24.4 | 0 |
| P12163_1_F4,16519 | R.TLADYNIQK.E       | 1673.968 | 0.00656  | 3 | 1 | 28.7 | 0 |
| P12163_1_F4,16540 | R.TLADYNIQK.E       | 1673.968 | 0.00571  | 2 | 1 | 34.4 | 0 |
| P12163_1_F5,15308 | R.TLADYNIQK.E       | 1673.968 | 0.00763  | 2 | 1 | 35.6 | 0 |
| P12163_1_F9,15481 | R.TLADYNIQK.E       | 1673.968 | 0.00107  | 2 | 1 | 35.9 | 0 |
| P12163_1_F9,15483 | R.TLADYNIQK.E       | 1673.968 | 0.01085  | 3 | 1 | 27.1 | 0 |
| P12163_2_F1,15639 | R.TLADYNIQK.E       | 1673.968 | 0.00397  | 2 | 1 | 34.1 | 0 |
| P12163_2_F9,14704 | R.TLADYNIQK.E       | 1673.968 | 0.00662  | 3 | 1 | 28.2 | 0 |
| P12163_1_F2,10421 | K.EANSESFVVR.T      | 1441.759 | 0.00465  | 3 | 1 | 40   | 0 |
| P12163_1_F2,10684 | K.EANSESFVVR.T      | 1441.759 | 0.00429  | 3 | 1 | 50.1 | 0 |
| P12163_1_F2,10694 | K.EANSESFVVR.T      | 1441.759 | 0.00239  | 2 | 1 | 25.2 | 0 |
| P12163_1_F3,10627 | K.EANSESFVVR.T      | 1441.759 | 0.00288  | 3 | 1 | 39.6 | 0 |
| P12163_1_F3,11110 | K.EANSESFVVR.T      | 1441.759 | 0.00315  | 3 | 1 | 37.2 | 0 |
| P12163_1_F3,13688 | K.EANSESFVVR.T      | 1441.759 | 0.00339  | 2 | 1 | 32.7 | 0 |
| P12163_1_F7,21208 | K.EIVVVCDPSYSDIFEET | 2738.405 | 0.00275  | 3 | 1 | 39.3 | 0 |
| P12163_1_F7,20054 | K.EIVVVCDPSYSDIFEET | 3299.748 | 0.00751  | 4 | 1 | 35.3 | 0 |
| P12163_1_F4,16445 | K.HPVYITEGSYTNK.V   | 2230.233 | 0.00893  | 3 | 1 | 32.5 | 0 |
| P12163_1_F6,15801 | K.HPVYITEGSYTNK.V   | 2230.233 | 0.00752  | 3 | 1 | 39.8 | 0 |
| P12163_1_F7,14927 | K.HPVYITEGSYTNK.V   | 2230.233 | 0.00334  | 4 | 1 | 32.7 | 0 |
| P12163_1_F8,15655 | K.HPVYITEGSYTNK.V   | 2230.233 | 0.00446  | 4 | 1 | 31.4 | 0 |
| P12163_2_F6,15167 | K.HPVYITEGSYTNK.V   | 2230.233 | 0.00285  | 2 | 1 | 34.1 | 0 |
| P12163_2_F6,15187 | K.HPVYITEGSYTNK.V   | 2230.233 | 0.00317  | 3 | 1 | 60.2 | 0 |
| P12163_2_F9,14629 | K.HPVYITEGSYTNK.V   | 2230.233 | 0.011    | 3 | 1 | 66.5 | 0 |
| P12163_2_F9,14630 | K.HPVYITEGSYTNK.V   | 2230.233 | 0.00482  | 4 | 1 | 25   | 0 |
| P12163_1_F3,21343 | K.SVSVILLAGGK.G     | 1652.057 | 0.00143  | 2 | 1 | 55.1 | 0 |
| P12163_1_F4,22289 | K.SVSVILLAGGK.G     | 1652.057 | 0.00443  | 2 | 1 | 63.4 | 0 |
| P12163_1_F4,22338 | K.SVSVILLAGGK.G     | 1652.057 | 0.00454  | 3 | 1 | 33.3 | 0 |
| P12163_2_F1,21769 | K.SVSVILLAGGK.G     | 1652.057 | 0.00023  | 2 | 1 | 42.8 | 0 |
| P12163_2_F1,21801 | K.SVSVILLAGGK.G     | 1652.057 | 0.00361  | 3 | 1 | 29.5 | 0 |
| P12163_2_F1,20791 | K.VLMDALR.V         | 1121.665 | 0.00383  | 2 | 1 | 25   | 0 |
| P12163_1_F3,18512 | R.VGAAVLGVPAK.A     | 1590.02  | 0.00752  | 2 | 1 | 49.1 | 0 |
| P12163_1_F3,18517 | R.VGAAVLGVPAK.A     | 1590.02  | 0.0048   | 3 | 1 | 38.4 | 0 |
| P12163_1_F3,18999 | R.VGAAVLGVPAK.A     | 1590.02  | 0.00344  | 2 | 1 | 34.1 | 0 |
| P12163_1_F4,19027 | R.VGAAVLGVPAK.A     | 1590.02  | 0.0069   | 3 | 1 | 24.6 | 0 |
| P12163_1_F4,19051 | R.VGAAVLGVPAK.A     | 1590.02  | 0.0061   | 2 | 1 | 45.8 | 0 |
| P12163_1_F6,17654 | R.VGAAVLGVPAK.A     | 1590.02  | -0.00048 | 3 | 1 | 42.6 | 0 |
| P12163_1_F7,17275 | R.VGAAVLGVPAK.A     | 1590.02  | 0.00447  | 3 | 1 | 39.6 | 0 |
| P12163_2_F1,18344 | R.VGAAVLGVPAK.A     | 1590.02  | 0.00795  | 3 | 1 | 30.5 | 0 |

|                                        |          |          |   |   |      |   |
|----------------------------------------|----------|----------|---|---|------|---|
| P12163_2_F1,18355 R.VGAAVLGVPAK.A      | 1590.02  | 0.00848  | 2 | 1 | 32.8 | 0 |
| P12163_2_F4,16377 R.VGAAVLGVPAK.A      | 1590.02  | 0.00105  | 3 | 1 | 37.2 | 0 |
| P12163_2_F4,16479 R.VGAAVLGVPAK.A      | 1590.02  | 0.00276  | 2 | 1 | 48.9 | 0 |
| P12163_2_F4,16924 R.VGAAVLGVPAK.A      | 1590.02  | 0.00411  | 3 | 1 | 52.1 | 0 |
| P12163_1_F3,16226 K.ASEAAVLEVVQK.N     | 1852.1   | 0.00172  | 3 | 1 | 25.7 | 0 |
| P12163_1_F3,19776 K.ASEAAVLEVVQK.N     | 1852.1   | 0.00674  | 2 | 1 | 84.9 | 0 |
| P12163_1_F3,19833 K.ASEAAVLEVVQK.N     | 1852.1   | 0.00775  | 3 | 1 | 43   | 0 |
| P12163_1_F4,20354 K.ASEAAVLEVVQK.N     | 1852.1   | 0.00433  | 3 | 1 | 39.6 | 0 |
| P12163_1_F4,20392 K.ASEAAVLEVVQK.N     | 1852.1   | -0.00136 | 2 | 1 | 59.3 | 0 |
| P12163_1_F6,18822 K.ASEAAVLEVVQK.N     | 1852.1   | 0.0001   | 3 | 1 | 30.1 | 0 |
| P12163_2_F1,19803 K.ASEAAVLEVVQK.N     | 1852.1   | 0.00424  | 3 | 1 | 45.2 | 0 |
| P12163_2_F1,19824 K.ASEAAVLEVVQK.N     | 1852.1   | 0.00138  | 2 | 1 | 87.9 | 0 |
| P12163_1_S1,18019 K.EFTDISLGVR.R       | 1440.8   | 0.00286  | 3 | 1 | 37   | 0 |
| P12163_1_S1,18919 K.EFTDISLGVR.R       | 1440.8   | 0.0031   | 3 | 1 | 28.4 | 0 |
| P12163_1_S1,19002 K.EFTDISLGVR.R       | 1440.8   | 0.00261  | 2 | 1 | 25.7 | 0 |
| P12163_1_F2,13492 K.GLTDLVTDTDK.A      | 1786.005 | 0.00782  | 3 | 1 | 24.1 | 0 |
| P12163_1_F2,15080 K.GLTDLVTDTDK.A      | 1786.005 | 0.00683  | 3 | 1 | 30   | 0 |
| P12163_1_F2,18052 K.GLTDLVTDTDK.A      | 1786.005 | 0.00818  | 3 | 1 | 39.9 | 0 |
| P12163_1_F2,18067 K.GLTDLVTDTDK.A      | 1786.005 | 0.00557  | 2 | 1 | 64.7 | 0 |
| P12163_1_F5,9991 K.IHASQIDK.V          | 1519.905 | 0.00218  | 3 | 1 | 36.2 | 0 |
| P12163_1_F5,10008 K.IHASQIDK.V         | 1519.905 | 0.00825  | 2 | 1 | 25.1 | 0 |
| P12163_2_S5,10449 K.IHASQIDK.V         | 1519.905 | 0.00611  | 3 | 1 | 42.9 | 0 |
| P12163_2_S5,10460 K.IHASQIDK.V         | 1519.905 | 0.00655  | 2 | 1 | 28.2 | 0 |
| P12163_1_S1,21823 K.STGPIPPSqliqvvesa  | 2530.47  | 0.00686  | 3 | 1 | 28   | 0 |
| P12163_1_S1,23280 K.STGPIPPSqliqvvesa  | 2530.47  | 0.00642  | 4 | 1 | 24.4 | 0 |
| P12163_1_S1,23336 K.STGPIPPSqliqvvesa  | 2530.47  | 0.00833  | 3 | 1 | 53.7 | 0 |
| P12163_1_S1,23601 K.STGPIPPSqliqvvesa  | 2530.47  | 0.00476  | 3 | 1 | 36   | 0 |
| P12163_1_S1,23813 K.STGPIPPSqliqvvesa  | 2530.47  | 0.00935  | 3 | 1 | 46.2 | 0 |
| P12163_1_S1,24018 K.STGPIPPSqliqvvesa  | 2530.47  | 0.01049  | 3 | 1 | 32.4 | 0 |
| P12163_1_F8,11429 K.TGAEVVM*DAVNKPR    | 2111.174 | 0.00561  | 3 | 1 | 31.3 | 0 |
| P12163_1_F8,14263 K.TGAEVVM*DAVNKPR    | 2111.174 | -0.00203 | 2 | 1 | 35   | 0 |
| P12163_2_F6,16003 K.TGAEVVM*DAVNKPR    | 2111.174 | 0.00371  | 2 | 1 | 37.4 | 0 |
| P12163_1_F8,13733 K.TGAEVVMDAVNKPR.I   | 2095.179 | 0.00405  | 3 | 1 | 39.2 | 0 |
| P12163_2_F6,16023 K.TGAEVVMDAVNKPR.I   | 2095.179 | 0.00666  | 3 | 1 | 27.4 | 0 |
| P12163_1_F6,14708 R.SVLVSNgalhak.L     | 1804.09  | 0.00594  | 3 | 1 | 32.8 | 0 |
| P12163_1_F8,14601 R.SVLVSNgalhak.L     | 1804.09  | 0.00384  | 3 | 1 | 26.9 | 0 |
| P12163_2_F6,14046 R.SVLVSNgalhak.L     | 1804.09  | 0.00585  | 3 | 1 | 26.3 | 0 |
| P12163_1_F6,11472 K.DLAEEHYK.D         | 1612.879 | 0.00592  | 3 | 1 | 42.7 | 0 |
| P12163_1_F7,10871 K.DLAEEHYK.D         | 1612.879 | 0.00487  | 3 | 1 | 45.4 | 0 |
| P12163_1_F9,11304 K.DLAEEHYK.D         | 1612.879 | 0.00472  | 3 | 1 | 41.7 | 0 |
| P12163_1_F9,11459 K.DLAEEHYK.D         | 1612.879 | 0.00378  | 2 | 1 | 31.5 | 0 |
| P12163_1_S10,1201 K.DLAEEHYK.D         | 1612.879 | 0.0073   | 3 | 1 | 31   | 0 |
| P12163_2_F10,1060 K.DLAEEHYK.D         | 1612.879 | 0.00244  | 3 | 1 | 37   | 0 |
| P12163_2_F6,11123 K.DLAEEHYK.D         | 1612.879 | 0.00588  | 2 | 1 | 32.2 | 0 |
| P12163_2_F7,10614 K.DLAEEHYK.D         | 1612.879 | 0.00475  | 3 | 1 | 43.8 | 0 |
| P12163_2_F9,11011 K.DLAEEHYK.D         | 1612.879 | -0.00292 | 2 | 1 | 24.7 | 0 |
| P12163_2_F1,20086 K.LIGSTDPLQAEPGTIR.C | 1972.102 | -0.00392 | 3 | 1 | 23.7 | 0 |
| P12163_1_F4,24351 R.EIGLWFK.E          | 1500.903 | 0.00426  | 2 | 1 | 26.9 | 0 |
| P12163_1_F5,22771 R.EIGLWFK.E          | 1500.903 | 0.00744  | 2 | 1 | 25.6 | 0 |
| P12163_2_F1,23662 R.EIGLWFK.E          | 1500.903 | 0.0067   | 2 | 1 | 24.4 | 0 |
| P12163_1_F2,8933 R.GDLAVQTGR.N         | 1220.69  | 0.00214  | 3 | 1 | 51.2 | 0 |

|                   |                     |          |          |   |   |      |   |
|-------------------|---------------------|----------|----------|---|---|------|---|
| P12163_1_F2,9167  | R.GDLAVQTGR.N       | 1220.69  | 0.00304  | 3 | 1 | 37.8 | 0 |
| P12163_1_F2,9419  | R.GDLAVQTGR.N       | 1220.69  | 0.00466  | 3 | 1 | 28.5 | 0 |
| P12163_1_F2,19101 | R.GLVGEIISR.F       | 1247.762 | 0.00205  | 3 | 1 | 36.6 | 0 |
| P12163_1_S1,18849 | R.GLVGEIISR.F       | 1247.762 | 0.0051   | 2 | 1 | 24.4 | 0 |
| P12163_1_F8,15702 | R.KLIGSTDPLQAEPGTIR | 2404.402 | 0.00478  | 3 | 1 | 28.6 | 0 |
| P12163_1_F8,15730 | R.KLIGSTDPLQAEPGTIR | 2404.402 | 0.00565  | 4 | 1 | 28   | 0 |
| P12163_1_F8,17509 | R.KLIGSTDPLQAEPGTIR | 2404.402 | 0.00556  | 3 | 1 | 74.9 | 0 |
| P12163_2_F6,17000 | R.KLIGSTDPLQAEPGTIR | 2404.402 | 0.00355  | 3 | 1 | 66.5 | 0 |
| P12163_2_S5,15969 | R.KLIGSTDPLQAEPGTIR | 2404.402 | 0.00277  | 4 | 1 | 31.8 | 0 |
| P12163_2_S5,16007 | R.KLIGSTDPLQAEPGTIR | 2404.402 | 0.001    | 3 | 1 | 59.1 | 0 |
| P12163_1_F4,9083  | R.NVVHGS DSPEN GK.R | 1948.034 | 0.00399  | 3 | 1 | 54.7 | 0 |
| P12163_1_F6,8782  | R.NVVHGS DSPEN GK.R | 1948.034 | 0.00358  | 2 | 1 | 39   | 0 |
| P12163_1_F7,8356  | R.NVVHGS DSPEN GK.R | 1948.034 | 0.00573  | 3 | 1 | 31.3 | 0 |
| P12163_2_F6,7066  | R.NVVHGS DSPEN GK.R | 1948.034 | 0.0051   | 3 | 1 | 23   | 0 |
| P12163_2_F6,8452  | R.NVVHGS DSPEN GK.R | 1948.034 | -0.00081 | 3 | 1 | 34.2 | 0 |
| P12163_2_F6,8504  | R.NVVHGS DSPEN GK.R | 1948.034 | 0.00264  | 2 | 1 | 41.8 | 0 |
| P12163_2_F7,7979  | R.NVVHGS DSPEN GK.R | 1948.034 | 0.00648  | 3 | 1 | 42.8 | 0 |
| P12163_1_F4,20417 | K.DALLNSLPK.L       | 1578.967 | 0.00542  | 3 | 1 | 32.8 | 0 |
| P12163_1_F4,20443 | K.DALLNSLPK.L       | 1578.967 | 0.0083   | 2 | 1 | 34.5 | 0 |
| P12163_1_F4,20705 | K.DALLNSLPK.L       | 1578.967 | 0.00326  | 3 | 1 | 25.4 | 0 |
| P12163_1_F4,20712 | K.DALLNSLPK.L       | 1578.967 | 0.00418  | 2 | 1 | 26.7 | 0 |
| P12163_2_F1,19837 | K.DALLNSLPK.L       | 1578.967 | 0.0035   | 2 | 1 | 32.6 | 0 |
| P12163_2_F1,19844 | K.DALLNSLPK.L       | 1578.967 | 0.00605  | 3 | 1 | 32.5 | 0 |
| P12163_2_F4,17651 | K.DALLNSLPK.L       | 1578.967 | 0.00056  | 3 | 1 | 22.5 | 0 |
| P12163_1_F3,17562 | K.QIPGGVTAAEGFK.A   | 1883.085 | 0.01018  | 3 | 1 | 30.7 | 0 |
| P12163_1_F3,17563 | K.QIPGGVTAAEGFK.A   | 1883.085 | -0.00175 | 2 | 1 | 26   | 0 |
| P12163_1_F4,18026 | K.QIPGGVTAAEGFK.A   | 1883.085 | 0.00616  | 3 | 1 | 43   | 0 |
| P12163_1_F4,18066 | K.QIPGGVTAAEGFK.A   | 1883.085 | 0.00315  | 2 | 1 | 46   | 0 |
| P12163_2_F1,17371 | K.QIPGGVTAAEGFK.A   | 1883.085 | -0.00509 | 2 | 1 | 49.5 | 0 |
| P12163_2_F4,15635 | K.QIPGGVTAAEGFK.A   | 1883.085 | 0.00094  | 3 | 1 | 27.3 | 0 |
| P12163_1_F8,16100 | K.SVAVESQVGGTYIR.V  | 1769.97  | 0.01139  | 2 | 1 | 25.2 | 0 |
| P12163_1_S1,10498 | K.SVAVESQVGGTYIR.V  | 1769.97  | 0.00084  | 3 | 1 | 30.8 | 0 |
| P12163_1_S1,12574 | K.SVAVESQVGGTYIR.V  | 1769.97  | 0.00147  | 3 | 1 | 47.5 | 0 |
| P12163_1_S1,15286 | K.SVAVESQVGGTYIR.V  | 1769.97  | 0.00359  | 2 | 1 | 40.1 | 0 |
| P12163_1_S1,15299 | K.SVAVESQVGGTYIR.V  | 1769.97  | 0.00279  | 3 | 1 | 59.7 | 0 |
| P12163_2_F6,15580 | K.SVAVESQVGGTYIR.V  | 1769.97  | 0.00347  | 2 | 1 | 40.6 | 0 |
| P12163_1_F3,21911 | R.IAAAAGYAGVSFYQNI  | 2239.233 | 0.00562  | 3 | 1 | 57   | 0 |
| P12163_1_F3,21968 | R.IAAAAGYAGVSFYQNI  | 2239.233 | 0.00291  | 2 | 1 | 76.8 | 0 |
| P12163_1_F4,22611 | R.IAAAAGYAGVSFYQNI  | 2239.233 | 0.00565  | 3 | 1 | 63.1 | 0 |
| P12163_1_F4,12957 | R.LSSVDCNEAK.Q      | 1730.92  | 0.00665  | 2 | 1 | 47.1 | 0 |
| P12163_2_F1,11928 | R.LSSVDCNEAK.Q      | 1730.92  | 0.00989  | 2 | 1 | 48.4 | 0 |
| P12163_2_F1,11970 | R.LSSVDCNEAK.Q      | 1730.92  | 0.00408  | 3 | 1 | 29.5 | 0 |
| P12163_1_F4,13730 | R.SVASSSLVK.A       | 1485.91  | 0.00233  | 2 | 1 | 26.1 | 0 |
| P12163_1_F5,12277 | R.SVASSSLVK.A       | 1485.91  | -0.00017 | 2 | 1 | 38.6 | 0 |
| P12163_2_F2,13110 | R.SVASSSLVK.A       | 1485.91  | 0.00655  | 2 | 1 | 34.5 | 0 |
| P12163_2_F2,13117 | R.SVASSSLVK.A       | 1485.91  | 0.00276  | 3 | 1 | 41   | 0 |
| P12163_2_F1,10077 | R.VTGANSEAEAAK.I    | 1755.97  | 0.00594  | 2 | 1 | 54.4 | 0 |
| P12163_1_F8,17204 | K.DVDGFHPLNIGR.L    | 1643.881 | 0.00077  | 3 | 1 | 36.9 | 0 |
| P12163_1_F8,17562 | K.DVDGFHPLNIGR.L    | 1643.881 | 0.00539  | 3 | 1 | 23.7 | 0 |
| P12163_1_F8,17616 | K.DVDGFHPLNIGR.L    | 1643.881 | 0.00029  | 2 | 1 | 31.4 | 0 |
| P12163_1_F8,17773 | K.DVDGFHPLNIGR.L    | 1643.881 | 0.00128  | 3 | 1 | 22.8 | 0 |

|                   |                        |          |          |   |   |      |   |
|-------------------|------------------------|----------|----------|---|---|------|---|
| P12163_2_F6,17074 | K.DVDGFHPLNIGR.L       | 1643.881 | 0.00758  | 3 | 1 | 36.8 | 0 |
| P12163_2_F6,17078 | K.DVDGFHPLNIGR.L       | 1643.881 | 0.00271  | 2 | 1 | 27.8 | 0 |
| P12163_2_F6,17286 | K.DVDGFHPLNIGR.L       | 1643.881 | 0.00149  | 3 | 1 | 28.2 | 0 |
| P12163_2_S5,16226 | K.DVDGFHPLNIGR.L       | 1643.881 | 0.00197  | 3 | 1 | 32.8 | 0 |
| P12163_2_S5,16449 | K.DVDGFHPLNIGR.L       | 1643.881 | -0.00001 | 3 | 1 | 24.2 | 0 |
| P12163_1_F7,13467 | K.GCIELLHR.Y           | 1301.73  | 0.00249  | 3 | 1 | 42.3 | 0 |
| P12163_1_F9,14400 | K.GCIELLHR.Y           | 1301.73  | 0.00243  | 3 | 1 | 45.7 | 0 |
| P12163_2_F6,13999 | K.GCIELLHR.Y           | 1301.73  | 0.0033   | 3 | 1 | 39.2 | 0 |
| P12163_2_F7,12954 | K.GCIELLHR.Y           | 1301.73  | 0.00306  | 3 | 1 | 27.6 | 0 |
| P12163_1_S1,11392 | R.DEITGEVSR.M          | 1309.69  | 0.00255  | 2 | 1 | 29.5 | 0 |
| P12163_1_S1,11630 | R.DEITGEVSR.M          | 1309.69  | 0.00311  | 2 | 1 | 26.2 | 0 |
| P12163_1_F6,12222 | R.EDATVSIVHSR.T        | 1517.822 | 0.002    | 3 | 1 | 71.1 | 0 |
| P12163_1_F8,11982 | R.EDATVSIVHSR.T        | 1517.822 | 0.00125  | 3 | 1 | 43.3 | 0 |
| P12163_2_F6,8792  | R.EDATVSIVHSR.T        | 1517.822 | 0.00156  | 4 | 1 | 33.4 | 0 |
| P12163_2_F6,11732 | R.EDATVSIVHSR.T        | 1517.822 | 0.00101  | 3 | 1 | 48.8 | 0 |
| P12163_1_F7,23867 | R.M*KDAIGVVPGLAVIL     | 2547.515 | 0.00045  | 3 | 1 | 33.7 | 0 |
| P12163_1_S1,17987 | R.SNIVGM*PAALLLQR.E    | 1803.046 | 0.00304  | 3 | 1 | 29   | 0 |
| P12163_1_S1,20200 | R.SNIVGM*PAALLLQR.E    | 1803.046 | 0.00241  | 3 | 1 | 52   | 0 |
| P12163_1_S1,23130 | R.SNIVGM*PAALLLQR.E    | 1803.046 | 0.00298  | 3 | 1 | 37.5 | 0 |
| P12163_1_S1,23044 | R.SNIVGMPAALLLQR.E     | 1787.051 | 0.00133  | 3 | 1 | 32.4 | 0 |
| P12163_1_S1,23094 | R.SNIVGMPAALLLQR.E     | 1787.051 | 0.00432  | 2 | 1 | 24.6 | 0 |
| P12163_1_S1,23266 | R.SNIVGMPAALLLQR.E     | 1787.051 | 0.00187  | 3 | 1 | 64.6 | 0 |
| P12163_1_S1,23317 | R.SNIVGMPAALLLQR.E     | 1787.051 | 0.00418  | 2 | 1 | 34.9 | 0 |
| P12163_1_S1,23517 | R.SNIVGMPAALLLQR.E     | 1787.051 | -0.00239 | 3 | 1 | 27.8 | 0 |
| P12163_1_F5,8559  | R.VHNFQ.-              | 948.5204 | 0.00284  | 2 | 1 | 28.5 | 0 |
| P12163_2_S3,9238  | R.VHNFQ.-              | 948.5204 | 0.00126  | 2 | 1 | 28.7 | 0 |
| P12163_1_F5,16986 | K.FADENFVK.K           | 1577.878 | 0.00131  | 2 | 1 | 24.7 | 0 |
| P12163_2_F1,17475 | K.FADENFVK.K           | 1577.878 | 0.00648  | 2 | 1 | 35   | 0 |
| P12163_2_F1,17492 | K.FADENFVK.K           | 1577.878 | 0.00631  | 3 | 1 | 25.8 | 0 |
| P12163_1_F2,6171  | K.GSSFHR.I ! K.GSSFHR. | 994.5372 | 0.00346  | 3 | 1 | 23.2 | 0 |
| P12163_2_F2,6195  | K.GSSFHR.I ! K.GSSFHR. | 994.5372 | 0.00151  | 3 | 1 | 32   | 0 |
| P12163_1_F8,20359 | K.HVVFGQVVEGM*DVV      | 2267.268 | 0.00341  | 4 | 1 | 40.4 | 0 |
| P12163_1_F8,20445 | K.HVVFGQVVEGM*DVV      | 2267.268 | 0.0065   | 3 | 1 | 68.5 | 0 |
| P12163_2_F6,16826 | K.HVVFGQVVEGM*DVV      | 2267.268 | 0.01274  | 3 | 1 | 51.7 | 0 |
| P12163_2_F6,20022 | K.HVVFGQVVEGM*DVV      | 2267.268 | 0.0059   | 3 | 1 | 64.1 | 0 |
| P12163_2_F6,20081 | K.HVVFGQVVEGM*DVV      | 2267.268 | 0.00281  | 4 | 1 | 40.4 | 0 |
| P12163_1_F8,20352 | K.HVVFGQVVEGM*DVV      | 2251.273 | 0.00389  | 3 | 1 | 24.7 | 0 |
| P12163_2_F6,19924 | K.HVVFGQVVEGM*DVV      | 2251.273 | 0.00338  | 3 | 1 | 36.8 | 0 |
| P12163_2_F6,19927 | K.HVVFGQVVEGM*DVV      | 2251.273 | 0.00201  | 4 | 1 | 27.8 | 0 |
| P12163_2_F6,19968 | K.HVVFGQVVEGM*DVV      | 2251.273 | -0.0008  | 2 | 1 | 62.7 | 0 |
| P12163_2_F8_12070 | K.HVVFGQVVEGM*DVV      | 2251.273 | 0.00971  | 3 | 1 | 39.8 | 0 |
| P12163_1_F4,7410  | K.TAENFR.Q ! K.TAENFR. | 1041.563 | 0.00249  | 3 | 1 | 33.7 | 0 |
| P12163_2_F2,7039  | K.TAENFR.Q ! K.TAENFR. | 1041.563 | 0.00225  | 3 | 1 | 31.4 | 0 |
| P12163_2_F1,17341 | K.TEWLDGK.H            | 1456.826 | 0.00323  | 2 | 1 | 25.6 | 0 |
| P12163_2_F1,17349 | K.TEWLDGK.H            | 1456.826 | 0.00412  | 3 | 1 | 22.3 | 0 |
| P12163_1_F5,9906  | R.ALCTGEK.G            | 1386.787 | 0.00705  | 2 | 1 | 26.7 | 0 |
| P12163_1_F6,10902 | R.ALCTGEK.G            | 1386.787 | 0.01195  | 2 | 1 | 26.2 | 0 |
| P12163_1_F8,10102 | R.ALCTGEK.G            | 1386.787 | 0.00237  | 2 | 1 | 27.1 | 0 |
| P12163_2_F2,10720 | R.ALCTGEK.G            | 1386.787 | 0.00655  | 2 | 1 | 27   | 0 |
| P12163_2_F2,10838 | R.ALCTGEK.G            | 1386.787 | 0.00185  | 3 | 1 | 29.9 | 0 |
| P12163_2_F2,11178 | R.ALCTGEK.G            | 1386.787 | 0.00683  | 2 | 1 | 26.2 | 0 |



|                                          |          |          |   |   |      |   |
|------------------------------------------|----------|----------|---|---|------|---|
| P12163_1_F4,16637 R.TNKPVVIADCGQLS.-     | 2110.179 | 0.00505  | 2 | 1 | 58.9 | 0 |
| P12163_2_F1,15898 R.TNKPVVIADCGQLS.-     | 2110.179 | 0.00519  | 2 | 1 | 38.4 | 0 |
| P12163_2_F1,15983 R.TNKPVVIADCGQLS.-     | 2110.179 | 0.0055   | 3 | 1 | 26.8 | 0 |
| P12163_2_F4,14509 R.TNKPVVIADCGQLS.-     | 2110.179 | 0.0046   | 3 | 1 | 30.5 | 0 |
| P12163_1_F3,21625 K.IVTEILPAK.R ! K.IVTE | 1592.024 | 0.00544  | 2 | 1 | 32   | 0 |
| P12163_1_F3,21639 K.IVTEILPAK.R ! K.IVTE | 1592.024 | 0.0033   | 3 | 1 | 38.8 | 0 |
| P12163_1_F3,21850 K.IVTEILPAK.R ! K.IVTE | 1592.024 | 0.0056   | 2 | 1 | 38.2 | 0 |
| P12163_1_F3,21881 K.IVTEILPAK.R ! K.IVTE | 1592.024 | 0.00393  | 3 | 1 | 38.9 | 0 |
| P12163_1_F5,21296 K.IVTEILPAK.R ! K.IVTE | 1592.024 | 0.00645  | 2 | 1 | 26   | 0 |
| P12163_1_F5,21310 K.IVTEILPAK.R ! K.IVTE | 1592.024 | -0.00024 | 3 | 1 | 25   | 0 |
| P12163_1_F6,20695 K.IVTEILPAK.R ! K.IVTE | 1592.024 | 0.00367  | 2 | 1 | 32.6 | 0 |
| P12163_1_F6,20736 K.IVTEILPAK.R ! K.IVTE | 1592.024 | 0.00153  | 3 | 1 | 30.8 | 0 |
| P12163_2_F4,19880 K.IVTEILPAK.R ! K.IVTE | 1592.024 | 0.00513  | 3 | 1 | 29.3 | 0 |
| P12163_2_F4,14383 K.TEVGYSQLHNPYSYI      | 3716.719 | 0.00088  | 4 | 1 | 51   | 0 |
| P12163_1_F6,12759 R.AEEYHQQYLAK.G        | 1988.07  | 0.00619  | 3 | 1 | 38.8 | 0 |
| P12163_2_F6,12150 R.AEEYHQQYLAK.G        | 1988.07  | 0.00721  | 3 | 1 | 43.2 | 0 |
| P12163_2_F6,12195 R.AEEYHQQYLAK.G        | 1988.07  | 0.0015   | 2 | 1 | 56.5 | 0 |
| P12163_2_F6,12202 R.AEEYHQQYLAK.G        | 1988.07  | 0.0001   | 2 | 1 | 70   | 0 |
| P12163_2_F7,11604 R.AEEYHQQYLAK.G        | 1988.07  | 0.00937  | 3 | 1 | 29.1 | 0 |
| P12163_1_F9,9175 R.HDPTMLNR.Q            | 1287.678 | 0.00393  | 3 | 1 | 33.8 | 0 |
| P12163_2_F9,9159 R.HDPTMLNR.Q            | 1287.678 | 0.00234  | 3 | 1 | 30.1 | 0 |
| P12163_1_F3,6796 R.QGNDVGTQYR.S          | 1441.734 | 0.00256  | 3 | 1 | 27.2 | 0 |
| P12163_1_F3,8275 R.QGNDVGTQYR.S          | 1441.734 | 0.0028   | 2 | 1 | 36.1 | 0 |
| P12163_1_F4,8794 R.QGNDVGTQYR.S          | 1441.734 | 0.00316  | 2 | 1 | 30   | 0 |
| P12163_2_F1,7855 R.QGNDVGTQYR.S          | 1441.734 | 0.00594  | 2 | 1 | 26   | 0 |
| P12163_1_F3,18593 R.SGIYFYTPEQEK.A       | 2070.1   | 0.00367  | 2 | 1 | 34.3 | 0 |
| P12163_1_F4,19036 R.SGIYFYTPEQEK.A       | 2070.1   | 0.00886  | 3 | 1 | 30.5 | 0 |
| P12163_1_F4,19042 R.SGIYFYTPEQEK.A       | 2070.1   | 0.00753  | 2 | 1 | 37.4 | 0 |
| P12163_1_F9,17560 R.SGIYFYTPEQEK.A       | 2070.1   | 0.00826  | 3 | 1 | 25.7 | 0 |
| P12163_2_F1,18293 R.SGIYFYTPEQEK.A       | 2070.1   | 0.00301  | 3 | 1 | 31.5 | 0 |
| P12163_2_F1,18330 R.SGIYFYTPEQEK.A       | 2070.1   | 0.00381  | 2 | 1 | 33.7 | 0 |
| P12163_2_F9,16838 R.SGIYFYTPEQEK.A       | 2070.1   | 0.00865  | 3 | 1 | 25.1 | 0 |
| P12163_1_F5,11930 R.VPGVTK.T             | 1208.782 | 0.00861  | 3 | 1 | 27.4 | 0 |
| P12163_1_F4,9908 K.ADVTEGSAK.L           | 1485.837 | 0.00656  | 2 | 1 | 41.2 | 0 |
| P12163_2_F1,9030 K.ADVTEGSAK.L           | 1485.837 | 0.00646  | 2 | 1 | 40.5 | 0 |
| P12163_1_F4,15453 K.IFVAGATGSSGK.R       | 1702.995 | 0.00184  | 3 | 1 | 47.1 | 0 |
| P12163_1_F3,13297 K.SEITEEAENVSVK.Q      | 2172.149 | 0.00973  | 3 | 1 | 49.2 | 0 |
| P12163_1_F3,15686 K.SEITEEAENVSVK.Q      | 2172.149 | 0.00205  | 3 | 1 | 24   | 0 |
| P12163_1_F3,16509 K.SEITEEAENVSVK.Q      | 2172.149 | -0.00788 | 2 | 1 | 55.8 | 0 |
| P12163_1_F3,16660 K.SEITEEAENVSVK.Q      | 2172.149 | 0.00217  | 3 | 1 | 41.4 | 0 |
| P12163_1_F8,17670 K.SGINYTIIRPGGLR.N     | 1821.065 | 0.00323  | 3 | 1 | 25.1 | 0 |
| P12163_1_F7,23698 R.DQVAEVAVEALLHPE!     | 2693.461 | 0.00515  | 3 | 1 | 22.3 | 0 |
| P12163_1_F7,23740 R.DQVAEVAVEALLHPE!     | 2693.461 | 0.00636  | 4 | 1 | 25.9 | 0 |
| P12163_2_F10,2143 R.DQVAEVAVEALLHPE!     | 2693.461 | -0.00188 | 4 | 1 | 48.1 | 0 |
| P12163_2_F8_12070 R.DQVAEVAVEALLHPE!     | 2693.461 | 0.00388  | 4 | 1 | 53.4 | 0 |
| P12163_1_F4,25151 R.IVEQLLAK.G           | 1521.982 | 0.00419  | 2 | 1 | 36.6 | 0 |
| P12163_1_F4,25345 R.IVEQLLAK.G           | 1521.982 | 0.00549  | 3 | 1 | 29.6 | 0 |
| P12163_1_F4,25391 R.IVEQLLAK.G           | 1521.982 | 0.00797  | 2 | 1 | 32.4 | 0 |
| P12163_1_F7,22157 R.IVEQLLAK.G           | 1521.982 | 0.00213  | 3 | 1 | 21.9 | 0 |
| P12163_2_F1,24471 R.IVEQLLAK.G           | 1521.982 | 0.00498  | 3 | 1 | 36.7 | 0 |
| P12163_2_F1,24474 R.IVEQLLAK.G           | 1521.982 | 0.00528  | 2 | 1 | 38.1 | 0 |

|                                       |          |          |   |   |      |   |
|---------------------------------------|----------|----------|---|---|------|---|
| P12163_2_F1,24677 R.IVEQLLAK.G        | 1521.982 | 0.00477  | 3 | 1 | 29.8 | 0 |
| P12163_2_F1,24687 R.IVEQLLAK.G        | 1521.982 | 0.0061   | 2 | 1 | 32.4 | 0 |
| P12163_1_F4,19346 R.SYEDLFGSIK.Q      | 1766.978 | 0.00795  | 2 | 1 | 27.9 | 0 |
| P12163_1_F4,19356 R.SYEDLFGSIK.Q      | 1766.978 | 0.00696  | 3 | 1 | 33.3 | 0 |
| P12163_1_F4,22488 R.SYEDLFGSIK.Q      | 1766.978 | 0.01257  | 2 | 1 | 47.9 | 0 |
| P12163_1_F4,22615 R.SYEDLFGSIK.Q      | 1766.978 | 0.00783  | 3 | 1 | 39.7 | 0 |
| P12163_1_F9,20553 R.SYEDLFGSIK.Q      | 1766.978 | 0.00925  | 2 | 1 | 39.5 | 0 |
| P12163_1_F9,20566 R.SYEDLFGSIK.Q      | 1766.978 | 0.01104  | 3 | 1 | 22.4 | 0 |
| P12163_2_F1,21994 R.SYEDLFGSIK.Q      | 1766.978 | 0.00609  | 2 | 1 | 58.2 | 0 |
| P12163_2_F9,19500 R.SYEDLFGSIK.Q      | 1766.978 | 0.00663  | 3 | 1 | 27.4 | 0 |
| P12163_2_F1,10387 K.AASWNAENR.Q       | 1322.675 | 0.00635  | 2 | 1 | 28.9 | 0 |
| P12163_2_F2,10593 K.AASWNAENR.Q       | 1322.675 | 0.00375  | 2 | 1 | 38   | 0 |
| P12163_1_F3,20028 K.AITEGGFESLFK.Q    | 1907.073 | 0.00746  | 2 | 1 | 31.8 | 0 |
| P12163_1_F3,20071 K.AITEGGFESLFK.Q    | 1907.073 | 0.00493  | 3 | 1 | 47.2 | 0 |
| P12163_1_F3,23870 K.AITEGGFESLFK.Q    | 1907.073 | 0.00748  | 3 | 1 | 50.2 | 0 |
| P12163_1_F4,24693 K.AITEGGFESLFK.Q    | 1907.073 | 0.00757  | 3 | 1 | 41.7 | 0 |
| P12163_1_F5,23105 K.AITEGGFESLFK.Q    | 1907.073 | 0.00724  | 3 | 1 | 35.6 | 0 |
| P12163_1_F6,22448 K.AITEGGFESLFK.Q    | 1907.073 | 0.00166  | 3 | 1 | 40.9 | 0 |
| P12163_2_F1,24031 K.AITEGGFESLFK.Q    | 1907.073 | 0.0016   | 3 | 1 | 44.3 | 0 |
| P12163_1_F6,18154 K.ATNHLLNSLSEYR.A   | 1821.976 | 0.00186  | 3 | 1 | 30.7 | 0 |
| P12163_1_F6,18175 K.ATNHLLNSLSEYR.A   | 1821.976 | 0.00485  | 2 | 1 | 27.3 | 0 |
| P12163_1_F8,18053 K.ATNHLLNSLSEYR.A   | 1821.976 | -0.00057 | 3 | 1 | 36.5 | 0 |
| P12163_2_F6,17511 K.ATNHLLNSLSEYR.A   | 1821.976 | 0.00261  | 3 | 1 | 34.2 | 0 |
| P12163_2_F6,17529 K.ATNHLLNSLSEYR.A   | 1821.976 | 0.00075  | 2 | 1 | 31.5 | 0 |
| P12163_2_S3,15994 K.ATNHLLNSLSEYR.A   | 1821.976 | 0.00231  | 3 | 1 | 29.2 | 0 |
| P12163_1_F3,15244 K.QIFATDPNEK.L      | 1770.985 | 0.00496  | 3 | 1 | 41.1 | 0 |
| P12163_1_F3,15246 K.QIFATDPNEK.L      | 1770.985 | 0.00714  | 2 | 1 | 35   | 0 |
| P12163_1_F4,15506 K.QIFATDPNEK.L      | 1770.985 | 0.0178   | 3 | 1 | 38.6 | 0 |
| P12163_1_F4,15569 K.QIFATDPNEK.L      | 1770.985 | 0.0036   | 2 | 1 | 40.5 | 0 |
| P12163_2_F1,13227 K.TGPSVSEAAWGK.V    | 1797.996 | 0.00641  | 2 | 1 | 32.4 | 0 |
| P12163_1_S1,21799 K.VM*IPLANISSVNPVTI | 2420.441 | 0.00835  | 3 | 1 | 42   | 0 |
| P12163_1_S1,21839 K.VM*IPLANISSVNPVTI | 2420.441 | 0.00587  | 4 | 1 | 75.1 | 0 |
| P12163_1_S1,21947 K.VM*IPLANISSVNPVTI | 2420.441 | 0.0091   | 3 | 1 | 56.8 | 0 |
| P12163_1_S1,23675 K.VM*IPLANISSVNPVTI | 2420.441 | 0.00553  | 3 | 1 | 27.1 | 0 |
| P12163_1_S1,23558 K.VMIPLANISSVNPVTI  | 2404.446 | 0.00651  | 4 | 1 | 36.1 | 0 |
| P12163_1_S1,23577 K.VMIPLANISSVNPVTI  | 2404.446 | 0.00871  | 3 | 1 | 67.3 | 0 |
| P12163_1_S10,1597 R.NIWHNLK.T         | 1532.916 | 0.00765  | 3 | 1 | 32.8 | 0 |
| P12163_2_F8_12070 R.NIWHNLK.T         | 1532.916 | 0.0039   | 3 | 1 | 31.5 | 0 |
| P12163_1_F4,10869 K.AAIEAQDSNK.L      | 1654.922 | 0.01098  | 2 | 1 | 38.7 | 0 |
| P12163_1_F4,10884 K.AAIEAQDSNK.L      | 1654.922 | 0.01516  | 3 | 1 | 32.5 | 0 |
| P12163_1_F5,9478 K.AAIEAQDSNK.L       | 1654.922 | 0.0094   | 2 | 1 | 35.1 | 0 |
| P12163_2_F1,10103 K.AAIEAQDSNK.L      | 1654.922 | 0.00538  | 2 | 1 | 39.7 | 0 |
| P12163_1_F3,19757 K.FLADPDAYK.A       | 1647.92  | 0.00639  | 2 | 1 | 25.5 | 0 |
| P12163_1_F4,20229 K.FLADPDAYK.A       | 1647.92  | 0.00759  | 2 | 1 | 33.3 | 0 |
| P12163_1_F5,18998 K.FLADPDAYK.A       | 1647.92  | -0.00749 | 2 | 1 | 27.9 | 0 |
| P12163_1_F9,18668 K.FLADPDAYK.A       | 1647.92  | 0.00435  | 2 | 1 | 37.3 | 0 |
| P12163_2_F7,16875 K.FLADPDAYK.A       | 1647.92  | 0.00205  | 2 | 1 | 38.1 | 0 |
| P12163_2_F9,17775 K.FLADPDAYK.A       | 1647.92  | 0.00405  | 3 | 1 | 26.4 | 0 |
| P12163_1_S1,23050 K.LM*EILTYPTVEEAVK  | 2360.324 | 0.00537  | 3 | 1 | 37.9 | 0 |
| P12163_1_S1,23136 K.LM*EILTYPTVEEAVK  | 2360.324 | 0.00509  | 4 | 1 | 24.8 | 0 |
| P12163_2_S5,12696 R.AYGQEVTPHDGNGAD   | 2626.336 | 0.00356  | 4 | 1 | 33.8 | 0 |

|                                       |          |          |   |   |      |   |
|---------------------------------------|----------|----------|---|---|------|---|
| P12163_1_F4,25651 R.CSLVEYILK.E       | 1733.013 | 0.00218  | 2 | 1 | 26.2 | 0 |
| P12163_1_F4,25756 R.CSLVEYILK.E       | 1733.013 | 0.00051  | 3 | 1 | 31.3 | 0 |
| P12163_2_F1,24882 R.CSLVEYILK.E       | 1733.013 | 0.00081  | 3 | 1 | 22.1 | 0 |
| P12163_1_S1,24959 R.QEDSIIFSLLER.A    | 1753.964 | 0.0023   | 3 | 1 | 47.6 | 0 |
| P12163_1_S1,24977 R.QEDSIIFSLLER.A    | 1753.964 | 0.00357  | 2 | 1 | 35.8 | 0 |
| P12163_2_F1,8130 R.VDESENM*K.L        | 1575.814 | 0.0023   | 2 | 1 | 25.8 | 0 |
| P12163_1_F4,11363 R.VDESENMK.L        | 1559.819 | 0.01046  | 2 | 1 | 26.5 | 0 |
| P12163_1_F5,10024 R.VDESENMK.L        | 1559.819 | 0.01162  | 2 | 1 | 25.3 | 0 |
| P12163_2_F1,10485 R.VDESENMK.L        | 1559.819 | 0.0083   | 2 | 1 | 26.3 | 0 |
| P12163_1_F2,20543 K.ALIPDLYR.G        | 1264.757 | 0.00392  | 3 | 1 | 25   | 0 |
| P12163_1_S1,19607 K.ALIPDLYR.G        | 1264.757 | 0.00413  | 3 | 1 | 32   | 0 |
| P12163_1_F7,21325 K.APVQAHFGELDNFVGI  | 2785.477 | 0.00317  | 4 | 1 | 27.3 | 0 |
| P12163_1_F7,21326 K.APVQAHFGELDNFVGI  | 2785.477 | 0.00093  | 3 | 1 | 49.8 | 0 |
| P12163_1_F7,21558 K.APVQAHFGELDNFVGI  | 2785.477 | 0.00509  | 4 | 1 | 26   | 0 |
| P12163_1_F6,17785 K.DIHASVNWLK.A      | 1791.037 | 0.00698  | 3 | 1 | 34.8 | 0 |
| P12163_1_F6,18286 K.EMGM*DDHDPAAVEI   | 2350.074 | 0.00591  | 3 | 1 | 22.7 | 0 |
| P12163_2_F4,17037 K.EMGM*DDHDPAAVEI   | 2350.074 | 0.00321  | 3 | 1 | 27.2 | 0 |
| P12163_1_F6,19406 K.EMGMDDHDPAAVEI    | 2334.08  | 0.00213  | 3 | 1 | 32.6 | 0 |
| P12163_1_F4,18889 K.ISQLNPGFK.A       | 1611.968 | 0.00687  | 2 | 1 | 33   | 0 |
| P12163_1_F5,17567 K.ISQLNPGFK.A       | 1611.968 | 0.00441  | 2 | 1 | 38.5 | 0 |
| P12163_1_F5,17634 K.ISQLNPGFK.A       | 1611.968 | 0.00664  | 3 | 1 | 42.6 | 0 |
| P12163_1_F7,16716 K.ISQLNPGFK.A       | 1611.968 | -0.00217 | 2 | 1 | 24   | 0 |
| P12163_2_F1,18117 K.ISQLNPGFK.A       | 1611.968 | 0.00719  | 2 | 1 | 28.2 | 0 |
| P12163_2_F1,18157 K.ISQLNPGFK.A       | 1611.968 | 0.00502  | 3 | 1 | 40.7 | 0 |
| P12163_2_F2,18393 K.ISQLNPGFK.A       | 1611.968 | 0.00511  | 3 | 1 | 34.8 | 0 |
| P12163_1_F6,20907 K.VGLDTAEAQHLM*SG   | 2919.549 | 0.00238  | 3 | 1 | 42.1 | 0 |
| P12163_1_F7,22820 K.VGLDTAEAQHLM*SG   | 2919.549 | 0.00554  | 4 | 1 | 41.9 | 0 |
| P12163_1_F7,22832 K.VGLDTAEAQHLM*SG   | 2919.549 | -0.00302 | 3 | 1 | 45.8 | 0 |
| P12163_1_S1,17236 R.DDTTFDAYVVGK.E    | 1939.027 | 0.01378  | 3 | 1 | 37.9 | 0 |
| P12163_2_F6,17500 R.DDTTFDAYVVGK.E    | 1939.027 | 0.00306  | 2 | 1 | 47.1 | 0 |
| P12163_1_F4,18557 K.AKELESLSSEPGSVDD  | 2271.181 | 0.00482  | 2 | 1 | 62.9 | 0 |
| P12163_1_F6,21364 K.GDFFFSPEHPPLTEDA  | 2541.235 | 0.0033   | 3 | 1 | 29.1 | 0 |
| P12163_1_F6,22860 K.GDFFFSPEHPPLTEDA  | 2541.235 | 0.00054  | 3 | 1 | 28.5 | 0 |
| P12163_1_F6,23071 K.GDFFFSPEHPPLTEDA  | 2541.235 | 0.00555  | 3 | 1 | 23.8 | 0 |
| P12163_1_F7,22112 K.GDFFFSPEHPPLTEDA  | 2541.235 | 0.00369  | 3 | 1 | 26.4 | 0 |
| P12163_2_F10,20270 K.GDFFFSPEHPPLTEDA | 2541.235 | 0.00372  | 3 | 1 | 49.3 | 0 |
| P12163_2_F8_12070 K.GDFFFSPEHPPLTEDA  | 2541.235 | 0.0078   | 3 | 1 | 23.1 | 0 |
| P12163_2_F8_12070 K.GDFFFSPEHPPLTEDA  | 2541.235 | -0.00051 | 4 | 1 | 31.1 | 0 |
| P12163_2_F8_12070 K.GDFFFSPEHPPLTEDA  | 2541.235 | 0.0036   | 3 | 1 | 63   | 0 |
| P12163_1_F3,26792 K.ILAALGFSDEK.A     | 1772.041 | 0.00889  | 3 | 1 | 49.1 | 0 |
| P12163_1_F4,27613 K.ILAALGFSDEK.A     | 1772.041 | 0.00592  | 3 | 1 | 47.9 | 0 |
| P12163_1_F4,27614 K.ILAALGFSDEK.A     | 1772.041 | 0.00562  | 2 | 1 | 49.2 | 0 |
| P12163_1_F2,14897 K.SFAMGELEAR.K      | 1414.73  | 0.00175  | 3 | 1 | 31.2 | 0 |
| P12163_1_F2,17660 K.SFAMGELEAR.K      | 1414.73  | 0.00714  | 2 | 1 | 36.8 | 0 |
| P12163_1_F5,16889 R.ANGVTLFK.V        | 1457.894 | 0.00462  | 3 | 1 | 38.1 | 0 |
| P12163_2_F2,17622 R.ANGVTLFK.V        | 1457.894 | 0.00631  | 2 | 1 | 25   | 0 |
| P12163_2_F2,7555 R.SNSAVSNEK.A        | 1543.854 | 0.00918  | 2 | 1 | 52.5 | 0 |
| P12163_2_F6,19381 R.VIDWAVDHK.L       | 1690.974 | 0.00549  | 3 | 1 | 23.9 | 0 |
| P12163_2_F6,19396 R.VIDWAVDHK.L       | 1690.974 | 0.00114  | 2 | 1 | 28.7 | 0 |
| P12163_2_F6,19553 R.VIDWAVDHK.L       | 1690.974 | 0.00551  | 4 | 1 | 25.2 | 0 |
| P12163_2_F6,19617 R.VIDWAVDHK.L       | 1690.974 | 0.00429  | 3 | 1 | 42   | 0 |

|                   |                       |          |          |   |   |      |   |
|-------------------|-----------------------|----------|----------|---|---|------|---|
| P12163_1_F4,23324 | K.EFFEVLK.T           | 1519.898 | 0.00599  | 3 | 1 | 22.2 | 0 |
| P12163_1_F4,23332 | K.EFFEVLK.T           | 1519.898 | 0.00706  | 2 | 1 | 24.5 | 0 |
| P12163_1_F5,21923 | K.EFFEVLK.T           | 1519.898 | 0.00454  | 2 | 1 | 29.8 | 0 |
| P12163_2_S5,19888 | K.EFFEVLK.T           | 1519.898 | 0.00386  | 3 | 1 | 23.9 | 0 |
| P12163_1_F5,22646 | K.FIAWVK.R            | 1371.861 | 0.00773  | 2 | 1 | 27.1 | 0 |
| P12163_1_F4,15316 | K.FNVEAECPK.F         | 1701.909 | 0.00855  | 2 | 1 | 33.4 | 0 |
| P12163_1_F4,15354 | K.FNVEAECPK.F         | 1701.909 | 0.00831  | 3 | 1 | 39.1 | 0 |
| P12163_1_F5,14108 | K.FNVEAECPK.F         | 1701.909 | 0.00876  | 2 | 1 | 42.9 | 0 |
| P12163_2_F1,14271 | K.FNVEAECPK.F         | 1701.909 | 0.00897  | 2 | 1 | 42.3 | 0 |
| P12163_1_F5,6585  | K.GEEQEAAK.K          | 1469.806 | 0.00694  | 2 | 1 | 25.7 | 0 |
| P12163_2_F1,6996  | K.GEEQEAAK.K          | 1469.806 | 0.00682  | 2 | 1 | 26   | 0 |
| P12163_2_F1,7005  | K.GEEQEAAK.K          | 1469.806 | 0.00539  | 3 | 1 | 29.6 | 0 |
| P12163_1_F5,14792 | K.IALAEK.G ! R.IALAEK | 1252.808 | 0.0024   | 3 | 1 | 27.8 | 0 |
| P12163_2_F2,15557 | K.IALAEK.G ! R.IALAEK | 1252.808 | 0.00408  | 3 | 1 | 25.9 | 0 |
| P12163_1_F8,16648 | K.SPLLLQM*NPVHK.K     | 2001.177 | 0.00264  | 3 | 1 | 43.3 | 0 |
| P12163_1_F8,19531 | K.SPLLLQM*NPVHK.K     | 2001.177 | 0.00498  | 3 | 1 | 31.7 | 0 |
| P12163_2_F6,16142 | K.SPLLLQM*NPVHK.K     | 2001.177 | 0.00801  | 3 | 1 | 47.9 | 0 |
| P12163_1_F8,19534 | K.SPLLLQMNPVHK.K      | 1985.183 | 0.00384  | 3 | 1 | 63.3 | 0 |
| P12163_1_F8,19539 | K.SPLLLQMNPVHK.K      | 1985.183 | 0.00528  | 4 | 1 | 31.7 | 0 |
| P12163_2_F6,18980 | K.SPLLLQMNPVHK.K      | 1985.183 | 0.00396  | 4 | 1 | 29.5 | 0 |
| P12163_1_F7,23719 | R.FWVDFIDK.K          | 1677.946 | 0.00328  | 3 | 1 | 22.4 | 0 |
| P12163_1_F3,12212 | K.CPMAGTFYR.S ! K.CPM | 1406.686 | 0.00239  | 3 | 1 | 27.9 | 0 |
| P12163_1_S1,17899 | K.QLDCELIIR.K         | 1463.819 | 0.00598  | 2 | 1 | 26   | 0 |
| P12163_1_S1,17924 | K.QLDCELIIR.K         | 1463.819 | 0.00496  | 3 | 1 | 45.1 | 0 |
| P12163_1_F4,15531 | K.SSLPPLK.C           | 1349.861 | 0.0059   | 2 | 1 | 30.9 | 0 |
| P12163_1_F3,19839 | R.DIVELQLK.Q          | 1565.972 | 0.00192  | 3 | 1 | 30.9 | 0 |
| P12163_1_F3,19848 | R.DIVELQLK.Q          | 1565.972 | 0.00546  | 2 | 1 | 38.7 | 0 |
| P12163_1_F4,20459 | R.DIVELQLK.Q          | 1565.972 | 0.00568  | 2 | 1 | 37.9 | 0 |
| P12163_1_F4,20568 | R.DIVELQLK.Q          | 1565.972 | 0.00633  | 3 | 1 | 43   | 0 |
| P12163_2_F1,19881 | R.DIVELQLK.Q          | 1565.972 | 0.00596  | 2 | 1 | 47.4 | 0 |
| P12163_2_F4,17569 | R.DIVELQLK.Q          | 1565.972 | 0.00126  | 3 | 1 | 32.2 | 0 |
| P12163_1_F3,24856 | R.KPVSVDTPLFVIEP.-    | 2149.273 | 0.00097  | 2 | 1 | 27.9 | 0 |
| P12163_1_F6,23414 | R.KPVSVDTPLFVIEP.-    | 2149.273 | -0.00092 | 3 | 1 | 22.7 | 0 |
| P12163_1_S1,13755 | R.SGTIVEIIAEDR.K      | 1606.895 | 0.00275  | 3 | 1 | 44.9 | 0 |
| P12163_1_S1,20987 | R.SGTIVEIIAEDR.K      | 1606.895 | -0.00042 | 2 | 1 | 55.6 | 0 |
| P12163_1_S1,21047 | R.SGTIVEIIAEDR.K      | 1606.895 | 0.00221  | 3 | 1 | 46.7 | 0 |
| P12163_1_F3,16217 | R.SPAPGEPFVK.V        | 1734.005 | 0.005    | 2 | 1 | 30.2 | 0 |
| P12163_1_F3,16258 | R.SPAPGEPFVK.V        | 1734.005 | 0.00625  | 3 | 1 | 27.4 | 0 |
| P12163_1_F4,16670 | R.SPAPGEPFVK.V        | 1734.005 | 0.01202  | 2 | 1 | 35   | 0 |
| P12163_2_F1,15855 | R.SPAPGEPFVK.V        | 1734.005 | 0.00546  | 2 | 1 | 51.5 | 0 |
| P12163_2_F1,15865 | R.SPAPGEPFVK.V        | 1734.005 | 0.0034   | 3 | 1 | 26.9 | 0 |
| P12163_2_F2,238   | R.SPAPGEPFVK.V        | 1734.005 | 0.0013   | 3 | 1 | 22.7 | 0 |
| P12163_1_F3,11914 | K.AQVQSYAGESEAAIK.!   | 2160.176 | 0.00658  | 3 | 1 | 49.5 | 0 |
| P12163_1_F3,12815 | K.AQVQSYAGESEAAIK.!   | 2160.176 | 0.00427  | 3 | 1 | 30.3 | 0 |
| P12163_1_F3,15225 | K.AQVQSYAGESEAAIK.!   | 2160.176 | 0.00323  | 2 | 1 | 92.3 | 0 |
| P12163_1_F4,15789 | K.AQVQSYAGESEAAIK.!   | 2160.176 | 0.00385  | 3 | 1 | 50.3 | 0 |
| P12163_1_F3,19987 | K.GFEEILR.K           | 1167.667 | 0.00261  | 2 | 1 | 27.7 | 0 |
| P12163_1_S10,6859 | K.HSEALR.V            | 1016.579 | 0.00228  | 3 | 1 | 25.6 | 0 |
| P12163_2_F8_12070 | K.HSEALR.V            | 1016.579 | 0.00171  | 3 | 1 | 26.9 | 0 |
| P12163_1_F4,21690 | K.LLIAQIK.V           | 1406.955 | 0.00806  | 2 | 1 | 30.9 | 0 |
| P12163_1_F4,21692 | K.LLIAQIK.V           | 1406.955 | 0.00892  | 3 | 1 | 28.4 | 0 |

|                   |                      |          |          |   |   |      |   |
|-------------------|----------------------|----------|----------|---|---|------|---|
| P12163_1_F7,19314 | K.LLIAQIK.V          | 1406.955 | 0.00169  | 3 | 1 | 28.2 | 0 |
| P12163_2_F1,21287 | K.LLIAQIK.V          | 1406.955 | 0.00526  | 2 | 1 | 29.9 | 0 |
| P12163_2_F2,21228 | K.LLIAQIK.V          | 1406.955 | 0.00094  | 3 | 1 | 22.2 | 0 |
| P12163_2_F2,21235 | K.LLIAQIK.V          | 1406.955 | 0.00632  | 2 | 1 | 29.3 | 0 |
| P12163_2_S5,18221 | K.LLIAQIK.V          | 1406.955 | -0.00029 | 3 | 1 | 26.8 | 0 |
| P12163_1_F4,11563 | R.EDVSYEEK.E         | 1606.842 | 0.00641  | 2 | 1 | 36.5 | 0 |
| P12163_1_F3,20527 | R.EYFVDNMVATK.I      | 1925.03  | 0.00858  | 2 | 1 | 70.7 | 0 |
| P12163_1_F3,20543 | R.EYFVDNMVATK.I      | 1925.03  | 0.00272  | 3 | 1 | 42.2 | 0 |
| P12163_1_F9,19586 | R.EYFVDNMVATK.I      | 1925.03  | 0.00617  | 3 | 1 | 28.9 | 0 |
| P12163_1_F7,16706 | R.VEAYHGLVM*AYDGS    | 2379.211 | 0.00451  | 3 | 1 | 32.6 | 0 |
| P12163_1_F7,17856 | R.VEAYHGLVMAYDGS     | 2363.216 | 0.00209  | 3 | 1 | 27.3 | 0 |
| P12163_2_F4,17447 | R.VEAYHGLVMAYDGS     | 2363.216 | 0.00092  | 3 | 1 | 32.7 | 0 |
| P12163_1_F7,16961 | K.GMSEFHDVELQVR.D    | 1850.937 | 0.00341  | 3 | 1 | 35   | 0 |
| P12163_1_F8,15671 | K.LPNHEPILEAK.G      | 1869.105 | 0.00349  | 3 | 1 | 22.3 | 0 |
| P12163_1_F8,15710 | K.LPNHEPILEAK.G      | 1869.105 | 0.00521  | 4 | 1 | 22.3 | 0 |
| P12163_2_F6,15151 | K.LPNHEPILEAK.G      | 1869.105 | -0.00698 | 3 | 1 | 29.5 | 0 |
| P12163_2_F6,15166 | K.LPNHEPILEAK.G      | 1869.105 | -0.00192 | 2 | 1 | 27.1 | 0 |
| P12163_2_F6,15211 | K.LPNHEPILEAK.G      | 1869.105 | 0.00535  | 3 | 1 | 38.7 | 0 |
| P12163_1_F6,19196 | R.DYELDQYGVVNNAVY    | 3025.405 | 0.00201  | 3 | 1 | 68.4 | 0 |
| P12163_1_F7,18381 | R.DYELDQYGVVNNAVY    | 3025.405 | 0.00279  | 3 | 1 | 70.9 | 0 |
| P12163_1_S10,1351 | R.HEFFER.I           | 1168.605 | 0.00408  | 3 | 1 | 23.8 | 0 |
| P12163_2_F8_12070 | R.HEFFER.I           | 1168.605 | 0.00321  | 3 | 1 | 26.2 | 0 |
| P12163_1_F2,13897 | R.IGINCDEVAR.T       | 1450.763 | 0.0035   | 2 | 1 | 25.9 | 0 |
| P12163_1_F2,14090 | R.IGINCDEVAR.T       | 1450.763 | 0.00024  | 2 | 1 | 35.4 | 0 |
| P12163_1_S1,13266 | R.IGINCDEVAR.T       | 1450.763 | 0.00578  | 2 | 1 | 25   | 0 |
| P12163_1_S1,13339 | R.IGINCDEVAR.T       | 1450.763 | 0.00446  | 3 | 1 | 38.3 | 0 |
| P12163_2_F1,6690  | R.ISGGS AVR.L        | 1050.621 | 0.00494  | 3 | 1 | 32.7 | 0 |
| P12163_1_F3,19616 | R.TGESLALSELSLK.F    | 1956.147 | 0.00405  | 3 | 1 | 27.5 | 0 |
| P12163_1_F3,21451 | R.TGESLALSELSLK.F    | 1956.147 | -0.00462 | 3 | 1 | 28   | 0 |
| P12163_1_F4,22260 | R.TGESLALSELSLK.F    | 1956.147 | 0.00495  | 3 | 1 | 39.3 | 0 |
| P12163_2_F1,19667 | R.TGESLALSELSLK.F    | 1956.147 | 0.00336  | 3 | 1 | 25.6 | 0 |
| P12163_2_F1,21786 | R.TGESLALSELSLK.F    | 1956.147 | 0.00387  | 2 | 1 | 67.3 | 0 |
| P12163_1_F4,14234 | K.ACKPGATVANFTD.-    | 1960.042 | 0.0055   | 2 | 1 | 26.1 | 0 |
| P12163_1_F4,15347 | K.ACKPGATVANFTD.-    | 1960.042 | 0.00918  | 2 | 1 | 31.8 | 0 |
| P12163_1_F4,15421 | K.ACKPGATVANFTD.-    | 1960.042 | 0.00857  | 3 | 1 | 23   | 0 |
| P12163_2_F1,14435 | K.ACKPGATVANFTD.-    | 1960.042 | 0.00998  | 2 | 1 | 30.1 | 0 |
| P12163_1_S1,19422 | K.DTCLAVTGGSGIFEGV   | 2690.428 | 0.00835  | 4 | 1 | 40   | 0 |
| P12163_1_S1,19461 | K.DTCLAVTGGSGIFEGV   | 2690.428 | 0.00542  | 3 | 1 | 83.1 | 0 |
| P12163_1_S10,1898 | K.DTCLAVTGGSGIFEGV   | 2690.428 | 0.00536  | 3 | 1 | 78.1 | 0 |
| P12163_1_F3,27777 | K.FFINS LGDLVPFSNK.L | 2306.3   | -0.00142 | 3 | 1 | 37.3 | 0 |
| P12163_1_F5,25049 | K.LFYTFYLK.G         | 1703.003 | 0.00561  | 3 | 1 | 26.6 | 0 |
| P12163_2_F9,22417 | K.LFYTFYLK.G         | 1703.003 | 0.00714  | 3 | 1 | 26.9 | 0 |
| P12163_2_F9,22553 | K.LFYTFYLK.G         | 1703.003 | 0.00612  | 3 | 1 | 26   | 0 |
| P12163_1_S10,1505 | K.LYSGDLQK.R         | 1531.894 | 0.0073   | 3 | 1 | 23   | 0 |
| P12163_2_F8_12070 | K.LYSGDLQK.R         | 1531.894 | -0.00038 | 3 | 1 | 23.5 | 0 |
| P12163_2_F8_12070 | K.LYSGDLQK.R         | 1531.894 | 0.00527  | 2 | 1 | 26.7 | 0 |
| P12163_2_F1,22671 | K.QLVFPFK.L          | 1486.924 | 0.00489  | 3 | 1 | 30.1 | 0 |
| P12163_1_F4,9060  | R.GSPAYLR.L          | 1067.615 | 0.00339  | 3 | 1 | 22   | 0 |
| P12163_1_S10,9476 | R.GSPAYLR.L          | 1067.615 | 0.00024  | 3 | 1 | 23.8 | 0 |
| P12163_2_F10,8874 | R.GSPAYLR.L          | 1067.615 | 0.00324  | 3 | 1 | 25.8 | 0 |
| P12163_2_F10,1077 | R.GSPAYLR.L          | 1067.615 | 0.0028   | 2 | 1 | 26.1 | 0 |

|                   |                       |          |          |   |   |      |   |
|-------------------|-----------------------|----------|----------|---|---|------|---|
| P12163_2_F2,7808  | R.GSPAYLR.L           | 1067.615 | 0.00606  | 3 | 1 | 24.7 | 0 |
| P12163_2_F1,11441 | K.ALPDEK.K            | 1280.767 | 0.00538  | 3 | 1 | 22.8 | 0 |
| P12163_1_F4,21629 | K.EFIEVLK.T           | 1485.914 | 0.00786  | 2 | 1 | 25.8 | 0 |
| P12163_1_F4,21632 | K.EFIEVLK.T           | 1485.914 | 0.01223  | 3 | 1 | 26.8 | 0 |
| P12163_1_F4,15330 | K.FSVEAECPK.F         | 1674.898 | 0.00714  | 2 | 1 | 35.8 | 0 |
| P12163_1_F4,15348 | K.FSVEAECPK.F         | 1674.898 | 0.00372  | 3 | 1 | 28.9 | 0 |
| P12163_1_F5,14174 | K.FSVEAECPK.F         | 1674.898 | 0.00794  | 2 | 1 | 29.2 | 0 |
| P12163_2_F1,14297 | K.FSVEAECPK.F         | 1674.898 | 0.00584  | 2 | 1 | 38.3 | 0 |
| P12163_1_F5,6585  | K.GEEQEAAK.K          | 1469.806 | 0.00694  | 2 | 1 | 25.7 | 0 |
| P12163_2_F1,6996  | K.GEEQEAAK.K          | 1469.806 | 0.00682  | 2 | 1 | 26   | 0 |
| P12163_2_F1,7005  | K.GEEQEAAK.K          | 1469.806 | 0.00539  | 3 | 1 | 29.6 | 0 |
| P12163_1_F5,14792 | K.IALAEK.G ! R.IALAEK | 1252.808 | 0.0024   | 3 | 1 | 27.8 | 0 |
| P12163_2_F2,15557 | K.IALAEK.G ! R.IALAEK | 1252.808 | 0.00408  | 3 | 1 | 25.9 | 0 |
| P12163_2_F9,17779 | K.KEFIEVLK.T          | 1918.214 | 0.00835  | 3 | 1 | 28.2 | 0 |
| P12163_1_F8,16648 | K.SPLLLQM*NPVHK.K     | 2001.177 | 0.00264  | 3 | 1 | 43.3 | 0 |
| P12163_1_F8,19531 | K.SPLLLQM*NPVHK.K     | 2001.177 | 0.00498  | 3 | 1 | 31.7 | 0 |
| P12163_2_F6,16142 | K.SPLLLQM*NPVHK.K     | 2001.177 | 0.00801  | 3 | 1 | 47.9 | 0 |
| P12163_1_F8,19534 | K.SPLLLQMNPVHK.K      | 1985.183 | 0.00384  | 3 | 1 | 63.3 | 0 |
| P12163_1_F8,19539 | K.SPLLLQMNPVHK.K      | 1985.183 | 0.00528  | 4 | 1 | 31.7 | 0 |
| P12163_2_F6,18980 | K.SPLLLQMNPVHK.K      | 1985.183 | 0.00396  | 4 | 1 | 29.5 | 0 |
| P12163_1_F5,21208 | K.GELASLFK.K          | 1472.893 | 0.00583  | 3 | 1 | 21.9 | 0 |
| P12163_2_F1,22082 | K.GELASLFK.K          | 1472.893 | 0.01446  | 2 | 1 | 24.2 | 0 |
| P12163_2_F1,22102 | K.GELASLFK.K          | 1472.893 | 0.00559  | 3 | 1 | 34.4 | 0 |
| P12163_2_F2,21641 | K.GELASLFK.K          | 1472.893 | 0.00784  | 3 | 1 | 32.9 | 0 |
| P12163_2_F2,21657 | K.GELASLFK.K          | 1472.893 | 0.00558  | 2 | 1 | 33.3 | 0 |
| P12163_1_F4,13735 | K.SVPELCCSVK.V        | 1786.965 | 0.01275  | 3 | 1 | 27   | 0 |
| P12163_1_F4,16207 | K.SVPELCCSVK.V        | 1786.965 | 0.00995  | 2 | 1 | 45.3 | 0 |
| P12163_1_F4,16239 | K.SVPELCCSVK.V        | 1786.965 | 0.00702  | 3 | 1 | 37.5 | 0 |
| P12163_2_F1,15395 | K.SVPELCCSVK.V        | 1786.965 | 0.00365  | 2 | 1 | 39.6 | 0 |
| P12163_1_F6,15905 | K.SWMEEHIQATGK.I      | 2025.068 | 0.00277  | 3 | 1 | 23.5 | 0 |
| P12163_1_F9,15424 | K.SWMEEHIQATGK.I      | 2025.068 | 0.00475  | 3 | 1 | 36.6 | 0 |
| P12163_2_F2,52    | K.VVAFIK.G            | 1284.85  | 0.00394  | 2 | 1 | 26.3 | 0 |
| P12163_1_F6,19160 | R.NIGASVFSHLK.S       | 1781.053 | 0.0079   | 3 | 1 | 22.1 | 0 |
| P12163_2_F7,16796 | R.NIGASVFSHLK.S       | 1781.053 | 0.00892  | 3 | 1 | 43.4 | 0 |
| P12163_2_S5,17750 | R.NIGASVFSHLK.S       | 1781.053 | 0.00052  | 3 | 1 | 42.9 | 0 |
| P12163_1_F5,13019 | R.SAPMCGFSQK.V        | 1720.897 | 0.0115   | 2 | 1 | 37.6 | 0 |
| P12163_2_F1,13376 | R.SAPMCGFSQK.V        | 1720.897 | -0.00196 | 2 | 1 | 30.2 | 0 |
| P12163_2_F2,17479 | R.TALTQAWK.S          | 1526.915 | 0.00873  | 2 | 1 | 28.1 | 0 |
| P12163_2_F2,17504 | R.TALTQAWK.S          | 1526.915 | 0.00573  | 3 | 1 | 27.4 | 0 |
| P12163_1_F3,23465 | K.CLDEAFSPFGIK.D      | 1992.072 | 0.006    | 3 | 1 | 42.5 | 0 |
| P12163_1_F3,23484 | K.CLDEAFSPFGIK.D      | 1992.072 | 0.00303  | 2 | 1 | 50.6 | 0 |
| P12163_1_F4,24270 | K.CLDEAFSPFGIK.D      | 1992.072 | 0.00483  | 3 | 1 | 31.6 | 0 |
| P12163_1_F7,12817 | K.KNPNICAYDGSSLDSR    | 2405.234 | 0.00584  | 3 | 1 | 38.9 | 0 |
| P12163_1_F4,10525 | K.LGEEAATK.A          | 1426.836 | 0.01325  | 3 | 1 | 22   | 0 |
| P12163_1_F4,19250 | K.MLGLNPSVK.R         | 1566.95  | 0.00728  | 2 | 1 | 30.2 | 0 |
| P12163_2_F1,18447 | K.MLGLNPSVK.R         | 1566.95  | -0.00378 | 3 | 1 | 25.9 | 0 |
| P12163_1_F4,18462 | K.NVATVVSENIK.C       | 1911.101 | 0.00251  | 3 | 1 | 44   | 0 |
| P12163_1_F4,18563 | K.NVATVVSENIK.C       | 1911.101 | 0.00101  | 2 | 1 | 46.5 | 0 |
| P12163_2_F1,17772 | K.NVATVVSENIK.C       | 1911.101 | 0.00345  | 2 | 1 | 50.7 | 0 |
| P12163_2_F1,17848 | K.NVATVVSENIK.C       | 1911.101 | 0.00446  | 3 | 1 | 59.6 | 0 |
| P12163_2_F4,15988 | K.NVATVVSENIK.C       | 1911.101 | 0.00539  | 3 | 1 | 32.7 | 0 |

|                   |                      |          |          |   |   |      |   |
|-------------------|----------------------|----------|----------|---|---|------|---|
| P12163_2_F6,16099 | R.EMGLTVHLSK.N       | 1723.003 | -0.00029 | 3 | 1 | 23.5 | 0 |
| P12163_1_F6,19667 | R.YFHVTEDEILK.K      | 1873.068 | 0.00475  | 3 | 1 | 40   | 0 |
| P12163_1_F6,19706 | R.YFHVTEDEILK.K      | 1873.068 | 0.00575  | 2 | 1 | 25.7 | 0 |
| P12163_2_F6,19320 | R.YFHVTEDEILK.K      | 1873.068 | 0.00505  | 2 | 1 | 37.5 | 0 |
| P12163_2_F6,19323 | R.YFHVTEDEILK.K      | 1873.068 | 0.00547  | 3 | 1 | 39.5 | 0 |
| P12163_2_F7,17526 | R.YFHVTEDEILK.K      | 1873.068 | 0.00874  | 3 | 1 | 30.7 | 0 |
| P12163_2_F10,1933 | K.FKDGFPNLFIPNAHGIF  | 2551.439 | 0.00417  | 4 | 1 | 36.5 | 0 |
| P12163_1_F7,19072 | K.VCLFYCPETHSLAER.\  | 2186.068 | 0.00133  | 3 | 1 | 35.7 | 0 |
| P12163_1_F8,20050 | K.VCLFYCPETHSLAER.\  | 2186.068 | 0.00232  | 3 | 1 | 38.9 | 0 |
| P12163_2_F10,1775 | K.VCLFYCPETHSLAER.\  | 2186.068 | 0.00331  | 3 | 1 | 28   | 0 |
| P12163_2_S5,18670 | K.VCLFYCPETHSLAER.\  | 2186.068 | 0.0031   | 3 | 1 | 47.8 | 0 |
| P12163_1_F9,11313 | K.VLAAHGAAK.I ! K.VL | 1445.905 | 0.00534  | 3 | 1 | 30.1 | 0 |
| P12163_1_F9,11325 | K.VLAAHGAAK.I ! K.VL | 1445.905 | 0.00773  | 2 | 1 | 38.9 | 0 |
| P12163_2_F7,10559 | K.VLAAHGAAK.I ! K.VL | 1445.905 | 0.00435  | 3 | 1 | 29   | 0 |
| P12163_2_F7,10574 | K.VLAAHGAAK.I ! K.VL | 1445.905 | 0.00569  | 2 | 1 | 44.3 | 0 |
| P12163_1_F6,21806 | R.GGPTSLVTFDIHALQEI  | 2145.161 | -0.0053  | 3 | 1 | 56.5 | 0 |
| P12163_1_F7,21103 | R.GGPTSLVTFDIHALQEI  | 2145.161 | 0.0037   | 3 | 1 | 36.7 | 0 |
| P12163_1_F7,21295 | R.GGPTSLVTFDIHALQEI  | 2145.161 | 0.004    | 3 | 1 | 38.4 | 0 |
| P12163_2_S5,20543 | R.GGPTSLVTFDIHALQEI  | 2145.161 | 0.00355  | 3 | 1 | 52.4 | 0 |
| P12163_2_F7,16152 | R.GQHVAFLASFSSPGK.I  | 2141.196 | 0.00386  | 3 | 1 | 41.7 | 0 |
| P12163_1_F2,15262 | R.ILSNIPTSR.G        | 1304.784 | 0.0019   | 3 | 1 | 24.9 | 0 |
| P12163_1_F2,16485 | R.ILSNIPTSR.G        | 1304.784 | 0.00145  | 3 | 1 | 23.4 | 0 |
| P12163_1_S1,12599 | R.VAAQSDAIELR.S      | 1476.832 | -0.0011  | 3 | 1 | 50.7 | 0 |
| P12163_1_S1,14335 | R.VAAQSDAIELR.S      | 1476.832 | 0.00798  | 2 | 1 | 32.2 | 0 |
| P12163_2_F1,15920 | K.EAFLEK.F           | 1344.798 | 0.00631  | 2 | 1 | 26.1 | 0 |
| P12163_1_F6,14770 | K.GDYTSIIHGK.Y       | 1698.963 | 0.00637  | 3 | 1 | 32.2 | 0 |
| P12163_1_F6,14778 | K.GDYTSIIHGK.Y       | 1698.963 | 0.00436  | 2 | 1 | 28.6 | 0 |
| P12163_1_F2,18825 | K.GFDPDVLVK.V        | 1712.968 | 0.0036   | 3 | 1 | 43.9 | 0 |
| P12163_1_F2,18827 | K.GFDPDVLVK.V        | 1712.968 | 0.0031   | 2 | 1 | 44.2 | 0 |
| P12163_1_F2,19082 | K.GFDPDVLVK.V        | 1712.968 | 0.00642  | 3 | 1 | 25.1 | 0 |
| P12163_1_F3,19430 | K.GFDPDVLVK.V        | 1712.968 | 0.00822  | 3 | 1 | 25   | 0 |
| P12163_1_F3,19444 | K.GFDPDVLVK.V        | 1712.968 | 0.0084   | 2 | 1 | 42.7 | 0 |
| P12163_2_F7,11824 | K.LM*HGELVEK.E       | 1679.961 | 0.00495  | 3 | 1 | 39.8 | 0 |
| P12163_2_F7,13727 | K.LM*HGELVEK.E       | 1679.961 | -0.00111 | 3 | 1 | 35.5 | 0 |
| P12163_1_F9,15134 | K.LMHGELVEK.E        | 1663.966 | 0.00346  | 3 | 1 | 23.2 | 0 |
| P12163_1_F9,15188 | K.LMHGELVEK.E        | 1663.966 | 0.00225  | 2 | 1 | 42.6 | 0 |
| P12163_1_F2,18930 | K.NVQIVDTTCPWVSK.V   | 2255.231 | 0.00546  | 3 | 1 | 49   | 0 |
| P12163_2_F2,17486 | K.VWTTVEK.H          | 1470.878 | 0.00496  | 2 | 1 | 24.9 | 0 |
| P12163_1_F7,13849 | K.YSHEETVATASFAGK.   | 2206.16  | 0.00489  | 4 | 1 | 27.5 | 0 |
| P12163_1_F7,13855 | K.YSHEETVATASFAGK.   | 2206.16  | 0.00324  | 3 | 1 | 37.7 | 0 |
| P12163_2_F4,13537 | K.YSHEETVATASFAGK.   | 2206.16  | 0.00105  | 3 | 1 | 37.1 | 0 |
| P12163_2_F6,13943 | K.YSHEETVATASFAGK.   | 2206.16  | -0.00102 | 3 | 1 | 23.7 | 0 |
| P12163_1_F4,11789 | K.ADGLAAGK.G         | 1310.789 | 0.00136  | 2 | 1 | 27.8 | 0 |
| P12163_2_F1,10824 | K.ADGLAAGK.G         | 1310.789 | 0.0047   | 2 | 1 | 34.5 | 0 |
| P12163_2_F1,10845 | K.ADGLAAGK.G         | 1310.789 | 0.00349  | 3 | 1 | 44.6 | 0 |
| P12163_1_F2,19629 | K.AGIPTFGPSSEAAALEC  | 2398.307 | 0.01115  | 3 | 1 | 43.5 | 0 |
| P12163_1_S1,18609 | K.AGIPTFGPSSEAAALEC  | 2398.307 | 0.01337  | 3 | 1 | 38.3 | 0 |
| P12163_1_F5,10750 | K.GYPGSYEK.G         | 1508.82  | 0.00887  | 2 | 1 | 28.5 | 0 |
| P12163_1_S10,1216 | K.GYPGSYEK.G         | 1508.82  | 0.00566  | 3 | 1 | 30.9 | 0 |
| P12163_1_F7,17535 | K.IFHAGTALDADGNFIA   | 2308.199 | -0.00083 | 3 | 1 | 44   | 0 |
| P12163_1_F7,18693 | K.IFHAGTALDADGNFIA   | 2308.199 | 0.0112   | 3 | 1 | 48.5 | 0 |

|                   |                    |          |          |   |   |      |   |
|-------------------|--------------------|----------|----------|---|---|------|---|
| P12163_1_F7,18697 | K.IFHAGTALDADGNFIA | 2308.199 | 0.00064  | 4 | 1 | 60.2 | 0 |
| P12163_1_F7,19166 | K.IFHAGTALDADGNFIA | 2308.199 | 0.00094  | 3 | 1 | 46.8 | 0 |
| P12163_1_F7,19548 | K.IFHAGTALDADGNFIA | 2308.199 | 0.00361  | 3 | 1 | 92.9 | 0 |
| P12163_1_F3,17707 | K.QYIQEEGAPIVVK.A  | 2082.205 | 0.01253  | 3 | 1 | 38.8 | 0 |
| P12163_1_F3,17716 | K.QYIQEEGAPIVVK.A  | 2082.205 | 0.00581  | 2 | 1 | 67   | 0 |
| P12163_1_F4,12933 | K.TFTDPNAAK.Q      | 1572.884 | 0.00931  | 2 | 1 | 38.1 | 0 |
| P12163_1_F6,15763 | R.EHALCYALK.R      | 1712.961 | 0.00551  | 3 | 1 | 52   | 0 |
| P12163_1_F9,15430 | R.EHALCYALK.R      | 1712.961 | 0.00833  | 3 | 1 | 22.4 | 0 |
| P12163_2_F9,14798 | R.EHALCYALK.R      | 1712.961 | 0.00221  | 3 | 1 | 28.1 | 0 |
| P12163_1_F5,7659  | K.ECGVENK.Q        | 1443.772 | 0.01167  | 2 | 1 | 25   | 0 |
| P12163_2_F2,8538  | K.ECGVENK.Q        | 1443.772 | 0.01072  | 3 | 1 | 22.1 | 0 |
| P12163_2_F8_12070 | K.HWVSILR.N        | 1214.731 | 0.00348  | 3 | 1 | 26.2 | 0 |
| P12163_1_F2,19363 | K.VISAVAAPPALQK.L  | 1873.173 | 0.00326  | 2 | 1 | 33.4 | 0 |
| P12163_1_F4,20642 | K.VISAVAAPPALQK.L  | 1873.173 | 0.00691  | 3 | 1 | 32   | 0 |
| P12163_1_S1,17866 | K.VISAVAAPPALQK.L  | 1873.173 | 0.00808  | 3 | 1 | 31.8 | 0 |
| P12163_1_F2,18351 | R.DEETLQPSIYLNK.L  | 2158.185 | 0.00345  | 2 | 1 | 45.1 | 0 |
| P12163_1_S1,17430 | R.DEETLQPSIYLNK.L  | 2158.185 | 0.00617  | 3 | 1 | 40.1 | 0 |
| P12163_2_F6,17980 | R.DEETLQPSIYLNK.L  | 2158.185 | 0.00687  | 2 | 1 | 34.3 | 0 |
| P12163_1_F2,16886 | R.LLM*YEASR.D      | 1302.703 | 0.00469  | 3 | 1 | 22.8 | 0 |
| P12163_1_F7,20073 | R.M*LVFVPPHPLIK.H  | 2015.234 | 0.00798  | 3 | 1 | 40.1 | 0 |
| P12163_1_F7,22439 | R.M*LVFVPPHPLIK.H  | 2015.234 | 0.00645  | 3 | 1 | 31.8 | 0 |
| P12163_2_F6,20726 | R.M*LVFVPPHPLIK.H  | 2015.234 | 0.00849  | 3 | 1 | 27.8 | 0 |
| P12163_2_S5,18844 | R.M*LVFVPPHPLIK.H  | 2015.234 | 0.0123   | 3 | 1 | 26.2 | 0 |
| P12163_2_S5,18857 | R.M*LVFVPPHPLIK.H  | 2015.234 | 0.00687  | 4 | 1 | 31.9 | 0 |
| P12163_2_S5,21276 | R.MLVFVPPHPLIK.H   | 1999.239 | 0.00675  | 3 | 1 | 35.8 | 0 |
| P12163_1_F2,12162 | R.NEQTPCIFR.N      | 1565.805 | 0.00116  | 3 | 1 | 39.3 | 0 |
| P12163_1_F2,14846 | R.NEQTPCIFR.N      | 1565.805 | 0.00301  | 2 | 1 | 27.5 | 0 |
| P12163_2_F1,10610 | K.AGGSVEGSNLGSK.N  | 1770.981 | 0.00227  | 2 | 1 | 62.9 | 0 |
| P12163_1_F4,22789 | K.AVELVFESEK.A     | 1759.01  | 0.00253  | 2 | 1 | 44.3 | 0 |
| P12163_1_F4,22816 | K.AVELVFESEK.A     | 1759.01  | 0.00794  | 3 | 1 | 24.9 | 0 |
| P12163_1_F2,16116 | K.NVVYEADSDSVLTK.C | 2148.164 | 0.00987  | 3 | 1 | 29.4 | 0 |
| P12163_1_F2,16893 | K.NVVYEADSDSVLTK.C | 2148.164 | 0.00369  | 2 | 1 | 59.6 | 0 |
| P12163_1_S1,16105 | K.NVVYEADSDSVLTK.C | 2148.164 | 0.00297  | 3 | 1 | 24.9 | 0 |
| P12163_1_F4,10240 | K.VESSQVGSJK.N     | 1672.933 | 0.00739  | 2 | 1 | 30.8 | 0 |
| P12163_2_F1,9260  | K.VESSQVGSJK.N     | 1672.933 | 0.00821  | 3 | 1 | 35.6 | 0 |
| P12163_2_F1,9297  | K.VESSQVGSJK.N     | 1672.933 | 0.00631  | 2 | 1 | 47.1 | 0 |
| P12163_1_F4,23549 | K.YEQLLFYJK.S      | 1769.009 | 0.00677  | 2 | 1 | 34.3 | 0 |
| P12163_1_F5,22125 | K.YEQLLFYJK.S      | 1769.009 | 0.00917  | 3 | 1 | 27.2 | 0 |
| P12163_2_F1,22937 | K.YEQLLFYJK.S      | 1769.009 | -0.00013 | 2 | 1 | 42.5 | 0 |
| P12163_2_F8_12070 | K.YEQLLFYJK.S      | 1769.009 | 0.00872  | 3 | 1 | 32   | 0 |
| P12163_1_F5,11416 | R.AYLDDQK.N        | 1460.82  | 0.00451  | 2 | 1 | 29.2 | 0 |
| P12163_2_F1,11884 | R.AYLDDQK.N        | 1460.82  | 0.00417  | 2 | 1 | 27.7 | 0 |
| P12163_2_F8_12070 | R.AYLDDQK.N        | 1460.82  | 0.00393  | 2 | 1 | 28.4 | 0 |
| P12163_1_F5,21066 | R.NNGFLNMLK.L      | 1658.951 | 0.00747  | 2 | 1 | 37.9 | 0 |
| P12163_1_F4,4930  | K.ESSEER.E         | 1169.559 | 0.00747  | 2 | 1 | 30.3 | 0 |
| P12163_2_F1,4254  | K.ESSEER.E         | 1169.559 | 0.00287  | 2 | 1 | 31.2 | 0 |
| P12163_1_F3,21264 | K.ISEYVAQLR.R      | 1382.794 | 0.0069   | 2 | 1 | 29.2 | 0 |
| P12163_1_F3,21466 | K.ISEYVAQLR.R      | 1382.794 | 0.00386  | 2 | 1 | 29.3 | 0 |
| P12163_2_F1,21642 | K.ISEYVAQLR.R      | 1382.794 | 0.00278  | 2 | 1 | 30.9 | 0 |
| P12163_2_F2,12673 | K.LM*EYQNK.R       | 1549.85  | -0.00131 | 3 | 1 | 24.4 | 0 |
| P12163_1_S10,1513 | K.LMEYQNK.R        | 1533.855 | 0.01034  | 2 | 1 | 27.8 | 0 |



|                   |                       |          |          |   |   |      |   |
|-------------------|-----------------------|----------|----------|---|---|------|---|
| P12163_2_F2,15011 | K.LMEYQNK.R           | 1533.855 | 0.00355  | 3 | 1 | 24.7 | 0 |
| P12163_1_F7,23888 | K.LQSILM*PLSEFDHAEF   | 2482.347 | 0.00617  | 3 | 1 | 35.4 | 0 |
| P12163_1_F7,24525 | K.LQSILM*PLSEFDHAEF   | 2482.347 | 0.00747  | 4 | 1 | 39.4 | 0 |
| P12163_1_F7,24599 | K.LQSILM*PLSEFDHAEF   | 2482.347 | 0.00605  | 3 | 1 | 58   | 0 |
| P12163_1_S1,24481 | K.NANNSPLTGVIFAPFEI   | 2655.46  | 0.00778  | 4 | 1 | 51.3 | 0 |
| P12163_1_F5,10714 | R.DNVALK.G            | 1267.783 | 0.00585  | 2 | 1 | 23.9 | 0 |
| P12163_2_F1,11267 | R.DNVALK.G            | 1267.783 | 0.00678  | 3 | 1 | 28.7 | 0 |
| P12163_1_F9,18391 | R.ILNLHK.N ! K.LLNLHK | 1345.878 | 0.00675  | 3 | 1 | 24.5 | 0 |
| P12163_1_S10,1590 | R.ILNLHK.N ! K.LLNLHK | 1345.878 | 0.00765  | 3 | 1 | 27.7 | 0 |
| P12163_2_F9,15186 | R.ILNLHK.N ! K.LLNLHK | 1345.878 | 0.00456  | 3 | 1 | 25.4 | 0 |
| P12163_1_F7,21050 | K.ATCYPFSM*EQLAPAC    | 2780.299 | 0.00186  | 3 | 1 | 35   | 0 |
| P12163_1_F8,14572 | K.ERADEVSGPLVMR.A     | 1762.942 | 0.00142  | 3 | 1 | 29.6 | 0 |
| P12163_1_F3,20518 | K.ESEVLETIVK.K        | 1755.036 | 0.00744  | 2 | 1 | 41.3 | 0 |
| P12163_1_F4,21068 | K.ESEVLETIVK.K        | 1755.036 | 0.00708  | 3 | 1 | 22.9 | 0 |
| P12163_2_F8_12070 | K.ESNRPYGAICASPALV    | 3200.771 | 0.0043   | 5 | 1 | 32.1 | 0 |
| P12163_2_F8_12070 | K.ESNRPYGAICASPALV    | 3200.771 | 0.00702  | 4 | 1 | 45.4 | 0 |
| P12163_2_F8_12070 | K.ESNRPYGAICASPALV    | 3200.771 | 0.00326  | 3 | 1 | 31.6 | 0 |
| P12163_2_F9,18701 | K.ESNRPYGAICASPALV    | 3200.771 | 0.00582  | 4 | 1 | 33.5 | 0 |
| P12163_1_F2,23575 | K.LVADVLIDEAAK.L      | 1865.12  | 0.0042   | 3 | 1 | 46.7 | 0 |
| P12163_1_F3,24585 | K.LVADVLIDEAAK.L      | 1865.12  | 0.0075   | 3 | 1 | 29.7 | 0 |
| P12163_1_F5,23365 | K.LVADVLIDEAAK.L      | 1865.12  | 0.00093  | 3 | 1 | 35.6 | 0 |
| P12163_1_S1,22683 | K.LVADVLIDEAAK.L      | 1865.12  | 0.00426  | 3 | 1 | 47.2 | 0 |
| P12163_1_S1,22917 | K.LVADVLIDEAAK.L      | 1865.12  | 0.00657  | 3 | 1 | 44.4 | 0 |
| P12163_1_S1,13289 | R.ADEVSGPLVM*R.A ! K  | 1493.794 | 0.00616  | 3 | 1 | 34.7 | 0 |
| P12163_1_S1,15847 | R.ADEVSGPLVMR.A ! K.  | 1477.799 | 0.00112  | 3 | 1 | 42.7 | 0 |
| P12163_1_F9,9070  | R.VDACHGVK.I          | 1493.835 | 0.00278  | 2 | 1 | 26.7 | 0 |
| P12163_1_F9,9111  | R.VDACHGVK.I          | 1493.835 | 0.00509  | 3 | 1 | 29.9 | 0 |
| P12163_1_S1,10922 | K.DIVEDPR.R           | 1147.626 | 0.00348  | 2 | 1 | 38.7 | 0 |
| P12163_1_F4,10429 | K.EGETVEPGAK.I        | 1624.9   | 0.00801  | 2 | 1 | 37.9 | 0 |
| P12163_2_F1,9599  | K.EGETVEPGAK.I        | 1624.9   | 0.00907  | 2 | 1 | 42.2 | 0 |
| P12163_1_F4,219   | K.GLVVPVIR.N          | 1156.772 | 0.0034   | 2 | 1 | 25.2 | 0 |
| P12163_1_F4,24998 | K.LGLM*SGFVK.A        | 1575.939 | 0.0082   | 3 | 1 | 27.4 | 0 |
| P12163_2_F1,24421 | K.LGLM*SGFVK.A        | 1575.939 | 0.00142  | 3 | 1 | 31.2 | 0 |
| P12163_2_F1,24343 | K.LGLMSGFVK.A         | 1559.944 | 0.0022   | 3 | 1 | 26.3 | 0 |
| P12163_1_F3,11370 | K.QTPSEEAAPAVK.D      | 1836.032 | 0.00797  | 2 | 1 | 30.9 | 0 |
| P12163_1_F3,10372 | K.SGEGVAQAAPAEK.A     | 1823.012 | 0.00729  | 2 | 1 | 63.3 | 0 |
| P12163_1_F3,10395 | K.SGEGVAQAAPAEK.A     | 1823.012 | 0.00692  | 3 | 1 | 33.2 | 0 |
| P12163_1_F4,9528  | K.SGEGVAQAAPAEK.A     | 1823.012 | 0.00614  | 3 | 1 | 31   | 0 |
| P12163_1_F4,10861 | K.SGEGVAQAAPAEK.A     | 1823.012 | 0.01361  | 3 | 1 | 39.1 | 0 |
| P12163_1_F4,10879 | K.SGEGVAQAAPAEK.A     | 1823.012 | 0.00845  | 2 | 1 | 82.9 | 0 |
| P12163_2_F1,10075 | K.SGEGVAQAAPAEK.A     | 1823.012 | 0.00263  | 2 | 1 | 80.9 | 0 |
| P12163_1_F5,17728 | R.MNFAEIEK.E          | 1589.882 | 0.00827  | 3 | 1 | 28.9 | 0 |
| P12163_2_F1,18244 | R.MNFAEIEK.E          | 1589.882 | -0.00004 | 2 | 1 | 32.2 | 0 |
| P12163_1_F2,17601 | K.AVIEELDR.I          | 1248.71  | 0.00348  | 2 | 1 | 32.3 | 0 |
| P12163_1_F2,18366 | K.GVYIAEQGLVR.Y       | 1508.874 | 0.00273  | 2 | 1 | 27.6 | 0 |
| P12163_1_F6,19565 | K.LIYTEDPLILHTPTGR.I  | 2143.206 | -0.00421 | 3 | 1 | 30   | 0 |
| P12163_1_F6,21603 | K.LIYTEDPLILHTPTGR.I  | 2143.206 | 0.00149  | 3 | 1 | 46   | 0 |
| P12163_1_F6,21630 | K.LIYTEDPLILHTPTGR.I  | 2143.206 | 0.00189  | 2 | 1 | 48.7 | 0 |
| P12163_2_F10,1894 | K.LIYTEDPLILHTPTGR.I  | 2143.206 | 0.00035  | 3 | 1 | 30.7 | 0 |
| P12163_2_F4,20246 | K.LIYTEDPLILHTPTGR.I  | 2143.206 | 0.00107  | 3 | 1 | 25.9 | 0 |
| P12163_2_S5,20028 | K.LIYTEDPLILHTPTGR.I  | 2143.206 | 0.00281  | 3 | 1 | 52.3 | 0 |

|                   |                    |          |          |   |   |      |   |
|-------------------|--------------------|----------|----------|---|---|------|---|
| P12163_1_F4,24356 | R.LFWQPPLK.E       | 1637.003 | 0.0019   | 3 | 1 | 30.5 | 0 |
| P12163_1_F4,24400 | R.LFWQPPLK.E       | 1637.003 | 0.00651  | 2 | 1 | 29.3 | 0 |
| P12163_1_F7,21032 | R.LINYIEDEEHGVR.L  | 1890.986 | 0.00016  | 3 | 1 | 36.2 | 0 |
| P12163_1_F8,21947 | R.LINYIEDEEHGVR.L  | 1890.986 | 0.00589  | 3 | 1 | 25.6 | 0 |
| P12163_1_F6,17173 | R.QPYPVVPDDHVDIATP | 2499.37  | 0.00344  | 3 | 1 | 40.9 | 0 |
| P12163_2_F4,16009 | R.QPYPVVPDDHVDIATP | 2499.37  | 0.00557  | 3 | 1 | 46.9 | 0 |
| P12163_2_F4,16011 | R.QPYPVVPDDHVDIATP | 2499.37  | 0.00829  | 4 | 1 | 23.6 | 0 |
| P12163_1_F3,13523 | R.QQDDDEEILK.N     | 1840.975 | 0.00096  | 2 | 1 | 41.3 | 0 |
| P12163_1_S1,18775 | K.GQLVPDEIVVTM*VK. | 2152.251 | 0.01075  | 3 | 1 | 36.7 | 0 |
| P12163_1_S1,22005 | K.GQLVPDEIVVTMVK.E | 2136.256 | 0.00325  | 3 | 1 | 26.5 | 0 |
| P12163_2_F2,12956 | K.GTQCELIK.E       | 1556.893 | 0.00644  | 2 | 1 | 26.3 | 0 |
| P12163_1_F4,16372 | K.IMISGAPASGK.G    | 1639.966 | 0.00361  | 2 | 1 | 32.3 | 0 |
| P12163_2_F1,15600 | K.IMISGAPASGK.G    | 1639.966 | 0.00204  | 3 | 1 | 41.9 | 0 |
| P12163_1_F8,22350 | K.YGLVHIAAGDLLR.A  | 1701.995 | 0.00319  | 3 | 1 | 23.4 | 0 |
| P12163_1_F4,11518 | R.AEIAAGSENGK.R    | 1654.922 | 0.00952  | 3 | 1 | 21.9 | 0 |
| P12163_1_F4,11560 | R.AEIAAGSENGK.R    | 1654.922 | 0.01106  | 2 | 1 | 28.1 | 0 |
| P12163_2_F1,10676 | R.AEIAAGSENGK.R    | 1654.922 | 0.00752  | 2 | 1 | 30.9 | 0 |
| P12163_2_F2,16510 | R.KSALGSLAA.-      | 1425.888 | 0.00152  | 2 | 1 | 35.8 | 0 |
| P12163_1_F5,13848 | R.SLSQATALK.K      | 1526.936 | 0.00423  | 3 | 1 | 39.3 | 0 |
| P12163_1_F5,13855 | R.SLSQATALK.K      | 1526.936 | 0.00599  | 2 | 1 | 41.4 | 0 |
| P12163_2_F1,14098 | R.SLSQATALK.K      | 1526.936 | 0.00357  | 3 | 1 | 29.2 | 0 |
| P12163_2_F2,14604 | R.SLSQATALK.K      | 1526.936 | 0.00567  | 2 | 1 | 43.5 | 0 |
| P12163_2_F2,14618 | R.SLSQATALK.K      | 1526.936 | 0.00549  | 3 | 1 | 28.9 | 0 |
| P12163_1_F5,11298 | K.AGYQGNTFK.L      | 1593.884 | -0.00019 | 3 | 1 | 23.7 | 0 |
| P12163_1_F5,11311 | K.AGYQGNTFK.L      | 1593.884 | 0.00374  | 2 | 1 | 31.2 | 0 |
| P12163_1_F5,11333 | K.AGYQGNTFK.L      | 1593.884 | 0.00173  | 3 | 1 | 35.3 | 0 |
| P12163_1_S10,1267 | K.AGYQGNTFK.L      | 1593.884 | 0.0056   | 3 | 1 | 36.6 | 0 |
| P12163_2_F2,12056 | K.AGYQGNTFK.L      | 1593.884 | 0.0023   | 3 | 1 | 35   | 0 |
| P12163_1_F5,13752 | K.DLLANPK.C        | 1378.851 | 0.00421  | 3 | 1 | 37.3 | 0 |
| P12163_1_S10,5159 | K.HQEAAAR.L        | 1086.596 | 0.00355  | 3 | 1 | 34.7 | 0 |
| P12163_1_F4,23239 | K.SDANVFELIQK.H    | 1872.069 | 0.0051   | 3 | 1 | 34.3 | 0 |
| P12163_2_F2,15027 | R.AVYLAK.H         | 1272.814 | 0.00209  | 3 | 1 | 22.8 | 0 |
| P12163_2_F9,4947  | R.DHAEDTR.I        | 1147.564 | -0.00174 | 3 | 1 | 34.3 | 0 |
| P12163_2_F9,4979  | R.DHAEDTR.I        | 1147.564 | 0.002    | 2 | 1 | 26.1 | 0 |
| P12163_1_F5,17008 | R.GMLSTFSQK.Y      | 1606.908 | 0.00788  | 2 | 1 | 34.6 | 0 |
| P12163_1_F5,17029 | R.GMLSTFSQK.Y      | 1606.908 | 0.01033  | 3 | 1 | 27.4 | 0 |
| P12163_2_F1,17509 | R.GMLSTFSQK.Y      | 1606.908 | 0.00634  | 3 | 1 | 29.4 | 0 |
| P12163_2_F1,17528 | R.GMLSTFSQK.Y      | 1606.908 | 0.00738  | 2 | 1 | 38.6 | 0 |
| P12163_1_F3,18012 | K.MEMTTPVISK.K     | 1744.98  | 0.00488  | 2 | 1 | 46.5 | 0 |
| P12163_1_F3,18020 | K.MEMTTPVISK.K     | 1744.98  | 0.00788  | 3 | 1 | 34   | 0 |
| P12163_1_F5,17397 | K.YGANLPLPK.D      | 1580.962 | 0.0064   | 2 | 1 | 25   | 0 |
| P12163_1_F3,22490 | R.LLM*DLATETAK.Y   | 1830.05  | 0.00929  | 3 | 1 | 32.2 | 0 |
| P12163_1_F3,24469 | R.LLMDLATETAK.Y    | 1814.055 | 0.00632  | 3 | 1 | 28   | 0 |
| P12163_1_F3,24666 | R.LLMDLATETAK.Y    | 1814.055 | 0.00415  | 2 | 1 | 55.8 | 0 |
| P12163_1_F3,24703 | R.LLMDLATETAK.Y    | 1814.055 | 0.00308  | 3 | 1 | 36.9 | 0 |
| P12163_1_F2,15691 | R.NEIALEVER.K      | 1376.769 | 0.00457  | 2 | 1 | 38.9 | 0 |
| P12163_1_S10,9556 | R.RGQYEIR.E        | 1225.695 | 0.00242  | 3 | 1 | 29.8 | 0 |
| P12163_2_F8_1207  | R.RGQYEIR.E        | 1225.695 | 0.00263  | 3 | 1 | 28.4 | 0 |
| P12163_1_F9,13730 | R.RNEIALEVER.K     | 1532.87  | 0.00415  | 3 | 1 | 42.9 | 0 |
| P12163_1_S10,1405 | R.RNEIALEVER.K     | 1532.87  | 0.00421  | 3 | 1 | 37.4 | 0 |
| P12163_2_F7,12477 | R.RNEIALEVER.K     | 1532.87  | 0.00208  | 3 | 1 | 30.6 | 0 |

|                   |                        |          |          |   |   |      |   |
|-------------------|------------------------|----------|----------|---|---|------|---|
| P12163_2_F9,12954 | R.RNEIALEVER.K         | 1532.87  | 0.00214  | 3 | 1 | 48.1 | 0 |
| P12163_1_F2,14792 | R.TGDFDNGASR.S         | 1375.691 | 0.00248  | 2 | 1 | 24.8 | 0 |
| P12163_1_F8,22547 | K.HLPDDPLFQLVSK.L      | 2117.221 | 0.00711  | 3 | 1 | 27.5 | 0 |
| P12163_2_F6,22185 | K.HLPDDPLFQLVSK.L      | 2117.221 | 0.00612  | 3 | 1 | 38.9 | 0 |
| P12163_1_S1,25053 | K.LFEVVPILTK.L         | 1864.177 | 0.00729  | 3 | 1 | 33.3 | 0 |
| P12163_1_F4,22116 | K.SVTLDWIEK.N          | 1698.989 | 0.00758  | 3 | 1 | 26.4 | 0 |
| P12163_1_F4,22120 | K.SVTLDWIEK.N          | 1698.989 | 0.01089  | 2 | 1 | 46.8 | 0 |
| P12163_2_F1,21678 | K.SVTLDWIEK.N          | 1698.989 | 0.00505  | 2 | 1 | 44.1 | 0 |
| P12163_1_F2,14818 | K.SVVDECGENVTTQLI      | 2416.249 | 0.0127   | 3 | 1 | 48   | 0 |
| P12163_1_F8,17218 | K.VVPGFGHGVLR.K        | 1441.858 | 0.00114  | 3 | 1 | 43.7 | 0 |
| P12163_2_F6,16555 | K.VVPGFGHGVLR.K        | 1441.858 | 0.00225  | 3 | 1 | 55.5 | 0 |
| P12163_2_F6,20517 | K.VVPGFGHGVLR.K        | 1441.858 | 0.00105  | 3 | 1 | 36.7 | 0 |
| P12163_1_F4,16713 | R.ATVPDYVYK.A          | 1663.952 | 0.00404  | 2 | 1 | 39.6 | 0 |
| P12163_2_F1,15892 | R.ATVPDYVYK.A          | 1663.952 | 0.00508  | 2 | 1 | 33.7 | 0 |
| P12163_1_F4,15249 | R.GLSIPECQK.L          | 1639.93  | 0.00645  | 2 | 1 | 26.5 | 0 |
| P12163_1_F5,14009 | R.GLSIPECQK.L          | 1639.93  | 0.00873  | 2 | 1 | 26.6 | 0 |
| P12163_2_F1,14217 | R.GLSIPECQK.L          | 1639.93  | 0.00753  | 2 | 1 | 24.9 | 0 |
| P12163_1_F9,15086 | K.FTETAEAHFR.L         | 1512.775 | 0.00035  | 3 | 1 | 43.3 | 0 |
| P12163_2_F6,14688 | K.FTETAEAHFR.L         | 1512.775 | 0.00101  | 3 | 1 | 41   | 0 |
| P12163_2_F7,13708 | K.FTETAEAHFR.L         | 1512.775 | 0.00146  | 3 | 1 | 63.7 | 0 |
| P12163_1_F5,17949 | K.GGFMEFDK.L           | 1538.813 | 0.00848  | 2 | 1 | 26   | 0 |
| P12163_1_F3,18451 | K.LIASPDMM*VK.V ! K.I  | 1728.985 | 0.00542  | 2 | 1 | 26.9 | 0 |
| P12163_1_F3,20571 | K.LIASPDMMVK.V         | 1712.99  | 0.01214  | 2 | 1 | 32.4 | 0 |
| P12163_1_S1,20158 | K.NAGADLVGGDDLIEQI     | 2336.292 | 0.01082  | 3 | 1 | 52.2 | 0 |
| P12163_2_F2,18833 | K.TAISLLK.Q            | 1353.893 | 0.00616  | 3 | 1 | 27.6 | 0 |
| P12163_2_F7,16501 | K.TGIVHIPFGK.A         | 1677.031 | 0.00149  | 3 | 1 | 24.5 | 0 |
| P12163_2_F7,16541 | K.TGIVHIPFGK.A         | 1677.031 | 0.00327  | 2 | 1 | 24   | 0 |
| P12163_2_F7,16699 | K.TGIVHIPFGK.A         | 1677.031 | 0.00434  | 3 | 1 | 22.3 | 0 |
| P12163_2_F7,16927 | K.TGIVHIPFGK.A         | 1677.031 | 0.00308  | 3 | 1 | 24.4 | 0 |
| P12163_1_F4,17162 | K.VAVLAQGEK.F          | 1522.941 | 0.00674  | 2 | 1 | 38.3 | 0 |
| P12163_2_F1,16291 | K.VAVLAQGEK.F          | 1522.941 | 0.00666  | 2 | 1 | 35.8 | 0 |
| P12163_2_F1,16306 | K.VAVLAQGEK.F          | 1522.941 | 0.00494  | 3 | 1 | 27.4 | 0 |
| P12163_1_F2,9842  | K.AALTVEPR.G           | 1160.694 | 0.00341  | 3 | 1 | 26   | 0 |
| P12163_1_F2,12833 | K.AALTVEPR.G           | 1160.694 | 0.00468  | 2 | 1 | 37.4 | 0 |
| P12163_1_F3,10071 | K.AALTVEPR.G           | 1160.694 | 0.00506  | 3 | 1 | 30.5 | 0 |
| P12163_1_F3,13207 | K.AALTVEPR.G           | 1160.694 | 0.00182  | 2 | 1 | 28.5 | 0 |
| P12163_2_F1,12612 | K.AALTVEPR.G           | 1160.694 | 0.00304  | 2 | 1 | 36.7 | 0 |
| P12163_2_S5,16693 | K.SFSASPSNSSYAPTDV/    | 2716.373 | 0.00241  | 3 | 1 | 29.3 | 0 |
| P12163_1_F7,19383 | K.VEPLPDGSGHFFNLSV     | 2693.451 | 0.00486  | 3 | 1 | 50.2 | 0 |
| P12163_2_F10,1783 | K.VEPLPDGSGHFFNLSV     | 2693.451 | 0.00588  | 3 | 1 | 43.7 | 0 |
| P12163_2_F6,18952 | R.ESCEFFHDPFK.G        | 2051.015 | 0.01302  | 3 | 1 | 32.9 | 0 |
| P12163_1_F2,18104 | R.GPEFVSLDSGAVK.L      | 1914.079 | 0.00894  | 3 | 1 | 25.6 | 0 |
| P12163_1_F3,18670 | R.GPEFVSLDSGAVK.L      | 1914.079 | -0.00241 | 2 | 1 | 46.8 | 0 |
| P12163_1_F5,9711  | R.QSEYYEQK.S           | 1682.885 | 0.00273  | 2 | 1 | 32   | 0 |
| P12163_2_F1,10180 | R.QSEYYEQK.S           | 1682.885 | 0.00273  | 2 | 1 | 25   | 0 |
| P12163_2_F2,10541 | R.QSEYYEQK.S           | 1682.885 | 0.00037  | 2 | 1 | 32.8 | 0 |
| P12163_1_F6,14504 | R.VYVGHSIYK.G          | 1673.983 | 0.00339  | 2 | 1 | 45.4 | 0 |
| P12163_1_F3,19176 | K.ATIGADFITK.E ! K.ATI | 1644.978 | 0.00716  | 3 | 1 | 22.9 | 0 |
| P12163_1_F4,20773 | K.ATIGADFITK.E ! K.ATI | 1644.978 | 0.00971  | 3 | 1 | 45.6 | 0 |
| P12163_2_F1,20163 | K.ATIGADFITK.E ! K.ATI | 1644.978 | 0.00517  | 2 | 1 | 36   | 0 |
| P12163_1_F3,22857 | K.EGINVEEAFQCIK.N      | 2216.184 | 0.00703  | 3 | 1 | 48.8 | 0 |

|                   |                       |          |          |   |   |      |   |
|-------------------|-----------------------|----------|----------|---|---|------|---|
| P12163_1_F3,22860 | K.EGINVEEAFQCIAK.N    | 2216.184 | 0.00702  | 2 | 1 | 77.7 | 0 |
| P12163_1_F3,12121 | K.EVQFEDR.L           | 1226.632 | 0.00411  | 2 | 1 | 33.2 | 0 |
| P12163_1_F2,8712  | K.IDVDGGNSR.V         | 1236.649 | 0.00541  | 3 | 1 | 33.5 | 0 |
| P12163_1_F5,16837 | K.TSLMNQYVVK.K        | 1806.004 | 0.00391  | 2 | 1 | 48.9 | 0 |
| P12163_2_F1,17386 | K.TSLMNQYVVK.K        | 1806.004 | -0.00237 | 2 | 1 | 31.1 | 0 |
| P12163_1_F3,19881 | K.VIILGDSGVGK.T       | 1666.036 | 0.00775  | 2 | 1 | 52.3 | 0 |
| P12163_1_F3,19960 | K.VIILGDSGVGK.T       | 1666.036 | 0.00874  | 3 | 1 | 40.9 | 0 |
| P12163_2_F2,19154 | K.VIILGDSGVGK.T       | 1666.036 | -0.00221 | 3 | 1 | 34.7 | 0 |
| P12163_1_F4,18190 | R.GNIPYFETSAK.E ! K.G | 1835.016 | 0.00836  | 2 | 1 | 39   | 0 |
| P12163_1_F4,18247 | R.GNIPYFETSAK.E ! K.G | 1835.016 | 0.00761  | 3 | 1 | 33   | 0 |
| P12163_2_F1,17433 | R.GNIPYFETSAK.E ! K.G | 1835.016 | 0.00354  | 2 | 1 | 27.7 | 0 |
| P12163_1_F6,19385 | K.EKPAIQVDTFCVHGGF    | 3238.714 | 0.00356  | 4 | 1 | 25.1 | 0 |
| P12163_2_F8_12070 | K.EKPAIQVDTFCVHGGF    | 3238.714 | 0.00664  | 4 | 1 | 32.5 | 0 |
| P12163_2_F1,12712 | K.NVTDLEK.Q           | 1426.836 | 0.00647  | 2 | 1 | 26.8 | 0 |
| P12163_1_F4,19957 | K.SYLANFGYDPNK.I      | 1997.059 | 0.0071   | 2 | 1 | 29.5 | 0 |
| P12163_1_F4,19971 | K.SYLANFGYDPNK.I      | 1997.059 | 0.0056   | 3 | 1 | 43.6 | 0 |
| P12163_1_F9,18509 | K.SYLANFGYDPNK.I      | 1997.059 | 0.00506  | 3 | 1 | 50.5 | 0 |
| P12163_1_F9,18534 | K.SYLANFGYDPNK.I      | 1997.059 | 0.00104  | 2 | 1 | 25.4 | 0 |
| P12163_2_F1,19393 | K.SYLANFGYDPNK.I      | 1997.059 | 0.00386  | 2 | 1 | 56.3 | 0 |
| P12163_2_F1,19416 | K.SYLANFGYDPNK.I      | 1997.059 | 0.00764  | 3 | 1 | 39.2 | 0 |
| P12163_1_F3,25442 | R.FPTLPFIPK.E         | 1668.034 | 0.00294  | 3 | 1 | 25.4 | 0 |
| P12163_1_F3,16764 | R.GNVQCLPEEELEK.N     | 2153.137 | 0.00886  | 3 | 1 | 46.3 | 0 |
| P12163_1_F3,16810 | R.GNVQCLPEEELEK.N     | 2153.137 | 0.00859  | 2 | 1 | 59.3 | 0 |
| P12163_1_F3,17024 | R.TPTPGPEFIEK.Y       | 1824.036 | 0.00743  | 2 | 1 | 34.1 | 0 |
| P12163_1_F3,17032 | R.TPTPGPEFIEK.Y       | 1824.036 | 0.00641  | 3 | 1 | 37.1 | 0 |
| P12163_1_F5,23137 | R.WFEVASLK.R          | 1587.935 | 0.00763  | 3 | 1 | 25.3 | 0 |
| P12163_1_F7,16316 | K.ALQNYEAYNSNVHR      | 2146.062 | 0.00337  | 3 | 1 | 50.3 | 0 |
| P12163_1_F8,17030 | K.ALQNYEAYNSNVHR      | 2146.062 | 0.00484  | 3 | 1 | 40.7 | 0 |
| P12163_2_S3,15401 | K.ALQNYEAYNSNVHR      | 2146.062 | 0.007    | 3 | 1 | 34.3 | 0 |
| P12163_1_S1,10672 | K.ATDEYELAR.K         | 1371.706 | 0.00276  | 3 | 1 | 42.1 | 0 |
| P12163_1_F6,17430 | K.IHAYEMELAK.Y        | 1813.014 | -0.00104 | 3 | 1 | 37.9 | 0 |
| P12163_2_F9,16267 | K.IHAYEMELAK.Y        | 1813.014 | 0.00085  | 3 | 1 | 31.8 | 0 |
| P12163_2_F9,16299 | K.IHAYEMELAK.Y        | 1813.014 | 0.00645  | 4 | 1 | 25.3 | 0 |
| P12163_1_F4,24797 | K.M*CGPTGIGFLFGK.S    | 2009.081 | 0.00605  | 3 | 1 | 33.4 | 0 |
| P12163_1_F3,25381 | K.MCGPTGIGFLFGK.S     | 1993.086 | 0.00626  | 3 | 1 | 35.2 | 0 |
| P12163_1_S1,24395 | K.YLYENLLSIPNIR.I     | 1912.084 | -0.00382 | 3 | 1 | 38.3 | 0 |
| P12163_2_F4,13295 | R.ASLHFYNTK.E         | 1688.958 | 0.00871  | 2 | 1 | 37.9 | 0 |
| P12163_1_F9,15820 | R.GIHFLSAK.A          | 1480.91  | 0.00667  | 3 | 1 | 31.3 | 0 |
| P12163_1_F9,15847 | R.GIHFLSAK.A          | 1480.91  | 0.00743  | 2 | 1 | 25.4 | 0 |
| P12163_2_S5,15021 | R.GIHFLSAK.A          | 1480.91  | 0.00562  | 3 | 1 | 24.1 | 0 |
| P12163_1_F2,19034 | K.GAAVIYEEIR.Q        | 1424.805 | 0.0047   | 2 | 1 | 24.2 | 0 |
| P12163_1_S1,10209 | K.IVDSIQDR.G          | 1249.705 | 0.00166  | 3 | 1 | 25.2 | 0 |
| P12163_1_S1,14985 | K.IVDSIQDR.G          | 1249.705 | 0.00461  | 2 | 1 | 35.4 | 0 |
| P12163_1_S1,15067 | K.SFGFDTAVEEAQR.A !   | 1760.876 | 0.00324  | 3 | 1 | 49.7 | 0 |
| P12163_1_S1,15953 | K.SFGFDTAVEEAQR.A !   | 1760.876 | 0.00249  | 3 | 1 | 45.8 | 0 |
| P12163_1_S1,17931 | K.SFGFDTAVEEAQR.A !   | 1760.876 | 0.00443  | 2 | 1 | 68.6 | 0 |
| P12163_1_S1,17970 | K.SFGFDTAVEEAQR.A !   | 1760.876 | 0.00135  | 3 | 1 | 89   | 0 |
| P12163_1_S1,19345 | K.YIDPTYMIR.A         | 1475.787 | 0.00236  | 3 | 1 | 30.4 | 0 |
| P12163_1_F3,16809 | R.GINQVYIIGDGTQK.C    | 2171.228 | 0.00568  | 3 | 1 | 42.6 | 0 |
| P12163_1_F3,18341 | R.GINQVYIIGDGTQK.C    | 2171.228 | 0.00674  | 2 | 1 | 63.5 | 0 |
| P12163_2_F2,17919 | R.GINQVYIIGDGTQK.C    | 2171.228 | 0.00583  | 3 | 1 | 22.4 | 0 |

|                   |                        |          |          |   |   |      |   |
|-------------------|------------------------|----------|----------|---|---|------|---|
| P12163_2_F10,6941 | R.GTHFR.R              | 921.5208 | -0.00426 | 3 | 1 | 25.9 | 0 |
| P12163_2_F9,6857  | R.GTHFR.R              | 921.5208 | 0.00159  | 3 | 1 | 23.8 | 0 |
| P12163_1_F2,10575 | R.QNQVVITDR.M          | 1376.78  | 0.00494  | 2 | 1 | 40.1 | 0 |
| P12163_1_F4,14872 | K.GPMATPIGK.G          | 1479.881 | 0.00495  | 3 | 1 | 24   | 0 |
| P12163_2_F6,17335 | K.TRYDDVNLITIR.E       | 1783.002 | 0.00121  | 3 | 1 | 43.4 | 0 |
| P12163_1_F7,13652 | R.ENTEGEYSGLEHQVVI     | 2151.062 | 0.00127  | 3 | 1 | 48.3 | 0 |
| P12163_1_F8,14224 | R.ENTEGEYSGLEHQVVI     | 2151.062 | 0.00616  | 3 | 1 | 87   | 0 |
| P12163_1_F8,14251 | R.ENTEGEYSGLEHQVVI     | 2151.062 | 0.00433  | 2 | 1 | 30.5 | 0 |
| P12163_2_F4,13269 | R.ENTEGEYSGLEHQVVI     | 2151.062 | 0.00952  | 3 | 1 | 28.4 | 0 |
| P12163_2_F8_1207C | R.ENTEGEYSGLEHQVVI     | 2151.062 | 0.00445  | 3 | 1 | 71.3 | 0 |
| P12163_2_S5,13820 | R.ENTEGEYSGLEHQVVI     | 2151.062 | 0.00124  | 3 | 1 | 75.6 | 0 |
| P12163_2_F1,14183 | R.GVVESLK.I            | 1339.841 | -0.00019 | 3 | 1 | 27.8 | 0 |
| P12163_2_S5,9777  | R.HLELHDK.A            | 1499.879 | 0.00594  | 4 | 1 | 36.4 | 0 |
| P12163_1_F3,24776 | R.IQNAILSTIAEGK.Y      | 1966.179 | 0.00791  | 3 | 1 | 29.7 | 0 |
| P12163_1_F4,25668 | R.IQNAILSTIAEGK.Y      | 1966.179 | 0.00611  | 3 | 1 | 44   | 0 |
| P12163_1_F6,18108 | R.VAEYAFHYAK.T         | 1807     | 0.0073   | 3 | 1 | 22.1 | 0 |
| P12163_2_F6,17540 | R.VAEYAFHYAK.T         | 1807     | 0.00259  | 3 | 1 | 30   | 0 |
| P12163_1_F4,22306 | K.AISFYTEAIK.L         | 1751.02  | 0.00611  | 3 | 1 | 44.1 | 0 |
| P12163_1_F4,22314 | K.AISFYTEAIK.L         | 1751.02  | 0.00625  | 2 | 1 | 56.5 | 0 |
| P12163_2_F1,21761 | K.AISFYTEAIK.L         | 1751.02  | 0.01079  | 3 | 1 | 33.6 | 0 |
| P12163_2_F1,21822 | K.AISFYTEAIK.L         | 1751.02  | 0.00455  | 2 | 1 | 56.7 | 0 |
| P12163_1_F8,18348 | K.DDGILVTPTTAYPPPK.    | 2293.29  | 0.00151  | 3 | 1 | 24   | 0 |
| P12163_1_F9,13614 | K.EMLSEDYQNR.A         | 1588.758 | 0.00387  | 2 | 1 | 26.1 | 0 |
| P12163_1_S1,13290 | K.EMLSEDYQNR.A         | 1588.758 | 0.00473  | 2 | 1 | 26.1 | 0 |
| P12163_2_F8_1207C | R.EMLGYYK.E            | 1511.839 | 0.00762  | 3 | 1 | 26.6 | 0 |
| P12163_1_F7,19214 | R.HVGHVLLQLPFAAQR.     | 1990.165 | 0.00798  | 3 | 1 | 40.2 | 0 |
| P12163_1_F5,18889 | R.SAISSLK.D            | 1426.909 | 0.0034   | 2 | 1 | 30.2 | 0 |
| P12163_1_F5,18900 | R.SAISSLK.D            | 1426.909 | 0.00145  | 3 | 1 | 47.8 | 0 |
| P12163_2_F2,19561 | R.SAISSLK.D            | 1426.909 | 0.00259  | 3 | 1 | 40.6 | 0 |
| P12163_2_F2,19571 | R.SAISSLK.D            | 1426.909 | 0.00656  | 2 | 1 | 30.8 | 0 |
| P12163_1_F2,21447 | R.TSTVVSTLVEGGATCI     | 2388.326 | 0.00643  | 3 | 1 | 50.1 | 0 |
| P12163_1_F3,19733 | K.FPENSVELYAEK.V       | 2034.1   | -0.00141 | 3 | 1 | 23.8 | 0 |
| P12163_1_F7,18472 | K.QGPTTPLPDLVTIHSPK    | 2409.396 | 0.00714  | 3 | 1 | 54   | 0 |
| P12163_1_S1,14863 | R.ELAEDGYSGVEVR.V      | 1727.875 | 0.0075   | 2 | 1 | 31.5 | 0 |
| P12163_1_S1,14876 | R.ELAEDGYSGVEVR.V      | 1727.875 | 0.00382  | 3 | 1 | 30.5 | 0 |
| P12163_1_S1,14895 | R.ELAEDGYSGVEVR.V      | 1727.875 | 0.00427  | 3 | 1 | 53.2 | 0 |
| P12163_2_F6,14922 | R.ELAEDGYSGVEVR.V      | 1727.875 | 0.00224  | 2 | 1 | 36.1 | 0 |
| P12163_1_F4,15822 | R.ELTSVVQK.R           | 1511.925 | 0.00537  | 2 | 1 | 26.7 | 0 |
| P12163_1_F4,16021 | R.ELTSVVQK.R           | 1511.925 | 0.00955  | 2 | 1 | 29   | 0 |
| P12163_2_F1,16671 | R.FIMESGAK.G           | 1490.85  | 0.00536  | 2 | 1 | 25.4 | 0 |
| P12163_1_F2,16387 | R.GLCAIAQAESLR.Y       | 1592.873 | 0.00196  | 3 | 1 | 25.4 | 0 |
| P12163_1_F5,11798 | R.TQNVLGEK.G           | 1496.889 | 0.00575  | 2 | 1 | 27.4 | 0 |
| P12163_2_F1,12249 | R.TQNVLGEK.G           | 1496.889 | 0.00805  | 2 | 1 | 32.2 | 0 |
| P12163_2_F2,12617 | R.TQNVLGEK.G           | 1496.889 | 0.00433  | 2 | 1 | 26.7 | 0 |
| P12163_2_F2,12631 | R.TQNVLGEK.G           | 1496.889 | 0.00407  | 3 | 1 | 30.4 | 0 |
| P12163_1_F5,15614 | K.ELNAAFSLK.L          | 1487.868 | 0.00817  | 2 | 1 | 36.6 | 0 |
| P12163_1_F4,19284 | K.EYEALLPDK.I          | 1685.957 | 0.01083  | 2 | 1 | 25.5 | 0 |
| P12163_1_F6,15479 | K.IAVEGGEGHYLK.E ! K.I | 1824.048 | 0.00655  | 2 | 1 | 25.7 | 0 |
| P12163_1_F8,15355 | K.IAVEGGEGHYLK.E ! K.I | 1824.048 | 0.00622  | 3 | 1 | 23.3 | 0 |
| P12163_1_F8,15364 | K.IAVEGGEGHYLK.E ! K.I | 1824.048 | 0.00317  | 2 | 1 | 27.4 | 0 |
| P12163_2_F6,14823 | K.IAVEGGEGHYLK.E ! K.I | 1824.048 | 0.00553  | 2 | 1 | 45.1 | 0 |

|                    |                        |          |          |   |   |      |   |
|--------------------|------------------------|----------|----------|---|---|------|---|
| P12163_2_F6,14827  | K.IAVEGGEGHYLK.E ! K.I | 1824.048 | 0.00437  | 3 | 1 | 30.2 | 0 |
| P12163_2_S3,8047   | K.VHNLQQ.-             | 1042.595 | 0.00296  | 2 | 1 | 24.1 | 0 |
| P12163_1_F3,13764  | R.NLLADPR.C            | 1102.652 | 0.00309  | 2 | 1 | 39.6 | 0 |
| P12163_1_F4,13079  | R.QGAQFNIQR.V          | 1365.754 | 0.00265  | 2 | 1 | 29.2 | 0 |
| P12163_2_F1,12031  | R.QGAQFNIQR.V          | 1365.754 | 0.00369  | 2 | 1 | 24.8 | 0 |
| P12163_1_F7,16639  | R.VTFEDGHTVETLEEK      | 2413.271 | 0.00782  | 3 | 1 | 35.1 | 0 |
| P12163_2_S5,16250  | R.VTFEDGHTVETLEEK      | 2413.271 | 0.00434  | 4 | 1 | 22.2 | 0 |
| P12163_1_F4,18597  | K.GELGDYYCMAAK.S       | 1985.992 | 0.01018  | 2 | 1 | 36   | 0 |
| P12163_1_S1,23350  | K.GLIVGIISNAEYR.Y      | 1708.99  | 0.00728  | 2 | 1 | 24.6 | 0 |
| P12163_2_F8_12070  | K.NYPCFGFAAK.M         | 1782.946 | 0.00544  | 3 | 1 | 23.2 | 0 |
| P12163_1_F2,22941  | K.SGAIVLPDLVAVK.E      | 1890.188 | 0.00745  | 3 | 1 | 22.5 | 0 |
| P12163_1_S1,21457  | K.SGAIVLPDLVAVK.E      | 1890.188 | 0.007    | 3 | 1 | 26.7 | 0 |
| P12163_1_F7,18822  | R.AGNIAPPEALHIGDSFF    | 2101.098 | 0.00152  | 3 | 1 | 64.1 | 0 |
| P12163_2_F10,17500 | R.AGNIAPPEALHIGDSFF    | 2101.098 | 0.00041  | 3 | 1 | 31.5 | 0 |
| P12163_2_S5,18263  | R.AGNIAPPEALHIGDSFF    | 2101.098 | 0.0179   | 3 | 1 | 44.6 | 0 |
| P12163_1_F2,21098  | R.IYEIALER.A           | 1310.762 | 0.00564  | 2 | 1 | 28.8 | 0 |
| P12163_1_F9,20416  | R.IYEIALER.A           | 1310.762 | 0.00256  | 2 | 1 | 24.7 | 0 |
| P12163_2_F1,21553  | R.IYEIALER.A           | 1310.762 | -0.00328 | 2 | 1 | 25.7 | 0 |
| P12163_1_S10,11111 | R.VHEGFK.L             | 1324.783 | 0.00675  | 3 | 1 | 29.2 | 0 |
| P12163_2_F8_12070  | R.VHEGFK.L             | 1324.783 | 0.00743  | 3 | 1 | 30.2 | 0 |
| P12163_1_F3,14003  | K.EADVETLSK.A          | 1599.905 | 0.00785  | 2 | 1 | 39   | 0 |
| P12163_1_F4,14535  | K.EADVETLSK.A          | 1599.905 | 0.00949  | 2 | 1 | 45.9 | 0 |
| P12163_1_F9,17196  | K.IFVHALR.K            | 1159.725 | 0.00462  | 3 | 1 | 24.1 | 0 |
| P12163_2_F9,16231  | K.IFVHALR.K            | 1159.725 | 0.0051   | 3 | 1 | 30.7 | 0 |
| P12163_2_F9,16466  | K.IFVHALR.K            | 1159.725 | 0.00237  | 3 | 1 | 30.9 | 0 |
| P12163_1_F5,8030   | K.SINESCQK.F           | 1573.846 | 0.00497  | 2 | 1 | 34.6 | 0 |
| P12163_2_F2,8869   | K.SINESCQK.F           | 1573.846 | 0.00271  | 2 | 1 | 36.5 | 0 |
| P12163_1_F8,10865  | K.VIERPLTENER.F        | 1659.933 | 0.00343  | 2 | 1 | 26.8 | 0 |
| P12163_1_F4,19075  | R.FALTVDGK.I           | 1458.878 | 0.00658  | 2 | 1 | 33.2 | 0 |
| P12163_2_F1,18379  | R.FALTVDGK.I           | 1458.878 | 0.00548  | 2 | 1 | 29   | 0 |
| P12163_1_F3,20693  | R.IVMVGDTLK.K          | 1583.965 | 0.00251  | 2 | 1 | 28.5 | 0 |
| P12163_1_F3,20721  | R.IVMVGDTLK.K          | 1583.965 | 0.00336  | 3 | 1 | 37.9 | 0 |
| P12163_1_F2,17390  | R.VFVTCTTGLNR.S        | 1571.852 | 0.00313  | 2 | 1 | 24.5 | 0 |
| P12163_1_F3,12137  | K.EAEPMSVDSK.A         | 1700.898 | 0.00684  | 2 | 1 | 33.7 | 0 |
| P12163_2_F2,14187  | K.EQGNTLFK.A           | 1544.889 | 0.00395  | 2 | 1 | 32.8 | 0 |
| P12163_2_F2,14213  | K.EQGNTLFK.A           | 1544.889 | 0.01175  | 3 | 1 | 22.1 | 0 |
| P12163_2_F1,18468  | K.FTLGQGNVIK.G         | 1685.021 | 0.00219  | 2 | 1 | 41.3 | 0 |
| P12163_1_F5,18281  | K.GWDIGIK.T            | 1396.841 | 0.00839  | 3 | 1 | 24.2 | 0 |
| P12163_2_F2,18913  | K.GWDIGIK.T            | 1396.841 | 0.00656  | 3 | 1 | 24   | 0 |
| P12163_1_F4,18754  | K.LQDGTVFVK.K          | 1614.968 | 0.00715  | 2 | 1 | 37.9 | 0 |
| P12163_1_F4,18762  | K.LQDGTVFVK.K          | 1614.968 | 0.00717  | 3 | 1 | 27.6 | 0 |
| P12163_1_F5,11963  | K.VACNLNNAACK.L        | 1842.977 | 0.00635  | 2 | 1 | 54.5 | 0 |
| P12163_2_F1,12407  | K.VACNLNNAACK.L        | 1842.977 | 0.00494  | 3 | 1 | 25.2 | 0 |
| P12163_2_F1,12409  | K.VACNLNNAACK.L        | 1842.977 | 0.00986  | 2 | 1 | 34.7 | 0 |
| P12163_2_F2,12773  | K.VACNLNNAACK.L        | 1842.977 | 0.00932  | 2 | 1 | 56.9 | 0 |
| P12163_1_F8,16583  | K.YIEYDTSFGDEEKK.Q     | 2636.386 | 0.00322  | 3 | 1 | 31.6 | 0 |
| P12163_1_F6,18707  | K.AFEQAQNCLLPM*GV      | 2792.376 | 0.00339  | 3 | 1 | 38.6 | 0 |
| P12163_1_F6,20208  | K.AFEQAQNCLLPM*GV      | 2792.376 | 0.00066  | 3 | 1 | 44   | 0 |
| P12163_1_F6,20189  | K.AFEQAQNCLLPMGVT      | 2776.381 | 0.00099  | 3 | 1 | 69.4 | 0 |
| P12163_1_F8,6730   | K.EQDQAAVDSHR.K        | 1559.772 | 0.00629  | 2 | 1 | 24.3 | 0 |
| P12163_1_F8,6737   | K.EQDQAAVDSHR.K        | 1559.772 | 0.00406  | 3 | 1 | 40.2 | 0 |

|                   |                       |          |          |   |   |      |   |
|-------------------|-----------------------|----------|----------|---|---|------|---|
| P12163_2_F6,6647  | K.EQDQAAVDSHR.K       | 1559.772 | 0.00022  | 3 | 1 | 23.2 | 0 |
| P12163_2_F6,6648  | K.EQDQAAVDSHR.K       | 1559.772 | 0.00125  | 2 | 1 | 52.8 | 0 |
| P12163_1_F7,17338 | K.INVNGGALAIGHPLGT    | 2193.241 | 0.00306  | 3 | 1 | 32.6 | 0 |
| P12163_2_S5,16477 | K.INVNGGALAIGHPLGT    | 2193.241 | 0.00054  | 3 | 1 | 52.9 | 0 |
| P12163_1_S1,12321 | R.GDCADEL CNVR.K      | 1612.736 | 0.00446  | 3 | 1 | 53.2 | 0 |
| P12163_1_F6,7658  | R.KEQDQAAVDSHR.K      | 1992.072 | 0.00337  | 3 | 1 | 44.4 | 0 |
| P12163_1_S1,23071 | R.MAAFYAGFPETVPVR.    | 1960.03  | 0.00617  | 3 | 1 | 42.9 | 0 |
| P12163_1_F3,23862 | R.QCSSLQAVADVAAA      | 2297.274 | 0.00975  | 3 | 1 | 49.6 | 0 |
| P12163_1_S1,15729 | K.SDQELLEMSR.S        | 1511.768 | 0.00713  | 2 | 1 | 28.1 | 0 |
| P12163_1_F2,18213 | R.CAETLGNYLAER.N      | 1700.858 | 0.00654  | 2 | 1 | 28.1 | 0 |
| P12163_1_S1,15100 | R.NIMGISDVDR.A        | 1524.799 | 0.00008  | 3 | 1 | 36.8 | 0 |
| P12163_1_F3,24684 | R.QCFLAGLVIR.S        | 1480.861 | 0.00256  | 2 | 1 | 26.8 | 0 |
| P12163_1_F5,19542 | R.QDGLIGVLSTEEKS.S    | 2171.202 | 0.00449  | 3 | 1 | 29.6 | 0 |
| P12163_1_S1,19352 | R.QDGLIGVLSTEEKS.S    | 2171.202 | 0.00599  | 3 | 1 | 55.3 | 0 |
| P12163_2_F10,1517 | R.VEISAQNHNYAVDPA1    | 2675.461 | 0.00504  | 3 | 1 | 40.5 | 0 |
| P12163_2_F10,1523 | R.VEISAQNHNYAVDPA1    | 2675.461 | 0.00195  | 4 | 1 | 25.7 | 0 |
| P12163_1_F4,23331 | R.VIAYDFGIK.H         | 1633.977 | 0.0038   | 3 | 1 | 22.6 | 0 |
| P12163_1_F4,23526 | R.VIAYDFGIK.H         | 1633.977 | 0.0054   | 2 | 1 | 26.4 | 0 |
| P12163_2_F1,22723 | R.VIAYDFGIK.H         | 1633.977 | 0.00602  | 2 | 1 | 38.1 | 0 |
| P12163_2_F9,20111 | R.VIAYDFGIK.H         | 1633.977 | 0.00745  | 3 | 1 | 33.9 | 0 |
| P12163_1_F6,18990 | K.ETIHLISLKE          | 1749.073 | 0.00324  | 3 | 1 | 33.3 | 0 |
| P12163_2_F6,18526 | K.ETIHLISLKE          | 1749.073 | 0.00501  | 3 | 1 | 33.7 | 0 |
| P12163_1_S1,20895 | K.IGEDQLFYFQQR.G      | 1847.959 | 0.00165  | 2 | 1 | 35   | 0 |
| P12163_1_S1,20896 | K.IGEDQLFYFQQR.G      | 1847.959 | 0.00236  | 3 | 1 | 45.6 | 0 |
| P12163_1_F9,9081  | R.EHPDLVR.K           | 1169.658 | 0.0037   | 3 | 1 | 22.3 | 0 |
| P12163_2_F1,7688  | R.GLCAGDR.S           | 1052.546 | 0.00132  | 2 | 1 | 27.5 | 0 |
| P12163_1_F4,13752 | R.GLVQVQSK.A          | 1466.915 | 0.00834  | 2 | 1 | 37.1 | 0 |
| P12163_1_F3,17269 | R.INAMETGQFER.T       | 1599.81  | 0.00533  | 2 | 1 | 40.1 | 0 |
| P12163_2_F1,16865 | R.INAMETGQFER.T       | 1599.81  | 0.00227  | 2 | 1 | 30.1 | 0 |
| P12163_1_F9,7485  | R.VEHEASTSK.I         | 1595.885 | 0.00792  | 3 | 1 | 30.9 | 0 |
| P12163_2_F7,7184  | R.VEHEASTSK.I         | 1595.885 | 0.00537  | 3 | 1 | 30.1 | 0 |
| P12163_2_F9,7967  | R.VEHEASTSK.I         | 1595.885 | 0.00654  | 3 | 1 | 44   | 0 |
| P12163_2_F4,12995 | K.AGAEVIGISGDDSSSHI   | 2238.182 | 0.00484  | 2 | 1 | 34.3 | 0 |
| P12163_2_S5,13033 | K.AGAEVIGISGDDSSSHI   | 2238.182 | 0.00509  | 3 | 1 | 54.8 | 0 |
| P12163_1_F8,19321 | K.GKPVVVYFYPADETPC    | 3040.658 | 0.01004  | 3 | 1 | 37.4 | 0 |
| P12163_1_F4,17331 | K.GQAPPSFTLK.D        | 1653.978 | 0.00627  | 2 | 1 | 23.9 | 0 |
| P12163_2_F1,16462 | K.GQAPPSFTLK.D        | 1653.978 | 0.00614  | 3 | 1 | 26.8 | 0 |
| P12163_1_F9,11700 | K.HIDETLK.F           | 1463.868 | 0.00528  | 3 | 1 | 31.4 | 0 |
| P12163_2_F9,10916 | K.HIDETLK.F           | 1463.868 | 0.00711  | 3 | 1 | 46.2 | 0 |
| P12163_2_F9,10931 | K.HIDETLK.F           | 1463.868 | 0.00638  | 2 | 1 | 26.1 | 0 |
| P12163_1_F3,22070 | K.NGVVQLIYNNQFQPEF    | 2499.382 | 0.00357  | 3 | 1 | 25.6 | 0 |
| P12163_2_F7,18944 | R.LPYTLLSDEGNK.V      | 1958.105 | 0.00421  | 3 | 1 | 40.8 | 0 |
| P12163_2_F8_12070 | R.QTYVLDK.N           | 1474.873 | 0.00727  | 3 | 1 | 22.1 | 0 |
| P12163_2_F8_12070 | R.QTYVLDK.N           | 1474.873 | 0.0019   | 2 | 1 | 25.2 | 0 |
| P12163_1_F4,14145 | K.DIASVAQK.L          | 1439.868 | 0.0077   | 2 | 1 | 32   | 0 |
| P12163_1_F5,15360 | K.ISTLPNGVK.I         | 1536.957 | 0.01324  | 2 | 1 | 31.7 | 0 |
| P12163_2_F1,15852 | K.ISTLPNGVK.I         | 1536.957 | 0.00436  | 2 | 1 | 31.9 | 0 |
| P12163_1_F2,19418 | K.SAILM*NLESR.M ! K.S | 1453.799 | 0.00316  | 3 | 1 | 40.7 | 0 |
| P12163_2_F1,11250 | K.TVEGV TAK.D         | 1412.857 | -0.00677 | 3 | 1 | 27.9 | 0 |
| P12163_1_F4,20007 | R.EQMGYSFDALK.T       | 1896.999 | 0.00863  | 3 | 1 | 46.3 | 0 |
| P12163_1_F4,20042 | R.EQMGYSFDALK.T       | 1896.999 | 0.01565  | 2 | 1 | 35.8 | 0 |

|                   |                     |          |          |   |   |      |   |
|-------------------|---------------------|----------|----------|---|---|------|---|
| P12163_1_F9,18537 | R.EQMGYSFDALK.T     | 1896.999 | 0.01193  | 3 | 1 | 27.4 | 0 |
| P12163_2_F1,19462 | R.EQMGYSFDALK.T     | 1896.999 | 0.00181  | 2 | 1 | 35.6 | 0 |
| P12163_1_F6,14122 | R.KPVEHFLK.T        | 1910.199 | 0.01415  | 4 | 1 | 31.6 | 0 |
| P12163_1_S1,11992 | R.M*VVSEDIGR.Q      | 1325.704 | 0.00556  | 2 | 1 | 26.5 | 0 |
| P12163_1_S1,14428 | R.MVVSSEDIGR.Q      | 1309.709 | 0.00106  | 2 | 1 | 28.2 | 0 |
| P12163_1_F8,17701 | K.ARPLSLDDDAIR.V    | 1759.001 | -0.00114 | 3 | 1 | 37.9 | 0 |
| P12163_1_F8,17770 | K.ARPLSLDDDAIR.V    | 1759.001 | 0.00499  | 2 | 1 | 34.6 | 0 |
| P12163_2_F6,17226 | K.ARPLSLDDDAIR.V    | 1759.001 | -0.00004 | 3 | 1 | 30.9 | 0 |
| P12163_1_S1,22684 | K.NQVSYFPFALGPR.I   | 1799.975 | 0.00478  | 3 | 1 | 41.7 | 0 |
| P12163_1_F3,20177 | K.NVGFSMNDVIEECK.L  | 2250.135 | 0.01156  | 3 | 1 | 59.2 | 0 |
| P12163_1_F5,20528 | R.ASLMGIIK.N        | 1440.907 | 0.0088   | 2 | 1 | 37   | 0 |
| P12163_1_F5,20537 | R.ASLMGIIK.N        | 1440.907 | 0.00998  | 3 | 1 | 32.2 | 0 |
| P12163_2_F1,21196 | R.ASLMGIIK.N        | 1440.907 | -0.00055 | 3 | 1 | 32.9 | 0 |
| P12163_1_F9,8019  | R.EIEEHGNNK.N       | 1677.902 | 0.01071  | 3 | 1 | 22.1 | 0 |
| P12163_1_F3,20948 | R.ICVGQNFALVEAK.M   | 2057.167 | 0.01365  | 3 | 1 | 36.5 | 0 |
| P12163_1_F9,15566 | R.VNPFLHK.L         | 1462.899 | 0.01192  | 3 | 1 | 21.9 | 0 |
| P12163_2_F9,14593 | R.VNPFLHK.L         | 1462.899 | 0.00352  | 3 | 1 | 29.6 | 0 |
| P12163_1_S10,1891 | K.GSFETIHIQDALGHEFA | 2433.246 | -0.00002 | 4 | 1 | 31.9 | 0 |
| P12163_2_F10,1782 | K.GSFETIHIQDALGHEFA | 2433.246 | 0.00114  | 4 | 1 | 68.9 | 0 |
| P12163_2_F8_12070 | K.GSFETIHIQDALGHEFA | 2433.246 | 0.00432  | 3 | 1 | 35.7 | 0 |
| P12163_2_F8_12070 | K.GSFETIHIQDALGHEFA | 2433.246 | 0.00178  | 4 | 1 | 55.1 | 0 |
| P12163_1_F2,20307 | K.LSIIIEAR.K        | 1234.731 | 0.00276  | 2 | 1 | 30.9 | 0 |
| P12163_1_S1,21699 | K.TYPAGFMDVVSIPK.T  | 2133.187 | 0.00113  | 3 | 1 | 31.2 | 0 |
| P12163_1_S1,24788 | R.ECLPLILVLR.N      | 1529.939 | 0.00253  | 3 | 1 | 30.3 | 0 |
| P12163_1_S1,23383 | R.EVIAILMQR.H       | 1376.824 | 0.00148  | 3 | 1 | 35.4 | 0 |
| P12163_1_F9,10664 | R.HVLVDGK.V         | 1375.852 | 0.00455  | 3 | 1 | 24.7 | 0 |
| P12163_1_F9,11118 | R.HVLVDGK.V         | 1375.852 | 0.00253  | 3 | 1 | 29   | 0 |
| P12163_2_F2,12487 | R.SVQFGQK.G         | 1401.831 | 0.00994  | 2 | 1 | 27.7 | 0 |
| P12163_2_F2,12526 | R.SVQFGQK.G         | 1401.831 | 0.0057   | 3 | 1 | 28.8 | 0 |
| P12163_2_F6,18352 | K.EAYYQQLPQDQWAVI   | 2199.114 | 0.00312  | 2 | 1 | 35.6 | 0 |
| P12163_2_F6,20953 | K.IFFVHGFDSCR.H     | 1688.852 | 0.00168  | 3 | 1 | 44.8 | 0 |
| P12163_2_F6,20957 | K.IFFVHGFDSCR.H     | 1688.852 | 0.006    | 2 | 1 | 24.2 | 0 |
| P12163_2_F7,18931 | K.IFFVHGFDSCR.H     | 1688.852 | 0.00402  | 3 | 1 | 25.2 | 0 |
| P12163_1_F2,8762  | K.TCGSPGGPAVTAPR.I  | 1631.848 | 0.00506  | 3 | 1 | 55.6 | 0 |
| P12163_1_S1,8562  | K.TCGSPGGPAVTAPR.I  | 1631.848 | 0.0047   | 3 | 1 | 34.7 | 0 |
| P12163_1_F4,10355 | K.YIPHR.L           | 989.5834 | 0.00683  | 3 | 1 | 28.3 | 0 |
| P12163_1_S10,1058 | K.YIPHR.L           | 989.5834 | 0.00494  | 3 | 1 | 36.8 | 0 |
| P12163_1_F2,7026  | R.AGYGESDPNPNR.T    | 1580.761 | 0.00362  | 3 | 1 | 28.5 | 0 |
| P12163_1_S1,20190 | R.LVPVILQR.Y        | 1241.825 | 0.0048   | 3 | 1 | 30.2 | 0 |
| P12163_1_F6,9358  | R.QQGEYESLHR.D      | 1550.786 | 0.00046  | 3 | 1 | 38.7 | 0 |
| P12163_2_S5,9353  | R.QQGEYESLHR.D      | 1550.786 | -0.00131 | 3 | 1 | 31.5 | 0 |
| P12163_1_F6,10125 | K.RPDSQEYGSYGK.R    | 2052.061 | 0.00654  | 3 | 1 | 24.5 | 0 |
| P12163_1_F9,9839  | K.RPDSQEYGSYGK.R    | 2052.061 | 0.00732  | 3 | 1 | 30.5 | 0 |
| P12163_1_F9,8755  | K.RPESEYGSYGK.R     | 1790.861 | 0.00407  | 3 | 1 | 44.2 | 0 |
| P12163_2_F9,9296  | K.RPESEYGSYGK.R     | 1790.861 | 0.00227  | 3 | 1 | 41   | 0 |
| P12163_2_F9,12113 | R.KPESEYEGGYGGGSEY  | 2806.43  | 0.00794  | 4 | 1 | 29.5 | 0 |
| P12163_1_F9,8118  | R.RPESGESFGGR.T     | 1539.782 | 0.00261  | 3 | 1 | 46.8 | 0 |
| P12163_2_F9,8613  | R.RPESGESFGGR.T     | 1539.782 | 0.00252  | 3 | 1 | 29   | 0 |
| P12163_1_F4,9520  | R.SDDEEGYK.K        | 1550.779 | 0.0066   | 2 | 1 | 25.7 | 0 |
| P12163_1_F5,9992  | R.SESEYGSYAK.R      | 1785.911 | 0.00712  | 2 | 1 | 50.7 | 0 |
| P12163_2_F1,10420 | R.SESEYGSYAK.R      | 1785.911 | 0.00546  | 3 | 1 | 36.7 | 0 |



|                   |                      |          |          |   |   |      |   |
|-------------------|----------------------|----------|----------|---|---|------|---|
| P12163_1_F2,7899  | R.TESEYGG SAYGR.K    | 1580.749 | 0.00307  | 3 | 1 | 30.6 | 0 |
| P12163_2_F9,10117 | R.TESEYGG SAYGR.K    | 1580.749 | 0.00131  | 2 | 1 | 48.7 | 0 |
| P12163_1_F4,26058 | K.AFM*ALVLK.G        | 1516.938 | 0.00569  | 3 | 1 | 24.2 | 0 |
| P12163_2_F1,25255 | K.AFMALVLK.G         | 1500.943 | 0.00336  | 3 | 1 | 31.8 | 0 |
| P12163_1_F5,15305 | K.EFAEGLEK.I         | 1530.862 | 0.00384  | 3 | 1 | 29.8 | 0 |
| P12163_1_F5,15370 | K.EFAEGLEK.I         | 1530.862 | 0.00859  | 2 | 1 | 36.7 | 0 |
| P12163_2_F1,15678 | K.EFAEGLEK.I         | 1530.862 | 0.00211  | 2 | 1 | 36.7 | 0 |
| P12163_2_F2,21615 | K.IEGEFK.G           | 1330.783 | -0.00978 | 3 | 1 | 24.5 | 0 |
| P12163_1_F7,14127 | K.KVPVFIHGEK.V       | 2066.289 | 0.00784  | 4 | 1 | 28.9 | 0 |
| P12163_2_F7,14898 | K.VPVFIHGEK.V        | 1633.989 | 0.00484  | 3 | 1 | 26.4 | 0 |
| P12163_2_F1,15659 | K.YSEELMAK.A         | 1578.866 | 0.00687  | 2 | 1 | 29.8 | 0 |
| P12163_2_F1,23148 | R.LLELNPVYK.K        | 1697.046 | 0.00567  | 2 | 1 | 38.5 | 0 |
| P12163_2_F1,23165 | R.LLELNPVYK.K        | 1697.046 | 0.00409  | 3 | 1 | 27.7 | 0 |
| P12163_2_F7,19750 | R.LLELNPVYK.K        | 1697.046 | 0.00634  | 3 | 1 | 25   | 0 |
| P12163_2_F1,16608 | K.EFAPSIPAK.N        | 1567.93  | 0.00525  | 3 | 1 | 31   | 0 |
| P12163_2_F2,17412 | K.GEWSIVK.G          | 1426.851 | 0.00451  | 2 | 1 | 27.1 | 0 |
| P12163_1_F7,18082 | K.LSSALSAASSACDHIR.  | 1950.002 | 0.00228  | 3 | 1 | 41.8 | 0 |
| P12163_1_F8,18897 | K.LSSALSAASSACDHIR.  | 1950.002 | 0.00408  | 3 | 1 | 50.2 | 0 |
| P12163_2_F6,18506 | K.LSSALSAASSACDHIR.  | 1950.002 | 0.00372  | 3 | 1 | 39.5 | 0 |
| P12163_1_F3,11295 | K.NITCLTR.L          | 1181.661 | 0.00371  | 3 | 1 | 32.1 | 0 |
| P12163_1_F5,12575 | K.NVSIYK.A           | 1331.814 | 0.00794  | 3 | 1 | 23.9 | 0 |
| P12163_1_S1,19406 | K.VLVVANPANTNALILK   | 2258.406 | -0.00189 | 4 | 1 | 29.3 | 0 |
| P12163_1_S1,21147 | K.VLVVANPANTNALILK   | 2258.406 | 0.00795  | 3 | 1 | 54.2 | 0 |
| P12163_1_S1,21159 | K.VLVVANPANTNALILK   | 2258.406 | 0.00171  | 4 | 1 | 43   | 0 |
| P12163_2_F2,12791 | R.GAAIK.A ! R.GAALLK | 1180.787 | 0.00564  | 3 | 1 | 22.1 | 0 |
| P12163_2_F1,24383 | K.FFEVPTGWK.F        | 1718.973 | 0.00573  | 3 | 1 | 24.2 | 0 |
| P12163_1_S1,21248 | K.LVTVEDIVR.K        | 1347.815 | 0.00027  | 2 | 1 | 27.3 | 0 |
| P12163_1_S1,22814 | R.DSQEALAPLVEVALK.   | 2191.279 | 0.00684  | 3 | 1 | 35   | 0 |
| P12163_1_F2,7144  | R.LSGTGSEGATIR.L     | 1452.796 | 0.00081  | 3 | 1 | 23.9 | 0 |
| P12163_1_F2,7926  | R.LSGTGSEGATIR.L     | 1452.796 | 0.00459  | 3 | 1 | 26.6 | 0 |
| P12163_1_F2,9646  | R.LSGTGSEGATIR.L     | 1452.796 | 0.00249  | 3 | 1 | 38.2 | 0 |
| P12163_2_F1,11853 | R.LSGTGSEGATIR.L     | 1452.796 | 0.00422  | 2 | 1 | 39.1 | 0 |
| P12163_2_F8_12070 | R.LYIEQYK.D          | 1693.962 | 0.00417  | 3 | 1 | 23.7 | 0 |
| P12163_1_F2,18353 | R.SM*PTSAALDVVAK.N   | 1914.083 | 0.00561  | 3 | 1 | 28.4 | 0 |
| P12163_1_F3,13762 | R.YDYENV DAGAAK.E    | 1923.991 | 0.00532  | 2 | 1 | 26.1 | 0 |
| P12163_1_F3,13796 | R.YDYENV DAGAAK.E    | 1923.991 | 0.00683  | 3 | 1 | 44   | 0 |
| P12163_1_F3,16695 | -.MGESITDGTLAK.F     | 1831.009 | 0.00813  | 2 | 1 | 59.8 | 0 |
| P12163_1_F4,10672 | K.APSPPPK.R          | 1398.856 | 0.00811  | 2 | 1 | 37.5 | 0 |
| P12163_1_F4,10341 | K.EGETVEPGTK.I       | 1654.911 | 0.0115   | 2 | 1 | 27.8 | 0 |
| P12163_2_F1,9470  | K.EGETVEPGTK.I       | 1654.911 | 0.00584  | 2 | 1 | 35.6 | 0 |
| P12163_1_F4,219   | K.GLVVPVIR.N         | 1156.772 | 0.0034   | 2 | 1 | 25.2 | 0 |
| P12163_1_F4,24998 | K.LGLM*SGFVK.A       | 1575.939 | 0.0082   | 3 | 1 | 27.4 | 0 |
| P12163_2_F1,24421 | K.LGLM*SGFVK.A       | 1575.939 | 0.00142  | 3 | 1 | 31.2 | 0 |
| P12163_2_F1,24343 | K.LGLMSGFVK.A        | 1559.944 | 0.0022   | 3 | 1 | 26.3 | 0 |
| P12163_1_F8,10042 | K.SGEGVAHVAPSEK.I    | 1876.038 | 0.00803  | 3 | 1 | 24.3 | 0 |
| P12163_2_F6,9925  | K.SGEGVAHVAPSEK.I    | 1876.038 | 0.00494  | 3 | 1 | 40.2 | 0 |
| P12163_1_F9,11572 | K.VETVSEKPK.A        | 1929.178 | 0.00984  | 4 | 1 | 23.3 | 0 |
| P12163_1_F5,11938 | K.ACAEVGIK.S         | 1455.845 | 0.01018  | 2 | 1 | 34.5 | 0 |
| P12163_2_F2,12811 | K.ACAEVGIK.S         | 1455.845 | 0.01118  | 2 | 1 | 34.2 | 0 |
| P12163_2_F2,12827 | K.ACAEVGIK.S         | 1455.845 | 0.00257  | 3 | 1 | 26.5 | 0 |
| P12163_1_S10,1609 | K.ADATVTIVHSHTPDPE   | 2449.299 | 0.01211  | 4 | 1 | 23.6 | 0 |

|                   |                     |          |          |   |   |      |   |
|-------------------|---------------------|----------|----------|---|---|------|---|
| P12163_2_F8_12070 | K.ADATVTIVHSHTPDPE  | 2449.299 | 0.00647  | 4 | 1 | 27.1 | 0 |
| P12163_1_F4,14828 | K.ATIIDGK.A         | 1325.825 | 0.00852  | 2 | 1 | 24.4 | 0 |
| P12163_2_F1,18206 | K.GCLELLK.R         | 1440.87  | 0.00889  | 3 | 1 | 26.6 | 0 |
| P12163_1_S10,8757 | K.HINEEK.V          | 1377.795 | 0.00837  | 3 | 1 | 27.4 | 0 |
| P12163_1_F4,22162 | K.VLGEISLEK.D       | 1595.983 | 0.01101  | 3 | 1 | 22.3 | 0 |
| P12163_1_F8,17031 | R.LVGDVDFHEACK.V    | 1998.057 | 0.00552  | 2 | 1 | 50   | 0 |
| P12163_1_F8,17068 | R.LVGDVDFHEACK.V    | 1998.057 | 0.00888  | 3 | 1 | 26.8 | 0 |
| P12163_1_F8,16207 | K.LQNSYQGFVDSPHK.I  | 2228.192 | 0.00631  | 3 | 1 | 35.3 | 0 |
| P12163_2_F6,15660 | K.LQNSYQGFVDSPHK.I  | 2228.192 | 0.00808  | 3 | 1 | 63.5 | 0 |
| P12163_1_F2,5931  | K.VAASDEAAR.L       | 1193.643 | 0.00378  | 3 | 1 | 53.4 | 0 |
| P12163_1_F3,17704 | K.VNFPEVPR.G        | 1261.721 | 0.00593  | 2 | 1 | 34.4 | 0 |
| P12163_1_F3,15319 | R.APPVLPAAK.E       | 1471.946 | 0.00397  | 2 | 1 | 27   | 0 |
| P12163_1_F3,15348 | R.APPVLPAAK.E       | 1471.946 | 0.00557  | 3 | 1 | 30   | 0 |
| P12163_1_F3,17888 | R.DAFQGQPGLLSAK.V   | 1940.106 | 0.0033   | 2 | 1 | 48.3 | 0 |
| P12163_1_F3,17906 | R.DAFQGQPGLLSAK.V   | 1940.106 | 0.00643  | 3 | 1 | 48.7 | 0 |
| P12163_1_F3,21695 | R.GFGFVTMGSVEEAK.E  | 2067.104 | 0.00561  | 3 | 1 | 51.8 | 0 |
| P12163_1_F3,21714 | R.GFGFVTMGSVEEAK.E  | 2067.104 | 0.00663  | 2 | 1 | 73.4 | 0 |
| P12163_1_F4,12861 | R.LNMANER.A         | 1151.614 | 0.00335  | 2 | 1 | 30.2 | 0 |
| P12163_1_F2,16309 | K.AADM*FQNEEVTTSAI  | 2668.28  | 0.01413  | 3 | 1 | 27   | 0 |
| P12163_1_F9,16954 | K.GHLLNAGICQLCK.G   | 2092.162 | 0.00709  | 3 | 1 | 33.9 | 0 |
| P12163_2_F4,12600 | K.HEAAQAYVDAAHCYI   | 2342.181 | 0.00241  | 3 | 1 | 60.9 | 0 |
| P12163_2_S3,12605 | K.HEAAQAYVDAAHCYI   | 2342.181 | 0.01147  | 4 | 1 | 41.4 | 0 |
| P12163_1_F9,12094 | K.LANCHLK.L         | 1463.861 | 0.00625  | 3 | 1 | 27.2 | 0 |
| P12163_1_F9,12112 | K.LANCHLK.L         | 1463.861 | 0.00667  | 2 | 1 | 24.1 | 0 |
| P12163_1_F7,18885 | K.VAQYAAELEQYHK.S   | 2158.175 | 0.00344  | 3 | 1 | 75.1 | 0 |
| P12163_2_F4,18441 | K.VAQYAAELEQYHK.S   | 2158.175 | 0.00539  | 3 | 1 | 33.6 | 0 |
| P12163_1_F3,20531 | K.YEDAADLFDK.A      | 1794.937 | 0.00792  | 2 | 1 | 35.9 | 0 |
| P12163_1_F5,14259 | R.QSLNNLLK.Y        | 1651.995 | 0.00811  | 2 | 1 | 30.8 | 0 |
| P12163_2_F2,15031 | R.QSLNNLLK.Y        | 1651.995 | 0.00538  | 2 | 1 | 36.7 | 0 |
| P12163_2_F7,13734 | K.GSHMLQIDVNSEK.G   | 2066.116 | 0.00124  | 3 | 1 | 29.4 | 0 |
| P12163_1_S1,22513 | K.LLYVTCLYTGTR.E    | 1820.988 | 0.00462  | 3 | 1 | 22.8 | 0 |
| P12163_1_S1,23876 | K.LLYVTCLYTGTR.E    | 1820.988 | 0.00945  | 3 | 1 | 40.6 | 0 |
| P12163_1_F2,16620 | K.VVEPADIVQK.T      | 1706.031 | 0.00353  | 3 | 1 | 25.8 | 0 |
| P12163_1_F3,17188 | K.VVEPADIVQK.T      | 1706.031 | 0.00604  | 2 | 1 | 32.8 | 0 |
| P12163_1_F3,17196 | K.VVEPADIVQK.T      | 1706.031 | 0.0047   | 3 | 1 | 24   | 0 |
| P12163_1_F5,9380  | R.APSLHK.V          | 1260.788 | 0.0106   | 3 | 1 | 29.3 | 0 |
| P12163_2_F4,9478  | R.APSLHK.V          | 1260.788 | 0.00472  | 3 | 1 | 26.1 | 0 |
| P12163_1_S1,24791 | R.FLVPLSVSGR.I      | 1491.92  | 0.00268  | 3 | 1 | 42.4 | 0 |
| P12163_1_F3,20282 | R.GGPQMIQLSLDGK.R   | 1952.109 | -0.00043 | 3 | 1 | 36.7 | 0 |
| P12163_1_F5,12213 | R.QYNIEDPK.N        | 1614.895 | 0.00859  | 2 | 1 | 27.4 | 0 |
| P12163_1_F3,22175 | K.ELISASELEELK.L    | 1969.131 | 0.0101   | 3 | 1 | 38.5 | 0 |
| P12163_1_F3,22193 | K.ELISASELEELK.L    | 1969.131 | 0.005    | 2 | 1 | 62   | 0 |
| P12163_2_F9,16933 | K.RFIGLEEQIK.K      | 1938.163 | 0.00441  | 3 | 1 | 27.8 | 0 |
| P12163_2_F2,17511 | K.SLENLNLK.S        | 1538.936 | 0.00499  | 2 | 1 | 42.5 | 0 |
| P12163_2_F2,17552 | K.SLENLNLK.S        | 1538.936 | 0.00026  | 3 | 1 | 32.5 | 0 |
| P12163_1_F4,5092  | R.AAESSES.R.G       | 1140.58  | 0.00409  | 2 | 1 | 28.5 | 0 |
| P12163_2_F1,4419  | R.AAESSES.R.G       | 1140.58  | 0.00331  | 2 | 1 | 29.7 | 0 |
| P12163_1_F2,15805 | R.EGCTVTTLTVTAEPK.N | 2215.21  | 0.00661  | 3 | 1 | 29   | 0 |
| P12163_2_F2,5763  | R.SSNSDQSK.L        | 1460.78  | 0.00637  | 2 | 1 | 32.1 | 0 |
| P12163_1_F7,15632 | R.VDCQLLQHLHSENK.L  | 2329.254 | 0.00467  | 4 | 1 | 34.2 | 0 |
| P12163_1_F7,15649 | R.VDCQLLQHLHSENK.L  | 2329.254 | 0.00692  | 3 | 1 | 31.5 | 0 |

|                   |                         |          |          |   |   |      |   |
|-------------------|-------------------------|----------|----------|---|---|------|---|
| P12163_1_F3,24221 | K.ALAVFALR.D ! K.ALA    | 1164.741 | 0.00214  | 2 | 1 | 26.9 | 0 |
| P12163_1_F4,24303 | K.AVELWLADK.A           | 1652.983 | 0.0123   | 3 | 1 | 29.4 | 0 |
| P12163_1_F4,24305 | K.AVELWLADK.A           | 1652.983 | 0.00912  | 2 | 1 | 47.4 | 0 |
| P12163_1_F3,18638 | K.GLPGSFSEDAALK.A       | 1900.064 | 0.00828  | 3 | 1 | 35.7 | 0 |
| P12163_1_F5,5544  | K.SADNQNTGK.S           | 1542.833 | 0.01211  | 2 | 1 | 28.8 | 0 |
| P12163_2_F1,5736  | K.SADNQNTGK.S           | 1542.833 | 0.00747  | 2 | 1 | 31.6 | 0 |
| P12163_2_F1,10067 | K.SSNVNDVPGK.L          | 1624.911 | 0.00569  | 2 | 1 | 36.4 | 0 |
| P12163_1_S1,22563 | R.AAEIYGLNILADR.I       | 1722.969 | 0.00247  | 2 | 1 | 61.5 | 0 |
| P12163_1_S1,22580 | R.AAEIYGLNILADR.I       | 1722.969 | 0.00161  | 3 | 1 | 52.7 | 0 |
| P12163_1_F3,10354 | R.VVDDSNTGTAK.Y         | 1714.943 | 0.00434  | 2 | 1 | 34.7 | 0 |
| P12163_2_F9,7581  | K.AGM*THIVR.D           | 1204.677 | 0.00184  | 3 | 1 | 28.2 | 0 |
| P12163_1_F9,11162 | K.AGMTHIVR.D            | 1188.682 | 0.00316  | 3 | 1 | 31.4 | 0 |
| P12163_2_F9,10645 | K.AGMTHIVR.D            | 1188.682 | 0.00211  | 3 | 1 | 22.6 | 0 |
| P12163_1_F2,21767 | K.DEM*IDIIGVTK.G        | 1858.045 | 0.00324  | 3 | 1 | 38.7 | 0 |
| P12163_2_F2,14291 | K.SIQAQLEK.I            | 1524.921 | 0.00983  | 2 | 1 | 53.3 | 0 |
| P12163_1_F4,23800 | K.VDYAYGFFEK.Q          | 1846.984 | 0.00067  | 2 | 1 | 32.6 | 0 |
| P12163_2_F9,20554 | K.VDYAYGFFEK.Q          | 1846.984 | 0.00853  | 3 | 1 | 26.5 | 0 |
| P12163_2_F4,14721 | R.HGSLGFLPR.K           | 1287.747 | 0.00329  | 3 | 1 | 34.1 | 0 |
| P12163_1_F5,18186 | R.LALEEIK.I ! R.LALEEII | 1423.898 | 0.00765  | 2 | 1 | 26.2 | 0 |
| P12163_1_F9,12913 | R.VLAHTQIR.K            | 1241.763 | 0.00392  | 3 | 1 | 22.8 | 0 |
| P12163_1_F5,20073 | K.AGLLDQLK.S            | 1465.92  | 0.0087   | 3 | 1 | 32.8 | 0 |
| P12163_1_F3,11359 | K.GAGEVLSGR.G           | 1149.653 | 0.0046   | 2 | 1 | 26.7 | 0 |
| P12163_1_F4,5353  | K.GEESNECER.F           | 1413.622 | 0.00193  | 2 | 1 | 30.3 | 0 |
| P12163_2_F1,8480  | K.GVTECEK.F             | 1430.777 | 0.0041   | 3 | 1 | 23.3 | 0 |
| P12163_2_F2,8734  | K.GVTECEK.F             | 1430.777 | -0.00079 | 2 | 1 | 28.2 | 0 |
| P12163_1_F4,15768 | M.AADEIELK.T            | 1496.878 | 0.00923  | 2 | 1 | 35.1 | 0 |
| P12163_1_F3,22269 | R.LGDYSDWLQK.R          | 1833     | 0.00666  | 2 | 1 | 29.1 | 0 |
| P12163_1_F4,22876 | R.LGDYSDWLQK.R          | 1833     | 0.02438  | 2 | 1 | 29.4 | 0 |
| P12163_1_F9,13978 | R.YIEFHR.C              | 1168.642 | 0.00629  | 3 | 1 | 23.6 | 0 |
| P12163_2_F8_12070 | R.YIEFHR.C              | 1168.642 | 0.00545  | 3 | 1 | 23.9 | 0 |
| P12163_1_S1,23793 | K.DTLADDLLAPVLK.A       | 1992.184 | 0.00721  | 3 | 1 | 35.6 | 0 |
| P12163_1_F2,15621 | K.VEIFTQAR.D            | 1267.731 | 0.00383  | 3 | 1 | 34.3 | 0 |
| P12163_1_F2,19169 | K.VEIFTQAR.D            | 1267.731 | 0.00659  | 2 | 1 | 24   | 0 |
| P12163_2_S5,14809 | K.VNVNGGAVALGHPLC       | 2135.199 | 0.0011   | 3 | 1 | 25.3 | 0 |
| P12163_2_F2,8638  | R.AAAATASGK.F           | 1355.81  | -0.00432 | 2 | 1 | 34.5 | 0 |
| P12163_1_F4,24658 | R.CVATLLSEM*K.R         | 1775.986 | 0.00894  | 3 | 1 | 28.5 | 0 |
| P12163_1_F4,24666 | R.CVATLLSEM.K.R         | 1759.991 | 0.00723  | 2 | 1 | 37.1 | 0 |
| P12163_1_F4,24751 | R.CVATLLSEM.K.R         | 1759.991 | 0.00876  | 3 | 1 | 41.9 | 0 |
| P12163_1_S1,12559 | R.GDCVDELCNAR.M         | 1612.736 | 0.00488  | 2 | 1 | 24.4 | 0 |
| P12163_1_F3,22538 | R.QCSSGLQAVADVATA       | 2327.285 | 0.01006  | 3 | 1 | 58.1 | 0 |
| P12163_2_F2,11709 | K.ATALAGQK.T            | 1367.847 | 0.00039  | 2 | 1 | 32.7 | 0 |
| P12163_1_F3,24793 | K.GVADFLQEVTSK.K        | 1902.079 | 0.01008  | 3 | 1 | 43.7 | 0 |
| P12163_1_F3,24810 | K.GVADFLQEVTSK.K        | 1902.079 | 0.00251  | 2 | 1 | 51.5 | 0 |
| P12163_2_F9,10613 | K.IHEPTVGK.L            | 1488.899 | 0.00354  | 3 | 1 | 24.8 | 0 |
| P12163_1_S1,22245 | K.TTLM DVLAGR.K         | 1380.782 | 0.00404  | 2 | 1 | 38.6 | 0 |
| P12163_1_F3,22766 | R.MTLLLGPPGAGK.T ! -.   | 1763.071 | 0.00862  | 2 | 1 | 37.5 | 0 |
| P12163_1_F3,22782 | R.MTLLLGPPGAGK.T ! -.   | 1763.071 | 0.00918  | 3 | 1 | 36.8 | 0 |
| P12163_2_F1,23085 | R.MTLLLGPPGAGK.T ! -.   | 1763.071 | 0.00332  | 2 | 1 | 26.8 | 0 |
| P12163_1_F9,10964 | R.THPAALVK.N            | 1444.91  | 0.00892  | 3 | 1 | 31.7 | 0 |
| P12163_1_F4,18048 | R.VGIDIPK.I ! R.VGIDLPI | 1349.861 | 0.01075  | 2 | 1 | 24.8 | 0 |
| P12163_1_S10,1014 | K.AAFHEK.F              | 1310.768 | 0.00863  | 3 | 1 | 25.9 | 0 |

|                   |                        |          |          |   |   |      |   |
|-------------------|------------------------|----------|----------|---|---|------|---|
| P12163_2_F2,13029 | K.AGLQASQIK.V          | 1523.937 | 0.00716  | 2 | 1 | 48.9 | 0 |
| P12163_1_F2,18757 | K.M*EEAM*GACDCIITK     | 2269.079 | 0.00676  | 3 | 1 | 23.6 | 0 |
| P12163_1_F8,21647 | K.VLILMSDTGGGHR.A      | 1659.915 | 0.00248  | 3 | 1 | 24.2 | 0 |
| P12163_2_F6,21264 | K.VLILMSDTGGGHR.A      | 1659.915 | -0.00196 | 3 | 1 | 23.3 | 0 |
| P12163_2_F2,10572 | R.ASAEAIK.A            | 1297.794 | 0.0044   | 3 | 1 | 36.5 | 0 |
| P12163_1_F4,13508 | R.CYCPTADVAK.R         | 1792.918 | 0.00828  | 3 | 1 | 35.4 | 0 |
| P12163_2_F1,12545 | R.CYCPTADVAK.R         | 1792.918 | 0.0084   | 2 | 1 | 27.3 | 0 |
| P12163_1_F5,18029 | R.SYNFLVK.H            | 1478.883 | 0.0053   | 2 | 1 | 26.8 | 0 |
| P12163_2_F2,18684 | R.SYNFLVK.H            | 1478.883 | -0.005   | 2 | 1 | 26.6 | 0 |
| P12163_1_S1,22711 | K.ADLDSALIDQLGLK.E     | 2080.211 | 0.00479  | 3 | 1 | 41   | 0 |
| P12163_1_F2,10342 | K.GEEGALSMTR.L         | 1455.741 | 0.00185  | 3 | 1 | 46.5 | 0 |
| P12163_1_F2,11163 | K.GEEGALSMTR.L         | 1455.741 | 0.00417  | 3 | 1 | 41.5 | 0 |
| P12163_1_F2,22878 | K.VLDTILR.S            | 1133.72  | 0.00254  | 2 | 1 | 24.1 | 0 |
| P12163_1_F3,18494 | R.DVLPLQVDNK.A         | 1749.037 | 0.00483  | 2 | 1 | 43.3 | 0 |
| P12163_1_F3,18510 | R.DVLPLQVDNK.A         | 1749.037 | 0.00627  | 3 | 1 | 28.3 | 0 |
| P12163_1_F7,19259 | R.EVLAGGHLGYEEVQG      | 2230.213 | 0.00291  | 3 | 1 | 44.6 | 0 |
| P12163_1_F9,12209 | R.GVHSGLVVK.G          | 1503.947 | 0.00354  | 3 | 1 | 33.9 | 0 |
| P12163_2_F9,11063 | R.GVHSGLVVK.G          | 1503.947 | 0.00493  | 2 | 1 | 26.9 | 0 |
| P12163_1_F2,19218 | R.STLFVAAVR.S          | 1267.768 | 0.00352  | 2 | 1 | 27.2 | 0 |
| P12163_1_F9,18475 | K.HILEIIAK.E           | 1544.998 | 0.00943  | 3 | 1 | 44.4 | 0 |
| P12163_2_F7,16499 | K.HILEIIAK.E           | 1544.998 | 0.00526  | 3 | 1 | 39.2 | 0 |
| P12163_2_F9,17534 | K.HILEIIAK.E           | 1544.998 | 0.00451  | 3 | 1 | 25.6 | 0 |
| P12163_1_F2,20761 | K.IQQQDIVDVLDK.Q       | 2022.169 | 0.00428  | 3 | 1 | 35.2 | 0 |
| P12163_1_F2,20789 | K.IQQQDIVDVLDK.Q       | 2022.169 | 0.00566  | 3 | 1 | 52.5 | 0 |
| P12163_1_F7,22156 | K.LDSSEVAADVFTEDLK     | 2487.391 | 0.00129  | 3 | 1 | 34   | 0 |
| P12163_1_F4,25101 | K.LPYTYFLEK.L          | 1782.03  | 0.00897  | 3 | 1 | 25.2 | 0 |
| P12163_1_F4,18349 | K.LSEEVDLNAK.F         | 1813.016 | -0.00164 | 2 | 1 | 38.4 | 0 |
| P12163_1_F4,18058 | R.ITGLEVEEK.L          | 1625.957 | 0.00613  | 3 | 1 | 25.7 | 0 |
| P12163_1_F2,12873 | R.TVGFSGADIR.N         | 1326.732 | 0.00409  | 3 | 1 | 32.1 | 0 |
| P12163_2_F6,19618 | K.AIEPIYGHWIR.S        | 1658.932 | -0.00076 | 3 | 1 | 28.1 | 0 |
| P12163_1_F3,23388 | K.ASLGSVDFITSLCK.S     | 2106.172 | 0.00832  | 3 | 1 | 39.3 | 0 |
| P12163_1_F4,21135 | K.EALAVAAAMEK.G        | 1711.987 | 0.00695  | 2 | 1 | 53.5 | 0 |
| P12163_1_F4,21159 | K.EALAVAAAMEK.G        | 1711.987 | 0.0053   | 3 | 1 | 35.9 | 0 |
| P12163_2_F1,20603 | K.EALAVAAAMEK.G        | 1711.987 | -0.00667 | 2 | 1 | 35.1 | 0 |
| P12163_2_F9,6562  | K.GTTHPIGR.A           | 1142.658 | -0.00138 | 3 | 1 | 41.5 | 0 |
| P12163_1_S10,1035 | K.HSVLQK.K             | 1319.826 | 0.00412  | 3 | 1 | 31.3 | 0 |
| P12163_2_F6,19155 | R.IVQLTEEAQLNPK.L      | 2523.527 | 0.00552  | 4 | 1 | 43.5 | 0 |
| P12163_2_F7,18763 | R.QDIQHILINQFK.S       | 1992.149 | 0.00411  | 3 | 1 | 25.5 | 0 |
| P12163_2_S5,16346 | K.DITPDDKQELDEALQR     | 2494.324 | 0.0059   | 4 | 1 | 33.4 | 0 |
| P12163_1_F3,18137 | K.GDPGIAALYDK.L        | 1727.979 | 0.00371  | 2 | 1 | 26   | 0 |
| P12163_1_F3,23311 | K.LLVSEELQPFGEK.L      | 2097.205 | 0.01013  | 3 | 1 | 36.6 | 0 |
| P12163_1_F3,23313 | K.LLVSEELQPFGEK.L      | 2097.205 | 0.01181  | 2 | 1 | 48.5 | 0 |
| P12163_2_F8_12070 | K.RQEWLLSELR.G         | 1633.933 | 0.00067  | 3 | 1 | 52   | 0 |
| P12163_2_F6,17057 | K.SLLLQVAGHR.D         | 1397.853 | -0.00043 | 3 | 1 | 41.1 | 0 |
| P12163_1_F3,20217 | R.DLLEGDPYLK.Q ! K.DI  | 1771.01  | 0.00961  | 3 | 1 | 36.1 | 0 |
| P12163_1_F4,19269 | R.LVVQLK.K             | 1307.887 | 0.0104   | 3 | 1 | 22.7 | 0 |
| P12163_2_F1,18518 | R.LVVQLK.K             | 1307.887 | 0.00713  | 3 | 1 | 22.9 | 0 |
| P12163_1_S1,10305 | K.DFVTASDGR.K          | 1271.653 | 0.00377  | 3 | 1 | 25.7 | 0 |
| P12163_1_F6,15978 | K.LQHGEYISLGK.I ! K.LI | 1853.074 | 0.00769  | 3 | 1 | 22.5 | 0 |
| P12163_1_F5,17440 | K.LSAVSSSLK.T          | 1499.925 | 0.00627  | 2 | 1 | 24   | 0 |
| P12163_1_F5,19734 | K.NLFNIGYK.R           | 1576.931 | 0.00798  | 3 | 1 | 27   | 0 |

|                   |                        |          |          |   |   |      |   |
|-------------------|------------------------|----------|----------|---|---|------|---|
| P12163_2_F2,20319 | K.NLFNIGYK.R           | 1576.931 | 0.00222  | 3 | 1 | 26.4 | 0 |
| P12163_2_F2,20378 | K.NLFNIGYK.R           | 1576.931 | 0.00169  | 2 | 1 | 31.7 | 0 |
| P12163_1_F4,18872 | K.YEDLSELCKN.A         | 1878.973 | 0.0166   | 2 | 1 | 33.8 | 0 |
| P12163_1_F8,20850 | R.ACSFASGLVNFVGHVNI    | 2256.113 | 0.00346  | 3 | 1 | 44.8 | 0 |
| P12163_1_F3,23880 | R.NAQIPELVEVPWK.G      | 2131.237 | 0.00362  | 3 | 1 | 23.2 | 0 |
| P12163_1_F8,17539 | K.ADGFAGVFPCHK.Y ! f   | 1883.027 | 0.01005  | 3 | 1 | 39.8 | 0 |
| P12163_2_F6,17048 | K.ADGFAGVFPCHK.Y ! f   | 1883.027 | 0.00294  | 3 | 1 | 39.6 | 0 |
| P12163_1_F3,19031 | K.MITGDQLAIK.E         | 1769.045 | 0.01124  | 3 | 1 | 35.5 | 0 |
| P12163_1_F9,14383 | K.VHAIIDK.Y ! R.VHAIID | 1403.883 | 0.00995  | 3 | 1 | 30.8 | 0 |
| P12163_1_F4,18782 | R.ALNLGVNVK.M          | 1535.973 | 0.01072  | 3 | 1 | 32.1 | 0 |
| P12163_2_F1,18020 | R.ALNLGVNVK.M          | 1535.973 | -0.00017 | 2 | 1 | 35.9 | 0 |
| P12163_1_F8,21498 | R.EVHFFPFNPVVK.R       | 2084.143 | 0.01032  | 3 | 1 | 26.8 | 0 |
| P12163_2_S5,6781  | R.HDSAETIR.R           | 1232.654 | -0.00015 | 3 | 1 | 26.8 | 0 |
| P12163_2_F1,20053 | R.LLEGDPLK.I ! R.LLEGI | 1492.919 | 0.0018   | 2 | 1 | 26.8 | 0 |
| P12163_1_F7,19835 | K.DLIIDHASLFPAR.D      | 1772.001 | -0.00101 | 3 | 1 | 35   | 0 |
| P12163_1_F7,19898 | K.DLIIDHASLFPAR.D      | 1772.001 | 0.00121  | 2 | 1 | 47.9 | 0 |
| P12163_2_S5,19046 | K.DLIIDHASLFPAR.D      | 1772.001 | 0.00055  | 3 | 1 | 37.1 | 0 |
| P12163_1_F3,25272 | K.DSGILAYTSPNPSIF.-    | 1885.985 | 0.00264  | 2 | 1 | 42.2 | 0 |
| P12163_1_F6,11031 | K.EIHESIK.K            | 1463.868 | 0.00621  | 2 | 1 | 25.7 | 0 |
| P12163_1_S1,22627 | K.FYGDAEFLNLPR.L       | 1745.916 | 0.001    | 3 | 1 | 40.4 | 0 |
| P12163_1_F2,23793 | K.VIDATTAFFVK.N        | 1891.115 | 0.00411  | 3 | 1 | 47.8 | 0 |
| P12163_2_F1,23083 | R.EFVWTSWCK.T          | 1850.972 | 0.00799  | 3 | 1 | 23.3 | 0 |
| P12163_1_S1,8031  | R.ESDDESVPER.L         | 1580.734 | 0.00379  | 2 | 1 | 51.8 | 0 |
| P12163_1_S1,9667  | K.AGATAVGLSGM*DGR      | 1582.816 | 0.00319  | 3 | 1 | 24.7 | 0 |
| P12163_1_S1,12522 | K.AGATAVGLSGMDGR.J     | 1566.821 | 0.00544  | 3 | 1 | 48.9 | 0 |
| P12163_1_S1,14292 | K.AGATAVGLSGMDGR.J     | 1566.821 | 0.00559  | 3 | 1 | 68.5 | 0 |
| P12163_1_F4,21043 | K.DNLLASVVK.D          | 1566.967 | 0.0027   | 3 | 1 | 28.8 | 0 |
| P12163_1_F2,19909 | K.LGFVGEVAR.V          | 1251.736 | 0.00194  | 2 | 1 | 32.2 | 0 |
| P12163_1_F2,21334 | R.FGIEPVFR.D           | 1268.73  | 0.00315  | 2 | 1 | 24.3 | 0 |
| P12163_1_F4,7037  | R.SLAQGVR.T            | 1034.626 | 0.00404  | 3 | 1 | 28.5 | 0 |
| P12163_1_S1,9384  | R.TASIIDGR.V           | 1136.658 | 0.00195  | 3 | 1 | 22.5 | 0 |
| P12163_1_S1,24450 | R.VDILSESLPFIQK.F      | 2097.242 | 0.00701  | 3 | 1 | 51.4 | 0 |
| P12163_2_F6,21873 | K.RGEDDIFSLAFAR.I      | 1800.955 | 0.00388  | 3 | 1 | 29.4 | 0 |
| P12163_1_F6,18584 | K.VVADAGHSANEPGIA.     | 2971.594 | 0.00558  | 4 | 1 | 31.3 | 0 |
| P12163_1_F2,13176 | R.DLIPENER.S           | 1289.7   | 0.00132  | 2 | 1 | 25.2 | 0 |
| P12163_1_S1,22855 | R.FFDPDFYR.I           | 1410.7   | 0.00357  | 2 | 1 | 27.3 | 0 |
| P12163_1_S1,22881 | R.FFDPDFYR.I           | 1410.7   | 0.00266  | 3 | 1 | 26.5 | 0 |
| P12163_1_F9,11676 | R.HINATIVQGR.Y         | 1412.828 | 0.00342  | 3 | 1 | 35.4 | 0 |
| P12163_2_F9,15400 | R.IENHYFLNK.G          | 1786.011 | 0.00722  | 3 | 1 | 25   | 0 |
| P12163_1_F4,16411 | R.SCFVDAYSK.R          | 1684.882 | 0.00664  | 2 | 1 | 33.7 | 0 |
| P12163_2_F1,15479 | R.SCFVDAYSK.R          | 1684.882 | 0.0028   | 2 | 1 | 31.3 | 0 |
| P12163_2_F1,19117 | K.LPNNIFER.S           | 1306.742 | 0.00451  | 2 | 1 | 26.4 | 0 |
| P12163_1_F4,27213 | K.NAIVSGLGLLGIK.Q      | 1863.189 | 0.00876  | 3 | 1 | 57   | 0 |
| P12163_1_S1,7153  | K.QGNVDSVEEEAR.A       | 1636.808 | 0.00596  | 3 | 1 | 28.3 | 0 |
| P12163_1_F2,17533 | K.TMMDLPAGFR.Q         | 1442.744 | 0.00284  | 3 | 1 | 27.4 | 0 |
| P12163_2_F1,18575 | R.FDLQNTLQK.L          | 1714.995 | 0.00418  | 2 | 1 | 39.7 | 0 |
| P12163_1_F5,17589 | R.IHSLFYK.A            | 1515.914 | 0.01002  | 3 | 1 | 34.1 | 0 |
| P12163_2_F4,16665 | R.IHSLFYK.A            | 1515.914 | 0.00156  | 3 | 1 | 25.6 | 0 |
| P12163_1_F3,23266 | R.MLADPAFLYK.L         | 1777.018 | 0.01002  | 3 | 1 | 22.9 | 0 |
| P12163_1_F4,10183 | K.ENQDEIQTK.N          | 1712.927 | 0.00967  | 2 | 1 | 30   | 0 |
| P12163_1_F5,18320 | K.FASLVSNSSK.K         | 1647.953 | -0.00101 | 2 | 1 | 30.8 | 0 |

|                   |                     |          |          |   |   |      |   |
|-------------------|---------------------|----------|----------|---|---|------|---|
| P12163_1_F6,21185 | K.M*NILVEPDVHDIFAR. | 2089.105 | 0.00657  | 3 | 1 | 47.2 | 0 |
| P12163_1_S1,15208 | K.NLDEQVISSSVR.D    | 1650.896 | 0.00234  | 3 | 1 | 58.8 | 0 |
| P12163_1_F3,14843 | K.NVCYDSGFPR.G      | 1518.731 | 0.00646  | 2 | 1 | 32.1 | 0 |
| P12163_1_F2,18438 | R.CASQISGQTITSNDVLI | 2543.396 | -0.00145 | 3 | 1 | 46.3 | 0 |
| P12163_1_F4,12543 | R.GGQVTEEGLK.W      | 1625.932 | 0.00681  | 2 | 1 | 42.2 | 0 |
| P12163_2_F1,11571 | R.GGQVTEEGLK.W      | 1625.932 | 0.00837  | 2 | 1 | 34.3 | 0 |
| P12163_1_F4,11028 | K.AESQLSSESSQTK.G   | 1990.055 | 0.00525  | 2 | 1 | 29.6 | 0 |
| P12163_2_F1,11450 | K.GSFSQGDGYK.S      | 1653.869 | 0.00468  | 2 | 1 | 41.9 | 0 |
| P12163_2_S5,19725 | K.LIADYWDPHGVAPK.L  | 2190.217 | 0.00695  | 4 | 1 | 30.4 | 0 |
| P12163_1_S1,19972 | K.LPPDIAGTFSGVTEK.V | 2140.211 | 0.00431  | 3 | 1 | 38   | 0 |
| P12163_1_S1,13396 | R.DGSGDFEIR.N       | 1299.648 | 0.00466  | 2 | 1 | 34.8 | 0 |
| P12163_1_S1,18810 | R.GEGLSDLATR.L      | 1435.806 | 0.00594  | 3 | 1 | 56.5 | 0 |
| P12163_1_S1,19560 | R.GEGLSDLATR.L      | 1435.806 | 0.0025   | 2 | 1 | 28.3 | 0 |
| P12163_1_S1,17365 | R.LCGSGDIFSDGR.G    | 1587.774 | 0.00406  | 2 | 1 | 26.2 | 0 |
| P12163_2_S3,13332 | K.EHGQLCPDHVPEVYH   | 2539.209 | 0.00313  | 4 | 1 | 24.2 | 0 |
| P12163_2_F1,20407 | K.FDALTIK.E         | 1415.872 | -0.00055 | 2 | 1 | 25.4 | 0 |
| P12163_2_F2,21550 | K.SLLEYIK.A         | 1473.914 | 0.00507  | 2 | 1 | 24.1 | 0 |
| P12163_1_F5,21896 | R.AYFEALALK.E       | 1633.977 | 0.00382  | 3 | 1 | 27.1 | 0 |
| P12163_2_F9,19903 | R.AYFEALALK.E       | 1633.977 | 0.00745  | 3 | 1 | 37.4 | 0 |
| P12163_1_F3,20775 | R.LTEQVVFSDPYK.V    | 2034.137 | 0.0003   | 2 | 1 | 34.1 | 0 |
| P12163_1_S1,24327 | R.NFQAITEVVSAIR.K   | 1751.996 | -0.00056 | 3 | 1 | 44.5 | 0 |
| P12163_2_F2,15005 | R.QALELAK.L         | 1380.867 | 0.00401  | 2 | 1 | 27.7 | 0 |
| P12163_1_F2,14916 | K.DTQVIPIR.R        | 1245.747 | 0.00632  | 2 | 1 | 27.8 | 0 |
| P12163_1_F9,13227 | K.HAIIIASK.K        | 1460.941 | 0.00673  | 3 | 1 | 34.6 | 0 |
| P12163_1_F3,13887 | K.QDIIVSNSSEDK.S    | 1856.022 | 0.00479  | 2 | 1 | 43   | 0 |
| P12163_2_F1,11815 | R.GWNESASPNVR.G     | 1520.776 | 0.00532  | 2 | 1 | 25   | 0 |
| P12163_1_F2,23616 | R.LVLGDLQTPFVK.Y    | 1938.188 | 0.00704  | 3 | 1 | 31.9 | 0 |
| P12163_1_F8,19871 | R.NPFVICGATHVPIYR.G | 2048.105 | -0.00195 | 3 | 1 | 38.4 | 0 |
| P12163_2_F6,19483 | R.NPFVICGATHVPIYR.G | 2048.105 | 0.00153  | 3 | 1 | 26.3 | 0 |
| P12163_1_S1,20514 | R.VVIFDLQQR.L       | 1421.842 | 0.00536  | 3 | 1 | 52.8 | 0 |
| P12163_2_F4,9524  | K.HVSVVAK.L         | 1347.857 | 0.00749  | 3 | 1 | 32.3 | 0 |
| P12163_1_F4,21219 | K.LCEAVEAMK.L       | 1658.907 | 0.01516  | 2 | 1 | 30.8 | 0 |
| P12163_1_F2,18106 | K.LDSLVM*GSR.G      | 1297.709 | 0.0029   | 3 | 1 | 30.4 | 0 |
| P12163_2_F1,24034 | K.WAIDNLEK.G        | 1710.005 | 0.00065  | 2 | 1 | 34.7 | 0 |
| P12163_1_F9,18026 | R.DKLCEAVEAMK.L     | 2206.234 | 0.00782  | 4 | 1 | 35.2 | 0 |
| P12163_2_F9,17315 | R.DKLCEAVEAMK.L     | 2206.234 | 0.00478  | 4 | 1 | 37.9 | 0 |
| P12163_2_F1,11047 | R.GLGTIQR.V         | 1048.642 | 0.00123  | 2 | 1 | 25.1 | 0 |
| P12163_1_F3,20708 | R.SIGVALDFSK.G      | 1644.978 | 0.00571  | 2 | 1 | 50.8 | 0 |
| P12163_1_F3,20869 | K.AVLIGINYPGTK.A    | 1854.131 | 0.00419  | 2 | 1 | 41.9 | 0 |
| P12163_2_F1,9867  | K.DVYAGGSK.R        | 1404.794 | 0.0026   | 3 | 1 | 36.7 | 0 |
| P12163_1_F3,29229 | K.SLPLSTLIEILK.Q    | 1935.235 | 0.00598  | 2 | 1 | 41.4 | 0 |
| P12163_1_F3,29236 | K.SLPLSTLIEILK.Q    | 1935.235 | 0.00804  | 3 | 1 | 35.1 | 0 |
| P12163_1_F4,12257 | R.EVEAGYGEGGYHK.N   | 2004.028 | 0.00852  | 3 | 1 | 52.1 | 0 |
| P12163_1_F9,15489 | R.GIHIPSGLR.H       | 1253.763 | 0.00437  | 3 | 1 | 23.5 | 0 |
| P12163_1_F3,4740  | R.HHRPSGDEDVEDR.E   | 1852.884 | 0.00259  | 3 | 1 | 29.1 | 0 |
| P12163_2_S3,14608 | R.SAEPGDVLFVHYSGH   | 2233.13  | -0.00565 | 4 | 1 | 23.3 | 0 |
| P12163_1_S1,15974 | K.DVVACLNEAM*ER.Q   | 1726.841 | 0.00227  | 2 | 1 | 29.3 | 0 |
| P12163_1_S1,16257 | K.GLPLTEFDR.D       | 1351.752 | 0.00418  | 3 | 1 | 25.2 | 0 |
| P12163_2_F7,10473 | K.NVVIEHTK.D        | 1547.937 | -0.0025  | 3 | 1 | 22.8 | 0 |
| P12163_1_F3,17658 | R.AGLVVDGGGELK.M    | 1723.021 | 0.00763  | 2 | 1 | 53.9 | 0 |
| P12163_1_F3,23949 | R.LAGAGIVSILQK.I    | 1778.136 | 0.00371  | 3 | 1 | 60.5 | 0 |

|                   |                        |          |          |   |   |      |   |
|-------------------|------------------------|----------|----------|---|---|------|---|
| P12163_1_S1,17562 | R.SDVNVSVAPILTK.L      | 1951.168 | 0.00662  | 3 | 1 | 31.1 | 0 |
| P12163_2_F1,10664 | R.VQLGGQEER.V          | 1319.722 | 0.00244  | 2 | 1 | 26.8 | 0 |
| P12163_2_F6,15320 | K.SAELETAVIEKPPSQR..   | 2363.339 | 0.00582  | 3 | 1 | 32.3 | 0 |
| P12163_1_F3,21571 | K.VTEEIALDSFANK.T      | 2045.137 | 0.01113  | 3 | 1 | 41.5 | 0 |
| P12163_2_F6,19048 | R.DLIYEVHVR.G          | 1560.905 | 0.0028   | 3 | 1 | 43.5 | 0 |
| P12163_2_F2,20879 | R.FCCLLTK.F            | 1549.869 | 0.01038  | 2 | 1 | 26.3 | 0 |
| P12163_1_F3,27110 | R.FVAFTLIDSVK.G        | 1848.109 | 0.00476  | 3 | 1 | 27.7 | 0 |
| P12163_1_F2,20724 | R.GVDNSVYYM*LAPK.C     | 2081.12  | -0.0004  | 3 | 1 | 29.2 | 0 |
| P12163_2_F9,12424 | R.NCGHDAINEFK.L        | 1912.98  | 0.00929  | 3 | 1 | 26.7 | 0 |
| P12163_1_F7,21817 | K.AHGLAQASIADCVTEI     | 2522.297 | 0.00618  | 3 | 1 | 46.2 | 0 |
| P12163_1_F9,9645  | K.HVEDENIK.L           | 1591.89  | 0.00627  | 3 | 1 | 38.2 | 0 |
| P12163_1_F4,16210 | K.SGSVTALVGSSGAGK.     | 1886.08  | 0.00736  | 3 | 1 | 46.7 | 0 |
| P12163_2_F1,11613 | R.INDSVSPSEK.V         | 1683.937 | 0.00371  | 2 | 1 | 30.6 | 0 |
| P12163_1_F7,15249 | R.LSTVQNAHQIALCSDG     | 2174.129 | 0.00443  | 3 | 1 | 31.3 | 0 |
| P12163_1_F4,16199 | R.QVLAYQQSGIK.L        | 1843.09  | 0.0071   | 3 | 1 | 23.8 | 0 |
| P12163_2_F6,12274 | R.TTIVIAHR.L ! R.TTLVI | 1214.752 | 0.00149  | 3 | 1 | 47.2 | 0 |
| P12163_1_F7,17733 | K.AIGCELDLSDKPM*GL     | 2555.378 | 0.00083  | 4 | 1 | 28.5 | 0 |
| P12163_1_F7,17768 | K.AIGCELDLSDKPM*GL     | 2555.378 | 0.00629  | 3 | 1 | 31.4 | 0 |
| P12163_1_F7,19201 | K.AIGCELDLSDKPM*GL     | 2555.378 | 0.00699  | 4 | 1 | 21.9 | 0 |
| P12163_1_F7,19380 | K.AIGCELDLSDKPM*GL     | 2555.378 | 0.00701  | 3 | 1 | 29.2 | 0 |
| P12163_1_F8,18649 | K.AIGCELDLSDKPM*GL     | 2555.378 | 0.00355  | 4 | 1 | 27.7 | 0 |
| P12163_1_F8,18739 | K.AIGCELDLSDKPM*GL     | 2555.378 | 0.00545  | 3 | 1 | 28.5 | 0 |
| P12163_1_F8,20245 | K.AIGCELDLSDKPM*GL     | 2555.378 | 0.00347  | 3 | 1 | 30.9 | 0 |
| P12163_2_S5,17027 | K.AIGCELDLSDKPM*GL     | 2555.378 | 0.00379  | 4 | 1 | 40.9 | 0 |
| P12163_2_S5,17070 | K.AIGCELDLSDKPM*GL     | 2555.378 | 0.00178  | 2 | 1 | 39.4 | 0 |
| P12163_1_F7,19199 | K.AIGCELDLSDKPMGLC     | 2539.383 | 0.00734  | 3 | 1 | 37   | 0 |
| P12163_1_F7,19206 | K.AIGCELDLSDKPMGLC     | 2539.383 | 0.01096  | 4 | 1 | 24.2 | 0 |
| P12163_1_F7,19212 | K.AIGCELDLSDKPMGLC     | 2539.383 | 0.00284  | 2 | 1 | 35.2 | 0 |
| P12163_1_F8,20262 | K.AIGCELDLSDKPMGLC     | 2539.383 | 0.00563  | 3 | 1 | 38.5 | 0 |
| P12163_2_S5,18389 | K.AIGCELDLSDKPMGLC     | 2539.383 | 0.00724  | 4 | 1 | 27.7 | 0 |
| P12163_1_F2,22667 | K.AILFAVPGAFTPTCSQF    | 2416.352 | -0.00275 | 3 | 1 | 28.6 | 0 |
| P12163_1_F2,23884 | K.AILFAVPGAFTPTCSQF    | 2416.352 | 0.00649  | 3 | 1 | 49.1 | 0 |
| P12163_1_F3,25080 | K.AILFAVPGAFTPTCSQF    | 2416.352 | 0.00073  | 3 | 1 | 47.7 | 0 |
| P12163_1_F4,25874 | K.AILFAVPGAFTPTCSQF    | 2416.352 | 0.00526  | 3 | 1 | 38.9 | 0 |
| P12163_1_F5,23767 | K.AILFAVPGAFTPTCSQF    | 2416.352 | 0.00103  | 3 | 1 | 38.9 | 0 |
| P12163_1_S1,21437 | K.AILFAVPGAFTPTCSQF    | 2416.352 | -0.00016 | 4 | 1 | 24.4 | 0 |
| P12163_1_S1,21621 | K.AILFAVPGAFTPTCSQF    | 2416.352 | -0.0026  | 4 | 1 | 29   | 0 |
| P12163_1_S1,22722 | K.AILFAVPGAFTPTCSQF    | 2416.352 | 0.00476  | 4 | 1 | 35.8 | 0 |
| P12163_1_S1,22754 | K.AILFAVPGAFTPTCSQF    | 2416.352 | 0.00661  | 3 | 1 | 46.6 | 0 |
| P12163_1_S1,22768 | K.AILFAVPGAFTPTCSQF    | 2416.352 | -0.00247 | 2 | 1 | 37.7 | 0 |
| P12163_1_S1,22935 | K.AILFAVPGAFTPTCSQF    | 2416.352 | 0.00464  | 4 | 1 | 43.8 | 0 |
| P12163_1_S1,22959 | K.AILFAVPGAFTPTCSQF    | 2416.352 | 0.01051  | 3 | 1 | 44   | 0 |
| P12163_1_F3,13690 | K.ATPVSAAISVGDK.L      | 1824.069 | 0.00328  | 2 | 1 | 28.4 | 0 |
| P12163_1_F3,16787 | K.ATPVSAAISVGDK.L      | 1824.069 | 0.00376  | 3 | 1 | 31.3 | 0 |
| P12163_1_F3,16789 | K.ATPVSAAISVGDK.L      | 1824.069 | -0.0001  | 2 | 1 | 50.9 | 0 |
| P12163_1_F7,14314 | K.HLPGFVEK.S           | 1534.92  | -0.0025  | 3 | 1 | 28   | 0 |
| P12163_1_F9,15325 | K.HLPGFVEK.S           | 1534.92  | 0.00694  | 2 | 1 | 24.7 | 0 |
| P12163_1_F9,15329 | K.HLPGFVEK.S           | 1534.92  | 0.0032   | 3 | 1 | 45.1 | 0 |
| P12163_1_F9,15870 | K.HLPGFVEK.S           | 1534.92  | 0.00674  | 3 | 1 | 25.1 | 0 |
| P12163_1_F9,18837 | K.HLPGFVEK.S           | 1534.92  | 0.00329  | 3 | 1 | 25.3 | 0 |
| P12163_1_F9,19042 | K.HLPGFVEK.S           | 1534.92  | 0.0053   | 3 | 1 | 36   | 0 |

|                   |                  |          |          |   |   |      |   |
|-------------------|------------------|----------|----------|---|---|------|---|
| P12163_1_F9,21365 | K.HLPGFVEK.S     | 1534.92  | 0.00344  | 3 | 1 | 30.1 | 0 |
| P12163_1_S10,1525 | K.HLPGFVEK.S     | 1534.92  | 0.00593  | 3 | 1 | 35.1 | 0 |
| P12163_2_F10,1409 | K.HLPGFVEK.S     | 1534.92  | 0.01097  | 3 | 1 | 32.9 | 0 |
| P12163_2_F9,14154 | K.HLPGFVEK.S     | 1534.92  | 0.00294  | 4 | 1 | 30.8 | 0 |
| P12163_2_F9,14301 | K.HLPGFVEK.S     | 1534.92  | 0.00509  | 3 | 1 | 33.3 | 0 |
| P12163_2_F9,14363 | K.HLPGFVEK.S     | 1534.92  | 0.0049   | 4 | 1 | 34.3 | 0 |
| P12163_2_F9,14546 | K.HLPGFVEK.S     | 1534.92  | 0.00521  | 3 | 1 | 31.3 | 0 |
| P12163_1_F9,16427 | R.RYALLAENGVVK.V | 1941.174 | 0.00879  | 3 | 1 | 36.3 | 0 |
| P12163_2_F4,15492 | R.RYALLAENGVVK.V | 1941.174 | 0.00123  | 3 | 1 | 33.8 | 0 |
| P12163_1_F4,21198 | R.YALLAENGVVK.V  | 1785.073 | 0.00579  | 2 | 1 | 62.9 | 0 |
| P12163_1_F4,21250 | R.YALLAENGVVK.V  | 1785.073 | 0.00681  | 3 | 1 | 59.2 | 0 |
| P12163_1_F4,23102 | R.YALLAENGVVK.V  | 1785.073 | -0.00429 | 2 | 1 | 43.1 | 0 |
| P12163_1_F4,23129 | R.YALLAENGVVK.V  | 1785.073 | -0.00594 | 3 | 1 | 28.2 | 0 |
| P12163_1_F4,23383 | R.YALLAENGVVK.V  | 1785.073 | -0.00087 | 3 | 1 | 48.6 | 0 |
| P12163_1_F4,23408 | R.YALLAENGVVK.V  | 1785.073 | 0.00387  | 2 | 1 | 48.1 | 0 |
| P12163_1_F5,20011 | R.YALLAENGVVK.V  | 1785.073 | 0.00007  | 2 | 1 | 34   | 0 |
| P12163_1_F5,20029 | R.YALLAENGVVK.V  | 1785.073 | 0.00795  | 3 | 1 | 45   | 0 |
| P12163_1_F6,20056 | R.YALLAENGVVK.V  | 1785.073 | 0.00363  | 2 | 1 | 30.8 | 0 |
| P12163_1_F7,18435 | R.YALLAENGVVK.V  | 1785.073 | 0.00087  | 3 | 1 | 26   | 0 |
| P12163_1_F7,18851 | R.YALLAENGVVK.V  | 1785.073 | 0.0003   | 3 | 1 | 48.8 | 0 |
| P12163_1_F8,19875 | R.YALLAENGVVK.V  | 1785.073 | 0.00642  | 3 | 1 | 30.2 | 0 |
| P12163_1_F9,19610 | R.YALLAENGVVK.V  | 1785.073 | 0.00546  | 3 | 1 | 31.6 | 0 |
| P12163_1_F9,19640 | R.YALLAENGVVK.V  | 1785.073 | 0.00635  | 2 | 1 | 64.3 | 0 |
| P12163_2_F1,20703 | R.YALLAENGVVK.V  | 1785.073 | 0.00381  | 3 | 1 | 52.3 | 0 |
| P12163_2_F1,20705 | R.YALLAENGVVK.V  | 1785.073 | 0.00625  | 2 | 1 | 65.4 | 0 |
| P12163_2_F1,20942 | R.YALLAENGVVK.V  | 1785.073 | 0.00288  | 3 | 1 | 31.8 | 0 |
| P12163_2_F1,20953 | R.YALLAENGVVK.V  | 1785.073 | -0.00017 | 2 | 1 | 33.7 | 0 |
| P12163_2_F4,18037 | R.YALLAENGVVK.V  | 1785.073 | 0        | 3 | 1 | 25.7 | 0 |
| P12163_2_F9,18408 | R.YALLAENGVVK.V  | 1785.073 | 0.00492  | 3 | 1 | 58.7 | 0 |
| P12163_2_F9,18446 | R.YALLAENGVVK.V  | 1785.073 | 0.00549  | 2 | 1 | 70.3 | 0 |
| P12163_2_F9,18615 | R.YALLAENGVVK.V  | 1785.073 | 0.00576  | 3 | 1 | 50.4 | 0 |
| P12163_2_S5,18201 | R.YALLAENGVVK.V  | 1785.073 | -0.00099 | 3 | 1 | 40.6 | 0 |
| P12163_2_S5,18647 | R.YALLAENGVVK.V  | 1785.073 | 0.00015  | 3 | 1 | 25.2 | 0 |
| P12163_1_F4,16260 | K.ADLPGLK.K      | 1321.83  | 0.00612  | 3 | 1 | 29.4 | 0 |
| P12163_1_F4,16512 | K.ADLPGLK.K      | 1321.83  | 0.00711  | 3 | 1 | 22.5 | 0 |
| P12163_1_F5,15103 | K.ADLPGLK.K      | 1321.83  | 0.00697  | 3 | 1 | 28   | 0 |
| P12163_1_F5,16113 | K.ADLPGLK.K      | 1321.83  | 0.00688  | 3 | 1 | 26.9 | 0 |
| P12163_1_F5,16369 | K.ADLPGLK.K      | 1321.83  | 0.004    | 3 | 1 | 26.8 | 0 |
| P12163_1_F6,15870 | K.ADLPGLK.K      | 1321.83  | 0.00675  | 3 | 1 | 31.9 | 0 |
| P12163_1_F7,14463 | K.ADLPGLK.K      | 1321.83  | 0.00144  | 3 | 1 | 22.8 | 0 |
| P12163_1_F7,15056 | K.ADLPGLK.K      | 1321.83  | 0.00402  | 3 | 1 | 31.7 | 0 |
| P12163_1_F8,15150 | K.ADLPGLK.K      | 1321.83  | 0.00247  | 3 | 1 | 23.2 | 0 |
| P12163_1_F8,15852 | K.ADLPGLK.K      | 1321.83  | 0.0072   | 3 | 1 | 29.6 | 0 |
| P12163_2_F1,15235 | K.ADLPGLK.K      | 1321.83  | 0.00465  | 3 | 1 | 31.5 | 0 |
| P12163_2_F1,15458 | K.ADLPGLK.K      | 1321.83  | 0.00609  | 3 | 1 | 33.5 | 0 |
| P12163_2_F1,15711 | K.ADLPGLK.K      | 1321.83  | 0.0051   | 3 | 1 | 31.4 | 0 |
| P12163_2_F2,327   | K.ADLPGLK.K      | 1321.83  | 0.00778  | 3 | 1 | 23.6 | 0 |
| P12163_2_F2,632   | K.ADLPGLK.K      | 1321.83  | 0.00472  | 3 | 1 | 28.8 | 0 |
| P12163_2_F2,993   | K.ADLPGLK.K      | 1321.83  | 0.00837  | 3 | 1 | 30.6 | 0 |
| P12163_2_S5,13809 | K.ADLPGLK.K      | 1321.83  | 0.00297  | 3 | 1 | 25.3 | 0 |
| P12163_2_S5,14030 | K.ADLPGLK.K      | 1321.83  | 0.00063  | 3 | 1 | 31.8 | 0 |



|                    |                        |          |          |   |   |      |   |
|--------------------|------------------------|----------|----------|---|---|------|---|
| P12163_2_S5,14497  | K.ADLPLGK.K            | 1321.83  | 0.00465  | 3 | 1 | 29.5 | 0 |
| P12163_1_F2,19052  | K.ASM*ENGVLTVTVPK.     | 2070.172 | 0.00558  | 3 | 1 | 29.4 | 0 |
| P12163_1_F3,17688  | K.ASM*ENGVLTVTVPK.     | 2070.172 | 0.0058   | 2 | 1 | 51.3 | 0 |
| P12163_1_F3,17836  | K.ASM*ENGVLTVTVPK.     | 2070.172 | 0.00556  | 3 | 1 | 39.1 | 0 |
| P12163_1_F3,19760  | K.ASM*ENGVLTVTVPK.     | 2070.172 | 0.00567  | 3 | 1 | 41   | 0 |
| P12163_1_F6,18624  | K.ASM*ENGVLTVTVPK.     | 2070.172 | 0.00459  | 3 | 1 | 30.6 | 0 |
| P12163_2_S3,14258  | K.ASM*ENGVLTVTVPK.     | 2070.172 | -0.0032  | 3 | 1 | 28.7 | 0 |
| P12163_1_F3,17089  | K.ASMENGVLTVTVPK.V     | 2054.178 | 0.0076   | 3 | 1 | 22.9 | 0 |
| P12163_1_F3,17130  | K.ASMENGVLTVTVPK.V     | 2054.178 | 0.0046   | 2 | 1 | 56.1 | 0 |
| P12163_1_F3,17408  | K.ASMENGVLTVTVPK.V     | 2054.178 | 0.00292  | 3 | 1 | 27   | 0 |
| P12163_1_F3,17444  | K.ASMENGVLTVTVPK.V     | 2054.178 | 0.00442  | 2 | 1 | 38.7 | 0 |
| P12163_1_F3,17505  | K.ASMENGVLTVTVPK.V     | 2054.178 | 0.00383  | 4 | 1 | 34.2 | 0 |
| P12163_1_F3,19514  | K.ASMENGVLTVTVPK.V     | 2054.178 | 0.01582  | 2 | 1 | 49.7 | 0 |
| P12163_1_F3,19787  | K.ASMENGVLTVTVPK.V     | 2054.178 | 0.0058   | 3 | 1 | 40.7 | 0 |
| P12163_1_F3,19805  | K.ASMENGVLTVTVPK.V     | 2054.178 | 0.00574  | 2 | 1 | 62.5 | 0 |
| P12163_1_F4,20206  | K.ASMENGVLTVTVPK.V     | 2054.178 | 0.00817  | 3 | 1 | 35.8 | 0 |
| P12163_1_F5,18443  | K.ASMENGVLTVTVPK.V     | 2054.178 | 0.00721  | 3 | 1 | 35.6 | 0 |
| P12163_1_F5,18890  | K.ASMENGVLTVTVPK.V     | 2054.178 | 0.0026   | 2 | 1 | 55.9 | 0 |
| P12163_1_F6,18609  | K.ASMENGVLTVTVPK.V     | 2054.178 | 0.0073   | 3 | 1 | 44.9 | 0 |
| P12163_1_F6,18643  | K.ASMENGVLTVTVPK.V     | 2054.178 | -0.00026 | 2 | 1 | 74   | 0 |
| P12163_1_F6,19012  | K.ASMENGVLTVTVPK.V     | 2054.178 | 0.00223  | 3 | 1 | 34.3 | 0 |
| P12163_1_F7,18181  | K.ASMENGVLTVTVPK.V     | 2054.178 | 0.00385  | 3 | 1 | 33.8 | 0 |
| P12163_1_F8,19120  | K.ASMENGVLTVTVPK.V     | 2054.178 | 0.00625  | 3 | 1 | 36.6 | 0 |
| P12163_2_F1,19689  | K.ASMENGVLTVTVPK.V     | 2054.178 | 0.01153  | 3 | 1 | 29.7 | 0 |
| P12163_2_F1,19711  | K.ASMENGVLTVTVPK.V     | 2054.178 | 0.00306  | 2 | 1 | 70.6 | 0 |
| P12163_2_F4,17789  | K.ASMENGVLTVTVPK.V     | 2054.178 | 0.00406  | 3 | 1 | 33.4 | 0 |
| P12163_2_F4,17801  | K.ASMENGVLTVTVPK.V     | 2054.178 | 0.0048   | 2 | 1 | 55   | 0 |
| P12163_2_F7,17055  | K.ASMENGVLTVTVPK.V     | 2054.178 | 0.00703  | 3 | 1 | 31.3 | 0 |
| P12163_2_F7,17056  | K.ASMENGVLTVTVPK.V     | 2054.178 | -0.00088 | 2 | 1 | 42.2 | 0 |
| P12163_2_S3,15598  | K.ASMENGVLTVTVPK.V     | 2054.178 | 0.00388  | 3 | 1 | 25.5 | 0 |
| P12163_1_F9,12608  | K.ETPEAHVFK.V ! K.ETF  | 1665.942 | 0.00626  | 3 | 1 | 28.9 | 0 |
| P12163_1_F9,12736  | K.ETPEAHVFK.V ! K.ETF  | 1665.942 | 0.00388  | 2 | 1 | 31   | 0 |
| P12163_2_F10,11550 | K.ETPEAHVFK.V ! K.ETF  | 1665.942 | 0.00257  | 3 | 1 | 32.4 | 0 |
| P12163_2_F6,12210  | K.ETPEAHVFK.V ! K.ETF  | 1665.942 | 0.00614  | 3 | 1 | 32.6 | 0 |
| P12163_2_F7,11639  | K.ETPEAHVFK.V ! K.ETF  | 1665.942 | 0.00062  | 2 | 1 | 28.2 | 0 |
| P12163_2_F8_12070  | K.ETPEAHVFK.V ! K.ETF  | 1665.942 | 0.00332  | 3 | 1 | 30.6 | 0 |
| P12163_2_F9,11708  | K.ETPEAHVFK.V ! K.ETF  | 1665.942 | 0.00665  | 3 | 1 | 23.8 | 0 |
| P12163_2_F2,11421  | K.LPENAK.T ! R.LPENAK  | 1279.783 | 0.00548  | 3 | 1 | 27   | 0 |
| P12163_1_F2,9575   | K.VEVEDGR.V            | 1107.595 | 0.0058   | 2 | 1 | 29   | 0 |
| P12163_1_F3,9560   | K.VEVEDGR.V            | 1107.595 | 0.00292  | 2 | 1 | 34.5 | 0 |
| P12163_1_F3,13483  | R.VLQISGER.K ! R.VLQIS | 1205.716 | 0.00202  | 3 | 1 | 41.5 | 0 |
| P12163_1_F3,15914  | R.VLQISGER.K ! R.VLQIS | 1205.716 | 0.00023  | 2 | 1 | 31.7 | 0 |
| P12163_1_F9,15358  | R.VLQISGER.K ! R.VLQIS | 1205.716 | 0.00025  | 2 | 1 | 26.3 | 0 |
| P12163_1_F3,15506  | K.DTVIGAVPK.S          | 1507.93  | 0.008    | 2 | 1 | 38.6 | 0 |
| P12163_1_F3,15526  | K.DTVIGAVPK.S          | 1507.93  | 0.00066  | 3 | 1 | 30   | 0 |
| P12163_1_F4,15738  | K.DTVIGAVPK.S          | 1507.93  | 0.00225  | 3 | 1 | 36.6 | 0 |
| P12163_1_F4,15757  | K.DTVIGAVPK.S          | 1507.93  | 0.00424  | 2 | 1 | 27.2 | 0 |
| P12163_1_F7,14096  | K.DTVIGAVPK.S          | 1507.93  | 0.00242  | 2 | 1 | 24.4 | 0 |
| P12163_2_F4,13810  | K.DTVIGAVPK.S          | 1507.93  | -0.00108 | 3 | 1 | 26.7 | 0 |
| P12163_1_F9,14542  | K.KDTVIGAVPK.S         | 1940.231 | 0.0051   | 4 | 1 | 29.3 | 0 |
| P12163_1_F4,12435  | K.STLTTSIEK.F          | 1587.941 | 0.00382  | 2 | 1 | 27.4 | 0 |

|                   |                   |          |          |   |   |      |   |
|-------------------|-------------------|----------|----------|---|---|------|---|
| P12163_1_F4,12735 | K.STLTTSIEK.F     | 1587.941 | 0.01015  | 3 | 1 | 23.3 | 0 |
| P12163_1_F4,14982 | K.STLTTSIEK.F     | 1587.941 | 0.00484  | 3 | 1 | 36.1 | 0 |
| P12163_1_F7,13168 | K.STLTTSIEK.F     | 1587.941 | 0.00244  | 2 | 1 | 46.3 | 0 |
| P12163_2_F1,13887 | K.STLTTSIEK.F     | 1587.941 | 0.00378  | 2 | 1 | 32.3 | 0 |
| P12163_2_F1,13897 | K.STLTTSIEK.F     | 1587.941 | 0.00397  | 3 | 1 | 25.6 | 0 |
| P12163_2_F2,2376  | K.STLTTSIEK.F     | 1587.941 | 0.0049   | 3 | 1 | 22.1 | 0 |
| P12163_2_F2,2549  | K.STLTTSIEK.F     | 1587.941 | 0.00439  | 3 | 1 | 25.6 | 0 |
| P12163_2_F2,2942  | K.STLTTSIEK.F     | 1587.941 | 0.00379  | 3 | 1 | 26.4 | 0 |
| P12163_2_F2,3037  | K.STLTTSIEK.F     | 1587.941 | 0.00482  | 2 | 1 | 26.1 | 0 |
| P12163_2_F2,3123  | K.STLTTSIEK.F     | 1587.941 | 0.0049   | 3 | 1 | 31.5 | 0 |
| P12163_1_F3,11877 | K.VNTDESPSIATR.Y  | 1593.839 | 0.00505  | 2 | 1 | 25.9 | 0 |
| P12163_1_S1,8538  | K.VNTDESPSIATR.Y  | 1593.839 | 0.002    | 3 | 1 | 40.4 | 0 |
| P12163_1_S1,8771  | K.VNTDESPSIATR.Y  | 1593.839 | 0.00248  | 3 | 1 | 26.4 | 0 |
| P12163_1_S1,9261  | K.VNTDESPSIATR.Y  | 1593.839 | 0.00086  | 3 | 1 | 23.4 | 0 |
| P12163_1_S1,9347  | K.VNTDESPSIATR.Y  | 1593.839 | -0.00672 | 4 | 1 | 35.4 | 0 |
| P12163_1_S1,9572  | K.VNTDESPSIATR.Y  | 1593.839 | 0.00353  | 3 | 1 | 43.3 | 0 |
| P12163_1_S1,10321 | K.VNTDESPSIATR.Y  | 1593.839 | 0.00194  | 3 | 1 | 57.8 | 0 |
| P12163_1_S1,11128 | K.VNTDESPSIATR.Y  | 1593.839 | 0.00027  | 2 | 1 | 24.7 | 0 |
| P12163_1_S1,11157 | K.VNTDESPSIATR.Y  | 1593.839 | 0.00278  | 3 | 1 | 57.7 | 0 |
| P12163_1_F8,18114 | R.M*IHPHIDELSK.Q  | 1920.108 | 0.00408  | 3 | 1 | 31.3 | 0 |
| P12163_1_F8,20100 | R.M*IHPHIDELSK.Q  | 1920.108 | 0.00895  | 2 | 1 | 30.4 | 0 |
| P12163_2_F6,17498 | R.M*IHPHIDELSK.Q  | 1920.108 | 0.00477  | 2 | 1 | 33.8 | 0 |
| P12163_2_F6,19655 | R.M*IHPHIDELSK.Q  | 1920.108 | 0.00426  | 3 | 1 | 42.6 | 0 |
| P12163_2_F6,19668 | R.M*IHPHIDELSK.Q  | 1920.108 | 0.00147  | 2 | 1 | 40.9 | 0 |
| P12163_2_F6,20071 | R.M*IHPHIDELSK.Q  | 1920.108 | 0.00411  | 3 | 1 | 34.4 | 0 |
| P12163_1_F8,20146 | R.MIHPHIDELSK.Q   | 1904.113 | 0.00015  | 3 | 1 | 47.4 | 0 |
| P12163_1_S10,1856 | R.MIHPHIDELSK.Q   | 1904.113 | 0.00486  | 3 | 1 | 27.5 | 0 |
| P12163_2_F6,18168 | R.MIHPHIDELSK.Q   | 1904.113 | 0.00576  | 3 | 1 | 27.3 | 0 |
| P12163_2_F6,19638 | R.MIHPHIDELSK.Q   | 1904.113 | 0.0048   | 3 | 1 | 46.1 | 0 |
| P12163_2_F8_12070 | R.MIHPHIDELSK.Q   | 1904.113 | 0.00906  | 3 | 1 | 32.1 | 0 |
| P12163_2_F9,18298 | R.MIHPHIDELSK.Q   | 1904.113 | 0.0078   | 3 | 1 | 33.5 | 0 |
| P12163_1_F3,18607 | R.SIPTVM*IFK.N    | 1659.996 | 0.00361  | 3 | 1 | 29.9 | 0 |
| P12163_1_F3,20942 | R.SIPTVM*IFK.N    | 1659.996 | 0.00529  | 3 | 1 | 33   | 0 |
| P12163_1_F3,23229 | R.SIPTVM*IFK.N    | 1659.996 | 0.00364  | 3 | 1 | 30.6 | 0 |
| P12163_1_F4,21565 | R.SIPTVM*IFK.N    | 1659.996 | 0.00502  | 3 | 1 | 23.1 | 0 |
| P12163_1_F4,23951 | R.SIPTVM*IFK.N    | 1659.996 | 0.0064   | 3 | 1 | 30.9 | 0 |
| P12163_2_F1,21102 | R.SIPTVM*IFK.N    | 1659.996 | 0.00847  | 3 | 1 | 30.8 | 0 |
| P12163_2_F1,23409 | R.SIPTVM*IFK.N    | 1659.996 | 0.00772  | 3 | 1 | 38.5 | 0 |
| P12163_2_F4,18778 | R.SIPTVM*IFK.N    | 1659.996 | 0.00235  | 3 | 1 | 30.5 | 0 |
| P12163_2_F4,20488 | R.SIPTVM*IFK.N    | 1659.996 | -0.00317 | 3 | 1 | 28.2 | 0 |
| P12163_1_F3,20445 | R.SIPTVMIFK.N     | 1644.001 | 0.00502  | 3 | 1 | 32.8 | 0 |
| P12163_1_F3,23151 | R.SIPTVMIFK.N     | 1644.001 | 0.0019   | 3 | 1 | 34.7 | 0 |
| P12163_1_F3,23171 | R.SIPTVMIFK.N     | 1644.001 | 0.00477  | 2 | 1 | 36.5 | 0 |
| P12163_1_F4,20894 | R.SIPTVMIFK.N     | 1644.001 | 0.00537  | 2 | 1 | 26.6 | 0 |
| P12163_1_F4,23876 | R.SIPTVMIFK.N     | 1644.001 | 0.00352  | 3 | 1 | 23.1 | 0 |
| P12163_1_F4,23881 | R.SIPTVMIFK.N     | 1644.001 | 0.00421  | 2 | 1 | 41   | 0 |
| P12163_1_F6,21788 | R.SIPTVMIFK.N     | 1644.001 | 0.00274  | 3 | 1 | 33.2 | 0 |
| P12163_2_F1,23361 | R.SIPTVMIFK.N     | 1644.001 | 0.00574  | 3 | 1 | 35.2 | 0 |
| P12163_1_F2,19052 | K.ASM*ENGLTVTVPK. | 2070.172 | 0.00558  | 3 | 1 | 29.4 | 0 |
| P12163_1_F3,17688 | K.ASM*ENGLTVTVPK. | 2070.172 | 0.0058   | 2 | 1 | 51.3 | 0 |
| P12163_1_F3,17836 | K.ASM*ENGLTVTVPK. | 2070.172 | 0.00556  | 3 | 1 | 39.1 | 0 |

|                    |                       |          |          |   |   |      |   |
|--------------------|-----------------------|----------|----------|---|---|------|---|
| P12163_1_F3,19760  | K.ASM*ENGLVLTVTVPK.   | 2070.172 | 0.00567  | 3 | 1 | 41   | 0 |
| P12163_1_F6,18624  | K.ASM*ENGLVLTVTVPK.   | 2070.172 | 0.00459  | 3 | 1 | 30.6 | 0 |
| P12163_2_S3,14258  | K.ASM*ENGLVLTVTVPK.   | 2070.172 | -0.0032  | 3 | 1 | 28.7 | 0 |
| P12163_1_F3,17089  | K.ASMENGLVLTVTVPK.V   | 2054.178 | 0.0076   | 3 | 1 | 22.9 | 0 |
| P12163_1_F3,17130  | K.ASMENGLVLTVTVPK.V   | 2054.178 | 0.0046   | 2 | 1 | 56.1 | 0 |
| P12163_1_F3,17408  | K.ASMENGLVLTVTVPK.V   | 2054.178 | 0.00292  | 3 | 1 | 27   | 0 |
| P12163_1_F3,17444  | K.ASMENGLVLTVTVPK.V   | 2054.178 | 0.00442  | 2 | 1 | 38.7 | 0 |
| P12163_1_F3,17505  | K.ASMENGLVLTVTVPK.V   | 2054.178 | 0.00383  | 4 | 1 | 34.2 | 0 |
| P12163_1_F3,19514  | K.ASMENGLVLTVTVPK.V   | 2054.178 | 0.01582  | 2 | 1 | 49.7 | 0 |
| P12163_1_F3,19787  | K.ASMENGLVLTVTVPK.V   | 2054.178 | 0.0058   | 3 | 1 | 40.7 | 0 |
| P12163_1_F3,19805  | K.ASMENGLVLTVTVPK.V   | 2054.178 | 0.00574  | 2 | 1 | 62.5 | 0 |
| P12163_1_F4,20206  | K.ASMENGLVLTVTVPK.V   | 2054.178 | 0.00817  | 3 | 1 | 35.8 | 0 |
| P12163_1_F5,18443  | K.ASMENGLVLTVTVPK.V   | 2054.178 | 0.00721  | 3 | 1 | 35.6 | 0 |
| P12163_1_F5,18890  | K.ASMENGLVLTVTVPK.V   | 2054.178 | 0.0026   | 2 | 1 | 55.9 | 0 |
| P12163_1_F6,18609  | K.ASMENGLVLTVTVPK.V   | 2054.178 | 0.0073   | 3 | 1 | 44.9 | 0 |
| P12163_1_F6,18643  | K.ASMENGLVLTVTVPK.V   | 2054.178 | -0.00026 | 2 | 1 | 74   | 0 |
| P12163_1_F6,19012  | K.ASMENGLVLTVTVPK.V   | 2054.178 | 0.00223  | 3 | 1 | 34.3 | 0 |
| P12163_1_F7,18181  | K.ASMENGLVLTVTVPK.V   | 2054.178 | 0.00385  | 3 | 1 | 33.8 | 0 |
| P12163_1_F8,19120  | K.ASMENGLVLTVTVPK.V   | 2054.178 | 0.00625  | 3 | 1 | 36.6 | 0 |
| P12163_2_F1,19689  | K.ASMENGLVLTVTVPK.V   | 2054.178 | 0.01153  | 3 | 1 | 29.7 | 0 |
| P12163_2_F1,19711  | K.ASMENGLVLTVTVPK.V   | 2054.178 | 0.00306  | 2 | 1 | 70.6 | 0 |
| P12163_2_F4,17789  | K.ASMENGLVLTVTVPK.V   | 2054.178 | 0.00406  | 3 | 1 | 33.4 | 0 |
| P12163_2_F4,17801  | K.ASMENGLVLTVTVPK.V   | 2054.178 | 0.0048   | 2 | 1 | 55   | 0 |
| P12163_2_F7,17055  | K.ASMENGLVLTVTVPK.V   | 2054.178 | 0.00703  | 3 | 1 | 31.3 | 0 |
| P12163_2_F7,17056  | K.ASMENGLVLTVTVPK.V   | 2054.178 | -0.00088 | 2 | 1 | 42.2 | 0 |
| P12163_2_S3,15598  | K.ASMENGLVLTVTVPK.V   | 2054.178 | 0.00388  | 3 | 1 | 25.5 | 0 |
| P12163_1_F9,12608  | K.ETPEAHVFK.V ! K.ETF | 1665.942 | 0.00626  | 3 | 1 | 28.9 | 0 |
| P12163_1_F9,12736  | K.ETPEAHVFK.V ! K.ETF | 1665.942 | 0.00388  | 2 | 1 | 31   | 0 |
| P12163_2_F10,11550 | K.ETPEAHVFK.V ! K.ETF | 1665.942 | 0.00257  | 3 | 1 | 32.4 | 0 |
| P12163_2_F6,12210  | K.ETPEAHVFK.V ! K.ETF | 1665.942 | 0.00614  | 3 | 1 | 32.6 | 0 |
| P12163_2_F7,11639  | K.ETPEAHVFK.V ! K.ETF | 1665.942 | 0.00062  | 2 | 1 | 28.2 | 0 |
| P12163_2_F8_12070  | K.ETPEAHVFK.V ! K.ETF | 1665.942 | 0.00332  | 3 | 1 | 30.6 | 0 |
| P12163_2_F9,11708  | K.ETPEAHVFK.V ! K.ETF | 1665.942 | 0.00665  | 3 | 1 | 23.8 | 0 |
| P12163_2_F2,11421  | K.LPENAK.T ! R.LPENAK | 1279.783 | 0.00548  | 3 | 1 | 27   | 0 |
| P12163_1_F2,9655   | K.VEVEDDR.V           | 1165.6   | 0.00114  | 2 | 1 | 39.4 | 0 |
| P12163_1_F6,9022   | K.VEVEDDR.V           | 1165.6   | 0.00226  | 2 | 1 | 31.3 | 0 |
| P12163_1_S1,9802   | K.VEVEDDR.V           | 1165.6   | 0.00352  | 2 | 1 | 41.9 | 0 |
| P12163_1_S1,10016  | K.VEVEDDR.V           | 1165.6   | 0.0037   | 2 | 1 | 39.7 | 0 |
| P12163_1_S1,10449  | K.VEVEDDR.V           | 1165.6   | 0.00416  | 2 | 1 | 28   | 0 |
| P12163_1_S1,12172  | K.VEVEDDR.V           | 1165.6   | 0.00304  | 2 | 1 | 36.5 | 0 |
| P12163_1_S10,416   | K.VEVEDDR.V           | 1165.6   | 0.0034   | 2 | 1 | 34.3 | 0 |
| P12163_2_F4,9092   | K.VEVEDDR.V           | 1165.6   | -0.00006 | 2 | 1 | 38.2 | 0 |
| P12163_1_F6,16738  | K.VEVEDDRVQLISGQR.I   | 2047.109 | -0.00002 | 2 | 1 | 30.2 | 0 |
| P12163_2_S5,15363  | K.VEVEDDRVQLISGQR.I   | 2047.109 | 0.0015   | 3 | 1 | 32.8 | 0 |
| P12163_1_F4,9362   | R.SSGM*FSR.R          | 1091.546 | 0.00394  | 3 | 1 | 24.6 | 0 |
| P12163_1_F4,9415   | R.SSGMFSR.R           | 1075.551 | 0.00172  | 3 | 1 | 24   | 0 |
| P12163_1_F4,10016  | R.SSGMFSR.R           | 1075.551 | 0.00361  | 3 | 1 | 27.7 | 0 |
| P12163_1_F2,19052  | K.ASM*ENGLVLTVTVPK.   | 2070.172 | 0.00558  | 3 | 1 | 29.4 | 0 |
| P12163_1_F3,17688  | K.ASM*ENGLVLTVTVPK.   | 2070.172 | 0.0058   | 2 | 1 | 51.3 | 0 |
| P12163_1_F3,17836  | K.ASM*ENGLVLTVTVPK.   | 2070.172 | 0.00556  | 3 | 1 | 39.1 | 0 |
| P12163_1_F3,19760  | K.ASM*ENGLVLTVTVPK.   | 2070.172 | 0.00567  | 3 | 1 | 41   | 0 |

|                   |                      |          |          |   |   |      |   |
|-------------------|----------------------|----------|----------|---|---|------|---|
| P12163_1_F6,18624 | K.ASM*ENGVLTVTVPK.   | 2070.172 | 0.00459  | 3 | 1 | 30.6 | 0 |
| P12163_2_S3,14258 | K.ASM*ENGVLTVTVPK.   | 2070.172 | -0.0032  | 3 | 1 | 28.7 | 0 |
| P12163_1_F3,17089 | K.ASMENGVLTVTVPK.V   | 2054.178 | 0.0076   | 3 | 1 | 22.9 | 0 |
| P12163_1_F3,17130 | K.ASMENGVLTVTVPK.V   | 2054.178 | 0.0046   | 2 | 1 | 56.1 | 0 |
| P12163_1_F3,17408 | K.ASMENGVLTVTVPK.V   | 2054.178 | 0.00292  | 3 | 1 | 27   | 0 |
| P12163_1_F3,17444 | K.ASMENGVLTVTVPK.V   | 2054.178 | 0.00442  | 2 | 1 | 38.7 | 0 |
| P12163_1_F3,17505 | K.ASMENGVLTVTVPK.V   | 2054.178 | 0.00383  | 4 | 1 | 34.2 | 0 |
| P12163_1_F3,19514 | K.ASMENGVLTVTVPK.V   | 2054.178 | 0.01582  | 2 | 1 | 49.7 | 0 |
| P12163_1_F3,19787 | K.ASMENGVLTVTVPK.V   | 2054.178 | 0.0058   | 3 | 1 | 40.7 | 0 |
| P12163_1_F3,19805 | K.ASMENGVLTVTVPK.V   | 2054.178 | 0.00574  | 2 | 1 | 62.5 | 0 |
| P12163_1_F4,20206 | K.ASMENGVLTVTVPK.V   | 2054.178 | 0.00817  | 3 | 1 | 35.8 | 0 |
| P12163_1_F5,18443 | K.ASMENGVLTVTVPK.V   | 2054.178 | 0.00721  | 3 | 1 | 35.6 | 0 |
| P12163_1_F5,18890 | K.ASMENGVLTVTVPK.V   | 2054.178 | 0.0026   | 2 | 1 | 55.9 | 0 |
| P12163_1_F6,18609 | K.ASMENGVLTVTVPK.V   | 2054.178 | 0.0073   | 3 | 1 | 44.9 | 0 |
| P12163_1_F6,18643 | K.ASMENGVLTVTVPK.V   | 2054.178 | -0.00026 | 2 | 1 | 74   | 0 |
| P12163_1_F6,19012 | K.ASMENGVLTVTVPK.V   | 2054.178 | 0.00223  | 3 | 1 | 34.3 | 0 |
| P12163_1_F7,18181 | K.ASMENGVLTVTVPK.V   | 2054.178 | 0.00385  | 3 | 1 | 33.8 | 0 |
| P12163_1_F8,19120 | K.ASMENGVLTVTVPK.V   | 2054.178 | 0.00625  | 3 | 1 | 36.6 | 0 |
| P12163_2_F1,19689 | K.ASMENGVLTVTVPK.V   | 2054.178 | 0.01153  | 3 | 1 | 29.7 | 0 |
| P12163_2_F1,19711 | K.ASMENGVLTVTVPK.V   | 2054.178 | 0.00306  | 2 | 1 | 70.6 | 0 |
| P12163_2_F4,17789 | K.ASMENGVLTVTVPK.V   | 2054.178 | 0.00406  | 3 | 1 | 33.4 | 0 |
| P12163_2_F4,17801 | K.ASMENGVLTVTVPK.V   | 2054.178 | 0.0048   | 2 | 1 | 55   | 0 |
| P12163_2_F7,17055 | K.ASMENGVLTVTVPK.V   | 2054.178 | 0.00703  | 3 | 1 | 31.3 | 0 |
| P12163_2_F7,17056 | K.ASMENGVLTVTVPK.V   | 2054.178 | -0.00088 | 2 | 1 | 42.2 | 0 |
| P12163_2_S3,15598 | K.ASMENGVLTVTVPK.V   | 2054.178 | 0.00388  | 3 | 1 | 25.5 | 0 |
| P12163_2_F6,13654 | K.EEVKVEVEEGR.I      | 1911.064 | 0.00224  | 2 | 1 | 40.6 | 0 |
| P12163_2_F7,12730 | K.EEVKVEVEEGR.I      | 1911.064 | 0.0118   | 2 | 1 | 35.9 | 0 |
| P12163_2_F7,12986 | K.EEVKVEVEEGR.I      | 1911.064 | 0.00548  | 2 | 1 | 40.8 | 0 |
| P12163_1_F8,11469 | K.ETPQAHVFK.A        | 1664.958 | 0.00339  | 2 | 1 | 24.4 | 0 |
| P12163_1_F9,12031 | K.ETPQAHVFK.A        | 1664.958 | 0.01066  | 3 | 1 | 25   | 0 |
| P12163_1_F9,12041 | K.ETPQAHVFK.A        | 1664.958 | 0.00691  | 2 | 1 | 31   | 0 |
| P12163_1_F9,12485 | K.ETPQAHVFK.A        | 1664.958 | 0.01019  | 2 | 1 | 26.3 | 0 |
| P12163_1_F9,13271 | K.ETPQAHVFK.A        | 1664.958 | 0.00088  | 3 | 1 | 27.6 | 0 |
| P12163_2_F10,1072 | K.ETPQAHVFK.A        | 1664.958 | 0.00064  | 3 | 1 | 22.8 | 0 |
| P12163_2_F10,1092 | K.ETPQAHVFK.A        | 1664.958 | 0.00031  | 3 | 1 | 30   | 0 |
| P12163_2_F7,11099 | K.ETPQAHVFK.A        | 1664.958 | 0.00559  | 2 | 1 | 32.2 | 0 |
| P12163_2_F9,11225 | K.ETPQAHVFK.A        | 1664.958 | 0.00571  | 3 | 1 | 24.6 | 0 |
| P12163_2_F1,9426  | K.VEVEEGR.I          | 1121.61  | 0.00194  | 2 | 1 | 27.5 | 0 |
| P12163_2_F4,8111  | K.VEVEEGR.I          | 1121.61  | 0.002    | 2 | 1 | 35   | 0 |
| P12163_2_F4,9058  | K.VEVEEGR.I          | 1121.61  | 0.00288  | 2 | 1 | 25.7 | 0 |
| P12163_1_F3,23521 | R.ETSQFANAIDWK.E     | 2131.164 | 0.00463  | 2 | 1 | 53.6 | 0 |
| P12163_1_F4,24299 | R.ETSQFANAIDWK.E     | 2131.164 | 0.00549  | 3 | 1 | 42.2 | 0 |
| P12163_1_F6,11421 | R.LPDNAK.M ! R.LPDNA | 1265.767 | 0.00788  | 3 | 1 | 26.7 | 0 |
| P12163_1_F2,17764 | K.AALVNDVDDVEK.H     | 1896.053 | 0.00248  | 3 | 1 | 25   | 0 |
| P12163_1_F2,17780 | K.AALVNDVDDVEK.H     | 1896.053 | 0.00184  | 2 | 1 | 26.6 | 0 |
| P12163_1_F3,18334 | K.AALVNDVDDVEK.H     | 1896.053 | 0.00392  | 3 | 1 | 47.2 | 0 |
| P12163_1_F3,18335 | K.AALVNDVDDVEK.H     | 1896.053 | 0.01096  | 2 | 1 | 66.5 | 0 |
| P12163_1_F6,16963 | K.AALVNDVDDVEK.H     | 1896.053 | 0.00095  | 3 | 1 | 38.4 | 0 |
| P12163_1_F6,17641 | K.AALVNDVDDVEK.H     | 1896.053 | 0.00396  | 3 | 1 | 28.6 | 0 |
| P12163_1_F5,14229 | K.FGLGNK.A           | 1243.762 | 0.00628  | 3 | 1 | 23.4 | 0 |
| P12163_1_F3,20772 | K.IVAISLDDPK.A       | 1679.02  | 0.00853  | 2 | 1 | 38.3 | 0 |

|                                      |          |          |   |   |      |   |
|--------------------------------------|----------|----------|---|---|------|---|
| P12163_1_F3,20801 K.IVAISLDDPK.A     | 1679.02  | 0.00471  | 3 | 1 | 24.8 | 0 |
| P12163_1_F6,19603 K.IVAISLDDPK.A     | 1679.02  | 0.00666  | 3 | 1 | 33.1 | 0 |
| P12163_1_F2,19510 K.M*EVATDELYTPIK.Q | 2134.156 | 0.00518  | 3 | 1 | 31   | 0 |
| P12163_1_F2,20691 K.M*EVATDELYTPIK.Q | 2134.156 | 0.0122   | 3 | 1 | 29.3 | 0 |
| P12163_1_F2,20693 K.M*EVATDELYTPIK.Q | 2134.156 | 0.00516  | 2 | 1 | 26.6 | 0 |
| P12163_1_S1,16963 K.M*EVATDELYTPIK.Q | 2134.156 | 0.00416  | 2 | 1 | 40.4 | 0 |
| P12163_1_S1,19735 K.MEVATDELYTPIK.Q  | 2118.161 | 0.00458  | 2 | 1 | 60.8 | 0 |
| P12163_1_F4,15051 K.VITETNESWAK.L    | 1886.048 | 0.00553  | 3 | 1 | 28.7 | 0 |
| P12163_1_F4,17543 K.VITETNESWAK.L    | 1886.048 | 0.00309  | 2 | 1 | 48.2 | 0 |
| P12163_1_F4,17605 K.VITETNESWAK.L    | 1886.048 | 0.00646  | 3 | 1 | 47.3 | 0 |
| P12163_2_F1,16663 K.VITETNESWAK.L    | 1886.048 | 0.00373  | 2 | 1 | 40.1 | 0 |
| P12163_2_F1,16672 K.VITETNESWAK.L    | 1886.048 | 0.00262  | 3 | 1 | 45.1 | 0 |
| P12163_1_F4,19235 R.VFFVNNSGK.K      | 1619.937 | 0.00211  | 3 | 1 | 37.1 | 0 |
| P12163_1_F4,19254 R.VFFVNNSGK.K      | 1619.937 | 0.00463  | 2 | 1 | 35.2 | 0 |
| P12163_1_F5,17897 R.VFFVNNSGK.K      | 1619.937 | 0.00681  | 2 | 1 | 42.7 | 0 |
| P12163_1_F5,17907 R.VFFVNNSGK.K      | 1619.937 | 0.00454  | 3 | 1 | 35   | 0 |
| P12163_1_F5,18163 R.VFFVNNSGK.K      | 1619.937 | 0.00423  | 2 | 1 | 25.3 | 0 |
| P12163_1_F5,18446 R.VFFVNNSGK.K      | 1619.937 | 0.00345  | 2 | 1 | 32.5 | 0 |
| P12163_1_F7,16985 R.VFFVNNSGK.K      | 1619.937 | -0.00164 | 3 | 1 | 22.8 | 0 |
| P12163_2_F1,18397 R.VFFVNNSGK.K      | 1619.937 | 0.00661  | 2 | 1 | 34.5 | 0 |
| P12163_2_F1,18412 R.VFFVNNSGK.K      | 1619.937 | 0.00562  | 3 | 1 | 35.1 | 0 |
| P12163_2_S5,16289 R.VFFVNNSGK.K      | 1619.937 | -0.0002  | 3 | 1 | 26.4 | 0 |
| P12163_2_S5,16947 R.VFFVNNSGK.K      | 1619.937 | 0.00403  | 3 | 1 | 30.6 | 0 |
| P12163_1_F4,15165 K.AGVIGLTK.T       | 1366.888 | 0.00759  | 3 | 1 | 29.9 | 0 |
| P12163_1_F4,17328 K.AGVIGLTK.T       | 1366.888 | 0.00867  | 3 | 1 | 37.3 | 0 |
| P12163_1_F5,16043 K.AGVIGLTK.T       | 1366.888 | 0.00668  | 2 | 1 | 24.8 | 0 |
| P12163_1_F7,15281 K.AGVIGLTK.T       | 1366.888 | -0.00111 | 3 | 1 | 26.2 | 0 |
| P12163_2_F1,16597 K.AGVIGLTK.T       | 1366.888 | 0.00618  | 2 | 1 | 27.7 | 0 |
| P12163_2_F1,16640 K.AGVIGLTK.T       | 1366.888 | 0.00639  | 3 | 1 | 43.4 | 0 |
| P12163_2_F2,418 K.AGVIGLTK.T         | 1366.888 | 0.01125  | 3 | 1 | 31.5 | 0 |
| P12163_1_F4,18284 K.EADVESM*IK.T     | 1645.893 | 0.00959  | 2 | 1 | 24   | 0 |
| P12163_1_F3,17769 K.EADVESMIK.T      | 1629.898 | 0.00753  | 2 | 1 | 31.8 | 0 |
| P12163_1_F4,18222 K.EADVESMIK.T      | 1629.898 | 0.01359  | 2 | 1 | 45   | 0 |
| P12163_1_F4,18253 K.EADVESMIK.T      | 1629.898 | 0.01107  | 3 | 1 | 44.7 | 0 |
| P12163_2_F1,17470 K.EADVESMIK.T      | 1629.898 | 0.00706  | 3 | 1 | 29.7 | 0 |
| P12163_2_F1,17485 K.EADVESMIK.T      | 1629.898 | 0.00565  | 2 | 1 | 33.1 | 0 |
| P12163_2_F1,9475 K.EAEEVCK.E         | 1472.787 | 0.00673  | 2 | 1 | 24.8 | 0 |
| P12163_2_F1,9512 K.EAEEVCK.E         | 1472.787 | 0.00417  | 3 | 1 | 29.9 | 0 |
| P12163_1_S1,15134 K.EIEASGGQALTFGGDV | 2374.271 | 0.01148  | 3 | 1 | 42   | 0 |
| P12163_1_S1,17206 K.EIEASGGQALTFGGDV | 2374.271 | 0.0152   | 3 | 1 | 59.4 | 0 |
| P12163_1_S1,17494 K.EIEASGGQALTFGGDV | 2374.271 | 0.00041  | 3 | 1 | 71.7 | 0 |
| P12163_1_F4,14121 R.AVATSLGK.A       | 1354.851 | 0.00737  | 2 | 1 | 35.8 | 0 |
| P12163_1_F5,12744 R.AVATSLGK.A       | 1354.851 | 0.00767  | 2 | 1 | 28.1 | 0 |
| P12163_1_F5,12751 R.AVATSLGK.A       | 1354.851 | 0.00461  | 3 | 1 | 26.7 | 0 |
| P12163_2_F1,13073 R.AVATSLGK.A       | 1354.851 | 0.0047   | 3 | 1 | 32.2 | 0 |
| P12163_2_F1,13090 R.AVATSLGK.A       | 1354.851 | 0.00493  | 2 | 1 | 38.4 | 0 |
| P12163_1_S1,19214 R.NINVNAIAPGFIASDM | 2571.406 | 0.00136  | 3 | 1 | 56.4 | 0 |
| P12163_1_S1,20037 R.NINVNAIAPGFIASDM | 2555.411 | 0.00583  | 3 | 1 | 48.6 | 0 |
| P12163_1_S1,21028 R.NINVNAIAPGFIASDM | 2555.411 | 0.0094   | 3 | 1 | 84.8 | 0 |
| P12163_1_S1,21049 R.NINVNAIAPGFIASDM | 2555.411 | 0.0061   | 4 | 1 | 56.2 | 0 |
| P12163_1_F4,12495 K.EVEEYDDK.L       | 1634.837 | 0.00523  | 3 | 1 | 29.7 | 0 |

|                   |                       |          |          |   |   |      |   |
|-------------------|-----------------------|----------|----------|---|---|------|---|
| P12163_1_F4,12579 | K.EVEEYDDK.L          | 1634.837 | 0.00749  | 2 | 1 | 39.5 | 0 |
| P12163_1_F9,11845 | K.EVEEYDDK.L          | 1634.837 | 0.00733  | 2 | 1 | 34.3 | 0 |
| P12163_2_F1,11520 | K.EVEEYDDK.L          | 1634.837 | 0.00791  | 2 | 1 | 39.3 | 0 |
| P12163_1_S1,9556  | K.TELEAEEQEPTR.M      | 1735.865 | -0.00183 | 3 | 1 | 49.4 | 0 |
| P12163_1_S1,11089 | K.TELEAEEQEPTR.M      | 1735.865 | -0.00267 | 3 | 1 | 36.8 | 0 |
| P12163_1_S1,11650 | K.TELEAEEQEPTR.M      | 1735.865 | 0.00711  | 3 | 1 | 26.9 | 0 |
| P12163_1_S1,11862 | K.TELEAEEQEPTR.M      | 1735.865 | 0.00415  | 2 | 1 | 50.7 | 0 |
| P12163_1_S1,11929 | K.TELEAEEQEPTR.M      | 1735.865 | 0.00267  | 3 | 1 | 52.6 | 0 |
| P12163_1_F3,18839 | K.TPVTITDEWGEK.T      | 1984.085 | -0.00111 | 2 | 1 | 31.6 | 0 |
| P12163_1_F4,13193 | R.AVSGQPPLK.V         | 1504.931 | 0.0061   | 2 | 1 | 31.7 | 0 |
| P12163_1_F4,13212 | R.AVSGQPPLK.V         | 1504.931 | 0.00584  | 3 | 1 | 31.9 | 0 |
| P12163_1_F7,11406 | R.AVSGQPPLK.V         | 1504.931 | 0.00296  | 2 | 1 | 27.2 | 0 |
| P12163_2_F1,12258 | R.AVSGQPPLK.V         | 1504.931 | 0.0057   | 2 | 1 | 31.3 | 0 |
| P12163_2_S5,10827 | R.AVSGQPPLK.V         | 1504.931 | 0.00173  | 3 | 1 | 27.7 | 0 |
| P12163_1_S1,18264 | R.CLVDTVYGTGELGFR.A   | 1933.999 | -0.00256 | 3 | 1 | 25.7 | 0 |
| P12163_1_S1,19833 | R.CLVDTVYGTGELGFR.A   | 1933.999 | 0.00611  | 3 | 1 | 31.6 | 0 |
| P12163_1_S1,21678 | R.CLVDTVYGTGELGFR.A   | 1933.999 | 0.00167  | 3 | 1 | 36.8 | 0 |
| P12163_1_F3,22159 | R.GDGGLFVLVK.E        | 1612.988 | 0.00296  | 2 | 1 | 46.5 | 0 |
| P12163_1_F3,22169 | R.GDGGLFVLVK.E        | 1612.988 | 0.00512  | 3 | 1 | 31   | 0 |
| P12163_1_F4,23162 | R.GDGGLFVLVK.E        | 1612.988 | 0.00416  | 3 | 1 | 40.6 | 0 |
| P12163_1_F4,23258 | R.GDGGLFVLVK.E        | 1612.988 | 0.00726  | 2 | 1 | 42.7 | 0 |
| P12163_1_F5,21782 | R.GDGGLFVLVK.E        | 1612.988 | 0.00532  | 2 | 1 | 38.8 | 0 |
| P12163_1_F6,21189 | R.GDGGLFVLVK.E        | 1612.988 | 0.0044   | 2 | 1 | 41.8 | 0 |
| P12163_2_F1,22596 | R.GDGGLFVLVK.E        | 1612.988 | 0.0069   | 2 | 1 | 54.1 | 0 |
| P12163_1_F2,15489 | K.DLAGAIEAGR.V        | 1276.716 | 0.00397  | 2 | 1 | 32.1 | 0 |
| P12163_1_S1,15186 | K.DLAGAIEAGR.V        | 1276.716 | 0.0033   | 3 | 1 | 43.6 | 0 |
| P12163_1_F3,18088 | K.VAMECGVGVFTK.T      | 1906.039 | 0.01804  | 3 | 1 | 25   | 0 |
| P12163_1_F3,19619 | K.VAMECGVGVFTK.T      | 1906.039 | 0.01444  | 3 | 1 | 46.1 | 0 |
| P12163_1_F3,19630 | K.VAMECGVGVFTK.T      | 1906.039 | 0.0045   | 2 | 1 | 67.7 | 0 |
| P12163_1_F4,20222 | K.VAMECGVGVFTK.T      | 1906.039 | 0.00616  | 3 | 1 | 41   | 0 |
| P12163_1_F4,20231 | K.VAMECGVGVFTK.T      | 1906.039 | 0.0132   | 2 | 1 | 57.6 | 0 |
| P12163_2_F1,19659 | K.VAMECGVGVFTK.T      | 1906.039 | 0.0021   | 2 | 1 | 54.4 | 0 |
| P12163_2_F1,19662 | K.VAMECGVGVFTK.T      | 1906.039 | 0.00268  | 3 | 1 | 41.9 | 0 |
| P12163_1_F8,20804 | R.ILEPLLHENK.I        | 1814.1   | -0.00603 | 3 | 1 | 33.2 | 0 |
| P12163_1_F8,20820 | R.ILEPLLHENK.I        | 1814.1   | 0.00217  | 2 | 1 | 26.9 | 0 |
| P12163_2_F6,20381 | R.ILEPLLHENK.I        | 1814.1   | 0.00459  | 3 | 1 | 38.4 | 0 |
| P12163_2_F6,20421 | R.ILEPLLHENK.I        | 1814.1   | 0.00289  | 2 | 1 | 29.2 | 0 |
| P12163_2_F6,20606 | R.ILEPLLHENK.I        | 1814.1   | 0.00471  | 3 | 1 | 23.5 | 0 |
| P12163_1_F3,25634 | R.LLADDLFLAK.V        | 1727.056 | 0.00482  | 3 | 1 | 35.1 | 0 |
| P12163_1_F3,25808 | R.LLADDLFLAK.V        | 1727.056 | 0.00568  | 2 | 1 | 52.5 | 0 |
| P12163_1_S1,22705 | R.LLADDLFLAK.V        | 1727.056 | 0.00314  | 3 | 1 | 32.3 | 0 |
| P12163_1_F4,15871 | R.VPAAIVK.R           | 1305.871 | 0.00675  | 2 | 1 | 28.7 | 0 |
| P12163_2_F1,15021 | R.VPAAIVK.R           | 1305.871 | 0.00772  | 3 | 1 | 31.8 | 0 |
| P12163_1_F2,22407 | R.YQVLAGVIEQR.I       | 1579.911 | 0.00283  | 3 | 1 | 54.5 | 0 |
| P12163_1_S1,21494 | R.YQVLAGVIEQR.I       | 1579.911 | 0.00594  | 2 | 1 | 33   | 0 |
| P12163_1_S1,21551 | R.YQVLAGVIEQR.I       | 1579.911 | 0.00391  | 3 | 1 | 47.2 | 0 |
| P12163_1_S1,21767 | R.YQVLAGVIEQR.I       | 1579.911 | 0.00277  | 3 | 1 | 75.1 | 0 |
| P12163_2_F7,19892 | R.YQVLAGVIEQR.I       | 1579.911 | 0.00274  | 3 | 1 | 55.4 | 0 |
| P12163_2_F7,19912 | R.YQVLAGVIEQR.I       | 1579.911 | 0.00162  | 2 | 1 | 47.9 | 0 |
| P12163_1_F5,9436  | K.DTGIGEK.L ! K.DTGLC | 1327.768 | 0.01078  | 2 | 1 | 24.4 | 0 |
| P12163_2_F1,9982  | K.DTGIGEK.L ! K.DTGLC | 1327.768 | 0.00634  | 2 | 1 | 28   | 0 |

|                   |                        |          |          |   |   |      |   |
|-------------------|------------------------|----------|----------|---|---|------|---|
| P12163_2_F1,9987  | K.DTGIGEK.L ! K.DTGLC  | 1327.768 | 0.00585  | 3 | 1 | 23.6 | 0 |
| P12163_1_F2,16331 | K.ENLYATSLEFR.L        | 1646.869 | 0.00026  | 3 | 1 | 31   | 0 |
| P12163_1_F2,17508 | K.ENLYATSLEFR.L        | 1646.869 | 0.00403  | 2 | 1 | 35.9 | 0 |
| P12163_1_F2,19631 | K.ENLYATSLEFR.L        | 1646.869 | 0.00009  | 2 | 1 | 37.2 | 0 |
| P12163_1_F2,19691 | K.ENLYATSLEFR.L        | 1646.869 | -0.00127 | 3 | 1 | 52.6 | 0 |
| P12163_1_S1,19247 | K.ENLYATSLEFR.L        | 1646.869 | 0.0014   | 3 | 1 | 37.5 | 0 |
| P12163_2_F7,17388 | K.ENLYATSLEFR.L        | 1646.869 | 0.00607  | 2 | 1 | 48.5 | 0 |
| P12163_1_F3,25651 | K.LEFNTLQAIYQEELK.L    | 2447.364 | 0.00451  | 3 | 1 | 43   | 0 |
| P12163_1_F9,18744 | K.NHLLLELAK.L          | 1659.041 | 0.00384  | 3 | 1 | 51.8 | 0 |
| P12163_1_F9,18765 | K.NHLLLELAK.L          | 1659.041 | 0.0047   | 2 | 1 | 46.9 | 0 |
| P12163_1_F9,18803 | K.NHLLLELAK.L          | 1659.041 | 0.00468  | 4 | 1 | 30.6 | 0 |
| P12163_1_F9,18954 | K.NHLLLELAK.L          | 1659.041 | 0.00282  | 3 | 1 | 43.9 | 0 |
| P12163_1_S10,1823 | K.NHLLLELAK.L          | 1659.041 | 0.00273  | 3 | 1 | 39.2 | 0 |
| P12163_2_F8_12070 | K.NHLLLELAK.L          | 1659.041 | 0.00681  | 3 | 1 | 52.4 | 0 |
| P12163_2_F9,17520 | K.NHLLLELAK.L          | 1659.041 | 0.00828  | 4 | 1 | 31.7 | 0 |
| P12163_2_F9,17578 | K.NHLLLELAK.L          | 1659.041 | 0.00501  | 3 | 1 | 52.6 | 0 |
| P12163_2_F9,17612 | K.NHLLLELAK.L          | 1659.041 | 0.0074   | 2 | 1 | 44.9 | 0 |
| P12163_2_F9,17809 | K.NHLLLELAK.L          | 1659.041 | 0.00606  | 3 | 1 | 52.7 | 0 |
| P12163_2_F10,1478 | K.SIQCVMHETGASEEVA     | 2272.064 | 0.00122  | 3 | 1 | 41   | 0 |
| P12163_2_F4,14608 | K.SIQCVMHETGASEEVA     | 2272.064 | 0.00164  | 3 | 1 | 34.9 | 0 |
| P12163_2_F7,15406 | R.KENLYATSLEFR.L       | 2079.169 | -0.00626 | 3 | 1 | 38.2 | 0 |
| P12163_1_F4,18069 | K.ASM*ENGLVVK.I        | 1771.024 | -0.00007 | 3 | 1 | 34.9 | 0 |
| P12163_2_F1,14416 | K.ASM*ENGLVVK.I        | 1771.024 | -0.00207 | 2 | 1 | 28.4 | 0 |
| P12163_1_F4,18035 | K.ASMENGLVVK.I         | 1755.029 | 0.00769  | 2 | 1 | 49.6 | 0 |
| P12163_1_F4,18043 | K.ASMENGLVVK.I         | 1755.029 | 0.00692  | 3 | 1 | 39.4 | 0 |
| P12163_2_F1,17416 | K.ASMENGLVVK.I         | 1755.029 | 0.00329  | 2 | 1 | 49.6 | 0 |
| P12163_2_F1,18236 | K.CPVLNTPTDWK.E        | 1939.057 | 0.00187  | 2 | 1 | 26.9 | 0 |
| P12163_2_F1,18275 | K.CPVLNTPTDWK.E        | 1939.057 | 0.00492  | 3 | 1 | 32.1 | 0 |
| P12163_1_F7,17272 | K.ETPEAHVFTADLPGLK     | 2333.296 | 0.00394  | 3 | 1 | 28.4 | 0 |
| P12163_1_F7,19029 | K.ETPEAHVFTADLPGLK     | 2333.296 | 0.00217  | 2 | 1 | 60.7 | 0 |
| P12163_1_F8,18081 | K.ETPEAHVFTADLPGLK     | 2333.296 | 0.00007  | 3 | 1 | 24.3 | 0 |
| P12163_1_F8,20033 | K.ETPEAHVFTADLPGLK     | 2333.296 | 0.00544  | 3 | 1 | 45   | 0 |
| P12163_2_F9,17839 | K.ETPEAHVFTADLPGLK     | 2333.296 | 0.00553  | 3 | 1 | 37.2 | 0 |
| P12163_2_S5,16733 | K.ETPEAHVFTADLPGLK     | 2333.296 | 0.00625  | 3 | 1 | 40.4 | 0 |
| P12163_2_S5,18265 | K.ETPEAHVFTADLPGLK     | 2333.296 | 0.00452  | 4 | 1 | 25.9 | 0 |
| P12163_2_S5,18308 | K.ETPEAHVFTADLPGLK     | 2333.296 | 0.00485  | 5 | 1 | 26   | 0 |
| P12163_2_S5,18470 | K.ETPEAHVFTADLPGLK     | 2333.296 | 0.01066  | 3 | 1 | 28.1 | 0 |
| P12163_2_F2,11421 | K.LPENAK.T ! R.LPENAK  | 1279.783 | 0.00548  | 3 | 1 | 27   | 0 |
| P12163_1_F2,9340  | K.VEVDEGR.V            | 1107.595 | 0.0004   | 2 | 1 | 34.5 | 0 |
| P12163_2_F4,8802  | K.VEVDEGR.V            | 1107.595 | -0.00096 | 2 | 1 | 25   | 0 |
| P12163_1_F3,13483 | R.VLQISGER.K ! R.VLQIS | 1205.716 | 0.00202  | 3 | 1 | 41.5 | 0 |
| P12163_1_F3,15914 | R.VLQISGER.K ! R.VLQIS | 1205.716 | 0.00023  | 2 | 1 | 31.7 | 0 |
| P12163_1_F9,15358 | R.VLQISGER.K ! R.VLQIS | 1205.716 | 0.00025  | 2 | 1 | 26.3 | 0 |
| P12163_1_F3,10479 | K.AVIASGAR.Y           | 1048.642 | 0.003    | 2 | 1 | 24   | 0 |
| P12163_1_F2,18945 | K.NLAVFVSGGGSNFR.S     | 1728.933 | 0.00456  | 3 | 1 | 35.3 | 0 |
| P12163_1_F2,19276 | K.NLAVFVSGGGSNFR.S     | 1728.933 | 0.00201  | 3 | 1 | 29.9 | 0 |
| P12163_1_F2,20743 | K.NLAVFVSGGGSNFR.S     | 1728.933 | -0.00005 | 2 | 1 | 34.6 | 0 |
| P12163_1_F2,20744 | K.NLAVFVSGGGSNFR.S     | 1728.933 | 0.00264  | 3 | 1 | 41.5 | 0 |
| P12163_1_F3,21025 | K.NLAVFVSGGGSNFR.S     | 1728.933 | 0.00411  | 2 | 1 | 28.1 | 0 |
| P12163_2_F1,21165 | K.NLAVFVSGGGSNFR.S     | 1728.933 | 0.01517  | 2 | 1 | 28.2 | 0 |
| P12163_1_F2,22975 | R.DNSIPVILFPK.T        | 1851.12  | 0.00268  | 3 | 1 | 38.6 | 0 |

|                   |                       |          |          |   |   |      |   |
|-------------------|-----------------------|----------|----------|---|---|------|---|
| P12163_1_F3,23689 | R.DNSIPVILFPK.T       | 1851.12  | 0.00715  | 3 | 1 | 28.6 | 0 |
| P12163_1_F3,23695 | R.DNSIPVILFPK.T       | 1851.12  | -0.00218 | 2 | 1 | 38.6 | 0 |
| P12163_1_F5,22936 | R.DNSIPVILFPK.T       | 1851.12  | 0.00379  | 3 | 1 | 26.4 | 0 |
| P12163_2_F4,21222 | R.DNSIPVILFPK.T       | 1851.12  | 0.00595  | 3 | 1 | 28   | 0 |
| P12163_2_F10,1894 | R.SIVNIHPSLLPAFGGK.C  | 2258.348 | -0.00097 | 3 | 1 | 22.2 | 0 |
| P12163_1_F9,12998 | R.VLLEEHR.L           | 1199.705 | 0.0048   | 3 | 1 | 31.5 | 0 |
| P12163_1_F9,13038 | R.VLLEEHR.L           | 1199.705 | 0.00628  | 2 | 1 | 26.3 | 0 |
| P12163_2_F7,11944 | R.VLLEEHR.L           | 1199.705 | 0.00359  | 3 | 1 | 48.8 | 0 |
| P12163_2_F7,11968 | R.VLLEEHR.L           | 1199.705 | 0.00286  | 2 | 1 | 34   | 0 |
| P12163_2_F10,1540 | R.YSGPTIHFVDEHYDTG    | 2298.109 | -0.00088 | 4 | 1 | 38.7 | 0 |
| P12163_2_F4,15462 | R.YSGPTIHFVDEHYDTG    | 2298.109 | 0.0022   | 4 | 1 | 35.9 | 0 |
| P12163_2_F4,15463 | R.YSGPTIHFVDEHYDTG    | 2298.109 | -0.00086 | 3 | 1 | 42.4 | 0 |
| P12163_2_S3,14741 | R.YSGPTIHFVDEHYDTG    | 2298.109 | 0.00296  | 4 | 1 | 27.4 | 0 |
| P12163_1_F4,14772 | K.ANLADEDIK.A         | 1596.905 | 0.00963  | 3 | 1 | 39.2 | 0 |
| P12163_1_F5,13447 | K.ANLADEDIK.A         | 1596.905 | -0.00255 | 2 | 1 | 31.6 | 0 |
| P12163_2_F1,13745 | K.ANLADEDIK.A         | 1596.905 | 0.00335  | 2 | 1 | 42.6 | 0 |
| P12163_1_F4,25772 | K.LFGVTTLDVVR.A       | 1523.91  | 0.00205  | 2 | 1 | 30.9 | 0 |
| P12163_1_S1,19465 | K.LFGVTTLDVVR.A       | 1523.91  | 0.00221  | 3 | 1 | 24.3 | 0 |
| P12163_1_S1,20850 | K.LFGVTTLDVVR.A       | 1523.91  | 0.00089  | 3 | 1 | 30.9 | 0 |
| P12163_1_S1,22819 | K.LFGVTTLDVVR.A       | 1523.91  | 0.00372  | 2 | 1 | 38.5 | 0 |
| P12163_1_S1,22985 | K.LFGVTTLDVVR.A       | 1523.91  | 0.00215  | 3 | 1 | 74.4 | 0 |
| P12163_1_S1,23027 | K.LFGVTTLDVVR.A       | 1523.91  | 0.00418  | 2 | 1 | 36.6 | 0 |
| P12163_1_S1,23856 | K.VAVLGAAGGIGQPLAI    | 2403.462 | 0.00582  | 4 | 1 | 40   | 0 |
| P12163_1_F3,22350 | R.DDLFNINAGIVK.T ! R. | 1927.111 | 0.00659  | 2 | 1 | 71.4 | 0 |
| P12163_1_F3,22356 | R.DDLFNINAGIVK.T ! R. | 1927.111 | 0.00685  | 3 | 1 | 58.9 | 0 |
| P12163_1_F6,20960 | R.DDLFNINAGIVK.T ! R. | 1927.111 | 0.00265  | 3 | 1 | 24.9 | 0 |
| P12163_1_F6,20959 | R.LALYDIANTPGVAAD\    | 2585.399 | 0.00029  | 4 | 1 | 56.9 | 0 |
| P12163_1_F6,20998 | R.LALYDIANTPGVAAD\    | 2585.399 | 0.00257  | 3 | 1 | 90   | 0 |
| P12163_1_F6,21941 | R.LALYDIANTPGVAAD\    | 2585.399 | 0.00194  | 3 | 1 | 88.1 | 0 |
| P12163_1_F6,22170 | R.LALYDIANTPGVAAD\    | 2585.399 | -0.00211 | 3 | 1 | 40.8 | 0 |
| P12163_2_F8_12070 | R.LALYDIANTPGVAAD\    | 2585.399 | 0.00317  | 3 | 1 | 81.5 | 0 |
| P12163_2_F8_12070 | R.LALYDIANTPGVAAD\    | 2585.399 | 0.00421  | 4 | 1 | 64.3 | 0 |
| P12163_1_F3,9270  | R.TQDGGTEVVEAK.A      | 1842.006 | 0.00676  | 3 | 1 | 23.1 | 0 |
| P12163_1_F3,11287 | R.TQDGGTEVVEAK.A      | 1842.006 | 0.0054   | 2 | 1 | 36.9 | 0 |
| P12163_1_F2,6539  | K.GSTFHR.V ! K.GSTFHR | 1008.553 | 0.00449  | 3 | 1 | 33.1 | 0 |
| P12163_1_F4,6988  | K.GSTFHR.V ! K.GSTFHR | 1008.553 | 0.00467  | 3 | 1 | 26.4 | 0 |
| P12163_2_S3,6565  | K.GSTFHR.V ! K.GSTFHR | 1008.553 | 0.00554  | 3 | 1 | 29.5 | 0 |
| P12163_1_S10,1275 | K.HVVFGK.V ! R.HVVFG  | 1294.809 | 0.00417  | 3 | 1 | 30.5 | 0 |
| P12163_2_F8_12070 | K.HVVFGK.V ! R.HVVFG  | 1294.809 | 0.00426  | 3 | 1 | 27   | 0 |
| P12163_1_F4,7410  | K.TAENFR.Q ! K.TAENFF | 1041.563 | 0.00249  | 3 | 1 | 33.7 | 0 |
| P12163_2_F2,7039  | K.TAENFR.Q ! K.TAENFF | 1041.563 | 0.00225  | 3 | 1 | 31.4 | 0 |
| P12163_1_F3,20986 | K.VLSGMDVVYK.V        | 1718.997 | 0.0059   | 2 | 1 | 40.3 | 0 |
| P12163_1_F4,21621 | K.VLSGMDVVYK.V        | 1718.997 | 0.01116  | 2 | 1 | 45.2 | 0 |
| P12163_1_F4,21627 | K.VLSGMDVVYK.V        | 1718.997 | 0.00979  | 3 | 1 | 22.7 | 0 |
| P12163_2_F1,21162 | K.VLSGMDVVYK.V        | 1718.997 | 0.0031   | 2 | 1 | 40.4 | 0 |
| P12163_1_F5,9906  | R.ALCTGEK.G           | 1386.787 | 0.00705  | 2 | 1 | 26.7 | 0 |
| P12163_1_F6,10902 | R.ALCTGEK.G           | 1386.787 | 0.01195  | 2 | 1 | 26.2 | 0 |
| P12163_1_F8,10102 | R.ALCTGEK.G           | 1386.787 | 0.00237  | 2 | 1 | 27.1 | 0 |
| P12163_2_F2,10720 | R.ALCTGEK.G           | 1386.787 | 0.00655  | 2 | 1 | 27   | 0 |
| P12163_2_F2,10838 | R.ALCTGEK.G           | 1386.787 | 0.00185  | 3 | 1 | 29.9 | 0 |
| P12163_2_F2,11178 | R.ALCTGEK.G           | 1386.787 | 0.00683  | 2 | 1 | 26.2 | 0 |



|                   |                       |          |          |   |   |      |   |
|-------------------|-----------------------|----------|----------|---|---|------|---|
| P12163_1_F5,11003 | R.GGESIYGEK.F         | 1547.853 | 0.00892  | 2 | 1 | 35.5 | 0 |
| P12163_2_F1,11384 | R.GGESIYGEK.F         | 1547.853 | 0.00362  | 2 | 1 | 25.5 | 0 |
| P12163_2_F1,11397 | R.GGESIYGEK.F         | 1547.853 | 0.00199  | 3 | 1 | 42.5 | 0 |
| P12163_1_F8,18677 | K.FIAGHSDVM*AGVLA\    | 2239.273 | 0.00293  | 3 | 1 | 37.3 | 0 |
| P12163_1_F8,21568 | K.FIAGHSDVM*AGVLA\    | 2239.273 | 0.00107  | 3 | 1 | 40.3 | 0 |
| P12163_1_F8,21477 | K.FIAGHSDVMAGVLAV     | 2223.278 | 0.00332  | 3 | 1 | 38.4 | 0 |
| P12163_1_F9,8435  | K.HVVETTK.Y           | 1421.857 | 0.00286  | 3 | 1 | 35.2 | 0 |
| P12163_1_F8,20523 | K.IAEFLASHPR.V        | 1444.821 | 0.00112  | 3 | 1 | 32.2 | 0 |
| P12163_1_F8,20830 | K.IAEFLASHPR.V        | 1444.821 | 0.00652  | 3 | 1 | 25.3 | 0 |
| P12163_1_F9,19964 | K.IAEFLASHPR.V        | 1444.821 | 0.0004   | 3 | 1 | 23.2 | 0 |
| P12163_2_F6,20025 | K.IAEFLASHPR.V        | 1444.821 | -0.00095 | 3 | 1 | 26.4 | 0 |
| P12163_2_F6,20262 | K.IAEFLASHPR.V        | 1444.821 | 0.00394  | 3 | 1 | 33   | 0 |
| P12163_2_F7,18105 | K.IAEFLASHPR.V        | 1444.821 | 0.00286  | 3 | 1 | 49.5 | 0 |
| P12163_1_F5,5196  | K.QQDNAQK.I           | 1439.806 | 0.00512  | 2 | 1 | 26.4 | 0 |
| P12163_2_F1,5500  | K.QQDNAQK.I           | 1439.806 | 0.0039   | 2 | 1 | 27.2 | 0 |
| P12163_2_F2,6130  | K.QQDNAQK.I           | 1439.806 | 0.00596  | 2 | 1 | 24   | 0 |
| P12163_1_F3,21919 | R.DALESLLAK.L         | 1567.951 | 0.00648  | 3 | 1 | 28.3 | 0 |
| P12163_1_F4,22698 | R.DALESLLAK.L         | 1567.951 | 0.00459  | 3 | 1 | 25.2 | 0 |
| P12163_1_F4,22703 | R.DALESLLAK.L         | 1567.951 | 0.00957  | 2 | 1 | 30.7 | 0 |
| P12163_1_F4,22963 | R.DALESLLAK.L         | 1567.951 | 0.00215  | 2 | 1 | 27.3 | 0 |
| P12163_1_F5,21423 | R.DALESLLAK.L         | 1567.951 | 0.00777  | 3 | 1 | 31.8 | 0 |
| P12163_2_F1,22223 | R.DALESLLAK.L         | 1567.951 | 0.0069   | 3 | 1 | 33.9 | 0 |
| P12163_2_F1,11151 | R.QQICDIR.K           | 1236.667 | 0.00231  | 2 | 1 | 26.2 | 0 |
| P12163_1_F2,23746 | K.EYLPIEGLAAFNK.V     | 2073.184 | 0.00274  | 2 | 1 | 48.2 | 0 |
| P12163_1_F2,23918 | K.EYLPIEGLAAFNK.V     | 2073.184 | 0.01052  | 3 | 1 | 37.6 | 0 |
| P12163_1_F3,24782 | K.EYLPIEGLAAFNK.V     | 2073.184 | 0.00659  | 3 | 1 | 42.6 | 0 |
| P12163_1_F3,24796 | K.EYLPIEGLAAFNK.V     | 2073.184 | 0.01008  | 2 | 1 | 46.9 | 0 |
| P12163_1_F5,23786 | K.EYLPIEGLAAFNK.V     | 2073.184 | 0.0074   | 3 | 1 | 40.4 | 0 |
| P12163_1_F6,23326 | K.EYLPIEGLAAFNK.V     | 2073.184 | 0.00278  | 3 | 1 | 33.7 | 0 |
| P12163_1_F7,22762 | K.EYLPIEGLAAFNK.V     | 2073.184 | 0.00689  | 3 | 1 | 45.8 | 0 |
| P12163_2_F8_12070 | K.EYLPIEGLAAFNK.V     | 2073.184 | -0.00031 | 3 | 1 | 29.1 | 0 |
| P12163_1_F9,17259 | K.INLGVGAYR.D ! K.LNI | 1266.747 | -0.00395 | 2 | 1 | 33.1 | 0 |
| P12163_1_F9,14424 | K.KAENMLER.G          | 1711.998 | 0.00711  | 3 | 1 | 29.8 | 0 |
| P12163_1_F2,24005 | K.VTAELFGADNSVLK.     | 2185.269 | 0.00766  | 3 | 1 | 22.5 | 0 |
| P12163_1_F3,10764 | M.VAAVNVS.F           | 1119.679 | 0.00228  | 3 | 1 | 35.4 | 0 |
| P12163_1_F3,12401 | M.VAAVNVS.F           | 1119.679 | 0.0014   | 2 | 1 | 24.5 | 0 |
| P12163_1_F2,22320 | R.TEELQPYVLDVVK.K     | 2141.231 | 0.00527  | 3 | 1 | 40.1 | 0 |
| P12163_1_F8,22272 | R.TEELQPYVLDVVK.K     | 2141.231 | 0.00194  | 3 | 1 | 30.8 | 0 |
| P12163_1_S1,18672 | R.TEELQPYVLDVVK.K     | 2141.231 | 0.00653  | 3 | 1 | 37.4 | 0 |
| P12163_1_S1,18752 | R.TEELQPYVLDVVK.K     | 2141.231 | 0.002    | 2 | 1 | 30.9 | 0 |
| P12163_1_S1,21115 | R.TEELQPYVLDVVK.K     | 2141.231 | 0.0077   | 2 | 1 | 53.8 | 0 |
| P12163_1_S1,21120 | R.TEELQPYVLDVVK.K     | 2141.231 | 0.00629  | 3 | 1 | 61.5 | 0 |
| P12163_1_F4,15950 | K.GGLSAGDVAQYK.Y      | 1845.033 | 0.00761  | 3 | 1 | 49.7 | 0 |
| P12163_1_F4,15969 | K.GGLSAGDVAQYK.Y      | 1845.033 | 0.00586  | 2 | 1 | 75.7 | 0 |
| P12163_2_F1,15135 | K.GGLSAGDVAQYK.Y      | 1845.033 | 0.00089  | 3 | 1 | 51.5 | 0 |
| P12163_2_F1,15148 | K.GGLSAGDVAQYK.Y      | 1845.033 | -0.00226 | 2 | 1 | 55.9 | 0 |
| P12163_1_F4,21081 | K.GPGLFADIGK.K        | 1582.941 | 0.00998  | 2 | 1 | 42.9 | 0 |
| P12163_1_F4,21101 | K.GPGLFADIGK.K        | 1582.941 | 0.0093   | 3 | 1 | 36.2 | 0 |
| P12163_2_F1,20455 | K.GPGLFADIGK.K        | 1582.941 | 0.00207  | 3 | 1 | 33.8 | 0 |
| P12163_2_F1,20487 | K.GPGLFADIGK.K        | 1582.941 | 0.00034  | 2 | 1 | 25.9 | 0 |
| P12163_2_F1,20672 | K.GPGLFADIGK.K        | 1582.941 | -0.00054 | 3 | 1 | 31.1 | 0 |

|                   |                      |          |          |   |   |      |   |
|-------------------|----------------------|----------|----------|---|---|------|---|
| P12163_2_F1,20699 | K.GPGLFADIGK.K       | 1582.941 | 0.00878  | 2 | 1 | 30.8 | 0 |
| P12163_2_F4,18291 | K.GPGLFADIGK.K       | 1582.941 | 0.0009   | 3 | 1 | 45.9 | 0 |
| P12163_2_F8,12070 | K.LGALLQHEVIPK.S     | 1926.2   | 0.00033  | 3 | 1 | 23.5 | 0 |
| P12163_1_F5,18724 | K.NVLFDVK.V          | 1442.883 | 0.01048  | 2 | 1 | 30   | 0 |
| P12163_1_F5,18742 | K.NVLFDVK.V          | 1442.883 | 0.00794  | 3 | 1 | 30.5 | 0 |
| P12163_2_F1,18951 | K.NVLFDVK.V          | 1442.883 | 0.00563  | 3 | 1 | 29.6 | 0 |
| P12163_2_S5,16986 | K.NVLFDVK.V          | 1442.883 | 0.00041  | 3 | 1 | 26   | 0 |
| P12163_1_F3,20112 | K.SLLTISSEVDTK.A     | 1901.105 | 0.00608  | 2 | 1 | 54.6 | 0 |
| P12163_1_F6,20951 | R.FSTNENTFTVGGSYAV   | 3094.631 | 0.00103  | 3 | 1 | 23.9 | 0 |
| P12163_1_S1,16744 | K.EIFGVTDEDEDADK.L   | 1947.017 | 0.00168  | 3 | 1 | 73.5 | 0 |
| P12163_1_F8,18119 | K.EIFGVTDEDEDADKLR.Q | 2216.202 | 0.00525  | 2 | 1 | 43.9 | 0 |
| P12163_1_F8,18237 | K.EIFGVTDEDEDADKLR.Q | 2216.202 | 0.00564  | 3 | 1 | 29.4 | 0 |
| P12163_2_F6,17686 | K.EIFGVTDEDEDADKLR.Q | 2216.202 | 0.00399  | 3 | 1 | 32.1 | 0 |
| P12163_2_F9,16540 | K.EIFGVTDEDEDADKLR.Q | 2216.202 | 0.00201  | 3 | 1 | 31.5 | 0 |
| P12163_2_S5,17106 | K.EIFGVTDEDEDADKLR.Q | 2216.202 | 0.00489  | 3 | 1 | 34.8 | 0 |
| P12163_1_F3,13982 | K.GGDAVNPPALK.G      | 1646.969 | 0.00956  | 2 | 1 | 37.2 | 0 |
| P12163_1_F4,14475 | K.GGDAVNPPALK.G      | 1646.969 | 0.01046  | 2 | 1 | 59.9 | 0 |
| P12163_1_F4,14582 | K.GGDAVNPPALK.G      | 1646.969 | 0.00757  | 3 | 1 | 25.8 | 0 |
| P12163_2_F1,13534 | K.GGDAVNPPALK.G      | 1646.969 | 0.00484  | 2 | 1 | 62   | 0 |
| P12163_1_F3,17363 | K.GPVVMNMSGYSEK.G    | 2007.05  | 0.00526  | 3 | 1 | 55.1 | 0 |
| P12163_1_F4,24225 | K.LAVQALFGK.V        | 1554.983 | 0.0027   | 2 | 1 | 38.3 | 0 |
| P12163_2_F1,23611 | K.LAVQALFGK.V        | 1554.983 | 0.00402  | 2 | 1 | 27   | 0 |
| P12163_1_F2,18874 | K.TGFSM*EDVLR.K      | 1474.751 | 0.00407  | 3 | 1 | 51.1 | 0 |
| P12163_1_S1,13250 | K.TGFSM*EDVLR.K      | 1474.751 | 0.00449  | 3 | 1 | 42.1 | 0 |
| P12163_1_S1,18368 | K.TGFSMEDVLR.K       | 1458.756 | 0.00239  | 3 | 1 | 45.8 | 0 |
| P12163_1_S1,19977 | K.TGFSMEDVLR.K       | 1458.756 | -0.00058 | 3 | 1 | 48.3 | 0 |
| P12163_1_S1,20133 | K.TGFSMEDVLR.K       | 1458.756 | 0.00195  | 2 | 1 | 28.2 | 0 |
| P12163_1_F4,18216 | K.CLEDEAIK.V         | 1698.956 | 0.01137  | 2 | 1 | 47.3 | 0 |
| P12163_1_F4,18221 | K.CLEDEAIK.V         | 1698.956 | 0.00934  | 3 | 1 | 45.8 | 0 |
| P12163_2_F1,17465 | K.CLEDEAIK.V         | 1698.956 | 0.00453  | 2 | 1 | 35.3 | 0 |
| P12163_2_F1,17490 | K.CLEDEAIK.V         | 1698.956 | 0.00646  | 3 | 1 | 39.4 | 0 |
| P12163_2_F6,16259 | R.DEEIDYFPSR.Y       | 1574.764 | 0.00692  | 2 | 1 | 25.4 | 0 |
| P12163_1_F6,14944 | R.FSTVIHER.G         | 1292.726 | 0.00468  | 3 | 1 | 48.8 | 0 |
| P12163_1_F9,14558 | R.FSTVIHER.G         | 1292.726 | 0.00456  | 3 | 1 | 57.7 | 0 |
| P12163_2_F4,13693 | R.FSTVIHER.G         | 1292.726 | 0.00204  | 3 | 1 | 43.3 | 0 |
| P12163_2_F9,13763 | R.FSTVIHER.G         | 1292.726 | 0.00141  | 3 | 1 | 35.8 | 0 |
| P12163_2_S5,14057 | R.FSTVIHER.G         | 1292.726 | 0.00351  | 3 | 1 | 32.9 | 0 |
| P12163_1_F7,20096 | R.GPILLEDYHLVEK.L    | 2134.237 | 0.00355  | 3 | 1 | 25.4 | 0 |
| P12163_1_F8,21093 | R.GPILLEDYHLVEK.L    | 2134.237 | 0.00295  | 3 | 1 | 34.3 | 0 |
| P12163_2_F10,1853 | R.GPILLEDYHLVEK.L    | 2134.237 | 0.00456  | 4 | 1 | 25.8 | 0 |
| P12163_2_S5,19461 | R.GPILLEDYHLVEK.L    | 2134.237 | 0.00361  | 3 | 1 | 25.2 | 0 |
| P12163_1_F3,21696 | R.LGPNYLQLPVNAPK.C   | 2132.269 | -0.00071 | 3 | 1 | 26.2 | 0 |
| P12163_1_F3,21747 | R.LGPNYLQLPVNAPK.C   | 2132.269 | 0.00225  | 2 | 1 | 49.4 | 0 |
| P12163_2_F6,20783 | R.LGPNYLQLPVNAPK.C   | 2132.269 | 0.00409  | 3 | 1 | 26.9 | 0 |
| P12163_1_F9,7932  | R.VTHEIR.H           | 1058.626 | 0.00542  | 3 | 1 | 28.8 | 0 |
| P12163_1_F6,12374 | K.NHIYTS GASGTNAAVI  | 2036.083 | 0.00246  | 3 | 1 | 42.5 | 0 |
| P12163_2_S3,10956 | K.NHIYTS GASGTNAAVI  | 2036.083 | 0.0084   | 3 | 1 | 40.1 | 0 |
| P12163_1_F3,15253 | K.QPPESQELLAK.V      | 1848.069 | 0.00201  | 2 | 1 | 29.1 | 0 |
| P12163_1_F3,15269 | K.QPPESQELLAK.V      | 1848.069 | 0.00376  | 3 | 1 | 23.9 | 0 |
| P12163_1_F5,15164 | K.TVIEKPHNDHLP LIEAS | 2677.525 | 0.00829  | 3 | 1 | 32.6 | 0 |
| P12163_1_F6,15760 | K.TVIEKPHNDHLP LIEAS | 2677.525 | 0.00351  | 5 | 1 | 24.9 | 0 |

|                   |                     |          |          |   |   |      |   |
|-------------------|---------------------|----------|----------|---|---|------|---|
| P12163_2_S5,13248 | K.TVIEKPHNDHPLIEAS  | 2677.525 | 0.00066  | 5 | 1 | 28.7 | 0 |
| P12163_2_S5,14246 | K.TVIEKPHNDHPLIEAS  | 2677.525 | 0.00291  | 5 | 1 | 25.8 | 0 |
| P12163_2_S5,14275 | K.TVIEKPHNDHPLIEAS  | 2677.525 | 0.00145  | 4 | 1 | 22.1 | 0 |
| P12163_2_S5,14337 | K.TVIEKPHNDHPLIEAS  | 2677.525 | 0.00529  | 3 | 1 | 27.3 | 0 |
| P12163_1_F7,22594 | R.AERPDLTVILPQSLK.. | 2401.464 | 0.00403  | 4 | 1 | 35.7 | 0 |
| P12163_1_F8,23576 | R.AERPDLTVILPQSLK.. | 2401.464 | 0.00424  | 3 | 1 | 23.7 | 0 |
| P12163_2_F9,20887 | R.AERPDLTVILPQSLK.. | 2401.464 | 0.00087  | 4 | 1 | 23.3 | 0 |
| P12163_2_S5,21395 | R.AERPDLTVILPQSLK.. | 2401.464 | 0.00035  | 4 | 1 | 27.7 | 0 |
| P12163_1_F3,18095 | R.AIGFFGTR.N        | 1172.673 | 0.00394  | 3 | 1 | 24.8 | 0 |
| P12163_1_F4,18087 | R.LLM*ETCQEAK.N     | 1846.986 | 0.00345  | 2 | 1 | 25   | 0 |
| P12163_1_F4,18104 | R.LLM*ETCQEAK.N     | 1846.986 | 0.01109  | 3 | 1 | 33.5 | 0 |
| P12163_2_F1,17230 | R.LLMETCQEAK.N      | 1830.991 | 0.00761  | 2 | 1 | 40.6 | 0 |
| P12163_2_F8_12070 | K.GAEAALTAIEM*ASLF  | 2763.496 | 0.00624  | 4 | 1 | 29.2 | 0 |
| P12163_2_F8_12070 | K.GAEAALTAIEM*ASLF  | 2763.496 | 0.00104  | 4 | 1 | 27.1 | 0 |
| P12163_1_F3,23146 | K.LLLEGALETFK.K     | 1842.12  | 0.0044   | 3 | 1 | 39.1 | 0 |
| P12163_1_F3,23191 | K.LLLEGALETFK.K     | 1842.12  | 0.00465  | 2 | 1 | 37.8 | 0 |
| P12163_1_F3,26575 | K.LLLEGALETFK.K     | 1842.12  | 0.00848  | 3 | 1 | 36.4 | 0 |
| P12163_1_F3,26593 | K.LLLEGALETFK.K     | 1842.12  | 0.00437  | 2 | 1 | 56.1 | 0 |
| P12163_1_F4,27486 | K.LLLEGALETFK.K     | 1842.12  | 0.00848  | 3 | 1 | 49.2 | 0 |
| P12163_1_F4,27487 | K.LLLEGALETFK.K     | 1842.12  | 0.00729  | 2 | 1 | 30.9 | 0 |
| P12163_1_S10,2116 | K.LLLEGALETFKK.Y    | 2274.42  | 0.00128  | 4 | 1 | 35   | 0 |
| P12163_1_F2,18059 | R.FAVVVAR.F         | 1065.672 | 0.00243  | 2 | 1 | 26.8 | 0 |
| P12163_1_F5,17667 | R.FNELVTK.L         | 1458.878 | 0.00656  | 2 | 1 | 23.9 | 0 |
| P12163_2_S5,16761 | R.FNELVTK.L         | 1458.878 | 0.00448  | 3 | 1 | 24.5 | 0 |
| P12163_1_F6,16815 | R.HLTGFLTK.N        | 1524.936 | 0.00169  | 3 | 1 | 30.6 | 0 |
| P12163_1_F9,16528 | R.HLTGFLTK.N        | 1524.936 | 0.00322  | 3 | 1 | 35.5 | 0 |
| P12163_2_F4,15520 | R.HLTGFLTK.N        | 1524.936 | 0.0052   | 3 | 1 | 22.8 | 0 |
| P12163_2_F4,15777 | R.HLTGFLTK.N        | 1524.936 | 0.00568  | 3 | 1 | 22   | 0 |
| P12163_2_F9,15533 | R.HLTGFLTK.N        | 1524.936 | 0.00532  | 3 | 1 | 25.4 | 0 |
| P12163_2_S5,15603 | R.HLTGFLTK.N        | 1524.936 | 0.00256  | 3 | 1 | 38.7 | 0 |
| P12163_1_F3,17442 | K.LVIVGDGGTGK.T     | 1623.989 | 0.00686  | 2 | 1 | 33.9 | 0 |
| P12163_1_F4,17728 | K.NLQYYEISAK.S      | 1837.032 | 0.00637  | 3 | 1 | 44.2 | 0 |
| P12163_1_F4,17823 | K.NLQYYEISAK.S      | 1837.032 | 0.0064   | 2 | 1 | 48.1 | 0 |
| P12163_1_F5,16489 | K.NLQYYEISAK.S      | 1837.032 | 0.00732  | 2 | 1 | 44.2 | 0 |
| P12163_1_F9,16694 | K.NLQYYEISAK.S      | 1837.032 | 0.00734  | 2 | 1 | 46.4 | 0 |
| P12163_1_F9,16710 | K.NLQYYEISAK.S      | 1837.032 | 0.00487  | 3 | 1 | 40.3 | 0 |
| P12163_2_F1,16919 | K.NLQYYEISAK.S      | 1837.032 | 0.00706  | 2 | 1 | 40.8 | 0 |
| P12163_2_F1,16962 | K.NLQYYEISAK.S      | 1837.032 | 0.00619  | 3 | 1 | 44.3 | 0 |
| P12163_2_F9,15756 | K.NLQYYEISAK.S      | 1837.032 | 0.00691  | 3 | 1 | 35.4 | 0 |
| P12163_2_F10,9659 | K.QVTFHR.K          | 1091.626 | 0.00406  | 3 | 1 | 33   | 0 |
| P12163_2_F8_12070 | K.QVTFHR.K          | 1091.626 | 0.0025   | 3 | 1 | 33.1 | 0 |
| P12163_2_F1,18795 | R.FYCWDTAGQEK.F     | 2013     | 0.00774  | 2 | 1 | 41.2 | 0 |
| P12163_1_F9,13088 | R.HLTGEFEK.K        | 1568.889 | 0.00731  | 3 | 1 | 28.3 | 0 |
| P12163_2_F8_12070 | R.HLTGEFEK.K        | 1568.889 | 0.00479  | 3 | 1 | 27.3 | 0 |
| P12163_1_F3,20410 | R.VCENIPIVLCGNK.V   | 2124.177 | 0.00565  | 2 | 1 | 42.5 | 0 |
| P12163_1_F3,20418 | R.VCENIPIVLCGNK.V   | 2124.177 | 0.0088   | 3 | 1 | 51.3 | 0 |
| P12163_2_F4,18605 | R.VCENIPIVLCGNK.V   | 2124.177 | -0.00158 | 3 | 1 | 24.9 | 0 |
| P12163_1_F9,8296  | K.HVTTVK.N          | 1292.815 | 0.00768  | 3 | 1 | 27.9 | 0 |
| P12163_2_F4,7790  | K.HVTTVK.N          | 1292.815 | 0.00633  | 3 | 1 | 29.3 | 0 |
| P12163_2_F8_12070 | K.HVTTVK.N          | 1292.815 | 0.00297  | 3 | 1 | 26.8 | 0 |
| P12163_1_F6,9449  | K.IHHLNAGAEK.I      | 1697.991 | -0.00075 | 4 | 1 | 25.3 | 0 |

|                   |                         |          |          |   |   |      |   |
|-------------------|-------------------------|----------|----------|---|---|------|---|
| P12163_1_F6,9467  | K.IHHLNAGAEK.I          | 1697.991 | -0.00113 | 2 | 1 | 32.9 | 0 |
| P12163_1_F6,9477  | K.IHHLNAGAEK.I          | 1697.991 | -0.00488 | 3 | 1 | 37.1 | 0 |
| P12163_2_F7,8638  | K.IHHLNAGAEK.I          | 1697.991 | 0.00238  | 3 | 1 | 29.2 | 0 |
| P12163_1_F3,24865 | K.IQYDVVQM*LLK.H        | 1974.155 | 0.0079   | 3 | 1 | 32.2 | 0 |
| P12163_1_F3,25107 | K.IQYDVVQM*LLK.H        | 1974.155 | 0.00392  | 3 | 1 | 28   | 0 |
| P12163_1_F4,12373 | K.LAESSGDSGANVK.R       | 1843.002 | 0.00652  | 3 | 1 | 72   | 0 |
| P12163_2_F1,11389 | K.LAESSGDSGANVK.R       | 1843.002 | 0.00715  | 3 | 1 | 72.9 | 0 |
| P12163_2_F1,11467 | K.LAESSGDSGANVK.R       | 1843.002 | 0.00701  | 2 | 1 | 65.7 | 0 |
| P12163_1_F9,6579  | R.EIAEHR.A              | 1058.59  | 0.00287  | 2 | 1 | 25.1 | 0 |
| P12163_1_F9,6597  | R.EIAEHR.A              | 1058.59  | 0.00414  | 3 | 1 | 39.3 | 0 |
| P12163_2_F9,7309  | R.EIAEHR.A              | 1058.59  | 0.00243  | 3 | 1 | 31.3 | 0 |
| P12163_2_F8_12070 | R.GHGGIQQLLAAEQEAC      | 2672.453 | -0.0032  | 4 | 1 | 49.7 | 0 |
| P12163_2_F8_12070 | R.GHGGIQQLLAAEQEAC      | 2672.453 | 0.00328  | 4 | 1 | 56.2 | 0 |
| P12163_1_F9,13760 | K.LGLHSLR.Q             | 1099.689 | 0.00582  | 3 | 1 | 27.3 | 0 |
| P12163_1_S10,1383 | K.LGLHSLR.Q             | 1099.689 | 0.00411  | 3 | 1 | 27.6 | 0 |
| P12163_2_F8_12070 | K.LGLHSLR.Q             | 1099.689 | 0.00096  | 3 | 1 | 23.5 | 0 |
| P12163_1_F3,22280 | K.NISFTVWDVGGQDK.I      | 2174.17  | 0.00557  | 3 | 1 | 53   | 0 |
| P12163_1_F3,22292 | K.NISFTVWDVGGQDK.I      | 2174.17  | 0.00447  | 2 | 1 | 52.7 | 0 |
| P12163_1_F2,15045 | K.QDLPNAM*NAAEITDK      | 2255.18  | 0.00945  | 3 | 1 | 49.7 | 0 |
| P12163_1_F2,17460 | K.QDLPNAM*NAAEITDK      | 2255.18  | 0.0084   | 3 | 1 | 60.1 | 0 |
| P12163_1_F2,17366 | K.QDLPNAMNAAEITDK       | 2239.185 | 0.0102   | 3 | 1 | 40.7 | 0 |
| P12163_1_F4,25130 | R.DAVLLVFANK.Q          | 1698.041 | 0.00766  | 2 | 1 | 48.2 | 0 |
| P12163_1_F4,25142 | R.DAVLLVFANK.Q          | 1698.041 | 0.00837  | 3 | 1 | 32.2 | 0 |
| P12163_1_F5,23424 | R.DAVLLVFANK.Q          | 1698.041 | 0.00903  | 3 | 1 | 32.5 | 0 |
| P12163_1_F6,22847 | R.DAVLLVFANK.Q          | 1698.041 | 0.00108  | 3 | 1 | 33.3 | 0 |
| P12163_1_S10,7703 | R.DEIHR.L ! R.DEIHR.V ! | 973.5368 | 0.00142  | 3 | 1 | 25.2 | 0 |
| P12163_2_F8_12070 | R.DEIHR.L ! R.DEIHR.V ! | 973.5368 | 0.00487  | 3 | 1 | 23.9 | 0 |
| P12163_1_F3,24417 | R.ILM*VGLDAAGK.T        | 1712.024 | 0.01475  | 3 | 1 | 40.2 | 0 |
| P12163_1_F3,24177 | R.ILMVGLDAAGK.T         | 1696.029 | 0.00749  | 3 | 1 | 36.2 | 0 |
| P12163_1_F3,24222 | R.ILMVGLDAAGK.T         | 1696.029 | 0.00644  | 2 | 1 | 37.7 | 0 |
| P12163_1_F6,15030 | K.HILNLGHGK.V           | 1710.063 | 0.00503  | 3 | 1 | 24.4 | 0 |
| P12163_1_F3,19914 | K.NVSVAEPMLLK.A         | 1809.076 | 0.00427  | 3 | 1 | 42.5 | 0 |
| P12163_1_F5,14515 | K.SYQIICEK.Y            | 1648.919 | 0.01182  | 2 | 1 | 32.8 | 0 |
| P12163_1_F9,15084 | K.SYQIICEK.Y            | 1648.919 | 0.00678  | 2 | 1 | 33.7 | 0 |
| P12163_2_F1,14609 | K.SYQIICEK.Y            | 1648.919 | 0.0009   | 3 | 1 | 28.5 | 0 |
| P12163_2_F2,15333 | K.SYQIICEK.Y            | 1648.919 | 0.00448  | 2 | 1 | 30.9 | 0 |
| P12163_1_F7,21242 | K.VGTPEENVAHFFEVA       | 2382.291 | 0.00472  | 3 | 1 | 50.1 | 0 |
| P12163_1_F7,21250 | K.VGTPEENVAHFFEVA       | 2382.291 | 0.0035   | 4 | 1 | 37.9 | 0 |
| P12163_1_F8,22240 | K.VGTPEENVAHFFEVA       | 2382.291 | 0.00542  | 4 | 1 | 24   | 0 |
| P12163_1_F8,22260 | K.VGTPEENVAHFFEVA       | 2382.291 | 0.00631  | 3 | 1 | 49   | 0 |
| P12163_2_S5,17453 | K.VGTPEENVAHFFEVA       | 2382.291 | 0.00472  | 3 | 1 | 29.2 | 0 |
| P12163_1_F9,18705 | K.VLHALLR.K             | 1125.741 | 0.00423  | 3 | 1 | 35.4 | 0 |
| P12163_1_F9,18911 | K.VLHALLR.K             | 1125.741 | 0.00336  | 3 | 1 | 33.7 | 0 |
| P12163_2_F7,16674 | K.VLHALLR.K             | 1125.741 | 0.00288  | 3 | 1 | 31.5 | 0 |
| P12163_1_S1,17808 | R.EFDPEESVPYVGK.A       | 2104.106 | 0.00497  | 3 | 1 | 47.1 | 0 |
| P12163_1_S1,17817 | R.EFDPEESVPYVGK.A       | 2104.106 | -0.00019 | 2 | 1 | 29.6 | 0 |
| P12163_2_F6,18248 | R.EFDPEESVPYVGK.A       | 2104.106 | 0.0044   | 3 | 1 | 31.1 | 0 |
| P12163_1_F5,15683 | K.EQAISALGK.L           | 1524.921 | -0.00613 | 3 | 1 | 28.7 | 0 |
| P12163_1_F5,15697 | K.EQAISALGK.L           | 1524.921 | 0.00704  | 3 | 1 | 34.7 | 0 |
| P12163_1_F4,19395 | K.GLSLEEIESK.I          | 1712.989 | 0.00667  | 3 | 1 | 50.9 | 0 |
| P12163_1_F4,19420 | K.GLSLEEIESK.I          | 1712.989 | 0.00602  | 2 | 1 | 59.2 | 0 |

|                   |                     |          |          |   |   |      |   |
|-------------------|---------------------|----------|----------|---|---|------|---|
| P12163_1_F7,17210 | K.GLSLEEIESK.I      | 1712.989 | 0.0008   | 2 | 1 | 24.5 | 0 |
| P12163_2_F1,18869 | K.GLSLEEIESK.I      | 1712.989 | 0.00403  | 3 | 1 | 48.4 | 0 |
| P12163_2_F1,18903 | K.GLSLEEIESK.I      | 1712.989 | 0.0045   | 2 | 1 | 42.1 | 0 |
| P12163_2_S5,16694 | K.GLSLEEIESK.I      | 1712.989 | -0.00197 | 3 | 1 | 24.7 | 0 |
| P12163_1_F5,11748 | K.GSLQEYK.E         | 1432.826 | 0.01442  | 2 | 1 | 28.3 | 0 |
| P12163_1_F5,11807 | K.GSLQEYK.E         | 1432.826 | 0.00407  | 3 | 1 | 30.5 | 0 |
| P12163_2_F2,12536 | K.GSLQEYK.E         | 1432.826 | 0.00732  | 2 | 1 | 29.1 | 0 |
| P12163_2_F2,12543 | K.GSLQEYK.E         | 1432.826 | 0.00758  | 3 | 1 | 27.9 | 0 |
| P12163_1_F3,25944 | K.SEGSFLELFQGPNLK.A | 2274.259 | 0.00513  | 3 | 1 | 39.4 | 0 |
| P12163_1_S1,6368  | R.EYSAGGEDES.R.I    | 1503.686 | 0.00365  | 3 | 1 | 23.7 | 0 |
| P12163_1_S1,7182  | R.EYSAGGEDES.R.I    | 1503.686 | 0.00611  | 3 | 1 | 44.3 | 0 |
| P12163_1_S1,8164  | R.EYSAGGEDES.R.I    | 1503.686 | 0.00479  | 3 | 1 | 52.2 | 0 |
| P12163_1_F3,20970 | R.QIEDTLVSLK.S      | 1754.052 | 0.00979  | 2 | 1 | 46.1 | 0 |
| P12163_1_F3,14955 | K.CQGLALVNR.F       | 1334.752 | 0.00296  | 2 | 1 | 24.4 | 0 |
| P12163_1_F3,19492 | K.GVELSQTPIELK.S    | 1922.142 | 0.00519  | 2 | 1 | 64.9 | 0 |
| P12163_1_F3,19495 | K.GVELSQTPIELK.S    | 1922.142 | 0.00601  | 3 | 1 | 42.2 | 0 |
| P12163_1_F4,15308 | K.LISDAEK.A         | 1383.83  | 0.0079   | 2 | 1 | 28.7 | 0 |
| P12163_1_F7,17176 | K.QSPLAISHEYEVIK.I  | 2222.264 | 0.00482  | 3 | 1 | 25.8 | 0 |
| P12163_1_F8,18034 | K.QSPLAISHEYEVIK.I  | 2222.264 | 0.0059   | 3 | 1 | 31.4 | 0 |
| P12163_2_F10,1605 | K.QSPLAISHEYEVIK.I  | 2222.264 | 0.00317  | 3 | 1 | 26.5 | 0 |
| P12163_2_F10,1608 | K.QSPLAISHEYEVIK.I  | 2222.264 | 0.00174  | 4 | 1 | 25.4 | 0 |
| P12163_2_F6,17527 | K.QSPLAISHEYEVIK.I  | 2222.264 | 0.00104  | 3 | 1 | 35   | 0 |
| P12163_1_F4,22747 | R.FNVEEVFK.C        | 1619.925 | 0.00629  | 2 | 1 | 35.8 | 0 |
| P12163_1_F4,22753 | R.FNVEEVFK.C        | 1619.925 | 0.00412  | 3 | 1 | 31.2 | 0 |
| P12163_1_F5,21388 | R.FNVEEVFK.C        | 1619.925 | 0.00709  | 2 | 1 | 26.9 | 0 |
| P12163_2_F1,22194 | R.FNVEEVFK.C        | 1619.925 | 0.00783  | 2 | 1 | 42.9 | 0 |
| P12163_2_F1,22195 | R.FNVEEVFK.C        | 1619.925 | 0.00481  | 3 | 1 | 28.9 | 0 |
| P12163_1_S1,12324 | R.SAGCTEEYSVVER.S   | 1790.853 | 0.00863  | 2 | 1 | 43.2 | 0 |
| P12163_1_S1,12344 | R.SAGCTEEYSVVER.S   | 1790.853 | 0.0028   | 3 | 1 | 40.5 | 0 |
| P12163_1_F2,18324 | K.CGINYQPPTVVPGGDL  | 2494.358 | 0.01244  | 3 | 1 | 22   | 0 |
| P12163_1_S1,17084 | K.CGINYQPPTVVPGGDL  | 2494.358 | 0.00704  | 3 | 1 | 43.9 | 0 |
| P12163_1_F3,16232 | K.DVNAAVATIK.T      | 1609.973 | 0.01067  | 2 | 1 | 50.8 | 0 |
| P12163_1_F3,16249 | K.DVNAAVATIK.T      | 1609.973 | 0.00358  | 3 | 1 | 31.1 | 0 |
| P12163_1_F4,16677 | K.DVNAAVATIK.T      | 1609.973 | 0.00647  | 2 | 1 | 49.8 | 0 |
| P12163_1_F4,16736 | K.DVNAAVATIK.T      | 1609.973 | 0.00577  | 3 | 1 | 51.9 | 0 |
| P12163_2_F1,15943 | K.DVNAAVATIK.T      | 1609.973 | 0.00313  | 2 | 1 | 48.6 | 0 |
| P12163_1_F4,21549 | K.FDLMYAK.R         | 1495.844 | 0.00717  | 2 | 1 | 28.7 | 0 |
| P12163_2_F1,16132 | R.EDLAALEK.D        | 1496.878 | 0.00811  | 2 | 1 | 26.9 | 0 |
| P12163_2_F1,16157 | R.EDLAALEK.D        | 1496.878 | 0.00627  | 3 | 1 | 26.3 | 0 |
| P12163_1_F8,19059 | R.QLFHPEQLISGK.E    | 2005.169 | 0.01053  | 2 | 1 | 40.3 | 0 |
| P12163_1_F8,19062 | R.QLFHPEQLISGK.E    | 2005.169 | 0.00359  | 3 | 1 | 36.2 | 0 |
| P12163_2_F6,18606 | R.QLFHPEQLISGK.E    | 2005.169 | 0.00245  | 3 | 1 | 37.5 | 0 |
| P12163_2_F6,18623 | R.QLFHPEQLISGK.E    | 2005.169 | 0.00461  | 2 | 1 | 41.9 | 0 |
| P12163_1_F3,23150 | R.TVQFVDWCPTGFK.C   | 2193.162 | 0.00535  | 3 | 1 | 49   | 0 |
| P12163_1_F3,23178 | R.TVQFVDWCPTGFK.C   | 2193.162 | 0.00377  | 2 | 1 | 54.3 | 0 |
| P12163_1_F8,13833 | K.GLCSPGDVVALHR.I   | 1755.948 | 0.00622  | 3 | 1 | 24.2 | 0 |
| P12163_1_F8,16063 | K.GLCSPGDVVALHR.I   | 1755.948 | 0.00034  | 3 | 1 | 75.6 | 0 |
| P12163_2_F6,15517 | K.GLCSPGDVVALHR.I   | 1755.948 | -0.00068 | 3 | 1 | 63   | 0 |
| P12163_2_S5,14739 | K.GLCSPGDVVALHR.I   | 1755.948 | 0.00199  | 3 | 1 | 67.6 | 0 |
| P12163_1_F2,12689 | K.IVCTLGPASR.S      | 1377.783 | 0.00296  | 3 | 1 | 22.4 | 0 |
| P12163_1_F2,14970 | K.IVCTLGPASR.S      | 1377.783 | 0.0005   | 3 | 1 | 49.3 | 0 |

|                   |                       |          |          |   |   |      |   |
|-------------------|-----------------------|----------|----------|---|---|------|---|
| P12163_1_F9,10798 | K.VLGPHAK.N           | 1329.846 | 0.00699  | 3 | 1 | 36.1 | 0 |
| P12163_1_F2,18593 | R.GDLGM*EIPVEK.I      | 1812.003 | 0.00011  | 2 | 1 | 25.6 | 0 |
| P12163_1_F3,19175 | R.GDLGMEIPVEK.I       | 1796.008 | 0.0151   | 2 | 1 | 40.8 | 0 |
| P12163_1_F3,22656 | R.GLIPILAEGBSAK.A     | 1777.104 | 0.00559  | 3 | 1 | 36.3 | 0 |
| P12163_2_F1,22986 | R.GLIPILAEGBSAK.A     | 1777.104 | 0.00341  | 2 | 1 | 25.9 | 0 |
| P12163_2_F1,23025 | R.GLIPILAEGBSAK.A     | 1777.104 | 0.00799  | 3 | 1 | 25.5 | 0 |
| P12163_1_F4,19035 | R.IGVASVIK.I          | 1394.919 | 0.00307  | 3 | 1 | 28.3 | 0 |
| P12163_2_F1,18278 | R.IGVASVIK.I          | 1394.919 | 0.00445  | 3 | 1 | 31.1 | 0 |
| P12163_2_F1,18286 | R.IGVASVIK.I          | 1394.919 | 0.00272  | 2 | 1 | 26.7 | 0 |
| P12163_1_F3,12393 | K.ATNELVLR.L ! R.ATNI | 1219.731 | 0.00181  | 3 | 1 | 32.1 | 0 |
| P12163_2_F1,14196 | K.ATNELVLR.L ! R.ATNI | 1219.731 | 0.00389  | 2 | 1 | 26.6 | 0 |
| P12163_1_S1,17758 | K.ELVENLSVLR.F        | 1475.873 | 0.00063  | 3 | 1 | 23.5 | 0 |
| P12163_1_S1,20471 | K.ELVENLSVLR.F        | 1475.873 | -0.00201 | 3 | 1 | 29   | 0 |
| P12163_1_S1,20474 | K.ELVENLSVLR.F        | 1475.873 | 0.00232  | 2 | 1 | 26.1 | 0 |
| P12163_1_F5,14523 | R.IDHYLGK.E           | 1453.862 | 0.00756  | 3 | 1 | 24.1 | 0 |
| P12163_1_F6,15310 | R.IDHYLGK.E           | 1453.862 | 0.0057   | 2 | 1 | 25.8 | 0 |
| P12163_1_F6,15324 | R.IDHYLGK.E           | 1453.862 | 0.00696  | 3 | 1 | 35.4 | 0 |
| P12163_2_F9,14321 | R.IDHYLGK.E           | 1453.862 | 0.0033   | 3 | 1 | 25.7 | 0 |
| P12163_2_S5,14430 | R.IDHYLGK.E           | 1453.862 | 0.00453  | 3 | 1 | 35.6 | 0 |
| P12163_1_F3,19552 | R.LQPDEAIYLK.I        | 1798.057 | 0.0072   | 2 | 1 | 39.3 | 0 |
| P12163_1_F3,19558 | R.LQPDEAIYLK.I        | 1798.057 | 0.00661  | 3 | 1 | 34.9 | 0 |
| P12163_1_S1,21121 | R.LVLDAIEGER.R        | 1418.816 | 0.00387  | 2 | 1 | 44.8 | 0 |
| P12163_1_S1,21369 | R.LVLDAIEGER.R        | 1418.816 | -0.00161 | 2 | 1 | 42.3 | 0 |
| P12163_1_F4,25879 | R.WDGVFLM*K.A         | 1716.96  | 0.00867  | 3 | 1 | 25.8 | 0 |
| P12163_1_F3,20880 | K.AFLQGGDCAESFK.E     | 2151.136 | 0.00838  | 3 | 1 | 69   | 0 |
| P12163_1_F4,14355 | K.APEPVLK.T           | 1361.861 | 0.01774  | 2 | 1 | 31.6 | 0 |
| P12163_1_F4,17984 | K.GVANPLGIK.V ! R.GV  | 1476.936 | 0.00597  | 2 | 1 | 37.9 | 0 |
| P12163_2_F1,17047 | K.GVANPLGIK.V ! R.GV  | 1476.936 | 0.00662  | 2 | 1 | 38.9 | 0 |
| P12163_2_F1,17095 | K.GVANPLGIK.V ! R.GV  | 1476.936 | 0.00575  | 3 | 1 | 44   | 0 |
| P12163_2_F2,1227  | K.GVANPLGIK.V ! R.GV  | 1476.936 | 0.01526  | 3 | 1 | 27.3 | 0 |
| P12163_2_S5,15311 | K.GVANPLGIK.V ! R.GV  | 1476.936 | -0.0046  | 3 | 1 | 31.7 | 0 |
| P12163_1_F9,15584 | K.LPHLIR.A            | 1052.688 | 0.00363  | 3 | 1 | 29.9 | 0 |
| P12163_1_F9,16999 | K.LPHLIR.A            | 1052.688 | 0.003    | 3 | 1 | 25.5 | 0 |
| P12163_1_S10,1536 | K.LPHLIR.A            | 1052.688 | 0.00438  | 3 | 1 | 23.7 | 0 |
| P12163_2_F1,12799 | R.AFATGGYAAM*QR.V     | 1563.789 | 0.00256  | 3 | 1 | 25.2 | 0 |
| P12163_1_F2,13174 | R.AFATGGYAAMQR.V      | 1547.794 | 0.00187  | 3 | 1 | 52.5 | 0 |
| P12163_1_F2,15591 | R.AFATGGYAAMQR.V      | 1547.794 | 0.00525  | 2 | 1 | 35.5 | 0 |
| P12163_1_F4,5753  | R.YHTHCDPR.L          | 1389.664 | 0.00037  | 2 | 1 | 27.4 | 0 |
| P12163_2_F2,5773  | R.YHTHCDPR.L          | 1389.664 | 0.00285  | 2 | 1 | 30.6 | 0 |
| P12163_1_F5,14446 | K.APLGGLK.K           | 1263.824 | 0.007    | 3 | 1 | 26   | 0 |
| P12163_2_F2,15187 | K.APLGGLK.K           | 1263.824 | 0.00115  | 3 | 1 | 22.6 | 0 |
| P12163_1_F4,25968 | K.EANNFLWPFK.L        | 1874.042 | 0.00392  | 3 | 1 | 27.4 | 0 |
| P12163_2_F1,25119 | K.EANNFLWPFK.L        | 1874.042 | 0.00305  | 3 | 1 | 39   | 0 |
| P12163_1_F4,16353 | K.GGFYVNPEAK.L        | 1689.942 | 0.00368  | 2 | 1 | 28.7 | 0 |
| P12163_1_F5,15071 | K.GGFYVNPEAK.L        | 1689.942 | 0.00951  | 2 | 1 | 43   | 0 |
| P12163_2_F1,15461 | K.GGFYVNPEAK.L        | 1689.942 | -0.00236 | 2 | 1 | 32.5 | 0 |
| P12163_1_F9,6825  | R.NHYVEGGDAGNR.E      | 1592.772 | 0.0047   | 3 | 1 | 33.7 | 0 |
| P12163_2_S5,7485  | R.NHYVEGGDAGNR.E      | 1592.772 | 0.00062  | 3 | 1 | 30   | 0 |
| P12163_1_F4,23335 | R.QIFNGVFLK.V         | 1674.02  | 0.00222  | 3 | 1 | 28.6 | 0 |
| P12163_2_F1,22789 | R.QIFNGVFLK.V         | 1674.02  | 0.00618  | 2 | 1 | 51   | 0 |
| P12163_2_F1,22794 | R.QIFNGVFLK.V         | 1674.02  | 0.00372  | 3 | 1 | 33.2 | 0 |

|                   |                       |          |          |   |   |      |   |
|-------------------|-----------------------|----------|----------|---|---|------|---|
| P12163_1_F3,20272 | R.VEPYVTYGYPNLK.S     | 2151.195 | 0.00245  | 2 | 1 | 55.4 | 0 |
| P12163_2_F6,19286 | R.VEPYVTYGYPNLK.S     | 2151.195 | -0.00247 | 3 | 1 | 35.7 | 0 |
| P12163_2_F6,19337 | R.VEPYVTYGYPNLK.S     | 2151.195 | 0.00333  | 2 | 1 | 43.1 | 0 |
| P12163_2_F1,11441 | K.ALPDEK.K            | 1280.767 | 0.00538  | 3 | 1 | 22.8 | 0 |
| P12163_1_F5,20712 | K.EFFEALK.T           | 1491.867 | 0.00745  | 2 | 1 | 25.7 | 0 |
| P12163_1_F5,20719 | K.EFFEALK.T           | 1491.867 | 0.00632  | 3 | 1 | 22.6 | 0 |
| P12163_1_F5,6585  | K.GEEQEAAK.K          | 1469.806 | 0.00694  | 2 | 1 | 25.7 | 0 |
| P12163_2_F1,6996  | K.GEEQEAAK.K          | 1469.806 | 0.00682  | 2 | 1 | 26   | 0 |
| P12163_2_F1,7005  | K.GEEQEAAK.K          | 1469.806 | 0.00539  | 3 | 1 | 29.6 | 0 |
| P12163_1_F5,14792 | K.IALAEK.G ! R.IALAEK | 1252.808 | 0.0024   | 3 | 1 | 27.8 | 0 |
| P12163_2_F2,15557 | K.IALAEK.G ! R.IALAEK | 1252.808 | 0.00408  | 3 | 1 | 25.9 | 0 |
| P12163_1_F8,16648 | K.SPLLLQM*NPVHK.K     | 2001.177 | 0.00264  | 3 | 1 | 43.3 | 0 |
| P12163_1_F8,19531 | K.SPLLLQM*NPVHK.K     | 2001.177 | 0.00498  | 3 | 1 | 31.7 | 0 |
| P12163_2_F6,16142 | K.SPLLLQM*NPVHK.K     | 2001.177 | 0.00801  | 3 | 1 | 47.9 | 0 |
| P12163_1_F8,19534 | K.SPLLLQMNPNVHK.K     | 1985.183 | 0.00384  | 3 | 1 | 63.3 | 0 |
| P12163_1_F8,19539 | K.SPLLLQMNPNVHK.K     | 1985.183 | 0.00528  | 4 | 1 | 31.7 | 0 |
| P12163_2_F6,18980 | K.SPLLLQMNPNVHK.K     | 1985.183 | 0.00396  | 4 | 1 | 29.5 | 0 |
| P12163_1_F7,23719 | R.FWVDFIDK.K          | 1677.946 | 0.00328  | 3 | 1 | 22.4 | 0 |
| P12163_1_F4,16413 | K.DLAAAIK.D           | 1309.83  | 0.0099   | 2 | 1 | 34.5 | 0 |
| P12163_2_F9,17876 | K.NREEALIVLAEAK.R     | 2064.227 | 0.01041  | 3 | 1 | 41.2 | 0 |
| P12163_1_F3,23879 | R.EEALIVLAEAK.R       | 1794.083 | 0.00046  | 2 | 1 | 49.6 | 0 |
| P12163_1_F4,24668 | R.EEALIVLAEAK.R       | 1794.083 | 0.00844  | 3 | 1 | 23.2 | 0 |
| P12163_1_F3,25634 | R.LLADDLFLAK.V        | 1727.056 | 0.00482  | 3 | 1 | 35.1 | 0 |
| P12163_1_F3,25808 | R.LLADDLFLAK.V        | 1727.056 | 0.00568  | 2 | 1 | 52.5 | 0 |
| P12163_1_S1,22705 | R.LLADDLFLAK.V        | 1727.056 | 0.00314  | 3 | 1 | 32.3 | 0 |
| P12163_2_S5,13625 | R.SSFAVHAGPISK.F      | 1809.048 | 0.00394  | 3 | 1 | 27.3 | 0 |
| P12163_1_F2,22407 | R.YQVLAGVIEQR.I       | 1579.911 | 0.00283  | 3 | 1 | 54.5 | 0 |
| P12163_1_S1,21494 | R.YQVLAGVIEQR.I       | 1579.911 | 0.00594  | 2 | 1 | 33   | 0 |
| P12163_1_S1,21551 | R.YQVLAGVIEQR.I       | 1579.911 | 0.00391  | 3 | 1 | 47.2 | 0 |
| P12163_1_S1,21767 | R.YQVLAGVIEQR.I       | 1579.911 | 0.00277  | 3 | 1 | 75.1 | 0 |
| P12163_2_F7,19892 | R.YQVLAGVIEQR.I       | 1579.911 | 0.00274  | 3 | 1 | 55.4 | 0 |
| P12163_2_F7,19912 | R.YQVLAGVIEQR.I       | 1579.911 | 0.00162  | 2 | 1 | 47.9 | 0 |
| P12163_1_F2,15684 | K.DAFTPGEEIEGK.D      | 1901.011 | 0.00415  | 2 | 1 | 24.4 | 0 |
| P12163_1_F3,16196 | K.DAFTPGEEIEGK.D      | 1901.011 | 0.02227  | 2 | 1 | 31.5 | 0 |
| P12163_1_F7,22593 | K.DVDTLYTTPEM*LHAI    | 2618.367 | 0.00675  | 3 | 1 | 30.6 | 0 |
| P12163_1_F7,20703 | K.DVDTLYTTPEMLHALI    | 2602.372 | 0.00228  | 3 | 1 | 31.5 | 0 |
| P12163_1_F7,22604 | K.DVDTLYTTPEMLHALI    | 2602.372 | 0.00528  | 3 | 1 | 53.8 | 0 |
| P12163_1_F7,22649 | K.DVDTLYTTPEMLHALI    | 2602.372 | 0.00407  | 4 | 1 | 26.1 | 0 |
| P12163_1_S1,17698 | K.TLVDAYNFSR.E        | 1489.795 | 0.00481  | 2 | 1 | 27.4 | 0 |
| P12163_1_F3,11170 | R.ADAEVDPEM*K.H       | 1728.893 | 0.00022  | 2 | 1 | 29.9 | 0 |
| P12163_1_F3,13151 | R.ADAEVDPEM*K.H       | 1728.893 | 0.00116  | 2 | 1 | 29.1 | 0 |
| P12163_1_F2,12748 | R.ADAEVDPEMK.H        | 1712.898 | 0.00418  | 2 | 1 | 39.9 | 0 |
| P12163_1_F3,13100 | R.ADAEVDPEMK.H        | 1712.898 | 0.01476  | 2 | 1 | 33.6 | 0 |
| P12163_2_F4,12744 | R.DVSAVYHDSNEPASIR    | 2064.03  | 0.00233  | 3 | 1 | 28.7 | 0 |
| P12163_2_F4,12779 | R.DVSAVYHDSNEPASIR    | 2064.03  | 0.00106  | 2 | 1 | 25.8 | 0 |
| P12163_1_F4,12270 | R.EDSVMDGEK.R         | 1617.825 | 0.00465  | 2 | 1 | 23.9 | 0 |
| P12163_1_S1,12099 | K.EAAPTFEQPR.M        | 1449.764 | 0.0027   | 3 | 1 | 33.2 | 0 |
| P12163_2_F7,14111 | K.LVVHITK.N           | 1417.935 | 0.00222  | 3 | 1 | 23.5 | 0 |
| P12163_2_F1,21136 | K.NFMSLPNIK.V         | 1671.971 | 0.00982  | 3 | 1 | 29.5 | 0 |
| P12163_1_F4,18518 | K.SFQCELVFAK.M        | 1837.014 | 0.00329  | 3 | 1 | 33.7 | 0 |
| P12163_1_F4,18564 | K.SFQCELVFAK.M        | 1837.014 | 0.00299  | 2 | 1 | 26.3 | 0 |

|                   |                       |          |          |   |   |      |   |
|-------------------|-----------------------|----------|----------|---|---|------|---|
| P12163_1_F4,21020 | K.SFQCELVFAK.M        | 1837.014 | 0.00347  | 2 | 1 | 24.6 | 0 |
| P12163_1_F4,23073 | K.SFQCELVFAK.M        | 1837.014 | 0.00347  | 3 | 1 | 26.9 | 0 |
| P12163_1_F7,18654 | K.SFQCELVFAK.M        | 1837.014 | -0.0001  | 3 | 1 | 27.8 | 0 |
| P12163_2_F1,20510 | K.SFQCELVFAK.M        | 1837.014 | 0.00434  | 3 | 1 | 33.8 | 0 |
| P12163_2_F1,20516 | K.SFQCELVFAK.M        | 1837.014 | 0.00447  | 2 | 1 | 36.1 | 0 |
| P12163_1_F3,27916 | K.VPLILGIWGGK.G       | 1761.125 | 0.00231  | 3 | 1 | 34.6 | 0 |
| P12163_1_F9,11491 | R.VYDDEV.R.K          | 1199.621 | 0.00332  | 2 | 1 | 24.6 | 0 |
| P12163_1_S10,1227 | R.VYDDEV.R.K          | 1199.621 | 0.00568  | 2 | 1 | 24.2 | 0 |
| P12163_2_F9,11203 | R.VYDDEV.R.K          | 1199.621 | 0.00462  | 2 | 1 | 24.2 | 0 |
| P12163_1_F4,7293  | K.DQEQTQTDK.S         | 1700.891 | 0.00679  | 2 | 1 | 39.3 | 0 |
| P12163_2_F1,6480  | K.DQEQTQTDK.S         | 1700.891 | 0.00139  | 2 | 1 | 24.4 | 0 |
| P12163_1_S1,23040 | K.EVLIVDEFTGR.V       | 1581.879 | 0.00702  | 3 | 1 | 33.3 | 0 |
| P12163_1_F7,17225 | K.GVHIVTVNDYLAR.R     | 1760.996 | 0.00477  | 3 | 1 | 35.7 | 0 |
| P12163_1_F8,18006 | K.GVHIVTVNDYLAR.R     | 1760.996 | -0.00027 | 3 | 1 | 43.9 | 0 |
| P12163_1_F8,18020 | K.GVHIVTVNDYLAR.R     | 1760.996 | 0.00162  | 2 | 1 | 24.4 | 0 |
| P12163_2_F6,17490 | K.GVHIVTVNDYLAR.R     | 1760.996 | 0.00252  | 3 | 1 | 50.2 | 0 |
| P12163_2_F6,17526 | K.GVHIVTVNDYLAR.R     | 1760.996 | -0.00162 | 2 | 1 | 37   | 0 |
| P12163_1_S1,19937 | K.QLFEYDEV.LNSQR.D    | 1944.997 | 0.00524  | 3 | 1 | 52.2 | 0 |
| P12163_1_S1,19965 | K.QLFEYDEV.LNSQR.D    | 1944.997 | 0.00426  | 2 | 1 | 42.6 | 0 |
| P12163_1_F6,12613 | R.DIHYTVDEK.Q         | 1727.942 | 0.00695  | 3 | 1 | 22.2 | 0 |
| P12163_1_F6,12642 | R.DIHYTVDEK.Q         | 1727.942 | 0.00993  | 2 | 1 | 32.1 | 0 |
| P12163_2_F6,12075 | R.DIHYTVDEK.Q         | 1727.942 | -0.00697 | 3 | 1 | 25.8 | 0 |
| P12163_1_F3,18221 | R.VEDLPIESK.M         | 1637.957 | 0.0036   | 2 | 1 | 40.1 | 0 |
| P12163_1_F5,13034 | K.ELAGSIQK.G          | 1453.883 | 0.01014  | 2 | 1 | 24.9 | 0 |
| P12163_2_F1,13383 | K.ELAGSIQK.G          | 1453.883 | 0.00036  | 3 | 1 | 24.4 | 0 |
| P12163_1_F4,14464 | K.TLCEGIAK.C ! R.TLCE | 1499.871 | 0.01393  | 2 | 1 | 37   | 0 |
| P12163_1_F5,12999 | K.TLCEGIAK.C ! R.TLCE | 1499.871 | 0.01461  | 2 | 1 | 36.1 | 0 |
| P12163_2_F1,13392 | K.TLCEGIAK.C ! R.TLCE | 1499.871 | 0.00549  | 2 | 1 | 25.8 | 0 |
| P12163_2_F1,13427 | K.TLCEGIAK.C ! R.TLCE | 1499.871 | 0.00313  | 3 | 1 | 25.1 | 0 |
| P12163_1_S1,25550 | R.ANTFVAEVLGLDPR.E    | 1806.006 | 0.00371  | 3 | 1 | 67.1 | 0 |
| P12163_1_F3,22350 | R.DDLFNINAGIVK.T ! R. | 1927.111 | 0.00659  | 2 | 1 | 71.4 | 0 |
| P12163_1_F3,22356 | R.DDLFNINAGIVK.T ! R. | 1927.111 | 0.00685  | 3 | 1 | 58.9 | 0 |
| P12163_1_F6,20960 | R.DDLFNINAGIVK.T ! R. | 1927.111 | 0.00265  | 3 | 1 | 24.9 | 0 |
| P12163_2_F1,13209 | R.IQNGGTEVVEAK.T ! R  | 1853.059 | -0.00022 | 2 | 1 | 40.9 | 0 |
| P12163_1_S1,21722 | R.LLGVTM*LDVVR.A ! K  | 1535.913 | -0.00397 | 3 | 1 | 22.8 | 0 |
| P12163_1_S1,24770 | R.LLGVTMLDVVR.A ! K.  | 1519.918 | 0.00569  | 2 | 1 | 26.4 | 0 |
| P12163_1_S1,17947 | K.NSNM*LLALNPALTGC    | 1962.074 | 0.0083   | 3 | 1 | 30.8 | 0 |
| P12163_1_S1,20683 | K.NSNM*LLALNPALTGG    | 1946.079 | 0.00203  | 3 | 1 | 41.5 | 0 |
| P12163_1_S1,21431 | K.NSNM*LLALNPALTGG    | 1946.079 | 0.00242  | 3 | 1 | 38.9 | 0 |
| P12163_2_F1,7191  | K.QVAQQEAER.S         | 1362.728 | 0.00434  | 2 | 1 | 35.6 | 0 |
| P12163_1_F3,21075 | K.VLPSIGNEVLK.A       | 1777.104 | 0.02146  | 2 | 1 | 34.1 | 0 |
| P12163_1_F3,21107 | K.VLPSIGNEVLK.A       | 1777.104 | 0.00372  | 3 | 1 | 25.9 | 0 |
| P12163_2_F1,21662 | K.VLPSIGNEVLK.A       | 1777.104 | 0.00717  | 3 | 1 | 34.1 | 0 |
| P12163_1_F2,18043 | R.AEGESEAAQLISEATSF   | 2329.234 | 0.00804  | 3 | 1 | 57.1 | 0 |
| P12163_1_F3,17215 | R.AVLFDR.F            | 1024.609 | 0.00277  | 2 | 1 | 25.1 | 0 |
| P12163_2_F1,16431 | R.AVLFDR.F            | 1024.609 | 0.00133  | 2 | 1 | 24.6 | 0 |
| P12163_1_F6,13935 | R.SPHVAYLPGGK.N       | 1734.016 | 0.00788  | 3 | 1 | 22.2 | 0 |
| P12163_2_S3,12145 | R.SPHVAYLPGGK.N       | 1734.016 | 0.00344  | 3 | 1 | 26   | 0 |
| P12163_2_S5,12865 | R.SPHVAYLPGGK.N       | 1734.016 | 0.00431  | 3 | 1 | 23.1 | 0 |
| P12163_2_F1,16807 | K.EVYASIVK.A ! K.EVY  | 1516.919 | 0.00749  | 3 | 1 | 24   | 0 |
| P12163_1_F7,15846 | K.HVICM*DANIPSAVSS    | 2577.27  | 0.00249  | 3 | 1 | 34.6 | 0 |



|                   |                     |          |          |   |   |      |   |
|-------------------|---------------------|----------|----------|---|---|------|---|
| P12163_1_F7,17905 | K.HVICMDANIPSAVSSV  | 2561.275 | -0.00078 | 3 | 1 | 28.3 | 0 |
| P12163_2_S5,17428 | K.HVICMDANIPSAVSSV  | 2561.275 | 0.00636  | 3 | 1 | 43.4 | 0 |
| P12163_1_F6,14853 | K.LQHGEYVSLGK.V     | 1839.058 | 0.00579  | 3 | 1 | 35.6 | 0 |
| P12163_2_F6,14165 | K.LQHGEYVSLGK.V     | 1839.058 | 0.00366  | 3 | 1 | 32.6 | 0 |
| P12163_1_S1,20305 | K.LVDLSGQLDTPVK.H   | 1896.126 | 0.00648  | 3 | 1 | 57.2 | 0 |
| P12163_1_F8,15624 | R.GIPVDVGGEPGHALR.1 | 1777.986 | 0.00228  | 3 | 1 | 37.6 | 0 |
| P12163_1_F8,15694 | R.GIPVDVGGEPGHALR.1 | 1777.986 | -0.00203 | 2 | 1 | 48.5 | 0 |
| P12163_2_F6,15152 | R.GIPVDVGGEPGHALR.1 | 1777.986 | 0.00261  | 3 | 1 | 27.3 | 0 |
| P12163_2_S5,14196 | R.GIPVDVGGEPGHALR.1 | 1777.986 | 0.00453  | 3 | 1 | 32.7 | 0 |
| P12163_2_S5,14415 | R.GIPVDVGGEPGHALR.1 | 1777.986 | 0.00201  | 3 | 1 | 61.6 | 0 |
| P12163_1_F2,16418 | R.VAIFADTR.A        | 1196.694 | 0.004    | 3 | 1 | 30   | 0 |
| P12163_1_F6,8699  | K.ANSELSSHQK.K      | 1708.944 | 0.00735  | 3 | 1 | 22   | 0 |
| P12163_1_F9,13728 | K.THVVLGCVNK.A      | 1735.014 | 0.01064  | 3 | 1 | 26.8 | 0 |
| P12163_1_F9,13749 | K.THVVLGCVNK.A      | 1735.014 | 0.0005   | 3 | 1 | 22.6 | 0 |
| P12163_2_F9,12625 | K.THVVLGCVNK.A      | 1735.014 | 0.00155  | 4 | 1 | 28.1 | 0 |
| P12163_1_F6,19766 | K.VDDHIGVAIAGLTADC  | 1984.076 | 0.00926  | 3 | 1 | 24.9 | 0 |
| P12163_1_F7,18939 | K.VDDHIGVAIAGLTADC  | 1984.076 | 0.00149  | 3 | 1 | 35   | 0 |
| P12163_1_F7,18963 | K.VDDHIGVAIAGLTADC  | 1984.076 | 0.00115  | 2 | 1 | 66.9 | 0 |
| P12163_2_F4,18527 | K.VDDHIGVAIAGLTADC  | 1984.076 | 0.00572  | 3 | 1 | 39.2 | 0 |
| P12163_1_F4,14230 | R.ETLQGETLK.S       | 1626.952 | 0.00464  | 2 | 1 | 39.4 | 0 |
| P12163_2_F1,13195 | R.ETLQGETLK.S       | 1626.952 | 0.01104  | 2 | 1 | 38.7 | 0 |
| P12163_1_F3,26147 | R.LFQVEYAMEAVK.Q    | 2036.135 | 0.00325  | 3 | 1 | 34   | 0 |
| P12163_1_F4,20416 | R.LVVQLADK.A        | 1493.951 | 0.00372  | 2 | 1 | 27.1 | 0 |
| P12163_1_F4,20488 | R.LVVQLADK.A        | 1493.951 | 0.00594  | 3 | 1 | 29.2 | 0 |
| P12163_1_F4,18287 | K.EIAEVQELK.E       | 1666.984 | 0.00366  | 2 | 1 | 36.9 | 0 |
| P12163_1_F4,18378 | K.EIAEVQELK.E       | 1666.984 | 0.01043  | 3 | 1 | 36.7 | 0 |
| P12163_1_F3,26986 | K.FDALLVELK.E       | 1656.019 | 0.00801  | 3 | 1 | 42.9 | 0 |
| P12163_1_F4,27817 | K.FDALLVELK.E       | 1656.019 | 0.0054   | 3 | 1 | 27.3 | 0 |
| P12163_1_F3,20723 | K.ISTMTAEEYFEK.H    | 2057.072 | 0.00946  | 2 | 1 | 57.4 | 0 |
| P12163_1_F3,20732 | K.ISTMTAEEYFEK.H    | 2057.072 | 0.0122   | 3 | 1 | 42.9 | 0 |
| P12163_1_F4,21355 | K.ISTMTAEEYFEK.H    | 2057.072 | 0.01463  | 3 | 1 | 31.8 | 0 |
| P12163_1_F4,21402 | K.ISTMTAEEYFEK.H    | 2057.072 | 0.0058   | 2 | 1 | 28   | 0 |
| P12163_1_F9,15690 | K.QAYESIEVPK.Y      | 1772.005 | 0.00444  | 3 | 1 | 48.1 | 0 |
| P12163_1_F4,18583 | R.AFDEVNSTLQTK.F    | 1961.08  | 0.00779  | 3 | 1 | 30.7 | 0 |
| P12163_1_F4,18589 | R.AFDEVNSTLQTK.F    | 1961.08  | 0.01001  | 2 | 1 | 47.6 | 0 |
| P12163_1_F4,19209 | R.TIDWEGMAK.M       | 1658.903 | 0.01534  | 2 | 1 | 25.9 | 0 |
| P12163_2_F1,18459 | R.TIDWEGMAK.M       | 1658.903 | 0.00688  | 2 | 1 | 27.8 | 0 |
| P12163_1_F3,10148 | K.EGVVDTPAESK.G     | 1739.964 | 0.00443  | 2 | 1 | 30.6 | 0 |
| P12163_1_F3,10189 | K.EGVVDTPAESK.G     | 1739.964 | 0.00822  | 3 | 1 | 24.7 | 0 |
| P12163_1_F3,10562 | K.EGVVDTPAESK.G     | 1739.964 | 0.00384  | 3 | 1 | 23.9 | 0 |
| P12163_1_F3,12173 | K.EGVVDTPAESK.G     | 1739.964 | 0.00743  | 2 | 1 | 30.9 | 0 |
| P12163_1_F3,9701  | K.GVVDTPAETK.E      | 1624.937 | 0.00459  | 3 | 1 | 29.5 | 0 |
| P12163_1_F3,11708 | K.GVVDTPAETK.E      | 1624.937 | 0.00869  | 2 | 1 | 40.1 | 0 |
| P12163_1_F9,18532 | K.KPLLMAIK.S        | 1826.206 | 0.01148  | 3 | 1 | 27.7 | 0 |
| P12163_2_F9,17136 | K.KPLLMAIK.S        | 1826.206 | 0.00244  | 4 | 1 | 24   | 0 |
| P12163_1_F2,10972 | K.SQIYDVSQSR.M      | 1486.78  | -0.00106 | 3 | 1 | 24.5 | 0 |
| P12163_1_S1,9775  | K.STVPVTDGASSGESTE  | 2357.229 | 0.01044  | 3 | 1 | 48.4 | 0 |
| P12163_1_S1,10717 | K.STVPVTDGASSGESTE  | 2357.229 | 0.0072   | 3 | 1 | 81.1 | 0 |
| P12163_1_F3,23097 | R.M*FYGPGGPYALFAGF  | 2200.172 | 0.00298  | 3 | 1 | 32.5 | 0 |
| P12163_1_F3,25057 | R.MFYGPGGPYALFAGK   | 2184.177 | 0.00556  | 3 | 1 | 37.9 | 0 |
| P12163_1_F2,18998 | K.ADEISNIIR.E       | 1334.758 | 0.0026   | 2 | 1 | 36.6 | 0 |

|                   |                     |          |          |   |   |      |   |
|-------------------|---------------------|----------|----------|---|---|------|---|
| P12163_1_S1,16282 | K.ASSVAQVVNTFQER.G  | 1839.987 | 0.00409  | 3 | 1 | 28.3 | 0 |
| P12163_1_S1,19966 | K.ASSVAQVVNTFQER.G  | 1839.987 | -0.00276 | 2 | 1 | 36.3 | 0 |
| P12163_1_S1,19990 | K.ASSVAQVVNTFQER.G  | 1839.987 | -0.0056  | 3 | 1 | 23.5 | 0 |
| P12163_1_F6,18192 | R.EAYPGDVFYLSR.L    | 1857.944 | 0.00234  | 3 | 1 | 43.5 | 0 |
| P12163_1_F7,17300 | R.EAYPGDVFYLSR.L    | 1857.944 | 0.0045   | 3 | 1 | 51.1 | 0 |
| P12163_2_F4,16857 | R.EAYPGDVFYLSR.L    | 1857.944 | 0.00039  | 3 | 1 | 36.9 | 0 |
| P12163_1_F2,15697 | R.ELIIGDR.Q         | 1119.667 | 0.00257  | 2 | 1 | 25.5 | 0 |
| P12163_1_F3,8241  | R.GEISASESR.L       | 1239.648 | 0.00315  | 2 | 1 | 29.2 | 0 |
| P12163_1_F5,12091 | R.VGSAAQIK.A        | 1381.862 | 0.00838  | 2 | 1 | 26.7 | 0 |
| P12163_2_F2,12258 | R.VGSAAQIK.A        | 1381.862 | 0.00278  | 2 | 1 | 31.3 | 0 |
| P12163_2_F2,12884 | R.VGSAAQIK.A        | 1381.862 | 0.00404  | 2 | 1 | 29.7 | 0 |
| P12163_2_F2,12971 | R.VGSAAQIK.A        | 1381.862 | 0.00498  | 3 | 1 | 24.3 | 0 |
| P12163_1_F4,18697 | K.AGGYGVIIPK.G      | 1582.978 | 0.01139  | 3 | 1 | 27.5 | 0 |
| P12163_1_F9,17287 | K.AGGYGVIIPK.G      | 1582.978 | 0.01295  | 3 | 1 | 43.8 | 0 |
| P12163_2_F1,17947 | K.AGGYGVIIPK.G      | 1582.978 | 0.01296  | 2 | 1 | 38.3 | 0 |
| P12163_2_F9,16015 | K.AGGYGVIIPK.G      | 1582.978 | 0.01696  | 2 | 1 | 29.3 | 0 |
| P12163_2_F1,16646 | K.KLEPLEVETASSSSQNI | 2441.298 | 0.00027  | 2 | 1 | 55.6 | 0 |
| P12163_1_S10,7495 | K.NHVEEK.V          | 1363.779 | 0.0125   | 3 | 1 | 24.1 | 0 |
| P12163_1_F4,16689 | K.NLELTDTVK.N       | 1640.968 | 0.01044  | 3 | 1 | 37.1 | 0 |
| P12163_1_F4,16708 | K.NLELTDTVK.N       | 1640.968 | 0.00365  | 2 | 1 | 37.5 | 0 |
| P12163_2_F1,15948 | K.NLELTDTVK.N       | 1640.968 | 0.00613  | 2 | 1 | 35.7 | 0 |
| P12163_1_F4,18980 | R.CEVTLFTK.K        | 1605.913 | 0.00596  | 3 | 1 | 34   | 0 |
| P12163_2_F1,18166 | R.CEVTLFTK.K        | 1605.913 | 0.00062  | 2 | 1 | 24.7 | 0 |
| P12163_1_F3,15266 | R.NEETGEINIVYK.R    | 2017.106 | 0.00306  | 3 | 1 | 23.7 | 0 |
| P12163_1_F3,17045 | R.NEETGEINIVYK.R    | 2017.106 | 0.00627  | 2 | 1 | 53   | 0 |
| P12163_1_S1,16899 | K.DACAFLGDGMSR.I    | 1603.751 | 0.00639  | 2 | 1 | 31.4 | 0 |
| P12163_1_F4,19951 | K.EMLSLVK.N         | 1427.875 | 0.00279  | 2 | 1 | 29.6 | 0 |
| P12163_1_F5,19161 | K.EMLSLVK.N         | 1427.875 | 0.00588  | 3 | 1 | 30.9 | 0 |
| P12163_2_F1,19307 | K.EMLSLVK.N         | 1427.875 | 0.01077  | 2 | 1 | 27.1 | 0 |
| P12163_2_F1,19328 | K.EMLSLVK.N         | 1427.875 | 0.00141  | 3 | 1 | 29.1 | 0 |
| P12163_2_F1,19630 | K.EMLSLVK.N         | 1427.875 | 0.00492  | 3 | 1 | 24.6 | 0 |
| P12163_1_F8,19159 | R.IEGLETVVHGR.G     | 1513.864 | 0.00579  | 3 | 1 | 24.5 | 0 |
| P12163_2_F6,18696 | R.IEGLETVVHGR.G     | 1513.864 | 0.0102   | 3 | 1 | 53.6 | 0 |
| P12163_2_F6,18776 | R.IEGLETVVHGR.G     | 1513.864 | 0.00412  | 2 | 1 | 30.5 | 0 |
| P12163_1_S1,21640 | R.LLFCGVGCQVQALR.S  | 1925.04  | 0.00312  | 3 | 1 | 78.8 | 0 |
| P12163_1_F4,17126 | R.TPEEVLAAK.G       | 1565.936 | 0.00861  | 2 | 1 | 25.2 | 0 |
| P12163_2_F1,16253 | R.TPEEVLAAK.G       | 1565.936 | 0.00609  | 3 | 1 | 24.2 | 0 |
| P12163_2_S3,13178 | R.YSLDYHTIR.N       | 1471.785 | -0.00025 | 3 | 1 | 35.7 | 0 |
| P12163_1_S1,19081 | K.GMIGM*VSIGDVVR.A  | 1653.897 | 0.00328  | 2 | 1 | 31.7 | 0 |
| P12163_1_S1,19096 | K.GMIGM*VSIGDVVR.A  | 1653.897 | 0.00227  | 3 | 1 | 44.3 | 0 |
| P12163_1_F3,14882 | K.LITVSPDTK.V       | 1581.967 | 0.00649  | 3 | 1 | 23.7 | 0 |
| P12163_1_F3,16851 | K.LITVSPDTK.V       | 1581.967 | 0.00802  | 2 | 1 | 36.9 | 0 |
| P12163_1_F3,16872 | K.LITVSPDTK.V       | 1581.967 | 0.00841  | 3 | 1 | 36.1 | 0 |
| P12163_1_F2,11667 | K.SVAGITER.D        | 1249.742 | 0.00371  | 3 | 1 | 22.4 | 0 |
| P12163_1_F2,16164 | K.SVAGITER.D        | 1249.742 | 0.00053  | 2 | 1 | 38.9 | 0 |
| P12163_2_S5,7204  | R.AVVSEHR.E         | 1101.632 | 0.00284  | 3 | 1 | 29.8 | 0 |
| P12163_1_F9,14909 | R.HIPVIDDK.G        | 1544.926 | 0.00524  | 3 | 1 | 29.3 | 0 |
| P12163_2_F9,13711 | R.HIPVIDDK.G        | 1544.926 | 0.0041   | 3 | 1 | 36.5 | 0 |
| P12163_1_F8,19633 | R.M*EEHGFESTTISDILK | 2461.274 | 0.01237  | 3 | 1 | 31.3 | 0 |
| P12163_1_F8,20673 | R.MEEHGFESTTISDILK. | 2445.279 | 0.01003  | 3 | 1 | 37.5 | 0 |
| P12163_1_S10,1318 | K.EHGFSGFR.N        | 1240.638 | 0.00313  | 3 | 1 | 24.8 | 0 |

|                   |                      |          |          |   |   |      |   |
|-------------------|----------------------|----------|----------|---|---|------|---|
| P12163_1_F9,10579 | K.HEGIPLR.F          | 1125.668 | 0.00346  | 3 | 1 | 22.5 | 0 |
| P12163_2_F8_12070 | K.HEGIPLR.F          | 1125.668 | 0.00547  | 3 | 1 | 25.6 | 0 |
| P12163_2_F9,9884  | K.HEGIPLR.F          | 1125.668 | 0.00403  | 3 | 1 | 30.5 | 0 |
| P12163_1_F6,19876 | K.HYLGPFEEAFGK.I     | 1874.042 | 0.00837  | 3 | 1 | 40   | 0 |
| P12163_1_F9,19493 | K.HYLGPFEEAFGK.I     | 1874.042 | 0.00498  | 3 | 1 | 31.2 | 0 |
| P12163_2_F6,19556 | K.HYLGPFEEAFGK.I     | 1874.042 | 0.00552  | 3 | 1 | 38.2 | 0 |
| P12163_1_F5,15323 | K.NEAFNCNNGDVFK.W    | 2137.059 | 0.00361  | 2 | 1 | 37.4 | 0 |
| P12163_1_F5,22344 | K.NSFITWIDK.V        | 1731.989 | 0.00746  | 3 | 1 | 30.4 | 0 |
| P12163_2_F1,23133 | K.NSFITWIDK.V        | 1731.989 | 0.00353  | 3 | 1 | 35.5 | 0 |
| P12163_1_F5,6580  | R.STEAENCK.I         | 1546.799 | 0.0074   | 2 | 1 | 26.6 | 0 |
| P12163_2_F2,7369  | R.STEAENCK.I         | 1546.799 | 0.00572  | 2 | 1 | 41.2 | 0 |
| P12163_1_F2,12585 | K.ASNEIEEGLSNR.G     | 1622.829 | 0.00094  | 3 | 1 | 34.2 | 0 |
| P12163_1_F2,14181 | K.ASNEIEEGLSNR.G     | 1622.829 | 0.00231  | 2 | 1 | 46.1 | 0 |
| P12163_1_F4,18316 | K.CSLDVAFSPSK.A      | 1818.988 | 0.00603  | 2 | 1 | 34.2 | 0 |
| P12163_2_F1,17545 | K.CSLDVAFSPSK.A      | 1818.988 | 0.00533  | 2 | 1 | 40.6 | 0 |
| P12163_1_F4,15524 | K.CTVLYPASAK.A       | 1717.977 | 0.00254  | 3 | 1 | 26.4 | 0 |
| P12163_2_F1,14520 | K.CTVLYPASAK.A       | 1717.977 | 0.0059   | 3 | 1 | 34.2 | 0 |
| P12163_2_F1,14522 | K.CTVLYPASAK.A       | 1717.977 | 0.00314  | 2 | 1 | 34.1 | 0 |
| P12163_2_F1,19032 | K.ILASELPK.N         | 1478.94  | 0.00266  | 2 | 1 | 36.4 | 0 |
| P12163_1_F6,22440 | R.IDCLELPLIQHAQGPDI  | 2495.287 | -0.00166 | 3 | 1 | 23.6 | 0 |
| P12163_2_F4,21034 | R.IDCLELPLIQHAQGPDI  | 2495.287 | 0.0035   | 3 | 1 | 48.1 | 0 |
| P12163_1_F6,16027 | R.LNTYTTEPVHHVDQTV   | 2703.493 | 0.00689  | 4 | 1 | 32.4 | 0 |
| P12163_2_F8_12070 | R.LNTYTTEPVHHVDQTV   | 2703.493 | 0.00049  | 4 | 1 | 41.2 | 0 |
| P12163_1_F3,15474 | K.AYEGVPAPYDK.V ! K. | 1817.989 | -0.00599 | 2 | 1 | 40   | 0 |
| P12163_2_F1,15198 | K.AYEGVPAPYDK.V ! K. | 1817.989 | 0.00311  | 2 | 1 | 41.9 | 0 |
| P12163_1_F2,22469 | K.LGSQLDILAPVK.Y     | 1862.157 | 0.00654  | 3 | 1 | 37.1 | 0 |
| P12163_1_F3,23218 | K.LGSQLDILAPVK.Y     | 1862.157 | 0.00117  | 2 | 1 | 53.5 | 0 |
| P12163_1_F3,23220 | K.LGSQLDILAPVK.Y     | 1862.157 | 0.00825  | 3 | 1 | 42.5 | 0 |
| P12163_1_F5,10805 | M.VSGSGICAK.R        | 1486.851 | 0.00859  | 2 | 1 | 36.7 | 0 |
| P12163_1_F9,11893 | R.GMIPHK.T           | 1290.781 | -0.00883 | 3 | 1 | 25.8 | 0 |
| P12163_2_F9,11176 | R.GMIPHK.T           | 1290.781 | 0.01352  | 3 | 1 | 23   | 0 |
| P12163_1_F5,18472 | R.LASIVAK.E          | 1309.866 | 0.00458  | 2 | 1 | 29.7 | 0 |
| P12163_1_F3,20121 | R.MVIPDALK.V         | 1494.917 | 0.00391  | 3 | 1 | 32.7 | 0 |
| P12163_1_F3,20139 | R.MVIPDALK.V         | 1494.917 | 0.00843  | 2 | 1 | 35.2 | 0 |
| P12163_2_F1,20140 | R.MVIPDALK.V         | 1494.917 | 0.0046   | 3 | 1 | 27.9 | 0 |
| P12163_1_F3,8021  | K.ATDMSIR.I          | 1097.593 | 0.003    | 3 | 1 | 26.8 | 0 |
| P12163_1_F3,10093 | K.ATDMSIR.I          | 1097.593 | 0.00242  | 3 | 1 | 36.2 | 0 |
| P12163_2_F4,13724 | K.KLPSEHNLLQNGNIGG   | 2998.591 | 0.00618  | 4 | 1 | 33.7 | 0 |
| P12163_2_F10,1480 | K.LPSEHNLLQNGNIGGQ   | 2566.291 | -0.00046 | 3 | 1 | 37.3 | 0 |
| P12163_1_F4,21477 | R.DNFMDAWEAK.E       | 1834.925 | 0.00197  | 2 | 1 | 43.5 | 0 |
| P12163_2_S3,9299  | R.EMSYHK.V           | 1402.761 | 0.00323  | 3 | 1 | 25.9 | 0 |
| P12163_2_S5,9763  | R.EMSYHK.V           | 1402.761 | 0.00422  | 3 | 1 | 23.9 | 0 |
| P12163_1_F8,14673 | R.VM*IHQPLGTAGGK.A   | 1933.115 | 0.00505  | 3 | 1 | 36.7 | 0 |
| P12163_2_F6,14142 | R.VM*IHQPLGTAGGK.A   | 1933.115 | 0.00409  | 3 | 1 | 40.9 | 0 |
| P12163_1_F8,14661 | R.VMIHQPLGTAGGK.A    | 1917.12  | 0.00398  | 3 | 1 | 34.2 | 0 |
| P12163_2_F6,14114 | R.VMIHQPLGTAGGK.A    | 1917.12  | 0.00461  | 3 | 1 | 39.6 | 0 |
| P12163_2_F6,14137 | R.VMIHQPLGTAGGK.A    | 1917.12  | 0.00053  | 2 | 1 | 39.4 | 0 |
| P12163_1_F3,17162 | K.IPQLPADAK.I        | 1560.957 | 0.0038   | 3 | 1 | 26.5 | 0 |
| P12163_2_F1,16811 | K.IPQLPADAK.I        | 1560.957 | 0.0074   | 2 | 1 | 25   | 0 |
| P12163_1_F2,12835 | K.LSEGQLIDGR.L       | 1391.78  | 0.00464  | 3 | 1 | 31.5 | 0 |
| P12163_1_F8,15674 | K.REDAQPLGFVTER.T    | 1951.019 | 0.00383  | 2 | 1 | 34.4 | 0 |

|                   |                       |          |          |   |   |      |   |
|-------------------|-----------------------|----------|----------|---|---|------|---|
| P12163_1_F8,15693 | K.REDAQPLGFETER.T     | 1951.019 | 0.00284  | 3 | 1 | 71.3 | 0 |
| P12163_2_F6,15093 | K.REDAQPLGFETER.T     | 1951.019 | 0.00574  | 3 | 1 | 35.1 | 0 |
| P12163_2_F6,15098 | K.REDAQPLGFETER.T     | 1951.019 | 0.00299  | 2 | 1 | 40.1 | 0 |
| P12163_1_F6,19714 | K.VPAVVEHAPAGLVAG     | 2722.571 | 0.00554  | 4 | 1 | 32.8 | 0 |
| P12163_1_F2,17062 | R.FEAPCVLQNNR.E       | 1651.853 | 0.00275  | 3 | 1 | 26   | 0 |
| P12163_1_F4,7659  | R.HVIHCK.G            | 1401.824 | 0.00535  | 3 | 1 | 23.3 | 0 |
| P12163_1_F5,6342  | R.HVIHCK.G            | 1401.824 | 0.00403  | 3 | 1 | 25.6 | 0 |
| P12163_2_F4,6635  | R.HVIHCK.G            | 1401.824 | 0.00193  | 3 | 1 | 24.5 | 0 |
| P12163_1_F8,20956 | K.ELAQAYEVLSDPEKR.    | 2356.297 | -0.00328 | 3 | 1 | 50.1 | 0 |
| P12163_2_S5,19891 | K.ELAQAYEVLSDPEKR.    | 2356.297 | 0.00425  | 3 | 1 | 53.4 | 0 |
| P12163_1_F3,23557 | K.VLEVIVEK.G          | 1536.982 | 0.00578  | 2 | 1 | 39.1 | 0 |
| P12163_1_F3,23644 | K.VLEVIVEK.G          | 1536.982 | 0.00445  | 3 | 1 | 28.2 | 0 |
| P12163_1_F4,21707 | K.YYEILGVSK.S ! K.YYE | 1679.983 | 0.00216  | 3 | 1 | 26   | 0 |
| P12163_1_F4,21727 | K.YYEILGVSK.S ! K.YYE | 1679.983 | 0.00562  | 2 | 1 | 33.6 | 0 |
| P12163_2_F1,21183 | K.YYEILGVSK.S ! K.YYE | 1679.983 | 0.00504  | 3 | 1 | 23.9 | 0 |
| P12163_2_F1,21187 | K.YYEILGVSK.S ! K.YYE | 1679.983 | 0.00854  | 2 | 1 | 30.4 | 0 |
| P12163_2_F9,19043 | K.YYEILGVSK.S ! K.YYE | 1679.983 | 0.00681  | 3 | 1 | 31.1 | 0 |
| P12163_1_F3,17548 | R.EIYDQYGEDALK.E      | 2052.075 | 0.00434  | 2 | 1 | 42   | 0 |
| P12163_2_F6,13624 | R.GEDVIHPLK.V         | 1615.963 | 0.00178  | 3 | 1 | 23.7 | 0 |
| P12163_1_F6,12454 | R.RGEDVIHPLK.V        | 1772.064 | 0.00643  | 4 | 1 | 27.4 | 0 |
| P12163_2_F1,18508 | K.AALSDEYFVK.R        | 1750.984 | 0.00741  | 3 | 1 | 35.4 | 0 |
| P12163_2_F1,18510 | K.AALSDEYFVK.R        | 1750.984 | 0.00331  | 2 | 1 | 54.3 | 0 |
| P12163_2_F9,16960 | K.AALSDEYFVK.R        | 1750.984 | 0.00405  | 3 | 1 | 34.5 | 0 |
| P12163_1_S1,18098 | K.APTIAAAAYLR.M       | 1421.842 | 0.00339  | 3 | 1 | 65.4 | 0 |
| P12163_1_S1,18125 | K.APTIAAAAYLR.M       | 1421.842 | 0.00475  | 2 | 1 | 26.6 | 0 |
| P12163_1_F3,10977 | R.ESLDDPDTK.I         | 1627.863 | 0.00723  | 2 | 1 | 29.6 | 0 |
| P12163_2_F6,23544 | R.KLAEVFSIVGR.D       | 1956.174 | 0.00199  | 3 | 1 | 28.7 | 0 |
| P12163_1_F2,13562 | R.LGQVSVSNATR.R       | 1435.817 | 0.00353  | 2 | 1 | 29   | 0 |
| P12163_1_F3,15803 | R.YQIPVSQEGTVK.A      | 1957.121 | 0.0071   | 3 | 1 | 41.2 | 0 |
| P12163_1_F4,16291 | R.YQIPVSQEGTVK.A      | 1957.121 | 0.01118  | 3 | 1 | 31.6 | 0 |
| P12163_2_F1,15477 | R.YQIPVSQEGTVK.A      | 1957.121 | 0.00284  | 3 | 1 | 49.7 | 0 |
| P12163_2_F1,15494 | R.YQIPVSQEGTVK.A      | 1957.121 | -0.00282 | 2 | 1 | 30.2 | 0 |
| P12163_1_F8,21557 | K.FLDDFHLQTK.R        | 1872.048 | 0.00518  | 2 | 1 | 52   | 0 |
| P12163_2_F6,21173 | K.FLDDFHLQTK.R        | 1872.048 | 0.00434  | 3 | 1 | 26.9 | 0 |
| P12163_1_F9,15509 | K.HVISGILK.H          | 1474.957 | 0.00841  | 3 | 1 | 44.7 | 0 |
| P12163_2_F4,14700 | K.HVISGILK.H          | 1474.957 | 0.00541  | 3 | 1 | 49.9 | 0 |
| P12163_2_F9,14253 | K.HVISGILK.H          | 1474.957 | 0.00022  | 3 | 1 | 31.3 | 0 |
| P12163_2_F6,18463 | K.LFDAIDENKDER.L      | 2073.107 | 0.00544  | 2 | 1 | 30.8 | 0 |
| P12163_1_F7,18831 | K.VLSDFDTSNDSHIDIK.   | 2414.266 | 0.0062   | 3 | 1 | 38.7 | 0 |
| P12163_1_F3,10060 | R.ESDSVAIDGQNTK.G     | 1972.044 | 0.00038  | 3 | 1 | 31.6 | 0 |
| P12163_1_F3,11461 | R.ESDSVAIDGQNTK.G     | 1972.044 | 0.01109  | 2 | 1 | 31   | 0 |
| P12163_1_F3,11500 | R.ESDSVAIDGQNTK.G     | 1972.044 | 0.0089   | 3 | 1 | 39.1 | 0 |
| P12163_1_S1,19914 | R.LLTDSGEPNIDVIK.K    | 2122.222 | 0.00243  | 4 | 1 | 35.4 | 0 |
| P12163_1_S1,19964 | R.LLTDSGEPNIDVIK.K    | 2122.222 | 0.0079   | 3 | 1 | 43.2 | 0 |
| P12163_1_F3,29480 | K.LLLLLNVIDPK.I       | 1906.166 | 0.00683  | 3 | 1 | 25.4 | 0 |
| P12163_1_F6,10839 | R.EGISISHPAR.F        | 1370.769 | 0.01333  | 3 | 1 | 31.7 | 0 |
| P12163_2_F7,9942  | R.EGISISHPAR.F        | 1370.769 | 0.0025   | 3 | 1 | 29.4 | 0 |
| P12163_2_F7,12478 | R.FGM*HAQVGTVR.D      | 1522.81  | 0.00084  | 3 | 1 | 24.7 | 0 |
| P12163_1_F3,26230 | R.SLVDLLPVIK.V        | 1705.108 | 0.00407  | 2 | 1 | 31.6 | 0 |
| P12163_1_F8,15522 | R.SSLPAVQIDHDLK.V     | 2031.169 | 0.00187  | 3 | 1 | 22.9 | 0 |
| P12163_1_F8,17039 | R.SSLPAVQIDHDLK.V     | 2031.169 | -0.00213 | 2 | 1 | 44.3 | 0 |

|                   |                       |          |          |   |   |      |   |
|-------------------|-----------------------|----------|----------|---|---|------|---|
| P12163_1_F8,17077 | R.SSLPAVQIDHDLK.V     | 2031.169 | 0.00664  | 3 | 1 | 52.4 | 0 |
| P12163_2_F6,16474 | R.SSLPAVQIDHDLK.V     | 2031.169 | 0.00367  | 3 | 1 | 47.2 | 0 |
| P12163_2_F6,16527 | R.SSLPAVQIDHDLK.V     | 2031.169 | 0.00725  | 2 | 1 | 52   | 0 |
| P12163_1_F4,17101 | R.VCGTIDIEK.A         | 1642.929 | 0.01315  | 2 | 1 | 34.2 | 0 |
| P12163_1_F3,8930  | K.QASLANEQLR.S        | 1433.801 | 0.00292  | 3 | 1 | 33.7 | 0 |
| P12163_1_F5,22473 | K.WLPLAYK.M           | 1498.924 | 0.00186  | 3 | 1 | 23.1 | 0 |
| P12163_1_F9,9649  | R.HAFQVSDR.I          | 1263.675 | 0.00453  | 3 | 1 | 33.3 | 0 |
| P12163_1_S10,1050 | R.HAFQVSDR.I          | 1263.675 | 0.00411  | 3 | 1 | 22.8 | 0 |
| P12163_2_F4,8996  | R.HAFQVSDR.I          | 1263.675 | 0.00099  | 3 | 1 | 31.4 | 0 |
| P12163_2_S5,9629  | R.HAFQVSDR.I          | 1263.675 | 0.00189  | 3 | 1 | 42.6 | 0 |
| P12163_1_F6,21401 | R.LITDGQDHGVNGFIVQ    | 2286.251 | 0.00168  | 3 | 1 | 30.9 | 0 |
| P12163_1_F7,17457 | R.LQANDFSTLPEAHACT    | 2752.455 | 0.00393  | 4 | 1 | 48.1 | 0 |
| P12163_1_F7,17530 | R.LQANDFSTLPEAHACT    | 2752.455 | 0.0107   | 3 | 1 | 36.9 | 0 |
| P12163_2_S5,16828 | R.LQANDFSTLPEAHACT    | 2752.455 | 0.00563  | 3 | 1 | 35.8 | 0 |
| P12163_1_S1,13632 | R.LVASDPAFR.K         | 1279.731 | 0.00305  | 3 | 1 | 44   | 0 |
| P12163_1_F6,9498  | K.ADLHVEHGDK.V        | 1728.949 | -0.00558 | 3 | 1 | 28.5 | 0 |
| P12163_1_F6,9568  | K.ADLHVEHGDK.V        | 1728.949 | -0.0002  | 2 | 1 | 51.6 | 0 |
| P12163_2_F6,9216  | K.ADLHVEHGDK.V        | 1728.949 | 0.00879  | 4 | 1 | 38   | 0 |
| P12163_2_F4,14420 | K.DTLIYPAHDYK.G       | 1944.069 | 0.00282  | 3 | 1 | 22.3 | 0 |
| P12163_2_F4,14428 | K.DTLIYPAHDYK.G       | 1944.069 | 0.00344  | 2 | 1 | 24.4 | 0 |
| P12163_1_S1,18369 | K.GFTVSTVGEEIQYNPR    | 2101.087 | 0.00052  | 3 | 1 | 47.6 | 0 |
| P12163_1_F4,22125 | K.SIM*ENLNLSYPK.M     | 2033.12  | 0.00562  | 3 | 1 | 26.6 | 0 |
| P12163_1_F4,22082 | K.SIMENLNLSYPK.M      | 2017.125 | 0.00267  | 2 | 1 | 31.7 | 0 |
| P12163_1_F6,17619 | K.SVHSQIFTLPK.D       | 1865.11  | 0.00845  | 3 | 1 | 24.7 | 0 |
| P12163_1_F6,14742 | R.ATPGHTLGCVTYVSGI    | 2828.394 | -0.00209 | 3 | 1 | 40.6 | 0 |
| P12163_2_S5,13719 | R.ATPGHTLGCVTYVSGI    | 2828.394 | 0.0049   | 3 | 1 | 22.2 | 0 |
| P12163_1_F8,16649 | K.AGAGSATLSMAYAAV     | 2077.157 | 0.03293  | 3 | 1 | 30.4 | 0 |
| P12163_1_F5,13034 | K.ELAGSIQK.G          | 1453.883 | 0.01014  | 2 | 1 | 24.9 | 0 |
| P12163_2_F1,13383 | K.ELAGSIQK.G          | 1453.883 | 0.00036  | 3 | 1 | 24.4 | 0 |
| P12163_1_F4,14464 | K.TLCEGIAC.C ! R.TLCE | 1499.871 | 0.01393  | 2 | 1 | 37   | 0 |
| P12163_1_F5,12999 | K.TLCEGIAC.C ! R.TLCE | 1499.871 | 0.01461  | 2 | 1 | 36.1 | 0 |
| P12163_2_F1,13392 | K.TLCEGIAC.C ! R.TLCE | 1499.871 | 0.00549  | 2 | 1 | 25.8 | 0 |
| P12163_2_F1,13427 | K.TLCEGIAC.C ! R.TLCE | 1499.871 | 0.00313  | 3 | 1 | 25.1 | 0 |
| P12163_1_S1,25550 | R.ANTFVAEVLGLDPR.E    | 1806.006 | 0.00371  | 3 | 1 | 67.1 | 0 |
| P12163_2_F1,13209 | R.IQNGGTEVVEAK.T ! R  | 1853.059 | -0.00022 | 2 | 1 | 40.9 | 0 |
| P12163_1_S1,21722 | R.LLGVTM*LDVVR.A ! K  | 1535.913 | -0.00397 | 3 | 1 | 22.8 | 0 |
| P12163_1_S1,24770 | R.LLGVTMLDVVR.A ! K   | 1519.918 | 0.00569  | 2 | 1 | 26.4 | 0 |
| P12163_1_F2,11861 | K.GDAEEAFAR.V         | 1269.638 | 0.00397  | 2 | 1 | 37.5 | 0 |
| P12163_1_S1,17495 | K.LADAAGEVIR.K        | 1318.763 | 0.00404  | 2 | 1 | 26.8 | 0 |
| P12163_1_S1,17545 | K.LADAAGEVIR.K        | 1318.763 | 0.00159  | 3 | 1 | 54.5 | 0 |
| P12163_1_F3,21876 | K.QIHQQALDVLQWQ.-     | 1911.039 | 0.00311  | 2 | 1 | 63.2 | 0 |
| P12163_2_F1,22089 | K.QIHQQALDVLQWQ.-     | 1911.039 | 0.00344  | 2 | 1 | 33.2 | 0 |
| P12163_1_F4,18166 | R.ATSFNVIAAGDK.Q      | 1802.027 | 0.0076   | 3 | 1 | 46   | 0 |
| P12163_1_F4,18184 | R.ATSFNVIAAGDK.Q      | 1802.027 | 0.00789  | 2 | 1 | 76.5 | 0 |
| P12163_2_F1,17463 | R.ATSFNVIAAGDK.Q      | 1802.027 | 0.00429  | 2 | 1 | 65.9 | 0 |
| P12163_2_F1,17489 | R.ATSFNVIAAGDK.Q      | 1802.027 | 0.00529  | 3 | 1 | 38.5 | 0 |
| P12163_1_S1,16264 | R.GDQLYWEASSDAR.A     | 1801.866 | 0.00415  | 2 | 1 | 45.4 | 0 |
| P12163_1_F2,9344  | R.TTLNGEEVSTR.T       | 1510.801 | 0.00465  | 3 | 1 | 26.5 | 0 |
| P12163_1_S1,22600 | K.FGIINEDGQFLYR.G     | 1875.991 | 0.00081  | 3 | 1 | 43.4 | 0 |
| P12163_1_F5,15388 | K.IENLNQNIK.A         | 1694.006 | 0.0047   | 2 | 1 | 32.5 | 0 |
| P12163_2_F2,16203 | K.IENLNQNIK.A         | 1694.006 | 0.00328  | 2 | 1 | 33.4 | 0 |

|                   |                          |          |          |   |   |      |   |
|-------------------|--------------------------|----------|----------|---|---|------|---|
| P12163_1_F2,23350 | K.VPIEITIGELK.K          | 1820.135 | 0.00952  | 3 | 1 | 27   | 0 |
| P12163_1_F3,24331 | K.VPIEITIGELK.K          | 1820.135 | 0.00538  | 3 | 1 | 31   | 0 |
| P12163_1_S1,14740 | K.YIGLSEASASTIR.R        | 1671.922 | 0.00605  | 3 | 1 | 41   | 0 |
| P12163_2_F6,17647 | K.YIGLSEASASTIR.R        | 1671.922 | -0.0009  | 2 | 1 | 24.8 | 0 |
| P12163_1_F5,10587 | R.AACEASLK.R             | 1457.824 | 0.01135  | 2 | 1 | 28   | 0 |
| P12163_2_F2,11353 | R.AACEASLK.R             | 1457.824 | 0.00721  | 2 | 1 | 24.6 | 0 |
| P12163_2_F2,11399 | R.AACEASLK.R             | 1457.824 | 0.00707  | 3 | 1 | 28.6 | 0 |
| P12163_2_F10,1916 | R.LDVVDYIDLYYQHR.V !     | 2017.033 | 0.00299  | 3 | 1 | 28.7 | 0 |
| P12163_1_F4,14785 | K.AIVVTGAK.G             | 1366.888 | 0.00564  | 3 | 1 | 35.3 | 0 |
| P12163_1_F4,14791 | K.AIVVTGAK.G             | 1366.888 | 0.0078   | 2 | 1 | 32.8 | 0 |
| P12163_2_F1,13798 | K.AIVVTGAK.G             | 1366.888 | 0.00578  | 2 | 1 | 32.5 | 0 |
| P12163_2_F1,13800 | K.AIVVTGAK.G             | 1366.888 | 0.00639  | 3 | 1 | 33.5 | 0 |
| P12163_2_F1,9963  | K.ASPDPEVK.K             | 1450.836 | 0.00273  | 2 | 1 | 40.5 | 0 |
| P12163_1_F4,21203 | K.QQIFADLEK.Y            | 1699.984 | 0.01123  | 2 | 1 | 32.2 | 0 |
| P12163_2_F1,20658 | K.QQIFADLEK.Y            | 1699.984 | 0.00763  | 2 | 1 | 30.3 | 0 |
| P12163_1_F3,13783 | R.GATLSAPVEQAK.S         | 1780.042 | 0.00971  | 2 | 1 | 26.6 | 0 |
| P12163_1_F8,21789 | R.QWALDILEHR.R           | 1584.88  | 0.00038  | 3 | 1 | 23.3 | 0 |
| P12163_2_F6,21417 | R.QWALDILEHR.R           | 1584.88  | -0.00025 | 3 | 1 | 48.2 | 0 |
| P12163_1_S1,24132 | R.TNQTSPQVIVDLLDIGH      | 2449.412 | 0.00756  | 3 | 1 | 37.7 | 0 |
| P12163_1_F4,19568 | K.AQMLHISSGK.D           | 1655.997 | 0.00725  | 3 | 1 | 27.4 | 0 |
| P12163_1_F8,20486 | K.LLWPDHSEFVR.M          | 1702.922 | 0.00339  | 3 | 1 | 25.8 | 0 |
| P12163_1_F7,21013 | R.DGLLPDLATFDTHR.I       | 1874.991 | 0.00408  | 2 | 1 | 25.7 | 0 |
| P12163_1_F7,21055 | R.DGLLPDLATFDTHR.I       | 1874.991 | 0.00269  | 3 | 1 | 65.8 | 0 |
| P12163_2_F4,20430 | R.DGLLPDLATFDTHR.I       | 1874.991 | 0.00191  | 3 | 1 | 48.9 | 0 |
| P12163_2_S5,20350 | R.DGLLPDLATFDTHR.I       | 1874.991 | 0.00368  | 3 | 1 | 40.5 | 0 |
| P12163_2_F6,16233 | R.GIAHPLM*FVR.L          | 1460.835 | 0.00051  | 3 | 1 | 31.9 | 0 |
| P12163_1_F3,21727 | R.IMGAVPVSGTNFYK.L       | 2092.172 | 0.00604  | 3 | 1 | 36.3 | 0 |
| P12163_1_F2,8757  | R.SSEAEAETSLR.R          | 1483.754 | 0.00161  | 3 | 1 | 46.4 | 0 |
| P12163_1_F2,10686 | R.SSEAEAETSLR.R          | 1483.754 | 0.00416  | 2 | 1 | 25.4 | 0 |
| P12163_1_F6,16964 | K.EGFVAATVTPQHLVLI       | 2156.213 | 0.00494  | 3 | 1 | 27.9 | 0 |
| P12163_1_F6,19515 | K.EGFVAATVTPQHLVLI       | 2156.213 | 0.00446  | 3 | 1 | 32.9 | 0 |
| P12163_1_F6,19545 | K.EGFVAATVTPQHLVLI       | 2156.213 | -0.00289 | 2 | 1 | 36.7 | 0 |
| P12163_1_F7,18740 | K.EGFVAATVTPQHLVLI       | 2156.213 | 0.00497  | 3 | 1 | 69.3 | 0 |
| P12163_2_F6,16664 | K.FFLGTDSAPHER.G         | 1680.865 | 0.01593  | 3 | 1 | 60.4 | 0 |
| P12163_1_F4,23197 | K.VFEEMGALDK.L           | 1746.956 | 0.01879  | 2 | 1 | 33.4 | 0 |
| P12163_1_F4,23219 | K.VFEEMGALDK.L           | 1746.956 | 0.00714  | 3 | 1 | 24.9 | 0 |
| P12163_1_F8,18559 | K.VVMEHITMDAVK.F         | 2082.155 | 0.00318  | 3 | 1 | 34.6 | 0 |
| P12163_2_F9,14407 | R.KTGVVFAVK.L            | 1861.204 | 0.00013  | 4 | 1 | 29.2 | 0 |
| P12163_1_F2,13441 | R.QAVVSAVTSGSR.K         | 1465.828 | 0.00259  | 3 | 1 | 66.2 | 0 |
| P12163_1_F3,17015 | K.AMADFGDDEYK.H          | 1869.915 | 0.00775  | 2 | 1 | 54.6 | 0 |
| P12163_1_F4,23756 | K.FLPVEFCK.G             | 1647.939 | 0.0069   | 2 | 1 | 24.1 | 0 |
| P12163_2_F1,23171 | K.FLPVEFCK.G             | 1647.939 | 0.00718  | 3 | 1 | 22.5 | 0 |
| P12163_2_F1,23191 | K.FLPVEFCK.G             | 1647.939 | 0.0081   | 2 | 1 | 27.6 | 0 |
| P12163_2_F7,15138 | K.IAIIIDHEK.K ! K.IAILDI | 1546.941 | 0.00399  | 3 | 1 | 31.9 | 0 |
| P12163_2_F7,15170 | K.IAIIIDHEK.K ! K.IAILDI | 1546.941 | 0.00097  | 2 | 1 | 35.3 | 0 |
| P12163_1_F9,20028 | K.IWPHSFEFR.L            | 1522.811 | 0.00087  | 3 | 1 | 24.2 | 0 |
| P12163_2_F9,19090 | K.IWPHSFEFR.L            | 1522.811 | 0.00252  | 3 | 1 | 32.3 | 0 |
| P12163_2_F6,16546 | K.NDHGEELLFVSSK.A        | 2083.128 | 0.00595  | 3 | 1 | 27.4 | 0 |
| P12163_1_S1,22765 | R.VEGLETLDYLDNLQNI       | 2472.344 | 0.00772  | 3 | 1 | 36.4 | 0 |
| P12163_2_F1,17916 | K.QVAAFMEK.V             | 1531.876 | 0.0079   | 3 | 1 | 25.4 | 0 |
| P12163_1_F2,7694  | K.TQDM*EDR.L             | 1214.562 | 0.00335  | 2 | 1 | 29.4 | 0 |

|                   |                       |          |          |   |   |      |   |
|-------------------|-----------------------|----------|----------|---|---|------|---|
| P12163_1_F9,10517 | R.EAFEQHV.R.D         | 1319.701 | 0.00279  | 3 | 1 | 31   | 0 |
| P12163_1_F4,23845 | R.LIELEALQK.A         | 1665.041 | 0.00611  | 2 | 1 | 45.3 | 0 |
| P12163_1_F4,23847 | R.LIELEALQK.A         | 1665.041 | 0.00674  | 3 | 1 | 36.5 | 0 |
| P12163_2_F1,23266 | R.LIELEALQK.A         | 1665.041 | 0.00461  | 3 | 1 | 25.5 | 0 |
| P12163_2_F1,23279 | R.LIELEALQK.A         | 1665.041 | 0.00569  | 2 | 1 | 41.3 | 0 |
| P12163_1_F9,19602 | R.LNQEFFSHLK.F        | 1871.064 | 0.00901  | 3 | 1 | 33.7 | 0 |
| P12163_2_F7,17818 | R.LNQEFFSHLK.F        | 1871.064 | 0.00289  | 3 | 1 | 26.1 | 0 |
| P12163_1_F3,26329 | R.SLLTLLDENIANAQK.S   | 2251.312 | 0.00469  | 3 | 1 | 66.7 | 0 |
| P12163_1_F5,18056 | K.ASNPFVNLK.K         | 1597.952 | 0.00762  | 2 | 1 | 41.2 | 0 |
| P12163_1_F5,18089 | K.ASNPFVNLK.K         | 1597.952 | 0.00524  | 3 | 1 | 33.3 | 0 |
| P12163_2_F2,18769 | K.ASNPFVNLK.K         | 1597.952 | 0.0051   | 2 | 1 | 43.7 | 0 |
| P12163_2_F7,15048 | K.EINALEQH.R.N        | 1526.859 | 0.0008   | 3 | 1 | 34.6 | 0 |
| P12163_1_F8,17852 | K.VICDHLGLGVK.T       | 1819.072 | 0.01132  | 2 | 1 | 34.5 | 0 |
| P12163_2_F6,17354 | K.VICDHLGLGVK.T       | 1819.072 | 0.00394  | 2 | 1 | 35   | 0 |
| P12163_2_F6,19293 | K.VPEGF.DYELYN.R.N    | 1805.901 | 0.0103   | 2 | 1 | 24.2 | 0 |
| P12163_1_S1,19240 | K.YVYTIDDDCFVAK.D     | 2217.136 | 0.00535  | 3 | 1 | 45.6 | 0 |
| P12163_1_F3,25409 | R.FVDAIMTIPK.G        | 1743.033 | 0.0054   | 3 | 1 | 23.6 | 0 |
| P12163_1_F3,25513 | R.FVDAIMTIPK.G        | 1743.033 | 0.0036   | 2 | 1 | 50.4 | 0 |
| P12163_1_F3,19007 | K.FGDEDLEVVK.K        | 1758.973 | 0.00553  | 2 | 1 | 51.8 | 0 |
| P12163_2_F2,7398  | K.GANQAACGAK.L        | 1555.847 | 0.00528  | 2 | 1 | 31.8 | 0 |
| P12163_1_S1,20272 | K.LITDALSGCGVR.L      | 1565.862 | 0.00717  | 2 | 1 | 27.8 | 0 |
| P12163_1_S1,20328 | K.LITDALSGCGVR.L      | 1565.862 | 0.00178  | 3 | 1 | 44.4 | 0 |
| P12163_1_S1,20523 | K.LITDALSGCGVR.L      | 1565.862 | 0.00429  | 2 | 1 | 33.1 | 0 |
| P12163_1_S1,20632 | K.LITDALSGCGVR.L      | 1565.862 | 0.00202  | 3 | 1 | 31.6 | 0 |
| P12163_2_F1,9663  | K.TSQTLAGGK.G         | 1470.874 | 0.00417  | 2 | 1 | 39.5 | 0 |
| P12163_2_F2,9984  | K.TSQTLAGGK.G         | 1470.874 | 0.00967  | 2 | 1 | 35.8 | 0 |
| P12163_1_F5,11792 | R.DQNLVPK.N           | 1421.857 | 0.00682  | 2 | 1 | 30.8 | 0 |
| P12163_1_F2,17588 | R.EIPDSVNIQVAK.A      | 1921.121 | 0.00747  | 3 | 1 | 30   | 0 |
| P12163_1_F4,12930 | K.DVMPETDK.L          | 1542.829 | 0.00532  | 2 | 1 | 27.8 | 0 |
| P12163_2_F1,20979 | K.LFPALK.S            | 1296.85  | 0.00626  | 3 | 1 | 22.5 | 0 |
| P12163_1_F4,10890 | K.SIGSADGAEAK.E       | 1613.895 | 0.00765  | 3 | 1 | 36.4 | 0 |
| P12163_2_F1,10096 | K.SIGSADGAEAK.E       | 1613.895 | 0.00711  | 3 | 1 | 53   | 0 |
| P12163_1_F3,20813 | K.SVEYEFLEENLGSK.S    | 2252.191 | 0.00449  | 3 | 1 | 42.9 | 0 |
| P12163_1_F3,22032 | K.SVEYEFLEENLGSK.S    | 2252.191 | 0.00521  | 3 | 1 | 59   | 0 |
| P12163_2_F1,13952 | R.FCADAAVK.D          | 1489.829 | 0.00491  | 3 | 1 | 22.3 | 0 |
| P12163_2_F1,13969 | R.FCADAAVK.D          | 1489.829 | 0.00626  | 2 | 1 | 27.2 | 0 |
| P12163_1_F5,22049 | R.FWAA.YVDEK.W ! R.FV | 1736.947 | 0.00478  | 2 | 1 | 25.2 | 0 |
| P12163_2_F8_1207C | R.FWAA.YVDEK.W ! R.FV | 1736.947 | 0.0008   | 3 | 1 | 22   | 0 |
| P12163_1_S1,19246 | K.GLGADEVFTESQLEVK    | 2330.27  | -0.00377 | 3 | 1 | 52   | 0 |
| P12163_1_F8,20052 | K.KPITVSTSSFIFK.D     | 2367.441 | 0.00712  | 3 | 1 | 56.7 | 0 |
| P12163_2_F6,19608 | K.KPITVSTSSFIFK.D     | 2367.441 | 0.00883  | 3 | 1 | 50.7 | 0 |
| P12163_1_F2,21399 | K.M*IELPPVEVK.E       | 1779.055 | 0.00258  | 3 | 1 | 35.8 | 0 |
| P12163_1_F2,21648 | K.M*IELPPVEVK.E       | 1779.055 | 0.00666  | 3 | 1 | 31.2 | 0 |
| P12163_1_F4,13915 | R.EGPPDSVIK.M         | 1549.905 | 0.00601  | 2 | 1 | 31.1 | 0 |
| P12163_1_F9,15309 | R.GIHSINIIR.D         | 1326.816 | 0.00334  | 3 | 1 | 34.5 | 0 |
| P12163_2_F7,13849 | R.GIHSINIIR.D         | 1326.816 | -0.00554 | 3 | 1 | 33.5 | 0 |
| P12163_2_F9,14111 | R.GIHSINIIR.D         | 1326.816 | 0.00244  | 3 | 1 | 30.9 | 0 |
| P12163_2_F6,15309 | R.IEGVYPVRPK.V        | 1766.078 | 0.00462  | 2 | 1 | 27.4 | 0 |
| P12163_1_S10,1891 | K.GSFETIHIQDALGHEFA   | 2433.246 | -0.00002 | 4 | 1 | 31.9 | 0 |
| P12163_2_F10,1782 | K.GSFETIHIQDALGHEFA   | 2433.246 | 0.00114  | 4 | 1 | 68.9 | 0 |
| P12163_2_F8_1207C | K.GSFETIHIQDALGHEFA   | 2433.246 | 0.00432  | 3 | 1 | 35.7 | 0 |

|                   |                       |          |          |   |   |      |   |
|-------------------|-----------------------|----------|----------|---|---|------|---|
| P12163_2_F8_12070 | K.GSFETIHIQDALGHEFA   | 2433.246 | 0.00178  | 4 | 1 | 55.1 | 0 |
| P12163_1_F2_20307 | K.LSIIIEEAR.K         | 1234.731 | 0.00276  | 2 | 1 | 30.9 | 0 |
| P12163_1_S1_21699 | K.TYPAGFMDVVSIPK.T    | 2133.187 | 0.00113  | 3 | 1 | 31.2 | 0 |
| P12163_1_S1_23383 | R.EVIAILMQR.H         | 1376.824 | 0.00148  | 3 | 1 | 35.4 | 0 |
| P12163_1_F9_11537 | R.HVLVDAK.V           | 1389.867 | 0.00056  | 3 | 1 | 23.7 | 0 |
| P12163_2_F2_12487 | R.SVQFGQK.G           | 1401.831 | 0.00994  | 2 | 1 | 27.7 | 0 |
| P12163_2_F2_12526 | R.SVQFGQK.G           | 1401.831 | 0.0057   | 3 | 1 | 28.8 | 0 |
| P12163_1_F4_20977 | K.IFWGDPR.E           | 1194.657 | 0.00719  | 2 | 1 | 24.9 | 0 |
| P12163_1_S1_21156 | K.IPLSCLVIGNR.G       | 1545.909 | 0.00186  | 3 | 1 | 65.7 | 0 |
| P12163_2_F1_17403 | K.QIVVVMK.I           | 1424.912 | 0.00255  | 2 | 1 | 32.2 | 0 |
| P12163_1_F8_19502 | K.YGAKPDAETLDIVNTV    | 2541.413 | 0.00562  | 3 | 1 | 35.4 | 0 |
| P12163_2_S5_18000 | K.YGAKPDAETLDIVNTV    | 2541.413 | 0.00002  | 4 | 1 | 31.5 | 0 |
| P12163_1_F7_20972 | R.NGDHLILVTIVPEGGLI   | 2512.459 | 0.0043   | 4 | 1 | 32.7 | 0 |
| P12163_1_F7_20975 | R.NGDHLILVTIVPEGGLI   | 2512.459 | 0.00836  | 3 | 1 | 34   | 0 |
| P12163_2_S5_19883 | R.NGDHLILVTIVPEGGLI   | 2512.459 | 0.0041   | 4 | 1 | 28.8 | 0 |
| P12163_1_F3_16969 | R.VGVAVDFSACSK.K      | 1848.015 | 0.0061   | 3 | 1 | 42.6 | 0 |
| P12163_1_F3_18519 | R.VGVAVDFSACSK.K      | 1848.015 | 0.00842  | 2 | 1 | 65.7 | 0 |
| P12163_2_F1_13567 | K.AAGVTSIGVR.G        | 1234.742 | 0.00492  | 2 | 1 | 24.7 | 0 |
| P12163_1_F6_13646 | K.CDPAGHFFGHK.A       | 1880.969 | 0.00058  | 4 | 1 | 22.6 | 0 |
| P12163_1_F4_13279 | K.DSVCVVTQK.K         | 1643.925 | 0.00232  | 2 | 1 | 35.7 | 0 |
| P12163_1_F4_21273 | K.EQEAINFLEK.K        | 1829.026 | 0.00556  | 3 | 1 | 29.3 | 0 |
| P12163_1_F4_21278 | K.EQEAINFLEK.K        | 1829.026 | 0.00796  | 2 | 1 | 58.6 | 0 |
| P12163_2_F1_20749 | K.EQEAINFLEK.K        | 1829.026 | 0.00174  | 2 | 1 | 50   | 0 |
| P12163_2_F1_20772 | K.EQEAINFLEK.K        | 1829.026 | 0.00577  | 3 | 1 | 37.5 | 0 |
| P12163_1_F2_21578 | K.YGYEM*PVDVLAK.W     | 2009.087 | -0.00655 | 3 | 1 | 27.3 | 0 |
| P12163_1_F6_16308 | R.HITIFSPEGR.L        | 1460.816 | -0.00076 | 3 | 1 | 44   | 0 |
| P12163_1_F5_17562 | K.AFIEQSLK.D          | 1543.93  | 0.0099   | 3 | 1 | 36.4 | 0 |
| P12163_2_F1_18009 | K.AFIEQSLK.D          | 1543.93  | 0.00507  | 3 | 1 | 36.2 | 0 |
| P12163_1_F4_11659 | K.IHAFHNVCR.H         | 1457.774 | 0.0033   | 4 | 1 | 38.9 | 0 |
| P12163_2_F4_10216 | K.IHAFHNVCR.H         | 1457.774 | 0.00194  | 4 | 1 | 36.5 | 0 |
| P12163_1_S1_21745 | K.LVYEFNPQIPIEK.A     | 2198.268 | 0.00252  | 3 | 1 | 37.9 | 0 |
| P12163_1_F8_5492  | R.CESGSTEGTDDTHR.L    | 1855.803 | 0.00621  | 3 | 1 | 39.2 | 0 |
| P12163_2_S5_5986  | R.CESGSTEGTDDTHR.L    | 1855.803 | 0.00207  | 3 | 1 | 37.3 | 0 |
| P12163_1_F2_11626 | R.GLESPAYCSGR.Y       | 1500.742 | -0.00102 | 2 | 1 | 30.4 | 0 |
| P12163_1_S1_20983 | R.IGEVEFVCCR.D        | 1511.819 | 0.00331  | 2 | 1 | 28.5 | 0 |
| P12163_1_F3_24704 | K.AFFQEFSELDAK.I      | 2040.09  | 0.00667  | 3 | 1 | 52.1 | 0 |
| P12163_1_F3_24733 | K.AFFQEFSELDAK.I      | 2040.09  | 0.00732  | 2 | 1 | 31.5 | 0 |
| P12163_1_F4_25599 | K.AFFQEFSELDAK.I      | 2040.09  | 0.00736  | 3 | 1 | 37.4 | 0 |
| P12163_1_F9_15327 | K.LHGGLVIK.H          | 1444.946 | 0.00214  | 3 | 1 | 30.6 | 0 |
| P12163_1_F8_20004 | R.IPTLAIHLDR.N        | 1452.884 | 0.00255  | 3 | 1 | 77.5 | 0 |
| P12163_2_F6_19598 | R.IPTLAIHLDR.N        | 1452.884 | 0.00243  | 3 | 1 | 65.1 | 0 |
| P12163_2_F2_14037 | R.ITNSFCSNSK.L        | 1765.936 | 0.00314  | 2 | 1 | 25.8 | 0 |
| P12163_1_F3_23649 | R.LDNLCSFCSLK.A       | 2096.08  | 0.0052   | 3 | 1 | 25.9 | 0 |
| P12163_1_S1_15730 | R.LQTVGYQQISER.E      | 1725.944 | 0.0019   | 2 | 1 | 30.6 | 0 |
| P12163_2_F2_11228 | K.GSSNSYAIK.K         | 1534.868 | 0.00856  | 2 | 1 | 28   | 0 |
| P12163_1_F3_27425 | K.TIAECLADELINAAC.G   | 2240.242 | 0.00207  | 3 | 1 | 45.3 | 0 |
| P12163_1_F3_12396 | R.IGSAGVVR.R          | 1062.657 | 0.00275  | 2 | 1 | 25.9 | 0 |
| P12163_2_F4_12786 | R.LTNSLM*MHGR.N       | 1479.771 | -0.00107 | 3 | 1 | 28.2 | 0 |
| P12163_2_F4_14631 | R.LTNSLMMHGR.N        | 1463.776 | 0.00466  | 3 | 1 | 45.9 | 0 |
| P12163_1_F2_15576 | R.QAVDISPLR.R         | 1302.768 | 0.00228  | 2 | 1 | 26.9 | 0 |
| P12163_1_S1_23305 | R.VNQAIYLITTGAR.E ! F | 1724.001 | 0.00243  | 2 | 1 | 27.3 | 0 |



|                   |                       |          |          |   |   |      |   |
|-------------------|-----------------------|----------|----------|---|---|------|---|
| P12163_1_S1,23816 | R.VNQAIYLITTGAR.E ! F | 1724.001 | 0.0019   | 3 | 1 | 51.7 | 0 |
| P12163_1_S1,23955 | R.VNQAIYLITTGAR.E ! F | 1724.001 | 0.00259  | 2 | 1 | 30.3 | 0 |
| P12163_2_F1,16975 | K.AATFPLTK.K          | 1456.898 | 0.00282  | 2 | 1 | 24.6 | 0 |
| P12163_1_F9,9531  | K.EGLEVHAR.S          | 1214.679 | 0.00469  | 3 | 1 | 41   | 0 |
| P12163_2_F7,8994  | K.EGLEVHAR.S          | 1214.679 | 0.00583  | 3 | 1 | 32.6 | 0 |
| P12163_1_F2,12894 | K.ENQDTISVFR.T        | 1512.796 | 0.00303  | 3 | 1 | 23.7 | 0 |
| P12163_1_F2,16126 | K.ENQDTISVFR.T        | 1512.796 | 0.00422  | 2 | 1 | 43.8 | 0 |
| P12163_2_F6,8778  | K.LSEEETHEAR.R        | 1504.754 | 0.00321  | 3 | 1 | 32.6 | 0 |
| P12163_2_F7,8319  | K.LSEEETHEAR.R        | 1504.754 | 0.00087  | 3 | 1 | 30.4 | 0 |
| P12163_1_F5,14383 | R.EASILGSAK.G         | 1483.894 | 0.00828  | 3 | 1 | 29.2 | 0 |
| P12163_1_F7,9986  | R.SATDDKLSEEETHEA     | 2527.273 | 0.00133  | 3 | 1 | 31.8 | 0 |
| P12163_1_F3,23166 | K.CPYVASMGVYVFK.K     | 2129.138 | 0.00948  | 3 | 1 | 30   | 0 |
| P12163_1_S1,24592 | K.IFVLTQFNSASLNR.H    | 1914.075 | 0.00087  | 3 | 1 | 34.6 | 0 |
| P12163_2_F1,14102 | R.ASDYGLVK.I          | 1460.857 | 0.00519  | 2 | 1 | 25   | 0 |
| P12163_1_F8,12771 | R.ECTVEHSIVGER.S      | 1719.864 | 0.01214  | 2 | 1 | 53.3 | 0 |
| P12163_1_F8,12774 | R.ECTVEHSIVGER.S      | 1719.864 | 0.00021  | 3 | 1 | 37.7 | 0 |
| P12163_1_F4,18784 | R.LDYGVVELK.D         | 1544.914 | -0.00506 | 2 | 1 | 34.8 | 0 |
| P12163_1_F4,19267 | R.LDYGVVELK.D         | 1544.914 | 0.00402  | 2 | 1 | 27.7 | 0 |
| P12163_1_F4,24286 | R.QFTWVFEDAK.N        | 1879.021 | 0.00216  | 3 | 1 | 36.8 | 0 |
| P12163_1_F4,24294 | R.QFTWVFEDAK.N        | 1879.021 | 0.00131  | 2 | 1 | 25.1 | 0 |
| P12163_1_F3,19402 | K.LPAAVLSTSAK.A       | 1666.036 | 0.0028   | 3 | 1 | 44.3 | 0 |
| P12163_1_F3,19448 | K.LPAAVLSTSAK.A       | 1666.036 | 0.01146  | 2 | 1 | 30.3 | 0 |
| P12163_1_F4,21227 | K.SDLLILK.T           | 1409.919 | -0.00094 | 2 | 1 | 40.5 | 0 |
| P12163_2_F1,20636 | K.SDLLILK.T           | 1409.919 | -0.0014  | 2 | 1 | 30.7 | 0 |
| P12163_1_F9,12598 | R.DHLPVPK.T           | 1413.867 | 0.00916  | 3 | 1 | 24.2 | 0 |
| P12163_2_F1,19277 | R.LEAIVER.M           | 1133.683 | 0.00057  | 2 | 1 | 27.3 | 0 |
| P12163_1_F4,22831 | R.QLAALLVSK.V         | 1551.009 | 0.00326  | 3 | 1 | 32.3 | 0 |
| P12163_1_F4,22833 | R.QLAALLVSK.V         | 1551.009 | 0.00485  | 2 | 1 | 49.9 | 0 |
| P12163_1_F7,19743 | R.QLLHFAVSDVSDDVR.    | 2005.066 | -0.00151 | 3 | 1 | 34.2 | 0 |
| P12163_2_F7,12772 | K.DALVSHLR.S          | 1214.716 | 0.00257  | 3 | 1 | 43.2 | 0 |
| P12163_1_F3,27553 | K.ESAVEILDWTK.T       | 2012.152 | 0.01036  | 3 | 1 | 33.6 | 0 |
| P12163_1_F3,22372 | K.IIAGADSFGAELK.D     | 1900.1   | -0.00088 | 2 | 1 | 44   | 0 |
| P12163_1_F3,22440 | K.IIAGADSFGAELK.D     | 1900.1   | 0.00322  | 3 | 1 | 38.1 | 0 |
| P12163_1_F3,19883 | K.SMTEMPLIGK.N        | 1714.969 | 0.01163  | 2 | 1 | 34.4 | 0 |
| P12163_1_F4,23210 | K.YYEETEFFIK.W        | 1977.047 | 0.00792  | 3 | 1 | 41   | 0 |
| P12163_2_F9,20165 | K.YYEETEFFIK.W        | 1977.047 | 0.00213  | 3 | 1 | 38.7 | 0 |
| P12163_1_F2,21066 | R.ELNPVEM*IPGGSM*K    | 2142.139 | 0.00792  | 3 | 1 | 24.7 | 0 |
| P12163_1_F2,11904 | K.AVSDIEAR.I          | 1164.653 | 0.00159  | 2 | 1 | 28.5 | 0 |
| P12163_1_F5,7583  | K.EAVSNGDEK.A         | 1556.838 | 0.00816  | 2 | 1 | 37   | 0 |
| P12163_2_F1,8019  | K.EAVSNGDEK.A         | 1556.838 | 0.00568  | 2 | 1 | 32.3 | 0 |
| P12163_2_F6,9371  | K.EGFHDGEQASGSEAD     | 2400.152 | -0.00031 | 3 | 1 | 42.4 | 0 |
| P12163_1_F4,17262 | K.IDTSYQGIYK.Q        | 1796.005 | 0.00588  | 2 | 1 | 30.3 | 0 |
| P12163_1_S10,1512 | R.RGFLLGDR.L          | 1237.732 | 0.00388  | 3 | 1 | 29.3 | 0 |
| P12163_1_S1,8126  | R.SDAQGEVIER.L        | 1407.738 | 0.00241  | 3 | 1 | 31.6 | 0 |
| P12163_1_S1,9677  | R.SDAQGEVIER.L        | 1407.738 | 0.00318  | 2 | 1 | 45.2 | 0 |
| P12163_2_S5,12143 | K.DTTDHLNAATQER.E     | 1938.946 | 0.00372  | 3 | 1 | 24.5 | 0 |
| P12163_1_F4,10481 | K.ENPSQVEPK.Y         | 1635.916 | 0.00668  | 2 | 1 | 27.8 | 0 |
| P12163_1_F2,17683 | K.GVIFLAATNR.R        | 1365.816 | 0.00293  | 3 | 1 | 37.6 | 0 |
| P12163_1_F4,22180 | K.NDVGIFQSLAEK.L      | 1929.09  | 0.01451  | 3 | 1 | 31.5 | 0 |
| P12163_1_F4,22216 | K.NDVGIFQSLAEK.L      | 1929.09  | 0.00737  | 2 | 1 | 27.7 | 0 |
| P12163_1_F7,20198 | R.AATEVGVAM*ISHLLR    | 1888.063 | 0.00156  | 3 | 1 | 31.9 | 0 |

|                   |                     |          |          |   |   |      |   |
|-------------------|---------------------|----------|----------|---|---|------|---|
| P12163_1_F8,19544 | R.GQTLSQLVFHR.L     | 1589.907 | 0.00052  | 3 | 1 | 54.1 | 0 |
| P12163_2_F6,19023 | R.GQTLSQLVFHR.L     | 1589.907 | -0.00023 | 3 | 1 | 50.4 | 0 |
| P12163_2_F1,11804 | K.EANIVAK.I         | 1352.836 | 0.007    | 2 | 1 | 24.8 | 0 |
| P12163_1_F6,20920 | K.GDTLYIIHINPNSLDES | 2361.235 | 0.0128   | 3 | 1 | 45   | 0 |
| P12163_1_F3,21909 | K.IGVALDFSPSSK.F    | 1829.063 | 0.00715  | 3 | 1 | 43.2 | 0 |
| P12163_1_F2,18106 | K.LDSLVM*GSR.G      | 1297.709 | 0.0029   | 3 | 1 | 30.4 | 0 |
| P12163_1_S1,18515 | K.SGSPLIPLTEFR.E    | 1620.926 | 0.00476  | 3 | 1 | 33.2 | 0 |
| P12163_1_S1,19565 | K.SGSPLIPLTEFR.E    | 1620.926 | 0.00062  | 3 | 1 | 31.7 | 0 |
| P12163_1_S1,21252 | K.SGSPLIPLTEFR.E    | 1620.926 | 0.01344  | 2 | 1 | 32.5 | 0 |
| P12163_1_F4,28471 | R.LLEAIEDLK.L       | 1652.009 | 0.00894  | 2 | 1 | 49.4 | 0 |
| P12163_1_F2,13668 | K.CPFTGTVSIR.G      | 1441.777 | 0.00204  | 3 | 1 | 25.4 | 0 |
| P12163_1_F5,17238 | K.SIGLGFK.T         | 1329.835 | 0.00605  | 3 | 1 | 26   | 0 |
| P12163_2_F2,18005 | K.SIGLGFK.T         | 1329.835 | 0.00533  | 3 | 1 | 29.2 | 0 |
| P12163_2_F2,16497 | K.VFLSSK.K          | 1288.808 | 0.00168  | 3 | 1 | 22.1 | 0 |
| P12163_1_F4,12690 | K.VIPAGSSGGAK.K     | 1551.931 | 0.00047  | 3 | 1 | 41.2 | 0 |
| P12163_2_F1,11852 | K.VIPAGSSGGAK.K     | 1551.931 | 0.00653  | 3 | 1 | 50.4 | 0 |
| P12163_2_S3,11929 | R.HSNIPAHISPCFR.V   | 1839.959 | 0.00252  | 4 | 1 | 33.6 | 0 |
| P12163_2_F4,15436 | R.NYLHFVK.K         | 1528.91  | 0.00315  | 2 | 1 | 24.8 | 0 |
| P12163_1_F3,19377 | K.AQEDVVAACNEFGIK.  | 2259.19  | 0.0126   | 3 | 1 | 49.9 | 0 |
| P12163_1_F9,12261 | K.AVPHYLR.R         | 1159.689 | 0.00426  | 3 | 1 | 28.5 | 0 |
| P12163_1_F9,12929 | R.HAEALDAITR.Y      | 1400.78  | -0.00125 | 3 | 1 | 51.7 | 0 |
| P12163_2_F7,11894 | R.HAEALDAITR.Y      | 1400.78  | 0.00253  | 3 | 1 | 57.8 | 0 |
| P12163_2_F6,8105  | R.HKPTPVDEAR.A      | 1758.012 | 0.00628  | 4 | 1 | 25.4 | 0 |
| P12163_1_F9,15760 | R.LAHDILER.E        | 1270.742 | 0.00325  | 3 | 1 | 39.4 | 0 |
| P12163_2_F7,14195 | R.LAHDILER.E        | 1270.742 | 0.00382  | 3 | 1 | 29.8 | 0 |
| P12163_1_F5,17538 | R.NLMEEISK.I        | 1571.892 | 0.01236  | 2 | 1 | 32.4 | 0 |
| P12163_1_F3,23368 | K.AQIVTPLLLK.E      | 1704.124 | 0.00487  | 3 | 1 | 41.1 | 0 |
| P12163_1_F3,23391 | K.AQIVTPLLLK.E      | 1704.124 | 0.00567  | 2 | 1 | 49.9 | 0 |
| P12163_1_F4,14565 | K.EDVAELGK.K        | 1468.847 | 0.00837  | 2 | 1 | 34.7 | 0 |
| P12163_1_S1,19637 | K.IVDLPEIR.E        | 1258.767 | 0.00199  | 2 | 1 | 32.8 | 0 |
| P12163_1_F9,9984  | K.LHPEVTAR.I        | 1226.716 | 0.00257  | 3 | 1 | 27.5 | 0 |
| P12163_1_F4,17910 | R.ETGEYIAQLK.L      | 1760.005 | -0.00101 | 2 | 1 | 39.6 | 0 |
| P12163_2_F1,17172 | R.ETGEYIAQLK.L      | 1760.005 | 0.00977  | 2 | 1 | 42.5 | 0 |
| P12163_2_F4,12524 | R.NYLHPMGK.A        | 1567.887 | 0.00455  | 3 | 1 | 24   | 0 |
| P12163_2_F6,16291 | K.AIEANDGKPLPLYQK.L | 2569.512 | 0.00538  | 3 | 1 | 24.6 | 0 |
| P12163_1_F3,14144 | K.GLSAGLLR.Q        | 1090.689 | 0.00584  | 3 | 1 | 47.4 | 0 |
| P12163_1_F5,17307 | K.NEGFGAFYK.G       | 1640.889 | 0.00581  | 3 | 1 | 31.7 | 0 |
| P12163_1_F5,17351 | K.NEGFGAFYK.G       | 1640.889 | 0.00913  | 2 | 1 | 30.6 | 0 |
| P12163_1_F4,13336 | R.IQLGQGSAGTVTK.T   | 1868.106 | 0.00419  | 3 | 1 | 37.7 | 0 |
| P12163_1_F4,15411 | R.IQLGQGSAGTVTK.T   | 1868.106 | 0.00758  | 2 | 1 | 52.1 | 0 |
| P12163_1_F3,26002 | R.IVADEGVLLALWK.G   | 1922.157 | 0.003    | 3 | 1 | 51.1 | 0 |
| P12163_1_F3,20630 | R.NYTNAFQALYR.I     | 1664.87  | 0.00406  | 2 | 1 | 30.7 | 0 |
| P12163_1_F2,12575 | K.AVGVEVDQTGAVK.V   | 1881.09  | 0.00185  | 3 | 1 | 53.2 | 0 |
| P12163_2_F7,11583 | K.HILIATGSR.A       | 1271.774 | 0.00272  | 3 | 1 | 38.2 | 0 |
| P12163_1_F5,15808 | R.FSANFGAK.V        | 1449.831 | 0.00742  | 3 | 1 | 23.5 | 0 |
| P12163_2_F2,16555 | R.FSANFGAK.V        | 1449.831 | 0.01069  | 3 | 1 | 23.9 | 0 |
| P12163_2_F8_12070 | R.GINLHPR.T         | 1110.668 | 0.00296  | 3 | 1 | 25   | 0 |
| P12163_1_S1,19694 | R.GM*GSTVDLLFR.K    | 1515.814 | -0.00207 | 2 | 1 | 29.6 | 0 |
| P12163_1_F5,15827 | R.LLSNAGVK.L        | 1409.894 | 0.00744  | 2 | 1 | 30.6 | 0 |
| P12163_2_F2,16578 | R.LLSNAGVK.L        | 1409.894 | 0.00632  | 2 | 1 | 24.6 | 0 |
| P12163_1_F8,15858 | K.EIACALEQSGHR.F    | 1674.853 | 0.00378  | 3 | 1 | 32.4 | 0 |

|                   |                         |          |          |   |   |      |   |
|-------------------|-------------------------|----------|----------|---|---|------|---|
| P12163_2_F6,15283 | K.EIACALEQSGHR.F        | 1674.853 | 0.00453  | 3 | 1 | 34.5 | 0 |
| P12163_2_S5,16324 | K.FINLPDDQPDKESTPPK     | 2853.576 | 0.00459  | 4 | 1 | 29.7 | 0 |
| P12163_1_F4,12896 | K.GENYDLGEGGADK.K       | 1932.976 | 0.01155  | 2 | 1 | 27.1 | 0 |
| P12163_1_F7,22675 | K.GIM*VNTFEELESHAV      | 2152.101 | 0.00272  | 3 | 1 | 62.1 | 0 |
| P12163_1_F6,19063 | K.LPHDNTVAAYTQSLA.      | 2620.363 | -0.00272 | 3 | 1 | 75.3 | 0 |
| P12163_2_F1,22836 | K.VWPSVVFNK.E           | 1684.004 | 0.00141  | 3 | 1 | 25.7 | 0 |
| P12163_1_F4,10394 | K.AEAAGNNDPCVK.I        | 1853.964 | 0.0051   | 2 | 1 | 40.5 | 0 |
| P12163_1_F4,16615 | K.AIAACTEAIEK.H         | 1785.004 | 0.01194  | 2 | 1 | 42.6 | 0 |
| P12163_2_F1,15767 | K.AIAACTEAIEK.H         | 1785.004 | 0.00788  | 2 | 1 | 44.8 | 0 |
| P12163_1_F3,12357 | K.EIGPDGQEVTK.V         | 1780.99  | 0.00706  | 2 | 1 | 34   | 0 |
| P12163_1_F3,18978 | K.VIPAVTEEVK.D          | 1693.036 | 0.00557  | 3 | 1 | 27.9 | 0 |
| P12163_2_F9,9483  | R.KAEAAGNNDPCVK.I       | 2286.264 | 0.01917  | 3 | 1 | 40.8 | 0 |
| P12163_1_S1,12306 | R.VSEEDIQACEER.Y        | 1768.832 | 0.00544  | 2 | 1 | 40.1 | 0 |
| P12163_1_F7,18849 | K.IICNVDEQDIAEHLR.E     | 2129.096 | 0.00445  | 3 | 1 | 74.4 | 0 |
| P12163_1_F4,13353 | R.AEEIPEEEK.N           | 1681.91  | 0.01052  | 2 | 1 | 37.2 | 0 |
| P12163_1_F2,19429 | R.DDDLLEQIGK.D          | 1753.979 | 0.00366  | 3 | 1 | 33   | 0 |
| P12163_1_F8,20091 | R.DIYFDLVDHDK.V ! K.I   | 1988.059 | 0.00259  | 3 | 1 | 45.8 | 0 |
| P12163_1_F6,23032 | R.LLEV FYHK.I           | 1656.993 | 0.0086   | 3 | 1 | 31   | 0 |
| P12163_1_S10,1174 | R.QVVHFR.S              | 1089.647 | 0.00294  | 3 | 1 | 36.8 | 0 |
| P12163_2_F8_1207  | R.QVVHFR.S              | 1089.647 | 0.00354  | 3 | 1 | 26.5 | 0 |
| P12163_1_F3,23617 | K.LADFAPLNTNYK.T        | 1861.068 | 0.00697  | 2 | 1 | 34.1 | 0 |
| P12163_1_F3,23643 | K.LADFAPLNTNYK.T        | 1861.068 | 0.00642  | 3 | 1 | 30.5 | 0 |
| P12163_1_F2,16607 | K.LTVLPTNR.D            | 1217.752 | 0.00203  | 2 | 1 | 24.7 | 0 |
| P12163_1_F3,25880 | R.FIDL VNEAVNK.H        | 1870.089 | 0.005    | 3 | 1 | 48.7 | 0 |
| P12163_1_S1,15959 | R.FVEANPQFDGR.G         | 1583.812 | 0.00518  | 3 | 1 | 41.2 | 0 |
| P12163_2_S5,14287 | R.VALDTQSLEDEPDHGF      | 2362.235 | -0.00535 | 3 | 1 | 34.7 | 0 |
| P12163_1_F3,16189 | R.VYAQGDVYPDYSK.L       | 2113.106 | 0.0037   | 2 | 1 | 48.1 | 0 |
| P12163_2_F1,8469  | K.AAVDGG EK.L           | 1354.779 | 0.00502  | 2 | 1 | 31   | 0 |
| P12163_2_F1,19414 | K.QTALLSELNK.Q          | 1725.037 | 0.00849  | 3 | 1 | 38.4 | 0 |
| P12163_1_F9,18847 | K.RIEQLIAEANANPK.D      | 2175.27  | 0.00033  | 3 | 1 | 37.6 | 0 |
| P12163_1_F9,4506  | R.DHEVDSR.G             | 1161.58  | 0.00059  | 2 | 1 | 25.1 | 0 |
| P12163_1_F8,14107 | R.HIVVPNP DVR.G         | 1449.848 | 0.00204  | 3 | 1 | 60.9 | 0 |
| P12163_2_F6,13565 | R.HIVVPNP DVR.G         | 1449.848 | 0.00198  | 3 | 1 | 58.4 | 0 |
| P12163_1_F4,24344 | R.IEQLIAEANANPK.D       | 2019.169 | 0.00993  | 3 | 1 | 44.1 | 0 |
| P12163_2_F1,14293 | K.ALLQSDVQSK.N          | 1697.005 | 0.00572  | 2 | 1 | 46.4 | 0 |
| P12163_2_F8_1207  | K.SEGGSHGR.H            | 1090.554 | 0.00394  | 3 | 1 | 21.9 | 0 |
| P12163_1_F4,20094 | R.DLSSLI AK.K ! R.DLSSI | 1454.904 | 0.00772  | 2 | 1 | 28.2 | 0 |
| P12163_1_F3,25142 | R.GDQY AIALALLDEGK.     | 2185.232 | -0.01251 | 3 | 1 | 26.2 | 0 |
| P12163_1_F9,18122 | R.HWVLDPIDGTK.G         | 1889.074 | 0.00337  | 3 | 1 | 41.6 | 0 |
| P12163_1_F2,6013  | R.QDGAQETLER.I          | 1450.744 | 0.00176  | 3 | 1 | 22.6 | 0 |
| P12163_2_F2,10885 | K.GGVVYSNK.V            | 1431.842 | 0.00262  | 2 | 1 | 43.9 | 0 |
| P12163_1_F4,18393 | K.IEQLEVEK.Q            | 1595.946 | 0.01233  | 2 | 1 | 33.4 | 0 |
| P12163_1_F4,19329 | K.VTLQQLGLSK.D          | 1823.121 | 0.00187  | 2 | 1 | 49.7 | 0 |
| P12163_1_F4,22257 | R.ALVSFQEELK.D          | 1772.041 | 0.0046   | 3 | 1 | 47.2 | 0 |
| P12163_1_S1,15995 | R.ESVYGYSDDFER.K ! R    | 1770.812 | 0.00615  | 2 | 1 | 35   | 0 |
| P12163_2_F1,15751 | R.QILIEK.A ! K.QILLEK.I | 1351.877 | 0.00587  | 3 | 1 | 23.9 | 0 |
| P12163_1_F3,20276 | K.IICLSGPPGVGK.T        | 1806.077 | 0.00187  | 2 | 1 | 32.7 | 0 |
| P12163_1_F2,22513 | K.LLAALQESR.K           | 1304.784 | 0.0062   | 2 | 1 | 24.4 | 0 |
| P12163_1_F3,23187 | K.LQCQQVLEELD VYK.R     | 2373.294 | 0.01425  | 3 | 1 | 28.5 | 0 |
| P12163_1_S1,23845 | K.NVGTANPLVLIDEIDK      | 2319.338 | 0.0056   | 3 | 1 | 34.7 | 0 |
| P12163_1_F3,10300 | K.SSSAIVSTNPR.L         | 1422.785 | 0.00624  | 2 | 1 | 27.5 | 0 |

|                   |                     |          |          |   |   |      |   |
|-------------------|---------------------|----------|----------|---|---|------|---|
| P12163_1_S1,9792  | K.TVESLDAEAAAR.T    | 1465.78  | 0.00951  | 3 | 1 | 34.7 | 0 |
| P12163_1_F9,9617  | K.DLSSNQLHR.S       | 1373.744 | 0.00291  | 3 | 1 | 31.2 | 0 |
| P12163_1_F3,13788 | K.DMDDVVTK.T        | 1530.829 | 0.00634  | 2 | 1 | 33.6 | 0 |
| P12163_1_F4,13415 | K.DVPNVAEK.A        | 1479.863 | 0.01016  | 2 | 1 | 25.5 | 0 |
| P12163_2_F1,23864 | K.LAGLILK.N         | 1335.918 | 0.00669  | 2 | 1 | 25.7 | 0 |
| P12163_1_F3,17389 | R.VVCEATLSPEVK.I    | 1940.098 | 0.00369  | 2 | 1 | 50.2 | 0 |
| P12163_2_F1,21443 | R.WLSLDSSVK.A       | 1642.962 | -0.00178 | 2 | 1 | 28.4 | 0 |
| P12163_1_F6,14244 | K.TMVYPEPGFEHHR.R   | 1903.943 | 0.00942  | 3 | 1 | 29.1 | 0 |
| P12163_1_F4,6548  | R.DGDQDNQAK.V       | 1598.823 | 0.00709  | 2 | 1 | 31.5 | 0 |
| P12163_1_S1,19337 | R.EIAQAYADSFAPR.D   | 1742.901 | 0.00301  | 3 | 1 | 43.3 | 0 |
| P12163_2_F6,19463 | R.HFEVDLSAFR.N      | 1524.811 | 0.00125  | 3 | 1 | 36   | 0 |
| P12163_2_F1,20144 | R.MFDADLYEK.C       | 1739.913 | 0.00371  | 2 | 1 | 26   | 0 |
| P12163_2_F7,14129 | R.NILDIDKDR.M       | 1710.001 | 0.00844  | 3 | 1 | 28.1 | 0 |
| P12163_2_F2,17969 | K.AAWEFK.E          | 1430.825 | 0.00653  | 3 | 1 | 23   | 0 |
| P12163_1_F7,20377 | K.DVALAHILVYENPSAC  | 2289.196 | 0.00179  | 3 | 1 | 35.9 | 0 |
| P12163_1_F2,17266 | K.VEDPQNQLLNPAVK.C  | 2173.244 | 0.0044   | 3 | 1 | 41.3 | 0 |
| P12163_1_F9,8819  | R.ETAHLK.A          | 1306.794 | 0.00487  | 3 | 1 | 28.6 | 0 |
| P12163_2_F1,20740 | R.QNEIWYPLSK.T      | 1886.063 | 0.00283  | 2 | 1 | 34.6 | 0 |
| P12163_1_F2,18701 | R.VVVTSSISSITPSPK.W | 2110.258 | 0.0098   | 3 | 1 | 25.4 | 0 |
| P12163_2_F2,13667 | K.GGIVTQVK.Q        | 1409.894 | 0.00719  | 2 | 1 | 30.2 | 0 |
| P12163_1_F3,25209 | K.LQELNNAVVLSTLTSK  | 2338.38  | 0.00259  | 3 | 1 | 24.1 | 0 |
| P12163_1_S1,17338 | K.LTITDDDVIEK.S     | 1870.063 | 0.00399  | 3 | 1 | 34.2 | 0 |
| P12163_2_F2,19120 | K.NLILAGVK.S        | 1435.946 | 0.00473  | 3 | 1 | 27.6 | 0 |
| P12163_1_S1,12844 | K.STVAASAATSINPR.L  | 1649.912 | 0.00468  | 3 | 1 | 25.6 | 0 |
| P12163_1_F3,25928 | K.VFIVGSGALGCEFLK.N | 2205.256 | 0.01204  | 3 | 1 | 43.1 | 0 |
| P12163_2_F1,13535 | K.ADLPGVK.K         | 1307.814 | 0.00496  | 3 | 1 | 26.9 | 0 |
| P12163_1_F2,19052 | K.ASM*ENGVLTVTVPK.  | 2070.172 | 0.00558  | 3 | 1 | 29.4 | 0 |
| P12163_1_F3,17688 | K.ASM*ENGVLTVTVPK.  | 2070.172 | 0.0058   | 2 | 1 | 51.3 | 0 |
| P12163_1_F3,17836 | K.ASM*ENGVLTVTVPK.  | 2070.172 | 0.00556  | 3 | 1 | 39.1 | 0 |
| P12163_1_F3,19760 | K.ASM*ENGVLTVTVPK.  | 2070.172 | 0.00567  | 3 | 1 | 41   | 0 |
| P12163_1_F6,18624 | K.ASM*ENGVLTVTVPK.  | 2070.172 | 0.00459  | 3 | 1 | 30.6 | 0 |
| P12163_2_S3,14258 | K.ASM*ENGVLTVTVPK.  | 2070.172 | -0.0032  | 3 | 1 | 28.7 | 0 |
| P12163_1_F3,17089 | K.ASMENGVLTVTVPK.V  | 2054.178 | 0.0076   | 3 | 1 | 22.9 | 0 |
| P12163_1_F3,17130 | K.ASMENGVLTVTVPK.V  | 2054.178 | 0.0046   | 2 | 1 | 56.1 | 0 |
| P12163_1_F3,17408 | K.ASMENGVLTVTVPK.V  | 2054.178 | 0.00292  | 3 | 1 | 27   | 0 |
| P12163_1_F3,17444 | K.ASMENGVLTVTVPK.V  | 2054.178 | 0.00442  | 2 | 1 | 38.7 | 0 |
| P12163_1_F3,17505 | K.ASMENGVLTVTVPK.V  | 2054.178 | 0.00383  | 4 | 1 | 34.2 | 0 |
| P12163_1_F3,19514 | K.ASMENGVLTVTVPK.V  | 2054.178 | 0.01582  | 2 | 1 | 49.7 | 0 |
| P12163_1_F3,19787 | K.ASMENGVLTVTVPK.V  | 2054.178 | 0.0058   | 3 | 1 | 40.7 | 0 |
| P12163_1_F3,19805 | K.ASMENGVLTVTVPK.V  | 2054.178 | 0.00574  | 2 | 1 | 62.5 | 0 |
| P12163_1_F4,20206 | K.ASMENGVLTVTVPK.V  | 2054.178 | 0.00817  | 3 | 1 | 35.8 | 0 |
| P12163_1_F5,18443 | K.ASMENGVLTVTVPK.V  | 2054.178 | 0.00721  | 3 | 1 | 35.6 | 0 |
| P12163_1_F5,18890 | K.ASMENGVLTVTVPK.V  | 2054.178 | 0.0026   | 2 | 1 | 55.9 | 0 |
| P12163_1_F6,18609 | K.ASMENGVLTVTVPK.V  | 2054.178 | 0.0073   | 3 | 1 | 44.9 | 0 |
| P12163_1_F6,18643 | K.ASMENGVLTVTVPK.V  | 2054.178 | -0.00026 | 2 | 1 | 74   | 0 |
| P12163_1_F6,19012 | K.ASMENGVLTVTVPK.V  | 2054.178 | 0.00223  | 3 | 1 | 34.3 | 0 |
| P12163_1_F7,18181 | K.ASMENGVLTVTVPK.V  | 2054.178 | 0.00385  | 3 | 1 | 33.8 | 0 |
| P12163_1_F8,19120 | K.ASMENGVLTVTVPK.V  | 2054.178 | 0.00625  | 3 | 1 | 36.6 | 0 |
| P12163_2_F1,19689 | K.ASMENGVLTVTVPK.V  | 2054.178 | 0.01153  | 3 | 1 | 29.7 | 0 |
| P12163_2_F1,19711 | K.ASMENGVLTVTVPK.V  | 2054.178 | 0.00306  | 2 | 1 | 70.6 | 0 |
| P12163_2_F4,17789 | K.ASMENGVLTVTVPK.V  | 2054.178 | 0.00406  | 3 | 1 | 33.4 | 0 |

|                    |                       |          |          |   |   |      |   |
|--------------------|-----------------------|----------|----------|---|---|------|---|
| P12163_2_F4,17801  | K.ASMENGVLTVTPK.V     | 2054.178 | 0.0048   | 2 | 1 | 55   | 0 |
| P12163_2_F7,17055  | K.ASMENGVLTVTPK.V     | 2054.178 | 0.00703  | 3 | 1 | 31.3 | 0 |
| P12163_2_F7,17056  | K.ASMENGVLTVTPK.V     | 2054.178 | -0.00088 | 2 | 1 | 42.2 | 0 |
| P12163_2_S3,15598  | K.ASMENGVLTVTPK.V     | 2054.178 | 0.00388  | 3 | 1 | 25.5 | 0 |
| P12163_1_F9,12608  | K.ETPEAHVFK.V ! K.ETF | 1665.942 | 0.00626  | 3 | 1 | 28.9 | 0 |
| P12163_1_F9,12736  | K.ETPEAHVFK.V ! K.ETF | 1665.942 | 0.00388  | 2 | 1 | 31   | 0 |
| P12163_2_F10,11550 | K.ETPEAHVFK.V ! K.ETF | 1665.942 | 0.00257  | 3 | 1 | 32.4 | 0 |
| P12163_2_F6,12210  | K.ETPEAHVFK.V ! K.ETF | 1665.942 | 0.00614  | 3 | 1 | 32.6 | 0 |
| P12163_2_F7,11639  | K.ETPEAHVFK.V ! K.ETF | 1665.942 | 0.00062  | 2 | 1 | 28.2 | 0 |
| P12163_2_F8_12070  | K.ETPEAHVFK.V ! K.ETF | 1665.942 | 0.00332  | 3 | 1 | 30.6 | 0 |
| P12163_2_F9,11708  | K.ETPEAHVFK.V ! K.ETF | 1665.942 | 0.00665  | 3 | 1 | 23.8 | 0 |
| P12163_1_F2,9655   | K.VEVEDDR.V           | 1165.6   | 0.00114  | 2 | 1 | 39.4 | 0 |
| P12163_1_F6,9022   | K.VEVEDDR.V           | 1165.6   | 0.00226  | 2 | 1 | 31.3 | 0 |
| P12163_1_S1,9802   | K.VEVEDDR.V           | 1165.6   | 0.00352  | 2 | 1 | 41.9 | 0 |
| P12163_1_S1,10016  | K.VEVEDDR.V           | 1165.6   | 0.0037   | 2 | 1 | 39.7 | 0 |
| P12163_1_S1,10449  | K.VEVEDDR.V           | 1165.6   | 0.00416  | 2 | 1 | 28   | 0 |
| P12163_1_S1,12172  | K.VEVEDDR.V           | 1165.6   | 0.00304  | 2 | 1 | 36.5 | 0 |
| P12163_1_S10,416   | K.VEVEDDR.V           | 1165.6   | 0.0034   | 2 | 1 | 34.3 | 0 |
| P12163_2_F4,9092   | K.VEVEDDR.V           | 1165.6   | -0.00006 | 2 | 1 | 38.2 | 0 |
| P12163_1_F6,16738  | K.VEVEDDRVLQISGQR.I   | 2047.109 | -0.00002 | 2 | 1 | 30.2 | 0 |
| P12163_2_S5,15363  | K.VEVEDDRVLQISGQR.I   | 2047.109 | 0.0015   | 3 | 1 | 32.8 | 0 |
| P12163_1_F4,9254   | K.EQDDCYK.L           | 1565.773 | 0.00877  | 2 | 1 | 25   | 0 |
| P12163_1_F5,7999   | K.EQDDCYK.L           | 1565.773 | 0.00869  | 2 | 1 | 33.9 | 0 |
| P12163_2_F1,8592   | K.EQDDCYK.L           | 1565.773 | 0.00697  | 2 | 1 | 33.7 | 0 |
| P12163_1_F7,18524  | K.ITIHGVLTIK.G        | 1818.131 | 0.00183  | 3 | 1 | 26.1 | 0 |
| P12163_1_F8,18577  | K.ITIHGVLTIK.G        | 1818.131 | 0.0066   | 3 | 1 | 34.5 | 0 |
| P12163_1_F8,19354  | K.ITIHGVLTIK.G        | 1818.131 | 0.00759  | 3 | 1 | 39.9 | 0 |
| P12163_1_F8,19364  | K.ITIHGVLTIK.G        | 1818.131 | 0.00577  | 2 | 1 | 42.9 | 0 |
| P12163_1_F8,19388  | K.ITIHGVLTIK.G        | 1818.131 | 0.00906  | 4 | 1 | 23.1 | 0 |
| P12163_1_F8,19589  | K.ITIHGVLTIK.G        | 1818.131 | 0.00696  | 3 | 1 | 44   | 0 |
| P12163_1_F8,19843  | K.ITIHGVLTIK.G        | 1818.131 | 0.00729  | 3 | 1 | 41.7 | 0 |
| P12163_1_F8,19848  | K.ITIHGVLTIK.G        | 1818.131 | 0.00077  | 2 | 1 | 41.6 | 0 |
| P12163_1_F8,20083  | K.ITIHGVLTIK.G        | 1818.131 | 0.00681  | 3 | 1 | 26.4 | 0 |
| P12163_1_S10,18030 | K.ITIHGVLTIK.G        | 1818.131 | 0.00585  | 3 | 1 | 25.1 | 0 |
| P12163_2_F6,18799  | K.ITIHGVLTIK.G        | 1818.131 | 0.00069  | 3 | 1 | 22.3 | 0 |
| P12163_2_F6,18813  | K.ITIHGVLTIK.G        | 1818.131 | 0.00367  | 2 | 1 | 48.8 | 0 |
| P12163_2_F6,19014  | K.ITIHGVLTIK.G        | 1818.131 | 0.00174  | 3 | 1 | 40.2 | 0 |
| P12163_2_F6,19028  | K.ITIHGVLTIK.G        | 1818.131 | 0.00549  | 2 | 1 | 42.7 | 0 |
| P12163_2_F6,19979  | K.ITIHGVLTIK.G        | 1818.131 | 0.00579  | 3 | 1 | 32.8 | 0 |
| P12163_2_F7,17150  | K.ITIHGVLTIK.G        | 1818.131 | 0.00252  | 3 | 1 | 34.7 | 0 |
| P12163_2_F8_12070  | K.ITIHGVLTIK.G        | 1818.131 | -0.00012 | 3 | 1 | 38.1 | 0 |
| P12163_2_F8_12070  | K.ITIHGVLTIK.G        | 1818.131 | 0.00942  | 3 | 1 | 27   | 0 |
| P12163_2_S5,17776  | K.ITIHGVLTIK.G        | 1818.131 | 0.00375  | 2 | 1 | 31.7 | 0 |
| P12163_2_S5,17794  | K.ITIHGVLTIK.G        | 1818.131 | 0.00114  | 4 | 1 | 28.7 | 0 |
| P12163_1_F2,21510  | K.NGVLNIVIPR.T        | 1398.873 | 0.00337  | 2 | 1 | 27   | 0 |
| P12163_1_F2,21557  | K.NGVLNIVIPR.T        | 1398.873 | 0.00156  | 3 | 1 | 53.8 | 0 |
| P12163_1_F4,22814  | K.NGVLNIVIPR.T        | 1398.873 | 0.00449  | 2 | 1 | 29.5 | 0 |
| P12163_1_F2,15709  | R.SYGYNTSLALPDDAF     | 2386.239 | 0.01239  | 3 | 1 | 26.1 | 0 |
| P12163_1_F2,16526  | R.SYGYNTSLALPDDAF     | 2386.239 | 0.00498  | 3 | 1 | 27.5 | 0 |
| P12163_1_F5,18070  | R.SYGYNTSLALPDDAF     | 2386.239 | 0.01242  | 3 | 1 | 31.3 | 0 |
| P12163_1_F7,16335  | R.SYGYNTSLALPDDAF     | 2386.239 | 0.00852  | 3 | 1 | 35   | 0 |

|                   |                   |          |          |   |   |      |   |
|-------------------|-------------------|----------|----------|---|---|------|---|
| P12163_1_F7,17773 | R.SYGYNTSLALPDDAI | 2386.239 | 0.00894  | 3 | 1 | 45.4 | 0 |
| P12163_1_F8,18596 | R.SYGYNTSLALPDDAI | 2386.239 | 0.01455  | 3 | 1 | 47.5 | 0 |
| P12163_1_F8,18598 | R.SYGYNTSLALPDDAI | 2386.239 | 0.01115  | 2 | 1 | 33   | 0 |
| P12163_1_S1,17771 | R.SYGYNTSLALPDDAI | 2386.239 | 0.01668  | 3 | 1 | 46.7 | 0 |
| P12163_2_F6,18155 | R.SYGYNTSLALPDDAI | 2386.239 | 0.00775  | 2 | 1 | 79.9 | 0 |
| P12163_2_F6,18159 | R.SYGYNTSLALPDDAI | 2386.239 | 0.0042   | 3 | 1 | 49.4 | 0 |
| P12163_2_F7,16643 | R.SYGYNTSLALPDDAI | 2386.239 | -0.00231 | 2 | 1 | 55.2 | 0 |
| P12163_2_F8_1207C | R.SYGYNTSLALPDDAI | 2386.239 | 0.00021  | 3 | 1 | 52.5 | 0 |
| P12163_1_F4,17037 | R.YDVPGLGK.D      | 1456.862 | 0.00691  | 3 | 1 | 31.7 | 0 |
| P12163_1_F7,15001 | R.YDVPGLGK.D      | 1456.862 | 0.00523  | 3 | 1 | 29.3 | 0 |
| P12163_1_F9,16011 | R.YDVPGLGK.D      | 1456.862 | 0.01012  | 3 | 1 | 22.4 | 0 |
| P12163_2_F1,16238 | R.YDVPGLGK.D      | 1456.862 | 0.00517  | 3 | 1 | 31.5 | 0 |
| P12163_2_F4,14661 | R.YDVPGLGK.D      | 1456.862 | -0.00029 | 3 | 1 | 24.5 | 0 |
| P12163_2_F8_1207C | R.YDVPGLGK.D      | 1456.862 | 0.00775  | 3 | 1 | 28.3 | 0 |
| P12163_2_F9,14926 | R.YDVPGLGK.D      | 1456.862 | 0.00265  | 3 | 1 | 22.6 | 0 |
| P12163_2_F1,8530  | K.VGSEVAR.R       | 1021.594 | 0.0025   | 2 | 1 | 24.5 | 0 |
| P12163_1_F3,27597 | K.VPAIEEFVFLK.L   | 1900.14  | 0.00524  | 3 | 1 | 34.7 | 0 |
| P12163_1_F4,18924 | K.YVGVSLVGK.T     | 1529.951 | 0.00644  | 2 | 1 | 39.4 | 0 |
| P12163_1_F4,18929 | K.YVGVSLVGK.T     | 1529.951 | 0.00602  | 3 | 1 | 29.7 | 0 |
| P12163_1_F5,17669 | K.YVGVSLVGK.T     | 1529.951 | 0.00827  | 3 | 1 | 29.3 | 0 |
| P12163_1_F5,17688 | K.YVGVSLVGK.T     | 1529.951 | 0.00844  | 2 | 1 | 37.9 | 0 |
| P12163_1_F6,17604 | K.YVGVSLVGK.T     | 1529.951 | 0.0027   | 2 | 1 | 26.3 | 0 |
| P12163_1_F6,18041 | K.YVGVSLVGK.T     | 1529.951 | 0.00574  | 2 | 1 | 29   | 0 |
| P12163_1_F6,18050 | K.YVGVSLVGK.T     | 1529.951 | 0.0053   | 3 | 1 | 28.7 | 0 |
| P12163_1_F7,16723 | K.YVGVSLVGK.T     | 1529.951 | 0.00234  | 2 | 1 | 30.6 | 0 |
| P12163_1_F7,17191 | K.YVGVSLVGK.T     | 1529.951 | 0.00988  | 2 | 1 | 38.4 | 0 |
| P12163_1_F7,17201 | K.YVGVSLVGK.T     | 1529.951 | 0.00059  | 3 | 1 | 27.4 | 0 |
| P12163_1_F8,17996 | K.YVGVSLVGK.T     | 1529.951 | 0.00218  | 3 | 1 | 33.4 | 0 |
| P12163_1_F9,17475 | K.YVGVSLVGK.T     | 1529.951 | 0.00386  | 3 | 1 | 26   | 0 |
| P12163_1_F9,17500 | K.YVGVSLVGK.T     | 1529.951 | 0.0052   | 2 | 1 | 39.8 | 0 |
| P12163_1_S10,1699 | K.YVGVSLVGK.T     | 1529.951 | 0.00194  | 3 | 1 | 23   | 0 |
| P12163_2_F1,18199 | K.YVGVSLVGK.T     | 1529.951 | 0.00692  | 3 | 1 | 37.2 | 0 |
| P12163_2_F1,18200 | K.YVGVSLVGK.T     | 1529.951 | 0.0048   | 2 | 1 | 39.3 | 0 |
| P12163_2_F4,16306 | K.YVGVSLVGK.T     | 1529.951 | 0.00158  | 3 | 1 | 26.7 | 0 |
| P12163_2_F4,16356 | K.YVGVSLVGK.T     | 1529.951 | 0.00412  | 2 | 1 | 35.4 | 0 |
| P12163_2_F8_1207C | K.YVGVSLVGK.T     | 1529.951 | 0.01038  | 2 | 1 | 26   | 0 |
| P12163_2_F8_1207C | K.YVGVSLVGK.T     | 1529.951 | 0.00542  | 3 | 1 | 27.1 | 0 |
| P12163_2_F9,16239 | K.YVGVSLVGK.T     | 1529.951 | 0.01036  | 2 | 1 | 38.8 | 0 |
| P12163_2_F9,16273 | K.YVGVSLVGK.T     | 1529.951 | 0.00554  | 3 | 1 | 42.5 | 0 |
| P12163_1_F4,17907 | R.GGVIDEEALVR.A   | 1461.821 | 0.00924  | 2 | 1 | 34.1 | 0 |
| P12163_1_F5,15933 | R.GGVIDEEALVR.A   | 1461.821 | 0.00272  | 2 | 1 | 29.6 | 0 |
| P12163_1_F6,17109 | R.GGVIDEEALVR.A   | 1461.821 | 0.00466  | 2 | 1 | 36.9 | 0 |
| P12163_1_S1,16081 | R.GGVIDEEALVR.A   | 1461.821 | 0.00388  | 2 | 1 | 52.4 | 0 |
| P12163_1_S1,16090 | R.GGVIDEEALVR.A   | 1461.821 | 0.01271  | 3 | 1 | 65.2 | 0 |
| P12163_1_S10,18   | R.GGVIDEEALVR.A   | 1461.821 | 0.00768  | 2 | 1 | 28.1 | 0 |
| P12163_2_F2,16722 | R.GGVIDEEALVR.A   | 1461.821 | 0.00188  | 2 | 1 | 32.8 | 0 |
| P12163_2_F4,15848 | R.GGVIDEEALVR.A   | 1461.821 | 0.00012  | 2 | 1 | 49.4 | 0 |
| P12163_1_F4,12201 | R.QVDQPGM*IGK.V   | 1696.951 | 0.00485  | 3 | 1 | 29.7 | 0 |
| P12163_1_F4,12240 | R.QVDQPGM*IGK.V   | 1696.951 | 0.00622  | 2 | 1 | 29.6 | 0 |
| P12163_1_F4,14070 | R.QVDQPGM*IGK.V   | 1696.951 | 0.01116  | 2 | 1 | 24.8 | 0 |
| P12163_2_F1,11342 | R.QVDQPGM*IGK.V   | 1696.951 | 0.00716  | 3 | 1 | 28.4 | 0 |

|                   |                     |          |          |   |   |      |   |
|-------------------|---------------------|----------|----------|---|---|------|---|
| P12163_1_F3,13557 | R.QVDQPGMIGK.V      | 1680.956 | 0.0043   | 2 | 1 | 36.5 | 0 |
| P12163_1_F4,14030 | R.QVDQPGMIGK.V      | 1680.956 | 0.00458  | 2 | 1 | 35.1 | 0 |
| P12163_1_F4,14076 | R.QVDQPGMIGK.V      | 1680.956 | 0.00758  | 3 | 1 | 36.4 | 0 |
| P12163_1_F5,12734 | R.QVDQPGMIGK.V      | 1680.956 | 0.00838  | 2 | 1 | 31.4 | 0 |
| P12163_2_F1,13094 | R.QVDQPGMIGK.V      | 1680.956 | 0.00773  | 3 | 1 | 24.8 | 0 |
| P12163_2_F4,12003 | R.QVDQPGMIGK.V      | 1680.956 | 0.00152  | 3 | 1 | 27.7 | 0 |
| P12163_1_F5,6765  | K.ESLPEHENR.L       | 1414.723 | 0.00593  | 3 | 1 | 33.2 | 0 |
| P12163_1_F9,7616  | K.ESLPEHENR.L       | 1414.723 | 0.00209  | 3 | 1 | 33.5 | 0 |
| P12163_2_F7,7278  | K.ESLPEHENR.L       | 1414.723 | 0.00428  | 2 | 1 | 31.4 | 0 |
| P12163_2_F7,7302  | K.ESLPEHENR.L       | 1414.723 | 0.00233  | 3 | 1 | 33.7 | 0 |
| P12163_1_F7,18710 | K.HLLLPITDQNPYLSEGF | 2371.292 | 0.00217  | 3 | 1 | 65.1 | 0 |
| P12163_1_F7,18717 | K.HLLLPITDQNPYLSEGF | 2371.292 | 0.00065  | 4 | 1 | 66   | 0 |
| P12163_1_F7,19014 | K.HLLLPITDQNPYLSEGF | 2371.292 | -0.00319 | 4 | 1 | 37.9 | 0 |
| P12163_1_F7,19034 | K.HLLLPITDQNPYLSEGF | 2371.292 | -0.00644 | 3 | 1 | 37.1 | 0 |
| P12163_1_F7,19718 | K.HLLLPITDQNPYLSEGF | 2371.292 | 0.00679  | 3 | 1 | 42   | 0 |
| P12163_1_F7,19948 | K.HLLLPITDQNPYLSEGF | 2371.292 | 0.00439  | 3 | 1 | 67.2 | 0 |
| P12163_1_F7,19965 | K.HLLLPITDQNPYLSEGF | 2371.292 | 0.00076  | 2 | 1 | 32.4 | 0 |
| P12163_1_F8,20983 | K.HLLLPITDQNPYLSEGF | 2371.292 | 0.00292  | 3 | 1 | 55.3 | 0 |
| P12163_1_F9,20393 | K.HLLLPITDQNPYLSEGF | 2371.292 | -0.00152 | 3 | 1 | 31.2 | 0 |
| P12163_1_S10,1845 | K.HLLLPITDQNPYLSEGF | 2371.292 | 0.00281  | 4 | 1 | 61.8 | 0 |
| P12163_2_F10,1722 | K.HLLLPITDQNPYLSEGF | 2371.292 | 0.00297  | 4 | 1 | 42.3 | 0 |
| P12163_2_F10,1723 | K.HLLLPITDQNPYLSEGF | 2371.292 | 0.00235  | 3 | 1 | 49.4 | 0 |
| P12163_2_F10,1753 | K.HLLLPITDQNPYLSEGF | 2371.292 | 0.00345  | 4 | 1 | 34.3 | 0 |
| P12163_2_F10,1817 | K.HLLLPITDQNPYLSEGF | 2371.292 | 0.00571  | 3 | 1 | 66.9 | 0 |
| P12163_2_F10,1838 | K.HLLLPITDQNPYLSEGF | 2371.292 | 0.01168  | 3 | 1 | 28.9 | 0 |
| P12163_2_F9,18670 | K.HLLLPITDQNPYLSEGF | 2371.292 | 0.00157  | 3 | 1 | 42.6 | 0 |
| P12163_2_S5,17223 | K.HLLLPITDQNPYLSEGF | 2371.292 | -0.00063 | 4 | 1 | 32.7 | 0 |
| P12163_2_S5,17987 | K.HLLLPITDQNPYLSEGF | 2371.292 | 0.00247  | 3 | 1 | 24.9 | 0 |
| P12163_2_S5,18016 | K.HLLLPITDQNPYLSEGF | 2371.292 | 0.00049  | 4 | 1 | 61.4 | 0 |
| P12163_2_S5,19183 | K.HLLLPITDQNPYLSEGF | 2371.292 | 0.00149  | 4 | 1 | 58.9 | 0 |
| P12163_2_S5,19309 | K.HLLLPITDQNPYLSEGF | 2371.292 | 0.00232  | 3 | 1 | 67.5 | 0 |
| P12163_1_F4,13897 | R.QAAATTAALAK.K     | 1624.984 | -0.00491 | 2 | 1 | 36.4 | 0 |
| P12163_1_F4,13907 | R.QAAATTAALAK.K     | 1624.984 | 0.00636  | 3 | 1 | 29.6 | 0 |
| P12163_1_F5,12564 | R.QAAATTAALAK.K     | 1624.984 | 0.00573  | 2 | 1 | 43.9 | 0 |
| P12163_2_F1,12934 | R.QAAATTAALAK.K     | 1624.984 | 0.00353  | 2 | 1 | 39   | 0 |
| P12163_2_F1,13029 | R.QAAATTAALAK.K     | 1624.984 | 0.00324  | 3 | 1 | 53.7 | 0 |
| P12163_1_F6,8405  | R.QKESLPEHENR.L     | 1975.082 | 0.00487  | 4 | 1 | 42   | 0 |
| P12163_1_F5,19085 | R.WHLSEGGFQEFR.L    | 1796.902 | 0.00329  | 3 | 1 | 30.6 | 0 |
| P12163_2_F9,18106 | R.WHLSEGGFQEFR.L    | 1796.902 | -0.0058  | 3 | 1 | 26.6 | 0 |
| P12163_2_S5,18238 | R.WHLSEGGFQEFR.L    | 1796.902 | 0.00203  | 3 | 1 | 43.4 | 0 |
| P12163_1_F2,19170 | K.ASM*ESGVLTVTPK.V  | 2043.162 | 0.00489  | 3 | 1 | 21.9 | 0 |
| P12163_1_F3,17839 | K.ASM*ESGVLTVTPK.V  | 2043.162 | -0.00364 | 2 | 1 | 26.9 | 0 |
| P12163_1_F2,17016 | K.ASMESGVLTVTPK.V   | 2027.167 | 0.00114  | 3 | 1 | 26   | 0 |
| P12163_1_F3,15462 | K.ASMESGVLTVTPK.V   | 2027.167 | 0.00262  | 4 | 1 | 31.8 | 0 |
| P12163_1_F3,16999 | K.ASMESGVLTVTPK.V   | 2027.167 | -0.00066 | 3 | 1 | 32.2 | 0 |
| P12163_1_F3,17277 | K.ASMESGVLTVTPK.V   | 2027.167 | 0.00495  | 3 | 1 | 27.3 | 0 |
| P12163_1_F3,17795 | K.ASMESGVLTVTPK.V   | 2027.167 | 0.00135  | 3 | 1 | 26.8 | 0 |
| P12163_1_F3,17819 | K.ASMESGVLTVTPK.V   | 2027.167 | 0.00336  | 2 | 1 | 50.3 | 0 |
| P12163_1_F3,19762 | K.ASMESGVLTVTPK.V   | 2027.167 | -0.00046 | 2 | 1 | 72   | 0 |
| P12163_1_F3,19775 | K.ASMESGVLTVTPK.V   | 2027.167 | 0.00717  | 3 | 1 | 32.7 | 0 |
| P12163_1_F5,18612 | K.ASMESGVLTVTPK.V   | 2027.167 | -0.00092 | 2 | 1 | 51.1 | 0 |

|                   |                       |          |          |   |   |      |   |
|-------------------|-----------------------|----------|----------|---|---|------|---|
| P12163_1_F5,19106 | K.ASMESGVLTVTVPK.V    | 2027.167 | 0.00486  | 3 | 1 | 30   | 0 |
| P12163_1_F9,12608 | K.ETPEAHVFK.V ! K.ETF | 1665.942 | 0.00626  | 3 | 1 | 28.9 | 0 |
| P12163_1_F9,12736 | K.ETPEAHVFK.V ! K.ETF | 1665.942 | 0.00388  | 2 | 1 | 31   | 0 |
| P12163_2_F10,1155 | K.ETPEAHVFK.V ! K.ETF | 1665.942 | 0.00257  | 3 | 1 | 32.4 | 0 |
| P12163_2_F6,12210 | K.ETPEAHVFK.V ! K.ETF | 1665.942 | 0.00614  | 3 | 1 | 32.6 | 0 |
| P12163_2_F7,11639 | K.ETPEAHVFK.V ! K.ETF | 1665.942 | 0.00062  | 2 | 1 | 28.2 | 0 |
| P12163_2_F8_12070 | K.ETPEAHVFK.V ! K.ETF | 1665.942 | 0.00332  | 3 | 1 | 30.6 | 0 |
| P12163_2_F9,11708 | K.ETPEAHVFK.V ! K.ETF | 1665.942 | 0.00665  | 3 | 1 | 23.8 | 0 |
| P12163_1_F2,9655  | K.VEVEDDR.V           | 1165.6   | 0.00114  | 2 | 1 | 39.4 | 0 |
| P12163_1_F6,9022  | K.VEVEDDR.V           | 1165.6   | 0.00226  | 2 | 1 | 31.3 | 0 |
| P12163_1_S1,9802  | K.VEVEDDR.V           | 1165.6   | 0.00352  | 2 | 1 | 41.9 | 0 |
| P12163_1_S1,10016 | K.VEVEDDR.V           | 1165.6   | 0.0037   | 2 | 1 | 39.7 | 0 |
| P12163_1_S1,10449 | K.VEVEDDR.V           | 1165.6   | 0.00416  | 2 | 1 | 28   | 0 |
| P12163_1_S1,12172 | K.VEVEDDR.V           | 1165.6   | 0.00304  | 2 | 1 | 36.5 | 0 |
| P12163_1_S10,416  | K.VEVEDDR.V           | 1165.6   | 0.0034   | 2 | 1 | 34.3 | 0 |
| P12163_2_F4,9092  | K.VEVEDDR.V           | 1165.6   | -0.00006 | 2 | 1 | 38.2 | 0 |
| P12163_1_F6,16738 | K.VEVEDDRVLQISGQR.I   | 2047.109 | -0.00002 | 2 | 1 | 30.2 | 0 |
| P12163_2_S5,15363 | K.VEVEDDRVLQISGQR.I   | 2047.109 | 0.0015   | 3 | 1 | 32.8 | 0 |
| P12163_1_F4,9362  | R.SSGM*FSR.R          | 1091.546 | 0.00394  | 3 | 1 | 24.6 | 0 |
| P12163_1_F4,9415  | R.SSGMFSR.R           | 1075.551 | 0.00172  | 3 | 1 | 24   | 0 |
| P12163_1_F4,10016 | R.SSGMFSR.R           | 1075.551 | 0.00361  | 3 | 1 | 27.7 | 0 |
| P12163_1_F2,16636 | K.GIEVISLSR.S         | 1277.773 | 0.00334  | 3 | 1 | 41.1 | 0 |
| P12163_1_S1,15846 | K.GIEVISLSR.S         | 1277.773 | 0.00289  | 3 | 1 | 32.2 | 0 |
| P12163_1_S1,17618 | K.GIEVISLSR.S         | 1277.773 | 0.00394  | 3 | 1 | 58.7 | 0 |
| P12163_1_S1,17704 | K.GIEVISLSR.S         | 1277.773 | 0.00376  | 2 | 1 | 26.4 | 0 |
| P12163_1_S1,8002  | R.AEAGVVDDSR.S        | 1322.685 | 0.00227  | 3 | 1 | 30.4 | 0 |
| P12163_1_S1,9608  | R.AEAGVVDDSR.S        | 1322.685 | 0.00259  | 2 | 1 | 60.9 | 0 |
| P12163_1_F3,15842 | R.INGEANVVAVNAAK.E    | 1978.154 | 0.00644  | 3 | 1 | 40.4 | 0 |
| P12163_1_F4,16340 | R.INGEANVVAVNAAK.E    | 1978.154 | 0.00939  | 2 | 1 | 69.4 | 0 |
| P12163_2_F1,15552 | R.INGEANVVAVNAAK.E    | 1978.154 | 0.00215  | 2 | 1 | 68.7 | 0 |
| P12163_2_F4,14158 | R.INGEANVVAVNAAK.E    | 1978.154 | -0.0007  | 3 | 1 | 34.9 | 0 |
| P12163_1_F2,18455 | R.SAPIDVVADV.K.S      | 1722.026 | 0.00164  | 3 | 1 | 26.7 | 0 |
| P12163_1_F2,18529 | R.SAPIDVVADV.K.S      | 1722.026 | 0.00336  | 2 | 1 | 30.5 | 0 |
| P12163_1_F3,16883 | R.SAPIDVVADV.K.S      | 1722.026 | 0.00424  | 2 | 1 | 37.3 | 0 |
| P12163_1_F3,19087 | R.SAPIDVVADV.K.S      | 1722.026 | 0.00614  | 2 | 1 | 55.8 | 0 |
| P12163_1_F3,19126 | R.SAPIDVVADV.K.S      | 1722.026 | 0.00494  | 3 | 1 | 47   | 0 |
| P12163_1_F5,18390 | R.SAPIDVVADV.K.S      | 1722.026 | 0.00554  | 3 | 1 | 27.3 | 0 |
| P12163_1_F6,18184 | R.SAPIDVVADV.K.S      | 1722.026 | -0.00145 | 3 | 1 | 23.9 | 0 |
| P12163_2_F2,18621 | R.SAPIDVVADV.K.S      | 1722.026 | -0.00266 | 2 | 1 | 40.9 | 0 |
| P12163_2_F2,18634 | R.SAPIDVVADV.K.S      | 1722.026 | 0.00164  | 3 | 1 | 30.5 | 0 |
| P12163_2_F4,17377 | R.SAPIDVVADV.K.S      | 1722.026 | 0.00077  | 3 | 1 | 33.3 | 0 |
| P12163_1_F2,19521 | R.VVVLGGSGFVGS.AICK   | 2158.251 | 0.00243  | 3 | 1 | 43.3 | 0 |
| P12163_1_F2,21792 | R.VVVLGGSGFVGS.AICK   | 2158.251 | 0.00471  | 3 | 1 | 61.4 | 0 |
| P12163_1_F3,22487 | R.VVVLGGSGFVGS.AICK   | 2158.251 | 0.0009   | 3 | 1 | 49.2 | 0 |
| P12163_1_F5,21355 | R.VVVLGGSGFVGS.AICK   | 2158.251 | 0.00258  | 3 | 1 | 36.8 | 0 |
| P12163_1_F9,7928  | K.DHVNDVK.V           | 1434.816 | 0.00872  | 2 | 1 | 26.1 | 0 |
| P12163_1_S10,8875 | K.DHVNDVK.V           | 1434.816 | 0.0101   | 2 | 1 | 25.6 | 0 |
| P12163_2_F9,8164  | K.DHVNDVK.V           | 1434.816 | 0.00517  | 3 | 1 | 22.7 | 0 |
| P12163_1_F8,18158 | K.DTLILLHAQAPR.A      | 1651.98  | 0.00245  | 3 | 1 | 59   | 0 |
| P12163_1_F8,18169 | K.DTLILLHAQAPR.A      | 1651.98  | 0.00216  | 2 | 1 | 42.1 | 0 |
| P12163_1_F9,17712 | K.DTLILLHAQAPR.A      | 1651.98  | 0.0017   | 3 | 1 | 36   | 0 |



|                   |                         |          |          |   |   |      |   |
|-------------------|-------------------------|----------|----------|---|---|------|---|
| P12163_2_F6,17669 | K.DTLILLHAQAPR.A        | 1651.98  | 0.00062  | 3 | 1 | 51   | 0 |
| P12163_2_F6,17683 | K.DTLILLHAQAPR.A        | 1651.98  | 0.00182  | 2 | 1 | 55.1 | 0 |
| P12163_2_S5,16689 | K.DTLILLHAQAPR.A        | 1651.98  | 0.00306  | 2 | 1 | 53.8 | 0 |
| P12163_2_S5,16774 | K.DTLILLHAQAPR.A        | 1651.98  | 0.00125  | 3 | 1 | 51.8 | 0 |
| P12163_1_F5,22987 | K.IIEVLK.R ! K.IIEVLK.† | 1322.887 | 0.00646  | 2 | 1 | 31.5 | 0 |
| P12163_1_F4,5868  | K.YHNDAADR.L            | 1265.618 | -0.00388 | 2 | 1 | 25.6 | 0 |
| P12163_1_F4,5886  | K.YHNDAADR.L            | 1265.618 | 0.00324  | 3 | 1 | 31.8 | 0 |
| P12163_1_F5,4973  | K.YHNDAADR.L            | 1265.618 | 0.00426  | 3 | 1 | 24.9 | 0 |
| P12163_2_F4,5157  | K.YHNDAADR.L            | 1265.618 | 0.00297  | 3 | 1 | 27   | 0 |
| P12163_1_F4,19218 | R.DVICEM*VQK.L          | 1745.939 | 0.0029   | 2 | 1 | 29.7 | 0 |
| P12163_1_F3,18789 | R.DVICEMVQK.L           | 1729.944 | 0.00674  | 2 | 1 | 57.5 | 0 |
| P12163_1_F3,18801 | R.DVICEMVQK.L           | 1729.944 | 0.00511  | 3 | 1 | 39.2 | 0 |
| P12163_1_F4,19224 | R.DVICEMVQK.L           | 1729.944 | 0.0076   | 2 | 1 | 57   | 0 |
| P12163_2_F1,18497 | R.DVICEMVQK.L           | 1729.944 | 0.00544  | 2 | 1 | 55.1 | 0 |
| P12163_2_F1,18511 | R.DVICEMVQK.L           | 1729.944 | 0.00052  | 3 | 1 | 29.9 | 0 |
| P12163_1_F4,12213 | K.AYEAEQSQUIER.E        | 1724.876 | 0.00458  | 2 | 1 | 26.1 | 0 |
| P12163_1_S1,10066 | K.AYEAEQSQUIER.E        | 1724.876 | 0.00004  | 3 | 1 | 46.8 | 0 |
| P12163_1_S1,10074 | K.AYEAEQSQUIER.E        | 1724.876 | 0.00367  | 3 | 1 | 46.6 | 0 |
| P12163_1_S1,11381 | K.AYEAEQSQUIER.E        | 1724.876 | 0.0049   | 2 | 1 | 35.3 | 0 |
| P12163_2_F2,7098  | K.SAAAQK.V              | 1183.725 | 0.00446  | 3 | 1 | 35.6 | 0 |
| P12163_1_S1,16614 | K.SGEPAFSVLVSR.F        | 1552.864 | 0.00344  | 3 | 1 | 64.4 | 0 |
| P12163_1_S1,18688 | K.SGEPAFSVLVSR.F        | 1552.864 | 0.00017  | 3 | 1 | 52.5 | 0 |
| P12163_1_F6,19585 | K.VAVSFTHIHK.S          | 1723.073 | 0.00694  | 2 | 1 | 42.3 | 0 |
| P12163_1_F6,19590 | K.VAVSFTHIHK.S          | 1723.073 | 0.00657  | 3 | 1 | 34.9 | 0 |
| P12163_1_F8,19712 | K.VAVSFTHIHK.S          | 1723.073 | 0.01086  | 2 | 1 | 49.3 | 0 |
| P12163_1_F8,19904 | K.VAVSFTHIHK.S          | 1723.073 | 0.00159  | 3 | 1 | 31.8 | 0 |
| P12163_2_F4,18103 | K.VAVSFTHIHK.S          | 1723.073 | 0.00279  | 3 | 1 | 31.9 | 0 |
| P12163_2_F6,19129 | K.VAVSFTHIHK.S          | 1723.073 | 0.00546  | 2 | 1 | 47.7 | 0 |
| P12163_2_F6,19206 | K.VAVSFTHIHK.S          | 1723.073 | 0.00387  | 3 | 1 | 45.9 | 0 |
| P12163_2_F7,17398 | K.VAVSFTHIHK.S          | 1723.073 | 0.00388  | 2 | 1 | 43.4 | 0 |
| P12163_2_F7,17425 | K.VAVSFTHIHK.S          | 1723.073 | 0.0048   | 3 | 1 | 38.9 | 0 |
| P12163_2_S5,17876 | K.VAVSFTHIHK.S          | 1723.073 | 0.00378  | 3 | 1 | 39.3 | 0 |
| P12163_1_F2,22242 | R.IAEPNTDLEFWK.T        | 2168.185 | 0.00427  | 3 | 1 | 34.9 | 0 |
| P12163_1_F3,22923 | R.IAEPNTDLEFWK.T        | 2168.185 | 0.00745  | 3 | 1 | 45   | 0 |
| P12163_1_F3,22925 | R.IAEPNTDLEFWK.T        | 2168.185 | 0.00031  | 2 | 1 | 24.9 | 0 |
| P12163_1_F5,21839 | R.IAEPNTDLEFWK.T        | 2168.185 | 0.00733  | 3 | 1 | 27.8 | 0 |
| P12163_1_F3,18941 | K.QAGPAFDYLEK.A         | 1847.016 | 0.00959  | 3 | 1 | 26.8 | 0 |
| P12163_1_F3,18944 | K.QAGPAFDYLEK.A         | 1847.016 | 0.0052   | 2 | 1 | 41.2 | 0 |
| P12163_1_F4,19265 | K.QAGPAFDYLEK.A         | 1847.016 | 0.00662  | 3 | 1 | 33.5 | 0 |
| P12163_1_F4,19274 | K.QAGPAFDYLEK.A         | 1847.016 | 0.00678  | 2 | 1 | 59.6 | 0 |
| P12163_2_F1,18516 | K.QAGPAFDYLEK.A         | 1847.016 | 0.00556  | 2 | 1 | 35.7 | 0 |
| P12163_2_F1,18559 | K.QAGPAFDYLEK.A         | 1847.016 | 0.00623  | 3 | 1 | 24.4 | 0 |
| P12163_2_F4,16771 | K.QAGPAFDYLEK.A         | 1847.016 | 0.00035  | 3 | 1 | 34.4 | 0 |
| P12163_2_F9,17019 | K.QAGPAFDYLEK.A         | 1847.016 | 0.00968  | 3 | 1 | 25.4 | 0 |
| P12163_1_F3,23692 | K.VIGESLDLIK.Y          | 1695.051 | 0.01198  | 2 | 1 | 50.6 | 0 |
| P12163_1_F3,23706 | K.VIGESLDLIK.Y          | 1695.051 | 0.00092  | 3 | 1 | 40.6 | 0 |
| P12163_1_F3,23922 | K.VIGESLDLIK.Y          | 1695.051 | 0.00644  | 2 | 1 | 42.1 | 0 |
| P12163_1_F3,23938 | K.VIGESLDLIK.Y          | 1695.051 | 0.00527  | 3 | 1 | 42   | 0 |
| P12163_1_F6,22341 | K.VIGESLDLIK.Y          | 1695.051 | -0.0025  | 3 | 1 | 29.1 | 0 |
| P12163_1_F9,12549 | K.VPALEHNGK.V ! K.VP    | 1572.932 | 0.01357  | 3 | 1 | 34.8 | 0 |
| P12163_1_F6,12155 | K.YDITAGRPK.L           | 1628.958 | 0.00547  | 2 | 1 | 25.8 | 0 |

|                   |                       |          |          |   |   |      |   |
|-------------------|-----------------------|----------|----------|---|---|------|---|
| P12163_1_F8,19224 | K.YVDSNFEGPSLLPDDP    | 2786.446 | 0.00569  | 3 | 1 | 62.2 | 0 |
| P12163_2_F10,1705 | K.YVDSNFEGPSLLPDDP    | 2786.446 | 0.00705  | 4 | 1 | 31.2 | 0 |
| P12163_2_F7,16960 | K.YVDSNFEGPSLLPDDP    | 2786.446 | 0.00068  | 3 | 1 | 33.9 | 0 |
| P12163_2_S5,17656 | K.YVDSNFEGPSLLPDDP    | 2786.446 | 0.00338  | 3 | 1 | 60.2 | 0 |
| P12163_2_S5,17815 | K.YVDSNFEGPSLLPDDP    | 2786.446 | 0.01465  | 4 | 1 | 45.6 | 0 |
| P12163_2_F2,21598 | K.FFVGGNWK.C          | 1562.894 | 0.00488  | 3 | 1 | 22.2 | 0 |
| P12163_1_F7,14479 | K.VATPAQAQEVHFELR.    | 2000.087 | 0.00085  | 3 | 1 | 43.5 | 0 |
| P12163_2_S5,14197 | K.VATPAQAQEVHFELR.    | 2000.087 | 0.00258  | 4 | 1 | 34   | 0 |
| P12163_2_S5,15846 | K.VATPAQAQEVHFELR.    | 2000.087 | 0.00376  | 3 | 1 | 80.4 | 0 |
| P12163_1_F5,20483 | K.VAYALSQGLK.V        | 1658.01  | 0.00755  | 3 | 1 | 41.6 | 0 |
| P12163_1_F5,20548 | K.VAYALSQGLK.V        | 1658.01  | 0.00567  | 2 | 1 | 44.8 | 0 |
| P12163_1_F9,20016 | K.VAYALSQGLK.V        | 1658.01  | 0.00245  | 3 | 1 | 27.2 | 0 |
| P12163_2_F8_12070 | K.VAYALSQGLK.V        | 1658.01  | 0.00578  | 3 | 1 | 38.8 | 0 |
| P12163_2_F9,18893 | K.VAYALSQGLK.V        | 1658.01  | 0.00479  | 2 | 1 | 24.9 | 0 |
| P12163_2_F9,18997 | K.VAYALSQGLK.V        | 1658.01  | 0.00599  | 3 | 1 | 40.7 | 0 |
| P12163_1_S1,14516 | K.VIACVGETLEQR.E      | 1678.91  | 0.00411  | 3 | 1 | 42.5 | 0 |
| P12163_1_S1,21186 | K.VIACVGETLEQR.E      | 1678.91  | 0.00777  | 3 | 1 | 67.1 | 0 |
| P12163_1_S1,21242 | K.VIACVGETLEQR.E      | 1678.91  | 0.00492  | 2 | 1 | 44.9 | 0 |
| P12163_1_S1,21360 | K.VIACVGETLEQR.E      | 1678.91  | 0.00171  | 3 | 1 | 64.9 | 0 |
| P12163_1_S1,21411 | K.VIACVGETLEQR.E      | 1678.91  | 0.00954  | 2 | 1 | 51.6 | 0 |
| P12163_1_S1,21538 | K.VIACVGETLEQR.E      | 1678.91  | 0.00486  | 3 | 1 | 67.9 | 0 |
| P12163_1_S1,21592 | K.VIACVGETLEQR.E      | 1678.91  | 0.00578  | 2 | 1 | 38.6 | 0 |
| P12163_1_S1,21831 | K.VIACVGETLEQR.E      | 1678.91  | 0.00027  | 3 | 1 | 49.7 | 0 |
| P12163_1_F3,20724 | R.LILNESNEFVGDK.V     | 2086.164 | 0.00626  | 3 | 1 | 36.1 | 0 |
| P12163_1_F3,20745 | R.LILNESNEFVGDK.V     | 2086.164 | 0.00448  | 2 | 1 | 62.1 | 0 |
| P12163_1_S1,19084 | K.DSTLIMQLLR.D        | 1493.866 | -0.00037 | 3 | 1 | 24   | 0 |
| P12163_2_F1,9483  | K.LAEQAER.Y ! R.LAEQ. | 1120.626 | 0.00298  | 2 | 1 | 24.7 | 0 |
| P12163_1_F4,17544 | R.EQYVYLAK.L          | 1621.941 | 0.00753  | 3 | 1 | 27.6 | 0 |
| P12163_1_F4,17567 | R.EQYVYLAK.L          | 1621.941 | 0.00467  | 2 | 1 | 49.3 | 0 |
| P12163_1_F9,16551 | R.EQYVYLAK.L          | 1621.941 | 0.00621  | 2 | 1 | 35.7 | 0 |
| P12163_2_F1,16678 | R.EQYVYLAK.L          | 1621.941 | 0.00493  | 2 | 1 | 39.9 | 0 |
| P12163_2_F1,16689 | R.EQYVYLAK.L          | 1621.941 | 0.00648  | 3 | 1 | 29.7 | 0 |
| P12163_1_F4,19313 | R.NLLSVAYK.N          | 1515.935 | 0.00473  | 2 | 1 | 24.7 | 0 |
| P12163_1_F5,18080 | R.NLLSVAYK.N          | 1515.935 | 0.00697  | 2 | 1 | 39.6 | 0 |
| P12163_1_F5,18081 | R.NLLSVAYK.N          | 1515.935 | 0.00381  | 3 | 1 | 34.8 | 0 |
| P12163_1_F6,18423 | R.NLLSVAYK.N          | 1515.935 | 0.01068  | 3 | 1 | 31.8 | 0 |
| P12163_1_F9,17887 | R.NLLSVAYK.N          | 1515.935 | 0.006    | 3 | 1 | 24.6 | 0 |
| P12163_2_F1,18587 | R.NLLSVAYK.N          | 1515.935 | 0.00633  | 2 | 1 | 42.2 | 0 |
| P12163_2_F1,18588 | R.NLLSVAYK.N          | 1515.935 | 0.00501  | 3 | 1 | 35.5 | 0 |
| P12163_2_F2,18787 | R.NLLSVAYK.N          | 1515.935 | 0.00681  | 3 | 1 | 28.1 | 0 |
| P12163_2_F2,18808 | R.NLLSVAYK.N          | 1515.935 | 0.00629  | 2 | 1 | 32.4 | 0 |
| P12163_2_F8_12070 | R.NLLSVAYK.N          | 1515.935 | 0.00594  | 3 | 1 | 30.9 | 0 |
| P12163_2_S5,16404 | R.NLLSVAYK.N          | 1515.935 | 0.00054  | 3 | 1 | 31.7 | 0 |
| P12163_1_F4,24604 | R.YEEMVEFMQK.L        | 1941.991 | 0.00724  | 3 | 1 | 28.1 | 0 |
| P12163_1_S10,8273 | K.HEGSIK.E            | 1278.763 | 0.00593  | 3 | 1 | 26.3 | 0 |
| P12163_1_F5,10277 | K.LAADYHPR.L          | 1246.685 | 0.00457  | 3 | 1 | 32.8 | 0 |
| P12163_1_F9,11350 | K.LAADYHPR.L          | 1246.685 | 0.00328  | 3 | 1 | 28.7 | 0 |
| P12163_2_F4,10430 | K.LAADYHPR.L          | 1246.685 | 0.00358  | 3 | 1 | 22.7 | 0 |
| P12163_2_F7,10561 | K.LAADYHPR.L          | 1246.685 | 0.00262  | 3 | 1 | 41.2 | 0 |
| P12163_2_S5,11074 | K.LAADYHPR.L          | 1246.685 | 0.0028   | 3 | 1 | 39.1 | 0 |
| P12163_1_F9,9995  | K.QAEVIGGHK.S         | 1546.916 | 0.00502  | 3 | 1 | 49.2 | 0 |

|                    |                      |          |          |   |   |      |   |
|--------------------|----------------------|----------|----------|---|---|------|---|
| P12163_1_F9,10076  | K.QAEVIGGHK.S        | 1546.916 | 0.00548  | 2 | 1 | 25.3 | 0 |
| P12163_1_F2,14983  | K.SYLVINEVR.E        | 1396.81  | 0.00267  | 3 | 1 | 46.4 | 0 |
| P12163_1_F2,18424  | K.SYLVINEVR.E        | 1396.81  | -0.00381 | 2 | 1 | 28.5 | 0 |
| P12163_1_F9,17992  | K.SYLVINEVR.E        | 1396.81  | 0.00181  | 2 | 1 | 38.1 | 0 |
| P12163_2_F1,18704  | K.SYLVINEVR.E        | 1396.81  | 0.00349  | 2 | 1 | 27.6 | 0 |
| P12163_1_F7,16646  | R.FYNVDVNAVPHK.L     | 2011.122 | 0.00564  | 3 | 1 | 55.3 | 0 |
| P12163_1_F7,16676  | R.FYNVDVNAVPHK.L     | 2011.122 | -0.00397 | 2 | 1 | 31   | 0 |
| P12163_1_F8,17408  | R.FYNVDVNAVPHK.L     | 2011.122 | -0.00111 | 3 | 1 | 58.9 | 0 |
| P12163_1_F8,17416  | R.FYNVDVNAVPHK.L     | 2011.122 | 0.00637  | 2 | 1 | 47.6 | 0 |
| P12163_2_F6,16944  | R.FYNVDVNAVPHK.L     | 2011.122 | 0.00325  | 2 | 1 | 45.2 | 0 |
| P12163_2_F6,16957  | R.FYNVDVNAVPHK.L     | 2011.122 | 0.00678  | 3 | 1 | 54.8 | 0 |
| P12163_1_F4,26897  | K.AVEQLFQALNK.V      | 1869.105 | 0.00557  | 3 | 1 | 55.9 | 0 |
| P12163_1_F4,27085  | K.AVEQLFQALNK.V      | 1869.105 | 0.00608  | 3 | 1 | 38.2 | 0 |
| P12163_1_F4,27094  | K.AVEQLFQALNK.V      | 1869.105 | 0.0028   | 2 | 1 | 60.8 | 0 |
| P12163_1_F7,23506  | K.AVEQLFQALNK.V      | 1869.105 | 0.00113  | 3 | 1 | 43.9 | 0 |
| P12163_1_F4,9426   | K.HHQAYVTNYNK.A      | 1983.066 | 0.00874  | 3 | 1 | 34.4 | 0 |
| P12163_1_F5,7777   | K.HHQAYVTNYNK.A      | 1983.066 | 0.01156  | 3 | 1 | 28.1 | 0 |
| P12163_2_F2,8621   | K.HHQAYVTNYNK.A      | 1983.066 | 0.00232  | 3 | 1 | 33.9 | 0 |
| P12163_2_F4,8258   | K.HHQAYVTNYNK.A      | 1983.066 | -0.0095  | 3 | 1 | 32.3 | 0 |
| P12163_2_S3,8505   | K.HHQAYVTNYNK.A      | 1983.066 | 0.00016  | 3 | 1 | 43.7 | 0 |
| P12163_1_S1,17688  | K.VDTSTVVQLQGAIK.F   | 2067.227 | 0.00907  | 3 | 1 | 37.9 | 0 |
| P12163_1_S1,17719  | K.VDTSTVVQLQGAIK.F   | 2067.227 | 0.00653  | 2 | 1 | 59   | 0 |
| P12163_1_S1,17989  | K.VDTSTVVQLQGAIK.F   | 2067.227 | 0.00478  | 3 | 1 | 26.6 | 0 |
| P12163_1_S10,17650 | K.VDTSTVVQLQGAIK.F   | 2067.227 | 0.00664  | 3 | 1 | 43.4 | 0 |
| P12163_1_F6,13280  | K.YASDVYQK.E         | 1581.873 | 0.00724  | 2 | 1 | 26.2 | 0 |
| P12163_1_S10,13560 | K.YASDVYQK.E         | 1581.873 | 0.00734  | 3 | 1 | 25   | 0 |
| P12163_1_S1,15758  | R.LVVETTANQDPLVTK.   | 2236.301 | 0.00392  | 4 | 1 | 28   | 0 |
| P12163_1_S1,17481  | R.LVVETTANQDPLVTK.   | 2236.301 | 0.00685  | 2 | 1 | 55.7 | 0 |
| P12163_1_S1,17557  | R.LVVETTANQDPLVTK.   | 2236.301 | 0.007    | 4 | 1 | 55.6 | 0 |
| P12163_1_F7,16754  | K.GIAHITGGGFTDNIPR.1 | 1930.045 | -0.00176 | 3 | 1 | 32   | 0 |
| P12163_1_F7,16783  | K.GIAHITGGGFTDNIPR.1 | 1930.045 | -0.00087 | 2 | 1 | 40.4 | 0 |
| P12163_1_F8,17558  | K.GIAHITGGGFTDNIPR.1 | 1930.045 | 0.00553  | 3 | 1 | 72   | 0 |
| P12163_2_F6,17081  | K.GIAHITGGGFTDNIPR.1 | 1930.045 | 0.00331  | 2 | 1 | 46.4 | 0 |
| P12163_2_F6,17127  | K.GIAHITGGGFTDNIPR.1 | 1930.045 | -0.002   | 3 | 1 | 69   | 0 |
| P12163_1_F4,22757  | K.GLGAVIYEDSWK.V     | 1946.084 | 0.0015   | 2 | 1 | 34.7 | 0 |
| P12163_2_F1,22244  | K.GLGAVIYEDSWK.V     | 1946.084 | 0.00276  | 2 | 1 | 46   | 0 |
| P12163_2_F1,22247  | K.GLGAVIYEDSWK.V     | 1946.084 | 0.00394  | 3 | 1 | 38.5 | 0 |
| P12163_2_F9,19728  | K.GLGAVIYEDSWK.V     | 1946.084 | 0.00286  | 3 | 1 | 30.3 | 0 |
| P12163_1_F3,21885  | K.QVLDIISEGGVK.G     | 1866.116 | 0.00248  | 3 | 1 | 54.8 | 0 |
| P12163_1_F3,21915  | K.QVLDIISEGGVK.G     | 1866.116 | 0.00185  | 2 | 1 | 52.4 | 0 |
| P12163_1_F4,22648  | K.QVLDIISEGGVK.G     | 1866.116 | 0.00367  | 3 | 1 | 34.3 | 0 |
| P12163_1_F6,20779  | K.QVLDIISEGGVK.G     | 1866.116 | -0.0056  | 3 | 1 | 23.6 | 0 |
| P12163_1_F4,18266  | K.VPAVFK.W           | 1268.819 | 0.00908  | 3 | 1 | 24.3 | 0 |
| P12163_1_F6,17599  | K.VPAVFK.W           | 1268.819 | 0.0063   | 2 | 1 | 23.9 | 0 |
| P12163_2_F1,17508  | K.VPAVFK.W           | 1268.819 | 0.00683  | 3 | 1 | 30.8 | 0 |
| P12163_1_F4,19482  | R.VLAQSDLSLK.D       | 1682.031 | 0.00756  | 2 | 1 | 36.1 | 0 |
| P12163_2_F1,18830  | R.VLAQSDLSLK.D       | 1682.031 | 0.004    | 2 | 1 | 40.4 | 0 |
| P12163_2_F1,7190   | K.ADAAAK.E           | 1154.699 | 0.00573  | 3 | 1 | 30.2 | 0 |
| P12163_1_F4,19325  | K.FELIGSSNIK.I       | 1716.015 | 0.00614  | 3 | 1 | 22.9 | 0 |
| P12163_1_F7,18844  | K.FELIGSSNIK.I       | 1716.015 | 0.00542  | 3 | 1 | 38.4 | 0 |
| P12163_2_F1,21172  | K.FELIGSSNIK.I       | 1716.015 | 0.00455  | 3 | 1 | 37.4 | 0 |

|                   |                    |          |          |   |   |      |   |
|-------------------|--------------------|----------|----------|---|---|------|---|
| P12163_2_F1,21182 | K.FELIGSSNIK.I     | 1716.015 | 0.00487  | 2 | 1 | 34.6 | 0 |
| P12163_2_F4,18432 | K.FELIGSSNIK.I     | 1716.015 | 0.00359  | 3 | 1 | 22.2 | 0 |
| P12163_1_F3,13945 | R.GLAANTDDLQK.A    | 1753.99  | 0.00362  | 2 | 1 | 52.2 | 0 |
| P12163_1_F3,13946 | R.GLAANTDDLQK.A    | 1753.99  | 0.00049  | 3 | 1 | 31.7 | 0 |
| P12163_1_F4,12079 | R.GLAANTDDLQK.A    | 1753.99  | 0.00592  | 3 | 1 | 39.2 | 0 |
| P12163_1_F4,14399 | R.GLAANTDDLQK.A    | 1753.99  | 0.01448  | 2 | 1 | 41.6 | 0 |
| P12163_1_F7,12753 | R.GLAANTDDLQK.A    | 1753.99  | -0.00197 | 3 | 1 | 22.6 | 0 |
| P12163_2_F1,13543 | R.GLAANTDDLQK.A    | 1753.99  | 0.00808  | 2 | 1 | 49.7 | 0 |
| P12163_2_F4,12470 | R.GLAANTDDLQK.A    | 1753.99  | 0.00025  | 3 | 1 | 28.6 | 0 |
| P12163_2_S3,11679 | R.GLAANTDDLQK.A    | 1753.99  | -0.00233 | 3 | 1 | 37.7 | 0 |
| P12163_1_F2,16396 | R.LLYSSAFSSR.T     | 1434.789 | 0.00265  | 3 | 1 | 22.1 | 0 |
| P12163_1_F2,17609 | R.LLYSSAFSSR.T     | 1434.789 | 0.00565  | 3 | 1 | 42.5 | 0 |
| P12163_1_F2,18247 | R.LLYSSAFSSR.T     | 1434.789 | 0.00373  | 3 | 1 | 42.8 | 0 |
| P12163_1_F8,18172 | R.SGEFEVTYLDNDTR.I | 1949.939 | 0.00711  | 2 | 1 | 35.5 | 0 |
| P12163_2_F7,14927 | K.AAPFINHSFGK.S    | 1797.027 | 0.00419  | 3 | 1 | 29.9 | 0 |
| P12163_2_F7,14954 | K.AAPFINHSFGK.S    | 1797.027 | 0.00411  | 2 | 1 | 31.1 | 0 |
| P12163_1_F4,15560 | K.SDVAGEVLK.L      | 1525.905 | 0.01245  | 3 | 1 | 44.3 | 0 |
| P12163_1_F4,15633 | K.SDVAGEVLK.L      | 1525.905 | 0.00605  | 2 | 1 | 38.8 | 0 |
| P12163_2_F1,14622 | K.SDVAGEVLK.L      | 1525.905 | 0.00245  | 2 | 1 | 37.3 | 0 |
| P12163_1_F3,5114  | K.TDESTEESSEK.S    | 1936.944 | 0.00541  | 3 | 1 | 25.2 | 0 |
| P12163_1_F3,6541  | K.TDESTEESSEK.S    | 1936.944 | 0.00397  | 3 | 1 | 36.9 | 0 |
| P12163_1_F3,7511  | K.TDESTEESSEK.S    | 1936.944 | 0.0067   | 3 | 1 | 49.1 | 0 |
| P12163_1_F3,7596  | K.TDESTEESSEK.S    | 1936.944 | 0.00534  | 2 | 1 | 44.9 | 0 |
| P12163_1_F5,6199  | K.TSENTSTAK.T      | 1546.853 | 0.00734  | 2 | 1 | 28.3 | 0 |
| P12163_2_F1,6572  | K.TSENTSTAK.T      | 1546.853 | 0.00603  | 2 | 1 | 31.4 | 0 |
| P12163_2_F1,6580  | K.TSENTSTAK.T      | 1546.853 | 0.00544  | 3 | 1 | 24.2 | 0 |
| P12163_2_F2,7100  | K.TSENTSTAK.T      | 1546.853 | 0.00439  | 2 | 1 | 36.9 | 0 |
| P12163_2_F2,7146  | K.TSENTSTAK.T      | 1546.853 | 0.00529  | 3 | 1 | 23.1 | 0 |
| P12163_2_F7,15789 | K.VGDFEM*HLK.R     | 1699.93  | 0.00489  | 3 | 1 | 32.5 | 0 |
| P12163_2_F6,17823 | K.VGDFEMHLK.R      | 1683.935 | 0.00659  | 2 | 1 | 27.1 | 0 |
| P12163_2_F6,17852 | K.VGDFEMHLK.R      | 1683.935 | 0.00372  | 3 | 1 | 36.7 | 0 |
| P12163_1_F4,4536  | K.DPEHAHR.H        | 1165.602 | 0.00423  | 3 | 1 | 36.1 | 0 |
| P12163_2_S5,5130  | K.DPEHAHR.H        | 1165.602 | -0.0009  | 3 | 1 | 37.8 | 0 |
| P12163_1_F9,6233  | K.EEDQEAHGK.K      | 1650.854 | 0.00738  | 3 | 1 | 35.1 | 0 |
| P12163_2_F9,7074  | K.EEDQEAHGK.K      | 1650.854 | 0.00381  | 3 | 1 | 29.2 | 0 |
| P12163_1_F5,13561 | K.EEEFDYK.K        | 1567.81  | 0.01496  | 2 | 1 | 23.9 | 0 |
| P12163_1_F6,7728  | R.RPSETESGDYGR.K   | 1657.808 | -0.01479 | 3 | 1 | 29.9 | 0 |
| P12163_1_F6,7738  | R.RPSETESGDYGR.K   | 1657.808 | -0.00566 | 2 | 1 | 27.8 | 0 |
| P12163_1_F9,5928  | R.RPSETESGDYGR.K   | 1657.808 | 0.00396  | 3 | 1 | 24.7 | 0 |
| P12163_2_F7,5837  | R.RPSETESGDYGR.K   | 1657.808 | 0.00246  | 3 | 1 | 41.5 | 0 |
| P12163_2_F7,6979  | R.RPSETESGDYGR.K   | 1657.808 | 0.00165  | 3 | 1 | 31.4 | 0 |
| P12163_1_F3,6228  | R.RRPSETESGDYGR.K  | 1813.909 | 0.00826  | 4 | 1 | 31.4 | 0 |
| P12163_1_F4,6579  | R.RRPSETESGDYGR.K  | 1813.909 | 0.00378  | 4 | 1 | 32   | 0 |
| P12163_1_F5,4722  | R.RRPSETESGDYGR.K  | 1813.909 | 0.0033   | 4 | 1 | 36   | 0 |
| P12163_1_F5,5559  | R.RRPSETESGDYGR.K  | 1813.909 | 0.00458  | 4 | 1 | 31.1 | 0 |
| P12163_1_F5,5571  | R.RRPSETESGDYGR.K  | 1813.909 | 0.00133  | 2 | 1 | 30.4 | 0 |
| P12163_2_S3,6551  | R.RRPSETESGDYGR.K  | 1813.909 | -0.0001  | 4 | 1 | 32.2 | 0 |
| P12163_1_F4,6971  | K.ADSAASTSASK.Q    | 1603.875 | 0.007    | 3 | 1 | 35.2 | 0 |
| P12163_1_F4,6984  | K.ADSAASTSASK.Q    | 1603.875 | 0.00831  | 2 | 1 | 37.4 | 0 |
| P12163_1_F4,8234  | K.ADSAASTSASK.Q    | 1603.875 | 0.00469  | 2 | 1 | 48.8 | 0 |
| P12163_1_F4,8327  | K.ADSAASTSASK.Q    | 1603.875 | 0.00808  | 3 | 1 | 37.3 | 0 |

|                    |                     |          |          |   |   |      |   |
|--------------------|---------------------|----------|----------|---|---|------|---|
| P12163_2_F6,17100  | K.GYDPEVIDIR.S      | 1480.795 | 0.00965  | 2 | 1 | 28.6 | 0 |
| P12163_1_F8,22637  | K.QGHELLLFEALR.E    | 1729.99  | 0.00188  | 2 | 1 | 40.8 | 0 |
| P12163_1_F8,22642  | K.QGHELLLFEALR.E    | 1729.99  | 0.00227  | 3 | 1 | 30.7 | 0 |
| P12163_1_S10,2072  | K.QGHELLLFEALR.E    | 1729.99  | 0.00371  | 3 | 1 | 27.2 | 0 |
| P12163_2_F10,1973  | K.QGHELLLFEALR.E    | 1729.99  | 0.00359  | 3 | 1 | 34.6 | 0 |
| P12163_2_F6,22310  | K.QGHELLLFEALR.E    | 1729.99  | 0.00311  | 3 | 1 | 31.9 | 0 |
| P12163_1_F9,6119   | R.QLGAEHSQR.L       | 1329.718 | 0.00295  | 3 | 1 | 44.6 | 0 |
| P12163_2_F9,6873   | R.QLGAEHSQR.L       | 1329.718 | 0.00253  | 3 | 1 | 43.6 | 0 |
| P12163_2_F4,8484   | R.YHVM*QAAK.T       | 1571.882 | 0.00656  | 3 | 1 | 40.2 | 0 |
| P12163_2_S5,8951   | R.YHVM*QAAK.T       | 1571.882 | 0.00161  | 3 | 1 | 32.2 | 0 |
| P12163_2_F4,11121  | R.YHVMQAAK.T        | 1555.887 | 0.00422  | 3 | 1 | 43.6 | 0 |
| P12163_1_F3,18398  | K.IFNPQGTGVVLCGQK.A | 2226.252 | 0.00435  | 3 | 1 | 28.5 | 0 |
| P12163_1_F3,20382  | K.IFNPQGTGVVLCGQK.A | 2226.252 | 0.00558  | 3 | 1 | 54.4 | 0 |
| P12163_1_F3,20440  | K.IFNPQGTGVVLCGQK.A | 2226.252 | 0.00136  | 2 | 1 | 72.6 | 0 |
| P12163_1_F8,14234  | K.KGDVVEISQVM*GR.G  | 2042.152 | 0.00477  | 3 | 1 | 35.3 | 0 |
| P12163_1_F8,17772  | K.KGDVVEISQVMGR.G   | 2026.158 | 0.00218  | 2 | 1 | 35.3 | 0 |
| P12163_2_F6,17250  | K.KGDVVEISQVMGR.G   | 2026.158 | 0.00272  | 2 | 1 | 33.9 | 0 |
| P12163_1_S1,20451  | K.QM*AEEVTSIVLAEGV  | 2631.401 | 0.01058  | 3 | 1 | 66.5 | 0 |
| P12163_1_S1,23576  | K.QMAEEVTSIVLAEGVS  | 2615.406 | 0.00647  | 3 | 1 | 57.6 | 0 |
| P12163_1_F3,20172  | K.SVAGSTAEVLCGLK.K  | 2000.131 | 0.00414  | 3 | 1 | 59   | 0 |
| P12163_1_F3,20176  | K.SVAGSTAEVLCGLK.K  | 2000.131 | 0.00603  | 2 | 1 | 88.4 | 0 |
| P12163_1_F4,20735  | K.SVAGSTAEVLCGLK.K  | 2000.131 | 0.00616  | 3 | 1 | 30.8 | 0 |
| P12163_1_F6,19170  | K.SVAGSTAEVLCGLK.K  | 2000.131 | 0.00226  | 3 | 1 | 39.2 | 0 |
| P12163_1_F5,16667  | R.SLIESGFSSK.E      | 1662.952 | 0.00922  | 2 | 1 | 29.3 | 0 |
| P12163_1_F5,16711  | R.SLIESGFSSK.E      | 1662.952 | 0.00553  | 3 | 1 | 42.1 | 0 |
| P12163_2_F1,17234  | R.SLIESGFSSK.E      | 1662.952 | 0.00886  | 2 | 1 | 43.9 | 0 |
| P12163_1_S10,6362  | K.SHDGTTK.K         | 1353.758 | 0.00463  | 3 | 1 | 34.6 | 0 |
| P12163_2_F8_12070  | K.SHDGTTK.K         | 1353.758 | 0.00247  | 3 | 1 | 34.9 | 0 |
| P12163_1_F8,14693  | K.SPTGDEAYNDNGLVPI  | 2008.988 | 0.00179  | 2 | 1 | 26.9 | 0 |
| P12163_1_F2,20846  | R.DVGVNSVVLFPK.V    | 1882.126 | 0.00089  | 3 | 1 | 35   | 0 |
| P12163_1_F3,18840  | R.DVGVNSVVLFPK.V    | 1882.126 | 0.00628  | 2 | 1 | 33.7 | 0 |
| P12163_1_F3,21150  | R.DVGVNSVVLFPK.V    | 1882.126 | 0.01007  | 3 | 1 | 41.3 | 0 |
| P12163_1_F8,14181  | R.EDGVIM*NDETVHQLC  | 2512.263 | 0.00529  | 3 | 1 | 28.8 | 0 |
| P12163_2_S5,13442  | R.EDGVIM*NDETVHQLC  | 2512.263 | 0.00688  | 3 | 1 | 32.7 | 0 |
| P12163_1_F8,13546  | R.EDGVIMNDETVHQLCI  | 2496.268 | 0.00445  | 3 | 1 | 24.4 | 0 |
| P12163_1_F8,16036  | R.EDGVIMNDETVHQLCI  | 2496.268 | 0.00319  | 3 | 1 | 42.4 | 0 |
| P12163_2_S5,15038  | R.EDGVIMNDETVHQLCI  | 2496.268 | 0.00622  | 3 | 1 | 55.6 | 0 |
| P12163_2_S5,15067  | R.EDGVIMNDETVHQLCI  | 2496.268 | 0.00527  | 4 | 1 | 26.6 | 0 |
| P12163_1_F9,12474  | R.HGLVQEVAK.A       | 1588.963 | 0.00637  | 2 | 1 | 33.4 | 0 |
| P12163_1_F9,12479  | R.HGLVQEVAK.A       | 1588.963 | 0.00619  | 3 | 1 | 30.4 | 0 |
| P12163_1_S10,12730 | R.HGLVQEVAK.A       | 1588.963 | 0.00532  | 3 | 1 | 33.3 | 0 |
| P12163_2_F1,12824  | K.ELEVEK.F          | 1354.804 | 0.0069   | 3 | 1 | 31.3 | 0 |
| P12163_1_F8,19929  | K.FITHTVPFSEINK.A   | 2141.221 | 0.00198  | 2 | 1 | 29   | 0 |
| P12163_2_F6,19478  | K.FITHTVPFSEINK.A   | 2141.221 | -0.00191 | 2 | 1 | 47.2 | 0 |
| P12163_2_F6,19530  | K.FITHTVPFSEINK.A   | 2141.221 | 0.00279  | 4 | 1 | 22.5 | 0 |
| P12163_1_F3,20583  | K.INPLAPLDK.V       | 1588.988 | 0.00394  | 2 | 1 | 25.4 | 0 |
| P12163_1_F9,14137  | K.THPM*NLLNER.T     | 1544.816 | 0.00451  | 3 | 1 | 27.7 | 0 |
| P12163_2_F7,10650  | K.THPM*NLLNER.T     | 1544.816 | 0.00277  | 3 | 1 | 30.3 | 0 |
| P12163_2_F7,12673  | K.THPM*NLLNER.T     | 1544.816 | 0.00136  | 3 | 1 | 37.6 | 0 |
| P12163_1_F9,14112  | K.THPM*NLLNER.T     | 1528.821 | 0.00562  | 3 | 1 | 26.6 | 0 |
| P12163_2_F7,12732  | K.THPM*NLLNER.T     | 1528.821 | 0.00688  | 3 | 1 | 49.6 | 0 |

|                   |                        |          |          |   |   |      |   |
|-------------------|------------------------|----------|----------|---|---|------|---|
| P12163_1_F3,15895 | R.SDLPSVVEK.Y          | 1581.931 | 0.00646  | 3 | 1 | 31.5 | 0 |
| P12163_1_F4,16302 | R.SDLPSVVEK.Y          | 1581.931 | 0.0029   | 2 | 1 | 26.4 | 0 |
| P12163_1_F4,16322 | R.SDLPSVVEK.Y          | 1581.931 | 0.00475  | 3 | 1 | 31.4 | 0 |
| P12163_2_F1,15493 | R.SDLPSVVEK.Y          | 1581.931 | 0.00097  | 3 | 1 | 31.1 | 0 |
| P12163_2_F1,15505 | R.SDLPSVVEK.Y          | 1581.931 | 0.00488  | 2 | 1 | 32   | 0 |
| P12163_1_F2,17507 | K.DAANMLDIR.V          | 1322.704 | 0.00483  | 2 | 1 | 31.8 | 0 |
| P12163_1_S1,16718 | K.DAANMLDIR.V          | 1322.704 | 0.00435  | 2 | 1 | 27.9 | 0 |
| P12163_1_F8,23606 | K.IWELVQPHLK.T         | 1871.136 | 0.00123  | 3 | 1 | 36.6 | 0 |
| P12163_1_F7,16465 | R.HEEADSLYVEEVDVGI     | 2577.226 | 0.00443  | 3 | 1 | 76.1 | 0 |
| P12163_2_F10,1585 | R.HEEADSLYVEEVDVGI     | 2577.226 | -0.00145 | 3 | 1 | 35.5 | 0 |
| P12163_2_S5,16356 | R.HEEADSLYVEEVDVGI     | 2577.226 | 0.00254  | 3 | 1 | 84.6 | 0 |
| P12163_2_S5,16399 | R.HEEADSLYVEEVDVGI     | 2577.226 | 0.00626  | 4 | 1 | 36.9 | 0 |
| P12163_1_F4,19126 | R.IICSGLVK.Y           | 1497.928 | 0.00206  | 2 | 1 | 24.7 | 0 |
| P12163_1_F4,19157 | R.IICSGLVK.Y           | 1497.928 | -0.00015 | 3 | 1 | 25.2 | 0 |
| P12163_2_F1,18370 | R.IICSGLVK.Y           | 1497.928 | -0.00196 | 2 | 1 | 23.9 | 0 |
| P12163_1_F8,18835 | R.SVVVLANLKPR.N        | 1804.163 | 0.00557  | 3 | 1 | 40.5 | 0 |
| P12163_1_F8,18849 | R.SVVVLANLKPR.N        | 1804.163 | 0.00578  | 2 | 1 | 31.1 | 0 |
| P12163_2_F6,18371 | R.SVVVLANLKPR.N        | 1804.163 | 0.00032  | 3 | 1 | 26.1 | 0 |
| P12163_2_F6,18387 | R.SVVVLANLKPR.N        | 1804.163 | 0.00246  | 2 | 1 | 37.3 | 0 |
| P12163_2_F6,18459 | R.SVVVLANLKPR.N        | 1804.163 | 0.00705  | 4 | 1 | 23.5 | 0 |
| P12163_1_F4,18547 | K.EAIAYGLADK.I         | 1658.957 | 0.00636  | 2 | 1 | 40.7 | 0 |
| P12163_1_F4,18573 | K.EAIAYGLADK.I         | 1658.957 | 0.0063   | 3 | 1 | 42.1 | 0 |
| P12163_2_F1,17854 | K.EAIAYGLADK.I         | 1658.957 | 0.00351  | 3 | 1 | 37.5 | 0 |
| P12163_2_F4,16041 | K.EAIAYGLADK.I         | 1658.957 | 0.00243  | 3 | 1 | 27   | 0 |
| P12163_2_F9,16368 | K.EAIAYGLADK.I         | 1658.957 | 0.00114  | 3 | 1 | 38.4 | 0 |
| P12163_1_F3,15517 | K.IIDSQDAAYEK.R        | 1861.016 | 0.00666  | 2 | 1 | 49.7 | 0 |
| P12163_1_F3,15603 | K.IIDSQDAAYEK.R        | 1861.016 | 0.00589  | 3 | 1 | 56.3 | 0 |
| P12163_1_F3,15826 | K.IIDSQDAAYEK.R        | 1861.016 | 0.01072  | 2 | 1 | 25.5 | 0 |
| P12163_1_S1,14211 | K.IIDSQDAAYEK.R        | 1861.016 | 0.00729  | 3 | 1 | 23.5 | 0 |
| P12163_1_S1,19515 | K.LYLPVVGR.S           | 1220.767 | 0.00149  | 3 | 1 | 36.4 | 0 |
| P12163_1_F2,10087 | R.EAGGPQAAPSGFR.-      | 1548.807 | 0.00301  | 3 | 1 | 32.9 | 0 |
| P12163_1_F2,11252 | R.EAGGPQAAPSGFR.-      | 1548.807 | -0.00195 | 2 | 1 | 26.5 | 0 |
| P12163_1_F2,11290 | R.EAGGPQAAPSGFR.-      | 1548.807 | 0.00307  | 3 | 1 | 52.7 | 0 |
| P12163_1_F5,8512  | R.GLQPNSTK.L           | 1539.895 | 0.00568  | 2 | 1 | 27.5 | 0 |
| P12163_2_F2,9307  | R.GLQPNSTK.L           | 1539.895 | 0.00326  | 2 | 1 | 32.2 | 0 |
| P12163_1_F9,4203  | K.EDDAAHDR.H           | 1232.581 | 0.00503  | 2 | 1 | 33.1 | 0 |
| P12163_1_F9,4209  | K.EDDAAHDR.H           | 1232.581 | 0.00202  | 3 | 1 | 45.8 | 0 |
| P12163_2_F6,4601  | K.EDDAAHDR.H           | 1232.581 | 0.0031   | 3 | 1 | 36.4 | 0 |
| P12163_2_F7,4195  | K.EDDAAHDR.H           | 1232.581 | 0.00385  | 3 | 1 | 46.6 | 0 |
| P12163_1_F2,22582 | K.LDGVVTLVDAK.H        | 1738.057 | 0.00638  | 3 | 1 | 41.1 | 0 |
| P12163_1_F3,23383 | K.LDGVVTLVDAK.H        | 1738.057 | -0.0001  | 3 | 1 | 36.9 | 0 |
| P12163_1_S1,21574 | K.LDGVVTLVDAK.H        | 1738.057 | -0.00181 | 3 | 1 | 32.3 | 0 |
| P12163_1_F5,12080 | K.NLNGQELEK.G          | 1652.943 | 0.00906  | 2 | 1 | 42.9 | 0 |
| P12163_1_F7,19667 | K.TTLLNHILTAEHGK.R     | 2156.265 | 0.00106  | 3 | 1 | 42.1 | 0 |
| P12163_2_F10,1833 | K.TTLLNHILTAEHGK.R     | 2156.265 | 0.01227  | 4 | 1 | 33.9 | 0 |
| P12163_2_F10,1844 | K.TTLLNHILTAEHGK.R     | 2156.265 | 0.00619  | 3 | 1 | 34.3 | 0 |
| P12163_2_F10,1860 | K.TTLLNHILTAEHGK.R     | 2156.265 | 0.00143  | 4 | 1 | 38   | 0 |
| P12163_1_F4,21600 | R.MISELVSK.K ! -.MISEL | 1514.907 | 0.00767  | 3 | 1 | 25.5 | 0 |
| P12163_2_F1,21147 | R.MISELVSK.K ! -.MISEL | 1514.907 | 0.00839  | 3 | 1 | 26.1 | 0 |
| P12163_2_F1,21170 | R.MISELVSK.K ! -.MISEL | 1514.907 | 0.00809  | 2 | 1 | 30.4 | 0 |
| P12163_1_F8,16438 | K.GTVDFGFSHVM*FATGI    | 1901.948 | 0.0079   | 3 | 1 | 23.1 | 0 |

|                   |                     |          |          |   |   |      |   |
|-------------------|---------------------|----------|----------|---|---|------|---|
| P12163_2_F6,15921 | K.GTVDGFSHVM*FATGI  | 1901.948 | -0.00296 | 3 | 1 | 27.9 | 0 |
| P12163_1_F8,18759 | K.GTVDGFSHVMFATGR   | 1885.953 | -0.00323 | 3 | 1 | 32.1 | 0 |
| P12163_1_F8,18810 | K.GTVDGFSHVMFATGR   | 1885.953 | 0.00258  | 2 | 1 | 35.4 | 0 |
| P12163_2_S5,13730 | K.IVDPHTVDVDGK.L    | 1903.075 | 0.00677  | 3 | 1 | 27.5 | 0 |
| P12163_2_S5,13771 | K.IVDPHTVDVDGK.L    | 1903.075 | 0.0036   | 2 | 1 | 50   | 0 |
| P12163_1_F4,20096 | K.LLVYASK.F         | 1401.893 | 0.01069  | 2 | 1 | 28.6 | 0 |
| P12163_2_F1,19484 | K.LLVYASK.F         | 1401.893 | 0.00593  | 2 | 1 | 31   | 0 |
| P12163_2_F1,19565 | K.LLVYASK.F         | 1401.893 | 0.00346  | 3 | 1 | 31.5 | 0 |
| P12163_1_F8,17922 | R.GIEFHTEESPQAILK.S | 2307.28  | 0.00316  | 3 | 1 | 48.6 | 0 |
| P12163_1_F8,17937 | R.GIEFHTEESPQAILK.S | 2307.28  | 0.00221  | 4 | 1 | 29   | 0 |
| P12163_1_F8,17949 | R.GIEFHTEESPQAILK.S | 2307.28  | 0.00468  | 2 | 1 | 36.8 | 0 |
| P12163_2_F6,17435 | R.GIEFHTEESPQAILK.S | 2307.28  | 0.00325  | 3 | 1 | 48.3 | 0 |
| P12163_2_F6,17480 | R.GIEFHTEESPQAILK.S | 2307.28  | 0.00453  | 4 | 1 | 26.5 | 0 |
| P12163_1_F2,24506 | R.INLTPVALM*EGGALA  | 2222.304 | 0.00585  | 3 | 1 | 59.8 | 0 |
| P12163_2_F4,7045  | K.AGNAYHK.F         | 1368.784 | 0.00576  | 3 | 1 | 24.5 | 0 |
| P12163_1_F8,17959 | K.GVVAEIIHDPGR.G    | 1566.891 | 0.00011  | 3 | 1 | 41.7 | 0 |
| P12163_1_F8,17999 | K.GVVAEIIHDPGR.G    | 1566.891 | 0.00259  | 2 | 1 | 63.2 | 0 |
| P12163_2_F6,17467 | K.GVVAEIIHDPGR.G    | 1566.891 | -0.00316 | 3 | 1 | 49.2 | 0 |
| P12163_2_S5,16609 | K.GVVAEIIHDPGR.G    | 1566.891 | 0.00149  | 3 | 1 | 42.8 | 0 |
| P12163_2_S5,16643 | K.GVVAEIIHDPGR.G    | 1566.891 | -0.00213 | 2 | 1 | 25.6 | 0 |
| P12163_1_F6,15544 | R.ASGDYAVIISHNPDND  | 2350.158 | 0.00329  | 3 | 1 | 59.2 | 0 |
| P12163_1_F7,14710 | R.ASGDYAVIISHNPDND  | 2350.158 | 0.01163  | 3 | 1 | 49.4 | 0 |
| P12163_2_F4,14360 | R.ASGDYAVIISHNPDND  | 2350.158 | 0.00449  | 3 | 1 | 54.2 | 0 |
| P12163_1_F5,7431  | R.GQAAATAAK.A       | 1396.837 | 0.00072  | 3 | 1 | 40.7 | 0 |
| P12163_2_F2,8327  | R.GQAAATAAK.A       | 1396.837 | 0.00507  | 3 | 1 | 40.9 | 0 |
| P12163_1_F8,16311 | R.SIPEGAVVCNVEHHVC  | 2279.15  | 0.00235  | 4 | 1 | 29.9 | 0 |
| P12163_2_F10,1519 | R.SIPEGAVVCNVEHHVC  | 2279.15  | 0.00195  | 4 | 1 | 66.4 | 0 |
| P12163_2_F10,1520 | R.SIPEGAVVCNVEHHVC  | 2279.15  | 0.00623  | 3 | 1 | 67.1 | 0 |
| P12163_1_S1,18766 | K.APIYLYINSTGTTR.D  | 1874.032 | 0.00047  | 3 | 1 | 41   | 0 |
| P12163_1_S1,20110 | K.APIYLYINSTGTTR.D  | 1874.032 | -0.00481 | 3 | 1 | 42.5 | 0 |
| P12163_2_F6,20623 | K.APIYLYINSTGTTR.D  | 1874.032 | 0.0044   | 2 | 1 | 43.8 | 0 |
| P12163_1_F4,17339 | K.EFGVIDK.V         | 1415.835 | 0.00575  | 2 | 1 | 33.8 | 0 |
| P12163_1_F4,17344 | K.EFGVIDK.V         | 1415.835 | 0.00638  | 3 | 1 | 24.7 | 0 |
| P12163_1_F5,16047 | K.EFGVIDK.V         | 1415.835 | 0.00381  | 2 | 1 | 32.3 | 0 |
| P12163_1_F5,16076 | K.EFGVIDK.V         | 1415.835 | 0.0104   | 3 | 1 | 29.9 | 0 |
| P12163_1_F6,16638 | K.EFGVIDK.V         | 1415.835 | 0.00795  | 2 | 1 | 31.4 | 0 |
| P12163_2_F1,16495 | K.EFGVIDK.V         | 1415.835 | 0.00483  | 2 | 1 | 33.6 | 0 |
| P12163_1_F9,10974 | K.HTGNSEEFVTK.T     | 1856.996 | 0.00048  | 3 | 1 | 31.9 | 0 |
| P12163_1_F9,10988 | K.HTGNSEEFVTK.T     | 1856.996 | 0.0048   | 3 | 1 | 33.8 | 0 |
| P12163_1_S1,17301 | R.GQETIM*AEVAPPEEW  | 2554.295 | 0.00932  | 3 | 1 | 35.1 | 0 |
| P12163_1_S1,19956 | R.GQETIMAEVAPPEEWI  | 2538.301 | 0.00515  | 3 | 1 | 40.4 | 0 |
| P12163_2_S3,16310 | R.SATYNEHRPDTPPDL   | 2987.564 | 0.00877  | 4 | 1 | 36.2 | 0 |
| P12163_1_F9,12312 | K.APSSEYVNVSR.W     | 1512.796 | 0.0027   | 2 | 1 | 33.8 | 0 |
| P12163_1_F2,18342 | K.DDITVYSALSK.A     | 1820.026 | 0.00558  | 2 | 1 | 43.7 | 0 |
| P12163_1_F3,18932 | K.DDITVYSALSK.A     | 1820.026 | 0.00562  | 2 | 1 | 41.9 | 0 |
| P12163_1_F3,18954 | K.DDITVYSALSK.A     | 1820.026 | -0.00096 | 3 | 1 | 32.9 | 0 |
| P12163_1_F9,15032 | K.HIDALLR.I         | 1141.699 | 0.00447  | 3 | 1 | 25.2 | 0 |
| P12163_1_F4,18742 | K.LAPVGYGIK.K       | 1525.956 | 0.00609  | 3 | 1 | 22.9 | 0 |
| P12163_2_F1,17987 | K.LAPVGYGIK.K       | 1525.956 | 0.00495  | 3 | 1 | 25.2 | 0 |
| P12163_2_F1,18002 | K.LAPVGYGIK.K       | 1525.956 | 0.00339  | 2 | 1 | 26.6 | 0 |
| P12163_2_F9,15930 | K.LAPVGYGIK.K       | 1525.956 | 0.00207  | 3 | 1 | 22   | 0 |

|                   |                       |          |          |   |   |      |   |
|-------------------|-----------------------|----------|----------|---|---|------|---|
| P12163_1_F4,14652 | R.SYITGYQASK.D        | 1725.963 | 0.00941  | 2 | 1 | 48.2 | 0 |
| P12163_1_F4,14664 | R.SYITGYQASK.D        | 1725.963 | 0.00653  | 3 | 1 | 30   | 0 |
| P12163_1_F5,13417 | R.SYITGYQASK.D        | 1725.963 | 0.00685  | 2 | 1 | 32.6 | 0 |
| P12163_2_F1,13622 | R.SYITGYQASK.D        | 1725.963 | 0.00371  | 2 | 1 | 44.5 | 0 |
| P12163_2_F1,13659 | R.SYITGYQASK.D        | 1725.963 | 0.00479  | 3 | 1 | 32.8 | 0 |
| P12163_1_F6,22778 | K.DPFLNLHPEVSLLR.G    | 1954.106 | -0.00004 | 3 | 1 | 29   | 0 |
| P12163_1_F2,10975 | K.VIGVGGGGSNAVNR.M    | 1560.876 | -0.00171 | 3 | 1 | 58.9 | 0 |
| P12163_1_F2,12890 | K.VIGVGGGGSNAVNR.M    | 1560.876 | 0.00278  | 2 | 1 | 61.3 | 0 |
| P12163_1_F2,12907 | K.VIGVGGGGSNAVNR.M    | 1560.876 | 0.00051  | 3 | 1 | 102  | 0 |
| P12163_1_F3,5887  | R.GEGTNTISNPR.K       | 1449.76  | 0.00241  | 3 | 1 | 28.3 | 0 |
| P12163_1_F3,8348  | R.GEGTNTISNPR.K       | 1449.76  | 0.00462  | 2 | 1 | 42.5 | 0 |
| P12163_2_F1,7974  | R.GEGTNTISNPR.K       | 1449.76  | 0.00438  | 2 | 1 | 31.2 | 0 |
| P12163_1_F4,16085 | R.GLGAGGNPEIGM*NA/    | 2081.127 | 0.00497  | 3 | 1 | 56.3 | 0 |
| P12163_1_F3,15527 | R.GLGAGGNPEIGMNAA     | 2065.132 | 0.0051   | 2 | 1 | 70.2 | 0 |
| P12163_1_F4,16035 | R.GLGAGGNPEIGMNAA     | 2065.132 | 0.01019  | 3 | 1 | 57.3 | 0 |
| P12163_1_F4,16060 | R.GLGAGGNPEIGMNAA     | 2065.132 | -0.00042 | 2 | 1 | 54.4 | 0 |
| P12163_2_F1,15262 | R.GLGAGGNPEIGMNAA     | 2065.132 | 0.00452  | 2 | 1 | 71   | 0 |
| P12163_1_F2,15851 | R.LQIGQELTR.G         | 1361.805 | 0.00375  | 3 | 1 | 34.7 | 0 |
| P12163_1_F2,16088 | R.LQIGQELTR.G         | 1361.805 | 0.00078  | 3 | 1 | 33.7 | 0 |
| P12163_1_S10,1327 | K.GYFEDR.R            | 1090.547 | 0.0039   | 2 | 1 | 24.1 | 0 |
| P12163_2_F1,11742 | K.GYFEDR.R            | 1090.547 | 0.00304  | 2 | 1 | 43.9 | 0 |
| P12163_1_F6,11719 | R.DIVNSHYK.A          | 1583.9   | 0.00662  | 3 | 1 | 44.6 | 0 |
| P12163_1_F9,11605 | R.DIVNSHYK.A          | 1583.9   | 0.00749  | 2 | 1 | 30.4 | 0 |
| P12163_2_F7,10740 | R.DIVNSHYK.A          | 1583.9   | 0.00314  | 3 | 1 | 30.9 | 0 |
| P12163_2_F7,10763 | R.DIVNSHYK.A          | 1583.9   | 0.00689  | 2 | 1 | 34.7 | 0 |
| P12163_1_F8,18025 | R.HETADINTFSWGVANI    | 2122.062 | 0.00768  | 3 | 1 | 38.9 | 0 |
| P12163_2_F6,17492 | R.HETADINTFSWGVANI    | 2122.062 | 0.00666  | 3 | 1 | 32.6 | 0 |
| P12163_1_F4,8449  | R.HGEHIAAYGEGNER.R    | 1843.899 | 0.00281  | 3 | 1 | 44.8 | 0 |
| P12163_1_F6,8330  | R.HGEHIAAYGEGNER.R    | 1843.899 | 0.00068  | 3 | 1 | 25.7 | 0 |
| P12163_2_F7,7480  | R.HGEHIAAYGEGNER.R    | 1843.899 | 0.0017   | 3 | 1 | 27   | 0 |
| P12163_2_S3,7838  | R.HGEHIAAYGEGNER.R    | 1843.899 | 0.00374  | 3 | 1 | 37.6 | 0 |
| P12163_1_F2,10888 | R.TLPAPTTDPTK.L       | 1750.021 | -0.0022  | 3 | 1 | 22.4 | 0 |
| P12163_1_F2,13225 | R.TLPAPTTDPTK.L       | 1750.021 | 0.00733  | 2 | 1 | 34.1 | 0 |
| P12163_1_F2,6539  | K.GSTFHR.V ! K.GSTFHR | 1008.553 | 0.00449  | 3 | 1 | 33.1 | 0 |
| P12163_1_F4,6988  | K.GSTFHR.V ! K.GSTFHR | 1008.553 | 0.00467  | 3 | 1 | 26.4 | 0 |
| P12163_2_S3,6565  | K.GSTFHR.V ! K.GSTFHR | 1008.553 | 0.00554  | 3 | 1 | 29.5 | 0 |
| P12163_1_S10,1275 | K.HVVFGK.V ! R.HVVFG  | 1294.809 | 0.00417  | 3 | 1 | 30.5 | 0 |
| P12163_2_F8_1207  | K.HVVFGK.V ! R.HVVFG  | 1294.809 | 0.00426  | 3 | 1 | 27   | 0 |
| P12163_1_F4,7410  | K.TAENFR.Q ! K.TAENFR | 1041.563 | 0.00249  | 3 | 1 | 33.7 | 0 |
| P12163_2_F2,7039  | K.TAENFR.Q ! K.TAENFR | 1041.563 | 0.00225  | 3 | 1 | 31.4 | 0 |
| P12163_2_F1,17582 | K.VVDGYSVIK.D         | 1587.957 | 0.00296  | 2 | 1 | 30.4 | 0 |
| P12163_1_F5,9906  | R.ALCTGEK.G           | 1386.787 | 0.00705  | 2 | 1 | 26.7 | 0 |
| P12163_1_F6,10902 | R.ALCTGEK.G           | 1386.787 | 0.01195  | 2 | 1 | 26.2 | 0 |
| P12163_1_F8,10102 | R.ALCTGEK.G           | 1386.787 | 0.00237  | 2 | 1 | 27.1 | 0 |
| P12163_2_F2,10720 | R.ALCTGEK.G           | 1386.787 | 0.00655  | 2 | 1 | 27   | 0 |
| P12163_2_F2,10838 | R.ALCTGEK.G           | 1386.787 | 0.00185  | 3 | 1 | 29.9 | 0 |
| P12163_2_F2,11178 | R.ALCTGEK.G           | 1386.787 | 0.00683  | 2 | 1 | 26.2 | 0 |
| P12163_1_F2,17937 | K.AAALNAGSEAPTIFDK    | 2184.212 | 0.00598  | 3 | 1 | 34   | 0 |
| P12163_1_F3,18421 | K.AAALNAGSEAPTIFDK    | 2184.212 | 0.00775  | 3 | 1 | 45.4 | 0 |
| P12163_1_F3,20079 | K.AAALNAGSEAPTIFDK    | 2184.212 | 0.00196  | 2 | 1 | 88.6 | 0 |
| P12163_1_F3,20093 | K.AAALNAGSEAPTIFDK    | 2184.212 | 0.00655  | 3 | 1 | 80   | 0 |



|                   |                       |          |          |   |   |      |   |
|-------------------|-----------------------|----------|----------|---|---|------|---|
| P12163_1_F3,17736 | K.EIPSSIVYEDEK.V      | 2017.095 | 0.01319  | 3 | 1 | 30.9 | 0 |
| P12163_1_F3,17740 | K.EIPSSIVYEDEK.V      | 2017.095 | 0.00768  | 2 | 1 | 48.4 | 0 |
| P12163_2_F1,14457 | R.DGLTTLAK.A          | 1426.873 | 0.00682  | 3 | 1 | 26.9 | 0 |
| P12163_1_F7,18989 | R.DINPQAPVHVLIIPK.F   | 2262.379 | 0.00465  | 3 | 1 | 36.6 | 0 |
| P12163_1_F7,19036 | R.DINPQAPVHVLIIPK.F   | 2262.379 | 0.0024   | 2 | 1 | 29   | 0 |
| P12163_2_S5,17630 | R.DINPQAPVHVLIIPK.F   | 2262.379 | 0.00675  | 3 | 1 | 42.5 | 0 |
| P12163_1_F6,18580 | R.HGDILGHLLCASK.I     | 2029.147 | 0.00701  | 3 | 1 | 26   | 0 |
| P12163_1_F6,18603 | R.HGDILGHLLCASK.I     | 2029.147 | 0.00365  | 4 | 1 | 27.6 | 0 |
| P12163_1_F7,17759 | R.HGDILGHLLCASK.I     | 2029.147 | 0.0014   | 3 | 1 | 40.6 | 0 |
| P12163_2_F10,1486 | K.RQESEGRPLQASQLA     | 3132.609 | -0.00154 | 4 | 1 | 45.3 | 0 |
| P12163_1_F2,19767 | R.AIM*ANAGSSLM*GIG    | 2391.283 | 0.00499  | 3 | 1 | 50.3 | 0 |
| P12163_1_F2,21024 | R.AIMANAGSSLMGIGTA    | 2359.293 | 0.00094  | 3 | 1 | 96.5 | 0 |
| P12163_1_F2,11798 | R.AVQAQEGIASLR.D      | 1546.885 | 0.00476  | 3 | 1 | 56.2 | 0 |
| P12163_1_F2,15738 | R.AVQAQEGIASLR.D      | 1546.885 | 0.00592  | 2 | 1 | 29.9 | 0 |
| P12163_1_F2,15989 | R.AVQAQEGIASLR.D      | 1546.885 | -0.00282 | 2 | 1 | 24.9 | 0 |
| P12163_1_S1,15419 | R.AVQAQEGIASLR.D      | 1546.885 | 0.0035   | 2 | 1 | 30.5 | 0 |
| P12163_1_F2,19864 | R.DNVDTLIVIPNDK.L     | 2064.18  | 0.00445  | 2 | 1 | 27.3 | 0 |
| P12163_1_F2,19878 | R.DNVDTLIVIPNDK.L     | 2064.18  | 0.00644  | 3 | 1 | 27.2 | 0 |
| P12163_1_S1,18586 | R.DNVDTLIVIPNDK.L     | 2064.18  | 0.00464  | 3 | 1 | 42.7 | 0 |
| P12163_1_S1,18676 | R.DNVDTLIVIPNDK.L     | 2064.18  | 0.00299  | 2 | 1 | 55.4 | 0 |
| P12163_1_F6,17338 | R.QEESGRPLQASQLAQ     | 2976.508 | -0.00015 | 3 | 1 | 51.6 | 0 |
| P12163_1_F6,17352 | R.QEESGRPLQASQLAQ     | 2976.508 | 0.00512  | 4 | 1 | 54   | 0 |
| P12163_1_F2,14883 | K.EAAVVDVPEPEK.I      | 1891.063 | 0.00239  | 3 | 1 | 50.6 | 0 |
| P12163_1_F2,14890 | K.EAAVVDVPEPEK.I      | 1891.063 | 0.00043  | 2 | 1 | 55.3 | 0 |
| P12163_1_S1,14083 | K.EAAVVDVPEPEK.I      | 1891.063 | 0.00398  | 3 | 1 | 36.9 | 0 |
| P12163_1_F9,6662  | K.GCTHQVENGD.K.F      | 1852.943 | 0.01634  | 3 | 1 | 24.5 | 0 |
| P12163_2_F4,13058 | K.GHISYYVTGK.E        | 1732.984 | 0.00476  | 2 | 1 | 40   | 0 |
| P12163_2_F4,13078 | K.GHISYYVTGK.E        | 1732.984 | 0.00153  | 3 | 1 | 36.3 | 0 |
| P12163_2_S5,13547 | K.GHISYYVTGK.E        | 1732.984 | 0.00321  | 3 | 1 | 32.3 | 0 |
| P12163_1_F3,25094 | K.NLLFALTVEPSNVK.L    | 2153.279 | 0.00479  | 3 | 1 | 50.7 | 0 |
| P12163_1_F4,15777 | K.VYGGSLDNVK.G        | 1659.953 | 0.00363  | 2 | 1 | 38   | 0 |
| P12163_1_F9,15099 | K.VYGGSLDNVK.G        | 1659.953 | 0.01793  | 2 | 1 | 30.4 | 0 |
| P12163_2_F1,14950 | K.VYGGSLDNVK.G        | 1659.953 | 0.00639  | 2 | 1 | 28.4 | 0 |
| P12163_2_F1,14989 | K.VYGGSLDNVK.G        | 1659.953 | 0.0067   | 3 | 1 | 26.9 | 0 |
| P12163_2_F8_12070 | K.VYGGSLDNVK.G        | 1659.953 | 0.00751  | 3 | 1 | 41.8 | 0 |
| P12163_1_F7,19852 | K.AYLAGFAM*PHDAPLI    | 2502.298 | 0.0033   | 3 | 1 | 25.6 | 0 |
| P12163_1_F7,21031 | K.AYLAGFAM*PHDAPLI    | 2502.298 | 0.00841  | 3 | 1 | 34.5 | 0 |
| P12163_1_F7,19373 | K.AYLAGFAM*PHDAPLI    | 2486.303 | 0.007    | 3 | 1 | 27.6 | 0 |
| P12163_2_S5,19050 | K.AYLAGFAMPHDAPLE     | 2486.303 | 0.00442  | 3 | 1 | 21.9 | 0 |
| P12163_2_S5,20252 | K.AYLAGFAMPHDAPLE     | 2470.308 | 0.00321  | 4 | 1 | 37.4 | 0 |
| P12163_1_F4,6304  | R.GSAHTVVR.A          | 1130.658 | 0.00297  | 3 | 1 | 38.1 | 0 |
| P12163_1_F7,17497 | R.GYHM*VSGAVDVGLF     | 1928     | 0.00474  | 3 | 1 | 46.4 | 0 |
| P12163_1_F4,17537 | R.LPESCPTWAK.K        | 1796.982 | 0.00626  | 3 | 1 | 24.2 | 0 |
| P12163_1_F4,17542 | R.LPESCPTWAK.K        | 1796.982 | 0.0058   | 2 | 1 | 46.6 | 0 |
| P12163_1_F2,7765  | R.SAAVEDVAR.F         | 1221.674 | 0.00318  | 2 | 1 | 33.3 | 0 |
| P12163_1_F2,11746 | R.SAAVEDVAR.F         | 1221.674 | 0.00228  | 2 | 1 | 42.2 | 0 |
| P12163_1_F2,11995 | R.SAAVEDVAR.F         | 1221.674 | 0.00334  | 2 | 1 | 31.1 | 0 |
| P12163_1_F4,22603 | K.FGFDDAFNYK.E ! K.FC | 1831.947 | 0.00457  | 2 | 1 | 40.1 | 0 |
| P12163_1_F4,22629 | K.FGFDDAFNYK.E ! K.FC | 1831.947 | 0.00624  | 3 | 1 | 30.9 | 0 |
| P12163_1_S1,21705 | K.M*LDAVLLNMR.L ! K.  | 1495.828 | 0.00183  | 3 | 1 | 49   | 0 |
| P12163_1_S1,21951 | K.M*LDAVLLNMR.L ! K.  | 1495.828 | 0.00207  | 3 | 1 | 64   | 0 |

|                   |                        |          |          |   |   |      |   |
|-------------------|------------------------|----------|----------|---|---|------|---|
| P12163_1_S1,22184 | K.MLDAVLLNM*R.L ! K.   | 1495.828 | 0.00264  | 3 | 1 | 33.4 | 0 |
| P12163_1_S1,22431 | K.MLDAVLLNM*R.L ! K.   | 1495.828 | -0.00063 | 3 | 1 | 30.8 | 0 |
| P12163_2_F2,15643 | K.NPQGLFK.I            | 1411.852 | 0.00852  | 3 | 1 | 24.6 | 0 |
| P12163_1_F3,16690 | K.VEEGSNAILVK.N        | 1767.047 | -0.00435 | 2 | 1 | 39   | 0 |
| P12163_2_F1,16351 | K.VEEGSNAILVK.N        | 1767.047 | 0.00599  | 2 | 1 | 38.2 | 0 |
| P12163_2_F1,16397 | K.VEEGSNAILVK.N        | 1767.047 | 0.0022   | 3 | 1 | 23.4 | 0 |
| P12163_1_F6,13419 | K.VVDSGHPEFK.K         | 1722.963 | 0.00132  | 2 | 1 | 32.1 | 0 |
| P12163_2_F6,12789 | K.VVDSGHPEFK.K         | 1722.963 | 0.00755  | 3 | 1 | 23.3 | 0 |
| P12163_2_F1,16921 | K.FFETSAK.T            | 1437.82  | 0.00411  | 3 | 1 | 24.2 | 0 |
| P12163_1_F4,17531 | K.GQALADEYGIK.F        | 1773     | 0.00196  | 2 | 1 | 41.8 | 0 |
| P12163_1_F3,20638 | K.ILLIGDSGVGK.S ! K.LI | 1680.052 | 0.00865  | 3 | 1 | 25.3 | 0 |
| P12163_1_F3,22883 | K.ILLIGDSGVGK.S ! K.LI | 1680.052 | 0.00487  | 3 | 1 | 44.5 | 0 |
| P12163_1_F3,22897 | K.ILLIGDSGVGK.S ! K.LI | 1680.052 | 0.00801  | 2 | 1 | 43.1 | 0 |
| P12163_1_F6,21587 | K.ILLIGDSGVGK.S ! K.LI | 1680.052 | 0.00223  | 3 | 1 | 32.2 | 0 |
| P12163_2_F4,20559 | K.ILLIGDSGVGK.S ! K.LI | 1680.052 | 0.00142  | 3 | 1 | 28.6 | 0 |
| P12163_1_S1,9787  | K.INQPDQAGGAAQAAQ      | 1899.994 | 0.01242  | 3 | 1 | 101  | 0 |
| P12163_1_F4,19025 | R.ADYDYLIK.L           | 1608.909 | 0.00914  | 2 | 1 | 38.6 | 0 |
| P12163_1_F9,17542 | R.ADYDYLIK.L           | 1608.909 | 0.0071   | 2 | 1 | 32.5 | 0 |
| P12163_2_F1,18294 | R.ADYDYLIK.L           | 1608.909 | 0.00259  | 3 | 1 | 24.4 | 0 |
| P12163_2_F9,16809 | R.ADYDYLIK.L           | 1608.909 | 0.00662  | 2 | 1 | 29.4 | 0 |
| P12163_1_F5,15053 | K.AFYEEV.K.R           | 1622.889 | 0.01122  | 2 | 1 | 34.6 | 0 |
| P12163_1_F5,19414 | K.AYLED FYK.F          | 1656.909 | 0.00997  | 3 | 1 | 31.5 | 0 |
| P12163_1_F9,19135 | K.AYLED FYK.F          | 1656.909 | 0.0115   | 3 | 1 | 29   | 0 |
| P12163_1_F9,19180 | K.AYLED FYK.F          | 1656.909 | 0.00698  | 2 | 1 | 25.6 | 0 |
| P12163_2_F8_12070 | K.AYLED FYK.F          | 1656.909 | 0.00376  | 3 | 1 | 29.9 | 0 |
| P12163_2_F8_12070 | K.AYLED FYK.F          | 1656.909 | 0.00134  | 2 | 1 | 36.2 | 0 |
| P12163_2_F9,18285 | K.AYLED FYK.F          | 1656.909 | 0.00306  | 2 | 1 | 30.1 | 0 |
| P12163_2_S5,17977 | K.AYLED FYK.F          | 1656.909 | -0.00158 | 3 | 1 | 25.9 | 0 |
| P12163_1_F4,18417 | K.LSYGESQMLDK.A        | 1879.009 | 0.00667  | 2 | 1 | 52.3 | 0 |
| P12163_2_F1,17670 | K.LSYGESQMLDK.A        | 1879.009 | 0.0101   | 3 | 1 | 34.8 | 0 |
| P12163_1_F9,19472 | K.YPPYQSIFSK.L         | 1838.031 | 0.00748  | 3 | 1 | 26.7 | 0 |
| P12163_2_F9,21880 | R.VHDSVVFIF.-          | 1366.767 | 0.00272  | 2 | 1 | 35.2 | 0 |
| P12163_2_F1,16921 | K.FFETSAK.T            | 1437.82  | 0.00411  | 3 | 1 | 24.2 | 0 |
| P12163_1_F4,17531 | K.GQALADEYGIK.F        | 1773     | 0.00196  | 2 | 1 | 41.8 | 0 |
| P12163_1_F3,20638 | K.ILLIGDSGVGK.S ! K.LI | 1680.052 | 0.00865  | 3 | 1 | 25.3 | 0 |
| P12163_1_F3,22883 | K.ILLIGDSGVGK.S ! K.LI | 1680.052 | 0.00487  | 3 | 1 | 44.5 | 0 |
| P12163_1_F3,22897 | K.ILLIGDSGVGK.S ! K.LI | 1680.052 | 0.00801  | 2 | 1 | 43.1 | 0 |
| P12163_1_F6,21587 | K.ILLIGDSGVGK.S ! K.LI | 1680.052 | 0.00223  | 3 | 1 | 32.2 | 0 |
| P12163_2_F4,20559 | K.ILLIGDSGVGK.S ! K.LI | 1680.052 | 0.00142  | 3 | 1 | 28.6 | 0 |
| P12163_1_F3,27171 | K.TNLNVEEVFFSIAK.D     | 2219.253 | 0.00567  | 3 | 1 | 44.7 | 0 |
| P12163_1_F4,19025 | R.ADYDYLIK.L           | 1608.909 | 0.00914  | 2 | 1 | 38.6 | 0 |
| P12163_1_F9,17542 | R.ADYDYLIK.L           | 1608.909 | 0.0071   | 2 | 1 | 32.5 | 0 |
| P12163_2_F1,18294 | R.ADYDYLIK.L           | 1608.909 | 0.00259  | 3 | 1 | 24.4 | 0 |
| P12163_2_F9,16809 | R.ADYDYLIK.L           | 1608.909 | 0.00662  | 2 | 1 | 29.4 | 0 |
| P12163_1_F5,15388 | K.IENLNQNIK.A          | 1694.006 | 0.0047   | 2 | 1 | 32.5 | 0 |
| P12163_2_F2,16203 | K.IENLNQNIK.A          | 1694.006 | 0.00328  | 2 | 1 | 33.4 | 0 |
| P12163_2_F4,16477 | K.RLDVDCIDL YYQHR.I    | 2170.102 | 0.00405  | 3 | 1 | 35.7 | 0 |
| P12163_1_S1,14740 | K.YIGLSEASASTIR.R      | 1671.922 | 0.00605  | 3 | 1 | 41   | 0 |
| P12163_2_F6,17647 | K.YIGLSEASASTIR.R      | 1671.922 | -0.0009  | 2 | 1 | 24.8 | 0 |
| P12163_1_F5,10587 | R.AACEASLK.R           | 1457.824 | 0.01135  | 2 | 1 | 28   | 0 |
| P12163_2_F2,11353 | R.AACEASLK.R           | 1457.824 | 0.00721  | 2 | 1 | 24.6 | 0 |

|                    |                        |          |          |   |   |      |   |
|--------------------|------------------------|----------|----------|---|---|------|---|
| P12163_2_F2,11399  | R.AACEASLK.R           | 1457.824 | 0.00707  | 3 | 1 | 28.6 | 0 |
| P12163_1_F2,22544  | R.VPIEVTIGELK.K ! K.VI | 1806.12  | 0.00667  | 3 | 1 | 36.1 | 0 |
| P12163_1_F2,22596  | R.VPIEVTIGELK.K ! K.VI | 1806.12  | 0.00238  | 2 | 1 | 30   | 0 |
| P12163_1_F3,23327  | R.VPIEVTIGELK.K ! K.VI | 1806.12  | 0.00628  | 3 | 1 | 27.1 | 0 |
| P12163_1_F3,23328  | R.VPIEVTIGELK.K ! K.VI | 1806.12  | 0.00658  | 2 | 1 | 34.7 | 0 |
| P12163_1_F4,23403  | K.EEEYIEWFQK.A         | 2009.048 | 0.00623  | 3 | 1 | 24.7 | 0 |
| P12163_2_F9,20428  | K.EEEYIEWFQK.A         | 2009.048 | 0.01004  | 3 | 1 | 29   | 0 |
| P12163_1_F7,15388  | K.NVTILDQSPHQLAK.A     | 2172.26  | 0.00703  | 3 | 1 | 54.4 | 0 |
| P12163_1_F8,16150  | K.NVTILDQSPHQLAK.A     | 2172.26  | -0.00434 | 2 | 1 | 61   | 0 |
| P12163_1_F8,16179  | K.NVTILDQSPHQLAK.A     | 2172.26  | 0.00556  | 3 | 1 | 63.9 | 0 |
| P12163_2_F10,1451' | K.NVTILDQSPHQLAK.A     | 2172.26  | 0.00555  | 4 | 1 | 32.3 | 0 |
| P12163_2_F6,15694  | K.NVTILDQSPHQLAK.A     | 2172.26  | 0.00469  | 3 | 1 | 66   | 0 |
| P12163_2_F8_12070  | K.NVTILDQSPHQLAK.A     | 2172.26  | 0.00673  | 3 | 1 | 41.3 | 0 |
| P12163_2_F9,11016  | R.FIQHK.K              | 1280.793 | 0.00882  | 3 | 1 | 24.2 | 0 |
| P12163_1_S1,20791  | R.VVDVGGGTGFTTLGIV     | 2228.311 | 0.00387  | 4 | 1 | 40.1 | 0 |
| P12163_1_S1,20813  | R.VVDVGGGTGFTTLGIV     | 2228.311 | 0.00494  | 3 | 1 | 77.2 | 0 |
| P12163_1_F8,20148  | R.YVSAGSIEYWPDPQR.(    | 2072.039 | 0.00483  | 2 | 1 | 29.8 | 0 |
| P12163_2_F2,18006  | K.GFLLNK.T             | 1299.824 | 0.00688  | 2 | 1 | 29.7 | 0 |
| P12163_2_F2,18054  | K.GFLLNK.T             | 1299.824 | 0.00724  | 3 | 1 | 23.5 | 0 |
| P12163_2_F1,12652  | K.GITDVATNK.S          | 1526.9   | 0.00674  | 2 | 1 | 44.7 | 0 |
| P12163_1_F7,19820  | K.HEFEDYAVPVALVEN!     | 2336.182 | 0.00363  | 3 | 1 | 43.2 | 0 |
| P12163_1_F7,19862  | K.HEFEDYAVPVALVEN!     | 2336.182 | -0.00392 | 2 | 1 | 32.4 | 0 |
| P12163_1_F8,20833  | K.HEFEDYAVPVALVEN!     | 2336.182 | 0.00111  | 3 | 1 | 32.9 | 0 |
| P12163_2_F10,1825' | K.HEFEDYAVPVALVEN!     | 2336.182 | 0.00177  | 3 | 1 | 23.1 | 0 |
| P12163_2_F10,1832  | K.HEFEDYAVPVALVEN!     | 2336.182 | 0.00465  | 4 | 1 | 22.6 | 0 |
| P12163_1_F3,24179  | K.QENVNTLTILVMGK.G     | 2168.257 | 0.00425  | 3 | 1 | 31.8 | 0 |
| P12163_1_F2,9400   | K.SSTVNSVIGER.V        | 1452.796 | 0.0036   | 3 | 1 | 26.3 | 0 |
| P12163_1_F3,14068  | K.SSTVNSVIGER.V        | 1452.796 | 0.00162  | 2 | 1 | 25.3 | 0 |
| P12163_2_F1,13559  | K.SSTVNSVIGER.V        | 1452.796 | 0.00072  | 2 | 1 | 26.2 | 0 |
| P12163_1_F4,15164  | K.EELQQTIAK.H          | 1667.979 | 0.00647  | 2 | 1 | 34.1 | 0 |
| P12163_1_S10,9056  | K.HLATASA.-            | 974.5572 | 0.00276  | 2 | 1 | 33.4 | 0 |
| P12163_1_F4,25563  | K.LPNVLFLK.V           | 1552.008 | 0.00126  | 3 | 1 | 36.3 | 0 |
| P12163_1_F4,25596  | K.LPNVLFLK.V           | 1552.008 | 0.00528  | 2 | 1 | 29   | 0 |
| P12163_2_F1,24873  | K.LPNVLFLK.V           | 1552.008 | 0.00474  | 3 | 1 | 33.3 | 0 |
| P12163_1_F4,16714  | K.VDVDELK.S            | 1425.841 | 0.01205  | 2 | 1 | 28.1 | 0 |
| P12163_1_F5,15198  | K.VDVDELK.S            | 1425.841 | 0.00645  | 2 | 1 | 26.4 | 0 |
| P12163_1_F7,14457  | K.VDVDELK.S            | 1425.841 | 0.00482  | 3 | 1 | 24.3 | 0 |
| P12163_1_F7,14461  | K.VDVDELK.S            | 1425.841 | 0.00203  | 2 | 1 | 32   | 0 |
| P12163_2_F4,14132  | K.VDVDELK.S            | 1425.841 | 0.00116  | 3 | 1 | 22.1 | 0 |
| P12163_1_F3,28761  | R.FIAPFLAELAK.K        | 1828.119 | 0.00405  | 3 | 1 | 27.7 | 0 |
| P12163_1_F8,12002  | K.AIIVQPHR.V           | 1237.768 | 0.00296  | 3 | 1 | 40.4 | 0 |
| P12163_2_F6,11743  | K.AIIVQPHR.V           | 1237.768 | 0.00134  | 3 | 1 | 38.3 | 0 |
| P12163_1_F2,23155  | R.DPVPFFLAPK.V         | 1739.035 | 0.00838  | 3 | 1 | 27.5 | 0 |
| P12163_1_F3,20943  | R.IYVPPGIPVK.R         | 1691.072 | 0.00874  | 2 | 1 | 30.2 | 0 |
| P12163_1_F3,20947  | R.IYVPPGIPVK.R         | 1691.072 | 0.00782  | 3 | 1 | 29   | 0 |
| P12163_1_F5,19747  | R.VNVLFK.H             | 1327.856 | 0.00741  | 2 | 1 | 30.1 | 0 |
| P12163_2_F2,20332  | R.VNVLFK.H             | 1327.856 | 0.00423  | 2 | 1 | 34.2 | 0 |
| P12163_2_F2,20369  | R.VNVLFK.H             | 1327.856 | 0.00562  | 3 | 1 | 23.1 | 0 |
| P12163_1_F3,9602   | R.VSAANSRPPNPQ.-       | 1541.834 | 0.00478  | 2 | 1 | 42.5 | 0 |
| P12163_1_F3,9835   | R.VSAANSRPPNPQ.-       | 1541.834 | 0.0043   | 2 | 1 | 26.7 | 0 |
| P12163_2_F1,9306   | R.VSAANSRPPNPQ.-       | 1541.834 | 0.00324  | 2 | 1 | 34.2 | 0 |

|                   |                        |          |          |   |   |      |   |
|-------------------|------------------------|----------|----------|---|---|------|---|
| P12163_1_F6,14260 | K.HSFDTPLYR.F ! K.HSF  | 1439.758 | 0.00512  | 3 | 1 | 25.8 | 0 |
| P12163_2_F9,13373 | K.HSFDTPLYR.F ! K.HSF  | 1439.758 | 0.00347  | 3 | 1 | 29.8 | 0 |
| P12163_2_F6,11058 | K.LVHDQESLR.S          | 1400.78  | 0.00047  | 3 | 1 | 24.3 | 0 |
| P12163_2_F7,10575 | K.LVHDQESLR.S          | 1400.78  | 0.0011   | 3 | 1 | 31.4 | 0 |
| P12163_1_F6,14197 | K.SNSFVESVSHK.I ! R.SN | 1829.001 | 0.00702  | 3 | 1 | 46.9 | 0 |
| P12163_2_S3,12701 | K.SNSFVESVSHK.I ! R.SN | 1829.001 | 0.00432  | 3 | 1 | 28.2 | 0 |
| P12163_1_F9,12391 | R.DFEYSSEAQESR.N       | 1751.803 | 0.00167  | 2 | 1 | 28.1 | 0 |
| P12163_1_S1,11331 | R.DFEYSSEAQESR.N       | 1751.803 | 0.00417  | 3 | 1 | 40.8 | 0 |
| P12163_1_S1,12448 | R.DFEYSSEAQESR.N       | 1751.803 | 0.00427  | 2 | 1 | 51.5 | 0 |
| P12163_1_F8,19899 | R.EIVDGIHTLVAK.I       | 1903.147 | 0.00727  | 3 | 1 | 28.9 | 0 |
| P12163_2_F6,19469 | R.EIVDGIHTLVAK.I       | 1903.147 | -0.00017 | 3 | 1 | 26.9 | 0 |
| P12163_1_F2,15584 | K.EAQLIDVR.E           | 1247.726 | 0.00281  | 2 | 1 | 30.5 | 0 |
| P12163_2_F7,11237 | K.M*QDPNFHK.E          | 1640.867 | 0.00128  | 3 | 1 | 23.2 | 0 |
| P12163_1_F9,12135 | K.MQDPNFHK.E           | 1624.873 | 0.00425  | 3 | 1 | 24.5 | 0 |
| P12163_2_F7,11245 | K.MQDPNFHK.E           | 1624.873 | 0.0059   | 3 | 1 | 22.3 | 0 |
| P12163_2_F7,11252 | K.MQDPNFHK.E           | 1624.873 | 0.00282  | 2 | 1 | 24.8 | 0 |
| P12163_2_S5,18186 | R.EASLLQDIQPGEHLK.K    | 2286.291 | 0.00313  | 3 | 1 | 36.8 | 0 |
| P12163_1_F8,21835 | R.EILVQHLLVK.E         | 1800.157 | 0.0067   | 3 | 1 | 23.9 | 0 |
| P12163_1_F8,21838 | R.EILVQHLLVK.E         | 1800.157 | 0.00605  | 2 | 1 | 56.3 | 0 |
| P12163_1_F6,18331 | R.VSQGEDLSDLAVEHSI     | 2779.439 | 0.00751  | 3 | 1 | 39.8 | 0 |
| P12163_1_F7,17436 | R.VSQGEDLSDLAVEHSI     | 2779.439 | 0.00967  | 3 | 1 | 56.7 | 0 |
| P12163_2_F4,17079 | R.VSQGEDLSDLAVEHSI     | 2779.439 | 0.00661  | 3 | 1 | 38.1 | 0 |
| P12163_1_F3,23067 | K.QTFSSLDDLLQK.S       | 2003.127 | 0.00686  | 3 | 1 | 55.1 | 0 |
| P12163_1_F3,23082 | K.QTFSSLDDLLQK.S       | 2003.127 | 0.00376  | 2 | 1 | 60.1 | 0 |
| P12163_1_F2,12379 | K.YPQIADTYR.I          | 1430.758 | 0.00165  | 3 | 1 | 40.5 | 0 |
| P12163_1_F9,15226 | K.YPQIADTYR.I          | 1430.758 | 0.00422  | 2 | 1 | 26.3 | 0 |
| P12163_1_F5,16710 | R.FEGAFSK.D            | 1393.794 | 0.00614  | 3 | 1 | 22.1 | 0 |
| P12163_2_F1,16992 | R.FEGAFSK.D            | 1393.794 | 0.00534  | 2 | 1 | 26   | 0 |
| P12163_2_F2,17415 | R.FEGAFSK.D            | 1393.794 | 0.01044  | 2 | 1 | 26.9 | 0 |
| P12163_1_F3,28605 | R.IEALPTFILFK.D        | 1900.177 | 0.00769  | 3 | 1 | 36.4 | 0 |
| P12163_1_F4,16474 | R.IENSLSVK.Q           | 1497.91  | 0.00066  | 2 | 1 | 26.4 | 0 |
| P12163_1_F5,15220 | R.IENSLSVK.Q           | 1497.91  | 0.00481  | 3 | 1 | 31.9 | 0 |
| P12163_1_F5,15224 | R.IENSLSVK.Q           | 1497.91  | 0.00526  | 2 | 1 | 29.9 | 0 |
| P12163_1_F9,13758 | K.EHLCVLK.D            | 1506.892 | 0.00774  | 3 | 1 | 30.4 | 0 |
| P12163_1_F8,19960 | K.LGVTQCTIAHALEK.T     | 2149.226 | 0.00151  | 3 | 1 | 33.7 | 0 |
| P12163_2_F6,19583 | K.LGVTQCTIAHALEK.T     | 2149.226 | -0.00296 | 3 | 1 | 32.8 | 0 |
| P12163_1_F8,19689 | R.IQNLNSLQHVLK.K       | 1739.023 | -0.00025 | 3 | 1 | 39.1 | 0 |
| P12163_2_F6,19215 | R.IQNLNSLQHVLK.K       | 1739.023 | -0.00028 | 3 | 1 | 77.1 | 0 |
| P12163_1_F6,13288 | R.LDETLSAHR.N          | 1345.738 | 0.00401  | 3 | 1 | 32.2 | 0 |
| P12163_2_F6,12631 | R.LDETLSAHR.N          | 1345.738 | -0.00118 | 3 | 1 | 30.7 | 0 |
| P12163_1_F8,18653 | R.VVHGIDVFDPK.F        | 1834.068 | 0.00211  | 2 | 1 | 51.7 | 0 |
| P12163_2_F6,18164 | R.VVHGIDVFDPK.F        | 1834.068 | -0.00249 | 2 | 1 | 46.8 | 0 |
| P12163_2_F6,18174 | R.VVHGIDVFDPK.F        | 1834.068 | 0.00542  | 3 | 1 | 40.2 | 0 |
| P12163_2_F6,18448 | R.VVHGIDVFDPK.F        | 1834.068 | 0.00617  | 3 | 1 | 22.2 | 0 |
| P12163_1_F4,11971 | K.GASSVEGVEAK.L        | 1641.927 | 0.00888  | 2 | 1 | 58.5 | 0 |
| P12163_1_F4,12011 | K.GASSVEGVEAK.L        | 1641.927 | 0.0117   | 3 | 1 | 45.7 | 0 |
| P12163_2_F1,11138 | K.GASSVEGVEAK.L        | 1641.927 | 0.00482  | 2 | 1 | 44.3 | 0 |
| P12163_1_S1,10018 | K.GGSPYGAGTFAGDGS      | 1760.851 | 0.00402  | 3 | 1 | 40.5 | 0 |
| P12163_1_S1,10695 | K.GGSPYGAGTFAGDGS      | 1760.851 | 0.00423  | 3 | 1 | 51   | 0 |
| P12163_1_S1,12575 | K.GGSPYGAGTFAGDGS      | 1760.851 | -0.00066 | 2 | 1 | 24.8 | 0 |
| P12163_1_F9,11701 | K.HIAGIAK.K            | 1317.846 | 0.00923  | 3 | 1 | 31.7 | 0 |

|                    |                        |          |          |   |   |      |   |
|--------------------|------------------------|----------|----------|---|---|------|---|
| P12163_1_S10,1181  | K.HIAGIAK.K            | 1317.846 | 0.01154  | 3 | 1 | 33.7 | 0 |
| P12163_2_F8_12070  | K.HIAGIAK.K            | 1317.846 | 0.00062  | 3 | 1 | 31.5 | 0 |
| P12163_2_F1,22331  | R.FGMMAAQFK.A          | 1638.896 | 0.00622  | 2 | 1 | 31.3 | 0 |
| P12163_2_F6,17785  | R.QPTELELEQAFHQGK.I    | 2363.281 | -0.00167 | 3 | 1 | 37.7 | 0 |
| P12163_1_F3,19176  | K.ATIGADFITK.E ! K.ATI | 1644.978 | 0.00716  | 3 | 1 | 22.9 | 0 |
| P12163_1_F4,20773  | K.ATIGADFITK.E ! K.ATI | 1644.978 | 0.00971  | 3 | 1 | 45.6 | 0 |
| P12163_2_F1,20163  | K.ATIGADFITK.E ! K.ATI | 1644.978 | 0.00517  | 2 | 1 | 36   | 0 |
| P12163_1_F3,24371  | K.EGFNVEAAFECIAK.N     | 2193.147 | 0.00551  | 3 | 1 | 45.3 | 0 |
| P12163_1_F3,12121  | K.EVQFEDR.L            | 1226.632 | 0.00411  | 2 | 1 | 33.2 | 0 |
| P12163_1_F3,19881  | K.VIILGDSGVGK.T        | 1666.036 | 0.00775  | 2 | 1 | 52.3 | 0 |
| P12163_1_F3,19960  | K.VIILGDSGVGK.T        | 1666.036 | 0.00874  | 3 | 1 | 40.9 | 0 |
| P12163_2_F2,19154  | K.VIILGDSGVGK.T        | 1666.036 | -0.00221 | 3 | 1 | 34.7 | 0 |
| P12163_1_F4,18190  | R.GNIPYFETSAK.E ! K.G  | 1835.016 | 0.00836  | 2 | 1 | 39   | 0 |
| P12163_1_F4,18247  | R.GNIPYFETSAK.E ! K.G  | 1835.016 | 0.00761  | 3 | 1 | 33   | 0 |
| P12163_2_F1,17433  | R.GNIPYFETSAK.E ! K.G  | 1835.016 | 0.00354  | 2 | 1 | 27.7 | 0 |
| P12163_1_F4,22603  | K.FGFDDAFNYK.E ! K.FC  | 1831.947 | 0.00457  | 2 | 1 | 40.1 | 0 |
| P12163_1_F4,22629  | K.FGFDDAFNYK.E ! K.FC  | 1831.947 | 0.00624  | 3 | 1 | 30.9 | 0 |
| P12163_2_F1,16110  | K.LAGCYVVGSAK.E        | 1877.041 | 0.005    | 3 | 1 | 28.9 | 0 |
| P12163_2_F9,14893  | K.LAGCYVVGSAK.E        | 1877.041 | 0.00401  | 3 | 1 | 39.9 | 0 |
| P12163_1_S1,21705  | K.M*LDAVLLNMR.L ! K.   | 1495.828 | 0.00183  | 3 | 1 | 49   | 0 |
| P12163_1_S1,21951  | K.M*LDAVLLNMR.L ! K.   | 1495.828 | 0.00207  | 3 | 1 | 64   | 0 |
| P12163_1_S1,22184  | K.MLDAVLLNM*R.L ! K.   | 1495.828 | 0.00264  | 3 | 1 | 33.4 | 0 |
| P12163_1_S1,22431  | K.MLDAVLLNM*R.L ! K.   | 1495.828 | -0.00063 | 3 | 1 | 30.8 | 0 |
| P12163_1_F6,11695  | K.VLDSTHPK.Y           | 1504.894 | 0.006    | 3 | 1 | 22.6 | 0 |
| P12163_1_F3,23098  | R.VILSNYVTGFPK.E       | 1946.157 | 0.00062  | 2 | 1 | 61.2 | 0 |
| P12163_1_F3,23103  | R.VILSNYVTGFPK.E       | 1946.157 | 0.00515  | 3 | 1 | 65.8 | 0 |
| P12163_1_F4,23403  | K.EEEYIEWFQK.A         | 2009.048 | 0.00623  | 3 | 1 | 24.7 | 0 |
| P12163_2_F9,20428  | K.EEEYIEWFQK.A         | 2009.048 | 0.01004  | 3 | 1 | 29   | 0 |
| P12163_1_F7,20821  | K.IVEGDAEDLPFPTDYA     | 2327.134 | 0.00574  | 2 | 1 | 38.7 | 0 |
| P12163_1_F7,15388  | K.NVTILDQSPHQLAK.A     | 2172.26  | 0.00703  | 3 | 1 | 54.4 | 0 |
| P12163_1_F8,16150  | K.NVTILDQSPHQLAK.A     | 2172.26  | -0.00434 | 2 | 1 | 61   | 0 |
| P12163_1_F8,16179  | K.NVTILDQSPHQLAK.A     | 2172.26  | 0.00556  | 3 | 1 | 63.9 | 0 |
| P12163_2_F10,14511 | K.NVTILDQSPHQLAK.A     | 2172.26  | 0.00555  | 4 | 1 | 32.3 | 0 |
| P12163_2_F6,15694  | K.NVTILDQSPHQLAK.A     | 2172.26  | 0.00469  | 3 | 1 | 66   | 0 |
| P12163_2_F8_12070  | K.NVTILDQSPHQLAK.A     | 2172.26  | 0.00673  | 3 | 1 | 41.3 | 0 |
| P12163_2_F9,11016  | R.FIQHK.K              | 1280.793 | 0.00882  | 3 | 1 | 24.2 | 0 |
| P12163_1_F8,20148  | R.YVSAGSIEYWPDPQR.(    | 2072.039 | 0.00483  | 2 | 1 | 29.8 | 0 |
| P12163_1_S1,13819  | K.DSLGAPLCPCR.H        | 1549.777 | 0.00212  | 3 | 1 | 43.6 | 0 |
| P12163_1_S1,13994  | K.DSLGAPLCPCR.H        | 1549.777 | 0.00824  | 2 | 1 | 41.6 | 0 |
| P12163_1_S10,9209  | K.GLADHK.D             | 1248.752 | 0.0092   | 3 | 1 | 26   | 0 |
| P12163_2_F8_12070  | K.GLADHK.D             | 1248.752 | 0.00404  | 3 | 1 | 23.1 | 0 |
| P12163_1_F4,15834  | K.SVTSVVIK.G           | 1440.925 | 0.00407  | 2 | 1 | 31.4 | 0 |
| P12163_1_F4,15883  | K.SVTSVVIK.G           | 1440.925 | 0.01133  | 3 | 1 | 26   | 0 |
| P12163_2_F1,15095  | K.SVTSVVIK.G           | 1440.925 | 0.00223  | 2 | 1 | 25.5 | 0 |
| P12163_2_F9,15200  | R.RSDTFFCVDK.S         | 1882.994 | 0.00576  | 3 | 1 | 30.7 | 0 |
| P12163_1_F4,19102  | R.SDTFFCVDK.S          | 1726.893 | 0.01181  | 2 | 1 | 28.3 | 0 |
| P12163_1_F4,19122  | R.SDTFFCVDK.S          | 1726.893 | 0.00617  | 3 | 1 | 23.3 | 0 |
| P12163_2_F1,18323  | R.SDTFFCVDK.S          | 1726.893 | 0.01071  | 2 | 1 | 24.9 | 0 |
| P12163_1_F4,17430  | K.AAEILAK.E            | 1323.846 | 0.0084   | 2 | 1 | 25   | 0 |
| P12163_2_F1,16484  | K.AAEILAK.E            | 1323.846 | 0.00602  | 3 | 1 | 22.6 | 0 |
| P12163_2_F1,16523  | K.AAEILAK.E            | 1323.846 | 0.00408  | 2 | 1 | 31.2 | 0 |

|                    |                        |          |          |   |   |      |   |
|--------------------|------------------------|----------|----------|---|---|------|---|
| P12163_2_F2,16945  | K.AAEILAK.E            | 1323.846 | 0.00431  | 3 | 1 | 22.4 | 0 |
| P12163_1_F3,18053  | K.DVTITAFSK.I          | 1589.936 | 0.01034  | 2 | 1 | 37.7 | 0 |
| P12163_1_F2,19057  | K.EGISAEVINLR.S        | 1504.864 | 0.00339  | 2 | 1 | 42.5 | 0 |
| P12163_1_S1,18179  | K.EGISAEVINLR.S        | 1504.864 | 0.00467  | 2 | 1 | 27.4 | 0 |
| P12163_1_S1,19962  | K.SNYMSSGQISVPIVFR.I   | 2089.105 | 0.00186  | 3 | 1 | 27.5 | 0 |
| P12163_1_S1,21582  | K.SNYMSSGQISVPIVFR.I   | 2089.105 | -0.00215 | 2 | 1 | 37.6 | 0 |
| P12163_1_S1,12063  | K.VLSPYSEDAR.G         | 1527.796 | 0.00298  | 3 | 1 | 40.3 | 0 |
| P12163_1_S1,14031  | K.VLSPYSEDAR.G         | 1527.796 | 0.00293  | 2 | 1 | 32.4 | 0 |
| P12163_1_F5,14043  | K.CNMQIDPVK.Y          | 1712.928 | 0.00612  | 2 | 1 | 32.7 | 0 |
| P12163_2_F1,14282  | K.CNMQIDPVK.Y          | 1712.928 | 0.00232  | 2 | 1 | 29.2 | 0 |
| P12163_1_F4,11528  | K.GATVGDVAVK.K         | 1425.852 | 0.00848  | 2 | 1 | 36.5 | 0 |
| P12163_1_F5,10212  | K.GATVGDVAVK.K         | 1425.852 | 0.00752  | 2 | 1 | 33.2 | 0 |
| P12163_1_F4,23394  | K.SISSGFGVLLK.E        | 1716.052 | 0.00667  | 3 | 1 | 30.6 | 0 |
| P12163_1_F4,23452  | K.SISSGFGVLLK.E        | 1716.052 | 0.00557  | 2 | 1 | 51.7 | 0 |
| P12163_2_F1,22856  | K.SISSGFGVLLK.E        | 1716.052 | 0.00397  | 2 | 1 | 55.2 | 0 |
| P12163_2_F1,22892  | K.SISSGFGVLLK.E        | 1716.052 | 0.0046   | 3 | 1 | 43.1 | 0 |
| P12163_1_F3,17306  | K.YYSDIAGPEYAAK.Y      | 2056.085 | 0.00772  | 2 | 1 | 55   | 0 |
| P12163_1_F5,14000  | R.GLDGGLPK.F           | 1364.836 | 0.00779  | 2 | 1 | 27.5 | 0 |
| P12163_2_F7,12252  | K.GFHEQPPEIK.A         | 1790.006 | 0.00606  | 3 | 1 | 26.6 | 0 |
| P12163_1_S1,20247  | K.GLVDLGVTAIPR.F       | 1514.921 | 0.00355  | 3 | 1 | 53.7 | 0 |
| P12163_1_F8,21081  | K.GVSYISNIDLFHSAK.A    | 2188.222 | 0.00542  | 3 | 1 | 36.2 | 0 |
| P12163_2_F6,20705  | K.GVSYISNIDLFHSAK.A    | 2188.222 | 0.00242  | 3 | 1 | 67.7 | 0 |
| P12163_1_F7,20669  | R.DSLYGPFPELISPEKPA    | 2624.454 | 0.00425  | 3 | 1 | 36.9 | 0 |
| P12163_1_F7,20790  | R.DSLYGPFPELISPEKPA    | 2624.454 | 0.00459  | 4 | 1 | 25.8 | 0 |
| P12163_2_F10,18921 | R.DSLYGPFPELISPEKPA    | 2624.454 | 0.00407  | 3 | 1 | 27.1 | 0 |
| P12163_2_S5,19964  | R.DSLYGPFPELISPEKPA    | 2624.454 | 0.00351  | 4 | 1 | 30.7 | 0 |
| P12163_2_S5,19971  | R.DSLYGPFPELISPEKPA    | 2624.454 | 0.00491  | 3 | 1 | 51.9 | 0 |
| P12163_2_F7,11940  | R.QFTHTDYITR.F         | 1585.828 | 0.00163  | 3 | 1 | 24.2 | 0 |
| P12163_1_S1,23328  | K.AFADEIGIPFMETSAK.    | 2335.246 | 0.00446  | 4 | 1 | 34.4 | 0 |
| P12163_1_S1,23426  | K.AFADEIGIPFMETSAK.    | 2335.246 | 0.00995  | 3 | 1 | 52.5 | 0 |
| P12163_2_F1,10503  | K.CDLTANK.V            | 1429.793 | 0.00687  | 2 | 1 | 25.9 | 0 |
| P12163_1_F3,20638  | K.ILLIGDSGVGK.S ! K.LI | 1680.052 | 0.00865  | 3 | 1 | 25.3 | 0 |
| P12163_1_F3,22883  | K.ILLIGDSGVGK.S ! K.LI | 1680.052 | 0.00487  | 3 | 1 | 44.5 | 0 |
| P12163_1_F3,22897  | K.ILLIGDSGVGK.S ! K.LI | 1680.052 | 0.00801  | 2 | 1 | 43.1 | 0 |
| P12163_1_F6,21587  | K.ILLIGDSGVGK.S ! K.LI | 1680.052 | 0.00223  | 3 | 1 | 32.2 | 0 |
| P12163_2_F4,20559  | K.ILLIGDSGVGK.S ! K.LI | 1680.052 | 0.00142  | 3 | 1 | 28.6 | 0 |
| P12163_2_F1,13248  | K.VVSYETAK.A           | 1504.883 | 0.00458  | 2 | 1 | 30.8 | 0 |
| P12163_2_F2,10327  | R.YASENVNK.L           | 1532.853 | 0.0038   | 2 | 1 | 27.2 | 0 |
| P12163_1_F3,14537  | K.EIEQQLQTGTGGVK.F     | 2096.181 | 0.01281  | 3 | 1 | 33.6 | 0 |
| P12163_1_F4,16756  | K.ESGNDSDAFGFK.F       | 1881.944 | 0.00642  | 2 | 1 | 50.4 | 0 |
| P12163_1_F4,16757  | K.ESGNDSDAFGFK.F       | 1881.944 | 0.00548  | 3 | 1 | 33.3 | 0 |
| P12163_1_F3,23799  | K.IGSVTLTNILK.E        | 1767.12  | 0.00637  | 3 | 1 | 46   | 0 |
| P12163_1_F4,24619  | K.IGSVTLTNILK.E        | 1767.12  | 0.00572  | 2 | 1 | 58.1 | 0 |
| P12163_1_F4,24653  | K.IGSVTLTNILK.E        | 1767.12  | 0.00541  | 3 | 1 | 49.8 | 0 |
| P12163_2_F1,23965  | K.IGSVTLTNILK.E        | 1767.12  | 0.0043   | 3 | 1 | 42.7 | 0 |
| P12163_2_F9,12975  | K.RDDLSGMQLSGNK.V      | 2029.096 | 0.00237  | 3 | 1 | 27.9 | 0 |
| P12163_1_F8,19278  | R.LVGAHIELISK.E        | 1788.12  | 0.00256  | 3 | 1 | 22.4 | 0 |
| P12163_2_F6,19036  | R.LVGAHIELISK.E        | 1788.12  | 0.00051  | 3 | 1 | 31.4 | 0 |
| P12163_1_F9,11655  | K.KVDINDEAQK.E         | 2072.211 | 0.00367  | 3 | 1 | 34.8 | 0 |
| P12163_1_F3,22949  | K.MLVIGSEPPFK.V        | 1826.071 | 0.00625  | 2 | 1 | 25.1 | 0 |
| P12163_1_F3,21246  | K.NPLDLLPPSK.M         | 1702.036 | 0.00514  | 3 | 1 | 25.6 | 0 |

|                    |                         |          |          |   |   |      |   |
|--------------------|-------------------------|----------|----------|---|---|------|---|
| P12163_1_F3,21281  | K.NPLDLLPPSK.M          | 1702.036 | 0.00288  | 2 | 1 | 36.8 | 0 |
| P12163_1_F3,21436  | K.NPLDLLPPSK.M          | 1702.036 | 0.00334  | 3 | 1 | 23.4 | 0 |
| P12163_1_F6,20343  | K.NPLDLLPPSK.M          | 1702.036 | -0.00173 | 3 | 1 | 32.9 | 0 |
| P12163_1_F6,16662  | K.SFTSEFPHVER.Y         | 1639.838 | 0.00142  | 3 | 1 | 46.9 | 0 |
| P12163_1_F6,16666  | K.SFTSEFPHVER.Y         | 1639.838 | 0.00492  | 2 | 1 | 29   | 0 |
| P12163_2_F6,15966  | K.SFTSEFPHVER.Y         | 1639.838 | 0.0031   | 3 | 1 | 33.2 | 0 |
| P12163_1_F3,19567  | K.YNDENTVSFVTLNK.V      | 2252.202 | 0.00169  | 2 | 1 | 34.6 | 0 |
| P12163_2_F1,15352  | K.DVNTAVATIK.T          | 1639.984 | -0.00067 | 3 | 1 | 31.5 | 0 |
| P12163_2_F1,15390  | K.DVNTAVATIK.T          | 1639.984 | 0.01147  | 2 | 1 | 30.4 | 0 |
| P12163_2_F1,20432  | K.FDLMYSK.R             | 1511.839 | 0.00029  | 2 | 1 | 26.6 | 0 |
| P12163_1_F3,23662  | R.AVQFVDWCPTGFK.C       | 2163.152 | 0.00355  | 2 | 1 | 39.6 | 0 |
| P12163_2_F1,16132  | R.EDLAALEK.D            | 1496.878 | 0.00811  | 2 | 1 | 26.9 | 0 |
| P12163_2_F1,16157  | R.EDLAALEK.D            | 1496.878 | 0.00627  | 3 | 1 | 26.3 | 0 |
| P12163_1_F8,19059  | R.QLFHPEQLISGK.E        | 2005.169 | 0.01053  | 2 | 1 | 40.3 | 0 |
| P12163_1_F8,19062  | R.QLFHPEQLISGK.E        | 2005.169 | 0.00359  | 3 | 1 | 36.2 | 0 |
| P12163_2_F6,18606  | R.QLFHPEQLISGK.E        | 2005.169 | 0.00245  | 3 | 1 | 37.5 | 0 |
| P12163_2_F6,18623  | R.QLFHPEQLISGK.E        | 2005.169 | 0.00461  | 2 | 1 | 41.9 | 0 |
| P12163_1_F3,22457  | K.IAALPIAYAK.S          | 1639.04  | 0.00602  | 3 | 1 | 35   | 0 |
| P12163_1_F3,22464  | K.IAALPIAYAK.S          | 1639.04  | 0.00288  | 2 | 1 | 47.8 | 0 |
| P12163_2_F7,19462  | K.IAALPIAYAK.S          | 1639.04  | 0.00438  | 2 | 1 | 34.4 | 0 |
| P12163_2_F2,12055  | K.QAALVNK.Q             | 1351.852 | 0.0043   | 3 | 1 | 29.1 | 0 |
| P12163_1_F4,12771  | R.CGEVCAEYAK.T          | 1794.897 | 0.00784  | 2 | 1 | 50   | 0 |
| P12163_1_F5,11367  | R.CGEVCAEYAK.T          | 1794.897 | 0.00482  | 2 | 1 | 48.9 | 0 |
| P12163_2_F1,11785  | R.CGEVCAEYAK.T          | 1794.897 | 0.00778  | 2 | 1 | 45.5 | 0 |
| P12163_2_F8_12070  | R.RTDELVDGPNASHITP'     | 2582.348 | -0.01161 | 4 | 1 | 37.7 | 0 |
| P12163_1_F6,17226  | R.TDELVDGPNASHITPT.     | 2426.246 | 0.00002  | 3 | 1 | 45.3 | 0 |
| P12163_2_F4,15962  | R.TDELVDGPNASHITPT.     | 2426.246 | -0.00145 | 3 | 1 | 29.9 | 0 |
| P12163_2_S3,7087   | K.DYQSDHK.F             | 1500.79  | 0.00535  | 3 | 1 | 25   | 0 |
| P12163_2_S5,7516   | K.DYQSDHK.F             | 1500.79  | 0.00472  | 3 | 1 | 26.1 | 0 |
| P12163_1_S1,17864  | K.FTITTYSPITGVAITSSG'   | 2540.407 | 0.00544  | 3 | 1 | 54.7 | 0 |
| P12163_1_S1,18979  | K.FTITTYSPITGVAITSSG'   | 2540.407 | 0.01063  | 3 | 1 | 72.1 | 0 |
| P12163_1_F4,17061  | K.GPGLYTDIGK.K          | 1628.947 | 0.01266  | 3 | 1 | 28   | 0 |
| P12163_1_F9,16030  | K.GPGLYTDIGK.K          | 1628.947 | 0.00861  | 3 | 1 | 33.1 | 0 |
| P12163_2_F4,14705  | K.GPGLYTDIGK.K          | 1628.947 | 0.0126   | 3 | 1 | 23   | 0 |
| P12163_2_F1,18863  | K.TIISFK.S ! K.TILSFK.V | 1316.84  | 0.00242  | 2 | 1 | 25.5 | 0 |
| P12163_1_F8,19767  | R.VNNAGIASALIQHEWF      | 2612.488 | 0.00844  | 4 | 1 | 51.6 | 0 |
| P12163_2_F10,1756' | R.VNNAGIASALIQHEWF      | 2612.488 | 0.00252  | 4 | 1 | 55.2 | 0 |
| P12163_1_F9,13741  | K.FNVHYEK.A             | 1544.868 | 0.00488  | 2 | 1 | 24.6 | 0 |
| P12163_2_S5,13260  | K.FNVHYEK.A             | 1544.868 | 0.00648  | 3 | 1 | 22.4 | 0 |
| P12163_1_S1,20841  | K.ISDPESIAEVLK.Q        | 1909.11  | 0.00388  | 3 | 1 | 44.1 | 0 |
| P12163_1_F5,22568  | K.NFLWGF GDK.A          | 1691.937 | 0.00277  | 3 | 1 | 35.7 | 0 |
| P12163_2_F1,23415  | K.NFLWGF GDK.A          | 1691.937 | 0.00809  | 2 | 1 | 32.9 | 0 |
| P12163_2_F1,23426  | K.NFLWGF GDK.A          | 1691.937 | 0.00514  | 3 | 1 | 30.7 | 0 |
| P12163_1_F7,15457  | K.QVYADHATNVDTVFT       | 2141.093 | 0.00217  | 3 | 1 | 35.2 | 0 |
| P12163_2_F10,1488' | K.QVYADHATNVDTVFT       | 2141.093 | 0.00376  | 3 | 1 | 39.3 | 0 |
| P12163_2_F4,15094  | K.QVYADHATNVDTVFT       | 2141.093 | 0.00187  | 3 | 1 | 32.4 | 0 |
| P12163_1_F3,22483  | R.CQMNGVPICLIYGK.E      | 2261.206 | 0.01448  | 3 | 1 | 26.3 | 0 |
| P12163_1_F2,19266  | K.AM*EVAEELR.A          | 1367.714 | 0.00245  | 2 | 1 | 36.2 | 0 |
| P12163_2_F1,19048  | K.AMEVAEELR.A           | 1351.719 | 0.00741  | 2 | 1 | 31.5 | 0 |
| P12163_1_F9,18057  | K.SYVAFYGV EK.A         | 1770.989 | 0.01009  | 2 | 1 | 37   | 0 |
| P12163_1_F9,18073  | K.SYVAFYGV EK.A         | 1770.989 | 0.00383  | 3 | 1 | 35.8 | 0 |

|                   |                     |          |          |   |   |      |   |
|-------------------|---------------------|----------|----------|---|---|------|---|
| P12163_2_F1,18652 | K.SYVAFYGVK.A       | 1770.989 | 0.01293  | 2 | 1 | 53.2 | 0 |
| P12163_2_F1,18664 | K.SYVAFYGVK.A       | 1770.989 | 0.00974  | 3 | 1 | 27.1 | 0 |
| P12163_2_F9,17068 | K.SYVAFYGVK.A       | 1770.989 | 0.00389  | 3 | 1 | 42.6 | 0 |
| P12163_2_F7,16557 | K.YPEQIYESMR.Y      | 1619.804 | 0.00481  | 2 | 1 | 39.7 | 0 |
| P12163_1_F2,12579 | R.EFSVVDSR.-        | 1242.663 | 0.00242  | 3 | 1 | 26   | 0 |
| P12163_1_F2,18720 | R.VIAEIAR.A         | 1075.678 | 0.00238  | 2 | 1 | 25.4 | 0 |
| P12163_1_F4,18647 | K.AVALEENALK.W      | 1665.999 | 0.00302  | 3 | 1 | 51.5 | 0 |
| P12163_1_F4,16798 | K.CLLEATAGPK.A      | 1667.961 | 0.00445  | 2 | 1 | 30   | 0 |
| P12163_2_F1,15991 | K.CLLEATAGPK.A      | 1667.961 | 0.00447  | 2 | 1 | 43.1 | 0 |
| P12163_1_F3,19729 | K.EIIDYMAK.I        | 1590.902 | 0.00096  | 3 | 1 | 23.8 | 0 |
| P12163_1_F3,19736 | K.EIIDYMAK.I        | 1590.902 | 0.00312  | 2 | 1 | 26   | 0 |
| P12163_1_F4,20337 | K.EIIDYMAK.I        | 1590.902 | 0.00192  | 3 | 1 | 25   | 0 |
| P12163_2_F1,19724 | K.EIIDYMAK.I        | 1590.902 | 0.00406  | 2 | 1 | 33.6 | 0 |
| P12163_1_F2,23390 | K.IVDLPDGFLEK.V     | 1854.083 | 0.00467  | 3 | 1 | 25.6 | 0 |
| P12163_1_F2,20878 | R.NIQAFVDEVR.R      | 1494.822 | 0.00844  | 2 | 1 | 36.7 | 0 |
| P12163_1_F2,21271 | R.NIQAFVDEVR.R      | 1494.822 | 0.00324  | 2 | 1 | 34.9 | 0 |
| P12163_1_F4,18678 | K.AIGIMQAAK.K       | 1510.923 | 0.00119  | 2 | 1 | 35   | 0 |
| P12163_1_F4,18706 | K.AIGIMQAAK.K       | 1510.923 | 0.00786  | 3 | 1 | 36   | 0 |
| P12163_2_F1,17917 | K.AIGIMQAAK.K       | 1510.923 | 0.00637  | 2 | 1 | 47.8 | 0 |
| P12163_2_F1,17737 | K.EVAALVEK.E        | 1466.904 | -0.00042 | 2 | 1 | 35.7 | 0 |
| P12163_1_F6,19302 | K.GAFELITDESK.A     | 1818.01  | -0.00163 | 3 | 1 | 28.9 | 0 |
| P12163_1_S1,22901 | K.GVFVTVVDLSEEK.G   | 2030.163 | 0.00795  | 3 | 1 | 39.2 | 0 |
| P12163_1_F4,21052 | R.ALSLALAGK.G       | 1451.941 | 0.01071  | 2 | 1 | 43.3 | 0 |
| P12163_1_F4,21066 | R.ALSLALAGK.G       | 1451.941 | 0.00498  | 3 | 1 | 33.4 | 0 |
| P12163_2_F1,20470 | R.ALSLALAGK.G       | 1451.941 | 0.00681  | 3 | 1 | 25.6 | 0 |
| P12163_2_F1,20490 | R.ALSLALAGK.G       | 1451.941 | 0.00765  | 2 | 1 | 40.7 | 0 |
| P12163_1_F6,17607 | K.IFVYESPHK.L       | 1727.994 | 0.00659  | 3 | 1 | 29.8 | 0 |
| P12163_2_F6,16570 | K.IFVYESPHK.L       | 1727.994 | 0.00542  | 3 | 1 | 33.9 | 0 |
| P12163_1_F8,16196 | R.ARPCELYVCNLPR.S   | 1952.015 | 0.00297  | 3 | 1 | 26.3 | 0 |
| P12163_2_F6,15629 | R.ARPCELYVCNLPR.S   | 1952.015 | 0.00819  | 3 | 1 | 24.8 | 0 |
| P12163_2_F6,15662 | R.ARPCELYVCNLPR.S   | 1952.015 | 0.00212  | 2 | 1 | 29   | 0 |
| P12163_1_S1,15063 | R.DAALSLNGTDFR.G    | 1583.833 | 0.00416  | 3 | 1 | 29.4 | 0 |
| P12163_1_S1,17255 | R.DAALSLNGTDFR.G    | 1583.833 | 0.00332  | 3 | 1 | 23.4 | 0 |
| P12163_1_F3,11081 | R.FGTVVSAR.V        | 1140.668 | 0.00775  | 3 | 1 | 28.4 | 0 |
| P12163_1_F4,16715 | R.NAEALISPPK.K      | 1647.989 | 0.0047   | 3 | 1 | 29.7 | 0 |
| P12163_1_F4,16794 | R.NAEALISPPK.K      | 1647.989 | -0.00206 | 2 | 1 | 38.3 | 0 |
| P12163_1_F2,19461 | K.AINVDLLR.N        | 1217.752 | 0.00323  | 2 | 1 | 24.6 | 0 |
| P12163_1_F4,5228  | K.GSNPNAEDR.I       | 1263.623 | 0.00202  | 2 | 1 | 40   | 0 |
| P12163_2_F1,4533  | K.GSNPNAEDR.I       | 1263.623 | 0.0023   | 2 | 1 | 37.9 | 0 |
| P12163_1_F4,25481 | R.DLFEQLLK.H        | 1613.972 | 0.00794  | 2 | 1 | 40.7 | 0 |
| P12163_1_F5,6090  | R.NDAACQGK.G        | 1471.778 | 0.00928  | 2 | 1 | 33.9 | 0 |
| P12163_2_F2,7011  | R.NDAACQGK.G        | 1471.778 | 0.01058  | 2 | 1 | 33.6 | 0 |
| P12163_1_F2,16965 | R.NPDAVANDPTISFK.T  | 2097.144 | 0.00761  | 3 | 1 | 55.8 | 0 |
| P12163_1_F2,16988 | R.NPDAVANDPTISFK.T  | 2097.144 | 0.00519  | 2 | 1 | 36.8 | 0 |
| P12163_1_S1,16063 | R.NPDAVANDPTISFK.T  | 2097.144 | 0.00612  | 3 | 1 | 36   | 0 |
| P12163_2_F1,23218 | K.FSLPELTVK.V       | 1642.004 | 0.00511  | 2 | 1 | 38.1 | 0 |
| P12163_1_F3,25593 | K.VPALLILGEK.D      | 1661.082 | 0.00247  | 3 | 1 | 40.5 | 0 |
| P12163_1_F3,25661 | K.VPALLILGEK.D      | 1661.082 | 0.00476  | 2 | 1 | 67.7 | 0 |
| P12163_2_F1,25573 | K.VPALLILGEK.D      | 1661.082 | 0.00457  | 3 | 1 | 28.7 | 0 |
| P12163_1_F3,14449 | R.GYGLSDPPAEPEK.A ! | 1968.053 | 0.00574  | 2 | 1 | 29.5 | 0 |
| P12163_1_F3,14469 | R.GYGLSDPPAEPEK.A ! | 1968.053 | 0.01036  | 3 | 1 | 27.7 | 0 |



|                   |                     |          |          |   |   |      |   |
|-------------------|---------------------|----------|----------|---|---|------|---|
| P12163_2_F7,14219 | R.HQM*VAVAAAGFR.A   | 1577.852 | -0.0011  | 3 | 1 | 31.1 | 0 |
| P12163_1_F3,15114 | R.SEIPIAPENK.E      | 1705.994 | 0.00427  | 2 | 1 | 30.7 | 0 |
| P12163_1_F4,15434 | R.SEIPIAPENK.E      | 1705.994 | 0.01151  | 2 | 1 | 24.2 | 0 |
| P12163_1_F5,17885 | R.DDPTVPDHSNTPFAT   | 2458.252 | 0.01037  | 3 | 1 | 24.5 | 0 |
| P12163_1_F9,8025  | R.GDQQHFVR.R        | 1290.686 | 0.00146  | 3 | 1 | 29.5 | 0 |
| P12163_1_F3,17585 | R.GPAEADELLSK.V     | 1737.984 | 0.00327  | 2 | 1 | 31.7 | 0 |
| P12163_1_F5,14523 | R.IDHYLGK.E         | 1453.862 | 0.00756  | 3 | 1 | 24.1 | 0 |
| P12163_1_F6,15310 | R.IDHYLGK.E         | 1453.862 | 0.0057   | 2 | 1 | 25.8 | 0 |
| P12163_1_F6,15324 | R.IDHYLGK.E         | 1453.862 | 0.00696  | 3 | 1 | 35.4 | 0 |
| P12163_2_F9,14321 | R.IDHYLGK.E         | 1453.862 | 0.0033   | 3 | 1 | 25.7 | 0 |
| P12163_2_S5,14430 | R.IDHYLGK.E         | 1453.862 | 0.00453  | 3 | 1 | 35.6 | 0 |
| P12163_1_S1,16482 | R.YQGVTIPEAYER.L    | 1729.906 | 0.00416  | 2 | 1 | 41.8 | 0 |
| P12163_1_F4,22321 | K.GILEQEIFK.R       | 1685.009 | 0.00717  | 2 | 1 | 41.3 | 0 |
| P12163_2_F6,17829 | K.HLIEAISEVR.T      | 1470.858 | 0.00008  | 3 | 1 | 51.7 | 0 |
| P12163_2_F6,17847 | K.HLIEAISEVR.T      | 1470.858 | 0.0011   | 2 | 1 | 27.5 | 0 |
| P12163_1_F4,20839 | K.IESVLASK.S        | 1454.904 | 0.00524  | 2 | 1 | 37.7 | 0 |
| P12163_1_F4,20856 | K.IESVLASK.S        | 1454.904 | 0.00592  | 3 | 1 | 35.4 | 0 |
| P12163_1_F5,19684 | K.IESVLASK.S        | 1454.904 | 0.00865  | 3 | 1 | 25.1 | 0 |
| P12163_2_F1,20237 | K.IESVLASK.S        | 1454.904 | 0.00472  | 3 | 1 | 37.1 | 0 |
| P12163_1_F3,27173 | K.LEGSLNLLAEFNK.A   | 2185.232 | 0.00343  | 3 | 1 | 33   | 0 |
| P12163_1_F3,17204 | R.AAESNVDSYNLGITK.I | 2190.186 | 0.01017  | 3 | 1 | 58.3 | 0 |
| P12163_1_F2,23422 | K.AVVESVPLDSFLK.F   | 2012.189 | 0.00429  | 3 | 1 | 26.7 | 0 |
| P12163_1_S1,22167 | K.AVVESVPLDSFLK.F   | 2012.189 | 0.00951  | 3 | 1 | 27.9 | 0 |
| P12163_1_S1,22267 | K.AVVESVPLDSFLK.F   | 2012.189 | 0.0074   | 2 | 1 | 32.2 | 0 |
| P12163_1_F3,20461 | K.GITFFDTADK.Y      | 1722.952 | 0.00153  | 2 | 1 | 51   | 0 |
| P12163_1_F4,20913 | K.GITFFDTADK.Y      | 1722.952 | 0.00747  | 2 | 1 | 50.2 | 0 |
| P12163_1_S10,9771 | K.HAFSK.G           | 1197.72  | 0.00613  | 3 | 1 | 25.8 | 0 |
| P12163_1_F3,20811 | K.YGPYTNEILLGK.A    | 1976.131 | 0.00654  | 3 | 1 | 32.6 | 0 |
| P12163_1_F4,21394 | K.YGPYTNEILLGK.A    | 1976.131 | 0.00285  | 3 | 1 | 44.1 | 0 |
| P12163_2_F1,11728 | R.ENIQVATK.F        | 1510.905 | 0.00639  | 2 | 1 | 39.4 | 0 |
| P12163_1_F3,24223 | K.EGLVTLEEDLVK.L    | 1953.136 | 0.00219  | 2 | 1 | 69   | 0 |
| P12163_1_F3,24247 | K.EGLVTLEEDLVK.L    | 1953.136 | 0.00442  | 3 | 1 | 67.2 | 0 |
| P12163_1_F3,21460 | K.TVGNPSVFNFVK.D    | 2014.158 | -0.00038 | 3 | 1 | 43.8 | 0 |
| P12163_2_F1,21836 | K.TVGNPSVFNFVK.D    | 2014.158 | 0.00778  | 3 | 1 | 36.4 | 0 |
| P12163_2_F4,15457 | K.YAAFSHCFR.T       | 1462.72  | 0.00412  | 3 | 1 | 27.3 | 0 |
| P12163_1_F8,18466 | R.FVHTLNATACAIPR.M  | 1875.021 | 0.0008   | 3 | 1 | 55.5 | 0 |
| P12163_1_F8,18473 | R.FVHTLNATACAIPR.M  | 1875.021 | -0.0012  | 2 | 1 | 52.7 | 0 |
| P12163_2_F6,18008 | R.FVHTLNATACAIPR.M  | 1875.021 | 0.00224  | 3 | 1 | 56.3 | 0 |
| P12163_1_F2,5537  | R.TEAGAAGTATR.G     | 1309.701 | 0.00333  | 3 | 1 | 26.1 | 0 |
| P12163_1_F4,13387 | K.AASNQVDFQTK.A     | 1817.001 | 0.00624  | 3 | 1 | 42.3 | 0 |
| P12163_1_F4,13401 | K.AASNQVDFQTK.A     | 1817.001 | 0.00551  | 2 | 1 | 69.5 | 0 |
| P12163_2_F1,12417 | K.AASNQVDFQTK.A     | 1817.001 | 0.00105  | 2 | 1 | 52   | 0 |
| P12163_1_F3,20347 | K.DGLPTLLEK.M       | 1593.967 | 0.00344  | 2 | 1 | 29.3 | 0 |
| P12163_2_F1,15756 | K.GAWNETFDSSK.T     | 1849.954 | 0.0034   | 2 | 1 | 44   | 0 |
| P12163_1_F4,22295 | K.NLYVSSIFQK.S      | 1807.057 | 0.00558  | 3 | 1 | 49.5 | 0 |
| P12163_1_F4,22298 | K.NLYVSSIFQK.S      | 1807.057 | 0.00691  | 2 | 1 | 40.4 | 0 |
| P12163_2_F1,21838 | K.NLYVSSIFQK.S      | 1807.057 | 0.00588  | 3 | 1 | 30.3 | 0 |
| P12163_1_F5,21616 | K.NQFVSAFDGFK.V     | 1868.016 | 0.01008  | 3 | 1 | 33.4 | 0 |
| P12163_1_F3,25398 | K.GVPDFWLTAMK.N     | 1873.05  | 0.00876  | 3 | 1 | 30.2 | 0 |
| P12163_1_F3,25407 | K.GVPDFWLTAMK.N     | 1873.05  | 0.00672  | 2 | 1 | 26.9 | 0 |
| P12163_1_F3,26393 | K.LEFYDPNPYFK.N     | 2188.157 | 0.00768  | 3 | 1 | 29.7 | 0 |

|                   |                         |          |          |   |   |      |   |
|-------------------|-------------------------|----------|----------|---|---|------|---|
| P12163_2_F6,16263 | K.LQNLAGQHSDVLEK.I      | 2160.223 | 0.00553  | 3 | 1 | 40.9 | 0 |
| P12163_2_F6,16273 | K.LQNLAGQHSDVLEK.I      | 2160.223 | 0.00504  | 4 | 1 | 30   | 0 |
| P12163_1_S1,15300 | K.NNDVLSEEITER.D        | 1722.881 | 0.00386  | 2 | 1 | 27.7 | 0 |
| P12163_1_S1,15341 | K.NNDVLSEEITER.D        | 1722.881 | 0.00662  | 3 | 1 | 55.6 | 0 |
| P12163_1_F4,20678 | R.ADLVGVLK.N            | 1422.914 | 0.00667  | 3 | 1 | 40.8 | 0 |
| P12163_2_F1,20129 | R.ADLVGVLK.N            | 1422.914 | 0.00541  | 3 | 1 | 37.1 | 0 |
| P12163_1_F3,22575 | K.FLDGIYVSEK.S ! K.FLI  | 1779.015 | 0.00558  | 2 | 1 | 37.4 | 0 |
| P12163_1_F4,23334 | K.FLDGIYVSEK.S ! K.FLI  | 1779.015 | 0.00486  | 3 | 1 | 38.4 | 0 |
| P12163_1_F4,23410 | K.FLDGIYVSEK.S ! K.FLI  | 1779.015 | 0.01024  | 2 | 1 | 29.4 | 0 |
| P12163_1_S1,19122 | K.TILSSETMDIPDGVK.V     | 2214.215 | 0.00614  | 3 | 1 | 35   | 0 |
| P12163_2_F9,16897 | R.KFLDGIYVSEK.S ! R.K   | 2211.315 | 0.01256  | 3 | 1 | 37.9 | 0 |
| P12163_1_F5,12185 | R.SAALINQK.C            | 1452.899 | 0.00968  | 2 | 1 | 36.7 | 0 |
| P12163_2_F2,12993 | R.SAALINQK.C            | 1452.899 | 0.00264  | 2 | 1 | 40.6 | 0 |
| P12163_2_F2,13010 | R.SAALINQK.C            | 1452.899 | 0.006    | 3 | 1 | 31.3 | 0 |
| P12163_1_F8,19825 | R.TALSHVGNLITGVTK.C     | 2119.27  | 0.00133  | 3 | 1 | 32.5 | 0 |
| P12163_2_F1,14065 | K.GLAFTENER.D           | 1340.711 | 0.00231  | 2 | 1 | 31.2 | 0 |
| P12163_1_S1,20618 | K.GQAIFASGSPFPDVEYI     | 2592.355 | 0.00809  | 3 | 1 | 46.6 | 0 |
| P12163_1_F5,22987 | K.IIEVLK.R ! K.ILEVLK.N | 1322.887 | 0.00646  | 2 | 1 | 31.5 | 0 |
| P12163_1_F5,7616  | R.DAHYLR.G              | 1078.595 | 0.00146  | 3 | 1 | 22.8 | 0 |
| P12163_1_S10,9764 | R.DAHYLR.G              | 1078.595 | 0.00278  | 3 | 1 | 28.8 | 0 |
| P12163_2_F4,8031  | R.DAHYLR.G              | 1078.595 | 0.00242  | 3 | 1 | 36   | 0 |
| P12163_1_S1,21512 | R.ILGLGDLGCQGM*GIP      | 2409.345 | 0.00501  | 3 | 1 | 61.3 | 0 |
| P12163_1_S1,23058 | R.ILGLGDLGCQGMGIPV      | 2393.35  | 0.01315  | 4 | 1 | 40   | 0 |
| P12163_1_S1,23069 | R.ILGLGDLGCQGMGIPV      | 2393.35  | 0.00855  | 3 | 1 | 66.7 | 0 |
| P12163_1_F2,17898 | K.ALFSQITTR.F           | 1340.784 | 0.00195  | 3 | 1 | 22.7 | 0 |
| P12163_2_F2,9507  | K.NQIDAANK.A            | 1367.81  | 0.012    | 2 | 1 | 25.5 | 0 |
| P12163_2_F2,9554  | K.NQIDAANK.A            | 1367.81  | 0.00424  | 3 | 1 | 23.9 | 0 |
| P12163_1_F2,9765  | K.STVLVTGAGGR.T         | 1321.774 | 0.00287  | 3 | 1 | 47.5 | 0 |
| P12163_1_F2,11592 | K.STVLVTGAGGR.T         | 1321.774 | 0.00065  | 3 | 1 | 23.5 | 0 |
| P12163_1_F8,19119 | R.ELLVGKDELLQTETR       | 2467.386 | 0.00521  | 2 | 1 | 66.8 | 0 |
| P12163_1_F8,19217 | R.ELLVGKDELLQTETR       | 2467.386 | 0.00214  | 3 | 1 | 27.5 | 0 |
| P12163_2_S5,17653 | R.ELLVGKDELLQTETR       | 2467.386 | 0.00424  | 3 | 1 | 27.3 | 0 |
| P12163_2_F2,12933 | R.TGQIVYK.K             | 1416.867 | 0.0066   | 2 | 1 | 25.2 | 0 |
| P12163_1_S1,23783 | K.FLQAVGEAIPVR.D        | 1603.947 | 0.00235  | 2 | 1 | 40.3 | 0 |
| P12163_2_F7,17002 | K.KVLEIGIGTGPNLK.Y      | 2351.479 | 0.0077   | 3 | 1 | 37.4 | 0 |
| P12163_1_F5,14270 | K.SYAEVAGYK.S           | 1724.931 | -0.00065 | 2 | 1 | 34   | 0 |
| P12163_2_F1,14530 | K.SYAEVAGYK.S           | 1724.931 | 0.00473  | 2 | 1 | 24.8 | 0 |
| P12163_1_F3,20828 | K.VLEIGIGTGPNLK.Y       | 1919.179 | 0.00893  | 3 | 1 | 24.8 | 0 |
| P12163_1_F3,22530 | K.VLEIGIGTGPNLK.Y       | 1919.179 | 0.007    | 2 | 1 | 68.7 | 0 |
| P12163_1_F3,22592 | K.VLEIGIGTGPNLK.Y       | 1919.179 | 0.00617  | 3 | 1 | 52.1 | 0 |
| P12163_1_F3,22208 | K.YAQTAAVAAGLPLTN       | 2344.348 | 0.00258  | 3 | 1 | 47.2 | 0 |
| P12163_1_F3,23366 | K.YAQTAAVAAGLPLTN       | 2344.348 | 0.00645  | 3 | 1 | 67.7 | 0 |
| P12163_1_S1,19958 | K.AVLAVADLER.K          | 1360.81  | 0.0027   | 3 | 1 | 59.7 | 0 |
| P12163_1_S1,19998 | K.AVLAVADLER.K          | 1360.81  | 0.00429  | 2 | 1 | 39.4 | 0 |
| P12163_1_F4,20234 | K.QQQILLATQVVK.M        | 1977.232 | 0.00387  | 3 | 1 | 29.7 | 0 |
| P12163_2_F1,19697 | K.QQQILLATQVVK.M        | 1977.232 | 0.00204  | 3 | 1 | 23.4 | 0 |
| P12163_2_F1,19732 | K.QQQILLATQVVK.M        | 1977.232 | -0.00224 | 2 | 1 | 28.4 | 0 |
| P12163_1_F4,24820 | R.EQNVFETLIGK.Q         | 1886.084 | -0.00221 | 3 | 1 | 23.1 | 0 |
| P12163_1_F4,24879 | R.EQNVFETLIGK.Q         | 1886.084 | 0.00696  | 2 | 1 | 47.9 | 0 |
| P12163_1_S10,9691 | R.GIHPIR.I              | 996.6256 | 0.00536  | 3 | 1 | 30.9 | 0 |
| P12163_2_F7,12121 | R.IAVEHLER.I            | 1270.742 | 0.00403  | 3 | 1 | 49.8 | 0 |

|                   |                      |          |          |   |   |      |   |
|-------------------|----------------------|----------|----------|---|---|------|---|
| P12163_1_F4,17210 | K.DLGLDVAK.G         | 1438.873 | 0.0055   | 2 | 1 | 37.9 | 0 |
| P12163_1_F4,17213 | K.DLGLDVAK.G         | 1438.873 | -0.00083 | 3 | 1 | 25.8 | 0 |
| P12163_1_F4,17495 | K.DLGLDVAK.G         | 1438.873 | 0.00018  | 2 | 1 | 26.8 | 0 |
| P12163_1_F5,8765  | K.GTVNTEGSVK.Q       | 1599.916 | 0.01141  | 2 | 1 | 34.8 | 0 |
| P12163_1_F3,27948 | R.LGALIDTM*NALK.D !  | 1884.108 | 0.00351  | 3 | 1 | 28.3 | 0 |
| P12163_1_F3,27942 | R.LGALIDTMNALK.D ! R | 1868.113 | 0.00534  | 3 | 1 | 37.2 | 0 |
| P12163_1_F3,28117 | R.LGALIDTMNALK.D ! R | 1868.113 | 0.00333  | 3 | 1 | 48.9 | 0 |
| P12163_1_F4,27323 | R.LTIINLLK.Y         | 1650.077 | 0.00598  | 2 | 1 | 38.7 | 0 |
| P12163_1_F3,10592 | R.RPETDIDSY.-        | 1399.701 | 0.00289  | 2 | 1 | 27.7 | 0 |
| P12163_1_F2,20073 | K.FVPGVM*DTAVAK.H    | 1859.056 | 0.00223  | 3 | 1 | 42   | 0 |
| P12163_2_F6,18686 | K.LVFHALEER.K        | 1417.81  | 0.00114  | 3 | 1 | 29.7 | 0 |
| P12163_2_F7,16751 | K.LVFHALEER.K        | 1417.81  | 0.00031  | 3 | 1 | 42.3 | 0 |
| P12163_1_S1,17450 | K.VVVNAAGPFCDSVR.K   | 1794.947 | -0.00156 | 2 | 1 | 32.4 | 0 |
| P12163_1_F8,21084 | R.IIEIM*ATEHK.W      | 1809.04  | 0.00847  | 3 | 1 | 22.2 | 0 |
| P12163_1_F8,21082 | R.IIEIMATEHK.W       | 1793.045 | 0.00316  | 3 | 1 | 27.2 | 0 |
| P12163_2_F6,20685 | R.IIEIMATEHK.W       | 1793.045 | 0.0016   | 3 | 1 | 29.1 | 0 |
| P12163_1_S1,17173 | R.NEYCESAVDFVAR.R    | 1863.885 | 0.00816  | 3 | 1 | 51.7 | 0 |
| P12163_1_S1,17178 | R.NEYCESAVDFVAR.R    | 1863.885 | 0.0054   | 2 | 1 | 32.6 | 0 |
| P12163_2_F6,16407 | K.IMVLDSHK.L         | 1550.918 | -0.0007  | 3 | 1 | 42.9 | 0 |
| P12163_1_F3,15746 | R.GELATALR.K         | 1134.678 | 0.00291  | 2 | 1 | 26.9 | 0 |
| P12163_2_F1,14759 | R.GELATALR.K         | 1134.678 | 0.00115  | 2 | 1 | 25.1 | 0 |
| P12163_1_F2,22732 | R.LVVAPPNFVIK.I      | 1805.151 | 0.00302  | 3 | 1 | 27.5 | 0 |
| P12163_1_F3,23564 | R.LVVAPPNFVIK.I      | 1805.151 | 0.008    | 3 | 1 | 36.7 | 0 |
| P12163_1_F3,23572 | R.LVVAPPNFVIK.I      | 1805.151 | 0.00593  | 2 | 1 | 33.9 | 0 |
| P12163_1_S1,17923 | R.NGIPLTAAANFTR.C    | 1822.012 | -0.00014 | 3 | 1 | 39.6 | 0 |
| P12163_1_F4,22069 | R.VQFTEFIQK.N        | 1748.02  | 0.01182  | 2 | 1 | 28.9 | 0 |
| P12163_2_F1,21585 | R.VQFTEFIQK.N        | 1748.02  | 0.00426  | 2 | 1 | 34.1 | 0 |
| P12163_1_F3,21853 | K.GQIFEPQLAFTSK.H    | 2074.179 | 0.00525  | 2 | 1 | 26   | 0 |
| P12163_1_F3,21861 | K.GQIFEPQLAFTSK.H    | 2074.179 | 0.00569  | 3 | 1 | 47.1 | 0 |
| P12163_1_F4,21507 | K.LFDSLAK.L          | 1401.856 | 0.01171  | 2 | 1 | 29   | 0 |
| P12163_1_F4,21550 | K.LFDSLAK.L          | 1401.856 | 0.00503  | 3 | 1 | 27.8 | 0 |
| P12163_1_F5,20444 | K.LFDSLAK.L          | 1401.856 | 0.00701  | 3 | 1 | 24.4 | 0 |
| P12163_2_F1,20806 | K.LFDSLAK.L          | 1401.856 | 0.00551  | 3 | 1 | 27.3 | 0 |
| P12163_1_F5,12854 | K.SSFDVGPK.L         | 1444.826 | 0.01099  | 2 | 1 | 26.7 | 0 |
| P12163_1_S10,7836 | R.AAHDVK.A           | 1248.752 | 0.00815  | 3 | 1 | 22   | 0 |
| P12163_1_F8,20376 | R.VTSEFSDSSIFLHK.I   | 2320.228 | 0.00543  | 3 | 1 | 46.4 | 0 |
| P12163_1_F3,15474 | K.AYEGVPAPYDK.V ! K. | 1817.989 | -0.00599 | 2 | 1 | 40   | 0 |
| P12163_2_F1,15198 | K.AYEGVPAPYDK.V ! K. | 1817.989 | 0.00311  | 2 | 1 | 41.9 | 0 |
| P12163_1_F5,10805 | M.VSGSGICAK.R        | 1486.851 | 0.00859  | 2 | 1 | 36.7 | 0 |
| P12163_1_F9,11893 | R.GMIPHK.T           | 1290.781 | -0.00883 | 3 | 1 | 25.8 | 0 |
| P12163_2_F9,11176 | R.GMIPHK.T           | 1290.781 | 0.01352  | 3 | 1 | 23   | 0 |
| P12163_1_F2,22833 | R.LGPQLEIIAPIK.Y     | 1900.209 | 0.00515  | 3 | 1 | 30.2 | 0 |
| P12163_1_F3,20121 | R.MVIPDALK.V         | 1494.917 | 0.00391  | 3 | 1 | 32.7 | 0 |
| P12163_1_F3,20139 | R.MVIPDALK.V         | 1494.917 | 0.00843  | 2 | 1 | 35.2 | 0 |
| P12163_2_F1,20140 | R.MVIPDALK.V         | 1494.917 | 0.0046   | 3 | 1 | 27.9 | 0 |
| P12163_1_S1,19561 | K.LADGLFLESCR.E      | 1584.836 | 0.00306  | 3 | 1 | 37.1 | 0 |
| P12163_1_S1,21213 | K.LADGLFLESCR.E      | 1584.836 | 0.0051   | 3 | 1 | 41.7 | 0 |
| P12163_1_F9,9956  | K.VTAVHK.A           | 1262.804 | 0.00766  | 3 | 1 | 26.4 | 0 |
| P12163_1_F9,10800 | K.YEVHGDMDK.R        | 1586.846 | 0.00301  | 2 | 1 | 32.2 | 0 |
| P12163_2_F9,10652 | K.YEVHGDMDK.R        | 1586.846 | 0.00633  | 2 | 1 | 29.1 | 0 |
| P12163_2_F6,14992 | R.HENVDIVVIR.E       | 1497.869 | 0.00084  | 3 | 1 | 34.3 | 0 |

|                   |                     |          |          |   |   |      |   |
|-------------------|---------------------|----------|----------|---|---|------|---|
| P12163_1_F6,18250 | R.HLQFPSFADR.L      | 1521.812 | 0.00216  | 3 | 1 | 24.8 | 0 |
| P12163_1_F9,17645 | R.HLQFPSFADR.L      | 1521.812 | 0.003    | 3 | 1 | 45.7 | 0 |
| P12163_1_F3,16264 | K.SGVEPSGCLELVK.H   | 1983.104 | 0.00514  | 3 | 1 | 26.6 | 0 |
| P12163_1_F3,17773 | K.SGVEPSGCLELVK.H   | 1983.104 | 0.00742  | 2 | 1 | 51.8 | 0 |
| P12163_1_F3,17785 | K.SGVEPSGCLELVK.H   | 1983.104 | 0.0031   | 3 | 1 | 43.7 | 0 |
| P12163_1_F3,16055 | K.VLVQVNTSGEESK.S   | 1998.133 | -0.00425 | 2 | 1 | 51.2 | 0 |
| P12163_1_F3,21683 | R.CFGENYVQEIVEK.A   | 2223.158 | 0.00196  | 3 | 1 | 38.5 | 0 |
| P12163_1_F4,22382 | R.CFGENYVQEIVEK.A   | 2223.158 | 0.00757  | 3 | 1 | 38.1 | 0 |
| P12163_1_F9,7426  | R.QVYEAGHR.C        | 1263.675 | 0.00602  | 3 | 1 | 31.3 | 0 |
| P12163_1_S10,6423 | R.VHQAER.S          | 1114.627 | 0.00136  | 3 | 1 | 24.6 | 0 |
| P12163_1_F3,14168 | K.IDTVEAPSK.T       | 1567.915 | 0.00623  | 2 | 1 | 43.9 | 0 |
| P12163_1_F7,19332 | R.ADM*VIPVATVSGLHA  | 1957.084 | 0.00414  | 3 | 1 | 38   | 0 |
| P12163_1_F7,19316 | R.ADMVIPVATVSGLHA   | 1941.089 | 0.00282  | 3 | 1 | 38.5 | 0 |
| P12163_1_F8,19231 | R.ITFGDTHLAM*FR.V   | 1728.904 | 0.00067  | 3 | 1 | 37.9 | 0 |
| P12163_2_F6,18715 | R.ITFGDTHLAM*FR.V   | 1728.904 | 0.00466  | 3 | 1 | 32.5 | 0 |
| P12163_1_F8,21325 | R.ITFGDTHLAMFR.V    | 1712.91  | 0.00208  | 2 | 1 | 33.5 | 0 |
| P12163_1_F8,14163 | R.LRPGVVAVASPGSR.I  | 1670.001 | 0.00084  | 3 | 1 | 37.6 | 0 |
| P12163_1_F7,20965 | R.WLLQPVGDGDTSHIG   | 2478.36  | 0.00665  | 3 | 1 | 62.1 | 0 |
| P12163_1_F4,23764 | K.ALALDLQGFK.T      | 1684.025 | 0.0088   | 3 | 1 | 37.7 | 0 |
| P12163_2_F1,23178 | K.ALALDLQGFK.T      | 1684.025 | 0.00385  | 3 | 1 | 39   | 0 |
| P12163_2_F1,23217 | K.ALALDLQGFK.T      | 1684.025 | 0.00312  | 2 | 1 | 49.3 | 0 |
| P12163_1_F3,22996 | K.ALCLLGECYEVK.K    | 2063.113 | 0.00392  | 2 | 1 | 39.3 | 0 |
| P12163_1_F4,23849 | K.ALCLLGECYEVK.K    | 2063.113 | 0.01621  | 3 | 1 | 28.3 | 0 |
| P12163_1_F9,13140 | K.DAAAHILK.A        | 1446.889 | 0.00825  | 3 | 1 | 28.3 | 0 |
| P12163_2_F1,8118  | K.QAEAEADK.A        | 1469.806 | 0.0025   | 2 | 1 | 36.3 | 0 |
| P12163_1_S1,22025 | R.VDSAIDDLTEAVK.I   | 1984.106 | 0.00756  | 3 | 1 | 70.6 | 0 |
| P12163_1_S1,13918 | K.DITLQEVNR.V       | 1391.78  | 0.00173  | 3 | 1 | 46   | 0 |
| P12163_1_F3,16228 | K.DSGTAMLVGVVSSSK   | 2004.089 | 0.00577  | 2 | 1 | 24.1 | 0 |
| P12163_1_F3,16251 | K.DSGTAMLVGVVSSSK   | 2004.089 | 0.01079  | 3 | 1 | 31.8 | 0 |
| P12163_1_F2,11312 | K.VVGVGGGGNNAVNR    | 1573.871 | 0.0009   | 3 | 1 | 99.9 | 0 |
| P12163_2_F1,11229 | K.VVGVGGGGNNAVNR    | 1573.871 | 0.00879  | 2 | 1 | 26   | 0 |
| P12163_1_F2,15821 | R.GLGTGGNPLLGEQAAI  | 2436.319 | 0.01386  | 3 | 1 | 40.9 | 0 |
| P12163_1_F2,17217 | R.GLGTGGNPLLGEQAAI  | 2436.319 | 0.01287  | 3 | 1 | 32.6 | 0 |
| P12163_2_S5,15168 | R.GVPLPLNTPTSPSTVNS | 2491.393 | -0.00261 | 4 | 1 | 22.9 | 0 |
| P12163_1_F2,12730 | K.EGYAAIGGGSPLR.K   | 1551.843 | 0.00258  | 3 | 1 | 36   | 0 |
| P12163_1_F2,15493 | K.EGYAAIGGGSPLR.K   | 1551.843 | 0.00501  | 2 | 1 | 47.2 | 0 |
| P12163_1_F4,14803 | K.ITDEQAQALK.T      | 1725     | 0.0034   | 2 | 1 | 41.9 | 0 |
| P12163_2_F1,13852 | K.ITDEQAQALK.T      | 1725     | -0.00048 | 2 | 1 | 37.7 | 0 |
| P12163_1_F8,9304  | K.NISQEDDHNPVR.Y    | 1727.861 | 0.00454  | 2 | 1 | 35.6 | 0 |
| P12163_2_F6,9217  | K.NISQEDDHNPVR.Y    | 1727.861 | 0.00224  | 2 | 1 | 33.4 | 0 |
| P12163_1_F6,11126 | R.GINNDHTLAYQSR.V   | 1792.924 | 0.00077  | 3 | 1 | 25.8 | 0 |
| P12163_1_F3,24859 | R.YWYYPFTEEAVQQIK.R | 2410.29  | 0.01067  | 3 | 1 | 30.9 | 0 |
| P12163_1_F7,19245 | K.AVHLEPVPFDIER.D   | 1826.011 | 0.00137  | 3 | 1 | 33.2 | 0 |
| P12163_1_F7,19265 | K.AVHLEPVPFDIER.D   | 1826.011 | 0.00343  | 2 | 1 | 32.6 | 0 |
| P12163_2_S5,18366 | K.AVHLEPVPFDIER.D   | 1826.011 | 0.00257  | 3 | 1 | 21.9 | 0 |
| P12163_2_S5,18404 | K.AVHLEPVPFDIER.D   | 1826.011 | 0.00397  | 2 | 1 | 44.3 | 0 |
| P12163_2_F1,16554 | K.CLLESVNEK.L       | 1699.951 | 0.00121  | 2 | 1 | 29.8 | 0 |
| P12163_1_F2,20410 | K.EFILGELSR.V       | 1367.784 | 0.00214  | 3 | 1 | 30.6 | 0 |
| P12163_2_F1,16693 | K.GSTVFSGYK.R       | 1716.942 | -0.00409 | 2 | 1 | 28.2 | 0 |
| P12163_2_F2,14844 | R.IYSGLNQK.I        | 1530.91  | 0.00253  | 2 | 1 | 34.8 | 0 |
| P12163_1_F5,15639 | K.NTSLEGIYK.S       | 1632.942 | 0.00642  | 2 | 1 | 28.8 | 0 |

|                    |                        |          |          |   |   |      |   |
|--------------------|------------------------|----------|----------|---|---|------|---|
| P12163_1_F5,18142  | K.SLNIFNSK.L           | 1530.91  | 0.00505  | 2 | 1 | 35.4 | 0 |
| P12163_2_F2,18770  | K.SLNIFNSK.L           | 1530.91  | 0.00686  | 3 | 1 | 22.2 | 0 |
| P12163_1_S1,21499  | R.AVTCEDFFAAMR.D       | 1721.829 | 0.01507  | 2 | 1 | 28.8 | 0 |
| P12163_2_F1,20648  | R.IWTPAQDLPK.T         | 1777.047 | 0.00735  | 2 | 1 | 25   | 0 |
| P12163_1_F8,20029  | R.LLDHPAFDLR.N         | 1500.848 | 0.00343  | 3 | 1 | 30.9 | 0 |
| P12163_2_F6,19535  | R.LLDHPAFDLR.N         | 1500.848 | 0.00235  | 3 | 1 | 23.5 | 0 |
| P12163_2_F6,19546  | R.LLDHPAFDLR.N         | 1500.848 | 0.00159  | 2 | 1 | 29.9 | 0 |
| P12163_1_F8,17539  | K.ADGFAFVPEHK.Y ! f    | 1883.027 | 0.01005  | 3 | 1 | 39.8 | 0 |
| P12163_2_F6,17048  | K.ADGFAFVPEHK.Y ! f    | 1883.027 | 0.00294  | 3 | 1 | 39.6 | 0 |
| P12163_1_F8,18030  | K.GAPEQILNLAHNK.S      | 2013.17  | 0.00518  | 3 | 1 | 36.9 | 0 |
| P12163_2_F6,17541  | K.GAPEQILNLAHNK.S      | 2013.17  | 0.00053  | 3 | 1 | 41.7 | 0 |
| P12163_1_F4,18782  | R.ALNLGVNVK.M          | 1535.973 | 0.01072  | 3 | 1 | 32.1 | 0 |
| P12163_2_F1,18020  | R.ALNLGVNVK.M          | 1535.973 | -0.00017 | 2 | 1 | 35.9 | 0 |
| P12163_2_S5,6781   | R.HDSAETIR.R           | 1232.654 | -0.00015 | 3 | 1 | 26.8 | 0 |
| P12163_2_F1,20053  | R.LLEGDPLK.I ! R.LLEGI | 1492.919 | 0.0018   | 2 | 1 | 26.8 | 0 |
| P12163_2_F1,6605   | K.ADAGASK.T            | 1227.715 | 0.00722  | 2 | 1 | 25.9 | 0 |
| P12163_2_F1,6637   | K.ADAGASK.T            | 1227.715 | 0.00449  | 3 | 1 | 28.7 | 0 |
| P12163_2_F7,18593  | K.CHFVGDIFSGK.K        | 1988.088 | 0.00433  | 3 | 1 | 38.2 | 0 |
| P12163_2_F7,18599  | K.CHFVGDIFSGK.K        | 1988.088 | 0.00516  | 4 | 1 | 25.9 | 0 |
| P12163_2_F1,10596  | K.TYPQQAGTIR.K         | 1438.796 | 0.00342  | 2 | 1 | 25.3 | 0 |
| P12163_1_F7,12010  | K.VVEVSTSK.T           | 1456.883 | -0.00028 | 3 | 1 | 26.3 | 0 |
| P12163_2_F1,12819  | K.VVEVSTSK.T           | 1456.883 | 0.00718  | 2 | 1 | 35.3 | 0 |
| P12163_1_S1,20763  | R.LPTDETLTQLK.D        | 1980.184 | 0.00658  | 3 | 1 | 37.3 | 0 |
| P12163_1_F9,10881  | K.LAPGGHLGR.F          | 1181.706 | 0.00533  | 3 | 1 | 39.3 | 0 |
| P12163_1_F4,14246  | K.QIGAYADAEK.A         | 1673.932 | 0.0053   | 3 | 1 | 24.7 | 0 |
| P12163_1_F4,14249  | K.QIGAYADAEK.A         | 1673.932 | 0.0016   | 2 | 1 | 34.2 | 0 |
| P12163_2_F1,13296  | K.QIGAYADAEK.A         | 1673.932 | 0.00262  | 2 | 1 | 29.2 | 0 |
| P12163_1_F4,13235  | R.AGQGAFGNMCR.G        | 1472.704 | 0.00365  | 2 | 1 | 27.7 | 0 |
| P12163_1_F3,19862  | R.MSLLAEAQR.V          | 1322.74  | 0.00216  | 2 | 1 | 24.8 | 0 |
| P12163_2_F1,19089  | R.MSLLAEAQR.V          | 1322.74  | 0.00698  | 2 | 1 | 30.5 | 0 |
| P12163_1_S1,16450  | R.NIPGVEVVNVER.L       | 1628.927 | 0.00177  | 3 | 1 | 55.2 | 0 |
| P12163_1_F7,18481  | K.HIEFSLTSPFGGGRPGR    | 2119.135 | -0.0002  | 4 | 1 | 33.9 | 0 |
| P12163_1_F2,3909   | K.SIHHR.V              | 1024.595 | 0.00141  | 3 | 1 | 23.1 | 0 |
| P12163_1_F4,22578  | R.LQTLVFK.S            | 1456.935 | 0.00023  | 2 | 1 | 28.7 | 0 |
| P12163_1_S1,21400  | R.QLVNIPSFVVR.V        | 1575.952 | 0.00337  | 2 | 1 | 24.1 | 0 |
| P12163_1_F4,18180  | R.YGFLEESQNK.L         | 1822.979 | 0.00593  | 2 | 1 | 35.5 | 0 |
| P12163_1_F5,17018  | R.YGFLEESQNK.L         | 1822.979 | 0.00717  | 2 | 1 | 45.1 | 0 |
| P12163_2_F1,17309  | R.YGFLEESQNK.L         | 1822.979 | 0.00879  | 2 | 1 | 26.2 | 0 |
| P12163_2_F8,12070  | R.YGFLEESQNK.L         | 1822.979 | 0.00593  | 3 | 1 | 24.3 | 0 |
| P12163_1_S10,13360 | K.DAFHLR.V             | 1062.6   | 0.00349  | 3 | 1 | 24   | 0 |
| P12163_1_F2,13647  | K.ENVSSALEAAR.I        | 1579.823 | 0.0037   | 2 | 1 | 24.1 | 0 |
| P12163_1_S1,13478  | K.ENVSSALEAAR.I        | 1579.823 | 0.0055   | 2 | 1 | 54.8 | 0 |
| P12163_2_F6,15215  | K.LLGCHGPLAQR.Q        | 1525.857 | 0.00292  | 3 | 1 | 33.4 | 0 |
| P12163_1_S1,22945  | R.VAIGQVLLSVR.C        | 1458.931 | 0.00343  | 3 | 1 | 52.1 | 0 |
| P12163_1_F5,12082  | R.VHPFHVLR.I           | 1308.784 | 0.00684  | 4 | 1 | 35   | 0 |
| P12163_2_F4,12257  | R.VHPFHVLR.I           | 1308.784 | 0.00184  | 4 | 1 | 35.4 | 0 |
| P12163_2_F4,12259  | R.VHPFHVLR.I           | 1308.784 | 0.00222  | 3 | 1 | 22   | 0 |
| P12163_1_F3,22406  | K.IANLNENIEALSVK.I     | 2136.248 | 0.0074   | 3 | 1 | 39.8 | 0 |
| P12163_2_F4,16477  | K.RLDVDCIDLYYQHR.I     | 2170.102 | 0.00405  | 3 | 1 | 35.7 | 0 |
| P12163_1_S1,14740  | K.YIGLSEASASTIR.R      | 1671.922 | 0.00605  | 3 | 1 | 41   | 0 |
| P12163_2_F6,17647  | K.YIGLSEASASTIR.R      | 1671.922 | -0.0009  | 2 | 1 | 24.8 | 0 |

|                   |                     |          |          |   |   |      |   |
|-------------------|---------------------|----------|----------|---|---|------|---|
| P12163_1_F5,10587 | R.AACEASLK.R        | 1457.824 | 0.01135  | 2 | 1 | 28   | 0 |
| P12163_2_F2,11353 | R.AACEASLK.R        | 1457.824 | 0.00721  | 2 | 1 | 24.6 | 0 |
| P12163_2_F2,11399 | R.AACEASLK.R        | 1457.824 | 0.00707  | 3 | 1 | 28.6 | 0 |
| P12163_1_F9,12962 | R.FQPGNLEHNQK.L     | 1920.055 | 0.00588  | 3 | 1 | 24.9 | 0 |
| P12163_2_F1,22929 | K.LLLVVNK.M         | 1406.955 | 0.00199  | 2 | 1 | 27.5 | 0 |
| P12163_1_S1,18750 | K.VLAIYCDDNR.V      | 1542.789 | 0.00746  | 2 | 1 | 38.2 | 0 |
| P12163_1_F8,18102 | R.FTILDAPGHK.S      | 1707.005 | 0.0031   | 3 | 1 | 37.8 | 0 |
| P12163_2_F6,17567 | R.FTILDAPGHK.S      | 1707.005 | 0.00421  | 3 | 1 | 48.1 | 0 |
| P12163_1_F9,6928  | R.HAGPGENLR.I       | 1254.686 | 0.00464  | 3 | 1 | 26.2 | 0 |
| P12163_1_S10,8186 | R.HAGPGENLR.I       | 1254.686 | 0.00596  | 3 | 1 | 22.6 | 0 |
| P12163_1_F4,14975 | R.IQVNNISICTEK.F    | 1914.057 | 0.00205  | 2 | 1 | 29.6 | 0 |
| P12163_2_F1,13987 | R.IQVNNISICTEK.F    | 1914.057 | -0.00029 | 2 | 1 | 40.3 | 0 |
| P12163_1_F2,19441 | K.NYGGSVEVLSVESGD   | 2620.375 | 0.00451  | 3 | 1 | 30.2 | 0 |
| P12163_2_F6,19065 | K.NYGGSVEVLSVESGD   | 2620.375 | 0.00673  | 3 | 1 | 70.1 | 0 |
| P12163_1_S1,12576 | K.YVGPDSIASGIR.A    | 1538.848 | 0.00388  | 3 | 1 | 42.2 | 0 |
| P12163_1_F6,17560 | R.ASNPSAPAGSSPGLYS. | 3082.605 | 0.01365  | 4 | 1 | 34.1 | 0 |
| P12163_2_F8_1207  | R.ASNPSAPAGSSPGLYS. | 3082.605 | 0.00289  | 4 | 1 | 22.1 | 0 |
| P12163_2_F8_1207  | R.ETTVEAVNGHLDILRP  | 2684.555 | 0.00715  | 3 | 1 | 36.4 | 0 |
| P12163_1_F2,11149 | R.QVYDEEVR.E        | 1341.695 | 0.00539  | 2 | 1 | 27   | 0 |
| P12163_1_F3,11372 | R.QVYDEEVR.E        | 1341.695 | 0.00537  | 2 | 1 | 24.3 | 0 |
| P12163_2_F2,19265 | K.FWTVSDK.T         | 1490.846 | 0.00512  | 2 | 1 | 26.7 | 0 |
| P12163_1_F2,15263 | K.TVGIHGLGR.I       | 1189.757 | 0.00261  | 3 | 1 | 36.3 | 0 |
| P12163_1_S1,20242 | R.ELVSALVEGR.L      | 1376.805 | 0.00235  | 2 | 1 | 44.9 | 0 |
| P12163_1_S1,20278 | R.ELVSALVEGR.L      | 1376.805 | 0.0045   | 3 | 1 | 45.6 | 0 |
| P12163_1_F3,17648 | R.EVIDALGPK.G       | 1549.941 | 0.00493  | 2 | 1 | 40.6 | 0 |
| P12163_1_F9,5826  | R.GPHVDER.E         | 1113.595 | 0.00352  | 3 | 1 | 42   | 0 |
| P12163_1_S10,7300 | R.GPHVDER.E         | 1113.595 | 0.00013  | 3 | 1 | 36   | 0 |
| P12163_1_S1,10508 | K.GYPPAEAAAADR.M    | 1421.733 | 0.00396  | 2 | 1 | 27.8 | 0 |
| P12163_2_F6,9903  | K.QIGGQTHEVAAK.V    | 1847.059 | 0.00409  | 3 | 1 | 34.7 | 0 |
| P12163_1_S1,11688 | K.SQDISVTVADAR.F    | 1565.844 | 0.00325  | 3 | 1 | 32.9 | 0 |
| P12163_1_S1,13791 | K.SQDISVTVADAR.F    | 1565.844 | 0.00226  | 2 | 1 | 25.2 | 0 |
| P12163_1_F8,16636 | R.GYDQVVHDVDLQK.L   | 2124.155 | 0.00801  | 3 | 1 | 25.4 | 0 |
| P12163_2_F6,16156 | R.GYDQVVHDVDLQK.L   | 2124.155 | 0.003    | 3 | 1 | 34.1 | 0 |
| P12163_2_F4,15023 | R.YIDHGSPADQLEESGL  | 2365.157 | 0.00357  | 3 | 1 | 37   | 0 |
| P12163_1_F7,17110 | R.AAIGLSEHGFNTACIT  | 2398.301 | 0.01247  | 3 | 1 | 49.2 | 0 |
| P12163_1_F2,14602 | R.AASTILATGGYGR.A   | 1541.859 | 0.00118  | 3 | 1 | 23.6 | 0 |
| P12163_1_F4,19276 | R.AFGGQSLDFGK.G     | 1734.963 | -0.00015 | 3 | 1 | 42.6 | 0 |
| P12163_1_F4,19285 | R.AFGGQSLDFGK.G     | 1734.963 | 0.00808  | 2 | 1 | 42.9 | 0 |
| P12163_2_F1,18668 | R.AFGGQSLDFGK.G     | 1734.963 | 0.00647  | 3 | 1 | 47.2 | 0 |
| P12163_1_F3,18429 | R.TQETLEEGCQLIDK.A  | 2272.195 | 0.01214  | 3 | 1 | 53.4 | 0 |
| P12163_1_F3,16293 | R.VMQNNAAVFR.T      | 1453.789 | 0.00338  | 2 | 1 | 25.4 | 0 |
| P12163_1_F4,22135 | K.AGLFNBPILK.D      | 1638.02  | 0.00358  | 3 | 1 | 35.6 | 0 |
| P12163_1_F3,17559 | K.DSDCFLQPNLNK.F    | 2059.074 | 0.00938  | 2 | 1 | 40.5 | 0 |
| P12163_1_F2,18112 | K.QDPQPLPYLAEK.I    | 2007.137 | -0.0009  | 3 | 1 | 30.1 | 0 |
| P12163_1_F8,16782 | R.ASSVVISGTDIVRPR.G | 1861.081 | 0.00134  | 3 | 1 | 26.7 | 0 |
| P12163_1_F8,16811 | R.ASSVVISGTDIVRPR.G | 1861.081 | 0.00346  | 2 | 1 | 35.4 | 0 |
| P12163_2_F6,16274 | R.ASSVVISGTDIVRPR.G | 1861.081 | 0.00169  | 2 | 1 | 28.6 | 0 |
| P12163_1_F3,16541 | R.GQFAPSGNSPPFPGPS  | 2408.282 | 0.0017   | 3 | 1 | 29.5 | 0 |
| P12163_1_F3,18601 | K.FGLSTDNVVDAK.I    | 1874.048 | 0.01501  | 3 | 1 | 24.4 | 0 |
| P12163_1_F3,18633 | K.FGLSTDNVVDAK.I    | 1874.048 | 0.00782  | 2 | 1 | 40.7 | 0 |
| P12163_1_F4,24309 | K.IGLVFNPHYGGK.M    | 1773.052 | 0.00225  | 2 | 1 | 35.8 | 0 |

|                   |                       |          |          |   |   |      |   |
|-------------------|-----------------------|----------|----------|---|---|------|---|
| P12163_1_F7,16360 | K.MAEIPASETAFPHR.A    | 1860.958 | 0.00679  | 3 | 1 | 25.6 | 0 |
| P12163_2_S5,15931 | K.MAEIPASETAFPHR.A    | 1860.958 | 0.00202  | 3 | 1 | 47.4 | 0 |
| P12163_1_F5,14700 | K.QMMELGK.I           | 1444.811 | 0.01151  | 2 | 1 | 23.9 | 0 |
| P12163_2_F4,12270 | R.DVDIGINHHGEDSYAE    | 2564.284 | 0.00436  | 4 | 1 | 22.4 | 0 |
| P12163_1_F3,25562 | K.LEPVVELLK.E         | 1648.05  | 0.00182  | 3 | 1 | 45.2 | 0 |
| P12163_1_F3,25610 | K.LEPVVELLK.E         | 1648.05  | 0.00457  | 2 | 1 | 24.5 | 0 |
| P12163_1_F3,18813 | K.MDAPLISTSVK.W       | 1770.029 | 0.00675  | 2 | 1 | 31.4 | 0 |
| P12163_1_S10,6759 | K.SHSAIER.L           | 1103.611 | 0.00149  | 3 | 1 | 25.3 | 0 |
| P12163_2_F8_12070 | K.SHSAIER.L           | 1103.611 | 0.00104  | 3 | 1 | 25.1 | 0 |
| P12163_2_F9,10610 | R.GDQGKHANIFR.A       | 1475.766 | 0.00424  | 3 | 1 | 28   | 0 |
| P12163_1_F3,21233 | R.IPNDAICQAILQK.M     | 2092.204 | 0.01275  | 3 | 1 | 32.8 | 0 |
| P12163_1_F3,18516 | K.DVTELIGK.T          | 1482.899 | 0.00533  | 3 | 1 | 29.2 | 0 |
| P12163_1_F9,8436  | K.EHNPEIK.L           | 1474.847 | 0.006    | 3 | 1 | 23.3 | 0 |
| P12163_1_S10,9284 | K.EHNPEIK.L           | 1474.847 | 0.00591  | 3 | 1 | 29.6 | 0 |
| P12163_2_F8_12070 | K.EHNPEIK.L           | 1474.847 | 0.00423  | 3 | 1 | 26   | 0 |
| P12163_1_S10,1819 | K.LYGVPEPVESAVLSGGF   | 3033.75  | 0.00943  | 4 | 1 | 29.1 | 0 |
| P12163_1_F3,19989 | K.TPNSYVLQQFENPANF    | 2555.371 | 0.00481  | 3 | 1 | 60.7 | 0 |
| P12163_2_F9,21508 | R.YLSSVLFESVK.K       | 1880.099 | 0.01151  | 3 | 1 | 27.2 | 0 |
| P12163_1_F5,7822  | K.AGGSEEANVK.E        | 1569.869 | 0.01319  | 2 | 1 | 33.9 | 0 |
| P12163_2_F1,8362  | K.AGGSEEANVK.E        | 1569.869 | 0.00257  | 2 | 1 | 40.9 | 0 |
| P12163_1_S1,15191 | K.ALQDAVPEDVR.G       | 1516.827 | -0.00279 | 2 | 1 | 29.1 | 0 |
| P12163_2_F1,7478  | K.DANQSDQVK.R         | 1612.875 | 0.00678  | 2 | 1 | 38.4 | 0 |
| P12163_1_F3,11623 | R.DSIDDVSSGK.G        | 1630.874 | 0.00602  | 2 | 1 | 36.5 | 0 |
| P12163_1_F9,11844 | R.NLELDHK.G           | 1476.863 | 0.00494  | 3 | 1 | 26.2 | 0 |
| P12163_2_F7,10989 | R.NLELDHK.G           | 1476.863 | 0.00635  | 3 | 1 | 25.6 | 0 |
| P12163_1_F2,19404 | K.FTDFAAVR.K ! R.FTDF | 1230.678 | 0.00274  | 2 | 1 | 25.2 | 0 |
| P12163_1_F9,12922 | K.GGNPTHSHIFDR.Y      | 1504.781 | 0.00332  | 3 | 1 | 24.5 | 0 |
| P12163_1_F4,22547 | K.SSVLESIVGK.D        | 1626.989 | 0.00806  | 3 | 1 | 23.4 | 0 |
| P12163_1_F6,20102 | R.EYAEFLHIPR.K        | 1578.858 | 0.00353  | 3 | 1 | 34.8 | 0 |
| P12163_1_F8,20163 | R.EYAEFLHIPR.K        | 1578.858 | 0.00386  | 3 | 1 | 46.6 | 0 |
| P12163_2_F6,19688 | R.EYAEFLHIPR.K        | 1578.858 | -0.00499 | 3 | 1 | 40.1 | 0 |
| P12163_1_F4,16842 | R.EYFSTTPEYK.H        | 1872.984 | 0.00429  | 2 | 1 | 25.1 | 0 |
| P12163_2_F2,15989 | K.NALYQATIK.Q         | 1629.978 | -0.00325 | 3 | 1 | 27   | 0 |
| P12163_1_S1,23261 | K.VVDAPEILTVIGK.I     | 1962.21  | 0.00539  | 3 | 1 | 27.8 | 0 |
| P12163_1_F8,19804 | R.FLLTHPDVQDIEK.V     | 2163.227 | 0.00471  | 3 | 1 | 43.9 | 0 |
| P12163_1_F8,19807 | R.FLLTHPDVQDIEK.V     | 2163.227 | -0.00005 | 2 | 1 | 29.9 | 0 |
| P12163_2_F6,19332 | R.FLLTHPDVQDIEK.V     | 2163.227 | -0.00453 | 3 | 1 | 43.2 | 0 |
| P12163_2_F7,19373 | R.TVVYSQFLESYK.S      | 2072.152 | 0.00108  | 3 | 1 | 28.5 | 0 |
| P12163_2_F4,15543 | R.YLYPHFR.Y           | 1299.715 | 0.00127  | 3 | 1 | 22.5 | 0 |
| P12163_1_F9,17056 | K.AEITHIFR.A          | 1290.747 | 0.00483  | 3 | 1 | 46   | 0 |
| P12163_2_F9,16004 | K.AEITHIFR.A          | 1290.747 | 0.00126  | 3 | 1 | 22.6 | 0 |
| P12163_1_F3,25800 | K.FFLGIGIPGDTK.N      | 1873.104 | 0.00181  | 2 | 1 | 32.8 | 0 |
| P12163_2_F1,17920 | K.SVLGTLESSSSTPK.D    | 2001.132 | -0.00044 | 2 | 1 | 47.1 | 0 |
| P12163_1_F6,21374 | K.VNTVLGSHAPPLTVTL    | 2178.291 | -0.0004  | 3 | 1 | 35   | 0 |
| P12163_1_F4,21675 | R.TFEVLGIEK.T         | 1643.983 | 0.00646  | 2 | 1 | 28.8 | 0 |
| P12163_2_F1,21206 | R.TFEVLGIEK.T         | 1643.983 | 0.00294  | 2 | 1 | 41.7 | 0 |
| P12163_1_F4,14269 | K.DVTEAIQK.V          | 1511.889 | 0.00789  | 2 | 1 | 39.5 | 0 |
| P12163_1_S1,16921 | K.ELDLTSPEVVTK.Y      | 1939.121 | 0.01036  | 3 | 1 | 45.8 | 0 |
| P12163_2_F6,20206 | K.IVEGVLSHQLK.Q       | 1831.126 | 0.00257  | 3 | 1 | 36.1 | 0 |
| P12163_2_F6,20207 | K.IVEGVLSHQLK.Q       | 1831.126 | 0.00203  | 2 | 1 | 53.5 | 0 |
| P12163_2_F2,11274 | K.SAAEIANK.A          | 1411.836 | 0.00346  | 2 | 1 | 31.2 | 0 |

|                   |                        |          |          |   |   |      |   |
|-------------------|------------------------|----------|----------|---|---|------|---|
| P12163_1_F4,22865 | R.FIFSEINQK.F          | 1734.005 | 0.00971  | 3 | 1 | 23.1 | 0 |
| P12163_2_F1,22301 | R.FIFSEINQK.F          | 1734.005 | 0.00506  | 3 | 1 | 29.9 | 0 |
| P12163_2_F1,17834 | K.AIATWEVR.L           | 1249.721 | 0.00113  | 2 | 1 | 24.1 | 0 |
| P12163_2_F1,23033 | K.GIPPWVPLK.G          | 1615.019 | -0.00215 | 2 | 1 | 26.4 | 0 |
| P12163_1_F3,26008 | R.AEEIADYLNEVELK.K     | 2244.222 | 0.00893  | 3 | 1 | 39.9 | 0 |
| P12163_1_F3,24349 | R.GPLELITLK.T          | 1592.024 | 0.00984  | 3 | 1 | 22.3 | 0 |
| P12163_1_F8,20891 | R.LGAAATAFLHK.L        | 1708.037 | 0.00656  | 3 | 1 | 38.1 | 0 |
| P12163_2_F6,20461 | R.LGAAATAFLHK.L        | 1708.037 | 0.00575  | 3 | 1 | 48.5 | 0 |
| P12163_2_F6,20475 | R.LGAAATAFLHK.L        | 1708.037 | 0.01137  | 2 | 1 | 29.5 | 0 |
| P12163_1_F5,25262 | K.LIELLGK.F ! K.LLELLC | 1393.924 | 0.00623  | 2 | 1 | 30.6 | 0 |
| P12163_2_F1,26492 | K.LIELLGK.F ! K.LLELLC | 1393.924 | 0.00689  | 2 | 1 | 30.1 | 0 |
| P12163_1_F4,13884 | K.LVEGPNPNEK.G         | 1704.974 | 0.00422  | 3 | 1 | 26.6 | 0 |
| P12163_2_F1,12845 | K.LVEGPNPNEK.G         | 1704.974 | 0.00485  | 2 | 1 | 34.4 | 0 |
| P12163_1_F3,24179 | K.QENVNTLTILVMGK.G     | 2168.257 | 0.00425  | 3 | 1 | 31.8 | 0 |
| P12163_1_F3,24982 | K.VLPNGTAWIPNLVK.T     | 2130.289 | 0.0028   | 3 | 1 | 40.8 | 0 |
| P12163_1_F4,22172 | R.AITDNFGEQIWK.R       | 2030.117 | 0.00613  | 3 | 1 | 49.8 | 0 |
| P12163_1_S1,21664 | K.GGVDPALIESSMSQMC     | 2542.346 | 0.00685  | 3 | 1 | 60.8 | 0 |
| P12163_1_S1,21694 | K.GGVDPALIESSMSQMC     | 2542.346 | 0.00111  | 4 | 1 | 23.6 | 0 |
| P12163_1_F3,18417 | K.LVIADVQDK.L          | 1608.978 | 0.00413  | 2 | 1 | 48.1 | 0 |
| P12163_1_F4,24326 | K.YGILGLVK.C           | 1470.95  | 0.00293  | 2 | 1 | 24.2 | 0 |
| P12163_2_F9,20418 | K.YGILGLVK.C           | 1470.95  | 0.00402  | 3 | 1 | 37.5 | 0 |
| P12163_1_F3,25692 | R.LINVNTIGGFLGAK.H     | 2025.232 | 0.00495  | 3 | 1 | 46.3 | 0 |
| P12163_1_F4,20344 | R.SFGSILDTPK.S         | 1672.973 | 0.00497  | 2 | 1 | 29.9 | 0 |
| P12163_1_F6,15761 | K.LVSFHPK.S            | 1435.888 | 0.00345  | 3 | 1 | 23.4 | 0 |
| P12163_1_F3,27569 | K.SYVDLLQDLM*EK.T      | 2078.13  | 0.00718  | 3 | 1 | 40.6 | 0 |
| P12163_1_F3,27581 | K.SYVDLLQDLM*EK.T      | 2062.135 | 0.00265  | 3 | 1 | 28.1 | 0 |
| P12163_1_F9,8951  | R.SLAAEHEGK.S          | 1549.879 | 0.00833  | 3 | 1 | 24.1 | 0 |
| P12163_1_F9,8968  | R.SLAAEHEGK.S          | 1549.879 | 0.00857  | 2 | 1 | 39.8 | 0 |
| P12163_1_F2,14373 | R.SSEFEESIQNGER.S      | 1815.866 | 0.00131  | 2 | 1 | 28.5 | 0 |
| P12163_1_S1,16281 | R.YGVGDSNFSAAPLR.A     | 1757.912 | -0.00192 | 2 | 1 | 29.4 | 0 |
| P12163_1_F7,20984 | K.EQWVFTTNVEPHVQ       | 2763.529 | -0.00455 | 3 | 1 | 28.8 | 0 |
| P12163_1_F7,20997 | K.EQWVFTTNVEPHVQ       | 2763.529 | -0.00144 | 4 | 1 | 28.3 | 0 |
| P12163_1_F4,14092 | K.ETLNAAEQVDK.A        | 1826.012 | 0.00529  | 2 | 1 | 66.6 | 0 |
| P12163_2_F1,18260 | K.IELDQLK.S            | 1466.904 | 0.00434  | 2 | 1 | 24.3 | 0 |
| P12163_1_F4,12023 | K.TIEACEATK.T          | 1630.893 | 0.01128  | 2 | 1 | 31.3 | 0 |
| P12163_2_F1,11139 | K.TIEACEATK.T          | 1630.893 | 0.01054  | 2 | 1 | 47.3 | 0 |
| P12163_1_S1,19854 | R.VQEVVDPYFQEAK.K      | 2160.18  | 0.00251  | 3 | 1 | 27.8 | 0 |
| P12163_1_F7,22386 | K.FIQIFGHAPDVYAR.S     | 1938.054 | -0.00081 | 3 | 1 | 36.1 | 0 |
| P12163_2_F2,17983 | K.GFYEYVK.A            | 1513.851 | -0.00269 | 2 | 1 | 24.8 | 0 |
| P12163_2_F2,17988 | K.GFYEYVK.A            | 1513.851 | 0.00005  | 3 | 1 | 31.7 | 0 |
| P12163_2_F7,9233  | R.AAHVYSEAK.R          | 1583.9   | 0.00634  | 3 | 1 | 30.4 | 0 |
| P12163_2_F2,13682 | R.INQGVINK.N           | 1493.926 | 0.00734  | 2 | 1 | 35.3 | 0 |
| P12163_1_F4,28015 | R.LAAIVLGIK.L          | 1506.024 | 0.00782  | 2 | 1 | 40   | 0 |
| P12163_1_F4,28033 | R.LAAIVLGIK.L          | 1506.024 | 0.00507  | 3 | 1 | 39.2 | 0 |
| P12163_1_F9,8478  | K.ATHITK.I             | 1278.799 | 0.00737  | 3 | 1 | 23.5 | 0 |
| P12163_1_S1,19531 | K.GFGFDVDNTIGSTPQIN    | 2518.34  | 0.01191  | 3 | 1 | 65.5 | 0 |
| P12163_1_F8,18580 | K.LALDQYGDSTIYQR.G     | 1947.012 | 0.00544  | 2 | 1 | 41.5 | 0 |
| P12163_2_F6,18129 | K.LALDQYGDSTIYQR.G     | 1947.012 | 0.00382  | 2 | 1 | 39   | 0 |
| P12163_1_S1,24648 | R.SSALSIIIDDYLR.M      | 1656.911 | -0.00118 | 3 | 1 | 34.4 | 0 |
| P12163_1_F4,20009 | R.YGTDAGSFFVK.T        | 1799.979 | 0.00957  | 3 | 1 | 34   | 0 |
| P12163_2_F9,17507 | R.YGTDAGSFFVK.T        | 1799.979 | 0.00657  | 3 | 1 | 35.6 | 0 |



|                   |                       |          |          |   |   |      |   |
|-------------------|-----------------------|----------|----------|---|---|------|---|
| P12163_1_F2,11492 | K.ADDSPEAVPQPK.V      | 1862.012 | -0.00095 | 2 | 1 | 51.3 | 0 |
| P12163_1_F4,11742 | K.ALPASTD SK.V        | 1497.873 | 0.00617  | 3 | 1 | 38.8 | 0 |
| P12163_1_F5,13905 | K.ELADDIK.Q           | 1411.825 | 0.00578  | 2 | 1 | 30.4 | 0 |
| P12163_1_F3,20784 | K.QLTQQVDEFLNTK.V     | 2172.212 | 0.00257  | 3 | 1 | 49.8 | 0 |
| P12163_1_F4,23184 | K.QLTQQVDEFLNTK.V     | 2172.212 | 0.0038   | 3 | 1 | 46.7 | 0 |
| P12163_1_S1,13666 | K.VEAAADPPPQVNSVPE    | 2227.254 | 0.0046   | 3 | 1 | 34.7 | 0 |
| P12163_1_S1,13711 | K.VEAAADPPPQVNSVPE    | 2227.254 | 0.00461  | 4 | 1 | 38.9 | 0 |
| P12163_1_F4,21035 | K.ANAVALGNYLTGK.G     | 1900.111 | 0.00284  | 3 | 1 | 45.3 | 0 |
| P12163_2_F1,20549 | K.ANAVALGNYLTGK.G     | 1900.111 | 0.00599  | 3 | 1 | 37.2 | 0 |
| P12163_1_F8,21558 | K.DFEQIGEF LHR.A      | 1694.88  | 0.00273  | 3 | 1 | 46.4 | 0 |
| P12163_1_F4,21103 | K.LCDLCNITV NK.N      | 1958.066 | 0.01395  | 3 | 1 | 40.2 | 0 |
| P12163_1_F4,21128 | K.LCDLCNITV NK.N      | 1958.066 | 0.01336  | 2 | 1 | 38   | 0 |
| P12163_1_F2,17722 | K.LIICGGSAYPR.D       | 1510.835 | 0.00352  | 3 | 1 | 23.7 | 0 |
| P12163_1_S1,16767 | K.NAVFGDSSALAPGGV     | 1821.976 | 0.00476  | 2 | 1 | 26.2 | 0 |
| P12163_1_F2,22313 | K.IAAALPGM*ETLSSTK.   | 2114.199 | 0.0077   | 3 | 1 | 43.1 | 0 |
| P12163_1_F3,21366 | K.LVFLGDQSVGK.T       | 1771.057 | 0.00108  | 2 | 1 | 31   | 0 |
| P12163_1_F3,22534 | R.ELNVMFIETSAK.A      | 1990.114 | 0.0081   | 3 | 1 | 34.7 | 0 |
| P12163_1_F3,23037 | R.GSDVHVLVGNK.T       | 1822.126 | 0.00618  | 3 | 1 | 38.2 | 0 |
| P12163_1_F4,12950 | R.QVSIEEGEAK.A ! R.QV | 1697.953 | 0.00375  | 2 | 1 | 44.3 | 0 |
| P12163_1_F4,12994 | R.QVSIEEGEAK.A ! R.QV | 1697.953 | 0.00795  | 3 | 1 | 36.3 | 0 |
| P12163_1_S1,12408 | K.CVIVDTQASGNNR.K !   | 1737.886 | 0.00068  | 3 | 1 | 39.1 | 0 |
| P12163_1_S1,12409 | K.CVIVDTQASGNNR.K !   | 1737.886 | 0.00793  | 2 | 1 | 31.5 | 0 |
| P12163_1_F3,24118 | K.NAGADNLIPMELALK.    | 2178.241 | 0.00987  | 3 | 1 | 31.5 | 0 |
| P12163_2_S5,18202 | R.FMIYVHAK.M ! R.FMI  | 1616.944 | 0.00063  | 3 | 1 | 28.4 | 0 |
| P12163_1_F7,22382 | R.FTAM*EFTPLQGHLLR    | 2081.116 | 0.00602  | 3 | 1 | 46   | 0 |
| P12163_1_F3,27876 | R.ISWILSPELSLK.T      | 1994.215 | 0.00725  | 3 | 1 | 52   | 0 |
| P12163_1_F3,25242 | K.NYSQFVSFPIYTWQEK    | 2645.386 | 0.00552  | 3 | 1 | 48.4 | 0 |
| P12163_1_S10,1530 | K.RLAPLLR.F           | 1142.767 | 0.00472  | 3 | 1 | 29.3 | 0 |
| P12163_1_F3,18382 | R.ELISNASDALDK.L ! R. | 1884.053 | 0.00752  | 3 | 1 | 60.2 | 0 |
| P12163_1_F3,18387 | R.ELISNASDALDK.L ! R. | 1884.053 | 0.01143  | 2 | 1 | 55.5 | 0 |
| P12163_1_F7,20596 | R.VFEINPEHPHIIQNLNAA  | 2742.54  | -0.00086 | 3 | 1 | 56.4 | 0 |
| P12163_1_S10,1886 | R.YLSFVK.G            | 1364.84  | 0.0068   | 3 | 1 | 23.3 | 0 |
| P12163_1_F3,24237 | K.IAAVMYTGVTATVK.C    | 2033.192 | 0.00719  | 3 | 1 | 66.4 | 0 |
| P12163_1_F4,25010 | K.M*YSSTFDAIFK.T      | 1934.019 | 0.00587  | 3 | 1 | 22.4 | 0 |
| P12163_2_F6,13847 | R.LM*TQVHGAEV NK.I    | 1951.089 | 0.00814  | 3 | 1 | 28.8 | 0 |
| P12163_2_F6,13834 | R.LMTQVHGAEV NK.I     | 1935.094 | 0.00268  | 3 | 1 | 35.6 | 0 |
| P12163_1_F3,24739 | R.NLPAGVLSYSSFEYLK    | 2396.332 | 0.00669  | 3 | 1 | 48   | 0 |
| P12163_2_F2,21949 | R.SWEVLLK.I           | 1482.914 | 0.00732  | 2 | 1 | 29   | 0 |
| P12163_2_F1,13287 | K.ASNGVVIA TEK.K      | 1697.005 | 0.00288  | 2 | 1 | 40   | 0 |
| P12163_1_S1,17695 | K.EPIPVTQLVR.E        | 1455.884 | 0.00085  | 3 | 1 | 36.4 | 0 |
| P12163_1_F4,20449 | K.NIEIGI GEK.K        | 1694.031 | 0.00356  | 3 | 1 | 30.5 | 0 |
| P12163_1_F4,20456 | K.NIEIGI GEK.K        | 1694.031 | 0.00549  | 2 | 1 | 28.1 | 0 |
| P12163_1_F5,5135  | K.QAEQYHR.L           | 1235.643 | 0.00392  | 3 | 1 | 24.7 | 0 |
| P12163_1_F2,15323 | R.VLTPNEIR.D          | 1245.747 | 0.00277  | 2 | 1 | 24.9 | 0 |
| P12163_1_F3,20177 | K.NVGFSMNDVIEECK.L    | 2250.135 | 0.01156  | 3 | 1 | 59.2 | 0 |
| P12163_1_F9,8019  | R.EIEEHGNNK.N         | 1677.902 | 0.01071  | 3 | 1 | 22.1 | 0 |
| P12163_1_F3,20948 | R.ICVGQNFALVEAK.M     | 2057.167 | 0.01365  | 3 | 1 | 36.5 | 0 |
| P12163_1_F3,27846 | R.LLIVGLASLEGEK.W     | 1950.209 | 0.00974  | 3 | 1 | 39.5 | 0 |
| P12163_1_F9,15566 | R.VNPFLHK.L           | 1462.899 | 0.01192  | 3 | 1 | 21.9 | 0 |
| P12163_2_F9,14593 | R.VNPFLHK.L           | 1462.899 | 0.00352  | 3 | 1 | 29.6 | 0 |
| P12163_1_F4,16347 | K.FANACGAITTK.K       | 1863.025 | 0.00827  | 2 | 1 | 24.5 | 0 |

|                   |                     |          |          |   |   |      |   |
|-------------------|---------------------|----------|----------|---|---|------|---|
| P12163_1_S1,22973 | K.GAIPALPTESEALNLLF | 2345.39  | 0.00443  | 3 | 1 | 32.8 | 0 |
| P12163_1_S1,23052 | K.GAIPALPTESEALNLLF | 2345.39  | 0.00634  | 4 | 1 | 30   | 0 |
| P12163_2_F6,21560 | K.LLLVTLGEHGCR.Y    | 1671.952 | 0.00112  | 3 | 1 | 33.6 | 0 |
| P12163_2_F1,22219 | R.EQIMSIWDK.A       | 1757.972 | 0.00651  | 2 | 1 | 39.8 | 0 |
| P12163_2_S5,10897 | R.SAHLEAMK.A        | 1494.856 | 0.00346  | 3 | 1 | 25.9 | 0 |
| P12163_1_F2,8558  | K.EVESLTR.S         | 1137.642 | 0.00403  | 3 | 1 | 22   | 0 |
| P12163_2_F8_12070 | K.GHQGVSLDELVGIVTF  | 1984.113 | -0.00187 | 3 | 1 | 37   | 0 |
| P12163_1_S1,20558 | K.NPLTAVMDVPR.N     | 1516.846 | 0.00532  | 2 | 1 | 35.7 | 0 |
| P12163_1_S1,20561 | K.NPLTAVMDVPR.N     | 1516.846 | 0.00071  | 3 | 1 | 58.5 | 0 |
| P12163_2_F1,14463 | R.GVTVGNVIR.V       | 1218.747 | 0.00369  | 2 | 1 | 27.4 | 0 |
| P12163_1_F2,9622  | R.SLTQASEDLR.R      | 1423.769 | 0.00246  | 3 | 1 | 27.3 | 0 |
| P12163_1_S1,18987 | K.ELENVPMVTTESGLQY  | 2546.363 | 0.00774  | 3 | 1 | 48.9 | 0 |
| P12163_1_F3,20273 | K.GLDEGILTMK.T      | 1684.976 | 0.00633  | 2 | 1 | 52.7 | 0 |
| P12163_1_F4,13964 | K.GRPYIFR.V         | 1212.715 | 0.00143  | 3 | 1 | 22.4 | 0 |
| P12163_2_F1,10961 | R.LCDDACEK.E        | 1618.802 | 0.00749  | 2 | 1 | 26   | 0 |
| P12163_1_F3,24948 | R.LYIPGPLAFPK.G     | 1824.124 | 0.00203  | 2 | 1 | 29.9 | 0 |
| P12163_1_F3,24960 | R.LYIPGPLAFPK.G     | 1824.124 | 0.00424  | 3 | 1 | 39.5 | 0 |
| P12163_1_F3,16664 | K.ETGLDQYAIK.F      | 1817.026 | -0.00166 | 2 | 1 | 50.2 | 0 |
| P12163_1_F5,22119 | K.LLVLAGK.A         | 1321.903 | 0.00739  | 2 | 1 | 30.7 | 0 |
| P12163_2_F1,22899 | K.LLVLAGK.A         | 1321.903 | 0.00146  | 3 | 1 | 22.1 | 0 |
| P12163_1_F3,15196 | K.NPANFNVDNVR.V     | 1563.818 | 0.00312  | 2 | 1 | 26.5 | 0 |
| P12163_1_S1,17735 | K.VAVFAGGVDTSATETI  | 2161.196 | -0.00043 | 3 | 1 | 39   | 0 |
| P12163_1_F4,13251 | R.AVDDGVNTYK.A      | 1689.927 | 0.00249  | 2 | 1 | 32.7 | 0 |
| P12163_1_F4,15061 | K.CTLISSEAEK.G      | 1832.988 | 0.00336  | 2 | 1 | 46.2 | 0 |
| P12163_2_F1,14003 | K.CTLISSEAEK.G      | 1832.988 | 0.00708  | 2 | 1 | 41.5 | 0 |
| P12163_1_S1,15769 | K.LADPEVVSNPSEYQK.I | 2284.228 | 0.00075  | 3 | 1 | 42.4 | 0 |
| P12163_1_F4,22999 | K.SLSNELIELEEK.L    | 2012.137 | 0.00004  | 2 | 1 | 49   | 0 |
| P12163_2_F1,17023 | K.TVVMEIK.G         | 1427.875 | 0.00353  | 3 | 1 | 25   | 0 |
| P12163_2_F10,1840 | K.VETAIDLPHKPTGIR.I | 2305.349 | 0.00243  | 4 | 1 | 25.9 | 0 |
| P12163_1_S1,22506 | K.ATSSIYPLQNVFIR.K  | 1913.08  | 0.00186  | 3 | 1 | 33.5 | 0 |
| P12163_1_S1,22507 | K.ATSSIYPLQNVFIR.K  | 1913.08  | 0.00415  | 2 | 1 | 36.1 | 0 |
| P12163_1_F2,23374 | K.FIAEVIGR.E        | 1208.73  | 0.00262  | 2 | 1 | 29.5 | 0 |
| P12163_1_F3,12083 | K.TTDNFTLR.L        | 1271.69  | 0.0058   | 3 | 1 | 24.2 | 0 |
| P12163_1_F3,19239 | R.EIMVAQAASCDLK.S   | 2044.103 | 0.0093   | 2 | 1 | 34.4 | 0 |
| P12163_1_F4,24896 | R.LFCIGFTK.R        | 1593.928 | 0.00505  | 3 | 1 | 22.7 | 0 |
| P12163_2_F1,16792 | K.ENLAAVGLK.G       | 1522.941 | 0.00105  | 2 | 1 | 46.9 | 0 |
| P12163_1_F3,24603 | K.IIAGLLAPDK.G      | 1619.035 | 0.0034   | 3 | 1 | 35.1 | 0 |
| P12163_1_F3,24638 | K.IIAGLLAPDK.G      | 1619.035 | 0.00781  | 2 | 1 | 38.1 | 0 |
| P12163_1_F4,21882 | R.ENVGFLLYENSK.M    | 2021.116 | 0.01919  | 3 | 1 | 27.4 | 0 |
| P12163_1_F6,13366 | R.HGEAVGIIGPSGTGK.S | 1988.138 | 0.00536  | 3 | 1 | 40.3 | 0 |
| P12163_1_F4,25235 | R.LIFLYEGK.I        | 1590.971 | 0.00825  | 3 | 1 | 22.5 | 0 |
| P12163_1_F3,16431 | K.AVDNSGTVIGIK.C    | 1782.058 | 0.00502  | 2 | 1 | 50.1 | 0 |
| P12163_2_F6,14170 | K.IYGVHDEAK.D       | 1753.01  | -0.00084 | 3 | 1 | 29.9 | 0 |
| P12163_2_F6,14177 | K.IYGVHDEAK.D       | 1753.01  | 0.0002   | 2 | 1 | 32.3 | 0 |
| P12163_2_F6,17664 | K.SEATNYESVYGEPIPVI | 2491.318 | -0.00118 | 3 | 1 | 24.8 | 0 |
| P12163_1_F3,20294 | K.VPELLEEAK.A       | 1751.005 | 0.00621  | 2 | 1 | 50.9 | 0 |
| P12163_2_F1,13984 | R.QGVIEVAK.I        | 1451.904 | 0.00579  | 3 | 1 | 26.5 | 0 |
| P12163_2_F2,13896 | K.SVAEFK.S          | 1288.772 | 0.00995  | 2 | 1 | 24   | 0 |
| P12163_1_S1,19547 | K.YQQIGFFPDER.A     | 1703.869 | 0.00818  | 2 | 1 | 31.9 | 0 |
| P12163_1_S1,19583 | K.YQQIGFFPDER.A     | 1703.869 | -0.00091 | 3 | 1 | 43.3 | 0 |
| P12163_1_F2,11572 | R.QGVLGEDDTGEESPK.. | 2169.113 | 0.00279  | 3 | 1 | 29.5 | 0 |

|                   |                        |          |          |   |   |      |   |
|-------------------|------------------------|----------|----------|---|---|------|---|
| P12163_1_F3,16425 | R.QPAIVCENCLYSQEK.I    | 2447.252 | -0.00014 | 3 | 1 | 40.1 | 0 |
| P12163_1_S1,21637 | R.YQTAGMLETVLR.Q       | 1685.92  | 0.00205  | 2 | 1 | 25.5 | 0 |
| P12163_2_F1,19921 | K.MPGGGAVSALIK.V       | 1709.024 | 0.00423  | 3 | 1 | 24   | 0 |
| P12163_1_F3,18794 | K.NPAFITLR.K           | 1235.741 | 0.00283  | 2 | 1 | 25.8 | 0 |
| P12163_2_F1,18535 | K.NPAFITLR.K           | 1235.741 | 0.00231  | 2 | 1 | 28.3 | 0 |
| P12163_1_F3,8423  | K.QVAAQEAER.A          | 1305.706 | 0.00537  | 2 | 1 | 34.2 | 0 |
| P12163_1_F3,19114 | R.AQGEATSAQLIGQAIA     | 2265.302 | 0.00794  | 3 | 1 | 49.6 | 0 |
| P12163_1_F7,18771 | R.VLTRPVADQLPTIYR.T    | 2046.201 | 0.00405  | 3 | 1 | 45.3 | 0 |
| P12163_2_F1,25063 | K.ETNPLVAIFK.S         | 1740.052 | 0.00755  | 3 | 1 | 28.5 | 0 |
| P12163_2_F1,18768 | K.LIAEELNTNK.I         | 1753.032 | -0.00292 | 2 | 1 | 43.4 | 0 |
| P12163_2_F1,12687 | K.STYEELQTSK.S         | 1793.974 | -0.00009 | 2 | 1 | 37.8 | 0 |
| P12163_1_F5,19785 | R.INLEAWEK.A           | 1610.936 | -0.00277 | 2 | 1 | 31.5 | 0 |
| P12163_1_F6,17085 | R.NVQFEVSHNDVLTSEE     | 2834.386 | -0.0011  | 3 | 1 | 81.3 | 0 |
| P12163_1_F7,16222 | R.NVQFEVSHNDVLTSEE     | 2834.386 | 0.001    | 3 | 1 | 50.4 | 0 |
| P12163_2_F1,8814  | K.ANIPEDR.Q            | 1118.611 | 0.0035   | 2 | 1 | 25   | 0 |
| P12163_1_F5,7597  | K.SAQNAYK.L            | 1389.795 | 0.00274  | 2 | 1 | 24.3 | 0 |
| P12163_1_F5,16631 | R.FINDGVYK.V           | 1563.899 | 0.00561  | 2 | 1 | 34.6 | 0 |
| P12163_1_S1,20556 | R.GLVDALGGFSR.A        | 1395.79  | 0.0069   | 2 | 1 | 24   | 0 |
| P12163_1_S1,20595 | R.GLVDALGGFSR.A        | 1395.79  | -0.00028 | 3 | 1 | 26.3 | 0 |
| P12163_1_S10,1306 | R.HVVDFK.K             | 1352.815 | 0.00702  | 3 | 1 | 23.7 | 0 |
| P12163_2_F2,19251 | K.FQGANLYIK.N          | 1661.983 | 0.00292  | 3 | 1 | 35.4 | 0 |
| P12163_2_F2,19260 | K.FQGANLYIK.N          | 1661.983 | 0.00931  | 2 | 1 | 27.5 | 0 |
| P12163_1_F4,23520 | K.QLFSPFGSITSCK.V      | 2080.136 | 0.00422  | 3 | 1 | 36.1 | 0 |
| P12163_2_F4,16073 | K.QVYVGHFLR.K          | 1422.816 | 0.00286  | 3 | 1 | 40.8 | 0 |
| P12163_2_F2,16970 | K.SGAGNIFIK.N          | 1514.915 | 0.00288  | 3 | 1 | 26.6 | 0 |
| P12163_2_F1,11866 | K.VATDLNGQSK.G         | 1640.943 | 0.00713  | 2 | 1 | 24.7 | 0 |
| P12163_1_F4,22132 | R.DEYSLVEALK.Q         | 1775.005 | 0.01296  | 3 | 1 | 22.9 | 0 |
| P12163_2_F2,17108 | R.FNNIPQVK.M           | 1567.942 | 0.01118  | 2 | 1 | 28.7 | 0 |
| P12163_1_S1,22275 | R.M*LDFDFLCGR.E        | 1593.771 | -0.00204 | 3 | 1 | 39.3 | 0 |
| P12163_1_F9,10582 | R.VPGIGHR.I ! R.VPGIGH | 1039.631 | 0.00607  | 3 | 1 | 27.8 | 0 |
| P12163_1_S1,22805 | R.VVAIIAEGVPEADTK.C    | 2120.242 | 0.00089  | 4 | 1 | 36   | 0 |
| P12163_1_S1,22907 | R.VVAIIAEGVPEADTK.C    | 2120.242 | 0.00533  | 3 | 1 | 44   | 0 |
| P12163_1_S1,19533 | K.AAVSAMPELLR.S        | 1461.84  | 0.00263  | 3 | 1 | 47.6 | 0 |
| P12163_2_F1,15964 | K.AILVNATDK.S          | 1552.952 | 0.00846  | 2 | 1 | 27.4 | 0 |
| P12163_1_F6,16239 | K.FYFHAEVR.K           | 1430.737 | 0.00423  | 3 | 1 | 25.9 | 0 |
| P12163_2_S5,15505 | K.FYFHAEVR.K           | 1430.737 | 0.00459  | 3 | 1 | 30.8 | 0 |
| P12163_1_F3,25001 | K.YYDAVMPFLK.A         | 1855.028 | 0.00509  | 3 | 1 | 27   | 0 |
| P12163_1_F9,4641  | R.SPHPEAR.A            | 1097.6   | 0.00002  | 3 | 1 | 30.7 | 0 |
| P12163_1_S1,22653 | K.AALDLLLPYQR.S        | 1576.936 | 0.00469  | 3 | 1 | 35.6 | 0 |
| P12163_2_F1,23758 | K.FLPVYLSK.G           | 1574.977 | 0.00533  | 2 | 1 | 30.1 | 0 |
| P12163_1_S1,22644 | K.GILQSDPFEVLDQK.G     | 2197.232 | 0.00645  | 3 | 1 | 45.5 | 0 |
| P12163_1_F4,20453 | R.AALVADEIAK.E         | 1608.978 | 0.00734  | 2 | 1 | 59.3 | 0 |
| P12163_2_F1,19895 | R.AALVADEIAK.E         | 1608.978 | 0.00268  | 2 | 1 | 45   | 0 |
| P12163_2_F4,17281 | R.TETSPEDIGGMHAAAC     | 2402.229 | -0.00105 | 3 | 1 | 35.2 | 0 |
| P12163_1_F4,24093 | K.IM*FALTSIK.G         | 1647.996 | 0.00582  | 3 | 1 | 27   | 0 |
| P12163_2_F1,9949  | K.TVGVSK.K             | 1198.762 | 0.00818  | 3 | 1 | 22.9 | 0 |
| P12163_1_F4,22017 | K.YSQVVSNALDMK.L !     | 1963.078 | 0.00821  | 3 | 1 | 53.8 | 0 |
| P12163_2_F2,18214 | R.LANIVCK.K            | 1425.871 | 0.0028   | 3 | 1 | 22.6 | 0 |
| P12163_1_F4,14900 | R.VLNTNVDGK.Q          | 1567.926 | 0.00915  | 2 | 1 | 26.1 | 0 |
| P12163_2_F1,13879 | R.VLNTNVDGK.Q          | 1567.926 | 0.00716  | 2 | 1 | 31.8 | 0 |
| P12163_1_F4,23898 | K.FIQEYLETNK.R         | 1893.058 | 0.0025   | 3 | 1 | 28.9 | 0 |

|                   |                        |          |          |   |   |      |   |
|-------------------|------------------------|----------|----------|---|---|------|---|
| P12163_2_F1,19772 | K.GELELWDK.L           | 1597.905 | 0.00815  | 2 | 1 | 30   | 0 |
| P12163_1_F4,24760 | K.LYDSFVAGLK.Q         | 1721.009 | 0.00222  | 3 | 1 | 22.4 | 0 |
| P12163_1_F3,26099 | R.LLISMLSDTK.F         | 1729.039 | 0.00605  | 3 | 1 | 25.9 | 0 |
| P12163_1_F8,16068 | R.TGVELIPVHCR.S        | 1584.883 | 0.00168  | 3 | 1 | 25.8 | 0 |
| P12163_2_F6,15567 | R.TGVELIPVHCR.S        | 1584.883 | 0.00084  | 3 | 1 | 27.7 | 0 |
| P12163_1_F8,19294 | K.HGVALNFTCVELR.T      | 1819.979 | -0.00144 | 3 | 1 | 36.5 | 0 |
| P12163_1_F8,16392 | K.TASHAAELTAGFYNPS     | 2211.11  | 0.00501  | 3 | 1 | 40.4 | 0 |
| P12163_2_F6,15890 | K.TASHAAELTAGFYNPS     | 2211.11  | 0.00093  | 3 | 1 | 39.8 | 0 |
| P12163_2_F4,16663 | R.HLSAFTYLR.L          | 1411.8   | 0.00415  | 3 | 1 | 33.7 | 0 |
| P12163_1_F7,21011 | R.LSPVLTGDHNFIEFER.I   | 2178.15  | 0.00233  | 3 | 1 | 60   | 0 |
| P12163_1_S10,1692 | R.RLFQIVR.E            | 1235.789 | 0.00349  | 3 | 1 | 33.7 | 0 |
| P12163_1_F4,25001 | K.DEPWWPVLK.T          | 1778.01  | 0.00298  | 2 | 1 | 24.4 | 0 |
| P12163_2_F4,6007  | K.EHPYPR.R             | 1102.595 | 0.00326  | 3 | 1 | 23.2 | 0 |
| P12163_2_S5,6960  | K.EHPYPR.R             | 1102.595 | 0.00197  | 3 | 1 | 23.8 | 0 |
| P12163_1_F3,28998 | K.SLLELVSAELDPK.T      | 2135.278 | 0.0047   | 3 | 1 | 35   | 0 |
| P12163_1_F2,19210 | R.QLTAGLNYPYSIR.L      | 1636.932 | 0.00359  | 2 | 1 | 30.5 | 0 |
| P12163_1_F2,15707 | R.YTM*EINALAR.K ! R.Y  | 1501.799 | 0.00517  | 3 | 1 | 46.6 | 0 |
| P12163_1_F2,18649 | K.EVPASFGFDTACK.I      | 2037.057 | 0.01077  | 3 | 1 | 24.5 | 0 |
| P12163_1_S1,14698 | K.IVDGPASSAAGNPDEL     | 2320.26  | 0.01037  | 3 | 1 | 59.8 | 0 |
| P12163_1_F5,8335  | K.QATETAVK.L           | 1455.863 | 0.00948  | 2 | 1 | 25.7 | 0 |
| P12163_2_F7,8866  | R.DPHGNVQVAK.I         | 1672.959 | 0.00365  | 3 | 1 | 41   | 0 |
| P12163_1_F8,21077 | R.IDHALPLPSVLK.N       | 1911.189 | 0.00615  | 3 | 1 | 40.3 | 0 |
| P12163_2_F1,17645 | K.AMSNYAPVLK.A         | 1701.982 | 0.00397  | 2 | 1 | 29.1 | 0 |
| P12163_2_F10,8791 | K.HENFK.E ! K.HENFK.Q  | 1282.736 | 0.00634  | 3 | 1 | 24.6 | 0 |
| P12163_1_F3,20312 | K.NVEEVSSCNIFVVK.G     | 2232.215 | 0.00616  | 2 | 1 | 50.8 | 0 |
| P12163_2_F1,8959  | R.AAPGGAGGVK.A         | 1392.842 | 0.00744  | 3 | 1 | 35.1 | 0 |
| P12163_1_F9,11868 | R.DYGYQVEER.V          | 1462.712 | 0.00323  | 2 | 1 | 25.9 | 0 |
| P12163_1_F4,19799 | K.SFDEIEFEK.L ! K.SFDE | 1751.931 | 0.00835  | 2 | 1 | 43.3 | 0 |
| P12163_2_F7,11947 | R.HGM*VAAGSLVR.Q       | 1417.789 | 0.00276  | 3 | 1 | 34.4 | 0 |
| P12163_2_F7,17067 | R.LQGNYYFQEQLSR.H      | 1950.002 | -0.00538 | 2 | 1 | 25   | 0 |
| P12163_2_F6,16385 | R.RDEEYDSMLGVVR.E      | 1872.943 | 0.00093  | 2 | 1 | 48.4 | 0 |
| P12163_2_F1,23293 | R.TLMNIFDK.A           | 1589.918 | 0.00342  | 2 | 1 | 34.5 | 0 |
| P12163_2_S5,9239  | K.ALQYHSER.L           | 1307.701 | 0.00191  | 3 | 1 | 29.9 | 0 |
| P12163_1_F7,21257 | K.VLGSAGHLIEAEFVE      | 2160.16  | -0.00332 | 3 | 1 | 25.3 | 0 |
| P12163_1_F2,22578 | R.AEELLDLDPSK.A        | 1895.058 | 0.00451  | 3 | 1 | 33.4 | 0 |
| P12163_1_S1,24025 | R.LAIAYGLISTPPR.M      | 1676.005 | 0.00444  | 3 | 1 | 31   | 0 |
| P12163_2_F6,15911 | R.YVLHDIDEEAK.E        | 1940.058 | 0.00469  | 3 | 1 | 26.8 | 0 |
| P12163_1_F9,11260 | K.AHNAVVLK.A           | 1459.92  | 0.00496  | 3 | 1 | 26.6 | 0 |
| P12163_1_F2,16935 | K.SQIVQDELVR.L         | 1490.848 | 0.00045  | 2 | 1 | 27.5 | 0 |
| P12163_1_F3,10846 | K.SQQVSASALR.H         | 1350.764 | 0.00281  | 2 | 1 | 28   | 0 |
| P12163_1_F8,17197 | R.AFVPPQH FIR.L        | 1515.874 | 0.0035   | 3 | 1 | 27.1 | 0 |
| P12163_1_F3,23790 | R.SSTFLNVVALGNVGAC     | 2242.302 | 0.00747  | 3 | 1 | 57.6 | 0 |
| P12163_1_F4,10530 | K.GGSSYCNLDR.L         | 1432.679 | 0.00335  | 2 | 1 | 29.4 | 0 |
| P12163_2_F4,6244  | R.HSSDAFSR.Y           | 1210.612 | 0.00223  | 3 | 1 | 25.1 | 0 |
| P12163_2_F2,18938 | R.SCMAWLDK.Q           | 1618.854 | 0.0052   | 2 | 1 | 43   | 0 |
| P12163_2_S5,20794 | R.VNDPMDPHLLL FAR.E    | 1942.052 | 0.00057  | 3 | 1 | 29.9 | 0 |
| P12163_1_F4,24510 | R.YMQIPGFQFK.T         | 1867.04  | 0.00217  | 2 | 1 | 24.4 | 0 |
| P12163_1_F9,12566 | K.ELNLTHK.F            | 1462.884 | 0.00717  | 3 | 1 | 23.5 | 0 |
| P12163_1_F3,16046 | K.IVNQDPPALSEK.S       | 1919.106 | 0.00329  | 2 | 1 | 24.1 | 0 |
| P12163_2_S5,16257 | K.RIDELSTFSDTPAPSVT    | 2296.209 | -0.00264 | 3 | 1 | 33.3 | 0 |
| P12163_1_F4,23095 | K.SIIAEVEASK.E         | 1726.021 | 0.00918  | 3 | 1 | 28.9 | 0 |

|                                      |          |          |   |   |      |   |
|--------------------------------------|----------|----------|---|---|------|---|
| P12163_1_S1,17963 R.VLYTENDVLAR.S    | 1596.89  | 0.00509  | 2 | 1 | 28.7 | 0 |
| P12163_2_F2,20554 K.ALFLAKP.-        | 1367.887 | 0.00496  | 3 | 1 | 31.8 | 0 |
| P12163_2_F6,10918 K.GGNDHEIFESER.T   | 1693.808 | 0.00696  | 2 | 1 | 36.4 | 0 |
| P12163_2_F1,16702 K.LIGTQSLK.S       | 1467.935 | 0.00623  | 3 | 1 | 22.4 | 0 |
| P12163_1_F7,21685 K.TVIDEYDYVFSENGLV | 2807.471 | 0.00488  | 3 | 1 | 40   | 0 |
| P12163_1_S1,16490 K.VVTVGVVGGSDLSK.I | 1925.153 | 0.00572  | 3 | 1 | 56.9 | 0 |
| P12163_1_F5,10128 K.ANSLAQLGK.Y      | 1509.921 | 0.00617  | 2 | 1 | 26.4 | 0 |
| P12163_1_F5,14601 K.ANSLAQLGK.Y      | 1509.921 | 0.00911  | 2 | 1 | 29.6 | 0 |
| P12163_1_F5,14620 K.ANSLAQLGK.Y      | 1509.921 | 0.00878  | 3 | 1 | 34   | 0 |
| P12163_1_F5,14827 K.ANSLAQLGK.Y      | 1509.921 | 0.00581  | 2 | 1 | 52.5 | 0 |
| P12163_1_F5,14836 K.ANSLAQLGK.Y      | 1509.921 | 0.00065  | 3 | 1 | 42.1 | 0 |
| P12163_1_F5,16085 K.ANSLAQLGK.Y      | 1509.921 | 0.00254  | 3 | 1 | 31.8 | 0 |
| P12163_1_F5,16231 K.ANSLAQLGK.Y      | 1509.921 | 0.00829  | 2 | 1 | 42.2 | 0 |
| P12163_1_F5,16337 K.ANSLAQLGK.Y      | 1509.921 | 0.00815  | 3 | 1 | 39.1 | 0 |
| P12163_1_F5,16515 K.ANSLAQLGK.Y      | 1509.921 | 0.00799  | 2 | 1 | 37.7 | 0 |
| P12163_1_F5,16586 K.ANSLAQLGK.Y      | 1509.921 | 0.00503  | 3 | 1 | 34   | 0 |
| P12163_1_F5,17147 K.ANSLAQLGK.Y      | 1509.921 | 0.00527  | 2 | 1 | 44.9 | 0 |
| P12163_1_F5,17174 K.ANSLAQLGK.Y      | 1509.921 | 0.00782  | 3 | 1 | 29.4 | 0 |
| P12163_1_F5,17404 K.ANSLAQLGK.Y      | 1509.921 | 0.00713  | 2 | 1 | 25.2 | 0 |
| P12163_1_F5,17423 K.ANSLAQLGK.Y      | 1509.921 | 0.00557  | 3 | 1 | 23.4 | 0 |
| P12163_1_F5,17818 K.ANSLAQLGK.Y      | 1509.921 | 0.00825  | 2 | 1 | 33.3 | 0 |
| P12163_1_F6,251 K.ANSLAQLGK.Y        | 1509.921 | 0.00512  | 3 | 1 | 38.4 | 0 |
| P12163_1_F6,721 K.ANSLAQLGK.Y        | 1509.921 | 0.0056   | 3 | 1 | 30   | 0 |
| P12163_1_F6,3763 K.ANSLAQLGK.Y       | 1509.921 | 0.00755  | 3 | 1 | 27.8 | 0 |
| P12163_1_F6,15434 K.ANSLAQLGK.Y      | 1509.921 | 0.00923  | 3 | 1 | 34.3 | 0 |
| P12163_1_F7,14644 K.ANSLAQLGK.Y      | 1509.921 | 0.00713  | 3 | 1 | 36.1 | 0 |
| P12163_1_F7,14692 K.ANSLAQLGK.Y      | 1509.921 | 0.00693  | 2 | 1 | 41.3 | 0 |
| P12163_1_F8,10581 K.ANSLAQLGK.Y      | 1509.921 | 0.00227  | 3 | 1 | 22.1 | 0 |
| P12163_1_F8,14574 K.ANSLAQLGK.Y      | 1509.921 | 0.00194  | 3 | 1 | 31.4 | 0 |
| P12163_1_F8,14588 K.ANSLAQLGK.Y      | 1509.921 | 0.00391  | 2 | 1 | 36.9 | 0 |
| P12163_1_F8,14821 K.ANSLAQLGK.Y      | 1509.921 | 0.00185  | 3 | 1 | 47.1 | 0 |
| P12163_1_F8,14843 K.ANSLAQLGK.Y      | 1509.921 | 0.00145  | 2 | 1 | 49.6 | 0 |
| P12163_1_F8,15386 K.ANSLAQLGK.Y      | 1509.921 | 0.00693  | 2 | 1 | 49.3 | 0 |
| P12163_1_S10,1500 K.ANSLAQLGK.Y      | 1509.921 | 0.00203  | 3 | 1 | 22.3 | 0 |
| P12163_2_F1,14779 K.ANSLAQLGK.Y      | 1509.921 | 0.00717  | 2 | 1 | 40.8 | 0 |
| P12163_2_F1,14793 K.ANSLAQLGK.Y      | 1509.921 | 0.00482  | 3 | 1 | 34.1 | 0 |
| P12163_2_F1,14985 K.ANSLAQLGK.Y      | 1509.921 | 0.00343  | 2 | 1 | 36.9 | 0 |
| P12163_2_F10,1409 K.ANSLAQLGK.Y      | 1509.921 | -0.00046 | 3 | 1 | 33.7 | 0 |
| P12163_2_F10,1410 K.ANSLAQLGK.Y      | 1509.921 | 0.00445  | 2 | 1 | 38.6 | 0 |
| P12163_2_F2,591 K.ANSLAQLGK.Y        | 1509.921 | 0.00119  | 2 | 1 | 27.4 | 0 |
| P12163_2_F2,773 K.ANSLAQLGK.Y        | 1509.921 | 0.00347  | 3 | 1 | 22.7 | 0 |
| P12163_2_F2,1183 K.ANSLAQLGK.Y       | 1509.921 | 0.00326  | 3 | 1 | 28.5 | 0 |
| P12163_2_F2,2479 K.ANSLAQLGK.Y       | 1509.921 | 0.00326  | 3 | 1 | 23.1 | 0 |
| P12163_2_F2,11028 K.ANSLAQLGK.Y      | 1509.921 | 0.00455  | 3 | 1 | 22.1 | 0 |
| P12163_2_F2,11029 K.ANSLAQLGK.Y      | 1509.921 | 0.00459  | 2 | 1 | 30.4 | 0 |
| P12163_2_F2,15404 K.ANSLAQLGK.Y      | 1509.921 | 0.00989  | 2 | 1 | 52.9 | 0 |
| P12163_2_F2,15416 K.ANSLAQLGK.Y      | 1509.921 | 0.01001  | 3 | 1 | 37.2 | 0 |
| P12163_2_F2,15619 K.ANSLAQLGK.Y      | 1509.921 | 0.00561  | 2 | 1 | 52.3 | 0 |
| P12163_2_F2,15661 K.ANSLAQLGK.Y      | 1509.921 | 0.00131  | 3 | 1 | 43.9 | 0 |
| P12163_2_F2,15844 K.ANSLAQLGK.Y      | 1509.921 | 0.00645  | 2 | 1 | 53.7 | 0 |
| P12163_2_F2,15903 K.ANSLAQLGK.Y      | 1509.921 | 0.00299  | 3 | 1 | 41.4 | 0 |

|                   |                    |          |          |   |   |      |   |
|-------------------|--------------------|----------|----------|---|---|------|---|
| P12163_2_F2,16123 | K.ANSLAQLGK.Y      | 1509.921 | 0.00645  | 2 | 1 | 27.7 | 0 |
| P12163_2_F2,16175 | K.ANSLAQLGK.Y      | 1509.921 | 0.01106  | 3 | 1 | 33.4 | 0 |
| P12163_2_F4,94    | K.ANSLAQLGK.Y      | 1509.921 | 0.00437  | 3 | 1 | 28.3 | 0 |
| P12163_2_F4,253   | K.ANSLAQLGK.Y      | 1509.921 | 0.00542  | 3 | 1 | 42.2 | 0 |
| P12163_2_F4,274   | K.ANSLAQLGK.Y      | 1509.921 | 0.00489  | 2 | 1 | 40.2 | 0 |
| P12163_2_F4,432   | K.ANSLAQLGK.Y      | 1509.921 | 0.0041   | 3 | 1 | 38.9 | 0 |
| P12163_2_F4,14347 | K.ANSLAQLGK.Y      | 1509.921 | 0.00521  | 3 | 1 | 37.6 | 0 |
| P12163_2_F4,14389 | K.ANSLAQLGK.Y      | 1509.921 | 0.00381  | 2 | 1 | 40   | 0 |
| P12163_2_S5,13556 | K.ANSLAQLGK.Y      | 1509.921 | 0.00152  | 3 | 1 | 30.1 | 0 |
| P12163_2_S5,13734 | K.ANSLAQLGK.Y      | 1509.921 | 0.00175  | 2 | 1 | 30.1 | 0 |
| P12163_2_S5,13814 | K.ANSLAQLGK.Y      | 1509.921 | 0.002    | 3 | 1 | 47.8 | 0 |
| P12163_2_S5,14344 | K.ANSLAQLGK.Y      | 1509.921 | 0.01082  | 3 | 1 | 22.4 | 0 |
| P12163_2_S5,14353 | K.ANSLAQLGK.Y      | 1509.921 | 0.00763  | 2 | 1 | 33.9 | 0 |
| P12163_2_F2,13755 | R.ALQNTCLK.T       | 1555.909 | 0.00252  | 2 | 1 | 28.9 | 0 |
| P12163_1_F4,16685 | R.EAAWGLAR.Y       | 1177.663 | 0.00413  | 2 | 1 | 26.5 | 0 |
| P12163_2_F1,15419 | R.EAAWGLAR.Y       | 1177.663 | 0.00229  | 2 | 1 | 26.1 | 0 |
| P12163_2_F1,15656 | R.EAAWGLAR.Y       | 1177.663 | 0.00227  | 2 | 1 | 28.4 | 0 |
| P12163_1_S1,17982 | R.LASIGLENTEANR.Q  | 1691.923 | 0.00219  | 2 | 1 | 38   | 0 |
| P12163_1_S1,18039 | R.LASIGLENTEANR.Q  | 1691.923 | 0.00593  | 3 | 1 | 37.8 | 0 |
| P12163_1_F8,13303 | K.ECPNAECGAGTFM*AI | 2504.069 | 0.00252  | 3 | 1 | 43.4 | 0 |
| P12163_2_S5,13015 | K.ECPNAECGAGTFM*AI | 2504.069 | 0.00306  | 3 | 1 | 30.4 | 0 |
| P12163_1_F2,8461  | K.EGIPPDQQR.L      | 1343.722 | 0.00348  | 2 | 1 | 24.7 | 0 |
| P12163_1_F2,8819  | K.EGIPPDQQR.L      | 1343.722 | 0.00186  | 2 | 1 | 31.4 | 0 |
| P12163_1_F2,9402  | K.EGIPPDQQR.L      | 1343.722 | 0.00464  | 2 | 1 | 24.9 | 0 |
| P12163_1_S1,8571  | K.EGIPPDQQR.L      | 1343.722 | 0.00366  | 2 | 1 | 24.2 | 0 |
| P12163_1_S1,8795  | K.EGIPPDQQR.L      | 1343.722 | 0.00362  | 2 | 1 | 28   | 0 |
| P12163_1_S1,9673  | K.EGIPPDQQR.L      | 1343.722 | 0.00446  | 2 | 1 | 27.2 | 0 |
| P12163_1_F6,17512 | K.ESTLHLVLR.L      | 1371.826 | 0.00506  | 3 | 1 | 32   | 0 |
| P12163_1_F6,17616 | K.ESTLHLVLR.L      | 1371.826 | 0.0033   | 2 | 1 | 38.6 | 0 |
| P12163_1_F8,17242 | K.ESTLHLVLR.L      | 1371.826 | 0.00389  | 3 | 1 | 45.5 | 0 |
| P12163_1_F8,17254 | K.ESTLHLVLR.L      | 1371.826 | 0.00334  | 2 | 1 | 32.5 | 0 |
| P12163_2_F6,16554 | K.ESTLHLVLR.L      | 1371.826 | 0.002    | 3 | 1 | 45.1 | 0 |
| P12163_2_F6,16567 | K.ESTLHLVLR.L      | 1371.826 | 0.00352  | 2 | 1 | 33.2 | 0 |
| P12163_2_F6,17041 | K.ESTLHLVLR.L      | 1371.826 | -0.00094 | 3 | 1 | 39.1 | 0 |
| P12163_2_F6,20405 | K.ESTLHLVLR.L      | 1371.826 | 0.00074  | 3 | 1 | 35.7 | 0 |
| P12163_2_F6,20850 | K.ESTLHLVLR.L      | 1371.826 | 0.00263  | 3 | 1 | 25.3 | 0 |
| P12163_2_F7,15271 | K.ESTLHLVLR.L      | 1371.826 | 0.00359  | 3 | 1 | 42.5 | 0 |
| P12163_1_F4,13534 | R.TLADYNIQK.E      | 1673.968 | 0.00907  | 2 | 1 | 24.4 | 0 |
| P12163_1_F4,16519 | R.TLADYNIQK.E      | 1673.968 | 0.00656  | 3 | 1 | 28.7 | 0 |
| P12163_1_F4,16540 | R.TLADYNIQK.E      | 1673.968 | 0.00571  | 2 | 1 | 34.4 | 0 |
| P12163_1_F5,15308 | R.TLADYNIQK.E      | 1673.968 | 0.00763  | 2 | 1 | 35.6 | 0 |
| P12163_1_F9,15481 | R.TLADYNIQK.E      | 1673.968 | 0.00107  | 2 | 1 | 35.9 | 0 |
| P12163_1_F9,15483 | R.TLADYNIQK.E      | 1673.968 | 0.01085  | 3 | 1 | 27.1 | 0 |
| P12163_2_F1,15639 | R.TLADYNIQK.E      | 1673.968 | 0.00397  | 2 | 1 | 34.1 | 0 |
| P12163_2_F9,14704 | R.TLADYNIQK.E      | 1673.968 | 0.00662  | 3 | 1 | 28.2 | 0 |
| P12163_1_F2,17000 | K.IIIAGGNFGCGSSR.E | 1712.906 | 0.00418  | 3 | 1 | 51.6 | 0 |
| P12163_1_F2,18604 | K.IIIAGGNFGCGSSR.E | 1712.906 | 0.00364  | 3 | 1 | 46.2 | 0 |
| P12163_1_S1,17658 | K.IIIAGGNFGCGSSR.E | 1712.906 | 0.00415  | 3 | 1 | 61.7 | 0 |
| P12163_1_S1,17661 | K.IIIAGGNFGCGSSR.E | 1712.906 | 0.00387  | 2 | 1 | 24.6 | 0 |
| P12163_1_F6,17322 | R.EHAPVALGAAGCSAV  | 2490.271 | 0.00306  | 3 | 1 | 73.8 | 0 |
| P12163_1_F6,17359 | R.EHAPVALGAAGCSAV  | 2490.271 | 0.00551  | 4 | 1 | 39.2 | 0 |

|                   |                        |          |          |   |   |      |   |
|-------------------|------------------------|----------|----------|---|---|------|---|
| P12163_1_F7,16412 | R.EHAPVALGAAGCSAV      | 2490.271 | -0.00081 | 3 | 1 | 85   | 0 |
| P12163_1_F7,16456 | R.EHAPVALGAAGCSAV      | 2490.271 | 0.00299  | 4 | 1 | 83.8 | 0 |
| P12163_1_F8,183   | R.EHAPVALGAAGCSAV      | 2490.271 | 0.00246  | 3 | 1 | 50.2 | 0 |
| P12163_1_F8,17190 | R.EHAPVALGAAGCSAV      | 2490.271 | -0.00318 | 3 | 1 | 50.6 | 0 |
| P12163_1_S10,1662 | R.EHAPVALGAAGCSAV      | 2490.271 | 0.00186  | 3 | 1 | 51.1 | 0 |
| P12163_1_S10,1666 | R.EHAPVALGAAGCSAV      | 2490.271 | 0.00351  | 4 | 1 | 39.6 | 0 |
| P12163_2_F10,1332 | R.EHAPVALGAAGCSAV      | 2490.271 | 0.00587  | 4 | 1 | 25.7 | 0 |
| P12163_2_F10,1557 | R.EHAPVALGAAGCSAV      | 2490.271 | 0.00483  | 3 | 1 | 105  | 0 |
| P12163_2_S5,13149 | R.EHAPVALGAAGCSAV      | 2490.271 | 0.00304  | 4 | 1 | 39.2 | 0 |
| P12163_2_S5,13476 | R.EHAPVALGAAGCSAV      | 2490.271 | -0.00005 | 4 | 1 | 51.5 | 0 |
| P12163_2_S5,16004 | R.EHAPVALGAAGCSAV      | 2490.271 | 0.00132  | 3 | 1 | 91.1 | 0 |
| P12163_2_S5,16011 | R.EHAPVALGAAGCSAV      | 2490.271 | 0.00499  | 4 | 1 | 46.2 | 0 |
| P12163_2_F1,14110 | R.FIDENETK.T           | 1603.879 | 0.00724  | 2 | 1 | 38.8 | 0 |
| P12163_1_F5,9896  | R.LINHTTGK.E           | 1491.91  | 0.00451  | 3 | 1 | 26.9 | 0 |
| P12163_1_F5,9915  | R.LINHTTGK.E           | 1491.91  | 0.01386  | 2 | 1 | 27.7 | 0 |
| P12163_1_F9,10975 | R.LINHTTGK.E           | 1491.91  | 0.00451  | 3 | 1 | 21.9 | 0 |
| P12163_2_S5,10429 | R.LINHTTGK.E           | 1491.91  | 0.00712  | 3 | 1 | 27.9 | 0 |
| P12163_1_F4,21734 | K.AEFPIFDK.V ! K.AEFPI | 1574.904 | 0.00428  | 2 | 1 | 26.4 | 0 |
| P12163_1_F4,21751 | K.AEFPIFDK.V ! K.AEFPI | 1574.904 | -0.00508 | 3 | 1 | 25   | 0 |
| P12163_1_F4,21925 | K.AEFPIFDK.V ! K.AEFPI | 1574.904 | 0.00614  | 2 | 1 | 25.2 | 0 |
| P12163_1_F4,22647 | K.AEFPIFDK.V ! K.AEFPI | 1574.904 | 0.00794  | 2 | 1 | 29.1 | 0 |
| P12163_1_F4,22984 | K.AEFPIFDK.V ! K.AEFPI | 1574.904 | 0.00758  | 3 | 1 | 24.4 | 0 |
| P12163_1_F5,20713 | K.AEFPIFDK.V ! K.AEFPI | 1574.904 | 0.00546  | 2 | 1 | 27.1 | 0 |
| P12163_1_F5,20757 | K.AEFPIFDK.V ! K.AEFPI | 1574.904 | 0.00521  | 3 | 1 | 23.4 | 0 |
| P12163_1_F6,20663 | K.AEFPIFDK.V ! K.AEFPI | 1574.904 | 0.00316  | 2 | 1 | 29.6 | 0 |
| P12163_1_F6,20709 | K.AEFPIFDK.V ! K.AEFPI | 1574.904 | 0.00356  | 3 | 1 | 25.1 | 0 |
| P12163_1_F7,19441 | K.AEFPIFDK.V ! K.AEFPI | 1574.904 | -0.00217 | 3 | 1 | 22.4 | 0 |
| P12163_2_F1,21277 | K.AEFPIFDK.V ! K.AEFPI | 1574.904 | 0.00548  | 2 | 1 | 24.7 | 0 |
| P12163_2_F1,21289 | K.AEFPIFDK.V ! K.AEFPI | 1574.904 | 0.0026   | 3 | 1 | 24.9 | 0 |
| P12163_2_F4,18984 | K.AEFPIFDK.V ! K.AEFPI | 1574.904 | 0.00296  | 2 | 1 | 30.8 | 0 |
| P12163_1_F4,19336 | K.ELNVLYEK.Y           | 1615.951 | 0.00843  | 2 | 1 | 38.9 | 0 |
| P12163_1_F4,20076 | K.SIYDFTVK.D ! K.SLYD  | 1580.914 | 0.00877  | 3 | 1 | 22   | 0 |
| P12163_1_F4,20205 | K.SIYDFTVK.D ! K.SLYD  | 1580.914 | 0.00495  | 2 | 1 | 36.1 | 0 |
| P12163_1_F4,20331 | K.SIYDFTVK.D ! K.SLYD  | 1580.914 | 0.00514  | 3 | 1 | 25.8 | 0 |
| P12163_1_F5,19008 | K.SIYDFTVK.D ! K.SLYD  | 1580.914 | 0.00671  | 2 | 1 | 25.3 | 0 |
| P12163_1_F9,18685 | K.SIYDFTVK.D ! K.SLYD  | 1580.914 | 0.00927  | 2 | 1 | 28.9 | 0 |
| P12163_2_F1,19705 | K.SIYDFTVK.D ! K.SLYD  | 1580.914 | 0.00573  | 2 | 1 | 35.7 | 0 |
| P12163_2_F1,19734 | K.SIYDFTVK.D ! K.SLYD  | 1580.914 | 0.00436  | 3 | 1 | 25.7 | 0 |
| P12163_2_F8_12070 | K.SIYDFTVK.D ! K.SLYD  | 1580.914 | 0.00742  | 3 | 1 | 24.4 | 0 |
| P12163_1_F3,23931 | K.VLLVVNVASK.C         | 1650.077 | 0.00383  | 2 | 1 | 34   | 0 |
| P12163_1_F2,17035 | K.ALEDADLGADISK.K      | 1926.064 | -0.00266 | 3 | 1 | 28.5 | 0 |
| P12163_1_F2,17885 | K.ALEDADLGADISK.K      | 1926.064 | 0.00376  | 3 | 1 | 41.2 | 0 |
| P12163_1_F2,17952 | K.ALEDADLGADISK.K      | 1926.064 | 0.00498  | 2 | 1 | 85.8 | 0 |
| P12163_1_S1,17029 | K.ALEDADLGADISK.K      | 1926.064 | 0.00727  | 3 | 1 | 68.6 | 0 |
| P12163_1_S1,17071 | K.ALEDADLGADISK.K      | 1926.064 | -0.00136 | 2 | 1 | 60.7 | 0 |
| P12163_1_S1,17376 | K.ALEDADLGADISK.K      | 1926.064 | 0.00349  | 3 | 1 | 47.4 | 0 |
| P12163_1_F3,16395 | R.GFSAEGYIDGK.N        | 1751.942 | 0.00235  | 2 | 1 | 42.9 | 0 |
| P12163_1_F4,17721 | R.GFSAEGYIDGK.N        | 1751.942 | 0.00623  | 3 | 1 | 49.3 | 0 |
| P12163_1_F4,17770 | R.GFSAEGYIDGK.N        | 1751.942 | 0.00557  | 2 | 1 | 53   | 0 |
| P12163_1_F7,15650 | R.GFSAEGYIDGK.N        | 1751.942 | -0.00325 | 3 | 1 | 22.6 | 0 |
| P12163_1_F7,15662 | R.GFSAEGYIDGK.N        | 1751.942 | 0.00219  | 2 | 1 | 25.7 | 0 |

|                    |                     |          |          |   |   |      |   |
|--------------------|---------------------|----------|----------|---|---|------|---|
| P12163_1_F9,16643  | R.GFSAEGYIDGK.N     | 1751.942 | 0.00956  | 3 | 1 | 25.5 | 0 |
| P12163_1_F9,16675  | R.GFSAEGYIDGK.N     | 1751.942 | 0.00747  | 2 | 1 | 50.3 | 0 |
| P12163_1_S10,1662' | R.GFSAEGYIDGK.N     | 1751.942 | 0.00734  | 3 | 1 | 25.9 | 0 |
| P12163_2_F1,16887  | R.GFSAEGYIDGK.N     | 1751.942 | 0.00641  | 3 | 1 | 39.1 | 0 |
| P12163_2_F9,15943  | R.GFSAEGYIDGK.N     | 1751.942 | 0.00572  | 3 | 1 | 32.6 | 0 |
| P12163_2_F8_12070  | R.RLDDCLR.Y         | 1251.678 | 0.00594  | 3 | 1 | 28.7 | 0 |
| P12163_1_F5,14424  | R.YCIVAGK.K         | 1418.829 | 0.00907  | 2 | 1 | 24.5 | 0 |
| P12163_1_F8,14570  | R.YCIVAGK.K         | 1418.829 | -0.00043 | 3 | 1 | 30   | 0 |
| P12163_1_S10,1491' | R.YCIVAGK.K         | 1418.829 | 0.00521  | 3 | 1 | 36.8 | 0 |
| P12163_1_F4,10779  | K.AM*AGTPADVK.E     | 1584.888 | 0.01119  | 3 | 1 | 23.2 | 0 |
| P12163_1_F4,10790  | K.AM*AGTPADVK.E     | 1584.888 | 0.0099   | 2 | 1 | 28.6 | 0 |
| P12163_1_F4,13321  | K.AM*AGTPADVK.E     | 1584.888 | 0.01371  | 3 | 1 | 31.9 | 0 |
| P12163_2_F1,9966   | K.AM*AGTPADVK.E     | 1584.888 | 0.00588  | 3 | 1 | 35.8 | 0 |
| P12163_2_F1,9969   | K.AM*AGTPADVK.E     | 1584.888 | 0.00566  | 2 | 1 | 31.7 | 0 |
| P12163_1_F4,13252  | K.AMAGTPADVK.E      | 1568.893 | 0.00286  | 2 | 1 | 38.3 | 0 |
| P12163_1_F4,13276  | K.AMAGTPADVK.E      | 1568.893 | 0.00804  | 3 | 1 | 27.7 | 0 |
| P12163_1_F5,11845  | K.AMAGTPADVK.E      | 1568.893 | 0.00184  | 2 | 1 | 55.2 | 0 |
| P12163_2_F1,9843   | K.AMAGTPADVK.E      | 1568.893 | 0.00558  | 3 | 1 | 36.2 | 0 |
| P12163_2_F1,12289  | K.AMAGTPADVK.E      | 1568.893 | 0.00762  | 2 | 1 | 39.6 | 0 |
| P12163_2_F1,12294  | K.AMAGTPADVK.E      | 1568.893 | 0.00192  | 3 | 1 | 26.4 | 0 |
| P12163_2_F1,12554  | K.AMAGTPADVK.E      | 1568.893 | 0.0035   | 2 | 1 | 44   | 0 |
| P12163_2_F4,11248  | K.AMAGTPADVK.E      | 1568.893 | -0.00438 | 3 | 1 | 29.5 | 0 |
| P12163_2_F1,12587  | K.LPPPEPK.K         | 1385.861 | 0.0053   | 3 | 1 | 27.5 | 0 |
| P12163_1_F4,8306   | K.SFNAPTR.T         | 1096.605 | 0.00144  | 3 | 1 | 38.2 | 0 |
| P12163_1_F4,10227  | K.SFNAPTR.T         | 1096.605 | 0.00309  | 3 | 1 | 23.5 | 0 |
| P12163_2_F1,7432   | K.SFNAPTR.T         | 1096.605 | 0.00351  | 3 | 1 | 38.1 | 0 |
| P12163_1_F3,20454  | K.VQVEDDNVLLISGER.I | 1990.076 | 0.00068  | 2 | 1 | 63.8 | 0 |
| P12163_1_F4,20550  | K.VQVEDDNVLLISGER.I | 1990.076 | -0.00228 | 2 | 1 | 25.4 | 0 |
| P12163_1_F4,19474  | K.EIDYM*LK.K        | 1535.86  | 0.00529  | 2 | 1 | 26.5 | 0 |
| P12163_2_F1,15548  | K.EIDYM*LK.K        | 1535.86  | 0.00659  | 2 | 1 | 25.8 | 0 |
| P12163_1_F9,18175  | K.EIDYMLK.K         | 1519.865 | 0.00935  | 2 | 1 | 25.4 | 0 |
| P12163_2_S5,16995  | K.EIDYMLK.K         | 1519.865 | 0.00033  | 2 | 1 | 26.2 | 0 |
| P12163_1_F2,16497  | K.QGQCM*SFLIQKPTTT' | 2653.379 | 0.00275  | 3 | 1 | 26.6 | 0 |
| P12163_1_F2,17245  | K.QGQCM*SFLIQKPTTT' | 2653.379 | 0.00434  | 3 | 1 | 23.3 | 0 |
| P12163_1_F2,17515  | K.QGQCM*SFLIQKPTTT' | 2653.379 | 0.00068  | 3 | 1 | 25.5 | 0 |
| P12163_1_F2,18863  | K.QGQCM*SFLIQKPTTT' | 2653.379 | 0.00539  | 3 | 1 | 25.4 | 0 |
| P12163_1_F2,17520  | K.QGQCMSFLIQKPTTTT  | 2637.384 | 0.00596  | 3 | 1 | 25.9 | 0 |
| P12163_1_F3,19459  | K.QGQCMSFLIQKPTTTT  | 2637.384 | 0.00488  | 3 | 1 | 28.8 | 0 |
| P12163_1_F5,15060  | K.TWNPINNK.K        | 1594.916 | 0.00636  | 2 | 1 | 30.3 | 0 |
| P12163_2_F2,15617  | K.TWNPINNK.K        | 1594.916 | 0.00396  | 2 | 1 | 26.7 | 0 |
| P12163_2_F2,15848  | K.TWNPINNK.K        | 1594.916 | 0.0055   | 2 | 1 | 30.3 | 0 |
| P12163_1_F5,13055  | R.CLAFNNQK.Q        | 1602.888 | 0.01094  | 2 | 1 | 32.7 | 0 |
| P12163_1_F5,13297  | R.CLAFNNQK.Q        | 1602.888 | 0.00486  | 2 | 1 | 32.8 | 0 |
| P12163_1_F6,14017  | R.CLAFNNQK.Q        | 1602.888 | 0.00702  | 2 | 1 | 25.2 | 0 |
| P12163_2_F2,13872  | R.CLAFNNQK.Q        | 1602.888 | 0.00646  | 2 | 1 | 34   | 0 |
| P12163_2_F2,13888  | R.CLAFNNQK.Q        | 1602.888 | 0.00512  | 3 | 1 | 37.7 | 0 |
| P12163_1_F4,20650  | K.GM*ALLTAEFDK.I    | 1820.008 | 0.00477  | 3 | 1 | 24.5 | 0 |
| P12163_1_F4,24687  | K.GM*ALLTAEFDK.I    | 1820.008 | 0.00627  | 3 | 1 | 43.4 | 0 |
| P12163_1_F4,24713  | K.GM*ALLTAEFDK.I    | 1820.008 | 0.00608  | 2 | 1 | 33   | 0 |
| P12163_1_F4,24697  | K.GMALLTAEFDK.I     | 1804.013 | 0.00759  | 3 | 1 | 32.4 | 0 |
| P12163_2_F1,24045  | K.GMALLTAEFDK.I     | 1804.013 | 0.00228  | 3 | 1 | 32.3 | 0 |



|                   |                        |          |          |   |   |      |   |
|-------------------|------------------------|----------|----------|---|---|------|---|
| P12163_1_F4,17428 | K.YEEQLELK.I           | 1659.941 | 0.01143  | 2 | 1 | 29.6 | 0 |
| P12163_1_F5,16148 | K.YEEQLELK.I           | 1659.941 | 0.00753  | 2 | 1 | 31.3 | 0 |
| P12163_1_F9,16399 | K.YEEQLELK.I           | 1659.941 | 0.01131  | 2 | 1 | 24   | 0 |
| P12163_2_F1,16543 | K.YEEQLELK.I           | 1659.941 | 0.00397  | 2 | 1 | 36   | 0 |
| P12163_2_F1,16545 | K.YEEQLELK.I           | 1659.941 | 0.00436  | 3 | 1 | 26.8 | 0 |
| P12163_1_F2,8902  | R.TAGIPDAR.T           | 1104.631 | 0.00419  | 2 | 1 | 24.1 | 0 |
| P12163_1_F2,8929  | R.TAGIPDAR.T           | 1104.631 | 0.00308  | 3 | 1 | 26.2 | 0 |
| P12163_1_F4,21620 | R.TYILTLK.L ! R.TYLLTI | 1459.934 | 0.00654  | 2 | 1 | 27.9 | 0 |
| P12163_1_F4,21626 | R.TYILTLK.L ! R.TYLLTI | 1459.934 | 0.0037   | 3 | 1 | 24.7 | 0 |
| P12163_1_F5,20535 | R.TYILTLK.L ! R.TYLLTI | 1459.934 | 0.00774  | 2 | 1 | 24.2 | 0 |
| P12163_1_F5,20555 | R.TYILTLK.L ! R.TYLLTI | 1459.934 | 0.00751  | 3 | 1 | 25.7 | 0 |
| P12163_1_F7,12059 | K.SLCLACGSNTGDGTEF     | 2415.185 | 0.00396  | 3 | 1 | 40.1 | 0 |
| P12163_1_F8,11185 | K.SLCLACGSNTGDGTEF     | 2415.185 | 0.00512  | 4 | 1 | 34.5 | 0 |
| P12163_1_F8,12505 | K.SLCLACGSNTGDGTEF     | 2415.185 | 0.01113  | 3 | 1 | 42.9 | 0 |
| P12163_1_F8,12567 | K.SLCLACGSNTGDGTEF     | 2415.185 | 0.00464  | 4 | 1 | 25.5 | 0 |
| P12163_2_F6,10966 | K.SLCLACGSNTGDGTEF     | 2415.185 | 0.00444  | 3 | 1 | 34.9 | 0 |
| P12163_2_F6,11001 | K.SLCLACGSNTGDGTEF     | 2415.185 | 0.0032   | 4 | 1 | 33.2 | 0 |
| P12163_1_F5,6755  | K.SSPDAPK.L            | 1309.757 | 0.00669  | 2 | 1 | 33.6 | 0 |
| P12163_2_F1,7287  | K.SSPDAPK.L            | 1309.757 | 0.00477  | 2 | 1 | 33.5 | 0 |
| P12163_2_F1,7305  | K.SSPDAPK.L            | 1309.757 | 0.00521  | 3 | 1 | 21.9 | 0 |
| P12163_1_F5,23039 | R.AGGIFLPIVK.S         | 1623.045 | 0.00712  | 2 | 1 | 28.2 | 0 |
| P12163_1_F7,21904 | R.AGGIFLPIVK.S         | 1623.045 | 0.00757  | 3 | 1 | 30.2 | 0 |
| P12163_2_F1,24136 | R.AGGIFLPIVK.S         | 1623.045 | 0.00532  | 3 | 1 | 25.1 | 0 |
| P12163_2_F1,24137 | R.AGGIFLPIVK.S         | 1623.045 | 0.0069   | 2 | 1 | 38.2 | 0 |
| P12163_1_F5,18697 | R.IAYQFVK.L            | 1476.903 | 0.00632  | 2 | 1 | 27.8 | 0 |
| P12163_2_F2,19353 | R.IAYQFVK.L            | 1476.903 | 0.00804  | 2 | 1 | 27.1 | 0 |
| P12163_2_F8_12070 | R.IAYQFVK.L            | 1476.903 | 0.00634  | 2 | 1 | 25.1 | 0 |
| P12163_1_F6,13175 | K.SPEDHGVVSDLK.K       | 1891.038 | 0.00462  | 3 | 1 | 25.4 | 0 |
| P12163_1_F8,13052 | K.SPEDHGVVSDLK.K       | 1891.038 | 0.00638  | 2 | 1 | 42   | 0 |
| P12163_2_F6,12627 | K.SPEDHGVVSDLK.K       | 1891.038 | 0.00729  | 3 | 1 | 28.6 | 0 |
| P12163_2_F6,12688 | K.SPEDHGVVSDLK.K       | 1891.038 | 0.00357  | 2 | 1 | 32.5 | 0 |
| P12163_1_S1,11599 | K.TPEQIEADIR.R         | 1475.801 | 0.00388  | 3 | 1 | 43.5 | 0 |
| P12163_1_S1,11871 | K.TPEQIEADIR.R         | 1475.801 | 0.00328  | 3 | 1 | 44.1 | 0 |
| P12163_1_S1,16099 | K.TPEQIEADIR.R         | 1475.801 | 0.00457  | 2 | 1 | 32   | 0 |
| P12163_1_S1,16118 | K.TPEQIEADIR.R         | 1475.801 | 0.00097  | 3 | 1 | 46.3 | 0 |
| P12163_1_F2,22138 | K.YFSPSEAVEYGIIDK.V    | 2326.243 | 0.00982  | 3 | 1 | 46.7 | 0 |
| P12163_2_F6,21750 | K.YFSPSEAVEYGIIDK.V    | 2326.243 | 0.02527  | 3 | 1 | 26.4 | 0 |
| P12163_2_F7,19672 | K.YFSPSEAVEYGIIDK.V    | 2326.243 | 0.00148  | 2 | 1 | 24.6 | 0 |
| P12163_1_F4,19466 | R.AALPSSTIMIK.Q        | 1740.055 | 0.00623  | 2 | 1 | 40.2 | 0 |
| P12163_1_F6,18238 | R.AALPSSTIMIK.Q        | 1740.055 | -0.00697 | 3 | 1 | 24.7 | 0 |
| P12163_2_F1,18799 | R.AALPSSTIMIK.Q        | 1740.055 | 0.00413  | 3 | 1 | 30.1 | 0 |
| P12163_2_F1,18808 | R.AALPSSTIMIK.Q        | 1740.055 | 0.0076   | 2 | 1 | 39.4 | 0 |
| P12163_2_F4,17006 | R.AALPSSTIMIK.Q        | 1740.055 | -0.00145 | 3 | 1 | 26.1 | 0 |
| P12163_1_F2,12139 | K.TEPVPEDGVAQPK.K      | 1975.096 | 0.00383  | 2 | 1 | 44.6 | 0 |
| P12163_1_F2,12210 | K.TEPVPEDGVAQPK.K      | 1975.096 | 0.00573  | 3 | 1 | 43.5 | 0 |
| P12163_1_S1,11548 | K.TEPVPEDGVAQPK.K      | 1975.096 | 0.00573  | 3 | 1 | 43.1 | 0 |
| P12163_2_S5,13882 | K.TTLYTADNDSKPYVFI     | 3073.646 | 0.0252   | 4 | 1 | 27.2 | 0 |
| P12163_1_F4,12252 | R.GTNMTSSEIK.T         | 1675.914 | 0.00693  | 2 | 1 | 32.3 | 0 |
| P12163_1_F5,10813 | R.GTNMTSSEIK.T         | 1675.914 | 0.00769  | 2 | 1 | 33.9 | 0 |
| P12163_2_F1,11329 | R.GTNMTSSEIK.T         | 1675.914 | 0.00637  | 2 | 1 | 27.7 | 0 |
| P12163_2_F1,11336 | R.GTNMTSSEIK.T         | 1675.914 | 0.00729  | 3 | 1 | 36   | 0 |

|                   |                       |          |          |   |   |      |   |
|-------------------|-----------------------|----------|----------|---|---|------|---|
| P12163_2_F2,11663 | R.GTNMTSSEIK.T        | 1675.914 | 0.00403  | 2 | 1 | 34   | 0 |
| P12163_1_F4,15458 | R.QNFEAYSLTK.K        | 1809     | 0.00679  | 3 | 1 | 36.8 | 0 |
| P12163_1_F4,17641 | R.QNFEAYSLTK.K        | 1809     | 0.0063   | 2 | 1 | 31.6 | 0 |
| P12163_1_F5,16240 | R.QNFEAYSLTK.K        | 1809     | 0.00588  | 2 | 1 | 42.3 | 0 |
| P12163_1_F9,16495 | R.QNFEAYSLTK.K        | 1809     | 0.00814  | 2 | 1 | 44.9 | 0 |
| P12163_1_F9,16520 | R.QNFEAYSLTK.K        | 1809     | 0.00595  | 3 | 1 | 47.7 | 0 |
| P12163_2_F1,16600 | R.QNFEAYSLTK.K        | 1809     | 0.00302  | 2 | 1 | 41.6 | 0 |
| P12163_2_F9,15671 | R.QNFEAYSLTK.K        | 1809     | 0.00646  | 3 | 1 | 38.5 | 0 |
| P12163_1_F4,17283 | K.LNPYLESGK.V         | 1628.947 | 0.00844  | 2 | 1 | 28.4 | 0 |
| P12163_1_F5,15901 | K.LNPYLESGK.V         | 1628.947 | 0.00618  | 3 | 1 | 26   | 0 |
| P12163_1_F7,15017 | K.LNPYLESGK.V         | 1628.947 | 0.00501  | 3 | 1 | 21.9 | 0 |
| P12163_2_F9,15219 | K.LNPYLESGK.V         | 1628.947 | 0.00744  | 2 | 1 | 36.6 | 0 |
| P12163_2_F9,15229 | K.LNPYLESGK.V         | 1628.947 | 0.009    | 3 | 1 | 29.1 | 0 |
| P12163_1_F3,24225 | K.VVAAALNPIDFK.R      | 1866.131 | 0.00667  | 2 | 1 | 28.1 | 0 |
| P12163_1_F3,24279 | K.VVAAALNPIDFK.R      | 1866.131 | 0.0041   | 3 | 1 | 60.2 | 0 |
| P12163_1_F4,15273 | R.EDQVLIK.V ! K.EDQVI | 1452.888 | 0.0073   | 2 | 1 | 28.3 | 0 |
| P12163_2_F4,13161 | R.EDQVLIK.V ! K.EDQVI | 1452.888 | 0.00294  | 2 | 1 | 26.7 | 0 |
| P12163_1_F3,17276 | R.SLGADLAIDYTK.E ! K  | 1875.068 | 0.00503  | 3 | 1 | 24.7 | 0 |
| P12163_1_F3,17314 | R.SLGADLAIDYTK.E ! K  | 1875.068 | 0.00527  | 2 | 1 | 26.1 | 0 |
| P12163_1_F3,18413 | R.SLGADLAIDYTK.E ! K  | 1875.068 | 0.00401  | 2 | 1 | 54.7 | 0 |
| P12163_1_F3,18424 | R.SLGADLAIDYTK.E ! K  | 1875.068 | 0.00386  | 3 | 1 | 54.1 | 0 |
| P12163_1_F3,19779 | R.SLGADLAIDYTK.E ! K  | 1875.068 | -0.00285 | 2 | 1 | 56.8 | 0 |
| P12163_1_F3,19856 | R.SLGADLAIDYTK.E ! K  | 1875.068 | 0.00836  | 3 | 1 | 52.4 | 0 |
| P12163_1_F4,15853 | K.AVAVLGGTEGVK.G      | 1709.042 | 0.00703  | 3 | 1 | 25.4 | 0 |
| P12163_1_F4,18745 | K.AVAVLGGTEGVK.G      | 1709.042 | 0.0085   | 3 | 1 | 53.9 | 0 |
| P12163_2_F1,14838 | K.AVAVLGGTEGVK.G      | 1709.042 | 0.00589  | 3 | 1 | 23   | 0 |
| P12163_2_F1,17910 | K.AVAVLGGTEGVK.G      | 1709.042 | 0.00937  | 2 | 1 | 38.4 | 0 |
| P12163_2_F1,17953 | K.AVAVLGGTEGVK.G      | 1709.042 | 0.00532  | 3 | 1 | 65.9 | 0 |
| P12163_2_F4,16098 | K.AVAVLGGTEGVK.G      | 1709.042 | -0.00158 | 3 | 1 | 46.9 | 0 |
| P12163_1_F9,5266  | K.EHGPPEDENR.H        | 1483.708 | 0.00257  | 2 | 1 | 28   | 0 |
| P12163_2_F7,5222  | K.EHGPPEDENR.H        | 1483.708 | 0.00307  | 2 | 1 | 30   | 0 |
| P12163_2_F9,6310  | K.EHGPPEDENR.H        | 1483.708 | 0.00344  | 3 | 1 | 32.1 | 0 |
| P12163_1_S10,9055 | K.GGHELK.T            | 1335.784 | 0.00625  | 3 | 1 | 23.2 | 0 |
| P12163_1_F8,14742 | R.AVVVHADPDDLK.G      | 1944.101 | 0.0068   | 3 | 1 | 31   | 0 |
| P12163_1_F8,14762 | R.AVVVHADPDDLK.G      | 1944.101 | 0.00586  | 2 | 1 | 79.5 | 0 |
| P12163_2_S5,13434 | R.AVVVHADPDDLK.G      | 1944.101 | 0.00854  | 3 | 1 | 32.6 | 0 |
| P12163_2_S5,13438 | R.AVVVHADPDDLK.G      | 1944.101 | 0.00551  | 4 | 1 | 23.5 | 0 |
| P12163_2_S5,13515 | R.AVVVHADPDDLK.G      | 1944.101 | 0.00524  | 2 | 1 | 75.9 | 0 |
| P12163_1_F6,11513 | K.VSANHVLGSGNCK.L     | 1951.064 | 0.0096   | 3 | 1 | 28.3 | 0 |
| P12163_1_F6,11529 | K.VSANHVLGSGNCK.L     | 1951.064 | 0.00137  | 2 | 1 | 26.1 | 0 |
| P12163_2_F4,10556 | K.VSANHVLGSGNCK.L     | 1951.064 | 0.00453  | 3 | 1 | 32   | 0 |
| P12163_2_S3,10296 | K.VSANHVLGSGNCK.L     | 1951.064 | 0.00897  | 3 | 1 | 31.3 | 0 |
| P12163_2_S5,10792 | K.VSANHVLGSGNCK.L     | 1951.064 | 0.00772  | 4 | 1 | 22.8 | 0 |
| P12163_1_F5,7446  | R.ASYQTSSK.A          | 1479.826 | 0.00425  | 2 | 1 | 31.8 | 0 |
| P12163_2_F10,8636 | R.ASYQTSSK.A          | 1479.826 | 0.00359  | 3 | 1 | 26.5 | 0 |
| P12163_2_F2,8305  | R.ASYQTSSK.A          | 1479.826 | 0.00601  | 2 | 1 | 30.8 | 0 |
| P12163_2_F2,8334  | R.ASYQTSSK.A          | 1479.826 | 0.00593  | 3 | 1 | 23.7 | 0 |
| P12163_2_F8_1207C | R.ASYQTSSK.A          | 1479.826 | 0.00479  | 2 | 1 | 26.2 | 0 |
| P12163_1_F3,15270 | R.GVAAATVAFNAGDVK     | 1999.143 | 0.0055   | 3 | 1 | 36.8 | 0 |
| P12163_1_F3,15296 | R.GVAAATVAFNAGDVK     | 1999.143 | 0.00595  | 2 | 1 | 35.1 | 0 |
| P12163_1_F3,18923 | R.GVAAATVAFNAGDVK     | 1999.143 | 0.00556  | 3 | 1 | 44.1 | 0 |

|                   |                        |          |          |   |   |      |   |
|-------------------|------------------------|----------|----------|---|---|------|---|
| P12163_1_F3,18933 | R.GVAAATVAFNAGDVK      | 1999.143 | -0.00593 | 2 | 1 | 62.9 | 0 |
| P12163_1_F2,18807 | R.TILEGTLVFDSANK.V     | 2116.211 | -0.00053 | 3 | 1 | 23.8 | 0 |
| P12163_1_F6,8786  | K.ESPANNPGLHTAR.D      | 1667.877 | 0.00556  | 3 | 1 | 30.4 | 0 |
| P12163_1_F8,6788  | K.ESPANNPGLHTAR.D      | 1667.877 | 0.0022   | 3 | 1 | 31.8 | 0 |
| P12163_1_F8,8546  | K.ESPANNPGLHTAR.D      | 1667.877 | 0.00292  | 3 | 1 | 52.1 | 0 |
| P12163_2_F6,6666  | K.ESPANNPGLHTAR.D      | 1667.877 | 0.00136  | 3 | 1 | 29.5 | 0 |
| P12163_2_F6,6697  | K.ESPANNPGLHTAR.D      | 1667.877 | -0.00366 | 4 | 1 | 32.3 | 0 |
| P12163_2_F7,8023  | K.ESPANNPGLHTAR.D      | 1667.877 | 0.00034  | 3 | 1 | 28.1 | 0 |
| P12163_1_F8,19368 | R.GFGHIGITVDDVYK.A     | 2129.185 | -0.00001 | 4 | 1 | 25.2 | 0 |
| P12163_1_F8,19386 | R.GFGHIGITVDDVYK.A     | 2129.185 | 0.0039   | 3 | 1 | 54.9 | 0 |
| P12163_2_F6,18920 | R.GFGHIGITVDDVYK.A     | 2129.185 | 0.00177  | 3 | 1 | 44.6 | 0 |
| P12163_1_F4,18814 | R.LGVEFAK.K            | 1371.846 | 0.00555  | 2 | 1 | 27.6 | 0 |
| P12163_2_F1,18101 | R.LGVEFAK.K            | 1371.846 | 0.00603  | 2 | 1 | 28   | 0 |
| P12163_1_F4,24052 | R.VLGM*SLLK.R          | 1484.933 | 0.00758  | 3 | 1 | 26.9 | 0 |
| P12163_2_F1,23501 | R.VLGM*SLLK.R          | 1484.933 | 0.00698  | 3 | 1 | 29.6 | 0 |
| P12163_2_F1,23458 | R.VLGM*SLLK.R          | 1468.938 | 0.00433  | 2 | 1 | 29   | 0 |
| P12163_2_F1,23541 | R.VLGM*SLLK.R          | 1468.938 | 0.00362  | 3 | 1 | 28.3 | 0 |
| P12163_1_F7,17682 | K.ALCADHNVSLLTVPSA     | 2404.348 | 0.00149  | 3 | 1 | 49.8 | 0 |
| P12163_1_F8,18576 | K.ALCADHNVSLLTVPSA     | 2404.348 | 0.00503  | 4 | 1 | 24.5 | 0 |
| P12163_2_S5,16837 | K.ALCADHNVSLLTVPSA     | 2404.348 | 0.00267  | 4 | 1 | 29.6 | 0 |
| P12163_2_S5,16887 | K.ALCADHNVSLLTVPSA     | 2404.348 | 0.00074  | 3 | 1 | 54   | 0 |
| P12163_1_F8,18013 | K.DFGEESDGLNVVQQH      | 2523.33  | 0.00279  | 4 | 1 | 30.3 | 0 |
| P12163_1_F8,18058 | K.DFGEESDGLNVVQQH      | 2523.33  | 0.00412  | 3 | 1 | 90.8 | 0 |
| P12163_2_F6,17579 | K.DFGEESDGLNVVQQH      | 2523.33  | -0.00072 | 3 | 1 | 29.2 | 0 |
| P12163_2_S5,16758 | K.DFGEESDGLNVVQQH      | 2523.33  | 0.01026  | 3 | 1 | 37.1 | 0 |
| P12163_2_S5,16789 | K.DFGEESDGLNVVQQH      | 2523.33  | 0.00139  | 4 | 1 | 49.7 | 0 |
| P12163_1_F8,16665 | K.HAAQLCVLAEDCNQP      | 2839.433 | 0.00272  | 3 | 1 | 33.3 | 0 |
| P12163_1_F8,16725 | K.HAAQLCVLAEDCNQP      | 2839.433 | 0.00774  | 4 | 1 | 27.6 | 0 |
| P12163_2_F6,16196 | K.HAAQLCVLAEDCNQP      | 2839.433 | 0.00428  | 3 | 1 | 48.7 | 0 |
| P12163_2_F6,16242 | K.HAAQLCVLAEDCNQP      | 2839.433 | 0.00474  | 4 | 1 | 41.6 | 0 |
| P12163_2_F1,20220 | K.TLGEWAGLCK.I         | 1742.972 | 0.00354  | 2 | 1 | 32   | 0 |
| P12163_2_F1,20254 | K.TLGEWAGLCK.I         | 1742.972 | 0.00938  | 3 | 1 | 28.3 | 0 |
| P12163_1_F5,15423 | K.LGLQNYTK.N           | 1544.926 | 0.00827  | 2 | 1 | 28.1 | 0 |
| P12163_1_F9,15783 | K.LGLQNYTK.N           | 1544.926 | 0.00769  | 2 | 1 | 27.3 | 0 |
| P12163_2_F2,16231 | K.LGLQNYTK.N           | 1544.926 | 0.00147  | 3 | 1 | 23.6 | 0 |
| P12163_2_F2,16264 | K.LGLQNYTK.N           | 1544.926 | 0.00621  | 2 | 1 | 34   | 0 |
| P12163_1_F3,23214 | K.VMSLVQLPQK.A         | 1751.071 | -0.00106 | 2 | 1 | 47.4 | 0 |
| P12163_1_F3,23264 | K.VMSLVQLPQK.A         | 1751.071 | 0.00462  | 3 | 1 | 44.7 | 0 |
| P12163_1_F8,21326 | R.LLILDHIQR.D ! R.LLIL | 1424.889 | 0.00117  | 3 | 1 | 66.4 | 0 |
| P12163_1_F8,21415 | R.LLILDHIQR.D ! R.LLIL | 1424.889 | 0.00275  | 2 | 1 | 28.9 | 0 |
| P12163_1_F8,21553 | R.LLILDHIQR.D ! R.LLIL | 1424.889 | 0.00195  | 3 | 1 | 36.6 | 0 |
| P12163_1_F9,20719 | R.LLILDHIQR.D ! R.LLIL | 1424.889 | 0.0042   | 3 | 1 | 35.2 | 0 |
| P12163_1_S10,1915 | R.LLILDHIQR.D ! R.LLIL | 1424.889 | 0.0024   | 3 | 1 | 30.9 | 0 |
| P12163_2_F6,21079 | R.LLILDHIQR.D ! R.LLIL | 1424.889 | 0.0021   | 3 | 1 | 59.4 | 0 |
| P12163_2_F8_12070 | R.LLILDHIQR.D ! R.LLIL | 1424.889 | -0.00084 | 3 | 1 | 25.9 | 0 |
| P12163_2_F8_12070 | R.LLILDHIQR.D ! R.LLIL | 1424.889 | 0.00264  | 3 | 1 | 29.4 | 0 |
| P12163_1_F3,23346 | R.NFAVITGVNAGISCVM     | 2389.319 | 0.00234  | 3 | 1 | 54.5 | 0 |
| P12163_2_F6,19252 | K.IFLHM*EEVR.R         | 1493.809 | 0.00224  | 3 | 1 | 42.3 | 0 |
| P12163_2_F7,17305 | K.IFLHM*EEVR.R         | 1493.809 | -0.00304 | 3 | 1 | 24.5 | 0 |
| P12163_2_F6,19131 | K.IFLHM*EEVR.R         | 1477.814 | 0.00545  | 3 | 1 | 34.5 | 0 |
| P12163_2_F6,19356 | K.IFLHM*EEVR.R         | 1477.814 | 0.00473  | 3 | 1 | 37.5 | 0 |

|                   |                     |          |          |   |   |      |   |
|-------------------|---------------------|----------|----------|---|---|------|---|
| P12163_2_F7,17308 | K.IFLHMEEVR.R       | 1477.814 | 0.00272  | 3 | 1 | 33.8 | 0 |
| P12163_1_F8,15971 | K.M*ELQEIH DNIR.S   | 1717.884 | 0.00406  | 3 | 1 | 23.4 | 0 |
| P12163_2_F6,15416 | K.M*ELQEIH DNIR.S   | 1717.884 | 0.00319  | 3 | 1 | 46.8 | 0 |
| P12163_1_F8,15906 | K.MELQEIH DNIR.S    | 1701.889 | 0.00173  | 3 | 1 | 45   | 0 |
| P12163_1_F8,15961 | K.MELQEIH DNIR.S    | 1701.889 | 0.00633  | 2 | 1 | 32.9 | 0 |
| P12163_2_F6,15369 | K.MELQEIH DNIR.S    | 1701.889 | 0.00347  | 3 | 1 | 52.3 | 0 |
| P12163_1_S1,20884 | K.NAAGFCIIEGPETVQDI | 2675.396 | 0.00809  | 3 | 1 | 53.2 | 0 |
| P12163_1_S1,20970 | K.NAAGFCIIEGPETVQDI | 2675.396 | 0.00683  | 4 | 1 | 58.8 | 0 |
| P12163_1_F2,15268 | K.YCLGTGYLACAR.C    | 1708.845 | -0.00148 | 3 | 1 | 23.4 | 0 |
| P12163_1_F2,17996 | K.YCLGTGYLACAR.C    | 1708.845 | 0.00557  | 2 | 1 | 29.7 | 0 |
| P12163_1_F3,24133 | K.ADFGAVMDV LK.K    | 1774.003 | 0.00452  | 3 | 1 | 43   | 0 |
| P12163_1_F3,24142 | K.ADFGAVMDV LK.K    | 1774.003 | 0.00269  | 2 | 1 | 35.2 | 0 |
| P12163_2_F1,20236 | K.TTWPYGS GVWSK.K   | 1977.069 | 0.00348  | 3 | 1 | 22.7 | 0 |
| P12163_2_F1,20239 | K.TTWPYGS GVWSK.K   | 1977.069 | 0.00435  | 2 | 1 | 44.5 | 0 |
| P12163_1_F6,11211 | K.TVVVSTAHLK.F ! R. | 1720.058 | 0.00657  | 3 | 1 | 22   | 0 |
| P12163_1_F6,14192 | K.TVVVSTAHLK.F ! R. | 1720.058 | 0.0096   | 3 | 1 | 31.3 | 0 |
| P12163_1_F6,14217 | K.TVVVSTAHLK.F ! R. | 1720.058 | 0.00554  | 2 | 1 | 49.4 | 0 |
| P12163_1_F8,14089 | K.TVVVSTAHLK.F ! R. | 1720.058 | 0.00723  | 3 | 1 | 43.7 | 0 |
| P12163_1_F8,14120 | K.TVVVSTAHLK.F ! R. | 1720.058 | 0.0103   | 2 | 1 | 39.7 | 0 |
| P12163_2_F6,13562 | K.TVVVSTAHLK.F ! R. | 1720.058 | 0.00468  | 2 | 1 | 50   | 0 |
| P12163_2_F6,13594 | K.TVVVSTAHLK.F ! R. | 1720.058 | 0.003    | 3 | 1 | 44.3 | 0 |
| P12163_2_S5,13000 | K.TVVVSTAHLK.F ! R. | 1720.058 | 0.00444  | 3 | 1 | 28.9 | 0 |
| P12163_2_F2,10771 | R.STTNNTFSAK.Y      | 1678.922 | 0.00663  | 2 | 1 | 29.9 | 0 |
| P12163_1_F5,16181 | K.HPSWVDIYNR.L      | 1590.833 | -0.00444 | 3 | 1 | 34.9 | 0 |
| P12163_2_F4,15496 | K.HPSWVDIYNR.L      | 1590.833 | 0.00477  | 3 | 1 | 23.9 | 0 |
| P12163_2_S5,15904 | K.HPSWVDIYNR.L      | 1590.833 | 0.00303  | 3 | 1 | 24.6 | 0 |
| P12163_1_S1,15582 | R.EILTM*VYVQR.S     | 1571.877 | -0.00009 | 3 | 1 | 28.2 | 0 |
| P12163_1_S1,17668 | R.EILTM*VYVQR.S     | 1571.877 | -0.0003  | 3 | 1 | 34.8 | 0 |
| P12163_1_S1,20873 | R.EILTMVYVQR.S      | 1555.882 | -0.00048 | 3 | 1 | 43.9 | 0 |
| P12163_1_F7,12807 | R.LAFPHAR.V         | 1115.663 | 0.00127  | 3 | 1 | 30   | 0 |
| P12163_1_F9,13902 | R.LAFPHAR.V         | 1115.663 | 0.00379  | 3 | 1 | 29.1 | 0 |
| P12163_1_S10,1397 | R.LAFPHAR.V         | 1115.663 | 0.00349  | 3 | 1 | 26.6 | 0 |
| P12163_2_F8_1207  | R.LAFPHAR.V         | 1115.663 | -0.00107 | 3 | 1 | 27.7 | 0 |
| P12163_2_F9,12723 | R.LAFPHAR.V         | 1115.663 | 0.00406  | 3 | 1 | 26.4 | 0 |
| P12163_2_F9,12945 | R.LAFPHAR.V         | 1115.663 | 0.00271  | 3 | 1 | 32   | 0 |
| P12163_2_F6,18699 | R.SGKPLWV VSEDMER.I | 2241.216 | 0.00332  | 3 | 1 | 25.4 | 0 |
| P12163_1_F8,19613 | K.DLLGVIGDCGDEYRR.  | 2042.028 | 0.00281  | 3 | 1 | 29.6 | 0 |
| P12163_1_F8,19617 | K.DLLGVIGDCGDEYRR.  | 2042.028 | 0.00329  | 2 | 1 | 31.9 | 0 |
| P12163_1_F6,16527 | K.HGVSIPV VAVR.Y    | 1437.884 | 0.00192  | 3 | 1 | 28.6 | 0 |
| P12163_1_F8,16440 | K.HGVSIPV VAVR.Y    | 1437.884 | 0.00372  | 3 | 1 | 44.4 | 0 |
| P12163_2_F6,15896 | K.HGVSIPV VAVR.Y    | 1437.884 | 0.00273  | 3 | 1 | 56.7 | 0 |
| P12163_2_S5,14737 | K.HGVSIPV VAVR.Y    | 1437.884 | 0.00237  | 3 | 1 | 22.3 | 0 |
| P12163_1_F4,22926 | K.M*AELCQLTG VK.L   | 1874.034 | 0.00412  | 3 | 1 | 42.4 | 0 |
| P12163_1_F4,22875 | K.MAELCQLTG VK.L    | 1858.039 | 0.00898  | 3 | 1 | 46.1 | 0 |
| P12163_1_F4,22883 | K.MAELCQLTG VK.L    | 1858.039 | 0.00559  | 2 | 1 | 48.3 | 0 |
| P12163_2_F1,22350 | K.MAELCQLTG VK.L    | 1858.039 | 0.00649  | 2 | 1 | 28.8 | 0 |
| P12163_1_F8,17050 | R.IDRDDAVDAML.R.Y   | 1693.884 | 0.00558  | 3 | 1 | 41.1 | 0 |
| P12163_1_F8,17078 | R.IDRDDAVDAML.R.Y   | 1693.884 | 0.00478  | 2 | 1 | 45.1 | 0 |
| P12163_1_F4,9477  | K.HATTVENATTANA.-   | 1604.818 | 0.0029   | 2 | 1 | 33.2 | 0 |
| P12163_1_F9,8807  | K.HATTVENATTANA.-   | 1604.818 | 0.00284  | 2 | 1 | 24.5 | 0 |
| P12163_1_S10,9651 | K.HATTVENATTANA.-   | 1604.818 | 0.00434  | 2 | 1 | 26.2 | 0 |

|                   |                     |          |          |   |   |      |   |
|-------------------|---------------------|----------|----------|---|---|------|---|
| P12163_1_F3,26358 | K.LMSPILSELAK.K     | 1810.097 | 0.00387  | 2 | 1 | 37.9 | 0 |
| P12163_1_F3,26361 | K.LMSPILSELAK.K     | 1810.097 | 0.0043   | 3 | 1 | 46.8 | 0 |
| P12163_1_F3,25588 | K.LPAVIFLK.V        | 1509.002 | 0.00501  | 3 | 1 | 35.8 | 0 |
| P12163_2_F1,25571 | K.LPAVIFLK.V        | 1509.002 | 0.00561  | 3 | 1 | 28.8 | 0 |
| P12163_1_F4,16714 | K.VDVDELK.S         | 1425.841 | 0.01205  | 2 | 1 | 28.1 | 0 |
| P12163_1_F5,15198 | K.VDVDELK.S         | 1425.841 | 0.00645  | 2 | 1 | 26.4 | 0 |
| P12163_1_F7,14457 | K.VDVDELK.S         | 1425.841 | 0.00482  | 3 | 1 | 24.3 | 0 |
| P12163_1_F7,14461 | K.VDVDELK.S         | 1425.841 | 0.00203  | 2 | 1 | 32   | 0 |
| P12163_2_F4,14132 | K.VDVDELK.S         | 1425.841 | 0.00116  | 3 | 1 | 22.1 | 0 |
| P12163_1_F3,15615 | K.AVAEALNER.I       | 1276.716 | 0.00374  | 2 | 1 | 35.4 | 0 |
| P12163_1_F3,15871 | K.AVAEALNER.I       | 1276.716 | 0.00351  | 2 | 1 | 34   | 0 |
| P12163_2_F1,14856 | K.AVAEALNER.I       | 1276.716 | 0.00339  | 2 | 1 | 40.1 | 0 |
| P12163_2_F4,13970 | K.AVAEALNER.I       | 1276.716 | 0.00073  | 2 | 1 | 31.7 | 0 |
| P12163_1_S1,18594 | K.QVQEFQEDVLER.A    | 1823.944 | 0.00294  | 3 | 1 | 52.8 | 0 |
| P12163_1_S1,18680 | K.QVQEFQEDVLER.A    | 1823.944 | 0.00396  | 2 | 1 | 70.2 | 0 |
| P12163_1_S1,18693 | K.QVQEFQEDVLER.A    | 1823.944 | 0.003    | 3 | 1 | 49.5 | 0 |
| P12163_2_F2,10120 | R.LQAEQK.Q          | 1452.863 | 0.00484  | 2 | 1 | 25.2 | 0 |
| P12163_1_F3,21946 | R.TVLDAFFLGK.A      | 1719.03  | 0.00404  | 2 | 1 | 29.5 | 0 |
| P12163_1_F3,26377 | R.TVLDAFFLGK.A      | 1719.03  | 0.00586  | 3 | 1 | 44   | 0 |
| P12163_1_F3,26385 | R.TVLDAFFLGK.A      | 1719.03  | 0.00506  | 2 | 1 | 59.9 | 0 |
| P12163_1_F4,27295 | R.TVLDAFFLGK.A      | 1719.03  | 0.00672  | 2 | 1 | 32.1 | 0 |
| P12163_1_F2,6145  | R.DGGYGGDGGSR.Y     | 1301.602 | 0.00239  | 2 | 1 | 49.7 | 0 |
| P12163_1_F3,5031  | R.DGGYGGDGGSR.Y     | 1301.602 | 0.0033   | 3 | 1 | 40.6 | 0 |
| P12163_2_F1,4385  | R.ESGGGGYGGSR.G     | 1344.645 | 0.00626  | 3 | 1 | 34.1 | 0 |
| P12163_2_F1,5573  | R.ESGGGGYGGSR.G     | 1344.645 | 0.00143  | 3 | 1 | 43.5 | 0 |
| P12163_1_F4,5690  | R.GSGGGGGGGYGSR.G   | 1329.645 | 0.00361  | 2 | 1 | 32.1 | 0 |
| P12163_1_F5,4912  | R.GSGGGGGGGYGSR.G   | 1329.645 | 0.00097  | 2 | 1 | 34.4 | 0 |
| P12163_2_F2,5817  | R.GSGGGGGGGYGSR.G   | 1329.645 | 0.00253  | 3 | 1 | 58.6 | 0 |
| P12163_1_F2,7394  | R.NITVNEAQR.G       | 1435.781 | 0.00403  | 3 | 1 | 38.2 | 0 |
| P12163_1_F2,8865  | R.NITVNEAQR.G       | 1435.781 | 0.00079  | 3 | 1 | 34.7 | 0 |
| P12163_1_F2,10328 | R.NITVNEAQR.G       | 1435.781 | 0.00016  | 2 | 1 | 26.8 | 0 |
| P12163_1_F3,9102  | R.NITVNEAQR.G       | 1435.781 | 0.01171  | 3 | 1 | 40.6 | 0 |
| P12163_2_F1,10183 | R.NITVNEAQR.G       | 1435.781 | 0.00346  | 2 | 1 | 28.4 | 0 |
| P12163_1_F5,16074 | K.AVISCFQK.L        | 1560.903 | 0.00743  | 3 | 1 | 24.3 | 0 |
| P12163_1_F5,16100 | K.AVISCFQK.L        | 1560.903 | -0.00392 | 2 | 1 | 33.6 | 0 |
| P12163_2_F2,16910 | K.AVISCFQK.L        | 1560.903 | 0.00986  | 3 | 1 | 33.9 | 0 |
| P12163_1_F6,13167 | K.EIQVHGLSDR.E      | 1457.801 | 0.00076  | 3 | 1 | 33.8 | 0 |
| P12163_1_F6,13244 | K.EIQVHGLSDR.E      | 1457.801 | -0.00101 | 2 | 1 | 26.7 | 0 |
| P12163_1_F8,12996 | K.EIQVHGLSDR.E      | 1457.801 | 0.00154  | 3 | 1 | 31.4 | 0 |
| P12163_2_F6,10797 | K.EIQVHGLSDR.E      | 1457.801 | 0.00031  | 3 | 1 | 28.5 | 0 |
| P12163_2_F6,12525 | K.EIQVHGLSDR.E      | 1457.801 | 0.00157  | 3 | 1 | 35.7 | 0 |
| P12163_2_F6,12548 | K.EIQVHGLSDR.E      | 1457.801 | 0.0032   | 2 | 1 | 43.8 | 0 |
| P12163_1_F8,16924 | K.NLHIPIM*VNSCTGK.M | 2208.209 | 0.00406  | 3 | 1 | 42.3 | 0 |
| P12163_1_F4,24251 | R.ESVLASVFDK.Y      | 1702.984 | 0.00603  | 2 | 1 | 36.7 | 0 |
| P12163_1_F4,24257 | R.ESVLASVFDK.Y      | 1702.984 | 0.00466  | 3 | 1 | 28.4 | 0 |
| P12163_1_S1,11102 | K.ATSEETSSGTDQYVVI  | 2425.219 | 0.01323  | 4 | 1 | 46   | 0 |
| P12163_1_S1,11489 | K.ATSEETSSGTDQYVVI  | 2425.219 | 0.00493  | 3 | 1 | 27.5 | 0 |
| P12163_1_F8,10417 | K.ATSEETSSGTDQYVVI  | 2581.32  | 0.00465  | 4 | 1 | 43.4 | 0 |
| P12163_2_S5,11437 | K.ATSEETSSGTDQYVVI  | 2581.32  | 0.00657  | 4 | 1 | 57.2 | 0 |
| P12163_2_S5,11458 | K.ATSEETSSGTDQYVVI  | 2581.32  | -0.00182 | 3 | 1 | 30.8 | 0 |
| P12163_1_F4,10176 | K.NVNNESAAAAPK.E    | 1893.065 | 0.01186  | 3 | 1 | 34.8 | 0 |

|                   |                     |          |          |   |   |      |   |
|-------------------|---------------------|----------|----------|---|---|------|---|
| P12163_1_F4,12424 | K.NVNNESAAAAPK.E    | 1893.065 | 0.00645  | 2 | 1 | 61.5 | 0 |
| P12163_1_F7,10654 | K.NVNNESAAAAPK.E    | 1893.065 | -0.00266 | 3 | 1 | 32.7 | 0 |
| P12163_2_F1,11482 | K.NVNNESAAAAPK.E    | 1893.065 | 0.00429  | 2 | 1 | 65.1 | 0 |
| P12163_2_F1,11549 | K.NVNNESAAAAPK.E    | 1893.065 | 0.00595  | 3 | 1 | 53   | 0 |
| P12163_1_F2,13541 | R.DGATAAEDVPAVEK.N  | 1981.07  | 0.00387  | 3 | 1 | 33.6 | 0 |
| P12163_2_F8_12070 | K.DLVLHPDYLHTFYEST  | 2410.234 | -0.00174 | 4 | 1 | 40.7 | 0 |
| P12163_2_S5,19240 | K.DLVLHPDYLHTFYEST  | 2410.234 | -0.00254 | 4 | 1 | 40.3 | 0 |
| P12163_2_S5,7033  | R.HVGESDK.A         | 1379.774 | 0.00559  | 3 | 1 | 21.9 | 0 |
| P12163_1_F5,19135 | R.LDYIITNHVHPVAK.Q  | 2228.301 | 0.00378  | 4 | 1 | 42.6 | 0 |
| P12163_1_F5,19181 | R.LDYIITNHVHPVAK.Q  | 2228.301 | 0.00305  | 3 | 1 | 32.6 | 0 |
| P12163_1_S10,1824 | R.LDYIITNHVHPVAK.Q  | 2228.301 | 0.0029   | 4 | 1 | 22.3 | 0 |
| P12163_2_F10,1709 | R.LDYIITNHVHPVAK.Q  | 2228.301 | 0.00482  | 3 | 1 | 37.2 | 0 |
| P12163_2_F4,18014 | R.LDYIITNHVHPVAK.Q  | 2228.301 | 0.00515  | 3 | 1 | 38.2 | 0 |
| P12163_2_S5,17757 | R.LDYIITNHVHPVAK.Q  | 2228.301 | 0.00762  | 4 | 1 | 22.7 | 0 |
| P12163_2_S5,17788 | R.LDYIITNHVHPVAK.Q  | 2228.301 | 0.00695  | 3 | 1 | 25.2 | 0 |
| P12163_1_F2,14205 | R.LFGPQVASR.V       | 1278.747 | 0.00194  | 3 | 1 | 35.9 | 0 |
| P12163_1_F4,20609 | K.FLSLPLK.S         | 1399.877 | -0.00065 | 3 | 1 | 23.7 | 0 |
| P12163_2_S5,17460 | K.FLSLPLK.S         | 1399.877 | 0.00349  | 3 | 1 | 21.9 | 0 |
| P12163_2_F6,15638 | K.LADEVDKEAPLSR.L   | 2051.159 | 0.00141  | 2 | 1 | 42.6 | 0 |
| P12163_1_F4,13395 | R.EACPTAEVYK.H      | 1775.946 | 0.00769  | 2 | 1 | 29.8 | 0 |
| P12163_1_F4,13410 | R.EACPTAEVYK.H      | 1775.946 | 0.00709  | 3 | 1 | 35.5 | 0 |
| P12163_1_F5,12054 | R.EACPTAEVYK.H      | 1775.946 | 0.01197  | 2 | 1 | 33.7 | 0 |
| P12163_2_F1,12434 | R.EACPTAEVYK.H      | 1775.946 | 0.00597  | 2 | 1 | 36.6 | 0 |
| P12163_2_F1,12477 | R.EACPTAEVYK.H      | 1775.946 | 0.00379  | 3 | 1 | 34.5 | 0 |
| P12163_2_F9,12011 | R.EACPTAEVYK.H      | 1775.946 | 0.02023  | 3 | 1 | 22.8 | 0 |
| P12163_1_F8,13881 | R.KQVEVVYDPDER.R    | 2085.144 | 0.0056   | 3 | 1 | 36.7 | 0 |
| P12163_2_F6,13416 | R.KQVEVVYDPDER.R    | 2085.144 | 0.00788  | 3 | 1 | 33.2 | 0 |
| P12163_2_F7,12207 | K.EFNPVAQSHSSTA.-   | 1678.834 | 0.00124  | 2 | 1 | 47.2 | 0 |
| P12163_1_F5,14118 | K.QNSNLQFVK.V       | 1685.979 | 0.00612  | 2 | 1 | 39.2 | 0 |
| P12163_1_F5,14140 | K.QNSNLQFVK.V       | 1685.979 | 0.00419  | 3 | 1 | 27.9 | 0 |
| P12163_2_F2,14869 | K.QNSNLQFVK.V       | 1685.979 | 0.00518  | 2 | 1 | 41.1 | 0 |
| P12163_2_F2,14976 | K.QNSNLQFVK.V       | 1685.979 | 0.00467  | 3 | 1 | 34   | 0 |
| P12163_1_F9,11639 | R.FAVDEHMK.K        | 1567.869 | 0.00886  | 3 | 1 | 28.9 | 0 |
| P12163_1_F9,11658 | R.FAVDEHMK.K        | 1567.869 | 0.00531  | 2 | 1 | 34.1 | 0 |
| P12163_2_F9,11083 | R.FAVDEHMK.K        | 1567.869 | 0.00582  | 3 | 1 | 30.9 | 0 |
| P12163_1_S1,13653 | R.NVEATANNQEIVNLAI  | 2060.104 | 0.00388  | 3 | 1 | 50.9 | 0 |
| P12163_1_S1,15941 | R.NVEATANNQEIVNLAI  | 2060.104 | 0.00307  | 3 | 1 | 71.5 | 0 |
| P12163_1_S1,15950 | R.NVEATANNQEIVNLAI  | 2060.104 | 0.00313  | 2 | 1 | 65.5 | 0 |
| P12163_1_F4,15992 | K.IASATSAIK.S       | 1469.915 | 0.0081   | 2 | 1 | 38.4 | 0 |
| P12163_2_F1,15047 | K.IASATSAIK.S       | 1469.915 | 0.006    | 2 | 1 | 34.6 | 0 |
| P12163_2_F1,15083 | K.IASATSAIK.S       | 1469.915 | 0.00853  | 3 | 1 | 35.5 | 0 |
| P12163_1_F4,14379 | K.TSCAASLAVK.F      | 1615.93  | 0.01079  | 2 | 1 | 30.7 | 0 |
| P12163_1_F5,12980 | K.TSCAASLAVK.F      | 1615.93  | -0.00133 | 3 | 1 | 33.2 | 0 |
| P12163_2_F1,13351 | K.TSCAASLAVK.F      | 1615.93  | 0.00509  | 3 | 1 | 27   | 0 |
| P12163_2_F2,13780 | K.TSCAASLAVK.F      | 1615.93  | 0.00337  | 2 | 1 | 37   | 0 |
| P12163_2_F2,13804 | K.TSCAASLAVK.F      | 1615.93  | 0.00443  | 3 | 1 | 32.8 | 0 |
| P12163_1_F7,16477 | R.IVFDTAPTGHTRL.L   | 1731.97  | 0.00242  | 3 | 1 | 22.4 | 0 |
| P12163_1_F8,17116 | R.IVFDTAPTGHTRL.L   | 1731.97  | 0.00209  | 2 | 1 | 36.6 | 0 |
| P12163_1_S1,19188 | R.LIVNQIIPPSASDCK.F | 2263.294 | 0.00517  | 3 | 1 | 35.9 | 0 |
| P12163_1_F4,14407 | K.IVYDEYNHER.Y      | 1641.817 | 0.01208  | 3 | 1 | 22.4 | 0 |
| P12163_1_F6,13870 | K.IVYDEYNHER.Y      | 1641.817 | 0.00491  | 3 | 1 | 37.8 | 0 |

|                   |                     |          |          |   |   |      |   |
|-------------------|---------------------|----------|----------|---|---|------|---|
| P12163_2_F6,13078 | K.IVYDEYNHER.Y      | 1641.817 | -0.00118 | 3 | 1 | 27.8 | 0 |
| P12163_1_S1,15616 | K.LANSVDLGSLR.D     | 1448.837 | 0.00311  | 3 | 1 | 28.5 | 0 |
| P12163_1_S1,18140 | K.LANSVDLGSLR.D     | 1448.837 | 0.00064  | 2 | 1 | 24.4 | 0 |
| P12163_1_S1,18201 | K.LANSVDLGSLR.D     | 1448.837 | 0.00188  | 3 | 1 | 26.6 | 0 |
| P12163_1_S1,6992  | R.DPQQDAER.V        | 1262.628 | 0.00576  | 2 | 1 | 30.1 | 0 |
| P12163_1_F2,16608 | R.NEESLVPGPATVAA\   | 2289.327 | 0.00782  | 3 | 1 | 25.3 | 0 |
| P12163_1_F2,19846 | R.NEESLVPGPATVAA\   | 2289.327 | 0.005    | 3 | 1 | 27.3 | 0 |
| P12163_1_S1,18320 | R.NEESLVPGPATVAA\   | 2289.327 | 0.00547  | 2 | 1 | 40.7 | 0 |
| P12163_2_S5,12161 | K.DVMEM*HVGAVQAGI   | 1948.952 | 0.00028  | 3 | 1 | 28.3 | 0 |
| P12163_1_F7,14858 | K.DVMEMHVGAVQAGE    | 1932.957 | 0.00493  | 3 | 1 | 33.7 | 0 |
| P12163_1_F8,15575 | K.DVMEMHVGAVQAGE    | 1932.957 | -0.00248 | 2 | 1 | 46.2 | 0 |
| P12163_1_F8,15601 | K.DVMEMHVGAVQAGE    | 1932.957 | 0.00355  | 3 | 1 | 49.1 | 0 |
| P12163_2_S5,14591 | K.DVMEMHVGAVQAGE    | 1932.957 | 0.00754  | 3 | 1 | 41.6 | 0 |
| P12163_2_S5,14638 | K.DVMEMHVGAVQAGE    | 1932.957 | 0.0015   | 2 | 1 | 46.8 | 0 |
| P12163_1_S1,16509 | K.NISVVAGIEAR.G     | 1432.842 | 0.00272  | 3 | 1 | 62.3 | 0 |
| P12163_1_S1,19819 | R.DTIDLFVER.Y       | 1411.773 | 0.00398  | 2 | 1 | 43.7 | 0 |
| P12163_1_F3,14604 | R.IAGISSAIR.V       | 1191.736 | 0.00496  | 3 | 1 | 36.2 | 0 |
| P12163_2_F1,18546 | R.IAGISSAIR.V       | 1191.736 | 0.004    | 2 | 1 | 24.2 | 0 |
| P12163_1_F2,9547  | K.IPIDSNTR.L        | 1219.695 | 0.00758  | 3 | 1 | 29.9 | 0 |
| P12163_1_F2,10792 | K.IPIDSNTR.L        | 1219.695 | -0.0025  | 3 | 1 | 33.9 | 0 |
| P12163_1_F2,13092 | K.IPIDSNTR.L        | 1219.695 | 0.00326  | 2 | 1 | 23.9 | 0 |
| P12163_2_F1,16438 | K.LGYEVVDK.V        | 1530.899 | 0.00287  | 3 | 1 | 26.5 | 0 |
| P12163_1_F8,12674 | R.LQVHGELDTR.V      | 1471.817 | 0.00691  | 2 | 1 | 31.1 | 0 |
| P12163_2_F6,10925 | R.LQVHGELDTR.V      | 1471.817 | 0.00246  | 3 | 1 | 24.8 | 0 |
| P12163_2_F6,12213 | R.LQVHGELDTR.V      | 1471.817 | 0.00057  | 3 | 1 | 37.3 | 0 |
| P12163_2_F6,12246 | R.LQVHGELDTR.V      | 1471.817 | 0.00231  | 2 | 1 | 30.3 | 0 |
| P12163_1_S1,15230 | R.VGAPSYVSAM*IR.H   | 1570.856 | 0.00917  | 3 | 1 | 22.2 | 0 |
| P12163_1_S1,18886 | R.VGAPSYVSAMIR.H    | 1554.862 | -0.00429 | 2 | 1 | 40.1 | 0 |
| P12163_1_F4,15877 | K.FLADGSAK.Y        | 1416.831 | 0.00999  | 2 | 1 | 30.8 | 0 |
| P12163_1_F5,14890 | K.FLADGSAK.Y        | 1416.831 | 0.00691  | 3 | 1 | 30   | 0 |
| P12163_2_F1,14882 | K.FLADGSAK.Y        | 1416.831 | 0.01021  | 2 | 1 | 25.2 | 0 |
| P12163_2_S5,14080 | K.FLADGSAK.Y        | 1416.831 | 0.00382  | 3 | 1 | 33.2 | 0 |
| P12163_1_S1,24123 | K.VILFGVPGAFTPTCSLK | 2415.393 | 0.00581  | 3 | 1 | 58.3 | 0 |
| P12163_1_S1,24145 | K.VILFGVPGAFTPTCSLK | 2415.393 | 0.00323  | 4 | 1 | 41.3 | 0 |
| P12163_1_F4,27906 | R.FALLVDDLK.V       | 1642.004 | 0.00702  | 3 | 1 | 37   | 0 |
| P12163_1_F4,27915 | R.FALLVDDLK.V       | 1642.004 | 0.00583  | 2 | 1 | 52.9 | 0 |
| P12163_1_F7,24332 | R.FALLVDDLK.V       | 1642.004 | 0.00282  | 3 | 1 | 29.5 | 0 |
| P12163_2_F9,19805 | R.FALLVDDLK.V       | 1798.105 | 0.00576  | 3 | 1 | 29.7 | 0 |
| P12163_1_F3,23294 | K.EIENGILWEVEGK.W   | 2124.18  | -0.00379 | 3 | 1 | 38.6 | 0 |
| P12163_1_F5,9100  | K.NIEGATK.F         | 1340.799 | 0.00594  | 2 | 1 | 25.3 | 0 |
| P12163_1_S1,19190 | K.VVDIVDTFR.L       | 1367.784 | 0.00113  | 3 | 1 | 40.8 | 0 |
| P12163_1_S1,23402 | K.VVDIVDTFR.L       | 1367.784 | 0.00311  | 3 | 1 | 48.9 | 0 |
| P12163_1_S1,23581 | K.VVDIVDTFR.L       | 1367.784 | 0.00403  | 2 | 1 | 35.5 | 0 |
| P12163_1_F4,15866 | R.LQEPAFDK.K        | 1683.953 | 0.00065  | 2 | 1 | 32.9 | 0 |
| P12163_1_F4,15913 | R.LQEPAFDK.K        | 1683.953 | 0.00254  | 3 | 1 | 32.1 | 0 |
| P12163_1_F4,16067 | R.LQEPAFDK.K        | 1683.953 | -0.00159 | 2 | 1 | 32.4 | 0 |
| P12163_2_F1,14976 | R.LQEPAFDK.K        | 1683.953 | 0.00213  | 2 | 1 | 35.4 | 0 |
| P12163_2_F1,15190 | R.LQEPAFDK.K        | 1683.953 | 0.00483  | 2 | 1 | 31.9 | 0 |
| P12163_1_F4,18086 | K.ANVFLDSSGK.H      | 1645.937 | 0.00443  | 2 | 1 | 41.6 | 0 |
| P12163_1_F4,18106 | K.ANVFLDSSGK.H      | 1645.937 | 0.00569  | 3 | 1 | 41.1 | 0 |
| P12163_2_F1,17294 | K.ANVFLDSSGK.H      | 1645.937 | 0.00367  | 2 | 1 | 32.6 | 0 |

|                   |                     |          |          |   |   |      |   |
|-------------------|---------------------|----------|----------|---|---|------|---|
| P12163_1_F5,16352 | K.NLGLNVVK.A        | 1464.936 | 0.00587  | 3 | 1 | 24   | 0 |
| P12163_2_F2,17109 | K.NLGLNVVK.A        | 1464.936 | 0.00851  | 2 | 1 | 26   | 0 |
| P12163_2_F2,17133 | K.NLGLNVVK.A        | 1464.936 | 0.00707  | 3 | 1 | 31.5 | 0 |
| P12163_1_F3,27948 | R.LGALIDTM*NALK.D!  | 1884.108 | 0.00351  | 3 | 1 | 28.3 | 0 |
| P12163_1_F3,27942 | R.LGALIDTMNALK.D!R  | 1868.113 | 0.00534  | 3 | 1 | 37.2 | 0 |
| P12163_1_F3,28117 | R.LGALIDTMNALK.D!R  | 1868.113 | 0.00333  | 3 | 1 | 48.9 | 0 |
| P12163_2_F1,11505 | R.RPTTEEASF.-       | 1341.695 | 0.00359  | 2 | 1 | 25.6 | 0 |
| P12163_2_F1,11161 | K.DAPAVVK.S         | 1307.814 | 0.00412  | 3 | 1 | 32.1 | 0 |
| P12163_1_F2,22522 | K.NILEIDYPTGPFGTK.D | 2273.264 | 0.01018  | 3 | 1 | 44.6 | 0 |
| P12163_2_F6,22204 | K.NILEIDYPTGPFGTK.D | 2273.264 | 0.00268  | 3 | 1 | 45.4 | 0 |
| P12163_1_F4,19170 | R.EELEAELEGK.N      | 1754.963 | 0.00643  | 3 | 1 | 36.8 | 0 |
| P12163_2_F1,18463 | R.EELEAELEGK.N      | 1754.963 | 0.00418  | 3 | 1 | 36.5 | 0 |
| P12163_2_F1,18469 | R.EELEAELEGK.N      | 1754.963 | 0.00182  | 2 | 1 | 27.3 | 0 |
| P12163_1_F8,12663 | R.VEDVNPVATGHER.E   | 1726.903 | 0.00269  | 3 | 1 | 41.5 | 0 |
| P12163_2_F6,12249 | R.VEDVNPVATGHER.E   | 1726.903 | 0.00173  | 3 | 1 | 47.3 | 0 |
| P12163_2_F6,12258 | R.VEDVNPVATGHER.E   | 1726.903 | 0.00608  | 2 | 1 | 43   | 0 |
| P12163_1_F3,14852 | K.AQILAER.L         | 1104.668 | 0.00329  | 2 | 1 | 26.8 | 0 |
| P12163_1_F3,18852 | K.LIavgvgtpnk.A     | 1677.052 | 0.00819  | 2 | 1 | 50.2 | 0 |
| P12163_1_F3,18862 | K.LIavgvgtpnk.A     | 1677.052 | 0.00412  | 3 | 1 | 37.5 | 0 |
| P12163_1_F4,19333 | K.LIavgvgtpnk.A     | 1677.052 | 0.00727  | 3 | 1 | 34.5 | 0 |
| P12163_2_F1,18585 | K.LIavgvgtpnk.A     | 1677.052 | 0.00554  | 3 | 1 | 29.8 | 0 |
| P12163_1_F4,21270 | R.SSVLQQGGM*FVFK.G  | 2052.141 | -0.00374 | 3 | 1 | 31.4 | 0 |
| P12163_1_F4,23806 | R.SSVLQQGGMFVFK.G   | 2036.146 | 0.00436  | 3 | 1 | 40   | 0 |
| P12163_2_F1,23260 | R.SSVLQQGGMFVFK.G   | 2036.146 | 0.004    | 3 | 1 | 34   | 0 |
| P12163_1_F5,16556 | R.TFFNPASAK.V       | 1590.91  | 0.00883  | 2 | 1 | 26.1 | 0 |
| P12163_1_F3,17619 | K.AQETVSSNSVVVFSK.  | 2190.223 | 0.00204  | 3 | 1 | 48.7 | 0 |
| P12163_1_F6,9322  | K.HIGGCDSTTALHR.E   | 1728.875 | 0.00087  | 3 | 1 | 34.9 | 0 |
| P12163_2_S3,8502  | K.HIGGCDSTTALHR.E   | 1728.875 | -0.00489 | 3 | 1 | 73.1 | 0 |
| P12163_1_F2,24061 | K.LVPLLTEAGAVAK.T   | 1890.188 | 0.00458  | 3 | 1 | 52.3 | 0 |
| P12163_1_F5,23700 | K.LVPLLTEAGAVAK.T   | 1890.188 | 0.00323  | 3 | 1 | 28.9 | 0 |
| P12163_1_F5,23935 | K.LVPLLTEAGAVAK.T   | 1890.188 | 0.00365  | 3 | 1 | 32.7 | 0 |
| P12163_1_S1,23015 | K.LVPLLTEAGAVAK.T   | 1890.188 | 0.00722  | 3 | 1 | 38.1 | 0 |
| P12163_1_F4,19496 | K.TVPNVFIGGK.H!R.TV | 1639.999 | 0.00352  | 2 | 1 | 26.1 | 0 |
| P12163_2_F1,18856 | K.TVPNVFIGGK.H!R.TV | 1639.999 | 0.0102   | 2 | 1 | 32   | 0 |
| P12163_1_F3,24946 | K.DFDLILAMDK.Q      | 1789.003 | 0.00458  | 2 | 1 | 35.4 | 0 |
| P12163_1_F3,24947 | K.DFDLILAMDK.Q      | 1789.003 | 0.00324  | 3 | 1 | 32.3 | 0 |
| P12163_1_F6,17160 | K.FNIDSAGTIDYHEGNP, | 2483.174 | 0.00668  | 3 | 1 | 69.7 | 0 |
| P12163_1_F8,17065 | K.FNIDSAGTIDYHEGNP, | 2483.174 | -0.00385 | 3 | 1 | 47.4 | 0 |
| P12163_2_F10,1404 | K.FNIDSAGTIDYHEGNP, | 2483.174 | 0.00156  | 4 | 1 | 35.3 | 0 |
| P12163_2_F10,1554 | K.FNIDSAGTIDYHEGNP, | 2483.174 | 0.00239  | 3 | 1 | 78.6 | 0 |
| P12163_2_F4,15917 | K.FNIDSAGTIDYHEGNP, | 2483.174 | 0.00182  | 3 | 1 | 48.4 | 0 |
| P12163_2_F6,10568 | R.EQLPEEAHK.K       | 1688.943 | 0.00512  | 3 | 1 | 35.6 | 0 |
| P12163_1_F3,11019 | R.SPAAEGVFR.D       | 1237.684 | 0.00113  | 3 | 1 | 26.5 | 0 |
| P12163_1_F3,22909 | R.DILLEYVK.N        | 1600.977 | 0.00751  | 2 | 1 | 34.5 | 0 |
| P12163_2_F1,23077 | R.DILLEYVK.N        | 1600.977 | 0.00559  | 2 | 1 | 36.5 | 0 |
| P12163_1_F3,17772 | R.LLAVSDPGQM*K.T    | 1783.024 | 0.01329  | 2 | 1 | 38   | 0 |
| P12163_1_F3,19849 | R.LLAVSDPGQMK.T     | 1767.029 | 0.00533  | 2 | 1 | 39.3 | 0 |
| P12163_1_F4,14690 | R.VLGTTPK.L         | 1319.851 | 0.00675  | 2 | 1 | 27.6 | 0 |
| P12163_2_F1,13612 | R.VLGTTPK.L         | 1319.851 | 0.00523  | 2 | 1 | 30.6 | 0 |
| P12163_2_F2,3671  | R.VLGTTPK.L         | 1319.851 | 0.00841  | 2 | 1 | 36.1 | 0 |
| P12163_1_F5,12996 | R.WNNVSGPEK.I       | 1638.906 | 0.00544  | 2 | 1 | 27.4 | 0 |



|                   |                       |          |          |   |   |      |   |
|-------------------|-----------------------|----------|----------|---|---|------|---|
| P12163_2_F2,13766 | R.WNNVSGPEK.I         | 1638.906 | 0.00754  | 2 | 1 | 29.1 | 0 |
| P12163_1_F2,13691 | K.GGAPADYQPSFR.G      | 1569.796 | 0.00235  | 2 | 1 | 49.5 | 0 |
| P12163_1_F8,19564 | K.HPEIDVPNLQVIK.L     | 2110.248 | -0.00014 | 3 | 1 | 29.8 | 0 |
| P12163_1_F8,19575 | K.HPEIDVPNLQVIK.L     | 2110.248 | 0.00344  | 4 | 1 | 23.6 | 0 |
| P12163_2_F6,19186 | K.HPEIDVPNLQVIK.L     | 2110.248 | 0.0032   | 4 | 1 | 28.5 | 0 |
| P12163_1_F4,20635 | K.YLFQEGVCYAK.K       | 1986.061 | 0.00384  | 2 | 1 | 56.2 | 0 |
| P12163_1_F4,20672 | K.YLFQEGVCYAK.K       | 1986.061 | 0.00655  | 3 | 1 | 37.4 | 0 |
| P12163_1_F9,19152 | K.YLFQEGVCYAK.K       | 1986.061 | 0.00352  | 3 | 1 | 31.6 | 0 |
| P12163_2_F9,18138 | K.YLFQEGVCYAK.K       | 1986.061 | 0.00487  | 3 | 1 | 45.5 | 0 |
| P12163_2_F1,10372 | R.GAGGDFGDK.G         | 1431.769 | 0.00695  | 2 | 1 | 38.6 | 0 |
| P12163_1_F5,18905 | K.AFEYMKV.K           | 1495.844 | 0.00621  | 2 | 1 | 23.9 | 0 |
| P12163_1_F5,18924 | K.AFEYMKV.K           | 1495.844 | 0.00635  | 3 | 1 | 22.4 | 0 |
| P12163_1_F3,12665 | K.GQTPLFPR.I          | 1219.71  | 0.00393  | 3 | 1 | 28.3 | 0 |
| P12163_1_F3,12927 | K.GQTPLFPR.I          | 1219.71  | 0.00255  | 3 | 1 | 27   | 0 |
| P12163_1_F3,15952 | K.GQTPLFPR.I          | 1219.71  | 0.00645  | 2 | 1 | 27   | 0 |
| P12163_1_F4,13036 | K.GQTPLFPR.I          | 1219.71  | 0.00441  | 3 | 1 | 28.9 | 0 |
| P12163_2_F1,11929 | K.GQTPLFPR.I          | 1219.71  | 0.00453  | 3 | 1 | 31   | 0 |
| P12163_1_F3,20583 | K.INPLAPLDK.V         | 1588.988 | 0.00394  | 2 | 1 | 25.4 | 0 |
| P12163_1_F4,22472 | R.TDLYFWESK.G         | 1796.968 | 0.00667  | 2 | 1 | 24.8 | 0 |
| P12163_1_F4,23404 | K.DTFWPIVK.A          | 1613.951 | 0.01708  | 2 | 1 | 24.4 | 0 |
| P12163_2_F1,22822 | K.DTFWPIVK.A          | 1613.951 | 0.0109   | 2 | 1 | 26   | 0 |
| P12163_2_F1,8419  | K.EVTGAK.L            | 1212.741 | 0.00544  | 3 | 1 | 26.7 | 0 |
| P12163_1_F5,8676  | K.LDCNQENK.S ! K.LDCN | 1628.852 | 0.00698  | 2 | 1 | 26.4 | 0 |
| P12163_2_F1,9242  | K.LDCNQENK.S ! K.LDCN | 1628.852 | 0.00722  | 2 | 1 | 25.3 | 0 |
| P12163_1_F4,22446 | K.YSDVIFLK.L          | 1592.951 | 0.00755  | 2 | 1 | 36.6 | 0 |
| P12163_1_F9,20548 | K.YSDVIFLK.L          | 1592.951 | 0.00737  | 2 | 1 | 30.2 | 0 |
| P12163_1_F9,20549 | K.YSDVIFLK.L          | 1592.951 | 0.00491  | 3 | 1 | 22.3 | 0 |
| P12163_2_F1,21878 | K.YSDVIFLK.L          | 1592.951 | 0.00389  | 2 | 1 | 32.5 | 0 |
| P12163_1_F3,18323 | K.AIEAVPDLK.A         | 1563.957 | 0.00651  | 2 | 1 | 37.5 | 0 |
| P12163_1_F3,18338 | K.AIEAVPDLK.A         | 1563.957 | 0.00544  | 3 | 1 | 34.1 | 0 |
| P12163_1_F2,24161 | K.QLPSGLLLVSGPFK.I    | 2064.268 | 0.00039  | 3 | 1 | 51.6 | 0 |
| P12163_1_F3,25379 | K.QLPSGLLLVSGPFK.I    | 2064.268 | 0.00669  | 3 | 1 | 51.2 | 0 |
| P12163_1_F3,25430 | K.QLPSGLLLVSGPFK.I    | 2064.268 | 0.00197  | 2 | 1 | 32.4 | 0 |
| P12163_1_F3,16458 | K.VDISGVNVDK.F        | 1653.963 | 0.0038   | 2 | 1 | 47.5 | 0 |
| P12163_1_F4,15221 | R.VNQSIVIGTSTK.V      | 1905.09  | 0.00599  | 2 | 1 | 60   | 0 |
| P12163_1_F4,15227 | R.VNQSIVIGTSTK.V      | 1905.09  | 0.00522  | 3 | 1 | 45.4 | 0 |
| P12163_2_F1,14134 | R.VNQSIVIGTSTK.V      | 1905.09  | 0.00033  | 2 | 1 | 52.1 | 0 |
| P12163_1_F5,22141 | K.MVEAFWK.E           | 1518.86  | 0.0045   | 2 | 1 | 29.8 | 0 |
| P12163_2_F2,22345 | K.MVEAFWK.E           | 1518.86  | 0.00694  | 3 | 1 | 22.4 | 0 |
| P12163_2_F2,22366 | K.MVEAFWK.E           | 1518.86  | 0.00844  | 2 | 1 | 26.9 | 0 |
| P12163_1_F3,24708 | K.NPLWNCAGIAAISAMI    | 2325.267 | 0.00568  | 3 | 1 | 60.6 | 0 |
| P12163_1_F6,18894 | K.VDPSVHPGEVSISEVIC   | 2641.466 | 0.0007   | 3 | 1 | 40.5 | 0 |
| P12163_1_S10,1767 | K.VDPSVHPGEVSISEVIC   | 2641.466 | 0.00696  | 4 | 1 | 25.6 | 0 |
| P12163_2_F4,17684 | K.VDPSVHPGEVSISEVIC   | 2641.466 | 0.00451  | 3 | 1 | 23.9 | 0 |
| P12163_1_F3,20590 | R.APLIPGMEAVK.K       | 1734.044 | 0.00676  | 2 | 1 | 29   | 0 |
| P12163_1_F3,20597 | R.APLIPGMEAVK.K       | 1734.044 | 0.00008  | 3 | 1 | 47.9 | 0 |
| P12163_1_F7,12012 | K.DATDDFEDVGHSDSAI    | 2040.905 | 0.00419  | 3 | 1 | 60   | 0 |
| P12163_1_F7,12018 | K.DATDDFEDVGHSDSAI    | 2040.905 | 0.00305  | 2 | 1 | 63.9 | 0 |
| P12163_2_F4,11597 | K.DATDDFEDVGHSDSAI    | 2040.905 | 0.00332  | 3 | 1 | 52.8 | 0 |
| P12163_2_F4,11622 | K.DATDDFEDVGHSDSAI    | 2040.905 | 0.00065  | 2 | 1 | 66.5 | 0 |
| P12163_2_F8,12070 | K.DATDDFEDVGHSDSAI    | 2040.905 | 0.00509  | 3 | 1 | 36.4 | 0 |

|                   |                     |          |          |   |   |      |   |
|-------------------|---------------------|----------|----------|---|---|------|---|
| P12163_1_F9,13795 | K.VHDFQEVAK.H       | 1680.953 | 0.0052   | 2 | 1 | 34.1 | 0 |
| P12163_1_F9,13800 | K.VHDFQEVAK.H       | 1680.953 | 0.00757  | 3 | 1 | 42.4 | 0 |
| P12163_1_F7,14633 | K.YHIGEIDSSSVPAK.R  | 2111.159 | 0.00594  | 3 | 1 | 37.2 | 0 |
| P12163_1_F4,21055 | R.DDCWLVISGK.V      | 1800.977 | 0.01081  | 2 | 1 | 42.3 | 0 |
| P12163_1_F2,15014 | K.ALQPLPAAADGNDK.S  | 1989.122 | -0.00172 | 2 | 1 | 28.2 | 0 |
| P12163_1_F2,15071 | K.ALQPLPAAADGNDK.S  | 1989.122 | 0.00711  | 3 | 1 | 40   | 0 |
| P12163_1_S1,14124 | K.ALQPLPAAADGNDK.S  | 1989.122 | 0.00272  | 2 | 1 | 40.2 | 0 |
| P12163_1_F2,22880 | K.DYGLIDGVIM*NPLK.A | 2172.219 | 0.00443  | 3 | 1 | 23.8 | 0 |
| P12163_1_F2,23958 | K.DYGLIDGVIM*NPLK.A | 2172.219 | 0.00539  | 3 | 1 | 40   | 0 |
| P12163_1_S1,21669 | K.DYGLIDGVIM*NPLK.A | 2172.219 | 0.00359  | 3 | 1 | 38.8 | 0 |
| P12163_1_S1,21781 | K.DYGLIDGVIM*NPLK.A | 2172.219 | 0.00441  | 4 | 1 | 48.6 | 0 |
| P12163_2_F6,15620 | K.INQDTRDYFMSPK.E   | 2338.196 | 0.00072  | 2 | 1 | 36.1 | 0 |
| P12163_1_S10,1602 | R.DYFMSPK.E         | 1495.807 | 0.00639  | 3 | 1 | 26   | 0 |
| P12163_1_F3,12484 | K.DTPDAPAMAAK.K     | 1695.92  | 0.00729  | 3 | 1 | 26.1 | 0 |
| P12163_1_F3,9544  | K.QLGPVTR.N         | 1074.657 | 0.00227  | 3 | 1 | 25.7 | 0 |
| P12163_1_F3,23678 | R.AGGVFLPIIK.S      | 1623.045 | 0.00604  | 3 | 1 | 35.5 | 0 |
| P12163_1_F4,24511 | R.AGGVFLPIIK.S      | 1623.045 | 0.00722  | 2 | 1 | 28.2 | 0 |
| P12163_1_F4,24541 | R.AGGVFLPIIK.S      | 1623.045 | 0.00682  | 3 | 1 | 35.6 | 0 |
| P12163_2_F1,23919 | R.AGGVFLPIIK.S      | 1623.045 | 0.00733  | 3 | 1 | 36.7 | 0 |
| P12163_2_F1,23923 | R.AGGVFLPIIK.S      | 1623.045 | 0.00744  | 2 | 1 | 35.6 | 0 |
| P12163_1_F4,21646 | R.IATYFVK.W         | 1449.893 | 0.00279  | 2 | 1 | 25.1 | 0 |
| P12163_1_F9,20149 | R.IATYFVK.W         | 1449.893 | 0.00915  | 2 | 1 | 30.3 | 0 |
| P12163_1_F3,17627 | K.AAAIGANNQAAQSILK  | 2149.255 | 0.00582  | 3 | 1 | 85.2 | 0 |
| P12163_2_F1,17417 | K.AAAIGANNQAAQSILK  | 2149.255 | 0.00739  | 2 | 1 | 104  | 0 |
| P12163_2_F1,17424 | K.AAAIGANNQAAQSILK  | 2149.255 | 0.00429  | 3 | 1 | 88.2 | 0 |
| P12163_2_F1,7286  | K.HGVTQPAAETS.-     | 1401.728 | 0.00471  | 2 | 1 | 36.7 | 0 |
| P12163_2_F2,7548  | K.HGVTQPAAETS.-     | 1401.728 | -0.00137 | 2 | 1 | 30   | 0 |
| P12163_1_F4,15892 | K.YQVCSPEALSK.L     | 1890.025 | 0.01284  | 2 | 1 | 35.9 | 0 |
| P12163_1_F4,15914 | K.YQVCSPEALSK.L     | 1890.025 | 0.01027  | 3 | 1 | 43   | 0 |
| P12163_2_F1,15059 | K.YQVCSPEALSK.L     | 1890.025 | 0.0079   | 2 | 1 | 30   | 0 |
| P12163_2_F1,18597 | R.EEAVQLALK.V       | 1608.978 | 0.00142  | 2 | 1 | 44.5 | 0 |
| P12163_1_F9,19592 | K.SISNLLITK.Q       | 1597.014 | 0.0038   | 3 | 1 | 27.1 | 0 |
| P12163_2_F1,12234 | R.ATSDPQIYK.K       | 1630.926 | 0.00508  | 2 | 1 | 33.3 | 0 |
| P12163_1_F4,23317 | R.AVM*SELFGK.A      | 1605.913 | 0.00649  | 3 | 1 | 23.9 | 0 |
| P12163_1_F4,23278 | R.AVMSELFGK.A       | 1589.918 | 0.00672  | 2 | 1 | 37.3 | 0 |
| P12163_1_F4,23279 | R.AVMSELFGK.A       | 1589.918 | 0.00577  | 3 | 1 | 25.1 | 0 |
| P12163_1_F5,21938 | R.AVMSELFGK.A       | 1589.918 | 0.00652  | 3 | 1 | 26.4 | 0 |
| P12163_2_F1,22688 | R.AVMSELFGK.A       | 1589.918 | -0.00113 | 3 | 1 | 29.5 | 0 |
| P12163_1_F5,7758  | R.DHVHALSK.G        | 1514.89  | 0.0082   | 2 | 1 | 35.5 | 0 |
| P12163_2_S5,7138  | R.DHVHALSK.G        | 1514.89  | 0.00317  | 4 | 1 | 31.2 | 0 |
| P12163_1_F4,19777 | K.IFGPGNQYVTAAM     | 1974.127 | 0.01251  | 3 | 1 | 42.8 | 0 |
| P12163_1_F9,18363 | K.IFGPGNQYVTAAM     | 1974.127 | 0.00942  | 3 | 1 | 32.1 | 0 |
| P12163_2_F1,19162 | K.IFGPGNQYVTAAM     | 1974.127 | 0.01206  | 3 | 1 | 24.7 | 0 |
| P12163_2_F1,19203 | K.IFGPGNQYVTAAM     | 1974.127 | 0.01258  | 2 | 1 | 41.7 | 0 |
| P12163_1_F5,11856 | K.SAETSVENMK.G      | 1703.909 | 0.01244  | 2 | 1 | 50.6 | 0 |
| P12163_2_F1,12235 | K.SAETSVENMK.G      | 1703.909 | 0.00553  | 3 | 1 | 25.1 | 0 |
| P12163_1_F7,19891 | R.LSELTHVEVQSLK.A   | 2091.227 | 0.00145  | 3 | 1 | 28.6 | 0 |
| P12163_1_F3,24421 | R.MYGGVSLDSFLK.Y    | 1925.066 | 0.00304  | 2 | 1 | 35.4 | 0 |
| P12163_1_F4,20502 | K.LVPVGYGIK.K       | 1553.988 | 0.00408  | 3 | 1 | 28.5 | 0 |
| P12163_2_F1,19960 | K.LVPVGYGIK.K       | 1553.988 | 0.00411  | 3 | 1 | 26.2 | 0 |
| P12163_1_F5,17298 | K.SLDQYLSGK.S       | 1618.926 | 0.00586  | 2 | 1 | 38.6 | 0 |

|                   |                       |          |          |   |   |      |   |
|-------------------|-----------------------|----------|----------|---|---|------|---|
| P12163_1_F4,14829 | K.SYISGNQLTK.D        | 1718.99  | 0.00566  | 2 | 1 | 48.2 | 0 |
| P12163_1_F5,13547 | K.SYISGNQLTK.D        | 1718.99  | 0.00392  | 2 | 1 | 44.6 | 0 |
| P12163_2_F1,13823 | K.SYISGNQLTK.D        | 1718.99  | 0.0077   | 2 | 1 | 48.6 | 0 |
| P12163_1_F7,17270 | M.AITFSDLHTESGLK.S    | 2127.191 | 0.00819  | 3 | 1 | 22.1 | 0 |
| P12163_2_F6,17595 | M.AITFSDLHTESGLK.S    | 2127.191 | 0.00474  | 3 | 1 | 28.1 | 0 |
| P12163_1_F3,24440 | K.AFGM*QTLCVLLGK.E    | 2062.165 | -0.00685 | 3 | 1 | 38   | 0 |
| P12163_1_F3,27058 | K.AFGM*QTLCVLLGK.E    | 2062.165 | 0.00002  | 3 | 1 | 25.2 | 0 |
| P12163_1_F3,27053 | K.AFGMQTLCVLLGK.E     | 2046.17  | 0.00314  | 3 | 1 | 38.1 | 0 |
| P12163_1_F3,14679 | K.DIPDVEGDK.A ! K.DIP | 1595.874 | 0.00691  | 2 | 1 | 35.9 | 0 |
| P12163_1_F9,14693 | K.LNAISHVTR.Y         | 1314.779 | 0.00525  | 3 | 1 | 37.5 | 0 |
| P12163_2_F4,13926 | K.LNAISHVTR.Y         | 1314.779 | 0.00242  | 3 | 1 | 34.2 | 0 |
| P12163_2_F7,13348 | K.LNAISHVTR.Y         | 1314.779 | 0.0021   | 3 | 1 | 44.7 | 0 |
| P12163_2_S5,12394 | R.KLNAISHVTR.Y        | 1747.08  | -0.00016 | 4 | 1 | 31   | 0 |
| P12163_2_F6,22733 | K.IHLFDIDIPGK.I       | 1876.115 | 0.00324  | 4 | 1 | 26   | 0 |
| P12163_1_F4,19822 | K.ITFIESK.S           | 1445.882 | -0.00049 | 2 | 1 | 29   | 0 |
| P12163_1_F5,18978 | K.ITFIESK.S           | 1445.882 | 0.00467  | 2 | 1 | 31.1 | 0 |
| P12163_1_F5,18996 | K.ITFIESK.S           | 1445.882 | 0.00681  | 3 | 1 | 22.6 | 0 |
| P12163_2_F1,19182 | K.ITFIESK.S           | 1445.882 | 0.00427  | 2 | 1 | 27.2 | 0 |
| P12163_2_F1,19375 | K.ITFIESK.S           | 1445.882 | 0.00493  | 2 | 1 | 31   | 0 |
| P12163_1_S1,18326 | R.APPALPLPTPPVAK.F    | 1977.236 | 0.00606  | 3 | 1 | 23.4 | 0 |
| P12163_1_S10,7180 | R.NIAHAR.R            | 985.5844 | 0.00241  | 3 | 1 | 25.4 | 0 |
| P12163_1_F4,19317 | K.ASDFMQLEK.G         | 1676.914 | 0.00812  | 2 | 1 | 32.5 | 0 |
| P12163_1_F4,19151 | K.EQIAQIMAK.L         | 1639.966 | 0.00603  | 2 | 1 | 32   | 0 |
| P12163_1_F4,19178 | K.EQIAQIMAK.L         | 1639.966 | 0.00659  | 3 | 1 | 36.1 | 0 |
| P12163_2_F1,18364 | K.EQIAQIMAK.L         | 1639.966 | 0.00553  | 2 | 1 | 46.5 | 0 |
| P12163_2_F1,18392 | K.EQIAQIMAK.L         | 1639.966 | 0.00731  | 3 | 1 | 29   | 0 |
| P12163_1_F9,6914  | K.REEEAAAAANR.D       | 1491.782 | 0.00509  | 2 | 1 | 44.6 | 0 |
| P12163_1_F4,14091 | K.VVEQEVTK.V          | 1539.92  | 0.00265  | 2 | 1 | 37.3 | 0 |
| P12163_2_F1,13056 | K.VVEQEVTK.V          | 1539.92  | 0.00475  | 3 | 1 | 31.6 | 0 |
| P12163_1_F3,19082 | K.DYSQGELSGILK.D      | 1918.074 | 0.01866  | 3 | 1 | 43.6 | 0 |
| P12163_1_F3,19092 | K.DYSQGELSGILK.D      | 1918.074 | 0.01058  | 2 | 1 | 59.8 | 0 |
| P12163_1_F9,18034 | K.GHFDLLIK.V          | 1550.951 | 0.01172  | 2 | 1 | 26.6 | 0 |
| P12163_1_F9,18042 | K.GHFDLLIK.V          | 1550.951 | 0.00673  | 3 | 1 | 27.2 | 0 |
| P12163_2_F9,16939 | K.GHFDLLIK.V          | 1550.951 | 0.0028   | 3 | 1 | 25.4 | 0 |
| P12163_1_F8,20325 | K.LDILAASHPNLK.V      | 1900.148 | 0.0058   | 3 | 1 | 27.7 | 0 |
| P12163_2_F6,19851 | K.LDILAASHPNLK.V      | 1900.148 | 0.00025  | 3 | 1 | 30.8 | 0 |
| P12163_1_F4,11768 | R.APLGQDAEGNTK.Y      | 1808.996 | 0.00775  | 2 | 1 | 35.8 | 0 |
| P12163_1_S1,18137 | R.FGSQEALEYGLIDR.I    | 1901.991 | 0.00251  | 3 | 1 | 42.2 | 0 |
| P12163_1_S1,20475 | R.FGSQEALEYGLIDR.I    | 1901.991 | 0.00128  | 3 | 1 | 58.4 | 0 |
| P12163_2_F6,20764 | R.FGSQEALEYGLIDR.I    | 1901.991 | 0.00221  | 2 | 1 | 46.4 | 0 |
| P12163_1_F4,7836  | R.GQADDIR.N           | 1078.579 | 0.00202  | 2 | 1 | 24.7 | 0 |
| P12163_2_F1,7050  | R.GQADDIR.N           | 1078.579 | 0.00328  | 2 | 1 | 32.3 | 0 |
| P12163_1_S1,11409 | R.IALDSPAGAAR.G       | 1345.774 | 0.0048   | 3 | 1 | 39.3 | 0 |
| P12163_1_S1,13323 | R.IALDSPAGAAR.G       | 1345.774 | 0.0043   | 2 | 1 | 37.5 | 0 |
| P12163_1_F2,14157 | R.NEADELLR.V          | 1263.685 | 0.0031   | 2 | 1 | 31.3 | 0 |
| P12163_1_F4,10552 | K.DGDGCITTK.E         | 1574.83  | 0.00604  | 2 | 1 | 27.4 | 0 |
| P12163_1_F4,21859 | K.EAFSLFDK.D          | 1564.883 | 0.01424  | 2 | 1 | 29   | 0 |
| P12163_1_F4,21926 | K.EAFSLFDK.D          | 1564.883 | 0.00499  | 3 | 1 | 23.8 | 0 |
| P12163_1_F5,20772 | K.EAFSLFDK.D          | 1564.883 | 0.00556  | 2 | 1 | 29.4 | 0 |
| P12163_2_F1,21397 | K.EAFSLFDK.D          | 1564.883 | 0.00259  | 3 | 1 | 23.7 | 0 |
| P12163_2_F1,21398 | K.EAFSLFDK.D          | 1564.883 | 0.01012  | 2 | 1 | 36.9 | 0 |

|                   |                      |          |          |   |   |      |   |
|-------------------|----------------------|----------|----------|---|---|------|---|
| P12163_1_F3,14964 | K.ELGTVMR.S          | 1109.629 | 0.00323  | 2 | 1 | 26.8 | 0 |
| P12163_1_F8,20044 | R.VFDKDQNGFISAAELR   | 2418.324 | 0.00373  | 2 | 1 | 41.2 | 0 |
| P12163_1_F4,16318 | K.NLVAGEAVYNEK.R     | 1915.074 | 0.0062   | 2 | 1 | 41.1 | 0 |
| P12163_2_F1,15455 | K.NLVAGEAVYNEK.R     | 1915.074 | -0.0011  | 2 | 1 | 42.5 | 0 |
| P12163_2_F1,15460 | K.NLVAGEAVYNEK.R     | 1915.074 | 0.00647  | 3 | 1 | 53.5 | 0 |
| P12163_2_F6,9738  | K.VVVEPHR.H          | 1139.684 | 0.00319  | 3 | 1 | 29.2 | 0 |
| P12163_2_F7,9224  | K.VVVEPHR.H          | 1139.684 | 0.00412  | 3 | 1 | 41.6 | 0 |
| P12163_1_F9,9479  | R.DHACVVGGR.M        | 1437.721 | 0.00491  | 3 | 1 | 32.4 | 0 |
| P12163_1_F9,13585 | R.HEGVFIK.G          | 1508.904 | 0.00252  | 3 | 1 | 27.1 | 0 |
| P12163_2_F8_12070 | R.HEGVFIK.G          | 1508.904 | 0.00778  | 3 | 1 | 26.2 | 0 |
| P12163_2_F6,19488 | K.MLDHFPTVVCAK.V     | 2026.107 | 0.01271  | 3 | 1 | 25.8 | 0 |
| P12163_1_F9,11313 | K.VLAAHGAAK.I ! K.VL | 1445.905 | 0.00534  | 3 | 1 | 30.1 | 0 |
| P12163_1_F9,11325 | K.VLAAHGAAK.I ! K.VL | 1445.905 | 0.00773  | 2 | 1 | 38.9 | 0 |
| P12163_2_F7,10559 | K.VLAAHGAAK.I ! K.VL | 1445.905 | 0.00435  | 3 | 1 | 29   | 0 |
| P12163_2_F7,10574 | K.VLAAHGAAK.I ! K.VL | 1445.905 | 0.00569  | 2 | 1 | 44.3 | 0 |
| P12163_1_F7,22104 | R.GGPTSLVIYDIHALQEI  | 2173.192 | 0.00193  | 3 | 1 | 52.8 | 0 |
| P12163_1_F2,15262 | R.ILSNIPSTR.G        | 1304.784 | 0.0019   | 3 | 1 | 24.9 | 0 |
| P12163_1_F2,16485 | R.ILSNIPSTR.G        | 1304.784 | 0.00145  | 3 | 1 | 23.4 | 0 |
| P12163_1_F5,13436 | K.ALLNPK.S           | 1263.824 | 0.00608  | 3 | 1 | 23.7 | 0 |
| P12163_2_F2,14202 | K.ALLNPK.S           | 1263.824 | 0.00542  | 3 | 1 | 30.4 | 0 |
| P12163_1_F3,12893 | K.ENQSQLSAIAR.Q      | 1520.833 | 0.00117  | 2 | 1 | 26.2 | 0 |
| P12163_1_F7,16223 | R.ESVETSLLLQHR.A     | 1715.959 | 0.01185  | 3 | 1 | 47.4 | 0 |
| P12163_1_F8,16893 | R.ESVETSLLLQHR.A     | 1715.959 | 0.00273  | 3 | 1 | 71.9 | 0 |
| P12163_2_F6,16324 | R.ESVETSLLLQHR.A     | 1715.959 | 0.0036   | 3 | 1 | 70.3 | 0 |
| P12163_2_S5,15921 | R.ESVETSLLLQHR.A     | 1715.959 | 0.00201  | 3 | 1 | 47.1 | 0 |
| P12163_2_F2,21366 | R.SLFGGFVK.W         | 1462.888 | 0.00156  | 2 | 1 | 24   | 0 |
| P12163_1_F3,27364 | K.LFPVILLPK.E        | 1648.102 | 0.00226  | 3 | 1 | 31.7 | 0 |
| P12163_1_F3,27373 | K.LFPVILLPK.E        | 1648.102 | 0.00596  | 2 | 1 | 33.2 | 0 |
| P12163_2_F2,10436 | K.NSTAAGVNVK.Y       | 1568.922 | 0.00587  | 2 | 1 | 47.8 | 0 |
| P12163_1_F5,12095 | K.SNNAILAEDK.H       | 1682.953 | 0.00874  | 2 | 1 | 40   | 0 |
| P12163_2_F1,12540 | K.SNNAILAEDK.H       | 1682.953 | 0.00838  | 2 | 1 | 53.9 | 0 |
| P12163_1_F8,19113 | K.VHWETDNVEEIALK.    | 2348.271 | 0.0064   | 3 | 1 | 32.6 | 0 |
| P12163_2_F6,18642 | K.VHWETDNVEEIALK.    | 2348.271 | 0.00643  | 3 | 1 | 40   | 0 |
| P12163_2_F6,18643 | K.VHWETDNVEEIALK.    | 2348.271 | 0.00407  | 4 | 1 | 31.9 | 0 |
| P12163_1_F4,11291 | K.VQQYTER.D          | 1227.663 | 0.00378  | 2 | 1 | 27.2 | 0 |
| P12163_2_F1,7324  | K.VQQYTER.D          | 1227.663 | 0.00469  | 3 | 1 | 26.5 | 0 |
| P12163_2_F4,12736 | R.IM*LNQPQSGSGHVE    | 2520.334 | 0.00713  | 3 | 1 | 41.6 | 0 |
| P12163_2_F1,16872 | R.M*YAAFTGQPIEK.V    | 1980.072 | 0.00375  | 2 | 1 | 39.3 | 0 |
| P12163_1_F3,20391 | R.MYAAFTGQPIEK.V     | 1964.077 | 0.00798  | 2 | 1 | 38.5 | 0 |
| P12163_1_F4,20924 | R.MYAAFTGQPIEK.V     | 1964.077 | 0.01006  | 2 | 1 | 44.1 | 0 |
| P12163_2_F1,20350 | R.MYAAFTGQPIEK.V     | 1964.077 | 0.00924  | 2 | 1 | 50   | 0 |
| P12163_1_F2,10563 | R.QVNEAVISR.H        | 1319.758 | 0.00282  | 3 | 1 | 47.3 | 0 |
| P12163_2_F9,11399 | K.FIDTHAR.F          | 1163.647 | 0.00541  | 3 | 1 | 28   | 0 |
| P12163_1_F8,19955 | K.LDLGHALALEK.E      | 1788.084 | 0.01401  | 3 | 1 | 31.1 | 0 |
| P12163_1_F8,20009 | K.LDLGHALALEK.E      | 1788.084 | 0.00213  | 2 | 1 | 62.8 | 0 |
| P12163_2_F6,19504 | K.LDLGHALALEK.E      | 1788.084 | 0.00153  | 3 | 1 | 30.6 | 0 |
| P12163_2_F6,19514 | K.LDLGHALALEK.E      | 1788.084 | 0.00487  | 2 | 1 | 56.7 | 0 |
| P12163_1_F8,19026 | R.DPMGIAYVTINRPK.S   | 2183.247 | -0.00056 | 3 | 1 | 32.9 | 0 |
| P12163_1_F4,23108 | R.SMMADM*AQAFK.S     | 1854.937 | 0.00618  | 3 | 1 | 23.4 | 0 |
| P12163_2_F1,22451 | R.SMMADMAQAFK.S      | 1838.942 | 0        | 3 | 1 | 31.3 | 0 |
| P12163_1_F4,13908 | K.IYVNSCER.Y         | 1344.688 | 0.00255  | 2 | 1 | 25.6 | 0 |

|                   |                      |          |          |   |   |      |   |
|-------------------|----------------------|----------|----------|---|---|------|---|
| P12163_1_F4,19639 | K.QQMIDCYIK.T        | 1806.97  | 0.00679  | 2 | 1 | 36.2 | 0 |
| P12163_1_F4,19673 | K.QQMIDCYIK.T        | 1806.97  | 0.01244  | 3 | 1 | 23.4 | 0 |
| P12163_1_F5,18352 | K.QQMIDCYIK.T        | 1806.97  | 0.00227  | 2 | 1 | 36.6 | 0 |
| P12163_2_F1,19093 | K.QQMIDCYIK.T        | 1806.97  | 0.01076  | 3 | 1 | 32.2 | 0 |
| P12163_1_F3,12237 | K.TLAQVVGSEEEAK.K    | 1969.106 | 0.00734  | 3 | 1 | 45.2 | 0 |
| P12163_1_F3,17801 | K.TLAQVVGSEEEAK.K    | 1969.106 | -0.00057 | 2 | 1 | 39.3 | 0 |
| P12163_1_F3,21410 | R.YFGFGCELDEETSNIK.I | 2404.159 | 0.0058   | 3 | 1 | 48.8 | 0 |
| P12163_1_F4,17201 | K.CAAPFQDCLAK.L      | 1888.987 | 0.00775  | 3 | 1 | 29.6 | 0 |
| P12163_1_F4,17207 | K.CAAPFQDCLAK.L      | 1888.987 | 0.00824  | 2 | 1 | 29.8 | 0 |
| P12163_1_F8,18563 | K.GFSITIIHTK.F       | 1725.052 | 0.00232  | 3 | 1 | 24.2 | 0 |
| P12163_2_F6,18091 | K.GFSITIIHTK.F       | 1725.052 | 0.0074   | 3 | 1 | 31.1 | 0 |
| P12163_2_F6,18097 | K.GFSITIIHTK.F       | 1725.052 | 0.00855  | 2 | 1 | 33.2 | 0 |
| P12163_1_F7,23139 | R.EFPIPSFPIGPFHK.Y   | 2221.263 | 0.00468  | 3 | 1 | 44.8 | 0 |
| P12163_1_F9,13162 | R.VGLHLER.K ! K.VGLH | 1127.684 | 0.00393  | 3 | 1 | 40.2 | 0 |
| P12163_2_F9,12024 | R.VGLHLER.K ! K.VGLH | 1127.684 | 0.00459  | 3 | 1 | 39   | 0 |
| P12163_1_F7,13938 | K.GALDGGLDIPHSDKR.I  | 2159.203 | 0.00629  | 4 | 1 | 36.6 | 0 |
| P12163_2_F8_12070 | K.GALDGGLDIPHSDKR.I  | 2159.203 | 0.00509  | 4 | 1 | 46.7 | 0 |
| P12163_1_F2,20216 | K.GIDADGLEALYK.K     | 1873.053 | 0.00007  | 3 | 1 | 51.8 | 0 |
| P12163_1_F2,20262 | K.GIDADGLEALYK.K     | 1873.053 | 0.00589  | 2 | 1 | 55.4 | 0 |
| P12163_1_F3,20776 | K.GIDADGLEALYK.K     | 1873.053 | 0.00719  | 2 | 1 | 75.8 | 0 |
| P12163_2_F6,9875  | K.QLDAEVHR.K         | 1271.701 | 0.00303  | 3 | 1 | 22.5 | 0 |
| P12163_2_F1,23302 | R.ALLDVGLIK.T        | 1550.014 | -0.00405 | 3 | 1 | 27.4 | 0 |
| P12163_2_F1,23374 | R.ALLDVGLIK.T        | 1550.014 | 0.00866  | 2 | 1 | 33.2 | 0 |
| P12163_1_F7,23339 | K.ESGTEKPVVAFIAGLT.  | 2705.545 | 0.00287  | 3 | 1 | 46.9 | 0 |
| P12163_1_F3,12541 | R.EAGVTVVESPAAK.I    | 1795.042 | 0.01178  | 3 | 1 | 28.7 | 0 |
| P12163_1_F3,12564 | R.EAGVTVVESPAAK.I    | 1795.042 | 0.00531  | 2 | 1 | 25.8 | 0 |
| P12163_1_F3,13868 | R.EAGVTVVESPAAK.I    | 1795.042 | 0.0038   | 3 | 1 | 34.1 | 0 |
| P12163_1_F3,13869 | R.EAGVTVVESPAAK.I    | 1795.042 | 0.00621  | 2 | 1 | 42   | 0 |
| P12163_1_F8,17121 | R.LIGPNCPGIHKPGECK.I | 2665.53  | 0.00743  | 4 | 1 | 26.3 | 0 |
| P12163_1_F9,9351  | R.M*GHAGAIVSGGK.G    | 1708.962 | 0.00921  | 3 | 1 | 34.1 | 0 |
| P12163_2_S5,11349 | R.MGHAGAIVSGGK.G     | 1692.968 | 0.00723  | 3 | 1 | 22.5 | 0 |
| P12163_1_S10,5908 | K.HATEM*GAQ.-        | 1164.562 | 0.00462  | 2 | 1 | 39.7 | 0 |
| P12163_2_F8_12070 | K.HATEM*GAQ.-        | 1164.562 | 0.00144  | 2 | 1 | 32.9 | 0 |
| P12163_2_F2,7000  | K.HATEMGAQ.-         | 1148.567 | 0.00722  | 2 | 1 | 31   | 0 |
| P12163_1_S1,9122  | R.ETTNLEDAAR.L       | 1423.733 | 0.00456  | 3 | 1 | 30.3 | 0 |
| P12163_1_S1,9540  | R.ETTNLEDAAR.L       | 1423.733 | 0.0021   | 3 | 1 | 22.8 | 0 |
| P12163_1_F3,16725 | R.LPVVDADGK.L        | 1521.91  | 0.01017  | 2 | 1 | 28.2 | 0 |
| P12163_1_F9,13930 | R.RLPVVDADGK.L       | 1678.011 | 0.002    | 3 | 1 | 28.1 | 0 |
| P12163_2_F7,12557 | R.RLPVVDADGK.L       | 1678.011 | -0.00106 | 3 | 1 | 29.6 | 0 |
| P12163_1_F7,16891 | K.CVVDNHGYAIYFSR.G   | 2004.99  | -0.00102 | 3 | 1 | 22.7 | 0 |
| P12163_1_F7,21702 | K.LATTLDHLVVATDDEI   | 2349.312 | 0.00796  | 2 | 1 | 45.1 | 0 |
| P12163_1_F4,10504 | K.SICSPSESSSSTK.S    | 1965.005 | 0.008    | 2 | 1 | 28.1 | 0 |
| P12163_2_F1,9687  | K.SICSPSESSSSTK.S    | 1965.005 | 0.00116  | 3 | 1 | 23   | 0 |
| P12163_1_F7,10735 | K.VDHEAHGVDAPEDVE    | 2355.204 | 0.00477  | 4 | 1 | 30.7 | 0 |
| P12163_2_F10,1066 | K.VDHEAHGVDAPEDVE    | 2355.204 | 0.00413  | 4 | 1 | 34.2 | 0 |
| P12163_2_F10,1067 | K.VDHEAHGVDAPEDVE    | 2355.204 | 0.00784  | 3 | 1 | 52.1 | 0 |
| P12163_1_F7,20628 | K.ISAAEIAAICQEAGM*F  | 2318.19  | 0.00078  | 3 | 1 | 78.4 | 0 |
| P12163_1_F9,16663 | K.KPDTDFEFYK.-       | 2202.221 | 0.0036   | 3 | 1 | 29.7 | 0 |
| P12163_2_F10,1539 | R.EAVELPLTHHELYK.Q   | 2287.291 | 0.00937  | 4 | 1 | 22.4 | 0 |
| P12163_2_F4,16077 | R.EAVELPLTHHELYK.Q   | 2287.291 | 0.00427  | 3 | 1 | 23   | 0 |
| P12163_1_F3,18476 | R.GVLLYGPPGTGK.T ! K | 1767.062 | 0.00594  | 2 | 1 | 41   | 0 |

|                   |                      |          |          |   |   |      |   |
|-------------------|----------------------|----------|----------|---|---|------|---|
| P12163_2_F1,18240 | R.GVLLYGPPGTGK.T ! K | 1767.062 | 0.0061   | 2 | 1 | 41   | 0 |
| P12163_2_F1,18262 | R.GVLLYGPPGTGK.T ! K | 1767.062 | 0.00702  | 3 | 1 | 43.8 | 0 |
| P12163_2_F1,10144 | K.AEAAEYQK.L         | 1517.842 | 0.00442  | 3 | 1 | 27.8 | 0 |
| P12163_1_F4,16755 | K.FNIANPTTGCQK.K     | 1959.058 | 0.00842  | 3 | 1 | 43.4 | 0 |
| P12163_1_F4,16791 | K.FNIANPTTGCQK.K     | 1959.058 | 0.0002   | 2 | 1 | 34.9 | 0 |
| P12163_2_F1,15859 | K.FNIANPTTGCQK.K     | 1959.058 | 0.00352  | 2 | 1 | 34.4 | 0 |
| P12163_2_F1,15877 | K.FNIANPTTGCQK.K     | 1959.058 | 0.00662  | 3 | 1 | 31.2 | 0 |
| P12163_1_F3,19536 | R.ISQEVNGDALGEEFK.C  | 2244.197 | 0.00745  | 3 | 1 | 40.1 | 0 |
| P12163_1_S1,14585 | R.LVTPLTLQR.K        | 1344.852 | 0.00236  | 3 | 1 | 22.8 | 0 |
| P12163_1_F4,4941  | K.AHSSTK.A           | 1238.731 | 0.00856  | 3 | 1 | 29.5 | 0 |
| P12163_2_S5,18558 | K.AIHAVNLGDSGFMVV    | 1990.085 | 0.00553  | 3 | 1 | 31.4 | 0 |
| P12163_1_F4,13744 | R.AGLGPQVTAQK.I      | 1678.011 | 0.00476  | 3 | 1 | 44.9 | 0 |
| P12163_2_F1,12770 | R.AGLGPQVTAQK.I      | 1678.011 | 0.00837  | 2 | 1 | 36.7 | 0 |
| P12163_2_F1,12791 | R.AGLGPQVTAQK.I      | 1678.011 | 0.00611  | 3 | 1 | 40.5 | 0 |
| P12163_1_F9,13826 | R.ELMSHSFR.A         | 1310.683 | 0.00282  | 3 | 1 | 45.6 | 0 |
| P12163_2_F9,13256 | R.ELMSHSFR.A         | 1310.683 | 0.00345  | 3 | 1 | 32.6 | 0 |
| P12163_1_F9,14674 | K.DGFLLNHAR.V        | 1346.748 | 0.00322  | 3 | 1 | 45.9 | 0 |
| P12163_2_F7,13271 | K.DGFLLNHAR.V        | 1346.748 | 0.00349  | 3 | 1 | 53   | 0 |
| P12163_2_F9,13965 | K.DGFLLNHAR.V        | 1346.748 | 0.00358  | 3 | 1 | 56.7 | 0 |
| P12163_1_F5,14497 | K.SGVFNFDTK.Y        | 1638.895 | 0.0098   | 2 | 1 | 49.8 | 0 |
| P12163_2_F1,14545 | K.SGVFNFDTK.Y        | 1638.895 | 0.00616  | 2 | 1 | 48.2 | 0 |
| P12163_1_F9,21204 | R.HFGLNWFVDPK.T      | 2039.132 | 0.00839  | 3 | 1 | 38.1 | 0 |
| P12163_1_F3,19438 | R.VLVGSGLETYEK.G     | 1903.1   | 0.00456  | 2 | 1 | 57.2 | 0 |
| P12163_2_F2,15730 | K.ISANMPYK.V         | 1531.876 | 0.00802  | 2 | 1 | 26.6 | 0 |
| P12163_2_F2,17086 | K.QYVGVWK.G          | 1487.883 | 0.00349  | 2 | 1 | 26.5 | 0 |
| P12163_1_F4,10758 | K.VYHVPR.V           | 1074.636 | 0.00535  | 3 | 1 | 27.7 | 0 |
| P12163_1_S10,1083 | K.VYHVPR.V           | 1074.636 | 0.00586  | 3 | 1 | 25.9 | 0 |
| P12163_1_F8,14751 | R.VPEHDLSGM*EGVLK.   | 2135.163 | 0.00476  | 3 | 1 | 33.7 | 0 |
| P12163_1_F8,18274 | R.VPEHDLSGMEGVLK.C   | 2119.168 | 0.00956  | 3 | 1 | 47.1 | 0 |
| P12163_2_F6,17726 | R.VPEHDLSGMEGVLK.C   | 2119.168 | 0.00674  | 3 | 1 | 54.5 | 0 |
| P12163_1_S1,12741 | K.DSPIPYEGAR.T       | 1408.737 | 0.00466  | 3 | 1 | 23.7 | 0 |
| P12163_2_F8_12070 | K.GVATVAALDANEHQ     | 2717.416 | 0.00349  | 3 | 1 | 55.8 | 0 |
| P12163_2_F8_12070 | K.GVATVAALDANEHQ     | 2717.416 | 0.00109  | 3 | 1 | 75.9 | 0 |
| P12163_1_F9,10402 | K.LGHVDCDSEK.S       | 1767.916 | 0.00497  | 3 | 1 | 25.1 | 0 |
| P12163_1_F9,10437 | K.LGHVDCDSEK.S       | 1767.916 | 0.00584  | 2 | 1 | 31.1 | 0 |
| P12163_2_F7,9775  | K.LGHVDCDSEK.S       | 1767.916 | 0.00548  | 3 | 1 | 30.8 | 0 |
| P12163_1_F8,23652 | K.SAFELEHIVEFVK.E    | 2156.221 | 0.00592  | 3 | 1 | 37.2 | 0 |
| P12163_2_F1,6715  | K.ASANTETK.K         | 1429.811 | 0.00097  | 2 | 1 | 24.9 | 0 |
| P12163_1_F3,22431 | K.ECGPM*VLDALIK.I    | 1970.091 | -0.00314 | 2 | 1 | 24.4 | 0 |
| P12163_1_F3,24145 | K.ECGPMVLDALIK.I     | 1954.096 | 0.01258  | 3 | 1 | 31.6 | 0 |
| P12163_1_S1,13833 | K.SEIDPSLTFR.R       | 1468.795 | 0.00459  | 3 | 1 | 23.1 | 0 |
| P12163_1_S1,15398 | K.SEIDPSLTFR.R       | 1468.795 | 0.00363  | 3 | 1 | 32.3 | 0 |
| P12163_1_F4,22424 | R.LEAIDDEFK.L        | 1687.936 | 0.00575  | 2 | 1 | 35.6 | 0 |
| P12163_1_F4,22512 | R.LEAIDDEFK.L        | 1687.936 | 0.00524  | 3 | 1 | 43.5 | 0 |
| P12163_1_S1,21899 | K.LGSLVIGVPIPR.E     | 1581.999 | 0.0066   | 3 | 1 | 32.5 | 0 |
| P12163_1_S1,19676 | K.NITGNAETPFLLAR.V   | 1821.017 | -0.00088 | 2 | 1 | 39.4 | 0 |
| P12163_1_S1,19695 | K.NITGNAETPFLLAR.V   | 1821.017 | 0.00397  | 3 | 1 | 47.7 | 0 |
| P12163_1_F5,11959 | K.NNALIGAK.I         | 1408.873 | 0.00372  | 2 | 1 | 34.5 | 0 |
| P12163_2_F2,12841 | K.NNALIGAK.I         | 1408.873 | 0.00254  | 2 | 1 | 35.1 | 0 |
| P12163_2_F2,12850 | K.NNALIGAK.I         | 1408.873 | 0.00626  | 3 | 1 | 32.9 | 0 |
| P12163_2_F6,12568 | R.DIAHVVATR.G        | 1285.753 | 0.00173  | 2 | 1 | 30.6 | 0 |

|                   |                     |          |          |   |   |      |   |
|-------------------|---------------------|----------|----------|---|---|------|---|
| P12163_1_F9,18503 | K.FHQEFAEFYK.C      | 1954.032 | 0.00479  | 3 | 1 | 42.8 | 0 |
| P12163_2_F9,17958 | K.FHQEFAEFYK.C      | 1954.032 | 0.00818  | 3 | 1 | 40   | 0 |
| P12163_1_F8,19719 | K.LAHFAVIVSR.Q      | 1416.863 | 0.00258  | 3 | 1 | 41.6 | 0 |
| P12163_2_F6,19122 | K.LAHFAVIVSR.Q      | 1416.863 | 0.00123  | 3 | 1 | 32.4 | 0 |
| P12163_1_F3,25516 | K.QAAISYLEGVIEK.L   | 2029.179 | 0.00269  | 3 | 1 | 30.4 | 0 |
| P12163_1_F4,21434 | R.VLGIPQIK.S        | 1475.977 | 0.00515  | 3 | 1 | 26   | 0 |
| P12163_2_F1,20908 | R.VLGIPQIK.S        | 1475.977 | 0.00746  | 2 | 1 | 30.4 | 0 |
| P12163_1_F3,24293 | K.FFFSAISGPK.I      | 1824.015 | 0.0029   | 3 | 1 | 44.6 | 0 |
| P12163_1_F4,25128 | K.FFFSAISGPK.I      | 1824.015 | 0.00701  | 3 | 1 | 39.4 | 0 |
| P12163_2_F9,14251 | K.QAGKPPVFLK.V      | 1997.267 | 0.00553  | 4 | 1 | 24.5 | 0 |
| P12163_1_S1,9159  | R.EAPPSTSEPDTK.T    | 2051.075 | 0.009    | 3 | 1 | 22.7 | 0 |
| P12163_1_F9,14388 | R.NIHYLVK.K         | 1494.925 | 0.00013  | 3 | 1 | 25.7 | 0 |
| P12163_1_F9,14404 | R.NIHYLVK.K         | 1494.925 | 0.00089  | 2 | 1 | 25.3 | 0 |
| P12163_2_F9,13480 | R.NIHYLVK.K         | 1494.925 | 0.0079   | 3 | 1 | 22.7 | 0 |
| P12163_1_F4,20557 | K.CGVLIGSGLGGMK.V   | 1857.055 | 0.00536  | 3 | 1 | 67.8 | 0 |
| P12163_2_F1,19945 | K.CGVLIGSGLGGMK.V   | 1857.055 | -0.00108 | 2 | 1 | 51   | 0 |
| P12163_2_F1,19959 | K.CGVLIGSGLGGMK.V   | 1857.055 | 0.005    | 3 | 1 | 70   | 0 |
| P12163_2_F6,18512 | K.EYQALIHCFGQNR.G   | 1939.975 | 0.00127  | 3 | 1 | 24.3 | 0 |
| P12163_2_F1,18015 | K.SFSTDGWWAPK.L     | 1802.99  | 0.00879  | 2 | 1 | 35.4 | 0 |
| P12163_2_F1,18017 | K.SFSTDGWWAPK.L     | 1802.99  | 0.0085   | 3 | 1 | 23.7 | 0 |
| P12163_2_S5,14278 | R.EDVNYINAHATSTPAC  | 2624.378 | 0.01366  | 3 | 1 | 31.3 | 0 |
| P12163_2_F8_12070 | K.EETHR.M           | 975.5161 | 0.00297  | 3 | 1 | 24.4 | 0 |
| P12163_1_F4,18876 | K.LSSELVDAK.G       | 1640.968 | 0.00492  | 2 | 1 | 28.5 | 0 |
| P12163_2_F1,18054 | K.LSSELVDAK.G       | 1640.968 | 0.00614  | 3 | 1 | 40.7 | 0 |
| P12163_2_F1,18055 | K.LSSELVDAK.G       | 1640.968 | 0.00676  | 2 | 1 | 42.8 | 0 |
| P12163_2_F1,20426 | K.SLAYQIIYR.A       | 1430.831 | 0.00061  | 2 | 1 | 24.8 | 0 |
| P12163_1_S10,1400 | R.AFAHFR.-          | 1052.594 | 0.0025   | 3 | 1 | 26.4 | 0 |
| P12163_2_F8_12070 | R.AFAHFR.-          | 1052.594 | 0.00211  | 3 | 1 | 33.7 | 0 |
| P12163_2_F8_12070 | K.ATM*EHVIIPTIEALNH | 2265.233 | -0.00206 | 4 | 1 | 31.3 | 0 |
| P12163_2_F8_12070 | K.ATMEHVIIPTIEALNHF | 2249.238 | 0.00114  | 4 | 1 | 53.3 | 0 |
| P12163_2_F8_12070 | K.ATMEHVIIPTIEALNHF | 2249.238 | 0.00232  | 3 | 1 | 48.5 | 0 |
| P12163_1_F9,12605 | K.TVQLDHIR.G        | 1285.753 | 0.00104  | 3 | 1 | 41.7 | 0 |
| P12163_1_S1,22050 | R.AVNAVIIGSDMQGVI   | 2449.394 | 0.00481  | 3 | 1 | 48.7 | 0 |
| P12163_1_S1,22130 | R.AVNAVIIGSDMQGVI   | 2449.394 | -0.00427 | 4 | 1 | 23.5 | 0 |
| P12163_1_F4,10203 | R.GAVSQNLR.H        | 1148.669 | 0.00448  | 2 | 1 | 24   | 0 |
| P12163_1_F3,22232 | K.APVSLPLENFK.S     | 1823.089 | 0.00523  | 2 | 1 | 43.7 | 0 |
| P12163_1_S1,14920 | K.ISDPLEEGCR.L      | 1479.741 | 0.00225  | 3 | 1 | 32.9 | 0 |
| P12163_1_F3,24363 | R.ELGEWGLDNYLSVK.C  | 2231.217 | 0.01011  | 3 | 1 | 34.1 | 0 |
| P12163_1_F4,18863 | R.YGLGAAVISK.D      | 1586.973 | 0.00222  | 2 | 1 | 29   | 0 |
| P12163_1_F4,18886 | R.YGLGAAVISK.D      | 1586.973 | 0.00378  | 3 | 1 | 34.2 | 0 |
| P12163_2_F1,18132 | R.YGLGAAVISK.D      | 1586.973 | -0.00112 | 2 | 1 | 29.3 | 0 |
| P12163_2_F9,16270 | R.YGLGAAVISK.D      | 1586.973 | 0.00162  | 3 | 1 | 26.6 | 0 |
| P12163_1_S1,15056 | K.FGVSVAADESCR.S    | 1601.789 | 0.0075   | 2 | 1 | 38.6 | 0 |
| P12163_1_S1,15062 | K.FGVSVAADESCR.S    | 1601.789 | 0.00191  | 3 | 1 | 61.6 | 0 |
| P12163_1_F6,21192 | K.LYEM*GVTPVLFEPV   | 2335.242 | 0.00742  | 3 | 1 | 52.6 | 0 |
| P12163_1_F6,23539 | K.LYEM*GVTPVLFEPV   | 2335.242 | -0.00152 | 3 | 1 | 24.5 | 0 |
| P12163_1_F3,24779 | R.AAVEM*ALIDAVAK.S  | 1926.119 | 0.00561  | 3 | 1 | 21.9 | 0 |
| P12163_1_F3,25841 | R.AAVEMALIDAVAK.S   | 1910.124 | 0.00489  | 3 | 1 | 57.8 | 0 |
| P12163_2_F9,18219 | R.GHGGFLHWDNIA.-    | 1627.828 | 0.00149  | 3 | 1 | 25.9 | 0 |
| P12163_1_F9,16871 | K.SPHINLDWR.E       | 1441.785 | 0.0045   | 3 | 1 | 24.9 | 0 |
| P12163_1_F7,19795 | K.WAHPIVPETGCVLVA   | 2654.495 | 0.00853  | 4 | 1 | 26.7 | 0 |

|                   |                       |          |          |   |   |      |   |
|-------------------|-----------------------|----------|----------|---|---|------|---|
| P12163_1_F7,19840 | K.WAHPIVPETGCVLVA     | 2654.495 | -0.00094 | 3 | 1 | 26   | 0 |
| P12163_2_F4,15107 | R.HPQEGPFGVINRPLH     | 2533.461 | 0.0069   | 4 | 1 | 31.6 | 0 |
| P12163_1_F4,19092 | R.NSLDEAAAALVK.K      | 1739.016 | 0.00474  | 2 | 1 | 53.4 | 0 |
| P12163_2_F1,18403 | R.NSLDEAAAALVK.K      | 1739.016 | 0.00608  | 2 | 1 | 53   | 0 |
| P12163_2_F1,18411 | R.NSLDEAAAALVK.K      | 1739.016 | 0.00781  | 3 | 1 | 39.6 | 0 |
| P12163_1_F6,16575 | K.AFQLDPK.I ! K.AFQLD | 1426.851 | 0.00959  | 2 | 1 | 24.4 | 0 |
| P12163_2_S5,14696 | K.AFQLDPK.I ! K.AFQLD | 1426.851 | 0.00116  | 3 | 1 | 27.3 | 0 |
| P12163_1_F4,14626 | K.DGVFVNGK.F          | 1443.842 | 0.00528  | 2 | 1 | 25.4 | 0 |
| P12163_1_F5,13061 | K.DGVFVNGK.F          | 1443.842 | 0.00786  | 2 | 1 | 25.9 | 0 |
| P12163_1_F4,19520 | K.GDAFVFPK.G          | 1488.867 | 0.0054   | 2 | 1 | 27.9 | 0 |
| P12163_1_F8,20741 | R.ADDFFSGLDKPGNTA     | 2580.33  | 0.01057  | 3 | 1 | 25.1 | 0 |
| P12163_1_F8,20795 | R.ADDFFSGLDKPGNTA     | 2580.33  | 0.00721  | 4 | 1 | 25   | 0 |
| P12163_2_F7,19399 | K.LHLIWVTAR.M         | 1412.868 | 0.00204  | 3 | 1 | 30.2 | 0 |
| P12163_1_F5,13399 | R.CYEVGINK.T          | 1590.877 | 0.01159  | 2 | 1 | 32.6 | 0 |
| P12163_2_F1,13712 | R.CYEVGINK.T          | 1590.877 | 0.00453  | 2 | 1 | 45.2 | 0 |
| P12163_1_S1,13411 | R.LAFPEENSSSSR.K      | 1627.823 | 0.0059   | 3 | 1 | 22.7 | 0 |
| P12163_1_S1,15061 | R.LAFPEENSSSSR.K      | 1627.823 | 0.00581  | 2 | 1 | 25.1 | 0 |
| P12163_1_S1,15074 | R.LAFPEENSSSSR.K      | 1627.823 | 0.00587  | 3 | 1 | 33.9 | 0 |
| P12163_2_F9,15019 | R.MHIEIYK.Y           | 1541.897 | 0.00505  | 3 | 1 | 26.4 | 0 |
| P12163_1_F4,8901  | K.EPDNPTK.S           | 1408.789 | 0.00652  | 2 | 1 | 31.2 | 0 |
| P12163_2_F1,8056  | K.EPDNPTK.S           | 1408.789 | 0.0059   | 2 | 1 | 31.5 | 0 |
| P12163_1_F3,12238 | K.EPETQLATSK.S        | 1711.969 | 0.00519  | 2 | 1 | 29.9 | 0 |
| P12163_1_F4,12810 | K.EPETQLATSK.S        | 1711.969 | 0.00661  | 2 | 1 | 29.7 | 0 |
| P12163_2_F1,8129  | K.NAESNAEVK.G         | 1569.869 | 0.0049   | 2 | 1 | 27.8 | 0 |
| P12163_2_F2,8461  | K.NAESNAEVK.G         | 1569.869 | 0.01043  | 2 | 1 | 27.2 | 0 |
| P12163_1_F6,18789 | R.YLEDVMAHK.Q         | 1713.945 | 0.0083   | 3 | 1 | 24   | 0 |
| P12163_1_F6,17291 | K.EM*IQTHCPAPASDIQV   | 2386.216 | 0.01118  | 3 | 1 | 27.4 | 0 |
| P12163_1_F6,17280 | K.EMIQTHCPAPASDIQV    | 2370.221 | 0.00632  | 3 | 1 | 30.5 | 0 |
| P12163_1_F4,19138 | K.VSLDPENFK.E         | 1656.942 | 0.00956  | 2 | 1 | 25.7 | 0 |
| P12163_2_F1,13387 | R.AILENPNDK.T         | 1621.937 | 0.00238  | 2 | 1 | 34.6 | 0 |
| P12163_1_F9,17489 | R.VGDYLAVK.G          | 1472.893 | 0.01446  | 2 | 1 | 29.5 | 0 |
| P12163_1_F9,17520 | R.VGDYLAVK.G          | 1472.893 | 0.00905  | 3 | 1 | 32.4 | 0 |
| P12163_2_F1,18211 | R.VGDYLAVK.G          | 1472.893 | 0.00472  | 2 | 1 | 25.4 | 0 |
| P12163_1_F4,25041 | K.FLLVMQK.H           | 1486.928 | 0.00433  | 2 | 1 | 31.1 | 0 |
| P12163_2_F1,24353 | K.FLLVMQK.H           | 1486.928 | 0.00247  | 2 | 1 | 26.3 | 0 |
| P12163_2_S3,14550 | K.HGYIGEFEYVDDHR.A    | 2040.972 | 0.00446  | 4 | 1 | 35.4 | 0 |
| P12163_2_S3,14565 | K.HGYIGEFEYVDDHR.A    | 2040.972 | 0.00237  | 3 | 1 | 37.3 | 0 |
| P12163_2_F1,15238 | R.FDVGVK.E            | 1272.777 | 0.00726  | 3 | 1 | 23.4 | 0 |
| P12163_2_F1,20128 | R.VSVLNDALK.S         | 1566.967 | 0.00678  | 2 | 1 | 30.9 | 0 |
| P12163_2_F1,20199 | R.VSVLNDALK.S         | 1566.967 | 0.01014  | 3 | 1 | 27.1 | 0 |
| P12163_2_F6,14729 | K.IENLQSHDNNEIYEK.A   | 2454.272 | 0.00756  | 3 | 1 | 32.1 | 0 |
| P12163_2_F6,8920  | K.VAVDADEGRR.R        | 1391.754 | 0.00448  | 2 | 1 | 31.7 | 0 |
| P12163_1_F8,20430 | K.VVIDHGAVPIFVK.L     | 2002.231 | 0.00546  | 3 | 1 | 27.7 | 0 |
| P12163_1_F8,20438 | K.VVIDHGAVPIFVK.L     | 2002.231 | 0.00485  | 2 | 1 | 63.4 | 0 |
| P12163_2_S5,18220 | K.VVIDHGAVPIFVK.L     | 2002.231 | 0.00243  | 3 | 1 | 22.6 | 0 |
| P12163_2_S5,18227 | K.VVIDHGAVPIFVK.L     | 2002.231 | 0.00405  | 4 | 1 | 28.7 | 0 |
| P12163_1_F2,13461 | R.EDNMVEIR.K          | 1309.672 | 0.00246  | 2 | 1 | 24.4 | 0 |
| P12163_1_F4,17269 | K.LAQGEYIAAEK.I       | 1801.032 | 0.00602  | 2 | 1 | 42.3 | 0 |
| P12163_2_F1,16418 | K.LAQGEYIAAEK.I       | 1801.032 | -0.00368 | 3 | 1 | 26.2 | 0 |
| P12163_1_F8,15651 | R.FPDHPEIGTTHDNFVR.   | 2186.093 | 0.00146  | 3 | 1 | 23.5 | 0 |
| P12163_2_F10,1435 | R.FPDHPEIGTTHDNFVR.   | 2186.093 | -0.00004 | 4 | 1 | 30.9 | 0 |



|                   |                      |          |          |   |   |      |   |
|-------------------|----------------------|----------|----------|---|---|------|---|
| P12163_1_F5,18216 | R.LFNAAYNAK.K        | 1619.936 | 0.00551  | 3 | 1 | 34   | 0 |
| P12163_2_F2,18820 | R.LFNAAYNAK.K        | 1619.936 | 0.00578  | 3 | 1 | 43.5 | 0 |
| P12163_1_F7,16303 | R.TEVGSLIYHGISK.G    | 2069.185 | 0.00735  | 3 | 1 | 32.7 | 0 |
| P12163_1_S1,25284 | K.IISIADLIR.Y        | 1317.841 | 0.00415  | 3 | 1 | 22.9 | 0 |
| P12163_1_S1,25291 | K.IISIADLIR.Y        | 1317.841 | 0.00376  | 2 | 1 | 34.8 | 0 |
| P12163_1_F3,24023 | R.LDLPLMVAQK.E       | 1736.06  | 0.00599  | 2 | 1 | 28.3 | 0 |
| P12163_1_F8,15642 | R.VHSECLTGDFGSAR.C   | 1952.98  | 0.00879  | 3 | 1 | 24.8 | 0 |
| P12163_1_F8,17784 | R.VHSECLTGDFGSAR.C   | 1952.98  | 0.00519  | 3 | 1 | 83   | 0 |
| P12163_2_F6,17293 | R.VHSECLTGDFGSAR.C   | 1952.98  | 0.00186  | 3 | 1 | 73.6 | 0 |
| P12163_1_F3,20848 | R.VPLITPIK.K         | 1488.997 | 0.00312  | 3 | 1 | 25.7 | 0 |
| P12163_2_F2,8185  | K.AQAEAEQK.T ! R.AQA | 1411.8   | 0.01132  | 2 | 1 | 32.5 | 0 |
| P12163_2_F2,19743 | K.NLASSLFK.L         | 1487.904 | 0.00574  | 3 | 1 | 37.8 | 0 |
| P12163_1_F4,18819 | K.QFGIGGALPPK.K      | 1693.026 | 0.00219  | 3 | 1 | 36.4 | 0 |
| P12163_2_F1,18155 | K.QFGIGGALPPK.K      | 1693.026 | 0.00255  | 2 | 1 | 25.8 | 0 |
| P12163_2_F1,18162 | K.QFGIGGALPPK.K      | 1693.026 | 0.00636  | 3 | 1 | 22.1 | 0 |
| P12163_1_F4,20584 | K.TASVLCLTTVK.N      | 1801.071 | 0.0022   | 3 | 1 | 27.8 | 0 |
| P12163_2_F1,20033 | K.TASVLCLTTVK.N      | 1801.071 | 0.00733  | 2 | 1 | 40.3 | 0 |
| P12163_2_F1,11657 | K.NCDFQMER.Y         | 1403.635 | 0.00452  | 2 | 1 | 24.7 | 0 |
| P12163_1_S1,21665 | R.LLILTDPR.T         | 1244.788 | 0.00421  | 2 | 1 | 40.6 | 0 |
| P12163_1_S1,21909 | R.LLILTDPR.T         | 1244.788 | 0.00317  | 2 | 1 | 38.1 | 0 |
| P12163_1_F4,22056 | R.NDGIYIINLGK.T      | 1828.079 | 0.00628  | 2 | 1 | 54.4 | 0 |
| P12163_1_F3,18242 | R.YVDIGIPANNK.G      | 1812.048 | 0.00313  | 2 | 1 | 47.4 | 0 |
| P12163_1_F3,18278 | R.YVDIGIPANNK.G      | 1812.048 | 0.00622  | 3 | 1 | 38   | 0 |
| P12163_1_F3,18272 | K.ATGASFLEAPVSGSK.F  | 2030.138 | 0.00638  | 3 | 1 | 28.8 | 0 |
| P12163_1_F3,19475 | K.CDPLISLGAK.Y       | 1681.977 | 0.00204  | 2 | 1 | 31.2 | 0 |
| P12163_1_F3,19487 | K.CDPLISLGAK.Y       | 1681.977 | 0.00782  | 3 | 1 | 29.5 | 0 |
| P12163_1_F8,19828 | K.KPAEDGQLIFLAAGDK   | 2585.507 | 0.00764  | 3 | 1 | 41.8 | 0 |
| P12163_2_F6,19430 | K.KPAEDGQLIFLAAGDK   | 2585.507 | 0.00572  | 3 | 1 | 41.8 | 0 |
| P12163_1_F9,16047 | K.LINGHIK.A          | 1402.899 | 0.00848  | 2 | 1 | 38.2 | 0 |
| P12163_1_F9,7347  | K.AGVAHK.I           | 1190.747 | 0.00756  | 3 | 1 | 27.4 | 0 |
| P12163_1_F2,12437 | K.ALAVDPR.I          | 1045.631 | 0.0044   | 2 | 1 | 46.7 | 0 |
| P12163_1_F4,18230 | K.GLPIIQK.A          | 1376.909 | 0.00754  | 2 | 1 | 27.9 | 0 |
| P12163_1_F4,23824 | K.ILALDITK.E         | 1494.971 | 0.00803  | 2 | 1 | 26   | 0 |
| P12163_2_F1,23252 | K.ILALDITK.E         | 1494.971 | 0.00479  | 2 | 1 | 26.6 | 0 |
| P12163_2_F1,23313 | K.ILALDITK.E         | 1494.971 | 0.00183  | 3 | 1 | 26.9 | 0 |
| P12163_1_F8,11990 | R.CGHQAVALLIGGATAR.  | 1785.97  | 0.00248  | 3 | 1 | 23.6 | 0 |
| P12163_1_F8,14152 | R.CGHQAVALLIGGATAR.  | 1785.97  | 0.00581  | 2 | 1 | 34.5 | 0 |
| P12163_2_F6,13573 | R.CGHQAVALLIGGATAR.  | 1785.97  | 0.01033  | 2 | 1 | 24.6 | 0 |
| P12163_1_S1,20594 | R.GLLESITSDNLR.S     | 1621.906 | -0.00199 | 3 | 1 | 49.3 | 0 |
| P12163_1_F2,17078 | R.IEQDIVDDK.V        | 1779.995 | 0.01748  | 2 | 1 | 24.2 | 0 |
| P12163_2_F2,9020  | R.SLASSNEK.T         | 1443.826 | 0.00363  | 2 | 1 | 28.8 | 0 |
| P12163_1_F8,18197 | K.AIENPELYVMKPQR.E   | 2296.294 | -0.00029 | 3 | 1 | 31.3 | 0 |
| P12163_1_F3,25346 | K.VPGNSAVIQFAEAMAI   | 2241.252 | 0.00423  | 3 | 1 | 32.8 | 0 |
| P12163_1_F4,13348 | R.EGGGNNIYGEDVK.E    | 1960.023 | 0.0094   | 2 | 1 | 56.3 | 0 |
| P12163_2_F1,12389 | R.EGGGNNIYGEDVK.E    | 1960.023 | -0.00034 | 2 | 1 | 73.1 | 0 |
| P12163_1_F4,18148 | R.LLMEQSSAVK.C       | 1714.003 | 0.0057   | 2 | 1 | 34.5 | 0 |
| P12163_2_F1,17348 | R.LLMEQSSAVK.C       | 1714.003 | 0.00496  | 2 | 1 | 27   | 0 |
| P12163_1_S1,22294 | K.GEIQTDAEELLIHK.T   | 2180.263 | 0.00883  | 3 | 1 | 46   | 0 |
| P12163_2_F1,16967 | K.LAESIVK.A          | 1367.872 | 0.00458  | 3 | 1 | 28.8 | 0 |
| P12163_1_F8,22361 | R.QSLETLTEHVK.A      | 2006.174 | 0.00394  | 3 | 1 | 57.6 | 0 |
| P12163_2_F6,22112 | R.QSLETLTEHVK.A      | 2006.174 | 0.00532  | 3 | 1 | 62.3 | 0 |

|                   |                       |          |          |   |   |      |   |
|-------------------|-----------------------|----------|----------|---|---|------|---|
| P12163_2_F8_1207  | R.QSLETLTEHVK.A       | 2006.174 | 0.00334  | 3 | 1 | 28.3 | 0 |
| P12163_2_F7,19435 | R.VPGIESVYEWK.G       | 1915.078 | 0.0061   | 3 | 1 | 24.8 | 0 |
| P12163_1_F3,25296 | K.NSGWEDLIFIPPGK.S    | 2181.216 | 0.00622  | 3 | 1 | 37.8 | 0 |
| P12163_1_F3,25529 | K.NSGWEDLIFIPPGK.S    | 2181.216 | 0.00667  | 3 | 1 | 37.5 | 0 |
| P12163_1_F3,19420 | K.SIGLLCFR.Q          | 1269.729 | 0.0025   | 3 | 1 | 35.5 | 0 |
| P12163_1_F3,21954 | K.SIGLLCFR.Q          | 1269.729 | -0.00178 | 2 | 1 | 24.5 | 0 |
| P12163_1_S1,20485 | R.QEDAEAFLAQVR.L      | 1680.886 | 0.01084  | 2 | 1 | 34.2 | 0 |
| P12163_1_F5,16845 | R.YCPVYFQK.E          | 1712.929 | 0.00647  | 2 | 1 | 24   | 0 |
| P12163_1_F8,13332 | K.EAVEHAQATGHVNFQ     | 2390.179 | 0.00504  | 3 | 1 | 58.2 | 0 |
| P12163_2_F4,12460 | K.EAVEHAQATGHVNFQ     | 2390.179 | 0.00585  | 3 | 1 | 69.6 | 0 |
| P12163_1_F4,16821 | R.CGVCQIGVIGQK.E      | 1927.071 | 0.00205  | 3 | 1 | 36.4 | 0 |
| P12163_2_F1,16043 | R.CGVCQIGVIGQK.E      | 1927.071 | 0.00526  | 3 | 1 | 37.6 | 0 |
| P12163_1_S1,13637 | R.EIAAYDIQTR.C        | 1584.853 | 0.00785  | 3 | 1 | 27.1 | 0 |
| P12163_1_F3,18721 | R.TIGPAEDLALK.L       | 1736.041 | 0.00204  | 2 | 1 | 24.3 | 0 |
| P12163_1_F2,20284 | K.EIVSSNPVVVFSK.T     | 2013.184 | 0.00592  | 3 | 1 | 29.7 | 0 |
| P12163_1_F4,19496 | K.TVPNVFIGGK.H ! R.TV | 1639.999 | 0.00352  | 2 | 1 | 26.1 | 0 |
| P12163_2_F1,18856 | K.TVPNVFIGGK.H ! R.TV | 1639.999 | 0.0102   | 2 | 1 | 32   | 0 |
| P12163_1_S1,17334 | K.VVELDIESDGSK.I      | 1899.053 | 0.00377  | 3 | 1 | 33.3 | 0 |
| P12163_1_F4,16883 | R.DAGALALADK.-        | 1552.915 | 0.01448  | 3 | 1 | 37.2 | 0 |
| P12163_1_F4,16911 | R.DAGALALADK.-        | 1552.915 | 0.00795  | 2 | 1 | 50.5 | 0 |
| P12163_1_F8,15269 | K.GPNHPHEAQQPIELPIR   | 2237.209 | 0.00209  | 3 | 1 | 30.7 | 0 |
| P12163_1_F9,16986 | R.ELFTHLK.V           | 1495.909 | 0.00417  | 3 | 1 | 32.5 | 0 |
| P12163_2_F9,16000 | R.ELFTHLK.V           | 1495.909 | 0.00576  | 3 | 1 | 33.5 | 0 |
| P12163_1_F9,13057 | R.IIEHAVR.G           | 1141.699 | 0.00366  | 3 | 1 | 36.4 | 0 |
| P12163_2_F7,11819 | R.IIEHAVR.G           | 1141.699 | 0.00075  | 3 | 1 | 37.7 | 0 |
| P12163_2_F6,18932 | R.LASTIAHIR.G         | 1398.873 | 0.00484  | 3 | 1 | 68.3 | 0 |
| P12163_1_F2,14868 | K.SAQAVQAAEAGIR.Q     | 1575.876 | 0.00232  | 2 | 1 | 45.3 | 0 |
| P12163_2_F9,7465  | K.TSHAVGQATK.T        | 1607.933 | 0.00663  | 3 | 1 | 28.5 | 0 |
| P12163_1_S1,21629 | R.ASLPIISLQPVVAGAAK   | 2243.395 | 0.00738  | 3 | 1 | 55.6 | 0 |
| P12163_1_S1,21693 | R.ASLPIISLQPVVAGAAK   | 2243.395 | 0.00533  | 4 | 1 | 54.9 | 0 |
| P12163_1_F7,17217 | R.QIGTLAHQQTISIQER.   | 2240.266 | -0.00267 | 3 | 1 | 35.2 | 0 |
| P12163_2_S5,16611 | R.QIGTLAHQQTISIQER.   | 2240.266 | 0.0063   | 3 | 1 | 37.2 | 0 |
| P12163_2_F4,11973 | K.DATDDFEDVGHSSSAI    | 2289.109 | -0.00029 | 3 | 1 | 24.7 | 0 |
| P12163_1_F4,22231 | K.DCWLIIEGK.V         | 1741.977 | 0.01469  | 3 | 1 | 28.9 | 0 |
| P12163_1_F7,19485 | K.FLDDHPGGDEVLLSAT    | 2479.329 | 0.00949  | 3 | 1 | 23.9 | 0 |
| P12163_1_F8,17172 | K.VYTLAEVSGHNDR.K     | 1764.918 | 0.00224  | 3 | 1 | 69.4 | 0 |
| P12163_2_F6,16508 | K.VYTLAEVSGHNDR.K     | 1764.918 | 0.00005  | 3 | 1 | 41.9 | 0 |
| P12163_2_F6,16543 | K.VYTLAEVSGHNDR.K     | 1764.918 | 0.00442  | 2 | 1 | 40.3 | 0 |
| P12163_2_F6,15870 | K.GATFVIDCGKPVEDK.I   | 2548.421 | 0.01198  | 4 | 1 | 21.9 | 0 |
| P12163_1_F3,22783 | K.IMDIASLEK.F         | 1627.955 | 0.00852  | 2 | 1 | 50.7 | 0 |
| P12163_1_F4,23552 | K.IMDIASLEK.F         | 1627.955 | 0.00652  | 2 | 1 | 26.5 | 0 |
| P12163_1_F4,23569 | K.IMDIASLEK.F         | 1627.955 | 0.00712  | 3 | 1 | 25.1 | 0 |
| P12163_1_F4,16152 | K.ITVTSDSNFSK.R       | 1807.006 | 0.00483  | 2 | 1 | 44   | 0 |
| P12163_2_F2,9080  | R.GAAAAGVK.G          | 1252.783 | 0.0011   | 2 | 1 | 36.6 | 0 |
| P12163_1_F3,12212 | K.CPMAGTFYR.S ! K.CPM | 1406.686 | 0.00239  | 3 | 1 | 27.9 | 0 |
| P12163_2_F1,14167 | K.VNDVIAK.K           | 1366.851 | 0.00485  | 2 | 1 | 26.2 | 0 |
| P12163_2_F1,14610 | R.CPAPGEPAFVK.V       | 1780.988 | -0.00467 | 2 | 1 | 26.7 | 0 |
| P12163_1_F4,19503 | R.DIMELQMK.Q          | 1615.901 | 0.00929  | 3 | 1 | 24.7 | 0 |
| P12163_1_F4,19529 | R.DIMELQMK.Q          | 1615.901 | 0.01098  | 2 | 1 | 30.9 | 0 |
| P12163_2_F1,18845 | R.DIMELQMK.Q          | 1615.901 | 0.00312  | 2 | 1 | 28.7 | 0 |
| P12163_1_F8,14564 | K.FDLHAEPDEEK.T       | 1938.006 | 0.00712  | 3 | 1 | 27   | 0 |

|                   |                           |          |          |   |   |      |   |
|-------------------|---------------------------|----------|----------|---|---|------|---|
| P12163_1_F8,14582 | K.FDLHAEPDEEK.T           | 1938.006 | 0.01495  | 2 | 1 | 28.9 | 0 |
| P12163_2_F6,14053 | K.FDLHAEPDEEK.T           | 1938.006 | -0.00235 | 2 | 1 | 39.5 | 0 |
| P12163_1_F3,23691 | K.LIFTFDDTK.K             | 1707.978 | 0.00849  | 2 | 1 | 45.8 | 0 |
| P12163_1_F2,16884 | R.FGSEAVFVPR.E            | 1412.784 | 0.00205  | 3 | 1 | 34.1 | 0 |
| P12163_1_F2,17914 | R.LSASAVDFPR.V            | 1366.763 | 0.00378  | 2 | 1 | 27.3 | 0 |
| P12163_1_F4,26829 | K.GSSLFGM*FSLK.E ! K.     | 1798.003 | 0.00572  | 3 | 1 | 24.1 | 0 |
| P12163_2_F1,23251 | K.GSSLFGM*FSLK.E ! K.     | 1798.003 | 0.01127  | 3 | 1 | 27.8 | 0 |
| P12163_1_S1,16641 | R.ANPAGDSPLGFFR.S         | 1652.87  | 0.00432  | 3 | 1 | 32.6 | 0 |
| P12163_1_S1,21107 | R.ANPAGDSPLGFFR.S         | 1652.87  | 0.00096  | 3 | 1 | 45.8 | 0 |
| P12163_1_S10,1012 | R.QHDPSFK.Y               | 1466.821 | 0.00869  | 3 | 1 | 30.3 | 0 |
| P12163_1_F3,12025 | R.SIESNIER.L              | 1251.685 | 0.00398  | 2 | 1 | 33.1 | 0 |
| P12163_1_F3,22245 | K.ILSQPLADIGGK.G          | 1820.11  | 0.00494  | 2 | 1 | 55.2 | 0 |
| P12163_1_F6,18086 | K.MANYLGSLNHEETR.L        | 1938.964 | 0.00402  | 3 | 1 | 32.2 | 0 |
| P12163_1_S1,9213  | R.GLVASPDGTR.V            | 1276.716 | 0.0048   | 2 | 1 | 38.6 | 0 |
| P12163_1_F6,14292 | R.GSPLALAQAHETR.N         | 1654.918 | 0.00679  | 3 | 1 | 25.5 | 0 |
| P12163_1_F8,14151 | R.GSPLALAQAHETR.N         | 1654.918 | 0.00256  | 3 | 1 | 51.2 | 0 |
| P12163_2_F6,13566 | R.GSPLALAQAHETR.N         | 1654.918 | 0.00232  | 3 | 1 | 77.8 | 0 |
| P12163_1_S1,19489 | K.LPSLTGPIQPAIAK.L        | 2014.252 | 0.00708  | 3 | 1 | 29.3 | 0 |
| P12163_2_F6,19481 | K.LQSFQYTEYFHNR.C         | 1965.976 | -0.00126 | 3 | 1 | 39.6 | 0 |
| P12163_1_F4,15311 | R.CLCGAPLESCK.-           | 1902.97  | 0.00689  | 2 | 1 | 30.4 | 0 |
| P12163_1_F4,15319 | R.CLCGAPLESCK.-           | 1902.97  | 0.00394  | 3 | 1 | 24.2 | 0 |
| P12163_2_F1,14303 | R.CLCGAPLESCK.-           | 1902.97  | 0.00591  | 2 | 1 | 29.4 | 0 |
| P12163_2_F1,16916 | R.LCGPIPVGGK.L            | 1605.961 | -0.00125 | 3 | 1 | 23.6 | 0 |
| P12163_2_F7,10897 | K.GAALLHQEGAR.E           | 1426.807 | 0.0021   | 3 | 1 | 24.1 | 0 |
| P12163_2_F7,10919 | K.GAALLHQEGAR.E           | 1426.807 | -0.00069 | 3 | 1 | 63.1 | 0 |
| P12163_1_F2,20847 | K.LSDAPLAIVDK.R           | 1750.057 | 0.00696  | 2 | 1 | 44.3 | 0 |
| P12163_1_F2,20877 | K.LSDAPLAIVDK.R           | 1750.057 | 0.00554  | 3 | 1 | 36.6 | 0 |
| P12163_1_S1,22878 | K.NITAVIPYFGYAR.A         | 1788.995 | 0.0006   | 3 | 1 | 29.7 | 0 |
| P12163_1_F6,17985 | R.EVYACCTHAVFSPPAI        | 2411.179 | 0.00735  | 3 | 1 | 27.1 | 0 |
| P12163_1_F4,22588 | K.ATELLGWEPK.I            | 1752.015 | 0.00635  | 2 | 1 | 36.7 | 0 |
| P12163_1_F7,21344 | R.ILVTTGGAGFIGSHLVDI      | 2292.354 | 0.00533  | 3 | 1 | 44.6 | 0 |
| P12163_1_F8,22323 | R.ILVTTGGAGFIGSHLVDI      | 2292.354 | 0.00224  | 3 | 1 | 38.6 | 0 |
| P12163_1_F9,9577  | R.QHGIEIR.I               | 1156.674 | 0.00253  | 3 | 1 | 31.5 | 0 |
| P12163_2_F8_12070 | R.QHGIEIR.I               | 1156.674 | 0.00253  | 3 | 1 | 24.5 | 0 |
| P12163_1_F7,19476 | R.VAETLM*FDYHR.Q          | 1701.857 | 0.002    | 3 | 1 | 42.1 | 0 |
| P12163_1_F5,7664  | K.GLQNQDK.V               | 1410.816 | 0.00828  | 2 | 1 | 28.3 | 0 |
| P12163_2_F2,8512  | K.GLQNQDK.V               | 1410.816 | 0.00816  | 2 | 1 | 27.9 | 0 |
| P12163_1_S1,20284 | K.LLGDDSQNFCYACFSC        | 2590.253 | 0.01489  | 3 | 1 | 37.2 | 0 |
| P12163_1_F8,15250 | K.RVVVVDDDSIVR.G          | 1560.937 | 0.00246  | 3 | 1 | 52.1 | 0 |
| P12163_2_F6,14638 | K.RVVVVDDDSIVR.G          | 1560.937 | 0.00408  | 3 | 1 | 57.2 | 0 |
| P12163_1_F3,14307 | R.MSVEEIR.E               | 1167.634 | 0.00347  | 2 | 1 | 25.4 | 0 |
| P12163_2_F6,14149 | K.LLESAHAVDR.E            | 1414.796 | -0.00178 | 3 | 1 | 37.2 | 0 |
| P12163_1_F8,15867 | R.ALGDHTVVPVK.V           | 1841.11  | 0.0115   | 2 | 1 | 39.5 | 0 |
| P12163_2_F6,15317 | R.ALGDHTVVPVK.V           | 1841.11  | 0.00208  | 3 | 1 | 36.1 | 0 |
| P12163_1_F8,21022 | R.IDNLVFHPIEDR.V          | 1771.964 | 0.00323  | 3 | 1 | 48.5 | 0 |
| P12163_2_S5,19412 | R.IDNLVFHPIEDR.V          | 1771.964 | 0.00107  | 3 | 1 | 56.4 | 0 |
| P12163_2_F1,21851 | R.VLIVMGK.T               | 1367.89  | -0.00035 | 3 | 1 | 25.2 | 0 |
| P12163_1_F3,14642 | K.IDIPR.V ! K.IDLPR.G ! J | 917.5721 | 0.00308  | 2 | 1 | 25.5 | 0 |
| P12163_1_S1,13355 | R.ALVDAPDM*VR.S ! M.      | 1406.761 | 0.01049  | 2 | 1 | 27.9 | 0 |
| P12163_1_S1,16302 | R.ALVDAPDMVR.S ! M.A      | 1390.767 | 0.01243  | 2 | 1 | 29.6 | 0 |
| P12163_2_F1,18841 | R.LSLTDIK.I               | 1397.882 | 0.00366  | 3 | 1 | 21.9 | 0 |

|                   |                         |          |          |   |   |      |   |
|-------------------|-------------------------|----------|----------|---|---|------|---|
| P12163_2_F1,18848 | R.LSLTDIK.I             | 1397.882 | 0.00653  | 2 | 1 | 26.7 | 0 |
| P12163_2_F1,16838 | R.VALVNYGK.D ! R.VAL    | 1471.909 | 0.00227  | 2 | 1 | 27.8 | 0 |
| P12163_2_F1,15569 | K.AGTFLTK.Y             | 1345.83  | 0.00491  | 2 | 1 | 29.4 | 0 |
| P12163_1_S1,22183 | K.LLLIASNANVGGPTTA      | 2839.563 | 0.00115  | 3 | 1 | 79.7 | 0 |
| P12163_1_S1,22218 | K.LLLIASNANVGGPTTA      | 2839.563 | 0.00418  | 4 | 1 | 71   | 0 |
| P12163_1_F5,13790 | R.SLGQDSWK.I            | 1528.858 | 0.00799  | 2 | 1 | 28.8 | 0 |
| P12163_2_F2,14454 | R.SLGQDSWK.I            | 1528.858 | 0.00411  | 2 | 1 | 39.1 | 0 |
| P12163_2_F6,19695 | R.SQLPNFPLISPHDK.W      | 2201.254 | 0.00517  | 3 | 1 | 37.8 | 0 |
| P12163_1_F5,23444 | K.FFLLDK.D              | 1390.855 | 0.00614  | 2 | 1 | 27.4 | 0 |
| P12163_1_S1,19580 | K.GILYPSIDSIR.D         | 1537.889 | 0.00413  | 3 | 1 | 30.9 | 0 |
| P12163_1_F7,14421 | R.AAVEEDLAEGHGEVG       | 2040.03  | 0.0026   | 2 | 1 | 43.5 | 0 |
| P12163_1_F7,14450 | R.AAVEEDLAEGHGEVG       | 2040.03  | 0.00209  | 3 | 1 | 79.3 | 0 |
| P12163_2_S5,14445 | R.AAVEEDLAEGHGEVG       | 2040.03  | 0.00293  | 3 | 1 | 78.3 | 0 |
| P12163_1_F2,23507 | R.ILPVM*LDVGTNNQK.I     | 2166.241 | 0.00407  | 3 | 1 | 33.8 | 0 |
| P12163_1_F9,11516 | K.EHDVVFANR.D           | 1390.738 | 0.00304  | 3 | 1 | 32.8 | 0 |
| P12163_1_F3,25211 | K.LPYLEAIVK.E           | 1654.04  | 0.00246  | 3 | 1 | 31.5 | 0 |
| P12163_1_F4,26131 | K.LPYLEAIVK.E           | 1654.04  | -0.0008  | 2 | 1 | 33.4 | 0 |
| P12163_1_F3,20663 | R.GNNFNLYLPGSGR.R       | 1746.886 | 0.00616  | 2 | 1 | 26.4 | 0 |
| P12163_1_F8,16680 | R.LHPPAPLLTSR.R         | 1505.911 | 0.00314  | 3 | 1 | 25.6 | 0 |
| P12163_2_F6,16163 | R.LHPPAPLLTSR.R         | 1505.911 | 0.00284  | 3 | 1 | 25   | 0 |
| P12163_1_F7,22688 | K.FPEVLGCDIEHEL.R.N     | 2018.032 | 0.00214  | 3 | 1 | 47   | 0 |
| P12163_2_F10,1897 | K.KFPEVLGCDIEHEL.R.N    | 2450.332 | 0.00558  | 4 | 1 | 68.5 | 0 |
| P12163_2_F1,16496 | K.VLGYNVDCCK.G          | 1675.93  | 0.00455  | 2 | 1 | 31.6 | 0 |
| P12163_1_F5,13893 | R.NNVQILGK.D            | 1493.926 | 0.00404  | 2 | 1 | 37.2 | 0 |
| P12163_2_F2,14673 | R.NNVQILGK.D            | 1493.926 | 0.00688  | 2 | 1 | 35.7 | 0 |
| P12163_2_F9,13042 | K.DRPFVLAR.A            | 1277.763 | 0.00038  | 3 | 1 | 23.7 | 0 |
| P12163_1_F9,11497 | R.DALHLDR.V             | 1143.642 | 0.00182  | 3 | 1 | 34.7 | 0 |
| P12163_2_F7,10685 | R.DALHLDR.V             | 1143.642 | 0.00179  | 3 | 1 | 23   | 0 |
| P12163_1_S10,9516 | R.EAIHVR.Y              | 1028.615 | 0.00289  | 3 | 1 | 26.1 | 0 |
| P12163_1_S1,22619 | R.FQVPDVVLPQFESK.K      | 2241.274 | 0.00776  | 3 | 1 | 40.8 | 0 |
| P12163_1_S1,22245 | K.TTLMDVLAGR.K          | 1380.782 | 0.00404  | 2 | 1 | 38.6 | 0 |
| P12163_1_S1,9785  | K.VTDVDNER.F            | 1251.648 | 0.00482  | 2 | 1 | 27.7 | 0 |
| P12163_1_F3,24783 | R.LTLLGPPSSGK.T         | 1791.12  | 0.01004  | 2 | 1 | 44.5 | 0 |
| P12163_1_F3,24799 | R.LTLLGPPSSGK.T         | 1791.12  | 0.00649  | 3 | 1 | 42.4 | 0 |
| P12163_1_F4,18048 | R.VGIDIPK.I ! R.VGIDLPI | 1349.861 | 0.01075  | 2 | 1 | 24.8 | 0 |
| P12163_1_F2,19311 | R.ITSPLEPSSVEK.I        | 2008.179 | 0.00736  | 2 | 1 | 31.2 | 0 |
| P12163_1_F3,28029 | R.LFQVEYAIEAIK.L        | 2032.194 | 0.00621  | 3 | 1 | 41.2 | 0 |
| P12163_1_F9,8958  | R.TLVEHAR.V             | 1129.663 | 0.00433  | 3 | 1 | 47.6 | 0 |
| P12163_1_F9,4752  | R.VETQNRH.F             | 1187.643 | 0.00324  | 3 | 1 | 37.1 | 0 |
| P12163_2_F9,5779  | R.VETQNRH.F             | 1187.643 | 0.00279  | 3 | 1 | 24.7 | 0 |
| P12163_1_F4,17977 | K.NPVELDGLK.K           | 1592.947 | 0.00858  | 2 | 1 | 28.2 | 0 |
| P12163_1_F3,22541 | K.VLLQOSPLALAK.A        | 1889.204 | 0.0041   | 2 | 1 | 30.3 | 0 |
| P12163_1_F3,22568 | K.VLLQOSPLALAK.A        | 1889.204 | 0.00576  | 3 | 1 | 45.1 | 0 |
| P12163_1_F4,24884 | K.VSSEVISFLK.E          | 1717.036 | 0.00284  | 3 | 1 | 27.5 | 0 |
| P12163_1_F2,21160 | R.LENVLVVTDANTK.F       | 2024.185 | -0.00001 | 3 | 1 | 41.9 | 0 |
| P12163_1_F3,24221 | K.ALAVFALR.D ! K.ALA    | 1164.741 | 0.00214  | 2 | 1 | 26.9 | 0 |
| P12163_1_F4,24914 | K.AVELWLVDK.A           | 1681.014 | 0.00444  | 3 | 1 | 23   | 0 |
| P12163_2_F1,24245 | K.AVELWLVDK.A           | 1681.014 | 0.00432  | 3 | 1 | 24   | 0 |
| P12163_1_F7,16885 | K.AVLPIENSVGGSIHR.N     | 1853.055 | 0.00386  | 3 | 1 | 43.2 | 0 |
| P12163_1_S1,16288 | R.VAYQGLPGAYSEAAA       | 1928.018 | 0.00192  | 3 | 1 | 26.4 | 0 |
| P12163_2_F1,15758 | K.SVFPYGK.I             | 1405.83  | 0.00023  | 2 | 1 | 24.8 | 0 |

|                   |                       |          |          |   |   |      |   |
|-------------------|-----------------------|----------|----------|---|---|------|---|
| P12163_1_S1,14175 | R.DAISSNSIPAFR.R      | 1581.854 | 0.00597  | 3 | 1 | 23.9 | 0 |
| P12163_1_S1,16672 | R.DAISSNSIPAFR.R      | 1581.854 | 0.00351  | 2 | 1 | 46.9 | 0 |
| P12163_1_F4,19940 | R.GSIPGVSFEQMK.L      | 1888.046 | 0.01117  | 3 | 1 | 50.3 | 0 |
| P12163_2_F9,15791 | R.RGSIPGVSFEQMK.L     | 2044.147 | 0.0062   | 3 | 1 | 28.2 | 0 |
| P12163_1_F2,18061 | K.AIYPDTFYR.S         | 1449.768 | 0.00632  | 2 | 1 | 24.5 | 0 |
| P12163_2_F9,13960 | K.RVDAIEYYNEK.I       | 2008.096 | 0.0005   | 3 | 1 | 29.9 | 0 |
| P12163_1_F5,12656 | R.AEAVYAESK.S         | 1575.884 | 0.00936  | 2 | 1 | 34   | 0 |
| P12163_2_F1,12957 | R.AEAVYAESK.S         | 1575.884 | 0.00326  | 2 | 1 | 40.4 | 0 |
| P12163_2_F2,11526 | R.SMVVTNNK.E          | 1500.866 | 0.00117  | 2 | 1 | 26   | 0 |
| P12163_1_F8,18104 | K.EKLEAAGCTLTVLPGF    | 2323.326 | -0.00351 | 3 | 1 | 54.8 | 0 |
| P12163_1_F5,15092 | R.AEEYFAK.K           | 1465.815 | 0.00543  | 2 | 1 | 24   | 0 |
| P12163_1_F5,15176 | R.AEEYFAK.K           | 1465.815 | 0.01041  | 3 | 1 | 25.8 | 0 |
| P12163_2_F1,14022 | R.GIAAGQGNSCGFGMR.    | 1786.863 | 0.00258  | 2 | 1 | 24.4 | 0 |
| P12163_1_F2,13368 | R.LNNLGPQPGSR.K       | 1456.817 | 0.00519  | 2 | 1 | 24.6 | 0 |
| P12163_2_F6,17138 | K.DGHLLGLAQSYAK.N     | 1981.133 | 0.00412  | 3 | 1 | 50.4 | 0 |
| P12163_1_F3,26719 | K.GLDFAAALMDDIK.N     | 1917.061 | 0.00865  | 3 | 1 | 39.9 | 0 |
| P12163_1_F4,18869 | K.LAYGDNSEFIK.D       | 1865.026 | 0.00512  | 3 | 1 | 43.6 | 0 |
| P12163_2_F1,18187 | K.LAYGDNSEFIK.D       | 1865.026 | 0.00046  | 2 | 1 | 28.7 | 0 |
| P12163_1_F3,19668 | R.VGCLSVLCEDEK.Q      | 2017.055 | 0.00042  | 2 | 1 | 27.7 | 0 |
| P12163_1_F5,15050 | K.SSLVYYDEK.G         | 1711.936 | 0.01617  | 2 | 1 | 28.8 | 0 |
| P12163_1_F3,17365 | R.NDELTVHEELK.R       | 1798.005 | 0.01146  | 2 | 1 | 34.8 | 0 |
| P12163_2_S5,12956 | R.SPLGVMHGK.S         | 1533.903 | 0.00233  | 3 | 1 | 34.8 | 0 |
| P12163_1_F6,15234 | R.YHSLVIEK.E ! R.YHSL | 1596.957 | 0.00794  | 2 | 1 | 33.6 | 0 |
| P12163_2_F7,13624 | R.YHSLVIEK.E ! R.YHSL | 1596.957 | 0.00323  | 3 | 1 | 29   | 0 |
| P12163_1_F4,19559 | K.LLGLNPK.V           | 1477.92  | 0.00179  | 2 | 1 | 24   | 0 |
| P12163_1_F8,11050 | M.APAAASDSIKPR.D      | 1792.054 | 0.00679  | 3 | 1 | 55.4 | 0 |
| P12163_2_F6,10900 | M.APAAASDSIKPR.D      | 1792.054 | 0.00409  | 3 | 1 | 35.5 | 0 |
| P12163_1_S1,14320 | R.DVCIVGVAR.T         | 1292.73  | 0.00271  | 2 | 1 | 33.9 | 0 |
| P12163_1_F6,18550 | R.LGHDSLVDGMLK.D      | 1893.072 | 0.00414  | 3 | 1 | 22.5 | 0 |
| P12163_1_F2,14850 | K.AEPNFSLTIR.N        | 1451.816 | 0.00501  | 3 | 1 | 28.8 | 0 |
| P12163_1_F2,15321 | K.AEPNFSLTIR.N        | 1451.816 | 0.00195  | 3 | 1 | 41.1 | 0 |
| P12163_1_S1,7217  | R.DPEEDER.R           | 1193.559 | 0.00593  | 2 | 1 | 32.6 | 0 |
| P12163_2_F7,13785 | R.LNVDAFHGDK.K        | 1723.959 | 0.00424  | 3 | 1 | 34.3 | 0 |
| P12163_2_F9,6270  | R.RDPEEDER.R          | 1349.66  | 0.00262  | 3 | 1 | 42   | 0 |
| P12163_1_F3,16529 | K.LTPQQVDEISK.Q       | 1866.079 | 0.0025   | 3 | 1 | 24.2 | 0 |
| P12163_1_F5,10823 | K.TAASGFSAK.L         | 1447.836 | 0.00312  | 2 | 1 | 38.2 | 0 |
| P12163_1_F3,22695 | R.ILSSVLGSQEAAK.D     | 1911.137 | 0.00552  | 3 | 1 | 33.2 | 0 |
| P12163_1_F3,22698 | R.ILSSVLGSQEAAK.D     | 1911.137 | -0.00239 | 2 | 1 | 26.5 | 0 |
| P12163_2_S3,8671  | R.TLQLHSGHGK.L        | 1685.991 | 0.00576  | 4 | 1 | 22.3 | 0 |
| P12163_1_F3,22128 | K.AIGSYGASFLQNQLK.†   | 2205.249 | -0.00235 | 3 | 1 | 48.1 | 0 |
| P12163_2_F1,8357  | K.DDVATNK.A           | 1370.774 | 0.01064  | 2 | 1 | 24.5 | 0 |
| P12163_1_S1,24371 | R.IPATLIADSAAAALM*†   | 2181.277 | 0.00624  | 3 | 1 | 28.4 | 0 |
| P12163_1_F8,19757 | R.LTAFELVHDR.I        | 1504.843 | 0.00667  | 3 | 1 | 48.9 | 0 |
| P12163_2_F6,19179 | R.LTAFELVHDR.I        | 1504.843 | 0.00604  | 3 | 1 | 41.3 | 0 |
| P12163_1_F3,16374 | K.DVADSVLSDK.S        | 1656.926 | 0.00548  | 2 | 1 | 47.5 | 0 |
| P12163_1_F3,16375 | K.DVADSVLSDK.S        | 1656.926 | 0.00574  | 3 | 1 | 25.8 | 0 |
| P12163_1_F3,22056 | R.EGYLYSISASTLGK.Q    | 2097.169 | 0.0107   | 3 | 1 | 38.4 | 0 |
| P12163_2_S5,7932  | R.HYVASTAER.E         | 1337.711 | 0.00273  | 3 | 1 | 23.4 | 0 |
| P12163_1_F2,12506 | R.YSSAAPLSPNAR.L      | 1537.828 | -0.00034 | 2 | 1 | 31.2 | 0 |
| P12163_1_S1,14691 | R.EILQNQDTSFCNR.T ! † | 1928.944 | 0.00185  | 2 | 1 | 33   | 0 |
| P12163_1_F3,25043 | R.FLGLDLVDK.G         | 1627.988 | 0.00921  | 3 | 1 | 35.8 | 0 |

|                   |                        |          |          |   |   |      |   |
|-------------------|------------------------|----------|----------|---|---|------|---|
| P12163_1_F4,19277 | R.LELEQTIGK.C ! R.LELI | 1638.989 | 0.00645  | 3 | 1 | 23.1 | 0 |
| P12163_1_F8,18842 | R.LHPAAPLLIPR.E ! R.LF | 1501.952 | 0.0027   | 3 | 1 | 25.7 | 0 |
| P12163_2_F6,18380 | R.LHPAAPLLIPR.E ! R.LF | 1501.952 | 0.00207  | 3 | 1 | 23.3 | 0 |
| P12163_1_F3,20253 | K.EAVPEMWSPEMK.S ! I   | 2042.055 | 0.00851  | 2 | 1 | 33.8 | 0 |
| P12163_1_F4,25832 | K.FSLETIK.E            | 1558.966 | 0.00683  | 2 | 1 | 40.7 | 0 |
| P12163_1_F8,16591 | K.YGVVNEHFEVTK.F       | 2030.117 | 0.00564  | 2 | 1 | 24.4 | 0 |
| P12163_1_F3,19047 | R.AFTEEQEALVVK.S       | 1972.121 | 0.00324  | 3 | 1 | 51   | 0 |
| P12163_1_F3,19063 | R.AFTEEQEALVVK.S       | 1972.121 | 0.00431  | 2 | 1 | 55.1 | 0 |
| P12163_1_F3,20479 | K.EFEPTPAQLLK.H        | 1881.094 | 0.00795  | 2 | 1 | 43.9 | 0 |
| P12163_1_F6,19587 | K.HPLAILGYVPR.D        | 1539.931 | 0.00165  | 3 | 1 | 29.2 | 0 |
| P12163_2_F6,19053 | K.HPLAILGYVPR.D        | 1539.931 | 0.00342  | 3 | 1 | 36.4 | 0 |
| P12163_1_S1,23931 | K.SVIDAFAGIVER.D       | 1580.895 | 0.00582  | 2 | 1 | 27.1 | 0 |
| P12163_2_F2,17547 | R.GFVPNALK.T           | 1453.899 | 0.01062  | 3 | 1 | 23.1 | 0 |
| P12163_1_F2,16109 | K.AVSLAIAR.D           | 1104.704 | 0.00165  | 2 | 1 | 24.4 | 0 |
| P12163_1_S1,16991 | K.ITQLTDNVYLCR.S       | 1799.963 | 0.00939  | 3 | 1 | 29.2 | 0 |
| P12163_1_S1,20390 | K.ITQLTDNVYLCR.S       | 1799.963 | -0.00011 | 2 | 1 | 27.9 | 0 |
| P12163_1_F3,23876 | K.NFLQTGMIVGGWDK.N     | 2174.189 | 0.00279  | 3 | 1 | 36   | 0 |
| P12163_2_F1,7143  | R.DGASGGVVR.T          | 1121.622 | 0.00434  | 2 | 1 | 26.3 | 0 |
| P12163_1_S1,24678 | K.VEEFVSIVAR.F         | 1452.836 | 0.00364  | 2 | 1 | 25.9 | 0 |
| P12163_1_F5,12788 | R.AFGYSESEGK.S         | 1682.885 | 0.00923  | 2 | 1 | 40.9 | 0 |
| P12163_1_S1,17852 | R.IAGIDQDELVDPK.L      | 2021.137 | 0.00023  | 3 | 1 | 56.4 | 0 |
| P12163_1_S1,17877 | R.IAGIDQDELVDPK.L      | 2021.137 | 0.01134  | 2 | 1 | 49.3 | 0 |
| P12163_1_F7,19844 | R.LHEISCPVLIVTGDTDR    | 2229.185 | 0.00274  | 3 | 1 | 44.6 | 0 |
| P12163_1_F5,19591 | K.ALVAFYQK.Y           | 1547.941 | 0.00338  | 3 | 1 | 22.1 | 0 |
| P12163_2_F2,20211 | K.ALVAFYQK.Y           | 1547.941 | 0.00509  | 2 | 1 | 27.9 | 0 |
| P12163_1_S1,22632 | K.AYEPILLGR.H          | 1448.878 | 0.00264  | 3 | 1 | 48.6 | 0 |
| P12163_2_F1,13476 | K.TAVAVTYCK.R          | 1620.924 | 0.00459  | 2 | 1 | 34.7 | 0 |
| P12163_1_S1,14579 | R.TLLVADPR.R           | 1188.725 | 0.00285  | 2 | 1 | 37.8 | 0 |
| P12163_2_F4,14578 | K.AGLYVHLR.I           | 1232.742 | 0.00276  | 3 | 1 | 37.9 | 0 |
| P12163_2_F2,17664 | K.QQPLTWYK.A           | 1671.968 | 0.00343  | 2 | 1 | 24.9 | 0 |
| P12163_1_F8,18777 | K.TGVLGPVVLHGIDEGk     | 2355.397 | -0.00274 | 4 | 1 | 32.3 | 0 |
| P12163_2_F10,1656 | K.TGVLGPVVLHGIDEGk     | 2355.397 | 0.00354  | 4 | 1 | 42   | 0 |
| P12163_1_F3,28150 | R.QNLLIVFEEISGDASK.I   | 2371.333 | 0.00904  | 3 | 1 | 42.7 | 0 |
| P12163_1_F3,20169 | K.ELINPGIEIK.M         | 1734.062 | 0.00721  | 3 | 1 | 23.4 | 0 |
| P12163_2_F1,20123 | K.ELLGWEPK.V           | 1579.93  | 0.00165  | 2 | 1 | 30.1 | 0 |
| P12163_1_F7,21344 | R.ILVTTGGAGFIGSHLVDI   | 2292.354 | 0.00533  | 3 | 1 | 44.6 | 0 |
| P12163_1_F8,22323 | R.ILVTTGGAGFIGSHLVDI   | 2292.354 | 0.00224  | 3 | 1 | 38.6 | 0 |
| P12163_1_F7,19476 | R.VAETLM*FDYHR.Q       | 1701.857 | 0.002    | 3 | 1 | 42.1 | 0 |
| P12163_1_F6,13620 | K.HPDNYIEIR.D          | 1460.78  | 0.00526  | 3 | 1 | 35   | 0 |
| P12163_1_S1,14433 | K.LDVIDTR.T            | 1135.662 | 0.00484  | 3 | 1 | 24.7 | 0 |
| P12163_1_F4,21485 | K.SIVFGPLPK.T ! K.SIVF | 1565.988 | 0.00656  | 2 | 1 | 32.1 | 0 |
| P12163_2_F1,20958 | K.SIVFGPLPK.T ! K.SIVF | 1565.988 | 0.00339  | 3 | 1 | 24   | 0 |
| P12163_2_F7,6334  | R.AATVHPTR.T ! R.AATV  | 1156.674 | 0.00141  | 3 | 1 | 26.2 | 0 |
| P12163_1_F3,16331 | K.AIELTEQADTK.G        | 1827.032 | 0.00393  | 2 | 1 | 57.2 | 0 |
| P12163_1_F4,12626 | K.NYCEGLQEDQK.I        | 1991.995 | 0.0049   | 2 | 1 | 39.4 | 0 |
| P12163_2_F1,11700 | K.NYCEGLQEDQK.I        | 1991.995 | 0.00434  | 2 | 1 | 39.1 | 0 |
| P12163_1_F2,14657 | R.ISSGVEGIAR.I         | 1292.748 | 0.0029   | 2 | 1 | 33.6 | 0 |
| P12163_1_F4,17635 | R.VPLQTIGAK.I          | 1534.978 | 0.00449  | 3 | 1 | 32.2 | 0 |
| P12163_1_F4,12526 | K.NCSATVGQVGNVGAN      | 2312.224 | 0.00359  | 3 | 1 | 52.2 | 0 |
| P12163_2_F1,11653 | K.NCSATVGQVGNVGAN      | 2312.224 | 0.00845  | 3 | 1 | 43   | 0 |
| P12163_1_S1,20006 | R.GAIIGDTIVSGTEVPIK.   | 2278.348 | 0.00503  | 3 | 1 | 54.1 | 0 |

|                   |                    |          |          |   |   |      |   |
|-------------------|--------------------|----------|----------|---|---|------|---|
| P12163_1_F9,9825  | R.GIITAGHR.G       | 1128.679 | 0.00315  | 3 | 1 | 33.4 | 0 |
| P12163_2_F6,18167 | R.NAYICLIHYGDGEK.R | 2261.184 | 0.01166  | 3 | 1 | 26.4 | 0 |
| P12163_1_F6,15997 | K.KNPFVANHLLR.K    | 1917.164 | 0.00464  | 4 | 1 | 35.9 | 0 |
| P12163_2_F7,15355 | K.NPFVANHLLR.K     | 1484.864 | -0.00073 | 3 | 1 | 64.3 | 0 |
| P12163_1_S10,1906 | R.ASTIPTMVGHTIAIHN | 2293.275 | 0.00874  | 4 | 1 | 27   | 0 |
| P12163_1_F8,16960 | R.EHLPYITDR.M      | 1560.869 | 0.00412  | 3 | 1 | 30.8 | 0 |
| P12163_2_F6,16383 | R.EHLPYITDR.M      | 1560.869 | 0.00118  | 3 | 1 | 36.1 | 0 |
| P12163_1_F4,14453 | K.IDVNPPK.G        | 1390.851 | 0.01211  | 2 | 1 | 25.6 | 0 |
| P12163_2_F1,13577 | K.IDVNPPK.G        | 1390.851 | 0.01059  | 2 | 1 | 24.7 | 0 |
| P12163_1_S1,22889 | K.SAGMSEAAIEELLR.V | 1780.942 | 0.002    | 3 | 1 | 42   | 0 |
| P12163_1_F6,15670 | R.CHSIPEHLFGK.V    | 1933.057 | 0.00633  | 4 | 1 | 23.1 | 0 |
| P12163_1_F2,15304 | R.SLSPSPVSDDLQK.I  | 1981.106 | 0.00186  | 2 | 1 | 33.1 | 0 |
| P12163_1_F3,15000 | K.GQMSGILLR.K      | 1278.751 | 0.00565  | 3 | 1 | 31.1 | 0 |
| P12163_2_F2,14909 | K.SNPFTVK.S        | 1400.836 | 0.00605  | 2 | 1 | 24   | 0 |
| P12163_1_F7,18010 | K.TSVEGVFAAGDVQDH  | 2307.131 | 0.00423  | 3 | 1 | 44.7 | 0 |
| P12163_2_S5,17805 | K.TSVEGVFAAGDVQDH  | 2307.131 | 0.00321  | 3 | 1 | 67.1 | 0 |
| P12163_2_F4,10282 | R.HVHLLVR.R        | 1177.747 | 0.00347  | 3 | 1 | 29.4 | 0 |
| P12163_1_S1,17750 | K.IFLQQPNSESQLR.R  | 1864.023 | 0.00427  | 3 | 1 | 34.7 | 0 |
| P12163_1_F6,10636 | R.HAYVDPNDPTK.I    | 1865.001 | 0.01251  | 3 | 1 | 36.3 | 0 |
| P12163_2_F7,9795  | R.HAYVDPNDPTK.I    | 1865.001 | 0.00804  | 3 | 1 | 31   | 0 |
| P12163_2_F1,6409  | R.QSNVGTEPR.V      | 1291.691 | 0.0038   | 2 | 1 | 28.6 | 0 |
| P12163_1_F6,7012  | R.TYHSQPVEHSN.-    | 1602.781 | 0.00377  | 2 | 1 | 30.9 | 0 |
| P12163_1_S1,21814 | K.LVCDLYALNR.I     | 1540.846 | 0.01111  | 3 | 1 | 43.8 | 0 |
| P12163_2_F10,1680 | K.THDEQLVGDVHALSA  | 2498.382 | 0.005    | 4 | 1 | 35.5 | 0 |
| P12163_2_F7,7624  | R.EACGGHGYYAAVNR.F | 1665.807 | 0.00053  | 3 | 1 | 25.1 | 0 |
| P12163_1_F4,13345 | R.NVDYVAPNK.A      | 1627.926 | 0.00248  | 2 | 1 | 43.8 | 0 |
| P12163_1_S10,1043 | K.ALHSLR.V         | 1000.62  | 0.00361  | 3 | 1 | 22.2 | 0 |
| P12163_2_F6,17455 | K.DHLVPCQLEALR.E   | 1754.952 | -0.00379 | 3 | 1 | 30.6 | 0 |
| P12163_2_F1,22288 | K.LQAFEGVSIK.M     | 1700.02  | 0.0001   | 3 | 1 | 44.8 | 0 |
| P12163_2_F2,8885  | R.GQNIASSK.Y       | 1412.832 | 0.0042   | 2 | 1 | 25.9 | 0 |
| P12163_1_S10,1247 | K.MLHNIR.Q         | 1087.635 | 0.00606  | 3 | 1 | 23.5 | 0 |
| P12163_1_F3,21335 | K.VLEVLR.N         | 1032.672 | 0.0032   | 2 | 1 | 31.2 | 0 |
| P12163_1_F3,14713 | R.DGYAEVVDPK.S     | 1700.932 | 0.01378  | 2 | 1 | 47.7 | 0 |
| P12163_1_F7,21926 | R.ILGLGDLGCHGM*GIP | 2418.346 | 0.00476  | 4 | 1 | 25.2 | 0 |
| P12163_2_S3,16848 | K.DGIDYAAVTVQLPGGI | 2065.087 | 0.00277  | 3 | 1 | 32.3 | 0 |
| P12163_2_F1,11759 | K.NAPPDFQNTK.L     | 1739.954 | 0.00332  | 2 | 1 | 30.8 | 0 |
| P12163_2_F2,6149  | K.NTSSSTGK.I       | 1389.779 | -0.00079 | 2 | 1 | 26.9 | 0 |
| P12163_1_F7,19821 | K.QLVASGKPFNGGEFI  | 2903.588 | 0.00167  | 4 | 1 | 26   | 0 |
| P12163_1_F5,15628 | K.NIAMGYVK.S       | 1503.881 | 0.00709  | 3 | 1 | 22.3 | 0 |
| P12163_1_F6,13252 | K.TALHDFHVANGGK.M  | 1975.097 | 0.00815  | 3 | 1 | 23.4 | 0 |
| P12163_2_F1,14762 | R.AEGGFLGAEK.I     | 1586.9   | 0.00772  | 3 | 1 | 39.8 | 0 |
| P12163_1_F2,18907 | R.VGFFAGPPAR.S     | 1379.774 | 0.00299  | 2 | 1 | 25.2 | 0 |
| P12163_1_F2,19940 | K.ALIINELTGR.V     | 1403.852 | 0.00308  | 3 | 1 | 36.3 | 0 |
| P12163_1_F4,22374 | K.LGSSSLALLAK.A    | 1668.052 | 0.00514  | 3 | 1 | 28   | 0 |
| P12163_2_F2,13737 | K.SWTYQEAK.S       | 1620.884 | 0.00703  | 2 | 1 | 27.2 | 0 |
| P12163_1_F2,23431 | R.LVEAVNAIEPQIK.S  | 2032.226 | 0.00573  | 3 | 1 | 24.7 | 0 |
| P12163_1_S1,21958 | K.DFVTLGLLPPTAEK.E | 2109.242 | 0.00382  | 3 | 1 | 41.3 | 0 |
| P12163_1_F3,23904 | K.ILVELGPAYVK.I    | 1810.13  | 0.00439  | 3 | 1 | 39.2 | 0 |
| P12163_1_F3,15046 | R.DDVDAFTEK.S      | 1647.869 | 0.00915  | 2 | 1 | 43   | 0 |
| P12163_1_F3,24855 | R.SLAVLEGIAISSNPYK | 2384.364 | 0.00394  | 3 | 1 | 59.9 | 0 |
| P12163_1_F2,10990 | K.ECEEEAGIPR.S     | 1493.721 | -0.00098 | 2 | 1 | 32.9 | 0 |

|                   |                       |          |          |   |   |      |   |
|-------------------|-----------------------|----------|----------|---|---|------|---|
| P12163_2_F1,18576 | R.AAAPYFGIK.A         | 1545.925 | 0.00459  | 3 | 1 | 26.7 | 0 |
| P12163_1_F3,21877 | R.DVIFCYDLK.L ! R.DVI | 1780.976 | 0.00818  | 2 | 1 | 44.6 | 0 |
| P12163_2_F8,12070 | R.FASHLR.K            | 1034.605 | 0.00553  | 3 | 1 | 26.5 | 0 |
| P12163_2_F4,15664 | K.AMVEHLQHYGVITSK.    | 2321.29  | 0.00572  | 3 | 1 | 35.7 | 0 |
| P12163_2_F1,14446 | K.SAAAPLLK.E          | 1378.888 | 0.00595  | 2 | 1 | 31   | 0 |
| P12163_2_F2,12020 | R.SWSGSGVVK.N         | 1529.853 | 0.00207  | 2 | 1 | 27.9 | 0 |
| P12163_1_F3,11976 | R.YVPLTSR.D           | 1139.673 | 0.00278  | 3 | 1 | 22.8 | 0 |
| P12163_1_S1,20362 | K.EAFTLFDTDGDGK.I     | 2024.043 | 0.00691  | 3 | 1 | 46.8 | 0 |
| P12163_1_S1,22012 | K.IAPSELGILMR.S       | 1503.887 | 0.00467  | 3 | 1 | 39.5 | 0 |
| P12163_1_F4,25621 | R.FLDLM*AK.H          | 1461.86  | 0.00441  | 3 | 1 | 25.8 | 0 |
| P12163_1_F4,14074 | R.SLGGNPTQAQLK.S      | 1822.064 | 0.00137  | 2 | 1 | 63.9 | 0 |
| P12163_1_F3,21326 | K.AFVDDVVNAYEK.L      | 1978.074 | 0.00958  | 3 | 1 | 47.4 | 0 |
| P12163_1_F3,24829 | K.AILPFLDPK.T         | 1622.014 | 0.00508  | 2 | 1 | 26.9 | 0 |
| P12163_1_F4,20838 | R.FEPQDNFFK.A         | 1779.953 | 0.00681  | 2 | 1 | 30.8 | 0 |
| P12163_1_F9,15913 | R.HAILDGDIGVK.E       | 1746.037 | 0.00444  | 3 | 1 | 29.3 | 0 |
| P12163_1_F3,6664  | K.AASSSTSLNTR.K       | 1398.749 | 0.00323  | 2 | 1 | 36.6 | 0 |
| P12163_2_F10,5758 | K.SHAGTNK.A           | 1322.764 | 0.00573  | 3 | 1 | 24.2 | 0 |
| P12163_1_F2,11399 | R.AGADIETVR.K         | 1235.69  | 0.00362  | 2 | 1 | 36.1 | 0 |
| P12163_1_F6,12915 | R.KLDEDTENLAHDR.V     | 2164.145 | 0.01198  | 3 | 1 | 28.5 | 0 |
| P12163_1_F3,23006 | K.EILNTTTFWDGPEK.Y    | 2259.212 | 0.00931  | 3 | 1 | 38.4 | 0 |
| P12163_1_F5,17686 | K.GAPWQDFSK.A         | 1643.9   | 0.003    | 2 | 1 | 25.2 | 0 |
| P12163_1_F2,17437 | K.QQSIEDVLR.Q         | 1320.742 | 0.00284  | 2 | 1 | 31.1 | 0 |
| P12163_1_F4,13372 | K.QEFYDGDGGK.S        | 1723.875 | 0.00746  | 2 | 1 | 45.9 | 0 |
| P12163_1_F8,15816 | K.IVVESQDEDKIQVR.V    | 2266.286 | 0.00397  | 2 | 1 | 34.2 | 0 |
| P12163_1_F3,13890 | K.VLTNLAR.S           | 1090.689 | 0.00443  | 3 | 1 | 24.9 | 0 |
| P12163_1_S1,24541 | R.DFLIQILGEER.V       | 1636.921 | 0.00154  | 3 | 1 | 55.5 | 0 |
| P12163_1_F3,15429 | R.SAPPIGFR.R          | 1245.726 | 0.00552  | 3 | 1 | 37.3 | 0 |
| P12163_2_F1,13830 | K.AAAEEAVLR.E         | 1233.71  | 0.0055   | 2 | 1 | 31.5 | 0 |
| P12163_1_F4,19095 | K.VPFPVAK.A           | 1365.871 | 0.00929  | 3 | 1 | 27.3 | 0 |
| P12163_1_F6,11878 | R.EYPHYVK.V           | 1543.873 | 0.00723  | 3 | 1 | 41.2 | 0 |
| P12163_1_F8,18986 | R.NYSFEDVNHFMAER.I    | 2062.959 | 0.00142  | 3 | 1 | 40.4 | 0 |
| P12163_1_S1,20524 | K.AICTEAGLLALR.E      | 1591.914 | 0.00185  | 2 | 1 | 24.9 | 0 |
| P12163_1_F4,15220 | K.DEFSGADIK.A         | 1589.863 | 0.00782  | 2 | 1 | 32.8 | 0 |
| P12163_1_F3,17099 | K.GVILYGEPGTGK.T      | 1799.052 | 0.00626  | 2 | 1 | 36.9 | 0 |
| P12163_1_F3,18782 | R.LPTVTPLSK.C         | 1563.993 | 0.00675  | 3 | 1 | 22.4 | 0 |
| P12163_1_S1,17627 | K.AGEVVTTIVQNNPR.S    | 1802.007 | -0.00209 | 2 | 1 | 52.5 | 0 |
| P12163_1_F9,13231 | K.HFEPPLR.A           | 1199.684 | 0.00258  | 3 | 1 | 26.1 | 0 |
| P12163_2_F2,13421 | R.AWAANPASK.K         | 1523.879 | 0.00394  | 2 | 1 | 27   | 0 |
| P12163_2_F9,7733  | R.NLSEEDRR.W          | 1322.697 | 0.00264  | 3 | 1 | 30.3 | 0 |
| P12163_1_F6,15013 | R.ELLIDHVGHR.C        | 1492.854 | 0.00227  | 3 | 1 | 43.6 | 0 |
| P12163_1_F9,11175 | R.GLIAHK.D            | 1246.809 | 0.00519  | 3 | 1 | 25.6 | 0 |
| P12163_1_F8,13373 | R.HTISVVPVTR.V        | 1412.853 | 0.00469  | 3 | 1 | 33.7 | 0 |
| P12163_1_F7,19460 | R.SQFPVLFVPHQETR.V    | 1989.086 | 0.0025   | 3 | 1 | 42.4 | 0 |
| P12163_1_F8,13334 | K.VELSHPNAELR.L       | 1568.87  | 0.002    | 2 | 1 | 25.1 | 0 |
| P12163_1_F4,13353 | R.AEEIPEEEK.N         | 1681.91  | 0.01052  | 2 | 1 | 37.2 | 0 |
| P12163_1_F8,20091 | R.DIYFDLVDHDK.V ! K.I | 1988.059 | 0.00259  | 3 | 1 | 45.8 | 0 |
| P12163_1_F6,23032 | R.LLEVIFYHK.I         | 1656.993 | 0.0086   | 3 | 1 | 31   | 0 |
| P12163_1_F4,24154 | K.EGVLAIFYGECWK.I     | 2067.083 | 0.00762  | 3 | 1 | 29.3 | 0 |
| P12163_1_F4,27867 | K.IFNALNSLELK.S       | 1870.126 | 0.0044   | 3 | 1 | 35.2 | 0 |
| P12163_1_F3,23393 | R.EYSDFVAELTSK.F      | 1997.069 | 0.00731  | 3 | 1 | 29.1 | 0 |
| P12163_2_F1,17735 | R.VAADIGLEK.K         | 1523.925 | 0.00257  | 2 | 1 | 25.1 | 0 |



|                   |                       |          |          |   |   |      |   |
|-------------------|-----------------------|----------|----------|---|---|------|---|
| P12163_1_F4,12885 | K.EVALAGSSGSK.A       | 1613.932 | 0.00556  | 2 | 1 | 27.3 | 0 |
| P12163_2_F7,7189  | R.AIEEHSEER.R         | 1403.707 | 0.00117  | 3 | 1 | 26.7 | 0 |
| P12163_1_F3,25102 | R.FEAIYPILK.E         | 1702.04  | 0.00465  | 3 | 1 | 24.3 | 0 |
| P12163_1_F3,24154 | R.VLLPMLSAK.S         | 1580.007 | 0.00567  | 3 | 1 | 27.6 | 0 |
| P12163_2_F1,17044 | K.GLQDVLK.T           | 1380.867 | 0.00907  | 3 | 1 | 26.5 | 0 |
| P12163_2_F1,17997 | K.YTFVENVK.N          | 1607.925 | 0.01375  | 2 | 1 | 30   | 0 |
| P12163_1_F9,10175 | R.CIDEGMHPR.V         | 1418.682 | 0.00505  | 3 | 1 | 28.2 | 0 |
| P12163_1_F3,22749 | R.VLVDGFEDIAK.R       | 1699.025 | 0.00314  | 2 | 1 | 40.9 | 0 |
| P12163_1_F4,27575 | K.IAVLGFAPK.K         | 1573.993 | 0.00366  | 3 | 1 | 31   | 0 |
| P12163_1_F4,21160 | K.NLFFSTDVEK.H        | 1808.005 | 0.00396  | 2 | 1 | 31.6 | 0 |
| P12163_2_F1,7246  | R.ETPEGQK.A           | 1396.789 | 0.00405  | 3 | 1 | 24.5 | 0 |
| P12163_1_F3,25077 | R.IITNLWSAELSK.L ! R  | 2084.221 | 0.00767  | 3 | 1 | 27.5 | 0 |
| P12163_1_S1,12979 | K.NECPQIVVGTPGR.I     | 1730.916 | 0.0062   | 2 | 1 | 44   | 0 |
| P12163_1_F4,22880 | K.VAVFYGGVNIK.I       | 1775.068 | 0.00516  | 3 | 1 | 36.9 | 0 |
| P12163_2_F6,19490 | R.ELAYQICHEFER.F      | 1898.937 | 0.00649  | 2 | 1 | 37.7 | 0 |
| P12163_2_F9,14205 | R.HFILDECDK.M         | 1784.946 | 0.0082   | 3 | 1 | 45.2 | 0 |
| P12163_1_F2,10088 | K.AGLAPDNEAR.D        | 1317.706 | 0.00301  | 2 | 1 | 31.7 | 0 |
| P12163_1_F3,14835 | K.VDGAIPAPK.K         | 1546.941 | 0.0052   | 2 | 1 | 39.6 | 0 |
| P12163_1_F3,24532 | R.EAEAFALLSEEGIAK.G   | 2186.216 | -0.00217 | 3 | 1 | 34.7 | 0 |
| P12163_1_F4,21144 | R.EIIAAEEASFGK.T      | 1873.053 | 0.01523  | 3 | 1 | 46.2 | 0 |
| P12163_2_F6,9822  | K.DGHFETTPVSHSGG.-    | 1731.824 | 0.0023   | 2 | 1 | 28.9 | 0 |
| P12163_1_F4,19450 | K.IVEQAFSAQK.E        | 1729.01  | 0.00243  | 3 | 1 | 31.6 | 0 |
| P12163_1_F4,15333 | K.NLVIDDCDAK.Q        | 1770.952 | 0.00666  | 2 | 1 | 43.3 | 0 |
| P12163_1_F5,16316 | K.QSVYVFGCK.D         | 1695.935 | 0.00224  | 2 | 1 | 32.2 | 0 |
| P12163_1_F9,15612 | K.REDLFITTK.L         | 1731.026 | 0.00445  | 3 | 1 | 34.4 | 0 |
| P12163_1_F4,21525 | R.DLIINAIAK.I         | 1507.967 | 0.01018  | 3 | 1 | 28.1 | 0 |
| P12163_2_F9,9897  | R.HIDCAADYR.N         | 1424.689 | 0.00309  | 3 | 1 | 32.6 | 0 |
| P12163_1_S1,22498 | R.SIGISNYDIFLTR.D     | 1802.995 | 0.00507  | 3 | 1 | 57.5 | 0 |
| P12163_1_F2,19078 | K.GGVVAEVEGLR.G       | 1389.8   | 0.002    | 2 | 1 | 42.1 | 0 |
| P12163_2_F6,14252 | K.SSAYLPTQEACIHK.I    | 2213.184 | 0.00959  | 3 | 1 | 46.1 | 0 |
| P12163_2_F1,14143 | R.QLQSEDVVVK.G        | 1753.032 | 0.00624  | 3 | 1 | 23.5 | 0 |
| P12163_1_S1,21652 | R.VADIATVLQP GD TLK.' | 2149.269 | 0.00558  | 3 | 1 | 36   | 0 |
| P12163_2_F6,17472 | K.DLNHIDILSK.S        | 1776.048 | 0.00421  | 3 | 1 | 34.1 | 0 |
| P12163_1_F8,21744 | K.ILFIPIHGK.K         | 1717.098 | 0.00492  | 3 | 1 | 27.5 | 0 |
| P12163_1_F3,26924 | K.VQNLVAEIVDSK.L      | 1923.137 | 0.00068  | 3 | 1 | 23.5 | 0 |
| P12163_1_S1,24612 | R.ILLSDLPR.K          | 1343.856 | 0.00335  | 2 | 1 | 26.9 | 0 |
| P12163_1_F3,19920 | K.DLPQVVIPK.T         | 1617.02  | 0.00113  | 3 | 1 | 26.9 | 0 |
| P12163_1_F3,27649 | K.LAILDFGLVTK.L       | 1798.13  | 0.00693  | 3 | 1 | 39.4 | 0 |
| P12163_2_F8_12070 | K.QLLDTGFFHADPHPGN    | 2452.304 | 0.00533  | 4 | 1 | 28.8 | 0 |
| P12163_1_S1,14226 | R.TSNQGVDAQALR.E      | 1662.908 | -0.00136 | 2 | 1 | 42.5 | 0 |
| P12163_1_S1,18958 | K.ADWEEDATSLVSK.N     | 2222.144 | 0.00516  | 3 | 1 | 29   | 0 |
| P12163_1_F5,17084 | K.AFTNYLGSNK.A        | 1722.963 | 0.00629  | 2 | 1 | 35.5 | 0 |
| P12163_1_F5,17373 | R.MYDYVVK.E           | 1525.854 | 0.01     | 2 | 1 | 25.1 | 0 |
| P12163_1_F3,20405 | R.SANVALLLR.F         | 1260.794 | 0.0015   | 2 | 1 | 30.8 | 0 |
| P12163_1_F4,28034 | K.ALEVIQFLK.E         | 1669.051 | 0.0074   | 3 | 1 | 43.1 | 0 |
| P12163_1_F3,26074 | R.AAAVAALSQVLSAEK.    | 2037.216 | 0.00322  | 3 | 1 | 26.4 | 0 |
| P12163_2_F1,25192 | R.ASALAALSSAFK.S      | 1745.042 | 0.0012   | 3 | 1 | 33.6 | 0 |
| P12163_1_S1,23478 | R.ASALAALSSAFNPSEI    | 1983.045 | 0.00132  | 3 | 1 | 40.8 | 0 |
| P12163_2_F6,14658 | K.AGQPHAEVFALR.D      | 1599.891 | 0.00142  | 3 | 1 | 34.3 | 0 |
| P12163_1_F4,18197 | K.EGIEQNLLQK.I        | 1780.042 | -0.00045 | 2 | 1 | 31.4 | 0 |
| P12163_1_F4,24027 | R.GNYGDLEM*LLK.E      | 1877.03  | 0.00708  | 3 | 1 | 34.6 | 0 |

|                                       |          |          |   |   |      |   |
|---------------------------------------|----------|----------|---|---|------|---|
| P12163_1_F9,15501 R.LNEAFIHR.I        | 1303.742 | 0.00428  | 3 | 1 | 43.6 | 0 |
| P12163_1_S1,17896 K.LPESVAALSANR.L    | 1531.874 | 0.00347  | 2 | 1 | 26.3 | 0 |
| P12163_1_F6,18826 K.YSDFLSLHR.F       | 1441.774 | 0.00026  | 3 | 1 | 30.8 | 0 |
| P12163_1_F3,20952 R.AAIASLIPSK.F      | 1579.004 | 0.00522  | 3 | 1 | 33.9 | 0 |
| P12163_1_S1,18380 R.QNDLDEAALFTR.H    | 1696.881 | 0.00378  | 2 | 1 | 44.6 | 0 |
| P12163_2_F1,8575 K.GTVGPDGK.W         | 1338.784 | 0.00423  | 2 | 1 | 30.8 | 0 |
| P12163_1_F3,19352 K.IAQGVVGAVADK.G    | 1736.053 | 0.00518  | 2 | 1 | 46.8 | 0 |
| P12163_2_F2,10814 R.GQATAVYK.V        | 1445.857 | -0.00114 | 2 | 1 | 34.8 | 0 |
| P12163_2_F7,19789 R.RVPIFSSSLDVFK.A   | 2103.242 | -0.00325 | 3 | 1 | 31.7 | 0 |
| P12163_1_F8,14504 K.KQLALPADTTVTGESK  | 2571.512 | 0.01769  | 4 | 1 | 32.5 | 0 |
| P12163_2_F6,13717 K.KQLALPADTTVTGESK  | 2571.512 | 0.00801  | 4 | 1 | 45.8 | 0 |
| P12163_1_F2,14126 K.QLALPADTTVTGESK.I | 2139.212 | 0.01456  | 3 | 1 | 25.8 | 0 |
| P12163_1_F2,14819 K.QLALPADTTVTGESK.I | 2139.212 | 0.00443  | 2 | 1 | 25.9 | 0 |
| P12163_1_F2,14882 K.QLALPADTTVTGESK.I | 2139.212 | 0.00976  | 3 | 1 | 39.8 | 0 |
| P12163_1_F2,15408 K.QLALPADTTVTGESK.I | 2139.212 | 0.00817  | 3 | 1 | 45.9 | 0 |
| P12163_1_F2,16431 K.QLALPADTTVTGESK.I | 2139.212 | 0.00643  | 3 | 1 | 37.7 | 0 |
| P12163_1_F2,16438 K.QLALPADTTVTGESK.I | 2139.212 | 0.00503  | 2 | 1 | 34.9 | 0 |
| P12163_1_F3,17105 K.QLALPADTTVTGESK.I | 2139.212 | 0.00643  | 3 | 1 | 43.2 | 0 |
| P12163_1_F4,16274 K.QLALPADTTVTGESK.I | 2139.212 | 0.01162  | 3 | 1 | 30.2 | 0 |
| P12163_1_F5,15788 K.QLALPADTTVTGESK.I | 2139.212 | 0.00315  | 2 | 1 | 49.1 | 0 |
| P12163_1_F5,16272 K.QLALPADTTVTGESK.I | 2139.212 | -0.00361 | 2 | 1 | 44.5 | 0 |
| P12163_1_F6,15209 K.QLALPADTTVTGESK.I | 2139.212 | -0.00299 | 3 | 1 | 27.7 | 0 |
| P12163_1_F6,15599 K.QLALPADTTVTGESK.I | 2139.212 | 0.00697  | 3 | 1 | 28.6 | 0 |
| P12163_1_F7,15907 K.QLALPADTTVTGESK.I | 2139.212 | 0.00283  | 2 | 1 | 49   | 0 |
| P12163_1_F8,16686 K.QLALPADTTVTGESK.I | 2139.212 | 0.00646  | 3 | 1 | 49.3 | 0 |
| P12163_1_F8,16700 K.QLALPADTTVTGESK.I | 2139.212 | 0.00141  | 2 | 1 | 69.5 | 0 |
| P12163_1_S1,13129 K.QLALPADTTVTGESK.I | 2139.212 | -0.00001 | 2 | 1 | 42.2 | 0 |
| P12163_1_S1,13156 K.QLALPADTTVTGESK.I | 2139.212 | 0.00877  | 3 | 1 | 22.8 | 0 |
| P12163_1_S1,13798 K.QLALPADTTVTGESK.I | 2139.212 | 0.00865  | 3 | 1 | 30.1 | 0 |
| P12163_1_S1,13950 K.QLALPADTTVTGESK.I | 2139.212 | 0.00637  | 4 | 1 | 32.4 | 0 |
| P12163_1_S1,14008 K.QLALPADTTVTGESK.I | 2139.212 | 0.00509  | 2 | 1 | 47   | 0 |
| P12163_1_S1,14144 K.QLALPADTTVTGESK.I | 2139.212 | 0.00691  | 3 | 1 | 39.8 | 0 |
| P12163_1_S1,14298 K.QLALPADTTVTGESK.I | 2139.212 | 0.00457  | 4 | 1 | 50   | 0 |
| P12163_1_S1,14332 K.QLALPADTTVTGESK.I | 2139.212 | 0.00167  | 2 | 1 | 28.6 | 0 |
| P12163_1_S1,14529 K.QLALPADTTVTGESK.I | 2139.212 | 0.0106   | 3 | 1 | 30.1 | 0 |
| P12163_1_S1,14598 K.QLALPADTTVTGESK.I | 2139.212 | 0.00849  | 4 | 1 | 44.8 | 0 |
| P12163_1_S1,14947 K.QLALPADTTVTGESK.I | 2139.212 | 0.01261  | 4 | 1 | 28.9 | 0 |
| P12163_1_S1,15155 K.QLALPADTTVTGESK.I | 2139.212 | 0.00955  | 3 | 1 | 49.4 | 0 |
| P12163_1_S1,15349 K.QLALPADTTVTGESK.I | 2139.212 | 0.00313  | 4 | 1 | 69   | 0 |
| P12163_1_S1,15556 K.QLALPADTTVTGESK.I | 2139.212 | 0.00413  | 2 | 1 | 55.7 | 0 |
| P12163_1_S1,15704 K.QLALPADTTVTGESK.I | 2139.212 | 0.00568  | 3 | 1 | 52.4 | 0 |
| P12163_1_S1,15822 K.QLALPADTTVTGESK.I | 2139.212 | 0.00349  | 4 | 1 | 69   | 0 |
| P12163_1_S10,95 K.QLALPADTTVTGESK.I   | 2139.212 | 0.00439  | 2 | 1 | 57.7 | 0 |
| P12163_1_S10,303 K.QLALPADTTVTGESK.I  | 2139.212 | 0.00763  | 3 | 1 | 31.8 | 0 |
| P12163_1_S10,1577 K.QLALPADTTVTGESK.I | 2139.212 | 0.00784  | 3 | 1 | 38.9 | 0 |
| P12163_2_F1,16364 K.QLALPADTTVTGESK.I | 2139.212 | 0.00651  | 2 | 1 | 40.5 | 0 |
| P12163_2_F2,16647 K.QLALPADTTVTGESK.I | 2139.212 | -0.00051 | 2 | 1 | 35.9 | 0 |
| P12163_2_F4,14477 K.QLALPADTTVTGESK.I | 2139.212 | 0.00601  | 3 | 1 | 35.5 | 0 |
| P12163_2_F4,15570 K.QLALPADTTVTGESK.I | 2139.212 | 0.00449  | 2 | 1 | 32.2 | 0 |
| P12163_2_F4,15577 K.QLALPADTTVTGESK.I | 2139.212 | 0.00613  | 3 | 1 | 53   | 0 |
| P12163_2_F6,16214 K.QLALPADTTVTGESK.I | 2139.212 | -0.00089 | 2 | 1 | 49   | 0 |

|                   |                      |          |          |   |   |      |   |
|-------------------|----------------------|----------|----------|---|---|------|---|
| P12163_2_F6,16271 | K.QLALPADTTVTGESK.I  | 2139.212 | 0.00226  | 3 | 1 | 36.6 | 0 |
| P12163_2_F2,14707 | K.VCQIVK.K           | 1354.834 | 0.00742  | 3 | 1 | 22.6 | 0 |
| P12163_1_F4,18009 | K.SAGGILLPK.A        | 1463.941 | 0.00509  | 2 | 1 | 28.9 | 0 |
| P12163_1_F4,18010 | K.SAGGILLPK.A        | 1463.941 | 0.00503  | 3 | 1 | 26.2 | 0 |
| P12163_1_F5,16734 | K.SAGGILLPK.A        | 1463.941 | 0.00722  | 3 | 1 | 22.5 | 0 |
| P12163_1_F7,15856 | K.SAGGILLPK.A        | 1463.941 | 0.00059  | 3 | 1 | 35.1 | 0 |
| P12163_1_F7,15917 | K.SAGGILLPK.A        | 1463.941 | 0.00129  | 2 | 1 | 28.1 | 0 |
| P12163_1_F9,17042 | K.SAGGILLPK.A        | 1463.941 | 0.00863  | 3 | 1 | 25.9 | 0 |
| P12163_2_F1,17077 | K.SAGGILLPK.A        | 1463.941 | 0.00533  | 3 | 1 | 27.2 | 0 |
| P12163_2_F1,17094 | K.SAGGILLPK.A        | 1463.941 | 0.00691  | 2 | 1 | 30.1 | 0 |
| P12163_2_F2,140   | K.SAGGILLPK.A        | 1463.941 | 0.00535  | 2 | 1 | 24.7 | 0 |
| P12163_2_F2,830   | K.SAGGILLPK.A        | 1463.941 | 0.00332  | 3 | 1 | 27.4 | 0 |
| P12163_2_F2,1117  | K.SAGGILLPK.A        | 1463.941 | 0.00511  | 2 | 1 | 27.5 | 0 |
| P12163_2_F2,1307  | K.SAGGILLPK.A        | 1463.941 | 0.00227  | 2 | 1 | 32.3 | 0 |
| P12163_2_F2,1765  | K.SAGGILLPK.A        | 1463.941 | 0.00419  | 3 | 1 | 23.5 | 0 |
| P12163_2_F2,1828  | K.SAGGILLPK.A        | 1463.941 | 0.00471  | 2 | 1 | 30.7 | 0 |
| P12163_2_F2,1972  | K.SAGGILLPK.A        | 1463.941 | 0.00407  | 3 | 1 | 24.6 | 0 |
| P12163_2_F2,2023  | K.SAGGILLPK.A        | 1463.941 | 0.00367  | 2 | 1 | 27.1 | 0 |
| P12163_2_S5,14949 | K.SAGGILLPK.A        | 1463.941 | 0.0011   | 3 | 1 | 24.9 | 0 |
| P12163_1_S10,1066 | R.HCFVK.E            | 1298.75  | 0.00839  | 3 | 1 | 24.5 | 0 |
| P12163_2_F8_1207  | R.HCFVK.E            | 1298.75  | -0.00055 | 3 | 1 | 22.1 | 0 |
| P12163_1_F4,16664 | R.LEQLPEK.S          | 1464.888 | 0.00661  | 2 | 1 | 27   | 0 |
| P12163_1_F7,14354 | R.LEQLPEK.S          | 1464.888 | 0.00131  | 3 | 1 | 22.5 | 0 |
| P12163_1_F7,15066 | R.LEQLPEK.S          | 1464.888 | 0.01001  | 3 | 1 | 22.2 | 0 |
| P12163_2_F1,15729 | R.LEQLPEK.S          | 1464.888 | 0.00518  | 3 | 1 | 22.2 | 0 |
| P12163_1_F8,21764 | K.IEPSFGVEASQLYPDVI  | 2487.359 | 0.00198  | 3 | 1 | 56.6 | 0 |
| P12163_1_S1,20629 | K.IEPSFGVEASQLYPDVI  | 2487.359 | 0.00543  | 4 | 1 | 25.4 | 0 |
| P12163_1_S1,20673 | K.IEPSFGVEASQLYPDVI  | 2487.359 | 0.00504  | 3 | 1 | 70.5 | 0 |
| P12163_1_F2,16621 | K.VVILGDGNPK.E ! K.V | 1619.994 | 0.00916  | 3 | 1 | 42.4 | 0 |
| P12163_1_F2,16631 | K.VVILGDGNPK.E ! K.V | 1619.994 | 0.00786  | 2 | 1 | 32   | 0 |
| P12163_1_F4,17955 | K.VVILGDGNPK.E ! K.V | 1619.994 | 0.00196  | 2 | 1 | 32.7 | 0 |
| P12163_1_F6,16784 | K.VVILGDGNPK.E ! K.V | 1619.994 | -0.00209 | 3 | 1 | 31   | 0 |
| P12163_1_F7,15901 | K.VVILGDGNPK.E ! K.V | 1619.994 | 0.00328  | 3 | 1 | 31.7 | 0 |
| P12163_1_F7,15910 | K.VVILGDGNPK.E ! K.V | 1619.994 | 0.0033   | 2 | 1 | 46.1 | 0 |
| P12163_1_S1,15560 | K.VVILGDGNPK.E ! K.V | 1619.994 | 0.00523  | 3 | 1 | 22.5 | 0 |
| P12163_2_F1,17152 | K.VVILGDGNPK.E ! K.V | 1619.994 | 0.00384  | 2 | 1 | 29   | 0 |
| P12163_2_F1,17180 | K.VVILGDGNPK.E ! K.V | 1619.994 | 0.00676  | 3 | 1 | 27.6 | 0 |
| P12163_2_F2,141   | K.VVILGDGNPK.E ! K.V | 1619.994 | 0.00366  | 2 | 1 | 46   | 0 |
| P12163_2_F4,15347 | K.VVILGDGNPK.E ! K.V | 1619.994 | 0.00415  | 3 | 1 | 28.2 | 0 |
| P12163_2_F4,15580 | K.VVILGDGNPK.E ! K.V | 1619.994 | -0.00228 | 2 | 1 | 41.6 | 0 |
| P12163_2_F4,15582 | K.VVILGDGNPK.E ! K.V | 1619.994 | -0.00728 | 3 | 1 | 44.8 | 0 |
| P12163_1_F9,10687 | R.IHGAVEPAK.S        | 1529.926 | 0.00547  | 3 | 1 | 36   | 0 |
| P12163_1_F9,10700 | R.IHGAVEPAK.S        | 1529.926 | 0.00596  | 2 | 1 | 28.3 | 0 |
| P12163_2_F7,9938  | R.IHGAVEPAK.S        | 1529.926 | 0.00481  | 3 | 1 | 35.3 | 0 |
| P12163_2_F9,9957  | R.IHGAVEPAK.S        | 1529.926 | -0.00063 | 4 | 1 | 30.1 | 0 |
| P12163_1_F9,13292 | K.IGEALHM*GGGQK.E    | 1822.01  | 0.00601  | 2 | 1 | 27.9 | 0 |
| P12163_2_F7,12104 | K.IGEALHM*GGGQK.E    | 1822.01  | 0.0068   | 3 | 1 | 26.2 | 0 |
| P12163_2_F7,14343 | K.IGEALHM*GGGQK.E    | 1822.01  | 0.00192  | 2 | 1 | 34.4 | 0 |
| P12163_1_F8,15881 | K.IGEALHM*GGGQK.E    | 1806.015 | 0.00736  | 2 | 1 | 31.1 | 0 |
| P12163_1_F9,16020 | K.IGEALHM*GGGQK.E    | 1806.015 | 0.00833  | 3 | 1 | 27.6 | 0 |
| P12163_2_F6,15666 | K.IGEALHM*GGGQK.E    | 1806.015 | 0.00304  | 2 | 1 | 32.8 | 0 |

|                    |                      |          |          |   |   |      |   |
|--------------------|----------------------|----------|----------|---|---|------|---|
| P12163_2_F7,14331  | K.IGEALHMGGGQK.E     | 1806.015 | 0.00569  | 3 | 1 | 35.7 | 0 |
| P12163_1_F8,12664  | K.IPGVGGGEGAAHGEEF   | 2073.118 | 0.00326  | 2 | 1 | 27.3 | 0 |
| P12163_1_F8,12682  | K.IPGVGGGEGAAHGEEF   | 2073.118 | 0.00445  | 4 | 1 | 31.9 | 0 |
| P12163_1_F8,19275  | K.IPGVGGGEGAAHGEEF   | 2073.118 | 0.00551  | 3 | 1 | 37.7 | 0 |
| P12163_1_F8,19973  | K.IPGVGGGEGAAHGEEF   | 2073.118 | 0.00725  | 3 | 1 | 29.8 | 0 |
| P12163_1_F9,12880  | K.IPGVGGGEGAAHGEEF   | 2073.118 | 0.0074   | 3 | 1 | 44.4 | 0 |
| P12163_1_S10,12510 | K.IPGVGGGEGAAHGEEF   | 2073.118 | 0.00671  | 3 | 1 | 22.9 | 0 |
| P12163_1_S10,12970 | K.IPGVGGGEGAAHGEEF   | 2073.118 | 0.0086   | 3 | 1 | 25.2 | 0 |
| P12163_2_F6,12334  | K.IPGVGGGEGAAHGEEF   | 2073.118 | 0.00022  | 4 | 1 | 31   | 0 |
| P12163_2_F6,14557  | K.IPGVGGGEGAAHGEEF   | 2073.118 | -0.001   | 3 | 1 | 27   | 0 |
| P12163_2_F8_12070  | K.IPGVGGGEGAAHGEEF   | 2073.118 | 0.00452  | 3 | 1 | 29.1 | 0 |
| P12163_2_F2,8458   | K.QQIPGVGTTDVHHQQ    | 3163.635 | -0.00299 | 4 | 1 | 25.1 | 0 |
| P12163_1_F3,16627  | K.GVPNSNYVVPLEK.S    | 2024.164 | 0.00142  | 3 | 1 | 30   | 0 |
| P12163_1_F3,16672  | K.GVPNSNYVVPLEK.S    | 2024.164 | 0.00357  | 4 | 1 | 35.4 | 0 |
| P12163_1_F6,17394  | K.GVPNSNYVVPLEK.S    | 2024.164 | -0.00014 | 3 | 1 | 24.8 | 0 |
| P12163_2_F1,18018  | K.GVPNSNYVVPLEK.S    | 2024.164 | 0.00455  | 2 | 1 | 32.9 | 0 |
| P12163_1_F2,4710   | R.EATGTVSSSDSR.I     | 1500.744 | 0.00114  | 3 | 1 | 28.3 | 0 |
| P12163_1_F2,5498   | R.EATGTVSSSDSR.I     | 1500.744 | 0.00288  | 3 | 1 | 25.2 | 0 |
| P12163_1_S1,4502   | R.EATGTVSSSDSR.I     | 1500.744 | 0.00387  | 3 | 1 | 34   | 0 |
| P12163_1_S1,4571   | R.EATGTVSSSDSR.I     | 1500.744 | 0.00333  | 4 | 1 | 22.6 | 0 |
| P12163_1_S1,5165   | R.EATGTVSSSDSR.I     | 1500.744 | 0.00429  | 3 | 1 | 42   | 0 |
| P12163_1_S1,5353   | R.EATGTVSSSDSR.I     | 1500.744 | 0.00042  | 3 | 1 | 44.1 | 0 |
| P12163_1_S1,6005   | R.EATGTVSSSDSR.I     | 1500.744 | 0.00432  | 3 | 1 | 51.9 | 0 |
| P12163_1_S1,6206   | R.EATGTVSSSDSR.I     | 1500.744 | 0.00312  | 3 | 1 | 43   | 0 |
| P12163_1_S1,7187   | R.EATGTVSSSDSR.I     | 1500.744 | 0.00554  | 2 | 1 | 35.8 | 0 |
| P12163_1_S1,7220   | R.EATGTVSSSDSR.I     | 1500.744 | 0.00684  | 3 | 1 | 65.3 | 0 |
| P12163_2_F9,4444   | R.GSDGEAHR.E         | 1132.565 | 0.00289  | 3 | 1 | 43.8 | 0 |
| P12163_2_S5,4323   | R.GSDGEAHR.E         | 1132.565 | 0.00424  | 3 | 1 | 48   | 0 |
| P12163_2_S5,4479   | R.GSDGEAHR.E         | 1132.565 | 0.00325  | 3 | 1 | 37.1 | 0 |
| P12163_1_F5,9600   | K.STYDVK.A           | 1320.762 | 0.00888  | 3 | 1 | 25.7 | 0 |
| P12163_1_F2,16621  | K.VVILGDGNPK.E ! K.V | 1619.994 | 0.00916  | 3 | 1 | 42.4 | 0 |
| P12163_1_F2,16631  | K.VVILGDGNPK.E ! K.V | 1619.994 | 0.00786  | 2 | 1 | 32   | 0 |
| P12163_1_F4,17955  | K.VVILGDGNPK.E ! K.V | 1619.994 | 0.00196  | 2 | 1 | 32.7 | 0 |
| P12163_1_F6,16784  | K.VVILGDGNPK.E ! K.V | 1619.994 | -0.00209 | 3 | 1 | 31   | 0 |
| P12163_1_F7,15901  | K.VVILGDGNPK.E ! K.V | 1619.994 | 0.00328  | 3 | 1 | 31.7 | 0 |
| P12163_1_F7,15910  | K.VVILGDGNPK.E ! K.V | 1619.994 | 0.0033   | 2 | 1 | 46.1 | 0 |
| P12163_1_S1,15560  | K.VVILGDGNPK.E ! K.V | 1619.994 | 0.00523  | 3 | 1 | 22.5 | 0 |
| P12163_2_F1,17152  | K.VVILGDGNPK.E ! K.V | 1619.994 | 0.00384  | 2 | 1 | 29   | 0 |
| P12163_2_F1,17180  | K.VVILGDGNPK.E ! K.V | 1619.994 | 0.00676  | 3 | 1 | 27.6 | 0 |
| P12163_2_F2,141    | K.VVILGDGNPK.E ! K.V | 1619.994 | 0.00366  | 2 | 1 | 46   | 0 |
| P12163_2_F4,15347  | K.VVILGDGNPK.E ! K.V | 1619.994 | 0.00415  | 3 | 1 | 28.2 | 0 |
| P12163_2_F4,15580  | K.VVILGDGNPK.E ! K.V | 1619.994 | -0.00228 | 2 | 1 | 41.6 | 0 |
| P12163_2_F4,15582  | K.VVILGDGNPK.E ! K.V | 1619.994 | -0.00728 | 3 | 1 | 44.8 | 0 |
| P12163_1_F3,12577  | R.VEGAVEPTK.S        | 1537.905 | 0.00627  | 2 | 1 | 28.7 | 0 |
| P12163_1_F4,13046  | R.VEGAVEPTK.S        | 1537.905 | 0.00273  | 2 | 1 | 31.2 | 0 |
| P12163_2_F1,12137  | R.VEGAVEPTK.S        | 1537.905 | 0.00259  | 2 | 1 | 33.1 | 0 |
| P12163_1_F2,11672  | K.APEEAASTGVPVGK.T   | 1921.085 | 0.00443  | 3 | 1 | 25.5 | 0 |
| P12163_1_F2,13107  | K.APEEAASTGVPVGK.T   | 1921.085 | 0.00551  | 2 | 1 | 69.2 | 0 |
| P12163_1_F2,13235  | K.APEEAASTGVPVGK.T   | 1921.085 | 0.00563  | 3 | 1 | 37   | 0 |
| P12163_1_F3,13621  | K.APEEAASTGVPVGK.T   | 1921.085 | 0.00719  | 2 | 1 | 26.2 | 0 |
| P12163_1_F3,13636  | K.APEEAASTGVPVGK.T   | 1921.085 | 0.00764  | 3 | 1 | 26.8 | 0 |

|                   |                       |          |          |   |   |      |   |
|-------------------|-----------------------|----------|----------|---|---|------|---|
| P12163_2_F4,12611 | K.APEEAASTGVPVGK.T    | 1921.085 | 0.00968  | 3 | 1 | 22.6 | 0 |
| P12163_1_F4,11480 | K.QVVEEAK.V           | 1410.841 | 0.00469  | 2 | 1 | 30.7 | 0 |
| P12163_1_F6,11135 | K.QVVEEAK.V           | 1410.841 | 0.00959  | 2 | 1 | 31.7 | 0 |
| P12163_1_F7,10012 | K.QVVEEAK.V           | 1410.841 | 0.00184  | 3 | 1 | 22.5 | 0 |
| P12163_1_F7,10029 | K.QVVEEAK.V           | 1410.841 | -0.00059 | 2 | 1 | 28.5 | 0 |
| P12163_2_F1,10634 | K.QVVEEAK.V           | 1410.841 | 0.00223  | 3 | 1 | 32.5 | 0 |
| P12163_1_F3,14521 | K.VDEAANAAVEEK.A      | 1854.006 | 0.00886  | 2 | 1 | 82   | 0 |
| P12163_1_F3,14828 | K.VDEAANAAVEEK.A      | 1854.006 | 0.0069   | 2 | 1 | 49.8 | 0 |
| P12163_1_F4,15064 | K.VDEAANAAVEEK.A      | 1854.006 | 0.00906  | 2 | 1 | 76.7 | 0 |
| P12163_1_F5,13828 | K.VDEAANAAVEEK.A      | 1854.006 | 0.00738  | 2 | 1 | 32.7 | 0 |
| P12163_1_F6,13967 | K.VDEAANAAVEEK.A      | 1854.006 | -0.0046  | 3 | 1 | 41.8 | 0 |
| P12163_1_F4,19605 | K.ASEYISSITGNK.N      | 1878.043 | 0.00756  | 3 | 1 | 35.8 | 0 |
| P12163_1_F4,19631 | K.ASEYISSITGNK.N      | 1878.043 | 0.00235  | 2 | 1 | 49.8 | 0 |
| P12163_1_F4,19793 | K.ASEYISSITGNK.N      | 1878.043 | 0.01128  | 3 | 1 | 40   | 0 |
| P12163_2_F1,18991 | K.ASEYISSITGNK.N      | 1878.043 | 0.00765  | 3 | 1 | 31.2 | 0 |
| P12163_2_F1,19003 | K.ASEYISSITGNK.N      | 1878.043 | 0.00973  | 2 | 1 | 35.5 | 0 |
| P12163_2_F9,17493 | K.ASEYISSITGNK.N      | 1878.043 | 0.00498  | 3 | 1 | 34.6 | 0 |
| P12163_1_F6,9808  | K.NTSGEEHQEIPK.Q      | 1977.05  | 0.00127  | 3 | 1 | 23.8 | 0 |
| P12163_1_F6,9816  | K.NTSGEEHQEIPK.Q      | 1977.05  | 0.00349  | 2 | 1 | 25.3 | 0 |
| P12163_2_F6,9500  | K.NTSGEEHQEIPK.Q      | 1977.05  | 0.00331  | 3 | 1 | 23.1 | 0 |
| P12163_2_F6,9532  | K.NTSGEEHQEIPK.Q      | 1977.05  | 0.00579  | 2 | 1 | 39.1 | 0 |
| P12163_1_F4,22150 | R.NGDLQGFQLFNK.A      | 1989.101 | 0.0076   | 2 | 1 | 60.9 | 0 |
| P12163_1_F4,22153 | R.NGDLQGFQLFNK.A      | 1989.101 | 0.00817  | 3 | 1 | 36.1 | 0 |
| P12163_1_F4,22177 | R.NGDLQGFQLFNK.A      | 1989.101 | 0.00643  | 3 | 1 | 40.9 | 0 |
| P12163_2_F1,21635 | R.NGDLQGFQLFNK.A      | 1989.101 | 0.00373  | 3 | 1 | 27.4 | 0 |
| P12163_2_F1,21656 | R.NGDLQGFQLFNK.A      | 1989.101 | 0.00346  | 2 | 1 | 61   | 0 |
| P12163_2_F1,21676 | R.NGDLQGFQLFNK.A      | 1989.101 | 0.00493  | 3 | 1 | 35.2 | 0 |
| P12163_2_F2,13768 | K.NM*AVNWEET.T        | 1744.915 | 0.00587  | 2 | 1 | 36   | 0 |
| P12163_2_F2,16425 | K.NMAVNWEET.T         | 1728.92  | 0.00377  | 3 | 1 | 38.9 | 0 |
| P12163_1_F4,24590 | R.ADLIAYLK.E ! R.ADLL | 1514.94  | 0.00767  | 3 | 1 | 36.4 | 0 |
| P12163_1_F4,24603 | R.ADLIAYLK.E ! R.ADLL | 1514.94  | 0.00882  | 2 | 1 | 40.3 | 0 |
| P12163_1_F5,23016 | R.ADLIAYLK.E ! R.ADLL | 1514.94  | 0.00914  | 3 | 1 | 34   | 0 |
| P12163_2_F1,23918 | R.ADLIAYLK.E ! R.ADLL | 1514.94  | 0.0035   | 3 | 1 | 32.5 | 0 |
| P12163_2_F1,23981 | R.ADLIAYLK.E ! R.ADLL | 1514.94  | 0.00396  | 2 | 1 | 39.6 | 0 |
| P12163_2_F4,20507 | R.ADLIAYLK.E ! R.ADLL | 1514.94  | -0.0004  | 3 | 1 | 25.7 | 0 |
| P12163_2_F9,20720 | R.ADLIAYLK.E ! R.ADLL | 1514.94  | 0.0065   | 3 | 1 | 25.2 | 0 |
| P12163_2_F9,20884 | R.ADLIAYLK.E ! R.ADLL | 1514.94  | 0.00389  | 3 | 1 | 34.6 | 0 |
| P12163_1_F4,10611 | R.QSGTTPGYSSAANK.!    | 2140.113 | 0.00657  | 3 | 1 | 32.7 | 0 |
| P12163_1_F4,12172 | R.QSGTTPGYSSAANK.!    | 2140.113 | 0.00169  | 2 | 1 | 57.9 | 0 |
| P12163_2_F1,11270 | R.QSGTTPGYSSAANK.!    | 2140.113 | 0.00209  | 2 | 1 | 65.2 | 0 |
| P12163_2_S5,11197 | R.QSGTTPGYSSAANK.!    | 2140.113 | 0.01053  | 3 | 1 | 22.4 | 0 |
| P12163_1_F4,4930  | K.ESSEER.E            | 1169.559 | 0.00747  | 2 | 1 | 30.3 | 0 |
| P12163_2_F1,4254  | K.ESSEER.E            | 1169.559 | 0.00287  | 2 | 1 | 31.2 | 0 |
| P12163_1_F7,22839 | K.KEVLDPVPSPLLSLAR    | 2344.442 | 0.00723  | 3 | 1 | 31.3 | 0 |
| P12163_1_F8,14633 | K.LHSIM*QPPSEFDHAEF   | 2490.291 | 0.01359  | 3 | 1 | 22.2 | 0 |
| P12163_1_F8,14679 | K.LHSIM*QPPSEFDHAEF   | 2490.291 | 0.0059   | 4 | 1 | 30.9 | 0 |
| P12163_1_S10,1459 | K.LHSIM*QPPSEFDHAEF   | 2490.291 | 0.00887  | 4 | 1 | 22.1 | 0 |
| P12163_2_F10,1360 | K.LHSIM*QPPSEFDHAEF   | 2490.291 | 0.00491  | 4 | 1 | 32   | 0 |
| P12163_2_F4,13709 | K.LHSIM*QPPSEFDHAEF   | 2490.291 | 0.00225  | 3 | 1 | 41.1 | 0 |
| P12163_2_S5,13873 | K.LHSIM*QPPSEFDHAEF   | 2490.291 | 0.00819  | 4 | 1 | 26.9 | 0 |
| P12163_1_F5,17000 | K.LHSIMQPPSEFDHAEK    | 2474.296 | 0.00666  | 3 | 1 | 41.2 | 0 |

|                    |                         |          |          |   |   |      |   |
|--------------------|-------------------------|----------|----------|---|---|------|---|
| P12163_1_F8,17069  | K.LHSIMQPPSEFDHAEK      | 2474.296 | 0.01187  | 4 | 1 | 33.6 | 0 |
| P12163_2_F10,1562' | K.LHSIMQPPSEFDHAEK      | 2474.296 | 0.00143  | 4 | 1 | 34.3 | 0 |
| P12163_2_F4,16056  | K.LHSIMQPPSEFDHAEK      | 2474.296 | 0.00947  | 4 | 1 | 37.3 | 0 |
| P12163_2_F4,16099  | K.LHSIMQPPSEFDHAEK      | 2474.296 | 0.0054   | 3 | 1 | 38   | 0 |
| P12163_1_F3,24862  | K.EFPWGPDLFEK.K         | 2030.084 | 0.01001  | 2 | 1 | 40.8 | 0 |
| P12163_1_F6,7281   | K.GHPHYEPPR.Y           | 1522.77  | 0.00284  | 3 | 1 | 24.5 | 0 |
| P12163_2_F7,6390   | K.GHPHYEPPR.Y           | 1522.77  | 0.00149  | 4 | 1 | 23.3 | 0 |
| P12163_2_F7,6396   | K.GHPHYEPPR.Y           | 1522.77  | 0.00065  | 3 | 1 | 25.4 | 0 |
| P12163_2_S3,6823   | K.GHPHYEPPR.Y           | 1522.77  | -0.00519 | 4 | 1 | 43.7 | 0 |
| P12163_2_S3,6837   | K.GHPHYEPPR.Y           | 1522.77  | -0.00502 | 3 | 1 | 31.9 | 0 |
| P12163_2_S5,7279   | K.GHPHYEPPR.Y           | 1522.77  | 0.00153  | 4 | 1 | 39.7 | 0 |
| P12163_1_F5,15787  | R.YEYLHIR.N             | 1297.721 | 0.00309  | 3 | 1 | 22.9 | 0 |
| P12163_1_F6,16472  | R.YEYLHIR.N             | 1297.721 | 0.00408  | 3 | 1 | 27.3 | 0 |
| P12163_1_F9,16039  | R.YEYLHIR.N             | 1297.721 | 0.00444  | 3 | 1 | 29.4 | 0 |
| P12163_2_F4,15183  | R.YEYLHIR.N             | 1297.721 | -0.00184 | 3 | 1 | 24.2 | 0 |
| P12163_2_S5,15497  | R.YEYLHIR.N             | 1297.721 | 0.00237  | 3 | 1 | 28.6 | 0 |
| P12163_2_S5,15707  | R.YEYLHIR.N             | 1297.721 | 0.00144  | 3 | 1 | 31.4 | 0 |
| P12163_1_F5,20003  | K.GMAVIWEEK.T           | 1670.94  | 0.01045  | 3 | 1 | 31.1 | 0 |
| P12163_1_F4,24590  | R.ADLIAYLK.E ! R.ADLL   | 1514.94  | 0.00767  | 3 | 1 | 36.4 | 0 |
| P12163_1_F4,24603  | R.ADLIAYLK.E ! R.ADLL   | 1514.94  | 0.00882  | 2 | 1 | 40.3 | 0 |
| P12163_1_F5,23016  | R.ADLIAYLK.E ! R.ADLL   | 1514.94  | 0.00914  | 3 | 1 | 34   | 0 |
| P12163_2_F1,23918  | R.ADLIAYLK.E ! R.ADLL   | 1514.94  | 0.0035   | 3 | 1 | 32.5 | 0 |
| P12163_2_F1,23981  | R.ADLIAYLK.E ! R.ADLL   | 1514.94  | 0.00396  | 2 | 1 | 39.6 | 0 |
| P12163_2_F4,20507  | R.ADLIAYLK.E ! R.ADLL   | 1514.94  | -0.0004  | 3 | 1 | 25.7 | 0 |
| P12163_2_F9,20720  | R.ADLIAYLK.E ! R.ADLL   | 1514.94  | 0.0065   | 3 | 1 | 25.2 | 0 |
| P12163_2_F9,20884  | R.ADLIAYLK.E ! R.ADLL   | 1514.94  | 0.00389  | 3 | 1 | 34.6 | 0 |
| P12163_1_F4,10611  | R.QSGTTPGYSYSAANK.      | 2140.113 | 0.00657  | 3 | 1 | 32.7 | 0 |
| P12163_1_F4,12172  | R.QSGTTPGYSYSAANK.      | 2140.113 | 0.00169  | 2 | 1 | 57.9 | 0 |
| P12163_2_F1,11270  | R.QSGTTPGYSYSAANK.      | 2140.113 | 0.00209  | 2 | 1 | 65.2 | 0 |
| P12163_2_S5,11197  | R.QSGTTPGYSYSAANK.      | 2140.113 | 0.01053  | 3 | 1 | 22.4 | 0 |
| P12163_1_S1,18196  | K.ISQLNNAIDNVSSR.L      | 1834.992 | 0.00529  | 3 | 1 | 51.4 | 0 |
| P12163_1_S1,18711  | K.ISQLNNAIDNVSSR.L      | 1834.992 | 0.00354  | 2 | 1 | 38.4 | 0 |
| P12163_1_S1,18762  | K.ISQLNNAIDNVSSR.L      | 1834.992 | 0.00164  | 3 | 1 | 65.4 | 0 |
| P12163_1_S1,18922  | K.ISQLNNAIDNVSSR.L      | 1834.992 | 0.00408  | 2 | 1 | 61.6 | 0 |
| P12163_1_S1,18990  | K.ISQLNNAIDNVSSR.L      | 1834.992 | 0.00232  | 3 | 1 | 62.6 | 0 |
| P12163_1_F6,14252  | K.RPIYYDEGLER.T         | 1714.907 | 0.00298  | 3 | 1 | 43.5 | 0 |
| P12163_2_F6,13472  | K.RPIYYDEGLER.T         | 1714.907 | -0.00389 | 3 | 1 | 35.6 | 0 |
| P12163_1_F2,15895  | R.SLLNEDEYGFR.R         | 1646.833 | 0.0018   | 3 | 1 | 37.8 | 0 |
| P12163_1_F2,15970  | R.SLLNEDEYGFR.R         | 1646.833 | 0.00536  | 2 | 1 | 28.9 | 0 |
| P12163_1_F2,18628  | R.SLLNEDEYGFR.R         | 1646.833 | -0.00108 | 3 | 1 | 49   | 0 |
| P12163_1_F2,18687  | R.SLLNEDEYGFR.R         | 1646.833 | 0.00374  | 2 | 1 | 40.6 | 0 |
| P12163_1_F9,18078  | R.SLLNEDEYGFR.R         | 1646.833 | 0.00178  | 2 | 1 | 36.3 | 0 |
| P12163_2_F4,17319  | R.SLLNEDEYGFR.R         | 1646.833 | 0.00342  | 2 | 1 | 32.3 | 0 |
| P12163_2_F1,13743  | R.AYVENLNK.Q            | 1558.905 | 0.01099  | 2 | 1 | 30.6 | 0 |
| P12163_2_F2,14217  | R.AYVENLNK.Q            | 1558.905 | 0.00195  | 2 | 1 | 33.9 | 0 |
| P12163_2_F2,14256  | R.AYVENLNK.Q            | 1558.905 | 0.0045   | 3 | 1 | 31.6 | 0 |
| P12163_1_F5,22526  | R.FLEEFK.S ! K.FLEEFK.. | 1420.83  | 0.00492  | 2 | 1 | 26   | 0 |
| P12163_1_F5,22753  | R.FLEEFK.S ! K.FLEEFK.. | 1420.83  | 0.00394  | 2 | 1 | 26.6 | 0 |
| P12163_1_F6,21627  | R.FLEEFK.S ! K.FLEEFK.. | 1420.83  | 0.00616  | 2 | 1 | 25.1 | 0 |
| P12163_1_F7,20836  | R.FLEEFK.S ! K.FLEEFK.. | 1420.83  | 0.0043   | 2 | 1 | 27.4 | 0 |
| P12163_2_F1,22438  | R.FLEEFK.S ! K.FLEEFK.. | 1420.83  | 0.00622  | 2 | 1 | 24.3 | 0 |

|                   |                         |          |          |   |   |      |   |
|-------------------|-------------------------|----------|----------|---|---|------|---|
| P12163_2_F2,21999 | R.FLEEFK.S ! K.FLEEFK.. | 1420.83  | 0.00652  | 2 | 1 | 24.5 | 0 |
| P12163_2_S5,19995 | R.FLEEFK.S ! K.FLEEFK.. | 1420.83  | 0.00072  | 3 | 1 | 25.1 | 0 |
| P12163_1_F3,18116 | R.LNVDNAVNPFPSEK.D      | 2152.186 | 0.01247  | 3 | 1 | 32.1 | 0 |
| P12163_1_F3,19324 | R.LNVDNAVNPFPSEK.D      | 2152.186 | 0.00665  | 3 | 1 | 45.7 | 0 |
| P12163_1_F3,19325 | R.LNVDNAVNPFPSEK.D      | 2152.186 | 0.00512  | 2 | 1 | 64   | 0 |
| P12163_1_F5,9231  | K.AQMEEEEK.R            | 1472.787 | 0.00636  | 2 | 1 | 26.1 | 0 |
| P12163_2_F2,10006 | K.AQMEEEEK.R            | 1472.787 | 0.0058   | 2 | 1 | 25.2 | 0 |
| P12163_1_F6,12134 | K.HGLSDAISK.V           | 1535.9   | 0.00605  | 3 | 1 | 32.4 | 0 |
| P12163_1_F7,10945 | K.HGLSDAISK.V           | 1535.9   | -0.00322 | 3 | 1 | 26.4 | 0 |
| P12163_1_F9,12120 | K.HGLSDAISK.V           | 1535.9   | 0.00611  | 3 | 1 | 42.7 | 0 |
| P12163_2_S3,10874 | K.HGLSDAISK.V           | 1535.9   | 0.00635  | 3 | 1 | 24.5 | 0 |
| P12163_2_S5,11399 | K.HGLSDAISK.V           | 1535.9   | 0.00062  | 3 | 1 | 22.3 | 0 |
| P12163_1_F8,18938 | R.VAPLTHAVGNVLK.R       | 1927.195 | 0.00454  | 4 | 1 | 22.8 | 0 |
| P12163_1_F8,18971 | R.VAPLTHAVGNVLK.R       | 1927.195 | 0.00554  | 3 | 1 | 32.6 | 0 |
| P12163_2_F6,18471 | R.VAPLTHAVGNVLK.R       | 1927.195 | -0.00019 | 3 | 1 | 30.6 | 0 |
| P12163_2_F6,18496 | R.VAPLTHAVGNVLK.R       | 1927.195 | 0.0021   | 4 | 1 | 23.8 | 0 |
| P12163_2_F6,18514 | R.VAPLTHAVGNVLK.R       | 1927.195 | 0.00202  | 2 | 1 | 44.5 | 0 |
| P12163_1_S1,15464 | K.GSPDVYLSGPIR.K        | 1564.864 | 0.00248  | 3 | 1 | 48.6 | 0 |
| P12163_1_F8,20430 | K.VVIDHGAVPIFVK.L       | 2002.231 | 0.00546  | 3 | 1 | 27.7 | 0 |
| P12163_1_F8,20438 | K.VVIDHGAVPIFVK.L       | 2002.231 | 0.00485  | 2 | 1 | 63.4 | 0 |
| P12163_2_S5,18220 | K.VVIDHGAVPIFVK.L       | 2002.231 | 0.00243  | 3 | 1 | 22.6 | 0 |
| P12163_2_S5,18227 | K.VVIDHGAVPIFVK.L       | 2002.231 | 0.00405  | 4 | 1 | 28.7 | 0 |
| P12163_1_F3,23216 | R.NAIALALSPVVK.A ! R.   | 1804.152 | 0.00542  | 3 | 1 | 37.9 | 0 |
| P12163_1_F3,23225 | R.NAIALALSPVVK.A ! R.   | 1804.152 | 0.00351  | 2 | 1 | 53.4 | 0 |
| P12163_1_F4,23973 | R.NAIALALSPVVK.A ! R.   | 1804.152 | 0.00245  | 2 | 1 | 45.9 | 0 |
| P12163_1_F4,24020 | R.NAIALALSPVVK.A ! R.   | 1804.152 | 0.01118  | 3 | 1 | 47.5 | 0 |
| P12163_2_F1,23421 | R.NAIALALSPVVK.A ! R.   | 1804.152 | 0.00254  | 3 | 1 | 34.3 | 0 |
| P12163_2_F1,23478 | R.NAIALALSPVVK.A ! R.   | 1804.152 | 0.00511  | 2 | 1 | 63.2 | 0 |
| P12163_2_F4,20850 | R.NAIALALSPVVK.A ! R.   | 1804.152 | 0.00173  | 3 | 1 | 30.5 | 0 |
| P12163_1_F5,14463 | K.AVAVLK.G              | 1208.819 | 0.00345  | 3 | 1 | 25.3 | 0 |
| P12163_2_F1,14669 | K.AVAVLK.G              | 1208.819 | 0.00153  | 3 | 1 | 27   | 0 |
| P12163_2_F1,14677 | K.AVAVLK.G              | 1208.819 | 0.00757  | 2 | 1 | 26.7 | 0 |
| P12163_2_F2,15235 | K.AVAVLK.G              | 1208.819 | 0.00699  | 3 | 1 | 31.8 | 0 |
| P12163_2_S5,13152 | K.AVAVLK.G              | 1208.819 | 0.00108  | 3 | 1 | 24.9 | 0 |
| P12163_1_F6,11444 | K.GGHELSTTGNAGGR.       | 1730.909 | 0.00009  | 3 | 1 | 41.6 | 0 |
| P12163_1_F6,11488 | K.GGHELSTTGNAGGR.       | 1730.909 | 0.00515  | 2 | 1 | 63.8 | 0 |
| P12163_2_F7,10551 | K.GGHELSTTGNAGGR.       | 1730.909 | 0.00222  | 2 | 1 | 49   | 0 |
| P12163_1_F8,19403 | R.AFVVHELEDDLK.G        | 2080.153 | -0.00026 | 3 | 1 | 46.3 | 0 |
| P12163_1_F8,19418 | R.AFVVHELEDDLK.G        | 2080.153 | 0.01155  | 2 | 1 | 56.6 | 0 |
| P12163_2_F8_1207C | R.AFVVHELEDDLK.G        | 2080.153 | 0.00352  | 3 | 1 | 24.3 | 0 |
| P12163_2_F8_1207C | R.AFVVHELEDDLK.G        | 2080.153 | 0.00643  | 3 | 1 | 36.7 | 0 |
| P12163_1_F6,16575 | K.AFQLDPK.I ! K.AFQLD   | 1426.851 | 0.00959  | 2 | 1 | 24.4 | 0 |
| P12163_2_S5,14696 | K.AFQLDPK.I ! K.AFQLD   | 1426.851 | 0.00116  | 3 | 1 | 27.3 | 0 |
| P12163_1_F4,14626 | K.DGVFVNGK.F            | 1443.842 | 0.00528  | 2 | 1 | 25.4 | 0 |
| P12163_1_F5,13061 | K.DGVFVNGK.F            | 1443.842 | 0.00786  | 2 | 1 | 25.9 | 0 |
| P12163_1_F8,20024 | R.AEDFFFSLGLKPGNTA      | 2536.34  | 0.00737  | 4 | 1 | 24.8 | 0 |
| P12163_1_F8,21386 | R.AEDFFFSLGLKPGNTA      | 2536.34  | 0.00985  | 3 | 1 | 43.1 | 0 |
| P12163_1_F8,21436 | R.AEDFFFSLGLKPGNTA      | 2536.34  | 0.00745  | 4 | 1 | 36.9 | 0 |
| P12163_1_F8,21671 | R.AEDFFFSLGLKPGNTA      | 2536.34  | 0.01363  | 3 | 1 | 27.3 | 0 |
| P12163_1_F8,21682 | R.AEDFFFSLGLKPGNTA      | 2536.34  | 0.00849  | 4 | 1 | 30.8 | 0 |
| P12163_2_F6,21051 | R.AEDFFFSLGLKPGNTA      | 2536.34  | -0.00155 | 4 | 1 | 30.3 | 0 |

|                   |                       |          |          |   |   |      |   |
|-------------------|-----------------------|----------|----------|---|---|------|---|
| P12163_2_F8_12070 | R.AEDFFFSGLGKPGNTA    | 2536.34  | 0.00033  | 4 | 1 | 27.4 | 0 |
| P12163_1_F9,6607  | K.HAVSEGTK.A          | 1436.832 | 0.00212  | 3 | 1 | 27   | 0 |
| P12163_1_S10,7890 | K.HAVSEGTK.A          | 1436.832 | 0.00554  | 3 | 1 | 44.2 | 0 |
| P12163_2_S5,7037  | K.HAVSEGTK.A          | 1436.832 | 0.00701  | 3 | 1 | 32.7 | 0 |
| P12163_1_F8,13222 | K.QVHPDIGISSK.A       | 1789.043 | 0.00487  | 3 | 1 | 32.3 | 0 |
| P12163_1_F3,20797 | R.LVLPGELAK.H         | 1547.998 | 0.00158  | 3 | 1 | 32.4 | 0 |
| P12163_1_F3,20817 | R.LVLPGELAK.H         | 1547.998 | 0.00622  | 2 | 1 | 28   | 0 |
| P12163_1_F4,21448 | R.LVLPGELAK.H         | 1547.998 | 0.00742  | 2 | 1 | 27.5 | 0 |
| P12163_1_F4,21461 | R.LVLPGELAK.H         | 1547.998 | 0.00719  | 3 | 1 | 26   | 0 |
| P12163_1_F6,19794 | R.LVLPGELAK.H         | 1547.998 | 0.00017  | 3 | 1 | 28.6 | 0 |
| P12163_2_F1,20911 | R.LVLPGELAK.H         | 1547.998 | 0.0099   | 2 | 1 | 24.9 | 0 |
| P12163_2_F1,20916 | R.LVLPGELAK.H         | 1547.998 | 0.00368  | 3 | 1 | 28.3 | 0 |
| P12163_1_F7,17538 | K.ECDLNLDGELDHEEFV    | 2670.318 | 0.00649  | 3 | 1 | 48.1 | 0 |
| P12163_1_F7,17867 | K.ECDLNLDGELDHEEFV    | 2670.318 | 0.01501  | 3 | 1 | 27.9 | 0 |
| P12163_1_F7,18055 | K.ECDLNLDGELDHEEFV    | 2670.318 | 0.00327  | 4 | 1 | 33   | 0 |
| P12163_1_F7,18080 | K.ECDLNLDGELDHEEFV    | 2670.318 | 0.00362  | 2 | 1 | 40.8 | 0 |
| P12163_2_S5,17598 | K.ECDLNLDGELDHEEFV    | 2670.318 | 0.00466  | 3 | 1 | 43.7 | 0 |
| P12163_2_S5,17661 | K.ECDLNLDGELDHEEFV    | 2670.318 | 0.00539  | 4 | 1 | 24.6 | 0 |
| P12163_1_F6,14305 | K.HLPGPHFDPPSK.E      | 1937.085 | 0.00887  | 4 | 1 | 25.7 | 0 |
| P12163_2_F9,13044 | K.HLPGPHFDPPSK.E      | 1937.085 | 0.00511  | 4 | 1 | 25.8 | 0 |
| P12163_2_F6,11359 | R.ATEGVPHVGK.V        | 1602.942 | 0.00469  | 2 | 1 | 33.7 | 0 |
| P12163_2_F7,10709 | R.ATEGVPHVGK.V        | 1602.942 | 0.00187  | 3 | 1 | 25.5 | 0 |
| P12163_2_F7,10849 | R.ATEGVPHVGK.V        | 1602.942 | 0.00621  | 2 | 1 | 32.7 | 0 |
| P12163_1_F4,25001 | K.DEPWWPVLK.T         | 1778.01  | 0.00298  | 2 | 1 | 24.4 | 0 |
| P12163_1_F5,21256 | K.GVPYSISL.-          | 1139.661 | 0.00418  | 2 | 1 | 52.8 | 0 |
| P12163_2_F2,21781 | K.GVPYSISL.-          | 1139.661 | 0.00252  | 2 | 1 | 45.5 | 0 |
| P12163_1_F6,13238 | R.QLSVM*HPIYR.L       | 1563.862 | 0.00189  | 3 | 1 | 33.6 | 0 |
| P12163_1_F6,16087 | R.QLSVMHPIYR.L        | 1547.867 | 0.00171  | 3 | 1 | 41   | 0 |
| P12163_1_F6,16104 | R.QLSVMHPIYR.L        | 1547.867 | 0.00112  | 2 | 1 | 30.7 | 0 |
| P12163_1_F8,15978 | R.QLSVMHPIYR.L        | 1547.867 | 0.00321  | 3 | 1 | 67.7 | 0 |
| P12163_2_F6,15403 | R.QLSVMHPIYR.L        | 1547.867 | 0.00312  | 3 | 1 | 48.9 | 0 |
| P12163_2_F6,15427 | R.QLSVMHPIYR.L        | 1547.867 | -0.00028 | 2 | 1 | 30.2 | 0 |
| P12163_2_S3,13965 | R.QLSVMHPIYR.L        | 1547.867 | 0.003    | 3 | 1 | 28.9 | 0 |
| P12163_2_S5,14981 | R.QLSVMHPIYR.L        | 1547.867 | 0.00156  | 3 | 1 | 25.6 | 0 |
| P12163_1_F4,16168 | K.DFVCVENAK.I ! K.DFV | 1689.909 | 0.01307  | 2 | 1 | 44.8 | 0 |
| P12163_1_F4,16205 | K.DFVCVENAK.I ! K.DFV | 1689.909 | 0.0047   | 3 | 1 | 39   | 0 |
| P12163_2_F1,15350 | K.DFVCVENAK.I ! K.DFV | 1689.909 | 0.00329  | 3 | 1 | 40.4 | 0 |
| P12163_2_F1,15417 | K.DFVCVENAK.I ! K.DFV | 1689.909 | 0.00925  | 2 | 1 | 38.5 | 0 |
| P12163_2_F1,17657 | K.VQLEPEQSWTAK.Q      | 2024.127 | 0.00114  | 2 | 1 | 27.7 | 0 |
| P12163_2_F1,17686 | K.VQLEPEQSWTAK.Q      | 2024.127 | 0.00658  | 3 | 1 | 37.5 | 0 |
| P12163_1_F5,10022 | R.ASVTGASVK.G         | 1427.868 | 0.00499  | 3 | 1 | 48   | 0 |
| P12163_1_F5,10036 | R.ASVTGASVK.G         | 1427.868 | 0.00644  | 2 | 1 | 35   | 0 |
| P12163_2_F2,10914 | R.ASVTGASVK.G         | 1427.868 | 0.00658  | 3 | 1 | 44.5 | 0 |
| P12163_2_F2,10916 | R.ASVTGASVK.G         | 1427.868 | 0.00576  | 2 | 1 | 38.2 | 0 |
| P12163_1_S1,22687 | K.AEEVLEVLK.K         | 1361.794 | 0.00504  | 2 | 1 | 36   | 0 |
| P12163_1_S1,22762 | K.AEEVLEVLK.K         | 1361.794 | 0.00283  | 3 | 1 | 38.7 | 0 |
| P12163_1_S1,22906 | K.AEEVLEVLK.K         | 1361.794 | 0.00388  | 2 | 1 | 40.2 | 0 |
| P12163_1_F9,11780 | R.FSHSGIEEK.R         | 1641.906 | 0.00808  | 2 | 1 | 31.5 | 0 |
| P12163_2_F9,11323 | R.FSHSGIEEK.R         | 1641.906 | 0.01028  | 2 | 1 | 24.8 | 0 |
| P12163_1_F2,4811  | R.TLEENEDNSR.T        | 1510.729 | 0.00088  | 3 | 1 | 22.7 | 0 |
| P12163_1_F2,5781  | R.TLEENEDNSR.T        | 1510.729 | 0.00661  | 3 | 1 | 28.4 | 0 |



|                   |                        |          |          |   |   |      |   |
|-------------------|------------------------|----------|----------|---|---|------|---|
| P12163_1_F2,7032  | R.TLEENEDNSR.T         | 1510.729 | 0.00457  | 3 | 1 | 27.6 | 0 |
| P12163_1_F2,8310  | R.TLEENEDNSR.T         | 1510.729 | 0.00492  | 2 | 1 | 29   | 0 |
| P12163_1_S1,6393  | R.TLEENEDNSR.T         | 1510.729 | 0.00427  | 3 | 1 | 23.1 | 0 |
| P12163_2_F1,24433 | K.LILYGLYK.Q           | 1591.008 | 0.00575  | 2 | 1 | 32.8 | 0 |
| P12163_2_F9,21059 | K.LILYGLYK.Q           | 1591.008 | 0.00463  | 3 | 1 | 28.1 | 0 |
| P12163_1_F4,11472 | K.TLPESTTNENK.L        | 1842.006 | 0.00737  | 2 | 1 | 43.1 | 0 |
| P12163_1_F4,11514 | K.TLPESTTNENK.L        | 1842.006 | 0.00703  | 3 | 1 | 23.3 | 0 |
| P12163_2_F1,10641 | K.TLPESTTNENK.L        | 1842.006 | -0.00067 | 2 | 1 | 35.9 | 0 |
| P12163_2_F1,10671 | K.TLPESTTNENK.L        | 1842.006 | 0.00643  | 3 | 1 | 24.4 | 0 |
| P12163_1_F8,15588 | M.GLQEEFEEHAEK.A       | 2054.065 | 0.00513  | 3 | 1 | 38.4 | 0 |
| P12163_1_F8,15648 | M.GLQEEFEEHAEK.A       | 2054.065 | 0.0019   | 2 | 1 | 43.9 | 0 |
| P12163_2_F6,15041 | M.GLQEEFEEHAEK.A       | 2054.065 | 0.00372  | 3 | 1 | 49.7 | 0 |
| P12163_2_F6,15089 | M.GLQEEFEEHAEK.A       | 2054.065 | 0.00538  | 2 | 1 | 66.8 | 0 |
| P12163_1_F4,14641 | K.VYGPAYASPK.R         | 1660.952 | 0.00484  | 2 | 1 | 33.4 | 0 |
| P12163_1_F4,14682 | K.VYGPAYASPK.R         | 1660.952 | 0.00755  | 3 | 1 | 32.4 | 0 |
| P12163_2_F1,13654 | K.VYGPAYASPK.R         | 1660.952 | 0.00611  | 3 | 1 | 25.6 | 0 |
| P12163_2_F9,13034 | K.VYGPAYASPK.R         | 1660.952 | 0.00644  | 2 | 1 | 35.4 | 0 |
| P12163_1_F4,14715 | R.SQGTELLGK.T          | 1540.915 | 0.00963  | 2 | 1 | 28.9 | 0 |
| P12163_1_F5,13311 | R.SQGTELLGK.T          | 1540.915 | 0.00999  | 2 | 1 | 36   | 0 |
| P12163_2_F1,13708 | R.SQGTELLGK.T          | 1540.915 | 0.0039   | 3 | 1 | 34.1 | 0 |
| P12163_1_F4,24969 | R.VILCLVEK.E           | 1581.986 | 0.00288  | 3 | 1 | 25.3 | 0 |
| P12163_2_F1,24175 | R.VILCLVEK.E           | 1581.986 | 0.00869  | 2 | 1 | 40.3 | 0 |
| P12163_2_F1,24219 | R.VILCLVEK.E           | 1581.986 | 0.00573  | 3 | 1 | 34.8 | 0 |
| P12163_1_F5,12774 | -.MCGITSAK.D ! K.MCGI  | 1475.817 | 0.01152  | 2 | 1 | 25.6 | 0 |
| P12163_2_F2,13588 | -.MCGITSAK.D ! K.MCGI  | 1475.817 | 0.01558  | 2 | 1 | 37.8 | 0 |
| P12163_1_F6,18716 | R.ASDSADLEFLQLHGDC     | 2222.099 | 0.00364  | 3 | 1 | 70.6 | 0 |
| P12163_1_F6,18761 | R.ASDSADLEFLQLHGDC     | 2222.099 | 0.00063  | 2 | 1 | 28.5 | 0 |
| P12163_1_F7,17825 | R.ASDSADLEFLQLHGDC     | 2222.099 | 0.00298  | 3 | 1 | 60.9 | 0 |
| P12163_1_F7,17847 | R.ASDSADLEFLQLHGDC     | 2222.099 | -0.00083 | 2 | 1 | 54.4 | 0 |
| P12163_2_F10,1670 | R.ASDSADLEFLQLHGDC     | 2222.099 | 0.00076  | 3 | 1 | 40.7 | 0 |
| P12163_2_F4,17409 | R.ASDSADLEFLQLHGDC     | 2222.099 | 0.00175  | 3 | 1 | 49.6 | 0 |
| P12163_2_S5,17361 | R.ASDSADLEFLQLHGDC     | 2222.099 | 0.00451  | 3 | 1 | 62.6 | 0 |
| P12163_2_F1,18418 | R.SAFPDLVQK.N          | 1612.952 | 0.00328  | 2 | 1 | 27.2 | 0 |
| P12163_1_F2,6171  | K.GSSFHR.I ! K.GSSFHR. | 994.5372 | 0.00346  | 3 | 1 | 23.2 | 0 |
| P12163_2_F2,6195  | K.GSSFHR.I ! K.GSSFHR. | 994.5372 | 0.00151  | 3 | 1 | 32   | 0 |
| P12163_1_S10,1275 | K.HVVFGK.V ! R.HVVFG   | 1294.809 | 0.00417  | 3 | 1 | 30.5 | 0 |
| P12163_2_F8_1207  | K.HVVFGK.V ! R.HVVFG   | 1294.809 | 0.00426  | 3 | 1 | 27   | 0 |
| P12163_1_F5,9906  | R.ALCTGEK.G            | 1386.787 | 0.00705  | 2 | 1 | 26.7 | 0 |
| P12163_1_F6,10902 | R.ALCTGEK.G            | 1386.787 | 0.01195  | 2 | 1 | 26.2 | 0 |
| P12163_1_F8,10102 | R.ALCTGEK.G            | 1386.787 | 0.00237  | 2 | 1 | 27.1 | 0 |
| P12163_2_F2,10720 | R.ALCTGEK.G            | 1386.787 | 0.00655  | 2 | 1 | 27   | 0 |
| P12163_2_F2,10838 | R.ALCTGEK.G            | 1386.787 | 0.00185  | 3 | 1 | 29.9 | 0 |
| P12163_2_F2,11178 | R.ALCTGEK.G            | 1386.787 | 0.00683  | 2 | 1 | 26.2 | 0 |
| P12163_1_F3,17765 | K.ATGDNVGPLLLK.K       | 1806.094 | -0.00078 | 3 | 1 | 22.1 | 0 |
| P12163_1_F3,19769 | K.ATGDNVGPLLLK.K       | 1806.094 | 0.00507  | 3 | 1 | 25   | 0 |
| P12163_1_F3,19770 | K.ATGDNVGPLLLK.K       | 1806.094 | 0.00516  | 2 | 1 | 34.2 | 0 |
| P12163_1_F6,18742 | K.ATGDNVGPLLLK.K       | 1806.094 | 0.00072  | 3 | 1 | 34.1 | 0 |
| P12163_1_F2,16436 | R.AEQGINLDIR.K         | 1489.828 | 0.00229  | 2 | 1 | 34.9 | 0 |
| P12163_1_F2,16519 | R.AEQGINLDIR.K         | 1489.828 | 0.00184  | 3 | 1 | 25.7 | 0 |
| P12163_1_F6,14950 | R.SGTFPLCDGSHVK.H      | 2013.068 | 0.0074   | 3 | 1 | 31.4 | 0 |
| P12163_1_F8,14789 | R.SGTFPLCDGSHVK.H      | 2013.068 | 0.00315  | 2 | 1 | 26.1 | 0 |

|                   |                       |          |          |   |   |      |   |
|-------------------|-----------------------|----------|----------|---|---|------|---|
| P12163_1_F8,14802 | R.SGTFPLCDGSHVK.H     | 2013.068 | 0.0083   | 3 | 1 | 38.1 | 0 |
| P12163_2_F6,14205 | R.SGTFPLCDGSHVK.H     | 2013.068 | 0.00003  | 2 | 1 | 29.9 | 0 |
| P12163_1_F7,18105 | K.DYGLIDGVIM*NPHK.I   | 2196.194 | 0.00394  | 3 | 1 | 53.3 | 0 |
| P12163_1_F7,19397 | K.DYGLIDGVIM*NPHK.I   | 2196.194 | 0.00631  | 3 | 1 | 49.1 | 0 |
| P12163_1_F8,18942 | K.DYGLIDGVIM*NPHK.I   | 2196.194 | 0.00745  | 3 | 1 | 64.8 | 0 |
| P12163_1_F8,18953 | K.DYGLIDGVIM*NPHK.I   | 2196.194 | 0.0051   | 4 | 1 | 26.8 | 0 |
| P12163_2_F6,18510 | K.DYGLIDGVIM*NPHK.I   | 2196.194 | 0.00394  | 3 | 1 | 78   | 0 |
| P12163_2_F6,19976 | K.DYGLIDGVIM*NPHK.I   | 2196.194 | 0.00302  | 4 | 1 | 35   | 0 |
| P12163_2_F6,19943 | K.DYGLIDGVIMNPHK.I    | 2180.199 | 0.00046  | 4 | 1 | 32.2 | 0 |
| P12163_2_F6,25125 | R.FQNVLSQLFQHR.I      | 1821.007 | 0.00556  | 3 | 1 | 28.1 | 0 |
| P12163_1_F7,17805 | R.IMIHQPLGGAQGGQSE    | 3646.904 | 0.00994  | 4 | 1 | 25.2 | 0 |
| P12163_1_F5,20291 | K.DLEWFK.E            | 1445.825 | 0.00816  | 2 | 1 | 26.7 | 0 |
| P12163_2_F1,20692 | K.DLEWFK.E            | 1445.825 | 0.01488  | 2 | 1 | 24.3 | 0 |
| P12163_2_F2,20783 | K.DLEWFK.E            | 1445.825 | 0.00792  | 2 | 1 | 26.6 | 0 |
| P12163_1_F5,16898 | K.ELEFYK.W ! K.ELEFYF | 1436.824 | 0.01113  | 2 | 1 | 25.1 | 0 |
| P12163_1_F4,19688 | R.CLEETELSFK.H        | 1863.998 | 0.01094  | 2 | 1 | 25.6 | 0 |
| P12163_1_F4,19707 | R.CLEETELSFK.H        | 1863.998 | 0.00919  | 3 | 1 | 25.5 | 0 |
| P12163_1_F4,19870 | R.CLEETELSFK.H        | 1863.998 | 0.01368  | 2 | 1 | 28.6 | 0 |
| P12163_2_F1,19075 | R.CLEETELSFK.H        | 1863.998 | 0.00312  | 2 | 1 | 31.8 | 0 |
| P12163_2_F1,19105 | R.CLEETELSFK.H        | 1863.998 | 0.0088   | 3 | 1 | 36.8 | 0 |
| P12163_2_F6,17778 | K.GHIDVDTPFGAM*K.L    | 2012.073 | 0.00287  | 3 | 1 | 50.5 | 0 |
| P12163_2_F6,17780 | K.GHIDVDTPFGAM*K.L    | 2012.073 | 0.00343  | 4 | 1 | 39   | 0 |
| P12163_2_F6,14849 | K.GHIDVDTPFGAMK.L     | 1996.078 | -0.00069 | 4 | 1 | 33.4 | 0 |
| P12163_2_F6,17734 | K.GHIDVDTPFGAMK.L     | 1996.078 | -0.00532 | 3 | 1 | 31.9 | 0 |
| P12163_2_F6,17758 | K.GHIDVDTPFGAMK.L     | 1996.078 | 0.00763  | 2 | 1 | 61.4 | 0 |
| P12163_1_F2,23999 | K.IPVTLIYDDIK.N       | 1898.146 | 0.01154  | 3 | 1 | 26.7 | 0 |
| P12163_1_F3,25202 | K.IPVTLIYDDIK.N       | 1898.146 | 0.01064  | 3 | 1 | 27.9 | 0 |
| P12163_1_F3,25214 | K.IPVTLIYDDIK.N       | 1898.146 | 0.00708  | 2 | 1 | 37.2 | 0 |
| P12163_1_F8,22348 | K.NGISYIDIPITFRPK.D   | 2342.369 | 0.00584  | 3 | 1 | 40.8 | 0 |
| P12163_1_F9,4442  | K.DHGAPSDNER.H        | 1401.666 | -0.00044 | 3 | 1 | 47.9 | 0 |
| P12163_1_F9,4444  | K.DHGAPSDNER.H        | 1401.666 | -0.00044 | 2 | 1 | 26.2 | 0 |
| P12163_2_F9,5687  | K.DHGAPSDNER.H        | 1401.666 | 0.00141  | 3 | 1 | 36.1 | 0 |
| P12163_1_S10,9055 | K.GGHELSK.T           | 1335.784 | 0.00625  | 3 | 1 | 23.2 | 0 |
| P12163_1_F8,14742 | R.AVVVHADPDDLKG.G     | 1944.101 | 0.0068   | 3 | 1 | 31   | 0 |
| P12163_1_F8,14762 | R.AVVVHADPDDLKG.G     | 1944.101 | 0.00586  | 2 | 1 | 79.5 | 0 |
| P12163_2_S5,13434 | R.AVVVHADPDDLKG.G     | 1944.101 | 0.00854  | 3 | 1 | 32.6 | 0 |
| P12163_2_S5,13438 | R.AVVVHADPDDLKG.G     | 1944.101 | 0.00551  | 4 | 1 | 23.5 | 0 |
| P12163_2_S5,13515 | R.AVVVHADPDDLKG.G     | 1944.101 | 0.00524  | 2 | 1 | 75.9 | 0 |
| P12163_1_F8,16743 | K.IDHDANPQLIEEYK.V    | 2293.228 | 0.00914  | 3 | 1 | 37   | 0 |
| P12163_1_F8,16745 | K.IDHDANPQLIEEYK.V    | 2293.228 | 0.00229  | 2 | 1 | 66.8 | 0 |
| P12163_2_F6,16229 | K.IDHDANPQLIEEYK.V    | 2293.228 | 0.00707  | 3 | 1 | 38.1 | 0 |
| P12163_2_F6,16258 | K.IDHDANPQLIEEYK.V    | 2293.228 | 0.00131  | 2 | 1 | 59.8 | 0 |
| P12163_1_F2,6992  | K.NGQEVPEZR.R         | 1319.686 | 0.00313  | 2 | 1 | 25.5 | 0 |
| P12163_1_F3,5845  | K.NGQEVPEZR.R         | 1319.686 | 0.00334  | 3 | 1 | 25.4 | 0 |
| P12163_1_F3,7118  | K.NGQEVPEZR.R         | 1319.686 | 0.00349  | 2 | 1 | 33.4 | 0 |
| P12163_1_F3,28022 | K.VYGLPTLILFK.N       | 1872.182 | 0.00597  | 3 | 1 | 31.3 | 0 |
| P12163_1_F3,28030 | K.VYGLPTLILFK.N       | 1872.182 | 0.00231  | 2 | 1 | 29.9 | 0 |
| P12163_1_F3,14221 | K.GNVQPGAVLQTVSK.T    | 2006.185 | 0.00671  | 3 | 1 | 41.9 | 0 |
| P12163_1_F3,17407 | K.GNVQPGAVLQTVSK.T    | 2006.185 | 0.00353  | 3 | 1 | 44.7 | 0 |
| P12163_1_F3,17455 | K.GNVQPGAVLQTVSK.T    | 2006.185 | 0.00037  | 2 | 1 | 55.7 | 0 |
| P12163_1_S1,19223 | K.M*DGVETFDIDLK.E     | 2007.056 | 0.00584  | 3 | 1 | 36.1 | 0 |

|                    |                         |          |          |   |   |      |   |
|--------------------|-------------------------|----------|----------|---|---|------|---|
| P12163_1_S1,21053  | K.MDGVETFDIDLK.E        | 1991.062 | -0.00457 | 3 | 1 | 38.4 | 0 |
| P12163_1_F4,12830  | K.VGM*SCEGCVGAVK.I      | 1978.002 | 0.00678  | 3 | 1 | 23.1 | 0 |
| P12163_2_F1,11940  | K.VGM*SCEGCVGAVK.I      | 1978.002 | 0.00121  | 2 | 1 | 24.3 | 0 |
| P12163_1_F4,14858  | K.VGMSCEGCVGAVK.R       | 1962.007 | 0.00455  | 2 | 1 | 64.4 | 0 |
| P12163_2_F1,13903  | K.VGMSCEGCVGAVK.R       | 1962.007 | 0.00599  | 2 | 1 | 78.3 | 0 |
| P12163_1_F3,20735  | K.QTCLFVVVGPK.S         | 1856.092 | 0.00023  | 3 | 1 | 41.4 | 0 |
| P12163_1_F3,20746  | K.QTCLFVVVGPK.S         | 1856.092 | 0.00304  | 2 | 1 | 36.1 | 0 |
| P12163_1_F4,21379  | K.QTCLFVVVGPK.S         | 1856.092 | 0.00197  | 3 | 1 | 31.8 | 0 |
| P12163_1_F7,20602  | R.DLNLGDLVGEAYGTH       | 2034.056 | 0.0035   | 3 | 1 | 55.4 | 0 |
| P12163_1_F7,20656  | R.DLNLGDLVGEAYGTH       | 2034.056 | -0.00483 | 2 | 1 | 40.7 | 0 |
| P12163_2_F10,1907  | R.DLNLGDLVGEAYGTH       | 2034.056 | -0.00664 | 3 | 1 | 56   | 0 |
| P12163_2_F10,1910  | R.DLNLGDLVGEAYGTH       | 2034.056 | 0.00449  | 3 | 1 | 73.2 | 0 |
| P12163_2_F6,19326  | R.TIDIAHAWIM*K.N        | 1923.098 | 0.00883  | 3 | 1 | 29.7 | 0 |
| P12163_1_F2,7035   | K.AVDDPR.T              | 976.5365 | 0.00178  | 2 | 1 | 26.1 | 0 |
| P12163_2_F1,6810   | K.AVDDPR.T              | 976.5365 | 0.00264  | 2 | 1 | 32   | 0 |
| P12163_1_F4,19473  | K.FIVEASVK.A            | 1500.925 | 0.00598  | 3 | 1 | 39.2 | 0 |
| P12163_1_F4,19481  | K.FIVEASVK.A            | 1500.925 | 0.00679  | 2 | 1 | 31.3 | 0 |
| P12163_2_F1,18739  | K.FIVEASVK.A            | 1500.925 | 0.00505  | 2 | 1 | 27.4 | 0 |
| P12163_2_F4,16957  | K.FIVEASVK.A            | 1500.925 | -0.00149 | 3 | 1 | 31   | 0 |
| P12163_1_F4,19511  | R.LITAIK.T ! K.LITAIK.E | 1266.86  | 0.01187  | 3 | 1 | 24.4 | 0 |
| P12163_2_F1,18791  | R.LITAIK.T ! K.LITAIK.E | 1266.86  | 0.00587  | 3 | 1 | 33   | 0 |
| P12163_1_F5,12831  | K.DYAEAIK.G             | 1417.815 | 0.00585  | 3 | 1 | 24.2 | 0 |
| P12163_1_F6,13699  | K.DYAEAIK.G             | 1417.815 | 0.00545  | 2 | 1 | 26.7 | 0 |
| P12163_1_S10,1374  | K.DYAEAIK.G             | 1417.815 | 0.00801  | 3 | 1 | 36   | 0 |
| P12163_2_F8_12070  | K.DYAEAIK.G             | 1417.815 | 0.00417  | 3 | 1 | 26.3 | 0 |
| P12163_2_F8_12070  | K.DYAEAIK.G             | 1417.815 | 0.00783  | 2 | 1 | 32.8 | 0 |
| P12163_1_F3,20646  | K.GVNPWIEVDGGVGP        | 2132.196 | 0.00285  | 3 | 1 | 63.5 | 0 |
| P12163_1_F3,20684  | K.GVNPWIEVDGGVGP        | 2132.196 | 0.00351  | 2 | 1 | 60.4 | 0 |
| P12163_1_S1,20060  | K.SDIIVSPSILSANFAK.L    | 2270.322 | 0.00429  | 3 | 1 | 51.4 | 0 |
| P12163_1_S1,22688  | K.LELFSYENNPYAR.I       | 1919.98  | -0.00115 | 3 | 1 | 40.6 | 0 |
| P12163_1_F3,20109  | K.LLVDITGSK.E           | 1553.972 | 0.00732  | 2 | 1 | 28.8 | 0 |
| P12163_1_F3,21715  | K.LLVDITGSK.E           | 1553.972 | 0.00456  | 2 | 1 | 39.3 | 0 |
| P12163_1_F3,21749  | K.LLVDITGSK.E           | 1553.972 | 0.00355  | 3 | 1 | 26.1 | 0 |
| P12163_1_F4,22661  | K.LLVDITGSK.E           | 1553.972 | 0.00247  | 3 | 1 | 27.4 | 0 |
| P12163_1_F4,22701  | K.LLVDITGSK.E           | 1553.972 | 0.00836  | 2 | 1 | 38.4 | 0 |
| P12163_1_F8,20105  | R.ERNDTLEVATSSLSTL      | 2267.214 | 0.00408  | 3 | 1 | 56.2 | 0 |
| P12163_2_S5,18774  | R.ERNDTLEVATSSLSTL      | 2267.214 | -0.00417 | 4 | 1 | 36.1 | 0 |
| P12163_1_F3,21875  | K.APAASGSSFNQLLGIK      | 2169.249 | 0.00554  | 3 | 1 | 41.9 | 0 |
| P12163_2_F1,22169  | K.APAASGSSFNQLLGIK      | 2169.249 | 0.00293  | 3 | 1 | 31.8 | 0 |
| P12163_2_F7,18945  | K.APAASGSSFNQLLGIK      | 2169.249 | 0.00353  | 3 | 1 | 26.9 | 0 |
| P12163_1_F5,6204   | K.GAAQETNK.W            | 1426.811 | 0.00721  | 2 | 1 | 39.5 | 0 |
| P12163_1_F5,6226   | K.GAAQETNK.W            | 1426.811 | 0.00334  | 3 | 1 | 26.9 | 0 |
| P12163_2_F2,7132   | K.GAAQETNK.W            | 1426.811 | 0.00679  | 2 | 1 | 40   | 0 |
| P12163_1_S1,19529  | R.AM*GLQSLPVAFGPET      | 2341.305 | 0.00047  | 3 | 1 | 47.1 | 0 |
| P12163_1_S1,21122  | R.AMGLQSLPVAFGPET       | 2325.31  | 0.00302  | 4 | 1 | 61.2 | 0 |
| P12163_1_F4,13363  | K.DLAEPGVK.R            | 1436.857 | 0.00837  | 2 | 1 | 27.3 | 0 |
| P12163_1_F4,13422  | K.DLAEPGVK.R            | 1436.857 | 0.01121  | 3 | 1 | 34.2 | 0 |
| P12163_2_F1,12383  | K.DLAEPGVK.R            | 1436.857 | 0.00199  | 2 | 1 | 39   | 0 |
| P12163_2_F1,12433  | K.DLAEPGVK.R            | 1436.857 | 0.00443  | 3 | 1 | 33.5 | 0 |
| P12163_2_F8_12070  | K.ELLDQNPPIGPAM*IHP     | 2856.539 | 0.00616  | 4 | 1 | 32.6 | 0 |
| P12163_1_S10,18190 | K.ELLDQNPPIGPAMIHP      | 2840.544 | 0.00993  | 4 | 1 | 29.9 | 0 |

|                   |                        |            |          |          |   |   |      |   |
|-------------------|------------------------|------------|----------|----------|---|---|------|---|
| P12163_2_F8_12070 | K.ELLDQNP              | IGPAMIHPSI | 2840.544 | 0.0054   | 4 | 1 | 22.4 | 0 |
| P12163_1_F4,12640 | R.IYLHQEGV             | PASHR.G    | 1810.987 | 0.00016  | 3 | 1 | 24   | 0 |
| P12163_1_F3,19225 | K.NDEIYDAIEV           | K.E        | 1917.042 | 0.00689  | 3 | 1 | 51.9 | 0 |
| P12163_1_F3,19249 | K.NDEIYDAIEV           | K.E        | 1917.042 | 0.00369  | 2 | 1 | 56.7 | 0 |
| P12163_1_F6,11060 | K.QLESYHK              | .G         | 1512.863 | 0.00503  | 3 | 1 | 24.5 | 0 |
| P12163_1_S1,9175  | R.SLEEM*NQEADQYR       | .S         | 1932.891 | 0.006    | 3 | 1 | 23.1 | 0 |
| P12163_1_S1,11522 | R.SLEEM*NQEADQYR       | .S         | 1932.891 | 0.00501  | 3 | 1 | 35.1 | 0 |
| P12163_1_S1,11888 | R.SLEEMNQEADQYR        | .S         | 1916.896 | -0.01506 | 3 | 1 | 56.5 | 0 |
| P12163_1_S1,15671 | R.SLEEMNQEADQYR        | .S         | 1916.896 | 0.00418  | 2 | 1 | 41.4 | 0 |
| P12163_1_S1,15717 | R.SLEEMNQEADQYR        | .S         | 1916.896 | 0.00294  | 3 | 1 | 46.3 | 0 |
| P12163_1_F4,17242 | K.GISASALPYK           | .R         | 1614.967 | 0.00216  | 2 | 1 | 37.9 | 0 |
| P12163_1_F4,17264 | K.GISASALPYK           | .R         | 1614.967 | 0.00398  | 3 | 1 | 25.9 | 0 |
| P12163_1_F9,16304 | K.GISASALPYK           | .R         | 1614.967 | 0.00184  | 2 | 1 | 25   | 0 |
| P12163_1_F3,15346 | K.ISSQDVEDNICK         | .F         | 2016.053 | 0.00609  | 3 | 1 | 54.1 | 0 |
| P12163_1_F3,15375 | K.ISSQDVEDNICK         | .F         | 2016.053 | 0.00832  | 2 | 1 | 63.8 | 0 |
| P12163_1_F9,9888  | R.DSHGIAQVK            | .S         | 1562.911 | 0.00504  | 2 | 1 | 38.3 | 0 |
| P12163_1_F9,9898  | R.DSHGIAQVK            | .S         | 1562.911 | 0.00541  | 3 | 1 | 47.7 | 0 |
| P12163_2_F9,9500  | R.DSHGIAQVK            | .S         | 1562.911 | 0.00697  | 3 | 1 | 28.1 | 0 |
| P12163_1_F2,15527 | K.IQQLTEER             | .K         | 1320.742 | 0.00149  | 2 | 1 | 24.5 | 0 |
| P12163_1_F3,11378 | K.IQQLTEER             | .K         | 1320.742 | 0.0028   | 3 | 1 | 36.7 | 0 |
| P12163_2_F4,13726 | K.IQQLTEER             | .K         | 1320.742 | -0.00033 | 2 | 1 | 26.6 | 0 |
| P12163_2_F1,18914 | K.VIEFTK.L ! K.VLEFTK  |            | 1344.835 | 0.00662  | 3 | 1 | 22.4 | 0 |
| P12163_1_F3,18585 | R.TIQT DINELK          | .K         | 1783.042 | -0.00887 | 2 | 1 | 33   | 0 |
| P12163_1_F4,19032 | R.TIQT DINELK          | .K         | 1783.042 | 0.00502  | 3 | 1 | 49.1 | 0 |
| P12163_1_F4,19133 | R.TIQT DINELK          | .K         | 1783.042 | 0.01057  | 2 | 1 | 51.2 | 0 |
| P12163_2_F1,18329 | R.TIQT DINELK          | .K         | 1783.042 | 0.00775  | 3 | 1 | 33.2 | 0 |
| P12163_1_F3,19176 | K.ATIGADFITK.E ! K.ATI |            | 1644.978 | 0.00716  | 3 | 1 | 22.9 | 0 |
| P12163_1_F4,20773 | K.ATIGADFITK.E ! K.ATI |            | 1644.978 | 0.00971  | 3 | 1 | 45.6 | 0 |
| P12163_2_F1,20163 | K.ATIGADFITK.E ! K.ATI |            | 1644.978 | 0.00517  | 2 | 1 | 36   | 0 |
| P12163_1_F3,18945 | K.VIVLGDSGVGK          | .T         | 1652.02  | 0.00634  | 3 | 1 | 34   | 0 |
| P12163_1_F4,18190 | R.GNIPYFETSAK.E ! K.G  |            | 1835.016 | 0.00836  | 2 | 1 | 39   | 0 |
| P12163_1_F4,18247 | R.GNIPYFETSAK.E ! K.G  |            | 1835.016 | 0.00761  | 3 | 1 | 33   | 0 |
| P12163_2_F1,17433 | R.GNIPYFETSAK.E ! K.G  |            | 1835.016 | 0.00354  | 2 | 1 | 27.7 | 0 |
| P12163_1_F8,21321 | K.DFPQCGFSHTVVQILK     |            | 2484.353 | 0.00438  | 3 | 1 | 44   | 0 |
| P12163_1_F8,21346 | K.DFPQCGFSHTVVQILK     |            | 2484.353 | 0.00956  | 4 | 1 | 28.1 | 0 |
| P12163_1_F4,19089 | K.SGELQELLEK           | .A         | 1754.016 | 0.00687  | 3 | 1 | 29.1 | 0 |
| P12163_2_F1,21584 | K.SGELQELLEK           | .A         | 1754.016 | 0.00669  | 3 | 1 | 30.6 | 0 |
| P12163_2_F1,22677 | K.VVLFM*K              | .G         | 1360.848 | 0.00392  | 3 | 1 | 23.4 | 0 |
| P12163_1_F5,21870 | K.VVLFMK               | .G         | 1344.853 | 0.00572  | 3 | 1 | 22.6 | 0 |
| P12163_2_F2,22236 | K.VVLFMK               | .G         | 1344.853 | -0.00011 | 2 | 1 | 36.6 | 0 |
| P12163_1_F4,24160 | K.AMQLLESGLK           | .V         | 1698.008 | 0.00906  | 2 | 1 | 29.1 | 0 |
| P12163_1_F4,24164 | K.AMQLLESGLK           | .V         | 1698.008 | 0.00839  | 3 | 1 | 47   | 0 |
| P12163_2_F1,23551 | K.AMQLLESGLK           | .V         | 1698.008 | 0.00689  | 3 | 1 | 56.1 | 0 |
| P12163_1_F3,20847 | K.VLEQLSGQTPVFSK       | .A         | 2141.243 | -0.00014 | 3 | 1 | 59.8 | 0 |
| P12163_1_F3,22939 | K.VLEQLSGQTPVFSK       | .A         | 2141.243 | 0.0043   | 3 | 1 | 41.8 | 0 |
| P12163_1_F9,7103  | R.VGIQHR               | .V         | 1013.616 | 0.00684  | 3 | 1 | 25.5 | 0 |
| P12163_2_F8_12070 | R.VGIQHR               | .V         | 1013.616 | 0.00135  | 3 | 1 | 29.5 | 0 |
| P12163_1_F2,12998 | K.SSDDIFVCER           | .V         | 1531.736 | 0.00442  | 3 | 1 | 22.8 | 0 |
| P12163_1_F2,13358 | K.SSDDIFVCER           | .V         | 1531.736 | 0.00247  | 3 | 1 | 33.8 | 0 |
| P12163_1_F2,15358 | K.SSDDIFVCER           | .V         | 1531.736 | 0.00446  | 2 | 1 | 27.8 | 0 |
| P12163_1_S1,15385 | K.SSDDIFVCER           | .V         | 1531.736 | 0.00235  | 3 | 1 | 28.4 | 0 |

|                                          |          |          |   |   |      |   |
|------------------------------------------|----------|----------|---|---|------|---|
| P12163_1_S10,5561 R.RAEEQR.L             | 1092.606 | 0.00202  | 3 | 1 | 30.8 | 0 |
| P12163_2_F10,4973 R.RAEEQR.L             | 1092.606 | 0.00238  | 3 | 1 | 29.4 | 0 |
| P12163_1_F7,18176 R.TVCVNQHQPWNWDI       | 2557.271 | 0.00198  | 3 | 1 | 22.6 | 0 |
| P12163_1_F2,22136 K.ILDTPSLLSEGSSGVK.I   | 2211.269 | 0.00922  | 3 | 1 | 26.5 | 0 |
| P12163_1_F3,20638 K.ILLIGDSGVGK.S ! K.LI | 1680.052 | 0.00865  | 3 | 1 | 25.3 | 0 |
| P12163_1_F3,22883 K.ILLIGDSGVGK.S ! K.LI | 1680.052 | 0.00487  | 3 | 1 | 44.5 | 0 |
| P12163_1_F3,22897 K.ILLIGDSGVGK.S ! K.LI | 1680.052 | 0.00801  | 2 | 1 | 43.1 | 0 |
| P12163_1_F6,21587 K.ILLIGDSGVGK.S ! K.LI | 1680.052 | 0.00223  | 3 | 1 | 32.2 | 0 |
| P12163_2_F4,20559 K.ILLIGDSGVGK.S ! K.LI | 1680.052 | 0.00142  | 3 | 1 | 28.6 | 0 |
| P12163_1_F3,26076 R.VNVEQCFEELVLK.I      | 2215.225 | 0.00734  | 3 | 1 | 48.6 | 0 |
| P12163_1_F4,22603 K.FGFDDAFNYK.E ! K.FC  | 1831.947 | 0.00457  | 2 | 1 | 40.1 | 0 |
| P12163_1_F4,22629 K.FGFDDAFNYK.E ! K.FC  | 1831.947 | 0.00624  | 3 | 1 | 30.9 | 0 |
| P12163_1_F3,28499 K.FLELVMPAIK.E         | 1769.085 | 0.00415  | 2 | 1 | 26.5 | 0 |
| P12163_1_S1,21705 K.M*LDAVLLNMR.L ! K.   | 1495.828 | 0.00183  | 3 | 1 | 49   | 0 |
| P12163_1_S1,21951 K.M*LDAVLLNMR.L ! K.   | 1495.828 | 0.00207  | 3 | 1 | 64   | 0 |
| P12163_1_S1,22184 K.MLDAVLLNM*R.L ! K.   | 1495.828 | 0.00264  | 3 | 1 | 33.4 | 0 |
| P12163_1_S1,22431 K.MLDAVLLNM*R.L ! K.   | 1495.828 | -0.00063 | 3 | 1 | 30.8 | 0 |
| P12163_2_F2,16045 K.IEEWNK.I             | 1426.815 | 0.01246  | 2 | 1 | 26.6 | 0 |
| P12163_1_F8,15610 K.LDM*IDDHLGGSR.Y      | 1648.827 | 0.00253  | 3 | 1 | 22.5 | 0 |
| P12163_1_F8,18925 K.LDMIDDHLGGSR.Y       | 1632.832 | 0.00229  | 3 | 1 | 39.9 | 0 |
| P12163_2_S5,17813 K.LDMIDDHLGGSR.Y       | 1632.832 | 0.00424  | 3 | 1 | 31.5 | 0 |
| P12163_1_F2,19999 R.NPDLDLAPVELK.G       | 1932.126 | 0.00957  | 3 | 1 | 28.9 | 0 |
| P12163_1_S1,18649 R.NPDLDLAPVELK.G       | 1932.126 | 0.0057   | 3 | 1 | 27.7 | 0 |
| P12163_1_S1,18691 R.NPDLDLAPVELK.G       | 1932.126 | 0.00425  | 2 | 1 | 46.6 | 0 |
| P12163_1_F4,23747 K.IELLVDK.T ! R.IELLVI | 1437.914 | 0.00718  | 2 | 1 | 29.1 | 0 |
| P12163_1_F4,24583 K.IELLVDK.T ! R.IELLVI | 1437.914 | 0.00762  | 2 | 1 | 31   | 0 |
| P12163_2_F1,23179 K.IELLVDK.T ! R.IELLVI | 1437.914 | 0.00392  | 2 | 1 | 30.4 | 0 |
| P12163_2_F1,23808 K.IELLVDK.T ! R.IELLVI | 1437.914 | 0.00634  | 2 | 1 | 30.9 | 0 |
| P12163_1_F8,18363 K.RTDGLTVLCMADDTA      | 2156.074 | 0.00403  | 3 | 1 | 30.2 | 0 |
| P12163_2_F1,16728 R.NVMIIENIDK.V         | 1683.956 | 0.01363  | 2 | 1 | 36.1 | 0 |
| P12163_2_F1,16756 R.NVMIIENIDK.V         | 1683.956 | 0.00974  | 3 | 1 | 26.5 | 0 |
| P12163_2_F1,11523 K.EETVDTVK.T           | 1528.868 | 0.00906  | 3 | 1 | 23.7 | 0 |
| P12163_1_F9,17826 K.FYAPGDFK.A           | 1552.862 | 0.00444  | 2 | 1 | 26.2 | 0 |
| P12163_1_F4,24354 R.DLLM*VLK.A           | 1455.906 | 0.00423  | 3 | 1 | 29.4 | 0 |
| P12163_2_F1,23765 R.DLLM*VLK.A           | 1455.906 | 0.00405  | 3 | 1 | 24   | 0 |
| P12163_1_F4,24287 R.DLLMVLK.A            | 1439.912 | 0.0064   | 2 | 1 | 33.8 | 0 |
| P12163_1_F4,24291 R.DLLMVLK.A            | 1439.912 | 0.00624  | 3 | 1 | 23.5 | 0 |
| P12163_2_F1,23710 R.DLLMVLK.A            | 1439.912 | 0.00252  | 3 | 1 | 22.8 | 0 |
| P12163_1_F3,25950 K.AVPVLLFK.N           | 1594.055 | 0.00296  | 3 | 1 | 36.6 | 0 |
| P12163_1_F4,26864 K.AVPVLLFK.N           | 1594.055 | 0.00287  | 3 | 1 | 37.6 | 0 |
| P12163_1_F5,24695 K.AVPVLLFK.N           | 1594.055 | 0.00329  | 3 | 1 | 33.5 | 0 |
| P12163_2_F1,25905 K.AVPVLLFK.N           | 1594.055 | 0.00605  | 3 | 1 | 31.3 | 0 |
| P12163_2_F1,25917 K.AVPVLLFK.N           | 1594.055 | 0.00667  | 2 | 1 | 34.3 | 0 |
| P12163_1_F2,20865 K.EFYIAAIER.V          | 1415.784 | 0.00673  | 2 | 1 | 34.8 | 0 |
| P12163_1_F4,15020 R.ETVVG TMPK.E         | 1569.913 | 0.00545  | 3 | 1 | 36.5 | 0 |
| P12163_1_F5,17338 K.GVTFGSFK.V           | 1450.851 | 0.00384  | 2 | 1 | 28.9 | 0 |
| P12163_1_F5,17359 K.GVTFGSFK.V           | 1450.851 | 0.00509  | 3 | 1 | 33.4 | 0 |
| P12163_2_F1,17881 K.GVTFGSFK.V           | 1450.851 | 0.00474  | 2 | 1 | 25.6 | 0 |
| P12163_2_F2,18074 K.GVTFGSFK.V           | 1450.851 | 0.00557  | 3 | 1 | 29.9 | 0 |
| P12163_2_S5,16060 K.GVTFGSFK.V           | 1450.851 | 0.00381  | 3 | 1 | 29.5 | 0 |
| P12163_2_F1,18710 K.LMMEQLSK.R           | 1587.906 | 0.00764  | 3 | 1 | 22.4 | 0 |

|                   |                      |          |          |   |   |      |   |
|-------------------|----------------------|----------|----------|---|---|------|---|
| P12163_2_F1,4806  | R.NNDEATAAR.L        | 1265.639 | 0.00038  | 2 | 1 | 32.4 | 0 |
| P12163_1_F2,16518 | K.ALAVVDQTPDSAK.K    | 1923.101 | 0.01029  | 3 | 1 | 30.5 | 0 |
| P12163_1_F2,16548 | K.ALAVVDQTPDSAK.K    | 1923.101 | 0.00777  | 2 | 1 | 68   | 0 |
| P12163_1_F5,11369 | R.AWEESEK.S ! K.AWEE | 1486.8   | 0.01136  | 2 | 1 | 26   | 0 |
| P12163_2_F2,12038 | R.AWEESEK.S ! K.AWEE | 1486.8   | -0.0014  | 2 | 1 | 25.9 | 0 |
| P12163_2_F2,12057 | R.AWEESEK.S ! K.AWEE | 1486.8   | -0.00313 | 3 | 1 | 35.3 | 0 |
| P12163_1_F3,16496 | R.DVALAEVEK.E        | 1581.931 | 0.0102   | 3 | 1 | 28.1 | 0 |
| P12163_1_F3,16507 | R.DVALAEVEK.E        | 1581.931 | 0.00811  | 2 | 1 | 49.3 | 0 |
| P12163_1_F4,18512 | K.YLLDAASGK.D        | 1545.91  | 0.00706  | 2 | 1 | 35.6 | 0 |
| P12163_1_F4,18543 | K.YLLDAASGK.D        | 1545.91  | 0.01102  | 3 | 1 | 23.8 | 0 |
| P12163_2_F1,17771 | K.YLLDAASGK.D        | 1545.91  | 0.00472  | 3 | 1 | 30.3 | 0 |
| P12163_1_F3,19923 | R.LDISSVSLAK.S       | 1698.026 | 0.00715  | 3 | 1 | 42   | 0 |
| P12163_1_F3,19943 | R.LDISSVSLAK.S       | 1698.026 | 0.00626  | 2 | 1 | 52.8 | 0 |
| P12163_1_F7,21365 | R.SPLSADLFGSICCTVQH  | 2685.395 | 0.00162  | 3 | 1 | 63.6 | 0 |
| P12163_2_F6,19210 | K.AALELAQNVKDPIEEK   | 2680.565 | 0.00716  | 3 | 1 | 32.7 | 0 |
| P12163_1_F6,13940 | K.YHSM*VLQISER.E     | 1682.884 | 0.00495  | 3 | 1 | 22.7 | 0 |
| P12163_1_F6,16911 | K.YHSMVLQISER.E      | 1666.889 | 0.00192  | 3 | 1 | 26.9 | 0 |
| P12163_2_F6,16204 | K.YHSMVLQISER.E      | 1666.889 | 0.0084   | 3 | 1 | 23   | 0 |
| P12163_1_F2,17679 | R.IPEDEVIVDPK.K      | 1862.073 | 0.00453  | 3 | 1 | 30.3 | 0 |
| P12163_1_S1,16600 | R.IPEDEVIVDPK.K      | 1862.073 | 0.00621  | 3 | 1 | 23.9 | 0 |
| P12163_1_S1,21700 | R.CGDFIQATYDAFNND    | 2816.341 | 0.00445  | 3 | 1 | 54.4 | 0 |
| P12163_1_F6,18015 | R.NTIDLITHYPGR.L     | 1703.938 | -0.00371 | 3 | 1 | 27.9 | 0 |
| P12163_1_F7,17089 | R.NTIDLITHYPGR.L     | 1703.938 | 0.00307  | 3 | 1 | 29.2 | 0 |
| P12163_1_F8,17856 | R.NTIDLITHYPGR.L     | 1703.938 | 0.00451  | 3 | 1 | 48.8 | 0 |
| P12163_2_F6,17364 | R.NTIDLITHYPGR.L     | 1703.938 | -0.00797 | 3 | 1 | 48   | 0 |
| P12163_1_F7,22883 | R.VSLPEAFLVHLSR.E    | 1859.069 | -0.00159 | 3 | 1 | 65.4 | 0 |
| P12163_1_F6,16707 | K.LSVQVFHVHAGR.E     | 1653.949 | 0.0023   | 3 | 1 | 51.6 | 0 |
| P12163_1_F6,16718 | K.LSVQVFHVHAGR.E     | 1653.949 | 0.00376  | 4 | 1 | 29.1 | 0 |
| P12163_2_S5,15344 | K.LSVQVFHVHAGR.E     | 1653.949 | 0.00112  | 4 | 1 | 43.1 | 0 |
| P12163_2_S5,15369 | K.LSVQVFHVHAGR.E     | 1653.949 | 0.00188  | 3 | 1 | 27.2 | 0 |
| P12163_1_S1,25163 | R.FALVPLGPPLLAYSSK.  | 2281.378 | 0.00944  | 3 | 1 | 33.4 | 0 |
| P12163_1_F3,11444 | R.VATQLVR.M          | 1090.689 | 0.00172  | 3 | 1 | 22.8 | 0 |
| P12163_1_F4,20486 | K.GEQFSPDFLK.I       | 1775.979 | 0.00902  | 2 | 1 | 41.8 | 0 |
| P12163_2_F1,19897 | K.GEQFSPDFLK.I       | 1775.979 | 0.00464  | 3 | 1 | 24.7 | 0 |
| P12163_2_F1,19905 | K.GEQFSPDFLK.I       | 1775.979 | 0.00846  | 2 | 1 | 44.2 | 0 |
| P12163_1_S10,1458 | K.GLEYEYK.A          | 1509.841 | 0.00548  | 3 | 1 | 25.9 | 0 |
| P12163_2_F2,14399 | K.GLEYEYK.A          | 1509.841 | 0.01374  | 2 | 1 | 24.6 | 0 |
| P12163_1_F2,20561 | K.YQPPLLPSDLK.R      | 1976.168 | 0.003    | 3 | 1 | 31   | 0 |
| P12163_1_F8,11331 | R.DGHVEIANDQGNR.F    | 1841.941 | 0.00345  | 3 | 1 | 38.8 | 0 |
| P12163_1_F8,11571 | R.DGHVEIANDQGNR.F    | 1841.941 | 0.0033   | 3 | 1 | 41.1 | 0 |
| P12163_1_F5,17500 | R.TIFDVK.R           | 1330.819 | 0.00764  | 2 | 1 | 32.9 | 0 |
| P12163_1_F5,17524 | R.TIFDVK.R           | 1330.819 | 0.0059   | 3 | 1 | 23.8 | 0 |
| P12163_2_F1,18011 | R.TIFDVK.R           | 1330.819 | 0.0053   | 2 | 1 | 32.5 | 0 |
| P12163_2_F1,23795 | R.VMDYFIK.L          | 1523.875 | 0.00386  | 2 | 1 | 28.9 | 0 |
| P12163_2_F1,7853  | K.GEGAPECDK.F        | 1570.799 | 0.00467  | 3 | 1 | 25.5 | 0 |
| P12163_2_F1,7854  | K.GEGAPECDK.F        | 1570.799 | 0.00756  | 2 | 1 | 27.7 | 0 |
| P12163_1_S1,15636 | K.LETAPADFR.F        | 1323.721 | 0.00311  | 2 | 1 | 26.2 | 0 |
| P12163_1_S1,15699 | K.LETAPADFR.F        | 1323.721 | 0.00403  | 3 | 1 | 36.3 | 0 |
| P12163_1_F4,21453 | R.ALCPSDWIEK.W       | 1826.993 | 0.00858  | 2 | 1 | 35.8 | 0 |
| P12163_1_F4,21463 | R.ALCPSDWIEK.W       | 1826.993 | 0.00977  | 3 | 1 | 35.1 | 0 |
| P12163_1_F5,18830 | K.LSNFYMK.K          | 1510.855 | 0.01073  | 2 | 1 | 26.2 | 0 |

|                   |                       |          |          |   |   |      |   |
|-------------------|-----------------------|----------|----------|---|---|------|---|
| P12163_1_F8,18507 | R.APHFELPEPLTGK.M     | 2044.169 | 0.00205  | 4 | 1 | 23.9 | 0 |
| P12163_1_F8,20007 | R.APHFELPEPLTGK.M     | 2044.169 | 0.00175  | 3 | 1 | 39.9 | 0 |
| P12163_1_F8,20017 | R.APHFELPEPLTGK.M     | 2044.169 | 0.00421  | 4 | 1 | 27.3 | 0 |
| P12163_2_F6,19551 | R.APHFELPEPLTGK.M     | 2044.169 | 0.00319  | 3 | 1 | 36.8 | 0 |
| P12163_1_F2,16775 | R.IESQGVSLGFR.A       | 1496.837 | 0.00268  | 3 | 1 | 33.5 | 0 |
| P12163_1_F3,18041 | K.DLSVVLATAK.T        | 1625.009 | 0.00153  | 3 | 1 | 33.7 | 0 |
| P12163_1_F3,20624 | K.DLSVVLATAK.T        | 1625.009 | 0.00687  | 2 | 1 | 49.3 | 0 |
| P12163_1_F3,20627 | K.DLSVVLATAK.T        | 1625.009 | 0.00678  | 3 | 1 | 39.2 | 0 |
| P12163_1_F4,20055 | K.EPNNLYNLNSFK.H      | 2061.122 | 0.00745  | 3 | 1 | 29.4 | 0 |
| P12163_1_F4,20068 | K.EPNNLYNLNSFK.H      | 2061.122 | -0.00272 | 2 | 1 | 31.1 | 0 |
| P12163_2_F2,15340 | K.NNCFLVK.E ! K.NNCFI | 1502.861 | 0.00176  | 3 | 1 | 22.4 | 0 |
| P12163_1_F3,22850 | K.GLGYAINTSEELNFVK    | 2363.307 | 0.00665  | 3 | 1 | 53.5 | 0 |
| P12163_2_F1,14093 | R.DIVNIQNSK.G         | 1638.963 | 0.00813  | 2 | 1 | 40.8 | 0 |
| P12163_2_F1,14094 | R.DIVNIQNSK.G         | 1638.963 | 0.0048   | 3 | 1 | 26.9 | 0 |
| P12163_2_F7,7904  | R.M*DVHESVPR.K        | 1389.71  | -0.00222 | 3 | 1 | 24.8 | 0 |
| P12163_1_F6,11221 | R.MDVHESVPR.K         | 1373.715 | 0.00414  | 3 | 1 | 26.8 | 0 |
| P12163_2_F7,10372 | R.MDVHESVPR.K         | 1373.715 | 0.00108  | 3 | 1 | 26.5 | 0 |
| P12163_1_F4,14800 | K.GSAITGPIGK.E        | 1508.926 | 0.00574  | 2 | 1 | 43.2 | 0 |
| P12163_1_F4,14816 | K.GSAITGPIGK.E        | 1508.926 | 0.00758  | 3 | 1 | 30.8 | 0 |
| P12163_1_F5,19521 | K.NLYIISVK.G          | 1557.982 | 0.01075  | 2 | 1 | 31.9 | 0 |
| P12163_2_F1,20188 | K.NLYIISVK.G          | 1557.982 | 0.00318  | 3 | 1 | 30.5 | 0 |
| P12163_2_F1,20207 | K.NLYIISVK.G          | 1557.982 | 0.00276  | 2 | 1 | 28.2 | 0 |
| P12163_1_S1,19026 | R.MSLGLPVAATVNCAD     | 2598.384 | 0.00161  | 3 | 1 | 43.4 | 0 |
| P12163_1_F3,18555 | K.LLGEAQSPEEGLK.E     | 1979.127 | 0.0038   | 3 | 1 | 37.3 | 0 |
| P12163_2_S3,14441 | R.ASISGHVQTLLR.E      | 1585.933 | 0.00592  | 3 | 1 | 26.9 | 0 |
| P12163_1_F2,15508 | R.GVDNFM*STVR.D       | 1445.736 | 0.0015   | 3 | 1 | 26.2 | 0 |
| P12163_1_F2,17654 | R.GVDNFM*STVR.D       | 1445.736 | 0.00764  | 2 | 1 | 26.9 | 0 |
| P12163_1_F2,15484 | R.GVDNFMSTVR.D        | 1429.741 | 0.00066  | 3 | 1 | 38.6 | 0 |
| P12163_1_F3,18210 | R.GVDNFMSTVR.D        | 1429.741 | 0.00524  | 2 | 1 | 35.4 | 0 |
| P12163_2_F7,10983 | K.HVPITIGGTR.I        | 1354.811 | 0.00163  | 3 | 1 | 24   | 0 |
| P12163_2_F7,12450 | K.HVPITIGGTR.I        | 1354.811 | 0.00151  | 3 | 1 | 48.7 | 0 |
| P12163_1_F3,21019 | R.QVFSGPIVTLK.V       | 1797.109 | 0.00486  | 3 | 1 | 31   | 0 |
| P12163_1_F3,21024 | R.QVFSGPIVTLK.V       | 1797.109 | 0.00277  | 2 | 1 | 56.2 | 0 |
| P12163_1_S1,14048 | R.VLVVDGGGSLR.C       | 1375.821 | 0.00722  | 3 | 1 | 31.7 | 0 |
| P12163_1_S1,16689 | R.VLVVDGGGSLR.C       | 1375.821 | 0.00599  | 3 | 1 | 52.1 | 0 |
| P12163_1_F4,11047 | K.EDTVPNASDK.M        | 1683.901 | 0.00804  | 2 | 1 | 27.7 | 0 |
| P12163_1_F2,17361 | K.NSTIEQEILGSSGR.A    | 1794.95  | 0.00491  | 3 | 1 | 27.8 | 0 |
| P12163_1_S1,18527 | K.NSTIEQEILGSSGR.A    | 1794.95  | -0.00316 | 3 | 1 | 32.6 | 0 |
| P12163_1_S1,18531 | K.NSTIEQEILGSSGR.A    | 1794.95  | 0.00321  | 2 | 1 | 37.8 | 0 |
| P12163_1_F3,10568 | K.QISQPDAESADNK.N     | 2011.055 | 0.00759  | 3 | 1 | 47.4 | 0 |
| P12163_1_F3,10582 | K.QISQPDAESADNK.N     | 2011.055 | 0.00445  | 2 | 1 | 41.7 | 0 |
| P12163_1_F8,20229 | K.AEFPFHVIPK.L        | 1793.057 | -0.00585 | 2 | 1 | 34.3 | 0 |
| P12163_1_F8,20236 | K.AEFPFHVIPK.L        | 1793.057 | 0.00692  | 3 | 1 | 34.9 | 0 |
| P12163_2_F6,19770 | K.AEFPFHVIPK.L        | 1793.057 | 0.00125  | 3 | 1 | 51.1 | 0 |
| P12163_2_F8_12070 | K.HQDDVDK.N           | 1464.79  | 0.00501  | 3 | 1 | 25.1 | 0 |
| P12163_1_F4,20701 | K.VEGGWILEGQK.R       | 1824.048 | 0.00816  | 2 | 1 | 32.7 | 0 |
| P12163_2_F1,20057 | K.VEGGWILEGQK.R       | 1824.048 | 0.00498  | 3 | 1 | 34.8 | 0 |
| P12163_1_F2,20847 | K.LSDAPLAIVDK.R       | 1750.057 | 0.00696  | 2 | 1 | 44.3 | 0 |
| P12163_1_F2,20877 | K.LSDAPLAIVDK.R       | 1750.057 | 0.00554  | 3 | 1 | 36.6 | 0 |
| P12163_1_S1,22553 | K.LVANLITEAGANR.V     | 1645.954 | 0.00134  | 3 | 1 | 45.4 | 0 |
| P12163_1_S1,22764 | K.LVANLITEAGANR.V     | 1645.954 | 0.0014   | 3 | 1 | 47.2 | 0 |

|                    |                       |          |          |   |   |      |   |
|--------------------|-----------------------|----------|----------|---|---|------|---|
| P12163_1_S1,22974  | K.LVANLITEAGANR.V     | 1645.954 | 0.00332  | 3 | 1 | 30.2 | 0 |
| P12163_1_S1,22878  | K.NITAVIPYFGYAR.A     | 1788.995 | 0.0006   | 3 | 1 | 29.7 | 0 |
| P12163_2_S5,17463  | K.IAGFSTHLMK.R        | 1712.998 | 0.00298  | 3 | 1 | 28.3 | 0 |
| P12163_1_F2,23738  | K.ILEEVAIIPSK.R       | 1820.135 | 0.00308  | 3 | 1 | 41.2 | 0 |
| P12163_1_F2,23750  | K.ILEEVAIIPSK.R       | 1820.135 | 0.00403  | 2 | 1 | 45.8 | 0 |
| P12163_1_F2,23911  | K.ILEEVAIIPSK.R       | 1820.135 | 0.00404  | 3 | 1 | 28.2 | 0 |
| P12163_1_S1,22585  | K.ILEEVAIIPSK.R       | 1820.135 | 0.00278  | 3 | 1 | 35.2 | 0 |
| P12163_1_F2,19381  | R.M*DFVPDESAIK.T      | 1875.998 | 0.00707  | 2 | 1 | 23.9 | 0 |
| P12163_2_F8_12070  | K.GSDDAHLNTHVLVD      | 2583.252 | 0.01151  | 3 | 1 | 44.6 | 0 |
| P12163_1_F8,18776  | K.M*HLFDVDIPGGR.S     | 1676.873 | 0.00561  | 3 | 1 | 28.3 | 0 |
| P12163_2_F6,18293  | K.M*HLFDVDIPGGR.S     | 1676.873 | 0.0045   | 3 | 1 | 59.4 | 0 |
| P12163_1_F8,21506  | K.MHLFDVDIPGGR.S      | 1660.878 | 0.00513  | 3 | 1 | 51.6 | 0 |
| P12163_1_F2,19198  | R.AIETQCYVIAAAQAGK    | 2302.268 | 0.00838  | 3 | 1 | 43.2 | 0 |
| P12163_1_F3,19690  | R.AIETQCYVIAAAQAGK    | 2302.268 | -0.00026 | 3 | 1 | 45.4 | 0 |
| P12163_1_F4,24574  | R.EFALLLK.Q           | 1441.924 | 0.00621  | 2 | 1 | 26.1 | 0 |
| P12163_1_S1,26125  | R.ILEFLNPELSR.T       | 1634.942 | 0.00076  | 3 | 1 | 22.9 | 0 |
| P12163_1_S1,26184  | R.ILEFLNPELSR.T       | 1634.942 | 0.00424  | 2 | 1 | 27.6 | 0 |
| P12163_1_F4,18698  | R.LQNSIENLPK.L        | 1764.048 | 0.0063   | 3 | 1 | 54   | 0 |
| P12163_2_F1,17913  | R.LQNSIENLPK.L        | 1764.048 | 0.00516  | 3 | 1 | 41.3 | 0 |
| P12163_2_F1,17932  | R.LQNSIENLPK.L        | 1764.048 | 0.00859  | 2 | 1 | 35.3 | 0 |
| P12163_1_F6,14922  | R.LAGGANVVAHGYTK.0    | 1966.133 | 0.00975  | 3 | 1 | 36.6 | 0 |
| P12163_1_F6,14945  | R.LAGGANVVAHGYTK.0    | 1966.133 | 0.00907  | 2 | 1 | 31.4 | 0 |
| P12163_1_F8,14780  | R.LAGGANVVAHGYTK.0    | 1966.133 | 0.00756  | 3 | 1 | 22.6 | 0 |
| P12163_2_F6,14254  | R.LAGGANVVAHGYTK.0    | 1966.133 | -0.00228 | 3 | 1 | 42.6 | 0 |
| P12163_1_F3,10620  | R.QPIGTAAQTQDGK.D     | 1923.076 | 0.00729  | 3 | 1 | 36.8 | 0 |
| P12163_1_F9,17632  | R.SLGAIIYNK.D ! R.SL0 | 1658.01  | 0.00613  | 3 | 1 | 27.2 | 0 |
| P12163_1_F8,21375  | K.LDDSHYFFTLR.V       | 1717.885 | 0.00364  | 3 | 1 | 33.3 | 0 |
| P12163_1_F4,21638  | K.VATGILSGVVK.V       | 1652.057 | 0.00961  | 2 | 1 | 38.4 | 0 |
| P12163_1_F4,21672  | K.VATGILSGVVK.V       | 1652.057 | 0.005    | 3 | 1 | 51.8 | 0 |
| P12163_2_F1,21214  | K.VATGILSGVVK.V       | 1652.057 | 0.00739  | 2 | 1 | 71.8 | 0 |
| P12163_1_F4,18727  | R.MIAAGSGQLIK.G       | 1697.024 | 0.00876  | 2 | 1 | 27.9 | 0 |
| P12163_2_F1,18008  | R.MIAAGSGQLIK.G       | 1697.024 | 0.00054  | 2 | 1 | 42.7 | 0 |
| P12163_1_F4,20826  | K.WLVENTDIK.L         | 1726     | 0.00062  | 3 | 1 | 27.4 | 0 |
| P12163_2_F1,20148  | K.WLVENTDIK.L         | 1726     | 0.00118  | 2 | 1 | 30.5 | 0 |
| P12163_2_F1,20157  | K.WLVENTDIK.L         | 1726     | 0.00245  | 3 | 1 | 29.1 | 0 |
| P12163_1_F3,20104  | R.EIIPVEGLK.L         | 1606.004 | 0.00586  | 3 | 1 | 34.1 | 0 |
| P12163_1_F2,9263   | R.M*VGAEGSPVR.C       | 1322.704 | 0.00455  | 3 | 1 | 40.9 | 0 |
| P12163_1_F2,9285   | R.MVGAEGSPVR.C        | 1306.709 | 0.0044   | 3 | 1 | 36.2 | 0 |
| P12163_2_F1,18936  | K.IGPLGLSPK.K         | 1489.956 | 0.00141  | 3 | 1 | 25.9 | 0 |
| P12163_1_F2,22385  | K.VAVVPSAAALVIK.A     | 1846.199 | 0.00364  | 3 | 1 | 37.7 | 0 |
| P12163_1_F2,22434  | K.VAVVPSAAALVIK.A     | 1846.199 | 0.0028   | 2 | 1 | 24.5 | 0 |
| P12163_1_F3,12810  | R.VTGGEVGAASSLAPK.    | 1952.127 | 0.00362  | 3 | 1 | 33.4 | 0 |
| P12163_1_F3,15667  | R.VTGGEVGAASSLAPK.    | 1952.127 | 0.0014   | 2 | 1 | 83   | 0 |
| P12163_1_F3,15674  | R.VTGGEVGAASSLAPK.    | 1952.127 | 0.00671  | 3 | 1 | 59.3 | 0 |
| P12163_2_F10,19590 | K.DYHDPPPAPLIDFEEL0   | 2661.402 | -0.00169 | 4 | 1 | 27.7 | 0 |
| P12163_1_F4,18413  | R.SFGAAVIYNK.E        | 1677.978 | 0.01291  | 2 | 1 | 49.4 | 0 |
| P12163_1_F4,14836  | R.YGGGANELADGYNK.0    | 2037.05  | 0.00967  | 2 | 1 | 75.8 | 0 |
| P12163_1_F4,14871  | R.YGGGANELADGYNK.0    | 2037.05  | 0.00862  | 3 | 1 | 55.1 | 0 |
| P12163_1_F9,14235  | R.YGGGANELADGYNK.0    | 2037.05  | 0.01393  | 3 | 1 | 29.1 | 0 |
| P12163_1_F9,14244  | R.YGGGANELADGYNK.0    | 2037.05  | 0.01204  | 3 | 1 | 22.6 | 0 |
| P12163_1_F3,16347  | K.DASATAGLLEK.L       | 1683.974 | 0.00134  | 3 | 1 | 38.2 | 0 |



|                   |                       |          |          |   |   |      |   |
|-------------------|-----------------------|----------|----------|---|---|------|---|
| P12163_2_F6,19022 | K.SFM*EMVHEVAESQK.    | 2276.151 | 0.00775  | 3 | 1 | 23.3 | 0 |
| P12163_1_F5,12746 | R.FGSVENCK.S          | 1548.83  | 0.00613  | 2 | 1 | 34.2 | 0 |
| P12163_2_F1,13077 | R.FGSVENCK.S          | 1548.83  | 0.00507  | 2 | 1 | 32.1 | 0 |
| P12163_2_F2,13527 | R.FGSVENCK.S          | 1548.83  | 0.01185  | 2 | 1 | 26.4 | 0 |
| P12163_2_F2,13608 | R.FGSVENCK.S          | 1548.83  | 0.00882  | 3 | 1 | 35   | 0 |
| P12163_1_F5,16327 | R.ADVFQVK.V           | 1414.851 | 0.01075  | 3 | 1 | 23.5 | 0 |
| P12163_2_F1,16724 | R.ADVFQVK.V           | 1414.851 | 0.0022   | 3 | 1 | 31.8 | 0 |
| P12163_2_F1,16835 | R.ADVFQVK.V           | 1414.851 | 0.00554  | 2 | 1 | 30.5 | 0 |
| P12163_2_F7,10177 | R.DLDIDRR.S           | 1206.674 | 0.00274  | 3 | 1 | 32.2 | 0 |
| P12163_1_F2,15317 | R.VSLEQNTLVIR.G       | 1575.937 | 0.00174  | 3 | 1 | 26.6 | 0 |
| P12163_1_S1,17617 | R.VSLEQNTLVIR.G       | 1575.937 | 0.00455  | 2 | 1 | 53.7 | 0 |
| P12163_1_F4,18904 | K.DSLQGSLACLK.L       | 1800.015 | -0.00369 | 2 | 1 | 40   | 0 |
| P12163_2_F1,18172 | K.DSLQGSLACLK.L       | 1800.015 | 0.00217  | 2 | 1 | 38.2 | 0 |
| P12163_2_F1,18223 | K.DSLQGSLACLK.L       | 1800.015 | 0.00598  | 3 | 1 | 37.4 | 0 |
| P12163_1_F5,18236 | R.KTSGSVVLIP.-        | 1609.014 | 0.01546  | 2 | 1 | 41   | 0 |
| P12163_2_F2,19049 | R.KTSGSVVLIP.-        | 1609.014 | 0.00522  | 2 | 1 | 50.1 | 0 |
| P12163_2_S5,13410 | R.VNHTYPLSQAAQAHT     | 2542.295 | -0.00529 | 4 | 1 | 66.6 | 0 |
| P12163_1_F8,15312 | K.AFDLGGHQIAR.R       | 1488.822 | 0.00303  | 3 | 1 | 61.6 | 0 |
| P12163_2_F6,14680 | K.AFDLGGHQIAR.R       | 1488.822 | 0.00312  | 3 | 1 | 69.2 | 0 |
| P12163_1_F3,25309 | K.ILFLGLDNAGK.T       | 1769.078 | 0.00394  | 3 | 1 | 35.7 | 0 |
| P12163_1_F3,25325 | K.ILFLGLDNAGK.T       | 1769.078 | 0.00417  | 2 | 1 | 51.4 | 0 |
| P12163_1_F7,16040 | R.LVQHQPQYPTSEELS     | 2763.514 | 0.0053   | 3 | 1 | 71.5 | 0 |
| P12163_2_F10,1510 | R.LVQHQPQYPTSEELS     | 2763.514 | 0.00551  | 4 | 1 | 22.5 | 0 |
| P12163_1_F3,21037 | K.MQYLFDENGR.R ! -.M  | 1576.773 | 0.00632  | 2 | 1 | 27.5 | 0 |
| P12163_1_F9,12497 | R.HDIIGDVR.G          | 1228.695 | 0.00355  | 2 | 1 | 32.7 | 0 |
| P12163_1_F9,12502 | R.HDIIGDVR.G          | 1228.695 | 0.00292  | 3 | 1 | 43.4 | 0 |
| P12163_2_F9,11713 | R.HDIIGDVR.G          | 1228.695 | 0.00247  | 3 | 1 | 34.9 | 0 |
| P12163_1_F7,11246 | R.QAHCADVGSHLLGR.I    | 1824.944 | 0.00379  | 3 | 1 | 46.2 | 0 |
| P12163_1_F4,22945 | K.AIYEIPYIK.E         | 1718.035 | 0.00442  | 2 | 1 | 41.5 | 0 |
| P12163_2_F1,22408 | K.AIYEIPYIK.E         | 1718.035 | -0.00216 | 2 | 1 | 24.8 | 0 |
| P12163_2_F1,22413 | K.AIYEIPYIK.E         | 1718.035 | 0.0007   | 3 | 1 | 22.4 | 0 |
| P12163_1_F3,23450 | K.GNLEAQVDQLLNTEK     | 2280.266 | 0.00242  | 3 | 1 | 58.2 | 0 |
| P12163_1_F4,25076 | K.LLDLVEK.S           | 1437.914 | 0.00628  | 2 | 1 | 31.1 | 0 |
| P12163_1_F4,13562 | K.AQTVDLNAK.S         | 1654.958 | 0.01145  | 2 | 1 | 45.8 | 0 |
| P12163_2_F6,12225 | K.DIPDVEGDRK.S ! K.DI | 1751.975 | -0.00414 | 2 | 1 | 34.2 | 0 |
| P12163_1_F3,20715 | R.TLPVILGK.E          | 1448.966 | 0.00815  | 2 | 1 | 30.1 | 0 |
| P12163_1_F4,21143 | R.TLPVILGK.E          | 1448.966 | 0.01081  | 2 | 1 | 26.8 | 0 |
| P12163_2_F1,20559 | R.TLPVILGK.E          | 1448.966 | 0.00995  | 2 | 1 | 24.3 | 0 |
| P12163_1_F3,24793 | K.GVADFLQEVTSK.K      | 1902.079 | 0.01008  | 3 | 1 | 43.7 | 0 |
| P12163_1_F3,24810 | K.GVADFLQEVTSK.K      | 1902.079 | 0.00251  | 2 | 1 | 51.5 | 0 |
| P12163_1_S1,22245 | K.TTLMVLAGR.K         | 1380.782 | 0.00404  | 2 | 1 | 38.6 | 0 |
| P12163_1_F3,24783 | R.LTLLGPPSSGK.T       | 1791.12  | 0.01004  | 2 | 1 | 44.5 | 0 |
| P12163_1_F3,24799 | R.LTLLGPPSSGK.T       | 1791.12  | 0.00649  | 3 | 1 | 42.4 | 0 |
| P12163_1_F2,14341 | K.AVDPQLETVVK.N       | 1822.053 | 0.00952  | 2 | 1 | 35.3 | 0 |
| P12163_1_F3,12406 | K.AVDPQLETVVK.N       | 1822.053 | 0.00648  | 3 | 1 | 23.9 | 0 |
| P12163_1_F3,14784 | K.AVDPQLETVVK.N       | 1822.053 | 0.00422  | 2 | 1 | 39.6 | 0 |
| P12163_1_F4,24935 | K.NLEAYFDAWDK.F       | 1980.032 | 0.00417  | 3 | 1 | 24.8 | 0 |
| P12163_1_F3,19641 | R.GNALLEFR.G          | 1223.705 | 0.00358  | 2 | 1 | 25.4 | 0 |
| P12163_1_S1,17960 | K.SFEVTELPVR.S        | 1480.831 | 0.00303  | 3 | 1 | 34.3 | 0 |
| P12163_2_F6,15697 | K.VFEAHTDYIR.C        | 1554.822 | 0.00374  | 3 | 1 | 43.7 | 0 |
| P12163_1_F4,20285 | R.ANEILPSIPK.E        | 1690.036 | 0.00245  | 2 | 1 | 24.9 | 0 |

|                   |                      |          |          |   |   |      |   |
|-------------------|----------------------|----------|----------|---|---|------|---|
| P12163_1_F4,20300 | R.ANEILPSIPK.E       | 1690.036 | 0.00353  | 3 | 1 | 35.1 | 0 |
| P12163_2_F1,19791 | R.ANEILPSIPK.E       | 1690.036 | 0.00371  | 2 | 1 | 25   | 0 |
| P12163_2_F6,16345 | K.GRVPILMDGGVR.R     | 1573.915 | -0.00073 | 3 | 1 | 30.4 | 0 |
| P12163_1_F5,19283 | K.NLEGLLSTK.V        | 1582.962 | 0.00869  | 3 | 1 | 31.3 | 0 |
| P12163_2_F1,19973 | K.NLEGLLSTK.V        | 1582.962 | 0.00356  | 3 | 1 | 36.8 | 0 |
| P12163_2_F1,20007 | K.NLEGLLSTK.V        | 1582.962 | 0.00436  | 2 | 1 | 28.1 | 0 |
| P12163_1_F3,23515 | R.SITNLPILIK.G       | 1720.119 | 0.01059  | 2 | 1 | 33   | 0 |
| P12163_1_F3,20065 | R.FQAQTEAANLICGAK.   | 2230.211 | 0.0037   | 3 | 1 | 58.4 | 0 |
| P12163_1_F4,20718 | R.FQAQTEAANLICGAK.   | 2230.211 | 0.00517  | 3 | 1 | 31.9 | 0 |
| P12163_1_F3,24720 | R.IIVFVGSPIK.H       | 1681.087 | 0.00556  | 3 | 1 | 26.4 | 0 |
| P12163_1_F2,17547 | R.VLVTPTSDBGK.I      | 1738.057 | -0.00529 | 2 | 1 | 34.1 | 0 |
| P12163_1_F3,18176 | R.VLVTPTSDBGK.I      | 1738.057 | 0.00163  | 2 | 1 | 29.6 | 0 |
| P12163_1_F5,21048 | K.LWDINVK.S          | 1495.909 | 0.00557  | 2 | 1 | 25.4 | 0 |
| P12163_1_F7,19771 | K.SSILLQDAAPHLQK.C   | 2242.338 | 0.00511  | 3 | 1 | 28   | 0 |
| P12163_1_F8,20706 | K.SSILLQDAAPHLQK.C   | 2242.338 | 0.0086   | 3 | 1 | 32   | 0 |
| P12163_1_F2,11037 | R.QTIEQNTLLNR.L      | 1633.917 | 0.00687  | 3 | 1 | 25.2 | 0 |
| P12163_1_F2,11337 | R.QTIEQNTLLNR.L      | 1633.917 | 0.00483  | 3 | 1 | 40.8 | 0 |
| P12163_1_F3,14449 | R.GYGLSDPPAEPEK.A !  | 1968.053 | 0.00574  | 2 | 1 | 29.5 | 0 |
| P12163_1_F3,14469 | R.GYGLSDPPAEPEK.A !  | 1968.053 | 0.01036  | 3 | 1 | 27.7 | 0 |
| P12163_2_F7,13153 | R.HQMVG VATAGFR.A    | 1577.852 | 0.00023  | 3 | 1 | 24.2 | 0 |
| P12163_1_F3,15114 | R.SEIPIAPENK.E       | 1705.994 | 0.00427  | 2 | 1 | 30.7 | 0 |
| P12163_1_F4,15434 | R.SEIPIAPENK.E       | 1705.994 | 0.01151  | 2 | 1 | 24.2 | 0 |
| P12163_1_F5,10503 | K.EYVEDCK.Q          | 1550.798 | 0.00895  | 2 | 1 | 24.9 | 0 |
| P12163_2_F1,10946 | K.EYVEDCK.Q          | 1550.798 | 0.00687  | 2 | 1 | 24.5 | 0 |
| P12163_2_F1,22388 | K.FAVMFNK.S          | 1464.849 | 0.0016   | 3 | 1 | 22.8 | 0 |
| P12163_2_F2,21959 | K.FAVMFNK.S          | 1464.849 | 0.00181  | 3 | 1 | 22.9 | 0 |
| P12163_1_F6,23058 | K.VNLFVDHSQVM*DLE    | 2395.205 | 0.00864  | 3 | 1 | 45.7 | 0 |
| P12163_2_F1,21693 | K.SIFVYPIK.S         | 1574.977 | 0.00229  | 3 | 1 | 28.6 | 0 |
| P12163_1_F5,14548 | R.INNCTFQGVK.L       | 1788.989 | 0.0039   | 2 | 1 | 41.9 | 0 |
| P12163_2_F2,15297 | R.INNCTFQGVK.L       | 1788.989 | 0.0011   | 2 | 1 | 44   | 0 |
| P12163_1_F5,9480  | R.KVNSAAEAAA.-       | 1539.895 | 0.01111  | 2 | 1 | 31.5 | 0 |
| P12163_2_F2,10342 | R.KVNSAAEAAA.-       | 1539.895 | 0.00633  | 2 | 1 | 46.9 | 0 |
| P12163_1_F5,20165 | K.LCAVLNVNK.R        | 1638.982 | 0.00312  | 3 | 1 | 33.2 | 0 |
| P12163_1_F3,18113 | R.GQTASSLVEFPSK.E    | 1959.101 | 0.00541  | 2 | 1 | 66.7 | 0 |
| P12163_1_F2,24162 | R.LLELANATEPTVLEK.I  | 2249.321 | 0.00502  | 3 | 1 | 45.5 | 0 |
| P12163_1_S1,23323 | R.LLELANATEPTVLEK.I  | 2249.321 | 0.00619  | 3 | 1 | 64.8 | 0 |
| P12163_1_S1,23358 | R.LLELANATEPTVLEK.I  | 2249.321 | 0.00676  | 4 | 1 | 60.4 | 0 |
| P12163_2_S3,10286 | K.GHVVTNYHVIR.G      | 1598.907 | 0.00091  | 3 | 1 | 28.9 | 0 |
| P12163_2_S3,10291 | K.GHVVTNYHVIR.G      | 1598.907 | 0.00411  | 4 | 1 | 45.6 | 0 |
| P12163_1_F8,19385 | K.IVGFDQDKDVAVLR.I   | 2183.264 | 0.00345  | 2 | 1 | 53.2 | 0 |
| P12163_2_S5,17715 | K.IVGFDQDKDVAVLR.I   | 2183.264 | 0.0046   | 3 | 1 | 28.6 | 0 |
| P12163_1_S1,12589 | K.LQTDELATVR.L       | 1449.821 | 0.00344  | 3 | 1 | 52.1 | 0 |
| P12163_1_F3,12009 | K.EGQTIVVGGASEANTK   | 2169.197 | 0.0033   | 3 | 1 | 31.6 | 0 |
| P12163_1_F4,13876 | K.SLSSGEPAPSNIK.E    | 1895.069 | 0.00526  | 2 | 1 | 69.5 | 0 |
| P12163_1_S1,9409  | R.AVATEDAQSYAER.E    | 1714.855 | 0.00112  | 3 | 1 | 44.4 | 0 |
| P12163_1_S1,9883  | R.AVATEDAQSYAER.E    | 1714.855 | -0.00116 | 3 | 1 | 33.2 | 0 |
| P12163_1_S1,12246 | R.AVATEDAQSYAER.E    | 1714.855 | 0.00068  | 2 | 1 | 35.5 | 0 |
| P12163_1_F6,14929 | K.HGEIDYEAVVK.L      | 1868.037 | 0.00841  | 3 | 1 | 22.6 | 0 |
| P12163_1_F2,18232 | K.LAEGFNGADLR.N      | 1466.79  | 0.00073  | 2 | 1 | 26   | 0 |
| P12163_1_F3,18476 | R.GVLLYGPPGTGK.T ! K | 1767.062 | 0.00594  | 2 | 1 | 41   | 0 |
| P12163_2_F1,18240 | R.GVLLYGPPGTGK.T ! K | 1767.062 | 0.0061   | 2 | 1 | 41   | 0 |

|                   |                      |          |          |   |   |      |   |
|-------------------|----------------------|----------|----------|---|---|------|---|
| P12163_2_F1,18262 | R.GVLLYGPPGTGK.T ! K | 1767.062 | 0.00702  | 3 | 1 | 43.8 | 0 |
| P12163_1_F2,17193 | K.AFVDSGAQSTIISK.S   | 2032.153 | 0.00826  | 3 | 1 | 42.9 | 0 |
| P12163_1_F8,16783 | K.DIPSHFLDEER.Y      | 1661.844 | 0.00227  | 3 | 1 | 47.2 | 0 |
| P12163_2_F6,16224 | K.DIPSHFLDEER.Y      | 1661.844 | 0.00179  | 3 | 1 | 36.6 | 0 |
| P12163_1_F6,21336 | K.GIDENWAAALEHNPE.   | 2415.199 | -0.0008  | 3 | 1 | 45   | 0 |
| P12163_1_F7,20552 | K.GIDENWAAALEHNPE.   | 2415.199 | 0.00316  | 3 | 1 | 54.1 | 0 |
| P12163_1_F5,7525  | R.AAGQGVGSQTK.D      | 1611.927 | 0.00286  | 2 | 1 | 42.7 | 0 |
| P12163_2_F1,7992  | R.AAGQGVGSQTK.D      | 1611.927 | 0.0018   | 2 | 1 | 44.5 | 0 |
| P12163_1_S1,17646 | R.APSIAEEFER.V       | 1452.764 | 0.00504  | 2 | 1 | 27.6 | 0 |
| P12163_2_F1,8931  | R.GGSNVDSVK.N        | 1470.837 | 0.00843  | 2 | 1 | 25.8 | 0 |
| P12163_2_F2,9102  | R.GGSNVDSVK.N        | 1470.837 | 0.00623  | 2 | 1 | 49.2 | 0 |
| P12163_2_F6,19592 | K.HPELFESLGIAQPK.G   | 2174.243 | -0.00077 | 4 | 1 | 25.5 | 0 |
| P12163_1_F3,18476 | R.GVLLYGPPGTGK.T ! K | 1767.062 | 0.00594  | 2 | 1 | 41   | 0 |
| P12163_2_F1,18240 | R.GVLLYGPPGTGK.T ! K | 1767.062 | 0.0061   | 2 | 1 | 41   | 0 |
| P12163_2_F1,18262 | R.GVLLYGPPGTGK.T ! K | 1767.062 | 0.00702  | 3 | 1 | 43.8 | 0 |
| P12163_1_F4,14387 | R.VSGSELVQK.Y        | 1554.931 | 0.01722  | 2 | 1 | 26.4 | 0 |
| P12163_1_F7,21898 | K.AGLTM*SSIDWLLLHC   | 2474.313 | -0.00099 | 3 | 1 | 22.6 | 0 |
| P12163_1_F7,23658 | K.AGLTM*SSIDWLLLHC   | 2474.313 | -0.00654 | 3 | 1 | 48.5 | 0 |
| P12163_1_F2,15518 | R.LDVPMER.V          | 1163.64  | 0.00289  | 2 | 1 | 25.7 | 0 |
| P12163_1_F3,22186 | R.VVPQTIESALEK.A     | 1922.142 | 0.00212  | 3 | 1 | 31   | 0 |
| P12163_1_F5,21011 | R.VVPQTIESALEK.A     | 1922.142 | 0.00304  | 3 | 1 | 28.2 | 0 |
| P12163_1_F4,14342 | K.DIAAEAVK.K         | 1424.857 | 0.01163  | 2 | 1 | 35.9 | 0 |
| P12163_1_F3,20020 | R.SDSQVFLFANSK.C     | 1951.074 | -0.00037 | 3 | 1 | 27.4 | 0 |
| P12163_1_F4,20566 | R.SDSQVFLFANSK.C     | 1951.074 | 0.00245  | 2 | 1 | 51.9 | 0 |
| P12163_1_F3,23125 | R.SIVGATLEVIQK.R     | 1866.152 | 0.00612  | 3 | 1 | 64.5 | 0 |
| P12163_1_F3,23177 | R.SIVGATLEVIQK.R     | 1866.152 | 0.00367  | 2 | 1 | 66.9 | 0 |
| P12163_1_F4,26541 | K.ADWLVLNFK.D        | 1714.015 | 0.01009  | 3 | 1 | 30.9 | 0 |
| P12163_1_F4,26571 | K.ADWLVLNFK.D        | 1714.015 | 0.01398  | 2 | 1 | 38.9 | 0 |
| P12163_1_S1,17790 | R.AMGGSVPFEEALAAAR.  | 1809.947 | 0.00243  | 3 | 1 | 26.6 | 0 |
| P12163_1_F3,20197 | R.LSPGIDELVK.K       | 1679.02  | 0.00618  | 3 | 1 | 37.5 | 0 |
| P12163_1_F3,20205 | R.LSPGIDELVK.K       | 1679.02  | 0.00539  | 2 | 1 | 42.2 | 0 |
| P12163_1_F5,19073 | K.AFEFVAK.E          | 1419.846 | 0.00365  | 2 | 1 | 28.1 | 0 |
| P12163_2_F1,19202 | K.AFEFVAK.E          | 1419.846 | 0.00449  | 2 | 1 | 33   | 0 |
| P12163_2_F2,19747 | K.AFEFVAK.E          | 1419.846 | -0.00474 | 2 | 1 | 25.6 | 0 |
| P12163_1_S1,15111 | K.LSDLDPETR.S        | 1349.721 | 0.00447  | 3 | 1 | 30   | 0 |
| P12163_2_F1,20988 | R.FVLCEIK.K          | 1516.902 | 0.00841  | 3 | 1 | 24.6 | 0 |
| P12163_1_F5,12578 | K.SLGLGQEEK.A        | 1568.91  | 0.00689  | 2 | 1 | 31.4 | 0 |
| P12163_2_F1,12977 | K.SLGLGQEEK.A        | 1568.91  | 0.00547  | 2 | 1 | 33.4 | 0 |
| P12163_1_F8,10933 | R.EPGATPTMHVPR.K     | 1596.847 | 0.00195  | 3 | 1 | 27.3 | 0 |
| P12163_2_F6,11826 | R.EPGATPTMHVPR.K     | 1596.847 | -0.00015 | 3 | 1 | 41.8 | 0 |
| P12163_1_S1,25237 | R.IFTQFFDPEGIANAQK.! | 2434.323 | 0.00165  | 3 | 1 | 31.1 | 0 |
| P12163_2_F1,15900 | K.SSLGPVGLDK.M       | 1580.947 | 0.0025   | 2 | 1 | 29.3 | 0 |
| P12163_2_F1,15915 | K.SSLGPVGLDK.M       | 1580.947 | 0.00315  | 3 | 1 | 30.1 | 0 |
| P12163_1_S1,23925 | K.VLVELAELQDR.E      | 1588.921 | -0.00104 | 3 | 1 | 40.4 | 0 |
| P12163_1_S1,24137 | K.VLVELAELQDR.E      | 1588.921 | 0.00214  | 3 | 1 | 55.9 | 0 |
| P12163_1_S1,17432 | R.GANDYMLDEMERA      | 1747.793 | 0.00039  | 2 | 1 | 29.5 | 0 |
| P12163_2_F9,12688 | K.DHPYDPAQDSVLSR.V   | 1903.945 | 0.00142  | 3 | 1 | 27   | 0 |
| P12163_1_S1,12064 | K.NLVSVESVASDR.R     | 1579.859 | 0.01024  | 3 | 1 | 23.9 | 0 |
| P12163_1_S1,15692 | K.NLVSVESVASDR.R     | 1579.859 | 0.00322  | 3 | 1 | 55.9 | 0 |
| P12163_1_F4,17798 | K.TNYLIVDSK.T        | 1660.973 | 0.00624  | 3 | 1 | 28.9 | 0 |
| P12163_2_F1,16922 | K.TNYLIVDSK.T        | 1660.973 | 0.00318  | 3 | 1 | 33   | 0 |

|                   |                    |          |          |   |   |      |   |
|-------------------|--------------------|----------|----------|---|---|------|---|
| P12163_1_S1,17671 | K.DVVAWHAQQEALTV   | 1999.055 | 0.0061   | 2 | 1 | 30.7 | 0 |
| P12163_1_S1,17964 | K.FSDVYLDER.V      | 1447.737 | 0.00274  | 2 | 1 | 30.7 | 0 |
| P12163_1_F5,17828 | K.SAAEFANLYK.E     | 1721.968 | 0.00354  | 2 | 1 | 53.3 | 0 |
| P12163_2_F1,18295 | K.SAAEFANLYK.E     | 1721.968 | -0.00166 | 2 | 1 | 46.3 | 0 |
| P12163_2_F2,18536 | K.SAAEFANLYK.E     | 1721.968 | 0.00574  | 2 | 1 | 37.9 | 0 |
| P12163_1_F4,19464 | K.EDALVDFK.S       | 1544.878 | 0.00628  | 3 | 1 | 35.5 | 0 |
| P12163_2_F1,18730 | K.EDALVDFK.S       | 1544.878 | 0.00553  | 3 | 1 | 26.5 | 0 |
| P12163_2_F4,16726 | K.FIQSHLLSR.L      | 1404.826 | 0.00423  | 3 | 1 | 26.5 | 0 |
| P12163_1_F4,9331  | K.LSEANQQNR.F      | 1363.723 | 0.0034   | 2 | 1 | 26.5 | 0 |
| P12163_2_F1,8468  | K.LSEANQQNR.F      | 1363.723 | 0.00424  | 2 | 1 | 25.5 | 0 |
| P12163_1_F9,12740 | K.ILHAAGPAK.V      | 1485.936 | 0.0037   | 3 | 1 | 23.7 | 0 |
| P12163_2_F7,11785 | K.ILHAAGPAK.V      | 1485.936 | 0.00565  | 3 | 1 | 33.7 | 0 |
| P12163_1_S1,22344 | K.LYVPSELVSVYR.E   | 1728.984 | 0.00071  | 3 | 1 | 31   | 0 |
| P12163_2_F6,22956 | K.LYVPSELVSVYR.E   | 1728.984 | 0.00405  | 2 | 1 | 29.3 | 0 |
| P12163_1_S1,13729 | R.LIQSQDDIR.N      | 1391.78  | 0.00223  | 2 | 1 | 28.2 | 0 |
| P12163_1_F4,13258 | K.ETQLEVEQK.L      | 1711.969 | 0.00179  | 2 | 1 | 48.3 | 0 |
| P12163_1_F4,13264 | K.ETQLEVEQK.L      | 1711.969 | -0.00325 | 3 | 1 | 27.1 | 0 |
| P12163_2_F1,12268 | K.ETQLEVEQK.L      | 1711.969 | -0.00107 | 2 | 1 | 47.4 | 0 |
| P12163_1_S1,23509 | K.IYYSPLGNFMDER.D  | 1908.947 | 0.00048  | 3 | 1 | 27.9 | 0 |
| P12163_1_F4,17433 | R.AEISAALTK.M      | 1511.925 | 0.00301  | 3 | 1 | 23.3 | 0 |
| P12163_1_F8,16502 | K.FAATVEPAHLK.T    | 1792.058 | 0.00576  | 3 | 1 | 46.9 | 0 |
| P12163_2_F6,15995 | K.FAATVEPAHLK.T    | 1792.058 | 0.00306  | 3 | 1 | 41.6 | 0 |
| P12163_1_F3,6655  | R.DNEAEVR.I        | 1136.585 | 0.00232  | 2 | 1 | 24.7 | 0 |
| P12163_1_F3,22616 | R.LLPVVINASK.D     | 1662.077 | 0.00406  | 3 | 1 | 44.9 | 0 |
| P12163_1_F3,22677 | R.LLPVVINASK.D     | 1662.077 | 0.00228  | 2 | 1 | 31.9 | 0 |
| P12163_1_F3,6490  | K.DAYGDGR.H        | 1057.522 | 0.00229  | 2 | 1 | 26.4 | 0 |
| P12163_1_F9,12615 | K.EHLNAESVTVK.D    | 1835.048 | 0.01328  | 3 | 1 | 37.2 | 0 |
| P12163_1_F9,12719 | K.EHLNAESVTVK.D    | 1835.048 | 0.00714  | 2 | 1 | 43.9 | 0 |
| P12163_2_F1,8233  | K.TPAEADV.K        | 1438.836 | 0.00295  | 2 | 1 | 24.7 | 0 |
| P12163_2_F1,10175 | K.TPAEADV.K        | 1438.836 | 0.00688  | 3 | 1 | 33.2 | 0 |
| P12163_2_F2,11705 | K.ICAEAEK.V        | 1428.798 | 0.00369  | 3 | 1 | 22.5 | 0 |
| P12163_1_S1,17587 | R.GLYPVETISIVGK.I  | 1984.194 | 0.00213  | 3 | 1 | 23.3 | 0 |
| P12163_1_S1,20283 | R.GLYPVETISIVGK.I  | 1984.194 | 0.00735  | 3 | 1 | 47.4 | 0 |
| P12163_1_F8,18496 | R.NNIDFLSLSHTR.G   | 1720.928 | -0.00085 | 3 | 1 | 24   | 0 |
| P12163_2_F6,18010 | R.NNIDFLSLSHTR.G   | 1720.928 | 0.00404  | 3 | 1 | 33.4 | 0 |
| P12163_1_F8,18160 | K.FAATVEAAHLK.S    | 1766.042 | 0.00581  | 3 | 1 | 39.9 | 0 |
| P12163_2_F6,17741 | K.FAATVEAAHLK.S    | 1766.042 | 0.00365  | 3 | 1 | 53.8 | 0 |
| P12163_1_F3,6655  | R.DNEAEVR.I        | 1136.585 | 0.00232  | 2 | 1 | 24.7 | 0 |
| P12163_1_F4,21341 | R.LLAVEGCGALGK.L   | 1796.056 | 0.00712  | 2 | 1 | 52.5 | 0 |
| P12163_1_F4,21342 | R.LLAVEGCGALGK.L   | 1796.056 | 0.01303  | 3 | 1 | 63.4 | 0 |
| P12163_1_S1,20601 | K.EDAQAIIDSLR.E    | 1534.838 | 0.0056   | 2 | 1 | 33.7 | 0 |
| P12163_1_S1,20625 | K.EDAQAIIDSLR.E    | 1534.838 | 0.00501  | 3 | 1 | 48.2 | 0 |
| P12163_1_F6,9555  | R.AVPLHDHK.G       | 1524.911 | 0.00304  | 3 | 1 | 30.7 | 0 |
| P12163_1_F3,24518 | R.VIELDIWPNSK.K    | 1922.121 | 0.01314  | 3 | 1 | 29.5 | 0 |
| P12163_1_F3,24522 | R.VIELDIWPNSK.K    | 1922.121 | 0.00388  | 2 | 1 | 38.2 | 0 |
| P12163_1_F3,23185 | K.LYDNSAMENLFK.S   | 2053.088 | 0.00435  | 2 | 1 | 24.1 | 0 |
| P12163_1_F5,16585 | R.ASQFDLVK.A       | 1515.899 | 0.00659  | 2 | 1 | 26.8 | 0 |
| P12163_2_F1,16978 | R.ASQFDLVK.A       | 1515.899 | -0.01613 | 2 | 1 | 27.5 | 0 |
| P12163_1_F7,19716 | R.SVYLSFVPDEEIGGHD | 2757.419 | 0.00644  | 3 | 1 | 33.4 | 0 |
| P12163_1_F7,19722 | R.SVYLSFVPDEEIGGHD | 2757.419 | 0.00579  | 4 | 1 | 30.5 | 0 |
| P12163_1_F4,14566 | K.SEVVIGDAK.E      | 1525.905 | 0.00859  | 2 | 1 | 37.4 | 0 |

|                   |                       |          |          |   |   |      |   |
|-------------------|-----------------------|----------|----------|---|---|------|---|
| P12163_2_F1,13601 | K.SEVVIGDAK.E         | 1525.905 | 0.00021  | 2 | 1 | 37   | 0 |
| P12163_1_F8,21596 | R.ITQAIIDHALK.I       | 1831.126 | 0.00271  | 3 | 1 | 28.9 | 0 |
| P12163_2_F6,21336 | R.ITQAIIDHALK.I       | 1831.126 | 0.00628  | 3 | 1 | 42   | 0 |
| P12163_2_F2,19448 | R.WAIDNLK.L           | 1467.878 | 0.00566  | 2 | 1 | 26.3 | 0 |
| P12163_1_F4,22632 | K.EDLMEQMGLK.S        | 1801.965 | 0.00882  | 3 | 1 | 35   | 0 |
| P12163_1_F4,22634 | K.EDLMEQMGLK.S        | 1801.965 | 0.00784  | 2 | 1 | 32.3 | 0 |
| P12163_1_F3,27427 | K.NSTNIDTVIDWLVK.H    | 2226.259 | 0.00524  | 3 | 1 | 33   | 0 |
| P12163_1_F3,22491 | K.QEM*ELSLIGLQNAGK    | 2255.252 | 0.02168  | 3 | 1 | 27.9 | 0 |
| P12163_1_F3,22450 | K.QEMELSLIGLQNAGK.    | 2239.258 | -0.00736 | 2 | 1 | 43.4 | 0 |
| P12163_1_F8,15312 | K.AFDLGGHQIAR.R       | 1488.822 | 0.00303  | 3 | 1 | 61.6 | 0 |
| P12163_2_F6,14680 | K.AFDLGGHQIAR.R       | 1488.822 | 0.00312  | 3 | 1 | 69.2 | 0 |
| P12163_1_F3,25309 | K.ILFLGLDNAGK.T       | 1769.078 | 0.00394  | 3 | 1 | 35.7 | 0 |
| P12163_1_F3,25325 | K.ILFLGLDNAGK.T       | 1769.078 | 0.00417  | 2 | 1 | 51.4 | 0 |
| P12163_1_F6,18063 | R.YHLGLTNFTTGK.G      | 1960.111 | 0.00618  | 3 | 1 | 52.3 | 0 |
| P12163_1_F7,19007 | K.AFVVVGDTDGHVGLC     | 2278.302 | -0.00449 | 3 | 1 | 33.9 | 0 |
| P12163_1_F4,21184 | K.ATFECLLK.T          | 1589.918 | 0.00607  | 3 | 1 | 31.3 | 0 |
| P12163_2_F1,20453 | K.ATFECLLK.T          | 1589.918 | -0.00119 | 3 | 1 | 31.2 | 0 |
| P12163_2_F1,16781 | R.GAILLAK.L           | 1293.871 | 0.00602  | 2 | 1 | 29.3 | 0 |
| P12163_2_F1,16813 | R.GAILLAK.L           | 1293.871 | 0.00479  | 3 | 1 | 37.1 | 0 |
| P12163_1_F3,17905 | K.ALAVLR.S ! K.ALAVLI | 946.6351 | 0.00409  | 2 | 1 | 24.4 | 0 |
| P12163_1_F5,15460 | K.QYAVFDEK.V          | 1607.889 | 0.01119  | 2 | 1 | 27.8 | 0 |
| P12163_1_S10,1585 | K.QYAVFDEK.V          | 1607.889 | 0.00787  | 3 | 1 | 27   | 0 |
| P12163_1_S1,18883 | K.SPPEIPVVTLPK.F      | 2014.204 | 0.01576  | 2 | 1 | 32.1 | 0 |
| P12163_1_S1,18887 | K.SPPEIPVVTLPK.F      | 2014.204 | 0.00747  | 3 | 1 | 44.4 | 0 |
| P12163_1_F3,14321 | K.AVMVEEPPK.R         | 1639.918 | 0.00671  | 2 | 1 | 43.6 | 0 |
| P12163_1_S1,23117 | R.NLDLLLGLENR.V       | 1573.921 | 0.00258  | 3 | 1 | 47.4 | 0 |
| P12163_1_S1,23214 | R.NLDLLLGLENR.V       | 1573.921 | -0.0005  | 2 | 1 | 27.1 | 0 |
| P12163_1_S1,19826 | R.VTGLLECDGIR.D       | 1536.836 | 0.002    | 2 | 1 | 26   | 0 |
| P12163_1_S1,19889 | R.VTGLLECDGIR.D       | 1536.836 | 0.00395  | 3 | 1 | 77.2 | 0 |
| P12163_1_S1,17745 | K.LFPDEISADQSK.A      | 1958.069 | 0.00579  | 3 | 1 | 39.9 | 0 |
| P12163_1_F6,17648 | K.NTYDHLLFSR.S        | 1569.833 | 0.00249  | 2 | 1 | 29.4 | 0 |
| P12163_2_S3,15575 | K.NTYDHLLFSR.S        | 1569.833 | 0.00264  | 3 | 1 | 23.2 | 0 |
| P12163_1_F3,23573 | K.YLASMEGAVLSGK.L     | 1934.088 | 0.01348  | 3 | 1 | 32   | 0 |
| P12163_1_F4,24275 | K.YLASMEGAVLSGK.L     | 1934.088 | 0.00613  | 3 | 1 | 48   | 0 |
| P12163_1_F7,21858 | K.IDYPAACNAM*ETLLV    | 2570.357 | 0.00466  | 3 | 1 | 45.2 | 0 |
| P12163_1_F3,20480 | R.EEIPDLLK.L          | 1564.941 | 0.00698  | 3 | 1 | 30.3 | 0 |
| P12163_1_F9,15992 | R.VGTLFHR.D           | 1133.673 | 0.0034   | 3 | 1 | 24.9 | 0 |
| P12163_1_S10,1605 | R.VGTLFHR.D           | 1133.673 | 0.00481  | 3 | 1 | 30.9 | 0 |
| P12163_2_F9,15101 | R.VGTLFHR.D           | 1133.673 | 0.00721  | 3 | 1 | 49.5 | 0 |
| P12163_1_F3,24590 | K.NLLNFVELPPK.D       | 1892.147 | 0.00209  | 2 | 1 | 35.6 | 0 |
| P12163_1_F3,24602 | K.NLLNFVELPPK.D       | 1892.147 | -0.00001 | 3 | 1 | 42.1 | 0 |
| P12163_1_F6,18163 | R.NFLLEQYAGHER.S      | 1780.928 | -0.00005 | 3 | 1 | 27.2 | 0 |
| P12163_2_F6,17528 | R.NFLLEQYAGHER.S      | 1780.928 | 0.00283  | 3 | 1 | 28.3 | 0 |
| P12163_2_F1,18291 | R.SEESIEAAFEK.L       | 1847.985 | 0.00423  | 3 | 1 | 25.5 | 0 |
| P12163_1_F4,17601 | R.IVMAAAK.H           | 1382.865 | 0.00884  | 3 | 1 | 30.5 | 0 |
| P12163_1_F9,19400 | R.IVNPFFHAR.L         | 1404.805 | 0.0015   | 3 | 1 | 37.9 | 0 |
| P12163_2_F7,17508 | R.IVNPFFHAR.L         | 1404.805 | 0.00066  | 3 | 1 | 27.2 | 0 |
| P12163_1_S1,24369 | R.VVEGAVAETSALLEQF    | 2252.296 | 0.00817  | 3 | 1 | 29.6 | 0 |
| P12163_2_F6,17214 | K.IPFHTDAAQALGK.I     | 1977.138 | 0.00426  | 3 | 1 | 39   | 0 |
| P12163_1_F9,11786 | R.ITALHDR.L           | 1129.663 | 0.00127  | 3 | 1 | 36.4 | 0 |
| P12163_2_F9,11167 | R.ITALHDR.L           | 1129.663 | 0.0022   | 3 | 1 | 43.7 | 0 |

|                   |                      |          |          |   |   |      |   |
|-------------------|----------------------|----------|----------|---|---|------|---|
| P12163_1_F4,20653 | R.SQIADLIGASPK.E     | 1808.074 | 0.00423  | 3 | 1 | 35.6 | 0 |
| P12163_1_F3,23746 | K.SNGQMLAINEIFEK.N   | 2202.205 | 0.00655  | 3 | 1 | 35.3 | 0 |
| P12163_1_F8,10887 | R.ALPTESDEHPK.I      | 1832.001 | 0.00358  | 3 | 1 | 41   | 0 |
| P12163_1_F8,10891 | R.ALPTESDEHPK.I      | 1832.001 | 0.00495  | 2 | 1 | 28   | 0 |
| P12163_2_F1,16960 | R.SPCIQHK.T          | 1566.95  | 0.00885  | 3 | 1 | 31.3 | 0 |
| P12163_1_F2,15645 | K.ADLLDAR.K          | 1077.621 | 0.00126  | 2 | 1 | 26.2 | 0 |
| P12163_1_F3,23331 | K.LVLLGDVVGAGK.S     | 1650.041 | 0.0082   | 3 | 1 | 38.6 | 0 |
| P12163_1_F3,23374 | K.LVLLGDVVGAGK.S     | 1650.041 | 0.00403  | 2 | 1 | 50.3 | 0 |
| P12163_1_F3,23875 | K.TATNVNDIFYEIAK.R   | 2207.217 | 0.00531  | 3 | 1 | 47.7 | 0 |
| P12163_1_F3,26157 | K.FDDIVLLTEGK.L      | 1858.078 | 0.00965  | 3 | 1 | 36.5 | 0 |
| P12163_1_F3,26159 | K.FDDIVLLTEGK.L      | 1858.078 | 0.00448  | 2 | 1 | 39.2 | 0 |
| P12163_1_S1,24413 | R.IDSLAESFLQR.S      | 1582.874 | 0.00109  | 3 | 1 | 30.3 | 0 |
| P12163_2_F1,23497 | R.LLAIMGPSGSGK.T     | 1739.035 | 0.00428  | 3 | 1 | 34.2 | 0 |
| P12163_2_F6,9875  | K.QLDAEVHR.K         | 1271.701 | 0.00303  | 3 | 1 | 22.5 | 0 |
| P12163_1_F4,22600 | R.ALLDVGLVK.T        | 1535.998 | 0.00504  | 3 | 1 | 30.9 | 0 |
| P12163_1_F3,19934 | R.GIEADNLEELYK.K     | 2002.095 | 0.00176  | 2 | 1 | 75.1 | 0 |
| P12163_1_F3,19952 | R.GIEADNLEELYK.K     | 2002.095 | 0.00547  | 3 | 1 | 32.8 | 0 |
| P12163_1_F4,21767 | K.ILVDIK.S           | 1379.908 | 0.00993  | 2 | 1 | 24.9 | 0 |
| P12163_2_F6,19768 | K.LLDIVHPAAK.I       | 1685.057 | -0.00126 | 3 | 1 | 29.7 | 0 |
| P12163_2_F6,19855 | K.LLDIVHPAAK.I       | 1685.057 | 0.0032   | 2 | 1 | 52.6 | 0 |
| P12163_1_F5,20360 | R.LNMIGIK.K          | 1396.881 | 0.0092   | 2 | 1 | 24.1 | 0 |
| P12163_2_F1,11606 | K.LASCGCDNTVK.V      | 1832.945 | 0.00968  | 2 | 1 | 31.1 | 0 |
| P12163_1_F4,14202 | R.LATASSDSSIK.I      | 1687.969 | 0.00381  | 2 | 1 | 48.8 | 0 |
| P12163_1_F4,22359 | R.SVAWAPNLGLPK.S     | 1861.116 | 0.00577  | 3 | 1 | 35.8 | 0 |
| P12163_1_F4,22377 | R.SVAWAPNLGLPK.S     | 1861.116 | 0.00263  | 2 | 1 | 31.1 | 0 |
| P12163_1_S1,17311 | K.VVGTQAPVQLGSLR.A   | 1729.027 | 0.00311  | 2 | 1 | 31.7 | 0 |
| P12163_1_S1,17317 | K.VVGTQAPVQLGSLR.A   | 1729.027 | 0.00387  | 3 | 1 | 47.2 | 0 |
| P12163_1_F3,24659 | R.FFYASSACIYPEFK.Q   | 2338.204 | 0.00517  | 3 | 1 | 34   | 0 |
| P12163_1_F8,20778 | R.ISVTGAGGFIASHIAR.F | 1861.06  | 0.00169  | 3 | 1 | 97.5 | 0 |
| P12163_1_F8,20945 | K.QFVIDVLHPGR.A      | 1584.916 | 0.00257  | 3 | 1 | 41.9 | 0 |
| P12163_2_F6,20545 | K.QFVIDVLHPGR.A      | 1584.916 | 0.00131  | 3 | 1 | 50.1 | 0 |
| P12163_1_F2,21363 | K.STGFGLIYDSVDSAK.k  | 2168.17  | 0.00626  | 3 | 1 | 38.5 | 0 |
| P12163_1_F7,19607 | R.KQFVIDVLHPGR.A     | 2017.217 | 0.00674  | 4 | 1 | 42.3 | 0 |
| P12163_1_F4,10543 | K.SSPAVTEPK.S        | 1523.889 | 0.00487  | 2 | 1 | 43.8 | 0 |
| P12163_2_F1,9710  | K.SSPAVTEPK.S        | 1523.889 | 0.00669  | 2 | 1 | 35   | 0 |
| P12163_1_S1,18596 | R.LNISGLEQANQIPR.V   | 1857.05  | 0.0032   | 3 | 1 | 62.2 | 0 |
| P12163_2_F2,11076 | R.VSYAGAGQK.M        | 1488.863 | 0.01113  | 3 | 1 | 25.4 | 0 |
| P12163_1_F3,26562 | K.IVLAIVEDETEEK.S    | 2096.195 | 0.00758  | 3 | 1 | 55   | 0 |
| P12163_1_F3,19682 | K.QEIDAFPTLK.I       | 1770.026 | 0.01144  | 3 | 1 | 41.3 | 0 |
| P12163_1_F3,19698 | K.QEIDAFPTLK.I       | 1770.026 | 0.00862  | 2 | 1 | 41.6 | 0 |
| P12163_1_S1,19974 | R.LAPQLDEAAPILAK.L   | 2058.242 | 0.00471  | 3 | 1 | 46.3 | 0 |
| P12163_1_F4,16935 | K.DKQVVDEVSTGV.-     | 1884.053 | -0.00113 | 2 | 1 | 41.4 | 0 |
| P12163_2_F1,17576 | K.VIVNLK.G           | 1293.871 | 0.00409  | 3 | 1 | 22.4 | 0 |
| P12163_1_F3,25859 | R.NIFIILVPNK.A       | 1779.135 | -0.00103 | 3 | 1 | 22.6 | 0 |
| P12163_1_F3,25874 | R.NIFIILVPNK.A       | 1779.135 | 0.00882  | 2 | 1 | 43.5 | 0 |
| P12163_1_F3,23657 | K.IFLENVIR.D         | 1307.799 | 0.00128  | 2 | 1 | 24   | 0 |
| P12163_1_F3,22224 | K.TVTAMDVVYALK.R     | 1919.113 | 0.00422  | 3 | 1 | 23.3 | 0 |
| P12163_2_F6,9587  | R.DAVTYTEHAR.R       | 1466.754 | 0.00372  | 3 | 1 | 29.2 | 0 |
| P12163_2_F7,9136  | R.DAVTYTEHAR.R       | 1466.754 | 0.00228  | 3 | 1 | 31.6 | 0 |
| P12163_2_F6,13234 | K.AQLEEDPIVHR.H      | 1610.88  | 0.00182  | 3 | 1 | 37.5 | 0 |
| P12163_1_F9,7558  | K.AVADAHSK.R         | 1406.821 | 0.00641  | 2 | 1 | 41.5 | 0 |

|                   |                     |          |          |   |   |      |   |
|-------------------|---------------------|----------|----------|---|---|------|---|
| P12163_1_F9,7574  | K.AVADAHSK.R        | 1406.821 | 0.00582  | 3 | 1 | 31.9 | 0 |
| P12163_1_F3,25861 | R.LAALLMESR.E       | 1307.766 | -0.00223 | 2 | 1 | 25.8 | 0 |
| P12163_2_F1,15335 | K.SIAEQADELK.I      | 1711.969 | -0.00826 | 2 | 1 | 51.2 | 0 |
| P12163_1_F3,14813 | R.DITFQNTAGPSK.H    | 1887.043 | 0.0061   | 2 | 1 | 58.4 | 0 |
| P12163_1_F3,14826 | R.DITFQNTAGPSK.H    | 1887.043 | 0.00849  | 3 | 1 | 54.7 | 0 |
| P12163_1_F3,20650 | R.IGATSDLLAVK.G     | 1696.046 | -0.00108 | 2 | 1 | 48.2 | 0 |
| P12163_1_F8,18871 | K.HAVELEQSFMEGAYN   | 2185.065 | 0.00517  | 3 | 1 | 24.3 | 0 |
| P12163_2_F6,18392 | K.HAVELEQSFMEGAYN   | 2185.065 | 0.00087  | 3 | 1 | 48.6 | 0 |
| P12163_1_F2,13657 | K.LTEVSQQFDR.F      | 1526.812 | 0.00146  | 3 | 1 | 39.5 | 0 |
| P12163_1_F8,19697 | R.DIYEHAVLLSVK.V    | 1995.173 | 0.001    | 3 | 1 | 27.3 | 0 |
| P12163_1_F5,13511 | K.GLCGGINSTAVK.I    | 1785.015 | 0.00734  | 2 | 1 | 30.5 | 0 |
| P12163_1_F9,16441 | K.KNVIVTISSDK.G     | 2116.31  | 0.00774  | 3 | 1 | 33   | 0 |
| P12163_1_F2,18524 | K.LGELDSYEIEGGETK.C | 2248.18  | 0.00833  | 3 | 1 | 28.4 | 0 |
| P12163_1_S1,19031 | K.LGELDSYEIEGGETK.C | 2248.18  | 0.00503  | 3 | 1 | 34.3 | 0 |
| P12163_1_S10,1629 | K.FLSHIR.E          | 1076.652 | 0.00508  | 3 | 1 | 30.1 | 0 |
| P12163_1_S10,1648 | K.FLSHIR.E          | 1076.652 | 0.00364  | 3 | 1 | 24.3 | 0 |
| P12163_1_F7,16396 | R.AGMTAPQAAGVIHSD   | 2438.296 | 0.00575  | 3 | 1 | 59.6 | 0 |
| P12163_2_F2,13619 | R.TYFTSGEK.E        | 1540.847 | 0.0035   | 2 | 1 | 25.4 | 0 |
| P12163_1_F3,22451 | K.AEDVVSTMLAK.G     | 1772.008 | 0.00912  | 2 | 1 | 24.1 | 0 |
| P12163_1_F3,15754 | K.ISNVSLGATEQDIK.E  | 2083.185 | 0.00874  | 3 | 1 | 47.9 | 0 |
| P12163_1_F3,18201 | K.ISNVSLGATEQDIK.E  | 2083.185 | 0.00712  | 3 | 1 | 59.8 | 0 |
| P12163_1_F3,22535 | K.SAFSAAEQTVSNAGSA  | 2478.312 | 0.00123  | 3 | 1 | 68.1 | 0 |
| P12163_1_F8,16240 | K.HVELPVPTPSK.D     | 1812.084 | 0.0033   | 3 | 1 | 25.3 | 0 |
| P12163_1_F3,23172 | K.LEATALNPVDWK.I    | 1965.126 | 0.00126  | 3 | 1 | 40.4 | 0 |
| P12163_1_F3,23192 | K.LEATALNPVDWK.I    | 1965.126 | 0.00317  | 2 | 1 | 44.1 | 0 |
| P12163_1_F8,21574 | R.KFPCIPATDVAGEVVG  | 3171.785 | 0.00283  | 3 | 1 | 36.7 | 0 |
| P12163_2_F1,16057 | K.LNSFDTAPK.K       | 1600.915 | 0.00381  | 2 | 1 | 27.7 | 0 |
| P12163_1_F9,17192 | K.VHNLIFGR.T        | 1259.753 | 0.0026   | 3 | 1 | 34.9 | 0 |
| P12163_1_S10,1734 | K.VHNLIFGR.T        | 1259.753 | 0.00467  | 3 | 1 | 22   | 0 |
| P12163_1_S1,16950 | R.YEVDGYVYDAAEQPK   | 2355.196 | 0.01018  | 3 | 1 | 41   | 0 |
| P12163_1_F4,24833 | K.EGM*DCNLLFWK.G    | 2037.039 | 0.00817  | 3 | 1 | 33.3 | 0 |
| P12163_1_F4,24865 | K.EGMDCNLLFWK.G     | 2021.044 | 0.00877  | 3 | 1 | 34.6 | 0 |
| P12163_1_S1,17493 | K.VGSNIEVDGAPWR.V   | 1703.902 | 0.002    | 2 | 1 | 31.3 | 0 |
| P12163_1_F4,13447 | R.LNETDVGDK.K       | 1598.885 | 0.00797  | 2 | 1 | 37.8 | 0 |
| P12163_1_F7,17701 | K.AVYGTLFEAHR.S     | 1696.896 | -0.00099 | 3 | 1 | 29.8 | 0 |
| P12163_1_F8,18605 | K.AVYGTLFEAHR.S     | 1696.896 | 0.00246  | 3 | 1 | 38.9 | 0 |
| P12163_1_S1,21780 | K.IINDCLDGLIR.N     | 1605.894 | 0.00417  | 2 | 1 | 27.2 | 0 |
| P12163_1_S1,20724 | R.LYPQPPLLIR.R      | 1513.941 | 0.00428  | 3 | 1 | 26.6 | 0 |
| P12163_1_F3,10533 | K.LDEAGSLR.E        | 1164.653 | 0.00194  | 3 | 1 | 27.2 | 0 |
| P12163_1_S1,20339 | R.AVVNEIESISR.L     | 1520.859 | 0.00649  | 2 | 1 | 40.5 | 0 |
| P12163_1_S1,21795 | R.LAEVLCECPGEYYR.F  | 2062.988 | 0.00063  | 2 | 1 | 24.4 | 0 |
| P12163_1_S1,21807 | R.LAEVLCECPGEYYR.F  | 2062.988 | 0.00105  | 3 | 1 | 42.2 | 0 |
| P12163_2_F9,7350  | K.EMAAPHNR.K        | 1229.636 | 0.00163  | 3 | 1 | 27.1 | 0 |
| P12163_1_F2,11576 | M.TLGSGGSSVVVPR.N   | 1519.875 | -0.00072 | 3 | 1 | 53.3 | 0 |
| P12163_1_S1,11131 | M.TLGSGGSSVVVPR.N   | 1519.875 | 0.00138  | 3 | 1 | 73.7 | 0 |
| P12163_1_F3,26030 | R.EYTMEDILTQLK.K    | 2092.146 | 0.00745  | 3 | 1 | 27.4 | 0 |
| P12163_1_F4,27097 | K.ILALLGSGDK.Q      | 1594.999 | 0.00686  | 3 | 1 | 26.2 | 0 |
| P12163_2_F1,26116 | K.ILALLGSGDK.Q      | 1594.999 | 0.00233  | 3 | 1 | 32.4 | 0 |
| P12163_2_F6,19560 | K.VFEHAGDLVNIK.V    | 1950.127 | 0.00405  | 3 | 1 | 22.5 | 0 |
| P12163_1_F3,24439 | R.IVLNEIETLK.R      | 1780.104 | 0.00595  | 3 | 1 | 22.5 | 0 |
| P12163_2_F6,11317 | K.IVQEHGAVEK.A      | 1718.006 | 0.00526  | 2 | 1 | 24.8 | 0 |

|                   |                       |          |         |   |   |      |   |
|-------------------|-----------------------|----------|---------|---|---|------|---|
| P12163_2_F7,10739 | K.IVQEHGAVEK.A        | 1718.006 | 0.00522 | 3 | 1 | 24.2 | 0 |
| P12163_1_F3,15090 | K.TVEDANAVIEK.L       | 1797.021 | 0.00798 | 2 | 1 | 53.3 | 0 |
| P12163_2_F1,16047 | K.VYVGNLAK.T          | 1471.909 | 0.00483 | 3 | 1 | 28.7 | 0 |
| P12163_1_F2,19755 | R.EALGALPLYQR.T       | 1534.889 | 0.00559 | 2 | 1 | 27.8 | 0 |
| P12163_1_S1,18685 | R.EALGALPLYQR.T       | 1534.889 | 0.00595 | 3 | 1 | 41.4 | 0 |
| P12163_1_F2,10405 | R.EIVDAR.A ! R.EIVDAR | 1006.583 | 0.00473 | 2 | 1 | 26.9 | 0 |
| P12163_2_F9,18738 | R.NYLQDM*LALVK.R      | 1932.108 | 0.01359 | 3 | 1 | 23.4 | 0 |
| P12163_1_F8,19770 | K.LHVIPVLASR.S        | 1408.894 | 0.00208 | 3 | 1 | 32.2 | 0 |
| P12163_2_F6,19204 | K.LHVIPVLASR.S        | 1408.894 | 0.00127 | 3 | 1 | 30.7 | 0 |
| P12163_2_F7,8458  | K.NGGPVDIHR.V ! K.NG  | 1268.701 | 0.00326 | 3 | 1 | 41.2 | 0 |
| P12163_2_F1,7373  | R.DSDTGGQVK.Y         | 1514.827 | 0.00213 | 2 | 1 | 26.7 | 0 |
| P12163_1_F2,22923 | R.DIPIEVLELDNK.N      | 2006.163 | 0.00691 | 3 | 1 | 26.5 | 0 |
| P12163_2_F1,25379 | R.FIVLAGLK.G          | 1468.971 | 0.00236 | 3 | 1 | 28.3 | 0 |
| P12163_1_S10,5063 | R.TAQHAGR.V           | 1044.585 | 0.00459 | 3 | 1 | 24.6 | 0 |
| P12163_2_F8_12070 | R.TAQHAGR.V           | 1044.585 | 0.00066 | 3 | 1 | 43.7 | 0 |
| P12163_2_S5,5902  | K.HESCGQCTPCR.E       | 1695.73  | 0.00044 | 3 | 1 | 27.8 | 0 |
| P12163_1_S1,15401 | K.STDVVDIAR.L         | 1350.753 | 0.0058  | 2 | 1 | 34.5 | 0 |
| P12163_1_F7,14983 | K.VSDGRPSYLVVNADE!    | 2988.519 | 0.0058  | 3 | 1 | 49.2 | 0 |
| P12163_1_F7,14997 | K.VSDGRPSYLVVNADE!    | 2988.519 | 0.00796 | 4 | 1 | 25.5 | 0 |
| P12163_2_S5,13685 | K.SVCTSVNECMCHGIPE    | 2413.067 | 0.00111 | 3 | 1 | 28   | 0 |
| P12163_1_F4,13917 | K.VTEECLEK.G          | 1615.882 | 0.00715 | 2 | 1 | 45.9 | 0 |
| P12163_2_F1,12914 | K.VTEECLEK.G          | 1615.882 | 0.00557 | 2 | 1 | 36.1 | 0 |
| P12163_2_F9,11475 | R.FVGHGVGK.V          | 1408.852 | 0.00283 | 3 | 1 | 45.8 | 0 |
| P12163_1_S1,21200 | K.LVPVALEGSAPFR.S     | 1562.921 | 0.00518 | 3 | 1 | 50.4 | 0 |
| P12163_1_F4,21352 | K.VYDLAYYK.A          | 1642.93  | 0.01202 | 2 | 1 | 35.4 | 0 |
| P12163_2_F1,20774 | K.VYDLAYYK.A          | 1642.93  | 0.00708 | 2 | 1 | 24.1 | 0 |
| P12163_2_F1,18451 | R.ELCFIER.E           | 1270.677 | 0.00212 | 2 | 1 | 26.8 | 0 |
| P12163_1_F9,16143 | K.RDELTLEGIK.Q        | 1782.058 | 0.00668 | 3 | 1 | 41.2 | 0 |
| P12163_2_F9,15208 | K.RDELTLEGIK.Q        | 1782.058 | 0.00797 | 3 | 1 | 40.4 | 0 |
| P12163_1_F4,19120 | R.DELTLEGIK.Q         | 1625.957 | 0.0048  | 2 | 1 | 45.9 | 0 |
| P12163_2_S5,11848 | R.ELYIHR.I            | 1134.657 | 0.00602 | 3 | 1 | 24.6 | 0 |
| P12163_1_F5,11484 | K.SVGIDPK.Q           | 1323.809 | 0.00534 | 2 | 1 | 29.3 | 0 |
| P12163_1_S10,1649 | K.VAHVQEFDYGDHPVP     | 2495.262 | 0.00261 | 4 | 1 | 33.9 | 0 |
| P12163_2_S5,15812 | K.VAHVQEFDYGDHPVP     | 2495.262 | 0.00297 | 4 | 1 | 22.8 | 0 |
| P12163_1_F8,15398 | R.ETVPEVNPDVKVSD!     | 2883.571 | 0.00706 | 4 | 1 | 30.6 | 0 |
| P12163_1_F6,17777 | K.AVVIHIPYR.L         | 1371.841 | 0.00355 | 3 | 1 | 27.2 | 0 |
| P12163_2_S5,16125 | K.AVVIHIPYR.L         | 1371.841 | 0.0052  | 3 | 1 | 26.8 | 0 |
| P12163_1_S1,15037 | K.DVILIATR.R          | 1204.757 | 0.00439 | 3 | 1 | 26.2 | 0 |
| P12163_1_F2,15432 | K.LDTFAAVYR.K         | 1359.757 | 0.00991 | 3 | 1 | 26.5 | 0 |
| P12163_1_F8,17789 | K.NIAKPIIAEQIPK.Y     | 2347.484 | 0.02045 | 3 | 1 | 23.9 | 0 |
| P12163_1_F4,12851 | K.SFEESQTVQK.A        | 1790.974 | 0.0076  | 2 | 1 | 37.8 | 0 |
| P12163_2_F1,11899 | K.SFEESQTVQK.A        | 1790.974 | 0.00018 | 2 | 1 | 32.4 | 0 |
| P12163_2_S5,13632 | K.YHLIDSK.N           | 1483.873 | 0.00237 | 3 | 1 | 24.6 | 0 |
| P12163_1_S1,23221 | K.EGLSFLETSALEATNV    | 2546.381 | 0.01307 | 3 | 1 | 26.9 | 0 |
| P12163_1_F3,20987 | K.IVLIGDSGVGK.S ! K.L | 1666.036 | 0.00077 | 2 | 1 | 38   | 0 |
| P12163_1_F3,25149 | R.GAVGALLVYDITK.R     | 1928.168 | 0.00212 | 3 | 1 | 46.7 | 0 |
| P12163_1_F3,25181 | R.GAVGALLVYDITK.R     | 1928.168 | 0.00304 | 2 | 1 | 53.5 | 0 |
| P12163_1_F2,12689 | K.IVCTLGPASR.S        | 1377.783 | 0.00296 | 3 | 1 | 22.4 | 0 |
| P12163_1_F2,14970 | K.IVCTLGPASR.S        | 1377.783 | 0.0005  | 3 | 1 | 49.3 | 0 |
| P12163_2_F6,10540 | K.KGDSVVALHR.V        | 1690.022 | 0.00545 | 4 | 1 | 29.3 | 0 |
| P12163_1_F3,20358 | R.GDLGMEIPIEK.I       | 1810.024 | 0.01006 | 2 | 1 | 42.1 | 0 |



|                   |                      |          |          |   |   |      |   |
|-------------------|----------------------|----------|----------|---|---|------|---|
| P12163_2_F2,11431 | K.EQQAFEK.T          | 1487.831 | 0.00239  | 2 | 1 | 30.9 | 0 |
| P12163_2_F9,13436 | R.CQHENVFLK.C        | 1912.021 | 0.00398  | 3 | 1 | 36.8 | 0 |
| P12163_2_F2,21324 | R.CVLGLLK.D          | 1410.896 | 0.00655  | 3 | 1 | 26.6 | 0 |
| P12163_2_F2,21344 | R.CVLGLLK.D          | 1410.896 | 0.00367  | 2 | 1 | 29.4 | 0 |
| P12163_2_F8_12070 | K.GYVQNFLQK.E        | 1704.989 | 0.00252  | 3 | 1 | 22.1 | 0 |
| P12163_1_F7,16255 | K.NFFEEHLHTDEEIR.Y   | 2120.035 | 0.00029  | 4 | 1 | 34.6 | 0 |
| P12163_1_F3,20005 | R.FTLDTDNYIK.A       | 1838.016 | 0.002    | 2 | 1 | 54.3 | 0 |
| P12163_1_F3,20006 | R.FTLDTDNYIK.A       | 1838.016 | 0.00594  | 3 | 1 | 27.9 | 0 |
| P12163_2_F2,16961 | R.AQLLAQAK.V         | 1450.92  | -0.00197 | 2 | 1 | 26.9 | 0 |
| P12163_1_F4,16281 | R.QLGESQFQQMK.A      | 1932.047 | 0.0108   | 3 | 1 | 29.1 | 0 |
| P12163_2_F8_12070 | R.TDAEIATIIGHEVAHAN  | 2278.246 | 0.00156  | 4 | 1 | 35.1 | 0 |
| P12163_2_F8_12070 | R.TDAEIATIIGHEVAHAN  | 2278.246 | 0.00226  | 3 | 1 | 35.8 | 0 |
| P12163_1_F4,20605 | K.SANIPIAVIEK.G      | 1763.089 | 0.00609  | 3 | 1 | 31.9 | 0 |
| P12163_2_F1,20040 | K.SANIPIAVIEK.G      | 1763.089 | 0.00349  | 2 | 1 | 46.2 | 0 |
| P12163_1_F4,25038 | R.LM*NVITESVK.L      | 1758.029 | 0.00668  | 3 | 1 | 43.4 | 0 |
| P12163_2_F2,19033 | R.QFLENLK.L          | 1499.904 | 0.00796  | 3 | 1 | 25.5 | 0 |
| P12163_1_S1,19225 | K.ELPFDNVIQR.D       | 1534.853 | 0.00295  | 3 | 1 | 40.3 | 0 |
| P12163_1_F2,14062 | K.ILVSQPDR.I         | 1231.731 | 0.00733  | 2 | 1 | 27.4 | 0 |
| P12163_1_F8,18594 | K.VLAPVFPDGRPR.E     | 1627.959 | 0.00562  | 3 | 1 | 30.9 | 0 |
| P12163_2_F6,18089 | K.VLAPVFPDGRPR.E     | 1627.959 | 0.00727  | 3 | 1 | 32.6 | 0 |
| P12163_1_F3,20247 | K.ENVQIIVLGTGK.K     | 1879.147 | 0.00592  | 3 | 1 | 28.3 | 0 |
| P12163_1_F3,25567 | R.ALATYGTQALAEMMK    | 2207.202 | -0.00055 | 3 | 1 | 35.6 | 0 |
| P12163_1_S1,23258 | R.FSLLCQAALAPR.I     | 1779.973 | 0.00067  | 2 | 1 | 26.6 | 0 |
| P12163_1_S1,23351 | R.FSLLCQAALAPR.I     | 1779.973 | 0.0026   | 3 | 1 | 52.3 | 0 |
| P12163_1_F7,16503 | K.DDVASPGGTTIAGIHEI  | 2518.361 | 0.00646  | 3 | 1 | 61.6 | 0 |
| P12163_1_S10,8988 | K.HPGQLK.D           | 1287.799 | 0.00555  | 3 | 1 | 22.4 | 0 |
| P12163_1_F4,18138 | R.DAFESIGVK.V        | 1573.905 | 0.00855  | 3 | 1 | 29.3 | 0 |
| P12163_2_F1,17430 | R.DAFESIGVK.V        | 1573.905 | 0.00552  | 3 | 1 | 31.8 | 0 |
| P12163_1_F4,18674 | K.DFLNECLSSK.D       | 1820.967 | 0.00412  | 2 | 1 | 53.5 | 0 |
| P12163_2_F1,17950 | K.DFLNECLSSK.D       | 1820.967 | 0.00214  | 2 | 1 | 29.8 | 0 |
| P12163_1_F9,9617  | K.DLSSNQLHR.S        | 1373.744 | 0.00291  | 3 | 1 | 31.2 | 0 |
| P12163_2_F1,23864 | K.LAGLILK.N          | 1335.918 | 0.00669  | 2 | 1 | 25.7 | 0 |
| P12163_1_F7,14095 | K.EHVIKPVIEK.Y       | 2201.378 | 0.0062   | 4 | 1 | 23.8 | 0 |
| P12163_2_F7,14553 | K.TIFHLNPSGR.F       | 1445.817 | 0.00234  | 3 | 1 | 28   | 0 |
| P12163_1_F7,17230 | R.SIGFVSDDVGLDADHC   | 2443.238 | 0.00697  | 3 | 1 | 68.9 | 0 |
| P12163_2_S5,16669 | R.SIGFVSDDVGLDADHC   | 2443.238 | 0.00745  | 3 | 1 | 55.6 | 0 |
| P12163_1_F8,13779 | K.NIPAHENEVNQPIIGR.S | 2105.14  | 0.0077   | 3 | 1 | 26.2 | 0 |
| P12163_2_S5,12721 | K.NIPAHENEVNQPIIGR.S | 2105.14  | 0.0023   | 3 | 1 | 35.3 | 0 |
| P12163_1_F8,19821 | K.QLVEGAQLLVHTK.F    | 2044.237 | 0.00343  | 3 | 1 | 53.3 | 0 |
| P12163_2_F4,14914 | R.FVASEESYAHPEYK.R   | 2265.165 | 0.00175  | 3 | 1 | 27.2 | 0 |
| P12163_1_F2,13867 | K.AVGFECDVR.R        | 1253.679 | -0.00185 | 2 | 1 | 27.2 | 0 |
| P12163_1_S1,20762 | K.QVLDAAVSALR.S      | 1446.858 | 0.00323  | 2 | 1 | 30.8 | 0 |
| P12163_1_S1,20795 | K.QVLDAAVSALR.S      | 1446.858 | 0.00364  | 3 | 1 | 74.1 | 0 |
| P12163_2_F6,19628 | K.VVESTFEHFGK.L      | 1888.042 | 0.00626  | 3 | 1 | 26.9 | 0 |
| P12163_1_F2,13868 | K.AAAIVSAAGSGGAR.    | 1519.849 | 0.00393  | 3 | 1 | 40.1 | 0 |
| P12163_1_F2,15474 | K.AAAIVSAAGSGGAR.    | 1519.849 | 0.00488  | 2 | 1 | 33.4 | 0 |
| P12163_1_F3,21356 | K.AVLLALR.A          | 1059.719 | 0.00323  | 2 | 1 | 26.6 | 0 |
| P12163_1_F4,9461  | R.AQYHLR.Q           | 1091.626 | 0.00463  | 3 | 1 | 24.9 | 0 |
| P12163_1_F4,23535 | K.TLSFISEVEEK.D      | 1890.068 | 0.00593  | 2 | 1 | 31   | 0 |
| P12163_1_F8,16538 | R.FTNDLDIDEHK.G      | 1955.033 | 0.00775  | 3 | 1 | 36   | 0 |
| P12163_1_F8,16586 | R.FTNDLDIDEHK.G      | 1955.033 | 0.00636  | 2 | 1 | 30.6 | 0 |

|                   |                         |          |          |   |   |      |   |
|-------------------|-------------------------|----------|----------|---|---|------|---|
| P12163_1_S1,20886 | R.TFILIAETSNCR.I        | 1728.926 | 0.0046   | 2 | 1 | 25.5 | 0 |
| P12163_2_F6,18638 | R.ENNWLTEHVDFQR.V       | 1991.988 | 0.01217  | 2 | 1 | 51.2 | 0 |
| P12163_1_F8,20697 | R.VAGAIPIHPGFLR.Q       | 1651.995 | 0.00096  | 3 | 1 | 27.4 | 0 |
| P12163_1_F6,20630 | R.VFLIGDSSGGNVVHEV      | 2231.209 | 0.00326  | 3 | 1 | 87.6 | 0 |
| P12163_2_F10,1818 | R.VFLIGDSSGGNVVHEV      | 2231.209 | 0.00239  | 3 | 1 | 47.5 | 0 |
| P12163_1_S1,22412 | -.SIFDFEAIR.K           | 1401.768 | 0.0016   | 3 | 1 | 37.6 | 0 |
| P12163_1_F8,14835 | K.EDFGGGHPDPNLTYAI      | 2326.192 | 0.00889  | 3 | 1 | 31.6 | 0 |
| P12163_2_S5,14017 | K.EDFGGGHPDPNLTYAI      | 2326.192 | 0.00514  | 3 | 1 | 26.7 | 0 |
| P12163_2_F1,14714 | R.NMILGK.G ! R.NMILG    | 1283.797 | 0.00506  | 3 | 1 | 24.2 | 0 |
| P12163_1_F4,15920 | K.LQEEEEAAEAEK.S        | 1926.028 | 0.00892  | 3 | 1 | 49.9 | 0 |
| P12163_1_F2,18566 | K.TTEEINEEVVDLK.G       | 2127.164 | 0.00358  | 3 | 1 | 46.7 | 0 |
| P12163_2_F1,13527 | R.ELEEGINK.R            | 1539.884 | 0.0046   | 2 | 1 | 32.2 | 0 |
| P12163_2_S5,16670 | K.DPLYLGLQEHR.L         | 1644.901 | 0.00387  | 3 | 1 | 24.5 | 0 |
| P12163_1_F3,12281 | R.DGPTDPNALAK.W         | 1706.953 | 0.00563  | 2 | 1 | 26.8 | 0 |
| P12163_1_F2,15930 | R.MLGNNESAFDSAR.S       | 1715.832 | 0.00446  | 2 | 1 | 28.2 | 0 |
| P12163_1_F2,22144 | K.ILDTPSLLAEGSK.G       | 1952.152 | 0.00214  | 3 | 1 | 49   | 0 |
| P12163_1_F3,21707 | K.LLMIGDSGVGK.S         | 1698.008 | -0.0094  | 3 | 1 | 33.9 | 0 |
| P12163_1_F3,25092 | R.VNVQOCFEELVLK.I       | 2214.241 | 0.00659  | 3 | 1 | 51.2 | 0 |
| P12163_1_F4,18855 | K.DFLDAVNK.V            | 1529.878 | 0.0048   | 2 | 1 | 49.4 | 0 |
| P12163_2_F1,15834 | K.GVLCYGPPTGK.T         | 1814.009 | 0.0131   | 2 | 1 | 36   | 0 |
| P12163_2_F1,17446 | R.VIGSELVQK.Y           | 1580.983 | 0.00403  | 2 | 1 | 27.1 | 0 |
| P12163_1_F7,17775 | K.GTVVLVVFQAEEGGG       | 2461.366 | 0.00459  | 3 | 1 | 27.7 | 0 |
| P12163_1_F7,18866 | K.IHQNPGLGYQEFETSQ      | 2606.352 | 0.00444  | 3 | 1 | 48   | 0 |
| P12163_1_F9,10821 | R.IIQEHR.T ! K.IIQEHR.L | 1099.652 | 0.00465  | 3 | 1 | 27.5 | 0 |
| P12163_1_F2,15154 | K.NIEVAVM*TR.E          | 1352.751 | 0.00631  | 3 | 1 | 25.6 | 0 |
| P12163_2_F1,22268 | R.ALLEVVESGGK.N         | 1710.026 | 0.00558  | 2 | 1 | 46.2 | 0 |
| P12163_1_F3,15662 | R.GTDTIVLGVEK.K         | 1740.036 | 0.00555  | 3 | 1 | 30.7 | 0 |
| P12163_1_S1,22312 | K.AIGELIPYEVNIEK.K      | 2293.326 | 0.00598  | 3 | 1 | 38.3 | 0 |
| P12163_1_F4,12264 | K.ATTVAPVK.D            | 1394.883 | 0.00892  | 2 | 1 | 30.6 | 0 |
| P12163_2_F2,18331 | K.LFLANQEK.F            | 1570.941 | 0.00343  | 2 | 1 | 29.8 | 0 |
| P12163_1_F2,21437 | K.VDFGDITALEK.I         | 1816.031 | 0.00593  | 3 | 1 | 39.1 | 0 |
| P12163_2_F6,18836 | R.GFGPLLPGLHK.V         | 1744.073 | 0.00121  | 3 | 1 | 25.1 | 0 |
| P12163_1_F4,22592 | R.GLFNAVEFDK.T          | 1747.984 | 0.00975  | 2 | 1 | 50.6 | 0 |
| P12163_1_F9,6924  | K.HEEGAIEER.A           | 1373.696 | 0.00624  | 3 | 1 | 40.1 | 0 |
| P12163_1_F3,27620 | R.ILVFIVEDGK.L          | 1741.072 | 0.00413  | 3 | 1 | 29.5 | 0 |
| P12163_1_F3,25066 | R.LEELQVLDIK.F          | 1808.099 | 0.00394  | 3 | 1 | 36.4 | 0 |
| P12163_1_S1,23483 | K.IYEVGDVVLLDEK.K       | 2100.205 | 0.00606  | 3 | 1 | 40   | 0 |
| P12163_1_F9,9277  | R.MQLHAER.S             | 1188.646 | 0.00306  | 3 | 1 | 22.5 | 0 |
| P12163_1_S1,9543  | R.QTDESTAVVGNPR.T       | 1677.871 | 0.00102  | 2 | 1 | 24   | 0 |
| P12163_1_F3,10881 | K.GEFEEAER.E            | 1270.622 | 0.00638  | 2 | 1 | 27.7 | 0 |
| P12163_1_F2,22967 | K.INELLPADGLTVK.H       | 1991.2   | 0.00746  | 3 | 1 | 37   | 0 |
| P12163_1_F2,7031  | K.TGEDVGVSR.R           | 1223.653 | 0.0038   | 3 | 1 | 22.8 | 0 |
| P12163_1_F5,19365 | K.GLEIFCK.S             | 1474.855 | 0.00752  | 2 | 1 | 23.9 | 0 |
| P12163_2_F4,17400 | K.LYEEGYHCILEGEPDD      | 2399.113 | 0.00507  | 3 | 1 | 33.8 | 0 |
| P12163_2_F6,20055 | K.VSSPLLILHGAEDK.V      | 2087.232 | -0.00148 | 3 | 1 | 26.6 | 0 |
| P12163_1_F3,12562 | K.SSELVEDEAETK.Q        | 1945.022 | 0.00837  | 3 | 1 | 37.7 | 0 |
| P12163_1_F4,9816  | R.EYSEEESEGNGK.S        | 1965.95  | 0.00003  | 2 | 1 | 29   | 0 |
| P12163_2_F7,16656 | R.WFSPLECGSHTR.D        | 1780.874 | 0.00701  | 3 | 1 | 39.1 | 0 |
| P12163_1_F3,8423  | K.QVAAQEAER.A           | 1305.706 | 0.00537  | 2 | 1 | 34.2 | 0 |
| P12163_1_F4,17751 | K.VPGGGAASALIK.V        | 1649.021 | 0.00691  | 3 | 1 | 25.4 | 0 |
| P12163_2_F6,14761 | R.EIAQTIAHSANK.V        | 1891.086 | -0.00801 | 3 | 1 | 27   | 0 |

|                   |                       |          |          |   |   |      |   |
|-------------------|-----------------------|----------|----------|---|---|------|---|
| P12163_1_F6,18092 | K.GLLTLNPYHSDR.F      | 1689.923 | 0.00455  | 3 | 1 | 36.4 | 0 |
| P12163_1_F7,22508 | R.M*LLTVDENLKPLSVP    | 2548.499 | 0.01165  | 4 | 1 | 24.4 | 0 |
| P12163_1_F3,13352 | R.VQDPDPGLQK.V        | 1704.974 | -0.0004  | 2 | 1 | 28.3 | 0 |
| P12163_1_F2,11760 | K.DAFGSCVQQGANR.V     | 1713.828 | 0.00305  | 3 | 1 | 47.3 | 0 |
| P12163_1_F7,12471 | K.HCLSHAVGDADECVV     | 2632.197 | -0.0013  | 3 | 1 | 39.4 | 0 |
| P12163_1_F6,21155 | K.TGYLIVEPAHMELAEP    | 2706.5   | -0.0013  | 3 | 1 | 28.4 | 0 |
| P12163_2_F9,11007 | K.EGITHALR.S          | 1200.7   | -0.00063 | 3 | 1 | 22.9 | 0 |
| P12163_1_F9,14353 | K.RGEILQLER.K         | 1417.843 | 0.00391  | 3 | 1 | 38.8 | 0 |
| P12163_1_F9,7903  | R.HTAVIEDR.R          | 1244.69  | 0.00288  | 3 | 1 | 37.4 | 0 |
| P12163_2_F1,19800 | K.ANNLTVGLDGLK.T      | 1823.085 | 0.00335  | 3 | 1 | 40.5 | 0 |
| P12163_1_F7,20735 | K.DIVIGSGPQGPFDHLLF   | 2125.171 | 0.00099  | 3 | 1 | 51.9 | 0 |
| P12163_1_S1,24093 | K.VLLQSLSEFPVR.A      | 1692     | 0.00263  | 3 | 1 | 35.4 | 0 |
| P12163_1_F3,21666 | K.FVENDISMIPK.I       | 1901.066 | 0.0147   | 2 | 1 | 43.1 | 0 |
| P12163_1_S1,24706 | R.LVGPLDTHIQISK.I     | 2005.252 | 0.00727  | 3 | 1 | 44.5 | 0 |
| P12163_1_F4,19460 | R.VDFWPNQEQL.L        | 1899.022 | 0.00158  | 2 | 1 | 29   | 0 |
| P12163_2_F6,21845 | K.HM*LDVPELIEM*K.R    | 2095.139 | 0.01062  | 3 | 1 | 22.6 | 0 |
| P12163_2_F4,9124  | K.SAIHGQQGLK.A        | 1646.98  | 0.00245  | 3 | 1 | 30.5 | 0 |
| P12163_1_S1,15442 | R.SEQDLLSGIGR.E       | 1478.812 | -0.00003 | 3 | 1 | 32.9 | 0 |
| P12163_2_F2,12558 | K.FANTPPK.D ! R.FANTP | 1382.825 | 0.01025  | 2 | 1 | 28.9 | 0 |
| P12163_1_S10,9771 | K.HAFSK.G             | 1197.72  | 0.00613  | 3 | 1 | 25.8 | 0 |
| P12163_2_F10,1916 | R.LDVDYIDLYYQHR.V !   | 2017.033 | 0.00299  | 3 | 1 | 28.7 | 0 |
| P12163_1_F7,22069 | K.AYSSLLEDNPLDPVLH    | 2519.397 | 0.0049   | 3 | 1 | 64.4 | 0 |
| P12163_2_F2,16948 | K.GLWAEAEK.A          | 1511.868 | -0.00441 | 2 | 1 | 32   | 0 |
| P12163_1_F4,25387 | R.LEGILLEAK.G         | 1594.004 | 0.00756  | 3 | 1 | 29.1 | 0 |
| P12163_2_F6,15229 | K.TSGIPVAELCEHR.F     | 1772.927 | 0.0054   | 3 | 1 | 37.9 | 0 |
| P12163_2_S5,20746 | R.MEIYVVALSQHR.G      | 1749.962 | 0.00299  | 3 | 1 | 36   | 0 |
| P12163_1_S1,12410 | R.NVGSCVADVETAR.V     | 1681.848 | 0.00279  | 3 | 1 | 47.9 | 0 |
| P12163_1_F9,11359 | R.HIQGLPCR.G          | 1284.715 | 0.00202  | 3 | 1 | 31.5 | 0 |
| P12163_1_F4,20198 | R.QILVDLK.M           | 1436.93  | 0.00394  | 3 | 1 | 24.3 | 0 |
| P12163_1_F4,15472 | R.VGGVEIPNNK.R        | 1634.969 | 0.01036  | 3 | 1 | 23.3 | 0 |
| P12163_1_F4,17601 | R.IVMAAAAK.H          | 1382.865 | 0.00884  | 3 | 1 | 30.5 | 0 |
| P12163_2_F4,10806 | R.IVNSNHFAR.L         | 1361.759 | 0.00139  | 3 | 1 | 41.3 | 0 |
| P12163_1_S1,24171 | R.VVEGAVAETSALLDQI    | 2238.28  | 0.00817  | 3 | 1 | 27   | 0 |
| P12163_1_F3,24686 | K.LGLVYQINIAPK.K      | 1937.204 | 0.00984  | 3 | 1 | 23.3 | 0 |
| P12163_2_S5,8319  | K.QHLSTDAGK.A         | 1564.89  | 0.00431  | 3 | 1 | 30   | 0 |
| P12163_1_F4,18737 | K.SDALLEQMK.Q         | 1642.929 | 0.01134  | 2 | 1 | 49.1 | 0 |
| P12163_1_F2,12446 | K.EVDELAR.K           | 1135.626 | 0.00276  | 2 | 1 | 26.2 | 0 |
| P12163_2_F6,19502 | K.IIAHGINCFVNR.Q      | 1717.947 | 0.00309  | 3 | 1 | 33.3 | 0 |
| P12163_1_F3,25985 | K.LIEEIMIGEDK.L       | 1898.076 | 0.0017   | 3 | 1 | 37   | 0 |
| P12163_1_F6,12065 | K.DYDFGHK.F           | 1489.79  | 0.01332  | 3 | 1 | 23.8 | 0 |
| P12163_1_F3,17036 | K.SLVTVSAEYDSK.A      | 1907.058 | 0.00638  | 2 | 1 | 37.9 | 0 |
| P12163_1_F4,13450 | K.VDTYSSVSTK.V        | 1694.942 | 0.01047  | 2 | 1 | 30.4 | 0 |
| P12163_1_F7,20486 | K.DTPIASVEELHNLGG     | 2658.456 | 0.00637  | 4 | 1 | 26.7 | 0 |
| P12163_1_F7,14455 | K.GTEAVQLPAEQTEHIG    | 2416.329 | 0.0074   | 3 | 1 | 31.1 | 0 |
| P12163_2_F2,19681 | R.AFESMLK.E           | 1433.828 | 0.005    | 2 | 1 | 28.8 | 0 |
| P12163_2_S5,15350 | K.HDFVFYSDR.L         | 1489.738 | -0.0004  | 3 | 1 | 29   | 0 |
| P12163_1_F7,20822 | K.TTVCDMIIQQLHDQR.'   | 2162.1   | 0.00653  | 3 | 1 | 25.6 | 0 |
| P12163_2_F10,1715 | R.LVVEHGLGHLPFTEK.(   | 2284.327 | 0.00692  | 3 | 1 | 33.2 | 0 |
| P12163_1_S1,14384 | R.IISVSDEER.K         | 1351.737 | 0.01005  | 2 | 1 | 29.3 | 0 |
| P12163_1_F5,20308 | R.LLSLAQK.S           | 1380.903 | 0.00892  | 2 | 1 | 24.3 | 0 |
| P12163_1_F7,23131 | R.SVPIEDFVMHGLVDR.I   | 2018.068 | 0.00333  | 3 | 1 | 49.8 | 0 |

|                   |                        |          |          |   |   |      |   |
|-------------------|------------------------|----------|----------|---|---|------|---|
| P12163_1_F4,13467 | K.GDDVVQYK.F           | 1531.858 | 0.00643  | 2 | 1 | 39.3 | 0 |
| P12163_1_F3,20768 | K.SSQUALTSNAFQDVIFK.   | 2364.302 | 0.0019   | 3 | 1 | 36.1 | 0 |
| P12163_2_F6,19268 | R.AASLPILLCHGK.G       | 1888.13  | 0.00351  | 3 | 1 | 35.7 | 0 |
| P12163_1_F2,9549  | K.DLEGAEER.D           | 1222.622 | 0.00324  | 2 | 1 | 25.5 | 0 |
| P12163_1_F3,22467 | K.DMGFFDITK.E          | 1681.908 | 0.00116  | 3 | 1 | 24.4 | 0 |
| P12163_1_F7,18409 | K.VACGSEHVVALVSAG      | 2585.385 | 0.00851  | 3 | 1 | 45.3 | 0 |
| P12163_2_F8_12070 | K.ELNVDEGHPDVHR.L      | 1820.919 | 0.01584  | 3 | 1 | 48.9 | 0 |
| P12163_2_F9,20117 | K.LHLFELEEEMK.I        | 2026.114 | 0.00481  | 3 | 1 | 28.9 | 0 |
| P12163_2_F1,17552 | K.LSSAGLVYK.H          | 1545.946 | 0.00303  | 2 | 1 | 35.2 | 0 |
| P12163_1_F4,15400 | K.LIGATDPQK.S          | 1550.936 | 0.00512  | 2 | 1 | 26.5 | 0 |
| P12163_1_S1,21223 | R.GLISEIISR.F          | 1291.789 | 0.00444  | 2 | 1 | 36.4 | 0 |
| P12163_2_F6,16198 | R.TFIAIKPDGVQR.G       | 1953.174 | 0.00075  | 2 | 1 | 36.1 | 0 |
| P12163_2_F8_12070 | K.GIVAQLHAEKPPQEVIT    | 3200.841 | 0.00999  | 4 | 1 | 26.7 | 0 |
| P12163_1_F3,16704 | K.QTEPVIDYYSK.K        | 1951.063 | 0.00651  | 2 | 1 | 24.5 | 0 |
| P12163_1_F3,20214 | R.LILVGPPGSGK.G        | 1646.046 | 0.00451  | 2 | 1 | 28.2 | 0 |
| P12163_1_F3,28278 | K.VLTAIALYEMASK.E      | 2018.182 | 0.00705  | 3 | 1 | 36.9 | 0 |
| P12163_2_F1,18007 | R.CAVESTLFLK.Q         | 1662.934 | 0.00561  | 3 | 1 | 23   | 0 |
| P12163_1_F9,10703 | R.DHGELIK.V            | 1419.842 | 0.00802  | 3 | 1 | 31   | 0 |
| P12163_2_F1,22121 | K.AMVEELK.N ! K.AMV    | 1540.923 | 0.00716  | 2 | 1 | 25.5 | 0 |
| P12163_2_F1,14310 | K.NFTLEEQAK.V          | 1687.947 | 0.00742  | 2 | 1 | 39.2 | 0 |
| P12163_2_F1,9396  | R.SNNELDASK.L          | 1585.864 | 0.00701  | 2 | 1 | 25   | 0 |
| P12163_2_F9,11322 | K.GHFLNPEQR.D          | 1401.754 | 0.00031  | 3 | 1 | 31.8 | 0 |
| P12163_1_F7,16433 | R.ENLSGEGEEFIYHSK.G    | 2347.203 | 0.00906  | 3 | 1 | 53.3 | 0 |
| P12163_2_F1,14133 | R.GATLVGVDK.F          | 1467.899 | 0.00262  | 3 | 1 | 22.3 | 0 |
| P12163_1_F2,13555 | K.GIAVVAAR.A           | 1060.678 | 0.00231  | 2 | 1 | 33.6 | 0 |
| P12163_1_F2,8992  | R.AAPVNTLNPQR.T        | 1484.849 | -0.00105 | 3 | 1 | 24.6 | 0 |
| P12163_1_F3,23952 | R.TAMIVADFK.T          | 1703.002 | 0.00245  | 3 | 1 | 23   | 0 |
| P12163_1_F4,18056 | K.DVSSMFDEK.W          | 1665.861 | 0.00529  | 2 | 1 | 34   | 0 |
| P12163_2_F7,12819 | K.HIVGLAGPPGAGK.S      | 1782.085 | 0.00841  | 3 | 1 | 50.2 | 0 |
| P12163_1_F3,20932 | R.LLPTSALASNVNVK.H     | 2035.237 | 0.00416  | 3 | 1 | 57.7 | 0 |
| P12163_1_F7,18560 | K.LILAAHVQPITR.T       | 1636.021 | -0.00171 | 3 | 1 | 36.5 | 0 |
| P12163_1_F9,7307  | K.NLGGGAEAHAR.F        | 1356.729 | 0.002    | 3 | 1 | 49.2 | 0 |
| P12163_1_F3,22428 | R.NPALLYGLAPEVLK.E     | 1993.194 | 0.00529  | 3 | 1 | 36.6 | 0 |
| P12163_2_S5,12104 | K.KPTEPQPQPQQAQP       | 3375.812 | 0.00417  | 4 | 1 | 26.1 | 0 |
| P12163_1_F3,23077 | K.TWPGLVGLTAEAEK.      | 2209.232 | 0.00802  | 3 | 1 | 52.6 | 0 |
| P12163_2_F1,19225 | R.TYQQLGPNAAAIK.T      | 2025.195 | 0.01172  | 3 | 1 | 34.7 | 0 |
| P12163_2_F6,19412 | K.NSYLVATLHSIR.K       | 1677.959 | 0.00304  | 3 | 1 | 38.5 | 0 |
| P12163_2_F1,4811  | K.SPGSEGNEQR.T         | 1364.671 | 0.00122  | 2 | 1 | 31.9 | 0 |
| P12163_1_F3,18664 | R.NLGFEPDPEGIK.G       | 1924.064 | 0.0047   | 2 | 1 | 48.4 | 0 |
| P12163_1_S1,8750  | K.AAEDTEGVGVAR.L       | 1478.775 | 0.00323  | 3 | 1 | 38.8 | 0 |
| P12163_1_F8,16927 | K.MELDTHNIDTLK.Y       | 2038.11  | 0.0006   | 3 | 1 | 25.8 | 0 |
| P12163_2_F6,14885 | R.LEVDPHLK.Q           | 1558.941 | 0.00161  | 3 | 1 | 35.7 | 0 |
| P12163_1_F3,25155 | K.LMLTPEYLELK.F        | 1958.149 | 0.00756  | 3 | 1 | 33.7 | 0 |
| P12163_2_F10,1930 | R.GGALLETITHPGFHLK.    | 2299.338 | 0.00023  | 4 | 1 | 23.5 | 0 |
| P12163_1_F3,13857 | R.NFEQMEEER.T          | 1515.705 | 0.00694  | 2 | 1 | 40.3 | 0 |
| P12163_1_S1,15229 | K.IGNSPVVCNSNLSAVR     | 1991.065 | 0.0022   | 3 | 1 | 46.9 | 0 |
| P12163_1_S1,14850 | R.GGSELLVEAGDQR.R      | 1634.865 | 0.0043   | 2 | 1 | 51.4 | 0 |
| P12163_2_F6,17404 | R.VIHLPPQIQGK.V        | 1838.147 | 0.00503  | 3 | 1 | 23.2 | 0 |
| P12163_1_S1,10841 | K.ITEESADCEPR.I        | 1610.763 | 0.00768  | 2 | 1 | 28.6 | 0 |
| P12163_1_F5,20598 | R.IATYFYK.G ! R.IATYF' | 1513.887 | 0.01195  | 2 | 1 | 25.4 | 0 |
| P12163_1_F3,22877 | R.M*LADPSFLFK.I ! R.M  | 1793.013 | 0.00916  | 3 | 1 | 23.4 | 0 |

|                   |                     |          |          |   |   |      |   |
|-------------------|---------------------|----------|----------|---|---|------|---|
| P12163_1_F4,21425 | K.SEILASLK.N        | 1468.919 | 0.00457  | 3 | 1 | 24.7 | 0 |
| P12163_2_F1,6429  | R.EETGGNSAQK.V      | 1628.87  | 0.00412  | 2 | 1 | 36.1 | 0 |
| P12163_1_F2,22801 | R.VQASTLTFPEIIAK.L  | 2126.268 | 0.00343  | 3 | 1 | 48   | 0 |
| P12163_2_F6,18880 | K.SIRDESNLILLPR.Q   | 1830.075 | 0.00629  | 2 | 1 | 41.2 | 0 |
| P12163_1_S1,18868 | R.DESNLILLPR.Q      | 1473.858 | 0.00336  | 2 | 1 | 24.1 | 0 |
| P12163_1_F3,24365 | R.VFCEQWYGPF.R.N    | 1792.878 | 0.00056  | 2 | 1 | 24.5 | 0 |
| P12163_1_S1,22872 | K.AISLFGDVVR.L      | 1380.815 | 0.00149  | 2 | 1 | 42.4 | 0 |
| P12163_2_F7,14454 | K.HPEVAQFLGGR.L     | 1514.838 | 0.00296  | 3 | 1 | 37.6 | 0 |
| P12163_1_F4,20827 | R.GIETNLYAQFK.C     | 1892.074 | 0.00777  | 3 | 1 | 47.5 | 0 |
| P12163_1_F3,12344 | K.GAVLQEAR.V        | 1147.674 | 0.0034   | 2 | 1 | 24.8 | 0 |
| P12163_1_F3,25728 | K.IEATEVFFAVTK.L    | 1963.136 | 0.00582  | 3 | 1 | 39   | 0 |
| P12163_1_F3,27629 | R.SIATLAITLLK.T     | 1853.193 | 0.00425  | 3 | 1 | 37.2 | 0 |
| P12163_1_S1,15471 | K.LADDPNIGLQR.Y     | 1515.843 | 0.00186  | 3 | 1 | 24   | 0 |
| P12163_2_F1,18296 | K.SGNEQFLTEISK.W    | 1961.08  | -0.00097 | 2 | 1 | 52.6 | 0 |
| P12163_1_S1,13123 | K.VGESDEPAIYR.I     | 1539.796 | 0.00571  | 2 | 1 | 41.9 | 0 |
| P12163_1_S1,16550 | K.DSTGDELVDVVK.V    | 1885.037 | 0.00162  | 3 | 1 | 29.2 | 0 |
| P12163_1_S1,15869 | R.NGGVVVAFSDAR.V    | 1495.817 | 0.00446  | 2 | 1 | 39.3 | 0 |
| P12163_1_F3,10845 | R.NLDVAGR.I         | 1048.605 | 0.00368  | 2 | 1 | 24.2 | 0 |
| P12163_1_F8,19637 | K.IDFIHAVER.S       | 1403.795 | 0.00355  | 3 | 1 | 24.2 | 0 |
| P12163_1_S1,16385 | R.ISTGALDDIR.R      | 1364.769 | 0.0011   | 2 | 1 | 29.4 | 0 |
| P12163_1_S1,15678 | R.SDVLDPALR.R       | 1289.737 | 0.00241  | 2 | 1 | 32.8 | 0 |
| P12163_1_S1,15068 | R.AVPGNPPLGISR.G    | 1595.917 | 0.00119  | 3 | 1 | 46.7 | 0 |
| P12163_1_F3,19561 | R.VDSGVVIDLK.N      | 1653.004 | 0.00318  | 2 | 1 | 42.9 | 0 |
| P12163_1_F3,25030 | R.WAMEGEFWELDQSTP   | 2562.279 | 0.00716  | 3 | 1 | 30   | 0 |
| P12163_2_F6,20429 | K.NLLISAQFLHK.E     | 1892.158 | 0.00231  | 3 | 1 | 33.8 | 0 |
| P12163_1_F2,11201 | K.VSDEGGIPR.S       | 1290.696 | 0.00806  | 2 | 1 | 25.2 | 0 |
| P12163_1_F4,18777 | R.DFTQMIK.A         | 1490.85  | 0.0146   | 2 | 1 | 25.9 | 0 |
| P12163_1_F7,14833 | K.DLGNSSNNTTVFLPHC  | 2523.301 | 0.00649  | 4 | 1 | 25.3 | 0 |
| P12163_1_F3,18448 | R.ANADDAFYELQNP.K.E | 2204.144 | 0.00783  | 3 | 1 | 30.2 | 0 |
| P12163_1_F4,24165 | R.MTLDELFEQK.G      | 1862.019 | 0.00798  | 3 | 1 | 27.6 | 0 |
| P12163_1_F3,26378 | K.CFAAIEEIVTSGFDNK  | 2538.301 | 0.00762  | 3 | 1 | 57.7 | 0 |
| P12163_1_F3,22767 | K.NVTALTVLNIDPK.V   | 2006.211 | 0.00919  | 3 | 1 | 26.5 | 0 |
| P12163_2_F1,12277 | K.QVLTASADK.S       | 1540.915 | 0.0111   | 3 | 1 | 28.3 | 0 |
| P12163_1_F3,23878 | R.DALVDLFGK.V       | 1585.941 | 0.00362  | 2 | 1 | 25.3 | 0 |
| P12163_1_F3,21866 | R.FYPGIPDALK.F      | 1729.014 | 0.0042   | 3 | 1 | 22.9 | 0 |
| P12163_1_S1,23520 | R.IQLLQLSDFSR.K     | 1623.937 | 0.00033  | 3 | 1 | 38.5 | 0 |
| P12163_1_F2,17852 | K.EQSVFPEIR.Y       | 1408.774 | 0.0021   | 2 | 1 | 28.6 | 0 |
| P12163_1_F3,16475 | K.IVVNCGIGDAAQNAK.  | 2138.185 | -0.00086 | 3 | 1 | 78.9 | 0 |
| P12163_1_F8,15639 | R.EEFSYTNIHQVPK.I   | 2200.186 | 0.00683  | 3 | 1 | 29.2 | 0 |
| P12163_2_F1,12930 | K.GVEQLPEK.K        | 1507.894 | 0.00099  | 2 | 1 | 24.7 | 0 |
| P12163_1_F8,14444 | R.AIVPALHQK.Y       | 1585.005 | 0.0003   | 3 | 1 | 25.9 | 0 |
| P12163_1_F3,20718 | R.LTLDVIGK.A        | 1466.94  | 0.00487  | 2 | 1 | 39.8 | 0 |
| P12163_1_F2,17086 | K.CEYELVMER.M       | 1532.739 | 0.00549  | 2 | 1 | 28.4 | 0 |
| P12163_1_F3,19975 | K.GAPIPLIPK.T       | 1513.993 | 0.00242  | 3 | 1 | 44.6 | 0 |
| P12163_2_F6,17954 | R.DQCAHLLIPLNK.C    | 2030.168 | 0.00366  | 2 | 1 | 47.9 | 0 |
| P12163_1_F6,18040 | R.DIIYTQQAEPVQGEGPI | 2973.614 | 0.00058  | 3 | 1 | 48   | 0 |
| P12163_1_F4,10458 | R.IDAEDSSSSK.L      | 1646.869 | 0.01213  | 2 | 1 | 48.6 | 0 |
| P12163_1_F4,19213 | R.VWVADVDTGK.A      | 1697.968 | 0.0062   | 2 | 1 | 29.2 | 0 |
| P12163_2_F8_12070 | K.AIASLLSDDDHFTDAT  | 2652.373 | 0.0033   | 4 | 1 | 41.9 | 0 |
| P12163_2_F7,6886  | R.ENAHGESVCCNNVR.A  | 1949.886 | 0.00269  | 3 | 1 | 38   | 0 |
| P12163_1_F4,26400 | R.LCVYYALLK.A       | 1751.039 | 0.00311  | 3 | 1 | 43.4 | 0 |

|                   |                       |          |          |   |   |      |   |
|-------------------|-----------------------|----------|----------|---|---|------|---|
| P12163_1_F3,20842 | K.IQGIHPCTSLEK.K      | 2024.167 | 0.00271  | 2 | 1 | 26.9 | 0 |
| P12163_1_F8,14929 | R.APHDDAELIIR.D       | 1553.859 | 0.00099  | 3 | 1 | 38.9 | 0 |
| P12163_2_S5,17865 | R.SHPDIPTLPYAPLR.C    | 1881.054 | 0.00388  | 3 | 1 | 51.1 | 0 |
| P12163_1_F4,19238 | K.LVSEFDK.S           | 1445.846 | 0.00513  | 2 | 1 | 24.7 | 0 |
| P12163_1_S1,17736 | R.FAVSLPDGPSR.G       | 1449.8   | 0.00308  | 3 | 1 | 40.7 | 0 |
| P12163_1_F9,7716  | R.VPAHGK.L            | 1216.762 | 0.00499  | 3 | 1 | 29.4 | 0 |
| P12163_1_F4,17840 | K.LSGGVAVIK.V ! K.LSC | 1451.941 | 0.00685  | 2 | 1 | 36.2 | 0 |
| P12163_1_F4,17849 | K.LSGGVAVIK.V ! K.LSC | 1451.941 | 0.00546  | 3 | 1 | 29.5 | 0 |
| P12163_1_F4,18755 | K.LSGGVAVIK.V ! K.LSC | 1451.941 | 0.00627  | 3 | 1 | 29.5 | 0 |
| P12163_1_F4,18793 | K.LSGGVAVIK.V ! K.LSC | 1451.941 | 0.00573  | 2 | 1 | 36.3 | 0 |
| P12163_1_F5,16593 | K.LSGGVAVIK.V ! K.LSC | 1451.941 | 0.00381  | 2 | 1 | 33   | 0 |
| P12163_1_F6,17094 | K.LSGGVAVIK.V ! K.LSC | 1451.941 | 0.0066   | 3 | 1 | 25.3 | 0 |
| P12163_1_F7,15767 | K.LSGGVAVIK.V ! K.LSC | 1451.941 | 0.00323  | 2 | 1 | 24.7 | 0 |
| P12163_1_F7,15810 | K.LSGGVAVIK.V ! K.LSC | 1451.941 | 0.00276  | 3 | 1 | 32.1 | 0 |
| P12163_1_F7,16269 | K.LSGGVAVIK.V ! K.LSC | 1451.941 | 0.00321  | 3 | 1 | 25.8 | 0 |
| P12163_1_F8,17074 | K.LSGGVAVIK.V ! K.LSC | 1451.941 | 0.00288  | 3 | 1 | 34.2 | 0 |
| P12163_1_F9,16894 | K.LSGGVAVIK.V ! K.LSC | 1451.941 | 0.00606  | 3 | 1 | 33.7 | 0 |
| P12163_2_F1,16989 | K.LSGGVAVIK.V ! K.LSC | 1451.941 | 0.00463  | 2 | 1 | 27.1 | 0 |
| P12163_2_F1,17994 | K.LSGGVAVIK.V ! K.LSC | 1451.941 | 0.00413  | 2 | 1 | 33.8 | 0 |
| P12163_2_F2,356   | K.LSGGVAVIK.V ! K.LSC | 1451.941 | 0.00372  | 3 | 1 | 27.9 | 0 |
| P12163_2_F2,835   | K.LSGGVAVIK.V ! K.LSC | 1451.941 | 0.00492  | 3 | 1 | 35.2 | 0 |
| P12163_2_F2,864   | K.LSGGVAVIK.V ! K.LSC | 1451.941 | 0.00453  | 2 | 1 | 37.9 | 0 |
| P12163_2_F2,1030  | K.LSGGVAVIK.V ! K.LSC | 1451.941 | 0.00414  | 3 | 1 | 33.4 | 0 |
| P12163_2_F2,1058  | K.LSGGVAVIK.V ! K.LSC | 1451.941 | 0.00323  | 2 | 1 | 37.1 | 0 |
| P12163_2_F2,1221  | K.LSGGVAVIK.V ! K.LSC | 1451.941 | 0.0039   | 3 | 1 | 31.6 | 0 |
| P12163_2_F2,1252  | K.LSGGVAVIK.V ! K.LSC | 1451.941 | 0.00427  | 2 | 1 | 39.5 | 0 |
| P12163_2_F2,1417  | K.LSGGVAVIK.V ! K.LSC | 1451.941 | 0.00498  | 3 | 1 | 29.2 | 0 |
| P12163_2_F2,1500  | K.LSGGVAVIK.V ! K.LSC | 1451.941 | 0.00493  | 2 | 1 | 24.3 | 0 |
| P12163_2_F2,1603  | K.LSGGVAVIK.V ! K.LSC | 1451.941 | 0.00693  | 3 | 1 | 29.1 | 0 |
| P12163_2_F2,1801  | K.LSGGVAVIK.V ! K.LSC | 1451.941 | 0.00441  | 3 | 1 | 28.2 | 0 |
| P12163_2_F2,1909  | K.LSGGVAVIK.V ! K.LSC | 1451.941 | 0.00331  | 2 | 1 | 29.3 | 0 |
| P12163_2_F2,1994  | K.LSGGVAVIK.V ! K.LSC | 1451.941 | 0.00531  | 3 | 1 | 32.3 | 0 |
| P12163_2_F2,2097  | K.LSGGVAVIK.V ! K.LSC | 1451.941 | 0.00349  | 2 | 1 | 38.1 | 0 |
| P12163_2_F2,2189  | K.LSGGVAVIK.V ! K.LSC | 1451.941 | 0.00324  | 3 | 1 | 24.9 | 0 |
| P12163_2_F4,15464 | K.LSGGVAVIK.V ! K.LSC | 1451.941 | -0.00073 | 2 | 1 | 24.6 | 0 |
| P12163_2_F4,15934 | K.LSGGVAVIK.V ! K.LSC | 1451.941 | 0.0063   | 3 | 1 | 24.1 | 0 |
| P12163_2_F9,15243 | K.LSGGVAVIK.V ! K.LSC | 1451.941 | 0.00042  | 3 | 1 | 22.6 | 0 |
| P12163_2_S5,15426 | K.LSGGVAVIK.V ! K.LSC | 1451.941 | 0.0042   | 3 | 1 | 27.3 | 0 |
| P12163_1_F6,19646 | R.GLLNVAVVK.C         | 1520.998 | 0.01057  | 3 | 1 | 26.5 | 0 |
| P12163_2_F4,18422 | R.GLLNVAVVK.C         | 1520.998 | 0.0082   | 3 | 1 | 31.8 | 0 |
| P12163_2_F4,18435 | R.GLLNVAVVK.C         | 1520.998 | 0.01051  | 2 | 1 | 24.3 | 0 |
| P12163_1_F3,20810 | K.GYVLTCIAYPK.S       | 1893.076 | 0.00196  | 2 | 1 | 49.2 | 0 |
| P12163_1_F3,20839 | K.GYVLTCIAYPK.S       | 1893.076 | 0.00054  | 3 | 1 | 38.8 | 0 |
| P12163_1_F4,21382 | K.GYVLTCIAYPK.S       | 1893.076 | 0.00938  | 2 | 1 | 33.1 | 0 |
| P12163_1_F6,19620 | K.GYVLTCIAYPK.S       | 1893.076 | -0.00328 | 3 | 1 | 24.9 | 0 |
| P12163_1_F6,19872 | K.GYVLTCIAYPK.S       | 1893.076 | -0.00333 | 3 | 1 | 25   | 0 |
| P12163_1_F6,19928 | K.GYVLTCIAYPK.S       | 1893.076 | -0.00284 | 2 | 1 | 54.1 | 0 |
| P12163_2_F1,20928 | K.GYVLTCIAYPK.S       | 1893.076 | 0.00408  | 2 | 1 | 56.6 | 0 |
| P12163_2_F4,18379 | K.GYVLTCIAYPK.S       | 1893.076 | 0.00075  | 3 | 1 | 25.3 | 0 |
| P12163_2_F4,18725 | K.GYVLTCIAYPK.S       | 1893.076 | -0.00249 | 3 | 1 | 24.3 | 0 |
| P12163_2_F7,18050 | K.GYVLTCIAYPK.S       | 1893.076 | -0.01224 | 2 | 1 | 59.1 | 0 |

|                   |                    |          |          |   |   |      |   |
|-------------------|--------------------|----------|----------|---|---|------|---|
| P12163_2_F7,18093 | K.GYVLTCIAYPK.S    | 1893.076 | 0.00567  | 3 | 1 | 37.6 | 0 |
| P12163_2_F9,18366 | K.GYVLTCIAYPK.S    | 1893.076 | 0.00786  | 3 | 1 | 33.7 | 0 |
| P12163_2_F9,18571 | K.GYVLTCIAYPK.S    | 1893.076 | 0.00678  | 3 | 1 | 39.1 | 0 |
| P12163_1_F4,12348 | K.SDCVIYTHK.E      | 1730.936 | 0.007    | 2 | 1 | 28.2 | 0 |
| P12163_1_F6,10058 | K.SDCVIYTHK.E      | 1730.936 | 0.00553  | 3 | 1 | 27.4 | 0 |
| P12163_1_F6,11050 | K.SDCVIYTHK.E      | 1730.936 | 0.00434  | 2 | 1 | 25.4 | 0 |
| P12163_1_F6,11771 | K.SDCVIYTHK.E      | 1730.936 | 0.0067   | 2 | 1 | 39.6 | 0 |
| P12163_1_F7,11177 | K.SDCVIYTHK.E      | 1730.936 | 0.00694  | 3 | 1 | 27.6 | 0 |
| P12163_2_F4,10265 | K.SDCVIYTHK.E      | 1730.936 | 0.00037  | 3 | 1 | 34.3 | 0 |
| P12163_2_F4,10835 | K.SDCVIYTHK.E      | 1730.936 | 0.00487  | 3 | 1 | 22.6 | 0 |
| P12163_2_F6,9756  | K.SDCVIYTHK.E      | 1730.936 | 0.00391  | 3 | 1 | 37.7 | 0 |
| P12163_2_F6,9794  | K.SDCVIYTHK.E      | 1730.936 | 0.00713  | 4 | 1 | 24.1 | 0 |
| P12163_2_F6,11235 | K.SDCVIYTHK.E      | 1730.936 | 0.00382  | 3 | 1 | 34.6 | 0 |
| P12163_2_F6,11458 | K.SDCVIYTHK.E      | 1730.936 | 0.00492  | 2 | 1 | 53   | 0 |
| P12163_2_F7,9256  | K.SDCVIYTHK.E      | 1730.936 | 0.00229  | 3 | 1 | 32   | 0 |
| P12163_2_F7,10867 | K.SDCVIYTHK.E      | 1730.936 | 0.00514  | 3 | 1 | 44.7 | 0 |
| P12163_2_F7,10880 | K.SDCVIYTHK.E      | 1730.936 | 0.0054   | 2 | 1 | 47.9 | 0 |
| P12163_2_S3,10677 | K.SDCVIYTHK.E      | 1730.936 | 0.00697  | 3 | 1 | 33.5 | 0 |
| P12163_1_F9,8368  | R.EATHPDALR.A      | 1313.711 | 0.00342  | 3 | 1 | 50.7 | 0 |
| P12163_2_F6,6902  | R.EATHPDALR.A      | 1313.711 | 0.0029   | 4 | 1 | 22   | 0 |
| P12163_2_F6,8368  | R.EATHPDALR.A      | 1313.711 | 0.00245  | 2 | 1 | 27.1 | 0 |
| P12163_1_F7,7901  | R.NIAVGHPR.E       | 1167.69  | 0.00217  | 3 | 1 | 38.3 | 0 |
| P12163_1_F9,8655  | R.NIAVGHPR.E       | 1167.69  | 0.00334  | 3 | 1 | 27.6 | 0 |
| P12163_1_F9,8759  | R.NIAVGHPR.E       | 1167.69  | 0.00287  | 2 | 1 | 24   | 0 |
| P12163_1_F9,8904  | R.NIAVGHPR.E       | 1167.69  | 0.00364  | 3 | 1 | 32.4 | 0 |
| P12163_1_F9,11296 | R.NIAVGHPR.E       | 1167.69  | 0.00397  | 3 | 1 | 37.8 | 0 |
| P12163_1_F9,12059 | R.NIAVGHPR.E       | 1167.69  | 0.0043   | 3 | 1 | 38.8 | 0 |
| P12163_1_F9,12337 | R.NIAVGHPR.E       | 1167.69  | 0.00316  | 3 | 1 | 39.2 | 0 |
| P12163_1_F9,12635 | R.NIAVGHPR.E       | 1167.69  | 0.00085  | 3 | 1 | 38.5 | 0 |
| P12163_1_F9,12946 | R.NIAVGHPR.E       | 1167.69  | -0.00305 | 3 | 1 | 37   | 0 |
| P12163_1_F9,13257 | R.NIAVGHPR.E       | 1167.69  | 0.00127  | 3 | 1 | 39.1 | 0 |
| P12163_2_F10,8689 | R.NIAVGHPR.E       | 1167.69  | 0.0079   | 3 | 1 | 32.5 | 0 |
| P12163_2_F8_12070 | R.NIAVGHPR.E       | 1167.69  | 0.00082  | 3 | 1 | 31.5 | 0 |
| P12163_2_F9,8451  | R.NIAVGHPR.E       | 1167.69  | 0.00316  | 3 | 1 | 30.3 | 0 |
| P12163_2_F9,8659  | R.NIAVGHPR.E       | 1167.69  | 0.00247  | 3 | 1 | 34.3 | 0 |
| P12163_1_F8,16721 | K.LDQLPGDM*AIGHVR. | 1841.985 | -0.00066 | 3 | 1 | 30.6 | 0 |
| P12163_1_F8,19345 | K.LDQLPGDM*AIGHVR. | 1841.985 | 0.00237  | 3 | 1 | 34.8 | 0 |
| P12163_1_F8,19367 | K.LDQLPGDM*AIGHVR. | 1841.985 | 0.00191  | 2 | 1 | 24.3 | 0 |
| P12163_2_F6,16221 | K.LDQLPGDM*AIGHVR. | 1841.985 | 0.003    | 3 | 1 | 38.1 | 0 |
| P12163_2_S5,15553 | K.LDQLPGDM*AIGHVR. | 1841.985 | 0.0021   | 3 | 1 | 44.7 | 0 |
| P12163_1_F8,19327 | K.LDQLPGDMAIGHVR.Y | 1825.99  | 0.00114  | 3 | 1 | 50.7 | 0 |
| P12163_2_F6,18852 | K.LDQLPGDMAIGHVR.Y | 1825.99  | -0.00293 | 2 | 1 | 38   | 0 |
| P12163_2_S5,17823 | K.LDQLPGDMAIGHVR.Y | 1825.99  | 0.0024   | 3 | 1 | 49.1 | 0 |
| P12163_1_F4,14959 | R.YSTAGSSMLK.N     | 1652.914 | 0.0027   | 2 | 1 | 28.5 | 0 |
| P12163_1_F4,14993 | R.YSTAGSSMLK.N     | 1652.914 | 0.00498  | 3 | 1 | 47.2 | 0 |
| P12163_2_F1,13888 | R.YSTAGSSMLK.N     | 1652.914 | 0.00736  | 2 | 1 | 24.5 | 0 |
| P12163_2_F2,14436 | R.YSTAGSSMLK.N     | 1652.914 | 0.00826  | 2 | 1 | 35.4 | 0 |
| P12163_2_F8_12070 | R.YSTAGSSMLK.N     | 1652.914 | 0.0041   | 2 | 1 | 32.3 | 0 |
| P12163_1_F7,18326 | K.DFEEPGSLAPTGLHLG | 2534.371 | 0.00425  | 4 | 1 | 45   | 0 |
| P12163_2_S5,16442 | K.DFEEPGSLAPTGLHLG | 2534.371 | 0.00157  | 4 | 1 | 39.7 | 0 |
| P12163_2_S5,17511 | K.DFEEPGSLAPTGLHLG | 2534.371 | 0.00617  | 4 | 1 | 41.6 | 0 |

|                    |                        |          |          |   |   |      |   |
|--------------------|------------------------|----------|----------|---|---|------|---|
| P12163_2_S5,17513  | K.DFEPPGSLAPTGLHLG     | 2534.371 | 0.00393  | 3 | 1 | 57.9 | 0 |
| P12163_1_S1,16549  | K.YM*VIQGEPEGAVIR.G    | 1752.962 | 0.00349  | 2 | 1 | 24.2 | 0 |
| P12163_2_F6,19020  | K.YM*VIQGEPEGAVIR.G    | 1752.962 | 0.00059  | 2 | 1 | 35.5 | 0 |
| P12163_1_F8,19535  | K.YMVIQGEPEGAVIR.G     | 1736.967 | 0.00249  | 2 | 1 | 39.5 | 0 |
| P12163_1_S1,18334  | K.YMVIQGEPEGAVIR.G     | 1736.967 | 0.014    | 2 | 1 | 34.3 | 0 |
| P12163_1_S1,18372  | K.YMVIQGEPEGAVIR.G     | 1736.967 | 0.00249  | 3 | 1 | 34.2 | 0 |
| P12163_1_S1,18581  | K.YMVIQGEPEGAVIR.G     | 1736.967 | 0.00072  | 2 | 1 | 35   | 0 |
| P12163_1_S1,18615  | K.YMVIQGEPEGAVIR.G     | 1736.967 | 0.00141  | 3 | 1 | 25.3 | 0 |
| P12163_2_F6,18988  | K.YMVIQGEPEGAVIR.G     | 1736.967 | 0.00242  | 2 | 1 | 37   | 0 |
| P12163_1_F4,14706  | R.AAENVYIQK.M          | 1643.958 | 0.00348  | 2 | 1 | 46.7 | 0 |
| P12163_1_F4,14708  | R.AAENVYIQK.M          | 1643.958 | 0.00271  | 3 | 1 | 34.7 | 0 |
| P12163_1_F5,13407  | R.AAENVYIQK.M          | 1643.958 | 0.00492  | 2 | 1 | 46.5 | 0 |
| P12163_1_F7,12989  | R.AAENVYIQK.M          | 1643.958 | 0.00679  | 3 | 1 | 28.8 | 0 |
| P12163_1_F9,13977  | R.AAENVYIQK.M          | 1643.958 | 0.00214  | 2 | 1 | 50.8 | 0 |
| P12163_2_F1,13724  | R.AAENVYIQK.M          | 1643.958 | 0.00228  | 2 | 1 | 47.2 | 0 |
| P12163_2_F1,13750  | R.AAENVYIQK.M          | 1643.958 | 0.00541  | 3 | 1 | 32.3 | 0 |
| P12163_2_F8_12070  | R.AAENVYIQK.M          | 1643.958 | 0.00732  | 2 | 1 | 46.9 | 0 |
| P12163_2_F9,13143  | R.AAENVYIQK.M          | 1643.958 | 0.00634  | 2 | 1 | 37.2 | 0 |
| P12163_1_F3,8678   | R.VLSEEER.A            | 1165.637 | -0.02292 | 3 | 1 | 23.8 | 0 |
| P12163_1_F3,8702   | R.VLSEEER.A            | 1165.637 | 0.00543  | 3 | 1 | 31.1 | 0 |
| P12163_1_F3,12062  | R.VLSEEER.A            | 1165.637 | 0.00426  | 2 | 1 | 23.9 | 0 |
| P12163_1_F3,21625  | K.IVTEILPAK.R ! K.IVTE | 1592.024 | 0.00544  | 2 | 1 | 32   | 0 |
| P12163_1_F3,21639  | K.IVTEILPAK.R ! K.IVTE | 1592.024 | 0.0033   | 3 | 1 | 38.8 | 0 |
| P12163_1_F3,21850  | K.IVTEILPAK.R ! K.IVTE | 1592.024 | 0.0056   | 2 | 1 | 38.2 | 0 |
| P12163_1_F3,21881  | K.IVTEILPAK.R ! K.IVTE | 1592.024 | 0.00393  | 3 | 1 | 38.9 | 0 |
| P12163_1_F5,21296  | K.IVTEILPAK.R ! K.IVTE | 1592.024 | 0.00645  | 2 | 1 | 26   | 0 |
| P12163_1_F5,21310  | K.IVTEILPAK.R ! K.IVTE | 1592.024 | -0.00024 | 3 | 1 | 25   | 0 |
| P12163_1_F6,20695  | K.IVTEILPAK.R ! K.IVTE | 1592.024 | 0.00367  | 2 | 1 | 32.6 | 0 |
| P12163_1_F6,20736  | K.IVTEILPAK.R ! K.IVTE | 1592.024 | 0.00153  | 3 | 1 | 30.8 | 0 |
| P12163_2_F4,19880  | K.IVTEILPAK.R ! K.IVTE | 1592.024 | 0.00513  | 3 | 1 | 29.3 | 0 |
| P12163_2_F7,6739   | R.HDPTTLNR.Q           | 1257.685 | 0.00114  | 3 | 1 | 31   | 0 |
| P12163_1_F9,12608  | K.ETPEAHVFK.V ! K.ETF  | 1665.942 | 0.00626  | 3 | 1 | 28.9 | 0 |
| P12163_1_F9,12736  | K.ETPEAHVFK.V ! K.ETF  | 1665.942 | 0.00388  | 2 | 1 | 31   | 0 |
| P12163_2_F10,11550 | K.ETPEAHVFK.V ! K.ETF  | 1665.942 | 0.00257  | 3 | 1 | 32.4 | 0 |
| P12163_2_F6,12210  | K.ETPEAHVFK.V ! K.ETF  | 1665.942 | 0.00614  | 3 | 1 | 32.6 | 0 |
| P12163_2_F7,11639  | K.ETPEAHVFK.V ! K.ETF  | 1665.942 | 0.00062  | 2 | 1 | 28.2 | 0 |
| P12163_2_F8_12070  | K.ETPEAHVFK.V ! K.ETF  | 1665.942 | 0.00332  | 3 | 1 | 30.6 | 0 |
| P12163_2_F9,11708  | K.ETPEAHVFK.V ! K.ETF  | 1665.942 | 0.00665  | 3 | 1 | 23.8 | 0 |
| P12163_1_F2,20367  | R.ASIEDGVLTVTVPK.E     | 2037.205 | 0.0045   | 2 | 1 | 32   | 0 |
| P12163_1_F2,20407  | R.ASIEDGVLTVTVPK.E     | 2037.205 | 0.00575  | 3 | 1 | 24.5 | 0 |
| P12163_1_F4,16877  | R.EEGPPALLK.G          | 1561.941 | 0.01159  | 2 | 1 | 25.9 | 0 |
| P12163_1_F4,16959  | R.EEGPPALLK.G          | 1561.941 | 0.00171  | 3 | 1 | 24.8 | 0 |
| P12163_2_F1,16138  | R.EEGPPALLK.G          | 1561.941 | 0.00575  | 2 | 1 | 29   | 0 |
| P12163_1_F8,14296  | R.LQTGQYASAPDAVR.L     | 1780.949 | 0.00359  | 2 | 1 | 52.4 | 0 |
| P12163_1_S1,11561  | R.LQTGQYASAPDAVR.L     | 1780.949 | 0.00175  | 3 | 1 | 48.2 | 0 |
| P12163_1_S1,13481  | R.LQTGQYASAPDAVR.L     | 1780.949 | -0.00087 | 2 | 1 | 50.2 | 0 |
| P12163_1_S1,13600  | R.LQTGQYASAPDAVR.L     | 1780.949 | 0.00187  | 3 | 1 | 31.7 | 0 |
| P12163_2_F6,13823  | R.LQTGQYASAPDAVR.L     | 1780.949 | 0.00265  | 2 | 1 | 60.6 | 0 |
| P12163_1_F9,14301  | R.HDVVFPVR.F           | 1272.737 | 0.00468  | 3 | 1 | 26.9 | 0 |
| P12163_2_F7,12830  | R.HDVVFPVR.F           | 1272.737 | 0.003    | 3 | 1 | 48.9 | 0 |
| P12163_1_F7,16876  | R.TVAYTNHTVLPEALEK     | 2394.349 | 0.00513  | 3 | 1 | 47   | 0 |



|                   |                     |          |          |   |   |      |   |
|-------------------|---------------------|----------|----------|---|---|------|---|
| P12163_2_F10,1565 | R.TVAYTNHTVLPEALEK  | 2394.349 | 0.00483  | 3 | 1 | 26.9 | 0 |
| P12163_2_F10,1567 | R.TVAYTNHTVLPEALEK  | 2394.349 | 0.00723  | 4 | 1 | 27.5 | 0 |
| P12163_2_F10,1584 | R.TVAYTNHTVLPEALEK  | 2394.349 | 0.00738  | 3 | 1 | 32.7 | 0 |
| P12163_2_S5,16154 | R.TVAYTNHTVLPEALEK  | 2394.349 | 0.00431  | 4 | 1 | 26.4 | 0 |
| P12163_2_S5,16169 | R.TVAYTNHTVLPEALEK  | 2394.349 | 0.00285  | 3 | 1 | 32.5 | 0 |
| P12163_1_F5,17540 | K.SVIAALK.S         | 1309.866 | 0.00872  | 3 | 1 | 31.4 | 0 |
| P12163_2_F1,18052 | K.SVIAALK.S         | 1309.866 | 0.00473  | 3 | 1 | 25.2 | 0 |
| P12163_2_F2,18270 | K.SVIAALK.S         | 1309.866 | 0.00539  | 3 | 1 | 29.9 | 0 |
| P12163_2_F2,18284 | K.SVIAALK.S         | 1309.866 | 0.00606  | 2 | 1 | 35.6 | 0 |
| P12163_1_F4,18952 | R.YNVEDEFVAVK.S     | 1821.984 | 0.00569  | 2 | 1 | 56.3 | 0 |
| P12163_2_F1,18214 | R.YNVEDEFVAVK.S     | 1821.984 | 0.00381  | 3 | 1 | 45.4 | 0 |
| P12163_2_F1,18248 | R.YNVEDEFVAVK.S     | 1821.984 | 0.00647  | 2 | 1 | 50.9 | 0 |
| P12163_2_F9,16770 | R.YNVEDEFVAVK.S     | 1821.984 | 0.00511  | 2 | 1 | 24.6 | 0 |
| P12163_2_F4,8789  | K.HLHAIGAK.M        | 1454.905 | 0.00321  | 3 | 1 | 24.4 | 0 |
| P12163_2_S5,9196  | K.HLHAIGAK.M        | 1454.905 | 0.00506  | 4 | 1 | 23.7 | 0 |
| P12163_2_S5,9208  | K.HLHAIGAK.M        | 1454.905 | 0.00372  | 3 | 1 | 25.6 | 0 |
| P12163_1_S1,18620 | K.QLNYVECFPDGYR.K   | 1964.948 | 0.00276  | 2 | 1 | 36.4 | 0 |
| P12163_1_S1,18698 | K.QLNYVECFPDGYR.K   | 1964.948 | 0.00284  | 3 | 1 | 39.4 | 0 |
| P12163_2_F6,18810 | K.QLNYVECFPDGYR.K   | 1964.948 | 0.00664  | 2 | 1 | 37.8 | 0 |
| P12163_2_F7,17181 | K.QLNYVECFPDGYR.K   | 1964.948 | 0.00036  | 2 | 1 | 37.2 | 0 |
| P12163_1_F8,16603 | K.EGDTVLLPNYGGDHV   | 2322.255 | 0.00229  | 2 | 1 | 39.2 | 0 |
| P12163_1_F8,16628 | K.EGDTVLLPNYGGDHV   | 2322.255 | 0.00875  | 3 | 1 | 33.5 | 0 |
| P12163_2_F10,1499 | K.EGDTVLLPNYGGDHV   | 2322.255 | 0.00356  | 3 | 1 | 50.7 | 0 |
| P12163_2_F10,1500 | K.EGDTVLLPNYGGDHV   | 2322.255 | 0.00496  | 4 | 1 | 34.2 | 0 |
| P12163_2_S5,15388 | K.EGDTVLLPNYGGDHV   | 2322.255 | 0.00323  | 3 | 1 | 39.4 | 0 |
| P12163_1_F4,18386 | K.TNAGILLPEK.S      | 1664.02  | 0.00956  | 3 | 1 | 26.4 | 0 |
| P12163_1_F4,18409 | K.TNAGILLPEK.S      | 1664.02  | 0.00991  | 2 | 1 | 51.4 | 0 |
| P12163_1_F2,24851 | K.QLVPLLLIPK.R      | 1742.176 | 0.0025   | 3 | 1 | 33.3 | 0 |
| P12163_1_F3,26402 | K.QLVPLLLIPK.R      | 1742.176 | 0.00848  | 3 | 1 | 37.8 | 0 |
| P12163_1_F3,26411 | K.QLVPLLLIPK.R      | 1742.176 | 0.00526  | 2 | 1 | 39   | 0 |
| P12163_1_F5,24770 | K.QLVPLLLIPK.R      | 1742.176 | 0.00722  | 3 | 1 | 21.9 | 0 |
| P12163_1_F3,16417 | K.SLGADEVLDYK.T     | 1818.01  | 0.00438  | 2 | 1 | 26.5 | 0 |
| P12163_1_F3,18493 | K.SLGADEVLDYK.T     | 1818.01  | 0.0055   | 2 | 1 | 72.2 | 0 |
| P12163_1_F3,18546 | K.SLGADEVLDYK.T     | 1818.01  | 0.00359  | 3 | 1 | 46.4 | 0 |
| P12163_1_F8,18882 | K.IPTAHYEFGANYIDPK. | 2444.307 | 0.00687  | 3 | 1 | 29.7 | 0 |
| P12163_2_F10,1676 | K.IPTAHYEFGANYIDPK. | 2444.307 | 0.00356  | 4 | 1 | 23.7 | 0 |
| P12163_2_F10,1677 | K.IPTAHYEFGANYIDPK. | 2444.307 | 0.00465  | 3 | 1 | 32.6 | 0 |
| P12163_1_F6,19610 | K.VDYM*NLPCPIPYEEIF | 2466.21  | 0.0035   | 3 | 1 | 42.2 | 0 |
| P12163_1_F6,21412 | K.VDYM*NLPCPIPYEEIF | 2466.21  | 0.00677  | 3 | 1 | 44.6 | 0 |
| P12163_1_F6,21414 | K.VDYM*NLPCPIPYEEIF | 2466.21  | 0.00038  | 3 | 1 | 37.3 | 0 |
| P12163_1_F6,21413 | K.VDYMNLPCPIPYEEIHI | 2450.215 | 0.00338  | 3 | 1 | 27.6 | 0 |
| P12163_1_S1,15901 | K.FAVAAAPVAGGGDAP   | 2291.297 | 0.00675  | 3 | 1 | 44.7 | 0 |
| P12163_1_S1,15969 | K.FAVAAAPVAGGGDAP   | 2291.297 | 0.00502  | 4 | 1 | 50.2 | 0 |
| P12163_1_F4,14916 | K.VGSSEAALLAK.L     | 1653.999 | 0.01006  | 3 | 1 | 26.5 | 0 |
| P12163_1_F4,17892 | K.VGSSEAALLAK.L     | 1653.999 | 0.00421  | 3 | 1 | 22.9 | 0 |
| P12163_2_F1,17096 | K.VGSSEAALLAK.L     | 1653.999 | -0.00041 | 3 | 1 | 33.9 | 0 |
| P12163_2_F2,1129  | K.VGSSEAALLAK.L     | 1653.999 | 0.00928  | 3 | 1 | 33   | 0 |
| P12163_2_F2,1533  | K.VGSSEAALLAK.L     | 1653.999 | 0.01435  | 3 | 1 | 30.4 | 0 |
| P12163_1_F4,20502 | K.LVPVGYGIK.K       | 1553.988 | 0.00408  | 3 | 1 | 28.5 | 0 |
| P12163_2_F1,19960 | K.LVPVGYGIK.K       | 1553.988 | 0.00411  | 3 | 1 | 26.2 | 0 |
| P12163_1_F4,14652 | R.SYITGYQASK.D      | 1725.963 | 0.00941  | 2 | 1 | 48.2 | 0 |

|                   |                     |          |          |   |   |      |   |
|-------------------|---------------------|----------|----------|---|---|------|---|
| P12163_1_F4,14664 | R.SYITGYQASK.D      | 1725.963 | 0.00653  | 3 | 1 | 30   | 0 |
| P12163_1_F5,13417 | R.SYITGYQASK.D      | 1725.963 | 0.00685  | 2 | 1 | 32.6 | 0 |
| P12163_2_F1,13622 | R.SYITGYQASK.D      | 1725.963 | 0.00371  | 2 | 1 | 44.5 | 0 |
| P12163_2_F1,13659 | R.SYITGYQASK.D      | 1725.963 | 0.00479  | 3 | 1 | 32.8 | 0 |
| P12163_1_F2,13946 | R.GDLAIVTGR.N       | 1205.716 | 0.00279  | 3 | 1 | 48.8 | 0 |
| P12163_1_F2,15818 | R.GDLAIVTGR.N       | 1205.716 | 0.00387  | 2 | 1 | 33.6 | 0 |
| P12163_1_S1,15272 | R.GDLAIVTGR.N       | 1205.716 | 0.00317  | 2 | 1 | 32.1 | 0 |
| P12163_1_F6,11902 | R.NIHGSDSVESAQK.E   | 2093.145 | 0.00809  | 3 | 1 | 63.3 | 0 |
| P12163_1_F6,11941 | R.NIHGSDSVESAQK.E   | 2093.145 | 0.0064   | 2 | 1 | 41.5 | 0 |
| P12163_2_F4,10975 | R.NIHGSDSVESAQK.E   | 2093.145 | 0.00461  | 3 | 1 | 45.4 | 0 |
| P12163_1_F3,14120 | R.TVEAAGITEEEIK.A   | 1998.121 | 0.00481  | 3 | 1 | 28.7 | 0 |
| P12163_1_F3,14190 | R.TVEAAGITEEEIK.A   | 1998.121 | 0.00399  | 2 | 1 | 29.9 | 0 |
| P12163_1_F3,16988 | R.TVEAAGITEEEIK.A   | 1998.121 | 0.01789  | 3 | 1 | 53.6 | 0 |
| P12163_1_F3,17005 | R.TVEAAGITEEEIK.A   | 1998.121 | 0.00475  | 2 | 1 | 70.3 | 0 |
| P12163_1_F8,17412 | R.TVEAAGITEEEIKAEDS | 2832.56  | 0.0106   | 4 | 1 | 42.3 | 0 |
| P12163_2_F6,16964 | R.TVEAAGITEEEIKAEDS | 2832.56  | 0.01015  | 3 | 1 | 32.3 | 0 |
| P12163_1_F4,19435 | K.EALSYALSAK.E      | 1660.973 | 0.00242  | 2 | 1 | 33.8 | 0 |
| P12163_1_F9,18098 | K.EALSYALSAK.E      | 1660.973 | 0.00249  | 3 | 1 | 24.8 | 0 |
| P12163_2_F9,17193 | K.EALSYALSAK.E      | 1660.973 | 0.00687  | 3 | 1 | 28.5 | 0 |
| P12163_1_F3,19395 | R.TLSDFGVPEYK.I     | 1977.115 | 0.00706  | 3 | 1 | 22.2 | 0 |
| P12163_1_F3,22341 | R.TLSDFGVPEYK.I     | 1977.115 | 0.00239  | 2 | 1 | 36.8 | 0 |
| P12163_1_F3,22354 | R.TLSDFGVPEYK.I     | 1977.115 | 0.00643  | 3 | 1 | 27.8 | 0 |
| P12163_1_F3,4545  | K.NSTTPATDR.I       | 1266.659 | 0.00304  | 3 | 1 | 34.9 | 0 |
| P12163_1_F3,5722  | K.NSTTPATDR.I       | 1266.659 | 0.00253  | 2 | 1 | 28   | 0 |
| P12163_2_F1,4197  | K.NSTTPATDR.I       | 1266.659 | 0.00295  | 3 | 1 | 29.8 | 0 |
| P12163_2_F1,5362  | K.NSTTPATDR.I       | 1266.659 | 0.00271  | 2 | 1 | 27.3 | 0 |
| P12163_1_F5,10994 | R.NPSLSHYVR.F       | 1376.759 | 0.00784  | 3 | 1 | 32.1 | 0 |
| P12163_2_F4,10961 | R.NPSLSHYVR.F       | 1376.759 | 0.00253  | 3 | 1 | 32.5 | 0 |
| P12163_1_F9,16362 | K.RVEEVYYDMK.I      | 1940.041 | 0.01195  | 3 | 1 | 34.3 | 0 |
| P12163_2_F9,16143 | K.RVEEVYYDMK.I      | 1940.041 | 0.00502  | 3 | 1 | 29.8 | 0 |
| P12163_1_F8,19777 | R.YVVNQVLAGNYDCPR   | 2072.054 | 0.00469  | 2 | 1 | 35.5 | 0 |
| P12163_1_S1,19050 | R.YVVNQVLAGNYDCPR   | 2072.054 | 0.00731  | 2 | 1 | 42.8 | 0 |
| P12163_1_S1,19093 | R.YVVNQVLAGNYDCPR   | 2072.054 | 0.00219  | 3 | 1 | 60.7 | 0 |
| P12163_2_F6,19316 | R.YVVNQVLAGNYDCPR   | 2072.054 | 0.00775  | 2 | 1 | 38.2 | 0 |
| P12163_2_F7,14861 | K.RYEDIPVLGQR.Q     | 1649.928 | 0.00128  | 3 | 1 | 43.2 | 0 |
| P12163_1_F2,17464 | R.SQGGLLEGLYR.V     | 1496.837 | -0.00151 | 3 | 1 | 38.4 | 0 |
| P12163_1_F3,17812 | R.SQGGLLEGLYR.V     | 1496.837 | 0.00134  | 3 | 1 | 39.8 | 0 |
| P12163_1_F3,20224 | R.SQGGLLEGLYR.V     | 1496.837 | 0.00376  | 2 | 1 | 25.2 | 0 |
| P12163_1_F3,20306 | R.SQGGLLEGLYR.V     | 1496.837 | 0.00371  | 3 | 1 | 33   | 0 |
| P12163_2_F1,19808 | R.SQGGLLEGLYR.V     | 1496.837 | 0.00126  | 2 | 1 | 28.1 | 0 |
| P12163_1_F5,15193 | K.SIQTLYGK.E        | 1517.915 | 0.00546  | 3 | 1 | 24.9 | 0 |
| P12163_1_F6,15871 | K.SIQTLYGK.E        | 1517.915 | 0.00531  | 3 | 1 | 26.8 | 0 |
| P12163_1_F9,15536 | K.SIQTLYGK.E        | 1517.915 | 0.00715  | 2 | 1 | 30   | 0 |
| P12163_2_F1,15513 | K.SIQTLYGK.E        | 1517.915 | 0.00973  | 2 | 1 | 30.4 | 0 |
| P12163_2_F2,15983 | K.SIQTLYGK.E        | 1517.915 | 0.00708  | 3 | 1 | 33.4 | 0 |
| P12163_2_F1,13238 | R.SLEEIER.A         | 1179.652 | 0.00058  | 2 | 1 | 27.2 | 0 |
| P12163_1_F7,17926 | K.AFVEHYTTTFDANR.T  | 2037.997 | 0.00319  | 3 | 1 | 28   | 0 |
| P12163_1_F8,18705 | K.AFVEHYTTTFDANR.T  | 2037.997 | -0.00021 | 2 | 1 | 45.5 | 0 |
| P12163_1_F8,18708 | K.AFVEHYTTTFDANR.T  | 2037.997 | 0.00337  | 3 | 1 | 40.2 | 0 |
| P12163_2_F6,18270 | K.AFVEHYTTTFDANR.T  | 2037.997 | 0.00424  | 3 | 1 | 29.7 | 0 |
| P12163_1_F4,14483 | K.IQGSQNIVAK.L      | 1666.011 | 0.01452  | 3 | 1 | 24.1 | 0 |

|                   |                       |          |          |   |   |      |   |
|-------------------|-----------------------|----------|----------|---|---|------|---|
| P12163_2_F1,13526 | K.IQGSQNIVAK.L        | 1666.011 | 0.00438  | 3 | 1 | 26.5 | 0 |
| P12163_1_F2,11517 | K.SSFAGALTTPR.V       | 1411.785 | -0.00321 | 3 | 1 | 29   | 0 |
| P12163_1_F2,13876 | K.SSFAGALTTPR.V       | 1411.785 | 0.00132  | 3 | 1 | 35.6 | 0 |
| P12163_1_F2,15062 | K.SSFAGALTTPR.V       | 1411.785 | 0.00162  | 3 | 1 | 32.1 | 0 |
| P12163_1_F3,17084 | R.AVAEDTYNIVK.G       | 1831.042 | 0.00541  | 3 | 1 | 44   | 0 |
| P12163_1_F3,17184 | R.AVAEDTYNIVK.G       | 1831.042 | 0.00527  | 2 | 1 | 64.2 | 0 |
| P12163_1_F4,17651 | R.AVAEDTYNIVK.G       | 1831.042 | 0.00427  | 2 | 1 | 65.2 | 0 |
| P12163_1_S1,22559 | K.EVVGDLFNQLR.L       | 1593.89  | 0.00235  | 3 | 1 | 40.6 | 0 |
| P12163_1_S1,22594 | K.EVVGDLFNQLR.L       | 1593.89  | 0.00394  | 2 | 1 | 32.3 | 0 |
| P12163_1_F4,23202 | R.LVELINQK.E          | 1564.988 | 0.00838  | 2 | 1 | 36.4 | 0 |
| P12163_1_F4,23211 | R.LVELINQK.E          | 1564.988 | 0.00582  | 3 | 1 | 27.3 | 0 |
| P12163_2_F1,22649 | R.LVELINQK.E          | 1564.988 | 0.00646  | 2 | 1 | 37.1 | 0 |
| P12163_2_F1,22653 | R.LVELINQK.E          | 1564.988 | 0.00526  | 3 | 1 | 29.9 | 0 |
| P12163_1_F2,6464  | K.DNPETDECR.T         | 1439.637 | 0.00362  | 2 | 1 | 33.3 | 0 |
| P12163_1_S1,7122  | K.DNPETDECR.T         | 1439.637 | 0.00293  | 3 | 1 | 42.1 | 0 |
| P12163_1_F3,13835 | K.DSDPLEAYCK.D        | 1805.92  | 0.00561  | 3 | 1 | 22.8 | 0 |
| P12163_1_F3,15873 | K.DSDPLEAYCK.D        | 1805.92  | 0.00711  | 2 | 1 | 30.1 | 0 |
| P12163_1_F9,15490 | K.DSDPLEAYCK.D        | 1805.92  | 0.00639  | 3 | 1 | 22.5 | 0 |
| P12163_2_F2,15302 | K.DSDPLEAYCK.D        | 1805.92  | -0.00593 | 2 | 1 | 28.2 | 0 |
| P12163_1_F8,12132 | R.ELDVAHPAAK.S        | 1658.969 | 0.00636  | 3 | 1 | 24.9 | 0 |
| P12163_1_F8,12155 | R.ELDVAHPAAK.S        | 1658.969 | 0.00575  | 2 | 1 | 36.3 | 0 |
| P12163_2_F6,11851 | R.ELDVAHPAAK.S        | 1658.969 | 0.00345  | 3 | 1 | 30.5 | 0 |
| P12163_1_F3,21493 | R.IDDIVSGIK.K         | 1567.952 | 0.013    | 2 | 1 | 31.2 | 0 |
| P12163_1_F4,22380 | R.IDDIVSGIK.K         | 1567.952 | 0.00752  | 2 | 1 | 37.9 | 0 |
| P12163_1_F4,22406 | R.IDDIVSGIK.K         | 1567.952 | 0.00675  | 3 | 1 | 22   | 0 |
| P12163_1_F4,21415 | K.ALEIAQEINQK.G       | 1865.095 | 0.00202  | 2 | 1 | 47.1 | 0 |
| P12163_1_F4,21417 | K.ALEIAQEINQK.G       | 1865.095 | 0.00404  | 3 | 1 | 40.7 | 0 |
| P12163_2_F1,20929 | K.ALEIAQEINQK.G       | 1865.095 | 0.00014  | 3 | 1 | 29.8 | 0 |
| P12163_1_F4,24621 | R.LEGLAAFAEK.R        | 1656.978 | 0.01254  | 2 | 1 | 32.2 | 0 |
| P12163_1_F4,24714 | R.LEGLAAFAEK.R        | 1656.978 | 0.00827  | 3 | 1 | 38.2 | 0 |
| P12163_2_F1,23958 | R.LEGLAAFAEK.R        | 1656.978 | 0.00653  | 3 | 1 | 29.6 | 0 |
| P12163_1_S1,23046 | R.DLCDPYLNLFR.N       | 1729.888 | 0.00496  | 3 | 1 | 43.1 | 0 |
| P12163_1_S1,23270 | R.DLCDPYLNLFR.N       | 1729.888 | 0.0208   | 3 | 1 | 41.3 | 0 |
| P12163_1_F8,21706 | R.ERPSGSLNTPLVVAA     | 2589.518 | 0.0022   | 4 | 1 | 23.2 | 0 |
| P12163_1_F8,21742 | R.ERPSGSLNTPLVVAA     | 2589.518 | 0.00461  | 3 | 1 | 48.1 | 0 |
| P12163_2_F6,21364 | R.ERPSGSLNTPLVVAA     | 2589.518 | 0.00572  | 3 | 1 | 25.8 | 0 |
| P12163_1_F7,11321 | K.APELHM*EIHK.H ! K.A | 1829.02  | 0.01066  | 4 | 1 | 22.6 | 0 |
| P12163_1_F7,13987 | K.APELHM*EIHK.H ! K.A | 1829.02  | 0.00794  | 4 | 1 | 24.5 | 0 |
| P12163_1_F7,13984 | K.APELHMEIHK.H ! K.AI | 1813.025 | 0.00802  | 4 | 1 | 32.1 | 0 |
| P12163_1_F7,14262 | K.APELHMEIHK.H ! K.AI | 1813.025 | 0.00814  | 4 | 1 | 29.2 | 0 |
| P12163_2_F7,18782 | R.LLFFEহার.K          | 1336.768 | 0.00299  | 3 | 1 | 46   | 0 |
| P12163_1_F4,13323 | R.ATEGPVCDK.N         | 1697.935 | 0.009    | 3 | 1 | 29.5 | 0 |
| P12163_1_F3,25753 | R.VVTALTLLK.K ! R.VV  | 1566.045 | 0.00126  | 3 | 1 | 26.7 | 0 |
| P12163_1_F3,25788 | R.VVTALTLLK.K ! R.VV  | 1566.045 | 0.00523  | 2 | 1 | 35.2 | 0 |
| P12163_2_F1,25701 | R.VVTALTLLK.K ! R.VV  | 1566.045 | 0.00467  | 2 | 1 | 26.2 | 0 |
| P12163_2_F1,25722 | R.VVTALTLLK.K ! R.VV  | 1566.045 | 0.00462  | 3 | 1 | 34.3 | 0 |
| P12163_1_F4,24699 | K.VAEFFNAAVK.L        | 1703.994 | 0.00734  | 3 | 1 | 40   | 0 |
| P12163_1_F4,24716 | K.VAEFFNAAVK.L        | 1703.994 | 0.00941  | 2 | 1 | 62.6 | 0 |
| P12163_2_F1,24035 | K.VAEFFNAAVK.L        | 1703.994 | 0.00487  | 2 | 1 | 44.7 | 0 |
| P12163_2_F1,24040 | K.VAEFFNAAVK.L        | 1703.994 | 0.00368  | 3 | 1 | 43.5 | 0 |
| P12163_1_F4,18186 | R.GFVEEDFEK.V         | 1707.905 | 0.00859  | 2 | 1 | 26.9 | 0 |

|                   |                      |          |          |   |   |      |   |
|-------------------|----------------------|----------|----------|---|---|------|---|
| P12163_1_F4,25690 | K.AFFVPVWK.W         | 1601.966 | 0.00476  | 2 | 1 | 27.1 | 0 |
| P12163_1_F4,25760 | K.AFFVPVWK.W         | 1601.966 | 0.00402  | 3 | 1 | 25.6 | 0 |
| P12163_1_F5,23848 | K.AFFVPVWK.W         | 1601.966 | 0.00576  | 2 | 1 | 30.1 | 0 |
| P12163_1_F3,17088 | R.CINCGSTADLVEYEK.V  | 2367.178 | 0.01013  | 3 | 1 | 50.4 | 0 |
| P12163_1_F3,17129 | R.CINCGSTADLVEYEK.V  | 2367.178 | 0.0031   | 2 | 1 | 39.7 | 0 |
| P12163_1_F3,11009 | K.ALAGAAADR.K        | 1119.642 | -0.00061 | 2 | 1 | 28.2 | 0 |
| P12163_1_F5,16131 | K.FIYDEEK.A          | 1551.851 | 0.00831  | 3 | 1 | 29.7 | 0 |
| P12163_1_F6,16685 | K.FIYDEEK.A          | 1551.851 | 0.00753  | 2 | 1 | 28.2 | 0 |
| P12163_1_F9,16333 | K.FIYDEEK.A          | 1551.851 | 0.00469  | 2 | 1 | 31.2 | 0 |
| P12163_1_S10,1644 | K.FIYDEEK.A          | 1551.851 | 0.00657  | 3 | 1 | 32.2 | 0 |
| P12163_1_F4,21208 | K.SVNYLPNVLSK.M      | 1842.094 | 0.00743  | 3 | 1 | 24.7 | 0 |
| P12163_1_F9,19614 | K.SVNYLPNVLSK.M      | 1842.094 | 0.00395  | 3 | 1 | 28.1 | 0 |
| P12163_2_F1,20719 | K.SVNYLPNVLSK.M      | 1842.094 | 0.006    | 2 | 1 | 53.1 | 0 |
| P12163_1_F4,13630 | K.VGNVTVEEGK.K       | 1639.947 | 0.00563  | 2 | 1 | 39.3 | 0 |
| P12163_2_F1,12692 | K.VGNVTVEEGK.K       | 1639.947 | 0.00419  | 2 | 1 | 38.3 | 0 |
| P12163_1_F6,16904 | K.VAVSFTHTIK.A       | 1711.036 | 0.00525  | 2 | 1 | 38.8 | 0 |
| P12163_1_F6,16910 | K.VAVSFTHTIK.A       | 1711.036 | 0.00655  | 3 | 1 | 37.3 | 0 |
| P12163_1_F6,12212 | R.VSPVTHSVGNCVK.R    | 1992.116 | 0.00666  | 3 | 1 | 37   | 0 |
| P12163_2_F6,11812 | R.VSPVTHSVGNCVK.R    | 1992.116 | 0.00348  | 3 | 1 | 35.4 | 0 |
| P12163_2_F7,11229 | R.VSPVTHSVGNCVK.R    | 1992.116 | 0.00159  | 3 | 1 | 31.1 | 0 |
| P12163_1_F4,5217  | R.GGGAGAPSSGGNR.V    | 1348.687 | 0.00045  | 2 | 1 | 35.1 | 0 |
| P12163_2_F1,4565  | R.GGGAGAPSSGGNR.V    | 1348.687 | 0.0028   | 3 | 1 | 26.5 | 0 |
| P12163_1_F3,7149  | R.VNSGPPPPR.R        | 1224.7   | 0.00248  | 3 | 1 | 31.5 | 0 |
| P12163_1_F3,8533  | R.VNSGPPPPR.R        | 1224.7   | 0.00527  | 3 | 1 | 28.2 | 0 |
| P12163_1_F3,8560  | R.VNSGPPPPR.R        | 1224.7   | 0.00425  | 2 | 1 | 33.3 | 0 |
| P12163_1_F5,14304 | K.TAQGFLNK.-         | 1486.884 | 0.00716  | 3 | 1 | 22.4 | 0 |
| P12163_2_F2,15017 | K.TAQGFLNK.-         | 1486.884 | 0.00397  | 2 | 1 | 28.3 | 0 |
| P12163_2_F2,15020 | K.TAQGFLNK.-         | 1486.884 | 0.00386  | 3 | 1 | 34.8 | 0 |
| P12163_1_F5,11583 | K.YGNLEENK.Y         | 1574.863 | 0.00506  | 2 | 1 | 33   | 0 |
| P12163_2_F2,12366 | K.YGNLEENK.Y         | 1574.863 | 0.00824  | 2 | 1 | 28.5 | 0 |
| P12163_1_F4,20297 | R.AEAFVNLGEPK.I      | 1783.021 | 0.00526  | 2 | 1 | 56.1 | 0 |
| P12163_1_F4,20315 | R.AEAFVNLGEPK.I      | 1783.021 | 0.00566  | 3 | 1 | 56.4 | 0 |
| P12163_2_F1,19710 | R.AEAFVNLGEPK.I      | 1783.021 | 0.00366  | 2 | 1 | 50.3 | 0 |
| P12163_2_F1,19723 | R.AEAFVNLGEPK.I      | 1783.021 | 0.00611  | 3 | 1 | 60.7 | 0 |
| P12163_2_F6,15868 | R.TLEVHWGELHR.G      | 1680.912 | 0.00483  | 3 | 1 | 34.5 | 0 |
| P12163_1_F2,18647 | K.EGTAQDQIDQLIK.D    | 2067.154 | 0.00794  | 3 | 1 | 38.3 | 0 |
| P12163_1_F3,19157 | K.EGTAQDQIDQLIK.D    | 2067.154 | -0.00298 | 3 | 1 | 47.1 | 0 |
| P12163_1_F3,19180 | K.EGTAQDQIDQLIK.D    | 2067.154 | 0.00515  | 2 | 1 | 35.5 | 0 |
| P12163_1_F8,18896 | K.VLVIDYKPTTVR.V     | 2012.236 | 0.00526  | 2 | 1 | 34.9 | 0 |
| P12163_2_F6,18461 | K.VLVIDYKPTTVR.V     | 2012.236 | 0.00356  | 2 | 1 | 33.4 | 0 |
| P12163_1_F4,15468 | K.AAVEAELK.K         | 1438.873 | 0.00121  | 2 | 1 | 32.4 | 0 |
| P12163_1_F5,14218 | K.AAVEAELK.K         | 1438.873 | 0.01133  | 2 | 1 | 31.6 | 0 |
| P12163_1_F5,11369 | R.AWEESEK.S ! K.AWEE | 1486.8   | 0.01136  | 2 | 1 | 26   | 0 |
| P12163_2_F2,12038 | R.AWEESEK.S ! K.AWEE | 1486.8   | -0.0014  | 2 | 1 | 25.9 | 0 |
| P12163_2_F2,12057 | R.AWEESEK.S ! K.AWEE | 1486.8   | -0.00313 | 3 | 1 | 35.3 | 0 |
| P12163_2_S5,11573 | -.M*IQPQTHLNVADNSG   | 2172.113 | 0.00403  | 3 | 1 | 31.7 | 0 |
| P12163_1_F7,13799 | -.MIQPQTHLNVADNSGA   | 2156.118 | -0.00122 | 3 | 1 | 38   | 0 |
| P12163_2_S5,13349 | -.MIQPQTHLNVADNSGA   | 2156.118 | 0.00037  | 3 | 1 | 44.4 | 0 |
| P12163_1_F8,14499 | R.YDDNAAVVIDHEGNP!   | 2365.224 | 0.00691  | 2 | 1 | 43.2 | 0 |
| P12163_2_S5,13669 | R.YDDNAAVVIDHEGNP!   | 2365.224 | 0.00586  | 3 | 1 | 54.5 | 0 |
| P12163_1_F9,15958 | K.QYAVFDAK.V         | 1549.883 | 0.00538  | 2 | 1 | 30.9 | 0 |

|                   |                      |          |          |   |   |      |   |
|-------------------|----------------------|----------|----------|---|---|------|---|
| P12163_1_S10,1589 | K.QYAVFDAK.V         | 1549.883 | 0.01111  | 3 | 1 | 31.7 | 0 |
| P12163_2_F1,16002 | K.QYAVFDAK.V         | 1549.883 | 0.00217  | 3 | 1 | 35.3 | 0 |
| P12163_2_F1,16003 | K.QYAVFDAK.V         | 1549.883 | 0.01122  | 2 | 1 | 34.5 | 0 |
| P12163_2_F6,20169 | R.IELNHAFVLR.S       | 1586.932 | -0.00073 | 3 | 1 | 25.2 | 0 |
| P12163_1_F3,14981 | K.LQGACGSCPSSVMTM    | 2338.148 | 0.00585  | 3 | 1 | 33.3 | 0 |
| P12163_1_F3,15025 | K.LQGACGSCPSSVMTM    | 2322.153 | 0.01089  | 3 | 1 | 34.5 | 0 |
| P12163_1_F3,17001 | K.LQGACGSCPSSVMTM    | 2322.153 | 0.00921  | 3 | 1 | 61.6 | 0 |
| P12163_2_F1,16755 | K.LQGACGSCPSSVMTM    | 2322.153 | 0.00696  | 3 | 1 | 43.8 | 0 |
| P12163_1_S1,13483 | R.ITGPAAGVMTVR.V     | 1476.851 | 0.00754  | 3 | 1 | 35   | 0 |
| P12163_1_F4,19326 | K.AGATVLFEEANK.G     | 1858.053 | 0.01729  | 3 | 1 | 24.1 | 0 |
| P12163_1_F4,19357 | K.AGATVLFEEANK.G     | 1858.053 | 0.01019  | 2 | 1 | 63.1 | 0 |
| P12163_2_F1,18630 | K.AGATVLFEEANK.G     | 1858.053 | 0.00525  | 2 | 1 | 60.1 | 0 |
| P12163_1_F2,16181 | K.GTNNLGVVNPVR.V     | 1642.954 | 0.00465  | 2 | 1 | 54.7 | 0 |
| P12163_2_F6,18824 | K.LQHEGFVVLDPK.A     | 2119.201 | 0.00454  | 3 | 1 | 27   | 0 |
| P12163_1_F4,20586 | K.NAILTAGFYQEK.L     | 1963.111 | 0.00254  | 3 | 1 | 36.4 | 0 |
| P12163_1_F4,20608 | K.NAILTAGFYQEK.L     | 1963.111 | -0.00085 | 2 | 1 | 38.6 | 0 |
| P12163_2_F1,19985 | K.NAILTAGFYQEK.L     | 1963.111 | 0.00413  | 3 | 1 | 40.1 | 0 |
| P12163_2_S3,14311 | K.GILSSYDHASIR.R     | 1622.88  | -0.00068 | 3 | 1 | 28.1 | 0 |
| P12163_1_F2,15812 | R.DLVGVAYTEEETK.A    | 2062.116 | 0.00929  | 3 | 1 | 34.9 | 0 |
| P12163_1_F2,17323 | R.DLVGVAYTEEETK.A    | 2062.116 | 0.00481  | 2 | 1 | 43.3 | 0 |
| P12163_1_F2,17385 | R.DLVGVAYTEEETK.A    | 2062.116 | 0.00557  | 3 | 1 | 49.9 | 0 |
| P12163_1_S1,23225 | K.LAESGIFNLNAVTR.K   | 1910.065 | 0.00355  | 3 | 1 | 44.5 | 0 |
| P12163_1_S1,23283 | K.LAESGIFNLNAVTR.K   | 1910.065 | 0.00409  | 2 | 1 | 27.8 | 0 |
| P12163_1_F7,18516 | R.AFGASDIIAVDVHDEK   | 2295.244 | 0.00417  | 3 | 1 | 58.6 | 0 |
| P12163_1_F8,19510 | R.AFGASDIIAVDVHDEK   | 2295.244 | 0.0105   | 3 | 1 | 52.4 | 0 |
| P12163_1_S1,16516 | R.GNLEAVGVPTSVPVR.   | 1799.033 | 0.00381  | 3 | 1 | 29.7 | 0 |
| P12163_1_S1,16522 | R.GNLEAVGVPTSVPVR.   | 1799.033 | 0.00213  | 2 | 1 | 35.4 | 0 |
| P12163_1_F6,13908 | R.VAHELLQAGHR.Y      | 1534.876 | 0.00258  | 3 | 1 | 34.5 | 0 |
| P12163_2_F6,13070 | R.VAHELLQAGHR.Y      | 1534.876 | 0.00051  | 3 | 1 | 31   | 0 |
| P12163_1_F2,14290 | K.GNVQPD AVLQTVSK.A  | 2064.191 | 0.0041   | 3 | 1 | 28.3 | 0 |
| P12163_1_F2,17481 | K.GNVQPD AVLQTVSK.A  | 2064.191 | 0.00071  | 2 | 1 | 46.5 | 0 |
| P12163_1_S1,19223 | K.M*DG VETFDIDLK.E   | 2007.056 | 0.00584  | 3 | 1 | 36.1 | 0 |
| P12163_1_S1,21053 | K.MDGVETFDIDLK.E     | 1991.062 | -0.00457 | 3 | 1 | 38.4 | 0 |
| P12163_1_F6,20958 | K.HAFDWALIHLCR.L     | 1842.974 | 0.00431  | 3 | 1 | 60.3 | 0 |
| P12163_2_F6,20709 | K.HAFDWALIHLCR.L     | 1842.974 | 0.00488  | 3 | 1 | 43.3 | 0 |
| P12163_1_F3,16548 | K.TAPIVVPGK.A ! K.TA | 1603.04  | 0.00655  | 3 | 1 | 25.2 | 0 |
| P12163_1_F3,18651 | K.TAPIVVPGK.A ! K.TA | 1603.04  | 0.00694  | 2 | 1 | 29.7 | 0 |
| P12163_1_F3,10237 | K.HFQSIHK.H          | 1504.884 | 0.01125  | 4 | 1 | 33.8 | 0 |
| P12163_1_F6,12156 | R.GIYNM*SHGIGK.K     | 1800.989 | 0.01281  | 3 | 1 | 24.1 | 0 |
| P12163_2_S5,11496 | R.GIYNM*SHGIGK.K     | 1800.989 | 0.00801  | 3 | 1 | 26.4 | 0 |
| P12163_2_S5,14227 | R.GIYNM*SHGIGK.K     | 1784.994 | 0.00342  | 3 | 1 | 33.4 | 0 |
| P12163_1_S1,18677 | K.FAVLNTGIYECR.S     | 1746.915 | 0.00225  | 3 | 1 | 32.9 | 0 |
| P12163_1_S1,20792 | K.FAVLNTGIYECR.S     | 1746.915 | -0.00138 | 2 | 1 | 28.5 | 0 |
| P12163_1_F4,18686 | R.CPTCGAAQSFESK.S    | 2198.083 | 0.00827  | 3 | 1 | 35.7 | 0 |
| P12163_2_F1,17926 | R.CPTCGAAQSFESK.S    | 2198.083 | 0.00734  | 3 | 1 | 33.5 | 0 |
| P12163_1_S1,20996 | K.AVCVEAGMLALR.R     | 1593.876 | 0.00358  | 3 | 1 | 42.8 | 0 |
| P12163_1_F3,18476 | R.GVLLYGPPGTGK.T ! K | 1767.062 | 0.00594  | 2 | 1 | 41   | 0 |
| P12163_2_F1,18240 | R.GVLLYGPPGTGK.T ! K | 1767.062 | 0.0061   | 2 | 1 | 41   | 0 |
| P12163_2_F1,18262 | R.GVLLYGPPGTGK.T ! K | 1767.062 | 0.00702  | 3 | 1 | 43.8 | 0 |
| P12163_1_S10,1286 | K.HDIFK.K            | 1267.762 | 0.00958  | 3 | 1 | 23.5 | 0 |
| P12163_2_F8_12070 | K.HDIFK.K            | 1267.762 | 0.00229  | 3 | 1 | 25.5 | 0 |

|                   |                     |          |          |   |   |      |   |
|-------------------|---------------------|----------|----------|---|---|------|---|
| P12163_1_F6,22921 | K.LAFGEHFPGVVNPLDC  | 2228.213 | 0.00037  | 3 | 1 | 36.5 | 0 |
| P12163_1_F7,22085 | K.LAFGEHFPGVVNPLDC  | 2228.213 | -0.00254 | 3 | 1 | 33.1 | 0 |
| P12163_1_F6,16372 | K.AHGGGLSGQAQAITLC  | 2068.156 | 0.0025   | 3 | 1 | 36.1 | 0 |
| P12163_1_F7,15535 | K.AHGGGLSGQAQAITLC  | 2068.156 | 0.00301  | 3 | 1 | 31.6 | 0 |
| P12163_1_F4,14412 | R.VVLQEGTGK.F       | 1538.936 | 0.01394  | 2 | 1 | 38.2 | 0 |
| P12163_2_F1,13384 | R.VVLQEGTGK.F       | 1538.936 | 0.00754  | 2 | 1 | 33.1 | 0 |
| P12163_2_F6,14157 | K.DIHPQFYEDAK.V     | 1971.043 | 0.00512  | 3 | 1 | 36.8 | 0 |
| P12163_1_F2,14626 | R.SAVVVDADQVEK.F    | 1868.059 | 0.00757  | 3 | 1 | 51.3 | 0 |
| P12163_1_F2,14628 | R.SAVVVDADQVEK.F    | 1868.059 | 0.00192  | 2 | 1 | 68.6 | 0 |
| P12163_1_F3,15148 | R.SAVVVDADQVEK.F    | 1868.059 | 0.01015  | 3 | 1 | 35.3 | 0 |
| P12163_2_F2,17554 | K.NLAILNK.R         | 1393.899 | 0.00864  | 2 | 1 | 28.1 | 0 |
| P12163_2_F2,17602 | K.NLAILNK.R         | 1393.899 | 0.0036   | 3 | 1 | 23.7 | 0 |
| P12163_1_F6,20113 | R.LIDDLQHVDTDSR.L   | 2045.045 | 0.00072  | 3 | 1 | 41   | 0 |
| P12163_1_F6,20140 | R.LIDDLQHVDTDSR.L   | 2045.045 | 0.00509  | 2 | 1 | 54   | 0 |
| P12163_1_F3,24973 | K.SPEEMLMILQK.V     | 1927.085 | 0.00877  | 3 | 1 | 41.3 | 0 |
| P12163_1_F4,23586 | R.IALLQQVEGPK.S     | 1804.115 | 0.00564  | 3 | 1 | 29.7 | 0 |
| P12163_1_F4,23598 | R.IALLQQVEGPK.S     | 1804.115 | 0.00934  | 2 | 1 | 59.9 | 0 |
| P12163_2_F1,23001 | R.IALLQQVEGPK.S     | 1804.115 | 0.00294  | 3 | 1 | 25.9 | 0 |
| P12163_2_S5,13394 | K.YSEHFLR.K         | 1255.674 | 0.00202  | 3 | 1 | 24.5 | 0 |
| P12163_1_F3,18846 | R.AAGVLENYAEGEK.Y   | 1959.064 | 0.01104  | 2 | 1 | 33.5 | 0 |
| P12163_1_F4,19280 | R.AAGVLENYAEGEK.Y   | 1959.064 | 0.0097   | 2 | 1 | 60.8 | 0 |
| P12163_1_F4,19307 | R.AAGVLENYAEGEK.Y   | 1959.064 | 0.00954  | 3 | 1 | 39.9 | 0 |
| P12163_1_F3,26525 | K.LGDIM*GILNK.R     | 1698.008 | 0.00823  | 3 | 1 | 22.4 | 0 |
| P12163_1_F3,26543 | K.LGDIMGILNK.R      | 1682.013 | 0.00247  | 3 | 1 | 23.5 | 0 |
| P12163_1_F7,14228 | R.AVEASESERPIPDIR.T | 1973.06  | 0.00203  | 3 | 1 | 30.6 | 0 |
| P12163_1_F7,14230 | R.AVEASESERPIPDIR.T | 1973.06  | -0.00527 | 2 | 1 | 50.8 | 0 |
| P12163_1_F2,13461 | R.EDNMVEIR.K        | 1309.672 | 0.00246  | 2 | 1 | 24.4 | 0 |
| P12163_1_F7,19310 | R.VVIDHGAVPIFVR.L   | 1726.032 | 0.00253  | 3 | 1 | 45.4 | 0 |
| P12163_1_F7,19370 | R.VVIDHGAVPIFVR.L   | 1726.032 | 0.00354  | 2 | 1 | 46.7 | 0 |
| P12163_2_S5,18279 | R.VVIDHGAVPIFVR.L   | 1726.032 | 0.00184  | 3 | 1 | 62.7 | 0 |
| P12163_2_F2,15834 | K.AVQTVWK.V         | 1439.883 | 0.00436  | 2 | 1 | 28   | 0 |
| P12163_2_F2,15939 | K.AVQTVWK.V         | 1439.883 | 0.0054   | 3 | 1 | 25   | 0 |
| P12163_2_F2,16072 | K.AVQTVWK.V         | 1439.883 | 0.00136  | 2 | 1 | 24.4 | 0 |
| P12163_2_F4,16864 | K.DGIEVGTMVPEVPEF   | 2441.312 | -0.00012 | 3 | 1 | 28   | 0 |
| P12163_1_F4,16976 | K.YAVSGLAEASEK.Y    | 1833.021 | 0.00566  | 2 | 1 | 54.3 | 0 |
| P12163_1_F4,16988 | K.YAVSGLAEASEK.Y    | 1833.021 | 0.00841  | 3 | 1 | 58.4 | 0 |
| P12163_2_F1,16154 | K.YAVSGLAEASEK.Y    | 1833.021 | -0.0042  | 2 | 1 | 53   | 0 |
| P12163_1_F3,26987 | R.LVEYFADEFNK.Q     | 1983.068 | 0.00398  | 3 | 1 | 29.1 | 0 |
| P12163_1_F7,21938 | K.VGIFALAYAAHK.A    | 1869.121 | 0.00769  | 3 | 1 | 26.2 | 0 |
| P12163_1_F8,22878 | K.VGIFALAYAAHK.A    | 1869.121 | 0.00706  | 3 | 1 | 29.8 | 0 |
| P12163_1_F3,12870 | K.VGISTDATGEK.V     | 1685.953 | 0.00683  | 2 | 1 | 47.8 | 0 |
| P12163_1_F4,13432 | K.VGISTDATGEK.V     | 1685.953 | 0.00921  | 2 | 1 | 33.8 | 0 |
| P12163_1_F4,23910 | K.LMELVGESEK.L      | 1742.982 | 0.01344  | 3 | 1 | 32.5 | 0 |
| P12163_1_F4,23926 | K.LMELVGESEK.L      | 1742.982 | 0.00837  | 2 | 1 | 47.8 | 0 |
| P12163_2_F1,23309 | K.LMELVGESEK.L      | 1742.982 | 0.00513  | 3 | 1 | 32   | 0 |
| P12163_1_F9,9149  | K.VQAHLGR.V         | 1084.653 | 0.00248  | 3 | 1 | 32.8 | 0 |
| P12163_1_F6,19864 | R.DIEPQAPTHILIIPK.V | 2293.374 | 0.00391  | 3 | 1 | 31.2 | 0 |
| P12163_1_F7,19046 | R.DIEPQAPTHILIIPK.V | 2293.374 | 0.00589  | 3 | 1 | 30   | 0 |
| P12163_1_F7,19057 | R.DIEPQAPTHILIIPK.V | 2293.374 | 0.00256  | 4 | 1 | 25.1 | 0 |
| P12163_1_S10,1076 | R.HCEILGR.L         | 1188.646 | 0.00802  | 3 | 1 | 24.6 | 0 |
| P12163_1_F3,25255 | K.YWLPELPGIAK.M     | 1895.125 | 0.00506  | 2 | 1 | 37.5 | 0 |

|                   |                       |          |          |   |   |      |   |
|-------------------|-----------------------|----------|----------|---|---|------|---|
| P12163_1_F3,25265 | K.YWLPELPGIAK.M       | 1895.125 | 0.00465  | 3 | 1 | 41.2 | 0 |
| P12163_1_F5,17435 | R.LMFASK.Y            | 1304.786 | 0.00556  | 3 | 1 | 32.2 | 0 |
| P12163_2_F1,17804 | R.LMFASK.Y            | 1304.786 | 0.00466  | 3 | 1 | 27.2 | 0 |
| P12163_1_F3,22480 | K.M*YADNQNMFEDFK      | 2424.146 | 0.00658  | 3 | 1 | 39.3 | 0 |
| P12163_1_F3,23732 | K.MYADNQNMFEDFK.]     | 2408.151 | 0.00718  | 3 | 1 | 58.9 | 0 |
| P12163_1_F2,15435 | R.LDSMEPDPEGK.L       | 1825.946 | 0.00798  | 2 | 1 | 24.3 | 0 |
| P12163_1_S1,15077 | R.LDSMEPDPEGK.L       | 1825.946 | 0.00615  | 2 | 1 | 24.8 | 0 |
| P12163_1_F3,14679 | K.DIPDVEGDK.A ! K.DIP | 1595.874 | 0.00691  | 2 | 1 | 35.9 | 0 |
| P12163_1_F3,20715 | R.TLPVILGK.E          | 1448.966 | 0.00815  | 2 | 1 | 30.1 | 0 |
| P12163_1_F4,21143 | R.TLPVILGK.E          | 1448.966 | 0.01081  | 2 | 1 | 26.8 | 0 |
| P12163_2_F1,20559 | R.TLPVILGK.E          | 1448.966 | 0.00995  | 2 | 1 | 24.3 | 0 |
| P12163_1_F8,17995 | K.GTLDIIEHVR.S        | 1456.843 | 0.00334  | 3 | 1 | 33.7 | 0 |
| P12163_2_F6,17476 | K.GTLDIIEHVR.S        | 1456.843 | 0.00067  | 3 | 1 | 56.2 | 0 |
| P12163_1_F4,25408 | K.ISALALLK.M          | 1436.966 | 0.00516  | 2 | 1 | 28.7 | 0 |
| P12163_2_F1,24733 | K.ISALALLK.M          | 1436.966 | -0.00188 | 3 | 1 | 26.5 | 0 |
| P12163_1_F5,18056 | K.ASNPFVNLK.K         | 1597.952 | 0.00762  | 2 | 1 | 41.2 | 0 |
| P12163_1_F5,18089 | K.ASNPFVNLK.K         | 1597.952 | 0.00524  | 3 | 1 | 33.3 | 0 |
| P12163_2_F2,18769 | K.ASNPFVNLK.K         | 1597.952 | 0.0051   | 2 | 1 | 43.7 | 0 |
| P12163_1_F3,20923 | R.YVDAVLTVPK.G        | 1713.041 | 0.00636  | 2 | 1 | 28.1 | 0 |
| P12163_1_F4,22322 | K.AFEEWNSLTAK.F       | 1904.037 | 0.00469  | 2 | 1 | 31.1 | 0 |
| P12163_2_F1,21739 | K.AFEEWNSLTAK.F       | 1904.037 | 0.00426  | 3 | 1 | 22.6 | 0 |
| P12163_1_F5,12622 | R.NLLAGNK.A           | 1337.836 | 0.00623  | 2 | 1 | 28.8 | 0 |
| P12163_2_F2,13438 | R.NLLAGNK.A           | 1337.836 | 0.01121  | 2 | 1 | 28.7 | 0 |
| P12163_1_F3,18794 | K.NPAFITLR.K          | 1235.741 | 0.00283  | 2 | 1 | 25.8 | 0 |
| P12163_2_F1,18535 | K.NPAFITLR.K          | 1235.741 | 0.00231  | 2 | 1 | 28.3 | 0 |
| P12163_2_F1,13947 | R.EIAQTISK.S          | 1497.91  | 0.004    | 3 | 1 | 24.6 | 0 |
| P12163_2_F1,13958 | R.EIAQTISK.S          | 1497.91  | 0.00246  | 2 | 1 | 27.6 | 0 |
| P12163_2_F9,16691 | K.LPASHVIHTVGPIYDAI   | 2963.553 | 0.00094  | 4 | 1 | 44.1 | 0 |
| P12163_2_F6,9812  | R.M*LGGGGADGAIHR.A    | 1531.795 | 0.00447  | 3 | 1 | 62.3 | 0 |
| P12163_1_F8,12734 | R.MLGGGGADGAIHR.A     | 1515.8   | 0.00096  | 3 | 1 | 65.9 | 0 |
| P12163_2_F6,12283 | R.MLGGGGADGAIHR.A     | 1515.8   | 0.00093  | 3 | 1 | 42.8 | 0 |
| P12163_1_F7,21247 | K.SVHDFVVEVVEGDAR     | 1962.023 | 0.00321  | 3 | 1 | 47.9 | 0 |
| P12163_2_S5,21052 | K.SVHDFVVEVVEGDAR     | 1962.023 | 0.00402  | 3 | 1 | 61   | 0 |
| P12163_1_F4,18764 | R.NILCEAVEK.H         | 1683.956 | 0.0107   | 3 | 1 | 41.2 | 0 |
| P12163_1_F5,17444 | R.NILCEAVEK.H         | 1683.956 | 0.00891  | 2 | 1 | 33   | 0 |
| P12163_2_F2,13990 | K.MIYASSK.D ! K.MLYA  | 1407.813 | 0.00478  | 2 | 1 | 30.3 | 0 |
| P12163_1_F2,20338 | R.YAVYDYDFVTAENCQ     | 2594.269 | 0.00671  | 3 | 1 | 47.6 | 0 |
| P12163_1_S1,19878 | R.YAVYDYDFVTAENCQ     | 2594.269 | 0.01418  | 3 | 1 | 54.2 | 0 |
| P12163_2_F6,19829 | R.YAVYDYDFVTAENCQ     | 2594.269 | 0.00923  | 3 | 1 | 43.1 | 0 |
| P12163_1_S1,19345 | K.YIDPTYMIR.A         | 1475.787 | 0.00236  | 3 | 1 | 30.4 | 0 |
| P12163_1_F5,12311 | R.HAYIPIAR.V          | 1244.742 | 0.0074   | 3 | 1 | 29   | 0 |
| P12163_2_F4,12417 | R.HAYIPIAR.V          | 1244.742 | 0.00329  | 3 | 1 | 32   | 0 |
| P12163_2_F9,11953 | R.HAYIPIAR.V          | 1244.742 | 0.00392  | 3 | 1 | 25.3 | 0 |
| P12163_1_F2,20406 | K.ELEEVGGLEELEK.E     | 2082.143 | 0.00705  | 2 | 1 | 44.7 | 0 |
| P12163_1_F2,20491 | K.ELEEVGGLEELEK.E     | 2082.143 | 0.00577  | 3 | 1 | 66.1 | 0 |
| P12163_1_F3,20881 | K.ELEEVGGLEELEK.E     | 2082.143 | 0.01012  | 3 | 1 | 40.5 | 0 |
| P12163_1_F8,22280 | K.RFPVGPIADVPYFR.R    | 1938.09  | -0.00005 | 3 | 1 | 59.8 | 0 |
| P12163_1_F3,26426 | K.ISLTELATVVK.S       | 1796.135 | 0.00936  | 2 | 1 | 25.6 | 0 |
| P12163_1_F3,26429 | K.ISLTELATVVK.S       | 1796.135 | 0.00025  | 3 | 1 | 30.9 | 0 |
| P12163_1_F2,7830  | R.TSSGAAGEAELR.E      | 1452.76  | -0.00283 | 3 | 1 | 38.9 | 0 |
| P12163_1_F2,9752  | R.TSSGAAGEAELR.E      | 1452.76  | 0.00335  | 2 | 1 | 32.1 | 0 |

|                   |                             |          |          |   |   |      |   |
|-------------------|-----------------------------|----------|----------|---|---|------|---|
| P12163_1_F3,29075 | K.AINPLELAM*EALK.V          | 2037.187 | 0.00185  | 3 | 1 | 31.1 | 0 |
| P12163_1_F3,29060 | K.AINPLELAMEALK.V           | 2021.192 | 0.00428  | 3 | 1 | 36.2 | 0 |
| P12163_1_F4,20185 | K.DAYVNLLSK.L               | 1630.962 | -0.00154 | 3 | 1 | 27.5 | 0 |
| P12163_2_F1,19636 | K.DAYVNLLSK.L               | 1630.962 | 0.005    | 2 | 1 | 29.4 | 0 |
| P12163_1_F5,20591 | R.GNLFILK.M ! K.GNLFILK.M   | 1412.909 | 0.0078   | 2 | 1 | 26.9 | 0 |
| P12163_1_F5,20610 | R.GNLFILK.M ! K.GNLFILK.M   | 1412.909 | 0.00507  | 3 | 1 | 24.4 | 0 |
| P12163_1_F4,24773 | R.IAGLIPIK.S                | 1432.971 | 0.00423  | 3 | 1 | 24.2 | 0 |
| P12163_2_F1,24159 | R.IAGLIPIK.S                | 1432.971 | 0.00657  | 2 | 1 | 24.9 | 0 |
| P12163_1_F3,24926 | K.EQDFWLVIIEPK.F            | 2012.131 | 0.00363  | 2 | 1 | 35.4 | 0 |
| P12163_1_F3,24932 | K.EQDFWLVIIEPK.F            | 2012.131 | 0.00146  | 3 | 1 | 29.3 | 0 |
| P12163_1_F4,20886 | K.YYFVVANAK.F               | 1682.973 | 0.01494  | 3 | 1 | 22.7 | 0 |
| P12163_1_F9,19299 | K.YYFVVANAK.F               | 1682.973 | 0.00642  | 3 | 1 | 31.8 | 0 |
| P12163_1_S1,15979 | K.GAVDLGIAVQR.A             | 1402.832 | 0.00094  | 3 | 1 | 68.1 | 0 |
| P12163_1_S1,16003 | K.GAVDLGIAVQR.A             | 1402.832 | 0.00327  | 2 | 1 | 34.6 | 0 |
| P12163_1_F4,13513 | R.ACENVTQPLK.F              | 1767.988 | -0.00319 | 2 | 1 | 31.1 | 0 |
| P12163_2_F1,12531 | R.ACENVTQPLK.F              | 1767.988 | 0.00003  | 2 | 1 | 35.8 | 0 |
| P12163_1_F4,13427 | K.NGVDAENAGIYGSQK           | 2131.124 | -0.00027 | 2 | 1 | 48.4 | 0 |
| P12163_1_F5,10237 | R.AGASYTVK.D                | 1404.831 | 0.00919  | 3 | 1 | 26.5 | 0 |
| P12163_1_F5,10239 | R.AGASYTVK.D                | 1404.831 | 0.00109  | 2 | 1 | 25.2 | 0 |
| P12163_2_F2,11075 | R.AGASYTVK.D                | 1404.831 | 0.00037  | 2 | 1 | 36   | 0 |
| P12163_2_F4,12388 | K.VLHITTR.K                 | 1143.715 | 0.00507  | 3 | 1 | 23.6 | 0 |
| P12163_1_F2,24002 | R.VIDLFSSPDVVK.Q            | 1927.136 | 0.007    | 3 | 1 | 49   | 0 |
| P12163_1_F5,23862 | R.VIDLFSSPDVVK.Q            | 1927.136 | 0.00172  | 3 | 1 | 29.6 | 0 |
| P12163_1_S1,23269 | R.VIDLFSSPDVVK.Q            | 1927.136 | 0.00553  | 3 | 1 | 51.1 | 0 |
| P12163_2_F1,8493  | K.AMEESGNDK.F               | 1588.81  | 0.00556  | 2 | 1 | 25.7 | 0 |
| P12163_1_S1,8076  | R.EDDNVETIR.K               | 1394.706 | 0.00344  | 3 | 1 | 25   | 0 |
| P12163_1_S1,10698 | R.EDDNVETIR.K               | 1394.706 | 0.00284  | 2 | 1 | 28.1 | 0 |
| P12163_1_S1,6580  | K.VGEASH.-                  | 903.4837 | 0.00465  | 2 | 1 | 27.1 | 0 |
| P12163_1_F3,23092 | K.VNFWEDPLSPSK.W            | 2027.106 | 0.00775  | 2 | 1 | 37.3 | 0 |
| P12163_1_F3,23107 | K.VNFWEDPLSPSK.W            | 2027.106 | 0.00822  | 3 | 1 | 44.4 | 0 |
| P12163_1_F8,15011 | K.ATAEHVADAIADNR.A          | 1757.908 | 0.00084  | 3 | 1 | 24.7 | 0 |
| P12163_2_F6,14481 | K.ATAEHVADAIADNR.A          | 1757.908 | 0.00257  | 3 | 1 | 34.3 | 0 |
| P12163_1_F5,10627 | R.GSGVQYQVK.G               | 1701.974 | 0.00793  | 2 | 1 | 35   | 0 |
| P12163_2_F8_1207C | R.CDEVSEALVAEGLHA'          | 2594.33  | 0.00235  | 4 | 1 | 31.9 | 0 |
| P12163_1_F5,13818 | R.ELAQQIEK.E ! R.ELAQQIEK.E | 1566.931 | 0.00899  | 2 | 1 | 37.3 | 0 |
| P12163_1_F5,13853 | R.ELAQQIEK.E ! R.ELAQQIEK.E | 1566.931 | 0.00404  | 3 | 1 | 24   | 0 |
| P12163_1_S10,1404 | K.MHDLIR.D ! R.MHDLIR.D     | 1088.619 | 0.00092  | 3 | 1 | 22.5 | 0 |
| P12163_2_F8_1207C | K.MHDLIR.D ! R.MHDLIR.D     | 1088.619 | 0.00263  | 3 | 1 | 24.5 | 0 |
| P12163_1_F9,7678  | R.GIHEIR.E                  | 1028.615 | 0.0037   | 3 | 1 | 31.3 | 0 |
| P12163_1_F4,14948 | K.LYDAEATK.Q                | 1518.862 | 0.01073  | 2 | 1 | 27.8 | 0 |
| P12163_1_F8,16395 | R.LGSGVLSEHYVR.S            | 1620.901 | 0.00302  | 3 | 1 | 33.8 | 0 |
| P12163_2_S3,14400 | R.LGSGVLSEHYVR.S            | 1620.901 | 0.0023   | 3 | 1 | 36.2 | 0 |
| P12163_1_F3,19365 | K.GIGLDGLNEAQIAK.A          | 2007.169 | 0.00615  | 3 | 1 | 64.3 | 0 |
| P12163_1_F3,19391 | K.GIGLDGLNEAQIAK.A          | 2007.169 | 0.00535  | 2 | 1 | 84.1 | 0 |
| P12163_1_S1,15187 | R.ILLCQTSPSSSTR.S           | 1840.974 | -0.00272 | 2 | 1 | 34.4 | 0 |
| P12163_1_F8,19598 | K.GTEELNNILEHAK.Q           | 2076.154 | 0.00687  | 3 | 1 | 40.5 | 0 |
| P12163_2_F6,19228 | K.GTEELNNILEHAK.Q           | 2076.154 | 0.00111  | 3 | 1 | 28.2 | 0 |
| P12163_2_F2,8862  | K.NANVTNPK.V                | 1465.858 | 0.00626  | 2 | 1 | 27.2 | 0 |
| P12163_1_F8,13020 | R.DALSDGQVHVEK.M            | 1906.049 | 0.00748  | 3 | 1 | 31.4 | 0 |
| P12163_1_F3,14813 | R.DITFQNTAGPSK.H            | 1887.043 | 0.0061   | 2 | 1 | 58.4 | 0 |
| P12163_1_F3,14826 | R.DITFQNTAGPSK.H            | 1887.043 | 0.00849  | 3 | 1 | 54.7 | 0 |



|                   |                       |          |          |   |   |      |   |
|-------------------|-----------------------|----------|----------|---|---|------|---|
| P12163_2_S5,21298 | K.LNDELYEVHQIMTR.N    | 2065.069 | -0.00254 | 3 | 1 | 40.5 | 0 |
| P12163_2_F1,17553 | R.NVQEV LGVGEK.L      | 1780.042 | 0.00726  | 2 | 1 | 28.7 | 0 |
| P12163_2_F1,17602 | R.NVQEV LGVGEK.L      | 1780.042 | 0.00225  | 3 | 1 | 22   | 0 |
| P12163_1_F9,16989 | K.IHNAEVLFR.E         | 1402.811 | -0.00185 | 3 | 1 | 25.2 | 0 |
| P12163_1_S10,5223 | K.SHSNAPAR.I          | 1143.617 | 0.00402  | 3 | 1 | 28.9 | 0 |
| P12163_2_F8_12070 | K.SHSNAPAR.I          | 1143.617 | 0.00333  | 3 | 1 | 27.6 | 0 |
| P12163_1_F6,19320 | K.ITPLPVWHGAGYR.S     | 1770.996 | 0.0006   | 3 | 1 | 32.8 | 0 |
| P12163_2_F6,18872 | K.ITPLPVWHGAGYR.S     | 1770.996 | -0.00345 | 3 | 1 | 34   | 0 |
| P12163_1_F5,15102 | K.VNEELLK.L           | 1452.888 | 0.00535  | 2 | 1 | 24.5 | 0 |
| P12163_1_F2,12052 | K.EGYASIGGG SPLR.R    | 1567.838 | -0.00199 | 3 | 1 | 24.5 | 0 |
| P12163_2_F1,16184 | K.SQNFSTASLVGDEK.I    | 2091.118 | 0.00754  | 3 | 1 | 48.2 | 0 |
| P12163_2_F1,16206 | K.SQNFSTASLVGDEK.I    | 2091.118 | 0.00361  | 2 | 1 | 67.9 | 0 |
| P12163_2_F2,13171 | K.SYADNFK.W           | 1452.794 | 0.0072   | 2 | 1 | 34.5 | 0 |
| P12163_1_F5,5799  | R.TATQQSGSK.L         | 1485.848 | 0.00843  | 2 | 1 | 34.2 | 0 |
| P12163_2_F2,6696  | R.TATQQSGSK.L         | 1485.848 | 0.00295  | 2 | 1 | 36.6 | 0 |
| P12163_1_S1,23949 | R.FLTLQEADSLIR.Q      | 1709.974 | -0.00011 | 3 | 1 | 40.1 | 0 |
| P12163_1_F8,20002 | R.FVLVPGTHVQIDK.L     | 2061.232 | 0.00504  | 3 | 1 | 24.7 | 0 |
| P12163_2_F6,19569 | R.FVLVPGTHVQIDK.L     | 2061.232 | 0.00456  | 3 | 1 | 26.9 | 0 |
| P12163_1_F2,9373  | K.GETQVVS GTNYR.L     | 1614.839 | 0.00442  | 2 | 1 | 26   | 0 |
| P12163_1_F8,19192 | K.HVMEIGQFAVTEY NK.   | 2374.268 | 0.00929  | 3 | 1 | 44.4 | 0 |
| P12163_2_F6,18735 | K.HVMEIGQFAVTEY NK.   | 2374.268 | 0.00233  | 3 | 1 | 45.4 | 0 |
| P12163_1_F3,24551 | K.TELNITSLFAK.R       | 1845.094 | 0.00367  | 3 | 1 | 33.4 | 0 |
| P12163_1_F3,24561 | K.TELNITSLFAK.R       | 1845.094 | 0.01117  | 2 | 1 | 29.4 | 0 |
| P12163_2_F1,15149 | R.VFVTAGSEEK.L        | 1674.952 | 0.00157  | 2 | 1 | 30.1 | 0 |
| P12163_1_F9,17618 | K.RIDSFVQSIR.V        | 1524.88  | 0.00351  | 3 | 1 | 48.3 | 0 |
| P12163_1_F2,18023 | R.IDSFVQSIR.V         | 1368.779 | 0.00303  | 3 | 1 | 24   | 0 |
| P12163_1_F2,22099 | R.IDSFVQSIR.V         | 1368.779 | 0.00511  | 2 | 1 | 24.4 | 0 |
| P12163_1_S1,19095 | K.SGVTVLDALR.E        | 1334.794 | 0.00307  | 2 | 1 | 24   | 0 |
| P12163_1_F3,24003 | R.DVLFPQILK.E         | 1681.051 | 0.0025   | 2 | 1 | 27.5 | 0 |
| P12163_1_F3,24008 | R.DVLFPQILK.E         | 1681.051 | 0.0016   | 3 | 1 | 36.6 | 0 |
| P12163_1_F2,8937  | K.DYEQAEP R.N         | 1311.648 | 0.00011  | 2 | 1 | 24.5 | 0 |
| P12163_1_F3,5809  | R.DGADV R.G ! K.DGADV | 936.5052 | 0.0015   | 2 | 1 | 33.7 | 0 |
| P12163_2_F1,5481  | R.DGADV R.G ! K.DGADV | 936.5052 | 0.00236  | 2 | 1 | 28.5 | 0 |
| P12163_2_F6,15452 | K.HGVVAETMTEMGDPK     | 2210.141 | 0.01013  | 3 | 1 | 25.6 | 0 |
| P12163_1_F4,17295 | K.IVICEAAEK.H         | 1640.95  | 0.00511  | 3 | 1 | 29.8 | 0 |
| P12163_1_F4,17319 | K.IVICEAAEK.H         | 1640.95  | 0.0104   | 2 | 1 | 24   | 0 |
| P12163_2_F7,5943  | K.ASEQQHSLSR.S        | 1446.76  | 0.00126  | 3 | 1 | 29   | 0 |
| P12163_2_S5,6819  | K.ASEQQHSLSR.S        | 1446.76  | 0.0021   | 3 | 1 | 46.3 | 0 |
| P12163_1_S1,23692 | K.DALPTLLYGFR.F       | 1569.894 | 0.00226  | 3 | 1 | 36.1 | 0 |
| P12163_1_F3,20987 | K.IVLIGDSGVGK.S ! K.L | 1666.036 | 0.00077  | 2 | 1 | 38   | 0 |
| P12163_1_F9,12267 | R.HLVAVSTEDGK.S ! R.I | 1764.011 | 0.00715  | 3 | 1 | 56.2 | 0 |
| P12163_2_F7,11303 | R.HLVAVSTEDGK.S ! R.I | 1764.011 | 0.00289  | 3 | 1 | 47.6 | 0 |
| P12163_1_F5,22435 | K.FGEAVWFK.A          | 1591.909 | 0.00903  | 2 | 1 | 27.2 | 0 |
| P12163_1_F9,12965 | R.ELEVIHSR.W          | 1286.737 | 0.00316  | 3 | 1 | 38.7 | 0 |
| P12163_2_F7,11920 | R.ELEVIHSR.W          | 1286.737 | 0.00121  | 3 | 1 | 40.4 | 0 |
| P12163_1_F4,18352 | R.AALLVSQDPK.V ! R.A. | 1650.005 | 0.00603  | 2 | 1 | 32.7 | 0 |
| P12163_1_F8,18504 | R.QLSHPLL VLR.A       | 1479.931 | 0.00045  | 3 | 1 | 29.1 | 0 |
| P12163_2_F6,17924 | R.QLSHPLL VLR.A       | 1479.931 | 0.00399  | 3 | 1 | 28.5 | 0 |
| P12163_1_F7,16147 | K.DVANAHIQAFEVPSAS    | 2173.13  | -0.00069 | 3 | 1 | 42.7 | 0 |
| P12163_1_F8,15224 | K.TGHLLALDGASER.L     | 1643.902 | 0.00435  | 3 | 1 | 38.2 | 0 |
| P12163_2_F6,14610 | K.TGHLLALDGASER.L     | 1643.902 | 0.00423  | 3 | 1 | 34.6 | 0 |

|                   |                       |          |          |   |   |      |   |
|-------------------|-----------------------|----------|----------|---|---|------|---|
| P12163_1_F4,12595 | K.GDYTAAAVK.I         | 1503.863 | 0.00762  | 2 | 1 | 35.7 | 0 |
| P12163_2_F1,11659 | K.GDYTAAAVK.I         | 1503.863 | 0.006    | 3 | 1 | 39.3 | 0 |
| P12163_1_F3,27630 | R.GLLLLAEM*SSAGNLA    | 2212.283 | 0.006    | 3 | 1 | 50.5 | 0 |
| P12163_2_F6,19571 | R.LNEAVM*HFGESIK.E    | 2099.141 | 0.00449  | 3 | 1 | 30.2 | 0 |
| P12163_2_F6,20780 | R.LNEAVMHFGESIK.E     | 2083.147 | 0.00174  | 3 | 1 | 40.5 | 0 |
| P12163_1_F3,19217 | R.VVITFDGK.Y          | 1486.909 | 0.00249  | 2 | 1 | 28.1 | 0 |
| P12163_2_F1,18758 | K.LLLDNPAAAK.V        | 1634.01  | 0.00555  | 2 | 1 | 43.4 | 0 |
| P12163_1_F4,15078 | K.SESNEPNVQDFK.L      | 2002.034 | 0.00707  | 2 | 1 | 29.1 | 0 |
| P12163_2_F1,14024 | K.SESNEPNVQDFK.L      | 2002.034 | -0.00279 | 2 | 1 | 41.9 | 0 |
| P12163_1_F6,17910 | K.HYVGPFESEFGK.I      | 1876.021 | 0.01119  | 3 | 1 | 24.9 | 0 |
| P12163_1_F9,16478 | R.EHGFLGFR.N ! K.EHGI | 1266.69  | 0.00344  | 3 | 1 | 25.4 | 0 |
| P12163_1_S10,1680 | R.EHGFLGFR.N ! K.EHGI | 1266.69  | 0.0023   | 3 | 1 | 24.6 | 0 |
| P12163_1_F7,16557 | K.FLPADPYAHKD.-       | 1882.032 | 0.00881  | 3 | 1 | 41.3 | 0 |
| P12163_2_F6,16573 | K.FLPADPYAHKD.-       | 1882.032 | 0.00038  | 3 | 1 | 35.6 | 0 |
| P12163_2_F2,15052 | R.EWVVQNK.L           | 1510.884 | 0.00287  | 2 | 1 | 27.3 | 0 |
| P12163_1_F9,17850 | K.AISNYAPVLK.A        | 1684.025 | 0.01478  | 3 | 1 | 26.5 | 0 |
| P12163_2_F9,16525 | K.AISNYAPVLK.A        | 1684.025 | 0.00551  | 3 | 1 | 24.9 | 0 |
| P12163_1_S1,21739 | R.M*CMPSPSIDQFIDAVI   | 2463.254 | 0.00877  | 3 | 1 | 22.9 | 0 |
| P12163_1_F5,17636 | R.ACGLVDFK.C          | 1517.861 | 0.00373  | 2 | 1 | 24.8 | 0 |
| P12163_1_F4,22485 | R.QNFVWGGFPGPEK.E     | 2071.122 | 0.01157  | 3 | 1 | 36.7 | 0 |
| P12163_2_F1,21930 | R.QNFVWGGFPGPEK.E     | 2071.122 | 0.00479  | 3 | 1 | 32.3 | 0 |
| P12163_1_F2,17602 | R.FADNLGDDATIEK.I     | 2017.07  | 0.00129  | 3 | 1 | 40.2 | 0 |
| P12163_1_F6,19370 | R.YELEPPHVLITATAAGI   | 2256.229 | 0.00665  | 3 | 1 | 34.9 | 0 |
| P12163_2_F10,1705 | R.YELEPPHVLITATAAGI   | 2256.229 | 0.00428  | 3 | 1 | 23.2 | 0 |
| P12163_2_F2,17720 | K.AGGWYNSLK.N         | 1603.905 | 0.00777  | 2 | 1 | 26.3 | 0 |
| P12163_1_F8,17247 | K.CLADMVINHR.T        | 1532.798 | -0.00144 | 3 | 1 | 31.8 | 0 |
| P12163_2_F6,16591 | K.CLADMVINHR.T        | 1532.798 | 0.00192  | 3 | 1 | 52.6 | 0 |
| P12163_1_F3,20722 | K.VIDPLLSEK.G         | 1621.998 | 0.0097   | 3 | 1 | 32.5 | 0 |
| P12163_1_F3,20733 | K.VIDPLLSEK.G         | 1621.998 | 0.0068   | 2 | 1 | 33.9 | 0 |
| P12163_2_F9,11000 | R.ALHIVNR.T           | 1126.7   | 0.00192  | 3 | 1 | 31.4 | 0 |
| P12163_2_F7,11487 | R.NEACIAGLHDK.G       | 1835.989 | -0.0094  | 3 | 1 | 33   | 0 |
| P12163_1_F8,16978 | R.SALSGFVDVHR.L       | 1491.822 | 0.00388  | 3 | 1 | 48.2 | 0 |
| P12163_2_F6,16397 | R.SALSGFVDVHR.L       | 1491.822 | 0.0013   | 3 | 1 | 35.7 | 0 |
| P12163_2_F6,20955 | K.VSQLEHVFIK.G        | 1531.89  | 0.0033   | 2 | 1 | 38.8 | 0 |
| P12163_1_F3,26716 | R.FMVIPDMLK.N         | 1701.989 | 0.00208  | 3 | 1 | 23.9 | 0 |
| P12163_1_F3,26736 | R.FMVIPDMLK.N         | 1701.989 | 0.00355  | 2 | 1 | 26.6 | 0 |
| P12163_2_F9,20156 | R.GVLDSAGFPAVVTAHI    | 3038.648 | 0.00046  | 4 | 1 | 30.4 | 0 |
| P12163_2_F6,21957 | R.VLELLCHR.D          | 1343.777 | 0.00294  | 3 | 1 | 34.9 | 0 |
| P12163_2_F7,19862 | R.VLELLCHR.D          | 1343.777 | 0.00267  | 3 | 1 | 30.7 | 0 |
| P12163_1_F8,16410 | K.HEVCNAYTELNDPIVC    | 2362.176 | 0.00333  | 3 | 1 | 55.3 | 0 |
| P12163_2_F6,15876 | K.HEVCNAYTELNDPIVC    | 2362.176 | 0.00216  | 3 | 1 | 45.1 | 0 |
| P12163_1_F4,18101 | R.NPETYILK.D          | 1585.941 | 0.00594  | 3 | 1 | 23.7 | 0 |
| P12163_2_S5,16044 | K.NVADSIPLEHITR.I     | 1768.986 | 0.00072  | 3 | 1 | 34.3 | 0 |
| P12163_1_F4,22610 | R.TVLAEAINLK.G        | 1680.052 | 0.00096  | 2 | 1 | 61.9 | 0 |
| P12163_2_F1,22128 | R.TVLAEAINLK.G        | 1680.052 | 0.00814  | 2 | 1 | 60.7 | 0 |
| P12163_1_F9,19351 | K.HNGILGFEEFAR.A      | 1693.896 | -0.00113 | 3 | 1 | 41.5 | 0 |
| P12163_2_F7,17524 | K.HNGILGFEEFAR.A      | 1693.896 | 0.001    | 3 | 1 | 43.2 | 0 |
| P12163_1_F4,26704 | R.VFDLFDTK.H ! K.VFDI | 1592.914 | 0.00595  | 2 | 1 | 26.1 | 0 |
| P12163_1_F6,15074 | K.FEFVAHHK.G          | 1622.926 | 0.00777  | 4 | 1 | 25.8 | 0 |
| P12163_2_F6,11681 | K.GPASDQIHDFR.D       | 1546.792 | 0.00079  | 3 | 1 | 42.2 | 0 |
| P12163_2_F7,11052 | K.GPASDQIHDFR.D       | 1546.792 | 0.00766  | 3 | 1 | 50   | 0 |

|                   |                        |          |         |   |   |      |   |
|-------------------|------------------------|----------|---------|---|---|------|---|
| P12163_1_F4,23327 | K.LAFIDVAK.G           | 1484.93  | 0.00443 | 2 | 1 | 27.8 | 0 |
| P12163_1_F6,19641 | K.VPQSDEEFFLHPATVR     | 2176.134 | 0.00608 | 3 | 1 | 31.2 | 0 |
| P12163_2_S5,18390 | K.VPQSDEEFFLHPATVR     | 2176.134 | 0.00161 | 3 | 1 | 45.5 | 0 |
| P12163_2_F1,18895 | R.ALLDGLEK.A           | 1466.904 | 0.00984 | 2 | 1 | 26.4 | 0 |
| P12163_2_F1,18937 | R.ALLDGLEK.A           | 1466.904 | 0.00433 | 3 | 1 | 25.2 | 0 |
| P12163_1_F2,10405 | R.EIVDAR.A ! R.EIVDAR  | 1006.583 | 0.00473 | 2 | 1 | 26.9 | 0 |
| P12163_1_F4,24970 | K.M*SLAELLDESK.V       | 1860.024 | 0.01177 | 3 | 1 | 44.2 | 0 |
| P12163_1_F9,17392 | R.LFLHDIR.R            | 1217.731 | 0.00351 | 3 | 1 | 31.4 | 0 |
| P12163_2_F9,16526 | R.LFLHDIR.R            | 1217.731 | 0.00138 | 3 | 1 | 39   | 0 |
| P12163_1_S1,14691 | R.EILQNQDTSFCNR.T ! R  | 1928.944 | 0.00185 | 2 | 1 | 33   | 0 |
| P12163_1_F8,20925 | R.LHPAVPLLIPR.K ! R.LI | 1529.983 | 0.00367 | 3 | 1 | 22.8 | 0 |
| P12163_2_F6,20544 | R.LHPAVPLLIPR.K ! R.LI | 1529.983 | 0.00181 | 3 | 1 | 25.4 | 0 |
| P12163_1_F4,24000 | K.ASVATGLATILK.-       | 1753.104 | 0.00234 | 3 | 1 | 42.7 | 0 |
| P12163_2_F1,23473 | K.ASVATGLATILK.-       | 1753.104 | 0.00522 | 3 | 1 | 30   | 0 |
| P12163_2_F1,25778 | K.VFAIIGVK.V           | 1454.955 | 0.01043 | 2 | 1 | 31.2 | 0 |
| P12163_2_F6,16406 | K.HLYVQVIDDTK.M        | 1939.111 | 0.00596 | 3 | 1 | 40.3 | 0 |
| P12163_1_F5,14492 | R.EHGLQF.-             | 1034.557 | 0.00257 | 2 | 1 | 24   | 0 |
| P12163_2_F2,15130 | R.EHGLQF.-             | 1034.557 | 0.00211 | 2 | 1 | 25.4 | 0 |
| P12163_1_S1,11815 | K.EVSNSFGVDSR.I        | 1500.76  | 0.00329 | 3 | 1 | 29   | 0 |
| P12163_1_S1,12976 | K.EVSNSFGVDSR.I        | 1500.76  | 0.01028 | 2 | 1 | 26.5 | 0 |
| P12163_2_F1,17840 | R.LGAEMTLK.Q           | 1470.881 | 0.00046 | 2 | 1 | 25.1 | 0 |
| P12163_1_F8,19142 | K.HMDPLLPLPR.L         | 1492.861 | 0.0017  | 3 | 1 | 26.8 | 0 |
| P12163_2_F6,18665 | K.HMDPLLPLPR.L         | 1492.861 | 0.00284 | 3 | 1 | 26.7 | 0 |
| P12163_1_F7,21669 | R.QGIALALHSAADVLR.     | 1839.075 | 0.00884 | 3 | 1 | 49.6 | 0 |
| P12163_1_F7,14609 | K.GTIAGGGVIPHIHK.S     | 1965.185 | 0.00149 | 4 | 1 | 22.8 | 0 |
| P12163_1_F3,19051 | R.GDEELDTLIK.G         | 1740.984 | 0.00233 | 2 | 1 | 56.2 | 0 |
| P12163_1_F3,19073 | R.GDEELDTLIK.G         | 1740.984 | 0.00429 | 3 | 1 | 38.4 | 0 |
| P12163_1_F3,26366 | K.GLEILAFPCNQFLK.Q     | 2258.283 | 0.00918 | 3 | 1 | 26.5 | 0 |
| P12163_1_F4,15166 | R.VNGPNAEPLYK.F        | 1810.032 | 0.00183 | 2 | 1 | 35.4 | 0 |
| P12163_2_F1,14125 | R.VNGPNAEPLYK.F        | 1810.032 | 0.00379 | 2 | 1 | 36.2 | 0 |
| P12163_2_F1,10586 | K.VNVEESK.I            | 1412.82  | 0.00591 | 2 | 1 | 25.5 | 0 |
| P12163_1_F4,22328 | R.SIFCIVEK.A           | 1603.934 | 0.00474 | 2 | 1 | 34.5 | 0 |
| P12163_2_F1,21915 | R.SIFCIVEK.A           | 1603.934 | 0.00459 | 3 | 1 | 29.9 | 0 |
| P12163_2_F2,17214 | K.NINLEIK.K            | 1451.904 | 0.00254 | 2 | 1 | 28   | 0 |
| P12163_2_F2,12769 | R.GINLSGGQK.Q ! K.GLN  | 1481.89  | 0.00533 | 2 | 1 | 34.5 | 0 |
| P12163_2_F2,12799 | R.GINLSGGQK.Q ! K.GLN  | 1481.89  | 0.00305 | 3 | 1 | 37.4 | 0 |
| P12163_1_F9,9837  | K.HIGGCTETVK.L         | 1709.946 | 0.00216 | 3 | 1 | 31.6 | 0 |
| P12163_2_F9,9472  | K.HIGGCTETVK.L         | 1709.946 | 0.00723 | 3 | 1 | 59.6 | 0 |
| P12163_2_F2,15698 | K.TWCSYSSEVK.L         | 1854.952 | 0.00854 | 2 | 1 | 33.2 | 0 |
| P12163_1_F7,22066 | K.KDVM*DASGVALVLI      | 2936.634 | 0.00205 | 4 | 1 | 33   | 0 |
| P12163_1_F5,16435 | K.NLLDTVK.V            | 1410.878 | 0.00598 | 2 | 1 | 28.4 | 0 |
| P12163_2_F1,16864 | K.NLLDTVK.V            | 1410.878 | 0.0049  | 2 | 1 | 29.6 | 0 |
| P12163_1_F3,20656 | K.VYVVGEDGILK.E        | 1800.073 | 0.00277 | 2 | 1 | 60.5 | 0 |
| P12163_1_F3,20660 | K.VYVVGEDGILK.E        | 1800.073 | 0.00158 | 3 | 1 | 38.6 | 0 |
| P12163_1_S1,17348 | R.ENPGCLFIATNR.D       | 1695.879 | 0.0057  | 3 | 1 | 34.6 | 0 |
| P12163_1_F3,19917 | R.GASLPSDMFEAAK.S      | 1932.036 | 0.00298 | 3 | 1 | 28.5 | 0 |
| P12163_1_F3,19945 | R.GASLPSDMFEAAK.S      | 1932.036 | 0.0084  | 2 | 1 | 48.3 | 0 |
| P12163_1_F3,22877 | R.M*LADPSFLFK.I ! R.M  | 1793.013 | 0.00916 | 3 | 1 | 23.4 | 0 |
| P12163_1_F3,18759 | K.DFVGDVPLSK.K         | 1684.973 | 0.00727 | 2 | 1 | 36.4 | 0 |
| P12163_1_F3,18760 | K.DFVGDVPLSK.K         | 1684.973 | 0.00723 | 3 | 1 | 22   | 0 |
| P12163_1_F3,22101 | R.NAIINAAELASYDQVK     | 2328.302 | 0.00824 | 3 | 1 | 55   | 0 |

|                   |                        |          |          |   |   |      |   |
|-------------------|------------------------|----------|----------|---|---|------|---|
| P12163_1_F4,28678 | K.LSAAISAILEK.K        | 1724.078 | 0.00595  | 3 | 1 | 28.3 | 0 |
| P12163_1_F4,16953 | M.PCLNISTNVK.L         | 1754.009 | 0.00151  | 3 | 1 | 26.6 | 0 |
| P12163_2_F1,16170 | M.PCLNISTNVK.L         | 1754.009 | 0.00539  | 2 | 1 | 28.7 | 0 |
| P12163_1_F3,14066 | K.DVVSADSLQSK.D        | 1756.99  | 0.00442  | 2 | 1 | 60.8 | 0 |
| P12163_1_F6,15187 | K.LVNYQHLM*PTR.Y       | 1691.92  | 0.00423  | 3 | 1 | 30.2 | 0 |
| P12163_1_F8,17960 | K.LVNYQHLMPTR.Y        | 1675.926 | 0.01402  | 3 | 1 | 32.4 | 0 |
| P12163_1_F3,12113 | K.ALGVER.V             | 948.5779 | 0.0036   | 2 | 1 | 28.4 | 0 |
| P12163_1_F4,12220 | K.ALGVER.V             | 948.5779 | 0.00217  | 2 | 1 | 29.2 | 0 |
| P12163_1_F5,20487 | K.CLTQRVLPEK.L         | 1852.093 | -0.01955 | 3 | 1 | 29.9 | 0 |
| P12163_1_F2,20249 | K.NAAVELGQFGIR.V       | 1578.891 | 0.0052   | 2 | 1 | 29.4 | 0 |
| P12163_1_F2,20278 | K.NAAVELGQFGIR.V       | 1578.891 | 0.00558  | 3 | 1 | 48   | 0 |
| P12163_2_F2,13285 | K.VFAQQGAK.V           | 1456.873 | 0.01287  | 2 | 1 | 24.4 | 0 |
| P12163_1_F2,22641 | K.DVVFDYPITDA.-        | 1558.794 | 0.00185  | 2 | 1 | 39.9 | 0 |
| P12163_1_S1,13862 | K.DVVLIATR.R           | 1190.741 | 0.00229  | 3 | 1 | 35.6 | 0 |
| P12163_1_S1,16183 | K.DVVLIATR.R           | 1190.741 | 0.00339  | 2 | 1 | 25.1 | 0 |
| P12163_1_F5,25262 | K.LIELLGK.F ! K.LLELLC | 1393.924 | 0.00623  | 2 | 1 | 30.6 | 0 |
| P12163_2_F1,26492 | K.LIELLGK.F ! K.LLELLC | 1393.924 | 0.00689  | 2 | 1 | 30.1 | 0 |
| P12163_1_F9,8433  | R.LAPPHSR.D            | 1081.642 | 0.00792  | 3 | 1 | 22.9 | 0 |
| P12163_1_F6,20082 | K.SSSVFIPHGPQAVQDIA    | 2484.351 | 0.00299  | 3 | 1 | 32.5 | 0 |
| P12163_1_F3,13872 | R.AMNEINAAAR.L         | 1364.726 | 0.00626  | 2 | 1 | 38.6 | 0 |
| P12163_2_F1,13121 | R.AMNEINAAAR.L         | 1364.726 | 0.00294  | 2 | 1 | 39.4 | 0 |
| P12163_2_S3,7087  | K.DYQSDHK.F            | 1500.79  | 0.00535  | 3 | 1 | 25   | 0 |
| P12163_2_S5,7516  | K.DYQSDHK.F            | 1500.79  | 0.00472  | 3 | 1 | 26.1 | 0 |
| P12163_1_S1,24005 | K.SIFSIVPDQR.S         | 1612.9   | 0.00272  | 3 | 1 | 42.6 | 0 |
| P12163_1_F3,13872 | R.AMNEINAAAR.L         | 1364.726 | 0.00626  | 2 | 1 | 38.6 | 0 |
| P12163_2_F1,13121 | R.AMNEINAAAR.L         | 1364.726 | 0.00294  | 2 | 1 | 39.4 | 0 |
| P12163_1_S1,23866 | R.SQIQAYVFDVIR.A       | 1742.974 | 0.00741  | 3 | 1 | 30.9 | 0 |
| P12163_2_F1,23391 | K.FASFLAGK.N           | 1448.872 | 0.00459  | 2 | 1 | 30.4 | 0 |
| P12163_1_F5,13997 | R.ASAIGLK.I            | 1267.819 | 0.00719  | 3 | 1 | 27.8 | 0 |
| P12163_2_F2,14811 | R.ASAIGLK.I            | 1267.819 | 0.00287  | 3 | 1 | 29.5 | 0 |
| P12163_1_F3,23152 | K.AIELFAFDTVNK.H       | 1976.131 | 0.00245  | 3 | 1 | 30.3 | 0 |
| P12163_1_F3,25708 | K.AIELFAFDTVNK.H       | 1976.131 | 0.00161  | 3 | 1 | 44.1 | 0 |
| P12163_1_S1,15929 | R.TAVAPLETIR.T         | 1374.826 | 0.0002   | 3 | 1 | 31.4 | 0 |
| P12163_1_F4,12660 | K.DVSDSIQAK.Y          | 1570.89  | 0.00735  | 2 | 1 | 29   | 0 |
| P12163_1_F5,19348 | K.SFAFQLAK.T           | 1519.909 | 0.00666  | 3 | 1 | 24.6 | 0 |
| P12163_1_F5,19373 | K.SFAFQLAK.T           | 1519.909 | 0.00865  | 2 | 1 | 35.6 | 0 |
| P12163_2_F1,12615 | K.VIATPNAK.T           | 1421.894 | 0.00156  | 2 | 1 | 32.9 | 0 |
| P12163_1_F3,20036 | R.SDIVITPVIK.Q         | 1693.072 | 0.00817  | 2 | 1 | 34.5 | 0 |
| P12163_1_F3,20040 | R.SDIVITPVIK.Q         | 1693.072 | 0.00596  | 3 | 1 | 23.6 | 0 |
| P12163_2_F1,14599 | K.SLGDFK.E             | 1274.756 | 0.00249  | 3 | 1 | 23.3 | 0 |
| P12163_2_F7,15934 | K.VAVSFTHVIK.S         | 1709.057 | 0.01029  | 3 | 1 | 35.7 | 0 |
| P12163_2_S5,16734 | K.VAVSFTHVIK.S         | 1709.057 | 0.00444  | 3 | 1 | 24.5 | 0 |
| P12163_1_F3,11232 | K.QQENVLAESR.M         | 1477.791 | 0.00186  | 2 | 1 | 38.2 | 0 |
| P12163_1_F4,24710 | R.LESALAEK.A           | 1581.967 | 0.00636  | 3 | 1 | 36.6 | 0 |
| P12163_2_F1,24000 | R.LESALAEK.A           | 1581.967 | -0.0012  | 3 | 1 | 32.3 | 0 |
| P12163_1_F4,14485 | R.EGNIVTQVK.T          | 1595.958 | 0.00976  | 3 | 1 | 27.3 | 0 |
| P12163_2_F1,13477 | R.EGNIVTQVK.T          | 1595.958 | 0.00841  | 2 | 1 | 35.9 | 0 |
| P12163_1_F4,18169 | R.LQSVDFEAGQK.L        | 1887.043 | 0.00874  | 2 | 1 | 48.3 | 0 |
| P12163_1_F4,20476 | K.GMAGSQALIAK.S        | 1768.061 | 0.00855  | 3 | 1 | 33.8 | 0 |
| P12163_2_F1,19879 | K.GMAGSQALIAK.S        | 1768.061 | 0.00201  | 3 | 1 | 35.7 | 0 |
| P12163_2_F1,22932 | K.LSFQTDWLK.A          | 1746.005 | 0.00238  | 2 | 1 | 24.6 | 0 |

|                   |                        |          |          |   |   |      |   |
|-------------------|------------------------|----------|----------|---|---|------|---|
| P12163_2_F1,11597 | K.EVDGIK.V ! K.EVDGLI  | 1268.767 | 0.00441  | 3 | 1 | 23.8 | 0 |
| P12163_1_F5,7531  | K.NSAEQTVK.E           | 1484.853 | 0.01286  | 2 | 1 | 24.9 | 0 |
| P12163_2_F2,8421  | K.NSAEQTVK.E           | 1484.853 | 0.00632  | 2 | 1 | 27.7 | 0 |
| P12163_1_F9,9069  | R.QAAINVHR.G           | 1212.711 | 0.00364  | 3 | 1 | 40.8 | 0 |
| P12163_1_F8,16419 | R.SQLDQLHTEFETTR.A     | 2009.024 | 0.00038  | 2 | 1 | 54.4 | 0 |
| P12163_2_S5,15758 | R.SQLDQLHTEFETTR.A     | 2009.024 | 0.0066   | 3 | 1 | 34.1 | 0 |
| P12163_2_F1,24462 | K.SILSLLPK.F           | 1478.977 | 0.00641  | 2 | 1 | 38.5 | 0 |
| P12163_2_F1,24465 | K.SILSLLPK.F           | 1478.977 | 0.00504  | 3 | 1 | 39.9 | 0 |
| P12163_2_S5,12386 | K.TSTVSEADDGNASSVK     | 2700.426 | 0.00562  | 4 | 1 | 46.7 | 0 |
| P12163_1_F5,19686 | R.GFTLEELK.A           | 1544.914 | 0.00566  | 2 | 1 | 37.2 | 0 |
| P12163_1_F5,19709 | R.GFTLEELK.A           | 1544.914 | 0.00464  | 3 | 1 | 31.2 | 0 |
| P12163_1_F2,13793 | R.SLEGLQSNVQR.L        | 1534.849 | 0.00028  | 2 | 1 | 25.2 | 0 |
| P12163_1_F7,19457 | K.SLGVDHVVDLSNESVI     | 2702.518 | -0.00581 | 3 | 1 | 24.5 | 0 |
| P12163_1_F4,24601 | R.ELLWAAK.G            | 1551.972 | 0.00977  | 2 | 1 | 24.5 | 0 |
| P12163_2_F1,23915 | R.ELLWAAK.G            | 1551.972 | 0.01087  | 2 | 1 | 31.1 | 0 |
| P12163_2_F7,14527 | R.LHIEVIR.T            | 1183.746 | 0.00285  | 3 | 1 | 31.2 | 0 |
| P12163_1_F2,7566  | R.TGGPAAA AVGSR.L      | 1318.738 | 0.00505  | 3 | 1 | 40.3 | 0 |
| P12163_1_F2,9346  | R.TGGPAAA AVGSR.L      | 1318.738 | 0.00329  | 2 | 1 | 36   | 0 |
| P12163_1_S1,12971 | K.GNPIEESDITR.L ! R.GN | 1534.801 | 0.00298  | 2 | 1 | 40.2 | 0 |
| P12163_1_F8,20925 | R.LHPAVPLLIPR.K ! R.LI | 1529.983 | 0.00367  | 3 | 1 | 22.8 | 0 |
| P12163_2_F6,20544 | R.LHPAVPLLIPR.K ! R.LI | 1529.983 | 0.00181  | 3 | 1 | 25.4 | 0 |
| P12163_1_F4,19277 | R.LELEQTIGK.C ! R.LELI | 1638.989 | 0.00645  | 3 | 1 | 23.1 | 0 |
| P12163_1_F8,20925 | R.LHPAVPLLIPR.K ! R.LI | 1529.983 | 0.00367  | 3 | 1 | 22.8 | 0 |
| P12163_2_F6,20544 | R.LHPAVPLLIPR.K ! R.LI | 1529.983 | 0.00181  | 3 | 1 | 25.4 | 0 |
| P12163_1_F3,24097 | K.DFMIQAGDFLK.G        | 1893.04  | 0.00727  | 3 | 1 | 38.6 | 0 |
| P12163_1_F4,7410  | K.TAENFR.Q ! K.TAENFF  | 1041.563 | 0.00249  | 3 | 1 | 33.7 | 0 |
| P12163_2_F2,7039  | K.TAENFR.Q ! K.TAENFF  | 1041.563 | 0.00225  | 3 | 1 | 31.4 | 0 |
| P12163_2_F7,18501 | K.SVFM*FNALSEDEKK.     | 2573.405 | 0.01139  | 4 | 1 | 29   | 0 |
| P12163_1_F3,23337 | K.SVFMFNALSEDEK.K      | 2125.11  | 0.00846  | 3 | 1 | 33.9 | 0 |
| P12163_1_F3,23351 | K.SVFMFNALSEDEK.K      | 2125.11  | 0.0159   | 2 | 1 | 52.8 | 0 |
| P12163_1_F7,22078 | K.FFLASSPPDVPLNFHK.    | 2424.354 | 0.00439  | 4 | 1 | 26.6 | 0 |
| P12163_2_S5,21035 | K.FFLASSPPDVPLNFHK.    | 2424.354 | 0.00354  | 3 | 1 | 36.2 | 0 |
| P12163_2_F7,9637  | R.DPHVTLR.C            | 1141.663 | 0.00273  | 3 | 1 | 24.6 | 0 |
| P12163_1_S1,19585 | K.LITPSILSDR.L         | 1418.852 | -0.00045 | 3 | 1 | 50.4 | 0 |
| P12163_1_F5,15424 | K.LLSEAPK.Y ! K.LLSEA  | 1365.856 | -0.0032  | 2 | 1 | 26.3 | 0 |
| P12163_2_F1,15725 | K.LLSEAPK.Y ! K.LLSEA  | 1365.856 | 0.00027  | 3 | 1 | 26.8 | 0 |
| P12163_2_F2,8985  | R.QGNIGAAK.L           | 1366.826 | 0.00267  | 2 | 1 | 29   | 0 |
| P12163_1_F4,18389 | R.VVLLNTK.N            | 1394.919 | 0.00522  | 2 | 1 | 29.3 | 0 |
| P12163_2_F1,17783 | R.VVLLNTK.N            | 1394.919 | 0.00046  | 3 | 1 | 28.8 | 0 |
| P12163_1_F9,18336 | R.HPFILAIR.D           | 1270.794 | -0.00012 | 3 | 1 | 23   | 0 |
| P12163_2_F7,16099 | R.HPFILAIR.D           | 1270.794 | 0.00157  | 3 | 1 | 22.8 | 0 |
| P12163_2_F6,22085 | R.VLEHEVEFWNM*SR.G     | 1995.99  | 0.00208  | 3 | 1 | 21.9 | 0 |
| P12163_1_F3,25097 | K.ILFLGLDNSGK.T        | 1785.073 | 0.00753  | 2 | 1 | 29.4 | 0 |
| P12163_1_F7,16040 | R.LVQHQPQTQYPTSEELS    | 2763.514 | 0.0053   | 3 | 1 | 71.5 | 0 |
| P12163_2_F10,1510 | R.LVQHQPQTQYPTSEELS    | 2763.514 | 0.00551  | 4 | 1 | 22.5 | 0 |
| P12163_1_F6,5447  | K.ATQEEGHSTTR.L        | 1520.761 | 0.00502  | 3 | 1 | 24.3 | 0 |
| P12163_2_F7,4417  | K.ATQEEGHSTTR.L        | 1520.761 | -0.0029  | 3 | 1 | 24.4 | 0 |
| P12163_1_F4,5765  | K.EAEENER.K            | 1180.575 | -0.00199 | 2 | 1 | 26.6 | 0 |
| P12163_1_F4,20243 | K.EAFEVFCNK.G          | 1751.925 | 0.00818  | 3 | 1 | 22.3 | 0 |
| P12163_2_F1,19634 | K.EAFEVFCNK.G          | 1751.925 | 0.01707  | 2 | 1 | 31.5 | 0 |
| P12163_2_F9,4612  | R.SANDDHER.S ! K.SANI  | 1247.592 | 0.0025   | 3 | 1 | 51.9 | 0 |

|                   |                       |          |          |   |   |      |   |
|-------------------|-----------------------|----------|----------|---|---|------|---|
| P12163_2_F6,16076 | R.GQIFLGCDNHPLSR.Q    | 1917.991 | -0.00362 | 3 | 1 | 47.4 | 0 |
| P12163_2_F6,16102 | R.GQIFLGCDNHPLSR.Q    | 1917.991 | -0.00122 | 2 | 1 | 35.2 | 0 |
| P12163_1_F4,22065 | R.QEIMDLVAK.S         | 1654.966 | 0.00513  | 3 | 1 | 25   | 0 |
| P12163_1_F4,10157 | K.AEVNEASSAK.R        | 1613.895 | 0.01046  | 3 | 1 | 40.5 | 0 |
| P12163_2_F1,9239  | K.AEVNEASSAK.R        | 1613.895 | 0.00641  | 2 | 1 | 47   | 0 |
| P12163_2_F2,17993 | R.ACYPFK.L            | 1506.86  | 0.00328  | 2 | 1 | 25.8 | 0 |
| P12163_1_F2,8462  | K.TTSTALVDR.F         | 1267.716 | 0.00326  | 3 | 1 | 33.2 | 0 |
| P12163_1_F2,10715 | K.TTSTALVDR.F         | 1267.716 | -0.00248 | 2 | 1 | 27.4 | 0 |
| P12163_2_F2,11970 | R.QQYGLAK.S           | 1415.847 | 0.00652  | 3 | 1 | 28.2 | 0 |
| P12163_2_F6,18279 | K.EPWLLNHGDFER.L      | 1816.928 | -0.00268 | 3 | 1 | 28.4 | 0 |
| P12163_2_F6,18291 | K.EPWLLNHGDFER.L      | 1816.928 | -0.00044 | 2 | 1 | 34.7 | 0 |
| P12163_1_F4,18818 | R.MLVCVAGK.D          | 1485.874 | 0.00524  | 2 | 1 | 25.7 | 0 |
| P12163_1_F3,25187 | K.GGIEFLELCGFEK.T ! K | 2107.135 | 0.00207  | 3 | 1 | 43.7 | 0 |
| P12163_1_S1,23814 | K.IEGGEFLFLPR.E       | 1581.894 | 0.00022  | 3 | 1 | 33.3 | 0 |
| P12163_1_S1,23839 | K.IEGGEFLFLPR.E       | 1581.894 | 0.00181  | 2 | 1 | 26.8 | 0 |
| P12163_1_F7,17783 | K.INIIDTPGHSDFGGEVE   | 2260.151 | 0.00756  | 3 | 1 | 43   | 0 |
| P12163_1_F7,14597 | R.NIAIIAHVDHGK.T      | 1896.128 | 0.00197  | 4 | 1 | 22.4 | 0 |
| P12163_1_F7,14631 | R.NIAIIAHVDHGK.T      | 1896.128 | 0.00776  | 3 | 1 | 30.5 | 0 |
| P12163_1_F4,20277 | K.QPNTGLFVGLNK.G      | 1896.116 | 0.00702  | 3 | 1 | 33.3 | 0 |
| P12163_2_F1,19727 | K.QPNTGLFVGLNK.G      | 1896.116 | 0.00552  | 3 | 1 | 23.6 | 0 |
| P12163_1_F4,17629 | R.EVAGFAPYEK.R ! R.EV | 1718.957 | 0.00934  | 2 | 1 | 24.2 | 0 |
| P12163_1_F7,20866 | R.ESYDM*LGILYDNHPR    | 2143.043 | 0.00252  | 3 | 1 | 42.1 | 0 |
| P12163_2_S5,20400 | R.ESYDMLGILYDNHPR.I   | 2127.048 | 0.00852  | 3 | 1 | 24.1 | 0 |
| P12163_2_F2,22869 | R.LSAWLVK.H           | 1424.909 | 0.0024   | 2 | 1 | 26   | 0 |
| P12163_1_F5,23809 | R.LLAYLSK.K           | 1415.908 | 0.00589  | 2 | 1 | 32.1 | 0 |
| P12163_1_F6,13785 | R.LTSHLELHR.K         | 1409.817 | 0.00232  | 3 | 1 | 40.2 | 0 |
| P12163_2_F6,12984 | R.LTSHLELHR.K         | 1409.817 | 0.00358  | 3 | 1 | 43.9 | 0 |
| P12163_2_F1,17886 | K.ATGCNVLLIQK.S       | 1825.083 | 0.00123  | 2 | 1 | 41.5 | 0 |
| P12163_1_F9,10928 | R.HAQGEINSGINVR.K     | 1698.919 | 0.0047   | 3 | 1 | 40.6 | 0 |
| P12163_2_F7,10186 | R.HAQGEINSGINVR.K     | 1698.919 | 0.00236  | 3 | 1 | 22.6 | 0 |
| P12163_1_F7,20771 | R.GPTILFFQENAGNIAHF   | 2189.177 | 0.00391  | 3 | 1 | 50.7 | 0 |
| P12163_1_F8,21252 | R.SIQEFLAEHVR.K       | 1632.901 | -0.00018 | 3 | 1 | 32.8 | 0 |
| P12163_2_F6,20888 | R.SIQEFLAEHVR.K       | 1632.901 | 0.00045  | 3 | 1 | 39.7 | 0 |
| P12163_1_F7,22238 | K.LGAELSAPAWIVHTVF    | 2024.159 | 0.00405  | 3 | 1 | 60.7 | 0 |
| P12163_1_F5,4791  | R.RQQSPASADG.-        | 1320.681 | 0.00366  | 2 | 1 | 34.6 | 0 |
| P12163_2_S3,5318  | R.RQQSPASADG.-        | 1320.681 | -0.00176 | 2 | 1 | 32   | 0 |
| P12163_2_F2,13989 | K.NSVIQINNK.L         | 1637.979 | 0.00103  | 2 | 1 | 25.2 | 0 |
| P12163_1_F3,16521 | R.AFVEQYEPQDK.S       | 1962.043 | 0.00761  | 2 | 1 | 32   | 0 |
| P12163_1_F3,16546 | R.AFVEQYEPQDK.S       | 1962.043 | 0.00721  | 3 | 1 | 23.3 | 0 |
| P12163_2_F6,20430 | R.AHIFLLEYPDAK.G      | 2025.163 | 0.0044   | 3 | 1 | 56.4 | 0 |
| P12163_2_F7,18485 | R.AHIFLLEYPDAK.G      | 2025.163 | 0.0055   | 4 | 1 | 29.6 | 0 |
| P12163_1_F3,18732 | R.VVYTSSNAAVFYNDK     | 2286.223 | 0.00268  | 3 | 1 | 31.3 | 0 |
| P12163_1_F9,8169  | K.ELPPHR.L            | 1052.615 | 0.0046   | 3 | 1 | 28.6 | 0 |
| P12163_1_F2,18107 | K.IIAVCADDPEYK.H      | 2002.078 | 0.00611  | 2 | 1 | 25.9 | 0 |
| P12163_1_F2,18145 | K.IIAVCADDPEYK.H      | 2002.078 | 0.00805  | 3 | 1 | 25.7 | 0 |
| P12163_1_F3,18013 | R.NYTLMQPLPQDCK.L     | 2216.166 | 0.00948  | 3 | 1 | 40.2 | 0 |
| P12163_1_F3,18042 | R.NYTLMQPLPQDCK.L     | 2216.166 | 0.00279  | 2 | 1 | 37.9 | 0 |
| P12163_1_F2,8984  | R.VEVDDR.K            | 1036.558 | 0.00079  | 2 | 1 | 32.4 | 0 |
| P12163_1_F8,11968 | K.DATNDFEDVGHSDSAI    | 2039.921 | 0.00684  | 3 | 1 | 51   | 0 |
| P12163_2_S5,11928 | K.DATNDFEDVGHSDSAI    | 2039.921 | 0.00174  | 3 | 1 | 45.7 | 0 |
| P12163_1_F6,15578 | K.IHQFEEVATHNK.T      | 2061.134 | 0.00809  | 3 | 1 | 41.1 | 0 |

|                   |                     |          |          |   |   |      |   |
|-------------------|---------------------|----------|----------|---|---|------|---|
| P12163_1_F8,15875 | R.ACGLATHFVPSR.L    | 1706.895 | 0.00733  | 3 | 1 | 23.5 | 0 |
| P12163_1_F3,27233 | R.ADAWISDAIQLK.K    | 2026.143 | 0.01309  | 3 | 1 | 45.7 | 0 |
| P12163_1_F9,16242 | R.EHIPLFR.L         | 1215.715 | 0.00379  | 3 | 1 | 38.5 | 0 |
| P12163_2_F1,22218 | R.LLLDDLK.Q         | 1437.914 | 0.00396  | 2 | 1 | 30.3 | 0 |
| P12163_2_F1,12870 | K.ALGSSSIDAK.G      | 1556.91  | 0.00681  | 2 | 1 | 36   | 0 |
| P12163_1_F2,11836 | R.QTISDNFSVR.Q      | 1470.785 | 0.00343  | 3 | 1 | 23.4 | 0 |
| P12163_1_F2,23177 | K.SAIDSVALLQSTLTK.V | 2155.279 | 0.00802  | 3 | 1 | 31.9 | 0 |
| P12163_1_F3,22672 | K.YILELQPAIK.G      | 1796.114 | 0.00191  | 2 | 1 | 33.5 | 0 |
| P12163_2_F4,18520 | K.AM*LPEIVQAGDPVLF  | 2363.269 | 0.00108  | 3 | 1 | 29.8 | 0 |
| P12163_1_F5,12678 | K.EYISYQSK.E        | 1625.899 | 0.00408  | 2 | 1 | 24.5 | 0 |
| P12163_1_S1,18425 | K.SFIAMVAMPPR.N     | 1392.797 | 0.00292  | 3 | 1 | 39.6 | 0 |
| P12163_1_F2,10747 | K.TVAVEVVR.L        | 1176.725 | -0.00247 | 2 | 1 | 25.2 | 0 |
| P12163_1_F3,10576 | K.NENSAVLAGGCGAR.I  | 1679.844 | -0.00196 | 2 | 1 | 31.9 | 0 |
| P12163_2_F1,22587 | R.ISSLLCSNDLK.T     | 1858.056 | 0.00318  | 2 | 1 | 44.5 | 0 |
| P12163_1_F2,12642 | K.YEESLQDAR.D       | 1414.712 | 0.00323  | 2 | 1 | 23.9 | 0 |
| P12163_1_F7,20883 | R.QSLLDHITVQLAPR.A  | 1895.102 | 0.00143  | 3 | 1 | 26.9 | 0 |
| P12163_1_F4,12285 | K.VAVCSAATK.S       | 1514.882 | 0.00534  | 2 | 1 | 24.5 | 0 |
| P12163_2_F6,16736 | R.QAYNDAFSHFNVR.C   | 1872.929 | -0.00111 | 3 | 1 | 37   | 0 |
| P12163_1_F2,18582 | K.DPITQAAALAQK.N    | 1835.085 | 0.00396  | 3 | 1 | 31.9 | 0 |
| P12163_1_F4,15532 | K.TSDFIDGAK.Q       | 1561.868 | 0.00641  | 2 | 1 | 25.4 | 0 |
| P12163_2_F7,10446 | K.AHFTAPSSVR.R      | 1376.759 | 0.00026  | 3 | 1 | 23.7 | 0 |
| P12163_1_F9,17413 | K.WVIHIER.I         | 1256.742 | 0.0051   | 3 | 1 | 33.7 | 0 |
| P12163_2_F7,6251  | K.TIQDHADR.Y        | 1259.665 | 0.0005   | 3 | 1 | 22.3 | 0 |
| P12163_1_F7,16385 | R.VFHADPVVLHYR.N    | 1756.98  | 0.00516  | 4 | 1 | 45.8 | 0 |
| P12163_1_F9,10219 | R.ALEVHPR.L         | 1125.668 | 0.0001   | 3 | 1 | 32.3 | 0 |
| P12163_1_F3,27353 | R.LPLITIFDSK.H      | 1755.088 | 0.00533  | 3 | 1 | 25.1 | 0 |
| P12163_1_S1,22564 | K.ETLTNVVIPTFDIK.L  | 2198.289 | 0.00481  | 3 | 1 | 30.6 | 0 |
| P12163_1_S1,21701 | K.LLQPVIFSTTDGK.E   | 2027.2   | 0.00521  | 3 | 1 | 29.9 | 0 |
| P12163_1_F3,12139 | K.FDEVASR.L         | 1127.6   | 0.00198  | 3 | 1 | 25.3 | 0 |
| P12163_1_F9,13692 | R.ASHILIK.H         | 1389.904 | 0.00822  | 2 | 1 | 28.2 | 0 |
| P12163_2_F2,15051 | K.TVSLCVK.R         | 1414.855 | 0.00228  | 2 | 1 | 25   | 0 |
| P12163_2_F1,16881 | R.LVYTNENGEIVK.G    | 1987.132 | 0.00683  | 2 | 1 | 41.8 | 0 |
| P12163_1_S10,1570 | R.HFLDLR.K          | 1104.647 | 0.00619  | 3 | 1 | 30.9 | 0 |
| P12163_2_S5,11749 | R.ICGHVHFER.L       | 1458.758 | -0.0002  | 4 | 1 | 28.5 | 0 |
| P12163_1_S1,22716 | K.SVLADTVIVATGAVAI  | 2123.29  | 0.00635  | 3 | 1 | 38.5 | 0 |
| P12163_1_F8,22973 | K.VSGLFFAIGHEPATK.F | 2182.248 | 0.00737  | 3 | 1 | 50.5 | 0 |
| P12163_2_F1,9304  | K.AGQDDAIK.V        | 1425.816 | 0.00773  | 2 | 1 | 36.7 | 0 |
| P12163_2_F1,14556 | K.TCNAALLETGK.S     | 1887.047 | 0.00265  | 2 | 1 | 59.5 | 0 |
| P12163_1_F9,5728  | K.ACQTHGNLR.S       | 1360.706 | 0.00471  | 3 | 1 | 28.9 | 0 |
| P12163_1_F9,6347  | R.DDEAEHCK.T        | 1611.789 | 0.00523  | 2 | 1 | 31.9 | 0 |
| P12163_1_F7,17807 | K.GGTVVNDEEPTLEQLC  | 2848.497 | -0.00084 | 3 | 1 | 71.5 | 0 |
| P12163_2_F6,15425 | R.AYPFHEIEPK.W      | 1839.026 | 0.006    | 3 | 1 | 24.9 | 0 |
| P12163_1_F3,13088 | K.EEGPAPVPTPAK.V    | 1801.032 | 0.00991  | 2 | 1 | 30.1 | 0 |
| P12163_1_F5,20265 | K.GNWLDLQYK.E       | 1744.984 | 0.00335  | 2 | 1 | 28.9 | 0 |
| P12163_1_F5,22435 | K.FGEAVWFK.A        | 1591.909 | 0.00903  | 2 | 1 | 27.2 | 0 |
| P12163_2_F7,12289 | R.ELEVIHCR.W        | 1359.736 | 0.00324  | 3 | 1 | 27.1 | 0 |
| P12163_1_F2,19332 | R.GVEDIILR.S        | 1218.736 | 0.00319  | 2 | 1 | 26.8 | 0 |
| P12163_2_F1,13813 | R.SAQMGQIVEK.V      | 1698.967 | -0.0048  | 2 | 1 | 35.8 | 0 |
| P12163_1_F7,18727 | K.EAAAALAAIEAQHR.   | 1854.013 | -0.00407 | 3 | 1 | 37.5 | 0 |
| P12163_1_F3,25327 | K.VAEVFTAIGYK.H     | 1806.062 | 0.00967  | 3 | 1 | 27.3 | 0 |
| P12163_1_F4,12269 | K.IQNNPVTDTK.L      | 1867.038 | 0.00398  | 2 | 1 | 33.5 | 0 |

|                   |                         |          |          |   |   |      |   |
|-------------------|-------------------------|----------|----------|---|---|------|---|
| P12163_1_S1,21865 | K.VSSSSNNEAHSIFGR.I     | 1985.06  | -0.00015 | 3 | 1 | 44.5 | 0 |
| P12163_2_F7,17538 | K.HNFGAELLQLR.N         | 1601.906 | 0.00394  | 3 | 1 | 36.5 | 0 |
| P12163_2_F1,6191  | R.AEAAAAR.K             | 963.5524 | 0.00182  | 2 | 1 | 29.3 | 0 |
| P12163_2_F7,19432 | K.EAHLFFLEGMK.N         | 1930.072 | -0.00044 | 3 | 1 | 26   | 0 |
| P12163_1_F7,21781 | K.EILLTPGENFLVVTHK.     | 2418.422 | 0.0024   | 3 | 1 | 45.8 | 0 |
| P12163_1_F7,22651 | K.ESQSSFALFVNSLPHI      | 2307.24  | -0.0002  | 3 | 1 | 45.4 | 0 |
| P12163_1_F8,20568 | K.IFAGETLLHDR.K         | 1575.88  | 0.0027   | 3 | 1 | 51.1 | 0 |
| P12163_1_S1,22359 | K.YADAATFLLR.W          | 1444.81  | 0.00408  | 3 | 1 | 50.6 | 0 |
| P12163_1_F4,11898 | R.SQPASDALAK.A          | 1595.921 | 0.0076   | 2 | 1 | 25.5 | 0 |
| P12163_1_F3,14642 | K.IDIPR.V ! K.IDLPR.G ! | 917.5721 | 0.00308  | 2 | 1 | 25.5 | 0 |
| P12163_1_S1,24338 | K.LAVLLLSGGQGTR.L       | 1588.969 | 0.00022  | 3 | 1 | 22.6 | 0 |
| P12163_2_F1,19019 | K.LFDQISK.L             | 1458.878 | 0.00624  | 2 | 1 | 25.8 | 0 |
| P12163_1_S1,22608 | K.LTETFMSLSER.L         | 1617.846 | 0.00033  | 2 | 1 | 25   | 0 |
| P12163_1_F8,12928 | K.KDDEINSETEQNDLSV      | 2729.369 | 0.00729  | 3 | 1 | 45.8 | 0 |
| P12163_1_S1,15845 | K.VTIQEPTFDR.I          | 1509.821 | 0.00478  | 2 | 1 | 26   | 0 |
| P12163_1_F4,24096 | K.ALLAEYLAAQK.R         | 1799.089 | 0.00934  | 2 | 1 | 48.8 | 0 |
| P12163_1_F4,25393 | R.LLPLLAK.S             | 1375.95  | 0.0082   | 3 | 1 | 29.2 | 0 |
| P12163_1_F9,7006  | R.AEICHGER.L            | 1275.642 | 0.00267  | 3 | 1 | 29.5 | 0 |
| P12163_1_F9,19468 | R.HIEDFWK.K             | 1695.968 | 0.00316  | 3 | 1 | 30.8 | 0 |
| P12163_1_S1,22421 | K.GPLGELSLVYPR.E        | 1604.931 | 0.00294  | 2 | 1 | 27.8 | 0 |
| P12163_1_F3,7534  | K.VNVEENTR.I            | 1264.68  | 0.0025   | 3 | 1 | 25.8 | 0 |
| P12163_2_S5,21909 | K.IPLTELLPHK.I          | 1882.199 | 0.00371  | 3 | 1 | 28.9 | 0 |
| P12163_1_F9,16071 | K.ITLHLK.V ! K.ITLHLK.  | 1332.882 | 0.00619  | 3 | 1 | 29.9 | 0 |
| P12163_2_F1,16744 | K.ITFPEK.G              | 1342.819 | 0.00417  | 3 | 1 | 23.5 | 0 |
| P12163_1_F3,14628 | R.DGNDLIVTQK.I          | 1710.985 | 0.00324  | 2 | 1 | 39   | 0 |
| P12163_2_F1,18309 | R.GAFEWSVQK.I           | 1659.931 | 0.00526  | 2 | 1 | 43.1 | 0 |
| P12163_2_F6,23744 | R.GLHLLLEYFVNR.C        | 1664.943 | 0.00106  | 3 | 1 | 26   | 0 |
| P12163_1_F3,20007 | K.NVPYVFVPSK.Q          | 1758.041 | 0.00383  | 2 | 1 | 29.6 | 0 |
| P12163_2_F2,13373 | K.TQIQQLK.D             | 1466.915 | 0.00641  | 2 | 1 | 27.9 | 0 |
| P12163_1_S1,17919 | K.EGDTVLLPEYGGAEVI      | 2285.248 | 0.00602  | 3 | 1 | 43.3 | 0 |
| P12163_1_S10,1607 | K.RLIPAFSR.V            | 1263.784 | 0.00344  | 3 | 1 | 30.3 | 0 |
| P12163_1_S1,22213 | K.SSILNALVGEDR.T        | 1577.88  | 0.00166  | 2 | 1 | 29.8 | 0 |
| P12163_1_F8,17883 | K.TTIGNVPEHLLPR.V       | 1751.012 | 0.00051  | 3 | 1 | 36.6 | 0 |
| P12163_1_F4,13434 | K.AEFQDSSVEK.I          | 1747.932 | 0.00273  | 2 | 1 | 28.5 | 0 |
| P12163_1_F3,25418 | K.VLPQALALIK.S          | 1674.114 | 0.00795  | 3 | 1 | 49.2 | 0 |
| P12163_1_F4,19379 | K.AIGPQALDLK.L          | 1634.01  | 0.00801  | 2 | 1 | 39.4 | 0 |
| P12163_2_S5,16325 | R.YTIYSPLDDQPCADHD      | 2370.097 | 0.00212  | 3 | 1 | 39.2 | 0 |
| P12163_1_F9,13592 | K.LLHEGIR.F             | 1141.699 | 0.0039   | 3 | 1 | 25   | 0 |
| P12163_1_F9,17481 | K.VVQFLHR.Q             | 1202.731 | 0.00578  | 3 | 1 | 32.6 | 0 |
| P12163_1_S1,20814 | R.AAGALALAPLVDR.G       | 1541.932 | 0.00424  | 3 | 1 | 62.8 | 0 |
| P12163_2_F2,22500 | R.GLSWFTVK.F            | 1545.925 | 0.0021   | 3 | 1 | 22.2 | 0 |
| P12163_2_F8_12070 | K.AVLHPTGPLFDQESQA      | 2812.593 | 0.00749  | 4 | 1 | 24.6 | 0 |
| P12163_1_F3,18717 | R.EIETCIECSALK.Q        | 2061.082 | 0.00322  | 3 | 1 | 36.5 | 0 |
| P12163_1_F4,12597 | K.ITEEAEQK.R            | 1555.879 | 0.00298  | 2 | 1 | 25   | 0 |
| P12163_1_F7,19581 | R.DRPLSSPESLQLYLD'      | 2409.256 | -0.00111 | 3 | 1 | 49.4 | 0 |
| P12163_1_S1,11822 | K.TGPSLADA AVGR.I       | 1418.79  | 0.00127  | 3 | 1 | 43   | 0 |
| P12163_1_F4,22742 | K.VVIPLSQLK.A           | 1605.056 | 0.0031   | 3 | 1 | 23.6 | 0 |
| P12163_1_S1,16322 | K.APSVDISALR.E          | 1332.779 | 0.00478  | 2 | 1 | 31.2 | 0 |
| P12163_2_F8_12070 | R.HVLYQQYK.E            | 1686.979 | 0.00529  | 3 | 1 | 36.4 | 0 |
| P12163_1_F6,14892 | K.FYHPDVYDGR.G          | 1572.775 | 0.01158  | 2 | 1 | 32.3 | 0 |
| P12163_1_F9,12675 | R.HTLVLK.K              | 1318.867 | -0.00032 | 3 | 1 | 23.8 | 0 |



|                   |                        |          |          |   |   |      |   |
|-------------------|------------------------|----------|----------|---|---|------|---|
| P12163_2_F6,14924 | K.HVIDLANTVR.R         | 1441.843 | 0.00361  | 3 | 1 | 39.1 | 0 |
| P12163_1_S1,12018 | K.QIIQAEGPSGPNR.D      | 1670.913 | 0.00403  | 3 | 1 | 30.8 | 0 |
| P12163_2_F1,23654 | K.AMFEEWIAK.Q          | 1732.955 | 0.00574  | 3 | 1 | 26.1 | 0 |
| P12163_2_F1,20029 | R.NWLHDGLVMNN.-        | 1616.816 | 0.00218  | 2 | 1 | 45.6 | 0 |
| P12163_2_F1,8102  | K.EASAPEK.T            | 1339.768 | 0.00513  | 2 | 1 | 24   | 0 |
| P12163_2_F6,15155 | K.TKEDVVVAADSVEK.V     | 2402.391 | 0.00713  | 3 | 1 | 33   | 0 |
| P12163_1_F2,19498 | K.VVIDAFR.L            | 1123.678 | -0.00015 | 2 | 1 | 26   | 0 |
| P12163_1_S1,19086 | R.AVAVVVDPIQSVK.G      | 1933.194 | 0.00917  | 3 | 1 | 48.5 | 0 |
| P12163_2_F6,20005 | K.GQHFELLPFGGGR.R      | 1718.928 | -0.00201 | 3 | 1 | 23.2 | 0 |
| P12163_2_F6,22384 | R.ATPLEILLKPR.L        | 1859.194 | 0.00388  | 3 | 1 | 31.9 | 0 |
| P12163_1_F4,15323 | K.AANFIER.L            | 1124.637 | 0.00152  | 2 | 1 | 25.1 | 0 |
| P12163_1_F3,24685 | R.GYLTSAFFTTGLK.V      | 2014.147 | 0.00374  | 3 | 1 | 32.4 | 0 |
| P12163_1_F3,25203 | K.LPLVGLISK.C          | 1548.034 | 0.00518  | 3 | 1 | 30.3 | 0 |
| P12163_1_F3,23690 | R.NLILSDIGLAEK.R       | 1894.147 | 0.00678  | 3 | 1 | 37.2 | 0 |
| P12163_1_F9,8576  | K.HECLVDDR.F           | 1347.663 | 0.00303  | 3 | 1 | 31.6 | 0 |
| P12163_1_F4,20412 | R.NTLNYLTAASAVK.D      | 1974.148 | 0.00259  | 3 | 1 | 27.2 | 0 |
| P12163_2_F6,19917 | K.GQHFELIPFGAGR.R      | 1732.944 | 0.00339  | 3 | 1 | 32   | 0 |
| P12163_1_F3,23666 | R.FIDSPIDFK.G ! R.FLDS | 1689.967 | 0.00644  | 2 | 1 | 35.2 | 0 |
| P12163_1_F3,25770 | K.EVISLIFDK.A          | 1672.014 | 0.00663  | 3 | 1 | 30.8 | 0 |
| P12163_1_F3,24661 | K.LILAGGLDFK.V         | 1655.035 | 0.00317  | 3 | 1 | 28.8 | 0 |
| P12163_2_S5,15370 | K.VAGIPIATTEEHR.N      | 1798.996 | 0.00217  | 3 | 1 | 28.6 | 0 |
| P12163_1_F5,17892 | R.FAAEQFVK.K           | 1547.904 | -0.00171 | 2 | 1 | 28.7 | 0 |
| P12163_1_F3,17942 | K.TMGPVPLPTK.K         | 1648.992 | 0.00208  | 2 | 1 | 35.3 | 0 |
| P12163_2_F8_12070 | R.FHFEIR.T             | 1152.647 | 0.00271  | 3 | 1 | 26.7 | 0 |
| P12163_1_F4,27805 | K.FLLALTGVK.A          | 1570.019 | 0.00545  | 2 | 1 | 40.5 | 0 |
| P12163_1_F3,23666 | R.FIDSPIDFK.G ! R.FLDS | 1689.967 | 0.00644  | 2 | 1 | 35.2 | 0 |
| P12163_2_F6,19474 | K.TVFGQYGELVHVK.L !    | 2085.195 | 0.00705  | 3 | 1 | 24.9 | 0 |
| P12163_1_F5,20308 | R.LLSLAQK.S            | 1380.903 | 0.00892  | 2 | 1 | 24.3 | 0 |
| P12163_1_F4,12865 | K.ATNIDDVDK.T          | 1598.885 | 0.00551  | 2 | 1 | 43.1 | 0 |
| P12163_1_F4,24873 | K.LNETLEM*LEK.K        | 1844.029 | 0.0055   | 3 | 1 | 30   | 0 |
| P12163_1_F5,12152 | K.QLLEQNK.Q ! R.QLLEQ  | 1480.894 | 0.00909  | 3 | 1 | 28.3 | 0 |
| P12163_1_F3,15185 | K.QYIQEPPTVEK.C        | 1940.095 | -0.00432 | 2 | 1 | 31.9 | 0 |
| P12163_1_F7,20914 | K.FETELNTLHPILSECR.V   | 2263.169 | 0.00404  | 3 | 1 | 53.8 | 0 |
| P12163_2_F6,17530 | R.YCTDHLELFR.Q         | 1657.831 | 0.00019  | 3 | 1 | 39.1 | 0 |
| P12163_2_S5,20913 | K.VLPYFHFYR.G          | 1545.852 | 0.00278  | 3 | 1 | 24.8 | 0 |
| P12163_2_F6,18199 | R.TAEHPEIVFLK.V        | 2021.153 | 0.01038  | 2 | 1 | 29.3 | 0 |
| P12163_2_F6,19734 | K.LVFVDFHSR.A          | 1423.8   | 0.00043  | 3 | 1 | 31.7 | 0 |
| P12163_2_F6,16422 | K.RDGSTLGEIVLR.G       | 1619.938 | -0.00128 | 3 | 1 | 45.8 | 0 |
| P12163_1_F4,16556 | K.ALAETGGDIVK.A        | 1681.994 | 0.00875  | 3 | 1 | 60.7 | 0 |
| P12163_2_F6,15079 | R.EDLISKPENIR.E        | 1922.117 | -0.00395 | 2 | 1 | 26   | 0 |
| P12163_1_F4,16556 | K.ALAETGGDIVK.A        | 1681.994 | 0.00875  | 3 | 1 | 60.7 | 0 |
| P12163_1_S1,19476 | K.DISSFLDER.D          | 1385.721 | 0.00663  | 2 | 1 | 28.2 | 0 |
| P12163_1_S1,21822 | K.LDDVVNYIR.R          | 1410.789 | 0.00629  | 2 | 1 | 42.8 | 0 |
| P12163_2_F1,17247 | K.TAEFVISK.L           | 1502.904 | -0.00224 | 2 | 1 | 24.3 | 0 |
| P12163_2_F1,19765 | K.FSPASLNIGAK.T        | 1713.015 | 0.00165  | 3 | 1 | 29.1 | 0 |
| P12163_1_F7,19241 | K.YPLVPGHEIVGIVK.E     | 2129.294 | 0.00659  | 3 | 1 | 34.3 | 0 |
| P12163_1_S1,23659 | R.LDNEDLILGYISGK.I     | 2158.222 | 0.00464  | 3 | 1 | 26.6 | 0 |
| P12163_1_F5,6028  | R.SSEEGANSEK.W         | 1645.849 | 0.00734  | 2 | 1 | 39.7 | 0 |
| P12163_1_F4,13185 | K.AAAAAASDVAK.A        | 1553.911 | 0.00874  | 3 | 1 | 36.9 | 0 |
| P12163_1_F3,16848 | K.ITEVGEDEIK.A         | 1740.984 | 0.00559  | 2 | 1 | 35.9 | 0 |
| P12163_1_S1,16274 | K.GETFGEIVGLAR.A       | 1552.864 | -0.00148 | 3 | 1 | 28   | 0 |

|                   |                        |          |          |   |   |      |   |
|-------------------|------------------------|----------|----------|---|---|------|---|
| P12163_1_S1,13013 | K.VNTLAEGVALAR.E       | 1517.895 | 0.00441  | 3 | 1 | 37.5 | 0 |
| P12163_1_F9,6599  | K.VQHPGVR.D            | 1096.653 | 0.0027   | 3 | 1 | 23.6 | 0 |
| P12163_1_F5,15757 | R.AAEIYAGYK.I ! R.AAE  | 1593.91  | 0.00531  | 3 | 1 | 32   | 0 |
| P12163_1_F3,20063 | K.LTNEDVILYSAK.V       | 1974.137 | 0.00285  | 3 | 1 | 28.1 | 0 |
| P12163_1_F3,18036 | K.VEDIDAYAPK.D         | 1728.963 | -0.00046 | 2 | 1 | 26.6 | 0 |
| P12163_2_F2,13472 | K.NQLAIAK.R            | 1365.867 | 0.00795  | 2 | 1 | 27.1 | 0 |
| P12163_1_S1,16044 | R.ENQNLTDPESISSAYAI    | 2661.346 | 0.0106   | 3 | 1 | 42.2 | 0 |
| P12163_1_F6,13648 | K.ALHHIDLEK.L          | 1684     | 0.00798  | 2 | 1 | 47.7 | 0 |
| P12163_2_F1,14795 | R.GPVIQSPIR.S          | 1270.778 | 0.00624  | 2 | 1 | 27.2 | 0 |
| P12163_2_F1,22121 | K.AMVEELK.N ! K.AM     | 1540.923 | 0.00716  | 2 | 1 | 25.5 | 0 |
| P12163_1_F3,23580 | K.EFPELLSIK.D ! K.EFPE | 1684.014 | 0.0022   | 3 | 1 | 23.1 | 0 |
| P12163_1_F2,13313 | R.AAMEMQAEAEER.K       | 1540.74  | 0.00677  | 2 | 1 | 61.7 | 0 |
| P12163_1_F9,11943 | R.QAHINIADGK.K         | 1674.975 | 0.00895  | 3 | 1 | 25.3 | 0 |
| P12163_2_S3,14311 | K.GILSSYDHASIR.R       | 1622.88  | -0.00068 | 3 | 1 | 28.1 | 0 |
| P12163_1_S1,16062 | R.DLVGVAYTEDETK.A      | 2048.101 | 0.01124  | 3 | 1 | 76.5 | 0 |
| P12163_1_F4,24718 | K.AFIFVVGK.Q           | 1488.94  | 0.00697  | 3 | 1 | 25.6 | 0 |
| P12163_1_F8,18792 | R.VLPFHAALDQETR.L      | 1800.991 | 0.00571  | 3 | 1 | 34.2 | 0 |
| P12163_2_F4,19936 | R.LVLLPFEHHVYAAR.E     | 1969.132 | 0.00217  | 4 | 1 | 26.7 | 0 |
| P12163_2_S5,20807 | R.SLLPLVELARPEEK.L     | 2289.364 | 0.00464  | 4 | 1 | 22.8 | 0 |
| P12163_2_F9,20179 | K.HVLGEFLEFK.G         | 1827.062 | 0.00313  | 3 | 1 | 45.8 | 0 |
| P12163_1_F2,15629 | K.TSMFGLAPSR.L         | 1370.74  | 0.00583  | 3 | 1 | 25   | 0 |
| P12163_1_F4,21053 | R.FVDSCIDFK.G          | 1738.929 | 0.01439  | 2 | 1 | 35.3 | 0 |
| P12163_1_F7,20877 | R.FYQELIDEHLDPNR.T     | 2093.06  | 0.0033   | 3 | 1 | 41.9 | 0 |
| P12163_2_F6,19917 | K.GQHFELIPFGAGR.R      | 1732.944 | 0.00339  | 3 | 1 | 32   | 0 |
| P12163_1_F4,21053 | R.FVDSCIDFK.G          | 1738.929 | 0.01439  | 2 | 1 | 35.3 | 0 |
| P12163_1_F4,17217 | K.ALSITQSVQK.Y         | 1683.026 | 0.0053   | 2 | 1 | 42.2 | 0 |
| P12163_2_F1,8168  | K.SGASDDVCSK.L ! K.SC  | 1633.831 | 0.00118  | 2 | 1 | 24.2 | 0 |
| P12163_1_F3,17905 | K.ALAVLR.S ! K.ALAVLI  | 946.6351 | 0.00409  | 2 | 1 | 24.4 | 0 |
| P12163_2_F1,18837 | K.IESIDSLK.N           | 1512.909 | 0.00686  | 2 | 1 | 31.8 | 0 |
| P12163_1_F7,19250 | K.HQGPLPPPPEVDDVLL     | 2183.213 | 0.00104  | 3 | 1 | 22   | 0 |
| P12163_1_F2,8997  | R.AEEEEVEER.I          | 1294.643 | 0.00058  | 2 | 1 | 36   | 0 |
| P12163_2_S5,13546 | K.GPDVHYDEPLGSSNEA     | 3046.533 | 0.00696  | 4 | 1 | 54.9 | 0 |
| P12163_2_F6,10943 | R.TADTAIHSGEVEK.G      | 1966.07  | 0.00513  | 3 | 1 | 30.9 | 0 |
| P12163_1_F2,15714 | K.DFLLTAR.R            | 1139.673 | 0.00536  | 3 | 1 | 24.7 | 0 |
| P12163_1_F9,10383 | K.QIHEIK.D             | 1375.852 | 0.00959  | 3 | 1 | 22.9 | 0 |
| P12163_2_F6,17512 | K.DAQALFHSLR.S         | 1461.812 | 0.00247  | 3 | 1 | 44.1 | 0 |
| P12163_2_F1,13767 | R.SAYAATPTTLK.I        | 1732.01  | 0.00316  | 2 | 1 | 33.2 | 0 |
| P12163_1_F9,8169  | K.ELPPHR.L             | 1052.615 | 0.0046   | 3 | 1 | 28.6 | 0 |
| P12163_1_F7,11387 | K.TPVSQPPAHPPLNER.I    | 1944.06  | 0.00287  | 3 | 1 | 24.1 | 0 |
| P12163_1_F3,19663 | K.FSLGLTEEDAK.N        | 1818.01  | 0.0069   | 2 | 1 | 53.7 | 0 |
| P12163_1_F4,8248  | K.NSPFVQR.H            | 1151.647 | 0.00346  | 3 | 1 | 35.2 | 0 |
| P12163_1_F3,17119 | K.FGGVASDEVVGEK.V      | 1902.043 | 0.00666  | 2 | 1 | 55.1 | 0 |
| P12163_1_F3,19332 | K.IAMTAPVITK.S         | 1653.023 | 0.00893  | 3 | 1 | 36.4 | 0 |
| P12163_1_S1,21826 | R.GGGGSGFIPIAEYGA      | 2146.087 | 0.00272  | 3 | 1 | 50.9 | 0 |
| P12163_2_F8_12070 | R.NHYDLLF.-            | 1225.652 | 0.00289  | 2 | 1 | 33.8 | 0 |
| P12163_1_F2,20839 | K.DTTISTLANEVTGK.L     | 2058.154 | 0.0057   | 3 | 1 | 33.7 | 0 |
| P12163_1_F3,26291 | R.VGVLLGSSF.K.G        | 1714.072 | -0.0005  | 3 | 1 | 28   | 0 |
| P12163_2_F6,8399  | K.AADTLHQEER.S         | 1473.76  | 0.00063  | 2 | 1 | 32.3 | 0 |
| P12163_1_F4,22870 | K.ELLQLEEDVK.L         | 1824.057 | 0.00628  | 2 | 1 | 38.2 | 0 |
| P12163_1_F4,21439 | K.DYSAITLLK.K          | 1631.983 | -0.00282 | 2 | 1 | 33.8 | 0 |
| P12163_1_F3,24158 | K.FTMFNPNFVR.Q         | 1576.825 | 0.00319  | 2 | 1 | 27.8 | 0 |

|                   |                         |          |          |   |   |      |   |
|-------------------|-------------------------|----------|----------|---|---|------|---|
| P12163_2_S5,16600 | K.QVVGLDLVDDESKPEI      | 2407.329 | -0.003   | 3 | 1 | 27   | 0 |
| P12163_2_F1,23303 | R.LLLLEQK.F             | 1464.961 | 0.0054   | 2 | 1 | 30.2 | 0 |
| P12163_2_F6,11109 | K.GPPVTPLHER.M          | 1406.806 | 0.00026  | 3 | 1 | 33.1 | 0 |
| P12163_1_F7,22100 | R.GLGDFLLVGIHNDQTV      | 2592.461 | -0.00025 | 3 | 1 | 56.2 | 0 |
| P12163_1_F7,21613 | R.EVLVELELPHLQR.S       | 1879.095 | 0.00168  | 3 | 1 | 45.3 | 0 |
| P12163_2_F1,15751 | R.QILIEK.A ! K.QILLEK.I | 1351.877 | 0.00587  | 3 | 1 | 23.9 | 0 |
| P12163_1_F7,19279 | R.ALGFLPEEGHGVYVAI      | 2019.096 | 0.00443  | 3 | 1 | 38.7 | 0 |
| P12163_1_F3,28728 | R.LEDLISVLSK.L          | 1725.062 | 0.00653  | 3 | 1 | 36.9 | 0 |
| P12163_1_F2,13166 | K.GESENLYEVR.L          | 1499.764 | 0.00874  | 2 | 1 | 28.7 | 0 |
| P12163_1_S1,19037 | K.TLVPDDEFTLAK.V        | 1957.11  | 0.01156  | 3 | 1 | 37   | 0 |
| P12163_2_F6,10396 | K.DAAVEIEHR.L           | 1343.722 | 0.0012   | 3 | 1 | 23.6 | 0 |
| P12163_1_F7,23759 | K.EVNDEEPLFPAFHFFK.     | 2574.349 | 0.00913  | 3 | 1 | 21.9 | 0 |
| P12163_1_F6,10641 | K.NHAAGVGGYAVDGC        | 1807.881 | -0.00084 | 3 | 1 | 28   | 0 |
| P12163_1_F7,17572 | R.EFMASGEEGTAAALTC      | 2761.21  | 0.0084   | 3 | 1 | 63.1 | 0 |
| P12163_1_F2,7801  | K.CTAAASLDGER.K         | 1454.721 | 0.00382  | 3 | 1 | 27.6 | 0 |
| P12163_1_F4,16624 | R.QYCEISANLSK.K         | 1921.031 | 0.00426  | 3 | 1 | 42.3 | 0 |
| P12163_1_F9,12015 | K.HLVQDISR.A            | 1271.737 | 0.00243  | 3 | 1 | 25.8 | 0 |
| P12163_2_F1,24192 | R.VLNLGLLK.A            | 1477.993 | 0.00818  | 2 | 1 | 27.1 | 0 |
| P12163_1_F3,25101 | K.MELPPWTDIVK.T         | 1937.103 | 0.00481  | 3 | 1 | 45.5 | 0 |
| P12163_1_F2,11595 | R.DLDQVAGR.I            | 1177.648 | -0.00008 | 2 | 1 | 24.6 | 0 |
| P12163_1_F8,18490 | K.VTEHIIPSFK.K          | 1779.062 | 0.00466  | 3 | 1 | 30.5 | 0 |
| P12163_1_F3,27535 | R.ALFLGIANVLK.E         | 1767.135 | 0.00464  | 3 | 1 | 30.7 | 0 |
| P12163_1_S1,24246 | R.FLQDAVTAIER.C         | 1566.879 | 0.00434  | 3 | 1 | 35.2 | 0 |
| P12163_2_F1,17037 | R.LVAEGIAEK.S           | 1537.941 | 0.00291  | 3 | 1 | 34.6 | 0 |
| P12163_1_S1,9065  | K.DTGETSGSVDVR.F        | 1526.76  | 0.00306  | 3 | 1 | 37.9 | 0 |
| P12163_1_S1,15141 | K.IVFPSPTR.R            | 1321.778 | 0.00058  | 3 | 1 | 25.6 | 0 |
| P12163_2_F7,16760 | K.KGSVDVMELELK.K        | 2260.335 | 0.01156  | 3 | 1 | 34.7 | 0 |
| P12163_1_S10,1328 | K.YNVVNPNDGHPLPESI      | 2525.336 | 0.01453  | 4 | 1 | 23.6 | 0 |
| P12163_1_S1,11368 | K.AALDQMSVEASR.T        | 1581.821 | 0.00472  | 3 | 1 | 33.7 | 0 |
| P12163_2_F7,10243 | R.TVHIGDDEK.A           | 1621.901 | 0.00519  | 3 | 1 | 30.1 | 0 |
| P12163_1_S1,23081 | K.DVVELLTSAADGAK.S      | 1997.137 | 0.01403  | 3 | 1 | 40.7 | 0 |
| P12163_2_F6,21511 | R.VLIPLHFK.L            | 1704.067 | 0.00127  | 3 | 1 | 28   | 0 |
| P12163_1_F4,13793 | K.EALEGNDVPAK.V         | 1750.979 | 0.01051  | 2 | 1 | 40.4 | 0 |
| P12163_1_F3,13318 | K.VLSTEQDPSAK.R         | 1783.006 | 0.00942  | 2 | 1 | 33   | 0 |
| P12163_1_F4,14038 | K.VNQSDGGVSLAK.E        | 1783.017 | 0.01252  | 2 | 1 | 26.8 | 0 |
| P12163_1_S1,23039 | R.TGPDDLVASILSK.V       | 1924.121 | 0.00454  | 3 | 1 | 28.8 | 0 |
| P12163_1_S1,20376 | K.LFTFDSDEGR.D          | 1490.743 | 0.00255  | 2 | 1 | 25.3 | 0 |
| P12163_1_S1,21659 | R.ISLFQSLQSEQQAR.L      | 1939.055 | 0.00045  | 3 | 1 | 33.2 | 0 |
| P12163_1_F9,16780 | K.QLGHLLVK.S            | 1515.983 | 0.0036   | 3 | 1 | 29.7 | 0 |
| P12163_1_F4,11556 | K.STSLQPEPK.D           | 1594.926 | 0.00444  | 2 | 1 | 26.6 | 0 |
| P12163_1_S1,25015 | K.GVPDDLVLFLDK.K        | 1939.136 | 0.01084  | 3 | 1 | 36.3 | 0 |
| P12163_1_F9,10851 | R.AAVHYAAAESK.H         | 1725.974 | 0.00916  | 3 | 1 | 33   | 0 |
| P12163_1_S1,12573 | K.GFDSSVGEDQVR.A        | 1599.792 | 0.00842  | 2 | 1 | 23.9 | 0 |
| P12163_1_F4,12581 | R.EAEDAIEK.L            | 1512.837 | 0.01168  | 2 | 1 | 39.3 | 0 |
| P12163_1_S1,21873 | K.LISGTGLQLLR.R         | 1474.926 | 0.00312  | 3 | 1 | 61   | 0 |
| P12163_1_F3,27880 | R.GVPVAINCLAALLK.E      | 2047.256 | 0.00623  | 3 | 1 | 26.1 | 0 |
| P12163_1_F3,14151 | K.SALLCIQR.L            | 1264.735 | 0.00561  | 3 | 1 | 33.1 | 0 |
| P12163_2_S3,18447 | K.YASFLQA.-             | 1103.604 | 0.00123  | 2 | 1 | 32.1 | 0 |
| P12163_2_F1,7929  | K.SSAAASSAASK.A         | 1646.917 | 0.00378  | 2 | 1 | 47.3 | 0 |
| P12163_1_F9,8839  | K.THNLQNPENK.R          | 1802.997 | 0.00814  | 3 | 1 | 29.6 | 0 |
| P12163_1_F3,23580 | K.EFPELLSIK.D ! K.EFPE  | 1684.014 | 0.0022   | 3 | 1 | 23.1 | 0 |

|                   |                        |          |          |   |   |      |   |
|-------------------|------------------------|----------|----------|---|---|------|---|
| P12163_2_F1,9396  | R.SNNELDASK.L          | 1585.864 | 0.00701  | 2 | 1 | 25   | 0 |
| P12163_2_F1,21209 | K.VDYLLGK.Q            | 1415.872 | 0.00455  | 2 | 1 | 28.2 | 0 |
| P12163_1_F4,7336  | R.TADGDEGGK.H          | 1457.769 | 0.00749  | 2 | 1 | 28.8 | 0 |
| P12163_1_F4,19171 | K.SISAISMEVK.E         | 1672.976 | 0.00101  | 2 | 1 | 37.2 | 0 |
| P12163_1_S1,12768 | K.TSPSPLPQTSTAVSPGS    | 2350.307 | -0.00118 | 3 | 1 | 36.3 | 0 |
| P12163_2_F6,15719 | K.NLQLHPIQVK.S         | 1798.116 | 0.00541  | 3 | 1 | 22.7 | 0 |
| P12163_1_F4,14896 | R.DFQLTNSEGK.V         | 1860.991 | 0.01019  | 2 | 1 | 35.1 | 0 |
| P12163_1_F8,15922 | R.AVNVVHVVDASGK.F      | 1903.122 | 0.00689  | 3 | 1 | 39   | 0 |
| P12163_1_F4,20667 | R.GFSEFEAIK.H          | 1635.92  | 0.00834  | 3 | 1 | 26   | 0 |
| P12163_1_F4,23213 | K.VDLLNQLK.E           | 1550.973 | 0.00268  | 2 | 1 | 25.8 | 0 |
| P12163_1_F3,28088 | R.LSIAQVLTVISQK.Q      | 2008.263 | 0.00298  | 3 | 1 | 29.1 | 0 |
| P12163_1_F2,18384 | K.FYTLTTGANER.R        | 1576.827 | -0.00083 | 2 | 1 | 31.7 | 0 |
| P12163_1_S1,20664 | R.DFGPPQEVAETLIK.K     | 2152.211 | 0.00022  | 3 | 1 | 40.5 | 0 |
| P12163_2_F2,13990 | K.MIYASSK.D ! K.MLYA   | 1407.813 | 0.00478  | 2 | 1 | 30.3 | 0 |
| P12163_2_F1,11693 | K.QVVVEK.L             | 1309.83  | 0.00639  | 2 | 1 | 26.3 | 0 |
| P12163_2_F2,19092 | R.FLSAAVK.L            | 1343.851 | 0.00536  | 3 | 1 | 27.5 | 0 |
| P12163_1_F7,14600 | R.QILNAGADHVLHK.V      | 2024.186 | 0.00969  | 3 | 1 | 29.1 | 0 |
| P12163_1_F3,25665 | K.DGVLVEGLFWK.D        | 1871.089 | -0.00275 | 3 | 1 | 32   | 0 |
| P12163_1_F3,16371 | K.SISAGQPVEFTK.S       | 1872.069 | 0.01442  | 2 | 1 | 36.7 | 0 |
| P12163_1_F3,22131 | K.APPGFPGSPYAINFK.L    | 2171.211 | 0.00584  | 3 | 1 | 34.8 | 0 |
| P12163_1_F3,23800 | R.VGPLYFVVK.D          | 1727.072 | 0.00703  | 3 | 1 | 24.8 | 0 |
| P12163_1_F3,26769 | R.EAAVLALGAI AEGCIK    | 2194.272 | 0.00663  | 3 | 1 | 49.1 | 0 |
| P12163_2_F2,17985 | R.QAAGLLLK.N           | 1421.93  | 0.00882  | 3 | 1 | 27.2 | 0 |
| P12163_1_F3,14787 | K.QLVLGAR.V            | 1060.678 | 0.00485  | 2 | 1 | 25.7 | 0 |
| P12163_2_F1,18440 | R.LFINQCYSK.G          | 1780.988 | -0.00264 | 2 | 1 | 32.9 | 0 |
| P12163_1_S1,23193 | K.LVFDDLLER.V          | 1423.81  | 0.00261  | 2 | 1 | 52.4 | 0 |
| P12163_2_S5,18118 | R.DLFDDHLEELR.Q        | 1705.87  | 0.00151  | 3 | 1 | 37   | 0 |
| P12163_2_F1,11939 | K.TNEAEAVETAK.E        | 1770.969 | -0.00599 | 2 | 1 | 33.8 | 0 |
| P12163_1_F4,22894 | R.ICLDILK.D ! K.LCLDLI | 1482.917 | 0.00625  | 2 | 1 | 27.7 | 0 |
| P12163_1_S1,12971 | K.GNPIEESDITR.L ! R.GN | 1534.801 | 0.00298  | 2 | 1 | 40.2 | 0 |
| P12163_2_F6,19766 | R.LHPAVPLLIAR.K        | 1503.968 | 0.00134  | 3 | 1 | 26.4 | 0 |
| P12163_1_F4,23538 | K.AVEIALQQIK.S         | 1721.078 | 0.01041  | 3 | 1 | 28.1 | 0 |
| P12163_1_F9,16489 | R.ELHNVFIK.K           | 1607.973 | 0.00849  | 2 | 1 | 36.5 | 0 |
| P12163_2_F2,14147 | K.AAENVYIK.K           | 1515.899 | 0.0024   | 2 | 1 | 39.7 | 0 |
| P12163_2_F1,12663 | K.VLSEEEK.A            | 1441.836 | 0.00218  | 2 | 1 | 25.2 | 0 |
| P12163_2_F10,1597 | K.FPTLVTHQESLESK.V     | 2224.243 | 0.00375  | 3 | 1 | 23.7 | 0 |
| P12163_1_F8,16963 | K.VCMLGDAQHV EEA EK    | 2324.183 | 0.01746  | 3 | 1 | 36.1 | 0 |
| P12163_1_F8,19687 | R.DLKPSNLLL NANC DLK   | 2740.579 | 0.00606  | 3 | 1 | 22.6 | 0 |
| P12163_1_F9,7998  | R.QLPQHPR.Q            | 1179.69  | 0.00457  | 3 | 1 | 22.8 | 0 |
| P12163_1_F2,15546 | K.NFVITDPR.I ! K.NFVIT | 1265.716 | 0.00565  | 2 | 1 | 29   | 0 |
| P12163_1_F4,19401 | R.AAEWGLVLK.T          | 1594.978 | -0.01686 | 3 | 1 | 24.2 | 0 |
| P12163_1_F6,14964 | K.HKPATVIPFR.R         | 1871.148 | 0.00279  | 4 | 1 | 31.5 | 0 |
| P12163_2_F9,20538 | K.YELEYILR.E           | 1402.788 | 0.00379  | 2 | 1 | 26   | 0 |
| P12163_1_F3,20090 | K.VPVLA EVEK.V         | 1591.988 | 0.00427  | 3 | 1 | 28.1 | 0 |
| P12163_1_F3,14536 | R.DVAEATVDVK.A         | 1654.947 | 0.01035  | 2 | 1 | 63   | 0 |
| P12163_2_F6,14729 | K.IENLQSHDNNEIYEK.A    | 2454.272 | 0.00756  | 3 | 1 | 32.1 | 0 |
| P12163_1_S1,7914  | K.TGVDADEAR.R          | 1237.633 | 0.00828  | 2 | 1 | 31.8 | 0 |
| P12163_1_F2,20782 | K.EATGIDFNELGNDLK.V    | 2244.197 | 0.00883  | 3 | 1 | 25.1 | 0 |
| P12163_1_F3,24420 | R.DVIAFPILK.I          | 1624.029 | 0.00377  | 3 | 1 | 49.5 | 0 |
| P12163_2_F2,16695 | K.AASLAFK.D            | 1315.819 | 0.00326  | 3 | 1 | 22.1 | 0 |
| P12163_1_F3,24697 | R.EYTGAPYFAAISALK.I    | 2210.232 | 0.00224  | 3 | 1 | 34.2 | 0 |

|                   |                        |          |          |   |   |      |   |
|-------------------|------------------------|----------|----------|---|---|------|---|
| P12163_2_F2,10309 | K.ETNVSVK.I            | 1384.826 | 0.00547  | 2 | 1 | 25.7 | 0 |
| P12163_1_F3,9212  | R.QATEYDPR.R           | 1283.653 | 0.0045   | 2 | 1 | 37.5 | 0 |
| P12163_2_F1,22633 | K.LTELIVDK.S           | 1538.961 | 0.00959  | 2 | 1 | 36.5 | 0 |
| P12163_1_F4,24661 | R.LNILPFK.V            | 1452.94  | 0.001    | 3 | 1 | 26.6 | 0 |
| P12163_1_S1,17300 | K.SDLEVIQVTEPPK.R      | 2063.184 | 0.0038   | 3 | 1 | 43.9 | 0 |
| P12163_1_F3,17405 | K.YTPQELNVDVK.S        | 1914.079 | 0.00782  | 2 | 1 | 26.5 | 0 |
| P12163_1_F4,7064  | K.AASSEENDGNK.D        | 1729.881 | 0.0032   | 2 | 1 | 24.9 | 0 |
| P12163_1_S1,18062 | R.TMEEMAQEADEYR.S      | 1906.846 | 0.00167  | 2 | 1 | 55.8 | 0 |
| P12163_1_F9,14451 | K.HSLSLTLR.H           | 1230.747 | 0.00525  | 3 | 1 | 27.2 | 0 |
| P12163_2_F6,11351 | R.VVDESHVGPPR.G        | 1495.817 | 0.00307  | 3 | 1 | 27.1 | 0 |
| P12163_1_F8,12341 | K.ETPSAVPPPKPK.N       | 2257.368 | 0.00805  | 3 | 1 | 24.9 | 0 |
| P12163_1_F3,12380 | K.GLAEVAR.N            | 1019.615 | 0.00329  | 2 | 1 | 29.7 | 0 |
| P12163_1_F2,9093  | K.GASLAPGDSR.F         | 1234.669 | 0.00127  | 2 | 1 | 39.9 | 0 |
| P12163_1_S1,20269 | K.LQNFTEAVADANR.A      | 1752.918 | 0.00346  | 2 | 1 | 32.3 | 0 |
| P12163_2_F6,9088  | K.KDPTAVTSSESQSR.L     | 2101.135 | 0.00179  | 3 | 1 | 28.2 | 0 |
| P12163_1_F4,21405 | R.EVLINLYNK.T          | 1714.036 | 0.00675  | 2 | 1 | 31.7 | 0 |
| P12163_2_F6,17483 | K.LDVGSYGYDNSYTVR      | 2012.987 | 0.00532  | 2 | 1 | 29.7 | 0 |
| P12163_2_F2,16613 | K.VNMLEK.S             | 1341.802 | 0.00538  | 2 | 1 | 28.7 | 0 |
| P12163_1_F2,8727  | R.GSASVGQSTLTR.F       | 1467.807 | 0.00287  | 3 | 1 | 49   | 0 |
| P12163_1_S1,22693 | R.LEIQAIADDITSK.Y      | 2025.169 | 0.0047   | 3 | 1 | 39.5 | 0 |
| P12163_1_S1,19476 | K.DISSFLDER.D          | 1385.721 | 0.00663  | 2 | 1 | 28.2 | 0 |
| P12163_2_F6,15079 | R.EDLISKPENIR.E        | 1922.117 | -0.00395 | 2 | 1 | 26   | 0 |
| P12163_1_S1,16196 | K.DIVGELPR.R           | 1202.705 | 0.00382  | 2 | 1 | 24.1 | 0 |
| P12163_1_S1,21714 | K.VALVAEDELIR.G        | 1531.9   | -0.00101 | 2 | 1 | 39.8 | 0 |
| P12163_2_F2,8297  | K.NEQYQAK.L            | 1488.827 | 0.00735  | 2 | 1 | 27.5 | 0 |
| P12163_2_F2,11571 | R.AIQYGSK.F            | 1374.82  | 0.00598  | 2 | 1 | 28.5 | 0 |
| P12163_2_F1,17448 | K.QEMFQPTASIK.D        | 1888.046 | -0.00044 | 2 | 1 | 28.9 | 0 |
| P12163_1_S1,20767 | R.AFGADLILTDPK.G       | 1940.131 | 0.00278  | 3 | 1 | 36.1 | 0 |
| P12163_2_F1,5610  | K.GEPEPR.N             | 988.5365 | 0.00152  | 2 | 1 | 26.5 | 0 |
| P12163_1_F4,17747 | R.ATVVEAIK.E           | 1438.909 | 0.00194  | 3 | 1 | 32.8 | 0 |
| P12163_1_S1,9320  | R.DAQDYEQPR.E          | 1425.691 | -0.00264 | 2 | 1 | 25.9 | 0 |
| P12163_2_F6,7808  | R.EHEQVDAVDR.D         | 1501.755 | 0.00412  | 3 | 1 | 30.2 | 0 |
| P12163_2_F4,6236  | K.ELSAHGR.D            | 1073.6   | 0.00026  | 3 | 1 | 31.4 | 0 |
| P12163_2_F6,14625 | R.ENQLEIDHLK.F         | 1847.048 | 0.00414  | 3 | 1 | 42.9 | 0 |
| P12163_2_F8_12070 | K.IQNHF.K.F ! R.LQNHFK | 1394.836 | 0.00239  | 3 | 1 | 22.9 | 0 |
| P12163_1_F2,22593 | R.VAGAAALAPFIDK.G      | 1852.115 | 0.00348  | 3 | 1 | 40.2 | 0 |
| P12163_1_F4,10105 | K.AGGALQGPR.A          | 1187.68  | 0.00663  | 2 | 1 | 26.2 | 0 |
| P12163_1_S1,17145 | R.DVQEACVYDGYTLPK      | 2366.216 | 0.00656  | 3 | 1 | 52.9 | 0 |
| P12163_1_F3,20245 | K.ISIEPVLGK.K          | 1563.993 | 0.00887  | 3 | 1 | 36.8 | 0 |
| P12163_2_F10,1912 | R.LFLSPYELTPTHR.N      | 1878.043 | -0.00173 | 3 | 1 | 41.4 | 0 |
| P12163_2_F2,16799 | K.AYAVGASFK.G          | 1521.889 | 0.00286  | 3 | 1 | 27.7 | 0 |
| P12163_1_F4,21519 | K.SLAAALMSDAK.F        | 1685.972 | 0.01016  | 3 | 1 | 29.1 | 0 |
| P12163_1_F8,15735 | K.ALTNSGLIDPASHR.L     | 1755.965 | 0.00127  | 3 | 1 | 53.8 | 0 |
| P12163_2_F9,11797 | R.VLNLHSR.L            | 1142.695 | -0.00015 | 3 | 1 | 30.8 | 0 |
| P12163_2_F9,17594 | R.LSWALVHSR.Q          | 1372.8   | 0.00085  | 3 | 1 | 39.1 | 0 |
| P12163_2_F1,6086  | R.QAEDVQR.G            | 1149.617 | 0.00617  | 2 | 1 | 30.3 | 0 |
| P12163_1_F4,18856 | K.DYNQLFVK.K           | 1634.936 | 0.00718  | 2 | 1 | 35.6 | 0 |
| P12163_2_F1,15625 | K.VYCPDELAK.V          | 1702.929 | 0.0069   | 2 | 1 | 26   | 0 |
| P12163_2_F1,12694 | K.NLELQEGK.L           | 1538.9   | 0.00217  | 2 | 1 | 32.1 | 0 |
| P12163_1_S1,19405 | R.LVFDEPEPGVTVVK.L     | 2137.236 | 0.00776  | 3 | 1 | 30.9 | 0 |
| P12163_2_F1,11156 | K.SQSSVLDQK.A          | 1599.916 | 0.00668  | 2 | 1 | 26.2 | 0 |

|                   |                        |          |          |   |   |      |   |
|-------------------|------------------------|----------|----------|---|---|------|---|
| P12163_1_S1,25566 | K.VPLSILGLPFR.S        | 1515.956 | 0.00042  | 3 | 1 | 37.6 | 0 |
| P12163_1_F5,20417 | K.SLGLMCFK.K           | 1563.885 | 0.00794  | 2 | 1 | 27   | 0 |
| P12163_2_F2,6046  | R.ASSDQNK.L            | 1357.753 | 0.00596  | 2 | 1 | 28.2 | 0 |
| P12163_1_S10,1448 | R.FAVHIR.E             | 1046.641 | 0.00646  | 3 | 1 | 30.3 | 0 |
| P12163_2_F1,22248 | R.IGGGVFPVIK.E         | 1595.014 | 0.00316  | 3 | 1 | 29.9 | 0 |
| P12163_2_F9,16424 | K.IFDLHR.H             | 1104.647 | 0.00439  | 3 | 1 | 25.6 | 0 |
| P12163_1_F3,25335 | K.LGEVFSGAYLVGK.K      | 1948.136 | 0.00522  | 3 | 1 | 41.1 | 0 |
| P12163_2_F2,14669 | R.LNQYVQGNK.E          | 1671.964 | 0.00674  | 2 | 1 | 27.3 | 0 |
| P12163_1_F4,17277 | R.VCQMVLQDNNAK.K       | 2028.083 | 0.00527  | 2 | 1 | 43   | 0 |
| P12163_1_F4,25017 | K.LVESIIDAEK.A         | 1725.025 | 0.00853  | 3 | 1 | 37.1 | 0 |
| P12163_1_F3,18909 | K.NFDYVVVNAEGK.L       | 1963.074 | -0.00071 | 2 | 1 | 54.1 | 0 |
| P12163_2_F1,9199  | R.DTEATYK.D            | 1435.789 | 0.00534  | 2 | 1 | 24.8 | 0 |
| P12163_1_F8,16460 | R.THALDTGEAVNVLK.C     | 2076.191 | 0.00717  | 3 | 1 | 29.3 | 0 |
| P12163_1_S1,12971 | K.GNPIEESDITR.L ! R.GN | 1534.801 | 0.00298  | 2 | 1 | 40.2 | 0 |
| P12163_2_F6,19917 | K.GQHFELIPFGAGR.R      | 1732.944 | 0.00339  | 3 | 1 | 32   | 0 |
| P12163_1_F9,10365 | K.ENVEAFHR.I           | 1305.685 | 0.00575  | 3 | 1 | 45.9 | 0 |
| P12163_1_F8,19166 | K.MYYDFYAGGAEDEH1      | 2618.269 | 0.01368  | 3 | 1 | 53   | 0 |
| P12163_1_F5,6774  | R.AGACSTCAGK.L         | 1590.819 | 0.00652  | 2 | 1 | 44.9 | 0 |
| P12163_1_F6,8019  | R.AGACSTCAGK.L         | 1590.819 | 0.01581  | 3 | 1 | 39.2 | 0 |
| P12163_1_F8,7160  | R.AGACSTCAGK.L         | 1590.819 | 0.00344  | 2 | 1 | 38.4 | 0 |
| P12163_1_F8,7180  | R.AGACSTCAGK.L         | 1590.819 | 0.00225  | 3 | 1 | 37.3 | 0 |
| P12163_1_S10,8490 | R.AGACSTCAGK.L         | 1590.819 | 0.00927  | 3 | 1 | 34.8 | 0 |
| P12163_2_F1,7268  | R.AGACSTCAGK.L         | 1590.819 | 0.0047   | 2 | 1 | 46.3 | 0 |
| P12163_2_F2,7592  | R.AGACSTCAGK.L         | 1590.819 | 0.00728  | 2 | 1 | 44.6 | 0 |
| P12163_2_F2,7635  | R.AGACSTCAGK.L         | 1590.819 | 0.00621  | 3 | 1 | 44.2 | 0 |
| P12163_2_F2,7818  | R.AGACSTCAGK.L         | 1590.819 | 0.0071   | 2 | 1 | 38.1 | 0 |
| P12163_2_F2,8026  | R.AGACSTCAGK.L         | 1590.819 | 0.00526  | 2 | 1 | 37.7 | 0 |
| P12163_2_S5,7118  | R.AGACSTCAGK.L         | 1590.819 | 0.00177  | 3 | 1 | 38.7 | 0 |
| P12163_2_S5,7794  | R.AGACSTCAGK.L         | 1590.819 | 0.00852  | 3 | 1 | 33.8 | 0 |
| P12163_1_F3,20263 | K.ALLADDPVLK.R         | 1663.025 | 0.00729  | 2 | 1 | 58.6 | 0 |
| P12163_1_F3,20298 | K.ALLADDPVLK.R         | 1663.025 | 0.00525  | 3 | 1 | 44.6 | 0 |
| P12163_1_F4,20799 | K.ALLADDPVLK.R         | 1663.025 | 0.00175  | 2 | 1 | 43.5 | 0 |
| P12163_2_F1,20201 | K.ALLADDPVLK.R         | 1663.025 | 0.00321  | 3 | 1 | 37.7 | 0 |
| P12163_2_F1,20208 | K.ALLADDPVLK.R         | 1663.025 | 0.00173  | 2 | 1 | 44.8 | 0 |
| P12163_1_F3,22606 | K.LAVAINDSLK.S         | 1652.02  | 0.0059   | 3 | 1 | 38.7 | 0 |
| P12163_1_F4,23363 | K.LAVAINDSLK.S         | 1652.02  | 0.00691  | 2 | 1 | 45.5 | 0 |
| P12163_1_F4,23364 | K.LAVAINDSLK.S         | 1652.02  | 0.00485  | 3 | 1 | 34.4 | 0 |
| P12163_2_F1,22786 | K.LAVAINDSLK.S         | 1652.02  | 0.00559  | 2 | 1 | 48   | 0 |
| P12163_2_F1,22815 | K.LAVAINDSLK.S         | 1652.02  | 0.00257  | 3 | 1 | 35   | 0 |
| P12163_1_F6,7026  | -.M*HETGASEEVARE       | 1636.79  | 0.00137  | 3 | 1 | 44.2 | 0 |
| P12163_2_F6,6578  | -.M*HETGASEEVARE       | 1636.79  | -0.00424 | 3 | 1 | 43.5 | 0 |
| P12163_2_F7,6141  | -.M*HETGASEEVARE       | 1636.79  | 0.00263  | 3 | 1 | 52.5 | 0 |
| P12163_2_F7,8062  | -.M*HETGASEEVARE       | 1636.79  | 0.00032  | 3 | 1 | 35.5 | 0 |
| P12163_2_F7,8080  | -.MHETGASEEVARE        | 1620.795 | 0.00323  | 3 | 1 | 33.7 | 0 |
| P12163_1_F4,19914 | K.EQWSPALTISK.V        | 1868.074 | 0.0093   | 2 | 1 | 43.8 | 0 |
| P12163_1_F4,19915 | K.EQWSPALTISK.V        | 1868.074 | 0.00624  | 3 | 1 | 38.3 | 0 |
| P12163_2_F1,19347 | K.EQWSPALTISK.V        | 1868.074 | 0.00921  | 3 | 1 | 34.2 | 0 |
| P12163_2_F1,19352 | K.EQWSPALTISK.V        | 1868.074 | -0.00356 | 2 | 1 | 62.6 | 0 |
| P12163_1_F2,19212 | K.AADEGLVILESPK.V      | 1950.137 | 0.00597  | 3 | 1 | 40.8 | 0 |
| P12163_1_F2,20215 | K.AADEGLVILESPK.V      | 1950.137 | 0.00531  | 2 | 1 | 87.7 | 0 |
| P12163_1_F2,20358 | K.AADEGLVILESPK.V      | 1950.137 | 0.00462  | 3 | 1 | 42.5 | 0 |

|                   |                       |          |          |   |   |      |   |
|-------------------|-----------------------|----------|----------|---|---|------|---|
| P12163_1_F9,17247 | K.AHELYLEIK.S         | 1724.02  | 0.00235  | 3 | 1 | 44.3 | 0 |
| P12163_2_F9,16518 | K.AHELYLEIK.S         | 1724.02  | 0.00589  | 3 | 1 | 34.3 | 0 |
| P12163_2_F9,16577 | K.AHELYLEIK.S         | 1724.02  | -0.00016 | 4 | 1 | 34.7 | 0 |
| P12163_1_F4,20033 | K.GLTLEEIEAK.C        | 1711.01  | 0.00987  | 2 | 1 | 56.7 | 0 |
| P12163_2_F1,19494 | K.GLTLEEIEAK.C        | 1711.01  | 0.00381  | 3 | 1 | 48.6 | 0 |
| P12163_2_F1,19510 | K.GLTLEEIEAK.C        | 1711.01  | 0.00747  | 2 | 1 | 55.3 | 0 |
| P12163_1_F2,8502  | M.TQSNPNEQNVELNR.T    | 1946.983 | -0.00314 | 3 | 1 | 37.2 | 0 |
| P12163_1_F2,8516  | M.TQSNPNEQNVELNR.T    | 1946.983 | 0.00433  | 3 | 1 | 35.4 | 0 |
| P12163_1_S1,9943  | M.TQSNPNEQNVELNR.T    | 1946.983 | 0.00277  | 3 | 1 | 63   | 0 |
| P12163_1_F3,21214 | K.ELATDIEALK.K        | 1711.01  | 0.00609  | 3 | 1 | 51.2 | 0 |
| P12163_1_F3,21334 | K.ELATDIEALK.K        | 1711.01  | 0.00923  | 2 | 1 | 57.8 | 0 |
| P12163_1_F3,21423 | K.ELATDIEALK.K        | 1711.01  | 0.00519  | 3 | 1 | 52.8 | 0 |
| P12163_1_S1,22321 | K.LAEAADALEEGVR.G     | 1647.885 | 0.00933  | 2 | 1 | 38.9 | 0 |
| P12163_1_S1,22370 | K.LAEAADALEEGVR.G     | 1647.885 | 0.00347  | 3 | 1 | 54.9 | 0 |
| P12163_1_F7,19712 | R.TSELGGFFANVDANHI    | 2265.12  | 0.00291  | 3 | 1 | 37.7 | 0 |
| P12163_2_S5,19491 | R.TSELGGFFANVDANHI    | 2265.12  | -0.00231 | 3 | 1 | 35.4 | 0 |
| P12163_1_F2,23076 | K.DDVVIQFLNPK.V       | 1896.105 | 0.00653  | 3 | 1 | 35   | 0 |
| P12163_1_F3,23889 | K.DDVVIQFLNPK.V       | 1896.105 | 0.01267  | 2 | 1 | 39.6 | 0 |
| P12163_1_F8,15108 | R.VQAIADAAHR.I        | 1355.77  | 0.00262  | 3 | 1 | 47.7 | 0 |
| P12163_2_F6,14455 | R.VQAIADAAHR.I        | 1355.77  | 0.00202  | 3 | 1 | 42.6 | 0 |
| P12163_1_F2,10771 | R.EASEEEIQAAR.N       | 1536.781 | -0.00267 | 2 | 1 | 48.5 | 0 |
| P12163_1_S1,8163  | R.EASEEEIQAAR.N       | 1536.781 | 0.00378  | 3 | 1 | 40.2 | 0 |
| P12163_1_F4,21333 | K.SLIVEGLAESK.K       | 1754.052 | 0.00648  | 3 | 1 | 35.3 | 0 |
| P12163_1_F4,21368 | K.SLIVEGLAESK.K       | 1754.052 | 0.00454  | 2 | 1 | 54.6 | 0 |
| P12163_1_S1,22856 | R.LINILDQR.L          | 1288.789 | -0.00496 | 2 | 1 | 30   | 0 |
| P12163_1_S1,23066 | R.LINILDQR.L          | 1288.789 | -0.00468 | 2 | 1 | 28.3 | 0 |
| P12163_1_F2,21688 | K.ILAGTYVPVDAVK.L     | 1954.183 | 0.00861  | 3 | 1 | 37.8 | 0 |
| P12163_2_F6,21344 | K.ILAGTYVPVDAVK.L     | 1954.183 | -0.00999 | 3 | 1 | 37.9 | 0 |
| P12163_1_F2,7722  | R.AQGDGDSAIDR.L ! R./ | 1408.697 | 0.00225  | 2 | 1 | 36.6 | 0 |
| P12163_1_S1,6538  | R.AQGDGDSAIDR.L ! R./ | 1408.697 | 0.00393  | 3 | 1 | 47.1 | 0 |
| P12163_1_F9,16056 | K.QHALAIGFTK.M        | 1694.021 | 0.01343  | 3 | 1 | 39.5 | 0 |
| P12163_2_F9,14912 | K.QHALAIGFTK.M        | 1694.021 | 0.00134  | 3 | 1 | 52.9 | 0 |
| P12163_1_F4,22780 | R.ALLADLTGK.D         | 1509.946 | 0.00823  | 2 | 1 | 55   | 0 |
| P12163_2_F1,22355 | R.ALLADLTGK.D         | 1509.946 | 0.00459  | 2 | 1 | 53.2 | 0 |
| P12163_2_F7,4330  | R.AAESDQGAHR.R        | 1345.676 | 0.00181  | 3 | 1 | 38.5 | 0 |
| P12163_2_S5,5364  | R.AAESDQGAHR.R        | 1345.676 | 0.00436  | 3 | 1 | 43.3 | 0 |
| P12163_1_F3,18924 | K.FVLDPNANVEK.I       | 1854.058 | -0.00108 | 2 | 1 | 40.4 | 0 |
| P12163_1_F3,18967 | K.FVLDPNANVEK.I       | 1854.058 | 0.00744  | 3 | 1 | 40.4 | 0 |
| P12163_1_F7,19580 | R.IAVGQKPAIADVETPLI   | 2627.57  | 0.00923  | 3 | 1 | 37   | 0 |
| P12163_2_S5,18483 | R.IAVGQKPAIADVETPLI   | 2627.57  | 0.00656  | 3 | 1 | 33.6 | 0 |
| P12163_1_F6,9619  | R.GSFGEAGSHAK.T       | 1655.896 | -0.00223 | 2 | 1 | 38.8 | 0 |
| P12163_1_F9,9339  | R.GSFGEAGSHAK.T       | 1655.896 | 0.00901  | 2 | 1 | 40.7 | 0 |
| P12163_1_F7,20446 | R.FVTHIDDPAAALTK.Y    | 2220.285 | 0.00253  | 3 | 1 | 48.6 | 0 |
| P12163_2_S5,19579 | R.FVTHIDDPAAALTK.Y    | 2220.285 | 0.00275  | 4 | 1 | 38.7 | 0 |
| P12163_1_F9,16313 | R.GHSLLEIR.I          | 1343.758 | 0.00309  | 3 | 1 | 39.8 | 0 |
| P12163_2_F7,14707 | R.GHSLLEIR.I          | 1343.758 | 0.00546  | 3 | 1 | 46.9 | 0 |
| P12163_1_F3,23015 | K.NVDILGVEFAK.S       | 1813.068 | 0.00777  | 2 | 1 | 67   | 0 |
| P12163_1_F3,23030 | K.NVDILGVEFAK.S       | 1813.068 | 0.0061   | 3 | 1 | 53.3 | 0 |
| P12163_1_F5,6069  | K.GIAHDVHQR.Y         | 1336.739 | 0.00317  | 3 | 1 | 41.5 | 0 |
| P12163_2_S5,7179  | K.GIAHDVHQR.Y         | 1336.739 | 0.00333  | 4 | 1 | 34.7 | 0 |
| P12163_1_F8,18426 | R.IGPHGVEIPGLR.Q      | 1548.916 | 0.00376  | 3 | 1 | 39.2 | 0 |

|                                        |          |          |   |   |      |   |
|----------------------------------------|----------|----------|---|---|------|---|
| P12163_2_F6,17911 R.IGPHGVEIPGLR.Q     | 1548.916 | 0.00238  | 3 | 1 | 46.7 | 0 |
| P12163_1_F8,11194 K.VPPVHAPTR.L        | 1277.763 | 0.00568  | 3 | 1 | 39.5 | 0 |
| P12163_2_F6,10986 K.VPPVHAPTR.L        | 1277.763 | 0.00478  | 3 | 1 | 40.7 | 0 |
| P12163_1_F5,11756 R.GGPNYQTGLAK.M      | 1713.974 | 0.00326  | 2 | 1 | 40.9 | 0 |
| P12163_2_F1,12176 R.GGPNYQTGLAK.M      | 1713.974 | 0.00946  | 2 | 1 | 48   | 0 |
| P12163_2_F7,11757 R.ERDPLIVGR.V        | 1358.806 | 0.00286  | 3 | 1 | 35.7 | 0 |
| P12163_2_F7,11767 R.ERDPLIVGR.V        | 1358.806 | 0.0027   | 2 | 1 | 32.8 | 0 |
| P12163_1_S1,21072 K.LGLGGTSYEDFIR.N    | 1731.922 | 0.00589  | 2 | 1 | 43.7 | 0 |
| P12163_1_S1,21096 K.LGLGGTSYEDFIR.N    | 1731.922 | 0.00521  | 3 | 1 | 65.2 | 0 |
| P12163_1_F8,9506 R.QVADEDPVHR.K        | 1469.765 | 0.00164  | 3 | 1 | 37.7 | 0 |
| P12163_2_F6,9411 R.QVADEDPVHR.K        | 1469.765 | 0.00089  | 3 | 1 | 43.4 | 0 |
| P12163_1_S1,17096 K.MVTMTGASGAFLR.L    | 1645.871 | 0.00392  | 3 | 1 | 41.7 | 0 |
| P12163_1_S1,19711 K.MVTMTGASGAFLR.L    | 1645.871 | 0.00425  | 2 | 1 | 36.1 | 0 |
| P12163_1_F8,18535 K.VMALELGAHK.I       | 1676.998 | 0.01065  | 3 | 1 | 58.2 | 0 |
| P12163_2_F6,17994 K.VMALELGAHK.I       | 1676.998 | 0.00408  | 3 | 1 | 54.4 | 0 |
| P12163_1_F8,18690 R.VPTLAIHLDR.T       | 1438.868 | 0.00072  | 3 | 1 | 61.3 | 0 |
| P12163_2_F6,18230 R.VPTLAIHLDR.T       | 1438.868 | 0.00045  | 3 | 1 | 58.5 | 0 |
| P12163_1_S1,13003 R.FQQVATQPAEER.S     | 1707.897 | -0.00211 | 2 | 1 | 51   | 0 |
| P12163_1_S1,13020 R.FQQVATQPAEER.S     | 1707.897 | 0.00636  | 3 | 1 | 51.5 | 0 |
| P12163_1_F9,12225 R.HDDVLESVR.S        | 1373.733 | 0.00576  | 3 | 1 | 33.2 | 0 |
| P12163_2_F7,11231 R.HDDVLESVR.S        | 1373.733 | 0.0006   | 3 | 1 | 40.2 | 0 |
| P12163_1_F4,20389 K.VQGLYDFCK.K        | 1737.945 | 0.00554  | 3 | 1 | 36.9 | 0 |
| P12163_2_F1,19781 K.VQGLYDFCK.K        | 1737.945 | 0.00088  | 2 | 1 | 44.4 | 0 |
| P12163_1_F7,15164 R.IAIGTPGEASHPDALK.. | 2185.244 | 0.00545  | 3 | 1 | 44.6 | 0 |
| P12163_2_S5,14483 R.IAIGTPGEASHPDALK.. | 2185.244 | 0.00275  | 3 | 1 | 37.4 | 0 |
| P12163_1_F7,17568 K.GIPCDEETLYGVIHR.M  | 2049.038 | 0.00384  | 3 | 1 | 35.9 | 0 |
| P12163_2_S5,17209 K.GIPCDEETLYGVIHR.M  | 2049.038 | 0.00042  | 3 | 1 | 69.2 | 0 |
| P12163_1_F4,24371 K.LTFLENSGLAK.Y      | 1801.068 | 0.00735  | 3 | 1 | 38.7 | 0 |
| P12163_2_F1,23685 K.LTFLENSGLAK.Y      | 1801.068 | -0.00471 | 3 | 1 | 42.6 | 0 |
| P12163_1_F8,12796 R.VHTVVLNDPGR.L      | 1510.864 | 0.00497  | 3 | 1 | 49.5 | 0 |
| P12163_2_F6,12355 R.VHTVVLNDPGR.L      | 1510.864 | -0.0013  | 3 | 1 | 46.8 | 0 |
| P12163_1_F8,12228 K.VIAM*NSHQLPR.K     | 1585.879 | 0.00162  | 3 | 1 | 42.8 | 0 |
| P12163_1_F8,14995 K.VIAMNSHQLPR.K      | 1569.884 | 0.00451  | 3 | 1 | 69.5 | 0 |
| P12163_1_F3,24234 K.VWPIEVDLK.F        | 1707.03  | 0.00506  | 3 | 1 | 41.4 | 0 |
| P12163_1_F3,24266 K.VWPIEVDLK.F        | 1707.03  | 0.00566  | 2 | 1 | 40.4 | 0 |
| P12163_1_F4,19169 K.ILSSGEQYEIK.L      | 1875.068 | 0.00709  | 2 | 1 | 47.8 | 0 |
| P12163_2_F1,18461 K.ILSSGEQYEIK.L      | 1875.068 | 0.00653  | 2 | 1 | 62   | 0 |
| P12163_1_F8,16876 K.GHTFIQFEPAPR.R     | 1703.917 | 0.00283  | 3 | 1 | 37.2 | 0 |
| P12163_2_F6,16298 K.GHTFIQFEPAPR.R     | 1703.917 | 0.00181  | 3 | 1 | 33.4 | 0 |
| P12163_1_F9,7304 R.VEHVQPSR.C          | 1255.706 | 0.00335  | 3 | 1 | 26.7 | 0 |
| P12163_2_F7,6997 R.VEHVQPSR.C          | 1255.706 | 0.00215  | 3 | 1 | 26.5 | 0 |
| P12163_1_F7,17181 K.AVPNLQLEHGLAVER.   | 1950.107 | 0.00235  | 3 | 1 | 50.8 | 0 |
| P12163_2_S5,16448 K.AVPNLQLEHGLAVER.   | 1950.107 | 0.0025   | 3 | 1 | 49.4 | 0 |
| P12163_1_F4,12320 R.NVSQADASIK.A       | 1640.943 | 0.00359  | 2 | 1 | 52.3 | 0 |
| P12163_2_F1,11416 R.NVSQADASIK.A       | 1640.943 | 0.00157  | 2 | 1 | 43.3 | 0 |
| P12163_1_F3,16728 R.GNLDIFSGR.G        | 1282.706 | 0.00844  | 3 | 1 | 33.6 | 0 |
| P12163_1_F8,19681 R.GPAEASADAVHFVLK.   | 2120.196 | 0.01056  | 3 | 1 | 32.9 | 0 |
| P12163_2_S5,15226 K.VDPSQVTPDVHFQK.D   | 2205.212 | 0.0041   | 3 | 1 | 38.4 | 0 |
| P12163_2_F6,18201 R.QAELIDHFVK.Q       | 1808.053 | 0.00207  | 3 | 1 | 35.3 | 0 |
| P12163_1_F3,24000 R.DGLLPSIFAK.V       | 1669.014 | 0.00777  | 3 | 1 | 43.1 | 0 |
| P12163_1_F2,22026 K.VGIFYVDGVR.R       | 1428.815 | 0.00358  | 2 | 1 | 36.1 | 0 |



|                    |                       |          |          |   |   |      |   |
|--------------------|-----------------------|----------|----------|---|---|------|---|
| P12163_1_F3,24510  | R.VPAIVSALEK.M        | 1635.03  | 0.00292  | 3 | 1 | 43.7 | 0 |
| P12163_1_F6,20039  | R.FDVIVVGGGHAGCEA.    | 2361.229 | 0.00511  | 3 | 1 | 46.7 | 0 |
| P12163_1_F3,25332  | R.FLQAVGLATDVK.L      | 1870.126 | 0.00498  | 3 | 1 | 54.1 | 0 |
| P12163_1_F4,18892  | R.NILEDPELK.S         | 1678.984 | 0.01529  | 3 | 1 | 35.4 | 0 |
| P12163_1_F3,18907  | R.VELPDAYPYK.S        | 1803.015 | 0.00563  | 2 | 1 | 39.9 | 0 |
| P12163_2_F6,15433  | K.HLDDFEVVR.W         | 1433.769 | 0.00042  | 3 | 1 | 41.4 | 0 |
| P12163_1_F7,21388  | R.DASIVEEFQTAVAAHK    | 2324.271 | 0.00268  | 3 | 1 | 53.1 | 0 |
| P12163_1_F3,17110  | K.ASGESSESSTSLTVFK.!  | 2225.176 | 0.00664  | 3 | 1 | 57.8 | 0 |
| P12163_1_F3,24521  | R.AAMLQGVSEVAEAVK     | 2111.199 | 0.00821  | 3 | 1 | 44.8 | 0 |
| P12163_1_F3,25544  | R.EGYITAMANLIEK.E     | 2061.151 | 0.00528  | 3 | 1 | 36.3 | 0 |
| P12163_1_S1,8260   | M.APPPPAQAAGGGGGG     | 2006.047 | 0.00385  | 3 | 1 | 35.6 | 0 |
| P12163_1_F4,22357  | R.GQETMLSFIQK.F       | 1890.061 | 0.00481  | 3 | 1 | 39.5 | 0 |
| P12163_2_F10,1640' | K.EVVHCVTLHEIDVINS!   | 2324.233 | 0.00472  | 3 | 1 | 52   | 0 |
| P12163_1_S1,19343  | K.TFYEEAQLETLR.Q      | 1803.943 | 0.00316  | 3 | 1 | 42.8 | 0 |
| P12163_1_F8,16996  | R.IVVVTHGGVIR.T       | 1453.916 | 0.00252  | 3 | 1 | 39.7 | 0 |
| P12163_1_F8,14568  | R.EPSETELALAEHQGK.!   | 2247.208 | 0.00924  | 3 | 1 | 41.4 | 0 |
| P12163_1_S1,9468   | R.DDNEEAANLR.K        | 1450.707 | 0.0076   | 2 | 1 | 40.1 | 0 |
| P12163_1_F3,24641  | R.LDIEDFLQK.K         | 1728.999 | 0.00635  | 3 | 1 | 28.3 | 0 |
| P12163_1_F3,23567  | R.ITMIVADAYK.G        | 1733.013 | 0.00222  | 3 | 1 | 42.7 | 0 |
| P12163_2_F6,19054  | R.GLFGGLVDHK.Q        | 1593.957 | -0.00112 | 3 | 1 | 39.7 | 0 |
| P12163_2_F6,8861   | R.EVHSADYNPTR.R       | 1592.797 | 0.00315  | 3 | 1 | 34.2 | 0 |
| P12163_2_S5,15690  | R.VAHVLPVSDDGGSTAI    | 2226.203 | 0.00466  | 3 | 1 | 51.7 | 0 |
| P12163_2_F6,22066  | R.LIVIAQHRL.D         | 1366.884 | 0.00258  | 3 | 1 | 34   | 0 |
| P12163_2_F1,20124  | R.SSTFSTLLTK.L        | 1692.999 | 0.00399  | 2 | 1 | 32.9 | 0 |
| P12163_1_S1,10286  | R.QATAVIVQPSSPR.F     | 1657.954 | 0.00314  | 3 | 1 | 34.2 | 0 |
| P12163_2_F1,11553  | R.NTETGENVAIK.I       | 1784.001 | 0.00079  | 2 | 1 | 42.9 | 0 |
| P12163_1_F3,22826  | K.CVETLDLLK.I         | 1698.992 | 0.01032  | 3 | 1 | 41.7 | 0 |
| P12163_1_F3,25656  | K.LLALYLSSPDNK.E      | 1942.147 | 0.00153  | 3 | 1 | 32.9 | 0 |
| P12163_1_F7,16568  | K.AETEYTVTQAISAQEA    | 2585.367 | 0.00311  | 3 | 1 | 52.8 | 0 |
| P12163_1_F3,25308  | K.TVFNFMDLCK.T        | 1982.07  | 0.00849  | 3 | 1 | 43.5 | 0 |
| P12163_1_F2,22812  | R.GSGPVILELPLDK.I     | 1946.178 | 0.00394  | 2 | 1 | 38.9 | 0 |
| P12163_1_F3,12765  | K.EIDDVDAK.I          | 1512.837 | 0.00381  | 2 | 1 | 38.5 | 0 |
| P12163_1_F7,20580  | K.VPFSNVVYIEHSDFR.M   | 2113.102 | -0.00156 | 3 | 1 | 34.3 | 0 |
| P12163_2_F6,19181  | R.DHSALMSILDR.R       | 1561.831 | 0.00053  | 3 | 1 | 33.9 | 0 |
| P12163_1_F3,23933  | R.DFQTVLQEFQK.I       | 1991.106 | 0.00707  | 3 | 1 | 52.9 | 0 |
| P12163_1_F9,17731  | R.HAFIGIGFR.E         | 1321.768 | 0.00262  | 3 | 1 | 44.7 | 0 |
| P12163_1_S1,16390  | K.ALDVGDDPAALPK.G     | 1890.079 | 0.00952  | 3 | 1 | 35   | 0 |
| P12163_1_F4,18308  | K.DAIQIITK.M          | 1509.946 | 0.01059  | 2 | 1 | 38   | 0 |
| P12163_1_F7,22360  | K.GSLIALPDHIPLK.F     | 2095.31  | 0.00472  | 3 | 1 | 34   | 0 |
| P12163_1_F3,12840  | K.NNTQVLINCR.N        | 1535.827 | 0.00076  | 2 | 1 | 35.9 | 0 |
| P12163_1_F9,11791  | R.EIHGQVLK.L ! K.EIHG | 1531.942 | 0.00578  | 3 | 1 | 37.3 | 0 |
| P12163_1_F2,11971  | K.EVVAEDQPAAAEK.T     | 1965.075 | 0.00464  | 2 | 1 | 41.4 | 0 |
| P12163_1_S1,20755  | R.GQVLNTLEEIQER.H     | 1833.002 | 0.00728  | 3 | 1 | 39.8 | 0 |
| P12163_1_F3,20860  | R.LSDDLLAENFK.I       | 1987.096 | 0.00179  | 2 | 1 | 41.5 | 0 |
| P12163_2_F6,14682  | R.SLLQEDEFHR.L        | 1577.822 | 0.0025   | 3 | 1 | 37.7 | 0 |
| P12163_1_S1,22391  | R.GALVVLEGLDR.C       | 1445.863 | 0.00416  | 3 | 1 | 41.2 | 0 |
| P12163_1_F3,24919  | K.LLALDPLNK.E         | 1605.02  | 0.01037  | 2 | 1 | 35.7 | 0 |
| P12163_1_F2,18064  | K.NFADVGGGVLGCR.G     | 1625.837 | 0.00107  | 3 | 1 | 39   | 0 |
| P12163_2_F1,16152  | K.IFGGTTPK.T          | 1428.867 | -0.00078 | 3 | 1 | 34.3 | 0 |
| P12163_1_F3,24895  | K.LLTEFQPFGGK.G       | 1845.073 | 0.0093   | 3 | 1 | 35.7 | 0 |
| P12163_1_S1,20806  | K.AVELVILPR.S         | 1313.846 | 0.00336  | 3 | 1 | 62.1 | 0 |

|                   |                        |          |          |   |   |      |   |
|-------------------|------------------------|----------|----------|---|---|------|---|
| P12163_1_S1,24513 | K.AFADELGIPFLETSAK.    | 2317.29  | 0.00952  | 3 | 1 | 34.9 | 0 |
| P12163_1_S1,23503 | K.LADDTVLLSQLPLK.S     | 2134.294 | 0.00555  | 3 | 1 | 40.5 | 0 |
| P12163_1_S1,22077 | K.IEDLSSQLQTQAAEQFI    | 2544.377 | 0.00702  | 3 | 1 | 60.5 | 0 |
| P12163_1_F7,20553 | R.TAIPEAITLEHVAK.S     | 2214.332 | 0.0043   | 3 | 1 | 70.6 | 0 |
| P12163_1_S1,16223 | K.LDTLVVGSR.G          | 1263.757 | 0.00581  | 3 | 1 | 44.5 | 0 |
| P12163_2_F7,12389 | R.FIDQGHNL.R.S         | 1403.77  | 0.00075  | 3 | 1 | 33.4 | 0 |
| P12163_1_F7,17585 | K.AVVESLPADSFVASHP     | 2086.123 | 0.00382  | 3 | 1 | 64.2 | 0 |
| P12163_1_F3,6553  | K.ADEDVR.M             | 1008.526 | 0.0006   | 2 | 1 | 35.9 | 0 |
| P12163_1_F9,18855 | R.ILCLHGFR.Q ! R.ILCLF | 1319.756 | 0.00502  | 3 | 1 | 41.6 | 0 |
| P12163_1_F3,26912 | R.ALLFSFLPDDK.S        | 1874.088 | 0.0137   | 3 | 1 | 43.7 | 0 |
| P12163_2_F1,20268 | R.LWDAVPK.L            | 1436.872 | 0.0037   | 3 | 1 | 24.2 | 0 |
| P12163_1_S1,18316 | R.DRLGLRPCDQR.R        | 1689.912 | 0.00826  | 3 | 1 | 33.7 | 0 |
| P12163_2_F6,15125 | K.GVHYEYVEENLPNK.S     | 2299.218 | 0.00809  | 3 | 1 | 43.3 | 0 |
| P12163_1_F3,11889 | K.NCFAIASDR.R          | 1357.684 | 0.00447  | 3 | 1 | 36.3 | 0 |
| P12163_1_S1,20363 | K.NCGDSVFQQIHER.D      | 1869.943 | 0.01007  | 3 | 1 | 60.1 | 0 |
| P12163_2_F7,16734 | K.QVFGHFLR.K           | 1406.821 | 0.00198  | 3 | 1 | 39.8 | 0 |
| P12163_1_F9,12220 | R.HLVATVGK.F           | 1432.91  | 0.01229  | 3 | 1 | 35.6 | 0 |
| P12163_1_F4,24113 | R.ASAFTFGVVYGNMK.I     | 2100.141 | 0.01058  | 3 | 1 | 34   | 0 |
| P12163_1_S1,14317 | K.ADDVPLDVR.M          | 1303.716 | -0.00095 | 2 | 1 | 39.3 | 0 |
| P12163_1_F3,12427 | R.ATSGVDDDLK.A         | 1628.895 | 0.00908  | 2 | 1 | 37   | 0 |
| P12163_2_F6,21880 | R.QTLINLLTNHDR.G       | 1741.986 | 0.00126  | 3 | 1 | 37.3 | 0 |
| P12163_1_F3,18484 | R.AAALNIVPTSTGAAK./    | 1993.19  | 0.00887  | 3 | 1 | 43.5 | 0 |
| P12163_1_F9,8849  | K.LVHGGAQNK.G          | 1531.916 | 0.00662  | 3 | 1 | 40.9 | 0 |
| P12163_1_F4,25439 | K.GPSWAALLEAGVK.R      | 1907.121 | 0.00112  | 3 | 1 | 49.1 | 0 |
| P12163_1_F2,20234 | K.IIM*VDPLEAK.R        | 1753.039 | 0.00394  | 3 | 1 | 43.5 | 0 |
| P12163_1_F7,16992 | K.ELNMAPHVVELDER.I     | 1956.016 | 0.00448  | 3 | 1 | 40.5 | 0 |
| P12163_1_F4,27642 | K.LSSTIAEILQTK.L       | 1912.157 | -0.00149 | 3 | 1 | 36.3 | 0 |
| P12163_2_F7,16732 | R.LHLATLIR.A           | 1240.804 | 0.00357  | 3 | 1 | 34.2 | 0 |
| P12163_1_F3,25826 | R.LIEFAEAVQSK.L        | 1843.078 | 0.00675  | 3 | 1 | 40.8 | 0 |
| P12163_1_F8,16041 | R.TLDPHIEEQFGSGR.L     | 1889.966 | 0.00156  | 2 | 1 | 48.6 | 0 |
| P12163_1_F3,12651 | R.EAPTTTITNAPANEK.S    | 2166.186 | 0.00624  | 3 | 1 | 39.3 | 0 |
| P12163_1_F3,20584 | K.DEAGICFPDLK.L        | 1872.999 | 0.00533  | 2 | 1 | 45.8 | 0 |
| P12163_2_F6,15050 | K.ALADAGLHVDK.I        | 1718.006 | 0.00336  | 3 | 1 | 38.7 | 0 |
| P12163_1_F3,24888 | R.QLLTDLEEVVEVNK.Q     | 2267.259 | 0.00832  | 3 | 1 | 39.4 | 0 |
| P12163_1_F4,9932  | R.AGATDSEYSSK.R        | 1723.896 | 0.001    | 2 | 1 | 39.9 | 0 |
| P12163_1_F9,19507 | K.IIGLLGHK.A           | 1458.962 | 0.00832  | 3 | 1 | 35.8 | 0 |
| P12163_1_F7,20295 | K.TVADSLYPKPVVIFNP     | 2524.475 | 0.00337  | 3 | 1 | 37.5 | 0 |
| P12163_2_F6,18385 | K.IHENPELGFQEFETSK.I   | 2513.313 | 0.00315  | 3 | 1 | 40.2 | 0 |
| P12163_1_F3,23347 | R.FVTAVVGFVK.K         | 1632.993 | 0.00349  | 3 | 1 | 37.1 | 0 |
| P12163_1_F9,15504 | K.HSGFGLGFER.M         | 1410.743 | 0.00509  | 3 | 1 | 40.1 | 0 |
| P12163_2_F6,18599 | K.IIPLQDAHEFDK.I       | 2034.148 | 0.00275  | 3 | 1 | 44   | 0 |
| P12163_1_S10,6004 | K.QAEEHER.F            | 1202.607 | 0.00313  | 3 | 1 | 41.1 | 0 |
| P12163_1_S1,22514 | R.LFISNPDLVLR.F        | 1590.952 | 0.00319  | 3 | 1 | 43.2 | 0 |
| P12163_1_F5,5610  | K.ATDSNQSSK.T          | 1646.881 | 0.00174  | 2 | 1 | 46.5 | 0 |
| P12163_1_F2,8985  | K.AANDCVQEGVR.A        | 1522.759 | 0.00269  | 2 | 1 | 42.6 | 0 |
| P12163_1_F3,22933 | K.GGPNPTSNTVLAAVLI     | 2276.307 | 0.0004   | 3 | 1 | 33.4 | 0 |
| P12163_2_F9,7953  | K.THAVDSGK.I           | 1537.843 | 0.00132  | 3 | 1 | 42.8 | 0 |
| P12163_1_S1,9953  | R.AGDDGSSYPVER.A       | 1469.717 | 0.005    | 2 | 1 | 37   | 0 |
| P12163_1_F4,13803 | R.VQAEGDFNAK.L         | 1686.927 | 0.00047  | 2 | 1 | 39.1 | 0 |
| P12163_1_F3,16902 | K.GVLPENQPVVVK.A       | 1887.152 | 0.00338  | 3 | 1 | 38.1 | 0 |
| P12163_2_S5,16400 | K.LLDTDVESHIDR.N       | 1716.907 | -0.0005  | 3 | 1 | 35   | 0 |

|                   |                        |          |          |   |   |      |   |
|-------------------|------------------------|----------|----------|---|---|------|---|
| P12163_2_S5,20616 | R.FVQPNIDHLIFNR.F      | 1917.065 | 0.00376  | 3 | 1 | 36.7 | 0 |
| P12163_1_F5,18227 | R.AFWNSPVGPK.T         | 1710.979 | 0.01407  | 3 | 1 | 35.9 | 0 |
| P12163_1_F3,25054 | R.VFITGALDELK.I        | 1814.088 | 0.00278  | 3 | 1 | 45.6 | 0 |
| P12163_1_S1,18563 | R.NVLVIGGDALSR.F       | 1517.895 | -0.0005  | 3 | 1 | 49.9 | 0 |
| P12163_1_F7,20860 | K.IIILTDADVDGAHIR.T    | 1926.096 | 0.00109  | 3 | 1 | 46.5 | 0 |
| P12163_1_F3,24437 | R.NLAFTTTSTELEEAFK.    | 2410.296 | 0.0046   | 3 | 1 | 43.2 | 0 |
| P12163_1_F8,14565 | R.TVIVIAHR.L ! R.TVLVI | 1212.773 | 0.00582  | 3 | 1 | 35.5 | 0 |
| P12163_1_F3,24190 | K.ILVYEFVFNK.S ! R.LL' | 1830.098 | 0.00651  | 2 | 1 | 36.3 | 0 |
| P12163_1_F8,21115 | R.ICAACLLLDHK.T        | 1922.081 | 0.00859  | 3 | 1 | 40.4 | 0 |
| P12163_1_F3,8402  | R.NTLQQLER.V           | 1305.743 | 0.00071  | 3 | 1 | 33   | 0 |
| P12163_1_F8,23867 | R.SAAEALGLLHVLSR.E     | 1741.027 | 0.00235  | 3 | 1 | 60   | 0 |
| P12163_1_F3,24608 | K.NVIFTVWDVGGQEK.I     | 2200.222 | -0.00136 | 3 | 1 | 51.7 | 0 |
| P12163_1_F4,18429 | K.ELFQGNPVEK.L         | 1866.058 | -0.00002 | 2 | 1 | 47.7 | 0 |
| P12163_1_F2,16189 | R.AAEAGFIDQNEPVAK.'    | 2168.181 | 0.00861  | 3 | 1 | 49.5 | 0 |
| P12163_1_F4,21414 | K.ELLALAANK.D          | 1550.973 | 0.00603  | 2 | 1 | 47.7 | 0 |
| P12163_1_F3,12012 | K.ADVSDPAQVK.S         | 1637.932 | -0.00117 | 2 | 1 | 42.2 | 0 |
| P12163_1_S1,21726 | -.MIYDVNSPLFR.S        | 1658.888 | 0.00166  | 3 | 1 | 34.6 | 0 |
| P12163_1_F9,17728 | K.HAFIGLGFNER.N        | 1564.854 | 0.00239  | 3 | 1 | 34.7 | 0 |
| P12163_2_F6,19576 | K.EFGFFQVTNHGVSK.D     | 2205.191 | 0.00295  | 3 | 1 | 43.6 | 0 |
| P12163_2_F6,16410 | R.DGPLVVFHR.T          | 1343.774 | 0.00257  | 3 | 1 | 41.3 | 0 |
| P12163_1_F8,14189 | K.SGPEGGNTLLSEPKPI     | 2702.439 | 0.00509  | 3 | 1 | 36.6 | 0 |
| P12163_1_F7,20131 | K.LCAQAAGLPVEIVHYI     | 2589.432 | 0.00862  | 3 | 1 | 40.5 | 0 |
| P12163_1_F9,12632 | R.HIQLAVR.N            | 1140.715 | 0.00278  | 3 | 1 | 33.2 | 0 |
| P12163_1_S1,22531 | K.FAGDVAELGIIR.A       | 1564.9   | 0.00349  | 3 | 1 | 41.9 | 0 |
| P12163_1_F7,20350 | K.LPFDEASLVNLHAAR.'    | 1957.081 | 0.00017  | 3 | 1 | 60   | 0 |
| P12163_1_F9,12065 | K.AVTLTHVR.Y           | 1200.737 | 0.00227  | 3 | 1 | 42.2 | 0 |
| P12163_1_F3,27975 | K.LVDIAAAGLGMK.K       | 1767.066 | 0.00748  | 3 | 1 | 46.1 | 0 |
| P12163_1_F8,12535 | R.APGGPPSNVAISHVR.L    | 1762.987 | 0.00128  | 3 | 1 | 37.3 | 0 |
| P12163_2_F1,20769 | R.TMVQLDELYK.D         | 1848.04  | 0.00717  | 2 | 1 | 38.1 | 0 |
| P12163_1_S1,10480 | R.VTAPPAPPR.K          | 1209.726 | 0.00204  | 3 | 1 | 38.2 | 0 |
| P12163_1_S10,1010 | K.FHGAEK.N             | 1425.795 | 0.00541  | 3 | 1 | 38.6 | 0 |
| P12163_1_F3,24471 | K.INDWVSLQESFDK.I      | 2189.17  | 0.01465  | 3 | 1 | 36.1 | 0 |
| P12163_1_F9,9482  | K.HAVVVK.V             | 1260.825 | 0.00669  | 3 | 1 | 37.1 | 0 |
| P12163_1_S1,21553 | R.SLTTEGLLYLEQR.I      | 1827.016 | 0.00378  | 3 | 1 | 34.8 | 0 |
| P12163_1_S1,17331 | K.DITELIASGR.E         | 1378.784 | 0.00364  | 3 | 1 | 35.2 | 0 |
| P12163_1_S1,22492 | K.IDPSLLEALEK.S        | 1836.094 | 0.00503  | 3 | 1 | 35.1 | 0 |
| P12163_2_F1,13512 | K.ALGGTITGSDK.R        | 1627.947 | 0.00731  | 2 | 1 | 46.8 | 0 |
| P12163_1_F7,16141 | K.GLLPDTHPLAAAAAR.     | 1778.023 | 0.00287  | 3 | 1 | 35.3 | 0 |
| P12163_1_F8,22689 | K.DIQLNIDHILLK.A       | 2043.242 | 0.00596  | 3 | 1 | 43   | 0 |
| P12163_1_F3,22173 | R.QVQCISFLAAKPPGV.-    | 2223.278 | 0.00629  | 3 | 1 | 45.8 | 0 |
| P12163_1_F8,11825 | R.QVAAGGTHSVVLTR.E     | 1699.976 | -0.00171 | 3 | 1 | 39.4 | 0 |
| P12163_2_F4,17612 | R.TEGIIPAPEPTHAIAATI   | 2262.276 | 0.00422  | 3 | 1 | 35.6 | 0 |
| P12163_1_F3,16366 | K.AVQGNVGVLDQK.D       | 1964.138 | 0.00437  | 3 | 1 | 40.7 | 0 |
| P12163_1_S1,25025 | R.LQDTLLELVQR.E        | 1631.963 | -0.00032 | 3 | 1 | 52.8 | 0 |
| P12163_1_F3,26256 | K.VSLYLADVVLPK.F       | 1925.193 | 0.00627  | 3 | 1 | 41.5 | 0 |
| P12163_1_F3,24711 | R.GAVGAMLVYDITK.R      | 1946.124 | 0.0045   | 3 | 1 | 47.8 | 0 |
| P12163_1_F3,22311 | K.SNAELALDYGFIESK.S    | 2265.222 | 0.00655  | 3 | 1 | 39.3 | 0 |
| P12163_2_F1,19685 | K.IEELSLEK.A           | 1683.962 | 0.0038   | 3 | 1 | 35.5 | 0 |
| P12163_1_F2,12266 | R.IAGGQEVCGVR.E        | 1577.837 | 0.00369  | 2 | 1 | 36.1 | 0 |
| P12163_1_S1,19490 | K.VLVIGGGDGGVLR.E      | 1515.916 | -0.00153 | 3 | 1 | 53.2 | 0 |
| P12163_1_F3,18567 | R.VEVAEPANFTVK.E       | 1912.1   | 0.00615  | 3 | 1 | 43.9 | 0 |

|                   |                      |          |          |   |   |      |   |
|-------------------|----------------------|----------|----------|---|---|------|---|
| P12163_1_F8,19102 | R.LHPPAPLLIAR.D      | 1501.952 | 0.00324  | 3 | 1 | 34.7 | 0 |
| P12163_2_F2,18592 | K.AAQYFNIK.L         | 1562.915 | -0.00221 | 2 | 1 | 35.6 | 0 |
| P12163_1_F4,27244 | K.LIDALLAK.G         | 1464.961 | 0.01098  | 2 | 1 | 45.5 | 0 |
| P12163_1_F6,20890 | K.AEAVHLAIDDLGPNCF   | 2520.318 | 0.00195  | 3 | 1 | 55.1 | 0 |
| P12163_1_F3,26746 | K.VLDEFFLSTAGK.F     | 1935.105 | 0.00358  | 3 | 1 | 40.8 | 0 |
| P12163_2_F1,20179 | K.AGPGILGVNIGK.N     | 1704.063 | -0.00805 | 3 | 1 | 38.9 | 0 |
| P12163_1_F3,22660 | K.SNFDQLIEVATK.K     | 1973.116 | 0.00912  | 3 | 1 | 34.5 | 0 |
| P12163_1_F7,19959 | K.QSLIESITLEHSAPVR.R | 2084.165 | 0.00403  | 3 | 1 | 47   | 0 |
| P12163_1_F6,20961 | K.ILTPEVVNTQTGAFLH   | 2200.239 | 0.00208  | 3 | 1 | 63.1 | 0 |
| P12163_1_S1,22571 | R.VQGLLEVLPNR.L      | 1541.932 | 0.00521  | 2 | 1 | 40.1 | 0 |
| P12163_2_F6,16020 | K.ILLETPHK.I         | 1558.978 | 0.00213  | 3 | 1 | 35   | 0 |
| P12163_1_F6,20802 | K.FIIEAANHPTDPEADEI  | 2818.508 | 0.00556  | 3 | 1 | 44.7 | 0 |
| P12163_2_F8_12070 | K.VTEAAGHFPNLHLEQI   | 2561.353 | 0.00509  | 4 | 1 | 33   | 0 |
| P12163_1_F7,19426 | R.LGVVDVNHLAAVAVSR   | 1825.06  | -0.00164 | 3 | 1 | 40.2 | 0 |
| P12163_1_F4,12412 | R.EVIEGSEEK.I        | 1627.9   | 0.00484  | 2 | 1 | 39.1 | 0 |
| P12163_1_F6,20986 | K.GFVLTCVAYPTSDCVI   | 2939.526 | 0.00396  | 3 | 1 | 41.1 | 0 |
| P12163_1_F3,24063 | R.LVINGLSLVK.D       | 1664.093 | -0.00381 | 3 | 1 | 41.5 | 0 |
| P12163_2_F1,6786  | K.SAGDTQNP.K.S       | 1525.843 | 0.00863  | 3 | 1 | 41.9 | 0 |
| P12163_2_F2,19510 | R.SLWEAMNTK.Q        | 1687.93  | -0.00057 | 3 | 1 | 44.5 | 0 |
| P12163_1_F4,17678 | R.SLGAAVIYNK.D       | 1643.994 | 0.00773  | 2 | 1 | 42.4 | 0 |
| P12163_1_F3,24428 | R.DNVIDFVTSSMK.Y     | 1964.062 | -0.00031 | 3 | 1 | 36.5 | 0 |
| P12163_2_S5,21178 | R.AFVPAVLLGEAEHK.A   | 2089.227 | 0.00215  | 3 | 1 | 37.6 | 0 |
| P12163_1_F6,16577 | K.LDHYQILK.Y         | 1637.983 | 0.00935  | 2 | 1 | 38.7 | 0 |
| P12163_1_F6,20348 | K.SLGNTLEPNELVHNFG   | 2573.326 | -0.00075 | 3 | 1 | 40.1 | 0 |
| P12163_2_F6,19712 | R.IVVVLEHK.I         | 1544.998 | 0.00307  | 3 | 1 | 37.5 | 0 |
| P12163_2_F2,13584 | M.AGEASMLK.F         | 1414.818 | 0.00955  | 2 | 1 | 40.4 | 0 |
| P12163_1_F3,26097 | R.ALQVLDQVFPK.D      | 1866.131 | 0.00519  | 3 | 1 | 39   | 0 |
| P12163_1_F4,24683 | K.LLLGDVLK.D         | 1478.977 | 0.00424  | 3 | 1 | 33.6 | 0 |
| P12163_1_F3,21444 | K.GAFELGCTVCPVAIK.N  | 2230.218 | 0.01041  | 3 | 1 | 36.4 | 0 |
| P12163_1_F8,15973 | R.VLAEAGTDLNHR.D     | 1599.876 | 0.00323  | 3 | 1 | 67.7 | 0 |
| P12163_2_F1,23840 | K.LLLET.LAK.E        | 1508.987 | 0.00065  | 2 | 1 | 42.1 | 0 |
| P12163_1_F9,11934 | R.VCGNPHAIR.K        | 1440.805 | 0.00237  | 3 | 1 | 37.8 | 0 |
| P12163_2_F8_12070 | K.RLENTAR.H          | 1163.68  | -0.00198 | 3 | 1 | 34.4 | 0 |
| P12163_1_F3,10358 | R.ESSSIQQEAQQQPNNQ   | 2639.348 | 0.0045   | 3 | 1 | 41.8 | 0 |
| P12163_1_F4,20425 | K.VTINYPF.K.G        | 1718.994 | 0.00821  | 2 | 1 | 37.1 | 0 |
| P12163_1_F3,18661 | R.DISELNLPK.T        | 1636.973 | 0.00308  | 3 | 1 | 34.6 | 0 |
| P12163_1_F5,20246 | R.LYQYYLDK.T         | 1713.967 | 0.00229  | 2 | 1 | 36.1 | 0 |
| P12163_1_F9,14033 | K.NHLEPFVDGR.A       | 1487.791 | 0.00277  | 3 | 1 | 23.4 | 0 |
| P12163_1_S1,17832 | R.FIEDESFER.G        | 1475.732 | 0.00547  | 2 | 1 | 39.1 | 0 |
| P12163_2_F6,12950 | K.HVTDLDAIDR.M       | 1458.785 | 0.00319  | 3 | 1 | 42.5 | 0 |
| P12163_1_F3,11137 | K.AEEASVETEPK.F      | 1797.969 | 0.00303  | 2 | 1 | 39.1 | 0 |
| P12163_2_F7,17860 | R.REELEQLLVAER.V     | 1789.012 | 0.00235  | 3 | 1 | 44.2 | 0 |
| P12163_1_F4,22707 | K.SEIEYYAMLAK.V      | 1926.05  | 0.00746  | 3 | 1 | 39.9 | 0 |
| P12163_1_F4,21037 | R.SLVDDVLNK.V        | 1610.957 | 0.00616  | 2 | 1 | 48.8 | 0 |
| P12163_2_F6,22308 | R.FQIGEVFAHVPR.E     | 1703.953 | 0.00148  | 3 | 1 | 46.6 | 0 |
| P12163_1_F3,15515 | R.AAIGVVDPDK.G       | 1592.947 | 0.00536  | 2 | 1 | 39.5 | 0 |
| P12163_1_F9,12510 | K.GHAVGDIPGVR.F      | 1381.785 | -0.00273 | 3 | 1 | 38.4 | 0 |
| P12163_1_F5,21623 | R.ASSFSEFFK.H        | 1657.905 | 0.00693  | 3 | 1 | 35.1 | 0 |
| P12163_1_F9,14036 | R.LPHLPR.S           | 1036.657 | 0.00103  | 3 | 1 | 34   | 0 |
| P12163_1_F9,13076 | K.HIADLAGK.T         | 1432.873 | 0.00981  | 3 | 1 | 37   | 0 |
| P12163_1_S1,21910 | R.TFADPFEIYR.A       | 1562.816 | 0.00364  | 3 | 1 | 33.4 | 0 |

|                   |                      |          |          |   |   |      |   |
|-------------------|----------------------|----------|----------|---|---|------|---|
| P12163_1_F3,27284 | K.VLLELLVPGQK.A      | 1817.172 | 0.0056   | 3 | 1 | 38.1 | 0 |
| P12163_1_S1,18462 | K.DLSAALLGPR.S       | 1316.784 | 0.00181  | 3 | 1 | 48.9 | 0 |
| P12163_1_F3,23813 | K.NAECLADELADQFK.N   | 2232.143 | 0.01078  | 3 | 1 | 35.7 | 0 |
| P12163_1_F4,17628 | R.EALESVVSEQK.Y      | 1827.032 | 0.00764  | 3 | 1 | 42.3 | 0 |
| P12163_1_F3,25396 | K.FAFILYDSSSK.N      | 1886.052 | 0.00145  | 2 | 1 | 40.2 | 0 |
| P12163_2_S5,15905 | R.GTHAVIVVIDSTDR.A   | 1786.996 | 0.0028   | 3 | 1 | 49.9 | 0 |
| P12163_1_F8,14049 | K.AEATPGSALITTSHGK.  | 2149.207 | 0.00463  | 3 | 1 | 52.8 | 0 |
| P12163_1_F5,16852 | R.QFVNLQYK.K         | 1647.968 | 0.00329  | 2 | 1 | 35.6 | 0 |
| P12163_1_F2,20266 | K.AITAGILAGCSDAIAQF  | 2268.284 | 0.00758  | 3 | 1 | 46.6 | 0 |
| P12163_1_F3,24322 | K.LILPVLDK.F         | 1519.008 | 0.00255  | 3 | 1 | 33.3 | 0 |
| P12163_2_F6,18076 | R.IVHAPVFLR.C        | 1355.846 | 0.00519  | 3 | 1 | 39.4 | 0 |
| P12163_2_F4,16974 | R.VVEIEEPAADHGAVVI   | 2108.165 | -0.00184 | 3 | 1 | 37.8 | 0 |
| P12163_2_F2,8610  | K.GCVEQCEK.T         | 1617.818 | 0.0035   | 2 | 1 | 36.7 | 0 |
| P12163_1_F3,19145 | K.VDIISVGP.K.E       | 1606.999 | 0.01005  | 2 | 1 | 36.9 | 0 |
| P12163_1_S1,18295 | K.LLLTPAEGNAAAQAA.   | 2305.333 | 0.00389  | 3 | 1 | 48   | 0 |
| P12163_1_S1,9200  | K.SSASGSVSQTQSASNQ   | 2371.175 | 0.00601  | 3 | 1 | 49.9 | 0 |
| P12163_2_F6,18844 | K.IFLDHLEGT.P.R.I    | 1601.895 | 0.00226  | 3 | 1 | 45.9 | 0 |
| P12163_1_F7,21813 | K.EASHVEGFSPELALVT   | 2706.492 | 0.00506  | 4 | 1 | 35.9 | 0 |
| P12163_1_F7,19768 | R.FGQEEETY.NIVAAHGY  | 2492.215 | 0.00218  | 3 | 1 | 44.1 | 0 |
| P12163_1_F3,15821 | R.LGANVGS.AQGPTGLG.I | 2035.176 | 0.0088   | 3 | 1 | 56.4 | 0 |
| P12163_1_F3,23081 | R.IGNNEITILVNDAEK.S  | 2251.275 | 0.00323  | 3 | 1 | 50.7 | 0 |
| P12163_2_F1,17161 | R.IASTNITENVV.K.I    | 1897.121 | 0.00503  | 2 | 1 | 58.1 | 0 |
| P12163_1_F6,16581 | R.NAVQAAGDVALPNQF    | 2760.375 | 0.00111  | 3 | 1 | 50.7 | 0 |
| P12163_1_S1,22678 | K.QELLNLIADQDR.G     | 1731.954 | 0.00377  | 3 | 1 | 53.9 | 0 |
| P12163_1_F2,17731 | R.QQLQEAEAE.LER.L    | 1747.913 | 0.00575  | 2 | 1 | 45.3 | 0 |
| P12163_1_F3,24633 | K.VFGGQLVGQALAAAS    | 2125.259 | 0.00609  | 3 | 1 | 39   | 0 |
| P12163_2_F6,16087 | K.LTGEAILVHR.G       | 1412.853 | 0.00259  | 3 | 1 | 42.4 | 0 |
| P12163_1_F3,27943 | K.LILAILDNQNLGK.L    | 2033.258 | 0.00695  | 3 | 1 | 36.7 | 0 |
| P12163_1_S1,23132 | K.LEGFSVLQLAQR.E     | 1664.964 | 0.002    | 3 | 1 | 48.7 | 0 |
| P12163_1_F7,18980 | K.GFDQATNII.LDESHER. | 2149.083 | -0.0007  | 3 | 1 | 40.6 | 0 |
| P12163_1_S1,24902 | R.QILQSALVVLEQR.R    | 1801.085 | 0.00159  | 3 | 1 | 37.6 | 0 |
| P12163_1_F3,11434 | K.QVAEAGGENVEAGEK    | 2096.108 | 0.0076   | 3 | 1 | 42.2 | 0 |
| P12163_1_F4,26169 | R.VFYDLLEK.G         | 1634.961 | 0.00739  | 2 | 1 | 43.8 | 0 |
| P12163_1_F5,11342 | R.NMQPIP.NQK.I       | 1677.957 | 0.0022   | 2 | 1 | 36.8 | 0 |
| P12163_1_F4,23776 | R.IEELLQEDQN.VK.H    | 2066.159 | 0.00796  | 3 | 1 | 34.7 | 0 |
| P12163_2_F1,12428 | K.SISSQPQN.QFK.S     | 1872.044 | 0.00044  | 2 | 1 | 46   | 0 |
| P12163_1_F3,22253 | R.IDQIISAGEIGK.S     | 1852.1   | 0.01372  | 3 | 1 | 48.7 | 0 |
| P12163_2_F7,6055  | K.HDETSQHVEATE.-     | 1686.787 | 0.00437  | 3 | 1 | 35.1 | 0 |
| P12163_1_F8,20547 | R.ATAEHLFEVINSR.E    | 1790.97  | 0.001    | 3 | 1 | 41.4 | 0 |
| P12163_1_F4,16731 | K.LQSELVGNASK.V      | 1754.027 | 0.00951  | 2 | 1 | 40.1 | 0 |
| P12163_1_F8,11830 | K.EDVTLQVHGDR.I      | 1572.828 | 0.00571  | 3 | 1 | 44.7 | 0 |
| P12163_1_S1,22000 | R.LIVSYPSLLR.Q       | 1464.909 | 0.00171  | 3 | 1 | 40.3 | 0 |
| P12163_1_F4,21893 | R.NWTIENATQLGLK.G    | 2096.196 | 0.00422  | 3 | 1 | 35   | 0 |
| P12163_1_F3,26659 | R.LAEISDLVSLK.F      | 1796.099 | -0.00008 | 3 | 1 | 34.7 | 0 |
| P12163_2_F2,7648  | K.AETGGAGGGPK.I      | 1509.848 | 0.00707  | 2 | 1 | 38.3 | 0 |
| P12163_1_F9,11933 | K.HDEIIVGCQSGK.R     | 1951.053 | 0.00863  | 3 | 1 | 35.1 | 0 |
| P12163_1_S1,12278 | K.TIVNNESA.EIIR.M    | 1662.933 | 0.00222  | 3 | 1 | 43   | 0 |

| ExpectValu Ions | Reference           | DIFF_MOIPI | Miss | Mod  | Mat | Nurr | Engine | Tag | Dec   | ITRAQ_T |
|-----------------|---------------------|------------|------|------|-----|------|--------|-----|-------|---------|
| 1.86E-02 0 0    | Cs6g21770.1/Cs6g217 | 4.03       | 0    | 0    | 0   | 2    | MASCOT | T   | PLEX8 |         |
| 2.49E-06 0 0    | Cs6g21770.1/Cs6g217 | 4.03       | 0    | 0    | 0   | 2    | MASCOT | T   | PLEX8 |         |
| 3.06E-06 0 0    | Cs6g21770.1/Cs6g217 | 4.03       | 0    | 0    | 0   | 2    | MASCOT | T   | PLEX8 |         |
| 2.46E-06 0 0    | Cs6g21770.1/Cs6g217 | 4.03       | 0    | 0    | 0   | 2    | MASCOT | T   | PLEX8 |         |
| 1.02E-02 0 0    | Cs6g21770.1/Cs6g217 | 4.03       | 0    | 0    | 0   | 2    | MASCOT | T   | PLEX8 |         |
| 4.96E-05 0 0    | Cs6g21770.1/Cs6g217 | 4.03       | 0    | 0    | 0   | 2    | MASCOT | T   | PLEX8 |         |
| 9.45E-02 0 0    | Cs6g21770.1/Cs6g217 | 4.03       | 0    | 0    | 0   | 2    | MASCOT | T   | PLEX8 |         |
| 7.60E-06 0 0    | Cs6g21770.1/Cs6g217 | 4.03       | 0    | 0    | 0   | 2    | MASCOT | T   | PLEX8 |         |
| 1.63E-02 0 0    | Cs6g21770.1/Cs6g217 | 4.03       | 0    | 0    | 0   | 2    | MASCOT | T   | PLEX8 |         |
| 6.96E-04 0 0    | Cs6g21770.1/Cs6g217 | 4.03       | 0    | 0    | 0   | 2    | MASCOT | T   | PLEX8 |         |
| 3.06E-03 0 0    | Cs6g21770.1/Cs6g217 | 4.03       | 0    | 0    | 0   | 2    | MASCOT | T   | PLEX8 |         |
| 3.90E-05 0 0    | Cs6g21770.1/Cs6g217 | 4.03       | 0    | 0    | 0   | 2    | MASCOT | T   | PLEX8 |         |
| 4.10E-04 0 0    | Cs6g21770.1/Cs6g217 | 4.03       | 0    | 0    | 0   | 2    | MASCOT | T   | PLEX8 |         |
| 1.28E-01 0 0    | Cs6g21770.1/Cs6g217 | 4.53       | 0    | 15.9 | 0   | 2    | MASCOT | T   |       |         |
| 2.63E-03 0 0    | Cs6g21770.1/Cs6g217 | 4.53       | 0    | 15.9 | 0   | 2    | MASCOT | T   |       |         |
| 1.55E-02 0 0    | Cs6g21770.1/Cs6g217 | 4.53       | 0    | 0    | 0   | 2    | MASCOT | T   |       |         |
| 5.27E-05 0 0    | Cs6g21770.1/Cs6g217 | 4.53       | 0    | 0    | 0   | 2    | MASCOT | T   |       |         |
| 3.93E-06 0 0    | Cs6g21770.1/Cs6g217 | 4.53       | 0    | 0    | 0   | 2    | MASCOT | T   |       |         |
| 3.93E-05 0 0    | Cs6g21770.1/Cs6g217 | 4.53       | 0    | 0    | 0   | 2    | MASCOT | T   |       |         |
| 2.09E-02 0 0    | Cs6g21770.1         | 5.84       | 0    | 15.9 | 0   | 2    | MASCOT | T   | PLEX8 |         |
| 1.66E-01 0 0    | Cs6g21770.1         | 5.84       | 0    | 15.9 | 0   | 2    | MASCOT | T   | PLEX8 |         |
| 1.60E-01 0 0    | Cs6g21770.1         | 5.84       | 0    | 15.9 | 0   | 2    | MASCOT | T   | PLEX8 |         |
| 5.18E-03 0 0    | Cs6g21770.1         | 5.84       | 0    | 15.9 | 0   | 2    | MASCOT | T   | PLEX8 |         |
| 2.10E-01 0 0    | Cs6g21770.1         | 5.84       | 0    | 15.9 | 0   | 2    | MASCOT | T   | PLEX8 |         |
| 8.92E-04 0 0    | Cs6g21770.1         | 5.84       | 0    | 0    | 0   | 2    | MASCOT | T   | PLEX8 |         |
| 1.11E-03 0 0    | Cs6g21770.1         | 5.84       | 0    | 0    | 0   | 2    | MASCOT | T   | PLEX8 |         |
| 9.06E-02 0 0    | Cs6g21770.1         | 5.84       | 0    | 0    | 0   | 2    | MASCOT | T   | PLEX8 |         |
| 1.01E-03 0 0    | Cs6g21770.1         | 5.84       | 0    | 0    | 0   | 2    | MASCOT | T   | PLEX8 |         |
| 8.16E-02 0 0    | Cs6g21770.1         | 5.84       | 0    | 0    | 0   | 2    | MASCOT | T   | PLEX8 |         |
| 1.75E-03 0 0    | Cs6g21770.1         | 5.84       | 0    | 0    | 0   | 2    | MASCOT | T   | PLEX8 |         |
| 1.35E-01 0 0    | Cs6g21770.1/Cs6g217 | 4.53       | 0    | 0    | 0   | 2    | MASCOT | T   | PLEX8 |         |
| 7.24E-02 0 0    | Cs6g21770.1/Cs6g217 | 4.53       | 0    | 0    | 0   | 2    | MASCOT | T   | PLEX8 |         |
| 2.28E-02 0 0    | Cs6g21770.1/Cs6g217 | 4.53       | 0    | 0    | 0   | 2    | MASCOT | T   | PLEX8 |         |
| 3.31E-01 0 0    | Cs6g21770.1/Cs6g217 | 4.53       | 0    | 0    | 0   | 2    | MASCOT | T   | PLEX8 |         |
| 5.38E-03 0 0    | Cs6g21770.1/Cs6g217 | 4.53       | 0    | 0    | 0   | 2    | MASCOT | T   | PLEX8 |         |
| 4.57E-02 0 0    | Cs6g21770.1/Cs6g217 | 4.53       | 0    | 0    | 0   | 2    | MASCOT | T   | PLEX8 |         |
| 8.06E-03 0 0    | Cs6g21770.1/Cs6g217 | 4.53       | 0    | 0    | 0   | 2    | MASCOT | T   | PLEX8 |         |
| 5.71E-02 0 0    | Cs6g21770.1/Cs6g217 | 4.53       | 0    | 0    | 0   | 2    | MASCOT | T   | PLEX8 |         |
| 8.64E-02 0 0    | Cs6g21770.1/Cs6g217 | 4.53       | 0    | 0    | 0   | 2    | MASCOT | T   | PLEX8 |         |
| 1.88E-02 0 0    | Cs6g21770.1/Cs6g217 | 4.53       | 0    | 0    | 0   | 2    | MASCOT | T   | PLEX8 |         |
| 1.57E-02 0 0    | Cs6g21770.1/Cs6g217 | 4.53       | 0    | 0    | 0   | 2    | MASCOT | T   | PLEX8 |         |
| 1.31E-02 0 0    | Cs6g21770.1/Cs6g217 | 4.53       | 0    | 0    | 0   | 2    | MASCOT | T   | PLEX8 |         |
| 1.83E-01 0 0    | Cs6g21770.1/Cs6g217 | 4.53       | 0    | 0    | 0   | 2    | MASCOT | T   | PLEX8 |         |
| 5.29E-01 0 0    | Cs6g21760.1/Cs6g217 | 6          | 0    | 0    | 0   | 2    | MASCOT | T   | PLEX8 |         |
| 7.63E-02 0 0    | Cs6g21760.1/Cs6g217 | 6          | 0    | 0    | 0   | 2    | MASCOT | T   | PLEX8 |         |
| 1.22E-01 0 0    | Cs6g21760.1/Cs6g217 | 6          | 0    | 0    | 0   | 2    | MASCOT | T   | PLEX8 |         |
| 5.92E-04 0 0    | Cs6g21760.1/Cs6g217 | 6          | 0    | 0    | 0   | 2    | MASCOT | T   | PLEX8 |         |
| 8.81E-03 0 0    | Cs6g21760.1/Cs6g217 | 6          | 0    | 0    | 0   | 2    | MASCOT | T   | PLEX8 |         |
| 1.69E-01 0 0    | Cs6g21760.1/Cs6g217 | 6          | 0    | 0    | 0   | 2    | MASCOT | T   | PLEX8 |         |
| 5.14E-05 0 0    | Cs6g21760.1/Cs6g217 | 6          | 0    | 0    | 0   | 2    | MASCOT | T   | PLEX8 |         |

|          |     |                     |      |   |      |   |        |        |       |       |
|----------|-----|---------------------|------|---|------|---|--------|--------|-------|-------|
| 6.00E-03 | 0 0 | Cs6g21760.1/Cs6g217 | 6    | 0 | 0    | 2 | MASCOT | T      | PLEX8 |       |
| 2.50E-02 | 0 0 | Cs6g21760.1/Cs6g217 | 6    | 0 | 0    | 2 | MASCOT | T      |       |       |
| 3.72E-01 | 0 0 | Cs6g21760.1/Cs6g217 | 6    | 0 | 0    | 2 | MASCOT | T      | PLEX8 |       |
| 5.10E-01 | 0 0 | Cs6g21760.1/Cs6g217 | 6    | 0 | 0    | 2 | MASCOT | T      |       |       |
| 2.72E-01 | 0 0 | Cs6g21760.1/Cs6g217 | 6    | 0 | 0    | 2 | MASCOT | T      |       |       |
| 6.79E-02 | 0 0 | Cs5g11720.1/Cs5g117 | 5.84 | 0 | 0    | 2 | MASCOT | T      | PLEX8 |       |
| 3.38E-03 | 0 0 | Cs5g11720.1/Cs5g117 | 5.84 | 0 | 0    | 2 | MASCOT | T      |       |       |
| 9.72E-02 | 0 0 | Cs5g11720.1/Cs5g117 | 5.84 | 0 | 0    | 2 | MASCOT | T      |       |       |
| 8.05E-03 | 0 0 | Cs6g21770.1/Cs6g217 | 5.84 | 0 | 15.9 | 0 | 2      | MASCOT | T     | PLEX8 |
| 1.23E-03 | 0 0 | Cs6g21770.1/Cs6g217 | 5.33 | 0 | 0    | 2 | MASCOT | T      | PLEX8 |       |
| 1.16E-01 | 0 0 | Cs6g21770.1/Cs6g217 | 5.33 | 0 | 0    | 2 | MASCOT | T      | PLEX8 |       |
| 1.46E-03 | 0 0 | Cs6g21770.1/Cs6g217 | 5.33 | 0 | 0    | 2 | MASCOT | T      | PLEX8 |       |
| 8.68E-04 | 0 0 | Cs6g21770.1/Cs6g217 | 5.33 | 0 | 0    | 2 | MASCOT | T      | PLEX8 |       |
| 1.89E-03 | 0 0 | Cs6g21770.1/Cs6g217 | 5.33 | 0 | 0    | 2 | MASCOT | T      | PLEX8 |       |
| 3.92E-01 | 0 0 | Cs6g21770.1/Cs6g217 | 4.68 | 0 | 0    | 2 | MASCOT | T      | PLEX8 |       |
| 4.87E-01 | 0 0 | Cs6g21770.1/Cs6g217 | 4.68 | 0 | 0    | 2 | MASCOT | T      | PLEX8 |       |
| 2.19E-03 | 0 0 | Cs6g21770.1/Cs6g217 | 4.68 | 0 | 0    | 2 | MASCOT | T      | PLEX8 |       |
| 6.12E-02 | 0 0 | Cs7g06240.1/Cs7g062 | 6    | 0 | 0    | 2 | MASCOT | T      | PLEX8 |       |
| 1.02E-03 | 0 0 | Cs7g06240.1/Cs7g062 | 6    | 0 | 0    | 2 | MASCOT | T      | PLEX8 |       |
| 6.15E-04 | 0 0 | Cs7g06240.1/Cs7g062 | 6    | 0 | 0    | 2 | MASCOT | T      | PLEX8 |       |
| 4.25E-03 | 0 0 | Cs7g06240.1/Cs7g062 | 6    | 0 | 0    | 2 | MASCOT | T      | PLEX8 |       |
| 4.20E-03 | 0 0 | Cs7g06240.1/Cs7g062 | 6    | 0 | 0    | 2 | MASCOT | T      | PLEX8 |       |
| 1.28E-01 | 0 0 | Cs7g06240.1/Cs7g062 | 6    | 0 | 0    | 2 | MASCOT | T      |       |       |
| 6.49E-04 | 0 0 | Cs7g06240.1/Cs7g062 | 6    | 0 | 0    | 2 | MASCOT | T      | PLEX8 |       |
| 3.03E-01 | 0 0 | Cs7g06240.1/Cs7g062 | 6    | 0 | 0    | 2 | MASCOT | T      |       |       |
| 1.05E-05 | 0 0 | Cs7g06240.1/Cs7g062 | 6    | 0 | 0    | 2 | MASCOT | T      | PLEX8 |       |
| 6.25E-05 | 0 0 | Cs7g06240.1/Cs7g062 | 6    | 0 | 0    | 2 | MASCOT | T      | PLEX8 |       |
| 7.74E-02 | 0 0 | Cs7g06240.1/Cs7g062 | 6    | 0 | 0    | 2 | MASCOT | T      | PLEX8 |       |
| 3.54E-02 | 0 0 | Cs7g06240.1/Cs7g062 | 6    | 0 | 0    | 2 | MASCOT | T      | PLEX8 |       |
| 6.61E-03 | 0 0 | Cs7g06240.1/Cs7g062 | 6    | 0 | 0    | 2 | MASCOT | T      |       |       |
| 3.15E-02 | 0 0 | Cs6g21770.1/Cs6g217 | 5.66 | 0 | 0    | 2 | MASCOT | T      | PLEX8 |       |
| 5.33E-03 | 0 0 | Cs6g21770.1/Cs6g217 | 5.66 | 0 | 0    | 2 | MASCOT | T      | PLEX8 |       |
| 1.09E-02 | 0 0 | Cs6g21770.1/Cs6g217 | 5.66 | 0 | 0    | 2 | MASCOT | T      | PLEX8 |       |
| 1.41E-01 | 0 0 | Cs6g21770.1/Cs6g217 | 5.66 | 0 | 0    | 2 | MASCOT | T      | PLEX8 |       |
| 2.22E-01 | 0 0 | Cs6g21770.1/Cs6g217 | 5.66 | 0 | 0    | 2 | MASCOT | T      | PLEX8 |       |
| 1.07E-02 | 0 0 | Cs6g21760.1/Cs6g217 | 5.97 | 0 | 0    | 2 | MASCOT | T      |       |       |
| 4.49E-02 | 0 0 | Cs6g21760.1/Cs6g217 | 5.97 | 0 | 0    | 2 | MASCOT | T      |       |       |
| 1.47E-02 | 0 0 | Cs6g21760.1/Cs6g217 | 5.97 | 0 | 0    | 2 | MASCOT | T      |       |       |
| 2.08E-05 | 0 0 | Cs6g21760.1/Cs6g217 | 5.97 | 0 | 0    | 2 | MASCOT | T      |       |       |
| 1.09E-03 | 0 0 | Cs6g21760.1/Cs6g217 | 5.97 | 0 | 0    | 2 | MASCOT | T      |       |       |
| 4.09E-02 | 0 0 | Cs6g21770.1/Cs6g217 | 8.75 | 0 | 0    | 2 | MASCOT | T      | PLEX8 |       |
| 2.71E-01 | 0 0 | Cs6g21770.1         | 4.53 | 0 | 0    | 2 | MASCOT | T      |       |       |
| 4.04E-01 | 0 0 | Cs6g21770.1         | 4.53 | 0 | 0    | 2 | MASCOT | T      | PLEX8 |       |
| 1.86E-01 | 0 0 | Cs6g21770.1/Cs6g217 | 8.75 | 0 | 0    | 2 | MASCOT | T      | PLEX8 |       |
| 2.73E-02 | 0 0 | Cs6g21770.1/Cs6g217 | 8.75 | 0 | 0    | 2 | MASCOT | T      |       |       |
| 9.17E-02 | 0 0 | Cs6g21770.1/Cs6g217 | 8.75 | 0 | 0    | 2 | MASCOT | T      | PLEX8 |       |
| 6.15E-03 | 0 0 | Cs6g21770.1/Cs6g217 | 4.68 | 1 | 0    | 2 | MASCOT | T      | PLEX8 |       |
| 1.33E-03 | 0 0 | Cs6g21770.1/Cs6g217 | 4.68 | 1 | 0    | 2 | MASCOT | T      | PLEX8 |       |
| 2.92E-01 | 0 0 | Cs6g21770.1/Cs6g217 | 8.8  | 0 | 15.9 | 0 | 2      | MASCOT | T     |       |
| 3.60E-02 | 0 0 | Cs6g21770.1/Cs6g217 | 8.8  | 0 | 15.9 | 0 | 2      | MASCOT | T     |       |
| 2.89E-01 | 0 0 | Cs6g21770.1/Cs6g217 | 8.8  | 0 | 0    | 2 | MASCOT | T      |       |       |

|          |     |                     |      |   |      |   |        |        |       |       |
|----------|-----|---------------------|------|---|------|---|--------|--------|-------|-------|
| 4.07E-02 | 0 0 | Cs2g14410.1/Cs2g144 | 4.37 | 0 | 0    | 2 | MASCOT | T      | PLEX8 |       |
| 2.28E-03 | 0 0 | Cs2g14410.1/Cs2g144 | 4.37 | 0 | 0    | 2 | MASCOT | T      |       |       |
| 1.57E-08 | 0 0 | Cs2g14410.1/Cs2g144 | 4.37 | 0 | 0    | 2 | MASCOT | T      |       |       |
| 5.34E-02 | 0 0 | Cs2g14410.1/Cs2g144 | 6.06 | 1 | 0    | 2 | MASCOT | T      | PLEX8 |       |
| 2.41E-03 | 0 0 | Cs2g14410.1/Cs2g144 | 6.06 | 1 | 0    | 2 | MASCOT | T      | PLEX8 |       |
| 1.81E-01 | 0 0 | Cs6g21770.1/Cs6g217 | 8.25 | 0 | 0    | 2 | MASCOT | T      | PLEX8 |       |
| 1.85E-01 | 0 0 | Cs6g21770.1         | 5.84 | 0 | 0    | 2 | MASCOT | T      | PLEX8 |       |
| 1.43E-03 | 0 0 | Cs6g21770.1         | 5.84 | 0 | 0    | 2 | MASCOT | T      | PLEX8 |       |
| 9.96E-03 | 0 0 | Cs6g21770.1         | 5.84 | 0 | 0    | 2 | MASCOT | T      | PLEX8 |       |
| 1.96E-01 | 0 0 | Cs6g21770.1         | 5.84 | 0 | 0    | 2 | MASCOT | T      | PLEX8 |       |
| 2.30E-02 | 0 0 | Cs6g21770.1         | 5.84 | 0 | 0    | 2 | MASCOT | T      |       |       |
| 2.26E-02 | 0 0 | Cs6g21760.1/Cs6g217 | 4.37 | 0 | 0    | 2 | MASCOT | T      | PLEX8 |       |
| 1.04E-02 | 0 0 | Cs6g21760.1/Cs6g217 | 4.37 | 0 | 0    | 2 | MASCOT | T      |       |       |
| 1.55E-03 | 0 0 | Cs6g21760.1/Cs6g217 | 4.37 | 0 | 0    | 2 | MASCOT | T      |       |       |
| 5.97E-03 | 0 0 | Cs6g21760.1/Cs6g217 | 4.37 | 0 | 0    | 2 | MASCOT | T      |       |       |
| 7.61E-04 | 0 0 | Cs6g21760.1/Cs6g217 | 4.37 | 0 | 0    | 2 | MASCOT | T      |       |       |
| 1.56E-02 | 0 0 | Cs6g21770.1/Cs6g217 | 5.84 | 0 | 0    | 2 | MASCOT | T      | PLEX8 |       |
| 1.01E-01 | 0 0 | Cs6g21770.1/Cs6g217 | 5.84 | 0 | 0    | 2 | MASCOT | T      | PLEX8 |       |
| 8.10E-03 | 0 0 | Cs6g21770.1/Cs6g217 | 4    | 0 | 0    | 2 | MASCOT | T      | PLEX8 |       |
| 7.52E-03 | 0 0 | Cs6g21770.1/Cs6g217 | 4    | 0 | 0    | 2 | MASCOT | T      |       |       |
| 4.61E-04 | 0 0 | Cs6g21770.1/Cs6g217 | 4    | 0 | 0    | 2 | MASCOT | T      |       |       |
| 1.12E-01 | 0 0 | Cs6g21770.1/Cs6g217 | 4    | 0 | 0    | 2 | MASCOT | T      |       |       |
| 3.64E-01 | 0 0 | Cs6g21770.1/Cs6g217 | 4    | 0 | 0    | 2 | MASCOT | T      |       |       |
| 9.02E-03 | 0 0 | Cs6g21770.1/Cs6g217 | 4    | 0 | 0    | 2 | MASCOT | T      |       |       |
| 5.18E-03 | 0 0 | Cs6g21770.1/Cs6g217 | 4    | 0 | 0    | 2 | MASCOT | T      |       |       |
| 6.36E-07 | 0 0 | Cs6g21770.1/Cs6g217 | 4    | 0 | 0    | 2 | MASCOT | T      |       |       |
| 6.75E-03 | 0 0 | Cs6g21770.1/Cs6g217 | 4    | 0 | 0    | 2 | MASCOT | T      | PLEX8 |       |
| 6.70E-02 | 0 0 | Cs2g14410.1/Cs2g144 | 4.14 | 0 | 15.9 | 0 | 2      | MASCOT | T     | PLEX8 |
| 6.40E-04 | 0 0 | Cs2g14410.1/Cs2g144 | 4.14 | 0 | 0    | 2 | MASCOT | T      | PLEX8 |       |
| 5.38E-02 | 0 0 | Cs2g14410.1/Cs2g144 | 4.14 | 0 | 0    | 2 | MASCOT | T      | PLEX8 |       |
| 7.92E-03 | 0 0 | Cs2g14410.1/Cs2g144 | 4.14 | 0 | 0    | 2 | MASCOT | T      | PLEX8 |       |
| 8.70E-03 | 0 0 | Cs6g21770.1/Cs6g217 | 4.03 | 0 | 0    | 2 | MASCOT | T      | PLEX8 |       |
| 3.44E-02 | 0 0 | Cs6g21770.1/Cs6g217 | 5.84 | 0 | 0    | 2 | MASCOT | T      |       |       |
| 1.01E-03 | 0 0 | Cs6g21770.1/Cs6g217 | 8.59 | 1 | 15.9 | 0 | 2      | MASCOT | T     | PLEX8 |
| 2.72E-01 | 0 0 | Cs6g21770.1/Cs6g217 | 4.53 | 0 | 0    | 2 | MASCOT | T      | PLEX8 |       |
| 2.54E-02 | 0 0 | Cs6g21770.1/Cs6g217 | 4.53 | 0 | 0    | 2 | MASCOT | T      | PLEX8 |       |
| 4.09E-01 | 0 0 | Cs6g21770.1/Cs6g217 | 4.53 | 0 | 0    | 2 | MASCOT | T      | PLEX8 |       |
| 3.53E-01 | 0 0 | Cs6g21770.1/Cs6g217 | 4.53 | 0 | 0    | 2 | MASCOT | T      |       |       |
| 1.96E-02 | 0 0 | Cs6g21770.1/Cs6g217 | 4.53 | 0 | 0    | 2 | MASCOT | T      | PLEX8 |       |
| 2.44E-02 | 0 0 | Cs6g21770.1/Cs6g217 | 4.53 | 0 | 0    | 2 | MASCOT | T      |       |       |
| 2.47E-01 | 0 0 | Cs6g21760.1/Cs6g217 | 4.53 | 0 | 0    | 2 | MASCOT | T      | PLEX8 |       |
| 9.84E-02 | 0 0 | Cs6g21760.1/Cs6g217 | 4.53 | 0 | 0    | 2 | MASCOT | T      | PLEX8 |       |
| 2.16E-01 | 0 0 | Cs6g21760.1/Cs6g217 | 4.53 | 0 | 0    | 2 | MASCOT | T      | PLEX8 |       |
| 5.56E-02 | 0 0 | Cs6g21760.1/Cs6g217 | 4.53 | 0 | 0    | 2 | MASCOT | T      | PLEX8 |       |
| 2.10E-01 | 0 0 | Cs6g21760.1/Cs6g217 | 4.53 | 0 | 0    | 2 | MASCOT | T      | PLEX8 |       |
| 1.30E-01 | 0 0 | Cs6g21760.1/Cs6g217 | 4.53 | 0 | 0    | 2 | MASCOT | T      | PLEX8 |       |
| 3.88E-01 | 0 0 | Cs6g21760.1/Cs6g217 | 4.53 | 0 | 0    | 2 | MASCOT | T      | PLEX8 |       |
| 8.31E-02 | 0 0 | Cs6g21760.1/Cs6g217 | 4.53 | 0 | 0    | 2 | MASCOT | T      | PLEX8 |       |
| 8.45E-02 | 0 0 | Cs6g21760.1/Cs6g217 | 4.53 | 0 | 0    | 2 | MASCOT | T      | PLEX8 |       |
| 5.25E-04 | 0 0 | Cs6g21770.1/Cs6g217 | 4.75 | 0 | 0    | 2 | MASCOT | T      | PLEX8 |       |
| 9.28E-03 | 0 0 | Cs6g21770.1/Cs6g217 | 4.53 | 0 | 0    | 2 | MASCOT | T      | PLEX8 |       |



|          |     |                     |      |   |   |   |        |   |       |
|----------|-----|---------------------|------|---|---|---|--------|---|-------|
| 7.06E-02 | 0 0 | Cs6g21770.1/Cs6g217 | 4.53 | 0 | 0 | 2 | MASCOT | T | PLEX8 |
| 1.70E-01 | 0 0 | Cs6g21770.1         | 4.03 | 0 | 0 | 2 | MASCOT | T | PLEX8 |
| 3.50E-02 | 0 0 | Cs6g21770.1         | 4.03 | 0 | 0 | 2 | MASCOT | T | PLEX8 |
| 2.53E-02 | 0 0 | Cs6g21770.1         | 4.03 | 0 | 0 | 2 | MASCOT | T | PLEX8 |
| 2.19E-02 | 0 0 | Cs6g21770.1         | 4.03 | 0 | 0 | 2 | MASCOT | T | PLEX8 |
| 2.68E-01 | 0 0 | Cs6g21770.1         | 4.03 | 0 | 0 | 2 | MASCOT | T | PLEX8 |
| 4.49E-03 | 0 0 | Cs6g21770.1/Cs6g217 | 3.84 | 1 | 0 | 2 | MASCOT | T |       |
| 2.43E-05 | 0 0 | Cs6g21770.1/Cs6g217 | 3.84 | 1 | 0 | 2 | MASCOT | T |       |
| 6.99E-05 | 0 0 | Cs6g21770.1/Cs6g217 | 3.84 | 1 | 0 | 2 | MASCOT | T |       |
| 6.88E-07 | 0 0 | Cs6g21770.1/Cs6g217 | 3.84 | 1 | 0 | 2 | MASCOT | T |       |
| 6.30E-08 | 0 0 | Cs6g21770.1/Cs6g217 | 3.84 | 1 | 0 | 2 | MASCOT | T |       |
| 1.29E-04 | 0 0 | Cs6g21770.1/Cs6g217 | 4.53 | 0 | 0 | 2 | MASCOT | T | PLEX8 |
| 6.52E-03 | 0 0 | Cs6g21770.1/Cs6g217 | 4.53 | 0 | 0 | 2 | MASCOT | T | PLEX8 |
| 6.79E-06 | 0 0 | Cs6g21770.1/Cs6g217 | 4.53 | 0 | 0 | 2 | MASCOT | T | PLEX8 |
| 3.30E-04 | 0 0 | Cs6g21770.1/Cs6g217 | 4.53 | 0 | 0 | 2 | MASCOT | T | PLEX8 |
| 7.40E-02 | 0 0 | Cs6g21770.1/Cs6g217 | 4.53 | 0 | 0 | 2 | MASCOT | T | PLEX8 |
| 9.35E-02 | 0 0 | Cs6g21770.1/Cs6g217 | 4.53 | 0 | 0 | 2 | MASCOT | T | PLEX8 |
| 1.35E-01 | 0 0 | Cs6g21770.1/Cs6g217 | 4.53 | 0 | 0 | 2 | MASCOT | T | PLEX8 |
| 9.19E-02 | 0 0 | Cs6g21770.1/Cs6g217 | 4.53 | 0 | 0 | 2 | MASCOT | T | PLEX8 |
| 7.13E-02 | 0 0 | Cs6g21770.1/Cs6g217 | 4.53 | 0 | 0 | 2 | MASCOT | T | PLEX8 |
| 1.53E-01 | 0 0 | Cs6g21770.1/Cs6g217 | 5.81 | 0 | 0 | 2 | MASCOT | T | PLEX8 |
| 2.45E-03 | 0 0 | Cs6g21770.1/Cs6g217 | 5.81 | 0 | 0 | 2 | MASCOT | T | PLEX8 |
| 2.20E-03 | 0 0 | Cs6g21770.1/Cs6g217 | 5.81 | 0 | 0 | 2 | MASCOT | T | PLEX8 |
| 3.76E-02 | 0 0 | Cs6g21770.1/Cs6g217 | 5.81 | 0 | 0 | 2 | MASCOT | T | PLEX8 |
| 6.59E-02 | 0 0 | Cs6g21770.1/Cs6g217 | 5.81 | 0 | 0 | 2 | MASCOT | T | PLEX8 |
| 5.52E-02 | 0 0 | Cs6g21770.1/Cs6g217 | 5.81 | 0 | 0 | 2 | MASCOT | T | PLEX8 |
| 4.10E-02 | 0 0 | Cs6g21770.1/Cs6g217 | 5.81 | 0 | 0 | 2 | MASCOT | T | PLEX8 |
| 5.30E-02 | 0 0 | Cs6g21770.1/Cs6g217 | 5.81 | 0 | 0 | 2 | MASCOT | T | PLEX8 |
| 1.22E-02 | 0 0 | Cs6g21770.1/Cs6g217 | 6.92 | 0 | 0 | 2 | MASCOT | T | PLEX8 |
| 4.34E-02 | 0 0 | Cs6g21770.1/Cs6g217 | 6.92 | 0 | 0 | 2 | MASCOT | T | PLEX8 |
| 1.08E-02 | 0 0 | Cs6g21770.1/Cs6g217 | 6.92 | 0 | 0 | 2 | MASCOT | T | PLEX8 |
| 1.27E-02 | 0 0 | Cs6g21770.1/Cs6g217 | 6.92 | 0 | 0 | 2 | MASCOT | T | PLEX8 |
| 9.96E-03 | 0 0 | Cs6g21770.1/Cs6g217 | 6.92 | 0 | 0 | 2 | MASCOT | T | PLEX8 |
| 2.80E-02 | 0 0 | Cs6g21770.1/Cs6g217 | 6.92 | 0 | 0 | 2 | MASCOT | T | PLEX8 |
| 9.28E-03 | 0 0 | Cs6g21770.1/Cs6g217 | 6.92 | 0 | 0 | 2 | MASCOT | T | PLEX8 |
| 1.17E-02 | 0 0 | Cs6g21770.1/Cs6g217 | 6.92 | 0 | 0 | 2 | MASCOT | T | PLEX8 |
| 6.35E-03 | 0 0 | Cs6g21770.1/Cs6g217 | 6.92 | 0 | 0 | 2 | MASCOT | T | PLEX8 |
| 2.85E-02 | 0 0 | Cs6g21770.1/Cs6g217 | 6.92 | 0 | 0 | 2 | MASCOT | T | PLEX8 |
| 3.26E-02 | 0 0 | Cs6g21770.1/Cs6g217 | 6.92 | 0 | 0 | 2 | MASCOT | T |       |
| 4.63E-02 | 0 0 | Cs6g21770.1/Cs6g217 | 6.92 | 0 | 0 | 2 | MASCOT | T |       |
| 4.97E-02 | 0 0 | Cs6g21770.1/Cs6g217 | 6.92 | 0 | 0 | 2 | MASCOT | T |       |
| 1.09E-04 | 0 0 | Cs6g11350.1/Cs6g113 | 4.25 | 0 | 0 | 2 | MASCOT | T | PLEX8 |
| 1.24E-01 | 0 0 | Cs6g11350.1/Cs6g113 | 4.32 | 1 | 0 | 2 | MASCOT | T | PLEX8 |
| 1.74E-01 | 0 0 | Cs6g11350.1/Cs6g113 | 6.1  | 0 | 0 | 2 | MASCOT | T | PLEX8 |
| 5.57E-04 | 0 0 | Cs6g11350.1/Cs6g113 | 4.75 | 0 | 0 | 2 | MASCOT | T | PLEX8 |
| 9.10E-03 | 0 0 | Cs6g11350.1/Cs6g113 | 4.75 | 0 | 0 | 2 | MASCOT | T | PLEX8 |
| 6.26E-02 | 0 0 | Cs6g11350.1/Cs6g113 | 4.56 | 0 | 0 | 2 | MASCOT | T | PLEX8 |
| 7.10E-03 | 0 0 | Cs6g11350.1/Cs6g113 | 4.25 | 0 | 0 | 2 | MASCOT | T | PLEX8 |
| 9.48E-02 | 0 0 | Cs6g11350.1/Cs6g113 | 4.25 | 0 | 0 | 2 | MASCOT | T | PLEX8 |
| 1.34E-03 | 0 0 | Cs6g11350.1/Cs6g113 | 4.25 | 0 | 0 | 2 | MASCOT | T | PLEX8 |
| 4.18E-03 | 0 0 | Cs6g11350.1/Cs6g113 | 4.25 | 0 | 0 | 2 | MASCOT | T | PLEX8 |

|          |     |                     |      |   |   |   |        |   |       |
|----------|-----|---------------------|------|---|---|---|--------|---|-------|
| 4.49E-06 | 0 0 | Cs6g11350.1/Cs6g113 | 5.33 | 0 | 0 | 2 | MASCOT | T |       |
| 2.15E-01 | 0 0 | Cs6g11350.1/Cs6g113 | 4.09 | 0 | 0 | 2 | MASCOT | T | PLEX8 |
| 1.50E-04 | 0 0 | Cs6g11350.1/Cs6g113 | 4.09 | 0 | 0 | 2 | MASCOT | T | PLEX8 |
| 4.19E-04 | 0 0 | Cs6g11350.1/Cs6g113 | 4.25 | 0 | 0 | 2 | MASCOT | T | PLEX8 |
| 2.10E-03 | 0 0 | Cs6g11350.1/Cs6g113 | 4.25 | 0 | 0 | 2 | MASCOT | T | PLEX8 |
| 2.87E-05 | 0 0 | Cs6g11350.1/Cs6g113 | 4.25 | 0 | 0 | 2 | MASCOT | T | PLEX8 |
| 1.37E-02 | 0 0 | Cs6g11350.1/Cs6g113 | 4.25 | 0 | 0 | 2 | MASCOT | T | PLEX8 |
| 1.03E-01 | 0 0 | Cs6g11350.1/Cs6g113 | 6    | 0 | 0 | 2 | MASCOT | T |       |
| 9.55E-02 | 0 0 | Cs6g11350.1/Cs6g113 | 8.75 | 0 | 0 | 2 | MASCOT | T | PLEX8 |
| 1.76E-01 | 0 0 | Cs6g11350.1/Cs6g113 | 8.75 | 0 | 0 | 2 | MASCOT | T | PLEX8 |
| 6.20E-04 | 0 0 | Cs6g11350.1/Cs6g113 | 4.25 | 0 | 0 | 2 | MASCOT | T | PLEX8 |
| 2.41E-03 | 0 0 | Cs6g11350.1/Cs6g113 | 4.25 | 0 | 0 | 2 | MASCOT | T | PLEX8 |
| 6.26E-02 | 0 0 | Cs6g11350.1/Cs6g113 | 4.25 | 0 | 0 | 2 | MASCOT | T | PLEX8 |
| 1.02E-01 | 0 0 | Cs6g11350.1/Cs6g113 | 4.53 | 0 | 0 | 2 | MASCOT | T | PLEX8 |
| 2.06E-01 | 0 0 | Cs6g11350.1/Cs6g113 | 6    | 0 | 0 | 2 | MASCOT | T | PLEX8 |
| 2.02E-01 | 0 0 | Cs6g11350.1/Cs6g113 | 6    | 0 | 0 | 2 | MASCOT | T | PLEX8 |
| 3.70E-03 | 0 0 | Cs6g11350.1/Cs6g113 | 4.25 | 0 | 0 | 2 | MASCOT | T |       |
| 3.66E-03 | 0 0 | Cs6g11350.1/Cs6g113 | 4.25 | 0 | 0 | 2 | MASCOT | T |       |
| 3.49E-04 | 0 0 | Cs6g11350.1/Cs6g113 | 4.25 | 0 | 0 | 2 | MASCOT | T |       |
| 3.07E-02 | 0 0 | Cs6g11350.1/Cs6g113 | 4.25 | 0 | 0 | 2 | MASCOT | T | PLEX8 |
| 4.12E-03 | 0 0 | Cs6g11350.1/Cs6g113 | 4.25 | 0 | 0 | 2 | MASCOT | T | PLEX8 |
| 2.67E-04 | 0 0 | Cs6g11350.1/Cs6g113 | 4.75 | 0 | 0 | 2 | MASCOT | T | PLEX8 |
| 3.00E-04 | 0 0 | Cs6g11350.1/Cs6g113 | 4.14 | 0 | 0 | 2 | MASCOT | T |       |
| 2.44E-01 | 0 0 | Cs6g11350.1/Cs6g113 | 4.53 | 0 | 0 | 2 | MASCOT | T | PLEX8 |
| 4.42E-02 | 0 0 | Cs6g11350.1/Cs6g113 | 4.25 | 0 | 0 | 2 | MASCOT | T |       |
| 2.20E-04 | 0 0 | Cs6g11350.1/Cs6g113 | 4.25 | 0 | 0 | 2 | MASCOT | T |       |
| 1.16E-01 | 0 0 | Cs6g11350.1/Cs6g113 | 4.14 | 0 | 0 | 2 | MASCOT | T | PLEX8 |
| 2.85E-01 | 0 0 | Cs6g11350.1/Cs6g113 | 4.14 | 0 | 0 | 2 | MASCOT | T | PLEX8 |
| 1.74E-01 | 0 0 | Cs6g11350.1/Cs6g113 | 4.14 | 0 | 0 | 2 | MASCOT | T | PLEX8 |
| 8.96E-02 | 0 0 | Cs6g11350.1/Cs6g113 | 4.25 | 0 | 0 | 2 | MASCOT | T |       |
| 3.56E-03 | 0 0 | Cs6g11350.1/Cs6g113 | 6    | 0 | 0 | 2 | MASCOT | T | PLEX8 |
| 5.38E-05 | 0 0 | Cs6g11350.1/Cs6g113 | 4.25 | 0 | 0 | 2 | MASCOT | T | PLEX8 |
| 8.38E-05 | 0 0 | Cs6g11350.1/Cs6g113 | 4.25 | 0 | 0 | 2 | MASCOT | T | PLEX8 |
| 6.11E-02 | 0 0 | Cs6g11350.1/Cs6g113 | 4.25 | 0 | 0 | 2 | MASCOT | T | PLEX8 |
| 5.05E-03 | 0 0 | Cs6g11350.1/Cs6g113 | 4.14 | 0 | 0 | 2 | MASCOT | T | PLEX8 |
| 7.21E-02 | 0 0 | Cs6g11350.1/Cs6g113 | 4.14 | 0 | 0 | 2 | MASCOT | T | PLEX8 |
| 2.22E-01 | 0 0 | Cs6g11350.1/Cs6g113 | 4.53 | 0 | 0 | 2 | MASCOT | T | PLEX8 |
| 1.05E-04 | 0 0 | Cs6g11350.1/Cs6g113 | 4.53 | 0 | 0 | 2 | MASCOT | T |       |
| 2.86E-03 | 0 0 | Cs6g11350.1/Cs6g113 | 4    | 0 | 0 | 2 | MASCOT | T | PLEX8 |
| 5.43E-02 | 0 0 | Cs6g11350.1/Cs6g113 | 4.53 | 0 | 0 | 2 | MASCOT | T | PLEX8 |
| 3.30E-02 | 0 0 | Cs6g11350.1/Cs6g113 | 4.53 | 0 | 0 | 2 | MASCOT | T | PLEX8 |
| 1.64E-02 | 0 0 | Cs6g11350.1/Cs6g113 | 4.25 | 0 | 0 | 2 | MASCOT | T | PLEX8 |
| 5.17E-03 | 0 0 | Cs6g11350.1/Cs6g113 | 6    | 0 | 0 | 2 | MASCOT | T | PLEX8 |
| 2.73E-03 | 0 0 | Cs6g11350.1/Cs6g113 | 6    | 0 | 0 | 2 | MASCOT | T | PLEX8 |
| 1.74E-03 | 0 0 | Cs6g11350.1/Cs6g113 | 4.21 | 0 | 0 | 2 | MASCOT | T | PLEX8 |
| 2.21E-01 | 0 0 | Cs6g11350.1/Cs6g113 | 6    | 0 | 0 | 2 | MASCOT | T | PLEX8 |
| 3.60E-02 | 0 0 | Cs6g11350.1/Cs6g113 | 4.37 | 0 | 0 | 2 | MASCOT | T | PLEX8 |
| 1.19E-03 | 0 0 | Cs6g11350.1/Cs6g113 | 3.92 | 0 | 0 | 2 | MASCOT | T | PLEX8 |
| 4.37E-02 | 0 0 | Cs6g11350.1/Cs6g113 | 6.47 | 0 | 0 | 2 | MASCOT | T | PLEX8 |
| 1.53E-03 | 0 0 | Cs6g11350.1/Cs6g113 | 4.65 | 0 | 0 | 2 | MASCOT | T | PLEX8 |
| 8.63E-04 | 0 0 | Cs6g11350.1/Cs6g113 | 4.65 | 0 | 0 | 2 | MASCOT | T | PLEX8 |

|          |     |                     |      |   |      |   |        |        |       |       |
|----------|-----|---------------------|------|---|------|---|--------|--------|-------|-------|
| 4.35E-03 | 0 0 | Cs6g11350.1/Cs6g113 | 4.25 | 0 | 0    | 2 | MASCOT | T      | PLEX8 |       |
| 2.96E-04 | 0 0 | Cs6g11350.1/Cs6g113 | 4.25 | 0 | 0    | 2 | MASCOT | T      | PLEX8 |       |
| 6.81E-03 | 0 0 | Cs7g31810.1/Cs7g318 | 8.63 | 0 | 0    | 2 | MASCOT | T      | PLEX8 |       |
| 3.78E-03 | 0 0 | Cs7g31810.1/Cs7g318 | 4.83 | 0 | 0    | 2 | MASCOT | T      |       |       |
| 3.07E-01 | 0 0 | Cs7g31810.1/Cs7g318 | 6.05 | 0 | 0    | 2 | MASCOT | T      |       |       |
| 7.02E-06 | 0 0 | Cs7g31810.1/Cs7g318 | 4.37 | 0 | 0    | 2 | MASCOT | T      | PLEX8 |       |
| 2.17E-01 | 0 0 | Cs7g31810.1/Cs7g318 | 6    | 0 | 0    | 2 | MASCOT | T      |       |       |
| 6.45E-02 | 0 0 | Cs7g31810.1/Cs7g318 | 6    | 0 | 0    | 2 | MASCOT | T      |       |       |
| 4.57E-08 | 0 0 | Cs7g31810.1/Cs7g318 | 4.41 | 0 | 15.9 | 0 | 2      | MASCOT | T     | PLEX8 |
| 2.07E-07 | 0 0 | Cs7g31810.1/Cs7g318 | 4.41 | 0 | 15.9 | 0 | 2      | MASCOT | T     | PLEX8 |
| 6.08E-06 | 0 0 | Cs7g31810.1/Cs7g318 | 4.41 | 0 | 15.9 | 0 | 2      | MASCOT | T     |       |
| 3.84E-08 | 0 0 | Cs7g31810.1/Cs7g318 | 4.41 | 0 | 15.9 | 0 | 2      | MASCOT | T     |       |
| 5.74E-06 | 0 0 | Cs7g31810.1/Cs7g318 | 4.41 | 0 | 0    | 2 | MASCOT | T      | PLEX8 |       |
| 7.13E-02 | 0 0 | Cs7g31810.1/Cs7g318 | 4.37 | 0 | 15.9 | 0 | 2      | MASCOT | T     | PLEX8 |
| 8.26E-02 | 0 0 | Cs7g31810.1/Cs7g318 | 4.37 | 0 | 0    | 2 | MASCOT | T      | PLEX8 |       |
| 5.41E-06 | 0 0 | Cs7g31810.1/Cs7g318 | 5.4  | 0 | 0    | 2 | MASCOT | T      | PLEX8 |       |
| 6.90E-05 | 0 0 | Cs7g31810.1/Cs7g318 | 5.4  | 0 | 0    | 2 | MASCOT | T      | PLEX8 |       |
| 3.97E-02 | 0 0 | Cs7g31810.1/Cs7g318 | 8.75 | 0 | 0    | 2 | MASCOT | T      | PLEX8 |       |
| 2.19E-03 | 0 0 | Cs7g31810.1/Cs7g318 | 8.75 | 0 | 0    | 2 | MASCOT | T      | PLEX8 |       |
| 1.29E-01 | 0 0 | Cs7g31810.1/Cs7g318 | 5.96 | 0 | 0    | 2 | MASCOT | T      | PLEX8 |       |
| 1.09E-02 | 0 0 | Cs7g31810.1/Cs7g318 | 4.41 | 0 | 0    | 2 | MASCOT | T      | PLEX8 |       |
| 1.42E-01 | 0 0 | Cs7g31810.1/Cs7g318 | 4.37 | 0 | 0    | 2 | MASCOT | T      | PLEX8 |       |
| 1.71E-01 | 0 0 | Cs7g31810.1/Cs7g318 | 4.37 | 0 | 0    | 2 | MASCOT | T      | PLEX8 |       |
| 1.08E-01 | 0 0 | Cs7g31810.1/Cs7g318 | 4.37 | 0 | 0    | 2 | MASCOT | T      | PLEX8 |       |
| 2.11E-02 | 0 0 | Cs7g31810.1/Cs7g318 | 5.45 | 1 | 0    | 2 | MASCOT | T      | PLEX8 |       |
| 1.91E-03 | 0 0 | Cs7g31810.1/Cs7g318 | 8.47 | 0 | 0    | 2 | MASCOT | T      | PLEX8 |       |
| 9.35E-02 | 0 0 | Cs7g31810.1/Cs7g318 | 8.47 | 0 | 0    | 2 | MASCOT | T      | PLEX8 |       |
| 1.11E-04 | 0 0 | Cs7g31810.1/Cs7g318 | 8.47 | 0 | 0    | 2 | MASCOT | T      | PLEX8 |       |
| 1.31E-05 | 0 0 | Cs7g31810.1/Cs7g318 | 8.47 | 0 | 0    | 2 | MASCOT | T      | PLEX8 |       |
| 5.34E-04 | 0 0 | Cs7g31810.1/Cs7g318 | 4.37 | 0 | 0    | 2 | MASCOT | T      |       |       |
| 7.86E-05 | 0 0 | Cs7g31810.1/Cs7g318 | 4.37 | 0 | 0    | 2 | MASCOT | T      |       |       |
| 3.04E-03 | 0 0 | Cs7g31810.1/Cs7g318 | 4.37 | 0 | 0    | 2 | MASCOT | T      |       |       |
| 2.28E-02 | 0 0 | Cs7g31810.1/Cs7g318 | 5.93 | 0 | 0    | 2 | MASCOT | T      | PLEX8 |       |
| 1.27E-02 | 0 0 | Cs7g31810.1/Cs7g318 | 5.93 | 0 | 0    | 2 | MASCOT | T      | PLEX8 |       |
| 2.55E-04 | 0 0 | Cs7g31810.1/Cs7g318 | 5.32 | 0 | 0    | 2 | MASCOT | T      | PLEX8 |       |
| 3.26E-01 | 0 0 | Cs7g31810.1/Cs7g318 | 5.32 | 0 | 0    | 2 | MASCOT | T      | PLEX8 |       |
| 1.90E-01 | 0 0 | Cs7g31810.1/Cs7g318 | 8.73 | 0 | 0    | 2 | MASCOT | T      | PLEX8 |       |
| 9.23E-03 | 0 0 | Cs7g31810.1/Cs7g318 | 4.37 | 0 | 0    | 2 | MASCOT | T      | PLEX8 |       |
| 1.64E-04 | 0 0 | Cs7g31810.1/Cs7g318 | 6    | 0 | 0    | 2 | MASCOT | T      | PLEX8 |       |
| 1.29E-02 | 0 0 | Cs7g31810.1/Cs7g318 | 4.37 | 0 | 15.9 | 0 | 2      | MASCOT | T     | PLEX8 |
| 3.04E-03 | 0 0 | Cs7g31810.1/Cs7g318 | 4.37 | 0 | 15.9 | 0 | 2      | MASCOT | T     |       |
| 6.63E-02 | 0 0 | Cs7g31810.1/Cs7g318 | 4.37 | 0 | 15.9 | 0 | 2      | MASCOT | T     | PLEX8 |
| 9.03E-02 | 0 0 | Cs7g31810.1/Cs7g318 | 4.37 | 0 | 0    | 2 | MASCOT | T      | PLEX8 |       |
| 1.79E-01 | 0 0 | Cs7g31810.1/Cs7g318 | 4.37 | 0 | 0    | 2 | MASCOT | T      | PLEX8 |       |
| 1.04E-02 | 0 0 | Cs7g31810.1/Cs7g318 | 4.37 | 0 | 0    | 2 | MASCOT | T      | PLEX8 |       |
| 6.04E-02 | 0 0 | Cs7g31810.1/Cs7g318 | 6.92 | 0 | 15.9 | 0 | 2      | MASCOT | T     | PLEX8 |
| 8.59E-04 | 0 0 | Cs7g31810.1/Cs7g318 | 6.92 | 0 | 15.9 | 0 | 2      | MASCOT | T     | PLEX8 |
| 1.14E-02 | 0 0 | Cs7g31810.1/Cs7g318 | 6.92 | 0 | 15.9 | 0 | 2      | MASCOT | T     | PLEX8 |
| 4.28E-04 | 0 0 | Cs7g31810.1/Cs7g318 | 6.92 | 0 | 15.9 | 0 | 2      | MASCOT | T     | PLEX8 |
| 6.79E-04 | 0 0 | Cs7g31810.1/Cs7g318 | 6.92 | 0 | 15.9 | 0 | 2      | MASCOT | T     | PLEX8 |
| 8.21E-04 | 0 0 | Cs7g31810.1/Cs7g318 | 6.92 | 0 | 15.9 | 0 | 2      | MASCOT | T     | PLEX8 |

|          |     |                     |      |   |      |   |        |        |       |       |
|----------|-----|---------------------|------|---|------|---|--------|--------|-------|-------|
| 8.98E-04 | 0 0 | Cs7g31810.1/Cs7g318 | 6.92 | 0 | 0    | 2 | MASCOT | T      | PLEX8 |       |
| 2.42E-04 | 0 0 | Cs7g31810.1/Cs7g318 | 6.92 | 0 | 0    | 2 | MASCOT | T      | PLEX8 |       |
| 4.71E-01 | 0 0 | Cs7g31810.1/Cs7g318 | 8.76 | 0 | 0    | 2 | MASCOT | T      |       |       |
| 5.80E-05 | 0 0 | Cs7g31810.1/Cs7g318 | 9.76 | 0 | 0    | 2 | MASCOT | T      | PLEX8 |       |
| 5.58E-02 | 0 0 | Cs7g31810.1/Cs7g318 | 9.76 | 0 | 0    | 2 | MASCOT | T      | PLEX8 |       |
| 3.71E-02 | 0 0 | Cs7g31810.1/Cs7g318 | 9.76 | 0 | 0    | 2 | MASCOT | T      | PLEX8 |       |
| 5.90E-05 | 0 0 | Cs7g31810.1/Cs7g318 | 9.76 | 0 | 0    | 2 | MASCOT | T      | PLEX8 |       |
| 2.31E-02 | 0 0 | Cs7g31810.1/Cs7g318 | 9.76 | 0 | 0    | 2 | MASCOT | T      |       |       |
| 1.41E-01 | 0 0 | Cs7g31810.1/Cs7g318 | 9.76 | 0 | 0    | 2 | MASCOT | T      |       |       |
| 3.89E-04 | 0 0 | Cs7g31810.1/Cs7g318 | 4.37 | 0 | 0    | 2 | MASCOT | T      |       |       |
| 1.13E-01 | 0 0 | Cs7g31810.1/Cs7g318 | 4.53 | 0 | 0    | 2 | MASCOT | T      | PLEX8 |       |
| 2.62E-02 | 0 0 | Cs7g31810.1/Cs7g318 | 4.53 | 0 | 0    | 2 | MASCOT | T      | PLEX8 |       |
| 1.90E-03 | 0 0 | Cs7g31810.1/Cs7g318 | 6    | 0 | 0    | 2 | MASCOT | T      | PLEX8 |       |
| 7.10E-02 | 0 0 | Cs7g31810.1/Cs7g318 | 4.53 | 0 | 0    | 2 | MASCOT | T      | PLEX8 |       |
| 2.67E-05 | 0 0 | Cs7g31810.1/Cs7g318 | 4.65 | 0 | 0    | 2 | MASCOT | T      | PLEX8 |       |
| 2.61E-04 | 0 0 | Cs7g31810.1/Cs7g318 | 4.65 | 0 | 0    | 2 | MASCOT | T      |       |       |
| 1.90E-06 | 0 0 | Cs7g31810.1/Cs7g318 | 4.65 | 0 | 0    | 2 | MASCOT | T      | PLEX8 |       |
| 6.84E-07 | 0 0 | Cs7g31810.1/Cs7g318 | 4.65 | 0 | 0    | 2 | MASCOT | T      |       |       |
| 6.07E-02 | 0 0 | Cs7g31810.1/Cs7g318 | 8.41 | 0 | 0    | 2 | MASCOT | T      | PLEX8 |       |
| 9.70E-02 | 0 0 | Cs7g31810.1/Cs7g318 | 8.41 | 0 | 0    | 2 | MASCOT | T      | PLEX8 |       |
| 1.95E-02 | 0 0 | Cs7g31810.1/Cs7g318 | 5.97 | 0 | 0    | 2 | MASCOT | T      | PLEX8 |       |
| 3.05E-01 | 0 0 | Cs7g31810.1/Cs7g318 | 5.97 | 0 | 15.9 | 0 | 2      | MASCOT | T     |       |
| 3.28E-02 | 0 0 | Cs7g31810.1/Cs7g318 | 5.97 | 0 | 0    | 2 | MASCOT | T      |       |       |
| 2.17E-02 | 0 0 | Cs7g31810.1/Cs7g318 | 5.97 | 0 | 0    | 2 | MASCOT | T      |       |       |
| 8.47E-02 | 0 0 | Cs7g31810.1/Cs7g318 | 5.81 | 0 | 0    | 2 | MASCOT | T      | PLEX8 |       |
| 9.80E-06 | 0 0 | Cs7g31810.1/Cs7g318 | 5.81 | 0 | 0    | 2 | MASCOT | T      | PLEX8 |       |
| 3.07E-04 | 0 0 | Cs7g31810.1/Cs7g318 | 5.81 | 0 | 0    | 2 | MASCOT | T      | PLEX8 |       |
| 6.21E-06 | 0 0 | Cs7g31810.1/Cs7g318 | 5.81 | 0 | 0    | 2 | MASCOT | T      | PLEX8 |       |
| 6.27E-05 | 0 0 | Cs7g31810.1/Cs7g318 | 5.81 | 0 | 0    | 2 | MASCOT | T      | PLEX8 |       |
| 1.98E-01 | 0 0 | Cs8g16700.1/Cs8g167 | 6.05 | 0 | 0    | 2 | MASCOT | T      | PLEX8 |       |
| 4.52E-01 | 0 0 | Cs8g16700.1/Cs8g167 | 6.05 | 0 | 0    | 2 | MASCOT | T      | PLEX8 |       |
| 3.08E-01 | 0 0 | Cs8g16700.1/Cs8g167 | 6.05 | 0 | 0    | 2 | MASCOT | T      | PLEX8 |       |
| 4.25E-01 | 0 0 | Cs8g16700.1/Cs8g167 | 6.05 | 0 | 0    | 2 | MASCOT | T      | PLEX8 |       |
| 5.08E-02 | 0 0 | Cs8g16700.1/Cs8g167 | 6.05 | 0 | 0    | 2 | MASCOT | T      | PLEX8 |       |
| 3.87E-01 | 0 0 | Cs8g16700.1/Cs8g167 | 6.05 | 0 | 0    | 2 | MASCOT | T      |       |       |
| 1.97E-01 | 0 0 | Cs8g16700.1/Cs8g167 | 6.05 | 0 | 0    | 2 | MASCOT | T      | PLEX8 |       |
| 3.56E-01 | 0 0 | Cs8g16700.1/Cs8g167 | 6.05 | 0 | 0    | 2 | MASCOT | T      |       |       |
| 3.14E-01 | 0 0 | Cs8g16700.1/Cs8g167 | 6.05 | 0 | 0    | 2 | MASCOT | T      | PLEX8 |       |
| 3.29E-01 | 0 0 | Cs8g16700.1/Cs8g167 | 6.05 | 0 | 0    | 2 | MASCOT | T      | PLEX8 |       |
| 3.28E-01 | 0 0 | Cs8g16700.1/Cs8g167 | 6.05 | 0 | 0    | 2 | MASCOT | T      |       |       |
| 3.38E-04 | 0 0 | Cs8g16700.1/Cs8g167 | 8.79 | 0 | 15.9 | 0 | 2      | MASCOT | T     | PLEX8 |
| 2.97E-04 | 0 0 | Cs8g16700.1/Cs8g167 | 8.79 | 0 | 15.9 | 0 | 2      | MASCOT | T     |       |
| 3.77E-02 | 0 0 | Cs8g16700.1/Cs8g167 | 8.79 | 0 | 15.9 | 0 | 2      | MASCOT | T     |       |
| 2.73E-03 | 0 0 | Cs8g16700.1/Cs8g167 | 8.79 | 0 | 15.9 | 0 | 2      | MASCOT | T     |       |
| 1.69E-02 | 0 0 | Cs8g16700.1/Cs8g167 | 8.79 | 0 | 15.9 | 0 | 2      | MASCOT | T     | PLEX8 |
| 8.50E-02 | 0 0 | Cs8g16700.1/Cs8g167 | 8.79 | 0 | 0    | 2 | MASCOT | T      | PLEX8 |       |
| 9.05E-03 | 0 0 | Cs8g16700.1/Cs8g167 | 8.79 | 0 | 0    | 2 | MASCOT | T      | PLEX8 |       |
| 4.83E-04 | 0 0 | Cs8g16700.1/Cs8g167 | 8.79 | 0 | 0    | 2 | MASCOT | T      | PLEX8 |       |
| 9.45E-04 | 0 0 | Cs8g16700.1/Cs8g167 | 8.79 | 0 | 0    | 2 | MASCOT | T      |       |       |
| 4.78E-04 | 0 0 | Cs8g16700.1/Cs8g167 | 8.79 | 0 | 0    | 2 | MASCOT | T      |       |       |
| 1.37E-04 | 0 0 | Cs8g16700.1/Cs8g167 | 8.79 | 0 | 0    | 2 | MASCOT | T      |       |       |

|          |     |                     |      |   |      |   |        |        |       |       |
|----------|-----|---------------------|------|---|------|---|--------|--------|-------|-------|
| 3.46E-04 | 0 0 | Cs8g16700.1/Cs8g167 | 8.79 | 0 | 0    | 2 | MASCOT | T      |       |       |
| 1.59E-04 | 0 0 | Cs8g16700.1/Cs8g167 | 8.79 | 0 | 0    | 2 | MASCOT | T      |       |       |
| 4.68E-03 | 0 0 | Cs8g16700.1/Cs8g167 | 8.79 | 0 | 0    | 2 | MASCOT | T      | PLEX8 |       |
| 5.23E-03 | 0 0 | Cs8g16700.1/Cs8g167 | 8.79 | 0 | 0    | 2 | MASCOT | T      | PLEX8 |       |
| 2.28E-03 | 0 0 | Cs8g16700.1/Cs8g167 | 4.03 | 0 | 15.9 | 0 | 2      | MASCOT | T     | PLEX8 |
| 1.97E-02 | 0 0 | Cs8g16700.1/Cs8g167 | 4.03 | 0 | 15.9 | 0 | 2      | MASCOT | T     | PLEX8 |
| 5.27E-05 | 0 0 | Cs8g16700.1/Cs8g167 | 4.03 | 0 | 0    | 2 | MASCOT | T      | PLEX8 |       |
| 1.09E-03 | 0 0 | Cs8g16700.1/Cs8g167 | 4.03 | 0 | 0    | 2 | MASCOT | T      |       |       |
| 4.06E-02 | 0 0 | Cs8g16700.1/Cs8g167 | 4.03 | 0 | 0    | 2 | MASCOT | T      | PLEX8 |       |
| 4.29E-04 | 0 0 | Cs8g16700.1/Cs8g167 | 4.21 | 0 | 0    | 2 | MASCOT | T      |       |       |
| 2.10E-02 | 0 0 | Cs8g16700.1/Cs8g167 | 4.14 | 0 | 15.9 | 0 | 2      | MASCOT | T     |       |
| 6.34E-02 | 0 0 | Cs8g16700.1/Cs8g167 | 4.14 | 0 | 15.9 | 0 | 2      | MASCOT | T     |       |
| 6.38E-05 | 0 0 | Cs8g16700.1/Cs8g167 | 4.14 | 0 | 15.9 | 0 | 2      | MASCOT | T     |       |
| 4.16E-02 | 0 0 | Cs8g16700.1/Cs8g167 | 4.14 | 0 | 15.9 | 0 | 2      | MASCOT | T     |       |
| 3.41E-02 | 0 0 | Cs8g16700.1/Cs8g167 | 4.14 | 0 | 0    | 2 | MASCOT | T      |       |       |
| 5.05E-04 | 0 0 | Cs8g16700.1/Cs8g167 | 4.14 | 0 | 0    | 2 | MASCOT | T      |       |       |
| 1.70E-03 | 0 0 | Cs8g16700.1/Cs8g167 | 4.14 | 0 | 0    | 2 | MASCOT | T      |       |       |
| 8.86E-04 | 0 0 | Cs8g16700.1/Cs8g167 | 4.14 | 0 | 0    | 2 | MASCOT | T      |       |       |
| 1.90E-02 | 0 0 | Cs8g16700.1/Cs8g167 | 4    | 0 | 0    | 2 | MASCOT | T      | PLEX8 |       |
| 4.54E-02 | 0 0 | Cs8g16700.1/Cs8g167 | 4    | 0 | 0    | 2 | MASCOT | T      |       |       |
| 4.20E-02 | 0 0 | Cs8g16700.1/Cs8g167 | 4.32 | 0 | 0    | 2 | MASCOT | T      |       |       |
| 5.19E-02 | 0 0 | Cs8g16700.1/Cs8g167 | 5.84 | 0 | 0    | 2 | MASCOT | T      | PLEX8 |       |
| 8.65E-02 | 0 0 | Cs8g16700.1/Cs8g167 | 5.84 | 0 | 0    | 2 | MASCOT | T      | PLEX8 |       |
| 5.04E-02 | 0 0 | Cs8g16700.1/Cs8g167 | 5.84 | 0 | 0    | 2 | MASCOT | T      | PLEX8 |       |
| 2.98E-01 | 0 0 | Cs8g16700.1/Cs8g167 | 5.84 | 0 | 0    | 2 | MASCOT | T      | PLEX8 |       |
| 1.77E-01 | 0 0 | Cs8g16700.1/Cs8g167 | 5.84 | 0 | 0    | 2 | MASCOT | T      | PLEX8 |       |
| 5.68E-02 | 0 0 | Cs8g16700.1/Cs8g167 | 5.84 | 0 | 0    | 2 | MASCOT | T      | PLEX8 |       |
| 7.40E-02 | 0 0 | Cs8g16700.1/Cs8g167 | 5.84 | 0 | 0    | 2 | MASCOT | T      | PLEX8 |       |
| 3.83E-02 | 0 0 | Cs8g16700.1/Cs8g167 | 5.84 | 0 | 0    | 2 | MASCOT | T      | PLEX8 |       |
| 3.46E-02 | 0 0 | Cs8g16700.1/Cs8g167 | 5.84 | 0 | 0    | 2 | MASCOT | T      | PLEX8 |       |
| 5.20E-02 | 0 0 | Cs8g16700.1/Cs8g167 | 5.84 | 0 | 0    | 2 | MASCOT | T      | PLEX8 |       |
| 2.53E-01 | 0 0 | Cs8g16700.1/Cs8g167 | 5.84 | 0 | 0    | 2 | MASCOT | T      | PLEX8 |       |
| 2.93E-02 | 0 0 | Cs8g16700.1/Cs8g167 | 5.84 | 0 | 0    | 2 | MASCOT | T      | PLEX8 |       |
| 3.67E-01 | 0 0 | Cs8g16700.1/Cs8g167 | 5.84 | 0 | 0    | 2 | MASCOT | T      | PLEX8 |       |
| 5.05E-02 | 0 0 | Cs8g16700.1/Cs8g167 | 5.84 | 0 | 0    | 2 | MASCOT | T      | PLEX8 |       |
| 8.35E-02 | 0 0 | Cs8g16700.1/Cs8g167 | 5.84 | 0 | 0    | 2 | MASCOT | T      | PLEX8 |       |
| 6.80E-02 | 0 0 | Cs8g16700.1/Cs8g167 | 5.84 | 0 | 0    | 2 | MASCOT | T      | PLEX8 |       |
| 2.59E-01 | 0 0 | Cs8g16700.1/Cs8g167 | 5.84 | 0 | 0    | 2 | MASCOT | T      | PLEX8 |       |
| 1.52E-01 | 0 0 | Cs8g16700.1/Cs8g167 | 5.84 | 0 | 0    | 2 | MASCOT | T      |       |       |
| 3.81E-01 | 0 0 | Cs8g16700.1/Cs8g167 | 6.74 | 0 | 15.9 | 0 | 2      | MASCOT | T     | PLEX8 |
| 7.16E-02 | 0 0 | Cs8g16700.1/Cs8g167 | 6    | 0 | 0    | 2 | MASCOT | T      | PLEX8 |       |
| 6.72E-03 | 0 0 | Cs8g16700.1/Cs8g167 | 6    | 0 | 0    | 2 | MASCOT | T      | PLEX8 |       |
| 1.36E-01 | 0 0 | Cs8g16700.1/Cs8g167 | 6    | 0 | 0    | 2 | MASCOT | T      | PLEX8 |       |
| 1.91E-01 | 0 0 | Cs8g16700.1/Cs8g167 | 8.75 | 0 | 15.9 | 0 | 2      | MASCOT | T     | PLEX8 |
| 9.92E-02 | 0 0 | Cs8g16700.1/Cs8g167 | 8.75 | 0 | 15.9 | 0 | 2      | MASCOT | T     |       |
| 1.08E-01 | 0 0 | Cs8g16700.1/Cs8g167 | 8.75 | 0 | 15.9 | 0 | 2      | MASCOT | T     | PLEX8 |
| 2.78E-01 | 0 0 | Cs8g16700.1/Cs8g167 | 8.75 | 0 | 15.9 | 0 | 2      | MASCOT | T     |       |
| 3.22E-01 | 0 0 | Cs8g16700.1/Cs8g167 | 8.75 | 0 | 0    | 2 | MASCOT | T      | PLEX8 |       |
| 7.91E-02 | 0 0 | Cs8g16700.1/Cs8g167 | 8.75 | 0 | 0    | 2 | MASCOT | T      | PLEX8 |       |
| 3.22E-01 | 0 0 | Cs8g16700.1/Cs8g167 | 8.75 | 0 | 0    | 2 | MASCOT | T      |       |       |
| 3.35E-01 | 0 0 | Cs8g16700.1/Cs8g167 | 8.75 | 0 | 0    | 2 | MASCOT | T      |       |       |

|          |     |                     |      |   |      |   |        |        |       |       |
|----------|-----|---------------------|------|---|------|---|--------|--------|-------|-------|
| 1.24E-01 | 0 0 | Cs8g16700.1/Cs8g167 | 8.75 | 0 | 0    | 2 | MASCOT | T      |       |       |
| 4.27E-01 | 0 0 | Cs8g16700.1/Cs8g167 | 8.75 | 0 | 0    | 2 | MASCOT | T      |       |       |
| 2.46E-01 | 0 0 | Cs8g16700.1/Cs8g167 | 8.75 | 0 | 0    | 2 | MASCOT | T      | PLEX8 |       |
| 3.65E-01 | 0 0 | Cs8g16700.1/Cs8g167 | 8.75 | 0 | 0    | 2 | MASCOT | T      | PLEX8 |       |
| 3.07E-02 | 0 0 | Cs8g16700.1/Cs8g167 | 6.74 | 0 | 0    | 2 | MASCOT | T      |       |       |
| 5.65E-04 | 0 0 | Cs8g16700.1/Cs8g167 | 4.21 | 0 | 0    | 2 | MASCOT | T      | PLEX8 |       |
| 7.10E-03 | 0 0 | Cs8g16700.1/Cs8g167 | 5.66 | 0 | 0    | 2 | MASCOT | T      | PLEX8 |       |
| 1.80E-02 | 0 0 | Cs8g16700.1/Cs8g167 | 5.66 | 0 | 0    | 2 | MASCOT | T      | PLEX8 |       |
| 7.10E-03 | 0 0 | Cs8g16700.1/Cs8g167 | 5.66 | 0 | 0    | 2 | MASCOT | T      | PLEX8 |       |
| 1.62E-02 | 0 0 | Cs8g16700.1/Cs8g167 | 5.66 | 0 | 0    | 2 | MASCOT | T      | PLEX8 |       |
| 2.04E-02 | 0 0 | Cs8g16700.1/Cs8g167 | 5.66 | 0 | 0    | 2 | MASCOT | T      | PLEX8 |       |
| 1.45E-02 | 0 0 | Cs8g16700.1/Cs8g167 | 5.66 | 0 | 0    | 2 | MASCOT | T      | PLEX8 |       |
| 1.19E-01 | 0 0 | Cs8g16700.1/Cs8g167 | 6.74 | 0 | 0    | 2 | MASCOT | T      | PLEX8 |       |
| 8.48E-02 | 0 0 | Cs8g16700.1/Cs8g167 | 6.74 | 0 | 0    | 2 | MASCOT | T      | PLEX8 |       |
| 2.58E-02 | 0 0 | Cs8g16700.1/Cs8g167 | 6.74 | 0 | 0    | 2 | MASCOT | T      | PLEX8 |       |
| 1.04E-01 | 0 0 | Cs8g16700.1/Cs8g167 | 6.74 | 0 | 0    | 2 | MASCOT | T      |       |       |
| 2.36E-02 | 0 0 | Cs8g16700.1/Cs8g167 | 6.74 | 0 | 0    | 2 | MASCOT | T      |       |       |
| 2.77E-06 | 0 0 | Cs8g16700.1/Cs8g167 | 4.25 | 0 | 0    | 2 | MASCOT | T      | PLEX8 |       |
| 1.97E-02 | 0 0 | Cs8g16700.1/Cs8g167 | 4.25 | 0 | 0    | 2 | MASCOT | T      | PLEX8 |       |
| 2.64E-02 | 0 0 | Cs8g16700.1/Cs8g167 | 3.92 | 0 | 0    | 2 | MASCOT | T      |       |       |
| 9.78E-04 | 0 0 | Cs8g16700.1/Cs8g167 | 3.92 | 0 | 0    | 2 | MASCOT | T      | PLEX8 |       |
| 2.10E-03 | 0 0 | Cs8g16700.1/Cs8g167 | 3.92 | 0 | 0    | 2 | MASCOT | T      | PLEX8 |       |
| 8.75E-05 | 0 0 | Cs8g16700.1/Cs8g167 | 3.92 | 0 | 0    | 2 | MASCOT | T      | PLEX8 |       |
| 4.75E-01 | 0 0 | Cs8g16700.1/Cs8g167 | 4.21 | 0 | 15.9 | 0 | 2      | MASCOT | T     | PLEX8 |
| 3.41E-03 | 0 0 | Cs8g16700.1/Cs8g167 | 4.21 | 0 | 15.9 | 0 | 2      | MASCOT | T     |       |
| 1.08E-02 | 0 0 | Cs8g16700.1/Cs8g167 | 4.21 | 0 | 15.9 | 0 | 2      | MASCOT | T     |       |
| 1.03E-01 | 0 0 | Cs8g16700.1/Cs8g167 | 4.21 | 0 | 0    | 2 | MASCOT | T      |       |       |
| 4.52E-03 | 0 0 | Cs8g16700.1/Cs8g167 | 4.21 | 0 | 0    | 2 | MASCOT | T      |       |       |
| 4.95E-02 | 0 0 | Cs8g16700.1/Cs8g167 | 4.21 | 0 | 0    | 2 | MASCOT | T      |       |       |
| 8.09E-03 | 0 0 | Cs8g16700.1/Cs8g167 | 5.83 | 0 | 0    | 2 | MASCOT | T      | PLEX8 |       |
| 3.87E-02 | 0 0 | Cs8g16700.1/Cs8g167 | 5.83 | 0 | 0    | 2 | MASCOT | T      | PLEX8 |       |
| 9.10E-03 | 0 0 | Cs8g16700.1/Cs8g167 | 5.83 | 0 | 0    | 2 | MASCOT | T      | PLEX8 |       |
| 1.77E-02 | 0 0 | Cs8g16700.1/Cs8g167 | 5.83 | 0 | 0    | 2 | MASCOT | T      | PLEX8 |       |
| 3.24E-02 | 0 0 | Cs8g16700.1/Cs8g167 | 5.83 | 0 | 0    | 2 | MASCOT | T      | PLEX8 |       |
| 5.99E-02 | 0 0 | Cs8g16700.1/Cs8g167 | 5.83 | 0 | 0    | 2 | MASCOT | T      | PLEX8 |       |
| 9.47E-03 | 0 0 | Cs8g16700.1/Cs8g167 | 5.83 | 0 | 0    | 2 | MASCOT | T      | PLEX8 |       |
| 1.94E-02 | 0 0 | Cs8g16700.1/Cs8g167 | 5.83 | 0 | 0    | 2 | MASCOT | T      | PLEX8 |       |
| 2.01E-03 | 0 0 | Cs8g16700.1/Cs8g167 | 5.83 | 0 | 0    | 2 | MASCOT | T      | PLEX8 |       |
| 3.66E-02 | 0 0 | Cs8g16700.1/Cs8g167 | 5.83 | 0 | 0    | 2 | MASCOT | T      |       |       |
| 7.82E-02 | 0 0 | Cs8g16700.1/Cs8g167 | 5.83 | 0 | 0    | 2 | MASCOT | T      |       |       |
| 1.39E-03 | 0 0 | Cs8g16700.1/Cs8g167 | 5.83 | 0 | 0    | 2 | MASCOT | T      |       |       |
| 1.68E-01 | 0 0 | Cs8g16700.1/Cs8g167 | 5.83 | 0 | 0    | 2 | MASCOT | T      |       |       |
| 1.21E-02 | 0 0 | Cs8g16700.1/Cs8g167 | 4.14 | 0 | 0    | 2 | MASCOT | T      | PLEX8 |       |
| 4.22E-03 | 0 0 | Cs8g16700.1/Cs8g167 | 4.14 | 0 | 0    | 2 | MASCOT | T      | PLEX8 |       |
| 3.29E-02 | 0 0 | Cs8g16700.1/Cs8g167 | 4.14 | 0 | 0    | 2 | MASCOT | T      | PLEX8 |       |
| 3.95E-02 | 0 0 | Cs8g16700.1/Cs8g167 | 4.14 | 0 | 0    | 2 | MASCOT | T      | PLEX8 |       |
| 9.82E-02 | 0 0 | Cs8g16700.1/Cs8g167 | 4.14 | 0 | 0    | 2 | MASCOT | T      | PLEX8 |       |
| 3.97E-02 | 0 0 | Cs8g16700.1/Cs8g167 | 4.14 | 0 | 0    | 2 | MASCOT | T      | PLEX8 |       |
| 8.92E-02 | 0 0 | Cs8g16700.1/Cs8g167 | 4.14 | 0 | 0    | 2 | MASCOT | T      | PLEX8 |       |
| 4.97E-03 | 0 0 | Cs8g16700.1/Cs8g167 | 4.14 | 0 | 0    | 2 | MASCOT | T      | PLEX8 |       |
| 2.69E-02 | 0 0 | Cs8g16700.1/Cs8g167 | 4.14 | 0 | 0    | 2 | MASCOT | T      | PLEX8 |       |

|          |     |                     |      |   |      |   |        |        |       |       |
|----------|-----|---------------------|------|---|------|---|--------|--------|-------|-------|
| 4.07E-02 | 0 0 | Cs8g16700.1/Cs8g167 | 4.22 | 0 | 0    | 2 | MASCOT | T      | PLEX8 |       |
| 2.23E-05 | 0 0 | Cs8g16700.1/Cs8g167 | 4.22 | 0 | 0    | 2 | MASCOT | T      | PLEX8 |       |
| 1.72E-04 | 0 0 | Cs8g16700.1/Cs8g167 | 4.22 | 0 | 0    | 2 | MASCOT | T      | PLEX8 |       |
| 2.49E-03 | 0 0 | Cs8g16700.1/Cs8g167 | 4.22 | 0 | 0    | 2 | MASCOT | T      | PLEX8 |       |
| 6.96E-03 | 0 0 | Cs8g16700.1/Cs8g167 | 4.22 | 0 | 0    | 2 | MASCOT | T      | PLEX8 |       |
| 6.92E-07 | 0 0 | Cs8g16700.1/Cs8g167 | 4.22 | 0 | 0    | 2 | MASCOT | T      | PLEX8 |       |
| 1.98E-03 | 0 0 | Cs8g16700.1/Cs8g167 | 4.22 | 0 | 0    | 2 | MASCOT | T      | PLEX8 |       |
| 6.33E-02 | 0 0 | Cs8g16700.1/Cs8g167 | 4.22 | 0 | 0    | 2 | MASCOT | T      | PLEX8 |       |
| 2.02E-04 | 0 0 | Cs8g16700.1/Cs8g167 | 4.22 | 0 | 0    | 2 | MASCOT | T      | PLEX8 |       |
| 2.51E-02 | 0 0 | Cs8g16700.1/Cs8g167 | 4.22 | 0 | 0    | 2 | MASCOT | T      | PLEX8 |       |
| 4.00E-04 | 0 0 | Cs8g16700.1/Cs8g167 | 4.22 | 0 | 0    | 2 | MASCOT | T      | PLEX8 |       |
| 3.92E-02 | 0 0 | Cs8g16700.1/Cs8g167 | 4.22 | 0 | 0    | 2 | MASCOT | T      | PLEX8 |       |
| 8.18E-02 | 0 0 | Cs8g16700.1/Cs8g167 | 4.22 | 0 | 0    | 2 | MASCOT | T      |       |       |
| 8.48E-03 | 0 0 | Cs8g16700.1/Cs8g167 | 4.22 | 0 | 0    | 2 | MASCOT | T      | PLEX8 |       |
| 2.01E-03 | 0 0 | Cs8g16700.1/Cs8g167 | 4.22 | 0 | 0    | 2 | MASCOT | T      |       |       |
| 1.47E-03 | 0 0 | Cs8g16700.1/Cs8g167 | 4.22 | 0 | 0    | 2 | MASCOT | T      |       |       |
| 6.18E-07 | 0 0 | Cs8g16700.1/Cs8g167 | 4.22 | 0 | 0    | 2 | MASCOT | T      |       |       |
| 1.55E-03 | 0 0 | Cs8g16700.1/Cs8g167 | 4.22 | 0 | 0    | 2 | MASCOT | T      |       |       |
| 6.26E-07 | 0 0 | Cs8g16700.1/Cs8g167 | 4.22 | 0 | 0    | 2 | MASCOT | T      |       |       |
| 9.73E-04 | 0 0 | Cs8g16700.1/Cs8g167 | 3.91 | 0 | 0    | 2 | MASCOT | T      | PLEX8 |       |
| 2.60E-06 | 0 0 | Cs8g16700.1/Cs8g167 | 3.91 | 0 | 0    | 2 | MASCOT | T      | PLEX8 |       |
| 2.40E-04 | 0 0 | Cs8g16700.1/Cs8g167 | 3.91 | 0 | 0    | 2 | MASCOT | T      | PLEX8 |       |
| 9.58E-03 | 0 0 | Cs8g16700.1/Cs8g167 | 4.53 | 0 | 15.9 | 0 | 2      | MASCOT | T     | PLEX8 |
| 1.04E-02 | 0 0 | Cs8g16700.1/Cs8g167 | 4.53 | 0 | 15.9 | 0 | 2      | MASCOT | T     | PLEX8 |
| 1.07E-01 | 0 0 | Cs8g16700.1/Cs8g167 | 4.53 | 0 | 15.9 | 0 | 2      | MASCOT | T     |       |
| 3.55E-02 | 0 0 | Cs8g16700.1/Cs8g167 | 4.53 | 0 | 15.9 | 0 | 2      | MASCOT | T     |       |
| 2.24E-02 | 0 0 | Cs8g16700.1/Cs8g167 | 4.53 | 0 | 0    | 2 | MASCOT | T      | PLEX8 |       |
| 4.77E-04 | 0 0 | Cs8g16700.1/Cs8g167 | 4.53 | 0 | 0    | 2 | MASCOT | T      |       |       |
| 3.04E-04 | 0 0 | Cs8g16700.1/Cs8g167 | 4.53 | 0 | 0    | 2 | MASCOT | T      |       |       |
| 1.04E-03 | 0 0 | Cs8g16700.1/Cs8g167 | 4.53 | 0 | 0    | 2 | MASCOT | T      |       |       |
| 2.66E-02 | 0 0 | Cs8g16700.1/Cs8g167 | 6.74 | 0 | 0    | 2 | MASCOT | T      | PLEX8 |       |
| 2.95E-02 | 0 0 | Cs8g16700.1/Cs8g167 | 6.74 | 0 | 0    | 2 | MASCOT | T      | PLEX8 |       |
| 7.15E-02 | 0 0 | Cs8g16700.1/Cs8g167 | 6.74 | 0 | 0    | 2 | MASCOT | T      | PLEX8 |       |
| 1.49E-02 | 0 0 | Cs8g16700.1/Cs8g167 | 6.74 | 0 | 0    | 2 | MASCOT | T      | PLEX8 |       |
| 7.12E-02 | 0 0 | Cs8g16700.1/Cs8g167 | 6.74 | 0 | 0    | 2 | MASCOT | T      |       |       |
| 4.78E-02 | 0 0 | Cs8g16700.1/Cs8g167 | 6.74 | 0 | 0    | 2 | MASCOT | T      |       |       |
| 3.51E-02 | 0 0 | Cs8g16700.1/Cs8g167 | 6.74 | 0 | 0    | 2 | MASCOT | T      | PLEX8 |       |
| 3.87E-02 | 0 0 | Cs8g16700.1/Cs8g167 | 6.74 | 0 | 0    | 2 | MASCOT | T      |       |       |
| 1.09E-01 | 0 0 | Cs8g16700.1/Cs8g167 | 4.21 | 0 | 0    | 2 | MASCOT | T      | PLEX8 |       |
| 9.78E-02 | 0 0 | Cs8g16700.1/Cs8g167 | 4.21 | 0 | 0    | 2 | MASCOT | T      |       |       |
| 1.99E-06 | 0 0 | Cs8g16700.1/Cs8g167 | 4.21 | 0 | 0    | 2 | MASCOT | T      |       |       |
| 1.56E-03 | 0 0 | Cs8g16700.1/Cs8g167 | 4.21 | 0 | 0    | 2 | MASCOT | T      |       |       |
| 9.16E-07 | 0 0 | Cs8g16700.1/Cs8g167 | 4.21 | 0 | 0    | 2 | MASCOT | T      |       |       |
| 6.76E-02 | 0 0 | Cs8g16700.1/Cs8g167 | 4.21 | 0 | 0    | 2 | MASCOT | T      |       |       |
| 5.40E-07 | 0 0 | Cs8g16700.1/Cs8g167 | 4.21 | 0 | 0    | 2 | MASCOT | T      |       |       |
| 1.73E-03 | 0 0 | Cs8g16700.1/Cs8g167 | 4.21 | 0 | 0    | 2 | MASCOT | T      |       |       |
| 3.12E-02 | 0 0 | Cs8g16700.1/Cs8g167 | 4.21 | 0 | 0    | 2 | MASCOT | T      |       |       |
| 1.88E-01 | 0 0 | Cs8g16700.1/Cs8g167 | 4.21 | 0 | 0    | 2 | MASCOT | T      |       |       |
| 7.46E-02 | 0 0 | Cs8g16700.1/Cs8g167 | 4.21 | 0 | 0    | 2 | MASCOT | T      |       |       |
| 2.29E-03 | 0 0 | Cs8g16700.1/Cs8g167 | 6.74 | 0 | 0    | 2 | MASCOT | T      | PLEX8 |       |
| 1.19E-01 | 0 0 | Cs8g16700.1/Cs8g167 | 6.74 | 0 | 0    | 2 | MASCOT | T      | PLEX8 |       |

|          |     |                     |      |   |      |   |        |        |       |       |
|----------|-----|---------------------|------|---|------|---|--------|--------|-------|-------|
| 6.53E-02 | 0 0 | Cs8g16700.1/Cs8g167 | 6.74 | 0 | 0    | 2 | MASCOT | T      | PLEX8 |       |
| 1.46E-02 | 0 0 | Cs8g16700.1/Cs8g167 | 6.74 | 0 | 0    | 2 | MASCOT | T      | PLEX8 |       |
| 1.54E-02 | 0 0 | Cs8g16700.1/Cs8g167 | 6.74 | 0 | 0    | 2 | MASCOT | T      | PLEX8 |       |
| 2.86E-02 | 0 0 | Cs8g16700.1/Cs8g167 | 6.74 | 0 | 0    | 2 | MASCOT | T      | PLEX8 |       |
| 1.64E-02 | 0 0 | Cs8g16700.1/Cs8g167 | 6.74 | 0 | 0    | 2 | MASCOT | T      | PLEX8 |       |
| 6.25E-02 | 0 0 | Cs8g16700.1/Cs8g167 | 6.74 | 0 | 0    | 2 | MASCOT | T      |       |       |
| 1.59E-01 | 0 0 | Cs8g16700.1/Cs8g167 | 6.74 | 0 | 0    | 2 | MASCOT | T      |       |       |
| 6.67E-02 | 0 0 | Cs8g16700.1/Cs8g167 | 6.74 | 0 | 0    | 2 | MASCOT | T      |       |       |
| 1.81E-02 | 0 0 | Cs8g16700.1/Cs8g167 | 6.74 | 0 | 0    | 2 | MASCOT | T      |       |       |
| 9.16E-03 | 0 0 | Cs8g16700.1/Cs8g167 | 5.84 | 0 | 15.9 | 0 | 2      | MASCOT | T     | PLEX8 |
| 1.20E-02 | 0 0 | Cs8g16700.1/Cs8g167 | 5.84 | 0 | 15.9 | 0 | 2      | MASCOT | T     | PLEX8 |
| 1.97E-05 | 0 0 | Cs8g16700.1/Cs8g167 | 5.84 | 0 | 15.9 | 0 | 2      | MASCOT | T     | PLEX8 |
| 1.65E-02 | 0 0 | Cs8g16700.1/Cs8g167 | 5.84 | 0 | 15.9 | 0 | 2      | MASCOT | T     | PLEX8 |
| 9.56E-04 | 0 0 | Cs8g16700.1/Cs8g167 | 5.84 | 0 | 15.9 | 0 | 2      | MASCOT | T     | PLEX8 |
| 9.52E-03 | 0 0 | Cs8g16700.1/Cs8g167 | 5.84 | 0 | 15.9 | 0 | 2      | MASCOT | T     | PLEX8 |
| 1.24E-02 | 0 0 | Cs8g16700.1/Cs8g167 | 5.84 | 0 | 0    | 2 | MASCOT | T      | PLEX8 |       |
| 1.29E-03 | 0 0 | Cs8g16700.1/Cs8g167 | 5.84 | 0 | 0    | 2 | MASCOT | T      | PLEX8 |       |
| 1.11E-02 | 0 0 | Cs8g16700.1/Cs8g167 | 5.84 | 0 | 0    | 2 | MASCOT | T      | PLEX8 |       |
| 3.02E-02 | 0 0 | Cs8g16700.1/Cs8g167 | 5.84 | 0 | 0    | 2 | MASCOT | T      | PLEX8 |       |
| 9.49E-03 | 0 0 | Cs8g16700.1/Cs8g167 | 5.84 | 0 | 0    | 2 | MASCOT | T      | PLEX8 |       |
| 5.09E-01 | 0 0 | Cs8g16700.1/Cs8g167 | 8.75 | 0 | 0    | 2 | MASCOT | T      | PLEX8 |       |
| 4.48E-01 | 0 0 | Cs8g16700.1/Cs8g167 | 8.75 | 0 | 0    | 2 | MASCOT | T      | PLEX8 |       |
| 1.30E-01 | 0 0 | Cs8g16700.1/Cs8g167 | 8.47 | 0 | 0    | 2 | MASCOT | T      | PLEX8 |       |
| 1.56E-01 | 0 0 | Cs8g16700.1/Cs8g167 | 8.47 | 0 | 0    | 2 | MASCOT | T      | PLEX8 |       |
| 9.65E-02 | 0 0 | Cs8g16700.1/Cs8g167 | 8.47 | 0 | 0    | 2 | MASCOT | T      | PLEX8 |       |
| 4.20E-02 | 0 0 | Cs8g16700.1/Cs8g167 | 8.47 | 0 | 0    | 2 | MASCOT | T      | PLEX8 |       |
| 1.90E-01 | 0 0 | Cs8g16700.1/Cs8g167 | 8.47 | 0 | 0    | 2 | MASCOT | T      | PLEX8 |       |
| 8.38E-02 | 0 0 | Cs8g16700.1/Cs8g167 | 8.47 | 0 | 0    | 2 | MASCOT | T      | PLEX8 |       |
| 4.75E-02 | 0 0 | Cs8g16700.1/Cs8g167 | 8.47 | 0 | 0    | 2 | MASCOT | T      | PLEX8 |       |
| 2.97E-01 | 0 0 | Cs8g16700.1/Cs8g167 | 6.41 | 0 | 15.9 | 0 | 2      | MASCOT | T     | PLEX8 |
| 3.05E-01 | 0 0 | Cs8g16700.1/Cs8g167 | 6.41 | 0 | 15.9 | 0 | 2      | MASCOT | T     | PLEX8 |
| 8.28E-04 | 0 0 | Cs8g16700.1/Cs8g167 | 6.41 | 0 | 15.9 | 0 | 2      | MASCOT | T     | PLEX8 |
| 6.77E-06 | 0 0 | Cs8g16700.1/Cs8g167 | 6.41 | 0 | 15.9 | 0 | 2      | MASCOT | T     | PLEX8 |
| 6.02E-02 | 0 0 | Cs8g16700.1/Cs8g167 | 6.41 | 0 | 15.9 | 0 | 2      | MASCOT | T     | PLEX8 |
| 5.31E-04 | 0 0 | Cs8g16700.1/Cs8g167 | 6.41 | 0 | 15.9 | 0 | 2      | MASCOT | T     | PLEX8 |
| 4.14E-01 | 0 0 | Cs8g16700.1/Cs8g167 | 6.41 | 0 | 15.9 | 0 | 2      | MASCOT | T     | PLEX8 |
| 2.58E-04 | 0 0 | Cs8g16700.1/Cs8g167 | 6.41 | 0 | 15.9 | 0 | 2      | MASCOT | T     | PLEX8 |
| 2.33E-06 | 0 0 | Cs8g16700.1/Cs8g167 | 6.41 | 0 | 15.9 | 0 | 2      | MASCOT | T     | PLEX8 |
| 1.42E-01 | 0 0 | Cs8g16700.1/Cs8g167 | 6.41 | 0 | 15.9 | 0 | 2      | MASCOT | T     | PLEX8 |
| 1.17E-01 | 0 0 | Cs8g16700.1/Cs8g167 | 6.41 | 0 | 15.9 | 0 | 2      | MASCOT | T     |       |
| 2.60E-03 | 0 0 | Cs8g16700.1/Cs8g167 | 6.41 | 0 | 15.9 | 0 | 2      | MASCOT | T     |       |
| 1.49E-05 | 0 0 | Cs8g16700.1/Cs8g167 | 6.41 | 0 | 0    | 2 | MASCOT | T      | PLEX8 |       |
| 5.77E-07 | 0 0 | Cs8g16700.1/Cs8g167 | 6.41 | 0 | 0    | 2 | MASCOT | T      | PLEX8 |       |
| 6.87E-04 | 0 0 | Cs8g16700.1/Cs8g167 | 6.41 | 0 | 0    | 2 | MASCOT | T      | PLEX8 |       |
| 9.59E-03 | 0 0 | Cs8g16700.1/Cs8g167 | 6.41 | 0 | 0    | 2 | MASCOT | T      | PLEX8 |       |
| 1.91E-06 | 0 0 | Cs8g16700.1/Cs8g167 | 6.41 | 0 | 0    | 2 | MASCOT | T      | PLEX8 |       |
| 7.05E-05 | 0 0 | Cs8g16700.1/Cs8g167 | 6.41 | 0 | 0    | 2 | MASCOT | T      | PLEX8 |       |
| 1.09E-05 | 0 0 | Cs8g16700.1/Cs8g167 | 6.41 | 0 | 0    | 2 | MASCOT | T      | PLEX8 |       |
| 9.73E-03 | 0 0 | Cs8g16700.1/Cs8g167 | 6.41 | 0 | 0    | 2 | MASCOT | T      | PLEX8 |       |
| 2.51E-08 | 0 0 | Cs8g16700.1/Cs8g167 | 6.41 | 0 | 0    | 2 | MASCOT | T      | PLEX8 |       |
| 3.44E-04 | 0 0 | Cs8g16700.1/Cs8g167 | 6.41 | 0 | 0    | 2 | MASCOT | T      |       |       |



|          |     |                     |      |   |      |   |        |        |         |
|----------|-----|---------------------|------|---|------|---|--------|--------|---------|
| 7.79E-04 | 0 0 | Cs8g16700.1/Cs8g167 | 6.41 | 0 | 0    | 2 | MASCOT | T      |         |
| 2.64E-03 | 0 0 | Cs8g16700.1/Cs8g167 | 6.41 | 0 | 0    | 2 | MASCOT | T      |         |
| 6.29E-04 | 0 0 | Cs8g16700.1/Cs8g167 | 6.41 | 0 | 0    | 2 | MASCOT | T      |         |
| 1.80E-02 | 0 0 | Cs8g16700.1/Cs8g167 | 5.81 | 0 | 15.9 | 0 | 2      | MASCOT | T PLEX8 |
| 5.42E-03 | 0 0 | Cs8g16700.1/Cs8g167 | 5.81 | 0 | 15.9 | 0 | 2      | MASCOT | T PLEX8 |
| 1.42E-01 | 0 0 | Cs8g16700.1/Cs8g167 | 5.81 | 0 | 15.9 | 0 | 2      | MASCOT | T PLEX8 |
| 8.13E-03 | 0 0 | Cs8g16700.1/Cs8g167 | 5.81 | 0 | 15.9 | 0 | 2      | MASCOT | T PLEX8 |
| 1.54E-02 | 0 0 | Cs8g16700.1/Cs8g167 | 5.81 | 0 | 15.9 | 0 | 2      | MASCOT | T PLEX8 |
| 1.35E-01 | 0 0 | Cs8g16700.1/Cs8g167 | 5.81 | 0 | 15.9 | 0 | 2      | MASCOT | T PLEX8 |
| 1.99E-02 | 0 0 | Cs8g16700.1/Cs8g167 | 5.81 | 0 | 0    | 2 | MASCOT | T      | PLEX8   |
| 2.10E-02 | 0 0 | Cs8g16700.1/Cs8g167 | 5.81 | 0 | 0    | 2 | MASCOT | T      | PLEX8   |
| 8.92E-02 | 0 0 | Cs8g16700.1/Cs8g167 | 5.81 | 0 | 0    | 2 | MASCOT | T      | PLEX8   |
| 2.60E-04 | 0 0 | Cs8g16700.1/Cs8g167 | 5.81 | 0 | 0    | 2 | MASCOT | T      | PLEX8   |
| 7.38E-03 | 0 0 | Cs8g16700.1/Cs8g167 | 5.81 | 0 | 0    | 2 | MASCOT | T      | PLEX8   |
| 7.76E-02 | 0 0 | Cs8g16700.1/Cs8g167 | 5.81 | 0 | 0    | 2 | MASCOT | T      | PLEX8   |
| 5.60E-04 | 0 0 | Cs8g16700.1/Cs8g167 | 5.81 | 0 | 0    | 2 | MASCOT | T      | PLEX8   |
| 9.22E-02 | 0 0 | Cs8g16700.1/Cs8g167 | 4.53 | 0 | 0    | 2 | MASCOT | T      | PLEX8   |
| 1.07E-02 | 0 0 | Cs8g16700.1/Cs8g167 | 4.53 | 0 | 0    | 2 | MASCOT | T      | PLEX8   |
| 1.97E-02 | 0 0 | Cs8g16700.1/Cs8g167 | 4.53 | 0 | 0    | 2 | MASCOT | T      | PLEX8   |
| 1.78E-01 | 0 0 | Cs8g16700.1/Cs8g167 | 4.53 | 0 | 0    | 2 | MASCOT | T      | PLEX8   |
| 1.38E-01 | 0 0 | Cs8g16700.1/Cs8g167 | 4.53 | 0 | 0    | 2 | MASCOT | T      | PLEX8   |
| 7.16E-02 | 0 0 | Cs8g16700.1/Cs8g167 | 4.53 | 0 | 0    | 2 | MASCOT | T      | PLEX8   |
| 2.72E-03 | 0 0 | Cs8g16700.1/Cs8g167 | 4.53 | 0 | 0    | 2 | MASCOT | T      | PLEX8   |
| 1.27E-01 | 0 0 | Cs8g16700.1/Cs8g167 | 4.53 | 0 | 0    | 2 | MASCOT | T      | PLEX8   |
| 5.34E-02 | 0 0 | Cs8g16700.1/Cs8g167 | 4.53 | 0 | 0    | 2 | MASCOT | T      | PLEX8   |
| 3.97E-03 | 0 0 | Cs5g19940.1/Cs5g199 | 4.53 | 0 | 15.9 | 0 | 2      | MASCOT | T PLEX8 |
| 4.72E-03 | 0 0 | Cs5g19940.1/Cs5g199 | 4.53 | 0 | 15.9 | 0 | 2      | MASCOT | T PLEX8 |
| 5.22E-03 | 0 0 | Cs5g19940.1/Cs5g199 | 4.53 | 0 | 0    | 2 | MASCOT | T      | PLEX8   |
| 4.40E-04 | 0 0 | Cs5g19940.1/Cs5g199 | 4.53 | 0 | 0    | 2 | MASCOT | T      | PLEX8   |
| 4.21E-03 | 0 0 | Cs5g19940.1/Cs5g199 | 4.53 | 0 | 0    | 2 | MASCOT | T      | PLEX8   |
| 5.82E-03 | 0 0 | Cs5g19940.1/Cs5g199 | 5.88 | 0 | 0    | 2 | MASCOT | T      | PLEX8   |
| 2.93E-03 | 0 0 | Cs5g19940.1/Cs5g199 | 5.88 | 0 | 0    | 2 | MASCOT | T      | PLEX8   |
| 1.43E-01 | 0 0 | Cs5g19940.1/Cs5g199 | 5.88 | 0 | 0    | 2 | MASCOT | T      | PLEX8   |
| 1.53E-03 | 0 0 | Cs5g19940.1/Cs5g199 | 5.88 | 0 | 0    | 2 | MASCOT | T      | PLEX8   |
| 5.23E-04 | 0 0 | Cs5g19940.1/Cs5g199 | 5.88 | 0 | 0    | 2 | MASCOT | T      | PLEX8   |
| 3.52E-03 | 0 0 | Cs5g19940.1/Cs5g199 | 5.88 | 0 | 0    | 2 | MASCOT | T      | PLEX8   |
| 1.42E-02 | 0 0 | Cs5g19940.1/Cs5g199 | 4.53 | 0 | 0    | 2 | MASCOT | T      | PLEX8   |
| 5.84E-02 | 0 0 | Cs5g19940.1/Cs5g199 | 4.53 | 0 | 0    | 2 | MASCOT | T      | PLEX8   |
| 3.23E-03 | 0 0 | Cs5g19940.1/Cs5g199 | 4.53 | 0 | 0    | 2 | MASCOT | T      | PLEX8   |
| 3.07E-03 | 0 0 | Cs5g19940.1/Cs5g199 | 4.53 | 0 | 0    | 2 | MASCOT | T      | PLEX8   |
| 2.46E-03 | 0 0 | Cs5g19940.1/Cs5g199 | 5.21 | 0 | 0    | 2 | MASCOT | T      | PLEX8   |
| 1.91E-03 | 0 0 | Cs5g19940.1/Cs5g199 | 4.14 | 0 | 0    | 2 | MASCOT | T      | PLEX8   |
| 5.31E-04 | 0 0 | Cs5g19940.1/Cs5g199 | 4.14 | 0 | 0    | 2 | MASCOT | T      | PLEX8   |
| 1.39E-04 | 0 0 | Cs5g19940.1/Cs5g199 | 4.14 | 0 | 0    | 2 | MASCOT | T      |         |
| 4.00E-05 | 0 0 | Cs5g19940.1/Cs5g199 | 4.14 | 0 | 0    | 2 | MASCOT | T      |         |
| 3.86E-02 | 0 0 | Cs5g19940.1/Cs5g199 | 4.03 | 0 | 0    | 2 | MASCOT | T      |         |
| 8.78E-02 | 0 0 | Cs5g19940.1/Cs5g199 | 6.1  | 0 | 0    | 2 | MASCOT | T      | PLEX8   |
| 2.70E-03 | 0 0 | Cs5g19940.1/Cs5g199 | 8.25 | 0 | 0    | 2 | MASCOT | T      | PLEX8   |
| 3.64E-03 | 0 0 | Cs5g19940.1/Cs5g199 | 8.25 | 0 | 0    | 2 | MASCOT | T      | PLEX8   |
| 1.19E-01 | 0 0 | Cs5g19940.1/Cs5g199 | 8.5  | 1 | 0    | 2 | MASCOT | T      | PLEX8   |
| 1.39E-02 | 0 0 | Cs5g19940.1/Cs5g199 | 4.37 | 0 | 0    | 2 | MASCOT | T      |         |

|          |     |                     |      |   |      |   |        |         |         |
|----------|-----|---------------------|------|---|------|---|--------|---------|---------|
| 1.81E-02 | 0 0 | Cs5g19940.1/Cs5g199 | 4.37 | 0 | 0    | 2 | MASCOT | T       |         |
| 1.86E-02 | 0 0 | Cs5g19940.1/Cs5g199 | 4.37 | 0 | 0    | 2 | MASCOT | T       |         |
| 1.78E-02 | 0 0 | Cs5g19940.1/Cs5g199 | 8.75 | 0 | 0    | 2 | MASCOT | T PLEX8 |         |
| 3.21E-02 | 0 0 | Cs5g19940.1/Cs5g199 | 8.75 | 0 | 0    | 2 | MASCOT | T PLEX8 |         |
| 1.46E-02 | 0 0 | Cs5g19940.1/Cs5g199 | 8.75 | 0 | 0    | 2 | MASCOT | T PLEX8 |         |
| 2.70E-02 | 0 0 | Cs5g19940.1/Cs5g199 | 8.75 | 0 | 0    | 2 | MASCOT | T PLEX8 |         |
| 2.71E-02 | 0 0 | Cs5g19940.1/Cs5g199 | 8.75 | 0 | 0    | 2 | MASCOT | T PLEX8 |         |
| 1.04E-02 | 0 0 | Cs5g19940.1/Cs5g199 | 8.5  | 0 | 15.9 | 0 | 2      | MASCOT  | T PLEX8 |
| 4.29E-01 | 0 0 | Cs5g19940.1/Cs5g199 | 8.5  | 0 | 15.9 | 0 | 2      | MASCOT  | T PLEX8 |
| 1.86E-02 | 0 0 | Cs5g19940.1/Cs5g199 | 8.5  | 0 | 0    | 2 | MASCOT | T PLEX8 |         |
| 1.03E-01 | 0 0 | Cs5g19940.1/Cs5g199 | 4.32 | 1 | 0    | 2 | MASCOT | T PLEX8 |         |
| 8.71E-02 | 0 0 | Cs5g19940.1/Cs5g199 | 4.32 | 1 | 0    | 2 | MASCOT | T PLEX8 |         |
| 1.35E-03 | 0 0 | Cs5g19940.1/Cs5g199 | 4.14 | 0 | 0    | 2 | MASCOT | T PLEX8 |         |
| 3.13E-02 | 0 0 | Cs5g19940.1/Cs5g199 | 4.14 | 0 | 0    | 2 | MASCOT | T PLEX8 |         |
| 3.73E-04 | 0 0 | Cs5g19940.1/Cs5g199 | 4.14 | 0 | 0    | 2 | MASCOT | T PLEX8 |         |
| 1.88E-03 | 0 0 | Cs5g19940.1/Cs5g199 | 4.41 | 1 | 0    | 2 | MASCOT | T PLEX8 |         |
| 4.02E-04 | 0 0 | Cs5g19940.1/Cs5g199 | 4.41 | 1 | 0    | 2 | MASCOT | T PLEX8 |         |
| 7.09E-04 | 0 0 | Cs5g19940.1/Cs5g199 | 4.41 | 1 | 0    | 2 | MASCOT | T PLEX8 |         |
| 7.66E-05 | 0 0 | Cs5g19940.1/Cs5g199 | 4.41 | 1 | 0    | 2 | MASCOT | T PLEX8 |         |
| 7.86E-04 | 0 0 | Cs5g19940.1/Cs5g199 | 5.97 | 0 | 0    | 2 | MASCOT | T PLEX8 |         |
| 3.14E-02 | 0 0 | Cs5g19940.1/Cs5g199 | 4.21 | 0 | 15.9 | 0 | 2      | MASCOT  | T PLEX8 |
| 7.21E-03 | 0 0 | Cs5g19940.1/Cs5g199 | 4.21 | 0 | 0    | 2 | MASCOT | T PLEX8 |         |
| 1.66E-04 | 0 0 | Cs5g19940.1/Cs5g199 | 4.41 | 0 | 0    | 2 | MASCOT | T PLEX8 |         |
| 1.10E-01 | 0 0 | Cs5g19940.1/Cs5g199 | 5.84 | 0 | 0    | 2 | MASCOT | T PLEX8 |         |
| 2.27E-02 | 0 0 | Cs5g19940.1/Cs5g199 | 4.18 | 1 | 0    | 2 | MASCOT | T       |         |
| 1.69E-02 | 0 0 | Cs5g19940.1/Cs5g199 | 4.18 | 1 | 0    | 2 | MASCOT | T PLEX8 |         |
| 1.96E-01 | 0 0 | Cs5g19940.1/Cs5g199 | 8.76 | 0 | 0    | 2 | MASCOT | T PLEX8 |         |
| 2.69E-04 | 0 0 | Cs5g19940.1/Cs5g199 | 5.32 | 0 | 0    | 2 | MASCOT | T PLEX8 |         |
| 8.20E-07 | 0 0 | Cs5g19940.1/Cs5g199 | 5.32 | 0 | 0    | 2 | MASCOT | T PLEX8 |         |
| 3.14E-06 | 0 0 | Cs5g19940.1/Cs5g199 | 5.32 | 0 | 0    | 2 | MASCOT | T PLEX8 |         |
| 9.80E-02 | 0 0 | Cs5g19940.1/Cs5g199 | 5.32 | 0 | 0    | 2 | MASCOT | T       |         |
| 6.19E-02 | 0 0 | Cs5g19940.1/Cs5g199 | 5.32 | 0 | 0    | 2 | MASCOT | T PLEX8 |         |
| 1.16E-02 | 0 0 | Cs5g19940.1/Cs5g199 | 5.32 | 0 | 0    | 2 | MASCOT | T PLEX8 |         |
| 1.22E-05 | 0 0 | Cs5g19940.1/Cs5g199 | 5.32 | 0 | 0    | 2 | MASCOT | T PLEX8 |         |
| 9.31E-02 | 0 0 | Cs5g19940.1/Cs5g199 | 5.32 | 0 | 0    | 2 | MASCOT | T PLEX8 |         |
| 1.59E-06 | 0 0 | Cs5g19940.1/Cs5g199 | 5.32 | 0 | 0    | 2 | MASCOT | T PLEX8 |         |
| 4.24E-02 | 0 0 | Cs5g19940.1/Cs5g199 | 5.32 | 0 | 0    | 2 | MASCOT | T PLEX8 |         |
| 2.93E-03 | 0 0 | Cs5g19940.1/Cs5g199 | 5.32 | 0 | 0    | 2 | MASCOT | T       |         |
| 3.34E-02 | 0 0 | Cs5g19940.1/Cs5g199 | 10   | 1 | 0    | 2 | MASCOT | T PLEX8 |         |
| 6.29E-03 | 0 0 | Cs5g19940.1/Cs5g199 | 10   | 1 | 0    | 2 | MASCOT | T PLEX8 |         |
| 2.53E-03 | 0 0 | Cs5g19940.1/Cs5g199 | 5.52 | 0 | 0    | 2 | MASCOT | T PLEX8 |         |
| 1.47E-04 | 0 0 | Cs5g19940.1/Cs5g199 | 5.52 | 0 | 0    | 2 | MASCOT | T PLEX8 |         |
| 1.45E-02 | 0 0 | Cs5g19940.1/Cs5g199 | 6.92 | 0 | 0    | 2 | MASCOT | T PLEX8 |         |
| 1.48E-01 | 0 0 | Cs5g19940.1/Cs5g199 | 6.92 | 0 | 0    | 2 | MASCOT | T PLEX8 |         |
| 2.45E-01 | 0 0 | Cs5g19940.1/Cs5g199 | 6.92 | 0 | 0    | 2 | MASCOT | T PLEX8 |         |
| 5.79E-02 | 0 0 | Cs5g19940.1/Cs5g199 | 6.92 | 0 | 0    | 2 | MASCOT | T       |         |
| 1.80E-04 | 0 0 | Cs5g19940.1/Cs5g199 | 8.22 | 0 | 0    | 2 | MASCOT | T       |         |
| 2.03E-04 | 0 0 | Cs5g19940.1/Cs5g199 | 8.22 | 0 | 0    | 2 | MASCOT | T       |         |
| 5.46E-03 | 0 0 | Cs5g19940.1/Cs5g199 | 4.03 | 0 | 0    | 2 | MASCOT | T       |         |
| 1.20E-03 | 0 0 | Cs5g19940.1/Cs5g199 | 4.03 | 0 | 0    | 2 | MASCOT | T       |         |
| 3.53E-03 | 0 0 | Cs5g19940.1/Cs5g199 | 4    | 0 | 0    | 2 | MASCOT | T       |         |

|          |     |                     |      |   |      |   |        |        |       |       |
|----------|-----|---------------------|------|---|------|---|--------|--------|-------|-------|
| 8.98E-05 | 0 0 | Cs5g19940.1/Cs5g199 | 4    | 0 | 0    | 2 | MASCOT | T      |       |       |
| 2.50E-04 | 0 0 | Cs5g19940.1/Cs5g199 | 4.53 | 0 | 0    | 2 | MASCOT | T      | PLEX8 |       |
| 2.75E-03 | 0 0 | Cs5g19940.1/Cs5g199 | 4.53 | 0 | 0    | 2 | MASCOT | T      | PLEX8 |       |
| 1.25E-02 | 0 0 | Cs5g19940.1/Cs5g199 | 4.53 | 0 | 0    | 2 | MASCOT | T      | PLEX8 |       |
| 1.73E-01 | 0 0 | Cs5g19940.1/Cs5g199 | 5.72 | 0 | 0    | 2 | MASCOT | T      | PLEX8 |       |
| 1.39E-02 | 0 0 | Cs5g19940.1/Cs5g199 | 5.84 | 0 | 0    | 2 | MASCOT | T      |       |       |
| 1.15E-01 | 0 0 | Cs5g19940.1/Cs5g199 | 6.74 | 0 | 0    | 2 | MASCOT | T      |       |       |
| 1.35E-03 | 0 0 | Cs5g19940.1/Cs5g199 | 5.84 | 0 | 0    | 2 | MASCOT | T      | PLEX8 |       |
| 3.43E-03 | 0 0 | Cs5g19940.1/Cs5g199 | 5.84 | 0 | 0    | 2 | MASCOT | T      | PLEX8 |       |
| 1.45E-03 | 0 0 | Cs5g19940.1/Cs5g199 | 5.84 | 0 | 0    | 2 | MASCOT | T      | PLEX8 |       |
| 1.40E-02 | 0 0 | Cs5g19940.1/Cs5g199 | 5.84 | 0 | 0    | 2 | MASCOT | T      | PLEX8 |       |
| 1.01E-01 | 0 0 | Cs5g19940.1/Cs5g199 | 5.84 | 0 | 0    | 2 | MASCOT | T      | PLEX8 |       |
| 3.18E-03 | 0 0 | Cs5g19940.1/Cs5g199 | 5.84 | 0 | 0    | 2 | MASCOT | T      | PLEX8 |       |
| 1.36E-01 | 0 0 | Cs5g19940.1/Cs5g199 | 5.84 | 0 | 0    | 2 | MASCOT | T      | PLEX8 |       |
| 1.85E-02 | 0 0 | Cs5g19940.1/Cs5g199 | 5.84 | 0 | 0    | 2 | MASCOT | T      | PLEX8 |       |
| 6.99E-03 | 0 0 | Cs5g19940.1/Cs5g199 | 5.84 | 0 | 0    | 2 | MASCOT | T      | PLEX8 |       |
| 1.03E-03 | 0 0 | Cs5g19940.1/Cs5g199 | 5.84 | 0 | 0    | 2 | MASCOT | T      | PLEX8 |       |
| 1.23E-01 | 0 0 | Cs5g19940.1/Cs5g199 | 5.84 | 0 | 0    | 2 | MASCOT | T      | PLEX8 |       |
| 1.82E-04 | 0 0 | Cs5g19940.1/Cs5g199 | 5.84 | 0 | 0    | 2 | MASCOT | T      | PLEX8 |       |
| 2.85E-03 | 0 0 | Cs5g19940.1/Cs5g199 | 5.84 | 0 | 0    | 2 | MASCOT | T      | PLEX8 |       |
| 3.41E-01 | 0 0 | Cs7g09060.1/Cs7g090 | 5.88 | 0 | 0    | 2 | MASCOT | T      | PLEX8 |       |
| 4.74E-02 | 0 0 | Cs7g09060.1/Cs7g090 | 6.05 | 0 | 0    | 2 | MASCOT | T      | PLEX8 |       |
| 6.27E-03 | 0 0 | Cs7g09060.1/Cs7g090 | 6.05 | 0 | 0    | 2 | MASCOT | T      | PLEX8 |       |
| 2.87E-03 | 0 0 | Cs7g09060.1/Cs7g090 | 6.05 | 0 | 0    | 2 | MASCOT | T      | PLEX8 |       |
| 1.10E-02 | 0 0 | Cs7g09060.1/Cs7g090 | 6.05 | 0 | 0    | 2 | MASCOT | T      | PLEX8 |       |
| 7.61E-05 | 0 0 | Cs7g09060.1/Cs7g090 | 5.32 | 0 | 0    | 2 | MASCOT | T      | PLEX8 |       |
| 7.90E-02 | 0 0 | Cs7g09060.1/Cs7g090 | 5.32 | 0 | 0    | 2 | MASCOT | T      |       |       |
| 7.40E-03 | 0 0 | Cs7g09060.1/Cs7g090 | 5.32 | 0 | 0    | 2 | MASCOT | T      | PLEX8 |       |
| 2.28E-04 | 0 0 | Cs7g09060.1/Cs7g090 | 5.32 | 0 | 0    | 2 | MASCOT | T      |       |       |
| 3.64E-02 | 0 0 | Cs7g09060.1/Cs7g090 | 8.69 | 0 | 0    | 2 | MASCOT | T      | PLEX8 |       |
| 1.78E-01 | 0 0 | Cs7g09060.1/Cs7g090 | 4.37 | 0 | 0    | 2 | MASCOT | T      | PLEX8 |       |
| 1.72E-03 | 0 0 | Cs7g09060.1/Cs7g090 | 4.37 | 0 | 0    | 2 | MASCOT | T      | PLEX8 |       |
| 9.66E-02 | 0 0 | Cs7g09060.1/Cs7g090 | 6    | 0 | 0    | 2 | MASCOT | T      | PLEX8 |       |
| 1.83E-02 | 0 0 | Cs7g09060.1/Cs7g090 | 6    | 0 | 0    | 2 | MASCOT | T      |       |       |
| 1.93E-04 | 0 0 | Cs7g09060.1/Cs7g090 | 6    | 0 | 0    | 2 | MASCOT | T      |       |       |
| 8.10E-05 | 0 0 | Cs7g09060.1/Cs7g090 | 6    | 0 | 0    | 2 | MASCOT | T      | PLEX8 |       |
| 1.06E-02 | 0 0 | Cs7g09060.1/Cs7g090 | 8.75 | 0 | 15.9 | 0 | 2      | MASCOT | T     | PLEX8 |
| 2.59E-02 | 0 0 | Cs7g09060.1/Cs7g090 | 8.75 | 0 | 15.9 | 0 | 2      | MASCOT | T     | PLEX8 |
| 6.80E-02 | 0 0 | Cs7g09060.1/Cs7g090 | 8.75 | 0 | 0    | 2 | MASCOT | T      | PLEX8 |       |
| 2.34E-04 | 0 0 | Cs7g09060.1/Cs7g090 | 4.09 | 0 | 0    | 2 | MASCOT | T      | PLEX8 |       |
| 2.75E-05 | 0 0 | Cs7g09060.1/Cs7g090 | 4.09 | 0 | 0    | 2 | MASCOT | T      | PLEX8 |       |
| 7.79E-04 | 0 0 | Cs7g09060.1/Cs7g090 | 4.09 | 0 | 0    | 2 | MASCOT | T      | PLEX8 |       |
| 1.13E-05 | 0 0 | Cs7g09060.1/Cs7g090 | 4.09 | 0 | 0    | 2 | MASCOT | T      | PLEX8 |       |
| 1.73E-04 | 0 0 | Cs7g09060.1/Cs7g090 | 4.09 | 0 | 0    | 2 | MASCOT | T      | PLEX8 |       |
| 4.38E-04 | 0 0 | Cs7g09060.1/Cs7g090 | 4.09 | 0 | 0    | 2 | MASCOT | T      | PLEX8 |       |
| 7.81E-02 | 0 0 | Cs7g09060.1/Cs7g090 | 5.4  | 0 | 0    | 2 | MASCOT | T      | PLEX8 |       |
| 1.88E-04 | 0 0 | Cs7g09060.1/Cs7g090 | 5.4  | 0 | 0    | 2 | MASCOT | T      | PLEX8 |       |
| 7.04E-02 | 0 0 | Cs7g09060.1/Cs7g090 | 5.4  | 0 | 0    | 2 | MASCOT | T      | PLEX8 |       |
| 1.10E-01 | 0 0 | Cs7g09060.1/Cs7g090 | 5.4  | 0 | 0    | 2 | MASCOT | T      | PLEX8 |       |
| 7.01E-02 | 0 0 | Cs7g09060.1/Cs7g090 | 5.4  | 0 | 0    | 2 | MASCOT | T      | PLEX8 |       |
| 3.46E-01 | 0 0 | Cs7g09060.1/Cs7g090 | 5.4  | 0 | 0    | 2 | MASCOT | T      | PLEX8 |       |

|          |     |                     |      |   |      |   |        |        |       |       |
|----------|-----|---------------------|------|---|------|---|--------|--------|-------|-------|
| 9.30E-03 | 0 0 | Cs7g09060.1/Cs7g090 | 4.53 | 0 | 0    | 2 | MASCOT | T      | PLEX8 |       |
| 3.88E-02 | 0 0 | Cs7g09060.1/Cs7g090 | 4.53 | 0 | 0    | 2 | MASCOT | T      | PLEX8 |       |
| 2.75E-03 | 0 0 | Cs7g09060.1/Cs7g090 | 4.53 | 0 | 0    | 2 | MASCOT | T      | PLEX8 |       |
| 1.74E-02 | 0 0 | Cs7g09060.1/Cs7g090 | 4.53 | 0 | 0    | 2 | MASCOT | T      | PLEX8 |       |
| 1.19E-01 | 0 0 | Cs7g09060.1/Cs7g090 | 4.53 | 0 | 0    | 2 | MASCOT | T      | PLEX8 |       |
| 3.71E-01 | 0 0 | Cs7g09060.1/Cs7g090 | 4.53 | 0 | 0    | 2 | MASCOT | T      | PLEX8 |       |
| 4.15E-03 | 0 0 | Cs7g09060.1/Cs7g090 | 4.53 | 0 | 0    | 2 | MASCOT | T      | PLEX8 |       |
| 1.93E-01 | 0 0 | Cs7g09060.1/Cs7g090 | 4.53 | 0 | 0    | 2 | MASCOT | T      | PLEX8 |       |
| 1.02E-01 | 0 0 | Cs7g09060.1/Cs7g090 | 4.53 | 0 | 0    | 2 | MASCOT | T      | PLEX8 |       |
| 1.88E-01 | 0 0 | Cs7g09060.1/Cs7g090 | 4.53 | 0 | 0    | 2 | MASCOT | T      | PLEX8 |       |
| 1.44E-01 | 0 0 | Cs7g09060.1/Cs7g090 | 6.74 | 0 | 0    | 2 | MASCOT | T      | PLEX8 |       |
| 5.89E-03 | 0 0 | Cs7g09060.1/Cs7g090 | 6.74 | 0 | 0    | 2 | MASCOT | T      | PLEX8 |       |
| 2.36E-01 | 0 0 | Cs7g09060.1/Cs7g090 | 6.74 | 0 | 0    | 2 | MASCOT | T      | PLEX8 |       |
| 6.78E-02 | 0 0 | Cs7g09060.1/Cs7g090 | 6.74 | 0 | 0    | 2 | MASCOT | T      | PLEX8 |       |
| 5.42E-03 | 0 0 | Cs7g09060.1/Cs7g090 | 4.41 | 0 | 0    | 2 | MASCOT | T      | PLEX8 |       |
| 8.73E-02 | 0 0 | Cs7g09060.1/Cs7g090 | 8.76 | 0 | 0    | 2 | MASCOT | T      |       |       |
| 2.32E-01 | 0 0 | Cs7g09060.1/Cs7g090 | 4.21 | 0 | 0    | 2 | MASCOT | T      | PLEX8 |       |
| 1.03E-02 | 0 0 | Cs7g09060.1/Cs7g090 | 4.21 | 0 | 0    | 2 | MASCOT | T      | PLEX8 |       |
| 1.09E-01 | 0 0 | Cs7g09060.1/Cs7g090 | 5.55 | 0 | 0    | 2 | MASCOT | T      | PLEX8 |       |
| 1.47E-01 | 0 0 | Cs7g09060.1/Cs7g090 | 5.55 | 0 | 0    | 2 | MASCOT | T      | PLEX8 |       |
| 1.73E-01 | 0 0 | Cs7g09060.1/Cs7g090 | 8.46 | 0 | 0    | 2 | MASCOT | T      | PLEX8 |       |
| 1.83E-04 | 0 0 | Cs7g09060.1/Cs7g090 | 4.37 | 0 | 0    | 2 | MASCOT | T      | PLEX8 |       |
| 2.35E-03 | 0 0 | Cs7g09060.1/Cs7g090 | 4.21 | 0 | 0    | 2 | MASCOT | T      |       |       |
| 1.43E-01 | 0 0 | Cs7g09060.1/Cs7g090 | 4.21 | 0 | 0    | 2 | MASCOT | T      |       |       |
| 2.40E-04 | 0 0 | Cs7g09060.1/Cs7g090 | 9.8  | 0 | 0    | 2 | MASCOT | T      | PLEX8 |       |
| 1.38E-03 | 0 0 | Cs7g09060.1/Cs7g090 | 9.8  | 0 | 0    | 2 | MASCOT | T      |       |       |
| 2.33E-01 | 0 0 | Cs7g09060.1/Cs7g090 | 6.79 | 0 | 0    | 2 | MASCOT | T      | PLEX8 |       |
| 1.88E-01 | 0 0 | Cs7g09060.1/Cs7g090 | 6.79 | 0 | 0    | 2 | MASCOT | T      | PLEX8 |       |
| 2.07E-01 | 0 0 | Cs7g09060.1/Cs7g090 | 6.79 | 0 | 0    | 2 | MASCOT | T      | PLEX8 |       |
| 1.04E-01 | 0 0 | Cs7g09060.1/Cs7g090 | 6.79 | 0 | 0    | 2 | MASCOT | T      | PLEX8 |       |
| 4.72E-02 | 0 0 | Cs7g09060.1/Cs7g090 | 6.79 | 0 | 0    | 2 | MASCOT | T      | PLEX8 |       |
| 8.43E-02 | 0 0 | Cs7g09060.1/Cs7g090 | 8.27 | 0 | 0    | 2 | MASCOT | T      | PLEX8 |       |
| 7.57E-02 | 0 0 | Cs7g09060.1/Cs7g090 | 8.27 | 0 | 0    | 2 | MASCOT | T      | PLEX8 |       |
| 2.45E-01 | 0 0 | Cs7g09060.1/Cs7g090 | 8.27 | 0 | 0    | 2 | MASCOT | T      | PLEX8 |       |
| 7.63E-02 | 0 0 | Cs7g09060.1/Cs7g090 | 8.27 | 0 | 0    | 2 | MASCOT | T      | PLEX8 |       |
| 6.79E-02 | 0 0 | Cs7g09060.1/Cs7g090 | 8.27 | 0 | 0    | 2 | MASCOT | T      | PLEX8 |       |
| 2.16E-01 | 0 0 | Cs7g09060.1/Cs7g090 | 8.27 | 0 | 0    | 2 | MASCOT | T      | PLEX8 |       |
| 2.46E-01 | 0 0 | Cs7g09060.1/Cs7g090 | 5.84 | 0 | 15.9 | 0 | 2      | MASCOT | T     | PLEX8 |
| 1.88E-01 | 0 0 | Cs7g09060.1/Cs7g090 | 5.84 | 0 | 15.9 | 0 | 2      | MASCOT | T     | PLEX8 |
| 2.47E-01 | 0 0 | Cs7g09060.1/Cs7g090 | 5.84 | 0 | 15.9 | 0 | 2      | MASCOT | T     | PLEX8 |
| 7.53E-02 | 0 0 | Cs7g09060.1/Cs7g090 | 5.84 | 0 | 0    | 2 | MASCOT | T      | PLEX8 |       |
| 7.04E-03 | 0 0 | Cs7g09060.1/Cs7g090 | 5.84 | 0 | 0    | 2 | MASCOT | T      | PLEX8 |       |
| 3.63E-01 | 0 0 | Cs7g09060.1/Cs7g090 | 5.84 | 0 | 0    | 2 | MASCOT | T      | PLEX8 |       |
| 9.48E-03 | 0 0 | Cs7g09060.1/Cs7g090 | 5.84 | 0 | 0    | 2 | MASCOT | T      | PLEX8 |       |
| 3.03E-02 | 0 0 | Cs7g09060.1/Cs7g090 | 5.84 | 0 | 0    | 2 | MASCOT | T      | PLEX8 |       |
| 1.12E-02 | 0 0 | Cs7g09060.1/Cs7g090 | 5.84 | 0 | 0    | 2 | MASCOT | T      | PLEX8 |       |
| 1.02E-01 | 0 0 | Cs7g09060.1/Cs7g090 | 5.84 | 0 | 0    | 2 | MASCOT | T      | PLEX8 |       |
| 2.78E-01 | 0 0 | Cs7g09060.1/Cs7g090 | 6.1  | 0 | 0    | 2 | MASCOT | T      | PLEX8 |       |
| 2.64E-01 | 0 0 | Cs7g09060.1/Cs7g090 | 6.1  | 0 | 0    | 2 | MASCOT | T      | PLEX8 |       |
| 2.29E-01 | 0 0 | Cs7g09060.1/Cs7g090 | 6.1  | 0 | 0    | 2 | MASCOT | T      | PLEX8 |       |
| 6.16E-03 | 0 0 | Cs7g09060.1/Cs7g090 | 4.37 | 0 | 0    | 2 | MASCOT | T      | PLEX8 |       |

|          |     |                       |      |   |      |   |        |        |       |       |
|----------|-----|-----------------------|------|---|------|---|--------|--------|-------|-------|
| 1.04E-02 | 0 0 | Cs7g09060.1/Cs7g090   | 4.37 | 0 | 0    | 2 | MASCOT | T      | PLEX8 |       |
| 1.20E-02 | 0 0 | Cs7g09060.1/Cs7g090   | 4.37 | 0 | 0    | 2 | MASCOT | T      | PLEX8 |       |
| 1.07E-02 | 0 0 | Cs2g13250.1/Cs7g090   | 6.07 | 1 | 0    | 2 | MASCOT | T      | PLEX8 |       |
| 1.24E-03 | 0 0 | Cs2g13250.1/Cs7g090   | 6.07 | 1 | 0    | 2 | MASCOT | T      | PLEX8 |       |
| 2.97E-02 | 0 0 | Cs2g13250.1/Cs7g090   | 6.07 | 1 | 0    | 2 | MASCOT | T      | PLEX8 |       |
| 4.73E-03 | 0 0 | Cs7g09060.1/Cs7g090   | 6.74 | 0 | 0    | 2 | MASCOT | T      | PLEX8 |       |
| 2.54E-02 | 0 0 | Cs7g09060.1/Cs7g090   | 6.74 | 0 | 0    | 2 | MASCOT | T      | PLEX8 |       |
| 2.57E-03 | 0 0 | Cs7g09060.1/Cs7g090   | 4.25 | 0 | 0    | 2 | MASCOT | T      | PLEX8 |       |
| 2.60E-04 | 0 0 | Cs7g09060.1/Cs7g090   | 4.25 | 0 | 0    | 2 | MASCOT | T      | PLEX8 |       |
| 2.48E-03 | 0 0 | Cs7g09060.1/Cs7g090   | 4.25 | 0 | 0    | 2 | MASCOT | T      |       |       |
| 1.70E-02 | 0 0 | Cs7g09060.1/Cs7g090   | 4.25 | 0 | 0    | 2 | MASCOT | T      |       |       |
| 5.64E-04 | 0 0 | Cs7g09060.1/Cs7g090   | 4.25 | 0 | 0    | 2 | MASCOT | T      |       |       |
| 2.30E-02 | 0 0 | Cs7g09060.1/Cs7g090   | 4.25 | 0 | 0    | 2 | MASCOT | T      |       |       |
| 1.76E-03 | 0 0 | Cs7g09060.1/Cs7g090   | 4.25 | 0 | 0    | 2 | MASCOT | T      |       |       |
| 4.73E-03 | 0 0 | Cs7g09060.1/Cs7g090   | 4.25 | 0 | 0    | 2 | MASCOT | T      |       |       |
| 1.48E-02 | 0 0 | Cs7g09060.1/Cs7g090   | 4.25 | 0 | 0    | 2 | MASCOT | T      |       |       |
| 9.16E-02 | 0 0 | Cs7g09060.1/Cs7g090   | 8.41 | 0 | 0    | 2 | MASCOT | T      | PLEX8 |       |
| 6.93E-03 | 0 0 | Cs7g09060.1/Cs7g090   | 8.41 | 0 | 0    | 2 | MASCOT | T      | PLEX8 |       |
| 3.91E-02 | 0 0 | Cs7g09060.1/Cs7g090   | 8.41 | 0 | 0    | 2 | MASCOT | T      | PLEX8 |       |
| 3.28E-02 | 0 0 | Cs7g09060.1/Cs7g090   | 4.14 | 0 | 0    | 2 | MASCOT | T      | PLEX8 |       |
| 5.12E-02 | 0 0 | Cs7g09060.1/Cs7g090   | 4.14 | 0 | 0    | 2 | MASCOT | T      | PLEX8 |       |
| 1.79E-01 | 0 0 | Cs7g09060.1/Cs7g090   | 4.14 | 0 | 0    | 2 | MASCOT | T      |       |       |
| 3.98E-02 | 0 0 | Cs7g09060.1/Cs7g090   | 4.14 | 0 | 0    | 2 | MASCOT | T      |       |       |
| 1.29E-03 | 0 0 | Cs7g09060.1/Cs7g090   | 4.14 | 0 | 0    | 2 | MASCOT | T      |       |       |
| 2.01E-05 | 0 0 | Cs7g09060.1/Cs7g090   | 4.14 | 0 | 0    | 2 | MASCOT | T      |       |       |
| 2.83E-08 | 0 0 | Cs7g09060.1/Cs7g090   | 4.14 | 0 | 0    | 2 | MASCOT | T      |       |       |
| 6.95E-04 | 0 0 | Cs7g09060.1/Cs7g090   | 4.14 | 0 | 0    | 2 | MASCOT | T      | PLEX8 |       |
| 2.28E-01 | 0 0 | orange1.1t03572.1/ora | 5.88 | 0 | 0    | 2 | MASCOT | T      | PLEX8 |       |
| 1.34E-02 | 0 0 | orange1.1t03572.1/ora | 5.88 | 0 | 0    | 2 | MASCOT | T      | PLEX8 |       |
| 2.57E-01 | 0 0 | orange1.1t03572.1/ora | 5.88 | 0 | 0    | 2 | MASCOT | T      | PLEX8 |       |
| 3.35E-02 | 0 0 | orange1.1t03572.1/ora | 6.05 | 0 | 0    | 2 | MASCOT | T      | PLEX8 |       |
| 1.44E-01 | 0 0 | orange1.1t03572.1/ora | 6.05 | 0 | 0    | 2 | MASCOT | T      | PLEX8 |       |
| 1.27E-01 | 0 0 | orange1.1t03572.1/ora | 6.05 | 0 | 0    | 2 | MASCOT | T      | PLEX8 |       |
| 3.07E-01 | 0 0 | orange1.1t03572.1/ora | 6.05 | 0 | 0    | 2 | MASCOT | T      | PLEX8 |       |
| 1.18E-01 | 0 0 | orange1.1t03572.1/ora | 6.05 | 0 | 0    | 2 | MASCOT | T      |       |       |
| 9.35E-03 | 0 0 | orange1.1t03572.1/ora | 5.32 | 0 | 15.9 | 0 | 2      | MASCOT | T     | PLEX8 |
| 4.61E-02 | 0 0 | orange1.1t03572.1/ora | 5.32 | 0 | 15.9 | 0 | 2      | MASCOT | T     | PLEX8 |
| 1.10E-02 | 0 0 | orange1.1t03572.1/ora | 5.32 | 0 | 15.9 | 0 | 2      | MASCOT | T     | PLEX8 |
| 8.23E-02 | 0 0 | orange1.1t03572.1/ora | 5.32 | 0 | 0    | 2 | MASCOT | T      | PLEX8 |       |
| 1.31E-03 | 0 0 | orange1.1t03572.1/ora | 5.32 | 0 | 0    | 2 | MASCOT | T      | PLEX8 |       |
| 2.08E-03 | 0 0 | orange1.1t03572.1/ora | 5.32 | 0 | 0    | 2 | MASCOT | T      | PLEX8 |       |
| 8.43E-02 | 0 0 | orange1.1t03572.1/ora | 3.93 | 0 | 0    | 2 | MASCOT | T      | PLEX8 |       |
| 5.47E-02 | 0 0 | orange1.1t03572.1/ora | 3.83 | 0 | 0    | 2 | MASCOT | T      |       |       |
| 3.43E-04 | 0 0 | orange1.1t03572.1/ora | 3.83 | 0 | 0    | 2 | MASCOT | T      |       |       |
| 3.56E-02 | 0 0 | orange1.1t03572.1/ora | 6.1  | 0 | 0    | 2 | MASCOT | T      | PLEX8 |       |
| 9.60E-02 | 0 0 | orange1.1t03572.1/ora | 6.1  | 0 | 0    | 2 | MASCOT | T      | PLEX8 |       |
| 3.72E-01 | 0 0 | orange1.1t03572.1/ora | 4.53 | 0 | 0    | 2 | MASCOT | T      | PLEX8 |       |
| 4.79E-04 | 0 0 | orange1.1t03572.1/ora | 4.53 | 0 | 0    | 2 | MASCOT | T      | PLEX8 |       |
| 7.07E-04 | 0 0 | orange1.1t03572.1/ora | 5.84 | 0 | 0    | 2 | MASCOT | T      | PLEX8 |       |
| 1.20E-03 | 0 0 | orange1.1t03572.1/ora | 5.84 | 0 | 0    | 2 | MASCOT | T      | PLEX8 |       |
| 1.30E-05 | 0 0 | orange1.1t03572.1/ora | 5.84 | 0 | 0    | 2 | MASCOT | T      | PLEX8 |       |

|          |     |                       |      |   |      |   |        |        |       |       |
|----------|-----|-----------------------|------|---|------|---|--------|--------|-------|-------|
| 4.16E-01 | 0 0 | orange1.1t03572.1/ora | 5.21 | 0 | 0    | 2 | MASCOT | T      | PLEX8 |       |
| 7.40E-07 | 0 0 | orange1.1t03572.1/ora | 5.21 | 0 | 0    | 2 | MASCOT | T      | PLEX8 |       |
| 4.97E-03 | 0 0 | orange1.1t03572.1/ora | 6    | 0 | 0    | 2 | MASCOT | T      |       |       |
| 8.18E-04 | 0 0 | orange1.1t03572.1/ora | 4.03 | 0 | 0    | 2 | MASCOT | T      |       |       |
| 1.44E-01 | 0 0 | orange1.1t03572.1/ora | 4.21 | 0 | 0    | 2 | MASCOT | T      |       |       |
| 2.88E-01 | 0 0 | orange1.1t03572.1/ora | 8.76 | 0 | 15.9 | 0 | 2      | MASCOT | T     | PLEX8 |
| 3.07E-01 | 0 0 | orange1.1t03572.1/ora | 8.76 | 0 | 15.9 | 0 | 2      | MASCOT | T     | PLEX8 |
| 1.39E-03 | 0 0 | orange1.1t03572.1/ora | 8.76 | 0 | 0    | 2 | MASCOT | T      | PLEX8 |       |
| 2.89E-01 | 0 0 | orange1.1t03572.1/ora | 6    | 0 | 0    | 2 | MASCOT | T      | PLEX8 |       |
| 3.70E-05 | 0 0 | orange1.1t03572.1/ora | 6    | 0 | 0    | 2 | MASCOT | T      | PLEX8 |       |
| 1.97E-02 | 0 0 | orange1.1t03572.1/ora | 6    | 0 | 0    | 2 | MASCOT | T      | PLEX8 |       |
| 1.30E-01 | 0 0 | orange1.1t03572.1/ora | 8.76 | 0 | 0    | 2 | MASCOT | T      | PLEX8 |       |
| 7.73E-03 | 0 0 | orange1.1t03572.1/ora | 8.49 | 0 | 0    | 2 | MASCOT | T      |       |       |
| 6.83E-04 | 0 0 | orange1.1t03572.1/ora | 8.49 | 0 | 0    | 2 | MASCOT | T      | PLEX8 |       |
| 2.49E-03 | 0 0 | orange1.1t03572.1/ora | 8.49 | 0 | 0    | 2 | MASCOT | T      |       |       |
| 3.04E-03 | 0 0 | orange1.1t03572.1/ora | 5.38 | 0 | 0    | 2 | MASCOT | T      | PLEX8 |       |
| 1.10E-02 | 0 0 | orange1.1t03572.1/ora | 5.38 | 0 | 0    | 2 | MASCOT | T      | PLEX8 |       |
| 2.75E-03 | 0 0 | orange1.1t03572.1/ora | 5.38 | 0 | 0    | 2 | MASCOT | T      | PLEX8 |       |
| 2.76E-02 | 0 0 | orange1.1t03572.1/ora | 5.38 | 0 | 0    | 2 | MASCOT | T      | PLEX8 |       |
| 7.29E-03 | 0 0 | orange1.1t03572.1/ora | 5.38 | 0 | 0    | 2 | MASCOT | T      | PLEX8 |       |
| 2.92E-02 | 0 0 | orange1.1t03572.1/ora | 4.14 | 0 | 0    | 2 | MASCOT | T      | PLEX8 |       |
| 1.29E-04 | 0 0 | orange1.1t03572.1/ora | 4.14 | 0 | 0    | 2 | MASCOT | T      | PLEX8 |       |
| 2.44E-02 | 0 0 | orange1.1t03572.1/ora | 4.14 | 0 | 0    | 2 | MASCOT | T      | PLEX8 |       |
| 1.88E-02 | 0 0 | orange1.1t03572.1/ora | 8.44 | 0 | 0    | 2 | MASCOT | T      | PLEX8 |       |
| 1.23E-02 | 0 0 | orange1.1t03572.1/ora | 8.44 | 0 | 0    | 2 | MASCOT | T      | PLEX8 |       |
| 1.73E-01 | 0 0 | orange1.1t03572.1/ora | 5.5  | 0 | 0    | 2 | MASCOT | T      | PLEX8 |       |
| 4.75E-02 | 0 0 | orange1.1t03572.1/ora | 4.18 | 1 | 0    | 2 | MASCOT | T      | PLEX8 |       |
| 1.01E-01 | 0 0 | orange1.1t03572.1/ora | 5.84 | 0 | 0    | 2 | MASCOT | T      | PLEX8 |       |
| 1.48E-01 | 0 0 | orange1.1t03572.1/ora | 6.1  | 0 | 0    | 2 | MASCOT | T      | PLEX8 |       |
| 1.81E-01 | 0 0 | orange1.1t03572.1/ora | 6.1  | 0 | 0    | 2 | MASCOT | T      | PLEX8 |       |
| 4.71E-02 | 0 0 | orange1.1t03572.1/ora | 5.4  | 0 | 15.9 | 0 | 2      | MASCOT | T     | PLEX8 |
| 1.31E-01 | 0 0 | orange1.1t03572.1/ora | 5.4  | 0 | 15.9 | 0 | 2      | MASCOT | T     | PLEX8 |
| 6.49E-02 | 0 0 | orange1.1t03572.1/ora | 5.4  | 0 | 15.9 | 0 | 2      | MASCOT | T     | PLEX8 |
| 6.66E-03 | 0 0 | orange1.1t03572.1/ora | 5.4  | 0 | 15.9 | 0 | 2      | MASCOT | T     | PLEX8 |
| 2.48E-03 | 0 0 | orange1.1t03572.1/ora | 5.4  | 0 | 0    | 2 | MASCOT | T      | PLEX8 |       |
| 1.03E-04 | 0 0 | orange1.1t03572.1/ora | 5.4  | 0 | 0    | 2 | MASCOT | T      | PLEX8 |       |
| 1.66E-02 | 0 0 | orange1.1t03572.1/ora | 5.4  | 0 | 0    | 2 | MASCOT | T      | PLEX8 |       |
| 3.19E-02 | 0 0 | orange1.1t03572.1/ora | 8.25 | 0 | 0    | 2 | MASCOT | T      | PLEX8 |       |
| 6.00E-08 | 0 0 | orange1.1t03572.1/ora | 8.25 | 0 | 0    | 2 | MASCOT | T      |       |       |
| 8.11E-02 | 0 0 | orange1.1t03572.1/ora | 8.75 | 0 | 0    | 2 | MASCOT | T      | PLEX8 |       |
| 1.47E-01 | 0 0 | orange1.1t03572.1/ora | 8.75 | 0 | 0    | 2 | MASCOT | T      | PLEX8 |       |
| 1.09E-06 | 0 0 | orange1.1t03572.1/ora | 8.08 | 0 | 0    | 2 | MASCOT | T      | PLEX8 |       |
| 4.43E-02 | 0 0 | orange1.1t03572.1/ora | 8.08 | 0 | 0    | 2 | MASCOT | T      | PLEX8 |       |
| 3.37E-02 | 0 0 | orange1.1t03572.1/ora | 8.08 | 0 | 0    | 2 | MASCOT | T      | PLEX8 |       |
| 6.22E-02 | 0 0 | orange1.1t03572.1/ora | 5.74 | 0 | 15.9 | 0 | 2      | MASCOT | T     | PLEX8 |
| 1.34E-03 | 0 0 | orange1.1t03572.1/ora | 5.74 | 0 | 0    | 2 | MASCOT | T      | PLEX8 |       |
| 5.95E-02 | 0 0 | orange1.1t03572.1/ora | 8.56 | 0 | 0    | 2 | MASCOT | T      | PLEX8 |       |
| 8.49E-03 | 0 0 | orange1.1t03572.1/ora | 8.56 | 0 | 0    | 2 | MASCOT | T      | PLEX8 |       |
| 3.70E-05 | 0 0 | orange1.1t03572.1/ora | 5.97 | 0 | 0    | 2 | MASCOT | T      |       |       |
| 5.25E-02 | 0 0 | orange1.1t03572.1/ora | 8.72 | 0 | 15.9 | 0 | 2      | MASCOT | T     | PLEX8 |
| 7.13E-04 | 0 0 | orange1.1t03572.1/ora | 8.72 | 0 | 0    | 2 | MASCOT | T      | PLEX8 |       |

|          |     |                       |      |   |      |   |        |        |       |       |
|----------|-----|-----------------------|------|---|------|---|--------|--------|-------|-------|
| 1.90E-02 | 0 0 | orange1.1t03572.1/ora | 8.72 | 0 | 0    | 2 | MASCOT | T      | PLEX8 |       |
| 1.33E-02 | 0 0 | orange1.1t03572.1/ora | 8.72 | 0 | 0    | 2 | MASCOT | T      | PLEX8 |       |
| 1.92E-02 | 0 0 | orange1.1t03572.1/ora | 8.72 | 0 | 0    | 2 | MASCOT | T      | PLEX8 |       |
| 2.49E-02 | 0 0 | orange1.1t03572.1/ora | 5.21 | 0 | 0    | 2 | MASCOT | T      | PLEX8 |       |
| 5.09E-02 | 0 0 | orange1.1t01932.1/ora | 5.88 | 0 | 0    | 2 | MASCOT | T      | PLEX8 |       |
| 2.60E-01 | 0 0 | orange1.1t01932.1/ora | 5.88 | 0 | 0    | 2 | MASCOT | T      | PLEX8 |       |
| 9.06E-02 | 0 0 | orange1.1t01932.1/ora | 5.88 | 0 | 0    | 2 | MASCOT | T      | PLEX8 |       |
| 4.38E-03 | 0 0 | orange1.1t01932.1/ora | 5.88 | 0 | 0    | 2 | MASCOT | T      | PLEX8 |       |
| 1.55E-01 | 0 0 | orange1.1t01932.1/ora | 5.88 | 0 | 0    | 2 | MASCOT | T      | PLEX8 |       |
| 7.20E-03 | 0 0 | orange1.1t01932.1/ora | 5.88 | 0 | 0    | 2 | MASCOT | T      | PLEX8 |       |
| 2.07E-01 | 0 0 | orange1.1t01932.1/ora | 5.88 | 0 | 0    | 2 | MASCOT | T      | PLEX8 |       |
| 4.80E-02 | 0 0 | orange1.1t01932.1/ora | 5.88 | 0 | 0    | 2 | MASCOT | T      | PLEX8 |       |
| 5.68E-02 | 0 0 | orange1.1t01932.1/ora | 5.88 | 0 | 0    | 2 | MASCOT | T      | PLEX8 |       |
| 7.05E-02 | 0 0 | orange1.1t01932.1/ora | 5.88 | 0 | 0    | 2 | MASCOT | T      | PLEX8 |       |
| 1.05E-05 | 0 0 | orange1.1t01933.1     | 4.37 | 0 | 15.9 | 0 | 2      | MASCOT | T     | PLEX8 |
| 8.18E-04 | 0 0 | orange1.1t01933.1     | 4.37 | 0 | 15.9 | 0 | 2      | MASCOT | T     | PLEX8 |
| 1.24E-02 | 0 0 | orange1.1t01933.1     | 4.37 | 0 | 15.9 | 0 | 2      | MASCOT | T     | PLEX8 |
| 1.33E-05 | 0 0 | orange1.1t01933.1     | 4.37 | 0 | 15.9 | 0 | 2      | MASCOT | T     | PLEX8 |
| 2.99E-03 | 0 0 | orange1.1t01933.1     | 4.37 | 0 | 15.9 | 0 | 2      | MASCOT | T     | PLEX8 |
| 1.21E-03 | 0 0 | orange1.1t01933.1     | 4.37 | 0 | 15.9 | 0 | 2      | MASCOT | T     | PLEX8 |
| 3.49E-06 | 0 0 | orange1.1t01933.1     | 4.37 | 0 | 15.9 | 0 | 2      | MASCOT | T     | PLEX8 |
| 7.06E-02 | 0 0 | orange1.1t01933.1     | 4.37 | 0 | 15.9 | 0 | 2      | MASCOT | T     | PLEX8 |
| 7.75E-02 | 0 0 | orange1.1t01933.1     | 4.37 | 0 | 15.9 | 0 | 2      | MASCOT | T     | PLEX8 |
| 6.25E-02 | 0 0 | orange1.1t01933.1     | 4.37 | 0 | 0    | 2 | MASCOT | T      | PLEX8 |       |
| 3.88E-03 | 0 0 | orange1.1t01933.1     | 4.37 | 0 | 0    | 2 | MASCOT | T      | PLEX8 |       |
| 2.05E-03 | 0 0 | orange1.1t01933.1     | 4.37 | 0 | 0    | 2 | MASCOT | T      | PLEX8 |       |
| 8.81E-04 | 0 0 | orange1.1t01933.1     | 4.37 | 0 | 0    | 2 | MASCOT | T      | PLEX8 |       |
| 1.22E-01 | 0 0 | orange1.1t01933.1     | 4.37 | 0 | 0    | 2 | MASCOT | T      | PLEX8 |       |
| 3.38E-04 | 0 0 | orange1.1t01933.1     | 4.37 | 0 | 0    | 2 | MASCOT | T      | PLEX8 |       |
| 2.76E-05 | 0 0 | orange1.1t01933.1     | 4.37 | 0 | 0    | 2 | MASCOT | T      | PLEX8 |       |
| 7.11E-03 | 0 0 | orange1.1t01933.1     | 4.37 | 0 | 0    | 2 | MASCOT | T      | PLEX8 |       |
| 7.54E-06 | 0 0 | orange1.1t01933.1     | 4.37 | 0 | 0    | 2 | MASCOT | T      | PLEX8 |       |
| 2.59E-01 | 0 0 | orange1.1t01933.1     | 4.37 | 0 | 0    | 2 | MASCOT | T      | PLEX8 |       |
| 5.48E-03 | 0 0 | orange1.1t01933.1     | 4.37 | 0 | 0    | 2 | MASCOT | T      | PLEX8 |       |
| 1.03E-01 | 0 0 | orange1.1t01933.1     | 4.37 | 0 | 0    | 2 | MASCOT | T      | PLEX8 |       |
| 5.21E-03 | 0 0 | orange1.1t01933.1/ora | 4.03 | 0 | 0    | 2 | MASCOT | T      | PLEX8 |       |
| 7.79E-02 | 0 0 | orange1.1t01933.1/ora | 4.03 | 0 | 0    | 2 | MASCOT | T      | PLEX8 |       |
| 4.00E-01 | 0 0 | orange1.1t01933.1/ora | 5.84 | 0 | 0    | 2 | MASCOT | T      | PLEX8 |       |
| 1.64E-02 | 0 0 | orange1.1t01933.1/ora | 5.84 | 0 | 0    | 2 | MASCOT | T      | PLEX8 |       |
| 1.25E-02 | 0 0 | orange1.1t01933.1/ora | 5.84 | 0 | 0    | 2 | MASCOT | T      | PLEX8 |       |
| 1.58E-01 | 0 0 | orange1.1t01933.1/ora | 5.84 | 0 | 0    | 2 | MASCOT | T      | PLEX8 |       |
| 1.78E-01 | 0 0 | orange1.1t01933.1/ora | 5.84 | 0 | 0    | 2 | MASCOT | T      | PLEX8 |       |
| 4.09E-01 | 0 0 | orange1.1t01933.1/ora | 5.84 | 0 | 0    | 2 | MASCOT | T      | PLEX8 |       |
| 9.68E-03 | 0 0 | orange1.1t01933.1/ora | 5.84 | 0 | 0    | 2 | MASCOT | T      | PLEX8 |       |
| 2.34E-01 | 0 0 | orange1.1t01933.1/ora | 5.84 | 0 | 0    | 2 | MASCOT | T      | PLEX8 |       |
| 1.39E-02 | 0 0 | orange1.1t01933.1/ora | 5.84 | 0 | 0    | 2 | MASCOT | T      | PLEX8 |       |
| 7.65E-02 | 0 0 | orange1.1t01933.1/ora | 5.84 | 0 | 0    | 2 | MASCOT | T      | PLEX8 |       |
| 6.01E-03 | 0 0 | orange1.1t01933.1/ora | 5.84 | 0 | 0    | 2 | MASCOT | T      | PLEX8 |       |
| 8.11E-03 | 0 0 | orange1.1t01933.1/ora | 5.84 | 0 | 0    | 2 | MASCOT | T      | PLEX8 |       |
| 2.84E-02 | 0 0 | orange1.1t01933.1/ora | 5.84 | 0 | 0    | 2 | MASCOT | T      | PLEX8 |       |
| 2.86E-02 | 0 0 | orange1.1t01933.1/ora | 5.84 | 0 | 0    | 2 | MASCOT | T      | PLEX8 |       |

|          |     |                       |      |   |      |   |        |        |       |       |
|----------|-----|-----------------------|------|---|------|---|--------|--------|-------|-------|
| 7.91E-03 | 0 0 | orange1.1t01933.1/ora | 5.84 | 0 | 0    | 2 | MASCOT | T      | PLEX8 |       |
| 5.94E-03 | 0 0 | orange1.1t01933.1/ora | 5.84 | 0 | 0    | 2 | MASCOT | T      | PLEX8 |       |
| 6.49E-03 | 0 0 | orange1.1t01933.1/ora | 5.84 | 0 | 0    | 2 | MASCOT | T      | PLEX8 |       |
| 6.08E-03 | 0 0 | orange1.1t01933.1/ora | 5.84 | 0 | 0    | 2 | MASCOT | T      | PLEX8 |       |
| 3.60E-01 | 0 0 | orange1.1t01933.1/ora | 5.84 | 0 | 0    | 2 | MASCOT | T      | PLEX8 |       |
| 2.15E-01 | 0 0 | orange1.1t01933.1/ora | 5.84 | 0 | 0    | 2 | MASCOT | T      | PLEX8 |       |
| 6.47E-02 | 0 0 | orange1.1t01933.1/ora | 5.84 | 0 | 0    | 2 | MASCOT | T      |       |       |
| 1.33E-02 | 0 0 | orange1.1t01933.1/ora | 5.84 | 0 | 0    | 2 | MASCOT | T      |       |       |
| 5.03E-03 | 0 0 | orange1.1t01933.1     | 3.66 | 0 | 0    | 2 | MASCOT | T      | PLEX8 |       |
| 8.55E-03 | 0 0 | orange1.1t01933.1     | 3.66 | 0 | 0    | 2 | MASCOT | T      | PLEX8 |       |
| 3.91E-01 | 0 0 | orange1.1t01933.1/ora | 6.74 | 0 | 0    | 2 | MASCOT | T      | PLEX8 |       |
| 3.06E-02 | 0 0 | orange1.1t01933.1/ora | 6.74 | 0 | 0    | 2 | MASCOT | T      | PLEX8 |       |
| 5.02E-02 | 0 0 | orange1.1t01933.1/ora | 6.74 | 0 | 0    | 2 | MASCOT | T      | PLEX8 |       |
| 2.54E-02 | 0 0 | orange1.1t01933.1/ora | 6.74 | 0 | 0    | 2 | MASCOT | T      | PLEX8 |       |
| 1.16E-01 | 0 0 | orange1.1t01933.1/ora | 6.74 | 0 | 0    | 2 | MASCOT | T      | PLEX8 |       |
| 2.28E-01 | 0 0 | orange1.1t01933.1/ora | 6.74 | 0 | 0    | 2 | MASCOT | T      | PLEX8 |       |
| 3.52E-01 | 0 0 | orange1.1t01933.1/ora | 6.74 | 0 | 0    | 2 | MASCOT | T      | PLEX8 |       |
| 9.34E-02 | 0 0 | orange1.1t01933.1/ora | 6.74 | 0 | 0    | 2 | MASCOT | T      | PLEX8 |       |
| 2.85E-01 | 0 0 | orange1.1t01933.1/ora | 6.74 | 0 | 0    | 2 | MASCOT | T      | PLEX8 |       |
| 1.12E-01 | 0 0 | orange1.1t01933.1/ora | 6.74 | 0 | 0    | 2 | MASCOT | T      | PLEX8 |       |
| 3.70E-01 | 0 0 | orange1.1t01933.1/ora | 6.74 | 0 | 0    | 2 | MASCOT | T      | PLEX8 |       |
| 6.70E-02 | 0 0 | orange1.1t01933.1/ora | 6.74 | 0 | 0    | 2 | MASCOT | T      | PLEX8 |       |
| 1.42E-01 | 0 0 | orange1.1t01933.1/ora | 6.74 | 0 | 0    | 2 | MASCOT | T      | PLEX8 |       |
| 3.64E-02 | 0 0 | orange1.1t01933.1/ora | 6.74 | 0 | 0    | 2 | MASCOT | T      | PLEX8 |       |
| 3.34E-02 | 0 0 | orange1.1t01933.1/ora | 6.74 | 0 | 0    | 2 | MASCOT | T      | PLEX8 |       |
| 3.66E-01 | 0 0 | orange1.1t01933.1/ora | 6.74 | 0 | 0    | 2 | MASCOT | T      | PLEX8 |       |
| 9.38E-07 | 0 0 | orange1.1t01933.1     | 4.56 | 1 | 0    | 2 | MASCOT | T      | PLEX8 |       |
| 3.17E-02 | 0 0 | orange1.1t01933.1     | 4.56 | 1 | 0    | 2 | MASCOT | T      | PLEX8 |       |
| 1.24E-04 | 0 0 | orange1.1t01933.1     | 4.56 | 1 | 0    | 2 | MASCOT | T      | PLEX8 |       |
| 5.94E-05 | 0 0 | orange1.1t01933.1     | 4.56 | 1 | 0    | 2 | MASCOT | T      | PLEX8 |       |
| 8.22E-04 | 0 0 | orange1.1t01933.1     | 4.56 | 1 | 0    | 2 | MASCOT | T      | PLEX8 |       |
| 6.04E-06 | 0 0 | orange1.1t01933.1     | 4.56 | 1 | 0    | 2 | MASCOT | T      | PLEX8 |       |
| 9.19E-03 | 0 0 | orange1.1t01933.1     | 4.56 | 1 | 0    | 2 | MASCOT | T      |       |       |
| 3.53E-02 | 0 0 | orange1.1t01933.1     | 4.56 | 1 | 0    | 2 | MASCOT | T      |       |       |
| 1.32E-02 | 0 0 | orange1.1t01933.1     | 4.56 | 1 | 0    | 2 | MASCOT | T      |       |       |
| 8.45E-05 | 0 0 | orange1.1t01933.1     | 4.56 | 1 | 0    | 2 | MASCOT | T      |       |       |
| 1.28E-04 | 0 0 | orange1.1t01933.1     | 4.56 | 1 | 0    | 2 | MASCOT | T      |       |       |
| 7.41E-02 | 0 0 | orange1.1t01933.1/ora | 5.99 | 0 | 0    | 2 | MASCOT | T      | PLEX8 |       |
| 2.47E-01 | 0 0 | orange1.1t01933.1/ora | 5.99 | 0 | 0    | 2 | MASCOT | T      | PLEX8 |       |
| 2.30E-01 | 0 0 | orange1.1t01933.1/ora | 5.99 | 0 | 0    | 2 | MASCOT | T      | PLEX8 |       |
| 2.82E-01 | 0 0 | orange1.1t01933.1/ora | 5.99 | 0 | 0    | 2 | MASCOT | T      | PLEX8 |       |
| 2.19E-01 | 0 0 | orange1.1t01933.1/ora | 5.99 | 0 | 0    | 2 | MASCOT | T      | PLEX8 |       |
| 3.42E-01 | 0 0 | orange1.1t01933.1/ora | 5.99 | 0 | 0    | 2 | MASCOT | T      | PLEX8 |       |
| 3.08E-03 | 0 0 | orange1.1t01933.1/ora | 4    | 0 | 15.9 | 0 | 2      | MASCOT | T     | PLEX8 |
| 1.02E-02 | 0 0 | orange1.1t01933.1/ora | 4    | 0 | 15.9 | 0 | 2      | MASCOT | T     | PLEX8 |
| 9.46E-03 | 0 0 | orange1.1t01933.1/ora | 4    | 0 | 15.9 | 0 | 2      | MASCOT | T     | PLEX8 |
| 1.19E-01 | 0 0 | orange1.1t01933.1/ora | 4    | 0 | 15.9 | 0 | 2      | MASCOT | T     | PLEX8 |
| 4.31E-03 | 0 0 | orange1.1t01933.1/ora | 4    | 0 | 15.9 | 0 | 2      | MASCOT | T     | PLEX8 |
| 3.00E-03 | 0 0 | orange1.1t01933.1/ora | 4    | 0 | 15.9 | 0 | 2      | MASCOT | T     | PLEX8 |
| 1.12E-02 | 0 0 | orange1.1t01933.1/ora | 4    | 0 | 15.9 | 0 | 2      | MASCOT | T     | PLEX8 |
| 3.92E-03 | 0 0 | orange1.1t01933.1/ora | 4    | 0 | 15.9 | 0 | 2      | MASCOT | T     | PLEX8 |



|              |                       |      |   |      |   |   |        |   |       |
|--------------|-----------------------|------|---|------|---|---|--------|---|-------|
| 2.19E-01 0 0 | orange1.1t01933.1/ora | 4    | 0 | 15.9 | 0 | 2 | MASCOT | T | PLEX8 |
| 3.38E-03 0 0 | orange1.1t01933.1/ora | 4    | 0 |      | 0 | 2 | MASCOT | T | PLEX8 |
| 1.42E-01 0 0 | orange1.1t01933.1/ora | 4    | 0 |      | 0 | 2 | MASCOT | T | PLEX8 |
| 4.77E-02 0 0 | orange1.1t01933.1/ora | 4    | 0 |      | 0 | 2 | MASCOT | T | PLEX8 |
| 2.53E-03 0 0 | orange1.1t01933.1/ora | 4    | 0 |      | 0 | 2 | MASCOT | T | PLEX8 |
| 1.06E-02 0 0 | orange1.1t01933.1/ora | 4    | 0 |      | 0 | 2 | MASCOT | T | PLEX8 |
| 7.50E-03 0 0 | orange1.1t01933.1/ora | 4    | 0 |      | 0 | 2 | MASCOT | T | PLEX8 |
| 5.79E-02 0 0 | orange1.1t01933.1/ora | 4    | 0 |      | 0 | 2 | MASCOT | T | PLEX8 |
| 1.92E-03 0 0 | orange1.1t01933.1/ora | 4    | 0 |      | 0 | 2 | MASCOT | T | PLEX8 |
| 5.73E-03 0 0 | orange1.1t01933.1/ora | 4    | 0 |      | 0 | 2 | MASCOT | T | PLEX8 |
| 2.57E-03 0 0 | orange1.1t01933.1/ora | 4    | 0 |      | 0 | 2 | MASCOT | T | PLEX8 |
| 2.67E-03 0 0 | orange1.1t01933.1/ora | 4    | 0 |      | 0 | 2 | MASCOT | T | PLEX8 |
| 5.48E-02 0 0 | orange1.1t01933.1/ora | 4    | 0 |      | 0 | 2 | MASCOT | T | PLEX8 |
| 2.84E-03 0 0 | orange1.1t01933.1/ora | 4    | 0 |      | 0 | 2 | MASCOT | T | PLEX8 |
| 2.05E-01 0 0 | orange1.1t01933.1/ora | 4    | 0 |      | 0 | 2 | MASCOT | T | PLEX8 |
| 2.26E-02 0 0 | orange1.1t01933.1/ora | 4    | 0 |      | 0 | 2 | MASCOT | T | PLEX8 |
| 1.19E-01 0 0 | orange1.1t01933.1/ora | 4    | 0 |      | 0 | 2 | MASCOT | T |       |
| 2.58E-02 0 0 | orange1.1t01933.1/ora | 4    | 0 |      | 0 | 2 | MASCOT | T |       |
| 1.11E-02 0 0 | orange1.1t01933.1     | 4.37 | 0 |      | 0 | 2 | MASCOT | T | PLEX8 |
| 8.57E-04 0 0 | orange1.1t01933.1     | 4.37 | 0 |      | 0 | 2 | MASCOT | T | PLEX8 |
| 3.62E-03 0 0 | orange1.1t01933.1     | 4.37 | 0 |      | 0 | 2 | MASCOT | T | PLEX8 |
| 1.48E-05 0 0 | orange1.1t01933.1     | 4.37 | 0 |      | 0 | 2 | MASCOT | T | PLEX8 |
| 6.96E-03 0 0 | orange1.1t01933.1     | 4.37 | 0 |      | 0 | 2 | MASCOT | T | PLEX8 |
| 1.13E-01 0 0 | orange1.1t01933.1     | 4.37 | 0 |      | 0 | 2 | MASCOT | T | PLEX8 |
| 1.02E-03 0 0 | orange1.1t01933.1     | 4.37 | 0 |      | 0 | 2 | MASCOT | T | PLEX8 |
| 3.07E-03 0 0 | orange1.1t01933.1     | 4.37 | 0 |      | 0 | 2 | MASCOT | T | PLEX8 |
| 1.97E-05 0 0 | orange1.1t01933.1     | 4.37 | 0 |      | 0 | 2 | MASCOT | T | PLEX8 |
| 2.69E-02 0 0 | orange1.1t01933.1     | 4.37 | 0 |      | 0 | 2 | MASCOT | T | PLEX8 |
| 1.94E-02 0 0 | orange1.1t01933.1     | 4.37 | 0 |      | 0 | 2 | MASCOT | T | PLEX8 |
| 2.58E-01 0 0 | orange1.1t01933.1     | 4.37 | 0 |      | 0 | 2 | MASCOT | T | PLEX8 |
| 5.29E-05 0 0 | orange1.1t01933.1     | 4.37 | 0 |      | 0 | 2 | MASCOT | T | PLEX8 |
| 1.48E-04 0 0 | orange1.1t01933.1     | 4.37 | 0 |      | 0 | 2 | MASCOT | T | PLEX8 |
| 1.10E-03 0 0 | orange1.1t01933.1     | 4.37 | 0 |      | 0 | 2 | MASCOT | T | PLEX8 |
| 1.40E-02 0 0 | orange1.1t01933.1     | 4.37 | 0 |      | 0 | 2 | MASCOT | T | PLEX8 |
| 1.01E-01 0 0 | orange1.1t01933.1     | 4.37 | 0 |      | 0 | 2 | MASCOT | T |       |
| 3.10E-02 0 0 | orange1.1t01933.1     | 4.37 | 0 |      | 0 | 2 | MASCOT | T | PLEX8 |
| 2.64E-06 0 0 | orange1.1t01933.1     | 4.37 | 0 |      | 0 | 2 | MASCOT | T | PLEX8 |
| 5.75E-03 0 0 | orange1.1t01933.1     | 4.37 | 0 |      | 0 | 2 | MASCOT | T | PLEX8 |
| 1.18E-02 0 0 | orange1.1t01933.1     | 4.37 | 0 |      | 0 | 2 | MASCOT | T |       |
| 1.25E-03 0 0 | orange1.1t01932.1/ora | 4.53 | 0 |      | 0 | 2 | MASCOT | T | PLEX8 |
| 2.03E-01 0 0 | orange1.1t01932.1/ora | 4.53 | 0 |      | 0 | 2 | MASCOT | T | PLEX8 |
| 3.67E-02 0 0 | orange1.1t01932.1/ora | 4.53 | 0 |      | 0 | 2 | MASCOT | T | PLEX8 |
| 7.55E-06 0 0 | orange1.1t01932.1/ora | 4.53 | 0 |      | 0 | 2 | MASCOT | T |       |
| 1.55E-03 0 0 | orange1.1t01932.1/ora | 4.53 | 0 |      | 0 | 2 | MASCOT | T |       |
| 9.18E-09 0 0 | orange1.1t01932.1/ora | 4.53 | 0 |      | 0 | 2 | MASCOT | T |       |
| 3.05E-04 0 0 | orange1.1t01932.1/ora | 4.53 | 0 |      | 0 | 2 | MASCOT | T |       |
| 5.13E-09 0 0 | orange1.1t01932.1/ora | 4.53 | 0 |      | 0 | 2 | MASCOT | T |       |
| 2.58E-04 0 0 | orange1.1t01932.1/ora | 4.53 | 0 |      | 0 | 2 | MASCOT | T |       |
| 5.23E-03 0 0 | orange1.1t01932.1/ora | 4.53 | 0 |      | 0 | 2 | MASCOT | T |       |
| 2.05E-01 0 0 | orange1.1t01932.1/ora | 4.53 | 0 |      | 0 | 2 | MASCOT | T |       |
| 8.24E-02 0 0 | orange1.1t01932.1/ora | 4.53 | 0 |      | 0 | 2 | MASCOT | T |       |

|          |     |                       |      |   |   |   |        |   |       |
|----------|-----|-----------------------|------|---|---|---|--------|---|-------|
| 1.65E-03 | 0 0 | orange1.1t01932.1/ora | 4.53 | 0 | 0 | 2 | MASCOT | T |       |
| 9.10E-02 | 0 0 | orange1.1t01933.1/ora | 4.56 | 1 | 0 | 2 | MASCOT | T | PLEX8 |
| 7.49E-02 | 0 0 | orange1.1t01932.1/ora | 9.47 | 0 | 0 | 2 | MASCOT | T | PLEX8 |
| 1.77E-01 | 0 0 | orange1.1t01932.1/ora | 9.47 | 0 | 0 | 2 | MASCOT | T | PLEX8 |
| 7.14E-02 | 0 0 | orange1.1t01932.1/ora | 9.47 | 0 | 0 | 2 | MASCOT | T | PLEX8 |
| 2.84E-02 | 0 0 | orange1.1t01933.1/ora | 5.66 | 0 | 0 | 2 | MASCOT | T | PLEX8 |
| 1.37E-01 | 0 0 | orange1.1t01933.1/ora | 5.66 | 0 | 0 | 2 | MASCOT | T | PLEX8 |
| 6.63E-02 | 0 0 | orange1.1t01933.1/ora | 5.66 | 0 | 0 | 2 | MASCOT | T | PLEX8 |
| 3.22E-01 | 0 0 | orange1.1t01933.1/ora | 5.66 | 0 | 0 | 2 | MASCOT | T | PLEX8 |
| 3.98E-02 | 0 0 | orange1.1t01933.1/ora | 5.66 | 0 | 0 | 2 | MASCOT | T | PLEX8 |
| 6.61E-02 | 0 0 | orange1.1t01933.1/ora | 5.66 | 0 | 0 | 2 | MASCOT | T | PLEX8 |
| 1.39E-01 | 0 0 | orange1.1t01933.1     | 5.97 | 0 | 0 | 2 | MASCOT | T | PLEX8 |
| 6.16E-02 | 0 0 | orange1.1t01933.1     | 5.97 | 0 | 0 | 2 | MASCOT | T | PLEX8 |
| 9.84E-02 | 0 0 | orange1.1t01933.1     | 5.97 | 0 | 0 | 2 | MASCOT | T | PLEX8 |
| 2.33E-02 | 0 0 | orange1.1t01933.1/ora | 4.03 | 0 | 0 | 2 | MASCOT | T | PLEX8 |
| 8.52E-03 | 0 0 | orange1.1t01933.1/ora | 4.03 | 0 | 0 | 2 | MASCOT | T | PLEX8 |
| 2.56E-03 | 0 0 | orange1.1t01933.1/ora | 4.03 | 0 | 0 | 2 | MASCOT | T | PLEX8 |
| 7.05E-03 | 0 0 | orange1.1t01933.1/ora | 4.03 | 0 | 0 | 2 | MASCOT | T | PLEX8 |
| 8.13E-03 | 0 0 | orange1.1t01933.1/ora | 4.03 | 0 | 0 | 2 | MASCOT | T | PLEX8 |
| 2.69E-01 | 0 0 | orange1.1t01933.1/ora | 4.03 | 0 | 0 | 2 | MASCOT | T | PLEX8 |
| 2.33E-01 | 0 0 | orange1.1t01933.1/ora | 4.03 | 0 | 0 | 2 | MASCOT | T | PLEX8 |
| 1.93E-01 | 0 0 | orange1.1t01933.1/ora | 4.03 | 0 | 0 | 2 | MASCOT | T | PLEX8 |
| 4.12E-02 | 0 0 | orange1.1t01933.1/ora | 4.03 | 0 | 0 | 2 | MASCOT | T | PLEX8 |
| 3.07E-02 | 0 0 | orange1.1t01933.1/ora | 4.03 | 0 | 0 | 2 | MASCOT | T | PLEX8 |
| 4.62E-02 | 0 0 | orange1.1t01933.1/ora | 4.03 | 0 | 0 | 2 | MASCOT | T | PLEX8 |
| 3.02E-01 | 0 0 | orange1.1t01933.1/ora | 4.03 | 0 | 0 | 2 | MASCOT | T | PLEX8 |
| 1.98E-02 | 0 0 | orange1.1t01933.1/ora | 4.03 | 0 | 0 | 2 | MASCOT | T | PLEX8 |
| 2.84E-02 | 0 0 | orange1.1t01933.1/ora | 4.03 | 0 | 0 | 2 | MASCOT | T | PLEX8 |
| 4.31E-02 | 0 0 | orange1.1t01933.1/ora | 4.03 | 0 | 0 | 2 | MASCOT | T |       |
| 7.19E-02 | 0 0 | orange1.1t01933.1/ora | 4.03 | 0 | 0 | 2 | MASCOT | T |       |
| 1.81E-01 | 0 0 | orange1.1t01932.1/ora | 4.37 | 0 | 0 | 2 | MASCOT | T | PLEX8 |
| 7.68E-02 | 0 0 | orange1.1t01932.1/ora | 6    | 0 | 0 | 2 | MASCOT | T | PLEX8 |
| 6.48E-02 | 0 0 | orange1.1t01932.1/ora | 6    | 0 | 0 | 2 | MASCOT | T | PLEX8 |
| 3.24E-02 | 0 0 | orange1.1t01932.1/ora | 6    | 0 | 0 | 2 | MASCOT | T | PLEX8 |
| 7.40E-02 | 0 0 | orange1.1t01932.1/ora | 6    | 0 | 0 | 2 | MASCOT | T | PLEX8 |
| 1.46E-01 | 0 0 | orange1.1t01932.1/ora | 6    | 0 | 0 | 2 | MASCOT | T |       |
| 2.02E-04 | 0 0 | orange1.1t01933.1/ora | 5.84 | 0 | 0 | 2 | MASCOT | T |       |
| 4.85E-03 | 0 0 | orange1.1t01933.1/ora | 5.84 | 0 | 0 | 2 | MASCOT | T | PLEX8 |
| 4.57E-02 | 0 0 | orange1.1t01933.1/ora | 5.84 | 0 | 0 | 2 | MASCOT | T | PLEX8 |
| 7.92E-02 | 0 0 | orange1.1t01933.1/ora | 5.84 | 0 | 0 | 2 | MASCOT | T | PLEX8 |
| 7.25E-02 | 0 0 | orange1.1t01933.1/ora | 5.84 | 0 | 0 | 2 | MASCOT | T | PLEX8 |
| 6.60E-02 | 0 0 | orange1.1t01933.1/ora | 5.84 | 0 | 0 | 2 | MASCOT | T | PLEX8 |
| 4.77E-02 | 0 0 | orange1.1t01933.1/ora | 5.84 | 0 | 0 | 2 | MASCOT | T |       |
| 4.31E-04 | 0 0 | orange1.1t01933.1/ora | 4.53 | 0 | 0 | 2 | MASCOT | T | PLEX8 |
| 2.66E-02 | 0 0 | orange1.1t01933.1/ora | 4.53 | 0 | 0 | 2 | MASCOT | T | PLEX8 |
| 7.94E-05 | 0 0 | orange1.1t01933.1/ora | 4.53 | 0 | 0 | 2 | MASCOT | T | PLEX8 |
| 1.03E-02 | 0 0 | orange1.1t01933.1/ora | 4.53 | 0 | 0 | 2 | MASCOT | T |       |
| 3.58E-03 | 0 0 | orange1.1t01933.1/ora | 4.53 | 0 | 0 | 2 | MASCOT | T | PLEX8 |
| 9.88E-03 | 0 0 | orange1.1t01933.1/ora | 4.53 | 0 | 0 | 2 | MASCOT | T | PLEX8 |
| 9.47E-02 | 0 0 | orange1.1t01933.1/ora | 4.53 | 0 | 0 | 2 | MASCOT | T | PLEX8 |
| 1.31E-03 | 0 0 | orange1.1t01933.1/ora | 4.53 | 0 | 0 | 2 | MASCOT | T |       |

|          |     |                       |      |   |   |   |        |   |       |
|----------|-----|-----------------------|------|---|---|---|--------|---|-------|
| 1.17E-02 | 0 0 | orange1.1t01933.1/ora | 4.53 | 0 | 0 | 2 | MASCOT | T |       |
| 1.13E-01 | 0 0 | orange1.1t01933.1/ora | 4.53 | 0 | 0 | 2 | MASCOT | T |       |
| 5.29E-06 | 0 0 | orange1.1t01933.1/ora | 4.53 | 0 | 0 | 2 | MASCOT | T |       |
| 2.89E-02 | 0 0 | orange1.1t01933.1/ora | 4.53 | 0 | 0 | 2 | MASCOT | T |       |
| 1.28E-01 | 0 0 | orange1.1t01933.1/ora | 4.53 | 0 | 0 | 2 | MASCOT | T |       |
| 1.70E-04 | 0 0 | orange1.1t01933.1/ora | 4.53 | 0 | 0 | 2 | MASCOT | T | PLEX8 |
| 8.98E-02 | 0 0 | orange1.1t01932.1/ora | 6    | 0 | 0 | 2 | MASCOT | T | PLEX8 |
| 2.65E-03 | 0 0 | orange1.1t01932.1/ora | 6    | 0 | 0 | 2 | MASCOT | T | PLEX8 |
| 3.06E-03 | 0 0 | orange1.1t01932.1/ora | 6    | 0 | 0 | 2 | MASCOT | T | PLEX8 |
| 7.55E-02 | 0 0 | orange1.1t01932.1/ora | 6    | 0 | 0 | 2 | MASCOT | T | PLEX8 |
| 1.11E-02 | 0 0 | orange1.1t01932.1/ora | 6    | 0 | 0 | 2 | MASCOT | T | PLEX8 |
| 6.29E-03 | 0 0 | orange1.1t01932.1/ora | 6    | 0 | 0 | 2 | MASCOT | T | PLEX8 |
| 1.24E-01 | 0 0 | orange1.1t01932.1/ora | 6    | 0 | 0 | 2 | MASCOT | T | PLEX8 |
| 2.98E-03 | 0 0 | orange1.1t01932.1/ora | 6    | 0 | 0 | 2 | MASCOT | T | PLEX8 |
| 1.02E-03 | 0 0 | orange1.1t01932.1/ora | 6    | 0 | 0 | 2 | MASCOT | T | PLEX8 |
| 1.92E-02 | 0 0 | orange1.1t01932.1/ora | 6    | 0 | 0 | 2 | MASCOT | T | PLEX8 |
| 4.22E-03 | 0 0 | orange1.1t01932.1/ora | 6    | 0 | 0 | 2 | MASCOT | T | PLEX8 |
| 9.67E-02 | 0 0 | orange1.1t01932.1/ora | 6    | 0 | 0 | 2 | MASCOT | T | PLEX8 |
| 9.35E-04 | 0 0 | orange1.1t01932.1/ora | 6    | 0 | 0 | 2 | MASCOT | T | PLEX8 |
| 2.82E-02 | 0 0 | orange1.1t01932.1/ora | 6    | 0 | 0 | 2 | MASCOT | T | PLEX8 |
| 1.00E-02 | 0 0 | orange1.1t01932.1/ora | 6    | 0 | 0 | 2 | MASCOT | T | PLEX8 |
| 2.83E-03 | 0 0 | orange1.1t01932.1/ora | 6    | 0 | 0 | 2 | MASCOT | T | PLEX8 |
| 3.54E-02 | 0 0 | orange1.1t01932.1/ora | 6    | 0 | 0 | 2 | MASCOT | T | PLEX8 |
| 1.20E-01 | 0 0 | orange1.1t01933.1/ora | 4.41 | 1 | 0 | 2 | MASCOT | T | PLEX8 |
| 1.40E-01 | 0 0 | orange1.1t01932.1/ora | 5.84 | 0 | 0 | 2 | MASCOT | T |       |
| 2.85E-01 | 0 0 | orange1.1t01932.1/ora | 5.84 | 0 | 0 | 2 | MASCOT | T |       |
| 8.01E-02 | 0 0 | orange1.1t01932.1/ora | 5.84 | 0 | 0 | 2 | MASCOT | T |       |
| 2.08E-01 | 0 0 | orange1.1t01932.1/ora | 5.84 | 0 | 0 | 2 | MASCOT | T |       |
| 1.30E-01 | 0 0 | orange1.1t01932.1/ora | 5.84 | 0 | 0 | 2 | MASCOT | T |       |
| 1.26E-01 | 0 0 | orange1.1t01932.1/ora | 5.84 | 0 | 0 | 2 | MASCOT | T |       |
| 1.01E-01 | 0 0 | orange1.1t01932.1/ora | 5.84 | 0 | 0 | 2 | MASCOT | T |       |
| 3.05E-01 | 0 0 | orange1.1t01932.1/ora | 5.84 | 0 | 0 | 2 | MASCOT | T |       |
| 1.01E-01 | 0 0 | orange1.1t01932.1/ora | 5.84 | 0 | 0 | 2 | MASCOT | T |       |
| 9.72E-02 | 0 0 | orange1.1t01932.1/ora | 5.84 | 0 | 0 | 2 | MASCOT | T |       |
| 1.25E-01 | 0 0 | orange1.1t01933.1/ora | 4.53 | 0 | 0 | 2 | MASCOT | T | PLEX8 |
| 5.87E-01 | 0 0 | orange1.1t01933.1/ora | 4.53 | 0 | 0 | 2 | MASCOT | T | PLEX8 |
| 1.42E-01 | 0 0 | orange1.1t01933.1/ora | 4.53 | 0 | 0 | 2 | MASCOT | T | PLEX8 |
| 1.12E-01 | 0 0 | orange1.1t01933.1/ora | 4.53 | 0 | 0 | 2 | MASCOT | T |       |
| 1.67E-01 | 0 0 | orange1.1t01932.1/ora | 8.75 | 0 | 0 | 2 | MASCOT | T | PLEX8 |
| 1.64E-02 | 0 0 | orange1.1t01933.1     | 4.53 | 0 | 0 | 2 | MASCOT | T | PLEX8 |
| 3.73E-02 | 0 0 | orange1.1t01933.1     | 4.53 | 0 | 0 | 2 | MASCOT | T | PLEX8 |
| 3.76E-01 | 0 0 | orange1.1t01932.1/ora | 8.75 | 0 | 0 | 2 | MASCOT | T | PLEX8 |
| 4.99E-01 | 0 0 | orange1.1t01932.1/ora | 8.75 | 0 | 0 | 2 | MASCOT | T | PLEX8 |
| 9.93E-03 | 0 0 | orange1.1t01932.1/ora | 6    | 0 | 0 | 2 | MASCOT | T | PLEX8 |
| 6.77E-02 | 0 0 | orange1.1t01932.1/ora | 6    | 0 | 0 | 2 | MASCOT | T | PLEX8 |
| 5.58E-04 | 0 0 | orange1.1t01932.1/ora | 6    | 0 | 0 | 2 | MASCOT | T | PLEX8 |
| 7.81E-03 | 0 0 | orange1.1t01932.1/ora | 6    | 0 | 0 | 2 | MASCOT | T | PLEX8 |
| 7.76E-04 | 0 0 | orange1.1t01932.1/ora | 6    | 0 | 0 | 2 | MASCOT | T | PLEX8 |
| 1.93E-03 | 0 0 | orange1.1t01932.1/ora | 6    | 0 | 0 | 2 | MASCOT | T | PLEX8 |
| 1.23E-02 | 0 0 | orange1.1t01932.1/ora | 6    | 0 | 0 | 2 | MASCOT | T | PLEX8 |
| 2.99E-05 | 0 0 | orange1.1t01932.1/ora | 6    | 0 | 0 | 2 | MASCOT | T | PLEX8 |

|          |     |                       |      |   |      |   |        |        |       |       |
|----------|-----|-----------------------|------|---|------|---|--------|--------|-------|-------|
| 3.68E-05 | 0 0 | orange1.1t01932.1/ora | 6    | 0 | 0    | 2 | MASCOT | T      | PLEX8 |       |
| 2.44E-02 | 0 0 | orange1.1t01932.1/ora | 6    | 0 | 0    | 2 | MASCOT | T      | PLEX8 |       |
| 4.53E-05 | 0 0 | orange1.1t01932.1/ora | 6    | 0 | 0    | 2 | MASCOT | T      | PLEX8 |       |
| 1.01E-04 | 0 0 | orange1.1t01932.1/ora | 6    | 0 | 0    | 2 | MASCOT | T      | PLEX8 |       |
| 5.19E-04 | 0 0 | orange1.1t01932.1/ora | 6    | 0 | 0    | 2 | MASCOT | T      | PLEX8 |       |
| 5.40E-03 | 0 0 | orange1.1t01932.1/ora | 6    | 0 | 0    | 2 | MASCOT | T      | PLEX8 |       |
| 1.14E-04 | 0 0 | orange1.1t01932.1/ora | 6    | 0 | 0    | 2 | MASCOT | T      | PLEX8 |       |
| 5.46E-02 | 0 0 | orange1.1t01932.1/ora | 6    | 0 | 0    | 2 | MASCOT | T      | PLEX8 |       |
| 3.15E-01 | 0 0 | orange1.1t01932.1/ora | 6    | 0 | 0    | 2 | MASCOT | T      | PLEX8 |       |
| 2.90E-04 | 0 0 | orange1.1t01932.1/ora | 6    | 0 | 0    | 2 | MASCOT | T      | PLEX8 |       |
| 3.37E-04 | 0 0 | orange1.1t01932.1/ora | 6    | 0 | 0    | 2 | MASCOT | T      | PLEX8 |       |
| 1.64E-03 | 0 0 | orange1.1t01932.1/ora | 6    | 0 | 0    | 2 | MASCOT | T      | PLEX8 |       |
| 1.52E-02 | 0 0 | orange1.1t01932.1/ora | 6    | 0 | 0    | 2 | MASCOT | T      | PLEX8 |       |
| 3.49E-02 | 0 0 | orange1.1t01932.1/ora | 6    | 0 | 0    | 2 | MASCOT | T      | PLEX8 |       |
| 5.11E-01 | 0 0 | orange1.1t01932.1/ora | 6    | 0 | 0    | 2 | MASCOT | T      |       |       |
| 5.48E-01 | 0 0 | orange1.1t01932.1/ora | 8.26 | 0 | 0    | 2 | MASCOT | T      | PLEX8 |       |
| 2.21E-01 | 0 0 | orange1.1t01932.1/ora | 8.26 | 0 | 0    | 2 | MASCOT | T      | PLEX8 |       |
| 1.92E-02 | 0 0 | orange1.1t01932.1/ora | 8.26 | 0 | 0    | 2 | MASCOT | T      | PLEX8 |       |
| 5.13E-02 | 0 0 | orange1.1t01932.1/ora | 8.26 | 0 | 0    | 2 | MASCOT | T      | PLEX8 |       |
| 3.43E-02 | 0 0 | orange1.1t01932.1/ora | 8.26 | 0 | 0    | 2 | MASCOT | T      | PLEX8 |       |
| 3.78E-01 | 0 0 | orange1.1t01932.1/ora | 8.26 | 0 | 0    | 2 | MASCOT | T      | PLEX8 |       |
| 1.22E-01 | 0 0 | orange1.1t01932.1/ora | 8.26 | 0 | 0    | 2 | MASCOT | T      | PLEX8 |       |
| 2.87E-02 | 0 0 | orange1.1t01932.1/ora | 8.26 | 0 | 0    | 2 | MASCOT | T      | PLEX8 |       |
| 8.28E-03 | 0 0 | orange1.1t01932.1/ora | 8.26 | 0 | 0    | 2 | MASCOT | T      | PLEX8 |       |
| 1.96E-01 | 0 0 | orange1.1t01932.1/ora | 8.26 | 0 | 0    | 2 | MASCOT | T      | PLEX8 |       |
| 2.68E-03 | 0 0 | orange1.1t01933.1/ora | 4.32 | 1 | 0    | 2 | MASCOT | T      | PLEX8 |       |
| 7.51E-03 | 0 0 | orange1.1t01933.1/ora | 4.32 | 1 | 0    | 2 | MASCOT | T      | PLEX8 |       |
| 1.03E-02 | 0 0 | orange1.1t01933.1/ora | 4.32 | 1 | 0    | 2 | MASCOT | T      |       |       |
| 4.19E-03 | 0 0 | orange1.1t03773.1     | 4.53 | 0 | 0    | 2 | MASCOT | T      | PLEX8 |       |
| 8.19E-04 | 0 0 | orange1.1t03773.1     | 4.53 | 0 | 0    | 2 | MASCOT | T      | PLEX8 |       |
| 2.16E-03 | 0 0 | orange1.1t03773.1     | 4.53 | 0 | 0    | 2 | MASCOT | T      | PLEX8 |       |
| 1.36E-01 | 0 0 | orange1.1t03773.1     | 4.53 | 0 | 0    | 2 | MASCOT | T      | PLEX8 |       |
| 1.12E-02 | 0 0 | orange1.1t03773.1     | 4.53 | 0 | 0    | 2 | MASCOT | T      | PLEX8 |       |
| 7.88E-03 | 0 0 | orange1.1t03773.1     | 4.53 | 0 | 0    | 2 | MASCOT | T      | PLEX8 |       |
| 9.50E-04 | 0 0 | orange1.1t03773.1     | 4.53 | 0 | 0    | 2 | MASCOT | T      | PLEX8 |       |
| 3.32E-02 | 0 0 | orange1.1t03773.1     | 4.53 | 0 | 0    | 2 | MASCOT | T      | PLEX8 |       |
| 3.83E-03 | 0 0 | orange1.1t03773.1     | 4.53 | 0 | 0    | 2 | MASCOT | T      | PLEX8 |       |
| 3.54E-03 | 0 0 | orange1.1t03773.1     | 4.53 | 0 | 0    | 2 | MASCOT | T      | PLEX8 |       |
| 6.20E-03 | 0 0 | orange1.1t03773.1     | 4.53 | 0 | 0    | 2 | MASCOT | T      |       |       |
| 3.27E-02 | 0 0 | orange1.1t03773.1     | 8.8  | 0 | 0    | 2 | MASCOT | T      |       |       |
| 5.50E-02 | 0 0 | orange1.1t03773.1     | 8.8  | 0 | 0    | 2 | MASCOT | T      |       |       |
| 5.27E-03 | 0 0 | orange1.1t03773.1     | 6.11 | 0 | 0    | 2 | MASCOT | T      |       |       |
| 2.62E-01 | 0 0 | orange1.1t03769.1/ora | 4.37 | 0 | 0    | 2 | MASCOT | T      | PLEX8 |       |
| 7.74E-02 | 0 0 | orange1.1t03773.1/ora | 6.85 | 0 | 0    | 2 | MASCOT | T      | PLEX8 |       |
| 6.54E-02 | 0 0 | orange1.1t03773.1/ora | 6.85 | 0 | 0    | 2 | MASCOT | T      |       |       |
| 7.77E-03 | 0 0 | orange1.1t03773.1     | 4.25 | 0 | 15.9 | 0 | 2      | MASCOT | T     | PLEX8 |
| 2.53E-01 | 0 0 | orange1.1t03773.1/ora | 3.92 | 0 | 15.9 | 0 | 2      | MASCOT | T     | PLEX8 |
| 4.96E-02 | 0 0 | orange1.1t03773.1     | 4.37 | 0 | 0    | 2 | MASCOT | T      | PLEX8 |       |
| 2.73E-01 | 0 0 | orange1.1t03773.1     | 4.37 | 0 | 0    | 2 | MASCOT | T      | PLEX8 |       |
| 2.44E-01 | 0 0 | orange1.1t03773.1     | 4.37 | 0 | 0    | 2 | MASCOT | T      | PLEX8 |       |
| 1.19E-01 | 0 0 | orange1.1t03773.1     | 4.37 | 0 | 0    | 2 | MASCOT | T      | PLEX8 |       |

|          |     |                       |      |   |   |   |        |   |       |
|----------|-----|-----------------------|------|---|---|---|--------|---|-------|
| 3.73E-01 | 0 0 | orange1.1t03773.1     | 4.37 | 0 | 0 | 2 | MASCOT | T | PLEX8 |
| 2.12E-01 | 0 0 | orange1.1t03773.1     | 4.37 | 0 | 0 | 2 | MASCOT | T |       |
| 6.28E-03 | 0 0 | orange1.1t03773.1     | 4.37 | 0 | 0 | 2 | MASCOT | T | PLEX8 |
| 3.62E-02 | 0 0 | orange1.1t03773.1     | 4.37 | 0 | 0 | 2 | MASCOT | T | PLEX8 |
| 5.51E-02 | 0 0 | orange1.1t03773.1     | 4.37 | 0 | 0 | 2 | MASCOT | T | PLEX8 |
| 3.51E-01 | 0 0 | orange1.1t03773.1     | 4.37 | 0 | 0 | 2 | MASCOT | T | PLEX8 |
| 2.42E-04 | 0 0 | orange1.1t03769.1/ora | 5.52 | 0 | 0 | 2 | MASCOT | T | PLEX8 |
| 1.29E-03 | 0 0 | orange1.1t03769.1/ora | 5.52 | 0 | 0 | 2 | MASCOT | T | PLEX8 |
| 1.70E-01 | 0 0 | orange1.1t03773.1     | 4.09 | 0 | 0 | 2 | MASCOT | T | PLEX8 |
| 1.93E-02 | 0 0 | orange1.1t03773.1     | 4.09 | 0 | 0 | 2 | MASCOT | T |       |
| 3.09E-02 | 0 0 | orange1.1t03773.1     | 4.09 | 0 | 0 | 2 | MASCOT | T |       |
| 5.59E-02 | 0 0 | orange1.1t03773.1     | 4.09 | 0 | 0 | 2 | MASCOT | T |       |
| 3.15E-02 | 0 0 | orange1.1t03773.1     | 4.09 | 0 | 0 | 2 | MASCOT | T |       |
| 1.04E-01 | 0 0 | orange1.1t03773.1     | 4.09 | 0 | 0 | 2 | MASCOT | T |       |
| 5.66E-02 | 0 0 | orange1.1t03773.1     | 4.09 | 0 | 0 | 2 | MASCOT | T |       |
| 5.44E-02 | 0 0 | orange1.1t03773.1     | 8.46 | 0 | 0 | 2 | MASCOT | T | PLEX8 |
| 7.48E-03 | 0 0 | orange1.1t03773.1     | 5.86 | 0 | 0 | 2 | MASCOT | T | PLEX8 |
| 3.82E-01 | 0 0 | orange1.1t03773.1     | 8.47 | 0 | 0 | 2 | MASCOT | T | PLEX8 |
| 3.74E-07 | 0 0 | orange1.1t03773.1/ora | 4    | 0 | 0 | 2 | MASCOT | T |       |
| 1.00E-04 | 0 0 | orange1.1t03773.1/ora | 4    | 0 | 0 | 2 | MASCOT | T |       |
| 6.71E-07 | 0 0 | orange1.1t03773.1/ora | 4    | 0 | 0 | 2 | MASCOT | T |       |
| 5.55E-06 | 0 0 | orange1.1t03773.1/ora | 4    | 0 | 0 | 2 | MASCOT | T |       |
| 2.95E-02 | 0 0 | orange1.1t03773.1/ora | 4    | 0 | 0 | 2 | MASCOT | T |       |
| 8.81E-02 | 0 0 | orange1.1t03773.1     | 4.37 | 0 | 0 | 2 | MASCOT | T | PLEX8 |
| 1.87E-01 | 0 0 | orange1.1t03773.1     | 4.37 | 0 | 0 | 2 | MASCOT | T | PLEX8 |
| 7.99E-02 | 0 0 | orange1.1t03773.1     | 4.37 | 0 | 0 | 2 | MASCOT | T | PLEX8 |
| 8.79E-03 | 0 0 | orange1.1t03773.1     | 4.37 | 0 | 0 | 2 | MASCOT | T | PLEX8 |
| 3.49E-02 | 0 0 | orange1.1t03773.1     | 4.37 | 0 | 0 | 2 | MASCOT | T | PLEX8 |
| 5.14E-01 | 0 0 | orange1.1t03773.1     | 4.37 | 0 | 0 | 2 | MASCOT | T | PLEX8 |
| 2.83E-01 | 0 0 | orange1.1t03773.1     | 4.37 | 0 | 0 | 2 | MASCOT | T | PLEX8 |
| 3.18E-01 | 0 0 | orange1.1t03773.1     | 4.37 | 0 | 0 | 2 | MASCOT | T | PLEX8 |
| 6.83E-02 | 0 0 | orange1.1t03773.1     | 4.37 | 0 | 0 | 2 | MASCOT | T | PLEX8 |
| 2.30E-02 | 0 0 | orange1.1t03773.1     | 4.37 | 0 | 0 | 2 | MASCOT | T | PLEX8 |
| 6.96E-02 | 0 0 | orange1.1t03773.1     | 4.37 | 0 | 0 | 2 | MASCOT | T | PLEX8 |
| 2.63E-01 | 0 0 | orange1.1t03773.1     | 4.37 | 0 | 0 | 2 | MASCOT | T | PLEX8 |
| 1.20E-02 | 0 0 | orange1.1t03773.1     | 4.37 | 0 | 0 | 2 | MASCOT | T | PLEX8 |
| 4.18E-01 | 0 0 | orange1.1t03773.1     | 4.37 | 0 | 0 | 2 | MASCOT | T |       |
| 1.39E-02 | 0 0 | orange1.1t03773.1     | 4.37 | 0 | 0 | 2 | MASCOT | T | PLEX8 |
| 9.94E-03 | 0 0 | orange1.1t03773.1     | 4.37 | 0 | 0 | 2 | MASCOT | T | PLEX8 |
| 3.37E-02 | 0 0 | orange1.1t03773.1     | 4.37 | 0 | 0 | 2 | MASCOT | T | PLEX8 |
| 2.92E-02 | 0 0 | orange1.1t03773.1     | 4.37 | 0 | 0 | 2 | MASCOT | T | PLEX8 |
| 1.13E-01 | 0 0 | orange1.1t03773.1     | 4.37 | 0 | 0 | 2 | MASCOT | T | PLEX8 |
| 2.67E-01 | 0 0 | orange1.1t03773.1     | 4.37 | 0 | 0 | 2 | MASCOT | T | PLEX8 |
| 2.82E-02 | 0 0 | orange1.1t03773.1     | 4.37 | 0 | 0 | 2 | MASCOT | T | PLEX8 |
| 1.49E-02 | 0 0 | orange1.1t03773.1     | 4.37 | 0 | 0 | 2 | MASCOT | T | PLEX8 |
| 2.13E-01 | 0 0 | orange1.1t03773.1     | 4.37 | 0 | 0 | 2 | MASCOT | T |       |
| 1.88E-01 | 0 0 | orange1.1t03773.1     | 4.53 | 0 | 0 | 2 | MASCOT | T | PLEX8 |
| 1.12E-01 | 0 0 | orange1.1t03773.1     | 4.37 | 0 | 0 | 2 | MASCOT | T | PLEX8 |
| 2.79E-04 | 0 0 | orange1.1t03773.1     | 4.37 | 0 | 0 | 2 | MASCOT | T | PLEX8 |
| 1.36E-01 | 0 0 | orange1.1t03773.1     | 4.37 | 0 | 0 | 2 | MASCOT | T | PLEX8 |
| 3.14E-02 | 0 0 | orange1.1t03773.1     | 4.37 | 0 | 0 | 2 | MASCOT | T | PLEX8 |

|          |     |                        |      |   |      |   |        |        |       |       |
|----------|-----|------------------------|------|---|------|---|--------|--------|-------|-------|
| 1.12E-01 | 0 0 | orange1.1t03773.1      | 4.37 | 0 | 0    | 2 | MASCOT | T      | PLEX8 |       |
| 4.99E-03 | 0 0 | orange1.1t03773.1      | 4.37 | 0 | 0    | 2 | MASCOT | T      |       |       |
| 1.88E-02 | 0 0 | orange1.1t03773.1/ora  | 4.41 | 1 | 0    | 2 | MASCOT | T      | PLEX8 |       |
| 5.37E-02 | 0 0 | orange1.1t03773.1 ! or | 9.76 | 0 | 15.9 | 0 | 2      | MASCOT | T     | PLEX8 |
| 2.48E-01 | 0 0 | orange1.1t03773.1 ! or | 9.76 | 0 | 0    | 2 | MASCOT | T      | PLEX8 |       |
| 8.54E-03 | 0 0 | orange1.1t03773.1 ! or | 9.76 | 0 | 0    | 2 | MASCOT | T      | PLEX8 |       |
| 9.37E-02 | 0 0 | orange1.1t03773.1      | 5.83 | 0 | 0    | 2 | MASCOT | T      | PLEX8 |       |
| 2.24E-03 | 0 0 | orange1.1t03773.1      | 5.83 | 0 | 0    | 2 | MASCOT | T      | PLEX8 |       |
| 2.97E-01 | 0 0 | orange1.1t03773.1      | 6    | 0 | 0    | 2 | MASCOT | T      |       |       |
| 3.58E-02 | 0 0 | orange1.1t03773.1      | 3.93 | 0 | 0    | 2 | MASCOT | T      | PLEX8 |       |
| 1.18E-03 | 0 0 | orange1.1t03773.1      | 3.93 | 0 | 0    | 2 | MASCOT | T      | PLEX8 |       |
| 9.11E-02 | 0 0 | orange1.1t03773.1      | 3.93 | 0 | 0    | 2 | MASCOT | T      |       |       |
| 5.83E-03 | 0 0 | orange1.1t03773.1      | 3.93 | 0 | 0    | 2 | MASCOT | T      | PLEX8 |       |
| 2.01E-01 | 0 0 | orange1.1t03773.1      | 5.81 | 0 | 0    | 2 | MASCOT | T      | PLEX8 |       |
| 7.69E-03 | 0 0 | orange1.1t03773.1      | 6.41 | 0 | 0    | 2 | MASCOT | T      | PLEX8 |       |
| 3.20E-03 | 0 0 | orange1.1t03773.1      | 6.41 | 0 | 0    | 2 | MASCOT | T      | PLEX8 |       |
| 9.42E-04 | 0 0 | orange1.1t03773.1      | 6.41 | 0 | 0    | 2 | MASCOT | T      | PLEX8 |       |
| 2.48E-03 | 0 0 | orange1.1t03773.1      | 6.41 | 0 | 0    | 2 | MASCOT | T      | PLEX8 |       |
| 7.87E-02 | 0 0 | orange1.1t03773.1      | 4.37 | 0 | 0    | 2 | MASCOT | T      | PLEX8 |       |
| 5.10E-03 | 0 0 | orange1.1t03773.1      | 4.37 | 0 | 0    | 2 | MASCOT | T      | PLEX8 |       |
| 4.98E-03 | 0 0 | orange1.1t03773.1      | 4.37 | 0 | 0    | 2 | MASCOT | T      | PLEX8 |       |
| 2.53E-02 | 0 0 | orange1.1t03773.1      | 6.41 | 0 | 0    | 2 | MASCOT | T      | PLEX8 |       |
| 2.60E-01 | 0 0 | orange1.1t03773.1      | 6.41 | 0 | 0    | 2 | MASCOT | T      | PLEX8 |       |
| 8.65E-04 | 0 0 | orange1.1t03773.1 ! or | 6    | 0 | 15.9 | 0 | 2      | MASCOT | T     | PLEX8 |
| 5.84E-02 | 0 0 | Cs9g03300.1/Cs9g033    | 6.05 | 0 | 0    | 2 | MASCOT | T      | PLEX8 |       |
| 1.45E-01 | 0 0 | Cs9g03300.1/Cs9g033    | 6.05 | 0 | 0    | 2 | MASCOT | T      | PLEX8 |       |
| 2.74E-01 | 0 0 | Cs9g03300.1/Cs9g033    | 6.05 | 0 | 0    | 2 | MASCOT | T      | PLEX8 |       |
| 1.05E-01 | 0 0 | Cs9g03300.1/Cs9g033    | 6.05 | 0 | 0    | 2 | MASCOT | T      | PLEX8 |       |
| 9.24E-02 | 0 0 | Cs9g03300.1/Cs9g033    | 6.05 | 0 | 0    | 2 | MASCOT | T      | PLEX8 |       |
| 8.70E-02 | 0 0 | Cs9g03300.1/Cs9g033    | 6.05 | 0 | 0    | 2 | MASCOT | T      | PLEX8 |       |
| 1.23E-01 | 0 0 | Cs9g03300.1/Cs9g033    | 6.05 | 0 | 0    | 2 | MASCOT | T      | PLEX8 |       |
| 8.21E-03 | 0 0 | Cs9g03300.1/Cs9g033    | 6.05 | 0 | 0    | 2 | MASCOT | T      | PLEX8 |       |
| 1.72E-01 | 0 0 | Cs9g03300.1/Cs9g033    | 6.05 | 0 | 0    | 2 | MASCOT | T      | PLEX8 |       |
| 4.17E-01 | 0 0 | Cs9g03300.1/Cs9g033    | 6.05 | 0 | 0    | 2 | MASCOT | T      | PLEX8 |       |
| 1.78E-01 | 0 0 | Cs9g03300.1/Cs9g033    | 6.05 | 0 | 0    | 2 | MASCOT | T      |       |       |
| 8.25E-02 | 0 0 | Cs9g03300.1/Cs9g033    | 6.05 | 0 | 0    | 2 | MASCOT | T      |       |       |
| 2.72E-01 | 0 0 | Cs9g03300.1/Cs9g033    | 6.74 | 0 | 0    | 2 | MASCOT | T      | PLEX8 |       |
| 2.02E-01 | 0 0 | Cs9g03300.1/Cs9g033    | 6.74 | 0 | 0    | 2 | MASCOT | T      |       |       |
| 2.09E-01 | 0 0 | Cs9g03300.1/Cs9g033    | 6.74 | 0 | 0    | 2 | MASCOT | T      |       |       |
| 5.81E-03 | 0 0 | Cs9g03300.1/Cs9g033    | 3.93 | 0 | 0    | 2 | MASCOT | T      | PLEX8 |       |
| 1.36E-02 | 0 0 | Cs9g03300.1/Cs9g033    | 3.93 | 0 | 0    | 2 | MASCOT | T      | PLEX8 |       |
| 3.15E-03 | 0 0 | Cs9g03300.1/Cs9g033    | 3.83 | 0 | 0    | 2 | MASCOT | T      | PLEX8 |       |
| 2.74E-02 | 0 0 | Cs9g03300.1/Cs9g033    | 3.83 | 0 | 0    | 2 | MASCOT | T      | PLEX8 |       |
| 8.75E-03 | 0 0 | Cs9g03300.1/Cs9g033    | 3.83 | 0 | 0    | 2 | MASCOT | T      | PLEX8 |       |
| 2.42E-04 | 0 0 | Cs9g03300.1/Cs9g033    | 3.83 | 0 | 0    | 2 | MASCOT | T      | PLEX8 |       |
| 4.11E-02 | 0 0 | Cs9g03300.1/Cs9g033    | 3.83 | 0 | 0    | 2 | MASCOT | T      | PLEX8 |       |
| 1.25E-01 | 0 0 | Cs9g03300.1/Cs9g033    | 3.83 | 0 | 0    | 2 | MASCOT | T      | PLEX8 |       |
| 2.19E-02 | 0 0 | Cs9g03300.1/Cs9g033    | 3.83 | 0 | 0    | 2 | MASCOT | T      | PLEX8 |       |
| 4.40E-02 | 0 0 | Cs9g03300.1/Cs9g033    | 3.83 | 0 | 0    | 2 | MASCOT | T      |       |       |
| 1.19E-01 | 0 0 | Cs9g03300.1/Cs9g033    | 3.91 | 0 | 0    | 2 | MASCOT | T      | PLEX8 |       |
| 7.63E-03 | 0 0 | Cs9g03300.1/Cs9g033    | 3.91 | 0 | 0    | 2 | MASCOT | T      |       |       |

|          |     |                     |      |   |   |   |        |   |       |
|----------|-----|---------------------|------|---|---|---|--------|---|-------|
| 7.70E-03 | 0 0 | Cs9g03300.1/Cs9g033 | 3.91 | 0 | 0 | 2 | MASCOT | T | PLEX8 |
| 2.22E-02 | 0 0 | Cs9g03300.1/Cs9g033 | 3.91 | 0 | 0 | 2 | MASCOT | T |       |
| 8.27E-03 | 0 0 | Cs9g03300.1/Cs9g033 | 3.91 | 0 | 0 | 2 | MASCOT | T |       |
| 2.41E-01 | 0 0 | Cs9g03300.1/Cs9g033 | 3.91 | 0 | 0 | 2 | MASCOT | T | PLEX8 |
| 1.65E-04 | 0 0 | Cs9g03300.1/Cs9g033 | 3.91 | 0 | 0 | 2 | MASCOT | T | PLEX8 |
| 2.46E-04 | 0 0 | Cs9g03300.1/Cs9g033 | 3.91 | 0 | 0 | 2 | MASCOT | T | PLEX8 |
| 6.82E-02 | 0 0 | Cs9g03300.1/Cs9g033 | 6.1  | 0 | 0 | 2 | MASCOT | T | PLEX8 |
| 1.18E-01 | 0 0 | Cs9g03300.1/Cs9g033 | 6.1  | 0 | 0 | 2 | MASCOT | T | PLEX8 |
| 1.00E-01 | 0 0 | Cs9g03300.1/Cs9g033 | 6.1  | 0 | 0 | 2 | MASCOT | T | PLEX8 |
| 2.09E-02 | 0 0 | Cs9g03300.1/Cs9g033 | 6.1  | 0 | 0 | 2 | MASCOT | T | PLEX8 |
| 4.59E-01 | 0 0 | Cs9g03300.1/Cs9g033 | 6.1  | 0 | 0 | 2 | MASCOT | T | PLEX8 |
| 5.88E-02 | 0 0 | Cs9g03300.1/Cs9g033 | 6.1  | 0 | 0 | 2 | MASCOT | T | PLEX8 |
| 1.29E-01 | 0 0 | Cs9g03300.1/Cs9g033 | 6.1  | 0 | 0 | 2 | MASCOT | T | PLEX8 |
| 5.71E-02 | 0 0 | Cs9g03300.1/Cs9g033 | 6.1  | 0 | 0 | 2 | MASCOT | T | PLEX8 |
| 4.17E-02 | 0 0 | Cs9g03300.1/Cs9g033 | 6.1  | 0 | 0 | 2 | MASCOT | T | PLEX8 |
| 4.77E-01 | 0 0 | Cs9g03300.1/Cs9g033 | 6.1  | 0 | 0 | 2 | MASCOT | T |       |
| 5.83E-01 | 0 0 | Cs9g03300.1/Cs9g033 | 4.53 | 0 | 0 | 2 | MASCOT | T | PLEX8 |
| 3.20E-01 | 0 0 | Cs9g03300.1/Cs9g033 | 4.53 | 0 | 0 | 2 | MASCOT | T | PLEX8 |
| 1.78E-01 | 0 0 | Cs9g03300.1/Cs9g033 | 4.53 | 0 | 0 | 2 | MASCOT | T | PLEX8 |
| 2.73E-01 | 0 0 | Cs9g03300.1/Cs9g033 | 4.53 | 0 | 0 | 2 | MASCOT | T | PLEX8 |
| 2.50E-02 | 0 0 | Cs9g03300.1/Cs9g033 | 4.53 | 0 | 0 | 2 | MASCOT | T | PLEX8 |
| 3.53E-02 | 0 0 | Cs9g03300.1/Cs9g033 | 4.53 | 0 | 0 | 2 | MASCOT | T | PLEX8 |
| 9.04E-03 | 0 0 | Cs9g03300.1/Cs9g033 | 4.53 | 0 | 0 | 2 | MASCOT | T | PLEX8 |
| 1.91E-01 | 0 0 | Cs9g03300.1/Cs9g033 | 4.53 | 0 | 0 | 2 | MASCOT | T | PLEX8 |
| 6.05E-02 | 0 0 | Cs9g03300.1/Cs9g033 | 4.53 | 0 | 0 | 2 | MASCOT | T | PLEX8 |
| 3.23E-02 | 0 0 | Cs9g03300.1/Cs9g033 | 4.53 | 0 | 0 | 2 | MASCOT | T | PLEX8 |
| 1.04E-01 | 0 0 | Cs9g03300.1/Cs9g033 | 4.53 | 0 | 0 | 2 | MASCOT | T | PLEX8 |
| 1.31E-01 | 0 0 | Cs9g03300.1/Cs9g033 | 4.53 | 0 | 0 | 2 | MASCOT | T |       |
| 2.19E-02 | 0 0 | Cs9g03300.1/Cs9g033 | 4.53 | 0 | 0 | 2 | MASCOT | T |       |
| 8.71E-02 | 0 0 | Cs9g03300.1/Cs9g033 | 5.84 | 0 | 0 | 2 | MASCOT | T | PLEX8 |
| 2.50E-02 | 0 0 | Cs9g03300.1/Cs9g033 | 5.84 | 0 | 0 | 2 | MASCOT | T | PLEX8 |
| 2.08E-01 | 0 0 | Cs9g03300.1/Cs9g033 | 5.84 | 0 | 0 | 2 | MASCOT | T | PLEX8 |
| 1.64E-04 | 0 0 | Cs9g03300.1/Cs9g033 | 5.84 | 0 | 0 | 2 | MASCOT | T | PLEX8 |
| 1.20E-03 | 0 0 | Cs9g03300.1/Cs9g033 | 5.84 | 0 | 0 | 2 | MASCOT | T | PLEX8 |
| 2.89E-01 | 0 0 | Cs9g03300.1/Cs9g033 | 5.84 | 0 | 0 | 2 | MASCOT | T | PLEX8 |
| 1.28E-03 | 0 0 | Cs9g03300.1/Cs9g033 | 5.84 | 0 | 0 | 2 | MASCOT | T | PLEX8 |
| 1.88E-02 | 0 0 | Cs9g03300.1/Cs9g033 | 5.84 | 0 | 0 | 2 | MASCOT | T | PLEX8 |
| 9.53E-04 | 0 0 | Cs9g03300.1/Cs9g033 | 5.84 | 0 | 0 | 2 | MASCOT | T | PLEX8 |
| 2.28E-02 | 0 0 | Cs9g03300.1/Cs9g033 | 5.84 | 0 | 0 | 2 | MASCOT | T | PLEX8 |
| 2.12E-03 | 0 0 | Cs9g03300.1/Cs9g033 | 5.84 | 0 | 0 | 2 | MASCOT | T | PLEX8 |
| 3.18E-03 | 0 0 | Cs9g03300.1/Cs9g033 | 5.84 | 0 | 0 | 2 | MASCOT | T | PLEX8 |
| 2.95E-03 | 0 0 | Cs9g03300.1/Cs9g033 | 5.84 | 0 | 0 | 2 | MASCOT | T | PLEX8 |
| 4.02E-04 | 0 0 | Cs9g03300.1/Cs9g033 | 5.84 | 0 | 0 | 2 | MASCOT | T | PLEX8 |
| 5.49E-01 | 0 0 | Cs9g03300.1/Cs9g033 | 5.84 | 0 | 0 | 2 | MASCOT | T | PLEX8 |
| 1.74E-03 | 0 0 | Cs9g03300.1/Cs9g033 | 5.84 | 0 | 0 | 2 | MASCOT | T | PLEX8 |
| 3.32E-02 | 0 0 | Cs9g03300.1/Cs9g033 | 5.84 | 0 | 0 | 2 | MASCOT | T | PLEX8 |
| 9.21E-04 | 0 0 | Cs9g03300.1/Cs9g033 | 5.84 | 0 | 0 | 2 | MASCOT | T | PLEX8 |
| 3.23E-02 | 0 0 | Cs9g03300.1/Cs9g033 | 5.84 | 0 | 0 | 2 | MASCOT | T | PLEX8 |
| 1.35E-01 | 0 0 | Cs9g03300.1/Cs9g033 | 5.84 | 0 | 0 | 2 | MASCOT | T |       |
| 1.00E-01 | 0 0 | Cs9g03300.1/Cs9g033 | 5.84 | 0 | 0 | 2 | MASCOT | T |       |
| 1.65E-05 | 0 0 | Cs9g03300.1/Cs9g033 | 5.84 | 0 | 0 | 2 | MASCOT | T | PLEX8 |

|              |                     |      |        |   |          |   |       |
|--------------|---------------------|------|--------|---|----------|---|-------|
| 2.38E-04 0 0 | Cs9g03300.1/Cs9g033 | 5.84 | 0      | 0 | 2 MASCOT | T | PLEX8 |
| 1.91E-04 0 0 | Cs9g03300.1/Cs9g033 | 5.84 | 0      | 0 | 2 MASCOT | T | PLEX8 |
| 6.22E-04 0 0 | Cs9g03300.1/Cs9g033 | 5.84 | 0      | 0 | 2 MASCOT | T | PLEX8 |
| 2.71E-03 0 0 | Cs9g03300.1/Cs9g033 | 5.84 | 0      | 0 | 2 MASCOT | T |       |
| 4.31E-03 0 0 | Cs9g03300.1/Cs9g033 | 5.84 | 0      | 0 | 2 MASCOT | T | PLEX8 |
| 2.22E-03 0 0 | Cs9g03300.1/Cs9g033 | 5.84 | 0      | 0 | 2 MASCOT | T | PLEX8 |
| 4.18E-02 0 0 | Cs9g03300.1/Cs9g033 | 5.84 | 0      | 0 | 2 MASCOT | T |       |
| 1.18E-02 0 0 | Cs9g03300.1/Cs9g033 | 5.84 | 0      | 0 | 2 MASCOT | T |       |
| 3.03E-01 0 0 | Cs9g03300.1/Cs9g033 | 8.75 | 0      | 0 | 2 MASCOT | T | PLEX8 |
| 6.65E-03 0 0 | Cs9g03300.1/Cs9g033 | 6.07 | 1      | 0 | 2 MASCOT | T | PLEX8 |
| 1.34E-01 0 0 | Cs9g03300.1/Cs9g033 | 4.53 | 0      | 0 | 2 MASCOT | T |       |
| 2.69E-02 0 0 | Cs9g03300.1/Cs9g033 | 4.53 | 0 15.9 | 0 | 2 MASCOT | T | PLEX8 |
| 2.40E-02 0 0 | Cs9g03300.1/Cs9g033 | 4.53 | 0 15.9 | 0 | 2 MASCOT | T | PLEX8 |
| 2.99E-02 0 0 | Cs9g03300.1/Cs9g033 | 4.53 | 0 15.9 | 0 | 2 MASCOT | T | PLEX8 |
| 2.31E-02 0 0 | Cs9g03300.1/Cs9g033 | 4.53 | 0 15.9 | 0 | 2 MASCOT | T | PLEX8 |
| 4.85E-02 0 0 | Cs9g03300.1/Cs9g033 | 4.53 | 0 15.9 | 0 | 2 MASCOT | T | PLEX8 |
| 2.35E-02 0 0 | Cs9g03300.1/Cs9g033 | 4.53 | 0 15.9 | 0 | 2 MASCOT | T | PLEX8 |
| 7.47E-04 0 0 | Cs9g03300.1/Cs9g033 | 4.53 | 0 15.9 | 0 | 2 MASCOT | T |       |
| 1.27E-03 0 0 | Cs9g03300.1/Cs9g033 | 4.53 | 0      | 0 | 2 MASCOT | T | PLEX8 |
| 6.59E-03 0 0 | Cs9g03300.1/Cs9g033 | 4.53 | 0      | 0 | 2 MASCOT | T | PLEX8 |
| 3.62E-03 0 0 | Cs9g03300.1/Cs9g033 | 4.53 | 0      | 0 | 2 MASCOT | T | PLEX8 |
| 1.30E-03 0 0 | Cs9g03300.1/Cs9g033 | 4.53 | 0      | 0 | 2 MASCOT | T | PLEX8 |
| 9.69E-04 0 0 | Cs9g03300.1/Cs9g033 | 4.53 | 0      | 0 | 2 MASCOT | T |       |
| 1.84E-03 0 0 | Cs9g03300.1/Cs9g033 | 4.53 | 0      | 0 | 2 MASCOT | T | PLEX8 |
| 2.13E-04 0 0 | Cs9g03300.1/Cs9g033 | 4.53 | 0      | 0 | 2 MASCOT | T | PLEX8 |
| 8.16E-03 0 0 | Cs9g03300.1/Cs9g033 | 4.53 | 0      | 0 | 2 MASCOT | T | PLEX8 |
| 5.95E-04 0 0 | Cs9g03300.1/Cs9g033 | 4.53 | 0      | 0 | 2 MASCOT | T |       |
| 3.87E-03 0 0 | Cs9g03300.1/Cs9g033 | 4.53 | 0      | 0 | 2 MASCOT | T |       |
| 1.48E-03 0 0 | Cs9g03300.1/Cs9g033 | 6    | 0      | 0 | 2 MASCOT | T | PLEX8 |
| 1.27E-02 0 0 | Cs9g03300.1/Cs9g033 | 6    | 0      | 0 | 2 MASCOT | T | PLEX8 |
| 1.18E-03 0 0 | Cs9g03300.1/Cs9g033 | 6    | 0      | 0 | 2 MASCOT | T | PLEX8 |
| 4.65E-04 0 0 | Cs9g03300.1/Cs9g033 | 6    | 0      | 0 | 2 MASCOT | T | PLEX8 |
| 1.97E-01 0 0 | Cs9g03300.1/Cs9g033 | 5.81 | 0      | 0 | 2 MASCOT | T | PLEX8 |
| 1.01E-01 0 0 | Cs9g03300.1/Cs9g033 | 5.81 | 0      | 0 | 2 MASCOT | T | PLEX8 |
| 3.22E-01 0 0 | Cs9g03300.1/Cs9g033 | 5.81 | 0      | 0 | 2 MASCOT | T | PLEX8 |
| 2.39E-01 0 0 | Cs9g03300.1/Cs9g033 | 5.81 | 0      | 0 | 2 MASCOT | T | PLEX8 |
| 5.41E-02 0 0 | Cs9g03300.1         | 6.71 | 0      | 0 | 2 MASCOT | T | PLEX8 |
| 5.42E-02 0 0 | Cs9g03300.1         | 6.71 | 0      | 0 | 2 MASCOT | T | PLEX8 |
| 2.41E-02 0 0 | Cs9g03300.1         | 6.71 | 0      | 0 | 2 MASCOT | T | PLEX8 |
| 1.28E-01 0 0 | Cs9g03300.1         | 6.71 | 0      | 0 | 2 MASCOT | T | PLEX8 |
| 5.95E-02 0 0 | Cs9g03300.1         | 6.71 | 0      | 0 | 2 MASCOT | T | PLEX8 |
| 3.19E-01 0 0 | Cs9g03300.1         | 6.71 | 0      | 0 | 2 MASCOT | T | PLEX8 |
| 2.17E-01 0 0 | Cs9g03300.1         | 6.71 | 0      | 0 | 2 MASCOT | T |       |
| 1.44E-01 0 0 | Cs9g03300.1         | 6.71 | 0      | 0 | 2 MASCOT | T |       |
| 1.15E-01 0 0 | Cs9g03300.1/Cs9g033 | 9.72 | 0      | 0 | 2 MASCOT | T | PLEX8 |
| 4.86E-03 0 0 | Cs9g03300.1/Cs9g033 | 9.72 | 0      | 0 | 2 MASCOT | T | PLEX8 |
| 3.05E-04 0 0 | Cs9g03300.1/Cs9g033 | 9.72 | 0      | 0 | 2 MASCOT | T |       |
| 1.48E-02 0 0 | Cs9g03300.1/Cs9g033 | 9.72 | 0      | 0 | 2 MASCOT | T |       |
| 1.26E-05 0 0 | Cs9g03300.1/Cs9g033 | 9.72 | 0      | 0 | 2 MASCOT | T |       |
| 6.19E-02 0 0 | Cs9g03300.1/Cs9g033 | 9.72 | 0      | 0 | 2 MASCOT | T |       |
| 5.04E-05 0 0 | Cs9g03300.1/Cs9g033 | 9.72 | 0      | 0 | 2 MASCOT | T |       |



|          |     |                     |      |   |   |   |        |   |       |
|----------|-----|---------------------|------|---|---|---|--------|---|-------|
| 1.84E-01 | 0 0 | Cs9g03300.1/Cs9g033 | 9.72 | 0 | 0 | 2 | MASCOT | T | PLEX8 |
| 2.08E-01 | 0 0 | Cs9g03300.1/Cs9g033 | 8.24 | 0 | 0 | 2 | MASCOT | T | PLEX8 |
| 2.08E-01 | 0 0 | Cs9g03300.1/Cs9g033 | 8.24 | 0 | 0 | 2 | MASCOT | T | PLEX8 |
| 2.31E-01 | 0 0 | Cs9g03300.1/Cs9g033 | 8.24 | 0 | 0 | 2 | MASCOT | T | PLEX8 |
| 2.52E-01 | 0 0 | Cs9g03300.1/Cs9g033 | 8.24 | 0 | 0 | 2 | MASCOT | T | PLEX8 |
| 2.23E-01 | 0 0 | Cs9g03300.1/Cs9g033 | 8.24 | 0 | 0 | 2 | MASCOT | T | PLEX8 |
| 1.91E-01 | 0 0 | Cs9g03300.1/Cs9g033 | 8.24 | 0 | 0 | 2 | MASCOT | T | PLEX8 |
| 2.51E-01 | 0 0 | Cs9g03300.1/Cs9g033 | 8.24 | 0 | 0 | 2 | MASCOT | T | PLEX8 |
| 2.56E-01 | 0 0 | Cs9g03300.1/Cs9g033 | 8.24 | 0 | 0 | 2 | MASCOT | T |       |
| 1.65E-01 | 0 0 | Cs9g03300.1/Cs9g033 | 8.24 | 0 | 0 | 2 | MASCOT | T |       |
| 1.49E-01 | 0 0 | Cs9g03300.1/Cs9g033 | 8.24 | 0 | 0 | 2 | MASCOT | T | PLEX8 |
| 3.60E-01 | 0 0 | Cs9g03300.1/Cs9g033 | 8.24 | 0 | 0 | 2 | MASCOT | T | PLEX8 |
| 4.95E-02 | 0 0 | Cs9g03300.1         | 6.73 | 0 | 0 | 2 | MASCOT | T | PLEX8 |
| 7.72E-02 | 0 0 | Cs9g03300.1         | 6.73 | 0 | 0 | 2 | MASCOT | T | PLEX8 |
| 1.87E-03 | 0 0 | Cs9g03300.1         | 6.73 | 0 | 0 | 2 | MASCOT | T | PLEX8 |
| 1.20E-01 | 0 0 | Cs9g03300.1         | 6.73 | 0 | 0 | 2 | MASCOT | T | PLEX8 |
| 9.63E-02 | 0 0 | Cs9g03300.1         | 6.73 | 0 | 0 | 2 | MASCOT | T | PLEX8 |
| 6.52E-03 | 0 0 | Cs9g03300.1/Cs9g033 | 4.03 | 0 | 0 | 2 | MASCOT | T | PLEX8 |
| 6.20E-03 | 0 0 | Cs9g03300.1/Cs9g033 | 4.03 | 0 | 0 | 2 | MASCOT | T | PLEX8 |
| 6.08E-04 | 0 0 | Cs9g03300.1/Cs9g033 | 4.03 | 0 | 0 | 2 | MASCOT | T | PLEX8 |
| 3.19E-01 | 0 0 | Cs9g03300.1/Cs9g033 | 4.03 | 0 | 0 | 2 | MASCOT | T | PLEX8 |
| 9.07E-03 | 0 0 | Cs9g03300.1/Cs9g033 | 4.03 | 0 | 0 | 2 | MASCOT | T |       |
| 1.01E-02 | 0 0 | Cs9g03300.1/Cs9g033 | 4.03 | 0 | 0 | 2 | MASCOT | T |       |
| 6.68E-03 | 0 0 | Cs9g03300.1/Cs9g033 | 4.03 | 0 | 0 | 2 | MASCOT | T |       |
| 9.32E-03 | 0 0 | Cs9g03300.1/Cs9g033 | 4.37 | 0 | 0 | 2 | MASCOT | T |       |
| 8.87E-03 | 0 0 | Cs9g03300.1/Cs9g033 | 4.37 | 0 | 0 | 2 | MASCOT | T | PLEX8 |
| 1.13E-03 | 0 0 | Cs9g03300.1/Cs9g033 | 4.37 | 0 | 0 | 2 | MASCOT | T | PLEX8 |
| 5.56E-02 | 0 0 | Cs9g03300.1/Cs9g033 | 4.37 | 0 | 0 | 2 | MASCOT | T | PLEX8 |
| 2.33E-02 | 0 0 | Cs9g03300.1/Cs9g033 | 4.37 | 0 | 0 | 2 | MASCOT | T | PLEX8 |
| 1.42E-02 | 0 0 | Cs9g03300.1/Cs9g033 | 4.37 | 0 | 0 | 2 | MASCOT | T | PLEX8 |
| 1.75E-01 | 0 0 | Cs9g03300.1/Cs9g033 | 4.37 | 0 | 0 | 2 | MASCOT | T | PLEX8 |
| 1.62E-02 | 0 0 | Cs9g03300.1/Cs9g033 | 4.37 | 0 | 0 | 2 | MASCOT | T | PLEX8 |
| 8.54E-03 | 0 0 | Cs9g03300.1/Cs9g033 | 4.37 | 0 | 0 | 2 | MASCOT | T | PLEX8 |
| 6.91E-03 | 0 0 | Cs9g03300.1/Cs9g033 | 4.37 | 0 | 0 | 2 | MASCOT | T |       |
| 1.81E-02 | 0 0 | Cs9g03300.1/Cs9g033 | 4.37 | 0 | 0 | 2 | MASCOT | T | PLEX8 |
| 4.98E-03 | 0 0 | Cs9g03300.1/Cs9g033 | 4.37 | 0 | 0 | 2 | MASCOT | T | PLEX8 |
| 3.10E-03 | 0 0 | Cs9g03300.1/Cs9g033 | 4.37 | 0 | 0 | 2 | MASCOT | T | PLEX8 |
| 2.81E-02 | 0 0 | Cs9g03300.1/Cs9g033 | 6.14 | 1 | 0 | 2 | MASCOT | T | PLEX8 |
| 6.66E-02 | 0 0 | Cs9g03300.1/Cs9g033 | 6.14 | 1 | 0 | 2 | MASCOT | T |       |
| 9.95E-03 | 0 0 | Cs9g03300.1/Cs9g033 | 6.14 | 1 | 0 | 2 | MASCOT | T | PLEX8 |
| 4.71E-02 | 0 0 | Cs9g03300.1/Cs9g033 | 5.96 | 1 | 0 | 2 | MASCOT | T | PLEX8 |
| 3.17E-03 | 0 0 | Cs9g03300.1/Cs9g033 | 5.96 | 1 | 0 | 2 | MASCOT | T |       |
| 1.42E-01 | 0 0 | Cs9g03300.1/Cs9g033 | 6    | 0 | 0 | 2 | MASCOT | T | PLEX8 |
| 1.10E-01 | 0 0 | Cs9g03300.1/Cs9g033 | 6    | 0 | 0 | 2 | MASCOT | T | PLEX8 |
| 1.45E-01 | 0 0 | Cs9g03300.1/Cs9g033 | 6    | 0 | 0 | 2 | MASCOT | T | PLEX8 |
| 1.31E-01 | 0 0 | Cs9g03300.1/Cs9g033 | 6    | 0 | 0 | 2 | MASCOT | T | PLEX8 |
| 7.69E-02 | 0 0 | Cs9g03300.1/Cs9g033 | 6    | 0 | 0 | 2 | MASCOT | T | PLEX8 |
| 2.05E-01 | 0 0 | Cs9g03300.1/Cs9g033 | 6    | 0 | 0 | 2 | MASCOT | T | PLEX8 |
| 3.77E-01 | 0 0 | Cs9g03300.1/Cs9g033 | 6    | 0 | 0 | 2 | MASCOT | T | PLEX8 |
| 5.20E-02 | 0 0 | Cs9g03300.1/Cs9g033 | 6    | 0 | 0 | 2 | MASCOT | T |       |
| 2.97E-01 | 0 0 | Cs9g03300.1/Cs9g033 | 6    | 0 | 0 | 2 | MASCOT | T |       |

|          |     |                     |      |   |   |   |        |   |       |
|----------|-----|---------------------|------|---|---|---|--------|---|-------|
| 2.93E-03 | 0 0 | Cs9g03300.1/Cs9g033 | 4    | 0 | 0 | 2 | MASCOT | T | PLEX8 |
| 1.06E-02 | 0 0 | Cs9g03300.1/Cs9g033 | 4    | 0 | 0 | 2 | MASCOT | T | PLEX8 |
| 3.92E-02 | 0 0 | Cs9g03300.1/Cs9g033 | 4    | 0 | 0 | 2 | MASCOT | T | PLEX8 |
| 1.04E-02 | 0 0 | Cs9g03300.1/Cs9g033 | 4    | 0 | 0 | 2 | MASCOT | T | PLEX8 |
| 4.12E-05 | 0 0 | Cs9g03300.1/Cs9g033 | 4    | 0 | 0 | 2 | MASCOT | T |       |
| 1.70E-05 | 0 0 | Cs9g03300.1/Cs9g033 | 4    | 0 | 0 | 2 | MASCOT | T |       |
| 2.81E-04 | 0 0 | Cs9g03300.1/Cs9g033 | 4    | 0 | 0 | 2 | MASCOT | T |       |
| 1.73E-06 | 0 0 | Cs9g03300.1/Cs9g033 | 4    | 0 | 0 | 2 | MASCOT | T |       |
| 1.70E-01 | 0 0 | Cs9g03300.1/Cs9g033 | 4    | 0 | 0 | 2 | MASCOT | T | PLEX8 |
| 3.39E-02 | 0 0 | Cs9g03300.1/Cs9g033 | 4    | 0 | 0 | 2 | MASCOT | T | PLEX8 |
| 4.66E-04 | 0 0 | Cs9g03300.1/Cs9g033 | 4    | 0 | 0 | 2 | MASCOT | T | PLEX8 |
| 3.16E-03 | 0 0 | Cs9g03300.1/Cs9g033 | 4.37 | 0 | 0 | 2 | MASCOT | T | PLEX8 |
| 1.20E-01 | 0 0 | Cs9g03300.1/Cs9g033 | 4.37 | 0 | 0 | 2 | MASCOT | T | PLEX8 |
| 1.50E-01 | 0 0 | Cs9g03300.1/Cs9g033 | 4.37 | 0 | 0 | 2 | MASCOT | T | PLEX8 |
| 6.48E-02 | 0 0 | Cs9g03300.1/Cs9g033 | 4.37 | 0 | 0 | 2 | MASCOT | T | PLEX8 |
| 3.30E-02 | 0 0 | Cs9g03300.1/Cs9g033 | 4.37 | 0 | 0 | 2 | MASCOT | T | PLEX8 |
| 9.86E-03 | 0 0 | Cs9g03300.1/Cs9g033 | 4.37 | 0 | 0 | 2 | MASCOT | T | PLEX8 |
| 1.71E-03 | 0 0 | Cs9g03300.1/Cs9g033 | 4.37 | 0 | 0 | 2 | MASCOT | T | PLEX8 |
| 7.97E-03 | 0 0 | Cs9g03300.1/Cs9g033 | 4.37 | 0 | 0 | 2 | MASCOT | T | PLEX8 |
| 3.96E-02 | 0 0 | Cs9g03300.1/Cs9g033 | 4.37 | 0 | 0 | 2 | MASCOT | T | PLEX8 |
| 1.44E-01 | 0 0 | Cs9g03300.1/Cs9g033 | 4.37 | 0 | 0 | 2 | MASCOT | T | PLEX8 |
| 7.62E-02 | 0 0 | Cs9g03300.1/Cs9g033 | 4.37 | 0 | 0 | 2 | MASCOT | T | PLEX8 |
| 5.51E-02 | 0 0 | Cs9g03300.1/Cs9g033 | 4.37 | 0 | 0 | 2 | MASCOT | T | PLEX8 |
| 1.95E-03 | 0 0 | Cs9g03300.1/Cs9g033 | 4.37 | 0 | 0 | 2 | MASCOT | T | PLEX8 |
| 1.09E-02 | 0 0 | Cs9g03300.1/Cs9g033 | 4.37 | 0 | 0 | 2 | MASCOT | T | PLEX8 |
| 1.37E-03 | 0 0 | Cs9g03300.1/Cs9g033 | 4.37 | 0 | 0 | 2 | MASCOT | T | PLEX8 |
| 2.96E-01 | 0 0 | Cs9g03300.1/Cs9g033 | 4.37 | 0 | 0 | 2 | MASCOT | T | PLEX8 |
| 6.09E-03 | 0 0 | Cs9g03300.1/Cs9g033 | 4.37 | 0 | 0 | 2 | MASCOT | T | PLEX8 |
| 4.21E-02 | 0 0 | Cs9g03300.1/Cs9g033 | 4.37 | 0 | 0 | 2 | MASCOT | T | PLEX8 |
| 1.69E-01 | 0 0 | Cs9g03300.1/Cs9g033 | 4.37 | 0 | 0 | 2 | MASCOT | T |       |
| 1.13E-02 | 0 0 | Cs9g03300.1/Cs9g033 | 4.37 | 0 | 0 | 2 | MASCOT | T |       |
| 5.71E-02 | 0 0 | Cs3g17430.1/Cs3g174 | 6.05 | 0 | 0 | 2 | MASCOT | T | PLEX8 |
| 3.62E-04 | 0 0 | Cs3g17430.1/Cs3g174 | 6.05 | 0 | 0 | 2 | MASCOT | T | PLEX8 |
| 9.57E-05 | 0 0 | Cs3g17430.1/Cs3g174 | 6.05 | 0 | 0 | 2 | MASCOT | T | PLEX8 |
| 1.03E-03 | 0 0 | Cs3g17430.1/Cs3g174 | 6.05 | 0 | 0 | 2 | MASCOT | T | PLEX8 |
| 1.96E-01 | 0 0 | Cs3g17430.1/Cs3g174 | 6.05 | 0 | 0 | 2 | MASCOT | T | PLEX8 |
| 3.99E-03 | 0 0 | Cs3g17430.1/Cs3g174 | 6.05 | 0 | 0 | 2 | MASCOT | T | PLEX8 |
| 1.57E-03 | 0 0 | Cs3g17430.1/Cs3g174 | 6.05 | 0 | 0 | 2 | MASCOT | T | PLEX8 |
| 7.78E-03 | 0 0 | Cs9g05470.1/Cs9g054 | 4.25 | 0 | 0 | 2 | MASCOT | T | PLEX8 |
| 6.23E-03 | 0 0 | Cs9g05470.1/Cs9g054 | 4.25 | 0 | 0 | 2 | MASCOT | T | PLEX8 |
| 4.31E-01 | 0 0 | Cs9g05470.1/Cs9g054 | 4.25 | 0 | 0 | 2 | MASCOT | T | PLEX8 |
| 1.54E-01 | 0 0 | Cs3g17430.1/Cs3g174 | 5.84 | 0 | 0 | 2 | MASCOT | T | PLEX8 |
| 2.78E-01 | 0 0 | Cs3g17430.1/Cs3g174 | 5.84 | 0 | 0 | 2 | MASCOT | T | PLEX8 |
| 7.76E-02 | 0 0 | Cs3g17430.1/Cs3g174 | 5.84 | 0 | 0 | 2 | MASCOT | T | PLEX8 |
| 1.57E-01 | 0 0 | Cs3g17430.1/Cs3g174 | 5.84 | 0 | 0 | 2 | MASCOT | T | PLEX8 |
| 2.35E-01 | 0 0 | Cs3g17430.1/Cs3g174 | 5.84 | 0 | 0 | 2 | MASCOT | T | PLEX8 |
| 1.27E-01 | 0 0 | Cs3g17430.1/Cs3g174 | 5.84 | 0 | 0 | 2 | MASCOT | T |       |
| 3.35E-02 | 0 0 | Cs3g17430.1/Cs3g174 | 4.37 | 0 | 0 | 2 | MASCOT | T | PLEX8 |
| 3.23E-02 | 0 0 | Cs3g17430.1/Cs3g174 | 4.37 | 0 | 0 | 2 | MASCOT | T | PLEX8 |
| 4.13E-01 | 0 0 | Cs3g17430.1/Cs3g174 | 4.37 | 0 | 0 | 2 | MASCOT | T | PLEX8 |
| 6.31E-03 | 0 0 | Cs3g17430.1/Cs3g174 | 4.37 | 0 | 0 | 2 | MASCOT | T | PLEX8 |

|          |     |                     |      |   |      |   |        |        |       |       |
|----------|-----|---------------------|------|---|------|---|--------|--------|-------|-------|
| 9.13E-03 | 0 0 | Cs3g17430.1/Cs3g174 | 4.37 | 0 | 0    | 2 | MASCOT | T      | PLEX8 |       |
| 3.58E-02 | 0 0 | Cs3g17430.1/Cs3g174 | 4.37 | 0 | 0    | 2 | MASCOT | T      |       |       |
| 1.83E-03 | 0 0 | Cs3g17430.1/Cs3g174 | 4.37 | 0 | 0    | 2 | MASCOT | T      |       |       |
| 1.88E-02 | 0 0 | Cs3g17430.1/Cs3g174 | 4.37 | 0 | 0    | 2 | MASCOT | T      |       |       |
| 1.46E-02 | 0 0 | Cs3g17430.1/Cs3g174 | 4.37 | 0 | 0    | 2 | MASCOT | T      |       |       |
| 4.12E-03 | 0 0 | Cs3g17430.1/Cs3g174 | 6.74 | 0 | 0    | 2 | MASCOT | T      | PLEX8 |       |
| 1.69E-01 | 0 0 | Cs3g17430.1/Cs3g174 | 6.74 | 0 | 0    | 2 | MASCOT | T      | PLEX8 |       |
| 3.81E-02 | 0 0 | Cs3g17430.1         | 6.74 | 0 | 15.9 | 0 | 2      | MASCOT | T     | PLEX8 |
| 5.06E-03 | 0 0 | Cs3g17430.1         | 6.74 | 0 | 0    | 2 | MASCOT | T      | PLEX8 |       |
| 6.15E-02 | 0 0 | Cs3g17430.1/Cs3g174 | 8.75 | 0 | 0    | 2 | MASCOT | T      | PLEX8 |       |
| 9.96E-02 | 0 0 | Cs3g17430.1/Cs3g174 | 8.75 | 0 | 0    | 2 | MASCOT | T      | PLEX8 |       |
| 8.79E-04 | 0 0 | Cs3g17430.1/Cs3g174 | 8.59 | 1 | 0    | 2 | MASCOT | T      | PLEX8 |       |
| 3.07E-05 | 0 0 | Cs3g17430.1/Cs3g174 | 4.37 | 0 | 0    | 2 | MASCOT | T      |       |       |
| 8.94E-05 | 0 0 | Cs3g17430.1/Cs3g174 | 4.37 | 0 | 0    | 2 | MASCOT | T      |       |       |
| 1.03E-02 | 0 0 | Cs3g17430.1/Cs3g174 | 4.37 | 0 | 0    | 2 | MASCOT | T      |       |       |
| 2.23E-09 | 0 0 | Cs3g17430.1         | 3.67 | 0 | 0    | 2 | MASCOT | T      | PLEX8 |       |
| 5.18E-05 | 0 0 | Cs3g17430.1         | 3.67 | 0 | 0    | 2 | MASCOT | T      | PLEX8 |       |
| 2.19E-02 | 0 0 | Cs3g17430.1         | 6.04 | 0 | 0    | 2 | MASCOT | T      | PLEX8 |       |
| 6.60E-02 | 0 0 | Cs3g17430.1         | 6.04 | 0 | 0    | 2 | MASCOT | T      | PLEX8 |       |
| 2.77E-03 | 0 0 | Cs3g17430.1         | 6.04 | 0 | 0    | 2 | MASCOT | T      | PLEX8 |       |
| 5.77E-03 | 0 0 | Cs3g17430.1         | 6.04 | 0 | 0    | 2 | MASCOT | T      | PLEX8 |       |
| 1.01E-02 | 0 0 | Cs3g17430.1         | 6.04 | 0 | 0    | 2 | MASCOT | T      | PLEX8 |       |
| 6.03E-05 | 0 0 | Cs3g17430.1/Cs3g174 | 6.79 | 0 | 0    | 2 | MASCOT | T      |       |       |
| 1.10E-02 | 0 0 | Cs3g17430.1         | 4.65 | 0 | 15.9 | 0 | 2      | MASCOT | T     | PLEX8 |
| 1.35E-02 | 0 0 | Cs3g17430.1         | 4.65 | 0 | 0    | 2 | MASCOT | T      | PLEX8 |       |
| 5.58E-03 | 0 0 | Cs3g17430.1         | 4.65 | 0 | 0    | 2 | MASCOT | T      | PLEX8 |       |
| 4.02E-02 | 0 0 | Cs3g17430.1         | 4.65 | 0 | 0    | 2 | MASCOT | T      | PLEX8 |       |
| 2.50E-01 | 0 0 | Cs3g17430.1/Cs3g174 | 4.53 | 0 | 0    | 2 | MASCOT | T      | PLEX8 |       |
| 3.64E-02 | 0 0 | Cs3g17430.1/Cs3g174 | 4.53 | 0 | 0    | 2 | MASCOT | T      | PLEX8 |       |
| 1.29E-01 | 0 0 | Cs3g17430.1/Cs3g174 | 4.53 | 0 | 0    | 2 | MASCOT | T      | PLEX8 |       |
| 1.24E-01 | 0 0 | Cs3g17430.1/Cs3g174 | 4.53 | 0 | 0    | 2 | MASCOT | T      | PLEX8 |       |
| 4.01E-02 | 0 0 | Cs3g17430.1/Cs3g174 | 4.53 | 0 | 0    | 2 | MASCOT | T      | PLEX8 |       |
| 2.28E-01 | 0 0 | Cs3g17430.1/Cs3g174 | 4.53 | 0 | 0    | 2 | MASCOT | T      | PLEX8 |       |
| 1.49E-01 | 0 0 | Cs3g17430.1/Cs3g174 | 4.53 | 0 | 0    | 2 | MASCOT | T      |       |       |
| 3.53E-02 | 0 0 | Cs3g17430.1/Cs3g174 | 4.03 | 0 | 0    | 2 | MASCOT | T      | PLEX8 |       |
| 1.16E-02 | 0 0 | Cs3g17430.1/Cs3g174 | 4.03 | 0 | 0    | 2 | MASCOT | T      |       |       |
| 9.19E-07 | 0 0 | Cs3g17430.1/Cs3g174 | 4.03 | 0 | 0    | 2 | MASCOT | T      |       |       |
| 2.89E-03 | 0 0 | Cs3g17430.1/Cs3g174 | 4.03 | 0 | 0    | 2 | MASCOT | T      |       |       |
| 1.41E-06 | 0 0 | Cs3g17430.1/Cs3g174 | 4.03 | 0 | 0    | 2 | MASCOT | T      |       |       |
| 2.33E-01 | 0 0 | Cs3g17430.1/Cs3g174 | 8.75 | 0 | 0    | 2 | MASCOT | T      | PLEX8 |       |
| 2.04E-01 | 0 0 | Cs3g17430.1/Cs3g174 | 8.75 | 0 | 0    | 2 | MASCOT | T      | PLEX8 |       |
| 4.00E-02 | 0 0 | Cs3g17430.1/Cs3g174 | 6.07 | 1 | 0    | 2 | MASCOT | T      | PLEX8 |       |
| 3.03E-01 | 0 0 | Cs3g17430.1/Cs3g174 | 8.59 | 0 | 0    | 2 | MASCOT | T      | PLEX8 |       |
| 1.35E-03 | 0 0 | Cs3g17430.1/Cs3g174 | 8.52 | 0 | 15.9 | 0 | 2      | MASCOT | T     | PLEX8 |
| 7.15E-03 | 0 0 | Cs3g17430.1/Cs3g174 | 8.52 | 0 | 0    | 2 | MASCOT | T      | PLEX8 |       |
| 1.29E-04 | 0 0 | Cs3g17430.1/Cs3g174 | 8.52 | 0 | 0    | 2 | MASCOT | T      | PLEX8 |       |
| 1.20E-01 | 0 0 | Cs3g17430.1/Cs3g174 | 6    | 0 | 0    | 2 | MASCOT | T      | PLEX8 |       |
| 1.02E-01 | 0 0 | Cs3g17430.1/Cs3g174 | 6    | 0 | 0    | 2 | MASCOT | T      | PLEX8 |       |
| 8.71E-02 | 0 0 | Cs3g17430.1/Cs3g174 | 6    | 0 | 0    | 2 | MASCOT | T      | PLEX8 |       |
| 3.35E-01 | 0 0 | Cs3g17430.1/Cs3g174 | 6    | 0 | 0    | 2 | MASCOT | T      | PLEX8 |       |
| 2.43E-02 | 0 0 | Cs3g17430.1/Cs3g174 | 5.55 | 0 | 0    | 2 | MASCOT | T      |       |       |

|          |     |                     |      |   |   |   |        |   |       |
|----------|-----|---------------------|------|---|---|---|--------|---|-------|
| 3.77E-02 | 0 0 | Cs3g17430.1/Cs3g174 | 5.55 | 0 | 0 | 2 | MASCOT | T |       |
| 1.06E-05 | 0 0 | Cs3g17430.1/Cs3g174 | 5.72 | 0 | 0 | 2 | MASCOT | T |       |
| 4.83E-04 | 0 0 | Cs3g17430.1/Cs3g174 | 5.72 | 0 | 0 | 2 | MASCOT | T | PLEX8 |
| 1.11E-04 | 0 0 | Cs3g17430.1/Cs3g174 | 5.97 | 0 | 0 | 2 | MASCOT | T | PLEX8 |
| 8.27E-04 | 0 0 | Cs3g17430.1/Cs3g174 | 5.97 | 0 | 0 | 2 | MASCOT | T | PLEX8 |
| 6.95E-05 | 0 0 | Cs3g17430.1/Cs3g174 | 5.97 | 0 | 0 | 2 | MASCOT | T | PLEX8 |
| 9.88E-05 | 0 0 | Cs3g17430.1/Cs3g174 | 5.97 | 0 | 0 | 2 | MASCOT | T | PLEX8 |
| 3.84E-03 | 0 0 | Cs3g17430.1/Cs3g174 | 5.97 | 0 | 0 | 2 | MASCOT | T | PLEX8 |
| 2.95E-02 | 0 0 | Cs3g17430.1/Cs3g174 | 5.97 | 0 | 0 | 2 | MASCOT | T |       |
| 4.20E-02 | 0 0 | Cs3g17430.1/Cs3g174 | 5.97 | 0 | 0 | 2 | MASCOT | T | PLEX8 |
| 1.90E-03 | 0 0 | Cs3g17430.1/Cs3g174 | 5.97 | 0 | 0 | 2 | MASCOT | T | PLEX8 |
| 7.63E-02 | 0 0 | Cs3g17430.1/Cs3g174 | 5.97 | 0 | 0 | 2 | MASCOT | T |       |
| 2.23E-03 | 0 0 | Cs3g17430.1/Cs3g174 | 5.97 | 0 | 0 | 2 | MASCOT | T | PLEX8 |
| 2.59E-03 | 0 0 | Cs3g17430.1/Cs3g174 | 5.97 | 0 | 0 | 2 | MASCOT | T | PLEX8 |
| 1.08E-01 | 0 0 | Cs3g17430.1/Cs3g174 | 5.97 | 0 | 0 | 2 | MASCOT | T | PLEX8 |
| 1.03E-03 | 0 0 | Cs3g17430.1/Cs3g174 | 5.97 | 0 | 0 | 2 | MASCOT | T |       |
| 5.25E-01 | 0 0 | Cs3g17430.1/Cs3g174 | 5.97 | 0 | 0 | 2 | MASCOT | T |       |
| 1.96E-01 | 0 0 | Cs3g17430.1/Cs3g174 | 8.56 | 0 | 0 | 2 | MASCOT | T | PLEX8 |
| 1.95E-04 | 0 0 | Cs3g17430.1/Cs3g174 | 8.56 | 0 | 0 | 2 | MASCOT | T | PLEX8 |
| 6.25E-04 | 0 0 | Cs3g17430.1/Cs3g174 | 8.56 | 0 | 0 | 2 | MASCOT | T | PLEX8 |
| 3.07E-04 | 0 0 | Cs3g17430.1/Cs3g174 | 8.56 | 0 | 0 | 2 | MASCOT | T | PLEX8 |
| 3.94E-04 | 0 0 | Cs3g17430.1/Cs3g174 | 8.56 | 0 | 0 | 2 | MASCOT | T | PLEX8 |
| 8.79E-02 | 0 0 | Cs3g17430.1/Cs3g174 | 8.56 | 0 | 0 | 2 | MASCOT | T | PLEX8 |
| 8.01E-03 | 0 0 | Cs3g17430.1/Cs3g174 | 6.74 | 0 | 0 | 2 | MASCOT | T | PLEX8 |
| 3.17E-02 | 0 0 | Cs7g19800.1         | 5.88 | 0 | 0 | 2 | MASCOT | T | PLEX8 |
| 1.77E-02 | 0 0 | Cs7g19800.1         | 5.88 | 0 | 0 | 2 | MASCOT | T | PLEX8 |
| 1.28E-01 | 0 0 | Cs7g19800.1         | 5.88 | 0 | 0 | 2 | MASCOT | T | PLEX8 |
| 2.15E-03 | 0 0 | Cs7g19800.1         | 5.88 | 0 | 0 | 2 | MASCOT | T | PLEX8 |
| 9.67E-02 | 0 0 | Cs7g19800.1         | 5.88 | 0 | 0 | 2 | MASCOT | T | PLEX8 |
| 3.39E-02 | 0 0 | Cs7g19800.1         | 5.88 | 0 | 0 | 2 | MASCOT | T | PLEX8 |
| 1.68E-02 | 0 0 | Cs7g19800.1         | 5.88 | 0 | 0 | 2 | MASCOT | T | PLEX8 |
| 4.01E-01 | 0 0 | Cs7g19800.1         | 5.88 | 0 | 0 | 2 | MASCOT | T |       |
| 1.45E-02 | 0 0 | Cs7g19800.1         | 4.14 | 0 | 0 | 2 | MASCOT | T |       |
| 8.41E-02 | 0 0 | Cs7g19800.1         | 4.37 | 0 | 0 | 2 | MASCOT | T | PLEX8 |
| 9.55E-03 | 0 0 | Cs7g19800.1         | 4.37 | 0 | 0 | 2 | MASCOT | T | PLEX8 |
| 2.72E-02 | 0 0 | Cs7g19800.1         | 4.37 | 0 | 0 | 2 | MASCOT | T | PLEX8 |
| 6.61E-04 | 0 0 | Cs7g19800.1         | 4.37 | 0 | 0 | 2 | MASCOT | T | PLEX8 |
| 5.82E-02 | 0 0 | Cs7g19800.1         | 4.37 | 0 | 0 | 2 | MASCOT | T | PLEX8 |
| 2.98E-02 | 0 0 | Cs7g19800.1         | 5.84 | 0 | 0 | 2 | MASCOT | T |       |
| 4.44E-02 | 0 0 | Cs7g19800.1         | 4.53 | 0 | 0 | 2 | MASCOT | T | PLEX8 |
| 2.58E-07 | 0 0 | Cs7g19800.1         | 4.53 | 0 | 0 | 2 | MASCOT | T |       |
| 3.47E-01 | 0 0 | Cs7g19800.1         | 5.38 | 0 | 0 | 2 | MASCOT | T | PLEX8 |
| 1.36E-01 | 0 0 | Cs7g19800.1         | 4.53 | 0 | 0 | 2 | MASCOT | T | PLEX8 |
| 1.00E-03 | 0 0 | Cs7g19800.1         | 4.53 | 0 | 0 | 2 | MASCOT | T | PLEX8 |
| 1.84E-02 | 0 0 | Cs7g19800.1         | 5.99 | 0 | 0 | 2 | MASCOT | T | PLEX8 |
| 1.17E-02 | 0 0 | Cs7g19800.1         | 5.99 | 0 | 0 | 2 | MASCOT | T | PLEX8 |
| 6.76E-06 | 0 0 | Cs7g19800.1         | 4.79 | 1 | 0 | 2 | MASCOT | T | PLEX8 |
| 7.23E-03 | 0 0 | Cs7g19800.1         | 4.79 | 1 | 0 | 2 | MASCOT | T | PLEX8 |
| 9.58E-03 | 0 0 | Cs7g19800.1         | 4.53 | 0 | 0 | 2 | MASCOT | T | PLEX8 |
| 1.17E-01 | 0 0 | Cs7g19800.1         | 4.53 | 0 | 0 | 2 | MASCOT | T | PLEX8 |
| 5.34E-02 | 0 0 | Cs7g19800.1         | 4.53 | 0 | 0 | 2 | MASCOT | T |       |

|              |                     |      |        |   |          |   |       |
|--------------|---------------------|------|--------|---|----------|---|-------|
| 4.43E-01 0 0 | Cs7g19800.1         | 8.47 | 0      | 0 | 2 MASCOT | T | PLEX8 |
| 4.16E-02 0 0 | Cs7g19800.1         | 8.47 | 0      | 0 | 2 MASCOT | T | PLEX8 |
| 4.16E-03 0 0 | Cs7g06240.1/Cs7g062 | 5.66 | 0      | 0 | 2 MASCOT | T | PLEX8 |
| 2.73E-01 0 0 | Cs7g06240.1/Cs7g062 | 5.66 | 0      | 0 | 2 MASCOT | T | PLEX8 |
| 2.87E-02 0 0 | Cs7g19800.1         | 4.53 | 0 15.9 | 0 | 2 MASCOT | T | PLEX8 |
| 3.45E-02 0 0 | Cs7g19800.1         | 5.81 | 0 15.9 | 0 | 2 MASCOT | T |       |
| 3.14E-01 0 0 | Cs7g19800.1         | 5.81 | 0 15.9 | 0 | 2 MASCOT | T |       |
| 9.79E-03 0 0 | Cs7g19800.1         | 4.03 | 0      | 0 | 2 MASCOT | T |       |
| 3.55E-02 0 0 | Cs7g19800.1         | 4.03 | 0      | 0 | 2 MASCOT | T |       |
| 1.36E-02 0 0 | Cs7g19800.1         | 4.03 | 0      | 0 | 2 MASCOT | T |       |
| 2.33E-02 0 0 | Cs7g19800.1         | 4.03 | 0      | 0 | 2 MASCOT | T |       |
| 6.31E-03 0 0 | Cs7g19800.1         | 4.68 | 1      | 0 | 2 MASCOT | T | PLEX8 |
| 3.17E-02 0 0 | Cs7g19800.1         | 5.4  | 0      | 0 | 2 MASCOT | T | PLEX8 |
| 9.14E-04 0 0 | Cs7g19800.1         | 5.4  | 0      | 0 | 2 MASCOT | T | PLEX8 |
| 2.01E-03 0 0 | Cs7g19800.1         | 5.4  | 0      | 0 | 2 MASCOT | T | PLEX8 |
| 3.29E-02 0 0 | Cs7g19800.1         | 5.4  | 0      | 0 | 2 MASCOT | T | PLEX8 |
| 5.37E-04 0 0 | Cs7g19800.1         | 5.4  | 0      | 0 | 2 MASCOT | T | PLEX8 |
| 1.14E-01 0 0 | Cs7g19800.1         | 4.03 | 0      | 0 | 2 MASCOT | T | PLEX8 |
| 7.17E-02 0 0 | Cs7g19800.1         | 4.03 | 0      | 0 | 2 MASCOT | T | PLEX8 |
| 1.34E-01 0 0 | Cs7g19800.1         | 4.03 | 0      | 0 | 2 MASCOT | T |       |
| 3.88E-01 0 0 | Cs7g19800.1         | 4.03 | 0      | 0 | 2 MASCOT | T | PLEX8 |
| 3.23E-03 0 0 | Cs7g19800.1         | 4.03 | 0      | 0 | 2 MASCOT | T |       |
| 1.99E-02 0 0 | Cs7g19800.1         | 4.03 | 0      | 0 | 2 MASCOT | T |       |
| 7.03E-03 0 0 | Cs7g19800.1         | 3.84 | 0      | 0 | 2 MASCOT | T | PLEX8 |
| 1.23E-05 0 0 | Cs7g19800.1         | 4.37 | 0      | 0 | 2 MASCOT | T |       |
| 9.74E-02 0 0 | Cs7g19800.1         | 4.37 | 0      | 0 | 2 MASCOT | T |       |
| 1.68E-02 0 0 | Cs7g19800.1         | 4.14 | 0      | 0 | 2 MASCOT | T |       |
| 1.59E-02 0 0 | Cs7g19800.1         | 4.14 | 0 15.9 | 0 | 2 MASCOT | T | PLEX8 |
| 1.99E-02 0 0 | Cs7g19800.1         | 4.53 | 0 15.9 | 0 | 2 MASCOT | T | PLEX8 |
| 4.76E-05 0 0 | Cs7g19800.1         | 4.53 | 0 15.9 | 0 | 2 MASCOT | T | PLEX8 |
| 7.43E-07 0 0 | Cs7g19800.1         | 4.53 | 0      | 0 | 2 MASCOT | T | PLEX8 |
| 1.30E-06 0 0 | Cs7g19800.1         | 4.53 | 0      | 0 | 2 MASCOT | T | PLEX8 |
| 5.14E-01 0 0 | Cs7g19800.1         | 4.68 | 0      | 0 | 2 MASCOT | T | PLEX8 |
| 4.72E-03 0 0 | Cs7g19800.1         | 4.68 | 0      | 0 | 2 MASCOT | T | PLEX8 |
| 2.03E-02 0 0 | Cs7g19800.1         | 4.37 | 0      | 0 | 2 MASCOT | T | PLEX8 |
| 5.38E-02 0 0 | Cs7g19800.1         | 4.37 | 0      | 0 | 2 MASCOT | T | PLEX8 |
| 1.74E-01 0 0 | Cs7g19800.1         | 4.37 | 0      | 0 | 2 MASCOT | T | PLEX8 |
| 2.38E-02 0 0 | Cs7g19800.1         | 4.37 | 0      | 0 | 2 MASCOT | T | PLEX8 |
| 9.41E-02 0 0 | Cs7g19800.1         | 4.37 | 0      | 0 | 2 MASCOT | T | PLEX8 |
| 6.57E-03 0 0 | Cs7g19800.1         | 4.25 | 0      | 0 | 2 MASCOT | T | PLEX8 |
| 1.04E-04 0 0 | Cs7g19800.1         | 4.25 | 0      | 0 | 2 MASCOT | T |       |
| 8.56E-03 0 0 | Cs7g19800.1         | 4.25 | 0      | 0 | 2 MASCOT | T |       |
| 1.28E-03 0 0 | Cs7g19800.1         | 4.37 | 0      | 0 | 2 MASCOT | T |       |
| 3.42E-03 0 0 | Cs7g19800.1         | 4.37 | 0      | 0 | 2 MASCOT | T |       |
| 6.67E-04 0 0 | Cs7g19800.1         | 4.37 | 0      | 0 | 2 MASCOT | T |       |
| 1.02E-01 0 0 | Cs2g21420.1/Cs8g160 | 4.75 | 0      | 0 | 2 MASCOT | T | PLEX8 |
| 8.69E-06 0 0 | Cs2g21420.1/Cs8g160 | 4.37 | 0      | 0 | 2 MASCOT | T | PLEX8 |
| 8.02E-04 0 0 | Cs2g21420.1/Cs8g160 | 4.37 | 0      | 0 | 2 MASCOT | T | PLEX8 |
| 8.48E-05 0 0 | Cs8g16040.1         | 4.21 | 0      | 0 | 2 MASCOT | T |       |
| 1.95E-02 0 0 | Cs8g16040.1         | 4.21 | 0      | 0 | 2 MASCOT | T |       |
| 8.95E-03 0 0 | Cs8g16040.1/Cs8g160 | 4.37 | 0      | 0 | 2 MASCOT | T | PLEX8 |

|          |     |                     |      |   |   |   |        |   |       |
|----------|-----|---------------------|------|---|---|---|--------|---|-------|
| 1.05E-01 | 0 0 | Cs8g16040.1/Cs8g160 | 4.37 | 0 | 0 | 2 | MASCOT | T | PLEX8 |
| 1.25E-01 | 0 0 | Cs8g16040.1/Cs8g160 | 4.37 | 0 | 0 | 2 | MASCOT | T | PLEX8 |
| 2.10E-02 | 0 0 | Cs8g16040.1/Cs8g160 | 4.37 | 0 | 0 | 2 | MASCOT | T | PLEX8 |
| 1.50E-02 | 0 0 | Cs8g16040.1/Cs8g160 | 4.37 | 0 | 0 | 2 | MASCOT | T | PLEX8 |
| 5.30E-02 | 0 0 | Cs8g16040.1/Cs8g160 | 4.37 | 0 | 0 | 2 | MASCOT | T | PLEX8 |
| 5.88E-02 | 0 0 | Cs8g16040.1/Cs8g160 | 4.37 | 0 | 0 | 2 | MASCOT | T | PLEX8 |
| 6.76E-02 | 0 0 | Cs8g16040.1/Cs8g160 | 4.37 | 0 | 0 | 2 | MASCOT | T | PLEX8 |
| 1.50E-02 | 0 0 | Cs8g16040.1/Cs8g160 | 4.37 | 0 | 0 | 2 | MASCOT | T | PLEX8 |
| 1.64E-01 | 0 0 | Cs8g16040.1/Cs8g160 | 4.37 | 0 | 0 | 2 | MASCOT | T | PLEX8 |
| 3.04E-02 | 0 0 | Cs8g16040.1/Cs8g160 | 4.37 | 0 | 0 | 2 | MASCOT | T | PLEX8 |
| 8.96E-03 | 0 0 | Cs2g21420.1/Cs8g160 | 4.11 | 1 | 0 | 2 | MASCOT | T | PLEX8 |
| 2.44E-02 | 0 0 | Cs8g16040.1/Cs8g160 | 4.21 | 0 | 0 | 2 | MASCOT | T | PLEX8 |
| 4.07E-02 | 0 0 | Cs8g16040.1/Cs8g160 | 4.21 | 0 | 0 | 2 | MASCOT | T | PLEX8 |
| 9.02E-03 | 0 0 | Cs8g16040.1/Cs8g160 | 4.21 | 0 | 0 | 2 | MASCOT | T | PLEX8 |
| 5.16E-04 | 0 0 | Cs8g16040.1/Cs8g160 | 4.21 | 0 | 0 | 2 | MASCOT | T | PLEX8 |
| 1.95E-02 | 0 0 | Cs8g16040.1/Cs8g160 | 4.21 | 0 | 0 | 2 | MASCOT | T | PLEX8 |
| 4.13E-01 | 0 0 | Cs8g16040.1/Cs8g160 | 4.21 | 0 | 0 | 2 | MASCOT | T | PLEX8 |
| 3.68E-01 | 0 0 | Cs8g16040.1/Cs8g160 | 4.21 | 0 | 0 | 2 | MASCOT | T | PLEX8 |
| 7.11E-02 | 0 0 | Cs8g16040.1/Cs8g160 | 4.23 | 1 | 0 | 2 | MASCOT | T | PLEX8 |
| 2.38E-01 | 0 0 | Cs8g16040.1/Cs8g160 | 3.83 | 0 | 0 | 2 | MASCOT | T | PLEX8 |
| 7.20E-02 | 0 0 | Cs8g16040.1/Cs8g160 | 3.83 | 0 | 0 | 2 | MASCOT | T | PLEX8 |
| 1.91E-02 | 0 0 | Cs8g16040.1/Cs8g160 | 3.83 | 0 | 0 | 2 | MASCOT | T | PLEX8 |
| 4.27E-03 | 0 0 | Cs8g16040.1/Cs8g160 | 3.83 | 0 | 0 | 2 | MASCOT | T | PLEX8 |
| 3.13E-04 | 0 0 | Cs8g16040.1/Cs8g160 | 3.83 | 0 | 0 | 2 | MASCOT | T | PLEX8 |
| 5.35E-02 | 0 0 | Cs8g16040.1/Cs8g160 | 3.83 | 0 | 0 | 2 | MASCOT | T | PLEX8 |
| 7.45E-03 | 0 0 | Cs8g16040.1/Cs8g160 | 3.83 | 0 | 0 | 2 | MASCOT | T | PLEX8 |
| 1.43E-04 | 0 0 | Cs8g16040.1/Cs8g160 | 3.83 | 0 | 0 | 2 | MASCOT | T | PLEX8 |
| 7.79E-05 | 0 0 | Cs8g16040.1/Cs8g160 | 3.83 | 0 | 0 | 2 | MASCOT | T | PLEX8 |
| 3.75E-04 | 0 0 | Cs8g16040.1/Cs8g160 | 3.83 | 0 | 0 | 2 | MASCOT | T | PLEX8 |
| 9.31E-03 | 0 0 | Cs8g16040.1/Cs8g160 | 3.83 | 0 | 0 | 2 | MASCOT | T | PLEX8 |
| 2.39E-02 | 0 0 | Cs2g21420.1/Cs8g160 | 3.92 | 0 | 0 | 2 | MASCOT | T | PLEX8 |
| 4.14E-05 | 0 0 | Cs8g16040.1/Cs8g160 | 8.75 | 0 | 0 | 2 | MASCOT | T | PLEX8 |
| 6.83E-04 | 0 0 | Cs8g16040.1/Cs8g160 | 8.75 | 0 | 0 | 2 | MASCOT | T | PLEX8 |
| 2.68E-03 | 0 0 | Cs8g16040.1/Cs8g160 | 8.75 | 0 | 0 | 2 | MASCOT | T | PLEX8 |
| 5.63E-05 | 0 0 | Cs8g16040.1/Cs8g160 | 8.75 | 0 | 0 | 2 | MASCOT | T | PLEX8 |
| 1.30E-01 | 0 0 | Cs8g16040.1/Cs8g160 | 8.75 | 0 | 0 | 2 | MASCOT | T | PLEX8 |
| 5.65E-02 | 0 0 | Cs8g16040.1/Cs8g160 | 8.75 | 0 | 0 | 2 | MASCOT | T | PLEX8 |
| 1.46E-02 | 0 0 | Cs8g16040.1/Cs8g160 | 4.53 | 0 | 0 | 2 | MASCOT | T | PLEX8 |
| 3.05E-02 | 0 0 | Cs8g16040.1/Cs8g160 | 4.53 | 0 | 0 | 2 | MASCOT | T | PLEX8 |
| 4.02E-02 | 0 0 | Cs8g16040.1/Cs8g160 | 4.53 | 0 | 0 | 2 | MASCOT | T | PLEX8 |
| 3.10E-01 | 0 0 | Cs8g16040.1/Cs8g160 | 5.84 | 0 | 0 | 2 | MASCOT | T | PLEX8 |
| 3.91E-06 | 0 0 | Cs8g16040.1/Cs8g160 | 5.84 | 0 | 0 | 2 | MASCOT | T | PLEX8 |
| 3.23E-02 | 0 0 | Cs8g16040.1/Cs8g160 | 5.84 | 0 | 0 | 2 | MASCOT | T | PLEX8 |
| 1.57E-02 | 0 0 | Cs2g11170.1/Cs2g111 | 8.75 | 0 | 0 | 2 | MASCOT | T | PLEX8 |
| 8.03E-02 | 0 0 | Cs2g11170.1/Cs2g111 | 8.75 | 0 | 0 | 2 | MASCOT | T | PLEX8 |
| 8.10E-02 | 0 0 | Cs2g11170.1/Cs2g111 | 8.75 | 0 | 0 | 2 | MASCOT | T | PLEX8 |
| 1.68E-02 | 0 0 | Cs2g11170.1/Cs2g111 | 8.75 | 0 | 0 | 2 | MASCOT | T | PLEX8 |
| 3.60E-02 | 0 0 | Cs2g11170.1/Cs2g111 | 8.75 | 0 | 0 | 2 | MASCOT | T | PLEX8 |
| 1.93E-01 | 0 0 | Cs2g11170.1/Cs2g111 | 8.75 | 0 | 0 | 2 | MASCOT | T | PLEX8 |
| 2.43E-01 | 0 0 | Cs2g11170.1/Cs2g111 | 8.75 | 0 | 0 | 2 | MASCOT | T | PLEX8 |
| 4.38E-02 | 0 0 | Cs2g11170.1/Cs2g111 | 8.75 | 0 | 0 | 2 | MASCOT | T | PLEX8 |

|          |     |                     |      |   |      |   |        |        |       |       |
|----------|-----|---------------------|------|---|------|---|--------|--------|-------|-------|
| 1.87E-01 | 0 0 | Cs2g11170.1/Cs2g111 | 8.75 | 0 | 0    | 2 | MASCOT | T      | PLEX8 |       |
| 2.71E-02 | 0 0 | Cs2g11170.1/Cs2g111 | 8.75 | 0 | 0    | 2 | MASCOT | T      | PLEX8 |       |
| 3.11E-02 | 0 0 | Cs2g11170.1/Cs2g111 | 8.75 | 0 | 0    | 2 | MASCOT | T      | PLEX8 |       |
| 1.40E-01 | 0 0 | Cs2g11170.1/Cs2g111 | 8.75 | 0 | 0    | 2 | MASCOT | T      | PLEX8 |       |
| 2.99E-02 | 0 0 | Cs2g11170.1/Cs2g111 | 8.75 | 0 | 0    | 2 | MASCOT | T      | PLEX8 |       |
| 1.17E-01 | 0 0 | Cs2g11170.1/Cs2g111 | 8.75 | 0 | 0    | 2 | MASCOT | T      | PLEX8 |       |
| 2.15E-02 | 0 0 | Cs2g11170.1/Cs2g111 | 8.75 | 0 | 0    | 2 | MASCOT | T      | PLEX8 |       |
| 1.17E-02 | 0 0 | Cs2g11170.1/Cs2g111 | 8.75 | 0 | 0    | 2 | MASCOT | T      | PLEX8 |       |
| 3.31E-02 | 0 0 | Cs2g11170.1/Cs2g111 | 8.75 | 0 | 0    | 2 | MASCOT | T      | PLEX8 |       |
| 1.39E-02 | 0 0 | Cs2g11170.1/Cs2g111 | 8.75 | 0 | 0    | 2 | MASCOT | T      | PLEX8 |       |
| 4.93E-02 | 0 0 | Cs2g11170.1/Cs2g111 | 8.75 | 0 | 0    | 2 | MASCOT | T      | PLEX8 |       |
| 8.03E-03 | 0 0 | Cs2g11170.1/Cs2g111 | 8.75 | 0 | 0    | 2 | MASCOT | T      | PLEX8 |       |
| 8.57E-02 | 0 0 | Cs2g11170.1/Cs2g111 | 8.75 | 0 | 0    | 2 | MASCOT | T      | PLEX8 |       |
| 2.69E-01 | 0 0 | Cs2g11170.1/Cs2g111 | 8.75 | 0 | 0    | 2 | MASCOT | T      | PLEX8 |       |
| 7.93E-02 | 0 0 | Cs2g11170.1/Cs2g111 | 8.75 | 0 | 0    | 2 | MASCOT | T      | PLEX8 |       |
| 1.09E-01 | 0 0 | Cs2g11170.1/Cs2g111 | 8.75 | 0 | 0    | 2 | MASCOT | T      | PLEX8 |       |
| 8.37E-02 | 0 0 | Cs2g11170.1/Cs2g111 | 8.75 | 0 | 0    | 2 | MASCOT | T      | PLEX8 |       |
| 4.27E-02 | 0 0 | Cs2g11170.1/Cs2g111 | 8.75 | 0 | 0    | 2 | MASCOT | T      | PLEX8 |       |
| 1.12E-02 | 0 0 | Cs2g11170.1/Cs2g111 | 8.75 | 0 | 0    | 2 | MASCOT | T      | PLEX8 |       |
| 2.33E-01 | 0 0 | Cs2g11170.1/Cs2g111 | 8.75 | 0 | 0    | 2 | MASCOT | T      | PLEX8 |       |
| 2.44E-01 | 0 0 | Cs2g11170.1/Cs2g111 | 8.75 | 0 | 0    | 2 | MASCOT | T      | PLEX8 |       |
| 2.80E-01 | 0 0 | Cs2g11170.1/Cs2g111 | 8.75 | 0 | 0    | 2 | MASCOT | T      | PLEX8 |       |
| 3.91E-01 | 0 0 | Cs2g11170.1/Cs2g111 | 8.75 | 0 | 0    | 2 | MASCOT | T      | PLEX8 |       |
| 1.33E-01 | 0 0 | Cs2g11170.1/Cs2g111 | 8.75 | 0 | 0    | 2 | MASCOT | T      |       |       |
| 1.61E-01 | 0 0 | Cs8g16040.1/Cs8g160 | 4.21 | 0 | 0    | 2 | MASCOT | T      | PLEX8 |       |
| 1.85E-01 | 0 0 | Cs8g16040.1/Cs8g160 | 4.75 | 0 | 0    | 2 | MASCOT | T      | PLEX8 |       |
| 1.98E-01 | 0 0 | Cs8g16040.1/Cs8g160 | 4.75 | 0 | 0    | 2 | MASCOT | T      |       |       |
| 9.08E-02 | 0 0 | Cs8g16040.1/Cs8g160 | 4.75 | 0 | 0    | 2 | MASCOT | T      |       |       |
| 1.95E-03 | 0 0 | Cs8g16040.1/Cs8g160 | 4.75 | 0 | 0    | 2 | MASCOT | T      | PLEX8 |       |
| 1.87E-03 | 0 0 | Cs8g16040.1/Cs8g160 | 4.75 | 0 | 0    | 2 | MASCOT | T      | PLEX8 |       |
| 2.46E-01 | 0 0 | Cs8g16040.1/Cs8g160 | 4.75 | 0 | 0    | 2 | MASCOT | T      | PLEX8 |       |
| 3.91E-01 | 0 0 | Cs8g16040.1/Cs8g160 | 4.75 | 0 | 0    | 2 | MASCOT | T      | PLEX8 |       |
| 4.81E-02 | 0 0 | Cs8g16040.1/Cs8g160 | 4.75 | 0 | 0    | 2 | MASCOT | T      | PLEX8 |       |
| 2.95E-03 | 0 0 | Cs8g16040.1/Cs8g160 | 4.75 | 0 | 0    | 2 | MASCOT | T      | PLEX8 |       |
| 9.08E-03 | 0 0 | Cs8g16040.1/Cs8g160 | 4.75 | 0 | 0    | 2 | MASCOT | T      | PLEX8 |       |
| 1.64E-01 | 0 0 | Cs8g16040.1/Cs8g160 | 4.75 | 0 | 0    | 2 | MASCOT | T      |       |       |
| 1.05E-01 | 0 0 | Cs8g16040.1/Cs8g160 | 4    | 0 | 0    | 2 | MASCOT | T      | PLEX8 |       |
| 5.70E-02 | 0 0 | Cs8g16040.1/Cs8g160 | 4    | 0 | 0    | 2 | MASCOT | T      |       |       |
| 4.94E-02 | 0 0 | Cs8g16040.1/Cs8g160 | 4    | 0 | 0    | 2 | MASCOT | T      |       |       |
| 8.16E-02 | 0 0 | Cs8g16040.1/Cs8g160 | 4    | 0 | 0    | 2 | MASCOT | T      |       |       |
| 1.71E-01 | 0 0 | Cs8g16040.1/Cs8g160 | 4    | 0 | 0    | 2 | MASCOT | T      |       |       |
| 7.52E-04 | 0 0 | Cs8g16040.1/Cs8g160 | 4    | 0 | 0    | 2 | MASCOT | T      |       |       |
| 1.51E-03 | 0 0 | Cs8g16040.1/Cs8g160 | 4    | 0 | 0    | 2 | MASCOT | T      |       |       |
| 3.49E-03 | 0 0 | Cs8g16040.1/Cs8g160 | 4    | 0 | 0    | 2 | MASCOT | T      |       |       |
| 1.24E-01 | 0 0 | Cs8g16040.1/Cs8g160 | 4    | 0 | 0    | 2 | MASCOT | T      |       |       |
| 5.41E-03 | 0 0 | Cs8g16040.1/Cs8g160 | 4    | 0 | 0    | 2 | MASCOT | T      | PLEX8 |       |
| 9.98E-02 | 0 0 | Cs8g16040.1/Cs8g160 | 4.41 | 1 | 0    | 2 | MASCOT | T      | PLEX8 |       |
| 2.24E-01 | 0 0 | Cs8g16040.1/Cs8g160 | 5.81 | 0 | 0    | 2 | MASCOT | T      |       |       |
| 1.73E-01 | 0 0 | Cs8g16040.1/Cs8g160 | 5.81 | 0 | 0    | 2 | MASCOT | T      |       |       |
| 4.98E-07 | 0 0 | Cs8g16040.1/Cs8g160 | 5.81 | 0 | 0    | 2 | MASCOT | T      |       |       |
| 3.65E-02 | 0 0 | Cs2g21420.1/Cs8g160 | 4.37 | 0 | 15.9 | 0 | 2      | MASCOT | T     | PLEX8 |

|          |     |                     |      |   |      |   |   |        |   |       |
|----------|-----|---------------------|------|---|------|---|---|--------|---|-------|
| 6.47E-04 | 0 0 | Cs2g21420.1/Cs8g160 | 4.37 | 0 | 15.9 | 0 | 2 | MASCOT | T | PLEX8 |
| 1.31E-02 | 0 0 | Cs2g21420.1/Cs8g160 | 4.37 | 0 | 15.9 | 0 | 2 | MASCOT | T | PLEX8 |
| 5.48E-05 | 0 0 | Cs2g21420.1/Cs8g160 | 4.37 | 0 |      | 0 | 2 | MASCOT | T | PLEX8 |
| 3.15E-06 | 0 0 | Cs2g21420.1/Cs8g160 | 4.37 | 0 |      | 0 | 2 | MASCOT | T | PLEX8 |
| 2.70E-04 | 0 0 | Cs2g21420.1/Cs8g160 | 4.37 | 0 |      | 0 | 2 | MASCOT | T | PLEX8 |
| 1.03E-01 | 0 0 | Cs8g16040.1         | 5.88 | 0 | 15.9 | 0 | 2 | MASCOT | T | PLEX8 |
| 2.10E-02 | 0 0 | Cs8g16040.1         | 5.88 | 0 | 15.9 | 0 | 2 | MASCOT | T | PLEX8 |
| 3.20E-02 | 0 0 | Cs8g16040.1         | 5.88 | 0 | 15.9 | 0 | 2 | MASCOT | T | PLEX8 |
| 2.64E-02 | 0 0 | Cs8g16040.1         | 5.88 | 0 | 15.9 | 0 | 2 | MASCOT | T | PLEX8 |
| 1.13E-01 | 0 0 | Cs8g16040.1         | 5.88 | 0 | 15.9 | 0 | 2 | MASCOT | T |       |
| 1.74E-01 | 0 0 | Cs8g16040.1         | 5.88 | 0 |      | 0 | 2 | MASCOT | T | PLEX8 |
| 1.53E-02 | 0 0 | Cs8g16040.1         | 5.88 | 0 |      | 0 | 2 | MASCOT | T | PLEX8 |
| 1.46E-02 | 0 0 | Cs8g16040.1         | 5.88 | 0 |      | 0 | 2 | MASCOT | T | PLEX8 |
| 2.81E-03 | 0 0 | Cs8g16040.1         | 5.88 | 0 |      | 0 | 2 | MASCOT | T | PLEX8 |
| 6.89E-02 | 0 0 | Cs8g16040.1         | 5.88 | 0 |      | 0 | 2 | MASCOT | T | PLEX8 |
| 7.04E-03 | 0 0 | Cs8g16040.1         | 5.88 | 0 |      | 0 | 2 | MASCOT | T | PLEX8 |
| 1.67E-02 | 0 0 | Cs8g16040.1         | 5.88 | 0 |      | 0 | 2 | MASCOT | T | PLEX8 |
| 3.02E-01 | 0 0 | Cs8g16040.1         | 5.88 | 0 |      | 0 | 2 | MASCOT | T |       |
| 1.83E-01 | 0 0 | Cs8g16040.1         | 5.88 | 0 |      | 0 | 2 | MASCOT | T |       |
| 2.25E-02 | 0 0 | Cs8g16040.1/Cs8g160 | 4.14 | 0 | 15.9 | 0 | 2 | MASCOT | T |       |
| 8.76E-02 | 0 0 | Cs8g16040.1/Cs8g160 | 4.14 | 0 |      | 0 | 2 | MASCOT | T |       |
| 3.44E-04 | 0 0 | Cs8g16040.1/Cs8g160 | 4.14 | 0 |      | 0 | 2 | MASCOT | T |       |
| 8.59E-04 | 0 0 | Cs8g16040.1/Cs8g160 | 8.75 | 0 |      | 0 | 2 | MASCOT | T | PLEX8 |
| 9.24E-04 | 0 0 | Cs8g16040.1/Cs8g160 | 8.75 | 0 |      | 0 | 2 | MASCOT | T | PLEX8 |
| 2.32E-03 | 0 0 | Cs8g16040.1/Cs8g160 | 8.75 | 0 |      | 0 | 2 | MASCOT | T | PLEX8 |
| 5.28E-02 | 0 0 | Cs8g16040.1/Cs8g160 | 8.75 | 0 |      | 0 | 2 | MASCOT | T | PLEX8 |
| 9.79E-04 | 0 0 | Cs8g16040.1/Cs8g160 | 8.75 | 0 |      | 0 | 2 | MASCOT | T | PLEX8 |
| 3.65E-04 | 0 0 | Cs8g16040.1/Cs8g160 | 8.75 | 0 |      | 0 | 2 | MASCOT | T | PLEX8 |
| 2.45E-02 | 0 0 | Cs8g16040.1/Cs8g160 | 8.75 | 0 |      | 0 | 2 | MASCOT | T | PLEX8 |
| 5.85E-03 | 0 0 | Cs8g16040.1/Cs8g160 | 8.75 | 0 |      | 0 | 2 | MASCOT | T | PLEX8 |
| 3.89E-04 | 0 0 | Cs8g16040.1/Cs8g160 | 8.75 | 0 |      | 0 | 2 | MASCOT | T | PLEX8 |
| 2.11E-03 | 0 0 | Cs8g16040.1/Cs8g160 | 8.75 | 0 |      | 0 | 2 | MASCOT | T | PLEX8 |
| 1.21E-04 | 0 0 | Cs8g16040.1/Cs8g160 | 8.75 | 0 |      | 0 | 2 | MASCOT | T | PLEX8 |
| 8.18E-04 | 0 0 | Cs8g16040.1/Cs8g160 | 8.75 | 0 |      | 0 | 2 | MASCOT | T | PLEX8 |
| 1.56E-03 | 0 0 | Cs8g16040.1/Cs8g160 | 8.75 | 0 |      | 0 | 2 | MASCOT | T | PLEX8 |
| 9.68E-03 | 0 0 | Cs8g16040.1/Cs8g160 | 8.75 | 0 |      | 0 | 2 | MASCOT | T | PLEX8 |
| 9.26E-04 | 0 0 | Cs8g16040.1/Cs8g160 | 8.75 | 0 |      | 0 | 2 | MASCOT | T | PLEX8 |
| 1.43E-04 | 0 0 | Cs8g16040.1/Cs8g160 | 8.75 | 0 |      | 0 | 2 | MASCOT | T | PLEX8 |
| 1.73E-01 | 0 0 | Cs8g16040.1/Cs8g160 | 8.75 | 0 |      | 0 | 2 | MASCOT | T | PLEX8 |
| 1.28E-03 | 0 0 | Cs8g16040.1/Cs8g160 | 8.75 | 0 |      | 0 | 2 | MASCOT | T | PLEX8 |
| 4.96E-03 | 0 0 | Cs8g16040.1/Cs8g160 | 8.75 | 0 |      | 0 | 2 | MASCOT | T | PLEX8 |
| 1.34E-02 | 0 0 | Cs8g16040.1/Cs8g160 | 8.75 | 0 |      | 0 | 2 | MASCOT | T | PLEX8 |
| 1.63E-03 | 0 0 | Cs8g16040.1/Cs8g160 | 8.75 | 0 |      | 0 | 2 | MASCOT | T | PLEX8 |
| 8.12E-04 | 0 0 | Cs8g16040.1/Cs8g160 | 8.75 | 0 |      | 0 | 2 | MASCOT | T |       |
| 1.27E-02 | 0 0 | Cs8g16040.1/Cs8g160 | 8.75 | 0 |      | 0 | 2 | MASCOT | T |       |
| 1.44E-03 | 0 0 | Cs8g16040.1/Cs8g160 | 8.75 | 0 |      | 0 | 2 | MASCOT | T |       |
| 7.39E-06 | 0 0 | Cs8g16040.1/Cs8g160 | 6    | 0 |      | 0 | 2 | MASCOT | T | PLEX8 |
| 3.95E-01 | 0 0 | Cs8g16040.1/Cs8g160 | 6    | 0 |      | 0 | 2 | MASCOT | T | PLEX8 |
| 1.61E-02 | 0 0 | Cs8g16040.1/Cs8g160 | 6    | 0 |      | 0 | 2 | MASCOT | T | PLEX8 |
| 1.87E-04 | 0 0 | Cs8g16040.1/Cs8g160 | 6    | 0 |      | 0 | 2 | MASCOT | T | PLEX8 |
| 9.54E-03 | 0 0 | Cs8g16040.1/Cs8g160 | 6    | 0 |      | 0 | 2 | MASCOT | T |       |



|          |     |                     |      |   |      |   |        |        |       |       |
|----------|-----|---------------------|------|---|------|---|--------|--------|-------|-------|
| 1.60E-02 | 0 0 | Cs8g16040.1/Cs8g160 | 6    | 0 | 0    | 2 | MASCOT | T      | PLEX8 |       |
| 6.79E-02 | 0 0 | Cs8g16040.1/Cs8g160 | 6    | 0 | 0    | 2 | MASCOT | T      | PLEX8 |       |
| 2.89E-03 | 0 0 | Cs8g16040.1/Cs8g160 | 6    | 0 | 0    | 2 | MASCOT | T      | PLEX8 |       |
| 3.51E-02 | 0 0 | Cs8g16040.1/Cs8g160 | 6    | 0 | 0    | 2 | MASCOT | T      |       |       |
| 4.61E-04 | 0 0 | Cs8g16040.1/Cs8g160 | 6    | 0 | 0    | 2 | MASCOT | T      | PLEX8 |       |
| 1.89E-03 | 0 0 | Cs8g16040.1/Cs8g160 | 6    | 0 | 0    | 2 | MASCOT | T      | PLEX8 |       |
| 4.47E-02 | 0 0 | Cs8g16040.1/Cs8g160 | 6    | 0 | 0    | 2 | MASCOT | T      |       |       |
| 7.37E-02 | 0 0 | Cs8g16040.1/Cs8g160 | 6    | 0 | 0    | 2 | MASCOT | T      | PLEX8 |       |
| 4.53E-02 | 0 0 | Cs8g16040.1/Cs8g160 | 6    | 0 | 0    | 2 | MASCOT | T      | PLEX8 |       |
| 2.79E-02 | 0 0 | Cs8g16040.1/Cs8g160 | 6    | 0 | 0    | 2 | MASCOT | T      | PLEX8 |       |
| 5.56E-03 | 0 0 | Cs8g16040.1/Cs8g160 | 6    | 0 | 0    | 2 | MASCOT | T      | PLEX8 |       |
| 8.52E-04 | 0 0 | Cs8g16040.1/Cs8g160 | 6    | 0 | 0    | 2 | MASCOT | T      | PLEX8 |       |
| 1.09E-02 | 0 0 | Cs8g16040.1/Cs8g160 | 6    | 0 | 0    | 2 | MASCOT | T      | PLEX8 |       |
| 8.86E-03 | 0 0 | Cs2g21420.1/Cs8g160 | 5.84 | 0 | 0    | 2 | MASCOT | T      | PLEX8 |       |
| 4.00E-02 | 0 0 | Cs2g21420.1/Cs8g160 | 5.84 | 0 | 0    | 2 | MASCOT | T      | PLEX8 |       |
| 5.43E-02 | 0 0 | Cs2g21420.1/Cs8g160 | 5.84 | 0 | 0    | 2 | MASCOT | T      | PLEX8 |       |
| 3.59E-02 | 0 0 | Cs2g21420.1/Cs8g160 | 5.84 | 0 | 0    | 2 | MASCOT | T      | PLEX8 |       |
| 1.14E-01 | 0 0 | Cs2g21420.1/Cs8g160 | 5.84 | 0 | 0    | 2 | MASCOT | T      | PLEX8 |       |
| 5.83E-02 | 0 0 | Cs2g21420.1/Cs8g160 | 5.84 | 0 | 0    | 2 | MASCOT | T      | PLEX8 |       |
| 3.29E-01 | 0 0 | Cs8g16040.1/Cs8g160 | 4.37 | 0 | 0    | 2 | MASCOT | T      | PLEX8 |       |
| 3.73E-03 | 0 0 | Cs8g16040.1/Cs8g160 | 4.37 | 0 | 0    | 2 | MASCOT | T      | PLEX8 |       |
| 4.70E-04 | 0 0 | Cs8g16040.1/Cs8g160 | 4.37 | 0 | 0    | 2 | MASCOT | T      | PLEX8 |       |
| 2.85E-04 | 0 0 | Cs8g16040.1/Cs8g160 | 4.37 | 0 | 0    | 2 | MASCOT | T      | PLEX8 |       |
| 3.17E-02 | 0 0 | Cs8g16040.1/Cs8g160 | 4.37 | 0 | 0    | 2 | MASCOT | T      | PLEX8 |       |
| 1.94E-03 | 0 0 | Cs8g16040.1/Cs8g160 | 4.37 | 0 | 0    | 2 | MASCOT | T      | PLEX8 |       |
| 6.01E-04 | 0 0 | Cs8g16040.1/Cs8g160 | 4.37 | 0 | 0    | 2 | MASCOT | T      | PLEX8 |       |
| 2.09E-03 | 0 0 | Cs8g16040.1/Cs8g160 | 4.37 | 0 | 0    | 2 | MASCOT | T      | PLEX8 |       |
| 1.69E-05 | 0 0 | Cs8g16040.1/Cs8g160 | 4.37 | 0 | 0    | 2 | MASCOT | T      | PLEX8 |       |
| 6.89E-03 | 0 0 | Cs8g16040.1/Cs8g160 | 4.37 | 0 | 0    | 2 | MASCOT | T      | PLEX8 |       |
| 1.25E-03 | 0 0 | Cs8g16040.1/Cs8g160 | 4.37 | 0 | 0    | 2 | MASCOT | T      | PLEX8 |       |
| 6.37E-05 | 0 0 | Cs8g16040.1/Cs8g160 | 4.37 | 0 | 0    | 2 | MASCOT | T      | PLEX8 |       |
| 1.90E-01 | 0 0 | Cs8g16040.1/Cs8g160 | 4.37 | 0 | 0    | 2 | MASCOT | T      | PLEX8 |       |
| 1.09E-02 | 0 0 | Cs8g16040.1/Cs8g160 | 4.37 | 0 | 0    | 2 | MASCOT | T      | PLEX8 |       |
| 7.18E-02 | 0 0 | Cs8g16040.1/Cs8g160 | 4.37 | 0 | 0    | 2 | MASCOT | T      | PLEX8 |       |
| 1.50E-02 | 0 0 | Cs8g16040.1/Cs8g160 | 4.37 | 0 | 0    | 2 | MASCOT | T      | PLEX8 |       |
| 3.09E-04 | 0 0 | Cs8g16040.1/Cs8g160 | 4.37 | 0 | 0    | 2 | MASCOT | T      | PLEX8 |       |
| 2.84E-03 | 0 0 | Cs8g16040.1/Cs8g160 | 4.37 | 0 | 0    | 2 | MASCOT | T      | PLEX8 |       |
| 1.36E-03 | 0 0 | Cs8g16040.1/Cs8g160 | 4.37 | 0 | 0    | 2 | MASCOT | T      | PLEX8 |       |
| 5.25E-03 | 0 0 | Cs8g16040.1/Cs8g160 | 4.37 | 0 | 0    | 2 | MASCOT | T      | PLEX8 |       |
| 4.64E-01 | 0 0 | Cs8g16040.1/Cs8g160 | 4.37 | 0 | 0    | 2 | MASCOT | T      | PLEX8 |       |
| 1.49E-01 | 0 0 | Cs8g16040.1/Cs8g160 | 4.37 | 0 | 0    | 2 | MASCOT | T      | PLEX8 |       |
| 6.35E-02 | 0 0 | Cs8g16040.1/Cs8g160 | 4.37 | 0 | 0    | 2 | MASCOT | T      | PLEX8 |       |
| 1.76E-01 | 0 0 | Cs8g16040.1/Cs8g160 | 4.37 | 0 | 0    | 2 | MASCOT | T      |       |       |
| 5.32E-05 | 0 0 | Cs8g16040.1/Cs8g160 | 4.37 | 0 | 0    | 2 | MASCOT | T      |       |       |
| 8.96E-02 | 0 0 | Cs8g16040.1/Cs8g160 | 5.81 | 0 | 0    | 2 | MASCOT | T      | PLEX8 |       |
| 5.56E-02 | 0 0 | Cs8g16040.1/Cs8g160 | 5.81 | 0 | 0    | 2 | MASCOT | T      | PLEX8 |       |
| 8.39E-02 | 0 0 | Cs8g16040.1/Cs8g160 | 5.81 | 0 | 0    | 2 | MASCOT | T      | PLEX8 |       |
| 4.69E-02 | 0 0 | Cs8g16040.1/Cs8g160 | 5.81 | 0 | 0    | 2 | MASCOT | T      | PLEX8 |       |
| 1.81E-02 | 0 0 | Cs2g09190.1         | 9.8  | 0 | 0    | 2 | MASCOT | T      |       |       |
| 4.47E-06 | 0 0 | Cs2g09190.1         | 4.22 | 0 | 15.9 | 0 | 2      | MASCOT | T     | PLEX8 |
| 2.80E-09 | 0 0 | Cs2g09190.1         | 4.22 | 0 | 15.9 | 0 | 2      | MASCOT | T     | PLEX8 |

|              |             |      |   |      |   |   |        |   |       |
|--------------|-------------|------|---|------|---|---|--------|---|-------|
| 1.18E-02 0 0 | Cs2g09190.1 | 4.22 | 0 | 15.9 | 0 | 2 | MASCOT | T | PLEX8 |
| 5.22E-02 0 0 | Cs2g09190.1 | 4.22 | 0 | 15.9 | 0 | 2 | MASCOT | T | PLEX8 |
| 9.52E-09 0 0 | Cs2g09190.1 | 4.22 | 0 | 15.9 | 0 | 2 | MASCOT | T | PLEX8 |
| 7.18E-06 0 0 | Cs2g09190.1 | 4.22 | 0 |      | 0 | 2 | MASCOT | T | PLEX8 |
| 1.20E-08 0 0 | Cs2g09190.1 | 4.22 | 0 |      | 0 | 2 | MASCOT | T | PLEX8 |
| 3.48E-06 0 0 | Cs2g09190.1 | 4.22 | 0 |      | 0 | 2 | MASCOT | T | PLEX8 |
| 1.74E-07 0 0 | Cs2g09190.1 | 4.22 | 0 |      | 0 | 2 | MASCOT | T | PLEX8 |
| 3.35E-02 0 0 | Cs2g09190.1 | 4.75 | 0 |      | 0 | 2 | MASCOT | T | PLEX8 |
| 5.03E-03 0 0 | Cs2g09190.1 | 4.75 | 0 |      | 0 | 2 | MASCOT | T | PLEX8 |
| 8.46E-02 0 0 | Cs2g09190.1 | 4.75 | 0 |      | 0 | 2 | MASCOT | T | PLEX8 |
| 6.28E-03 0 0 | Cs2g09190.1 | 4.75 | 0 |      | 0 | 2 | MASCOT | T | PLEX8 |
| 2.82E-06 0 0 | Cs2g09190.1 | 3.92 | 0 |      | 0 | 2 | MASCOT | T | PLEX8 |
| 4.79E-02 0 0 | Cs2g09190.1 | 4.03 | 0 |      | 0 | 2 | MASCOT | T |       |
| 5.59E-04 0 0 | Cs2g09190.1 | 5.32 | 0 |      | 0 | 2 | MASCOT | T | PLEX8 |
| 2.95E-02 0 0 | Cs2g09190.1 | 5.32 | 0 |      | 0 | 2 | MASCOT | T | PLEX8 |
| 4.41E-06 0 0 | Cs2g09190.1 | 4.14 | 0 |      | 0 | 2 | MASCOT | T | PLEX8 |
| 2.40E-04 0 0 | Cs2g09190.1 | 4.14 | 0 |      | 0 | 2 | MASCOT | T | PLEX8 |
| 3.28E-04 0 0 | Cs2g09190.1 | 4.14 | 0 |      | 0 | 2 | MASCOT | T | PLEX8 |
| 4.55E-06 0 0 | Cs2g09190.1 | 4.14 | 0 |      | 0 | 2 | MASCOT | T | PLEX8 |
| 2.78E-04 0 0 | Cs2g09190.1 | 4.14 | 0 |      | 0 | 2 | MASCOT | T | PLEX8 |
| 1.61E-03 0 0 | Cs2g09190.1 | 4.14 | 0 |      | 0 | 2 | MASCOT | T | PLEX8 |
| 4.16E-04 0 0 | Cs2g09190.1 | 4.14 | 0 |      | 0 | 2 | MASCOT | T | PLEX8 |
| 2.48E-04 0 0 | Cs2g09190.1 | 4.37 | 0 |      | 0 | 2 | MASCOT | T | PLEX8 |
| 1.93E-01 0 0 | Cs2g09190.1 | 8.75 | 0 |      | 0 | 2 | MASCOT | T | PLEX8 |
| 7.86E-02 0 0 | Cs2g09190.1 | 8.75 | 0 |      | 0 | 2 | MASCOT | T | PLEX8 |
| 5.03E-04 0 0 | Cs2g09190.1 | 5.75 | 0 | 15.9 | 0 | 2 | MASCOT | T | PLEX8 |
| 3.42E-04 0 0 | Cs2g09190.1 | 5.75 | 0 |      | 0 | 2 | MASCOT | T | PLEX8 |
| 3.26E-06 0 0 | Cs2g09190.1 | 5.75 | 0 |      | 0 | 2 | MASCOT | T | PLEX8 |
| 2.09E-02 0 0 | Cs2g09190.1 | 5.75 | 0 |      | 0 | 2 | MASCOT | T | PLEX8 |
| 3.73E-03 0 0 | Cs2g09190.1 | 5.75 | 0 |      | 0 | 2 | MASCOT | T | PLEX8 |
| 4.66E-02 0 0 | Cs2g09190.1 | 6    | 0 |      | 0 | 2 | MASCOT | T | PLEX8 |
| 5.37E-02 0 0 | Cs2g09190.1 | 6    | 0 |      | 0 | 2 | MASCOT | T | PLEX8 |
| 7.60E-02 0 0 | Cs2g09190.1 | 6    | 0 |      | 0 | 2 | MASCOT | T | PLEX8 |
| 3.41E-04 0 0 | Cs2g09190.1 | 4.37 | 0 |      | 0 | 2 | MASCOT | T |       |
| 5.42E-05 0 0 | Cs2g09190.1 | 4.37 | 0 |      | 0 | 2 | MASCOT | T |       |
| 4.76E-02 0 0 | Cs2g09190.1 | 5.88 | 0 |      | 0 | 2 | MASCOT | T | PLEX8 |
| 1.30E-01 0 0 | Cs2g09190.1 | 5.88 | 0 |      | 0 | 2 | MASCOT | T | PLEX8 |
| 1.46E-02 0 0 | Cs2g09190.1 | 5.88 | 0 |      | 0 | 2 | MASCOT | T | PLEX8 |
| 1.71E-01 0 0 | Cs2g09190.1 | 5.88 | 0 |      | 0 | 2 | MASCOT | T |       |
| 4.70E-02 0 0 | Cs2g09190.1 | 5.88 | 0 |      | 0 | 2 | MASCOT | T |       |
| 1.25E-01 0 0 | Cs2g09190.1 | 5.88 | 0 |      | 0 | 2 | MASCOT | T | PLEX8 |
| 1.43E-02 0 0 | Cs2g09190.1 | 4.54 | 0 |      | 0 | 2 | MASCOT | T | PLEX8 |
| 1.40E-02 0 0 | Cs2g09190.1 | 4.54 | 0 |      | 0 | 2 | MASCOT | T | PLEX8 |
| 1.46E-01 0 0 | Cs2g09190.1 | 4.54 | 0 |      | 0 | 2 | MASCOT | T | PLEX8 |
| 6.03E-06 0 0 | Cs2g09190.1 | 4.54 | 0 |      | 0 | 2 | MASCOT | T | PLEX8 |
| 1.57E-02 0 0 | Cs2g09190.1 | 6.1  | 0 |      | 0 | 2 | MASCOT | T | PLEX8 |
| 1.41E-01 0 0 | Cs2g09190.1 | 6.1  | 0 |      | 0 | 2 | MASCOT | T | PLEX8 |
| 4.07E-03 0 0 | Cs2g09190.1 | 6.1  | 0 |      | 0 | 2 | MASCOT | T | PLEX8 |
| 2.54E-02 0 0 | Cs2g09190.1 | 4.14 | 0 |      | 0 | 2 | MASCOT | T | PLEX8 |
| 2.10E-02 0 0 | Cs2g09190.1 | 4.14 | 0 |      | 0 | 2 | MASCOT | T | PLEX8 |
| 3.13E-03 0 0 | Cs2g09190.1 | 4.14 | 0 |      | 0 | 2 | MASCOT | T | PLEX8 |

|              |                     |      |   |   |          |   |       |
|--------------|---------------------|------|---|---|----------|---|-------|
| 6.14E-02 0 0 | Cs2g09190.1         | 4.14 | 0 | 0 | 2 MASCOT | T | PLEX8 |
| 1.34E-03 0 0 | Cs2g09190.1         | 4.14 | 0 | 0 | 2 MASCOT | T | PLEX8 |
| 1.91E-01 0 0 | Cs2g09190.1         | 4.14 | 0 | 0 | 2 MASCOT | T |       |
| 1.37E-01 0 0 | Cs2g09190.1         | 4.11 | 1 | 0 | 2 MASCOT | T | PLEX8 |
| 6.64E-03 0 0 | Cs2g09190.1         | 4.56 | 1 | 0 | 2 MASCOT | T | PLEX8 |
| 6.40E-02 0 0 | Cs2g09190.1         | 4.56 | 1 | 0 | 2 MASCOT | T | PLEX8 |
| 3.33E-01 0 0 | Cs2g09190.1         | 4.53 | 0 | 0 | 2 MASCOT | T | PLEX8 |
| 7.34E-03 0 0 | Cs2g09190.1         | 4.53 | 0 | 0 | 2 MASCOT | T | PLEX8 |
| 6.60E-03 0 0 | Cs2g09190.1         | 4.53 | 0 | 0 | 2 MASCOT | T | PLEX8 |
| 1.05E-02 0 0 | Cs2g09190.1         | 4.53 | 0 | 0 | 2 MASCOT | T | PLEX8 |
| 4.27E-05 0 0 | Cs2g09190.1         | 4.37 | 0 | 0 | 2 MASCOT | T | PLEX8 |
| 5.49E-07 0 0 | Cs2g09190.1         | 4.37 | 0 | 0 | 2 MASCOT | T | PLEX8 |
| 9.20E-05 0 0 | Cs2g09190.1         | 4.41 | 0 | 0 | 2 MASCOT | T | PLEX8 |
| 8.85E-04 0 0 | Cs2g09190.1         | 4.41 | 0 | 0 | 2 MASCOT | T | PLEX8 |
| 1.62E-01 0 0 | Cs2g09190.1         | 4.41 | 0 | 0 | 2 MASCOT | T |       |
| 8.25E-04 0 0 | Cs2g09190.1         | 4.41 | 0 | 0 | 2 MASCOT | T | PLEX8 |
| 1.52E-01 0 0 | Cs2g09190.1         | 4.41 | 0 | 0 | 2 MASCOT | T |       |
| 5.37E-04 0 0 | Cs2g09190.1         | 4.41 | 0 | 0 | 2 MASCOT | T | PLEX8 |
| 3.47E-03 0 0 | Cs2g09190.1         | 4.03 | 0 | 0 | 2 MASCOT | T |       |
| 5.81E-04 0 0 | Cs2g09190.1         | 4.03 | 0 | 0 | 2 MASCOT | T |       |
| 1.46E-01 0 0 | Cs2g09190.1         | 4.03 | 0 | 0 | 2 MASCOT | T |       |
| 3.00E-05 0 0 | Cs2g09190.1         | 4.21 | 0 | 0 | 2 MASCOT | T | PLEX8 |
| 5.79E-06 0 0 | Cs2g09190.1         | 4.37 | 0 | 0 | 2 MASCOT | T | PLEX8 |
| 8.90E-07 0 0 | Cs2g09190.1         | 4.37 | 0 | 0 | 2 MASCOT | T | PLEX8 |
| 4.93E-01 0 0 | Cs2g09190.1         | 6.72 | 0 | 0 | 2 MASCOT | T | PLEX8 |
| 2.06E-02 0 0 | Cs2g09190.1         | 6.72 | 0 | 0 | 2 MASCOT | T | PLEX8 |
| 1.61E-01 0 0 | Cs6g15540.1/Cs6g155 | 8.63 | 0 | 0 | 2 MASCOT | T | PLEX8 |
| 3.70E-04 0 0 | Cs6g15540.1/Cs6g155 | 8.8  | 0 | 0 | 2 MASCOT | T | PLEX8 |
| 5.66E-02 0 0 | Cs6g15540.1/Cs6g155 | 8.8  | 0 | 0 | 2 MASCOT | T |       |
| 1.50E-05 0 0 | Cs6g15540.1/Cs6g155 | 8.8  | 0 | 0 | 2 MASCOT | T | PLEX8 |
| 5.80E-07 0 0 | Cs6g15540.1/Cs6g155 | 8.8  | 0 | 0 | 2 MASCOT | T | PLEX8 |
| 2.78E-03 0 0 | Cs6g15540.1/Cs6g155 | 8.8  | 0 | 0 | 2 MASCOT | T | PLEX8 |
| 3.43E-02 0 0 | Cs6g15540.1/Cs6g155 | 8.8  | 0 | 0 | 2 MASCOT | T | PLEX8 |
| 7.58E-02 0 0 | Cs6g15540.1/Cs6g155 | 4.14 | 0 | 0 | 2 MASCOT | T | PLEX8 |
| 4.09E-03 0 0 | Cs6g15540.1/Cs6g155 | 4.14 | 0 | 0 | 2 MASCOT | T | PLEX8 |
| 3.77E-02 0 0 | Cs6g15540.1/Cs6g155 | 4.14 | 0 | 0 | 2 MASCOT | T | PLEX8 |
| 8.56E-03 0 0 | Cs6g15540.1/Cs6g155 | 4.53 | 0 | 0 | 2 MASCOT | T | PLEX8 |
| 9.95E-04 0 0 | Cs6g15540.1/Cs6g155 | 4.53 | 0 | 0 | 2 MASCOT | T | PLEX8 |
| 2.57E-05 0 0 | Cs6g15540.1/Cs6g155 | 4.53 | 0 | 0 | 2 MASCOT | T | PLEX8 |
| 3.92E-04 0 0 | Cs6g15540.1/Cs6g155 | 4.53 | 0 | 0 | 2 MASCOT | T | PLEX8 |
| 3.71E-02 0 0 | Cs6g15540.1/Cs6g155 | 4.53 | 0 | 0 | 2 MASCOT | T | PLEX8 |
| 4.87E-02 0 0 | Cs6g15540.1/Cs6g155 | 4.53 | 0 | 0 | 2 MASCOT | T | PLEX8 |
| 7.89E-03 0 0 | Cs6g15540.1/Cs6g155 | 4.53 | 0 | 0 | 2 MASCOT | T | PLEX8 |
| 7.25E-03 0 0 | Cs6g15540.1/Cs6g155 | 4.53 | 0 | 0 | 2 MASCOT | T | PLEX8 |
| 3.11E-01 0 0 | Cs6g15540.1/Cs6g155 | 4.53 | 0 | 0 | 2 MASCOT | T |       |
| 2.76E-01 0 0 | Cs6g15540.1/Cs6g155 | 4.53 | 0 | 0 | 2 MASCOT | T |       |
| 1.69E-01 0 0 | Cs6g15540.1/Cs6g155 | 6.75 | 0 | 0 | 2 MASCOT | T | PLEX8 |
| 1.62E-02 0 0 | Cs6g15540.1/Cs6g155 | 6.75 | 0 | 0 | 2 MASCOT | T | PLEX8 |
| 1.85E-03 0 0 | Cs6g15540.1/Cs6g155 | 6.75 | 0 | 0 | 2 MASCOT | T | PLEX8 |
| 2.43E-01 0 0 | Cs6g15540.1/Cs6g155 | 6.75 | 0 | 0 | 2 MASCOT | T | PLEX8 |
| 1.52E-03 0 0 | Cs6g15540.1/Cs6g155 | 6.75 | 0 | 0 | 2 MASCOT | T |       |

|          |     |                     |      |   |      |   |        |        |       |       |
|----------|-----|---------------------|------|---|------|---|--------|--------|-------|-------|
| 6.45E-02 | 0 0 | Cs6g15540.1/Cs6g155 | 6.75 | 0 | 0    | 2 | MASCOT | T      |       |       |
| 1.01E-01 | 0 0 | Cs6g15540.1/Cs6g155 | 6.75 | 0 | 0    | 2 | MASCOT | T      | PLEX8 |       |
| 2.57E-02 | 0 0 | Cs6g15540.1/Cs6g155 | 6.75 | 0 | 0    | 2 | MASCOT | T      |       |       |
| 6.96E-04 | 0 0 | Cs6g15540.1/Cs6g155 | 6.75 | 0 | 0    | 2 | MASCOT | T      |       |       |
| 3.67E-01 | 0 0 | Cs6g15540.1/Cs6g155 | 5.84 | 0 | 0    | 2 | MASCOT | T      | PLEX8 |       |
| 4.50E-01 | 0 0 | Cs6g15540.1/Cs6g155 | 5.84 | 0 | 0    | 2 | MASCOT | T      | PLEX8 |       |
| 3.92E-01 | 0 0 | Cs6g15540.1/Cs6g155 | 5.84 | 0 | 0    | 2 | MASCOT | T      | PLEX8 |       |
| 7.97E-03 | 0 0 | Cs6g15540.1/Cs6g155 | 4.32 | 1 | 0    | 2 | MASCOT | T      | PLEX8 |       |
| 6.40E-03 | 0 0 | Cs6g15540.1/Cs6g155 | 6    | 0 | 15.9 | 0 | 2      | MASCOT | T     |       |
| 1.09E-01 | 0 0 | Cs6g15540.1/Cs6g155 | 8.22 | 0 | 0    | 2 | MASCOT | T      | PLEX8 |       |
| 2.91E-02 | 0 0 | Cs6g15540.1/Cs6g155 | 4.53 | 0 | 0    | 2 | MASCOT | T      | PLEX8 |       |
| 2.85E-02 | 0 0 | Cs6g15540.1/Cs6g155 | 4.53 | 0 | 0    | 2 | MASCOT | T      | PLEX8 |       |
| 2.99E-02 | 0 0 | Cs6g15540.1/Cs6g155 | 4.53 | 0 | 0    | 2 | MASCOT | T      | PLEX8 |       |
| 1.21E-01 | 0 0 | Cs6g15540.1/Cs6g155 | 4.53 | 0 | 0    | 2 | MASCOT | T      | PLEX8 |       |
| 6.13E-02 | 0 0 | Cs6g15540.1/Cs6g155 | 4.53 | 0 | 0    | 2 | MASCOT | T      | PLEX8 |       |
| 5.61E-02 | 0 0 | Cs6g15540.1/Cs6g155 | 4.53 | 0 | 0    | 2 | MASCOT | T      |       |       |
| 1.22E-01 | 0 0 | Cs6g15540.1/Cs6g155 | 6.69 | 0 | 15.9 | 0 | 2      | MASCOT | T     | PLEX8 |
| 2.61E-01 | 0 0 | Cs6g15540.1/Cs6g155 | 6.69 | 0 | 15.9 | 0 | 2      | MASCOT | T     | PLEX8 |
| 3.30E-03 | 0 0 | Cs6g15540.1/Cs6g155 | 6.69 | 0 | 0    | 2 | MASCOT | T      | PLEX8 |       |
| 7.65E-02 | 0 0 | Cs6g15540.1/Cs6g155 | 6.69 | 0 | 0    | 2 | MASCOT | T      | PLEX8 |       |
| 8.61E-02 | 0 0 | Cs6g15540.1/Cs6g155 | 6.69 | 0 | 0    | 2 | MASCOT | T      | PLEX8 |       |
| 8.40E-03 | 0 0 | Cs6g15540.1/Cs6g155 | 6.69 | 0 | 0    | 2 | MASCOT | T      | PLEX8 |       |
| 3.14E-02 | 0 0 | Cs6g15540.1/Cs6g155 | 6.69 | 0 | 0    | 2 | MASCOT | T      | PLEX8 |       |
| 7.20E-02 | 0 0 | Cs6g15540.1/Cs6g155 | 6.69 | 0 | 0    | 2 | MASCOT | T      | PLEX8 |       |
| 1.64E-01 | 0 0 | Cs6g15540.1/Cs6g155 | 6.69 | 0 | 0    | 2 | MASCOT | T      |       |       |
| 6.00E-05 | 0 0 | Cs6g15540.1/Cs6g155 | 8.76 | 0 | 0    | 2 | MASCOT | T      | PLEX8 |       |
| 1.14E-02 | 0 0 | Cs6g15540.1/Cs6g155 | 8.76 | 0 | 0    | 2 | MASCOT | T      | PLEX8 |       |
| 1.05E-01 | 0 0 | Cs6g15540.1/Cs6g155 | 8.76 | 0 | 0    | 2 | MASCOT | T      |       |       |
| 2.75E-02 | 0 0 | Cs6g15540.1/Cs6g155 | 8.76 | 0 | 0    | 2 | MASCOT | T      |       |       |
| 1.72E-01 | 0 0 | Cs6g15540.1/Cs6g155 | 8.76 | 0 | 0    | 2 | MASCOT | T      |       |       |
| 2.48E-02 | 0 0 | Cs6g15540.1/Cs6g155 | 8.76 | 0 | 0    | 2 | MASCOT | T      |       |       |
| 1.60E-02 | 0 0 | Cs6g15540.1/Cs6g155 | 8.76 | 0 | 0    | 2 | MASCOT | T      |       |       |
| 6.64E-04 | 0 0 | Cs6g15540.1         | 9.76 | 0 | 15.9 | 0 | 2      | MASCOT | T     | PLEX8 |
| 6.17E-05 | 0 0 | Cs6g15540.1         | 9.76 | 0 | 15.9 | 0 | 2      | MASCOT | T     | PLEX8 |
| 1.46E-03 | 0 0 | Cs6g15540.1         | 9.76 | 0 | 0    | 2 | MASCOT | T      | PLEX8 |       |
| 1.94E-02 | 0 0 | Cs6g15540.1/Cs6g155 | 7.89 | 0 | 0    | 2 | MASCOT | T      | PLEX8 |       |
| 3.15E-02 | 0 0 | Cs6g15540.1/Cs6g155 | 7.89 | 0 | 0    | 2 | MASCOT | T      | PLEX8 |       |
| 1.65E-02 | 0 0 | Cs6g15540.1/Cs6g155 | 7.89 | 0 | 0    | 2 | MASCOT | T      | PLEX8 |       |
| 2.74E-01 | 0 0 | Cs6g15540.1/Cs6g155 | 7.89 | 0 | 0    | 2 | MASCOT | T      | PLEX8 |       |
| 1.35E-01 | 0 0 | Cs6g15540.1/Cs6g155 | 7.89 | 0 | 0    | 2 | MASCOT | T      | PLEX8 |       |
| 1.77E-01 | 0 0 | Cs6g15540.1/Cs6g155 | 7.89 | 0 | 0    | 2 | MASCOT | T      | PLEX8 |       |
| 2.57E-01 | 0 0 | Cs6g15540.1/Cs6g155 | 7.89 | 0 | 0    | 2 | MASCOT | T      | PLEX8 |       |
| 3.51E-02 | 0 0 | Cs6g15540.1/Cs7g261 | 7.91 | 0 | 0    | 2 | MASCOT | T      | PLEX8 |       |
| 6.02E-02 | 0 0 | Cs6g15540.1/Cs7g261 | 7.91 | 0 | 0    | 2 | MASCOT | T      | PLEX8 |       |
| 1.84E-01 | 0 0 | Cs6g15540.1/Cs6g155 | 5.5  | 0 | 0    | 2 | MASCOT | T      | PLEX8 |       |
| 1.22E-01 | 0 0 | Cs6g15540.1         | 4.53 | 0 | 0    | 2 | MASCOT | T      | PLEX8 |       |
| 1.57E-01 | 0 0 | Cs6g15540.1         | 4.53 | 0 | 0    | 2 | MASCOT | T      |       |       |
| 1.58E-06 | 0 0 | Cs6g15540.1         | 4.53 | 0 | 0    | 2 | MASCOT | T      |       |       |
| 2.05E-04 | 0 0 | Cs6g15540.1         | 4.53 | 0 | 0    | 2 | MASCOT | T      |       |       |
| 1.39E-02 | 0 0 | Cs6g15540.1         | 4.53 | 0 | 0    | 2 | MASCOT | T      |       |       |
| 2.59E-03 | 0 0 | Cs6g15540.1         | 4.53 | 0 | 0    | 2 | MASCOT | T      |       |       |

|          |     |                     |      |   |   |   |        |   |       |
|----------|-----|---------------------|------|---|---|---|--------|---|-------|
| 3.77E-08 | 0 0 | Cs6g15540.1         | 4.53 | 0 | 0 | 2 | MASCOT | T |       |
| 1.43E-05 | 0 0 | Cs6g15540.1         | 4.53 | 0 | 0 | 2 | MASCOT | T |       |
| 7.83E-03 | 0 0 | Cs6g15540.1/Cs6g155 | 4.21 | 0 | 0 | 2 | MASCOT | T | PLEX8 |
| 5.78E-06 | 0 0 | Cs6g15540.1/Cs6g155 | 4.21 | 0 | 0 | 2 | MASCOT | T | PLEX8 |
| 1.08E-03 | 0 0 | Cs6g15540.1/Cs6g155 | 4.21 | 0 | 0 | 2 | MASCOT | T | PLEX8 |
| 7.93E-02 | 0 0 | Cs6g15540.1/Cs6g155 | 4.21 | 0 | 0 | 2 | MASCOT | T | PLEX8 |
| 1.26E-02 | 0 0 | Cs6g15540.1/Cs6g155 | 4.21 | 0 | 0 | 2 | MASCOT | T | PLEX8 |
| 1.06E-01 | 0 0 | Cs6g15540.1/Cs6g155 | 4.21 | 0 | 0 | 2 | MASCOT | T |       |
| 8.03E-02 | 0 0 | Cs6g15540.1/Cs6g155 | 4.21 | 0 | 0 | 2 | MASCOT | T | PLEX8 |
| 9.72E-02 | 0 0 | Cs6g15540.1/Cs6g155 | 4.21 | 0 | 0 | 2 | MASCOT | T | PLEX8 |
| 1.36E-01 | 0 0 | Cs6g15540.1/Cs6g155 | 4.21 | 0 | 0 | 2 | MASCOT | T | PLEX8 |
| 1.57E-03 | 0 0 | Cs6g15540.1/Cs6g155 | 4.21 | 0 | 0 | 2 | MASCOT | T |       |
| 1.08E-06 | 0 0 | Cs6g15540.1/Cs6g155 | 4.21 | 0 | 0 | 2 | MASCOT | T |       |
| 1.31E-03 | 0 0 | Cs6g15540.1/Cs6g155 | 4.21 | 0 | 0 | 2 | MASCOT | T |       |
| 6.08E-05 | 0 0 | Cs6g15540.1/Cs6g155 | 4.21 | 0 | 0 | 2 | MASCOT | T |       |
| 8.51E-03 | 0 0 | Cs6g15540.1/Cs6g155 | 4.21 | 0 | 0 | 2 | MASCOT | T | PLEX8 |
| 2.11E-02 | 0 0 | Cs6g15540.1/Cs6g155 | 4.21 | 0 | 0 | 2 | MASCOT | T |       |
| 1.73E-01 | 0 0 | Cs6g15540.1/Cs6g155 | 3.92 | 0 | 0 | 2 | MASCOT | T |       |
| 1.31E-02 | 0 0 | Cs6g15540.1/Cs6g155 | 8.8  | 0 | 0 | 2 | MASCOT | T | PLEX8 |
| 6.28E-03 | 0 0 | Cs6g15540.1/Cs6g155 | 8.8  | 0 | 0 | 2 | MASCOT | T | PLEX8 |
| 8.48E-04 | 0 0 | Cs6g15540.1/Cs6g155 | 8.8  | 0 | 0 | 2 | MASCOT | T | PLEX8 |
| 3.70E-03 | 0 0 | Cs6g15540.1/Cs6g155 | 8.8  | 0 | 0 | 2 | MASCOT | T | PLEX8 |
| 8.60E-03 | 0 0 | Cs6g15540.1/Cs6g155 | 8.8  | 0 | 0 | 2 | MASCOT | T | PLEX8 |
| 1.13E-01 | 0 0 | Cs6g15540.1/Cs6g155 | 8.8  | 0 | 0 | 2 | MASCOT | T | PLEX8 |
| 2.23E-03 | 0 0 | Cs6g15540.1/Cs6g155 | 8.8  | 0 | 0 | 2 | MASCOT | T | PLEX8 |
| 8.61E-03 | 0 0 | Cs6g15540.1/Cs6g155 | 8.8  | 0 | 0 | 2 | MASCOT | T | PLEX8 |
| 4.95E-02 | 0 0 | Cs6g15540.1/Cs6g155 | 8.8  | 0 | 0 | 2 | MASCOT | T | PLEX8 |
| 2.18E-01 | 0 0 | Cs6g15540.1/Cs6g155 | 8.8  | 0 | 0 | 2 | MASCOT | T | PLEX8 |
| 2.55E-02 | 0 0 | Cs6g15540.1/Cs6g155 | 8.8  | 0 | 0 | 2 | MASCOT | T | PLEX8 |
| 1.23E-01 | 0 0 | Cs6g15540.1/Cs6g155 | 8.8  | 0 | 0 | 2 | MASCOT | T |       |
| 3.70E-04 | 0 0 | Cs6g15540.1/Cs6g155 | 4.53 | 0 | 0 | 2 | MASCOT | T |       |
| 9.31E-02 | 0 0 | Cs6g15540.1/Cs6g155 | 4.21 | 0 | 0 | 2 | MASCOT | T | PLEX8 |
| 4.94E-02 | 0 0 | Cs6g15540.1/Cs6g155 | 4.21 | 0 | 0 | 2 | MASCOT | T | PLEX8 |
| 2.43E-02 | 0 0 | Cs6g15540.1/Cs6g155 | 4.21 | 0 | 0 | 2 | MASCOT | T | PLEX8 |
| 5.47E-03 | 0 0 | Cs6g15540.1/Cs6g155 | 4.21 | 0 | 0 | 2 | MASCOT | T |       |
| 2.25E-06 | 0 0 | Cs6g15540.1/Cs6g155 | 4.54 | 0 | 0 | 2 | MASCOT | T | PLEX8 |
| 4.03E-03 | 0 0 | Cs6g15540.1/Cs6g155 | 4.54 | 0 | 0 | 2 | MASCOT | T | PLEX8 |
| 1.67E-05 | 0 0 | Cs6g15540.1/Cs6g155 | 4.54 | 0 | 0 | 2 | MASCOT | T | PLEX8 |
| 1.21E-04 | 0 0 | Cs6g15540.1/Cs6g155 | 4.54 | 0 | 0 | 2 | MASCOT | T | PLEX8 |
| 1.52E-01 | 0 0 | Cs6g15540.1/Cs6g155 | 4.54 | 0 | 0 | 2 | MASCOT | T |       |
| 1.35E-06 | 0 0 | Cs6g15540.1/Cs6g155 | 4.54 | 0 | 0 | 2 | MASCOT | T |       |
| 5.55E-07 | 0 0 | Cs6g15540.1         | 4.09 | 0 | 0 | 2 | MASCOT | T | PLEX8 |
| 1.40E-02 | 0 0 | Cs6g15540.1         | 4.09 | 0 | 0 | 2 | MASCOT | T | PLEX8 |
| 4.07E-08 | 0 0 | Cs6g15540.1         | 4.09 | 0 | 0 | 2 | MASCOT | T | PLEX8 |
| 1.63E-02 | 0 0 | Cs6g15540.1         | 4.09 | 0 | 0 | 2 | MASCOT | T | PLEX8 |
| 3.62E-02 | 0 0 | Cs6g15540.1         | 4.09 | 0 | 0 | 2 | MASCOT | T | PLEX8 |
| 9.82E-03 | 0 0 | Cs6g15540.1         | 4.09 | 0 | 0 | 2 | MASCOT | T | PLEX8 |
| 8.77E-03 | 0 0 | Cs6g15540.1         | 4.09 | 0 | 0 | 2 | MASCOT | T | PLEX8 |
| 9.35E-02 | 0 0 | Cs4g10280.1/Cs4g102 | 5.4  | 0 | 0 | 2 | MASCOT | T | PLEX8 |
| 7.99E-04 | 0 0 | Cs4g10280.1/Cs4g102 | 5.4  | 0 | 0 | 2 | MASCOT | T |       |
| 5.64E-04 | 0 0 | Cs4g10280.1/Cs4g102 | 5.4  | 0 | 0 | 2 | MASCOT | T | PLEX8 |

|          |     |                     |      |   |      |   |        |        |       |       |
|----------|-----|---------------------|------|---|------|---|--------|--------|-------|-------|
| 1.70E-05 | 0 0 | Cs4g10280.1/Cs4g102 | 5.4  | 0 | 0    | 2 | MASCOT | T      | PLEX8 |       |
| 2.09E-03 | 0 0 | Cs4g10280.1/Cs4g102 | 5.4  | 0 | 0    | 2 | MASCOT | T      | PLEX8 |       |
| 1.77E-05 | 0 0 | Cs4g10280.1/Cs4g102 | 5.4  | 0 | 0    | 2 | MASCOT | T      |       |       |
| 1.29E-01 | 0 0 | Cs4g10280.1/Cs4g102 | 5.32 | 0 | 0    | 2 | MASCOT | T      | PLEX8 |       |
| 1.30E-03 | 0 0 | Cs4g10280.1/Cs4g102 | 5.84 | 0 | 0    | 2 | MASCOT | T      |       |       |
| 8.86E-05 | 0 0 | Cs4g10280.1/Cs4g102 | 5.84 | 0 | 0    | 2 | MASCOT | T      |       |       |
| 3.74E-01 | 0 0 | Cs2g21430.1/Cs2g214 | 6.75 | 0 | 0    | 2 | MASCOT | T      | PLEX8 |       |
| 1.30E-01 | 0 0 | Cs2g21430.1/Cs2g214 | 6.75 | 0 | 0    | 2 | MASCOT | T      | PLEX8 |       |
| 1.17E-02 | 0 0 | Cs2g21430.1/Cs2g214 | 6.75 | 0 | 0    | 2 | MASCOT | T      | PLEX8 |       |
| 3.97E-01 | 0 0 | Cs1g26040.1/Cs1g260 | 8.75 | 0 | 15.9 | 0 | 2      | MASCOT | T     | PLEX8 |
| 2.59E-02 | 0 0 | Cs1g26040.1/Cs1g260 | 8.75 | 0 | 0    | 2 | MASCOT | T      | PLEX8 |       |
| 8.50E-03 | 0 0 | Cs1g26040.1/Cs1g260 | 8.75 | 0 | 0    | 2 | MASCOT | T      | PLEX8 |       |
| 7.18E-02 | 0 0 | Cs1g26040.1/Cs1g260 | 8.75 | 0 | 0    | 2 | MASCOT | T      | PLEX8 |       |
| 6.15E-02 | 0 0 | Cs1g26040.1/Cs1g260 | 8.75 | 0 | 0    | 2 | MASCOT | T      |       |       |
| 9.68E-02 | 0 0 | Cs2g21430.1/Cs2g214 | 8.76 | 0 | 0    | 2 | MASCOT | T      |       |       |
| 5.19E-02 | 0 0 | Cs4g10280.1/Cs4g102 | 6    | 0 | 0    | 2 | MASCOT | T      | PLEX8 |       |
| 1.59E-02 | 0 0 | Cs4g10280.1/Cs4g102 | 6    | 0 | 0    | 2 | MASCOT | T      | PLEX8 |       |
| 2.23E-03 | 0 0 | Cs4g10280.1/Cs4g102 | 4.37 | 0 | 0    | 2 | MASCOT | T      | PLEX8 |       |
| 2.30E-02 | 0 0 | Cs4g10280.1/Cs4g102 | 4.37 | 0 | 0    | 2 | MASCOT | T      | PLEX8 |       |
| 1.13E-01 | 0 0 | Cs1g26040.1/Cs1g260 | 6    | 0 | 0    | 2 | MASCOT | T      | PLEX8 |       |
| 3.45E-02 | 0 0 | Cs1g26040.1/Cs1g260 | 6    | 0 | 0    | 2 | MASCOT | T      | PLEX8 |       |
| 7.63E-03 | 0 0 | Cs1g26040.1/Cs1g260 | 6    | 0 | 0    | 2 | MASCOT | T      | PLEX8 |       |
| 9.64E-03 | 0 0 | Cs1g26040.1/Cs1g260 | 6    | 0 | 0    | 2 | MASCOT | T      | PLEX8 |       |
| 1.25E-02 | 0 0 | Cs1g26040.1/Cs1g260 | 6    | 0 | 0    | 2 | MASCOT | T      | PLEX8 |       |
| 1.17E-01 | 0 0 | Cs1g26040.1/Cs1g260 | 6    | 0 | 0    | 2 | MASCOT | T      | PLEX8 |       |
| 3.38E-02 | 0 0 | Cs1g26040.1/Cs1g260 | 6    | 0 | 0    | 2 | MASCOT | T      | PLEX8 |       |
| 3.60E-02 | 0 0 | Cs1g26040.1/Cs1g260 | 6    | 0 | 0    | 2 | MASCOT | T      | PLEX8 |       |
| 6.78E-02 | 0 0 | Cs4g10280.1/Cs4g102 | 5.84 | 0 | 15.9 | 0 | 2      | MASCOT | T     | PLEX8 |
| 7.65E-05 | 0 0 | Cs4g10280.1/Cs4g102 | 4    | 0 | 0    | 2 | MASCOT | T      |       |       |
| 3.28E-02 | 0 0 | Cs4g10280.1/Cs4g102 | 6.75 | 0 | 0    | 2 | MASCOT | T      | PLEX8 |       |
| 1.74E-01 | 0 0 | Cs1g26040.1/Cs1g260 | 8.75 | 0 | 0    | 2 | MASCOT | T      | PLEX8 |       |
| 9.09E-03 | 0 0 | Cs1g26040.1/Cs1g260 | 8.75 | 0 | 0    | 2 | MASCOT | T      | PLEX8 |       |
| 9.43E-03 | 0 0 | Cs1g26040.1/Cs1g260 | 8.75 | 0 | 0    | 2 | MASCOT | T      | PLEX8 |       |
| 8.08E-03 | 0 0 | Cs2g21430.1/Cs2g214 | 5.72 | 0 | 0    | 2 | MASCOT | T      | PLEX8 |       |
| 1.54E-02 | 0 0 | Cs2g21430.1/Cs2g214 | 5.72 | 0 | 0    | 2 | MASCOT | T      | PLEX8 |       |
| 4.70E-02 | 0 0 | Cs2g21430.1/Cs2g214 | 5.72 | 0 | 0    | 2 | MASCOT | T      | PLEX8 |       |
| 1.29E-01 | 0 0 | Cs2g21430.1/Cs2g214 | 5.72 | 0 | 0    | 2 | MASCOT | T      | PLEX8 |       |
| 2.13E-01 | 0 0 | Cs2g21430.1/Cs2g214 | 5.72 | 0 | 0    | 2 | MASCOT | T      | PLEX8 |       |
| 4.61E-02 | 0 0 | Cs2g21430.1/Cs2g214 | 5.72 | 0 | 0    | 2 | MASCOT | T      | PLEX8 |       |
| 1.63E-02 | 0 0 | Cs2g21430.1/Cs2g214 | 5.72 | 0 | 0    | 2 | MASCOT | T      | PLEX8 |       |
| 1.16E-01 | 0 0 | Cs2g21430.1/Cs2g214 | 5.72 | 0 | 0    | 2 | MASCOT | T      |       |       |
| 1.20E-01 | 0 0 | Cs1g26040.1/Cs1g260 | 8.41 | 0 | 0    | 2 | MASCOT | T      | PLEX8 |       |
| 1.03E-03 | 0 0 | Cs1g26040.1/Cs1g260 | 8.41 | 0 | 0    | 2 | MASCOT | T      | PLEX8 |       |
| 7.22E-03 | 0 0 | Cs1g26040.1/Cs1g260 | 8.41 | 0 | 0    | 2 | MASCOT | T      | PLEX8 |       |
| 6.87E-03 | 0 0 | Cs1g26040.1/Cs1g260 | 8.41 | 0 | 0    | 2 | MASCOT | T      | PLEX8 |       |
| 6.42E-03 | 0 0 | Cs1g26040.1/Cs1g260 | 8.41 | 0 | 0    | 2 | MASCOT | T      | PLEX8 |       |
| 3.38E-04 | 0 0 | Cs1g26040.1/Cs1g260 | 8.41 | 0 | 0    | 2 | MASCOT | T      | PLEX8 |       |
| 1.90E-01 | 0 0 | Cs4g10280.1/Cs4g102 | 6.41 | 0 | 0    | 2 | MASCOT | T      | PLEX8 |       |
| 4.05E-01 | 0 0 | Cs4g10280.1/Cs4g102 | 4.56 | 0 | 0    | 2 | MASCOT | T      | PLEX8 |       |
| 4.93E-01 | 0 0 | Cs4g10280.1/Cs4g102 | 4.56 | 0 | 0    | 2 | MASCOT | T      | PLEX8 |       |
| 4.47E-03 | 0 0 | Cs4g10280.1/Cs4g102 | 4.56 | 0 | 0    | 2 | MASCOT | T      |       |       |

|          |     |                       |      |   |      |   |        |        |       |
|----------|-----|-----------------------|------|---|------|---|--------|--------|-------|
| 6.76E-03 | 0 0 | Cs4g10280.1/Cs4g102   | 8.59 | 0 | 0    | 2 | MASCOT | T      | PLEX8 |
| 7.03E-03 | 0 0 | Cs4g10280.1/Cs4g102   | 8.59 | 0 | 0    | 2 | MASCOT | T      | PLEX8 |
| 1.62E-02 | 0 0 | Cs4g10280.1/Cs4g102   | 8.59 | 0 | 0    | 2 | MASCOT | T      | PLEX8 |
| 4.79E-01 | 0 0 | Cs4g10280.1/Cs4g102   | 8.59 | 0 | 0    | 2 | MASCOT | T      | PLEX8 |
| 7.14E-02 | 0 0 | Cs4g10280.1/Cs4g102   | 6    | 0 | 0    | 2 | MASCOT | T      | PLEX8 |
| 2.35E-03 | 0 0 | Cs4g10280.1/Cs4g102   | 5.83 | 0 | 0    | 2 | MASCOT | T      | PLEX8 |
| 5.06E-02 | 0 0 | Cs4g10280.1/Cs4g102   | 5.83 | 0 | 0    | 2 | MASCOT | T      | PLEX8 |
| 8.71E-02 | 0 0 | Cs4g10280.1/Cs4g102   | 5.83 | 0 | 0    | 2 | MASCOT | T      | PLEX8 |
| 7.40E-03 | 0 0 | Cs2g21430.1/Cs2g214   | 6.07 | 1 | 0    | 2 | MASCOT | T      |       |
| 6.97E-03 | 0 0 | Cs2g21430.1/Cs2g214   | 6.07 | 1 | 0    | 2 | MASCOT | T      |       |
| 1.55E-02 | 0 0 | Cs2g21430.1/Cs2g214   | 6.07 | 1 | 0    | 2 | MASCOT | T      |       |
| 1.50E+00 | 0 0 | Cs1g26040.1/Cs1g260   | 9.73 | 0 | 0    | 2 | MASCOT | T      | PLEX8 |
| 8.18E-01 | 0 0 | Cs1g26040.1/Cs1g260   | 9.73 | 0 | 0    | 2 | MASCOT | T      |       |
| 9.18E-01 | 0 0 | Cs1g26040.1/Cs1g260   | 9.73 | 0 | 0    | 2 | MASCOT | T      | PLEX8 |
| 1.80E-01 | 0 0 | Cs4g10280.1/Cs4g102   | 8.59 | 0 | 0    | 2 | MASCOT | T      | PLEX8 |
| 5.36E-01 | 0 0 | Cs4g10280.1/Cs4g102   | 8.59 | 0 | 0    | 2 | MASCOT | T      | PLEX8 |
| 2.42E-04 | 0 0 | orange1.1t03769.1/ora | 5.52 | 0 | 0    | 2 | MASCOT | T      | PLEX8 |
| 1.29E-03 | 0 0 | orange1.1t03769.1/ora | 5.52 | 0 | 0    | 2 | MASCOT | T      | PLEX8 |
| 1.66E-01 | 0 0 | orange1.1t04376.1     | 6.75 | 0 | 0    | 2 | MASCOT | T      | PLEX8 |
| 7.26E-02 | 0 0 | orange1.1t04376.1     | 6.75 | 0 | 0    | 2 | MASCOT | T      | PLEX8 |
| 1.13E-01 | 0 0 | orange1.1t04376.1     | 4.14 | 0 | 15.9 | 0 | 2      | MASCOT | T     |
| 2.38E-03 | 0 0 | orange1.1t04376.1     | 4.14 | 0 | 15.9 | 0 | 2      | MASCOT | T     |
| 1.26E-06 | 0 0 | orange1.1t04376.1     | 4.14 | 0 | 15.9 | 0 | 2      | MASCOT | T     |
| 5.01E-02 | 0 0 | orange1.1t04376.1     | 4.14 | 0 | 15.9 | 0 | 2      | MASCOT | T     |
| 4.67E-05 | 0 0 | orange1.1t04376.1     | 4.14 | 0 | 15.9 | 0 | 2      | MASCOT | T     |
| 4.47E-03 | 0 0 | orange1.1t04376.1/ora | 5.84 | 0 | 0    | 2 | MASCOT | T      | PLEX8 |
| 9.47E-03 | 0 0 | orange1.1t04376.1/ora | 5.84 | 0 | 0    | 2 | MASCOT | T      | PLEX8 |
| 1.69E-02 | 0 0 | orange1.1t04376.1/ora | 5.84 | 0 | 0    | 2 | MASCOT | T      | PLEX8 |
| 1.63E-01 | 0 0 | orange1.1t04376.1/ora | 8.75 | 0 | 0    | 2 | MASCOT | T      | PLEX8 |
| 8.43E-02 | 0 0 | orange1.1t04376.1/ora | 8.75 | 1 | 0    | 2 | MASCOT | T      |       |
| 2.14E-02 | 0 0 | orange1.1t03775.1/ora | 4.14 | 0 | 0    | 2 | MASCOT | T      |       |
| 7.10E-03 | 0 0 | orange1.1t04376.1/ora | 5.55 | 0 | 0    | 2 | MASCOT | T      | PLEX8 |
| 1.33E-01 | 0 0 | orange1.1t04376.1/ora | 5.55 | 0 | 0    | 2 | MASCOT | T      | PLEX8 |
| 9.90E-03 | 0 0 | orange1.1t04376.1/ora | 3.91 | 0 | 0    | 2 | MASCOT | T      |       |
| 1.17E-03 | 0 0 | orange1.1t04376.1/ora | 4.37 | 0 | 0    | 2 | MASCOT | T      | PLEX8 |
| 1.46E-03 | 0 0 | orange1.1t04376.1/ora | 4.37 | 0 | 0    | 2 | MASCOT | T      | PLEX8 |
| 3.41E-03 | 0 0 | orange1.1t04376.1/ora | 4.37 | 0 | 0    | 2 | MASCOT | T      | PLEX8 |
| 2.38E-02 | 0 0 | orange1.1t04376.1/ora | 4.37 | 0 | 0    | 2 | MASCOT | T      | PLEX8 |
| 3.17E-01 | 0 0 | orange1.1t04376.1/ora | 4.53 | 0 | 0    | 2 | MASCOT | T      | PLEX8 |
| 3.87E-03 | 0 0 | orange1.1t04376.1/ora | 4.03 | 0 | 0    | 2 | MASCOT | T      | PLEX8 |
| 2.09E-03 | 0 0 | orange1.1t04376.1/ora | 4.03 | 0 | 0    | 2 | MASCOT | T      | PLEX8 |
| 5.87E-03 | 0 0 | orange1.1t04376.1/ora | 4.14 | 0 | 0    | 2 | MASCOT | T      | PLEX8 |
| 2.87E-02 | 0 0 | orange1.1t04376.1/ora | 4.14 | 0 | 0    | 2 | MASCOT | T      | PLEX8 |
| 1.46E-02 | 0 0 | orange1.1t04376.1/ora | 4.14 | 0 | 0    | 2 | MASCOT | T      | PLEX8 |
| 4.46E-02 | 0 0 | Cs9g05405.1 ! orange1 | 4.14 | 0 | 0    | 2 | MASCOT | T      | PLEX8 |
| 2.48E-03 | 0 0 | orange1.1t04376.1     | 4.14 | 0 | 0    | 2 | MASCOT | T      | PLEX8 |
| 5.44E-03 | 0 0 | orange1.1t04376.1     | 4.14 | 0 | 0    | 2 | MASCOT | T      | PLEX8 |
| 3.14E-03 | 0 0 | orange1.1t04376.1     | 4.14 | 0 | 0    | 2 | MASCOT | T      | PLEX8 |
| 4.97E-03 | 0 0 | orange1.1t04376.1     | 4.14 | 0 | 0    | 2 | MASCOT | T      | PLEX8 |
| 9.92E-02 | 0 0 | orange1.1t04376.1/ora | 6.1  | 0 | 0    | 2 | MASCOT | T      |       |
| 2.44E-03 | 0 0 | orange1.1t04376.1     | 5.32 | 0 | 0    | 2 | MASCOT | T      | PLEX8 |

|          |     |                       |      |   |      |   |        |        |       |       |
|----------|-----|-----------------------|------|---|------|---|--------|--------|-------|-------|
| 7.39E-04 | 0 0 | orange1.1t04376.1     | 5.32 | 0 | 0    | 2 | MASCOT | T      | PLEX8 |       |
| 6.09E-05 | 0 0 | orange1.1t04376.1     | 5.32 | 0 | 0    | 2 | MASCOT | T      | PLEX8 |       |
| 1.54E-02 | 0 0 | orange1.1t04376.1     | 5.32 | 0 | 0    | 2 | MASCOT | T      | PLEX8 |       |
| 7.71E-03 | 0 0 | orange1.1t04376.1     | 5.32 | 0 | 0    | 2 | MASCOT | T      | PLEX8 |       |
| 5.84E-03 | 0 0 | orange1.1t04376.1     | 5.32 | 0 | 0    | 2 | MASCOT | T      | PLEX8 |       |
| 1.05E-01 | 0 0 | orange1.1t04376.1     | 5.32 | 0 | 0    | 2 | MASCOT | T      |       |       |
| 4.45E-01 | 0 0 | orange1.1t03770.1/ora | 6    | 0 | 0    | 2 | MASCOT | T      | PLEX8 |       |
| 4.97E-02 | 0 0 | orange1.1t03770.1/ora | 6    | 0 | 0    | 2 | MASCOT | T      | PLEX8 |       |
| 4.51E-01 | 0 0 | orange1.1t03770.1/ora | 6    | 0 | 0    | 2 | MASCOT | T      | PLEX8 |       |
| 9.48E-03 | 0 0 | orange1.1t04376.1/ora | 6.74 | 0 | 0    | 2 | MASCOT | T      | PLEX8 |       |
| 1.69E-01 | 0 0 | orange1.1t04376.1/ora | 6.74 | 0 | 0    | 2 | MASCOT | T      | PLEX8 |       |
| 3.80E-01 | 0 0 | orange1.1t04376.1/ora | 6.74 | 0 | 0    | 2 | MASCOT | T      |       |       |
| 5.40E-02 | 0 0 | orange1.1t04376.1/ora | 6.74 | 0 | 0    | 2 | MASCOT | T      | PLEX8 |       |
| 1.07E-05 | 0 0 | orange1.1t04376.1/ora | 4.37 | 0 | 0    | 2 | MASCOT | T      |       |       |
| 2.43E-02 | 0 0 | orange1.1t03769.1/ora | 8.75 | 0 | 15.9 | 0 | 2      | MASCOT | T     | PLEX8 |
| 5.86E-03 | 0 0 | orange1.1t03769.1/ora | 8.75 | 0 | 0    | 2 | MASCOT | T      | PLEX8 |       |
| 6.05E-02 | 0 0 | orange1.1t03769.1/ora | 8.75 | 0 | 0    | 2 | MASCOT | T      | PLEX8 |       |
| 1.25E-05 | 0 0 | orange1.1t03769.1/ora | 8.75 | 0 | 0    | 2 | MASCOT | T      | PLEX8 |       |
| 9.46E-04 | 0 0 | orange1.1t03769.1/ora | 8.75 | 0 | 0    | 2 | MASCOT | T      | PLEX8 |       |
| 6.93E-02 | 0 0 | orange1.1t03769.1/ora | 8.75 | 0 | 0    | 2 | MASCOT | T      | PLEX8 |       |
| 9.43E-02 | 0 0 | orange1.1t03769.1/ora | 8.75 | 0 | 0    | 2 | MASCOT | T      |       |       |
| 2.00E-01 | 0 0 | orange1.1t03769.1/ora | 8.75 | 0 | 0    | 2 | MASCOT | T      |       |       |
| 5.32E-02 | 0 0 | orange1.1t03775.1/ora | 8.75 | 0 | 0    | 2 | MASCOT | T      | PLEX8 |       |
| 2.16E-03 | 0 0 | orange1.1t04376.1/ora | 6.41 | 0 | 0    | 2 | MASCOT | T      | PLEX8 |       |
| 5.22E-03 | 0 0 | orange1.1t04376.1/ora | 6.41 | 0 | 0    | 2 | MASCOT | T      | PLEX8 |       |
| 1.87E-02 | 0 0 | orange1.1t04376.1/ora | 6.14 | 1 | 0    | 2 | MASCOT | T      | PLEX8 |       |
| 1.49E-02 | 0 0 | orange1.1t04376.1/ora | 6.14 | 1 | 0    | 2 | MASCOT | T      | PLEX8 |       |
| 3.96E-04 | 0 0 | Cs5g32980.1           | 4.53 | 0 | 0    | 2 | MASCOT | T      | PLEX8 |       |
| 1.49E-01 | 0 0 | Cs5g32980.1           | 4.53 | 0 | 0    | 2 | MASCOT | T      | PLEX8 |       |
| 2.72E-03 | 0 0 | Cs5g32980.1/Cs9g044   | 4.14 | 0 | 0    | 2 | MASCOT | T      | PLEX8 |       |
| 1.46E-02 | 0 0 | Cs5g32980.1/Cs9g044   | 4.14 | 0 | 0    | 2 | MASCOT | T      | PLEX8 |       |
| 9.34E-03 | 0 0 | Cs5g32980.1/Cs9g044   | 4.14 | 0 | 0    | 2 | MASCOT | T      | PLEX8 |       |
| 3.06E-01 | 0 0 | Cs5g32980.1           | 4.37 | 0 | 0    | 2 | MASCOT | T      | PLEX8 |       |
| 5.79E-03 | 0 0 | Cs5g32980.1           | 4.48 | 0 | 0    | 2 | MASCOT | T      | PLEX8 |       |
| 1.10E-03 | 0 0 | Cs5g32980.1           | 4.48 | 0 | 0    | 2 | MASCOT | T      |       |       |
| 3.54E-03 | 0 0 | Cs5g32980.1           | 4.48 | 0 | 0    | 2 | MASCOT | T      | PLEX8 |       |
| 2.55E-02 | 0 0 | Cs5g32980.1           | 4.48 | 0 | 0    | 2 | MASCOT | T      | PLEX8 |       |
| 2.93E-02 | 0 0 | Cs5g32980.1           | 4.48 | 0 | 0    | 2 | MASCOT | T      |       |       |
| 1.99E-03 | 0 0 | Cs5g32980.1           | 4.37 | 0 | 0    | 2 | MASCOT | T      | PLEX8 |       |
| 2.00E-02 | 0 0 | Cs5g32980.1           | 4.37 | 0 | 0    | 2 | MASCOT | T      | PLEX8 |       |
| 4.40E-02 | 0 0 | Cs5g32980.1           | 4.37 | 0 | 15.9 | 0 | 2      | MASCOT | T     | PLEX8 |
| 1.83E-03 | 0 0 | Cs5g32980.1           | 5.4  | 0 | 0    | 2 | MASCOT | T      | PLEX8 |       |
| 7.90E-03 | 0 0 | Cs5g32980.1           | 4.14 | 0 | 0    | 2 | MASCOT | T      | PLEX8 |       |
| 2.98E-02 | 0 0 | Cs5g32980.1           | 4.37 | 0 | 0    | 2 | MASCOT | T      | PLEX8 |       |
| 3.54E-03 | 0 0 | Cs5g32980.1 ! Cs9g04  | 4.53 | 0 | 0    | 2 | MASCOT | T      | PLEX8 |       |
| 4.40E-05 | 0 0 | Cs5g32980.1 ! Cs9g04  | 4.53 | 0 | 0    | 2 | MASCOT | T      | PLEX8 |       |
| 3.81E-04 | 0 0 | Cs5g32980.1 ! Cs9g04  | 4.53 | 0 | 0    | 2 | MASCOT | T      | PLEX8 |       |
| 1.78E-02 | 0 0 | Cs5g32980.1           | 5.72 | 0 | 0    | 2 | MASCOT | T      | PLEX8 |       |
| 7.93E-02 | 0 0 | Cs5g32980.1           | 6.41 | 0 | 0    | 2 | MASCOT | T      | PLEX8 |       |
| 8.07E-03 | 0 0 | Cs5g32980.1           | 4.37 | 0 | 0    | 2 | MASCOT | T      | PLEX8 |       |
| 9.51E-02 | 0 0 | Cs5g32980.1           | 4.37 | 0 | 0    | 2 | MASCOT | T      | PLEX8 |       |



|          |     |                     |      |   |      |   |        |        |       |       |
|----------|-----|---------------------|------|---|------|---|--------|--------|-------|-------|
| 1.20E-03 | 0 0 | Cs5g32980.1         | 4.21 | 0 | 0    | 2 | MASCOT | T      |       |       |
| 2.66E-02 | 0 0 | Cs5g32980.1         | 8.75 | 0 | 0    | 2 | MASCOT | T      | PLEX8 |       |
| 1.07E-02 | 0 0 | Cs5g32980.1         | 8.75 | 0 | 0    | 2 | MASCOT | T      | PLEX8 |       |
| 7.99E-02 | 0 0 | Cs5g32980.1         | 3.98 | 0 | 0    | 2 | MASCOT | T      | PLEX8 |       |
| 8.29E-04 | 0 0 | Cs5g32980.1         | 4.75 | 0 | 0    | 2 | MASCOT | T      | PLEX8 |       |
| 1.53E-03 | 0 0 | Cs5g32980.1         | 5.32 | 0 | 0    | 2 | MASCOT | T      | PLEX8 |       |
| 1.17E-07 | 0 0 | Cs5g32980.1         | 5.32 | 0 | 0    | 2 | MASCOT | T      | PLEX8 |       |
| 1.16E-05 | 0 0 | Cs5g32980.1         | 5.32 | 0 | 0    | 2 | MASCOT | T      | PLEX8 |       |
| 2.67E-06 | 0 0 | Cs5g32980.1         | 5.32 | 0 | 0    | 2 | MASCOT | T      |       |       |
| 4.05E-02 | 0 0 | Cs5g32980.1         | 6.74 | 0 | 15.9 | 0 | 2      | MASCOT | T     | PLEX8 |
| 2.92E-04 | 0 0 | Cs5g32980.1         | 6.74 | 0 | 15.9 | 0 | 2      | MASCOT | T     | PLEX8 |
| 1.42E-04 | 0 0 | Cs5g32980.1         | 6.74 | 0 | 15.9 | 0 | 2      | MASCOT | T     |       |
| 3.18E-02 | 0 0 | Cs5g32980.1         | 9.75 | 0 | 0    | 2 | MASCOT | T      | PLEX8 |       |
| 1.47E-03 | 0 0 | Cs5g32980.1         | 6.74 | 0 | 15.9 | 0 | 2      | MASCOT | T     |       |
| 4.56E-02 | 0 0 | Cs5g32980.1         | 6.74 | 0 | 15.9 | 0 | 2      | MASCOT | T     |       |
| 5.27E-01 | 0 0 | Cs5g32980.1         | 5.84 | 0 | 0    | 2 | MASCOT | T      | PLEX8 |       |
| 7.38E-02 | 0 0 | Cs5g32980.1         | 6.46 | 0 | 0    | 2 | MASCOT | T      | PLEX8 |       |
| 8.65E-02 | 0 0 | Cs5g32980.1         | 5.81 | 0 | 0    | 2 | MASCOT | T      | PLEX8 |       |
| 1.36E-01 | 0 0 | Cs3g27220.1/Cs3g272 | 9.8  | 0 | 0    | 2 | MASCOT | T      | PLEX8 |       |
| 1.79E-01 | 0 0 | Cs3g27220.1/Cs3g272 | 9.8  | 0 | 0    | 2 | MASCOT | T      |       |       |
| 1.19E-01 | 0 0 | Cs3g27220.1/Cs3g272 | 9.8  | 0 | 0    | 2 | MASCOT | T      |       |       |
| 3.77E-03 | 0 0 | Cs3g27220.2/Cs3g272 | 4.54 | 0 | 0    | 2 | MASCOT | T      | PLEX8 |       |
| 1.01E-01 | 0 0 | Cs3g27220.2/Cs3g272 | 4.54 | 0 | 0    | 2 | MASCOT | T      | PLEX8 |       |
| 5.91E-02 | 0 0 | Cs3g27220.2/Cs3g272 | 4.54 | 0 | 0    | 2 | MASCOT | T      | PLEX8 |       |
| 1.47E-03 | 0 0 | Cs3g27220.2/Cs3g272 | 4.54 | 0 | 0    | 2 | MASCOT | T      | PLEX8 |       |
| 1.52E-03 | 0 0 | Cs3g27220.2/Cs3g272 | 4.54 | 0 | 0    | 2 | MASCOT | T      | PLEX8 |       |
| 1.46E-03 | 0 0 | Cs3g27220.2/Cs3g272 | 4.54 | 0 | 0    | 2 | MASCOT | T      | PLEX8 |       |
| 6.80E-02 | 0 0 | Cs3g27220.2/Cs3g272 | 4.54 | 0 | 0    | 2 | MASCOT | T      | PLEX8 |       |
| 8.83E-03 | 0 0 | Cs3g27220.2/Cs3g272 | 4.54 | 0 | 0    | 2 | MASCOT | T      |       |       |
| 8.49E-02 | 0 0 | Cs3g27220.2/Cs3g272 | 4.54 | 0 | 0    | 2 | MASCOT | T      |       |       |
| 6.24E-02 | 0 0 | Cs3g27220.1/Cs3g272 | 4.14 | 0 | 0    | 2 | MASCOT | T      | PLEX8 |       |
| 5.68E-02 | 0 0 | Cs3g27220.1/Cs3g272 | 6.1  | 0 | 0    | 2 | MASCOT | T      | PLEX8 |       |
| 1.58E-01 | 0 0 | Cs3g27220.1/Cs3g272 | 6.1  | 0 | 0    | 2 | MASCOT | T      | PLEX8 |       |
| 1.64E-03 | 0 0 | Cs3g27220.1/Cs3g272 | 6.1  | 0 | 0    | 2 | MASCOT | T      | PLEX8 |       |
| 1.78E-01 | 0 0 | Cs3g27220.1/Cs3g272 | 6.1  | 0 | 0    | 2 | MASCOT | T      | PLEX8 |       |
| 1.38E-01 | 0 0 | Cs3g27220.1/Cs3g272 | 6    | 0 | 0    | 2 | MASCOT | T      |       |       |
| 1.47E-02 | 0 0 | Cs3g27220.1/Cs3g272 | 6    | 0 | 0    | 2 | MASCOT | T      |       |       |
| 3.33E-02 | 0 0 | Cs3g27220.1/Cs3g272 | 6    | 0 | 0    | 2 | MASCOT | T      |       |       |
| 2.86E-03 | 0 0 | Cs3g27220.1/Cs3g272 | 5.21 | 0 | 0    | 2 | MASCOT | T      | PLEX8 |       |
| 8.93E-02 | 0 0 | Cs3g27220.1/Cs3g272 | 5.21 | 0 | 0    | 2 | MASCOT | T      | PLEX8 |       |
| 9.05E-02 | 0 0 | Cs3g27220.1/Cs3g272 | 5.21 | 0 | 0    | 2 | MASCOT | T      |       |       |
| 7.54E-03 | 0 0 | Cs3g27220.1/Cs3g272 | 5.21 | 0 | 0    | 2 | MASCOT | T      | PLEX8 |       |
| 4.20E-02 | 0 0 | Cs3g27220.1/Cs3g272 | 5.21 | 0 | 0    | 2 | MASCOT | T      | PLEX8 |       |
| 2.96E-02 | 0 0 | Cs3g27220.1/Cs3g272 | 4.75 | 0 | 0    | 2 | MASCOT | T      | PLEX8 |       |
| 3.99E-03 | 0 0 | Cs3g27220.1/Cs3g272 | 4.75 | 0 | 0    | 2 | MASCOT | T      | PLEX8 |       |
| 1.02E-02 | 0 0 | Cs3g27220.1/Cs3g272 | 4.75 | 0 | 0    | 2 | MASCOT | T      | PLEX8 |       |
| 7.85E-03 | 0 0 | Cs3g27220.1/Cs3g272 | 4.75 | 0 | 0    | 2 | MASCOT | T      | PLEX8 |       |
| 9.77E-02 | 0 0 | Cs3g27220.1/Cs3g272 | 4.75 | 0 | 0    | 2 | MASCOT | T      | PLEX8 |       |
| 1.13E-01 | 0 0 | Cs3g27220.1/Cs3g272 | 4.14 | 0 | 0    | 2 | MASCOT | T      | PLEX8 |       |
| 1.43E-03 | 0 0 | Cs3g27220.1/Cs3g272 | 4.14 | 0 | 0    | 2 | MASCOT | T      | PLEX8 |       |
| 7.14E-05 | 0 0 | Cs3g27220.1/Cs3g272 | 4.14 | 0 | 0    | 2 | MASCOT | T      | PLEX8 |       |

|          |     |                     |      |   |      |   |        |        |       |       |
|----------|-----|---------------------|------|---|------|---|--------|--------|-------|-------|
| 2.04E-03 | 0 0 | Cs3g27220.1/Cs3g272 | 4.14 | 0 | 0    | 2 | MASCOT | T      | PLEX8 |       |
| 1.51E-01 | 0 0 | Cs3g27220.1/Cs3g272 | 4.41 | 1 | 0    | 2 | MASCOT | T      | PLEX8 |       |
| 9.08E-03 | 0 0 | Cs3g27220.1/Cs3g272 | 4.41 | 1 | 0    | 2 | MASCOT | T      | PLEX8 |       |
| 9.30E-02 | 0 0 | Cs3g27220.1/Cs3g272 | 4.41 | 1 | 0    | 2 | MASCOT | T      |       |       |
| 6.54E-03 | 0 0 | Cs3g27220.1/Cs3g272 | 4.41 | 1 | 0    | 2 | MASCOT | T      |       |       |
| 1.36E-03 | 0 0 | Cs3g27220.1/Cs3g272 | 4.41 | 1 | 0    | 2 | MASCOT | T      |       |       |
| 3.69E-02 | 0 0 | Cs3g27220.1/Cs3g272 | 5.97 | 0 | 0    | 2 | MASCOT | T      | PLEX8 |       |
| 7.47E-02 | 0 0 | Cs3g27220.1/Cs3g272 | 5.97 | 0 | 0    | 2 | MASCOT | T      | PLEX8 |       |
| 3.93E-02 | 0 0 | Cs3g27220.1/Cs3g272 | 5.97 | 0 | 0    | 2 | MASCOT | T      | PLEX8 |       |
| 9.65E-03 | 0 0 | Cs3g27220.1/Cs3g272 | 5.84 | 0 | 0    | 2 | MASCOT | T      | PLEX8 |       |
| 8.88E-02 | 0 0 | Cs3g27220.1/Cs3g272 | 5.84 | 0 | 0    | 2 | MASCOT | T      | PLEX8 |       |
| 2.95E-03 | 0 0 | Cs3g27220.1/Cs3g272 | 5.84 | 0 | 0    | 2 | MASCOT | T      | PLEX8 |       |
| 3.86E-02 | 0 0 | Cs3g27220.1/Cs3g272 | 4.37 | 0 | 0    | 2 | MASCOT | T      | PLEX8 |       |
| 5.71E-02 | 0 0 | Cs3g27220.1/Cs3g272 | 4.37 | 0 | 0    | 2 | MASCOT | T      | PLEX8 |       |
| 1.26E-01 | 0 0 | Cs3g27220.1/Cs3g272 | 4.37 | 0 | 0    | 2 | MASCOT | T      | PLEX8 |       |
| 4.96E-02 | 0 0 | Cs3g27220.1/Cs3g272 | 4.37 | 0 | 0    | 2 | MASCOT | T      |       |       |
| 3.32E-03 | 0 0 | Cs3g27220.1/Cs3g272 | 4.37 | 0 | 0    | 2 | MASCOT | T      | PLEX8 |       |
| 1.47E-04 | 0 0 | Cs3g27220.1/Cs3g272 | 4.03 | 0 | 0    | 2 | MASCOT | T      |       |       |
| 1.35E-02 | 0 0 | Cs3g27220.1/Cs3g272 | 4.03 | 0 | 0    | 2 | MASCOT | T      |       |       |
| 2.10E-06 | 0 0 | Cs3g27220.1/Cs3g272 | 4.03 | 0 | 0    | 2 | MASCOT | T      |       |       |
| 1.31E-02 | 0 0 | Cs3g27220.1/Cs3g272 | 4.03 | 0 | 0    | 2 | MASCOT | T      |       |       |
| 1.12E-01 | 0 0 | Cs3g27220.1/Cs3g272 | 4.25 | 0 | 0    | 2 | MASCOT | T      | PLEX8 |       |
| 2.07E-02 | 0 0 | Cs3g27220.1/Cs3g272 | 4.25 | 0 | 0    | 2 | MASCOT | T      | PLEX8 |       |
| 6.87E-03 | 0 0 | Cs3g27220.1/Cs3g272 | 4.25 | 0 | 0    | 2 | MASCOT | T      | PLEX8 |       |
| 4.90E-02 | 0 0 | Cs3g27220.1/Cs3g272 | 4.25 | 0 | 0    | 2 | MASCOT | T      | PLEX8 |       |
| 2.64E-02 | 0 0 | Cs3g27220.1/Cs3g272 | 4.03 | 0 | 0    | 2 | MASCOT | T      | PLEX8 |       |
| 4.68E-03 | 0 0 | Cs3g27220.1/Cs3g272 | 4.03 | 0 | 0    | 2 | MASCOT | T      |       |       |
| 9.77E-02 | 0 0 | Cs3g27220.1/Cs3g272 | 8.76 | 0 | 0    | 2 | MASCOT | T      | PLEX8 |       |
| 3.17E-02 | 0 0 | Cs3g27220.1/Cs3g272 | 8.76 | 0 | 0    | 2 | MASCOT | T      | PLEX8 |       |
| 2.16E-02 | 0 0 | Cs3g27220.1/Cs3g272 | 8.76 | 0 | 0    | 2 | MASCOT | T      | PLEX8 |       |
| 4.23E-02 | 0 0 | Cs3g27220.1/Cs3g272 | 8.76 | 0 | 0    | 2 | MASCOT | T      |       |       |
| 4.37E-02 | 0 0 | Cs3g27220.1/Cs3g272 | 8.76 | 0 | 0    | 2 | MASCOT | T      | PLEX8 |       |
| 7.14E-02 | 0 0 | Cs3g27220.1/Cs3g272 | 8.75 | 0 | 0    | 2 | MASCOT | T      | PLEX8 |       |
| 4.39E-02 | 0 0 | Cs3g27220.1/Cs3g272 | 5.4  | 0 | 15.9 | 0 | 2      | MASCOT | T     | PLEX8 |
| 9.88E-02 | 0 0 | Cs3g27220.1/Cs3g272 | 5.4  | 0 | 15.9 | 0 | 2      | MASCOT | T     | PLEX8 |
| 3.69E-02 | 0 0 | Cs3g27220.1/Cs3g272 | 5.4  | 0 | 15.9 | 0 | 2      | MASCOT | T     | PLEX8 |
| 2.41E-02 | 0 0 | Cs3g27220.1/Cs3g272 | 5.4  | 0 | 15.9 | 0 | 2      | MASCOT | T     | PLEX8 |
| 2.45E-02 | 0 0 | Cs3g27220.1/Cs3g272 | 5.4  | 0 | 15.9 | 0 | 2      | MASCOT | T     | PLEX8 |
| 1.28E-03 | 0 0 | Cs3g27220.1/Cs3g272 | 5.4  | 0 | 0    | 2 | MASCOT | T      | PLEX8 |       |
| 8.67E-02 | 0 0 | Cs3g27220.1/Cs3g272 | 5.4  | 0 | 0    | 2 | MASCOT | T      | PLEX8 |       |
| 4.07E-03 | 0 0 | Cs3g27220.1/Cs3g272 | 5.4  | 0 | 0    | 2 | MASCOT | T      | PLEX8 |       |
| 4.80E-04 | 0 0 | Cs3g27220.1/Cs3g272 | 5.4  | 0 | 0    | 2 | MASCOT | T      | PLEX8 |       |
| 2.16E-02 | 0 0 | Cs3g27220.1/Cs3g272 | 5.4  | 0 | 0    | 2 | MASCOT | T      | PLEX8 |       |
| 6.45E-04 | 0 0 | Cs3g27220.1/Cs3g272 | 5.4  | 0 | 0    | 2 | MASCOT | T      | PLEX8 |       |
| 1.46E-03 | 0 0 | Cs3g27220.1/Cs3g272 | 5.4  | 0 | 0    | 2 | MASCOT | T      | PLEX8 |       |
| 3.40E-03 | 0 0 | Cs3g27220.1/Cs3g272 | 5.4  | 0 | 0    | 2 | MASCOT | T      | PLEX8 |       |
| 1.69E-01 | 0 0 | Cs3g27220.1/Cs3g272 | 5.84 | 0 | 15.9 | 0 | 2      | MASCOT | T     |       |
| 6.94E-03 | 0 0 | Cs3g27220.1/Cs3g272 | 6.75 | 1 | 0    | 2 | MASCOT | T      | PLEX8 |       |
| 3.89E-01 | 0 0 | Cs3g27220.1/Cs3g272 | 4.37 | 0 | 0    | 2 | MASCOT | T      | PLEX8 |       |
| 2.53E-02 | 0 0 | Cs3g27220.1/Cs3g272 | 4.37 | 0 | 0    | 2 | MASCOT | T      | PLEX8 |       |
| 5.65E-02 | 0 0 | Cs3g27220.1/Cs3g272 | 4.37 | 0 | 0    | 2 | MASCOT | T      | PLEX8 |       |

|              |                      |      |   |   |   |        |   |       |
|--------------|----------------------|------|---|---|---|--------|---|-------|
| 1.17E-02 0 0 | Cs3g27220.1/Cs3g272  | 4.48 | 0 | 0 | 2 | MASCOT | T | PLEX8 |
| 1.49E-01 0 0 | Cs3g27220.1/Cs3g272  | 6.01 | 0 | 0 | 2 | MASCOT | T | PLEX8 |
| 1.07E-01 0 0 | Cs3g27220.1/Cs3g272  | 6.01 | 0 | 0 | 2 | MASCOT | T | PLEX8 |
| 5.62E-03 0 0 | Cs4g08220.1/Cs4g082  | 5.88 | 0 | 0 | 2 | MASCOT | T |       |
| 5.25E-03 0 0 | Cs4g08220.1/Cs4g082  | 5.88 | 0 | 0 | 2 | MASCOT | T |       |
| 9.72E-02 0 0 | Cs4g08220.1/Cs4g082  | 5.88 | 0 | 0 | 2 | MASCOT | T |       |
| 6.41E-03 0 0 | Cs4g08220.1/Cs4g082  | 5.88 | 0 | 0 | 2 | MASCOT | T |       |
| 1.85E-02 0 0 | Cs4g08220.1/Cs4g082  | 5.88 | 0 | 0 | 2 | MASCOT | T |       |
| 3.27E-03 0 0 | Cs4g08220.1/Cs4g082  | 8.8  | 0 | 0 | 2 | MASCOT | T | PLEX8 |
| 3.56E-02 0 0 | Cs4g08220.1/Cs4g082  | 8.8  | 0 | 0 | 2 | MASCOT | T | PLEX8 |
| 3.88E-02 0 0 | Cs4g08220.1/Cs4g082  | 8.8  | 0 | 0 | 2 | MASCOT | T | PLEX8 |
| 2.43E-02 0 0 | Cs4g08220.1/Cs4g082  | 8.8  | 0 | 0 | 2 | MASCOT | T | PLEX8 |
| 5.30E-02 0 0 | Cs4g08220.1/Cs4g082  | 8.8  | 0 | 0 | 2 | MASCOT | T | PLEX8 |
| 2.39E-02 0 0 | Cs4g08220.1/Cs4g082  | 8.8  | 0 | 0 | 2 | MASCOT | T | PLEX8 |
| 3.21E-02 0 0 | Cs4g08220.1/Cs4g082  | 8.8  | 0 | 0 | 2 | MASCOT | T | PLEX8 |
| 4.23E-02 0 0 | Cs4g08220.1/Cs4g082  | 8.8  | 0 | 0 | 2 | MASCOT | T | PLEX8 |
| 1.37E-01 0 0 | Cs4g08220.1/Cs4g082  | 8.8  | 0 | 0 | 2 | MASCOT | T |       |
| 3.69E-01 0 0 | Cs4g08220.1/Cs4g082  | 4.53 | 0 | 0 | 2 | MASCOT | T | PLEX8 |
| 1.13E-03 0 0 | Cs4g08220.1/Cs4g082  | 4.25 | 0 | 0 | 2 | MASCOT | T | PLEX8 |
| 2.95E-02 0 0 | Cs4g08220.1/Cs4g082  | 3.91 | 0 | 0 | 2 | MASCOT | T | PLEX8 |
| 1.09E-03 0 0 | Cs4g08220.1/Cs4g082  | 3.91 | 0 | 0 | 2 | MASCOT | T | PLEX8 |
| 6.61E-04 0 0 | Cs4g08220.1/Cs4g082  | 3.91 | 0 | 0 | 2 | MASCOT | T |       |
| 1.30E-02 0 0 | Cs4g08220.1/Cs4g082  | 3.91 | 0 | 0 | 2 | MASCOT | T | PLEX8 |
| 9.56E-02 0 0 | Cs4g08220.1/Cs4g082  | 4.53 | 0 | 0 | 2 | MASCOT | T | PLEX8 |
| 6.12E-02 0 0 | Cs4g08220.1/Cs4g082  | 4.53 | 0 | 0 | 2 | MASCOT | T | PLEX8 |
| 8.53E-02 0 0 | Cs4g08220.1/Cs4g082  | 4.53 | 0 | 0 | 2 | MASCOT | T | PLEX8 |
| 8.27E-02 0 0 | Cs4g08220.1/Cs4g082  | 4.53 | 0 | 0 | 2 | MASCOT | T |       |
| 1.49E-02 0 0 | Cs4g08220.1/Cs4g082  | 4.14 | 0 | 0 | 2 | MASCOT | T | PLEX8 |
| 1.24E-02 0 0 | Cs4g08220.1/Cs4g082  | 4.14 | 0 | 0 | 2 | MASCOT | T | PLEX8 |
| 1.75E-01 0 0 | Cs4g08220.1/Cs4g082  | 5.4  | 0 | 0 | 2 | MASCOT | T | PLEX8 |
| 8.57E-02 0 0 | Cs4g08220.1/Cs4g082  | 5.4  | 0 | 0 | 2 | MASCOT | T | PLEX8 |
| 6.82E-02 0 0 | Cs4g08220.1/Cs4g082  | 6    | 0 | 0 | 2 | MASCOT | T | PLEX8 |
| 1.90E-01 0 0 | Cs4g08220.1/Cs4g082  | 6    | 0 | 0 | 2 | MASCOT | T | PLEX8 |
| 1.65E-01 0 0 | Cs4g08220.1/Cs4g082  | 6    | 0 | 0 | 2 | MASCOT | T | PLEX8 |
| 5.70E-02 0 0 | Cs4g08220.1/Cs4g082  | 6    | 0 | 0 | 2 | MASCOT | T | PLEX8 |
| 1.49E-01 0 0 | Cs4g08220.1/Cs4g082  | 6    | 0 | 0 | 2 | MASCOT | T | PLEX8 |
| 3.03E-01 0 0 | Cs4g08220.1/Cs4g082  | 6    | 0 | 0 | 2 | MASCOT | T | PLEX8 |
| 7.56E-02 0 0 | Cs4g08220.1/Cs4g082  | 6    | 0 | 0 | 2 | MASCOT | T |       |
| 4.14E-01 0 0 | Cs4g08220.1/Cs4g082  | 5.4  | 0 | 0 | 2 | MASCOT | T | PLEX8 |
| 8.16E-03 0 0 | Cs2g24810.1 ! Cs4g08 | 8.76 | 0 | 0 | 2 | MASCOT | T | PLEX8 |
| 8.62E-03 0 0 | Cs4g08220.1/Cs4g082  | 4.54 | 0 | 0 | 2 | MASCOT | T | PLEX8 |
| 1.57E-02 0 0 | Cs4g08220.1/Cs4g082  | 4.54 | 0 | 0 | 2 | MASCOT | T | PLEX8 |
| 1.06E-01 0 0 | Cs4g08220.1/Cs4g082  | 5.32 | 0 | 0 | 2 | MASCOT | T | PLEX8 |
| 1.78E-01 0 0 | Cs4g08220.1/Cs4g082  | 5.32 | 0 | 0 | 2 | MASCOT | T | PLEX8 |
| 5.55E-03 0 0 | Cs4g08220.1/Cs4g082  | 5.96 | 1 | 0 | 2 | MASCOT | T | PLEX8 |
| 2.91E-02 0 0 | Cs4g08220.1/Cs4g082  | 5.96 | 1 | 0 | 2 | MASCOT | T | PLEX8 |
| 4.38E-03 0 0 | Cs4g08220.1/Cs4g082  | 5.96 | 1 | 0 | 2 | MASCOT | T | PLEX8 |
| 4.58E-04 0 0 | Cs4g08220.1/Cs4g082  | 4.65 | 0 | 0 | 2 | MASCOT | T | PLEX8 |
| 5.56E-03 0 0 | Cs4g08220.1/Cs4g082  | 4.65 | 0 | 0 | 2 | MASCOT | T | PLEX8 |
| 4.63E-03 0 0 | Cs4g08220.1/Cs4g082  | 4.65 | 0 | 0 | 2 | MASCOT | T | PLEX8 |
| 4.54E-04 0 0 | Cs4g08220.1/Cs4g082  | 4.65 | 0 | 0 | 2 | MASCOT | T | PLEX8 |

|          |     |                     |      |   |      |   |        |        |       |       |
|----------|-----|---------------------|------|---|------|---|--------|--------|-------|-------|
| 3.58E-02 | 0 0 | Cs4g08220.1/Cs4g082 | 5.5  | 0 | 0    | 2 | MASCOT | T      | PLEX8 |       |
| 5.81E-03 | 0 0 | Cs4g08220.1/Cs4g082 | 5.5  | 0 | 0    | 2 | MASCOT | T      | PLEX8 |       |
| 9.01E-04 | 0 0 | Cs4g08220.1/Cs4g082 | 5.5  | 0 | 0    | 2 | MASCOT | T      | PLEX8 |       |
| 2.84E-01 | 0 0 | Cs4g08220.1/Cs4g082 | 8.72 | 0 | 0    | 2 | MASCOT | T      | PLEX8 |       |
| 5.62E-02 | 0 0 | Cs4g08220.1/Cs4g082 | 4.21 | 0 | 0    | 2 | MASCOT | T      |       |       |
| 2.13E-03 | 0 0 | Cs4g08220.1/Cs4g082 | 4.21 | 0 | 0    | 2 | MASCOT | T      |       |       |
| 8.60E-04 | 0 0 | Cs4g08220.1/Cs4g082 | 5.84 | 0 | 0    | 2 | MASCOT | T      | PLEX8 |       |
| 1.36E-05 | 0 0 | Cs4g08220.1/Cs4g082 | 5.84 | 0 | 0    | 2 | MASCOT | T      | PLEX8 |       |
| 1.61E-02 | 0 0 | Cs4g08220.1/Cs4g082 | 4.37 | 0 | 0    | 2 | MASCOT | T      |       |       |
| 6.47E-03 | 0 0 | Cs4g08220.1/Cs4g082 | 4.03 | 0 | 0    | 2 | MASCOT | T      | PLEX8 |       |
| 2.93E-03 | 0 0 | Cs4g08220.1/Cs4g082 | 4.03 | 0 | 0    | 2 | MASCOT | T      | PLEX8 |       |
| 7.62E-02 | 0 0 | Cs4g08220.1/Cs4g082 | 4.03 | 0 | 0    | 2 | MASCOT | T      | PLEX8 |       |
| 1.36E-02 | 0 0 | Cs4g08220.1/Cs4g082 | 4.03 | 0 | 0    | 2 | MASCOT | T      | PLEX8 |       |
| 1.17E-04 | 0 0 | Cs4g08220.1/Cs4g082 | 4.03 | 0 | 0    | 2 | MASCOT | T      | PLEX8 |       |
| 1.85E-03 | 0 0 | Cs4g08220.1/Cs4g082 | 4.03 | 0 | 0    | 2 | MASCOT | T      | PLEX8 |       |
| 5.62E-03 | 0 0 | Cs4g08220.1/Cs4g082 | 4.03 | 0 | 0    | 2 | MASCOT | T      | PLEX8 |       |
| 4.73E-01 | 0 0 | Cs4g08220.1/Cs4g082 | 4.03 | 0 | 0    | 2 | MASCOT | T      | PLEX8 |       |
| 2.31E-01 | 0 0 | Cs4g08220.1/Cs4g082 | 6.1  | 0 | 0    | 2 | MASCOT | T      | PLEX8 |       |
| 1.44E-01 | 0 0 | Cs4g08220.1/Cs4g082 | 6.1  | 0 | 0    | 2 | MASCOT | T      | PLEX8 |       |
| 2.00E-01 | 0 0 | Cs4g08220.1/Cs4g082 | 4.37 | 0 | 0    | 2 | MASCOT | T      | PLEX8 |       |
| 2.08E-01 | 0 0 | Cs4g08220.1/Cs4g082 | 4.37 | 0 | 0    | 2 | MASCOT | T      | PLEX8 |       |
| 1.03E-01 | 0 0 | Cs4g08220.1/Cs4g082 | 4.37 | 0 | 0    | 2 | MASCOT | T      | PLEX8 |       |
| 1.41E-01 | 0 0 | Cs8g05730.1         | 6.05 | 0 | 0    | 2 | MASCOT | T      | PLEX8 |       |
| 1.34E-01 | 0 0 | Cs8g05730.1         | 6.05 | 0 | 0    | 2 | MASCOT | T      | PLEX8 |       |
| 9.43E-04 | 0 0 | Cs8g05730.1         | 6.79 | 0 | 0    | 2 | MASCOT | T      | PLEX8 |       |
| 1.13E-03 | 0 0 | Cs8g05730.1         | 6.79 | 0 | 0    | 2 | MASCOT | T      | PLEX8 |       |
| 1.38E-01 | 0 0 | Cs8g05730.1         | 6.79 | 0 | 0    | 2 | MASCOT | T      |       |       |
| 1.97E-04 | 0 0 | Cs8g05730.1         | 6.79 | 0 | 0    | 2 | MASCOT | T      |       |       |
| 2.16E-02 | 0 0 | Cs8g05730.1         | 6.79 | 0 | 0    | 2 | MASCOT | T      |       |       |
| 1.25E-03 | 0 0 | Cs8g05730.1         | 6.05 | 0 | 0    | 2 | MASCOT | T      | PLEX8 |       |
| 5.74E-02 | 0 0 | Cs8g05730.1         | 6.05 | 0 | 0    | 2 | MASCOT | T      | PLEX8 |       |
| 1.84E-02 | 0 0 | Cs8g05730.1         | 6.05 | 0 | 0    | 2 | MASCOT | T      | PLEX8 |       |
| 1.36E-01 | 0 0 | Cs8g05730.1         | 6.05 | 0 | 0    | 2 | MASCOT | T      | PLEX8 |       |
| 5.90E-02 | 0 0 | Cs8g05730.1         | 6.05 | 0 | 0    | 2 | MASCOT | T      | PLEX8 |       |
| 2.14E-02 | 0 0 | Cs8g05730.1         | 6.05 | 0 | 0    | 2 | MASCOT | T      | PLEX8 |       |
| 1.46E-02 | 0 0 | Cs8g05730.1         | 6.05 | 0 | 0    | 2 | MASCOT | T      | PLEX8 |       |
| 1.91E-06 | 0 0 | Cs8g05730.1         | 5.84 | 0 | 0    | 2 | MASCOT | T      |       |       |
| 1.07E-02 | 0 0 | Cs8g05730.1         | 4.14 | 0 | 0    | 2 | MASCOT | T      | PLEX8 |       |
| 7.03E-03 | 0 0 | Cs8g05730.1         | 4.14 | 0 | 0    | 2 | MASCOT | T      |       |       |
| 9.66E-04 | 0 0 | Cs8g05730.1         | 4.14 | 0 | 0    | 2 | MASCOT | T      | PLEX8 |       |
| 1.92E-04 | 0 0 | Cs8g05730.1         | 4.14 | 0 | 0    | 2 | MASCOT | T      | PLEX8 |       |
| 2.57E-02 | 0 0 | Cs8g05730.1         | 4.14 | 0 | 0    | 2 | MASCOT | T      | PLEX8 |       |
| 5.06E-04 | 0 0 | Cs8g05730.1         | 4.32 | 1 | 0    | 2 | MASCOT | T      | PLEX8 |       |
| 6.50E-02 | 0 0 | Cs8g05730.1         | 4.32 | 1 | 0    | 2 | MASCOT | T      | PLEX8 |       |
| 1.30E-04 | 0 0 | Cs8g05730.1         | 6.74 | 0 | 0    | 2 | MASCOT | T      |       |       |
| 9.55E-02 | 0 0 | Cs8g05730.1         | 8.75 | 0 | 0    | 2 | MASCOT | T      | PLEX8 |       |
| 2.63E-01 | 0 0 | Cs8g05730.1         | 8.75 | 0 | 0    | 2 | MASCOT | T      | PLEX8 |       |
| 4.55E-02 | 0 0 | Cs8g05730.1         | 8.41 | 0 | 0    | 2 | MASCOT | T      |       |       |
| 1.41E-02 | 0 0 | Cs8g05730.1         | 4.32 | 1 | 0    | 2 | MASCOT | T      | PLEX8 |       |
| 1.83E-02 | 0 0 | Cs8g05730.1         | 4.37 | 0 | 0    | 2 | MASCOT | T      | PLEX8 |       |
| 3.55E-02 | 0 0 | Cs8g05730.1         | 4.65 | 0 | 15.9 | 0 | 2      | MASCOT | T     | PLEX8 |

|              |             |      |   |      |   |   |        |   |       |
|--------------|-------------|------|---|------|---|---|--------|---|-------|
| 9.57E-02 0 0 | Cs8g05730.1 | 4.65 | 0 | 15.9 | 0 | 2 | MASCOT | T | PLEX8 |
| 2.56E-01 0 0 | Cs8g05730.1 | 4.65 | 0 | 15.9 | 0 | 2 | MASCOT | T |       |
| 7.71E-02 0 0 | Cs8g05730.1 | 4.65 | 0 | 15.9 | 0 | 2 | MASCOT | T |       |
| 2.26E-02 0 0 | Cs8g05730.1 | 4.65 | 0 |      | 0 | 2 | MASCOT | T | PLEX8 |
| 5.29E-02 0 0 | Cs8g05730.1 | 4.65 | 0 |      | 0 | 2 | MASCOT | T | PLEX8 |
| 5.55E-02 0 0 | Cs8g05730.1 | 4.65 | 0 |      | 0 | 2 | MASCOT | T |       |
| 1.96E-01 0 0 | Cs8g05730.1 | 4.65 | 0 |      | 0 | 2 | MASCOT | T | PLEX8 |
| 9.71E-03 0 0 | Cs8g05730.1 | 4.65 | 0 |      | 0 | 2 | MASCOT | T |       |
| 2.77E-02 0 0 | Cs8g05730.1 | 6.05 | 0 |      | 0 | 2 | MASCOT | T | PLEX8 |
| 1.13E-01 0 0 | Cs8g05730.1 | 6.05 | 0 |      | 0 | 2 | MASCOT | T | PLEX8 |
| 4.68E-02 0 0 | Cs8g05730.1 | 6.05 | 0 |      | 0 | 2 | MASCOT | T | PLEX8 |
| 2.92E-01 0 0 | Cs8g05730.1 | 4.53 | 0 |      | 0 | 2 | MASCOT | T | PLEX8 |
| 3.53E-01 0 0 | Cs8g05730.1 | 4.53 | 0 |      | 0 | 2 | MASCOT | T | PLEX8 |
| 6.41E-04 0 0 | Cs8g05730.1 | 4.37 | 0 |      | 0 | 2 | MASCOT | T | PLEX8 |
| 2.35E-02 0 0 | Cs8g05730.1 | 4.37 | 0 |      | 0 | 2 | MASCOT | T | PLEX8 |
| 2.44E-02 0 0 | Cs8g05730.1 | 4.37 | 0 |      | 0 | 2 | MASCOT | T | PLEX8 |
| 1.97E-03 0 0 | Cs8g05730.1 | 3.77 | 0 | 15.9 | 0 | 2 | MASCOT | T | PLEX8 |
| 2.33E-02 0 0 | Cs8g05730.1 | 3.77 | 0 |      | 0 | 2 | MASCOT | T | PLEX8 |
| 4.85E-03 0 0 | Cs8g05730.1 | 3.77 | 0 |      | 0 | 2 | MASCOT | T |       |
| 8.30E-04 0 0 | Cs8g05730.1 | 3.77 | 0 |      | 0 | 2 | MASCOT | T |       |
| 2.79E-03 0 0 | Cs8g05730.1 | 9.76 | 0 |      | 0 | 2 | MASCOT | T | PLEX8 |
| 2.14E-02 0 0 | Cs8g05730.1 | 9.76 | 0 |      | 0 | 2 | MASCOT | T | PLEX8 |
| 1.89E-04 0 0 | Cs8g05730.1 | 4.23 | 1 |      | 0 | 2 | MASCOT | T |       |
| 5.80E-04 0 0 | Cs8g05730.1 | 4.75 | 0 |      | 0 | 2 | MASCOT | T | PLEX8 |
| 2.63E-01 0 0 | Cs8g05730.1 | 4.75 | 0 |      | 0 | 2 | MASCOT | T | PLEX8 |
| 4.76E-05 0 0 | Cs8g05730.1 | 4.75 | 0 |      | 0 | 2 | MASCOT | T | PLEX8 |
| 5.78E-02 0 0 | Cs8g05730.1 | 6.14 | 1 |      | 0 | 2 | MASCOT | T | PLEX8 |
| 2.09E-02 0 0 | Cs8g05730.1 | 6.14 | 1 |      | 0 | 2 | MASCOT | T | PLEX8 |
| 7.26E-02 0 0 | Cs8g05730.1 | 9.47 | 0 |      | 0 | 2 | MASCOT | T | PLEX8 |
| 5.58E-03 0 0 | Cs8g05730.1 | 4.37 | 0 |      | 0 | 2 | MASCOT | T | PLEX8 |
| 3.53E-01 0 0 | Cs8g05730.1 | 4.37 | 0 |      | 0 | 2 | MASCOT | T | PLEX8 |
| 1.42E-01 0 0 | Cs5g09320.1 | 6.79 | 0 |      | 0 | 2 | MASCOT | T | PLEX8 |
| 3.69E-02 0 0 | Cs5g09320.1 | 4.53 | 0 |      | 0 | 2 | MASCOT | T | PLEX8 |
| 1.08E-03 0 0 | Cs5g09320.1 | 4.53 | 0 |      | 0 | 2 | MASCOT | T | PLEX8 |
| 7.06E-02 0 0 | Cs5g09320.1 | 6.79 | 0 |      | 0 | 2 | MASCOT | T | PLEX8 |
| 2.23E-02 0 0 | Cs5g09320.1 | 6.79 | 0 |      | 0 | 2 | MASCOT | T | PLEX8 |
| 2.58E-01 0 0 | Cs5g09320.1 | 4.37 | 0 |      | 0 | 2 | MASCOT | T | PLEX8 |
| 1.48E-01 0 0 | Cs5g09320.1 | 4.37 | 0 |      | 0 | 2 | MASCOT | T | PLEX8 |
| 7.33E-03 0 0 | Cs5g09320.1 | 4.37 | 0 |      | 0 | 2 | MASCOT | T | PLEX8 |
| 1.39E-01 0 0 | Cs5g09320.1 | 4.37 | 0 |      | 0 | 2 | MASCOT | T | PLEX8 |
| 6.07E-02 0 0 | Cs5g09320.1 | 4.14 | 0 |      | 0 | 2 | MASCOT | T | PLEX8 |
| 2.22E-03 0 0 | Cs5g09320.1 | 4.14 | 0 |      | 0 | 2 | MASCOT | T | PLEX8 |
| 6.05E-02 0 0 | Cs5g09320.1 | 4.14 | 0 |      | 0 | 2 | MASCOT | T | PLEX8 |
| 1.65E-02 0 0 | Cs5g09320.1 | 6.1  | 0 |      | 0 | 2 | MASCOT | T | PLEX8 |
| 1.08E-02 0 0 | Cs5g09320.1 | 6.1  | 0 |      | 0 | 2 | MASCOT | T | PLEX8 |
| 2.77E-03 0 0 | Cs5g09320.1 | 4    | 0 |      | 0 | 2 | MASCOT | T | PLEX8 |
| 3.77E-05 0 0 | Cs5g09320.1 | 4    | 0 |      | 0 | 2 | MASCOT | T | PLEX8 |
| 4.41E-03 0 0 | Cs5g09320.1 | 8.75 | 0 |      | 0 | 2 | MASCOT | T | PLEX8 |
| 1.29E-03 0 0 | Cs5g09320.1 | 4.03 | 0 |      | 0 | 2 | MASCOT | T | PLEX8 |
| 1.83E-06 0 0 | Cs5g09320.1 | 4.37 | 0 |      | 0 | 2 | MASCOT | T |       |
| 1.28E-04 0 0 | Cs5g09320.1 | 4.37 | 0 |      | 0 | 2 | MASCOT | T |       |

|              |             |      |   |      |          |          |         |
|--------------|-------------|------|---|------|----------|----------|---------|
| 6.37E-06 0 0 | Cs5g09320.1 | 4.37 | 0 | 0    | 2 MASCOT | T        |         |
| 5.63E-04 0 0 | Cs5g09320.1 | 4.54 | 0 | 0    | 2 MASCOT | T        | PLEX8   |
| 5.08E-05 0 0 | Cs5g09320.1 | 4.54 | 0 | 0    | 2 MASCOT | T        | PLEX8   |
| 1.21E-01 0 0 | Cs5g09320.1 | 4.14 | 0 | 0    | 2 MASCOT | T        | PLEX8   |
| 5.29E-01 0 0 | Cs5g09320.1 | 6    | 0 | 15.9 | 0        | 2 MASCOT | T PLEX8 |
| 1.94E-01 0 0 | Cs5g09320.1 | 6    | 0 | 0    | 2 MASCOT | T        | PLEX8   |
| 2.87E-01 0 0 | Cs5g09320.1 | 6    | 0 | 0    | 2 MASCOT | T        | PLEX8   |
| 1.71E-01 0 0 | Cs5g09320.1 | 6    | 0 | 0    | 2 MASCOT | T        | PLEX8   |
| 1.99E-03 0 0 | Cs5g09320.1 | 9.75 | 0 | 15.9 | 0        | 2 MASCOT | T       |
| 5.55E-05 0 0 | Cs5g09320.1 | 9.75 | 0 | 15.9 | 0        | 2 MASCOT | T PLEX8 |
| 7.47E-02 0 0 | Cs5g09320.1 | 5.84 | 0 | 0    | 2 MASCOT | T        |         |
| 2.30E-02 0 0 | Cs5g09320.1 | 5.84 | 0 | 0    | 2 MASCOT | T        |         |
| 7.53E-04 0 0 | Cs5g09320.1 | 5.4  | 0 | 0    | 2 MASCOT | T        | PLEX8   |
| 4.24E-02 0 0 | Cs5g09320.1 | 5.4  | 0 | 0    | 2 MASCOT | T        | PLEX8   |
| 2.14E-01 0 0 | Cs5g09320.1 | 5.4  | 0 | 0    | 2 MASCOT | T        | PLEX8   |
| 4.16E-03 0 0 | Cs5g09320.1 | 6.05 | 0 | 0    | 2 MASCOT | T        | PLEX8   |
| 3.32E-01 0 0 | Cs5g09320.1 | 6.05 | 0 | 0    | 2 MASCOT | T        | PLEX8   |
| 1.74E-02 0 0 | Cs5g09320.1 | 6.05 | 0 | 0    | 2 MASCOT | T        | PLEX8   |
| 3.26E-01 0 0 | Cs5g09320.1 | 8.22 | 0 | 0    | 2 MASCOT | T        | PLEX8   |
| 3.70E-01 0 0 | Cs5g09320.1 | 8.22 | 0 | 0    | 2 MASCOT | T        | PLEX8   |
| 6.46E-03 0 0 | Cs5g09320.1 | 10   | 1 | 0    | 2 MASCOT | T        | PLEX8   |
| 4.97E-03 0 0 | Cs5g09320.1 | 10   | 1 | 0    | 2 MASCOT | T        | PLEX8   |
| 6.30E-04 0 0 | Cs5g09320.1 | 8.59 | 0 | 0    | 2 MASCOT | T        | PLEX8   |
| 1.23E-01 0 0 | Cs5g09320.1 | 8.59 | 0 | 0    | 2 MASCOT | T        | PLEX8   |
| 5.49E-04 0 0 | Cs5g09320.1 | 8.59 | 0 | 0    | 2 MASCOT | T        | PLEX8   |
| 1.34E-04 0 0 | Cs5g09320.1 | 4.37 | 0 | 0    | 2 MASCOT | T        | PLEX8   |
| 3.77E-02 0 0 | Cs5g09320.1 | 3.93 | 0 | 0    | 2 MASCOT | T        | PLEX8   |
| 1.84E-02 0 0 | Cs5g09320.1 | 3.93 | 0 | 0    | 2 MASCOT | T        |         |
| 4.45E-02 0 0 | Cs5g09320.1 | 3.93 | 0 | 0    | 2 MASCOT | T        | PLEX8   |
| 1.78E-01 0 0 | Cs5g09320.1 | 8.72 | 0 | 0    | 2 MASCOT | T        |         |
| 1.66E-02 0 0 | Cs8g17170.1 | 5.88 | 0 | 0    | 2 MASCOT | T        | PLEX8   |
| 3.07E-01 0 0 | Cs8g17170.1 | 5.88 | 0 | 0    | 2 MASCOT | T        | PLEX8   |
| 3.24E-03 0 0 | Cs8g17170.1 | 6.05 | 0 | 0    | 2 MASCOT | T        | PLEX8   |
| 9.90E-02 0 0 | Cs8g17170.1 | 8.8  | 0 | 0    | 2 MASCOT | T        | PLEX8   |
| 1.96E-02 0 0 | Cs8g17170.1 | 8.8  | 0 | 0    | 2 MASCOT | T        | PLEX8   |
| 2.17E-02 0 0 | Cs8g17170.1 | 8.8  | 0 | 0    | 2 MASCOT | T        | PLEX8   |
| 1.57E-02 0 0 | Cs8g17170.1 | 8.8  | 0 | 0    | 2 MASCOT | T        | PLEX8   |
| 1.75E-02 0 0 | Cs8g17170.1 | 8.8  | 0 | 0    | 2 MASCOT | T        | PLEX8   |
| 3.24E-02 0 0 | Cs8g17170.1 | 4.25 | 0 | 0    | 2 MASCOT | T        | PLEX8   |
| 7.25E-02 0 0 | Cs8g17170.1 | 4.53 | 0 | 0    | 2 MASCOT | T        | PLEX8   |
| 1.74E-03 0 0 | Cs8g17170.1 | 4.37 | 0 | 0    | 2 MASCOT | T        |         |
| 2.51E-04 0 0 | Cs8g17170.1 | 4.37 | 0 | 0    | 2 MASCOT | T        |         |
| 9.24E-04 0 0 | Cs8g17170.1 | 6.07 | 1 | 0    | 2 MASCOT | T        | PLEX8   |
| 5.53E-03 0 0 | Cs8g17170.1 | 4.21 | 0 | 0    | 2 MASCOT | T        |         |
| 4.50E-02 0 0 | Cs8g17170.1 | 8.75 | 0 | 0    | 2 MASCOT | T        | PLEX8   |
| 2.43E-01 0 0 | Cs8g17170.1 | 8.75 | 0 | 0    | 2 MASCOT | T        | PLEX8   |
| 3.22E-02 0 0 | Cs8g17170.1 | 4.37 | 0 | 0    | 2 MASCOT | T        | PLEX8   |
| 9.16E-03 0 0 | Cs8g17170.1 | 4.37 | 0 | 0    | 2 MASCOT | T        | PLEX8   |
| 7.76E-02 0 0 | Cs8g17170.1 | 4.37 | 0 | 0    | 2 MASCOT | T        | PLEX8   |
| 3.32E-03 0 0 | Cs8g17170.1 | 5.55 | 0 | 0    | 2 MASCOT | T        | PLEX8   |
| 1.84E-03 0 0 | Cs8g17170.1 | 5.55 | 0 | 0    | 2 MASCOT | T        | PLEX8   |

|              |                     |      |        |   |          |   |       |
|--------------|---------------------|------|--------|---|----------|---|-------|
| 2.10E-03 0 0 | Cs8g17170.1         | 5.55 | 0      | 0 | 2 MASCOT | T | PLEX8 |
| 1.94E-03 0 0 | Cs8g17170.1         | 5.55 | 0      | 0 | 2 MASCOT | T | PLEX8 |
| 6.32E-02 0 0 | Cs8g17170.1         | 5.72 | 0 15.9 | 0 | 2 MASCOT | T | PLEX8 |
| 1.16E-02 0 0 | Cs8g17170.1         | 5.72 | 0      | 0 | 2 MASCOT | T | PLEX8 |
| 4.97E-03 0 0 | Cs8g17170.1         | 4.37 | 0      | 0 | 2 MASCOT | T |       |
| 1.14E-01 0 0 | Cs8g17170.1         | 4.31 | 0      | 0 | 2 MASCOT | T | PLEX8 |
| 1.33E-03 0 0 | Cs8g17170.1         | 4.31 | 0      | 0 | 2 MASCOT | T | PLEX8 |
| 7.85E-02 0 0 | Cs8g17170.1         | 4.31 | 0      | 0 | 2 MASCOT | T | PLEX8 |
| 1.24E-01 0 0 | Cs8g17170.1         | 9.72 | 0      | 0 | 2 MASCOT | T | PLEX8 |
| 4.45E-01 0 0 | Cs8g17170.1         | 8.59 | 0      | 0 | 2 MASCOT | T | PLEX8 |
| 3.22E-02 0 0 | Cs8g17170.1         | 8.59 | 0      | 0 | 2 MASCOT | T | PLEX8 |
| 2.68E-01 0 0 | Cs8g17170.1         | 8.59 | 0      | 0 | 2 MASCOT | T | PLEX8 |
| 3.49E-02 0 0 | Cs8g17170.1         | 8.59 | 0      | 0 | 2 MASCOT | T | PLEX8 |
| 1.29E-02 0 0 | Cs8g17170.1         | 8.59 | 0      | 0 | 2 MASCOT | T | PLEX8 |
| 2.27E-03 0 0 | Cs8g17170.1         | 6    | 0      | 0 | 2 MASCOT | T | PLEX8 |
| 1.15E-02 0 0 | Cs8g17170.1         | 6    | 0      | 0 | 2 MASCOT | T | PLEX8 |
| 4.98E-03 0 0 | Cs8g17170.1         | 6    | 0      | 0 | 2 MASCOT | T | PLEX8 |
| 8.63E-03 0 0 | Cs8g17170.1         | 6    | 0      | 0 | 2 MASCOT | T | PLEX8 |
| 3.35E-04 0 0 | Cs8g17170.1         | 5.84 | 0      | 0 | 2 MASCOT | T |       |
| 7.17E-02 0 0 | Cs8g17170.1         | 8.59 | 0      | 0 | 2 MASCOT | T | PLEX8 |
| 2.57E-02 0 0 | Cs8g17170.1         | 8.59 | 0      | 0 | 2 MASCOT | T | PLEX8 |
| 1.06E-01 0 0 | Cs8g17170.1         | 8.59 | 0      | 0 | 2 MASCOT | T | PLEX8 |
| 5.99E-02 0 0 | Cs8g17170.1         | 8.59 | 0      | 0 | 2 MASCOT | T | PLEX8 |
| 1.13E-02 0 0 | Cs8g17170.1         | 8.34 | 0      | 0 | 2 MASCOT | T | PLEX8 |
| 1.29E-04 0 0 | Cs8g17170.1         | 8.34 | 0      | 0 | 2 MASCOT | T | PLEX8 |
| 1.50E-02 0 0 | Cs8g17170.1         | 8.34 | 0      | 0 | 2 MASCOT | T | PLEX8 |
| 1.18E-04 0 0 | Cs8g17170.1         | 5.71 | 0      | 0 | 2 MASCOT | T | PLEX8 |
| 1.17E-01 0 0 | Cs8g17170.1         | 5.66 | 0      | 0 | 2 MASCOT | T | PLEX8 |
| 8.00E-02 0 0 | Cs3g22850.1/Cs3g228 | 6.05 | 0      | 0 | 2 MASCOT | T | PLEX8 |
| 6.02E-02 0 0 | Cs3g22850.1/Cs3g228 | 6.05 | 0      | 0 | 2 MASCOT | T | PLEX8 |
| 5.80E-02 0 0 | Cs3g22850.1/Cs3g228 | 4.25 | 0      | 0 | 2 MASCOT | T | PLEX8 |
| 2.79E-04 0 0 | Cs3g22850.1/Cs3g228 | 4.25 | 0      | 0 | 2 MASCOT | T | PLEX8 |
| 6.20E-04 0 0 | Cs3g22850.1/Cs3g228 | 4.25 | 0      | 0 | 2 MASCOT | T | PLEX8 |
| 1.03E-02 0 0 | Cs3g22850.1/Cs3g228 | 4    | 0      | 0 | 2 MASCOT | T | PLEX8 |
| 3.57E-03 0 0 | Cs3g22850.1/Cs3g228 | 4    | 0      | 0 | 2 MASCOT | T | PLEX8 |
| 1.61E-01 0 0 | Cs3g22850.1/Cs3g228 | 4.25 | 0      | 0 | 2 MASCOT | T | PLEX8 |
| 2.27E-01 0 0 | Cs3g22850.1/Cs3g228 | 4.25 | 0      | 0 | 2 MASCOT | T | PLEX8 |
| 2.10E-03 0 0 | Cs3g22850.1/Cs3g228 | 4    | 0      | 0 | 2 MASCOT | T |       |
| 7.12E-03 0 0 | Cs3g22850.1/Cs3g228 | 5.4  | 0      | 0 | 2 MASCOT | T | PLEX8 |
| 1.46E-03 0 0 | Cs3g22850.1/Cs3g228 | 5.4  | 0      | 0 | 2 MASCOT | T | PLEX8 |
| 3.60E-02 0 0 | Cs3g22850.1/Cs3g228 | 5.4  | 0      | 0 | 2 MASCOT | T | PLEX8 |
| 4.39E-02 0 0 | Cs3g22850.1/Cs3g228 | 5.4  | 0      | 0 | 2 MASCOT | T | PLEX8 |
| 1.09E-03 0 0 | Cs3g22850.1/Cs3g228 | 5.4  | 0      | 0 | 2 MASCOT | T | PLEX8 |
| 1.64E-01 0 0 | Cs3g22850.1/Cs3g228 | 4.31 | 0      | 0 | 2 MASCOT | T | PLEX8 |
| 2.12E-02 0 0 | Cs3g22850.1/Cs3g228 | 4.49 | 1      | 0 | 2 MASCOT | T | PLEX8 |
| 8.37E-02 0 0 | Cs3g22850.1/Cs3g228 | 4.49 | 1      | 0 | 2 MASCOT | T |       |
| 1.16E-01 0 0 | Cs3g22850.1/Cs3g228 | 6.75 | 0      | 0 | 2 MASCOT | T | PLEX8 |
| 2.64E-02 0 0 | Cs3g22850.1/Cs3g228 | 6.75 | 0      | 0 | 2 MASCOT | T | PLEX8 |
| 8.11E-02 0 0 | Cs3g22850.1/Cs3g228 | 6.14 | 0      | 0 | 2 MASCOT | T | PLEX8 |
| 2.31E-02 0 0 | Cs3g22850.1/Cs3g228 | 5.84 | 0      | 0 | 2 MASCOT | T | PLEX8 |
| 2.02E-02 0 0 | Cs3g22850.1/Cs3g228 | 5.84 | 0      | 0 | 2 MASCOT | T | PLEX8 |

|          |     |                     |      |   |      |   |        |        |       |       |
|----------|-----|---------------------|------|---|------|---|--------|--------|-------|-------|
| 8.79E-03 | 0 0 | Cs3g22850.1/Cs3g228 | 5.84 | 0 | 0    | 2 | MASCOT | T      | PLEX8 |       |
| 2.06E-03 | 0 0 | Cs3g22850.1/Cs3g228 | 5.84 | 0 | 0    | 2 | MASCOT | T      | PLEX8 |       |
| 1.43E-03 | 0 0 | Cs3g22850.1/Cs3g228 | 5.84 | 0 | 0    | 2 | MASCOT | T      | PLEX8 |       |
| 1.48E-02 | 0 0 | Cs3g22850.1         | 4.03 | 0 | 0    | 2 | MASCOT | T      |       |       |
| 9.71E-06 | 0 0 | Cs3g22850.1         | 4.03 | 0 | 0    | 2 | MASCOT | T      |       |       |
| 2.00E-03 | 0 0 | Cs3g22850.1/Cs3g228 | 4.03 | 0 | 0    | 2 | MASCOT | T      | PLEX8 |       |
| 1.02E-03 | 0 0 | Cs3g22850.1/Cs3g228 | 4.03 | 0 | 0    | 2 | MASCOT | T      | PLEX8 |       |
| 2.39E-03 | 0 0 | Cs3g22850.1/Cs3g228 | 4.03 | 0 | 0    | 2 | MASCOT | T      | PLEX8 |       |
| 3.74E-02 | 0 0 | Cs3g22850.1/Cs3g228 | 6.71 | 0 | 0    | 2 | MASCOT | T      | PLEX8 |       |
| 4.01E-01 | 0 0 | Cs3g22850.1/Cs3g228 | 6.71 | 0 | 0    | 2 | MASCOT | T      | PLEX8 |       |
| 7.30E-03 | 0 0 | Cs3g22850.1         | 5.81 | 0 | 0    | 2 | MASCOT | T      | PLEX8 |       |
| 4.60E-03 | 0 0 | Cs3g22850.1         | 5.81 | 0 | 0    | 2 | MASCOT | T      | PLEX8 |       |
| 1.85E-01 | 0 0 | Cs3g22850.1/Cs3g228 | 6    | 0 | 0    | 2 | MASCOT | T      | PLEX8 |       |
| 1.92E-03 | 0 0 | Cs3g22850.1/Cs3g228 | 6    | 0 | 0    | 2 | MASCOT | T      | PLEX8 |       |
| 8.65E-02 | 0 0 | Cs3g22850.1/Cs3g228 | 6    | 0 | 0    | 2 | MASCOT | T      |       |       |
| 1.75E-02 | 0 0 | Cs3g22850.1         | 4.53 | 0 | 0    | 2 | MASCOT | T      |       |       |
| 4.81E-01 | 0 0 | Cs3g22850.1/Cs3g228 | 4.25 | 0 | 0    | 2 | MASCOT | T      | PLEX8 |       |
| 1.45E-01 | 0 0 | Cs3g22850.1/Cs3g228 | 5.32 | 0 | 0    | 2 | MASCOT | T      | PLEX8 |       |
| 7.80E-02 | 0 0 | Cs3g22850.1/Cs3g228 | 5.32 | 0 | 0    | 2 | MASCOT | T      |       |       |
| 8.23E-02 | 0 0 | Cs3g22850.1         | 4.56 | 1 | 0    | 2 | MASCOT | T      | PLEX8 |       |
| 2.84E-01 | 0 0 | Cs1g19390.1/Cs1g193 | 9.5  | 0 | 15.9 | 0 | 2      | MASCOT | T     | PLEX8 |
| 1.20E-01 | 0 0 | Cs3g22850.1/Cs3g228 | 5.55 | 0 | 0    | 2 | MASCOT | T      | PLEX8 |       |
| 1.20E-01 | 0 0 | Cs3g22850.1/Cs3g228 | 5.55 | 0 | 0    | 2 | MASCOT | T      | PLEX8 |       |
| 2.10E-02 | 0 0 | Cs3g22850.1         | 5.72 | 0 | 0    | 2 | MASCOT | T      | PLEX8 |       |
| 3.39E-02 | 0 0 | Cs3g22850.1         | 5.72 | 0 | 0    | 2 | MASCOT | T      | PLEX8 |       |
| 1.62E-01 | 0 0 | Cs7g30890.1         | 5.32 | 0 | 0    | 2 | MASCOT | T      | PLEX8 |       |
| 1.61E-02 | 0 0 | Cs7g30890.1         | 4.25 | 0 | 0    | 2 | MASCOT | T      |       |       |
| 2.71E-04 | 0 0 | Cs7g30890.1         | 4.25 | 0 | 0    | 2 | MASCOT | T      |       |       |
| 3.82E-02 | 0 0 | Cs7g30890.1         | 5.4  | 0 | 15.9 | 0 | 2      | MASCOT | T     | PLEX8 |
| 2.99E-02 | 0 0 | Cs7g30890.1         | 5.4  | 0 | 15.9 | 0 | 2      | MASCOT | T     | PLEX8 |
| 1.25E-01 | 0 0 | Cs7g30890.1         | 8.75 | 0 | 0    | 2 | MASCOT | T      | PLEX8 |       |
| 7.75E-02 | 0 0 | Cs7g30890.1         | 8.75 | 0 | 0    | 2 | MASCOT | T      | PLEX8 |       |
| 3.51E-02 | 0 0 | Cs7g30890.1         | 8.6  | 0 | 0    | 2 | MASCOT | T      | PLEX8 |       |
| 2.93E-01 | 0 0 | Cs7g30890.1         | 6    | 0 | 0    | 2 | MASCOT | T      | PLEX8 |       |
| 2.87E-02 | 0 0 | Cs7g30890.1         | 5.84 | 0 | 0    | 2 | MASCOT | T      | PLEX8 |       |
| 1.85E-01 | 0 0 | Cs7g30890.1         | 8.75 | 0 | 0    | 2 | MASCOT | T      | PLEX8 |       |
| 1.02E-04 | 0 0 | Cs7g30890.1         | 8.75 | 1 | 0    | 2 | MASCOT | T      | PLEX8 |       |
| 1.09E-04 | 0 0 | Cs7g30890.1         | 8.75 | 1 | 0    | 2 | MASCOT | T      | PLEX8 |       |
| 1.45E-02 | 0 0 | Cs7g30890.1         | 8.75 | 1 | 0    | 2 | MASCOT | T      | PLEX8 |       |
| 2.53E-02 | 0 0 | Cs7g30890.1         | 8.47 | 0 | 0    | 2 | MASCOT | T      | PLEX8 |       |
| 3.64E-02 | 0 0 | Cs7g30890.1         | 5.72 | 0 | 0    | 2 | MASCOT | T      | PLEX8 |       |
| 2.03E-02 | 0 0 | Cs7g30890.1         | 5.72 | 0 | 0    | 2 | MASCOT | T      | PLEX8 |       |
| 5.25E-02 | 0 0 | Cs7g30890.1         | 5.72 | 0 | 0    | 2 | MASCOT | T      | PLEX8 |       |
| 1.95E-01 | 0 0 | Cs7g30890.1         | 6    | 0 | 0    | 2 | MASCOT | T      | PLEX8 |       |
| 2.17E-01 | 0 0 | Cs7g30890.1         | 6    | 0 | 0    | 2 | MASCOT | T      | PLEX8 |       |
| 3.51E-04 | 0 0 | Cs7g30890.1         | 4.22 | 0 | 0    | 2 | MASCOT | T      | PLEX8 |       |
| 8.80E-03 | 0 0 | Cs7g30890.1         | 4.22 | 0 | 0    | 2 | MASCOT | T      | PLEX8 |       |
| 1.75E-03 | 0 0 | Cs7g30890.1         | 4.22 | 0 | 0    | 2 | MASCOT | T      | PLEX8 |       |
| 1.45E-04 | 0 0 | Cs7g30890.1         | 4.22 | 0 | 0    | 2 | MASCOT | T      |       |       |
| 2.27E-04 | 0 0 | Cs7g30890.1         | 4.22 | 0 | 0    | 2 | MASCOT | T      |       |       |
| 9.88E-03 | 0 0 | Cs7g30890.1         | 5.32 | 0 | 0    | 2 | MASCOT | T      | PLEX8 |       |



|              |                       |      |   |   |          |   |       |
|--------------|-----------------------|------|---|---|----------|---|-------|
| 1.29E-01 0 0 | Cs7g30890.1           | 4.14 | 0 | 0 | 2 MASCOT | T | PLEX8 |
| 9.05E-02 0 0 | Cs7g30890.1           | 4.14 | 0 | 0 | 2 MASCOT | T | PLEX8 |
| 1.09E-02 0 0 | Cs7g30890.1           | 6    | 0 | 0 | 2 MASCOT | T | PLEX8 |
| 1.47E-01 0 0 | Cs7g30890.1           | 6    | 0 | 0 | 2 MASCOT | T | PLEX8 |
| 2.72E-05 0 0 | Cs7g30890.1           | 6    | 0 | 0 | 2 MASCOT | T | PLEX8 |
| 2.64E-02 0 0 | Cs7g30890.1           | 6    | 0 | 0 | 2 MASCOT | T |       |
| 6.76E-06 0 0 | Cs7g30890.1           | 6    | 0 | 0 | 2 MASCOT | T |       |
| 2.00E-01 0 0 | Cs7g30890.1           | 5.99 | 0 | 0 | 2 MASCOT | T | PLEX8 |
| 6.48E-02 0 0 | Cs7g30890.1           | 8.75 | 0 | 0 | 2 MASCOT | T | PLEX8 |
| 1.25E-01 0 0 | Cs7g30890.1           | 4.37 | 0 | 0 | 2 MASCOT | T |       |
| 8.74E-02 0 0 | Cs7g30890.1           | 6.47 | 0 | 0 | 2 MASCOT | T | PLEX8 |
| 1.28E-03 0 0 | Cs7g30890.1           | 8.26 | 0 | 0 | 2 MASCOT | T | PLEX8 |
| 8.21E-02 0 0 | Cs7g30890.1           | 8.47 | 0 | 0 | 2 MASCOT | T | PLEX8 |
| 1.80E-03 0 0 | orange1.1t00226.1/ora | 4.53 | 0 | 0 | 2 MASCOT | T | PLEX8 |
| 1.02E-04 0 0 | orange1.1t00226.1/ora | 4.53 | 0 | 0 | 2 MASCOT | T | PLEX8 |
| 1.32E-02 0 0 | orange1.1t00226.1/ora | 4.53 | 0 | 0 | 2 MASCOT | T | PLEX8 |
| 9.63E-05 0 0 | orange1.1t00226.1/ora | 4.53 | 0 | 0 | 2 MASCOT | T | PLEX8 |
| 1.12E-01 0 0 | orange1.1t00226.1/ora | 4.53 | 0 | 0 | 2 MASCOT | T | PLEX8 |
| 8.67E-03 0 0 | orange1.1t00226.1/ora | 5.99 | 0 | 0 | 2 MASCOT | T |       |
| 2.68E-02 0 0 | orange1.1t00226.1/ora | 8.64 | 0 | 0 | 2 MASCOT | T | PLEX8 |
| 3.08E-03 0 0 | orange1.1t00226.1/ora | 8.64 | 0 | 0 | 2 MASCOT | T | PLEX8 |
| 6.19E-03 0 0 | orange1.1t00226.1/ora | 8.64 | 0 | 0 | 2 MASCOT | T | PLEX8 |
| 8.26E-03 0 0 | orange1.1t00226.1/ora | 8.64 | 0 | 0 | 2 MASCOT | T | PLEX8 |
| 6.54E-02 0 0 | orange1.1t00226.1/ora | 8.64 | 0 | 0 | 2 MASCOT | T | PLEX8 |
| 1.02E-05 0 0 | orange1.1t00226.1/ora | 8.64 | 0 | 0 | 2 MASCOT | T | PLEX8 |
| 5.31E-03 0 0 | orange1.1t00226.1/ora | 8.64 | 0 | 0 | 2 MASCOT | T |       |
| 3.29E-01 0 0 | orange1.1t00226.1/ora | 8.64 | 0 | 0 | 2 MASCOT | T |       |
| 1.09E-01 0 0 | orange1.1t00226.1/ora | 8.64 | 0 | 0 | 2 MASCOT | T |       |
| 8.59E-02 0 0 | orange1.1t00226.1/ora | 8.79 | 0 | 0 | 2 MASCOT | T | PLEX8 |
| 6.22E-02 0 0 | orange1.1t00226.1/ora | 8.79 | 0 | 0 | 2 MASCOT | T | PLEX8 |
| 6.36E-02 0 0 | orange1.1t00226.1/ora | 4.53 | 0 | 0 | 2 MASCOT | T | PLEX8 |
| 2.48E-01 0 0 | orange1.1t00226.1/ora | 6.1  | 0 | 0 | 2 MASCOT | T | PLEX8 |
| 7.49E-03 0 0 | orange1.1t00226.1/ora | 6.1  | 0 | 0 | 2 MASCOT | T |       |
| 9.33E-03 0 0 | orange1.1t00226.1/ora | 6.1  | 0 | 0 | 2 MASCOT | T |       |
| 2.46E-03 0 0 | orange1.1t00226.1/ora | 6.1  | 0 | 0 | 2 MASCOT | T |       |
| 6.98E-03 0 0 | orange1.1t00226.1/ora | 6.1  | 0 | 0 | 2 MASCOT | T |       |
| 1.98E-06 0 0 | orange1.1t00226.1/ora | 6.1  | 0 | 0 | 2 MASCOT | T |       |
| 1.23E-02 0 0 | orange1.1t00226.1/ora | 6.1  | 0 | 0 | 2 MASCOT | T |       |
| 3.06E-05 0 0 | orange1.1t00226.1/ora | 6.1  | 0 | 0 | 2 MASCOT | T |       |
| 1.66E-02 0 0 | orange1.1t00226.1/ora | 6.1  | 0 | 0 | 2 MASCOT | T |       |
| 2.52E-01 0 0 | orange1.1t00226.1/ora | 6.1  | 0 | 0 | 2 MASCOT | T |       |
| 1.79E-03 0 0 | orange1.1t00226.1/ora | 6.1  | 0 | 0 | 2 MASCOT | T |       |
| 6.12E-02 0 0 | orange1.1t00226.1/ora | 6.1  | 0 | 0 | 2 MASCOT | T |       |
| 1.76E-01 0 0 | orange1.1t00226.1/ora | 6.1  | 0 | 0 | 2 MASCOT | T |       |
| 3.17E-01 0 0 | orange1.1t00226.1/ora | 4.53 | 0 | 0 | 2 MASCOT | T | PLEX8 |
| 1.44E-01 0 0 | orange1.1t00226.1/ora | 4.53 | 0 | 0 | 2 MASCOT | T |       |
| 2.19E-01 0 0 | orange1.1t00226.1/ora | 4.53 | 0 | 0 | 2 MASCOT | T | PLEX8 |
| 2.65E-01 0 0 | orange1.1t00226.1/ora | 4.53 | 0 | 0 | 2 MASCOT | T |       |
| 1.99E-01 0 0 | orange1.1t00226.1/ora | 5.32 | 0 | 0 | 2 MASCOT | T | PLEX8 |
| 1.45E-03 0 0 | orange1.1t00226.1/ora | 5.32 | 0 | 0 | 2 MASCOT | T | PLEX8 |
| 1.88E-03 0 0 | orange1.1t00226.1/ora | 5.32 | 0 | 0 | 2 MASCOT | T | PLEX8 |

|              |                       |      |   |   |   |        |   |       |
|--------------|-----------------------|------|---|---|---|--------|---|-------|
| 3.24E-02 0 0 | orange1.1t00226.1/ora | 5.32 | 0 | 0 | 2 | MASCOT | T | PLEX8 |
| 3.31E-02 0 0 | orange1.1t00226.1/ora | 5.32 | 0 | 0 | 2 | MASCOT | T | PLEX8 |
| 1.16E-02 0 0 | orange1.1t00226.1/ora | 5.32 | 0 | 0 | 2 | MASCOT | T | PLEX8 |
| 5.73E-02 0 0 | orange1.1t00226.1/ora | 5.32 | 0 | 0 | 2 | MASCOT | T | PLEX8 |
| 8.08E-03 0 0 | orange1.1t00226.1/ora | 5.32 | 0 | 0 | 2 | MASCOT | T | PLEX8 |
| 1.65E-05 0 0 | orange1.1t00226.1/ora | 5.32 | 0 | 0 | 2 | MASCOT | T | PLEX8 |
| 9.14E-06 0 0 | orange1.1t00226.1/ora | 5.32 | 0 | 0 | 2 | MASCOT | T | PLEX8 |
| 1.92E-05 0 0 | orange1.1t00226.1/ora | 5.32 | 0 | 0 | 2 | MASCOT | T | PLEX8 |
| 4.96E-06 0 0 | orange1.1t00226.1/ora | 5.32 | 0 | 0 | 2 | MASCOT | T | PLEX8 |
| 3.81E-05 0 0 | orange1.1t00226.1/ora | 5.32 | 0 | 0 | 2 | MASCOT | T |       |
| 1.04E-05 0 0 | orange1.1t00226.1/ora | 5.32 | 0 | 0 | 2 | MASCOT | T |       |
| 1.60E-01 0 0 | orange1.1t00226.1/ora | 5.59 | 0 | 0 | 2 | MASCOT | T | PLEX8 |
| 1.26E-01 0 0 | orange1.1t00226.1/ora | 5.59 | 0 | 0 | 2 | MASCOT | T | PLEX8 |
| 1.52E-01 0 0 | orange1.1t00226.1/ora | 5.59 | 0 | 0 | 2 | MASCOT | T | PLEX8 |
| 1.86E-02 0 0 | orange1.1t00226.1/ora | 4.21 | 0 | 0 | 2 | MASCOT | T | PLEX8 |
| 2.11E-02 0 0 | orange1.1t00226.1/ora | 4.21 | 0 | 0 | 2 | MASCOT | T | PLEX8 |
| 3.58E-03 0 0 | orange1.1t00226.1/ora | 4.21 | 0 | 0 | 2 | MASCOT | T | PLEX8 |
| 4.64E-03 0 0 | orange1.1t00226.1/ora | 4.21 | 0 | 0 | 2 | MASCOT | T |       |
| 3.65E-03 0 0 | orange1.1t00226.1/ora | 4.21 | 0 | 0 | 2 | MASCOT | T | PLEX8 |
| 1.30E-02 0 0 | orange1.1t00226.1/ora | 4.65 | 0 | 0 | 2 | MASCOT | T | PLEX8 |
| 1.64E-03 0 0 | orange1.1t00226.1/ora | 4.65 | 0 | 0 | 2 | MASCOT | T | PLEX8 |
| 1.55E-01 0 0 | orange1.1t00226.1/ora | 4.65 | 0 | 0 | 2 | MASCOT | T | PLEX8 |
| 1.46E-01 0 0 | orange1.1t00226.1/ora | 12   | 0 | 0 | 2 | MASCOT | T | PLEX8 |
| 2.10E-01 0 0 | orange1.1t00226.1/ora | 12   | 0 | 0 | 2 | MASCOT | T | PLEX8 |
| 1.79E-04 0 0 | orange1.1t00226.1/ora | 12   | 0 | 0 | 2 | MASCOT | T | PLEX8 |
| 1.27E-01 0 0 | orange1.1t00226.1/ora | 12   | 0 | 0 | 2 | MASCOT | T | PLEX8 |
| 8.09E-02 0 0 | orange1.1t00226.1/ora | 12   | 0 | 0 | 2 | MASCOT | T | PLEX8 |
| 2.06E-04 0 0 | orange1.1t00226.1/ora | 12   | 0 | 0 | 2 | MASCOT | T | PLEX8 |
| 2.11E-04 0 0 | orange1.1t00226.1/ora | 12   | 0 | 0 | 2 | MASCOT | T | PLEX8 |
| 3.96E-04 0 0 | orange1.1t00226.1/ora | 12   | 0 | 0 | 2 | MASCOT | T | PLEX8 |
| 1.61E-02 0 0 | orange1.1t00226.1/ora | 12   | 0 | 0 | 2 | MASCOT | T | PLEX8 |
| 1.41E-03 0 0 | orange1.1t00226.1/ora | 12   | 0 | 0 | 2 | MASCOT | T | PLEX8 |
| 5.72E-05 0 0 | orange1.1t00226.1/ora | 12   | 0 | 0 | 2 | MASCOT | T | PLEX8 |
| 6.51E-03 0 0 | orange1.1t00226.1/ora | 12   | 0 | 0 | 2 | MASCOT | T |       |
| 1.52E-03 0 0 | orange1.1t00226.1/ora | 12   | 0 | 0 | 2 | MASCOT | T |       |
| 1.74E-01 0 0 | orange1.1t00226.1/ora | 12   | 0 | 0 | 2 | MASCOT | T |       |
| 1.17E-01 0 0 | orange1.1t00226.1/ora | 12   | 0 | 0 | 2 | MASCOT | T | PLEX8 |
| 7.55E-02 0 0 | orange1.1t00226.1/ora | 12   | 0 | 0 | 2 | MASCOT | T |       |
| 1.82E-04 0 0 | orange1.1t00226.1/ora | 12   | 0 | 0 | 2 | MASCOT | T |       |
| 6.75E-03 0 0 | orange1.1t00226.1/ora | 5.72 | 0 | 0 | 2 | MASCOT | T | PLEX8 |
| 3.40E-01 0 0 | orange1.1t00226.1/ora | 5.72 | 0 | 0 | 2 | MASCOT | T | PLEX8 |
| 3.32E-02 0 0 | orange1.1t00226.1/ora | 5.72 | 0 | 0 | 2 | MASCOT | T | PLEX8 |
| 3.64E-02 0 0 | orange1.1t00226.1/ora | 5.72 | 0 | 0 | 2 | MASCOT | T | PLEX8 |
| 2.70E-03 0 0 | orange1.1t00226.1/ora | 5.72 | 0 | 0 | 2 | MASCOT | T | PLEX8 |
| 5.39E-06 0 0 | orange1.1t00226.1/ora | 5.72 | 0 | 0 | 2 | MASCOT | T | PLEX8 |
| 1.57E-01 0 0 | orange1.1t00226.1/ora | 5.72 | 0 | 0 | 2 | MASCOT | T | PLEX8 |
| 1.45E-07 0 0 | orange1.1t00226.1/ora | 5.72 | 0 | 0 | 2 | MASCOT | T | PLEX8 |
| 6.90E-02 0 0 | orange1.1t00226.1/ora | 5.72 | 0 | 0 | 2 | MASCOT | T | PLEX8 |
| 6.70E-07 0 0 | orange1.1t00226.1/ora | 5.72 | 0 | 0 | 2 | MASCOT | T | PLEX8 |
| 1.14E-01 0 0 | orange1.1t00226.1/ora | 5.72 | 0 | 0 | 2 | MASCOT | T | PLEX8 |
| 4.06E-03 0 0 | orange1.1t00226.1/ora | 5.72 | 0 | 0 | 2 | MASCOT | T | PLEX8 |

|          |     |                       |      |   |      |   |        |        |       |       |
|----------|-----|-----------------------|------|---|------|---|--------|--------|-------|-------|
| 1.99E-03 | 0 0 | orange1.1t00226.1/ora | 5.72 | 0 | 0    | 2 | MASCOT | T      | PLEX8 |       |
| 1.88E-06 | 0 0 | orange1.1t00226.1/ora | 5.72 | 0 | 0    | 2 | MASCOT | T      | PLEX8 |       |
| 2.45E-05 | 0 0 | orange1.1t00226.1/ora | 5.72 | 0 | 0    | 2 | MASCOT | T      | PLEX8 |       |
| 1.21E-04 | 0 0 | orange1.1t00226.1/ora | 5.72 | 0 | 0    | 2 | MASCOT | T      | PLEX8 |       |
| 8.66E-04 | 0 0 | orange1.1t00226.1/ora | 5.72 | 0 | 0    | 2 | MASCOT | T      | PLEX8 |       |
| 1.84E-01 | 0 0 | orange1.1t00226.1/ora | 4.25 | 0 | 0    | 2 | MASCOT | T      | PLEX8 |       |
| 1.66E-01 | 0 0 | orange1.1t00226.1/ora | 4.25 | 0 | 0    | 2 | MASCOT | T      | PLEX8 |       |
| 1.30E-01 | 0 0 | orange1.1t00226.1/ora | 4.25 | 0 | 0    | 2 | MASCOT | T      | PLEX8 |       |
| 2.51E-01 | 0 0 | orange1.1t00226.1/ora | 4.25 | 0 | 0    | 2 | MASCOT | T      | PLEX8 |       |
| 6.42E-02 | 0 0 | orange1.1t00226.1/ora | 4.25 | 0 | 0    | 2 | MASCOT | T      | PLEX8 |       |
| 6.99E-02 | 0 0 | orange1.1t00226.1/ora | 4.25 | 0 | 0    | 2 | MASCOT | T      | PLEX8 |       |
| 2.78E-02 | 0 0 | orange1.1t00226.1/ora | 6.11 | 0 | 15.9 | 0 | 2      | MASCOT | T     | PLEX8 |
| 1.89E-02 | 0 0 | orange1.1t00226.1/ora | 6.11 | 0 | 15.9 | 0 | 2      | MASCOT | T     | PLEX8 |
| 2.15E-03 | 0 0 | orange1.1t00226.1/ora | 6.11 | 0 | 15.9 | 0 | 2      | MASCOT | T     | PLEX8 |
| 5.47E-02 | 0 0 | orange1.1t00226.1/ora | 6.11 | 0 | 15.9 | 0 | 2      | MASCOT | T     | PLEX8 |
| 8.42E-03 | 0 0 | orange1.1t00226.1/ora | 6.11 | 0 | 0    | 2 | MASCOT | T      | PLEX8 |       |
| 2.14E-01 | 0 0 | orange1.1t00226.1/ora | 6.11 | 0 | 0    | 2 | MASCOT | T      | PLEX8 |       |
| 2.99E-01 | 0 0 | orange1.1t00226.1/ora | 6.11 | 0 | 0    | 2 | MASCOT | T      | PLEX8 |       |
| 2.53E-02 | 0 0 | orange1.1t00226.1/ora | 6.11 | 0 | 0    | 2 | MASCOT | T      |       |       |
| 3.84E-01 | 0 0 | orange1.1t00226.1/ora | 8.75 | 0 | 0    | 2 | MASCOT | T      | PLEX8 |       |
| 3.40E-03 | 0 0 | orange1.1t00226.1/ora | 8.75 | 0 | 0    | 2 | MASCOT | T      | PLEX8 |       |
| 1.00E-02 | 0 0 | orange1.1t00226.1/ora | 8.75 | 0 | 0    | 2 | MASCOT | T      | PLEX8 |       |
| 8.80E-03 | 0 0 | orange1.1t00226.1/ora | 8.75 | 0 | 0    | 2 | MASCOT | T      | PLEX8 |       |
| 5.56E-03 | 0 0 | orange1.1t00226.1/ora | 8.75 | 0 | 0    | 2 | MASCOT | T      | PLEX8 |       |
| 2.74E-01 | 0 0 | orange1.1t00226.1/ora | 8.75 | 0 | 0    | 2 | MASCOT | T      | PLEX8 |       |
| 1.85E-01 | 0 0 | orange1.1t00226.1/ora | 8.75 | 0 | 0    | 2 | MASCOT | T      | PLEX8 |       |
| 3.72E-01 | 0 0 | orange1.1t00226.1/ora | 8.75 | 0 | 0    | 2 | MASCOT | T      | PLEX8 |       |
| 2.25E-01 | 0 0 | orange1.1t00226.1/ora | 8.75 | 0 | 0    | 2 | MASCOT | T      | PLEX8 |       |
| 2.72E-01 | 0 0 | orange1.1t00226.1/ora | 8.75 | 0 | 0    | 2 | MASCOT | T      | PLEX8 |       |
| 3.48E-03 | 0 0 | orange1.1t00226.1/ora | 8.75 | 0 | 0    | 2 | MASCOT | T      | PLEX8 |       |
| 1.02E-01 | 0 0 | orange1.1t00226.1/ora | 8.75 | 0 | 0    | 2 | MASCOT | T      | PLEX8 |       |
| 2.06E-01 | 0 0 | orange1.1t00226.1/ora | 8.75 | 0 | 0    | 2 | MASCOT | T      | PLEX8 |       |
| 4.15E-01 | 0 0 | orange1.1t00226.1/ora | 8.75 | 0 | 0    | 2 | MASCOT | T      | PLEX8 |       |
| 3.25E-01 | 0 0 | orange1.1t00226.1/ora | 8.75 | 0 | 0    | 2 | MASCOT | T      | PLEX8 |       |
| 5.98E-01 | 0 0 | orange1.1t00226.1/ora | 8.75 | 0 | 0    | 2 | MASCOT | T      |       |       |
| 1.53E-01 | 0 0 | orange1.1t00226.1/ora | 8.75 | 0 | 0    | 2 | MASCOT | T      |       |       |
| 5.84E-04 | 0 0 | orange1.1t00226.1/ora | 4.37 | 0 | 0    | 2 | MASCOT | T      | PLEX8 |       |
| 2.11E-03 | 0 0 | orange1.1t00226.1/ora | 4.37 | 0 | 0    | 2 | MASCOT | T      | PLEX8 |       |
| 6.14E-03 | 0 0 | orange1.1t00226.1/ora | 4.37 | 0 | 0    | 2 | MASCOT | T      | PLEX8 |       |
| 6.46E-04 | 0 0 | orange1.1t00226.1/ora | 4.37 | 0 | 0    | 2 | MASCOT | T      | PLEX8 |       |
| 1.59E-03 | 0 0 | orange1.1t00226.1/ora | 4.37 | 0 | 0    | 2 | MASCOT | T      | PLEX8 |       |
| 1.11E-02 | 0 0 | orange1.1t00226.1/ora | 4.37 | 0 | 0    | 2 | MASCOT | T      | PLEX8 |       |
| 6.08E-04 | 0 0 | orange1.1t00226.1/ora | 4.37 | 0 | 0    | 2 | MASCOT | T      | PLEX8 |       |
| 7.03E-04 | 0 0 | orange1.1t00226.1/ora | 4.37 | 0 | 0    | 2 | MASCOT | T      | PLEX8 |       |
| 6.80E-04 | 0 0 | orange1.1t00226.1/ora | 4.37 | 0 | 0    | 2 | MASCOT | T      | PLEX8 |       |
| 5.97E-03 | 0 0 | orange1.1t00226.1/ora | 4.37 | 0 | 0    | 2 | MASCOT | T      | PLEX8 |       |
| 1.87E-02 | 0 0 | orange1.1t00226.1/ora | 4.37 | 0 | 0    | 2 | MASCOT | T      | PLEX8 |       |
| 4.19E-04 | 0 0 | orange1.1t00226.1/ora | 4.37 | 0 | 0    | 2 | MASCOT | T      | PLEX8 |       |
| 5.99E-03 | 0 0 | orange1.1t00226.1/ora | 4.37 | 0 | 0    | 2 | MASCOT | T      | PLEX8 |       |
| 6.99E-03 | 0 0 | orange1.1t00226.1/ora | 4.37 | 0 | 0    | 2 | MASCOT | T      | PLEX8 |       |
| 1.33E-01 | 0 0 | orange1.1t00226.1/ora | 4.37 | 0 | 0    | 2 | MASCOT | T      | PLEX8 |       |

|          |     |                       |      |   |   |   |        |   |       |
|----------|-----|-----------------------|------|---|---|---|--------|---|-------|
| 6.18E-03 | 0 0 | orange1.1t00226.1/ora | 4.37 | 0 | 0 | 2 | MASCOT | T | PLEX8 |
| 8.58E-03 | 0 0 | orange1.1t00226.1/ora | 4.37 | 0 | 0 | 2 | MASCOT | T | PLEX8 |
| 3.23E-03 | 0 0 | orange1.1t00226.1/ora | 4.37 | 0 | 0 | 2 | MASCOT | T | PLEX8 |
| 6.26E-04 | 0 0 | orange1.1t00226.1/ora | 4.37 | 0 | 0 | 2 | MASCOT | T | PLEX8 |
| 5.85E-03 | 0 0 | orange1.1t00226.1/ora | 4.37 | 0 | 0 | 2 | MASCOT | T | PLEX8 |
| 5.06E-02 | 0 0 | orange1.1t00226.1/ora | 4.37 | 0 | 0 | 2 | MASCOT | T | PLEX8 |
| 1.03E-03 | 0 0 | orange1.1t00226.1/ora | 4.37 | 0 | 0 | 2 | MASCOT | T |       |
| 3.17E-02 | 0 0 | orange1.1t00226.1/ora | 4.37 | 0 | 0 | 2 | MASCOT | T | PLEX8 |
| 1.51E-03 | 0 0 | orange1.1t00226.1/ora | 4.37 | 0 | 0 | 2 | MASCOT | T | PLEX8 |
| 8.84E-03 | 0 0 | orange1.1t00226.1/ora | 4.37 | 0 | 0 | 2 | MASCOT | T | PLEX8 |
| 6.48E-04 | 0 0 | orange1.1t00226.1/ora | 4.37 | 0 | 0 | 2 | MASCOT | T | PLEX8 |
| 6.15E-03 | 0 0 | orange1.1t00226.1/ora | 4.37 | 0 | 0 | 2 | MASCOT | T | PLEX8 |
| 1.87E-02 | 0 0 | orange1.1t00226.1/ora | 4.37 | 0 | 0 | 2 | MASCOT | T | PLEX8 |
| 1.07E-02 | 0 0 | orange1.1t00226.1/ora | 4.37 | 0 | 0 | 2 | MASCOT | T | PLEX8 |
| 1.19E-03 | 0 0 | orange1.1t00226.1/ora | 4.37 | 0 | 0 | 2 | MASCOT | T | PLEX8 |
| 5.27E-04 | 0 0 | orange1.1t00226.1/ora | 4.37 | 0 | 0 | 2 | MASCOT | T | PLEX8 |
| 1.39E-01 | 0 0 | orange1.1t00226.1/ora | 4.37 | 0 | 0 | 2 | MASCOT | T |       |
| 1.36E-03 | 0 0 | orange1.1t00226.1/ora | 4.37 | 0 | 0 | 2 | MASCOT | T |       |
| 5.14E-05 | 0 0 | orange1.1t00226.1/ora | 4.75 | 0 | 0 | 2 | MASCOT | T | PLEX8 |
| 3.52E-01 | 0 0 | orange1.1t00226.1/ora | 4.75 | 0 | 0 | 2 | MASCOT | T | PLEX8 |
| 1.99E-04 | 0 0 | orange1.1t00226.1/ora | 4.75 | 0 | 0 | 2 | MASCOT | T | PLEX8 |
| 7.45E-05 | 0 0 | orange1.1t00226.1/ora | 4.75 | 0 | 0 | 2 | MASCOT | T | PLEX8 |
| 2.06E-01 | 0 0 | orange1.1t00226.1/ora | 8.22 | 0 | 0 | 2 | MASCOT | T | PLEX8 |
| 1.17E-02 | 0 0 | orange1.1t00226.1/ora | 8.22 | 0 | 0 | 2 | MASCOT | T | PLEX8 |
| 4.45E-03 | 0 0 | orange1.1t00226.1/ora | 8.22 | 0 | 0 | 2 | MASCOT | T | PLEX8 |
| 7.26E-06 | 0 0 | orange1.1t00226.1/ora | 8.22 | 0 | 0 | 2 | MASCOT | T | PLEX8 |
| 1.30E-03 | 0 0 | orange1.1t00226.1/ora | 8.22 | 0 | 0 | 2 | MASCOT | T | PLEX8 |
| 4.09E-03 | 0 0 | orange1.1t00226.1/ora | 8.22 | 0 | 0 | 2 | MASCOT | T | PLEX8 |
| 1.97E-04 | 0 0 | orange1.1t00226.1/ora | 8.22 | 0 | 0 | 2 | MASCOT | T | PLEX8 |
| 1.01E-01 | 0 0 | orange1.1t00226.1/ora | 8.22 | 0 | 0 | 2 | MASCOT | T | PLEX8 |
| 3.42E-04 | 0 0 | orange1.1t00226.1/ora | 8.22 | 0 | 0 | 2 | MASCOT | T | PLEX8 |
| 1.44E-01 | 0 0 | orange1.1t00226.1/ora | 8.22 | 0 | 0 | 2 | MASCOT | T | PLEX8 |
| 3.25E-01 | 0 0 | orange1.1t00226.1/ora | 8.22 | 0 | 0 | 2 | MASCOT | T | PLEX8 |
| 2.89E-01 | 0 0 | orange1.1t00226.1/ora | 8.22 | 0 | 0 | 2 | MASCOT | T | PLEX8 |
| 1.26E-02 | 0 0 | orange1.1t00226.1/ora | 8.22 | 0 | 0 | 2 | MASCOT | T | PLEX8 |
| 3.78E-06 | 0 0 | orange1.1t00226.1/ora | 8.22 | 0 | 0 | 2 | MASCOT | T | PLEX8 |
| 9.20E-06 | 0 0 | orange1.1t00226.1/ora | 8.22 | 0 | 0 | 2 | MASCOT | T | PLEX8 |
| 1.26E-02 | 0 0 | orange1.1t00226.1/ora | 8.22 | 0 | 0 | 2 | MASCOT | T | PLEX8 |
| 4.79E-03 | 0 0 | orange1.1t00226.1/ora | 8.22 | 0 | 0 | 2 | MASCOT | T | PLEX8 |
| 3.65E-02 | 0 0 | orange1.1t00226.1/ora | 8.22 | 0 | 0 | 2 | MASCOT | T | PLEX8 |
| 9.38E-03 | 0 0 | orange1.1t00226.1/ora | 8.22 | 0 | 0 | 2 | MASCOT | T | PLEX8 |
| 1.19E-03 | 0 0 | orange1.1t00226.1/ora | 8.22 | 0 | 0 | 2 | MASCOT | T | PLEX8 |
| 1.87E-01 | 0 0 | orange1.1t00226.1/ora | 8.22 | 0 | 0 | 2 | MASCOT | T | PLEX8 |
| 2.50E-03 | 0 0 | orange1.1t00226.1/ora | 8.22 | 0 | 0 | 2 | MASCOT | T | PLEX8 |
| 3.61E-01 | 0 0 | orange1.1t00226.1/ora | 8.22 | 0 | 0 | 2 | MASCOT | T | PLEX8 |
| 1.37E-02 | 0 0 | orange1.1t00226.1/ora | 8.22 | 0 | 0 | 2 | MASCOT | T | PLEX8 |
| 1.35E-01 | 0 0 | orange1.1t00226.1/ora | 8.22 | 0 | 0 | 2 | MASCOT | T |       |
| 1.63E-03 | 0 0 | orange1.1t00226.1/ora | 6.75 | 1 | 0 | 2 | MASCOT | T | PLEX8 |
| 7.61E-05 | 0 0 | orange1.1t00226.1/ora | 4.53 | 0 | 0 | 2 | MASCOT | T | PLEX8 |
| 1.36E-03 | 0 0 | orange1.1t00226.1/ora | 4.53 | 0 | 0 | 2 | MASCOT | T | PLEX8 |
| 4.43E-01 | 0 0 | orange1.1t00226.1/ora | 8.72 | 0 | 0 | 2 | MASCOT | T | PLEX8 |

|          |     |                       |      |   |   |   |        |   |       |
|----------|-----|-----------------------|------|---|---|---|--------|---|-------|
| 3.55E-01 | 0 0 | orange1.1t00226.1/ora | 8.72 | 0 | 0 | 2 | MASCOT | T | PLEX8 |
| 4.62E-01 | 0 0 | orange1.1t00226.1/ora | 8.72 | 0 | 0 | 2 | MASCOT | T | PLEX8 |
| 1.25E-01 | 0 0 | orange1.1t00226.1/ora | 8.72 | 0 | 0 | 2 | MASCOT | T | PLEX8 |
| 1.61E-01 | 0 0 | orange1.1t00226.1/ora | 8.72 | 0 | 0 | 2 | MASCOT | T | PLEX8 |
| 4.57E-03 | 0 0 | orange1.1t00226.1/ora | 8.72 | 0 | 0 | 2 | MASCOT | T | PLEX8 |
| 1.60E-03 | 0 0 | orange1.1t00226.1/ora | 8.72 | 0 | 0 | 2 | MASCOT | T | PLEX8 |
| 9.01E-02 | 0 0 | orange1.1t00226.1/ora | 8.72 | 0 | 0 | 2 | MASCOT | T | PLEX8 |
| 8.82E-05 | 0 0 | orange1.1t00226.1/ora | 8.72 | 0 | 0 | 2 | MASCOT | T | PLEX8 |
| 1.06E-04 | 0 0 | orange1.1t00226.1/ora | 8.72 | 0 | 0 | 2 | MASCOT | T | PLEX8 |
| 3.70E-05 | 0 0 | orange1.1t00226.1/ora | 8.72 | 0 | 0 | 2 | MASCOT | T | PLEX8 |
| 2.86E-03 | 0 0 | orange1.1t00226.1/ora | 8.72 | 0 | 0 | 2 | MASCOT | T | PLEX8 |
| 2.12E-04 | 0 0 | orange1.1t00226.1/ora | 8.72 | 0 | 0 | 2 | MASCOT | T | PLEX8 |
| 1.76E-01 | 0 0 | orange1.1t00226.1/ora | 8.72 | 0 | 0 | 2 | MASCOT | T | PLEX8 |
| 3.55E-03 | 0 0 | orange1.1t00226.1/ora | 8.72 | 0 | 0 | 2 | MASCOT | T | PLEX8 |
| 3.53E-05 | 0 0 | orange1.1t00226.1/ora | 8.72 | 0 | 0 | 2 | MASCOT | T | PLEX8 |
| 5.66E-03 | 0 0 | orange1.1t00226.1/ora | 8.72 | 0 | 0 | 2 | MASCOT | T | PLEX8 |
| 1.07E-03 | 0 0 | orange1.1t00226.1/ora | 8.72 | 0 | 0 | 2 | MASCOT | T |       |
| 1.51E-01 | 0 0 | orange1.1t00226.1/ora | 8.72 | 0 | 0 | 2 | MASCOT | T | PLEX8 |
| 1.63E-03 | 0 0 | orange1.1t00226.1/ora | 8.72 | 0 | 0 | 2 | MASCOT | T | PLEX8 |
| 1.57E-02 | 0 0 | orange1.1t00226.1/ora | 8.72 | 0 | 0 | 2 | MASCOT | T | PLEX8 |
| 4.10E-03 | 0 0 | orange1.1t00226.1/ora | 8.72 | 0 | 0 | 2 | MASCOT | T | PLEX8 |
| 2.43E-01 | 0 0 | orange1.1t00226.1/ora | 8.72 | 0 | 0 | 2 | MASCOT | T | PLEX8 |
| 1.04E-02 | 0 0 | orange1.1t00226.1/ora | 8.72 | 0 | 0 | 2 | MASCOT | T | PLEX8 |
| 3.05E-05 | 0 0 | orange1.1t00226.1/ora | 8.72 | 0 | 0 | 2 | MASCOT | T | PLEX8 |
| 4.43E-03 | 0 0 | orange1.1t00226.1/ora | 8.72 | 0 | 0 | 2 | MASCOT | T | PLEX8 |
| 3.45E-05 | 0 0 | orange1.1t00226.1/ora | 8.72 | 0 | 0 | 2 | MASCOT | T | PLEX8 |
| 1.52E-02 | 0 0 | orange1.1t00226.1/ora | 8.72 | 0 | 0 | 2 | MASCOT | T | PLEX8 |
| 1.23E-02 | 0 0 | orange1.1t00226.1/ora | 8.72 | 0 | 0 | 2 | MASCOT | T | PLEX8 |
| 4.74E-05 | 0 0 | orange1.1t00226.1/ora | 8.72 | 0 | 0 | 2 | MASCOT | T | PLEX8 |
| 4.31E-03 | 0 0 | orange1.1t00226.1/ora | 8.72 | 0 | 0 | 2 | MASCOT | T | PLEX8 |
| 7.19E-06 | 0 0 | orange1.1t00226.1/ora | 8.72 | 0 | 0 | 2 | MASCOT | T | PLEX8 |
| 1.06E-04 | 0 0 | orange1.1t00226.1/ora | 8.72 | 0 | 0 | 2 | MASCOT | T | PLEX8 |
| 1.08E-01 | 0 0 | orange1.1t00226.1/ora | 8.72 | 0 | 0 | 2 | MASCOT | T | PLEX8 |
| 1.81E-01 | 0 0 | orange1.1t00226.1/ora | 8.72 | 0 | 0 | 2 | MASCOT | T | PLEX8 |
| 3.89E-04 | 0 0 | orange1.1t00226.1/ora | 8.72 | 0 | 0 | 2 | MASCOT | T | PLEX8 |
| 1.55E-04 | 0 0 | orange1.1t00226.1/ora | 8.72 | 0 | 0 | 2 | MASCOT | T | PLEX8 |
| 8.58E-04 | 0 0 | orange1.1t00226.1/ora | 8.72 | 0 | 0 | 2 | MASCOT | T | PLEX8 |
| 2.21E-02 | 0 0 | orange1.1t00226.1/ora | 8.72 | 0 | 0 | 2 | MASCOT | T |       |
| 5.62E-03 | 0 0 | Cs4g08220.1/Cs4g082   | 5.88 | 0 | 0 | 2 | MASCOT | T |       |
| 5.25E-03 | 0 0 | Cs4g08220.1/Cs4g082   | 5.88 | 0 | 0 | 2 | MASCOT | T |       |
| 9.72E-02 | 0 0 | Cs4g08220.1/Cs4g082   | 5.88 | 0 | 0 | 2 | MASCOT | T |       |
| 6.41E-03 | 0 0 | Cs4g08220.1/Cs4g082   | 5.88 | 0 | 0 | 2 | MASCOT | T |       |
| 1.85E-02 | 0 0 | Cs4g08220.1/Cs4g082   | 5.88 | 0 | 0 | 2 | MASCOT | T |       |
| 1.21E-02 | 0 0 | Cs5g03150.1/Cs5g031   | 4.53 | 0 | 0 | 2 | MASCOT | T | PLEX8 |
| 1.89E-03 | 0 0 | Cs5g03150.1/Cs5g031   | 4.53 | 0 | 0 | 2 | MASCOT | T | PLEX8 |
| 5.78E-04 | 0 0 | Cs5g03150.1/Cs5g031   | 4.25 | 0 | 0 | 2 | MASCOT | T | PLEX8 |
| 1.14E-01 | 0 0 | Cs5g03150.1/Cs5g031   | 4.25 | 0 | 0 | 2 | MASCOT | T | PLEX8 |
| 1.99E-02 | 0 0 | Cs5g03150.1/Cs5g031   | 4.37 | 0 | 0 | 2 | MASCOT | T | PLEX8 |
| 7.07E-02 | 0 0 | Cs5g03150.1/Cs5g031   | 4.37 | 0 | 0 | 2 | MASCOT | T |       |
| 1.06E-02 | 0 0 | Cs5g03150.1/Cs5g031   | 4.37 | 0 | 0 | 2 | MASCOT | T |       |
| 3.13E-02 | 0 0 | Cs5g03150.1/Cs5g031   | 4.37 | 0 | 0 | 2 | MASCOT | T | PLEX8 |

|          |     |                     |      |   |      |   |        |        |       |       |
|----------|-----|---------------------|------|---|------|---|--------|--------|-------|-------|
| 2.52E-06 | 0 0 | Cs5g03150.1/Cs5g031 | 3.91 | 0 | 0    | 2 | MASCOT | T      |       |       |
| 8.46E-05 | 0 0 | Cs5g03150.1/Cs5g031 | 3.91 | 0 | 0    | 2 | MASCOT | T      |       |       |
| 1.94E-01 | 0 0 | Cs5g03150.1/Cs5g031 | 4.53 | 0 | 0    | 2 | MASCOT | T      | PLEX8 |       |
| 3.32E-02 | 0 0 | Cs5g03150.1/Cs5g031 | 4.53 | 0 | 0    | 2 | MASCOT | T      | PLEX8 |       |
| 3.77E-02 | 0 0 | Cs5g03150.1/Cs5g031 | 4.53 | 0 | 0    | 2 | MASCOT | T      | PLEX8 |       |
| 2.04E-02 | 0 0 | Cs5g03150.1/Cs5g031 | 4.53 | 0 | 0    | 2 | MASCOT | T      |       |       |
| 1.80E-03 | 0 0 | Cs5g03150.1/Cs5g031 | 5.4  | 0 | 0    | 2 | MASCOT | T      | PLEX8 |       |
| 5.02E-04 | 0 0 | Cs5g03150.1/Cs5g031 | 5.4  | 0 | 0    | 2 | MASCOT | T      | PLEX8 |       |
| 9.41E-05 | 0 0 | Cs5g03150.1/Cs5g031 | 5.4  | 0 | 0    | 2 | MASCOT | T      | PLEX8 |       |
| 3.19E-03 | 0 0 | Cs5g03150.1/Cs5g031 | 5.4  | 0 | 0    | 2 | MASCOT | T      | PLEX8 |       |
| 4.67E-02 | 0 0 | Cs5g03150.1/Cs5g031 | 5.4  | 0 | 0    | 2 | MASCOT | T      | PLEX8 |       |
| 1.79E-01 | 0 0 | Cs5g03150.1/Cs5g031 | 5.84 | 0 | 0    | 2 | MASCOT | T      | PLEX8 |       |
| 2.39E-01 | 0 0 | Cs5g03150.1/Cs5g031 | 5.84 | 0 | 0    | 2 | MASCOT | T      | PLEX8 |       |
| 1.90E-01 | 0 0 | Cs5g03150.1/Cs5g031 | 5.84 | 0 | 0    | 2 | MASCOT | T      |       |       |
| 4.14E-01 | 0 0 | Cs4g08220.1/Cs4g082 | 5.4  | 0 | 0    | 2 | MASCOT | T      | PLEX8 |       |
| 1.15E-02 | 0 0 | Cs5g03150.1/Cs5g031 | 8.75 | 0 | 0    | 2 | MASCOT | T      | PLEX8 |       |
| 1.23E-02 | 0 0 | Cs5g03150.1/Cs5g031 | 8.75 | 0 | 0    | 2 | MASCOT | T      | PLEX8 |       |
| 5.82E-03 | 0 0 | Cs5g03150.1/Cs5g031 | 8.75 | 0 | 0    | 2 | MASCOT | T      | PLEX8 |       |
| 1.31E-02 | 0 0 | Cs5g03150.1/Cs5g031 | 3.83 | 0 | 0    | 2 | MASCOT | T      | PLEX8 |       |
| 2.49E-02 | 0 0 | Cs5g03150.1/Cs5g031 | 5.32 | 0 | 0    | 2 | MASCOT | T      | PLEX8 |       |
| 1.78E-02 | 0 0 | Cs5g03150.1/Cs5g031 | 5.32 | 0 | 0    | 2 | MASCOT | T      | PLEX8 |       |
| 9.06E-02 | 0 0 | Cs5g03150.1/Cs5g031 | 5.32 | 0 | 0    | 2 | MASCOT | T      | PLEX8 |       |
| 5.17E-02 | 0 0 | Cs5g03150.1/Cs5g031 | 5.32 | 0 | 0    | 2 | MASCOT | T      |       |       |
| 5.55E-03 | 0 0 | Cs4g08220.1/Cs4g082 | 5.96 | 1 | 0    | 2 | MASCOT | T      | PLEX8 |       |
| 2.91E-02 | 0 0 | Cs4g08220.1/Cs4g082 | 5.96 | 1 | 0    | 2 | MASCOT | T      | PLEX8 |       |
| 4.38E-03 | 0 0 | Cs4g08220.1/Cs4g082 | 5.96 | 1 | 0    | 2 | MASCOT | T      | PLEX8 |       |
| 3.26E-03 | 0 0 | Cs5g03150.1/Cs5g031 | 5.72 | 0 | 0    | 2 | MASCOT | T      | PLEX8 |       |
| 5.89E-02 | 0 0 | Cs5g03150.1/Cs5g031 | 5.72 | 0 | 0    | 2 | MASCOT | T      | PLEX8 |       |
| 2.03E-01 | 0 0 | Cs5g03150.1/Cs5g031 | 5.72 | 0 | 0    | 2 | MASCOT | T      | PLEX8 |       |
| 1.95E-02 | 0 0 | Cs5g03150.1/Cs5g031 | 5.72 | 0 | 0    | 2 | MASCOT | T      | PLEX8 |       |
| 1.55E-01 | 0 0 | Cs5g03150.1/Cs5g031 | 5.72 | 0 | 0    | 2 | MASCOT | T      | PLEX8 |       |
| 2.89E-02 | 0 0 | Cs5g03150.1/Cs5g031 | 4.37 | 0 | 15.9 | 0 | 2      | MASCOT | T     | PLEX8 |
| 1.74E-01 | 0 0 | Cs5g03150.1/Cs5g031 | 4.37 | 0 | 0    | 2 | MASCOT | T      | PLEX8 |       |
| 1.97E-02 | 0 0 | Cs5g03150.1/Cs5g031 | 4.37 | 0 | 0    | 2 | MASCOT | T      | PLEX8 |       |
| 1.72E-01 | 0 0 | Cs5g03150.1/Cs5g031 | 4.37 | 0 | 0    | 2 | MASCOT | T      | PLEX8 |       |
| 7.82E-04 | 0 0 | Cs5g03150.1/Cs5g031 | 4.53 | 0 | 0    | 2 | MASCOT | T      | PLEX8 |       |
| 3.29E-03 | 0 0 | Cs5g03150.1/Cs5g031 | 4.53 | 0 | 0    | 2 | MASCOT | T      | PLEX8 |       |
| 2.68E-01 | 0 0 | Cs5g03150.1         | 5.5  | 0 | 0    | 2 | MASCOT | T      | PLEX8 |       |
| 7.61E-02 | 0 0 | Cs5g03150.1         | 5.5  | 0 | 0    | 2 | MASCOT | T      | PLEX8 |       |
| 5.62E-02 | 0 0 | Cs4g08220.1/Cs4g082 | 4.21 | 0 | 0    | 2 | MASCOT | T      |       |       |
| 2.13E-03 | 0 0 | Cs4g08220.1/Cs4g082 | 4.21 | 0 | 0    | 2 | MASCOT | T      |       |       |
| 4.24E-04 | 0 0 | Cs5g03150.1/Cs5g031 | 5.84 | 0 | 0    | 2 | MASCOT | T      | PLEX8 |       |
| 9.52E-03 | 0 0 | Cs5g03150.1/Cs5g031 | 5.84 | 0 | 0    | 2 | MASCOT | T      | PLEX8 |       |
| 9.23E-02 | 0 0 | Cs5g03150.1/Cs5g031 | 4.37 | 0 | 0    | 2 | MASCOT | T      |       |       |
| 6.47E-03 | 0 0 | Cs4g08220.1/Cs4g082 | 4.03 | 0 | 0    | 2 | MASCOT | T      | PLEX8 |       |
| 2.93E-03 | 0 0 | Cs4g08220.1/Cs4g082 | 4.03 | 0 | 0    | 2 | MASCOT | T      | PLEX8 |       |
| 7.62E-02 | 0 0 | Cs4g08220.1/Cs4g082 | 4.03 | 0 | 0    | 2 | MASCOT | T      | PLEX8 |       |
| 1.36E-02 | 0 0 | Cs4g08220.1/Cs4g082 | 4.03 | 0 | 0    | 2 | MASCOT | T      | PLEX8 |       |
| 1.17E-04 | 0 0 | Cs4g08220.1/Cs4g082 | 4.03 | 0 | 0    | 2 | MASCOT | T      | PLEX8 |       |
| 1.85E-03 | 0 0 | Cs4g08220.1/Cs4g082 | 4.03 | 0 | 0    | 2 | MASCOT | T      | PLEX8 |       |
| 5.62E-03 | 0 0 | Cs4g08220.1/Cs4g082 | 4.03 | 0 | 0    | 2 | MASCOT | T      | PLEX8 |       |

|          |     |                     |      |   |      |   |        |        |       |       |
|----------|-----|---------------------|------|---|------|---|--------|--------|-------|-------|
| 4.73E-01 | 0 0 | Cs4g08220.1/Cs4g082 | 4.03 | 0 | 0    | 2 | MASCOT | T      | PLEX8 |       |
| 2.31E-01 | 0 0 | Cs4g08220.1/Cs4g082 | 6.1  | 0 | 0    | 2 | MASCOT | T      | PLEX8 |       |
| 1.44E-01 | 0 0 | Cs4g08220.1/Cs4g082 | 6.1  | 0 | 0    | 2 | MASCOT | T      | PLEX8 |       |
| 5.62E-03 | 0 0 | Cs4g08220.1/Cs4g082 | 5.88 | 0 | 0    | 2 | MASCOT | T      |       |       |
| 5.25E-03 | 0 0 | Cs4g08220.1/Cs4g082 | 5.88 | 0 | 0    | 2 | MASCOT | T      |       |       |
| 9.72E-02 | 0 0 | Cs4g08220.1/Cs4g082 | 5.88 | 0 | 0    | 2 | MASCOT | T      |       |       |
| 6.41E-03 | 0 0 | Cs4g08220.1/Cs4g082 | 5.88 | 0 | 0    | 2 | MASCOT | T      |       |       |
| 1.85E-02 | 0 0 | Cs4g08220.1/Cs4g082 | 5.88 | 0 | 0    | 2 | MASCOT | T      |       |       |
| 1.21E-02 | 0 0 | Cs5g03150.1/Cs5g031 | 4.53 | 0 | 0    | 2 | MASCOT | T      | PLEX8 |       |
| 1.89E-03 | 0 0 | Cs5g03150.1/Cs5g031 | 4.53 | 0 | 0    | 2 | MASCOT | T      | PLEX8 |       |
| 5.19E-02 | 0 0 | Cs9g19220.1         | 8.8  | 0 | 0    | 2 | MASCOT | T      | PLEX8 |       |
| 2.12E-01 | 0 0 | Cs9g19220.1         | 8.8  | 0 | 0    | 2 | MASCOT | T      | PLEX8 |       |
| 1.44E-01 | 0 0 | Cs9g19220.1         | 8.8  | 0 | 0    | 2 | MASCOT | T      | PLEX8 |       |
| 5.78E-04 | 0 0 | Cs5g03150.1/Cs5g031 | 4.25 | 0 | 0    | 2 | MASCOT | T      | PLEX8 |       |
| 1.14E-01 | 0 0 | Cs5g03150.1/Cs5g031 | 4.25 | 0 | 0    | 2 | MASCOT | T      | PLEX8 |       |
| 3.70E-03 | 0 0 | Cs9g19220.1         | 4.37 | 0 | 0    | 2 | MASCOT | T      | PLEX8 |       |
| 3.02E-03 | 0 0 | Cs9g19220.1         | 4.37 | 0 | 0    | 2 | MASCOT | T      | PLEX8 |       |
| 4.50E-03 | 0 0 | Cs9g19220.1         | 4.37 | 0 | 0    | 2 | MASCOT | T      | PLEX8 |       |
| 9.98E-02 | 0 0 | Cs9g19220.1         | 4.37 | 0 | 0    | 2 | MASCOT | T      |       |       |
| 2.95E-02 | 0 0 | Cs4g08220.1/Cs4g082 | 3.91 | 0 | 0    | 2 | MASCOT | T      | PLEX8 |       |
| 1.09E-03 | 0 0 | Cs4g08220.1/Cs4g082 | 3.91 | 0 | 0    | 2 | MASCOT | T      | PLEX8 |       |
| 6.61E-04 | 0 0 | Cs4g08220.1/Cs4g082 | 3.91 | 0 | 0    | 2 | MASCOT | T      |       |       |
| 1.30E-02 | 0 0 | Cs4g08220.1/Cs4g082 | 3.91 | 0 | 0    | 2 | MASCOT | T      | PLEX8 |       |
| 1.94E-01 | 0 0 | Cs5g03150.1/Cs5g031 | 4.53 | 0 | 0    | 2 | MASCOT | T      | PLEX8 |       |
| 3.32E-02 | 0 0 | Cs5g03150.1/Cs5g031 | 4.53 | 0 | 0    | 2 | MASCOT | T      | PLEX8 |       |
| 3.77E-02 | 0 0 | Cs5g03150.1/Cs5g031 | 4.53 | 0 | 0    | 2 | MASCOT | T      | PLEX8 |       |
| 2.04E-02 | 0 0 | Cs5g03150.1/Cs5g031 | 4.53 | 0 | 0    | 2 | MASCOT | T      |       |       |
| 3.67E-04 | 0 0 | Cs9g19220.1         | 5.4  | 0 | 0    | 2 | MASCOT | T      | PLEX8 |       |
| 3.07E-01 | 0 0 | Cs9g19220.1         | 5.4  | 0 | 0    | 2 | MASCOT | T      | PLEX8 |       |
| 1.79E-01 | 0 0 | Cs5g03150.1/Cs5g031 | 5.84 | 0 | 0    | 2 | MASCOT | T      | PLEX8 |       |
| 2.39E-01 | 0 0 | Cs5g03150.1/Cs5g031 | 5.84 | 0 | 0    | 2 | MASCOT | T      | PLEX8 |       |
| 1.90E-01 | 0 0 | Cs5g03150.1/Cs5g031 | 5.84 | 0 | 0    | 2 | MASCOT | T      |       |       |
| 4.14E-01 | 0 0 | Cs4g08220.1/Cs4g082 | 5.4  | 0 | 0    | 2 | MASCOT | T      | PLEX8 |       |
| 2.49E-02 | 0 0 | Cs5g03150.1/Cs5g031 | 5.32 | 0 | 0    | 2 | MASCOT | T      | PLEX8 |       |
| 1.78E-02 | 0 0 | Cs5g03150.1/Cs5g031 | 5.32 | 0 | 0    | 2 | MASCOT | T      | PLEX8 |       |
| 9.06E-02 | 0 0 | Cs5g03150.1/Cs5g031 | 5.32 | 0 | 0    | 2 | MASCOT | T      | PLEX8 |       |
| 5.17E-02 | 0 0 | Cs5g03150.1/Cs5g031 | 5.32 | 0 | 0    | 2 | MASCOT | T      |       |       |
| 5.55E-03 | 0 0 | Cs4g08220.1/Cs4g082 | 5.96 | 1 | 0    | 2 | MASCOT | T      | PLEX8 |       |
| 2.91E-02 | 0 0 | Cs4g08220.1/Cs4g082 | 5.96 | 1 | 0    | 2 | MASCOT | T      | PLEX8 |       |
| 4.38E-03 | 0 0 | Cs4g08220.1/Cs4g082 | 5.96 | 1 | 0    | 2 | MASCOT | T      | PLEX8 |       |
| 3.26E-03 | 0 0 | Cs5g03150.1/Cs5g031 | 5.72 | 0 | 0    | 2 | MASCOT | T      | PLEX8 |       |
| 5.89E-02 | 0 0 | Cs5g03150.1/Cs5g031 | 5.72 | 0 | 0    | 2 | MASCOT | T      | PLEX8 |       |
| 2.03E-01 | 0 0 | Cs5g03150.1/Cs5g031 | 5.72 | 0 | 0    | 2 | MASCOT | T      | PLEX8 |       |
| 1.95E-02 | 0 0 | Cs5g03150.1/Cs5g031 | 5.72 | 0 | 0    | 2 | MASCOT | T      | PLEX8 |       |
| 1.55E-01 | 0 0 | Cs5g03150.1/Cs5g031 | 5.72 | 0 | 0    | 2 | MASCOT | T      | PLEX8 |       |
| 7.82E-04 | 0 0 | Cs5g03150.1/Cs5g031 | 4.53 | 0 | 0    | 2 | MASCOT | T      | PLEX8 |       |
| 3.29E-03 | 0 0 | Cs5g03150.1/Cs5g031 | 4.53 | 0 | 0    | 2 | MASCOT | T      | PLEX8 |       |
| 6.21E-02 | 0 0 | Cs9g19220.1         | 4.53 | 0 | 0    | 2 | MASCOT | T      | PLEX8 |       |
| 3.02E-02 | 0 0 | Cs9g19220.1         | 4.53 | 0 | 0    | 2 | MASCOT | T      | PLEX8 |       |
| 7.20E-03 | 0 0 | Cs9g19220.1         | 5.5  | 0 | 15.9 | 0 | 2      | MASCOT | T     | PLEX8 |
| 5.62E-02 | 0 0 | Cs4g08220.1/Cs4g082 | 4.21 | 0 | 0    | 2 | MASCOT | T      |       |       |

|          |     |                     |      |   |   |   |        |   |       |
|----------|-----|---------------------|------|---|---|---|--------|---|-------|
| 2.13E-03 | 0 0 | Cs4g08220.1/Cs4g082 | 4.21 | 0 | 0 | 2 | MASCOT | T |       |
| 4.47E-02 | 0 0 | Cs9g19220.1         | 5.84 | 0 | 0 | 2 | MASCOT | T | PLEX8 |
| 9.23E-02 | 0 0 | Cs5g03150.1/Cs5g031 | 4.37 | 0 | 0 | 2 | MASCOT | T |       |
| 6.47E-03 | 0 0 | Cs4g08220.1/Cs4g082 | 4.03 | 0 | 0 | 2 | MASCOT | T | PLEX8 |
| 2.93E-03 | 0 0 | Cs4g08220.1/Cs4g082 | 4.03 | 0 | 0 | 2 | MASCOT | T | PLEX8 |
| 7.62E-02 | 0 0 | Cs4g08220.1/Cs4g082 | 4.03 | 0 | 0 | 2 | MASCOT | T | PLEX8 |
| 1.36E-02 | 0 0 | Cs4g08220.1/Cs4g082 | 4.03 | 0 | 0 | 2 | MASCOT | T | PLEX8 |
| 1.17E-04 | 0 0 | Cs4g08220.1/Cs4g082 | 4.03 | 0 | 0 | 2 | MASCOT | T | PLEX8 |
| 1.85E-03 | 0 0 | Cs4g08220.1/Cs4g082 | 4.03 | 0 | 0 | 2 | MASCOT | T | PLEX8 |
| 5.62E-03 | 0 0 | Cs4g08220.1/Cs4g082 | 4.03 | 0 | 0 | 2 | MASCOT | T | PLEX8 |
| 4.73E-01 | 0 0 | Cs4g08220.1/Cs4g082 | 4.03 | 0 | 0 | 2 | MASCOT | T | PLEX8 |
| 1.76E-01 | 0 0 | Cs9g19220.1         | 6.1  | 0 | 0 | 2 | MASCOT | T | PLEX8 |
| 2.00E-01 | 0 0 | Cs4g08220.1/Cs4g082 | 4.37 | 0 | 0 | 2 | MASCOT | T | PLEX8 |
| 2.08E-01 | 0 0 | Cs4g08220.1/Cs4g082 | 4.37 | 0 | 0 | 2 | MASCOT | T | PLEX8 |
| 1.03E-01 | 0 0 | Cs4g08220.1/Cs4g082 | 4.37 | 0 | 0 | 2 | MASCOT | T | PLEX8 |
| 1.87E-01 | 0 0 | Cs9g07830.1         | 4.68 | 0 | 0 | 2 | MASCOT | T | PLEX8 |
| 3.56E-03 | 0 0 | Cs9g07830.1         | 4.68 | 0 | 0 | 2 | MASCOT | T | PLEX8 |
| 1.52E-01 | 0 0 | Cs9g07830.1         | 4.68 | 0 | 0 | 2 | MASCOT | T | PLEX8 |
| 6.20E-05 | 0 0 | Cs9g07830.1         | 4.65 | 0 | 0 | 2 | MASCOT | T | PLEX8 |
| 1.33E-04 | 0 0 | Cs9g07830.1         | 4.65 | 0 | 0 | 2 | MASCOT | T | PLEX8 |
| 5.27E-01 | 0 0 | Cs9g07830.1         | 5.84 | 0 | 0 | 2 | MASCOT | T | PLEX8 |
| 1.09E-01 | 0 0 | Cs9g07830.1         | 4.53 | 0 | 0 | 2 | MASCOT | T | PLEX8 |
| 1.12E-03 | 0 0 | Cs9g07830.1         | 4.53 | 0 | 0 | 2 | MASCOT | T | PLEX8 |
| 1.47E-02 | 0 0 | Cs9g07830.1         | 4.14 | 0 | 0 | 2 | MASCOT | T | PLEX8 |
| 4.34E-02 | 0 0 | Cs9g07830.1         | 4.25 | 0 | 0 | 2 | MASCOT | T | PLEX8 |
| 8.95E-03 | 0 0 | Cs9g07830.1         | 4.25 | 0 | 0 | 2 | MASCOT | T | PLEX8 |
| 2.27E-06 | 0 0 | Cs9g07830.1         | 4.53 | 0 | 0 | 2 | MASCOT | T | PLEX8 |
| 2.44E-03 | 0 0 | Cs9g07830.1         | 4.53 | 0 | 0 | 2 | MASCOT | T | PLEX8 |
| 1.39E-06 | 0 0 | Cs9g07830.1         | 4.53 | 0 | 0 | 2 | MASCOT | T | PLEX8 |
| 2.74E-01 | 0 0 | Cs9g07830.1         | 6    | 0 | 0 | 2 | MASCOT | T | PLEX8 |
| 1.59E-06 | 0 0 | Cs9g07830.1         | 4.25 | 0 | 0 | 2 | MASCOT | T |       |
| 4.47E-04 | 0 0 | Cs9g07830.1         | 5.72 | 0 | 0 | 2 | MASCOT | T | PLEX8 |
| 2.41E-02 | 0 0 | Cs9g07830.1         | 5.72 | 0 | 0 | 2 | MASCOT | T | PLEX8 |
| 2.03E-01 | 0 0 | Cs9g07830.1         | 4.37 | 0 | 0 | 2 | MASCOT | T | PLEX8 |
| 5.56E-03 | 0 0 | Cs9g07830.1         | 5.73 | 0 | 0 | 2 | MASCOT | T | PLEX8 |
| 4.71E-03 | 0 0 | Cs9g07830.1         | 5.73 | 0 | 0 | 2 | MASCOT | T | PLEX8 |
| 2.72E-09 | 0 0 | Cs9g07830.1         | 5.73 | 0 | 0 | 2 | MASCOT | T | PLEX8 |
| 7.50E-02 | 0 0 | Cs9g07830.1         | 9.8  | 0 | 0 | 2 | MASCOT | T | PLEX8 |
| 4.57E-01 | 0 0 | Cs9g07830.1         | 4.53 | 0 | 0 | 2 | MASCOT | T | PLEX8 |
| 2.31E-01 | 0 0 | Cs9g07830.1         | 4.53 | 0 | 0 | 2 | MASCOT | T | PLEX8 |
| 2.83E-02 | 0 0 | Cs9g07830.1         | 4.37 | 0 | 0 | 2 | MASCOT | T | PLEX8 |
| 4.94E-05 | 0 0 | Cs9g07830.1         | 5.21 | 0 | 0 | 2 | MASCOT | T | PLEX8 |
| 2.00E-04 | 0 0 | Cs9g07830.1         | 5.21 | 0 | 0 | 2 | MASCOT | T |       |
| 3.44E-02 | 0 0 | Cs9g07830.1         | 5.21 | 0 | 0 | 2 | MASCOT | T |       |
| 8.71E-02 | 0 0 | Cs9g07830.1         | 4.37 | 0 | 0 | 2 | MASCOT | T | PLEX8 |
| 3.01E-04 | 0 0 | Cs9g07830.1         | 5.84 | 0 | 0 | 2 | MASCOT | T |       |
| 5.13E-05 | 0 0 | Cs9g07830.1         | 5.84 | 0 | 0 | 2 | MASCOT | T |       |
| 1.27E-01 | 0 0 | Cs9g07830.1         | 5.84 | 0 | 0 | 2 | MASCOT | T | PLEX8 |
| 8.76E-04 | 0 0 | Cs9g07830.1         | 4    | 0 | 0 | 2 | MASCOT | T | PLEX8 |
| 1.43E-03 | 0 0 | Cs9g07830.1         | 4    | 0 | 0 | 2 | MASCOT | T | PLEX8 |
| 4.30E-01 | 0 0 | Cs9g07830.1         | 4.25 | 0 | 0 | 2 | MASCOT | T |       |



|              |                       |      |        |   |          |   |       |
|--------------|-----------------------|------|--------|---|----------|---|-------|
| 3.65E-04 0 0 | Cs9g07830.1           | 4.25 | 0      | 0 | 2 MASCOT | T | PLEX8 |
| 6.60E-03 0 0 | Cs9g07830.1           | 4.25 | 0      | 0 | 2 MASCOT | T | PLEX8 |
| 1.09E-02 0 0 | Cs9g07830.1           | 4.37 | 0      | 0 | 2 MASCOT | T | PLEX8 |
| 9.88E-02 0 0 | Cs9g07830.1           | 4.37 | 0      | 0 | 2 MASCOT | T | PLEX8 |
| 1.15E-01 0 0 | Cs9g07830.1           | 4.37 | 0      | 0 | 2 MASCOT | T | PLEX8 |
| 3.37E-02 0 0 | Cs9g07830.1           | 4.37 | 0      | 0 | 2 MASCOT | T |       |
| 7.83E-03 0 0 | Cs9g07830.1           | 4.37 | 0      | 0 | 2 MASCOT | T |       |
| 2.34E-02 0 0 | Cs9g07830.1           | 4.37 | 0      | 0 | 2 MASCOT | T |       |
| 3.14E-01 0 0 | Cs9g07830.1           | 4.37 | 0      | 0 | 2 MASCOT | T |       |
| 7.19E-04 0 0 | gi 113952681          | 4.53 | 0      | 0 | 2 MASCOT | T | PLEX8 |
| 9.40E-02 0 0 | gi 113952681          | 4.03 | 0      | 0 | 2 MASCOT | T | PLEX8 |
| 2.06E-02 0 0 | gi 113952681          | 4.03 | 0      | 0 | 2 MASCOT | T | PLEX8 |
| 4.77E-02 0 0 | gi 113952681          | 4    | 0      | 0 | 2 MASCOT | T |       |
| 2.40E-02 0 0 | gi 113952681          | 4    | 0      | 0 | 2 MASCOT | T |       |
| 1.97E-01 0 0 | gi 113952681          | 4.53 | 0      | 0 | 2 MASCOT | T | PLEX8 |
| 2.19E-01 0 0 | gi 113952681          | 8.59 | 0      | 0 | 2 MASCOT | T | PLEX8 |
| 1.42E-01 0 0 | gi 113952681          | 4.54 | 0      | 0 | 2 MASCOT | T | PLEX8 |
| 2.44E-02 0 0 | gi 113952681          | 4.54 | 0      | 0 | 2 MASCOT | T | PLEX8 |
| 2.15E-02 0 0 | gi 113952681          | 4.54 | 0      | 0 | 2 MASCOT | T | PLEX8 |
| 2.03E-02 0 0 | gi 113952681          | 4.54 | 0      | 0 | 2 MASCOT | T |       |
| 7.71E-02 0 0 | gi 113952669/gi 11395 | 6.92 | 0      | 0 | 2 MASCOT | T | PLEX8 |
| 2.05E-01 0 0 | gi 113952681          | 5.84 | 0      | 0 | 2 MASCOT | T | PLEX8 |
| 9.43E-03 0 0 | gi 113952681          | 6    | 0      | 0 | 2 MASCOT | T | PLEX8 |
| 1.85E-02 0 0 | gi 113952681          | 6    | 0      | 0 | 2 MASCOT | T | PLEX8 |
| 2.45E-02 0 0 | gi 113952681          | 6    | 0      | 0 | 2 MASCOT | T |       |
| 2.74E-02 0 0 | gi 113952681          | 6    | 0      | 0 | 2 MASCOT | T | PLEX8 |
| 2.78E-02 0 0 | gi 113952681          | 6    | 0      | 0 | 2 MASCOT | T |       |
| 9.16E-02 0 0 | gi 113952681          | 8.75 | 0      | 0 | 2 MASCOT | T | PLEX8 |
| 8.27E-02 0 0 | gi 113952681          | 8.75 | 0      | 0 | 2 MASCOT | T | PLEX8 |
| 1.69E-01 0 0 | gi 113952681          | 4.37 | 0      | 0 | 2 MASCOT | T | PLEX8 |
| 1.54E-02 0 0 | gi 113952681          | 5.32 | 0      | 0 | 2 MASCOT | T | PLEX8 |
| 1.30E-03 0 0 | gi 113952681          | 6    | 0      | 0 | 2 MASCOT | T | PLEX8 |
| 5.11E-04 0 0 | gi 113952681          | 6    | 0      | 0 | 2 MASCOT | T | PLEX8 |
| 1.72E-01 0 0 | gi 113952681          | 8.31 | 0      | 0 | 2 MASCOT | T | PLEX8 |
| 3.69E-01 0 0 | gi 113952681          | 8.44 | 0      | 0 | 2 MASCOT | T |       |
| 1.47E-02 0 0 | gi 113952681          | 6    | 0      | 0 | 2 MASCOT | T | PLEX8 |
| 8.85E-03 0 0 | gi 113952681          | 6    | 0      | 0 | 2 MASCOT | T | PLEX8 |
| 1.91E-01 0 0 | gi 113952669/gi 11395 | 8.75 | 0      | 0 | 2 MASCOT | T | PLEX8 |
| 3.24E-01 0 0 | gi 113952669/gi 11395 | 8.75 | 0      | 0 | 2 MASCOT | T | PLEX8 |
| 1.93E-02 0 0 | gi 113952681          | 6.74 | 0      | 0 | 2 MASCOT | T | PLEX8 |
| 9.80E-02 0 0 | gi 113952681          | 6.74 | 0      | 0 | 2 MASCOT | T | PLEX8 |
| 8.34E-02 0 0 | gi 113952681          | 5.72 | 0      | 0 | 2 MASCOT | T | PLEX8 |
| 3.90E-03 0 0 | gi 113952681          | 8.47 | 0      | 0 | 2 MASCOT | T | PLEX8 |
| 1.85E-01 0 0 | gi 113952681          | 5.5  | 0      | 0 | 2 MASCOT | T | PLEX8 |
| 3.24E-02 0 0 | gi 113952681          | 8.73 | 0      | 0 | 2 MASCOT | T | PLEX8 |
| 2.78E-01 0 0 | Cs7g06000.1           | 5.28 | 0      | 0 | 2 MASCOT | T | PLEX8 |
| 1.55E-02 0 0 | Cs7g06000.1           | 4.53 | 0      | 0 | 2 MASCOT | T | PLEX8 |
| 7.17E-02 0 0 | Cs7g06000.1           | 5.88 | 0 15.9 | 0 | 2 MASCOT | T | PLEX8 |
| 3.02E-02 0 0 | Cs7g06000.1           | 5.88 | 0      | 0 | 2 MASCOT | T | PLEX8 |
| 5.91E-03 0 0 | Cs7g06000.1           | 5.88 | 0      | 0 | 2 MASCOT | T | PLEX8 |
| 3.82E-03 0 0 | Cs7g06000.1           | 5.88 | 0      | 0 | 2 MASCOT | T | PLEX8 |

|          |     |                      |      |   |   |   |        |   |       |
|----------|-----|----------------------|------|---|---|---|--------|---|-------|
| 5.99E-03 | 0 0 | Cs7g06000.1          | 5.88 | 0 | 0 | 2 | MASCOT | T | PLEX8 |
| 1.52E-02 | 0 0 | Cs7g02830.1/Cs9g178  | 3.84 | 0 | 0 | 2 | MASCOT | T | PLEX8 |
| 1.20E-03 | 0 0 | Cs7g06000.1/orange1. | 4.53 | 0 | 0 | 2 | MASCOT | T | PLEX8 |
| 1.38E-02 | 0 0 | Cs7g06000.1/orange1. | 4.53 | 0 | 0 | 2 | MASCOT | T | PLEX8 |
| 4.40E-03 | 0 0 | Cs7g06000.1/orange1. | 4.53 | 0 | 0 | 2 | MASCOT | T | PLEX8 |
| 1.60E-03 | 0 0 | Cs7g06000.1/orange1. | 4.53 | 0 | 0 | 2 | MASCOT | T | PLEX8 |
| 7.21E-03 | 0 0 | Cs7g06000.1/orange1. | 4.53 | 0 | 0 | 2 | MASCOT | T | PLEX8 |
| 3.43E-02 | 0 0 | Cs7g06000.1/orange1. | 4.53 | 0 | 0 | 2 | MASCOT | T | PLEX8 |
| 2.12E-03 | 0 0 | Cs7g06000.1/orange1. | 4.53 | 0 | 0 | 2 | MASCOT | T | PLEX8 |
| 9.77E-02 | 0 0 | Cs7g06000.1/orange1. | 4.53 | 0 | 0 | 2 | MASCOT | T | PLEX8 |
| 2.18E-02 | 0 0 | Cs7g06000.1          | 4.37 | 0 | 0 | 2 | MASCOT | T | PLEX8 |
| 3.99E-02 | 0 0 | Cs7g06000.1          | 4.37 | 0 | 0 | 2 | MASCOT | T | PLEX8 |
| 4.90E-02 | 0 0 | Cs7g06000.1          | 4.37 | 0 | 0 | 2 | MASCOT | T | PLEX8 |
| 1.04E-01 | 0 0 | Cs7g06000.1          | 4.37 | 0 | 0 | 2 | MASCOT | T | PLEX8 |
| 3.67E-02 | 0 0 | Cs7g06000.1          | 4.37 | 0 | 0 | 2 | MASCOT | T | PLEX8 |
| 7.52E-02 | 0 0 | Cs7g06000.1          | 4.37 | 0 | 0 | 2 | MASCOT | T | PLEX8 |
| 3.26E-02 | 0 0 | Cs7g06000.1          | 4.37 | 0 | 0 | 2 | MASCOT | T | PLEX8 |
| 6.04E-02 | 0 0 | Cs7g06000.1          | 4.37 | 0 | 0 | 2 | MASCOT | T | PLEX8 |
| 4.01E-01 | 0 0 | Cs7g06000.1          | 4.37 | 0 | 0 | 2 | MASCOT | T | PLEX8 |
| 1.87E-01 | 0 0 | Cs7g06000.1          | 4.37 | 0 | 0 | 2 | MASCOT | T | PLEX8 |
| 1.85E-01 | 0 0 | Cs7g06000.1          | 4.37 | 0 | 0 | 2 | MASCOT | T | PLEX8 |
| 6.41E-02 | 0 0 | Cs7g06000.1          | 4.37 | 0 | 0 | 2 | MASCOT | T | PLEX8 |
| 2.37E-02 | 0 0 | Cs6g09690.1 ! Cs4g16 | 8.75 | 0 | 0 | 2 | MASCOT | T | PLEX8 |
| 1.00E-01 | 0 0 | Cs7g06000.1/orange1. | 6.14 | 1 | 0 | 2 | MASCOT | T | PLEX8 |
| 2.33E-01 | 0 0 | Cs7g06000.1          | 5.84 | 0 | 0 | 2 | MASCOT | T | PLEX8 |
| 4.17E-02 | 0 0 | Cs7g06000.1          | 5.84 | 0 | 0 | 2 | MASCOT | T | PLEX8 |
| 6.60E-02 | 0 0 | Cs7g06000.1          | 5.84 | 0 | 0 | 2 | MASCOT | T | PLEX8 |
| 6.44E-02 | 0 0 | Cs7g06000.1          | 5.84 | 0 | 0 | 2 | MASCOT | T | PLEX8 |
| 2.04E-01 | 0 0 | Cs7g06000.1          | 5.84 | 0 | 0 | 2 | MASCOT | T | PLEX8 |
| 6.20E-02 | 0 0 | Cs7g06000.1          | 5.84 | 0 | 0 | 2 | MASCOT | T | PLEX8 |
| 5.05E-01 | 0 0 | Cs7g06000.1          | 5.84 | 0 | 0 | 2 | MASCOT | T | PLEX8 |
| 3.62E-02 | 0 0 | Cs7g06000.1          | 5.84 | 0 | 0 | 2 | MASCOT | T | PLEX8 |
| 1.92E-01 | 0 0 | Cs7g06000.1          | 5.84 | 0 | 0 | 2 | MASCOT | T | PLEX8 |
| 2.09E-01 | 0 0 | Cs7g06000.1          | 5.84 | 0 | 0 | 2 | MASCOT | T | PLEX8 |
| 4.30E-01 | 0 0 | Cs7g06000.1          | 5.84 | 0 | 0 | 2 | MASCOT | T | PLEX8 |
| 1.23E-01 | 0 0 | Cs7g06000.1          | 5.84 | 0 | 0 | 2 | MASCOT | T | PLEX8 |
| 1.18E-01 | 0 0 | Cs7g06000.1          | 5.84 | 0 | 0 | 2 | MASCOT | T | PLEX8 |
| 4.62E-02 | 0 0 | Cs7g06000.1          | 5.84 | 0 | 0 | 2 | MASCOT | T | PLEX8 |
| 6.56E-02 | 0 0 | Cs7g06000.1          | 5.84 | 0 | 0 | 2 | MASCOT | T | PLEX8 |
| 7.88E-02 | 0 0 | Cs7g06000.1          | 5.84 | 0 | 0 | 2 | MASCOT | T | PLEX8 |
| 8.24E-02 | 0 0 | Cs7g06000.1          | 5.84 | 0 | 0 | 2 | MASCOT | T | PLEX8 |
| 4.48E-02 | 0 0 | Cs7g06000.1          | 5.84 | 0 | 0 | 2 | MASCOT | T | PLEX8 |
| 3.19E-01 | 0 0 | Cs7g06000.1          | 5.84 | 0 | 0 | 2 | MASCOT | T | PLEX8 |
| 4.60E-01 | 0 0 | Cs7g06000.1          | 5.84 | 0 | 0 | 2 | MASCOT | T | PLEX8 |
| 3.77E-01 | 0 0 | Cs7g06000.1          | 5.84 | 0 | 0 | 2 | MASCOT | T | PLEX8 |
| 3.94E-03 | 0 0 | Cs7g06000.1          | 5.84 | 0 | 0 | 2 | MASCOT | T | PLEX8 |
| 8.65E-02 | 0 0 | Cs7g06000.1          | 5.84 | 0 | 0 | 2 | MASCOT | T | PLEX8 |
| 1.91E-02 | 0 0 | Cs7g06000.1          | 6    | 0 | 0 | 2 | MASCOT | T | PLEX8 |
| 5.48E-02 | 0 0 | Cs7g06000.1          | 6    | 0 | 0 | 2 | MASCOT | T | PLEX8 |
| 4.16E-02 | 0 0 | Cs7g06000.1          | 6    | 0 | 0 | 2 | MASCOT | T | PLEX8 |
| 1.78E-01 | 0 0 | Cs7g06000.1          | 6    | 0 | 0 | 2 | MASCOT | T | PLEX8 |

|          |     |                      |      |   |      |   |        |        |       |       |
|----------|-----|----------------------|------|---|------|---|--------|--------|-------|-------|
| 5.82E-02 | 0 0 | Cs7g06000.1          | 6    | 0 | 0    | 2 | MASCOT | T      |       |       |
| 1.43E-04 | 0 0 | Cs7g06000.1          | 8.73 | 0 | 0    | 2 | MASCOT | T      | PLEX8 |       |
| 2.91E-03 | 0 0 | Cs7g06000.1          | 8.73 | 0 | 0    | 2 | MASCOT | T      | PLEX8 |       |
| 3.51E-03 | 0 0 | Cs7g06000.1          | 8.73 | 0 | 0    | 2 | MASCOT | T      | PLEX8 |       |
| 1.04E-01 | 0 0 | Cs7g06000.1          | 8.73 | 0 | 0    | 2 | MASCOT | T      |       |       |
| 4.30E-01 | 0 0 | Cs7g06000.1/orange1. | 4.37 | 0 | 0    | 2 | MASCOT | T      |       |       |
| 1.32E-01 | 0 0 | Cs7g06000.1          | 6    | 0 | 15.9 | 0 | 2      | MASCOT | T     | PLEX8 |
| 3.31E-03 | 0 0 | Cs7g06000.1          | 6    | 0 | 15.9 | 0 | 2      | MASCOT | T     | PLEX8 |
| 1.97E-02 | 0 0 | Cs7g06000.1          | 6    | 0 | 0    | 2 | MASCOT | T      | PLEX8 |       |
| 5.19E-03 | 0 0 | Cs7g06000.1          | 6    | 0 | 0    | 2 | MASCOT | T      | PLEX8 |       |
| 9.16E-06 | 0 0 | Cs7g06000.1          | 6    | 0 | 0    | 2 | MASCOT | T      | PLEX8 |       |
| 7.04E-02 | 0 0 | Cs7g06000.1          | 6    | 0 | 0    | 2 | MASCOT | T      | PLEX8 |       |
| 6.20E-03 | 0 0 | Cs7g06000.1          | 6    | 0 | 0    | 2 | MASCOT | T      | PLEX8 |       |
| 2.73E-03 | 0 0 | Cs7g06000.1          | 6    | 0 | 0    | 2 | MASCOT | T      | PLEX8 |       |
| 7.60E-02 | 0 0 | Cs7g06000.1          | 6    | 0 | 0    | 2 | MASCOT | T      | PLEX8 |       |
| 1.66E-02 | 0 0 | Cs7g06000.1          | 6    | 0 | 0    | 2 | MASCOT | T      |       |       |
| 8.61E-02 | 0 0 | Cs7g06000.1          | 6    | 0 | 0    | 2 | MASCOT | T      | PLEX8 |       |
| 1.03E-01 | 0 0 | Cs7g06000.1          | 6    | 0 | 0    | 2 | MASCOT | T      | PLEX8 |       |
| 7.62E-03 | 0 0 | Cs7g06000.1          | 6    | 0 | 0    | 2 | MASCOT | T      | PLEX8 |       |
| 1.37E-02 | 0 0 | Cs7g06000.1          | 6    | 0 | 0    | 2 | MASCOT | T      | PLEX8 |       |
| 6.33E-02 | 0 0 | Cs7g06000.1          | 6    | 0 | 0    | 2 | MASCOT | T      | PLEX8 |       |
| 4.51E-04 | 0 0 | Cs7g06000.1          | 5.83 | 0 | 0    | 2 | MASCOT | T      | PLEX8 |       |
| 1.13E-03 | 0 0 | Cs7g06000.1          | 5.83 | 0 | 0    | 2 | MASCOT | T      | PLEX8 |       |
| 3.08E-04 | 0 0 | Cs7g06000.1          | 8.75 | 0 | 0    | 2 | MASCOT | T      | PLEX8 |       |
| 1.14E-01 | 0 0 | Cs7g06000.1          | 8.75 | 0 | 0    | 2 | MASCOT | T      | PLEX8 |       |
| 5.41E-04 | 0 0 | Cs7g06000.1          | 8.75 | 0 | 0    | 2 | MASCOT | T      | PLEX8 |       |
| 3.62E-04 | 0 0 | Cs7g06000.1          | 8.75 | 0 | 0    | 2 | MASCOT | T      | PLEX8 |       |
| 9.97E-04 | 0 0 | Cs7g06000.1          | 8.75 | 0 | 0    | 2 | MASCOT | T      | PLEX8 |       |
| 2.24E-03 | 0 0 | Cs7g06000.1          | 8.75 | 0 | 0    | 2 | MASCOT | T      | PLEX8 |       |
| 1.52E-02 | 0 0 | Cs7g06000.1          | 8.75 | 0 | 0    | 2 | MASCOT | T      | PLEX8 |       |
| 3.28E-02 | 0 0 | Cs7g06000.1          | 8.75 | 0 | 0    | 2 | MASCOT | T      | PLEX8 |       |
| 6.60E-03 | 0 0 | Cs7g06000.1          | 8.75 | 0 | 0    | 2 | MASCOT | T      | PLEX8 |       |
| 3.37E-03 | 0 0 | Cs7g06000.1          | 8.75 | 0 | 0    | 2 | MASCOT | T      | PLEX8 |       |
| 8.29E-03 | 0 0 | Cs7g06000.1          | 8.75 | 0 | 0    | 2 | MASCOT | T      | PLEX8 |       |
| 5.74E-03 | 0 0 | Cs7g06000.1          | 8.75 | 0 | 0    | 2 | MASCOT | T      | PLEX8 |       |
| 7.18E-03 | 0 0 | Cs7g06000.1          | 8.75 | 0 | 0    | 2 | MASCOT | T      | PLEX8 |       |
| 6.88E-03 | 0 0 | Cs7g06000.1          | 8.75 | 0 | 0    | 2 | MASCOT | T      | PLEX8 |       |
| 2.50E-04 | 0 0 | Cs7g06000.1          | 8.75 | 0 | 0    | 2 | MASCOT | T      | PLEX8 |       |
| 8.74E-02 | 0 0 | Cs7g06000.1          | 8.75 | 0 | 0    | 2 | MASCOT | T      |       |       |
| 4.40E-02 | 0 0 | Cs7g06000.1          | 8.75 | 0 | 0    | 2 | MASCOT | T      | PLEX8 |       |
| 1.96E-03 | 0 0 | Cs7g06000.1          | 8.75 | 0 | 0    | 2 | MASCOT | T      | PLEX8 |       |
| 4.97E-03 | 0 0 | Cs7g06000.1          | 8.75 | 0 | 0    | 2 | MASCOT | T      | PLEX8 |       |
| 4.81E-04 | 0 0 | Cs7g06000.1          | 8.75 | 0 | 0    | 2 | MASCOT | T      |       |       |
| 1.91E-02 | 0 0 | Cs7g06000.1          | 6    | 0 | 0    | 2 | MASCOT | T      | PLEX8 |       |
| 1.20E-02 | 0 0 | Cs7g06000.1          | 6    | 0 | 0    | 2 | MASCOT | T      | PLEX8 |       |
| 3.68E-03 | 0 0 | Cs7g06000.1          | 6    | 0 | 0    | 2 | MASCOT | T      | PLEX8 |       |
| 9.43E-03 | 0 0 | Cs7g06000.1          | 6    | 0 | 0    | 2 | MASCOT | T      | PLEX8 |       |
| 1.30E-01 | 0 0 | Cs7g06000.1          | 6    | 0 | 0    | 2 | MASCOT | T      | PLEX8 |       |
| 2.49E-03 | 0 0 | Cs7g06000.1          | 8.75 | 0 | 15.9 | 0 | 2      | MASCOT | T     | PLEX8 |
| 3.17E-01 | 0 0 | Cs7g06000.1          | 8.75 | 0 | 15.9 | 0 | 2      | MASCOT | T     | PLEX8 |
| 1.05E-03 | 0 0 | Cs7g06000.1          | 8.75 | 0 | 15.9 | 0 | 2      | MASCOT | T     | PLEX8 |

|          |     |                       |      |   |      |   |   |        |   |       |
|----------|-----|-----------------------|------|---|------|---|---|--------|---|-------|
| 6.73E-04 | 0 0 | Cs7g06000.1           | 8.75 | 0 | 15.9 | 0 | 2 | MASCOT | T | PLEX8 |
| 3.84E-02 | 0 0 | Cs7g06000.1           | 8.75 | 0 | 15.9 | 0 | 2 | MASCOT | T | PLEX8 |
| 1.80E-03 | 0 0 | Cs7g06000.1           | 8.75 | 0 | 15.9 | 0 | 2 | MASCOT | T | PLEX8 |
| 3.53E-04 | 0 0 | Cs7g06000.1           | 8.75 | 0 | 0    | 0 | 2 | MASCOT | T | PLEX8 |
| 1.37E-03 | 0 0 | Cs7g06000.1           | 8.75 | 0 | 0    | 0 | 2 | MASCOT | T | PLEX8 |
| 4.06E-05 | 0 0 | Cs7g06000.1           | 8.75 | 0 | 0    | 0 | 2 | MASCOT | T | PLEX8 |
| 2.39E-04 | 0 0 | Cs7g06000.1           | 8.75 | 0 | 0    | 0 | 2 | MASCOT | T | PLEX8 |
| 8.01E-03 | 0 0 | Cs7g06000.1           | 8.75 | 0 | 0    | 0 | 2 | MASCOT | T |       |
| 2.25E-01 | 0 0 | Cs7g06000.1           | 8.75 | 0 | 0    | 0 | 2 | MASCOT | T |       |
| 7.55E-03 | 0 0 | Cs7g06000.1/orange1.  | 4.14 | 0 | 0    | 0 | 2 | MASCOT | T | PLEX8 |
| 6.23E-02 | 0 0 | Cs7g06000.1/orange1.  | 4.14 | 0 | 0    | 0 | 2 | MASCOT | T | PLEX8 |
| 1.39E-02 | 0 0 | Cs7g06000.1/orange1.  | 4.14 | 0 | 0    | 0 | 2 | MASCOT | T |       |
| 6.08E-02 | 0 0 | Cs7g06000.1/orange1.  | 4.14 | 0 | 0    | 0 | 2 | MASCOT | T |       |
| 3.26E-04 | 0 0 | Cs7g06000.1/orange1.  | 4.14 | 0 | 0    | 0 | 2 | MASCOT | T |       |
| 5.47E-05 | 0 0 | Cs7g06000.1/orange1.  | 4.14 | 0 | 0    | 0 | 2 | MASCOT | T |       |
| 9.79E-04 | 0 0 | Cs7g06000.1           | 9.72 | 0 | 0    | 0 | 2 | MASCOT | T | PLEX8 |
| 2.88E-02 | 0 0 | Cs7g06000.1           | 9.72 | 0 | 0    | 0 | 2 | MASCOT | T | PLEX8 |
| 4.12E-03 | 0 0 | Cs7g06000.1           | 9.72 | 0 | 0    | 0 | 2 | MASCOT | T | PLEX8 |
| 1.23E-01 | 0 0 | Cs7g06000.1           | 9.72 | 0 | 0    | 0 | 2 | MASCOT | T |       |
| 2.87E-02 | 0 0 | Cs7g06000.1           | 9.72 | 0 | 0    | 0 | 2 | MASCOT | T |       |
| 1.54E-03 | 0 0 | Cs7g06000.1           | 9.72 | 0 | 0    | 0 | 2 | MASCOT | T |       |
| 1.83E-03 | 0 0 | Cs7g06000.1           | 9.72 | 0 | 0    | 0 | 2 | MASCOT | T |       |
| 3.81E-02 | 0 0 | Cs7g06000.1           | 9.72 | 0 | 0    | 0 | 2 | MASCOT | T |       |
| 1.95E-05 | 0 0 | Cs7g06000.1           | 9.72 | 0 | 0    | 0 | 2 | MASCOT | T |       |
| 4.89E-02 | 0 0 | Cs7g06000.1           | 9.72 | 0 | 0    | 0 | 2 | MASCOT | T |       |
| 2.06E-04 | 0 0 | Cs7g06000.1           | 9.72 | 0 | 0    | 0 | 2 | MASCOT | T |       |
| 1.02E-02 | 0 0 | Cs7g06000.1           | 9.72 | 0 | 0    | 0 | 2 | MASCOT | T |       |
| 7.61E-04 | 0 0 | Cs7g06000.1           | 9.72 | 0 | 0    | 0 | 2 | MASCOT | T |       |
| 1.10E-02 | 0 0 | Cs7g06000.1           | 9.72 | 0 | 0    | 0 | 2 | MASCOT | T |       |
| 1.68E-03 | 0 0 | Cs7g06000.1           | 9.72 | 0 | 0    | 0 | 2 | MASCOT | T |       |
| 1.28E-03 | 0 0 | Cs7g06000.1           | 9.72 | 0 | 0    | 0 | 2 | MASCOT | T |       |
| 4.29E-02 | 0 0 | Cs7g06000.1           | 9.72 | 0 | 0    | 0 | 2 | MASCOT | T |       |
| 4.32E-02 | 0 0 | Cs7g06000.1           | 9.72 | 0 | 0    | 0 | 2 | MASCOT | T | PLEX8 |
| 2.11E-01 | 0 0 | Cs7g06000.1           | 9.72 | 0 | 0    | 0 | 2 | MASCOT | T | PLEX8 |
| 4.02E-01 | 0 0 | Cs7g06000.1           | 8.59 | 0 | 0    | 0 | 2 | MASCOT | T |       |
| 5.09E-02 | 0 0 | orange1.1t01932.1/ora | 5.88 | 0 | 0    | 0 | 2 | MASCOT | T | PLEX8 |
| 2.60E-01 | 0 0 | orange1.1t01932.1/ora | 5.88 | 0 | 0    | 0 | 2 | MASCOT | T | PLEX8 |
| 9.06E-02 | 0 0 | orange1.1t01932.1/ora | 5.88 | 0 | 0    | 0 | 2 | MASCOT | T | PLEX8 |
| 4.38E-03 | 0 0 | orange1.1t01932.1/ora | 5.88 | 0 | 0    | 0 | 2 | MASCOT | T | PLEX8 |
| 1.55E-01 | 0 0 | orange1.1t01932.1/ora | 5.88 | 0 | 0    | 0 | 2 | MASCOT | T | PLEX8 |
| 7.20E-03 | 0 0 | orange1.1t01932.1/ora | 5.88 | 0 | 0    | 0 | 2 | MASCOT | T | PLEX8 |
| 2.07E-01 | 0 0 | orange1.1t01932.1/ora | 5.88 | 0 | 0    | 0 | 2 | MASCOT | T | PLEX8 |
| 4.80E-02 | 0 0 | orange1.1t01932.1/ora | 5.88 | 0 | 0    | 0 | 2 | MASCOT | T | PLEX8 |
| 5.68E-02 | 0 0 | orange1.1t01932.1/ora | 5.88 | 0 | 0    | 0 | 2 | MASCOT | T | PLEX8 |
| 7.05E-02 | 0 0 | orange1.1t01932.1/ora | 5.88 | 0 | 0    | 0 | 2 | MASCOT | T | PLEX8 |
| 2.78E-03 | 0 0 | orange1.1t01932.1     | 4.14 | 0 | 0    | 0 | 2 | MASCOT | T | PLEX8 |
| 1.34E-01 | 0 0 | orange1.1t01932.1     | 4.14 | 0 | 0    | 0 | 2 | MASCOT | T | PLEX8 |
| 1.09E-01 | 0 0 | orange1.1t01932.1/ora | 6.75 | 0 | 0    | 0 | 2 | MASCOT | T | PLEX8 |
| 3.49E-01 | 0 0 | orange1.1t01932.1/ora | 6.75 | 0 | 0    | 0 | 2 | MASCOT | T | PLEX8 |
| 2.08E-02 | 0 0 | orange1.1t01932.1/ora | 6.75 | 0 | 0    | 0 | 2 | MASCOT | T | PLEX8 |
| 7.74E-02 | 0 0 | orange1.1t01932.1/ora | 6.75 | 0 | 0    | 0 | 2 | MASCOT | T | PLEX8 |

|              |                       |      |   |      |   |        |        |       |       |
|--------------|-----------------------|------|---|------|---|--------|--------|-------|-------|
| 3.04E-04 0 0 | orange1.1t01932.1     | 4.32 | 1 | 0    | 2 | MASCOT | T      | PLEX8 |       |
| 5.59E-03 0 0 | orange1.1t01932.1     | 4.32 | 1 | 0    | 2 | MASCOT | T      | PLEX8 |       |
| 1.94E-04 0 0 | orange1.1t01932.1     | 4.32 | 1 | 0    | 2 | MASCOT | T      | PLEX8 |       |
| 3.79E-06 0 0 | orange1.1t01932.1     | 4.32 | 1 | 0    | 2 | MASCOT | T      | PLEX8 |       |
| 7.77E-02 0 0 | orange1.1t01932.1/ora | 5.83 | 0 | 0    | 2 | MASCOT | T      | PLEX8 |       |
| 1.77E-02 0 0 | orange1.1t01932.1/ora | 5.83 | 0 | 0    | 2 | MASCOT | T      | PLEX8 |       |
| 1.01E-01 0 0 | orange1.1t01932.1/ora | 5.83 | 0 | 0    | 2 | MASCOT | T      | PLEX8 |       |
| 3.75E-02 0 0 | orange1.1t01932.1/ora | 3.92 | 0 | 15.9 | 0 | 2      | MASCOT | T     | PLEX8 |
| 1.41E-02 0 0 | orange1.1t01932.1/ora | 3.92 | 0 | 15.9 | 0 | 2      | MASCOT | T     | PLEX8 |
| 7.56E-02 0 0 | orange1.1t01932.1/ora | 3.92 | 0 | 0    | 2 | MASCOT | T      | PLEX8 |       |
| 3.86E-03 0 0 | orange1.1t01932.1     | 4.37 | 0 | 0    | 2 | MASCOT | T      | PLEX8 |       |
| 3.84E-04 0 0 | orange1.1t01932.1     | 4.37 | 0 | 0    | 2 | MASCOT | T      | PLEX8 |       |
| 5.59E-04 0 0 | orange1.1t01932.1     | 4.37 | 0 | 0    | 2 | MASCOT | T      | PLEX8 |       |
| 5.08E-04 0 0 | orange1.1t01932.1     | 4.37 | 0 | 0    | 2 | MASCOT | T      | PLEX8 |       |
| 2.26E-04 0 0 | orange1.1t01932.1     | 4.37 | 0 | 0    | 2 | MASCOT | T      | PLEX8 |       |
| 2.51E-02 0 0 | orange1.1t01932.1     | 4.37 | 0 | 0    | 2 | MASCOT | T      | PLEX8 |       |
| 1.25E-03 0 0 | orange1.1t01932.1/ora | 4.53 | 0 | 0    | 2 | MASCOT | T      | PLEX8 |       |
| 2.03E-01 0 0 | orange1.1t01932.1/ora | 4.53 | 0 | 0    | 2 | MASCOT | T      | PLEX8 |       |
| 3.67E-02 0 0 | orange1.1t01932.1/ora | 4.53 | 0 | 0    | 2 | MASCOT | T      | PLEX8 |       |
| 7.55E-06 0 0 | orange1.1t01932.1/ora | 4.53 | 0 | 0    | 2 | MASCOT | T      | PLEX8 |       |
| 1.55E-03 0 0 | orange1.1t01932.1/ora | 4.53 | 0 | 0    | 2 | MASCOT | T      | PLEX8 |       |
| 9.18E-09 0 0 | orange1.1t01932.1/ora | 4.53 | 0 | 0    | 2 | MASCOT | T      | PLEX8 |       |
| 3.05E-04 0 0 | orange1.1t01932.1/ora | 4.53 | 0 | 0    | 2 | MASCOT | T      | PLEX8 |       |
| 5.13E-09 0 0 | orange1.1t01932.1/ora | 4.53 | 0 | 0    | 2 | MASCOT | T      | PLEX8 |       |
| 2.58E-04 0 0 | orange1.1t01932.1/ora | 4.53 | 0 | 0    | 2 | MASCOT | T      | PLEX8 |       |
| 5.23E-03 0 0 | orange1.1t01932.1/ora | 4.53 | 0 | 0    | 2 | MASCOT | T      | PLEX8 |       |
| 2.05E-01 0 0 | orange1.1t01932.1/ora | 4.53 | 0 | 0    | 2 | MASCOT | T      | PLEX8 |       |
| 8.24E-02 0 0 | orange1.1t01932.1/ora | 4.53 | 0 | 0    | 2 | MASCOT | T      | PLEX8 |       |
| 1.65E-03 0 0 | orange1.1t01932.1/ora | 4.53 | 0 | 0    | 2 | MASCOT | T      | PLEX8 |       |
| 7.49E-02 0 0 | orange1.1t01932.1/ora | 9.47 | 0 | 0    | 2 | MASCOT | T      | PLEX8 |       |
| 1.77E-01 0 0 | orange1.1t01932.1/ora | 9.47 | 0 | 0    | 2 | MASCOT | T      | PLEX8 |       |
| 7.14E-02 0 0 | orange1.1t01932.1/ora | 9.47 | 0 | 0    | 2 | MASCOT | T      | PLEX8 |       |
| 1.17E-02 0 0 | orange1.1t01932.1/ora | 4.03 | 0 | 0    | 2 | MASCOT | T      | PLEX8 |       |
| 1.63E-01 0 0 | orange1.1t01932.1/ora | 4.03 | 0 | 0    | 2 | MASCOT | T      | PLEX8 |       |
| 7.70E-03 0 0 | orange1.1t01932.1/ora | 4.03 | 0 | 0    | 2 | MASCOT | T      | PLEX8 |       |
| 1.30E-01 0 0 | orange1.1t01932.1/ora | 4.03 | 0 | 0    | 2 | MASCOT | T      | PLEX8 |       |
| 1.81E-01 0 0 | orange1.1t01932.1/ora | 4.37 | 0 | 0    | 2 | MASCOT | T      | PLEX8 |       |
| 7.68E-02 0 0 | orange1.1t01932.1/ora | 6    | 0 | 0    | 2 | MASCOT | T      | PLEX8 |       |
| 6.48E-02 0 0 | orange1.1t01932.1/ora | 6    | 0 | 0    | 2 | MASCOT | T      | PLEX8 |       |
| 3.24E-02 0 0 | orange1.1t01932.1/ora | 6    | 0 | 0    | 2 | MASCOT | T      | PLEX8 |       |
| 7.40E-02 0 0 | orange1.1t01932.1/ora | 6    | 0 | 0    | 2 | MASCOT | T      | PLEX8 |       |
| 1.46E-01 0 0 | orange1.1t01932.1/ora | 6    | 0 | 0    | 2 | MASCOT | T      | PLEX8 |       |
| 2.34E-02 0 0 | orange1.1t01932.1/ora | 6    | 0 | 0    | 2 | MASCOT | T      | PLEX8 |       |
| 2.41E-02 0 0 | orange1.1t01932.1/ora | 6    | 0 | 0    | 2 | MASCOT | T      | PLEX8 |       |
| 1.98E-01 0 0 | orange1.1t01932.1/ora | 4.53 | 0 | 0    | 2 | MASCOT | T      | PLEX8 |       |
| 8.98E-02 0 0 | orange1.1t01932.1/ora | 6    | 0 | 0    | 2 | MASCOT | T      | PLEX8 |       |
| 2.65E-03 0 0 | orange1.1t01932.1/ora | 6    | 0 | 0    | 2 | MASCOT | T      | PLEX8 |       |
| 3.06E-03 0 0 | orange1.1t01932.1/ora | 6    | 0 | 0    | 2 | MASCOT | T      | PLEX8 |       |
| 7.55E-02 0 0 | orange1.1t01932.1/ora | 6    | 0 | 0    | 2 | MASCOT | T      | PLEX8 |       |
| 1.11E-02 0 0 | orange1.1t01932.1/ora | 6    | 0 | 0    | 2 | MASCOT | T      | PLEX8 |       |
| 6.29E-03 0 0 | orange1.1t01932.1/ora | 6    | 0 | 0    | 2 | MASCOT | T      | PLEX8 |       |

|              |                       |      |   |   |          |   |       |
|--------------|-----------------------|------|---|---|----------|---|-------|
| 1.24E-01 0 0 | orange1.1t01932.1/ora | 6    | 0 | 0 | 2 MASCOT | T | PLEX8 |
| 2.98E-03 0 0 | orange1.1t01932.1/ora | 6    | 0 | 0 | 2 MASCOT | T | PLEX8 |
| 1.02E-03 0 0 | orange1.1t01932.1/ora | 6    | 0 | 0 | 2 MASCOT | T | PLEX8 |
| 1.92E-02 0 0 | orange1.1t01932.1/ora | 6    | 0 | 0 | 2 MASCOT | T | PLEX8 |
| 4.22E-03 0 0 | orange1.1t01932.1/ora | 6    | 0 | 0 | 2 MASCOT | T | PLEX8 |
| 9.67E-02 0 0 | orange1.1t01932.1/ora | 6    | 0 | 0 | 2 MASCOT | T | PLEX8 |
| 9.35E-04 0 0 | orange1.1t01932.1/ora | 6    | 0 | 0 | 2 MASCOT | T | PLEX8 |
| 2.82E-02 0 0 | orange1.1t01932.1/ora | 6    | 0 | 0 | 2 MASCOT | T | PLEX8 |
| 1.00E-02 0 0 | orange1.1t01932.1/ora | 6    | 0 | 0 | 2 MASCOT | T | PLEX8 |
| 2.83E-03 0 0 | orange1.1t01932.1/ora | 6    | 0 | 0 | 2 MASCOT | T | PLEX8 |
| 3.54E-02 0 0 | orange1.1t01932.1/ora | 6    | 0 | 0 | 2 MASCOT | T | PLEX8 |
| 1.40E-01 0 0 | orange1.1t01932.1/ora | 5.84 | 0 | 0 | 2 MASCOT | T |       |
| 2.85E-01 0 0 | orange1.1t01932.1/ora | 5.84 | 0 | 0 | 2 MASCOT | T |       |
| 8.01E-02 0 0 | orange1.1t01932.1/ora | 5.84 | 0 | 0 | 2 MASCOT | T |       |
| 2.08E-01 0 0 | orange1.1t01932.1/ora | 5.84 | 0 | 0 | 2 MASCOT | T |       |
| 1.30E-01 0 0 | orange1.1t01932.1/ora | 5.84 | 0 | 0 | 2 MASCOT | T |       |
| 1.26E-01 0 0 | orange1.1t01932.1/ora | 5.84 | 0 | 0 | 2 MASCOT | T |       |
| 1.01E-01 0 0 | orange1.1t01932.1/ora | 5.84 | 0 | 0 | 2 MASCOT | T |       |
| 3.05E-01 0 0 | orange1.1t01932.1/ora | 5.84 | 0 | 0 | 2 MASCOT | T |       |
| 1.01E-01 0 0 | orange1.1t01932.1/ora | 5.84 | 0 | 0 | 2 MASCOT | T |       |
| 9.72E-02 0 0 | orange1.1t01932.1/ora | 5.84 | 0 | 0 | 2 MASCOT | T |       |
| 4.18E-01 0 0 | orange1.1t01932.1/ora | 4.53 | 0 | 0 | 2 MASCOT | T | PLEX8 |
| 1.67E-01 0 0 | orange1.1t01932.1/ora | 8.75 | 0 | 0 | 2 MASCOT | T | PLEX8 |
| 3.76E-01 0 0 | orange1.1t01932.1/ora | 8.75 | 0 | 0 | 2 MASCOT | T | PLEX8 |
| 4.99E-01 0 0 | orange1.1t01932.1/ora | 8.75 | 0 | 0 | 2 MASCOT | T | PLEX8 |
| 9.93E-03 0 0 | orange1.1t01932.1/ora | 6    | 0 | 0 | 2 MASCOT | T | PLEX8 |
| 6.77E-02 0 0 | orange1.1t01932.1/ora | 6    | 0 | 0 | 2 MASCOT | T | PLEX8 |
| 5.58E-04 0 0 | orange1.1t01932.1/ora | 6    | 0 | 0 | 2 MASCOT | T | PLEX8 |
| 7.81E-03 0 0 | orange1.1t01932.1/ora | 6    | 0 | 0 | 2 MASCOT | T | PLEX8 |
| 7.76E-04 0 0 | orange1.1t01932.1/ora | 6    | 0 | 0 | 2 MASCOT | T | PLEX8 |
| 1.93E-03 0 0 | orange1.1t01932.1/ora | 6    | 0 | 0 | 2 MASCOT | T | PLEX8 |
| 1.23E-02 0 0 | orange1.1t01932.1/ora | 6    | 0 | 0 | 2 MASCOT | T | PLEX8 |
| 2.99E-05 0 0 | orange1.1t01932.1/ora | 6    | 0 | 0 | 2 MASCOT | T | PLEX8 |
| 3.68E-05 0 0 | orange1.1t01932.1/ora | 6    | 0 | 0 | 2 MASCOT | T | PLEX8 |
| 2.44E-02 0 0 | orange1.1t01932.1/ora | 6    | 0 | 0 | 2 MASCOT | T | PLEX8 |
| 4.53E-05 0 0 | orange1.1t01932.1/ora | 6    | 0 | 0 | 2 MASCOT | T | PLEX8 |
| 1.01E-04 0 0 | orange1.1t01932.1/ora | 6    | 0 | 0 | 2 MASCOT | T | PLEX8 |
| 5.19E-04 0 0 | orange1.1t01932.1/ora | 6    | 0 | 0 | 2 MASCOT | T | PLEX8 |
| 5.40E-03 0 0 | orange1.1t01932.1/ora | 6    | 0 | 0 | 2 MASCOT | T | PLEX8 |
| 1.14E-04 0 0 | orange1.1t01932.1/ora | 6    | 0 | 0 | 2 MASCOT | T | PLEX8 |
| 5.46E-02 0 0 | orange1.1t01932.1/ora | 6    | 0 | 0 | 2 MASCOT | T | PLEX8 |
| 3.15E-01 0 0 | orange1.1t01932.1/ora | 6    | 0 | 0 | 2 MASCOT | T | PLEX8 |
| 2.90E-04 0 0 | orange1.1t01932.1/ora | 6    | 0 | 0 | 2 MASCOT | T | PLEX8 |
| 3.37E-04 0 0 | orange1.1t01932.1/ora | 6    | 0 | 0 | 2 MASCOT | T | PLEX8 |
| 1.64E-03 0 0 | orange1.1t01932.1/ora | 6    | 0 | 0 | 2 MASCOT | T | PLEX8 |
| 1.52E-02 0 0 | orange1.1t01932.1/ora | 6    | 0 | 0 | 2 MASCOT | T | PLEX8 |
| 3.49E-02 0 0 | orange1.1t01932.1/ora | 6    | 0 | 0 | 2 MASCOT | T | PLEX8 |
| 5.11E-01 0 0 | orange1.1t01932.1/ora | 6    | 0 | 0 | 2 MASCOT | T |       |
| 5.48E-01 0 0 | orange1.1t01932.1/ora | 8.26 | 0 | 0 | 2 MASCOT | T | PLEX8 |
| 2.21E-01 0 0 | orange1.1t01932.1/ora | 8.26 | 0 | 0 | 2 MASCOT | T | PLEX8 |
| 1.92E-02 0 0 | orange1.1t01932.1/ora | 8.26 | 0 | 0 | 2 MASCOT | T | PLEX8 |

|          |     |                       |      |   |      |   |        |        |       |       |
|----------|-----|-----------------------|------|---|------|---|--------|--------|-------|-------|
| 5.13E-02 | 0 0 | orange1.1t01932.1/ora | 8.26 | 0 | 0    | 2 | MASCOT | T      | PLEX8 |       |
| 3.43E-02 | 0 0 | orange1.1t01932.1/ora | 8.26 | 0 | 0    | 2 | MASCOT | T      | PLEX8 |       |
| 3.78E-01 | 0 0 | orange1.1t01932.1/ora | 8.26 | 0 | 0    | 2 | MASCOT | T      | PLEX8 |       |
| 1.22E-01 | 0 0 | orange1.1t01932.1/ora | 8.26 | 0 | 0    | 2 | MASCOT | T      | PLEX8 |       |
| 2.87E-02 | 0 0 | orange1.1t01932.1/ora | 8.26 | 0 | 0    | 2 | MASCOT | T      | PLEX8 |       |
| 8.28E-03 | 0 0 | orange1.1t01932.1/ora | 8.26 | 0 | 0    | 2 | MASCOT | T      | PLEX8 |       |
| 1.96E-01 | 0 0 | orange1.1t01932.1/ora | 8.26 | 0 | 0    | 2 | MASCOT | T      | PLEX8 |       |
| 9.14E-02 | 0 0 | Cs9g17510.1/Cs9g175   | 5.88 | 0 | 15.9 | 0 | 2      | MASCOT | T     | PLEX8 |
| 1.76E-01 | 0 0 | Cs9g17510.1/Cs9g175   | 5.88 | 0 | 0    | 2 | MASCOT | T      | PLEX8 |       |
| 1.77E-01 | 0 0 | Cs9g17510.1/Cs9g175   | 5.88 | 0 | 0    | 2 | MASCOT | T      | PLEX8 |       |
| 1.61E-01 | 0 0 | Cs9g17510.1/Cs9g175   | 5.88 | 0 | 0    | 2 | MASCOT | T      | PLEX8 |       |
| 1.28E-01 | 0 0 | Cs9g17510.1/Cs9g175   | 5.88 | 0 | 0    | 2 | MASCOT | T      | PLEX8 |       |
| 1.05E-01 | 0 0 | Cs9g17510.1/Cs9g175   | 5.88 | 0 | 0    | 2 | MASCOT | T      | PLEX8 |       |
| 2.26E-01 | 0 0 | Cs9g17510.1/Cs9g175   | 5.88 | 0 | 0    | 2 | MASCOT | T      | PLEX8 |       |
| 9.17E-02 | 0 0 | Cs9g17510.1/Cs9g175   | 4.25 | 0 | 0    | 2 | MASCOT | T      |       |       |
| 1.39E-05 | 0 0 | Cs9g17510.1/Cs9g175   | 4.53 | 0 | 0    | 2 | MASCOT | T      | PLEX8 |       |
| 1.64E-01 | 0 0 | Cs9g17510.1/Cs9g175   | 4.53 | 0 | 0    | 2 | MASCOT | T      | PLEX8 |       |
| 6.81E-02 | 0 0 | Cs9g17510.1/Cs9g175   | 4.53 | 0 | 0    | 2 | MASCOT | T      | PLEX8 |       |
| 4.31E-04 | 0 0 | Cs9g17510.1/Cs9g175   | 4.53 | 0 | 0    | 2 | MASCOT | T      | PLEX8 |       |
| 5.93E-02 | 0 0 | Cs9g17510.2/Cs9g175   | 4.37 | 0 | 0    | 2 | MASCOT | T      | PLEX8 |       |
| 4.57E-02 | 0 0 | Cs9g17510.2/Cs9g175   | 4.37 | 0 | 0    | 2 | MASCOT | T      | PLEX8 |       |
| 2.00E-01 | 0 0 | Cs9g17510.2/Cs9g175   | 4.37 | 0 | 0    | 2 | MASCOT | T      | PLEX8 |       |
| 2.92E-01 | 0 0 | Cs9g17510.2/Cs9g175   | 4.37 | 0 | 0    | 2 | MASCOT | T      | PLEX8 |       |
| 2.53E-02 | 0 0 | Cs9g17510.2/Cs9g175   | 4.37 | 0 | 0    | 2 | MASCOT | T      | PLEX8 |       |
| 4.05E-07 | 0 0 | Cs9g17510.2/Cs9g175   | 4.37 | 0 | 0    | 2 | MASCOT | T      | PLEX8 |       |
| 3.60E-04 | 0 0 | Cs9g17510.1/Cs9g175   | 4.53 | 0 | 0    | 2 | MASCOT | T      |       |       |
| 5.79E-03 | 0 0 | Cs9g17510.1/Cs9g175   | 4.53 | 0 | 0    | 2 | MASCOT | T      |       |       |
| 1.23E-03 | 0 0 | Cs9g17510.1/Cs9g175   | 4.53 | 0 | 0    | 2 | MASCOT | T      |       |       |
| 2.38E-05 | 0 0 | Cs9g17510.1/Cs9g175   | 4.53 | 0 | 0    | 2 | MASCOT | T      |       |       |
| 1.50E-03 | 0 0 | Cs9g17510.1/Cs9g175   | 4.53 | 0 | 0    | 2 | MASCOT | T      |       |       |
| 3.28E-02 | 0 0 | Cs9g17510.1/Cs9g175   | 4.68 | 1 | 0    | 2 | MASCOT | T      | PLEX8 |       |
| 9.65E-02 | 0 0 | Cs9g17510.1/Cs9g175   | 4.68 | 1 | 0    | 2 | MASCOT | T      | PLEX8 |       |
| 1.06E-01 | 0 0 | Cs9g17510.1/Cs9g175   | 4.68 | 1 | 0    | 2 | MASCOT | T      | PLEX8 |       |
| 4.89E-02 | 0 0 | Cs9g17510.2/Cs9g175   | 4.25 | 0 | 15.9 | 0 | 2      | MASCOT | T     |       |
| 1.69E-01 | 0 0 | Cs9g17510.2/Cs9g175   | 4.25 | 0 | 0    | 2 | MASCOT | T      | PLEX8 |       |
| 6.71E-04 | 0 0 | Cs9g17510.2/Cs9g175   | 4.25 | 0 | 0    | 2 | MASCOT | T      | PLEX8 |       |
| 1.80E-01 | 0 0 | Cs9g17510.2/Cs9g175   | 4.25 | 0 | 0    | 2 | MASCOT | T      |       |       |
| 4.50E-02 | 0 0 | Cs9g17510.2/Cs9g175   | 4.21 | 0 | 0    | 2 | MASCOT | T      | PLEX8 |       |
| 7.32E-02 | 0 0 | Cs9g17510.1/Cs9g175   | 5.84 | 0 | 0    | 2 | MASCOT | T      | PLEX8 |       |
| 1.67E-02 | 0 0 | Cs9g17510.1/Cs9g175   | 5.84 | 0 | 0    | 2 | MASCOT | T      |       |       |
| 8.08E-03 | 0 0 | Cs9g17510.1/Cs9g175   | 5.84 | 0 | 0    | 2 | MASCOT | T      |       |       |
| 3.80E-02 | 0 0 | Cs9g17510.1/Cs9g175   | 5.84 | 0 | 0    | 2 | MASCOT | T      |       |       |
| 1.01E-02 | 0 0 | Cs9g17510.1/Cs9g175   | 5.84 | 0 | 0    | 2 | MASCOT | T      |       |       |
| 2.19E-01 | 0 0 | Cs9g17510.1/Cs9g175   | 4.53 | 0 | 0    | 2 | MASCOT | T      | PLEX8 |       |
| 4.65E-01 | 0 0 | Cs9g17510.1/Cs9g175   | 4.53 | 0 | 0    | 2 | MASCOT | T      |       |       |
| 7.81E-04 | 0 0 | Cs9g17510.1/Cs9g175   | 4.56 | 0 | 0    | 2 | MASCOT | T      | PLEX8 |       |
| 3.11E-03 | 0 0 | Cs9g17510.1/Cs9g175   | 4.56 | 0 | 0    | 2 | MASCOT | T      | PLEX8 |       |
| 2.83E-01 | 0 0 | Cs9g17510.1/Cs9g175   | 4.25 | 0 | 15.9 | 0 | 2      | MASCOT | T     | PLEX8 |
| 1.58E-02 | 0 0 | Cs9g17510.1/Cs9g175   | 4.25 | 0 | 0    | 2 | MASCOT | T      | PLEX8 |       |
| 8.94E-03 | 0 0 | Cs9g17510.1/Cs9g175   | 4.25 | 0 | 0    | 2 | MASCOT | T      | PLEX8 |       |
| 1.43E-04 | 0 0 | Cs9g17510.1/Cs9g175   | 4.25 | 0 | 0    | 2 | MASCOT | T      | PLEX8 |       |

|          |     |                     |      |   |      |   |        |        |       |       |
|----------|-----|---------------------|------|---|------|---|--------|--------|-------|-------|
| 1.83E-05 | 0 0 | Cs9g17510.1/Cs9g175 | 4.25 | 0 | 0    | 2 | MASCOT | T      | PLEX8 |       |
| 6.76E-02 | 0 0 | Cs9g17510.1/Cs9g175 | 4.25 | 0 | 0    | 2 | MASCOT | T      | PLEX8 |       |
| 3.93E-02 | 0 0 | Cs9g17510.1/Cs9g175 | 4.25 | 0 | 0    | 2 | MASCOT | T      | PLEX8 |       |
| 3.63E-04 | 0 0 | Cs9g17510.1/Cs9g175 | 4.25 | 0 | 0    | 2 | MASCOT | T      | PLEX8 |       |
| 1.16E-03 | 0 0 | Cs9g17510.1/Cs9g175 | 4.25 | 0 | 0    | 2 | MASCOT | T      | PLEX8 |       |
| 1.67E-01 | 0 0 | Cs9g17510.1/Cs9g175 | 4.25 | 0 | 0    | 2 | MASCOT | T      | PLEX8 |       |
| 2.02E-01 | 0 0 | Cs9g17510.1/Cs9g175 | 4.25 | 0 | 0    | 2 | MASCOT | T      |       |       |
| 8.47E-02 | 0 0 | Cs9g17510.1/Cs9g175 | 4.25 | 0 | 0    | 2 | MASCOT | T      | PLEX8 |       |
| 3.28E-01 | 0 0 | Cs9g17510.1/Cs9g175 | 5.88 | 0 | 0    | 2 | MASCOT | T      | PLEX8 |       |
| 3.50E-01 | 0 0 | Cs9g17510.1/Cs9g175 | 5.88 | 0 | 0    | 2 | MASCOT | T      | PLEX8 |       |
| 3.07E-01 | 0 0 | Cs9g17510.1/Cs9g175 | 5.88 | 0 | 0    | 2 | MASCOT | T      | PLEX8 |       |
| 4.81E-02 | 0 0 | Cs9g17510.1/Cs9g175 | 4.14 | 0 | 0    | 2 | MASCOT | T      | PLEX8 |       |
| 3.04E-02 | 0 0 | Cs9g17510.1/Cs9g175 | 4.14 | 0 | 0    | 2 | MASCOT | T      | PLEX8 |       |
| 7.30E-03 | 0 0 | Cs9g17510.1/Cs9g175 | 4.14 | 0 | 0    | 2 | MASCOT | T      | PLEX8 |       |
| 3.74E-02 | 0 0 | Cs9g17510.1/Cs9g175 | 4.14 | 0 | 0    | 2 | MASCOT | T      | PLEX8 |       |
| 2.58E-01 | 0 0 | Cs9g17510.1/Cs9g175 | 4.31 | 0 | 15.9 | 0 | 2      | MASCOT | T     | PLEX8 |
| 7.37E-03 | 0 0 | Cs9g17510.1/Cs9g175 | 4.31 | 0 | 15.9 | 0 | 2      | MASCOT | T     | PLEX8 |
| 2.01E-01 | 0 0 | Cs9g17510.1/Cs9g175 | 4.31 | 0 | 15.9 | 0 | 2      | MASCOT | T     | PLEX8 |
| 9.29E-03 | 0 0 | Cs9g17510.1/Cs9g175 | 4.31 | 0 | 15.9 | 0 | 2      | MASCOT | T     | PLEX8 |
| 3.07E-04 | 0 0 | Cs9g17510.1/Cs9g175 | 4.31 | 0 | 15.9 | 0 | 2      | MASCOT | T     | PLEX8 |
| 6.70E-02 | 0 0 | Cs9g17510.1/Cs9g175 | 4.31 | 0 | 0    | 2 | MASCOT | T      | PLEX8 |       |
| 9.29E-03 | 0 0 | Cs9g17510.1/Cs9g175 | 4.31 | 0 | 0    | 2 | MASCOT | T      | PLEX8 |       |
| 1.60E-04 | 0 0 | Cs9g17510.1/Cs9g175 | 4.31 | 0 | 0    | 2 | MASCOT | T      | PLEX8 |       |
| 4.10E-02 | 0 0 | Cs9g17510.1/Cs9g175 | 4.31 | 0 | 0    | 2 | MASCOT | T      |       |       |
| 3.78E-01 | 0 0 | Cs9g17510.1/Cs9g175 | 4.31 | 0 | 0    | 2 | MASCOT | T      | PLEX8 |       |
| 1.01E-03 | 0 0 | Cs9g17510.1/Cs9g175 | 4.31 | 0 | 0    | 2 | MASCOT | T      | PLEX8 |       |
| 4.16E-01 | 0 0 | Cs9g17510.1/Cs9g175 | 4.31 | 0 | 0    | 2 | MASCOT | T      |       |       |
| 4.15E-01 | 0 0 | Cs9g17510.1/Cs9g175 | 4.31 | 0 | 0    | 2 | MASCOT | T      |       |       |
| 1.12E-02 | 0 0 | Cs9g17510.1/Cs9g175 | 4.09 | 0 | 15.9 | 0 | 2      | MASCOT | T     | PLEX8 |
| 8.69E-05 | 0 0 | Cs9g17510.1/Cs9g175 | 4.09 | 0 | 15.9 | 0 | 2      | MASCOT | T     | PLEX8 |
| 6.31E-04 | 0 0 | Cs9g17510.1/Cs9g175 | 4.09 | 0 | 15.9 | 0 | 2      | MASCOT | T     | PLEX8 |
| 1.36E-02 | 0 0 | Cs9g17510.1/Cs9g175 | 4.09 | 0 | 15.9 | 0 | 2      | MASCOT | T     | PLEX8 |
| 5.86E-03 | 0 0 | Cs9g17510.1/Cs9g175 | 4.09 | 0 | 0    | 2 | MASCOT | T      | PLEX8 |       |
| 6.78E-04 | 0 0 | Cs9g17510.1/Cs9g175 | 4.09 | 0 | 0    | 2 | MASCOT | T      | PLEX8 |       |
| 2.06E-04 | 0 0 | Cs9g17510.1/Cs9g175 | 4.09 | 0 | 0    | 2 | MASCOT | T      | PLEX8 |       |
| 3.63E-06 | 0 0 | Cs9g17510.1/Cs9g175 | 4.2  | 0 | 0    | 2 | MASCOT | T      |       |       |
| 1.59E-02 | 0 0 | Cs9g17510.1/Cs9g175 | 4.25 | 0 | 0    | 2 | MASCOT | T      | PLEX8 |       |
| 1.12E-01 | 0 0 | Cs9g17510.1/Cs9g175 | 4.25 | 0 | 0    | 2 | MASCOT | T      | PLEX8 |       |
| 1.35E-01 | 0 0 | Cs9g17510.1/Cs9g175 | 4.25 | 0 | 0    | 2 | MASCOT | T      | PLEX8 |       |
| 1.64E-01 | 0 0 | Cs9g17510.1/Cs9g175 | 5.84 | 0 | 0    | 2 | MASCOT | T      | PLEX8 |       |
| 3.21E-02 | 0 0 | Cs9g17510.1/Cs9g175 | 6    | 0 | 0    | 2 | MASCOT | T      | PLEX8 |       |
| 5.51E-02 | 0 0 | Cs9g17510.1/Cs9g175 | 5.72 | 0 | 0    | 2 | MASCOT | T      | PLEX8 |       |
| 2.38E-02 | 0 0 | Cs9g17510.1/Cs9g175 | 5.72 | 0 | 0    | 2 | MASCOT | T      | PLEX8 |       |
| 8.84E-02 | 0 0 | Cs9g17510.1/Cs9g175 | 5.72 | 0 | 0    | 2 | MASCOT | T      | PLEX8 |       |
| 8.04E-04 | 0 0 | Cs2g21430.1/Cs2g214 | 4.31 | 0 | 0    | 2 | MASCOT | T      | PLEX8 |       |
| 1.64E-02 | 0 0 | Cs2g21430.1/Cs2g214 | 4.31 | 0 | 0    | 2 | MASCOT | T      | PLEX8 |       |
| 1.67E-02 | 0 0 | Cs2g21430.1/Cs2g214 | 4.31 | 0 | 0    | 2 | MASCOT | T      | PLEX8 |       |
| 8.43E-05 | 0 0 | Cs2g21430.1/Cs2g214 | 4.31 | 0 | 0    | 2 | MASCOT | T      | PLEX8 |       |
| 1.37E-02 | 0 0 | Cs2g21430.1/Cs2g214 | 4.31 | 0 | 0    | 2 | MASCOT | T      | PLEX8 |       |
| 3.23E-04 | 0 0 | Cs2g21430.1/Cs2g214 | 4.31 | 0 | 0    | 2 | MASCOT | T      | PLEX8 |       |
| 3.21E-09 | 0 0 | Cs2g21430.1/Cs2g214 | 4.31 | 0 | 0    | 2 | MASCOT | T      | PLEX8 |       |



|          |     |                     |      |   |      |   |        |        |       |       |
|----------|-----|---------------------|------|---|------|---|--------|--------|-------|-------|
| 1.26E-03 | 0 0 | Cs2g21430.1/Cs2g214 | 4.31 | 0 | 0    | 2 | MASCOT | T      | PLEX8 |       |
| 3.77E-03 | 0 0 | Cs2g21430.1/Cs2g214 | 4.31 | 0 | 0    | 2 | MASCOT | T      |       |       |
| 1.40E-05 | 0 0 | Cs2g21430.1/Cs2g214 | 4.31 | 0 | 0    | 2 | MASCOT | T      |       |       |
| 3.74E-01 | 0 0 | Cs2g21430.1/Cs2g214 | 6.75 | 0 | 0    | 2 | MASCOT | T      | PLEX8 |       |
| 1.30E-01 | 0 0 | Cs2g21430.1/Cs2g214 | 6.75 | 0 | 0    | 2 | MASCOT | T      | PLEX8 |       |
| 1.17E-02 | 0 0 | Cs2g21430.1/Cs2g214 | 6.75 | 0 | 0    | 2 | MASCOT | T      | PLEX8 |       |
| 1.45E-01 | 0 0 | Cs2g21430.1/Cs2g214 | 5.84 | 0 | 0    | 2 | MASCOT | T      |       |       |
| 4.22E-03 | 0 0 | Cs2g21430.1/Cs2g214 | 5.84 | 0 | 0    | 2 | MASCOT | T      |       |       |
| 8.28E-02 | 0 0 | Cs2g21430.1/Cs2g214 | 5.84 | 0 | 0    | 2 | MASCOT | T      | PLEX8 |       |
| 5.77E-04 | 0 0 | Cs2g21430.1/Cs2g214 | 8.75 | 0 | 0    | 2 | MASCOT | T      | PLEX8 |       |
| 1.60E-04 | 0 0 | Cs2g21430.1/Cs2g214 | 8.75 | 0 | 0    | 2 | MASCOT | T      | PLEX8 |       |
| 3.97E-01 | 0 0 | Cs1g26040.1/Cs1g260 | 8.75 | 0 | 15.9 | 0 | 2      | MASCOT | T     | PLEX8 |
| 2.59E-02 | 0 0 | Cs1g26040.1/Cs1g260 | 8.75 | 0 | 0    | 2 | MASCOT | T      | PLEX8 |       |
| 8.50E-03 | 0 0 | Cs1g26040.1/Cs1g260 | 8.75 | 0 | 0    | 2 | MASCOT | T      | PLEX8 |       |
| 7.18E-02 | 0 0 | Cs1g26040.1/Cs1g260 | 8.75 | 0 | 0    | 2 | MASCOT | T      | PLEX8 |       |
| 6.15E-02 | 0 0 | Cs1g26040.1/Cs1g260 | 8.75 | 0 | 0    | 2 | MASCOT | T      |       |       |
| 9.68E-02 | 0 0 | Cs2g21430.1/Cs2g214 | 8.76 | 0 | 0    | 2 | MASCOT | T      |       |       |
| 6.68E-03 | 0 0 | Cs2g21430.1/Cs2g214 | 4.37 | 0 | 0    | 2 | MASCOT | T      | PLEX8 |       |
| 6.56E-03 | 0 0 | Cs2g21430.1/Cs2g214 | 4.37 | 0 | 0    | 2 | MASCOT | T      | PLEX8 |       |
| 1.13E-01 | 0 0 | Cs1g26040.1/Cs1g260 | 6    | 0 | 0    | 2 | MASCOT | T      | PLEX8 |       |
| 2.76E-01 | 0 0 | Cs2g21430.1/Cs2g214 | 4.56 | 0 | 0    | 2 | MASCOT | T      | PLEX8 |       |
| 3.45E-02 | 0 0 | Cs1g26040.1/Cs1g260 | 6    | 0 | 0    | 2 | MASCOT | T      | PLEX8 |       |
| 7.63E-03 | 0 0 | Cs1g26040.1/Cs1g260 | 6    | 0 | 0    | 2 | MASCOT | T      | PLEX8 |       |
| 9.64E-03 | 0 0 | Cs1g26040.1/Cs1g260 | 6    | 0 | 0    | 2 | MASCOT | T      | PLEX8 |       |
| 1.25E-02 | 0 0 | Cs1g26040.1/Cs1g260 | 6    | 0 | 0    | 2 | MASCOT | T      | PLEX8 |       |
| 1.17E-01 | 0 0 | Cs1g26040.1/Cs1g260 | 6    | 0 | 0    | 2 | MASCOT | T      | PLEX8 |       |
| 3.38E-02 | 0 0 | Cs1g26040.1/Cs1g260 | 6    | 0 | 0    | 2 | MASCOT | T      | PLEX8 |       |
| 3.60E-02 | 0 0 | Cs1g26040.1/Cs1g260 | 6    | 0 | 0    | 2 | MASCOT | T      | PLEX8 |       |
| 1.42E-01 | 0 0 | Cs2g21430.1/Cs2g214 | 5.84 | 0 | 15.9 | 0 | 2      | MASCOT | T     | PLEX8 |
| 1.28E-03 | 0 0 | Cs2g21430.1/Cs2g214 | 5.84 | 0 | 0    | 2 | MASCOT | T      | PLEX8 |       |
| 6.07E-03 | 0 0 | Cs2g21430.1/Cs2g214 | 5.84 | 0 | 0    | 2 | MASCOT | T      | PLEX8 |       |
| 1.74E-01 | 0 0 | Cs1g26040.1/Cs1g260 | 8.75 | 0 | 0    | 2 | MASCOT | T      | PLEX8 |       |
| 9.09E-03 | 0 0 | Cs1g26040.1/Cs1g260 | 8.75 | 0 | 0    | 2 | MASCOT | T      | PLEX8 |       |
| 9.43E-03 | 0 0 | Cs1g26040.1/Cs1g260 | 8.75 | 0 | 0    | 2 | MASCOT | T      | PLEX8 |       |
| 8.08E-03 | 0 0 | Cs2g21430.1/Cs2g214 | 5.72 | 0 | 0    | 2 | MASCOT | T      | PLEX8 |       |
| 1.54E-02 | 0 0 | Cs2g21430.1/Cs2g214 | 5.72 | 0 | 0    | 2 | MASCOT | T      | PLEX8 |       |
| 4.70E-02 | 0 0 | Cs2g21430.1/Cs2g214 | 5.72 | 0 | 0    | 2 | MASCOT | T      | PLEX8 |       |
| 1.29E-01 | 0 0 | Cs2g21430.1/Cs2g214 | 5.72 | 0 | 0    | 2 | MASCOT | T      | PLEX8 |       |
| 2.13E-01 | 0 0 | Cs2g21430.1/Cs2g214 | 5.72 | 0 | 0    | 2 | MASCOT | T      | PLEX8 |       |
| 4.61E-02 | 0 0 | Cs2g21430.1/Cs2g214 | 5.72 | 0 | 0    | 2 | MASCOT | T      | PLEX8 |       |
| 1.63E-02 | 0 0 | Cs2g21430.1/Cs2g214 | 5.72 | 0 | 0    | 2 | MASCOT | T      | PLEX8 |       |
| 1.16E-01 | 0 0 | Cs2g21430.1/Cs2g214 | 5.72 | 0 | 0    | 2 | MASCOT | T      |       |       |
| 1.20E-01 | 0 0 | Cs1g26040.1/Cs1g260 | 8.41 | 0 | 0    | 2 | MASCOT | T      | PLEX8 |       |
| 1.03E-03 | 0 0 | Cs1g26040.1/Cs1g260 | 8.41 | 0 | 0    | 2 | MASCOT | T      | PLEX8 |       |
| 7.22E-03 | 0 0 | Cs1g26040.1/Cs1g260 | 8.41 | 0 | 0    | 2 | MASCOT | T      | PLEX8 |       |
| 6.87E-03 | 0 0 | Cs1g26040.1/Cs1g260 | 8.41 | 0 | 0    | 2 | MASCOT | T      | PLEX8 |       |
| 6.42E-03 | 0 0 | Cs1g26040.1/Cs1g260 | 8.41 | 0 | 0    | 2 | MASCOT | T      | PLEX8 |       |
| 3.38E-04 | 0 0 | Cs1g26040.1/Cs1g260 | 8.41 | 0 | 0    | 2 | MASCOT | T      | PLEX8 |       |
| 4.48E-01 | 0 0 | Cs2g21430.1/Cs2g214 | 6.41 | 0 | 0    | 2 | MASCOT | T      | PLEX8 |       |
| 1.95E-02 | 0 0 | Cs2g21430.1/Cs2g214 | 8.59 | 0 | 0    | 2 | MASCOT | T      | PLEX8 |       |
| 2.31E-02 | 0 0 | Cs2g21430.1/Cs2g214 | 8.59 | 0 | 0    | 2 | MASCOT | T      | PLEX8 |       |

|          |     |                       |      |   |      |   |        |        |       |       |
|----------|-----|-----------------------|------|---|------|---|--------|--------|-------|-------|
| 3.54E-02 | 0 0 | Cs2g21430.1/Cs2g214   | 8.59 | 0 | 0    | 2 | MASCOT | T      | PLEX8 |       |
| 4.15E-02 | 0 0 | Cs2g21430.1/Cs2g214   | 8.59 | 0 | 0    | 2 | MASCOT | T      | PLEX8 |       |
| 8.97E-03 | 0 0 | Cs2g21430.1/Cs2g214   | 8.59 | 0 | 0    | 2 | MASCOT | T      | PLEX8 |       |
| 3.49E-02 | 0 0 | Cs2g21430.1/Cs2g214   | 8.59 | 0 | 0    | 2 | MASCOT | T      | PLEX8 |       |
| 3.09E-02 | 0 0 | Cs2g21430.1/Cs2g214   | 8.59 | 0 | 0    | 2 | MASCOT | T      | PLEX8 |       |
| 5.58E-02 | 0 0 | Cs2g21430.1/Cs2g214   | 8.59 | 0 | 0    | 2 | MASCOT | T      | PLEX8 |       |
| 3.12E-02 | 0 0 | Cs2g21430.1/Cs2g214   | 8.59 | 0 | 0    | 2 | MASCOT | T      |       |       |
| 6.20E-02 | 0 0 | Cs2g21430.1/Cs2g214   | 8.59 | 0 | 0    | 2 | MASCOT | T      | PLEX8 |       |
| 2.76E-03 | 0 0 | Cs2g21430.1/Cs2g214   | 5.84 | 0 | 0    | 2 | MASCOT | T      | PLEX8 |       |
| 1.10E-02 | 0 0 | Cs2g21430.1/Cs2g214   | 5.84 | 0 | 0    | 2 | MASCOT | T      | PLEX8 |       |
| 4.91E-02 | 0 0 | Cs2g21430.1/Cs2g214   | 5.83 | 0 | 0    | 2 | MASCOT | T      | PLEX8 |       |
| 1.40E-01 | 0 0 | Cs2g21430.1/Cs2g214   | 5.83 | 0 | 0    | 2 | MASCOT | T      | PLEX8 |       |
| 7.40E-03 | 0 0 | Cs2g21430.1/Cs2g214   | 6.07 | 1 | 0    | 2 | MASCOT | T      |       |       |
| 6.97E-03 | 0 0 | Cs2g21430.1/Cs2g214   | 6.07 | 1 | 0    | 2 | MASCOT | T      |       |       |
| 1.55E-02 | 0 0 | Cs2g21430.1/Cs2g214   | 6.07 | 1 | 0    | 2 | MASCOT | T      |       |       |
| 1.74E-02 | 0 0 | Cs2g21430.1/Cs2g214   | 7.94 | 0 | 15.9 | 0 | 2      | MASCOT | T     | PLEX8 |
| 4.51E-02 | 0 0 | Cs2g21430.1/Cs2g214   | 7.94 | 0 | 15.9 | 0 | 2      | MASCOT | T     | PLEX8 |
| 6.79E-03 | 0 0 | Cs2g21430.1/Cs2g214   | 7.94 | 0 | 0    | 2 | MASCOT | T      | PLEX8 |       |
| 3.48E-03 | 0 0 | Cs2g21430.1/Cs2g214   | 7.94 | 0 | 0    | 2 | MASCOT | T      |       |       |
| 1.50E+00 | 0 0 | Cs1g26040.1/Cs1g260   | 9.73 | 0 | 0    | 2 | MASCOT | T      | PLEX8 |       |
| 8.18E-01 | 0 0 | Cs1g26040.1/Cs1g260   | 9.73 | 0 | 0    | 2 | MASCOT | T      |       |       |
| 9.18E-01 | 0 0 | Cs1g26040.1/Cs1g260   | 9.73 | 0 | 0    | 2 | MASCOT | T      | PLEX8 |       |
| 6.75E-05 | 0 0 | orange1.1t01459.1/ora | 4.53 | 0 | 0    | 2 | MASCOT | T      |       |       |
| 3.51E-02 | 0 0 | orange1.1t01459.1/ora | 4.53 | 0 | 0    | 2 | MASCOT | T      |       |       |
| 2.21E-01 | 0 0 | orange1.1t01459.1/ora | 4.4  | 0 | 0    | 2 | MASCOT | T      | PLEX8 |       |
| 2.94E-02 | 0 0 | orange1.1t01459.1/ora | 4.4  | 0 | 0    | 2 | MASCOT | T      | PLEX8 |       |
| 1.02E-02 | 0 0 | orange1.1t01459.1/ora | 4.4  | 0 | 0    | 2 | MASCOT | T      |       |       |
| 4.89E-01 | 0 0 | orange1.1t01459.1/ora | 5.84 | 0 | 0    | 2 | MASCOT | T      | PLEX8 |       |
| 6.93E-02 | 0 0 | orange1.1t01459.1/ora | 5.32 | 0 | 0    | 2 | MASCOT | T      | PLEX8 |       |
| 1.46E-02 | 0 0 | orange1.1t01459.1/ora | 5.32 | 0 | 0    | 2 | MASCOT | T      | PLEX8 |       |
| 9.79E-05 | 0 0 | orange1.1t01459.1/ora | 4.14 | 0 | 0    | 2 | MASCOT | T      | PLEX8 |       |
| 3.28E-03 | 0 0 | orange1.1t01459.1/ora | 4.14 | 0 | 0    | 2 | MASCOT | T      | PLEX8 |       |
| 1.23E-04 | 0 0 | orange1.1t01459.1/ora | 4.14 | 0 | 0    | 2 | MASCOT | T      | PLEX8 |       |
| 9.26E-03 | 0 0 | orange1.1t01459.1/ora | 4.25 | 0 | 0    | 2 | MASCOT | T      | PLEX8 |       |
| 4.15E-04 | 0 0 | orange1.1t01459.1/ora | 4.25 | 0 | 0    | 2 | MASCOT | T      | PLEX8 |       |
| 1.53E-03 | 0 0 | orange1.1t01459.1/ora | 4.25 | 0 | 0    | 2 | MASCOT | T      | PLEX8 |       |
| 1.78E-02 | 0 0 | orange1.1t01459.1/ora | 4.25 | 0 | 0    | 2 | MASCOT | T      | PLEX8 |       |
| 1.12E-03 | 0 0 | orange1.1t01459.1/ora | 8.75 | 0 | 0    | 2 | MASCOT | T      | PLEX8 |       |
| 4.65E-03 | 0 0 | orange1.1t01459.1/ora | 8.75 | 0 | 0    | 2 | MASCOT | T      |       |       |
| 2.73E-01 | 0 0 | orange1.1t01459.1/ora | 9.75 | 0 | 0    | 2 | MASCOT | T      |       |       |
| 6.15E-02 | 0 0 | orange1.1t01459.1/ora | 9.75 | 0 | 0    | 2 | MASCOT | T      | PLEX8 |       |
| 1.08E-05 | 0 0 | orange1.1t01459.1/ora | 3.84 | 0 | 0    | 2 | MASCOT | T      |       |       |
| 1.57E-02 | 0 0 | Cs2g11170.1/Cs2g111   | 8.75 | 0 | 0    | 2 | MASCOT | T      | PLEX8 |       |
| 8.03E-02 | 0 0 | Cs2g11170.1/Cs2g111   | 8.75 | 0 | 0    | 2 | MASCOT | T      | PLEX8 |       |
| 8.10E-02 | 0 0 | Cs2g11170.1/Cs2g111   | 8.75 | 0 | 0    | 2 | MASCOT | T      | PLEX8 |       |
| 1.68E-02 | 0 0 | Cs2g11170.1/Cs2g111   | 8.75 | 0 | 0    | 2 | MASCOT | T      | PLEX8 |       |
| 3.60E-02 | 0 0 | Cs2g11170.1/Cs2g111   | 8.75 | 0 | 0    | 2 | MASCOT | T      | PLEX8 |       |
| 1.93E-01 | 0 0 | Cs2g11170.1/Cs2g111   | 8.75 | 0 | 0    | 2 | MASCOT | T      | PLEX8 |       |
| 2.43E-01 | 0 0 | Cs2g11170.1/Cs2g111   | 8.75 | 0 | 0    | 2 | MASCOT | T      | PLEX8 |       |
| 4.38E-02 | 0 0 | Cs2g11170.1/Cs2g111   | 8.75 | 0 | 0    | 2 | MASCOT | T      | PLEX8 |       |
| 1.87E-01 | 0 0 | Cs2g11170.1/Cs2g111   | 8.75 | 0 | 0    | 2 | MASCOT | T      | PLEX8 |       |

|          |     |                       |      |   |   |   |        |   |       |
|----------|-----|-----------------------|------|---|---|---|--------|---|-------|
| 2.71E-02 | 0 0 | Cs2g11170.1/Cs2g111   | 8.75 | 0 | 0 | 2 | MASCOT | T | PLEX8 |
| 3.11E-02 | 0 0 | Cs2g11170.1/Cs2g111   | 8.75 | 0 | 0 | 2 | MASCOT | T | PLEX8 |
| 1.40E-01 | 0 0 | Cs2g11170.1/Cs2g111   | 8.75 | 0 | 0 | 2 | MASCOT | T | PLEX8 |
| 2.99E-02 | 0 0 | Cs2g11170.1/Cs2g111   | 8.75 | 0 | 0 | 2 | MASCOT | T | PLEX8 |
| 1.17E-01 | 0 0 | Cs2g11170.1/Cs2g111   | 8.75 | 0 | 0 | 2 | MASCOT | T | PLEX8 |
| 2.15E-02 | 0 0 | Cs2g11170.1/Cs2g111   | 8.75 | 0 | 0 | 2 | MASCOT | T | PLEX8 |
| 1.17E-02 | 0 0 | Cs2g11170.1/Cs2g111   | 8.75 | 0 | 0 | 2 | MASCOT | T | PLEX8 |
| 3.31E-02 | 0 0 | Cs2g11170.1/Cs2g111   | 8.75 | 0 | 0 | 2 | MASCOT | T | PLEX8 |
| 1.39E-02 | 0 0 | Cs2g11170.1/Cs2g111   | 8.75 | 0 | 0 | 2 | MASCOT | T | PLEX8 |
| 4.93E-02 | 0 0 | Cs2g11170.1/Cs2g111   | 8.75 | 0 | 0 | 2 | MASCOT | T | PLEX8 |
| 8.03E-03 | 0 0 | Cs2g11170.1/Cs2g111   | 8.75 | 0 | 0 | 2 | MASCOT | T | PLEX8 |
| 8.57E-02 | 0 0 | Cs2g11170.1/Cs2g111   | 8.75 | 0 | 0 | 2 | MASCOT | T | PLEX8 |
| 2.69E-01 | 0 0 | Cs2g11170.1/Cs2g111   | 8.75 | 0 | 0 | 2 | MASCOT | T | PLEX8 |
| 7.93E-02 | 0 0 | Cs2g11170.1/Cs2g111   | 8.75 | 0 | 0 | 2 | MASCOT | T | PLEX8 |
| 1.09E-01 | 0 0 | Cs2g11170.1/Cs2g111   | 8.75 | 0 | 0 | 2 | MASCOT | T | PLEX8 |
| 8.37E-02 | 0 0 | Cs2g11170.1/Cs2g111   | 8.75 | 0 | 0 | 2 | MASCOT | T | PLEX8 |
| 4.27E-02 | 0 0 | Cs2g11170.1/Cs2g111   | 8.75 | 0 | 0 | 2 | MASCOT | T | PLEX8 |
| 1.12E-02 | 0 0 | Cs2g11170.1/Cs2g111   | 8.75 | 0 | 0 | 2 | MASCOT | T | PLEX8 |
| 2.33E-01 | 0 0 | Cs2g11170.1/Cs2g111   | 8.75 | 0 | 0 | 2 | MASCOT | T | PLEX8 |
| 2.44E-01 | 0 0 | Cs2g11170.1/Cs2g111   | 8.75 | 0 | 0 | 2 | MASCOT | T | PLEX8 |
| 2.80E-01 | 0 0 | Cs2g11170.1/Cs2g111   | 8.75 | 0 | 0 | 2 | MASCOT | T | PLEX8 |
| 3.91E-01 | 0 0 | Cs2g11170.1/Cs2g111   | 8.75 | 0 | 0 | 2 | MASCOT | T | PLEX8 |
| 1.33E-01 | 0 0 | Cs2g11170.1/Cs2g111   | 8.75 | 0 | 0 | 2 | MASCOT | T | PLEX8 |
| 1.46E-02 | 0 0 | orange1.1t01459.1/ora | 5.84 | 0 | 0 | 2 | MASCOT | T | PLEX8 |
| 1.02E-01 | 0 0 | orange1.1t01459.1/ora | 8.75 | 0 | 0 | 2 | MASCOT | T | PLEX8 |
| 1.26E-02 | 0 0 | orange1.1t01459.1/ora | 8.75 | 0 | 0 | 2 | MASCOT | T | PLEX8 |
| 1.39E-01 | 0 0 | orange1.1t01459.1/ora | 8.75 | 0 | 0 | 2 | MASCOT | T | PLEX8 |
| 1.26E-02 | 0 0 | orange1.1t01459.1/ora | 8.75 | 0 | 0 | 2 | MASCOT | T | PLEX8 |
| 9.54E-03 | 0 0 | orange1.1t01459.1/ora | 5.55 | 0 | 0 | 2 | MASCOT | T | PLEX8 |
| 2.21E-03 | 0 0 | orange1.1t01459.1/ora | 5.55 | 0 | 0 | 2 | MASCOT | T | PLEX8 |
| 2.29E-02 | 0 0 | orange1.1t01459.1/ora | 5.55 | 0 | 0 | 2 | MASCOT | T | PLEX8 |
| 4.36E-03 | 0 0 | orange1.1t01459.1/ora | 4.25 | 0 | 0 | 2 | MASCOT | T | PLEX8 |
| 2.08E-01 | 0 0 | orange1.1t01459.1/ora | 6.41 | 0 | 0 | 2 | MASCOT | T | PLEX8 |
| 3.25E-02 | 0 0 | orange1.1t01459.1/ora | 5.8  | 0 | 0 | 2 | MASCOT | T | PLEX8 |
| 6.35E-03 | 0 0 | orange1.1t01459.1/ora | 5.8  | 0 | 0 | 2 | MASCOT | T | PLEX8 |
| 2.08E-01 | 0 0 | orange1.1t01459.1/ora | 5.8  | 0 | 0 | 2 | MASCOT | T | PLEX8 |
| 5.03E-02 | 0 0 | orange1.1t01459.1/ora | 8.5  | 0 | 0 | 2 | MASCOT | T | PLEX8 |
| 8.99E-03 | 0 0 | orange1.1t01459.1/ora | 8.5  | 0 | 0 | 2 | MASCOT | T | PLEX8 |
| 7.60E-03 | 0 0 | orange1.1t01459.1/ora | 8.5  | 0 | 0 | 2 | MASCOT | T | PLEX8 |
| 4.17E-02 | 0 0 | orange1.1t01459.1/ora | 6    | 0 | 0 | 2 | MASCOT | T | PLEX8 |
| 8.91E-02 | 0 0 | orange1.1t01459.1/ora | 4.03 | 0 | 0 | 2 | MASCOT | T | PLEX8 |
| 2.43E-02 | 0 0 | orange1.1t01459.1/ora | 5.97 | 0 | 0 | 2 | MASCOT | T | PLEX8 |
| 1.27E-01 | 0 0 | orange1.1t01459.1/ora | 5.97 | 0 | 0 | 2 | MASCOT | T | PLEX8 |
| 1.91E-02 | 0 0 | orange1.1t01459.1/ora | 5.97 | 0 | 0 | 2 | MASCOT | T | PLEX8 |
| 1.62E-01 | 0 0 | orange1.1t01459.1/ora | 5.97 | 0 | 0 | 2 | MASCOT | T | PLEX8 |
| 2.42E-02 | 0 0 | orange1.1t01459.1/ora | 5.97 | 0 | 0 | 2 | MASCOT | T | PLEX8 |
| 1.35E-01 | 0 0 | orange1.1t01459.1/ora | 5.97 | 0 | 0 | 2 | MASCOT | T | PLEX8 |
| 2.64E-02 | 0 0 | orange1.1t01459.1/ora | 5.97 | 0 | 0 | 2 | MASCOT | T | PLEX8 |
| 5.23E-01 | 0 0 | Cs6g16010.1/Cs6g160   | 4.37 | 0 | 0 | 2 | MASCOT | T | PLEX8 |
| 1.10E-02 | 0 0 | Cs6g16010.1/Cs6g160   | 6    | 0 | 0 | 2 | MASCOT | T | PLEX8 |
| 9.62E-02 | 0 0 | Cs6g16010.1/Cs6g160   | 6    | 0 | 0 | 2 | MASCOT | T | PLEX8 |

|          |     |                     |      |        |   |   |        |   |       |
|----------|-----|---------------------|------|--------|---|---|--------|---|-------|
| 1.21E-02 | 0 0 | Cs6g16010.1/Cs6g160 | 6    | 0      | 0 | 2 | MASCOT | T | PLEX8 |
| 2.00E-02 | 0 0 | Cs6g16010.1/Cs6g160 | 6    | 0      | 0 | 2 | MASCOT | T | PLEX8 |
| 5.46E-02 | 0 0 | Cs6g16010.1/Cs6g160 | 6    | 0      | 0 | 2 | MASCOT | T | PLEX8 |
| 4.76E-02 | 0 0 | Cs6g16010.1/Cs6g160 | 6    | 0      | 0 | 2 | MASCOT | T | PLEX8 |
| 5.22E-02 | 0 0 | Cs6g16010.1/Cs6g160 | 6    | 0      | 0 | 2 | MASCOT | T | PLEX8 |
| 1.28E-02 | 0 0 | Cs6g16010.1/Cs6g160 | 6    | 0      | 0 | 2 | MASCOT | T | PLEX8 |
| 1.90E-02 | 0 0 | Cs6g16010.1/Cs6g160 | 6    | 0      | 0 | 2 | MASCOT | T | PLEX8 |
| 1.06E-01 | 0 0 | Cs6g16010.1/Cs6g160 | 6    | 0      | 0 | 2 | MASCOT | T | PLEX8 |
| 1.05E-02 | 0 0 | Cs6g16010.1/Cs6g160 | 6    | 0      | 0 | 2 | MASCOT | T | PLEX8 |
| 4.09E-01 | 0 0 | Cs6g16010.1/Cs6g160 | 6    | 0      | 0 | 2 | MASCOT | T |       |
| 3.18E-03 | 0 0 | Cs6g16010.1/Cs6g160 | 8.75 | 0      | 0 | 2 | MASCOT | T | PLEX8 |
| 7.42E-04 | 0 0 | Cs6g16010.1/Cs6g160 | 8.76 | 0      | 0 | 2 | MASCOT | T | PLEX8 |
| 4.35E-01 | 0 0 | Cs6g16010.1/Cs6g160 | 8.76 | 0      | 0 | 2 | MASCOT | T | PLEX8 |
| 2.68E-01 | 0 0 | Cs6g16010.1/Cs6g160 | 8.76 | 0      | 0 | 2 | MASCOT | T | PLEX8 |
| 5.18E-02 | 0 0 | Cs6g16010.1/Cs6g160 | 5.84 | 0      | 0 | 2 | MASCOT | T | PLEX8 |
| 3.66E-01 | 0 0 | Cs6g16010.1/Cs6g160 | 5.84 | 0      | 0 | 2 | MASCOT | T | PLEX8 |
| 1.77E-02 | 0 0 | Cs6g16010.1/Cs6g160 | 5.84 | 0      | 0 | 2 | MASCOT | T | PLEX8 |
| 1.16E-03 | 0 0 | Cs6g16010.1/Cs6g160 | 4.14 | 0      | 0 | 2 | MASCOT | T | PLEX8 |
| 2.25E-03 | 0 0 | Cs6g16010.1/Cs6g160 | 4.14 | 0      | 0 | 2 | MASCOT | T | PLEX8 |
| 2.70E-01 | 0 0 | Cs6g16010.1/Cs6g160 | 4.14 | 0      | 0 | 2 | MASCOT | T |       |
| 3.30E-02 | 0 0 | Cs6g16010.1/Cs6g160 | 4.14 | 0      | 0 | 2 | MASCOT | T | PLEX8 |
| 2.60E-03 | 0 0 | Cs6g16010.1/Cs6g160 | 4.4  | 0      | 0 | 2 | MASCOT | T | PLEX8 |
| 1.06E-02 | 0 0 | Cs6g16010.1/Cs6g160 | 4.4  | 0      | 0 | 2 | MASCOT | T | PLEX8 |
| 3.28E-03 | 0 0 | Cs6g16010.1/Cs6g160 | 4.4  | 0      | 0 | 2 | MASCOT | T | PLEX8 |
| 1.00E-01 | 0 0 | Cs6g16010.1/Cs6g160 | 4.4  | 0      | 0 | 2 | MASCOT | T |       |
| 2.60E-02 | 0 0 | Cs6g16010.1/Cs6g160 | 4.4  | 0      | 0 | 2 | MASCOT | T |       |
| 6.92E-04 | 0 0 | Cs6g16010.1/Cs6g160 | 8.22 | 0      | 0 | 2 | MASCOT | T | PLEX8 |
| 2.83E-03 | 0 0 | Cs6g16010.1/Cs6g160 | 8.22 | 0      | 0 | 2 | MASCOT | T | PLEX8 |
| 1.22E-04 | 0 0 | Cs6g16010.1/Cs6g160 | 8.22 | 0      | 0 | 2 | MASCOT | T | PLEX8 |
| 3.88E-06 | 0 0 | Cs6g16010.1/Cs6g160 | 8.22 | 0      | 0 | 2 | MASCOT | T | PLEX8 |
| 1.49E-01 | 0 0 | Cs6g16010.1/Cs6g160 | 5.75 | 0      | 0 | 2 | MASCOT | T | PLEX8 |
| 8.92E-02 | 0 0 | Cs6g16010.1/Cs6g160 | 5.75 | 0      | 0 | 2 | MASCOT | T | PLEX8 |
| 2.99E-01 | 0 0 | Cs6g16010.1/Cs6g160 | 5.75 | 0      | 0 | 2 | MASCOT | T | PLEX8 |
| 8.50E-02 | 0 0 | Cs6g16010.1/Cs6g160 | 4.53 | 0 15.9 | 0 | 2 | MASCOT | T | PLEX8 |
| 4.07E-02 | 0 0 | Cs6g16010.1/Cs6g160 | 4.53 | 0      | 0 | 2 | MASCOT | T | PLEX8 |
| 4.00E-03 | 0 0 | Cs6g16010.1/Cs6g160 | 4.53 | 0      | 0 | 2 | MASCOT | T | PLEX8 |
| 9.67E-03 | 0 0 | Cs6g16010.1/Cs6g160 | 4.53 | 0      | 0 | 2 | MASCOT | T | PLEX8 |
| 2.15E-05 | 0 0 | Cs6g16010.1/Cs6g160 | 4.53 | 0      | 0 | 2 | MASCOT | T | PLEX8 |
| 2.15E-02 | 0 0 | Cs6g16010.1/Cs6g160 | 4.53 | 0      | 0 | 2 | MASCOT | T | PLEX8 |
| 1.24E-01 | 0 0 | Cs6g16010.1/Cs6g160 | 4.53 | 0      | 0 | 2 | MASCOT | T | PLEX8 |
| 2.21E-06 | 0 0 | Cs6g16010.1/Cs6g160 | 4.53 | 0      | 0 | 2 | MASCOT | T | PLEX8 |
| 1.53E-05 | 0 0 | Cs6g16010.1/Cs6g160 | 4.53 | 0      | 0 | 2 | MASCOT | T | PLEX8 |
| 1.58E-01 | 0 0 | Cs6g16010.1/Cs6g160 | 4.53 | 0      | 0 | 2 | MASCOT | T | PLEX8 |
| 1.10E-02 | 0 0 | Cs6g16010.1/Cs6g160 | 4.37 | 0      | 0 | 2 | MASCOT | T | PLEX8 |
| 6.33E-02 | 0 0 | Cs6g16010.1/Cs6g160 | 4.37 | 0      | 0 | 2 | MASCOT | T | PLEX8 |
| 1.35E-01 | 0 0 | Cs6g16010.1/Cs6g160 | 4.37 | 0      | 0 | 2 | MASCOT | T | PLEX8 |
| 9.03E-03 | 0 0 | Cs6g16010.1/Cs6g160 | 4.37 | 0      | 0 | 2 | MASCOT | T |       |
| 1.12E-02 | 0 0 | Cs6g16010.1/Cs6g160 | 6.47 | 0      | 0 | 2 | MASCOT | T |       |
| 1.95E-01 | 0 0 | Cs6g16010.1/Cs6g160 | 5.97 | 0      | 0 | 2 | MASCOT | T |       |
| 2.41E-03 | 0 0 | Cs6g16010.1/Cs6g160 | 5.97 | 0      | 0 | 2 | MASCOT | T |       |
| 1.01E-02 | 0 0 | Cs6g16010.1/Cs6g160 | 5.21 | 0 15.9 | 0 | 2 | MASCOT | T | PLEX8 |

|          |     |                     |      |   |   |   |        |   |       |
|----------|-----|---------------------|------|---|---|---|--------|---|-------|
| 4.24E-02 | 0 0 | Cs6g16010.1/Cs6g160 | 5.21 | 0 | 0 | 2 | MASCOT | T | PLEX8 |
| 2.62E-01 | 0 0 | Cs6g16010.1/Cs6g160 | 5.21 | 0 | 0 | 2 | MASCOT | T | PLEX8 |
| 3.15E-02 | 0 0 | Cs6g16010.1/Cs6g160 | 6.91 | 0 | 0 | 2 | MASCOT | T | PLEX8 |
| 1.34E-03 | 0 0 | Cs6g16010.1/Cs6g160 | 6.91 | 0 | 0 | 2 | MASCOT | T | PLEX8 |
| 1.34E-01 | 0 0 | Cs6g16010.1/Cs6g160 | 6.91 | 0 | 0 | 2 | MASCOT | T | PLEX8 |
| 2.36E-03 | 0 0 | Cs6g16010.1/Cs6g160 | 6.91 | 0 | 0 | 2 | MASCOT | T | PLEX8 |
| 6.49E-04 | 0 0 | Cs6g16010.1/Cs6g160 | 6.91 | 0 | 0 | 2 | MASCOT | T | PLEX8 |
| 3.73E-02 | 0 0 | Cs6g16010.1/Cs6g160 | 6.14 | 1 | 0 | 2 | MASCOT | T |       |
| 1.04E-01 | 0 0 | Cs6g16010.1/Cs6g160 | 4.21 | 0 | 0 | 2 | MASCOT | T | PLEX8 |
| 1.08E-02 | 0 0 | Cs6g16010.1/Cs6g160 | 4.21 | 0 | 0 | 2 | MASCOT | T | PLEX8 |
| 7.85E-02 | 0 0 | Cs6g16010.1/Cs6g160 | 4.21 | 0 | 0 | 2 | MASCOT | T | PLEX8 |
| 2.12E-02 | 0 0 | Cs6g16010.1/Cs6g160 | 4.21 | 0 | 0 | 2 | MASCOT | T | PLEX8 |
| 4.72E-02 | 0 0 | Cs6g16010.1/Cs6g160 | 4.21 | 0 | 0 | 2 | MASCOT | T |       |
| 2.95E-02 | 0 0 | Cs6g16010.1/Cs6g160 | 4.37 | 0 | 0 | 2 | MASCOT | T | PLEX8 |
| 2.27E-02 | 0 0 | Cs6g16010.1/Cs6g160 | 4.37 | 0 | 0 | 2 | MASCOT | T | PLEX8 |
| 2.81E-02 | 0 0 | Cs6g16010.1/Cs6g160 | 4.37 | 0 | 0 | 2 | MASCOT | T | PLEX8 |
| 1.65E-04 | 0 0 | Cs6g16010.1/Cs6g160 | 5.4  | 0 | 0 | 2 | MASCOT | T | PLEX8 |
| 1.11E-01 | 0 0 | Cs6g16010.1/Cs6g160 | 5.4  | 0 | 0 | 2 | MASCOT | T | PLEX8 |
| 1.70E-01 | 0 0 | Cs5g11720.1/Cs5g117 | 6.1  | 0 | 0 | 2 | MASCOT | T | PLEX8 |
| 8.41E-02 | 0 0 | Cs5g11720.1/Cs5g117 | 6.1  | 0 | 0 | 2 | MASCOT | T | PLEX8 |
| 1.89E-01 | 0 0 | Cs5g11720.1/Cs5g117 | 4.09 | 0 | 0 | 2 | MASCOT | T | PLEX8 |
| 2.05E-02 | 0 0 | Cs5g11720.1/Cs5g117 | 4.09 | 0 | 0 | 2 | MASCOT | T | PLEX8 |
| 6.79E-02 | 0 0 | Cs5g11720.1/Cs5g117 | 5.84 | 0 | 0 | 2 | MASCOT | T | PLEX8 |
| 3.38E-03 | 0 0 | Cs5g11720.1/Cs5g117 | 5.84 | 0 | 0 | 2 | MASCOT | T |       |
| 9.72E-02 | 0 0 | Cs5g11720.1/Cs5g117 | 5.84 | 0 | 0 | 2 | MASCOT | T |       |
| 6.12E-02 | 0 0 | Cs7g06240.1/Cs7g062 | 6    | 0 | 0 | 2 | MASCOT | T | PLEX8 |
| 1.02E-03 | 0 0 | Cs7g06240.1/Cs7g062 | 6    | 0 | 0 | 2 | MASCOT | T | PLEX8 |
| 6.15E-04 | 0 0 | Cs7g06240.1/Cs7g062 | 6    | 0 | 0 | 2 | MASCOT | T | PLEX8 |
| 4.25E-03 | 0 0 | Cs7g06240.1/Cs7g062 | 6    | 0 | 0 | 2 | MASCOT | T | PLEX8 |
| 4.20E-03 | 0 0 | Cs7g06240.1/Cs7g062 | 6    | 0 | 0 | 2 | MASCOT | T | PLEX8 |
| 1.28E-01 | 0 0 | Cs7g06240.1/Cs7g062 | 6    | 0 | 0 | 2 | MASCOT | T |       |
| 6.49E-04 | 0 0 | Cs7g06240.1/Cs7g062 | 6    | 0 | 0 | 2 | MASCOT | T | PLEX8 |
| 3.03E-01 | 0 0 | Cs7g06240.1/Cs7g062 | 6    | 0 | 0 | 2 | MASCOT | T |       |
| 1.05E-05 | 0 0 | Cs7g06240.1/Cs7g062 | 6    | 0 | 0 | 2 | MASCOT | T | PLEX8 |
| 6.25E-05 | 0 0 | Cs7g06240.1/Cs7g062 | 6    | 0 | 0 | 2 | MASCOT | T | PLEX8 |
| 7.74E-02 | 0 0 | Cs7g06240.1/Cs7g062 | 6    | 0 | 0 | 2 | MASCOT | T | PLEX8 |
| 3.54E-02 | 0 0 | Cs7g06240.1/Cs7g062 | 6    | 0 | 0 | 2 | MASCOT | T | PLEX8 |
| 6.61E-03 | 0 0 | Cs7g06240.1/Cs7g062 | 6    | 0 | 0 | 2 | MASCOT | T |       |
| 2.60E-01 | 0 0 | Cs5g11720.1/Cs5g117 | 5.66 | 0 | 0 | 2 | MASCOT | T | PLEX8 |
| 6.97E-02 | 0 0 | Cs5g11720.1/Cs5g117 | 5.66 | 0 | 0 | 2 | MASCOT | T | PLEX8 |
| 1.12E-01 | 0 0 | Cs5g11720.1/Cs5g117 | 4.37 | 0 | 0 | 2 | MASCOT | T | PLEX8 |
| 2.92E-02 | 0 0 | Cs5g11720.1/Cs5g117 | 6.92 | 0 | 0 | 2 | MASCOT | T | PLEX8 |
| 7.61E-02 | 0 0 | Cs5g11720.1/Cs5g117 | 6.92 | 0 | 0 | 2 | MASCOT | T | PLEX8 |
| 6.15E-02 | 0 0 | Cs5g11720.1/Cs5g117 | 6.92 | 0 | 0 | 2 | MASCOT | T | PLEX8 |
| 3.26E-02 | 0 0 | Cs5g11720.1/Cs5g117 | 6.92 | 0 | 0 | 2 | MASCOT | T | PLEX8 |
| 3.67E-01 | 0 0 | Cs5g11720.1/Cs5g117 | 11   | 0 | 0 | 2 | MASCOT | T | PLEX8 |
| 2.84E-04 | 0 0 | Cs5g11720.1/Cs5g117 | 9.8  | 0 | 0 | 2 | MASCOT | T | PLEX8 |
| 1.16E-04 | 0 0 | Cs5g11720.1/Cs5g117 | 9.8  | 0 | 0 | 2 | MASCOT | T |       |
| 1.89E-02 | 0 0 | Cs5g11720.1/Cs5g117 | 4.37 | 0 | 0 | 2 | MASCOT | T | PLEX8 |
| 1.02E-01 | 0 0 | Cs5g11720.1/Cs5g117 | 4.37 | 0 | 0 | 2 | MASCOT | T | PLEX8 |
| 2.33E-02 | 0 0 | Cs5g11720.1/Cs5g117 | 4.37 | 0 | 0 | 2 | MASCOT | T | PLEX8 |

|          |     |                     |      |   |      |   |        |        |       |
|----------|-----|---------------------|------|---|------|---|--------|--------|-------|
| 3.51E-01 | 0 0 | Cs5g11720.1/Cs5g117 | 4.37 | 0 | 0    | 2 | MASCOT | T      | PLEX8 |
| 2.73E-01 | 0 0 | Cs5g11720.1/Cs5g117 | 4.37 | 0 | 0    | 2 | MASCOT | T      | PLEX8 |
| 8.09E-04 | 0 0 | Cs5g11720.1/Cs5g117 | 4.09 | 0 | 0    | 2 | MASCOT | T      |       |
| 3.95E-06 | 0 0 | Cs5g11720.1/Cs5g117 | 4.09 | 0 | 0    | 2 | MASCOT | T      |       |
| 9.81E-04 | 0 0 | Cs5g11720.1/Cs5g117 | 4.09 | 0 | 0    | 2 | MASCOT | T      |       |
| 6.30E-04 | 0 0 | Cs5g11720.1/Cs5g117 | 4.09 | 0 | 0    | 2 | MASCOT | T      |       |
| 4.43E-03 | 0 0 | Cs5g11720.1/Cs5g117 | 4.21 | 0 | 0    | 2 | MASCOT | T      |       |
| 1.16E-02 | 0 0 | Cs5g11720.1/Cs5g117 | 4.65 | 0 | 15.9 | 0 | 2      | MASCOT | T     |
| 8.32E-04 | 0 0 | Cs5g11720.1/Cs5g117 | 4.65 | 0 | 0    | 2 | MASCOT | T      | PLEX8 |
| 1.10E-03 | 0 0 | Cs5g11720.1/Cs5g117 | 4.65 | 0 | 0    | 2 | MASCOT | T      | PLEX8 |
| 6.10E-03 | 0 0 | Cs5g11720.1/Cs5g117 | 4.65 | 0 | 0    | 2 | MASCOT | T      |       |
| 8.54E-04 | 0 0 | Cs5g11720.1/Cs5g117 | 4.65 | 0 | 0    | 2 | MASCOT | T      |       |
| 1.73E-02 | 0 0 | Cs5g11720.1/Cs5g117 | 4.31 | 0 | 0    | 2 | MASCOT | T      |       |
| 9.24E-03 | 0 0 | Cs5g11720.1/Cs5g117 | 5.84 | 0 | 15.9 | 0 | 2      | MASCOT | T     |
| 1.73E-01 | 0 0 | Cs5g11720.1/Cs5g117 | 5.84 | 0 | 0    | 2 | MASCOT | T      |       |
| 1.43E-02 | 0 0 | Cs5g11720.1/Cs5g117 | 4.75 | 0 | 0    | 2 | MASCOT | T      | PLEX8 |
| 2.53E-03 | 0 0 | Cs5g11720.1/Cs5g117 | 4.75 | 0 | 0    | 2 | MASCOT | T      |       |
| 2.31E-01 | 0 0 | Cs5g11720.1/Cs5g117 | 4.75 | 0 | 0    | 2 | MASCOT | T      |       |
| 1.64E-01 | 0 0 | Cs5g11720.1/Cs5g117 | 4.75 | 0 | 0    | 2 | MASCOT | T      |       |
| 1.11E-03 | 0 0 | Cs5g11720.1/Cs5g117 | 4.75 | 0 | 0    | 2 | MASCOT | T      |       |
| 1.18E-01 | 0 0 | Cs5g11720.1/Cs5g117 | 6    | 0 | 0    | 2 | MASCOT | T      | PLEX8 |
| 7.08E-02 | 0 0 | Cs5g11720.1/Cs5g117 | 4.68 | 0 | 0    | 2 | MASCOT | T      | PLEX8 |
| 1.19E-03 | 0 0 | Cs5g11720.1/Cs5g117 | 4.68 | 0 | 0    | 2 | MASCOT | T      | PLEX8 |
| 1.29E-01 | 0 0 | Cs5g11720.1/Cs5g117 | 4.68 | 0 | 0    | 2 | MASCOT | T      |       |
| 6.33E-02 | 0 0 | Cs5g11720.1/Cs5g117 | 8.75 | 1 | 0    | 2 | MASCOT | T      | PLEX8 |
| 2.26E-01 | 0 0 | Cs5g11720.1/Cs5g117 | 8.72 | 0 | 0    | 2 | MASCOT | T      | PLEX8 |
| 3.06E-01 | 0 0 | Cs5g11720.1/Cs5g117 | 8.72 | 0 | 0    | 2 | MASCOT | T      | PLEX8 |
| 2.56E-01 | 0 0 | Cs5g11720.1/Cs5g117 | 8.72 | 0 | 0    | 2 | MASCOT | T      | PLEX8 |
| 3.76E-05 | 0 0 | Cs7g12130.1/Cs7g121 | 4.37 | 0 | 0    | 2 | MASCOT | T      |       |
| 1.42E-05 | 0 0 | Cs7g12130.1/Cs7g121 | 4.37 | 0 | 0    | 2 | MASCOT | T      |       |
| 1.23E-03 | 0 0 | Cs7g12130.1/Cs7g121 | 4.37 | 0 | 0    | 2 | MASCOT | T      |       |
| 7.06E-02 | 0 0 | Cs7g12130.1/Cs7g121 | 4.14 | 0 | 0    | 2 | MASCOT | T      | PLEX8 |
| 6.15E-02 | 0 0 | Cs7g12130.1/Cs7g121 | 4.14 | 0 | 0    | 2 | MASCOT | T      | PLEX8 |
| 2.64E-03 | 0 0 | Cs7g12130.1/Cs7g121 | 3.89 | 1 | 0    | 2 | MASCOT | T      |       |
| 9.86E-03 | 0 0 | Cs7g12130.1/Cs7g121 | 4.14 | 0 | 0    | 2 | MASCOT | T      |       |
| 2.65E-02 | 0 0 | Cs7g12130.1/Cs7g121 | 4.14 | 0 | 0    | 2 | MASCOT | T      |       |
| 2.27E-01 | 0 0 | Cs7g12130.1/Cs7g121 | 4.14 | 0 | 0    | 2 | MASCOT | T      |       |
| 6.91E-02 | 0 0 | Cs7g12130.1/Cs7g121 | 4.14 | 0 | 0    | 2 | MASCOT | T      |       |
| 2.75E-04 | 0 0 | Cs7g12130.1/Cs7g121 | 4.14 | 0 | 0    | 2 | MASCOT | T      |       |
| 1.27E-01 | 0 0 | Cs7g12130.1/Cs7g121 | 4.14 | 0 | 0    | 2 | MASCOT | T      |       |
| 5.58E-02 | 0 0 | Cs7g12130.1/Cs7g121 | 4.53 | 0 | 0    | 2 | MASCOT | T      | PLEX8 |
| 1.01E-02 | 0 0 | Cs7g12130.1/Cs7g121 | 5.32 | 0 | 0    | 2 | MASCOT | T      | PLEX8 |
| 4.22E-02 | 0 0 | Cs7g12130.1/Cs7g121 | 5.32 | 0 | 0    | 2 | MASCOT | T      | PLEX8 |
| 2.00E-01 | 0 0 | Cs7g12130.1/Cs7g121 | 4.21 | 0 | 0    | 2 | MASCOT | T      | PLEX8 |
| 7.13E-02 | 0 0 | Cs7g12130.1/Cs7g121 | 4.21 | 0 | 0    | 2 | MASCOT | T      | PLEX8 |
| 8.91E-04 | 0 0 | Cs2g19730.1/Cs2g197 | 6    | 0 | 0    | 2 | MASCOT | T      | PLEX8 |
| 1.63E-03 | 0 0 | Cs7g12130.1/Cs7g121 | 5.83 | 0 | 0    | 2 | MASCOT | T      | PLEX8 |
| 3.24E-03 | 0 0 | Cs7g12130.1/Cs7g121 | 5.83 | 0 | 0    | 2 | MASCOT | T      | PLEX8 |
| 3.43E-03 | 0 0 | Cs7g12130.1/Cs7g121 | 5.83 | 0 | 0    | 2 | MASCOT | T      | PLEX8 |
| 5.68E-06 | 0 0 | Cs7g12130.1/Cs7g121 | 5.83 | 0 | 0    | 2 | MASCOT | T      | PLEX8 |
| 1.91E-03 | 0 0 | Cs7g12130.1/Cs7g121 | 5.83 | 0 | 0    | 2 | MASCOT | T      | PLEX8 |

|          |     |                     |      |   |      |   |        |        |       |
|----------|-----|---------------------|------|---|------|---|--------|--------|-------|
| 7.30E-03 | 0 0 | Cs7g12130.1/Cs7g121 | 5.83 | 0 | 0    | 2 | MASCOT | T      | PLEX8 |
| 3.03E-03 | 0 0 | Cs7g12130.1/Cs7g121 | 5.83 | 0 | 0    | 2 | MASCOT | T      | PLEX8 |
| 9.64E-04 | 0 0 | Cs7g12130.1/Cs7g121 | 5.83 | 0 | 0    | 2 | MASCOT | T      | PLEX8 |
| 1.60E-05 | 0 0 | Cs7g12130.1/Cs7g121 | 4.14 | 0 | 0    | 2 | MASCOT | T      |       |
| 2.46E-03 | 0 0 | Cs2g19730.1/Cs2g197 | 12   | 1 | 0    | 2 | MASCOT | T      |       |
| 2.22E-01 | 0 0 | Cs7g12130.1/Cs7g121 | 5.72 | 0 | 0    | 2 | MASCOT | T      | PLEX8 |
| 3.71E-03 | 0 0 | Cs7g12130.1/Cs7g121 | 4.03 | 0 | 0    | 2 | MASCOT | T      | PLEX8 |
| 1.57E-03 | 0 0 | Cs7g12130.1/Cs7g121 | 4.03 | 0 | 0    | 2 | MASCOT | T      | PLEX8 |
| 2.91E-01 | 0 0 | Cs7g12130.1/Cs7g121 | 4.03 | 0 | 0    | 2 | MASCOT | T      | PLEX8 |
| 1.58E-01 | 0 0 | Cs7g12130.1/Cs7g121 | 4.03 | 0 | 0    | 2 | MASCOT | T      | PLEX8 |
| 6.78E-04 | 0 0 | Cs7g12130.1/Cs7g121 | 4.03 | 0 | 0    | 2 | MASCOT | T      | PLEX8 |
| 5.08E-04 | 0 0 | Cs7g12130.1/Cs7g121 | 4.03 | 0 | 0    | 2 | MASCOT | T      | PLEX8 |
| 1.62E-01 | 0 0 | Cs7g12130.1/Cs7g121 | 4.03 | 0 | 0    | 2 | MASCOT | T      | PLEX8 |
| 1.09E-01 | 0 0 | Cs7g12130.1/Cs7g121 | 8.59 | 0 | 0    | 2 | MASCOT | T      | PLEX8 |
| 4.13E-03 | 0 0 | Cs7g12130.1/Cs7g121 | 4.56 | 0 | 15.9 | 0 | 2      | MASCOT | T     |
| 5.27E-05 | 0 0 | Cs7g12130.1/Cs7g121 | 4.56 | 0 | 0    | 2 | MASCOT | T      | PLEX8 |
| 7.60E-04 | 0 0 | Cs7g12130.1/Cs7g121 | 5.32 | 0 | 0    | 2 | MASCOT | T      | PLEX8 |
| 2.72E-02 | 0 0 | Cs7g12130.1/Cs7g121 | 5.32 | 0 | 0    | 2 | MASCOT | T      | PLEX8 |
| 4.28E-04 | 0 0 | Cs7g12130.1/Cs7g121 | 5.32 | 0 | 0    | 2 | MASCOT | T      | PLEX8 |
| 2.60E-01 | 0 0 | Cs7g12130.1/Cs7g121 | 5.32 | 0 | 0    | 2 | MASCOT | T      | PLEX8 |
| 1.52E-01 | 0 0 | Cs7g12130.1/Cs7g121 | 5.32 | 0 | 0    | 2 | MASCOT | T      |       |
| 2.48E-03 | 0 0 | Cs7g12130.1/Cs7g121 | 4.56 | 1 | 0    | 2 | MASCOT | T      | PLEX8 |
| 5.21E-04 | 0 0 | Cs7g12130.1/Cs7g121 | 8.22 | 0 | 0    | 2 | MASCOT | T      | PLEX8 |
| 7.40E-03 | 0 0 | Cs7g12130.1/Cs7g121 | 8.22 | 0 | 0    | 2 | MASCOT | T      | PLEX8 |
| 3.42E-02 | 0 0 | Cs7g12130.1/Cs7g121 | 8.22 | 0 | 0    | 2 | MASCOT | T      | PLEX8 |
| 9.92E-02 | 0 0 | Cs7g12130.1/Cs7g121 | 6.75 | 1 | 0    | 2 | MASCOT | T      | PLEX8 |
| 4.68E-02 | 0 0 | Cs7g12130.1/Cs7g121 | 6.75 | 1 | 0    | 2 | MASCOT | T      | PLEX8 |
| 4.35E-02 | 0 0 | Cs7g12130.1/Cs7g121 | 4.53 | 0 | 15.9 | 0 | 2      | MASCOT | T     |
| 3.66E-01 | 0 0 | Cs7g12130.1/Cs7g121 | 4.53 | 0 | 15.9 | 0 | 2      | MASCOT | T     |
| 5.24E-04 | 0 0 | Cs7g12130.1/Cs7g121 | 4.53 | 0 | 0    | 2 | MASCOT | T      |       |
| 1.85E-01 | 0 0 | Cs2g19730.1/Cs2g197 | 8.59 | 0 | 0    | 2 | MASCOT | T      |       |
| 1.12E-01 | 0 0 | orange1.1t03475.1   | 5.88 | 0 | 0    | 2 | MASCOT | T      | PLEX8 |
| 2.02E-05 | 0 0 | orange1.1t03475.1   | 5.88 | 0 | 0    | 2 | MASCOT | T      | PLEX8 |
| 3.39E-02 | 0 0 | orange1.1t03475.1   | 4.37 | 0 | 15.9 | 0 | 2      | MASCOT | T     |
| 1.56E-01 | 0 0 | orange1.1t03475.1   | 4.37 | 0 | 0    | 2 | MASCOT | T      | PLEX8 |
| 1.34E-03 | 0 0 | orange1.1t03475.1   | 4.37 | 0 | 0    | 2 | MASCOT | T      | PLEX8 |
| 5.99E-03 | 0 0 | orange1.1t03475.1   | 4.37 | 0 | 0    | 2 | MASCOT | T      | PLEX8 |
| 7.79E-03 | 0 0 | orange1.1t03475.1   | 4.37 | 0 | 0    | 2 | MASCOT | T      | PLEX8 |
| 5.70E-02 | 0 0 | orange1.1t03475.1   | 3.93 | 0 | 0    | 2 | MASCOT | T      | PLEX8 |
| 7.90E-02 | 0 0 | orange1.1t03475.1   | 3.83 | 0 | 0    | 2 | MASCOT | T      | PLEX8 |
| 1.84E-05 | 0 0 | orange1.1t03475.1   | 3.83 | 0 | 0    | 2 | MASCOT | T      | PLEX8 |
| 6.64E-02 | 0 0 | orange1.1t03475.1   | 4.37 | 0 | 0    | 2 | MASCOT | T      | PLEX8 |
| 2.16E-03 | 0 0 | orange1.1t03475.1   | 6.74 | 0 | 0    | 2 | MASCOT | T      | PLEX8 |
| 7.79E-05 | 0 0 | orange1.1t03475.1   | 6.74 | 0 | 0    | 2 | MASCOT | T      | PLEX8 |
| 1.53E-03 | 0 0 | orange1.1t03475.1   | 6.74 | 0 | 0    | 2 | MASCOT | T      | PLEX8 |
| 1.37E-01 | 0 0 | orange1.1t03475.1   | 6    | 0 | 0    | 2 | MASCOT | T      | PLEX8 |
| 8.89E-06 | 0 0 | orange1.1t03475.1   | 5.84 | 0 | 0    | 2 | MASCOT | T      | PLEX8 |
| 5.75E-04 | 0 0 | orange1.1t03475.1   | 5.84 | 0 | 0    | 2 | MASCOT | T      | PLEX8 |
| 8.88E-02 | 0 0 | orange1.1t03475.1   | 5.84 | 0 | 0    | 2 | MASCOT | T      | PLEX8 |
| 2.47E-05 | 0 0 | orange1.1t03475.1   | 5.84 | 0 | 0    | 2 | MASCOT | T      | PLEX8 |
| 4.59E-03 | 0 0 | orange1.1t03475.1   | 5.84 | 0 | 0    | 2 | MASCOT | T      | PLEX8 |

|          |     |                     |      |   |      |   |        |        |       |
|----------|-----|---------------------|------|---|------|---|--------|--------|-------|
| 6.81E-04 | 0 0 | orange1.1t03475.1   | 5.32 | 0 | 0    | 2 | MASCOT | T      | PLEX8 |
| 2.80E-04 | 0 0 | orange1.1t03475.1   | 8.75 | 0 | 0    | 2 | MASCOT | T      |       |
| 2.01E-01 | 0 0 | orange1.1t03475.1   | 4.37 | 0 | 0    | 2 | MASCOT | T      | PLEX8 |
| 7.26E-02 | 0 0 | orange1.1t03475.1   | 4    | 0 | 0    | 2 | MASCOT | T      | PLEX8 |
| 2.66E-04 | 0 0 | orange1.1t03475.1   | 4    | 0 | 0    | 2 | MASCOT | T      | PLEX8 |
| 1.57E-02 | 0 0 | orange1.1t03475.1   | 5.55 | 0 | 0    | 2 | MASCOT | T      | PLEX8 |
| 3.63E-02 | 0 0 | orange1.1t03475.1   | 5.55 | 0 | 0    | 2 | MASCOT | T      | PLEX8 |
| 3.57E-01 | 0 0 | orange1.1t03475.1   | 5.55 | 0 | 0    | 2 | MASCOT | T      | PLEX8 |
| 7.47E-03 | 0 0 | orange1.1t03475.1   | 5.55 | 0 | 0    | 2 | MASCOT | T      | PLEX8 |
| 7.40E-04 | 0 0 | orange1.1t03475.1   | 5.55 | 0 | 0    | 2 | MASCOT | T      | PLEX8 |
| 4.11E-02 | 0 0 | orange1.1t03475.1   | 5.55 | 0 | 0    | 2 | MASCOT | T      | PLEX8 |
| 3.53E-01 | 0 0 | orange1.1t03475.1   | 5.55 | 0 | 0    | 2 | MASCOT | T      | PLEX8 |
| 1.49E-01 | 0 0 | orange1.1t03475.1   | 4.48 | 0 | 0    | 2 | MASCOT | T      | PLEX8 |
| 8.33E-02 | 0 0 | orange1.1t03475.1   | 4.48 | 0 | 0    | 2 | MASCOT | T      | PLEX8 |
| 9.40E-02 | 0 0 | orange1.1t03475.1   | 8.8  | 0 | 0    | 2 | MASCOT | T      | PLEX8 |
| 8.19E-02 | 0 0 | orange1.1t03475.1   | 8.8  | 0 | 0    | 2 | MASCOT | T      | PLEX8 |
| 2.57E-01 | 0 0 | orange1.1t03475.1   | 5.84 | 0 | 0    | 2 | MASCOT | T      |       |
| 1.49E-03 | 0 0 | orange1.1t03475.1   | 4.37 | 0 | 0    | 2 | MASCOT | T      | PLEX8 |
| 2.54E-02 | 0 0 | orange1.1t03475.1   | 4.37 | 0 | 0    | 2 | MASCOT | T      | PLEX8 |
| 6.53E-04 | 0 0 | orange1.1t03475.1   | 4.37 | 0 | 0    | 2 | MASCOT | T      | PLEX8 |
| 7.84E-02 | 0 0 | orange1.1t03475.1   | 4.37 | 0 | 0    | 2 | MASCOT | T      | PLEX8 |
| 1.56E-02 | 0 0 | orange1.1t03475.1   | 4.37 | 0 | 0    | 2 | MASCOT | T      | PLEX8 |
| 2.60E-01 | 0 0 | orange1.1t03475.1   | 4.37 | 0 | 0    | 2 | MASCOT | T      | PLEX8 |
| 1.46E-02 | 0 0 | orange1.1t03475.1   | 4.37 | 0 | 0    | 2 | MASCOT | T      | PLEX8 |
| 2.64E-02 | 0 0 | orange1.1t03475.1   | 6    | 0 | 0    | 2 | MASCOT | T      | PLEX8 |
| 4.50E-03 | 0 0 | orange1.1t03475.1   | 5.84 | 0 | 0    | 2 | MASCOT | T      | PLEX8 |
| 1.52E-02 | 0 0 | orange1.1t03475.1   | 4.03 | 0 | 0    | 2 | MASCOT | T      | PLEX8 |
| 2.95E-02 | 0 0 | orange1.1t03475.1   | 4.03 | 0 | 0    | 2 | MASCOT | T      | PLEX8 |
| 1.10E-01 | 0 0 | orange1.1t02795.1   | 4.14 | 0 | 0    | 2 | MASCOT | T      | PLEX8 |
| 7.31E-03 | 0 0 | Cs6g05890.1/Cs7g289 | 4.22 | 0 | 0    | 2 | MASCOT | T      | PLEX8 |
| 4.80E-03 | 0 0 | Cs6g05890.1/Cs7g289 | 4.22 | 0 | 0    | 2 | MASCOT | T      | PLEX8 |
| 3.22E-04 | 0 0 | Cs6g05890.1/Cs7g289 | 4.22 | 0 | 0    | 2 | MASCOT | T      | PLEX8 |
| 1.19E-03 | 0 0 | Cs6g05890.1/Cs7g289 | 4.22 | 0 | 0    | 2 | MASCOT | T      | PLEX8 |
| 2.35E-03 | 0 0 | Cs6g05890.1/Cs7g289 | 4.22 | 0 | 0    | 2 | MASCOT | T      | PLEX8 |
| 2.57E-04 | 0 0 | Cs6g05890.1/Cs7g289 | 4.22 | 0 | 0    | 2 | MASCOT | T      | PLEX8 |
| 1.20E-03 | 0 0 | Cs6g05890.1/Cs7g289 | 4.22 | 0 | 0    | 2 | MASCOT | T      | PLEX8 |
| 2.44E-05 | 0 0 | Cs6g05890.1/Cs7g289 | 4.22 | 0 | 0    | 2 | MASCOT | T      | PLEX8 |
| 3.25E-04 | 0 0 | Cs6g05890.1/Cs7g289 | 4.22 | 0 | 0    | 2 | MASCOT | T      |       |
| 6.28E-06 | 0 0 | Cs6g05890.1/Cs7g289 | 4.22 | 0 | 0    | 2 | MASCOT | T      | PLEX8 |
| 2.48E-03 | 0 0 | Cs6g05890.1/Cs7g289 | 4.22 | 0 | 0    | 2 | MASCOT | T      |       |
| 2.90E-05 | 0 0 | Cs6g05890.1/Cs7g289 | 4.22 | 0 | 0    | 2 | MASCOT | T      |       |
| 1.03E-03 | 0 0 | Cs6g05890.1/Cs7g289 | 4.22 | 0 | 0    | 2 | MASCOT | T      |       |
| 2.82E-03 | 0 0 | Cs6g05890.1/Cs7g289 | 4.22 | 0 | 0    | 2 | MASCOT | T      |       |
| 1.54E-03 | 0 0 | Cs6g05890.1/Cs7g289 | 4.22 | 0 | 0    | 2 | MASCOT | T      |       |
| 1.12E-04 | 0 0 | Cs6g05890.1/Cs7g289 | 4.22 | 0 | 0    | 2 | MASCOT | T      |       |
| 7.95E-04 | 0 0 | Cs6g05890.1/Cs7g289 | 4.22 | 0 | 0    | 2 | MASCOT | T      |       |
| 1.12E-01 | 0 0 | Cs6g05890.1/Cs7g289 | 4.53 | 0 | 0    | 2 | MASCOT | T      | PLEX8 |
| 1.72E-06 | 0 0 | orange1.1t02795.1   | 5.84 | 0 | 15.9 | 0 | 2      | MASCOT | T     |
| 2.12E-03 | 0 0 | orange1.1t02795.1   | 5.84 | 0 | 0    | 2 | MASCOT | T      |       |
| 7.21E-04 | 0 0 | orange1.1t02795.1   | 4.37 | 0 | 0    | 2 | MASCOT | T      | PLEX8 |
| 4.86E-01 | 0 0 | orange1.1t02795.1   | 4.37 | 0 | 0    | 2 | MASCOT | T      | PLEX8 |



|          |     |                       |      |   |      |   |        |        |       |       |
|----------|-----|-----------------------|------|---|------|---|--------|--------|-------|-------|
| 2.64E-01 | 0 0 | orange1.1t02795.1     | 4.37 | 0 | 0    | 2 | MASCOT | T      | PLEX8 |       |
| 4.94E-05 | 0 0 | orange1.1t02795.1     | 4.37 | 0 | 0    | 2 | MASCOT | T      | PLEX8 |       |
| 1.41E-03 | 0 0 | orange1.1t02795.1     | 4.37 | 0 | 0    | 2 | MASCOT | T      | PLEX8 |       |
| 2.23E-02 | 0 0 | orange1.1t02795.1     | 5.4  | 0 | 0    | 2 | MASCOT | T      | PLEX8 |       |
| 6.39E-04 | 0 0 | orange1.1t02795.1     | 5.4  | 0 | 0    | 2 | MASCOT | T      | PLEX8 |       |
| 1.32E-06 | 0 0 | orange1.1t02795.1     | 5.4  | 0 | 0    | 2 | MASCOT | T      | PLEX8 |       |
| 1.59E-07 | 0 0 | orange1.1t02795.1     | 5.4  | 0 | 0    | 2 | MASCOT | T      | PLEX8 |       |
| 1.03E-02 | 0 0 | orange1.1t02795.1     | 5.4  | 0 | 0    | 2 | MASCOT | T      | PLEX8 |       |
| 1.10E-01 | 0 0 | Cs8g18260.1 ! orange1 | 4.53 | 0 | 0    | 2 | MASCOT | T      | PLEX8 |       |
| 1.41E-04 | 0 0 | Cs8g18260.1 ! orange1 | 4.53 | 0 | 0    | 2 | MASCOT | T      | PLEX8 |       |
| 2.87E-04 | 0 0 | Cs8g18260.1 ! orange1 | 4.53 | 0 | 0    | 2 | MASCOT | T      | PLEX8 |       |
| 7.45E-06 | 0 0 | Cs8g18260.1 ! orange1 | 4.53 | 0 | 0    | 2 | MASCOT | T      | PLEX8 |       |
| 4.83E-03 | 0 0 | Cs8g18260.1 ! orange1 | 4.53 | 0 | 0    | 2 | MASCOT | T      | PLEX8 |       |
| 2.07E-01 | 0 0 | Cs8g18260.1 ! orange1 | 4.53 | 0 | 0    | 2 | MASCOT | T      | PLEX8 |       |
| 1.51E-01 | 0 0 | Cs8g18260.1 ! orange1 | 4.53 | 0 | 0    | 2 | MASCOT | T      | PLEX8 |       |
| 8.12E-02 | 0 0 | Cs8g18260.1 ! orange1 | 4.53 | 0 | 0    | 2 | MASCOT | T      | PLEX8 |       |
| 2.21E-01 | 0 0 | Cs8g18260.1 ! orange1 | 4.53 | 0 | 0    | 2 | MASCOT | T      | PLEX8 |       |
| 1.71E-02 | 0 0 | orange1.1t02795.1     | 6    | 0 | 0    | 2 | MASCOT | T      | PLEX8 |       |
| 1.11E-01 | 0 0 | Cs6g05890.1/Cs7g289   | 4.53 | 0 | 0    | 2 | MASCOT | T      | PLEX8 |       |
| 1.48E-01 | 0 0 | Cs6g05890.1/Cs7g289   | 4.53 | 0 | 0    | 2 | MASCOT | T      | PLEX8 |       |
| 2.10E-02 | 0 0 | Cs6g05890.1/Cs7g289   | 4.53 | 0 | 0    | 2 | MASCOT | T      | PLEX8 |       |
| 6.37E-02 | 0 0 | Cs6g05890.1/Cs7g289   | 4.53 | 0 | 0    | 2 | MASCOT | T      | PLEX8 |       |
| 1.17E-01 | 0 0 | Cs6g05890.1/Cs7g289   | 4.53 | 0 | 0    | 2 | MASCOT | T      | PLEX8 |       |
| 7.03E-03 | 0 0 | Cs6g05890.1/Cs7g289   | 4.53 | 0 | 0    | 2 | MASCOT | T      | PLEX8 |       |
| 5.02E-02 | 0 0 | Cs6g05890.1/Cs7g289   | 5.84 | 0 | 0    | 2 | MASCOT | T      | PLEX8 |       |
| 2.46E-02 | 0 0 | Cs6g05890.1/Cs7g289   | 5.84 | 0 | 0    | 2 | MASCOT | T      | PLEX8 |       |
| 9.87E-03 | 0 0 | Cs6g05890.1/Cs7g289   | 5.84 | 0 | 0    | 2 | MASCOT | T      |       |       |
| 1.01E-01 | 0 0 | Cs6g05890.1/Cs7g289   | 5.84 | 0 | 0    | 2 | MASCOT | T      |       |       |
| 9.58E-04 | 0 0 | Cs6g05890.1/Cs7g289   | 5.84 | 0 | 0    | 2 | MASCOT | T      | PLEX8 |       |
| 5.56E-03 | 0 0 | Cs6g05890.1/Cs7g289   | 5.84 | 0 | 0    | 2 | MASCOT | T      | PLEX8 |       |
| 1.67E-02 | 0 0 | orange1.1t02795.1     | 5.84 | 0 | 0    | 2 | MASCOT | T      | PLEX8 |       |
| 3.50E-02 | 0 0 | orange1.1t02795.1     | 5.84 | 0 | 0    | 2 | MASCOT | T      | PLEX8 |       |
| 1.40E-02 | 0 0 | orange1.1t02795.1     | 5.84 | 0 | 0    | 2 | MASCOT | T      | PLEX8 |       |
| 2.49E-01 | 0 0 | orange1.1t02795.1     | 5.84 | 0 | 0    | 2 | MASCOT | T      | PLEX8 |       |
| 2.97E-02 | 0 0 | orange1.1t02795.1     | 5.84 | 0 | 0    | 2 | MASCOT | T      |       |       |
| 1.80E-02 | 0 0 | orange1.1t02795.1     | 5.84 | 0 | 15.9 | 0 | 2      | MASCOT | T     | PLEX8 |
| 9.96E-04 | 0 0 | orange1.1t02795.1     | 5.84 | 0 | 0    | 2 | MASCOT | T      | PLEX8 |       |
| 2.54E-04 | 0 0 | orange1.1t02795.1     | 5.84 | 0 | 0    | 2 | MASCOT | T      | PLEX8 |       |
| 3.35E-02 | 0 0 | orange1.1t02795.1     | 5.84 | 0 | 0    | 2 | MASCOT | T      | PLEX8 |       |
| 3.46E-02 | 0 0 | orange1.1t02795.1     | 6.14 | 1 | 0    | 2 | MASCOT | T      | PLEX8 |       |
| 1.12E-02 | 0 0 | orange1.1t02795.1     | 6.46 | 0 | 0    | 2 | MASCOT | T      | PLEX8 |       |
| 7.52E-04 | 0 0 | orange1.1t02795.1     | 6.46 | 0 | 0    | 2 | MASCOT | T      | PLEX8 |       |
| 2.30E-03 | 0 0 | orange1.1t02795.1     | 6.46 | 0 | 0    | 2 | MASCOT | T      | PLEX8 |       |
| 2.32E-03 | 0 0 | orange1.1t02795.1     | 6.46 | 0 | 0    | 2 | MASCOT | T      | PLEX8 |       |
| 2.41E-03 | 0 0 | Cs6g05890.1/Cs7g289   | 4.14 | 0 | 15.9 | 0 | 2      | MASCOT | T     |       |
| 1.31E-03 | 0 0 | Cs6g05890.1/Cs7g289   | 4.14 | 0 | 15.9 | 0 | 2      | MASCOT | T     |       |
| 4.30E-05 | 0 0 | Cs6g05890.1/Cs7g289   | 4.14 | 0 | 15.9 | 0 | 2      | MASCOT | T     |       |
| 1.18E-01 | 0 0 | orange1.1t02795.1     | 4.53 | 0 | 15.9 | 0 | 2      | MASCOT | T     |       |
| 2.53E-03 | 0 0 | Cs3g14220.1/Cs3g142   | 4.37 | 0 | 0    | 2 | MASCOT | T      | PLEX8 |       |
| 9.99E-05 | 0 0 | Cs3g14220.1/Cs3g142   | 4.37 | 0 | 0    | 2 | MASCOT | T      | PLEX8 |       |
| 2.21E-02 | 0 0 | Cs3g14220.1/Cs3g142   | 4.37 | 0 | 0    | 2 | MASCOT | T      | PLEX8 |       |

|          |     |                       |      |   |   |   |        |   |       |
|----------|-----|-----------------------|------|---|---|---|--------|---|-------|
| 9.07E-04 | 0 0 | Cs3g14220.1/Cs3g142   | 4.37 | 0 | 0 | 2 | MASCOT | T | PLEX8 |
| 3.84E-04 | 0 0 | Cs3g14220.1/Cs3g142   | 4.37 | 0 | 0 | 2 | MASCOT | T |       |
| 2.48E-06 | 0 0 | Cs3g14220.1/Cs3g142   | 4.37 | 0 | 0 | 2 | MASCOT | T |       |
| 6.64E-05 | 0 0 | Cs3g14220.1/Cs3g142   | 4.37 | 0 | 0 | 2 | MASCOT | T |       |
| 2.69E-04 | 0 0 | Cs3g14220.1/Cs3g142   | 4.37 | 0 | 0 | 2 | MASCOT | T |       |
| 5.09E-01 | 0 0 | Cs3g14220.1/Cs3g142   | 4.37 | 0 | 0 | 2 | MASCOT | T |       |
| 2.25E-01 | 0 0 | orange1.1t02795.1     | 6.75 | 0 | 0 | 2 | MASCOT | T | PLEX8 |
| 1.06E-01 | 0 0 | orange1.1t02795.1     | 6.75 | 0 | 0 | 2 | MASCOT | T |       |
| 7.71E-05 | 0 0 | orange1.1t02795.1     | 6.75 | 0 | 0 | 2 | MASCOT | T | PLEX8 |
| 1.55E-01 | 0 0 | orange1.1t02795.1     | 6.75 | 0 | 0 | 2 | MASCOT | T | PLEX8 |
| 1.60E-03 | 0 0 | orange1.1t02795.1     | 6.75 | 0 | 0 | 2 | MASCOT | T | PLEX8 |
| 1.04E-01 | 0 0 | Cs7g28940.1/Cs8g182   | 4.37 | 0 | 0 | 2 | MASCOT | T | PLEX8 |
| 1.77E-02 | 0 0 | Cs7g28940.1/Cs8g182   | 4.37 | 0 | 0 | 2 | MASCOT | T | PLEX8 |
| 4.27E-04 | 0 0 | Cs7g28940.1/Cs8g182   | 4.37 | 0 | 0 | 2 | MASCOT | T | PLEX8 |
| 4.02E-05 | 0 0 | Cs7g28940.1/Cs8g182   | 4.37 | 0 | 0 | 2 | MASCOT | T | PLEX8 |
| 4.78E-02 | 0 0 | Cs3g14220.1/Cs3g142   | 4.37 | 0 | 0 | 2 | MASCOT | T |       |
| 3.94E-06 | 0 0 | Cs3g14220.1/Cs3g142   | 4.37 | 0 | 0 | 2 | MASCOT | T |       |
| 2.32E-02 | 0 0 | Cs3g14220.1/Cs3g142   | 4.37 | 0 | 0 | 2 | MASCOT | T |       |
| 6.87E-06 | 0 0 | Cs3g14220.1/Cs3g142   | 4.37 | 0 | 0 | 2 | MASCOT | T |       |
| 3.44E-02 | 0 0 | Cs3g14220.1/Cs3g142   | 4.37 | 0 | 0 | 2 | MASCOT | T |       |
| 1.67E-02 | 0 0 | Cs3g14220.1/Cs3g142   | 4.37 | 0 | 0 | 2 | MASCOT | T |       |
| 5.59E-02 | 0 0 | Cs3g14220.1/Cs3g142   | 4.37 | 0 | 0 | 2 | MASCOT | T |       |
| 1.30E-02 | 0 0 | orange1.1t03280.1/ora | 3.92 | 0 | 0 | 2 | MASCOT | T | PLEX8 |
| 3.53E-04 | 0 0 | orange1.1t03280.1/ora | 3.92 | 0 | 0 | 2 | MASCOT | T | PLEX8 |
| 9.23E-02 | 0 0 | orange1.1t03280.1/ora | 3.92 | 0 | 0 | 2 | MASCOT | T | PLEX8 |
| 1.20E-02 | 0 0 | orange1.1t03280.1/ora | 4.37 | 0 | 0 | 2 | MASCOT | T |       |
| 3.34E-05 | 0 0 | orange1.1t03280.1/ora | 4.37 | 0 | 0 | 2 | MASCOT | T |       |
| 2.05E-03 | 0 0 | orange1.1t03280.1/ora | 4.37 | 0 | 0 | 2 | MASCOT | T | PLEX8 |
| 9.25E-03 | 0 0 | orange1.1t03280.1/ora | 4.37 | 0 | 0 | 2 | MASCOT | T | PLEX8 |
| 2.48E-04 | 0 0 | orange1.1t03280.1/ora | 4.37 | 0 | 0 | 2 | MASCOT | T | PLEX8 |
| 2.66E-03 | 0 0 | orange1.1t03280.1/ora | 4.37 | 0 | 0 | 2 | MASCOT | T | PLEX8 |
| 1.57E-03 | 0 0 | orange1.1t03280.1/ora | 4.37 | 0 | 0 | 2 | MASCOT | T | PLEX8 |
| 1.12E-03 | 0 0 | orange1.1t03280.1/ora | 4.37 | 0 | 0 | 2 | MASCOT | T | PLEX8 |
| 9.23E-02 | 0 0 | orange1.1t03280.1/ora | 4.37 | 0 | 0 | 2 | MASCOT | T | PLEX8 |
| 4.48E-01 | 0 0 | orange1.1t03280.1/ora | 5.84 | 0 | 0 | 2 | MASCOT | T | PLEX8 |
| 1.03E-01 | 0 0 | orange1.1t03280.1/ora | 5.84 | 0 | 0 | 2 | MASCOT | T | PLEX8 |
| 1.56E-02 | 0 0 | orange1.1t03280.1     | 6    | 0 | 0 | 2 | MASCOT | T | PLEX8 |
| 6.23E-04 | 0 0 | orange1.1t03280.1     | 6    | 0 | 0 | 2 | MASCOT | T | PLEX8 |
| 3.83E-02 | 0 0 | orange1.1t03280.1     | 6    | 0 | 0 | 2 | MASCOT | T | PLEX8 |
| 3.75E-02 | 0 0 | orange1.1t03280.1     | 6    | 0 | 0 | 2 | MASCOT | T | PLEX8 |
| 7.90E-02 | 0 0 | orange1.1t03280.1     | 6    | 0 | 0 | 2 | MASCOT | T | PLEX8 |
| 1.42E-03 | 0 0 | orange1.1t03280.1     | 6    | 0 | 0 | 2 | MASCOT | T | PLEX8 |
| 2.07E-02 | 0 0 | orange1.1t03280.1     | 6    | 0 | 0 | 2 | MASCOT | T | PLEX8 |
| 9.28E-04 | 0 0 | orange1.1t03280.1     | 6    | 0 | 0 | 2 | MASCOT | T | PLEX8 |
| 1.65E-03 | 0 0 | orange1.1t03280.1     | 6    | 0 | 0 | 2 | MASCOT | T | PLEX8 |
| 4.70E-02 | 0 0 | orange1.1t03280.1     | 6    | 0 | 0 | 2 | MASCOT | T | PLEX8 |
| 2.30E-02 | 0 0 | orange1.1t03280.1     | 6    | 0 | 0 | 2 | MASCOT | T | PLEX8 |
| 5.13E-02 | 0 0 | orange1.1t03280.1     | 6    | 0 | 0 | 2 | MASCOT | T | PLEX8 |
| 4.40E-02 | 0 0 | orange1.1t03280.1/ora | 9.75 | 0 | 0 | 2 | MASCOT | T | PLEX8 |
| 1.30E-01 | 0 0 | orange1.1t03280.1/ora | 9.75 | 0 | 0 | 2 | MASCOT | T | PLEX8 |
| 2.99E-01 | 0 0 | orange1.1t03280.1/ora | 9.75 | 0 | 0 | 2 | MASCOT | T |       |

|          |     |                       |      |   |   |   |        |   |       |
|----------|-----|-----------------------|------|---|---|---|--------|---|-------|
| 2.45E-03 | 0 0 | orange1.1t03280.1/ora | 9.75 | 0 | 0 | 2 | MASCOT | T |       |
| 1.08E-03 | 0 0 | orange1.1t03280.1/ora | 9.75 | 0 | 0 | 2 | MASCOT | T |       |
| 3.17E-01 | 0 0 | orange1.1t03280.1/ora | 4.21 | 0 | 0 | 2 | MASCOT | T |       |
| 2.31E-03 | 0 0 | orange1.1t03280.1/ora | 4.21 | 0 | 0 | 2 | MASCOT | T | PLEX8 |
| 2.95E-03 | 0 0 | orange1.1t03280.1/ora | 4.21 | 0 | 0 | 2 | MASCOT | T | PLEX8 |
| 4.53E-02 | 0 0 | orange1.1t03280.1/ora | 4.21 | 0 | 0 | 2 | MASCOT | T |       |
| 2.89E-04 | 0 0 | orange1.1t03280.1/ora | 4.21 | 0 | 0 | 2 | MASCOT | T |       |
| 3.54E-04 | 0 0 | orange1.1t03280.1/ora | 4.21 | 0 | 0 | 2 | MASCOT | T |       |
| 3.17E-02 | 0 0 | orange1.1t03280.1/ora | 4.21 | 0 | 0 | 2 | MASCOT | T |       |
| 1.34E-02 | 0 0 | orange1.1t03280.1/ora | 4.21 | 0 | 0 | 2 | MASCOT | T |       |
| 1.36E-01 | 0 0 | orange1.1t03280.1/ora | 4.21 | 0 | 0 | 2 | MASCOT | T |       |
| 4.30E-04 | 0 0 | orange1.1t03280.1/ora | 4.37 | 0 | 0 | 2 | MASCOT | T | PLEX8 |
| 4.21E-04 | 0 0 | orange1.1t03280.1/ora | 4.37 | 0 | 0 | 2 | MASCOT | T | PLEX8 |
| 4.57E-06 | 0 0 | orange1.1t03280.1/ora | 4.37 | 0 | 0 | 2 | MASCOT | T | PLEX8 |
| 3.57E-03 | 0 0 | orange1.1t03280.1/ora | 4.37 | 0 | 0 | 2 | MASCOT | T | PLEX8 |
| 4.12E-06 | 0 0 | orange1.1t03280.1/ora | 4.37 | 0 | 0 | 2 | MASCOT | T | PLEX8 |
| 2.04E-03 | 0 0 | orange1.1t03280.1/ora | 4.37 | 0 | 0 | 2 | MASCOT | T | PLEX8 |
| 1.48E-01 | 0 0 | orange1.1t03280.1/ora | 4.37 | 0 | 0 | 2 | MASCOT | T |       |
| 2.85E-07 | 0 0 | orange1.1t03280.1/ora | 4.37 | 0 | 0 | 2 | MASCOT | T |       |
| 5.68E-09 | 0 0 | orange1.1t03280.1/ora | 4.37 | 0 | 0 | 2 | MASCOT | T |       |
| 2.71E-08 | 0 0 | orange1.1t03280.1/ora | 4.37 | 0 | 0 | 2 | MASCOT | T |       |
| 2.82E-06 | 0 0 | orange1.1t03280.1/ora | 4.37 | 0 | 0 | 2 | MASCOT | T |       |
| 2.71E-06 | 0 0 | orange1.1t03280.1/ora | 4.37 | 0 | 0 | 2 | MASCOT | T |       |
| 3.74E-02 | 0 0 | orange1.1t03280.1/ora | 8.76 | 0 | 0 | 2 | MASCOT | T | PLEX8 |
| 9.60E-02 | 0 0 | orange1.1t03280.1     | 5.84 | 0 | 0 | 2 | MASCOT | T | PLEX8 |
| 3.04E-01 | 0 0 | orange1.1t03280.1/ora | 5.21 | 0 | 0 | 2 | MASCOT | T |       |
| 5.36E-02 | 0 0 | orange1.1t03280.1/ora | 5.84 | 0 | 0 | 2 | MASCOT | T | PLEX8 |
| 4.54E-01 | 0 0 | orange1.1t03280.1/ora | 11   | 0 | 0 | 2 | MASCOT | T | PLEX8 |
| 2.26E-02 | 0 0 | orange1.1t03280.1/ora | 11   | 0 | 0 | 2 | MASCOT | T |       |
| 1.10E-01 | 0 0 | orange1.1t03280.1/ora | 11   | 0 | 0 | 2 | MASCOT | T | PLEX8 |
| 2.29E-01 | 0 0 | orange1.1t03280.1/ora | 11   | 0 | 0 | 2 | MASCOT | T |       |
| 3.06E-02 | 0 0 | orange1.1t03280.1/ora | 11   | 0 | 0 | 2 | MASCOT | T |       |
| 5.51E-02 | 0 0 | orange1.1t03280.1/ora | 4.37 | 0 | 0 | 2 | MASCOT | T | PLEX8 |
| 1.92E-01 | 0 0 | orange1.1t03280.1/ora | 4.37 | 0 | 0 | 2 | MASCOT | T | PLEX8 |
| 9.32E-03 | 0 0 | orange1.1t03280.1/ora | 4.37 | 0 | 0 | 2 | MASCOT | T | PLEX8 |
| 1.03E-04 | 0 0 | orange1.1t03280.1/ora | 4.37 | 0 | 0 | 2 | MASCOT | T | PLEX8 |
| 6.17E-04 | 0 0 | orange1.1t03280.1/ora | 4.37 | 0 | 0 | 2 | MASCOT | T | PLEX8 |
| 3.87E-03 | 0 0 | orange1.1t03280.1/ora | 4.37 | 0 | 0 | 2 | MASCOT | T | PLEX8 |
| 3.33E-02 | 0 0 | orange1.1t03280.1/ora | 4.37 | 0 | 0 | 2 | MASCOT | T | PLEX8 |
| 1.72E-02 | 0 0 | orange1.1t03280.1/ora | 4.37 | 0 | 0 | 2 | MASCOT | T | PLEX8 |
| 1.33E-04 | 0 0 | orange1.1t03280.1/ora | 4.37 | 0 | 0 | 2 | MASCOT | T | PLEX8 |
| 1.02E-04 | 0 0 | orange1.1t03280.1/ora | 4.37 | 0 | 0 | 2 | MASCOT | T | PLEX8 |
| 4.67E-02 | 0 0 | orange1.1t03280.1/ora | 4.37 | 0 | 0 | 2 | MASCOT | T | PLEX8 |
| 7.64E-02 | 0 0 | orange1.1t03280.1/ora | 4.37 | 0 | 0 | 2 | MASCOT | T | PLEX8 |
| 1.90E-02 | 0 0 | orange1.1t03280.1     | 4.37 | 0 | 0 | 2 | MASCOT | T | PLEX8 |
| 5.48E-03 | 0 0 | orange1.1t03280.1     | 4.37 | 0 | 0 | 2 | MASCOT | T | PLEX8 |
| 1.15E-01 | 0 0 | orange1.1t03280.1     | 4.37 | 0 | 0 | 2 | MASCOT | T | PLEX8 |
| 5.65E-04 | 0 0 | orange1.1t03280.1     | 4.37 | 0 | 0 | 2 | MASCOT | T | PLEX8 |
| 1.32E-01 | 0 0 | orange1.1t03280.1     | 4.37 | 0 | 0 | 2 | MASCOT | T | PLEX8 |
| 2.08E-01 | 0 0 | orange1.1t03280.1     | 4.37 | 0 | 0 | 2 | MASCOT | T | PLEX8 |
| 2.16E-04 | 0 0 | orange1.1t03280.1     | 4.37 | 0 | 0 | 2 | MASCOT | T | PLEX8 |

|          |     |                       |      |   |      |   |        |        |       |       |
|----------|-----|-----------------------|------|---|------|---|--------|--------|-------|-------|
| 5.91E-02 | 0 0 | orange1.1t03280.1/ora | 11   | 0 | 0    | 2 | MASCOT | T      | PLEX8 |       |
| 3.45E-01 | 0 0 | orange1.1t03280.1/ora | 11   | 0 | 0    | 2 | MASCOT | T      | PLEX8 |       |
| 1.06E-02 | 0 0 | orange1.1t03280.1/ora | 9.7  | 0 | 0    | 2 | MASCOT | T      | PLEX8 |       |
| 3.76E-02 | 0 0 | orange1.1t03280.1/ora | 8.8  | 0 | 0    | 2 | MASCOT | T      | PLEX8 |       |
| 2.57E-02 | 0 0 | orange1.1t03280.1/ora | 8.8  | 0 | 0    | 2 | MASCOT | T      | PLEX8 |       |
| 3.28E-02 | 0 0 | orange1.1t03280.1/ora | 8.8  | 0 | 0    | 2 | MASCOT | T      | PLEX8 |       |
| 5.31E-02 | 0 0 | orange1.1t03280.1/ora | 8.8  | 0 | 0    | 2 | MASCOT | T      | PLEX8 |       |
| 3.57E-02 | 0 0 | orange1.1t03280.1/ora | 8.8  | 0 | 0    | 2 | MASCOT | T      |       |       |
| 9.17E-03 | 0 0 | orange1.1t03280.1/ora | 6.79 | 0 | 0    | 2 | MASCOT | T      | PLEX8 |       |
| 1.14E-02 | 0 0 | orange1.1t03280.1/ora | 6.79 | 0 | 0    | 2 | MASCOT | T      | PLEX8 |       |
| 5.09E-04 | 0 0 | orange1.1t03280.1/ora | 6.79 | 0 | 0    | 2 | MASCOT | T      | PLEX8 |       |
| 2.35E-03 | 0 0 | orange1.1t03280.1/ora | 6.79 | 0 | 0    | 2 | MASCOT | T      |       |       |
| 2.14E-03 | 0 0 | orange1.1t03280.1/ora | 6.79 | 0 | 0    | 2 | MASCOT | T      |       |       |
| 1.03E-01 | 0 0 | orange1.1t03280.1/ora | 4.79 | 1 | 0    | 2 | MASCOT | T      |       |       |
| 5.24E-03 | 0 0 | orange1.1t03280.1/ora | 6    | 0 | 0    | 2 | MASCOT | T      | PLEX8 |       |
| 2.51E-02 | 0 0 | orange1.1t03280.1/ora | 6    | 0 | 0    | 2 | MASCOT | T      |       |       |
| 8.68E-03 | 0 0 | Cs5g02720.1/orange1.  | 4.54 | 0 | 0    | 2 | MASCOT | T      | PLEX8 |       |
| 8.11E-06 | 0 0 | Cs5g02720.1/orange1.  | 4.54 | 0 | 0    | 2 | MASCOT | T      | PLEX8 |       |
| 4.54E-02 | 0 0 | Cs5g02720.1/orange1.  | 5.38 | 1 | 0    | 2 | MASCOT | T      | PLEX8 |       |
| 7.62E-03 | 0 0 | Cs5g02720.1/orange1.  | 3.83 | 0 | 0    | 2 | MASCOT | T      | PLEX8 |       |
| 1.06E-01 | 0 0 | Cs5g02720.1/orange1.  | 4.75 | 1 | 0    | 2 | MASCOT | T      |       |       |
| 1.33E-01 | 0 0 | Cs5g02720.1/orange1.  | 4.75 | 1 | 0    | 2 | MASCOT | T      | PLEX8 |       |
| 1.03E-01 | 0 0 | Cs5g02720.1/orange1.  | 4.75 | 1 | 0    | 2 | MASCOT | T      | PLEX8 |       |
| 9.05E-03 | 0 0 | Cs5g02720.1           | 4.53 | 0 | 15.9 | 0 | 2      | MASCOT | T     | PLEX8 |
| 3.17E-03 | 0 0 | Cs5g02720.1           | 4.53 | 0 | 15.9 | 0 | 2      | MASCOT | T     | PLEX8 |
| 1.99E-02 | 0 0 | Cs5g02720.1           | 6    | 0 | 0    | 2 | MASCOT | T      | PLEX8 |       |
| 5.36E-03 | 0 0 | Cs5g02720.1           | 6    | 0 | 0    | 2 | MASCOT | T      | PLEX8 |       |
| 1.87E-02 | 0 0 | Cs6g19310.1/Cs7g123   | 8.22 | 0 | 15.9 | 0 | 2      | MASCOT | T     | PLEX8 |
| 9.19E-02 | 0 0 | Cs6g19310.1/Cs7g123   | 8.22 | 0 | 15.9 | 0 | 2      | MASCOT | T     | PLEX8 |
| 2.19E-02 | 0 0 | Cs5g02720.1/orange1.  | 5.96 | 1 | 0    | 2 | MASCOT | T      |       |       |
| 9.13E-03 | 0 0 | Cs5g02720.1/orange1.  | 5.96 | 1 | 0    | 2 | MASCOT | T      |       |       |
| 1.40E-07 | 0 0 | Cs5g02720.1           | 4.03 | 0 | 0    | 2 | MASCOT | T      | PLEX8 |       |
| 1.38E-07 | 0 0 | Cs5g02720.1           | 4.03 | 0 | 0    | 2 | MASCOT | T      |       |       |
| 3.20E-02 | 0 0 | Cs5g02720.1/orange1.  | 12   | 1 | 0    | 2 | MASCOT | T      | PLEX8 |       |
| 9.86E-02 | 0 0 | Cs5g02720.1/orange1.  | 12   | 1 | 0    | 2 | MASCOT | T      |       |       |
| 9.25E-02 | 0 0 | Cs5g02720.1/Cs6g193   | 5.88 | 0 | 0    | 2 | MASCOT | T      | PLEX8 |       |
| 2.25E-01 | 0 0 | Cs5g02720.1           | 9.6  | 0 | 0    | 2 | MASCOT | T      | PLEX8 |       |
| 4.88E-04 | 0 0 | Cs5g02720.1           | 5.32 | 0 | 0    | 2 | MASCOT | T      | PLEX8 |       |
| 1.19E-02 | 0 0 | Cs5g02720.1           | 5.32 | 0 | 0    | 2 | MASCOT | T      | PLEX8 |       |
| 4.68E-03 | 0 0 | Cs5g02720.1           | 5.32 | 0 | 0    | 2 | MASCOT | T      | PLEX8 |       |
| 3.63E-04 | 0 0 | Cs5g02720.1           | 5.32 | 0 | 0    | 2 | MASCOT | T      | PLEX8 |       |
| 3.46E-04 | 0 0 | Cs5g02720.1           | 5.32 | 0 | 0    | 2 | MASCOT | T      | PLEX8 |       |
| 2.54E-02 | 0 0 | Cs5g02720.1           | 5.32 | 0 | 0    | 2 | MASCOT | T      | PLEX8 |       |
| 1.36E-02 | 0 0 | Cs5g02720.1           | 6.85 | 0 | 0    | 2 | MASCOT | T      | PLEX8 |       |
| 4.92E-02 | 0 0 | Cs5g02720.1           | 6.85 | 0 | 0    | 2 | MASCOT | T      | PLEX8 |       |
| 6.65E-04 | 0 0 | Cs5g02720.1           | 6.85 | 0 | 0    | 2 | MASCOT | T      | PLEX8 |       |
| 3.04E-04 | 0 0 | Cs5g02720.1           | 6.85 | 0 | 0    | 2 | MASCOT | T      | PLEX8 |       |
| 7.38E-02 | 0 0 | Cs5g02720.1           | 6.85 | 0 | 0    | 2 | MASCOT | T      | PLEX8 |       |
| 1.86E-03 | 0 0 | Cs5g02720.1           | 6.85 | 0 | 0    | 2 | MASCOT | T      | PLEX8 |       |
| 1.85E-02 | 0 0 | Cs5g02720.1           | 6.85 | 0 | 0    | 2 | MASCOT | T      |       |       |
| 5.94E-03 | 0 0 | Cs5g02720.1/orange1.  | 6.75 | 0 | 15.9 | 0 | 2      | MASCOT | T     | PLEX8 |

|              |                      |      |   |      |   |   |        |   |       |
|--------------|----------------------|------|---|------|---|---|--------|---|-------|
| 1.13E-04 0 0 | Cs5g02720.1/orange1. | 6.75 | 0 | 15.9 | 0 | 2 | MASCOT | T | PLEX8 |
| 2.14E-03 0 0 | Cs5g02720.1/orange1. | 6.75 | 0 | 15.9 | 0 | 2 | MASCOT | T | PLEX8 |
| 1.09E-01 0 0 | Cs5g02720.1/orange1. | 6.75 | 0 | 15.9 | 0 | 2 | MASCOT | T | PLEX8 |
| 3.16E-05 0 0 | Cs5g02720.1/orange1. | 6.75 | 0 | 15.9 | 0 | 2 | MASCOT | T | PLEX8 |
| 2.58E-03 0 0 | Cs5g02720.1/orange1. | 6.75 | 0 | 0    | 0 | 2 | MASCOT | T | PLEX8 |
| 8.15E-04 0 0 | Cs5g02720.1/orange1. | 6.75 | 0 | 0    | 0 | 2 | MASCOT | T | PLEX8 |
| 3.10E-04 0 0 | Cs5g02720.1/orange1. | 6.75 | 0 | 0    | 0 | 2 | MASCOT | T | PLEX8 |
| 1.40E-01 0 0 | Cs5g02720.1/orange1. | 6.75 | 0 | 0    | 0 | 2 | MASCOT | T | PLEX8 |
| 1.08E-02 0 0 | Cs5g02720.1/orange1. | 6.75 | 0 | 0    | 0 | 2 | MASCOT | T | PLEX8 |
| 1.27E-01 0 0 | Cs5g02720.1          | 6.75 | 0 | 0    | 0 | 2 | MASCOT | T | PLEX8 |
| 4.11E-02 0 0 | Cs5g02720.1          | 6.75 | 0 | 0    | 0 | 2 | MASCOT | T |       |
| 2.10E-01 0 0 | Cs5g02720.1          | 6.75 | 0 | 0    | 0 | 2 | MASCOT | T |       |
| 3.40E-02 0 0 | Cs5g02720.1          | 6.75 | 0 | 0    | 0 | 2 | MASCOT | T |       |
| 9.83E-02 0 0 | Cs5g02720.1/orange1. | 4.21 | 0 | 0    | 0 | 2 | MASCOT | T | PLEX8 |
| 1.06E-02 0 0 | Cs5g02720.1/orange1. | 4.21 | 0 | 0    | 0 | 2 | MASCOT | T | PLEX8 |
| 1.31E-02 0 0 | Cs5g02720.1/orange1. | 4.21 | 0 | 0    | 0 | 2 | MASCOT | T |       |
| 4.72E-01 0 0 | Cs5g02720.1/Cs6g193  | 9.75 | 0 | 0    | 0 | 2 | MASCOT | T | PLEX8 |
| 2.55E-01 0 0 | Cs5g02720.1/Cs6g193  | 9.75 | 0 | 0    | 0 | 2 | MASCOT | T | PLEX8 |
| 4.00E-04 0 0 | Cs5g02720.1/Cs6g193  | 9.75 | 0 | 0    | 0 | 2 | MASCOT | T |       |
| 7.15E-02 0 0 | Cs5g02720.1/Cs6g193  | 8.59 | 0 | 0    | 0 | 2 | MASCOT | T | PLEX8 |
| 3.05E-02 0 0 | Cs5g02720.1/Cs6g193  | 8.59 | 0 | 0    | 0 | 2 | MASCOT | T | PLEX8 |
| 1.66E-01 0 0 | Cs5g02720.1/Cs6g193  | 8.59 | 0 | 0    | 0 | 2 | MASCOT | T | PLEX8 |
| 1.52E-01 0 0 | Cs5g02720.1/Cs6g193  | 8.59 | 0 | 0    | 0 | 2 | MASCOT | T |       |
| 7.15E-02 0 0 | Cs5g02720.1/Cs6g193  | 8.59 | 0 | 0    | 0 | 2 | MASCOT | T | PLEX8 |
| 6.90E-02 0 0 | Cs5g02720.1/Cs6g193  | 8.59 | 0 | 0    | 0 | 2 | MASCOT | T | PLEX8 |
| 6.39E-02 0 0 | Cs5g02720.1/Cs6g193  | 8.59 | 0 | 0    | 0 | 2 | MASCOT | T |       |
| 6.05E-02 0 0 | Cs5g02720.1          | 8.47 | 0 | 0    | 0 | 2 | MASCOT | T | PLEX8 |
| 6.96E-03 0 0 | Cs5g02720.1          | 8.47 | 0 | 0    | 0 | 2 | MASCOT | T | PLEX8 |
| 5.15E-02 0 0 | Cs5g02720.1          | 8.47 | 0 | 0    | 0 | 2 | MASCOT | T | PLEX8 |
| 3.11E-02 0 0 | Cs5g02720.1          | 8.47 | 0 | 0    | 0 | 2 | MASCOT | T | PLEX8 |
| 5.00E-03 0 0 | Cs5g02720.1          | 8.47 | 0 | 0    | 0 | 2 | MASCOT | T | PLEX8 |
| 4.16E-03 0 0 | Cs5g02720.1          | 8.47 | 0 | 0    | 0 | 2 | MASCOT | T | PLEX8 |
| 3.04E-02 0 0 | Cs5g02720.1          | 8.47 | 0 | 0    | 0 | 2 | MASCOT | T | PLEX8 |
| 1.05E-01 0 0 | Cs7g27470.1          | 5.84 | 0 | 0    | 0 | 2 | MASCOT | T | PLEX8 |
| 2.38E-01 0 0 | Cs7g27470.1/Cs8g169  | 6.1  | 0 | 0    | 0 | 2 | MASCOT | T | PLEX8 |
| 6.51E-02 0 0 | Cs7g27470.1/Cs8g169  | 6.1  | 0 | 0    | 0 | 2 | MASCOT | T | PLEX8 |
| 2.81E-01 0 0 | Cs7g27470.1/Cs8g169  | 6.1  | 0 | 0    | 0 | 2 | MASCOT | T | PLEX8 |
| 6.47E-02 0 0 | Cs7g27470.1/Cs8g169  | 6.1  | 0 | 0    | 0 | 2 | MASCOT | T | PLEX8 |
| 1.90E-01 0 0 | Cs7g27470.1/Cs8g169  | 6.1  | 0 | 0    | 0 | 2 | MASCOT | T |       |
| 2.78E-02 0 0 | Cs7g27470.1/Cs8g169  | 9.75 | 0 | 0    | 0 | 2 | MASCOT | T |       |
| 8.10E-04 0 0 | Cs7g27470.1/Cs8g169  | 9.75 | 0 | 0    | 0 | 2 | MASCOT | T |       |
| 2.86E-02 0 0 | Cs7g27470.1/Cs8g169  | 9.75 | 0 | 0    | 0 | 2 | MASCOT | T |       |
| 3.67E-04 0 0 | Cs7g27470.1          | 5.84 | 0 | 0    | 0 | 2 | MASCOT | T |       |
| 6.34E-03 0 0 | Cs7g27470.1          | 5.84 | 0 | 0    | 0 | 2 | MASCOT | T |       |
| 7.65E-06 0 0 | Cs7g27470.1          | 5.84 | 0 | 0    | 0 | 2 | MASCOT | T |       |
| 6.82E-03 0 0 | Cs7g27470.1          | 5.84 | 0 | 0    | 0 | 2 | MASCOT | T |       |
| 2.17E-02 0 0 | Cs7g27470.1/Cs8g169  | 7.96 | 0 | 0    | 0 | 2 | MASCOT | T | PLEX8 |
| 1.63E-01 0 0 | Cs7g27470.1/orange1. | 9.47 | 0 | 0    | 0 | 2 | MASCOT | T | PLEX8 |
| 7.13E-03 0 0 | Cs7g27470.1          | 4.37 | 0 | 0    | 0 | 2 | MASCOT | T | PLEX8 |
| 6.15E-02 0 0 | Cs7g27470.1/Cs8g169  | 8.33 | 0 | 0    | 0 | 2 | MASCOT | T |       |
| 1.19E-01 0 0 | Cs7g27470.1/Cs8g169  | 8.33 | 0 | 0    | 0 | 2 | MASCOT | T |       |

|          |     |                       |      |   |   |   |        |   |       |
|----------|-----|-----------------------|------|---|---|---|--------|---|-------|
| 1.57E-03 | 0 0 | Cs7g27470.1           | 8.05 | 0 | 0 | 2 | MASCOT | T | PLEX8 |
| 1.35E-01 | 0 0 | Cs7g27470.1/Cs8g169   | 6.73 | 0 | 0 | 2 | MASCOT | T | PLEX8 |
| 2.83E-03 | 0 0 | Cs7g27470.1/Cs8g169   | 6.73 | 0 | 0 | 2 | MASCOT | T | PLEX8 |
| 7.14E-03 | 0 0 | Cs7g27470.1/Cs8g169   | 6.73 | 0 | 0 | 2 | MASCOT | T | PLEX8 |
| 7.81E-03 | 0 0 | Cs7g27470.1/Cs8g169   | 6.73 | 0 | 0 | 2 | MASCOT | T | PLEX8 |
| 6.06E-03 | 0 0 | Cs7g27470.1/Cs8g169   | 6.73 | 0 | 0 | 2 | MASCOT | T | PLEX8 |
| 2.45E-03 | 0 0 | Cs7g27470.1/Cs8g169   | 6.73 | 0 | 0 | 2 | MASCOT | T |       |
| 3.60E-03 | 0 0 | Cs7g27470.1/Cs8g169   | 6.73 | 0 | 0 | 2 | MASCOT | T |       |
| 1.01E-01 | 0 0 | Cs7g27470.1/Cs8g169   | 6.73 | 0 | 0 | 2 | MASCOT | T |       |
| 7.95E-03 | 0 0 | Cs7g27470.1           | 6.05 | 0 | 0 | 2 | MASCOT | T |       |
| 1.21E-01 | 0 0 | Cs7g27470.1/orange1.  | 6.74 | 0 | 0 | 2 | MASCOT | T | PLEX8 |
| 2.01E-01 | 0 0 | Cs7g27470.1/orange1.  | 8.59 | 0 | 0 | 2 | MASCOT | T | PLEX8 |
| 2.21E-01 | 0 0 | Cs7g27470.1/orange1.  | 8.59 | 0 | 0 | 2 | MASCOT | T | PLEX8 |
| 1.91E-01 | 0 0 | Cs7g27470.1/orange1.  | 8.59 | 0 | 0 | 2 | MASCOT | T |       |
| 1.17E-01 | 0 0 | Cs7g27470.1/orange1.  | 8.59 | 0 | 0 | 2 | MASCOT | T |       |
| 3.01E-02 | 0 0 | Cs7g27470.1/orange1.  | 8.59 | 0 | 0 | 2 | MASCOT | T |       |
| 1.20E-01 | 0 0 | Cs7g27470.1           | 8.59 | 0 | 0 | 2 | MASCOT | T | PLEX8 |
| 1.18E-01 | 0 0 | Cs7g27470.1           | 8.59 | 0 | 0 | 2 | MASCOT | T |       |
| 1.93E-01 | 0 0 | Cs7g27470.1/orange1.  | 6.74 | 0 | 0 | 2 | MASCOT | T | PLEX8 |
| 6.96E-02 | 0 0 | Cs7g27470.1/orange1.  | 6.74 | 0 | 0 | 2 | MASCOT | T | PLEX8 |
| 1.01E-01 | 0 0 | Cs7g27470.1/Cs8g169   | 5.84 | 0 | 0 | 2 | MASCOT | T | PLEX8 |
| 1.09E-01 | 0 0 | Cs7g27470.1/Cs8g169   | 5.84 | 0 | 0 | 2 | MASCOT | T | PLEX8 |
| 2.40E-01 | 0 0 | Cs7g27470.1/Cs8g169   | 5.84 | 0 | 0 | 2 | MASCOT | T | PLEX8 |
| 1.53E-01 | 0 0 | Cs7g27470.1/Cs8g169   | 5.84 | 0 | 0 | 2 | MASCOT | T | PLEX8 |
| 1.99E-01 | 0 0 | Cs7g27470.1/Cs8g169   | 5.84 | 0 | 0 | 2 | MASCOT | T | PLEX8 |
| 1.79E-01 | 0 0 | Cs7g27470.1/Cs8g169   | 5.84 | 0 | 0 | 2 | MASCOT | T | PLEX8 |
| 1.62E-01 | 0 0 | Cs7g27470.1/Cs8g169   | 5.84 | 0 | 0 | 2 | MASCOT | T | PLEX8 |
| 6.18E-04 | 0 0 | Cs7g27470.1/Cs8g170   | 8.75 | 0 | 0 | 2 | MASCOT | T | PLEX8 |
| 6.06E-03 | 0 0 | Cs7g27470.1/Cs8g170   | 8.75 | 0 | 0 | 2 | MASCOT | T | PLEX8 |
| 3.94E-03 | 0 0 | Cs7g27470.1/Cs8g170   | 8.75 | 0 | 0 | 2 | MASCOT | T | PLEX8 |
| 2.38E-01 | 0 0 | Cs7g27470.1/Cs8g170   | 8.75 | 0 | 0 | 2 | MASCOT | T | PLEX8 |
| 3.83E-02 | 0 0 | Cs7g27470.1/Cs8g170   | 8.75 | 0 | 0 | 2 | MASCOT | T | PLEX8 |
| 5.73E-03 | 0 0 | Cs7g27470.1/Cs8g170   | 8.75 | 0 | 0 | 2 | MASCOT | T | PLEX8 |
| 7.04E-02 | 0 0 | Cs7g27470.1/Cs8g169   | 5.55 | 0 | 0 | 2 | MASCOT | T | PLEX8 |
| 4.33E-03 | 0 0 | Cs7g27470.1/Cs8g169   | 5.55 | 0 | 0 | 2 | MASCOT | T | PLEX8 |
| 7.02E-03 | 0 0 | Cs7g27470.1/Cs8g169   | 5.55 | 0 | 0 | 2 | MASCOT | T | PLEX8 |
| 2.14E-01 | 0 0 | Cs7g27470.1/Cs8g169   | 5.55 | 0 | 0 | 2 | MASCOT | T | PLEX8 |
| 9.48E-04 | 0 0 | Cs7g27470.1           | 5.32 | 0 | 0 | 2 | MASCOT | T | PLEX8 |
| 2.92E-03 | 0 0 | Cs7g27470.1           | 5.32 | 0 | 0 | 2 | MASCOT | T | PLEX8 |
| 4.20E-06 | 0 0 | Cs7g27470.1           | 5.32 | 0 | 0 | 2 | MASCOT | T | PLEX8 |
| 5.80E-02 | 0 0 | Cs7g27470.1           | 5.32 | 0 | 0 | 2 | MASCOT | T | PLEX8 |
| 2.89E-01 | 0 0 | Cs7g27470.1           | 5.32 | 0 | 0 | 2 | MASCOT | T |       |
| 1.73E-01 | 0 0 | Cs7g27470.1           | 5.32 | 0 | 0 | 2 | MASCOT | T |       |
| 1.22E-05 | 0 0 | Cs7g27470.1           | 5.32 | 0 | 0 | 2 | MASCOT | T |       |
| 1.49E-03 | 0 0 | Cs7g27470.1/orange1.  | 5.81 | 0 | 0 | 2 | MASCOT | T | PLEX8 |
| 4.57E-05 | 0 0 | Cs7g27470.1/orange1.  | 5.81 | 0 | 0 | 2 | MASCOT | T | PLEX8 |
| 2.29E-02 | 0 0 | orange1.1t04187.1/ora | 4.37 | 0 | 0 | 2 | MASCOT | T |       |
| 1.38E-07 | 0 0 | orange1.1t04187.1/ora | 4.37 | 0 | 0 | 2 | MASCOT | T |       |
| 1.88E-03 | 0 0 | orange1.1t04187.1/ora | 4.14 | 0 | 0 | 2 | MASCOT | T | PLEX8 |
| 1.04E-01 | 0 0 | orange1.1t04187.1/ora | 6.74 | 0 | 0 | 2 | MASCOT | T | PLEX8 |
| 4.12E-02 | 0 0 | orange1.1t04187.1/ora | 6.74 | 0 | 0 | 2 | MASCOT | T | PLEX8 |

|          |     |                       |      |   |      |   |        |        |       |       |
|----------|-----|-----------------------|------|---|------|---|--------|--------|-------|-------|
| 4.15E-03 | 0 0 | orange1.1t04187.1/ora | 6.74 | 0 | 0    | 2 | MASCOT | T      | PLEX8 |       |
| 1.25E-02 | 0 0 | orange1.1t03226.1/ora | 5.4  | 0 | 0    | 2 | MASCOT | T      | PLEX8 |       |
| 3.36E-02 | 0 0 | orange1.1t03226.1/ora | 5.4  | 0 | 0    | 2 | MASCOT | T      | PLEX8 |       |
| 5.69E-02 | 0 0 | Cs2g27720.1/Cs2g277   | 9.7  | 1 | 0    | 2 | MASCOT | T      | PLEX8 |       |
| 2.79E-02 | 0 0 | Cs2g27720.1/Cs2g277   | 9.7  | 1 | 0    | 2 | MASCOT | T      | PLEX8 |       |
| 1.38E-03 | 0 0 | orange1.1t04187.1/ora | 4.53 | 0 | 0    | 2 | MASCOT | T      | PLEX8 |       |
| 3.48E-04 | 0 0 | orange1.1t04187.1/ora | 4.53 | 0 | 0    | 2 | MASCOT | T      | PLEX8 |       |
| 2.04E-01 | 0 0 | orange1.1t04187.1/ora | 6    | 0 | 0    | 2 | MASCOT | T      | PLEX8 |       |
| 5.07E-02 | 0 0 | orange1.1t04187.1/ora | 6    | 0 | 0    | 2 | MASCOT | T      | PLEX8 |       |
| 5.62E-03 | 0 0 | Cs2g27720.1/Cs2g277   | 5.72 | 0 | 0    | 2 | MASCOT | T      | PLEX8 |       |
| 2.19E-01 | 0 0 | orange1.1t03226.1/ora | 5.37 | 0 | 0    | 2 | MASCOT | T      | PLEX8 |       |
| 3.40E-02 | 0 0 | orange1.1t03226.1/ora | 5.37 | 0 | 0    | 2 | MASCOT | T      | PLEX8 |       |
| 3.48E-03 | 0 0 | orange1.1t03226.1/ora | 5.37 | 0 | 0    | 2 | MASCOT | T      | PLEX8 |       |
| 3.49E-02 | 0 0 | orange1.1t03226.1/ora | 5.37 | 0 | 0    | 2 | MASCOT | T      | PLEX8 |       |
| 9.32E-03 | 0 0 | orange1.1t03226.1/ora | 5.37 | 0 | 0    | 2 | MASCOT | T      | PLEX8 |       |
| 1.17E-02 | 0 0 | orange1.1t03226.1/ora | 5.37 | 0 | 0    | 2 | MASCOT | T      | PLEX8 |       |
| 3.86E-02 | 0 0 | orange1.1t03226.1/ora | 5.37 | 0 | 0    | 2 | MASCOT | T      | PLEX8 |       |
| 1.44E-02 | 0 0 | orange1.1t03226.1/ora | 5.37 | 0 | 0    | 2 | MASCOT | T      | PLEX8 |       |
| 2.75E-04 | 0 0 | orange1.1t03226.1/ora | 5.37 | 0 | 0    | 2 | MASCOT | T      | PLEX8 |       |
| 9.99E-02 | 0 0 | orange1.1t03226.1/ora | 5.37 | 0 | 0    | 2 | MASCOT | T      | PLEX8 |       |
| 3.08E-04 | 0 0 | orange1.1t03226.1/ora | 5.37 | 0 | 0    | 2 | MASCOT | T      | PLEX8 |       |
| 5.29E-02 | 0 0 | Cs2g27720.1/Cs2g277   | 4.53 | 0 | 0    | 2 | MASCOT | T      | PLEX8 |       |
| 5.05E-04 | 0 0 | Cs2g27720.1/Cs2g277   | 4.53 | 0 | 0    | 2 | MASCOT | T      | PLEX8 |       |
| 4.94E-01 | 0 0 | Cs2g27720.1/Cs2g277   | 4.53 | 0 | 0    | 2 | MASCOT | T      | PLEX8 |       |
| 1.73E-01 | 0 0 | Cs2g27720.1/Cs2g277   | 8.59 | 0 | 0    | 2 | MASCOT | T      | PLEX8 |       |
| 2.47E-01 | 0 0 | Cs2g27720.1/Cs2g277   | 8.59 | 0 | 0    | 2 | MASCOT | T      |       |       |
| 4.85E-01 | 0 0 | Cs2g27720.1/Cs2g277   | 8.59 | 0 | 0    | 2 | MASCOT | T      | PLEX8 |       |
| 2.38E-02 | 0 0 | orange1.1t04187.1/ora | 6.05 | 0 | 15.9 | 0 | 2      | MASCOT | T     | PLEX8 |
| 4.27E-04 | 0 0 | orange1.1t04187.1/ora | 6.05 | 0 | 0    | 2 | MASCOT | T      | PLEX8 |       |
| 1.72E-05 | 0 0 | orange1.1t04187.1/ora | 6.05 | 0 | 0    | 2 | MASCOT | T      | PLEX8 |       |
| 7.89E-02 | 0 0 | orange1.1t04187.1/ora | 6.05 | 0 | 0    | 2 | MASCOT | T      | PLEX8 |       |
| 1.00E-04 | 0 0 | orange1.1t04187.1/ora | 6.05 | 0 | 0    | 2 | MASCOT | T      | PLEX8 |       |
| 2.73E-01 | 0 0 | orange1.1t04187.1/ora | 5.88 | 0 | 0    | 2 | MASCOT | T      | PLEX8 |       |
| 1.63E-02 | 0 0 | orange1.1t04187.1/ora | 5.88 | 0 | 0    | 2 | MASCOT | T      | PLEX8 |       |
| 3.83E-03 | 0 0 | orange1.1t04187.1/ora | 5.88 | 0 | 0    | 2 | MASCOT | T      | PLEX8 |       |
| 1.40E-02 | 0 0 | Cs2g27720.1/Cs2g277   | 4.11 | 1 | 0    | 2 | MASCOT | T      |       |       |
| 3.21E-01 | 0 0 | orange1.1t03226.1/ora | 6.09 | 0 | 0    | 2 | MASCOT | T      | PLEX8 |       |
| 8.50E-03 | 0 0 | Cs2g27720.1/Cs2g277   | 6.74 | 0 | 0    | 2 | MASCOT | T      |       |       |
| 1.08E-02 | 0 0 | Cs2g27720.1/Cs2g277   | 4.21 | 0 | 15.9 | 0 | 2      | MASCOT | T     |       |
| 9.03E-03 | 0 0 | Cs2g27720.1/Cs2g277   | 4.21 | 0 | 0    | 2 | MASCOT | T      | PLEX8 |       |
| 2.70E-01 | 0 0 | Cs2g27720.1/Cs2g277   | 4.21 | 0 | 0    | 2 | MASCOT | T      |       |       |
| 2.10E-01 | 0 0 | orange1.1t03226.1/ora | 4.37 | 0 | 0    | 2 | MASCOT | T      | PLEX8 |       |
| 7.24E-02 | 0 0 | Cs2g27720.1/Cs2g277   | 9.75 | 0 | 0    | 2 | MASCOT | T      | PLEX8 |       |
| 7.11E-02 | 0 0 | Cs2g03070.1/Cs2g030   | 5.88 | 0 | 0    | 2 | MASCOT | T      | PLEX8 |       |
| 1.43E-01 | 0 0 | Cs2g03070.1/Cs2g030   | 5.88 | 0 | 0    | 2 | MASCOT | T      | PLEX8 |       |
| 2.16E-01 | 0 0 | Cs2g03070.1/Cs2g030   | 4.37 | 0 | 0    | 2 | MASCOT | T      | PLEX8 |       |
| 5.93E-03 | 0 0 | Cs2g03070.1/Cs2g030   | 8.64 | 0 | 0    | 2 | MASCOT | T      | PLEX8 |       |
| 5.05E-02 | 0 0 | Cs2g03070.1/Cs2g030   | 8.64 | 0 | 0    | 2 | MASCOT | T      |       |       |
| 6.54E-02 | 0 0 | Cs2g03070.1/Cs2g030   | 5.84 | 0 | 0    | 2 | MASCOT | T      | PLEX8 |       |
| 1.88E-02 | 0 0 | Cs2g03070.1/Cs2g030   | 5.84 | 0 | 0    | 2 | MASCOT | T      | PLEX8 |       |
| 7.08E-02 | 0 0 | Cs2g03070.1/Cs2g030   | 5.84 | 0 | 0    | 2 | MASCOT | T      | PLEX8 |       |

|          |     |                     |      |   |      |   |        |        |       |
|----------|-----|---------------------|------|---|------|---|--------|--------|-------|
| 3.87E-04 | 0 0 | Cs2g03070.1/Cs2g030 | 4.53 | 0 | 0    | 2 | MASCOT | T      | PLEX8 |
| 3.77E-02 | 0 0 | Cs2g03070.1/Cs2g030 | 6    | 0 | 0    | 2 | MASCOT | T      | PLEX8 |
| 7.80E-02 | 0 0 | Cs2g03070.1/Cs2g030 | 6    | 0 | 0    | 2 | MASCOT | T      | PLEX8 |
| 3.36E-02 | 0 0 | Cs2g03070.1/Cs2g030 | 6    | 0 | 0    | 2 | MASCOT | T      | PLEX8 |
| 3.51E-03 | 0 0 | Cs2g03070.1/Cs2g030 | 6    | 0 | 0    | 2 | MASCOT | T      | PLEX8 |
| 4.27E-02 | 0 0 | Cs2g03070.1/Cs2g030 | 6    | 0 | 0    | 2 | MASCOT | T      | PLEX8 |
| 4.14E-05 | 0 0 | Cs2g03070.1/Cs2g030 | 4.53 | 0 | 0    | 2 | MASCOT | T      |       |
| 7.71E-02 | 0 0 | Cs2g03070.1/Cs2g030 | 8.76 | 0 | 0    | 2 | MASCOT | T      |       |
| 1.04E-01 | 0 0 | Cs2g03070.1/Cs2g030 | 8.76 | 0 | 0    | 2 | MASCOT | T      |       |
| 1.62E-01 | 0 0 | Cs2g03070.1/Cs2g030 | 8.76 | 0 | 0    | 2 | MASCOT | T      |       |
| 1.03E-01 | 0 0 | Cs2g03070.1/Cs2g030 | 9.47 | 0 | 0    | 2 | MASCOT | T      | PLEX8 |
| 5.74E-02 | 0 0 | Cs2g03070.1/Cs2g030 | 4.35 | 1 | 0    | 2 | MASCOT | T      | PLEX8 |
| 2.13E-02 | 0 0 | Cs2g03070.1/Cs2g030 | 4.35 | 1 | 0    | 2 | MASCOT | T      | PLEX8 |
| 2.46E-02 | 0 0 | Cs2g03070.1         | 5.88 | 0 | 0    | 2 | MASCOT | T      | PLEX8 |
| 6.36E-02 | 0 0 | Cs2g03070.1         | 6.09 | 0 | 0    | 2 | MASCOT | T      | PLEX8 |
| 6.62E-02 | 0 0 | Cs2g03070.1/Cs2g030 | 4.03 | 0 | 0    | 2 | MASCOT | T      | PLEX8 |
| 5.35E-03 | 0 0 | Cs2g03070.1/Cs2g030 | 4.4  | 0 | 0    | 2 | MASCOT | T      | PLEX8 |
| 1.23E-01 | 0 0 | Cs2g03070.1/Cs2g030 | 4.4  | 0 | 0    | 2 | MASCOT | T      | PLEX8 |
| 1.41E-03 | 0 0 | Cs2g03070.1/Cs2g030 | 4.4  | 0 | 0    | 2 | MASCOT | T      | PLEX8 |
| 9.08E-02 | 0 0 | Cs2g03070.1/Cs2g030 | 5.21 | 0 | 0    | 2 | MASCOT | T      | PLEX8 |
| 1.64E-01 | 0 0 | Cs2g03070.1/Cs2g030 | 4.37 | 0 | 0    | 2 | MASCOT | T      | PLEX8 |
| 1.84E-03 | 0 0 | Cs2g03070.1/Cs2g030 | 4.83 | 1 | 0    | 2 | MASCOT | T      | PLEX8 |
| 1.12E-01 | 0 0 | Cs2g03070.1/Cs2g030 | 4.21 | 0 | 0    | 2 | MASCOT | T      | PLEX8 |
| 9.46E-02 | 0 0 | Cs2g03070.1/Cs2g030 | 5.18 | 0 | 0    | 2 | MASCOT | T      | PLEX8 |
| 3.19E-01 | 0 0 | Cs2g03070.1/Cs2g030 | 5.18 | 0 | 0    | 2 | MASCOT | T      | PLEX8 |
| 3.27E-01 | 0 0 | Cs2g03070.1/Cs2g030 | 5.18 | 0 | 0    | 2 | MASCOT | T      | PLEX8 |
| 4.14E-01 | 0 0 | Cs2g03070.1/Cs2g030 | 5.18 | 0 | 0    | 2 | MASCOT | T      | PLEX8 |
| 4.15E-03 | 0 0 | Cs2g03070.1/Cs2g030 | 5.18 | 0 | 0    | 2 | MASCOT | T      |       |
| 2.82E-01 | 0 0 | gi 113952630        | 4.53 | 0 | 0    | 2 | MASCOT | T      | PLEX8 |
| 5.53E-04 | 0 0 | gi 113952630        | 4.53 | 0 | 0    | 2 | MASCOT | T      | PLEX8 |
| 6.20E-02 | 0 0 | gi 113952630        | 4.53 | 0 | 0    | 2 | MASCOT | T      | PLEX8 |
| 1.06E-02 | 0 0 | gi 113952630        | 4.53 | 0 | 0    | 2 | MASCOT | T      | PLEX8 |
| 4.54E-03 | 0 0 | gi 113952630        | 4.53 | 0 | 0    | 2 | MASCOT | T      | PLEX8 |
| 1.22E-01 | 0 0 | gi 113952630        | 4.53 | 0 | 0    | 2 | MASCOT | T      | PLEX8 |
| 1.84E-02 | 0 0 | gi 113952630        | 4.53 | 0 | 0    | 2 | MASCOT | T      | PLEX8 |
| 2.34E-04 | 0 0 | gi 113952630        | 4.53 | 0 | 0    | 2 | MASCOT | T      | PLEX8 |
| 2.26E-02 | 0 0 | gi 113952630        | 4.53 | 0 | 0    | 2 | MASCOT | T      | PLEX8 |
| 3.79E-03 | 0 0 | gi 113952630        | 4.53 | 0 | 0    | 2 | MASCOT | T      |       |
| 3.24E-01 | 0 0 | gi 113952630        | 8.8  | 0 | 0    | 2 | MASCOT | T      | PLEX8 |
| 5.03E-01 | 0 0 | gi 113952630        | 8.8  | 0 | 0    | 2 | MASCOT | T      |       |
| 9.43E-03 | 0 0 | gi 113952630        | 4.03 | 0 | 15.9 | 0 | 2      | MASCOT | T     |
| 7.93E-04 | 0 0 | gi 113952630        | 4.03 | 0 | 15.9 | 0 | 2      | MASCOT | T     |
| 5.26E-03 | 0 0 | gi 113952630        | 4.03 | 0 | 0    | 2 | MASCOT | T      |       |
| 1.82E-03 | 0 0 | gi 113952630        | 4.03 | 0 | 0    | 2 | MASCOT | T      |       |
| 2.14E-06 | 0 0 | gi 113952630        | 4.03 | 0 | 0    | 2 | MASCOT | T      |       |
| 1.95E-02 | 0 0 | gi 113952630        | 4.03 | 0 | 0    | 2 | MASCOT | T      |       |
| 1.18E-01 | 0 0 | gi 113952630        | 4.21 | 0 | 0    | 2 | MASCOT | T      |       |
| 6.03E-02 | 0 0 | gi 113952630        | 4.21 | 0 | 0    | 2 | MASCOT | T      | PLEX8 |
| 3.06E-02 | 0 0 | gi 113952630        | 4.21 | 0 | 0    | 2 | MASCOT | T      | PLEX8 |
| 2.48E-02 | 0 0 | gi 113952630        | 4.21 | 0 | 0    | 2 | MASCOT | T      | PLEX8 |
| 1.11E-02 | 0 0 | gi 113952630        | 4.21 | 0 | 0    | 2 | MASCOT | T      |       |



|              |              |      |        |   |          |         |
|--------------|--------------|------|--------|---|----------|---------|
| 7.45E-02 0 0 | gi 113952630 | 4.21 | 0      | 0 | 2 MASCOT | T       |
| 8.30E-04 0 0 | gi 113952630 | 4.21 | 0      | 0 | 2 MASCOT | T       |
| 1.31E-03 0 0 | gi 113952630 | 4.21 | 0      | 0 | 2 MASCOT | T       |
| 8.54E-03 0 0 | gi 113952630 | 4.21 | 0      | 0 | 2 MASCOT | T PLEX8 |
| 6.07E-03 0 0 | gi 113952630 | 5.4  | 0 15.9 | 0 | 2 MASCOT | T PLEX8 |
| 1.45E-06 0 0 | gi 113952630 | 5.4  | 0 15.9 | 0 | 2 MASCOT | T PLEX8 |
| 1.86E-06 0 0 | gi 113952630 | 5.4  | 0 15.9 | 0 | 2 MASCOT | T PLEX8 |
| 3.66E-03 0 0 | gi 113952630 | 5.4  | 0 15.9 | 0 | 2 MASCOT | T PLEX8 |
| 5.44E-03 0 0 | gi 113952630 | 5.4  | 0 15.9 | 0 | 2 MASCOT | T PLEX8 |
| 6.70E-02 0 0 | gi 113952630 | 5.4  | 0 15.9 | 0 | 2 MASCOT | T PLEX8 |
| 1.02E-04 0 0 | gi 113952630 | 5.4  | 0 15.9 | 0 | 2 MASCOT | T PLEX8 |
| 1.09E-01 0 0 | gi 113952630 | 5.4  | 0 15.9 | 0 | 2 MASCOT | T PLEX8 |
| 5.82E-06 0 0 | gi 113952630 | 5.4  | 0 15.9 | 0 | 2 MASCOT | T PLEX8 |
| 9.15E-05 0 0 | gi 113952630 | 5.4  | 0 15.9 | 0 | 2 MASCOT | T PLEX8 |
| 3.88E-07 0 0 | gi 113952630 | 5.4  | 0 15.9 | 0 | 2 MASCOT | T PLEX8 |
| 2.58E-04 0 0 | gi 113952630 | 5.4  | 0      | 0 | 2 MASCOT | T PLEX8 |
| 2.50E-06 0 0 | gi 113952630 | 5.4  | 0      | 0 | 2 MASCOT | T PLEX8 |
| 2.24E-04 0 0 | gi 113952630 | 5.4  | 0      | 0 | 2 MASCOT | T PLEX8 |
| 3.04E-06 0 0 | gi 113952630 | 5.4  | 0      | 0 | 2 MASCOT | T PLEX8 |
| 2.11E-06 0 0 | gi 113952630 | 5.4  | 0      | 0 | 2 MASCOT | T PLEX8 |
| 4.04E-03 0 0 | gi 113952630 | 5.4  | 0      | 0 | 2 MASCOT | T PLEX8 |
| 2.15E-03 0 0 | gi 113952630 | 5.4  | 0      | 0 | 2 MASCOT | T PLEX8 |
| 2.16E-01 0 0 | gi 113952630 | 5.4  | 0      | 0 | 2 MASCOT | T PLEX8 |
| 1.68E-05 0 0 | gi 113952630 | 5.4  | 0      | 0 | 2 MASCOT | T PLEX8 |
| 1.26E+00 0 0 | gi 113952630 | 8.75 | 0      | 0 | 2 MASCOT | T PLEX8 |
| 6.58E-04 0 0 | gi 113952630 | 5.83 | 0      | 0 | 2 MASCOT | T PLEX8 |
| 5.45E-02 0 0 | gi 113952630 | 5.83 | 0      | 0 | 2 MASCOT | T PLEX8 |
| 1.83E-01 0 0 | gi 113952630 | 5.83 | 0      | 0 | 2 MASCOT | T PLEX8 |
| 3.15E-03 0 0 | gi 113952630 | 5.83 | 0      | 0 | 2 MASCOT | T PLEX8 |
| 2.69E-02 0 0 | gi 113952630 | 5.83 | 0      | 0 | 2 MASCOT | T PLEX8 |
| 2.33E-01 0 0 | gi 113952630 | 5.83 | 0      | 0 | 2 MASCOT | T PLEX8 |
| 5.93E-02 0 0 | gi 113952630 | 5.83 | 0      | 0 | 2 MASCOT | T PLEX8 |
| 2.24E-02 0 0 | gi 113952630 | 5.83 | 0      | 0 | 2 MASCOT | T PLEX8 |
| 3.48E-04 0 0 | gi 113952630 | 5.83 | 0      | 0 | 2 MASCOT | T PLEX8 |
| 7.98E-02 0 0 | gi 113952630 | 5.83 | 0      | 0 | 2 MASCOT | T       |
| 1.95E-03 0 0 | gi 113952630 | 5.83 | 0      | 0 | 2 MASCOT | T PLEX8 |
| 2.55E-02 0 0 | gi 113952630 | 5.83 | 0      | 0 | 2 MASCOT | T PLEX8 |
| 1.96E-03 0 0 | gi 113952630 | 5.83 | 0      | 0 | 2 MASCOT | T PLEX8 |
| 2.06E-02 0 0 | gi 113952630 | 5.83 | 0      | 0 | 2 MASCOT | T PLEX8 |
| 1.03E-04 0 0 | gi 113952630 | 5.83 | 0      | 0 | 2 MASCOT | T PLEX8 |
| 1.85E-01 0 0 | gi 113952630 | 5.83 | 0      | 0 | 2 MASCOT | T PLEX8 |
| 3.28E-03 0 0 | gi 113952630 | 5.83 | 0      | 0 | 2 MASCOT | T PLEX8 |
| 7.11E-03 0 0 | gi 113952630 | 9.76 | 0 15.9 | 0 | 2 MASCOT | T PLEX8 |
| 3.16E-03 0 0 | gi 113952630 | 9.76 | 0 15.9 | 0 | 2 MASCOT | T PLEX8 |
| 8.83E-04 0 0 | gi 113952630 | 9.76 | 0      | 0 | 2 MASCOT | T PLEX8 |
| 3.60E-03 0 0 | gi 113952630 | 9.76 | 0      | 0 | 2 MASCOT | T       |
| 1.88E-03 0 0 | gi 113952630 | 9.76 | 0      | 0 | 2 MASCOT | T       |
| 1.00E-01 0 0 | gi 113952630 | 12   | 1      | 0 | 2 MASCOT | T PLEX8 |
| 1.94E-01 0 0 | gi 113952630 | 6.41 | 0      | 0 | 2 MASCOT | T PLEX8 |
| 1.27E-03 0 0 | gi 113952630 | 6.41 | 0      | 0 | 2 MASCOT | T PLEX8 |
| 8.13E-02 0 0 | gi 113952630 | 6.41 | 0      | 0 | 2 MASCOT | T PLEX8 |

|              |              |      |        |   |          |   |       |
|--------------|--------------|------|--------|---|----------|---|-------|
| 4.84E-04 0 0 | gi 113952630 | 6.41 | 0      | 0 | 2 MASCOT | T | PLEX8 |
| 4.62E-03 0 0 | gi 113952630 | 6.41 | 0      | 0 | 2 MASCOT | T | PLEX8 |
| 7.43E-04 0 0 | gi 113952630 | 6.41 | 0      | 0 | 2 MASCOT | T | PLEX8 |
| 8.78E-05 0 0 | gi 113952630 | 6.41 | 0      | 0 | 2 MASCOT | T | PLEX8 |
| 2.03E-01 0 0 | gi 113952630 | 6.41 | 0      | 0 | 2 MASCOT | T | PLEX8 |
| 4.21E-03 0 0 | gi 113952630 | 6.41 | 0      | 0 | 2 MASCOT | T | PLEX8 |
| 1.03E-01 0 0 | gi 113952630 | 6.41 | 0      | 0 | 2 MASCOT | T | PLEX8 |
| 5.29E-02 0 0 | gi 113952630 | 6.41 | 0      | 0 | 2 MASCOT | T | PLEX8 |
| 1.63E-01 0 0 | gi 113952630 | 6.41 | 0      | 0 | 2 MASCOT | T | PLEX8 |
| 1.67E-04 0 0 | gi 113952630 | 6.41 | 0      | 0 | 2 MASCOT | T | PLEX8 |
| 2.61E-01 0 0 | gi 113952630 | 6.41 | 0      | 0 | 2 MASCOT | T | PLEX8 |
| 4.78E-02 0 0 | gi 113952630 | 6.41 | 0      | 0 | 2 MASCOT | T | PLEX8 |
| 2.70E-03 0 0 | gi 113952630 | 6.41 | 0      | 0 | 2 MASCOT | T | PLEX8 |
| 2.78E-01 0 0 | gi 113952630 | 6.41 | 0      | 0 | 2 MASCOT | T | PLEX8 |
| 1.47E-01 0 0 | gi 113952630 | 6.41 | 0      | 0 | 2 MASCOT | T | PLEX8 |
| 1.32E-01 0 0 | gi 113952630 | 6.41 | 0      | 0 | 2 MASCOT | T | PLEX8 |
| 3.58E-03 0 0 | gi 113952630 | 6.41 | 0      | 0 | 2 MASCOT | T | PLEX8 |
| 7.87E-03 0 0 | gi 113952630 | 6.41 | 0      | 0 | 2 MASCOT | T | PLEX8 |
| 2.00E-01 0 0 | gi 113952630 | 6.41 | 0      | 0 | 2 MASCOT | T | PLEX8 |
| 1.51E-03 0 0 | gi 113952630 | 4.53 | 0      | 0 | 2 MASCOT | T | PLEX8 |
| 7.22E-04 0 0 | gi 113952630 | 4.53 | 0      | 0 | 2 MASCOT | T | PLEX8 |
| 4.66E-03 0 0 | gi 113952630 | 4.53 | 0      | 0 | 2 MASCOT | T | PLEX8 |
| 1.91E-02 0 0 | gi 113952630 | 6.79 | 0 15.9 | 0 | 2 MASCOT | T | PLEX8 |
| 5.15E-02 0 0 | gi 113952630 | 6.79 | 0 15.9 | 0 | 2 MASCOT | T | PLEX8 |
| 1.42E-01 0 0 | gi 113952630 | 6.79 | 0 15.9 | 0 | 2 MASCOT | T | PLEX8 |
| 3.89E-03 0 0 | gi 113952630 | 6.79 | 0 15.9 | 0 | 2 MASCOT | T | PLEX8 |
| 7.45E-02 0 0 | gi 113952630 | 6.79 | 0 15.9 | 0 | 2 MASCOT | T | PLEX8 |
| 1.22E-01 0 0 | gi 113952630 | 6.79 | 0      | 0 | 2 MASCOT | T | PLEX8 |
| 6.20E-02 0 0 | gi 113952630 | 6.79 | 0      | 0 | 2 MASCOT | T | PLEX8 |
| 1.19E-03 0 0 | gi 113952630 | 6.79 | 0      | 0 | 2 MASCOT | T | PLEX8 |
| 4.58E-02 0 0 | gi 113952630 | 6.79 | 0      | 0 | 2 MASCOT | T | PLEX8 |
| 4.47E-02 0 0 | gi 113952630 | 6.79 | 0      | 0 | 2 MASCOT | T | PLEX8 |
| 1.57E-02 0 0 | gi 113952630 | 6.92 | 0      | 0 | 2 MASCOT | T | PLEX8 |
| 1.60E-03 0 0 | gi 113952630 | 6.92 | 0      | 0 | 2 MASCOT | T | PLEX8 |
| 8.94E-03 0 0 | gi 113952630 | 6.92 | 0      | 0 | 2 MASCOT | T | PLEX8 |
| 9.40E-04 0 0 | gi 113952630 | 6.92 | 0      | 0 | 2 MASCOT | T | PLEX8 |
| 4.31E-04 0 0 | gi 113952630 | 6.92 | 0      | 0 | 2 MASCOT | T | PLEX8 |
| 7.99E-02 0 0 | gi 113952630 | 6.92 | 0      | 0 | 2 MASCOT | T | PLEX8 |
| 1.76E-02 0 0 | gi 113952630 | 6.92 | 0      | 0 | 2 MASCOT | T | PLEX8 |
| 1.65E-02 0 0 | gi 113952630 | 6.92 | 0      | 0 | 2 MASCOT | T | PLEX8 |
| 1.35E-01 0 0 | gi 113952630 | 6.92 | 0      | 0 | 2 MASCOT | T | PLEX8 |
| 4.99E-02 0 0 | gi 113952630 | 6.92 | 0      | 0 | 2 MASCOT | T | PLEX8 |
| 1.32E-01 0 0 | gi 113952630 | 6.92 | 0      | 0 | 2 MASCOT | T | PLEX8 |
| 3.19E-02 0 0 | gi 113952630 | 6.92 | 0      | 0 | 2 MASCOT | T | PLEX8 |
| 1.42E-02 0 0 | gi 113952630 | 6.92 | 0      | 0 | 2 MASCOT | T | PLEX8 |
| 4.46E-03 0 0 | gi 113952630 | 6.92 | 0      | 0 | 2 MASCOT | T | PLEX8 |
| 6.05E-04 0 0 | gi 113952630 | 6.92 | 0      | 0 | 2 MASCOT | T | PLEX8 |
| 1.71E-04 0 0 | gi 113952630 | 6.92 | 0      | 0 | 2 MASCOT | T | PLEX8 |
| 9.30E-04 0 0 | gi 113952630 | 6.92 | 0      | 0 | 2 MASCOT | T | PLEX8 |
| 2.93E-01 0 0 | gi 113952630 | 6.92 | 0      | 0 | 2 MASCOT | T | PLEX8 |
| 6.18E-02 0 0 | gi 113952630 | 6.92 | 0      | 0 | 2 MASCOT | T | PLEX8 |

|          |     |                     |      |   |      |   |        |        |       |       |
|----------|-----|---------------------|------|---|------|---|--------|--------|-------|-------|
| 3.07E-02 | 0 0 | gi 113952630        | 6.92 | 0 | 0    | 2 | MASCOT | T      | PLEX8 |       |
| 1.03E-03 | 0 0 | gi 113952630        | 6.92 | 0 | 0    | 2 | MASCOT | T      | PLEX8 |       |
| 9.78E-03 | 0 0 | gi 113952630        | 6.92 | 0 | 0    | 2 | MASCOT | T      | PLEX8 |       |
| 6.82E-02 | 0 0 | gi 113952630        | 5.99 | 0 | 0    | 2 | MASCOT | T      |       |       |
| 2.37E-01 | 0 0 | gi 113952630        | 5.84 | 0 | 0    | 2 | MASCOT | T      | PLEX8 |       |
| 1.24E-01 | 0 0 | gi 113952630        | 5.84 | 0 | 0    | 2 | MASCOT | T      | PLEX8 |       |
| 2.15E-01 | 0 0 | gi 113952630        | 5.84 | 0 | 0    | 2 | MASCOT | T      | PLEX8 |       |
| 3.59E-01 | 0 0 | gi 113952630        | 5.84 | 0 | 0    | 2 | MASCOT | T      | PLEX8 |       |
| 2.01E-01 | 0 0 | gi 113952630        | 5.84 | 0 | 0    | 2 | MASCOT | T      |       |       |
| 9.15E-03 | 0 0 | gi 113952630        | 4.23 | 1 | 15.9 | 0 | 2      | MASCOT | T     | PLEX8 |
| 6.44E-02 | 0 0 | gi 113952630        | 4.23 | 1 | 15.9 | 0 | 2      | MASCOT | T     |       |
| 5.32E-02 | 0 0 | gi 113952630        | 4.23 | 1 | 15.9 | 0 | 2      | MASCOT | T     |       |
| 2.00E-03 | 0 0 | gi 113952630        | 4.23 | 1 | 0    | 2 | MASCOT | T      |       |       |
| 2.13E-01 | 0 0 | gi 113952630        | 8.59 | 0 | 0    | 2 | MASCOT | T      | PLEX8 |       |
| 6.56E-03 | 0 0 | gi 113952630        | 8.59 | 0 | 0    | 2 | MASCOT | T      | PLEX8 |       |
| 2.52E-01 | 0 0 | gi 113952630        | 8.59 | 0 | 0    | 2 | MASCOT | T      | PLEX8 |       |
| 3.82E-01 | 0 0 | gi 113952630        | 8.59 | 0 | 0    | 2 | MASCOT | T      | PLEX8 |       |
| 2.03E-02 | 0 0 | gi 113952630        | 8.59 | 0 | 0    | 2 | MASCOT | T      | PLEX8 |       |
| 2.62E-01 | 0 0 | gi 113952630        | 8.59 | 0 | 0    | 2 | MASCOT | T      | PLEX8 |       |
| 2.40E-01 | 0 0 | gi 113952630        | 8.59 | 0 | 0    | 2 | MASCOT | T      | PLEX8 |       |
| 2.13E-01 | 0 0 | gi 113952630        | 8.59 | 0 | 0    | 2 | MASCOT | T      |       |       |
| 3.03E-01 | 0 0 | gi 113952630        | 6.92 | 0 | 0    | 2 | MASCOT | T      | PLEX8 |       |
| 2.96E-04 | 0 0 | gi 113952630        | 6.92 | 0 | 0    | 2 | MASCOT | T      | PLEX8 |       |
| 1.64E-02 | 0 0 | gi 113952630        | 6.92 | 0 | 0    | 2 | MASCOT | T      | PLEX8 |       |
| 3.94E-01 | 0 0 | gi 113952630        | 6.92 | 0 | 0    | 2 | MASCOT | T      | PLEX8 |       |
| 4.13E-03 | 0 0 | gi 113952630        | 6.92 | 0 | 0    | 2 | MASCOT | T      | PLEX8 |       |
| 4.57E-02 | 0 0 | gi 113952630        | 6.92 | 0 | 0    | 2 | MASCOT | T      | PLEX8 |       |
| 1.49E-03 | 0 0 | gi 113952630        | 6.92 | 0 | 0    | 2 | MASCOT | T      |       |       |
| 1.80E-02 | 0 0 | gi 113952630        | 6.92 | 0 | 0    | 2 | MASCOT | T      | PLEX8 |       |
| 6.67E-02 | 0 0 | gi 113952630        | 6.92 | 0 | 0    | 2 | MASCOT | T      | PLEX8 |       |
| 8.15E-03 | 0 0 | gi 113952630        | 6.92 | 0 | 0    | 2 | MASCOT | T      | PLEX8 |       |
| 1.19E-02 | 0 0 | gi 113952630        | 6.92 | 0 | 0    | 2 | MASCOT | T      |       |       |
| 4.99E-02 | 0 0 | gi 113952630        | 6.92 | 0 | 0    | 2 | MASCOT | T      |       |       |
| 1.82E-01 | 0 0 | gi 113952630        | 5.97 | 0 | 0    | 2 | MASCOT | T      | PLEX8 |       |
| 1.20E-01 | 0 0 | Cs8g18260.1         | 4.31 | 0 | 0    | 2 | MASCOT | T      | PLEX8 |       |
| 7.31E-03 | 0 0 | Cs6g05890.1/Cs7g289 | 4.22 | 0 | 0    | 2 | MASCOT | T      | PLEX8 |       |
| 4.80E-03 | 0 0 | Cs6g05890.1/Cs7g289 | 4.22 | 0 | 0    | 2 | MASCOT | T      | PLEX8 |       |
| 3.22E-04 | 0 0 | Cs6g05890.1/Cs7g289 | 4.22 | 0 | 0    | 2 | MASCOT | T      | PLEX8 |       |
| 1.19E-03 | 0 0 | Cs6g05890.1/Cs7g289 | 4.22 | 0 | 0    | 2 | MASCOT | T      | PLEX8 |       |
| 2.35E-03 | 0 0 | Cs6g05890.1/Cs7g289 | 4.22 | 0 | 0    | 2 | MASCOT | T      | PLEX8 |       |
| 2.57E-04 | 0 0 | Cs6g05890.1/Cs7g289 | 4.22 | 0 | 0    | 2 | MASCOT | T      | PLEX8 |       |
| 1.20E-03 | 0 0 | Cs6g05890.1/Cs7g289 | 4.22 | 0 | 0    | 2 | MASCOT | T      | PLEX8 |       |
| 2.44E-05 | 0 0 | Cs6g05890.1/Cs7g289 | 4.22 | 0 | 0    | 2 | MASCOT | T      | PLEX8 |       |
| 3.25E-04 | 0 0 | Cs6g05890.1/Cs7g289 | 4.22 | 0 | 0    | 2 | MASCOT | T      |       |       |
| 6.28E-06 | 0 0 | Cs6g05890.1/Cs7g289 | 4.22 | 0 | 0    | 2 | MASCOT | T      | PLEX8 |       |
| 2.48E-03 | 0 0 | Cs6g05890.1/Cs7g289 | 4.22 | 0 | 0    | 2 | MASCOT | T      |       |       |
| 2.90E-05 | 0 0 | Cs6g05890.1/Cs7g289 | 4.22 | 0 | 0    | 2 | MASCOT | T      |       |       |
| 1.03E-03 | 0 0 | Cs6g05890.1/Cs7g289 | 4.22 | 0 | 0    | 2 | MASCOT | T      |       |       |
| 2.82E-03 | 0 0 | Cs6g05890.1/Cs7g289 | 4.22 | 0 | 0    | 2 | MASCOT | T      |       |       |
| 1.54E-03 | 0 0 | Cs6g05890.1/Cs7g289 | 4.22 | 0 | 0    | 2 | MASCOT | T      |       |       |
| 1.12E-04 | 0 0 | Cs6g05890.1/Cs7g289 | 4.22 | 0 | 0    | 2 | MASCOT | T      |       |       |

|          |     |                      |      |   |      |   |        |        |       |       |
|----------|-----|----------------------|------|---|------|---|--------|--------|-------|-------|
| 7.95E-04 | 0 0 | Cs6g05890.1/Cs7g289  | 4.22 | 0 | 0    | 2 | MASCOT | T      |       |       |
| 1.12E-01 | 0 0 | Cs6g05890.1/Cs7g289  | 4.53 | 0 | 0    | 2 | MASCOT | T      | PLEX8 |       |
| 3.94E-03 | 0 0 | Cs8g18260.1          | 5.84 | 0 | 15.9 | 0 | 2      | MASCOT | T     |       |
| 5.04E-03 | 0 0 | Cs8g18260.1          | 5.84 | 0 | 15.9 | 0 | 2      | MASCOT | T     |       |
| 6.79E-03 | 0 0 | Cs8g18260.1          | 5.84 | 0 | 0    | 2 | MASCOT | T      |       |       |
| 4.93E-04 | 0 0 | Cs8g18260.1          | 5.84 | 0 | 0    | 2 | MASCOT | T      |       |       |
| 3.51E-03 | 0 0 | Cs8g18250.1/Cs8g182  | 4.53 | 0 | 0    | 2 | MASCOT | T      | PLEX8 |       |
| 4.85E-05 | 0 0 | Cs8g18250.1/Cs8g182  | 4.53 | 0 | 0    | 2 | MASCOT | T      | PLEX8 |       |
| 1.11E-03 | 0 0 | Cs8g18250.1/Cs8g182  | 4.53 | 0 | 0    | 2 | MASCOT | T      | PLEX8 |       |
| 1.10E-01 | 0 0 | Cs8g18260.1 ! orange | 4.53 | 0 | 0    | 2 | MASCOT | T      | PLEX8 |       |
| 1.41E-04 | 0 0 | Cs8g18260.1 ! orange | 4.53 | 0 | 0    | 2 | MASCOT | T      | PLEX8 |       |
| 2.87E-04 | 0 0 | Cs8g18260.1 ! orange | 4.53 | 0 | 0    | 2 | MASCOT | T      | PLEX8 |       |
| 7.45E-06 | 0 0 | Cs8g18260.1 ! orange | 4.53 | 0 | 0    | 2 | MASCOT | T      | PLEX8 |       |
| 4.83E-03 | 0 0 | Cs8g18260.1 ! orange | 4.53 | 0 | 0    | 2 | MASCOT | T      | PLEX8 |       |
| 2.07E-01 | 0 0 | Cs8g18260.1 ! orange | 4.53 | 0 | 0    | 2 | MASCOT | T      | PLEX8 |       |
| 1.51E-01 | 0 0 | Cs8g18260.1 ! orange | 4.53 | 0 | 0    | 2 | MASCOT | T      | PLEX8 |       |
| 8.12E-02 | 0 0 | Cs8g18260.1 ! orange | 4.53 | 0 | 0    | 2 | MASCOT | T      | PLEX8 |       |
| 2.21E-01 | 0 0 | Cs8g18260.1 ! orange | 4.53 | 0 | 0    | 2 | MASCOT | T      | PLEX8 |       |
| 1.11E-01 | 0 0 | Cs6g05890.1/Cs7g289  | 4.53 | 0 | 0    | 2 | MASCOT | T      | PLEX8 |       |
| 1.48E-01 | 0 0 | Cs6g05890.1/Cs7g289  | 4.53 | 0 | 0    | 2 | MASCOT | T      | PLEX8 |       |
| 2.10E-02 | 0 0 | Cs6g05890.1/Cs7g289  | 4.53 | 0 | 0    | 2 | MASCOT | T      | PLEX8 |       |
| 6.37E-02 | 0 0 | Cs6g05890.1/Cs7g289  | 4.53 | 0 | 0    | 2 | MASCOT | T      | PLEX8 |       |
| 1.17E-01 | 0 0 | Cs6g05890.1/Cs7g289  | 4.53 | 0 | 0    | 2 | MASCOT | T      | PLEX8 |       |
| 7.03E-03 | 0 0 | Cs6g05890.1/Cs7g289  | 4.53 | 0 | 0    | 2 | MASCOT | T      | PLEX8 |       |
| 7.32E-03 | 0 0 | Cs6g05890.1/Cs7g289  | 6    | 0 | 0    | 2 | MASCOT | T      | PLEX8 |       |
| 3.62E-03 | 0 0 | Cs6g05890.1/Cs7g289  | 6    | 0 | 0    | 2 | MASCOT | T      | PLEX8 |       |
| 1.07E-02 | 0 0 | Cs6g05890.1/Cs7g289  | 6    | 0 | 0    | 2 | MASCOT | T      | PLEX8 |       |
| 2.27E-03 | 0 0 | Cs6g05890.1/Cs7g289  | 6    | 0 | 0    | 2 | MASCOT | T      | PLEX8 |       |
| 6.36E-03 | 0 0 | Cs6g05890.1/Cs7g289  | 6    | 0 | 0    | 2 | MASCOT | T      | PLEX8 |       |
| 5.02E-02 | 0 0 | Cs6g05890.1/Cs7g289  | 5.84 | 0 | 0    | 2 | MASCOT | T      | PLEX8 |       |
| 2.46E-02 | 0 0 | Cs6g05890.1/Cs7g289  | 5.84 | 0 | 0    | 2 | MASCOT | T      | PLEX8 |       |
| 9.87E-03 | 0 0 | Cs6g05890.1/Cs7g289  | 5.84 | 0 | 0    | 2 | MASCOT | T      |       |       |
| 1.01E-01 | 0 0 | Cs6g05890.1/Cs7g289  | 5.84 | 0 | 0    | 2 | MASCOT | T      |       |       |
| 9.58E-04 | 0 0 | Cs6g05890.1/Cs7g289  | 5.84 | 0 | 0    | 2 | MASCOT | T      | PLEX8 |       |
| 5.56E-03 | 0 0 | Cs6g05890.1/Cs7g289  | 5.84 | 0 | 0    | 2 | MASCOT | T      | PLEX8 |       |
| 9.44E-05 | 0 0 | Cs7g29010.1/Cs8g182  | 5.84 | 0 | 15.9 | 0 | 2      | MASCOT | T     | PLEX8 |
| 2.69E-02 | 0 0 | Cs7g29010.1/Cs8g182  | 5.84 | 0 | 15.9 | 0 | 2      | MASCOT | T     | PLEX8 |
| 4.61E-05 | 0 0 | Cs7g29010.1/Cs8g182  | 5.84 | 0 | 15.9 | 0 | 2      | MASCOT | T     | PLEX8 |
| 5.62E-02 | 0 0 | Cs7g29010.1/Cs8g182  | 5.84 | 0 | 15.9 | 0 | 2      | MASCOT | T     | PLEX8 |
| 7.04E-04 | 0 0 | Cs7g29010.1/Cs8g182  | 5.84 | 0 | 0    | 2 | MASCOT | T      | PLEX8 |       |
| 2.34E-02 | 0 0 | Cs7g29010.1/Cs8g182  | 5.84 | 0 | 0    | 2 | MASCOT | T      | PLEX8 |       |
| 1.20E-03 | 0 0 | Cs7g29010.1/Cs8g182  | 5.84 | 0 | 0    | 2 | MASCOT | T      | PLEX8 |       |
| 1.43E-04 | 0 0 | Cs7g29010.1/Cs8g182  | 5.84 | 0 | 0    | 2 | MASCOT | T      | PLEX8 |       |
| 4.94E-02 | 0 0 | Cs7g29010.1/Cs8g182  | 5.84 | 0 | 0    | 2 | MASCOT | T      | PLEX8 |       |
| 7.95E-03 | 0 0 | Cs7g29010.1/Cs8g182  | 5.84 | 0 | 0    | 2 | MASCOT | T      | PLEX8 |       |
| 1.94E-03 | 0 0 | Cs8g18260.1          | 4.53 | 0 | 15.9 | 0 | 2      | MASCOT | T     | PLEX8 |
| 3.36E-04 | 0 0 | Cs8g18260.1          | 4.53 | 0 | 15.9 | 0 | 2      | MASCOT | T     | PLEX8 |
| 1.30E-03 | 0 0 | Cs8g18260.1          | 4.53 | 0 | 0    | 2 | MASCOT | T      | PLEX8 |       |
| 3.03E-08 | 0 0 | Cs8g18260.1          | 4.53 | 0 | 0    | 2 | MASCOT | T      | PLEX8 |       |
| 6.84E-02 | 0 0 | Cs8g18260.1          | 4.53 | 0 | 0    | 2 | MASCOT | T      | PLEX8 |       |
| 5.53E-03 | 0 0 | Cs6g05890.1/Cs8g182  | 6.46 | 0 | 0    | 2 | MASCOT | T      | PLEX8 |       |

|          |     |                     |      |   |      |   |        |        |       |       |
|----------|-----|---------------------|------|---|------|---|--------|--------|-------|-------|
| 3.06E-05 | 0 0 | Cs6g05890.1/Cs8g182 | 6.46 | 0 | 0    | 2 | MASCOT | T      | PLEX8 |       |
| 6.46E-03 | 0 0 | Cs6g05890.1/Cs8g182 | 6.46 | 0 | 0    | 2 | MASCOT | T      | PLEX8 |       |
| 1.15E-01 | 0 0 | Cs6g05890.1/Cs8g182 | 6.46 | 0 | 0    | 2 | MASCOT | T      | PLEX8 |       |
| 6.94E-02 | 0 0 | Cs6g05890.1/Cs8g182 | 6.46 | 0 | 0    | 2 | MASCOT | T      | PLEX8 |       |
| 2.03E-01 | 0 0 | Cs6g05890.1/Cs8g182 | 6.46 | 0 | 0    | 2 | MASCOT | T      | PLEX8 |       |
| 1.64E-01 | 0 0 | Cs8g18260.1         | 8.47 | 0 | 15.9 | 0 | 2      | MASCOT | T     | PLEX8 |
| 2.51E-01 | 0 0 | Cs8g18260.1         | 8.47 | 0 | 0    | 2 | MASCOT | T      | PLEX8 |       |
| 2.41E-03 | 0 0 | Cs6g05890.1/Cs7g289 | 4.14 | 0 | 15.9 | 0 | 2      | MASCOT | T     |       |
| 1.31E-03 | 0 0 | Cs6g05890.1/Cs7g289 | 4.14 | 0 | 15.9 | 0 | 2      | MASCOT | T     |       |
| 4.30E-05 | 0 0 | Cs6g05890.1/Cs7g289 | 4.14 | 0 | 15.9 | 0 | 2      | MASCOT | T     |       |
| 4.50E-02 | 0 0 | Cs8g18260.1         | 4.21 | 0 | 15.9 | 0 | 2      | MASCOT | T     | PLEX8 |
| 2.53E-03 | 0 0 | Cs3g14220.1/Cs3g142 | 4.37 | 0 | 0    | 2 | MASCOT | T      | PLEX8 |       |
| 9.99E-05 | 0 0 | Cs3g14220.1/Cs3g142 | 4.37 | 0 | 0    | 2 | MASCOT | T      | PLEX8 |       |
| 2.21E-02 | 0 0 | Cs3g14220.1/Cs3g142 | 4.37 | 0 | 0    | 2 | MASCOT | T      | PLEX8 |       |
| 9.07E-04 | 0 0 | Cs3g14220.1/Cs3g142 | 4.37 | 0 | 0    | 2 | MASCOT | T      | PLEX8 |       |
| 3.84E-04 | 0 0 | Cs3g14220.1/Cs3g142 | 4.37 | 0 | 0    | 2 | MASCOT | T      |       |       |
| 2.48E-06 | 0 0 | Cs3g14220.1/Cs3g142 | 4.37 | 0 | 0    | 2 | MASCOT | T      |       |       |
| 6.64E-05 | 0 0 | Cs3g14220.1/Cs3g142 | 4.37 | 0 | 0    | 2 | MASCOT | T      |       |       |
| 2.69E-04 | 0 0 | Cs3g14220.1/Cs3g142 | 4.37 | 0 | 0    | 2 | MASCOT | T      |       |       |
| 5.09E-01 | 0 0 | Cs3g14220.1/Cs3g142 | 4.37 | 0 | 0    | 2 | MASCOT | T      |       |       |
| 2.54E-01 | 0 0 | Cs6g05890.1/Cs7g289 | 6.5  | 0 | 15.9 | 0 | 2      | MASCOT | T     | PLEX8 |
| 2.48E-01 | 0 0 | Cs6g05890.1/Cs7g289 | 6.5  | 0 | 15.9 | 0 | 2      | MASCOT | T     | PLEX8 |
| 1.45E-01 | 0 0 | Cs6g05890.1/Cs7g289 | 6.5  | 0 | 15.9 | 0 | 2      | MASCOT | T     | PLEX8 |
| 4.14E-03 | 0 0 | Cs6g05890.1/Cs7g289 | 6.5  | 0 | 15.9 | 0 | 2      | MASCOT | T     | PLEX8 |
| 3.71E-02 | 0 0 | Cs6g05890.1/Cs7g289 | 6.5  | 0 | 0    | 2 | MASCOT | T      | PLEX8 |       |
| 3.84E-02 | 0 0 | Cs6g05890.1/Cs7g289 | 6.5  | 0 | 0    | 2 | MASCOT | T      | PLEX8 |       |
| 1.04E-01 | 0 0 | Cs7g28940.1/Cs8g182 | 4.37 | 0 | 0    | 2 | MASCOT | T      | PLEX8 |       |
| 1.77E-02 | 0 0 | Cs7g28940.1/Cs8g182 | 4.37 | 0 | 0    | 2 | MASCOT | T      | PLEX8 |       |
| 4.27E-04 | 0 0 | Cs7g28940.1/Cs8g182 | 4.37 | 0 | 0    | 2 | MASCOT | T      | PLEX8 |       |
| 4.02E-05 | 0 0 | Cs7g28940.1/Cs8g182 | 4.37 | 0 | 0    | 2 | MASCOT | T      | PLEX8 |       |
| 4.78E-02 | 0 0 | Cs3g14220.1/Cs3g142 | 4.37 | 0 | 0    | 2 | MASCOT | T      |       |       |
| 3.94E-06 | 0 0 | Cs3g14220.1/Cs3g142 | 4.37 | 0 | 0    | 2 | MASCOT | T      |       |       |
| 2.32E-02 | 0 0 | Cs3g14220.1/Cs3g142 | 4.37 | 0 | 0    | 2 | MASCOT | T      |       |       |
| 6.87E-06 | 0 0 | Cs3g14220.1/Cs3g142 | 4.37 | 0 | 0    | 2 | MASCOT | T      |       |       |
| 3.44E-02 | 0 0 | Cs3g14220.1/Cs3g142 | 4.37 | 0 | 0    | 2 | MASCOT | T      |       |       |
| 1.67E-02 | 0 0 | Cs3g14220.1/Cs3g142 | 4.37 | 0 | 0    | 2 | MASCOT | T      |       |       |
| 5.59E-02 | 0 0 | Cs3g14220.1/Cs3g142 | 4.37 | 0 | 0    | 2 | MASCOT | T      |       |       |
| 2.90E-01 | 0 0 | Cs6g22020.1/Cs6g220 | 4.53 | 0 | 0    | 2 | MASCOT | T      | PLEX8 |       |
| 1.64E-03 | 0 0 | Cs6g22020.1/Cs6g220 | 4.53 | 0 | 0    | 2 | MASCOT | T      | PLEX8 |       |
| 1.12E-01 | 0 0 | Cs6g22020.1/Cs6g220 | 4.53 | 0 | 0    | 2 | MASCOT | T      | PLEX8 |       |
| 2.09E-02 | 0 0 | Cs6g22020.1/Cs6g220 | 4.53 | 0 | 0    | 2 | MASCOT | T      | PLEX8 |       |
| 1.53E-01 | 0 0 | Cs6g22020.1/Cs6g220 | 4.53 | 0 | 0    | 2 | MASCOT | T      | PLEX8 |       |
| 1.41E-01 | 0 0 | Cs6g22020.1/Cs6g220 | 4.53 | 0 | 0    | 2 | MASCOT | T      | PLEX8 |       |
| 3.51E-04 | 0 0 | Cs6g22020.1/Cs6g220 | 4.53 | 0 | 0    | 2 | MASCOT | T      | PLEX8 |       |
| 5.37E-02 | 0 0 | Cs6g22020.1/Cs6g220 | 4.53 | 0 | 0    | 2 | MASCOT | T      |       |       |
| 5.82E-02 | 0 0 | Cs6g22020.1/Cs6g220 | 4.53 | 0 | 0    | 2 | MASCOT | T      | PLEX8 |       |
| 3.08E-01 | 0 0 | Cs6g22020.1/Cs6g220 | 4.53 | 0 | 0    | 2 | MASCOT | T      | PLEX8 |       |
| 7.03E-04 | 0 0 | Cs6g22020.1/Cs6g220 | 4.53 | 0 | 0    | 2 | MASCOT | T      | PLEX8 |       |
| 3.70E-03 | 0 0 | Cs6g22020.1/Cs6g220 | 4.53 | 0 | 0    | 2 | MASCOT | T      |       |       |
| 2.30E-03 | 0 0 | Cs6g22020.1/Cs6g220 | 8.63 | 0 | 0    | 2 | MASCOT | T      | PLEX8 |       |
| 1.63E-03 | 0 0 | Cs6g22020.1/Cs6g220 | 8.63 | 0 | 0    | 2 | MASCOT | T      | PLEX8 |       |

|          |     |                     |      |   |   |   |        |   |       |
|----------|-----|---------------------|------|---|---|---|--------|---|-------|
| 8.04E-03 | 0 0 | Cs6g22020.1/Cs6g220 | 8.63 | 0 | 0 | 2 | MASCOT | T | PLEX8 |
| 4.53E-02 | 0 0 | Cs6g22020.1/Cs6g220 | 8.63 | 0 | 0 | 2 | MASCOT | T | PLEX8 |
| 3.43E-02 | 0 0 | Cs6g22020.1/Cs6g220 | 8.63 | 0 | 0 | 2 | MASCOT | T | PLEX8 |
| 3.41E-04 | 0 0 | Cs6g22020.1/Cs6g220 | 8.63 | 0 | 0 | 2 | MASCOT | T | PLEX8 |
| 1.54E-04 | 0 0 | Cs6g22020.1/Cs6g220 | 8.63 | 0 | 0 | 2 | MASCOT | T | PLEX8 |
| 1.41E-03 | 0 0 | Cs6g22020.1/Cs6g220 | 8.63 | 0 | 0 | 2 | MASCOT | T | PLEX8 |
| 7.76E-02 | 0 0 | Cs6g22020.1/Cs6g220 | 8.63 | 0 | 0 | 2 | MASCOT | T | PLEX8 |
| 7.94E-02 | 0 0 | Cs6g22020.1/Cs6g220 | 9.8  | 0 | 0 | 2 | MASCOT | T | PLEX8 |
| 8.59E-02 | 0 0 | Cs6g22020.1/Cs6g220 | 9.8  | 0 | 0 | 2 | MASCOT | T | PLEX8 |
| 1.96E-01 | 0 0 | Cs6g22020.1/Cs6g220 | 9.8  | 0 | 0 | 2 | MASCOT | T | PLEX8 |
| 1.93E-02 | 0 0 | Cs6g22020.1/Cs6g220 | 9.8  | 0 | 0 | 2 | MASCOT | T | PLEX8 |
| 2.09E-01 | 0 0 | Cs6g22020.1/Cs6g220 | 9.8  | 0 | 0 | 2 | MASCOT | T | PLEX8 |
| 9.25E-02 | 0 0 | Cs6g22020.1/Cs6g220 | 5.88 | 0 | 0 | 2 | MASCOT | T | PLEX8 |
| 2.13E-03 | 0 0 | Cs6g22020.1/Cs6g220 | 5.88 | 0 | 0 | 2 | MASCOT | T | PLEX8 |
| 3.98E-05 | 0 0 | Cs6g22020.1/Cs6g220 | 5.88 | 0 | 0 | 2 | MASCOT | T | PLEX8 |
| 1.20E-02 | 0 0 | Cs6g22020.1/Cs6g220 | 5.88 | 0 | 0 | 2 | MASCOT | T | PLEX8 |
| 7.96E-03 | 0 0 | Cs6g22020.1/Cs6g220 | 5.88 | 0 | 0 | 2 | MASCOT | T | PLEX8 |
| 1.67E-04 | 0 0 | Cs6g22020.1/Cs6g220 | 5.88 | 0 | 0 | 2 | MASCOT | T | PLEX8 |
| 7.48E-02 | 0 0 | Cs6g22020.1/Cs6g220 | 5.88 | 0 | 0 | 2 | MASCOT | T | PLEX8 |
| 1.42E-02 | 0 0 | Cs6g22020.1/Cs6g220 | 5.88 | 0 | 0 | 2 | MASCOT | T | PLEX8 |
| 6.80E-03 | 0 0 | Cs6g22020.1/Cs6g220 | 5.88 | 0 | 0 | 2 | MASCOT | T | PLEX8 |
| 3.63E-02 | 0 0 | Cs6g22020.1/Cs6g220 | 5.88 | 0 | 0 | 2 | MASCOT | T | PLEX8 |
| 8.68E-03 | 0 0 | Cs6g22020.1/Cs6g220 | 5.88 | 0 | 0 | 2 | MASCOT | T | PLEX8 |
| 7.63E-04 | 0 0 | Cs6g22020.1/Cs6g220 | 5.88 | 0 | 0 | 2 | MASCOT | T | PLEX8 |
| 2.20E-02 | 0 0 | Cs6g22020.1/Cs6g220 | 5.88 | 0 | 0 | 2 | MASCOT | T | PLEX8 |
| 1.25E-02 | 0 0 | Cs6g22020.1/Cs6g220 | 5.88 | 0 | 0 | 2 | MASCOT | T | PLEX8 |
| 2.15E-01 | 0 0 | Cs6g22020.1/Cs6g220 | 5.88 | 0 | 0 | 2 | MASCOT | T | PLEX8 |
| 8.10E-06 | 0 0 | Cs6g22020.1/Cs6g220 | 4.14 | 0 | 0 | 2 | MASCOT | T | PLEX8 |
| 2.66E-02 | 0 0 | Cs6g22020.1/Cs6g220 | 4.14 | 0 | 0 | 2 | MASCOT | T | PLEX8 |
| 1.63E-01 | 0 0 | Cs6g22020.1/Cs6g220 | 4.14 | 0 | 0 | 2 | MASCOT | T | PLEX8 |
| 9.21E-02 | 0 0 | Cs6g22020.1/Cs6g220 | 4.14 | 0 | 0 | 2 | MASCOT | T | PLEX8 |
| 2.82E-03 | 0 0 | Cs6g22020.1/Cs6g220 | 4.14 | 0 | 0 | 2 | MASCOT | T | PLEX8 |
| 9.20E-03 | 0 0 | Cs6g22020.1/Cs6g220 | 4.14 | 0 | 0 | 2 | MASCOT | T | PLEX8 |
| 1.70E-01 | 0 0 | Cs6g22020.1/Cs6g220 | 4.14 | 0 | 0 | 2 | MASCOT | T | PLEX8 |
| 5.05E-02 | 0 0 | Cs6g22020.1/Cs6g220 | 6.1  | 0 | 0 | 2 | MASCOT | T | PLEX8 |
| 2.54E-02 | 0 0 | Cs6g22020.1/Cs6g220 | 4.03 | 0 | 0 | 2 | MASCOT | T | PLEX8 |
| 1.89E-04 | 0 0 | Cs6g22020.1/Cs6g220 | 4.03 | 0 | 0 | 2 | MASCOT | T | PLEX8 |
| 4.25E-06 | 0 0 | Cs6g22020.1/Cs6g220 | 4.03 | 0 | 0 | 2 | MASCOT | T | PLEX8 |
| 8.41E-02 | 0 0 | Cs6g22020.1/Cs6g220 | 4.14 | 0 | 0 | 2 | MASCOT | T | PLEX8 |
| 5.31E-02 | 0 0 | Cs6g22020.1/Cs6g220 | 4.14 | 0 | 0 | 2 | MASCOT | T | PLEX8 |
| 2.49E-04 | 0 0 | Cs6g22020.1/Cs6g220 | 4.14 | 0 | 0 | 2 | MASCOT | T | PLEX8 |
| 2.72E-02 | 0 0 | Cs6g22020.1/Cs6g220 | 4.14 | 0 | 0 | 2 | MASCOT | T | PLEX8 |
| 2.08E-01 | 0 0 | Cs6g22020.1/Cs6g220 | 5.84 | 0 | 0 | 2 | MASCOT | T | PLEX8 |
| 3.01E-01 | 0 0 | Cs6g22020.1/Cs6g220 | 5.84 | 0 | 0 | 2 | MASCOT | T | PLEX8 |
| 1.45E-01 | 0 0 | Cs6g22020.1/Cs6g220 | 5.84 | 0 | 0 | 2 | MASCOT | T | PLEX8 |
| 1.31E-01 | 0 0 | Cs6g22020.1/Cs6g220 | 5.84 | 0 | 0 | 2 | MASCOT | T | PLEX8 |
| 5.21E-06 | 0 0 | Cs6g22020.1/Cs6g220 | 5.83 | 0 | 0 | 2 | MASCOT | T | PLEX8 |
| 2.87E-01 | 0 0 | Cs6g22020.1/Cs6g220 | 5.3  | 0 | 0 | 2 | MASCOT | T | PLEX8 |
| 4.71E-03 | 0 0 | Cs6g22020.1/Cs6g220 | 4.03 | 0 | 0 | 2 | MASCOT | T | PLEX8 |
| 2.57E-02 | 0 0 | Cs6g22020.1/Cs6g220 | 4.03 | 0 | 0 | 2 | MASCOT | T | PLEX8 |
| 3.56E-03 | 0 0 | Cs6g22020.1/Cs6g220 | 4.03 | 0 | 0 | 2 | MASCOT | T | PLEX8 |

|          |     |                     |      |   |      |   |        |        |       |       |
|----------|-----|---------------------|------|---|------|---|--------|--------|-------|-------|
| 6.06E-03 | 0 0 | Cs6g22020.1/Cs6g220 | 4.03 | 0 | 0    | 2 | MASCOT | T      | PLEX8 |       |
| 1.24E-02 | 0 0 | Cs6g22020.1/Cs6g220 | 4.03 | 0 | 0    | 2 | MASCOT | T      | PLEX8 |       |
| 3.14E-02 | 0 0 | Cs6g22020.1/Cs6g220 | 4.03 | 0 | 0    | 2 | MASCOT | T      |       |       |
| 1.41E-02 | 0 0 | Cs6g22020.1/Cs6g220 | 4.03 | 0 | 0    | 2 | MASCOT | T      | PLEX8 |       |
| 1.73E-01 | 0 0 | Cs6g22020.1/Cs6g220 | 8.72 | 0 | 0    | 2 | MASCOT | T      | PLEX8 |       |
| 4.38E-02 | 0 0 | Cs6g22020.1/Cs6g220 | 6.79 | 0 | 0    | 2 | MASCOT | T      | PLEX8 |       |
| 5.53E-02 | 0 0 | Cs6g22020.1/Cs6g220 | 6.79 | 0 | 0    | 2 | MASCOT | T      | PLEX8 |       |
| 1.35E-02 | 0 0 | Cs6g22020.1/Cs6g220 | 6.79 | 0 | 0    | 2 | MASCOT | T      | PLEX8 |       |
| 2.69E-02 | 0 0 | Cs6g22020.1/Cs6g220 | 8.5  | 0 | 15.9 | 0 | 2      | MASCOT | T     | PLEX8 |
| 9.45E-03 | 0 0 | Cs6g22020.1/Cs6g220 | 8.5  | 0 | 15.9 | 0 | 2      | MASCOT | T     | PLEX8 |
| 6.86E-02 | 0 0 | Cs6g22020.1/Cs6g220 | 8.5  | 0 | 0    | 2 | MASCOT | T      | PLEX8 |       |
| 2.48E-03 | 0 0 | Cs6g22020.1/Cs6g220 | 8.5  | 0 | 0    | 2 | MASCOT | T      | PLEX8 |       |
| 9.17E-03 | 0 0 | Cs6g22020.1/Cs6g220 | 8.5  | 0 | 0    | 2 | MASCOT | T      | PLEX8 |       |
| 2.69E-02 | 0 0 | Cs6g22020.1/Cs6g220 | 8.5  | 0 | 0    | 2 | MASCOT | T      | PLEX8 |       |
| 2.14E-04 | 0 0 | Cs6g22020.1/Cs6g220 | 8.5  | 0 | 0    | 2 | MASCOT | T      | PLEX8 |       |
| 3.30E-02 | 0 0 | Cs6g22020.1/Cs6g220 | 8.5  | 0 | 0    | 2 | MASCOT | T      | PLEX8 |       |
| 2.00E-02 | 0 0 | Cs6g22020.1/Cs6g220 | 5.84 | 0 | 0    | 2 | MASCOT | T      | PLEX8 |       |
| 1.59E-01 | 0 0 | Cs6g22020.1/Cs6g220 | 5.84 | 0 | 0    | 2 | MASCOT | T      | PLEX8 |       |
| 1.80E-01 | 0 0 | Cs6g22020.1/Cs6g220 | 5.84 | 0 | 0    | 2 | MASCOT | T      | PLEX8 |       |
| 5.81E-02 | 0 0 | Cs6g22020.1/Cs6g220 | 5.84 | 0 | 0    | 2 | MASCOT | T      | PLEX8 |       |
| 1.44E-01 | 0 0 | Cs6g22020.1/Cs6g220 | 5.84 | 0 | 0    | 2 | MASCOT | T      | PLEX8 |       |
| 8.54E-02 | 0 0 | Cs6g22020.1/Cs6g220 | 5.84 | 0 | 0    | 2 | MASCOT | T      | PLEX8 |       |
| 1.72E-03 | 0 0 | Cs6g22020.1/Cs6g220 | 4.25 | 0 | 0    | 2 | MASCOT | T      |       |       |
| 7.51E-05 | 0 0 | Cs6g22020.1/Cs6g220 | 4.25 | 0 | 0    | 2 | MASCOT | T      |       |       |
| 4.16E-03 | 0 0 | Cs6g22020.1/Cs6g220 | 4.25 | 0 | 0    | 2 | MASCOT | T      |       |       |
| 1.30E-04 | 0 0 | Cs6g22020.1/Cs6g220 | 4.25 | 0 | 0    | 2 | MASCOT | T      | PLEX8 |       |
| 1.32E-05 | 0 0 | Cs6g22020.1/Cs6g220 | 4.25 | 0 | 0    | 2 | MASCOT | T      | PLEX8 |       |
| 1.55E-03 | 0 0 | Cs6g22020.1/Cs6g220 | 5.37 | 0 | 0    | 2 | MASCOT | T      | PLEX8 |       |
| 1.58E-01 | 0 0 | Cs6g22020.1/Cs6g220 | 5.37 | 0 | 0    | 2 | MASCOT | T      | PLEX8 |       |
| 1.42E-01 | 0 0 | Cs6g22020.1/Cs6g220 | 5.37 | 0 | 0    | 2 | MASCOT | T      | PLEX8 |       |
| 4.31E-02 | 0 0 | Cs6g22020.1/Cs6g220 | 5.37 | 0 | 0    | 2 | MASCOT | T      | PLEX8 |       |
| 1.79E-01 | 0 0 | Cs6g22020.1/Cs6g220 | 5.37 | 0 | 0    | 2 | MASCOT | T      |       |       |
| 4.45E-02 | 0 0 | Cs6g22020.1/Cs6g220 | 5.37 | 0 | 0    | 2 | MASCOT | T      |       |       |
| 6.34E-02 | 0 0 | Cs1g20720.1/Cs1g207 | 4.53 | 0 | 0    | 2 | MASCOT | T      | PLEX8 |       |
| 1.60E-01 | 0 0 | Cs1g20720.1/Cs1g207 | 4.53 | 0 | 0    | 2 | MASCOT | T      | PLEX8 |       |
| 1.14E-01 | 0 0 | Cs1g20720.1/Cs1g207 | 4.53 | 0 | 0    | 2 | MASCOT | T      | PLEX8 |       |
| 2.91E-02 | 0 0 | Cs1g20720.1/Cs1g207 | 4.53 | 0 | 0    | 2 | MASCOT | T      | PLEX8 |       |
| 1.73E-01 | 0 0 | Cs1g20720.1/Cs1g207 | 4.53 | 0 | 0    | 2 | MASCOT | T      | PLEX8 |       |
| 2.23E-01 | 0 0 | Cs1g20720.2         | 5.88 | 0 | 0    | 2 | MASCOT | T      | PLEX8 |       |
| 8.98E-02 | 0 0 | Cs1g20720.1/Cs1g207 | 4.37 | 0 | 0    | 2 | MASCOT | T      | PLEX8 |       |
| 7.87E-02 | 0 0 | Cs1g20720.1/Cs1g207 | 4.32 | 1 | 0    | 2 | MASCOT | T      | PLEX8 |       |
| 3.03E-03 | 0 0 | Cs1g20720.1/Cs1g207 | 4.32 | 1 | 0    | 2 | MASCOT | T      | PLEX8 |       |
| 1.12E-01 | 0 0 | Cs1g20720.1/Cs1g207 | 4.37 | 0 | 0    | 2 | MASCOT | T      | PLEX8 |       |
| 6.45E-03 | 0 0 | Cs1g20720.1/Cs1g207 | 4.37 | 0 | 0    | 2 | MASCOT | T      | PLEX8 |       |
| 1.42E-02 | 0 0 | Cs1g20720.1/Cs1g207 | 4.65 | 0 | 0    | 2 | MASCOT | T      | PLEX8 |       |
| 2.11E-04 | 0 0 | Cs1g20720.1/Cs1g207 | 4.65 | 0 | 0    | 2 | MASCOT | T      | PLEX8 |       |
| 1.28E-02 | 0 0 | Cs1g20720.1/Cs1g207 | 4.65 | 0 | 0    | 2 | MASCOT | T      | PLEX8 |       |
| 8.89E-02 | 0 0 | Cs1g20720.1/Cs1g207 | 4.65 | 0 | 0    | 2 | MASCOT | T      | PLEX8 |       |
| 5.25E-03 | 0 0 | Cs1g20720.1/Cs1g207 | 4.65 | 0 | 0    | 2 | MASCOT | T      | PLEX8 |       |
| 6.13E-02 | 0 0 | Cs1g20720.1/Cs1g207 | 4.65 | 0 | 0    | 2 | MASCOT | T      | PLEX8 |       |
| 2.39E-01 | 0 0 | Cs1g20720.1/Cs1g207 | 4.65 | 0 | 0    | 2 | MASCOT | T      |       |       |

|          |     |                     |      |   |      |   |        |        |       |       |
|----------|-----|---------------------|------|---|------|---|--------|--------|-------|-------|
| 1.58E-01 | 0 0 | Cs1g20720.1/Cs1g207 | 4.65 | 0 | 0    | 2 | MASCOT | T      |       |       |
| 1.45E-01 | 0 0 | Cs1g20720.1/Cs1g207 | 4.25 | 0 | 0    | 2 | MASCOT | T      | PLEX8 |       |
| 2.72E-01 | 0 0 | Cs1g20720.1/Cs1g207 | 4.25 | 0 | 0    | 2 | MASCOT | T      | PLEX8 |       |
| 1.45E-01 | 0 0 | Cs1g20720.1/Cs1g207 | 4.25 | 0 | 0    | 2 | MASCOT | T      | PLEX8 |       |
| 1.60E-01 | 0 0 | Cs1g20720.1/Cs1g207 | 4.25 | 0 | 0    | 2 | MASCOT | T      | PLEX8 |       |
| 2.84E-01 | 0 0 | Cs1g20720.1/Cs1g207 | 4.25 | 0 | 0    | 2 | MASCOT | T      | PLEX8 |       |
| 6.76E-02 | 0 0 | Cs1g20720.1/Cs1g207 | 4.53 | 0 | 0    | 2 | MASCOT | T      | PLEX8 |       |
| 2.11E-01 | 0 0 | Cs1g20720.1/Cs1g207 | 5.59 | 0 | 15.9 | 0 | 2      | MASCOT | T     | PLEX8 |
| 8.73E-02 | 0 0 | Cs1g20720.1/Cs1g207 | 5.59 | 0 | 0    | 2 | MASCOT | T      | PLEX8 |       |
| 7.54E-03 | 0 0 | Cs1g20720.1/Cs1g207 | 6    | 0 | 15.9 | 0 | 2      | MASCOT | T     | PLEX8 |
| 2.77E-03 | 0 0 | Cs1g20720.1/Cs1g207 | 6    | 0 | 15.9 | 0 | 2      | MASCOT | T     | PLEX8 |
| 3.16E-03 | 0 0 | Cs1g20720.1/Cs1g207 | 6    | 0 | 15.9 | 0 | 2      | MASCOT | T     | PLEX8 |
| 3.17E-04 | 0 0 | Cs1g20720.1/Cs1g207 | 6    | 0 | 0    | 2 | MASCOT | T      | PLEX8 |       |
| 3.40E-03 | 0 0 | Cs1g20720.1/Cs1g207 | 6    | 0 | 0    | 2 | MASCOT | T      | PLEX8 |       |
| 5.99E-02 | 0 0 | Cs1g20720.1/Cs1g207 | 6    | 0 | 0    | 2 | MASCOT | T      | PLEX8 |       |
| 5.36E-04 | 0 0 | Cs1g20720.1/Cs1g207 | 6    | 0 | 0    | 2 | MASCOT | T      | PLEX8 |       |
| 2.25E-04 | 0 0 | Cs1g20720.1/Cs1g207 | 6    | 0 | 0    | 2 | MASCOT | T      | PLEX8 |       |
| 5.05E-03 | 0 0 | Cs1g20720.1/Cs1g207 | 6    | 0 | 0    | 2 | MASCOT | T      |       |       |
| 6.58E-02 | 0 0 | Cs1g20720.1/Cs1g207 | 3.83 | 0 | 0    | 2 | MASCOT | T      |       |       |
| 3.63E-03 | 0 0 | Cs1g20720.1/Cs1g207 | 3.83 | 0 | 0    | 2 | MASCOT | T      |       |       |
| 1.83E-03 | 0 0 | Cs1g20720.1/Cs1g207 | 3.83 | 0 | 0    | 2 | MASCOT | T      |       |       |
| 4.69E-02 | 0 0 | Cs1g20720.1/Cs1g207 | 5.81 | 0 | 15.9 | 0 | 2      | MASCOT | T     | PLEX8 |
| 1.88E-01 | 0 0 | Cs1g20720.1/Cs1g207 | 5.81 | 0 | 15.9 | 0 | 2      | MASCOT | T     | PLEX8 |
| 2.56E-03 | 0 0 | Cs1g20720.1/Cs1g207 | 5.81 | 0 | 15.9 | 0 | 2      | MASCOT | T     | PLEX8 |
| 8.24E-03 | 0 0 | Cs1g20720.1/Cs1g207 | 5.81 | 0 | 15.9 | 0 | 2      | MASCOT | T     | PLEX8 |
| 2.02E-01 | 0 0 | Cs1g20720.1/Cs1g207 | 5.81 | 0 | 15.9 | 0 | 2      | MASCOT | T     | PLEX8 |
| 2.92E-01 | 0 0 | Cs1g20720.1/Cs1g207 | 5.81 | 0 | 15.9 | 0 | 2      | MASCOT | T     |       |
| 5.85E-02 | 0 0 | Cs1g20720.1/Cs1g207 | 5.81 | 0 | 15.9 | 0 | 2      | MASCOT | T     |       |
| 2.41E-02 | 0 0 | Cs1g20720.1/Cs1g207 | 5.81 | 0 | 15.9 | 0 | 2      | MASCOT | T     |       |
| 2.72E-02 | 0 0 | Cs1g20720.1/Cs1g207 | 5.81 | 0 | 15.9 | 0 | 2      | MASCOT | T     | PLEX8 |
| 4.00E-01 | 0 0 | Cs1g20720.1/Cs1g207 | 5.81 | 0 | 0    | 2 | MASCOT | T      | PLEX8 |       |
| 6.51E-05 | 0 0 | Cs1g20720.1/Cs1g207 | 5.81 | 0 | 0    | 2 | MASCOT | T      | PLEX8 |       |
| 1.17E-02 | 0 0 | Cs1g20720.1/Cs1g207 | 5.81 | 0 | 0    | 2 | MASCOT | T      | PLEX8 |       |
| 5.23E-02 | 0 0 | Cs1g20720.1/Cs1g207 | 5.81 | 0 | 0    | 2 | MASCOT | T      | PLEX8 |       |
| 1.82E-01 | 0 0 | Cs1g20720.1/Cs1g207 | 5.81 | 0 | 0    | 2 | MASCOT | T      | PLEX8 |       |
| 3.35E-01 | 0 0 | Cs1g20720.1/Cs1g207 | 4.49 | 0 | 0    | 2 | MASCOT | T      | PLEX8 |       |
| 8.22E-02 | 0 0 | Cs1g20720.1/Cs1g207 | 5.84 | 0 | 15.9 | 0 | 2      | MASCOT | T     | PLEX8 |
| 2.54E-02 | 0 0 | Cs1g20720.1/Cs1g207 | 5.84 | 0 | 0    | 2 | MASCOT | T      | PLEX8 |       |
| 1.57E-02 | 0 0 | Cs1g20720.1/Cs1g207 | 5.84 | 0 | 0    | 2 | MASCOT | T      | PLEX8 |       |
| 1.08E-03 | 0 0 | Cs1g20720.2         | 6.14 | 1 | 0    | 2 | MASCOT | T      | PLEX8 |       |
| 1.01E-02 | 0 0 | Cs1g20720.2         | 6.14 | 1 | 0    | 2 | MASCOT | T      | PLEX8 |       |
| 3.14E-02 | 0 0 | Cs1g20720.2         | 6.74 | 0 | 0    | 2 | MASCOT | T      |       |       |
| 9.16E-04 | 0 0 | Cs1g20720.2         | 6.74 | 0 | 0    | 2 | MASCOT | T      |       |       |
| 3.49E-01 | 0 0 | Cs1g20720.1/Cs1g207 | 6    | 0 | 0    | 2 | MASCOT | T      | PLEX8 |       |
| 9.59E-02 | 0 0 | Cs1g20720.1/Cs1g207 | 6    | 0 | 0    | 2 | MASCOT | T      | PLEX8 |       |
| 5.32E-01 | 0 0 | Cs1g20720.1/Cs1g207 | 6    | 0 | 0    | 2 | MASCOT | T      | PLEX8 |       |
| 1.26E-01 | 0 0 | Cs1g20720.1/Cs1g207 | 6    | 0 | 0    | 2 | MASCOT | T      | PLEX8 |       |
| 3.83E-01 | 0 0 | Cs1g20720.1/Cs1g207 | 8.23 | 0 | 0    | 2 | MASCOT | T      |       |       |
| 7.22E-02 | 0 0 | Cs1g20720.1/Cs1g207 | 4.25 | 0 | 0    | 2 | MASCOT | T      | PLEX8 |       |
| 2.28E-03 | 0 0 | Cs1g20720.1/Cs1g207 | 4.25 | 0 | 0    | 2 | MASCOT | T      | PLEX8 |       |
| 1.10E-01 | 0 0 | Cs1g20720.1/Cs1g207 | 4.25 | 0 | 0    | 2 | MASCOT | T      | PLEX8 |       |



|          |     |                     |      |   |   |   |        |   |       |
|----------|-----|---------------------|------|---|---|---|--------|---|-------|
| 2.25E-01 | 0 0 | Cs1g20720.1/Cs1g207 | 4.25 | 0 | 0 | 2 | MASCOT | T | PLEX8 |
| 1.00E-01 | 0 0 | Cs1g20720.1/Cs1g207 | 4.25 | 0 | 0 | 2 | MASCOT | T | PLEX8 |
| 3.92E-03 | 0 0 | Cs1g20720.1/Cs1g207 | 4.25 | 0 | 0 | 2 | MASCOT | T | PLEX8 |
| 8.71E-04 | 0 0 | Cs1g20720.1/Cs1g207 | 4.25 | 0 | 0 | 2 | MASCOT | T | PLEX8 |
| 1.12E-01 | 0 0 | Cs1g20720.1/Cs1g207 | 4.25 | 0 | 0 | 2 | MASCOT | T | PLEX8 |
| 1.62E-03 | 0 0 | Cs1g20720.1/Cs1g207 | 4.25 | 0 | 0 | 2 | MASCOT | T | PLEX8 |
| 1.77E-02 | 0 0 | Cs1g20720.1/Cs1g207 | 4.25 | 0 | 0 | 2 | MASCOT | T | PLEX8 |
| 8.20E-02 | 0 0 | Cs1g20720.1/Cs1g207 | 4.25 | 0 | 0 | 2 | MASCOT | T | PLEX8 |
| 6.44E-01 | 0 0 | Cs7g10360.1/Cs7g103 | 6.05 | 0 | 0 | 2 | MASCOT | T | PLEX8 |
| 7.93E-03 | 0 0 | Cs7g10360.1/Cs7g103 | 5.84 | 0 | 0 | 2 | MASCOT | T | PLEX8 |
| 4.35E-02 | 0 0 | Cs7g10360.1         | 6.1  | 0 | 0 | 2 | MASCOT | T | PLEX8 |
| 1.45E-01 | 0 0 | Cs7g10360.1         | 6.1  | 0 | 0 | 2 | MASCOT | T | PLEX8 |
| 2.50E-01 | 0 0 | Cs7g10360.1         | 6.1  | 0 | 0 | 2 | MASCOT | T | PLEX8 |
| 2.20E-01 | 0 0 | Cs7g10360.1         | 6.1  | 0 | 0 | 2 | MASCOT | T | PLEX8 |
| 1.40E-01 | 0 0 | Cs7g10360.1         | 6.1  | 0 | 0 | 2 | MASCOT | T | PLEX8 |
| 6.78E-02 | 0 0 | Cs7g10360.1         | 6.1  | 0 | 0 | 2 | MASCOT | T | PLEX8 |
| 4.69E-02 | 0 0 | Cs7g10360.1/Cs7g103 | 4.37 | 0 | 0 | 2 | MASCOT | T | PLEX8 |
| 2.52E-02 | 0 0 | Cs7g10360.1/Cs7g103 | 4.32 | 0 | 0 | 2 | MASCOT | T | PLEX8 |
| 2.79E-02 | 0 0 | Cs7g10360.1/Cs7g103 | 4.25 | 0 | 0 | 2 | MASCOT | T | PLEX8 |
| 6.50E-04 | 0 0 | Cs7g10360.1/Cs7g103 | 4.25 | 0 | 0 | 2 | MASCOT | T | PLEX8 |
| 1.12E-01 | 0 0 | Cs7g10360.1/Cs7g103 | 4.25 | 0 | 0 | 2 | MASCOT | T | PLEX8 |
| 4.79E-03 | 0 0 | Cs7g10360.1         | 8.75 | 0 | 0 | 2 | MASCOT | T | PLEX8 |
| 5.24E-03 | 0 0 | Cs7g10360.1         | 8.75 | 0 | 0 | 2 | MASCOT | T | PLEX8 |
| 1.21E-02 | 0 0 | Cs7g10360.1/Cs7g103 | 9.76 | 0 | 0 | 2 | MASCOT | T | PLEX8 |
| 4.86E-02 | 0 0 | Cs7g10360.1         | 8.59 | 0 | 0 | 2 | MASCOT | T | PLEX8 |
| 6.75E-03 | 0 0 | Cs7g10360.1         | 8.59 | 0 | 0 | 2 | MASCOT | T | PLEX8 |
| 2.20E-02 | 0 0 | Cs7g10360.1         | 8.59 | 0 | 0 | 2 | MASCOT | T | PLEX8 |
| 2.06E-02 | 0 0 | Cs7g10360.1         | 8.59 | 0 | 0 | 2 | MASCOT | T | PLEX8 |
| 3.24E-01 | 0 0 | Cs7g10360.1         | 8.59 | 0 | 0 | 2 | MASCOT | T | PLEX8 |
| 3.32E-01 | 0 0 | Cs7g10360.1         | 8.59 | 0 | 0 | 2 | MASCOT | T | PLEX8 |
| 9.95E-02 | 0 0 | Cs7g10360.1         | 8.59 | 0 | 0 | 2 | MASCOT | T | PLEX8 |
| 1.06E-02 | 0 0 | Cs7g10360.1         | 8.59 | 0 | 0 | 2 | MASCOT | T | PLEX8 |
| 2.11E-02 | 0 0 | Cs7g10360.1         | 8.59 | 0 | 0 | 2 | MASCOT | T | PLEX8 |
| 4.32E-03 | 0 0 | Cs7g10360.1         | 8.59 | 0 | 0 | 2 | MASCOT | T | PLEX8 |
| 1.74E-02 | 0 0 | Cs7g10360.1         | 4.37 | 0 | 0 | 2 | MASCOT | T | PLEX8 |
| 2.78E-04 | 0 0 | Cs7g10360.1         | 4.37 | 0 | 0 | 2 | MASCOT | T |       |
| 2.52E-01 | 0 0 | Cs7g10360.1         | 6    | 0 | 0 | 2 | MASCOT | T | PLEX8 |
| 3.21E-02 | 0 0 | Cs7g10360.1         | 4    | 0 | 0 | 2 | MASCOT | T | PLEX8 |
| 8.38E-02 | 0 0 | Cs7g10360.1         | 4    | 0 | 0 | 2 | MASCOT | T | PLEX8 |
| 1.83E-02 | 0 0 | Cs7g10360.1         | 4    | 0 | 0 | 2 | MASCOT | T | PLEX8 |
| 8.84E-02 | 0 0 | Cs7g10360.1         | 8.6  | 0 | 0 | 2 | MASCOT | T | PLEX8 |
| 2.90E-05 | 0 0 | Cs7g10360.1         | 6    | 0 | 0 | 2 | MASCOT | T | PLEX8 |
| 2.85E-05 | 0 0 | Cs7g10360.1         | 6    | 0 | 0 | 2 | MASCOT | T | PLEX8 |
| 2.82E-03 | 0 0 | Cs7g10360.1         | 6.07 | 1 | 0 | 2 | MASCOT | T | PLEX8 |
| 1.87E-01 | 0 0 | Cs7g10360.1/Cs7g103 | 8.26 | 0 | 0 | 2 | MASCOT | T | PLEX8 |
| 3.49E-01 | 0 0 | Cs7g10360.1/Cs7g103 | 8.26 | 0 | 0 | 2 | MASCOT | T | PLEX8 |
| 6.59E-04 | 0 0 | Cs7g10360.1/Cs7g103 | 6    | 0 | 0 | 2 | MASCOT | T | PLEX8 |
| 1.30E-02 | 0 0 | Cs7g10360.1/Cs7g103 | 6    | 0 | 0 | 2 | MASCOT | T | PLEX8 |
| 2.25E-02 | 0 0 | Cs7g10360.1/Cs7g103 | 6    | 0 | 0 | 2 | MASCOT | T | PLEX8 |
| 3.32E-03 | 0 0 | Cs7g10360.1/Cs7g103 | 6    | 0 | 0 | 2 | MASCOT | T | PLEX8 |
| 2.32E-02 | 0 0 | Cs7g10360.1/Cs7g103 | 6    | 0 | 0 | 2 | MASCOT | T | PLEX8 |

|          |     |                       |      |   |      |   |        |        |       |
|----------|-----|-----------------------|------|---|------|---|--------|--------|-------|
| 3.80E-02 | 0 0 | Cs7g10360.1/Cs7g103   | 6    | 0 | 0    | 2 | MASCOT | T      | PLEX8 |
| 1.27E-01 | 0 0 | Cs7g10360.1/Cs7g103   | 6    | 0 | 0    | 2 | MASCOT | T      | PLEX8 |
| 3.93E-01 | 0 0 | Cs1g17380.1/Cs1g173   | 6    | 0 | 0    | 2 | MASCOT | T      | PLEX8 |
| 7.17E-03 | 0 0 | Cs3g26260.1/Cs3g262   | 5.32 | 0 | 0    | 2 | MASCOT | T      | PLEX8 |
| 1.75E-02 | 0 0 | Cs3g26260.1/Cs3g262   | 5.32 | 0 | 0    | 2 | MASCOT | T      | PLEX8 |
| 9.18E-02 | 0 0 | Cs3g26260.1/Cs3g262   | 5.32 | 0 | 0    | 2 | MASCOT | T      | PLEX8 |
| 4.14E-02 | 0 0 | Cs3g26260.1/Cs3g262   | 8.8  | 0 | 0    | 2 | MASCOT | T      | PLEX8 |
| 3.96E-02 | 0 0 | Cs3g26260.1/Cs3g262   | 8.8  | 0 | 0    | 2 | MASCOT | T      | PLEX8 |
| 8.89E-02 | 0 0 | Cs3g26260.1/Cs3g262   | 8.8  | 0 | 0    | 2 | MASCOT | T      | PLEX8 |
| 1.32E-02 | 0 0 | Cs3g26260.1/Cs3g262   | 5.84 | 0 | 0    | 2 | MASCOT | T      | PLEX8 |
| 6.44E-02 | 0 0 | Cs3g26260.1/Cs3g262   | 5.84 | 0 | 0    | 2 | MASCOT | T      | PLEX8 |
| 5.04E-04 | 0 0 | Cs3g26260.1/Cs3g262   | 5.84 | 0 | 0    | 2 | MASCOT | T      | PLEX8 |
| 6.02E-02 | 0 0 | Cs3g26260.1/Cs3g262   | 5.84 | 0 | 0    | 2 | MASCOT | T      |       |
| 1.39E-03 | 0 0 | Cs3g26260.1/Cs3g262   | 4.09 | 0 | 0    | 2 | MASCOT | T      | PLEX8 |
| 4.13E-02 | 0 0 | Cs3g26260.1/Cs3g262   | 4.09 | 0 | 0    | 2 | MASCOT | T      | PLEX8 |
| 2.04E-03 | 0 0 | Cs3g26260.1/Cs3g262   | 4.09 | 0 | 0    | 2 | MASCOT | T      | PLEX8 |
| 1.42E-01 | 0 0 | Cs3g26260.1/Cs3g262   | 8.6  | 0 | 0    | 2 | MASCOT | T      | PLEX8 |
| 2.68E-01 | 0 0 | Cs3g26260.1/Cs3g262   | 8.6  | 0 | 0    | 2 | MASCOT | T      |       |
| 2.90E-04 | 0 0 | Cs3g26260.1/Cs3g262   | 4.03 | 0 | 0    | 2 | MASCOT | T      | PLEX8 |
| 7.33E-02 | 0 0 | Cs3g26260.1/Cs3g262   | 3.83 | 0 | 0    | 2 | MASCOT | T      | PLEX8 |
| 3.42E-01 | 0 0 | Cs3g26260.1/Cs3g262   | 6    | 0 | 0    | 2 | MASCOT | T      | PLEX8 |
| 3.44E-02 | 0 0 | Cs3g26260.1/Cs3g262   | 4.37 | 0 | 0    | 2 | MASCOT | T      |       |
| 4.51E-03 | 0 0 | Cs3g26260.1/Cs3g262   | 5.84 | 0 | 0    | 2 | MASCOT | T      |       |
| 1.61E-01 | 0 0 | Cs3g26260.1/Cs3g262   | 5.84 | 0 | 0    | 2 | MASCOT | T      |       |
| 7.33E-03 | 0 0 | Cs3g26260.1/Cs3g262   | 5.72 | 0 | 0    | 2 | MASCOT | T      | PLEX8 |
| 5.36E-02 | 0 0 | Cs3g26260.1/Cs3g262   | 5.72 | 0 | 0    | 2 | MASCOT | T      | PLEX8 |
| 1.02E-04 | 0 0 | Cs3g26260.1/Cs3g262   | 3.91 | 0 | 0    | 2 | MASCOT | T      | PLEX8 |
| 7.39E-05 | 0 0 | Cs2g19730.1/Cs2g197   | 4.03 | 0 | 0    | 2 | MASCOT | T      | PLEX8 |
| 2.02E-04 | 0 0 | Cs2g19730.1/Cs2g197   | 4.03 | 0 | 0    | 2 | MASCOT | T      | PLEX8 |
| 2.24E-02 | 0 0 | Cs3g26260.1/Cs3g262   | 6.85 | 0 | 0    | 2 | MASCOT | T      | PLEX8 |
| 2.10E-01 | 0 0 | Cs3g26260.1/Cs3g262   | 5.84 | 0 | 0    | 2 | MASCOT | T      | PLEX8 |
| 3.42E-01 | 0 0 | Cs3g26260.1/Cs3g262   | 5.84 | 0 | 0    | 2 | MASCOT | T      | PLEX8 |
| 1.38E-02 | 0 0 | Cs3g26260.1/Cs3g262   | 5.84 | 0 | 0    | 2 | MASCOT | T      | PLEX8 |
| 4.67E-01 | 0 0 | Cs3g26260.1/Cs3g262   | 5.83 | 0 | 0    | 2 | MASCOT | T      | PLEX8 |
| 2.05E-02 | 0 0 | Cs3g26260.1/Cs3g262   | 5.83 | 0 | 0    | 2 | MASCOT | T      | PLEX8 |
| 3.68E-01 | 0 0 | Cs3g26260.1/Cs3g262   | 5.83 | 0 | 0    | 2 | MASCOT | T      | PLEX8 |
| 2.56E-01 | 0 0 | orange1.1t01800.1/ora | 8.75 | 0 | 0    | 2 | MASCOT | T      | PLEX8 |
| 1.03E-03 | 0 0 | Cs3g26260.1/Cs3g262   | 3.92 | 0 | 0    | 2 | MASCOT | T      |       |
| 1.10E-02 | 0 0 | Cs5g15920.1/Cs5g159   | 3.84 | 0 | 15.9 | 0 | 2      | MASCOT | T     |
| 3.82E-03 | 0 0 | Cs5g15920.1/Cs5g159   | 3.84 | 0 | 15.9 | 0 | 2      | MASCOT | T     |
| 5.43E-05 | 0 0 | Cs5g15920.1/Cs5g159   | 3.84 | 0 | 0    | 2 | MASCOT | T      |       |
| 1.74E-02 | 0 0 | Cs5g15920.1/Cs5g159   | 5.84 | 0 | 0    | 2 | MASCOT | T      | PLEX8 |
| 3.63E-03 | 0 0 | Cs5g15920.1/Cs5g159   | 4.25 | 0 | 0    | 2 | MASCOT | T      | PLEX8 |
| 2.90E-02 | 0 0 | Cs5g15920.1/Cs5g159   | 4.25 | 0 | 0    | 2 | MASCOT | T      | PLEX8 |
| 7.74E-03 | 0 0 | Cs9g17940.1           | 4    | 1 | 0    | 2 | MASCOT | T      | PLEX8 |
| 4.72E-02 | 0 0 | Cs9g17940.1           | 4    | 1 | 0    | 2 | MASCOT | T      | PLEX8 |
| 9.20E-03 | 0 0 | Cs5g15920.1/Cs5g159   | 5.32 | 0 | 0    | 2 | MASCOT | T      | PLEX8 |
| 2.91E-03 | 0 0 | Cs5g15920.1/Cs5g159   | 9.75 | 0 | 0    | 2 | MASCOT | T      | PLEX8 |
| 1.48E-01 | 0 0 | Cs5g15920.1/Cs5g159   | 9.75 | 0 | 0    | 2 | MASCOT | T      | PLEX8 |
| 2.62E-01 | 0 0 | Cs5g15920.1/Cs5g159   | 6    | 0 | 0    | 2 | MASCOT | T      | PLEX8 |
| 1.30E-02 | 0 0 | Cs5g15920.1/Cs5g159   | 6    | 0 | 0    | 2 | MASCOT | T      | PLEX8 |

|          |     |                      |      |   |      |   |        |         |         |
|----------|-----|----------------------|------|---|------|---|--------|---------|---------|
| 1.55E-01 | 0 0 | Cs5g15920.1/Cs5g159  | 6    | 0 | 0    | 2 | MASCOT | T       |         |
| 1.83E-01 | 0 0 | Cs5g15920.1/Cs5g159  | 4.14 | 0 | 0    | 2 | MASCOT | T PLEX8 |         |
| 1.07E-01 | 0 0 | Cs5g15920.1/Cs5g159  | 6    | 0 | 0    | 2 | MASCOT | T PLEX8 |         |
| 5.63E-01 | 0 0 | Cs5g15920.1/Cs5g159  | 6    | 0 | 0    | 2 | MASCOT | T PLEX8 |         |
| 1.11E-01 | 0 0 | Cs9g17940.1          | 8.22 | 0 | 0    | 2 | MASCOT | T PLEX8 |         |
| 9.60E-02 | 0 0 | Cs9g17940.1          | 8.22 | 0 | 0    | 2 | MASCOT | T PLEX8 |         |
| 1.43E-02 | 0 0 | Cs5g15920.1/Cs5g159  | 5.55 | 0 | 0    | 2 | MASCOT | T PLEX8 |         |
| 1.88E-01 | 0 0 | Cs5g15920.1/Cs5g159  | 5.81 | 0 | 0    | 2 | MASCOT | T PLEX8 |         |
| 8.42E-05 | 0 0 | Cs9g17940.1          | 4.32 | 1 | 0    | 2 | MASCOT | T       |         |
| 2.87E-01 | 0 0 | Cs5g15920.1/Cs5g159  | 9.75 | 0 | 0    | 2 | MASCOT | T PLEX8 |         |
| 3.55E-01 | 0 0 | Cs5g15920.1/Cs5g159  | 6.76 | 0 | 0    | 2 | MASCOT | T PLEX8 |         |
| 2.69E-01 | 0 0 | Cs5g15920.1/Cs5g159  | 6    | 0 | 15.9 | 0 | 2      | MASCOT  | T PLEX8 |
| 3.46E-01 | 0 0 | Cs5g15920.1/Cs5g159  | 6    | 0 | 0    | 2 | MASCOT | T PLEX8 |         |
| 1.70E-01 | 0 0 | Cs5g15920.1/Cs5g159  | 6    | 0 | 0    | 2 | MASCOT | T PLEX8 |         |
| 1.66E-02 | 0 0 | Cs5g15920.1/Cs5g159  | 6    | 0 | 0    | 2 | MASCOT | T PLEX8 |         |
| 3.23E-01 | 0 0 | Cs9g17940.1          | 4.37 | 0 | 0    | 2 | MASCOT | T PLEX8 |         |
| 7.72E-02 | 0 0 | Cs9g17940.1          | 4.37 | 0 | 0    | 2 | MASCOT | T PLEX8 |         |
| 1.31E-01 | 0 0 | Cs9g17940.1          | 5.83 | 0 | 15.9 | 0 | 2      | MASCOT  | T PLEX8 |
| 2.29E-01 | 0 0 | Cs9g17940.1          | 5.83 | 0 | 0    | 2 | MASCOT | T PLEX8 |         |
| 3.12E-02 | 0 0 | Cs5g15920.1/Cs5g159  | 6.92 | 0 | 0    | 2 | MASCOT | T PLEX8 |         |
| 1.03E-01 | 0 0 | Cs5g15920.1/Cs5g159  | 6.92 | 0 | 0    | 2 | MASCOT | T PLEX8 |         |
| 1.00E-02 | 0 0 | orange1.1t02948.1    | 6.05 | 0 | 0    | 2 | MASCOT | T       |         |
| 3.32E-01 | 0 0 | orange1.1t02948.1    | 6.05 | 0 | 0    | 2 | MASCOT | T PLEX8 |         |
| 2.40E-02 | 0 0 | orange1.1t02948.1    | 4.37 | 0 | 0    | 2 | MASCOT | T       |         |
| 2.89E-02 | 0 0 | orange1.1t02948.1    | 4.37 | 0 | 0    | 2 | MASCOT | T       |         |
| 2.94E-01 | 0 0 | Cs3g05840.1/orange1. | 6.74 | 0 | 0    | 2 | MASCOT | T       |         |
| 3.52E-03 | 0 0 | Cs3g05840.1/orange1. | 4.37 | 0 | 0    | 2 | MASCOT | T PLEX8 |         |
| 1.03E-03 | 0 0 | Cs3g05840.1/orange1. | 4.37 | 0 | 0    | 2 | MASCOT | T PLEX8 |         |
| 9.80E-04 | 0 0 | Cs3g05840.1/orange1. | 4.37 | 0 | 0    | 2 | MASCOT | T PLEX8 |         |
| 1.09E-03 | 0 0 | orange1.1t02948.1    | 5.4  | 0 | 0    | 2 | MASCOT | T PLEX8 |         |
| 4.04E-02 | 0 0 | orange1.1t02948.1    | 4.53 | 0 | 0    | 2 | MASCOT | T PLEX8 |         |
| 3.16E-01 | 0 0 | orange1.1t02948.1    | 8.23 | 0 | 0    | 2 | MASCOT | T PLEX8 |         |
| 1.05E-02 | 0 0 | orange1.1t02948.1    | 3.92 | 0 | 0    | 2 | MASCOT | T PLEX8 |         |
| 4.47E-03 | 0 0 | orange1.1t02948.1    | 3.92 | 0 | 0    | 2 | MASCOT | T PLEX8 |         |
| 4.33E-02 | 0 0 | orange1.1t02948.1    | 8.8  | 0 | 0    | 2 | MASCOT | T PLEX8 |         |
| 1.64E-01 | 0 0 | orange1.1t02948.1    | 4    | 0 | 0    | 2 | MASCOT | T       |         |
| 1.03E-02 | 0 0 | orange1.1t02948.1    | 6    | 0 | 0    | 2 | MASCOT | T PLEX8 |         |
| 2.12E-01 | 0 0 | orange1.1t02948.1    | 6    | 0 | 0    | 2 | MASCOT | T PLEX8 |         |
| 2.63E-02 | 0 0 | orange1.1t02948.1    | 6    | 0 | 0    | 2 | MASCOT | T PLEX8 |         |
| 3.20E-02 | 0 0 | orange1.1t02948.1    | 6    | 0 | 0    | 2 | MASCOT | T PLEX8 |         |
| 6.43E-02 | 0 0 | orange1.1t02948.1    | 6    | 0 | 0    | 2 | MASCOT | T PLEX8 |         |
| 3.25E-02 | 0 0 | orange1.1t02948.1    | 8.76 | 0 | 0    | 2 | MASCOT | T       |         |
| 1.16E-04 | 0 0 | Cs3g05840.1/orange1. | 9.76 | 0 | 0    | 2 | MASCOT | T PLEX8 |         |
| 6.43E-03 | 0 0 | orange1.1t02948.1    | 6    | 0 | 0    | 2 | MASCOT | T PLEX8 |         |
| 4.60E-04 | 0 0 | orange1.1t02948.1    | 5.32 | 0 | 0    | 2 | MASCOT | T PLEX8 |         |
| 1.97E-02 | 0 0 | orange1.1t02948.1    | 5.32 | 0 | 0    | 2 | MASCOT | T       |         |
| 1.90E-02 | 0 0 | orange1.1t02948.1    | 4.14 | 0 | 15.9 | 0 | 2      | MASCOT  | T PLEX8 |
| 4.63E-02 | 0 0 | orange1.1t02948.1    | 4.14 | 0 | 0    | 2 | MASCOT | T       |         |
| 1.16E-01 | 0 0 | orange1.1t02948.1    | 4.21 | 0 | 0    | 2 | MASCOT | T       |         |
| 2.12E-01 | 0 0 | Cs3g05840.1/orange1. | 8.75 | 0 | 0    | 2 | MASCOT | T PLEX8 |         |
| 1.10E-01 | 0 0 | Cs3g05840.1/orange1. | 8.75 | 0 | 0    | 2 | MASCOT | T PLEX8 |         |

|              |             |      |        |   |          |   |       |
|--------------|-------------|------|--------|---|----------|---|-------|
| 3.46E-01 0 0 | Cs8g05060.1 | 6.74 | 0      | 0 | 2 MASCOT | T | PLEX8 |
| 1.26E-01 0 0 | Cs8g05060.1 | 6.74 | 0      | 0 | 2 MASCOT | T | PLEX8 |
| 2.57E-01 0 0 | Cs8g05060.1 | 4.53 | 0      | 0 | 2 MASCOT | T | PLEX8 |
| 1.96E-01 0 0 | Cs8g05060.1 | 4.53 | 0      | 0 | 2 MASCOT | T | PLEX8 |
| 3.75E-02 0 0 | Cs8g05060.1 | 4.53 | 0      | 0 | 2 MASCOT | T | PLEX8 |
| 3.70E-03 0 0 | Cs8g05060.1 | 4.53 | 0      | 0 | 2 MASCOT | T | PLEX8 |
| 6.90E-05 0 0 | Cs8g05060.1 | 4.53 | 0      | 0 | 2 MASCOT | T | PLEX8 |
| 3.12E-05 0 0 | Cs8g05060.1 | 4.53 | 0      | 0 | 2 MASCOT | T | PLEX8 |
| 8.62E-05 0 0 | Cs8g05060.1 | 4.53 | 0      | 0 | 2 MASCOT | T | PLEX8 |
| 2.86E-03 0 0 | Cs8g05060.1 | 4.53 | 0      | 0 | 2 MASCOT | T | PLEX8 |
| 1.91E-04 0 0 | Cs8g05060.1 | 4.53 | 0      | 0 | 2 MASCOT | T | PLEX8 |
| 1.30E-03 0 0 | Cs8g05060.1 | 4.53 | 0      | 0 | 2 MASCOT | T | PLEX8 |
| 3.72E-02 0 0 | Cs8g05060.1 | 4.53 | 0      | 0 | 2 MASCOT | T | PLEX8 |
| 1.85E-02 0 0 | Cs8g05060.1 | 4.53 | 0      | 0 | 2 MASCOT | T | PLEX8 |
| 5.74E-02 0 0 | Cs8g05060.1 | 4.53 | 0      | 0 | 2 MASCOT | T | PLEX8 |
| 7.77E-04 0 0 | Cs8g05060.1 | 4.53 | 0      | 0 | 2 MASCOT | T | PLEX8 |
| 2.72E-02 0 0 | Cs8g05060.1 | 4.53 | 0      | 0 | 2 MASCOT | T | PLEX8 |
| 5.71E-03 0 0 | Cs8g05060.1 | 4.53 | 0      | 0 | 2 MASCOT | T |       |
| 1.05E-02 0 0 | Cs8g05060.1 | 4.53 | 0      | 0 | 2 MASCOT | T | PLEX8 |
| 7.14E-05 0 0 | Cs8g05060.1 | 4.53 | 0      | 0 | 2 MASCOT | T | PLEX8 |
| 4.29E-02 0 0 | Cs8g05060.1 | 4.53 | 0      | 0 | 2 MASCOT | T | PLEX8 |
| 7.20E-04 0 0 | Cs8g05060.1 | 4.53 | 0      | 0 | 2 MASCOT | T | PLEX8 |
| 5.56E-05 0 0 | Cs8g05060.1 | 4.53 | 0      | 0 | 2 MASCOT | T | PLEX8 |
| 1.04E-02 0 0 | Cs8g05060.1 | 5.98 | 0 15.9 | 0 | 2 MASCOT | T | PLEX8 |
| 2.23E-02 0 0 | Cs8g05060.1 | 5.98 | 0 15.9 | 0 | 2 MASCOT | T |       |
| 4.27E-03 0 0 | Cs8g05060.1 | 5.98 | 0 15.9 | 0 | 2 MASCOT | T |       |
| 5.14E-04 0 0 | Cs8g05060.1 | 5.98 | 0 15.9 | 0 | 2 MASCOT | T | PLEX8 |
| 4.97E-03 0 0 | Cs8g05060.1 | 5.98 | 0 15.9 | 0 | 2 MASCOT | T | PLEX8 |
| 6.18E-03 0 0 | Cs8g05060.1 | 5.98 | 0 15.9 | 0 | 2 MASCOT | T | PLEX8 |
| 3.20E-03 0 0 | Cs8g05060.1 | 5.98 | 0 15.9 | 0 | 2 MASCOT | T |       |
| 6.34E-03 0 0 | Cs8g05060.1 | 5.98 | 0 15.9 | 0 | 2 MASCOT | T |       |
| 7.49E-02 0 0 | Cs8g05060.1 | 5.98 | 0      | 0 | 2 MASCOT | T | PLEX8 |
| 4.98E-02 0 0 | Cs8g05060.1 | 5.98 | 0      | 0 | 2 MASCOT | T | PLEX8 |
| 3.18E-03 0 0 | Cs8g05060.1 | 5.98 | 0      | 0 | 2 MASCOT | T |       |
| 7.17E-03 0 0 | Cs8g05060.1 | 5.98 | 0      | 0 | 2 MASCOT | T | PLEX8 |
| 2.46E-02 0 0 | Cs8g05060.1 | 5.98 | 0      | 0 | 2 MASCOT | T |       |
| 2.58E-02 0 0 | Cs8g05060.1 | 5.98 | 0      | 0 | 2 MASCOT | T |       |
| 1.74E-02 0 0 | Cs8g05060.1 | 5.98 | 0      | 0 | 2 MASCOT | T |       |
| 5.02E-03 0 0 | Cs8g05060.1 | 5.98 | 0      | 0 | 2 MASCOT | T | PLEX8 |
| 2.35E-03 0 0 | Cs8g05060.1 | 5.98 | 0      | 0 | 2 MASCOT | T | PLEX8 |
| 4.45E-04 0 0 | Cs8g05060.1 | 5.98 | 0      | 0 | 2 MASCOT | T |       |
| 8.26E-02 0 0 | Cs8g05060.1 | 5.98 | 0      | 0 | 2 MASCOT | T | PLEX8 |
| 5.24E-03 0 0 | Cs8g05060.1 | 5.98 | 0      | 0 | 2 MASCOT | T | PLEX8 |
| 1.01E-01 0 0 | Cs8g05060.1 | 5.98 | 0      | 0 | 2 MASCOT | T |       |
| 4.19E-03 0 0 | Cs8g05060.1 | 5.98 | 0      | 0 | 2 MASCOT | T |       |
| 4.91E-06 0 0 | Cs8g05060.1 | 5.98 | 0      | 0 | 2 MASCOT | T |       |
| 1.58E-01 0 0 | Cs8g05060.1 | 5.32 | 0 15.9 | 0 | 2 MASCOT | T | PLEX8 |
| 1.27E-03 0 0 | Cs8g05060.1 | 5.32 | 0 15.9 | 0 | 2 MASCOT | T | PLEX8 |
| 2.57E-04 0 0 | Cs8g05060.1 | 5.32 | 0 15.9 | 0 | 2 MASCOT | T | PLEX8 |
| 5.55E-03 0 0 | Cs8g05060.1 | 5.32 | 0 15.9 | 0 | 2 MASCOT | T | PLEX8 |
| 1.15E-01 0 0 | Cs8g05060.1 | 5.32 | 0 15.9 | 0 | 2 MASCOT | T | PLEX8 |

|              |                      |      |   |      |   |   |        |   |       |
|--------------|----------------------|------|---|------|---|---|--------|---|-------|
| 1.67E-01 0 0 | Cs8g05060.1          | 5.32 | 0 | 15.9 | 0 | 2 | MASCOT | T | PLEX8 |
| 3.19E-02 0 0 | Cs8g05060.1          | 5.32 | 0 | 15.9 | 0 | 2 | MASCOT | T | PLEX8 |
| 2.04E-01 0 0 | Cs8g05060.1          | 5.32 | 0 | 15.9 | 0 | 2 | MASCOT | T | PLEX8 |
| 1.86E-05 0 0 | Cs8g05060.1          | 5.32 | 0 | 15.9 | 0 | 2 | MASCOT | T | PLEX8 |
| 1.07E-05 0 0 | Cs8g05060.1          | 5.32 | 0 | 15.9 | 0 | 2 | MASCOT | T | PLEX8 |
| 4.06E-04 0 0 | Cs8g05060.1          | 5.32 | 0 | 15.9 | 0 | 2 | MASCOT | T | PLEX8 |
| 4.28E-02 0 0 | Cs8g05060.1          | 5.32 | 0 | 15.9 | 0 | 2 | MASCOT | T |       |
| 2.21E-05 0 0 | Cs8g05060.1          | 5.32 | 0 |      | 0 | 2 | MASCOT | T | PLEX8 |
| 3.72E-04 0 0 | Cs8g05060.1          | 5.32 | 0 |      | 0 | 2 | MASCOT | T | PLEX8 |
| 3.02E-04 0 0 | Cs8g05060.1          | 5.32 | 0 |      | 0 | 2 | MASCOT | T | PLEX8 |
| 5.01E-01 0 0 | Cs8g05060.1          | 6.75 | 0 |      | 0 | 2 | MASCOT | T | PLEX8 |
| 3.18E-02 0 0 | Cs8g05060.1          | 6.75 | 0 |      | 0 | 2 | MASCOT | T | PLEX8 |
| 2.76E-02 0 0 | Cs8g05060.1          | 6.75 | 0 |      | 0 | 2 | MASCOT | T |       |
| 3.52E-02 0 0 | Cs8g05060.1          | 6.75 | 0 |      | 0 | 2 | MASCOT | T | PLEX8 |
| 1.39E-01 0 0 | Cs8g05060.1          | 8.41 | 0 |      | 0 | 2 | MASCOT | T | PLEX8 |
| 6.87E-03 0 0 | Cs8g05060.1          | 8.41 | 0 |      | 0 | 2 | MASCOT | T | PLEX8 |
| 4.39E-02 0 0 | Cs8g05060.1          | 8.41 | 0 |      | 0 | 2 | MASCOT | T | PLEX8 |
| 2.24E-02 0 0 | Cs8g05060.1          | 8.41 | 0 |      | 0 | 2 | MASCOT | T | PLEX8 |
| 2.71E-03 0 0 | Cs8g05060.1          | 8.41 | 0 |      | 0 | 2 | MASCOT | T | PLEX8 |
| 5.76E-04 0 0 | Cs8g05060.1          | 8.41 | 0 |      | 0 | 2 | MASCOT | T | PLEX8 |
| 3.35E-03 0 0 | Cs8g05060.1          | 8.41 | 0 |      | 0 | 2 | MASCOT | T |       |
| 8.26E-03 0 0 | Cs8g05060.1          | 8.41 | 0 |      | 0 | 2 | MASCOT | T |       |
| 2.13E-01 0 0 | Cs8g05060.1/orange1. | 5.97 | 0 |      | 0 | 2 | MASCOT | T | PLEX8 |
| 7.00E-02 0 0 | Cs8g05060.1          | 4.37 | 0 |      | 0 | 2 | MASCOT | T | PLEX8 |
| 4.70E-02 0 0 | Cs8g05060.1          | 4.37 | 0 |      | 0 | 2 | MASCOT | T | PLEX8 |
| 1.66E-02 0 0 | Cs8g05060.1          | 4.37 | 0 |      | 0 | 2 | MASCOT | T | PLEX8 |
| 7.98E-03 0 0 | Cs8g05060.1          | 4.37 | 0 |      | 0 | 2 | MASCOT | T | PLEX8 |
| 3.13E-03 0 0 | Cs8g05060.1          | 4.37 | 0 |      | 0 | 2 | MASCOT | T | PLEX8 |
| 2.26E-02 0 0 | Cs8g05060.1          | 4.37 | 0 |      | 0 | 2 | MASCOT | T | PLEX8 |
| 9.54E-04 0 0 | Cs8g05060.1          | 4.37 | 0 |      | 0 | 2 | MASCOT | T | PLEX8 |
| 3.15E-03 0 0 | Cs8g05060.1          | 4.37 | 0 |      | 0 | 2 | MASCOT | T | PLEX8 |
| 1.13E-02 0 0 | Cs8g05060.1          | 4.37 | 0 |      | 0 | 2 | MASCOT | T | PLEX8 |
| 1.05E-01 0 0 | Cs8g05060.1          | 4.37 | 0 |      | 0 | 2 | MASCOT | T | PLEX8 |
| 8.01E-02 0 0 | Cs8g05060.1          | 4.37 | 0 |      | 0 | 2 | MASCOT | T | PLEX8 |
| 6.69E-03 0 0 | Cs8g05060.1          | 4.37 | 0 |      | 0 | 2 | MASCOT | T | PLEX8 |
| 5.20E-02 0 0 | Cs8g05060.1          | 4.37 | 0 |      | 0 | 2 | MASCOT | T | PLEX8 |
| 1.21E-01 0 0 | Cs8g05060.1          | 4.37 | 0 |      | 0 | 2 | MASCOT | T | PLEX8 |
| 1.90E-01 0 0 | Cs8g05060.1          | 4.37 | 0 |      | 0 | 2 | MASCOT | T | PLEX8 |
| 9.59E-02 0 0 | Cs8g05060.1          | 4.37 | 0 |      | 0 | 2 | MASCOT | T | PLEX8 |
| 1.59E-01 0 0 | Cs8g05060.1          | 4.37 | 0 |      | 0 | 2 | MASCOT | T | PLEX8 |
| 5.47E-02 0 0 | Cs8g05060.1          | 4.37 | 0 |      | 0 | 2 | MASCOT | T | PLEX8 |
| 1.30E-01 0 0 | Cs8g05060.1          | 4.37 | 0 |      | 0 | 2 | MASCOT | T | PLEX8 |
| 2.81E-03 0 0 | Cs8g05060.1          | 4.37 | 0 |      | 0 | 2 | MASCOT | T | PLEX8 |
| 6.82E-02 0 0 | Cs8g05060.1          | 8.72 | 0 |      | 0 | 2 | MASCOT | T | PLEX8 |
| 5.63E-02 0 0 | Cs8g05060.1          | 8.72 | 0 |      | 0 | 2 | MASCOT | T | PLEX8 |
| 7.83E-03 0 0 | Cs8g05060.1/orange1. | 8.59 | 0 |      | 0 | 2 | MASCOT | T | PLEX8 |
| 7.31E-02 0 0 | Cs8g05060.1/orange1. | 8.59 | 0 |      | 0 | 2 | MASCOT | T | PLEX8 |
| 7.76E-02 0 0 | Cs8g05060.1/orange1. | 8.59 | 0 |      | 0 | 2 | MASCOT | T | PLEX8 |
| 1.07E-02 0 0 | Cs8g05060.1/orange1. | 8.59 | 0 |      | 0 | 2 | MASCOT | T | PLEX8 |
| 1.95E-01 0 0 | Cs8g05060.1/orange1. | 8.59 | 0 |      | 0 | 2 | MASCOT | T | PLEX8 |
| 6.93E-02 0 0 | Cs8g05060.1/orange1. | 8.59 | 0 |      | 0 | 2 | MASCOT | T | PLEX8 |

|          |     |                      |      |   |      |   |        |        |       |       |
|----------|-----|----------------------|------|---|------|---|--------|--------|-------|-------|
| 7.43E-02 | 0 0 | Cs8g05060.1/orange1. | 8.59 | 0 | 0    | 2 | MASCOT | T      | PLEX8 |       |
| 6.97E-02 | 0 0 | Cs8g05060.1/orange1. | 8.59 | 0 | 0    | 2 | MASCOT | T      | PLEX8 |       |
| 9.90E-03 | 0 0 | Cs8g05060.1/orange1. | 8.59 | 0 | 0    | 2 | MASCOT | T      | PLEX8 |       |
| 1.48E-01 | 0 0 | Cs8g05060.1/orange1. | 8.59 | 0 | 0    | 2 | MASCOT | T      | PLEX8 |       |
| 3.69E-02 | 0 0 | Cs8g05060.1/orange1. | 8.59 | 0 | 0    | 2 | MASCOT | T      | PLEX8 |       |
| 2.10E-01 | 0 0 | Cs8g05060.1/orange1. | 8.59 | 0 | 0    | 2 | MASCOT | T      | PLEX8 |       |
| 5.79E-03 | 0 0 | Cs8g05060.1/orange1. | 8.59 | 0 | 0    | 2 | MASCOT | T      | PLEX8 |       |
| 4.08E-01 | 0 0 | Cs8g05060.1/orange1. | 8.59 | 0 | 0    | 2 | MASCOT | T      |       |       |
| 1.29E-02 | 0 0 | Cs8g05060.1/orange1. | 8.59 | 0 | 0    | 2 | MASCOT | T      | PLEX8 |       |
| 6.53E-03 | 0 0 | Cs8g05060.1/orange1. | 8.59 | 0 | 0    | 2 | MASCOT | T      | PLEX8 |       |
| 1.74E-01 | 0 0 | Cs8g05060.1/orange1. | 8.59 | 0 | 0    | 2 | MASCOT | T      | PLEX8 |       |
| 1.60E-02 | 0 0 | Cs8g05060.1/orange1. | 8.59 | 0 | 0    | 2 | MASCOT | T      | PLEX8 |       |
| 1.74E-01 | 0 0 | Cs8g05060.1/orange1. | 8.59 | 0 | 0    | 2 | MASCOT | T      |       |       |
| 1.08E-01 | 0 0 | Cs8g05060.1/orange1. | 8.59 | 0 | 0    | 2 | MASCOT | T      |       |       |
| 9.21E-03 | 0 0 | Cs8g05060.1/orange1. | 8.59 | 0 | 0    | 2 | MASCOT | T      | PLEX8 |       |
| 3.09E-03 | 0 0 | Cs8g05060.1/orange1. | 8.59 | 0 | 0    | 2 | MASCOT | T      | PLEX8 |       |
| 1.23E-01 | 0 0 | Cs8g05060.1          | 5.88 | 0 | 0    | 2 | MASCOT | T      | PLEX8 |       |
| 4.64E-01 | 0 0 | Cs8g05060.1          | 5.88 | 0 | 0    | 2 | MASCOT | T      | PLEX8 |       |
| 2.99E-02 | 0 0 | Cs8g05060.1          | 3.93 | 0 | 0    | 2 | MASCOT | T      |       |       |
| 6.58E-02 | 0 0 | Cs8g05060.1          | 3.93 | 0 | 0    | 2 | MASCOT | T      |       |       |
| 2.12E-02 | 0 0 | Cs8g05060.1          | 4.37 | 0 | 0    | 2 | MASCOT | T      | PLEX8 |       |
| 1.23E-02 | 0 0 | Cs8g05060.1          | 4.37 | 0 | 0    | 2 | MASCOT | T      | PLEX8 |       |
| 1.58E-02 | 0 0 | Cs8g05060.1          | 4.37 | 0 | 0    | 2 | MASCOT | T      | PLEX8 |       |
| 3.37E-02 | 0 0 | Cs8g05060.1          | 4.37 | 0 | 0    | 2 | MASCOT | T      |       |       |
| 8.04E-03 | 0 0 | Cs8g05060.1          | 4.37 | 0 | 0    | 2 | MASCOT | T      |       |       |
| 2.26E-02 | 0 0 | Cs8g05060.1/orange1. | 4.14 | 0 | 0    | 2 | MASCOT | T      | PLEX8 |       |
| 6.82E-02 | 0 0 | Cs8g05060.1/orange1. | 4.14 | 0 | 0    | 2 | MASCOT | T      | PLEX8 |       |
| 1.26E-02 | 0 0 | Cs8g05060.1/orange1. | 4.14 | 0 | 0    | 2 | MASCOT | T      | PLEX8 |       |
| 3.54E-04 | 0 0 | Cs8g05060.1/orange1. | 4.14 | 0 | 0    | 2 | MASCOT | T      |       |       |
| 1.65E-05 | 0 0 | Cs8g05060.1/orange1. | 4.14 | 0 | 0    | 2 | MASCOT | T      |       |       |
| 9.12E-02 | 0 0 | Cs8g05060.1/orange1. | 4.14 | 0 | 0    | 2 | MASCOT | T      |       |       |
| 3.09E-02 | 0 0 | Cs8g05060.1/orange1. | 4.14 | 0 | 0    | 2 | MASCOT | T      | PLEX8 |       |
| 6.71E-04 | 0 0 | Cs8g05060.1/orange1. | 4.14 | 0 | 0    | 2 | MASCOT | T      | PLEX8 |       |
| 1.12E-02 | 0 0 | Cs8g05060.1          | 6.75 | 1 | 15.9 | 0 | 2      | MASCOT | T     | PLEX8 |
| 1.28E-01 | 0 0 | Cs8g05060.1          | 6.75 | 1 | 15.9 | 0 | 2      | MASCOT | T     | PLEX8 |
| 5.45E-04 | 0 0 | Cs8g05060.1          | 6.75 | 1 | 15.9 | 0 | 2      | MASCOT | T     | PLEX8 |
| 5.30E-02 | 0 0 | Cs8g05060.1          | 6.75 | 1 | 0    | 2 | MASCOT | T      | PLEX8 |       |
| 3.77E-02 | 0 0 | Cs8g05060.1          | 6.75 | 1 | 0    | 2 | MASCOT | T      | PLEX8 |       |
| 2.62E-03 | 0 0 | Cs8g05060.1          | 8.75 | 0 | 0    | 2 | MASCOT | T      | PLEX8 |       |
| 3.16E-05 | 0 0 | Cs8g05060.1          | 8.75 | 0 | 0    | 2 | MASCOT | T      | PLEX8 |       |
| 1.32E-05 | 0 0 | Cs8g05060.1          | 8.75 | 0 | 0    | 2 | MASCOT | T      | PLEX8 |       |
| 1.46E-01 | 0 0 | Cs8g05060.1          | 8.75 | 0 | 0    | 2 | MASCOT | T      | PLEX8 |       |
| 7.99E-03 | 0 0 | Cs8g05060.1          | 8.75 | 0 | 0    | 2 | MASCOT | T      | PLEX8 |       |
| 1.24E-04 | 0 0 | Cs8g05060.1          | 8.75 | 0 | 0    | 2 | MASCOT | T      | PLEX8 |       |
| 2.34E-05 | 0 0 | Cs8g05060.1          | 8.75 | 0 | 0    | 2 | MASCOT | T      | PLEX8 |       |
| 2.03E-03 | 0 0 | Cs8g05060.1          | 8.75 | 0 | 0    | 2 | MASCOT | T      | PLEX8 |       |
| 1.62E-04 | 0 0 | Cs8g05060.1          | 8.75 | 0 | 0    | 2 | MASCOT | T      | PLEX8 |       |
| 8.54E-03 | 0 0 | Cs8g05060.1          | 8.75 | 0 | 0    | 2 | MASCOT | T      | PLEX8 |       |
| 2.09E-03 | 0 0 | Cs8g05060.1          | 8.75 | 0 | 0    | 2 | MASCOT | T      | PLEX8 |       |
| 3.97E-02 | 0 0 | Cs8g05060.1          | 8.75 | 0 | 0    | 2 | MASCOT | T      | PLEX8 |       |
| 4.73E-04 | 0 0 | Cs8g05060.1          | 8.75 | 0 | 0    | 2 | MASCOT | T      | PLEX8 |       |

|              |                      |      |   |      |          |          |       |       |
|--------------|----------------------|------|---|------|----------|----------|-------|-------|
| 2.89E-02 0 0 | Cs8g05060.1          | 8.75 | 0 | 0    | 2 MASCOT | T        | PLEX8 |       |
| 2.32E-03 0 0 | Cs8g05060.1          | 8.75 | 0 | 0    | 2 MASCOT | T        | PLEX8 |       |
| 7.61E-02 0 0 | Cs8g05060.1          | 8.75 | 0 | 0    | 2 MASCOT | T        | PLEX8 |       |
| 3.44E-02 0 0 | Cs8g05060.1          | 8.75 | 0 | 0    | 2 MASCOT | T        | PLEX8 |       |
| 3.51E-02 0 0 | Cs8g05060.1          | 8.75 | 0 | 0    | 2 MASCOT | T        | PLEX8 |       |
| 1.16E-05 0 0 | Cs8g05060.1          | 8.75 | 0 | 0    | 2 MASCOT | T        | PLEX8 |       |
| 1.41E-03 0 0 | Cs8g05060.1          | 8.75 | 0 | 0    | 2 MASCOT | T        | PLEX8 |       |
| 6.84E-04 0 0 | Cs8g05060.1          | 8.75 | 0 | 0    | 2 MASCOT | T        | PLEX8 |       |
| 1.96E-03 0 0 | Cs8g05060.1          | 8.75 | 0 | 0    | 2 MASCOT | T        | PLEX8 |       |
| 9.20E-04 0 0 | Cs8g05060.1          | 8.75 | 0 | 0    | 2 MASCOT | T        | PLEX8 |       |
| 3.47E-03 0 0 | Cs8g05060.1          | 8.75 | 0 | 0    | 2 MASCOT | T        |       |       |
| 9.97E-04 0 0 | Cs8g05060.1          | 8.75 | 0 | 0    | 2 MASCOT | T        | PLEX8 |       |
| 3.22E-03 0 0 | Cs8g05060.1          | 5.84 | 0 | 0    | 2 MASCOT | T        | PLEX8 |       |
| 1.73E-01 0 0 | Cs8g05060.1          | 5.84 | 0 | 0    | 2 MASCOT | T        | PLEX8 |       |
| 6.63E-03 0 0 | Cs8g05060.1          | 5.84 | 0 | 0    | 2 MASCOT | T        | PLEX8 |       |
| 6.72E-02 0 0 | Cs8g05060.1          | 5.84 | 0 | 0    | 2 MASCOT | T        | PLEX8 |       |
| 3.58E-01 0 0 | Cs8g05060.1          | 5.84 | 0 | 0    | 2 MASCOT | T        | PLEX8 |       |
| 2.87E-01 0 0 | Cs8g05060.1          | 5.84 | 0 | 0    | 2 MASCOT | T        | PLEX8 |       |
| 1.67E-01 0 0 | Cs8g05060.1          | 5.84 | 0 | 0    | 2 MASCOT | T        | PLEX8 |       |
| 2.86E-03 0 0 | Cs8g05060.1          | 5.84 | 0 | 0    | 2 MASCOT | T        | PLEX8 |       |
| 1.06E-02 0 0 | Cs8g05060.1          | 5.84 | 0 | 0    | 2 MASCOT | T        | PLEX8 |       |
| 4.22E-03 0 0 | Cs8g05060.1          | 5.84 | 0 | 0    | 2 MASCOT | T        | PLEX8 |       |
| 4.96E-04 0 0 | Cs8g05060.1          | 5.84 | 0 | 0    | 2 MASCOT | T        | PLEX8 |       |
| 2.00E-02 0 0 | Cs8g05060.1          | 5.84 | 0 | 0    | 2 MASCOT | T        | PLEX8 |       |
| 6.70E-03 0 0 | Cs8g05060.1          | 5.84 | 0 | 0    | 2 MASCOT | T        | PLEX8 |       |
| 1.54E-03 0 0 | Cs8g05060.1          | 5.84 | 0 | 0    | 2 MASCOT | T        |       |       |
| 7.51E-02 0 0 | Cs8g05060.1/orange1. | 5.84 | 0 | 15.9 | 0        | 2 MASCOT | T     | PLEX8 |
| 6.80E-02 0 0 | Cs8g05060.1/orange1. | 5.84 | 0 | 15.9 | 0        | 2 MASCOT | T     | PLEX8 |
| 2.06E-01 0 0 | Cs8g05060.1/orange1. | 5.84 | 0 | 15.9 | 0        | 2 MASCOT | T     | PLEX8 |
| 9.14E-02 0 0 | Cs8g05060.1/orange1. | 5.84 | 0 | 15.9 | 0        | 2 MASCOT | T     | PLEX8 |
| 1.49E-02 0 0 | Cs8g05060.1/orange1. | 5.84 | 0 | 0    | 2 MASCOT | T        | PLEX8 |       |
| 2.06E-02 0 0 | Cs8g05060.1/orange1. | 5.84 | 0 | 0    | 2 MASCOT | T        | PLEX8 |       |
| 1.48E-02 0 0 | Cs8g05060.1/orange1. | 5.84 | 0 | 0    | 2 MASCOT | T        | PLEX8 |       |
| 4.69E-02 0 0 | Cs8g05060.1/orange1. | 5.84 | 0 | 0    | 2 MASCOT | T        | PLEX8 |       |
| 2.14E-01 0 0 | Cs8g05060.1/orange1. | 5.84 | 0 | 0    | 2 MASCOT | T        | PLEX8 |       |
| 1.09E-01 0 0 | Cs8g05060.1/orange1. | 5.84 | 0 | 0    | 2 MASCOT | T        | PLEX8 |       |
| 2.02E-02 0 0 | Cs1g26400.1          | 4.37 | 0 | 0    | 2 MASCOT | T        |       |       |
| 4.67E-02 0 0 | Cs1g26400.1          | 6.05 | 0 | 0    | 2 MASCOT | T        | PLEX8 |       |
| 2.59E-01 0 0 | Cs1g26400.1          | 4.21 | 0 | 0    | 2 MASCOT | T        | PLEX8 |       |
| 4.56E-02 0 0 | Cs1g26400.1          | 4.21 | 0 | 0    | 2 MASCOT | T        | PLEX8 |       |
| 6.32E-02 0 0 | Cs1g26400.1          | 4.21 | 0 | 0    | 2 MASCOT | T        | PLEX8 |       |
| 8.31E-04 0 0 | Cs1g26400.1          | 4.21 | 0 | 0    | 2 MASCOT | T        | PLEX8 |       |
| 2.72E-01 0 0 | Cs1g26400.1          | 4.21 | 0 | 0    | 2 MASCOT | T        | PLEX8 |       |
| 3.01E-01 0 0 | Cs1g26400.1          | 4.21 | 0 | 0    | 2 MASCOT | T        |       |       |
| 8.15E-02 0 0 | Cs1g26400.1          | 6.1  | 0 | 0    | 2 MASCOT | T        |       |       |
| 6.41E-02 0 0 | Cs1g26400.1          | 6.1  | 0 | 0    | 2 MASCOT | T        | PLEX8 |       |
| 1.67E-01 0 0 | Cs1g26400.1          | 8.22 | 0 | 0    | 2 MASCOT | T        | PLEX8 |       |
| 3.31E-03 0 0 | Cs1g26400.1          | 8.22 | 0 | 0    | 2 MASCOT | T        | PLEX8 |       |
| 6.95E-02 0 0 | Cs1g26400.1          | 8.22 | 0 | 0    | 2 MASCOT | T        | PLEX8 |       |
| 5.07E-02 0 0 | Cs1g26400.1          | 8.22 | 0 | 0    | 2 MASCOT | T        | PLEX8 |       |
| 1.65E-02 0 0 | Cs1g26400.1          | 8.22 | 0 | 0    | 2 MASCOT | T        | PLEX8 |       |

|              |             |      |        |   |          |   |       |
|--------------|-------------|------|--------|---|----------|---|-------|
| 1.87E-04 0 0 | Cs1g26400.1 | 4.03 | 0      | 0 | 2 MASCOT | T | PLEX8 |
| 7.78E-02 0 0 | Cs1g26400.1 | 4.03 | 0      | 0 | 2 MASCOT | T | PLEX8 |
| 8.03E-06 0 0 | Cs1g26400.1 | 4.03 | 0      | 0 | 2 MASCOT | T | PLEX8 |
| 2.64E-03 0 0 | Cs1g26400.1 | 4.03 | 0      | 0 | 2 MASCOT | T |       |
| 1.67E-03 0 0 | Cs1g26400.1 | 4.03 | 0      | 0 | 2 MASCOT | T |       |
| 1.43E-01 0 0 | Cs1g26400.1 | 4.03 | 0      | 0 | 2 MASCOT | T |       |
| 2.82E-01 0 0 | Cs1g26400.1 | 4.03 | 0      | 0 | 2 MASCOT | T | PLEX8 |
| 1.55E-02 0 0 | Cs1g26400.1 | 4.03 | 0      | 0 | 2 MASCOT | T | PLEX8 |
| 1.20E-01 0 0 | Cs1g26400.1 | 5.95 | 0 15.9 | 0 | 2 MASCOT | T | PLEX8 |
| 8.32E-04 0 0 | Cs1g26400.1 | 5.95 | 0 15.9 | 0 | 2 MASCOT | T | PLEX8 |
| 6.21E-02 0 0 | Cs1g26400.1 | 5.95 | 0 15.9 | 0 | 2 MASCOT | T | PLEX8 |
| 3.06E-04 0 0 | Cs1g26400.1 | 5.95 | 0 15.9 | 0 | 2 MASCOT | T |       |
| 1.01E-04 0 0 | Cs1g26400.1 | 5.95 | 0      | 0 | 2 MASCOT | T | PLEX8 |
| 7.34E-03 0 0 | Cs1g26400.1 | 5.95 | 0      | 0 | 2 MASCOT | T | PLEX8 |
| 3.47E-06 0 0 | Cs1g26400.1 | 9.75 | 0      | 0 | 2 MASCOT | T |       |
| 1.16E-03 0 0 | Cs1g26400.1 | 9.75 | 0      | 0 | 2 MASCOT | T |       |
| 5.62E-04 0 0 | Cs1g26400.1 | 4.14 | 0      | 0 | 2 MASCOT | T | PLEX8 |
| 9.18E-03 0 0 | Cs1g26400.1 | 4.14 | 0      | 0 | 2 MASCOT | T | PLEX8 |
| 1.05E-02 0 0 | Cs1g26400.1 | 4.14 | 0      | 0 | 2 MASCOT | T | PLEX8 |
| 1.96E-02 0 0 | Cs1g26400.1 | 4.14 | 0      | 0 | 2 MASCOT | T | PLEX8 |
| 2.98E-04 0 0 | Cs1g26400.1 | 4.14 | 0      | 0 | 2 MASCOT | T | PLEX8 |
| 6.30E-03 0 0 | Cs1g26400.1 | 4.14 | 0      | 0 | 2 MASCOT | T | PLEX8 |
| 2.09E-02 0 0 | Cs1g26400.1 | 4.14 | 0      | 0 | 2 MASCOT | T | PLEX8 |
| 1.17E-02 0 0 | Cs1g26400.1 | 4.14 | 0      | 0 | 2 MASCOT | T | PLEX8 |
| 1.44E-01 0 0 | Cs1g26400.1 | 4.14 | 0      | 0 | 2 MASCOT | T | PLEX8 |
| 1.33E-03 0 0 | Cs1g26400.1 | 4.14 | 0      | 0 | 2 MASCOT | T | PLEX8 |
| 9.68E-03 0 0 | Cs1g26400.1 | 4.14 | 0      | 0 | 2 MASCOT | T | PLEX8 |
| 2.06E-02 0 0 | Cs1g26400.1 | 4.14 | 0      | 0 | 2 MASCOT | T | PLEX8 |
| 4.55E-01 0 0 | Cs1g26400.1 | 5.5  | 0      | 0 | 2 MASCOT | T | PLEX8 |
| 3.25E-02 0 0 | Cs1g26400.1 | 5.5  | 0      | 0 | 2 MASCOT | T | PLEX8 |
| 4.39E-01 0 0 | Cs1g26400.1 | 6    | 0      | 0 | 2 MASCOT | T | PLEX8 |
| 3.47E-04 0 0 | Cs1g26400.1 | 6.05 | 0 15.9 | 0 | 2 MASCOT | T | PLEX8 |
| 6.68E-02 0 0 | Cs1g26400.1 | 6.05 | 0 15.9 | 0 | 2 MASCOT | T | PLEX8 |
| 7.08E-05 0 0 | Cs1g26400.1 | 6.05 | 0      | 0 | 2 MASCOT | T | PLEX8 |
| 1.03E-06 0 0 | Cs1g26400.1 | 6.05 | 0      | 0 | 2 MASCOT | T | PLEX8 |
| 4.57E-03 0 0 | Cs1g26400.1 | 6.05 | 0      | 0 | 2 MASCOT | T | PLEX8 |
| 4.23E-03 0 0 | Cs1g26400.1 | 6.05 | 0      | 0 | 2 MASCOT | T | PLEX8 |
| 1.00E-03 0 0 | Cs1g26400.1 | 6.05 | 0      | 0 | 2 MASCOT | T | PLEX8 |
| 6.69E-03 0 0 | Cs1g26400.1 | 8.59 | 0      | 0 | 2 MASCOT | T | PLEX8 |
| 2.85E-03 0 0 | Cs1g26400.1 | 8.59 | 0      | 0 | 2 MASCOT | T | PLEX8 |
| 3.40E-03 0 0 | Cs1g26400.1 | 8.59 | 0      | 0 | 2 MASCOT | T | PLEX8 |
| 3.27E-03 0 0 | Cs1g26400.1 | 8.59 | 0      | 0 | 2 MASCOT | T | PLEX8 |
| 3.66E-03 0 0 | Cs1g26400.1 | 8.59 | 0      | 0 | 2 MASCOT | T | PLEX8 |
| 4.56E-03 0 0 | Cs1g26400.1 | 8.59 | 0      | 0 | 2 MASCOT | T | PLEX8 |
| 3.27E-03 0 0 | Cs1g26400.1 | 8.59 | 0      | 0 | 2 MASCOT | T | PLEX8 |
| 2.59E-02 0 0 | Cs1g26400.1 | 8.59 | 0      | 0 | 2 MASCOT | T | PLEX8 |
| 8.31E-03 0 0 | Cs1g26400.1 | 8.59 | 0      | 0 | 2 MASCOT | T | PLEX8 |
| 4.48E-03 0 0 | Cs1g26400.1 | 8.59 | 0      | 0 | 2 MASCOT | T | PLEX8 |
| 6.71E-04 0 0 | Cs1g26400.1 | 8.59 | 0      | 0 | 2 MASCOT | T | PLEX8 |
| 3.37E-02 0 0 | Cs1g26400.1 | 8.59 | 0      | 0 | 2 MASCOT | T | PLEX8 |
| 3.90E-02 0 0 | Cs1g26400.1 | 8.59 | 0      | 0 | 2 MASCOT | T | PLEX8 |



|              |             |      |   |      |          |          |       |       |
|--------------|-------------|------|---|------|----------|----------|-------|-------|
| 3.73E-03 0 0 | Cs1g26400.1 | 8.59 | 0 | 0    | 2 MASCOT | T        | PLEX8 |       |
| 1.10E-02 0 0 | Cs1g26400.1 | 8.59 | 0 | 0    | 2 MASCOT | T        | PLEX8 |       |
| 7.22E-02 0 0 | Cs1g26400.1 | 8.59 | 0 | 0    | 2 MASCOT | T        | PLEX8 |       |
| 3.54E-03 0 0 | Cs1g26400.1 | 8.59 | 0 | 0    | 2 MASCOT | T        | PLEX8 |       |
| 2.49E-04 0 0 | Cs1g26400.1 | 8.59 | 0 | 0    | 2 MASCOT | T        | PLEX8 |       |
| 3.05E-01 0 0 | Cs1g26400.1 | 8.59 | 0 | 0    | 2 MASCOT | T        | PLEX8 |       |
| 7.05E-02 0 0 | Cs1g26400.1 | 8.59 | 0 | 0    | 2 MASCOT | T        | PLEX8 |       |
| 1.84E-01 0 0 | Cs1g26400.1 | 8.59 | 0 | 0    | 2 MASCOT | T        | PLEX8 |       |
| 6.06E-02 0 0 | Cs1g26400.1 | 8.59 | 0 | 0    | 2 MASCOT | T        | PLEX8 |       |
| 1.48E-01 0 0 | Cs1g26400.1 | 8.59 | 0 | 0    | 2 MASCOT | T        |       |       |
| 9.02E-03 0 0 | Cs1g26400.1 | 6.75 | 0 | 15.9 | 0        | 2 MASCOT | T     | PLEX8 |
| 2.93E-04 0 0 | Cs1g26400.1 | 6.75 | 0 | 15.9 | 0        | 2 MASCOT | T     | PLEX8 |
| 1.19E-04 0 0 | Cs1g26400.1 | 6.75 | 0 | 15.9 | 0        | 2 MASCOT | T     | PLEX8 |
| 9.53E-04 0 0 | Cs1g26400.1 | 6.75 | 0 | 15.9 | 0        | 2 MASCOT | T     | PLEX8 |
| 4.87E-03 0 0 | Cs1g26400.1 | 6.75 | 0 | 15.9 | 0        | 2 MASCOT | T     | PLEX8 |
| 1.92E-02 0 0 | Cs1g26400.1 | 6.75 | 0 | 0    | 2 MASCOT | T        | PLEX8 |       |
| 2.50E-03 0 0 | Cs1g26400.1 | 6.75 | 0 | 0    | 2 MASCOT | T        | PLEX8 |       |
| 2.54E-03 0 0 | Cs1g26400.1 | 6.75 | 0 | 0    | 2 MASCOT | T        | PLEX8 |       |
| 2.62E-03 0 0 | Cs1g26400.1 | 6.75 | 0 | 0    | 2 MASCOT | T        | PLEX8 |       |
| 9.27E-02 0 0 | Cs1g26400.1 | 5.96 | 1 | 0    | 2 MASCOT | T        | PLEX8 |       |
| 2.31E-01 0 0 | Cs1g26400.1 | 5.72 | 0 | 15.9 | 0        | 2 MASCOT | T     | PLEX8 |
| 1.40E-01 0 0 | Cs1g26400.1 | 5.72 | 0 | 15.9 | 0        | 2 MASCOT | T     | PLEX8 |
| 1.44E-01 0 0 | Cs1g26400.1 | 5.72 | 0 | 15.9 | 0        | 2 MASCOT | T     | PLEX8 |
| 5.70E-02 0 0 | Cs1g26400.1 | 5.72 | 0 | 15.9 | 0        | 2 MASCOT | T     | PLEX8 |
| 2.67E-01 0 0 | Cs1g26400.1 | 5.72 | 0 | 15.9 | 0        | 2 MASCOT | T     | PLEX8 |
| 3.43E-02 0 0 | Cs1g26400.1 | 5.72 | 0 | 15.9 | 0        | 2 MASCOT | T     | PLEX8 |
| 4.77E-02 0 0 | Cs1g26400.1 | 5.72 | 0 | 15.9 | 0        | 2 MASCOT | T     |       |
| 3.87E-01 0 0 | Cs1g26400.1 | 5.72 | 0 | 0    | 2 MASCOT | T        | PLEX8 |       |
| 1.25E-02 0 0 | Cs1g26400.1 | 5.72 | 0 | 0    | 2 MASCOT | T        | PLEX8 |       |
| 1.94E-02 0 0 | Cs1g26400.1 | 5.72 | 0 | 0    | 2 MASCOT | T        | PLEX8 |       |
| 1.21E-02 0 0 | Cs1g26400.1 | 5.72 | 0 | 0    | 2 MASCOT | T        | PLEX8 |       |
| 1.75E-02 0 0 | Cs1g26400.1 | 5.72 | 0 | 0    | 2 MASCOT | T        | PLEX8 |       |
| 2.03E-01 0 0 | Cs1g26400.1 | 5.72 | 0 | 0    | 2 MASCOT | T        | PLEX8 |       |
| 5.05E-02 0 0 | Cs1g26400.1 | 5.72 | 0 | 0    | 2 MASCOT | T        | PLEX8 |       |
| 8.06E-03 0 0 | Cs1g26400.1 | 5.72 | 0 | 0    | 2 MASCOT | T        | PLEX8 |       |
| 1.59E-02 0 0 | Cs1g26400.1 | 4.37 | 0 | 0    | 2 MASCOT | T        | PLEX8 |       |
| 5.37E-03 0 0 | Cs1g26400.1 | 4.37 | 0 | 0    | 2 MASCOT | T        |       |       |
| 9.65E-03 0 0 | Cs1g26400.1 | 4.37 | 0 | 0    | 2 MASCOT | T        | PLEX8 |       |
| 7.69E-03 0 0 | Cs1g26400.1 | 4.37 | 0 | 0    | 2 MASCOT | T        | PLEX8 |       |
| 6.86E-04 0 0 | Cs1g26400.1 | 4.37 | 0 | 0    | 2 MASCOT | T        | PLEX8 |       |
| 1.11E-04 0 0 | Cs1g26400.1 | 4.37 | 0 | 0    | 2 MASCOT | T        | PLEX8 |       |
| 6.49E-04 0 0 | Cs1g26400.1 | 4.37 | 0 | 0    | 2 MASCOT | T        | PLEX8 |       |
| 5.83E-03 0 0 | Cs1g26400.1 | 4.37 | 0 | 0    | 2 MASCOT | T        |       |       |
| 1.14E-03 0 0 | Cs1g26400.1 | 4.37 | 0 | 0    | 2 MASCOT | T        |       |       |
| 1.60E-06 0 0 | Cs1g26400.1 | 4.37 | 0 | 0    | 2 MASCOT | T        |       |       |
| 7.61E-04 0 0 | Cs1g26400.1 | 5.97 | 0 | 0    | 2 MASCOT | T        | PLEX8 |       |
| 1.84E-04 0 0 | Cs1g26400.1 | 5.97 | 0 | 0    | 2 MASCOT | T        | PLEX8 |       |
| 1.57E-03 0 0 | Cs1g26400.1 | 5.97 | 0 | 0    | 2 MASCOT | T        | PLEX8 |       |
| 1.96E-03 0 0 | Cs1g26400.1 | 5.97 | 0 | 0    | 2 MASCOT | T        | PLEX8 |       |
| 3.07E-01 0 0 | Cs1g26400.1 | 5.97 | 0 | 0    | 2 MASCOT | T        | PLEX8 |       |
| 1.99E-01 0 0 | Cs1g26400.1 | 5.97 | 0 | 0    | 2 MASCOT | T        | PLEX8 |       |

|              |                     |      |   |   |          |   |       |
|--------------|---------------------|------|---|---|----------|---|-------|
| 9.25E-04 0 0 | Cs1g26400.1         | 5.97 | 0 | 0 | 2 MASCOT | T | PLEX8 |
| 1.35E-01 0 0 | Cs1g26400.1         | 5.97 | 0 | 0 | 2 MASCOT | T |       |
| 2.28E-02 0 0 | Cs1g26400.1         | 5.97 | 0 | 0 | 2 MASCOT | T | PLEX8 |
| 3.25E-01 0 0 | Cs1g26400.1         | 5.97 | 0 | 0 | 2 MASCOT | T |       |
| 1.61E-01 0 0 | Cs6g15540.1/Cs6g155 | 8.63 | 0 | 0 | 2 MASCOT | T | PLEX8 |
| 1.25E-02 0 0 | Cs7g26180.1         | 8.75 | 0 | 0 | 2 MASCOT | T | PLEX8 |
| 3.65E-02 0 0 | Cs7g26180.1         | 8.75 | 0 | 0 | 2 MASCOT | T | PLEX8 |
| 1.04E-01 0 0 | Cs7g26180.1         | 8.75 | 0 | 0 | 2 MASCOT | T | PLEX8 |
| 1.67E-01 0 0 | Cs7g26180.1         | 8.75 | 0 | 0 | 2 MASCOT | T | PLEX8 |
| 2.25E-02 0 0 | Cs7g26180.1         | 8.75 | 0 | 0 | 2 MASCOT | T | PLEX8 |
| 4.16E-01 0 0 | Cs7g26180.1         | 8.59 | 0 | 0 | 2 MASCOT | T | PLEX8 |
| 1.42E-01 0 0 | Cs7g26180.1         | 6.75 | 0 | 0 | 2 MASCOT | T | PLEX8 |
| 4.44E-03 0 0 | Cs7g26180.1         | 6.75 | 0 | 0 | 2 MASCOT | T | PLEX8 |
| 1.22E-02 0 0 | Cs7g26180.1         | 6.75 | 0 | 0 | 2 MASCOT | T | PLEX8 |
| 1.70E-02 0 0 | Cs7g26180.1         | 6.75 | 0 | 0 | 2 MASCOT | T | PLEX8 |
| 1.50E-01 0 0 | Cs7g26180.1         | 6.75 | 0 | 0 | 2 MASCOT | T | PLEX8 |
| 8.36E-02 0 0 | Cs7g26180.1         | 6.75 | 0 | 0 | 2 MASCOT | T |       |
| 5.45E-03 0 0 | Cs7g26180.1         | 6.75 | 0 | 0 | 2 MASCOT | T | PLEX8 |
| 6.77E-04 0 0 | Cs7g26180.1         | 6.75 | 0 | 0 | 2 MASCOT | T |       |
| 2.11E-02 0 0 | Cs7g26180.1         | 6.75 | 0 | 0 | 2 MASCOT | T | PLEX8 |
| 1.49E-01 0 0 | Cs7g26180.1         | 6.75 | 0 | 0 | 2 MASCOT | T | PLEX8 |
| 1.25E-02 0 0 | Cs7g26180.1         | 6.75 | 0 | 0 | 2 MASCOT | T | PLEX8 |
| 1.84E-02 0 0 | Cs7g26180.1         | 6.75 | 0 | 0 | 2 MASCOT | T |       |
| 1.80E-02 0 0 | Cs7g26180.1         | 5.84 | 0 | 0 | 2 MASCOT | T | PLEX8 |
| 8.28E-02 0 0 | Cs7g26180.1         | 5.84 | 0 | 0 | 2 MASCOT | T | PLEX8 |
| 1.90E-02 0 0 | Cs7g26180.1         | 5.84 | 0 | 0 | 2 MASCOT | T | PLEX8 |
| 3.18E-02 0 0 | Cs7g26180.1         | 5.84 | 0 | 0 | 2 MASCOT | T | PLEX8 |
| 2.33E-02 0 0 | Cs7g26180.1         | 5.84 | 0 | 0 | 2 MASCOT | T | PLEX8 |
| 1.90E-02 0 0 | Cs7g26180.1         | 5.84 | 0 | 0 | 2 MASCOT | T | PLEX8 |
| 3.16E-02 0 0 | Cs7g26180.1         | 5.84 | 0 | 0 | 2 MASCOT | T | PLEX8 |
| 3.99E-01 0 0 | Cs7g26180.1         | 5.84 | 0 | 0 | 2 MASCOT | T |       |
| 1.18E-01 0 0 | Cs7g26180.1         | 5.84 | 0 | 0 | 2 MASCOT | T |       |
| 4.43E-04 0 0 | Cs7g26180.1         | 5.21 | 0 | 0 | 2 MASCOT | T | PLEX8 |
| 3.76E-05 0 0 | Cs7g26180.1         | 5.21 | 0 | 0 | 2 MASCOT | T | PLEX8 |
| 4.27E-02 0 0 | Cs7g26180.1         | 5.21 | 0 | 0 | 2 MASCOT | T | PLEX8 |
| 7.93E-04 0 0 | Cs7g26180.1         | 5.21 | 0 | 0 | 2 MASCOT | T |       |
| 2.00E-01 0 0 | Cs7g26180.1         | 5.21 | 0 | 0 | 2 MASCOT | T |       |
| 1.25E-01 0 0 | Cs7g26180.1         | 9.49 | 0 | 0 | 2 MASCOT | T | PLEX8 |
| 2.94E-02 0 0 | Cs7g26180.1         | 9.49 | 0 | 0 | 2 MASCOT | T | PLEX8 |
| 3.78E-02 0 0 | Cs7g26180.1         | 7.94 | 0 | 0 | 2 MASCOT | T | PLEX8 |
| 1.73E-02 0 0 | Cs7g26180.1         | 7.94 | 0 | 0 | 2 MASCOT | T | PLEX8 |
| 3.51E-02 0 0 | Cs6g15540.1/Cs7g261 | 7.91 | 0 | 0 | 2 MASCOT | T | PLEX8 |
| 6.02E-02 0 0 | Cs6g15540.1/Cs7g261 | 7.91 | 0 | 0 | 2 MASCOT | T | PLEX8 |
| 2.62E-02 0 0 | Cs7g26180.1         | 4.37 | 0 | 0 | 2 MASCOT | T | PLEX8 |
| 2.71E-01 0 0 | Cs7g26180.1         | 4.37 | 0 | 0 | 2 MASCOT | T |       |
| 2.69E-01 0 0 | Cs7g26180.1         | 5.84 | 0 | 0 | 2 MASCOT | T | PLEX8 |
| 2.81E-01 0 0 | Cs7g26180.1         | 5.84 | 0 | 0 | 2 MASCOT | T | PLEX8 |
| 2.80E-01 0 0 | Cs7g26180.1         | 5.84 | 0 | 0 | 2 MASCOT | T |       |
| 1.42E-09 0 0 | Cs7g26180.1         | 3.84 | 0 | 0 | 2 MASCOT | T | PLEX8 |
| 2.86E-06 0 0 | Cs7g26180.1         | 3.84 | 0 | 0 | 2 MASCOT | T |       |
| 5.32E-07 0 0 | Cs7g26180.1         | 3.84 | 0 | 0 | 2 MASCOT | T | PLEX8 |

|          |     |                     |      |   |      |   |        |        |       |       |
|----------|-----|---------------------|------|---|------|---|--------|--------|-------|-------|
| 2.18E-05 | 0 0 | Cs7g26180.1         | 3.84 | 0 | 0    | 2 | MASCOT | T      | PLEX8 |       |
| 5.30E-02 | 0 0 | Cs7g26180.1         | 8.8  | 0 | 0    | 2 | MASCOT | T      | PLEX8 |       |
| 6.93E-05 | 0 0 | Cs7g26180.1         | 3.77 | 0 | 15.9 | 0 | 2      | MASCOT | T     |       |
| 1.14E-04 | 0 0 | Cs7g26180.1         | 3.77 | 0 | 0    | 2 | MASCOT | T      |       |       |
| 8.94E-03 | 0 0 | Cs7g26180.1         | 4.14 | 0 | 0    | 2 | MASCOT | T      | PLEX8 |       |
| 1.30E-03 | 0 0 | Cs7g26180.1         | 4.14 | 0 | 0    | 2 | MASCOT | T      |       |       |
| 7.81E-03 | 0 0 | Cs7g26180.1         | 4.14 | 0 | 0    | 2 | MASCOT | T      | PLEX8 |       |
| 4.67E-04 | 0 0 | Cs7g26180.1         | 4.14 | 0 | 0    | 2 | MASCOT | T      | PLEX8 |       |
| 1.85E-03 | 0 0 | Cs7g26180.1         | 4.14 | 0 | 0    | 2 | MASCOT | T      | PLEX8 |       |
| 2.02E-02 | 0 0 | Cs7g26180.1         | 4.14 | 0 | 0    | 2 | MASCOT | T      | PLEX8 |       |
| 3.08E-02 | 0 0 | Cs7g26180.1         | 4.14 | 0 | 0    | 2 | MASCOT | T      | PLEX8 |       |
| 2.16E-03 | 0 0 | Cs7g26180.1         | 4.14 | 0 | 0    | 2 | MASCOT | T      |       |       |
| 1.68E-01 | 0 0 | Cs7g26180.1         | 4.14 | 0 | 0    | 2 | MASCOT | T      |       |       |
| 2.24E-01 | 0 0 | Cs7g26180.1         | 4.25 | 0 | 0    | 2 | MASCOT | T      | PLEX8 |       |
| 5.26E-01 | 0 0 | Cs7g26180.1         | 6.5  | 0 | 15.9 | 0 | 2      | MASCOT | T     | PLEX8 |
| 4.85E-01 | 0 0 | Cs7g26180.1         | 6.5  | 0 | 15.9 | 0 | 2      | MASCOT | T     | PLEX8 |
| 3.09E-01 | 0 0 | Cs7g26180.1         | 6.5  | 0 | 15.9 | 0 | 2      | MASCOT | T     |       |
| 5.16E-01 | 0 0 | Cs7g26180.1         | 6.5  | 0 | 0    | 2 | MASCOT | T      | PLEX8 |       |
| 2.81E-02 | 0 0 | Cs7g26180.1         | 6.5  | 0 | 0    | 2 | MASCOT | T      | PLEX8 |       |
| 5.35E-01 | 0 0 | Cs7g26180.1         | 6.5  | 0 | 0    | 2 | MASCOT | T      | PLEX8 |       |
| 1.94E-01 | 0 0 | Cs7g26180.1         | 6.5  | 0 | 0    | 2 | MASCOT | T      |       |       |
| 6.16E-02 | 0 0 | Cs7g26180.1         | 5.84 | 0 | 0    | 2 | MASCOT | T      | PLEX8 |       |
| 1.35E-01 | 0 0 | Cs5g03080.1/Cs5g030 | 5.84 | 0 | 0    | 2 | MASCOT | T      | PLEX8 |       |
| 5.25E-02 | 0 0 | Cs5g03080.1/Cs5g030 | 5.84 | 0 | 0    | 2 | MASCOT | T      | PLEX8 |       |
| 7.46E-03 | 0 0 | Cs5g03080.1/Cs5g030 | 5.84 | 0 | 0    | 2 | MASCOT | T      | PLEX8 |       |
| 2.41E-01 | 0 0 | Cs5g03080.1/Cs5g030 | 5.84 | 0 | 0    | 2 | MASCOT | T      | PLEX8 |       |
| 2.96E-01 | 0 0 | Cs5g03080.1/Cs5g030 | 5.84 | 0 | 0    | 2 | MASCOT | T      | PLEX8 |       |
| 2.34E-01 | 0 0 | Cs5g03080.1/Cs5g030 | 5.84 | 0 | 0    | 2 | MASCOT | T      |       |       |
| 1.84E-01 | 0 0 | Cs5g03080.1/Cs5g030 | 5.84 | 0 | 0    | 2 | MASCOT | T      | PLEX8 |       |
| 3.54E-02 | 0 0 | Cs5g03080.1/Cs5g030 | 5.84 | 0 | 0    | 2 | MASCOT | T      | PLEX8 |       |
| 8.86E-03 | 0 0 | Cs5g03080.1/Cs5g030 | 5.84 | 0 | 0    | 2 | MASCOT | T      | PLEX8 |       |
| 1.62E-01 | 0 0 | Cs5g03080.1/Cs5g030 | 8.6  | 0 | 0    | 2 | MASCOT | T      | PLEX8 |       |
| 2.39E-01 | 0 0 | Cs5g03080.1/Cs5g030 | 8.6  | 0 | 0    | 2 | MASCOT | T      | PLEX8 |       |
| 5.22E-02 | 0 0 | Cs5g03080.1/Cs5g030 | 8.6  | 0 | 0    | 2 | MASCOT | T      | PLEX8 |       |
| 6.89E-03 | 0 0 | Cs5g03080.1/Cs5g030 | 8.6  | 0 | 0    | 2 | MASCOT | T      |       |       |
| 6.75E-04 | 0 0 | Cs5g03080.1/Cs5g030 | 5.32 | 0 | 0    | 2 | MASCOT | T      | PLEX8 |       |
| 2.16E-02 | 0 0 | Cs5g03080.1/Cs5g030 | 5.32 | 0 | 0    | 2 | MASCOT | T      | PLEX8 |       |
| 3.71E-01 | 0 0 | Cs5g03080.1/Cs5g030 | 5.32 | 0 | 0    | 2 | MASCOT | T      | PLEX8 |       |
| 2.52E-04 | 0 0 | Cs5g03080.1/Cs5g030 | 5.32 | 0 | 0    | 2 | MASCOT | T      |       |       |
| 1.08E-06 | 0 0 | Cs5g03080.1/Cs5g030 | 4.25 | 0 | 0    | 2 | MASCOT | T      |       |       |
| 2.84E-02 | 0 0 | Cs5g03080.1/Cs5g030 | 4.37 | 0 | 0    | 2 | MASCOT | T      | PLEX8 |       |
| 1.09E-01 | 0 0 | Cs5g03080.1/Cs5g030 | 4.37 | 0 | 0    | 2 | MASCOT | T      | PLEX8 |       |
| 2.38E-02 | 0 0 | Cs5g03080.1/Cs5g030 | 8.75 | 0 | 0    | 2 | MASCOT | T      | PLEX8 |       |
| 4.54E-02 | 0 0 | Cs5g03080.1/Cs5g030 | 8.75 | 0 | 0    | 2 | MASCOT | T      | PLEX8 |       |
| 5.60E-02 | 0 0 | Cs5g03080.1/Cs5g030 | 8.75 | 0 | 0    | 2 | MASCOT | T      | PLEX8 |       |
| 1.45E-01 | 0 0 | Cs5g03080.1/Cs5g030 | 8.22 | 0 | 0    | 2 | MASCOT | T      |       |       |
| 1.79E-02 | 0 0 | Cs5g03080.1/Cs5g030 | 8.22 | 0 | 0    | 2 | MASCOT | T      |       |       |
| 3.06E-04 | 0 0 | Cs5g03080.1/Cs5g030 | 8.22 | 0 | 0    | 2 | MASCOT | T      |       |       |
| 1.82E-02 | 0 0 | Cs5g03080.1/Cs5g030 | 8.22 | 0 | 0    | 2 | MASCOT | T      |       |       |
| 7.01E-02 | 0 0 | Cs5g03080.1/Cs5g030 | 8.22 | 0 | 0    | 2 | MASCOT | T      |       |       |
| 3.72E-04 | 0 0 | Cs5g03080.1/Cs5g030 | 8.22 | 0 | 0    | 2 | MASCOT | T      |       |       |

|          |     |                     |      |   |      |   |        |        |       |       |
|----------|-----|---------------------|------|---|------|---|--------|--------|-------|-------|
| 1.44E-01 | 0 0 | Cs5g03080.1/Cs5g030 | 8.22 | 0 | 0    | 2 | MASCOT | T      | PLEX8 |       |
| 1.63E-02 | 0 0 | Cs5g03080.1/Cs5g030 | 3.84 | 0 | 0    | 2 | MASCOT | T      |       |       |
| 1.80E-02 | 0 0 | Cs5g03080.1/Cs5g030 | 3.84 | 0 | 0    | 2 | MASCOT | T      |       |       |
| 7.04E-03 | 0 0 | Cs5g03080.1/Cs5g030 | 6.1  | 0 | 0    | 2 | MASCOT | T      | PLEX8 |       |
| 2.44E-04 | 0 0 | Cs5g03080.1/Cs5g030 | 6.1  | 0 | 0    | 2 | MASCOT | T      | PLEX8 |       |
| 3.48E-03 | 0 0 | Cs5g03080.1/Cs5g030 | 6.1  | 0 | 0    | 2 | MASCOT | T      |       |       |
| 1.29E-04 | 0 0 | Cs5g03080.1/Cs5g030 | 6.1  | 0 | 0    | 2 | MASCOT | T      |       |       |
| 4.98E-04 | 0 0 | Cs5g03080.1/Cs5g030 | 6.1  | 0 | 0    | 2 | MASCOT | T      | PLEX8 |       |
| 4.39E-05 | 0 0 | Cs5g03080.1/Cs5g030 | 6.1  | 0 | 0    | 2 | MASCOT | T      | PLEX8 |       |
| 1.15E-01 | 0 0 | Cs5g03080.1/Cs5g030 | 9.75 | 0 | 0    | 2 | MASCOT | T      | PLEX8 |       |
| 4.36E-05 | 0 0 | Cs5g03080.1/Cs5g030 | 6.74 | 0 | 0    | 2 | MASCOT | T      | PLEX8 |       |
| 2.25E-02 | 0 0 | Cs5g03080.1/Cs5g030 | 6.74 | 0 | 0    | 2 | MASCOT | T      | PLEX8 |       |
| 4.30E-03 | 0 0 | Cs5g03080.1/Cs5g030 | 6.74 | 0 | 0    | 2 | MASCOT | T      | PLEX8 |       |
| 4.06E-05 | 0 0 | Cs5g03080.1/Cs5g030 | 6.74 | 0 | 0    | 2 | MASCOT | T      | PLEX8 |       |
| 1.63E-03 | 0 0 | Cs5g03080.1/Cs5g030 | 6.74 | 0 | 0    | 2 | MASCOT | T      | PLEX8 |       |
| 3.24E-02 | 0 0 | Cs5g03080.1/Cs5g030 | 8.23 | 0 | 0    | 2 | MASCOT | T      | PLEX8 |       |
| 2.68E-01 | 0 0 | Cs5g03080.1/Cs5g030 | 5.55 | 0 | 0    | 2 | MASCOT | T      | PLEX8 |       |
| 9.10E-03 | 0 0 | Cs5g03080.1/Cs5g030 | 5.29 | 0 | 15.9 | 0 | 2      | MASCOT | T     | PLEX8 |
| 6.44E-03 | 0 0 | Cs5g03080.1/Cs5g030 | 5.29 | 0 | 15.9 | 0 | 2      | MASCOT | T     | PLEX8 |
| 3.08E-04 | 0 0 | Cs5g03080.1/Cs5g030 | 5.29 | 0 | 0    | 2 | MASCOT | T      | PLEX8 |       |
| 5.71E-03 | 0 0 | Cs5g03080.1/Cs5g030 | 5.29 | 0 | 0    | 2 | MASCOT | T      | PLEX8 |       |
| 7.22E-02 | 0 0 | Cs5g03080.1/Cs5g030 | 5.99 | 0 | 0    | 2 | MASCOT | T      | PLEX8 |       |
| 1.05E-02 | 0 0 | Cs5g03080.1/Cs5g030 | 5.99 | 0 | 0    | 2 | MASCOT | T      | PLEX8 |       |
| 4.89E-02 | 0 0 | Cs5g03080.1/Cs5g030 | 5.99 | 0 | 0    | 2 | MASCOT | T      |       |       |
| 1.99E-02 | 0 0 | Cs5g03080.1/Cs5g030 | 5.99 | 0 | 0    | 2 | MASCOT | T      |       |       |
| 4.52E-02 | 0 0 | Cs5g03080.1/Cs5g030 | 4.53 | 0 | 0    | 2 | MASCOT | T      | PLEX8 |       |
| 3.20E-04 | 0 0 | Cs5g03080.1/Cs5g030 | 6    | 0 | 0    | 2 | MASCOT | T      | PLEX8 |       |
| 3.92E-05 | 0 0 | Cs5g03080.1/Cs5g030 | 6    | 0 | 0    | 2 | MASCOT | T      | PLEX8 |       |
| 3.90E-03 | 0 0 | Cs5g03080.1/Cs5g030 | 6    | 0 | 0    | 2 | MASCOT | T      |       |       |
| 2.33E-02 | 0 0 | Cs2g15020.1/Cs2g150 | 3.84 | 0 | 0    | 2 | MASCOT | T      | PLEX8 |       |
| 3.82E-02 | 0 0 | Cs2g15020.1/Cs2g150 | 3.84 | 0 | 0    | 2 | MASCOT | T      | PLEX8 |       |
| 2.61E-04 | 0 0 | Cs2g15020.1/Cs2g150 | 3.84 | 0 | 0    | 2 | MASCOT | T      |       |       |
| 4.67E-03 | 0 0 | Cs2g15020.1/Cs2g150 | 3.84 | 0 | 0    | 2 | MASCOT | T      | PLEX8 |       |
| 5.41E-02 | 0 0 | Cs2g15020.1/Cs2g150 | 5.82 | 0 | 0    | 2 | MASCOT | T      |       |       |
| 4.95E-03 | 0 0 | Cs2g15020.1/Cs2g150 | 4.25 | 0 | 0    | 2 | MASCOT | T      | PLEX8 |       |
| 3.38E-05 | 0 0 | Cs2g15020.1/Cs2g150 | 4.25 | 0 | 0    | 2 | MASCOT | T      | PLEX8 |       |
| 2.93E-02 | 0 0 | Cs2g15020.1/Cs2g150 | 8.61 | 0 | 0    | 2 | MASCOT | T      | PLEX8 |       |
| 2.45E-02 | 0 0 | Cs2g15020.1/Cs2g150 | 8.61 | 0 | 0    | 2 | MASCOT | T      | PLEX8 |       |
| 3.49E-02 | 0 0 | Cs2g15020.1/Cs2g150 | 8.72 | 0 | 0    | 2 | MASCOT | T      |       |       |
| 1.76E-01 | 0 0 | Cs2g15020.1/Cs2g150 | 8.72 | 0 | 0    | 2 | MASCOT | T      | PLEX8 |       |
| 1.40E-01 | 0 0 | Cs2g15020.1/Cs2g150 | 8.72 | 0 | 0    | 2 | MASCOT | T      | PLEX8 |       |
| 2.05E-03 | 0 0 | Cs2g15020.1/Cs2g150 | 8.72 | 0 | 0    | 2 | MASCOT | T      | PLEX8 |       |
| 1.73E-03 | 0 0 | Cs2g15020.1/Cs2g150 | 8.72 | 0 | 0    | 2 | MASCOT | T      |       |       |
| 1.55E-01 | 0 0 | Cs2g15020.1/Cs2g150 | 6    | 0 | 0    | 2 | MASCOT | T      |       |       |
| 9.47E-03 | 0 0 | Cs2g15020.1/Cs2g150 | 4.37 | 0 | 0    | 2 | MASCOT | T      | PLEX8 |       |
| 2.14E-02 | 0 0 | Cs2g15020.1/Cs2g150 | 4.21 | 0 | 0    | 2 | MASCOT | T      | PLEX8 |       |
| 1.39E-03 | 0 0 | Cs2g15020.1/Cs2g150 | 4.21 | 0 | 0    | 2 | MASCOT | T      | PLEX8 |       |
| 4.18E-03 | 0 0 | Cs2g15020.1/Cs2g150 | 4.21 | 0 | 0    | 2 | MASCOT | T      | PLEX8 |       |
| 1.28E-02 | 0 0 | Cs2g15020.1/Cs2g150 | 4.21 | 0 | 0    | 2 | MASCOT | T      | PLEX8 |       |
| 9.27E-03 | 0 0 | Cs2g15020.1/Cs2g150 | 6.75 | 0 | 0    | 2 | MASCOT | T      | PLEX8 |       |
| 2.69E-02 | 0 0 | Cs2g15020.1/Cs2g150 | 6.75 | 0 | 0    | 2 | MASCOT | T      | PLEX8 |       |

|          |     |                     |      |   |   |   |        |   |       |
|----------|-----|---------------------|------|---|---|---|--------|---|-------|
| 1.44E-01 | 0 0 | Cs2g15020.1/Cs2g150 | 4.37 | 0 | 0 | 2 | MASCOT | T | PLEX8 |
| 5.89E-02 | 0 0 | Cs2g15020.1/Cs2g150 | 4.37 | 0 | 0 | 2 | MASCOT | T | PLEX8 |
| 1.44E-01 | 0 0 | Cs2g15020.1/Cs2g150 | 4.37 | 0 | 0 | 2 | MASCOT | T | PLEX8 |
| 1.16E-01 | 0 0 | Cs2g15020.1/Cs2g150 | 4.37 | 0 | 0 | 2 | MASCOT | T | PLEX8 |
| 4.63E-02 | 0 0 | Cs2g15020.1/Cs2g150 | 4.37 | 0 | 0 | 2 | MASCOT | T | PLEX8 |
| 2.06E-02 | 0 0 | Cs2g15020.1/Cs2g150 | 4.37 | 0 | 0 | 2 | MASCOT | T | PLEX8 |
| 2.54E-01 | 0 0 | Cs2g15020.1/Cs2g150 | 4.37 | 0 | 0 | 2 | MASCOT | T |       |
| 4.51E-01 | 0 0 | Cs2g15020.1/Cs2g150 | 8.75 | 0 | 0 | 2 | MASCOT | T | PLEX8 |
| 4.21E-01 | 0 0 | Cs2g15020.1/Cs2g150 | 8.75 | 0 | 0 | 2 | MASCOT | T | PLEX8 |
| 1.85E-01 | 0 0 | Cs2g15020.1/Cs2g150 | 4.21 | 0 | 0 | 2 | MASCOT | T | PLEX8 |
| 1.51E-01 | 0 0 | Cs2g15020.1/Cs2g150 | 4.21 | 0 | 0 | 2 | MASCOT | T | PLEX8 |
| 9.75E-03 | 0 0 | Cs2g15020.1/Cs2g150 | 5.29 | 0 | 0 | 2 | MASCOT | T | PLEX8 |
| 7.45E-02 | 0 0 | Cs2g15020.1/Cs2g150 | 5.29 | 0 | 0 | 2 | MASCOT | T | PLEX8 |
| 2.72E-02 | 0 0 | Cs2g15020.1/Cs2g150 | 5.29 | 0 | 0 | 2 | MASCOT | T | PLEX8 |
| 2.45E-02 | 0 0 | Cs2g15020.1/Cs2g150 | 5.29 | 0 | 0 | 2 | MASCOT | T | PLEX8 |
| 1.42E-01 | 0 0 | Cs2g15020.1/Cs2g150 | 5.29 | 0 | 0 | 2 | MASCOT | T |       |
| 9.85E-02 | 0 0 | Cs2g15020.1/Cs2g150 | 5.29 | 0 | 0 | 2 | MASCOT | T |       |
| 1.60E-02 | 0 0 | Cs2g15020.1/Cs2g150 | 4.37 | 0 | 0 | 2 | MASCOT | T | PLEX8 |
| 1.93E-02 | 0 0 | Cs2g15020.1/Cs2g150 | 4.37 | 0 | 0 | 2 | MASCOT | T | PLEX8 |
| 1.74E-03 | 0 0 | Cs2g15020.1/Cs2g150 | 4.37 | 0 | 0 | 2 | MASCOT | T | PLEX8 |
| 2.82E-02 | 0 0 | Cs2g15020.1/Cs2g150 | 4.37 | 0 | 0 | 2 | MASCOT | T | PLEX8 |
| 5.72E-03 | 0 0 | Cs2g15020.1/Cs2g150 | 5.21 | 0 | 0 | 2 | MASCOT | T | PLEX8 |
| 2.14E-04 | 0 0 | Cs2g15020.1/Cs2g150 | 5.21 | 0 | 0 | 2 | MASCOT | T | PLEX8 |
| 3.87E-04 | 0 0 | Cs2g15020.1/Cs2g150 | 5.21 | 0 | 0 | 2 | MASCOT | T | PLEX8 |
| 2.98E-02 | 0 0 | Cs2g15020.1/Cs2g150 | 5.21 | 0 | 0 | 2 | MASCOT | T | PLEX8 |
| 2.71E-01 | 0 0 | Cs2g15020.1/Cs2g150 | 5.21 | 0 | 0 | 2 | MASCOT | T | PLEX8 |
| 2.48E-02 | 0 0 | Cs2g15020.1/Cs2g150 | 5.21 | 0 | 0 | 2 | MASCOT | T | PLEX8 |
| 2.52E-04 | 0 0 | Cs2g15020.1/Cs2g150 | 5.21 | 0 | 0 | 2 | MASCOT | T | PLEX8 |
| 2.78E-04 | 0 0 | Cs2g15020.1/Cs2g150 | 5.21 | 0 | 0 | 2 | MASCOT | T | PLEX8 |
| 2.77E-01 | 0 0 | Cs2g15020.1/Cs2g150 | 5.21 | 0 | 0 | 2 | MASCOT | T | PLEX8 |
| 3.14E-01 | 0 0 | Cs2g15020.1/Cs2g150 | 5.21 | 0 | 0 | 2 | MASCOT | T | PLEX8 |
| 7.03E-04 | 0 0 | Cs2g15020.1/Cs2g150 | 5.97 | 0 | 0 | 2 | MASCOT | T |       |
| 4.11E-02 | 0 0 | Cs2g15020.1/Cs2g150 | 5.97 | 0 | 0 | 2 | MASCOT | T |       |
| 2.05E-03 | 0 0 | Cs2g15020.1/Cs2g150 | 6.06 | 0 | 0 | 2 | MASCOT | T | PLEX8 |
| 6.47E-05 | 0 0 | Cs5g24360.1         | 6    | 0 | 0 | 2 | MASCOT | T |       |
| 5.02E-04 | 0 0 | Cs5g24360.1         | 6    | 0 | 0 | 2 | MASCOT | T |       |
| 2.22E-02 | 0 0 | Cs5g24360.1         | 5.88 | 0 | 0 | 2 | MASCOT | T | PLEX8 |
| 1.44E-01 | 0 0 | Cs5g24360.1         | 5.88 | 0 | 0 | 2 | MASCOT | T | PLEX8 |
| 2.29E-02 | 0 0 | Cs5g24360.1         | 5.88 | 0 | 0 | 2 | MASCOT | T | PLEX8 |
| 3.13E-02 | 0 0 | Cs5g24360.1         | 5.88 | 0 | 0 | 2 | MASCOT | T | PLEX8 |
| 2.36E-01 | 0 0 | Cs5g24360.1         | 5.88 | 0 | 0 | 2 | MASCOT | T |       |
| 8.00E-03 | 0 0 | Cs5g24360.1         | 8.63 | 0 | 0 | 2 | MASCOT | T |       |
| 2.46E-02 | 0 0 | Cs5g24360.1         | 8.63 | 0 | 0 | 2 | MASCOT | T | PLEX8 |
| 2.74E-02 | 0 0 | Cs5g24360.1         | 4.14 | 0 | 0 | 2 | MASCOT | T | PLEX8 |
| 9.56E-02 | 0 0 | Cs5g24360.1         | 4    | 0 | 0 | 2 | MASCOT | T |       |
| 2.32E-03 | 0 0 | Cs5g24360.1         | 4.37 | 0 | 0 | 2 | MASCOT | T |       |
| 1.01E-03 | 0 0 | Cs5g24360.1         | 4.37 | 0 | 0 | 2 | MASCOT | T |       |
| 1.26E-02 | 0 0 | Cs5g24360.1         | 4.37 | 0 | 0 | 2 | MASCOT | T |       |
| 3.58E-02 | 0 0 | Cs5g24360.1         | 4.37 | 0 | 0 | 2 | MASCOT | T |       |
| 6.02E-05 | 0 0 | Cs5g24360.1         | 4.37 | 0 | 0 | 2 | MASCOT | T |       |
| 6.91E-04 | 0 0 | Cs5g24360.1         | 4.37 | 0 | 0 | 2 | MASCOT | T |       |

|          |     |                     |      |   |      |   |   |        |         |
|----------|-----|---------------------|------|---|------|---|---|--------|---------|
| 2.97E-05 | 0 0 | Cs5g24360.1         | 5.83 | 0 | 15.9 | 0 | 2 | MASCOT | T       |
| 1.14E-02 | 0 0 | Cs5g24360.1         | 4.31 | 0 | 15.9 | 0 | 2 | MASCOT | T       |
| 5.53E-02 | 0 0 | Cs5g24360.1         | 4.31 | 0 | 15.9 | 0 | 2 | MASCOT | T       |
| 5.70E-04 | 0 0 | Cs5g24360.1         | 4.31 | 0 |      | 0 | 2 | MASCOT | T       |
| 1.36E-01 | 0 0 | Cs5g24360.1         | 5.96 | 0 | 15.9 | 0 | 2 | MASCOT | T       |
| 8.58E-02 | 0 0 | Cs5g24360.1         | 5.96 | 0 |      | 0 | 2 | MASCOT | T PLEX8 |
| 3.37E-01 | 0 0 | Cs5g24360.1         | 5.96 | 0 |      | 0 | 2 | MASCOT | T PLEX8 |
| 1.39E-01 | 0 0 | Cs5g24360.1         | 5.96 | 0 |      | 0 | 2 | MASCOT | T PLEX8 |
| 5.81E-04 | 0 0 | Cs5g24360.1         | 5.96 | 0 |      | 0 | 2 | MASCOT | T       |
| 4.07E-01 | 0 0 | Cs5g24360.1         | 5.66 | 0 |      | 0 | 2 | MASCOT | T PLEX8 |
| 1.56E-01 | 0 0 | Cs5g24360.1         | 5.66 | 0 |      | 0 | 2 | MASCOT | T PLEX8 |
| 6.39E-04 | 0 0 | Cs5g24360.1         | 4.53 | 0 | 15.9 | 0 | 2 | MASCOT | T PLEX8 |
| 1.37E-03 | 0 0 | Cs5g24360.1         | 4.53 | 0 | 15.9 | 0 | 2 | MASCOT | T PLEX8 |
| 1.97E-02 | 0 0 | Cs5g24360.1         | 4.53 | 0 | 15.9 | 0 | 2 | MASCOT | T PLEX8 |
| 1.04E-02 | 0 0 | Cs5g24360.1         | 4.53 | 0 |      | 0 | 2 | MASCOT | T PLEX8 |
| 1.07E-03 | 0 0 | Cs5g24360.1         | 4.53 | 0 |      | 0 | 2 | MASCOT | T PLEX8 |
| 1.34E-01 | 0 0 | Cs5g24360.1         | 4.37 | 0 |      | 0 | 2 | MASCOT | T PLEX8 |
| 8.96E-02 | 0 0 | Cs5g24360.1         | 4.37 | 0 |      | 0 | 2 | MASCOT | T PLEX8 |
| 3.46E-02 | 0 0 | Cs5g24360.1         | 6.75 | 0 |      | 0 | 2 | MASCOT | T PLEX8 |
| 1.29E-01 | 0 0 | Cs5g24360.1         | 6.75 | 0 |      | 0 | 2 | MASCOT | T PLEX8 |
| 4.17E-02 | 0 0 | Cs5g24360.1         | 6.75 | 0 |      | 0 | 2 | MASCOT | T PLEX8 |
| 1.58E-03 | 0 0 | Cs5g24360.1         | 6.75 | 0 |      | 0 | 2 | MASCOT | T PLEX8 |
| 3.36E-02 | 0 0 | Cs5g24360.1         | 8.76 | 0 | 15.9 | 0 | 2 | MASCOT | T PLEX8 |
| 1.78E-01 | 0 0 | Cs5g24360.1         | 8.76 | 0 | 15.9 | 0 | 2 | MASCOT | T PLEX8 |
| 1.40E-01 | 0 0 | Cs5g24360.1         | 8.76 | 0 | 15.9 | 0 | 2 | MASCOT | T PLEX8 |
| 5.23E-02 | 0 0 | Cs5g24360.1         | 8.76 | 0 |      | 0 | 2 | MASCOT | T PLEX8 |
| 2.91E-02 | 0 0 | Cs5g24360.1         | 8.76 | 0 |      | 0 | 2 | MASCOT | T PLEX8 |
| 4.14E-02 | 0 0 | Cs5g24360.1         | 8.76 | 0 |      | 0 | 2 | MASCOT | T       |
| 5.18E-03 | 0 0 | Cs5g24360.1         | 8.76 | 0 |      | 0 | 2 | MASCOT | T PLEX8 |
| 2.16E-01 | 0 0 | Cs5g24360.1         | 7.02 | 0 |      | 0 | 2 | MASCOT | T PLEX8 |
| 8.32E-02 | 0 0 | Cs5g24360.1         | 7.02 | 0 |      | 0 | 2 | MASCOT | T PLEX8 |
| 1.71E-02 | 0 0 | Cs5g24360.1         | 4.53 | 0 |      | 0 | 2 | MASCOT | T       |
| 2.23E-01 | 0 0 | Cs5g24360.1         | 5.72 | 0 |      | 0 | 2 | MASCOT | T PLEX8 |
| 5.88E-02 | 0 0 | Cs5g24360.1         | 5.72 | 0 |      | 0 | 2 | MASCOT | T PLEX8 |
| 6.11E-02 | 0 0 | Cs5g24360.1         | 5.72 | 0 |      | 0 | 2 | MASCOT | T PLEX8 |
| 3.68E-02 | 0 0 | Cs5g24360.1         | 5.72 | 0 |      | 0 | 2 | MASCOT | T PLEX8 |
| 7.40E-02 | 0 0 | Cs5g24360.1         | 5.81 | 0 |      | 0 | 2 | MASCOT | T PLEX8 |
| 2.12E-01 | 0 0 | Cs5g24360.1         | 5.81 | 0 |      | 0 | 2 | MASCOT | T PLEX8 |
| 4.55E-02 | 0 0 | Cs1g10270.1/Cs1g102 | 6    | 0 |      | 0 | 2 | MASCOT | T PLEX8 |
| 1.03E-01 | 0 0 | Cs1g10270.1/Cs1g102 | 4.03 | 0 |      | 0 | 2 | MASCOT | T PLEX8 |
| 1.85E-01 | 0 0 | Cs1g10270.1/Cs1g102 | 4.03 | 0 |      | 0 | 2 | MASCOT | T PLEX8 |
| 4.53E-04 | 0 0 | Cs1g10270.1/Cs1g102 | 4    | 0 |      | 0 | 2 | MASCOT | T       |
| 6.23E-04 | 0 0 | Cs1g10270.1/Cs1g102 | 4    | 0 |      | 0 | 2 | MASCOT | T       |
| 1.71E-01 | 0 0 | Cs1g10270.1/Cs1g102 | 6    | 0 |      | 0 | 2 | MASCOT | T PLEX8 |
| 1.68E-01 | 0 0 | Cs1g10270.1/Cs1g102 | 6    | 0 |      | 0 | 2 | MASCOT | T PLEX8 |
| 3.11E-02 | 0 0 | Cs1g10270.1/Cs1g102 | 8.59 | 0 |      | 0 | 2 | MASCOT | T PLEX8 |
| 1.17E-01 | 0 0 | Cs1g10270.1/Cs1g102 | 8.59 | 0 |      | 0 | 2 | MASCOT | T PLEX8 |
| 6.92E-02 | 0 0 | Cs1g10270.1/Cs1g102 | 8.59 | 0 |      | 0 | 2 | MASCOT | T PLEX8 |
| 1.73E-01 | 0 0 | Cs1g10270.1/Cs1g102 | 8.59 | 0 |      | 0 | 2 | MASCOT | T PLEX8 |
| 4.51E-02 | 0 0 | Cs1g10270.1/Cs1g102 | 8.59 | 0 |      | 0 | 2 | MASCOT | T PLEX8 |
| 6.99E-02 | 0 0 | Cs1g10270.1/Cs1g102 | 8.59 | 0 |      | 0 | 2 | MASCOT | T PLEX8 |

|          |     |                     |      |   |      |   |        |        |       |       |
|----------|-----|---------------------|------|---|------|---|--------|--------|-------|-------|
| 7.25E-02 | 0 0 | Cs1g10270.1/Cs1g102 | 8.59 | 0 | 0    | 2 | MASCOT | T      | PLEX8 |       |
| 4.11E-02 | 0 0 | Cs1g10270.1/Cs1g102 | 8.59 | 0 | 0    | 2 | MASCOT | T      | PLEX8 |       |
| 9.46E-02 | 0 0 | Cs1g10270.1/Cs1g102 | 8.59 | 0 | 0    | 2 | MASCOT | T      | PLEX8 |       |
| 5.70E-02 | 0 0 | Cs1g10270.1/Cs1g102 | 6.75 | 1 | 0    | 2 | MASCOT | T      | PLEX8 |       |
| 1.76E-02 | 0 0 | Cs1g10270.1/Cs1g102 | 5.84 | 0 | 0    | 2 | MASCOT | T      |       |       |
| 8.87E-02 | 0 0 | Cs1g10270.1/Cs1g102 | 5.84 | 0 | 0    | 2 | MASCOT | T      |       |       |
| 2.47E-03 | 0 0 | Cs1g10270.1/Cs1g102 | 5.84 | 0 | 0    | 2 | MASCOT | T      |       |       |
| 1.32E-02 | 0 0 | Cs1g10270.1/Cs1g102 | 5.84 | 0 | 0    | 2 | MASCOT | T      |       |       |
| 4.60E-02 | 0 0 | Cs1g10270.1/Cs1g102 | 5.32 | 0 | 0    | 2 | MASCOT | T      | PLEX8 |       |
| 1.41E-02 | 0 0 | Cs1g10270.1/Cs1g102 | 5.32 | 0 | 0    | 2 | MASCOT | T      | PLEX8 |       |
| 7.06E-02 | 0 0 | Cs1g10270.1/Cs1g102 | 5.32 | 0 | 0    | 2 | MASCOT | T      | PLEX8 |       |
| 1.51E-01 | 0 0 | Cs1g10270.1/Cs1g102 | 8.41 | 0 | 0    | 2 | MASCOT | T      | PLEX8 |       |
| 1.86E-03 | 0 0 | Cs1g10270.1/Cs1g102 | 8.47 | 0 | 0    | 2 | MASCOT | T      | PLEX8 |       |
| 2.71E-05 | 0 0 | Cs1g10270.1/Cs1g102 | 8.47 | 0 | 0    | 2 | MASCOT | T      | PLEX8 |       |
| 2.13E-01 | 0 0 | Cs1g10270.1/Cs1g102 | 8.47 | 0 | 0    | 2 | MASCOT | T      | PLEX8 |       |
| 5.52E-04 | 0 0 | Cs1g10270.1/Cs1g102 | 8.47 | 0 | 0    | 2 | MASCOT | T      | PLEX8 |       |
| 5.51E-06 | 0 0 | Cs1g10270.1/Cs1g102 | 4.37 | 0 | 0    | 2 | MASCOT | T      |       |       |
| 2.58E-04 | 0 0 | Cs1g10270.1/Cs1g102 | 4.37 | 0 | 0    | 2 | MASCOT | T      |       |       |
| 1.97E-04 | 0 0 | Cs1g10270.1/Cs1g102 | 4.37 | 0 | 0    | 2 | MASCOT | T      | PLEX8 |       |
| 5.06E-05 | 0 0 | Cs1g10270.1/Cs1g102 | 4.37 | 0 | 0    | 2 | MASCOT | T      | PLEX8 |       |
| 3.49E-03 | 0 0 | Cs1g10270.1/Cs1g102 | 3.92 | 0 | 0    | 2 | MASCOT | T      |       |       |
| 2.18E-02 | 0 0 | Cs1g10270.1/Cs1g102 | 3.92 | 0 | 0    | 2 | MASCOT | T      |       |       |
| 7.62E-02 | 0 0 | Cs1g10270.1/Cs1g102 | 3.92 | 0 | 0    | 2 | MASCOT | T      |       |       |
| 6.36E-02 | 0 0 | Cs1g10270.1/Cs1g102 | 4.03 | 0 | 0    | 2 | MASCOT | T      | PLEX8 |       |
| 6.05E-06 | 0 0 | Cs1g10270.1/Cs1g102 | 4.03 | 0 | 0    | 2 | MASCOT | T      | PLEX8 |       |
| 1.16E-03 | 0 0 | Cs1g10270.1/Cs1g102 | 4.03 | 0 | 0    | 2 | MASCOT | T      | PLEX8 |       |
| 8.00E-04 | 0 0 | Cs1g10270.1/Cs1g102 | 4.37 | 0 | 0    | 2 | MASCOT | T      | PLEX8 |       |
| 1.92E-03 | 0 0 | Cs1g10270.1/Cs1g102 | 4.37 | 0 | 0    | 2 | MASCOT | T      |       |       |
| 6.25E-02 | 0 0 | Cs1g10270.1/Cs1g102 | 4.37 | 0 | 0    | 2 | MASCOT | T      |       |       |
| 7.10E-02 | 0 0 | Cs1g10270.1/Cs1g102 | 6    | 0 | 0    | 2 | MASCOT | T      |       |       |
| 3.83E-02 | 0 0 | Cs1g10270.1/Cs1g102 | 6.75 | 0 | 0    | 2 | MASCOT | T      | PLEX8 |       |
| 3.58E-02 | 0 0 | Cs1g10270.1/Cs1g102 | 6.75 | 0 | 0    | 2 | MASCOT | T      | PLEX8 |       |
| 1.69E-01 | 0 0 | Cs1g10270.1/Cs1g102 | 6.75 | 0 | 0    | 2 | MASCOT | T      | PLEX8 |       |
| 2.33E-02 | 0 0 | Cs1g10270.1/Cs1g102 | 6.75 | 0 | 0    | 2 | MASCOT | T      | PLEX8 |       |
| 1.34E-02 | 0 0 | Cs1g10270.1/Cs1g102 | 9.41 | 0 | 0    | 2 | MASCOT | T      |       |       |
| 1.07E-01 | 0 0 | Cs1g10270.1/Cs1g102 | 5.32 | 0 | 0    | 2 | MASCOT | T      | PLEX8 |       |
| 3.00E-02 | 0 0 | Cs1g10270.1/Cs1g102 | 5.32 | 0 | 0    | 2 | MASCOT | T      | PLEX8 |       |
| 1.07E-02 | 0 0 | Cs1g10270.1/Cs1g102 | 5.32 | 0 | 0    | 2 | MASCOT | T      | PLEX8 |       |
| 1.40E-03 | 0 0 | Cs1g10270.1/Cs1g102 | 5.32 | 0 | 0    | 2 | MASCOT | T      | PLEX8 |       |
| 9.46E-02 | 0 0 | Cs1g10270.1/Cs1g102 | 5.32 | 0 | 0    | 2 | MASCOT | T      | PLEX8 |       |
| 5.09E-01 | 0 0 | Cs1g10270.1/Cs1g102 | 5.32 | 0 | 0    | 2 | MASCOT | T      |       |       |
| 1.47E-01 | 0 0 | Cs5g33470.1/Cs5g334 | 5.32 | 0 | 0    | 2 | MASCOT | T      |       |       |
| 2.77E-01 | 0 0 | Cs5g33470.1/Cs5g334 | 5.32 | 0 | 0    | 2 | MASCOT | T      |       |       |
| 2.13E-02 | 0 0 | Cs5g33470.1/Cs5g334 | 4.25 | 1 | 0    | 2 | MASCOT | T      | PLEX8 |       |
| 4.37E-04 | 0 0 | Cs5g33470.1/Cs5g334 | 4    | 0 | 0    | 2 | MASCOT | T      |       |       |
| 1.01E-04 | 0 0 | Cs5g33470.1/Cs5g334 | 4    | 0 | 0    | 2 | MASCOT | T      |       |       |
| 6.08E-02 | 0 0 | Cs5g33470.1/Cs5g334 | 6.74 | 0 | 0    | 2 | MASCOT | T      | PLEX8 |       |
| 1.25E-01 | 0 0 | Cs5g33470.1/Cs5g334 | 6.74 | 0 | 0    | 2 | MASCOT | T      |       |       |
| 2.29E-02 | 0 0 | Cs5g33470.1         | 6.5  | 0 | 15.9 | 0 | 2      | MASCOT | T     | PLEX8 |
| 2.72E-02 | 0 0 | Cs5g33470.1         | 6.5  | 0 | 15.9 | 0 | 2      | MASCOT | T     | PLEX8 |
| 1.97E-03 | 0 0 | Cs5g33470.1         | 6.5  | 0 | 0    | 2 | MASCOT | T      | PLEX8 |       |

|          |     |                     |      |   |      |   |        |        |       |       |
|----------|-----|---------------------|------|---|------|---|--------|--------|-------|-------|
| 8.36E-02 | 0 0 | Cs5g33470.1         | 6.5  | 0 | 0    | 2 | MASCOT | T      | PLEX8 |       |
| 5.93E-03 | 0 0 | Cs5g33470.1         | 6.5  | 0 | 0    | 2 | MASCOT | T      | PLEX8 |       |
| 8.61E-02 | 0 0 | Cs5g33470.1/Cs5g334 | 6.5  | 0 | 0    | 2 | MASCOT | T      |       |       |
| 7.90E-02 | 0 0 | Cs5g33470.1/Cs5g334 | 5.99 | 0 | 15.9 | 0 | 2      | MASCOT | T     | PLEX8 |
| 4.47E-02 | 0 0 | Cs5g33470.1/Cs5g334 | 5.99 | 0 | 15.9 | 0 | 2      | MASCOT | T     | PLEX8 |
| 6.49E-02 | 0 0 | Cs5g33470.1/Cs5g334 | 5.99 | 0 | 0    | 2 | MASCOT | T      | PLEX8 |       |
| 3.89E-03 | 0 0 | Cs5g33470.1/Cs5g334 | 5.99 | 0 | 0    | 2 | MASCOT | T      | PLEX8 |       |
| 1.22E-03 | 0 0 | Cs5g33470.1/Cs5g334 | 6.75 | 0 | 0    | 2 | MASCOT | T      |       |       |
| 1.17E-01 | 0 0 | Cs5g33470.1/Cs5g334 | 5.22 | 0 | 0    | 2 | MASCOT | T      | PLEX8 |       |
| 2.24E-01 | 0 0 | Cs5g33470.1/Cs5g334 | 4.37 | 0 | 0    | 2 | MASCOT | T      | PLEX8 |       |
| 2.89E-01 | 0 0 | Cs5g33470.1/Cs5g334 | 4.37 | 0 | 0    | 2 | MASCOT | T      | PLEX8 |       |
| 2.99E-01 | 0 0 | Cs5g33470.1/Cs5g334 | 8.75 | 0 | 0    | 2 | MASCOT | T      | PLEX8 |       |
| 2.38E-02 | 0 0 | Cs5g33470.1/Cs5g334 | 6    | 0 | 0    | 2 | MASCOT | T      | PLEX8 |       |
| 4.46E-02 | 0 0 | Cs5g33470.1/Cs5g334 | 6    | 0 | 0    | 2 | MASCOT | T      | PLEX8 |       |
| 7.56E-02 | 0 0 | Cs5g33470.1         | 5.84 | 0 | 0    | 2 | MASCOT | T      | PLEX8 |       |
| 1.42E-01 | 0 0 | Cs5g33470.1         | 5.84 | 0 | 0    | 2 | MASCOT | T      | PLEX8 |       |
| 3.39E-03 | 0 0 | Cs5g33470.1/Cs5g334 | 9.47 | 0 | 0    | 2 | MASCOT | T      | PLEX8 |       |
| 4.19E-04 | 0 0 | Cs5g33470.1/Cs5g334 | 5.32 | 0 | 0    | 2 | MASCOT | T      | PLEX8 |       |
| 4.51E-03 | 0 0 | Cs5g33470.1/Cs5g334 | 5.32 | 0 | 0    | 2 | MASCOT | T      | PLEX8 |       |
| 6.97E-03 | 0 0 | Cs5g33470.1/Cs5g334 | 5.32 | 0 | 0    | 2 | MASCOT | T      | PLEX8 |       |
| 8.24E-05 | 0 0 | Cs5g33470.1         | 6.89 | 0 | 0    | 2 | MASCOT | T      |       |       |
| 5.29E-04 | 0 0 | Cs4g06850.1/Cs4g068 | 5.21 | 0 | 0    | 2 | MASCOT | T      | PLEX8 |       |
| 1.56E-03 | 0 0 | Cs4g06850.1/Cs4g068 | 5.21 | 0 | 0    | 2 | MASCOT | T      | PLEX8 |       |
| 7.32E-03 | 0 0 | Cs4g06850.1/Cs4g068 | 5.21 | 0 | 0    | 2 | MASCOT | T      | PLEX8 |       |
| 4.64E-01 | 0 0 | Cs4g06850.1/Cs4g068 | 5.21 | 0 | 0    | 2 | MASCOT | T      | PLEX8 |       |
| 2.14E-01 | 0 0 | Cs5g33470.1/Cs5g334 | 5.84 | 0 | 0    | 2 | MASCOT | T      |       |       |
| 1.31E-02 | 0 0 | Cs1g14480.1/Cs1g144 | 4.14 | 0 | 0    | 2 | MASCOT | T      | PLEX8 |       |
| 2.56E-01 | 0 0 | Cs1g14480.1/Cs1g144 | 4.54 | 0 | 0    | 2 | MASCOT | T      | PLEX8 |       |
| 6.68E-03 | 0 0 | Cs1g14480.1/Cs1g144 | 6.74 | 0 | 0    | 2 | MASCOT | T      | PLEX8 |       |
| 1.32E-01 | 0 0 | Cs1g14480.1/Cs1g144 | 6.74 | 0 | 0    | 2 | MASCOT | T      |       |       |
| 2.43E-01 | 0 0 | Cs1g14480.1/Cs1g144 | 6.74 | 0 | 0    | 2 | MASCOT | T      | PLEX8 |       |
| 8.26E-05 | 0 0 | Cs1g14480.1/Cs1g144 | 4.37 | 0 | 15.9 | 0 | 2      | MASCOT | T     | PLEX8 |
| 4.42E-03 | 0 0 | Cs1g14480.1/Cs1g144 | 4.37 | 0 | 15.9 | 0 | 2      | MASCOT | T     | PLEX8 |
| 2.50E-01 | 0 0 | Cs1g14480.1/Cs1g144 | 8.75 | 0 | 0    | 2 | MASCOT | T      | PLEX8 |       |
| 3.27E-03 | 0 0 | Cs1g14480.1/Cs1g144 | 4.14 | 0 | 0    | 2 | MASCOT | T      | PLEX8 |       |
| 1.01E-02 | 0 0 | Cs1g14480.1/Cs1g144 | 4.41 | 1 | 0    | 2 | MASCOT | T      | PLEX8 |       |
| 5.13E-05 | 0 0 | Cs1g14480.1/Cs1g144 | 5.3  | 0 | 0    | 2 | MASCOT | T      | PLEX8 |       |
| 2.63E-03 | 0 0 | Cs1g14480.1/Cs1g144 | 5.3  | 0 | 0    | 2 | MASCOT | T      |       |       |
| 6.58E-03 | 0 0 | Cs1g14480.1/Cs1g144 | 5.3  | 0 | 0    | 2 | MASCOT | T      |       |       |
| 1.73E-01 | 0 0 | Cs1g14480.1/Cs1g144 | 5.3  | 0 | 0    | 2 | MASCOT | T      |       |       |
| 1.81E-03 | 0 0 | Cs1g14480.1/Cs1g144 | 4.09 | 0 | 15.9 | 0 | 2      | MASCOT | T     |       |
| 2.78E-02 | 0 0 | Cs1g14480.1/Cs1g144 | 4.03 | 0 | 0    | 2 | MASCOT | T      | PLEX8 |       |
| 1.74E-02 | 0 0 | Cs1g14480.1/Cs1g144 | 4.03 | 0 | 0    | 2 | MASCOT | T      |       |       |
| 1.25E-07 | 0 0 | Cs1g14480.1/Cs1g144 | 6.79 | 0 | 0    | 2 | MASCOT | T      | PLEX8 |       |
| 4.34E-05 | 0 0 | Cs1g14480.1/Cs1g144 | 6.79 | 0 | 0    | 2 | MASCOT | T      | PLEX8 |       |
| 3.55E-05 | 0 0 | Cs1g14480.1/Cs1g144 | 6.79 | 0 | 0    | 2 | MASCOT | T      |       |       |
| 3.50E-03 | 0 0 | Cs1g14480.1/Cs1g144 | 6.79 | 0 | 0    | 2 | MASCOT | T      |       |       |
| 3.85E-03 | 0 0 | Cs1g14480.1/Cs1g144 | 4.54 | 0 | 0    | 2 | MASCOT | T      | PLEX8 |       |
| 3.70E-01 | 0 0 | Cs1g14480.1/Cs1g144 | 4.54 | 0 | 0    | 2 | MASCOT | T      |       |       |
| 9.06E-03 | 0 0 | Cs1g14480.1/Cs1g144 | 4.54 | 0 | 0    | 2 | MASCOT | T      |       |       |
| 1.48E-01 | 0 0 | Cs1g14480.1/Cs1g144 | 4.37 | 0 | 0    | 2 | MASCOT | T      | PLEX8 |       |



|          |     |                       |      |   |      |   |        |        |       |       |
|----------|-----|-----------------------|------|---|------|---|--------|--------|-------|-------|
| 2.34E-02 | 0 0 | Cs1g14480.1/Cs1g144   | 4.37 | 0 | 0    | 2 | MASCOT | T      | PLEX8 |       |
| 8.67E-02 | 0 0 | Cs1g14480.1/Cs1g144   | 4.37 | 0 | 0    | 2 | MASCOT | T      | PLEX8 |       |
| 2.81E-01 | 0 0 | Cs1g14480.1/Cs1g144   | 8.75 | 0 | 0    | 2 | MASCOT | T      | PLEX8 |       |
| 4.92E-04 | 0 0 | Cs1g14480.1/Cs1g144   | 8.75 | 0 | 0    | 2 | MASCOT | T      | PLEX8 |       |
| 2.26E-02 | 0 0 | Cs1g14480.1/Cs1g144   | 8.06 | 0 | 0    | 2 | MASCOT | T      | PLEX8 |       |
| 1.76E-01 | 0 0 | Cs1g14480.1/Cs1g144   | 8.06 | 0 | 0    | 2 | MASCOT | T      | PLEX8 |       |
| 9.45E-03 | 0 0 | Cs1g14480.1/Cs1g144   | 8.06 | 0 | 0    | 2 | MASCOT | T      | PLEX8 |       |
| 4.92E-03 | 0 0 | Cs1g14480.1/Cs1g144   | 8.06 | 0 | 0    | 2 | MASCOT | T      | PLEX8 |       |
| 2.64E-02 | 0 0 | Cs1g14480.1/Cs1g144   | 5.66 | 0 | 15.9 | 0 | 2      | MASCOT | T     | PLEX8 |
| 1.19E-02 | 0 0 | Cs1g14480.1/Cs1g144   | 8.72 | 0 | 0    | 2 | MASCOT | T      | PLEX8 |       |
| 9.16E-02 | 0 0 | orange1.1t01869.1/ora | 8.76 | 0 | 15.9 | 0 | 2      | MASCOT | T     | PLEX8 |
| 6.50E-02 | 0 0 | orange1.1t01869.1/ora | 8.76 | 0 | 0    | 2 | MASCOT | T      | PLEX8 |       |
| 2.21E-03 | 0 0 | orange1.1t01869.1/ora | 8.75 | 0 | 0    | 2 | MASCOT | T      | PLEX8 |       |
| 7.29E-02 | 0 0 | orange1.1t01869.1/ora | 4.14 | 0 | 0    | 2 | MASCOT | T      |       |       |
| 8.08E-05 | 0 0 | orange1.1t01869.1/ora | 4.14 | 0 | 0    | 2 | MASCOT | T      |       |       |
| 1.91E-03 | 0 0 | orange1.1t01869.1/ora | 4.14 | 0 | 0    | 2 | MASCOT | T      |       |       |
| 9.33E-02 | 0 0 | orange1.1t01869.1/ora | 4.14 | 0 | 0    | 2 | MASCOT | T      |       |       |
| 1.28E-01 | 0 0 | orange1.1t01869.1/ora | 5.83 | 0 | 0    | 2 | MASCOT | T      | PLEX8 |       |
| 1.54E-02 | 0 0 | orange1.1t01869.1/ora | 9.76 | 0 | 0    | 2 | MASCOT | T      | PLEX8 |       |
| 1.19E-01 | 0 0 | orange1.1t01869.1/ora | 9.76 | 0 | 0    | 2 | MASCOT | T      |       |       |
| 4.61E-02 | 0 0 | orange1.1t01869.1/ora | 9.75 | 0 | 0    | 2 | MASCOT | T      | PLEX8 |       |
| 3.07E-02 | 0 0 | orange1.1t01869.1/ora | 5.66 | 0 | 0    | 2 | MASCOT | T      |       |       |
| 3.21E-03 | 0 0 | orange1.1t01869.1/ora | 5.97 | 0 | 0    | 2 | MASCOT | T      | PLEX8 |       |
| 3.07E-03 | 0 0 | orange1.1t01869.1/ora | 4.41 | 0 | 0    | 2 | MASCOT | T      | PLEX8 |       |
| 7.44E-02 | 0 0 | orange1.1t01869.1/ora | 4.41 | 0 | 0    | 2 | MASCOT | T      |       |       |
| 1.77E-02 | 0 0 | orange1.1t01869.1/ora | 8.27 | 0 | 0    | 2 | MASCOT | T      | PLEX8 |       |
| 5.09E-03 | 0 0 | orange1.1t01869.1/ora | 6    | 0 | 0    | 2 | MASCOT | T      | PLEX8 |       |
| 1.26E-01 | 0 0 | orange1.1t01869.1/ora | 6    | 0 | 0    | 2 | MASCOT | T      |       |       |
| 1.70E-04 | 0 0 | orange1.1t01869.1/ora | 6    | 0 | 0    | 2 | MASCOT | T      |       |       |
| 2.20E-02 | 0 0 | orange1.1t01869.1/ora | 5.99 | 0 | 0    | 2 | MASCOT | T      | PLEX8 |       |
| 1.24E-01 | 0 0 | orange1.1t01869.1/ora | 5.99 | 0 | 0    | 2 | MASCOT | T      | PLEX8 |       |
| 1.44E-02 | 0 0 | orange1.1t01869.1/ora | 5.99 | 0 | 0    | 2 | MASCOT | T      | PLEX8 |       |
| 7.08E-02 | 0 0 | orange1.1t01869.1/ora | 8.59 | 0 | 0    | 2 | MASCOT | T      | PLEX8 |       |
| 5.26E-03 | 0 0 | orange1.1t01869.1/ora | 8.59 | 0 | 0    | 2 | MASCOT | T      | PLEX8 |       |
| 1.50E-01 | 0 0 | orange1.1t01869.1/ora | 8.59 | 0 | 0    | 2 | MASCOT | T      |       |       |
| 7.55E-02 | 0 0 | orange1.1t01869.1/ora | 8.59 | 0 | 0    | 2 | MASCOT | T      | PLEX8 |       |
| 1.88E-01 | 0 0 | orange1.1t01869.1/ora | 5.99 | 0 | 0    | 2 | MASCOT | T      | PLEX8 |       |
| 6.95E-02 | 0 0 | orange1.1t01869.1/ora | 5.99 | 0 | 0    | 2 | MASCOT | T      | PLEX8 |       |
| 1.08E-02 | 0 0 | orange1.1t01869.1/ora | 5.32 | 0 | 0    | 2 | MASCOT | T      | PLEX8 |       |
| 3.51E-03 | 0 0 | orange1.1t01869.1/ora | 5.32 | 0 | 0    | 2 | MASCOT | T      | PLEX8 |       |
| 1.56E-06 | 0 0 | orange1.1t01869.1/ora | 5.84 | 0 | 0    | 2 | MASCOT | T      |       |       |
| 3.15E-03 | 0 0 | orange1.1t01869.1/ora | 5.84 | 0 | 0    | 2 | MASCOT | T      |       |       |
| 6.33E-02 | 0 0 | orange1.1t01869.1/ora | 4.03 | 0 | 0    | 2 | MASCOT | T      |       |       |
| 1.06E-01 | 0 0 | orange1.1t01869.1/ora | 4.03 | 0 | 0    | 2 | MASCOT | T      | PLEX8 |       |
| 6.91E-02 | 0 0 | orange1.1t00334.1/ora | 4.03 | 0 | 0    | 2 | MASCOT | T      |       |       |
| 3.74E-04 | 0 0 | orange1.1t00334.1/ora | 4.03 | 0 | 0    | 2 | MASCOT | T      |       |       |
| 3.80E-01 | 0 0 | orange1.1t00334.1/ora | 8.8  | 0 | 0    | 2 | MASCOT | T      | PLEX8 |       |
| 6.37E-01 | 0 0 | orange1.1t00334.1/ora | 8.8  | 0 | 0    | 2 | MASCOT | T      | PLEX8 |       |
| 6.01E-05 | 0 0 | orange1.1t00334.1/ora | 6.05 | 0 | 0    | 2 | MASCOT | T      | PLEX8 |       |
| 1.12E-02 | 0 0 | orange1.1t00334.1/ora | 4.09 | 0 | 0    | 2 | MASCOT | T      | PLEX8 |       |
| 1.58E-01 | 0 0 | orange1.1t00334.1/ora | 4.09 | 0 | 0    | 2 | MASCOT | T      | PLEX8 |       |

|          |     |                       |      |   |      |   |        |        |       |
|----------|-----|-----------------------|------|---|------|---|--------|--------|-------|
| 9.14E-03 | 0 0 | orange1.1t00334.1/ora | 4.09 | 0 | 0    | 2 | MASCOT | T      | PLEX8 |
| 5.66E-03 | 0 0 | orange1.1t00334.1/ora | 4.09 | 0 | 0    | 2 | MASCOT | T      | PLEX8 |
| 5.63E-06 | 0 0 | orange1.1t00334.1/ora | 4.25 | 0 | 0    | 2 | MASCOT | T      |       |
| 8.43E-04 | 0 0 | orange1.1t00334.1/ora | 4.09 | 0 | 15.9 | 0 | 2      | MASCOT | T     |
| 6.44E-02 | 0 0 | orange1.1t00334.1/ora | 6    | 0 | 0    | 2 | MASCOT | T      |       |
| 1.98E-02 | 0 0 | orange1.1t00334.1     | 4.53 | 0 | 0    | 2 | MASCOT | T      |       |
| 2.43E-03 | 0 0 | orange1.1t00334.1     | 4.53 | 0 | 0    | 2 | MASCOT | T      |       |
| 3.71E-03 | 0 0 | orange1.1t00334.1/ora | 3.62 | 0 | 0    | 2 | MASCOT | T      |       |
| 5.15E-03 | 0 0 | orange1.1t00334.1/ora | 4.37 | 0 | 0    | 2 | MASCOT | T      |       |
| 1.61E-03 | 0 0 | orange1.1t00334.1     | 5.87 | 0 | 0    | 2 | MASCOT | T      |       |
| 5.85E-03 | 0 0 | orange1.1t00334.1     | 5.87 | 0 | 0    | 2 | MASCOT | T      |       |
| 3.88E-06 | 0 0 | orange1.1t00334.1     | 5.87 | 0 | 0    | 2 | MASCOT | T      |       |
| 9.79E-03 | 0 0 | orange1.1t00334.1     | 5.21 | 0 | 0    | 2 | MASCOT | T      | PLEX8 |
| 5.65E-02 | 0 0 | orange1.1t00334.1/ora | 6.1  | 0 | 0    | 2 | MASCOT | T      | PLEX8 |
| 1.32E-02 | 0 0 | orange1.1t00334.1/ora | 5.32 | 0 | 0    | 2 | MASCOT | T      | PLEX8 |
| 9.55E-03 | 0 0 | orange1.1t00334.1/ora | 5.32 | 0 | 0    | 2 | MASCOT | T      | PLEX8 |
| 1.29E-01 | 0 0 | orange1.1t00334.1/ora | 8.76 | 0 | 0    | 2 | MASCOT | T      | PLEX8 |
| 1.04E-01 | 0 0 | orange1.1t00334.1/ora | 4.53 | 0 | 0    | 2 | MASCOT | T      | PLEX8 |
| 1.98E-01 | 0 0 | orange1.1t00334.1/ora | 4.53 | 0 | 0    | 2 | MASCOT | T      | PLEX8 |
| 3.53E-01 | 0 0 | orange1.1t00334.1/ora | 4.53 | 0 | 0    | 2 | MASCOT | T      | PLEX8 |
| 8.88E-02 | 0 0 | orange1.1t00334.1/ora | 4.53 | 0 | 0    | 2 | MASCOT | T      | PLEX8 |
| 2.85E-01 | 0 0 | orange1.1t00334.1/ora | 4.53 | 0 | 0    | 2 | MASCOT | T      | PLEX8 |
| 1.74E-03 | 0 0 | orange1.1t00334.1/ora | 4.37 | 0 | 0    | 2 | MASCOT | T      | PLEX8 |
| 5.05E-04 | 0 0 | orange1.1t00334.1/ora | 4.37 | 0 | 0    | 2 | MASCOT | T      | PLEX8 |
| 2.58E-01 | 0 0 | orange1.1t00334.1     | 8.41 | 0 | 0    | 2 | MASCOT | T      | PLEX8 |
| 1.08E-01 | 0 0 | orange1.1t02556.1     | 8.22 | 0 | 0    | 2 | MASCOT | T      | PLEX8 |
| 1.82E-01 | 0 0 | orange1.1t02556.1     | 4.54 | 0 | 0    | 2 | MASCOT | T      | PLEX8 |
| 7.05E-04 | 0 0 | orange1.1t02556.1     | 4.54 | 0 | 0    | 2 | MASCOT | T      | PLEX8 |
| 7.77E-03 | 0 0 | orange1.1t02556.1     | 4.54 | 0 | 0    | 2 | MASCOT | T      | PLEX8 |
| 2.34E-02 | 0 0 | orange1.1t02556.1     | 4.54 | 0 | 0    | 2 | MASCOT | T      | PLEX8 |
| 8.40E-05 | 0 0 | orange1.1t02556.1     | 4.54 | 0 | 0    | 2 | MASCOT | T      | PLEX8 |
| 2.67E-02 | 0 0 | orange1.1t02556.1     | 4.54 | 0 | 0    | 2 | MASCOT | T      | PLEX8 |
| 1.25E-04 | 0 0 | orange1.1t02556.1     | 4.54 | 0 | 0    | 2 | MASCOT | T      | PLEX8 |
| 4.23E-05 | 0 0 | orange1.1t02556.1     | 4.54 | 0 | 0    | 2 | MASCOT | T      | PLEX8 |
| 2.41E-03 | 0 0 | orange1.1t02556.1     | 4.54 | 0 | 0    | 2 | MASCOT | T      |       |
| 4.50E-03 | 0 0 | orange1.1t02556.1     | 4.54 | 0 | 0    | 2 | MASCOT | T      | PLEX8 |
| 4.05E-02 | 0 0 | orange1.1t02556.1     | 4.54 | 0 | 0    | 2 | MASCOT | T      | PLEX8 |
| 1.75E-02 | 0 0 | orange1.1t02556.1     | 4.54 | 0 | 0    | 2 | MASCOT | T      | PLEX8 |
| 3.77E-08 | 0 0 | orange1.1t02556.1     | 4.54 | 0 | 0    | 2 | MASCOT | T      | PLEX8 |
| 1.61E-05 | 0 0 | orange1.1t02556.1     | 4.54 | 0 | 0    | 2 | MASCOT | T      | PLEX8 |
| 1.33E-01 | 0 0 | orange1.1t02556.1     | 4.54 | 0 | 0    | 2 | MASCOT | T      | PLEX8 |
| 3.73E-03 | 0 0 | orange1.1t02556.1     | 4.54 | 0 | 0    | 2 | MASCOT | T      | PLEX8 |
| 9.45E-05 | 0 0 | orange1.1t02556.1     | 4.54 | 0 | 0    | 2 | MASCOT | T      | PLEX8 |
| 1.81E-05 | 0 0 | orange1.1t02556.1     | 4.54 | 0 | 0    | 2 | MASCOT | T      | PLEX8 |
| 3.73E-02 | 0 0 | orange1.1t02556.1     | 4.54 | 0 | 0    | 2 | MASCOT | T      | PLEX8 |
| 3.62E-02 | 0 0 | orange1.1t02556.1     | 4.54 | 0 | 0    | 2 | MASCOT | T      | PLEX8 |
| 1.11E-01 | 0 0 | orange1.1t02556.1     | 4.54 | 0 | 0    | 2 | MASCOT | T      | PLEX8 |
| 2.66E-02 | 0 0 | orange1.1t02556.1     | 4.54 | 0 | 0    | 2 | MASCOT | T      | PLEX8 |
| 9.80E-03 | 0 0 | orange1.1t02556.1     | 4.54 | 0 | 0    | 2 | MASCOT | T      | PLEX8 |
| 7.74E-02 | 0 0 | orange1.1t02556.1     | 4.54 | 0 | 0    | 2 | MASCOT | T      | PLEX8 |
| 7.67E-04 | 0 0 | orange1.1t02556.1     | 4.54 | 0 | 0    | 2 | MASCOT | T      | PLEX8 |

|              |                   |      |   |   |          |   |       |
|--------------|-------------------|------|---|---|----------|---|-------|
| 1.89E-04 0 0 | orange1.1t02556.1 | 4.54 | 0 | 0 | 2 MASCOT | T | PLEX8 |
| 1.59E-02 0 0 | orange1.1t02556.1 | 4.54 | 0 | 0 | 2 MASCOT | T | PLEX8 |
| 1.05E-04 0 0 | orange1.1t02556.1 | 4.54 | 0 | 0 | 2 MASCOT | T | PLEX8 |
| 2.44E-03 0 0 | orange1.1t02556.1 | 4.54 | 0 | 0 | 2 MASCOT | T | PLEX8 |
| 1.05E-03 0 0 | orange1.1t02556.1 | 4.54 | 0 | 0 | 2 MASCOT | T | PLEX8 |
| 3.94E-08 0 0 | orange1.1t02556.1 | 4.54 | 0 | 0 | 2 MASCOT | T | PLEX8 |
| 2.86E-04 0 0 | orange1.1t02556.1 | 4.54 | 0 | 0 | 2 MASCOT | T | PLEX8 |
| 5.19E-06 0 0 | orange1.1t02556.1 | 4.54 | 0 | 0 | 2 MASCOT | T | PLEX8 |
| 2.56E-08 0 0 | orange1.1t02556.1 | 4.54 | 0 | 0 | 2 MASCOT | T | PLEX8 |
| 1.88E-04 0 0 | orange1.1t02556.1 | 4.54 | 0 | 0 | 2 MASCOT | T | PLEX8 |
| 1.14E-03 0 0 | orange1.1t02556.1 | 4.54 | 0 | 0 | 2 MASCOT | T | PLEX8 |
| 4.40E-02 0 0 | orange1.1t02556.1 | 4.54 | 0 | 0 | 2 MASCOT | T | PLEX8 |
| 9.15E-02 0 0 | orange1.1t02556.1 | 4.54 | 0 | 0 | 2 MASCOT | T | PLEX8 |
| 2.43E-02 0 0 | orange1.1t02556.1 | 4.54 | 0 | 0 | 2 MASCOT | T | PLEX8 |
| 1.17E-01 0 0 | orange1.1t02556.1 | 4.54 | 0 | 0 | 2 MASCOT | T | PLEX8 |
| 7.19E-04 0 0 | orange1.1t02556.1 | 4.54 | 0 | 0 | 2 MASCOT | T | PLEX8 |
| 8.08E-02 0 0 | orange1.1t02556.1 | 4.54 | 0 | 0 | 2 MASCOT | T | PLEX8 |
| 4.80E-04 0 0 | orange1.1t02556.1 | 4.54 | 0 | 0 | 2 MASCOT | T |       |
| 1.55E-01 0 0 | orange1.1t02556.1 | 4.54 | 0 | 0 | 2 MASCOT | T |       |
| 8.16E-02 0 0 | orange1.1t02556.1 | 4.54 | 0 | 0 | 2 MASCOT | T | PLEX8 |
| 5.39E-02 0 0 | orange1.1t02556.1 | 4.54 | 0 | 0 | 2 MASCOT | T |       |
| 3.03E-04 0 0 | orange1.1t02556.1 | 4.54 | 0 | 0 | 2 MASCOT | T | PLEX8 |
| 3.14E-04 0 0 | orange1.1t02556.1 | 4.54 | 0 | 0 | 2 MASCOT | T | PLEX8 |
| 4.80E-03 0 0 | orange1.1t02556.1 | 4.54 | 0 | 0 | 2 MASCOT | T | PLEX8 |
| 8.92E-06 0 0 | orange1.1t02556.1 | 4.54 | 0 | 0 | 2 MASCOT | T | PLEX8 |
| 7.12E-02 0 0 | orange1.1t02556.1 | 4.54 | 0 | 0 | 2 MASCOT | T |       |
| 1.32E-01 0 0 | orange1.1t02556.1 | 4.54 | 0 | 0 | 2 MASCOT | T |       |
| 4.82E-02 0 0 | orange1.1t02556.1 | 4.54 | 0 | 0 | 2 MASCOT | T | PLEX8 |
| 3.53E-04 0 0 | orange1.1t02556.1 | 4.54 | 0 | 0 | 2 MASCOT | T | PLEX8 |
| 8.76E-02 0 0 | orange1.1t02556.1 | 4.54 | 0 | 0 | 2 MASCOT | T | PLEX8 |
| 3.00E-02 0 0 | orange1.1t02556.1 | 4.54 | 0 | 0 | 2 MASCOT | T | PLEX8 |
| 1.57E-04 0 0 | orange1.1t02556.1 | 4.54 | 0 | 0 | 2 MASCOT | T | PLEX8 |
| 1.30E-01 0 0 | orange1.1t02556.1 | 4.54 | 0 | 0 | 2 MASCOT | T |       |
| 2.79E-07 0 0 | orange1.1t02556.1 | 4.54 | 0 | 0 | 2 MASCOT | T |       |
| 9.07E-05 0 0 | orange1.1t02556.1 | 4.54 | 0 | 0 | 2 MASCOT | T | PLEX8 |
| 9.11E-03 0 0 | orange1.1t02556.1 | 4.54 | 0 | 0 | 2 MASCOT | T |       |
| 1.34E-05 0 0 | orange1.1t02556.1 | 4.54 | 0 | 0 | 2 MASCOT | T |       |
| 1.19E-01 0 0 | orange1.1t02556.1 | 4.54 | 0 | 0 | 2 MASCOT | T | PLEX8 |
| 1.70E-02 0 0 | orange1.1t02556.1 | 4.54 | 0 | 0 | 2 MASCOT | T | PLEX8 |
| 5.15E-03 0 0 | orange1.1t02556.1 | 4.54 | 0 | 0 | 2 MASCOT | T | PLEX8 |
| 5.42E-03 0 0 | orange1.1t02556.1 | 4.54 | 0 | 0 | 2 MASCOT | T | PLEX8 |
| 2.26E-03 0 0 | orange1.1t02556.1 | 4.54 | 0 | 0 | 2 MASCOT | T | PLEX8 |
| 1.91E-04 0 0 | orange1.1t02556.1 | 4.54 | 0 | 0 | 2 MASCOT | T | PLEX8 |
| 5.12E-06 0 0 | orange1.1t02556.1 | 4.54 | 0 | 0 | 2 MASCOT | T | PLEX8 |
| 3.58E-07 0 0 | orange1.1t02556.1 | 4.54 | 0 | 0 | 2 MASCOT | T | PLEX8 |
| 6.96E-05 0 0 | orange1.1t02556.1 | 4.54 | 0 | 0 | 2 MASCOT | T | PLEX8 |
| 1.34E-09 0 0 | orange1.1t02556.1 | 4.54 | 0 | 0 | 2 MASCOT | T | PLEX8 |
| 1.93E-06 0 0 | orange1.1t02556.1 | 4.54 | 0 | 0 | 2 MASCOT | T | PLEX8 |
| 1.12E-03 0 0 | orange1.1t02556.1 | 4.54 | 0 | 0 | 2 MASCOT | T | PLEX8 |
| 5.55E-03 0 0 | orange1.1t02556.1 | 4.54 | 0 | 0 | 2 MASCOT | T | PLEX8 |
| 1.30E-01 0 0 | orange1.1t02556.1 | 4.54 | 0 | 0 | 2 MASCOT | T | PLEX8 |

|          |     |                   |      |   |   |   |        |   |       |
|----------|-----|-------------------|------|---|---|---|--------|---|-------|
| 9.97E-03 | 0 0 | orange1.1t02556.1 | 4.54 | 0 | 0 | 2 | MASCOT | T | PLEX8 |
| 2.47E-02 | 0 0 | orange1.1t02556.1 | 4.54 | 0 | 0 | 2 | MASCOT | T | PLEX8 |
| 3.05E-03 | 0 0 | orange1.1t02556.1 | 4.54 | 0 | 0 | 2 | MASCOT | T | PLEX8 |
| 9.38E-03 | 0 0 | orange1.1t02556.1 | 4.54 | 0 | 0 | 2 | MASCOT | T | PLEX8 |
| 9.87E-02 | 0 0 | orange1.1t02556.1 | 4.54 | 0 | 0 | 2 | MASCOT | T |       |
| 1.72E-02 | 0 0 | orange1.1t02556.1 | 4.54 | 0 | 0 | 2 | MASCOT | T | PLEX8 |
| 1.16E-03 | 0 0 | orange1.1t02556.1 | 4.54 | 0 | 0 | 2 | MASCOT | T | PLEX8 |
| 6.70E-04 | 0 0 | orange1.1t02556.1 | 4.54 | 0 | 0 | 2 | MASCOT | T | PLEX8 |
| 9.74E-02 | 0 0 | orange1.1t02556.1 | 4.54 | 0 | 0 | 2 | MASCOT | T |       |
| 7.56E-05 | 0 0 | orange1.1t02556.1 | 4.54 | 0 | 0 | 2 | MASCOT | T | PLEX8 |
| 6.49E-06 | 0 0 | orange1.1t02556.1 | 4.54 | 0 | 0 | 2 | MASCOT | T | PLEX8 |
| 9.50E-09 | 0 0 | orange1.1t02556.1 | 4.54 | 0 | 0 | 2 | MASCOT | T | PLEX8 |
| 3.05E-05 | 0 0 | orange1.1t02556.1 | 4.54 | 0 | 0 | 2 | MASCOT | T | PLEX8 |
| 1.42E-01 | 0 0 | orange1.1t02556.1 | 4.54 | 0 | 0 | 2 | MASCOT | T | PLEX8 |
| 6.49E-03 | 0 0 | orange1.1t02556.1 | 4.54 | 0 | 0 | 2 | MASCOT | T | PLEX8 |
| 1.86E-02 | 0 0 | orange1.1t02556.1 | 4.54 | 0 | 0 | 2 | MASCOT | T | PLEX8 |
| 2.73E-05 | 0 0 | orange1.1t02556.1 | 4.54 | 0 | 0 | 2 | MASCOT | T | PLEX8 |
| 2.87E-03 | 0 0 | orange1.1t02556.1 | 4.54 | 0 | 0 | 2 | MASCOT | T | PLEX8 |
| 1.31E-01 | 0 0 | orange1.1t02556.1 | 4.54 | 0 | 0 | 2 | MASCOT | T |       |
| 1.06E-01 | 0 0 | orange1.1t02556.1 | 4.54 | 0 | 0 | 2 | MASCOT | T | PLEX8 |
| 4.87E-02 | 0 0 | orange1.1t02556.1 | 4.54 | 0 | 0 | 2 | MASCOT | T |       |
| 1.11E-01 | 0 0 | orange1.1t02556.1 | 4.54 | 0 | 0 | 2 | MASCOT | T | PLEX8 |
| 2.44E-02 | 0 0 | orange1.1t02556.1 | 4.54 | 0 | 0 | 2 | MASCOT | T | PLEX8 |
| 5.45E-02 | 0 0 | orange1.1t02556.1 | 4.54 | 0 | 0 | 2 | MASCOT | T |       |
| 5.17E-02 | 0 0 | orange1.1t02556.1 | 4.54 | 0 | 0 | 2 | MASCOT | T | PLEX8 |
| 7.47E-03 | 0 0 | orange1.1t02556.1 | 4.54 | 0 | 0 | 2 | MASCOT | T |       |
| 2.28E-02 | 0 0 | orange1.1t02556.1 | 4.54 | 0 | 0 | 2 | MASCOT | T |       |
| 2.29E-02 | 0 0 | orange1.1t02556.1 | 4.54 | 0 | 0 | 2 | MASCOT | T |       |
| 5.69E-03 | 0 0 | orange1.1t02556.1 | 4.54 | 0 | 0 | 2 | MASCOT | T |       |
| 6.21E-03 | 0 0 | orange1.1t02556.1 | 4.54 | 0 | 0 | 2 | MASCOT | T |       |
| 1.38E-02 | 0 0 | orange1.1t02556.1 | 4.54 | 0 | 0 | 2 | MASCOT | T |       |
| 1.41E-01 | 0 0 | orange1.1t02556.1 | 4.54 | 0 | 0 | 2 | MASCOT | T |       |
| 4.29E-05 | 0 0 | orange1.1t02556.1 | 4.54 | 0 | 0 | 2 | MASCOT | T |       |
| 1.39E-03 | 0 0 | orange1.1t02556.1 | 4.54 | 0 | 0 | 2 | MASCOT | T |       |
| 7.47E-05 | 0 0 | orange1.1t02556.1 | 4.54 | 0 | 0 | 2 | MASCOT | T |       |
| 5.90E-06 | 0 0 | orange1.1t02556.1 | 4.54 | 0 | 0 | 2 | MASCOT | T |       |
| 3.60E-03 | 0 0 | orange1.1t02556.1 | 4.54 | 0 | 0 | 2 | MASCOT | T |       |
| 5.17E-03 | 0 0 | orange1.1t02556.1 | 4.54 | 0 | 0 | 2 | MASCOT | T |       |
| 9.83E-10 | 0 0 | orange1.1t02556.1 | 4.54 | 0 | 0 | 2 | MASCOT | T |       |
| 1.25E-06 | 0 0 | orange1.1t02556.1 | 4.54 | 0 | 0 | 2 | MASCOT | T |       |
| 3.42E-02 | 0 0 | orange1.1t02556.1 | 4.54 | 0 | 0 | 2 | MASCOT | T |       |
| 2.18E-02 | 0 0 | orange1.1t02556.1 | 4.54 | 0 | 0 | 2 | MASCOT | T |       |
| 1.58E-01 | 0 0 | orange1.1t02556.1 | 4.54 | 0 | 0 | 2 | MASCOT | T |       |
| 4.67E-02 | 0 0 | orange1.1t02556.1 | 4.54 | 0 | 0 | 2 | MASCOT | T |       |
| 1.73E-01 | 0 0 | orange1.1t02556.1 | 4.09 | 0 | 0 | 2 | MASCOT | T | PLEX8 |
| 3.79E-01 | 0 0 | orange1.1t02556.1 | 4.09 | 0 | 0 | 2 | MASCOT | T | PLEX8 |
| 8.00E-02 | 0 0 | orange1.1t02556.1 | 4.09 | 0 | 0 | 2 | MASCOT | T | PLEX8 |
| 2.02E-01 | 0 0 | orange1.1t02556.1 | 4.09 | 0 | 0 | 2 | MASCOT | T | PLEX8 |
| 3.06E-02 | 0 0 | orange1.1t02556.1 | 4.09 | 0 | 0 | 2 | MASCOT | T | PLEX8 |
| 8.45E-02 | 0 0 | orange1.1t02556.1 | 4.09 | 0 | 0 | 2 | MASCOT | T | PLEX8 |
| 7.74E-02 | 0 0 | orange1.1t02556.1 | 4.09 | 0 | 0 | 2 | MASCOT | T | PLEX8 |

|          |     |                   |      |   |   |          |   |       |
|----------|-----|-------------------|------|---|---|----------|---|-------|
| 3.64E-01 | 0 0 | orange1.1t02556.1 | 4.09 | 0 | 0 | 2 MASCOT | T | PLEX8 |
| 1.64E-01 | 0 0 | orange1.1t02556.1 | 4.09 | 0 | 0 | 2 MASCOT | T |       |
| 6.04E-02 | 0 0 | orange1.1t02556.1 | 4.09 | 0 | 0 | 2 MASCOT | T |       |
| 2.86E-03 | 0 0 | orange1.1t02556.1 | 8.59 | 0 | 0 | 2 MASCOT | T | PLEX8 |
| 1.61E-01 | 0 0 | orange1.1t02556.1 | 8.59 | 0 | 0 | 2 MASCOT | T | PLEX8 |
| 1.70E-01 | 0 0 | orange1.1t02556.1 | 8.59 | 0 | 0 | 2 MASCOT | T | PLEX8 |
| 1.25E-02 | 0 0 | orange1.1t02556.1 | 8.59 | 0 | 0 | 2 MASCOT | T | PLEX8 |
| 4.61E-03 | 0 0 | orange1.1t02556.1 | 8.59 | 0 | 0 | 2 MASCOT | T | PLEX8 |
| 6.66E-03 | 0 0 | orange1.1t02556.1 | 8.59 | 0 | 0 | 2 MASCOT | T | PLEX8 |
| 4.33E-04 | 0 0 | orange1.1t02556.1 | 8.59 | 0 | 0 | 2 MASCOT | T | PLEX8 |
| 4.01E-03 | 0 0 | orange1.1t02556.1 | 8.59 | 0 | 0 | 2 MASCOT | T | PLEX8 |
| 1.53E-03 | 0 0 | orange1.1t02556.1 | 8.59 | 0 | 0 | 2 MASCOT | T | PLEX8 |
| 9.59E-03 | 0 0 | orange1.1t02556.1 | 8.59 | 0 | 0 | 2 MASCOT | T | PLEX8 |
| 8.63E-03 | 0 0 | orange1.1t02556.1 | 8.59 | 0 | 0 | 2 MASCOT | T | PLEX8 |
| 7.88E-02 | 0 0 | orange1.1t02556.1 | 8.59 | 0 | 0 | 2 MASCOT | T | PLEX8 |
| 1.80E-02 | 0 0 | orange1.1t02556.1 | 8.59 | 0 | 0 | 2 MASCOT | T | PLEX8 |
| 3.80E-02 | 0 0 | orange1.1t02556.1 | 8.59 | 0 | 0 | 2 MASCOT | T | PLEX8 |
| 1.05E-03 | 0 0 | orange1.1t02556.1 | 8.59 | 0 | 0 | 2 MASCOT | T | PLEX8 |
| 1.60E-01 | 0 0 | orange1.1t02556.1 | 8.59 | 0 | 0 | 2 MASCOT | T | PLEX8 |
| 5.26E-03 | 0 0 | orange1.1t02556.1 | 8.59 | 0 | 0 | 2 MASCOT | T | PLEX8 |
| 6.26E-02 | 0 0 | orange1.1t02556.1 | 8.59 | 0 | 0 | 2 MASCOT | T | PLEX8 |
| 2.13E-02 | 0 0 | orange1.1t02556.1 | 8.59 | 0 | 0 | 2 MASCOT | T | PLEX8 |
| 3.41E-02 | 0 0 | orange1.1t02556.1 | 8.59 | 0 | 0 | 2 MASCOT | T | PLEX8 |
| 6.22E-02 | 0 0 | orange1.1t02556.1 | 8.59 | 0 | 0 | 2 MASCOT | T | PLEX8 |
| 1.13E-01 | 0 0 | orange1.1t02556.1 | 8.59 | 0 | 0 | 2 MASCOT | T | PLEX8 |
| 3.92E-02 | 0 0 | orange1.1t02556.1 | 8.59 | 0 | 0 | 2 MASCOT | T | PLEX8 |
| 4.19E-02 | 0 0 | orange1.1t02556.1 | 8.59 | 0 | 0 | 2 MASCOT | T | PLEX8 |
| 2.97E-01 | 0 0 | orange1.1t02556.1 | 8.59 | 0 | 0 | 2 MASCOT | T |       |
| 3.44E-01 | 0 0 | orange1.1t02556.1 | 8.59 | 0 | 0 | 2 MASCOT | T |       |
| 9.27E-02 | 0 0 | orange1.1t02556.1 | 8.59 | 0 | 0 | 2 MASCOT | T |       |
| 3.70E-02 | 0 0 | orange1.1t02556.1 | 8.59 | 0 | 0 | 2 MASCOT | T |       |
| 2.11E-02 | 0 0 | orange1.1t02556.1 | 8.59 | 0 | 0 | 2 MASCOT | T | PLEX8 |
| 8.38E-02 | 0 0 | orange1.1t02556.1 | 8.59 | 0 | 0 | 2 MASCOT | T | PLEX8 |
| 1.18E-02 | 0 0 | orange1.1t02556.1 | 8.59 | 0 | 0 | 2 MASCOT | T | PLEX8 |
| 1.22E-01 | 0 0 | orange1.1t02556.1 | 8.59 | 0 | 0 | 2 MASCOT | T | PLEX8 |
| 1.69E-02 | 0 0 | orange1.1t02556.1 | 8.59 | 0 | 0 | 2 MASCOT | T | PLEX8 |
| 9.20E-04 | 0 0 | orange1.1t02556.1 | 8.59 | 0 | 0 | 2 MASCOT | T | PLEX8 |
| 5.92E-02 | 0 0 | orange1.1t02556.1 | 8.59 | 0 | 0 | 2 MASCOT | T | PLEX8 |
| 3.03E-02 | 0 0 | orange1.1t02556.1 | 8.59 | 0 | 0 | 2 MASCOT | T | PLEX8 |
| 1.03E-01 | 0 0 | orange1.1t02556.1 | 8.59 | 0 | 0 | 2 MASCOT | T | PLEX8 |
| 5.79E-02 | 0 0 | orange1.1t02556.1 | 8.59 | 0 | 0 | 2 MASCOT | T | PLEX8 |
| 1.41E-03 | 0 0 | orange1.1t02556.1 | 8.59 | 0 | 0 | 2 MASCOT | T | PLEX8 |
| 6.62E-02 | 0 0 | orange1.1t02556.1 | 8.59 | 0 | 0 | 2 MASCOT | T | PLEX8 |
| 1.36E-01 | 0 0 | orange1.1t02556.1 | 8.59 | 0 | 0 | 2 MASCOT | T | PLEX8 |
| 1.26E-01 | 0 0 | orange1.1t02556.1 | 8.59 | 0 | 0 | 2 MASCOT | T | PLEX8 |
| 1.50E-03 | 0 0 | orange1.1t02556.1 | 8.59 | 0 | 0 | 2 MASCOT | T | PLEX8 |
| 4.18E-02 | 0 0 | orange1.1t02556.1 | 8.59 | 0 | 0 | 2 MASCOT | T | PLEX8 |
| 2.36E-03 | 0 0 | orange1.1t02556.1 | 8.59 | 0 | 0 | 2 MASCOT | T | PLEX8 |
| 1.28E-01 | 0 0 | orange1.1t02556.1 | 8.59 | 0 | 0 | 2 MASCOT | T | PLEX8 |
| 4.28E-02 | 0 0 | orange1.1t02556.1 | 8.59 | 0 | 0 | 2 MASCOT | T | PLEX8 |
| 6.46E-02 | 0 0 | orange1.1t02556.1 | 8.59 | 0 | 0 | 2 MASCOT | T | PLEX8 |

|          |     |                   |      |   |   |          |   |       |
|----------|-----|-------------------|------|---|---|----------|---|-------|
| 1.21E-02 | 0 0 | orange1.1t02556.1 | 8.59 | 0 | 0 | 2 MASCOT | T | PLEX8 |
| 7.21E-04 | 0 0 | orange1.1t02556.1 | 8.59 | 0 | 0 | 2 MASCOT | T |       |
| 4.73E-02 | 0 0 | orange1.1t02556.1 | 8.59 | 0 | 0 | 2 MASCOT | T |       |
| 3.51E-02 | 0 0 | orange1.1t02556.1 | 8.59 | 0 | 0 | 2 MASCOT | T | PLEX8 |
| 1.28E-02 | 0 0 | orange1.1t02556.1 | 8.59 | 0 | 0 | 2 MASCOT | T | PLEX8 |
| 2.87E-02 | 0 0 | orange1.1t02556.1 | 8.59 | 0 | 0 | 2 MASCOT | T | PLEX8 |
| 6.44E-03 | 0 0 | orange1.1t02556.1 | 8.59 | 0 | 0 | 2 MASCOT | T | PLEX8 |
| 2.79E-03 | 0 0 | orange1.1t02556.1 | 8.59 | 0 | 0 | 2 MASCOT | T | PLEX8 |
| 1.93E-02 | 0 0 | orange1.1t02556.1 | 8.59 | 0 | 0 | 2 MASCOT | T | PLEX8 |
| 6.18E-03 | 0 0 | orange1.1t02556.1 | 8.59 | 0 | 0 | 2 MASCOT | T | PLEX8 |
| 3.01E-01 | 0 0 | orange1.1t02556.1 | 8.59 | 0 | 0 | 2 MASCOT | T | PLEX8 |
| 9.22E-02 | 0 0 | orange1.1t02556.1 | 8.59 | 0 | 0 | 2 MASCOT | T | PLEX8 |
| 7.80E-02 | 0 0 | orange1.1t02556.1 | 8.59 | 0 | 0 | 2 MASCOT | T | PLEX8 |
| 2.86E-03 | 0 0 | orange1.1t02556.1 | 8.59 | 0 | 0 | 2 MASCOT | T | PLEX8 |
| 6.74E-02 | 0 0 | orange1.1t02556.1 | 8.59 | 0 | 0 | 2 MASCOT | T | PLEX8 |
| 1.32E-01 | 0 0 | orange1.1t02556.1 | 8.59 | 0 | 0 | 2 MASCOT | T | PLEX8 |
| 4.75E-02 | 0 0 | orange1.1t02556.1 | 8.59 | 0 | 0 | 2 MASCOT | T | PLEX8 |
| 1.06E-01 | 0 0 | orange1.1t02556.1 | 8.59 | 0 | 0 | 2 MASCOT | T | PLEX8 |
| 6.82E-02 | 0 0 | orange1.1t02556.1 | 8.59 | 0 | 0 | 2 MASCOT | T | PLEX8 |
| 1.68E-01 | 0 0 | orange1.1t02556.1 | 8.59 | 0 | 0 | 2 MASCOT | T | PLEX8 |
| 1.84E-01 | 0 0 | orange1.1t02556.1 | 8.59 | 0 | 0 | 2 MASCOT | T | PLEX8 |
| 2.13E-01 | 0 0 | orange1.1t02556.1 | 8.59 | 0 | 0 | 2 MASCOT | T | PLEX8 |
| 9.40E-02 | 0 0 | orange1.1t02556.1 | 8.59 | 0 | 0 | 2 MASCOT | T | PLEX8 |
| 1.86E-01 | 0 0 | orange1.1t02556.1 | 8.59 | 0 | 0 | 2 MASCOT | T | PLEX8 |
| 1.53E-01 | 0 0 | orange1.1t02556.1 | 8.59 | 0 | 0 | 2 MASCOT | T |       |
| 2.53E-01 | 0 0 | orange1.1t02556.1 | 8.59 | 0 | 0 | 2 MASCOT | T | PLEX8 |
| 1.91E-01 | 0 0 | orange1.1t02556.1 | 8.59 | 0 | 0 | 2 MASCOT | T |       |
| 4.68E-02 | 0 0 | orange1.1t02556.1 | 8.59 | 0 | 0 | 2 MASCOT | T |       |
| 2.56E-01 | 0 0 | orange1.1t02556.1 | 8.59 | 0 | 0 | 2 MASCOT | T |       |
| 6.53E-02 | 0 0 | orange1.1t02556.1 | 8.59 | 0 | 0 | 2 MASCOT | T |       |
| 4.05E-03 | 0 0 | orange1.1t02556.1 | 8.59 | 0 | 0 | 2 MASCOT | T | PLEX8 |
| 1.20E-03 | 0 0 | orange1.1t02556.1 | 8.59 | 0 | 0 | 2 MASCOT | T |       |
| 1.05E-01 | 0 0 | orange1.1t02556.1 | 8.59 | 0 | 0 | 2 MASCOT | T | PLEX8 |
| 6.21E-04 | 0 0 | orange1.1t02556.1 | 8.59 | 0 | 0 | 2 MASCOT | T |       |
| 2.27E-01 | 0 0 | orange1.1t02556.1 | 8.59 | 0 | 0 | 2 MASCOT | T | PLEX8 |
| 4.06E-04 | 0 0 | orange1.1t02556.1 | 8.59 | 0 | 0 | 2 MASCOT | T | PLEX8 |
| 1.74E-01 | 0 0 | orange1.1t02556.1 | 8.59 | 0 | 0 | 2 MASCOT | T | PLEX8 |
| 1.21E-03 | 0 0 | orange1.1t02556.1 | 8.59 | 0 | 0 | 2 MASCOT | T |       |
| 9.48E-03 | 0 0 | orange1.1t02556.1 | 8.59 | 0 | 0 | 2 MASCOT | T |       |
| 6.47E-03 | 0 0 | orange1.1t02556.1 | 8.59 | 0 | 0 | 2 MASCOT | T | PLEX8 |
| 8.23E-02 | 0 0 | orange1.1t02556.1 | 8.59 | 0 | 0 | 2 MASCOT | T | PLEX8 |
| 2.27E-01 | 0 0 | orange1.1t02556.1 | 8.59 | 0 | 0 | 2 MASCOT | T | PLEX8 |
| 6.78E-02 | 0 0 | orange1.1t02556.1 | 8.59 | 0 | 0 | 2 MASCOT | T | PLEX8 |
| 1.82E-01 | 0 0 | orange1.1t02556.1 | 8.59 | 0 | 0 | 2 MASCOT | T |       |
| 1.03E-03 | 0 0 | orange1.1t02556.1 | 8.59 | 0 | 0 | 2 MASCOT | T |       |
| 1.30E-02 | 0 0 | orange1.1t02556.1 | 8.59 | 0 | 0 | 2 MASCOT | T |       |
| 1.10E-01 | 0 0 | orange1.1t02556.1 | 8.59 | 0 | 0 | 2 MASCOT | T | PLEX8 |
| 2.77E-01 | 0 0 | orange1.1t02556.1 | 8.59 | 0 | 0 | 2 MASCOT | T | PLEX8 |
| 9.56E-04 | 0 0 | orange1.1t02556.1 | 8.59 | 0 | 0 | 2 MASCOT | T | PLEX8 |
| 1.24E-02 | 0 0 | orange1.1t02556.1 | 8.59 | 0 | 0 | 2 MASCOT | T | PLEX8 |
| 7.10E-04 | 0 0 | orange1.1t02556.1 | 8.59 | 0 | 0 | 2 MASCOT | T | PLEX8 |

|              |                   |      |   |   |          |   |       |
|--------------|-------------------|------|---|---|----------|---|-------|
| 1.25E-02 0 0 | orange1.1t02556.1 | 8.59 | 0 | 0 | 2 MASCOT | T | PLEX8 |
| 1.20E-03 0 0 | orange1.1t02556.1 | 8.59 | 0 | 0 | 2 MASCOT | T |       |
| 5.12E-02 0 0 | orange1.1t02556.1 | 8.59 | 0 | 0 | 2 MASCOT | T | PLEX8 |
| 1.28E-01 0 0 | orange1.1t02556.1 | 8.59 | 0 | 0 | 2 MASCOT | T | PLEX8 |
| 5.13E-02 0 0 | orange1.1t02556.1 | 8.59 | 0 | 0 | 2 MASCOT | T | PLEX8 |
| 6.39E-02 0 0 | orange1.1t02556.1 | 8.59 | 0 | 0 | 2 MASCOT | T | PLEX8 |
| 9.46E-02 0 0 | orange1.1t02556.1 | 8.59 | 0 | 0 | 2 MASCOT | T | PLEX8 |
| 4.27E-02 0 0 | orange1.1t02556.1 | 8.59 | 0 | 0 | 2 MASCOT | T | PLEX8 |
| 1.10E-01 0 0 | orange1.1t02556.1 | 8.59 | 0 | 0 | 2 MASCOT | T |       |
| 1.10E-01 0 0 | orange1.1t02556.1 | 8.59 | 0 | 0 | 2 MASCOT | T |       |
| 1.32E-01 0 0 | orange1.1t02556.1 | 8.59 | 0 | 0 | 2 MASCOT | T |       |
| 3.03E-02 0 0 | orange1.1t02556.1 | 8.59 | 0 | 0 | 2 MASCOT | T |       |
| 1.55E-03 0 0 | orange1.1t02556.1 | 3.8  | 0 | 0 | 2 MASCOT | T |       |
| 7.80E-02 0 0 | orange1.1t02556.1 | 3.8  | 0 | 0 | 2 MASCOT | T |       |
| 4.58E-02 0 0 | orange1.1t02556.1 | 3.8  | 0 | 0 | 2 MASCOT | T |       |
| 4.18E-02 0 0 | orange1.1t02556.1 | 3.8  | 0 | 0 | 2 MASCOT | T |       |
| 2.15E-02 0 0 | orange1.1t02556.1 | 4.14 | 0 | 0 | 2 MASCOT | T | PLEX8 |
| 2.56E-03 0 0 | orange1.1t02556.1 | 4.14 | 0 | 0 | 2 MASCOT | T | PLEX8 |
| 1.53E-04 0 0 | orange1.1t02556.1 | 4.14 | 0 | 0 | 2 MASCOT | T | PLEX8 |
| 8.70E-02 0 0 | orange1.1t02556.1 | 4.14 | 0 | 0 | 2 MASCOT | T |       |
| 3.93E-02 0 0 | orange1.1t02556.1 | 4.14 | 0 | 0 | 2 MASCOT | T | PLEX8 |
| 6.83E-05 0 0 | orange1.1t02556.1 | 4.14 | 0 | 0 | 2 MASCOT | T | PLEX8 |
| 2.32E-03 0 0 | orange1.1t02556.1 | 4.14 | 0 | 0 | 2 MASCOT | T | PLEX8 |
| 7.45E-02 0 0 | orange1.1t02556.1 | 4.14 | 0 | 0 | 2 MASCOT | T | PLEX8 |
| 2.26E-03 0 0 | orange1.1t02556.1 | 4.14 | 0 | 0 | 2 MASCOT | T | PLEX8 |
| 5.43E-04 0 0 | orange1.1t02556.1 | 4.14 | 0 | 0 | 2 MASCOT | T | PLEX8 |
| 9.90E-02 0 0 | orange1.1t02556.1 | 4.14 | 0 | 0 | 2 MASCOT | T | PLEX8 |
| 1.23E-01 0 0 | orange1.1t02556.1 | 4.14 | 0 | 0 | 2 MASCOT | T | PLEX8 |
| 1.07E-02 0 0 | orange1.1t02556.1 | 4.14 | 0 | 0 | 2 MASCOT | T | PLEX8 |
| 5.66E-02 0 0 | orange1.1t02556.1 | 4.14 | 0 | 0 | 2 MASCOT | T | PLEX8 |
| 7.79E-04 0 0 | orange1.1t02556.1 | 4.14 | 0 | 0 | 2 MASCOT | T | PLEX8 |
| 3.62E-03 0 0 | orange1.1t02556.1 | 4.14 | 0 | 0 | 2 MASCOT | T | PLEX8 |
| 4.59E-04 0 0 | orange1.1t02556.1 | 4.14 | 0 | 0 | 2 MASCOT | T | PLEX8 |
| 2.33E-04 0 0 | orange1.1t02556.1 | 4.14 | 0 | 0 | 2 MASCOT | T | PLEX8 |
| 2.32E-03 0 0 | orange1.1t02556.1 | 4.14 | 0 | 0 | 2 MASCOT | T | PLEX8 |
| 1.18E-04 0 0 | orange1.1t02556.1 | 4.14 | 0 | 0 | 2 MASCOT | T | PLEX8 |
| 4.57E-03 0 0 | orange1.1t02556.1 | 4.14 | 0 | 0 | 2 MASCOT | T | PLEX8 |
| 4.94E-05 0 0 | orange1.1t02556.1 | 4.14 | 0 | 0 | 2 MASCOT | T | PLEX8 |
| 2.36E-03 0 0 | orange1.1t02556.1 | 4.14 | 0 | 0 | 2 MASCOT | T | PLEX8 |
| 8.61E-05 0 0 | orange1.1t02556.1 | 4.14 | 0 | 0 | 2 MASCOT | T | PLEX8 |
| 2.35E-03 0 0 | orange1.1t02556.1 | 4.14 | 0 | 0 | 2 MASCOT | T | PLEX8 |
| 2.57E-05 0 0 | orange1.1t02556.1 | 4.14 | 0 | 0 | 2 MASCOT | T | PLEX8 |
| 2.39E-03 0 0 | orange1.1t02556.1 | 4.14 | 0 | 0 | 2 MASCOT | T | PLEX8 |
| 8.25E-05 0 0 | orange1.1t02556.1 | 4.14 | 0 | 0 | 2 MASCOT | T | PLEX8 |
| 1.46E-05 0 0 | orange1.1t02556.1 | 4.14 | 0 | 0 | 2 MASCOT | T | PLEX8 |
| 7.43E-03 0 0 | orange1.1t02556.1 | 4.14 | 0 | 0 | 2 MASCOT | T | PLEX8 |
| 3.07E-02 0 0 | orange1.1t02556.1 | 4.14 | 0 | 0 | 2 MASCOT | T | PLEX8 |
| 3.51E-03 0 0 | orange1.1t02556.1 | 4.14 | 0 | 0 | 2 MASCOT | T | PLEX8 |
| 2.44E-03 0 0 | orange1.1t02556.1 | 4.14 | 0 | 0 | 2 MASCOT | T | PLEX8 |
| 6.19E-02 0 0 | orange1.1t02556.1 | 4.14 | 0 | 0 | 2 MASCOT | T | PLEX8 |
| 1.03E-03 0 0 | orange1.1t02556.1 | 4.14 | 0 | 0 | 2 MASCOT | T | PLEX8 |

|          |     |                   |      |   |   |          |   |       |
|----------|-----|-------------------|------|---|---|----------|---|-------|
| 1.94E-02 | 0 0 | orange1.1t02556.1 | 4.14 | 0 | 0 | 2 MASCOT | T | PLEX8 |
| 5.93E-06 | 0 0 | orange1.1t02556.1 | 4.14 | 0 | 0 | 2 MASCOT | T | PLEX8 |
| 4.63E-03 | 0 0 | orange1.1t02556.1 | 4.14 | 0 | 0 | 2 MASCOT | T | PLEX8 |
| 1.61E-03 | 0 0 | orange1.1t02556.1 | 4.14 | 0 | 0 | 2 MASCOT | T | PLEX8 |
| 2.33E-03 | 0 0 | orange1.1t02556.1 | 4.14 | 0 | 0 | 2 MASCOT | T | PLEX8 |
| 3.31E-05 | 0 0 | orange1.1t02556.1 | 4.14 | 0 | 0 | 2 MASCOT | T | PLEX8 |
| 6.46E-02 | 0 0 | orange1.1t02556.1 | 4.14 | 0 | 0 | 2 MASCOT | T | PLEX8 |
| 8.31E-06 | 0 0 | orange1.1t02556.1 | 4.14 | 0 | 0 | 2 MASCOT | T | PLEX8 |
| 1.19E-02 | 0 0 | orange1.1t02556.1 | 4.14 | 0 | 0 | 2 MASCOT | T | PLEX8 |
| 9.65E-03 | 0 0 | orange1.1t02556.1 | 4.14 | 0 | 0 | 2 MASCOT | T | PLEX8 |
| 1.10E-01 | 0 0 | orange1.1t02556.1 | 4.14 | 0 | 0 | 2 MASCOT | T | PLEX8 |
| 3.04E-03 | 0 0 | orange1.1t02556.1 | 4.14 | 0 | 0 | 2 MASCOT | T | PLEX8 |
| 4.66E-03 | 0 0 | orange1.1t02556.1 | 4.14 | 0 | 0 | 2 MASCOT | T | PLEX8 |
| 8.56E-03 | 0 0 | orange1.1t02556.1 | 4.14 | 0 | 0 | 2 MASCOT | T | PLEX8 |
| 1.11E-02 | 0 0 | orange1.1t02556.1 | 4.14 | 0 | 0 | 2 MASCOT | T |       |
| 2.04E-02 | 0 0 | orange1.1t02556.1 | 4.14 | 0 | 0 | 2 MASCOT | T | PLEX8 |
| 2.94E-03 | 0 0 | orange1.1t02556.1 | 4.14 | 0 | 0 | 2 MASCOT | T | PLEX8 |
| 1.61E-03 | 0 0 | orange1.1t02556.1 | 4.14 | 0 | 0 | 2 MASCOT | T | PLEX8 |
| 3.30E-04 | 0 0 | orange1.1t02556.1 | 4.14 | 0 | 0 | 2 MASCOT | T | PLEX8 |
| 1.99E-02 | 0 0 | orange1.1t02556.1 | 4.14 | 0 | 0 | 2 MASCOT | T | PLEX8 |
| 1.39E-02 | 0 0 | orange1.1t02556.1 | 4.14 | 0 | 0 | 2 MASCOT | T |       |
| 2.26E-03 | 0 0 | orange1.1t02556.1 | 4.14 | 0 | 0 | 2 MASCOT | T | PLEX8 |
| 8.95E-03 | 0 0 | orange1.1t02556.1 | 4.14 | 0 | 0 | 2 MASCOT | T |       |
| 7.49E-02 | 0 0 | orange1.1t02556.1 | 4.14 | 0 | 0 | 2 MASCOT | T | PLEX8 |
| 4.20E-02 | 0 0 | orange1.1t02556.1 | 4.14 | 0 | 0 | 2 MASCOT | T |       |
| 4.13E-02 | 0 0 | orange1.1t02556.1 | 4.14 | 0 | 0 | 2 MASCOT | T |       |
| 7.58E-03 | 0 0 | orange1.1t02556.1 | 4.14 | 0 | 0 | 2 MASCOT | T | PLEX8 |
| 8.89E-02 | 0 0 | orange1.1t02556.1 | 4.14 | 0 | 0 | 2 MASCOT | T | PLEX8 |
| 2.83E-03 | 0 0 | orange1.1t02556.1 | 4.14 | 0 | 0 | 2 MASCOT | T | PLEX8 |
| 3.09E-05 | 0 0 | orange1.1t02556.1 | 4.14 | 0 | 0 | 2 MASCOT | T |       |
| 4.45E-02 | 0 0 | orange1.1t02556.1 | 4.14 | 0 | 0 | 2 MASCOT | T | PLEX8 |
| 5.02E-03 | 0 0 | orange1.1t02556.1 | 4.14 | 0 | 0 | 2 MASCOT | T |       |
| 1.36E-01 | 0 0 | orange1.1t02556.1 | 4.14 | 0 | 0 | 2 MASCOT | T | PLEX8 |
| 9.54E-02 | 0 0 | orange1.1t02556.1 | 4.14 | 0 | 0 | 2 MASCOT | T |       |
| 6.77E-03 | 0 0 | orange1.1t02556.1 | 4.14 | 0 | 0 | 2 MASCOT | T |       |
| 1.68E-02 | 0 0 | orange1.1t02556.1 | 4.14 | 0 | 0 | 2 MASCOT | T |       |
| 6.46E-04 | 0 0 | orange1.1t02556.1 | 4.14 | 0 | 0 | 2 MASCOT | T |       |
| 4.23E-02 | 0 0 | orange1.1t02556.1 | 4.14 | 0 | 0 | 2 MASCOT | T |       |
| 8.00E-02 | 0 0 | orange1.1t02556.1 | 4.14 | 0 | 0 | 2 MASCOT | T | PLEX8 |
| 1.29E-02 | 0 0 | orange1.1t02556.1 | 4.14 | 0 | 0 | 2 MASCOT | T |       |
| 1.97E-02 | 0 0 | orange1.1t02556.1 | 4.14 | 0 | 0 | 2 MASCOT | T | PLEX8 |
| 4.35E-02 | 0 0 | orange1.1t02556.1 | 4.14 | 0 | 0 | 2 MASCOT | T | PLEX8 |
| 4.85E-02 | 0 0 | orange1.1t02556.1 | 4.14 | 0 | 0 | 2 MASCOT | T | PLEX8 |
| 3.31E-02 | 0 0 | orange1.1t02556.1 | 4.14 | 0 | 0 | 2 MASCOT | T |       |
| 2.07E-02 | 0 0 | orange1.1t02556.1 | 4.14 | 0 | 0 | 2 MASCOT | T | PLEX8 |
| 8.89E-02 | 0 0 | orange1.1t02556.1 | 4.14 | 0 | 0 | 2 MASCOT | T |       |
| 9.16E-03 | 0 0 | orange1.1t02556.1 | 4.14 | 0 | 0 | 2 MASCOT | T |       |
| 4.51E-02 | 0 0 | orange1.1t02556.1 | 4.14 | 0 | 0 | 2 MASCOT | T | PLEX8 |
| 1.24E-02 | 0 0 | orange1.1t02556.1 | 4.14 | 0 | 0 | 2 MASCOT | T |       |
| 2.32E-02 | 0 0 | orange1.1t02556.1 | 4.14 | 0 | 0 | 2 MASCOT | T |       |
| 1.17E-01 | 0 0 | orange1.1t02556.1 | 4.14 | 0 | 0 | 2 MASCOT | T |       |



|          |     |                   |      |   |   |          |   |       |
|----------|-----|-------------------|------|---|---|----------|---|-------|
| 4.12E-02 | 0 0 | orange1.1t02556.1 | 4.14 | 0 | 0 | 2 MASCOT | T |       |
| 2.87E-01 | 0 0 | orange1.1t02556.1 | 4.14 | 0 | 0 | 2 MASCOT | T |       |
| 2.26E-02 | 0 0 | orange1.1t02556.1 | 4.14 | 0 | 0 | 2 MASCOT | T |       |
| 4.60E-02 | 0 0 | orange1.1t02556.1 | 4.14 | 0 | 0 | 2 MASCOT | T |       |
| 2.16E-02 | 0 0 | orange1.1t02556.1 | 4.14 | 0 | 0 | 2 MASCOT | T |       |
| 1.14E-01 | 0 0 | orange1.1t02556.1 | 4.14 | 0 | 0 | 2 MASCOT | T |       |
| 3.08E-02 | 0 0 | orange1.1t02556.1 | 4.14 | 0 | 0 | 2 MASCOT | T |       |
| 8.53E-03 | 0 0 | orange1.1t02556.1 | 4.14 | 0 | 0 | 2 MASCOT | T |       |
| 3.79E-02 | 0 0 | orange1.1t02556.1 | 4.14 | 0 | 0 | 2 MASCOT | T |       |
| 3.98E-02 | 0 0 | orange1.1t02556.1 | 4.14 | 0 | 0 | 2 MASCOT | T |       |
| 2.46E-02 | 0 0 | orange1.1t02556.1 | 4.14 | 0 | 0 | 2 MASCOT | T |       |
| 9.40E-02 | 0 0 | orange1.1t02556.1 | 4.14 | 0 | 0 | 2 MASCOT | T |       |
| 2.91E-02 | 0 0 | orange1.1t02556.1 | 4.14 | 0 | 0 | 2 MASCOT | T |       |
| 8.60E-02 | 0 0 | orange1.1t02556.1 | 4.14 | 0 | 0 | 2 MASCOT | T |       |
| 4.27E-02 | 0 0 | orange1.1t02556.1 | 4.14 | 0 | 0 | 2 MASCOT | T |       |
| 5.69E-02 | 0 0 | orange1.1t02556.1 | 4.14 | 0 | 0 | 2 MASCOT | T |       |
| 2.28E-01 | 0 0 | orange1.1t02556.1 | 4.14 | 0 | 0 | 2 MASCOT | T |       |
| 8.63E-02 | 0 0 | orange1.1t02556.1 | 4.14 | 0 | 0 | 2 MASCOT | T |       |
| 3.94E-02 | 0 0 | orange1.1t02556.1 | 4.14 | 0 | 0 | 2 MASCOT | T |       |
| 5.44E-02 | 0 0 | orange1.1t02556.1 | 4.14 | 0 | 0 | 2 MASCOT | T | PLEX8 |
| 8.83E-05 | 0 0 | orange1.1t02556.1 | 4.14 | 0 | 0 | 2 MASCOT | T | PLEX8 |
| 5.06E-04 | 0 0 | orange1.1t02556.1 | 4.14 | 0 | 0 | 2 MASCOT | T | PLEX8 |
| 2.10E-02 | 0 0 | orange1.1t02556.1 | 4.14 | 0 | 0 | 2 MASCOT | T | PLEX8 |
| 8.75E-04 | 0 0 | orange1.1t02556.1 | 4.14 | 0 | 0 | 2 MASCOT | T | PLEX8 |
| 3.06E-02 | 0 0 | orange1.1t02556.1 | 4.14 | 0 | 0 | 2 MASCOT | T | PLEX8 |
| 6.58E-02 | 0 0 | orange1.1t02556.1 | 4.14 | 0 | 0 | 2 MASCOT | T | PLEX8 |
| 1.25E-05 | 0 0 | orange1.1t02556.1 | 4.14 | 0 | 0 | 2 MASCOT | T | PLEX8 |
| 3.09E-03 | 0 0 | orange1.1t02556.1 | 4.14 | 0 | 0 | 2 MASCOT | T | PLEX8 |
| 1.10E-05 | 0 0 | orange1.1t02556.1 | 4.14 | 0 | 0 | 2 MASCOT | T | PLEX8 |
| 4.16E-01 | 0 0 | orange1.1t02556.1 | 4.14 | 0 | 0 | 2 MASCOT | T | PLEX8 |
| 2.46E-05 | 0 0 | orange1.1t02556.1 | 4.14 | 0 | 0 | 2 MASCOT | T | PLEX8 |
| 3.49E-03 | 0 0 | orange1.1t02556.1 | 4.14 | 0 | 0 | 2 MASCOT | T | PLEX8 |
| 2.34E-02 | 0 0 | orange1.1t02556.1 | 4.14 | 0 | 0 | 2 MASCOT | T |       |
| 8.48E-03 | 0 0 | orange1.1t02556.1 | 4.14 | 0 | 0 | 2 MASCOT | T | PLEX8 |
| 1.84E-02 | 0 0 | orange1.1t02556.1 | 4.14 | 0 | 0 | 2 MASCOT | T | PLEX8 |
| 8.39E-05 | 0 0 | orange1.1t02556.1 | 4.14 | 0 | 0 | 2 MASCOT | T | PLEX8 |
| 5.73E-02 | 0 0 | orange1.1t02556.1 | 4.14 | 0 | 0 | 2 MASCOT | T | PLEX8 |
| 1.87E-03 | 0 0 | orange1.1t02556.1 | 4.14 | 0 | 0 | 2 MASCOT | T | PLEX8 |
| 2.22E-01 | 0 0 | orange1.1t02556.1 | 4.14 | 0 | 0 | 2 MASCOT | T | PLEX8 |
| 1.08E-01 | 0 0 | orange1.1t02556.1 | 4.14 | 0 | 0 | 2 MASCOT | T | PLEX8 |
| 6.11E-02 | 0 0 | orange1.1t02556.1 | 4.14 | 0 | 0 | 2 MASCOT | T | PLEX8 |
| 2.13E-01 | 0 0 | orange1.1t02556.1 | 4.14 | 0 | 0 | 2 MASCOT | T | PLEX8 |
| 2.39E-02 | 0 0 | orange1.1t02556.1 | 4.14 | 0 | 0 | 2 MASCOT | T | PLEX8 |
| 1.27E-02 | 0 0 | orange1.1t02556.1 | 4.14 | 0 | 0 | 2 MASCOT | T | PLEX8 |
| 1.23E-02 | 0 0 | orange1.1t02556.1 | 4.14 | 0 | 0 | 2 MASCOT | T |       |
| 9.48E-02 | 0 0 | orange1.1t02556.1 | 4.14 | 0 | 0 | 2 MASCOT | T | PLEX8 |
| 8.29E-04 | 0 0 | orange1.1t02556.1 | 4.14 | 0 | 0 | 2 MASCOT | T | PLEX8 |
| 2.36E-03 | 0 0 | orange1.1t02556.1 | 4.14 | 0 | 0 | 2 MASCOT | T |       |
| 5.10E-05 | 0 0 | orange1.1t02556.1 | 4.14 | 0 | 0 | 2 MASCOT | T | PLEX8 |
| 2.32E-03 | 0 0 | orange1.1t02556.1 | 4.14 | 0 | 0 | 2 MASCOT | T |       |
| 8.06E-05 | 0 0 | orange1.1t02556.1 | 4.14 | 0 | 0 | 2 MASCOT | T | PLEX8 |

|              |                   |      |   |   |          |   |       |
|--------------|-------------------|------|---|---|----------|---|-------|
| 1.84E-02 0 0 | orange1.1t02556.1 | 4.14 | 0 | 0 | 2 MASCOT | T | PLEX8 |
| 2.64E-05 0 0 | orange1.1t02556.1 | 4.14 | 0 | 0 | 2 MASCOT | T | PLEX8 |
| 1.86E-02 0 0 | orange1.1t02556.1 | 4.14 | 0 | 0 | 2 MASCOT | T | PLEX8 |
| 2.86E-02 0 0 | orange1.1t02556.1 | 4.14 | 0 | 0 | 2 MASCOT | T | PLEX8 |
| 8.95E-05 0 0 | orange1.1t02556.1 | 4.14 | 0 | 0 | 2 MASCOT | T | PLEX8 |
| 2.39E-03 0 0 | orange1.1t02556.1 | 4.14 | 0 | 0 | 2 MASCOT | T |       |
| 8.16E-04 0 0 | orange1.1t02556.1 | 4.14 | 0 | 0 | 2 MASCOT | T | PLEX8 |
| 1.87E-02 0 0 | orange1.1t02556.1 | 4.14 | 0 | 0 | 2 MASCOT | T | PLEX8 |
| 5.32E-04 0 0 | orange1.1t02556.1 | 4.14 | 0 | 0 | 2 MASCOT | T | PLEX8 |
| 3.89E-02 0 0 | orange1.1t02556.1 | 4.14 | 0 | 0 | 2 MASCOT | T | PLEX8 |
| 6.16E-02 0 0 | orange1.1t02556.1 | 4.14 | 0 | 0 | 2 MASCOT | T | PLEX8 |
| 1.91E-01 0 0 | orange1.1t02556.1 | 4.14 | 0 | 0 | 2 MASCOT | T | PLEX8 |
| 1.33E-03 0 0 | orange1.1t02556.1 | 4.14 | 0 | 0 | 2 MASCOT | T | PLEX8 |
| 2.08E-02 0 0 | orange1.1t02556.1 | 4.14 | 0 | 0 | 2 MASCOT | T | PLEX8 |
| 1.22E-01 0 0 | orange1.1t02556.1 | 4.14 | 0 | 0 | 2 MASCOT | T | PLEX8 |
| 1.95E-02 0 0 | orange1.1t02556.1 | 4.14 | 0 | 0 | 2 MASCOT | T | PLEX8 |
| 4.41E-04 0 0 | orange1.1t02556.1 | 4.14 | 0 | 0 | 2 MASCOT | T | PLEX8 |
| 9.13E-02 0 0 | orange1.1t02556.1 | 4.14 | 0 | 0 | 2 MASCOT | T | PLEX8 |
| 3.55E-02 0 0 | orange1.1t02556.1 | 4.14 | 0 | 0 | 2 MASCOT | T | PLEX8 |
| 2.69E-05 0 0 | orange1.1t02556.1 | 4.14 | 0 | 0 | 2 MASCOT | T | PLEX8 |
| 6.66E-02 0 0 | orange1.1t02556.1 | 4.14 | 0 | 0 | 2 MASCOT | T | PLEX8 |
| 1.67E-02 0 0 | orange1.1t02556.1 | 4.14 | 0 | 0 | 2 MASCOT | T |       |
| 5.06E-01 0 0 | orange1.1t02556.1 | 4.14 | 0 | 0 | 2 MASCOT | T |       |
| 2.64E-03 0 0 | orange1.1t02556.1 | 4.14 | 0 | 0 | 2 MASCOT | T |       |
| 1.75E-05 0 0 | orange1.1t02556.1 | 4.14 | 0 | 0 | 2 MASCOT | T |       |
| 5.62E-03 0 0 | orange1.1t02556.1 | 4.14 | 0 | 0 | 2 MASCOT | T |       |
| 4.12E-03 0 0 | orange1.1t02556.1 | 4.14 | 0 | 0 | 2 MASCOT | T |       |
| 2.61E-04 0 0 | orange1.1t02556.1 | 4.14 | 0 | 0 | 2 MASCOT | T |       |
| 5.56E-03 0 0 | orange1.1t02556.1 | 4.14 | 0 | 0 | 2 MASCOT | T |       |
| 3.44E-02 0 0 | orange1.1t02556.1 | 4.14 | 0 | 0 | 2 MASCOT | T |       |
| 1.11E-01 0 0 | orange1.1t02556.1 | 4.14 | 0 | 0 | 2 MASCOT | T |       |
| 1.03E-01 0 0 | orange1.1t02556.1 | 4.14 | 0 | 0 | 2 MASCOT | T |       |
| 6.36E-02 0 0 | orange1.1t02556.1 | 4.14 | 0 | 0 | 2 MASCOT | T |       |
| 1.36E-03 0 0 | orange1.1t02556.1 | 4.14 | 0 | 0 | 2 MASCOT | T |       |
| 2.97E-02 0 0 | orange1.1t02556.1 | 4.14 | 0 | 0 | 2 MASCOT | T | PLEX8 |
| 1.82E-03 0 0 | orange1.1t02556.1 | 4.14 | 0 | 0 | 2 MASCOT | T | PLEX8 |
| 2.47E-01 0 0 | orange1.1t02556.1 | 4.14 | 0 | 0 | 2 MASCOT | T | PLEX8 |
| 6.46E-04 0 0 | orange1.1t02556.1 | 4.14 | 0 | 0 | 2 MASCOT | T | PLEX8 |
| 4.00E-01 0 0 | orange1.1t02556.1 | 4.14 | 0 | 0 | 2 MASCOT | T | PLEX8 |
| 3.84E-01 0 0 | orange1.1t02556.1 | 4.14 | 0 | 0 | 2 MASCOT | T | PLEX8 |
| 4.66E-01 0 0 | orange1.1t02556.1 | 4.14 | 0 | 0 | 2 MASCOT | T | PLEX8 |
| 6.53E-04 0 0 | orange1.1t02556.1 | 4.14 | 0 | 0 | 2 MASCOT | T |       |
| 3.91E-02 0 0 | orange1.1t02556.1 | 4.14 | 0 | 0 | 2 MASCOT | T | PLEX8 |
| 1.46E-01 0 0 | orange1.1t02556.1 | 4.14 | 0 | 0 | 2 MASCOT | T | PLEX8 |
| 4.03E-02 0 0 | orange1.1t02556.1 | 4.14 | 0 | 0 | 2 MASCOT | T | PLEX8 |
| 1.76E-05 0 0 | orange1.1t02556.1 | 4.14 | 0 | 0 | 2 MASCOT | T | PLEX8 |
| 2.49E-02 0 0 | orange1.1t02556.1 | 4.14 | 0 | 0 | 2 MASCOT | T | PLEX8 |
| 9.69E-06 0 0 | orange1.1t02556.1 | 4.14 | 0 | 0 | 2 MASCOT | T | PLEX8 |
| 1.92E-02 0 0 | orange1.1t02556.1 | 4.14 | 0 | 0 | 2 MASCOT | T | PLEX8 |
| 2.06E-01 0 0 | orange1.1t02556.1 | 4.14 | 0 | 0 | 2 MASCOT | T | PLEX8 |
| 4.54E-03 0 0 | orange1.1t02556.1 | 4.14 | 0 | 0 | 2 MASCOT | T | PLEX8 |

|              |                   |      |   |   |          |   |       |
|--------------|-------------------|------|---|---|----------|---|-------|
| 6.90E-02 0 0 | orange1.1t02556.1 | 4.14 | 0 | 0 | 2 MASCOT | T | PLEX8 |
| 1.58E-03 0 0 | orange1.1t02556.1 | 4.14 | 0 | 0 | 2 MASCOT | T | PLEX8 |
| 1.16E-02 0 0 | orange1.1t02556.1 | 4.14 | 0 | 0 | 2 MASCOT | T |       |
| 1.14E-02 0 0 | orange1.1t02556.1 | 4.14 | 0 | 0 | 2 MASCOT | T | PLEX8 |
| 1.05E-01 0 0 | orange1.1t02556.1 | 4.14 | 0 | 0 | 2 MASCOT | T |       |
| 9.48E-05 0 0 | orange1.1t02556.1 | 4.14 | 0 | 0 | 2 MASCOT | T |       |
| 2.00E-02 0 0 | orange1.1t02556.1 | 4.83 | 1 | 0 | 2 MASCOT | T | PLEX8 |
| 5.53E-03 0 0 | orange1.1t02556.1 | 4.83 | 1 | 0 | 2 MASCOT | T | PLEX8 |
| 8.58E-03 0 0 | orange1.1t02556.1 | 4.83 | 1 | 0 | 2 MASCOT | T | PLEX8 |
| 4.68E-03 0 0 | orange1.1t02556.1 | 4.14 | 0 | 0 | 2 MASCOT | T | PLEX8 |
| 9.38E-04 0 0 | orange1.1t02556.1 | 4.14 | 0 | 0 | 2 MASCOT | T | PLEX8 |
| 1.45E-04 0 0 | orange1.1t02556.1 | 4.14 | 0 | 0 | 2 MASCOT | T | PLEX8 |
| 5.00E-03 0 0 | orange1.1t02556.1 | 4.14 | 0 | 0 | 2 MASCOT | T | PLEX8 |
| 1.98E-03 0 0 | orange1.1t02556.1 | 4.14 | 0 | 0 | 2 MASCOT | T | PLEX8 |
| 1.29E-05 0 0 | orange1.1t02556.1 | 4.14 | 0 | 0 | 2 MASCOT | T | PLEX8 |
| 7.93E-07 0 0 | orange1.1t02556.1 | 4.14 | 0 | 0 | 2 MASCOT | T | PLEX8 |
| 1.08E-07 0 0 | orange1.1t02556.1 | 4.14 | 0 | 0 | 2 MASCOT | T | PLEX8 |
| 1.82E-03 0 0 | orange1.1t02556.1 | 4.14 | 0 | 0 | 2 MASCOT | T | PLEX8 |
| 3.04E-08 0 0 | orange1.1t02556.1 | 4.14 | 0 | 0 | 2 MASCOT | T | PLEX8 |
| 9.90E-04 0 0 | orange1.1t02556.1 | 4.14 | 0 | 0 | 2 MASCOT | T | PLEX8 |
| 3.65E-02 0 0 | orange1.1t02556.1 | 4.14 | 0 | 0 | 2 MASCOT | T | PLEX8 |
| 2.61E-02 0 0 | orange1.1t02556.1 | 4.14 | 0 | 0 | 2 MASCOT | T | PLEX8 |
| 3.38E-05 0 0 | orange1.1t02556.1 | 4.14 | 0 | 0 | 2 MASCOT | T | PLEX8 |
| 1.43E-05 0 0 | orange1.1t02556.1 | 4.14 | 0 | 0 | 2 MASCOT | T | PLEX8 |
| 5.66E-03 0 0 | orange1.1t02556.1 | 4.14 | 0 | 0 | 2 MASCOT | T | PLEX8 |
| 8.26E-06 0 0 | orange1.1t02556.1 | 4.14 | 0 | 0 | 2 MASCOT | T | PLEX8 |
| 5.26E-06 0 0 | orange1.1t02556.1 | 4.14 | 0 | 0 | 2 MASCOT | T | PLEX8 |
| 1.14E-05 0 0 | orange1.1t02556.1 | 4.14 | 0 | 0 | 2 MASCOT | T | PLEX8 |
| 2.07E-04 0 0 | orange1.1t02556.1 | 4.14 | 0 | 0 | 2 MASCOT | T | PLEX8 |
| 1.47E-03 0 0 | orange1.1t02556.1 | 4.14 | 0 | 0 | 2 MASCOT | T | PLEX8 |
| 1.77E-03 0 0 | orange1.1t02556.1 | 4.14 | 0 | 0 | 2 MASCOT | T | PLEX8 |
| 2.15E-04 0 0 | orange1.1t02556.1 | 4.14 | 0 | 0 | 2 MASCOT | T | PLEX8 |
| 6.97E-04 0 0 | orange1.1t02556.1 | 4.14 | 0 | 0 | 2 MASCOT | T | PLEX8 |
| 7.04E-04 0 0 | orange1.1t02556.1 | 4.14 | 0 | 0 | 2 MASCOT | T | PLEX8 |
| 5.94E-04 0 0 | orange1.1t02556.1 | 4.14 | 0 | 0 | 2 MASCOT | T | PLEX8 |
| 8.29E-05 0 0 | orange1.1t02556.1 | 4.14 | 0 | 0 | 2 MASCOT | T | PLEX8 |
| 1.65E-04 0 0 | orange1.1t02556.1 | 4.14 | 0 | 0 | 2 MASCOT | T | PLEX8 |
| 7.68E-05 0 0 | orange1.1t02556.1 | 4.14 | 0 | 0 | 2 MASCOT | T | PLEX8 |
| 2.89E-05 0 0 | orange1.1t02556.1 | 4.14 | 0 | 0 | 2 MASCOT | T | PLEX8 |
| 3.44E-06 0 0 | orange1.1t02556.1 | 4.14 | 0 | 0 | 2 MASCOT | T | PLEX8 |
| 2.76E-03 0 0 | orange1.1t02556.1 | 4.14 | 0 | 0 | 2 MASCOT | T | PLEX8 |
| 3.11E-03 0 0 | orange1.1t02556.1 | 4.14 | 0 | 0 | 2 MASCOT | T | PLEX8 |
| 1.01E-06 0 0 | orange1.1t02556.1 | 4.14 | 0 | 0 | 2 MASCOT | T | PLEX8 |
| 2.31E-07 0 0 | orange1.1t02556.1 | 4.14 | 0 | 0 | 2 MASCOT | T | PLEX8 |
| 1.98E-03 0 0 | orange1.1t02556.1 | 4.14 | 0 | 0 | 2 MASCOT | T | PLEX8 |
| 3.86E-03 0 0 | orange1.1t02556.1 | 4.14 | 0 | 0 | 2 MASCOT | T | PLEX8 |
| 1.33E-04 0 0 | orange1.1t02556.1 | 4.14 | 0 | 0 | 2 MASCOT | T | PLEX8 |
| 5.12E-04 0 0 | orange1.1t02556.1 | 4.14 | 0 | 0 | 2 MASCOT | T | PLEX8 |
| 4.45E-03 0 0 | orange1.1t02556.1 | 4.14 | 0 | 0 | 2 MASCOT | T | PLEX8 |
| 1.88E-02 0 0 | orange1.1t02556.1 | 4.14 | 0 | 0 | 2 MASCOT | T | PLEX8 |
| 9.21E-05 0 0 | orange1.1t02556.1 | 4.14 | 0 | 0 | 2 MASCOT | T | PLEX8 |

|          |     |                   |      |   |   |   |        |   |       |
|----------|-----|-------------------|------|---|---|---|--------|---|-------|
| 2.96E-05 | 0 0 | orange1.1t02556.1 | 4.14 | 0 | 0 | 2 | MASCOT | T | PLEX8 |
| 2.67E-06 | 0 0 | orange1.1t02556.1 | 4.14 | 0 | 0 | 2 | MASCOT | T | PLEX8 |
| 1.27E-03 | 0 0 | orange1.1t02556.1 | 4.14 | 0 | 0 | 2 | MASCOT | T | PLEX8 |
| 2.05E-06 | 0 0 | orange1.1t02556.1 | 4.14 | 0 | 0 | 2 | MASCOT | T | PLEX8 |
| 1.12E-04 | 0 0 | orange1.1t02556.1 | 4.14 | 0 | 0 | 2 | MASCOT | T | PLEX8 |
| 1.27E-06 | 0 0 | orange1.1t02556.1 | 4.14 | 0 | 0 | 2 | MASCOT | T | PLEX8 |
| 2.58E-07 | 0 0 | orange1.1t02556.1 | 4.14 | 0 | 0 | 2 | MASCOT | T | PLEX8 |
| 4.73E-03 | 0 0 | orange1.1t02556.1 | 4.14 | 0 | 0 | 2 | MASCOT | T | PLEX8 |
| 2.55E-04 | 0 0 | orange1.1t02556.1 | 4.14 | 0 | 0 | 2 | MASCOT | T | PLEX8 |
| 6.29E-05 | 0 0 | orange1.1t02556.1 | 4.14 | 0 | 0 | 2 | MASCOT | T | PLEX8 |
| 9.39E-04 | 0 0 | orange1.1t02556.1 | 4.14 | 0 | 0 | 2 | MASCOT | T | PLEX8 |
| 1.65E-02 | 0 0 | orange1.1t02556.1 | 4.14 | 0 | 0 | 2 | MASCOT | T | PLEX8 |
| 3.28E-05 | 0 0 | orange1.1t02556.1 | 4.14 | 0 | 0 | 2 | MASCOT | T | PLEX8 |
| 2.41E-05 | 0 0 | orange1.1t02556.1 | 4.14 | 0 | 0 | 2 | MASCOT | T | PLEX8 |
| 2.06E-02 | 0 0 | orange1.1t02556.1 | 4.14 | 0 | 0 | 2 | MASCOT | T | PLEX8 |
| 4.69E-06 | 0 0 | orange1.1t02556.1 | 4.14 | 0 | 0 | 2 | MASCOT | T | PLEX8 |
| 1.64E-05 | 0 0 | orange1.1t02556.1 | 4.14 | 0 | 0 | 2 | MASCOT | T | PLEX8 |
| 1.48E-02 | 0 0 | orange1.1t02556.1 | 4.14 | 0 | 0 | 2 | MASCOT | T | PLEX8 |
| 1.75E-02 | 0 0 | orange1.1t02556.1 | 4.14 | 0 | 0 | 2 | MASCOT | T | PLEX8 |
| 3.12E-03 | 0 0 | orange1.1t02556.1 | 4.14 | 0 | 0 | 2 | MASCOT | T | PLEX8 |
| 1.51E-06 | 0 0 | orange1.1t02556.1 | 4.14 | 0 | 0 | 2 | MASCOT | T | PLEX8 |
| 1.72E-05 | 0 0 | orange1.1t02556.1 | 4.14 | 0 | 0 | 2 | MASCOT | T | PLEX8 |
| 4.63E-05 | 0 0 | orange1.1t02556.1 | 4.14 | 0 | 0 | 2 | MASCOT | T | PLEX8 |
| 1.08E-02 | 0 0 | orange1.1t02556.1 | 4.14 | 0 | 0 | 2 | MASCOT | T | PLEX8 |
| 3.91E-03 | 0 0 | orange1.1t02556.1 | 4.14 | 0 | 0 | 2 | MASCOT | T | PLEX8 |
| 1.36E-03 | 0 0 | orange1.1t02556.1 | 4.14 | 0 | 0 | 2 | MASCOT | T | PLEX8 |
| 1.17E-02 | 0 0 | orange1.1t02556.1 | 4.14 | 0 | 0 | 2 | MASCOT | T | PLEX8 |
| 2.47E-03 | 0 0 | orange1.1t02556.1 | 4.14 | 0 | 0 | 2 | MASCOT | T | PLEX8 |
| 3.86E-05 | 0 0 | orange1.1t02556.1 | 4.14 | 0 | 0 | 2 | MASCOT | T | PLEX8 |
| 3.70E-04 | 0 0 | orange1.1t02556.1 | 4.14 | 0 | 0 | 2 | MASCOT | T | PLEX8 |
| 2.84E-04 | 0 0 | orange1.1t02556.1 | 4.14 | 0 | 0 | 2 | MASCOT | T | PLEX8 |
| 7.58E-05 | 0 0 | orange1.1t02556.1 | 4.14 | 0 | 0 | 2 | MASCOT | T | PLEX8 |
| 2.47E-07 | 0 0 | orange1.1t02556.1 | 4.14 | 0 | 0 | 2 | MASCOT | T | PLEX8 |
| 3.26E-03 | 0 0 | orange1.1t02556.1 | 4.14 | 0 | 0 | 2 | MASCOT | T | PLEX8 |
| 1.74E-03 | 0 0 | orange1.1t02556.1 | 4.14 | 0 | 0 | 2 | MASCOT | T | PLEX8 |
| 6.69E-07 | 0 0 | orange1.1t02556.1 | 4.14 | 0 | 0 | 2 | MASCOT | T | PLEX8 |
| 2.55E-04 | 0 0 | orange1.1t02556.1 | 4.14 | 0 | 0 | 2 | MASCOT | T | PLEX8 |
| 7.03E-03 | 0 0 | orange1.1t02556.1 | 4.14 | 0 | 0 | 2 | MASCOT | T | PLEX8 |
| 1.45E-05 | 0 0 | orange1.1t02556.1 | 4.14 | 0 | 0 | 2 | MASCOT | T | PLEX8 |
| 3.12E-02 | 0 0 | orange1.1t02556.1 | 4.14 | 0 | 0 | 2 | MASCOT | T | PLEX8 |
| 2.66E-07 | 0 0 | orange1.1t02556.1 | 4.14 | 0 | 0 | 2 | MASCOT | T | PLEX8 |
| 2.31E-03 | 0 0 | orange1.1t02556.1 | 4.14 | 0 | 0 | 2 | MASCOT | T | PLEX8 |
| 3.50E-06 | 0 0 | orange1.1t02556.1 | 4.14 | 0 | 0 | 2 | MASCOT | T | PLEX8 |
| 2.19E-07 | 0 0 | orange1.1t02556.1 | 4.14 | 0 | 0 | 2 | MASCOT | T | PLEX8 |
| 3.30E-05 | 0 0 | orange1.1t02556.1 | 4.14 | 0 | 0 | 2 | MASCOT | T | PLEX8 |
| 3.09E-04 | 0 0 | orange1.1t02556.1 | 4.14 | 0 | 0 | 2 | MASCOT | T | PLEX8 |
| 1.46E-07 | 0 0 | orange1.1t02556.1 | 4.14 | 0 | 0 | 2 | MASCOT | T | PLEX8 |
| 3.51E-06 | 0 0 | orange1.1t02556.1 | 4.14 | 0 | 0 | 2 | MASCOT | T | PLEX8 |
| 1.43E-02 | 0 0 | orange1.1t02556.1 | 4.14 | 0 | 0 | 2 | MASCOT | T | PLEX8 |
| 5.82E-04 | 0 0 | orange1.1t02556.1 | 4.14 | 0 | 0 | 2 | MASCOT | T | PLEX8 |
| 4.55E-07 | 0 0 | orange1.1t02556.1 | 4.14 | 0 | 0 | 2 | MASCOT | T | PLEX8 |

|              |                   |      |   |   |          |   |       |
|--------------|-------------------|------|---|---|----------|---|-------|
| 2.62E-04 0 0 | orange1.1t02556.1 | 4.14 | 0 | 0 | 2 MASCOT | T | PLEX8 |
| 3.00E-03 0 0 | orange1.1t02556.1 | 4.14 | 0 | 0 | 2 MASCOT | T | PLEX8 |
| 3.01E-03 0 0 | orange1.1t02556.1 | 4.14 | 0 | 0 | 2 MASCOT | T | PLEX8 |
| 1.33E-05 0 0 | orange1.1t02556.1 | 4.14 | 0 | 0 | 2 MASCOT | T | PLEX8 |
| 2.19E-03 0 0 | orange1.1t02556.1 | 4.14 | 0 | 0 | 2 MASCOT | T | PLEX8 |
| 7.15E-05 0 0 | orange1.1t02556.1 | 4.14 | 0 | 0 | 2 MASCOT | T | PLEX8 |
| 1.97E-02 0 0 | orange1.1t02556.1 | 4.14 | 0 | 0 | 2 MASCOT | T | PLEX8 |
| 6.07E-06 0 0 | orange1.1t02556.1 | 4.14 | 0 | 0 | 2 MASCOT | T | PLEX8 |
| 8.94E-04 0 0 | orange1.1t02556.1 | 4.14 | 0 | 0 | 2 MASCOT | T | PLEX8 |
| 5.66E-03 0 0 | orange1.1t02556.1 | 4.14 | 0 | 0 | 2 MASCOT | T | PLEX8 |
| 6.63E-07 0 0 | orange1.1t02556.1 | 4.14 | 0 | 0 | 2 MASCOT | T | PLEX8 |
| 1.20E-04 0 0 | orange1.1t02556.1 | 4.14 | 0 | 0 | 2 MASCOT | T | PLEX8 |
| 3.72E-02 0 0 | orange1.1t02556.1 | 4.14 | 0 | 0 | 2 MASCOT | T |       |
| 4.24E-02 0 0 | orange1.1t02556.1 | 4.14 | 0 | 0 | 2 MASCOT | T |       |
| 1.46E-03 0 0 | orange1.1t02556.1 | 4.14 | 0 | 0 | 2 MASCOT | T |       |
| 3.78E-04 0 0 | orange1.1t02556.1 | 4.14 | 0 | 0 | 2 MASCOT | T |       |
| 2.08E-03 0 0 | orange1.1t02556.1 | 4.14 | 0 | 0 | 2 MASCOT | T |       |
| 3.45E-03 0 0 | orange1.1t02556.1 | 4.14 | 0 | 0 | 2 MASCOT | T |       |
| 8.44E-07 0 0 | orange1.1t02556.1 | 4.14 | 0 | 0 | 2 MASCOT | T |       |
| 4.74E-05 0 0 | orange1.1t02556.1 | 4.14 | 0 | 0 | 2 MASCOT | T |       |
| 2.65E-05 0 0 | orange1.1t02556.1 | 4.14 | 0 | 0 | 2 MASCOT | T |       |
| 1.11E-05 0 0 | orange1.1t02556.1 | 4.14 | 0 | 0 | 2 MASCOT | T |       |
| 1.01E-05 0 0 | orange1.1t02556.1 | 4.14 | 0 | 0 | 2 MASCOT | T |       |
| 5.44E-08 0 0 | orange1.1t02556.1 | 4.14 | 0 | 0 | 2 MASCOT | T |       |
| 8.45E-05 0 0 | orange1.1t02556.1 | 4.14 | 0 | 0 | 2 MASCOT | T |       |
| 3.03E-08 0 0 | orange1.1t02556.1 | 4.14 | 0 | 0 | 2 MASCOT | T |       |
| 1.25E-03 0 0 | orange1.1t02556.1 | 4.14 | 0 | 0 | 2 MASCOT | T |       |
| 3.92E-07 0 0 | orange1.1t02556.1 | 4.14 | 0 | 0 | 2 MASCOT | T |       |
| 7.27E-04 0 0 | orange1.1t02556.1 | 4.14 | 0 | 0 | 2 MASCOT | T |       |
| 2.49E-03 0 0 | orange1.1t02556.1 | 4.14 | 0 | 0 | 2 MASCOT | T |       |
| 5.38E-06 0 0 | orange1.1t02556.1 | 4.14 | 0 | 0 | 2 MASCOT | T |       |
| 4.85E-08 0 0 | orange1.1t02556.1 | 4.14 | 0 | 0 | 2 MASCOT | T |       |
| 2.44E-04 0 0 | orange1.1t02556.1 | 4.14 | 0 | 0 | 2 MASCOT | T |       |
| 7.59E-03 0 0 | orange1.1t02556.1 | 4.14 | 0 | 0 | 2 MASCOT | T |       |
| 4.36E-08 0 0 | orange1.1t02556.1 | 4.14 | 0 | 0 | 2 MASCOT | T |       |
| 2.65E-07 0 0 | orange1.1t02556.1 | 4.14 | 0 | 0 | 2 MASCOT | T |       |
| 1.03E-06 0 0 | orange1.1t02556.1 | 4.14 | 0 | 0 | 2 MASCOT | T |       |
| 8.39E-03 0 0 | orange1.1t02556.1 | 4.14 | 0 | 0 | 2 MASCOT | T |       |
| 2.43E-09 0 0 | orange1.1t02556.1 | 4.14 | 0 | 0 | 2 MASCOT | T |       |
| 1.72E-05 0 0 | orange1.1t02556.1 | 4.14 | 0 | 0 | 2 MASCOT | T |       |
| 2.09E-05 0 0 | orange1.1t02556.1 | 4.14 | 0 | 0 | 2 MASCOT | T |       |
| 1.33E-09 0 0 | orange1.1t02556.1 | 4.14 | 0 | 0 | 2 MASCOT | T |       |
| 1.56E-02 0 0 | orange1.1t02556.1 | 4.14 | 0 | 0 | 2 MASCOT | T |       |
| 5.88E-07 0 0 | orange1.1t02556.1 | 4.14 | 0 | 0 | 2 MASCOT | T |       |
| 4.99E-09 0 0 | orange1.1t02556.1 | 4.14 | 0 | 0 | 2 MASCOT | T |       |
| 1.81E-07 0 0 | orange1.1t02556.1 | 4.14 | 0 | 0 | 2 MASCOT | T |       |
| 2.44E-09 0 0 | orange1.1t02556.1 | 4.14 | 0 | 0 | 2 MASCOT | T |       |
| 2.48E-11 0 0 | orange1.1t02556.1 | 4.14 | 0 | 0 | 2 MASCOT | T |       |
| 2.27E-07 0 0 | orange1.1t02556.1 | 4.14 | 0 | 0 | 2 MASCOT | T |       |
| 5.66E-10 0 0 | orange1.1t02556.1 | 4.14 | 0 | 0 | 2 MASCOT | T |       |
| 1.43E-07 0 0 | orange1.1t02556.1 | 4.14 | 0 | 0 | 2 MASCOT | T |       |

|          |     |                   |      |   |   |   |        |   |
|----------|-----|-------------------|------|---|---|---|--------|---|
| 2.09E-10 | 0 0 | orange1.1t02556.1 | 4.14 | 0 | 0 | 2 | MASCOT | T |
| 1.62E-07 | 0 0 | orange1.1t02556.1 | 4.14 | 0 | 0 | 2 | MASCOT | T |
| 2.21E-10 | 0 0 | orange1.1t02556.1 | 4.14 | 0 | 0 | 2 | MASCOT | T |
| 1.44E-02 | 0 0 | orange1.1t02556.1 | 4.14 | 0 | 0 | 2 | MASCOT | T |
| 3.44E-07 | 0 0 | orange1.1t02556.1 | 4.14 | 0 | 0 | 2 | MASCOT | T |
| 2.18E-10 | 0 0 | orange1.1t02556.1 | 4.14 | 0 | 0 | 2 | MASCOT | T |
| 1.14E-07 | 0 0 | orange1.1t02556.1 | 4.14 | 0 | 0 | 2 | MASCOT | T |
| 8.87E-11 | 0 0 | orange1.1t02556.1 | 4.14 | 0 | 0 | 2 | MASCOT | T |
| 7.74E-07 | 0 0 | orange1.1t02556.1 | 4.14 | 0 | 0 | 2 | MASCOT | T |
| 1.27E-04 | 0 0 | orange1.1t02556.1 | 4.14 | 0 | 0 | 2 | MASCOT | T |
| 2.98E-07 | 0 0 | orange1.1t02556.1 | 4.14 | 0 | 0 | 2 | MASCOT | T |
| 6.20E-07 | 0 0 | orange1.1t02556.1 | 4.14 | 0 | 0 | 2 | MASCOT | T |
| 2.49E-11 | 0 0 | orange1.1t02556.1 | 4.14 | 0 | 0 | 2 | MASCOT | T |
| 2.33E-03 | 0 0 | orange1.1t02556.1 | 4.14 | 0 | 0 | 2 | MASCOT | T |
| 3.92E-08 | 0 0 | orange1.1t02556.1 | 4.14 | 0 | 0 | 2 | MASCOT | T |
| 4.62E-06 | 0 0 | orange1.1t02556.1 | 4.14 | 0 | 0 | 2 | MASCOT | T |
| 1.83E-08 | 0 0 | orange1.1t02556.1 | 4.14 | 0 | 0 | 2 | MASCOT | T |
| 9.92E-06 | 0 0 | orange1.1t02556.1 | 4.14 | 0 | 0 | 2 | MASCOT | T |
| 2.25E-10 | 0 0 | orange1.1t02556.1 | 4.14 | 0 | 0 | 2 | MASCOT | T |
| 1.76E-06 | 0 0 | orange1.1t02556.1 | 4.14 | 0 | 0 | 2 | MASCOT | T |
| 4.45E-07 | 0 0 | orange1.1t02556.1 | 4.14 | 0 | 0 | 2 | MASCOT | T |
| 3.65E-06 | 0 0 | orange1.1t02556.1 | 4.14 | 0 | 0 | 2 | MASCOT | T |
| 2.38E-03 | 0 0 | orange1.1t02556.1 | 4.14 | 0 | 0 | 2 | MASCOT | T |
| 1.31E-08 | 0 0 | orange1.1t02556.1 | 4.14 | 0 | 0 | 2 | MASCOT | T |
| 1.32E-03 | 0 0 | orange1.1t02556.1 | 4.14 | 0 | 0 | 2 | MASCOT | T |
| 4.44E-06 | 0 0 | orange1.1t02556.1 | 4.14 | 0 | 0 | 2 | MASCOT | T |
| 2.02E-08 | 0 0 | orange1.1t02556.1 | 4.14 | 0 | 0 | 2 | MASCOT | T |
| 2.49E-10 | 0 0 | orange1.1t02556.1 | 4.14 | 0 | 0 | 2 | MASCOT | T |
| 1.58E-04 | 0 0 | orange1.1t02556.1 | 4.14 | 0 | 0 | 2 | MASCOT | T |
| 5.87E-05 | 0 0 | orange1.1t02556.1 | 4.14 | 0 | 0 | 2 | MASCOT | T |
| 1.43E-03 | 0 0 | orange1.1t02556.1 | 4.14 | 0 | 0 | 2 | MASCOT | T |
| 3.49E-04 | 0 0 | orange1.1t02556.1 | 4.14 | 0 | 0 | 2 | MASCOT | T |
| 2.26E-03 | 0 0 | orange1.1t02556.1 | 4.14 | 0 | 0 | 2 | MASCOT | T |
| 1.43E-03 | 0 0 | orange1.1t02556.1 | 4.14 | 0 | 0 | 2 | MASCOT | T |
| 1.46E-03 | 0 0 | orange1.1t02556.1 | 4.14 | 0 | 0 | 2 | MASCOT | T |
| 7.18E-03 | 0 0 | orange1.1t02556.1 | 4.14 | 0 | 0 | 2 | MASCOT | T |
| 4.18E-04 | 0 0 | orange1.1t02556.1 | 4.14 | 0 | 0 | 2 | MASCOT | T |
| 2.35E-03 | 0 0 | orange1.1t02556.1 | 4.14 | 0 | 0 | 2 | MASCOT | T |
| 7.14E-07 | 0 0 | orange1.1t02556.1 | 4.14 | 0 | 0 | 2 | MASCOT | T |
| 1.62E-03 | 0 0 | orange1.1t02556.1 | 4.14 | 0 | 0 | 2 | MASCOT | T |
| 2.96E-04 | 0 0 | orange1.1t02556.1 | 4.14 | 0 | 0 | 2 | MASCOT | T |
| 2.73E-04 | 0 0 | orange1.1t02556.1 | 4.14 | 0 | 0 | 2 | MASCOT | T |
| 1.01E-04 | 0 0 | orange1.1t02556.1 | 4.14 | 0 | 0 | 2 | MASCOT | T |
| 5.21E-05 | 0 0 | orange1.1t02556.1 | 4.14 | 0 | 0 | 2 | MASCOT | T |
| 9.69E-07 | 0 0 | orange1.1t02556.1 | 4.14 | 0 | 0 | 2 | MASCOT | T |
| 1.67E-07 | 0 0 | orange1.1t02556.1 | 4.14 | 0 | 0 | 2 | MASCOT | T |
| 1.44E-05 | 0 0 | orange1.1t02556.1 | 4.14 | 0 | 0 | 2 | MASCOT | T |
| 2.14E-05 | 0 0 | orange1.1t02556.1 | 4.14 | 0 | 0 | 2 | MASCOT | T |
| 4.35E-07 | 0 0 | orange1.1t02556.1 | 4.14 | 0 | 0 | 2 | MASCOT | T |
| 4.15E-03 | 0 0 | orange1.1t02556.1 | 4.14 | 0 | 0 | 2 | MASCOT | T |
| 9.17E-07 | 0 0 | orange1.1t02556.1 | 4.14 | 0 | 0 | 2 | MASCOT | T |

|          |     |                   |      |   |   |   |        |   |
|----------|-----|-------------------|------|---|---|---|--------|---|
| 5.10E-08 | 0 0 | orange1.1t02556.1 | 4.14 | 0 | 0 | 2 | MASCOT | T |
| 1.08E-05 | 0 0 | orange1.1t02556.1 | 4.14 | 0 | 0 | 2 | MASCOT | T |
| 3.52E-03 | 0 0 | orange1.1t02556.1 | 4.14 | 0 | 0 | 2 | MASCOT | T |
| 4.50E-06 | 0 0 | orange1.1t02556.1 | 4.14 | 0 | 0 | 2 | MASCOT | T |
| 4.27E-09 | 0 0 | orange1.1t02556.1 | 4.14 | 0 | 0 | 2 | MASCOT | T |
| 4.17E-09 | 0 0 | orange1.1t02556.1 | 4.14 | 0 | 0 | 2 | MASCOT | T |
| 2.02E-08 | 0 0 | orange1.1t02556.1 | 4.14 | 0 | 0 | 2 | MASCOT | T |
| 1.13E-07 | 0 0 | orange1.1t02556.1 | 4.14 | 0 | 0 | 2 | MASCOT | T |
| 2.27E-11 | 0 0 | orange1.1t02556.1 | 4.14 | 0 | 0 | 2 | MASCOT | T |
| 1.54E-08 | 0 0 | orange1.1t02556.1 | 4.14 | 0 | 0 | 2 | MASCOT | T |
| 7.67E-11 | 0 0 | orange1.1t02556.1 | 4.14 | 0 | 0 | 2 | MASCOT | T |
| 1.08E-08 | 0 0 | orange1.1t02556.1 | 4.14 | 0 | 0 | 2 | MASCOT | T |
| 3.90E-09 | 0 0 | orange1.1t02556.1 | 4.14 | 0 | 0 | 2 | MASCOT | T |
| 8.99E-08 | 0 0 | orange1.1t02556.1 | 4.14 | 0 | 0 | 2 | MASCOT | T |
| 1.26E-07 | 0 0 | orange1.1t02556.1 | 4.14 | 0 | 0 | 2 | MASCOT | T |
| 4.87E-09 | 0 0 | orange1.1t02556.1 | 4.14 | 0 | 0 | 2 | MASCOT | T |
| 3.92E-09 | 0 0 | orange1.1t02556.1 | 4.14 | 0 | 0 | 2 | MASCOT | T |
| 2.49E-09 | 0 0 | orange1.1t02556.1 | 4.14 | 0 | 0 | 2 | MASCOT | T |
| 6.52E-07 | 0 0 | orange1.1t02556.1 | 4.14 | 0 | 0 | 2 | MASCOT | T |
| 1.21E-07 | 0 0 | orange1.1t02556.1 | 4.14 | 0 | 0 | 2 | MASCOT | T |
| 6.33E-08 | 0 0 | orange1.1t02556.1 | 4.14 | 0 | 0 | 2 | MASCOT | T |
| 1.48E-04 | 0 0 | orange1.1t02556.1 | 4.14 | 0 | 0 | 2 | MASCOT | T |
| 1.94E-07 | 0 0 | orange1.1t02556.1 | 4.14 | 0 | 0 | 2 | MASCOT | T |
| 4.06E-07 | 0 0 | orange1.1t02556.1 | 4.14 | 0 | 0 | 2 | MASCOT | T |
| 4.69E-10 | 0 0 | orange1.1t02556.1 | 4.14 | 0 | 0 | 2 | MASCOT | T |
| 5.25E-07 | 0 0 | orange1.1t02556.1 | 4.14 | 0 | 0 | 2 | MASCOT | T |
| 2.46E-06 | 0 0 | orange1.1t02556.1 | 4.14 | 0 | 0 | 2 | MASCOT | T |
| 8.90E-06 | 0 0 | orange1.1t02556.1 | 4.14 | 0 | 0 | 2 | MASCOT | T |
| 2.38E-07 | 0 0 | orange1.1t02556.1 | 4.14 | 0 | 0 | 2 | MASCOT | T |
| 4.55E-10 | 0 0 | orange1.1t02556.1 | 4.14 | 0 | 0 | 2 | MASCOT | T |
| 2.78E-06 | 0 0 | orange1.1t02556.1 | 4.14 | 0 | 0 | 2 | MASCOT | T |
| 2.52E-08 | 0 0 | orange1.1t02556.1 | 4.14 | 0 | 0 | 2 | MASCOT | T |
| 6.02E-07 | 0 0 | orange1.1t02556.1 | 4.14 | 0 | 0 | 2 | MASCOT | T |
| 5.63E-08 | 0 0 | orange1.1t02556.1 | 4.14 | 0 | 0 | 2 | MASCOT | T |
| 4.77E-07 | 0 0 | orange1.1t02556.1 | 4.14 | 0 | 0 | 2 | MASCOT | T |
| 1.49E-05 | 0 0 | orange1.1t02556.1 | 4.14 | 0 | 0 | 2 | MASCOT | T |
| 2.08E-07 | 0 0 | orange1.1t02556.1 | 4.14 | 0 | 0 | 2 | MASCOT | T |
| 7.46E-09 | 0 0 | orange1.1t02556.1 | 4.14 | 0 | 0 | 2 | MASCOT | T |
| 8.55E-06 | 0 0 | orange1.1t02556.1 | 4.14 | 0 | 0 | 2 | MASCOT | T |
| 4.80E-07 | 0 0 | orange1.1t02556.1 | 4.14 | 0 | 0 | 2 | MASCOT | T |
| 6.00E-09 | 0 0 | orange1.1t02556.1 | 4.14 | 0 | 0 | 2 | MASCOT | T |
| 1.23E-06 | 0 0 | orange1.1t02556.1 | 4.14 | 0 | 0 | 2 | MASCOT | T |
| 5.23E-08 | 0 0 | orange1.1t02556.1 | 4.14 | 0 | 0 | 2 | MASCOT | T |
| 9.70E-08 | 0 0 | orange1.1t02556.1 | 4.14 | 0 | 0 | 2 | MASCOT | T |
| 4.69E-06 | 0 0 | orange1.1t02556.1 | 4.14 | 0 | 0 | 2 | MASCOT | T |
| 1.06E-07 | 0 0 | orange1.1t02556.1 | 4.14 | 0 | 0 | 2 | MASCOT | T |
| 1.07E-08 | 0 0 | orange1.1t02556.1 | 4.14 | 0 | 0 | 2 | MASCOT | T |
| 2.07E-07 | 0 0 | orange1.1t02556.1 | 4.14 | 0 | 0 | 2 | MASCOT | T |
| 2.16E-08 | 0 0 | orange1.1t02556.1 | 4.14 | 0 | 0 | 2 | MASCOT | T |
| 3.27E-08 | 0 0 | orange1.1t02556.1 | 4.14 | 0 | 0 | 2 | MASCOT | T |
| 7.20E-06 | 0 0 | orange1.1t02556.1 | 4.14 | 0 | 0 | 2 | MASCOT | T |

|          |     |                   |      |   |   |          |   |
|----------|-----|-------------------|------|---|---|----------|---|
| 1.28E-07 | 0 0 | orange1.1t02556.1 | 4.14 | 0 | 0 | 2 MASCOT | T |
| 2.89E-08 | 0 0 | orange1.1t02556.1 | 4.14 | 0 | 0 | 2 MASCOT | T |
| 2.10E-07 | 0 0 | orange1.1t02556.1 | 4.14 | 0 | 0 | 2 MASCOT | T |
| 7.60E-06 | 0 0 | orange1.1t02556.1 | 4.14 | 0 | 0 | 2 MASCOT | T |
| 2.19E-06 | 0 0 | orange1.1t02556.1 | 4.14 | 0 | 0 | 2 MASCOT | T |
| 2.01E-06 | 0 0 | orange1.1t02556.1 | 4.14 | 0 | 0 | 2 MASCOT | T |
| 1.03E-06 | 0 0 | orange1.1t02556.1 | 4.14 | 0 | 0 | 2 MASCOT | T |
| 2.51E-08 | 0 0 | orange1.1t02556.1 | 4.14 | 0 | 0 | 2 MASCOT | T |
| 2.75E-06 | 0 0 | orange1.1t02556.1 | 4.14 | 0 | 0 | 2 MASCOT | T |
| 3.19E-09 | 0 0 | orange1.1t02556.1 | 4.14 | 0 | 0 | 2 MASCOT | T |
| 5.74E-07 | 0 0 | orange1.1t02556.1 | 4.14 | 0 | 0 | 2 MASCOT | T |
| 2.33E-07 | 0 0 | orange1.1t02556.1 | 4.14 | 0 | 0 | 2 MASCOT | T |
| 3.28E-04 | 0 0 | orange1.1t02556.1 | 4.14 | 0 | 0 | 2 MASCOT | T |
| 2.72E-03 | 0 0 | orange1.1t02556.1 | 4.14 | 0 | 0 | 2 MASCOT | T |
| 1.10E-03 | 0 0 | orange1.1t02556.1 | 4.14 | 0 | 0 | 2 MASCOT | T |
| 5.10E-09 | 0 0 | orange1.1t02556.1 | 4.14 | 0 | 0 | 2 MASCOT | T |
| 8.54E-03 | 0 0 | orange1.1t02556.1 | 4.14 | 0 | 0 | 2 MASCOT | T |
| 7.24E-06 | 0 0 | orange1.1t02556.1 | 4.14 | 0 | 0 | 2 MASCOT | T |
| 8.77E-06 | 0 0 | orange1.1t02556.1 | 4.14 | 0 | 0 | 2 MASCOT | T |
| 4.26E-02 | 0 0 | orange1.1t02556.1 | 4.14 | 0 | 0 | 2 MASCOT | T |
| 2.64E-02 | 0 0 | orange1.1t02556.1 | 4.14 | 0 | 0 | 2 MASCOT | T |
| 7.57E-04 | 0 0 | orange1.1t02556.1 | 4.14 | 0 | 0 | 2 MASCOT | T |
| 2.17E-02 | 0 0 | orange1.1t02556.1 | 4.14 | 0 | 0 | 2 MASCOT | T |
| 1.49E-03 | 0 0 | orange1.1t02556.1 | 4.14 | 0 | 0 | 2 MASCOT | T |
| 1.14E-05 | 0 0 | orange1.1t02556.1 | 4.14 | 0 | 0 | 2 MASCOT | T |
| 1.84E-05 | 0 0 | orange1.1t02556.1 | 4.14 | 0 | 0 | 2 MASCOT | T |
| 5.49E-03 | 0 0 | orange1.1t02556.1 | 4.14 | 0 | 0 | 2 MASCOT | T |
| 1.42E-04 | 0 0 | orange1.1t02556.1 | 4.14 | 0 | 0 | 2 MASCOT | T |
| 1.88E-03 | 0 0 | orange1.1t02556.1 | 4.14 | 0 | 0 | 2 MASCOT | T |
| 1.62E-05 | 0 0 | orange1.1t02556.1 | 4.14 | 0 | 0 | 2 MASCOT | T |
| 3.51E-03 | 0 0 | orange1.1t02556.1 | 4.14 | 0 | 0 | 2 MASCOT | T |
| 6.43E-03 | 0 0 | orange1.1t02556.1 | 4.14 | 0 | 0 | 2 MASCOT | T |
| 2.06E-02 | 0 0 | orange1.1t02556.1 | 4.14 | 0 | 0 | 2 MASCOT | T |
| 4.00E-02 | 0 0 | orange1.1t02556.1 | 4.14 | 0 | 0 | 2 MASCOT | T |
| 6.61E-06 | 0 0 | orange1.1t02556.1 | 4.14 | 0 | 0 | 2 MASCOT | T |
| 1.09E-05 | 0 0 | orange1.1t02556.1 | 4.14 | 0 | 0 | 2 MASCOT | T |
| 1.07E-04 | 0 0 | orange1.1t02556.1 | 4.14 | 0 | 0 | 2 MASCOT | T |
| 4.25E-03 | 0 0 | orange1.1t02556.1 | 4.14 | 0 | 0 | 2 MASCOT | T |
| 1.49E-04 | 0 0 | orange1.1t02556.1 | 4.14 | 0 | 0 | 2 MASCOT | T |
| 2.11E-10 | 0 0 | orange1.1t02556.1 | 4.14 | 0 | 0 | 2 MASCOT | T |
| 6.25E-07 | 0 0 | orange1.1t02556.1 | 4.14 | 0 | 0 | 2 MASCOT | T |
| 3.63E-05 | 0 0 | orange1.1t02556.1 | 4.14 | 0 | 0 | 2 MASCOT | T |
| 7.72E-08 | 0 0 | orange1.1t02556.1 | 4.14 | 0 | 0 | 2 MASCOT | T |
| 3.40E-05 | 0 0 | orange1.1t02556.1 | 4.14 | 0 | 0 | 2 MASCOT | T |
| 7.27E-03 | 0 0 | orange1.1t02556.1 | 4.14 | 0 | 0 | 2 MASCOT | T |
| 3.12E-05 | 0 0 | orange1.1t02556.1 | 4.14 | 0 | 0 | 2 MASCOT | T |
| 9.97E-03 | 0 0 | orange1.1t02556.1 | 4.14 | 0 | 0 | 2 MASCOT | T |
| 3.95E-06 | 0 0 | orange1.1t02556.1 | 4.14 | 0 | 0 | 2 MASCOT | T |
| 7.85E-04 | 0 0 | orange1.1t02556.1 | 4.14 | 0 | 0 | 2 MASCOT | T |
| 1.90E-06 | 0 0 | orange1.1t02556.1 | 4.14 | 0 | 0 | 2 MASCOT | T |
| 8.80E-08 | 0 0 | orange1.1t02556.1 | 4.14 | 0 | 0 | 2 MASCOT | T |



|          |     |                   |      |   |   |          |   |       |
|----------|-----|-------------------|------|---|---|----------|---|-------|
| 2.29E-05 | 0 0 | orange1.1t02556.1 | 4.14 | 0 | 0 | 2 MASCOT | T |       |
| 8.92E-03 | 0 0 | orange1.1t02556.1 | 4.14 | 0 | 0 | 2 MASCOT | T | PLEX8 |
| 3.07E-04 | 0 0 | orange1.1t02556.1 | 4.14 | 0 | 0 | 2 MASCOT | T | PLEX8 |
| 1.75E-03 | 0 0 | orange1.1t02556.1 | 4.14 | 0 | 0 | 2 MASCOT | T | PLEX8 |
| 8.03E-06 | 0 0 | orange1.1t02556.1 | 4.14 | 0 | 0 | 2 MASCOT | T | PLEX8 |
| 2.23E-05 | 0 0 | orange1.1t02556.1 | 4.14 | 0 | 0 | 2 MASCOT | T | PLEX8 |
| 3.86E-05 | 0 0 | orange1.1t02556.1 | 4.14 | 0 | 0 | 2 MASCOT | T | PLEX8 |
| 2.18E-05 | 0 0 | orange1.1t02556.1 | 4.14 | 0 | 0 | 2 MASCOT | T | PLEX8 |
| 3.97E-06 | 0 0 | orange1.1t02556.1 | 4.14 | 0 | 0 | 2 MASCOT | T | PLEX8 |
| 9.42E-05 | 0 0 | orange1.1t02556.1 | 4.14 | 0 | 0 | 2 MASCOT | T | PLEX8 |
| 2.87E-03 | 0 0 | orange1.1t02556.1 | 4.14 | 0 | 0 | 2 MASCOT | T | PLEX8 |
| 1.64E-04 | 0 0 | orange1.1t02556.1 | 4.14 | 0 | 0 | 2 MASCOT | T | PLEX8 |
| 1.80E-03 | 0 0 | orange1.1t02556.1 | 4.14 | 0 | 0 | 2 MASCOT | T | PLEX8 |
| 3.24E-04 | 0 0 | orange1.1t02556.1 | 4.14 | 0 | 0 | 2 MASCOT | T | PLEX8 |
| 1.23E-08 | 0 0 | orange1.1t02556.1 | 4.14 | 0 | 0 | 2 MASCOT | T | PLEX8 |
| 4.20E-04 | 0 0 | orange1.1t02556.1 | 4.14 | 0 | 0 | 2 MASCOT | T | PLEX8 |
| 4.21E-03 | 0 0 | orange1.1t02556.1 | 4.14 | 0 | 0 | 2 MASCOT | T | PLEX8 |
| 2.27E-02 | 0 0 | orange1.1t02556.1 | 4.14 | 0 | 0 | 2 MASCOT | T | PLEX8 |
| 3.39E-04 | 0 0 | orange1.1t02556.1 | 4.14 | 0 | 0 | 2 MASCOT | T | PLEX8 |
| 2.66E-07 | 0 0 | orange1.1t02556.1 | 4.14 | 0 | 0 | 2 MASCOT | T | PLEX8 |
| 1.82E-02 | 0 0 | orange1.1t02556.1 | 4.14 | 0 | 0 | 2 MASCOT | T | PLEX8 |
| 1.81E-06 | 0 0 | orange1.1t02556.1 | 4.14 | 0 | 0 | 2 MASCOT | T | PLEX8 |
| 1.49E-07 | 0 0 | orange1.1t02556.1 | 4.14 | 0 | 0 | 2 MASCOT | T | PLEX8 |
| 1.18E-05 | 0 0 | orange1.1t02556.1 | 4.14 | 0 | 0 | 2 MASCOT | T | PLEX8 |
| 1.08E-03 | 0 0 | orange1.1t02556.1 | 4.14 | 0 | 0 | 2 MASCOT | T | PLEX8 |
| 1.50E-03 | 0 0 | orange1.1t02556.1 | 4.14 | 0 | 0 | 2 MASCOT | T | PLEX8 |
| 2.86E-04 | 0 0 | orange1.1t02556.1 | 4.14 | 0 | 0 | 2 MASCOT | T | PLEX8 |
| 2.61E-04 | 0 0 | orange1.1t02556.1 | 4.14 | 0 | 0 | 2 MASCOT | T | PLEX8 |
| 9.29E-04 | 0 0 | orange1.1t02556.1 | 4.14 | 0 | 0 | 2 MASCOT | T | PLEX8 |
| 3.46E-04 | 0 0 | orange1.1t02556.1 | 4.14 | 0 | 0 | 2 MASCOT | T | PLEX8 |
| 1.80E-03 | 0 0 | orange1.1t02556.1 | 4.14 | 0 | 0 | 2 MASCOT | T | PLEX8 |
| 1.34E-02 | 0 0 | orange1.1t02556.1 | 4.14 | 0 | 0 | 2 MASCOT | T | PLEX8 |
| 2.53E-02 | 0 0 | orange1.1t02556.1 | 4.14 | 0 | 0 | 2 MASCOT | T | PLEX8 |
| 2.27E-04 | 0 0 | orange1.1t02556.1 | 4.14 | 0 | 0 | 2 MASCOT | T |       |
| 9.91E-04 | 0 0 | orange1.1t02556.1 | 4.14 | 0 | 0 | 2 MASCOT | T | PLEX8 |
| 3.09E-04 | 0 0 | orange1.1t02556.1 | 4.14 | 0 | 0 | 2 MASCOT | T | PLEX8 |
| 5.15E-03 | 0 0 | orange1.1t02556.1 | 4.14 | 0 | 0 | 2 MASCOT | T | PLEX8 |
| 6.03E-04 | 0 0 | orange1.1t02556.1 | 4.14 | 0 | 0 | 2 MASCOT | T | PLEX8 |
| 1.64E-03 | 0 0 | orange1.1t02556.1 | 4.14 | 0 | 0 | 2 MASCOT | T | PLEX8 |
| 8.11E-03 | 0 0 | orange1.1t02556.1 | 4.14 | 0 | 0 | 2 MASCOT | T |       |
| 4.23E-03 | 0 0 | orange1.1t02556.1 | 4.14 | 0 | 0 | 2 MASCOT | T | PLEX8 |
| 5.08E-06 | 0 0 | orange1.1t02556.1 | 4.14 | 0 | 0 | 2 MASCOT | T | PLEX8 |
| 2.39E-04 | 0 0 | orange1.1t02556.1 | 4.14 | 0 | 0 | 2 MASCOT | T | PLEX8 |
| 1.79E-05 | 0 0 | orange1.1t02556.1 | 4.14 | 0 | 0 | 2 MASCOT | T | PLEX8 |
| 2.16E-07 | 0 0 | orange1.1t02556.1 | 4.14 | 0 | 0 | 2 MASCOT | T | PLEX8 |
| 1.32E-06 | 0 0 | orange1.1t02556.1 | 4.14 | 0 | 0 | 2 MASCOT | T | PLEX8 |
| 2.02E-03 | 0 0 | orange1.1t02556.1 | 4.14 | 0 | 0 | 2 MASCOT | T | PLEX8 |
| 2.38E-04 | 0 0 | orange1.1t02556.1 | 4.14 | 0 | 0 | 2 MASCOT | T | PLEX8 |
| 3.93E-06 | 0 0 | orange1.1t02556.1 | 4.14 | 0 | 0 | 2 MASCOT | T | PLEX8 |
| 1.44E-02 | 0 0 | orange1.1t02556.1 | 4.14 | 0 | 0 | 2 MASCOT | T | PLEX8 |
| 2.83E-06 | 0 0 | orange1.1t02556.1 | 4.14 | 0 | 0 | 2 MASCOT | T | PLEX8 |

|          |     |                   |      |   |   |          |   |       |
|----------|-----|-------------------|------|---|---|----------|---|-------|
| 8.78E-05 | 0 0 | orange1.1t02556.1 | 4.14 | 0 | 0 | 2 MASCOT | T | PLEX8 |
| 2.76E-06 | 0 0 | orange1.1t02556.1 | 4.14 | 0 | 0 | 2 MASCOT | T | PLEX8 |
| 1.31E-02 | 0 0 | orange1.1t02556.1 | 4.14 | 0 | 0 | 2 MASCOT | T |       |
| 2.27E-09 | 0 0 | orange1.1t02556.1 | 4.14 | 0 | 0 | 2 MASCOT | T | PLEX8 |
| 2.77E-05 | 0 0 | orange1.1t02556.1 | 4.14 | 0 | 0 | 2 MASCOT | T | PLEX8 |
| 1.94E-07 | 0 0 | orange1.1t02556.1 | 4.14 | 0 | 0 | 2 MASCOT | T |       |
| 2.03E-06 | 0 0 | orange1.1t02556.1 | 4.14 | 0 | 0 | 2 MASCOT | T | PLEX8 |
| 1.60E-07 | 0 0 | orange1.1t02556.1 | 4.14 | 0 | 0 | 2 MASCOT | T | PLEX8 |
| 2.39E-08 | 0 0 | orange1.1t02556.1 | 4.14 | 0 | 0 | 2 MASCOT | T | PLEX8 |
| 1.03E-05 | 0 0 | orange1.1t02556.1 | 4.14 | 0 | 0 | 2 MASCOT | T | PLEX8 |
| 7.42E-07 | 0 0 | orange1.1t02556.1 | 4.14 | 0 | 0 | 2 MASCOT | T | PLEX8 |
| 3.67E-07 | 0 0 | orange1.1t02556.1 | 4.14 | 0 | 0 | 2 MASCOT | T | PLEX8 |
| 5.56E-08 | 0 0 | orange1.1t02556.1 | 4.14 | 0 | 0 | 2 MASCOT | T | PLEX8 |
| 8.96E-08 | 0 0 | orange1.1t02556.1 | 4.14 | 0 | 0 | 2 MASCOT | T | PLEX8 |
| 3.25E-04 | 0 0 | orange1.1t02556.1 | 4.14 | 0 | 0 | 2 MASCOT | T | PLEX8 |
| 1.98E-03 | 0 0 | orange1.1t02556.1 | 4.14 | 0 | 0 | 2 MASCOT | T | PLEX8 |
| 3.63E-06 | 0 0 | orange1.1t02556.1 | 4.14 | 0 | 0 | 2 MASCOT | T | PLEX8 |
| 2.76E-05 | 0 0 | orange1.1t02556.1 | 4.14 | 0 | 0 | 2 MASCOT | T | PLEX8 |
| 3.62E-05 | 0 0 | orange1.1t02556.1 | 4.14 | 0 | 0 | 2 MASCOT | T | PLEX8 |
| 1.34E-03 | 0 0 | orange1.1t02556.1 | 4.14 | 0 | 0 | 2 MASCOT | T | PLEX8 |
| 2.62E-03 | 0 0 | orange1.1t02556.1 | 4.14 | 0 | 0 | 2 MASCOT | T | PLEX8 |
| 6.54E-03 | 0 0 | orange1.1t02556.1 | 4.14 | 0 | 0 | 2 MASCOT | T | PLEX8 |
| 6.54E-04 | 0 0 | orange1.1t02556.1 | 4.14 | 0 | 0 | 2 MASCOT | T | PLEX8 |
| 1.76E-02 | 0 0 | orange1.1t02556.1 | 4.14 | 0 | 0 | 2 MASCOT | T | PLEX8 |
| 3.66E-02 | 0 0 | orange1.1t02556.1 | 4.14 | 0 | 0 | 2 MASCOT | T | PLEX8 |
| 4.47E-03 | 0 0 | orange1.1t02556.1 | 4.14 | 0 | 0 | 2 MASCOT | T | PLEX8 |
| 6.65E-05 | 0 0 | orange1.1t02556.1 | 4.14 | 0 | 0 | 2 MASCOT | T | PLEX8 |
| 2.96E-02 | 0 0 | orange1.1t02556.1 | 4.14 | 0 | 0 | 2 MASCOT | T | PLEX8 |
| 2.34E-04 | 0 0 | orange1.1t02556.1 | 4.14 | 0 | 0 | 2 MASCOT | T | PLEX8 |
| 1.05E-04 | 0 0 | orange1.1t02556.1 | 4.14 | 0 | 0 | 2 MASCOT | T | PLEX8 |
| 9.44E-04 | 0 0 | orange1.1t02556.1 | 4.14 | 0 | 0 | 2 MASCOT | T | PLEX8 |
| 2.03E-04 | 0 0 | orange1.1t02556.1 | 4.14 | 0 | 0 | 2 MASCOT | T |       |
| 4.98E-03 | 0 0 | orange1.1t02556.1 | 4.14 | 0 | 0 | 2 MASCOT | T |       |
| 1.57E-03 | 0 0 | orange1.1t02556.1 | 4.14 | 0 | 0 | 2 MASCOT | T |       |
| 1.56E-04 | 0 0 | orange1.1t02556.1 | 4.14 | 0 | 0 | 2 MASCOT | T | PLEX8 |
| 6.58E-03 | 0 0 | orange1.1t02556.1 | 4.14 | 0 | 0 | 2 MASCOT | T | PLEX8 |
| 6.85E-04 | 0 0 | orange1.1t02556.1 | 4.14 | 0 | 0 | 2 MASCOT | T | PLEX8 |
| 5.90E-03 | 0 0 | orange1.1t02556.1 | 4.14 | 0 | 0 | 2 MASCOT | T | PLEX8 |
| 2.17E-08 | 0 0 | orange1.1t02556.1 | 4.14 | 0 | 0 | 2 MASCOT | T | PLEX8 |
| 1.74E-04 | 0 0 | orange1.1t02556.1 | 4.14 | 0 | 0 | 2 MASCOT | T | PLEX8 |
| 1.46E-06 | 0 0 | orange1.1t02556.1 | 4.14 | 0 | 0 | 2 MASCOT | T | PLEX8 |
| 5.31E-08 | 0 0 | orange1.1t02556.1 | 4.14 | 0 | 0 | 2 MASCOT | T | PLEX8 |
| 2.35E-04 | 0 0 | orange1.1t02556.1 | 4.14 | 0 | 0 | 2 MASCOT | T | PLEX8 |
| 2.91E-09 | 0 0 | orange1.1t02556.1 | 4.14 | 0 | 0 | 2 MASCOT | T | PLEX8 |
| 6.62E-05 | 0 0 | orange1.1t02556.1 | 4.14 | 0 | 0 | 2 MASCOT | T |       |
| 1.55E-05 | 0 0 | orange1.1t02556.1 | 4.14 | 0 | 0 | 2 MASCOT | T |       |
| 6.10E-05 | 0 0 | orange1.1t02556.1 | 4.14 | 0 | 0 | 2 MASCOT | T |       |
| 1.78E-04 | 0 0 | orange1.1t02556.1 | 4.14 | 0 | 0 | 2 MASCOT | T |       |
| 1.47E-05 | 0 0 | orange1.1t02556.1 | 4.14 | 0 | 0 | 2 MASCOT | T |       |
| 3.82E-06 | 0 0 | orange1.1t02556.1 | 4.14 | 0 | 0 | 2 MASCOT | T |       |
| 2.19E-04 | 0 0 | orange1.1t02556.1 | 4.14 | 0 | 0 | 2 MASCOT | T |       |

|          |     |                   |      |   |      |   |        |        |       |       |
|----------|-----|-------------------|------|---|------|---|--------|--------|-------|-------|
| 5.64E-08 | 0 0 | orange1.1t02556.1 | 4.14 | 0 | 0    | 2 | MASCOT | T      |       |       |
| 2.37E-03 | 0 0 | orange1.1t02556.1 | 4.14 | 0 | 0    | 2 | MASCOT | T      | PLEX8 |       |
| 1.92E-02 | 0 0 | orange1.1t02556.1 | 4.14 | 0 | 0    | 2 | MASCOT | T      | PLEX8 |       |
| 2.93E-04 | 0 0 | orange1.1t02556.1 | 4.14 | 0 | 0    | 2 | MASCOT | T      | PLEX8 |       |
| 3.49E-06 | 0 0 | orange1.1t02556.1 | 4.14 | 0 | 0    | 2 | MASCOT | T      |       |       |
| 1.93E-03 | 0 0 | orange1.1t02556.1 | 4.14 | 0 | 0    | 2 | MASCOT | T      |       |       |
| 1.00E-02 | 0 0 | orange1.1t02556.1 | 4.14 | 0 | 0    | 2 | MASCOT | T      |       |       |
| 8.76E-03 | 0 0 | orange1.1t02556.1 | 4.14 | 0 | 0    | 2 | MASCOT | T      |       |       |
| 2.32E-04 | 0 0 | orange1.1t02556.1 | 4.14 | 0 | 0    | 2 | MASCOT | T      |       |       |
| 3.40E-03 | 0 0 | orange1.1t02556.1 | 4.14 | 0 | 0    | 2 | MASCOT | T      |       |       |
| 1.98E-03 | 0 0 | orange1.1t02556.1 | 4.14 | 0 | 0    | 2 | MASCOT | T      |       |       |
| 9.68E-05 | 0 0 | orange1.1t02556.1 | 4.14 | 0 | 0    | 2 | MASCOT | T      |       |       |
| 7.76E-02 | 0 0 | orange1.1t02556.1 | 9.8  | 0 | 0    | 2 | MASCOT | T      | PLEX8 |       |
| 5.68E-02 | 0 0 | orange1.1t02556.1 | 9.8  | 0 | 0    | 2 | MASCOT | T      | PLEX8 |       |
| 3.11E-02 | 0 0 | orange1.1t02556.1 | 9.8  | 0 | 0    | 2 | MASCOT | T      | PLEX8 |       |
| 6.75E-02 | 0 0 | orange1.1t02556.1 | 9.8  | 0 | 0    | 2 | MASCOT | T      | PLEX8 |       |
| 5.60E-02 | 0 0 | orange1.1t02556.1 | 9.8  | 0 | 0    | 2 | MASCOT | T      | PLEX8 |       |
| 7.30E-02 | 0 0 | orange1.1t02556.1 | 9.8  | 0 | 0    | 2 | MASCOT | T      | PLEX8 |       |
| 1.68E-01 | 0 0 | orange1.1t02556.1 | 6.05 | 0 | 0    | 2 | MASCOT | T      | PLEX8 |       |
| 4.29E-03 | 0 0 | orange1.1t02556.1 | 6.05 | 0 | 0    | 2 | MASCOT | T      | PLEX8 |       |
| 1.98E-01 | 0 0 | orange1.1t02556.1 | 6.05 | 0 | 0    | 2 | MASCOT | T      | PLEX8 |       |
| 2.17E-02 | 0 0 | orange1.1t02556.1 | 6.05 | 0 | 0    | 2 | MASCOT | T      | PLEX8 |       |
| 1.73E-01 | 0 0 | orange1.1t02556.1 | 6.05 | 0 | 0    | 2 | MASCOT | T      | PLEX8 |       |
| 1.60E-01 | 0 0 | orange1.1t02556.1 | 6.05 | 0 | 0    | 2 | MASCOT | T      | PLEX8 |       |
| 1.70E-01 | 0 0 | orange1.1t02556.1 | 6.05 | 0 | 0    | 2 | MASCOT | T      | PLEX8 |       |
| 4.05E-03 | 0 0 | orange1.1t02556.1 | 6.05 | 0 | 0    | 2 | MASCOT | T      | PLEX8 |       |
| 2.02E-02 | 0 0 | orange1.1t02556.1 | 6.05 | 0 | 0    | 2 | MASCOT | T      | PLEX8 |       |
| 5.24E-02 | 0 0 | orange1.1t02556.1 | 6.05 | 0 | 0    | 2 | MASCOT | T      |       |       |
| 5.05E-02 | 0 0 | orange1.1t02556.1 | 6.05 | 0 | 0    | 2 | MASCOT | T      |       |       |
| 6.13E-02 | 0 0 | orange1.1t02556.1 | 5.84 | 0 | 15.9 | 0 | 2      | MASCOT | T     | PLEX8 |
| 8.44E-02 | 0 0 | orange1.1t02556.1 | 5.84 | 0 | 15.9 | 0 | 2      | MASCOT | T     | PLEX8 |
| 8.64E-02 | 0 0 | orange1.1t02556.1 | 5.84 | 0 | 15.9 | 0 | 2      | MASCOT | T     | PLEX8 |
| 9.31E-02 | 0 0 | orange1.1t02556.1 | 5.84 | 0 | 15.9 | 0 | 2      | MASCOT | T     | PLEX8 |
| 8.83E-02 | 0 0 | orange1.1t02556.1 | 5.84 | 0 | 15.9 | 0 | 2      | MASCOT | T     | PLEX8 |
| 1.84E-01 | 0 0 | orange1.1t02556.1 | 5.84 | 0 | 15.9 | 0 | 2      | MASCOT | T     | PLEX8 |
| 3.74E-01 | 0 0 | orange1.1t02556.1 | 5.84 | 0 | 15.9 | 0 | 2      | MASCOT | T     | PLEX8 |
| 8.75E-02 | 0 0 | orange1.1t02556.1 | 5.84 | 0 | 15.9 | 0 | 2      | MASCOT | T     | PLEX8 |
| 2.16E-01 | 0 0 | orange1.1t02556.1 | 5.84 | 0 | 15.9 | 0 | 2      | MASCOT | T     | PLEX8 |
| 1.06E-01 | 0 0 | orange1.1t02556.1 | 5.84 | 0 | 15.9 | 0 | 2      | MASCOT | T     | PLEX8 |
| 2.22E-01 | 0 0 | orange1.1t02556.1 | 5.84 | 0 | 15.9 | 0 | 2      | MASCOT | T     | PLEX8 |
| 6.32E-02 | 0 0 | orange1.1t02556.1 | 5.84 | 0 | 15.9 | 0 | 2      | MASCOT | T     | PLEX8 |
| 7.51E-02 | 0 0 | orange1.1t02556.1 | 5.84 | 0 | 15.9 | 0 | 2      | MASCOT | T     | PLEX8 |
| 5.37E-02 | 0 0 | orange1.1t02556.1 | 5.84 | 0 | 15.9 | 0 | 2      | MASCOT | T     | PLEX8 |
| 8.10E-02 | 0 0 | orange1.1t02556.1 | 5.84 | 0 | 15.9 | 0 | 2      | MASCOT | T     | PLEX8 |
| 5.25E-02 | 0 0 | orange1.1t02556.1 | 5.84 | 0 | 15.9 | 0 | 2      | MASCOT | T     | PLEX8 |
| 7.19E-02 | 0 0 | orange1.1t02556.1 | 5.84 | 0 | 15.9 | 0 | 2      | MASCOT | T     | PLEX8 |
| 9.02E-02 | 0 0 | orange1.1t02556.1 | 5.84 | 0 | 15.9 | 0 | 2      | MASCOT | T     | PLEX8 |
| 9.72E-02 | 0 0 | orange1.1t02556.1 | 5.84 | 0 | 15.9 | 0 | 2      | MASCOT | T     | PLEX8 |
| 2.86E-01 | 0 0 | orange1.1t02556.1 | 5.84 | 0 | 15.9 | 0 | 2      | MASCOT | T     | PLEX8 |
| 8.11E-02 | 0 0 | orange1.1t02556.1 | 5.84 | 0 | 15.9 | 0 | 2      | MASCOT | T     | PLEX8 |
| 8.96E-02 | 0 0 | orange1.1t02556.1 | 5.84 | 0 | 15.9 | 0 | 2      | MASCOT | T     | PLEX8 |



|          |     |                   |      |   |      |   |   |        |   |       |
|----------|-----|-------------------|------|---|------|---|---|--------|---|-------|
| 3.67E-01 | 0 0 | orange1.1t02556.1 | 5.84 | 0 | 15.9 | 0 | 2 | MASCOT | T | PLEX8 |
| 7.28E-02 | 0 0 | orange1.1t02556.1 | 5.84 | 0 | 15.9 | 0 | 2 | MASCOT | T | PLEX8 |
| 1.10E-01 | 0 0 | orange1.1t02556.1 | 5.84 | 0 | 15.9 | 0 | 2 | MASCOT | T | PLEX8 |
| 2.18E-01 | 0 0 | orange1.1t02556.1 | 5.84 | 0 | 15.9 | 0 | 2 | MASCOT | T | PLEX8 |
| 1.72E-01 | 0 0 | orange1.1t02556.1 | 5.84 | 0 | 15.9 | 0 | 2 | MASCOT | T |       |
| 1.38E-01 | 0 0 | orange1.1t02556.1 | 5.84 | 0 | 15.9 | 0 | 2 | MASCOT | T |       |
| 9.15E-02 | 0 0 | orange1.1t02556.1 | 5.84 | 0 | 15.9 | 0 | 2 | MASCOT | T | PLEX8 |
| 2.60E-01 | 0 0 | orange1.1t02556.1 | 5.84 | 0 | 15.9 | 0 | 2 | MASCOT | T | PLEX8 |
| 8.89E-02 | 0 0 | orange1.1t02556.1 | 5.84 | 0 | 15.9 | 0 | 2 | MASCOT | T | PLEX8 |
| 8.74E-02 | 0 0 | orange1.1t02556.1 | 5.84 | 0 | 15.9 | 0 | 2 | MASCOT | T | PLEX8 |
| 6.80E-02 | 0 0 | orange1.1t02556.1 | 5.84 | 0 | 15.9 | 0 | 2 | MASCOT | T | PLEX8 |
| 5.32E-02 | 0 0 | orange1.1t02556.1 | 5.84 | 0 | 15.9 | 0 | 2 | MASCOT | T | PLEX8 |
| 5.87E-02 | 0 0 | orange1.1t02556.1 | 5.84 | 0 | 15.9 | 0 | 2 | MASCOT | T | PLEX8 |
| 6.48E-02 | 0 0 | orange1.1t02556.1 | 5.84 | 0 | 15.9 | 0 | 2 | MASCOT | T | PLEX8 |
| 9.10E-02 | 0 0 | orange1.1t02556.1 | 5.84 | 0 | 15.9 | 0 | 2 | MASCOT | T | PLEX8 |
| 1.38E-01 | 0 0 | orange1.1t02556.1 | 5.84 | 0 | 15.9 | 0 | 2 | MASCOT | T | PLEX8 |
| 8.89E-02 | 0 0 | orange1.1t02556.1 | 5.84 | 0 | 15.9 | 0 | 2 | MASCOT | T | PLEX8 |
| 1.19E-01 | 0 0 | orange1.1t02556.1 | 5.84 | 0 | 15.9 | 0 | 2 | MASCOT | T | PLEX8 |
| 4.81E-02 | 0 0 | orange1.1t02556.1 | 5.84 | 0 | 15.9 | 0 | 2 | MASCOT | T | PLEX8 |
| 8.82E-02 | 0 0 | orange1.1t02556.1 | 5.84 | 0 | 15.9 | 0 | 2 | MASCOT | T | PLEX8 |
| 9.83E-02 | 0 0 | orange1.1t02556.1 | 5.84 | 0 | 15.9 | 0 | 2 | MASCOT | T | PLEX8 |
| 3.64E-01 | 0 0 | orange1.1t02556.1 | 5.84 | 0 | 15.9 | 0 | 2 | MASCOT | T | PLEX8 |
| 1.02E-01 | 0 0 | orange1.1t02556.1 | 5.84 | 0 | 15.9 | 0 | 2 | MASCOT | T | PLEX8 |
| 1.06E-01 | 0 0 | orange1.1t02556.1 | 5.84 | 0 | 15.9 | 0 | 2 | MASCOT | T | PLEX8 |
| 3.71E-01 | 0 0 | orange1.1t02556.1 | 5.84 | 0 | 15.9 | 0 | 2 | MASCOT | T | PLEX8 |
| 9.45E-02 | 0 0 | orange1.1t02556.1 | 5.84 | 0 | 15.9 | 0 | 2 | MASCOT | T | PLEX8 |
| 1.75E-01 | 0 0 | orange1.1t02556.1 | 5.84 | 0 | 15.9 | 0 | 2 | MASCOT | T | PLEX8 |
| 2.71E-01 | 0 0 | orange1.1t02556.1 | 5.84 | 0 | 15.9 | 0 | 2 | MASCOT | T | PLEX8 |
| 3.11E-01 | 0 0 | orange1.1t02556.1 | 5.84 | 0 | 15.9 | 0 | 2 | MASCOT | T | PLEX8 |
| 1.46E-01 | 0 0 | orange1.1t02556.1 | 5.84 | 0 | 15.9 | 0 | 2 | MASCOT | T | PLEX8 |
| 1.50E-01 | 0 0 | orange1.1t02556.1 | 5.84 | 0 | 15.9 | 0 | 2 | MASCOT | T | PLEX8 |
| 2.33E-01 | 0 0 | orange1.1t02556.1 | 5.84 | 0 | 15.9 | 0 | 2 | MASCOT | T |       |
| 3.19E-01 | 0 0 | orange1.1t02556.1 | 5.84 | 0 | 15.9 | 0 | 2 | MASCOT | T |       |
| 1.69E-01 | 0 0 | orange1.1t02556.1 | 5.84 | 0 | 15.9 | 0 | 2 | MASCOT | T |       |
| 8.67E-02 | 0 0 | orange1.1t02556.1 | 5.84 | 0 | 15.9 | 0 | 2 | MASCOT | T |       |
| 1.31E-01 | 0 0 | orange1.1t02556.1 | 5.84 | 0 | 15.9 | 0 | 2 | MASCOT | T |       |
| 1.43E-01 | 0 0 | orange1.1t02556.1 | 5.84 | 0 |      | 0 | 2 | MASCOT | T | PLEX8 |
| 1.12E-01 | 0 0 | orange1.1t02556.1 | 5.84 | 0 |      | 0 | 2 | MASCOT | T | PLEX8 |
| 1.23E-01 | 0 0 | orange1.1t02556.1 | 5.84 | 0 |      | 0 | 2 | MASCOT | T | PLEX8 |
| 6.61E-02 | 0 0 | orange1.1t02556.1 | 5.84 | 0 |      | 0 | 2 | MASCOT | T | PLEX8 |
| 1.06E-01 | 0 0 | orange1.1t02556.1 | 5.84 | 0 |      | 0 | 2 | MASCOT | T | PLEX8 |
| 3.38E-01 | 0 0 | orange1.1t02556.1 | 5.84 | 0 |      | 0 | 2 | MASCOT | T | PLEX8 |
| 1.66E-01 | 0 0 | orange1.1t02556.1 | 5.84 | 0 |      | 0 | 2 | MASCOT | T | PLEX8 |
| 2.08E-01 | 0 0 | orange1.1t02556.1 | 5.84 | 0 |      | 0 | 2 | MASCOT | T | PLEX8 |
| 1.28E-01 | 0 0 | orange1.1t02556.1 | 5.84 | 0 |      | 0 | 2 | MASCOT | T | PLEX8 |
| 1.40E-01 | 0 0 | orange1.1t02556.1 | 5.84 | 0 |      | 0 | 2 | MASCOT | T | PLEX8 |
| 2.37E-01 | 0 0 | orange1.1t02556.1 | 5.84 | 0 |      | 0 | 2 | MASCOT | T | PLEX8 |
| 1.50E-01 | 0 0 | orange1.1t02556.1 | 5.84 | 0 |      | 0 | 2 | MASCOT | T | PLEX8 |
| 2.48E-01 | 0 0 | orange1.1t02556.1 | 5.84 | 0 |      | 0 | 2 | MASCOT | T | PLEX8 |
| 2.19E-01 | 0 0 | orange1.1t02556.1 | 5.84 | 0 |      | 0 | 2 | MASCOT | T | PLEX8 |
| 1.19E-01 | 0 0 | orange1.1t02556.1 | 5.84 | 0 |      | 0 | 2 | MASCOT | T | PLEX8 |

|          |     |                   |      |   |   |   |        |   |       |
|----------|-----|-------------------|------|---|---|---|--------|---|-------|
| 1.04E-01 | 0 0 | orange1.1t02556.1 | 5.84 | 0 | 0 | 2 | MASCOT | T | PLEX8 |
| 8.58E-02 | 0 0 | orange1.1t02556.1 | 5.84 | 0 | 0 | 2 | MASCOT | T | PLEX8 |
| 1.14E-01 | 0 0 | orange1.1t02556.1 | 5.84 | 0 | 0 | 2 | MASCOT | T |       |
| 1.92E-01 | 0 0 | orange1.1t02556.1 | 5.84 | 0 | 0 | 2 | MASCOT | T |       |
| 2.63E-01 | 0 0 | orange1.1t02556.1 | 5.84 | 0 | 0 | 2 | MASCOT | T |       |
| 1.59E-01 | 0 0 | orange1.1t02556.1 | 5.84 | 0 | 0 | 2 | MASCOT | T |       |
| 1.30E-01 | 0 0 | orange1.1t02556.1 | 5.84 | 0 | 0 | 2 | MASCOT | T |       |
| 8.31E-02 | 0 0 | orange1.1t02556.1 | 5.84 | 0 | 0 | 2 | MASCOT | T |       |
| 5.17E-02 | 0 0 | orange1.1t02556.1 | 5.84 | 1 | 0 | 2 | MASCOT | T | PLEX8 |
| 8.40E-03 | 0 0 | orange1.1t02556.1 | 5.84 | 1 | 0 | 2 | MASCOT | T | PLEX8 |
| 1.64E-02 | 0 0 | orange1.1t02556.1 | 5.84 | 1 | 0 | 2 | MASCOT | T | PLEX8 |
| 1.94E-02 | 0 0 | orange1.1t02556.1 | 5.84 | 1 | 0 | 2 | MASCOT | T | PLEX8 |
| 2.01E-02 | 0 0 | orange1.1t02556.1 | 5.84 | 1 | 0 | 2 | MASCOT | T | PLEX8 |
| 6.75E-03 | 0 0 | orange1.1t02556.1 | 5.84 | 1 | 0 | 2 | MASCOT | T | PLEX8 |
| 1.11E-02 | 0 0 | orange1.1t02556.1 | 5.84 | 1 | 0 | 2 | MASCOT | T | PLEX8 |
| 2.81E-02 | 0 0 | orange1.1t02556.1 | 5.84 | 1 | 0 | 2 | MASCOT | T | PLEX8 |
| 9.82E-03 | 0 0 | orange1.1t02556.1 | 5.84 | 1 | 0 | 2 | MASCOT | T | PLEX8 |
| 5.78E-03 | 0 0 | orange1.1t02556.1 | 5.84 | 1 | 0 | 2 | MASCOT | T | PLEX8 |
| 6.81E-03 | 0 0 | orange1.1t02556.1 | 5.84 | 1 | 0 | 2 | MASCOT | T | PLEX8 |
| 1.37E-02 | 0 0 | orange1.1t02556.1 | 5.84 | 1 | 0 | 2 | MASCOT | T | PLEX8 |
| 2.07E-02 | 0 0 | orange1.1t02556.1 | 5.84 | 1 | 0 | 2 | MASCOT | T | PLEX8 |
| 7.23E-03 | 0 0 | orange1.1t02556.1 | 5.84 | 1 | 0 | 2 | MASCOT | T | PLEX8 |
| 4.93E-03 | 0 0 | orange1.1t02556.1 | 5.84 | 1 | 0 | 2 | MASCOT | T | PLEX8 |
| 7.35E-03 | 0 0 | orange1.1t02556.1 | 5.84 | 1 | 0 | 2 | MASCOT | T | PLEX8 |
| 1.15E-02 | 0 0 | orange1.1t02556.1 | 5.84 | 1 | 0 | 2 | MASCOT | T | PLEX8 |
| 6.65E-02 | 0 0 | orange1.1t02556.1 | 5.84 | 1 | 0 | 2 | MASCOT | T | PLEX8 |
| 3.82E-02 | 0 0 | orange1.1t02556.1 | 5.84 | 1 | 0 | 2 | MASCOT | T | PLEX8 |
| 7.62E-03 | 0 0 | orange1.1t02556.1 | 5.84 | 1 | 0 | 2 | MASCOT | T | PLEX8 |
| 9.98E-03 | 0 0 | orange1.1t02556.1 | 5.84 | 1 | 0 | 2 | MASCOT | T | PLEX8 |
| 4.34E-03 | 0 0 | orange1.1t02556.1 | 5.84 | 1 | 0 | 2 | MASCOT | T | PLEX8 |
| 8.39E-03 | 0 0 | orange1.1t02556.1 | 5.84 | 1 | 0 | 2 | MASCOT | T | PLEX8 |
| 1.52E-02 | 0 0 | orange1.1t02556.1 | 5.84 | 1 | 0 | 2 | MASCOT | T | PLEX8 |
| 5.52E-02 | 0 0 | orange1.1t02556.1 | 5.84 | 1 | 0 | 2 | MASCOT | T |       |
| 2.37E-02 | 0 0 | orange1.1t02556.1 | 5.84 | 1 | 0 | 2 | MASCOT | T | PLEX8 |
| 6.89E-03 | 0 0 | orange1.1t02556.1 | 5.84 | 1 | 0 | 2 | MASCOT | T | PLEX8 |
| 1.21E-02 | 0 0 | orange1.1t02556.1 | 5.84 | 1 | 0 | 2 | MASCOT | T | PLEX8 |
| 3.37E-02 | 0 0 | orange1.1t02556.1 | 5.84 | 1 | 0 | 2 | MASCOT | T | PLEX8 |
| 5.56E-02 | 0 0 | orange1.1t02556.1 | 5.84 | 1 | 0 | 2 | MASCOT | T | PLEX8 |
| 8.40E-04 | 0 0 | orange1.1t02556.1 | 5.84 | 1 | 0 | 2 | MASCOT | T |       |
| 5.00E-02 | 0 0 | orange1.1t02556.1 | 5.84 | 1 | 0 | 2 | MASCOT | T | PLEX8 |
| 2.58E-02 | 0 0 | orange1.1t02556.1 | 5.84 | 1 | 0 | 2 | MASCOT | T | PLEX8 |
| 1.28E-02 | 0 0 | orange1.1t02556.1 | 5.84 | 1 | 0 | 2 | MASCOT | T | PLEX8 |
| 2.11E-02 | 0 0 | orange1.1t02556.1 | 5.84 | 1 | 0 | 2 | MASCOT | T | PLEX8 |
| 7.30E-03 | 0 0 | orange1.1t02556.1 | 5.84 | 1 | 0 | 2 | MASCOT | T | PLEX8 |
| 7.44E-03 | 0 0 | orange1.1t02556.1 | 5.84 | 1 | 0 | 2 | MASCOT | T | PLEX8 |
| 5.45E-02 | 0 0 | orange1.1t02556.1 | 5.84 | 1 | 0 | 2 | MASCOT | T | PLEX8 |
| 2.64E-02 | 0 0 | orange1.1t02556.1 | 5.84 | 1 | 0 | 2 | MASCOT | T | PLEX8 |
| 1.26E-02 | 0 0 | orange1.1t02556.1 | 5.84 | 1 | 0 | 2 | MASCOT | T | PLEX8 |
| 3.06E-02 | 0 0 | orange1.1t02556.1 | 5.84 | 1 | 0 | 2 | MASCOT | T | PLEX8 |
| 1.45E-02 | 0 0 | orange1.1t02556.1 | 5.84 | 1 | 0 | 2 | MASCOT | T | PLEX8 |
| 1.94E-02 | 0 0 | orange1.1t02556.1 | 5.84 | 1 | 0 | 2 | MASCOT | T | PLEX8 |

|          |     |                   |      |   |      |   |        |        |         |
|----------|-----|-------------------|------|---|------|---|--------|--------|---------|
| 5.07E-02 | 0 0 | orange1.1t02556.1 | 5.84 | 1 | 0    | 2 | MASCOT | T      | PLEX8   |
| 2.39E-03 | 0 0 | orange1.1t02556.1 | 5.84 | 1 | 0    | 2 | MASCOT | T      |         |
| 1.32E-02 | 0 0 | orange1.1t02556.1 | 5.84 | 1 | 0    | 2 | MASCOT | T      |         |
| 7.66E-02 | 0 0 | orange1.1t02556.1 | 5.84 | 1 | 0    | 2 | MASCOT | T      |         |
| 1.78E-02 | 0 0 | orange1.1t02556.1 | 5.84 | 1 | 0    | 2 | MASCOT | T      |         |
| 6.15E-03 | 0 0 | orange1.1t02556.1 | 5.84 | 1 | 0    | 2 | MASCOT | T      |         |
| 7.84E-03 | 0 0 | orange1.1t02556.1 | 5.84 | 1 | 0    | 2 | MASCOT | T      |         |
| 1.97E-02 | 0 0 | orange1.1t02556.1 | 5.84 | 1 | 0    | 2 | MASCOT | T      |         |
| 1.05E-02 | 0 0 | orange1.1t02556.1 | 5.84 | 1 | 0    | 2 | MASCOT | T      |         |
| 4.32E-02 | 0 0 | orange1.1t02556.1 | 5.84 | 1 | 0    | 2 | MASCOT | T      |         |
| 5.97E-02 | 0 0 | orange1.1t02556.1 | 4.37 | 0 | 15.9 | 0 | 2      | MASCOT | T PLEX8 |
| 1.06E-02 | 0 0 | orange1.1t02556.1 | 4.37 | 0 | 15.9 | 0 | 2      | MASCOT | T PLEX8 |
| 2.50E-02 | 0 0 | orange1.1t02556.1 | 4.37 | 0 | 15.9 | 0 | 2      | MASCOT | T PLEX8 |
| 3.61E-02 | 0 0 | orange1.1t02556.1 | 4.37 | 0 | 15.9 | 0 | 2      | MASCOT | T PLEX8 |
| 9.16E-03 | 0 0 | orange1.1t02556.1 | 4.37 | 0 | 15.9 | 0 | 2      | MASCOT | T PLEX8 |
| 3.24E-02 | 0 0 | orange1.1t02556.1 | 4.37 | 0 | 15.9 | 0 | 2      | MASCOT | T PLEX8 |
| 2.59E-02 | 0 0 | orange1.1t02556.1 | 4.37 | 0 | 15.9 | 0 | 2      | MASCOT | T PLEX8 |
| 9.12E-02 | 0 0 | orange1.1t02556.1 | 4.37 | 0 | 15.9 | 0 | 2      | MASCOT | T PLEX8 |
| 6.40E-02 | 0 0 | orange1.1t02556.1 | 4.37 | 0 | 15.9 | 0 | 2      | MASCOT | T PLEX8 |
| 7.63E-02 | 0 0 | orange1.1t02556.1 | 4.37 | 0 | 15.9 | 0 | 2      | MASCOT | T PLEX8 |
| 2.70E-02 | 0 0 | orange1.1t02556.1 | 4.37 | 0 | 15.9 | 0 | 2      | MASCOT | T PLEX8 |
| 1.31E-02 | 0 0 | orange1.1t02556.1 | 4.37 | 0 | 15.9 | 0 | 2      | MASCOT | T PLEX8 |
| 9.14E-02 | 0 0 | orange1.1t02556.1 | 4.37 | 0 | 15.9 | 0 | 2      | MASCOT | T PLEX8 |
| 2.04E-01 | 0 0 | orange1.1t02556.1 | 4.37 | 0 | 15.9 | 0 | 2      | MASCOT | T PLEX8 |
| 2.54E-02 | 0 0 | orange1.1t02556.1 | 4.37 | 0 | 15.9 | 0 | 2      | MASCOT | T PLEX8 |
| 9.71E-03 | 0 0 | orange1.1t02556.1 | 4.37 | 0 | 15.9 | 0 | 2      | MASCOT | T PLEX8 |
| 1.25E-01 | 0 0 | orange1.1t02556.1 | 4.37 | 0 | 15.9 | 0 | 2      | MASCOT | T PLEX8 |
| 1.86E-01 | 0 0 | orange1.1t02556.1 | 4.37 | 0 | 15.9 | 0 | 2      | MASCOT | T PLEX8 |
| 1.01E-02 | 0 0 | orange1.1t02556.1 | 4.37 | 0 | 15.9 | 0 | 2      | MASCOT | T PLEX8 |
| 7.23E-03 | 0 0 | orange1.1t02556.1 | 4.37 | 0 | 15.9 | 0 | 2      | MASCOT | T PLEX8 |
| 6.39E-02 | 0 0 | orange1.1t02556.1 | 4.37 | 0 | 15.9 | 0 | 2      | MASCOT | T       |
| 8.78E-03 | 0 0 | orange1.1t02556.1 | 4.37 | 0 | 15.9 | 0 | 2      | MASCOT | T       |
| 5.61E-03 | 0 0 | orange1.1t02556.1 | 4.37 | 0 | 15.9 | 0 | 2      | MASCOT | T       |
| 7.72E-04 | 0 0 | orange1.1t02556.1 | 4.37 | 0 | 15.9 | 0 | 2      | MASCOT | T       |
| 1.72E-02 | 0 0 | orange1.1t02556.1 | 4.37 | 0 | 15.9 | 0 | 2      | MASCOT | T       |
| 1.62E-02 | 0 0 | orange1.1t02556.1 | 4.37 | 0 | 15.9 | 0 | 2      | MASCOT | T       |
| 5.60E-03 | 0 0 | orange1.1t02556.1 | 4.37 | 0 | 15.9 | 0 | 2      | MASCOT | T       |
| 2.50E-07 | 0 0 | orange1.1t02556.1 | 4.37 | 0 | 15.9 | 0 | 2      | MASCOT | T       |
| 2.83E-06 | 0 0 | orange1.1t02556.1 | 4.37 | 0 | 15.9 | 0 | 2      | MASCOT | T       |
| 3.86E-02 | 0 0 | orange1.1t02556.1 | 4.37 | 0 | 15.9 | 0 | 2      | MASCOT | T       |
| 1.17E-06 | 0 0 | orange1.1t02556.1 | 4.37 | 0 | 15.9 | 0 | 2      | MASCOT | T       |
| 4.52E-02 | 0 0 | orange1.1t02556.1 | 4.37 | 0 | 15.9 | 0 | 2      | MASCOT | T       |
| 6.67E-04 | 0 0 | orange1.1t02556.1 | 4.37 | 0 | 15.9 | 0 | 2      | MASCOT | T       |
| 1.69E-04 | 0 0 | orange1.1t02556.1 | 4.37 | 0 | 15.9 | 0 | 2      | MASCOT | T       |
| 3.35E-06 | 0 0 | orange1.1t02556.1 | 4.37 | 0 | 15.9 | 0 | 2      | MASCOT | T       |
| 2.21E-04 | 0 0 | orange1.1t02556.1 | 4.37 | 0 | 15.9 | 0 | 2      | MASCOT | T       |
| 4.53E-03 | 0 0 | orange1.1t02556.1 | 4.37 | 0 | 15.9 | 0 | 2      | MASCOT | T       |
| 3.05E-02 | 0 0 | orange1.1t02556.1 | 4.37 | 0 | 15.9 | 0 | 2      | MASCOT | T       |
| 8.27E-02 | 0 0 | orange1.1t02556.1 | 4.37 | 0 | 15.9 | 0 | 2      | MASCOT | T       |
| 9.24E-03 | 0 0 | orange1.1t02556.1 | 4.37 | 0 | 15.9 | 0 | 2      | MASCOT | T       |
| 9.68E-03 | 0 0 | orange1.1t02556.1 | 4.37 | 0 | 15.9 | 0 | 2      | MASCOT | T       |

|          |     |                   |      |   |      |   |   |        |   |       |
|----------|-----|-------------------|------|---|------|---|---|--------|---|-------|
| 6.58E-05 | 0 0 | orange1.1t02556.1 | 4.37 | 0 | 15.9 | 0 | 2 | MASCOT | T |       |
| 1.14E-01 | 0 0 | orange1.1t02556.1 | 4.37 | 0 | 15.9 | 0 | 2 | MASCOT | T |       |
| 2.54E-03 | 0 0 | orange1.1t02556.1 | 4.37 | 0 | 15.9 | 0 | 2 | MASCOT | T |       |
| 8.96E-02 | 0 0 | orange1.1t02556.1 | 4.37 | 0 | 15.9 | 0 | 2 | MASCOT | T |       |
| 6.73E-02 | 0 0 | orange1.1t02556.1 | 4.37 | 0 | 15.9 | 0 | 2 | MASCOT | T |       |
| 6.74E-04 | 0 0 | orange1.1t02556.1 | 4.37 | 0 | 15.9 | 0 | 2 | MASCOT | T |       |
| 4.36E-03 | 0 0 | orange1.1t02556.1 | 4.37 | 0 | 15.9 | 0 | 2 | MASCOT | T |       |
| 1.39E-02 | 0 0 | orange1.1t02556.1 | 4.37 | 0 | 15.9 | 0 | 2 | MASCOT | T |       |
| 9.60E-03 | 0 0 | orange1.1t02556.1 | 4.37 | 0 | 15.9 | 0 | 2 | MASCOT | T |       |
| 3.62E-03 | 0 0 | orange1.1t02556.1 | 4.37 | 0 | 15.9 | 0 | 2 | MASCOT | T |       |
| 1.22E-02 | 0 0 | orange1.1t02556.1 | 4.37 | 0 | 15.9 | 0 | 2 | MASCOT | T |       |
| 3.20E-03 | 0 0 | orange1.1t02556.1 | 4.37 | 0 | 15.9 | 0 | 2 | MASCOT | T |       |
| 3.08E-02 | 0 0 | orange1.1t02556.1 | 4.37 | 0 | 15.9 | 0 | 2 | MASCOT | T |       |
| 8.62E-04 | 0 0 | orange1.1t02556.1 | 4.37 | 0 | 15.9 | 0 | 2 | MASCOT | T |       |
| 1.12E-02 | 0 0 | orange1.1t02556.1 | 4.37 | 0 | 15.9 | 0 | 2 | MASCOT | T |       |
| 6.69E-02 | 0 0 | orange1.1t02556.1 | 4.37 | 0 | 15.9 | 0 | 2 | MASCOT | T |       |
| 1.87E-01 | 0 0 | orange1.1t02556.1 | 4.37 | 0 | 15.9 | 0 | 2 | MASCOT | T |       |
| 2.39E-02 | 0 0 | orange1.1t02556.1 | 4.37 | 0 | 15.9 | 0 | 2 | MASCOT | T |       |
| 2.39E-01 | 0 0 | orange1.1t02556.1 | 4.37 | 0 | 15.9 | 0 | 2 | MASCOT | T |       |
| 1.96E-01 | 0 0 | orange1.1t02556.1 | 4.37 | 0 | 15.9 | 0 | 2 | MASCOT | T |       |
| 2.49E-01 | 0 0 | orange1.1t02556.1 | 4.37 | 0 | 15.9 | 0 | 2 | MASCOT | T |       |
| 6.74E-02 | 0 0 | orange1.1t02556.1 | 4.37 | 0 | 15.9 | 0 | 2 | MASCOT | T |       |
| 1.27E-02 | 0 0 | orange1.1t02556.1 | 4.37 | 0 | 15.9 | 0 | 2 | MASCOT | T |       |
| 1.42E-01 | 0 0 | orange1.1t02556.1 | 4.37 | 0 | 15.9 | 0 | 2 | MASCOT | T |       |
| 9.12E-02 | 0 0 | orange1.1t02556.1 | 4.37 | 0 | 15.9 | 0 | 2 | MASCOT | T |       |
| 2.33E-01 | 0 0 | orange1.1t02556.1 | 4.37 | 0 | 15.9 | 0 | 2 | MASCOT | T |       |
| 7.80E-02 | 0 0 | orange1.1t02556.1 | 4.37 | 0 | 15.9 | 0 | 2 | MASCOT | T |       |
| 4.12E-02 | 0 0 | orange1.1t02556.1 | 4.37 | 0 | 15.9 | 0 | 2 | MASCOT | T |       |
| 1.31E-03 | 0 0 | orange1.1t02556.1 | 4.37 | 0 | 15.9 | 0 | 2 | MASCOT | T |       |
| 1.51E-01 | 0 0 | orange1.1t02556.1 | 4.37 | 0 | 15.9 | 0 | 2 | MASCOT | T |       |
| 1.48E-03 | 0 0 | orange1.1t02556.1 | 4.37 | 0 | 15.9 | 0 | 2 | MASCOT | T |       |
| 2.04E-01 | 0 0 | orange1.1t02556.1 | 4.37 | 0 | 15.9 | 0 | 2 | MASCOT | T |       |
| 1.22E-02 | 0 0 | orange1.1t02556.1 | 4.37 | 0 | 15.9 | 0 | 2 | MASCOT | T |       |
| 1.51E-03 | 0 0 | orange1.1t02556.1 | 4.37 | 0 | 15.9 | 0 | 2 | MASCOT | T |       |
| 4.33E-05 | 0 0 | orange1.1t02556.1 | 4.37 | 0 | 15.9 | 0 | 2 | MASCOT | T |       |
| 8.71E-05 | 0 0 | orange1.1t02556.1 | 4.37 | 0 | 15.9 | 0 | 2 | MASCOT | T |       |
| 3.30E-03 | 0 0 | orange1.1t02556.1 | 4.37 | 0 | 15.9 | 0 | 2 | MASCOT | T |       |
| 3.68E-03 | 0 0 | orange1.1t02556.1 | 4.37 | 0 | 15.9 | 0 | 2 | MASCOT | T |       |
| 5.60E-02 | 0 0 | orange1.1t02556.1 | 4.37 | 0 | 15.9 | 0 | 2 | MASCOT | T |       |
| 1.06E-04 | 0 0 | orange1.1t02556.1 | 4.37 | 0 | 15.9 | 0 | 2 | MASCOT | T |       |
| 2.94E-02 | 0 0 | orange1.1t02556.1 | 4.37 | 0 | 15.9 | 0 | 2 | MASCOT | T |       |
| 1.10E-02 | 0 0 | orange1.1t02556.1 | 4.37 | 0 | 15.9 | 0 | 2 | MASCOT | T |       |
| 6.29E-02 | 0 0 | orange1.1t02556.1 | 4.37 | 0 | 15.9 | 0 | 2 | MASCOT | T | PLEX8 |
| 5.46E-02 | 0 0 | orange1.1t02556.1 | 4.37 | 0 | 15.9 | 0 | 2 | MASCOT | T | PLEX8 |
| 7.50E-02 | 0 0 | orange1.1t02556.1 | 4.37 | 0 | 15.9 | 0 | 2 | MASCOT | T | PLEX8 |
| 1.05E-02 | 0 0 | orange1.1t02556.1 | 4.37 | 0 | 15.9 | 0 | 2 | MASCOT | T | PLEX8 |
| 7.55E-04 | 0 0 | orange1.1t02556.1 | 4.37 | 0 | 15.9 | 0 | 2 | MASCOT | T | PLEX8 |
| 9.17E-02 | 0 0 | orange1.1t02556.1 | 4.37 | 0 | 15.9 | 0 | 2 | MASCOT | T | PLEX8 |
| 3.08E-02 | 0 0 | orange1.1t02556.1 | 4.37 | 0 | 15.9 | 0 | 2 | MASCOT | T | PLEX8 |
| 2.35E-02 | 0 0 | orange1.1t02556.1 | 4.37 | 0 | 15.9 | 0 | 2 | MASCOT | T | PLEX8 |
| 1.71E-01 | 0 0 | orange1.1t02556.1 | 4.37 | 0 |      | 0 | 2 | MASCOT | T | PLEX8 |



|          |     |                   |      |   |   |   |        |   |       |
|----------|-----|-------------------|------|---|---|---|--------|---|-------|
| 5.80E-03 | 0 0 | orange1.1t02556.1 | 4.37 | 0 | 0 | 2 | MASCOT | T | PLEX8 |
| 7.60E-03 | 0 0 | orange1.1t02556.1 | 4.37 | 0 | 0 | 2 | MASCOT | T | PLEX8 |
| 3.27E-02 | 0 0 | orange1.1t02556.1 | 4.37 | 0 | 0 | 2 | MASCOT | T | PLEX8 |
| 1.46E-01 | 0 0 | orange1.1t02556.1 | 4.37 | 0 | 0 | 2 | MASCOT | T | PLEX8 |
| 2.77E-04 | 0 0 | orange1.1t02556.1 | 4.37 | 0 | 0 | 2 | MASCOT | T | PLEX8 |
| 6.34E-02 | 0 0 | orange1.1t02556.1 | 4.37 | 0 | 0 | 2 | MASCOT | T | PLEX8 |
| 7.98E-02 | 0 0 | orange1.1t02556.1 | 4.37 | 0 | 0 | 2 | MASCOT | T | PLEX8 |
| 2.75E-04 | 0 0 | orange1.1t02556.1 | 4.37 | 0 | 0 | 2 | MASCOT | T | PLEX8 |
| 3.44E-04 | 0 0 | orange1.1t02556.1 | 4.37 | 0 | 0 | 2 | MASCOT | T | PLEX8 |
| 1.78E-01 | 0 0 | orange1.1t02556.1 | 4.37 | 0 | 0 | 2 | MASCOT | T | PLEX8 |
| 5.43E-02 | 0 0 | orange1.1t02556.1 | 4.37 | 0 | 0 | 2 | MASCOT | T | PLEX8 |
| 4.22E-02 | 0 0 | orange1.1t02556.1 | 4.37 | 0 | 0 | 2 | MASCOT | T | PLEX8 |
| 9.57E-02 | 0 0 | orange1.1t02556.1 | 4.37 | 0 | 0 | 2 | MASCOT | T | PLEX8 |
| 1.00E-02 | 0 0 | orange1.1t02556.1 | 4.37 | 0 | 0 | 2 | MASCOT | T | PLEX8 |
| 4.90E-03 | 0 0 | orange1.1t02556.1 | 4.37 | 0 | 0 | 2 | MASCOT | T | PLEX8 |
| 7.33E-03 | 0 0 | orange1.1t02556.1 | 4.37 | 0 | 0 | 2 | MASCOT | T | PLEX8 |
| 2.65E-04 | 0 0 | orange1.1t02556.1 | 4.37 | 0 | 0 | 2 | MASCOT | T | PLEX8 |
| 1.10E-04 | 0 0 | orange1.1t02556.1 | 4.37 | 0 | 0 | 2 | MASCOT | T | PLEX8 |
| 3.15E-04 | 0 0 | orange1.1t02556.1 | 4.37 | 0 | 0 | 2 | MASCOT | T | PLEX8 |
| 1.16E-02 | 0 0 | orange1.1t02556.1 | 4.37 | 0 | 0 | 2 | MASCOT | T |       |
| 1.10E-01 | 0 0 | orange1.1t02556.1 | 4.37 | 0 | 0 | 2 | MASCOT | T |       |
| 1.26E-02 | 0 0 | orange1.1t02556.1 | 4.37 | 0 | 0 | 2 | MASCOT | T |       |
| 1.48E-03 | 0 0 | orange1.1t02556.1 | 4.37 | 0 | 0 | 2 | MASCOT | T |       |
| 4.96E-03 | 0 0 | orange1.1t02556.1 | 4.37 | 0 | 0 | 2 | MASCOT | T |       |
| 1.07E-03 | 0 0 | orange1.1t02556.1 | 4.37 | 0 | 0 | 2 | MASCOT | T |       |
| 8.00E-03 | 0 0 | orange1.1t02556.1 | 4.37 | 0 | 0 | 2 | MASCOT | T |       |
| 6.94E-03 | 0 0 | orange1.1t02556.1 | 4.37 | 0 | 0 | 2 | MASCOT | T |       |
| 3.25E-03 | 0 0 | orange1.1t02556.1 | 4.37 | 0 | 0 | 2 | MASCOT | T |       |
| 2.94E-06 | 0 0 | orange1.1t02556.1 | 4.37 | 0 | 0 | 2 | MASCOT | T |       |
| 1.24E-05 | 0 0 | orange1.1t02556.1 | 4.37 | 0 | 0 | 2 | MASCOT | T |       |
| 2.63E-04 | 0 0 | orange1.1t02556.1 | 4.37 | 0 | 0 | 2 | MASCOT | T |       |
| 2.18E-05 | 0 0 | orange1.1t02556.1 | 4.37 | 0 | 0 | 2 | MASCOT | T |       |
| 2.58E-04 | 0 0 | orange1.1t02556.1 | 4.37 | 0 | 0 | 2 | MASCOT | T |       |
| 3.99E-04 | 0 0 | orange1.1t02556.1 | 4.37 | 0 | 0 | 2 | MASCOT | T |       |
| 2.44E-04 | 0 0 | orange1.1t02556.1 | 4.37 | 0 | 0 | 2 | MASCOT | T |       |
| 7.40E-04 | 0 0 | orange1.1t02556.1 | 4.37 | 0 | 0 | 2 | MASCOT | T |       |
| 6.58E-04 | 0 0 | orange1.1t02556.1 | 4.37 | 0 | 0 | 2 | MASCOT | T |       |
| 2.16E-03 | 0 0 | orange1.1t02556.1 | 4.37 | 0 | 0 | 2 | MASCOT | T |       |
| 4.28E-02 | 0 0 | orange1.1t02556.1 | 4.37 | 0 | 0 | 2 | MASCOT | T |       |
| 2.04E-04 | 0 0 | orange1.1t02556.1 | 4.37 | 0 | 0 | 2 | MASCOT | T |       |
| 8.13E-04 | 0 0 | orange1.1t02556.1 | 4.37 | 0 | 0 | 2 | MASCOT | T |       |
| 3.61E-03 | 0 0 | orange1.1t02556.1 | 4.37 | 0 | 0 | 2 | MASCOT | T |       |
| 3.22E-02 | 0 0 | orange1.1t02556.1 | 4.37 | 0 | 0 | 2 | MASCOT | T |       |
| 2.64E-02 | 0 0 | orange1.1t02556.1 | 4.37 | 0 | 0 | 2 | MASCOT | T |       |
| 6.69E-03 | 0 0 | orange1.1t02556.1 | 4.37 | 0 | 0 | 2 | MASCOT | T |       |
| 3.61E-02 | 0 0 | orange1.1t02556.1 | 4.37 | 0 | 0 | 2 | MASCOT | T |       |
| 1.18E-02 | 0 0 | orange1.1t02556.1 | 4.37 | 0 | 0 | 2 | MASCOT | T |       |
| 7.61E-02 | 0 0 | orange1.1t02556.1 | 4.37 | 0 | 0 | 2 | MASCOT | T |       |
| 6.81E-02 | 0 0 | orange1.1t02556.1 | 4.37 | 0 | 0 | 2 | MASCOT | T |       |
| 6.94E-02 | 0 0 | orange1.1t02556.1 | 4.37 | 0 | 0 | 2 | MASCOT | T |       |
| 1.99E-02 | 0 0 | orange1.1t02556.1 | 4.37 | 0 | 0 | 2 | MASCOT | T |       |

|              |                   |      |   |   |          |         |
|--------------|-------------------|------|---|---|----------|---------|
| 1.29E-01 0 0 | orange1.1t02556.1 | 4.37 | 0 | 0 | 2 MASCOT | T       |
| 4.07E-04 0 0 | orange1.1t02556.1 | 4.37 | 0 | 0 | 2 MASCOT | T       |
| 1.66E-04 0 0 | orange1.1t02556.1 | 4.37 | 0 | 0 | 2 MASCOT | T       |
| 7.78E-03 0 0 | orange1.1t02556.1 | 4.37 | 0 | 0 | 2 MASCOT | T       |
| 3.60E-02 0 0 | orange1.1t02556.1 | 4.37 | 0 | 0 | 2 MASCOT | T       |
| 4.22E-04 0 0 | orange1.1t02556.1 | 4.37 | 0 | 0 | 2 MASCOT | T PLEX8 |
| 7.41E-03 0 0 | orange1.1t02556.1 | 4.37 | 0 | 0 | 2 MASCOT | T PLEX8 |
| 2.51E-02 0 0 | orange1.1t02556.1 | 4.37 | 0 | 0 | 2 MASCOT | T PLEX8 |
| 7.82E-02 0 0 | orange1.1t02556.1 | 4.37 | 0 | 0 | 2 MASCOT | T PLEX8 |
| 1.71E-03 0 0 | orange1.1t02556.1 | 4.37 | 0 | 0 | 2 MASCOT | T PLEX8 |
| 3.13E-02 0 0 | orange1.1t02556.1 | 4.37 | 0 | 0 | 2 MASCOT | T PLEX8 |
| 2.73E-02 0 0 | orange1.1t02556.1 | 4.37 | 0 | 0 | 2 MASCOT | T PLEX8 |
| 6.58E-02 0 0 | orange1.1t02556.1 | 4.37 | 0 | 0 | 2 MASCOT | T PLEX8 |
| 7.72E-02 0 0 | orange1.1t02556.1 | 4.37 | 0 | 0 | 2 MASCOT | T PLEX8 |
| 2.18E-02 0 0 | orange1.1t02556.1 | 4.37 | 0 | 0 | 2 MASCOT | T PLEX8 |
| 9.71E-03 0 0 | orange1.1t02556.1 | 4.37 | 0 | 0 | 2 MASCOT | T PLEX8 |
| 7.21E-02 0 0 | orange1.1t02556.1 | 4.37 | 0 | 0 | 2 MASCOT | T PLEX8 |
| 3.53E-02 0 0 | orange1.1t02556.1 | 4.37 | 0 | 0 | 2 MASCOT | T       |
| 5.31E-04 0 0 | orange1.1t02556.1 | 4.37 | 0 | 0 | 2 MASCOT | T       |
| 1.34E-02 0 0 | orange1.1t02556.1 | 4.37 | 0 | 0 | 2 MASCOT | T PLEX8 |
| 2.21E-02 0 0 | orange1.1t02556.1 | 4.37 | 0 | 0 | 2 MASCOT | T PLEX8 |
| 1.99E-02 0 0 | orange1.1t02556.1 | 4.37 | 0 | 0 | 2 MASCOT | T PLEX8 |
| 2.24E-02 0 0 | orange1.1t02556.1 | 4.37 | 0 | 0 | 2 MASCOT | T PLEX8 |
| 1.28E-03 0 0 | orange1.1t02556.1 | 4.37 | 0 | 0 | 2 MASCOT | T PLEX8 |
| 1.34E-03 0 0 | orange1.1t02556.1 | 4.37 | 0 | 0 | 2 MASCOT | T PLEX8 |
| 1.86E-03 0 0 | orange1.1t02556.1 | 4.37 | 0 | 0 | 2 MASCOT | T PLEX8 |
| 2.25E-02 0 0 | orange1.1t02556.1 | 4.37 | 0 | 0 | 2 MASCOT | T PLEX8 |
| 3.86E-03 0 0 | orange1.1t02556.1 | 4.37 | 0 | 0 | 2 MASCOT | T PLEX8 |
| 2.13E-01 0 0 | orange1.1t02556.1 | 4.37 | 0 | 0 | 2 MASCOT | T PLEX8 |
| 6.76E-02 0 0 | orange1.1t02556.1 | 4.37 | 0 | 0 | 2 MASCOT | T PLEX8 |
| 3.35E-02 0 0 | orange1.1t02556.1 | 4.37 | 0 | 0 | 2 MASCOT | T PLEX8 |
| 1.32E-03 0 0 | orange1.1t02556.1 | 4.37 | 0 | 0 | 2 MASCOT | T PLEX8 |
| 5.20E-02 0 0 | orange1.1t02556.1 | 4.37 | 0 | 0 | 2 MASCOT | T PLEX8 |
| 7.60E-03 0 0 | orange1.1t02556.1 | 4.37 | 0 | 0 | 2 MASCOT | T PLEX8 |
| 1.79E-01 0 0 | orange1.1t02556.1 | 4.37 | 0 | 0 | 2 MASCOT | T PLEX8 |
| 3.30E-01 0 0 | orange1.1t02556.1 | 4.37 | 0 | 0 | 2 MASCOT | T PLEX8 |
| 8.84E-02 0 0 | orange1.1t02556.1 | 4.37 | 0 | 0 | 2 MASCOT | T PLEX8 |
| 5.56E-02 0 0 | orange1.1t02556.1 | 4.37 | 0 | 0 | 2 MASCOT | T PLEX8 |
| 3.79E-02 0 0 | orange1.1t02556.1 | 4.37 | 0 | 0 | 2 MASCOT | T PLEX8 |
| 1.71E-01 0 0 | orange1.1t02556.1 | 4.37 | 0 | 0 | 2 MASCOT | T PLEX8 |
| 1.30E-01 0 0 | orange1.1t02556.1 | 4.37 | 0 | 0 | 2 MASCOT | T PLEX8 |
| 1.21E-02 0 0 | orange1.1t02556.1 | 4.37 | 0 | 0 | 2 MASCOT | T PLEX8 |
| 6.22E-02 0 0 | orange1.1t02556.1 | 4.37 | 0 | 0 | 2 MASCOT | T PLEX8 |
| 8.29E-03 0 0 | orange1.1t02556.1 | 4.37 | 0 | 0 | 2 MASCOT | T PLEX8 |
| 8.81E-02 0 0 | orange1.1t02556.1 | 4.37 | 0 | 0 | 2 MASCOT | T PLEX8 |
| 3.95E-02 0 0 | orange1.1t02556.1 | 4.37 | 0 | 0 | 2 MASCOT | T PLEX8 |
| 2.35E-03 0 0 | orange1.1t02556.1 | 4.37 | 0 | 0 | 2 MASCOT | T PLEX8 |
| 3.22E-02 0 0 | orange1.1t02556.1 | 4.37 | 0 | 0 | 2 MASCOT | T PLEX8 |
| 5.09E-03 0 0 | orange1.1t02556.1 | 4.37 | 0 | 0 | 2 MASCOT | T PLEX8 |
| 5.95E-02 0 0 | orange1.1t02556.1 | 4.37 | 0 | 0 | 2 MASCOT | T PLEX8 |
| 5.48E-02 0 0 | orange1.1t02556.1 | 4.37 | 0 | 0 | 2 MASCOT | T PLEX8 |

|          |     |                   |      |   |   |   |        |   |       |
|----------|-----|-------------------|------|---|---|---|--------|---|-------|
| 5.79E-02 | 0 0 | orange1.1t02556.1 | 4.37 | 0 | 0 | 2 | MASCOT | T | PLEX8 |
| 7.11E-03 | 0 0 | orange1.1t02556.1 | 4.37 | 0 | 0 | 2 | MASCOT | T | PLEX8 |
| 5.83E-02 | 0 0 | orange1.1t02556.1 | 4.37 | 0 | 0 | 2 | MASCOT | T | PLEX8 |
| 5.87E-03 | 0 0 | orange1.1t02556.1 | 4.37 | 0 | 0 | 2 | MASCOT | T | PLEX8 |
| 2.11E-01 | 0 0 | orange1.1t02556.1 | 4.37 | 0 | 0 | 2 | MASCOT | T | PLEX8 |
| 5.43E-02 | 0 0 | orange1.1t02556.1 | 4.37 | 0 | 0 | 2 | MASCOT | T | PLEX8 |
| 2.09E-01 | 0 0 | orange1.1t02556.1 | 4.37 | 0 | 0 | 2 | MASCOT | T | PLEX8 |
| 1.49E-02 | 0 0 | orange1.1t02556.1 | 4.37 | 0 | 0 | 2 | MASCOT | T | PLEX8 |
| 1.94E-01 | 0 0 | orange1.1t02556.1 | 4.37 | 0 | 0 | 2 | MASCOT | T | PLEX8 |
| 1.27E-03 | 0 0 | orange1.1t02556.1 | 4.37 | 0 | 0 | 2 | MASCOT | T | PLEX8 |
| 5.86E-03 | 0 0 | orange1.1t02556.1 | 4.37 | 0 | 0 | 2 | MASCOT | T | PLEX8 |
| 1.07E-02 | 0 0 | orange1.1t02556.1 | 4.37 | 0 | 0 | 2 | MASCOT | T | PLEX8 |
| 4.98E-02 | 0 0 | orange1.1t02556.1 | 4.37 | 0 | 0 | 2 | MASCOT | T |       |
| 3.30E-02 | 0 0 | orange1.1t02556.1 | 4.37 | 0 | 0 | 2 | MASCOT | T | PLEX8 |
| 9.49E-03 | 0 0 | orange1.1t02556.1 | 4.37 | 0 | 0 | 2 | MASCOT | T | PLEX8 |
| 2.30E-02 | 0 0 | orange1.1t02556.1 | 4.37 | 0 | 0 | 2 | MASCOT | T | PLEX8 |
| 6.83E-03 | 0 0 | orange1.1t02556.1 | 4.37 | 0 | 0 | 2 | MASCOT | T | PLEX8 |
| 1.75E-02 | 0 0 | orange1.1t02556.1 | 4.37 | 0 | 0 | 2 | MASCOT | T | PLEX8 |
| 4.19E-02 | 0 0 | orange1.1t02556.1 | 4.37 | 0 | 0 | 2 | MASCOT | T | PLEX8 |
| 2.30E-03 | 0 0 | orange1.1t02556.1 | 4.37 | 0 | 0 | 2 | MASCOT | T | PLEX8 |
| 4.11E-03 | 0 0 | orange1.1t02556.1 | 4.37 | 0 | 0 | 2 | MASCOT | T | PLEX8 |
| 2.32E-01 | 0 0 | orange1.1t02556.1 | 4.37 | 0 | 0 | 2 | MASCOT | T | PLEX8 |
| 2.35E-02 | 0 0 | orange1.1t02556.1 | 4.37 | 0 | 0 | 2 | MASCOT | T | PLEX8 |
| 1.45E-01 | 0 0 | orange1.1t02556.1 | 4.37 | 0 | 0 | 2 | MASCOT | T | PLEX8 |
| 2.45E-03 | 0 0 | orange1.1t02556.1 | 4.37 | 0 | 0 | 2 | MASCOT | T | PLEX8 |
| 3.47E-02 | 0 0 | orange1.1t02556.1 | 4.37 | 0 | 0 | 2 | MASCOT | T | PLEX8 |
| 1.00E-01 | 0 0 | orange1.1t02556.1 | 4.37 | 0 | 0 | 2 | MASCOT | T | PLEX8 |
| 1.69E-01 | 0 0 | orange1.1t02556.1 | 4.37 | 0 | 0 | 2 | MASCOT | T | PLEX8 |
| 3.61E-02 | 0 0 | orange1.1t02556.1 | 4.37 | 0 | 0 | 2 | MASCOT | T | PLEX8 |
| 1.17E-02 | 0 0 | orange1.1t02556.1 | 4.37 | 0 | 0 | 2 | MASCOT | T | PLEX8 |
| 3.36E-02 | 0 0 | orange1.1t02556.1 | 4.37 | 0 | 0 | 2 | MASCOT | T | PLEX8 |
| 2.48E-03 | 0 0 | orange1.1t02556.1 | 4.37 | 0 | 0 | 2 | MASCOT | T | PLEX8 |
| 8.80E-02 | 0 0 | orange1.1t02556.1 | 4.37 | 0 | 0 | 2 | MASCOT | T | PLEX8 |
| 6.81E-03 | 0 0 | orange1.1t02556.1 | 4.37 | 0 | 0 | 2 | MASCOT | T | PLEX8 |
| 2.05E-01 | 0 0 | orange1.1t02556.1 | 4.37 | 0 | 0 | 2 | MASCOT | T | PLEX8 |
| 1.83E-01 | 0 0 | orange1.1t02556.1 | 4.37 | 0 | 0 | 2 | MASCOT | T | PLEX8 |
| 5.25E-02 | 0 0 | orange1.1t02556.1 | 4.37 | 0 | 0 | 2 | MASCOT | T |       |
| 2.19E-02 | 0 0 | orange1.1t02556.1 | 4.37 | 0 | 0 | 2 | MASCOT | T | PLEX8 |
| 1.60E-02 | 0 0 | orange1.1t02556.1 | 4.37 | 0 | 0 | 2 | MASCOT | T | PLEX8 |
| 4.74E-02 | 0 0 | orange1.1t02556.1 | 4.37 | 0 | 0 | 2 | MASCOT | T | PLEX8 |
| 1.12E-02 | 0 0 | orange1.1t02556.1 | 4.37 | 0 | 0 | 2 | MASCOT | T | PLEX8 |
| 1.57E-02 | 0 0 | orange1.1t02556.1 | 4.37 | 0 | 0 | 2 | MASCOT | T | PLEX8 |
| 1.46E-02 | 0 0 | orange1.1t02556.1 | 4.37 | 0 | 0 | 2 | MASCOT | T | PLEX8 |
| 2.40E-02 | 0 0 | orange1.1t02556.1 | 4.37 | 0 | 0 | 2 | MASCOT | T | PLEX8 |
| 6.60E-03 | 0 0 | orange1.1t02556.1 | 4.37 | 0 | 0 | 2 | MASCOT | T | PLEX8 |
| 1.56E-02 | 0 0 | orange1.1t02556.1 | 4.37 | 0 | 0 | 2 | MASCOT | T | PLEX8 |
| 9.51E-03 | 0 0 | orange1.1t02556.1 | 4.37 | 0 | 0 | 2 | MASCOT | T | PLEX8 |
| 2.22E-02 | 0 0 | orange1.1t02556.1 | 4.37 | 0 | 0 | 2 | MASCOT | T | PLEX8 |
| 3.80E-03 | 0 0 | orange1.1t02556.1 | 4.37 | 0 | 0 | 2 | MASCOT | T | PLEX8 |
| 3.08E-02 | 0 0 | orange1.1t02556.1 | 4.37 | 0 | 0 | 2 | MASCOT | T | PLEX8 |
| 2.41E-03 | 0 0 | orange1.1t02556.1 | 4.37 | 0 | 0 | 2 | MASCOT | T | PLEX8 |

|          |     |                   |      |   |      |   |        |        |       |       |
|----------|-----|-------------------|------|---|------|---|--------|--------|-------|-------|
| 2.26E-02 | 0 0 | orange1.1t02556.1 | 4.37 | 0 | 0    | 2 | MASCOT | T      | PLEX8 |       |
| 1.44E-02 | 0 0 | orange1.1t02556.1 | 4.37 | 0 | 0    | 2 | MASCOT | T      | PLEX8 |       |
| 2.18E-02 | 0 0 | orange1.1t02556.1 | 4.37 | 0 | 0    | 2 | MASCOT | T      | PLEX8 |       |
| 9.28E-03 | 0 0 | orange1.1t02556.1 | 4.37 | 0 | 0    | 2 | MASCOT | T      | PLEX8 |       |
| 1.45E-02 | 0 0 | orange1.1t02556.1 | 4.37 | 0 | 0    | 2 | MASCOT | T      | PLEX8 |       |
| 4.61E-03 | 0 0 | orange1.1t02556.1 | 4.37 | 0 | 0    | 2 | MASCOT | T      | PLEX8 |       |
| 3.23E-02 | 0 0 | orange1.1t02556.1 | 4.37 | 0 | 0    | 2 | MASCOT | T      | PLEX8 |       |
| 2.06E-02 | 0 0 | orange1.1t02556.1 | 4.37 | 0 | 0    | 2 | MASCOT | T      | PLEX8 |       |
| 2.06E-02 | 0 0 | orange1.1t02556.1 | 4.37 | 0 | 0    | 2 | MASCOT | T      | PLEX8 |       |
| 4.41E-02 | 0 0 | orange1.1t02556.1 | 4.37 | 0 | 0    | 2 | MASCOT | T      | PLEX8 |       |
| 6.85E-02 | 0 0 | orange1.1t02556.1 | 4.37 | 0 | 0    | 2 | MASCOT | T      | PLEX8 |       |
| 1.04E-02 | 0 0 | orange1.1t02556.1 | 4.37 | 0 | 0    | 2 | MASCOT | T      | PLEX8 |       |
| 1.40E-01 | 0 0 | orange1.1t02556.1 | 4.37 | 0 | 0    | 2 | MASCOT | T      | PLEX8 |       |
| 1.67E-02 | 0 0 | orange1.1t02556.1 | 4.37 | 0 | 0    | 2 | MASCOT | T      | PLEX8 |       |
| 1.30E-01 | 0 0 | orange1.1t02556.1 | 4.37 | 0 | 0    | 2 | MASCOT | T      | PLEX8 |       |
| 3.49E-01 | 0 0 | orange1.1t02556.1 | 4.37 | 0 | 0    | 2 | MASCOT | T      | PLEX8 |       |
| 5.12E-03 | 0 0 | orange1.1t02556.1 | 4.37 | 0 | 0    | 2 | MASCOT | T      | PLEX8 |       |
| 1.36E-02 | 0 0 | orange1.1t02556.1 | 4.37 | 0 | 0    | 2 | MASCOT | T      | PLEX8 |       |
| 2.64E-02 | 0 0 | orange1.1t02556.1 | 4.37 | 0 | 0    | 2 | MASCOT | T      | PLEX8 |       |
| 4.40E-02 | 0 0 | orange1.1t02556.1 | 4.37 | 0 | 0    | 2 | MASCOT | T      |       |       |
| 4.31E-02 | 0 0 | orange1.1t02556.1 | 4.37 | 0 | 0    | 2 | MASCOT | T      |       |       |
| 1.73E-02 | 0 0 | orange1.1t02556.1 | 4.37 | 0 | 0    | 2 | MASCOT | T      |       |       |
| 8.72E-03 | 0 0 | orange1.1t02556.1 | 4.37 | 0 | 0    | 2 | MASCOT | T      |       |       |
| 1.26E-03 | 0 0 | orange1.1t02556.1 | 4.37 | 0 | 0    | 2 | MASCOT | T      |       |       |
| 4.87E-03 | 0 0 | orange1.1t02556.1 | 4.37 | 0 | 0    | 2 | MASCOT | T      |       |       |
| 1.15E-03 | 0 0 | orange1.1t02556.1 | 4.37 | 0 | 0    | 2 | MASCOT | T      |       |       |
| 3.16E-02 | 0 0 | orange1.1t02556.1 | 4.37 | 0 | 0    | 2 | MASCOT | T      |       |       |
| 9.86E-02 | 0 0 | orange1.1t02556.1 | 4.37 | 0 | 0    | 2 | MASCOT | T      |       |       |
| 3.04E-02 | 0 0 | orange1.1t02556.1 | 4.21 | 0 | 15.9 | 0 | 2      | MASCOT | T     |       |
| 3.65E-02 | 0 0 | orange1.1t02556.1 | 4.21 | 0 | 15.9 | 0 | 2      | MASCOT | T     |       |
| 3.33E-03 | 0 0 | orange1.1t02556.1 | 4.21 | 0 | 15.9 | 0 | 2      | MASCOT | T     |       |
| 7.30E-04 | 0 0 | orange1.1t02556.1 | 4.21 | 0 | 15.9 | 0 | 2      | MASCOT | T     |       |
| 3.20E-02 | 0 0 | orange1.1t02556.1 | 4.21 | 0 | 15.9 | 0 | 2      | MASCOT | T     | PLEX8 |
| 2.87E-02 | 0 0 | orange1.1t02556.1 | 4.21 | 0 | 15.9 | 0 | 2      | MASCOT | T     | PLEX8 |
| 2.14E-02 | 0 0 | orange1.1t02556.1 | 4.21 | 0 | 15.9 | 0 | 2      | MASCOT | T     | PLEX8 |
| 3.08E-02 | 0 0 | orange1.1t02556.1 | 4.21 | 0 | 15.9 | 0 | 2      | MASCOT | T     | PLEX8 |
| 1.70E-02 | 0 0 | orange1.1t02556.1 | 4.21 | 0 | 15.9 | 0 | 2      | MASCOT | T     |       |
| 5.54E-04 | 0 0 | orange1.1t02556.1 | 4.21 | 0 | 15.9 | 0 | 2      | MASCOT | T     |       |
| 4.06E-02 | 0 0 | orange1.1t02556.1 | 4.21 | 0 | 15.9 | 0 | 2      | MASCOT | T     |       |
| 5.22E-03 | 0 0 | orange1.1t02556.1 | 4.21 | 0 | 0    | 2 | MASCOT | T      | PLEX8 |       |
| 5.89E-03 | 0 0 | orange1.1t02556.1 | 4.21 | 0 | 0    | 2 | MASCOT | T      | PLEX8 |       |
| 5.27E-03 | 0 0 | orange1.1t02556.1 | 4.21 | 0 | 0    | 2 | MASCOT | T      | PLEX8 |       |
| 5.39E-03 | 0 0 | orange1.1t02556.1 | 4.21 | 0 | 0    | 2 | MASCOT | T      | PLEX8 |       |
| 6.75E-03 | 0 0 | orange1.1t02556.1 | 4.21 | 0 | 0    | 2 | MASCOT | T      | PLEX8 |       |
| 1.77E-02 | 0 0 | orange1.1t02556.1 | 4.21 | 0 | 0    | 2 | MASCOT | T      | PLEX8 |       |
| 9.76E-03 | 0 0 | orange1.1t02556.1 | 4.21 | 0 | 0    | 2 | MASCOT | T      | PLEX8 |       |
| 3.72E-02 | 0 0 | orange1.1t02556.1 | 4.21 | 0 | 0    | 2 | MASCOT | T      | PLEX8 |       |
| 2.23E-02 | 0 0 | orange1.1t02556.1 | 4.21 | 0 | 0    | 2 | MASCOT | T      | PLEX8 |       |
| 4.73E-02 | 0 0 | orange1.1t02556.1 | 4.21 | 0 | 0    | 2 | MASCOT | T      | PLEX8 |       |
| 7.79E-02 | 0 0 | orange1.1t02556.1 | 4.21 | 0 | 0    | 2 | MASCOT | T      | PLEX8 |       |
| 3.37E-02 | 0 0 | orange1.1t02556.1 | 4.21 | 0 | 0    | 2 | MASCOT | T      | PLEX8 |       |

|          |     |                   |      |   |      |   |        |        |       |       |
|----------|-----|-------------------|------|---|------|---|--------|--------|-------|-------|
| 3.52E-02 | 0 0 | orange1.1t02556.1 | 4.21 | 0 | 0    | 2 | MASCOT | T      | PLEX8 |       |
| 8.80E-02 | 0 0 | orange1.1t02556.1 | 4.21 | 0 | 0    | 2 | MASCOT | T      |       |       |
| 1.84E-02 | 0 0 | orange1.1t02556.1 | 4.21 | 0 | 0    | 2 | MASCOT | T      |       |       |
| 5.52E-03 | 0 0 | orange1.1t02556.1 | 4.21 | 0 | 0    | 2 | MASCOT | T      |       |       |
| 3.96E-03 | 0 0 | orange1.1t02556.1 | 4.21 | 0 | 0    | 2 | MASCOT | T      |       |       |
| 4.31E-02 | 0 0 | orange1.1t02556.1 | 4.21 | 0 | 0    | 2 | MASCOT | T      |       |       |
| 7.37E-04 | 0 0 | orange1.1t02556.1 | 4.21 | 0 | 0    | 2 | MASCOT | T      |       |       |
| 4.53E-03 | 0 0 | orange1.1t02556.1 | 4.21 | 0 | 0    | 2 | MASCOT | T      |       |       |
| 7.48E-04 | 0 0 | orange1.1t02556.1 | 4.21 | 0 | 0    | 2 | MASCOT | T      |       |       |
| 5.64E-03 | 0 0 | orange1.1t02556.1 | 4.21 | 0 | 0    | 2 | MASCOT | T      | PLEX8 |       |
| 5.24E-02 | 0 0 | orange1.1t02556.1 | 4.21 | 0 | 0    | 2 | MASCOT | T      |       |       |
| 3.46E-02 | 0 0 | orange1.1t02556.1 | 4.21 | 0 | 0    | 2 | MASCOT | T      |       |       |
| 1.13E-02 | 0 0 | orange1.1t02556.1 | 4.21 | 0 | 0    | 2 | MASCOT | T      |       |       |
| 4.17E-03 | 0 0 | orange1.1t02556.1 | 4.21 | 0 | 0    | 2 | MASCOT | T      |       |       |
| 5.95E-02 | 0 0 | orange1.1t02556.1 | 4.21 | 0 | 0    | 2 | MASCOT | T      |       |       |
| 3.45E-03 | 0 0 | orange1.1t02556.1 | 5.96 | 1 | 15.9 | 0 | 2      | MASCOT | T     | PLEX8 |
| 9.73E-03 | 0 0 | orange1.1t02556.1 | 5.96 | 1 | 15.9 | 0 | 2      | MASCOT | T     | PLEX8 |
| 9.67E-02 | 0 0 | orange1.1t02556.1 | 5.96 | 1 | 15.9 | 0 | 2      | MASCOT | T     | PLEX8 |
| 1.02E-02 | 0 0 | orange1.1t02556.1 | 5.96 | 1 | 15.9 | 0 | 2      | MASCOT | T     |       |
| 1.40E-02 | 0 0 | orange1.1t02556.1 | 5.96 | 1 | 15.9 | 0 | 2      | MASCOT | T     | PLEX8 |
| 4.55E-02 | 0 0 | orange1.1t02556.1 | 5.96 | 1 | 15.9 | 0 | 2      | MASCOT | T     |       |
| 3.11E-03 | 0 0 | orange1.1t02556.1 | 5.96 | 1 | 15.9 | 0 | 2      | MASCOT | T     | PLEX8 |
| 2.15E-02 | 0 0 | orange1.1t02556.1 | 5.96 | 1 | 15.9 | 0 | 2      | MASCOT | T     |       |
| 5.34E-03 | 0 0 | orange1.1t02556.1 | 5.96 | 1 | 15.9 | 0 | 2      | MASCOT | T     | PLEX8 |
| 1.33E-02 | 0 0 | orange1.1t02556.1 | 5.96 | 1 | 15.9 | 0 | 2      | MASCOT | T     | PLEX8 |
| 1.02E-01 | 0 0 | orange1.1t02556.1 | 5.96 | 1 | 15.9 | 0 | 2      | MASCOT | T     |       |
| 7.72E-02 | 0 0 | orange1.1t02556.1 | 5.96 | 1 | 15.9 | 0 | 2      | MASCOT | T     | PLEX8 |
| 5.12E-02 | 0 0 | orange1.1t02556.1 | 5.96 | 1 | 15.9 | 0 | 2      | MASCOT | T     |       |
| 8.17E-03 | 0 0 | orange1.1t02556.1 | 5.96 | 1 | 15.9 | 0 | 2      | MASCOT | T     | PLEX8 |
| 6.00E-03 | 0 0 | orange1.1t02556.1 | 5.96 | 1 | 15.9 | 0 | 2      | MASCOT | T     |       |
| 8.65E-02 | 0 0 | orange1.1t02556.1 | 5.96 | 1 | 15.9 | 0 | 2      | MASCOT | T     | PLEX8 |
| 2.25E-03 | 0 0 | orange1.1t02556.1 | 5.96 | 1 | 15.9 | 0 | 2      | MASCOT | T     | PLEX8 |
| 2.63E-02 | 0 0 | orange1.1t02556.1 | 5.96 | 1 | 15.9 | 0 | 2      | MASCOT | T     |       |
| 1.74E-02 | 0 0 | orange1.1t02556.1 | 5.96 | 1 | 15.9 | 0 | 2      | MASCOT | T     | PLEX8 |
| 6.03E-04 | 0 0 | orange1.1t02556.1 | 5.96 | 1 | 15.9 | 0 | 2      | MASCOT | T     | PLEX8 |
| 5.53E-02 | 0 0 | orange1.1t02556.1 | 5.96 | 1 | 15.9 | 0 | 2      | MASCOT | T     |       |
| 1.20E-02 | 0 0 | orange1.1t02556.1 | 5.96 | 1 | 15.9 | 0 | 2      | MASCOT | T     |       |
| 7.30E-02 | 0 0 | orange1.1t02556.1 | 5.96 | 1 | 15.9 | 0 | 2      | MASCOT | T     |       |
| 9.06E-02 | 0 0 | orange1.1t02556.1 | 5.96 | 1 | 15.9 | 0 | 2      | MASCOT | T     |       |
| 7.02E-02 | 0 0 | orange1.1t02556.1 | 5.96 | 1 | 15.9 | 0 | 2      | MASCOT | T     |       |
| 1.89E-02 | 0 0 | orange1.1t02556.1 | 5.96 | 1 | 15.9 | 0 | 2      | MASCOT | T     | PLEX8 |
| 4.46E-03 | 0 0 | orange1.1t02556.1 | 5.96 | 1 | 15.9 | 0 | 2      | MASCOT | T     |       |
| 2.81E-05 | 0 0 | orange1.1t02556.1 | 5.96 | 1 | 15.9 | 0 | 2      | MASCOT | T     |       |
| 6.06E-02 | 0 0 | orange1.1t02556.1 | 5.96 | 1 | 15.9 | 0 | 2      | MASCOT | T     |       |
| 4.72E-02 | 0 0 | orange1.1t02556.1 | 5.96 | 1 | 15.9 | 0 | 2      | MASCOT | T     |       |
| 1.10E-02 | 0 0 | orange1.1t02556.1 | 5.96 | 1 | 15.9 | 0 | 2      | MASCOT | T     |       |
| 1.54E-02 | 0 0 | orange1.1t02556.1 | 5.96 | 1 | 15.9 | 0 | 2      | MASCOT | T     |       |
| 1.69E-05 | 0 0 | orange1.1t02556.1 | 5.96 | 1 | 15.9 | 0 | 2      | MASCOT | T     |       |
| 7.34E-04 | 0 0 | orange1.1t02556.1 | 5.96 | 1 | 0    | 2 | MASCOT | T      | PLEX8 |       |
| 7.60E-02 | 0 0 | orange1.1t02556.1 | 5.96 | 1 | 0    | 2 | MASCOT | T      |       |       |
| 1.42E-02 | 0 0 | orange1.1t02556.1 | 5.96 | 1 | 0    | 2 | MASCOT | T      |       |       |

|          |     |                     |      |   |      |   |        |         |         |
|----------|-----|---------------------|------|---|------|---|--------|---------|---------|
| 1.48E-02 | 0 0 | orange1.1t02556.1   | 5.96 | 1 | 0    | 2 | MASCOT | T       |         |
| 3.62E-04 | 0 0 | orange1.1t02556.1   | 5.96 | 1 | 0    | 2 | MASCOT | T       |         |
| 8.53E-02 | 0 0 | orange1.1t02556.1   | 5.96 | 1 | 0    | 2 | MASCOT | T       |         |
| 9.67E-03 | 0 0 | orange1.1t02556.1   | 5.96 | 1 | 0    | 2 | MASCOT | T       |         |
| 1.03E-04 | 0 0 | orange1.1t02556.1   | 4.21 | 0 | 15.9 | 0 | 2      | MASCOT  | T PLEX8 |
| 6.06E-03 | 0 0 | orange1.1t02556.1   | 4.21 | 0 | 15.9 | 0 | 2      | MASCOT  | T PLEX8 |
| 9.99E-03 | 0 0 | orange1.1t02556.1   | 4.21 | 0 | 15.9 | 0 | 2      | MASCOT  | T       |
| 1.40E-03 | 0 0 | orange1.1t02556.1   | 4.21 | 0 | 15.9 | 0 | 2      | MASCOT  | T       |
| 4.79E-04 | 0 0 | orange1.1t02556.1   | 4.21 | 0 | 15.9 | 0 | 2      | MASCOT  | T       |
| 8.55E-03 | 0 0 | orange1.1t02556.1   | 4.21 | 0 | 15.9 | 0 | 2      | MASCOT  | T       |
| 5.71E-05 | 0 0 | orange1.1t02556.1   | 4.21 | 0 | 15.9 | 0 | 2      | MASCOT  | T PLEX8 |
| 8.57E-03 | 0 0 | orange1.1t02556.1   | 4.21 | 0 | 15.9 | 0 | 2      | MASCOT  | T       |
| 1.23E-02 | 0 0 | orange1.1t02556.1   | 4.21 | 0 | 15.9 | 0 | 2      | MASCOT  | T PLEX8 |
| 4.18E-03 | 0 0 | orange1.1t02556.1   | 4.21 | 0 | 15.9 | 0 | 2      | MASCOT  | T       |
| 1.72E-05 | 0 0 | orange1.1t02556.1   | 4.21 | 0 | 15.9 | 0 | 2      | MASCOT  | T       |
| 2.42E-01 | 0 0 | orange1.1t02556.1   | 4.21 | 0 | 15.9 | 0 | 2      | MASCOT  | T       |
| 2.91E-03 | 0 0 | orange1.1t02556.1   | 4.21 | 0 | 0    | 2 | MASCOT | T PLEX8 |         |
| 9.41E-04 | 0 0 | orange1.1t02556.1   | 4.21 | 0 | 0    | 2 | MASCOT | T PLEX8 |         |
| 1.26E-02 | 0 0 | orange1.1t02556.1   | 4.21 | 0 | 0    | 2 | MASCOT | T       |         |
| 1.68E-03 | 0 0 | orange1.1t02556.1   | 4.21 | 0 | 0    | 2 | MASCOT | T       |         |
| 3.16E-02 | 0 0 | orange1.1t02556.1   | 4.21 | 0 | 0    | 2 | MASCOT | T PLEX8 |         |
| 8.04E-04 | 0 0 | orange1.1t02556.1   | 4.21 | 0 | 0    | 2 | MASCOT | T       |         |
| 2.15E-02 | 0 0 | orange1.1t02556.1   | 4.21 | 0 | 0    | 2 | MASCOT | T       |         |
| 1.98E-01 | 0 0 | Cs2g13410.1/Cs8g087 | 8.8  | 0 | 0    | 2 | MASCOT | T PLEX8 |         |
| 9.52E-02 | 0 0 | Cs2g13410.1/Cs8g087 | 8.8  | 0 | 0    | 2 | MASCOT | T PLEX8 |         |
| 3.46E-02 | 0 0 | Cs2g13410.1/Cs8g087 | 8.8  | 0 | 0    | 2 | MASCOT | T PLEX8 |         |
| 4.95E-04 | 0 0 | Cs2g13410.1/Cs8g087 | 8.8  | 0 | 0    | 2 | MASCOT | T PLEX8 |         |
| 5.77E-03 | 0 0 | Cs2g13410.1/Cs8g087 | 8.8  | 0 | 0    | 2 | MASCOT | T PLEX8 |         |
| 6.20E-02 | 0 0 | Cs2g13410.1/Cs8g087 | 8.8  | 0 | 0    | 2 | MASCOT | T PLEX8 |         |
| 5.19E-03 | 0 0 | Cs2g13410.1/Cs8g087 | 8.8  | 0 | 0    | 2 | MASCOT | T PLEX8 |         |
| 1.06E-02 | 0 0 | Cs2g13410.1/Cs8g087 | 8.8  | 0 | 0    | 2 | MASCOT | T PLEX8 |         |
| 1.47E-02 | 0 0 | Cs2g13410.1/Cs8g087 | 8.8  | 0 | 0    | 2 | MASCOT | T PLEX8 |         |
| 3.53E-02 | 0 0 | Cs2g13410.1/Cs8g087 | 8.8  | 0 | 0    | 2 | MASCOT | T PLEX8 |         |
| 2.82E-03 | 0 0 | Cs2g13410.1/Cs8g087 | 8.8  | 0 | 0    | 2 | MASCOT | T PLEX8 |         |
| 9.89E-02 | 0 0 | Cs2g13410.1/Cs8g087 | 8.8  | 0 | 0    | 2 | MASCOT | T PLEX8 |         |
| 2.79E-01 | 0 0 | Cs2g13410.1/Cs8g087 | 8.8  | 0 | 0    | 2 | MASCOT | T PLEX8 |         |
| 3.94E-01 | 0 0 | Cs2g13410.1/Cs8g087 | 8.8  | 0 | 0    | 2 | MASCOT | T PLEX8 |         |
| 4.10E-02 | 0 0 | Cs2g13410.1/Cs8g087 | 8.8  | 0 | 0    | 2 | MASCOT | T PLEX8 |         |
| 1.25E-02 | 0 0 | Cs2g13410.1/Cs8g087 | 8.8  | 0 | 0    | 2 | MASCOT | T PLEX8 |         |
| 8.66E-02 | 0 0 | Cs2g13410.1/Cs8g087 | 8.8  | 0 | 0    | 2 | MASCOT | T PLEX8 |         |
| 1.54E-01 | 0 0 | Cs2g13410.1/Cs8g087 | 8.8  | 0 | 0    | 2 | MASCOT | T PLEX8 |         |
| 3.22E-02 | 0 0 | Cs2g13410.1/Cs8g087 | 8.8  | 0 | 0    | 2 | MASCOT | T PLEX8 |         |
| 2.26E-02 | 0 0 | Cs2g13410.1/Cs8g087 | 8.8  | 0 | 0    | 2 | MASCOT | T PLEX8 |         |
| 6.83E-03 | 0 0 | Cs2g13410.1/Cs8g087 | 8.8  | 0 | 0    | 2 | MASCOT | T PLEX8 |         |
| 5.81E-01 | 0 0 | Cs2g13410.1/Cs8g087 | 8.8  | 0 | 0    | 2 | MASCOT | T PLEX8 |         |
| 6.73E-02 | 0 0 | Cs2g13410.1/Cs8g087 | 8.8  | 0 | 0    | 2 | MASCOT | T PLEX8 |         |
| 1.94E-02 | 0 0 | Cs2g13410.1/Cs8g087 | 8.8  | 0 | 0    | 2 | MASCOT | T PLEX8 |         |
| 1.83E-03 | 0 0 | Cs2g13410.1/Cs8g087 | 8.8  | 0 | 0    | 2 | MASCOT | T PLEX8 |         |
| 1.03E-03 | 0 0 | Cs2g13410.1/Cs8g087 | 8.8  | 0 | 0    | 2 | MASCOT | T PLEX8 |         |
| 1.09E-03 | 0 0 | Cs2g13410.1/Cs8g087 | 8.8  | 0 | 0    | 2 | MASCOT | T PLEX8 |         |
| 5.54E-01 | 0 0 | Cs2g13410.1/Cs8g087 | 8.8  | 0 | 0    | 2 | MASCOT | T       |         |

|          |     |                     |      |   |   |   |        |   |       |
|----------|-----|---------------------|------|---|---|---|--------|---|-------|
| 7.57E-03 | 0 0 | Cs2g13410.1/Cs8g087 | 8.8  | 0 | 0 | 2 | MASCOT | T | PLEX8 |
| 3.72E-02 | 0 0 | Cs2g13410.1/Cs8g087 | 8.8  | 0 | 0 | 2 | MASCOT | T | PLEX8 |
| 1.96E-02 | 0 0 | Cs2g13410.1/Cs8g087 | 8.8  | 0 | 0 | 2 | MASCOT | T | PLEX8 |
| 3.97E-02 | 0 0 | Cs2g13410.1/Cs8g087 | 8.8  | 0 | 0 | 2 | MASCOT | T | PLEX8 |
| 1.32E-02 | 0 0 | Cs2g13410.1/Cs8g087 | 8.8  | 0 | 0 | 2 | MASCOT | T | PLEX8 |
| 1.70E-01 | 0 0 | Cs2g13410.1/Cs8g087 | 8.8  | 0 | 0 | 2 | MASCOT | T | PLEX8 |
| 5.19E-01 | 0 0 | Cs2g13410.1/Cs8g087 | 8.8  | 0 | 0 | 2 | MASCOT | T | PLEX8 |
| 1.34E-01 | 0 0 | Cs2g13410.1/Cs8g087 | 8.8  | 0 | 0 | 2 | MASCOT | T | PLEX8 |
| 4.69E-01 | 0 0 | Cs2g13410.1/Cs8g087 | 8.8  | 0 | 0 | 2 | MASCOT | T | PLEX8 |
| 5.85E-01 | 0 0 | Cs2g13410.1/Cs8g087 | 8.8  | 0 | 0 | 2 | MASCOT | T | PLEX8 |
| 8.79E-02 | 0 0 | Cs2g13410.1/Cs8g087 | 8.8  | 0 | 0 | 2 | MASCOT | T | PLEX8 |
| 4.43E-04 | 0 0 | Cs2g13410.1/Cs8g087 | 8.8  | 0 | 0 | 2 | MASCOT | T | PLEX8 |
| 1.67E-02 | 0 0 | Cs2g13410.1/Cs8g087 | 8.8  | 0 | 0 | 2 | MASCOT | T | PLEX8 |
| 5.16E-04 | 0 0 | Cs2g13410.1/Cs8g087 | 8.8  | 0 | 0 | 2 | MASCOT | T | PLEX8 |
| 3.78E-03 | 0 0 | Cs2g13410.1/Cs8g087 | 8.8  | 0 | 0 | 2 | MASCOT | T | PLEX8 |
| 3.95E-04 | 0 0 | Cs2g13410.1/Cs8g087 | 8.8  | 0 | 0 | 2 | MASCOT | T | PLEX8 |
| 6.84E-03 | 0 0 | Cs2g13410.1/Cs8g087 | 8.8  | 0 | 0 | 2 | MASCOT | T | PLEX8 |
| 1.58E-01 | 0 0 | Cs2g13410.1/Cs8g087 | 8.8  | 0 | 0 | 2 | MASCOT | T | PLEX8 |
| 4.04E-02 | 0 0 | Cs2g13410.1/Cs8g087 | 8.8  | 0 | 0 | 2 | MASCOT | T | PLEX8 |
| 1.43E-01 | 0 0 | Cs2g13410.1/Cs8g087 | 8.8  | 0 | 0 | 2 | MASCOT | T | PLEX8 |
| 5.29E-03 | 0 0 | Cs2g13410.1/Cs8g087 | 8.8  | 0 | 0 | 2 | MASCOT | T | PLEX8 |
| 9.20E-03 | 0 0 | Cs2g13410.1/Cs8g087 | 8.8  | 0 | 0 | 2 | MASCOT | T | PLEX8 |
| 1.23E-02 | 0 0 | Cs2g13410.1/Cs8g087 | 8.8  | 0 | 0 | 2 | MASCOT | T | PLEX8 |
| 1.53E-02 | 0 0 | Cs2g13410.1/Cs8g087 | 8.8  | 0 | 0 | 2 | MASCOT | T | PLEX8 |
| 9.53E-03 | 0 0 | Cs2g13410.1/Cs8g087 | 8.8  | 0 | 0 | 2 | MASCOT | T | PLEX8 |
| 9.18E-02 | 0 0 | Cs2g13410.1/Cs8g087 | 8.8  | 0 | 0 | 2 | MASCOT | T | PLEX8 |
| 9.16E-02 | 0 0 | Cs2g13410.1/Cs8g087 | 8.8  | 0 | 0 | 2 | MASCOT | T | PLEX8 |
| 1.57E-03 | 0 0 | Cs2g13410.1/Cs8g087 | 8.8  | 0 | 0 | 2 | MASCOT | T | PLEX8 |
| 5.04E-01 | 0 0 | Cs2g13410.1/Cs8g087 | 8.8  | 0 | 0 | 2 | MASCOT | T | PLEX8 |
| 3.72E-02 | 0 0 | Cs2g13410.1/Cs8g087 | 8.8  | 0 | 0 | 2 | MASCOT | T | PLEX8 |
| 1.28E-01 | 0 0 | Cs2g13410.1         | 6.05 | 0 | 0 | 2 | MASCOT | T | PLEX8 |
| 2.08E-01 | 0 0 | Cs2g13410.1         | 6.05 | 0 | 0 | 2 | MASCOT | T | PLEX8 |
| 2.73E-01 | 0 0 | Cs2g13410.1         | 6.05 | 0 | 0 | 2 | MASCOT | T | PLEX8 |
| 1.13E-01 | 0 0 | Cs2g13410.1         | 6.05 | 0 | 0 | 2 | MASCOT | T | PLEX8 |
| 8.20E-02 | 0 0 | Cs2g13410.1         | 6.05 | 0 | 0 | 2 | MASCOT | T | PLEX8 |
| 1.09E-01 | 0 0 | Cs2g13410.1         | 6.05 | 0 | 0 | 2 | MASCOT | T | PLEX8 |
| 3.40E-01 | 0 0 | Cs2g13410.1         | 6.05 | 0 | 0 | 2 | MASCOT | T | PLEX8 |
| 2.87E-01 | 0 0 | Cs2g13410.1         | 6.05 | 0 | 0 | 2 | MASCOT | T | PLEX8 |
| 3.87E-01 | 0 0 | Cs2g13410.1         | 6.05 | 0 | 0 | 2 | MASCOT | T | PLEX8 |
| 4.90E-01 | 0 0 | Cs2g13410.1         | 6.05 | 0 | 0 | 2 | MASCOT | T | PLEX8 |
| 2.82E-01 | 0 0 | Cs2g13410.1         | 6.05 | 0 | 0 | 2 | MASCOT | T | PLEX8 |
| 8.31E-02 | 0 0 | Cs2g13410.1         | 6.1  | 0 | 0 | 2 | MASCOT | T | PLEX8 |
| 4.39E-02 | 0 0 | Cs2g13410.1         | 6.1  | 0 | 0 | 2 | MASCOT | T | PLEX8 |
| 4.00E-04 | 0 0 | Cs2g13410.1         | 4.37 | 0 | 0 | 2 | MASCOT | T | PLEX8 |
| 4.83E-02 | 0 0 | Cs2g13410.1         | 9.41 | 0 | 0 | 2 | MASCOT | T | PLEX8 |
| 4.02E-01 | 0 0 | Cs2g13410.1         | 9.41 | 0 | 0 | 2 | MASCOT | T | PLEX8 |
| 6.45E-02 | 0 0 | Cs2g13410.1         | 9.41 | 0 | 0 | 2 | MASCOT | T | PLEX8 |
| 1.36E-01 | 0 0 | Cs2g13410.1         | 9.41 | 0 | 0 | 2 | MASCOT | T | PLEX8 |
| 5.83E-02 | 0 0 | Cs2g13410.1         | 9.41 | 0 | 0 | 2 | MASCOT | T | PLEX8 |
| 6.80E-02 | 0 0 | Cs2g13410.1         | 9.41 | 0 | 0 | 2 | MASCOT | T | PLEX8 |
| 1.27E-02 | 0 0 | Cs2g13410.1         | 9.41 | 0 | 0 | 2 | MASCOT | T | PLEX8 |

|              |             |      |        |   |          |   |       |
|--------------|-------------|------|--------|---|----------|---|-------|
| 6.16E-02 0 0 | Cs2g13410.1 | 9.41 | 0      | 0 | 2 MASCOT | T | PLEX8 |
| 1.53E-01 0 0 | Cs2g13410.1 | 9.41 | 0      | 0 | 2 MASCOT | T | PLEX8 |
| 1.71E-01 0 0 | Cs2g13410.1 | 5.81 | 0      | 0 | 2 MASCOT | T | PLEX8 |
| 2.39E-02 0 0 | Cs2g13410.1 | 4.09 | 0      | 0 | 2 MASCOT | T | PLEX8 |
| 6.53E-05 0 0 | Cs2g13410.1 | 4.09 | 0      | 0 | 2 MASCOT | T | PLEX8 |
| 3.15E-05 0 0 | Cs2g13410.1 | 4.09 | 0      | 0 | 2 MASCOT | T | PLEX8 |
| 6.79E-05 0 0 | Cs2g13410.1 | 4.09 | 0      | 0 | 2 MASCOT | T | PLEX8 |
| 8.42E-05 0 0 | Cs2g13410.1 | 4.09 | 0      | 0 | 2 MASCOT | T | PLEX8 |
| 6.68E-03 0 0 | Cs2g13410.1 | 4.09 | 0      | 0 | 2 MASCOT | T | PLEX8 |
| 2.75E-02 0 0 | Cs2g13410.1 | 4.09 | 0      | 0 | 2 MASCOT | T | PLEX8 |
| 4.22E-03 0 0 | Cs2g13410.1 | 4.09 | 0      | 0 | 2 MASCOT | T | PLEX8 |
| 2.55E-04 0 0 | Cs2g13410.1 | 4.09 | 0      | 0 | 2 MASCOT | T | PLEX8 |
| 5.20E-03 0 0 | Cs2g13410.1 | 4.09 | 0      | 0 | 2 MASCOT | T | PLEX8 |
| 2.53E-05 0 0 | Cs2g13410.1 | 4.09 | 0      | 0 | 2 MASCOT | T | PLEX8 |
| 6.68E-05 0 0 | Cs2g13410.1 | 4.09 | 0      | 0 | 2 MASCOT | T | PLEX8 |
| 2.59E-05 0 0 | Cs2g13410.1 | 4.09 | 0      | 0 | 2 MASCOT | T |       |
| 3.26E-03 0 0 | Cs2g13410.1 | 4.09 | 0      | 0 | 2 MASCOT | T | PLEX8 |
| 4.46E-05 0 0 | Cs2g13410.1 | 4.09 | 0      | 0 | 2 MASCOT | T | PLEX8 |
| 1.30E-04 0 0 | Cs2g13410.1 | 4.09 | 0      | 0 | 2 MASCOT | T | PLEX8 |
| 4.55E-04 0 0 | Cs2g13410.1 | 4.09 | 0      | 0 | 2 MASCOT | T | PLEX8 |
| 4.02E-05 0 0 | Cs2g13410.1 | 4.09 | 0      | 0 | 2 MASCOT | T | PLEX8 |
| 2.24E-05 0 0 | Cs2g13410.1 | 4.09 | 0      | 0 | 2 MASCOT | T |       |
| 1.51E-03 0 0 | Cs2g13410.1 | 4.09 | 0      | 0 | 2 MASCOT | T | PLEX8 |
| 1.05E-01 0 0 | Cs2g13410.1 | 4.49 | 1      | 0 | 2 MASCOT | T | PLEX8 |
| 7.91E-02 0 0 | Cs2g13410.1 | 8.59 | 0 15.9 | 0 | 2 MASCOT | T | PLEX8 |
| 6.69E-02 0 0 | Cs2g13410.1 | 8.59 | 0 15.9 | 0 | 2 MASCOT | T | PLEX8 |
| 2.15E-01 0 0 | Cs2g13410.1 | 8.59 | 0 15.9 | 0 | 2 MASCOT | T |       |
| 2.44E-01 0 0 | Cs2g13410.1 | 8.59 | 0 15.9 | 0 | 2 MASCOT | T | PLEX8 |
| 1.16E-01 0 0 | Cs2g13410.1 | 8.59 | 0 15.9 | 0 | 2 MASCOT | T |       |
| 2.78E-01 0 0 | Cs2g13410.1 | 8.59 | 0 15.9 | 0 | 2 MASCOT | T | PLEX8 |
| 2.87E-01 0 0 | Cs2g13410.1 | 8.59 | 0 15.9 | 0 | 2 MASCOT | T | PLEX8 |
| 1.85E-01 0 0 | Cs2g13410.1 | 8.59 | 0 15.9 | 0 | 2 MASCOT | T |       |
| 6.01E-02 0 0 | Cs2g13410.1 | 8.59 | 0      | 0 | 2 MASCOT | T | PLEX8 |
| 6.18E-02 0 0 | Cs2g13410.1 | 8.59 | 0      | 0 | 2 MASCOT | T | PLEX8 |
| 7.77E-02 0 0 | Cs2g13410.1 | 8.59 | 0      | 0 | 2 MASCOT | T | PLEX8 |
| 3.83E-02 0 0 | Cs2g13410.1 | 8.59 | 0      | 0 | 2 MASCOT | T | PLEX8 |
| 1.18E-02 0 0 | Cs2g13410.1 | 8.59 | 0      | 0 | 2 MASCOT | T | PLEX8 |
| 4.02E-02 0 0 | Cs2g13410.1 | 8.59 | 0      | 0 | 2 MASCOT | T | PLEX8 |
| 8.08E-02 0 0 | Cs2g13410.1 | 8.59 | 0      | 0 | 2 MASCOT | T | PLEX8 |
| 8.51E-02 0 0 | Cs2g13410.1 | 8.59 | 0      | 0 | 2 MASCOT | T | PLEX8 |
| 7.22E-02 0 0 | Cs2g13410.1 | 8.59 | 0      | 0 | 2 MASCOT | T | PLEX8 |
| 8.15E-02 0 0 | Cs2g13410.1 | 8.59 | 0      | 0 | 2 MASCOT | T | PLEX8 |
| 1.08E-01 0 0 | Cs2g13410.1 | 8.59 | 0      | 0 | 2 MASCOT | T | PLEX8 |
| 7.84E-02 0 0 | Cs2g13410.1 | 8.59 | 0      | 0 | 2 MASCOT | T | PLEX8 |
| 2.83E-01 0 0 | Cs2g13410.1 | 8.59 | 0      | 0 | 2 MASCOT | T | PLEX8 |
| 9.17E-02 0 0 | Cs2g13410.1 | 8.59 | 0      | 0 | 2 MASCOT | T | PLEX8 |
| 8.54E-02 0 0 | Cs2g13410.1 | 8.59 | 0      | 0 | 2 MASCOT | T | PLEX8 |
| 2.01E-01 0 0 | Cs2g13410.1 | 8.59 | 0      | 0 | 2 MASCOT | T | PLEX8 |
| 1.04E-01 0 0 | Cs2g13410.1 | 8.59 | 0      | 0 | 2 MASCOT | T | PLEX8 |
| 1.15E-01 0 0 | Cs2g13410.1 | 8.59 | 0      | 0 | 2 MASCOT | T | PLEX8 |
| 8.50E-02 0 0 | Cs2g13410.1 | 8.59 | 0      | 0 | 2 MASCOT | T | PLEX8 |



|              |             |      |   |   |          |   |       |
|--------------|-------------|------|---|---|----------|---|-------|
| 6.17E-02 0 0 | Cs2g13410.1 | 8.59 | 0 | 0 | 2 MASCOT | T | PLEX8 |
| 2.23E-01 0 0 | Cs2g13410.1 | 8.59 | 0 | 0 | 2 MASCOT | T |       |
| 6.13E-02 0 0 | Cs2g13410.1 | 8.59 | 0 | 0 | 2 MASCOT | T | PLEX8 |
| 5.41E-02 0 0 | Cs2g13410.1 | 8.59 | 0 | 0 | 2 MASCOT | T | PLEX8 |
| 4.96E-02 0 0 | Cs2g13410.1 | 8.59 | 0 | 0 | 2 MASCOT | T | PLEX8 |
| 5.37E-02 0 0 | Cs2g13410.1 | 8.59 | 0 | 0 | 2 MASCOT | T | PLEX8 |
| 7.56E-02 0 0 | Cs2g13410.1 | 8.59 | 0 | 0 | 2 MASCOT | T | PLEX8 |
| 1.19E-01 0 0 | Cs2g13410.1 | 8.59 | 0 | 0 | 2 MASCOT | T | PLEX8 |
| 1.27E-01 0 0 | Cs2g13410.1 | 8.59 | 0 | 0 | 2 MASCOT | T |       |
| 1.86E-01 0 0 | Cs2g13410.1 | 8.59 | 0 | 0 | 2 MASCOT | T |       |
| 7.68E-02 0 0 | Cs2g13410.1 | 8.59 | 0 | 0 | 2 MASCOT | T | PLEX8 |
| 7.54E-02 0 0 | Cs2g13410.1 | 8.59 | 0 | 0 | 2 MASCOT | T | PLEX8 |
| 1.33E-01 0 0 | Cs2g13410.1 | 8.59 | 0 | 0 | 2 MASCOT | T | PLEX8 |
| 1.30E-01 0 0 | Cs2g13410.1 | 8.59 | 0 | 0 | 2 MASCOT | T | PLEX8 |
| 1.10E-01 0 0 | Cs2g13410.1 | 8.59 | 0 | 0 | 2 MASCOT | T |       |
| 7.45E-02 0 0 | Cs2g13410.1 | 8.59 | 0 | 0 | 2 MASCOT | T |       |
| 9.64E-02 0 0 | Cs2g13410.1 | 8.59 | 0 | 0 | 2 MASCOT | T |       |
| 6.35E-03 0 0 | Cs2g13410.1 | 4.53 | 0 | 0 | 2 MASCOT | T | PLEX8 |
| 1.07E-01 0 0 | Cs2g13410.1 | 8.8  | 0 | 0 | 2 MASCOT | T | PLEX8 |
| 2.99E-02 0 0 | Cs2g13410.1 | 8.8  | 0 | 0 | 2 MASCOT | T | PLEX8 |
| 6.16E-03 0 0 | Cs2g13410.1 | 8.8  | 0 | 0 | 2 MASCOT | T | PLEX8 |
| 1.48E-02 0 0 | Cs2g13410.1 | 8.8  | 0 | 0 | 2 MASCOT | T | PLEX8 |
| 5.18E-03 0 0 | Cs2g13410.1 | 8.8  | 0 | 0 | 2 MASCOT | T | PLEX8 |
| 2.71E-01 0 0 | Cs2g13410.1 | 8.8  | 0 | 0 | 2 MASCOT | T | PLEX8 |
| 6.49E-02 0 0 | Cs2g13410.1 | 8.8  | 0 | 0 | 2 MASCOT | T | PLEX8 |
| 1.38E-02 0 0 | Cs2g13410.1 | 8.8  | 0 | 0 | 2 MASCOT | T | PLEX8 |
| 5.43E-02 0 0 | Cs2g13410.1 | 8.8  | 0 | 0 | 2 MASCOT | T | PLEX8 |
| 1.37E-02 0 0 | Cs2g13410.1 | 8.8  | 0 | 0 | 2 MASCOT | T | PLEX8 |
| 1.29E-01 0 0 | Cs2g13410.1 | 8.8  | 0 | 0 | 2 MASCOT | T | PLEX8 |
| 2.60E-01 0 0 | Cs2g13410.1 | 8.8  | 0 | 0 | 2 MASCOT | T | PLEX8 |
| 7.53E-02 0 0 | Cs2g13410.1 | 8.8  | 0 | 0 | 2 MASCOT | T | PLEX8 |
| 1.59E-01 0 0 | Cs2g13410.1 | 8.8  | 0 | 0 | 2 MASCOT | T | PLEX8 |
| 9.48E-02 0 0 | Cs2g13410.1 | 8.8  | 0 | 0 | 2 MASCOT | T | PLEX8 |
| 5.97E-03 0 0 | Cs2g13410.1 | 8.8  | 0 | 0 | 2 MASCOT | T | PLEX8 |
| 7.01E-02 0 0 | Cs2g13410.1 | 8.8  | 0 | 0 | 2 MASCOT | T | PLEX8 |
| 4.31E-02 0 0 | Cs2g13410.1 | 8.8  | 0 | 0 | 2 MASCOT | T | PLEX8 |
| 2.58E-02 0 0 | Cs2g13410.1 | 8.8  | 0 | 0 | 2 MASCOT | T | PLEX8 |
| 6.70E-02 0 0 | Cs2g13410.1 | 8.8  | 0 | 0 | 2 MASCOT | T | PLEX8 |
| 3.00E-01 0 0 | Cs2g13410.1 | 8.8  | 0 | 0 | 2 MASCOT | T | PLEX8 |
| 7.04E-02 0 0 | Cs2g13410.1 | 8.8  | 0 | 0 | 2 MASCOT | T | PLEX8 |
| 1.41E-02 0 0 | Cs2g13410.1 | 8.8  | 0 | 0 | 2 MASCOT | T | PLEX8 |
| 1.19E-01 0 0 | Cs2g13410.1 | 8.8  | 0 | 0 | 2 MASCOT | T | PLEX8 |
| 3.80E-02 0 0 | Cs2g13410.1 | 8.8  | 0 | 0 | 2 MASCOT | T | PLEX8 |
| 3.48E-02 0 0 | Cs2g13410.1 | 8.8  | 0 | 0 | 2 MASCOT | T | PLEX8 |
| 6.50E-03 0 0 | Cs2g13410.1 | 8.8  | 0 | 0 | 2 MASCOT | T | PLEX8 |
| 1.36E-02 0 0 | Cs2g13410.1 | 8.8  | 0 | 0 | 2 MASCOT | T | PLEX8 |
| 7.45E-03 0 0 | Cs2g13410.1 | 8.8  | 0 | 0 | 2 MASCOT | T | PLEX8 |
| 2.52E-02 0 0 | Cs2g13410.1 | 8.8  | 0 | 0 | 2 MASCOT | T | PLEX8 |
| 7.38E-03 0 0 | Cs2g13410.1 | 8.8  | 0 | 0 | 2 MASCOT | T | PLEX8 |
| 1.04E-02 0 0 | Cs2g13410.1 | 8.8  | 0 | 0 | 2 MASCOT | T | PLEX8 |
| 1.34E-03 0 0 | Cs2g13410.1 | 8.8  | 0 | 0 | 2 MASCOT | T | PLEX8 |

|          |     |             |      |   |   |          |   |       |
|----------|-----|-------------|------|---|---|----------|---|-------|
| 6.92E-03 | 0 0 | Cs2g13410.1 | 8.8  | 0 | 0 | 2 MASCOT | T | PLEX8 |
| 1.33E-03 | 0 0 | Cs2g13410.1 | 8.8  | 0 | 0 | 2 MASCOT | T | PLEX8 |
| 6.84E-03 | 0 0 | Cs2g13410.1 | 8.8  | 0 | 0 | 2 MASCOT | T | PLEX8 |
| 1.40E-02 | 0 0 | Cs2g13410.1 | 8.8  | 0 | 0 | 2 MASCOT | T | PLEX8 |
| 1.57E-02 | 0 0 | Cs2g13410.1 | 8.8  | 0 | 0 | 2 MASCOT | T | PLEX8 |
| 2.93E-02 | 0 0 | Cs2g13410.1 | 8.8  | 0 | 0 | 2 MASCOT | T | PLEX8 |
| 1.20E-01 | 0 0 | Cs2g13410.1 | 8.8  | 0 | 0 | 2 MASCOT | T | PLEX8 |
| 1.05E-01 | 0 0 | Cs2g13410.1 | 8.8  | 0 | 0 | 2 MASCOT | T | PLEX8 |
| 1.39E-03 | 0 0 | Cs2g13410.1 | 8.8  | 0 | 0 | 2 MASCOT | T |       |
| 4.43E-02 | 0 0 | Cs2g13410.1 | 8.8  | 0 | 0 | 2 MASCOT | T |       |
| 2.25E-02 | 0 0 | Cs2g13410.1 | 8.8  | 0 | 0 | 2 MASCOT | T |       |
| 2.63E-02 | 0 0 | Cs2g13410.1 | 8.8  | 0 | 0 | 2 MASCOT | T |       |
| 1.60E-04 | 0 0 | Cs2g13410.1 | 4.37 | 0 | 0 | 2 MASCOT | T | PLEX8 |
| 9.30E-02 | 0 0 | Cs2g13410.1 | 4.37 | 0 | 0 | 2 MASCOT | T | PLEX8 |
| 1.08E-01 | 0 0 | Cs2g13410.1 | 4.37 | 0 | 0 | 2 MASCOT | T | PLEX8 |
| 1.47E-03 | 0 0 | Cs2g13410.1 | 4.37 | 0 | 0 | 2 MASCOT | T | PLEX8 |
| 4.62E-03 | 0 0 | Cs2g13410.1 | 4.37 | 0 | 0 | 2 MASCOT | T | PLEX8 |
| 1.13E-03 | 0 0 | Cs2g13410.1 | 4.37 | 0 | 0 | 2 MASCOT | T | PLEX8 |
| 1.70E-01 | 0 0 | Cs2g13410.1 | 4.37 | 0 | 0 | 2 MASCOT | T | PLEX8 |
| 3.04E-04 | 0 0 | Cs2g13410.1 | 4.37 | 0 | 0 | 2 MASCOT | T | PLEX8 |
| 1.58E-06 | 0 0 | Cs2g13410.1 | 4.37 | 0 | 0 | 2 MASCOT | T | PLEX8 |
| 2.12E-07 | 0 0 | Cs2g13410.1 | 4.37 | 0 | 0 | 2 MASCOT | T | PLEX8 |
| 1.83E-05 | 0 0 | Cs2g13410.1 | 4.37 | 0 | 0 | 2 MASCOT | T | PLEX8 |
| 1.10E-02 | 0 0 | Cs2g13410.1 | 4.37 | 0 | 0 | 2 MASCOT | T | PLEX8 |
| 4.95E-07 | 0 0 | Cs2g13410.1 | 4.37 | 0 | 0 | 2 MASCOT | T | PLEX8 |
| 1.76E-05 | 0 0 | Cs2g13410.1 | 4.37 | 0 | 0 | 2 MASCOT | T | PLEX8 |
| 1.36E-05 | 0 0 | Cs2g13410.1 | 4.37 | 0 | 0 | 2 MASCOT | T | PLEX8 |
| 3.34E-06 | 0 0 | Cs2g13410.1 | 4.37 | 0 | 0 | 2 MASCOT | T | PLEX8 |
| 8.00E-05 | 0 0 | Cs2g13410.1 | 4.37 | 0 | 0 | 2 MASCOT | T | PLEX8 |
| 1.45E-05 | 0 0 | Cs2g13410.1 | 4.37 | 0 | 0 | 2 MASCOT | T | PLEX8 |
| 5.26E-02 | 0 0 | Cs2g13410.1 | 4.37 | 0 | 0 | 2 MASCOT | T | PLEX8 |
| 8.95E-05 | 0 0 | Cs2g13410.1 | 4.37 | 0 | 0 | 2 MASCOT | T | PLEX8 |
| 1.78E-01 | 0 0 | Cs2g13410.1 | 4.37 | 0 | 0 | 2 MASCOT | T | PLEX8 |
| 9.84E-05 | 0 0 | Cs2g13410.1 | 4.37 | 0 | 0 | 2 MASCOT | T | PLEX8 |
| 2.74E-02 | 0 0 | Cs2g13410.1 | 4.37 | 0 | 0 | 2 MASCOT | T | PLEX8 |
| 2.18E-02 | 0 0 | Cs2g13410.1 | 4.37 | 0 | 0 | 2 MASCOT | T | PLEX8 |
| 5.55E-02 | 0 0 | Cs2g13410.1 | 4.37 | 0 | 0 | 2 MASCOT | T |       |
| 2.59E-06 | 0 0 | Cs2g13410.1 | 4.37 | 0 | 0 | 2 MASCOT | T | PLEX8 |
| 7.59E-04 | 0 0 | Cs2g13410.1 | 4.37 | 0 | 0 | 2 MASCOT | T | PLEX8 |
| 7.96E-04 | 0 0 | Cs2g13410.1 | 4.37 | 0 | 0 | 2 MASCOT | T | PLEX8 |
| 1.58E-03 | 0 0 | Cs2g13410.1 | 4.37 | 0 | 0 | 2 MASCOT | T |       |
| 8.30E-03 | 0 0 | Cs2g13410.1 | 4.37 | 0 | 0 | 2 MASCOT | T |       |
| 2.59E-04 | 0 0 | Cs2g13410.1 | 4.37 | 0 | 0 | 2 MASCOT | T |       |
| 5.36E-05 | 0 0 | Cs2g13410.1 | 4.37 | 0 | 0 | 2 MASCOT | T | PLEX8 |
| 1.13E-01 | 0 0 | Cs2g13410.1 | 4.37 | 0 | 0 | 2 MASCOT | T |       |
| 4.88E-03 | 0 0 | Cs2g13410.1 | 4.37 | 0 | 0 | 2 MASCOT | T | PLEX8 |
| 6.26E-02 | 0 0 | Cs2g13410.1 | 4.37 | 0 | 0 | 2 MASCOT | T | PLEX8 |
| 6.45E-06 | 0 0 | Cs2g13410.1 | 4.37 | 0 | 0 | 2 MASCOT | T | PLEX8 |
| 1.18E-03 | 0 0 | Cs2g13410.1 | 4.37 | 0 | 0 | 2 MASCOT | T |       |
| 3.03E-06 | 0 0 | Cs2g13410.1 | 4.37 | 0 | 0 | 2 MASCOT | T |       |
| 1.33E-01 | 0 0 | Cs2g13410.1 | 4.37 | 0 | 0 | 2 MASCOT | T | PLEX8 |

|              |             |      |   |   |          |   |       |
|--------------|-------------|------|---|---|----------|---|-------|
| 4.85E-02 0 0 | Cs2g13410.1 | 4.37 | 0 | 0 | 2 MASCOT | T | PLEX8 |
| 4.48E-04 0 0 | Cs2g13410.1 | 4.37 | 0 | 0 | 2 MASCOT | T | PLEX8 |
| 6.04E-03 0 0 | Cs2g13410.1 | 4.37 | 0 | 0 | 2 MASCOT | T | PLEX8 |
| 1.73E-01 0 0 | Cs2g13410.1 | 4.37 | 0 | 0 | 2 MASCOT | T |       |
| 1.78E-01 0 0 | Cs2g13410.1 | 4.37 | 0 | 0 | 2 MASCOT | T |       |
| 1.17E-01 0 0 | Cs2g13410.1 | 4.37 | 0 | 0 | 2 MASCOT | T |       |
| 1.17E-03 0 0 | Cs2g13410.1 | 4.37 | 0 | 0 | 2 MASCOT | T |       |
| 1.58E-02 0 0 | Cs2g13410.1 | 4.37 | 0 | 0 | 2 MASCOT | T |       |
| 9.33E-03 0 0 | Cs2g13410.1 | 4.37 | 0 | 0 | 2 MASCOT | T |       |
| 1.49E-01 0 0 | Cs2g13410.1 | 4.37 | 0 | 0 | 2 MASCOT | T |       |
| 2.62E-01 0 0 | Cs2g13410.1 | 4.37 | 0 | 0 | 2 MASCOT | T |       |
| 3.12E-04 0 0 | Cs2g13410.1 | 4.37 | 0 | 0 | 2 MASCOT | T |       |
| 1.22E-03 0 0 | Cs2g13410.1 | 4.37 | 0 | 0 | 2 MASCOT | T |       |
| 6.24E-03 0 0 | Cs2g13410.1 | 4.37 | 0 | 0 | 2 MASCOT | T |       |
| 3.00E-04 0 0 | Cs2g13410.1 | 4.37 | 0 | 0 | 2 MASCOT | T |       |
| 3.08E-03 0 0 | Cs2g13410.1 | 4.37 | 0 | 0 | 2 MASCOT | T |       |
| 8.42E-07 0 0 | Cs2g13410.1 | 4.37 | 0 | 0 | 2 MASCOT | T |       |
| 4.99E-04 0 0 | Cs2g13410.1 | 4.37 | 0 | 0 | 2 MASCOT | T |       |
| 2.21E-08 0 0 | Cs2g13410.1 | 4.37 | 0 | 0 | 2 MASCOT | T |       |
| 5.98E-05 0 0 | Cs2g13410.1 | 4.37 | 0 | 0 | 2 MASCOT | T |       |
| 9.15E-06 0 0 | Cs2g13410.1 | 4.37 | 0 | 0 | 2 MASCOT | T |       |
| 2.05E-04 0 0 | Cs2g13410.1 | 4.37 | 0 | 0 | 2 MASCOT | T |       |
| 4.26E-02 0 0 | Cs2g13410.1 | 4.37 | 0 | 0 | 2 MASCOT | T |       |
| 1.16E-01 0 0 | Cs2g13410.1 | 4.37 | 0 | 0 | 2 MASCOT | T | PLEX8 |
| 5.06E-04 0 0 | Cs2g13410.1 | 4.37 | 0 | 0 | 2 MASCOT | T | PLEX8 |
| 1.56E-03 0 0 | Cs2g13410.1 | 4.37 | 0 | 0 | 2 MASCOT | T | PLEX8 |
| 3.20E-01 0 0 | Cs2g13410.1 | 5.72 | 0 | 0 | 2 MASCOT | T |       |
| 8.29E-02 0 0 | Cs2g13410.1 | 4.53 | 0 | 0 | 2 MASCOT | T | PLEX8 |
| 1.13E-01 0 0 | Cs2g13410.1 | 4.53 | 0 | 0 | 2 MASCOT | T | PLEX8 |
| 1.62E-01 0 0 | Cs2g13410.1 | 4.53 | 0 | 0 | 2 MASCOT | T | PLEX8 |
| 1.99E-01 0 0 | Cs2g13410.1 | 4.53 | 0 | 0 | 2 MASCOT | T | PLEX8 |
| 1.96E-01 0 0 | Cs2g13410.1 | 4.53 | 0 | 0 | 2 MASCOT | T | PLEX8 |
| 3.69E-01 0 0 | Cs2g13410.1 | 4.53 | 0 | 0 | 2 MASCOT | T | PLEX8 |
| 2.83E-02 0 0 | Cs2g13410.1 | 4.53 | 0 | 0 | 2 MASCOT | T | PLEX8 |
| 8.38E-02 0 0 | Cs2g13410.1 | 4.53 | 0 | 0 | 2 MASCOT | T | PLEX8 |
| 4.21E-01 0 0 | Cs2g13410.1 | 4.53 | 0 | 0 | 2 MASCOT | T |       |
| 3.79E-01 0 0 | Cs2g13410.1 | 4.53 | 0 | 0 | 2 MASCOT | T |       |
| 1.47E-01 0 0 | Cs2g13410.1 | 4.53 | 0 | 0 | 2 MASCOT | T |       |
| 2.12E-01 0 0 | Cs2g13410.1 | 7.89 | 0 | 0 | 2 MASCOT | T | PLEX8 |
| 1.08E-01 0 0 | Cs2g13410.1 | 7.89 | 0 | 0 | 2 MASCOT | T | PLEX8 |
| 3.16E-01 0 0 | Cs2g13410.1 | 7.89 | 0 | 0 | 2 MASCOT | T | PLEX8 |
| 1.16E-02 0 0 | Cs2g13410.1 | 7.89 | 0 | 0 | 2 MASCOT | T | PLEX8 |
| 9.27E-04 0 0 | Cs2g13410.1 | 7.89 | 0 | 0 | 2 MASCOT | T | PLEX8 |
| 1.14E-02 0 0 | Cs2g13410.1 | 7.89 | 0 | 0 | 2 MASCOT | T | PLEX8 |
| 4.09E-03 0 0 | Cs2g13410.1 | 7.89 | 0 | 0 | 2 MASCOT | T | PLEX8 |
| 1.04E-01 0 0 | Cs2g13410.1 | 7.89 | 0 | 0 | 2 MASCOT | T |       |
| 5.74E-04 0 0 | Cs2g13410.1 | 7.89 | 0 | 0 | 2 MASCOT | T | PLEX8 |
| 7.97E-04 0 0 | Cs2g13410.1 | 7.89 | 0 | 0 | 2 MASCOT | T | PLEX8 |
| 6.01E-03 0 0 | Cs2g13410.1 | 7.89 | 0 | 0 | 2 MASCOT | T | PLEX8 |
| 1.39E-03 0 0 | Cs2g13410.1 | 7.89 | 0 | 0 | 2 MASCOT | T | PLEX8 |
| 2.42E-03 0 0 | Cs2g13410.1 | 7.89 | 0 | 0 | 2 MASCOT | T | PLEX8 |

|              |                     |      |        |   |          |   |       |
|--------------|---------------------|------|--------|---|----------|---|-------|
| 5.23E-02 0 0 | Cs2g13410.1         | 7.89 | 0      | 0 | 2 MASCOT | T | PLEX8 |
| 2.03E-01 0 0 | Cs2g13410.1         | 7.89 | 0      | 0 | 2 MASCOT | T | PLEX8 |
| 4.18E-03 0 0 | Cs2g13410.1         | 7.89 | 0      | 0 | 2 MASCOT | T | PLEX8 |
| 8.88E-03 0 0 | Cs2g13410.1         | 7.89 | 0      | 0 | 2 MASCOT | T | PLEX8 |
| 1.10E-01 0 0 | Cs2g13410.1         | 7.89 | 0      | 0 | 2 MASCOT | T |       |
| 3.80E-03 0 0 | Cs2g13410.1         | 7.89 | 0      | 0 | 2 MASCOT | T | PLEX8 |
| 1.07E-01 0 0 | Cs2g13410.1         | 7.89 | 0      | 0 | 2 MASCOT | T |       |
| 6.44E-04 0 0 | Cs2g13410.1         | 7.89 | 0      | 0 | 2 MASCOT | T | PLEX8 |
| 6.64E-04 0 0 | Cs2g13410.1         | 7.89 | 0      | 0 | 2 MASCOT | T | PLEX8 |
| 5.11E-02 0 0 | Cs2g13410.1         | 7.89 | 0      | 0 | 2 MASCOT | T | PLEX8 |
| 5.79E-03 0 0 | Cs2g13410.1         | 7.89 | 0      | 0 | 2 MASCOT | T | PLEX8 |
| 7.63E-03 0 0 | Cs2g13410.1         | 7.89 | 0      | 0 | 2 MASCOT | T | PLEX8 |
| 2.48E-01 0 0 | Cs2g13410.1         | 7.89 | 0      | 0 | 2 MASCOT | T | PLEX8 |
| 1.20E-02 0 0 | Cs2g13410.1         | 7.89 | 0      | 0 | 2 MASCOT | T | PLEX8 |
| 1.38E-03 0 0 | Cs2g13410.1         | 7.89 | 0      | 0 | 2 MASCOT | T | PLEX8 |
| 1.39E-03 0 0 | Cs2g13410.1         | 7.89 | 0      | 0 | 2 MASCOT | T | PLEX8 |
| 3.95E-02 0 0 | Cs2g13410.1         | 7.89 | 0      | 0 | 2 MASCOT | T | PLEX8 |
| 2.15E-03 0 0 | Cs2g13410.1         | 7.89 | 0      | 0 | 2 MASCOT | T | PLEX8 |
| 3.82E-02 0 0 | Cs2g13410.1         | 7.89 | 0      | 0 | 2 MASCOT | T | PLEX8 |
| 1.51E-02 0 0 | Cs2g13410.1         | 7.89 | 0      | 0 | 2 MASCOT | T | PLEX8 |
| 2.00E-04 0 0 | Cs2g13410.1         | 7.89 | 0      | 0 | 2 MASCOT | T |       |
| 6.64E-04 0 0 | Cs2g13410.1         | 7.89 | 0      | 0 | 2 MASCOT | T |       |
| 7.55E-05 0 0 | Cs2g13410.1         | 7.89 | 0      | 0 | 2 MASCOT | T |       |
| 7.49E-02 0 0 | Cs2g13410.1         | 7.89 | 0      | 0 | 2 MASCOT | T |       |
| 5.26E-03 0 0 | Cs2g13410.1         | 7.89 | 0      | 0 | 2 MASCOT | T | PLEX8 |
| 1.42E-03 0 0 | Cs2g13410.1         | 7.89 | 0      | 0 | 2 MASCOT | T | PLEX8 |
| 7.14E-06 0 0 | Cs2g13410.1         | 4.01 | 0      | 0 | 2 MASCOT | T | PLEX8 |
| 5.45E-02 0 0 | Cs3g15540.1/Cs3g155 | 5.87 | 0      | 0 | 2 MASCOT | T | PLEX8 |
| 3.44E-03 0 0 | Cs3g15540.1/Cs3g155 | 5.87 | 0      | 0 | 2 MASCOT | T | PLEX8 |
| 6.42E-02 0 0 | Cs3g15540.1/Cs3g155 | 5.87 | 0      | 0 | 2 MASCOT | T |       |
| 2.84E-04 0 0 | Cs3g15540.1/Cs3g155 | 5.87 | 0      | 0 | 2 MASCOT | T |       |
| 1.03E-04 0 0 | Cs3g15540.1/Cs3g155 | 5.87 | 0      | 0 | 2 MASCOT | T |       |
| 4.17E-02 0 0 | Cs3g15540.1/Cs3g155 | 5.87 | 0      | 0 | 2 MASCOT | T |       |
| 3.43E-03 0 0 | Cs3g15540.1/Cs3g155 | 5.87 | 0      | 0 | 2 MASCOT | T |       |
| 1.33E-02 0 0 | Cs3g15540.1/Cs3g155 | 5.87 | 0      | 0 | 2 MASCOT | T |       |
| 3.16E-02 0 0 | Cs3g15540.1/Cs3g155 | 5.87 | 0      | 0 | 2 MASCOT | T |       |
| 4.90E-04 0 0 | Cs3g15540.1/Cs3g155 | 5.87 | 0      | 0 | 2 MASCOT | T |       |
| 2.41E-02 0 0 | Cs3g15540.1/Cs3g155 | 5.87 | 0      | 0 | 2 MASCOT | T |       |
| 2.57E-02 0 0 | Cs3g15540.1/Cs3g155 | 6.74 | 0 15.9 | 0 | 2 MASCOT | T | PLEX8 |
| 8.83E-02 0 0 | Cs3g15540.1/Cs3g155 | 6.74 | 0 15.9 | 0 | 2 MASCOT | T | PLEX8 |
| 3.75E-02 0 0 | Cs3g15540.1/Cs3g155 | 6.74 | 0 15.9 | 0 | 2 MASCOT | T | PLEX8 |
| 1.02E-03 0 0 | Cs3g15540.1/Cs3g155 | 6.74 | 0 15.9 | 0 | 2 MASCOT | T | PLEX8 |
| 2.08E-04 0 0 | Cs3g15540.1/Cs3g155 | 6.74 | 0 15.9 | 0 | 2 MASCOT | T | PLEX8 |
| 6.93E-02 0 0 | Cs3g15540.1/Cs3g155 | 6.74 | 0 15.9 | 0 | 2 MASCOT | T | PLEX8 |
| 1.80E-03 0 0 | Cs3g15540.1/Cs3g155 | 6.74 | 0 15.9 | 0 | 2 MASCOT | T | PLEX8 |
| 3.79E-03 0 0 | Cs3g15540.1/Cs3g155 | 6.74 | 0 15.9 | 0 | 2 MASCOT | T | PLEX8 |
| 5.49E-02 0 0 | Cs3g15540.1/Cs3g155 | 6.74 | 0 15.9 | 0 | 2 MASCOT | T | PLEX8 |
| 5.49E-03 0 0 | Cs3g15540.1/Cs3g155 | 6.74 | 0 15.9 | 0 | 2 MASCOT | T | PLEX8 |
| 6.12E-03 0 0 | Cs3g15540.1/Cs3g155 | 6.74 | 0      | 0 | 2 MASCOT | T | PLEX8 |
| 1.21E-01 0 0 | Cs3g15540.1/Cs3g155 | 6.74 | 0      | 0 | 2 MASCOT | T | PLEX8 |
| 4.75E-02 0 0 | Cs3g15540.1/Cs3g155 | 6.74 | 0      | 0 | 2 MASCOT | T | PLEX8 |

|          |     |                     |      |   |      |   |        |        |       |       |
|----------|-----|---------------------|------|---|------|---|--------|--------|-------|-------|
| 2.84E-03 | 0 0 | Cs3g15540.1/Cs3g155 | 6.74 | 0 | 0    | 2 | MASCOT | T      | PLEX8 |       |
| 1.08E-03 | 0 0 | Cs3g15540.1/Cs3g155 | 6.74 | 0 | 0    | 2 | MASCOT | T      | PLEX8 |       |
| 2.59E-02 | 0 0 | Cs3g15540.1/Cs3g155 | 6.74 | 0 | 0    | 2 | MASCOT | T      | PLEX8 |       |
| 9.14E-03 | 0 0 | Cs3g15540.1/Cs3g155 | 6.74 | 0 | 0    | 2 | MASCOT | T      | PLEX8 |       |
| 3.18E-03 | 0 0 | Cs3g15540.1/Cs3g155 | 6.74 | 0 | 0    | 2 | MASCOT | T      |       |       |
| 6.40E-04 | 0 0 | Cs3g15540.1/Cs3g155 | 6.74 | 0 | 0    | 2 | MASCOT | T      |       |       |
| 7.90E-03 | 0 0 | Cs3g15540.1/Cs3g155 | 6.74 | 0 | 0    | 2 | MASCOT | T      |       |       |
| 1.14E-03 | 0 0 | Cs3g15540.1/Cs3g155 | 4.37 | 0 | 0    | 2 | MASCOT | T      | PLEX8 |       |
| 1.83E-02 | 0 0 | Cs3g15540.1/Cs3g155 | 4.37 | 0 | 0    | 2 | MASCOT | T      | PLEX8 |       |
| 4.39E-02 | 0 0 | Cs3g15540.1/Cs3g155 | 4.37 | 0 | 0    | 2 | MASCOT | T      | PLEX8 |       |
| 5.26E-05 | 0 0 | Cs3g15540.1/Cs3g155 | 4.37 | 0 | 0    | 2 | MASCOT | T      | PLEX8 |       |
| 1.12E-05 | 0 0 | Cs3g15540.1/Cs3g155 | 4.37 | 0 | 0    | 2 | MASCOT | T      | PLEX8 |       |
| 2.93E-01 | 0 0 | Cs3g15540.1/Cs3g155 | 4.37 | 0 | 0    | 2 | MASCOT | T      | PLEX8 |       |
| 1.11E-04 | 0 0 | Cs3g15540.1/Cs3g155 | 4.37 | 0 | 0    | 2 | MASCOT | T      | PLEX8 |       |
| 1.52E-03 | 0 0 | Cs3g15540.1/Cs3g155 | 4.37 | 0 | 0    | 2 | MASCOT | T      | PLEX8 |       |
| 1.85E-03 | 0 0 | Cs3g15540.1/Cs3g155 | 4.37 | 0 | 0    | 2 | MASCOT | T      |       |       |
| 1.49E-01 | 0 0 | Cs3g15540.1/Cs3g155 | 4.37 | 0 | 0    | 2 | MASCOT | T      | PLEX8 |       |
| 1.18E-03 | 0 0 | Cs3g15540.1/Cs3g155 | 4.37 | 0 | 0    | 2 | MASCOT | T      |       |       |
| 1.61E-02 | 0 0 | Cs3g15540.1/Cs3g155 | 6.06 | 1 | 0    | 2 | MASCOT | T      | PLEX8 |       |
| 8.69E-03 | 0 0 | Cs3g15540.1/Cs3g155 | 6.06 | 1 | 0    | 2 | MASCOT | T      | PLEX8 |       |
| 5.65E-02 | 0 0 | Cs3g15540.1/Cs3g155 | 6.06 | 1 | 0    | 2 | MASCOT | T      | PLEX8 |       |
| 8.81E-02 | 0 0 | Cs3g15540.1/Cs3g155 | 6.06 | 1 | 0    | 2 | MASCOT | T      | PLEX8 |       |
| 1.55E-01 | 0 0 | Cs3g15540.1/Cs3g155 | 6    | 0 | 0    | 2 | MASCOT | T      | PLEX8 |       |
| 4.11E-02 | 0 0 | Cs3g15540.1/Cs3g155 | 6    | 0 | 0    | 2 | MASCOT | T      | PLEX8 |       |
| 3.96E-03 | 0 0 | Cs3g15540.1/Cs3g155 | 6    | 0 | 0    | 2 | MASCOT | T      | PLEX8 |       |
| 2.02E-02 | 0 0 | Cs3g15540.1/Cs3g155 | 6    | 0 | 0    | 2 | MASCOT | T      | PLEX8 |       |
| 7.75E-02 | 0 0 | Cs3g15540.1/Cs3g155 | 6    | 0 | 0    | 2 | MASCOT | T      | PLEX8 |       |
| 3.90E-04 | 0 0 | Cs3g15540.1/Cs3g155 | 6    | 0 | 0    | 2 | MASCOT | T      | PLEX8 |       |
| 1.63E-01 | 0 0 | Cs3g15540.1/Cs3g155 | 6    | 0 | 0    | 2 | MASCOT | T      | PLEX8 |       |
| 4.59E-04 | 0 0 | Cs3g15540.1/Cs3g155 | 6    | 0 | 0    | 2 | MASCOT | T      | PLEX8 |       |
| 6.16E-02 | 0 0 | Cs3g15540.1/Cs3g155 | 6    | 0 | 0    | 2 | MASCOT | T      | PLEX8 |       |
| 4.63E-03 | 0 0 | Cs3g15540.1/Cs3g155 | 6    | 0 | 0    | 2 | MASCOT | T      | PLEX8 |       |
| 2.21E-02 | 0 0 | Cs3g15540.1/Cs3g155 | 9.75 | 0 | 0    | 2 | MASCOT | T      |       |       |
| 4.85E-03 | 0 0 | Cs3g15540.1/Cs3g155 | 4.9  | 0 | 0    | 2 | MASCOT | T      |       |       |
| 1.97E-02 | 0 0 | Cs3g15540.1/Cs3g155 | 5.5  | 0 | 15.9 | 0 | 2      | MASCOT | T     | PLEX8 |
| 1.27E-02 | 0 0 | Cs3g15540.1/Cs3g155 | 5.5  | 0 | 15.9 | 0 | 2      | MASCOT | T     | PLEX8 |
| 3.05E-04 | 0 0 | Cs3g15540.1/Cs3g155 | 5.5  | 0 | 15.9 | 0 | 2      | MASCOT | T     | PLEX8 |
| 1.18E-02 | 0 0 | Cs3g15540.1/Cs3g155 | 5.5  | 0 | 15.9 | 0 | 2      | MASCOT | T     | PLEX8 |
| 5.93E-03 | 0 0 | Cs3g15540.1/Cs3g155 | 5.5  | 0 | 15.9 | 0 | 2      | MASCOT | T     | PLEX8 |
| 3.21E-03 | 0 0 | Cs3g15540.1/Cs3g155 | 5.5  | 0 | 15.9 | 0 | 2      | MASCOT | T     | PLEX8 |
| 4.63E-03 | 0 0 | Cs3g15540.1/Cs3g155 | 5.5  | 0 | 0    | 2 | MASCOT | T      | PLEX8 |       |
| 1.94E-02 | 0 0 | Cs3g15540.1/Cs3g155 | 5.5  | 0 | 0    | 2 | MASCOT | T      | PLEX8 |       |
| 9.39E-03 | 0 0 | Cs3g15540.1/Cs3g155 | 5.5  | 0 | 0    | 2 | MASCOT | T      | PLEX8 |       |
| 4.40E-01 | 0 0 | Cs3g06370.1/Cs3g155 | 8.59 | 0 | 0    | 2 | MASCOT | T      | PLEX8 |       |
| 2.22E-03 | 0 0 | Cs3g06370.1/Cs3g155 | 9.8  | 0 | 0    | 2 | MASCOT | T      | PLEX8 |       |
| 1.92E-01 | 0 0 | Cs3g06370.1/Cs3g155 | 9.8  | 0 | 0    | 2 | MASCOT | T      | PLEX8 |       |
| 4.70E-02 | 0 0 | Cs3g06370.1/Cs3g155 | 9.8  | 0 | 0    | 2 | MASCOT | T      | PLEX8 |       |
| 1.61E-03 | 0 0 | Cs3g06370.1/Cs3g155 | 9.8  | 0 | 0    | 2 | MASCOT | T      | PLEX8 |       |
| 1.33E-04 | 0 0 | Cs3g06370.1/Cs3g155 | 9.8  | 0 | 0    | 2 | MASCOT | T      | PLEX8 |       |
| 2.04E-03 | 0 0 | Cs3g06370.1/Cs3g155 | 9.8  | 0 | 0    | 2 | MASCOT | T      | PLEX8 |       |
| 4.61E-02 | 0 0 | Cs3g06370.1/Cs3g155 | 9.8  | 0 | 0    | 2 | MASCOT | T      | PLEX8 |       |

|          |     |                     |      |   |      |   |        |        |       |       |
|----------|-----|---------------------|------|---|------|---|--------|--------|-------|-------|
| 2.02E-01 | 0 0 | Cs3g06370.1/Cs3g155 | 9.8  | 0 | 0    | 2 | MASCOT | T      | PLEX8 |       |
| 5.64E-02 | 0 0 | Cs3g06370.1/Cs3g155 | 4.53 | 0 | 0    | 2 | MASCOT | T      | PLEX8 |       |
| 5.75E-02 | 0 0 | Cs3g15540.1/Cs3g155 | 4.54 | 0 | 0    | 2 | MASCOT | T      | PLEX8 |       |
| 4.87E-03 | 0 0 | Cs3g15540.1/Cs3g155 | 4.54 | 0 | 0    | 2 | MASCOT | T      | PLEX8 |       |
| 1.49E-01 | 0 0 | Cs3g15540.1/Cs3g155 | 4.54 | 0 | 0    | 2 | MASCOT | T      | PLEX8 |       |
| 9.75E-02 | 0 0 | Cs3g15540.1/Cs3g155 | 4.54 | 0 | 0    | 2 | MASCOT | T      | PLEX8 |       |
| 3.79E-05 | 0 0 | Cs3g15540.1/Cs3g155 | 4.54 | 0 | 0    | 2 | MASCOT | T      | PLEX8 |       |
| 1.19E-06 | 0 0 | Cs3g15540.1/Cs3g155 | 4.54 | 0 | 0    | 2 | MASCOT | T      | PLEX8 |       |
| 2.21E-03 | 0 0 | Cs3g15540.1/Cs3g155 | 4.54 | 0 | 0    | 2 | MASCOT | T      | PLEX8 |       |
| 1.11E-02 | 0 0 | Cs3g15540.1/Cs3g155 | 4.54 | 0 | 0    | 2 | MASCOT | T      |       |       |
| 2.85E-03 | 0 0 | Cs3g15540.1/Cs3g155 | 4.54 | 0 | 0    | 2 | MASCOT | T      |       |       |
| 1.86E-03 | 0 0 | Cs3g15540.1/Cs3g155 | 4.54 | 0 | 0    | 2 | MASCOT | T      | PLEX8 |       |
| 2.48E-02 | 0 0 | Cs3g15540.1/Cs3g155 | 4.54 | 0 | 0    | 2 | MASCOT | T      |       |       |
| 6.64E-04 | 0 0 | Cs3g15540.1/Cs3g155 | 4.54 | 0 | 0    | 2 | MASCOT | T      |       |       |
| 1.44E-01 | 0 0 | Cs3g15540.1/Cs3g155 | 7.01 | 0 | 15.9 | 0 | 2      | MASCOT | T     | PLEX8 |
| 1.07E-03 | 0 0 | Cs3g15540.1/Cs3g155 | 7.01 | 0 | 15.9 | 0 | 2      | MASCOT | T     | PLEX8 |
| 6.93E-02 | 0 0 | Cs3g15540.1/Cs3g155 | 7.01 | 0 | 15.9 | 0 | 2      | MASCOT | T     | PLEX8 |
| 4.72E-03 | 0 0 | Cs3g15540.1/Cs3g155 | 7.01 | 0 | 15.9 | 0 | 2      | MASCOT | T     | PLEX8 |
| 1.41E-01 | 0 0 | Cs3g15540.1/Cs3g155 | 7.01 | 0 | 15.9 | 0 | 2      | MASCOT | T     | PLEX8 |
| 1.55E-02 | 0 0 | Cs3g15540.1/Cs3g155 | 7.01 | 0 | 15.9 | 0 | 2      | MASCOT | T     | PLEX8 |
| 2.28E-02 | 0 0 | Cs3g15540.1/Cs3g155 | 7.01 | 0 | 15.9 | 0 | 2      | MASCOT | T     | PLEX8 |
| 1.69E-02 | 0 0 | Cs3g15540.1/Cs3g155 | 7.01 | 0 | 15.9 | 0 | 2      | MASCOT | T     | PLEX8 |
| 7.54E-02 | 0 0 | Cs3g15540.1/Cs3g155 | 7.01 | 0 | 0    | 2 | MASCOT | T      | PLEX8 |       |
| 4.80E-03 | 0 0 | Cs3g15540.1/Cs3g155 | 7.01 | 0 | 0    | 2 | MASCOT | T      | PLEX8 |       |
| 1.79E-03 | 0 0 | Cs3g15540.1/Cs3g155 | 7.01 | 0 | 0    | 2 | MASCOT | T      | PLEX8 |       |
| 3.74E-03 | 0 0 | Cs3g15540.1/Cs3g155 | 7.01 | 0 | 0    | 2 | MASCOT | T      | PLEX8 |       |
| 4.22E-03 | 0 0 | Cs3g15540.1/Cs3g155 | 7.01 | 0 | 0    | 2 | MASCOT | T      | PLEX8 |       |
| 2.01E-01 | 0 0 | Cs3g15540.1/Cs3g155 | 7.01 | 0 | 0    | 2 | MASCOT | T      | PLEX8 |       |
| 1.71E-03 | 0 0 | Cs3g15540.1/Cs3g155 | 6.75 | 0 | 0    | 2 | MASCOT | T      | PLEX8 |       |
| 7.22E-02 | 0 0 | Cs3g15540.1/Cs3g155 | 6.75 | 0 | 0    | 2 | MASCOT | T      | PLEX8 |       |
| 5.55E-03 | 0 0 | Cs3g15540.1/Cs3g155 | 6.75 | 0 | 0    | 2 | MASCOT | T      | PLEX8 |       |
| 1.26E-01 | 0 0 | Cs3g15540.1/Cs3g155 | 6.75 | 0 | 0    | 2 | MASCOT | T      |       |       |
| 2.89E-03 | 0 0 | Cs3g06370.1/Cs3g155 | 6.74 | 0 | 0    | 2 | MASCOT | T      | PLEX8 |       |
| 1.99E-02 | 0 0 | Cs3g06370.1/Cs3g155 | 6.74 | 0 | 0    | 2 | MASCOT | T      | PLEX8 |       |
| 4.32E-02 | 0 0 | Cs3g06370.1/Cs3g155 | 6.74 | 0 | 0    | 2 | MASCOT | T      |       |       |
| 6.00E-02 | 0 0 | Cs3g06370.1/Cs3g155 | 6.74 | 0 | 0    | 2 | MASCOT | T      |       |       |
| 7.72E-02 | 0 0 | Cs3g06370.1/Cs3g155 | 6.74 | 0 | 0    | 2 | MASCOT | T      | PLEX8 |       |
| 3.35E-02 | 0 0 | Cs3g06370.1/Cs3g155 | 6.74 | 0 | 0    | 2 | MASCOT | T      |       |       |
| 5.21E-02 | 0 0 | Cs3g06370.1/Cs3g155 | 6.74 | 0 | 0    | 2 | MASCOT | T      |       |       |
| 6.94E-02 | 0 0 | Cs3g15540.1/Cs3g155 | 8.22 | 1 | 0    | 2 | MASCOT | T      | PLEX8 |       |
| 9.17E-02 | 0 0 | Cs3g15540.1/Cs3g155 | 8.22 | 1 | 0    | 2 | MASCOT | T      | PLEX8 |       |
| 8.63E-02 | 0 0 | Cs3g15540.1/Cs3g155 | 8.22 | 1 | 0    | 2 | MASCOT | T      | PLEX8 |       |
| 4.86E-02 | 0 0 | Cs3g15540.1/Cs3g155 | 8.22 | 1 | 0    | 2 | MASCOT | T      | PLEX8 |       |
| 5.60E-02 | 0 0 | Cs3g15540.1/Cs3g155 | 8.22 | 1 | 0    | 2 | MASCOT | T      | PLEX8 |       |
| 1.51E-01 | 0 0 | Cs3g15530.1/Cs3g155 | 8.59 | 0 | 0    | 2 | MASCOT | T      | PLEX8 |       |
| 2.08E-01 | 0 0 | Cs3g15530.1/Cs3g155 | 8.59 | 0 | 0    | 2 | MASCOT | T      |       |       |
| 2.67E-01 | 0 0 | Cs3g15530.1/Cs3g155 | 8.59 | 0 | 0    | 2 | MASCOT | T      | PLEX8 |       |
| 1.42E-01 | 0 0 | Cs2g19140.1         | 6.05 | 0 | 0    | 2 | MASCOT | T      | PLEX8 |       |
| 6.63E-02 | 0 0 | Cs2g19140.1         | 6.05 | 0 | 0    | 2 | MASCOT | T      | PLEX8 |       |
| 3.98E-04 | 0 0 | Cs2g19140.1         | 6.05 | 0 | 0    | 2 | MASCOT | T      | PLEX8 |       |
| 1.01E-03 | 0 0 | Cs2g19140.1         | 6.05 | 0 | 0    | 2 | MASCOT | T      | PLEX8 |       |

|          |     |                     |      |   |   |   |        |   |       |
|----------|-----|---------------------|------|---|---|---|--------|---|-------|
| 4.57E-03 | 0 0 | Cs2g19140.1         | 6.05 | 0 | 0 | 2 | MASCOT | T | PLEX8 |
| 9.79E-05 | 0 0 | Cs2g19140.1         | 6.05 | 0 | 0 | 2 | MASCOT | T | PLEX8 |
| 4.03E-02 | 0 0 | Cs2g19140.1         | 6.05 | 0 | 0 | 2 | MASCOT | T | PLEX8 |
| 3.05E-03 | 0 0 | Cs2g19140.1         | 6.05 | 0 | 0 | 2 | MASCOT | T | PLEX8 |
| 2.48E-01 | 0 0 | Cs2g19140.1         | 6.05 | 0 | 0 | 2 | MASCOT | T | PLEX8 |
| 3.26E-02 | 0 0 | Cs2g19140.1         | 6.05 | 0 | 0 | 2 | MASCOT | T | PLEX8 |
| 2.07E-03 | 0 0 | Cs2g19140.1         | 6.05 | 0 | 0 | 2 | MASCOT | T | PLEX8 |
| 6.40E-03 | 0 0 | Cs2g19140.1         | 6.05 | 0 | 0 | 2 | MASCOT | T | PLEX8 |
| 1.12E-03 | 0 0 | Cs2g19140.1         | 6.05 | 0 | 0 | 2 | MASCOT | T | PLEX8 |
| 4.07E-02 | 0 0 | Cs2g19140.1         | 6.05 | 0 | 0 | 2 | MASCOT | T | PLEX8 |
| 3.45E-04 | 0 0 | Cs2g19140.1         | 6.05 | 0 | 0 | 2 | MASCOT | T | PLEX8 |
| 4.29E-03 | 0 0 | Cs2g19140.1         | 6.05 | 0 | 0 | 2 | MASCOT | T | PLEX8 |
| 8.91E-05 | 0 0 | Cs2g19140.1         | 6.05 | 0 | 0 | 2 | MASCOT | T | PLEX8 |
| 8.61E-05 | 0 0 | Cs2g19140.1         | 6.05 | 0 | 0 | 2 | MASCOT | T | PLEX8 |
| 5.33E-03 | 0 0 | Cs2g19140.1         | 6.05 | 0 | 0 | 2 | MASCOT | T | PLEX8 |
| 1.26E-03 | 0 0 | Cs2g19140.1         | 6.05 | 0 | 0 | 2 | MASCOT | T | PLEX8 |
| 2.04E-04 | 0 0 | Cs2g19140.1         | 6.05 | 0 | 0 | 2 | MASCOT | T | PLEX8 |
| 5.28E-01 | 0 0 | Cs2g19140.1/Cs2g191 | 8.06 | 0 | 0 | 2 | MASCOT | T | PLEX8 |
| 4.36E-01 | 0 0 | Cs2g19140.1/Cs2g191 | 8.06 | 0 | 0 | 2 | MASCOT | T | PLEX8 |
| 3.30E-01 | 0 0 | Cs2g19140.1/Cs2g191 | 4.37 | 0 | 0 | 2 | MASCOT | T | PLEX8 |
| 2.05E-02 | 0 0 | Cs2g19140.1/Cs2g191 | 4.37 | 0 | 0 | 2 | MASCOT | T | PLEX8 |
| 1.65E-01 | 0 0 | Cs2g19140.1/Cs2g191 | 4.37 | 0 | 0 | 2 | MASCOT | T | PLEX8 |
| 3.38E-02 | 0 0 | Cs2g19140.1/Cs2g191 | 4.37 | 0 | 0 | 2 | MASCOT | T | PLEX8 |
| 1.76E-06 | 0 0 | Cs2g19140.1/Cs2g191 | 4.37 | 0 | 0 | 2 | MASCOT | T | PLEX8 |
| 2.82E-04 | 0 0 | Cs2g19140.1/Cs2g191 | 4.37 | 0 | 0 | 2 | MASCOT | T | PLEX8 |
| 1.43E-01 | 0 0 | Cs2g19140.1/Cs2g191 | 4.37 | 0 | 0 | 2 | MASCOT | T | PLEX8 |
| 2.31E-01 | 0 0 | Cs2g19140.1/Cs2g191 | 4.37 | 0 | 0 | 2 | MASCOT | T | PLEX8 |
| 2.47E-05 | 0 0 | Cs2g19140.1/Cs2g191 | 4.37 | 0 | 0 | 2 | MASCOT | T | PLEX8 |
| 1.50E-04 | 0 0 | Cs2g19140.1/Cs2g191 | 4.37 | 0 | 0 | 2 | MASCOT | T | PLEX8 |
| 4.51E-01 | 0 0 | Cs2g19140.1/Cs2g191 | 4.37 | 0 | 0 | 2 | MASCOT | T | PLEX8 |
| 2.15E-03 | 0 0 | Cs2g19140.1/Cs2g191 | 4.37 | 0 | 0 | 2 | MASCOT | T | PLEX8 |
| 1.90E-01 | 0 0 | Cs2g19140.1/Cs2g191 | 4.37 | 0 | 0 | 2 | MASCOT | T | PLEX8 |
| 3.45E-01 | 0 0 | Cs2g19140.1/Cs2g191 | 4.37 | 0 | 0 | 2 | MASCOT | T | PLEX8 |
| 3.34E-03 | 0 0 | Cs2g19140.1/Cs2g191 | 4.37 | 0 | 0 | 2 | MASCOT | T | PLEX8 |
| 1.67E-02 | 0 0 | Cs2g19140.1/Cs2g191 | 4.37 | 0 | 0 | 2 | MASCOT | T | PLEX8 |
| 4.13E-03 | 0 0 | Cs2g19140.1/Cs2g191 | 4.37 | 0 | 0 | 2 | MASCOT | T | PLEX8 |
| 7.20E-07 | 0 0 | Cs2g19140.1/Cs2g191 | 4.37 | 0 | 0 | 2 | MASCOT | T | PLEX8 |
| 1.30E-02 | 0 0 | Cs2g19140.1/Cs2g191 | 4.37 | 0 | 0 | 2 | MASCOT | T | PLEX8 |
| 1.63E-02 | 0 0 | Cs2g19140.1/Cs2g191 | 4.37 | 0 | 0 | 2 | MASCOT | T | PLEX8 |
| 4.67E-02 | 0 0 | Cs2g19140.1/Cs2g191 | 4.37 | 0 | 0 | 2 | MASCOT | T | PLEX8 |
| 5.56E-02 | 0 0 | Cs2g19140.1         | 8.75 | 0 | 0 | 2 | MASCOT | T | PLEX8 |
| 5.91E-02 | 0 0 | Cs2g19140.1         | 8.75 | 0 | 0 | 2 | MASCOT | T | PLEX8 |
| 1.50E-01 | 0 0 | Cs2g19140.1         | 8.75 | 0 | 0 | 2 | MASCOT | T | PLEX8 |
| 7.88E-02 | 0 0 | Cs2g19140.1         | 8.75 | 0 | 0 | 2 | MASCOT | T | PLEX8 |
| 1.61E-02 | 0 0 | Cs2g19140.1         | 8.75 | 0 | 0 | 2 | MASCOT | T | PLEX8 |
| 7.14E-02 | 0 0 | Cs2g19140.1         | 8.75 | 0 | 0 | 2 | MASCOT | T | PLEX8 |
| 8.48E-02 | 0 0 | Cs2g19140.1         | 8.75 | 0 | 0 | 2 | MASCOT | T | PLEX8 |
| 2.25E-01 | 0 0 | Cs2g19140.1         | 8.75 | 0 | 0 | 2 | MASCOT | T | PLEX8 |
| 2.38E-01 | 0 0 | Cs2g19140.1         | 8.75 | 0 | 0 | 2 | MASCOT | T | PLEX8 |
| 1.73E-01 | 0 0 | Cs2g19140.1         | 8.75 | 0 | 0 | 2 | MASCOT | T | PLEX8 |
| 5.96E-02 | 0 0 | Cs2g19140.1         | 8.75 | 0 | 0 | 2 | MASCOT | T | PLEX8 |

|          |     |                     |       |   |      |   |        |        |       |       |
|----------|-----|---------------------|-------|---|------|---|--------|--------|-------|-------|
| 1.96E-01 | 0 0 | Cs2g19140.1         | 8.75  | 0 | 0    | 2 | MASCOT | T      | PLEX8 |       |
| 1.26E-01 | 0 0 | Cs2g19140.1         | 8.75  | 0 | 0    | 2 | MASCOT | T      | PLEX8 |       |
| 1.02E-01 | 0 0 | Cs2g19140.1         | 8.75  | 0 | 0    | 2 | MASCOT | T      |       |       |
| 1.46E-01 | 0 0 | Cs2g19140.1/Cs2g191 | 4.53  | 0 | 0    | 2 | MASCOT | T      | PLEX8 |       |
| 5.15E-02 | 0 0 | Cs2g19140.1/Cs2g191 | 4.53  | 0 | 0    | 2 | MASCOT | T      | PLEX8 |       |
| 9.40E-02 | 0 0 | Cs2g19140.1/Cs2g191 | 4.53  | 0 | 0    | 2 | MASCOT | T      | PLEX8 |       |
| 1.72E-01 | 0 0 | Cs2g19140.1         | 4.53  | 0 | 0    | 2 | MASCOT | T      | PLEX8 |       |
| 1.12E-01 | 0 0 | Cs2g19140.1         | 4.53  | 0 | 0    | 2 | MASCOT | T      | PLEX8 |       |
| 1.97E-05 | 0 0 | Cs2g19140.1         | 4.65  | 0 | 15.9 | 0 | 2      | MASCOT | T     | PLEX8 |
| 7.07E-05 | 0 0 | Cs2g19140.1         | 4.65  | 0 | 15.9 | 0 | 2      | MASCOT | T     |       |
| 5.99E-06 | 0 0 | Cs2g19140.1         | 4.65  | 0 | 0    | 2 | MASCOT | T      | PLEX8 |       |
| 2.75E-02 | 0 0 | Cs2g19140.1/Cs2g191 | 5.84  | 0 | 0    | 2 | MASCOT | T      | PLEX8 |       |
| 1.34E-01 | 0 0 | Cs2g19140.1/Cs2g191 | 5.84  | 0 | 0    | 2 | MASCOT | T      | PLEX8 |       |
| 9.03E-02 | 0 0 | Cs2g19140.1         | 4.21  | 0 | 0    | 2 | MASCOT | T      |       |       |
| 3.07E-04 | 0 0 | Cs2g19140.1/Cs2g191 | 5.84  | 0 | 15.9 | 0 | 2      | MASCOT | T     |       |
| 9.46E-05 | 0 0 | Cs2g19140.1/Cs2g191 | 5.84  | 0 | 15.9 | 0 | 2      | MASCOT | T     |       |
| 5.70E-05 | 0 0 | Cs2g19140.1/Cs2g191 | 5.84  | 0 | 15.9 | 0 | 2      | MASCOT | T     |       |
| 2.05E-04 | 0 0 | Cs2g19140.1/Cs2g191 | 5.84  | 0 | 15.9 | 0 | 2      | MASCOT | T     |       |
| 4.57E-03 | 0 0 | Cs2g19140.1/Cs2g191 | 5.84  | 0 | 0    | 2 | MASCOT | T      |       |       |
| 2.47E-03 | 0 0 | Cs2g19140.1/Cs2g191 | 5.84  | 0 | 0    | 2 | MASCOT | T      |       |       |
| 5.78E-02 | 0 0 | Cs2g19140.1/Cs2g191 | 5.84  | 0 | 0    | 2 | MASCOT | T      |       |       |
| 9.04E-02 | 0 0 | Cs2g19140.1/Cs2g191 | 4.32  | 1 | 0    | 2 | MASCOT | T      | PLEX8 |       |
| 9.24E-02 | 0 0 | Cs2g19140.1/Cs2g191 | 4.32  | 1 | 0    | 2 | MASCOT | T      | PLEX8 |       |
| 1.08E-01 | 0 0 | Cs2g19140.1/Cs2g191 | 6     | 0 | 0    | 2 | MASCOT | T      | PLEX8 |       |
| 1.52E-03 | 0 0 | Cs2g19140.1/Cs2g191 | 5.4   | 0 | 0    | 2 | MASCOT | T      |       |       |
| 4.35E-01 | 0 0 | Cs2g19140.1/Cs2g191 | 5.4   | 0 | 0    | 2 | MASCOT | T      | PLEX8 |       |
| 8.23E-04 | 0 0 | Cs2g19140.1/Cs2g191 | 5.4   | 0 | 0    | 2 | MASCOT | T      | PLEX8 |       |
| 2.87E-02 | 0 0 | Cs2g19140.1/Cs2g191 | 5.4   | 0 | 0    | 2 | MASCOT | T      |       |       |
| 1.42E-01 | 0 0 | Cs2g19140.1/Cs2g191 | 5.4   | 0 | 0    | 2 | MASCOT | T      |       |       |
| 7.22E-04 | 0 0 | Cs2g19140.1/Cs2g191 | 5.4   | 0 | 0    | 2 | MASCOT | T      |       |       |
| 2.58E-04 | 0 0 | Cs2g19140.1/Cs2g191 | 5.4   | 0 | 0    | 2 | MASCOT | T      |       |       |
| 4.93E-02 | 0 0 | Cs2g19140.1/Cs2g191 | 5.4   | 0 | 0    | 2 | MASCOT | T      |       |       |
| 4.23E-02 | 0 0 | Cs2g19140.1         | 4.14  | 0 | 0    | 2 | MASCOT | T      | PLEX8 |       |
| 9.57E-03 | 0 0 | Cs2g19140.1         | 4.14  | 0 | 0    | 2 | MASCOT | T      | PLEX8 |       |
| 4.74E-04 | 0 0 | Cs2g19140.1         | 4.14  | 0 | 0    | 2 | MASCOT | T      | PLEX8 |       |
| 1.42E-04 | 0 0 | Cs2g19140.1         | 4.14  | 0 | 0    | 2 | MASCOT | T      | PLEX8 |       |
| 9.00E-05 | 0 0 | Cs2g19140.1         | 4.14  | 0 | 0    | 2 | MASCOT | T      | PLEX8 |       |
| 1.06E-02 | 0 0 | Cs2g19140.1/Cs2g191 | 10.84 | 0 | 0    | 2 | MASCOT | T      | PLEX8 |       |
| 1.88E-01 | 0 0 | Cs2g19140.1/Cs2g191 | 10.84 | 0 | 0    | 2 | MASCOT | T      | PLEX8 |       |
| 3.36E-03 | 0 0 | Cs2g19140.1/Cs2g191 | 5.66  | 0 | 0    | 2 | MASCOT | T      | PLEX8 |       |
| 7.28E-03 | 0 0 | Cs2g19140.1/Cs2g191 | 5.66  | 0 | 0    | 2 | MASCOT | T      | PLEX8 |       |
| 2.23E-01 | 0 0 | Cs2g19140.1/Cs2g191 | 5.66  | 0 | 0    | 2 | MASCOT | T      | PLEX8 |       |
| 2.15E-03 | 0 0 | Cs2g19140.1/Cs2g191 | 5.66  | 0 | 0    | 2 | MASCOT | T      | PLEX8 |       |
| 1.08E-03 | 0 0 | Cs2g19140.1/Cs2g191 | 5.66  | 0 | 0    | 2 | MASCOT | T      | PLEX8 |       |
| 5.51E-02 | 0 0 | Cs2g19140.1/Cs2g191 | 5.66  | 0 | 0    | 2 | MASCOT | T      | PLEX8 |       |
| 3.26E-02 | 0 0 | Cs2g19140.1/Cs2g191 | 5.66  | 0 | 0    | 2 | MASCOT | T      | PLEX8 |       |
| 1.93E-01 | 0 0 | Cs2g19140.1/Cs2g191 | 5.66  | 0 | 0    | 2 | MASCOT | T      | PLEX8 |       |
| 7.57E-02 | 0 0 | Cs2g19140.1/Cs2g191 | 5.66  | 0 | 0    | 2 | MASCOT | T      |       |       |
| 6.86E-02 | 0 0 | Cs2g19140.1/Cs2g191 | 5.66  | 0 | 0    | 2 | MASCOT | T      | PLEX8 |       |
| 2.57E-02 | 0 0 | Cs2g19140.1/Cs2g191 | 5.66  | 0 | 0    | 2 | MASCOT | T      | PLEX8 |       |
| 1.58E-01 | 0 0 | Cs2g19140.1/Cs2g191 | 5.66  | 0 | 0    | 2 | MASCOT | T      | PLEX8 |       |



|              |                     |      |   |      |   |   |        |   |       |
|--------------|---------------------|------|---|------|---|---|--------|---|-------|
| 1.18E-02 0 0 | Cs5g05440.1         | 4.14 | 0 | 15.9 | 0 | 2 | MASCOT | T | PLEX8 |
| 6.22E-03 0 0 | Cs5g05440.1         | 4.14 | 0 | 15.9 | 0 | 2 | MASCOT | T | PLEX8 |
| 6.63E-03 0 0 | Cs5g05440.1         | 4.14 | 0 | 15.9 | 0 | 2 | MASCOT | T | PLEX8 |
| 1.67E-01 0 0 | Cs5g05440.1         | 4.14 | 0 | 15.9 | 0 | 2 | MASCOT | T | PLEX8 |
| 1.24E-01 0 0 | Cs5g05440.1         | 4.14 | 0 | 15.9 | 0 | 2 | MASCOT | T | PLEX8 |
| 3.38E-01 0 0 | Cs5g05440.1         | 4.14 | 0 | 15.9 | 0 | 2 | MASCOT | T | PLEX8 |
| 1.58E-02 0 0 | Cs5g05440.1         | 4.14 | 0 |      | 0 | 2 | MASCOT | T | PLEX8 |
| 2.00E-02 0 0 | Cs5g05440.1         | 4.14 | 0 |      | 0 | 2 | MASCOT | T | PLEX8 |
| 6.75E-04 0 0 | Cs5g05440.1         | 4.14 | 0 |      | 0 | 2 | MASCOT | T | PLEX8 |
| 2.18E-03 0 0 | Cs5g05440.1         | 4.14 | 0 |      | 0 | 2 | MASCOT | T | PLEX8 |
| 1.52E-03 0 0 | Cs5g05440.1         | 4.14 | 0 |      | 0 | 2 | MASCOT | T | PLEX8 |
| 4.23E-01 0 0 | Cs5g05440.1         | 4.14 | 0 |      | 0 | 2 | MASCOT | T | PLEX8 |
| 2.88E-02 0 0 | Cs5g05440.1         | 4.14 | 0 |      | 0 | 2 | MASCOT | T | PLEX8 |
| 1.50E-03 0 0 | Cs5g05440.1         | 4.14 | 0 |      | 0 | 2 | MASCOT | T | PLEX8 |
| 6.01E-02 0 0 | Cs5g05440.1         | 4.14 | 0 |      | 0 | 2 | MASCOT | T | PLEX8 |
| 2.68E-01 0 0 | Cs5g05440.1/Cs5g054 | 4.21 | 0 |      | 0 | 2 | MASCOT | T | PLEX8 |
| 2.10E-04 0 0 | Cs5g05440.1/Cs5g054 | 4.21 | 0 |      | 0 | 2 | MASCOT | T | PLEX8 |
| 2.18E-01 0 0 | Cs5g05440.1/Cs5g054 | 6.85 | 0 |      | 0 | 2 | MASCOT | T | PLEX8 |
| 6.29E-02 0 0 | Cs5g05440.1/Cs5g054 | 6.85 | 0 |      | 0 | 2 | MASCOT | T | PLEX8 |
| 5.02E-02 0 0 | Cs5g05440.1/Cs5g054 | 6.85 | 0 |      | 0 | 2 | MASCOT | T |       |
| 1.50E-04 0 0 | Cs5g05440.1/Cs5g054 | 6.85 | 0 |      | 0 | 2 | MASCOT | T | PLEX8 |
| 1.60E-01 0 0 | Cs5g05440.1/Cs5g054 | 6.85 | 0 |      | 0 | 2 | MASCOT | T |       |
| 7.61E-02 0 0 | Cs5g05440.1/Cs5g054 | 6.85 | 0 |      | 0 | 2 | MASCOT | T |       |
| 1.12E-01 0 0 | Cs5g05440.1/Cs5g054 | 6.85 | 0 |      | 0 | 2 | MASCOT | T |       |
| 5.16E-03 0 0 | Cs5g05440.1/Cs5g054 | 6.85 | 0 |      | 0 | 2 | MASCOT | T |       |
| 2.14E-04 0 0 | Cs5g05440.1/Cs5g054 | 6.85 | 0 |      | 0 | 2 | MASCOT | T |       |
| 2.64E-01 0 0 | Cs5g05440.1/Cs5g054 | 6.85 | 0 |      | 0 | 2 | MASCOT | T |       |
| 8.82E-02 0 0 | Cs5g05440.1/Cs5g054 | 8.76 | 0 |      | 0 | 2 | MASCOT | T |       |
| 2.34E-01 0 0 | Cs5g05440.1         | 5.84 | 0 |      | 0 | 2 | MASCOT | T | PLEX8 |
| 2.85E-01 0 0 | Cs5g05440.1         | 5.84 | 0 |      | 0 | 2 | MASCOT | T | PLEX8 |
| 1.57E-02 0 0 | Cs5g05440.1         | 5.84 | 0 |      | 0 | 2 | MASCOT | T |       |
| 1.41E-01 0 0 | Cs5g05440.1         | 5.84 | 0 |      | 0 | 2 | MASCOT | T |       |
| 1.09E-01 0 0 | Cs5g05440.1         | 5.84 | 0 |      | 0 | 2 | MASCOT | T | PLEX8 |
| 1.05E-01 0 0 | Cs5g05440.1         | 5.84 | 0 |      | 0 | 2 | MASCOT | T | PLEX8 |
| 3.30E-01 0 0 | Cs5g05440.1/Cs5g054 | 5.84 | 0 |      | 0 | 2 | MASCOT | T | PLEX8 |
| 1.50E-02 0 0 | Cs5g05440.1/Cs5g054 | 5.84 | 0 |      | 0 | 2 | MASCOT | T | PLEX8 |
| 1.98E-04 0 0 | Cs5g05440.1/Cs5g054 | 5.84 | 0 |      | 0 | 2 | MASCOT | T | PLEX8 |
| 8.60E-03 0 0 | Cs5g05440.1/Cs5g054 | 5.84 | 0 |      | 0 | 2 | MASCOT | T | PLEX8 |
| 2.79E-02 0 0 | Cs5g05440.1/Cs5g054 | 5.84 | 0 |      | 0 | 2 | MASCOT | T | PLEX8 |
| 7.96E-02 0 0 | Cs5g05440.1         | 5.84 | 0 |      | 0 | 2 | MASCOT | T | PLEX8 |
| 2.16E-01 0 0 | Cs5g05440.1         | 5.84 | 0 |      | 0 | 2 | MASCOT | T | PLEX8 |
| 7.81E-02 0 0 | Cs5g05440.1         | 5.84 | 0 |      | 0 | 2 | MASCOT | T | PLEX8 |
| 1.46E-05 0 0 | Cs5g05440.1         | 5.84 | 0 |      | 0 | 2 | MASCOT | T | PLEX8 |
| 6.61E-04 0 0 | Cs5g05440.1         | 5.84 | 0 |      | 0 | 2 | MASCOT | T | PLEX8 |
| 4.26E-03 0 0 | Cs5g05440.1         | 5.84 | 0 |      | 0 | 2 | MASCOT | T | PLEX8 |
| 3.26E-02 0 0 | Cs5g05440.1         | 5.84 | 0 |      | 0 | 2 | MASCOT | T | PLEX8 |
| 1.98E-01 0 0 | Cs5g05440.1         | 5.84 | 0 |      | 0 | 2 | MASCOT | T |       |
| 8.20E-02 0 0 | Cs5g05440.1/Cs5g054 | 4.37 | 0 |      | 0 | 2 | MASCOT | T | PLEX8 |
| 3.56E-01 0 0 | Cs5g05440.1/Cs5g054 | 4.37 | 0 |      | 0 | 2 | MASCOT | T | PLEX8 |
| 1.47E-01 0 0 | Cs5g05440.1/Cs5g054 | 4.37 | 0 |      | 0 | 2 | MASCOT | T | PLEX8 |
| 6.65E-04 0 0 | Cs5g05440.1/Cs5g054 | 4.37 | 0 |      | 0 | 2 | MASCOT | T | PLEX8 |

|          |     |                     |      |   |      |   |        |        |         |
|----------|-----|---------------------|------|---|------|---|--------|--------|---------|
| 1.21E-04 | 0 0 | Cs5g05440.1         | 8.59 | 0 | 0    | 2 | MASCOT | T      |         |
| 2.34E-02 | 0 0 | Cs5g05440.1         | 8.59 | 0 | 0    | 2 | MASCOT | T      |         |
| 1.06E-03 | 0 0 | Cs5g05440.1         | 8.59 | 0 | 0    | 2 | MASCOT | T      | PLEX8   |
| 3.96E-02 | 0 0 | Cs5g05440.1/Cs5g054 | 6.05 | 0 | 15.9 | 0 | 2      | MASCOT | T PLEX8 |
| 1.51E-01 | 0 0 | Cs5g05440.1/Cs5g054 | 6.05 | 0 | 15.9 | 0 | 2      | MASCOT | T PLEX8 |
| 5.49E-03 | 0 0 | Cs5g05440.1/Cs5g054 | 6.05 | 0 | 15.9 | 0 | 2      | MASCOT | T PLEX8 |
| 2.87E-02 | 0 0 | Cs5g05440.1/Cs5g054 | 6.05 | 0 | 15.9 | 0 | 2      | MASCOT | T PLEX8 |
| 1.27E-03 | 0 0 | Cs5g05440.1/Cs5g054 | 6.05 | 0 | 15.9 | 0 | 2      | MASCOT | T PLEX8 |
| 2.21E-02 | 0 0 | Cs5g05440.1/Cs5g054 | 6.05 | 0 | 15.9 | 0 | 2      | MASCOT | T PLEX8 |
| 3.26E-01 | 0 0 | Cs5g05440.1/Cs5g054 | 6.05 | 0 | 15.9 | 0 | 2      | MASCOT | T PLEX8 |
| 5.17E-02 | 0 0 | Cs5g05440.1/Cs5g054 | 6.05 | 0 | 0    | 0 | 2      | MASCOT | T PLEX8 |
| 1.28E-08 | 0 0 | Cs5g05440.1/Cs5g054 | 6.05 | 0 | 0    | 0 | 2      | MASCOT | T PLEX8 |
| 4.38E-03 | 0 0 | Cs5g05440.1/Cs5g054 | 6.05 | 0 | 0    | 0 | 2      | MASCOT | T PLEX8 |
| 7.87E-02 | 0 0 | Cs5g05440.1/Cs5g054 | 6.05 | 0 | 0    | 0 | 2      | MASCOT | T PLEX8 |
| 6.13E-03 | 0 0 | Cs5g05440.1/Cs5g054 | 6.05 | 0 | 0    | 0 | 2      | MASCOT | T PLEX8 |
| 6.32E-03 | 0 0 | Cs5g05440.1/Cs5g054 | 6.05 | 0 | 0    | 0 | 2      | MASCOT | T PLEX8 |
| 4.98E-02 | 0 0 | Cs5g05440.1/Cs5g054 | 6.05 | 0 | 0    | 0 | 2      | MASCOT | T PLEX8 |
| 1.39E-01 | 0 0 | Cs5g05440.1/Cs5g054 | 6.05 | 0 | 0    | 0 | 2      | MASCOT | T PLEX8 |
| 8.41E-02 | 0 0 | Cs5g05440.1/Cs5g054 | 6.05 | 0 | 0    | 0 | 2      | MASCOT | T PLEX8 |
| 1.16E-01 | 0 0 | Cs5g05440.1/Cs5g054 | 6.05 | 0 | 0    | 0 | 2      | MASCOT | T       |
| 4.45E-02 | 0 0 | Cs5g05440.1/Cs5g054 | 6.05 | 0 | 0    | 0 | 2      | MASCOT | T PLEX8 |
| 2.84E-01 | 0 0 | Cs5g05440.1/Cs5g054 | 6.05 | 0 | 0    | 0 | 2      | MASCOT | T PLEX8 |
| 4.06E-03 | 0 0 | Cs5g05440.1         | 6.1  | 0 | 0    | 0 | 2      | MASCOT | T PLEX8 |
| 8.17E-03 | 0 0 | Cs5g05440.1         | 6.1  | 0 | 0    | 0 | 2      | MASCOT | T PLEX8 |
| 2.93E-04 | 0 0 | Cs5g05440.1         | 6.1  | 0 | 0    | 0 | 2      | MASCOT | T PLEX8 |
| 9.37E-03 | 0 0 | Cs5g05440.1         | 6.1  | 0 | 0    | 0 | 2      | MASCOT | T PLEX8 |
| 1.98E-01 | 0 0 | Cs5g05440.1         | 6.1  | 0 | 0    | 0 | 2      | MASCOT | T PLEX8 |
| 9.88E-02 | 0 0 | Cs5g05440.1/Cs5g054 | 9.75 | 0 | 0    | 0 | 2      | MASCOT | T PLEX8 |
| 1.93E-05 | 0 0 | Cs5g05440.1/Cs5g054 | 9.75 | 0 | 0    | 0 | 2      | MASCOT | T PLEX8 |
| 1.35E-02 | 0 0 | Cs5g05440.1/Cs5g054 | 5.99 | 0 | 0    | 0 | 2      | MASCOT | T PLEX8 |
| 2.14E-02 | 0 0 | Cs5g05440.1/Cs5g054 | 4.14 | 0 | 0    | 0 | 2      | MASCOT | T PLEX8 |
| 1.31E-01 | 0 0 | Cs5g05440.1/Cs5g054 | 4.14 | 0 | 0    | 0 | 2      | MASCOT | T PLEX8 |
| 9.37E-03 | 0 0 | Cs5g05440.1/Cs5g054 | 4.14 | 0 | 0    | 0 | 2      | MASCOT | T PLEX8 |
| 1.79E-02 | 0 0 | Cs5g05440.1/Cs5g054 | 4.14 | 0 | 0    | 0 | 2      | MASCOT | T PLEX8 |
| 5.11E-03 | 0 0 | Cs5g05440.1/Cs5g054 | 4.14 | 0 | 0    | 0 | 2      | MASCOT | T PLEX8 |
| 4.11E-03 | 0 0 | Cs5g05440.1/Cs5g054 | 4.14 | 0 | 0    | 0 | 2      | MASCOT | T PLEX8 |
| 1.33E-02 | 0 0 | Cs5g05440.1/Cs5g054 | 4.14 | 0 | 0    | 0 | 2      | MASCOT | T PLEX8 |
| 4.77E-02 | 0 0 | Cs5g05440.1/Cs5g054 | 4.14 | 0 | 0    | 0 | 2      | MASCOT | T PLEX8 |
| 1.28E-02 | 0 0 | Cs5g05440.1/Cs5g054 | 4.14 | 0 | 0    | 0 | 2      | MASCOT | T PLEX8 |
| 2.67E-02 | 0 0 | Cs5g05440.1/Cs5g054 | 4.14 | 0 | 0    | 0 | 2      | MASCOT | T       |
| 3.61E-02 | 0 0 | Cs5g05440.1/Cs5g054 | 4.14 | 0 | 0    | 0 | 2      | MASCOT | T PLEX8 |
| 1.72E-01 | 0 0 | Cs5g05440.1/Cs5g054 | 4.14 | 0 | 0    | 0 | 2      | MASCOT | T PLEX8 |
| 6.47E-03 | 0 0 | Cs5g05440.1/Cs5g054 | 4.14 | 0 | 0    | 0 | 2      | MASCOT | T PLEX8 |
| 4.52E-03 | 0 0 | Cs5g05440.1/Cs5g054 | 4.14 | 0 | 0    | 0 | 2      | MASCOT | T PLEX8 |
| 1.89E-03 | 0 0 | Cs5g05440.1/Cs5g054 | 4.14 | 0 | 0    | 0 | 2      | MASCOT | T PLEX8 |
| 4.31E-03 | 0 0 | Cs5g05440.1/Cs5g054 | 4.14 | 0 | 0    | 0 | 2      | MASCOT | T PLEX8 |
| 4.35E-03 | 0 0 | Cs5g05440.1/Cs5g054 | 4.14 | 0 | 0    | 0 | 2      | MASCOT | T PLEX8 |
| 3.89E-02 | 0 0 | Cs5g05440.1/Cs5g054 | 4.14 | 0 | 0    | 0 | 2      | MASCOT | T       |
| 8.69E-02 | 0 0 | Cs5g05440.1/Cs5g054 | 4.14 | 0 | 0    | 0 | 2      | MASCOT | T       |
| 4.47E-05 | 0 0 | Cs5g05440.1/Cs5g054 | 12   | 1 | 0    | 0 | 2      | MASCOT | T PLEX8 |
| 1.78E-02 | 0 0 | Cs5g05440.1/Cs5g054 | 12   | 1 | 0    | 0 | 2      | MASCOT | T       |

|          |     |                     |      |   |   |   |        |   |       |
|----------|-----|---------------------|------|---|---|---|--------|---|-------|
| 3.79E-04 | 0 0 | Cs5g05440.1/Cs5g054 | 5.81 | 0 | 0 | 2 | MASCOT | T |       |
| 5.54E-04 | 0 0 | Cs5g05440.1/Cs5g054 | 5.81 | 0 | 0 | 2 | MASCOT | T |       |
| 1.71E-01 | 0 0 | Cs5g07120.1         | 5.88 | 0 | 0 | 2 | MASCOT | T | PLEX8 |
| 8.72E-02 | 0 0 | Cs5g07120.1         | 5.88 | 0 | 0 | 2 | MASCOT | T | PLEX8 |
| 3.83E-02 | 0 0 | Cs5g07120.1         | 8.27 | 0 | 0 | 2 | MASCOT | T | PLEX8 |
| 1.93E-03 | 0 0 | Cs5g07120.1         | 8.27 | 0 | 0 | 2 | MASCOT | T | PLEX8 |
| 8.59E-03 | 0 0 | Cs5g07120.1         | 8.27 | 0 | 0 | 2 | MASCOT | T | PLEX8 |
| 1.87E-03 | 0 0 | Cs5g07120.1         | 8.27 | 0 | 0 | 2 | MASCOT | T | PLEX8 |
| 1.49E-03 | 0 0 | Cs5g07120.1         | 8.27 | 0 | 0 | 2 | MASCOT | T | PLEX8 |
| 1.03E-02 | 0 0 | Cs5g07120.1         | 8.27 | 0 | 0 | 2 | MASCOT | T | PLEX8 |
| 2.25E-01 | 0 0 | Cs5g07120.1         | 8.27 | 0 | 0 | 2 | MASCOT | T | PLEX8 |
| 1.79E-03 | 0 0 | Cs5g07120.1         | 8.27 | 0 | 0 | 2 | MASCOT | T | PLEX8 |
| 9.07E-03 | 0 0 | Cs5g07120.1         | 8.27 | 0 | 0 | 2 | MASCOT | T | PLEX8 |
| 2.98E-01 | 0 0 | Cs5g07120.1         | 8.27 | 0 | 0 | 2 | MASCOT | T | PLEX8 |
| 6.05E-02 | 0 0 | Cs5g07120.1         | 8.27 | 0 | 0 | 2 | MASCOT | T | PLEX8 |
| 8.28E-03 | 0 0 | Cs5g07120.1         | 8.27 | 0 | 0 | 2 | MASCOT | T |       |
| 6.19E-02 | 0 0 | Cs5g07120.1         | 8.27 | 0 | 0 | 2 | MASCOT | T |       |
| 4.28E-01 | 0 0 | Cs5g07120.1         | 5.84 | 0 | 0 | 2 | MASCOT | T | PLEX8 |
| 2.69E-01 | 0 0 | Cs5g07120.1         | 5.84 | 0 | 0 | 2 | MASCOT | T | PLEX8 |
| 2.55E-01 | 0 0 | Cs5g07120.1         | 5.84 | 0 | 0 | 2 | MASCOT | T |       |
| 4.80E-03 | 0 0 | Cs5g07120.1         | 4    | 0 | 0 | 2 | MASCOT | T | PLEX8 |
| 2.29E-02 | 0 0 | Cs5g07120.1         | 4    | 0 | 0 | 2 | MASCOT | T | PLEX8 |
| 4.07E-01 | 0 0 | Cs5g07120.1         | 4    | 0 | 0 | 2 | MASCOT | T | PLEX8 |
| 1.77E-01 | 0 0 | Cs5g07120.1         | 4    | 0 | 0 | 2 | MASCOT | T | PLEX8 |
| 2.88E-02 | 0 0 | Cs5g07120.1         | 4    | 0 | 0 | 2 | MASCOT | T | PLEX8 |
| 2.08E-01 | 0 0 | Cs5g07120.1         | 4    | 0 | 0 | 2 | MASCOT | T | PLEX8 |
| 2.56E-01 | 0 0 | Cs5g07120.1         | 4    | 0 | 0 | 2 | MASCOT | T |       |
| 4.95E-02 | 0 0 | Cs5g07120.1         | 9.75 | 0 | 0 | 2 | MASCOT | T | PLEX8 |
| 4.85E-02 | 0 0 | Cs5g07120.1         | 9.75 | 0 | 0 | 2 | MASCOT | T |       |
| 1.11E-03 | 0 0 | Cs5g07120.1         | 9.75 | 0 | 0 | 2 | MASCOT | T | PLEX8 |
| 4.49E-02 | 0 0 | Cs5g07120.1         | 9.75 | 0 | 0 | 2 | MASCOT | T | PLEX8 |
| 1.06E-02 | 0 0 | Cs5g07120.1         | 9.75 | 0 | 0 | 2 | MASCOT | T | PLEX8 |
| 5.44E-02 | 0 0 | Cs5g07120.1         | 8.76 | 0 | 0 | 2 | MASCOT | T | PLEX8 |
| 1.52E-01 | 0 0 | Cs5g07120.1         | 8.76 | 0 | 0 | 2 | MASCOT | T | PLEX8 |
| 2.53E-02 | 0 0 | Cs5g07120.1         | 8.76 | 0 | 0 | 2 | MASCOT | T | PLEX8 |
| 1.24E-01 | 0 0 | Cs5g07120.1         | 4.53 | 0 | 0 | 2 | MASCOT | T |       |
| 1.19E-01 | 0 0 | Cs5g07120.1         | 8.41 | 0 | 0 | 2 | MASCOT | T | PLEX8 |
| 1.37E-03 | 0 0 | Cs5g07120.1         | 8.41 | 0 | 0 | 2 | MASCOT | T | PLEX8 |
| 1.98E-01 | 0 0 | Cs5g07120.1         | 8.41 | 0 | 0 | 2 | MASCOT | T | PLEX8 |
| 3.83E-02 | 0 0 | Cs5g07120.1         | 8.41 | 0 | 0 | 2 | MASCOT | T | PLEX8 |
| 3.53E-03 | 0 0 | Cs5g07120.1         | 8.41 | 0 | 0 | 2 | MASCOT | T | PLEX8 |
| 2.07E-01 | 0 0 | Cs5g07120.1         | 6    | 0 | 0 | 2 | MASCOT | T | PLEX8 |
| 6.33E-02 | 0 0 | Cs5g07120.1         | 6.05 | 0 | 0 | 2 | MASCOT | T | PLEX8 |
| 1.53E-01 | 0 0 | Cs5g07120.1         | 6.05 | 0 | 0 | 2 | MASCOT | T |       |
| 9.93E-02 | 0 0 | Cs5g07120.1         | 6.05 | 0 | 0 | 2 | MASCOT | T | PLEX8 |
| 7.65E-02 | 0 0 | Cs5g07120.1         | 6.05 | 0 | 0 | 2 | MASCOT | T |       |
| 3.13E-02 | 0 0 | Cs5g07120.1         | 4.14 | 0 | 0 | 2 | MASCOT | T | PLEX8 |
| 1.11E-02 | 0 0 | Cs5g07120.1         | 4.14 | 0 | 0 | 2 | MASCOT | T | PLEX8 |
| 6.24E-02 | 0 0 | Cs5g07120.1         | 4.14 | 0 | 0 | 2 | MASCOT | T | PLEX8 |
| 2.50E-01 | 0 0 | Cs5g07120.1         | 4.14 | 0 | 0 | 2 | MASCOT | T | PLEX8 |
| 2.61E-02 | 0 0 | Cs5g07120.1         | 4.14 | 0 | 0 | 2 | MASCOT | T | PLEX8 |

|              |                     |      |   |      |   |        |        |       |       |
|--------------|---------------------|------|---|------|---|--------|--------|-------|-------|
| 1.04E-02 0 0 | Cs5g07120.1         | 4.14 | 0 | 0    | 2 | MASCOT | T      | PLEX8 |       |
| 4.58E-02 0 0 | Cs5g07120.1         | 4.14 | 0 | 0    | 2 | MASCOT | T      | PLEX8 |       |
| 1.49E-01 0 0 | Cs5g07120.1         | 4.14 | 0 | 0    | 2 | MASCOT | T      | PLEX8 |       |
| 2.44E-01 0 0 | Cs5g07120.1         | 4.14 | 0 | 0    | 2 | MASCOT | T      | PLEX8 |       |
| 2.10E-02 0 0 | Cs5g07120.1         | 4.14 | 0 | 0    | 2 | MASCOT | T      | PLEX8 |       |
| 1.09E-03 0 0 | Cs5g07120.1         | 4.14 | 0 | 0    | 2 | MASCOT | T      |       |       |
| 3.73E-03 0 0 | Cs5g07120.1         | 4.14 | 0 | 0    | 2 | MASCOT | T      |       |       |
| 1.68E-02 0 0 | Cs5g07120.1         | 4.14 | 0 | 15.9 | 0 | 2      | MASCOT | T     | PLEX8 |
| 3.15E-01 0 0 | Cs5g07120.1         | 4.14 | 0 | 15.9 | 0 | 2      | MASCOT | T     | PLEX8 |
| 4.75E-03 0 0 | Cs5g07120.1         | 4.14 | 0 | 15.9 | 0 | 2      | MASCOT | T     | PLEX8 |
| 9.89E-05 0 0 | Cs5g07120.1         | 4.14 | 0 | 0    | 2 | MASCOT | T      | PLEX8 |       |
| 3.28E-03 0 0 | Cs5g07120.1         | 4.14 | 0 | 0    | 2 | MASCOT | T      | PLEX8 |       |
| 4.96E-06 0 0 | Cs5g07120.1         | 4.14 | 0 | 0    | 2 | MASCOT | T      | PLEX8 |       |
| 2.63E-01 0 0 | Cs5g07120.1         | 4.14 | 0 | 0    | 2 | MASCOT | T      | PLEX8 |       |
| 1.31E-02 0 0 | Cs5g07120.1         | 4.14 | 0 | 0    | 2 | MASCOT | T      | PLEX8 |       |
| 6.36E-06 0 0 | Cs5g07120.1         | 4.14 | 0 | 0    | 2 | MASCOT | T      | PLEX8 |       |
| 1.59E-01 0 0 | Cs5g07120.1         | 4.14 | 0 | 0    | 2 | MASCOT | T      | PLEX8 |       |
| 1.63E-02 0 0 | Cs5g07120.1         | 4.14 | 0 | 0    | 2 | MASCOT | T      |       |       |
| 2.26E-01 0 0 | Cs5g07120.1         | 6.1  | 0 | 0    | 2 | MASCOT | T      | PLEX8 |       |
| 1.25E-01 0 0 | Cs5g07120.1         | 4.53 | 0 | 0    | 2 | MASCOT | T      | PLEX8 |       |
| 2.01E-01 0 0 | Cs5g07120.1         | 4.53 | 0 | 0    | 2 | MASCOT | T      | PLEX8 |       |
| 9.77E-02 0 0 | Cs5g07120.1         | 4.53 | 0 | 0    | 2 | MASCOT | T      | PLEX8 |       |
| 3.03E-02 0 0 | Cs5g07120.1         | 4.53 | 0 | 0    | 2 | MASCOT | T      | PLEX8 |       |
| 8.68E-02 0 0 | Cs5g07120.1         | 4.53 | 0 | 0    | 2 | MASCOT | T      | PLEX8 |       |
| 1.54E-01 0 0 | Cs5g07120.1         | 4.53 | 0 | 0    | 2 | MASCOT | T      |       |       |
| 3.06E-02 0 0 | Cs5g07120.1         | 5.32 | 0 | 0    | 2 | MASCOT | T      | PLEX8 |       |
| 2.89E-01 0 0 | Cs5g07120.1         | 5.32 | 0 | 0    | 2 | MASCOT | T      | PLEX8 |       |
| 2.55E-03 0 0 | Cs5g07120.1         | 5.32 | 0 | 0    | 2 | MASCOT | T      | PLEX8 |       |
| 6.19E-02 0 0 | Cs5g07120.1         | 5.32 | 0 | 0    | 2 | MASCOT | T      | PLEX8 |       |
| 6.47E-02 0 0 | Cs5g07120.1         | 5.32 | 0 | 0    | 2 | MASCOT | T      | PLEX8 |       |
| 1.10E-02 0 0 | Cs5g07120.1         | 5.32 | 0 | 0    | 2 | MASCOT | T      | PLEX8 |       |
| 2.35E-03 0 0 | Cs5g07120.1         | 5.32 | 0 | 0    | 2 | MASCOT | T      | PLEX8 |       |
| 3.88E-03 0 0 | Cs5g07120.1         | 5.32 | 0 | 0    | 2 | MASCOT | T      |       |       |
| 3.44E-02 0 0 | Cs5g07120.1         | 5.32 | 0 | 0    | 2 | MASCOT | T      |       |       |
| 4.51E-03 0 0 | Cs5g07120.1         | 5.32 | 0 | 0    | 2 | MASCOT | T      | PLEX8 |       |
| 1.33E-01 0 0 | Cs5g07120.1         | 5.32 | 0 | 0    | 2 | MASCOT | T      | PLEX8 |       |
| 4.28E-04 0 0 | Cs5g07120.1         | 5.32 | 0 | 0    | 2 | MASCOT | T      | PLEX8 |       |
| 4.35E-03 0 0 | Cs5g07120.1         | 5.32 | 0 | 0    | 2 | MASCOT | T      | PLEX8 |       |
| 2.57E-04 0 0 | Cs5g07120.1         | 5.32 | 0 | 0    | 2 | MASCOT | T      | PLEX8 |       |
| 1.12E-04 0 0 | Cs5g07120.1         | 3.84 | 0 | 0    | 2 | MASCOT | T      | PLEX8 |       |
| 6.58E-02 0 0 | Cs3g19810.1/Cs3g198 | 5.84 | 0 | 0    | 2 | MASCOT | T      | PLEX8 |       |
| 8.17E-04 0 0 | Cs3g19810.1/Cs3g198 | 5.84 | 0 | 0    | 2 | MASCOT | T      | PLEX8 |       |
| 1.60E-01 0 0 | Cs3g19810.1/Cs3g198 | 5.84 | 0 | 0    | 2 | MASCOT | T      | PLEX8 |       |
| 6.00E-03 0 0 | Cs3g19810.1/Cs3g198 | 5.32 | 0 | 0    | 2 | MASCOT | T      | PLEX8 |       |
| 1.78E-01 0 0 | Cs3g19810.1/Cs3g198 | 5.32 | 0 | 0    | 2 | MASCOT | T      | PLEX8 |       |
| 1.03E-02 0 0 | Cs3g19810.1/Cs3g198 | 5.32 | 0 | 0    | 2 | MASCOT | T      | PLEX8 |       |
| 6.44E-02 0 0 | Cs3g19810.1/Cs3g198 | 5.32 | 0 | 0    | 2 | MASCOT | T      |       |       |
| 3.43E-03 0 0 | Cs3g19810.1/Cs3g198 | 5.32 | 0 | 0    | 2 | MASCOT | T      | PLEX8 |       |
| 1.70E-03 0 0 | Cs3g19810.1/Cs3g198 | 5.32 | 0 | 0    | 2 | MASCOT | T      | PLEX8 |       |
| 2.89E-02 0 0 | Cs3g19810.1/Cs3g198 | 5.32 | 0 | 0    | 2 | MASCOT | T      |       |       |
| 1.95E-03 0 0 | Cs3g19810.1/Cs3g198 | 5.32 | 0 | 0    | 2 | MASCOT | T      | PLEX8 |       |

|          |     |                      |      |   |   |   |        |   |       |
|----------|-----|----------------------|------|---|---|---|--------|---|-------|
| 4.26E-03 | 0 0 | Cs3g19810.1/Cs3g198  | 5.32 | 0 | 0 | 2 | MASCOT | T | PLEX8 |
| 5.96E-02 | 0 0 | Cs3g19810.1/Cs3g198  | 5.32 | 0 | 0 | 2 | MASCOT | T | PLEX8 |
| 1.34E-03 | 0 0 | Cs3g19810.1/Cs3g198  | 5.32 | 0 | 0 | 2 | MASCOT | T |       |
| 6.58E-03 | 0 0 | Cs3g19810.1/Cs3g198  | 5.32 | 0 | 0 | 2 | MASCOT | T |       |
| 3.30E-01 | 0 0 | Cs3g19810.1/Cs3g198  | 6.85 | 0 | 0 | 2 | MASCOT | T | PLEX8 |
| 5.90E-02 | 0 0 | Cs3g19810.1/Cs3g198  | 6.85 | 0 | 0 | 2 | MASCOT | T | PLEX8 |
| 1.52E-02 | 0 0 | Cs3g19810.1/Cs3g198  | 6.85 | 0 | 0 | 2 | MASCOT | T | PLEX8 |
| 2.77E-01 | 0 0 | Cs3g19810.1/Cs3g198  | 6.85 | 0 | 0 | 2 | MASCOT | T | PLEX8 |
| 7.20E-02 | 0 0 | Cs3g19810.1/Cs3g198  | 6.85 | 0 | 0 | 2 | MASCOT | T | PLEX8 |
| 1.91E-01 | 0 0 | Cs3g19810.1/Cs3g198  | 6.85 | 0 | 0 | 2 | MASCOT | T | PLEX8 |
| 1.76E-02 | 0 0 | Cs3g19810.1/Cs3g198  | 6.85 | 0 | 0 | 2 | MASCOT | T | PLEX8 |
| 9.07E-02 | 0 0 | Cs3g19810.1/Cs3g198  | 6.85 | 0 | 0 | 2 | MASCOT | T | PLEX8 |
| 1.22E-02 | 0 0 | Cs3g19810.1/Cs3g198  | 6.85 | 0 | 0 | 2 | MASCOT | T | PLEX8 |
| 2.24E-01 | 0 0 | Cs3g19810.1/Cs3g198  | 6.85 | 0 | 0 | 2 | MASCOT | T | PLEX8 |
| 1.19E-02 | 0 0 | Cs3g19810.1/Cs3g198  | 6.85 | 0 | 0 | 2 | MASCOT | T | PLEX8 |
| 2.09E-03 | 0 0 | Cs3g19810.1/Cs3g198  | 6.85 | 0 | 0 | 2 | MASCOT | T |       |
| 4.05E-02 | 0 0 | Cs3g19810.1/Cs3g198  | 6.85 | 0 | 0 | 2 | MASCOT | T |       |
| 1.29E-01 | 0 0 | Cs1g24640.1 ! Cs3g19 | 5.84 | 0 | 0 | 2 | MASCOT | T | PLEX8 |
| 1.76E-01 | 0 0 | Cs1g24640.1 ! Cs3g19 | 5.84 | 0 | 0 | 2 | MASCOT | T | PLEX8 |
| 1.67E-01 | 0 0 | Cs1g24640.1 ! Cs3g19 | 5.84 | 0 | 0 | 2 | MASCOT | T |       |
| 1.69E-01 | 0 0 | Cs3g19810.1/Cs3g198  | 8.76 | 0 | 0 | 2 | MASCOT | T | PLEX8 |
| 3.53E-04 | 0 0 | Cs3g19810.1/Cs3g198  | 8.76 | 0 | 0 | 2 | MASCOT | T | PLEX8 |
| 4.85E-02 | 0 0 | Cs3g19810.1/Cs3g198  | 8.76 | 0 | 0 | 2 | MASCOT | T | PLEX8 |
| 3.99E-05 | 0 0 | Cs3g19810.1/Cs3g198  | 8.76 | 0 | 0 | 2 | MASCOT | T | PLEX8 |
| 5.92E-03 | 0 0 | Cs3g19810.1/Cs3g198  | 8.76 | 0 | 0 | 2 | MASCOT | T |       |
| 6.10E-02 | 0 0 | Cs3g19810.1/Cs3g198  | 8.76 | 0 | 0 | 2 | MASCOT | T | PLEX8 |
| 2.46E-02 | 0 0 | Cs3g19810.1/Cs3g198  | 8.76 | 0 | 0 | 2 | MASCOT | T | PLEX8 |
| 5.74E-05 | 0 0 | Cs3g19810.1/Cs3g198  | 8.76 | 0 | 0 | 2 | MASCOT | T | PLEX8 |
| 5.20E-02 | 0 0 | Cs3g19810.1/Cs3g198  | 8.75 | 0 | 0 | 2 | MASCOT | T | PLEX8 |
| 1.15E-02 | 0 0 | Cs3g19810.1/Cs3g198  | 8.75 | 0 | 0 | 2 | MASCOT | T | PLEX8 |
| 6.45E-02 | 0 0 | Cs3g19810.2          | 4.53 | 0 | 0 | 2 | MASCOT | T | PLEX8 |
| 3.46E-02 | 0 0 | Cs3g19810.1/Cs3g198  | 7.99 | 0 | 0 | 2 | MASCOT | T | PLEX8 |
| 1.10E-03 | 0 0 | Cs3g19810.1/Cs3g198  | 7.99 | 0 | 0 | 2 | MASCOT | T | PLEX8 |
| 2.53E-02 | 0 0 | Cs3g19810.1/Cs3g198  | 7.99 | 0 | 0 | 2 | MASCOT | T | PLEX8 |
| 2.19E-03 | 0 0 | Cs3g19810.1/Cs3g198  | 7.99 | 0 | 0 | 2 | MASCOT | T |       |
| 1.61E-03 | 0 0 | Cs3g19810.1/Cs3g198  | 4.14 | 0 | 0 | 2 | MASCOT | T | PLEX8 |
| 2.45E-03 | 0 0 | Cs3g19810.1/Cs3g198  | 4.14 | 0 | 0 | 2 | MASCOT | T | PLEX8 |
| 1.78E-04 | 0 0 | Cs3g19810.1/Cs3g198  | 4.14 | 0 | 0 | 2 | MASCOT | T | PLEX8 |
| 5.61E-03 | 0 0 | Cs3g19810.1/Cs3g198  | 4.14 | 0 | 0 | 2 | MASCOT | T |       |
| 8.47E-04 | 0 0 | Cs3g19810.1/Cs3g198  | 4.14 | 0 | 0 | 2 | MASCOT | T | PLEX8 |
| 1.94E-03 | 0 0 | Cs3g19810.1/Cs3g198  | 4.14 | 0 | 0 | 2 | MASCOT | T | PLEX8 |
| 8.65E-04 | 0 0 | Cs3g19810.1/Cs3g198  | 4.14 | 0 | 0 | 2 | MASCOT | T | PLEX8 |
| 3.76E-02 | 0 0 | Cs3g19810.1/Cs3g198  | 4.14 | 0 | 0 | 2 | MASCOT | T |       |
| 3.75E-03 | 0 0 | Cs3g19810.2          | 4.14 | 0 | 0 | 2 | MASCOT | T | PLEX8 |
| 1.51E-01 | 0 0 | Cs3g19810.1/Cs3g198  | 9.75 | 0 | 0 | 2 | MASCOT | T | PLEX8 |
| 2.06E-01 | 0 0 | Cs3g19810.1/Cs3g198  | 5.21 | 0 | 0 | 2 | MASCOT | T | PLEX8 |
| 1.74E-01 | 0 0 | Cs3g19810.1/Cs3g198  | 5.21 | 0 | 0 | 2 | MASCOT | T | PLEX8 |
| 1.66E-02 | 0 0 | Cs3g19810.1/Cs3g198  | 5.21 | 0 | 0 | 2 | MASCOT | T | PLEX8 |
| 1.13E-01 | 0 0 | Cs3g19810.1/Cs3g198  | 6.75 | 0 | 0 | 2 | MASCOT | T | PLEX8 |
| 1.70E-03 | 0 0 | Cs3g19810.1/Cs3g198  | 6.75 | 0 | 0 | 2 | MASCOT | T | PLEX8 |
| 1.10E-01 | 0 0 | Cs3g19810.1/Cs3g198  | 6.75 | 0 | 0 | 2 | MASCOT | T | PLEX8 |

|          |     |                     |      |   |      |   |        |        |       |       |
|----------|-----|---------------------|------|---|------|---|--------|--------|-------|-------|
| 1.38E-01 | 0 0 | Cs3g19810.1/Cs3g198 | 6.75 | 0 | 0    | 2 | MASCOT | T      |       |       |
| 1.67E-01 | 0 0 | Cs3g19810.1/Cs3g198 | 6.75 | 0 | 0    | 2 | MASCOT | T      | PLEX8 |       |
| 1.10E-01 | 0 0 | Cs3g19810.1/Cs3g198 | 6.75 | 0 | 0    | 2 | MASCOT | T      | PLEX8 |       |
| 2.26E-01 | 0 0 | Cs3g19810.1/Cs3g198 | 6.75 | 0 | 0    | 2 | MASCOT | T      | PLEX8 |       |
| 4.63E-03 | 0 0 | Cs3g19810.1/Cs3g198 | 6.75 | 0 | 0    | 2 | MASCOT | T      | PLEX8 |       |
| 2.99E-01 | 0 0 | Cs3g19810.1/Cs3g198 | 6.75 | 0 | 0    | 2 | MASCOT | T      | PLEX8 |       |
| 1.13E-02 | 0 0 | Cs3g19810.1/Cs3g198 | 6.75 | 0 | 0    | 2 | MASCOT | T      | PLEX8 |       |
| 1.04E-01 | 0 0 | Cs3g19810.1/Cs3g198 | 6.75 | 0 | 0    | 2 | MASCOT | T      |       |       |
| 1.45E-03 | 0 0 | Cs3g19810.1/Cs3g198 | 6.75 | 0 | 0    | 2 | MASCOT | T      |       |       |
| 2.30E-03 | 0 0 | Cs3g19810.1/Cs3g198 | 6.75 | 0 | 0    | 2 | MASCOT | T      |       |       |
| 1.47E-06 | 0 0 | Cs3g19810.1/Cs3g198 | 6.75 | 0 | 0    | 2 | MASCOT | T      |       |       |
| 1.57E-03 | 0 0 | Cs3g19810.1/Cs3g198 | 6.51 | 1 | 15.9 | 0 | 2      | MASCOT | T     |       |
| 2.19E-04 | 0 0 | Cs3g19810.1/Cs3g198 | 6.51 | 1 | 15.9 | 0 | 2      | MASCOT | T     | PLEX8 |
| 9.56E-03 | 0 0 | Cs3g19810.1/Cs3g198 | 6.51 | 1 | 15.9 | 0 | 2      | MASCOT | T     |       |
| 4.06E-03 | 0 0 | Cs3g19810.1/Cs3g198 | 6.51 | 1 | 0    | 2 | MASCOT | T      |       |       |
| 3.50E-04 | 0 0 | Cs3g19810.1/Cs3g198 | 6.51 | 1 | 0    | 2 | MASCOT | T      | PLEX8 |       |
| 8.73E-05 | 0 0 | Cs3g19810.1/Cs3g198 | 3.96 | 1 | 0    | 2 | MASCOT | T      | PLEX8 |       |
| 4.00E-02 | 0 0 | Cs3g19810.1/Cs3g198 | 3.96 | 1 | 0    | 2 | MASCOT | T      | PLEX8 |       |
| 4.75E-02 | 0 0 | Cs3g19810.1/Cs3g198 | 12   | 1 | 0    | 2 | MASCOT | T      | PLEX8 |       |
| 1.31E-02 | 0 0 | Cs3g19810.1/Cs3g198 | 12   | 1 | 0    | 2 | MASCOT | T      | PLEX8 |       |
| 6.24E-03 | 0 0 | Cs3g19810.1/Cs3g198 | 12   | 1 | 0    | 2 | MASCOT | T      |       |       |
| 6.92E-05 | 0 0 | Cs3g19810.1/Cs3g198 | 4.57 | 1 | 0    | 2 | MASCOT | T      |       |       |
| 6.57E-04 | 0 0 | Cs3g19810.1/Cs3g198 | 4.57 | 1 | 0    | 2 | MASCOT | T      | PLEX8 |       |
| 7.83E-04 | 0 0 | Cs3g19810.1/Cs3g198 | 4.57 | 1 | 0    | 2 | MASCOT | T      | PLEX8 |       |
| 1.68E-03 | 0 0 | Cs3g19810.1/Cs3g198 | 4.57 | 1 | 0    | 2 | MASCOT | T      | PLEX8 |       |
| 1.56E-02 | 0 0 | Cs3g19810.1/Cs3g198 | 4.57 | 1 | 0    | 2 | MASCOT | T      |       |       |
| 2.15E-02 | 0 0 | Cs6g10600.1/Cs6g106 | 4.37 | 0 | 0    | 2 | MASCOT | T      | PLEX8 |       |
| 2.48E-01 | 0 0 | Cs6g10600.1/Cs6g106 | 4.37 | 0 | 0    | 2 | MASCOT | T      | PLEX8 |       |
| 1.77E-02 | 0 0 | Cs6g10600.1/Cs6g106 | 4.11 | 1 | 0    | 2 | MASCOT | T      | PLEX8 |       |
| 1.20E-01 | 0 0 | Cs6g10600.1/Cs6g106 | 5.84 | 0 | 0    | 2 | MASCOT | T      | PLEX8 |       |
| 2.07E-02 | 0 0 | Cs6g10600.1/Cs6g106 | 5.84 | 0 | 0    | 2 | MASCOT | T      | PLEX8 |       |
| 8.65E-02 | 0 0 | Cs6g10600.1/Cs6g106 | 5.84 | 0 | 0    | 2 | MASCOT | T      |       |       |
| 5.91E-04 | 0 0 | Cs6g10600.1/Cs6g106 | 4.37 | 0 | 0    | 2 | MASCOT | T      | PLEX8 |       |
| 9.55E-02 | 0 0 | Cs6g10600.1/Cs6g106 | 4.37 | 0 | 0    | 2 | MASCOT | T      | PLEX8 |       |
| 1.52E-02 | 0 0 | Cs6g10600.1/Cs6g106 | 4.37 | 0 | 0    | 2 | MASCOT | T      | PLEX8 |       |
| 3.63E-02 | 0 0 | Cs6g10600.1/Cs6g106 | 4.37 | 0 | 0    | 2 | MASCOT | T      | PLEX8 |       |
| 3.53E-01 | 0 0 | Cs6g10600.1/Cs6g106 | 4.37 | 0 | 0    | 2 | MASCOT | T      |       |       |
| 4.75E-03 | 0 0 | Cs6g10600.1/Cs6g106 | 4.37 | 0 | 0    | 2 | MASCOT | T      | PLEX8 |       |
| 2.73E-02 | 0 0 | Cs6g10600.1/Cs6g106 | 5.32 | 0 | 0    | 2 | MASCOT | T      | PLEX8 |       |
| 4.20E-02 | 0 0 | Cs6g10600.1/Cs6g106 | 5.32 | 0 | 0    | 2 | MASCOT | T      | PLEX8 |       |
| 2.97E-02 | 0 0 | Cs6g10600.1/Cs6g106 | 5.32 | 0 | 0    | 2 | MASCOT | T      | PLEX8 |       |
| 6.44E-03 | 0 0 | Cs6g10600.1/Cs6g106 | 5.32 | 0 | 0    | 2 | MASCOT | T      | PLEX8 |       |
| 1.12E-01 | 0 0 | Cs6g10600.1/Cs6g106 | 5.32 | 0 | 0    | 2 | MASCOT | T      | PLEX8 |       |
| 2.16E-03 | 0 0 | Cs6g10600.1/Cs6g106 | 5.32 | 0 | 0    | 2 | MASCOT | T      |       |       |
| 2.56E-03 | 0 0 | Cs6g10600.1/Cs6g106 | 5.84 | 0 | 0    | 2 | MASCOT | T      | PLEX8 |       |
| 1.46E-02 | 0 0 | Cs6g10600.1/Cs6g106 | 5.84 | 0 | 0    | 2 | MASCOT | T      | PLEX8 |       |
| 6.63E-02 | 0 0 | Cs6g10600.1/Cs6g106 | 5.84 | 0 | 0    | 2 | MASCOT | T      | PLEX8 |       |
| 1.62E-03 | 0 0 | Cs6g10600.1/Cs6g106 | 5.84 | 0 | 0    | 2 | MASCOT | T      | PLEX8 |       |
| 6.21E-02 | 0 0 | Cs6g10600.1/Cs6g106 | 5.84 | 0 | 0    | 2 | MASCOT | T      | PLEX8 |       |
| 1.13E-03 | 0 0 | Cs6g10600.1/Cs6g106 | 5.84 | 0 | 0    | 2 | MASCOT | T      | PLEX8 |       |
| 8.83E-02 | 0 0 | Cs6g10600.1/Cs6g106 | 4.54 | 0 | 15.9 | 0 | 2      | MASCOT | T     | PLEX8 |

|          |     |                     |      |   |      |   |   |        |   |       |
|----------|-----|---------------------|------|---|------|---|---|--------|---|-------|
| 1.19E-02 | 0 0 | Cs6g10600.1/Cs6g106 | 4.54 | 0 | 15.9 | 0 | 2 | MASCOT | T | PLEX8 |
| 1.41E-03 | 0 0 | Cs6g10600.1/Cs6g106 | 4.54 | 0 |      | 0 | 2 | MASCOT | T | PLEX8 |
| 1.49E-03 | 0 0 | Cs6g10600.1/Cs6g106 | 4.54 | 0 |      | 0 | 2 | MASCOT | T | PLEX8 |
| 2.45E-01 | 0 0 | Cs6g10600.1/Cs6g106 | 4.54 | 0 |      | 0 | 2 | MASCOT | T |       |
| 3.69E-02 | 0 0 | Cs6g10600.1/Cs6g106 | 4.54 | 0 |      | 0 | 2 | MASCOT | T |       |
| 4.13E-02 | 0 0 | Cs6g10600.1/Cs6g106 | 5.21 | 0 | 15.9 | 0 | 2 | MASCOT | T | PLEX8 |
| 5.43E-02 | 0 0 | Cs6g10600.1/Cs6g106 | 5.21 | 0 | 15.9 | 0 | 2 | MASCOT | T | PLEX8 |
| 9.70E-05 | 0 0 | Cs6g10600.1/Cs6g106 | 5.21 | 0 |      | 0 | 2 | MASCOT | T | PLEX8 |
| 5.86E-03 | 0 0 | Cs6g10600.1/Cs6g106 | 5.21 | 0 |      | 0 | 2 | MASCOT | T | PLEX8 |
| 7.56E-05 | 0 0 | Cs6g10600.1/Cs6g106 | 5.32 | 0 |      | 0 | 2 | MASCOT | T | PLEX8 |
| 5.10E-05 | 0 0 | Cs6g10600.1/Cs6g106 | 5.32 | 0 |      | 0 | 2 | MASCOT | T | PLEX8 |
| 4.52E-04 | 0 0 | Cs6g10600.1/Cs6g106 | 5.32 | 0 |      | 0 | 2 | MASCOT | T | PLEX8 |
| 1.14E-01 | 0 0 | Cs6g10600.1/Cs6g106 | 8.75 | 0 |      | 0 | 2 | MASCOT | T | PLEX8 |
| 1.06E-01 | 0 0 | Cs6g10600.1/Cs6g106 | 8.75 | 0 |      | 0 | 2 | MASCOT | T | PLEX8 |
| 1.32E-01 | 0 0 | Cs6g10600.1/Cs6g106 | 8.75 | 0 |      | 0 | 2 | MASCOT | T | PLEX8 |
| 4.01E-02 | 0 0 | Cs6g10600.1/Cs6g106 | 8.75 | 0 |      | 0 | 2 | MASCOT | T | PLEX8 |
| 9.06E-03 | 0 0 | Cs6g10600.1/Cs6g106 | 5.84 | 0 |      | 0 | 2 | MASCOT | T | PLEX8 |
| 1.13E-04 | 0 0 | Cs6g10600.1/Cs6g106 | 5.84 | 0 |      | 0 | 2 | MASCOT | T | PLEX8 |
| 5.04E-04 | 0 0 | Cs6g10600.1/Cs6g106 | 5.84 | 0 |      | 0 | 2 | MASCOT | T | PLEX8 |
| 6.80E-02 | 0 0 | Cs6g10600.1/Cs6g106 | 6.74 | 0 |      | 0 | 2 | MASCOT | T | PLEX8 |
| 9.38E-02 | 0 0 | Cs6g10600.1/Cs6g106 | 6.74 | 0 |      | 0 | 2 | MASCOT | T | PLEX8 |
| 1.01E-01 | 0 0 | Cs6g10600.1/Cs6g106 | 6.74 | 0 |      | 0 | 2 | MASCOT | T | PLEX8 |
| 1.20E-01 | 0 0 | Cs6g10600.1/Cs6g106 | 6.74 | 0 |      | 0 | 2 | MASCOT | T | PLEX8 |
| 4.76E-01 | 0 0 | Cs6g10600.1/Cs6g106 | 8.5  | 0 |      | 0 | 2 | MASCOT | T | PLEX8 |
| 1.04E-01 | 0 0 | Cs6g10600.1/Cs6g106 | 5.66 | 0 |      | 0 | 2 | MASCOT | T | PLEX8 |
| 9.79E-02 | 0 0 | Cs6g10600.1/Cs6g106 | 5.66 | 0 |      | 0 | 2 | MASCOT | T | PLEX8 |
| 3.56E-02 | 0 0 | Cs6g10600.1/Cs6g106 | 5.66 | 0 |      | 0 | 2 | MASCOT | T | PLEX8 |
| 2.27E-03 | 0 0 | Cs6g10600.1/Cs6g106 | 5.66 | 0 |      | 0 | 2 | MASCOT | T | PLEX8 |
| 4.44E-04 | 0 0 | Cs6g10600.1/Cs6g106 | 6.41 | 0 |      | 0 | 2 | MASCOT | T | PLEX8 |
| 1.11E-01 | 0 0 | Cs6g10600.1/Cs6g106 | 6.41 | 0 |      | 0 | 2 | MASCOT | T | PLEX8 |
| 1.76E-02 | 0 0 | Cs6g10600.1/Cs6g106 | 6.41 | 0 |      | 0 | 2 | MASCOT | T | PLEX8 |
| 5.57E-04 | 0 0 | Cs6g10600.1/Cs6g106 | 4.37 | 0 |      | 0 | 2 | MASCOT | T | PLEX8 |
| 8.63E-04 | 0 0 | Cs6g10600.1/Cs6g106 | 4.37 | 0 |      | 0 | 2 | MASCOT | T | PLEX8 |
| 2.72E-04 | 0 0 | Cs6g10600.1/Cs6g106 | 4.37 | 0 |      | 0 | 2 | MASCOT | T | PLEX8 |
| 6.11E-04 | 0 0 | Cs6g10600.1/Cs6g106 | 4.37 | 0 |      | 0 | 2 | MASCOT | T | PLEX8 |
| 9.14E-03 | 0 0 | Cs6g10600.1/Cs6g106 | 4.37 | 0 |      | 0 | 2 | MASCOT | T | PLEX8 |
| 8.87E-03 | 0 0 | Cs6g10600.1/Cs6g106 | 4.37 | 0 |      | 0 | 2 | MASCOT | T | PLEX8 |
| 1.87E-02 | 0 0 | Cs6g10600.1/Cs6g106 | 4.03 | 0 |      | 0 | 2 | MASCOT | T | PLEX8 |
| 3.04E-02 | 0 0 | Cs6g10600.1/Cs6g106 | 4.03 | 0 |      | 0 | 2 | MASCOT | T | PLEX8 |
| 3.07E-02 | 0 0 | Cs4g01740.1         | 4.14 | 0 |      | 0 | 2 | MASCOT | T | PLEX8 |
| 9.07E-03 | 0 0 | Cs4g01740.1         | 4.14 | 0 |      | 0 | 2 | MASCOT | T | PLEX8 |
| 8.91E-02 | 0 0 | Cs4g01740.1         | 8.75 | 0 |      | 0 | 2 | MASCOT | T | PLEX8 |
| 8.20E-02 | 0 0 | Cs4g01740.1         | 8.75 | 0 |      | 0 | 2 | MASCOT | T | PLEX8 |
| 7.88E-02 | 0 0 | Cs4g01740.1         | 8.75 | 0 |      | 0 | 2 | MASCOT | T | PLEX8 |
| 1.98E-01 | 0 0 | Cs4g01740.1         | 8.75 | 0 |      | 0 | 2 | MASCOT | T | PLEX8 |
| 1.43E-01 | 0 0 | Cs4g01740.1         | 8.75 | 0 |      | 0 | 2 | MASCOT | T | PLEX8 |
| 2.72E-03 | 0 0 | Cs4g01740.1         | 4.37 | 0 |      | 0 | 2 | MASCOT | T | PLEX8 |
| 2.27E-04 | 0 0 | Cs4g01740.1         | 4.37 | 0 |      | 0 | 2 | MASCOT | T | PLEX8 |
| 6.50E-02 | 0 0 | Cs4g01740.1         | 4.37 | 0 |      | 0 | 2 | MASCOT | T | PLEX8 |
| 1.83E-03 | 0 0 | Cs4g01740.1         | 5.84 | 0 |      | 0 | 2 | MASCOT | T | PLEX8 |
| 3.74E-05 | 0 0 | Cs4g01740.1         | 5.84 | 0 |      | 0 | 2 | MASCOT | T | PLEX8 |

|          |     |                     |      |   |      |   |        |        |       |       |
|----------|-----|---------------------|------|---|------|---|--------|--------|-------|-------|
| 3.42E-05 | 0 0 | Cs4g01740.1         | 5.84 | 0 | 0    | 2 | MASCOT | T      | PLEX8 |       |
| 3.58E-03 | 0 0 | Cs4g01740.1         | 5.84 | 0 | 0    | 2 | MASCOT | T      | PLEX8 |       |
| 5.03E-04 | 0 0 | Cs4g01740.1         | 5.84 | 0 | 0    | 2 | MASCOT | T      | PLEX8 |       |
| 9.88E-05 | 0 0 | Cs4g01740.1         | 5.84 | 0 | 0    | 2 | MASCOT | T      | PLEX8 |       |
| 5.04E-02 | 0 0 | Cs4g01740.1         | 12   | 1 | 0    | 2 | MASCOT | T      | PLEX8 |       |
| 8.26E-04 | 0 0 | Cs4g01740.1         | 5.55 | 0 | 15.9 | 0 | 2      | MASCOT | T     |       |
| 9.35E-02 | 0 0 | Cs4g01740.1         | 5.55 | 0 | 15.9 | 0 | 2      | MASCOT | T     |       |
| 1.07E-01 | 0 0 | Cs4g01740.1         | 5.55 | 0 | 15.9 | 0 | 2      | MASCOT | T     |       |
| 8.54E-03 | 0 0 | Cs4g01740.1         | 5.55 | 0 | 15.9 | 0 | 2      | MASCOT | T     |       |
| 3.56E-02 | 0 0 | Cs4g01740.1         | 5.55 | 0 | 0    | 2 | MASCOT | T      | PLEX8 |       |
| 1.13E-01 | 0 0 | Cs4g01740.1         | 5.55 | 0 | 0    | 2 | MASCOT | T      |       |       |
| 1.81E-02 | 0 0 | Cs4g01740.1         | 5.55 | 0 | 0    | 2 | MASCOT | T      |       |       |
| 6.63E-03 | 0 0 | Cs4g01740.1         | 4.14 | 0 | 0    | 2 | MASCOT | T      | PLEX8 |       |
| 1.20E-05 | 0 0 | Cs4g01740.1         | 4.14 | 0 | 0    | 2 | MASCOT | T      |       |       |
| 2.26E-04 | 0 0 | Cs4g01740.1         | 4.14 | 0 | 0    | 2 | MASCOT | T      |       |       |
| 7.11E-03 | 0 0 | Cs4g01740.1         | 5.66 | 0 | 0    | 2 | MASCOT | T      | PLEX8 |       |
| 1.25E-01 | 0 0 | Cs4g01740.1         | 4.14 | 0 | 0    | 2 | MASCOT | T      |       |       |
| 1.28E-01 | 0 0 | Cs4g01740.1         | 5.32 | 0 | 15.9 | 0 | 2      | MASCOT | T     | PLEX8 |
| 2.92E-07 | 0 0 | Cs4g01740.1         | 5.84 | 0 | 0    | 2 | MASCOT | T      | PLEX8 |       |
| 2.43E-04 | 0 0 | Cs4g01740.1         | 5.84 | 0 | 0    | 2 | MASCOT | T      | PLEX8 |       |
| 1.04E-05 | 0 0 | Cs4g01740.1         | 4.25 | 0 | 0    | 2 | MASCOT | T      |       |       |
| 3.61E-06 | 0 0 | Cs4g01740.1         | 4.25 | 0 | 0    | 2 | MASCOT | T      |       |       |
| 1.62E-01 | 0 0 | Cs4g01740.1         | 8.75 | 0 | 0    | 2 | MASCOT | T      | PLEX8 |       |
| 1.99E-03 | 0 0 | Cs4g01740.1         | 4.21 | 0 | 0    | 2 | MASCOT | T      |       |       |
| 1.91E-02 | 0 0 | Cs4g01740.1         | 4.25 | 0 | 0    | 2 | MASCOT | T      | PLEX8 |       |
| 1.75E-01 | 0 0 | Cs4g01740.1         | 5.72 | 0 | 0    | 2 | MASCOT | T      | PLEX8 |       |
| 1.20E-03 | 0 0 | Cs4g01740.1         | 5.72 | 0 | 0    | 2 | MASCOT | T      | PLEX8 |       |
| 5.38E-04 | 0 0 | Cs4g01740.1         | 5.72 | 0 | 0    | 2 | MASCOT | T      | PLEX8 |       |
| 1.05E-03 | 0 0 | Cs4g01740.1         | 5.72 | 0 | 0    | 2 | MASCOT | T      | PLEX8 |       |
| 2.38E-02 | 0 0 | Cs4g01740.1         | 9.72 | 0 | 0    | 2 | MASCOT | T      | PLEX8 |       |
| 1.99E-01 | 0 0 | Cs4g01740.1         | 9.72 | 0 | 0    | 2 | MASCOT | T      | PLEX8 |       |
| 2.63E-04 | 0 0 | Cs4g01740.1         | 9.72 | 0 | 0    | 2 | MASCOT | T      | PLEX8 |       |
| 2.75E-02 | 0 0 | Cs4g01740.1         | 9.72 | 0 | 0    | 2 | MASCOT | T      |       |       |
| 3.35E-02 | 0 0 | Cs4g01740.1         | 9.72 | 0 | 0    | 2 | MASCOT | T      |       |       |
| 3.43E-04 | 0 0 | Cs4g01740.1         | 9.72 | 0 | 0    | 2 | MASCOT | T      |       |       |
| 4.99E-02 | 0 0 | Cs2g19440.1/Cs2g194 | 6.05 | 0 | 0    | 2 | MASCOT | T      | PLEX8 |       |
| 1.70E-01 | 0 0 | Cs2g19440.1/Cs2g194 | 6.05 | 0 | 0    | 2 | MASCOT | T      | PLEX8 |       |
| 2.82E-01 | 0 0 | Cs2g19440.1/Cs2g194 | 4.53 | 0 | 0    | 2 | MASCOT | T      |       |       |
| 8.52E-02 | 0 0 | Cs2g19440.1/Cs2g194 | 4.53 | 0 | 0    | 2 | MASCOT | T      |       |       |
| 1.65E-01 | 0 0 | Cs2g19440.1/Cs2g194 | 4.53 | 0 | 0    | 2 | MASCOT | T      |       |       |
| 4.04E-03 | 0 0 | Cs7g11110.1         | 4.21 | 0 | 0    | 2 | MASCOT | T      | PLEX8 |       |
| 1.14E-03 | 0 0 | Cs7g11110.1         | 4.21 | 0 | 0    | 2 | MASCOT | T      | PLEX8 |       |
| 3.18E-01 | 0 0 | Cs7g11110.1         | 8.75 | 0 | 0    | 2 | MASCOT | T      | PLEX8 |       |
| 5.54E-02 | 0 0 | Cs7g11110.1         | 8.75 | 0 | 0    | 2 | MASCOT | T      | PLEX8 |       |
| 4.54E-03 | 0 0 | Cs7g11110.1         | 6    | 0 | 0    | 2 | MASCOT | T      |       |       |
| 4.22E-03 | 0 0 | Cs7g11110.1         | 6    | 0 | 0    | 2 | MASCOT | T      | PLEX8 |       |
| 4.92E-03 | 0 0 | Cs7g11110.1         | 6.75 | 0 | 15.9 | 0 | 2      | MASCOT | T     | PLEX8 |
| 3.93E-02 | 0 0 | Cs7g11110.1         | 6.75 | 0 | 0    | 2 | MASCOT | T      | PLEX8 |       |
| 4.22E-02 | 0 0 | Cs7g11110.1         | 4.25 | 0 | 0    | 2 | MASCOT | T      | PLEX8 |       |
| 1.03E-02 | 0 0 | Cs7g11110.1         | 4.54 | 0 | 0    | 2 | MASCOT | T      | PLEX8 |       |
| 2.57E-04 | 0 0 | Cs7g11110.1         | 4.54 | 0 | 0    | 2 | MASCOT | T      | PLEX8 |       |



|          |     |                      |      |   |      |   |        |        |       |       |
|----------|-----|----------------------|------|---|------|---|--------|--------|-------|-------|
| 1.02E-01 | 0 0 | Cs7g11110.1          | 4.37 | 0 | 0    | 2 | MASCOT | T      | PLEX8 |       |
| 3.53E-02 | 0 0 | Cs7g11110.1          | 4.37 | 0 | 0    | 2 | MASCOT | T      | PLEX8 |       |
| 4.13E-02 | 0 0 | Cs7g11110.1          | 8.75 | 0 | 0    | 2 | MASCOT | T      | PLEX8 |       |
| 1.41E-02 | 0 0 | Cs7g11110.1          | 8.75 | 0 | 0    | 2 | MASCOT | T      | PLEX8 |       |
| 3.86E-02 | 0 0 | Cs7g11110.1          | 8.75 | 0 | 0    | 2 | MASCOT | T      |       |       |
| 1.82E-01 | 0 0 | Cs7g11110.1          | 8.75 | 0 | 0    | 2 | MASCOT | T      | PLEX8 |       |
| 1.47E-01 | 0 0 | Cs7g11110.1          | 8.75 | 0 | 0    | 2 | MASCOT | T      | PLEX8 |       |
| 1.40E-01 | 0 0 | Cs7g11110.1          | 8.75 | 0 | 0    | 2 | MASCOT | T      | PLEX8 |       |
| 3.54E-01 | 0 0 | Cs2g19440.1/Cs2g194  | 6.74 | 0 | 0    | 2 | MASCOT | T      | PLEX8 |       |
| 2.36E-01 | 0 0 | Cs2g19440.1/Cs2g194  | 6.74 | 0 | 0    | 2 | MASCOT | T      | PLEX8 |       |
| 2.58E-02 | 0 0 | Cs2g19440.1/Cs2g194  | 6.74 | 0 | 0    | 2 | MASCOT | T      | PLEX8 |       |
| 2.35E-01 | 0 0 | Cs2g19440.1/Cs2g194  | 6.74 | 0 | 0    | 2 | MASCOT | T      | PLEX8 |       |
| 2.45E-02 | 0 0 | Cs2g19440.1/Cs2g194  | 6.74 | 0 | 0    | 2 | MASCOT | T      |       |       |
| 3.15E-02 | 0 0 | Cs7g11110.1          | 4.37 | 0 | 0    | 2 | MASCOT | T      | PLEX8 |       |
| 3.75E-03 | 0 0 | Cs7g11110.1          | 4.37 | 0 | 0    | 2 | MASCOT | T      | PLEX8 |       |
| 1.44E-02 | 0 0 | Cs7g11110.1          | 4.37 | 0 | 0    | 2 | MASCOT | T      | PLEX8 |       |
| 6.89E-04 | 0 0 | Cs7g11110.1          | 4.37 | 0 | 0    | 2 | MASCOT | T      | PLEX8 |       |
| 1.04E-02 | 0 0 | Cs7g11110.1          | 4.37 | 0 | 0    | 2 | MASCOT | T      | PLEX8 |       |
| 6.03E-02 | 0 0 | Cs7g11110.1          | 4.14 | 0 | 0    | 2 | MASCOT | T      | PLEX8 |       |
| 6.26E-02 | 0 0 | Cs7g11110.1          | 4.14 | 0 | 0    | 2 | MASCOT | T      |       |       |
| 1.32E-03 | 0 0 | Cs7g11110.1          | 4.14 | 0 | 0    | 2 | MASCOT | T      |       |       |
| 1.55E-03 | 0 0 | Cs7g11110.1          | 4.14 | 0 | 0    | 2 | MASCOT | T      |       |       |
| 5.68E-05 | 0 0 | Cs7g11110.1          | 4.14 | 0 | 0    | 2 | MASCOT | T      |       |       |
| 2.31E-03 | 0 0 | Cs7g11110.1          | 4.14 | 0 | 0    | 2 | MASCOT | T      |       |       |
| 7.78E-02 | 0 0 | Cs7g11110.1          | 8.51 | 0 | 0    | 2 | MASCOT | T      | PLEX8 |       |
| 6.85E-02 | 0 0 | Cs7g11110.1          | 4.37 | 0 | 0    | 2 | MASCOT | T      | PLEX8 |       |
| 1.95E-01 | 0 0 | Cs2g19440.1/Cs2g194  | 5.84 | 0 | 15.9 | 0 | 2      | MASCOT | T     | PLEX8 |
| 1.31E-02 | 0 0 | Cs4g15270.1/Cs4g152  | 4.53 | 0 | 0    | 2 | MASCOT | T      | PLEX8 |       |
| 4.86E-02 | 0 0 | Cs4g15270.1/Cs4g152  | 4.53 | 0 | 0    | 2 | MASCOT | T      | PLEX8 |       |
| 2.33E-02 | 0 0 | Cs4g15270.1/Cs4g152  | 6.05 | 0 | 0    | 2 | MASCOT | T      | PLEX8 |       |
| 1.12E-02 | 0 0 | Cs4g15270.1/Cs4g152  | 6.74 | 0 | 0    | 2 | MASCOT | T      |       |       |
| 1.34E-01 | 0 0 | Cs4g15270.1/Cs4g152  | 6    | 0 | 0    | 2 | MASCOT | T      | PLEX8 |       |
| 2.21E-01 | 0 0 | Cs4g15270.1/Cs4g152  | 6    | 0 | 0    | 2 | MASCOT | T      | PLEX8 |       |
| 1.55E-01 | 0 0 | Cs4g15270.1/Cs4g152  | 6    | 0 | 0    | 2 | MASCOT | T      | PLEX8 |       |
| 3.10E-01 | 0 0 | Cs4g15270.1/Cs4g152  | 6    | 0 | 0    | 2 | MASCOT | T      | PLEX8 |       |
| 8.86E-02 | 0 0 | Cs4g15270.1/Cs4g152  | 8.75 | 0 | 0    | 2 | MASCOT | T      |       |       |
| 3.21E-02 | 0 0 | Cs5g21755.1 ! Cs4g15 | 6    | 0 | 0    | 2 | MASCOT | T      | PLEX8 |       |
| 2.87E-05 | 0 0 | Cs4g15270.1/Cs4g152  | 8.75 | 0 | 0    | 2 | MASCOT | T      | PLEX8 |       |
| 1.13E-03 | 0 0 | Cs4g15270.1/Cs4g152  | 6.75 | 0 | 0    | 2 | MASCOT | T      | PLEX8 |       |
| 1.84E-04 | 0 0 | Cs4g15270.1/Cs4g152  | 6.75 | 0 | 0    | 2 | MASCOT | T      | PLEX8 |       |
| 3.48E-01 | 0 0 | Cs4g15270.1/Cs4g152  | 6.75 | 0 | 0    | 2 | MASCOT | T      | PLEX8 |       |
| 7.66E-03 | 0 0 | Cs4g15270.1/Cs4g152  | 4.25 | 0 | 0    | 2 | MASCOT | T      | PLEX8 |       |
| 1.19E-03 | 0 0 | Cs4g15270.1/Cs4g152  | 4.25 | 0 | 0    | 2 | MASCOT | T      | PLEX8 |       |
| 2.10E-02 | 0 0 | Cs4g15270.1/Cs4g152  | 4.25 | 0 | 0    | 2 | MASCOT | T      | PLEX8 |       |
| 1.75E-02 | 0 0 | Cs4g15270.1/Cs4g152  | 4.25 | 0 | 0    | 2 | MASCOT | T      | PLEX8 |       |
| 5.65E-03 | 0 0 | Cs4g15270.1/Cs4g152  | 3.83 | 0 | 0    | 2 | MASCOT | T      | PLEX8 |       |
| 3.81E-02 | 0 0 | Cs4g15270.1/Cs4g152  | 4.25 | 0 | 0    | 2 | MASCOT | T      | PLEX8 |       |
| 2.21E-02 | 0 0 | Cs4g15270.1/Cs4g152  | 4.37 | 0 | 0    | 2 | MASCOT | T      |       |       |
| 2.09E-01 | 0 0 | Cs4g15270.1/Cs4g152  | 6.74 | 0 | 0    | 2 | MASCOT | T      | PLEX8 |       |
| 5.26E-02 | 0 0 | Cs4g15270.1/Cs4g152  | 6.74 | 0 | 0    | 2 | MASCOT | T      |       |       |
| 1.01E-02 | 0 0 | Cs4g15270.1/Cs4g152  | 6.74 | 0 | 0    | 2 | MASCOT | T      | PLEX8 |       |

|          |     |                     |      |   |      |   |        |        |       |       |
|----------|-----|---------------------|------|---|------|---|--------|--------|-------|-------|
| 1.91E-03 | 0 0 | Cs4g15270.1/Cs4g152 | 3.93 | 0 | 0    | 2 | MASCOT | T      | PLEX8 |       |
| 9.60E-04 | 0 0 | Cs4g15270.1/Cs4g152 | 3.93 | 0 | 0    | 2 | MASCOT | T      | PLEX8 |       |
| 2.09E-04 | 0 0 | Cs4g15270.1/Cs4g152 | 3.93 | 0 | 0    | 2 | MASCOT | T      | PLEX8 |       |
| 2.37E-01 | 0 0 | Cs4g15270.1/Cs4g152 | 6    | 0 | 0    | 2 | MASCOT | T      | PLEX8 |       |
| 6.01E-05 | 0 0 | Cs4g15270.1/Cs4g152 | 5.83 | 0 | 15.9 | 0 | 2      | MASCOT | T     |       |
| 8.36E-03 | 0 0 | Cs4g15270.1/Cs4g152 | 5.83 | 0 | 0    | 2 | MASCOT | T      |       |       |
| 1.76E-05 | 0 0 | Cs4g15270.1/Cs4g152 | 5.83 | 0 | 0    | 2 | MASCOT | T      |       |       |
| 1.96E-01 | 0 0 | Cs4g15270.1/Cs4g152 | 4.54 | 0 | 15.9 | 0 | 2      | MASCOT | T     | PLEX8 |
| 6.87E-02 | 0 0 | Cs4g15270.1/Cs4g152 | 4.54 | 0 | 0    | 2 | MASCOT | T      | PLEX8 |       |
| 5.75E-03 | 0 0 | Cs4g15270.1/Cs4g152 | 4.54 | 0 | 0    | 2 | MASCOT | T      | PLEX8 |       |
| 1.47E-01 | 0 0 | Cs4g15270.1/Cs4g152 | 4.54 | 0 | 0    | 2 | MASCOT | T      | PLEX8 |       |
| 1.40E-03 | 0 0 | Cs5g27000.1/Cs5g270 | 4.37 | 0 | 0    | 2 | MASCOT | T      |       |       |
| 2.24E-03 | 0 0 | Cs5g27000.1/Cs5g270 | 4.37 | 0 | 0    | 2 | MASCOT | T      |       |       |
| 3.87E-08 | 0 0 | Cs5g27000.1/Cs5g270 | 4.37 | 0 | 0    | 2 | MASCOT | T      |       |       |
| 3.68E-05 | 0 0 | Cs5g27000.1/Cs5g270 | 4.37 | 0 | 0    | 2 | MASCOT | T      |       |       |
| 7.57E-02 | 0 0 | Cs2g28930.1/Cs2g289 | 4.37 | 0 | 0    | 2 | MASCOT | T      | PLEX8 |       |
| 7.98E-02 | 0 0 | Cs5g27000.1/Cs5g270 | 8.6  | 0 | 0    | 2 | MASCOT | T      |       |       |
| 1.61E-01 | 0 0 | Cs5g27000.1/Cs5g270 | 5.84 | 0 | 0    | 2 | MASCOT | T      | PLEX8 |       |
| 5.47E-03 | 0 0 | Cs5g27000.1/Cs5g270 | 4.25 | 0 | 0    | 2 | MASCOT | T      | PLEX8 |       |
| 2.31E-02 | 0 0 | Cs5g27000.1/Cs5g270 | 4.25 | 0 | 0    | 2 | MASCOT | T      | PLEX8 |       |
| 1.65E-02 | 0 0 | Cs5g27000.1/Cs5g270 | 4.37 | 0 | 0    | 2 | MASCOT | T      | PLEX8 |       |
| 4.19E-02 | 0 0 | Cs2g28930.1/Cs2g289 | 8.47 | 0 | 0    | 2 | MASCOT | T      | PLEX8 |       |
| 2.97E-02 | 0 0 | Cs2g28930.1/Cs2g289 | 8.47 | 0 | 0    | 2 | MASCOT | T      | PLEX8 |       |
| 4.78E-02 | 0 0 | Cs2g28930.1/Cs2g289 | 8.47 | 0 | 0    | 2 | MASCOT | T      | PLEX8 |       |
| 1.57E-03 | 0 0 | Cs2g28930.1/Cs2g289 | 5.97 | 0 | 0    | 2 | MASCOT | T      | PLEX8 |       |
| 3.04E-02 | 0 0 | Cs2g28930.1/Cs2g289 | 5.97 | 0 | 0    | 2 | MASCOT | T      | PLEX8 |       |
| 5.10E-03 | 0 0 | Cs2g28930.1/Cs2g289 | 5.97 | 0 | 0    | 2 | MASCOT | T      | PLEX8 |       |
| 1.18E-03 | 0 0 | Cs5g27000.1         | 6.74 | 0 | 0    | 2 | MASCOT | T      | PLEX8 |       |
| 1.03E-05 | 0 0 | Cs5g27000.1         | 6.74 | 0 | 0    | 2 | MASCOT | T      | PLEX8 |       |
| 5.00E-02 | 0 0 | Cs5g27000.1         | 6.74 | 0 | 0    | 2 | MASCOT | T      | PLEX8 |       |
| 7.98E-03 | 0 0 | Cs5g27000.1         | 6.74 | 0 | 0    | 2 | MASCOT | T      | PLEX8 |       |
| 3.16E-06 | 0 0 | Cs5g27000.1         | 6.74 | 0 | 0    | 2 | MASCOT | T      | PLEX8 |       |
| 8.89E-03 | 0 0 | Cs5g27000.1         | 6.74 | 0 | 0    | 2 | MASCOT | T      |       |       |
| 8.98E-06 | 0 0 | Cs5g27000.1         | 6.74 | 0 | 0    | 2 | MASCOT | T      |       |       |
| 9.63E-03 | 0 0 | Cs2g28930.1/Cs2g289 | 5.84 | 0 | 0    | 2 | MASCOT | T      | PLEX8 |       |
| 4.64E-03 | 0 0 | Cs2g28930.1/Cs2g289 | 5.84 | 0 | 0    | 2 | MASCOT | T      |       |       |
| 1.11E-01 | 0 0 | Cs2g28930.1/Cs2g289 | 9.8  | 0 | 0    | 2 | MASCOT | T      | PLEX8 |       |
| 3.20E-01 | 0 0 | Cs2g28930.1/Cs2g289 | 9.2  | 0 | 0    | 2 | MASCOT | T      | PLEX8 |       |
| 2.51E-01 | 0 0 | Cs5g27000.1/Cs5g270 | 6    | 0 | 0    | 2 | MASCOT | T      | PLEX8 |       |
| 8.09E-04 | 0 0 | Cs2g28930.1/Cs2g289 | 6    | 0 | 0    | 2 | MASCOT | T      | PLEX8 |       |
| 8.78E-02 | 0 0 | Cs2g28930.1/Cs2g289 | 4.14 | 0 | 0    | 2 | MASCOT | T      |       |       |
| 3.12E-02 | 0 0 | Cs2g28930.1/Cs2g289 | 8.41 | 0 | 0    | 2 | MASCOT | T      | PLEX8 |       |
| 9.37E-02 | 0 0 | Cs9g16530.1         | 4.37 | 0 | 0    | 2 | MASCOT | T      | PLEX8 |       |
| 8.42E-04 | 0 0 | Cs9g16530.1         | 4.37 | 0 | 0    | 2 | MASCOT | T      | PLEX8 |       |
| 2.39E-06 | 0 0 | Cs9g16530.1         | 4.37 | 0 | 0    | 2 | MASCOT | T      | PLEX8 |       |
| 1.33E-01 | 0 0 | Cs9g16530.1         | 6.1  | 0 | 0    | 2 | MASCOT | T      | PLEX8 |       |
| 2.47E-02 | 0 0 | Cs9g16530.1         | 6.1  | 0 | 0    | 2 | MASCOT | T      | PLEX8 |       |
| 8.82E-02 | 0 0 | Cs9g16530.1         | 6.1  | 0 | 0    | 2 | MASCOT | T      | PLEX8 |       |
| 9.00E-02 | 0 0 | Cs9g16530.1         | 6.1  | 0 | 0    | 2 | MASCOT | T      | PLEX8 |       |
| 4.31E-02 | 0 0 | Cs9g16530.1         | 6.1  | 0 | 0    | 2 | MASCOT | T      | PLEX8 |       |
| 4.04E-02 | 0 0 | Cs9g16530.1         | 6.1  | 0 | 0    | 2 | MASCOT | T      | PLEX8 |       |

|              |             |      |        |   |          |         |
|--------------|-------------|------|--------|---|----------|---------|
| 3.09E-02 0 0 | Cs9g16530.1 | 6.1  | 0      | 0 | 2 MASCOT | T       |
| 1.68E-01 0 0 | Cs9g16530.1 | 6.1  | 0      | 0 | 2 MASCOT | T       |
| 7.94E-02 0 0 | Cs9g16530.1 | 6.1  | 0      | 0 | 2 MASCOT | T       |
| 1.93E-01 0 0 | Cs9g16530.1 | 5.84 | 0 15.9 | 0 | 2 MASCOT | T PLEX8 |
| 4.43E-02 0 0 | Cs9g16530.1 | 5.84 | 0 15.9 | 0 | 2 MASCOT | T PLEX8 |
| 2.14E-02 0 0 | Cs9g16530.1 | 5.84 | 0 15.9 | 0 | 2 MASCOT | T PLEX8 |
| 2.29E-02 0 0 | Cs9g16530.1 | 5.84 | 0 15.9 | 0 | 2 MASCOT | T PLEX8 |
| 4.68E-05 0 0 | Cs9g16530.1 | 5.84 | 0      | 0 | 2 MASCOT | T PLEX8 |
| 1.00E-01 0 0 | Cs9g16530.1 | 5.84 | 0      | 0 | 2 MASCOT | T PLEX8 |
| 5.47E-03 0 0 | Cs9g16530.1 | 4.37 | 0      | 0 | 2 MASCOT | T PLEX8 |
| 5.08E-02 0 0 | Cs9g16530.1 | 4.37 | 0      | 0 | 2 MASCOT | T PLEX8 |
| 1.77E-03 0 0 | Cs9g16530.1 | 4.37 | 0      | 0 | 2 MASCOT | T PLEX8 |
| 1.27E-02 0 0 | Cs9g16530.1 | 4.37 | 0      | 0 | 2 MASCOT | T PLEX8 |
| 5.17E-02 0 0 | Cs9g16530.1 | 4.37 | 0      | 0 | 2 MASCOT | T PLEX8 |
| 7.02E-03 0 0 | Cs9g16530.1 | 4.37 | 0      | 0 | 2 MASCOT | T PLEX8 |
| 2.01E-02 0 0 | Cs9g16530.1 | 4.37 | 0      | 0 | 2 MASCOT | T PLEX8 |
| 6.86E-05 0 0 | Cs9g16530.1 | 4.37 | 0      | 0 | 2 MASCOT | T PLEX8 |
| 1.31E-02 0 0 | Cs9g16530.1 | 4.37 | 0      | 0 | 2 MASCOT | T PLEX8 |
| 4.11E-02 0 0 | Cs9g16530.1 | 8.75 | 0      | 0 | 2 MASCOT | T PLEX8 |
| 9.13E-02 0 0 | Cs9g16530.1 | 8.75 | 0      | 0 | 2 MASCOT | T PLEX8 |
| 5.69E-02 0 0 | Cs9g16530.1 | 6    | 0      | 0 | 2 MASCOT | T PLEX8 |
| 3.58E-06 0 0 | Cs9g16530.1 | 6    | 0      | 0 | 2 MASCOT | T PLEX8 |
| 3.33E-05 0 0 | Cs9g16530.1 | 6    | 0      | 0 | 2 MASCOT | T PLEX8 |
| 3.03E-02 0 0 | Cs9g16530.1 | 6    | 0      | 0 | 2 MASCOT | T PLEX8 |
| 1.78E-03 0 0 | Cs9g16530.1 | 6    | 0      | 0 | 2 MASCOT | T PLEX8 |
| 6.90E-03 0 0 | Cs9g16530.1 | 6    | 0      | 0 | 2 MASCOT | T PLEX8 |
| 1.17E-03 0 0 | Cs9g16530.1 | 6    | 0      | 0 | 2 MASCOT | T PLEX8 |
| 1.49E-01 0 0 | Cs9g16530.1 | 6    | 0      | 0 | 2 MASCOT | T PLEX8 |
| 2.27E-02 0 0 | Cs9g16530.1 | 6    | 0      | 0 | 2 MASCOT | T PLEX8 |
| 6.11E-02 0 0 | Cs9g16530.1 | 6    | 0      | 0 | 2 MASCOT | T PLEX8 |
| 3.40E-03 0 0 | Cs9g16530.1 | 5.84 | 0      | 0 | 2 MASCOT | T PLEX8 |
| 8.89E-04 0 0 | Cs9g16530.1 | 5.84 | 0      | 0 | 2 MASCOT | T PLEX8 |
| 9.94E-03 0 0 | Cs9g16530.1 | 5.84 | 0      | 0 | 2 MASCOT | T PLEX8 |
| 4.36E-02 0 0 | Cs9g16530.1 | 5.84 | 0      | 0 | 2 MASCOT | T PLEX8 |
| 6.24E-03 0 0 | Cs9g16530.1 | 5.84 | 0      | 0 | 2 MASCOT | T PLEX8 |
| 5.32E-03 0 0 | Cs9g16530.1 | 5.84 | 0      | 0 | 2 MASCOT | T PLEX8 |
| 1.76E-02 0 0 | Cs9g16530.1 | 5.84 | 0      | 0 | 2 MASCOT | T PLEX8 |
| 6.98E-03 0 0 | Cs9g16530.1 | 5.84 | 0      | 0 | 2 MASCOT | T PLEX8 |
| 2.02E-01 0 0 | Cs9g16530.1 | 5.84 | 0      | 0 | 2 MASCOT | T PLEX8 |
| 7.60E-02 0 0 | Cs9g16530.1 | 5.84 | 0      | 0 | 2 MASCOT | T PLEX8 |
| 2.71E-03 0 0 | Cs9g16530.1 | 5.84 | 0      | 0 | 2 MASCOT | T PLEX8 |
| 5.00E-02 0 0 | Cs9g16530.1 | 5.84 | 0      | 0 | 2 MASCOT | T PLEX8 |
| 1.56E-02 0 0 | Cs9g16530.1 | 5.84 | 0      | 0 | 2 MASCOT | T       |
| 2.34E-03 0 0 | Cs9g16530.1 | 5.84 | 0      | 0 | 2 MASCOT | T PLEX8 |
| 1.47E-03 0 0 | Cs9g16530.1 | 5.84 | 0      | 0 | 2 MASCOT | T PLEX8 |
| 1.65E-01 0 0 | Cs9g16530.1 | 5.84 | 0      | 0 | 2 MASCOT | T PLEX8 |
| 1.56E-02 0 0 | Cs9g16530.1 | 5.84 | 0      | 0 | 2 MASCOT | T PLEX8 |
| 7.95E-03 0 0 | Cs9g16530.1 | 5.84 | 0      | 0 | 2 MASCOT | T PLEX8 |
| 3.68E-03 0 0 | Cs9g16530.1 | 5.84 | 0      | 0 | 2 MASCOT | T PLEX8 |
| 4.36E-03 0 0 | Cs9g16530.1 | 5.84 | 0      | 0 | 2 MASCOT | T PLEX8 |
| 5.92E-02 0 0 | Cs9g16530.1 | 5.84 | 0      | 0 | 2 MASCOT | T       |

|              |                       |      |   |   |          |   |       |
|--------------|-----------------------|------|---|---|----------|---|-------|
| 1.63E-01 0 0 | Cs9g16530.1           | 6    | 0 | 0 | 2 MASCOT | T |       |
| 2.04E-05 0 0 | Cs9g16530.1           | 4.65 | 0 | 0 | 2 MASCOT | T | PLEX8 |
| 3.80E-03 0 0 | Cs9g16530.1           | 4.65 | 0 | 0 | 2 MASCOT | T | PLEX8 |
| 4.59E-05 0 0 | Cs9g16530.1           | 4.65 | 0 | 0 | 2 MASCOT | T | PLEX8 |
| 3.15E-05 0 0 | Cs9g16530.1           | 4.65 | 0 | 0 | 2 MASCOT | T |       |
| 1.29E-02 0 0 | Cs9g16530.1           | 6.74 | 0 | 0 | 2 MASCOT | T | PLEX8 |
| 3.62E-03 0 0 | Cs9g16530.1           | 6.74 | 0 | 0 | 2 MASCOT | T | PLEX8 |
| 4.74E-02 0 0 | Cs9g16530.1           | 6.74 | 0 | 0 | 2 MASCOT | T | PLEX8 |
| 2.45E-01 0 0 | Cs9g16530.1           | 6.74 | 0 | 0 | 2 MASCOT | T | PLEX8 |
| 3.24E-02 0 0 | Cs9g16530.1           | 6.74 | 0 | 0 | 2 MASCOT | T | PLEX8 |
| 6.06E-04 0 0 | Cs9g16530.1           | 6.74 | 0 | 0 | 2 MASCOT | T | PLEX8 |
| 7.22E-03 0 0 | Cs9g16530.1           | 5.84 | 0 | 0 | 2 MASCOT | T |       |
| 2.80E-01 0 0 | Cs9g16530.1           | 4.14 | 0 | 0 | 2 MASCOT | T | PLEX8 |
| 1.88E-03 0 0 | Cs9g16530.1           | 4.14 | 0 | 0 | 2 MASCOT | T | PLEX8 |
| 4.75E-02 0 0 | Cs9g16530.1           | 4.14 | 0 | 0 | 2 MASCOT | T | PLEX8 |
| 1.85E-01 0 0 | Cs9g16530.1           | 4.14 | 0 | 0 | 2 MASCOT | T | PLEX8 |
| 2.01E-01 0 0 | Cs9g16530.1           | 4.14 | 0 | 0 | 2 MASCOT | T | PLEX8 |
| 8.62E-03 0 0 | Cs9g16530.1           | 4.14 | 0 | 0 | 2 MASCOT | T | PLEX8 |
| 1.12E-02 0 0 | Cs9g16530.1           | 4.14 | 0 | 0 | 2 MASCOT | T |       |
| 2.04E-02 0 0 | Cs9g16530.1           | 4.14 | 0 | 0 | 2 MASCOT | T |       |
| 2.44E-03 0 0 | Cs9g16530.1           | 4.14 | 0 | 0 | 2 MASCOT | T | PLEX8 |
| 4.62E-03 0 0 | Cs9g16530.1           | 4.14 | 0 | 0 | 2 MASCOT | T | PLEX8 |
| 2.12E-01 0 0 | Cs9g16530.1           | 9.75 | 0 | 0 | 2 MASCOT | T | PLEX8 |
| 3.98E-02 0 0 | Cs9g16530.1           | 9.75 | 0 | 0 | 2 MASCOT | T | PLEX8 |
| 5.32E-02 0 0 | Cs9g16530.1           | 9.75 | 0 | 0 | 2 MASCOT | T | PLEX8 |
| 2.27E-02 0 0 | Cs9g16530.1           | 9.75 | 0 | 0 | 2 MASCOT | T | PLEX8 |
| 9.33E-03 0 0 | Cs9g16530.1           | 9.75 | 0 | 0 | 2 MASCOT | T | PLEX8 |
| 1.51E-04 0 0 | Cs9g16530.1           | 9.75 | 0 | 0 | 2 MASCOT | T | PLEX8 |
| 2.74E-05 0 0 | Cs9g16530.1           | 9.75 | 0 | 0 | 2 MASCOT | T | PLEX8 |
| 8.74E-05 0 0 | Cs9g16530.1           | 9.75 | 0 | 0 | 2 MASCOT | T | PLEX8 |
| 4.27E-04 0 0 | Cs9g16530.1           | 9.75 | 0 | 0 | 2 MASCOT | T | PLEX8 |
| 1.97E-02 0 0 | Cs9g16530.1           | 9.75 | 0 | 0 | 2 MASCOT | T | PLEX8 |
| 1.35E-01 0 0 | Cs9g16530.1           | 9.75 | 0 | 0 | 2 MASCOT | T | PLEX8 |
| 1.25E-02 0 0 | Cs9g16530.1           | 9.75 | 0 | 0 | 2 MASCOT | T | PLEX8 |
| 8.57E-04 0 0 | Cs9g16530.1           | 9.75 | 0 | 0 | 2 MASCOT | T | PLEX8 |
| 4.09E-02 0 0 | Cs9g16530.1           | 9.75 | 0 | 0 | 2 MASCOT | T | PLEX8 |
| 1.72E-01 0 0 | Cs9g16530.1           | 9.75 | 0 | 0 | 2 MASCOT | T |       |
| 5.09E-01 0 0 | Cs9g16530.1 ! orange] | 8.75 | 0 | 0 | 2 MASCOT | T | PLEX8 |
| 7.76E-03 0 0 | Cs9g16530.1           | 5.55 | 0 | 0 | 2 MASCOT | T | PLEX8 |
| 1.19E-02 0 0 | Cs9g16530.1           | 5.55 | 0 | 0 | 2 MASCOT | T | PLEX8 |
| 5.69E-02 0 0 | Cs9g16530.1           | 5.55 | 0 | 0 | 2 MASCOT | T | PLEX8 |
| 4.71E-03 0 0 | Cs9g16530.1           | 3.91 | 0 | 0 | 2 MASCOT | T | PLEX8 |
| 1.70E-04 0 0 | Cs9g16530.1           | 3.91 | 0 | 0 | 2 MASCOT | T | PLEX8 |
| 7.98E-06 0 0 | Cs9g16530.1           | 3.91 | 0 | 0 | 2 MASCOT | T | PLEX8 |
| 3.22E-06 0 0 | Cs9g16530.1           | 3.91 | 0 | 0 | 2 MASCOT | T | PLEX8 |
| 4.09E-05 0 0 | Cs9g16530.1           | 3.91 | 0 | 0 | 2 MASCOT | T | PLEX8 |
| 1.32E-02 0 0 | Cs9g16530.1           | 3.91 | 0 | 0 | 2 MASCOT | T | PLEX8 |
| 1.91E-04 0 0 | Cs9g16530.1           | 3.91 | 0 | 0 | 2 MASCOT | T | PLEX8 |
| 1.10E-03 0 0 | Cs9g16530.1           | 3.91 | 0 | 0 | 2 MASCOT | T |       |
| 6.91E-06 0 0 | Cs9g16530.1           | 3.91 | 0 | 0 | 2 MASCOT | T | PLEX8 |
| 8.40E-05 0 0 | Cs9g16530.1           | 3.91 | 0 | 0 | 2 MASCOT | T |       |

|          |     |                      |      |   |   |   |        |   |       |
|----------|-----|----------------------|------|---|---|---|--------|---|-------|
| 4.23E-04 | 0 0 | Cs3g18360.1          | 8.63 | 0 | 0 | 2 | MASCOT | T | PLEX8 |
| 7.42E-05 | 0 0 | Cs3g18360.1          | 8.63 | 0 | 0 | 2 | MASCOT | T | PLEX8 |
| 8.17E-02 | 0 0 | Cs3g18360.1          | 8.63 | 0 | 0 | 2 | MASCOT | T | PLEX8 |
| 1.06E-03 | 0 0 | Cs3g18360.1          | 8.63 | 0 | 0 | 2 | MASCOT | T | PLEX8 |
| 3.20E-05 | 0 0 | Cs3g18360.1          | 8.63 | 0 | 0 | 2 | MASCOT | T | PLEX8 |
| 2.31E-01 | 0 0 | Cs3g18360.1          | 8.63 | 0 | 0 | 2 | MASCOT | T |       |
| 3.30E-05 | 0 0 | Cs3g18360.1          | 8.63 | 0 | 0 | 2 | MASCOT | T | PLEX8 |
| 9.87E-05 | 0 0 | Cs3g18360.1          | 8.63 | 0 | 0 | 2 | MASCOT | T | PLEX8 |
| 1.38E-03 | 0 0 | Cs3g18360.1          | 8.63 | 0 | 0 | 2 | MASCOT | T | PLEX8 |
| 3.05E-04 | 0 0 | Cs3g18360.1          | 8.63 | 0 | 0 | 2 | MASCOT | T | PLEX8 |
| 2.54E-02 | 0 0 | Cs3g18360.1          | 8.63 | 0 | 0 | 2 | MASCOT | T |       |
| 3.65E-04 | 0 0 | Cs3g18360.1          | 8.63 | 0 | 0 | 2 | MASCOT | T |       |
| 3.82E-02 | 0 0 | Cs3g18360.1          | 4.03 | 0 | 0 | 2 | MASCOT | T | PLEX8 |
| 1.66E-03 | 0 0 | Cs3g18360.1          | 4.03 | 0 | 0 | 2 | MASCOT | T | PLEX8 |
| 6.65E-02 | 0 0 | Cs3g18360.1          | 4.03 | 0 | 0 | 2 | MASCOT | T | PLEX8 |
| 3.34E-02 | 0 0 | Cs3g18360.1          | 4.03 | 0 | 0 | 2 | MASCOT | T | PLEX8 |
| 3.04E-03 | 0 0 | Cs3g18360.1          | 4.03 | 0 | 0 | 2 | MASCOT | T |       |
| 9.49E-02 | 0 0 | Cs3g18360.1/Cs7g231  | 4.14 | 0 | 0 | 2 | MASCOT | T | PLEX8 |
| 8.24E-02 | 0 0 | Cs3g18360.1/Cs7g231  | 4.14 | 0 | 0 | 2 | MASCOT | T | PLEX8 |
| 9.84E-02 | 0 0 | Cs3g18360.1/Cs7g231  | 4.14 | 0 | 0 | 2 | MASCOT | T | PLEX8 |
| 3.50E-02 | 0 0 | Cs3g18360.1          | 8.75 | 0 | 0 | 2 | MASCOT | T |       |
| 5.30E-04 | 0 0 | Cs3g18360.1          | 8.75 | 0 | 0 | 2 | MASCOT | T |       |
| 1.12E-01 | 0 0 | Cs3g18360.1          | 8.75 | 0 | 0 | 2 | MASCOT | T |       |
| 2.12E-02 | 0 0 | Cs3g18360.1          | 3.71 | 0 | 0 | 2 | MASCOT | T |       |
| 4.59E-02 | 0 0 | Cs1g01540.1 ! Cs3g18 | 8.75 | 0 | 0 | 2 | MASCOT | T | PLEX8 |
| 2.63E-01 | 0 0 | Cs1g01540.1 ! Cs3g18 | 8.75 | 0 | 0 | 2 | MASCOT | T |       |
| 5.65E-02 | 0 0 | Cs3g18360.1          | 4.37 | 0 | 0 | 2 | MASCOT | T | PLEX8 |
| 4.67E-03 | 0 0 | Cs3g18360.1          | 4.37 | 0 | 0 | 2 | MASCOT | T | PLEX8 |
| 2.92E-03 | 0 0 | Cs3g18360.1          | 4.37 | 0 | 0 | 2 | MASCOT | T | PLEX8 |
| 2.08E-02 | 0 0 | Cs3g18360.1          | 4.37 | 0 | 0 | 2 | MASCOT | T | PLEX8 |
| 5.00E-02 | 0 0 | Cs3g18360.1          | 4.37 | 0 | 0 | 2 | MASCOT | T | PLEX8 |
| 8.18E-04 | 0 0 | Cs3g18360.1          | 4.37 | 0 | 0 | 2 | MASCOT | T |       |
| 4.03E-03 | 0 0 | Cs3g18360.1          | 4.37 | 0 | 0 | 2 | MASCOT | T |       |
| 3.64E-02 | 0 0 | Cs3g18360.1          | 4.32 | 1 | 0 | 2 | MASCOT | T | PLEX8 |
| 2.28E-02 | 0 0 | Cs3g18360.1          | 4.31 | 0 | 0 | 2 | MASCOT | T | PLEX8 |
| 2.56E-03 | 0 0 | Cs3g18360.1          | 4.31 | 0 | 0 | 2 | MASCOT | T | PLEX8 |
| 5.04E-03 | 0 0 | Cs3g18360.1          | 4.31 | 0 | 0 | 2 | MASCOT | T | PLEX8 |
| 1.26E-02 | 0 0 | Cs3g18360.1          | 4.31 | 0 | 0 | 2 | MASCOT | T | PLEX8 |
| 8.88E-03 | 0 0 | Cs3g18360.1          | 4.31 | 0 | 0 | 2 | MASCOT | T | PLEX8 |
| 5.00E-02 | 0 0 | Cs3g18360.1          | 4.31 | 0 | 0 | 2 | MASCOT | T | PLEX8 |
| 3.13E-01 | 0 0 | Cs3g18360.1          | 4.37 | 0 | 0 | 2 | MASCOT | T | PLEX8 |
| 2.32E-01 | 0 0 | Cs3g18360.1          | 4.37 | 0 | 0 | 2 | MASCOT | T | PLEX8 |
| 4.64E-01 | 0 0 | Cs3g18360.1          | 4.37 | 0 | 0 | 2 | MASCOT | T |       |
| 5.34E-03 | 0 0 | Cs3g18360.1/Cs7g231  | 4.37 | 0 | 0 | 2 | MASCOT | T | PLEX8 |
| 2.96E-02 | 0 0 | Cs3g18360.1/Cs7g231  | 4.37 | 0 | 0 | 2 | MASCOT | T | PLEX8 |
| 1.13E-01 | 0 0 | Cs3g18360.1/Cs7g231  | 4.37 | 0 | 0 | 2 | MASCOT | T | PLEX8 |
| 6.33E-03 | 0 0 | Cs3g18360.1/Cs7g231  | 4.37 | 0 | 0 | 2 | MASCOT | T | PLEX8 |
| 2.89E-03 | 0 0 | Cs3g18360.1/Cs7g231  | 4.37 | 0 | 0 | 2 | MASCOT | T | PLEX8 |
| 1.21E-02 | 0 0 | Cs3g18360.1/Cs7g231  | 4.37 | 0 | 0 | 2 | MASCOT | T | PLEX8 |
| 2.94E-02 | 0 0 | Cs3g18360.1/Cs7g231  | 4.37 | 0 | 0 | 2 | MASCOT | T | PLEX8 |
| 3.41E-03 | 0 0 | Cs3g18360.1/Cs7g231  | 4.37 | 0 | 0 | 2 | MASCOT | T | PLEX8 |

|          |     |                      |      |   |      |   |        |        |       |       |
|----------|-----|----------------------|------|---|------|---|--------|--------|-------|-------|
| 4.67E-01 | 0 0 | Cs3g18360.1/Cs7g231  | 4.37 | 0 | 0    | 2 | MASCOT | T      | PLEX8 |       |
| 7.11E-02 | 0 0 | Cs3g18360.1/Cs7g231  | 4.37 | 0 | 0    | 2 | MASCOT | T      | PLEX8 |       |
| 5.82E-03 | 0 0 | Cs3g18360.1/Cs7g231  | 4.37 | 0 | 0    | 2 | MASCOT | T      | PLEX8 |       |
| 3.19E-01 | 0 0 | Cs3g18360.1/Cs7g231  | 4.37 | 0 | 0    | 2 | MASCOT | T      | PLEX8 |       |
| 1.28E-02 | 0 0 | Cs3g18360.1/Cs7g231  | 4.37 | 0 | 0    | 2 | MASCOT | T      | PLEX8 |       |
| 1.06E-02 | 0 0 | Cs3g18360.1/Cs7g231  | 4.37 | 0 | 0    | 2 | MASCOT | T      | PLEX8 |       |
| 3.48E-02 | 0 0 | Cs3g18360.1/Cs7g231  | 4.37 | 0 | 0    | 2 | MASCOT | T      | PLEX8 |       |
| 2.92E-02 | 0 0 | Cs3g18360.1/Cs7g231  | 4.37 | 0 | 0    | 2 | MASCOT | T      | PLEX8 |       |
| 1.05E-02 | 0 0 | Cs3g18360.1/Cs7g231  | 4.37 | 0 | 0    | 2 | MASCOT | T      | PLEX8 |       |
| 2.02E-01 | 0 0 | Cs1g01540.1 ! Cs3g18 | 5.06 | 0 | 15.9 | 0 | 2      | MASCOT | T     | PLEX8 |
| 1.93E-01 | 0 0 | Cs1g01540.1 ! Cs3g18 | 5.06 | 0 | 15.9 | 0 | 2      | MASCOT | T     |       |
| 1.08E-01 | 0 0 | Cs1g01540.1 ! Cs3g18 | 5.06 | 0 | 15.9 | 0 | 2      | MASCOT | T     |       |
| 1.60E-03 | 0 0 | Cs1g01540.1 ! Cs3g18 | 5.06 | 0 | 0    | 2 | MASCOT | T      |       |       |
| 9.90E-06 | 0 0 | Cs3g18360.1          | 4.03 | 0 | 0    | 2 | MASCOT | T      | PLEX8 |       |
| 1.08E-05 | 0 0 | Cs3g18360.1          | 4.03 | 0 | 0    | 2 | MASCOT | T      | PLEX8 |       |
| 7.32E-02 | 0 0 | Cs3g18360.1          | 4.03 | 0 | 0    | 2 | MASCOT | T      | PLEX8 |       |
| 1.87E-03 | 0 0 | Cs3g18360.1          | 4.03 | 0 | 0    | 2 | MASCOT | T      | PLEX8 |       |
| 9.05E-02 | 0 0 | Cs3g18360.1          | 4.03 | 0 | 0    | 2 | MASCOT | T      | PLEX8 |       |
| 8.28E-03 | 0 0 | Cs3g18360.1          | 9.6  | 1 | 0    | 2 | MASCOT | T      |       |       |
| 1.76E-01 | 0 0 | Cs3g18360.1          | 4.14 | 0 | 0    | 2 | MASCOT | T      |       |       |
| 1.40E-02 | 0 0 | Cs3g18360.1          | 4.14 | 0 | 0    | 2 | MASCOT | T      | PLEX8 |       |
| 1.36E-01 | 0 0 | Cs3g18360.1          | 4.14 | 0 | 0    | 2 | MASCOT | T      | PLEX8 |       |
| 2.26E-03 | 0 0 | Cs3g18360.1          | 4.14 | 0 | 0    | 2 | MASCOT | T      | PLEX8 |       |
| 2.19E-02 | 0 0 | Cs5g35290.1          | 6.05 | 0 | 0    | 2 | MASCOT | T      | PLEX8 |       |
| 4.38E-03 | 0 0 | Cs5g35290.1          | 4.53 | 0 | 0    | 2 | MASCOT | T      | PLEX8 |       |
| 2.24E-02 | 0 0 | Cs5g35290.1          | 4.53 | 0 | 0    | 2 | MASCOT | T      | PLEX8 |       |
| 3.11E-01 | 0 0 | Cs5g35290.1          | 4.53 | 0 | 0    | 2 | MASCOT | T      |       |       |
| 1.06E-01 | 0 0 | Cs5g35290.1          | 4.54 | 0 | 0    | 2 | MASCOT | T      | PLEX8 |       |
| 2.67E-02 | 0 0 | Cs5g35290.1          | 4.54 | 0 | 0    | 2 | MASCOT | T      | PLEX8 |       |
| 8.28E-02 | 0 0 | Cs5g35290.1          | 4.54 | 0 | 0    | 2 | MASCOT | T      |       |       |
| 1.47E-02 | 0 0 | Cs5g35290.1          | 4.54 | 0 | 0    | 2 | MASCOT | T      |       |       |
| 4.02E-01 | 0 0 | Cs5g35290.1          | 4.54 | 0 | 0    | 2 | MASCOT | T      | PLEX8 |       |
| 4.61E-02 | 0 0 | Cs5g35290.1          | 4.54 | 0 | 0    | 2 | MASCOT | T      |       |       |
| 2.30E-01 | 0 0 | Cs5g35290.1          | 4.54 | 0 | 0    | 2 | MASCOT | T      |       |       |
| 1.30E-01 | 0 0 | Cs5g35290.1          | 4.54 | 0 | 0    | 2 | MASCOT | T      |       |       |
| 6.50E-03 | 0 0 | Cs5g35290.1          | 4.54 | 0 | 0    | 2 | MASCOT | T      | PLEX8 |       |
| 1.16E-01 | 0 0 | Cs5g35290.1          | 4.54 | 0 | 0    | 2 | MASCOT | T      |       |       |
| 2.42E-02 | 0 0 | Cs5g35290.1          | 4.54 | 0 | 0    | 2 | MASCOT | T      |       |       |
| 4.02E-02 | 0 0 | Cs5g35290.1          | 4.54 | 0 | 0    | 2 | MASCOT | T      | PLEX8 |       |
| 1.64E-03 | 0 0 | Cs5g35290.1          | 4.54 | 0 | 0    | 2 | MASCOT | T      |       |       |
| 1.09E-03 | 0 0 | Cs5g35290.1          | 4.54 | 0 | 0    | 2 | MASCOT | T      | PLEX8 |       |
| 2.51E-02 | 0 0 | Cs5g35290.1          | 4.54 | 0 | 0    | 2 | MASCOT | T      |       |       |
| 4.62E-02 | 0 0 | Cs5g35290.1          | 4.54 | 0 | 0    | 2 | MASCOT | T      |       |       |
| 7.75E-03 | 0 0 | Cs5g35290.1          | 4.54 | 0 | 0    | 2 | MASCOT | T      |       |       |
| 6.56E-02 | 0 0 | Cs5g35290.1          | 4.54 | 0 | 0    | 2 | MASCOT | T      |       |       |
| 3.89E-01 | 0 0 | Cs5g35290.1          | 6.75 | 0 | 0    | 2 | MASCOT | T      | PLEX8 |       |
| 3.14E-02 | 0 0 | Cs5g35290.1          | 6    | 0 | 0    | 2 | MASCOT | T      | PLEX8 |       |
| 1.08E-01 | 0 0 | Cs5g35290.1          | 6    | 0 | 0    | 2 | MASCOT | T      | PLEX8 |       |
| 9.78E-02 | 0 0 | Cs5g35290.1          | 6    | 0 | 0    | 2 | MASCOT | T      | PLEX8 |       |
| 1.13E-01 | 0 0 | Cs5g35290.1          | 6    | 0 | 0    | 2 | MASCOT | T      | PLEX8 |       |
| 1.77E-02 | 0 0 | Cs5g35290.1          | 5.84 | 0 | 0    | 2 | MASCOT | T      | PLEX8 |       |

|          |     |                     |      |   |      |   |        |        |       |       |
|----------|-----|---------------------|------|---|------|---|--------|--------|-------|-------|
| 4.91E-03 | 0 0 | Cs5g35290.1         | 5.84 | 0 | 0    | 2 | MASCOT | T      | PLEX8 |       |
| 6.80E-03 | 0 0 | Cs5g35290.1         | 4.53 | 0 | 0    | 2 | MASCOT | T      | PLEX8 |       |
| 1.94E-01 | 0 0 | Cs5g35290.1         | 4.53 | 0 | 0    | 2 | MASCOT | T      |       |       |
| 6.17E-03 | 0 0 | Cs5g35290.1         | 4.53 | 0 | 0    | 2 | MASCOT | T      |       |       |
| 7.47E-03 | 0 0 | Cs5g35290.1         | 4.53 | 0 | 0    | 2 | MASCOT | T      |       |       |
| 3.87E-02 | 0 0 | Cs5g35290.1         | 4.37 | 0 | 0    | 2 | MASCOT | T      | PLEX8 |       |
| 2.96E-01 | 0 0 | Cs5g35290.1         | 4.14 | 0 | 0    | 2 | MASCOT | T      | PLEX8 |       |
| 2.79E-04 | 0 0 | Cs5g35290.1         | 4.14 | 0 | 0    | 2 | MASCOT | T      | PLEX8 |       |
| 6.06E-04 | 0 0 | Cs5g35290.1         | 4.14 | 0 | 0    | 2 | MASCOT | T      | PLEX8 |       |
| 2.29E-03 | 0 0 | Cs5g35290.1         | 4.14 | 0 | 0    | 2 | MASCOT | T      | PLEX8 |       |
| 7.21E-03 | 0 0 | Cs5g35290.1         | 4.14 | 0 | 0    | 2 | MASCOT | T      | PLEX8 |       |
| 3.32E-01 | 0 0 | Cs5g35290.1         | 8.72 | 0 | 0    | 2 | MASCOT | T      | PLEX8 |       |
| 2.84E-02 | 0 0 | Cs5g35290.1         | 8.72 | 0 | 0    | 2 | MASCOT | T      | PLEX8 |       |
| 3.22E-01 | 0 0 | Cs5g35290.1         | 8.72 | 0 | 0    | 2 | MASCOT | T      |       |       |
| 6.33E-03 | 0 0 | Cs5g35290.1         | 8.72 | 0 | 0    | 2 | MASCOT | T      | PLEX8 |       |
| 8.96E-03 | 0 0 | Cs5g35290.1         | 8.72 | 0 | 0    | 2 | MASCOT | T      | PLEX8 |       |
| 1.91E-02 | 0 0 | Cs5g35290.1         | 4.37 | 0 | 15.9 | 0 | 2      | MASCOT | T     | PLEX8 |
| 3.38E-02 | 0 0 | Cs5g35290.1         | 4.37 | 0 | 15.9 | 0 | 2      | MASCOT | T     | PLEX8 |
| 1.45E-02 | 0 0 | Cs5g35290.1         | 4.37 | 0 | 15.9 | 0 | 2      | MASCOT | T     | PLEX8 |
| 4.52E-04 | 0 0 | Cs5g35290.1         | 4.37 | 0 | 15.9 | 0 | 2      | MASCOT | T     | PLEX8 |
| 1.31E-02 | 0 0 | Cs5g35290.1         | 4.37 | 0 | 0    | 2 | MASCOT | T      | PLEX8 |       |
| 6.72E-02 | 0 0 | Cs5g35290.1         | 4.37 | 0 | 0    | 2 | MASCOT | T      | PLEX8 |       |
| 1.75E-03 | 0 0 | Cs5g35290.1         | 4.37 | 0 | 0    | 2 | MASCOT | T      | PLEX8 |       |
| 9.48E-05 | 0 0 | Cs5g35290.1         | 4.37 | 0 | 0    | 2 | MASCOT | T      | PLEX8 |       |
| 1.49E-02 | 0 0 | Cs5g35290.1         | 4.03 | 0 | 15.9 | 0 | 2      | MASCOT | T     |       |
| 2.39E-04 | 0 0 | Cs5g35290.1         | 4.03 | 0 | 15.9 | 0 | 2      | MASCOT | T     |       |
| 1.19E-01 | 0 0 | Cs5g35290.1         | 4.03 | 0 | 0    | 2 | MASCOT | T      |       |       |
| 4.48E-02 | 0 0 | Cs5g35290.1         | 5.75 | 0 | 15.9 | 0 | 2      | MASCOT | T     |       |
| 1.02E-03 | 0 0 | Cs5g35290.1         | 5.75 | 0 | 15.9 | 0 | 2      | MASCOT | T     |       |
| 5.56E-03 | 0 0 | Cs5g35290.1         | 5.75 | 0 | 0    | 2 | MASCOT | T      |       |       |
| 2.46E-03 | 0 0 | Cs5g35290.1         | 5.75 | 0 | 0    | 2 | MASCOT | T      |       |       |
| 1.69E-02 | 0 0 | Cs5g35290.1         | 5.75 | 0 | 15.9 | 0 | 2      | MASCOT | T     | PLEX8 |
| 1.17E-03 | 0 0 | Cs5g35290.1         | 5.75 | 0 | 0    | 2 | MASCOT | T      | PLEX8 |       |
| 2.74E-03 | 0 0 | Cs5g35290.1         | 5.75 | 0 | 0    | 2 | MASCOT | T      | PLEX8 |       |
| 1.01E-01 | 0 0 | Cs5g35290.1         | 8.17 | 0 | 0    | 2 | MASCOT | T      | PLEX8 |       |
| 1.39E-02 | 0 0 | Cs5g35290.1         | 8.17 | 0 | 0    | 2 | MASCOT | T      | PLEX8 |       |
| 1.32E-02 | 0 0 | Cs5g35290.1         | 8.17 | 0 | 0    | 2 | MASCOT | T      | PLEX8 |       |
| 3.15E-02 | 0 0 | Cs5g35290.1         | 8.17 | 0 | 0    | 2 | MASCOT | T      | PLEX8 |       |
| 2.14E-02 | 0 0 | Cs5g35290.1         | 8.17 | 0 | 0    | 2 | MASCOT | T      | PLEX8 |       |
| 2.81E-02 | 0 0 | Cs5g35290.1         | 8.17 | 0 | 0    | 2 | MASCOT | T      |       |       |
| 7.09E-02 | 0 0 | Cs5g35290.1         | 8.17 | 0 | 0    | 2 | MASCOT | T      | PLEX8 |       |
| 3.17E-01 | 0 0 | Cs5g35290.1         | 8.17 | 0 | 0    | 2 | MASCOT | T      | PLEX8 |       |
| 4.31E-01 | 0 0 | Cs5g35290.1         | 8.17 | 0 | 0    | 2 | MASCOT | T      |       |       |
| 4.08E-02 | 0 0 | Cs5g35290.1         | 8.17 | 0 | 0    | 2 | MASCOT | T      |       |       |
| 2.40E-01 | 0 0 | Cs1g25760.1/Cs1g257 | 4.14 | 0 | 0    | 2 | MASCOT | T      | PLEX8 |       |
| 5.33E-03 | 0 0 | Cs1g25760.1/Cs1g257 | 4.14 | 0 | 0    | 2 | MASCOT | T      | PLEX8 |       |
| 5.12E-01 | 0 0 | Cs1g25760.1/Cs1g257 | 4.14 | 0 | 0    | 2 | MASCOT | T      | PLEX8 |       |
| 4.14E-02 | 0 0 | Cs1g25760.1/Cs1g257 | 4.14 | 0 | 0    | 2 | MASCOT | T      | PLEX8 |       |
| 9.26E-02 | 0 0 | Cs1g25760.1/Cs1g257 | 4.14 | 0 | 0    | 2 | MASCOT | T      | PLEX8 |       |
| 5.99E-02 | 0 0 | Cs1g25760.1/Cs1g257 | 4.14 | 0 | 0    | 2 | MASCOT | T      | PLEX8 |       |
| 4.80E-02 | 0 0 | Cs1g25760.1/Cs1g257 | 4.14 | 0 | 0    | 2 | MASCOT | T      | PLEX8 |       |

|          |     |                     |      |   |      |   |        |        |       |       |
|----------|-----|---------------------|------|---|------|---|--------|--------|-------|-------|
| 1.17E-02 | 0 0 | Cs1g25760.1/Cs1g257 | 4.14 | 0 | 0    | 2 | MASCOT | T      | PLEX8 |       |
| 4.83E-02 | 0 0 | Cs1g25760.1/Cs1g257 | 4.14 | 0 | 0    | 2 | MASCOT | T      | PLEX8 |       |
| 2.36E-02 | 0 0 | Cs1g25760.1/Cs1g257 | 4.14 | 0 | 0    | 2 | MASCOT | T      | PLEX8 |       |
| 4.27E-06 | 0 0 | Cs1g25760.1         | 4.21 | 0 | 0    | 2 | MASCOT | T      | PLEX8 |       |
| 2.76E-04 | 0 0 | Cs1g25760.1         | 4.21 | 0 | 0    | 2 | MASCOT | T      | PLEX8 |       |
| 1.59E-02 | 0 0 | Cs1g25760.1         | 4.21 | 0 | 0    | 2 | MASCOT | T      | PLEX8 |       |
| 3.56E-03 | 0 0 | Cs1g25760.1         | 4.21 | 0 | 0    | 2 | MASCOT | T      | PLEX8 |       |
| 2.73E-04 | 0 0 | Cs1g25760.1         | 4.21 | 0 | 0    | 2 | MASCOT | T      | PLEX8 |       |
| 9.53E-04 | 0 0 | Cs1g25760.1         | 4.21 | 0 | 0    | 2 | MASCOT | T      |       |       |
| 5.44E-02 | 0 0 | Cs1g25760.1         | 4.21 | 0 | 0    | 2 | MASCOT | T      | PLEX8 |       |
| 1.54E-05 | 0 0 | Cs1g25760.1         | 4.21 | 0 | 0    | 2 | MASCOT | T      | PLEX8 |       |
| 1.46E-05 | 0 0 | Cs1g25760.1/Cs1g257 | 8.5  | 1 | 0    | 2 | MASCOT | T      | PLEX8 |       |
| 5.66E-02 | 0 0 | Cs1g25760.1         | 5.55 | 0 | 0    | 2 | MASCOT | T      | PLEX8 |       |
| 2.37E-01 | 0 0 | Cs1g25760.1         | 5.55 | 0 | 0    | 2 | MASCOT | T      | PLEX8 |       |
| 5.59E-02 | 0 0 | Cs1g25760.1         | 5.55 | 0 | 0    | 2 | MASCOT | T      | PLEX8 |       |
| 5.80E-02 | 0 0 | Cs1g25760.1         | 5.55 | 0 | 0    | 2 | MASCOT | T      | PLEX8 |       |
| 4.64E-02 | 0 0 | Cs1g25760.1         | 5.55 | 0 | 0    | 2 | MASCOT | T      | PLEX8 |       |
| 2.91E-01 | 0 0 | Cs1g25760.1/Cs1g257 | 9.44 | 0 | 0    | 2 | MASCOT | T      | PLEX8 |       |
| 1.23E-01 | 0 0 | Cs1g25760.1/Cs1g257 | 9.44 | 0 | 0    | 2 | MASCOT | T      |       |       |
| 2.44E-02 | 0 0 | Cs1g25760.1/Cs1g257 | 9.44 | 0 | 0    | 2 | MASCOT | T      |       |       |
| 6.51E-02 | 0 0 | Cs1g25760.1/Cs1g257 | 9.44 | 0 | 0    | 2 | MASCOT | T      | PLEX8 |       |
| 1.30E-01 | 0 0 | Cs1g25760.1/Cs1g257 | 9.44 | 0 | 0    | 2 | MASCOT | T      |       |       |
| 2.19E-01 | 0 0 | Cs1g25760.1         | 5.81 | 0 | 0    | 2 | MASCOT | T      |       |       |
| 2.96E-02 | 0 0 | Cs1g25760.1/Cs1g257 | 5.81 | 0 | 0    | 2 | MASCOT | T      |       |       |
| 2.09E-02 | 0 0 | Cs1g25760.1/Cs1g257 | 5.81 | 0 | 0    | 2 | MASCOT | T      |       |       |
| 2.38E-02 | 0 0 | Cs1g25760.1/Cs1g257 | 5.81 | 0 | 0    | 2 | MASCOT | T      |       |       |
| 1.82E-01 | 0 0 | Cs1g25760.1/Cs1g257 | 5.81 | 0 | 0    | 2 | MASCOT | T      | PLEX8 |       |
| 2.32E-01 | 0 0 | Cs1g25760.1/Cs1g257 | 5.81 | 0 | 0    | 2 | MASCOT | T      | PLEX8 |       |
| 1.29E-02 | 0 0 | Cs1g25760.1/Cs1g257 | 5.81 | 0 | 0    | 2 | MASCOT | T      | PLEX8 |       |
| 5.62E-02 | 0 0 | Cs1g25760.1/Cs1g257 | 4.4  | 0 | 15.9 | 0 | 2      | MASCOT | T     | PLEX8 |
| 3.23E-05 | 0 0 | Cs1g25760.1/Cs1g257 | 4.4  | 0 | 0    | 2 | MASCOT | T      | PLEX8 |       |
| 9.90E-04 | 0 0 | Cs1g25760.1/Cs1g257 | 4.4  | 0 | 0    | 2 | MASCOT | T      | PLEX8 |       |
| 3.22E-03 | 0 0 | Cs1g25760.1/Cs1g257 | 5.84 | 0 | 0    | 2 | MASCOT | T      | PLEX8 |       |
| 2.34E-01 | 0 0 | Cs1g25760.1/Cs1g257 | 5.84 | 0 | 0    | 2 | MASCOT | T      | PLEX8 |       |
| 2.24E-03 | 0 0 | Cs1g25760.1/Cs1g257 | 4.53 | 0 | 0    | 2 | MASCOT | T      | PLEX8 |       |
| 3.81E-04 | 0 0 | Cs1g25760.1/Cs1g257 | 4.53 | 0 | 0    | 2 | MASCOT | T      | PLEX8 |       |
| 4.04E-04 | 0 0 | Cs1g25760.1/Cs1g257 | 4.53 | 0 | 0    | 2 | MASCOT | T      | PLEX8 |       |
| 4.18E-06 | 0 0 | Cs1g25760.1/Cs1g257 | 4.53 | 0 | 0    | 2 | MASCOT | T      | PLEX8 |       |
| 5.45E-02 | 0 0 | Cs1g25760.1/Cs1g257 | 4.53 | 0 | 0    | 2 | MASCOT | T      | PLEX8 |       |
| 8.82E-02 | 0 0 | Cs1g25760.1/Cs1g257 | 4.53 | 0 | 0    | 2 | MASCOT | T      | PLEX8 |       |
| 1.26E-02 | 0 0 | Cs1g25760.1/Cs1g257 | 4.53 | 0 | 0    | 2 | MASCOT | T      | PLEX8 |       |
| 1.03E-01 | 0 0 | Cs1g25760.1/Cs1g257 | 4.53 | 0 | 0    | 2 | MASCOT | T      | PLEX8 |       |
| 6.50E-04 | 0 0 | Cs1g25760.1/Cs1g257 | 4.14 | 0 | 0    | 2 | MASCOT | T      |       |       |
| 7.03E-03 | 0 0 | Cs1g25760.1/Cs1g257 | 4.14 | 0 | 0    | 2 | MASCOT | T      | PLEX8 |       |
| 2.41E-04 | 0 0 | Cs1g25760.1/Cs1g257 | 4.14 | 0 | 0    | 2 | MASCOT | T      |       |       |
| 1.30E-04 | 0 0 | Cs1g25760.1/Cs1g257 | 4.14 | 0 | 0    | 2 | MASCOT | T      |       |       |
| 2.15E-03 | 0 0 | Cs1g25760.1/Cs1g257 | 4.14 | 0 | 0    | 2 | MASCOT | T      |       |       |
| 6.20E-04 | 0 0 | Cs1g25760.1/Cs1g257 | 4.14 | 0 | 0    | 2 | MASCOT | T      |       |       |
| 8.26E-03 | 0 0 | Cs1g25760.1/Cs1g257 | 4.21 | 0 | 0    | 2 | MASCOT | T      | PLEX8 |       |
| 1.15E-03 | 0 0 | Cs1g25760.1/Cs1g257 | 4.21 | 0 | 0    | 2 | MASCOT | T      | PLEX8 |       |
| 6.24E-03 | 0 0 | Cs1g25760.1/Cs1g257 | 4.21 | 0 | 0    | 2 | MASCOT | T      | PLEX8 |       |



|          |     |                      |      |   |      |   |        |        |       |       |
|----------|-----|----------------------|------|---|------|---|--------|--------|-------|-------|
| 3.55E-04 | 0 0 | Cs1g25760.1/Cs1g257  | 5.19 | 0 | 0    | 2 | MASCOT | T      | PLEX8 |       |
| 4.93E-04 | 0 0 | Cs1g25760.1/Cs1g257  | 8.73 | 0 | 0    | 2 | MASCOT | T      | PLEX8 |       |
| 1.32E-02 | 0 0 | Cs1g25760.1/Cs1g257  | 8.73 | 0 | 0    | 2 | MASCOT | T      | PLEX8 |       |
| 7.49E-02 | 0 0 | Cs1g25760.1/Cs1g257  | 8.73 | 0 | 0    | 2 | MASCOT | T      | PLEX8 |       |
| 1.54E-02 | 0 0 | Cs1g25760.1/Cs1g257  | 8.73 | 0 | 0    | 2 | MASCOT | T      | PLEX8 |       |
| 1.69E-04 | 0 0 | Cs1g25760.1/Cs1g257  | 8.73 | 0 | 0    | 2 | MASCOT | T      | PLEX8 |       |
| 1.94E-01 | 0 0 | orange1.1t01892.1    | 4.25 | 0 | 0    | 2 | MASCOT | T      | PLEX8 |       |
| 3.79E-01 | 0 0 | orange1.1t01892.1    | 4.25 | 0 | 0    | 2 | MASCOT | T      | PLEX8 |       |
| 1.43E-01 | 0 0 | orange1.1t01892.1    | 4.25 | 0 | 0    | 2 | MASCOT | T      | PLEX8 |       |
| 3.47E-02 | 0 0 | orange1.1t01892.1    | 4.25 | 0 | 0    | 2 | MASCOT | T      | PLEX8 |       |
| 8.89E-03 | 0 0 | orange1.1t01892.1    | 5.21 | 0 | 0    | 2 | MASCOT | T      | PLEX8 |       |
| 2.11E-02 | 0 0 | orange1.1t01892.1    | 5.21 | 0 | 0    | 2 | MASCOT | T      | PLEX8 |       |
| 8.94E-03 | 0 0 | orange1.1t01892.1    | 5.21 | 0 | 0    | 2 | MASCOT | T      | PLEX8 |       |
| 6.77E-04 | 0 0 | orange1.1t01892.1    | 4.21 | 0 | 0    | 2 | MASCOT | T      | PLEX8 |       |
| 1.16E-01 | 0 0 | orange1.1t01892.1    | 5.38 | 0 | 0    | 2 | MASCOT | T      | PLEX8 |       |
| 1.29E-01 | 0 0 | orange1.1t01892.1    | 5.38 | 0 | 0    | 2 | MASCOT | T      | PLEX8 |       |
| 7.38E-03 | 0 0 | orange1.1t01892.1    | 5.38 | 0 | 0    | 2 | MASCOT | T      | PLEX8 |       |
| 1.03E-02 | 0 0 | orange1.1t01892.1    | 5.38 | 0 | 0    | 2 | MASCOT | T      | PLEX8 |       |
| 2.23E-03 | 0 0 | orange1.1t01892.1    | 5.38 | 0 | 0    | 2 | MASCOT | T      | PLEX8 |       |
| 5.25E-02 | 0 0 | orange1.1t01892.1    | 5.38 | 0 | 0    | 2 | MASCOT | T      | PLEX8 |       |
| 1.32E-02 | 0 0 | orange1.1t01892.1    | 5.38 | 0 | 0    | 2 | MASCOT | T      | PLEX8 |       |
| 2.30E-01 | 0 0 | Cs7g26020.1/orange1. | 8.22 | 0 | 0    | 2 | MASCOT | T      | PLEX8 |       |
| 3.80E-01 | 0 0 | Cs7g26020.1/orange1. | 8.22 | 0 | 0    | 2 | MASCOT | T      | PLEX8 |       |
| 2.67E-03 | 0 0 | orange1.1t01892.1    | 4.25 | 0 | 0    | 2 | MASCOT | T      | PLEX8 |       |
| 9.48E-03 | 0 0 | orange1.1t01892.1    | 4.25 | 0 | 0    | 2 | MASCOT | T      | PLEX8 |       |
| 3.51E-02 | 0 0 | orange1.1t01892.1    | 4.25 | 0 | 0    | 2 | MASCOT | T      | PLEX8 |       |
| 9.03E-03 | 0 0 | orange1.1t01892.1    | 8.73 | 0 | 0    | 2 | MASCOT | T      | PLEX8 |       |
| 5.88E-02 | 0 0 | orange1.1t01892.1    | 8.73 | 0 | 0    | 2 | MASCOT | T      | PLEX8 |       |
| 1.74E-01 | 0 0 | orange1.1t01892.1    | 8.73 | 0 | 0    | 2 | MASCOT | T      | PLEX8 |       |
| 8.42E-02 | 0 0 | orange1.1t01892.1    | 8.73 | 0 | 0    | 2 | MASCOT | T      | PLEX8 |       |
| 1.53E-01 | 0 0 | orange1.1t01892.1    | 8.73 | 0 | 0    | 2 | MASCOT | T      | PLEX8 |       |
| 2.86E-02 | 0 0 | orange1.1t01892.1    | 8.73 | 0 | 0    | 2 | MASCOT | T      | PLEX8 |       |
| 5.89E-05 | 0 0 | orange1.1t01892.1    | 5.8  | 0 | 0    | 2 | MASCOT | T      | PLEX8 |       |
| 3.04E-05 | 0 0 | orange1.1t01892.1    | 5.8  | 0 | 0    | 2 | MASCOT | T      | PLEX8 |       |
| 1.05E-01 | 0 0 | orange1.1t01892.1    | 5.8  | 0 | 0    | 2 | MASCOT | T      | PLEX8 |       |
| 1.53E-02 | 0 0 | orange1.1t01892.1    | 8.56 | 0 | 0    | 2 | MASCOT | T      | PLEX8 |       |
| 9.17E-03 | 0 0 | orange1.1t01892.1    | 6.05 | 0 | 0    | 2 | MASCOT | T      | PLEX8 |       |
| 1.90E-01 | 0 0 | orange1.1t01892.1    | 6.05 | 0 | 0    | 2 | MASCOT | T      | PLEX8 |       |
| 4.73E-02 | 0 0 | orange1.1t01892.1    | 6.05 | 0 | 0    | 2 | MASCOT | T      | PLEX8 |       |
| 5.54E-02 | 0 0 | orange1.1t01892.1    | 6.05 | 0 | 0    | 2 | MASCOT | T      | PLEX8 |       |
| 2.46E-03 | 0 0 | orange1.1t01892.1    | 5.88 | 0 | 0    | 2 | MASCOT | T      | PLEX8 |       |
| 1.74E-03 | 0 0 | orange1.1t01892.1    | 5.88 | 0 | 0    | 2 | MASCOT | T      | PLEX8 |       |
| 8.82E-02 | 0 0 | orange1.1t01892.1    | 5.88 | 0 | 0    | 2 | MASCOT | T      | PLEX8 |       |
| 4.83E-01 | 0 0 | orange1.1t01892.1    | 5.88 | 0 | 0    | 2 | MASCOT | T      | PLEX8 |       |
| 7.78E-04 | 0 0 | Cs7g26020.1/orange1. | 5.84 | 0 | 0    | 2 | MASCOT | T      | PLEX8 |       |
| 6.62E-03 | 0 0 | Cs7g26020.1/orange1. | 5.84 | 0 | 0    | 2 | MASCOT | T      | PLEX8 |       |
| 9.22E-03 | 0 0 | Cs7g26020.1/orange1. | 5.84 | 0 | 0    | 2 | MASCOT | T      | PLEX8 |       |
| 1.32E-02 | 0 0 | Cs7g26020.1/orange1. | 5.84 | 0 | 0    | 2 | MASCOT | T      | PLEX8 |       |
| 2.27E-03 | 0 0 | Cs7g26020.1/orange1. | 5.84 | 0 | 0    | 2 | MASCOT | T      | PLEX8 |       |
| 6.75E-02 | 0 0 | orange1.1t01892.1    | 6.74 | 0 | 15.9 | 0 | 2      | MASCOT | T     | PLEX8 |
| 1.10E-01 | 0 0 | orange1.1t01892.1    | 6.74 | 0 | 15.9 | 0 | 2      | MASCOT | T     | PLEX8 |

|          |     |                      |      |   |      |   |   |        |   |       |
|----------|-----|----------------------|------|---|------|---|---|--------|---|-------|
| 2.00E-01 | 0 0 | orange1.1t01892.1    | 6.74 | 0 | 15.9 | 0 | 2 | MASCOT | T | PLEX8 |
| 9.08E-03 | 0 0 | orange1.1t01892.1    | 6.74 | 0 |      | 0 | 2 | MASCOT | T | PLEX8 |
| 1.37E-02 | 0 0 | orange1.1t01892.1    | 6.74 | 0 |      | 0 | 2 | MASCOT | T | PLEX8 |
| 4.39E-02 | 0 0 | orange1.1t01892.1    | 8.75 | 0 |      | 0 | 2 | MASCOT | T | PLEX8 |
| 1.72E-02 | 0 0 | orange1.1t01892.1    | 4.53 | 0 |      | 0 | 2 | MASCOT | T | PLEX8 |
| 9.72E-02 | 0 0 | orange1.1t01892.1    | 4.53 | 0 |      | 0 | 2 | MASCOT | T | PLEX8 |
| 7.64E-05 | 0 0 | orange1.1t01892.1    | 4.53 | 0 |      | 0 | 2 | MASCOT | T | PLEX8 |
| 2.39E-03 | 0 0 | orange1.1t01892.1    | 4.53 | 0 |      | 0 | 2 | MASCOT | T | PLEX8 |
| 4.06E-06 | 0 0 | Cs2g08950.1/orange1. | 6.73 | 0 |      | 0 | 2 | MASCOT | T | PLEX8 |
| 3.61E-02 | 0 0 | Cs6g17260.1/Cs6g172  | 6.1  | 0 |      | 0 | 2 | MASCOT | T | PLEX8 |
| 8.90E-03 | 0 0 | Cs6g17260.1/Cs6g172  | 6.1  | 0 |      | 0 | 2 | MASCOT | T | PLEX8 |
| 1.83E-02 | 0 0 | Cs6g17260.1/Cs6g172  | 4.68 | 1 |      | 0 | 2 | MASCOT | T | PLEX8 |
| 6.90E-02 | 0 0 | Cs6g17260.1/Cs6g172  | 6    | 0 | 15.9 | 0 | 2 | MASCOT | T | PLEX8 |
| 1.97E-02 | 0 0 | Cs6g17260.1/Cs6g172  | 4.37 | 0 |      | 0 | 2 | MASCOT | T | PLEX8 |
| 3.88E-01 | 0 0 | Cs6g17260.1/Cs6g172  | 4.37 | 0 |      | 0 | 2 | MASCOT | T | PLEX8 |
| 1.51E-01 | 0 0 | Cs6g17260.1/Cs6g172  | 4.37 | 0 |      | 0 | 2 | MASCOT | T | PLEX8 |
| 9.75E-02 | 0 0 | Cs6g17260.1/Cs6g172  | 6    | 0 |      | 0 | 2 | MASCOT | T | PLEX8 |
| 7.01E-02 | 0 0 | Cs6g17260.1/Cs6g172  | 6    | 0 |      | 0 | 2 | MASCOT | T | PLEX8 |
| 1.11E-01 | 0 0 | Cs6g17260.1/Cs6g172  | 6    | 0 |      | 0 | 2 | MASCOT | T | PLEX8 |
| 6.62E-02 | 0 0 | Cs6g17260.1/Cs6g172  | 6    | 0 |      | 0 | 2 | MASCOT | T | PLEX8 |
| 1.05E-03 | 0 0 | Cs6g17260.1/Cs6g172  | 5.75 | 0 | 15.9 | 0 | 2 | MASCOT | T |       |
| 5.76E-03 | 0 0 | Cs6g17260.1/Cs6g172  | 5.75 | 0 |      | 0 | 2 | MASCOT | T |       |
| 8.47E-03 | 0 0 | Cs6g17260.1/Cs6g172  | 5.75 | 0 |      | 0 | 2 | MASCOT | T |       |
| 3.59E-02 | 0 0 | Cs6g17260.1/Cs6g172  | 4.53 | 0 |      | 0 | 2 | MASCOT | T |       |
| 7.37E-03 | 0 0 | Cs6g17260.1/Cs6g172  | 4.37 | 0 |      | 0 | 2 | MASCOT | T | PLEX8 |
| 3.11E-03 | 0 0 | Cs6g17260.1/Cs6g172  | 4.37 | 0 |      | 0 | 2 | MASCOT | T | PLEX8 |
| 1.38E-03 | 0 0 | Cs6g17260.1/Cs6g172  | 4.37 | 0 |      | 0 | 2 | MASCOT | T | PLEX8 |
| 1.52E-04 | 0 0 | Cs6g17260.1/Cs6g172  | 4.25 | 0 |      | 0 | 2 | MASCOT | T | PLEX8 |
| 4.54E-03 | 0 0 | Cs6g17260.1/Cs6g172  | 4.25 | 0 |      | 0 | 2 | MASCOT | T |       |
| 1.56E-01 | 0 0 | Cs6g17260.1/Cs6g172  | 4.25 | 0 |      | 0 | 2 | MASCOT | T |       |
| 1.17E-04 | 0 0 | Cs6g17260.1/Cs6g172  | 4.25 | 0 |      | 0 | 2 | MASCOT | T |       |
| 2.28E-03 | 0 0 | Cs6g17260.1/Cs6g172  | 4.25 | 0 |      | 0 | 2 | MASCOT | T |       |
| 2.93E-05 | 0 0 | Cs6g17260.1/Cs6g172  | 4.25 | 0 |      | 0 | 2 | MASCOT | T |       |
| 7.41E-03 | 0 0 | Cs6g17260.1/Cs6g172  | 8.59 | 0 |      | 0 | 2 | MASCOT | T | PLEX8 |
| 9.31E-04 | 0 0 | Cs6g17260.1/Cs6g172  | 8.59 | 0 |      | 0 | 2 | MASCOT | T | PLEX8 |
| 1.03E-02 | 0 0 | Cs6g17260.1/Cs6g172  | 8.59 | 0 |      | 0 | 2 | MASCOT | T | PLEX8 |
| 4.79E-03 | 0 0 | Cs6g17260.1/Cs6g172  | 4.03 | 0 |      | 0 | 2 | MASCOT | T | PLEX8 |
| 3.06E-03 | 0 0 | Cs6g17260.1/Cs6g172  | 4.03 | 0 |      | 0 | 2 | MASCOT | T | PLEX8 |
| 6.13E-03 | 0 0 | Cs6g17260.1/Cs6g172  | 4.03 | 0 |      | 0 | 2 | MASCOT | T | PLEX8 |
| 3.43E-04 | 0 0 | Cs6g17260.1/Cs6g172  | 4.03 | 0 |      | 0 | 2 | MASCOT | T | PLEX8 |
| 4.69E-04 | 0 0 | Cs6g17260.1/Cs6g172  | 4.14 | 0 |      | 0 | 2 | MASCOT | T | PLEX8 |
| 5.67E-04 | 0 0 | Cs6g17260.1/Cs6g172  | 4.14 | 0 |      | 0 | 2 | MASCOT | T | PLEX8 |
| 2.39E-05 | 0 0 | Cs6g17260.1/Cs6g172  | 4.14 | 0 |      | 0 | 2 | MASCOT | T | PLEX8 |
| 2.65E-03 | 0 0 | Cs6g17260.1/Cs6g172  | 4.14 | 0 |      | 0 | 2 | MASCOT | T |       |
| 2.26E-03 | 0 0 | Cs6g17260.1/Cs6g172  | 4.14 | 0 |      | 0 | 2 | MASCOT | T |       |
| 4.33E-03 | 0 0 | Cs6g17260.1/Cs6g172  | 4.14 | 0 |      | 0 | 2 | MASCOT | T |       |
| 1.93E-04 | 0 0 | Cs6g17260.1/Cs6g172  | 4.14 | 0 |      | 0 | 2 | MASCOT | T | PLEX8 |
| 2.62E-03 | 0 0 | Cs6g17260.1/Cs6g172  | 4.37 | 0 |      | 0 | 2 | MASCOT | T | PLEX8 |
| 6.85E-02 | 0 0 | Cs6g17260.1/Cs6g172  | 4.37 | 0 |      | 0 | 2 | MASCOT | T | PLEX8 |
| 4.93E-03 | 0 0 | Cs6g17260.1/Cs6g172  | 4.37 | 0 |      | 0 | 2 | MASCOT | T | PLEX8 |
| 4.96E-01 | 0 0 | Cs6g17260.1/Cs6g172  | 4.37 | 0 |      | 0 | 2 | MASCOT | T | PLEX8 |

|          |     |                      |      |   |      |   |        |        |       |       |
|----------|-----|----------------------|------|---|------|---|--------|--------|-------|-------|
| 1.65E-02 | 0 0 | Cs6g17260.1/Cs6g172  | 4.37 | 0 | 0    | 2 | MASCOT | T      | PLEX8 |       |
| 2.50E-03 | 0 0 | Cs6g17260.1/Cs6g172  | 4.37 | 0 | 0    | 2 | MASCOT | T      | PLEX8 |       |
| 1.02E-03 | 0 0 | Cs6g17260.1/Cs6g172  | 4.37 | 0 | 0    | 2 | MASCOT | T      | PLEX8 |       |
| 4.14E-03 | 0 0 | Cs6g17260.1/Cs6g172  | 4.37 | 0 | 0    | 2 | MASCOT | T      | PLEX8 |       |
| 8.87E-02 | 0 0 | Cs6g17260.1/Cs6g172  | 4.37 | 0 | 0    | 2 | MASCOT | T      | PLEX8 |       |
| 1.77E-02 | 0 0 | Cs6g17260.1/Cs6g172  | 4.37 | 0 | 0    | 2 | MASCOT | T      | PLEX8 |       |
| 4.96E-01 | 0 0 | Cs6g17260.1/Cs6g172  | 5.84 | 0 | 0    | 2 | MASCOT | T      | PLEX8 |       |
| 3.37E-01 | 0 0 | Cs6g17260.1/Cs6g172  | 8.75 | 0 | 0    | 2 | MASCOT | T      | PLEX8 |       |
| 1.04E-04 | 0 0 | Cs6g17260.1/Cs6g172  | 5.97 | 0 | 15.9 | 0 | 2      | MASCOT | T     | PLEX8 |
| 4.51E-05 | 0 0 | Cs6g17260.1/Cs6g172  | 5.97 | 0 | 0    | 2 | MASCOT | T      | PLEX8 |       |
| 7.58E-03 | 0 0 | Cs6g17260.1/Cs6g172  | 5.97 | 0 | 0    | 2 | MASCOT | T      | PLEX8 |       |
| 1.00E-02 | 0 0 | Cs2g13550.1/Cs2g135  | 6.79 | 0 | 0    | 2 | MASCOT | T      |       |       |
| 1.43E-01 | 0 0 | Cs2g13550.1/Cs2g135  | 5.99 | 0 | 15.9 | 0 | 2      | MASCOT | T     |       |
| 1.11E-02 | 0 0 | Cs2g13550.1/Cs2g135  | 5.99 | 0 | 0    | 2 | MASCOT | T      |       |       |
| 2.72E-05 | 0 0 | Cs2g13550.1/Cs2g135  | 5.99 | 0 | 0    | 2 | MASCOT | T      |       |       |
| 1.78E-02 | 0 0 | Cs2g13550.1/Cs2g135  | 5.99 | 0 | 0    | 2 | MASCOT | T      |       |       |
| 9.56E-03 | 0 0 | Cs2g13550.1          | 4.37 | 0 | 0    | 2 | MASCOT | T      | PLEX8 |       |
| 2.50E-03 | 0 0 | Cs2g13550.1          | 4.37 | 0 | 0    | 2 | MASCOT | T      | PLEX8 |       |
| 5.54E-03 | 0 0 | Cs2g13550.1          | 4.37 | 0 | 0    | 2 | MASCOT | T      | PLEX8 |       |
| 9.21E-02 | 0 0 | gi 113952629/Cs2g135 | 8.75 | 0 | 0    | 2 | MASCOT | T      | PLEX8 |       |
| 1.22E-01 | 0 0 | gi 113952629/Cs2g135 | 8.75 | 0 | 0    | 2 | MASCOT | T      | PLEX8 |       |
| 1.24E-01 | 0 0 | gi 113952629/Cs2g135 | 8.75 | 0 | 0    | 2 | MASCOT | T      | PLEX8 |       |
| 2.81E-01 | 0 0 | Cs2g13550.1/Cs2g135  | 4.37 | 0 | 0    | 2 | MASCOT | T      | PLEX8 |       |
| 1.03E-01 | 0 0 | Cs2g13550.1/Cs2g135  | 6.61 | 0 | 0    | 2 | MASCOT | T      | PLEX8 |       |
| 2.74E-01 | 0 0 | Cs2g13550.1/Cs2g135  | 6.61 | 0 | 0    | 2 | MASCOT | T      | PLEX8 |       |
| 1.24E-01 | 0 0 | Cs2g13550.1/Cs2g135  | 6.61 | 0 | 0    | 2 | MASCOT | T      | PLEX8 |       |
| 1.19E-01 | 0 0 | Cs2g13550.1/Cs2g135  | 6.61 | 0 | 0    | 2 | MASCOT | T      | PLEX8 |       |
| 3.00E-02 | 0 0 | Cs2g13550.1/Cs2g135  | 6.61 | 0 | 0    | 2 | MASCOT | T      | PLEX8 |       |
| 3.94E-01 | 0 0 | Cs2g13550.1/Cs2g135  | 6.61 | 0 | 0    | 2 | MASCOT | T      |       |       |
| 5.49E-02 | 0 0 | Cs2g13550.1/Cs2g135  | 5.81 | 0 | 0    | 2 | MASCOT | T      | PLEX8 |       |
| 3.32E-05 | 0 0 | Cs2g13550.1/Cs2g135  | 5.81 | 0 | 0    | 2 | MASCOT | T      |       |       |
| 6.47E-02 | 0 0 | Cs2g13550.1/Cs2g135  | 5.81 | 0 | 0    | 2 | MASCOT | T      |       |       |
| 7.54E-02 | 0 0 | Cs2g13550.1/Cs2g135  | 4.37 | 0 | 0    | 2 | MASCOT | T      |       |       |
| 4.68E-01 | 0 0 | Cs2g13550.1/Cs2g135  | 4.53 | 0 | 15.9 | 0 | 2      | MASCOT | T     | PLEX8 |
| 5.13E-03 | 0 0 | Cs2g13550.1/Cs2g135  | 4.53 | 0 | 0    | 2 | MASCOT | T      | PLEX8 |       |
| 1.09E-01 | 0 0 | Cs2g13550.1/Cs2g135  | 4.53 | 0 | 0    | 2 | MASCOT | T      | PLEX8 |       |
| 3.20E-02 | 0 0 | Cs2g13550.1/Cs2g135  | 4.53 | 0 | 0    | 2 | MASCOT | T      | PLEX8 |       |
| 9.10E-09 | 0 0 | Cs2g13550.1/Cs2g135  | 6    | 0 | 0    | 2 | MASCOT | T      |       |       |
| 6.19E-03 | 0 0 | Cs2g13550.1/Cs2g135  | 4.14 | 0 | 15.9 | 0 | 2      | MASCOT | T     | PLEX8 |
| 5.94E-03 | 0 0 | Cs2g13550.1/Cs2g135  | 4.14 | 0 | 0    | 2 | MASCOT | T      | PLEX8 |       |
| 2.50E-02 | 0 0 | Cs2g13550.1/Cs2g135  | 4.37 | 0 | 0    | 2 | MASCOT | T      | PLEX8 |       |
| 1.48E-01 | 0 0 | Cs2g13550.1/Cs2g135  | 5.4  | 0 | 15.9 | 0 | 2      | MASCOT | T     | PLEX8 |
| 5.69E-05 | 0 0 | Cs2g13550.1/Cs2g135  | 5.4  | 0 | 15.9 | 0 | 2      | MASCOT | T     | PLEX8 |
| 6.61E-02 | 0 0 | Cs2g13550.1/Cs2g135  | 5.4  | 0 | 15.9 | 0 | 2      | MASCOT | T     |       |
| 2.27E-04 | 0 0 | Cs2g13550.1/Cs2g135  | 5.4  | 0 | 15.9 | 0 | 2      | MASCOT | T     | PLEX8 |
| 5.35E-04 | 0 0 | Cs2g13550.1/Cs2g135  | 5.4  | 0 | 15.9 | 0 | 2      | MASCOT | T     |       |
| 1.28E-04 | 0 0 | Cs2g13550.1/Cs2g135  | 5.4  | 0 | 0    | 2 | MASCOT | T      | PLEX8 |       |
| 1.66E-04 | 0 0 | Cs2g13550.1/Cs2g135  | 5.4  | 0 | 0    | 2 | MASCOT | T      | PLEX8 |       |
| 5.69E-06 | 0 0 | Cs2g13550.1/Cs2g135  | 5.4  | 0 | 0    | 2 | MASCOT | T      | PLEX8 |       |
| 1.92E-01 | 0 0 | Cs2g13550.1/Cs2g135  | 5.4  | 0 | 0    | 2 | MASCOT | T      | PLEX8 |       |
| 3.33E-03 | 0 0 | Cs2g13550.1/Cs2g135  | 5.4  | 0 | 0    | 2 | MASCOT | T      |       |       |

|          |     |                        |      |   |      |   |        |         |   |
|----------|-----|------------------------|------|---|------|---|--------|---------|---|
| 9.12E-05 | 0 0 | Cs2g13550.1/Cs2g135    | 5.4  | 0 | 0    | 2 | MASCOT | T       |   |
| 4.51E-05 | 0 0 | Cs2g13550.1/Cs2g135    | 5.4  | 0 | 0    | 2 | MASCOT | T       |   |
| 7.83E-05 | 0 0 | Cs2g13550.1            | 4.03 | 0 | 0    | 2 | MASCOT | T       |   |
| 5.22E-03 | 0 0 | Cs2g13550.1/Cs2g135    | 4.37 | 0 | 15.9 | 0 | 2      | MASCOT  | T |
| 4.00E-04 | 0 0 | Cs2g13550.1/Cs2g135    | 4.37 | 0 | 0    | 2 | MASCOT | T       |   |
| 5.34E-03 | 0 0 | Cs2g13550.1/Cs2g135    | 4.37 | 0 | 0    | 2 | MASCOT | T       |   |
| 2.08E-04 | 0 0 | Cs2g13550.1/Cs2g135    | 6.72 | 0 | 0    | 2 | MASCOT | T PLEX8 |   |
| 8.91E-05 | 0 0 | Cs2g13550.1/Cs2g135    | 6.72 | 0 | 0    | 2 | MASCOT | T PLEX8 |   |
| 3.09E-04 | 0 0 | Cs2g13550.1/Cs2g135    | 6.72 | 0 | 0    | 2 | MASCOT | T PLEX8 |   |
| 2.44E-03 | 0 0 | Cs2g30390.1/Cs2g303    | 4.03 | 0 | 0    | 2 | MASCOT | T       |   |
| 1.07E-04 | 0 0 | Cs2g30390.1/Cs2g303    | 4.03 | 0 | 0    | 2 | MASCOT | T       |   |
| 1.65E-02 | 0 0 | Cs2g30390.1/Cs2g303    | 4.37 | 0 | 0    | 2 | MASCOT | T PLEX8 |   |
| 4.00E-02 | 0 0 | Cs2g30390.1/Cs2g303    | 4.37 | 0 | 0    | 2 | MASCOT | T PLEX8 |   |
| 1.50E-01 | 0 0 | Cs2g30390.1/Cs2g303    | 4.37 | 0 | 0    | 2 | MASCOT | T PLEX8 |   |
| 4.04E-04 | 0 0 | Cs2g30390.1/Cs2g303    | 4    | 0 | 0    | 2 | MASCOT | T PLEX8 |   |
| 1.62E-01 | 0 0 | orange1.1t04018.1 ! C: | 4.53 | 0 | 0    | 2 | MASCOT | T PLEX8 |   |
| 1.96E-01 | 0 0 | orange1.1t04018.1 ! C: | 4.53 | 0 | 0    | 2 | MASCOT | T PLEX8 |   |
| 2.51E-01 | 0 0 | orange1.1t04018.1 ! C: | 4.53 | 0 | 0    | 2 | MASCOT | T PLEX8 |   |
| 2.61E-02 | 0 0 | orange1.1t04018.1 ! C: | 4.53 | 0 | 0    | 2 | MASCOT | T PLEX8 |   |
| 2.65E-01 | 0 0 | orange1.1t04018.1 ! C: | 4.53 | 0 | 0    | 2 | MASCOT | T PLEX8 |   |
| 7.74E-02 | 0 0 | orange1.1t04018.1 ! C: | 4.53 | 0 | 0    | 2 | MASCOT | T PLEX8 |   |
| 2.21E-02 | 0 0 | orange1.1t04018.1 ! C: | 4.53 | 0 | 0    | 2 | MASCOT | T PLEX8 |   |
| 8.13E-02 | 0 0 | Cs2g30390.1/Cs2g303    | 4.18 | 1 | 0    | 2 | MASCOT | T PLEX8 |   |
| 6.25E-02 | 0 0 | Cs2g30390.1/Cs2g303    | 6.75 | 0 | 0    | 2 | MASCOT | T PLEX8 |   |
| 2.28E-02 | 0 0 | Cs2g30390.1/Cs2g303    | 6.75 | 0 | 0    | 2 | MASCOT | T PLEX8 |   |
| 1.06E-03 | 0 0 | Cs2g30390.1/Cs2g303    | 6.75 | 0 | 0    | 2 | MASCOT | T PLEX8 |   |
| 9.84E-03 | 0 0 | Cs2g30390.1/Cs2g303    | 6.75 | 0 | 0    | 2 | MASCOT | T PLEX8 |   |
| 9.63E-02 | 0 0 | Cs2g30390.1/Cs2g303    | 6.75 | 0 | 0    | 2 | MASCOT | T PLEX8 |   |
| 1.23E-01 | 0 0 | Cs2g30390.1/Cs2g303    | 12   | 0 | 0    | 2 | MASCOT | T       |   |
| 6.78E-03 | 0 0 | Cs2g30390.1/Cs2g303    | 5.71 | 0 | 0    | 2 | MASCOT | T PLEX8 |   |
| 1.18E-02 | 0 0 | Cs2g30390.1/Cs2g303    | 6    | 0 | 0    | 2 | MASCOT | T PLEX8 |   |
| 6.21E-02 | 0 0 | Cs2g30390.1/Cs2g303    | 6    | 0 | 0    | 2 | MASCOT | T PLEX8 |   |
| 1.19E-01 | 0 0 | Cs2g30390.1/Cs2g303    | 5.84 | 0 | 0    | 2 | MASCOT | T PLEX8 |   |
| 1.52E-02 | 0 0 | Cs2g30390.1/Cs2g303    | 5.84 | 0 | 0    | 2 | MASCOT | T PLEX8 |   |
| 1.48E-02 | 0 0 | Cs2g30390.1/Cs2g303    | 5.83 | 0 | 0    | 2 | MASCOT | T       |   |
| 3.31E-04 | 0 0 | Cs2g30390.1/Cs2g303    | 5.83 | 0 | 0    | 2 | MASCOT | T       |   |
| 1.76E-02 | 0 0 | Cs2g30390.1/Cs2g303    | 6    | 0 | 0    | 2 | MASCOT | T PLEX8 |   |
| 2.01E-03 | 0 0 | Cs2g30390.1/Cs2g303    | 6    | 0 | 0    | 2 | MASCOT | T PLEX8 |   |
| 7.50E-02 | 0 0 | Cs2g30390.1/Cs2g303    | 4.54 | 0 | 0    | 2 | MASCOT | T       |   |
| 2.43E-02 | 0 0 | Cs2g30390.1/Cs2g303    | 9.75 | 0 | 0    | 2 | MASCOT | T       |   |
| 7.72E-02 | 0 0 | Cs2g30390.1/Cs2g303    | 9.75 | 0 | 0    | 2 | MASCOT | T       |   |
| 1.26E-01 | 0 0 | Cs2g30390.1/Cs2g303    | 9.75 | 0 | 0    | 2 | MASCOT | T       |   |
| 3.37E-01 | 0 0 | Cs2g30390.1/Cs2g303    | 4.53 | 0 | 0    | 2 | MASCOT | T PLEX8 |   |
| 6.37E-02 | 0 0 | Cs2g30390.1/Cs2g303    | 5.72 | 0 | 0    | 2 | MASCOT | T PLEX8 |   |
| 5.15E-03 | 0 0 | Cs2g30390.1/Cs2g303    | 5.72 | 0 | 0    | 2 | MASCOT | T PLEX8 |   |
| 4.52E-02 | 0 0 | Cs2g30390.1/Cs2g303    | 5.72 | 0 | 0    | 2 | MASCOT | T PLEX8 |   |
| 1.03E-01 | 0 0 | Cs2g30390.1/Cs2g303    | 5.72 | 0 | 0    | 2 | MASCOT | T PLEX8 |   |
| 6.84E-03 | 0 0 | Cs2g30390.1/Cs2g303    | 5.72 | 0 | 0    | 2 | MASCOT | T PLEX8 |   |
| 7.47E-02 | 0 0 | Cs2g04500.1/Cs2g045    | 5.84 | 0 | 0    | 2 | MASCOT | T PLEX8 |   |
| 1.31E-01 | 0 0 | Cs2g04500.1/Cs2g045    | 5.83 | 0 | 0    | 2 | MASCOT | T       |   |
| 1.60E-01 | 0 0 | Cs2g04500.1/Cs2g045    | 5.83 | 0 | 0    | 2 | MASCOT | T       |   |

|          |     |                     |      |   |      |   |        |        |       |       |
|----------|-----|---------------------|------|---|------|---|--------|--------|-------|-------|
| 9.51E-03 | 0 0 | Cs2g04500.1/Cs2g045 | 4.53 | 0 | 0    | 2 | MASCOT | T      | PLEX8 |       |
| 2.40E-02 | 0 0 | Cs2g04500.1/Cs2g045 | 4.53 | 0 | 0    | 2 | MASCOT | T      | PLEX8 |       |
| 2.06E-02 | 0 0 | Cs2g04500.1/Cs2g045 | 4.53 | 0 | 0    | 2 | MASCOT | T      | PLEX8 |       |
| 1.64E-04 | 0 0 | Cs2g04500.1/Cs2g045 | 4.53 | 0 | 0    | 2 | MASCOT | T      | PLEX8 |       |
| 5.31E-03 | 0 0 | Cs2g04500.1/Cs2g045 | 4.53 | 0 | 0    | 2 | MASCOT | T      | PLEX8 |       |
| 3.03E-02 | 0 0 | Cs2g04500.1/Cs2g045 | 4.53 | 0 | 0    | 2 | MASCOT | T      | PLEX8 |       |
| 4.38E-02 | 0 0 | Cs2g04500.1/Cs2g045 | 4.53 | 0 | 0    | 2 | MASCOT | T      | PLEX8 |       |
| 6.42E-02 | 0 0 | Cs2g04500.1/Cs2g045 | 4.53 | 0 | 0    | 2 | MASCOT | T      | PLEX8 |       |
| 6.26E-02 | 0 0 | Cs2g04500.1/Cs2g045 | 4.53 | 0 | 0    | 2 | MASCOT | T      | PLEX8 |       |
| 6.31E-02 | 0 0 | Cs2g04500.1/Cs2g045 | 4.53 | 0 | 0    | 2 | MASCOT | T      | PLEX8 |       |
| 1.40E-02 | 0 0 | Cs2g04500.1/Cs2g045 | 4.14 | 0 | 0    | 2 | MASCOT | T      | PLEX8 |       |
| 2.13E-02 | 0 0 | Cs2g04500.1/Cs2g045 | 8.75 | 0 | 0    | 2 | MASCOT | T      | PLEX8 |       |
| 1.45E-02 | 0 0 | Cs2g04500.1/Cs2g045 | 8.75 | 0 | 0    | 2 | MASCOT | T      | PLEX8 |       |
| 2.10E-03 | 0 0 | Cs2g04500.1/Cs2g045 | 9.75 | 0 | 0    | 2 | MASCOT | T      | PLEX8 |       |
| 4.61E-05 | 0 0 | Cs2g04500.1/Cs2g045 | 9.75 | 0 | 0    | 2 | MASCOT | T      | PLEX8 |       |
| 4.25E-05 | 0 0 | Cs2g04500.1/Cs2g045 | 9.75 | 0 | 0    | 2 | MASCOT | T      | PLEX8 |       |
| 2.16E-02 | 0 0 | Cs2g04500.1/Cs2g045 | 4.53 | 0 | 0    | 2 | MASCOT | T      | PLEX8 |       |
| 1.43E-03 | 0 0 | Cs2g04500.1/Cs2g045 | 4.53 | 0 | 0    | 2 | MASCOT | T      | PLEX8 |       |
| 2.73E-01 | 0 0 | Cs2g04500.1/Cs2g045 | 4.53 | 0 | 0    | 2 | MASCOT | T      | PLEX8 |       |
| 2.54E-04 | 0 0 | Cs2g04500.1/Cs2g045 | 8.72 | 0 | 0    | 2 | MASCOT | T      | PLEX8 |       |
| 3.99E-04 | 0 0 | Cs2g04500.1/Cs2g045 | 8.72 | 0 | 0    | 2 | MASCOT | T      | PLEX8 |       |
| 2.03E-01 | 0 0 | Cs2g04500.1/Cs2g045 | 8.72 | 0 | 0    | 2 | MASCOT | T      | PLEX8 |       |
| 8.26E-04 | 0 0 | Cs2g04500.1/Cs2g045 | 4.37 | 0 | 0    | 2 | MASCOT | T      | PLEX8 |       |
| 3.03E-02 | 0 0 | Cs2g04500.1/Cs2g045 | 4.37 | 0 | 0    | 2 | MASCOT | T      | PLEX8 |       |
| 7.49E-06 | 0 0 | Cs2g04500.1/Cs2g045 | 3.92 | 0 | 0    | 2 | MASCOT | T      | PLEX8 |       |
| 6.94E-02 | 0 0 | Cs2g04500.1/Cs2g045 | 8.75 | 0 | 0    | 2 | MASCOT | T      | PLEX8 |       |
| 1.44E-02 | 0 0 | Cs2g04500.1/Cs2g045 | 8.75 | 0 | 0    | 2 | MASCOT | T      | PLEX8 |       |
| 1.36E-01 | 0 0 | Cs2g04500.1/Cs2g045 | 8.75 | 0 | 0    | 2 | MASCOT | T      | PLEX8 |       |
| 4.92E-02 | 0 0 | Cs2g04500.1/Cs2g045 | 8.75 | 0 | 0    | 2 | MASCOT | T      | PLEX8 |       |
| 4.70E-03 | 0 0 | Cs2g04500.1/Cs2g045 | 9.6  | 1 | 0    | 2 | MASCOT | T      | PLEX8 |       |
| 6.04E-03 | 0 0 | Cs2g04500.1/Cs2g045 | 9.6  | 1 | 0    | 2 | MASCOT | T      | PLEX8 |       |
| 6.41E-02 | 0 0 | Cs2g04500.1/Cs2g045 | 5.66 | 0 | 0    | 2 | MASCOT | T      | PLEX8 |       |
| 1.15E-01 | 0 0 | Cs2g04500.1/Cs2g045 | 5.66 | 0 | 0    | 2 | MASCOT | T      | PLEX8 |       |
| 1.78E-01 | 0 0 | Cs2g04500.1/Cs2g045 | 5.66 | 0 | 0    | 2 | MASCOT | T      | PLEX8 |       |
| 9.02E-02 | 0 0 | Cs2g04500.1/Cs2g045 | 5.81 | 0 | 0    | 2 | MASCOT | T      | PLEX8 |       |
| 2.59E-01 | 0 0 | Cs5g28200.1/Cs5g282 | 4.53 | 0 | 0    | 2 | MASCOT | T      | PLEX8 |       |
| 4.08E-01 | 0 0 | Cs5g28200.1/Cs5g282 | 4.53 | 0 | 0    | 2 | MASCOT | T      | PLEX8 |       |
| 1.67E-01 | 0 0 | Cs5g28200.1/Cs5g282 | 4.53 | 0 | 0    | 2 | MASCOT | T      | PLEX8 |       |
| 8.02E-02 | 0 0 | Cs5g28200.1/Cs5g282 | 3.91 | 0 | 15.9 | 0 | 2      | MASCOT | T     | PLEX8 |
| 1.26E-04 | 0 0 | Cs5g28200.1/Cs5g282 | 3.91 | 0 | 0    | 2 | MASCOT | T      | PLEX8 |       |
| 1.99E-02 | 0 0 | Cs5g28200.1/Cs5g282 | 3.91 | 0 | 0    | 2 | MASCOT | T      | PLEX8 |       |
| 2.98E-02 | 0 0 | Cs5g28200.1/Cs5g282 | 4.53 | 0 | 0    | 2 | MASCOT | T      | PLEX8 |       |
| 2.25E-02 | 0 0 | Cs5g28200.1/Cs5g282 | 4.53 | 0 | 0    | 2 | MASCOT | T      | PLEX8 |       |
| 4.66E-02 | 0 0 | Cs5g28200.1/Cs5g282 | 6.74 | 0 | 0    | 2 | MASCOT | T      | PLEX8 |       |
| 1.13E-01 | 0 0 | Cs5g28200.1/Cs5g282 | 6.74 | 0 | 0    | 2 | MASCOT | T      | PLEX8 |       |
| 6.47E-03 | 0 0 | Cs5g28200.1/Cs5g282 | 6.75 | 0 | 0    | 2 | MASCOT | T      | PLEX8 |       |
| 6.37E-03 | 0 0 | Cs5g28200.1/Cs5g282 | 5.4  | 0 | 15.9 | 0 | 2      | MASCOT | T     | PLEX8 |
| 1.81E-02 | 0 0 | Cs5g28200.1/Cs5g282 | 5.4  | 0 | 15.9 | 0 | 2      | MASCOT | T     | PLEX8 |
| 3.49E-01 | 0 0 | Cs5g28200.1/Cs5g282 | 5.4  | 0 | 0    | 2 | MASCOT | T      | PLEX8 |       |
| 3.90E-03 | 0 0 | Cs5g28200.1/Cs5g282 | 5.4  | 0 | 0    | 2 | MASCOT | T      | PLEX8 |       |
| 9.18E-04 | 0 0 | Cs5g28200.1/Cs5g282 | 5.83 | 0 | 0    | 2 | MASCOT | T      | PLEX8 |       |

|          |     |                       |      |   |      |   |        |        |       |       |
|----------|-----|-----------------------|------|---|------|---|--------|--------|-------|-------|
| 1.83E-01 | 0 0 | Cs5g28200.1/Cs5g282   | 5.84 | 0 | 0    | 2 | MASCOT | T      | PLEX8 |       |
| 9.93E-02 | 0 0 | Cs5g28200.1/Cs5g282   | 4.37 | 0 | 0    | 2 | MASCOT | T      | PLEX8 |       |
| 1.55E-04 | 0 0 | Cs5g28200.1/Cs5g282   | 4.37 | 0 | 0    | 2 | MASCOT | T      | PLEX8 |       |
| 9.44E-05 | 0 0 | Cs5g28200.1/Cs5g282   | 4.37 | 0 | 0    | 2 | MASCOT | T      | PLEX8 |       |
| 2.13E-01 | 0 0 | Cs5g28200.1/Cs5g282   | 8.72 | 0 | 15.9 | 0 | 2      | MASCOT | T     | PLEX8 |
| 5.73E-03 | 0 0 | Cs5g28200.1/Cs5g282   | 8.72 | 0 | 0    | 2 | MASCOT | T      | PLEX8 |       |
| 2.60E-04 | 0 0 | Cs5g28200.1/Cs5g282   | 8.72 | 0 | 0    | 2 | MASCOT | T      | PLEX8 |       |
| 2.32E-03 | 0 0 | Cs5g28200.1/Cs5g282   | 8.72 | 0 | 0    | 2 | MASCOT | T      | PLEX8 |       |
| 8.73E-04 | 0 0 | Cs5g28200.1/Cs5g282   | 8.72 | 0 | 0    | 2 | MASCOT | T      | PLEX8 |       |
| 3.38E-01 | 0 0 | Cs5g28200.1/Cs5g282   | 5.97 | 0 | 0    | 2 | MASCOT | T      | PLEX8 |       |
| 1.02E-01 | 0 0 | Cs5g28200.1/Cs5g282   | 5.4  | 0 | 0    | 2 | MASCOT | T      | PLEX8 |       |
| 9.83E-03 | 0 0 | Cs5g28200.1/Cs5g282   | 5.4  | 0 | 0    | 2 | MASCOT | T      | PLEX8 |       |
| 1.15E-02 | 0 0 | Cs5g28200.1/Cs5g282   | 5.4  | 0 | 0    | 2 | MASCOT | T      | PLEX8 |       |
| 2.57E-01 | 0 0 | Cs5g28200.1/Cs5g282   | 5.4  | 0 | 0    | 2 | MASCOT | T      | PLEX8 |       |
| 3.49E-03 | 0 0 | Cs5g28200.1/Cs5g282   | 6.05 | 0 | 0    | 2 | MASCOT | T      | PLEX8 |       |
| 9.95E-03 | 0 0 | Cs5g28200.1/Cs5g282   | 6.05 | 0 | 0    | 2 | MASCOT | T      | PLEX8 |       |
| 8.81E-03 | 0 0 | Cs5g28200.1/Cs5g282   | 6.05 | 0 | 0    | 2 | MASCOT | T      | PLEX8 |       |
| 1.80E-01 | 0 0 | Cs5g28200.1/Cs5g282   | 4.37 | 0 | 0    | 2 | MASCOT | T      | PLEX8 |       |
| 1.95E-01 | 0 0 | Cs5g28200.1/Cs5g282   | 4.37 | 0 | 0    | 2 | MASCOT | T      | PLEX8 |       |
| 2.10E-01 | 0 0 | Cs5g28200.1/Cs5g282   | 4.37 | 0 | 0    | 2 | MASCOT | T      | PLEX8 |       |
| 4.29E-02 | 0 0 | Cs5g28200.1/Cs5g282   | 4.09 | 0 | 0    | 2 | MASCOT | T      |       |       |
| 3.34E-05 | 0 0 | Cs5g28200.1/Cs5g282   | 4.09 | 0 | 0    | 2 | MASCOT | T      |       |       |
| 1.31E-04 | 0 0 | orange1.1t03248.1/ora | 4.21 | 0 | 0    | 2 | MASCOT | T      | PLEX8 |       |
| 4.69E-05 | 0 0 | orange1.1t03248.1/ora | 4.14 | 0 | 0    | 2 | MASCOT | T      | PLEX8 |       |
| 8.76E-02 | 0 0 | orange1.1t03248.1/ora | 4.14 | 0 | 0    | 2 | MASCOT | T      | PLEX8 |       |
| 3.86E-01 | 0 0 | orange1.1t03248.1/ora | 5.84 | 0 | 0    | 2 | MASCOT | T      | PLEX8 |       |
| 1.72E-01 | 0 0 | orange1.1t03248.1/ora | 5.84 | 0 | 0    | 2 | MASCOT | T      | PLEX8 |       |
| 8.40E-02 | 0 0 | orange1.1t03248.1/ora | 5.84 | 0 | 0    | 2 | MASCOT | T      | PLEX8 |       |
| 4.07E-01 | 0 0 | orange1.1t03248.1/ora | 4.25 | 0 | 0    | 2 | MASCOT | T      | PLEX8 |       |
| 2.26E-04 | 0 0 | orange1.1t03248.1/ora | 4.25 | 0 | 0    | 2 | MASCOT | T      | PLEX8 |       |
| 5.00E-03 | 0 0 | orange1.1t03248.1/ora | 4.25 | 0 | 0    | 2 | MASCOT | T      |       |       |
| 4.27E-02 | 0 0 | orange1.1t03248.1/ora | 8.75 | 0 | 0    | 2 | MASCOT | T      | PLEX8 |       |
| 2.36E-03 | 0 0 | orange1.1t03248.1/ora | 8.75 | 0 | 0    | 2 | MASCOT | T      | PLEX8 |       |
| 9.34E-02 | 0 0 | orange1.1t03248.1/ora | 8.75 | 0 | 0    | 2 | MASCOT | T      | PLEX8 |       |
| 2.40E-03 | 0 0 | orange1.1t03248.1/ora | 8.75 | 0 | 0    | 2 | MASCOT | T      | PLEX8 |       |
| 1.34E-03 | 0 0 | orange1.1t03248.1/ora | 8.75 | 0 | 0    | 2 | MASCOT | T      | PLEX8 |       |
| 8.04E-04 | 0 0 | orange1.1t03248.1/ora | 8.75 | 0 | 0    | 2 | MASCOT | T      | PLEX8 |       |
| 6.87E-02 | 0 0 | orange1.1t03248.1/ora | 5.96 | 1 | 0    | 2 | MASCOT | T      | PLEX8 |       |
| 9.00E-03 | 0 0 | orange1.1t03248.1/ora | 5.37 | 0 | 15.9 | 0 | 2      | MASCOT | T     | PLEX8 |
| 2.66E-04 | 0 0 | orange1.1t03248.1/ora | 5.37 | 0 | 15.9 | 0 | 2      | MASCOT | T     | PLEX8 |
| 1.42E-03 | 0 0 | orange1.1t03248.1/ora | 5.37 | 0 | 0    | 2 | MASCOT | T      | PLEX8 |       |
| 1.62E-04 | 0 0 | orange1.1t03248.1/ora | 5.37 | 0 | 0    | 2 | MASCOT | T      | PLEX8 |       |
| 3.24E-04 | 0 0 | orange1.1t03248.1/ora | 5.37 | 0 | 0    | 2 | MASCOT | T      |       |       |
| 7.78E-05 | 0 0 | orange1.1t03248.1/ora | 4.14 | 0 | 0    | 2 | MASCOT | T      | PLEX8 |       |
| 1.96E-03 | 0 0 | orange1.1t03248.1/ora | 4.14 | 0 | 0    | 2 | MASCOT | T      | PLEX8 |       |
| 3.76E-04 | 0 0 | orange1.1t03248.1/ora | 4.14 | 0 | 0    | 2 | MASCOT | T      | PLEX8 |       |
| 3.10E-03 | 0 0 | orange1.1t03248.1/ora | 4.37 | 0 | 0    | 2 | MASCOT | T      | PLEX8 |       |
| 1.49E-04 | 0 0 | orange1.1t03248.1/ora | 4.37 | 0 | 0    | 2 | MASCOT | T      |       |       |
| 2.06E-02 | 0 0 | orange1.1t03248.1/ora | 4.37 | 0 | 0    | 2 | MASCOT | T      |       |       |
| 8.13E-07 | 0 0 | orange1.1t03248.1/ora | 4.37 | 0 | 0    | 2 | MASCOT | T      |       |       |
| 1.35E-01 | 0 0 | orange1.1t03248.1/ora | 4.21 | 0 | 0    | 2 | MASCOT | T      | PLEX8 |       |

|          |     |                       |      |   |      |   |        |        |       |       |
|----------|-----|-----------------------|------|---|------|---|--------|--------|-------|-------|
| 1.92E-01 | 0 0 | orange1.1t03248.1/ora | 4.21 | 0 | 0    | 2 | MASCOT | T      | PLEX8 |       |
| 6.19E-02 | 0 0 | orange1.1t03248.1/ora | 4.14 | 0 | 0    | 2 | MASCOT | T      | PLEX8 |       |
| 1.57E-02 | 0 0 | orange1.1t03248.1/ora | 4.53 | 0 | 0    | 2 | MASCOT | T      |       |       |
| 2.66E-02 | 0 0 | orange1.1t03248.1/ora | 4.53 | 0 | 0    | 2 | MASCOT | T      |       |       |
| 2.04E-03 | 0 0 | orange1.1t03248.1/ora | 8.07 | 0 | 0    | 2 | MASCOT | T      | PLEX8 |       |
| 3.48E-02 | 0 0 | orange1.1t03248.1/ora | 4.53 | 0 | 0    | 2 | MASCOT | T      | PLEX8 |       |
| 8.67E-03 | 0 0 | orange1.1t03248.1/ora | 4.53 | 0 | 0    | 2 | MASCOT | T      | PLEX8 |       |
| 5.12E-03 | 0 0 | orange1.1t03248.1/ora | 4.53 | 0 | 0    | 2 | MASCOT | T      | PLEX8 |       |
| 1.80E-01 | 0 0 | orange1.1t03248.1/ora | 4.21 | 0 | 0    | 2 | MASCOT | T      | PLEX8 |       |
| 2.11E-03 | 0 0 | Cs1g12600.1           | 6.74 | 0 | 0    | 2 | MASCOT | T      | PLEX8 |       |
| 3.32E-02 | 0 0 | Cs1g12600.1           | 6.74 | 0 | 0    | 2 | MASCOT | T      | PLEX8 |       |
| 1.78E-02 | 0 0 | Cs1g12600.1           | 6.74 | 0 | 0    | 2 | MASCOT | T      | PLEX8 |       |
| 1.05E-03 | 0 0 | Cs1g12600.1           | 6.74 | 0 | 0    | 2 | MASCOT | T      |       |       |
| 1.82E-01 | 0 0 | Cs1g12600.1           | 5.84 | 0 | 0    | 2 | MASCOT | T      | PLEX8 |       |
| 4.02E-01 | 0 0 | Cs1g12600.1           | 5.84 | 0 | 0    | 2 | MASCOT | T      | PLEX8 |       |
| 5.87E-04 | 0 0 | Cs1g12600.1           | 6.73 | 0 | 0    | 2 | MASCOT | T      | PLEX8 |       |
| 4.34E-02 | 0 0 | Cs1g12600.1           | 6.73 | 0 | 0    | 2 | MASCOT | T      | PLEX8 |       |
| 8.59E-02 | 0 0 | Cs1g12600.1           | 6.73 | 0 | 0    | 2 | MASCOT | T      | PLEX8 |       |
| 6.21E-03 | 0 0 | Cs1g12600.1           | 6.73 | 0 | 0    | 2 | MASCOT | T      |       |       |
| 3.41E-02 | 0 0 | Cs1g12600.1           | 4.37 | 0 | 15.9 | 0 | 2      | MASCOT | T     | PLEX8 |
| 4.16E-03 | 0 0 | Cs1g12600.1           | 4.37 | 0 | 0    | 2 | MASCOT | T      | PLEX8 |       |
| 1.56E-01 | 0 0 | Cs1g12600.1           | 8.75 | 0 | 0    | 2 | MASCOT | T      | PLEX8 |       |
| 4.88E-01 | 0 0 | Cs1g12600.1           | 8.75 | 0 | 0    | 2 | MASCOT | T      | PLEX8 |       |
| 2.13E-02 | 0 0 | Cs1g12600.1           | 5.84 | 0 | 0    | 2 | MASCOT | T      | PLEX8 |       |
| 7.49E-02 | 0 0 | Cs1g12600.1           | 8.8  | 0 | 0    | 2 | MASCOT | T      | PLEX8 |       |
| 9.30E-02 | 0 0 | Cs1g12600.1           | 8.8  | 0 | 0    | 2 | MASCOT | T      | PLEX8 |       |
| 6.87E-02 | 0 0 | Cs1g12600.1           | 4.17 | 0 | 0    | 2 | MASCOT | T      | PLEX8 |       |
| 4.47E-02 | 0 0 | Cs1g12600.1           | 4.17 | 0 | 0    | 2 | MASCOT | T      |       |       |
| 2.63E-02 | 0 0 | Cs1g12600.1           | 4.17 | 0 | 0    | 2 | MASCOT | T      | PLEX8 |       |
| 1.76E-02 | 0 0 | Cs1g12600.1           | 5.32 | 0 | 0    | 2 | MASCOT | T      | PLEX8 |       |
| 6.27E-02 | 0 0 | Cs1g12600.1           | 6    | 0 | 0    | 2 | MASCOT | T      |       |       |
| 1.09E-01 | 0 0 | Cs1g12600.1 ! Cs1g26  | 8.6  | 0 | 0    | 2 | MASCOT | T      |       |       |
| 1.45E-01 | 0 0 | Cs1g12600.1           | 9.76 | 0 | 0    | 2 | MASCOT | T      |       |       |
| 2.65E-01 | 0 0 | Cs1g12600.1           | 9.76 | 0 | 0    | 2 | MASCOT | T      | PLEX8 |       |
| 1.47E-01 | 0 0 | Cs1g12600.1           | 8.22 | 0 | 0    | 2 | MASCOT | T      | PLEX8 |       |
| 1.73E-01 | 0 0 | Cs1g12600.1           | 6.46 | 0 | 0    | 2 | MASCOT | T      | PLEX8 |       |
| 1.17E-03 | 0 0 | Cs1g12600.1           | 6.46 | 0 | 0    | 2 | MASCOT | T      | PLEX8 |       |
| 2.10E-02 | 0 0 | Cs1g12600.1           | 6.46 | 0 | 0    | 2 | MASCOT | T      | PLEX8 |       |
| 3.10E-03 | 0 0 | Cs1g12600.1           | 6.46 | 0 | 0    | 2 | MASCOT | T      | PLEX8 |       |
| 4.13E-04 | 0 0 | Cs1g12600.1           | 6.46 | 0 | 0    | 2 | MASCOT | T      | PLEX8 |       |
| 8.75E-03 | 0 0 | Cs1g12600.1           | 6.46 | 0 | 0    | 2 | MASCOT | T      | PLEX8 |       |
| 9.28E-05 | 0 0 | Cs1g12600.1           | 5.15 | 0 | 0    | 2 | MASCOT | T      | PLEX8 |       |
| 4.12E-03 | 0 0 | Cs1g12600.1           | 6.74 | 0 | 0    | 2 | MASCOT | T      | PLEX8 |       |
| 4.11E-03 | 0 0 | Cs1g12600.1           | 6.74 | 0 | 0    | 2 | MASCOT | T      | PLEX8 |       |
| 1.44E-01 | 0 0 | Cs6g07610.1/Cs6g076   | 6.05 | 0 | 0    | 2 | MASCOT | T      | PLEX8 |       |
| 5.96E-02 | 0 0 | Cs6g07610.1/Cs6g076   | 4.21 | 0 | 0    | 2 | MASCOT | T      | PLEX8 |       |
| 6.92E-02 | 0 0 | Cs6g07610.1/Cs6g076   | 4.21 | 0 | 0    | 2 | MASCOT | T      | PLEX8 |       |
| 1.46E-01 | 0 0 | Cs6g07610.1/Cs6g076   | 4.53 | 0 | 0    | 2 | MASCOT | T      | PLEX8 |       |
| 6.63E-05 | 0 0 | Cs6g07610.1/Cs6g076   | 4.53 | 0 | 0    | 2 | MASCOT | T      | PLEX8 |       |
| 2.88E-01 | 0 0 | Cs6g07610.1/Cs6g076   | 6.17 | 0 | 0    | 2 | MASCOT | T      | PLEX8 |       |
| 1.28E-02 | 0 0 | Cs6g07610.1/Cs6g076   | 4.4  | 0 | 0    | 2 | MASCOT | T      | PLEX8 |       |

|          |     |                     |      |   |      |   |        |        |       |       |
|----------|-----|---------------------|------|---|------|---|--------|--------|-------|-------|
| 1.48E-01 | 0 0 | Cs6g07610.1/Cs6g076 | 4.4  | 0 | 0    | 2 | MASCOT | T      | PLEX8 |       |
| 9.98E-04 | 0 0 | Cs6g07610.1/Cs6g076 | 4.4  | 0 | 0    | 2 | MASCOT | T      | PLEX8 |       |
| 3.09E-02 | 0 0 | Cs6g07610.1/Cs6g076 | 5.32 | 0 | 0    | 2 | MASCOT | T      |       |       |
| 1.79E-02 | 0 0 | Cs6g07610.1/Cs6g076 | 4.48 | 0 | 0    | 2 | MASCOT | T      | PLEX8 |       |
| 4.29E-02 | 0 0 | Cs6g07610.1/Cs6g076 | 4.37 | 0 | 0    | 2 | MASCOT | T      | PLEX8 |       |
| 2.03E-02 | 0 0 | Cs6g07610.1/Cs6g076 | 4.37 | 0 | 0    | 2 | MASCOT | T      | PLEX8 |       |
| 2.24E-02 | 0 0 | Cs6g07610.1/Cs6g076 | 6    | 0 | 0    | 2 | MASCOT | T      | PLEX8 |       |
| 2.50E-02 | 0 0 | Cs6g07610.1/Cs6g076 | 6    | 0 | 0    | 2 | MASCOT | T      | PLEX8 |       |
| 3.21E-03 | 0 0 | Cs6g07610.1/Cs6g076 | 6    | 0 | 0    | 2 | MASCOT | T      | PLEX8 |       |
| 2.40E-01 | 0 0 | Cs6g07610.1/Cs6g076 | 6    | 0 | 0    | 2 | MASCOT | T      | PLEX8 |       |
| 2.93E-01 | 0 0 | Cs6g07610.1/Cs6g076 | 6    | 0 | 0    | 2 | MASCOT | T      | PLEX8 |       |
| 2.56E-02 | 0 0 | Cs6g07610.1/Cs6g076 | 6    | 0 | 0    | 2 | MASCOT | T      | PLEX8 |       |
| 1.55E-01 | 0 0 | Cs6g07610.1/Cs6g076 | 4.37 | 0 | 15.9 | 0 | 2      | MASCOT | T     | PLEX8 |
| 3.70E-02 | 0 0 | Cs6g07610.1/Cs6g076 | 4.37 | 0 | 0    | 2 | MASCOT | T      | PLEX8 |       |
| 3.27E-01 | 0 0 | Cs6g07610.1/Cs6g076 | 4.25 | 0 | 0    | 2 | MASCOT | T      | PLEX8 |       |
| 5.14E-03 | 0 0 | Cs6g07610.1/Cs6g076 | 4.25 | 0 | 0    | 2 | MASCOT | T      | PLEX8 |       |
| 4.15E-03 | 0 0 | Cs6g07610.1/Cs6g076 | 4.25 | 0 | 0    | 2 | MASCOT | T      | PLEX8 |       |
| 1.13E-04 | 0 0 | Cs6g07610.1/Cs6g076 | 4.25 | 0 | 0    | 2 | MASCOT | T      | PLEX8 |       |
| 3.05E-04 | 0 0 | Cs6g07610.1/Cs6g076 | 6    | 0 | 0    | 2 | MASCOT | T      | PLEX8 |       |
| 5.03E-02 | 0 0 | Cs6g07610.1/Cs6g076 | 6    | 0 | 0    | 2 | MASCOT | T      | PLEX8 |       |
| 3.10E-03 | 0 0 | Cs6g07610.1/Cs6g076 | 4.75 | 0 | 0    | 2 | MASCOT | T      | PLEX8 |       |
| 5.50E-04 | 0 0 | Cs6g07610.1/Cs6g076 | 4.75 | 0 | 0    | 2 | MASCOT | T      | PLEX8 |       |
| 1.36E-03 | 0 0 | Cs6g07610.1/Cs6g076 | 4.75 | 0 | 0    | 2 | MASCOT | T      | PLEX8 |       |
| 3.40E-03 | 0 0 | Cs6g07610.1/Cs6g076 | 3.93 | 0 | 15.9 | 0 | 2      | MASCOT | T     | PLEX8 |
| 5.23E-02 | 0 0 | Cs6g07610.1/Cs6g076 | 3.93 | 0 | 0    | 2 | MASCOT | T      |       |       |
| 1.66E-02 | 0 0 | Cs6g07610.1/Cs6g076 | 4.53 | 0 | 0    | 2 | MASCOT | T      | PLEX8 |       |
| 2.09E-02 | 0 0 | Cs6g07610.1/Cs6g076 | 4.53 | 0 | 0    | 2 | MASCOT | T      | PLEX8 |       |
| 1.85E-01 | 0 0 | Cs6g07610.1/Cs6g076 | 5.97 | 0 | 0    | 2 | MASCOT | T      | PLEX8 |       |
| 8.03E-03 | 0 0 | Cs6g15320.1/Cs6g153 | 4.54 | 0 | 0    | 2 | MASCOT | T      | PLEX8 |       |
| 4.04E-02 | 0 0 | Cs6g15320.1/Cs6g153 | 4.54 | 0 | 0    | 2 | MASCOT | T      | PLEX8 |       |
| 2.45E-01 | 0 0 | Cs6g15320.1/Cs6g153 | 5.84 | 0 | 0    | 2 | MASCOT | T      | PLEX8 |       |
| 1.91E-03 | 0 0 | Cs6g15320.1/Cs6g153 | 4.14 | 0 | 0    | 2 | MASCOT | T      |       |       |
| 2.85E-06 | 0 0 | Cs6g15320.1/Cs6g153 | 4.14 | 0 | 0    | 2 | MASCOT | T      |       |       |
| 6.90E-02 | 0 0 | Cs6g15320.1/Cs6g153 | 3.91 | 0 | 0    | 2 | MASCOT | T      |       |       |
| 9.51E-02 | 0 0 | Cs6g15320.1/Cs6g153 | 6.74 | 0 | 0    | 2 | MASCOT | T      | PLEX8 |       |
| 3.47E-03 | 0 0 | Cs6g15320.1/Cs6g153 | 4.21 | 0 | 0    | 2 | MASCOT | T      |       |       |
| 3.69E-02 | 0 0 | Cs3g27220.1/Cs3g272 | 5.97 | 0 | 0    | 2 | MASCOT | T      | PLEX8 |       |
| 7.47E-02 | 0 0 | Cs3g27220.1/Cs3g272 | 5.97 | 0 | 0    | 2 | MASCOT | T      | PLEX8 |       |
| 3.93E-02 | 0 0 | Cs3g27220.1/Cs3g272 | 5.97 | 0 | 0    | 2 | MASCOT | T      | PLEX8 |       |
| 2.14E-03 | 0 0 | Cs6g15320.1/Cs6g153 | 6.75 | 0 | 0    | 2 | MASCOT | T      |       |       |
| 3.52E-02 | 0 0 | Cs6g15320.1/Cs6g153 | 8.6  | 0 | 0    | 2 | MASCOT | T      | PLEX8 |       |
| 7.10E-02 | 0 0 | Cs6g15320.1/Cs6g153 | 8.6  | 0 | 0    | 2 | MASCOT | T      | PLEX8 |       |
| 7.97E-02 | 0 0 | Cs6g15320.1/Cs6g153 | 5.4  | 0 | 0    | 2 | MASCOT | T      | PLEX8 |       |
| 1.11E-02 | 0 0 | Cs6g15320.1/Cs6g153 | 5.4  | 0 | 0    | 2 | MASCOT | T      | PLEX8 |       |
| 9.98E-02 | 0 0 | Cs6g15320.1/Cs6g153 | 5.4  | 0 | 0    | 2 | MASCOT | T      | PLEX8 |       |
| 3.74E-02 | 0 0 | Cs6g15320.1/Cs6g153 | 3.93 | 0 | 0    | 2 | MASCOT | T      | PLEX8 |       |
| 4.71E-02 | 0 0 | Cs6g15320.1/Cs6g153 | 8.76 | 0 | 0    | 2 | MASCOT | T      |       |       |
| 4.33E-02 | 0 0 | Cs6g15320.1/Cs6g153 | 5.84 | 0 | 0    | 2 | MASCOT | T      | PLEX8 |       |
| 2.21E-01 | 0 0 | Cs6g15320.1/Cs6g153 | 5.84 | 0 | 0    | 2 | MASCOT | T      | PLEX8 |       |
| 1.11E-03 | 0 0 | Cs6g15320.1/Cs6g153 | 4.43 | 1 | 0    | 2 | MASCOT | T      | PLEX8 |       |
| 1.25E-01 | 0 0 | Cs6g15320.1/Cs6g153 | 5.55 | 0 | 0    | 2 | MASCOT | T      | PLEX8 |       |



|          |     |                     |      |   |   |   |        |   |       |
|----------|-----|---------------------|------|---|---|---|--------|---|-------|
| 4.14E-03 | 0 0 | Cs6g15320.1/Cs6g153 | 5.55 | 0 | 0 | 2 | MASCOT | T | PLEX8 |
| 1.22E-01 | 0 0 | Cs6g15320.1/Cs6g153 | 5.55 | 0 | 0 | 2 | MASCOT | T |       |
| 5.82E-03 | 0 0 | Cs6g15320.1/Cs6g153 | 5.3  | 0 | 0 | 2 | MASCOT | T | PLEX8 |
| 5.03E-04 | 0 0 | Cs6g15320.1/Cs6g153 | 5.3  | 0 | 0 | 2 | MASCOT | T | PLEX8 |
| 2.07E-01 | 0 0 | Cs6g15320.1/Cs6g153 | 5.3  | 0 | 0 | 2 | MASCOT | T |       |
| 9.34E-04 | 0 0 | Cs6g15320.1/Cs6g153 | 5.3  | 0 | 0 | 2 | MASCOT | T |       |
| 2.02E-03 | 0 0 | Cs9g17990.1/Cs9g179 | 3.71 | 0 | 0 | 2 | MASCOT | T | PLEX8 |
| 2.39E-02 | 0 0 | Cs9g17990.1/Cs9g179 | 4.03 | 0 | 0 | 2 | MASCOT | T |       |
| 2.72E-02 | 0 0 | Cs9g17990.1/Cs9g179 | 4.03 | 0 | 0 | 2 | MASCOT | T |       |
| 4.41E-01 | 0 0 | Cs9g17990.1/Cs9g179 | 5.32 | 0 | 0 | 2 | MASCOT | T | PLEX8 |
| 2.85E-01 | 0 0 | Cs9g17990.1/Cs9g179 | 4.37 | 0 | 0 | 2 | MASCOT | T | PLEX8 |
| 3.59E-02 | 0 0 | Cs9g17990.1/Cs9g179 | 4.37 | 0 | 0 | 2 | MASCOT | T | PLEX8 |
| 1.54E-03 | 0 0 | Cs9g17990.1/Cs9g179 | 4.53 | 0 | 0 | 2 | MASCOT | T |       |
| 4.08E-05 | 0 0 | Cs9g17990.1/Cs9g179 | 4.53 | 0 | 0 | 2 | MASCOT | T |       |
| 3.95E-03 | 0 0 | Cs9g17990.1/Cs9g179 | 4.53 | 0 | 0 | 2 | MASCOT | T | PLEX8 |
| 8.58E-03 | 0 0 | Cs9g17990.1/Cs9g179 | 4.53 | 0 | 0 | 2 | MASCOT | T | PLEX8 |
| 3.57E-03 | 0 0 | Cs9g17990.1/Cs9g179 | 4.14 | 0 | 0 | 2 | MASCOT | T | PLEX8 |
| 3.51E-02 | 0 0 | Cs9g17990.1/Cs9g179 | 4.14 | 0 | 0 | 2 | MASCOT | T | PLEX8 |
| 4.46E-02 | 0 0 | Cs9g17990.1/Cs9g179 | 6.79 | 0 | 0 | 2 | MASCOT | T | PLEX8 |
| 4.98E-02 | 0 0 | Cs9g17990.1/Cs9g179 | 6.79 | 0 | 0 | 2 | MASCOT | T | PLEX8 |
| 6.60E-02 | 0 0 | Cs9g17990.1/Cs9g179 | 5.4  | 0 | 0 | 2 | MASCOT | T | PLEX8 |
| 9.56E-02 | 0 0 | Cs9g17990.1/Cs9g179 | 8.59 | 0 | 0 | 2 | MASCOT | T | PLEX8 |
| 3.97E-02 | 0 0 | Cs9g17990.1/Cs9g179 | 4.53 | 0 | 0 | 2 | MASCOT | T |       |
| 5.43E-02 | 0 0 | Cs9g17990.1/Cs9g179 | 4.53 | 0 | 0 | 2 | MASCOT | T |       |
| 6.61E-04 | 0 0 | Cs9g17990.1/Cs9g179 | 4.53 | 0 | 0 | 2 | MASCOT | T |       |
| 8.79E-02 | 0 0 | Cs9g17990.1/Cs9g179 | 4.53 | 0 | 0 | 2 | MASCOT | T |       |
| 4.74E-01 | 0 0 | Cs9g17990.1/Cs9g179 | 6.75 | 0 | 0 | 2 | MASCOT | T | PLEX8 |
| 2.01E-02 | 0 0 | Cs9g17990.1/Cs9g179 | 6.75 | 0 | 0 | 2 | MASCOT | T | PLEX8 |
| 9.48E-04 | 0 0 | Cs9g17990.1/Cs9g179 | 4.03 | 0 | 0 | 2 | MASCOT | T | PLEX8 |
| 3.21E-02 | 0 0 | Cs9g17990.1/Cs9g179 | 4.53 | 0 | 0 | 2 | MASCOT | T |       |
| 2.59E-04 | 0 0 | Cs9g17990.1/Cs9g179 | 5.32 | 0 | 0 | 2 | MASCOT | T | PLEX8 |
| 9.80E-02 | 0 0 | Cs9g17990.1/Cs9g179 | 4.53 | 0 | 0 | 2 | MASCOT | T | PLEX8 |
| 1.35E-02 | 0 0 | Cs9g17990.1/Cs9g179 | 4.53 | 0 | 0 | 2 | MASCOT | T | PLEX8 |
| 1.35E-03 | 0 0 | Cs9g17990.1/Cs9g179 | 6.92 | 0 | 0 | 2 | MASCOT | T | PLEX8 |
| 2.44E-03 | 0 0 | Cs9g17990.1/Cs9g179 | 6.92 | 0 | 0 | 2 | MASCOT | T | PLEX8 |
| 4.74E-03 | 0 0 | Cs2g28930.1/Cs2g289 | 4.37 | 0 | 0 | 2 | MASCOT | T |       |
| 8.71E-02 | 0 0 | Cs2g28930.1/Cs2g289 | 4.53 | 0 | 0 | 2 | MASCOT | T | PLEX8 |
| 1.31E-01 | 0 0 | Cs2g28930.1/Cs2g289 | 4.53 | 0 | 0 | 2 | MASCOT | T | PLEX8 |
| 1.23E-01 | 0 0 | Cs2g28930.1/Cs2g289 | 4.53 | 0 | 0 | 2 | MASCOT | T | PLEX8 |
| 1.28E-01 | 0 0 | Cs2g28930.1/Cs2g289 | 4.53 | 0 | 0 | 2 | MASCOT | T | PLEX8 |
| 7.57E-02 | 0 0 | Cs2g28930.1/Cs2g289 | 4.37 | 0 | 0 | 2 | MASCOT | T | PLEX8 |
| 7.65E-04 | 0 0 | Cs2g28930.1/Cs2g289 | 5.84 | 0 | 0 | 2 | MASCOT | T |       |
| 8.54E-03 | 0 0 | Cs2g28930.1/Cs2g289 | 4.37 | 0 | 0 | 2 | MASCOT | T | PLEX8 |
| 2.31E-03 | 0 0 | Cs2g28930.1/Cs2g289 | 4.03 | 0 | 0 | 2 | MASCOT | T |       |
| 6.20E-05 | 0 0 | Cs2g28930.1/Cs2g289 | 4.03 | 0 | 0 | 2 | MASCOT | T |       |
| 4.19E-02 | 0 0 | Cs2g28930.1/Cs2g289 | 8.47 | 0 | 0 | 2 | MASCOT | T | PLEX8 |
| 2.97E-02 | 0 0 | Cs2g28930.1/Cs2g289 | 8.47 | 0 | 0 | 2 | MASCOT | T | PLEX8 |
| 4.78E-02 | 0 0 | Cs2g28930.1/Cs2g289 | 8.47 | 0 | 0 | 2 | MASCOT | T | PLEX8 |
| 1.57E-03 | 0 0 | Cs2g28930.1/Cs2g289 | 5.97 | 0 | 0 | 2 | MASCOT | T | PLEX8 |
| 3.04E-02 | 0 0 | Cs2g28930.1/Cs2g289 | 5.97 | 0 | 0 | 2 | MASCOT | T | PLEX8 |
| 5.10E-03 | 0 0 | Cs2g28930.1/Cs2g289 | 5.97 | 0 | 0 | 2 | MASCOT | T | PLEX8 |

|          |     |                     |      |   |      |   |        |        |       |       |
|----------|-----|---------------------|------|---|------|---|--------|--------|-------|-------|
| 5.60E-02 | 0 0 | Cs2g28930.1/Cs2g289 | 9.76 | 0 | 0    | 2 | MASCOT | T      |       |       |
| 1.25E-04 | 0 0 | Cs2g28930.1/Cs2g289 | 6.73 | 0 | 0    | 2 | MASCOT | T      | PLEX8 |       |
| 1.39E-04 | 0 0 | Cs2g28930.1/Cs2g289 | 6.73 | 0 | 0    | 2 | MASCOT | T      | PLEX8 |       |
| 1.73E-05 | 0 0 | Cs2g28930.1/Cs2g289 | 6.73 | 0 | 0    | 2 | MASCOT | T      |       |       |
| 9.63E-03 | 0 0 | Cs2g28930.1/Cs2g289 | 5.84 | 0 | 0    | 2 | MASCOT | T      | PLEX8 |       |
| 4.64E-03 | 0 0 | Cs2g28930.1/Cs2g289 | 5.84 | 0 | 0    | 2 | MASCOT | T      |       |       |
| 1.11E-01 | 0 0 | Cs2g28930.1/Cs2g289 | 9.8  | 0 | 0    | 2 | MASCOT | T      | PLEX8 |       |
| 3.20E-01 | 0 0 | Cs2g28930.1/Cs2g289 | 9.2  | 0 | 0    | 2 | MASCOT | T      | PLEX8 |       |
| 8.09E-04 | 0 0 | Cs2g28930.1/Cs2g289 | 6    | 0 | 0    | 2 | MASCOT | T      | PLEX8 |       |
| 8.78E-02 | 0 0 | Cs2g28930.1/Cs2g289 | 4.14 | 0 | 0    | 2 | MASCOT | T      |       |       |
| 3.12E-02 | 0 0 | Cs2g28930.1/Cs2g289 | 8.41 | 0 | 0    | 2 | MASCOT | T      | PLEX8 |       |
| 1.10E-02 | 0 0 | Cs5g15920.1/Cs5g159 | 3.84 | 0 | 15.9 | 0 | 2      | MASCOT | T     |       |
| 3.82E-03 | 0 0 | Cs5g15920.1/Cs5g159 | 3.84 | 0 | 15.9 | 0 | 2      | MASCOT | T     |       |
| 5.43E-05 | 0 0 | Cs5g15920.1/Cs5g159 | 3.84 | 0 | 0    | 2 | MASCOT | T      |       |       |
| 1.74E-02 | 0 0 | Cs5g15920.1/Cs5g159 | 5.84 | 0 | 0    | 2 | MASCOT | T      | PLEX8 |       |
| 3.63E-03 | 0 0 | Cs5g15920.1/Cs5g159 | 4.25 | 0 | 0    | 2 | MASCOT | T      | PLEX8 |       |
| 2.90E-02 | 0 0 | Cs5g15920.1/Cs5g159 | 4.25 | 0 | 0    | 2 | MASCOT | T      | PLEX8 |       |
| 9.20E-03 | 0 0 | Cs5g15920.1/Cs5g159 | 5.32 | 0 | 0    | 2 | MASCOT | T      | PLEX8 |       |
| 2.91E-03 | 0 0 | Cs5g15920.1/Cs5g159 | 9.75 | 0 | 0    | 2 | MASCOT | T      | PLEX8 |       |
| 1.48E-01 | 0 0 | Cs5g15920.1/Cs5g159 | 9.75 | 0 | 0    | 2 | MASCOT | T      | PLEX8 |       |
| 2.62E-01 | 0 0 | Cs5g15920.1/Cs5g159 | 6    | 0 | 0    | 2 | MASCOT | T      | PLEX8 |       |
| 1.30E-02 | 0 0 | Cs5g15920.1/Cs5g159 | 6    | 0 | 0    | 2 | MASCOT | T      | PLEX8 |       |
| 1.55E-01 | 0 0 | Cs5g15920.1/Cs5g159 | 6    | 0 | 0    | 2 | MASCOT | T      |       |       |
| 1.83E-01 | 0 0 | Cs5g15920.1/Cs5g159 | 4.14 | 0 | 0    | 2 | MASCOT | T      | PLEX8 |       |
| 1.07E-01 | 0 0 | Cs5g15920.1/Cs5g159 | 6    | 0 | 0    | 2 | MASCOT | T      | PLEX8 |       |
| 5.63E-01 | 0 0 | Cs5g15920.1/Cs5g159 | 6    | 0 | 0    | 2 | MASCOT | T      | PLEX8 |       |
| 1.43E-02 | 0 0 | Cs5g15920.1/Cs5g159 | 5.55 | 0 | 0    | 2 | MASCOT | T      | PLEX8 |       |
| 1.88E-01 | 0 0 | Cs5g15920.1/Cs5g159 | 5.81 | 0 | 0    | 2 | MASCOT | T      | PLEX8 |       |
| 2.87E-01 | 0 0 | Cs5g15920.1/Cs5g159 | 9.75 | 0 | 0    | 2 | MASCOT | T      | PLEX8 |       |
| 3.55E-01 | 0 0 | Cs5g15920.1/Cs5g159 | 6.76 | 0 | 0    | 2 | MASCOT | T      | PLEX8 |       |
| 2.69E-01 | 0 0 | Cs5g15920.1/Cs5g159 | 6    | 0 | 15.9 | 0 | 2      | MASCOT | T     | PLEX8 |
| 3.46E-01 | 0 0 | Cs5g15920.1/Cs5g159 | 6    | 0 | 0    | 2 | MASCOT | T      | PLEX8 |       |
| 1.70E-01 | 0 0 | Cs5g15920.1/Cs5g159 | 6    | 0 | 0    | 2 | MASCOT | T      | PLEX8 |       |
| 1.66E-02 | 0 0 | Cs5g15920.1/Cs5g159 | 6    | 0 | 0    | 2 | MASCOT | T      | PLEX8 |       |
| 2.44E-01 | 0 0 | Cs5g15920.1/Cs5g159 | 4.37 | 0 | 15.9 | 0 | 2      | MASCOT | T     | PLEX8 |
| 3.12E-02 | 0 0 | Cs5g15920.1/Cs5g159 | 6.92 | 0 | 0    | 2 | MASCOT | T      | PLEX8 |       |
| 1.03E-01 | 0 0 | Cs5g15920.1/Cs5g159 | 6.92 | 0 | 0    | 2 | MASCOT | T      | PLEX8 |       |
| 1.01E-02 | 0 0 | Cs5g15920.1/Cs5g159 | 4.14 | 0 | 0    | 2 | MASCOT | T      | PLEX8 |       |
| 1.84E-02 | 0 0 | Cs6g15670.1/Cs6g156 | 8.8  | 0 | 0    | 2 | MASCOT | T      | PLEX8 |       |
| 7.72E-04 | 0 0 | Cs6g15670.1/Cs6g156 | 5.4  | 0 | 0    | 2 | MASCOT | T      | PLEX8 |       |
| 4.41E-02 | 0 0 | Cs6g15670.1/Cs6g156 | 5.83 | 0 | 0    | 2 | MASCOT | T      | PLEX8 |       |
| 5.77E-02 | 0 0 | Cs6g15670.1/Cs6g156 | 5.83 | 0 | 0    | 2 | MASCOT | T      | PLEX8 |       |
| 9.07E-02 | 0 0 | Cs6g15670.1/Cs6g156 | 5.83 | 0 | 0    | 2 | MASCOT | T      | PLEX8 |       |
| 1.32E-01 | 0 0 | Cs6g15670.1/Cs6g156 | 5.83 | 0 | 0    | 2 | MASCOT | T      | PLEX8 |       |
| 4.05E-01 | 0 0 | Cs6g15670.1/Cs6g156 | 4.53 | 0 | 0    | 2 | MASCOT | T      | PLEX8 |       |
| 1.05E-01 | 0 0 | Cs6g15670.1/Cs6g156 | 5.84 | 0 | 0    | 2 | MASCOT | T      |       |       |
| 1.05E-01 | 0 0 | Cs6g15670.1/Cs6g156 | 8.75 | 0 | 0    | 2 | MASCOT | T      | PLEX8 |       |
| 6.49E-02 | 0 0 | Cs6g15670.1/Cs6g156 | 8.75 | 0 | 0    | 2 | MASCOT | T      | PLEX8 |       |
| 1.02E-02 | 0 0 | Cs6g15670.1/Cs6g156 | 8.75 | 0 | 0    | 2 | MASCOT | T      | PLEX8 |       |
| 5.89E-03 | 0 0 | Cs6g15670.1/Cs6g156 | 5.84 | 0 | 0    | 2 | MASCOT | T      | PLEX8 |       |
| 3.07E-01 | 0 0 | Cs6g15670.1/Cs6g156 | 9.76 | 0 | 0    | 2 | MASCOT | T      | PLEX8 |       |

|          |     |                     |       |   |   |   |        |   |       |
|----------|-----|---------------------|-------|---|---|---|--------|---|-------|
| 8.29E-02 | 0 0 | Cs6g15670.1/Cs6g156 | 6.71  | 0 | 0 | 2 | MASCOT | T | PLEX8 |
| 6.17E-02 | 0 0 | Cs6g15670.1/Cs6g156 | 5.81  | 0 | 0 | 2 | MASCOT | T | PLEX8 |
| 1.39E-02 | 0 0 | Cs6g15670.1/Cs6g156 | 10.84 | 0 | 0 | 2 | MASCOT | T | PLEX8 |
| 2.39E-01 | 0 0 | Cs6g15670.1/Cs6g156 | 6     | 0 | 0 | 2 | MASCOT | T |       |
| 1.00E-03 | 0 0 | Cs6g15670.1/Cs6g156 | 6     | 0 | 0 | 2 | MASCOT | T |       |
| 3.66E-02 | 0 0 | Cs6g15670.1/Cs6g156 | 4.37  | 0 | 0 | 2 | MASCOT | T | PLEX8 |
| 3.78E-02 | 0 0 | Cs6g15670.1/Cs6g156 | 4.37  | 0 | 0 | 2 | MASCOT | T | PLEX8 |
| 5.08E-02 | 0 0 | Cs6g15670.1/Cs6g156 | 5.32  | 0 | 0 | 2 | MASCOT | T |       |
| 8.68E-02 | 0 0 | Cs6g15670.1/Cs6g156 | 5.4   | 0 | 0 | 2 | MASCOT | T | PLEX8 |
| 1.31E-02 | 0 0 | Cs6g15670.1/Cs6g156 | 5.55  | 0 | 0 | 2 | MASCOT | T | PLEX8 |
| 1.80E-03 | 0 0 | Cs6g15670.1/Cs6g156 | 5.55  | 0 | 0 | 2 | MASCOT | T | PLEX8 |
| 8.64E-03 | 0 0 | Cs2g02520.1         | 4.21  | 0 | 0 | 2 | MASCOT | T | PLEX8 |
| 6.94E-04 | 0 0 | Cs2g02520.1         | 4.21  | 0 | 0 | 2 | MASCOT | T | PLEX8 |
| 8.59E-02 | 0 0 | Cs2g02520.1         | 4.21  | 0 | 0 | 2 | MASCOT | T | PLEX8 |
| 8.08E-02 | 0 0 | Cs2g02520.1         | 4.21  | 0 | 0 | 2 | MASCOT | T | PLEX8 |
| 1.69E-02 | 0 0 | Cs2g02520.1         | 4.21  | 0 | 0 | 2 | MASCOT | T | PLEX8 |
| 1.18E-02 | 0 0 | Cs2g02520.1         | 4.21  | 0 | 0 | 2 | MASCOT | T | PLEX8 |
| 2.34E-02 | 0 0 | Cs2g02520.1         | 4.21  | 0 | 0 | 2 | MASCOT | T | PLEX8 |
| 4.48E-02 | 0 0 | Cs2g02520.1         | 4.21  | 0 | 0 | 2 | MASCOT | T | PLEX8 |
| 9.24E-02 | 0 0 | Cs2g02520.1         | 4.21  | 0 | 0 | 2 | MASCOT | T | PLEX8 |
| 1.47E-01 | 0 0 | Cs2g02520.1         | 4.21  | 0 | 0 | 2 | MASCOT | T |       |
| 1.22E-01 | 0 0 | Cs2g02520.1         | 4.21  | 0 | 0 | 2 | MASCOT | T |       |
| 6.53E-02 | 0 0 | Cs2g02520.1         | 4.21  | 0 | 0 | 2 | MASCOT | T |       |
| 4.85E-04 | 0 0 | Cs2g02520.1         | 4.21  | 0 | 0 | 2 | MASCOT | T |       |
| 2.02E-03 | 0 0 | Cs2g02520.1         | 4.21  | 0 | 0 | 2 | MASCOT | T |       |
| 7.98E-02 | 0 0 | Cs2g02520.1         | 4.21  | 0 | 0 | 2 | MASCOT | T |       |
| 2.17E-03 | 0 0 | Cs2g02520.1         | 4.21  | 0 | 0 | 2 | MASCOT | T |       |
| 2.97E-03 | 0 0 | Cs2g02520.1         | 4.21  | 0 | 0 | 2 | MASCOT | T |       |
| 4.03E-04 | 0 0 | Cs2g02520.1         | 4.21  | 0 | 0 | 2 | MASCOT | T |       |
| 7.14E-03 | 0 0 | Cs2g02520.1         | 4.21  | 0 | 0 | 2 | MASCOT | T |       |
| 1.05E-03 | 0 0 | Cs2g02520.1         | 4.21  | 0 | 0 | 2 | MASCOT | T |       |
| 4.89E-03 | 0 0 | Cs2g02520.1         | 4.21  | 0 | 0 | 2 | MASCOT | T |       |
| 8.18E-04 | 0 0 | Cs2g02520.1         | 4.21  | 0 | 0 | 2 | MASCOT | T |       |
| 2.35E-03 | 0 0 | Cs2g02520.1         | 4.21  | 0 | 0 | 2 | MASCOT | T |       |
| 8.16E-04 | 0 0 | Cs2g02520.1         | 4.21  | 0 | 0 | 2 | MASCOT | T |       |
| 7.24E-04 | 0 0 | Cs2g02520.1         | 4.21  | 0 | 0 | 2 | MASCOT | T |       |
| 8.27E-04 | 0 0 | Cs2g02520.1         | 4.21  | 0 | 0 | 2 | MASCOT | T |       |
| 7.36E-04 | 0 0 | Cs2g02520.1         | 4.21  | 0 | 0 | 2 | MASCOT | T |       |
| 6.94E-03 | 0 0 | Cs2g02520.1         | 4.21  | 0 | 0 | 2 | MASCOT | T |       |
| 5.91E-02 | 0 0 | Cs2g02520.1         | 4.21  | 0 | 0 | 2 | MASCOT | T |       |
| 2.58E-02 | 0 0 | Cs2g02520.1         | 4.21  | 0 | 0 | 2 | MASCOT | T |       |
| 2.97E-02 | 0 0 | Cs2g02520.1         | 4.21  | 0 | 0 | 2 | MASCOT | T |       |
| 1.21E-01 | 0 0 | Cs2g02520.1         | 4.21  | 0 | 0 | 2 | MASCOT | T | PLEX8 |
| 4.71E-02 | 0 0 | Cs2g02520.1         | 4.21  | 0 | 0 | 2 | MASCOT | T | PLEX8 |
| 2.00E-02 | 0 0 | Cs2g02520.1         | 4.21  | 0 | 0 | 2 | MASCOT | T | PLEX8 |
| 2.60E-02 | 0 0 | Cs2g02520.1         | 4.21  | 0 | 0 | 2 | MASCOT | T | PLEX8 |
| 3.70E-02 | 0 0 | Cs2g02520.1         | 4.21  | 0 | 0 | 2 | MASCOT | T | PLEX8 |
| 3.67E-03 | 0 0 | Cs2g02520.1         | 4.21  | 0 | 0 | 2 | MASCOT | T | PLEX8 |
| 1.84E-04 | 0 0 | Cs2g02520.1         | 4.21  | 0 | 0 | 2 | MASCOT | T | PLEX8 |
| 6.04E-02 | 0 0 | Cs2g02520.1         | 4.21  | 0 | 0 | 2 | MASCOT | T | PLEX8 |
| 8.40E-04 | 0 0 | Cs2g02520.1         | 4.21  | 0 | 0 | 2 | MASCOT | T | PLEX8 |

|              |             |      |   |      |   |        |        |       |       |
|--------------|-------------|------|---|------|---|--------|--------|-------|-------|
| 1.75E-04 0 0 | Cs2g02520.1 | 3.98 | 0 | 0    | 2 | MASCOT | T      | PLEX8 |       |
| 9.68E-05 0 0 | Cs2g02520.1 | 3.98 | 0 | 0    | 2 | MASCOT | T      | PLEX8 |       |
| 3.08E-03 0 0 | Cs2g02520.1 | 3.98 | 0 | 0    | 2 | MASCOT | T      | PLEX8 |       |
| 2.23E-07 0 0 | Cs2g02520.1 | 3.98 | 0 | 0    | 2 | MASCOT | T      | PLEX8 |       |
| 5.54E-04 0 0 | Cs2g02520.1 | 3.98 | 0 | 0    | 2 | MASCOT | T      | PLEX8 |       |
| 6.02E-08 0 0 | Cs2g02520.1 | 3.98 | 0 | 0    | 2 | MASCOT | T      | PLEX8 |       |
| 1.48E-05 0 0 | Cs2g02520.1 | 3.98 | 0 | 0    | 2 | MASCOT | T      | PLEX8 |       |
| 3.56E-03 0 0 | Cs2g02520.1 | 3.98 | 0 | 0    | 2 | MASCOT | T      | PLEX8 |       |
| 1.16E-04 0 0 | Cs2g02520.1 | 3.98 | 0 | 0    | 2 | MASCOT | T      |       |       |
| 6.85E-03 0 0 | Cs2g02520.1 | 3.98 | 0 | 0    | 2 | MASCOT | T      | PLEX8 |       |
| 1.12E-03 0 0 | Cs2g02520.1 | 3.98 | 0 | 0    | 2 | MASCOT | T      |       |       |
| 9.12E-02 0 0 | Cs2g02520.1 | 3.98 | 0 | 0    | 2 | MASCOT | T      | PLEX8 |       |
| 2.28E-02 0 0 | Cs2g02520.1 | 3.98 | 0 | 0    | 2 | MASCOT | T      | PLEX8 |       |
| 5.74E-04 0 0 | Cs2g02520.1 | 3.98 | 0 | 0    | 2 | MASCOT | T      | PLEX8 |       |
| 2.97E-02 0 0 | Cs2g02520.1 | 3.98 | 0 | 0    | 2 | MASCOT | T      | PLEX8 |       |
| 1.55E-02 0 0 | Cs2g02520.1 | 4    | 0 | 15.9 | 0 | 2      | MASCOT | T     | PLEX8 |
| 3.15E-02 0 0 | Cs2g02520.1 | 4    | 0 | 0    | 2 | MASCOT | T      | PLEX8 |       |
| 4.86E-03 0 0 | Cs2g02520.1 | 4    | 0 | 0    | 2 | MASCOT | T      | PLEX8 |       |
| 1.45E-02 0 0 | Cs2g02520.1 | 4.21 | 1 | 0    | 2 | MASCOT | T      |       |       |
| 7.40E-02 0 0 | Cs2g02520.1 | 4.21 | 1 | 0    | 2 | MASCOT | T      |       |       |
| 2.34E-03 0 0 | Cs2g02520.1 | 4.14 | 0 | 0    | 2 | MASCOT | T      | PLEX8 |       |
| 7.20E-03 0 0 | Cs2g02520.1 | 4.14 | 0 | 0    | 2 | MASCOT | T      | PLEX8 |       |
| 9.85E-03 0 0 | Cs2g02520.1 | 4.14 | 0 | 0    | 2 | MASCOT | T      | PLEX8 |       |
| 2.14E-02 0 0 | Cs2g02520.1 | 4.14 | 0 | 0    | 2 | MASCOT | T      | PLEX8 |       |
| 2.26E-03 0 0 | Cs2g02520.1 | 4.14 | 0 | 0    | 2 | MASCOT | T      | PLEX8 |       |
| 4.35E-04 0 0 | Cs2g02520.1 | 4.14 | 0 | 0    | 2 | MASCOT | T      | PLEX8 |       |
| 2.95E-01 0 0 | Cs2g02520.1 | 4.14 | 0 | 0    | 2 | MASCOT | T      | PLEX8 |       |
| 2.91E-03 0 0 | Cs2g02520.1 | 4.14 | 0 | 0    | 2 | MASCOT | T      | PLEX8 |       |
| 2.39E-03 0 0 | Cs2g02520.1 | 4.14 | 0 | 0    | 2 | MASCOT | T      | PLEX8 |       |
| 3.64E-03 0 0 | Cs2g02520.1 | 4.14 | 0 | 0    | 2 | MASCOT | T      | PLEX8 |       |
| 5.94E-03 0 0 | Cs2g02520.1 | 4.14 | 0 | 0    | 2 | MASCOT | T      | PLEX8 |       |
| 2.28E-03 0 0 | Cs2g02520.1 | 4.14 | 0 | 0    | 2 | MASCOT | T      | PLEX8 |       |
| 1.98E-02 0 0 | Cs2g02520.1 | 4.14 | 0 | 0    | 2 | MASCOT | T      | PLEX8 |       |
| 1.37E-02 0 0 | Cs2g02520.1 | 4.14 | 0 | 0    | 2 | MASCOT | T      | PLEX8 |       |
| 1.14E-03 0 0 | Cs2g02520.1 | 4.14 | 0 | 0    | 2 | MASCOT | T      | PLEX8 |       |
| 5.80E-03 0 0 | Cs2g02520.1 | 4.14 | 0 | 0    | 2 | MASCOT | T      | PLEX8 |       |
| 4.10E-03 0 0 | Cs2g02520.1 | 4.14 | 0 | 0    | 2 | MASCOT | T      | PLEX8 |       |
| 4.73E-01 0 0 | Cs2g02520.1 | 4.14 | 0 | 0    | 2 | MASCOT | T      | PLEX8 |       |
| 1.14E-02 0 0 | Cs2g02520.1 | 4.68 | 1 | 0    | 2 | MASCOT | T      | PLEX8 |       |
| 5.70E-02 0 0 | Cs2g02520.1 | 4.68 | 1 | 0    | 2 | MASCOT | T      |       |       |
| 1.78E-01 0 0 | Cs2g02520.1 | 5.84 | 0 | 0    | 2 | MASCOT | T      | PLEX8 |       |
| 2.57E-02 0 0 | Cs2g02520.1 | 5.84 | 0 | 0    | 2 | MASCOT | T      | PLEX8 |       |
| 5.42E-02 0 0 | Cs2g02520.1 | 5.84 | 0 | 0    | 2 | MASCOT | T      | PLEX8 |       |
| 2.96E-05 0 0 | Cs2g02520.1 | 5.84 | 0 | 0    | 2 | MASCOT | T      | PLEX8 |       |
| 2.73E-01 0 0 | Cs2g02520.1 | 5.84 | 0 | 0    | 2 | MASCOT | T      | PLEX8 |       |
| 3.70E-03 0 0 | Cs2g02520.1 | 5.84 | 0 | 0    | 2 | MASCOT | T      | PLEX8 |       |
| 5.07E-03 0 0 | Cs2g02520.1 | 5.84 | 0 | 0    | 2 | MASCOT | T      | PLEX8 |       |
| 4.63E-03 0 0 | Cs2g02520.1 | 5.84 | 0 | 0    | 2 | MASCOT | T      | PLEX8 |       |
| 3.16E-02 0 0 | Cs2g02520.1 | 5.84 | 0 | 0    | 2 | MASCOT | T      | PLEX8 |       |
| 1.56E-05 0 0 | Cs2g02520.1 | 5.84 | 0 | 0    | 2 | MASCOT | T      | PLEX8 |       |
| 3.98E-02 0 0 | Cs2g02520.1 | 5.84 | 0 | 0    | 2 | MASCOT | T      | PLEX8 |       |

|              |             |      |   |   |          |   |       |
|--------------|-------------|------|---|---|----------|---|-------|
| 1.50E-01 0 0 | Cs2g02520.1 | 5.84 | 0 | 0 | 2 MASCOT | T | PLEX8 |
| 1.96E-03 0 0 | Cs2g02520.1 | 5.84 | 0 | 0 | 2 MASCOT | T | PLEX8 |
| 6.37E-04 0 0 | Cs2g02520.1 | 5.84 | 0 | 0 | 2 MASCOT | T | PLEX8 |
| 1.77E-06 0 0 | Cs2g02520.1 | 5.84 | 0 | 0 | 2 MASCOT | T |       |
| 1.65E-03 0 0 | Cs2g02520.1 | 5.84 | 0 | 0 | 2 MASCOT | T | PLEX8 |
| 9.72E-02 0 0 | Cs2g02520.1 | 5.84 | 0 | 0 | 2 MASCOT | T | PLEX8 |
| 3.19E-03 0 0 | Cs2g02520.1 | 5.84 | 0 | 0 | 2 MASCOT | T | PLEX8 |
| 5.02E-03 0 0 | Cs2g02520.1 | 5.84 | 0 | 0 | 2 MASCOT | T | PLEX8 |
| 2.34E-02 0 0 | Cs2g02520.1 | 5.84 | 0 | 0 | 2 MASCOT | T | PLEX8 |
| 2.59E-02 0 0 | Cs2g02520.1 | 5.84 | 0 | 0 | 2 MASCOT | T | PLEX8 |
| 3.33E-04 0 0 | Cs2g02520.1 | 5.84 | 0 | 0 | 2 MASCOT | T | PLEX8 |
| 2.41E-02 0 0 | Cs2g02520.1 | 5.84 | 0 | 0 | 2 MASCOT | T | PLEX8 |
| 1.36E-03 0 0 | Cs2g02520.1 | 5.84 | 0 | 0 | 2 MASCOT | T | PLEX8 |
| 1.43E-04 0 0 | Cs2g02520.1 | 5.84 | 0 | 0 | 2 MASCOT | T | PLEX8 |
| 1.07E-01 0 0 | Cs2g02520.1 | 5.84 | 0 | 0 | 2 MASCOT | T | PLEX8 |
| 3.07E-05 0 0 | Cs2g02520.1 | 5.84 | 0 | 0 | 2 MASCOT | T | PLEX8 |
| 7.08E-04 0 0 | Cs2g02520.1 | 5.84 | 0 | 0 | 2 MASCOT | T | PLEX8 |
| 2.78E-02 0 0 | Cs2g02520.1 | 5.84 | 0 | 0 | 2 MASCOT | T | PLEX8 |
| 1.29E-02 0 0 | Cs2g02520.1 | 5.84 | 0 | 0 | 2 MASCOT | T | PLEX8 |
| 7.02E-03 0 0 | Cs2g02520.1 | 5.84 | 0 | 0 | 2 MASCOT | T | PLEX8 |
| 2.02E-02 0 0 | Cs2g02520.1 | 5.84 | 0 | 0 | 2 MASCOT | T | PLEX8 |
| 5.93E-05 0 0 | Cs2g02520.1 | 5.84 | 0 | 0 | 2 MASCOT | T | PLEX8 |
| 1.64E-03 0 0 | Cs2g02520.1 | 5.84 | 0 | 0 | 2 MASCOT | T | PLEX8 |
| 1.38E-02 0 0 | Cs2g02520.1 | 5.84 | 0 | 0 | 2 MASCOT | T | PLEX8 |
| 4.16E-01 0 0 | Cs2g02520.1 | 5.84 | 0 | 0 | 2 MASCOT | T | PLEX8 |
| 8.43E-04 0 0 | Cs2g02520.1 | 5.84 | 0 | 0 | 2 MASCOT | T | PLEX8 |
| 6.95E-02 0 0 | Cs2g02520.1 | 5.84 | 0 | 0 | 2 MASCOT | T | PLEX8 |
| 1.64E-02 0 0 | Cs2g02520.1 | 5.84 | 0 | 0 | 2 MASCOT | T | PLEX8 |
| 5.69E-04 0 0 | Cs2g02520.1 | 5.84 | 0 | 0 | 2 MASCOT | T |       |
| 5.43E-03 0 0 | Cs2g02520.1 | 5.84 | 0 | 0 | 2 MASCOT | T |       |
| 2.19E-06 0 0 | Cs2g02520.1 | 5.84 | 0 | 0 | 2 MASCOT | T | PLEX8 |
| 6.71E-03 0 0 | Cs2g02520.1 | 5.84 | 0 | 0 | 2 MASCOT | T | PLEX8 |
| 5.23E-04 0 0 | Cs2g02520.1 | 5.84 | 0 | 0 | 2 MASCOT | T |       |
| 3.87E-01 0 0 | Cs2g02520.1 | 5.84 | 0 | 0 | 2 MASCOT | T | PLEX8 |
| 2.47E-02 0 0 | Cs2g02520.1 | 5.84 | 0 | 0 | 2 MASCOT | T | PLEX8 |
| 2.90E-01 0 0 | Cs2g02520.1 | 5.84 | 0 | 0 | 2 MASCOT | T | PLEX8 |
| 3.16E-01 0 0 | Cs2g02520.1 | 5.84 | 0 | 0 | 2 MASCOT | T | PLEX8 |
| 4.67E-02 0 0 | Cs2g02520.1 | 5.84 | 0 | 0 | 2 MASCOT | T | PLEX8 |
| 1.38E-01 0 0 | Cs2g02520.1 | 5.84 | 0 | 0 | 2 MASCOT | T | PLEX8 |
| 1.38E-01 0 0 | Cs2g02520.1 | 5.84 | 0 | 0 | 2 MASCOT | T | PLEX8 |
| 2.38E-01 0 0 | Cs2g02520.1 | 5.84 | 0 | 0 | 2 MASCOT | T | PLEX8 |
| 1.42E-01 0 0 | Cs2g02520.1 | 5.84 | 0 | 0 | 2 MASCOT | T | PLEX8 |
| 1.28E-01 0 0 | Cs2g02520.1 | 5.84 | 0 | 0 | 2 MASCOT | T | PLEX8 |
| 2.86E-01 0 0 | Cs2g02520.1 | 5.84 | 0 | 0 | 2 MASCOT | T |       |
| 2.11E-01 0 0 | Cs2g02520.1 | 5.84 | 0 | 0 | 2 MASCOT | T | PLEX8 |
| 4.07E-01 0 0 | Cs2g02520.1 | 5.84 | 0 | 0 | 2 MASCOT | T | PLEX8 |
| 1.80E-01 0 0 | Cs2g02520.1 | 5.84 | 0 | 0 | 2 MASCOT | T | PLEX8 |
| 1.37E-01 0 0 | Cs2g02520.1 | 5.84 | 0 | 0 | 2 MASCOT | T | PLEX8 |
| 2.94E-01 0 0 | Cs2g02520.1 | 5.84 | 0 | 0 | 2 MASCOT | T | PLEX8 |
| 1.13E-01 0 0 | Cs2g02520.1 | 5.84 | 0 | 0 | 2 MASCOT | T | PLEX8 |
| 2.82E-01 0 0 | Cs2g02520.1 | 5.84 | 0 | 0 | 2 MASCOT | T | PLEX8 |

|              |             |      |   |   |          |   |       |
|--------------|-------------|------|---|---|----------|---|-------|
| 3.28E-01 0 0 | Cs2g02520.1 | 5.84 | 0 | 0 | 2 MASCOT | T |       |
| 1.91E-01 0 0 | Cs2g02520.1 | 5.84 | 0 | 0 | 2 MASCOT | T | PLEX8 |
| 1.76E-01 0 0 | Cs2g02520.1 | 5.84 | 0 | 0 | 2 MASCOT | T | PLEX8 |
| 2.36E-01 0 0 | Cs2g02520.1 | 5.84 | 0 | 0 | 2 MASCOT | T | PLEX8 |
| 2.53E-01 0 0 | Cs2g02520.1 | 5.84 | 0 | 0 | 2 MASCOT | T |       |
| 4.09E-01 0 0 | Cs2g02520.1 | 5.84 | 0 | 0 | 2 MASCOT | T | PLEX8 |
| 1.78E-01 0 0 | Cs2g02520.1 | 5.84 | 0 | 0 | 2 MASCOT | T | PLEX8 |
| 2.00E-01 0 0 | Cs2g02520.1 | 5.84 | 0 | 0 | 2 MASCOT | T | PLEX8 |
| 2.03E-01 0 0 | Cs2g02520.1 | 5.84 | 0 | 0 | 2 MASCOT | T | PLEX8 |
| 4.01E-01 0 0 | Cs2g02520.1 | 5.84 | 0 | 0 | 2 MASCOT | T | PLEX8 |
| 1.70E-01 0 0 | Cs2g02520.1 | 5.84 | 0 | 0 | 2 MASCOT | T | PLEX8 |
| 2.83E-01 0 0 | Cs2g02520.1 | 5.84 | 0 | 0 | 2 MASCOT | T | PLEX8 |
| 1.70E-01 0 0 | Cs2g02520.1 | 5.84 | 0 | 0 | 2 MASCOT | T | PLEX8 |
| 4.64E-02 0 0 | Cs2g02520.1 | 5.84 | 0 | 0 | 2 MASCOT | T |       |
| 2.86E-01 0 0 | Cs2g02520.1 | 6    | 0 | 0 | 2 MASCOT | T | PLEX8 |
| 1.95E-02 0 0 | Cs2g02520.1 | 6    | 0 | 0 | 2 MASCOT | T | PLEX8 |
| 1.10E-02 0 0 | Cs2g02520.1 | 6    | 0 | 0 | 2 MASCOT | T | PLEX8 |
| 2.34E-01 0 0 | Cs2g02520.1 | 6    | 0 | 0 | 2 MASCOT | T |       |
| 8.81E-04 0 0 | Cs2g02520.1 | 6    | 0 | 0 | 2 MASCOT | T | PLEX8 |
| 3.31E-03 0 0 | Cs2g02520.1 | 6    | 0 | 0 | 2 MASCOT | T | PLEX8 |
| 5.06E-03 0 0 | Cs2g02520.1 | 6    | 0 | 0 | 2 MASCOT | T | PLEX8 |
| 1.10E-03 0 0 | Cs2g02520.1 | 6    | 0 | 0 | 2 MASCOT | T | PLEX8 |
| 5.18E-05 0 0 | Cs2g02520.1 | 6    | 0 | 0 | 2 MASCOT | T | PLEX8 |
| 7.67E-02 0 0 | Cs2g02520.1 | 6    | 0 | 0 | 2 MASCOT | T | PLEX8 |
| 3.84E-01 0 0 | Cs2g02520.1 | 6    | 0 | 0 | 2 MASCOT | T | PLEX8 |
| 4.16E-03 0 0 | Cs2g02520.1 | 6    | 0 | 0 | 2 MASCOT | T | PLEX8 |
| 2.79E-03 0 0 | Cs2g02520.1 | 6    | 0 | 0 | 2 MASCOT | T | PLEX8 |
| 4.24E-02 0 0 | Cs2g02520.1 | 6    | 0 | 0 | 2 MASCOT | T |       |
| 7.45E-04 0 0 | Cs2g02520.1 | 6    | 0 | 0 | 2 MASCOT | T | PLEX8 |
| 3.02E-01 0 0 | Cs2g02520.1 | 6    | 0 | 0 | 2 MASCOT | T | PLEX8 |
| 6.96E-04 0 0 | Cs2g02520.1 | 6    | 0 | 0 | 2 MASCOT | T | PLEX8 |
| 1.71E-01 0 0 | Cs2g02520.1 | 6    | 0 | 0 | 2 MASCOT | T |       |
| 1.12E-04 0 0 | Cs2g02520.1 | 6    | 0 | 0 | 2 MASCOT | T | PLEX8 |
| 3.00E-05 0 0 | Cs2g02520.1 | 6    | 0 | 0 | 2 MASCOT | T | PLEX8 |
| 5.19E-05 0 0 | Cs2g02520.1 | 6    | 0 | 0 | 2 MASCOT | T | PLEX8 |
| 1.09E-02 0 0 | Cs2g02520.1 | 6    | 0 | 0 | 2 MASCOT | T | PLEX8 |
| 2.28E-01 0 0 | Cs2g02520.1 | 6    | 0 | 0 | 2 MASCOT | T | PLEX8 |
| 1.35E-01 0 0 | Cs2g02520.1 | 6    | 0 | 0 | 2 MASCOT | T |       |
| 4.69E-02 0 0 | Cs2g02520.1 | 6    | 0 | 0 | 2 MASCOT | T |       |
| 4.14E-02 0 0 | Cs2g02520.1 | 6    | 0 | 0 | 2 MASCOT | T |       |
| 2.23E-02 0 0 | Cs2g02520.1 | 6    | 0 | 0 | 2 MASCOT | T |       |
| 2.73E-02 0 0 | Cs2g02520.1 | 6    | 0 | 0 | 2 MASCOT | T |       |
| 1.98E-05 0 0 | Cs2g02520.1 | 6    | 0 | 0 | 2 MASCOT | T |       |
| 1.69E-06 0 0 | Cs2g02520.1 | 6    | 0 | 0 | 2 MASCOT | T |       |
| 3.10E-06 0 0 | Cs2g02520.1 | 6    | 0 | 0 | 2 MASCOT | T |       |
| 3.14E-03 0 0 | Cs2g02520.1 | 6    | 0 | 0 | 2 MASCOT | T |       |
| 1.25E-02 0 0 | Cs2g02520.1 | 6    | 0 | 0 | 2 MASCOT | T |       |
| 1.13E-01 0 0 | Cs2g02520.1 | 6    | 0 | 0 | 2 MASCOT | T |       |
| 2.91E-01 0 0 | Cs2g02520.1 | 6    | 0 | 0 | 2 MASCOT | T |       |
| 2.70E-01 0 0 | Cs2g02520.1 | 6    | 0 | 0 | 2 MASCOT | T |       |
| 7.63E-02 0 0 | Cs2g02520.1 | 6    | 0 | 0 | 2 MASCOT | T |       |

|              |             |      |   |   |          |   |       |
|--------------|-------------|------|---|---|----------|---|-------|
| 5.27E-02 0 0 | Cs2g02520.1 | 6    | 0 | 0 | 2 MASCOT | T |       |
| 7.37E-02 0 0 | Cs2g02520.1 | 6    | 0 | 0 | 2 MASCOT | T |       |
| 2.64E-02 0 0 | Cs2g02520.1 | 6    | 0 | 0 | 2 MASCOT | T |       |
| 5.92E-02 0 0 | Cs2g02520.1 | 6    | 0 | 0 | 2 MASCOT | T |       |
| 2.77E-01 0 0 | Cs2g02520.1 | 6    | 0 | 0 | 2 MASCOT | T |       |
| 5.69E-04 0 0 | Cs2g02520.1 | 6    | 0 | 0 | 2 MASCOT | T | PLEX8 |
| 1.59E-05 0 0 | Cs2g02520.1 | 6    | 0 | 0 | 2 MASCOT | T | PLEX8 |
| 1.27E-02 0 0 | Cs2g02520.1 | 6    | 0 | 0 | 2 MASCOT | T | PLEX8 |
| 2.42E-03 0 0 | Cs2g02520.1 | 6    | 0 | 0 | 2 MASCOT | T |       |
| 5.71E-03 0 0 | Cs2g02520.1 | 6    | 0 | 0 | 2 MASCOT | T |       |
| 1.10E-02 0 0 | Cs2g02520.1 | 6    | 0 | 0 | 2 MASCOT | T |       |
| 4.32E-03 0 0 | Cs2g02520.1 | 8.41 | 0 | 0 | 2 MASCOT | T | PLEX8 |
| 7.45E-02 0 0 | Cs2g02520.1 | 8.41 | 0 | 0 | 2 MASCOT | T | PLEX8 |
| 1.30E-01 0 0 | Cs2g02520.1 | 8.41 | 0 | 0 | 2 MASCOT | T | PLEX8 |
| 3.96E-02 0 0 | Cs2g02520.1 | 8.41 | 0 | 0 | 2 MASCOT | T | PLEX8 |
| 1.54E-02 0 0 | Cs2g02520.1 | 8.41 | 0 | 0 | 2 MASCOT | T | PLEX8 |
| 6.61E-02 0 0 | Cs2g02520.1 | 8.41 | 0 | 0 | 2 MASCOT | T | PLEX8 |
| 1.31E-01 0 0 | Cs2g02520.1 | 8.41 | 0 | 0 | 2 MASCOT | T | PLEX8 |
| 7.63E-03 0 0 | Cs2g02520.1 | 8.41 | 0 | 0 | 2 MASCOT | T | PLEX8 |
| 9.85E-02 0 0 | Cs2g02520.1 | 8.41 | 0 | 0 | 2 MASCOT | T | PLEX8 |
| 6.19E-03 0 0 | Cs2g02520.1 | 8.41 | 0 | 0 | 2 MASCOT | T | PLEX8 |
| 1.84E-01 0 0 | Cs2g02520.1 | 8.41 | 0 | 0 | 2 MASCOT | T | PLEX8 |
| 9.68E-03 0 0 | Cs2g02520.1 | 8.41 | 0 | 0 | 2 MASCOT | T | PLEX8 |
| 6.89E-03 0 0 | Cs2g02520.1 | 8.41 | 0 | 0 | 2 MASCOT | T | PLEX8 |
| 3.18E-01 0 0 | Cs2g02520.1 | 8.41 | 0 | 0 | 2 MASCOT | T | PLEX8 |
| 4.93E-02 0 0 | Cs2g02520.1 | 8.41 | 0 | 0 | 2 MASCOT | T | PLEX8 |
| 6.70E-02 0 0 | Cs2g02520.1 | 8.41 | 0 | 0 | 2 MASCOT | T | PLEX8 |
| 1.87E-01 0 0 | Cs2g02520.1 | 8.41 | 0 | 0 | 2 MASCOT | T | PLEX8 |
| 4.72E-03 0 0 | Cs2g02520.1 | 8.41 | 0 | 0 | 2 MASCOT | T | PLEX8 |
| 4.82E-03 0 0 | Cs2g02520.1 | 8.41 | 0 | 0 | 2 MASCOT | T | PLEX8 |
| 9.98E-03 0 0 | Cs2g02520.1 | 8.41 | 0 | 0 | 2 MASCOT | T | PLEX8 |
| 4.04E-02 0 0 | Cs2g02520.1 | 8.41 | 0 | 0 | 2 MASCOT | T | PLEX8 |
| 7.88E-02 0 0 | Cs2g02520.1 | 8.41 | 0 | 0 | 2 MASCOT | T | PLEX8 |
| 3.11E-01 0 0 | Cs2g02520.1 | 8.41 | 0 | 0 | 2 MASCOT | T | PLEX8 |
| 9.55E-02 0 0 | Cs2g02520.1 | 8.41 | 0 | 0 | 2 MASCOT | T | PLEX8 |
| 7.17E-02 0 0 | Cs2g02520.1 | 8.41 | 0 | 0 | 2 MASCOT | T | PLEX8 |
| 5.28E-03 0 0 | Cs2g02520.1 | 8.41 | 0 | 0 | 2 MASCOT | T | PLEX8 |
| 6.23E-03 0 0 | Cs2g02520.1 | 8.41 | 0 | 0 | 2 MASCOT | T | PLEX8 |
| 4.28E-02 0 0 | Cs2g02520.1 | 8.41 | 0 | 0 | 2 MASCOT | T | PLEX8 |
| 2.38E-02 0 0 | Cs2g02520.1 | 8.41 | 0 | 0 | 2 MASCOT | T | PLEX8 |
| 6.40E-03 0 0 | Cs2g02520.1 | 8.41 | 0 | 0 | 2 MASCOT | T | PLEX8 |
| 2.05E-01 0 0 | Cs2g02520.1 | 8.41 | 0 | 0 | 2 MASCOT | T | PLEX8 |
| 4.96E-03 0 0 | Cs2g02520.1 | 8.41 | 0 | 0 | 2 MASCOT | T | PLEX8 |
| 3.22E-02 0 0 | Cs2g02520.1 | 8.41 | 0 | 0 | 2 MASCOT | T |       |
| 2.64E-02 0 0 | Cs2g02520.1 | 8.41 | 0 | 0 | 2 MASCOT | T | PLEX8 |
| 3.24E-01 0 0 | Cs2g02520.1 | 8.41 | 0 | 0 | 2 MASCOT | T |       |
| 3.39E-02 0 0 | Cs2g02520.1 | 8.41 | 0 | 0 | 2 MASCOT | T |       |
| 2.31E-02 0 0 | Cs2g02520.1 | 8.41 | 0 | 0 | 2 MASCOT | T |       |
| 2.29E-04 0 0 | Cs2g02520.1 | 3.77 | 0 | 0 | 2 MASCOT | T | PLEX8 |
| 5.77E-03 0 0 | Cs2g02520.1 | 3.77 | 0 | 0 | 2 MASCOT | T | PLEX8 |
| 3.34E-01 0 0 | Cs2g02520.1 | 5.88 | 0 | 0 | 2 MASCOT | T | PLEX8 |

|              |             |      |   |   |          |   |       |
|--------------|-------------|------|---|---|----------|---|-------|
| 3.49E-01 0 0 | Cs2g02520.1 | 5.88 | 0 | 0 | 2 MASCOT | T | PLEX8 |
| 8.32E-05 0 0 | Cs2g02520.1 | 5.88 | 0 | 0 | 2 MASCOT | T | PLEX8 |
| 2.63E-04 0 0 | Cs2g02520.1 | 5.88 | 0 | 0 | 2 MASCOT | T | PLEX8 |
| 1.22E-05 0 0 | Cs2g02520.1 | 5.88 | 0 | 0 | 2 MASCOT | T | PLEX8 |
| 3.63E-04 0 0 | Cs2g02520.1 | 5.88 | 0 | 0 | 2 MASCOT | T | PLEX8 |
| 7.92E-05 0 0 | Cs2g02520.1 | 5.88 | 0 | 0 | 2 MASCOT | T | PLEX8 |
| 1.48E-04 0 0 | Cs2g02520.1 | 5.88 | 0 | 0 | 2 MASCOT | T | PLEX8 |
| 1.19E-03 0 0 | Cs2g02520.1 | 5.88 | 0 | 0 | 2 MASCOT | T | PLEX8 |
| 1.96E-04 0 0 | Cs2g02520.1 | 5.88 | 0 | 0 | 2 MASCOT | T | PLEX8 |
| 2.42E-03 0 0 | Cs2g02520.1 | 5.88 | 0 | 0 | 2 MASCOT | T | PLEX8 |
| 2.72E-03 0 0 | Cs2g02520.1 | 5.88 | 0 | 0 | 2 MASCOT | T | PLEX8 |
| 5.64E-02 0 0 | Cs2g02520.1 | 5.88 | 0 | 0 | 2 MASCOT | T | PLEX8 |
| 3.15E-01 0 0 | Cs2g02520.1 | 5.88 | 0 | 0 | 2 MASCOT | T | PLEX8 |
| 7.18E-02 0 0 | Cs2g02520.1 | 5.88 | 0 | 0 | 2 MASCOT | T |       |
| 9.18E-02 0 0 | Cs2g02520.1 | 5.88 | 0 | 0 | 2 MASCOT | T |       |
| 1.30E-02 0 0 | Cs2g02520.1 | 5.88 | 0 | 0 | 2 MASCOT | T |       |
| 5.09E-01 0 0 | Cs2g02520.1 | 5.88 | 0 | 0 | 2 MASCOT | T |       |
| 3.49E-04 0 0 | Cs2g02520.1 | 5.88 | 0 | 0 | 2 MASCOT | T | PLEX8 |
| 9.52E-05 0 0 | Cs2g02520.1 | 5.88 | 0 | 0 | 2 MASCOT | T | PLEX8 |
| 8.82E-03 0 0 | Cs2g02520.1 | 5.88 | 0 | 0 | 2 MASCOT | T | PLEX8 |
| 2.19E-03 0 0 | Cs2g02520.1 | 5.88 | 0 | 0 | 2 MASCOT | T | PLEX8 |
| 6.58E-03 0 0 | Cs2g02520.1 | 5.88 | 0 | 0 | 2 MASCOT | T |       |
| 4.04E-03 0 0 | Cs2g02520.1 | 5.88 | 0 | 0 | 2 MASCOT | T | PLEX8 |
| 2.40E-03 0 0 | Cs2g02520.1 | 5.88 | 0 | 0 | 2 MASCOT | T | PLEX8 |
| 4.99E-01 0 0 | Cs2g02520.1 | 5.88 | 0 | 0 | 2 MASCOT | T | PLEX8 |
| 2.63E-01 0 0 | Cs2g02520.1 | 5.88 | 0 | 0 | 2 MASCOT | T |       |
| 8.18E-03 0 0 | Cs2g02520.1 | 5.88 | 0 | 0 | 2 MASCOT | T | PLEX8 |
| 7.77E-05 0 0 | Cs2g02520.1 | 5.88 | 0 | 0 | 2 MASCOT | T | PLEX8 |
| 3.39E-03 0 0 | Cs2g02520.1 | 5.88 | 0 | 0 | 2 MASCOT | T | PLEX8 |
| 2.41E-02 0 0 | Cs2g02520.1 | 5.88 | 0 | 0 | 2 MASCOT | T |       |
| 1.87E-01 0 0 | Cs2g02520.1 | 5.88 | 0 | 0 | 2 MASCOT | T |       |
| 5.53E-06 0 0 | Cs2g02520.1 | 5.88 | 0 | 0 | 2 MASCOT | T | PLEX8 |
| 4.26E-03 0 0 | Cs2g02520.1 | 5.88 | 0 | 0 | 2 MASCOT | T | PLEX8 |
| 3.23E-02 0 0 | Cs2g02520.1 | 5.88 | 0 | 0 | 2 MASCOT | T | PLEX8 |
| 4.13E-01 0 0 | Cs2g02520.1 | 5.88 | 0 | 0 | 2 MASCOT | T |       |
| 1.85E-03 0 0 | Cs2g02520.1 | 5.88 | 0 | 0 | 2 MASCOT | T | PLEX8 |
| 2.90E-02 0 0 | Cs2g02520.1 | 5.88 | 0 | 0 | 2 MASCOT | T | PLEX8 |
| 4.43E-01 0 0 | Cs2g02520.1 | 5.88 | 0 | 0 | 2 MASCOT | T |       |
| 2.36E-02 0 0 | Cs2g02520.1 | 4.25 | 0 | 0 | 2 MASCOT | T |       |
| 6.46E-04 0 0 | Cs2g02520.1 | 4.25 | 0 | 0 | 2 MASCOT | T | PLEX8 |
| 3.12E-04 0 0 | Cs2g02520.1 | 4.25 | 0 | 0 | 2 MASCOT | T | PLEX8 |
| 1.45E-02 0 0 | Cs2g02520.1 | 4.25 | 0 | 0 | 2 MASCOT | T |       |
| 2.79E-01 0 0 | Cs2g02520.1 | 4.25 | 0 | 0 | 2 MASCOT | T |       |
| 3.30E-02 0 0 | Cs2g02520.1 | 4.25 | 0 | 0 | 2 MASCOT | T |       |
| 7.04E-02 0 0 | Cs2g02520.1 | 4.25 | 0 | 0 | 2 MASCOT | T |       |
| 4.96E-02 0 0 | Cs2g02520.1 | 4.25 | 0 | 0 | 2 MASCOT | T |       |
| 5.83E-03 0 0 | Cs2g02520.1 | 4.25 | 0 | 0 | 2 MASCOT | T | PLEX8 |
| 3.25E-01 0 0 | Cs2g02520.1 | 8.75 | 0 | 0 | 2 MASCOT | T | PLEX8 |
| 1.35E-03 0 0 | Cs2g02520.1 | 8.75 | 0 | 0 | 2 MASCOT | T | PLEX8 |
| 3.56E-01 0 0 | Cs2g02520.1 | 8.75 | 0 | 0 | 2 MASCOT | T | PLEX8 |
| 1.26E-01 0 0 | Cs2g02520.1 | 8.75 | 0 | 0 | 2 MASCOT | T | PLEX8 |



|              |             |      |   |   |          |   |       |
|--------------|-------------|------|---|---|----------|---|-------|
| 1.49E-01 0 0 | Cs2g02520.1 | 8.75 | 0 | 0 | 2 MASCOT | T | PLEX8 |
| 2.09E-02 0 0 | Cs2g02520.1 | 8.75 | 0 | 0 | 2 MASCOT | T | PLEX8 |
| 6.63E-05 0 0 | Cs2g02520.1 | 8.75 | 0 | 0 | 2 MASCOT | T | PLEX8 |
| 1.85E-03 0 0 | Cs2g02520.1 | 8.75 | 0 | 0 | 2 MASCOT | T | PLEX8 |
| 4.72E-04 0 0 | Cs2g02520.1 | 8.75 | 0 | 0 | 2 MASCOT | T | PLEX8 |
| 1.93E-03 0 0 | Cs2g02520.1 | 8.75 | 0 | 0 | 2 MASCOT | T | PLEX8 |
| 4.40E-03 0 0 | Cs2g02520.1 | 8.75 | 0 | 0 | 2 MASCOT | T | PLEX8 |
| 3.89E-04 0 0 | Cs2g02520.1 | 8.75 | 0 | 0 | 2 MASCOT | T | PLEX8 |
| 1.96E-03 0 0 | Cs2g02520.1 | 8.75 | 0 | 0 | 2 MASCOT | T | PLEX8 |
| 8.52E-02 0 0 | Cs2g02520.1 | 8.75 | 0 | 0 | 2 MASCOT | T | PLEX8 |
| 1.12E-06 0 0 | Cs2g02520.1 | 8.75 | 0 | 0 | 2 MASCOT | T | PLEX8 |
| 1.53E-05 0 0 | Cs2g02520.1 | 8.75 | 0 | 0 | 2 MASCOT | T | PLEX8 |
| 2.40E-06 0 0 | Cs2g02520.1 | 8.75 | 0 | 0 | 2 MASCOT | T | PLEX8 |
| 1.33E-01 0 0 | Cs2g02520.1 | 8.75 | 0 | 0 | 2 MASCOT | T | PLEX8 |
| 2.57E-02 0 0 | Cs2g02520.1 | 8.75 | 0 | 0 | 2 MASCOT | T | PLEX8 |
| 4.91E-02 0 0 | Cs2g02520.1 | 8.75 | 0 | 0 | 2 MASCOT | T |       |
| 7.23E-04 0 0 | Cs2g02520.1 | 8.75 | 0 | 0 | 2 MASCOT | T | PLEX8 |
| 3.32E-02 0 0 | Cs2g02520.1 | 8.75 | 0 | 0 | 2 MASCOT | T | PLEX8 |
| 2.72E-02 0 0 | Cs2g02520.1 | 8.75 | 0 | 0 | 2 MASCOT | T | PLEX8 |
| 7.40E-04 0 0 | Cs2g02520.1 | 8.75 | 0 | 0 | 2 MASCOT | T | PLEX8 |
| 3.59E-01 0 0 | Cs2g02520.1 | 8.75 | 0 | 0 | 2 MASCOT | T | PLEX8 |
| 2.02E-01 0 0 | Cs2g02520.1 | 8.75 | 0 | 0 | 2 MASCOT | T | PLEX8 |
| 2.34E-05 0 0 | Cs2g02520.1 | 8.75 | 0 | 0 | 2 MASCOT | T | PLEX8 |
| 9.23E-04 0 0 | Cs2g02520.1 | 8.75 | 0 | 0 | 2 MASCOT | T | PLEX8 |
| 8.81E-03 0 0 | Cs2g02520.1 | 8.75 | 0 | 0 | 2 MASCOT | T |       |
| 4.90E-01 0 0 | Cs2g02520.1 | 8.75 | 0 | 0 | 2 MASCOT | T | PLEX8 |
| 1.41E-03 0 0 | Cs2g02520.1 | 8.75 | 0 | 0 | 2 MASCOT | T | PLEX8 |
| 2.67E-05 0 0 | Cs2g02520.1 | 8.75 | 0 | 0 | 2 MASCOT | T | PLEX8 |
| 2.27E-05 0 0 | Cs2g02520.1 | 8.75 | 0 | 0 | 2 MASCOT | T | PLEX8 |
| 3.75E-08 0 0 | Cs2g02520.1 | 8.75 | 0 | 0 | 2 MASCOT | T | PLEX8 |
| 2.68E-05 0 0 | Cs2g02520.1 | 8.75 | 0 | 0 | 2 MASCOT | T | PLEX8 |
| 4.05E-05 0 0 | Cs2g02520.1 | 8.75 | 0 | 0 | 2 MASCOT | T | PLEX8 |
| 3.60E-02 0 0 | Cs2g02520.1 | 8.75 | 0 | 0 | 2 MASCOT | T | PLEX8 |
| 3.04E-04 0 0 | Cs2g02520.1 | 8.75 | 0 | 0 | 2 MASCOT | T | PLEX8 |
| 2.36E-04 0 0 | Cs2g02520.1 | 8.75 | 0 | 0 | 2 MASCOT | T | PLEX8 |
| 1.44E-02 0 0 | Cs2g02520.1 | 8.75 | 0 | 0 | 2 MASCOT | T |       |
| 1.94E-02 0 0 | Cs2g02520.1 | 8.75 | 0 | 0 | 2 MASCOT | T |       |
| 3.75E-02 0 0 | Cs2g02520.1 | 6    | 0 | 0 | 2 MASCOT | T | PLEX8 |
| 1.48E-01 0 0 | Cs2g02520.1 | 6    | 0 | 0 | 2 MASCOT | T | PLEX8 |
| 4.42E-02 0 0 | Cs2g02520.1 | 6    | 0 | 0 | 2 MASCOT | T | PLEX8 |
| 1.44E-02 0 0 | Cs2g02520.1 | 6    | 0 | 0 | 2 MASCOT | T | PLEX8 |
| 1.39E-01 0 0 | Cs2g02520.1 | 6    | 0 | 0 | 2 MASCOT | T | PLEX8 |
| 1.30E-01 0 0 | Cs2g02520.1 | 6    | 0 | 0 | 2 MASCOT | T | PLEX8 |
| 1.12E-01 0 0 | Cs2g02520.1 | 6    | 0 | 0 | 2 MASCOT | T | PLEX8 |
| 4.01E-02 0 0 | Cs2g02520.1 | 6    | 0 | 0 | 2 MASCOT | T | PLEX8 |
| 3.79E-02 0 0 | Cs2g02520.1 | 6    | 0 | 0 | 2 MASCOT | T | PLEX8 |
| 2.51E-02 0 0 | Cs2g02520.1 | 6    | 0 | 0 | 2 MASCOT | T | PLEX8 |
| 4.71E-02 0 0 | Cs2g02520.1 | 6    | 0 | 0 | 2 MASCOT | T | PLEX8 |
| 9.56E-02 0 0 | Cs2g02520.1 | 6    | 0 | 0 | 2 MASCOT | T | PLEX8 |
| 2.05E-01 0 0 | Cs2g02520.1 | 6    | 0 | 0 | 2 MASCOT | T | PLEX8 |
| 1.66E-01 0 0 | Cs2g02520.1 | 6    | 0 | 0 | 2 MASCOT | T | PLEX8 |

|              |                      |      |   |      |   |        |        |       |       |
|--------------|----------------------|------|---|------|---|--------|--------|-------|-------|
| 4.58E-02 0 0 | Cs2g02520.1          | 6    | 0 | 0    | 2 | MASCOT | T      | PLEX8 |       |
| 1.90E-02 0 0 | Cs2g02520.1          | 6    | 0 | 0    | 2 | MASCOT | T      | PLEX8 |       |
| 2.12E-02 0 0 | Cs2g02520.1          | 6    | 0 | 0    | 2 | MASCOT | T      | PLEX8 |       |
| 2.17E-02 0 0 | Cs2g02520.1          | 6    | 0 | 0    | 2 | MASCOT | T      | PLEX8 |       |
| 9.51E-02 0 0 | Cs2g02520.1          | 6    | 0 | 0    | 2 | MASCOT | T      | PLEX8 |       |
| 3.91E-02 0 0 | Cs4g16390.1/Cs4g195  | 6.05 | 0 | 0    | 2 | MASCOT | T      | PLEX8 |       |
| 5.86E-02 0 0 | Cs4g16390.1/Cs4g163  | 4.53 | 0 | 0    | 2 | MASCOT | T      | PLEX8 |       |
| 4.62E-02 0 0 | Cs4g16390.1/Cs4g163  | 4.53 | 0 | 0    | 2 | MASCOT | T      | PLEX8 |       |
| 9.27E-02 0 0 | Cs4g16390.1/Cs4g163  | 4.53 | 0 | 0    | 2 | MASCOT | T      | PLEX8 |       |
| 3.03E-03 0 0 | Cs4g16390.1/Cs4g163  | 5.99 | 0 | 15.9 | 0 | 2      | MASCOT | T     | PLEX8 |
| 3.63E-02 0 0 | Cs4g16390.1/Cs4g163  | 5.99 | 0 | 15.9 | 0 | 2      | MASCOT | T     | PLEX8 |
| 9.84E-02 0 0 | Cs4g16390.1/Cs4g163  | 5.99 | 0 | 15.9 | 0 | 2      | MASCOT | T     | PLEX8 |
| 3.88E-02 0 0 | Cs4g16390.1/Cs4g163  | 5.99 | 0 | 15.9 | 0 | 2      | MASCOT | T     | PLEX8 |
| 1.04E-02 0 0 | Cs4g16390.1/Cs4g163  | 5.99 | 0 | 15.9 | 0 | 2      | MASCOT | T     | PLEX8 |
| 5.06E-03 0 0 | Cs4g16390.1/Cs4g163  | 5.99 | 0 | 15.9 | 0 | 2      | MASCOT | T     |       |
| 1.71E-01 0 0 | Cs4g16390.1/Cs4g163  | 5.99 | 0 | 15.9 | 0 | 2      | MASCOT | T     |       |
| 5.14E-03 0 0 | Cs4g16390.1/Cs4g163  | 5.99 | 0 | 15.9 | 0 | 2      | MASCOT | T     | PLEX8 |
| 2.61E-03 0 0 | Cs4g16390.1/Cs4g163  | 5.99 | 0 | 15.9 | 0 | 2      | MASCOT | T     | PLEX8 |
| 4.04E-02 0 0 | Cs4g16390.1/Cs4g163  | 5.99 | 0 | 0    | 2 | MASCOT | T      | PLEX8 |       |
| 4.63E-03 0 0 | Cs4g16390.1/Cs4g163  | 5.99 | 0 | 0    | 2 | MASCOT | T      | PLEX8 |       |
| 3.52E-02 0 0 | Cs4g16390.1/Cs4g163  | 5.99 | 0 | 0    | 2 | MASCOT | T      | PLEX8 |       |
| 5.94E-03 0 0 | Cs4g16390.1/Cs4g163  | 5.99 | 0 | 0    | 2 | MASCOT | T      | PLEX8 |       |
| 4.16E-02 0 0 | Cs4g16390.1/Cs4g163  | 5.99 | 0 | 0    | 2 | MASCOT | T      | PLEX8 |       |
| 3.79E-03 0 0 | Cs4g16390.1/Cs4g163  | 5.99 | 0 | 0    | 2 | MASCOT | T      | PLEX8 |       |
| 1.26E-01 0 0 | Cs4g16390.1/Cs4g163  | 5.99 | 0 | 0    | 2 | MASCOT | T      | PLEX8 |       |
| 1.28E-01 0 0 | Cs4g16390.1/Cs4g163  | 5.99 | 0 | 0    | 2 | MASCOT | T      | PLEX8 |       |
| 6.23E-02 0 0 | Cs4g16390.1/Cs4g163  | 5.99 | 0 | 0    | 2 | MASCOT | T      | PLEX8 |       |
| 7.83E-02 0 0 | Cs4g16390.1/Cs4g163  | 5.99 | 0 | 0    | 2 | MASCOT | T      | PLEX8 |       |
| 3.70E-02 0 0 | Cs4g16390.1/Cs4g163  | 5.99 | 0 | 0    | 2 | MASCOT | T      | PLEX8 |       |
| 1.01E-02 0 0 | Cs4g16390.1/Cs4g163  | 5.99 | 0 | 0    | 2 | MASCOT | T      | PLEX8 |       |
| 6.19E-02 0 0 | Cs4g16390.1/Cs4g163  | 5.99 | 0 | 0    | 2 | MASCOT | T      | PLEX8 |       |
| 4.44E-03 0 0 | Cs4g16390.1/Cs4g163  | 5.99 | 0 | 0    | 2 | MASCOT | T      | PLEX8 |       |
| 3.58E-02 0 0 | Cs4g16390.1/Cs4g163  | 5.99 | 0 | 0    | 2 | MASCOT | T      | PLEX8 |       |
| 4.22E-03 0 0 | Cs4g16390.1/Cs4g163  | 5.99 | 0 | 0    | 2 | MASCOT | T      | PLEX8 |       |
| 3.81E-02 0 0 | Cs4g16390.1/Cs4g163  | 5.99 | 0 | 0    | 2 | MASCOT | T      | PLEX8 |       |
| 3.62E-02 0 0 | Cs4g16390.1/Cs4g163  | 5.99 | 0 | 0    | 2 | MASCOT | T      | PLEX8 |       |
| 1.32E-01 0 0 | Cs4g16390.1/Cs4g163  | 5.99 | 0 | 0    | 2 | MASCOT | T      |       |       |
| 3.49E-03 0 0 | Cs4g16390.1/Cs4g163  | 5.99 | 0 | 0    | 2 | MASCOT | T      | PLEX8 |       |
| 1.69E-01 0 0 | Cs4g16390.1/Cs4g163  | 5.99 | 0 | 0    | 2 | MASCOT | T      | PLEX8 |       |
| 6.06E-02 0 0 | Cs4g16390.1/Cs4g163  | 5.99 | 0 | 0    | 2 | MASCOT | T      |       |       |
| 9.64E-04 0 0 | Cs4g16390.1/Cs4g163  | 4.03 | 0 | 0    | 2 | MASCOT | T      | PLEX8 |       |
| 5.39E-04 0 0 | Cs4g16390.1/Cs4g163  | 4.03 | 0 | 0    | 2 | MASCOT | T      | PLEX8 |       |
| 2.24E-02 0 0 | Cs4g16390.1/Cs4g163  | 4.03 | 0 | 0    | 2 | MASCOT | T      | PLEX8 |       |
| 5.93E-02 0 0 | Cs4g16390.1/Cs4g163  | 4.03 | 0 | 0    | 2 | MASCOT | T      |       |       |
| 3.07E-06 0 0 | Cs4g16390.1/Cs4g163  | 4.03 | 0 | 0    | 2 | MASCOT | T      |       |       |
| 1.98E-03 0 0 | Cs4g16390.1/Cs4g163  | 4.03 | 0 | 0    | 2 | MASCOT | T      |       |       |
| 2.28E-03 0 0 | Cs4g16390.1/Cs4g163  | 4.03 | 0 | 0    | 2 | MASCOT | T      |       |       |
| 2.33E-01 0 0 | Cs4g16390.1/orange1. | 4.21 | 0 | 0    | 2 | MASCOT | T      | PLEX8 |       |
| 3.63E-03 0 0 | Cs4g16390.1/orange1. | 4.21 | 0 | 0    | 2 | MASCOT | T      | PLEX8 |       |
| 5.94E-05 0 0 | Cs4g16390.1/orange1. | 4.21 | 0 | 0    | 2 | MASCOT | T      | PLEX8 |       |
| 3.57E-07 0 0 | Cs4g16390.1/orange1. | 4.21 | 0 | 0    | 2 | MASCOT | T      | PLEX8 |       |

|          |     |                      |      |   |      |   |        |        |       |       |
|----------|-----|----------------------|------|---|------|---|--------|--------|-------|-------|
| 1.35E-01 | 0 0 | Cs4g16390.1/orange1. | 4.21 | 0 | 0    | 2 | MASCOT | T      | PLEX8 |       |
| 4.44E-03 | 0 0 | Cs4g16390.1/orange1. | 4.21 | 0 | 0    | 2 | MASCOT | T      | PLEX8 |       |
| 4.20E-02 | 0 0 | Cs4g16390.1/orange1. | 4.21 | 0 | 0    | 2 | MASCOT | T      | PLEX8 |       |
| 3.13E-02 | 0 0 | Cs4g16390.1/orange1. | 4.21 | 0 | 0    | 2 | MASCOT | T      | PLEX8 |       |
| 8.95E-02 | 0 0 | Cs4g16390.1/orange1. | 4.21 | 0 | 0    | 2 | MASCOT | T      | PLEX8 |       |
| 2.20E-03 | 0 0 | Cs4g16390.1/orange1. | 4.21 | 0 | 0    | 2 | MASCOT | T      | PLEX8 |       |
| 1.67E-04 | 0 0 | Cs4g16390.1/orange1. | 4.21 | 0 | 0    | 2 | MASCOT | T      | PLEX8 |       |
| 2.70E-01 | 0 0 | Cs4g16390.1/orange1. | 4.21 | 0 | 0    | 2 | MASCOT | T      |       |       |
| 6.43E-03 | 0 0 | Cs4g16390.1/orange1. | 4.21 | 0 | 0    | 2 | MASCOT | T      | PLEX8 |       |
| 1.49E-03 | 0 0 | Cs4g16390.1/orange1. | 4.21 | 0 | 0    | 2 | MASCOT | T      | PLEX8 |       |
| 5.73E-03 | 0 0 | Cs4g16390.1/orange1. | 4.21 | 0 | 0    | 2 | MASCOT | T      | PLEX8 |       |
| 2.14E-01 | 0 0 | Cs4g16390.1/Cs4g163  | 5.66 | 0 | 0    | 2 | MASCOT | T      | PLEX8 |       |
| 2.13E-01 | 0 0 | Cs4g16390.1/Cs4g163  | 5.66 | 0 | 0    | 2 | MASCOT | T      | PLEX8 |       |
| 2.21E-01 | 0 0 | Cs4g16390.1/Cs4g163  | 5.66 | 0 | 0    | 2 | MASCOT | T      | PLEX8 |       |
| 2.07E-01 | 0 0 | Cs4g16390.1/orange1. | 4.21 | 0 | 0    | 2 | MASCOT | T      | PLEX8 |       |
| 5.39E-03 | 0 0 | Cs4g16390.1/orange1. | 4.21 | 0 | 0    | 2 | MASCOT | T      | PLEX8 |       |
| 1.85E-02 | 0 0 | Cs4g16390.1/orange1. | 4.21 | 0 | 0    | 2 | MASCOT | T      | PLEX8 |       |
| 2.54E-06 | 0 0 | Cs4g16390.1/orange1. | 4.21 | 0 | 0    | 2 | MASCOT | T      | PLEX8 |       |
| 2.54E-04 | 0 0 | Cs4g16390.1/orange1. | 4.21 | 0 | 0    | 2 | MASCOT | T      | PLEX8 |       |
| 2.44E-06 | 0 0 | Cs4g16390.1/orange1. | 4.21 | 0 | 0    | 2 | MASCOT | T      | PLEX8 |       |
| 1.43E-04 | 0 0 | Cs4g16390.1/orange1. | 4.21 | 0 | 0    | 2 | MASCOT | T      | PLEX8 |       |
| 1.00E-03 | 0 0 | Cs4g16390.1/orange1. | 4.21 | 0 | 0    | 2 | MASCOT | T      | PLEX8 |       |
| 1.28E-01 | 0 0 | Cs4g16390.1/orange1. | 4.21 | 0 | 0    | 2 | MASCOT | T      |       |       |
| 2.18E-01 | 0 0 | Cs4g16390.1/orange1. | 4.21 | 0 | 0    | 2 | MASCOT | T      | PLEX8 |       |
| 1.94E-03 | 0 0 | Cs4g16390.1/orange1. | 4.21 | 0 | 0    | 2 | MASCOT | T      | PLEX8 |       |
| 8.38E-03 | 0 0 | Cs4g16390.1/orange1. | 4.21 | 0 | 0    | 2 | MASCOT | T      |       |       |
| 1.01E-04 | 0 0 | Cs4g16390.1/orange1. | 4.21 | 0 | 0    | 2 | MASCOT | T      | PLEX8 |       |
| 3.58E-02 | 0 0 | Cs4g16390.1/orange1. | 4.21 | 0 | 0    | 2 | MASCOT | T      | PLEX8 |       |
| 4.62E-02 | 0 0 | Cs4g16390.1/orange1. | 4.21 | 0 | 0    | 2 | MASCOT | T      | PLEX8 |       |
| 1.72E-04 | 0 0 | Cs4g16390.1/orange1. | 4.21 | 0 | 0    | 2 | MASCOT | T      |       |       |
| 8.28E-03 | 0 0 | Cs4g16390.1/orange1. | 4.21 | 0 | 0    | 2 | MASCOT | T      |       |       |
| 5.55E-02 | 0 0 | Cs4g16390.1/Cs4g163  | 4.41 | 0 | 0    | 2 | MASCOT | T      | PLEX8 |       |
| 2.25E-01 | 0 0 | Cs4g16390.1/Cs4g163  | 4.41 | 0 | 0    | 2 | MASCOT | T      | PLEX8 |       |
| 2.00E-02 | 0 0 | Cs4g16390.1/orange1. | 4.37 | 0 | 15.9 | 0 | 2      | MASCOT | T     | PLEX8 |
| 5.99E-04 | 0 0 | Cs4g16390.1/orange1. | 4.37 | 0 | 15.9 | 0 | 2      | MASCOT | T     | PLEX8 |
| 4.21E-05 | 0 0 | Cs4g16390.1/orange1. | 4.37 | 0 | 15.9 | 0 | 2      | MASCOT | T     | PLEX8 |
| 1.07E-03 | 0 0 | Cs4g16390.1/orange1. | 4.37 | 0 | 15.9 | 0 | 2      | MASCOT | T     | PLEX8 |
| 1.74E-04 | 0 0 | Cs4g16390.1/orange1. | 4.37 | 0 | 15.9 | 0 | 2      | MASCOT | T     | PLEX8 |
| 1.65E-03 | 0 0 | Cs4g16390.1/orange1. | 4.37 | 0 | 15.9 | 0 | 2      | MASCOT | T     | PLEX8 |
| 2.41E-04 | 0 0 | Cs4g16390.1/orange1. | 4.37 | 0 | 15.9 | 0 | 2      | MASCOT | T     | PLEX8 |
| 2.41E-04 | 0 0 | Cs4g16390.1/orange1. | 4.37 | 0 | 0    | 2 | MASCOT | T      | PLEX8 |       |
| 3.48E-06 | 0 0 | Cs4g16390.1/orange1. | 4.37 | 0 | 0    | 2 | MASCOT | T      | PLEX8 |       |
| 2.43E-02 | 0 0 | Cs4g16390.1/orange1. | 4.37 | 0 | 0    | 2 | MASCOT | T      | PLEX8 |       |
| 8.85E-02 | 0 0 | Cs4g16390.1/orange1. | 4.37 | 0 | 0    | 2 | MASCOT | T      |       |       |
| 2.04E-02 | 0 0 | Cs4g16390.1/orange1. | 4.37 | 0 | 0    | 2 | MASCOT | T      | PLEX8 |       |
| 1.13E-01 | 0 0 | Cs4g16390.1/Cs4g195  | 6.1  | 0 | 0    | 2 | MASCOT | T      | PLEX8 |       |
| 5.29E-03 | 0 0 | Cs4g16390.1/Cs4g195  | 6.1  | 0 | 0    | 2 | MASCOT | T      | PLEX8 |       |
| 2.12E-01 | 0 0 | Cs4g16390.1/Cs4g195  | 6.1  | 0 | 0    | 2 | MASCOT | T      | PLEX8 |       |
| 8.14E-02 | 0 0 | Cs4g16390.1/Cs4g195  | 6.1  | 0 | 0    | 2 | MASCOT | T      | PLEX8 |       |
| 1.29E-01 | 0 0 | Cs4g16390.1/Cs4g195  | 6.1  | 0 | 0    | 2 | MASCOT | T      | PLEX8 |       |
| 1.34E-02 | 0 0 | Cs4g16390.1/Cs4g195  | 6.1  | 0 | 0    | 2 | MASCOT | T      | PLEX8 |       |

|          |     |                      |      |   |      |   |        |        |       |       |
|----------|-----|----------------------|------|---|------|---|--------|--------|-------|-------|
| 4.36E-02 | 0 0 | Cs4g16390.1/Cs4g195  | 6.1  | 0 | 0    | 2 | MASCOT | T      | PLEX8 |       |
| 4.19E-02 | 0 0 | Cs4g16390.1/Cs4g195  | 6.1  | 0 | 0    | 2 | MASCOT | T      | PLEX8 |       |
| 2.96E-01 | 0 0 | Cs4g16390.1/Cs4g195  | 6.1  | 0 | 0    | 2 | MASCOT | T      | PLEX8 |       |
| 3.26E-02 | 0 0 | Cs4g16390.1/Cs4g195  | 6.1  | 0 | 0    | 2 | MASCOT | T      | PLEX8 |       |
| 2.61E-01 | 0 0 | Cs4g16390.1/Cs4g195  | 6.1  | 0 | 0    | 2 | MASCOT | T      | PLEX8 |       |
| 1.54E-01 | 0 0 | Cs4g16390.1/Cs4g195  | 6.1  | 0 | 0    | 2 | MASCOT | T      | PLEX8 |       |
| 3.15E-02 | 0 0 | Cs4g16390.1/Cs4g195  | 6.1  | 0 | 0    | 2 | MASCOT | T      |       |       |
| 2.17E-01 | 0 0 | Cs2g02990.1/Cs2g029  | 6.1  | 0 | 0    | 2 | MASCOT | T      | PLEX8 |       |
| 1.18E-01 | 0 0 | Cs2g02990.1/Cs2g029  | 6.1  | 0 | 0    | 2 | MASCOT | T      | PLEX8 |       |
| 1.27E-01 | 0 0 | Cs2g02990.1/Cs2g029  | 6.1  | 0 | 0    | 2 | MASCOT | T      |       |       |
| 8.00E-04 | 0 0 | Cs2g02990.1/Cs2g029  | 6    | 0 | 0    | 2 | MASCOT | T      |       |       |
| 1.42E-01 | 0 0 | Cs2g02990.1/Cs2g029  | 6    | 0 | 0    | 2 | MASCOT | T      |       |       |
| 1.58E-03 | 0 0 | Cs2g02990.1/Cs2g029  | 6    | 0 | 0    | 2 | MASCOT | T      |       |       |
| 7.50E-04 | 0 0 | Cs2g02990.1/Cs2g029  | 6    | 0 | 0    | 2 | MASCOT | T      |       |       |
| 1.37E-01 | 0 0 | Cs4g16390.1/Cs4g163  | 8.52 | 0 | 15.9 | 0 | 2      | MASCOT | T     | PLEX8 |
| 1.29E-01 | 0 0 | Cs4g16390.1/Cs4g163  | 8.52 | 0 | 15.9 | 0 | 2      | MASCOT | T     | PLEX8 |
| 1.32E-01 | 0 0 | Cs4g16390.1/Cs4g163  | 8.52 | 0 | 15.9 | 0 | 2      | MASCOT | T     | PLEX8 |
| 2.17E-01 | 0 0 | Cs4g16390.1/Cs4g163  | 8.52 | 0 | 15.9 | 0 | 2      | MASCOT | T     |       |
| 7.15E-02 | 0 0 | Cs4g16390.1/Cs4g163  | 8.52 | 0 | 15.9 | 0 | 2      | MASCOT | T     | PLEX8 |
| 1.89E-01 | 0 0 | Cs4g16390.1/Cs4g163  | 8.52 | 0 | 15.9 | 0 | 2      | MASCOT | T     | PLEX8 |
| 2.36E-01 | 0 0 | Cs4g16390.1/Cs4g163  | 8.52 | 0 | 15.9 | 0 | 2      | MASCOT | T     | PLEX8 |
| 2.14E-02 | 0 0 | Cs4g16390.1/Cs4g163  | 8.52 | 0 | 0    | 2 | MASCOT | T      | PLEX8 |       |
| 4.31E-01 | 0 0 | Cs4g16390.1/Cs4g163  | 8.52 | 0 | 0    | 2 | MASCOT | T      |       |       |
| 5.53E-02 | 0 0 | Cs4g16390.1/Cs4g163  | 8.52 | 0 | 0    | 2 | MASCOT | T      | PLEX8 |       |
| 2.02E-01 | 0 0 | Cs4g16390.1/Cs4g163  | 8.52 | 0 | 0    | 2 | MASCOT | T      | PLEX8 |       |
| 4.77E-02 | 0 0 | Cs4g16390.1/Cs4g163  | 8.52 | 0 | 0    | 2 | MASCOT | T      |       |       |
| 4.42E-02 | 0 0 | Cs4g16390.1/Cs4g163  | 8.52 | 0 | 0    | 2 | MASCOT | T      | PLEX8 |       |
| 3.25E-03 | 0 0 | Cs4g16390.1/orange1. | 5.72 | 0 | 0    | 2 | MASCOT | T      | PLEX8 |       |
| 2.25E-01 | 0 0 | Cs4g16390.1/orange1. | 5.72 | 0 | 0    | 2 | MASCOT | T      | PLEX8 |       |
| 4.54E-02 | 0 0 | Cs4g16390.1/orange1. | 5.72 | 0 | 0    | 2 | MASCOT | T      | PLEX8 |       |
| 1.08E-01 | 0 0 | Cs4g16390.1/orange1. | 5.72 | 0 | 0    | 2 | MASCOT | T      |       |       |
| 1.50E-01 | 0 0 | Cs4g16390.1/orange1. | 5.72 | 0 | 0    | 2 | MASCOT | T      | PLEX8 |       |
| 6.69E-02 | 0 0 | Cs4g16390.1/orange1. | 5.72 | 0 | 0    | 2 | MASCOT | T      | PLEX8 |       |
| 1.80E-01 | 0 0 | Cs4g16390.1/orange1. | 5.72 | 0 | 0    | 2 | MASCOT | T      |       |       |
| 9.99E-02 | 0 0 | Cs7g29010.1/Cs8g182  | 4.4  | 0 | 0    | 2 | MASCOT | T      | PLEX8 |       |
| 7.31E-03 | 0 0 | Cs6g05890.1/Cs7g289  | 4.22 | 0 | 0    | 2 | MASCOT | T      | PLEX8 |       |
| 4.80E-03 | 0 0 | Cs6g05890.1/Cs7g289  | 4.22 | 0 | 0    | 2 | MASCOT | T      | PLEX8 |       |
| 3.22E-04 | 0 0 | Cs6g05890.1/Cs7g289  | 4.22 | 0 | 0    | 2 | MASCOT | T      | PLEX8 |       |
| 1.19E-03 | 0 0 | Cs6g05890.1/Cs7g289  | 4.22 | 0 | 0    | 2 | MASCOT | T      | PLEX8 |       |
| 2.35E-03 | 0 0 | Cs6g05890.1/Cs7g289  | 4.22 | 0 | 0    | 2 | MASCOT | T      | PLEX8 |       |
| 2.57E-04 | 0 0 | Cs6g05890.1/Cs7g289  | 4.22 | 0 | 0    | 2 | MASCOT | T      | PLEX8 |       |
| 1.20E-03 | 0 0 | Cs6g05890.1/Cs7g289  | 4.22 | 0 | 0    | 2 | MASCOT | T      | PLEX8 |       |
| 2.44E-05 | 0 0 | Cs6g05890.1/Cs7g289  | 4.22 | 0 | 0    | 2 | MASCOT | T      | PLEX8 |       |
| 3.25E-04 | 0 0 | Cs6g05890.1/Cs7g289  | 4.22 | 0 | 0    | 2 | MASCOT | T      |       |       |
| 6.28E-06 | 0 0 | Cs6g05890.1/Cs7g289  | 4.22 | 0 | 0    | 2 | MASCOT | T      | PLEX8 |       |
| 2.48E-03 | 0 0 | Cs6g05890.1/Cs7g289  | 4.22 | 0 | 0    | 2 | MASCOT | T      |       |       |
| 2.90E-05 | 0 0 | Cs6g05890.1/Cs7g289  | 4.22 | 0 | 0    | 2 | MASCOT | T      |       |       |
| 1.03E-03 | 0 0 | Cs6g05890.1/Cs7g289  | 4.22 | 0 | 0    | 2 | MASCOT | T      |       |       |
| 2.82E-03 | 0 0 | Cs6g05890.1/Cs7g289  | 4.22 | 0 | 0    | 2 | MASCOT | T      |       |       |
| 1.54E-03 | 0 0 | Cs6g05890.1/Cs7g289  | 4.22 | 0 | 0    | 2 | MASCOT | T      |       |       |
| 1.12E-04 | 0 0 | Cs6g05890.1/Cs7g289  | 4.22 | 0 | 0    | 2 | MASCOT | T      |       |       |

|          |     |                     |      |   |      |   |        |        |       |       |
|----------|-----|---------------------|------|---|------|---|--------|--------|-------|-------|
| 7.95E-04 | 0 0 | Cs6g05890.1/Cs7g289 | 4.22 | 0 | 0    | 2 | MASCOT | T      |       |       |
| 1.12E-01 | 0 0 | Cs6g05890.1/Cs7g289 | 4.53 | 0 | 0    | 2 | MASCOT | T      | PLEX8 |       |
| 4.05E-04 | 0 0 | Cs6g05890.1/Cs7g289 | 5.84 | 0 | 0    | 2 | MASCOT | T      |       |       |
| 3.75E-03 | 0 0 | Cs6g05890.1/Cs7g289 | 5.84 | 0 | 0    | 2 | MASCOT | T      |       |       |
| 8.20E-06 | 0 0 | Cs6g05890.1/Cs7g289 | 4.53 | 0 | 0    | 2 | MASCOT | T      | PLEX8 |       |
| 1.27E-04 | 0 0 | Cs6g05890.1/Cs7g289 | 4.53 | 0 | 0    | 2 | MASCOT | T      | PLEX8 |       |
| 1.11E-01 | 0 0 | Cs6g05890.1/Cs7g289 | 4.53 | 0 | 0    | 2 | MASCOT | T      | PLEX8 |       |
| 1.48E-01 | 0 0 | Cs6g05890.1/Cs7g289 | 4.53 | 0 | 0    | 2 | MASCOT | T      | PLEX8 |       |
| 2.10E-02 | 0 0 | Cs6g05890.1/Cs7g289 | 4.53 | 0 | 0    | 2 | MASCOT | T      | PLEX8 |       |
| 6.37E-02 | 0 0 | Cs6g05890.1/Cs7g289 | 4.53 | 0 | 0    | 2 | MASCOT | T      | PLEX8 |       |
| 1.17E-01 | 0 0 | Cs6g05890.1/Cs7g289 | 4.53 | 0 | 0    | 2 | MASCOT | T      | PLEX8 |       |
| 7.03E-03 | 0 0 | Cs6g05890.1/Cs7g289 | 4.53 | 0 | 0    | 2 | MASCOT | T      | PLEX8 |       |
| 7.32E-03 | 0 0 | Cs6g05890.1/Cs7g289 | 6    | 0 | 0    | 2 | MASCOT | T      | PLEX8 |       |
| 3.62E-03 | 0 0 | Cs6g05890.1/Cs7g289 | 6    | 0 | 0    | 2 | MASCOT | T      | PLEX8 |       |
| 1.07E-02 | 0 0 | Cs6g05890.1/Cs7g289 | 6    | 0 | 0    | 2 | MASCOT | T      | PLEX8 |       |
| 2.27E-03 | 0 0 | Cs6g05890.1/Cs7g289 | 6    | 0 | 0    | 2 | MASCOT | T      | PLEX8 |       |
| 6.36E-03 | 0 0 | Cs6g05890.1/Cs7g289 | 6    | 0 | 0    | 2 | MASCOT | T      | PLEX8 |       |
| 5.02E-02 | 0 0 | Cs6g05890.1/Cs7g289 | 5.84 | 0 | 0    | 2 | MASCOT | T      | PLEX8 |       |
| 2.46E-02 | 0 0 | Cs6g05890.1/Cs7g289 | 5.84 | 0 | 0    | 2 | MASCOT | T      | PLEX8 |       |
| 9.87E-03 | 0 0 | Cs6g05890.1/Cs7g289 | 5.84 | 0 | 0    | 2 | MASCOT | T      |       |       |
| 1.01E-01 | 0 0 | Cs6g05890.1/Cs7g289 | 5.84 | 0 | 0    | 2 | MASCOT | T      |       |       |
| 9.58E-04 | 0 0 | Cs6g05890.1/Cs7g289 | 5.84 | 0 | 0    | 2 | MASCOT | T      | PLEX8 |       |
| 5.56E-03 | 0 0 | Cs6g05890.1/Cs7g289 | 5.84 | 0 | 0    | 2 | MASCOT | T      | PLEX8 |       |
| 9.44E-05 | 0 0 | Cs7g29010.1/Cs8g182 | 5.84 | 0 | 15.9 | 0 | 2      | MASCOT | T     | PLEX8 |
| 2.69E-02 | 0 0 | Cs7g29010.1/Cs8g182 | 5.84 | 0 | 15.9 | 0 | 2      | MASCOT | T     | PLEX8 |
| 4.61E-05 | 0 0 | Cs7g29010.1/Cs8g182 | 5.84 | 0 | 15.9 | 0 | 2      | MASCOT | T     | PLEX8 |
| 5.62E-02 | 0 0 | Cs7g29010.1/Cs8g182 | 5.84 | 0 | 15.9 | 0 | 2      | MASCOT | T     | PLEX8 |
| 7.04E-04 | 0 0 | Cs7g29010.1/Cs8g182 | 5.84 | 0 | 0    | 2 | MASCOT | T      | PLEX8 |       |
| 2.34E-02 | 0 0 | Cs7g29010.1/Cs8g182 | 5.84 | 0 | 0    | 2 | MASCOT | T      | PLEX8 |       |
| 1.20E-03 | 0 0 | Cs7g29010.1/Cs8g182 | 5.84 | 0 | 0    | 2 | MASCOT | T      | PLEX8 |       |
| 1.43E-04 | 0 0 | Cs7g29010.1/Cs8g182 | 5.84 | 0 | 0    | 2 | MASCOT | T      | PLEX8 |       |
| 4.94E-02 | 0 0 | Cs7g29010.1/Cs8g182 | 5.84 | 0 | 0    | 2 | MASCOT | T      | PLEX8 |       |
| 7.95E-03 | 0 0 | Cs7g29010.1/Cs8g182 | 5.84 | 0 | 0    | 2 | MASCOT | T      | PLEX8 |       |
| 9.97E-04 | 0 0 | Cs6g05890.1/Cs7g290 | 4.53 | 0 | 0    | 2 | MASCOT | T      | PLEX8 |       |
| 5.86E-02 | 0 0 | Cs7g28940.1/Cs7g290 | 6.46 | 0 | 0    | 2 | MASCOT | T      | PLEX8 |       |
| 2.17E-04 | 0 0 | Cs7g28940.1/Cs7g290 | 6.46 | 0 | 0    | 2 | MASCOT | T      | PLEX8 |       |
| 2.49E-01 | 0 0 | Cs7g28940.1/Cs7g290 | 6.46 | 0 | 0    | 2 | MASCOT | T      | PLEX8 |       |
| 3.46E-04 | 0 0 | Cs7g28940.1/Cs7g290 | 6.46 | 0 | 0    | 2 | MASCOT | T      | PLEX8 |       |
| 2.41E-03 | 0 0 | Cs6g05890.1/Cs7g289 | 4.14 | 0 | 15.9 | 0 | 2      | MASCOT | T     |       |
| 1.31E-03 | 0 0 | Cs6g05890.1/Cs7g289 | 4.14 | 0 | 15.9 | 0 | 2      | MASCOT | T     |       |
| 4.30E-05 | 0 0 | Cs6g05890.1/Cs7g289 | 4.14 | 0 | 15.9 | 0 | 2      | MASCOT | T     |       |
| 2.53E-03 | 0 0 | Cs3g14220.1/Cs3g142 | 4.37 | 0 | 0    | 2 | MASCOT | T      | PLEX8 |       |
| 9.99E-05 | 0 0 | Cs3g14220.1/Cs3g142 | 4.37 | 0 | 0    | 2 | MASCOT | T      | PLEX8 |       |
| 2.21E-02 | 0 0 | Cs3g14220.1/Cs3g142 | 4.37 | 0 | 0    | 2 | MASCOT | T      | PLEX8 |       |
| 9.07E-04 | 0 0 | Cs3g14220.1/Cs3g142 | 4.37 | 0 | 0    | 2 | MASCOT | T      | PLEX8 |       |
| 3.84E-04 | 0 0 | Cs3g14220.1/Cs3g142 | 4.37 | 0 | 0    | 2 | MASCOT | T      |       |       |
| 2.48E-06 | 0 0 | Cs3g14220.1/Cs3g142 | 4.37 | 0 | 0    | 2 | MASCOT | T      |       |       |
| 6.64E-05 | 0 0 | Cs3g14220.1/Cs3g142 | 4.37 | 0 | 0    | 2 | MASCOT | T      |       |       |
| 2.69E-04 | 0 0 | Cs3g14220.1/Cs3g142 | 4.37 | 0 | 0    | 2 | MASCOT | T      |       |       |
| 5.09E-01 | 0 0 | Cs3g14220.1/Cs3g142 | 4.37 | 0 | 0    | 2 | MASCOT | T      |       |       |
| 2.54E-01 | 0 0 | Cs6g05890.1/Cs7g289 | 6.5  | 0 | 15.9 | 0 | 2      | MASCOT | T     | PLEX8 |

|          |     |                     |      |   |      |   |   |        |   |       |
|----------|-----|---------------------|------|---|------|---|---|--------|---|-------|
| 2.48E-01 | 0 0 | Cs6g05890.1/Cs7g289 | 6.5  | 0 | 15.9 | 0 | 2 | MASCOT | T | PLEX8 |
| 1.45E-01 | 0 0 | Cs6g05890.1/Cs7g289 | 6.5  | 0 | 15.9 | 0 | 2 | MASCOT | T | PLEX8 |
| 4.14E-03 | 0 0 | Cs6g05890.1/Cs7g289 | 6.5  | 0 | 15.9 | 0 | 2 | MASCOT | T | PLEX8 |
| 3.71E-02 | 0 0 | Cs6g05890.1/Cs7g289 | 6.5  | 0 | 0    | 0 | 2 | MASCOT | T | PLEX8 |
| 3.84E-02 | 0 0 | Cs6g05890.1/Cs7g289 | 6.5  | 0 | 0    | 0 | 2 | MASCOT | T | PLEX8 |
| 4.78E-02 | 0 0 | Cs3g14220.1/Cs3g142 | 4.37 | 0 | 0    | 0 | 2 | MASCOT | T |       |
| 3.94E-06 | 0 0 | Cs3g14220.1/Cs3g142 | 4.37 | 0 | 0    | 0 | 2 | MASCOT | T |       |
| 2.32E-02 | 0 0 | Cs3g14220.1/Cs3g142 | 4.37 | 0 | 0    | 0 | 2 | MASCOT | T |       |
| 6.87E-06 | 0 0 | Cs3g14220.1/Cs3g142 | 4.37 | 0 | 0    | 0 | 2 | MASCOT | T |       |
| 3.44E-02 | 0 0 | Cs3g14220.1/Cs3g142 | 4.37 | 0 | 0    | 0 | 2 | MASCOT | T |       |
| 1.67E-02 | 0 0 | Cs3g14220.1/Cs3g142 | 4.37 | 0 | 0    | 0 | 2 | MASCOT | T |       |
| 5.59E-02 | 0 0 | Cs3g14220.1/Cs3g142 | 4.37 | 0 | 0    | 0 | 2 | MASCOT | T |       |
| 6.94E-03 | 0 0 | Cs4g04540.1         | 5.4  | 0 | 0    | 0 | 2 | MASCOT | T | PLEX8 |
| 2.25E-01 | 0 0 | Cs4g04540.1         | 5.4  | 0 | 0    | 0 | 2 | MASCOT | T | PLEX8 |
| 1.28E-01 | 0 0 | Cs4g04540.1         | 4.37 | 0 | 15.9 | 0 | 2 | MASCOT | T |       |
| 2.09E-02 | 0 0 | Cs4g04540.1         | 4.37 | 0 | 15.9 | 0 | 2 | MASCOT | T | PLEX8 |
| 1.94E-01 | 0 0 | Cs4g04540.1         | 4.37 | 0 | 15.9 | 0 | 2 | MASCOT | T | PLEX8 |
| 1.49E-02 | 0 0 | Cs4g04540.1         | 4.37 | 0 | 15.9 | 0 | 2 | MASCOT | T | PLEX8 |
| 1.67E-01 | 0 0 | Cs4g04540.1         | 4.37 | 0 | 0    | 0 | 2 | MASCOT | T | PLEX8 |
| 3.28E-03 | 0 0 | Cs4g04540.1         | 4.37 | 0 | 0    | 0 | 2 | MASCOT | T | PLEX8 |
| 1.36E-02 | 0 0 | Cs4g04540.1         | 4.03 | 0 | 0    | 0 | 2 | MASCOT | T | PLEX8 |
| 3.42E-04 | 0 0 | Cs4g04540.1         | 4.03 | 0 | 0    | 0 | 2 | MASCOT | T | PLEX8 |
| 2.32E-02 | 0 0 | Cs4g04540.1         | 4.65 | 0 | 0    | 0 | 2 | MASCOT | T | PLEX8 |
| 4.17E-03 | 0 0 | Cs4g04540.1         | 4.65 | 0 | 0    | 0 | 2 | MASCOT | T | PLEX8 |
| 2.43E-02 | 0 0 | Cs4g04540.1         | 4.65 | 0 | 0    | 0 | 2 | MASCOT | T | PLEX8 |
| 5.47E-02 | 0 0 | Cs4g04540.1         | 4.65 | 0 | 0    | 0 | 2 | MASCOT | T |       |
| 4.62E-03 | 0 0 | Cs4g04540.1         | 4.14 | 0 | 0    | 0 | 2 | MASCOT | T | PLEX8 |
| 8.30E-03 | 0 0 | Cs4g04540.1         | 4.14 | 0 | 0    | 0 | 2 | MASCOT | T | PLEX8 |
| 2.62E-05 | 0 0 | Cs4g04540.1         | 4.14 | 0 | 0    | 0 | 2 | MASCOT | T | PLEX8 |
| 2.59E-06 | 0 0 | Cs4g04540.1         | 4.14 | 0 | 0    | 0 | 2 | MASCOT | T | PLEX8 |
| 7.56E-02 | 0 0 | Cs4g04540.1         | 4.14 | 0 | 0    | 0 | 2 | MASCOT | T | PLEX8 |
| 2.71E-05 | 0 0 | Cs4g04540.1         | 4.14 | 0 | 0    | 0 | 2 | MASCOT | T |       |
| 2.27E-05 | 0 0 | Cs4g04540.1         | 4.14 | 0 | 0    | 0 | 2 | MASCOT | T | PLEX8 |
| 6.71E-03 | 0 0 | Cs4g04540.1         | 4.14 | 0 | 0    | 0 | 2 | MASCOT | T | PLEX8 |
| 8.24E-02 | 0 0 | Cs4g04540.1         | 5.81 | 0 | 0    | 0 | 2 | MASCOT | T | PLEX8 |
| 1.69E-01 | 0 0 | Cs4g04540.1         | 5.81 | 0 | 0    | 0 | 2 | MASCOT | T | PLEX8 |
| 9.10E-02 | 0 0 | Cs4g04540.1         | 5.81 | 0 | 0    | 0 | 2 | MASCOT | T | PLEX8 |
| 8.88E-02 | 0 0 | Cs4g04540.1         | 5.81 | 0 | 0    | 0 | 2 | MASCOT | T | PLEX8 |
| 5.14E-02 | 0 0 | Cs4g04540.1         | 6.75 | 0 | 0    | 0 | 2 | MASCOT | T | PLEX8 |
| 4.12E-03 | 0 0 | Cs4g04540.1         | 6.75 | 0 | 0    | 0 | 2 | MASCOT | T | PLEX8 |
| 7.63E-02 | 0 0 | Cs4g04540.1         | 6.75 | 0 | 0    | 0 | 2 | MASCOT | T | PLEX8 |
| 4.30E-02 | 0 0 | Cs4g04540.1         | 6.75 | 0 | 0    | 0 | 2 | MASCOT | T | PLEX8 |
| 2.90E-02 | 0 0 | Cs4g04540.1         | 6.75 | 0 | 0    | 0 | 2 | MASCOT | T | PLEX8 |
| 2.71E-02 | 0 0 | Cs4g04540.1         | 6.75 | 0 | 0    | 0 | 2 | MASCOT | T | PLEX8 |
| 1.73E-01 | 0 0 | Cs4g04540.1         | 6.75 | 0 | 0    | 0 | 2 | MASCOT | T |       |
| 6.04E-02 | 0 0 | Cs4g04540.1         | 6.75 | 0 | 0    | 0 | 2 | MASCOT | T | PLEX8 |
| 3.07E-02 | 0 0 | Cs4g04540.1         | 6.75 | 0 | 0    | 0 | 2 | MASCOT | T |       |
| 1.22E-02 | 0 0 | Cs4g04540.1         | 6.75 | 0 | 0    | 0 | 2 | MASCOT | T | PLEX8 |
| 1.03E-01 | 0 0 | Cs4g04540.1         | 6.75 | 0 | 0    | 0 | 2 | MASCOT | T |       |
| 1.59E-02 | 0 0 | Cs4g04540.1         | 5.32 | 0 | 0    | 0 | 2 | MASCOT | T |       |
| 4.46E-01 | 0 0 | Cs4g04540.1         | 5.32 | 0 | 0    | 0 | 2 | MASCOT | T |       |

|              |                       |      |   |      |   |        |        |       |       |
|--------------|-----------------------|------|---|------|---|--------|--------|-------|-------|
| 1.38E-04 0 0 | Cs4g04540.1           | 5.32 | 0 | 0    | 2 | MASCOT | T      | PLEX8 |       |
| 5.74E-03 0 0 | Cs4g04540.1           | 5.32 | 0 | 0    | 2 | MASCOT | T      | PLEX8 |       |
| 5.77E-02 0 0 | Cs4g04540.1           | 5.32 | 0 | 0    | 2 | MASCOT | T      | PLEX8 |       |
| 8.48E-05 0 0 | Cs4g04540.1           | 5.32 | 0 | 0    | 2 | MASCOT | T      | PLEX8 |       |
| 1.66E-02 0 0 | Cs4g04540.1           | 5.32 | 0 | 0    | 2 | MASCOT | T      | PLEX8 |       |
| 5.42E-04 0 0 | Cs4g04540.1           | 5.32 | 0 | 0    | 2 | MASCOT | T      | PLEX8 |       |
| 6.51E-03 0 0 | Cs4g04540.1           | 5.32 | 0 | 0    | 2 | MASCOT | T      | PLEX8 |       |
| 1.32E-02 0 0 | Cs4g04540.1           | 5.32 | 0 | 0    | 2 | MASCOT | T      | PLEX8 |       |
| 2.00E-03 0 0 | Cs4g04540.1           | 5.32 | 0 | 0    | 2 | MASCOT | T      | PLEX8 |       |
| 2.48E-02 0 0 | Cs4g04540.1           | 5.32 | 0 | 0    | 2 | MASCOT | T      | PLEX8 |       |
| 2.52E-05 0 0 | Cs4g04540.1           | 5.32 | 0 | 0    | 2 | MASCOT | T      | PLEX8 |       |
| 1.05E-03 0 0 | Cs4g04540.1           | 5.32 | 0 | 0    | 2 | MASCOT | T      | PLEX8 |       |
| 6.05E-02 0 0 | Cs4g04540.1           | 5.32 | 0 | 0    | 2 | MASCOT | T      | PLEX8 |       |
| 5.70E-03 0 0 | Cs4g04540.1           | 6    | 0 | 15.9 | 0 | 2      | MASCOT | T     | PLEX8 |
| 7.35E-03 0 0 | Cs4g04540.1           | 6    | 0 | 0    | 2 | MASCOT | T      | PLEX8 |       |
| 8.67E-04 0 0 | Cs4g04540.1           | 6    | 0 | 0    | 2 | MASCOT | T      | PLEX8 |       |
| 1.07E-01 0 0 | Cs4g04540.1           | 5.32 | 0 | 0    | 2 | MASCOT | T      | PLEX8 |       |
| 1.92E-02 0 0 | Cs4g04540.1           | 5.32 | 0 | 0    | 2 | MASCOT | T      | PLEX8 |       |
| 9.48E-02 0 0 | Cs4g04540.1           | 5.32 | 0 | 0    | 2 | MASCOT | T      | PLEX8 |       |
| 8.04E-05 0 0 | Cs4g04540.1           | 5.32 | 0 | 0    | 2 | MASCOT | T      | PLEX8 |       |
| 4.24E-02 0 0 | Cs4g04540.1           | 5.32 | 0 | 0    | 2 | MASCOT | T      | PLEX8 |       |
| 1.57E-01 0 0 | Cs4g04540.1           | 5.32 | 0 | 0    | 2 | MASCOT | T      |       |       |
| 5.19E-03 0 0 | Cs4g04540.1           | 5.32 | 0 | 0    | 2 | MASCOT | T      | PLEX8 |       |
| 3.21E-01 0 0 | Cs4g04540.1           | 5.32 | 0 | 0    | 2 | MASCOT | T      | PLEX8 |       |
| 1.39E-03 0 0 | Cs4g04540.1           | 5.32 | 0 | 0    | 2 | MASCOT | T      | PLEX8 |       |
| 1.98E-01 0 0 | Cs4g04540.1           | 4.37 | 0 | 0    | 2 | MASCOT | T      | PLEX8 |       |
| 2.27E-01 0 0 | Cs4g04540.1           | 4.37 | 0 | 0    | 2 | MASCOT | T      | PLEX8 |       |
| 2.53E-01 0 0 | Cs4g04540.1           | 4.37 | 0 | 0    | 2 | MASCOT | T      | PLEX8 |       |
| 8.23E-02 0 0 | Cs4g04540.1           | 4.37 | 0 | 0    | 2 | MASCOT | T      |       |       |
| 1.36E-01 0 0 | Cs4g04540.1           | 8.75 | 0 | 0    | 2 | MASCOT | T      |       |       |
| 2.10E-02 0 0 | Cs4g04540.1           | 8.75 | 0 | 0    | 2 | MASCOT | T      |       |       |
| 2.84E-01 0 0 | Cs4g04540.1           | 8.75 | 0 | 0    | 2 | MASCOT | T      | PLEX8 |       |
| 1.49E-02 0 0 | Cs4g04540.1           | 5.29 | 0 | 0    | 2 | MASCOT | T      | PLEX8 |       |
| 3.74E-01 0 0 | Cs4g04540.1           | 5.29 | 0 | 0    | 2 | MASCOT | T      | PLEX8 |       |
| 1.38E-03 0 0 | Cs4g04540.1           | 5.45 | 1 | 0    | 2 | MASCOT | T      | PLEX8 |       |
| 1.44E-03 0 0 | orange1.1t02649.1/ora | 4.14 | 0 | 0    | 2 | MASCOT | T      | PLEX8 |       |
| 2.09E-01 0 0 | orange1.1t02649.1/ora | 8.8  | 0 | 0    | 2 | MASCOT | T      | PLEX8 |       |
| 1.91E-01 0 0 | orange1.1t02649.1/ora | 8.8  | 0 | 0    | 2 | MASCOT | T      | PLEX8 |       |
| 8.52E-02 0 0 | orange1.1t02649.1/ora | 8.8  | 0 | 0    | 2 | MASCOT | T      | PLEX8 |       |
| 1.34E-01 0 0 | orange1.1t02649.1/ora | 8.8  | 0 | 0    | 2 | MASCOT | T      | PLEX8 |       |
| 1.31E-01 0 0 | orange1.1t02649.1/ora | 8.8  | 0 | 0    | 2 | MASCOT | T      | PLEX8 |       |
| 7.40E-02 0 0 | orange1.1t02649.1/ora | 8.8  | 0 | 0    | 2 | MASCOT | T      | PLEX8 |       |
| 9.33E-03 0 0 | orange1.1t02649.1/ora | 8.8  | 0 | 0    | 2 | MASCOT | T      | PLEX8 |       |
| 8.48E-02 0 0 | orange1.1t02649.1     | 4.21 | 0 | 0    | 2 | MASCOT | T      | PLEX8 |       |
| 3.67E-02 0 0 | orange1.1t02649.1/ora | 5.3  | 0 | 15.9 | 0 | 2      | MASCOT | T     | PLEX8 |
| 2.65E-03 0 0 | orange1.1t02649.1/ora | 5.3  | 0 | 15.9 | 0 | 2      | MASCOT | T     | PLEX8 |
| 4.97E-04 0 0 | orange1.1t02649.1/ora | 5.3  | 0 | 15.9 | 0 | 2      | MASCOT | T     | PLEX8 |
| 1.14E-02 0 0 | orange1.1t02649.1/ora | 5.3  | 0 | 15.9 | 0 | 2      | MASCOT | T     | PLEX8 |
| 3.39E-02 0 0 | orange1.1t02649.1/ora | 5.3  | 0 | 15.9 | 0 | 2      | MASCOT | T     |       |
| 9.00E-05 0 0 | orange1.1t02649.1/ora | 5.3  | 0 | 15.9 | 0 | 2      | MASCOT | T     | PLEX8 |
| 8.47E-05 0 0 | orange1.1t02649.1/ora | 5.3  | 0 | 15.9 | 0 | 2      | MASCOT | T     | PLEX8 |

|          |     |                       |      |   |      |   |   |        |   |       |
|----------|-----|-----------------------|------|---|------|---|---|--------|---|-------|
| 1.80E-02 | 0 0 | orange1.1t02649.1/ora | 5.3  | 0 | 15.9 | 0 | 2 | MASCOT | T | PLEX8 |
| 2.13E-03 | 0 0 | orange1.1t02649.1/ora | 5.59 | 0 |      | 0 | 2 | MASCOT | T | PLEX8 |
| 1.87E-03 | 0 0 | orange1.1t02649.1/ora | 5.59 | 0 |      | 0 | 2 | MASCOT | T | PLEX8 |
| 3.39E-03 | 0 0 | orange1.1t02649.1/ora | 5.3  | 0 |      | 0 | 2 | MASCOT | T | PLEX8 |
| 3.56E-04 | 0 0 | orange1.1t02649.1/ora | 5.3  | 0 |      | 0 | 2 | MASCOT | T | PLEX8 |
| 1.32E-03 | 0 0 | orange1.1t02649.1/ora | 5.3  | 0 |      | 0 | 2 | MASCOT | T | PLEX8 |
| 8.90E-04 | 0 0 | orange1.1t02649.1/ora | 5.3  | 0 |      | 0 | 2 | MASCOT | T | PLEX8 |
| 4.46E-02 | 0 0 | orange1.1t02649.1/ora | 5.3  | 0 |      | 0 | 2 | MASCOT | T | PLEX8 |
| 4.15E-04 | 0 0 | orange1.1t02649.1/ora | 5.3  | 0 |      | 0 | 2 | MASCOT | T |       |
| 8.29E-02 | 0 0 | orange1.1t02649.1/ora | 5.81 | 0 |      | 0 | 2 | MASCOT | T | PLEX8 |
| 3.73E-02 | 0 0 | orange1.1t02649.1/ora | 5.81 | 0 |      | 0 | 2 | MASCOT | T | PLEX8 |
| 3.78E-02 | 0 0 | orange1.1t02649.1/ora | 5.81 | 0 |      | 0 | 2 | MASCOT | T | PLEX8 |
| 9.60E-03 | 0 0 | orange1.1t02649.1/ora | 5.81 | 0 |      | 0 | 2 | MASCOT | T | PLEX8 |
| 3.00E-03 | 0 0 | orange1.1t02649.1/ora | 5.81 | 0 |      | 0 | 2 | MASCOT | T | PLEX8 |
| 2.83E-01 | 0 0 | orange1.1t02649.1/ora | 5.5  | 0 |      | 0 | 2 | MASCOT | T | PLEX8 |
| 3.44E-01 | 0 0 | orange1.1t02649.1/ora | 5.5  | 0 |      | 0 | 2 | MASCOT | T | PLEX8 |
| 7.70E-02 | 0 0 | orange1.1t02649.1/ora | 5.5  | 0 |      | 0 | 2 | MASCOT | T | PLEX8 |
| 2.53E-01 | 0 0 | orange1.1t02649.1/ora | 9.72 | 0 |      | 0 | 2 | MASCOT | T | PLEX8 |
| 2.68E-01 | 0 0 | orange1.1t02649.1/ora | 8.72 | 0 | 15.9 | 0 | 2 | MASCOT | T | PLEX8 |
| 2.30E-01 | 0 0 | orange1.1t02649.1/ora | 8.72 | 0 |      | 0 | 2 | MASCOT | T | PLEX8 |
| 1.47E-02 | 0 0 | orange1.1t02649.1/ora | 4.37 | 0 |      | 0 | 2 | MASCOT | T | PLEX8 |
| 1.57E-02 | 0 0 | orange1.1t02649.1/ora | 4.37 | 0 |      | 0 | 2 | MASCOT | T | PLEX8 |
| 5.10E-02 | 0 0 | orange1.1t02649.1/ora | 4.37 | 0 |      | 0 | 2 | MASCOT | T | PLEX8 |
| 3.22E-03 | 0 0 | orange1.1t02649.1/ora | 4.37 | 0 |      | 0 | 2 | MASCOT | T | PLEX8 |
| 5.46E-05 | 0 0 | orange1.1t02649.1/ora | 4.37 | 0 |      | 0 | 2 | MASCOT | T | PLEX8 |
| 1.41E-01 | 0 0 | orange1.1t02649.1/ora | 4.37 | 0 |      | 0 | 2 | MASCOT | T | PLEX8 |
| 3.93E-02 | 0 0 | orange1.1t02649.1/ora | 4.37 | 0 |      | 0 | 2 | MASCOT | T | PLEX8 |
| 2.18E-03 | 0 0 | orange1.1t02649.1     | 5.4  | 0 |      | 0 | 2 | MASCOT | T | PLEX8 |
| 1.80E-04 | 0 0 | orange1.1t02649.1     | 5.4  | 0 |      | 0 | 2 | MASCOT | T | PLEX8 |
| 2.58E-06 | 0 0 | orange1.1t02649.1     | 5.4  | 0 |      | 0 | 2 | MASCOT | T | PLEX8 |
| 8.40E-05 | 0 0 | orange1.1t02649.1     | 5.4  | 0 |      | 0 | 2 | MASCOT | T | PLEX8 |
| 1.67E-01 | 0 0 | orange1.1t02649.1     | 5.4  | 0 |      | 0 | 2 | MASCOT | T | PLEX8 |
| 2.11E-01 | 0 0 | orange1.1t02649.1     | 5.4  | 0 |      | 0 | 2 | MASCOT | T | PLEX8 |
| 1.71E-02 | 0 0 | orange1.1t02649.1     | 5.4  | 0 |      | 0 | 2 | MASCOT | T | PLEX8 |
| 5.64E-07 | 0 0 | orange1.1t02649.1     | 5.4  | 0 |      | 0 | 2 | MASCOT | T | PLEX8 |
| 1.96E-03 | 0 0 | orange1.1t02649.1     | 5.4  | 0 |      | 0 | 2 | MASCOT | T | PLEX8 |
| 5.00E-02 | 0 0 | orange1.1t02649.1/ora | 4.53 | 0 | 15.9 | 0 | 2 | MASCOT | T | PLEX8 |
| 1.51E-01 | 0 0 | orange1.1t02649.1/ora | 4.53 | 0 | 15.9 | 0 | 2 | MASCOT | T | PLEX8 |
| 3.32E-03 | 0 0 | orange1.1t02649.1/ora | 4.53 | 0 | 15.9 | 0 | 2 | MASCOT | T | PLEX8 |
| 1.46E-02 | 0 0 | orange1.1t02649.1/ora | 4.53 | 0 |      | 0 | 2 | MASCOT | T |       |
| 2.00E-02 | 0 0 | orange1.1t02649.1     | 5.75 | 0 | 15.9 | 0 | 2 | MASCOT | T | PLEX8 |
| 6.92E-02 | 0 0 | orange1.1t02649.1     | 5.75 | 0 | 15.9 | 0 | 2 | MASCOT | T | PLEX8 |
| 8.13E-02 | 0 0 | orange1.1t02649.1     | 5.75 | 0 | 15.9 | 0 | 2 | MASCOT | T | PLEX8 |
| 1.70E-06 | 0 0 | orange1.1t02649.1/ora | 4.25 | 0 | 15.9 | 0 | 2 | MASCOT | T |       |
| 3.10E-05 | 0 0 | orange1.1t02649.1/ora | 4.25 | 0 | 15.9 | 0 | 2 | MASCOT | T |       |
| 4.96E-07 | 0 0 | orange1.1t02649.1/ora | 4.25 | 0 | 15.9 | 0 | 2 | MASCOT | T |       |
| 2.51E-08 | 0 0 | orange1.1t02649.1/ora | 4.25 | 0 |      | 0 | 2 | MASCOT | T |       |
| 1.27E-01 | 0 0 | orange1.1t03281.1/ora | 4.37 | 0 |      | 0 | 2 | MASCOT | T | PLEX8 |
| 6.48E-03 | 0 0 | orange1.1t03281.1/ora | 4.37 | 0 |      | 0 | 2 | MASCOT | T | PLEX8 |
| 4.32E-06 | 0 0 | orange1.1t03281.1/ora | 4.37 | 0 |      | 0 | 2 | MASCOT | T | PLEX8 |
| 1.73E-02 | 0 0 | orange1.1t03281.1/ora | 4.37 | 0 |      | 0 | 2 | MASCOT | T | PLEX8 |



|          |     |                       |      |   |      |   |        |        |       |       |
|----------|-----|-----------------------|------|---|------|---|--------|--------|-------|-------|
| 6.82E-02 | 0 0 | orange1.1t03281.1/ora | 4.37 | 0 | 0    | 2 | MASCOT | T      | PLEX8 |       |
| 2.41E-01 | 0 0 | orange1.1t03281.1/ora | 5.84 | 0 | 0    | 2 | MASCOT | T      | PLEX8 |       |
| 1.37E-03 | 0 0 | orange1.1t03281.1     | 6    | 0 | 0    | 2 | MASCOT | T      | PLEX8 |       |
| 1.88E-03 | 0 0 | orange1.1t03281.1     | 6    | 0 | 0    | 2 | MASCOT | T      | PLEX8 |       |
| 1.02E-03 | 0 0 | orange1.1t03281.1     | 6    | 0 | 0    | 2 | MASCOT | T      | PLEX8 |       |
| 9.91E-04 | 0 0 | orange1.1t03281.1     | 6    | 0 | 0    | 2 | MASCOT | T      | PLEX8 |       |
| 2.39E-02 | 0 0 | orange1.1t03281.1     | 6    | 0 | 0    | 2 | MASCOT | T      | PLEX8 |       |
| 2.98E-01 | 0 0 | orange1.1t03281.1/ora | 10   | 0 | 15.9 | 0 | 2      | MASCOT | T     | PLEX8 |
| 4.30E-04 | 0 0 | orange1.1t03280.1/ora | 4.37 | 0 | 0    | 2 | MASCOT | T      | PLEX8 |       |
| 4.21E-04 | 0 0 | orange1.1t03280.1/ora | 4.37 | 0 | 0    | 2 | MASCOT | T      | PLEX8 |       |
| 4.57E-06 | 0 0 | orange1.1t03280.1/ora | 4.37 | 0 | 0    | 2 | MASCOT | T      | PLEX8 |       |
| 3.57E-03 | 0 0 | orange1.1t03280.1/ora | 4.37 | 0 | 0    | 2 | MASCOT | T      | PLEX8 |       |
| 4.12E-06 | 0 0 | orange1.1t03280.1/ora | 4.37 | 0 | 0    | 2 | MASCOT | T      | PLEX8 |       |
| 2.04E-03 | 0 0 | orange1.1t03280.1/ora | 4.37 | 0 | 0    | 2 | MASCOT | T      | PLEX8 |       |
| 1.48E-01 | 0 0 | orange1.1t03280.1/ora | 4.37 | 0 | 0    | 2 | MASCOT | T      |       |       |
| 2.85E-07 | 0 0 | orange1.1t03280.1/ora | 4.37 | 0 | 0    | 2 | MASCOT | T      |       |       |
| 5.68E-09 | 0 0 | orange1.1t03280.1/ora | 4.37 | 0 | 0    | 2 | MASCOT | T      |       |       |
| 2.71E-08 | 0 0 | orange1.1t03280.1/ora | 4.37 | 0 | 0    | 2 | MASCOT | T      |       |       |
| 2.82E-06 | 0 0 | orange1.1t03280.1/ora | 4.37 | 0 | 0    | 2 | MASCOT | T      |       |       |
| 2.71E-06 | 0 0 | orange1.1t03280.1/ora | 4.37 | 0 | 0    | 2 | MASCOT | T      |       |       |
| 2.75E-02 | 0 0 | orange1.1t03281.1/ora | 10   | 0 | 0    | 2 | MASCOT | T      | PLEX8 |       |
| 8.41E-01 | 0 0 | orange1.1t03281.1     | 6    | 0 | 0    | 2 | MASCOT | T      | PLEX8 |       |
| 4.81E-01 | 0 0 | orange1.1t03281.1     | 6    | 0 | 0    | 2 | MASCOT | T      | PLEX8 |       |
| 1.16E-02 | 0 0 | orange1.1t03281.1/ora | 4    | 0 | 15.9 | 0 | 2      | MASCOT | T     | PLEX8 |
| 1.80E-01 | 0 0 | orange1.1t03281.1     | 5.38 | 0 | 15.9 | 0 | 2      | MASCOT | T     | PLEX8 |
| 9.68E-02 | 0 0 | orange1.1t03281.1/ora | 4    | 0 | 0    | 2 | MASCOT | T      | PLEX8 |       |
| 7.19E-02 | 0 0 | orange1.1t03281.1/ora | 4    | 0 | 0    | 2 | MASCOT | T      | PLEX8 |       |
| 1.50E-03 | 0 0 | orange1.1t03281.1/ora | 4    | 0 | 0    | 2 | MASCOT | T      | PLEX8 |       |
| 3.14E-02 | 0 0 | orange1.1t03281.1     | 4.37 | 0 | 0    | 2 | MASCOT | T      | PLEX8 |       |
| 3.12E-01 | 0 0 | orange1.1t03281.1     | 4.37 | 0 | 0    | 2 | MASCOT | T      | PLEX8 |       |
| 3.89E-02 | 0 0 | orange1.1t03281.1     | 4.37 | 0 | 0    | 2 | MASCOT | T      | PLEX8 |       |
| 4.20E-03 | 0 0 | orange1.1t03281.1     | 4.37 | 0 | 0    | 2 | MASCOT | T      | PLEX8 |       |
| 3.58E-03 | 0 0 | orange1.1t03281.1     | 4.37 | 0 | 0    | 2 | MASCOT | T      | PLEX8 |       |
| 5.91E-02 | 0 0 | orange1.1t03280.1/ora | 11   | 0 | 0    | 2 | MASCOT | T      | PLEX8 |       |
| 3.45E-01 | 0 0 | orange1.1t03280.1/ora | 11   | 0 | 0    | 2 | MASCOT | T      | PLEX8 |       |
| 9.31E-02 | 0 0 | orange1.1t03281.1/ora | 8.6  | 0 | 15.9 | 0 | 2      | MASCOT | T     | PLEX8 |
| 7.69E-02 | 0 0 | orange1.1t03281.1/ora | 8.6  | 0 | 0    | 2 | MASCOT | T      | PLEX8 |       |
| 2.07E-01 | 0 0 | orange1.1t03281.1/ora | 8.6  | 0 | 0    | 2 | MASCOT | T      | PLEX8 |       |
| 3.76E-02 | 0 0 | orange1.1t03280.1/ora | 8.8  | 0 | 0    | 2 | MASCOT | T      | PLEX8 |       |
| 2.57E-02 | 0 0 | orange1.1t03280.1/ora | 8.8  | 0 | 0    | 2 | MASCOT | T      | PLEX8 |       |
| 3.28E-02 | 0 0 | orange1.1t03280.1/ora | 8.8  | 0 | 0    | 2 | MASCOT | T      | PLEX8 |       |
| 5.31E-02 | 0 0 | orange1.1t03280.1/ora | 8.8  | 0 | 0    | 2 | MASCOT | T      | PLEX8 |       |
| 3.57E-02 | 0 0 | orange1.1t03280.1/ora | 8.8  | 0 | 0    | 2 | MASCOT | T      |       |       |
| 5.62E-04 | 0 0 | orange1.1t03281.1/ora | 6.79 | 0 | 0    | 2 | MASCOT | T      | PLEX8 |       |
| 5.93E-04 | 0 0 | orange1.1t03281.1/ora | 6.79 | 0 | 0    | 2 | MASCOT | T      | PLEX8 |       |
| 3.75E-01 | 0 0 | orange1.1t03281.1/ora | 6.79 | 0 | 0    | 2 | MASCOT | T      | PLEX8 |       |
| 3.29E-01 | 0 0 | orange1.1t03281.1/ora | 6.79 | 0 | 0    | 2 | MASCOT | T      | PLEX8 |       |
| 1.86E-01 | 0 0 | orange1.1t03281.1/ora | 6.79 | 0 | 0    | 2 | MASCOT | T      | PLEX8 |       |
| 2.25E-02 | 0 0 | orange1.1t03281.1/ora | 6.79 | 0 | 0    | 2 | MASCOT | T      |       |       |
| 2.06E-04 | 0 0 | orange1.1t03281.1/ora | 6.79 | 0 | 0    | 2 | MASCOT | T      |       |       |
| 2.06E-02 | 0 0 | orange1.1t03281.1/ora | 4.53 | 0 | 0    | 2 | MASCOT | T      | PLEX8 |       |

|          |     |                       |      |   |      |   |        |        |       |       |
|----------|-----|-----------------------|------|---|------|---|--------|--------|-------|-------|
| 3.08E-01 | 0 0 | orange1.1t03281.1/ora | 4.53 | 0 | 0    | 2 | MASCOT | T      | PLEX8 |       |
| 2.23E-01 | 0 0 | orange1.1t03281.1/ora | 4.53 | 0 | 0    | 2 | MASCOT | T      | PLEX8 |       |
| 2.53E-02 | 0 0 | orange1.1t03533.1     | 5.87 | 0 | 0    | 2 | MASCOT | T      | PLEX8 |       |
| 6.07E-02 | 0 0 | orange1.1t03533.1     | 5.87 | 0 | 0    | 2 | MASCOT | T      |       |       |
| 1.04E-01 | 0 0 | Cs3g15530.1/orange1.  | 5.32 | 0 | 0    | 2 | MASCOT | T      |       |       |
| 2.57E-02 | 0 0 | Cs3g15540.1/Cs3g155   | 6.74 | 0 | 15.9 | 0 | 2      | MASCOT | T     | PLEX8 |
| 8.83E-02 | 0 0 | Cs3g15540.1/Cs3g155   | 6.74 | 0 | 15.9 | 0 | 2      | MASCOT | T     | PLEX8 |
| 3.75E-02 | 0 0 | Cs3g15540.1/Cs3g155   | 6.74 | 0 | 15.9 | 0 | 2      | MASCOT | T     | PLEX8 |
| 1.02E-03 | 0 0 | Cs3g15540.1/Cs3g155   | 6.74 | 0 | 15.9 | 0 | 2      | MASCOT | T     | PLEX8 |
| 2.08E-04 | 0 0 | Cs3g15540.1/Cs3g155   | 6.74 | 0 | 15.9 | 0 | 2      | MASCOT | T     | PLEX8 |
| 6.93E-02 | 0 0 | Cs3g15540.1/Cs3g155   | 6.74 | 0 | 15.9 | 0 | 2      | MASCOT | T     | PLEX8 |
| 1.80E-03 | 0 0 | Cs3g15540.1/Cs3g155   | 6.74 | 0 | 15.9 | 0 | 2      | MASCOT | T     | PLEX8 |
| 3.79E-03 | 0 0 | Cs3g15540.1/Cs3g155   | 6.74 | 0 | 15.9 | 0 | 2      | MASCOT | T     | PLEX8 |
| 5.49E-02 | 0 0 | Cs3g15540.1/Cs3g155   | 6.74 | 0 | 15.9 | 0 | 2      | MASCOT | T     | PLEX8 |
| 5.49E-03 | 0 0 | Cs3g15540.1/Cs3g155   | 6.74 | 0 | 15.9 | 0 | 2      | MASCOT | T     | PLEX8 |
| 6.12E-03 | 0 0 | Cs3g15540.1/Cs3g155   | 6.74 | 0 | 0    | 2 | MASCOT | T      | PLEX8 |       |
| 1.21E-01 | 0 0 | Cs3g15540.1/Cs3g155   | 6.74 | 0 | 0    | 2 | MASCOT | T      | PLEX8 |       |
| 4.75E-02 | 0 0 | Cs3g15540.1/Cs3g155   | 6.74 | 0 | 0    | 2 | MASCOT | T      | PLEX8 |       |
| 2.84E-03 | 0 0 | Cs3g15540.1/Cs3g155   | 6.74 | 0 | 0    | 2 | MASCOT | T      | PLEX8 |       |
| 1.08E-03 | 0 0 | Cs3g15540.1/Cs3g155   | 6.74 | 0 | 0    | 2 | MASCOT | T      | PLEX8 |       |
| 2.59E-02 | 0 0 | Cs3g15540.1/Cs3g155   | 6.74 | 0 | 0    | 2 | MASCOT | T      | PLEX8 |       |
| 9.14E-03 | 0 0 | Cs3g15540.1/Cs3g155   | 6.74 | 0 | 0    | 2 | MASCOT | T      | PLEX8 |       |
| 3.18E-03 | 0 0 | Cs3g15540.1/Cs3g155   | 6.74 | 0 | 0    | 2 | MASCOT | T      |       |       |
| 6.40E-04 | 0 0 | Cs3g15540.1/Cs3g155   | 6.74 | 0 | 0    | 2 | MASCOT | T      |       |       |
| 7.90E-03 | 0 0 | Cs3g15540.1/Cs3g155   | 6.74 | 0 | 0    | 2 | MASCOT | T      |       |       |
| 8.02E-04 | 0 0 | Cs3g06370.1/Cs7g160   | 4.37 | 0 | 0    | 2 | MASCOT | T      | PLEX8 |       |
| 4.91E-02 | 0 0 | Cs3g06370.1/Cs7g160   | 6.06 | 1 | 0    | 2 | MASCOT | T      | PLEX8 |       |
| 2.90E-02 | 0 0 | Cs3g06370.1/Cs7g160   | 6.06 | 1 | 0    | 2 | MASCOT | T      | PLEX8 |       |
| 9.39E-02 | 0 0 | orange1.1t03533.1     | 6    | 0 | 0    | 2 | MASCOT | T      | PLEX8 |       |
| 3.28E-02 | 0 0 | orange1.1t03533.1     | 6    | 0 | 0    | 2 | MASCOT | T      | PLEX8 |       |
| 1.26E-01 | 0 0 | orange1.1t03533.1     | 6    | 0 | 0    | 2 | MASCOT | T      | PLEX8 |       |
| 3.42E-02 | 0 0 | orange1.1t03533.1     | 5.5  | 0 | 15.9 | 0 | 2      | MASCOT | T     |       |
| 4.40E-01 | 0 0 | Cs3g06370.1/Cs3g155   | 8.59 | 0 | 0    | 2 | MASCOT | T      | PLEX8 |       |
| 2.22E-03 | 0 0 | Cs3g06370.1/Cs3g155   | 9.8  | 0 | 0    | 2 | MASCOT | T      | PLEX8 |       |
| 1.92E-01 | 0 0 | Cs3g06370.1/Cs3g155   | 9.8  | 0 | 0    | 2 | MASCOT | T      | PLEX8 |       |
| 4.70E-02 | 0 0 | Cs3g06370.1/Cs3g155   | 9.8  | 0 | 0    | 2 | MASCOT | T      | PLEX8 |       |
| 1.61E-03 | 0 0 | Cs3g06370.1/Cs3g155   | 9.8  | 0 | 0    | 2 | MASCOT | T      | PLEX8 |       |
| 1.33E-04 | 0 0 | Cs3g06370.1/Cs3g155   | 9.8  | 0 | 0    | 2 | MASCOT | T      | PLEX8 |       |
| 2.04E-03 | 0 0 | Cs3g06370.1/Cs3g155   | 9.8  | 0 | 0    | 2 | MASCOT | T      | PLEX8 |       |
| 4.61E-02 | 0 0 | Cs3g06370.1/Cs3g155   | 9.8  | 0 | 0    | 2 | MASCOT | T      | PLEX8 |       |
| 2.02E-01 | 0 0 | Cs3g06370.1/Cs3g155   | 9.8  | 0 | 0    | 2 | MASCOT | T      | PLEX8 |       |
| 5.64E-02 | 0 0 | Cs3g06370.1/Cs3g155   | 4.53 | 0 | 0    | 2 | MASCOT | T      | PLEX8 |       |
| 1.67E-02 | 0 0 | orange1.1t03533.1     | 4.54 | 0 | 0    | 2 | MASCOT | T      | PLEX8 |       |
| 8.56E-02 | 0 0 | orange1.1t03533.1     | 7.01 | 0 | 15.9 | 0 | 2      | MASCOT | T     | PLEX8 |
| 1.71E-03 | 0 0 | Cs3g15540.1/Cs3g155   | 6.75 | 0 | 0    | 2 | MASCOT | T      | PLEX8 |       |
| 7.22E-02 | 0 0 | Cs3g15540.1/Cs3g155   | 6.75 | 0 | 0    | 2 | MASCOT | T      | PLEX8 |       |
| 5.55E-03 | 0 0 | Cs3g15540.1/Cs3g155   | 6.75 | 0 | 0    | 2 | MASCOT | T      | PLEX8 |       |
| 1.26E-01 | 0 0 | Cs3g15540.1/Cs3g155   | 6.75 | 0 | 0    | 2 | MASCOT | T      |       |       |
| 2.89E-03 | 0 0 | Cs3g06370.1/Cs3g155   | 6.74 | 0 | 0    | 2 | MASCOT | T      | PLEX8 |       |
| 1.99E-02 | 0 0 | Cs3g06370.1/Cs3g155   | 6.74 | 0 | 0    | 2 | MASCOT | T      | PLEX8 |       |
| 4.32E-02 | 0 0 | Cs3g06370.1/Cs3g155   | 6.74 | 0 | 0    | 2 | MASCOT | T      |       |       |

|          |     |                     |      |   |      |   |        |        |       |       |
|----------|-----|---------------------|------|---|------|---|--------|--------|-------|-------|
| 6.00E-02 | 0 0 | Cs3g06370.1/Cs3g155 | 6.74 | 0 | 0    | 2 | MASCOT | T      |       |       |
| 7.72E-02 | 0 0 | Cs3g06370.1/Cs3g155 | 6.74 | 0 | 0    | 2 | MASCOT | T      | PLEX8 |       |
| 3.35E-02 | 0 0 | Cs3g06370.1/Cs3g155 | 6.74 | 0 | 0    | 2 | MASCOT | T      |       |       |
| 5.21E-02 | 0 0 | Cs3g06370.1/Cs3g155 | 6.74 | 0 | 0    | 2 | MASCOT | T      |       |       |
| 1.51E-01 | 0 0 | Cs3g15530.1/Cs3g155 | 8.59 | 0 | 0    | 2 | MASCOT | T      | PLEX8 |       |
| 2.08E-01 | 0 0 | Cs3g15530.1/Cs3g155 | 8.59 | 0 | 0    | 2 | MASCOT | T      |       |       |
| 2.67E-01 | 0 0 | Cs3g15530.1/Cs3g155 | 8.59 | 0 | 0    | 2 | MASCOT | T      | PLEX8 |       |
| 8.21E-05 | 0 0 | Cs7g25650.1/Cs7g256 | 4.03 | 0 | 0    | 2 | MASCOT | T      | PLEX8 |       |
| 1.70E-04 | 0 0 | Cs7g25650.1/Cs7g256 | 4.03 | 0 | 0    | 2 | MASCOT | T      | PLEX8 |       |
| 1.15E-01 | 0 0 | Cs7g25650.1/Cs7g256 | 4.03 | 0 | 0    | 2 | MASCOT | T      | PLEX8 |       |
| 1.35E-04 | 0 0 | Cs7g25650.1/Cs7g256 | 4.03 | 0 | 0    | 2 | MASCOT | T      |       |       |
| 2.14E-02 | 0 0 | Cs7g25650.1/Cs7g256 | 4.03 | 0 | 0    | 2 | MASCOT | T      |       |       |
| 6.23E-02 | 0 0 | Cs7g25650.1/Cs7g256 | 4.03 | 0 | 0    | 2 | MASCOT | T      |       |       |
| 2.29E-01 | 0 0 | Cs7g25650.1/Cs7g256 | 4.03 | 0 | 0    | 2 | MASCOT | T      |       |       |
| 7.01E-02 | 0 0 | Cs7g25650.1/Cs7g256 | 4.03 | 0 | 0    | 2 | MASCOT | T      | PLEX8 |       |
| 1.42E-03 | 0 0 | Cs7g25650.1/Cs7g256 | 4.54 | 0 | 0    | 2 | MASCOT | T      | PLEX8 |       |
| 8.04E-02 | 0 0 | Cs7g25650.1/Cs7g256 | 4.53 | 0 | 15.9 | 0 | 2      | MASCOT | T     | PLEX8 |
| 6.41E-02 | 0 0 | Cs7g25650.1/Cs7g256 | 4.53 | 0 | 15.9 | 0 | 2      | MASCOT | T     | PLEX8 |
| 8.30E-05 | 0 0 | Cs7g25650.1/Cs7g256 | 4.53 | 0 | 0    | 2 | MASCOT | T      | PLEX8 |       |
| 1.48E-03 | 0 0 | Cs7g25650.1/Cs7g256 | 4.53 | 0 | 0    | 2 | MASCOT | T      | PLEX8 |       |
| 6.52E-02 | 0 0 | Cs7g25650.1/Cs7g256 | 5.21 | 0 | 0    | 2 | MASCOT | T      | PLEX8 |       |
| 2.81E-03 | 0 0 | Cs7g25650.1/Cs7g256 | 6.74 | 0 | 0    | 2 | MASCOT | T      | PLEX8 |       |
| 3.58E-02 | 0 0 | Cs7g25650.1/Cs7g256 | 6.74 | 0 | 0    | 2 | MASCOT | T      | PLEX8 |       |
| 5.92E-02 | 0 0 | Cs7g25650.1/Cs7g256 | 6.74 | 0 | 0    | 2 | MASCOT | T      |       |       |
| 3.42E-02 | 0 0 | Cs7g25650.1/Cs7g256 | 8.75 | 0 | 0    | 2 | MASCOT | T      | PLEX8 |       |
| 6.26E-04 | 0 0 | Cs7g25650.1/Cs7g256 | 8.75 | 0 | 0    | 2 | MASCOT | T      | PLEX8 |       |
| 1.19E-03 | 0 0 | Cs7g25650.1/Cs7g256 | 8.75 | 0 | 0    | 2 | MASCOT | T      | PLEX8 |       |
| 3.02E-04 | 0 0 | Cs7g25650.1/Cs7g256 | 8.75 | 0 | 0    | 2 | MASCOT | T      | PLEX8 |       |
| 2.20E-03 | 0 0 | Cs7g25650.1/Cs7g256 | 8.75 | 0 | 0    | 2 | MASCOT | T      | PLEX8 |       |
| 4.35E-02 | 0 0 | Cs7g25650.1/Cs7g256 | 8.75 | 0 | 0    | 2 | MASCOT | T      | PLEX8 |       |
| 3.32E-02 | 0 0 | Cs7g25650.1/Cs7g256 | 8.75 | 0 | 0    | 2 | MASCOT | T      | PLEX8 |       |
| 1.01E-03 | 0 0 | Cs7g25650.1/Cs7g256 | 8.75 | 0 | 0    | 2 | MASCOT | T      | PLEX8 |       |
| 1.32E-03 | 0 0 | Cs7g25650.1/Cs7g256 | 8.75 | 0 | 0    | 2 | MASCOT | T      | PLEX8 |       |
| 6.27E-04 | 0 0 | Cs7g25650.1/Cs7g256 | 8.75 | 0 | 0    | 2 | MASCOT | T      | PLEX8 |       |
| 1.35E-01 | 0 0 | Cs7g25650.1/Cs7g256 | 8.75 | 0 | 0    | 2 | MASCOT | T      | PLEX8 |       |
| 8.34E-02 | 0 0 | Cs7g25650.1/Cs7g256 | 4.37 | 0 | 0    | 2 | MASCOT | T      | PLEX8 |       |
| 2.14E-01 | 0 0 | Cs7g25650.1/Cs7g256 | 4.37 | 0 | 0    | 2 | MASCOT | T      | PLEX8 |       |
| 1.70E-01 | 0 0 | Cs7g25650.1/Cs7g256 | 4.31 | 0 | 15.9 | 0 | 2      | MASCOT | T     | PLEX8 |
| 1.82E-01 | 0 0 | Cs7g25650.1/Cs7g256 | 4.31 | 0 | 15.9 | 0 | 2      | MASCOT | T     | PLEX8 |
| 1.62E-02 | 0 0 | Cs7g25650.1/Cs7g256 | 4.31 | 0 | 0    | 2 | MASCOT | T      | PLEX8 |       |
| 4.71E-02 | 0 0 | Cs7g25650.1/Cs7g256 | 5.97 | 0 | 0    | 2 | MASCOT | T      | PLEX8 |       |
| 1.18E-01 | 0 0 | Cs7g25650.1/Cs7g256 | 5.97 | 0 | 0    | 2 | MASCOT | T      | PLEX8 |       |
| 4.66E-02 | 0 0 | Cs7g25650.1/Cs7g256 | 4.37 | 0 | 0    | 2 | MASCOT | T      | PLEX8 |       |
| 1.49E-02 | 0 0 | Cs7g25650.1/Cs7g256 | 4.37 | 0 | 0    | 2 | MASCOT | T      | PLEX8 |       |
| 2.71E-02 | 0 0 | Cs7g25650.1/Cs7g256 | 4.37 | 0 | 0    | 2 | MASCOT | T      | PLEX8 |       |
| 2.66E-02 | 0 0 | Cs7g25650.1/Cs7g256 | 4.37 | 0 | 0    | 2 | MASCOT | T      | PLEX8 |       |
| 7.07E-02 | 0 0 | Cs7g25650.1/Cs7g256 | 5.33 | 0 | 0    | 2 | MASCOT | T      |       |       |
| 2.40E-02 | 0 0 | Cs7g25650.1/Cs7g256 | 5.33 | 0 | 0    | 2 | MASCOT | T      |       |       |
| 2.09E-02 | 0 0 | Cs7g25650.1/Cs7g256 | 5.32 | 0 | 0    | 2 | MASCOT | T      | PLEX8 |       |
| 1.37E-02 | 0 0 | Cs7g25650.1/Cs7g256 | 5.32 | 0 | 0    | 2 | MASCOT | T      | PLEX8 |       |
| 3.04E-01 | 0 0 | Cs7g25650.1/Cs7g256 | 5.32 | 0 | 0    | 2 | MASCOT | T      | PLEX8 |       |

|          |     |                      |      |   |      |   |        |        |       |       |
|----------|-----|----------------------|------|---|------|---|--------|--------|-------|-------|
| 6.18E-02 | 0 0 | Cs7g25650.1/Cs7g256  | 5.32 | 0 | 0    | 2 | MASCOT | T      |       |       |
| 1.46E-01 | 0 0 | Cs7g25650.1/Cs7g256  | 5.55 | 0 | 0    | 2 | MASCOT | T      | PLEX8 |       |
| 5.32E-03 | 0 0 | Cs7g25650.1/Cs7g256  | 5.81 | 0 | 15.9 | 0 | 2      | MASCOT | T     |       |
| 8.39E-03 | 0 0 | Cs7g25650.1/Cs7g256  | 5.81 | 0 | 15.9 | 0 | 2      | MASCOT | T     |       |
| 6.05E-04 | 0 0 | Cs7g25650.1/Cs7g256  | 5.81 | 0 | 0    | 2 | MASCOT | T      |       |       |
| 1.61E-03 | 0 0 | Cs7g25650.1/Cs7g256  | 5.81 | 0 | 0    | 2 | MASCOT | T      |       |       |
| 2.73E-05 | 0 0 | Cs7g25650.1/Cs7g256  | 5.81 | 0 | 0    | 2 | MASCOT | T      |       |       |
| 4.82E-02 | 0 0 | Cs7g25650.1/Cs7g256  | 9.72 | 0 | 0    | 2 | MASCOT | T      | PLEX8 |       |
| 4.24E-02 | 0 0 | Cs9g11200.1          | 4.37 | 0 | 0    | 2 | MASCOT | T      |       |       |
| 9.89E-03 | 0 0 | Cs9g11200.1          | 4.37 | 0 | 0    | 2 | MASCOT | T      |       |       |
| 2.54E-01 | 0 0 | Cs9g11200.1          | 4.37 | 0 | 0    | 2 | MASCOT | T      |       |       |
| 2.48E-02 | 0 0 | Cs9g11200.1          | 4.37 | 0 | 0    | 2 | MASCOT | T      |       |       |
| 1.04E-01 | 0 0 | Cs9g11200.1          | 4.37 | 0 | 0    | 2 | MASCOT | T      | PLEX8 |       |
| 2.34E-01 | 0 0 | Cs2g24950.1 ! Cs9g11 | 6    | 0 | 0    | 2 | MASCOT | T      |       |       |
| 1.44E-02 | 0 0 | Cs9g11200.1          | 8.25 | 0 | 0    | 2 | MASCOT | T      | PLEX8 |       |
| 2.38E-02 | 0 0 | Cs9g11200.1          | 9.75 | 0 | 0    | 2 | MASCOT | T      | PLEX8 |       |
| 7.29E-02 | 0 0 | Cs9g11200.1          | 9.75 | 0 | 0    | 2 | MASCOT | T      | PLEX8 |       |
| 5.59E-03 | 0 0 | Cs9g11200.1          | 9.75 | 0 | 0    | 2 | MASCOT | T      | PLEX8 |       |
| 7.54E-02 | 0 0 | Cs9g11200.1          | 6.42 | 0 | 0    | 2 | MASCOT | T      | PLEX8 |       |
| 1.15E-02 | 0 0 | Cs9g11200.1          | 9.44 | 0 | 0    | 2 | MASCOT | T      | PLEX8 |       |
| 3.04E-01 | 0 0 | Cs9g11200.1          | 9.44 | 0 | 0    | 2 | MASCOT | T      | PLEX8 |       |
| 3.01E-03 | 0 0 | Cs9g11200.1          | 9.44 | 0 | 0    | 2 | MASCOT | T      | PLEX8 |       |
| 1.10E-02 | 0 0 | Cs9g11200.1          | 9.44 | 0 | 0    | 2 | MASCOT | T      |       |       |
| 5.06E-03 | 0 0 | Cs9g11200.1          | 9.44 | 0 | 0    | 2 | MASCOT | T      | PLEX8 |       |
| 1.97E-02 | 0 0 | Cs9g11200.1          | 5.66 | 0 | 0    | 2 | MASCOT | T      | PLEX8 |       |
| 2.30E-01 | 0 0 | Cs9g11200.1          | 5.66 | 0 | 0    | 2 | MASCOT | T      | PLEX8 |       |
| 3.17E-01 | 0 0 | Cs9g11200.1          | 4.56 | 0 | 0    | 2 | MASCOT | T      | PLEX8 |       |
| 4.27E-02 | 0 0 | Cs9g11200.1          | 4.56 | 0 | 0    | 2 | MASCOT | T      |       |       |
| 2.83E-01 | 0 0 | Cs9g11200.1          | 5.32 | 0 | 15.9 | 0 | 2      | MASCOT | T     | PLEX8 |
| 6.68E-02 | 0 0 | Cs9g11200.1          | 5.32 | 0 | 15.9 | 0 | 2      | MASCOT | T     | PLEX8 |
| 3.29E-02 | 0 0 | Cs9g11200.1          | 5.32 | 0 | 0    | 2 | MASCOT | T      | PLEX8 |       |
| 3.61E-02 | 0 0 | Cs9g11200.1          | 5.32 | 0 | 0    | 2 | MASCOT | T      | PLEX8 |       |
| 1.77E-02 | 0 0 | Cs9g11200.1          | 5.32 | 0 | 0    | 2 | MASCOT | T      | PLEX8 |       |
| 2.16E-04 | 0 0 | Cs9g11200.1          | 5.84 | 0 | 15.9 | 0 | 2      | MASCOT | T     | PLEX8 |
| 2.53E-01 | 0 0 | Cs9g11200.1          | 5.84 | 0 | 0    | 2 | MASCOT | T      | PLEX8 |       |
| 5.99E-02 | 0 0 | Cs9g11200.1          | 5.84 | 0 | 0    | 2 | MASCOT | T      | PLEX8 |       |
| 1.41E-03 | 0 0 | Cs9g11200.1          | 5.84 | 0 | 0    | 2 | MASCOT | T      | PLEX8 |       |
| 3.41E-04 | 0 0 | Cs9g11200.1          | 5.84 | 0 | 0    | 2 | MASCOT | T      | PLEX8 |       |
| 4.33E-07 | 0 0 | Cs9g11200.1          | 5.84 | 0 | 0    | 2 | MASCOT | T      | PLEX8 |       |
| 6.33E-02 | 0 0 | Cs9g11200.1          | 6    | 0 | 0    | 2 | MASCOT | T      | PLEX8 |       |
| 9.80E-02 | 0 0 | Cs9g11200.1          | 6    | 0 | 0    | 2 | MASCOT | T      | PLEX8 |       |
| 1.41E-02 | 0 0 | Cs9g11200.1          | 6    | 0 | 0    | 2 | MASCOT | T      | PLEX8 |       |
| 2.20E-03 | 0 0 | Cs9g11200.1          | 6    | 0 | 0    | 2 | MASCOT | T      | PLEX8 |       |
| 2.81E-01 | 0 0 | Cs9g11200.1          | 6    | 0 | 0    | 2 | MASCOT | T      | PLEX8 |       |
| 2.55E-03 | 0 0 | Cs9g11200.1          | 6    | 0 | 0    | 2 | MASCOT | T      | PLEX8 |       |
| 3.98E-03 | 0 0 | Cs9g11200.1          | 6    | 0 | 0    | 2 | MASCOT | T      | PLEX8 |       |
| 2.38E-02 | 0 0 | Cs9g11200.1          | 6    | 0 | 0    | 2 | MASCOT | T      | PLEX8 |       |
| 6.12E-04 | 0 0 | Cs9g11200.1          | 6    | 0 | 0    | 2 | MASCOT | T      | PLEX8 |       |
| 7.83E-02 | 0 0 | Cs9g11200.1          | 6    | 0 | 0    | 2 | MASCOT | T      |       |       |
| 1.07E-01 | 0 0 | Cs9g11200.1          | 6    | 0 | 0    | 2 | MASCOT | T      |       |       |
| 6.75E-03 | 0 0 | Cs9g11200.1          | 4.53 | 0 | 15.9 | 0 | 2      | MASCOT | T     | PLEX8 |

|              |                       |      |   |      |   |   |        |   |       |
|--------------|-----------------------|------|---|------|---|---|--------|---|-------|
| 1.25E-05 0 0 | Cs9g11200.1           | 4.53 | 0 | 15.9 | 0 | 2 | MASCOT | T | PLEX8 |
| 2.62E-02 0 0 | Cs9g11200.1           | 4.53 | 0 |      | 0 | 2 | MASCOT | T | PLEX8 |
| 3.99E-02 0 0 | Cs9g11200.1           | 4.53 | 0 |      | 0 | 2 | MASCOT | T |       |
| 4.16E-01 0 0 | Cs9g11200.1           | 6    | 0 |      | 0 | 2 | MASCOT | T | PLEX8 |
| 7.57E-04 0 0 | Cs9g11200.1           | 4.08 | 1 |      | 0 | 2 | MASCOT | T | PLEX8 |
| 3.71E-03 0 0 | Cs9g11200.1           | 4.08 | 1 |      | 0 | 2 | MASCOT | T | PLEX8 |
| 2.05E-04 0 0 | Cs9g11200.1           | 4.08 | 1 |      | 0 | 2 | MASCOT | T | PLEX8 |
| 1.45E-04 0 0 | Cs9g11200.1           | 4.08 | 1 |      | 0 | 2 | MASCOT | T | PLEX8 |
| 1.79E-01 0 0 | orange1.1t03426.1/ora | 4.37 | 0 |      | 0 | 2 | MASCOT | T | PLEX8 |
| 3.06E-02 0 0 | orange1.1t03426.1/ora | 8.76 | 0 |      | 0 | 2 | MASCOT | T | PLEX8 |
| 5.67E-03 0 0 | orange1.1t03426.1/ora | 8.76 | 0 |      | 0 | 2 | MASCOT | T |       |
| 1.97E-02 0 0 | orange1.1t03426.1/ora | 8.76 | 0 |      | 0 | 2 | MASCOT | T |       |
| 1.79E-03 0 0 | orange1.1t03426.1/ora | 8.75 | 0 |      | 0 | 2 | MASCOT | T | PLEX8 |
| 4.04E-04 0 0 | orange1.1t03426.1/ora | 8.75 | 0 |      | 0 | 2 | MASCOT | T | PLEX8 |
| 3.22E-03 0 0 | orange1.1t03426.1/ora | 8.75 | 0 |      | 0 | 2 | MASCOT | T | PLEX8 |
| 2.09E-01 0 0 | orange1.1t03426.1/ora | 8.75 | 0 |      | 0 | 2 | MASCOT | T | PLEX8 |
| 7.27E-03 0 0 | orange1.1t03426.1/ora | 8.75 | 0 |      | 0 | 2 | MASCOT | T | PLEX8 |
| 1.99E-04 0 0 | orange1.1t03426.1/ora | 8.75 | 0 |      | 0 | 2 | MASCOT | T | PLEX8 |
| 1.21E-02 0 0 | orange1.1t03426.1/ora | 8.75 | 0 |      | 0 | 2 | MASCOT | T | PLEX8 |
| 8.09E-02 0 0 | orange1.1t03426.1/ora | 8.75 | 0 |      | 0 | 2 | MASCOT | T | PLEX8 |
| 1.34E-02 0 0 | orange1.1t03426.1/ora | 4.11 | 1 |      | 0 | 2 | MASCOT | T | PLEX8 |
| 4.19E-02 0 0 | orange1.1t03426.1/ora | 4.11 | 1 |      | 0 | 2 | MASCOT | T |       |
| 2.09E-02 0 0 | orange1.1t03426.1/ora | 4.11 | 1 |      | 0 | 2 | MASCOT | T | PLEX8 |
| 5.73E-02 0 0 | orange1.1t03426.1/ora | 5.83 | 0 |      | 0 | 2 | MASCOT | T | PLEX8 |
| 2.27E-03 0 0 | orange1.1t03426.1/ora | 9.72 | 0 |      | 0 | 2 | MASCOT | T | PLEX8 |
| 2.45E-05 0 0 | orange1.1t03426.1/ora | 3.83 | 0 |      | 0 | 2 | MASCOT | T |       |
| 4.72E-05 0 0 | orange1.1t03426.1/ora | 3.83 | 0 |      | 0 | 2 | MASCOT | T |       |
| 5.57E-06 0 0 | orange1.1t03426.1/ora | 3.83 | 0 |      | 0 | 2 | MASCOT | T | PLEX8 |
| 2.99E-02 0 0 | orange1.1t03426.1/ora | 3.83 | 0 |      | 0 | 2 | MASCOT | T |       |
| 1.05E-03 0 0 | orange1.1t03426.1/ora | 4.18 | 1 |      | 0 | 2 | MASCOT | T |       |
| 4.39E-02 0 0 | orange1.1t03426.1/ora | 8.8  | 0 |      | 0 | 2 | MASCOT | T | PLEX8 |
| 2.43E-01 0 0 | orange1.1t03426.1/ora | 8.8  | 0 |      | 0 | 2 | MASCOT | T | PLEX8 |
| 6.24E-04 0 0 | orange1.1t03426.1/ora | 8.8  | 0 |      | 0 | 2 | MASCOT | T | PLEX8 |
| 4.52E-03 0 0 | orange1.1t03426.1/ora | 8.8  | 0 |      | 0 | 2 | MASCOT | T | PLEX8 |
| 1.76E-02 0 0 | orange1.1t03426.1/ora | 8.8  | 0 |      | 0 | 2 | MASCOT | T |       |
| 4.50E-02 0 0 | orange1.1t03426.1/ora | 6.74 | 0 |      | 0 | 2 | MASCOT | T | PLEX8 |
| 3.03E-02 0 0 | orange1.1t03426.1/ora | 6.74 | 0 |      | 0 | 2 | MASCOT | T | PLEX8 |
| 1.23E-02 0 0 | orange1.1t03426.1/ora | 6.74 | 0 |      | 0 | 2 | MASCOT | T | PLEX8 |
| 2.08E-01 0 0 | orange1.1t03426.1/ora | 6.74 | 0 |      | 0 | 2 | MASCOT | T | PLEX8 |
| 8.33E-02 0 0 | orange1.1t03426.1/ora | 4.37 | 0 | 15.9 | 0 | 2 | MASCOT | T | PLEX8 |
| 1.70E-01 0 0 | orange1.1t03426.1/ora | 4.37 | 0 | 15.9 | 0 | 2 | MASCOT | T | PLEX8 |
| 1.94E-01 0 0 | orange1.1t03426.1/ora | 4.37 | 0 |      | 0 | 2 | MASCOT | T | PLEX8 |
| 3.20E-01 0 0 | orange1.1t03426.1/ora | 4.37 | 0 |      | 0 | 2 | MASCOT | T | PLEX8 |
| 9.83E-04 0 0 | orange1.1t03426.1/ora | 6    | 0 |      | 0 | 2 | MASCOT | T | PLEX8 |
| 7.32E-02 0 0 | orange1.1t03426.1/ora | 6    | 0 |      | 0 | 2 | MASCOT | T | PLEX8 |
| 1.92E-01 0 0 | orange1.1t03426.1/ora | 6    | 0 |      | 0 | 2 | MASCOT | T | PLEX8 |
| 7.40E-06 0 0 | orange1.1t03426.1/ora | 6.74 | 0 |      | 0 | 2 | MASCOT | T | PLEX8 |
| 1.32E-04 0 0 | orange1.1t03426.1/ora | 6.74 | 0 |      | 0 | 2 | MASCOT | T | PLEX8 |
| 2.80E-03 0 0 | Cs2g07700.1/orange1.  | 4.37 | 0 |      | 0 | 2 | MASCOT | T | PLEX8 |
| 1.91E-04 0 0 | Cs2g07700.1/orange1.  | 4.37 | 0 |      | 0 | 2 | MASCOT | T | PLEX8 |
| 1.56E-04 0 0 | Cs2g07700.1/orange1.  | 4.37 | 0 |      | 0 | 2 | MASCOT | T |       |

|          |     |                       |      |   |   |   |        |   |       |
|----------|-----|-----------------------|------|---|---|---|--------|---|-------|
| 6.11E-03 | 0 0 | Cs2g07700.1/orange1.  | 4.37 | 0 | 0 | 2 | MASCOT | T |       |
| 4.87E-04 | 0 0 | Cs2g07700.1/orange1.  | 4.37 | 0 | 0 | 2 | MASCOT | T |       |
| 3.05E-03 | 0 0 | Cs2g07700.1/orange1.  | 4.37 | 0 | 0 | 2 | MASCOT | T |       |
| 1.18E-01 | 0 0 | orange1.1t03426.1/ora | 6.75 | 0 | 0 | 2 | MASCOT | T |       |
| 1.61E-01 | 0 0 | orange1.1t03426.1/ora | 6.75 | 0 | 0 | 2 | MASCOT | T | PLEX8 |
| 2.51E-02 | 0 0 | orange1.1t02279.1     | 5.21 | 0 | 0 | 2 | MASCOT | T | PLEX8 |
| 7.41E-02 | 0 0 | orange1.1t02279.1     | 5.21 | 0 | 0 | 2 | MASCOT | T | PLEX8 |
| 1.77E-02 | 0 0 | orange1.1t02279.1     | 5.84 | 0 | 0 | 2 | MASCOT | T | PLEX8 |
| 6.64E-02 | 0 0 | orange1.1t02279.1     | 5.84 | 0 | 0 | 2 | MASCOT | T | PLEX8 |
| 2.37E-02 | 0 0 | orange1.1t02279.1     | 5.84 | 0 | 0 | 2 | MASCOT | T |       |
| 1.05E-02 | 0 0 | orange1.1t02279.1     | 5.83 | 0 | 0 | 2 | MASCOT | T | PLEX8 |
| 4.99E-03 | 0 0 | orange1.1t02279.1     | 5.83 | 0 | 0 | 2 | MASCOT | T | PLEX8 |
| 1.32E-02 | 0 0 | orange1.1t02279.1     | 5.83 | 0 | 0 | 2 | MASCOT | T | PLEX8 |
| 3.88E-02 | 0 0 | orange1.1t02279.1     | 5.83 | 0 | 0 | 2 | MASCOT | T | PLEX8 |
| 4.10E-03 | 0 0 | orange1.1t02279.1     | 5.83 | 0 | 0 | 2 | MASCOT | T | PLEX8 |
| 1.43E-01 | 0 0 | orange1.1t02279.1     | 5.83 | 0 | 0 | 2 | MASCOT | T |       |
| 1.42E-03 | 0 0 | orange1.1t02279.1     | 5.83 | 0 | 0 | 2 | MASCOT | T | PLEX8 |
| 1.00E-02 | 0 0 | orange1.1t02279.1     | 5.83 | 0 | 0 | 2 | MASCOT | T | PLEX8 |
| 1.33E-01 | 0 0 | orange1.1t02279.1     | 5.83 | 0 | 0 | 2 | MASCOT | T | PLEX8 |
| 5.50E-03 | 0 0 | orange1.1t02279.1     | 5.83 | 0 | 0 | 2 | MASCOT | T |       |
| 4.05E-03 | 0 0 | orange1.1t02279.1     | 8.75 | 0 | 0 | 2 | MASCOT | T | PLEX8 |
| 4.81E-02 | 0 0 | orange1.1t02279.1     | 8.75 | 0 | 0 | 2 | MASCOT | T | PLEX8 |
| 2.16E-02 | 0 0 | orange1.1t02279.1     | 8.75 | 0 | 0 | 2 | MASCOT | T | PLEX8 |
| 9.18E-02 | 0 0 | orange1.1t02279.1     | 8.75 | 0 | 0 | 2 | MASCOT | T | PLEX8 |
| 5.46E-03 | 0 0 | orange1.1t02279.1     | 8.75 | 0 | 0 | 2 | MASCOT | T | PLEX8 |
| 1.95E-05 | 0 0 | orange1.1t02279.1     | 8.75 | 0 | 0 | 2 | MASCOT | T |       |
| 4.29E-02 | 0 0 | orange1.1t02279.1     | 5.68 | 1 | 0 | 2 | MASCOT | T | PLEX8 |
| 1.40E-01 | 0 0 | orange1.1t02279.1     | 5.5  | 0 | 0 | 2 | MASCOT | T | PLEX8 |
| 1.35E-01 | 0 0 | orange1.1t02279.1     | 9.26 | 1 | 0 | 2 | MASCOT | T | PLEX8 |
| 3.21E-02 | 0 0 | orange1.1t02279.1     | 4.21 | 0 | 0 | 2 | MASCOT | T |       |
| 4.97E-02 | 0 0 | orange1.1t02279.1     | 4.03 | 0 | 0 | 2 | MASCOT | T | PLEX8 |
| 1.29E-03 | 0 0 | orange1.1t02279.1     | 4.03 | 0 | 0 | 2 | MASCOT | T | PLEX8 |
| 8.63E-06 | 0 0 | orange1.1t02279.1     | 4.03 | 0 | 0 | 2 | MASCOT | T | PLEX8 |
| 1.40E-01 | 0 0 | orange1.1t02279.1     | 4.03 | 0 | 0 | 2 | MASCOT | T | PLEX8 |
| 1.03E-04 | 0 0 | orange1.1t02279.1     | 4.03 | 0 | 0 | 2 | MASCOT | T | PLEX8 |
| 3.83E-02 | 0 0 | orange1.1t02279.1     | 4.32 | 1 | 0 | 2 | MASCOT | T | PLEX8 |
| 1.24E-02 | 0 0 | orange1.1t02279.1     | 4.32 | 1 | 0 | 2 | MASCOT | T | PLEX8 |
| 1.56E-01 | 0 0 | orange1.1t02279.1     | 8.75 | 0 | 0 | 2 | MASCOT | T | PLEX8 |
| 2.82E-03 | 0 0 | orange1.1t02279.1     | 4.37 | 0 | 0 | 2 | MASCOT | T | PLEX8 |
| 1.08E-02 | 0 0 | orange1.1t02279.1     | 4.37 | 0 | 0 | 2 | MASCOT | T | PLEX8 |
| 7.11E-03 | 0 0 | orange1.1t02279.1     | 4.37 | 0 | 0 | 2 | MASCOT | T | PLEX8 |
| 1.68E-02 | 0 0 | orange1.1t02279.1     | 4.37 | 0 | 0 | 2 | MASCOT | T | PLEX8 |
| 9.47E-03 | 0 0 | orange1.1t02279.1     | 4.37 | 0 | 0 | 2 | MASCOT | T | PLEX8 |
| 1.60E-02 | 0 0 | orange1.1t02279.1     | 4.37 | 0 | 0 | 2 | MASCOT | T | PLEX8 |
| 7.71E-02 | 0 0 | orange1.1t02279.1     | 4.37 | 0 | 0 | 2 | MASCOT | T | PLEX8 |
| 1.47E-01 | 0 0 | orange1.1t02279.1     | 5.32 | 0 | 0 | 2 | MASCOT | T |       |
| 7.32E-02 | 0 0 | orange1.1t02279.1     | 4.37 | 0 | 0 | 2 | MASCOT | T | PLEX8 |
| 1.73E-01 | 0 0 | orange1.1t02279.1     | 4.37 | 0 | 0 | 2 | MASCOT | T | PLEX8 |
| 1.53E-01 | 0 0 | orange1.1t02279.1     | 4.37 | 0 | 0 | 2 | MASCOT | T | PLEX8 |
| 1.56E-01 | 0 0 | orange1.1t02279.1     | 4.37 | 0 | 0 | 2 | MASCOT | T | PLEX8 |
| 3.43E-02 | 0 0 | orange1.1t02279.1     | 4.37 | 0 | 0 | 2 | MASCOT | T | PLEX8 |

|          |     |                       |      |        |   |   |        |         |
|----------|-----|-----------------------|------|--------|---|---|--------|---------|
| 4.28E-02 | 0 0 | orange1.1t02279.1     | 4.37 | 0      | 0 | 2 | MASCOT | T       |
| 1.33E-02 | 0 0 | Cs2g27720.1/Cs2g277   | 4.37 | 0      | 0 | 2 | MASCOT | T       |
| 1.05E-02 | 0 0 | Cs2g27720.1/Cs2g277   | 4.37 | 0      | 0 | 2 | MASCOT | T       |
| 3.88E-02 | 0 0 | Cs2g27720.1/Cs2g277   | 4.37 | 0      | 0 | 2 | MASCOT | T       |
| 4.83E-03 | 0 0 | Cs2g27720.1/Cs2g277   | 6.74 | 0      | 0 | 2 | MASCOT | T PLEX8 |
| 2.09E-03 | 0 0 | Cs2g27720.1/Cs2g277   | 6.74 | 0      | 0 | 2 | MASCOT | T PLEX8 |
| 6.01E-02 | 0 0 | Cs2g27720.1/Cs2g277   | 6.74 | 0      | 0 | 2 | MASCOT | T PLEX8 |
| 1.33E-01 | 0 0 | Cs2g27720.1/Cs2g277   | 6.74 | 0      | 0 | 2 | MASCOT | T PLEX8 |
| 5.15E-02 | 0 0 | Cs2g27720.1/Cs2g277   | 6.74 | 0      | 0 | 2 | MASCOT | T PLEX8 |
| 5.12E-02 | 0 0 | Cs2g27720.1/Cs2g277   | 6.74 | 0      | 0 | 2 | MASCOT | T PLEX8 |
| 1.58E-03 | 0 0 | Cs2g27720.1/Cs2g277   | 6.74 | 0      | 0 | 2 | MASCOT | T PLEX8 |
| 1.35E-02 | 0 0 | Cs2g27720.1/Cs2g277   | 6.74 | 0      | 0 | 2 | MASCOT | T PLEX8 |
| 5.69E-02 | 0 0 | Cs2g27720.1/Cs2g277   | 9.7  | 1      | 0 | 2 | MASCOT | T PLEX8 |
| 2.79E-02 | 0 0 | Cs2g27720.1/Cs2g277   | 9.7  | 1      | 0 | 2 | MASCOT | T PLEX8 |
| 4.03E-03 | 0 0 | Cs2g27720.1/Cs2g277   | 4.25 | 0      | 0 | 2 | MASCOT | T PLEX8 |
| 5.61E-03 | 0 0 | Cs2g27720.1/Cs2g277   | 4.25 | 0      | 0 | 2 | MASCOT | T PLEX8 |
| 2.78E-03 | 0 0 | Cs2g27720.1/Cs2g277   | 4.25 | 0      | 0 | 2 | MASCOT | T PLEX8 |
| 2.42E-05 | 0 0 | Cs2g27720.1/Cs2g277   | 4.25 | 0      | 0 | 2 | MASCOT | T PLEX8 |
| 5.48E-03 | 0 0 | Cs2g27720.1/Cs2g277   | 4.25 | 0      | 0 | 2 | MASCOT | T PLEX8 |
| 1.84E-03 | 0 0 | Cs2g27720.1/Cs2g277   | 4.25 | 0      | 0 | 2 | MASCOT | T PLEX8 |
| 5.62E-03 | 0 0 | Cs2g27720.1/Cs2g277   | 5.72 | 0      | 0 | 2 | MASCOT | T PLEX8 |
| 2.19E-01 | 0 0 | orange1.1t03226.1/ora | 5.37 | 0      | 0 | 2 | MASCOT | T PLEX8 |
| 3.40E-02 | 0 0 | orange1.1t03226.1/ora | 5.37 | 0      | 0 | 2 | MASCOT | T PLEX8 |
| 3.48E-03 | 0 0 | orange1.1t03226.1/ora | 5.37 | 0      | 0 | 2 | MASCOT | T PLEX8 |
| 3.49E-02 | 0 0 | orange1.1t03226.1/ora | 5.37 | 0      | 0 | 2 | MASCOT | T PLEX8 |
| 9.32E-03 | 0 0 | orange1.1t03226.1/ora | 5.37 | 0      | 0 | 2 | MASCOT | T PLEX8 |
| 1.17E-02 | 0 0 | orange1.1t03226.1/ora | 5.37 | 0      | 0 | 2 | MASCOT | T PLEX8 |
| 3.86E-02 | 0 0 | orange1.1t03226.1/ora | 5.37 | 0      | 0 | 2 | MASCOT | T PLEX8 |
| 1.44E-02 | 0 0 | orange1.1t03226.1/ora | 5.37 | 0      | 0 | 2 | MASCOT | T PLEX8 |
| 2.75E-04 | 0 0 | orange1.1t03226.1/ora | 5.37 | 0      | 0 | 2 | MASCOT | T PLEX8 |
| 9.99E-02 | 0 0 | orange1.1t03226.1/ora | 5.37 | 0      | 0 | 2 | MASCOT | T PLEX8 |
| 3.08E-04 | 0 0 | orange1.1t03226.1/ora | 5.37 | 0      | 0 | 2 | MASCOT | T PLEX8 |
| 5.29E-02 | 0 0 | Cs2g27720.1/Cs2g277   | 4.53 | 0      | 0 | 2 | MASCOT | T PLEX8 |
| 5.05E-04 | 0 0 | Cs2g27720.1/Cs2g277   | 4.53 | 0      | 0 | 2 | MASCOT | T PLEX8 |
| 4.94E-01 | 0 0 | Cs2g27720.1/Cs2g277   | 4.53 | 0      | 0 | 2 | MASCOT | T PLEX8 |
| 1.73E-01 | 0 0 | Cs2g27720.1/Cs2g277   | 8.59 | 0      | 0 | 2 | MASCOT | T PLEX8 |
| 2.47E-01 | 0 0 | Cs2g27720.1/Cs2g277   | 8.59 | 0      | 0 | 2 | MASCOT | T       |
| 4.85E-01 | 0 0 | Cs2g27720.1/Cs2g277   | 8.59 | 0      | 0 | 2 | MASCOT | T PLEX8 |
| 6.12E-02 | 0 0 | Cs2g27720.1/Cs2g277   | 6.05 | 0 15.9 | 0 | 2 | MASCOT | T PLEX8 |
| 1.40E-02 | 0 0 | Cs2g27720.1/Cs2g277   | 4.11 | 1      | 0 | 2 | MASCOT | T       |
| 8.50E-03 | 0 0 | Cs2g27720.1/Cs2g277   | 6.74 | 0      | 0 | 2 | MASCOT | T       |
| 1.08E-02 | 0 0 | Cs2g27720.1/Cs2g277   | 4.21 | 0 15.9 | 0 | 2 | MASCOT | T       |
| 9.03E-03 | 0 0 | Cs2g27720.1/Cs2g277   | 4.21 | 0      | 0 | 2 | MASCOT | T PLEX8 |
| 2.70E-01 | 0 0 | Cs2g27720.1/Cs2g277   | 4.21 | 0      | 0 | 2 | MASCOT | T       |
| 1.68E-01 | 0 0 | Cs2g27720.1/Cs2g277   | 8.76 | 0      | 0 | 2 | MASCOT | T PLEX8 |
| 9.13E-02 | 0 0 | Cs2g27720.1/Cs2g277   | 8.76 | 0      | 0 | 2 | MASCOT | T PLEX8 |
| 7.24E-02 | 0 0 | Cs2g27720.1/Cs2g277   | 9.75 | 0      | 0 | 2 | MASCOT | T PLEX8 |
| 3.85E-04 | 0 0 | Cs8g13200.1 ! Cs8g13  | 4.03 | 0      | 0 | 2 | MASCOT | T PLEX8 |
| 2.23E-02 | 0 0 | Cs8g13200.1/Cs8g132   | 6.1  | 0      | 0 | 2 | MASCOT | T PLEX8 |
| 1.21E-02 | 0 0 | Cs8g13200.1/Cs8g132   | 6.83 | 0      | 0 | 2 | MASCOT | T PLEX8 |
| 7.42E-03 | 0 0 | Cs8g13200.1/Cs8g132   | 6.83 | 0      | 0 | 2 | MASCOT | T PLEX8 |

|          |     |                     |      |   |      |   |        |        |       |       |
|----------|-----|---------------------|------|---|------|---|--------|--------|-------|-------|
| 8.51E-02 | 0 0 | Cs8g13200.1/Cs8g132 | 5.32 | 0 | 0    | 2 | MASCOT | T      | PLEX8 |       |
| 1.05E-03 | 0 0 | Cs8g13200.1/Cs8g132 | 5.32 | 0 | 0    | 2 | MASCOT | T      | PLEX8 |       |
| 2.94E-01 | 0 0 | Cs8g13200.1/Cs8g132 | 5.32 | 0 | 0    | 2 | MASCOT | T      | PLEX8 |       |
| 3.10E-03 | 0 0 | Cs8g13200.1/Cs8g132 | 5.32 | 0 | 0    | 2 | MASCOT | T      | PLEX8 |       |
| 5.54E-02 | 0 0 | Cs8g13200.1/Cs8g132 | 5.32 | 0 | 0    | 2 | MASCOT | T      | PLEX8 |       |
| 2.32E-04 | 0 0 | Cs8g13200.1/Cs8g132 | 5.32 | 0 | 0    | 2 | MASCOT | T      | PLEX8 |       |
| 6.70E-05 | 0 0 | Cs8g13200.1/Cs8g132 | 5.32 | 0 | 0    | 2 | MASCOT | T      | PLEX8 |       |
| 6.94E-02 | 0 0 | Cs8g13200.1/Cs8g132 | 5.32 | 0 | 0    | 2 | MASCOT | T      | PLEX8 |       |
| 7.68E-04 | 0 0 | Cs8g13200.1/Cs8g132 | 4.37 | 0 | 0    | 2 | MASCOT | T      | PLEX8 |       |
| 7.54E-04 | 0 0 | Cs8g13200.1/Cs8g132 | 4.37 | 0 | 0    | 2 | MASCOT | T      | PLEX8 |       |
| 8.80E-02 | 0 0 | Cs8g13200.1/Cs8g132 | 8.59 | 0 | 15.9 | 0 | 2      | MASCOT | T     | PLEX8 |
| 2.68E-01 | 0 0 | Cs8g13200.1/Cs8g132 | 8.59 | 0 | 0    | 2 | MASCOT | T      | PLEX8 |       |
| 1.13E-01 | 0 0 | Cs8g13200.1/Cs8g132 | 8.59 | 0 | 0    | 2 | MASCOT | T      | PLEX8 |       |
| 4.00E-01 | 0 0 | Cs8g13200.1/Cs8g132 | 8.59 | 0 | 0    | 2 | MASCOT | T      | PLEX8 |       |
| 7.56E-04 | 0 0 | Cs8g13200.1/Cs8g132 | 6.46 | 0 | 0    | 2 | MASCOT | T      | PLEX8 |       |
| 2.63E-01 | 0 0 | Cs8g13200.1/Cs8g132 | 6.46 | 0 | 0    | 2 | MASCOT | T      | PLEX8 |       |
| 1.14E-02 | 0 0 | Cs8g13200.1/Cs8g132 | 6.46 | 0 | 0    | 2 | MASCOT | T      | PLEX8 |       |
| 2.15E-02 | 0 0 | Cs8g13200.1/Cs8g132 | 6.46 | 0 | 0    | 2 | MASCOT | T      | PLEX8 |       |
| 1.75E-01 | 0 0 | Cs8g13200.1/Cs8g132 | 6.46 | 0 | 0    | 2 | MASCOT | T      | PLEX8 |       |
| 1.85E-04 | 0 0 | Cs8g13200.1/Cs8g132 | 6.46 | 0 | 0    | 2 | MASCOT | T      |       |       |
| 4.51E-04 | 0 0 | Cs8g13200.1/Cs8g132 | 5.88 | 0 | 15.9 | 0 | 2      | MASCOT | T     | PLEX8 |
| 5.10E-03 | 0 0 | Cs8g13200.1/Cs8g132 | 5.88 | 0 | 15.9 | 0 | 2      | MASCOT | T     |       |
| 9.53E-05 | 0 0 | Cs8g13200.1/Cs8g132 | 5.88 | 0 | 0    | 2 | MASCOT | T      |       |       |
| 6.19E-02 | 0 0 | Cs8g13200.1/Cs8g132 | 5.88 | 0 | 0    | 2 | MASCOT | T      |       |       |
| 2.43E-02 | 0 0 | Cs8g13200.1/Cs8g132 | 4.37 | 0 | 0    | 2 | MASCOT | T      | PLEX8 |       |
| 1.99E-02 | 0 0 | Cs8g13200.1/Cs8g132 | 4.37 | 0 | 0    | 2 | MASCOT | T      | PLEX8 |       |
| 9.09E-04 | 0 0 | Cs8g13200.1/Cs8g132 | 8.6  | 0 | 0    | 2 | MASCOT | T      | PLEX8 |       |
| 3.86E-03 | 0 0 | Cs8g13200.1/Cs8g132 | 8.6  | 0 | 0    | 2 | MASCOT | T      | PLEX8 |       |
| 1.10E-02 | 0 0 | Cs8g13200.1/Cs8g132 | 8.6  | 0 | 0    | 2 | MASCOT | T      |       |       |
| 1.91E-01 | 0 0 | Cs8g13200.1/Cs8g132 | 6    | 0 | 0    | 2 | MASCOT | T      |       |       |
| 2.02E-01 | 0 0 | Cs8g13200.1/Cs8g132 | 6    | 0 | 0    | 2 | MASCOT | T      | PLEX8 |       |
| 7.47E-04 | 0 0 | Cs8g13200.1/Cs8g132 | 4.21 | 0 | 0    | 2 | MASCOT | T      |       |       |
| 2.27E-01 | 0 0 | Cs8g13200.1         | 9.76 | 0 | 0    | 2 | MASCOT | T      | PLEX8 |       |
| 6.98E-03 | 0 0 | Cs8g13200.1/Cs8g132 | 7.98 | 0 | 15.9 | 0 | 2      | MASCOT | T     | PLEX8 |
| 6.46E-03 | 0 0 | Cs8g13200.1/Cs8g132 | 7.98 | 0 | 15.9 | 0 | 2      | MASCOT | T     | PLEX8 |
| 3.06E-02 | 0 0 | Cs8g13200.1/Cs8g132 | 7.98 | 0 | 15.9 | 0 | 2      | MASCOT | T     | PLEX8 |
| 2.47E-02 | 0 0 | Cs8g13200.1/Cs8g132 | 7.98 | 0 | 15.9 | 0 | 2      | MASCOT | T     | PLEX8 |
| 9.84E-03 | 0 0 | Cs8g13200.1/Cs8g132 | 7.98 | 0 | 0    | 2 | MASCOT | T      | PLEX8 |       |
| 2.16E-01 | 0 0 | Cs8g13200.1/Cs8g132 | 7.98 | 0 | 0    | 2 | MASCOT | T      | PLEX8 |       |
| 3.17E-03 | 0 0 | Cs8g13200.1/Cs8g132 | 7.98 | 0 | 0    | 2 | MASCOT | T      | PLEX8 |       |
| 8.16E-02 | 0 0 | Cs8g13200.1/Cs8g132 | 7.98 | 0 | 0    | 2 | MASCOT | T      | PLEX8 |       |
| 2.73E-03 | 0 0 | Cs8g13200.1         | 5.29 | 0 | 0    | 2 | MASCOT | T      | PLEX8 |       |
| 1.07E-01 | 0 0 | Cs3g24230.1         | 5.84 | 0 | 0    | 2 | MASCOT | T      |       |       |
| 1.36E-01 | 0 0 | Cs3g24230.1         | 5.84 | 0 | 0    | 2 | MASCOT | T      | PLEX8 |       |
| 1.41E-01 | 0 0 | Cs3g24230.1         | 5.84 | 0 | 0    | 2 | MASCOT | T      |       |       |
| 3.52E-02 | 0 0 | Cs3g24230.1         | 5.84 | 0 | 0    | 2 | MASCOT | T      |       |       |
| 4.13E-02 | 0 0 | Cs3g24230.1         | 4.53 | 0 | 15.9 | 0 | 2      | MASCOT | T     | PLEX8 |
| 1.02E-02 | 0 0 | Cs3g24230.1         | 5.4  | 0 | 0    | 2 | MASCOT | T      | PLEX8 |       |
| 1.21E-01 | 0 0 | Cs3g24230.1         | 8.75 | 0 | 0    | 2 | MASCOT | T      | PLEX8 |       |
| 8.01E-02 | 0 0 | Cs3g24230.1         | 5.4  | 0 | 15.9 | 0 | 2      | MASCOT | T     | PLEX8 |
| 3.39E-03 | 0 0 | Cs3g24230.1         | 5.4  | 0 | 15.9 | 0 | 2      | MASCOT | T     | PLEX8 |



|              |                      |      |   |   |          |   |       |
|--------------|----------------------|------|---|---|----------|---|-------|
| 6.30E-05 0 0 | Cs3g24230.1          | 5.4  | 0 | 0 | 2 MASCOT | T | PLEX8 |
| 8.94E-02 0 0 | Cs3g24230.1          | 5.4  | 0 | 0 | 2 MASCOT | T | PLEX8 |
| 1.84E-01 0 0 | Cs3g24230.1          | 4.53 | 0 | 0 | 2 MASCOT | T |       |
| 3.79E-02 0 0 | Cs3g24230.1          | 4.53 | 0 | 0 | 2 MASCOT | T |       |
| 1.96E-01 0 0 | Cs3g24230.1          | 8.47 | 0 | 0 | 2 MASCOT | T | PLEX8 |
| 1.30E-04 0 0 | Cs3g24230.1          | 8.47 | 0 | 0 | 2 MASCOT | T | PLEX8 |
| 3.84E-02 0 0 | Cs3g24230.1          | 8.47 | 0 | 0 | 2 MASCOT | T | PLEX8 |
| 8.92E-02 0 0 | Cs3g24230.1          | 8.47 | 0 | 0 | 2 MASCOT | T | PLEX8 |
| 3.33E-02 0 0 | Cs3g24230.1          | 8.47 | 0 | 0 | 2 MASCOT | T | PLEX8 |
| 3.56E-01 0 0 | Cs3g24230.1          | 8.47 | 0 | 0 | 2 MASCOT | T | PLEX8 |
| 2.02E-03 0 0 | Cs3g24230.1          | 8.47 | 0 | 0 | 2 MASCOT | T | PLEX8 |
| 5.91E-05 0 0 | Cs3g24230.1          | 8.47 | 0 | 0 | 2 MASCOT | T | PLEX8 |
| 2.22E-02 0 0 | Cs3g24230.1          | 5.55 | 0 | 0 | 2 MASCOT | T | PLEX8 |
| 7.83E-04 0 0 | Cs3g24230.1          | 5.55 | 0 | 0 | 2 MASCOT | T | PLEX8 |
| 7.39E-04 0 0 | Cs3g24230.1          | 5.55 | 0 | 0 | 2 MASCOT | T | PLEX8 |
| 1.62E-01 0 0 | Cs3g24230.1          | 5.55 | 0 | 0 | 2 MASCOT | T | PLEX8 |
| 1.52E-01 0 0 | Cs3g24230.1          | 5.72 | 0 | 0 | 2 MASCOT | T | PLEX8 |
| 1.92E-01 0 0 | Cs3g24230.1          | 5.72 | 0 | 0 | 2 MASCOT | T | PLEX8 |
| 1.90E-01 0 0 | Cs3g24230.1          | 5.72 | 0 | 0 | 2 MASCOT | T | PLEX8 |
| 4.52E-03 0 0 | Cs3g24230.1          | 5.97 | 0 | 0 | 2 MASCOT | T | PLEX8 |
| 1.56E-02 0 0 | Cs3g24230.1          | 5.97 | 0 | 0 | 2 MASCOT | T | PLEX8 |
| 2.09E-02 0 0 | Cs3g24230.1          | 4.65 | 0 | 0 | 2 MASCOT | T | PLEX8 |
| 1.90E-01 0 0 | Cs3g24230.1          | 4.65 | 0 | 0 | 2 MASCOT | T | PLEX8 |
| 6.76E-02 0 0 | Cs3g24230.1 ! Cs5g28 | 4.53 | 0 | 0 | 2 MASCOT | T | PLEX8 |
| 4.35E-02 0 0 | Cs3g24230.1 ! Cs5g28 | 4.53 | 0 | 0 | 2 MASCOT | T | PLEX8 |
| 5.02E-02 0 0 | Cs3g24230.1          | 9.53 | 1 | 0 | 2 MASCOT | T | PLEX8 |
| 3.06E-01 0 0 | Cs3g24230.1          | 5.32 | 0 | 0 | 2 MASCOT | T | PLEX8 |
| 5.31E-04 0 0 | Cs3g24230.1          | 5.32 | 0 | 0 | 2 MASCOT | T | PLEX8 |
| 3.74E-03 0 0 | Cs3g24230.1          | 4.21 | 0 | 0 | 2 MASCOT | T | PLEX8 |
| 5.70E-02 0 0 | Cs3g24230.1          | 4.21 | 0 | 0 | 2 MASCOT | T | PLEX8 |
| 3.00E-01 0 0 | Cs3g24230.1          | 4.21 | 0 | 0 | 2 MASCOT | T | PLEX8 |
| 1.59E-01 0 0 | Cs3g24230.1          | 4.21 | 0 | 0 | 2 MASCOT | T | PLEX8 |
| 4.91E-03 0 0 | Cs3g24230.1          | 4.21 | 0 | 0 | 2 MASCOT | T | PLEX8 |
| 2.49E-02 0 0 | Cs2g18800.1          | 8.75 | 0 | 0 | 2 MASCOT | T | PLEX8 |
| 1.34E-02 0 0 | Cs2g18800.1          | 8.75 | 0 | 0 | 2 MASCOT | T | PLEX8 |
| 1.23E-02 0 0 | Cs2g18800.1          | 8.75 | 0 | 0 | 2 MASCOT | T | PLEX8 |
| 1.96E-02 0 0 | Cs2g18800.1          | 8.75 | 0 | 0 | 2 MASCOT | T | PLEX8 |
| 3.84E-03 0 0 | Cs2g18800.1          | 8.75 | 0 | 0 | 2 MASCOT | T | PLEX8 |
| 4.93E-02 0 0 | Cs2g18800.1          | 4.14 | 0 | 0 | 2 MASCOT | T | PLEX8 |
| 1.11E-01 0 0 | Cs2g18800.1          | 9.76 | 0 | 0 | 2 MASCOT | T | PLEX8 |
| 5.81E-02 0 0 | Cs2g18800.1          | 9.76 | 0 | 0 | 2 MASCOT | T | PLEX8 |
| 4.48E-05 0 0 | Cs2g18800.1          | 4.37 | 0 | 0 | 2 MASCOT | T |       |
| 1.84E-01 0 0 | Cs2g18800.1          | 4.37 | 0 | 0 | 2 MASCOT | T |       |
| 1.65E-08 0 0 | Cs2g18800.1          | 4.37 | 0 | 0 | 2 MASCOT | T |       |
| 4.58E-03 0 0 | Cs2g18800.1          | 8.75 | 0 | 0 | 2 MASCOT | T |       |
| 1.17E-03 0 0 | Cs2g18800.1          | 8.75 | 0 | 0 | 2 MASCOT | T |       |
| 2.38E-01 0 0 | Cs2g18800.1          | 5.96 | 0 | 0 | 2 MASCOT | T | PLEX8 |
| 8.12E-05 0 0 | Cs2g18800.1          | 4.37 | 0 | 0 | 2 MASCOT | T |       |
| 2.35E-02 0 0 | Cs2g18800.1          | 4.37 | 0 | 0 | 2 MASCOT | T |       |
| 2.90E-04 0 0 | Cs2g18800.1          | 4.37 | 0 | 0 | 2 MASCOT | T |       |
| 1.24E-02 0 0 | Cs2g18800.1          | 8.47 | 0 | 0 | 2 MASCOT | T | PLEX8 |

|              |                     |      |   |      |   |        |        |       |       |
|--------------|---------------------|------|---|------|---|--------|--------|-------|-------|
| 3.30E-02 0 0 | Cs2g18800.1         | 8.47 | 0 | 0    | 2 | MASCOT | T      | PLEX8 |       |
| 3.03E-02 0 0 | Cs2g18800.1         | 8.47 | 0 | 0    | 2 | MASCOT | T      | PLEX8 |       |
| 1.75E-03 0 0 | Cs2g18800.1         | 8.47 | 0 | 0    | 2 | MASCOT | T      | PLEX8 |       |
| 9.95E-02 0 0 | Cs2g18800.1         | 8.8  | 0 | 15.9 | 0 | 2      | MASCOT | T     | PLEX8 |
| 1.70E-02 0 0 | Cs2g18800.1         | 8.8  | 0 | 0    | 2 | MASCOT | T      | PLEX8 |       |
| 9.04E-03 0 0 | Cs2g18800.1         | 8.8  | 0 | 0    | 2 | MASCOT | T      | PLEX8 |       |
| 8.41E-02 0 0 | Cs2g18800.1         | 8.8  | 0 | 0    | 2 | MASCOT | T      | PLEX8 |       |
| 3.50E-02 0 0 | Cs2g18800.1         | 8.54 | 0 | 15.9 | 0 | 2      | MASCOT | T     |       |
| 1.40E-03 0 0 | Cs2g18800.1         | 8.54 | 0 | 15.9 | 0 | 2      | MASCOT | T     | PLEX8 |
| 4.18E-03 0 0 | Cs2g18800.1         | 8.54 | 0 | 0    | 2 | MASCOT | T      | PLEX8 |       |
| 2.54E-01 0 0 | Cs2g18800.1         | 8.54 | 0 | 0    | 2 | MASCOT | T      |       |       |
| 3.98E-03 0 0 | Cs2g18800.1         | 8.54 | 0 | 0    | 2 | MASCOT | T      | PLEX8 |       |
| 1.30E-03 0 0 | Cs2g18800.1         | 4.56 | 1 | 15.9 | 0 | 2      | MASCOT | T     | PLEX8 |
| 3.38E-03 0 0 | Cs2g18800.1         | 4.56 | 1 | 15.9 | 0 | 2      | MASCOT | T     |       |
| 2.13E-03 0 0 | Cs2g18800.1         | 4.56 | 1 | 0    | 2 | MASCOT | T      | PLEX8 |       |
| 2.74E-03 0 0 | Cs2g18800.1         | 9.76 | 0 | 0    | 2 | MASCOT | T      | PLEX8 |       |
| 5.00E-01 0 0 | Cs2g18800.1         | 5.83 | 0 | 0    | 2 | MASCOT | T      |       |       |
| 1.99E-03 0 0 | Cs2g18800.1         | 5.83 | 0 | 0    | 2 | MASCOT | T      |       |       |
| 1.99E-02 0 0 | Cs2g18800.1         | 8.46 | 0 | 0    | 2 | MASCOT | T      | PLEX8 |       |
| 2.01E-02 0 0 | Cs2g18800.1         | 9.47 | 0 | 0    | 2 | MASCOT | T      |       |       |
| 1.01E-04 0 0 | Cs2g18800.1         | 9.47 | 0 | 0    | 2 | MASCOT | T      |       |       |
| 5.01E-03 0 0 | Cs5g16440.1         | 4.65 | 0 | 0    | 2 | MASCOT | T      | PLEX8 |       |
| 8.51E-02 0 0 | Cs5g16440.1         | 4.65 | 0 | 0    | 2 | MASCOT | T      | PLEX8 |       |
| 1.21E-02 0 0 | Cs5g16440.1         | 4.65 | 0 | 0    | 2 | MASCOT | T      | PLEX8 |       |
| 1.53E-02 0 0 | Cs5g16440.1         | 4.65 | 0 | 0    | 2 | MASCOT | T      | PLEX8 |       |
| 3.83E-04 0 0 | Cs5g16440.1         | 4.65 | 0 | 0    | 2 | MASCOT | T      |       |       |
| 1.05E-02 0 0 | Cs5g16440.1         | 4.37 | 0 | 0    | 2 | MASCOT | T      |       |       |
| 6.69E-02 0 0 | Cs5g16440.1         | 4.37 | 0 | 0    | 2 | MASCOT | T      |       |       |
| 1.44E-04 0 0 | Cs5g16440.1/Cs5g164 | 4.53 | 0 | 0    | 2 | MASCOT | T      | PLEX8 |       |
| 1.41E-01 0 0 | Cs5g16440.1/Cs5g164 | 6.74 | 0 | 0    | 2 | MASCOT | T      | PLEX8 |       |
| 2.93E-02 0 0 | Cs5g16440.1/Cs5g164 | 6.74 | 0 | 0    | 2 | MASCOT | T      | PLEX8 |       |
| 8.79E-03 0 0 | Cs5g16440.1/Cs5g164 | 6.74 | 0 | 0    | 2 | MASCOT | T      | PLEX8 |       |
| 9.81E-03 0 0 | Cs5g16440.1/Cs5g164 | 6.74 | 0 | 0    | 2 | MASCOT | T      | PLEX8 |       |
| 3.71E-02 0 0 | Cs5g16440.1/Cs5g164 | 6.74 | 0 | 0    | 2 | MASCOT | T      | PLEX8 |       |
| 2.43E-01 0 0 | Cs5g16440.1/Cs5g164 | 5.59 | 0 | 0    | 2 | MASCOT | T      | PLEX8 |       |
| 1.17E-02 0 0 | Cs5g16440.1         | 6    | 0 | 0    | 2 | MASCOT | T      | PLEX8 |       |
| 6.40E-05 0 0 | Cs5g16440.1/Cs5g164 | 3.92 | 0 | 0    | 2 | MASCOT | T      | PLEX8 |       |
| 5.96E-03 0 0 | Cs5g16440.1/Cs5g164 | 8.49 | 0 | 0    | 2 | MASCOT | T      | PLEX8 |       |
| 3.13E-03 0 0 | Cs5g16440.1/Cs5g164 | 8.49 | 0 | 0    | 2 | MASCOT | T      | PLEX8 |       |
| 4.95E-02 0 0 | Cs5g16440.1/Cs5g164 | 8.49 | 0 | 0    | 2 | MASCOT | T      | PLEX8 |       |
| 7.84E-03 0 0 | Cs5g16440.1/Cs5g164 | 8.49 | 0 | 0    | 2 | MASCOT | T      |       |       |
| 9.19E-03 0 0 | Cs5g16440.1/Cs5g164 | 4.37 | 0 | 0    | 2 | MASCOT | T      |       |       |
| 4.99E-02 0 0 | Cs5g16440.1/Cs5g164 | 4.37 | 0 | 0    | 2 | MASCOT | T      |       |       |
| 9.52E-03 0 0 | Cs5g16440.1/Cs5g164 | 6.1  | 0 | 0    | 2 | MASCOT | T      | PLEX8 |       |
| 3.52E-02 0 0 | Cs5g16440.1/Cs5g164 | 6.1  | 0 | 0    | 2 | MASCOT | T      | PLEX8 |       |
| 5.16E-02 0 0 | Cs5g16440.1         | 4.25 | 0 | 0    | 2 | MASCOT | T      | PLEX8 |       |
| 2.69E-01 0 0 | Cs5g16440.1         | 6    | 0 | 0    | 2 | MASCOT | T      | PLEX8 |       |
| 4.11E-01 0 0 | Cs5g16440.1         | 6    | 0 | 0    | 2 | MASCOT | T      | PLEX8 |       |
| 2.21E-02 0 0 | Cs5g16440.1         | 5.4  | 0 | 0    | 2 | MASCOT | T      | PLEX8 |       |
| 1.29E-01 0 0 | Cs5g16440.1         | 5.4  | 0 | 0    | 2 | MASCOT | T      |       |       |
| 8.66E-02 0 0 | Cs5g16440.1         | 5.4  | 0 | 0    | 2 | MASCOT | T      |       |       |

|          |     |                     |      |   |      |   |        |        |       |       |
|----------|-----|---------------------|------|---|------|---|--------|--------|-------|-------|
| 2.26E-01 | 0 0 | Cs5g16440.1/Cs5g164 | 4.53 | 0 | 0    | 2 | MASCOT | T      | PLEX8 |       |
| 2.25E-01 | 0 0 | Cs5g16440.1/Cs5g164 | 4.53 | 0 | 0    | 2 | MASCOT | T      | PLEX8 |       |
| 1.96E-01 | 0 0 | Cs5g16440.1/Cs5g164 | 4.53 | 0 | 0    | 2 | MASCOT | T      | PLEX8 |       |
| 1.95E-01 | 0 0 | Cs5g16440.1/Cs5g164 | 4.53 | 0 | 0    | 2 | MASCOT | T      | PLEX8 |       |
| 2.80E-02 | 0 0 | Cs5g16440.1/Cs5g164 | 4.53 | 0 | 0    | 2 | MASCOT | T      | PLEX8 |       |
| 1.96E-01 | 0 0 | Cs8g18910.1/Cs8g189 | 6.05 | 0 | 0    | 2 | MASCOT | T      | PLEX8 |       |
| 4.19E-05 | 0 0 | Cs8g18910.1/Cs8g189 | 4.25 | 0 | 15.9 | 0 | 2      | MASCOT | T     | PLEX8 |
| 3.94E-02 | 0 0 | Cs8g18910.1/Cs8g189 | 4.25 | 0 | 0    | 2 | MASCOT | T      | PLEX8 |       |
| 1.04E-01 | 0 0 | Cs8g18910.1/Cs8g189 | 4.25 | 0 | 0    | 2 | MASCOT | T      | PLEX8 |       |
| 1.88E-04 | 0 0 | Cs8g18910.1/Cs8g189 | 4.25 | 0 | 0    | 2 | MASCOT | T      | PLEX8 |       |
| 2.88E-04 | 0 0 | Cs8g18910.1/Cs8g189 | 4.25 | 0 | 0    | 2 | MASCOT | T      | PLEX8 |       |
| 3.20E-03 | 0 0 | Cs8g18910.1/Cs8g189 | 6    | 0 | 0    | 2 | MASCOT | T      | PLEX8 |       |
| 2.41E-02 | 0 0 | Cs8g18910.1/Cs8g189 | 5.32 | 0 | 0    | 2 | MASCOT | T      | PLEX8 |       |
| 1.36E-01 | 0 0 | Cs8g18910.1/Cs8g189 | 5.32 | 0 | 0    | 2 | MASCOT | T      | PLEX8 |       |
| 7.34E-05 | 0 0 | Cs8g18910.1/Cs8g189 | 6    | 0 | 0    | 2 | MASCOT | T      | PLEX8 |       |
| 3.53E-06 | 0 0 | Cs8g18910.1/Cs8g189 | 6    | 0 | 0    | 2 | MASCOT | T      | PLEX8 |       |
| 7.96E-02 | 0 0 | Cs8g18910.1/Cs8g189 | 4.53 | 0 | 0    | 2 | MASCOT | T      | PLEX8 |       |
| 1.07E-02 | 0 0 | Cs8g18910.1/Cs8g189 | 4.53 | 0 | 0    | 2 | MASCOT | T      | PLEX8 |       |
| 4.57E-01 | 0 0 | Cs8g18910.1/Cs8g189 | 4.53 | 0 | 0    | 2 | MASCOT | T      | PLEX8 |       |
| 6.35E-02 | 0 0 | Cs8g18910.1/Cs8g189 | 4.53 | 0 | 0    | 2 | MASCOT | T      | PLEX8 |       |
| 4.09E-02 | 0 0 | Cs8g18910.2         | 5.99 | 0 | 0    | 2 | MASCOT | T      | PLEX8 |       |
| 2.41E-03 | 0 0 | Cs8g18910.2         | 5.99 | 0 | 0    | 2 | MASCOT | T      | PLEX8 |       |
| 1.79E-02 | 0 0 | Cs8g18910.2         | 5.32 | 0 | 0    | 2 | MASCOT | T      | PLEX8 |       |
| 8.33E-02 | 0 0 | Cs8g18910.2         | 5.32 | 0 | 0    | 2 | MASCOT | T      | PLEX8 |       |
| 3.68E-02 | 0 0 | Cs8g18910.2         | 5.32 | 0 | 0    | 2 | MASCOT | T      | PLEX8 |       |
| 1.19E-01 | 0 0 | Cs8g18910.2         | 5.32 | 0 | 0    | 2 | MASCOT | T      | PLEX8 |       |
| 1.74E-02 | 0 0 | Cs8g18910.1/Cs8g189 | 5.99 | 0 | 0    | 2 | MASCOT | T      | PLEX8 |       |
| 2.88E-02 | 0 0 | Cs8g18910.1/Cs8g189 | 4.56 | 1 | 0    | 2 | MASCOT | T      | PLEX8 |       |
| 2.23E-02 | 0 0 | Cs8g18910.1/Cs8g189 | 4.56 | 1 | 0    | 2 | MASCOT | T      | PLEX8 |       |
| 2.68E-01 | 0 0 | Cs8g18910.2         | 8.37 | 0 | 15.9 | 0 | 2      | MASCOT | T     | PLEX8 |
| 5.77E-02 | 0 0 | Cs8g18910.1/Cs8g189 | 9.5  | 0 | 0    | 2 | MASCOT | T      | PLEX8 |       |
| 3.30E-02 | 0 0 | Cs8g18910.2         | 8.37 | 0 | 0    | 2 | MASCOT | T      | PLEX8 |       |
| 8.86E-04 | 0 0 | Cs8g18910.1/Cs8g189 | 4.68 | 0 | 0    | 2 | MASCOT | T      | PLEX8 |       |
| 2.72E-03 | 0 0 | Cs8g18910.1/Cs8g189 | 5.84 | 0 | 0    | 2 | MASCOT | T      | PLEX8 |       |
| 2.89E-01 | 0 0 | Cs8g18910.1/Cs8g189 | 5.84 | 0 | 0    | 2 | MASCOT | T      | PLEX8 |       |
| 4.16E-01 | 0 0 | Cs8g18910.1/Cs8g189 | 5.84 | 0 | 0    | 2 | MASCOT | T      | PLEX8 |       |
| 9.42E-02 | 0 0 | Cs8g18910.1/Cs8g189 | 5.84 | 0 | 0    | 2 | MASCOT | T      | PLEX8 |       |
| 1.01E-02 | 0 0 | Cs8g18910.1/Cs8g189 | 6    | 0 | 0    | 2 | MASCOT | T      | PLEX8 |       |
| 3.01E-02 | 0 0 | Cs8g18910.1/Cs8g189 | 6    | 0 | 0    | 2 | MASCOT | T      | PLEX8 |       |
| 3.16E-03 | 0 0 | Cs8g18910.1/Cs8g189 | 6    | 0 | 0    | 2 | MASCOT | T      | PLEX8 |       |
| 1.10E-02 | 0 0 | Cs5g19810.1         | 4.31 | 0 | 0    | 2 | MASCOT | T      | PLEX8 |       |
| 6.28E-02 | 0 0 | Cs5g19810.1         | 4.53 | 0 | 0    | 2 | MASCOT | T      | PLEX8 |       |
| 1.39E-01 | 0 0 | Cs5g19810.1         | 4.53 | 0 | 0    | 2 | MASCOT | T      | PLEX8 |       |
| 2.71E-03 | 0 0 | Cs5g19810.1/Cs5g198 | 5.21 | 0 | 0    | 2 | MASCOT | T      | PLEX8 |       |
| 2.08E-02 | 0 0 | Cs5g19810.1/Cs5g198 | 5.21 | 0 | 0    | 2 | MASCOT | T      | PLEX8 |       |
| 1.29E-01 | 0 0 | Cs5g19810.1/Cs7g287 | 4.22 | 0 | 0    | 2 | MASCOT | T      | PLEX8 |       |
| 1.99E-04 | 0 0 | Cs5g19810.1/Cs7g287 | 4.22 | 0 | 0    | 2 | MASCOT | T      | PLEX8 |       |
| 8.17E-02 | 0 0 | Cs5g19810.1/Cs7g287 | 4.22 | 0 | 0    | 2 | MASCOT | T      | PLEX8 |       |
| 2.95E-03 | 0 0 | Cs5g19810.1/Cs7g287 | 4.22 | 0 | 0    | 2 | MASCOT | T      | PLEX8 |       |
| 2.99E-03 | 0 0 | Cs5g19810.1/Cs5g198 | 4.53 | 0 | 15.9 | 0 | 2      | MASCOT | T     | PLEX8 |
| 1.68E-03 | 0 0 | Cs5g19810.1/Cs5g198 | 4.53 | 0 | 15.9 | 0 | 2      | MASCOT | T     | PLEX8 |

|          |     |                     |      |   |      |   |        |        |       |       |
|----------|-----|---------------------|------|---|------|---|--------|--------|-------|-------|
| 4.09E-02 | 0 0 | Cs5g19810.1/Cs5g198 | 4.53 | 0 | 0    | 2 | MASCOT | T      | PLEX8 |       |
| 4.29E-03 | 0 0 | Cs5g19810.1/Cs5g198 | 4.53 | 0 | 0    | 2 | MASCOT | T      | PLEX8 |       |
| 2.39E-03 | 0 0 | Cs5g19810.1/Cs5g198 | 5.32 | 0 | 15.9 | 0 | 2      | MASCOT | T     | PLEX8 |
| 2.06E-03 | 0 0 | Cs5g19810.1/Cs5g198 | 5.32 | 0 | 15.9 | 0 | 2      | MASCOT | T     | PLEX8 |
| 9.67E-05 | 0 0 | Cs5g19810.1/Cs5g198 | 5.32 | 0 | 15.9 | 0 | 2      | MASCOT | T     |       |
| 4.50E-04 | 0 0 | Cs5g19810.1/Cs5g198 | 5.32 | 0 | 0    | 2 | MASCOT | T      | PLEX8 |       |
| 1.82E-05 | 0 0 | Cs5g19810.1/Cs5g198 | 5.32 | 0 | 0    | 2 | MASCOT | T      | PLEX8 |       |
| 2.15E-05 | 0 0 | Cs5g19810.1/Cs5g198 | 5.32 | 0 | 0    | 2 | MASCOT | T      |       |       |
| 5.29E-03 | 0 0 | Cs5g19810.1/Cs5g198 | 4.65 | 0 | 0    | 2 | MASCOT | T      | PLEX8 |       |
| 7.67E-03 | 0 0 | Cs5g19810.1/Cs5g198 | 4.53 | 0 | 0    | 2 | MASCOT | T      | PLEX8 |       |
| 1.00E-04 | 0 0 | Cs5g19810.1/Cs5g198 | 4.53 | 0 | 0    | 2 | MASCOT | T      | PLEX8 |       |
| 1.61E-02 | 0 0 | Cs5g19810.1/Cs5g198 | 5.27 | 0 | 0    | 2 | MASCOT | T      | PLEX8 |       |
| 5.46E-02 | 0 0 | Cs5g19810.1/Cs5g198 | 5.27 | 0 | 0    | 2 | MASCOT | T      | PLEX8 |       |
| 1.59E-01 | 0 0 | Cs5g19810.1/Cs5g198 | 5.27 | 0 | 0    | 2 | MASCOT | T      | PLEX8 |       |
| 2.76E-01 | 0 0 | Cs5g19810.1/Cs5g198 | 6    | 0 | 0    | 2 | MASCOT | T      |       |       |
| 1.64E-01 | 0 0 | Cs5g19810.1/Cs5g198 | 9.75 | 0 | 0    | 2 | MASCOT | T      | PLEX8 |       |
| 2.17E-02 | 0 0 | Cs5g19810.1/Cs5g198 | 9.75 | 0 | 0    | 2 | MASCOT | T      | PLEX8 |       |
| 1.50E-01 | 0 0 | Cs5g19810.1/Cs5g198 | 4.37 | 0 | 0    | 2 | MASCOT | T      | PLEX8 |       |
| 3.58E-01 | 0 0 | Cs5g19810.1/Cs5g198 | 9.35 | 0 | 0    | 2 | MASCOT | T      | PLEX8 |       |
| 7.99E-02 | 0 0 | Cs5g19810.1         | 5.55 | 0 | 0    | 2 | MASCOT | T      | PLEX8 |       |
| 1.64E-04 | 0 0 | Cs5g19810.1/Cs5g198 | 5.55 | 0 | 0    | 2 | MASCOT | T      | PLEX8 |       |
| 6.44E-02 | 0 0 | Cs2g24360.1         | 5.84 | 0 | 0    | 2 | MASCOT | T      |       |       |
| 1.18E-01 | 0 0 | Cs2g24360.1         | 5.84 | 0 | 0    | 2 | MASCOT | T      | PLEX8 |       |
| 6.24E-02 | 0 0 | Cs2g24360.1         | 5.84 | 0 | 0    | 2 | MASCOT | T      | PLEX8 |       |
| 1.42E-01 | 0 0 | Cs2g24360.1         | 5.84 | 0 | 0    | 2 | MASCOT | T      | PLEX8 |       |
| 1.17E-01 | 0 0 | Cs2g24360.1         | 5.84 | 0 | 0    | 2 | MASCOT | T      | PLEX8 |       |
| 9.39E-04 | 0 0 | Cs2g24360.1         | 5.84 | 0 | 0    | 2 | MASCOT | T      | PLEX8 |       |
| 6.58E-05 | 0 0 | Cs2g24360.1         | 5.84 | 0 | 0    | 2 | MASCOT | T      | PLEX8 |       |
| 9.96E-02 | 0 0 | Cs2g24360.1         | 5.84 | 0 | 0    | 2 | MASCOT | T      | PLEX8 |       |
| 9.82E-04 | 0 0 | Cs2g24360.1         | 5.84 | 0 | 0    | 2 | MASCOT | T      | PLEX8 |       |
| 9.62E-03 | 0 0 | Cs2g24360.1         | 5.84 | 0 | 0    | 2 | MASCOT | T      | PLEX8 |       |
| 7.79E-03 | 0 0 | Cs2g24360.1         | 5.84 | 0 | 0    | 2 | MASCOT | T      | PLEX8 |       |
| 3.05E-03 | 0 0 | Cs2g24360.1         | 5.84 | 0 | 0    | 2 | MASCOT | T      | PLEX8 |       |
| 2.96E-01 | 0 0 | Cs2g24360.1         | 5.84 | 0 | 0    | 2 | MASCOT | T      | PLEX8 |       |
| 4.60E-02 | 0 0 | Cs2g24360.1         | 5.84 | 0 | 0    | 2 | MASCOT | T      | PLEX8 |       |
| 1.98E-01 | 0 0 | Cs2g24360.1         | 5.84 | 0 | 0    | 2 | MASCOT | T      | PLEX8 |       |
| 2.04E-02 | 0 0 | Cs2g24360.1         | 5.84 | 0 | 0    | 2 | MASCOT | T      | PLEX8 |       |
| 8.41E-02 | 0 0 | Cs2g24360.1         | 5.84 | 0 | 0    | 2 | MASCOT | T      | PLEX8 |       |
| 8.19E-04 | 0 0 | Cs2g24360.1         | 5.84 | 0 | 0    | 2 | MASCOT | T      | PLEX8 |       |
| 1.62E-01 | 0 0 | Cs2g24360.1         | 5.84 | 0 | 0    | 2 | MASCOT | T      | PLEX8 |       |
| 2.06E-02 | 0 0 | Cs2g24360.1         | 5.84 | 0 | 0    | 2 | MASCOT | T      | PLEX8 |       |
| 6.98E-02 | 0 0 | Cs2g24360.1         | 5.84 | 0 | 0    | 2 | MASCOT | T      | PLEX8 |       |
| 1.53E-02 | 0 0 | Cs2g24360.1         | 5.84 | 0 | 0    | 2 | MASCOT | T      | PLEX8 |       |
| 1.03E-02 | 0 0 | Cs2g24360.1         | 5.84 | 0 | 0    | 2 | MASCOT | T      | PLEX8 |       |
| 8.75E-02 | 0 0 | Cs2g24360.1         | 5.84 | 0 | 0    | 2 | MASCOT | T      | PLEX8 |       |
| 9.70E-02 | 0 0 | Cs2g24360.1         | 5.84 | 0 | 0    | 2 | MASCOT | T      | PLEX8 |       |
| 1.13E-03 | 0 0 | Cs2g24360.1         | 5.84 | 0 | 0    | 2 | MASCOT | T      | PLEX8 |       |
| 1.85E-01 | 0 0 | Cs2g24360.1         | 5.84 | 0 | 0    | 2 | MASCOT | T      | PLEX8 |       |
| 1.67E-03 | 0 0 | Cs2g24360.1         | 5.84 | 0 | 0    | 2 | MASCOT | T      | PLEX8 |       |
| 2.72E-01 | 0 0 | Cs2g24360.1         | 5.84 | 0 | 0    | 2 | MASCOT | T      | PLEX8 |       |
| 2.77E-01 | 0 0 | Cs2g24360.1         | 5.84 | 0 | 0    | 2 | MASCOT | T      | PLEX8 |       |

|          |     |             |      |   |      |   |        |        |       |       |
|----------|-----|-------------|------|---|------|---|--------|--------|-------|-------|
| 1.03E-01 | 0 0 | Cs2g24360.1 | 5.84 | 0 | 0    | 2 | MASCOT | T      | PLEX8 |       |
| 1.11E-03 | 0 0 | Cs2g24360.1 | 5.84 | 0 | 0    | 2 | MASCOT | T      | PLEX8 |       |
| 2.55E-04 | 0 0 | Cs2g24360.1 | 5.84 | 0 | 0    | 2 | MASCOT | T      | PLEX8 |       |
| 2.08E-02 | 0 0 | Cs2g24360.1 | 5.84 | 0 | 0    | 2 | MASCOT | T      |       |       |
| 1.42E-02 | 0 0 | Cs2g24360.1 | 5.84 | 0 | 0    | 2 | MASCOT | T      | PLEX8 |       |
| 1.57E-01 | 0 0 | Cs2g24360.1 | 5.84 | 0 | 0    | 2 | MASCOT | T      |       |       |
| 2.13E-02 | 0 0 | Cs2g24360.1 | 5.84 | 0 | 0    | 2 | MASCOT | T      | PLEX8 |       |
| 3.49E-03 | 0 0 | Cs2g24360.1 | 5.84 | 0 | 0    | 2 | MASCOT | T      |       |       |
| 1.76E-01 | 0 0 | Cs2g24360.1 | 5.84 | 0 | 0    | 2 | MASCOT | T      | PLEX8 |       |
| 1.74E-01 | 0 0 | Cs2g24360.1 | 5.84 | 0 | 0    | 2 | MASCOT | T      | PLEX8 |       |
| 2.62E-02 | 0 0 | Cs2g24360.1 | 5.84 | 0 | 0    | 2 | MASCOT | T      | PLEX8 |       |
| 9.02E-04 | 0 0 | Cs2g24360.1 | 5.84 | 0 | 0    | 2 | MASCOT | T      | PLEX8 |       |
| 3.14E-01 | 0 0 | Cs2g24360.1 | 5.84 | 0 | 0    | 2 | MASCOT | T      | PLEX8 |       |
| 5.64E-03 | 0 0 | Cs2g24360.1 | 5.84 | 0 | 0    | 2 | MASCOT | T      | PLEX8 |       |
| 1.16E-01 | 0 0 | Cs2g24360.1 | 5.84 | 0 | 0    | 2 | MASCOT | T      | PLEX8 |       |
| 1.69E-01 | 0 0 | Cs2g24360.1 | 5.84 | 0 | 0    | 2 | MASCOT | T      | PLEX8 |       |
| 3.21E-01 | 0 0 | Cs2g24360.1 | 5.84 | 0 | 0    | 2 | MASCOT | T      |       |       |
| 2.56E-01 | 0 0 | Cs2g24360.1 | 5.84 | 0 | 0    | 2 | MASCOT | T      |       |       |
| 3.41E-01 | 0 0 | Cs2g24360.1 | 6    | 0 | 0    | 2 | MASCOT | T      | PLEX8 |       |
| 8.84E-02 | 0 0 | Cs2g24360.1 | 6    | 0 | 0    | 2 | MASCOT | T      | PLEX8 |       |
| 3.35E-01 | 0 0 | Cs2g24360.1 | 6    | 0 | 0    | 2 | MASCOT | T      | PLEX8 |       |
| 4.37E-01 | 0 0 | Cs2g24360.1 | 6    | 0 | 0    | 2 | MASCOT | T      |       |       |
| 3.05E-01 | 0 0 | Cs2g24360.1 | 6    | 0 | 0    | 2 | MASCOT | T      |       |       |
| 5.38E-02 | 0 0 | Cs2g24360.1 | 9.6  | 1 | 15.9 | 0 | 2      | MASCOT | T     | PLEX8 |
| 6.86E-02 | 0 0 | Cs2g24360.1 | 9.6  | 1 | 0    | 2 | MASCOT | T      | PLEX8 |       |
| 3.90E-02 | 0 0 | Cs2g24360.1 | 9.6  | 1 | 0    | 2 | MASCOT | T      |       |       |
| 1.15E-01 | 0 0 | Cs2g24360.1 | 6.11 | 1 | 0    | 2 | MASCOT | T      | PLEX8 |       |
| 1.12E-01 | 0 0 | Cs2g24360.1 | 6.11 | 1 | 0    | 2 | MASCOT | T      | PLEX8 |       |
| 1.01E-01 | 0 0 | Cs2g24360.1 | 6.11 | 1 | 0    | 2 | MASCOT | T      | PLEX8 |       |
| 1.45E-02 | 0 0 | Cs2g24360.1 | 5.88 | 0 | 0    | 2 | MASCOT | T      | PLEX8 |       |
| 1.79E-05 | 0 0 | Cs2g24360.1 | 5.88 | 0 | 0    | 2 | MASCOT | T      | PLEX8 |       |
| 2.60E-02 | 0 0 | Cs2g24360.1 | 5.88 | 0 | 0    | 2 | MASCOT | T      | PLEX8 |       |
| 1.04E-03 | 0 0 | Cs2g24360.1 | 5.88 | 0 | 0    | 2 | MASCOT | T      | PLEX8 |       |
| 8.20E-04 | 0 0 | Cs2g24360.1 | 5.88 | 0 | 0    | 2 | MASCOT | T      | PLEX8 |       |
| 8.16E-03 | 0 0 | Cs2g24360.1 | 5.88 | 0 | 0    | 2 | MASCOT | T      |       |       |
| 3.38E-03 | 0 0 | Cs2g24360.1 | 5.88 | 0 | 0    | 2 | MASCOT | T      | PLEX8 |       |
| 1.43E-03 | 0 0 | Cs2g24360.1 | 5.88 | 0 | 0    | 2 | MASCOT | T      | PLEX8 |       |
| 2.99E-05 | 0 0 | Cs2g24360.1 | 5.88 | 0 | 0    | 2 | MASCOT | T      |       |       |
| 1.07E-02 | 0 0 | Cs2g24360.1 | 4.14 | 0 | 0    | 2 | MASCOT | T      | PLEX8 |       |
| 2.09E-01 | 0 0 | Cs2g24360.1 | 4.14 | 0 | 0    | 2 | MASCOT | T      | PLEX8 |       |
| 1.74E-02 | 0 0 | Cs2g24360.1 | 4.14 | 0 | 0    | 2 | MASCOT | T      | PLEX8 |       |
| 1.09E-02 | 0 0 | Cs2g24360.1 | 4.14 | 0 | 0    | 2 | MASCOT | T      |       |       |
| 5.27E-02 | 0 0 | Cs2g24360.1 | 6.74 | 0 | 0    | 2 | MASCOT | T      | PLEX8 |       |
| 6.04E-02 | 0 0 | Cs2g24360.1 | 6.74 | 0 | 0    | 2 | MASCOT | T      | PLEX8 |       |
| 5.60E-04 | 0 0 | Cs2g24360.1 | 6.74 | 0 | 0    | 2 | MASCOT | T      | PLEX8 |       |
| 4.33E-02 | 0 0 | Cs2g24360.1 | 6.74 | 0 | 0    | 2 | MASCOT | T      | PLEX8 |       |
| 4.72E-03 | 0 0 | Cs2g24360.1 | 6.74 | 0 | 0    | 2 | MASCOT | T      | PLEX8 |       |
| 2.30E-04 | 0 0 | Cs2g24360.1 | 6.74 | 0 | 0    | 2 | MASCOT | T      | PLEX8 |       |
| 6.50E-03 | 0 0 | Cs2g24360.1 | 6.74 | 0 | 0    | 2 | MASCOT | T      | PLEX8 |       |
| 2.99E-03 | 0 0 | Cs2g24360.1 | 6.74 | 0 | 0    | 2 | MASCOT | T      | PLEX8 |       |
| 3.01E-03 | 0 0 | Cs2g24360.1 | 6.74 | 0 | 0    | 2 | MASCOT | T      | PLEX8 |       |

|              |             |      |   |   |          |   |       |
|--------------|-------------|------|---|---|----------|---|-------|
| 2.18E-03 0 0 | Cs2g24360.1 | 6.74 | 0 | 0 | 2 MASCOT | T | PLEX8 |
| 4.36E-04 0 0 | Cs2g24360.1 | 6.74 | 0 | 0 | 2 MASCOT | T | PLEX8 |
| 2.19E-03 0 0 | Cs2g24360.1 | 6.74 | 0 | 0 | 2 MASCOT | T | PLEX8 |
| 4.74E-02 0 0 | Cs2g24360.1 | 6.74 | 0 | 0 | 2 MASCOT | T | PLEX8 |
| 2.79E-04 0 0 | Cs2g24360.1 | 6.74 | 0 | 0 | 2 MASCOT | T | PLEX8 |
| 1.29E-01 0 0 | Cs2g24360.1 | 6.74 | 0 | 0 | 2 MASCOT | T | PLEX8 |
| 1.48E-04 0 0 | Cs2g24360.1 | 6.74 | 0 | 0 | 2 MASCOT | T | PLEX8 |
| 2.65E-04 0 0 | Cs2g24360.1 | 6.74 | 0 | 0 | 2 MASCOT | T | PLEX8 |
| 1.69E-02 0 0 | Cs2g24360.1 | 6.74 | 0 | 0 | 2 MASCOT | T | PLEX8 |
| 2.52E-04 0 0 | Cs2g24360.1 | 6.74 | 0 | 0 | 2 MASCOT | T | PLEX8 |
| 1.27E-03 0 0 | Cs2g24360.1 | 6.74 | 0 | 0 | 2 MASCOT | T | PLEX8 |
| 8.30E-05 0 0 | Cs2g24360.1 | 6.74 | 0 | 0 | 2 MASCOT | T | PLEX8 |
| 5.54E-03 0 0 | Cs2g24360.1 | 6.74 | 0 | 0 | 2 MASCOT | T | PLEX8 |
| 3.74E-02 0 0 | Cs2g24360.1 | 6.74 | 0 | 0 | 2 MASCOT | T | PLEX8 |
| 1.38E-02 0 0 | Cs2g24360.1 | 6.74 | 0 | 0 | 2 MASCOT | T | PLEX8 |
| 1.31E-01 0 0 | Cs2g24360.1 | 6.74 | 0 | 0 | 2 MASCOT | T | PLEX8 |
| 3.11E-03 0 0 | Cs2g24360.1 | 6.74 | 0 | 0 | 2 MASCOT | T | PLEX8 |
| 8.78E-04 0 0 | Cs2g24360.1 | 6.74 | 0 | 0 | 2 MASCOT | T | PLEX8 |
| 4.89E-03 0 0 | Cs2g24360.1 | 6.74 | 0 | 0 | 2 MASCOT | T | PLEX8 |
| 2.12E-04 0 0 | Cs2g24360.1 | 6.74 | 0 | 0 | 2 MASCOT | T | PLEX8 |
| 1.09E-02 0 0 | Cs2g24360.1 | 6.74 | 0 | 0 | 2 MASCOT | T | PLEX8 |
| 2.09E-04 0 0 | Cs2g24360.1 | 6.74 | 0 | 0 | 2 MASCOT | T | PLEX8 |
| 2.06E-04 0 0 | Cs2g24360.1 | 6.74 | 0 | 0 | 2 MASCOT | T | PLEX8 |
| 2.90E-02 0 0 | Cs2g24360.1 | 6.74 | 0 | 0 | 2 MASCOT | T | PLEX8 |
| 6.38E-03 0 0 | Cs2g24360.1 | 6.74 | 0 | 0 | 2 MASCOT | T | PLEX8 |
| 1.59E-02 0 0 | Cs2g24360.1 | 6.74 | 0 | 0 | 2 MASCOT | T | PLEX8 |
| 1.83E-03 0 0 | Cs2g24360.1 | 6.74 | 0 | 0 | 2 MASCOT | T | PLEX8 |
| 3.28E-01 0 0 | Cs2g24360.1 | 6.74 | 0 | 0 | 2 MASCOT | T | PLEX8 |
| 3.29E-02 0 0 | Cs2g24360.1 | 6.74 | 0 | 0 | 2 MASCOT | T | PLEX8 |
| 1.50E-02 0 0 | Cs2g24360.1 | 6.74 | 0 | 0 | 2 MASCOT | T | PLEX8 |
| 5.82E-03 0 0 | Cs2g24360.1 | 6.74 | 0 | 0 | 2 MASCOT | T | PLEX8 |
| 9.01E-03 0 0 | Cs2g24360.1 | 6.74 | 0 | 0 | 2 MASCOT | T | PLEX8 |
| 2.50E-02 0 0 | Cs2g24360.1 | 6.74 | 0 | 0 | 2 MASCOT | T | PLEX8 |
| 2.65E-04 0 0 | Cs2g24360.1 | 6.74 | 0 | 0 | 2 MASCOT | T | PLEX8 |
| 5.62E-03 0 0 | Cs2g24360.1 | 6.74 | 0 | 0 | 2 MASCOT | T | PLEX8 |
| 1.13E-01 0 0 | Cs2g24360.1 | 6.74 | 0 | 0 | 2 MASCOT | T | PLEX8 |
| 5.49E-02 0 0 | Cs2g24360.1 | 4.14 | 0 | 0 | 2 MASCOT | T | PLEX8 |
| 8.14E-02 0 0 | Cs2g24360.1 | 4.14 | 0 | 0 | 2 MASCOT | T | PLEX8 |
| 1.43E-01 0 0 | Cs2g24360.1 | 4.14 | 0 | 0 | 2 MASCOT | T | PLEX8 |
| 2.95E-02 0 0 | Cs2g24360.1 | 4.14 | 0 | 0 | 2 MASCOT | T | PLEX8 |
| 8.32E-02 0 0 | Cs2g24360.1 | 4.14 | 0 | 0 | 2 MASCOT | T | PLEX8 |
| 1.08E-02 0 0 | Cs2g24360.1 | 4.14 | 0 | 0 | 2 MASCOT | T | PLEX8 |
| 7.88E-03 0 0 | Cs2g24360.1 | 4.14 | 0 | 0 | 2 MASCOT | T | PLEX8 |
| 5.34E-02 0 0 | Cs2g24360.1 | 4.14 | 0 | 0 | 2 MASCOT | T | PLEX8 |
| 7.07E-02 0 0 | Cs2g24360.1 | 4.14 | 0 | 0 | 2 MASCOT | T | PLEX8 |
| 3.09E-03 0 0 | Cs2g24360.1 | 4.14 | 0 | 0 | 2 MASCOT | T | PLEX8 |
| 7.02E-02 0 0 | Cs2g24360.1 | 4.14 | 0 | 0 | 2 MASCOT | T | PLEX8 |
| 3.02E-02 0 0 | Cs2g24360.1 | 4.14 | 0 | 0 | 2 MASCOT | T | PLEX8 |
| 3.44E-02 0 0 | Cs2g24360.1 | 4.14 | 0 | 0 | 2 MASCOT | T | PLEX8 |
| 1.76E-01 0 0 | Cs2g24360.1 | 4.14 | 0 | 0 | 2 MASCOT | T | PLEX8 |
| 1.25E-01 0 0 | Cs2g24360.1 | 4.14 | 0 | 0 | 2 MASCOT | T | PLEX8 |

|              |             |      |   |      |          |          |       |       |
|--------------|-------------|------|---|------|----------|----------|-------|-------|
| 6.99E-02 0 0 | Cs2g24360.1 | 4.14 | 0 | 0    | 2 MASCOT | T        | PLEX8 |       |
| 2.10E-01 0 0 | Cs2g24360.1 | 4.14 | 0 | 0    | 2 MASCOT | T        | PLEX8 |       |
| 3.10E-02 0 0 | Cs2g24360.1 | 4.14 | 0 | 0    | 2 MASCOT | T        | PLEX8 |       |
| 8.70E-02 0 0 | Cs2g24360.1 | 4.14 | 0 | 0    | 2 MASCOT | T        | PLEX8 |       |
| 1.22E-01 0 0 | Cs2g24360.1 | 4.14 | 0 | 0    | 2 MASCOT | T        | PLEX8 |       |
| 9.09E-02 0 0 | Cs2g24360.1 | 4.14 | 0 | 0    | 2 MASCOT | T        | PLEX8 |       |
| 1.13E-01 0 0 | Cs2g24360.1 | 4.14 | 0 | 0    | 2 MASCOT | T        |       |       |
| 1.59E-02 0 0 | Cs2g24360.1 | 4.14 | 0 | 0    | 2 MASCOT | T        |       |       |
| 3.80E-01 0 0 | Cs2g24360.1 | 4.14 | 0 | 0    | 2 MASCOT | T        |       |       |
| 1.01E-01 0 0 | Cs2g24360.1 | 4.14 | 0 | 0    | 2 MASCOT | T        | PLEX8 |       |
| 4.50E-02 0 0 | Cs2g24360.1 | 4.14 | 0 | 0    | 2 MASCOT | T        | PLEX8 |       |
| 3.28E-01 0 0 | Cs2g24360.1 | 4.14 | 0 | 0    | 2 MASCOT | T        |       |       |
| 3.88E-03 0 0 | Cs2g24360.1 | 4.14 | 0 | 15.9 | 0        | 2 MASCOT | T     |       |
| 7.46E-03 0 0 | Cs2g24360.1 | 4.14 | 0 | 15.9 | 0        | 2 MASCOT | T     |       |
| 1.92E-04 0 0 | Cs2g24360.1 | 4.14 | 0 | 0    | 2 MASCOT | T        |       |       |
| 9.41E-02 0 0 | Cs2g24360.1 | 5.84 | 0 | 15.9 | 0        | 2 MASCOT | T     | PLEX8 |
| 2.03E-01 0 0 | Cs2g24360.1 | 5.84 | 0 | 0    | 2 MASCOT | T        | PLEX8 |       |
| 1.30E-01 0 0 | Cs2g24360.1 | 5.84 | 0 | 0    | 2 MASCOT | T        | PLEX8 |       |
| 3.24E-01 0 0 | Cs2g24360.1 | 5.84 | 0 | 0    | 2 MASCOT | T        |       |       |
| 2.22E-01 0 0 | Cs2g24360.1 | 5.84 | 0 | 0    | 2 MASCOT | T        | PLEX8 |       |
| 3.42E-01 0 0 | Cs2g24360.1 | 5.84 | 0 | 0    | 2 MASCOT | T        | PLEX8 |       |
| 6.37E-06 0 0 | Cs2g24360.1 | 3.77 | 0 | 0    | 2 MASCOT | T        |       |       |
| 1.88E-01 0 0 | Cs2g24360.1 | 8.47 | 0 | 0    | 2 MASCOT | T        | PLEX8 |       |
| 6.15E-02 0 0 | Cs2g24360.1 | 8.47 | 0 | 0    | 2 MASCOT | T        | PLEX8 |       |
| 2.30E-02 0 0 | Cs2g24360.1 | 8.47 | 0 | 0    | 2 MASCOT | T        | PLEX8 |       |
| 1.00E-03 0 0 | Cs2g24360.1 | 8.47 | 0 | 0    | 2 MASCOT | T        | PLEX8 |       |
| 7.56E-02 0 0 | Cs2g24360.1 | 8.47 | 0 | 0    | 2 MASCOT | T        | PLEX8 |       |
| 1.12E-01 0 0 | Cs2g24360.1 | 8.47 | 0 | 0    | 2 MASCOT | T        | PLEX8 |       |
| 2.96E-02 0 0 | Cs2g24360.1 | 8.47 | 0 | 0    | 2 MASCOT | T        | PLEX8 |       |
| 3.56E-02 0 0 | Cs2g24360.1 | 8.47 | 0 | 0    | 2 MASCOT | T        | PLEX8 |       |
| 1.24E-01 0 0 | Cs2g24360.1 | 8.47 | 0 | 0    | 2 MASCOT | T        | PLEX8 |       |
| 2.04E-01 0 0 | Cs2g24360.1 | 8.47 | 0 | 0    | 2 MASCOT | T        | PLEX8 |       |
| 1.85E-02 0 0 | Cs2g24360.1 | 8.47 | 0 | 0    | 2 MASCOT | T        | PLEX8 |       |
| 1.09E-01 0 0 | Cs2g24360.1 | 8.47 | 0 | 0    | 2 MASCOT | T        | PLEX8 |       |
| 1.79E-03 0 0 | Cs2g24360.1 | 8.47 | 0 | 0    | 2 MASCOT | T        | PLEX8 |       |
| 2.32E-02 0 0 | Cs2g24360.1 | 8.47 | 0 | 0    | 2 MASCOT | T        | PLEX8 |       |
| 5.11E-02 0 0 | Cs2g24360.1 | 8.47 | 0 | 0    | 2 MASCOT | T        | PLEX8 |       |
| 1.06E-01 0 0 | Cs2g24360.1 | 8.47 | 0 | 0    | 2 MASCOT | T        |       |       |
| 1.84E-03 0 0 | Cs2g24360.1 | 8.47 | 0 | 0    | 2 MASCOT | T        |       |       |
| 1.20E-02 0 0 | Cs2g24360.1 | 8.47 | 0 | 0    | 2 MASCOT | T        | PLEX8 |       |
| 3.70E-01 0 0 | Cs2g24360.1 | 8.47 | 0 | 0    | 2 MASCOT | T        | PLEX8 |       |
| 1.96E-03 0 0 | Cs2g24360.1 | 8.47 | 0 | 0    | 2 MASCOT | T        | PLEX8 |       |
| 1.22E-01 0 0 | Cs2g24360.1 | 8.47 | 0 | 0    | 2 MASCOT | T        | PLEX8 |       |
| 1.63E-01 0 0 | Cs2g24360.1 | 8.47 | 0 | 0    | 2 MASCOT | T        | PLEX8 |       |
| 2.62E-01 0 0 | Cs2g24360.1 | 8.47 | 0 | 0    | 2 MASCOT | T        | PLEX8 |       |
| 9.98E-04 0 0 | Cs2g24360.1 | 8.47 | 0 | 0    | 2 MASCOT | T        | PLEX8 |       |
| 8.09E-03 0 0 | Cs2g24360.1 | 8.47 | 0 | 0    | 2 MASCOT | T        | PLEX8 |       |
| 5.67E-02 0 0 | Cs2g24360.1 | 8.47 | 0 | 0    | 2 MASCOT | T        | PLEX8 |       |
| 5.10E-02 0 0 | Cs2g24360.1 | 8.47 | 0 | 0    | 2 MASCOT | T        | PLEX8 |       |
| 1.05E-02 0 0 | Cs2g24360.1 | 8.47 | 0 | 0    | 2 MASCOT | T        | PLEX8 |       |
| 8.66E-03 0 0 | Cs2g24360.1 | 8.47 | 0 | 0    | 2 MASCOT | T        | PLEX8 |       |

|              |                      |      |        |   |          |   |       |
|--------------|----------------------|------|--------|---|----------|---|-------|
| 2.14E-02 0 0 | Cs2g24360.1          | 8.47 | 0      | 0 | 2 MASCOT | T | PLEX8 |
| 9.65E-03 0 0 | Cs2g24360.1          | 8.47 | 0      | 0 | 2 MASCOT | T | PLEX8 |
| 7.83E-02 0 0 | Cs2g24360.1          | 8.47 | 0      | 0 | 2 MASCOT | T | PLEX8 |
| 9.86E-03 0 0 | Cs2g24360.1          | 8.47 | 0      | 0 | 2 MASCOT | T | PLEX8 |
| 1.44E-01 0 0 | Cs2g24360.1          | 8.47 | 0      | 0 | 2 MASCOT | T |       |
| 8.58E-02 0 0 | Cs2g24360.1          | 8.47 | 0      | 0 | 2 MASCOT | T |       |
| 2.97E-03 0 0 | Cs2g24360.1          | 8.47 | 0      | 0 | 2 MASCOT | T |       |
| 9.00E-03 0 0 | Cs2g24360.1          | 8.47 | 0      | 0 | 2 MASCOT | T |       |
| 3.72E-03 0 0 | Cs2g24360.1          | 8.47 | 0      | 0 | 2 MASCOT | T |       |
| 2.96E-03 0 0 | Cs2g24360.1          | 8.47 | 0      | 0 | 2 MASCOT | T |       |
| 6.44E-02 0 0 | Cs2g24360.1          | 8.47 | 0      | 0 | 2 MASCOT | T |       |
| 8.74E-03 0 0 | Cs2g24360.1 ! Cs7g10 | 4.53 | 0 15.9 | 0 | 2 MASCOT | T | PLEX8 |
| 4.79E-03 0 0 | Cs2g24360.1 ! Cs7g10 | 4.53 | 0 15.9 | 0 | 2 MASCOT | T | PLEX8 |
| 1.24E-02 0 0 | Cs2g24360.1 ! Cs7g10 | 4.53 | 0 15.9 | 0 | 2 MASCOT | T | PLEX8 |
| 1.23E-02 0 0 | Cs2g24360.1 ! Cs7g10 | 4.53 | 0 15.9 | 0 | 2 MASCOT | T | PLEX8 |
| 7.35E-03 0 0 | Cs2g24360.1 ! Cs7g10 | 4.53 | 0 15.9 | 0 | 2 MASCOT | T | PLEX8 |
| 1.47E-02 0 0 | Cs2g24360.1 ! Cs7g10 | 4.53 | 0 15.9 | 0 | 2 MASCOT | T | PLEX8 |
| 7.32E-03 0 0 | Cs2g24360.1 ! Cs7g10 | 4.53 | 0 15.9 | 0 | 2 MASCOT | T | PLEX8 |
| 2.03E-02 0 0 | Cs2g24360.1 ! Cs7g10 | 4.53 | 0 15.9 | 0 | 2 MASCOT | T | PLEX8 |
| 3.53E-03 0 0 | Cs2g24360.1 ! Cs7g10 | 4.53 | 0 15.9 | 0 | 2 MASCOT | T | PLEX8 |
| 4.99E-03 0 0 | Cs2g24360.1 ! Cs7g10 | 4.53 | 0 15.9 | 0 | 2 MASCOT | T | PLEX8 |
| 1.10E-02 0 0 | Cs2g24360.1 ! Cs7g10 | 4.53 | 0 15.9 | 0 | 2 MASCOT | T | PLEX8 |
| 1.86E-02 0 0 | Cs2g24360.1 ! Cs7g10 | 4.53 | 0 15.9 | 0 | 2 MASCOT | T | PLEX8 |
| 1.31E-02 0 0 | Cs2g24360.1 ! Cs7g10 | 4.53 | 0 15.9 | 0 | 2 MASCOT | T | PLEX8 |
| 2.63E-02 0 0 | Cs2g24360.1 ! Cs7g10 | 4.53 | 0 15.9 | 0 | 2 MASCOT | T | PLEX8 |
| 1.43E-02 0 0 | Cs2g24360.1 ! Cs7g10 | 4.53 | 0 15.9 | 0 | 2 MASCOT | T | PLEX8 |
| 2.80E-02 0 0 | Cs2g24360.1 ! Cs7g10 | 4.53 | 0 15.9 | 0 | 2 MASCOT | T | PLEX8 |
| 3.44E-02 0 0 | Cs2g24360.1 ! Cs7g10 | 4.53 | 0 15.9 | 0 | 2 MASCOT | T | PLEX8 |
| 9.90E-03 0 0 | Cs2g24360.1 ! Cs7g10 | 4.53 | 0 15.9 | 0 | 2 MASCOT | T | PLEX8 |
| 7.68E-04 0 0 | Cs2g24360.1 ! Cs7g10 | 4.53 | 0 15.9 | 0 | 2 MASCOT | T | PLEX8 |
| 2.16E-03 0 0 | Cs2g24360.1 ! Cs7g10 | 4.53 | 0 15.9 | 0 | 2 MASCOT | T |       |
| 3.38E-02 0 0 | Cs2g24360.1 ! Cs7g10 | 4.53 | 0 15.9 | 0 | 2 MASCOT | T | PLEX8 |
| 1.01E-02 0 0 | Cs2g24360.1 ! Cs7g10 | 4.53 | 0 15.9 | 0 | 2 MASCOT | T | PLEX8 |
| 1.34E-02 0 0 | Cs2g24360.1 ! Cs7g10 | 4.53 | 0 15.9 | 0 | 2 MASCOT | T | PLEX8 |
| 1.28E-02 0 0 | Cs2g24360.1 ! Cs7g10 | 4.53 | 0 15.9 | 0 | 2 MASCOT | T | PLEX8 |
| 1.09E-02 0 0 | Cs2g24360.1 ! Cs7g10 | 4.53 | 0 15.9 | 0 | 2 MASCOT | T | PLEX8 |
| 1.47E-03 0 0 | Cs2g24360.1 ! Cs7g10 | 4.53 | 0 15.9 | 0 | 2 MASCOT | T | PLEX8 |
| 2.55E-04 0 0 | Cs2g24360.1 ! Cs7g10 | 4.53 | 0 15.9 | 0 | 2 MASCOT | T |       |
| 1.22E-02 0 0 | Cs2g24360.1 ! Cs7g10 | 4.53 | 0 15.9 | 0 | 2 MASCOT | T |       |
| 1.50E-02 0 0 | Cs2g24360.1 ! Cs7g10 | 4.53 | 0 15.9 | 0 | 2 MASCOT | T |       |
| 1.90E-02 0 0 | Cs2g24360.1 ! Cs7g10 | 4.53 | 0 15.9 | 0 | 2 MASCOT | T | PLEX8 |
| 3.33E-02 0 0 | Cs2g24360.1 ! Cs7g10 | 4.53 | 0 15.9 | 0 | 2 MASCOT | T | PLEX8 |
| 3.95E-04 0 0 | Cs2g24360.1 ! Cs7g10 | 4.53 | 0 15.9 | 0 | 2 MASCOT | T | PLEX8 |
| 1.62E-02 0 0 | Cs2g24360.1 ! Cs7g10 | 4.53 | 0 15.9 | 0 | 2 MASCOT | T |       |
| 3.31E-02 0 0 | Cs2g24360.1 ! Cs7g10 | 4.53 | 0 15.9 | 0 | 2 MASCOT | T |       |
| 1.55E-03 0 0 | Cs2g24360.1 ! Cs7g10 | 4.53 | 0 15.9 | 0 | 2 MASCOT | T |       |
| 3.59E-02 0 0 | Cs2g24360.1 ! Cs7g10 | 4.53 | 0 15.9 | 0 | 2 MASCOT | T | PLEX8 |
| 1.26E-02 0 0 | Cs2g24360.1 ! Cs7g10 | 4.53 | 0 15.9 | 0 | 2 MASCOT | T | PLEX8 |
| 9.98E-03 0 0 | Cs2g24360.1 ! Cs7g10 | 4.53 | 0 15.9 | 0 | 2 MASCOT | T | PLEX8 |
| 1.35E-02 0 0 | Cs2g24360.1 ! Cs7g10 | 4.53 | 0 15.9 | 0 | 2 MASCOT | T | PLEX8 |
| 8.05E-03 0 0 | Cs2g24360.1 ! Cs7g10 | 4.53 | 0 15.9 | 0 | 2 MASCOT | T |       |



|          |     |                      |      |   |      |   |   |        |   |       |
|----------|-----|----------------------|------|---|------|---|---|--------|---|-------|
| 5.72E-03 | 0 0 | Cs2g24360.1 ! Cs7g10 | 4.53 | 0 | 15.9 | 0 | 2 | MASCOT | T |       |
| 1.58E-02 | 0 0 | Cs2g24360.1 ! Cs7g10 | 4.53 | 0 | 15.9 | 0 | 2 | MASCOT | T | PLEX8 |
| 6.22E-03 | 0 0 | Cs2g24360.1 ! Cs7g10 | 4.53 | 0 | 15.9 | 0 | 2 | MASCOT | T | PLEX8 |
| 6.17E-03 | 0 0 | Cs2g24360.1 ! Cs7g10 | 4.53 | 0 | 15.9 | 0 | 2 | MASCOT | T | PLEX8 |
| 2.54E-02 | 0 0 | Cs2g24360.1 ! Cs7g10 | 4.53 | 0 | 15.9 | 0 | 2 | MASCOT | T | PLEX8 |
| 2.16E-02 | 0 0 | Cs2g24360.1 ! Cs7g10 | 4.53 | 0 | 15.9 | 0 | 2 | MASCOT | T | PLEX8 |
| 7.31E-03 | 0 0 | Cs2g24360.1 ! Cs7g10 | 4.53 | 0 | 15.9 | 0 | 2 | MASCOT | T | PLEX8 |
| 1.97E-02 | 0 0 | Cs2g24360.1 ! Cs7g10 | 4.53 | 0 | 15.9 | 0 | 2 | MASCOT | T | PLEX8 |
| 3.06E-02 | 0 0 | Cs2g24360.1 ! Cs7g10 | 4.53 | 0 | 15.9 | 0 | 2 | MASCOT | T | PLEX8 |
| 1.77E-02 | 0 0 | Cs2g24360.1 ! Cs7g10 | 4.53 | 0 | 15.9 | 0 | 2 | MASCOT | T | PLEX8 |
| 9.56E-03 | 0 0 | Cs2g24360.1 ! Cs7g10 | 4.53 | 0 | 15.9 | 0 | 2 | MASCOT | T | PLEX8 |
| 1.44E-02 | 0 0 | Cs2g24360.1 ! Cs7g10 | 4.53 | 0 | 15.9 | 0 | 2 | MASCOT | T | PLEX8 |
| 3.69E-02 | 0 0 | Cs2g24360.1 ! Cs7g10 | 4.53 | 0 | 15.9 | 0 | 2 | MASCOT | T | PLEX8 |
| 3.46E-03 | 0 0 | Cs2g24360.1 ! Cs7g10 | 4.53 | 0 | 15.9 | 0 | 2 | MASCOT | T | PLEX8 |
| 3.49E-02 | 0 0 | Cs2g24360.1 ! Cs7g10 | 4.53 | 0 | 15.9 | 0 | 2 | MASCOT | T | PLEX8 |
| 3.85E-02 | 0 0 | Cs2g24360.1 ! Cs7g10 | 4.53 | 0 | 15.9 | 0 | 2 | MASCOT | T | PLEX8 |
| 1.02E-03 | 0 0 | Cs2g24360.1 ! Cs7g10 | 4.53 | 0 | 15.9 | 0 | 2 | MASCOT | T | PLEX8 |
| 2.57E-03 | 0 0 | Cs2g24360.1 ! Cs7g10 | 4.53 | 0 | 15.9 | 0 | 2 | MASCOT | T |       |
| 1.97E-02 | 0 0 | Cs2g24360.1 ! Cs7g10 | 4.53 | 0 | 15.9 | 0 | 2 | MASCOT | T |       |
| 1.02E-02 | 0 0 | Cs2g24360.1 ! Cs7g10 | 4.53 | 0 | 15.9 | 0 | 2 | MASCOT | T |       |
| 2.35E-02 | 0 0 | Cs2g24360.1 ! Cs7g10 | 4.53 | 0 | 15.9 | 0 | 2 | MASCOT | T | PLEX8 |
| 7.34E-04 | 0 0 | Cs2g24360.1 ! Cs7g10 | 4.53 | 0 | 15.9 | 0 | 2 | MASCOT | T | PLEX8 |
| 1.74E-03 | 0 0 | Cs2g24360.1 ! Cs7g10 | 4.53 | 0 | 15.9 | 0 | 2 | MASCOT | T | PLEX8 |
| 4.40E-03 | 0 0 | Cs2g24360.1 ! Cs7g10 | 4.53 | 0 | 15.9 | 0 | 2 | MASCOT | T | PLEX8 |
| 8.21E-04 | 0 0 | Cs2g24360.1 ! Cs7g10 | 4.53 | 0 | 15.9 | 0 | 2 | MASCOT | T | PLEX8 |
| 2.00E-02 | 0 0 | Cs2g24360.1 ! Cs7g10 | 4.53 | 0 |      | 0 | 2 | MASCOT | T | PLEX8 |
| 2.85E-03 | 0 0 | Cs2g24360.1 ! Cs7g10 | 4.53 | 0 |      | 0 | 2 | MASCOT | T | PLEX8 |
| 2.31E-03 | 0 0 | Cs2g24360.1 ! Cs7g10 | 4.53 | 0 |      | 0 | 2 | MASCOT | T | PLEX8 |
| 5.23E-05 | 0 0 | Cs2g24360.1 ! Cs7g10 | 4.53 | 0 |      | 0 | 2 | MASCOT | T | PLEX8 |
| 5.76E-03 | 0 0 | Cs2g24360.1 ! Cs7g10 | 4.53 | 0 |      | 0 | 2 | MASCOT | T | PLEX8 |
| 3.44E-03 | 0 0 | Cs2g24360.1 ! Cs7g10 | 4.53 | 0 |      | 0 | 2 | MASCOT | T | PLEX8 |
| 2.85E-03 | 0 0 | Cs2g24360.1 ! Cs7g10 | 4.53 | 0 |      | 0 | 2 | MASCOT | T | PLEX8 |
| 2.13E-03 | 0 0 | Cs2g24360.1 ! Cs7g10 | 4.53 | 0 |      | 0 | 2 | MASCOT | T | PLEX8 |
| 1.12E-02 | 0 0 | Cs2g24360.1 ! Cs7g10 | 4.53 | 0 |      | 0 | 2 | MASCOT | T | PLEX8 |
| 3.47E-03 | 0 0 | Cs2g24360.1 ! Cs7g10 | 4.53 | 0 |      | 0 | 2 | MASCOT | T | PLEX8 |
| 1.91E-02 | 0 0 | Cs2g24360.1 ! Cs7g10 | 4.53 | 0 |      | 0 | 2 | MASCOT | T | PLEX8 |
| 6.12E-03 | 0 0 | Cs2g24360.1 ! Cs7g10 | 4.53 | 0 |      | 0 | 2 | MASCOT | T | PLEX8 |
| 3.87E-03 | 0 0 | Cs2g24360.1 ! Cs7g10 | 4.53 | 0 |      | 0 | 2 | MASCOT | T | PLEX8 |
| 2.81E-02 | 0 0 | Cs2g24360.1 ! Cs7g10 | 4.53 | 0 |      | 0 | 2 | MASCOT | T | PLEX8 |
| 3.93E-02 | 0 0 | Cs2g24360.1 ! Cs7g10 | 4.53 | 0 |      | 0 | 2 | MASCOT | T | PLEX8 |
| 2.06E-02 | 0 0 | Cs2g24360.1 ! Cs7g10 | 4.53 | 0 |      | 0 | 2 | MASCOT | T | PLEX8 |
| 3.62E-02 | 0 0 | Cs2g24360.1 ! Cs7g10 | 4.53 | 0 |      | 0 | 2 | MASCOT | T | PLEX8 |
| 1.40E-03 | 0 0 | Cs2g24360.1 ! Cs7g10 | 4.53 | 0 |      | 0 | 2 | MASCOT | T | PLEX8 |
| 1.06E-04 | 0 0 | Cs2g24360.1 ! Cs7g10 | 4.53 | 0 |      | 0 | 2 | MASCOT | T | PLEX8 |
| 1.22E-03 | 0 0 | Cs2g24360.1 ! Cs7g10 | 4.53 | 0 |      | 0 | 2 | MASCOT | T | PLEX8 |
| 1.92E-03 | 0 0 | Cs2g24360.1 ! Cs7g10 | 4.53 | 0 |      | 0 | 2 | MASCOT | T | PLEX8 |
| 3.48E-04 | 0 0 | Cs2g24360.1 ! Cs7g10 | 4.53 | 0 |      | 0 | 2 | MASCOT | T | PLEX8 |
| 3.35E-03 | 0 0 | Cs2g24360.1 ! Cs7g10 | 4.53 | 0 |      | 0 | 2 | MASCOT | T | PLEX8 |
| 3.92E-02 | 0 0 | Cs2g24360.1 ! Cs7g10 | 4.53 | 0 |      | 0 | 2 | MASCOT | T | PLEX8 |
| 3.18E-03 | 0 0 | Cs2g24360.1 ! Cs7g10 | 4.53 | 0 |      | 0 | 2 | MASCOT | T | PLEX8 |
| 4.96E-02 | 0 0 | Cs2g24360.1 ! Cs7g10 | 4.53 | 0 |      | 0 | 2 | MASCOT | T | PLEX8 |

|          |     |                      |      |   |      |   |        |        |       |       |
|----------|-----|----------------------|------|---|------|---|--------|--------|-------|-------|
| 3.11E-02 | 0 0 | Cs2g24360.1 ! Cs7g10 | 4.53 | 0 | 0    | 2 | MASCOT | T      | PLEX8 |       |
| 4.10E-03 | 0 0 | Cs2g24360.1 ! Cs7g10 | 4.53 | 0 | 0    | 2 | MASCOT | T      | PLEX8 |       |
| 5.61E-02 | 0 0 | Cs2g24360.1 ! Cs7g10 | 4.53 | 0 | 0    | 2 | MASCOT | T      |       |       |
| 3.33E-02 | 0 0 | Cs2g24360.1 ! Cs7g10 | 4.53 | 0 | 0    | 2 | MASCOT | T      |       |       |
| 3.78E-04 | 0 0 | Cs2g24360.1 ! Cs7g10 | 4.53 | 0 | 0    | 2 | MASCOT | T      |       |       |
| 2.93E-04 | 0 0 | Cs2g24360.1 ! Cs7g10 | 4.53 | 0 | 0    | 2 | MASCOT | T      |       |       |
| 1.37E-02 | 0 0 | Cs2g24360.1 ! Cs7g10 | 4.53 | 0 | 0    | 2 | MASCOT | T      | PLEX8 |       |
| 3.27E-03 | 0 0 | Cs2g24360.1          | 4.53 | 0 | 15.9 | 0 | 2      | MASCOT | T     | PLEX8 |
| 1.18E-02 | 0 0 | Cs2g24360.1          | 4.53 | 0 | 15.9 | 0 | 2      | MASCOT | T     | PLEX8 |
| 1.53E-01 | 0 0 | Cs2g24360.1          | 4.53 | 0 | 15.9 | 0 | 2      | MASCOT | T     | PLEX8 |
| 6.23E-02 | 0 0 | Cs2g24360.1          | 4.53 | 0 | 15.9 | 0 | 2      | MASCOT | T     | PLEX8 |
| 1.41E-01 | 0 0 | Cs2g24360.1          | 4.53 | 0 | 15.9 | 0 | 2      | MASCOT | T     | PLEX8 |
| 5.30E-03 | 0 0 | Cs2g24360.1          | 4.53 | 0 | 15.9 | 0 | 2      | MASCOT | T     | PLEX8 |
| 5.83E-02 | 0 0 | Cs2g24360.1          | 4.53 | 0 | 15.9 | 0 | 2      | MASCOT | T     | PLEX8 |
| 8.47E-03 | 0 0 | Cs2g24360.1          | 4.53 | 0 | 15.9 | 0 | 2      | MASCOT | T     | PLEX8 |
| 1.92E-02 | 0 0 | Cs2g24360.1          | 4.53 | 0 | 15.9 | 0 | 2      | MASCOT | T     | PLEX8 |
| 6.10E-02 | 0 0 | Cs2g24360.1          | 4.53 | 0 | 15.9 | 0 | 2      | MASCOT | T     | PLEX8 |
| 1.33E-01 | 0 0 | Cs2g24360.1          | 4.53 | 0 | 15.9 | 0 | 2      | MASCOT | T     | PLEX8 |
| 3.70E-02 | 0 0 | Cs2g24360.1          | 4.53 | 0 | 15.9 | 0 | 2      | MASCOT | T     | PLEX8 |
| 3.27E-01 | 0 0 | Cs2g24360.1          | 4.53 | 0 | 15.9 | 0 | 2      | MASCOT | T     | PLEX8 |
| 7.36E-02 | 0 0 | Cs2g24360.1          | 4.53 | 0 | 15.9 | 0 | 2      | MASCOT | T     | PLEX8 |
| 1.46E-01 | 0 0 | Cs2g24360.1          | 4.53 | 0 | 15.9 | 0 | 2      | MASCOT | T     | PLEX8 |
| 2.51E-02 | 0 0 | Cs2g24360.1          | 4.53 | 0 | 15.9 | 0 | 2      | MASCOT | T     | PLEX8 |
| 3.78E-02 | 0 0 | Cs2g24360.1          | 4.53 | 0 | 15.9 | 0 | 2      | MASCOT | T     | PLEX8 |
| 3.65E-02 | 0 0 | Cs2g24360.1          | 4.53 | 0 | 15.9 | 0 | 2      | MASCOT | T     | PLEX8 |
| 4.01E-02 | 0 0 | Cs2g24360.1          | 4.53 | 0 | 15.9 | 0 | 2      | MASCOT | T     | PLEX8 |
| 7.47E-02 | 0 0 | Cs2g24360.1          | 4.53 | 0 | 15.9 | 0 | 2      | MASCOT | T     | PLEX8 |
| 1.06E-01 | 0 0 | Cs2g24360.1          | 4.53 | 0 | 15.9 | 0 | 2      | MASCOT | T     | PLEX8 |
| 2.18E-01 | 0 0 | Cs2g24360.1          | 4.53 | 0 | 15.9 | 0 | 2      | MASCOT | T     | PLEX8 |
| 1.62E-01 | 0 0 | Cs2g24360.1          | 4.53 | 0 | 15.9 | 0 | 2      | MASCOT | T     | PLEX8 |
| 1.94E-03 | 0 0 | Cs2g24360.1          | 4.53 | 0 | 15.9 | 0 | 2      | MASCOT | T     | PLEX8 |
| 5.49E-02 | 0 0 | Cs2g24360.1          | 4.53 | 0 | 15.9 | 0 | 2      | MASCOT | T     | PLEX8 |
| 2.70E-02 | 0 0 | Cs2g24360.1          | 4.53 | 0 | 15.9 | 0 | 2      | MASCOT | T     |       |
| 9.66E-02 | 0 0 | Cs2g24360.1          | 4.53 | 0 | 15.9 | 0 | 2      | MASCOT | T     | PLEX8 |
| 1.40E-01 | 0 0 | Cs2g24360.1          | 4.53 | 0 | 15.9 | 0 | 2      | MASCOT | T     | PLEX8 |
| 1.98E-02 | 0 0 | Cs2g24360.1          | 4.53 | 0 | 15.9 | 0 | 2      | MASCOT | T     | PLEX8 |
| 1.57E-01 | 0 0 | Cs2g24360.1          | 4.53 | 0 | 15.9 | 0 | 2      | MASCOT | T     | PLEX8 |
| 1.09E-02 | 0 0 | Cs2g24360.1          | 4.53 | 0 | 15.9 | 0 | 2      | MASCOT | T     | PLEX8 |
| 1.97E-02 | 0 0 | Cs2g24360.1          | 4.53 | 0 | 15.9 | 0 | 2      | MASCOT | T     | PLEX8 |
| 6.99E-02 | 0 0 | Cs2g24360.1          | 4.53 | 0 | 15.9 | 0 | 2      | MASCOT | T     | PLEX8 |
| 8.48E-03 | 0 0 | Cs2g24360.1          | 4.53 | 0 | 15.9 | 0 | 2      | MASCOT | T     | PLEX8 |
| 1.19E-01 | 0 0 | Cs2g24360.1          | 4.53 | 0 | 15.9 | 0 | 2      | MASCOT | T     | PLEX8 |
| 1.25E-01 | 0 0 | Cs2g24360.1          | 4.53 | 0 | 15.9 | 0 | 2      | MASCOT | T     | PLEX8 |
| 5.98E-03 | 0 0 | Cs2g24360.1          | 4.53 | 0 | 15.9 | 0 | 2      | MASCOT | T     | PLEX8 |
| 3.58E-01 | 0 0 | Cs2g24360.1          | 4.53 | 0 | 15.9 | 0 | 2      | MASCOT | T     | PLEX8 |
| 4.60E-01 | 0 0 | Cs2g24360.1          | 4.53 | 0 | 15.9 | 0 | 2      | MASCOT | T     | PLEX8 |
| 8.71E-03 | 0 0 | Cs2g24360.1          | 4.53 | 0 | 15.9 | 0 | 2      | MASCOT | T     | PLEX8 |
| 3.95E-02 | 0 0 | Cs2g24360.1          | 4.53 | 0 | 15.9 | 0 | 2      | MASCOT | T     | PLEX8 |
| 3.31E-01 | 0 0 | Cs2g24360.1          | 4.53 | 0 | 15.9 | 0 | 2      | MASCOT | T     | PLEX8 |
| 3.99E-02 | 0 0 | Cs2g24360.1          | 4.53 | 0 | 15.9 | 0 | 2      | MASCOT | T     | PLEX8 |
| 1.84E-01 | 0 0 | Cs2g24360.1          | 4.53 | 0 | 15.9 | 0 | 2      | MASCOT | T     |       |

|              |             |      |   |   |          |   |       |
|--------------|-------------|------|---|---|----------|---|-------|
| 2.18E-01 0 0 | Cs2g24360.1 | 4.53 | 0 | 0 | 2 MASCOT | T | PLEX8 |
| 2.20E-02 0 0 | Cs2g24360.1 | 4.53 | 0 | 0 | 2 MASCOT | T | PLEX8 |
| 2.12E-03 0 0 | Cs2g24360.1 | 4.53 | 0 | 0 | 2 MASCOT | T | PLEX8 |
| 2.20E-02 0 0 | Cs2g24360.1 | 4.53 | 0 | 0 | 2 MASCOT | T | PLEX8 |
| 1.97E-03 0 0 | Cs2g24360.1 | 4.53 | 0 | 0 | 2 MASCOT | T | PLEX8 |
| 3.36E-01 0 0 | Cs2g24360.1 | 4.53 | 0 | 0 | 2 MASCOT | T | PLEX8 |
| 2.28E-01 0 0 | Cs2g24360.1 | 4.53 | 0 | 0 | 2 MASCOT | T | PLEX8 |
| 2.47E-03 0 0 | Cs2g24360.1 | 4.53 | 0 | 0 | 2 MASCOT | T | PLEX8 |
| 1.29E-03 0 0 | Cs2g24360.1 | 4.53 | 0 | 0 | 2 MASCOT | T | PLEX8 |
| 2.17E-02 0 0 | Cs2g24360.1 | 4.53 | 0 | 0 | 2 MASCOT | T | PLEX8 |
| 2.98E-03 0 0 | Cs2g24360.1 | 4.53 | 0 | 0 | 2 MASCOT | T | PLEX8 |
| 3.08E-02 0 0 | Cs2g24360.1 | 4.53 | 0 | 0 | 2 MASCOT | T | PLEX8 |
| 4.33E-01 0 0 | Cs2g24360.1 | 4.53 | 0 | 0 | 2 MASCOT | T | PLEX8 |
| 7.83E-02 0 0 | Cs2g24360.1 | 4.53 | 0 | 0 | 2 MASCOT | T | PLEX8 |
| 2.24E-03 0 0 | Cs2g24360.1 | 4.53 | 0 | 0 | 2 MASCOT | T | PLEX8 |
| 2.20E-02 0 0 | Cs2g24360.1 | 4.53 | 0 | 0 | 2 MASCOT | T | PLEX8 |
| 3.14E-03 0 0 | Cs2g24360.1 | 4.53 | 0 | 0 | 2 MASCOT | T | PLEX8 |
| 2.69E-04 0 0 | Cs2g24360.1 | 4.53 | 0 | 0 | 2 MASCOT | T | PLEX8 |
| 3.49E-02 0 0 | Cs2g24360.1 | 4.53 | 0 | 0 | 2 MASCOT | T | PLEX8 |
| 6.11E-02 0 0 | Cs2g24360.1 | 4.53 | 0 | 0 | 2 MASCOT | T | PLEX8 |
| 5.08E-03 0 0 | Cs2g24360.1 | 4.53 | 0 | 0 | 2 MASCOT | T | PLEX8 |
| 7.06E-02 0 0 | Cs2g24360.1 | 4.53 | 0 | 0 | 2 MASCOT | T | PLEX8 |
| 9.82E-04 0 0 | Cs2g24360.1 | 4.53 | 0 | 0 | 2 MASCOT | T | PLEX8 |
| 2.71E-01 0 0 | Cs2g24360.1 | 4.53 | 0 | 0 | 2 MASCOT | T | PLEX8 |
| 1.37E-02 0 0 | Cs2g24360.1 | 4.53 | 0 | 0 | 2 MASCOT | T | PLEX8 |
| 2.13E-01 0 0 | Cs2g24360.1 | 4.53 | 0 | 0 | 2 MASCOT | T | PLEX8 |
| 4.89E-04 0 0 | Cs2g24360.1 | 4.53 | 0 | 0 | 2 MASCOT | T | PLEX8 |
| 8.01E-03 0 0 | Cs2g24360.1 | 4.53 | 0 | 0 | 2 MASCOT | T | PLEX8 |
| 7.44E-03 0 0 | Cs2g24360.1 | 4.53 | 0 | 0 | 2 MASCOT | T | PLEX8 |
| 2.11E-03 0 0 | Cs2g24360.1 | 4.53 | 0 | 0 | 2 MASCOT | T | PLEX8 |
| 8.25E-03 0 0 | Cs2g24360.1 | 4.53 | 0 | 0 | 2 MASCOT | T |       |
| 2.49E-01 0 0 | Cs2g24360.1 | 4.53 | 0 | 0 | 2 MASCOT | T | PLEX8 |
| 1.58E-03 0 0 | Cs2g24360.1 | 4.53 | 0 | 0 | 2 MASCOT | T | PLEX8 |
| 2.28E-03 0 0 | Cs2g24360.1 | 4.53 | 0 | 0 | 2 MASCOT | T | PLEX8 |
| 1.36E-03 0 0 | Cs2g24360.1 | 4.53 | 0 | 0 | 2 MASCOT | T | PLEX8 |
| 2.08E-03 0 0 | Cs2g24360.1 | 4.53 | 0 | 0 | 2 MASCOT | T | PLEX8 |
| 2.92E-01 0 0 | Cs2g24360.1 | 4.53 | 0 | 0 | 2 MASCOT | T | PLEX8 |
| 3.29E-03 0 0 | Cs2g24360.1 | 4.53 | 0 | 0 | 2 MASCOT | T | PLEX8 |
| 3.04E-01 0 0 | Cs2g24360.1 | 4.53 | 0 | 0 | 2 MASCOT | T | PLEX8 |
| 3.13E-02 0 0 | Cs2g24360.1 | 4.53 | 0 | 0 | 2 MASCOT | T | PLEX8 |
| 9.03E-05 0 0 | Cs2g24360.1 | 4.53 | 0 | 0 | 2 MASCOT | T | PLEX8 |
| 3.08E-03 0 0 | Cs2g24360.1 | 4.53 | 0 | 0 | 2 MASCOT | T | PLEX8 |
| 2.57E-02 0 0 | Cs2g24360.1 | 4.53 | 0 | 0 | 2 MASCOT | T | PLEX8 |
| 1.43E-02 0 0 | Cs2g24360.1 | 4.53 | 0 | 0 | 2 MASCOT | T | PLEX8 |
| 4.43E-02 0 0 | Cs2g24360.1 | 4.53 | 0 | 0 | 2 MASCOT | T | PLEX8 |
| 4.81E-03 0 0 | Cs2g24360.1 | 4.53 | 0 | 0 | 2 MASCOT | T | PLEX8 |
| 1.97E-03 0 0 | Cs2g24360.1 | 4.53 | 0 | 0 | 2 MASCOT | T | PLEX8 |
| 1.07E-01 0 0 | Cs2g24360.1 | 4.53 | 0 | 0 | 2 MASCOT | T | PLEX8 |
| 1.40E-03 0 0 | Cs2g24360.1 | 4.53 | 0 | 0 | 2 MASCOT | T | PLEX8 |
| 8.44E-02 0 0 | Cs2g24360.1 | 4.53 | 0 | 0 | 2 MASCOT | T |       |
| 2.14E-02 0 0 | Cs6g15430.1 | 6.05 | 0 | 0 | 2 MASCOT | T | PLEX8 |

|              |                     |      |   |   |          |   |       |
|--------------|---------------------|------|---|---|----------|---|-------|
| 3.16E-04 0 0 | Cs6g15430.1         | 6.05 | 0 | 0 | 2 MASCOT | T | PLEX8 |
| 1.71E-05 0 0 | Cs6g15430.1         | 6.05 | 0 | 0 | 2 MASCOT | T | PLEX8 |
| 2.23E-04 0 0 | Cs6g15430.1         | 6.05 | 0 | 0 | 2 MASCOT | T | PLEX8 |
| 1.83E-05 0 0 | Cs6g15430.1         | 6.05 | 0 | 0 | 2 MASCOT | T | PLEX8 |
| 1.12E-03 0 0 | Cs6g15430.1         | 6.05 | 0 | 0 | 2 MASCOT | T | PLEX8 |
| 3.99E-02 0 0 | Cs6g15430.1         | 6.05 | 0 | 0 | 2 MASCOT | T | PLEX8 |
| 1.34E-04 0 0 | Cs6g15430.1         | 6.05 | 0 | 0 | 2 MASCOT | T | PLEX8 |
| 1.75E-05 0 0 | Cs6g15430.1         | 6.05 | 0 | 0 | 2 MASCOT | T | PLEX8 |
| 1.20E-01 0 0 | Cs6g15430.1         | 6.05 | 0 | 0 | 2 MASCOT | T | PLEX8 |
| 2.91E-03 0 0 | Cs6g15430.1         | 6.05 | 0 | 0 | 2 MASCOT | T | PLEX8 |
| 3.24E-03 0 0 | Cs6g15430.1         | 6.05 | 0 | 0 | 2 MASCOT | T | PLEX8 |
| 4.26E-02 0 0 | Cs6g15430.1         | 9.8  | 0 | 0 | 2 MASCOT | T | PLEX8 |
| 9.27E-02 0 0 | Cs6g15430.1         | 4.37 | 0 | 0 | 2 MASCOT | T | PLEX8 |
| 1.86E-02 0 0 | Cs6g15430.1         | 4.37 | 0 | 0 | 2 MASCOT | T | PLEX8 |
| 1.72E-02 0 0 | Cs6g15430.1         | 6.1  | 0 | 0 | 2 MASCOT | T | PLEX8 |
| 1.14E-02 0 0 | Cs6g15430.1         | 6.1  | 0 | 0 | 2 MASCOT | T | PLEX8 |
| 1.05E-01 0 0 | Cs6g15430.1         | 6.1  | 0 | 0 | 2 MASCOT | T | PLEX8 |
| 7.29E-02 0 0 | Cs6g15430.1         | 6.1  | 0 | 0 | 2 MASCOT | T | PLEX8 |
| 1.12E-01 0 0 | Cs6g15430.1         | 6.1  | 0 | 0 | 2 MASCOT | T | PLEX8 |
| 6.02E-02 0 0 | Cs6g15430.1         | 6.1  | 0 | 0 | 2 MASCOT | T | PLEX8 |
| 1.11E-01 0 0 | Cs6g15430.1         | 6.1  | 0 | 0 | 2 MASCOT | T | PLEX8 |
| 4.16E-02 0 0 | Cs6g15430.1         | 6.1  | 0 | 0 | 2 MASCOT | T | PLEX8 |
| 1.87E-02 0 0 | Cs6g15430.1         | 6.1  | 0 | 0 | 2 MASCOT | T | PLEX8 |
| 5.50E-02 0 0 | Cs6g15430.1         | 6.1  | 0 | 0 | 2 MASCOT | T | PLEX8 |
| 1.45E-01 0 0 | Cs6g15430.1         | 6.1  | 0 | 0 | 2 MASCOT | T | PLEX8 |
| 1.82E-01 0 0 | Cs6g15430.1         | 6.1  | 0 | 0 | 2 MASCOT | T | PLEX8 |
| 1.69E-06 0 0 | Cs6g15430.1         | 4.65 | 0 | 0 | 2 MASCOT | T | PLEX8 |
| 7.80E-07 0 0 | Cs6g15430.1         | 4.65 | 0 | 0 | 2 MASCOT | T | PLEX8 |
| 3.57E-07 0 0 | Cs6g15430.1         | 4.65 | 0 | 0 | 2 MASCOT | T | PLEX8 |
| 2.90E-07 0 0 | Cs6g15430.1         | 4.65 | 0 | 0 | 2 MASCOT | T | PLEX8 |
| 3.22E-01 0 0 | Cs4g08150.1/Cs4g081 | 4.37 | 0 | 0 | 2 MASCOT | T | PLEX8 |
| 2.72E-04 0 0 | Cs4g08150.1/Cs4g081 | 4.37 | 0 | 0 | 2 MASCOT | T | PLEX8 |
| 3.59E-03 0 0 | Cs4g08150.1/Cs4g081 | 4.37 | 0 | 0 | 2 MASCOT | T | PLEX8 |
| 1.50E-04 0 0 | Cs4g08150.1/Cs4g081 | 4.37 | 0 | 0 | 2 MASCOT | T | PLEX8 |
| 3.51E-03 0 0 | Cs4g08150.1/Cs4g081 | 4.37 | 0 | 0 | 2 MASCOT | T | PLEX8 |
| 2.91E-06 0 0 | Cs4g08150.1/Cs4g081 | 4.37 | 0 | 0 | 2 MASCOT | T | PLEX8 |
| 2.67E-06 0 0 | Cs4g08150.1/Cs4g081 | 4.37 | 0 | 0 | 2 MASCOT | T | PLEX8 |
| 7.46E-02 0 0 | Cs4g08150.1/Cs4g081 | 4.37 | 0 | 0 | 2 MASCOT | T | PLEX8 |
| 5.40E-03 0 0 | Cs4g08150.1/Cs4g081 | 4.37 | 0 | 0 | 2 MASCOT | T | PLEX8 |
| 2.82E-03 0 0 | Cs4g08150.1/Cs4g081 | 4.37 | 0 | 0 | 2 MASCOT | T | PLEX8 |
| 2.75E-01 0 0 | Cs6g15430.1         | 8.59 | 0 | 0 | 2 MASCOT | T | PLEX8 |
| 2.76E-02 0 0 | Cs6g15430.1         | 8.59 | 0 | 0 | 2 MASCOT | T | PLEX8 |
| 7.64E-02 0 0 | Cs6g15430.1         | 8.59 | 0 | 0 | 2 MASCOT | T | PLEX8 |
| 6.33E-02 0 0 | Cs6g15430.1         | 8.59 | 0 | 0 | 2 MASCOT | T | PLEX8 |
| 1.62E-02 0 0 | Cs6g15430.1         | 8.59 | 0 | 0 | 2 MASCOT | T | PLEX8 |
| 3.26E-02 0 0 | Cs6g15430.1         | 8.59 | 0 | 0 | 2 MASCOT | T | PLEX8 |
| 3.90E-01 0 0 | Cs6g15430.1         | 8.59 | 0 | 0 | 2 MASCOT | T | PLEX8 |
| 1.86E-02 0 0 | Cs6g15430.1         | 8.59 | 0 | 0 | 2 MASCOT | T | PLEX8 |
| 6.40E-02 0 0 | Cs6g15430.1         | 8.59 | 0 | 0 | 2 MASCOT | T | PLEX8 |
| 9.81E-03 0 0 | Cs6g15430.1         | 5.32 | 0 | 0 | 2 MASCOT | T | PLEX8 |
| 1.89E-01 0 0 | Cs6g15430.1         | 5.32 | 0 | 0 | 2 MASCOT | T | PLEX8 |

|              |                      |      |        |   |          |   |       |
|--------------|----------------------|------|--------|---|----------|---|-------|
| 2.99E-03 0 0 | Cs6g15430.1          | 5.32 | 0      | 0 | 2 MASCOT | T | PLEX8 |
| 2.44E-01 0 0 | Cs6g15430.1          | 5.32 | 0      | 0 | 2 MASCOT | T | PLEX8 |
| 2.07E-02 0 0 | Cs6g15430.1          | 5.32 | 0      | 0 | 2 MASCOT | T | PLEX8 |
| 7.04E-03 0 0 | Cs6g15430.1          | 5.32 | 0      | 0 | 2 MASCOT | T | PLEX8 |
| 4.42E-04 0 0 | Cs6g15430.1          | 5.32 | 0      | 0 | 2 MASCOT | T | PLEX8 |
| 8.84E-04 0 0 | Cs6g15430.1          | 5.32 | 0      | 0 | 2 MASCOT | T | PLEX8 |
| 3.20E-02 0 0 | Cs6g15430.1          | 5.32 | 0      | 0 | 2 MASCOT | T | PLEX8 |
| 3.70E-03 0 0 | Cs6g15430.1          | 5.32 | 0      | 0 | 2 MASCOT | T |       |
| 4.13E-05 0 0 | Cs6g15430.1          | 5.32 | 0      | 0 | 2 MASCOT | T |       |
| 1.12E-01 0 0 | Cs6g15430.1          | 4.37 | 0      | 0 | 2 MASCOT | T | PLEX8 |
| 2.26E-01 0 0 | Cs6g15430.1          | 4.37 | 0      | 0 | 2 MASCOT | T | PLEX8 |
| 3.63E-01 0 0 | Cs6g15430.1          | 4.37 | 0      | 0 | 2 MASCOT | T | PLEX8 |
| 1.04E-01 0 0 | Cs6g15430.1          | 4.37 | 0      | 0 | 2 MASCOT | T | PLEX8 |
| 1.05E-01 0 0 | Cs6g15430.1          | 4.37 | 0      | 0 | 2 MASCOT | T | PLEX8 |
| 1.32E-01 0 0 | Cs6g15430.1          | 4.37 | 0      | 0 | 2 MASCOT | T |       |
| 5.27E-01 0 0 | Cs6g15430.1          | 4.37 | 0      | 0 | 2 MASCOT | T |       |
| 3.19E-01 0 0 | Cs6g15430.1          | 4.37 | 0      | 0 | 2 MASCOT | T |       |
| 1.64E-02 0 0 | Cs4g08150.1 ! Cs6g15 | 8.8  | 0      | 0 | 2 MASCOT | T | PLEX8 |
| 9.06E-02 0 0 | Cs4g08150.1 ! Cs6g15 | 8.8  | 0      | 0 | 2 MASCOT | T | PLEX8 |
| 2.30E-01 0 0 | Cs4g08150.1 ! Cs6g15 | 8.8  | 0      | 0 | 2 MASCOT | T | PLEX8 |
| 8.43E-02 0 0 | Cs4g08150.1 ! Cs6g15 | 8.8  | 0      | 0 | 2 MASCOT | T | PLEX8 |
| 2.53E-02 0 0 | Cs4g08150.1 ! Cs6g15 | 8.8  | 0      | 0 | 2 MASCOT | T | PLEX8 |
| 2.83E-01 0 0 | Cs4g08150.1 ! Cs6g15 | 8.8  | 0      | 0 | 2 MASCOT | T | PLEX8 |
| 2.36E-01 0 0 | Cs4g08150.1 ! Cs6g15 | 8.8  | 0      | 0 | 2 MASCOT | T | PLEX8 |
| 1.42E-01 0 0 | Cs4g08150.1 ! Cs6g15 | 8.8  | 0      | 0 | 2 MASCOT | T | PLEX8 |
| 1.03E-01 0 0 | Cs4g08150.1 ! Cs6g15 | 8.8  | 0      | 0 | 2 MASCOT | T |       |
| 1.36E-01 0 0 | Cs6g15430.1          | 4.53 | 0      | 0 | 2 MASCOT | T |       |
| 2.04E-04 0 0 | Cs6g15430.1          | 4.53 | 0      | 0 | 2 MASCOT | T |       |
| 8.44E-04 0 0 | Cs6g15430.1          | 4.53 | 0      | 0 | 2 MASCOT | T |       |
| 1.39E-02 0 0 | Cs6g15430.1          | 6.14 | 1      | 0 | 2 MASCOT | T | PLEX8 |
| 3.61E-02 0 0 | Cs6g15430.1          | 8.75 | 0 15.9 | 0 | 2 MASCOT | T | PLEX8 |
| 1.87E-02 0 0 | Cs6g15430.1          | 8.75 | 0 15.9 | 0 | 2 MASCOT | T | PLEX8 |
| 3.38E-01 0 0 | Cs6g15430.1          | 8.75 | 0 15.9 | 0 | 2 MASCOT | T | PLEX8 |
| 6.05E-02 0 0 | Cs6g15430.1          | 8.75 | 0      | 0 | 2 MASCOT | T | PLEX8 |
| 6.14E-02 0 0 | Cs6g15430.1          | 8.75 | 0      | 0 | 2 MASCOT | T | PLEX8 |
| 2.47E-02 0 0 | Cs6g15430.1          | 8.75 | 0      | 0 | 2 MASCOT | T | PLEX8 |
| 3.96E-01 0 0 | Cs6g15430.1          | 8.75 | 0      | 0 | 2 MASCOT | T | PLEX8 |
| 1.73E-02 0 0 | Cs6g15430.1          | 8.75 | 0      | 0 | 2 MASCOT | T | PLEX8 |
| 1.06E-01 0 0 | Cs6g15430.1          | 8.75 | 0      | 0 | 2 MASCOT | T | PLEX8 |
| 1.66E-02 0 0 | Cs6g15430.1          | 8.75 | 0      | 0 | 2 MASCOT | T | PLEX8 |
| 3.93E-03 0 0 | Cs6g15430.1          | 8.75 | 0      | 0 | 2 MASCOT | T | PLEX8 |
| 9.40E-02 0 0 | Cs6g15430.1          | 8.75 | 0      | 0 | 2 MASCOT | T |       |
| 1.91E-01 0 0 | Cs6g15430.1          | 8.17 | 0      | 0 | 2 MASCOT | T | PLEX8 |
| 3.59E-02 0 0 | Cs6g15430.1          | 8.17 | 0      | 0 | 2 MASCOT | T | PLEX8 |
| 1.47E-01 0 0 | Cs6g15430.1          | 8.17 | 0      | 0 | 2 MASCOT | T | PLEX8 |
| 9.48E-02 0 0 | Cs6g15430.1          | 8.17 | 0      | 0 | 2 MASCOT | T | PLEX8 |
| 3.46E-02 0 0 | Cs6g15430.1          | 8.17 | 0      | 0 | 2 MASCOT | T | PLEX8 |
| 5.39E-02 0 0 | Cs6g15430.1          | 8.17 | 0      | 0 | 2 MASCOT | T |       |
| 1.39E-01 0 0 | Cs6g15430.1          | 8.17 | 0      | 0 | 2 MASCOT | T |       |
| 2.05E-01 0 0 | Cs6g15430.1          | 8.17 | 0      | 0 | 2 MASCOT | T | PLEX8 |
| 9.99E-02 0 0 | Cs6g15430.1          | 8.17 | 0      | 0 | 2 MASCOT | T | PLEX8 |

|              |                      |      |   |      |   |        |        |       |       |
|--------------|----------------------|------|---|------|---|--------|--------|-------|-------|
| 4.77E-02 0 0 | Cs6g15430.1          | 8.17 | 0 | 0    | 2 | MASCOT | T      | PLEX8 |       |
| 3.50E-02 0 0 | Cs6g15430.1          | 8.17 | 0 | 0    | 2 | MASCOT | T      | PLEX8 |       |
| 5.60E-02 0 0 | Cs6g15430.1          | 8.17 | 0 | 0    | 2 | MASCOT | T      |       |       |
| 3.24E-02 0 0 | Cs6g15430.1          | 8.17 | 0 | 0    | 2 | MASCOT | T      |       |       |
| 3.91E-02 0 0 | Cs4g16390.1/Cs4g195  | 6.05 | 0 | 0    | 2 | MASCOT | T      | PLEX8 |       |
| 5.86E-02 0 0 | Cs4g16390.1/Cs4g163  | 4.53 | 0 | 0    | 2 | MASCOT | T      | PLEX8 |       |
| 4.62E-02 0 0 | Cs4g16390.1/Cs4g163  | 4.53 | 0 | 0    | 2 | MASCOT | T      | PLEX8 |       |
| 9.27E-02 0 0 | Cs4g16390.1/Cs4g163  | 4.53 | 0 | 0    | 2 | MASCOT | T      | PLEX8 |       |
| 3.03E-03 0 0 | Cs4g16390.1/Cs4g163  | 5.99 | 0 | 15.9 | 0 | 2      | MASCOT | T     | PLEX8 |
| 3.63E-02 0 0 | Cs4g16390.1/Cs4g163  | 5.99 | 0 | 15.9 | 0 | 2      | MASCOT | T     | PLEX8 |
| 9.84E-02 0 0 | Cs4g16390.1/Cs4g163  | 5.99 | 0 | 15.9 | 0 | 2      | MASCOT | T     | PLEX8 |
| 3.88E-02 0 0 | Cs4g16390.1/Cs4g163  | 5.99 | 0 | 15.9 | 0 | 2      | MASCOT | T     | PLEX8 |
| 1.04E-02 0 0 | Cs4g16390.1/Cs4g163  | 5.99 | 0 | 15.9 | 0 | 2      | MASCOT | T     | PLEX8 |
| 5.06E-03 0 0 | Cs4g16390.1/Cs4g163  | 5.99 | 0 | 15.9 | 0 | 2      | MASCOT | T     |       |
| 1.71E-01 0 0 | Cs4g16390.1/Cs4g163  | 5.99 | 0 | 15.9 | 0 | 2      | MASCOT | T     |       |
| 5.14E-03 0 0 | Cs4g16390.1/Cs4g163  | 5.99 | 0 | 15.9 | 0 | 2      | MASCOT | T     | PLEX8 |
| 2.61E-03 0 0 | Cs4g16390.1/Cs4g163  | 5.99 | 0 | 15.9 | 0 | 2      | MASCOT | T     | PLEX8 |
| 4.04E-02 0 0 | Cs4g16390.1/Cs4g163  | 5.99 | 0 | 0    | 2 | MASCOT | T      | PLEX8 |       |
| 4.63E-03 0 0 | Cs4g16390.1/Cs4g163  | 5.99 | 0 | 0    | 2 | MASCOT | T      | PLEX8 |       |
| 3.52E-02 0 0 | Cs4g16390.1/Cs4g163  | 5.99 | 0 | 0    | 2 | MASCOT | T      | PLEX8 |       |
| 5.94E-03 0 0 | Cs4g16390.1/Cs4g163  | 5.99 | 0 | 0    | 2 | MASCOT | T      | PLEX8 |       |
| 4.16E-02 0 0 | Cs4g16390.1/Cs4g163  | 5.99 | 0 | 0    | 2 | MASCOT | T      | PLEX8 |       |
| 3.79E-03 0 0 | Cs4g16390.1/Cs4g163  | 5.99 | 0 | 0    | 2 | MASCOT | T      | PLEX8 |       |
| 1.26E-01 0 0 | Cs4g16390.1/Cs4g163  | 5.99 | 0 | 0    | 2 | MASCOT | T      | PLEX8 |       |
| 1.28E-01 0 0 | Cs4g16390.1/Cs4g163  | 5.99 | 0 | 0    | 2 | MASCOT | T      | PLEX8 |       |
| 6.23E-02 0 0 | Cs4g16390.1/Cs4g163  | 5.99 | 0 | 0    | 2 | MASCOT | T      | PLEX8 |       |
| 7.83E-02 0 0 | Cs4g16390.1/Cs4g163  | 5.99 | 0 | 0    | 2 | MASCOT | T      | PLEX8 |       |
| 3.70E-02 0 0 | Cs4g16390.1/Cs4g163  | 5.99 | 0 | 0    | 2 | MASCOT | T      | PLEX8 |       |
| 1.01E-02 0 0 | Cs4g16390.1/Cs4g163  | 5.99 | 0 | 0    | 2 | MASCOT | T      | PLEX8 |       |
| 6.19E-02 0 0 | Cs4g16390.1/Cs4g163  | 5.99 | 0 | 0    | 2 | MASCOT | T      | PLEX8 |       |
| 4.44E-03 0 0 | Cs4g16390.1/Cs4g163  | 5.99 | 0 | 0    | 2 | MASCOT | T      | PLEX8 |       |
| 3.58E-02 0 0 | Cs4g16390.1/Cs4g163  | 5.99 | 0 | 0    | 2 | MASCOT | T      | PLEX8 |       |
| 4.22E-03 0 0 | Cs4g16390.1/Cs4g163  | 5.99 | 0 | 0    | 2 | MASCOT | T      | PLEX8 |       |
| 3.81E-02 0 0 | Cs4g16390.1/Cs4g163  | 5.99 | 0 | 0    | 2 | MASCOT | T      | PLEX8 |       |
| 3.62E-02 0 0 | Cs4g16390.1/Cs4g163  | 5.99 | 0 | 0    | 2 | MASCOT | T      | PLEX8 |       |
| 1.32E-01 0 0 | Cs4g16390.1/Cs4g163  | 5.99 | 0 | 0    | 2 | MASCOT | T      |       |       |
| 3.49E-03 0 0 | Cs4g16390.1/Cs4g163  | 5.99 | 0 | 0    | 2 | MASCOT | T      | PLEX8 |       |
| 1.69E-01 0 0 | Cs4g16390.1/Cs4g163  | 5.99 | 0 | 0    | 2 | MASCOT | T      | PLEX8 |       |
| 6.06E-02 0 0 | Cs4g16390.1/Cs4g163  | 5.99 | 0 | 0    | 2 | MASCOT | T      |       |       |
| 9.64E-04 0 0 | Cs4g16390.1/Cs4g163  | 4.03 | 0 | 0    | 2 | MASCOT | T      | PLEX8 |       |
| 5.39E-04 0 0 | Cs4g16390.1/Cs4g163  | 4.03 | 0 | 0    | 2 | MASCOT | T      | PLEX8 |       |
| 2.24E-02 0 0 | Cs4g16390.1/Cs4g163  | 4.03 | 0 | 0    | 2 | MASCOT | T      | PLEX8 |       |
| 5.93E-02 0 0 | Cs4g16390.1/Cs4g163  | 4.03 | 0 | 0    | 2 | MASCOT | T      |       |       |
| 3.07E-06 0 0 | Cs4g16390.1/Cs4g163  | 4.03 | 0 | 0    | 2 | MASCOT | T      |       |       |
| 1.98E-03 0 0 | Cs4g16390.1/Cs4g163  | 4.03 | 0 | 0    | 2 | MASCOT | T      |       |       |
| 2.28E-03 0 0 | Cs4g16390.1/Cs4g163  | 4.03 | 0 | 0    | 2 | MASCOT | T      |       |       |
| 6.43E-03 0 0 | Cs4g16390.1/orange1. | 4.21 | 0 | 0    | 2 | MASCOT | T      | PLEX8 |       |
| 1.49E-03 0 0 | Cs4g16390.1/orange1. | 4.21 | 0 | 0    | 2 | MASCOT | T      | PLEX8 |       |
| 5.73E-03 0 0 | Cs4g16390.1/orange1. | 4.21 | 0 | 0    | 2 | MASCOT | T      | PLEX8 |       |
| 9.52E-02 0 0 | Cs4g19590.1/Cs4g195  | 4.65 | 0 | 0    | 2 | MASCOT | T      | PLEX8 |       |
| 2.39E-03 0 0 | Cs4g19590.1/Cs4g195  | 4.65 | 0 | 0    | 2 | MASCOT | T      | PLEX8 |       |

|          |     |                     |      |   |      |   |        |        |       |       |
|----------|-----|---------------------|------|---|------|---|--------|--------|-------|-------|
| 1.87E-01 | 0 0 | Cs4g19590.1/Cs4g195 | 4.65 | 0 | 0    | 2 | MASCOT | T      | PLEX8 |       |
| 4.50E-04 | 0 0 | Cs4g19590.1/Cs4g195 | 4.21 | 0 | 0    | 2 | MASCOT | T      | PLEX8 |       |
| 1.44E-03 | 0 0 | Cs4g19590.1/Cs4g195 | 4.21 | 0 | 0    | 2 | MASCOT | T      |       |       |
| 4.74E-02 | 0 0 | Cs4g19590.1/Cs4g195 | 4.54 | 0 | 0    | 2 | MASCOT | T      | PLEX8 |       |
| 4.45E-03 | 0 0 | Cs4g19590.1/Cs4g195 | 4.37 | 0 | 15.9 | 0 | 2      | MASCOT | T     | PLEX8 |
| 4.78E-04 | 0 0 | Cs4g19590.1/Cs4g195 | 4.37 | 0 | 0    | 2 | MASCOT | T      | PLEX8 |       |
| 2.86E-01 | 0 0 | Cs4g19590.1/Cs4g195 | 8.63 | 0 | 0    | 2 | MASCOT | T      |       |       |
| 1.13E-01 | 0 0 | Cs4g16390.1/Cs4g195 | 6.1  | 0 | 0    | 2 | MASCOT | T      | PLEX8 |       |
| 5.29E-03 | 0 0 | Cs4g16390.1/Cs4g195 | 6.1  | 0 | 0    | 2 | MASCOT | T      | PLEX8 |       |
| 2.12E-01 | 0 0 | Cs4g16390.1/Cs4g195 | 6.1  | 0 | 0    | 2 | MASCOT | T      | PLEX8 |       |
| 8.14E-02 | 0 0 | Cs4g16390.1/Cs4g195 | 6.1  | 0 | 0    | 2 | MASCOT | T      | PLEX8 |       |
| 1.29E-01 | 0 0 | Cs4g16390.1/Cs4g195 | 6.1  | 0 | 0    | 2 | MASCOT | T      | PLEX8 |       |
| 1.34E-02 | 0 0 | Cs4g16390.1/Cs4g195 | 6.1  | 0 | 0    | 2 | MASCOT | T      | PLEX8 |       |
| 4.36E-02 | 0 0 | Cs4g16390.1/Cs4g195 | 6.1  | 0 | 0    | 2 | MASCOT | T      | PLEX8 |       |
| 4.19E-02 | 0 0 | Cs4g16390.1/Cs4g195 | 6.1  | 0 | 0    | 2 | MASCOT | T      | PLEX8 |       |
| 2.96E-01 | 0 0 | Cs4g16390.1/Cs4g195 | 6.1  | 0 | 0    | 2 | MASCOT | T      | PLEX8 |       |
| 3.26E-02 | 0 0 | Cs4g16390.1/Cs4g195 | 6.1  | 0 | 0    | 2 | MASCOT | T      | PLEX8 |       |
| 2.61E-01 | 0 0 | Cs4g16390.1/Cs4g195 | 6.1  | 0 | 0    | 2 | MASCOT | T      | PLEX8 |       |
| 1.54E-01 | 0 0 | Cs4g16390.1/Cs4g195 | 6.1  | 0 | 0    | 2 | MASCOT | T      | PLEX8 |       |
| 3.15E-02 | 0 0 | Cs4g16390.1/Cs4g195 | 6.1  | 0 | 0    | 2 | MASCOT | T      |       |       |
| 2.17E-01 | 0 0 | Cs2g02990.1/Cs2g029 | 6.1  | 0 | 0    | 2 | MASCOT | T      | PLEX8 |       |
| 1.18E-01 | 0 0 | Cs2g02990.1/Cs2g029 | 6.1  | 0 | 0    | 2 | MASCOT | T      | PLEX8 |       |
| 1.27E-01 | 0 0 | Cs2g02990.1/Cs2g029 | 6.1  | 0 | 0    | 2 | MASCOT | T      |       |       |
| 8.00E-04 | 0 0 | Cs2g02990.1/Cs2g029 | 6    | 0 | 0    | 2 | MASCOT | T      |       |       |
| 1.42E-01 | 0 0 | Cs2g02990.1/Cs2g029 | 6    | 0 | 0    | 2 | MASCOT | T      |       |       |
| 1.58E-03 | 0 0 | Cs2g02990.1/Cs2g029 | 6    | 0 | 0    | 2 | MASCOT | T      |       |       |
| 7.50E-04 | 0 0 | Cs2g02990.1/Cs2g029 | 6    | 0 | 0    | 2 | MASCOT | T      |       |       |
| 1.37E-01 | 0 0 | Cs4g16390.1/Cs4g163 | 8.52 | 0 | 15.9 | 0 | 2      | MASCOT | T     | PLEX8 |
| 1.29E-01 | 0 0 | Cs4g16390.1/Cs4g163 | 8.52 | 0 | 15.9 | 0 | 2      | MASCOT | T     | PLEX8 |
| 1.32E-01 | 0 0 | Cs4g16390.1/Cs4g163 | 8.52 | 0 | 15.9 | 0 | 2      | MASCOT | T     | PLEX8 |
| 2.17E-01 | 0 0 | Cs4g16390.1/Cs4g163 | 8.52 | 0 | 15.9 | 0 | 2      | MASCOT | T     |       |
| 7.15E-02 | 0 0 | Cs4g16390.1/Cs4g163 | 8.52 | 0 | 15.9 | 0 | 2      | MASCOT | T     | PLEX8 |
| 1.89E-01 | 0 0 | Cs4g16390.1/Cs4g163 | 8.52 | 0 | 15.9 | 0 | 2      | MASCOT | T     | PLEX8 |
| 2.36E-01 | 0 0 | Cs4g16390.1/Cs4g163 | 8.52 | 0 | 15.9 | 0 | 2      | MASCOT | T     | PLEX8 |
| 2.14E-02 | 0 0 | Cs4g16390.1/Cs4g163 | 8.52 | 0 | 0    | 2 | MASCOT | T      | PLEX8 |       |
| 4.31E-01 | 0 0 | Cs4g16390.1/Cs4g163 | 8.52 | 0 | 0    | 2 | MASCOT | T      |       |       |
| 5.53E-02 | 0 0 | Cs4g16390.1/Cs4g163 | 8.52 | 0 | 0    | 2 | MASCOT | T      | PLEX8 |       |
| 2.02E-01 | 0 0 | Cs4g16390.1/Cs4g163 | 8.52 | 0 | 0    | 2 | MASCOT | T      | PLEX8 |       |
| 4.77E-02 | 0 0 | Cs4g16390.1/Cs4g163 | 8.52 | 0 | 0    | 2 | MASCOT | T      |       |       |
| 4.42E-02 | 0 0 | Cs4g16390.1/Cs4g163 | 8.52 | 0 | 0    | 2 | MASCOT | T      | PLEX8 |       |
| 3.84E-06 | 0 0 | Cs2g09790.1/Cs2g097 | 4.53 | 0 | 0    | 2 | MASCOT | T      |       |       |
| 6.26E-02 | 0 0 | Cs2g09790.1/Cs2g097 | 4.53 | 0 | 0    | 2 | MASCOT | T      | PLEX8 |       |
| 8.88E-02 | 0 0 | Cs2g09790.1/Cs2g097 | 6    | 0 | 15.9 | 0 | 2      | MASCOT | T     | PLEX8 |
| 1.57E-02 | 0 0 | Cs2g09790.1/Cs2g097 | 6    | 0 | 15.9 | 0 | 2      | MASCOT | T     | PLEX8 |
| 1.38E-02 | 0 0 | Cs2g09790.1/Cs2g097 | 6    | 0 | 15.9 | 0 | 2      | MASCOT | T     | PLEX8 |
| 2.69E-02 | 0 0 | Cs2g09790.1/Cs2g097 | 6    | 0 | 15.9 | 0 | 2      | MASCOT | T     | PLEX8 |
| 7.26E-02 | 0 0 | Cs2g09790.1/Cs2g097 | 6    | 0 | 15.9 | 0 | 2      | MASCOT | T     | PLEX8 |
| 2.78E-02 | 0 0 | Cs2g09790.1/Cs2g097 | 6    | 0 | 15.9 | 0 | 2      | MASCOT | T     | PLEX8 |
| 5.57E-04 | 0 0 | Cs2g09790.1/Cs2g097 | 6    | 0 | 0    | 2 | MASCOT | T      | PLEX8 |       |
| 2.10E-04 | 0 0 | Cs2g09790.1/Cs2g097 | 6    | 0 | 0    | 2 | MASCOT | T      | PLEX8 |       |
| 1.69E-03 | 0 0 | Cs2g09790.1/Cs2g097 | 6    | 0 | 0    | 2 | MASCOT | T      | PLEX8 |       |

|          |     |                     |      |   |      |   |        |        |       |       |
|----------|-----|---------------------|------|---|------|---|--------|--------|-------|-------|
| 5.32E-01 | 0 0 | Cs2g09790.1/Cs2g097 | 6    | 0 | 0    | 2 | MASCOT | T      | PLEX8 |       |
| 2.57E-01 | 0 0 | Cs2g09790.1/Cs2g097 | 4    | 0 | 0    | 2 | MASCOT | T      | PLEX8 |       |
| 8.73E-02 | 0 0 | Cs2g09790.1/Cs2g097 | 4    | 0 | 0    | 2 | MASCOT | T      | PLEX8 |       |
| 1.18E-02 | 0 0 | Cs2g09790.1/Cs2g097 | 4    | 0 | 0    | 2 | MASCOT | T      | PLEX8 |       |
| 5.24E-02 | 0 0 | Cs2g09790.1/Cs2g097 | 4    | 0 | 0    | 2 | MASCOT | T      | PLEX8 |       |
| 1.11E-03 | 0 0 | Cs2g09790.1/Cs2g097 | 4    | 0 | 0    | 2 | MASCOT | T      | PLEX8 |       |
| 1.13E-02 | 0 0 | Cs2g09790.1/Cs2g097 | 4    | 0 | 0    | 2 | MASCOT | T      | PLEX8 |       |
| 1.27E-01 | 0 0 | Cs2g09790.1/Cs2g097 | 4    | 0 | 0    | 2 | MASCOT | T      | PLEX8 |       |
| 3.53E-03 | 0 0 | Cs2g09790.1/Cs2g097 | 4    | 0 | 0    | 2 | MASCOT | T      | PLEX8 |       |
| 5.17E-03 | 0 0 | Cs2g09790.1/Cs2g097 | 4    | 0 | 0    | 2 | MASCOT | T      | PLEX8 |       |
| 6.08E-02 | 0 0 | Cs2g09790.1/Cs2g097 | 4    | 0 | 0    | 2 | MASCOT | T      | PLEX8 |       |
| 3.43E-03 | 0 0 | Cs2g09790.1/Cs2g097 | 4    | 0 | 0    | 2 | MASCOT | T      | PLEX8 |       |
| 2.26E-01 | 0 0 | Cs2g09790.1/Cs2g097 | 11   | 0 | 0    | 2 | MASCOT | T      | PLEX8 |       |
| 2.26E-01 | 0 0 | Cs2g09790.1/Cs2g097 | 5.59 | 0 | 0    | 2 | MASCOT | T      | PLEX8 |       |
| 1.51E-01 | 0 0 | Cs2g09790.1/Cs2g097 | 5.59 | 0 | 0    | 2 | MASCOT | T      | PLEX8 |       |
| 2.69E-02 | 0 0 | Cs2g09790.1/Cs2g097 | 5.24 | 0 | 0    | 2 | MASCOT | T      |       |       |
| 4.85E-04 | 0 0 | Cs2g09790.1/Cs2g097 | 4.25 | 0 | 0    | 2 | MASCOT | T      |       |       |
| 3.78E-03 | 0 0 | Cs2g09790.1/Cs2g097 | 4.25 | 0 | 0    | 2 | MASCOT | T      |       |       |
| 1.98E-01 | 0 0 | Cs2g09790.1/Cs2g097 | 4.25 | 0 | 0    | 2 | MASCOT | T      |       |       |
| 2.97E-01 | 0 0 | Cs2g09790.1/Cs2g097 | 4.25 | 0 | 0    | 2 | MASCOT | T      | PLEX8 |       |
| 1.52E-01 | 0 0 | Cs2g09790.1/Cs2g097 | 4.25 | 0 | 0    | 2 | MASCOT | T      | PLEX8 |       |
| 4.03E-02 | 0 0 | Cs2g09790.1/Cs2g097 | 8.72 | 0 | 0    | 2 | MASCOT | T      | PLEX8 |       |
| 1.46E-01 | 0 0 | Cs2g09790.1/Cs2g097 | 8.72 | 0 | 0    | 2 | MASCOT | T      | PLEX8 |       |
| 7.88E-02 | 0 0 | Cs2g09790.1/Cs2g097 | 8.72 | 0 | 0    | 2 | MASCOT | T      | PLEX8 |       |
| 9.09E-02 | 0 0 | Cs2g09790.1/Cs2g097 | 8.72 | 0 | 0    | 2 | MASCOT | T      | PLEX8 |       |
| 7.30E-02 | 0 0 | Cs2g09790.1/Cs2g097 | 8.72 | 0 | 0    | 2 | MASCOT | T      | PLEX8 |       |
| 4.56E-03 | 0 0 | Cs2g09790.1/Cs2g097 | 4.21 | 0 | 0    | 2 | MASCOT | T      | PLEX8 |       |
| 3.49E-03 | 0 0 | Cs2g09790.1/Cs2g097 | 4.21 | 0 | 0    | 2 | MASCOT | T      | PLEX8 |       |
| 1.81E-02 | 0 0 | Cs2g09790.1/Cs2g097 | 4.21 | 0 | 0    | 2 | MASCOT | T      | PLEX8 |       |
| 5.10E-03 | 0 0 | Cs2g09790.1/Cs2g097 | 4.21 | 0 | 0    | 2 | MASCOT | T      |       |       |
| 3.87E-02 | 0 0 | Cs2g09790.1/Cs2g097 | 4.21 | 0 | 0    | 2 | MASCOT | T      |       |       |
| 5.28E-02 | 0 0 | Cs2g09790.1/Cs2g097 | 4.21 | 0 | 0    | 2 | MASCOT | T      |       |       |
| 7.30E-02 | 0 0 | Cs2g09790.1/Cs2g097 | 4.21 | 0 | 0    | 2 | MASCOT | T      | PLEX8 |       |
| 9.72E-03 | 0 0 | Cs2g09790.1/Cs2g097 | 4.21 | 0 | 0    | 2 | MASCOT | T      | PLEX8 |       |
| 5.05E-03 | 0 0 | Cs2g09790.1/Cs2g097 | 4.21 | 0 | 0    | 2 | MASCOT | T      | PLEX8 |       |
| 8.80E-02 | 0 0 | Cs2g09790.1/Cs2g097 | 4.21 | 0 | 0    | 2 | MASCOT | T      | PLEX8 |       |
| 6.25E-03 | 0 0 | Cs2g09790.1/Cs2g097 | 4.21 | 0 | 0    | 2 | MASCOT | T      | PLEX8 |       |
| 6.08E-03 | 0 0 | Cs2g09790.1/Cs2g097 | 4.37 | 0 | 0    | 2 | MASCOT | T      | PLEX8 |       |
| 2.38E-01 | 0 0 | Cs2g09790.1/Cs2g097 | 6.73 | 0 | 0    | 2 | MASCOT | T      | PLEX8 |       |
| 1.59E-01 | 0 0 | Cs2g09790.1/Cs2g097 | 6.73 | 0 | 0    | 2 | MASCOT | T      | PLEX8 |       |
| 8.11E-02 | 0 0 | Cs2g09790.1/Cs2g097 | 6.73 | 0 | 0    | 2 | MASCOT | T      | PLEX8 |       |
| 7.77E-02 | 0 0 | Cs2g09790.1/Cs2g097 | 6.73 | 0 | 0    | 2 | MASCOT | T      | PLEX8 |       |
| 2.63E-02 | 0 0 | Cs2g09790.1/Cs2g097 | 6.73 | 0 | 0    | 2 | MASCOT | T      | PLEX8 |       |
| 2.58E-02 | 0 0 | Cs2g09790.1/Cs2g097 | 8.75 | 0 | 0    | 2 | MASCOT | T      | PLEX8 |       |
| 3.61E-01 | 0 0 | Cs2g09790.1/Cs2g097 | 8.75 | 0 | 0    | 2 | MASCOT | T      | PLEX8 |       |
| 2.30E-02 | 0 0 | Cs2g09790.1/Cs2g097 | 8.75 | 0 | 0    | 2 | MASCOT | T      | PLEX8 |       |
| 4.57E-02 | 0 0 | Cs2g09790.1/Cs2g097 | 5.75 | 0 | 15.9 | 0 | 2      | MASCOT | T     | PLEX8 |
| 1.47E-01 | 0 0 | Cs2g09790.1/Cs2g097 | 5.75 | 0 | 15.9 | 0 | 2      | MASCOT | T     | PLEX8 |
| 1.50E-01 | 0 0 | Cs2g09790.1/Cs2g097 | 5.75 | 0 | 15.9 | 0 | 2      | MASCOT | T     | PLEX8 |
| 4.30E-02 | 0 0 | Cs2g09790.1/Cs2g097 | 5.75 | 0 | 15.9 | 0 | 2      | MASCOT | T     | PLEX8 |
| 6.48E-02 | 0 0 | Cs2g09790.1/Cs2g097 | 5.75 | 0 | 15.9 | 0 | 2      | MASCOT | T     | PLEX8 |



|          |     |                     |      |   |   |   |        |   |       |
|----------|-----|---------------------|------|---|---|---|--------|---|-------|
| 6.11E-02 | 0 0 | Cs2g09790.1/Cs2g097 | 5.75 | 0 | 0 | 2 | MASCOT | T | PLEX8 |
| 8.31E-02 | 0 0 | Cs2g09790.1/Cs2g097 | 5.75 | 0 | 0 | 2 | MASCOT | T | PLEX8 |
| 2.52E-01 | 0 0 | Cs2g09790.1/Cs2g097 | 5.75 | 0 | 0 | 2 | MASCOT | T | PLEX8 |
| 1.05E-01 | 0 0 | Cs2g09790.1/Cs2g097 | 5.75 | 0 | 0 | 2 | MASCOT | T | PLEX8 |
| 1.47E-01 | 0 0 | Cs2g09790.1/Cs2g097 | 5.75 | 0 | 0 | 2 | MASCOT | T | PLEX8 |
| 2.03E-02 | 0 0 | Cs2g09790.1/Cs2g097 | 4.21 | 0 | 0 | 2 | MASCOT | T |       |
| 1.57E-01 | 0 0 | Cs2g09790.1/Cs2g097 | 4.21 | 0 | 0 | 2 | MASCOT | T | PLEX8 |
| 1.83E-03 | 0 0 | Cs2g09790.1/Cs2g097 | 4.21 | 0 | 0 | 2 | MASCOT | T | PLEX8 |
| 2.28E-02 | 0 0 | Cs5g09900.1/Cs5g099 | 4.37 | 0 | 0 | 2 | MASCOT | T | PLEX8 |
| 2.77E-03 | 0 0 | Cs5g09900.1/Cs5g099 | 4.37 | 0 | 0 | 2 | MASCOT | T | PLEX8 |
| 1.36E-02 | 0 0 | Cs5g09900.1/Cs5g099 | 4.37 | 0 | 0 | 2 | MASCOT | T | PLEX8 |
| 8.16E-02 | 0 0 | Cs5g09900.1/Cs5g099 | 4.37 | 0 | 0 | 2 | MASCOT | T | PLEX8 |
| 3.62E-01 | 0 0 | Cs5g09900.1/Cs5g099 | 3.92 | 0 | 0 | 2 | MASCOT | T |       |
| 2.94E-03 | 0 0 | Cs5g09900.1/Cs5g099 | 3.92 | 0 | 0 | 2 | MASCOT | T |       |
| 1.44E-02 | 0 0 | Cs5g09900.1/Cs5g099 | 6    | 0 | 0 | 2 | MASCOT | T | PLEX8 |
| 6.93E-03 | 0 0 | Cs5g09900.1/Cs5g099 | 6    | 0 | 0 | 2 | MASCOT | T | PLEX8 |
| 1.13E-02 | 0 0 | Cs5g09900.1/Cs5g099 | 6    | 0 | 0 | 2 | MASCOT | T | PLEX8 |
| 2.70E-02 | 0 0 | Cs5g09900.1/Cs5g099 | 6    | 0 | 0 | 2 | MASCOT | T | PLEX8 |
| 4.46E-02 | 0 0 | Cs5g09900.1/Cs5g099 | 6    | 0 | 0 | 2 | MASCOT | T | PLEX8 |
| 5.22E-03 | 0 0 | Cs5g09900.1/Cs5g099 | 6    | 0 | 0 | 2 | MASCOT | T | PLEX8 |
| 8.18E-02 | 0 0 | Cs5g09900.1/Cs5g099 | 6    | 0 | 0 | 2 | MASCOT | T |       |
| 2.53E-01 | 0 0 | Cs5g09900.1/Cs5g099 | 5.84 | 0 | 0 | 2 | MASCOT | T | PLEX8 |
| 1.72E-03 | 0 0 | Cs5g09900.1/Cs5g099 | 5.32 | 0 | 0 | 2 | MASCOT | T | PLEX8 |
| 1.16E-02 | 0 0 | Cs5g09900.1/Cs5g099 | 5.32 | 0 | 0 | 2 | MASCOT | T | PLEX8 |
| 6.47E-02 | 0 0 | Cs5g09900.1/Cs5g099 | 5.32 | 0 | 0 | 2 | MASCOT | T | PLEX8 |
| 3.04E-04 | 0 0 | Cs5g09900.1/Cs5g099 | 5.32 | 0 | 0 | 2 | MASCOT | T | PLEX8 |
| 2.61E-01 | 0 0 | Cs5g09900.1/Cs5g099 | 8.75 | 0 | 0 | 2 | MASCOT | T | PLEX8 |
| 5.11E-02 | 0 0 | Cs5g09900.1/Cs5g099 | 8.75 | 0 | 0 | 2 | MASCOT | T | PLEX8 |
| 1.63E-02 | 0 0 | Cs5g09900.1/Cs5g099 | 8.75 | 0 | 0 | 2 | MASCOT | T | PLEX8 |
| 2.12E-01 | 0 0 | Cs5g09900.1/Cs5g099 | 8.75 | 0 | 0 | 2 | MASCOT | T | PLEX8 |
| 1.64E-02 | 0 0 | Cs5g09900.1/Cs5g099 | 8.75 | 0 | 0 | 2 | MASCOT | T | PLEX8 |
| 5.24E-02 | 0 0 | Cs5g09900.1/Cs5g099 | 8.75 | 0 | 0 | 2 | MASCOT | T | PLEX8 |
| 2.12E-02 | 0 0 | Cs5g09900.1/Cs5g099 | 8.75 | 0 | 0 | 2 | MASCOT | T | PLEX8 |
| 4.60E-02 | 0 0 | Cs5g09900.1/Cs5g099 | 8.75 | 0 | 0 | 2 | MASCOT | T | PLEX8 |
| 1.35E-02 | 0 0 | Cs5g09900.1/Cs5g099 | 8.75 | 0 | 0 | 2 | MASCOT | T | PLEX8 |
| 6.18E-02 | 0 0 | Cs5g09900.1/Cs5g099 | 8.75 | 0 | 0 | 2 | MASCOT | T | PLEX8 |
| 3.82E-02 | 0 0 | Cs5g09900.1/Cs5g099 | 8.75 | 0 | 0 | 2 | MASCOT | T | PLEX8 |
| 6.41E-02 | 0 0 | Cs5g09900.1/Cs5g099 | 8.75 | 0 | 0 | 2 | MASCOT | T | PLEX8 |
| 1.95E-02 | 0 0 | Cs5g09900.1/Cs5g099 | 4.37 | 0 | 0 | 2 | MASCOT | T |       |
| 2.14E-04 | 0 0 | Cs5g09900.1/Cs5g099 | 4.37 | 0 | 0 | 2 | MASCOT | T |       |
| 7.36E-02 | 0 0 | Cs5g09900.1/Cs5g099 | 4.37 | 0 | 0 | 2 | MASCOT | T |       |
| 9.03E-02 | 0 0 | Cs5g09900.1/Cs5g099 | 4.37 | 0 | 0 | 2 | MASCOT | T |       |
| 1.94E-01 | 0 0 | Cs5g09900.1/Cs5g099 | 5.55 | 0 | 0 | 2 | MASCOT | T |       |
| 1.33E-02 | 0 0 | Cs5g09900.1/Cs5g099 | 5.55 | 0 | 0 | 2 | MASCOT | T |       |
| 9.73E-04 | 0 0 | Cs5g09900.1/Cs5g099 | 5.55 | 0 | 0 | 2 | MASCOT | T |       |
| 5.78E-02 | 0 0 | Cs5g09900.1/Cs5g099 | 5.55 | 0 | 0 | 2 | MASCOT | T |       |
| 1.20E-01 | 0 0 | Cs5g09900.1/Cs5g099 | 5.55 | 0 | 0 | 2 | MASCOT | T |       |
| 1.82E-05 | 0 0 | Cs5g09900.1/Cs5g099 | 5.55 | 0 | 0 | 2 | MASCOT | T |       |
| 6.46E-02 | 0 0 | Cs5g09900.1/Cs5g099 | 5.55 | 0 | 0 | 2 | MASCOT | T |       |
| 1.90E-03 | 0 0 | Cs5g09900.1/Cs5g099 | 4.53 | 0 | 0 | 2 | MASCOT | T |       |
| 1.56E-03 | 0 0 | Cs5g09900.1/Cs5g099 | 4.53 | 0 | 0 | 2 | MASCOT | T |       |

|          |     |                     |      |   |      |   |        |        |       |       |
|----------|-----|---------------------|------|---|------|---|--------|--------|-------|-------|
| 3.31E-04 | 0 0 | Cs5g09900.1/Cs5g099 | 6    | 0 | 0    | 2 | MASCOT | T      | PLEX8 |       |
| 5.03E-04 | 0 0 | Cs5g09900.1/Cs5g099 | 6    | 0 | 0    | 2 | MASCOT | T      | PLEX8 |       |
| 8.14E-02 | 0 0 | Cs5g09900.1/Cs5g099 | 6    | 0 | 0    | 2 | MASCOT | T      | PLEX8 |       |
| 1.07E-03 | 0 0 | Cs5g09900.1/Cs5g099 | 6    | 0 | 0    | 2 | MASCOT | T      | PLEX8 |       |
| 5.73E-04 | 0 0 | Cs5g09900.1/Cs5g099 | 6    | 0 | 0    | 2 | MASCOT | T      | PLEX8 |       |
| 5.79E-04 | 0 0 | Cs5g09900.1/Cs5g099 | 6    | 0 | 0    | 2 | MASCOT | T      | PLEX8 |       |
| 2.27E-03 | 0 0 | Cs5g09900.1/Cs5g099 | 6    | 0 | 0    | 2 | MASCOT | T      | PLEX8 |       |
| 2.12E-03 | 0 0 | Cs5g09900.1/Cs5g099 | 6    | 0 | 0    | 2 | MASCOT | T      | PLEX8 |       |
| 1.44E-03 | 0 0 | Cs5g09900.1/Cs5g099 | 6    | 0 | 0    | 2 | MASCOT | T      | PLEX8 |       |
| 1.98E-04 | 0 0 | Cs5g09900.1/Cs5g099 | 6    | 0 | 0    | 2 | MASCOT | T      | PLEX8 |       |
| 4.33E-02 | 0 0 | Cs5g09900.1/Cs5g099 | 8.75 | 0 | 0    | 2 | MASCOT | T      | PLEX8 |       |
| 4.81E-02 | 0 0 | Cs5g09900.1/Cs5g099 | 8.75 | 0 | 0    | 2 | MASCOT | T      | PLEX8 |       |
| 1.08E-01 | 0 0 | Cs5g09900.1/Cs5g099 | 6    | 0 | 15.9 | 0 | 2      | MASCOT | T     | PLEX8 |
| 1.38E-04 | 0 0 | Cs5g09900.1/Cs5g099 | 5.72 | 0 | 0    | 2 | MASCOT | T      | PLEX8 |       |
| 5.12E-03 | 0 0 | Cs5g09900.1/Cs5g099 | 5.72 | 0 | 0    | 2 | MASCOT | T      | PLEX8 |       |
| 6.08E-03 | 0 0 | Cs5g09900.1/Cs5g099 | 5.72 | 0 | 0    | 2 | MASCOT | T      |       |       |
| 4.68E-02 | 0 0 | Cs5g09900.1/Cs5g099 | 5.72 | 0 | 0    | 2 | MASCOT | T      | PLEX8 |       |
| 6.43E-05 | 0 0 | Cs5g09900.1/Cs5g099 | 5.72 | 0 | 0    | 2 | MASCOT | T      | PLEX8 |       |
| 1.45E-03 | 0 0 | Cs5g09900.1/Cs5g099 | 5.72 | 0 | 0    | 2 | MASCOT | T      | PLEX8 |       |
| 8.59E-03 | 0 0 | Cs5g09900.1/Cs5g099 | 5.72 | 0 | 0    | 2 | MASCOT | T      |       |       |
| 2.11E-02 | 0 0 | Cs5g09900.1/Cs5g099 | 4.37 | 0 | 0    | 2 | MASCOT | T      | PLEX8 |       |
| 2.34E-02 | 0 0 | Cs5g09900.1/Cs5g099 | 4.37 | 0 | 0    | 2 | MASCOT | T      | PLEX8 |       |
| 5.33E-02 | 0 0 | Cs5g09900.1/Cs5g099 | 4.37 | 0 | 0    | 2 | MASCOT | T      | PLEX8 |       |
| 2.57E-01 | 0 0 | Cs5g09900.1/Cs5g099 | 4.37 | 0 | 0    | 2 | MASCOT | T      | PLEX8 |       |
| 4.25E-01 | 0 0 | Cs5g09900.1/Cs5g099 | 4.37 | 0 | 0    | 2 | MASCOT | T      | PLEX8 |       |
| 2.57E-01 | 0 0 | Cs5g09900.1/Cs5g099 | 4.37 | 0 | 0    | 2 | MASCOT | T      | PLEX8 |       |
| 3.52E-01 | 0 0 | Cs5g09900.1/Cs5g099 | 4.37 | 0 | 0    | 2 | MASCOT | T      | PLEX8 |       |
| 3.16E-01 | 0 0 | Cs8g03280.1/Cs8g032 | 8.8  | 0 | 0    | 2 | MASCOT | T      |       |       |
| 5.04E-02 | 0 0 | Cs8g03280.1/Cs8g032 | 8.8  | 0 | 0    | 2 | MASCOT | T      |       |       |
| 1.21E-01 | 0 0 | Cs8g03280.1/Cs8g032 | 6.79 | 0 | 0    | 2 | MASCOT | T      | PLEX8 |       |
| 1.28E-02 | 0 0 | Cs8g03280.1/Cs8g032 | 6.79 | 0 | 0    | 2 | MASCOT | T      | PLEX8 |       |
| 2.05E-02 | 0 0 | Cs8g03280.1/Cs8g032 | 6.79 | 0 | 0    | 2 | MASCOT | T      | PLEX8 |       |
| 9.45E-03 | 0 0 | Cs8g03280.1/Cs8g032 | 6.79 | 0 | 0    | 2 | MASCOT | T      | PLEX8 |       |
| 2.16E-03 | 0 0 | Cs8g03280.1/Cs8g032 | 6.79 | 0 | 0    | 2 | MASCOT | T      | PLEX8 |       |
| 2.60E-02 | 0 0 | Cs8g03280.1/Cs8g032 | 6.79 | 0 | 0    | 2 | MASCOT | T      | PLEX8 |       |
| 3.91E-02 | 0 0 | Cs8g03280.1/Cs8g032 | 6.79 | 0 | 0    | 2 | MASCOT | T      | PLEX8 |       |
| 3.46E-03 | 0 0 | Cs8g03280.1/Cs8g032 | 4.37 | 0 | 0    | 2 | MASCOT | T      | PLEX8 |       |
| 2.97E-02 | 0 0 | Cs8g03280.1/Cs8g032 | 4.37 | 0 | 0    | 2 | MASCOT | T      | PLEX8 |       |
| 5.62E-02 | 0 0 | Cs8g03280.1/Cs8g032 | 4.37 | 0 | 0    | 2 | MASCOT | T      |       |       |
| 4.82E-01 | 0 0 | Cs8g03280.1/Cs8g032 | 4.37 | 0 | 0    | 2 | MASCOT | T      |       |       |
| 3.21E-02 | 0 0 | Cs8g03280.1/Cs8g032 | 4.37 | 0 | 0    | 2 | MASCOT | T      | PLEX8 |       |
| 7.10E-02 | 0 0 | Cs8g03280.1/Cs8g032 | 4.53 | 0 | 0    | 2 | MASCOT | T      | PLEX8 |       |
| 1.47E-02 | 0 0 | Cs8g03280.1/Cs8g032 | 4.53 | 0 | 0    | 2 | MASCOT | T      | PLEX8 |       |
| 4.79E-04 | 0 0 | Cs8g03280.1/Cs8g032 | 4.53 | 0 | 0    | 2 | MASCOT | T      | PLEX8 |       |
| 2.21E-03 | 0 0 | Cs8g03280.1/Cs8g032 | 4.53 | 0 | 0    | 2 | MASCOT | T      | PLEX8 |       |
| 8.70E-03 | 0 0 | Cs8g03280.1/Cs8g032 | 4.53 | 0 | 0    | 2 | MASCOT | T      | PLEX8 |       |
| 9.38E-03 | 0 0 | Cs8g03280.1/Cs8g032 | 6    | 0 | 0    | 2 | MASCOT | T      |       |       |
| 1.62E-02 | 0 0 | Cs8g03280.1/Cs8g032 | 6    | 0 | 0    | 2 | MASCOT | T      |       |       |
| 8.50E-05 | 0 0 | Cs8g03280.1/Cs8g032 | 6    | 0 | 0    | 2 | MASCOT | T      |       |       |
| 1.29E-03 | 0 0 | Cs8g03280.1/Cs8g032 | 8.75 | 0 | 0    | 2 | MASCOT | T      |       |       |
| 9.99E-02 | 0 0 | Cs8g03280.1/Cs8g032 | 8.75 | 0 | 0    | 2 | MASCOT | T      | PLEX8 |       |

|          |     |                      |      |   |   |   |        |   |       |
|----------|-----|----------------------|------|---|---|---|--------|---|-------|
| 5.07E-06 | 0 0 | Cs8g03280.1/Cs8g032  | 6.41 | 0 | 0 | 2 | MASCOT | T | PLEX8 |
| 4.57E-06 | 0 0 | Cs8g03280.1/Cs8g032  | 6.41 | 0 | 0 | 2 | MASCOT | T | PLEX8 |
| 1.65E-04 | 0 0 | Cs8g03280.1/Cs8g032  | 6.41 | 0 | 0 | 2 | MASCOT | T | PLEX8 |
| 2.29E-03 | 0 0 | Cs8g03280.1/Cs8g032  | 6.41 | 0 | 0 | 2 | MASCOT | T | PLEX8 |
| 1.15E-06 | 0 0 | Cs8g03280.1/Cs8g032  | 6.41 | 0 | 0 | 2 | MASCOT | T | PLEX8 |
| 1.71E-04 | 0 0 | Cs8g03280.1/Cs8g032  | 6.41 | 0 | 0 | 2 | MASCOT | T | PLEX8 |
| 3.50E-03 | 0 0 | Cs8g03280.1/Cs8g032  | 6.41 | 0 | 0 | 2 | MASCOT | T | PLEX8 |
| 1.96E-04 | 0 0 | Cs8g03280.1/Cs8g032  | 6.41 | 0 | 0 | 2 | MASCOT | T | PLEX8 |
| 7.55E-02 | 0 0 | Cs8g03280.1/Cs8g032  | 6.41 | 0 | 0 | 2 | MASCOT | T | PLEX8 |
| 6.56E-03 | 0 0 | Cs8g03280.1/Cs8g032  | 6.41 | 0 | 0 | 2 | MASCOT | T | PLEX8 |
| 1.03E-06 | 0 0 | Cs8g03280.1/Cs8g032  | 6.41 | 0 | 0 | 2 | MASCOT | T |       |
| 1.08E-01 | 0 0 | Cs8g03280.1/Cs8g032  | 8.63 | 0 | 0 | 2 | MASCOT | T | PLEX8 |
| 1.96E-01 | 0 0 | Cs8g03280.1/Cs8g032  | 8.63 | 0 | 0 | 2 | MASCOT | T | PLEX8 |
| 8.29E-02 | 0 0 | Cs8g03280.1/Cs8g032  | 8.63 | 0 | 0 | 2 | MASCOT | T | PLEX8 |
| 9.74E-02 | 0 0 | Cs8g03280.1/Cs8g032  | 8.63 | 0 | 0 | 2 | MASCOT | T | PLEX8 |
| 3.31E-02 | 0 0 | Cs8g03280.1/Cs8g032  | 8.63 | 0 | 0 | 2 | MASCOT | T | PLEX8 |
| 9.07E-03 | 0 0 | Cs8g03280.1/Cs8g032  | 8.63 | 0 | 0 | 2 | MASCOT | T | PLEX8 |
| 3.03E-02 | 0 0 | Cs8g03280.1/Cs8g032  | 8.63 | 0 | 0 | 2 | MASCOT | T | PLEX8 |
| 1.83E-01 | 0 0 | Cs8g03280.1/Cs8g032  | 8.63 | 0 | 0 | 2 | MASCOT | T | PLEX8 |
| 9.21E-02 | 0 0 | Cs8g03280.1/Cs8g032  | 8.63 | 0 | 0 | 2 | MASCOT | T | PLEX8 |
| 2.52E-02 | 0 0 | Cs8g03280.1/Cs8g032  | 8.63 | 0 | 0 | 2 | MASCOT | T | PLEX8 |
| 1.38E-01 | 0 0 | Cs8g03280.1/Cs8g032  | 8.63 | 0 | 0 | 2 | MASCOT | T | PLEX8 |
| 2.70E-01 | 0 0 | Cs8g03280.1/Cs8g032  | 5.99 | 0 | 0 | 2 | MASCOT | T | PLEX8 |
| 1.45E-01 | 0 0 | Cs8g03280.1/Cs8g032  | 5.99 | 0 | 0 | 2 | MASCOT | T | PLEX8 |
| 4.10E-01 | 0 0 | Cs8g03280.1/Cs8g032  | 5.99 | 0 | 0 | 2 | MASCOT | T | PLEX8 |
| 2.47E-02 | 0 0 | Cs8g03280.1/Cs8g032  | 5.99 | 0 | 0 | 2 | MASCOT | T | PLEX8 |
| 2.57E-02 | 0 0 | Cs8g03280.1/Cs8g032  | 5.99 | 0 | 0 | 2 | MASCOT | T | PLEX8 |
| 4.74E-02 | 0 0 | Cs8g03280.1/Cs8g032  | 8.75 | 0 | 0 | 2 | MASCOT | T | PLEX8 |
| 5.13E-02 | 0 0 | Cs8g03280.1/Cs8g032  | 8.75 | 0 | 0 | 2 | MASCOT | T | PLEX8 |
| 6.89E-02 | 0 0 | Cs8g03280.1/Cs8g032  | 8.75 | 0 | 0 | 2 | MASCOT | T | PLEX8 |
| 3.82E-02 | 0 0 | Cs8g03280.1/Cs8g032  | 5.72 | 0 | 0 | 2 | MASCOT | T | PLEX8 |
| 2.43E-02 | 0 0 | Cs8g03280.1/Cs8g032  | 5.72 | 0 | 0 | 2 | MASCOT | T | PLEX8 |
| 3.21E-01 | 0 0 | Cs8g03280.1/Cs8g032  | 5.72 | 0 | 0 | 2 | MASCOT | T | PLEX8 |
| 1.25E-01 | 0 0 | Cs8g03280.1/Cs8g032  | 4.37 | 0 | 0 | 2 | MASCOT | T | PLEX8 |
| 1.52E-02 | 0 0 | Cs8g03280.1/Cs8g032  | 4.78 | 0 | 0 | 2 | MASCOT | T | PLEX8 |
| 2.33E-02 | 0 0 | Cs8g03280.1/Cs8g032  | 4.78 | 0 | 0 | 2 | MASCOT | T | PLEX8 |
| 7.83E-04 | 0 0 | Cs8g03280.1/Cs8g032  | 4.78 | 0 | 0 | 2 | MASCOT | T | PLEX8 |
| 5.46E-02 | 0 0 | Cs8g03280.1/Cs8g032  | 4.78 | 0 | 0 | 2 | MASCOT | T | PLEX8 |
| 2.18E-03 | 0 0 | Cs8g03280.1/Cs8g032  | 4.78 | 0 | 0 | 2 | MASCOT | T | PLEX8 |
| 7.78E-04 | 0 0 | Cs8g03280.1/Cs8g032  | 4.78 | 0 | 0 | 2 | MASCOT | T |       |
| 3.15E-02 | 0 0 | Cs3g18780.1 ! Cs8g03 | 9.73 | 0 | 0 | 2 | MASCOT | T | PLEX8 |
| 5.71E-02 | 0 0 | Cs3g04170.1/Cs3g043  | 5.84 | 0 | 0 | 2 | MASCOT | T | PLEX8 |
| 5.67E-03 | 0 0 | Cs3g04170.1/Cs3g043  | 5.84 | 0 | 0 | 2 | MASCOT | T | PLEX8 |
| 1.89E-01 | 0 0 | Cs3g04170.1/Cs3g043  | 5.84 | 0 | 0 | 2 | MASCOT | T | PLEX8 |
| 3.35E-02 | 0 0 | Cs3g04170.1/Cs3g043  | 5.84 | 0 | 0 | 2 | MASCOT | T | PLEX8 |
| 3.41E-04 | 0 0 | Cs3g04170.1/Cs3g043  | 5.84 | 0 | 0 | 2 | MASCOT | T | PLEX8 |
| 3.78E-02 | 0 0 | Cs3g04190.1/Cs3g043  | 4.53 | 0 | 0 | 2 | MASCOT | T | PLEX8 |
| 1.15E-02 | 0 0 | Cs3g04190.1/Cs3g043  | 4.53 | 0 | 0 | 2 | MASCOT | T | PLEX8 |
| 9.06E-03 | 0 0 | Cs3g04190.1/Cs3g043  | 4.53 | 0 | 0 | 2 | MASCOT | T | PLEX8 |
| 2.72E-04 | 0 0 | Cs3g04190.1/Cs3g043  | 4.53 | 0 | 0 | 2 | MASCOT | T | PLEX8 |
| 8.38E-03 | 0 0 | Cs3g04190.1/Cs3g043  | 4.53 | 0 | 0 | 2 | MASCOT | T |       |

|          |     |                     |      |   |      |   |        |        |       |       |
|----------|-----|---------------------|------|---|------|---|--------|--------|-------|-------|
| 6.24E-04 | 0 0 | Cs3g04190.1/Cs3g043 | 4.53 | 0 | 0    | 2 | MASCOT | T      | PLEX8 |       |
| 1.18E-01 | 0 0 | Cs3g04170.1/Cs3g043 | 8.6  | 0 | 15.9 | 0 | 2      | MASCOT | T     | PLEX8 |
| 2.10E-01 | 0 0 | Cs3g04170.1/Cs3g043 | 8.6  | 0 | 15.9 | 0 | 2      | MASCOT | T     | PLEX8 |
| 3.96E-01 | 0 0 | Cs3g04170.1/Cs3g043 | 8.6  | 0 | 15.9 | 0 | 2      | MASCOT | T     | PLEX8 |
| 4.20E-01 | 0 0 | Cs3g04170.1/Cs3g043 | 8.6  | 0 | 0    | 0 | 2      | MASCOT | T     | PLEX8 |
| 3.34E-01 | 0 0 | Cs3g04170.1/Cs3g043 | 8.6  | 0 | 0    | 0 | 2      | MASCOT | T     | PLEX8 |
| 7.49E-02 | 0 0 | Cs3g04170.1/Cs3g043 | 8.6  | 0 | 0    | 0 | 2      | MASCOT | T     | PLEX8 |
| 4.30E-03 | 0 0 | Cs3g04170.1/Cs3g041 | 4.25 | 0 | 0    | 0 | 2      | MASCOT | T     | PLEX8 |
| 5.94E-04 | 0 0 | Cs3g04170.1/Cs3g041 | 6.75 | 0 | 0    | 0 | 2      | MASCOT | T     | PLEX8 |
| 1.85E-03 | 0 0 | Cs3g04170.1/Cs3g041 | 6.75 | 0 | 0    | 0 | 2      | MASCOT | T     | PLEX8 |
| 7.76E-02 | 0 0 | Cs3g04170.1/Cs3g041 | 6.75 | 0 | 0    | 0 | 2      | MASCOT | T     | PLEX8 |
| 3.39E-03 | 0 0 | Cs3g04170.1/Cs3g041 | 6.75 | 0 | 0    | 0 | 2      | MASCOT | T     | PLEX8 |
| 9.98E-03 | 0 0 | Cs3g04170.1/Cs3g041 | 6.75 | 0 | 0    | 0 | 2      | MASCOT | T     | PLEX8 |
| 4.59E-04 | 0 0 | Cs3g04170.1/Cs3g041 | 6.75 | 0 | 0    | 0 | 2      | MASCOT | T     | PLEX8 |
| 5.32E-02 | 0 0 | Cs3g04170.1/Cs3g041 | 6.75 | 0 | 0    | 0 | 2      | MASCOT | T     | PLEX8 |
| 4.94E-04 | 0 0 | Cs3g04170.1/Cs3g041 | 6.75 | 0 | 0    | 0 | 2      | MASCOT | T     | PLEX8 |
| 2.55E-03 | 0 0 | Cs3g04170.1/Cs3g041 | 6.75 | 0 | 0    | 0 | 2      | MASCOT | T     | PLEX8 |
| 4.85E-04 | 0 0 | Cs3g04170.1/Cs3g041 | 6.75 | 0 | 0    | 0 | 2      | MASCOT | T     | PLEX8 |
| 7.29E-03 | 0 0 | Cs3g04170.1/Cs3g043 | 4.21 | 0 | 0    | 0 | 2      | MASCOT | T     | PLEX8 |
| 1.04E-02 | 0 0 | Cs3g04170.1/Cs3g043 | 4.21 | 0 | 0    | 0 | 2      | MASCOT | T     | PLEX8 |
| 8.32E-04 | 0 0 | Cs3g04170.1/Cs3g041 | 4.75 | 0 | 0    | 0 | 2      | MASCOT | T     | PLEX8 |
| 3.37E-03 | 0 0 | Cs3g04170.1/Cs3g041 | 4.75 | 0 | 0    | 0 | 2      | MASCOT | T     | PLEX8 |
| 4.36E-02 | 0 0 | Cs3g04170.1/Cs3g043 | 4.21 | 0 | 0    | 0 | 2      | MASCOT | T     | PLEX8 |
| 3.26E-02 | 0 0 | Cs3g04170.1/Cs3g043 | 6.79 | 0 | 0    | 0 | 2      | MASCOT | T     | PLEX8 |
| 1.82E-01 | 0 0 | Cs3g04170.1/Cs3g043 | 6.79 | 0 | 0    | 0 | 2      | MASCOT | T     | PLEX8 |
| 1.22E-02 | 0 0 | Cs3g04190.1/Cs3g043 | 6.14 | 1 | 0    | 0 | 2      | MASCOT | T     | PLEX8 |
| 1.19E-04 | 0 0 | Cs3g04360.1         | 5.4  | 0 | 0    | 0 | 2      | MASCOT | T     | PLEX8 |
| 7.33E-04 | 0 0 | Cs3g04360.1         | 5.4  | 0 | 0    | 0 | 2      | MASCOT | T     | PLEX8 |
| 2.57E-01 | 0 0 | Cs3g04360.1         | 5.4  | 0 | 0    | 0 | 2      | MASCOT | T     | PLEX8 |
| 3.57E-01 | 0 0 | Cs3g04360.1         | 5.4  | 0 | 0    | 0 | 2      | MASCOT | T     | PLEX8 |
| 8.43E-03 | 0 0 | Cs3g04360.1         | 8.76 | 0 | 0    | 0 | 2      | MASCOT | T     | PLEX8 |
| 3.98E-02 | 0 0 | Cs3g04360.1         | 8.76 | 0 | 0    | 0 | 2      | MASCOT | T     | PLEX8 |
| 2.45E-02 | 0 0 | Cs3g04360.1         | 8.76 | 0 | 0    | 0 | 2      | MASCOT | T     | PLEX8 |
| 6.67E-03 | 0 0 | Cs3g04170.1/Cs3g043 | 6.75 | 0 | 0    | 0 | 2      | MASCOT | T     | PLEX8 |
| 5.46E-04 | 0 0 | Cs3g04170.1/Cs3g043 | 6.75 | 0 | 0    | 0 | 2      | MASCOT | T     | PLEX8 |
| 1.24E-02 | 0 0 | Cs3g04170.1/Cs3g043 | 6.75 | 0 | 0    | 0 | 2      | MASCOT | T     | PLEX8 |
| 2.28E-01 | 0 0 | Cs3g04170.1/Cs3g043 | 6.75 | 0 | 0    | 0 | 2      | MASCOT | T     | PLEX8 |
| 1.37E-01 | 0 0 | Cs3g04170.1/Cs3g043 | 6.75 | 0 | 0    | 0 | 2      | MASCOT | T     | PLEX8 |
| 2.55E-04 | 0 0 | Cs3g04170.1/Cs3g043 | 6.75 | 0 | 0    | 0 | 2      | MASCOT | T     | PLEX8 |
| 3.36E-02 | 0 0 | Cs3g04170.1/Cs3g043 | 5.84 | 0 | 0    | 0 | 2      | MASCOT | T     | PLEX8 |
| 5.27E-02 | 0 0 | Cs3g04170.1/Cs3g043 | 5.84 | 0 | 0    | 0 | 2      | MASCOT | T     | PLEX8 |
| 4.76E-01 | 0 0 | Cs3g04170.1/Cs3g043 | 5.84 | 0 | 0    | 0 | 2      | MASCOT | T     | PLEX8 |
| 4.67E-02 | 0 0 | Cs3g04170.1/Cs3g043 | 5.84 | 0 | 0    | 0 | 2      | MASCOT | T     | PLEX8 |
| 5.21E-03 | 0 0 | Cs3g04170.1/Cs3g043 | 5.84 | 0 | 0    | 0 | 2      | MASCOT | T     | PLEX8 |
| 1.94E-01 | 0 0 | Cs3g04170.1/Cs3g043 | 5.84 | 0 | 0    | 0 | 2      | MASCOT | T     | PLEX8 |
| 2.28E-01 | 0 0 | Cs2g16200.1/Cs2g162 | 9.8  | 0 | 0    | 0 | 2      | MASCOT | T     | PLEX8 |
| 7.47E-02 | 0 0 | Cs2g16200.1/Cs2g162 | 9.8  | 0 | 0    | 0 | 2      | MASCOT | T     | PLEX8 |
| 3.42E-02 | 0 0 | Cs2g16200.1/Cs2g162 | 4.21 | 0 | 0    | 0 | 2      | MASCOT | T     | PLEX8 |
| 8.89E-03 | 0 0 | Cs2g16200.1/Cs2g162 | 4.21 | 0 | 0    | 0 | 2      | MASCOT | T     | PLEX8 |
| 3.97E-02 | 0 0 | Cs2g16200.1/Cs2g162 | 4.03 | 0 | 0    | 0 | 2      | MASCOT | T     | PLEX8 |
| 3.86E-04 | 0 0 | Cs2g16200.1/Cs2g162 | 4.25 | 0 | 0    | 0 | 2      | MASCOT | T     | PLEX8 |

|          |     |                     |      |   |      |   |        |        |       |       |
|----------|-----|---------------------|------|---|------|---|--------|--------|-------|-------|
| 2.08E-03 | 0 0 | Cs2g16200.1/Cs2g162 | 4.25 | 0 | 0    | 2 | MASCOT | T      | PLEX8 |       |
| 2.38E-01 | 0 0 | Cs2g16200.1/Cs2g162 | 4.25 | 0 | 0    | 2 | MASCOT | T      | PLEX8 |       |
| 6.18E-03 | 0 0 | Cs2g16200.1/Cs2g162 | 4.25 | 0 | 0    | 2 | MASCOT | T      | PLEX8 |       |
| 6.53E-03 | 0 0 | Cs2g16220.1/Cs2g162 | 6    | 0 | 0    | 2 | MASCOT | T      | PLEX8 |       |
| 4.49E-02 | 0 0 | Cs2g16220.1/Cs2g162 | 6    | 0 | 0    | 2 | MASCOT | T      | PLEX8 |       |
| 9.51E-02 | 0 0 | Cs2g16220.1/Cs2g162 | 6    | 0 | 0    | 2 | MASCOT | T      | PLEX8 |       |
| 4.37E-02 | 0 0 | Cs2g16220.1/Cs2g162 | 6    | 0 | 0    | 2 | MASCOT | T      | PLEX8 |       |
| 1.17E-01 | 0 0 | Cs2g16200.1/Cs2g162 | 8.75 | 0 | 0    | 2 | MASCOT | T      | PLEX8 |       |
| 1.14E-01 | 0 0 | Cs2g16200.1/Cs2g162 | 8.75 | 0 | 0    | 2 | MASCOT | T      | PLEX8 |       |
| 1.75E-01 | 0 0 | Cs2g16200.1/Cs2g162 | 8.75 | 0 | 0    | 2 | MASCOT | T      | PLEX8 |       |
| 1.57E-04 | 0 0 | Cs2g16220.1/Cs2g162 | 4.14 | 0 | 0    | 2 | MASCOT | T      | PLEX8 |       |
| 2.09E-01 | 0 0 | Cs2g16220.1/Cs2g162 | 4.14 | 0 | 0    | 2 | MASCOT | T      |       |       |
| 6.39E-06 | 0 0 | Cs2g16220.1/Cs2g162 | 4.14 | 0 | 0    | 2 | MASCOT | T      |       |       |
| 3.30E-02 | 0 0 | Cs2g16220.1/Cs8g071 | 8.59 | 0 | 0    | 2 | MASCOT | T      | PLEX8 |       |
| 9.56E-04 | 0 0 | Cs2g16220.1/Cs8g071 | 8.59 | 0 | 0    | 2 | MASCOT | T      | PLEX8 |       |
| 2.20E-03 | 0 0 | Cs2g16220.1/Cs8g071 | 8.59 | 0 | 0    | 2 | MASCOT | T      | PLEX8 |       |
| 4.45E-01 | 0 0 | Cs2g16200.1/Cs2g162 | 6.75 | 0 | 0    | 2 | MASCOT | T      | PLEX8 |       |
| 1.74E-01 | 0 0 | Cs2g16200.1/Cs2g162 | 6.75 | 0 | 0    | 2 | MASCOT | T      | PLEX8 |       |
| 4.98E-04 | 0 0 | Cs2g16200.1/Cs2g162 | 6.75 | 0 | 0    | 2 | MASCOT | T      | PLEX8 |       |
| 8.04E-04 | 0 0 | Cs2g16200.1/Cs2g162 | 6.75 | 0 | 0    | 2 | MASCOT | T      | PLEX8 |       |
| 4.27E-02 | 0 0 | Cs2g16200.1/Cs2g162 | 6.46 | 0 | 0    | 2 | MASCOT | T      | PLEX8 |       |
| 4.53E-02 | 0 0 | Cs2g16200.1/Cs2g162 | 6.46 | 0 | 0    | 2 | MASCOT | T      | PLEX8 |       |
| 1.74E-01 | 0 0 | Cs2g16200.1/Cs2g162 | 6.46 | 0 | 0    | 2 | MASCOT | T      | PLEX8 |       |
| 7.07E-02 | 0 0 | Cs2g16200.1/Cs2g162 | 6.46 | 0 | 0    | 2 | MASCOT | T      | PLEX8 |       |
| 3.45E-01 | 0 0 | Cs2g16200.1/Cs2g162 | 6.46 | 0 | 0    | 2 | MASCOT | T      | PLEX8 |       |
| 1.19E-02 | 0 0 | Cs2g16200.1/Cs2g162 | 6.46 | 0 | 0    | 2 | MASCOT | T      | PLEX8 |       |
| 2.25E-03 | 0 0 | Cs2g16200.1/Cs2g162 | 6.46 | 0 | 0    | 2 | MASCOT | T      | PLEX8 |       |
| 1.83E-01 | 0 0 | Cs2g16200.1/Cs2g162 | 5.55 | 0 | 0    | 2 | MASCOT | T      | PLEX8 |       |
| 2.10E-01 | 0 0 | Cs2g16200.1/Cs2g162 | 5.81 | 0 | 0    | 2 | MASCOT | T      | PLEX8 |       |
| 3.57E-02 | 0 0 | Cs2g16200.1/Cs2g162 | 5.81 | 0 | 0    | 2 | MASCOT | T      | PLEX8 |       |
| 5.21E-02 | 0 0 | Cs2g16200.1/Cs2g162 | 5.81 | 0 | 0    | 2 | MASCOT | T      | PLEX8 |       |
| 2.48E-04 | 0 0 | Cs2g16200.1/Cs2g162 | 5.81 | 0 | 0    | 2 | MASCOT | T      | PLEX8 |       |
| 3.31E-01 | 0 0 | Cs2g16200.1/Cs2g162 | 5.81 | 0 | 0    | 2 | MASCOT | T      | PLEX8 |       |
| 4.89E-01 | 0 0 | Cs2g16220.1         | 6.1  | 0 | 0    | 2 | MASCOT | T      | PLEX8 |       |
| 1.13E-01 | 0 0 | Cs2g16220.1         | 6.1  | 0 | 0    | 2 | MASCOT | T      | PLEX8 |       |
| 2.43E-01 | 0 0 | Cs2g16220.1         | 6.1  | 0 | 0    | 2 | MASCOT | T      | PLEX8 |       |
| 2.44E-03 | 0 0 | Cs2g16220.1/Cs2g162 | 6.72 | 0 | 0    | 2 | MASCOT | T      | PLEX8 |       |
| 4.55E-03 | 0 0 | Cs2g16220.1/Cs2g162 | 6.72 | 0 | 0    | 2 | MASCOT | T      | PLEX8 |       |
| 3.18E-01 | 0 0 | Cs2g16220.1/Cs2g162 | 6.72 | 0 | 0    | 2 | MASCOT | T      | PLEX8 |       |
| 2.93E-01 | 0 0 | Cs3g17200.1         | 8.8  | 0 | 15.9 | 0 | 2      | MASCOT | T     | PLEX8 |
| 1.90E-01 | 0 0 | Cs3g17200.1         | 8.8  | 0 | 0    | 2 | MASCOT | T      | PLEX8 |       |
| 1.61E-02 | 0 0 | Cs3g17200.1         | 8.8  | 0 | 0    | 2 | MASCOT | T      | PLEX8 |       |
| 2.56E-02 | 0 0 | Cs3g17200.1         | 8.27 | 0 | 0    | 2 | MASCOT | T      | PLEX8 |       |
| 4.06E-02 | 0 0 | Cs3g17200.1         | 8.27 | 0 | 0    | 2 | MASCOT | T      | PLEX8 |       |
| 2.72E-01 | 0 0 | Cs3g17200.1         | 8.27 | 0 | 0    | 2 | MASCOT | T      | PLEX8 |       |
| 3.89E-02 | 0 0 | Cs3g17200.1         | 8.27 | 0 | 0    | 2 | MASCOT | T      | PLEX8 |       |
| 2.83E-02 | 0 0 | Cs3g17200.1         | 8.27 | 0 | 0    | 2 | MASCOT | T      | PLEX8 |       |
| 4.26E-02 | 0 0 | Cs3g17200.1         | 4.37 | 0 | 0    | 2 | MASCOT | T      | PLEX8 |       |
| 2.52E-02 | 0 0 | Cs3g17200.1         | 4.37 | 0 | 0    | 2 | MASCOT | T      | PLEX8 |       |
| 6.31E-02 | 0 0 | Cs3g17200.1         | 4.37 | 0 | 0    | 2 | MASCOT | T      | PLEX8 |       |
| 1.68E-02 | 0 0 | Cs3g17200.1         | 6.74 | 0 | 15.9 | 0 | 2      | MASCOT | T     |       |

|              |             |      |        |   |          |   |       |
|--------------|-------------|------|--------|---|----------|---|-------|
| 7.12E-02 0 0 | Cs3g17200.1 | 6.74 | 0 15.9 | 0 | 2 MASCOT | T |       |
| 2.25E-01 0 0 | Cs3g17200.1 | 6.74 | 0      | 0 | 2 MASCOT | T | PLEX8 |
| 3.84E-03 0 0 | Cs3g17200.1 | 6.74 | 0      | 0 | 2 MASCOT | T |       |
| 1.20E-02 0 0 | Cs3g17200.1 | 6.74 | 0      | 0 | 2 MASCOT | T |       |
| 5.13E-02 0 0 | Cs3g17200.1 | 8.6  | 1      | 0 | 2 MASCOT | T | PLEX8 |
| 3.88E-01 0 0 | Cs3g17200.1 | 6.75 | 0      | 0 | 2 MASCOT | T | PLEX8 |
| 2.28E-03 0 0 | Cs3g17200.1 | 6.75 | 0      | 0 | 2 MASCOT | T | PLEX8 |
| 1.59E-02 0 0 | Cs3g17200.1 | 6.75 | 0      | 0 | 2 MASCOT | T | PLEX8 |
| 1.34E-01 0 0 | Cs3g17200.1 | 6.75 | 0      | 0 | 2 MASCOT | T | PLEX8 |
| 2.86E-03 0 0 | Cs3g17200.1 | 6.75 | 0      | 0 | 2 MASCOT | T | PLEX8 |
| 2.79E-01 0 0 | Cs3g17200.1 | 6.75 | 0      | 0 | 2 MASCOT | T |       |
| 1.88E-02 0 0 | Cs3g17200.1 | 4.37 | 0      | 0 | 2 MASCOT | T |       |
| 2.37E-03 0 0 | Cs3g17200.1 | 4.21 | 0      | 0 | 2 MASCOT | T | PLEX8 |
| 1.18E-02 0 0 | Cs3g17200.1 | 4.21 | 0      | 0 | 2 MASCOT | T | PLEX8 |
| 3.05E-03 0 0 | Cs3g17200.1 | 4.21 | 0      | 0 | 2 MASCOT | T | PLEX8 |
| 2.42E-02 0 0 | Cs3g17200.1 | 4.21 | 0      | 0 | 2 MASCOT | T | PLEX8 |
| 2.37E-01 0 0 | Cs3g17200.1 | 4.21 | 0      | 0 | 2 MASCOT | T |       |
| 5.08E-02 0 0 | Cs3g17200.1 | 4    | 0      | 0 | 2 MASCOT | T | PLEX8 |
| 7.02E-02 0 0 | Cs3g17200.1 | 4    | 0      | 0 | 2 MASCOT | T | PLEX8 |
| 7.17E-03 0 0 | Cs3g17200.1 | 4    | 0      | 0 | 2 MASCOT | T | PLEX8 |
| 9.67E-03 0 0 | Cs3g17200.1 | 8.75 | 0      | 0 | 2 MASCOT | T | PLEX8 |
| 1.33E-02 0 0 | Cs3g17200.1 | 8.75 | 0      | 0 | 2 MASCOT | T | PLEX8 |
| 1.92E-02 0 0 | Cs3g17200.1 | 8.75 | 0      | 0 | 2 MASCOT | T | PLEX8 |
| 2.01E-02 0 0 | Cs3g17200.1 | 8.75 | 0      | 0 | 2 MASCOT | T | PLEX8 |
| 9.09E-03 0 0 | Cs3g17200.1 | 8.75 | 0      | 0 | 2 MASCOT | T | PLEX8 |
| 1.88E-02 0 0 | Cs3g17200.1 | 8.75 | 0      | 0 | 2 MASCOT | T | PLEX8 |
| 2.19E-01 0 0 | Cs3g17200.1 | 4.21 | 0      | 0 | 2 MASCOT | T | PLEX8 |
| 1.47E-02 0 0 | Cs3g17200.1 | 4.21 | 0      | 0 | 2 MASCOT | T |       |
| 2.73E-03 0 0 | Cs3g17200.1 | 4.21 | 0      | 0 | 2 MASCOT | T |       |
| 4.05E-02 0 0 | Cs3g17200.1 | 4.21 | 0      | 0 | 2 MASCOT | T | PLEX8 |
| 3.82E-01 0 0 | Cs3g17200.1 | 6.41 | 0      | 0 | 2 MASCOT | T | PLEX8 |
| 8.41E-02 0 0 | Cs8g15480.1 | 3.77 | 0      | 0 | 2 MASCOT | T | PLEX8 |
| 1.68E-04 0 0 | Cs8g15480.1 | 3.77 | 0      | 0 | 2 MASCOT | T | PLEX8 |
| 2.13E-03 0 0 | Cs8g15480.1 | 3.77 | 0      | 0 | 2 MASCOT | T |       |
| 4.91E-04 0 0 | Cs8g15480.1 | 3.77 | 0      | 0 | 2 MASCOT | T |       |
| 1.29E-02 0 0 | Cs8g15480.1 | 8.18 | 0 15.9 | 0 | 2 MASCOT | T | PLEX8 |
| 4.90E-02 0 0 | Cs8g15480.1 | 8.18 | 0      | 0 | 2 MASCOT | T | PLEX8 |
| 1.76E-01 0 0 | Cs8g15480.1 | 8.18 | 0      | 0 | 2 MASCOT | T | PLEX8 |
| 7.73E-02 0 0 | Cs8g15480.1 | 5.84 | 0      | 0 | 2 MASCOT | T |       |
| 2.76E-03 0 0 | Cs8g15480.1 | 5.84 | 0      | 0 | 2 MASCOT | T |       |
| 8.35E-02 0 0 | Cs8g15480.1 | 5.32 | 0      | 0 | 2 MASCOT | T | PLEX8 |
| 1.12E-01 0 0 | Cs8g15480.1 | 5.32 | 0      | 0 | 2 MASCOT | T | PLEX8 |
| 8.32E-02 0 0 | Cs8g15480.1 | 4.14 | 0      | 0 | 2 MASCOT | T | PLEX8 |
| 1.35E-03 0 0 | Cs8g15480.1 | 4.14 | 0      | 0 | 2 MASCOT | T | PLEX8 |
| 6.55E-02 0 0 | Cs8g15480.1 | 5.84 | 0      | 0 | 2 MASCOT | T | PLEX8 |
| 2.10E-02 0 0 | Cs8g15480.1 | 5.84 | 0      | 0 | 2 MASCOT | T | PLEX8 |
| 1.21E-01 0 0 | Cs8g15480.1 | 4.03 | 0 15.9 | 0 | 2 MASCOT | T | PLEX8 |
| 2.01E-02 0 0 | Cs8g15480.1 | 4.03 | 0      | 0 | 2 MASCOT | T |       |
| 2.22E-01 0 0 | Cs8g15480.1 | 4.21 | 0      | 0 | 2 MASCOT | T | PLEX8 |
| 1.73E-01 0 0 | Cs8g15480.1 | 4.21 | 0      | 0 | 2 MASCOT | T | PLEX8 |
| 7.58E-02 0 0 | Cs8g15480.1 | 4.21 | 0      | 0 | 2 MASCOT | T | PLEX8 |

|          |     |                     |      |   |      |   |        |        |       |
|----------|-----|---------------------|------|---|------|---|--------|--------|-------|
| 5.29E-02 | 0 0 | Cs8g15480.1         | 10   | 0 | 0    | 2 | MASCOT | T      | PLEX8 |
| 2.06E-01 | 0 0 | Cs8g15480.1         | 10   | 0 | 0    | 2 | MASCOT | T      |       |
| 3.91E-01 | 0 0 | Cs8g15480.1         | 4.21 | 0 | 0    | 2 | MASCOT | T      | PLEX8 |
| 6.94E-03 | 0 0 | Cs8g15480.1         | 4.21 | 0 | 0    | 2 | MASCOT | T      | PLEX8 |
| 6.57E-04 | 0 0 | Cs8g15480.1         | 4.21 | 0 | 0    | 2 | MASCOT | T      | PLEX8 |
| 3.94E-03 | 0 0 | Cs8g15480.1         | 6.1  | 0 | 0    | 2 | MASCOT | T      | PLEX8 |
| 5.09E-02 | 0 0 | Cs8g15480.1         | 6.1  | 0 | 0    | 2 | MASCOT | T      | PLEX8 |
| 4.49E-06 | 0 0 | Cs8g15480.1         | 6.1  | 0 | 0    | 2 | MASCOT | T      | PLEX8 |
| 2.49E-02 | 0 0 | Cs8g15480.1         | 6.1  | 0 | 0    | 2 | MASCOT | T      | PLEX8 |
| 7.35E-03 | 0 0 | Cs8g15480.1         | 6.1  | 0 | 0    | 2 | MASCOT | T      | PLEX8 |
| 3.50E-02 | 0 0 | Cs8g15480.1         | 6.1  | 0 | 0    | 2 | MASCOT | T      | PLEX8 |
| 2.22E-01 | 0 0 | Cs8g15480.1         | 6.1  | 0 | 0    | 2 | MASCOT | T      | PLEX8 |
| 7.05E-05 | 0 0 | Cs8g15480.1         | 6.1  | 0 | 0    | 2 | MASCOT | T      | PLEX8 |
| 1.48E-01 | 0 0 | Cs8g15480.1         | 6.1  | 0 | 0    | 2 | MASCOT | T      |       |
| 8.07E-02 | 0 0 | Cs8g15480.1         | 6.75 | 0 | 0    | 2 | MASCOT | T      | PLEX8 |
| 6.53E-02 | 0 0 | Cs8g15480.1         | 6.75 | 0 | 0    | 2 | MASCOT | T      | PLEX8 |
| 5.38E-01 | 0 0 | Cs8g15480.1         | 6.75 | 0 | 0    | 2 | MASCOT | T      | PLEX8 |
| 1.32E-02 | 0 0 | Cs8g15480.1         | 4.53 | 0 | 0    | 2 | MASCOT | T      |       |
| 9.65E-03 | 0 0 | Cs8g15480.1         | 4.53 | 0 | 0    | 2 | MASCOT | T      |       |
| 4.43E-04 | 0 0 | Cs8g15480.1         | 4.53 | 0 | 0    | 2 | MASCOT | T      |       |
| 1.09E-03 | 0 0 | Cs8g15480.1         | 4.53 | 0 | 0    | 2 | MASCOT | T      |       |
| 2.10E-01 | 0 0 | Cs8g15480.1         | 7.96 | 0 | 0    | 2 | MASCOT | T      | PLEX8 |
| 2.35E-06 | 0 0 | Cs7g19400.1/Cs7g194 | 4.14 | 0 | 0    | 2 | MASCOT | T      | PLEX8 |
| 6.24E-08 | 0 0 | Cs7g19400.1/Cs7g194 | 4.14 | 0 | 0    | 2 | MASCOT | T      | PLEX8 |
| 1.97E-03 | 0 0 | Cs7g19400.1/Cs7g194 | 4.03 | 0 | 0    | 2 | MASCOT | T      |       |
| 1.73E-02 | 0 0 | Cs7g19400.1/Cs7g194 | 4.03 | 0 | 0    | 2 | MASCOT | T      |       |
| 9.85E-03 | 0 0 | Cs7g19400.1/Cs7g194 | 4.53 | 0 | 0    | 2 | MASCOT | T      | PLEX8 |
| 1.78E-03 | 0 0 | Cs7g19400.1/Cs7g194 | 4.53 | 0 | 0    | 2 | MASCOT | T      | PLEX8 |
| 1.94E-02 | 0 0 | Cs7g19400.1/Cs7g194 | 3.92 | 0 | 15.9 | 0 | 2      | MASCOT | T     |
| 1.17E-02 | 0 0 | Cs7g19400.1/Cs7g194 | 3.92 | 0 | 0    | 2 | MASCOT | T      |       |
| 5.11E-04 | 0 0 | Cs7g19400.1/Cs7g194 | 3.92 | 0 | 0    | 2 | MASCOT | T      |       |
| 1.16E-01 | 0 0 | Cs7g19400.1/Cs7g194 | 4.14 | 0 | 0    | 2 | MASCOT | T      | PLEX8 |
| 1.06E-01 | 0 0 | Cs7g19400.1/Cs7g194 | 4.14 | 0 | 0    | 2 | MASCOT | T      | PLEX8 |
| 1.22E-02 | 0 0 | Cs7g19400.1/Cs7g194 | 4.14 | 0 | 0    | 2 | MASCOT | T      | PLEX8 |
| 9.51E-02 | 0 0 | Cs7g19400.1/Cs7g194 | 4.14 | 0 | 0    | 2 | MASCOT | T      | PLEX8 |
| 7.94E-04 | 0 0 | Cs7g19400.1         | 4.25 | 0 | 0    | 2 | MASCOT | T      | PLEX8 |
| 2.35E-01 | 0 0 | Cs7g19400.1         | 4.25 | 0 | 0    | 2 | MASCOT | T      | PLEX8 |
| 2.53E-02 | 0 0 | Cs7g19400.1         | 4.25 | 0 | 0    | 2 | MASCOT | T      | PLEX8 |
| 4.75E-02 | 0 0 | Cs7g19400.1         | 4.37 | 0 | 0    | 2 | MASCOT | T      | PLEX8 |
| 7.81E-02 | 0 0 | Cs7g19400.1         | 4.37 | 0 | 0    | 2 | MASCOT | T      | PLEX8 |
| 1.45E-01 | 0 0 | Cs7g19400.1         | 4.37 | 0 | 0    | 2 | MASCOT | T      | PLEX8 |
| 7.13E-03 | 0 0 | Cs7g19400.1/Cs7g194 | 6.75 | 0 | 0    | 2 | MASCOT | T      | PLEX8 |
| 3.38E-01 | 0 0 | Cs7g19400.1/Cs7g194 | 6.75 | 0 | 0    | 2 | MASCOT | T      | PLEX8 |
| 9.95E-02 | 0 0 | Cs7g19400.1/Cs7g194 | 6.75 | 0 | 0    | 2 | MASCOT | T      |       |
| 2.57E-01 | 0 0 | Cs7g19400.1/Cs7g194 | 6.75 | 0 | 0    | 2 | MASCOT | T      |       |
| 2.16E-04 | 0 0 | Cs7g19400.1/Cs7g194 | 6.75 | 0 | 0    | 2 | MASCOT | T      | PLEX8 |
| 5.87E-02 | 0 0 | Cs7g19400.1/Cs7g194 | 6.75 | 0 | 0    | 2 | MASCOT | T      | PLEX8 |
| 3.25E-01 | 0 0 | Cs7g19400.1/Cs7g194 | 6.75 | 0 | 0    | 2 | MASCOT | T      |       |
| 3.89E-03 | 0 0 | Cs7g19400.1/Cs7g194 | 6.75 | 0 | 0    | 2 | MASCOT | T      |       |
| 1.24E-03 | 0 0 | Cs7g19400.1/Cs7g194 | 5.84 | 0 | 0    | 2 | MASCOT | T      | PLEX8 |
| 2.30E-01 | 0 0 | Cs7g19400.1/Cs7g194 | 5.84 | 0 | 0    | 2 | MASCOT | T      | PLEX8 |

|          |     |                     |      |   |   |   |        |   |       |
|----------|-----|---------------------|------|---|---|---|--------|---|-------|
| 1.05E-01 | 0 0 | Cs7g19400.1/Cs7g194 | 4.4  | 0 | 0 | 2 | MASCOT | T | PLEX8 |
| 1.89E-01 | 0 0 | Cs7g19400.1/Cs7g194 | 5.95 | 0 | 0 | 2 | MASCOT | T | PLEX8 |
| 2.65E-01 | 0 0 | Cs7g19400.1/Cs7g194 | 5.95 | 0 | 0 | 2 | MASCOT | T | PLEX8 |
| 2.87E-02 | 0 0 | Cs7g19400.1/Cs7g194 | 8.73 | 0 | 0 | 2 | MASCOT | T | PLEX8 |
| 5.84E-02 | 0 0 | Cs7g19400.1/Cs7g194 | 8.73 | 0 | 0 | 2 | MASCOT | T | PLEX8 |
| 2.54E-01 | 0 0 | Cs7g19400.1/Cs7g194 | 4.14 | 0 | 0 | 2 | MASCOT | T | PLEX8 |
| 2.36E-01 | 0 0 | Cs7g19400.1/Cs7g194 | 4.14 | 0 | 0 | 2 | MASCOT | T | PLEX8 |
| 3.61E-04 | 0 0 | Cs7g19400.1/Cs7g194 | 5.99 | 0 | 0 | 2 | MASCOT | T | PLEX8 |
| 2.17E-05 | 0 0 | Cs7g19400.1/Cs7g194 | 5.99 | 0 | 0 | 2 | MASCOT | T | PLEX8 |
| 3.30E-03 | 0 0 | Cs7g19400.1/Cs7g194 | 5.99 | 0 | 0 | 2 | MASCOT | T | PLEX8 |
| 3.67E-04 | 0 0 | Cs7g19400.1/Cs7g194 | 5.99 | 0 | 0 | 2 | MASCOT | T | PLEX8 |
| 2.38E-02 | 0 0 | Cs4g13070.1/Cs4g130 | 4.53 | 0 | 0 | 2 | MASCOT | T | PLEX8 |
| 1.31E-02 | 0 0 | Cs4g13070.1/Cs4g130 | 4.53 | 0 | 0 | 2 | MASCOT | T | PLEX8 |
| 9.90E-02 | 0 0 | Cs4g13070.1/Cs4g130 | 4.53 | 0 | 0 | 2 | MASCOT | T | PLEX8 |
| 2.29E-02 | 0 0 | Cs4g13070.1/Cs4g130 | 6.74 | 0 | 0 | 2 | MASCOT | T | PLEX8 |
| 3.46E-01 | 0 0 | Cs4g13070.1/Cs4g130 | 6.74 | 0 | 0 | 2 | MASCOT | T | PLEX8 |
| 3.88E-02 | 0 0 | Cs4g13070.1/Cs4g130 | 4.03 | 0 | 0 | 2 | MASCOT | T |       |
| 2.98E-03 | 0 0 | Cs4g13070.1/Cs4g130 | 4.03 | 0 | 0 | 2 | MASCOT | T |       |
| 1.88E-01 | 0 0 | Cs1g15970.1/Cs4g130 | 4.21 | 0 | 0 | 2 | MASCOT | T |       |
| 1.67E-02 | 0 0 | Cs1g15970.1/Cs4g130 | 4.21 | 0 | 0 | 2 | MASCOT | T |       |
| 3.12E-01 | 0 0 | Cs4g13070.1/Cs4g130 | 8.75 | 0 | 0 | 2 | MASCOT | T | PLEX8 |
| 2.79E-01 | 0 0 | Cs4g13070.1/Cs4g130 | 6.92 | 0 | 0 | 2 | MASCOT | T | PLEX8 |
| 1.05E-02 | 0 0 | Cs4g13070.1/Cs4g130 | 6.92 | 0 | 0 | 2 | MASCOT | T | PLEX8 |
| 5.21E-02 | 0 0 | Cs4g13070.1/Cs4g130 | 6.92 | 0 | 0 | 2 | MASCOT | T | PLEX8 |
| 6.12E-05 | 0 0 | Cs4g13070.1/Cs4g130 | 6.92 | 0 | 0 | 2 | MASCOT | T |       |
| 7.84E-02 | 0 0 | Cs4g13070.2         | 5.21 | 0 | 0 | 2 | MASCOT | T | PLEX8 |
| 1.11E-01 | 0 0 | Cs4g13070.2         | 5.21 | 0 | 0 | 2 | MASCOT | T |       |
| 4.23E-01 | 0 0 | Cs4g13070.2         | 5.21 | 0 | 0 | 2 | MASCOT | T | PLEX8 |
| 2.38E-04 | 0 0 | Cs1g15970.1/Cs4g189 | 4.14 | 0 | 0 | 2 | MASCOT | T |       |
| 5.99E-04 | 0 0 | Cs1g15970.1/Cs4g189 | 4.14 | 0 | 0 | 2 | MASCOT | T |       |
| 3.11E-06 | 0 0 | Cs1g15970.1/Cs4g189 | 4.14 | 0 | 0 | 2 | MASCOT | T |       |
| 2.93E-08 | 0 0 | Cs1g15970.1/Cs4g189 | 4.14 | 0 | 0 | 2 | MASCOT | T |       |
| 5.36E-03 | 0 0 | Cs4g13070.1/Cs4g130 | 8.72 | 0 | 0 | 2 | MASCOT | T | PLEX8 |
| 6.18E-03 | 0 0 | Cs4g13070.1/Cs4g130 | 8.72 | 0 | 0 | 2 | MASCOT | T | PLEX8 |
| 4.00E-03 | 0 0 | Cs4g13070.1/Cs4g130 | 8.72 | 0 | 0 | 2 | MASCOT | T | PLEX8 |
| 1.68E-03 | 0 0 | Cs4g13070.1/Cs4g130 | 8.72 | 0 | 0 | 2 | MASCOT | T | PLEX8 |
| 2.36E-03 | 0 0 | Cs4g13070.1/Cs4g130 | 8.72 | 0 | 0 | 2 | MASCOT | T | PLEX8 |
| 4.08E-02 | 0 0 | Cs1g15970.1/Cs1g202 | 5.84 | 0 | 0 | 2 | MASCOT | T |       |
| 5.83E-03 | 0 0 | Cs4g13070.1/Cs4g130 | 4.75 | 0 | 0 | 2 | MASCOT | T | PLEX8 |
| 1.95E-06 | 0 0 | Cs4g13070.1/Cs4g130 | 4.75 | 0 | 0 | 2 | MASCOT | T | PLEX8 |
| 1.32E-04 | 0 0 | Cs4g13070.1/Cs4g130 | 4.75 | 0 | 0 | 2 | MASCOT | T | PLEX8 |
| 4.22E-03 | 0 0 | Cs4g13070.1/Cs4g130 | 5.84 | 0 | 0 | 2 | MASCOT | T | PLEX8 |
| 3.43E-05 | 0 0 | Cs4g13070.1/Cs4g130 | 5.84 | 0 | 0 | 2 | MASCOT | T | PLEX8 |
| 4.35E-01 | 0 0 | Cs4g13070.1/Cs4g130 | 5.84 | 0 | 0 | 2 | MASCOT | T | PLEX8 |
| 1.56E-01 | 0 0 | Cs4g13070.1/Cs4g130 | 9.76 | 0 | 0 | 2 | MASCOT | T | PLEX8 |
| 1.81E-01 | 0 0 | Cs4g13070.1/Cs4g130 | 9.76 | 0 | 0 | 2 | MASCOT | T | PLEX8 |
| 1.17E-03 | 0 0 | Cs4g13070.1/Cs4g130 | 5.55 | 0 | 0 | 2 | MASCOT | T | PLEX8 |
| 6.22E-04 | 0 0 | Cs4g13070.1/Cs4g130 | 5.55 | 0 | 0 | 2 | MASCOT | T | PLEX8 |
| 3.72E-02 | 0 0 | Cs4g13070.1/Cs4g130 | 5.55 | 0 | 0 | 2 | MASCOT | T | PLEX8 |
| 2.31E-03 | 0 0 | Cs4g10090.1/Cs4g100 | 4.7  | 0 | 0 | 2 | MASCOT | T |       |
| 2.55E-02 | 0 0 | Cs4g10090.1/Cs4g100 | 4.7  | 0 | 0 | 2 | MASCOT | T |       |



|          |     |                     |      |   |      |   |        |        |       |       |
|----------|-----|---------------------|------|---|------|---|--------|--------|-------|-------|
| 5.01E-02 | 0 0 | Cs4g10090.1/Cs4g100 | 6.1  | 0 | 0    | 2 | MASCOT | T      | PLEX8 |       |
| 2.81E-02 | 0 0 | Cs4g10090.1/Cs4g100 | 4.21 | 0 | 0    | 2 | MASCOT | T      | PLEX8 |       |
| 1.65E-01 | 0 0 | Cs4g10090.1/Cs4g100 | 4.21 | 0 | 15.9 | 0 | 2      | MASCOT | T     | PLEX8 |
| 2.56E-02 | 0 0 | Cs4g10090.1/Cs4g100 | 4.21 | 0 | 0    | 2 | MASCOT | T      | PLEX8 |       |
| 1.72E-02 | 0 0 | Cs4g10090.1/Cs4g100 | 8.59 | 0 | 0    | 2 | MASCOT | T      |       |       |
| 6.62E-02 | 0 0 | Cs4g10090.1/Cs4g100 | 8.59 | 0 | 0    | 2 | MASCOT | T      |       |       |
| 2.00E-02 | 0 0 | Cs4g10090.1/Cs4g100 | 8.25 | 1 | 0    | 2 | MASCOT | T      | PLEX8 |       |
| 4.04E-03 | 0 0 | Cs4g10090.1/Cs4g100 | 5.55 | 0 | 0    | 2 | MASCOT | T      | PLEX8 |       |
| 9.27E-04 | 0 0 | Cs4g10090.1/Cs4g100 | 5.55 | 0 | 0    | 2 | MASCOT | T      | PLEX8 |       |
| 2.06E-01 | 0 0 | Cs4g10090.1/Cs4g100 | 5.55 | 0 | 0    | 2 | MASCOT | T      | PLEX8 |       |
| 2.48E-03 | 0 0 | Cs4g10090.1/Cs4g100 | 5.55 | 0 | 0    | 2 | MASCOT | T      | PLEX8 |       |
| 1.20E-01 | 0 0 | Cs4g10090.1/Cs4g100 | 5.72 | 0 | 0    | 2 | MASCOT | T      | PLEX8 |       |
| 1.01E-02 | 0 0 | Cs4g10090.1/Cs4g100 | 9.44 | 0 | 0    | 2 | MASCOT | T      | PLEX8 |       |
| 4.68E-03 | 0 0 | Cs4g10090.1/Cs4g100 | 9.44 | 0 | 0    | 2 | MASCOT | T      | PLEX8 |       |
| 1.15E-03 | 0 0 | Cs4g10090.1/Cs4g100 | 9.44 | 0 | 0    | 2 | MASCOT | T      | PLEX8 |       |
| 4.82E-03 | 0 0 | Cs4g10090.1/Cs4g100 | 9.44 | 0 | 0    | 2 | MASCOT | T      | PLEX8 |       |
| 3.84E-04 | 0 0 | Cs4g10090.1/Cs4g100 | 9.44 | 0 | 0    | 2 | MASCOT | T      | PLEX8 |       |
| 4.73E-04 | 0 0 | Cs4g10090.1/Cs4g100 | 9.44 | 0 | 0    | 2 | MASCOT | T      | PLEX8 |       |
| 2.24E-04 | 0 0 | Cs4g10090.1/Cs4g100 | 9.44 | 0 | 0    | 2 | MASCOT | T      | PLEX8 |       |
| 4.96E-02 | 0 0 | Cs4g10090.1/Cs4g100 | 9.44 | 0 | 0    | 2 | MASCOT | T      |       |       |
| 2.85E-01 | 0 0 | Cs4g10090.1/Cs4g100 | 6.92 | 0 | 0    | 2 | MASCOT | T      | PLEX8 |       |
| 1.23E-02 | 0 0 | Cs4g10090.1/Cs4g100 | 6.92 | 0 | 0    | 2 | MASCOT | T      | PLEX8 |       |
| 8.73E-02 | 0 0 | Cs4g10090.1/Cs4g100 | 6.92 | 0 | 0    | 2 | MASCOT | T      |       |       |
| 2.53E-02 | 0 0 | Cs4g10090.1/Cs4g100 | 6.92 | 0 | 0    | 2 | MASCOT | T      | PLEX8 |       |
| 3.47E-02 | 0 0 | Cs4g10090.1/Cs4g100 | 6.92 | 0 | 0    | 2 | MASCOT | T      | PLEX8 |       |
| 4.75E-03 | 0 0 | Cs4g10090.1/Cs4g100 | 8.76 | 0 | 0    | 2 | MASCOT | T      | PLEX8 |       |
| 1.20E-02 | 0 0 | Cs4g10090.1/Cs4g100 | 8.76 | 0 | 0    | 2 | MASCOT | T      |       |       |
| 7.35E-02 | 0 0 | Cs4g10090.1/Cs4g100 | 8.76 | 0 | 0    | 2 | MASCOT | T      | PLEX8 |       |
| 1.34E-02 | 0 0 | Cs4g10090.1/Cs4g100 | 8.72 | 0 | 0    | 2 | MASCOT | T      | PLEX8 |       |
| 1.81E-03 | 0 0 | Cs4g10090.1/Cs4g100 | 5.81 | 0 | 0    | 2 | MASCOT | T      | PLEX8 |       |
| 4.41E-03 | 0 0 | Cs4g10090.1/Cs4g100 | 5.32 | 0 | 0    | 2 | MASCOT | T      | PLEX8 |       |
| 8.20E-04 | 0 0 | Cs4g10090.1/Cs4g100 | 5.32 | 0 | 0    | 2 | MASCOT | T      | PLEX8 |       |
| 1.87E-02 | 0 0 | Cs4g10090.1/Cs4g100 | 5.32 | 0 | 0    | 2 | MASCOT | T      | PLEX8 |       |
| 1.04E-02 | 0 0 | Cs4g10090.1/Cs4g100 | 5.32 | 0 | 0    | 2 | MASCOT | T      | PLEX8 |       |
| 2.04E-02 | 0 0 | Cs4g10090.1/Cs4g100 | 5.32 | 0 | 0    | 2 | MASCOT | T      | PLEX8 |       |
| 1.16E-01 | 0 0 | Cs9g01670.1         | 8.8  | 0 | 0    | 2 | MASCOT | T      | PLEX8 |       |
| 3.10E-03 | 0 0 | Cs9g01670.1         | 4    | 0 | 0    | 2 | MASCOT | T      |       |       |
| 1.78E-03 | 0 0 | Cs9g01670.1         | 4.03 | 0 | 0    | 2 | MASCOT | T      | PLEX8 |       |
| 1.47E-02 | 0 0 | Cs9g01670.1         | 4.03 | 0 | 0    | 2 | MASCOT | T      | PLEX8 |       |
| 1.32E-03 | 0 0 | Cs9g01670.1         | 4.03 | 0 | 0    | 2 | MASCOT | T      | PLEX8 |       |
| 9.52E-02 | 0 0 | Cs9g01670.1         | 6    | 0 | 0    | 2 | MASCOT | T      | PLEX8 |       |
| 1.01E-01 | 0 0 | Cs9g01670.1         | 6    | 0 | 0    | 2 | MASCOT | T      | PLEX8 |       |
| 1.00E-01 | 0 0 | Cs9g01670.1         | 4.37 | 0 | 15.9 | 0 | 2      | MASCOT | T     |       |
| 1.46E-03 | 0 0 | Cs9g01670.1         | 4.53 | 0 | 0    | 2 | MASCOT | T      | PLEX8 |       |
| 7.47E-02 | 0 0 | Cs9g01670.1         | 5.84 | 0 | 0    | 2 | MASCOT | T      | PLEX8 |       |
| 1.97E-02 | 0 0 | Cs9g01670.1         | 5.84 | 0 | 0    | 2 | MASCOT | T      | PLEX8 |       |
| 2.37E-04 | 0 0 | Cs9g01670.1         | 5.84 | 0 | 0    | 2 | MASCOT | T      | PLEX8 |       |
| 3.36E-03 | 0 0 | Cs9g01670.1         | 5.84 | 0 | 0    | 2 | MASCOT | T      | PLEX8 |       |
| 3.48E-02 | 0 0 | Cs9g01670.1         | 5.84 | 0 | 0    | 2 | MASCOT | T      | PLEX8 |       |
| 6.31E-04 | 0 0 | Cs9g01670.1         | 5.84 | 0 | 0    | 2 | MASCOT | T      | PLEX8 |       |
| 1.21E-02 | 0 0 | Cs9g01670.1         | 5.84 | 0 | 0    | 2 | MASCOT | T      | PLEX8 |       |

|              |             |      |   |   |          |   |       |
|--------------|-------------|------|---|---|----------|---|-------|
| 3.46E-03 0 0 | Cs9g01670.1 | 5.84 | 0 | 0 | 2 MASCOT | T | PLEX8 |
| 6.00E-02 0 0 | Cs9g01670.1 | 4.37 | 0 | 0 | 2 MASCOT | T | PLEX8 |
| 5.27E-03 0 0 | Cs9g01670.1 | 4.37 | 0 | 0 | 2 MASCOT | T | PLEX8 |
| 4.37E-02 0 0 | Cs9g01670.1 | 4.37 | 0 | 0 | 2 MASCOT | T | PLEX8 |
| 6.22E-03 0 0 | Cs9g01670.1 | 6.72 | 0 | 0 | 2 MASCOT | T | PLEX8 |
| 1.85E-01 0 0 | Cs9g01670.1 | 6.72 | 0 | 0 | 2 MASCOT | T | PLEX8 |
| 2.71E-02 0 0 | Cs9g01670.1 | 6.72 | 0 | 0 | 2 MASCOT | T |       |
| 2.32E-03 0 0 | Cs9g01670.1 | 6.72 | 0 | 0 | 2 MASCOT | T | PLEX8 |
| 3.41E-01 0 0 | Cs9g01670.1 | 6.72 | 0 | 0 | 2 MASCOT | T |       |
| 9.35E-02 0 0 | Cs9g01670.1 | 4.21 | 0 | 0 | 2 MASCOT | T | PLEX8 |
| 1.53E-03 0 0 | Cs9g01670.1 | 4.21 | 0 | 0 | 2 MASCOT | T | PLEX8 |
| 1.75E-03 0 0 | Cs9g01670.1 | 4.21 | 0 | 0 | 2 MASCOT | T | PLEX8 |
| 3.34E-06 0 0 | Cs9g01670.1 | 4.21 | 0 | 0 | 2 MASCOT | T |       |
| 9.10E-03 0 0 | Cs9g01670.1 | 8.06 | 0 | 0 | 2 MASCOT | T | PLEX8 |
| 1.95E-06 0 0 | Cs9g01670.1 | 8.06 | 0 | 0 | 2 MASCOT | T | PLEX8 |
| 1.67E-01 0 0 | Cs9g01670.1 | 6    | 0 | 0 | 2 MASCOT | T | PLEX8 |
| 7.32E-02 0 0 | Cs9g01670.1 | 6    | 0 | 0 | 2 MASCOT | T | PLEX8 |
| 4.72E-02 0 0 | Cs9g01670.1 | 5.5  | 0 | 0 | 2 MASCOT | T | PLEX8 |
| 1.57E-01 0 0 | Cs9g01670.1 | 5.5  | 0 | 0 | 2 MASCOT | T | PLEX8 |
| 1.47E-01 0 0 | Cs9g01670.1 | 6.88 | 0 | 0 | 2 MASCOT | T | PLEX8 |
| 1.03E-02 0 0 | Cs5g32640.1 | 4.4  | 0 | 0 | 2 MASCOT | T | PLEX8 |
| 2.39E-01 0 0 | Cs5g32640.1 | 4.4  | 0 | 0 | 2 MASCOT | T |       |
| 1.22E-01 0 0 | Cs5g32640.1 | 7.02 | 0 | 0 | 2 MASCOT | T | PLEX8 |
| 9.78E-04 0 0 | Cs5g32640.1 | 7.02 | 0 | 0 | 2 MASCOT | T | PLEX8 |
| 1.47E-01 0 0 | Cs5g32640.1 | 7.02 | 0 | 0 | 2 MASCOT | T | PLEX8 |
| 1.35E-03 0 0 | Cs5g32640.1 | 7.02 | 0 | 0 | 2 MASCOT | T |       |
| 1.25E-01 0 0 | Cs5g32640.1 | 7.02 | 0 | 0 | 2 MASCOT | T |       |
| 1.04E-02 0 0 | Cs5g32640.1 | 8.76 | 0 | 0 | 2 MASCOT | T | PLEX8 |
| 1.79E-04 0 0 | Cs5g32640.1 | 8.76 | 0 | 0 | 2 MASCOT | T | PLEX8 |
| 9.32E-02 0 0 | Cs5g32640.1 | 8.76 | 0 | 0 | 2 MASCOT | T | PLEX8 |
| 1.90E-04 0 0 | Cs5g32640.1 | 8.76 | 0 | 0 | 2 MASCOT | T | PLEX8 |
| 4.61E-03 0 0 | Cs5g32640.1 | 8.76 | 0 | 0 | 2 MASCOT | T |       |
| 1.15E-02 0 0 | Cs5g32640.1 | 8.76 | 0 | 0 | 2 MASCOT | T |       |
| 1.10E-01 0 0 | Cs5g32640.1 | 4.37 | 0 | 0 | 2 MASCOT | T |       |
| 4.57E-04 0 0 | Cs5g32640.1 | 4.37 | 0 | 0 | 2 MASCOT | T | PLEX8 |
| 1.28E-02 0 0 | Cs5g32640.1 | 4.53 | 0 | 0 | 2 MASCOT | T | PLEX8 |
| 9.81E-02 0 0 | Cs5g32640.1 | 4.53 | 0 | 0 | 2 MASCOT | T | PLEX8 |
| 3.21E-02 0 0 | Cs5g32640.1 | 5.99 | 0 | 0 | 2 MASCOT | T | PLEX8 |
| 2.57E-02 0 0 | Cs5g32640.1 | 5.99 | 0 | 0 | 2 MASCOT | T | PLEX8 |
| 4.21E-01 0 0 | Cs5g32640.1 | 8.75 | 0 | 0 | 2 MASCOT | T | PLEX8 |
| 7.46E-02 0 0 | Cs5g32640.1 | 5.99 | 0 | 0 | 2 MASCOT | T |       |
| 1.49E-01 0 0 | Cs5g32640.1 | 8.75 | 0 | 0 | 2 MASCOT | T | PLEX8 |
| 2.00E-02 0 0 | Cs5g32640.1 | 8.75 | 0 | 0 | 2 MASCOT | T | PLEX8 |
| 4.85E-03 0 0 | Cs5g32640.1 | 8.75 | 0 | 0 | 2 MASCOT | T | PLEX8 |
| 1.73E-01 0 0 | Cs5g32640.1 | 5.99 | 0 | 0 | 2 MASCOT | T | PLEX8 |
| 1.36E-02 0 0 | Cs5g32640.1 | 5.4  | 0 | 0 | 2 MASCOT | T | PLEX8 |
| 6.44E-05 0 0 | Cs5g32640.1 | 5.4  | 0 | 0 | 2 MASCOT | T | PLEX8 |
| 4.76E-03 0 0 | Cs5g32640.1 | 5.4  | 0 | 0 | 2 MASCOT | T | PLEX8 |
| 1.31E-04 0 0 | Cs5g32640.1 | 5.4  | 0 | 0 | 2 MASCOT | T | PLEX8 |
| 1.16E-01 0 0 | Cs5g32640.1 | 4.75 | 1 | 0 | 2 MASCOT | T |       |
| 1.27E-01 0 0 | Cs5g32640.1 | 6.92 | 0 | 0 | 2 MASCOT | T |       |

|          |     |                     |      |   |      |   |        |        |       |       |
|----------|-----|---------------------|------|---|------|---|--------|--------|-------|-------|
| 1.31E-03 | 0 0 | Cs3g27840.1/Cs3g278 | 4.37 | 0 | 0    | 2 | MASCOT | T      |       |       |
| 8.64E-02 | 0 0 | Cs3g27840.1/Cs3g278 | 6.85 | 0 | 0    | 2 | MASCOT | T      | PLEX8 |       |
| 9.05E-02 | 0 0 | Cs3g27840.1/Cs3g278 | 5.4  | 0 | 15.9 | 0 | 2      | MASCOT | T     | PLEX8 |
| 5.71E-03 | 0 0 | Cs3g27840.1/Cs3g278 | 5.84 | 0 | 0    | 2 | MASCOT | T      | PLEX8 |       |
| 3.04E-02 | 0 0 | Cs3g27840.1/Cs3g278 | 5.84 | 0 | 0    | 2 | MASCOT | T      | PLEX8 |       |
| 1.50E-01 | 0 0 | Cs3g27840.1/Cs3g278 | 5.84 | 0 | 0    | 2 | MASCOT | T      | PLEX8 |       |
| 1.30E-07 | 0 0 | Cs3g27840.1/Cs3g278 | 4.37 | 0 | 0    | 2 | MASCOT | T      | PLEX8 |       |
| 3.47E-04 | 0 0 | Cs3g27840.1/Cs3g278 | 5.72 | 0 | 0    | 2 | MASCOT | T      |       |       |
| 1.39E-06 | 0 0 | Cs3g27840.1/Cs3g278 | 4.37 | 0 | 0    | 2 | MASCOT | T      | PLEX8 |       |
| 1.54E-01 | 0 0 | Cs3g27840.1/Cs3g278 | 5.32 | 0 | 0    | 2 | MASCOT | T      | PLEX8 |       |
| 2.53E-04 | 0 0 | Cs3g27840.1/Cs3g278 | 5.32 | 0 | 0    | 2 | MASCOT | T      | PLEX8 |       |
| 2.11E-02 | 0 0 | Cs3g27840.1/Cs3g278 | 5.32 | 0 | 0    | 2 | MASCOT | T      | PLEX8 |       |
| 2.71E-04 | 0 0 | Cs3g27840.1/Cs3g278 | 5.32 | 0 | 0    | 2 | MASCOT | T      |       |       |
| 1.65E-01 | 0 0 | Cs3g27840.1/Cs3g278 | 5.32 | 0 | 0    | 2 | MASCOT | T      |       |       |
| 1.62E-02 | 0 0 | Cs3g27840.1/Cs3g278 | 5.81 | 0 | 0    | 2 | MASCOT | T      | PLEX8 |       |
| 1.71E-01 | 0 0 | Cs3g27840.1/Cs3g278 | 5.81 | 0 | 0    | 2 | MASCOT | T      | PLEX8 |       |
| 3.39E-01 | 0 0 | Cs3g27840.1/Cs3g278 | 8.22 | 0 | 0    | 2 | MASCOT | T      | PLEX8 |       |
| 5.58E-02 | 0 0 | Cs3g27840.1/Cs3g278 | 8.22 | 0 | 0    | 2 | MASCOT | T      | PLEX8 |       |
| 6.22E-03 | 0 0 | Cs3g27840.2/Cs3g278 | 6.1  | 0 | 0    | 2 | MASCOT | T      | PLEX8 |       |
| 8.00E-02 | 0 0 | Cs3g27840.1/Cs3g278 | 4.21 | 0 | 0    | 2 | MASCOT | T      | PLEX8 |       |
| 2.20E-03 | 0 0 | Cs3g27840.1/Cs3g278 | 4.21 | 0 | 0    | 2 | MASCOT | T      | PLEX8 |       |
| 4.65E-02 | 0 0 | Cs3g27840.1/Cs3g278 | 4.22 | 0 | 0    | 2 | MASCOT | T      | PLEX8 |       |
| 3.45E-04 | 0 0 | Cs3g27840.1/Cs3g278 | 4.22 | 0 | 0    | 2 | MASCOT | T      | PLEX8 |       |
| 7.52E-02 | 0 0 | Cs3g27840.1/Cs3g278 | 4.22 | 0 | 0    | 2 | MASCOT | T      |       |       |
| 2.30E-04 | 0 0 | Cs3g27840.1/Cs3g278 | 4.22 | 0 | 0    | 2 | MASCOT | T      | PLEX8 |       |
| 2.88E-07 | 0 0 | Cs3g27840.1/Cs3g278 | 4.22 | 0 | 0    | 2 | MASCOT | T      | PLEX8 |       |
| 1.25E-04 | 0 0 | Cs3g27840.1/Cs3g278 | 4.22 | 0 | 0    | 2 | MASCOT | T      |       |       |
| 4.56E-01 | 0 0 | Cs5g31770.1         | 6.85 | 0 | 0    | 2 | MASCOT | T      | PLEX8 |       |
| 1.10E-01 | 0 0 | Cs5g31770.1         | 6.85 | 0 | 0    | 2 | MASCOT | T      | PLEX8 |       |
| 8.66E-03 | 0 0 | Cs5g31770.1         | 4.37 | 0 | 0    | 2 | MASCOT | T      |       |       |
| 4.95E-01 | 0 0 | Cs5g31770.1         | 7.02 | 0 | 0    | 2 | MASCOT | T      | PLEX8 |       |
| 3.84E-03 | 0 0 | Cs5g31770.1         | 7.02 | 0 | 0    | 2 | MASCOT | T      | PLEX8 |       |
| 1.91E-03 | 0 0 | Cs5g31770.1         | 7.02 | 0 | 0    | 2 | MASCOT | T      | PLEX8 |       |
| 7.65E-02 | 0 0 | Cs5g31770.1         | 8.41 | 0 | 0    | 2 | MASCOT | T      | PLEX8 |       |
| 3.23E-01 | 0 0 | Cs5g31770.1         | 5.66 | 0 | 0    | 2 | MASCOT | T      | PLEX8 |       |
| 3.86E-03 | 0 0 | Cs5g31770.1         | 5.66 | 0 | 0    | 2 | MASCOT | T      | PLEX8 |       |
| 3.22E-01 | 0 0 | Cs5g31770.1         | 4.37 | 0 | 0    | 2 | MASCOT | T      | PLEX8 |       |
| 9.37E-03 | 0 0 | Cs5g31770.1         | 4.37 | 0 | 0    | 2 | MASCOT | T      | PLEX8 |       |
| 1.17E-02 | 0 0 | Cs5g31770.1         | 4.37 | 0 | 0    | 2 | MASCOT | T      | PLEX8 |       |
| 3.40E-02 | 0 0 | Cs5g31770.1         | 4.37 | 0 | 0    | 2 | MASCOT | T      | PLEX8 |       |
| 2.05E-01 | 0 0 | Cs5g31770.1         | 4.53 | 0 | 0    | 2 | MASCOT | T      | PLEX8 |       |
| 2.55E-01 | 0 0 | Cs5g31770.1         | 6.1  | 0 | 0    | 2 | MASCOT | T      | PLEX8 |       |
| 6.92E-03 | 0 0 | Cs5g31770.1         | 4.37 | 0 | 0    | 2 | MASCOT | T      |       |       |
| 1.44E-03 | 0 0 | Cs5g31770.1         | 4.37 | 0 | 0    | 2 | MASCOT | T      |       |       |
| 8.31E-02 | 0 0 | Cs5g31770.1         | 5.4  | 0 | 0    | 2 | MASCOT | T      | PLEX8 |       |
| 3.15E-01 | 0 0 | Cs5g31770.1         | 5.4  | 0 | 0    | 2 | MASCOT | T      | PLEX8 |       |
| 4.70E-02 | 0 0 | Cs5g31770.1         | 8.75 | 0 | 0    | 2 | MASCOT | T      | PLEX8 |       |
| 9.25E-04 | 0 0 | Cs5g06190.1/Cs5g317 | 6.25 | 0 | 0    | 2 | MASCOT | T      | PLEX8 |       |
| 1.42E-01 | 0 0 | Cs5g06190.1/Cs5g317 | 6.25 | 0 | 0    | 2 | MASCOT | T      | PLEX8 |       |
| 2.77E-03 | 0 0 | Cs5g06190.1/Cs5g317 | 6.25 | 0 | 0    | 2 | MASCOT | T      | PLEX8 |       |
| 1.36E-02 | 0 0 | Cs5g06190.1/Cs5g317 | 6.25 | 0 | 0    | 2 | MASCOT | T      | PLEX8 |       |

|          |     |                     |      |   |   |   |        |   |       |
|----------|-----|---------------------|------|---|---|---|--------|---|-------|
| 6.76E-03 | 0 0 | Cs5g06190.1/Cs5g317 | 6.25 | 0 | 0 | 2 | MASCOT | T |       |
| 3.39E-03 | 0 0 | Cs5g31770.1         | 8.22 | 0 | 0 | 2 | MASCOT | T | PLEX8 |
| 1.87E-02 | 0 0 | Cs5g31770.1         | 8.41 | 0 | 0 | 2 | MASCOT | T | PLEX8 |
| 1.75E-04 | 0 0 | Cs8g08330.1/Cs8g083 | 6.05 | 0 | 0 | 2 | MASCOT | T |       |
| 2.15E-04 | 0 0 | Cs8g08330.1/Cs8g083 | 6.05 | 0 | 0 | 2 | MASCOT | T |       |
| 2.55E-06 | 0 0 | Cs8g08330.1/Cs8g083 | 6.05 | 0 | 0 | 2 | MASCOT | T |       |
| 1.24E-06 | 0 0 | Cs8g08330.1/Cs8g083 | 6.05 | 0 | 0 | 2 | MASCOT | T |       |
| 4.65E-02 | 0 0 | Cs8g08330.1/Cs8g083 | 8.8  | 0 | 0 | 2 | MASCOT | T | PLEX8 |
| 2.42E-01 | 0 0 | Cs8g08330.1/Cs8g083 | 5.99 | 0 | 0 | 2 | MASCOT | T | PLEX8 |
| 1.16E-01 | 0 0 | Cs8g08330.1/Cs8g083 | 4.37 | 0 | 0 | 2 | MASCOT | T |       |
| 1.97E-01 | 0 0 | Cs8g08330.1/Cs8g083 | 3.83 | 0 | 0 | 2 | MASCOT | T |       |
| 5.19E-03 | 0 0 | Cs8g08330.1/Cs8g083 | 6    | 0 | 0 | 2 | MASCOT | T | PLEX8 |
| 9.37E-03 | 0 0 | Cs8g08330.1/Cs8g083 | 6    | 0 | 0 | 2 | MASCOT | T | PLEX8 |
| 8.67E-03 | 0 0 | Cs8g08330.1/Cs8g083 | 6.41 | 0 | 0 | 2 | MASCOT | T | PLEX8 |
| 4.38E-04 | 0 0 | Cs8g08330.1/Cs8g083 | 6.41 | 0 | 0 | 2 | MASCOT | T | PLEX8 |
| 8.07E-04 | 0 0 | Cs8g08330.1/Cs8g083 | 6.41 | 0 | 0 | 2 | MASCOT | T | PLEX8 |
| 1.59E-04 | 0 0 | Cs8g08330.1/Cs8g083 | 6.41 | 0 | 0 | 2 | MASCOT | T | PLEX8 |
| 5.27E-02 | 0 0 | Cs8g08330.1/Cs8g083 | 6.41 | 0 | 0 | 2 | MASCOT | T | PLEX8 |
| 2.52E-01 | 0 0 | Cs8g08330.1/Cs8g083 | 6.41 | 0 | 0 | 2 | MASCOT | T | PLEX8 |
| 8.69E-03 | 0 0 | Cs8g08330.1/Cs8g083 | 6.79 | 0 | 0 | 2 | MASCOT | T |       |
| 2.41E-03 | 0 0 | Cs8g08330.1/Cs8g083 | 3.84 | 0 | 0 | 2 | MASCOT | T | PLEX8 |
| 1.96E-02 | 0 0 | Cs8g08330.1/Cs8g083 | 5.4  | 0 | 0 | 2 | MASCOT | T | PLEX8 |
| 5.93E-02 | 0 0 | Cs8g08330.1/Cs8g083 | 5.4  | 0 | 0 | 2 | MASCOT | T | PLEX8 |
| 1.86E-01 | 0 0 | Cs8g08330.1/Cs8g083 | 5.4  | 0 | 0 | 2 | MASCOT | T | PLEX8 |
| 6.08E-02 | 0 0 | Cs8g08330.1/Cs8g083 | 5.21 | 0 | 0 | 2 | MASCOT | T | PLEX8 |
| 5.03E-02 | 0 0 | Cs8g08330.1/Cs8g083 | 6.75 | 0 | 0 | 2 | MASCOT | T |       |
| 2.83E-03 | 0 0 | Cs8g08330.1/Cs8g083 | 6.75 | 0 | 0 | 2 | MASCOT | T |       |
| 3.29E-02 | 0 0 | Cs8g08330.1/Cs8g083 | 5.72 | 0 | 0 | 2 | MASCOT | T | PLEX8 |
| 2.82E-02 | 0 0 | Cs8g08330.1/Cs8g083 | 4.14 | 0 | 0 | 2 | MASCOT | T | PLEX8 |
| 1.54E-03 | 0 0 | orange1.1t02009.1   | 4.54 | 0 | 0 | 2 | MASCOT | T | PLEX8 |
| 2.13E-02 | 0 0 | orange1.1t02009.1   | 8.8  | 0 | 0 | 2 | MASCOT | T | PLEX8 |
| 1.96E-03 | 0 0 | orange1.1t02009.1   | 8.8  | 0 | 0 | 2 | MASCOT | T | PLEX8 |
| 6.78E-03 | 0 0 | orange1.1t02009.1   | 5.88 | 0 | 0 | 2 | MASCOT | T | PLEX8 |
| 1.44E-01 | 0 0 | orange1.1t02009.1   | 5.88 | 0 | 0 | 2 | MASCOT | T | PLEX8 |
| 1.95E-02 | 0 0 | orange1.1t02009.1   | 5.88 | 0 | 0 | 2 | MASCOT | T | PLEX8 |
| 1.28E-03 | 0 0 | orange1.1t02009.1   | 5.88 | 0 | 0 | 2 | MASCOT | T | PLEX8 |
| 9.35E-02 | 0 0 | orange1.1t02009.1   | 5.88 | 0 | 0 | 2 | MASCOT | T | PLEX8 |
| 7.11E-02 | 0 0 | orange1.1t02009.1   | 5.88 | 0 | 0 | 2 | MASCOT | T | PLEX8 |
| 6.90E-03 | 0 0 | orange1.1t02009.1   | 5.88 | 0 | 0 | 2 | MASCOT | T | PLEX8 |
| 1.79E-02 | 0 0 | orange1.1t02009.1   | 4.53 | 0 | 0 | 2 | MASCOT | T | PLEX8 |
| 1.92E-02 | 0 0 | orange1.1t02009.1   | 4.37 | 0 | 0 | 2 | MASCOT | T | PLEX8 |
| 1.06E-02 | 0 0 | orange1.1t02009.1   | 5.84 | 0 | 0 | 2 | MASCOT | T | PLEX8 |
| 8.69E-04 | 0 0 | orange1.1t02009.1   | 4.1  | 0 | 0 | 2 | MASCOT | T | PLEX8 |
| 8.06E-02 | 0 0 | orange1.1t02009.1   | 5.81 | 0 | 0 | 2 | MASCOT | T | PLEX8 |
| 8.15E-02 | 0 0 | orange1.1t02009.1   | 4.53 | 0 | 0 | 2 | MASCOT | T | PLEX8 |
| 6.16E-03 | 0 0 | orange1.1t02009.1   | 6.05 | 0 | 0 | 2 | MASCOT | T |       |
| 2.11E-02 | 0 0 | orange1.1t02009.1   | 4.21 | 0 | 0 | 2 | MASCOT | T | PLEX8 |
| 2.98E-01 | 0 0 | orange1.1t02009.1   | 6.83 | 0 | 0 | 2 | MASCOT | T | PLEX8 |
| 1.87E-01 | 0 0 | orange1.1t02009.1   | 6.83 | 0 | 0 | 2 | MASCOT | T | PLEX8 |
| 2.48E-01 | 0 0 | orange1.1t02009.1   | 6.83 | 0 | 0 | 2 | MASCOT | T | PLEX8 |
| 2.30E-01 | 0 0 | orange1.1t02009.1   | 6.83 | 0 | 0 | 2 | MASCOT | T | PLEX8 |

|          |     |                     |      |   |      |   |        |        |       |       |
|----------|-----|---------------------|------|---|------|---|--------|--------|-------|-------|
| 5.17E-02 | 0 0 | orange1.1t02009.1   | 5.84 | 0 | 0    | 2 | MASCOT | T      | PLEX8 |       |
| 1.17E-02 | 0 0 | orange1.1t02009.1   | 6.75 | 0 | 0    | 2 | MASCOT | T      |       |       |
| 1.40E-03 | 0 0 | Cs5g27000.1/Cs5g270 | 4.37 | 0 | 0    | 2 | MASCOT | T      |       |       |
| 2.24E-03 | 0 0 | Cs5g27000.1/Cs5g270 | 4.37 | 0 | 0    | 2 | MASCOT | T      |       |       |
| 3.87E-08 | 0 0 | Cs5g27000.1/Cs5g270 | 4.37 | 0 | 0    | 2 | MASCOT | T      |       |       |
| 3.68E-05 | 0 0 | Cs5g27000.1/Cs5g270 | 4.37 | 0 | 0    | 2 | MASCOT | T      |       |       |
| 7.57E-02 | 0 0 | Cs2g28930.1/Cs2g289 | 4.37 | 0 | 0    | 2 | MASCOT | T      | PLEX8 |       |
| 7.98E-02 | 0 0 | Cs5g27000.1/Cs5g270 | 8.6  | 0 | 0    | 2 | MASCOT | T      |       |       |
| 1.61E-01 | 0 0 | Cs5g27000.1/Cs5g270 | 5.84 | 0 | 0    | 2 | MASCOT | T      | PLEX8 |       |
| 5.47E-03 | 0 0 | Cs5g27000.1/Cs5g270 | 4.25 | 0 | 0    | 2 | MASCOT | T      | PLEX8 |       |
| 2.31E-02 | 0 0 | Cs5g27000.1/Cs5g270 | 4.25 | 0 | 0    | 2 | MASCOT | T      | PLEX8 |       |
| 2.79E-01 | 0 0 | Cs5g27040.1         | 6    | 0 | 0    | 2 | MASCOT | T      | PLEX8 |       |
| 2.04E-01 | 0 0 | Cs5g27040.1         | 6    | 0 | 0    | 2 | MASCOT | T      | PLEX8 |       |
| 1.65E-02 | 0 0 | Cs5g27000.1/Cs5g270 | 4.37 | 0 | 0    | 2 | MASCOT | T      | PLEX8 |       |
| 4.19E-02 | 0 0 | Cs2g28930.1/Cs2g289 | 8.47 | 0 | 0    | 2 | MASCOT | T      | PLEX8 |       |
| 2.97E-02 | 0 0 | Cs2g28930.1/Cs2g289 | 8.47 | 0 | 0    | 2 | MASCOT | T      | PLEX8 |       |
| 4.78E-02 | 0 0 | Cs2g28930.1/Cs2g289 | 8.47 | 0 | 0    | 2 | MASCOT | T      | PLEX8 |       |
| 1.57E-03 | 0 0 | Cs2g28930.1/Cs2g289 | 5.97 | 0 | 0    | 2 | MASCOT | T      | PLEX8 |       |
| 3.04E-02 | 0 0 | Cs2g28930.1/Cs2g289 | 5.97 | 0 | 0    | 2 | MASCOT | T      | PLEX8 |       |
| 5.10E-03 | 0 0 | Cs2g28930.1/Cs2g289 | 5.97 | 0 | 0    | 2 | MASCOT | T      | PLEX8 |       |
| 9.63E-03 | 0 0 | Cs2g28930.1/Cs2g289 | 5.84 | 0 | 0    | 2 | MASCOT | T      | PLEX8 |       |
| 4.64E-03 | 0 0 | Cs2g28930.1/Cs2g289 | 5.84 | 0 | 0    | 2 | MASCOT | T      |       |       |
| 1.11E-01 | 0 0 | Cs2g28930.1/Cs2g289 | 9.8  | 0 | 0    | 2 | MASCOT | T      | PLEX8 |       |
| 3.20E-01 | 0 0 | Cs2g28930.1/Cs2g289 | 9.2  | 0 | 0    | 2 | MASCOT | T      | PLEX8 |       |
| 2.51E-01 | 0 0 | Cs5g27000.1/Cs5g270 | 6    | 0 | 0    | 2 | MASCOT | T      | PLEX8 |       |
| 7.68E-02 | 0 0 | Cs4g09680.1/Cs4g096 | 6.05 | 0 | 0    | 2 | MASCOT | T      | PLEX8 |       |
| 7.84E-02 | 0 0 | Cs4g09680.1/Cs4g096 | 6.05 | 0 | 0    | 2 | MASCOT | T      | PLEX8 |       |
| 3.77E-02 | 0 0 | Cs4g09680.1/Cs4g096 | 4.18 | 1 | 0    | 2 | MASCOT | T      | PLEX8 |       |
| 2.52E-01 | 0 0 | Cs4g09680.1/Cs4g096 | 4.25 | 0 | 0    | 2 | MASCOT | T      | PLEX8 |       |
| 1.22E-02 | 0 0 | Cs4g09680.1         | 4.25 | 0 | 0    | 2 | MASCOT | T      | PLEX8 |       |
| 1.55E-01 | 0 0 | Cs4g09680.1         | 4.25 | 0 | 0    | 2 | MASCOT | T      | PLEX8 |       |
| 2.95E-01 | 0 0 | Cs4g09680.1/Cs4g096 | 4.53 | 0 | 15.9 | 0 | 2      | MASCOT | T     | PLEX8 |
| 2.60E-01 | 0 0 | Cs4g09680.1/Cs4g096 | 4.53 | 0 | 15.9 | 0 | 2      | MASCOT | T     |       |
| 3.06E-03 | 0 0 | Cs4g09680.1/Cs4g096 | 4.22 | 0 | 0    | 2 | MASCOT | T      | PLEX8 |       |
| 2.30E-05 | 0 0 | Cs4g09680.1/Cs4g096 | 6    | 0 | 0    | 2 | MASCOT | T      | PLEX8 |       |
| 4.66E-02 | 0 0 | Cs4g09680.1/Cs4g096 | 5.84 | 0 | 0    | 2 | MASCOT | T      | PLEX8 |       |
| 4.39E-03 | 0 0 | Cs4g09680.1/Cs4g096 | 5.84 | 0 | 0    | 2 | MASCOT | T      | PLEX8 |       |
| 3.36E-04 | 0 0 | Cs4g09680.1         | 4.14 | 0 | 0    | 2 | MASCOT | T      | PLEX8 |       |
| 3.47E-02 | 0 0 | Cs4g09680.1         | 4.14 | 0 | 0    | 2 | MASCOT | T      | PLEX8 |       |
| 1.17E-04 | 0 0 | Cs4g09680.1         | 4.14 | 0 | 0    | 2 | MASCOT | T      | PLEX8 |       |
| 2.44E-01 | 0 0 | Cs4g09680.1/Cs4g096 | 6    | 0 | 0    | 2 | MASCOT | T      | PLEX8 |       |
| 3.19E-04 | 0 0 | Cs4g09680.1/Cs4g096 | 4.53 | 0 | 0    | 2 | MASCOT | T      | PLEX8 |       |
| 6.53E-02 | 0 0 | Cs4g09680.1/Cs4g096 | 4.53 | 0 | 0    | 2 | MASCOT | T      | PLEX8 |       |
| 9.52E-04 | 0 0 | Cs4g09680.1/Cs4g096 | 8.59 | 0 | 0    | 2 | MASCOT | T      | PLEX8 |       |
| 2.40E-01 | 0 0 | Cs4g09680.1/Cs4g096 | 5.97 | 0 | 0    | 2 | MASCOT | T      | PLEX8 |       |
| 4.69E-01 | 0 0 | Cs4g09680.1/Cs4g096 | 5.97 | 0 | 0    | 2 | MASCOT | T      | PLEX8 |       |
| 1.74E-01 | 0 0 | Cs7g19370.1/Cs7g193 | 6.79 | 0 | 0    | 2 | MASCOT | T      | PLEX8 |       |
| 6.14E-02 | 0 0 | Cs7g19370.1/Cs7g193 | 5.84 | 0 | 0    | 2 | MASCOT | T      | PLEX8 |       |
| 6.35E-05 | 0 0 | Cs7g19370.1/Cs7g193 | 4.53 | 0 | 0    | 2 | MASCOT | T      |       |       |
| 4.37E-03 | 0 0 | Cs7g19370.1/Cs7g193 | 4.53 | 0 | 0    | 2 | MASCOT | T      |       |       |
| 2.94E-02 | 0 0 | Cs7g19370.1/Cs7g193 | 4.25 | 0 | 0    | 2 | MASCOT | T      |       |       |

|          |     |                     |      |   |   |   |        |   |       |
|----------|-----|---------------------|------|---|---|---|--------|---|-------|
| 2.03E-03 | 0 0 | Cs7g19370.1/Cs7g193 | 4.25 | 0 | 0 | 2 | MASCOT | T |       |
| 5.61E-04 | 0 0 | Cs7g19370.1/Cs7g193 | 4.25 | 0 | 0 | 2 | MASCOT | T |       |
| 1.52E-01 | 0 0 | Cs7g19370.1/Cs7g193 | 6    | 0 | 0 | 2 | MASCOT | T | PLEX8 |
| 5.57E-01 | 0 0 | Cs7g19370.1/Cs7g193 | 6    | 0 | 0 | 2 | MASCOT | T | PLEX8 |
| 9.44E-03 | 0 0 | Cs7g19370.1/Cs7g193 | 5.97 | 0 | 0 | 2 | MASCOT | T | PLEX8 |
| 7.88E-02 | 0 0 | Cs7g19370.1/Cs7g193 | 5.97 | 0 | 0 | 2 | MASCOT | T | PLEX8 |
| 1.53E-02 | 0 0 | Cs7g19370.1/Cs7g193 | 5.97 | 0 | 0 | 2 | MASCOT | T | PLEX8 |
| 1.06E-04 | 0 0 | Cs7g19370.1/Cs7g193 | 5.97 | 0 | 0 | 2 | MASCOT | T | PLEX8 |
| 1.12E-01 | 0 0 | Cs7g19370.1/Cs7g193 | 4.65 | 0 | 0 | 2 | MASCOT | T | PLEX8 |
| 1.24E-01 | 0 0 | Cs7g19370.1/Cs7g193 | 4.37 | 0 | 0 | 2 | MASCOT | T | PLEX8 |
| 7.71E-03 | 0 0 | Cs7g19370.1/Cs7g193 | 8.59 | 1 | 0 | 2 | MASCOT | T | PLEX8 |
| 5.51E-02 | 0 0 | Cs7g19370.1/Cs7g193 | 4.53 | 0 | 0 | 2 | MASCOT | T | PLEX8 |
| 9.28E-04 | 0 0 | Cs7g19370.1/Cs7g193 | 4.53 | 0 | 0 | 2 | MASCOT | T | PLEX8 |
| 2.14E-02 | 0 0 | Cs7g19370.1/Cs7g193 | 4.53 | 0 | 0 | 2 | MASCOT | T | PLEX8 |
| 8.67E-02 | 0 0 | Cs7g19370.1/Cs7g193 | 5.66 | 0 | 0 | 2 | MASCOT | T |       |
| 1.72E-01 | 0 0 | Cs7g19370.1/Cs7g193 | 5.81 | 0 | 0 | 2 | MASCOT | T |       |
| 9.00E-04 | 0 0 | Cs5g31320.1         | 5.21 | 0 | 0 | 2 | MASCOT | T | PLEX8 |
| 6.19E-04 | 0 0 | Cs5g31320.1         | 5.84 | 0 | 0 | 2 | MASCOT | T | PLEX8 |
| 5.77E-02 | 0 0 | Cs5g31320.1         | 4.53 | 0 | 0 | 2 | MASCOT | T | PLEX8 |
| 8.43E-03 | 0 0 | Cs5g31320.1         | 5.72 | 0 | 0 | 2 | MASCOT | T | PLEX8 |
| 2.96E-04 | 0 0 | Cs5g31320.1         | 5.72 | 0 | 0 | 2 | MASCOT | T | PLEX8 |
| 2.29E-03 | 0 0 | Cs5g31320.1         | 5.72 | 0 | 0 | 2 | MASCOT | T | PLEX8 |
| 3.19E-01 | 0 0 | Cs5g31320.1         | 5.5  | 0 | 0 | 2 | MASCOT | T | PLEX8 |
| 3.29E-02 | 0 0 | Cs5g31320.1         | 8.72 | 0 | 0 | 2 | MASCOT | T | PLEX8 |
| 1.93E-02 | 0 0 | Cs5g31320.1         | 8.72 | 0 | 0 | 2 | MASCOT | T | PLEX8 |
| 5.00E-03 | 0 0 | Cs5g31320.1         | 6.05 | 0 | 0 | 2 | MASCOT | T | PLEX8 |
| 1.32E-01 | 0 0 | Cs5g31320.1         | 4.25 | 0 | 0 | 2 | MASCOT | T | PLEX8 |
| 4.61E-01 | 0 0 | Cs5g31320.1         | 6.73 | 0 | 0 | 2 | MASCOT | T |       |
| 1.79E-01 | 0 0 | Cs5g31320.1         | 5.21 | 0 | 0 | 2 | MASCOT | T | PLEX8 |
| 1.56E-02 | 0 0 | Cs5g31320.1         | 5.21 | 0 | 0 | 2 | MASCOT | T | PLEX8 |
| 8.60E-04 | 0 0 | Cs5g31320.1         | 5.21 | 0 | 0 | 2 | MASCOT | T | PLEX8 |
| 5.08E-03 | 0 0 | Cs5g31320.1         | 4    | 0 | 0 | 2 | MASCOT | T | PLEX8 |
| 8.35E-02 | 0 0 | Cs5g31320.1         | 4.53 | 0 | 0 | 2 | MASCOT | T | PLEX8 |
| 6.84E-03 | 0 0 | Cs5g31320.1         | 4.37 | 0 | 0 | 2 | MASCOT | T | PLEX8 |
| 1.60E-06 | 0 0 | Cs5g31320.1         | 4.37 | 0 | 0 | 2 | MASCOT | T | PLEX8 |
| 1.58E-03 | 0 0 | Cs5g31320.1         | 4.37 | 0 | 0 | 2 | MASCOT | T | PLEX8 |
| 5.39E-05 | 0 0 | Cs8g10790.1         | 8.54 | 0 | 0 | 2 | MASCOT | T | PLEX8 |
| 2.43E-08 | 0 0 | Cs8g10790.1         | 8.54 | 0 | 0 | 2 | MASCOT | T | PLEX8 |
| 9.53E-05 | 0 0 | Cs8g10790.1         | 8.54 | 0 | 0 | 2 | MASCOT | T | PLEX8 |
| 2.63E-05 | 0 0 | Cs8g10790.1         | 8.54 | 0 | 0 | 2 | MASCOT | T | PLEX8 |
| 5.08E-02 | 0 0 | Cs8g10790.1         | 8.54 | 0 | 0 | 2 | MASCOT | T | PLEX8 |
| 5.76E-03 | 0 0 | Cs8g10790.1         | 8.54 | 0 | 0 | 2 | MASCOT | T | PLEX8 |
| 4.62E-02 | 0 0 | Cs8g10790.1         | 8.54 | 0 | 0 | 2 | MASCOT | T | PLEX8 |
| 3.40E-04 | 0 0 | Cs8g10790.1         | 8.54 | 0 | 0 | 2 | MASCOT | T | PLEX8 |
| 3.41E-04 | 0 0 | Cs8g10790.1/Cs8g107 | 5.88 | 0 | 0 | 2 | MASCOT | T | PLEX8 |
| 4.16E-03 | 0 0 | Cs8g10790.1/Cs8g107 | 5.88 | 0 | 0 | 2 | MASCOT | T | PLEX8 |
| 1.90E-04 | 0 0 | Cs8g10790.1/Cs8g107 | 5.88 | 0 | 0 | 2 | MASCOT | T | PLEX8 |
| 3.19E-03 | 0 0 | Cs8g10790.1/Cs8g107 | 5.88 | 0 | 0 | 2 | MASCOT | T | PLEX8 |
| 7.92E-03 | 0 0 | Cs8g10790.1/Cs8g107 | 5.88 | 0 | 0 | 2 | MASCOT | T | PLEX8 |
| 9.06E-02 | 0 0 | Cs8g10790.1/Cs8g107 | 5.88 | 0 | 0 | 2 | MASCOT | T | PLEX8 |
| 7.83E-04 | 0 0 | Cs8g10790.1/Cs8g107 | 5.88 | 0 | 0 | 2 | MASCOT | T |       |

|          |     |                     |      |   |      |   |        |        |       |
|----------|-----|---------------------|------|---|------|---|--------|--------|-------|
| 1.48E-03 | 0 0 | Cs8g10790.1/Cs8g107 | 5.88 | 0 | 0    | 2 | MASCOT | T      | PLEX8 |
| 5.71E-02 | 0 0 | Cs8g10790.1/Cs8g107 | 5.88 | 0 | 0    | 2 | MASCOT | T      |       |
| 1.24E-01 | 0 0 | Cs8g10790.1/Cs8g107 | 4.21 | 0 | 0    | 2 | MASCOT | T      | PLEX8 |
| 8.36E-03 | 0 0 | Cs8g10790.1/Cs8g107 | 4.21 | 0 | 0    | 2 | MASCOT | T      | PLEX8 |
| 1.46E-01 | 0 0 | Cs8g10790.1/Cs8g107 | 4.21 | 0 | 0    | 2 | MASCOT | T      | PLEX8 |
| 9.97E-02 | 0 0 | Cs8g10790.1/Cs8g107 | 4.21 | 0 | 0    | 2 | MASCOT | T      | PLEX8 |
| 1.36E-01 | 0 0 | Cs8g10790.1/Cs8g107 | 4.21 | 0 | 0    | 2 | MASCOT | T      | PLEX8 |
| 1.15E-01 | 0 0 | Cs8g10790.1/Cs8g107 | 4.21 | 0 | 0    | 2 | MASCOT | T      | PLEX8 |
| 2.62E-01 | 0 0 | Cs8g10790.1/Cs8g107 | 4.21 | 0 | 0    | 2 | MASCOT | T      | PLEX8 |
| 1.19E-01 | 0 0 | Cs8g10790.1/Cs8g107 | 4.21 | 0 | 0    | 2 | MASCOT | T      | PLEX8 |
| 9.64E-03 | 0 0 | Cs8g10790.1/Cs8g107 | 4.21 | 0 | 0    | 2 | MASCOT | T      | PLEX8 |
| 9.35E-02 | 0 0 | Cs8g10790.1/Cs8g107 | 4.21 | 0 | 0    | 2 | MASCOT | T      | PLEX8 |
| 2.65E-01 | 0 0 | Cs8g10790.1/Cs8g107 | 4.21 | 0 | 0    | 2 | MASCOT | T      |       |
| 1.02E-02 | 0 0 | Cs8g10790.1/Cs8g107 | 4.37 | 0 | 0    | 2 | MASCOT | T      | PLEX8 |
| 2.93E-04 | 0 0 | Cs8g10790.1/Cs8g107 | 4.37 | 0 | 0    | 2 | MASCOT | T      |       |
| 1.21E-01 | 0 0 | Cs8g10790.1/Cs8g107 | 4.37 | 0 | 0    | 2 | MASCOT | T      |       |
| 1.48E-04 | 0 0 | Cs8g10790.1/Cs8g107 | 4.37 | 0 | 0    | 2 | MASCOT | T      |       |
| 1.62E-04 | 0 0 | Cs8g10790.1/Cs8g107 | 4.37 | 0 | 0    | 2 | MASCOT | T      |       |
| 3.56E-04 | 0 0 | Cs8g10790.1/Cs8g107 | 4.37 | 0 | 0    | 2 | MASCOT | T      |       |
| 1.39E-02 | 0 0 | Cs8g10790.1/Cs8g107 | 4.37 | 0 | 0    | 2 | MASCOT | T      |       |
| 5.06E-02 | 0 0 | Cs8g10790.1/Cs8g107 | 4.37 | 0 | 0    | 2 | MASCOT | T      |       |
| 3.00E-01 | 0 0 | Cs8g10790.1/Cs8g107 | 4.37 | 0 | 0    | 2 | MASCOT | T      |       |
| 2.22E-01 | 0 0 | Cs8g10790.1/Cs8g107 | 4.37 | 0 | 0    | 2 | MASCOT | T      | PLEX8 |
| 6.23E-02 | 0 0 | Cs8g10790.1/Cs8g107 | 8.22 | 0 | 0    | 2 | MASCOT | T      | PLEX8 |
| 2.40E-02 | 0 0 | Cs8g10790.1/Cs8g107 | 8.22 | 0 | 0    | 2 | MASCOT | T      | PLEX8 |
| 1.51E-01 | 0 0 | Cs8g10790.1/Cs8g107 | 8.22 | 0 | 0    | 2 | MASCOT | T      | PLEX8 |
| 2.37E-01 | 0 0 | Cs8g10790.1/Cs8g107 | 8.22 | 0 | 0    | 2 | MASCOT | T      | PLEX8 |
| 2.92E-02 | 0 0 | Cs8g10790.1/Cs8g107 | 8.22 | 0 | 0    | 2 | MASCOT | T      | PLEX8 |
| 8.85E-03 | 0 0 | Cs8g10790.1/Cs8g107 | 8.22 | 0 | 0    | 2 | MASCOT | T      | PLEX8 |
| 3.75E-02 | 0 0 | Cs8g10790.1/Cs8g107 | 8.22 | 0 | 0    | 2 | MASCOT | T      | PLEX8 |
| 2.27E-02 | 0 0 | Cs8g10790.1/Cs8g107 | 8.22 | 0 | 0    | 2 | MASCOT | T      | PLEX8 |
| 6.88E-02 | 0 0 | Cs8g10790.1/Cs8g107 | 8.22 | 0 | 0    | 2 | MASCOT | T      | PLEX8 |
| 5.27E-02 | 0 0 | Cs8g10790.1/Cs8g107 | 8.22 | 0 | 0    | 2 | MASCOT | T      | PLEX8 |
| 3.99E-02 | 0 0 | Cs8g10790.1         | 4.13 | 0 | 15.9 | 0 | 2      | MASCOT | T     |
| 6.55E-05 | 0 0 | Cs8g10790.1         | 4.13 | 0 | 0    | 2 | MASCOT | T      |       |
| 5.61E-03 | 0 0 | Cs8g10790.1         | 4.03 | 0 | 0    | 2 | MASCOT | T      | PLEX8 |
| 1.79E-01 | 0 0 | Cs8g10790.1         | 4.03 | 0 | 0    | 2 | MASCOT | T      | PLEX8 |
| 4.21E-03 | 0 0 | Cs8g10790.1         | 4.03 | 0 | 0    | 2 | MASCOT | T      | PLEX8 |
| 9.66E-06 | 0 0 | Cs8g10790.1         | 4.03 | 0 | 0    | 2 | MASCOT | T      | PLEX8 |
| 9.28E-03 | 0 0 | Cs8g10790.1         | 4.03 | 0 | 0    | 2 | MASCOT | T      | PLEX8 |
| 6.81E-02 | 0 0 | Cs8g10790.1         | 4.03 | 0 | 0    | 2 | MASCOT | T      | PLEX8 |
| 2.86E-01 | 0 0 | Cs8g10790.1         | 4.03 | 0 | 0    | 2 | MASCOT | T      | PLEX8 |
| 2.45E-02 | 0 0 | Cs8g10790.1         | 4.03 | 0 | 0    | 2 | MASCOT | T      | PLEX8 |
| 1.82E-01 | 0 0 | Cs8g10790.1         | 4.03 | 0 | 0    | 2 | MASCOT | T      |       |
| 4.08E-02 | 0 0 | Cs8g10790.1         | 4.03 | 0 | 0    | 2 | MASCOT | T      | PLEX8 |
| 3.11E-01 | 0 0 | Cs8g10790.1/Cs8g107 | 6.1  | 0 | 0    | 2 | MASCOT | T      | PLEX8 |
| 1.46E-01 | 0 0 | Cs8g10790.1/Cs8g107 | 8.75 | 0 | 0    | 2 | MASCOT | T      | PLEX8 |
| 4.04E-02 | 0 0 | Cs8g10790.1/Cs8g107 | 8.75 | 0 | 0    | 2 | MASCOT | T      | PLEX8 |
| 7.16E-03 | 0 0 | Cs8g10790.1/Cs8g107 | 8.75 | 0 | 0    | 2 | MASCOT | T      | PLEX8 |
| 2.18E-03 | 0 0 | Cs8g10790.1/Cs8g107 | 8.75 | 0 | 0    | 2 | MASCOT | T      | PLEX8 |
| 1.48E-03 | 0 0 | Cs8g10790.1/Cs8g107 | 8.75 | 0 | 0    | 2 | MASCOT | T      | PLEX8 |

|              |                     |      |   |   |          |   |       |
|--------------|---------------------|------|---|---|----------|---|-------|
| 1.93E-04 0 0 | Cs8g10790.1/Cs8g107 | 8.75 | 0 | 0 | 2 MASCOT | T | PLEX8 |
| 6.79E-02 0 0 | Cs8g10790.1/Cs8g107 | 8.75 | 0 | 0 | 2 MASCOT | T | PLEX8 |
| 3.18E-01 0 0 | Cs8g10790.1/Cs8g107 | 8.75 | 0 | 0 | 2 MASCOT | T | PLEX8 |
| 1.43E-03 0 0 | Cs8g10790.1/Cs8g107 | 8.75 | 0 | 0 | 2 MASCOT | T | PLEX8 |
| 8.07E-04 0 0 | Cs8g10790.1/Cs8g107 | 8.75 | 0 | 0 | 2 MASCOT | T | PLEX8 |
| 2.94E-01 0 0 | Cs8g10790.1/Cs8g107 | 8.75 | 0 | 0 | 2 MASCOT | T | PLEX8 |
| 8.20E-04 0 0 | Cs8g10790.1/Cs8g107 | 8.75 | 0 | 0 | 2 MASCOT | T | PLEX8 |
| 2.21E-02 0 0 | Cs8g10790.1/Cs8g107 | 8.75 | 0 | 0 | 2 MASCOT | T | PLEX8 |
| 5.69E-02 0 0 | Cs8g10790.1/Cs8g107 | 8.75 | 0 | 0 | 2 MASCOT | T | PLEX8 |
| 1.21E-01 0 0 | Cs8g10790.1/Cs8g107 | 8.75 | 0 | 0 | 2 MASCOT | T | PLEX8 |
| 2.83E-02 0 0 | Cs8g10790.1/Cs8g107 | 8.75 | 0 | 0 | 2 MASCOT | T | PLEX8 |
| 7.55E-03 0 0 | Cs8g10790.1/Cs8g107 | 8.75 | 0 | 0 | 2 MASCOT | T | PLEX8 |
| 3.09E-03 0 0 | Cs8g10790.1/Cs8g107 | 8.75 | 0 | 0 | 2 MASCOT | T | PLEX8 |
| 4.68E-01 0 0 | Cs8g10790.1/Cs8g107 | 8.75 | 0 | 0 | 2 MASCOT | T | PLEX8 |
| 9.15E-04 0 0 | Cs8g10790.1/Cs8g107 | 8.75 | 0 | 0 | 2 MASCOT | T | PLEX8 |
| 6.86E-02 0 0 | Cs8g10790.1/Cs8g107 | 8.75 | 0 | 0 | 2 MASCOT | T | PLEX8 |
| 1.10E-04 0 0 | Cs8g10790.1/Cs8g107 | 8.75 | 0 | 0 | 2 MASCOT | T | PLEX8 |
| 1.71E-01 0 0 | Cs8g10790.1/Cs8g107 | 8.75 | 0 | 0 | 2 MASCOT | T | PLEX8 |
| 5.26E-03 0 0 | Cs8g10790.1/Cs8g107 | 8.75 | 0 | 0 | 2 MASCOT | T | PLEX8 |
| 1.41E-03 0 0 | Cs8g10790.1/Cs8g107 | 8.75 | 0 | 0 | 2 MASCOT | T | PLEX8 |
| 1.52E-03 0 0 | Cs8g10790.1/Cs8g107 | 8.75 | 0 | 0 | 2 MASCOT | T | PLEX8 |
| 2.31E-02 0 0 | Cs8g10790.1/Cs8g107 | 8.75 | 0 | 0 | 2 MASCOT | T | PLEX8 |
| 5.38E-01 0 0 | Cs8g10790.1/Cs8g107 | 8.75 | 0 | 0 | 2 MASCOT | T | PLEX8 |
| 1.04E-03 0 0 | Cs8g10790.1/Cs8g107 | 8.75 | 0 | 0 | 2 MASCOT | T | PLEX8 |
| 5.04E-02 0 0 | Cs8g10790.1/Cs8g107 | 8.75 | 0 | 0 | 2 MASCOT | T | PLEX8 |
| 1.66E-01 0 0 | Cs8g10790.1/Cs8g107 | 8.75 | 0 | 0 | 2 MASCOT | T | PLEX8 |
| 9.92E-03 0 0 | Cs8g10790.1/Cs8g107 | 8.75 | 0 | 0 | 2 MASCOT | T | PLEX8 |
| 4.58E-01 0 0 | Cs8g10790.1/Cs8g107 | 8.75 | 0 | 0 | 2 MASCOT | T | PLEX8 |
| 4.34E-02 0 0 | Cs8g10790.1/Cs8g107 | 8.75 | 0 | 0 | 2 MASCOT | T | PLEX8 |
| 5.42E-01 0 0 | Cs8g10790.1/Cs8g107 | 8.75 | 0 | 0 | 2 MASCOT | T | PLEX8 |
| 1.67E-01 0 0 | Cs8g10790.1/Cs8g107 | 8.75 | 0 | 0 | 2 MASCOT | T | PLEX8 |
| 1.28E-01 0 0 | Cs8g10790.1/Cs8g107 | 8.75 | 0 | 0 | 2 MASCOT | T | PLEX8 |
| 2.81E-03 0 0 | Cs8g10790.1/Cs8g107 | 8.75 | 0 | 0 | 2 MASCOT | T | PLEX8 |
| 1.63E-03 0 0 | Cs8g10790.1/Cs8g107 | 8.75 | 0 | 0 | 2 MASCOT | T | PLEX8 |
| 5.97E-02 0 0 | Cs8g10790.1/Cs8g107 | 8.75 | 0 | 0 | 2 MASCOT | T | PLEX8 |
| 8.83E-02 0 0 | Cs8g10790.1/Cs8g107 | 8.75 | 0 | 0 | 2 MASCOT | T | PLEX8 |
| 1.66E-02 0 0 | Cs8g10790.1/Cs8g107 | 8.75 | 0 | 0 | 2 MASCOT | T |       |
| 3.37E-02 0 0 | Cs8g10790.1/Cs8g107 | 8.75 | 0 | 0 | 2 MASCOT | T |       |
| 3.80E-03 0 0 | Cs8g10790.1/Cs8g107 | 8.75 | 0 | 0 | 2 MASCOT | T |       |
| 6.53E-02 0 0 | Cs8g10790.1/Cs8g107 | 4.03 | 0 | 0 | 2 MASCOT | T | PLEX8 |
| 5.36E-02 0 0 | Cs8g10790.1/Cs8g107 | 4.03 | 0 | 0 | 2 MASCOT | T | PLEX8 |
| 2.59E-05 0 0 | Cs8g10790.1/Cs8g107 | 4.03 | 0 | 0 | 2 MASCOT | T | PLEX8 |
| 1.35E-01 0 0 | Cs8g10790.1/Cs8g107 | 4.03 | 0 | 0 | 2 MASCOT | T | PLEX8 |
| 1.06E-04 0 0 | Cs8g10790.1/Cs8g107 | 4.03 | 0 | 0 | 2 MASCOT | T | PLEX8 |
| 1.34E-07 0 0 | Cs8g10790.1/Cs8g107 | 4.03 | 0 | 0 | 2 MASCOT | T | PLEX8 |
| 3.52E-04 0 0 | Cs8g10790.1/Cs8g107 | 4.03 | 0 | 0 | 2 MASCOT | T | PLEX8 |
| 4.38E-03 0 0 | Cs8g10790.1/Cs8g107 | 4.03 | 0 | 0 | 2 MASCOT | T | PLEX8 |
| 1.51E-03 0 0 | Cs8g10790.1/Cs8g107 | 4.03 | 0 | 0 | 2 MASCOT | T | PLEX8 |
| 5.23E-04 0 0 | Cs8g10790.1/Cs8g107 | 4.03 | 0 | 0 | 2 MASCOT | T | PLEX8 |
| 1.82E-02 0 0 | Cs8g10790.1         | 8.75 | 0 | 0 | 2 MASCOT | T | PLEX8 |
| 2.68E-01 0 0 | Cs8g10790.1         | 8.75 | 0 | 0 | 2 MASCOT | T | PLEX8 |



|              |                     |      |   |   |          |   |       |
|--------------|---------------------|------|---|---|----------|---|-------|
| 9.84E-02 0 0 | Cs8g10790.1         | 8.75 | 0 | 0 | 2 MASCOT | T | PLEX8 |
| 1.61E-01 0 0 | Cs8g10790.1         | 8.75 | 0 | 0 | 2 MASCOT | T | PLEX8 |
| 1.04E-01 0 0 | Cs8g10790.1         | 8.75 | 0 | 0 | 2 MASCOT | T | PLEX8 |
| 1.16E-01 0 0 | Cs8g10790.1         | 8.75 | 0 | 0 | 2 MASCOT | T | PLEX8 |
| 2.20E-02 0 0 | Cs8g10790.1         | 8.75 | 0 | 0 | 2 MASCOT | T | PLEX8 |
| 1.06E-01 0 0 | Cs8g10790.1         | 8.75 | 0 | 0 | 2 MASCOT | T | PLEX8 |
| 3.99E-02 0 0 | Cs8g10790.1         | 8.75 | 0 | 0 | 2 MASCOT | T | PLEX8 |
| 2.88E-02 0 0 | Cs8g10790.1         | 8.75 | 0 | 0 | 2 MASCOT | T |       |
| 1.14E-01 0 0 | Cs8g10790.1/Cs8g107 | 4.21 | 0 | 0 | 2 MASCOT | T | PLEX8 |
| 1.06E-01 0 0 | Cs8g10790.1/Cs8g107 | 4.21 | 0 | 0 | 2 MASCOT | T | PLEX8 |
| 1.79E-01 0 0 | Cs8g10790.1/Cs8g107 | 4.21 | 0 | 0 | 2 MASCOT | T | PLEX8 |
| 4.45E-01 0 0 | Cs8g10790.1/Cs8g107 | 4.21 | 0 | 0 | 2 MASCOT | T | PLEX8 |
| 2.85E-01 0 0 | Cs8g10790.1/Cs8g107 | 4.21 | 0 | 0 | 2 MASCOT | T | PLEX8 |
| 1.55E-01 0 0 | Cs8g10790.1/Cs8g107 | 4.21 | 0 | 0 | 2 MASCOT | T | PLEX8 |
| 3.92E-01 0 0 | Cs8g10790.1/Cs8g107 | 4.21 | 0 | 0 | 2 MASCOT | T | PLEX8 |
| 1.19E-01 0 0 | Cs8g10790.1/Cs8g107 | 4.21 | 0 | 0 | 2 MASCOT | T | PLEX8 |
| 1.29E-01 0 0 | Cs8g10790.1/Cs8g107 | 4.21 | 0 | 0 | 2 MASCOT | T | PLEX8 |
| 1.49E-02 0 0 | Cs8g10790.1/Cs8g107 | 4.21 | 0 | 0 | 2 MASCOT | T | PLEX8 |
| 1.16E-01 0 0 | Cs8g10790.1/Cs8g107 | 4.21 | 0 | 0 | 2 MASCOT | T | PLEX8 |
| 1.09E-01 0 0 | Cs8g10790.1/Cs8g107 | 4.21 | 0 | 0 | 2 MASCOT | T | PLEX8 |
| 1.50E-01 0 0 | Cs8g10790.1/Cs8g107 | 4.21 | 0 | 0 | 2 MASCOT | T | PLEX8 |
| 1.53E-01 0 0 | Cs8g10790.1/Cs8g107 | 4.21 | 0 | 0 | 2 MASCOT | T |       |
| 1.59E-02 0 0 | Cs8g10790.1/Cs8g107 | 9.72 | 0 | 0 | 2 MASCOT | T |       |
| 3.96E-02 0 0 | Cs8g10790.1/Cs8g107 | 9.72 | 0 | 0 | 2 MASCOT | T |       |
| 5.40E-03 0 0 | Cs8g10790.1/Cs8g107 | 9.72 | 0 | 0 | 2 MASCOT | T |       |
| 9.56E-06 0 0 | Cs8g10790.1/Cs8g107 | 9.72 | 0 | 0 | 2 MASCOT | T |       |
| 1.08E-02 0 0 | Cs8g10790.1/Cs8g107 | 9.72 | 0 | 0 | 2 MASCOT | T |       |
| 6.69E-05 0 0 | Cs8g10790.1/Cs8g107 | 9.72 | 0 | 0 | 2 MASCOT | T |       |
| 2.37E-02 0 0 | Cs8g10790.1/Cs8g107 | 9.72 | 0 | 0 | 2 MASCOT | T |       |
| 1.38E-04 0 0 | Cs1g01760.1/Cs1g017 | 6.05 | 0 | 0 | 2 MASCOT | T | PLEX8 |
| 6.62E-09 0 0 | Cs1g01760.1/Cs1g017 | 6.05 | 0 | 0 | 2 MASCOT | T | PLEX8 |
| 3.77E-03 0 0 | Cs1g01760.1/Cs1g017 | 6.05 | 0 | 0 | 2 MASCOT | T | PLEX8 |
| 5.99E-04 0 0 | Cs1g01760.1/Cs1g017 | 6.05 | 0 | 0 | 2 MASCOT | T | PLEX8 |
| 1.78E-05 0 0 | Cs1g01760.1/Cs1g017 | 6.05 | 0 | 0 | 2 MASCOT | T |       |
| 3.64E-08 0 0 | Cs1g01760.1/Cs1g017 | 6.05 | 0 | 0 | 2 MASCOT | T |       |
| 1.30E-07 0 0 | Cs1g01760.1/Cs1g017 | 6.05 | 0 | 0 | 2 MASCOT | T |       |
| 8.34E-04 0 0 | Cs1g01760.1/Cs1g017 | 6.05 | 0 | 0 | 2 MASCOT | T | PLEX8 |
| 4.09E-01 0 0 | Cs1g01760.1/Cs1g017 | 6.05 | 0 | 0 | 2 MASCOT | T |       |
| 3.04E-02 0 0 | Cs1g01760.1/Cs1g017 | 9.75 | 0 | 0 | 2 MASCOT | T | PLEX8 |
| 2.66E-04 0 0 | Cs1g01760.1/Cs1g017 | 8.23 | 0 | 0 | 2 MASCOT | T |       |
| 3.68E-02 0 0 | Cs1g01760.1/Cs1g017 | 8.23 | 0 | 0 | 2 MASCOT | T |       |
| 3.77E-04 0 0 | Cs1g01760.1/Cs1g017 | 8.23 | 0 | 0 | 2 MASCOT | T | PLEX8 |
| 3.31E-03 0 0 | Cs1g01760.1/Cs1g017 | 8.23 | 0 | 0 | 2 MASCOT | T |       |
| 1.57E-02 0 0 | Cs1g01760.1/Cs1g017 | 4.53 | 0 | 0 | 2 MASCOT | T | PLEX8 |
| 2.61E-02 0 0 | Cs1g01760.1/Cs1g017 | 4.53 | 0 | 0 | 2 MASCOT | T | PLEX8 |
| 2.51E-02 0 0 | Cs1g01760.1/Cs1g017 | 4.53 | 0 | 0 | 2 MASCOT | T | PLEX8 |
| 2.06E-04 0 0 | Cs1g01760.1/Cs1g017 | 8.75 | 0 | 0 | 2 MASCOT | T | PLEX8 |
| 2.21E-02 0 0 | Cs1g01760.1/Cs1g017 | 8.75 | 0 | 0 | 2 MASCOT | T | PLEX8 |
| 2.79E-02 0 0 | Cs1g01760.1/Cs1g017 | 8.75 | 0 | 0 | 2 MASCOT | T | PLEX8 |
| 4.09E-06 0 0 | Cs1g01760.1/Cs1g017 | 8.75 | 0 | 0 | 2 MASCOT | T | PLEX8 |
| 1.62E-02 0 0 | Cs1g01760.1/Cs1g017 | 8.75 | 0 | 0 | 2 MASCOT | T | PLEX8 |

|          |     |                     |      |   |   |   |        |   |       |
|----------|-----|---------------------|------|---|---|---|--------|---|-------|
| 1.68E-01 | 0 0 | Cs1g01760.1/Cs1g017 | 8.75 | 0 | 0 | 2 | MASCOT | T | PLEX8 |
| 4.17E-04 | 0 0 | Cs1g01760.1/Cs1g017 | 8.75 | 0 | 0 | 2 | MASCOT | T | PLEX8 |
| 2.64E-03 | 0 0 | Cs1g01760.1/Cs1g017 | 8.75 | 0 | 0 | 2 | MASCOT | T | PLEX8 |
| 1.32E-05 | 0 0 | Cs1g01760.1/Cs1g017 | 8.75 | 0 | 0 | 2 | MASCOT | T | PLEX8 |
| 1.10E-02 | 0 0 | Cs1g01760.1/Cs1g017 | 8.75 | 0 | 0 | 2 | MASCOT | T | PLEX8 |
| 8.15E-02 | 0 0 | Cs1g01760.1/Cs1g017 | 8.75 | 0 | 0 | 2 | MASCOT | T | PLEX8 |
| 6.46E-04 | 0 0 | Cs1g01760.1/Cs1g017 | 8.75 | 0 | 0 | 2 | MASCOT | T | PLEX8 |
| 4.55E-03 | 0 0 | Cs1g01760.1/Cs1g017 | 4.68 | 1 | 0 | 2 | MASCOT | T | PLEX8 |
| 4.89E-01 | 0 0 | Cs1g01760.1/Cs1g017 | 4.53 | 0 | 0 | 2 | MASCOT | T | PLEX8 |
| 8.71E-04 | 0 0 | Cs1g01760.1/Cs1g017 | 4.53 | 0 | 0 | 2 | MASCOT | T | PLEX8 |
| 5.58E-01 | 0 0 | Cs1g01760.1/Cs1g017 | 4.53 | 0 | 0 | 2 | MASCOT | T | PLEX8 |
| 8.65E-04 | 0 0 | Cs1g01760.1/Cs1g017 | 4.53 | 0 | 0 | 2 | MASCOT | T | PLEX8 |
| 1.15E-04 | 0 0 | Cs1g01760.1/Cs1g017 | 4.53 | 0 | 0 | 2 | MASCOT | T | PLEX8 |
| 1.81E-03 | 0 0 | Cs1g01760.1/Cs1g017 | 4.53 | 0 | 0 | 2 | MASCOT | T | PLEX8 |
| 5.56E-03 | 0 0 | Cs1g01760.1/Cs1g017 | 4.53 | 0 | 0 | 2 | MASCOT | T | PLEX8 |
| 4.12E-02 | 0 0 | Cs1g01760.1/Cs1g017 | 4.53 | 0 | 0 | 2 | MASCOT | T | PLEX8 |
| 5.14E-01 | 0 0 | Cs1g01760.1/Cs1g017 | 4.53 | 0 | 0 | 2 | MASCOT | T | PLEX8 |
| 3.38E-02 | 0 0 | Cs1g01760.1/Cs1g017 | 4.53 | 0 | 0 | 2 | MASCOT | T | PLEX8 |
| 1.24E-04 | 0 0 | Cs1g01760.1/Cs1g017 | 4.53 | 0 | 0 | 2 | MASCOT | T | PLEX8 |
| 9.16E-04 | 0 0 | Cs1g01760.1/Cs1g017 | 4.53 | 0 | 0 | 2 | MASCOT | T | PLEX8 |
| 4.85E-02 | 0 0 | Cs1g01760.1/Cs1g017 | 4.53 | 0 | 0 | 2 | MASCOT | T |       |
| 2.65E-03 | 0 0 | Cs1g01760.1/Cs1g017 | 4.37 | 0 | 0 | 2 | MASCOT | T | PLEX8 |
| 4.90E-03 | 0 0 | Cs1g01760.1/Cs1g017 | 4.37 | 0 | 0 | 2 | MASCOT | T | PLEX8 |
| 1.56E-03 | 0 0 | Cs1g01760.1/Cs1g017 | 4.37 | 0 | 0 | 2 | MASCOT | T | PLEX8 |
| 4.44E-02 | 0 0 | Cs1g01760.1/Cs1g017 | 4.37 | 0 | 0 | 2 | MASCOT | T | PLEX8 |
| 2.05E-02 | 0 0 | Cs1g01760.1/Cs1g017 | 4.37 | 0 | 0 | 2 | MASCOT | T | PLEX8 |
| 1.10E-01 | 0 0 | Cs1g01760.1/Cs1g017 | 4.37 | 0 | 0 | 2 | MASCOT | T | PLEX8 |
| 8.09E-02 | 0 0 | Cs1g01760.1/Cs1g017 | 4.37 | 0 | 0 | 2 | MASCOT | T | PLEX8 |
| 4.68E-02 | 0 0 | Cs1g01760.1/Cs1g017 | 4.37 | 0 | 0 | 2 | MASCOT | T | PLEX8 |
| 1.82E-02 | 0 0 | Cs1g01760.1/Cs1g017 | 4.37 | 0 | 0 | 2 | MASCOT | T | PLEX8 |
| 2.28E-01 | 0 0 | Cs1g01760.1/Cs1g017 | 4.37 | 0 | 0 | 2 | MASCOT | T |       |
| 3.66E-01 | 0 0 | Cs1g01760.1/Cs1g017 | 4.37 | 0 | 0 | 2 | MASCOT | T | PLEX8 |
| 2.50E-01 | 0 0 | Cs1g01760.1/Cs1g017 | 4.37 | 0 | 0 | 2 | MASCOT | T | PLEX8 |
| 2.53E-01 | 0 0 | Cs1g01760.1/Cs1g017 | 4.37 | 0 | 0 | 2 | MASCOT | T |       |
| 2.75E-03 | 0 0 | Cs1g01760.1/Cs1g017 | 4.37 | 0 | 0 | 2 | MASCOT | T | PLEX8 |
| 2.72E-01 | 0 0 | Cs1g01760.1/Cs1g017 | 4.37 | 0 | 0 | 2 | MASCOT | T |       |
| 1.95E-01 | 0 0 | Cs1g01760.1/Cs1g017 | 4.37 | 0 | 0 | 2 | MASCOT | T | PLEX8 |
| 4.72E-02 | 0 0 | Cs1g01760.1/Cs1g017 | 4.37 | 0 | 0 | 2 | MASCOT | T |       |
| 1.90E-01 | 0 0 | Cs1g01760.1/Cs1g017 | 4.37 | 0 | 0 | 2 | MASCOT | T |       |
| 1.61E-01 | 0 0 | Cs1g01760.1/Cs1g017 | 8.59 | 0 | 0 | 2 | MASCOT | T | PLEX8 |
| 3.62E-01 | 0 0 | Cs1g01760.1/Cs1g017 | 8.59 | 0 | 0 | 2 | MASCOT | T | PLEX8 |
| 8.73E-02 | 0 0 | Cs1g01760.1/Cs1g017 | 8.59 | 0 | 0 | 2 | MASCOT | T | PLEX8 |
| 1.68E-01 | 0 0 | Cs1g01760.1/Cs1g017 | 8.59 | 0 | 0 | 2 | MASCOT | T |       |
| 1.71E-01 | 0 0 | Cs1g01760.1/Cs1g017 | 8.59 | 0 | 0 | 2 | MASCOT | T | PLEX8 |
| 1.13E-01 | 0 0 | Cs1g01760.1/Cs1g017 | 8.59 | 0 | 0 | 2 | MASCOT | T |       |
| 1.25E-01 | 0 0 | Cs1g01760.1/Cs1g017 | 8.59 | 0 | 0 | 2 | MASCOT | T | PLEX8 |
| 1.91E-02 | 0 0 | Cs1g01760.1/Cs1g017 | 8.2  | 0 | 0 | 2 | MASCOT | T | PLEX8 |
| 1.32E-01 | 0 0 | Cs1g01760.1/Cs1g017 | 8.2  | 0 | 0 | 2 | MASCOT | T |       |
| 6.38E-03 | 0 0 | Cs1g01760.1/Cs1g017 | 8.2  | 0 | 0 | 2 | MASCOT | T | PLEX8 |
| 3.21E-02 | 0 0 | Cs1g01760.1/Cs1g017 | 8.2  | 0 | 0 | 2 | MASCOT | T |       |
| 3.67E-04 | 0 0 | Cs1g01760.1/Cs1g017 | 8.2  | 0 | 0 | 2 | MASCOT | T |       |

|              |                     |      |   |   |   |        |         |
|--------------|---------------------|------|---|---|---|--------|---------|
| 2.74E-04 0 0 | Cs1g01760.1/Cs1g017 | 8.2  | 0 | 0 | 2 | MASCOT | T       |
| 2.93E-04 0 0 | Cs1g01760.1/Cs1g017 | 8.2  | 0 | 0 | 2 | MASCOT | T       |
| 3.80E-03 0 0 | Cs1g01760.1/Cs1g017 | 8.2  | 0 | 0 | 2 | MASCOT | T       |
| 2.06E-04 0 0 | Cs1g01760.1/Cs1g017 | 8.2  | 0 | 0 | 2 | MASCOT | T       |
| 7.69E-02 0 0 | Cs1g01760.1/Cs1g017 | 8.2  | 0 | 0 | 2 | MASCOT | T PLEX8 |
| 1.85E-01 0 0 | Cs1g01760.1/Cs1g017 | 7.97 | 0 | 0 | 2 | MASCOT | T PLEX8 |
| 1.38E-01 0 0 | Cs1g01760.1/Cs1g017 | 7.97 | 0 | 0 | 2 | MASCOT | T PLEX8 |
| 6.76E-02 0 0 | Cs1g01760.1/Cs1g017 | 7.97 | 0 | 0 | 2 | MASCOT | T PLEX8 |
| 1.66E-01 0 0 | Cs1g01760.1/Cs1g017 | 8.41 | 0 | 0 | 2 | MASCOT | T PLEX8 |
| 1.31E-01 0 0 | Cs1g01760.1/Cs1g017 | 8.41 | 0 | 0 | 2 | MASCOT | T PLEX8 |
| 2.74E-01 0 0 | Cs1g01760.1/Cs1g017 | 6    | 0 | 0 | 2 | MASCOT | T PLEX8 |
| 1.64E-03 0 0 | Cs1g01760.1/Cs1g017 | 6    | 0 | 0 | 2 | MASCOT | T PLEX8 |
| 8.55E-05 0 0 | Cs1g01760.1/Cs1g017 | 6    | 0 | 0 | 2 | MASCOT | T PLEX8 |
| 6.85E-02 0 0 | Cs1g01760.1/Cs1g017 | 6    | 0 | 0 | 2 | MASCOT | T PLEX8 |
| 2.92E-02 0 0 | Cs1g01760.1/Cs1g017 | 6    | 0 | 0 | 2 | MASCOT | T PLEX8 |
| 9.11E-04 0 0 | Cs1g01760.1/Cs1g017 | 6    | 0 | 0 | 2 | MASCOT | T       |
| 4.98E-02 0 0 | Cs1g01760.1/Cs1g017 | 6    | 0 | 0 | 2 | MASCOT | T       |
| 5.20E-04 0 0 | Cs1g01760.1/Cs1g017 | 6    | 0 | 0 | 2 | MASCOT | T       |
| 2.21E-02 0 0 | Cs1g01760.1/Cs1g017 | 6    | 0 | 0 | 2 | MASCOT | T PLEX8 |
| 3.96E-01 0 0 | Cs7g32500.1/Cs7g325 | 8.75 | 0 | 0 | 2 | MASCOT | T PLEX8 |
| 3.88E-02 0 0 | Cs8g09020.1         | 4.53 | 0 | 0 | 2 | MASCOT | T PLEX8 |
| 1.30E-07 0 0 | Cs8g09020.1         | 4.53 | 0 | 0 | 2 | MASCOT | T PLEX8 |
| 7.41E-04 0 0 | Cs8g09020.1         | 4.53 | 0 | 0 | 2 | MASCOT | T       |
| 5.91E-04 0 0 | Cs8g09020.1         | 4.53 | 0 | 0 | 2 | MASCOT | T PLEX8 |
| 4.42E-01 0 0 | Cs8g09020.1         | 6    | 0 | 0 | 2 | MASCOT | T PLEX8 |
| 4.56E-03 0 0 | Cs8g09020.1         | 6    | 0 | 0 | 2 | MASCOT | T PLEX8 |
| 2.40E-03 0 0 | Cs8g09020.1         | 6    | 0 | 0 | 2 | MASCOT | T PLEX8 |
| 1.20E-02 0 0 | Cs8g09020.1         | 6    | 0 | 0 | 2 | MASCOT | T PLEX8 |
| 4.04E-06 0 0 | Cs8g09020.1         | 6    | 0 | 0 | 2 | MASCOT | T PLEX8 |
| 4.23E-05 0 0 | Cs8g09020.1         | 6    | 0 | 0 | 2 | MASCOT | T PLEX8 |
| 4.39E-03 0 0 | Cs8g09020.1         | 6    | 0 | 0 | 2 | MASCOT | T PLEX8 |
| 1.93E-02 0 0 | Cs8g09020.1         | 6    | 0 | 0 | 2 | MASCOT | T PLEX8 |
| 5.63E-03 0 0 | Cs8g09020.1         | 6    | 0 | 0 | 2 | MASCOT | T PLEX8 |
| 1.54E-02 0 0 | Cs8g09020.1         | 6    | 0 | 0 | 2 | MASCOT | T PLEX8 |
| 4.12E-04 0 0 | Cs8g09020.1         | 4.21 | 0 | 0 | 2 | MASCOT | T PLEX8 |
| 1.43E-03 0 0 | Cs8g09020.1         | 4.21 | 0 | 0 | 2 | MASCOT | T PLEX8 |
| 2.36E-03 0 0 | Cs8g09020.1         | 4.21 | 0 | 0 | 2 | MASCOT | T PLEX8 |
| 1.55E-03 0 0 | Cs8g09020.1         | 4.21 | 0 | 0 | 2 | MASCOT | T PLEX8 |
| 6.41E-02 0 0 | Cs8g09020.1         | 4.21 | 0 | 0 | 2 | MASCOT | T PLEX8 |
| 5.68E-01 0 0 | Cs8g09020.1         | 4.21 | 0 | 0 | 2 | MASCOT | T PLEX8 |
| 2.01E-01 0 0 | Cs8g09020.1         | 4.21 | 0 | 0 | 2 | MASCOT | T PLEX8 |
| 1.16E-01 0 0 | Cs8g09020.1         | 4.21 | 0 | 0 | 2 | MASCOT | T PLEX8 |
| 3.62E-01 0 0 | Cs8g09020.1         | 4.21 | 0 | 0 | 2 | MASCOT | T PLEX8 |
| 5.76E-02 0 0 | Cs8g09020.1         | 4.21 | 0 | 0 | 2 | MASCOT | T PLEX8 |
| 1.94E-02 0 0 | Cs8g09020.1         | 4.21 | 0 | 0 | 2 | MASCOT | T       |
| 2.05E-02 0 0 | Cs8g09020.1         | 5.84 | 0 | 0 | 2 | MASCOT | T PLEX8 |
| 5.86E-03 0 0 | Cs8g09020.1         | 5.84 | 0 | 0 | 2 | MASCOT | T PLEX8 |
| 1.27E-03 0 0 | Cs8g09020.1         | 5.84 | 0 | 0 | 2 | MASCOT | T PLEX8 |
| 7.17E-03 0 0 | Cs8g09020.1         | 5.84 | 0 | 0 | 2 | MASCOT | T PLEX8 |
| 5.17E-05 0 0 | Cs8g09020.1         | 4.03 | 0 | 0 | 2 | MASCOT | T PLEX8 |
| 6.41E-02 0 0 | Cs8g09020.1         | 4.03 | 0 | 0 | 2 | MASCOT | T PLEX8 |

|              |             |      |   |   |          |   |       |
|--------------|-------------|------|---|---|----------|---|-------|
| 3.37E-01 0 0 | Cs8g09020.1 | 4.03 | 0 | 0 | 2 MASCOT | T | PLEX8 |
| 8.29E-04 0 0 | Cs8g09020.1 | 4.03 | 0 | 0 | 2 MASCOT | T |       |
| 1.18E-04 0 0 | Cs8g09020.1 | 4.03 | 0 | 0 | 2 MASCOT | T |       |
| 5.80E-04 0 0 | Cs8g09020.1 | 4.03 | 0 | 0 | 2 MASCOT | T |       |
| 1.19E-02 0 0 | Cs8g09020.1 | 4.03 | 0 | 0 | 2 MASCOT | T |       |
| 5.14E-02 0 0 | Cs8g09020.1 | 5.5  | 0 | 0 | 2 MASCOT | T | PLEX8 |
| 5.54E-03 0 0 | Cs8g09020.1 | 5.5  | 0 | 0 | 2 MASCOT | T | PLEX8 |
| 2.83E-02 0 0 | Cs8g09020.1 | 5.5  | 0 | 0 | 2 MASCOT | T | PLEX8 |
| 3.64E-01 0 0 | Cs8g09020.1 | 5.5  | 0 | 0 | 2 MASCOT | T | PLEX8 |
| 1.01E-01 0 0 | Cs8g09020.1 | 5.5  | 0 | 0 | 2 MASCOT | T | PLEX8 |
| 6.90E-02 0 0 | Cs8g09020.1 | 5.5  | 0 | 0 | 2 MASCOT | T | PLEX8 |
| 2.53E-01 0 0 | Cs8g09020.1 | 5.5  | 0 | 0 | 2 MASCOT | T | PLEX8 |
| 3.11E-03 0 0 | Cs8g09020.1 | 5.4  | 0 | 0 | 2 MASCOT | T | PLEX8 |
| 4.73E-03 0 0 | Cs8g09020.1 | 5.4  | 0 | 0 | 2 MASCOT | T | PLEX8 |
| 4.69E-04 0 0 | Cs8g09020.1 | 5.4  | 0 | 0 | 2 MASCOT | T | PLEX8 |
| 1.31E-03 0 0 | Cs8g09020.1 | 5.4  | 0 | 0 | 2 MASCOT | T | PLEX8 |
| 5.21E-04 0 0 | Cs8g09020.1 | 5.4  | 0 | 0 | 2 MASCOT | T | PLEX8 |
| 1.34E-03 0 0 | Cs8g09020.1 | 5.4  | 0 | 0 | 2 MASCOT | T | PLEX8 |
| 1.06E-05 0 0 | Cs8g09020.1 | 5.4  | 0 | 0 | 2 MASCOT | T |       |
| 4.18E-04 0 0 | Cs8g09020.1 | 5.4  | 0 | 0 | 2 MASCOT | T | PLEX8 |
| 6.35E-07 0 0 | Cs8g09020.1 | 5.4  | 0 | 0 | 2 MASCOT | T | PLEX8 |
| 1.67E-04 0 0 | Cs8g09020.1 | 5.4  | 0 | 0 | 2 MASCOT | T | PLEX8 |
| 4.05E-05 0 0 | Cs8g09020.1 | 5.4  | 0 | 0 | 2 MASCOT | T | PLEX8 |
| 4.20E-02 0 0 | Cs8g09020.1 | 5.4  | 0 | 0 | 2 MASCOT | T |       |
| 1.39E-01 0 0 | Cs8g09020.1 | 5.4  | 0 | 0 | 2 MASCOT | T | PLEX8 |
| 5.41E-02 0 0 | Cs8g09020.1 | 5.4  | 0 | 0 | 2 MASCOT | T | PLEX8 |
| 3.29E-04 0 0 | Cs8g09020.1 | 5.4  | 0 | 0 | 2 MASCOT | T | PLEX8 |
| 6.24E-03 0 0 | Cs8g09020.1 | 5.4  | 0 | 0 | 2 MASCOT | T |       |
| 2.80E-02 0 0 | Cs8g09020.1 | 5.4  | 0 | 0 | 2 MASCOT | T |       |
| 1.20E-08 0 0 | Cs8g09020.1 | 5.4  | 0 | 0 | 2 MASCOT | T |       |
| 2.16E-03 0 0 | Cs8g09020.1 | 5.4  | 0 | 0 | 2 MASCOT | T |       |
| 1.31E-02 0 0 | Cs8g09020.1 | 5.4  | 0 | 0 | 2 MASCOT | T |       |
| 2.15E-08 0 0 | Cs8g09020.1 | 5.4  | 0 | 0 | 2 MASCOT | T |       |
| 5.59E-02 0 0 | Cs8g09020.1 | 6.75 | 0 | 0 | 2 MASCOT | T | PLEX8 |
| 6.12E-02 0 0 | Cs8g09020.1 | 6.75 | 0 | 0 | 2 MASCOT | T | PLEX8 |
| 7.25E-02 0 0 | Cs8g09020.1 | 6.75 | 0 | 0 | 2 MASCOT | T | PLEX8 |
| 6.25E-02 0 0 | Cs8g09020.1 | 6.75 | 0 | 0 | 2 MASCOT | T | PLEX8 |
| 1.37E-02 0 0 | Cs8g09020.1 | 6.75 | 0 | 0 | 2 MASCOT | T | PLEX8 |
| 9.57E-02 0 0 | Cs8g09020.1 | 4.54 | 0 | 0 | 2 MASCOT | T | PLEX8 |
| 8.58E-03 0 0 | Cs8g09020.1 | 4.54 | 0 | 0 | 2 MASCOT | T |       |
| 1.47E-01 0 0 | Cs8g09020.1 | 4.54 | 0 | 0 | 2 MASCOT | T | PLEX8 |
| 3.13E-03 0 0 | Cs8g09020.1 | 4.54 | 0 | 0 | 2 MASCOT | T | PLEX8 |
| 9.23E-02 0 0 | Cs8g09020.1 | 4.54 | 0 | 0 | 2 MASCOT | T | PLEX8 |
| 4.07E-04 0 0 | Cs8g09020.1 | 4.54 | 0 | 0 | 2 MASCOT | T | PLEX8 |
| 1.80E-04 0 0 | Cs8g09020.1 | 4.54 | 0 | 0 | 2 MASCOT | T | PLEX8 |
| 7.71E-02 0 0 | Cs8g09020.1 | 4.54 | 0 | 0 | 2 MASCOT | T | PLEX8 |
| 4.76E-02 0 0 | Cs8g09020.1 | 4.54 | 0 | 0 | 2 MASCOT | T | PLEX8 |
| 2.17E-05 0 0 | Cs8g09020.1 | 6    | 0 | 0 | 2 MASCOT | T | PLEX8 |
| 4.35E-04 0 0 | Cs8g09020.1 | 6    | 0 | 0 | 2 MASCOT | T | PLEX8 |
| 4.00E-05 0 0 | Cs8g09020.1 | 6    | 0 | 0 | 2 MASCOT | T | PLEX8 |
| 9.47E-04 0 0 | Cs8g09020.1 | 6    | 0 | 0 | 2 MASCOT | T | PLEX8 |

|              |                     |      |   |      |          |          |       |       |
|--------------|---------------------|------|---|------|----------|----------|-------|-------|
| 3.84E-04 0 0 | Cs8g09020.1         | 6    | 0 | 0    | 2 MASCOT | T        | PLEX8 |       |
| 1.61E-03 0 0 | Cs8g09020.1         | 6    | 0 | 0    | 2 MASCOT | T        | PLEX8 |       |
| 2.82E-03 0 0 | Cs8g09020.1         | 5.99 | 0 | 0    | 2 MASCOT | T        | PLEX8 |       |
| 3.02E-01 0 0 | Cs8g09020.1         | 5.99 | 0 | 0    | 2 MASCOT | T        | PLEX8 |       |
| 3.32E-05 0 0 | Cs8g09020.1         | 5.99 | 0 | 0    | 2 MASCOT | T        | PLEX8 |       |
| 1.10E-08 0 0 | Cs8g09020.1         | 5.99 | 0 | 0    | 2 MASCOT | T        | PLEX8 |       |
| 2.20E-02 0 0 | Cs8g09020.1         | 5.38 | 1 | 0    | 2 MASCOT | T        | PLEX8 |       |
| 2.88E-02 0 0 | Cs8g09020.1         | 5.38 | 1 | 0    | 2 MASCOT | T        | PLEX8 |       |
| 1.25E-02 0 0 | Cs8g09020.1         | 5.38 | 1 | 0    | 2 MASCOT | T        |       |       |
| 1.38E-04 0 0 | Cs9g14620.1         | 4.23 | 1 | 0    | 2 MASCOT | T        | PLEX8 |       |
| 4.29E-02 0 0 | Cs9g14620.1         | 4.23 | 1 | 0    | 2 MASCOT | T        | PLEX8 |       |
| 7.21E-02 0 0 | Cs9g14620.1         | 4.23 | 1 | 0    | 2 MASCOT | T        | PLEX8 |       |
| 7.26E-02 0 0 | Cs9g14620.1         | 4.23 | 1 | 0    | 2 MASCOT | T        | PLEX8 |       |
| 7.77E-02 0 0 | Cs9g14620.1         | 4.23 | 1 | 0    | 2 MASCOT | T        |       |       |
| 1.45E-05 0 0 | Cs9g14620.1         | 4.23 | 1 | 0    | 2 MASCOT | T        |       |       |
| 3.65E-01 0 0 | Cs9g03530.1/Cs9g035 | 6.1  | 0 | 15.9 | 0        | 2 MASCOT | T     | PLEX8 |
| 2.05E-01 0 0 | Cs9g03530.1/Cs9g035 | 6.1  | 0 | 15.9 | 0        | 2 MASCOT | T     | PLEX8 |
| 2.11E-01 0 0 | Cs9g03530.1/Cs9g035 | 6.1  | 0 | 15.9 | 0        | 2 MASCOT | T     | PLEX8 |
| 4.50E-01 0 0 | Cs9g03530.1/Cs9g035 | 6.1  | 0 | 15.9 | 0        | 2 MASCOT | T     | PLEX8 |
| 3.17E-02 0 0 | Cs9g03530.1/Cs9g035 | 6.1  | 0 | 0    | 2 MASCOT | T        | PLEX8 |       |
| 1.01E-01 0 0 | Cs9g03530.1/Cs9g035 | 6.1  | 0 | 0    | 2 MASCOT | T        | PLEX8 |       |
| 2.04E-01 0 0 | Cs9g03530.1/Cs9g035 | 6.1  | 0 | 0    | 2 MASCOT | T        | PLEX8 |       |
| 3.55E-01 0 0 | Cs9g03530.1/Cs9g035 | 6.1  | 0 | 0    | 2 MASCOT | T        | PLEX8 |       |
| 4.65E-01 0 0 | Cs9g03530.1/Cs9g035 | 6.1  | 0 | 0    | 2 MASCOT | T        | PLEX8 |       |
| 5.46E-02 0 0 | Cs9g03530.1/Cs9g035 | 6.1  | 0 | 0    | 2 MASCOT | T        | PLEX8 |       |
| 3.68E-01 0 0 | Cs9g03530.1/Cs9g035 | 6.1  | 0 | 0    | 2 MASCOT | T        | PLEX8 |       |
| 1.51E-04 0 0 | Cs9g03530.1/Cs9g035 | 4.54 | 0 | 0    | 2 MASCOT | T        | PLEX8 |       |
| 8.15E-06 0 0 | Cs9g03530.1/Cs9g035 | 4.54 | 0 | 0    | 2 MASCOT | T        | PLEX8 |       |
| 1.30E-07 0 0 | Cs9g03530.1/Cs9g035 | 4.54 | 0 | 0    | 2 MASCOT | T        | PLEX8 |       |
| 2.58E-04 0 0 | Cs9g03530.1/Cs9g035 | 4.54 | 0 | 0    | 2 MASCOT | T        | PLEX8 |       |
| 9.86E-09 0 0 | Cs9g03530.1/Cs9g035 | 4.54 | 0 | 0    | 2 MASCOT | T        | PLEX8 |       |
| 2.47E-02 0 0 | Cs9g03530.1/Cs9g035 | 4.54 | 0 | 0    | 2 MASCOT | T        | PLEX8 |       |
| 2.75E-04 0 0 | Cs9g03530.1/Cs9g035 | 4.54 | 0 | 0    | 2 MASCOT | T        | PLEX8 |       |
| 1.79E-02 0 0 | Cs9g03530.1/Cs9g035 | 4.54 | 0 | 0    | 2 MASCOT | T        | PLEX8 |       |
| 2.65E-07 0 0 | Cs9g03530.1/Cs9g035 | 4.54 | 0 | 0    | 2 MASCOT | T        | PLEX8 |       |
| 2.04E-03 0 0 | Cs9g03530.1/Cs9g035 | 4.54 | 0 | 0    | 2 MASCOT | T        |       |       |
| 4.32E-02 0 0 | Cs9g03530.1/Cs9g035 | 4.54 | 0 | 0    | 2 MASCOT | T        | PLEX8 |       |
| 2.05E-05 0 0 | Cs9g03530.1/Cs9g035 | 4.54 | 0 | 0    | 2 MASCOT | T        | PLEX8 |       |
| 1.24E-05 0 0 | Cs9g03530.1/Cs9g035 | 4.54 | 0 | 0    | 2 MASCOT | T        | PLEX8 |       |
| 1.53E-07 0 0 | Cs9g03530.1/Cs9g035 | 4.54 | 0 | 0    | 2 MASCOT | T        | PLEX8 |       |
| 2.07E-08 0 0 | Cs9g03530.1/Cs9g035 | 4.54 | 0 | 0    | 2 MASCOT | T        | PLEX8 |       |
| 1.03E-06 0 0 | Cs9g03530.1/Cs9g035 | 4.54 | 0 | 0    | 2 MASCOT | T        | PLEX8 |       |
| 7.18E-06 0 0 | Cs9g03530.1/Cs9g035 | 4.54 | 0 | 0    | 2 MASCOT | T        | PLEX8 |       |
| 2.30E-04 0 0 | Cs9g03530.1/Cs9g035 | 4.54 | 0 | 0    | 2 MASCOT | T        |       |       |
| 2.42E-02 0 0 | Cs9g03530.1/Cs9g035 | 4.54 | 0 | 0    | 2 MASCOT | T        |       |       |
| 1.09E-04 0 0 | Cs9g03530.1/Cs9g035 | 4.54 | 0 | 0    | 2 MASCOT | T        |       |       |
| 5.91E-06 0 0 | Cs9g03530.1/Cs9g035 | 4.54 | 0 | 0    | 2 MASCOT | T        |       |       |
| 7.34E-03 0 0 | Cs9g14620.1         | 8.22 | 0 | 0    | 2 MASCOT | T        | PLEX8 |       |
| 1.30E-03 0 0 | Cs9g14620.1         | 8.22 | 0 | 0    | 2 MASCOT | T        | PLEX8 |       |
| 1.82E-02 0 0 | Cs9g14620.1         | 8.22 | 0 | 0    | 2 MASCOT | T        | PLEX8 |       |
| 5.10E-04 0 0 | Cs9g14620.1         | 8.22 | 0 | 0    | 2 MASCOT | T        | PLEX8 |       |

|          |     |                     |      |   |      |   |        |        |       |       |
|----------|-----|---------------------|------|---|------|---|--------|--------|-------|-------|
| 1.61E-01 | 0 0 | Cs9g14620.1         | 8.22 | 0 | 0    | 2 | MASCOT | T      | PLEX8 |       |
| 9.72E-03 | 0 0 | Cs9g14620.1         | 8.22 | 0 | 0    | 2 | MASCOT | T      | PLEX8 |       |
| 5.45E-02 | 0 0 | Cs9g14620.1         | 8.22 | 0 | 0    | 2 | MASCOT | T      | PLEX8 |       |
| 2.22E-02 | 0 0 | Cs9g14620.1         | 8.22 | 0 | 0    | 2 | MASCOT | T      | PLEX8 |       |
| 6.15E-04 | 0 0 | Cs9g14620.1         | 8.22 | 0 | 0    | 2 | MASCOT | T      | PLEX8 |       |
| 2.10E-03 | 0 0 | Cs9g14620.1         | 8.22 | 0 | 0    | 2 | MASCOT | T      | PLEX8 |       |
| 7.95E-02 | 0 0 | Cs9g14620.1         | 8.22 | 0 | 0    | 2 | MASCOT | T      | PLEX8 |       |
| 2.13E-01 | 0 0 | Cs9g14620.1         | 8.22 | 0 | 0    | 2 | MASCOT | T      | PLEX8 |       |
| 1.50E-03 | 0 0 | Cs9g14620.1         | 8.22 | 0 | 0    | 2 | MASCOT | T      | PLEX8 |       |
| 2.45E-01 | 0 0 | Cs9g03530.1/Cs9g035 | 5.99 | 0 | 0    | 2 | MASCOT | T      | PLEX8 |       |
| 2.25E-03 | 0 0 | Cs9g03530.1/Cs9g035 | 5.99 | 0 | 0    | 2 | MASCOT | T      | PLEX8 |       |
| 2.18E-04 | 0 0 | Cs9g03530.1/Cs9g035 | 5.99 | 0 | 0    | 2 | MASCOT | T      | PLEX8 |       |
| 6.96E-05 | 0 0 | Cs9g03530.1/Cs9g035 | 5.99 | 0 | 0    | 2 | MASCOT | T      | PLEX8 |       |
| 1.27E-03 | 0 0 | Cs9g03530.1/Cs9g035 | 5.99 | 0 | 0    | 2 | MASCOT | T      | PLEX8 |       |
| 5.00E-05 | 0 0 | Cs9g03530.1/Cs9g035 | 5.99 | 0 | 0    | 2 | MASCOT | T      | PLEX8 |       |
| 2.12E-03 | 0 0 | Cs9g03530.1/Cs9g035 | 5.99 | 0 | 0    | 2 | MASCOT | T      | PLEX8 |       |
| 4.51E-02 | 0 0 | Cs9g03530.1/Cs9g035 | 5.99 | 0 | 0    | 2 | MASCOT | T      | PLEX8 |       |
| 3.49E-03 | 0 0 | Cs9g03530.1/Cs9g035 | 5.99 | 0 | 0    | 2 | MASCOT | T      | PLEX8 |       |
| 2.25E-04 | 0 0 | Cs9g03530.1/Cs9g035 | 5.99 | 0 | 0    | 2 | MASCOT | T      | PLEX8 |       |
| 1.18E-01 | 0 0 | Cs9g03530.1/Cs9g035 | 5.99 | 0 | 0    | 2 | MASCOT | T      | PLEX8 |       |
| 1.02E-01 | 0 0 | Cs9g03530.1/Cs9g035 | 5.99 | 0 | 0    | 2 | MASCOT | T      | PLEX8 |       |
| 1.73E-03 | 0 0 | Cs9g03530.1/Cs9g035 | 5.99 | 0 | 0    | 2 | MASCOT | T      | PLEX8 |       |
| 1.39E-06 | 0 0 | Cs9g03530.1/Cs9g035 | 5.99 | 0 | 0    | 2 | MASCOT | T      | PLEX8 |       |
| 3.51E-02 | 0 0 | Cs9g03530.1/Cs9g035 | 5.99 | 0 | 0    | 2 | MASCOT | T      | PLEX8 |       |
| 3.36E-03 | 0 0 | Cs9g03530.1/Cs9g035 | 5.99 | 0 | 0    | 2 | MASCOT | T      | PLEX8 |       |
| 4.24E-03 | 0 0 | Cs9g03530.1/Cs9g035 | 5.99 | 0 | 0    | 2 | MASCOT | T      |       |       |
| 9.46E-02 | 0 0 | Cs9g03530.1/Cs9g035 | 5.55 | 0 | 0    | 2 | MASCOT | T      | PLEX8 |       |
| 9.18E-02 | 0 0 | Cs9g03530.1/Cs9g035 | 5.55 | 0 | 0    | 2 | MASCOT | T      | PLEX8 |       |
| 1.60E-01 | 0 0 | Cs9g14620.1         | 4.37 | 0 | 0    | 2 | MASCOT | T      | PLEX8 |       |
| 5.76E-01 | 0 0 | Cs9g03530.1/Cs9g035 | 4.37 | 0 | 0    | 2 | MASCOT | T      | PLEX8 |       |
| 3.88E-01 | 0 0 | Cs9g03530.1/Cs9g035 | 4.37 | 0 | 0    | 2 | MASCOT | T      | PLEX8 |       |
| 3.26E-01 | 0 0 | Cs9g03530.1/Cs9g035 | 4.37 | 0 | 0    | 2 | MASCOT | T      | PLEX8 |       |
| 3.34E-01 | 0 0 | Cs9g03530.1/Cs9g035 | 4.37 | 0 | 0    | 2 | MASCOT | T      |       |       |
| 3.48E-04 | 0 0 | Cs9g14620.1         | 4.14 | 0 | 15.9 | 0 | 2      | MASCOT | T     | PLEX8 |
| 5.03E-05 | 0 0 | Cs9g14620.1         | 4.14 | 0 | 0    | 2 | MASCOT | T      | PLEX8 |       |
| 4.93E-05 | 0 0 | Cs9g03530.1/Cs9g035 | 5.83 | 0 | 15.9 | 0 | 2      | MASCOT | T     |       |
| 6.79E-05 | 0 0 | Cs9g03530.1/Cs9g035 | 5.83 | 0 | 15.9 | 0 | 2      | MASCOT | T     |       |
| 2.76E-07 | 0 0 | Cs9g03530.1/Cs9g035 | 5.83 | 0 | 15.9 | 0 | 2      | MASCOT | T     |       |
| 6.96E-03 | 0 0 | Cs9g03530.1/Cs9g035 | 5.83 | 0 | 15.9 | 0 | 2      | MASCOT | T     |       |
| 2.64E-05 | 0 0 | Cs9g03530.1/Cs9g035 | 5.83 | 0 | 15.9 | 0 | 2      | MASCOT | T     |       |
| 4.19E-06 | 0 0 | Cs9g03530.1/Cs9g035 | 5.83 | 0 | 0    | 2 | MASCOT | T      |       |       |
| 5.19E-05 | 0 0 | Cs9g03530.1/Cs9g035 | 5.83 | 0 | 0    | 2 | MASCOT | T      |       |       |
| 4.75E-06 | 0 0 | Cs9g03530.1/Cs9g035 | 5.83 | 0 | 0    | 2 | MASCOT | T      |       |       |
| 1.04E-05 | 0 0 | Cs9g03530.1/Cs9g035 | 5.83 | 0 | 0    | 2 | MASCOT | T      | PLEX8 |       |
| 1.48E-03 | 0 0 | Cs9g14620.1         | 4.68 | 1 | 0    | 2 | MASCOT | T      | PLEX8 |       |
| 7.96E-03 | 0 0 | Cs9g14620.1         | 4.68 | 1 | 0    | 2 | MASCOT | T      | PLEX8 |       |
| 2.08E-01 | 0 0 | Cs9g03530.1/Cs9g035 | 4.37 | 0 | 0    | 2 | MASCOT | T      | PLEX8 |       |
| 5.40E-02 | 0 0 | Cs9g03530.1/Cs9g035 | 4.37 | 0 | 0    | 2 | MASCOT | T      | PLEX8 |       |
| 3.26E-02 | 0 0 | Cs9g03530.1/Cs9g035 | 9.47 | 0 | 0    | 2 | MASCOT | T      | PLEX8 |       |
| 4.69E-03 | 0 0 | Cs9g03530.1/Cs9g035 | 9.47 | 0 | 0    | 2 | MASCOT | T      | PLEX8 |       |
| 9.10E-02 | 0 0 | Cs6g10080.1/Cs6g100 | 5.84 | 0 | 0    | 2 | MASCOT | T      | PLEX8 |       |

|          |     |                     |      |   |      |   |        |        |       |       |
|----------|-----|---------------------|------|---|------|---|--------|--------|-------|-------|
| 6.55E-02 | 0 0 | Cs6g10080.1/Cs6g100 | 5.84 | 0 | 0    | 2 | MASCOT | T      | PLEX8 |       |
| 1.85E-01 | 0 0 | Cs6g10080.1/Cs6g100 | 5.84 | 0 | 0    | 2 | MASCOT | T      | PLEX8 |       |
| 1.15E-01 | 0 0 | Cs6g10080.1/Cs6g100 | 5.84 | 0 | 0    | 2 | MASCOT | T      | PLEX8 |       |
| 1.46E-01 | 0 0 | Cs6g10080.1/Cs6g100 | 5.84 | 0 | 0    | 2 | MASCOT | T      | PLEX8 |       |
| 1.72E-01 | 0 0 | Cs6g10080.1/Cs6g100 | 5.84 | 0 | 0    | 2 | MASCOT | T      | PLEX8 |       |
| 5.77E-02 | 0 0 | Cs6g10080.1/Cs6g100 | 5.84 | 0 | 0    | 2 | MASCOT | T      | PLEX8 |       |
| 1.13E-01 | 0 0 | Cs6g10080.1/Cs6g100 | 5.84 | 0 | 0    | 2 | MASCOT | T      | PLEX8 |       |
| 1.17E-01 | 0 0 | Cs6g10080.1/Cs6g100 | 5.84 | 0 | 0    | 2 | MASCOT | T      | PLEX8 |       |
| 4.78E-01 | 0 0 | Cs6g10080.1/Cs6g100 | 5.84 | 0 | 0    | 2 | MASCOT | T      | PLEX8 |       |
| 3.87E-01 | 0 0 | Cs6g10080.1/Cs6g100 | 5.84 | 0 | 0    | 2 | MASCOT | T      | PLEX8 |       |
| 1.02E-01 | 0 0 | Cs6g10080.1/Cs6g100 | 5.84 | 0 | 0    | 2 | MASCOT | T      | PLEX8 |       |
| 1.87E-01 | 0 0 | Cs6g10080.1/Cs6g100 | 5.84 | 0 | 0    | 2 | MASCOT | T      | PLEX8 |       |
| 1.28E-01 | 0 0 | Cs6g10080.1/Cs6g100 | 5.84 | 0 | 0    | 2 | MASCOT | T      | PLEX8 |       |
| 1.52E-01 | 0 0 | Cs6g10080.1/Cs6g100 | 4.14 | 0 | 0    | 2 | MASCOT | T      | PLEX8 |       |
| 1.41E-01 | 0 0 | Cs6g10070.1/Cs6g100 | 4.25 | 0 | 0    | 2 | MASCOT | T      | PLEX8 |       |
| 1.43E-01 | 0 0 | Cs6g10070.1/Cs6g100 | 4.25 | 0 | 0    | 2 | MASCOT | T      | PLEX8 |       |
| 9.82E-02 | 0 0 | Cs6g10070.1/Cs6g100 | 4.25 | 0 | 0    | 2 | MASCOT | T      | PLEX8 |       |
| 1.99E-02 | 0 0 | Cs6g10070.1/Cs6g100 | 4.25 | 0 | 0    | 2 | MASCOT | T      | PLEX8 |       |
| 1.33E-01 | 0 0 | Cs6g10070.1/Cs6g100 | 4.25 | 0 | 0    | 2 | MASCOT | T      | PLEX8 |       |
| 2.78E-01 | 0 0 | Cs6g10080.1/Cs6g100 | 4.53 | 0 | 0    | 2 | MASCOT | T      | PLEX8 |       |
| 1.19E-01 | 0 0 | Cs6g10080.1/Cs6g100 | 4.53 | 0 | 0    | 2 | MASCOT | T      | PLEX8 |       |
| 2.72E-01 | 0 0 | Cs6g10080.1/Cs6g100 | 4.53 | 0 | 0    | 2 | MASCOT | T      | PLEX8 |       |
| 3.59E-01 | 0 0 | Cs6g10080.1/Cs6g100 | 4.53 | 0 | 0    | 2 | MASCOT | T      | PLEX8 |       |
| 2.28E-01 | 0 0 | Cs6g10080.1/Cs6g100 | 4.53 | 0 | 0    | 2 | MASCOT | T      | PLEX8 |       |
| 3.88E-05 | 0 0 | Cs6g10080.1/Cs6g100 | 9.75 | 0 | 0    | 2 | MASCOT | T      |       |       |
| 2.42E-03 | 0 0 | Cs6g10080.1/Cs6g100 | 4.53 | 0 | 15.9 | 0 | 2      | MASCOT | T     | PLEX8 |
| 8.58E-03 | 0 0 | Cs6g10080.1/Cs6g100 | 4.53 | 0 | 15.9 | 0 | 2      | MASCOT | T     | PLEX8 |
| 7.79E-05 | 0 0 | Cs6g10080.1/Cs6g100 | 4.53 | 0 | 15.9 | 0 | 2      | MASCOT | T     | PLEX8 |
| 4.77E-02 | 0 0 | Cs6g10080.1/Cs6g100 | 4.53 | 0 | 15.9 | 0 | 2      | MASCOT | T     | PLEX8 |
| 2.21E-03 | 0 0 | Cs6g10080.1/Cs6g100 | 4.53 | 0 | 15.9 | 0 | 2      | MASCOT | T     | PLEX8 |
| 3.29E-01 | 0 0 | Cs6g10080.1/Cs6g100 | 4.53 | 0 | 0    | 2 | MASCOT | T      | PLEX8 |       |
| 4.54E-02 | 0 0 | Cs6g10080.1/Cs6g100 | 4.53 | 0 | 0    | 2 | MASCOT | T      | PLEX8 |       |
| 1.65E-04 | 0 0 | Cs6g10080.1/Cs6g100 | 4.53 | 0 | 0    | 2 | MASCOT | T      | PLEX8 |       |
| 3.78E-04 | 0 0 | Cs6g10080.1/Cs6g100 | 4.53 | 0 | 0    | 2 | MASCOT | T      | PLEX8 |       |
| 1.83E-07 | 0 0 | Cs6g10080.1/Cs6g100 | 4.53 | 0 | 0    | 2 | MASCOT | T      | PLEX8 |       |
| 2.68E-03 | 0 0 | Cs6g10080.1/Cs6g100 | 4.53 | 0 | 0    | 2 | MASCOT | T      | PLEX8 |       |
| 3.83E-05 | 0 0 | Cs6g10080.1/Cs6g100 | 4.53 | 0 | 0    | 2 | MASCOT | T      | PLEX8 |       |
| 4.70E-03 | 0 0 | Cs6g10080.1/Cs6g100 | 4.53 | 0 | 0    | 2 | MASCOT | T      | PLEX8 |       |
| 3.89E-03 | 0 0 | Cs6g10080.1/Cs6g100 | 4.53 | 0 | 0    | 2 | MASCOT | T      | PLEX8 |       |
| 2.09E-04 | 0 0 | Cs6g10080.1/Cs6g100 | 4.53 | 0 | 0    | 2 | MASCOT | T      | PLEX8 |       |
| 5.89E-04 | 0 0 | Cs6g10080.1/Cs6g100 | 4.53 | 0 | 0    | 2 | MASCOT | T      | PLEX8 |       |
| 2.13E-02 | 0 0 | Cs6g10070.1/Cs6g100 | 9.75 | 0 | 0    | 2 | MASCOT | T      | PLEX8 |       |
| 1.60E-01 | 0 0 | Cs6g10070.1/Cs6g100 | 9.75 | 0 | 0    | 2 | MASCOT | T      | PLEX8 |       |
| 1.61E-01 | 0 0 | Cs6g10070.1/Cs6g100 | 9.75 | 0 | 0    | 2 | MASCOT | T      | PLEX8 |       |
| 1.92E-01 | 0 0 | Cs6g10070.1/Cs6g100 | 9.75 | 0 | 0    | 2 | MASCOT | T      | PLEX8 |       |
| 8.05E-03 | 0 0 | Cs6g10070.1/Cs6g100 | 4.25 | 0 | 0    | 2 | MASCOT | T      | PLEX8 |       |
| 9.47E-04 | 0 0 | Cs6g10070.1/Cs6g100 | 4.25 | 0 | 0    | 2 | MASCOT | T      | PLEX8 |       |
| 9.51E-02 | 0 0 | Cs6g10070.1/Cs6g100 | 4.25 | 0 | 0    | 2 | MASCOT | T      | PLEX8 |       |
| 3.00E-01 | 0 0 | Cs6g10070.1/Cs6g100 | 4.25 | 0 | 0    | 2 | MASCOT | T      | PLEX8 |       |
| 2.62E-01 | 0 0 | Cs6g10080.1/Cs6g100 | 8.41 | 0 | 0    | 2 | MASCOT | T      | PLEX8 |       |
| 8.01E-02 | 0 0 | Cs6g10080.1/Cs6g100 | 8.41 | 0 | 0    | 2 | MASCOT | T      | PLEX8 |       |

|          |     |                     |      |   |      |   |        |        |       |       |
|----------|-----|---------------------|------|---|------|---|--------|--------|-------|-------|
| 5.22E-01 | 0 0 | Cs6g10080.1/Cs6g100 | 8.41 | 0 | 0    | 2 | MASCOT | T      |       |       |
| 3.62E-01 | 0 0 | Cs6g10080.1/Cs6g100 | 4.25 | 0 | 0    | 2 | MASCOT | T      | PLEX8 |       |
| 3.69E-02 | 0 0 | Cs6g10080.1/Cs6g100 | 4.25 | 0 | 0    | 2 | MASCOT | T      | PLEX8 |       |
| 3.48E-01 | 0 0 | Cs6g10080.1/Cs6g100 | 4.25 | 0 | 0    | 2 | MASCOT | T      | PLEX8 |       |
| 9.32E-02 | 0 0 | Cs6g10080.1/Cs6g100 | 4.25 | 0 | 0    | 2 | MASCOT | T      | PLEX8 |       |
| 3.03E-01 | 0 0 | Cs6g10080.1/Cs6g100 | 4.25 | 0 | 0    | 2 | MASCOT | T      | PLEX8 |       |
| 3.38E-03 | 0 0 | Cs6g10080.1/Cs6g100 | 4.25 | 0 | 0    | 2 | MASCOT | T      | PLEX8 |       |
| 4.66E-05 | 0 0 | Cs6g10080.1/Cs6g100 | 4.25 | 0 | 0    | 2 | MASCOT | T      | PLEX8 |       |
| 3.13E-01 | 0 0 | Cs6g10080.1/Cs6g100 | 4.25 | 0 | 0    | 2 | MASCOT | T      | PLEX8 |       |
| 1.89E-05 | 0 0 | Cs6g10080.1/Cs6g100 | 4.25 | 0 | 0    | 2 | MASCOT | T      | PLEX8 |       |
| 4.88E-02 | 0 0 | Cs6g10080.1/Cs6g100 | 4.25 | 0 | 0    | 2 | MASCOT | T      | PLEX8 |       |
| 4.13E-02 | 0 0 | Cs6g10080.1/Cs6g100 | 4.25 | 0 | 0    | 2 | MASCOT | T      | PLEX8 |       |
| 1.88E-02 | 0 0 | Cs6g10080.1/Cs6g100 | 4.25 | 0 | 0    | 2 | MASCOT | T      | PLEX8 |       |
| 2.08E-03 | 0 0 | Cs6g10080.1/Cs6g100 | 4.25 | 0 | 0    | 2 | MASCOT | T      | PLEX8 |       |
| 7.39E-06 | 0 0 | Cs6g10080.1/Cs6g100 | 4.25 | 0 | 0    | 2 | MASCOT | T      | PLEX8 |       |
| 6.18E-03 | 0 0 | Cs6g10080.1/Cs6g100 | 4.25 | 0 | 0    | 2 | MASCOT | T      | PLEX8 |       |
| 1.56E-02 | 0 0 | Cs6g10080.1/Cs6g100 | 4.25 | 0 | 0    | 2 | MASCOT | T      |       |       |
| 6.08E-02 | 0 0 | Cs6g10080.1/Cs6g100 | 4.25 | 0 | 0    | 2 | MASCOT | T      |       |       |
| 7.30E-01 | 0 0 | Cs6g10080.1/Cs6g100 | 8.8  | 0 | 0    | 2 | MASCOT | T      | PLEX8 |       |
| 8.30E-01 | 0 0 | Cs6g10080.1/Cs6g100 | 6    | 0 | 0    | 2 | MASCOT | T      | PLEX8 |       |
| 6.92E-01 | 0 0 | Cs6g10080.1/Cs6g100 | 6    | 0 | 0    | 2 | MASCOT | T      | PLEX8 |       |
| 1.69E-02 | 0 0 | Cs6g10080.1/Cs6g100 | 4.14 | 1 | 15.9 | 0 | 2      | MASCOT | T     | PLEX8 |
| 1.49E-02 | 0 0 | Cs6g10080.1/Cs6g100 | 4.14 | 1 | 0    | 2 | MASCOT | T      | PLEX8 |       |
| 2.30E-02 | 0 0 | Cs6g10080.1/Cs6g100 | 4.14 | 1 | 0    | 2 | MASCOT | T      |       |       |
| 7.31E-03 | 0 0 | Cs6g05890.1/Cs7g289 | 4.22 | 0 | 0    | 2 | MASCOT | T      | PLEX8 |       |
| 4.80E-03 | 0 0 | Cs6g05890.1/Cs7g289 | 4.22 | 0 | 0    | 2 | MASCOT | T      | PLEX8 |       |
| 3.22E-04 | 0 0 | Cs6g05890.1/Cs7g289 | 4.22 | 0 | 0    | 2 | MASCOT | T      | PLEX8 |       |
| 1.19E-03 | 0 0 | Cs6g05890.1/Cs7g289 | 4.22 | 0 | 0    | 2 | MASCOT | T      | PLEX8 |       |
| 2.35E-03 | 0 0 | Cs6g05890.1/Cs7g289 | 4.22 | 0 | 0    | 2 | MASCOT | T      | PLEX8 |       |
| 2.57E-04 | 0 0 | Cs6g05890.1/Cs7g289 | 4.22 | 0 | 0    | 2 | MASCOT | T      | PLEX8 |       |
| 1.20E-03 | 0 0 | Cs6g05890.1/Cs7g289 | 4.22 | 0 | 0    | 2 | MASCOT | T      | PLEX8 |       |
| 2.44E-05 | 0 0 | Cs6g05890.1/Cs7g289 | 4.22 | 0 | 0    | 2 | MASCOT | T      | PLEX8 |       |
| 3.25E-04 | 0 0 | Cs6g05890.1/Cs7g289 | 4.22 | 0 | 0    | 2 | MASCOT | T      |       |       |
| 6.28E-06 | 0 0 | Cs6g05890.1/Cs7g289 | 4.22 | 0 | 0    | 2 | MASCOT | T      | PLEX8 |       |
| 2.48E-03 | 0 0 | Cs6g05890.1/Cs7g289 | 4.22 | 0 | 0    | 2 | MASCOT | T      |       |       |
| 2.90E-05 | 0 0 | Cs6g05890.1/Cs7g289 | 4.22 | 0 | 0    | 2 | MASCOT | T      |       |       |
| 1.03E-03 | 0 0 | Cs6g05890.1/Cs7g289 | 4.22 | 0 | 0    | 2 | MASCOT | T      |       |       |
| 2.82E-03 | 0 0 | Cs6g05890.1/Cs7g289 | 4.22 | 0 | 0    | 2 | MASCOT | T      |       |       |
| 1.54E-03 | 0 0 | Cs6g05890.1/Cs7g289 | 4.22 | 0 | 0    | 2 | MASCOT | T      |       |       |
| 1.12E-04 | 0 0 | Cs6g05890.1/Cs7g289 | 4.22 | 0 | 0    | 2 | MASCOT | T      |       |       |
| 7.95E-04 | 0 0 | Cs6g05890.1/Cs7g289 | 4.22 | 0 | 0    | 2 | MASCOT | T      |       |       |
| 1.12E-01 | 0 0 | Cs6g05890.1/Cs7g289 | 4.53 | 0 | 0    | 2 | MASCOT | T      | PLEX8 |       |
| 4.05E-04 | 0 0 | Cs6g05890.1/Cs7g289 | 5.84 | 0 | 0    | 2 | MASCOT | T      |       |       |
| 3.75E-03 | 0 0 | Cs6g05890.1/Cs7g289 | 5.84 | 0 | 0    | 2 | MASCOT | T      |       |       |
| 8.20E-06 | 0 0 | Cs6g05890.1/Cs7g289 | 4.53 | 0 | 0    | 2 | MASCOT | T      | PLEX8 |       |
| 1.27E-04 | 0 0 | Cs6g05890.1/Cs7g289 | 4.53 | 0 | 0    | 2 | MASCOT | T      | PLEX8 |       |
| 1.11E-01 | 0 0 | Cs6g05890.1/Cs7g289 | 4.53 | 0 | 0    | 2 | MASCOT | T      | PLEX8 |       |
| 1.48E-01 | 0 0 | Cs6g05890.1/Cs7g289 | 4.53 | 0 | 0    | 2 | MASCOT | T      | PLEX8 |       |
| 2.10E-02 | 0 0 | Cs6g05890.1/Cs7g289 | 4.53 | 0 | 0    | 2 | MASCOT | T      | PLEX8 |       |
| 6.37E-02 | 0 0 | Cs6g05890.1/Cs7g289 | 4.53 | 0 | 0    | 2 | MASCOT | T      | PLEX8 |       |
| 1.17E-01 | 0 0 | Cs6g05890.1/Cs7g289 | 4.53 | 0 | 0    | 2 | MASCOT | T      | PLEX8 |       |



|          |     |                     |      |   |      |   |        |        |       |       |
|----------|-----|---------------------|------|---|------|---|--------|--------|-------|-------|
| 7.03E-03 | 0 0 | Cs6g05890.1/Cs7g289 | 4.53 | 0 | 0    | 2 | MASCOT | T      | PLEX8 |       |
| 7.32E-03 | 0 0 | Cs6g05890.1/Cs7g289 | 6    | 0 | 0    | 2 | MASCOT | T      | PLEX8 |       |
| 3.62E-03 | 0 0 | Cs6g05890.1/Cs7g289 | 6    | 0 | 0    | 2 | MASCOT | T      | PLEX8 |       |
| 1.07E-02 | 0 0 | Cs6g05890.1/Cs7g289 | 6    | 0 | 0    | 2 | MASCOT | T      | PLEX8 |       |
| 2.27E-03 | 0 0 | Cs6g05890.1/Cs7g289 | 6    | 0 | 0    | 2 | MASCOT | T      | PLEX8 |       |
| 6.36E-03 | 0 0 | Cs6g05890.1/Cs7g289 | 6    | 0 | 0    | 2 | MASCOT | T      | PLEX8 |       |
| 5.02E-02 | 0 0 | Cs6g05890.1/Cs7g289 | 5.84 | 0 | 0    | 2 | MASCOT | T      | PLEX8 |       |
| 2.46E-02 | 0 0 | Cs6g05890.1/Cs7g289 | 5.84 | 0 | 0    | 2 | MASCOT | T      | PLEX8 |       |
| 9.87E-03 | 0 0 | Cs6g05890.1/Cs7g289 | 5.84 | 0 | 0    | 2 | MASCOT | T      |       |       |
| 1.01E-01 | 0 0 | Cs6g05890.1/Cs7g289 | 5.84 | 0 | 0    | 2 | MASCOT | T      |       |       |
| 9.58E-04 | 0 0 | Cs6g05890.1/Cs7g289 | 5.84 | 0 | 0    | 2 | MASCOT | T      | PLEX8 |       |
| 5.56E-03 | 0 0 | Cs6g05890.1/Cs7g289 | 5.84 | 0 | 0    | 2 | MASCOT | T      | PLEX8 |       |
| 5.86E-02 | 0 0 | Cs7g28940.1/Cs7g290 | 6.46 | 0 | 0    | 2 | MASCOT | T      | PLEX8 |       |
| 2.17E-04 | 0 0 | Cs7g28940.1/Cs7g290 | 6.46 | 0 | 0    | 2 | MASCOT | T      | PLEX8 |       |
| 2.49E-01 | 0 0 | Cs7g28940.1/Cs7g290 | 6.46 | 0 | 0    | 2 | MASCOT | T      | PLEX8 |       |
| 3.46E-04 | 0 0 | Cs7g28940.1/Cs7g290 | 6.46 | 0 | 0    | 2 | MASCOT | T      | PLEX8 |       |
| 2.41E-03 | 0 0 | Cs6g05890.1/Cs7g289 | 4.14 | 0 | 15.9 | 0 | 2      | MASCOT | T     |       |
| 1.31E-03 | 0 0 | Cs6g05890.1/Cs7g289 | 4.14 | 0 | 15.9 | 0 | 2      | MASCOT | T     |       |
| 4.30E-05 | 0 0 | Cs6g05890.1/Cs7g289 | 4.14 | 0 | 15.9 | 0 | 2      | MASCOT | T     |       |
| 2.53E-03 | 0 0 | Cs3g14220.1/Cs3g142 | 4.37 | 0 | 0    | 2 | MASCOT | T      | PLEX8 |       |
| 9.99E-05 | 0 0 | Cs3g14220.1/Cs3g142 | 4.37 | 0 | 0    | 2 | MASCOT | T      | PLEX8 |       |
| 2.21E-02 | 0 0 | Cs3g14220.1/Cs3g142 | 4.37 | 0 | 0    | 2 | MASCOT | T      | PLEX8 |       |
| 9.07E-04 | 0 0 | Cs3g14220.1/Cs3g142 | 4.37 | 0 | 0    | 2 | MASCOT | T      | PLEX8 |       |
| 3.84E-04 | 0 0 | Cs3g14220.1/Cs3g142 | 4.37 | 0 | 0    | 2 | MASCOT | T      |       |       |
| 2.48E-06 | 0 0 | Cs3g14220.1/Cs3g142 | 4.37 | 0 | 0    | 2 | MASCOT | T      |       |       |
| 6.64E-05 | 0 0 | Cs3g14220.1/Cs3g142 | 4.37 | 0 | 0    | 2 | MASCOT | T      |       |       |
| 2.69E-04 | 0 0 | Cs3g14220.1/Cs3g142 | 4.37 | 0 | 0    | 2 | MASCOT | T      |       |       |
| 5.09E-01 | 0 0 | Cs3g14220.1/Cs3g142 | 4.37 | 0 | 0    | 2 | MASCOT | T      |       |       |
| 2.54E-01 | 0 0 | Cs6g05890.1/Cs7g289 | 6.5  | 0 | 15.9 | 0 | 2      | MASCOT | T     | PLEX8 |
| 2.48E-01 | 0 0 | Cs6g05890.1/Cs7g289 | 6.5  | 0 | 15.9 | 0 | 2      | MASCOT | T     | PLEX8 |
| 1.45E-01 | 0 0 | Cs6g05890.1/Cs7g289 | 6.5  | 0 | 15.9 | 0 | 2      | MASCOT | T     | PLEX8 |
| 4.14E-03 | 0 0 | Cs6g05890.1/Cs7g289 | 6.5  | 0 | 15.9 | 0 | 2      | MASCOT | T     | PLEX8 |
| 3.71E-02 | 0 0 | Cs6g05890.1/Cs7g289 | 6.5  | 0 | 0    | 2 | MASCOT | T      | PLEX8 |       |
| 3.84E-02 | 0 0 | Cs6g05890.1/Cs7g289 | 6.5  | 0 | 0    | 2 | MASCOT | T      | PLEX8 |       |
| 1.04E-01 | 0 0 | Cs7g28940.1/Cs8g182 | 4.37 | 0 | 0    | 2 | MASCOT | T      | PLEX8 |       |
| 1.77E-02 | 0 0 | Cs7g28940.1/Cs8g182 | 4.37 | 0 | 0    | 2 | MASCOT | T      | PLEX8 |       |
| 4.27E-04 | 0 0 | Cs7g28940.1/Cs8g182 | 4.37 | 0 | 0    | 2 | MASCOT | T      | PLEX8 |       |
| 4.02E-05 | 0 0 | Cs7g28940.1/Cs8g182 | 4.37 | 0 | 0    | 2 | MASCOT | T      | PLEX8 |       |
| 4.78E-02 | 0 0 | Cs3g14220.1/Cs3g142 | 4.37 | 0 | 0    | 2 | MASCOT | T      |       |       |
| 3.94E-06 | 0 0 | Cs3g14220.1/Cs3g142 | 4.37 | 0 | 0    | 2 | MASCOT | T      |       |       |
| 2.32E-02 | 0 0 | Cs3g14220.1/Cs3g142 | 4.37 | 0 | 0    | 2 | MASCOT | T      |       |       |
| 6.87E-06 | 0 0 | Cs3g14220.1/Cs3g142 | 4.37 | 0 | 0    | 2 | MASCOT | T      |       |       |
| 3.44E-02 | 0 0 | Cs3g14220.1/Cs3g142 | 4.37 | 0 | 0    | 2 | MASCOT | T      |       |       |
| 1.67E-02 | 0 0 | Cs3g14220.1/Cs3g142 | 4.37 | 0 | 0    | 2 | MASCOT | T      |       |       |
| 5.59E-02 | 0 0 | Cs3g14220.1/Cs3g142 | 4.37 | 0 | 0    | 2 | MASCOT | T      |       |       |
| 7.31E-03 | 0 0 | Cs6g05890.1/Cs7g289 | 4.22 | 0 | 0    | 2 | MASCOT | T      | PLEX8 |       |
| 4.80E-03 | 0 0 | Cs6g05890.1/Cs7g289 | 4.22 | 0 | 0    | 2 | MASCOT | T      | PLEX8 |       |
| 3.22E-04 | 0 0 | Cs6g05890.1/Cs7g289 | 4.22 | 0 | 0    | 2 | MASCOT | T      | PLEX8 |       |
| 1.19E-03 | 0 0 | Cs6g05890.1/Cs7g289 | 4.22 | 0 | 0    | 2 | MASCOT | T      | PLEX8 |       |
| 2.35E-03 | 0 0 | Cs6g05890.1/Cs7g289 | 4.22 | 0 | 0    | 2 | MASCOT | T      | PLEX8 |       |
| 2.57E-04 | 0 0 | Cs6g05890.1/Cs7g289 | 4.22 | 0 | 0    | 2 | MASCOT | T      | PLEX8 |       |

|          |     |                     |      |   |      |   |        |        |       |
|----------|-----|---------------------|------|---|------|---|--------|--------|-------|
| 1.20E-03 | 0 0 | Cs6g05890.1/Cs7g289 | 4.22 | 0 | 0    | 2 | MASCOT | T      | PLEX8 |
| 2.44E-05 | 0 0 | Cs6g05890.1/Cs7g289 | 4.22 | 0 | 0    | 2 | MASCOT | T      | PLEX8 |
| 3.25E-04 | 0 0 | Cs6g05890.1/Cs7g289 | 4.22 | 0 | 0    | 2 | MASCOT | T      |       |
| 6.28E-06 | 0 0 | Cs6g05890.1/Cs7g289 | 4.22 | 0 | 0    | 2 | MASCOT | T      | PLEX8 |
| 2.48E-03 | 0 0 | Cs6g05890.1/Cs7g289 | 4.22 | 0 | 0    | 2 | MASCOT | T      |       |
| 2.90E-05 | 0 0 | Cs6g05890.1/Cs7g289 | 4.22 | 0 | 0    | 2 | MASCOT | T      |       |
| 1.03E-03 | 0 0 | Cs6g05890.1/Cs7g289 | 4.22 | 0 | 0    | 2 | MASCOT | T      |       |
| 2.82E-03 | 0 0 | Cs6g05890.1/Cs7g289 | 4.22 | 0 | 0    | 2 | MASCOT | T      |       |
| 1.54E-03 | 0 0 | Cs6g05890.1/Cs7g289 | 4.22 | 0 | 0    | 2 | MASCOT | T      |       |
| 1.12E-04 | 0 0 | Cs6g05890.1/Cs7g289 | 4.22 | 0 | 0    | 2 | MASCOT | T      |       |
| 7.95E-04 | 0 0 | Cs6g05890.1/Cs7g289 | 4.22 | 0 | 0    | 2 | MASCOT | T      |       |
| 1.12E-01 | 0 0 | Cs6g05890.1/Cs7g289 | 4.53 | 0 | 0    | 2 | MASCOT | T      | PLEX8 |
| 4.05E-04 | 0 0 | Cs6g05890.1/Cs7g289 | 5.84 | 0 | 0    | 2 | MASCOT | T      |       |
| 3.75E-03 | 0 0 | Cs6g05890.1/Cs7g289 | 5.84 | 0 | 0    | 2 | MASCOT | T      |       |
| 8.20E-06 | 0 0 | Cs6g05890.1/Cs7g289 | 4.53 | 0 | 0    | 2 | MASCOT | T      | PLEX8 |
| 1.27E-04 | 0 0 | Cs6g05890.1/Cs7g289 | 4.53 | 0 | 0    | 2 | MASCOT | T      | PLEX8 |
| 1.11E-01 | 0 0 | Cs6g05890.1/Cs7g289 | 4.53 | 0 | 0    | 2 | MASCOT | T      | PLEX8 |
| 1.48E-01 | 0 0 | Cs6g05890.1/Cs7g289 | 4.53 | 0 | 0    | 2 | MASCOT | T      | PLEX8 |
| 2.10E-02 | 0 0 | Cs6g05890.1/Cs7g289 | 4.53 | 0 | 0    | 2 | MASCOT | T      | PLEX8 |
| 6.37E-02 | 0 0 | Cs6g05890.1/Cs7g289 | 4.53 | 0 | 0    | 2 | MASCOT | T      | PLEX8 |
| 1.17E-01 | 0 0 | Cs6g05890.1/Cs7g289 | 4.53 | 0 | 0    | 2 | MASCOT | T      | PLEX8 |
| 7.03E-03 | 0 0 | Cs6g05890.1/Cs7g289 | 4.53 | 0 | 0    | 2 | MASCOT | T      | PLEX8 |
| 7.32E-03 | 0 0 | Cs6g05890.1/Cs7g289 | 6    | 0 | 0    | 2 | MASCOT | T      | PLEX8 |
| 3.62E-03 | 0 0 | Cs6g05890.1/Cs7g289 | 6    | 0 | 0    | 2 | MASCOT | T      | PLEX8 |
| 1.07E-02 | 0 0 | Cs6g05890.1/Cs7g289 | 6    | 0 | 0    | 2 | MASCOT | T      | PLEX8 |
| 2.27E-03 | 0 0 | Cs6g05890.1/Cs7g289 | 6    | 0 | 0    | 2 | MASCOT | T      | PLEX8 |
| 6.36E-03 | 0 0 | Cs6g05890.1/Cs7g289 | 6    | 0 | 0    | 2 | MASCOT | T      | PLEX8 |
| 5.02E-02 | 0 0 | Cs6g05890.1/Cs7g289 | 5.84 | 0 | 0    | 2 | MASCOT | T      | PLEX8 |
| 2.46E-02 | 0 0 | Cs6g05890.1/Cs7g289 | 5.84 | 0 | 0    | 2 | MASCOT | T      | PLEX8 |
| 9.87E-03 | 0 0 | Cs6g05890.1/Cs7g289 | 5.84 | 0 | 0    | 2 | MASCOT | T      |       |
| 1.01E-01 | 0 0 | Cs6g05890.1/Cs7g289 | 5.84 | 0 | 0    | 2 | MASCOT | T      |       |
| 9.58E-04 | 0 0 | Cs6g05890.1/Cs7g289 | 5.84 | 0 | 0    | 2 | MASCOT | T      | PLEX8 |
| 5.56E-03 | 0 0 | Cs6g05890.1/Cs7g289 | 5.84 | 0 | 0    | 2 | MASCOT | T      | PLEX8 |
| 9.97E-04 | 0 0 | Cs6g05890.1/Cs7g290 | 4.53 | 0 | 0    | 2 | MASCOT | T      | PLEX8 |
| 5.53E-03 | 0 0 | Cs6g05890.1/Cs8g182 | 6.46 | 0 | 0    | 2 | MASCOT | T      | PLEX8 |
| 3.06E-05 | 0 0 | Cs6g05890.1/Cs8g182 | 6.46 | 0 | 0    | 2 | MASCOT | T      | PLEX8 |
| 6.46E-03 | 0 0 | Cs6g05890.1/Cs8g182 | 6.46 | 0 | 0    | 2 | MASCOT | T      | PLEX8 |
| 1.15E-01 | 0 0 | Cs6g05890.1/Cs8g182 | 6.46 | 0 | 0    | 2 | MASCOT | T      | PLEX8 |
| 6.94E-02 | 0 0 | Cs6g05890.1/Cs8g182 | 6.46 | 0 | 0    | 2 | MASCOT | T      | PLEX8 |
| 2.03E-01 | 0 0 | Cs6g05890.1/Cs8g182 | 6.46 | 0 | 0    | 2 | MASCOT | T      | PLEX8 |
| 2.41E-03 | 0 0 | Cs6g05890.1/Cs7g289 | 4.14 | 0 | 15.9 | 0 | 2      | MASCOT | T     |
| 1.31E-03 | 0 0 | Cs6g05890.1/Cs7g289 | 4.14 | 0 | 15.9 | 0 | 2      | MASCOT | T     |
| 4.30E-05 | 0 0 | Cs6g05890.1/Cs7g289 | 4.14 | 0 | 15.9 | 0 | 2      | MASCOT | T     |
| 2.53E-03 | 0 0 | Cs3g14220.1/Cs3g142 | 4.37 | 0 | 0    | 2 | MASCOT | T      | PLEX8 |
| 9.99E-05 | 0 0 | Cs3g14220.1/Cs3g142 | 4.37 | 0 | 0    | 2 | MASCOT | T      | PLEX8 |
| 2.21E-02 | 0 0 | Cs3g14220.1/Cs3g142 | 4.37 | 0 | 0    | 2 | MASCOT | T      | PLEX8 |
| 9.07E-04 | 0 0 | Cs3g14220.1/Cs3g142 | 4.37 | 0 | 0    | 2 | MASCOT | T      | PLEX8 |
| 3.84E-04 | 0 0 | Cs3g14220.1/Cs3g142 | 4.37 | 0 | 0    | 2 | MASCOT | T      |       |
| 2.48E-06 | 0 0 | Cs3g14220.1/Cs3g142 | 4.37 | 0 | 0    | 2 | MASCOT | T      |       |
| 6.64E-05 | 0 0 | Cs3g14220.1/Cs3g142 | 4.37 | 0 | 0    | 2 | MASCOT | T      |       |
| 2.69E-04 | 0 0 | Cs3g14220.1/Cs3g142 | 4.37 | 0 | 0    | 2 | MASCOT | T      |       |

|          |     |                     |      |   |      |   |        |        |         |
|----------|-----|---------------------|------|---|------|---|--------|--------|---------|
| 5.09E-01 | 0 0 | Cs3g14220.1/Cs3g142 | 4.37 | 0 | 0    | 2 | MASCOT | T      |         |
| 2.54E-01 | 0 0 | Cs6g05890.1/Cs7g289 | 6.5  | 0 | 15.9 | 0 | 2      | MASCOT | T PLEX8 |
| 2.48E-01 | 0 0 | Cs6g05890.1/Cs7g289 | 6.5  | 0 | 15.9 | 0 | 2      | MASCOT | T PLEX8 |
| 1.45E-01 | 0 0 | Cs6g05890.1/Cs7g289 | 6.5  | 0 | 15.9 | 0 | 2      | MASCOT | T PLEX8 |
| 4.14E-03 | 0 0 | Cs6g05890.1/Cs7g289 | 6.5  | 0 | 15.9 | 0 | 2      | MASCOT | T PLEX8 |
| 3.71E-02 | 0 0 | Cs6g05890.1/Cs7g289 | 6.5  | 0 | 0    | 0 | 2      | MASCOT | T PLEX8 |
| 3.84E-02 | 0 0 | Cs6g05890.1/Cs7g289 | 6.5  | 0 | 0    | 0 | 2      | MASCOT | T PLEX8 |
| 4.78E-02 | 0 0 | Cs3g14220.1/Cs3g142 | 4.37 | 0 | 0    | 0 | 2      | MASCOT | T       |
| 3.94E-06 | 0 0 | Cs3g14220.1/Cs3g142 | 4.37 | 0 | 0    | 0 | 2      | MASCOT | T       |
| 2.32E-02 | 0 0 | Cs3g14220.1/Cs3g142 | 4.37 | 0 | 0    | 0 | 2      | MASCOT | T       |
| 6.87E-06 | 0 0 | Cs3g14220.1/Cs3g142 | 4.37 | 0 | 0    | 0 | 2      | MASCOT | T       |
| 3.44E-02 | 0 0 | Cs3g14220.1/Cs3g142 | 4.37 | 0 | 0    | 0 | 2      | MASCOT | T       |
| 1.67E-02 | 0 0 | Cs3g14220.1/Cs3g142 | 4.37 | 0 | 0    | 0 | 2      | MASCOT | T       |
| 5.59E-02 | 0 0 | Cs3g14220.1/Cs3g142 | 4.37 | 0 | 0    | 0 | 2      | MASCOT | T       |
| 2.20E-01 | 0 0 | Cs2g11440.1/Cs2g114 | 5.88 | 0 | 0    | 0 | 2      | MASCOT | T       |
| 4.69E-02 | 0 0 | Cs2g11440.1/Cs2g114 | 5.88 | 0 | 0    | 0 | 2      | MASCOT | T PLEX8 |
| 9.91E-02 | 0 0 | Cs2g11440.1/Cs2g114 | 5.88 | 0 | 0    | 0 | 2      | MASCOT | T PLEX8 |
| 3.93E-01 | 0 0 | Cs2g11440.1/Cs2g114 | 5.88 | 0 | 0    | 0 | 2      | MASCOT | T       |
| 3.60E-04 | 0 0 | Cs2g11440.1/Cs2g114 | 4.21 | 0 | 0    | 0 | 2      | MASCOT | T PLEX8 |
| 5.56E-03 | 0 0 | Cs2g11440.1/Cs2g114 | 4.21 | 0 | 0    | 0 | 2      | MASCOT | T PLEX8 |
| 1.70E-02 | 0 0 | Cs2g11440.1/Cs2g114 | 4.21 | 0 | 0    | 0 | 2      | MASCOT | T PLEX8 |
| 4.38E-03 | 0 0 | Cs2g11440.1/Cs2g114 | 8.26 | 0 | 0    | 0 | 2      | MASCOT | T PLEX8 |
| 6.43E-02 | 0 0 | Cs2g11440.1/Cs2g114 | 8.26 | 0 | 0    | 0 | 2      | MASCOT | T PLEX8 |
| 3.17E-02 | 0 0 | Cs2g11440.1/Cs2g114 | 8.26 | 0 | 0    | 0 | 2      | MASCOT | T PLEX8 |
| 7.37E-02 | 0 0 | Cs2g11440.1/Cs2g114 | 8.26 | 0 | 0    | 0 | 2      | MASCOT | T PLEX8 |
| 5.17E-03 | 0 0 | Cs2g11440.1/Cs2g114 | 8.25 | 0 | 15.9 | 0 | 2      | MASCOT | T PLEX8 |
| 1.56E-02 | 0 0 | Cs2g11440.1/Cs2g114 | 8.25 | 0 | 15.9 | 0 | 2      | MASCOT | T PLEX8 |
| 3.95E-05 | 0 0 | Cs2g11440.1/Cs2g114 | 8.25 | 0 | 0    | 0 | 2      | MASCOT | T PLEX8 |
| 4.14E-02 | 0 0 | Cs2g11440.1/Cs2g114 | 5.84 | 0 | 0    | 0 | 2      | MASCOT | T PLEX8 |
| 5.36E-01 | 0 0 | Cs2g11440.1/Cs2g114 | 5.84 | 0 | 0    | 0 | 2      | MASCOT | T PLEX8 |
| 1.97E-02 | 0 0 | Cs2g11440.1/Cs2g114 | 5.84 | 0 | 0    | 0 | 2      | MASCOT | T PLEX8 |
| 3.15E-03 | 0 0 | Cs2g11440.1/Cs2g114 | 6.66 | 0 | 0    | 0 | 2      | MASCOT | T PLEX8 |
| 6.45E-03 | 0 0 | Cs2g11440.1/Cs2g114 | 6.66 | 0 | 0    | 0 | 2      | MASCOT | T PLEX8 |
| 6.50E-05 | 0 0 | Cs2g11440.1/Cs2g114 | 6.66 | 0 | 0    | 0 | 2      | MASCOT | T PLEX8 |
| 4.34E-04 | 0 0 | Cs2g11440.1/Cs2g114 | 6.66 | 0 | 0    | 0 | 2      | MASCOT | T PLEX8 |
| 1.26E-03 | 0 0 | Cs2g11440.1/Cs2g114 | 6.66 | 0 | 0    | 0 | 2      | MASCOT | T       |
| 2.85E-02 | 0 0 | Cs2g11440.1/Cs2g114 | 6.66 | 0 | 0    | 0 | 2      | MASCOT | T PLEX8 |
| 5.55E-04 | 0 0 | Cs2g11440.1/Cs2g114 | 6.66 | 0 | 0    | 0 | 2      | MASCOT | T PLEX8 |
| 1.94E-04 | 0 0 | Cs2g11440.1/Cs2g114 | 6.66 | 0 | 0    | 0 | 2      | MASCOT | T PLEX8 |
| 2.17E-04 | 0 0 | Cs2g11440.1/Cs2g114 | 6.66 | 0 | 0    | 0 | 2      | MASCOT | T PLEX8 |
| 2.17E-07 | 0 0 | Cs2g11440.1/Cs2g114 | 6.66 | 0 | 0    | 0 | 2      | MASCOT | T PLEX8 |
| 9.09E-06 | 0 0 | Cs2g11440.1/Cs2g114 | 6.66 | 0 | 0    | 0 | 2      | MASCOT | T PLEX8 |
| 5.81E-02 | 0 0 | Cs2g11440.1/Cs2g114 | 8.47 | 0 | 0    | 0 | 2      | MASCOT | T PLEX8 |
| 5.68E-02 | 0 0 | Cs2g11440.1/Cs2g114 | 8.47 | 0 | 0    | 0 | 2      | MASCOT | T PLEX8 |
| 9.88E-02 | 0 0 | Cs2g11440.1/Cs2g114 | 8.47 | 0 | 0    | 0 | 2      | MASCOT | T PLEX8 |
| 3.03E-03 | 0 0 | Cs2g11440.1/Cs2g114 | 9.47 | 0 | 0    | 0 | 2      | MASCOT | T PLEX8 |
| 8.85E-03 | 0 0 | Cs2g11440.1/Cs2g114 | 9.47 | 0 | 0    | 0 | 2      | MASCOT | T PLEX8 |
| 1.72E-01 | 0 0 | Cs2g11440.1/Cs2g114 | 9.47 | 0 | 0    | 0 | 2      | MASCOT | T PLEX8 |
| 1.68E-02 | 0 0 | Cs2g11440.1/Cs2g114 | 9.47 | 0 | 0    | 0 | 2      | MASCOT | T PLEX8 |
| 2.36E-04 | 0 0 | Cs2g11440.1/Cs2g114 | 9.47 | 0 | 0    | 0 | 2      | MASCOT | T PLEX8 |
| 1.48E-03 | 0 0 | Cs2g11440.1/Cs2g114 | 9.47 | 0 | 0    | 0 | 2      | MASCOT | T PLEX8 |

|          |     |                     |      |   |   |   |        |   |       |
|----------|-----|---------------------|------|---|---|---|--------|---|-------|
| 2.01E-01 | 0 0 | Cs2g11440.1/Cs2g114 | 9.47 | 0 | 0 | 2 | MASCOT | T | PLEX8 |
| 2.08E-02 | 0 0 | Cs2g11440.1/Cs2g114 | 9.47 | 0 | 0 | 2 | MASCOT | T | PLEX8 |
| 3.26E-03 | 0 0 | Cs2g11440.1/Cs2g114 | 9.47 | 0 | 0 | 2 | MASCOT | T | PLEX8 |
| 3.13E-03 | 0 0 | Cs2g11440.1/Cs2g114 | 9.47 | 0 | 0 | 2 | MASCOT | T | PLEX8 |
| 2.08E-03 | 0 0 | Cs2g11440.1/Cs2g114 | 9.47 | 0 | 0 | 2 | MASCOT | T |       |
| 1.80E-02 | 0 0 | Cs2g11440.1/Cs2g114 | 8.75 | 0 | 0 | 2 | MASCOT | T |       |
| 2.75E-02 | 0 0 | Cs2g11440.1/Cs2g114 | 8.75 | 0 | 0 | 2 | MASCOT | T |       |
| 4.31E-02 | 0 0 | Cs2g11440.1/Cs2g114 | 4.03 | 0 | 0 | 2 | MASCOT | T | PLEX8 |
| 1.81E-02 | 0 0 | Cs2g11440.1/Cs2g114 | 4.03 | 0 | 0 | 2 | MASCOT | T | PLEX8 |
| 1.33E-03 | 0 0 | Cs2g11440.1/Cs2g114 | 4.03 | 0 | 0 | 2 | MASCOT | T | PLEX8 |
| 1.99E-02 | 0 0 | Cs2g11440.1/Cs2g114 | 4.03 | 0 | 0 | 2 | MASCOT | T | PLEX8 |
| 5.41E-02 | 0 0 | Cs2g11440.1/Cs2g114 | 4.03 | 0 | 0 | 2 | MASCOT | T | PLEX8 |
| 2.62E-02 | 0 0 | Cs2g11440.1/Cs2g114 | 4.03 | 0 | 0 | 2 | MASCOT | T | PLEX8 |
| 2.04E-02 | 0 0 | Cs2g11440.1/Cs2g114 | 4.03 | 0 | 0 | 2 | MASCOT | T | PLEX8 |
| 1.11E-01 | 0 0 | Cs2g11440.1/Cs2g114 | 4.03 | 0 | 0 | 2 | MASCOT | T | PLEX8 |
| 1.99E-03 | 0 0 | Cs2g11440.1/Cs2g114 | 3.93 | 0 | 0 | 2 | MASCOT | T | PLEX8 |
| 4.76E-02 | 0 0 | Cs2g11440.1/Cs2g114 | 4.37 | 0 | 0 | 2 | MASCOT | T | PLEX8 |
| 2.50E-01 | 0 0 | Cs2g11440.1/Cs2g114 | 6.75 | 0 | 0 | 2 | MASCOT | T |       |
| 1.05E-02 | 0 0 | Cs7g08640.1/Cs7g086 | 4.21 | 0 | 0 | 2 | MASCOT | T | PLEX8 |
| 2.57E-01 | 0 0 | Cs7g08640.1/Cs7g086 | 4.21 | 0 | 0 | 2 | MASCOT | T |       |
| 1.06E-03 | 0 0 | Cs7g08640.1/Cs7g086 | 4.37 | 0 | 0 | 2 | MASCOT | T | PLEX8 |
| 2.19E-02 | 0 0 | Cs7g08640.1/Cs7g086 | 4.37 | 0 | 0 | 2 | MASCOT | T | PLEX8 |
| 8.37E-05 | 0 0 | Cs7g08640.1/Cs7g086 | 4.37 | 0 | 0 | 2 | MASCOT | T | PLEX8 |
| 1.77E-02 | 0 0 | Cs7g08640.1/Cs7g086 | 3.92 | 0 | 0 | 2 | MASCOT | T | PLEX8 |
| 2.38E-03 | 0 0 | Cs7g08640.1/Cs7g086 | 3.83 | 0 | 0 | 2 | MASCOT | T | PLEX8 |
| 1.20E-01 | 0 0 | Cs2g28180.1/Cs7g086 | 6    | 0 | 0 | 2 | MASCOT | T | PLEX8 |
| 2.02E-01 | 0 0 | Cs2g28180.1/Cs7g086 | 6    | 0 | 0 | 2 | MASCOT | T | PLEX8 |
| 5.22E-01 | 0 0 | Cs2g28180.1/Cs7g086 | 6    | 0 | 0 | 2 | MASCOT | T | PLEX8 |
| 1.75E-02 | 0 0 | Cs2g28180.1/Cs7g086 | 6    | 0 | 0 | 2 | MASCOT | T | PLEX8 |
| 1.00E-01 | 0 0 | Cs2g28180.1/Cs7g086 | 6    | 0 | 0 | 2 | MASCOT | T |       |
| 7.87E-03 | 0 0 | Cs7g08640.1/Cs7g086 | 4.25 | 0 | 0 | 2 | MASCOT | T | PLEX8 |
| 5.12E-02 | 0 0 | Cs7g08640.1/Cs7g086 | 4.25 | 0 | 0 | 2 | MASCOT | T | PLEX8 |
| 1.77E-03 | 0 0 | Cs7g08640.1/Cs7g086 | 4.25 | 0 | 0 | 2 | MASCOT | T |       |
| 2.47E-04 | 0 0 | Cs7g08640.1/Cs7g086 | 4.25 | 0 | 0 | 2 | MASCOT | T |       |
| 4.28E-04 | 0 0 | Cs7g08640.1/Cs7g086 | 4.25 | 0 | 0 | 2 | MASCOT | T |       |
| 2.26E-05 | 0 0 | Cs7g08640.1/Cs7g086 | 4.25 | 0 | 0 | 2 | MASCOT | T |       |
| 6.18E-03 | 0 0 | Cs7g08640.1/Cs7g086 | 4.25 | 0 | 0 | 2 | MASCOT | T |       |
| 8.60E-03 | 0 0 | Cs7g08640.1/Cs7g086 | 4.25 | 0 | 0 | 2 | MASCOT | T | PLEX8 |
| 2.02E-01 | 0 0 | Cs7g08640.1/Cs7g086 | 5.97 | 0 | 0 | 2 | MASCOT | T | PLEX8 |
| 2.01E-01 | 0 0 | Cs7g08640.1/Cs7g086 | 5.97 | 0 | 0 | 2 | MASCOT | T | PLEX8 |
| 4.72E-02 | 0 0 | Cs7g08640.1/Cs7g086 | 5.81 | 0 | 0 | 2 | MASCOT | T | PLEX8 |
| 1.93E-03 | 0 0 | Cs7g08640.1/Cs7g086 | 5.81 | 0 | 0 | 2 | MASCOT | T | PLEX8 |
| 5.73E-02 | 0 0 | Cs7g08640.1/Cs7g086 | 5.81 | 0 | 0 | 2 | MASCOT | T | PLEX8 |
| 5.49E-03 | 0 0 | Cs7g08640.1/Cs7g086 | 5.81 | 0 | 0 | 2 | MASCOT | T | PLEX8 |
| 3.88E-04 | 0 0 | Cs7g08640.1/Cs7g086 | 5.81 | 0 | 0 | 2 | MASCOT | T | PLEX8 |
| 1.23E-04 | 0 0 | Cs7g08640.1/Cs7g086 | 5.81 | 0 | 0 | 2 | MASCOT | T | PLEX8 |
| 9.31E-04 | 0 0 | Cs7g08640.1/Cs7g086 | 5.81 | 0 | 0 | 2 | MASCOT | T | PLEX8 |
| 1.08E-01 | 0 0 | Cs7g08640.1/Cs7g086 | 5.81 | 0 | 0 | 2 | MASCOT | T | PLEX8 |
| 2.64E-02 | 0 0 | Cs7g08640.1/Cs7g086 | 5.81 | 0 | 0 | 2 | MASCOT | T | PLEX8 |
| 1.13E-03 | 0 0 | Cs7g08640.1/Cs7g086 | 5.81 | 0 | 0 | 2 | MASCOT | T |       |
| 7.23E-03 | 0 0 | Cs7g08640.1/Cs7g086 | 5.81 | 0 | 0 | 2 | MASCOT | T | PLEX8 |

|          |     |                      |      |   |      |   |        |        |       |       |
|----------|-----|----------------------|------|---|------|---|--------|--------|-------|-------|
| 4.25E-03 | 0 0 | Cs7g08640.1/Cs7g086  | 5.81 | 0 | 0    | 2 | MASCOT | T      | PLEX8 |       |
| 1.15E-01 | 0 0 | Cs2g28180.1 ! Cs7g08 | 4.37 | 0 | 0    | 2 | MASCOT | T      | PLEX8 |       |
| 1.83E-01 | 0 0 | Cs2g28180.1 ! Cs7g08 | 4.37 | 0 | 0    | 2 | MASCOT | T      | PLEX8 |       |
| 3.70E-02 | 0 0 | Cs7g08640.2          | 6    | 0 | 0    | 2 | MASCOT | T      | PLEX8 |       |
| 1.06E-04 | 0 0 | Cs7g08640.2          | 6    | 0 | 0    | 2 | MASCOT | T      | PLEX8 |       |
| 7.70E-04 | 0 0 | Cs7g08640.2          | 6    | 0 | 0    | 2 | MASCOT | T      | PLEX8 |       |
| 5.72E-04 | 0 0 | Cs7g08640.2          | 6    | 0 | 0    | 2 | MASCOT | T      | PLEX8 |       |
| 4.01E-02 | 0 0 | Cs7g08640.2          | 6    | 0 | 0    | 2 | MASCOT | T      | PLEX8 |       |
| 6.03E-03 | 0 0 | Cs7g08640.2          | 6    | 0 | 0    | 2 | MASCOT | T      | PLEX8 |       |
| 2.61E-01 | 0 0 | Cs2g28180.1 ! Cs7g08 | 4.21 | 0 | 0    | 2 | MASCOT | T      | PLEX8 |       |
| 1.89E-01 | 0 0 | Cs2g28180.1 ! Cs7g08 | 4.21 | 0 | 0    | 2 | MASCOT | T      | PLEX8 |       |
| 2.60E-04 | 0 0 | Cs2g28180.1 ! Cs7g08 | 4.21 | 0 | 0    | 2 | MASCOT | T      | PLEX8 |       |
| 2.93E-04 | 0 0 | Cs2g28180.1 ! Cs7g08 | 4.21 | 0 | 0    | 2 | MASCOT | T      | PLEX8 |       |
| 1.58E-04 | 0 0 | Cs2g28180.1 ! Cs7g08 | 4.21 | 0 | 0    | 2 | MASCOT | T      | PLEX8 |       |
| 4.47E-04 | 0 0 | Cs2g28180.1 ! Cs7g08 | 4.21 | 0 | 0    | 2 | MASCOT | T      | PLEX8 |       |
| 1.87E-01 | 0 0 | Cs7g08640.1/Cs7g086  | 8.41 | 0 | 0    | 2 | MASCOT | T      | PLEX8 |       |
| 1.06E-02 | 0 0 | Cs7g08640.1/Cs7g086  | 9.72 | 0 | 0    | 2 | MASCOT | T      | PLEX8 |       |
| 2.08E-01 | 0 0 | Cs7g08640.1/Cs7g086  | 9.72 | 0 | 0    | 2 | MASCOT | T      | PLEX8 |       |
| 9.54E-02 | 0 0 | Cs7g08640.1/Cs7g086  | 9.72 | 0 | 0    | 2 | MASCOT | T      | PLEX8 |       |
| 2.94E-02 | 0 0 | Cs1g17840.1          | 4.21 | 0 | 15.9 | 0 | 2      | MASCOT | T     | PLEX8 |
| 4.02E-01 | 0 0 | Cs1g17840.1          | 4.21 | 0 | 15.9 | 0 | 2      | MASCOT | T     |       |
| 4.28E-04 | 0 0 | Cs1g17840.1          | 4.21 | 0 | 0    | 2 | MASCOT | T      | PLEX8 |       |
| 1.29E-03 | 0 0 | Cs1g17840.1          | 4.21 | 0 | 0    | 2 | MASCOT | T      | PLEX8 |       |
| 1.42E-01 | 0 0 | Cs1g17840.1          | 5.88 | 0 | 0    | 2 | MASCOT | T      | PLEX8 |       |
| 1.52E-01 | 0 0 | Cs1g17840.1          | 5.88 | 0 | 0    | 2 | MASCOT | T      | PLEX8 |       |
| 1.03E-01 | 0 0 | Cs1g17840.1          | 4.37 | 0 | 15.9 | 0 | 2      | MASCOT | T     | PLEX8 |
| 1.81E-01 | 0 0 | Cs1g17840.1          | 4.37 | 0 | 15.9 | 0 | 2      | MASCOT | T     |       |
| 1.78E-01 | 0 0 | Cs1g17840.1          | 4.37 | 0 | 0    | 2 | MASCOT | T      | PLEX8 |       |
| 1.89E-01 | 0 0 | Cs1g17840.1          | 4.37 | 0 | 0    | 2 | MASCOT | T      | PLEX8 |       |
| 9.01E-02 | 0 0 | Cs1g17840.1          | 4.37 | 0 | 0    | 2 | MASCOT | T      | PLEX8 |       |
| 1.07E-01 | 0 0 | Cs1g17840.1          | 8.22 | 0 | 0    | 2 | MASCOT | T      | PLEX8 |       |
| 1.21E-01 | 0 0 | Cs1g17840.1          | 8.22 | 0 | 0    | 2 | MASCOT | T      | PLEX8 |       |
| 1.19E-01 | 0 0 | Cs1g17840.1          | 6.74 | 0 | 0    | 2 | MASCOT | T      |       |       |
| 3.02E-01 | 0 0 | Cs1g17840.1          | 6.74 | 0 | 0    | 2 | MASCOT | T      | PLEX8 |       |
| 2.39E-02 | 0 0 | Cs1g17840.1          | 6.74 | 0 | 0    | 2 | MASCOT | T      | PLEX8 |       |
| 1.28E-01 | 0 0 | Cs1g17840.1          | 6.74 | 0 | 0    | 2 | MASCOT | T      | PLEX8 |       |
| 1.81E-02 | 0 0 | Cs1g17840.1          | 6.74 | 0 | 0    | 2 | MASCOT | T      | PLEX8 |       |
| 3.81E-01 | 0 0 | Cs1g17840.1/Cs4g150  | 8.26 | 0 | 0    | 2 | MASCOT | T      | PLEX8 |       |
| 2.43E-03 | 0 0 | Cs1g17840.1/Cs4g150  | 8.26 | 0 | 0    | 2 | MASCOT | T      | PLEX8 |       |
| 3.51E-01 | 0 0 | Cs1g17840.1 ! Cs4g15 | 8.44 | 0 | 0    | 2 | MASCOT | T      | PLEX8 |       |
| 4.25E-02 | 0 0 | Cs1g17840.1 ! Cs4g15 | 8.44 | 0 | 0    | 2 | MASCOT | T      | PLEX8 |       |
| 6.25E-04 | 0 0 | Cs1g17840.1 ! Cs4g15 | 8.44 | 0 | 0    | 2 | MASCOT | T      | PLEX8 |       |
| 2.40E-03 | 0 0 | Cs1g17840.1 ! Cs4g15 | 8.44 | 0 | 0    | 2 | MASCOT | T      | PLEX8 |       |
| 6.18E-03 | 0 0 | Cs1g17840.1 ! Cs4g15 | 8.44 | 0 | 0    | 2 | MASCOT | T      | PLEX8 |       |
| 5.47E-04 | 0 0 | Cs1g17840.1 ! Cs4g15 | 8.44 | 0 | 0    | 2 | MASCOT | T      | PLEX8 |       |
| 2.01E-03 | 0 0 | Cs1g17840.1 ! Cs4g15 | 8.44 | 0 | 0    | 2 | MASCOT | T      | PLEX8 |       |
| 6.99E-02 | 0 0 | Cs1g17840.1 ! Cs4g15 | 8.44 | 0 | 0    | 2 | MASCOT | T      |       |       |
| 5.99E-02 | 0 0 | Cs1g17840.1          | 8.75 | 0 | 0    | 2 | MASCOT | T      | PLEX8 |       |
| 1.04E-02 | 0 0 | Cs1g17840.1          | 8.75 | 0 | 0    | 2 | MASCOT | T      | PLEX8 |       |
| 1.31E-01 | 0 0 | Cs1g17840.1          | 8.75 | 0 | 0    | 2 | MASCOT | T      | PLEX8 |       |
| 1.10E-01 | 0 0 | Cs1g17840.1          | 8.75 | 0 | 0    | 2 | MASCOT | T      | PLEX8 |       |

|              |             |      |        |   |          |   |       |
|--------------|-------------|------|--------|---|----------|---|-------|
| 2.56E-02 0 0 | Cs1g17840.1 | 8.75 | 0      | 0 | 2 MASCOT | T | PLEX8 |
| 8.58E-02 0 0 | Cs1g17840.1 | 8.75 | 0      | 0 | 2 MASCOT | T | PLEX8 |
| 3.78E-02 0 0 | Cs1g17840.1 | 8.75 | 0      | 0 | 2 MASCOT | T | PLEX8 |
| 7.46E-02 0 0 | Cs1g17840.1 | 8.75 | 0      | 0 | 2 MASCOT | T | PLEX8 |
| 2.49E-02 0 0 | Cs1g17840.1 | 8.75 | 0      | 0 | 2 MASCOT | T | PLEX8 |
| 3.12E-04 0 0 | Cs1g17840.1 | 8.15 | 0      | 0 | 2 MASCOT | T |       |
| 1.90E-04 0 0 | Cs1g17840.1 | 8.15 | 0      | 0 | 2 MASCOT | T | PLEX8 |
| 6.48E-04 0 0 | Cs1g17840.1 | 8.15 | 0      | 0 | 2 MASCOT | T | PLEX8 |
| 1.88E-01 0 0 | Cs1g17840.1 | 8.76 | 0      | 0 | 2 MASCOT | T | PLEX8 |
| 1.78E-01 0 0 | Cs1g17840.1 | 5.19 | 0 15.9 | 0 | 2 MASCOT | T | PLEX8 |
| 1.19E-02 0 0 | Cs1g17840.1 | 5.19 | 0 15.9 | 0 | 2 MASCOT | T | PLEX8 |
| 2.54E-01 0 0 | Cs1g17840.1 | 5.19 | 0 15.9 | 0 | 2 MASCOT | T | PLEX8 |
| 3.15E-05 0 0 | Cs1g17840.1 | 5.19 | 0      | 0 | 2 MASCOT | T | PLEX8 |
| 6.85E-03 0 0 | Cs1g17840.1 | 5.19 | 0      | 0 | 2 MASCOT | T | PLEX8 |
| 1.43E-02 0 0 | Cs1g17840.1 | 5.19 | 0      | 0 | 2 MASCOT | T |       |
| 9.03E-04 0 0 | Cs1g17840.1 | 5.19 | 0      | 0 | 2 MASCOT | T |       |
| 1.91E-02 0 0 | Cs4g12840.1 | 4.53 | 0      | 0 | 2 MASCOT | T | PLEX8 |
| 1.69E-03 0 0 | Cs4g12840.1 | 4.53 | 0      | 0 | 2 MASCOT | T | PLEX8 |
| 5.46E-02 0 0 | Cs4g12840.1 | 4.53 | 0      | 0 | 2 MASCOT | T | PLEX8 |
| 1.73E-01 0 0 | Cs4g12840.1 | 4.53 | 0      | 0 | 2 MASCOT | T | PLEX8 |
| 1.00E-01 0 0 | Cs4g12840.1 | 4.53 | 0      | 0 | 2 MASCOT | T | PLEX8 |
| 6.46E-04 0 0 | Cs4g12840.1 | 4.53 | 0      | 0 | 2 MASCOT | T | PLEX8 |
| 1.27E-02 0 0 | Cs4g12840.1 | 4.53 | 0      | 0 | 2 MASCOT | T | PLEX8 |
| 5.91E-02 0 0 | Cs4g12840.1 | 4.21 | 0      | 0 | 2 MASCOT | T | PLEX8 |
| 1.62E-01 0 0 | Cs4g12840.1 | 4.21 | 0      | 0 | 2 MASCOT | T | PLEX8 |
| 2.92E-01 0 0 | Cs4g12840.1 | 4.21 | 0      | 0 | 2 MASCOT | T | PLEX8 |
| 8.32E-02 0 0 | Cs4g12840.1 | 4.21 | 0      | 0 | 2 MASCOT | T | PLEX8 |
| 2.63E-02 0 0 | Cs4g12840.1 | 4.21 | 0      | 0 | 2 MASCOT | T | PLEX8 |
| 6.80E-02 0 0 | Cs4g12840.1 | 4.21 | 0      | 0 | 2 MASCOT | T | PLEX8 |
| 8.50E-03 0 0 | Cs4g12840.1 | 5.32 | 0      | 0 | 2 MASCOT | T | PLEX8 |
| 3.45E-01 0 0 | Cs4g12840.1 | 5.32 | 0      | 0 | 2 MASCOT | T | PLEX8 |
| 1.84E-07 0 0 | Cs4g12840.1 | 5.32 | 0      | 0 | 2 MASCOT | T |       |
| 2.61E-02 0 0 | Cs4g12840.1 | 6.75 | 0      | 0 | 2 MASCOT | T | PLEX8 |
| 2.03E-01 0 0 | Cs4g12840.1 | 6.75 | 0      | 0 | 2 MASCOT | T | PLEX8 |
| 3.06E-01 0 0 | Cs4g12840.1 | 8.56 | 0      | 0 | 2 MASCOT | T | PLEX8 |
| 2.03E-02 0 0 | Cs4g12840.1 | 8.56 | 0      | 0 | 2 MASCOT | T | PLEX8 |
| 2.09E-02 0 0 | Cs4g12840.1 | 8.56 | 0      | 0 | 2 MASCOT | T | PLEX8 |
| 1.21E-03 0 0 | Cs4g12840.1 | 8.56 | 0      | 0 | 2 MASCOT | T | PLEX8 |
| 3.46E-05 0 0 | Cs4g12840.1 | 8.56 | 0      | 0 | 2 MASCOT | T | PLEX8 |
| 3.93E-03 0 0 | Cs4g12840.1 | 8.56 | 0      | 0 | 2 MASCOT | T | PLEX8 |
| 4.06E-04 0 0 | Cs4g12840.1 | 5.88 | 0      | 0 | 2 MASCOT | T | PLEX8 |
| 2.40E-04 0 0 | Cs4g12840.1 | 5.88 | 0      | 0 | 2 MASCOT | T | PLEX8 |
| 2.13E-04 0 0 | Cs4g12840.1 | 4.03 | 0      | 0 | 2 MASCOT | T | PLEX8 |
| 8.63E-04 0 0 | Cs4g12840.1 | 4.03 | 0      | 0 | 2 MASCOT | T |       |
| 1.91E-03 0 0 | Cs4g12840.1 | 4.03 | 0      | 0 | 2 MASCOT | T |       |
| 9.69E-04 0 0 | Cs4g12840.1 | 4.03 | 0      | 0 | 2 MASCOT | T | PLEX8 |
| 1.35E-05 0 0 | Cs4g12840.1 | 4.03 | 0      | 0 | 2 MASCOT | T | PLEX8 |
| 1.54E-02 0 0 | Cs4g12840.1 | 4.03 | 0      | 0 | 2 MASCOT | T | PLEX8 |
| 8.44E-04 0 0 | Cs4g12840.1 | 4.03 | 0      | 0 | 2 MASCOT | T |       |
| 5.91E-04 0 0 | Cs4g12840.1 | 4.03 | 0      | 0 | 2 MASCOT | T |       |
| 1.37E-02 0 0 | Cs4g12840.1 | 4.14 | 0      | 0 | 2 MASCOT | T |       |

|          |     |                       |      |   |      |   |        |        |       |       |
|----------|-----|-----------------------|------|---|------|---|--------|--------|-------|-------|
| 4.22E-04 | 0 0 | Cs4g12840.1           | 4.14 | 0 | 0    | 2 | MASCOT | T      |       |       |
| 3.42E-02 | 0 0 | Cs4g12840.1           | 4.14 | 0 | 0    | 2 | MASCOT | T      | PLEX8 |       |
| 5.32E-02 | 0 0 | Cs4g12840.1           | 8.59 | 1 | 0    | 2 | MASCOT | T      | PLEX8 |       |
| 4.24E-02 | 0 0 | Cs4g12840.1           | 8.59 | 1 | 0    | 2 | MASCOT | T      | PLEX8 |       |
| 4.60E-02 | 0 0 | Cs4g12840.1           | 8.59 | 1 | 0    | 2 | MASCOT | T      |       |       |
| 2.45E-01 | 0 0 | Cs4g12840.1           | 8.49 | 0 | 0    | 2 | MASCOT | T      | PLEX8 |       |
| 2.84E-02 | 0 0 | Cs4g12840.1           | 6.71 | 0 | 0    | 2 | MASCOT | T      |       |       |
| 3.29E-02 | 0 0 | Cs4g12840.1           | 6.71 | 0 | 0    | 2 | MASCOT | T      |       |       |
| 9.13E-02 | 0 0 | Cs4g12840.1           | 6.71 | 0 | 0    | 2 | MASCOT | T      |       |       |
| 1.66E-01 | 0 0 | Cs4g12840.1           | 5.81 | 0 | 0    | 2 | MASCOT | T      | PLEX8 |       |
| 6.58E-04 | 0 0 | orange1.1t00227.1/ora | 6.05 | 0 | 0    | 2 | MASCOT | T      |       |       |
| 4.24E-03 | 0 0 | orange1.1t00227.1/ora | 6.05 | 0 | 0    | 2 | MASCOT | T      |       |       |
| 4.54E-01 | 0 0 | orange1.1t00227.1/ora | 4.53 | 0 | 0    | 2 | MASCOT | T      | PLEX8 |       |
| 2.77E-02 | 0 0 | orange1.1t00227.1/ora | 4.53 | 0 | 0    | 2 | MASCOT | T      | PLEX8 |       |
| 2.75E-01 | 0 0 | orange1.1t00227.1/ora | 4.53 | 0 | 0    | 2 | MASCOT | T      | PLEX8 |       |
| 1.93E-01 | 0 0 | orange1.1t00227.1/ora | 4.53 | 0 | 0    | 2 | MASCOT | T      | PLEX8 |       |
| 1.11E-01 | 0 0 | orange1.1t00227.1/ora | 4.53 | 0 | 0    | 2 | MASCOT | T      | PLEX8 |       |
| 6.25E-02 | 0 0 | orange1.1t00227.1/ora | 4.53 | 0 | 0    | 2 | MASCOT | T      | PLEX8 |       |
| 2.19E-01 | 0 0 | orange1.1t00227.1/ora | 4.53 | 0 | 0    | 2 | MASCOT | T      | PLEX8 |       |
| 2.63E-03 | 0 0 | orange1.1t00227.1     | 4    | 0 | 0    | 2 | MASCOT | T      | PLEX8 |       |
| 1.02E-02 | 0 0 | orange1.1t00227.1/ora | 4.14 | 0 | 15.9 | 0 | 2      | MASCOT | T     | PLEX8 |
| 2.46E-02 | 0 0 | orange1.1t00227.1     | 4.41 | 0 | 0    | 2 | MASCOT | T      | PLEX8 |       |
| 1.61E-02 | 0 0 | orange1.1t00227.1     | 4.41 | 0 | 0    | 2 | MASCOT | T      | PLEX8 |       |
| 7.59E-04 | 0 0 | orange1.1t00227.1     | 4.41 | 0 | 0    | 2 | MASCOT | T      | PLEX8 |       |
| 1.14E-04 | 0 0 | orange1.1t00227.1     | 4.41 | 0 | 0    | 2 | MASCOT | T      |       |       |
| 3.50E-02 | 0 0 | orange1.1t00227.1     | 4.41 | 0 | 0    | 2 | MASCOT | T      |       |       |
| 3.45E-06 | 0 0 | orange1.1t00227.1     | 4.41 | 0 | 0    | 2 | MASCOT | T      |       |       |
| 3.66E-02 | 0 0 | orange1.1t00227.1     | 4.41 | 0 | 0    | 2 | MASCOT | T      |       |       |
| 7.71E-04 | 0 0 | orange1.1t00227.1/ora | 5.97 | 0 | 0    | 2 | MASCOT | T      |       |       |
| 6.30E-05 | 0 0 | orange1.1t00227.1/ora | 5.97 | 0 | 0    | 2 | MASCOT | T      |       |       |
| 7.88E-03 | 0 0 | orange1.1t00227.1/ora | 6.04 | 0 | 0    | 2 | MASCOT | T      | PLEX8 |       |
| 2.41E-02 | 0 0 | orange1.1t00227.1/ora | 6.04 | 0 | 0    | 2 | MASCOT | T      |       |       |
| 9.57E-04 | 0 0 | orange1.1t00227.1/ora | 6.04 | 0 | 0    | 2 | MASCOT | T      | PLEX8 |       |
| 1.29E-03 | 0 0 | orange1.1t00227.1/ora | 6.04 | 0 | 0    | 2 | MASCOT | T      | PLEX8 |       |
| 1.64E-01 | 0 0 | orange1.1t00227.1/ora | 6.04 | 0 | 0    | 2 | MASCOT | T      | PLEX8 |       |
| 2.81E-01 | 0 0 | orange1.1t00227.1/ora | 6.04 | 0 | 0    | 2 | MASCOT | T      |       |       |
| 2.93E-02 | 0 0 | orange1.1t00227.1/ora | 6.04 | 0 | 0    | 2 | MASCOT | T      | PLEX8 |       |
| 6.91E-02 | 0 0 | orange1.1t00227.1/ora | 6.04 | 0 | 0    | 2 | MASCOT | T      |       |       |
| 4.91E-02 | 0 0 | orange1.1t00227.1/ora | 5.88 | 0 | 0    | 2 | MASCOT | T      | PLEX8 |       |
| 2.87E-02 | 0 0 | orange1.1t00227.1/ora | 5.88 | 0 | 0    | 2 | MASCOT | T      | PLEX8 |       |
| 2.08E-02 | 0 0 | orange1.1t00227.1/ora | 6.1  | 0 | 0    | 2 | MASCOT | T      | PLEX8 |       |
| 3.37E-02 | 0 0 | orange1.1t00227.1/ora | 6.1  | 0 | 0    | 2 | MASCOT | T      | PLEX8 |       |
| 6.05E-02 | 0 0 | orange1.1t00227.1/ora | 6.17 | 0 | 0    | 2 | MASCOT | T      | PLEX8 |       |
| 3.32E-01 | 0 0 | orange1.1t00227.1/ora | 6.17 | 0 | 0    | 2 | MASCOT | T      | PLEX8 |       |
| 2.16E-02 | 0 0 | orange1.1t00227.1/ora | 6.17 | 0 | 0    | 2 | MASCOT | T      | PLEX8 |       |
| 1.66E-01 | 0 0 | orange1.1t00227.1/ora | 6.17 | 0 | 0    | 2 | MASCOT | T      | PLEX8 |       |
| 5.27E-02 | 0 0 | orange1.1t00227.1/ora | 8.75 | 0 | 0    | 2 | MASCOT | T      | PLEX8 |       |
| 9.22E-02 | 0 0 | orange1.1t00227.1/ora | 8.75 | 0 | 0    | 2 | MASCOT | T      | PLEX8 |       |
| 1.71E-01 | 0 0 | orange1.1t00227.1/ora | 8.75 | 0 | 0    | 2 | MASCOT | T      | PLEX8 |       |
| 5.91E-02 | 0 0 | orange1.1t00227.1/ora | 4.54 | 0 | 0    | 2 | MASCOT | T      | PLEX8 |       |
| 1.02E-02 | 0 0 | orange1.1t00227.1/ora | 4.54 | 0 | 0    | 2 | MASCOT | T      | PLEX8 |       |

|          |     |                       |      |   |      |   |        |        |       |       |
|----------|-----|-----------------------|------|---|------|---|--------|--------|-------|-------|
| 2.62E-03 | 0 0 | orange1.1t00227.1/ora | 4.54 | 0 | 0    | 2 | MASCOT | T      | PLEX8 |       |
| 2.70E-01 | 0 0 | orange1.1t00227.1     | 5.75 | 0 | 15.9 | 0 | 2      | MASCOT | T     | PLEX8 |
| 4.41E-04 | 0 0 | Cs3g20830.1/Cs3g208   | 4.49 | 0 | 0    | 2 | MASCOT | T      | PLEX8 |       |
| 1.94E-02 | 0 0 | Cs3g20830.1/Cs3g208   | 4.37 | 0 | 15.9 | 0 | 2      | MASCOT | T     |       |
| 1.28E-02 | 0 0 | Cs3g20830.1/Cs3g208   | 4.37 | 0 | 0    | 2 | MASCOT | T      |       |       |
| 1.15E-02 | 0 0 | Cs3g20830.1/Cs3g208   | 4.37 | 0 | 0    | 2 | MASCOT | T      |       |       |
| 2.13E-02 | 0 0 | Cs3g20830.1/Cs3g208   | 4.37 | 0 | 0    | 2 | MASCOT | T      |       |       |
| 8.96E-03 | 0 0 | Cs3g20830.1/Cs3g208   | 4.8  | 0 | 15.9 | 0 | 2      | MASCOT | T     | PLEX8 |
| 1.44E-02 | 0 0 | Cs3g20830.1/Cs3g208   | 4.8  | 0 | 0    | 2 | MASCOT | T      | PLEX8 |       |
| 2.62E-04 | 0 0 | Cs3g20830.1/Cs3g208   | 4.8  | 0 | 0    | 2 | MASCOT | T      | PLEX8 |       |
| 1.36E-01 | 0 0 | Cs7g30550.1/Cs7g305   | 4.25 | 0 | 0    | 2 | MASCOT | T      | PLEX8 |       |
| 2.46E-03 | 0 0 | Cs3g20830.1/Cs3g208   | 6    | 0 | 0    | 2 | MASCOT | T      | PLEX8 |       |
| 2.48E-02 | 0 0 | Cs3g20830.1/Cs3g208   | 6    | 0 | 0    | 2 | MASCOT | T      | PLEX8 |       |
| 2.70E-03 | 0 0 | Cs3g20830.1/Cs3g208   | 6    | 0 | 0    | 2 | MASCOT | T      | PLEX8 |       |
| 1.57E-02 | 0 0 | Cs3g20830.1/Cs3g208   | 6    | 0 | 0    | 2 | MASCOT | T      | PLEX8 |       |
| 5.96E-04 | 0 0 | Cs3g20830.1/Cs3g208   | 6    | 0 | 0    | 2 | MASCOT | T      | PLEX8 |       |
| 3.11E-01 | 0 0 | Cs3g20830.1/Cs3g208   | 6.75 | 0 | 0    | 2 | MASCOT | T      | PLEX8 |       |
| 2.91E-02 | 0 0 | Cs3g20830.1/Cs3g208   | 6.75 | 0 | 0    | 2 | MASCOT | T      | PLEX8 |       |
| 8.13E-02 | 0 0 | Cs3g20830.1/Cs3g208   | 9.75 | 0 | 0    | 2 | MASCOT | T      | PLEX8 |       |
| 1.28E-01 | 0 0 | Cs3g20830.1/Cs3g208   | 9.75 | 0 | 0    | 2 | MASCOT | T      | PLEX8 |       |
| 1.15E-01 | 0 0 | Cs3g20830.1/Cs3g208   | 9.75 | 0 | 0    | 2 | MASCOT | T      | PLEX8 |       |
| 7.13E-02 | 0 0 | Cs3g20830.1/Cs3g208   | 9.75 | 0 | 0    | 2 | MASCOT | T      | PLEX8 |       |
| 4.54E-02 | 0 0 | Cs3g20830.1/Cs3g208   | 9.75 | 0 | 0    | 2 | MASCOT | T      | PLEX8 |       |
| 5.72E-02 | 0 0 | Cs3g20830.1/Cs3g208   | 5.84 | 0 | 0    | 2 | MASCOT | T      | PLEX8 |       |
| 2.89E-01 | 0 0 | Cs3g20830.1/Cs3g208   | 5.84 | 0 | 0    | 2 | MASCOT | T      | PLEX8 |       |
| 6.39E-02 | 0 0 | Cs3g20830.1/Cs3g208   | 5.84 | 0 | 0    | 2 | MASCOT | T      | PLEX8 |       |
| 9.46E-02 | 0 0 | Cs3g20830.1/Cs3g208   | 5.84 | 0 | 0    | 2 | MASCOT | T      | PLEX8 |       |
| 1.03E-01 | 0 0 | Cs3g20830.1/Cs3g208   | 8.59 | 1 | 0    | 2 | MASCOT | T      | PLEX8 |       |
| 4.02E-02 | 0 0 | Cs3g20830.1/Cs3g208   | 8.59 | 1 | 0    | 2 | MASCOT | T      | PLEX8 |       |
| 7.54E-02 | 0 0 | Cs3g20800.1/Cs3g208   | 6.41 | 0 | 15.9 | 0 | 2      | MASCOT | T     | PLEX8 |
| 4.22E-02 | 0 0 | Cs3g20800.1/Cs3g208   | 6.41 | 0 | 15.9 | 0 | 2      | MASCOT | T     | PLEX8 |
| 8.08E-03 | 0 0 | Cs3g20800.1/Cs3g208   | 6.41 | 0 | 15.9 | 0 | 2      | MASCOT | T     | PLEX8 |
| 9.51E-02 | 0 0 | Cs3g20800.1/Cs3g208   | 6.41 | 0 | 0    | 2 | MASCOT | T      | PLEX8 |       |
| 4.98E-04 | 0 0 | Cs3g20800.1/Cs3g208   | 6.41 | 0 | 0    | 2 | MASCOT | T      | PLEX8 |       |
| 3.90E-02 | 0 0 | Cs3g20830.1/Cs3g208   | 5.84 | 0 | 15.9 | 0 | 2      | MASCOT | T     | PLEX8 |
| 2.27E-02 | 0 0 | Cs3g20830.1/Cs3g208   | 5.84 | 0 | 0    | 2 | MASCOT | T      |       |       |
| 1.90E-06 | 0 0 | Cs3g20830.1/Cs3g208   | 5.84 | 0 | 0    | 2 | MASCOT | T      |       |       |
| 3.14E-01 | 0 0 | Cs3g20830.1/Cs3g208   | 5.84 | 0 | 0    | 2 | MASCOT | T      |       |       |
| 6.14E-02 | 0 0 | Cs3g20800.1/Cs3g208   | 4.37 | 0 | 0    | 2 | MASCOT | T      | PLEX8 |       |
| 1.98E-01 | 0 0 | Cs3g20800.1/Cs3g208   | 4.37 | 0 | 0    | 2 | MASCOT | T      | PLEX8 |       |
| 6.49E-02 | 0 0 | Cs3g20800.1/Cs3g208   | 4.37 | 0 | 0    | 2 | MASCOT | T      | PLEX8 |       |
| 6.95E-02 | 0 0 | Cs3g20800.1/Cs3g208   | 4.37 | 0 | 0    | 2 | MASCOT | T      | PLEX8 |       |
| 5.69E-02 | 0 0 | Cs3g20800.1/Cs3g208   | 4.37 | 0 | 0    | 2 | MASCOT | T      | PLEX8 |       |
| 1.42E-02 | 0 0 | Cs7g27180.1/Cs7g271   | 8.8  | 0 | 0    | 2 | MASCOT | T      | PLEX8 |       |
| 9.99E-02 | 0 0 | Cs7g27180.1/Cs7g271   | 8.8  | 0 | 0    | 2 | MASCOT | T      | PLEX8 |       |
| 6.54E-02 | 0 0 | Cs7g27180.1/Cs7g271   | 8.8  | 0 | 0    | 2 | MASCOT | T      | PLEX8 |       |
| 2.95E-01 | 0 0 | Cs7g27180.1           | 4.53 | 0 | 0    | 2 | MASCOT | T      | PLEX8 |       |
| 2.35E-01 | 0 0 | Cs7g27180.1           | 4.53 | 0 | 0    | 2 | MASCOT | T      | PLEX8 |       |
| 1.46E-01 | 0 0 | Cs7g27180.1/Cs7g271   | 5.32 | 0 | 0    | 2 | MASCOT | T      | PLEX8 |       |
| 7.50E-05 | 0 0 | Cs7g27180.1/Cs7g271   | 5.32 | 0 | 0    | 2 | MASCOT | T      | PLEX8 |       |
| 8.11E-03 | 0 0 | Cs7g27180.1/Cs7g271   | 5.32 | 0 | 0    | 2 | MASCOT | T      |       |       |



|          |     |                     |      |   |      |   |        |        |       |       |
|----------|-----|---------------------|------|---|------|---|--------|--------|-------|-------|
| 2.36E-02 | 0 0 | Cs7g27180.1/Cs7g271 | 5.32 | 0 | 0    | 2 | MASCOT | T      |       |       |
| 6.28E-02 | 0 0 | Cs7g27180.1/Cs7g271 | 4.53 | 0 | 0    | 2 | MASCOT | T      | PLEX8 |       |
| 6.62E-02 | 0 0 | Cs7g27180.1/Cs7g271 | 5.59 | 0 | 15.9 | 0 | 2      | MASCOT | T     | PLEX8 |
| 2.98E-03 | 0 0 | Cs7g27180.1/Cs7g271 | 4.14 | 0 | 0    | 2 | MASCOT | T      | PLEX8 |       |
| 2.40E-01 | 0 0 | Cs7g27180.1/Cs7g271 | 5.83 | 0 | 0    | 2 | MASCOT | T      |       |       |
| 2.07E-03 | 0 0 | Cs7g27180.1/Cs7g271 | 5.83 | 0 | 0    | 2 | MASCOT | T      |       |       |
| 7.94E-02 | 0 0 | Cs7g27180.1/Cs7g271 | 5.84 | 0 | 0    | 2 | MASCOT | T      | PLEX8 |       |
| 1.49E-02 | 0 0 | Cs7g27180.1/Cs7g271 | 5.84 | 0 | 0    | 2 | MASCOT | T      | PLEX8 |       |
| 8.99E-02 | 0 0 | Cs7g27180.1/Cs7g271 | 5.84 | 0 | 0    | 2 | MASCOT | T      | PLEX8 |       |
| 3.49E-02 | 0 0 | Cs7g27180.1         | 6.74 | 0 | 0    | 2 | MASCOT | T      | PLEX8 |       |
| 7.83E-02 | 0 0 | Cs7g27180.1         | 6.74 | 0 | 0    | 2 | MASCOT | T      | PLEX8 |       |
| 1.49E-03 | 0 0 | Cs7g27180.1         | 5.72 | 0 | 15.9 | 0 | 2      | MASCOT | T     |       |
| 2.09E-07 | 0 0 | Cs7g27180.1         | 5.72 | 0 | 0    | 2 | MASCOT | T      |       |       |
| 3.00E-05 | 0 0 | Cs7g27180.1         | 5.72 | 0 | 0    | 2 | MASCOT | T      |       |       |
| 8.67E-02 | 0 0 | Cs7g27180.1/Cs7g271 | 8.72 | 0 | 0    | 2 | MASCOT | T      | PLEX8 |       |
| 8.71E-02 | 0 0 | Cs7g27180.1/Cs7g271 | 8.72 | 0 | 0    | 2 | MASCOT | T      | PLEX8 |       |
| 8.63E-02 | 0 0 | Cs7g27180.1/Cs7g271 | 8.72 | 0 | 0    | 2 | MASCOT | T      | PLEX8 |       |
| 5.49E-02 | 0 0 | Cs7g27180.1/Cs7g271 | 8.72 | 0 | 0    | 2 | MASCOT | T      |       |       |
| 2.54E-03 | 0 0 | Cs7g27180.1/Cs7g271 | 8.22 | 1 | 0    | 2 | MASCOT | T      | PLEX8 |       |
| 7.10E-06 | 0 0 | Cs7g27180.1/Cs7g271 | 5.32 | 0 | 0    | 2 | MASCOT | T      | PLEX8 |       |
| 1.69E-03 | 0 0 | Cs7g27180.1/Cs7g271 | 5.32 | 0 | 0    | 2 | MASCOT | T      | PLEX8 |       |
| 6.80E-03 | 0 0 | Cs7g27180.1/Cs7g271 | 5.32 | 0 | 0    | 2 | MASCOT | T      | PLEX8 |       |
| 7.37E-07 | 0 0 | Cs7g27180.1/Cs7g271 | 5.32 | 0 | 0    | 2 | MASCOT | T      | PLEX8 |       |
| 5.65E-04 | 0 0 | Cs7g27180.1/Cs7g271 | 5.32 | 0 | 0    | 2 | MASCOT | T      |       |       |
| 1.45E-03 | 0 0 | Cs7g27180.1/Cs7g271 | 5.32 | 0 | 0    | 2 | MASCOT | T      | PLEX8 |       |
| 1.69E-07 | 0 0 | Cs7g27180.1/Cs7g271 | 5.32 | 0 | 0    | 2 | MASCOT | T      | PLEX8 |       |
| 2.05E-03 | 0 0 | Cs7g27180.1/Cs7g271 | 5.32 | 0 | 0    | 2 | MASCOT | T      | PLEX8 |       |
| 4.78E-06 | 0 0 | Cs7g27180.1/Cs7g271 | 5.32 | 0 | 0    | 2 | MASCOT | T      | PLEX8 |       |
| 5.65E-02 | 0 0 | Cs7g27180.1/Cs7g271 | 5.32 | 0 | 0    | 2 | MASCOT | T      |       |       |
| 2.26E-05 | 0 0 | Cs7g27180.1/Cs7g271 | 5.32 | 0 | 0    | 2 | MASCOT | T      |       |       |
| 1.06E-01 | 0 0 | Cs7g27180.1/Cs7g271 | 5.32 | 0 | 0    | 2 | MASCOT | T      |       |       |
| 3.97E-04 | 0 0 | Cs9g02470.1/Cs9g024 | 4.25 | 0 | 0    | 2 | MASCOT | T      | PLEX8 |       |
| 1.45E-03 | 0 0 | Cs9g02470.1/Cs9g024 | 4.25 | 0 | 0    | 2 | MASCOT | T      | PLEX8 |       |
| 1.32E-05 | 0 0 | Cs9g02470.1/Cs9g024 | 4.25 | 0 | 0    | 2 | MASCOT | T      | PLEX8 |       |
| 1.95E-02 | 0 0 | Cs9g02470.1/Cs9g024 | 4.25 | 0 | 0    | 2 | MASCOT | T      | PLEX8 |       |
| 3.90E-03 | 0 0 | Cs9g02470.1/Cs9g024 | 4.25 | 0 | 0    | 2 | MASCOT | T      | PLEX8 |       |
| 2.56E-02 | 0 0 | Cs9g02470.1/Cs9g024 | 6.79 | 0 | 0    | 2 | MASCOT | T      | PLEX8 |       |
| 3.61E-02 | 0 0 | Cs9g02470.1/Cs9g024 | 6.79 | 0 | 0    | 2 | MASCOT | T      | PLEX8 |       |
| 5.02E-02 | 0 0 | Cs9g02470.1/Cs9g024 | 6.79 | 0 | 0    | 2 | MASCOT | T      | PLEX8 |       |
| 2.05E-02 | 0 0 | Cs9g02470.1/Cs9g024 | 6.79 | 0 | 0    | 2 | MASCOT | T      | PLEX8 |       |
| 4.26E-01 | 0 0 | Cs9g02470.1/Cs9g024 | 6.79 | 0 | 0    | 2 | MASCOT | T      | PLEX8 |       |
| 2.16E-01 | 0 0 | Cs9g02470.1/Cs9g024 | 6.79 | 0 | 0    | 2 | MASCOT | T      | PLEX8 |       |
| 1.34E-01 | 0 0 | Cs9g02470.1/Cs9g024 | 4.56 | 0 | 0    | 2 | MASCOT | T      | PLEX8 |       |
| 2.14E-01 | 0 0 | Cs9g02470.1/Cs9g024 | 4.56 | 0 | 0    | 2 | MASCOT | T      |       |       |
| 1.65E-01 | 0 0 | Cs9g02470.1/Cs9g024 | 4.56 | 0 | 0    | 2 | MASCOT | T      | PLEX8 |       |
| 1.78E-04 | 0 0 | Cs9g02470.1/Cs9g024 | 4.35 | 0 | 0    | 2 | MASCOT | T      | PLEX8 |       |
| 2.33E-02 | 0 0 | Cs9g02470.1/Cs9g024 | 5.84 | 0 | 0    | 2 | MASCOT | T      |       |       |
| 2.16E-01 | 0 0 | Cs9g02470.1/Cs9g024 | 5.84 | 0 | 0    | 2 | MASCOT | T      |       |       |
| 2.38E-03 | 0 0 | Cs9g02470.1/Cs9g024 | 5.84 | 0 | 0    | 2 | MASCOT | T      |       |       |
| 5.92E-05 | 0 0 | Cs9g02470.1/Cs9g024 | 5.84 | 0 | 0    | 2 | MASCOT | T      |       |       |
| 5.28E-03 | 0 0 | Cs9g02470.1/Cs9g024 | 5.84 | 0 | 0    | 2 | MASCOT | T      |       |       |

|          |     |                     |      |   |      |   |        |        |       |       |
|----------|-----|---------------------|------|---|------|---|--------|--------|-------|-------|
| 1.19E-01 | 0 0 | Cs9g02470.1/Cs9g024 | 4.53 | 0 | 0    | 2 | MASCOT | T      | PLEX8 |       |
| 2.29E-02 | 0 0 | Cs9g02470.1/Cs9g024 | 4.53 | 0 | 0    | 2 | MASCOT | T      | PLEX8 |       |
| 6.16E-02 | 0 0 | Cs9g02470.1/Cs9g024 | 5.84 | 0 | 0    | 2 | MASCOT | T      | PLEX8 |       |
| 4.58E-02 | 0 0 | Cs9g02470.1/Cs9g024 | 4.37 | 0 | 0    | 2 | MASCOT | T      | PLEX8 |       |
| 1.44E-01 | 0 0 | Cs9g02470.1/Cs9g024 | 4.37 | 0 | 0    | 2 | MASCOT | T      | PLEX8 |       |
| 5.30E-02 | 0 0 | Cs9g02470.1/Cs9g024 | 4.37 | 0 | 0    | 2 | MASCOT | T      | PLEX8 |       |
| 1.57E-01 | 0 0 | Cs9g02470.1/Cs9g024 | 6.74 | 0 | 0    | 2 | MASCOT | T      | PLEX8 |       |
| 5.69E-02 | 0 0 | Cs9g02470.1/Cs9g024 | 6.74 | 0 | 0    | 2 | MASCOT | T      | PLEX8 |       |
| 6.14E-02 | 0 0 | Cs9g02470.1/Cs9g024 | 6.41 | 0 | 0    | 2 | MASCOT | T      | PLEX8 |       |
| 4.02E-03 | 0 0 | Cs9g02470.1/Cs9g024 | 6.41 | 0 | 0    | 2 | MASCOT | T      | PLEX8 |       |
| 2.63E-02 | 0 0 | Cs9g02470.1/Cs9g024 | 6.41 | 0 | 0    | 2 | MASCOT | T      | PLEX8 |       |
| 1.14E-01 | 0 0 | Cs9g02470.1/Cs9g024 | 5.32 | 1 | 0    | 2 | MASCOT | T      | PLEX8 |       |
| 1.63E-01 | 0 0 | Cs9g02470.1/Cs9g024 | 8.75 | 0 | 15.9 | 0 | 2      | MASCOT | T     | PLEX8 |
| 1.24E-01 | 0 0 | Cs9g02470.1/Cs9g024 | 8.75 | 0 | 0    | 2 | MASCOT | T      | PLEX8 |       |
| 1.07E-01 | 0 0 | Cs9g02470.1/Cs9g024 | 8.75 | 0 | 0    | 2 | MASCOT | T      | PLEX8 |       |
| 5.31E-02 | 0 0 | Cs9g02470.1/Cs9g024 | 8.75 | 0 | 0    | 2 | MASCOT | T      | PLEX8 |       |
| 6.68E-02 | 0 0 | Cs9g02470.1/Cs9g024 | 6.74 | 0 | 0    | 2 | MASCOT | T      | PLEX8 |       |
| 5.15E-02 | 0 0 | Cs9g02470.1/Cs9g024 | 6.74 | 0 | 0    | 2 | MASCOT | T      | PLEX8 |       |
| 6.99E-02 | 0 0 | Cs9g02470.1/Cs9g024 | 6.74 | 0 | 0    | 2 | MASCOT | T      | PLEX8 |       |
| 4.60E-01 | 0 0 | Cs1g26040.1/Cs1g260 | 6.18 | 0 | 0    | 2 | MASCOT | T      | PLEX8 |       |
| 4.27E-01 | 0 0 | Cs1g26040.1/Cs1g260 | 6.18 | 0 | 0    | 2 | MASCOT | T      | PLEX8 |       |
| 7.90E-02 | 0 0 | Cs1g26040.1/Cs1g260 | 6.05 | 0 | 0    | 2 | MASCOT | T      | PLEX8 |       |
| 1.89E-02 | 0 0 | Cs1g26040.1/Cs1g260 | 6.05 | 0 | 0    | 2 | MASCOT | T      | PLEX8 |       |
| 3.97E-01 | 0 0 | Cs1g26040.1/Cs1g260 | 8.75 | 0 | 15.9 | 0 | 2      | MASCOT | T     | PLEX8 |
| 2.59E-02 | 0 0 | Cs1g26040.1/Cs1g260 | 8.75 | 0 | 0    | 2 | MASCOT | T      | PLEX8 |       |
| 8.50E-03 | 0 0 | Cs1g26040.1/Cs1g260 | 8.75 | 0 | 0    | 2 | MASCOT | T      | PLEX8 |       |
| 7.18E-02 | 0 0 | Cs1g26040.1/Cs1g260 | 8.75 | 0 | 0    | 2 | MASCOT | T      | PLEX8 |       |
| 6.15E-02 | 0 0 | Cs1g26040.1/Cs1g260 | 8.75 | 0 | 0    | 2 | MASCOT | T      | PLEX8 |       |
| 7.63E-03 | 0 0 | Cs1g26040.1/Cs1g260 | 4.37 | 0 | 0    | 2 | MASCOT | T      | PLEX8 |       |
| 9.60E-02 | 0 0 | Cs1g26040.1/Cs1g260 | 4.37 | 0 | 0    | 2 | MASCOT | T      | PLEX8 |       |
| 1.13E-01 | 0 0 | Cs1g26040.1/Cs1g260 | 6    | 0 | 0    | 2 | MASCOT | T      | PLEX8 |       |
| 3.45E-02 | 0 0 | Cs1g26040.1/Cs1g260 | 6    | 0 | 0    | 2 | MASCOT | T      | PLEX8 |       |
| 7.63E-03 | 0 0 | Cs1g26040.1/Cs1g260 | 6    | 0 | 0    | 2 | MASCOT | T      | PLEX8 |       |
| 9.64E-03 | 0 0 | Cs1g26040.1/Cs1g260 | 6    | 0 | 0    | 2 | MASCOT | T      | PLEX8 |       |
| 1.25E-02 | 0 0 | Cs1g26040.1/Cs1g260 | 6    | 0 | 0    | 2 | MASCOT | T      | PLEX8 |       |
| 1.17E-01 | 0 0 | Cs1g26040.1/Cs1g260 | 6    | 0 | 0    | 2 | MASCOT | T      | PLEX8 |       |
| 3.38E-02 | 0 0 | Cs1g26040.1/Cs1g260 | 6    | 0 | 0    | 2 | MASCOT | T      | PLEX8 |       |
| 3.60E-02 | 0 0 | Cs1g26040.1/Cs1g260 | 6    | 0 | 0    | 2 | MASCOT | T      | PLEX8 |       |
| 1.74E-01 | 0 0 | Cs1g26040.1/Cs1g260 | 8.75 | 0 | 0    | 2 | MASCOT | T      | PLEX8 |       |
| 9.09E-03 | 0 0 | Cs1g26040.1/Cs1g260 | 8.75 | 0 | 0    | 2 | MASCOT | T      | PLEX8 |       |
| 9.43E-03 | 0 0 | Cs1g26040.1/Cs1g260 | 8.75 | 0 | 0    | 2 | MASCOT | T      | PLEX8 |       |
| 8.16E-02 | 0 0 | Cs1g26040.1/Cs1g260 | 5.55 | 0 | 0    | 2 | MASCOT | T      | PLEX8 |       |
| 2.07E-02 | 0 0 | Cs1g26040.1/Cs1g260 | 5.55 | 0 | 0    | 2 | MASCOT | T      | PLEX8 |       |
| 1.57E-01 | 0 0 | Cs1g26040.1/Cs1g260 | 5.55 | 0 | 0    | 2 | MASCOT | T      | PLEX8 |       |
| 2.19E-02 | 0 0 | Cs1g26040.1/Cs1g260 | 5.55 | 0 | 0    | 2 | MASCOT | T      | PLEX8 |       |
| 1.20E-01 | 0 0 | Cs1g26040.1/Cs1g260 | 8.41 | 0 | 0    | 2 | MASCOT | T      | PLEX8 |       |
| 1.03E-03 | 0 0 | Cs1g26040.1/Cs1g260 | 8.41 | 0 | 0    | 2 | MASCOT | T      | PLEX8 |       |
| 7.22E-03 | 0 0 | Cs1g26040.1/Cs1g260 | 8.41 | 0 | 0    | 2 | MASCOT | T      | PLEX8 |       |
| 6.87E-03 | 0 0 | Cs1g26040.1/Cs1g260 | 8.41 | 0 | 0    | 2 | MASCOT | T      | PLEX8 |       |
| 6.42E-03 | 0 0 | Cs1g26040.1/Cs1g260 | 8.41 | 0 | 0    | 2 | MASCOT | T      | PLEX8 |       |
| 3.38E-04 | 0 0 | Cs1g26040.1/Cs1g260 | 8.41 | 0 | 0    | 2 | MASCOT | T      | PLEX8 |       |

|          |     |                     |      |   |      |   |        |        |       |       |
|----------|-----|---------------------|------|---|------|---|--------|--------|-------|-------|
| 2.57E-02 | 0 0 | Cs1g26040.1/Cs1g260 | 8.59 | 0 | 0    | 2 | MASCOT | T      | PLEX8 |       |
| 7.00E-03 | 0 0 | Cs1g26040.1/Cs1g260 | 4.65 | 0 | 0    | 2 | MASCOT | T      | PLEX8 |       |
| 4.45E-02 | 0 0 | Cs1g26040.1/Cs1g260 | 4.37 | 0 | 0    | 2 | MASCOT | T      | PLEX8 |       |
| 1.50E+00 | 0 0 | Cs1g26040.1/Cs1g260 | 9.73 | 0 | 0    | 2 | MASCOT | T      | PLEX8 |       |
| 8.18E-01 | 0 0 | Cs1g26040.1/Cs1g260 | 9.73 | 0 | 0    | 2 | MASCOT | T      |       |       |
| 9.18E-01 | 0 0 | Cs1g26040.1/Cs1g260 | 9.73 | 0 | 0    | 2 | MASCOT | T      | PLEX8 |       |
| 4.16E-03 | 0 0 | Cs8g07420.1/Cs8g074 | 4.03 | 0 | 0    | 2 | MASCOT | T      | PLEX8 |       |
| 4.80E-02 | 0 0 | Cs8g07420.1/Cs8g074 | 4.03 | 0 | 0    | 2 | MASCOT | T      | PLEX8 |       |
| 6.48E-02 | 0 0 | Cs8g07420.1/Cs8g074 | 6.75 | 0 | 0    | 2 | MASCOT | T      | PLEX8 |       |
| 1.06E-01 | 0 0 | Cs8g07420.1/Cs8g074 | 6.75 | 0 | 0    | 2 | MASCOT | T      | PLEX8 |       |
| 1.05E-01 | 0 0 | Cs8g07420.1/Cs8g074 | 6.75 | 0 | 0    | 2 | MASCOT | T      | PLEX8 |       |
| 7.16E-01 | 0 0 | Cs8g07420.1/Cs8g074 | 6.75 | 0 | 0    | 2 | MASCOT | T      |       |       |
| 1.56E-01 | 0 0 | Cs8g07420.1/Cs8g074 | 6.75 | 0 | 0    | 2 | MASCOT | T      |       |       |
| 6.69E-02 | 0 0 | Cs8g07420.1/Cs8g074 | 6.75 | 0 | 0    | 2 | MASCOT | T      |       |       |
| 1.60E-01 | 0 0 | Cs8g07420.1/Cs8g074 | 6.75 | 0 | 0    | 2 | MASCOT | T      | PLEX8 |       |
| 3.53E-04 | 0 0 | Cs8g07420.1/Cs8g074 | 4.56 | 1 | 0    | 2 | MASCOT | T      | PLEX8 |       |
| 5.82E-02 | 0 0 | Cs8g07420.1/Cs8g074 | 4.56 | 1 | 0    | 2 | MASCOT | T      | PLEX8 |       |
| 1.06E-04 | 0 0 | Cs8g07420.1/Cs8g074 | 6    | 0 | 0    | 2 | MASCOT | T      |       |       |
| 5.17E-05 | 0 0 | Cs8g07420.1/Cs8g074 | 6    | 0 | 0    | 2 | MASCOT | T      |       |       |
| 2.36E-02 | 0 0 | Cs8g07420.1/Cs8g074 | 4.41 | 0 | 0    | 2 | MASCOT | T      | PLEX8 |       |
| 6.81E-03 | 0 0 | Cs8g07420.1/Cs8g074 | 4.41 | 0 | 0    | 2 | MASCOT | T      | PLEX8 |       |
| 4.34E-05 | 0 0 | Cs8g07420.1/Cs8g074 | 6    | 0 | 0    | 2 | MASCOT | T      |       |       |
| 1.27E-03 | 0 0 | Cs8g07420.1/Cs8g074 | 4.14 | 0 | 0    | 2 | MASCOT | T      | PLEX8 |       |
| 5.78E-02 | 0 0 | Cs8g07420.1/Cs8g074 | 4.14 | 0 | 0    | 2 | MASCOT | T      | PLEX8 |       |
| 1.26E-02 | 0 0 | Cs8g07420.1/Cs8g074 | 4.14 | 0 | 0    | 2 | MASCOT | T      | PLEX8 |       |
| 2.01E-02 | 0 0 | Cs8g07420.1/Cs8g074 | 4.14 | 0 | 0    | 2 | MASCOT | T      | PLEX8 |       |
| 8.47E-02 | 0 0 | Cs8g07420.1/Cs8g074 | 5.88 | 0 | 0    | 2 | MASCOT | T      | PLEX8 |       |
| 4.37E-02 | 0 0 | Cs8g07420.1/Cs8g074 | 4.21 | 0 | 0    | 2 | MASCOT | T      | PLEX8 |       |
| 3.66E-05 | 0 0 | Cs8g07420.1/Cs8g074 | 4.21 | 0 | 0    | 2 | MASCOT | T      | PLEX8 |       |
| 3.23E-02 | 0 0 | Cs8g07420.1/Cs8g074 | 4.65 | 0 | 0    | 2 | MASCOT | T      | PLEX8 |       |
| 8.18E-03 | 0 0 | Cs8g07420.1/Cs8g074 | 5.21 | 0 | 0    | 2 | MASCOT | T      | PLEX8 |       |
| 3.04E-01 | 0 0 | Cs8g07420.1/Cs8g074 | 5.21 | 0 | 0    | 2 | MASCOT | T      | PLEX8 |       |
| 5.87E-02 | 0 0 | Cs8g07420.1/Cs8g074 | 5.21 | 0 | 0    | 2 | MASCOT | T      |       |       |
| 6.45E-02 | 0 0 | Cs8g07420.1/Cs8g074 | 5.21 | 0 | 0    | 2 | MASCOT | T      |       |       |
| 1.92E-01 | 0 0 | Cs8g07420.1/Cs8g074 | 5.21 | 0 | 0    | 2 | MASCOT | T      | PLEX8 |       |
| 8.01E-03 | 0 0 | Cs8g07420.1/Cs8g074 | 5.21 | 0 | 0    | 2 | MASCOT | T      |       |       |
| 1.55E-01 | 0 0 | Cs8g07420.1/Cs8g074 | 5.21 | 0 | 0    | 2 | MASCOT | T      |       |       |
| 8.83E-03 | 0 0 | Cs8g07420.1/Cs8g074 | 5.84 | 0 | 0    | 2 | MASCOT | T      | PLEX8 |       |
| 7.81E-02 | 0 0 | Cs8g07420.1/Cs8g074 | 6    | 0 | 0    | 2 | MASCOT | T      | PLEX8 |       |
| 7.43E-05 | 0 0 | Cs8g07420.1/Cs8g074 | 6    | 0 | 0    | 2 | MASCOT | T      |       |       |
| 1.68E-02 | 0 0 | Cs6g19310.1         | 4.37 | 0 | 0    | 2 | MASCOT | T      | PLEX8 |       |
| 6.74E-03 | 0 0 | Cs6g19310.1         | 4.37 | 0 | 0    | 2 | MASCOT | T      | PLEX8 |       |
| 6.38E-02 | 0 0 | Cs6g19310.1         | 4.37 | 0 | 0    | 2 | MASCOT | T      | PLEX8 |       |
| 1.55E-01 | 0 0 | Cs6g19310.1/Cs7g123 | 4.21 | 0 | 0    | 2 | MASCOT | T      | PLEX8 |       |
| 4.45E-02 | 0 0 | Cs6g19310.1/Cs7g123 | 4.21 | 0 | 0    | 2 | MASCOT | T      | PLEX8 |       |
| 1.87E-02 | 0 0 | Cs6g19310.1/Cs7g123 | 8.22 | 0 | 15.9 | 0 | 2      | MASCOT | T     | PLEX8 |
| 9.19E-02 | 0 0 | Cs6g19310.1/Cs7g123 | 8.22 | 0 | 15.9 | 0 | 2      | MASCOT | T     | PLEX8 |
| 5.62E-04 | 0 0 | Cs6g19310.1         | 5.55 | 0 | 0    | 2 | MASCOT | T      | PLEX8 |       |
| 5.98E-05 | 0 0 | Cs6g19310.1         | 5.55 | 0 | 0    | 2 | MASCOT | T      | PLEX8 |       |
| 1.27E-02 | 0 0 | Cs6g19310.1         | 5.55 | 0 | 0    | 2 | MASCOT | T      | PLEX8 |       |
| 9.50E-03 | 0 0 | Cs6g19310.1/Cs7g123 | 4.14 | 0 | 0    | 2 | MASCOT | T      | PLEX8 |       |

|          |     |                      |      |   |      |   |        |        |       |       |
|----------|-----|----------------------|------|---|------|---|--------|--------|-------|-------|
| 8.69E-03 | 0 0 | Cs6g19310.1/Cs7g123  | 4.14 | 0 | 0    | 2 | MASCOT | T      |       |       |
| 8.67E-02 | 0 0 | Cs6g19310.1/Cs7g123  | 4.14 | 0 | 0    | 2 | MASCOT | T      |       |       |
| 2.09E-03 | 0 0 | Cs6g19310.1          | 4.37 | 0 | 0    | 2 | MASCOT | T      | PLEX8 |       |
| 2.36E-01 | 0 0 | Cs6g19310.1          | 4.37 | 0 | 0    | 2 | MASCOT | T      |       |       |
| 9.25E-02 | 0 0 | Cs5g02720.1/Cs6g193  | 5.88 | 0 | 0    | 2 | MASCOT | T      | PLEX8 |       |
| 4.88E-02 | 0 0 | Cs6g19310.1 ! Cs7g12 | 5.32 | 0 | 0    | 2 | MASCOT | T      | PLEX8 |       |
| 1.82E-02 | 0 0 | Cs6g19310.1 ! Cs7g12 | 5.32 | 0 | 0    | 2 | MASCOT | T      |       |       |
| 9.83E-02 | 0 0 | Cs5g02720.1/orange1. | 4.21 | 0 | 0    | 2 | MASCOT | T      | PLEX8 |       |
| 1.06E-02 | 0 0 | Cs5g02720.1/orange1. | 4.21 | 0 | 0    | 2 | MASCOT | T      | PLEX8 |       |
| 1.31E-02 | 0 0 | Cs5g02720.1/orange1. | 4.21 | 0 | 0    | 2 | MASCOT | T      |       |       |
| 4.72E-01 | 0 0 | Cs5g02720.1/Cs6g193  | 9.75 | 0 | 0    | 2 | MASCOT | T      | PLEX8 |       |
| 2.55E-01 | 0 0 | Cs5g02720.1/Cs6g193  | 9.75 | 0 | 0    | 2 | MASCOT | T      | PLEX8 |       |
| 4.00E-04 | 0 0 | Cs5g02720.1/Cs6g193  | 9.75 | 0 | 0    | 2 | MASCOT | T      |       |       |
| 3.26E-02 | 0 0 | Cs6g19310.1          | 4.03 | 0 | 0    | 2 | MASCOT | T      |       |       |
| 7.15E-02 | 0 0 | Cs5g02720.1/Cs6g193  | 8.59 | 0 | 0    | 2 | MASCOT | T      | PLEX8 |       |
| 3.05E-02 | 0 0 | Cs5g02720.1/Cs6g193  | 8.59 | 0 | 0    | 2 | MASCOT | T      | PLEX8 |       |
| 1.66E-01 | 0 0 | Cs5g02720.1/Cs6g193  | 8.59 | 0 | 0    | 2 | MASCOT | T      | PLEX8 |       |
| 1.52E-01 | 0 0 | Cs5g02720.1/Cs6g193  | 8.59 | 0 | 0    | 2 | MASCOT | T      |       |       |
| 7.15E-02 | 0 0 | Cs5g02720.1/Cs6g193  | 8.59 | 0 | 0    | 2 | MASCOT | T      | PLEX8 |       |
| 6.90E-02 | 0 0 | Cs5g02720.1/Cs6g193  | 8.59 | 0 | 0    | 2 | MASCOT | T      | PLEX8 |       |
| 6.39E-02 | 0 0 | Cs5g02720.1/Cs6g193  | 8.59 | 0 | 0    | 2 | MASCOT | T      |       |       |
| 2.20E-02 | 0 0 | Cs6g19310.1/Cs7g123  | 8.72 | 0 | 15.9 | 0 | 2      | MASCOT | T     | PLEX8 |
| 7.96E-02 | 0 0 | Cs3g27030.1/Cs3g270  | 3.92 | 0 | 0    | 2 | MASCOT | T      |       |       |
| 8.84E-02 | 0 0 | Cs3g27030.1/Cs3g270  | 8.22 | 0 | 0    | 2 | MASCOT | T      | PLEX8 |       |
| 1.70E-03 | 0 0 | Cs3g27030.1/Cs3g270  | 8.22 | 0 | 0    | 2 | MASCOT | T      | PLEX8 |       |
| 1.12E-01 | 0 0 | Cs3g27030.1/Cs3g270  | 8.22 | 0 | 0    | 2 | MASCOT | T      | PLEX8 |       |
| 3.99E-02 | 0 0 | Cs3g27030.1/Cs3g270  | 8.22 | 0 | 0    | 2 | MASCOT | T      | PLEX8 |       |
| 5.03E-04 | 0 0 | Cs3g27030.1          | 8.75 | 0 | 0    | 2 | MASCOT | T      |       |       |
| 5.97E-02 | 0 0 | Cs3g27030.1/Cs3g270  | 9.76 | 0 | 0    | 2 | MASCOT | T      | PLEX8 |       |
| 1.00E-02 | 0 0 | Cs3g27030.1/Cs3g270  | 9.76 | 0 | 0    | 2 | MASCOT | T      | PLEX8 |       |
| 8.04E-03 | 0 0 | Cs3g27030.1/Cs3g270  | 4.14 | 0 | 0    | 2 | MASCOT | T      |       |       |
| 2.40E-01 | 0 0 | Cs3g27030.1/Cs3g270  | 4.37 | 0 | 0    | 2 | MASCOT | T      | PLEX8 |       |
| 9.42E-02 | 0 0 | Cs3g27030.1          | 6.92 | 0 | 0    | 2 | MASCOT | T      | PLEX8 |       |
| 1.10E-03 | 0 0 | Cs3g27030.1          | 6.92 | 0 | 0    | 2 | MASCOT | T      | PLEX8 |       |
| 4.73E-03 | 0 0 | Cs3g27030.1          | 6.92 | 0 | 0    | 2 | MASCOT | T      | PLEX8 |       |
| 2.26E-04 | 0 0 | Cs3g27030.1          | 6.92 | 0 | 0    | 2 | MASCOT | T      | PLEX8 |       |
| 6.88E-02 | 0 0 | Cs3g27030.1/Cs3g270  | 8.59 | 0 | 0    | 2 | MASCOT | T      | PLEX8 |       |
| 3.03E-01 | 0 0 | Cs3g27030.1/Cs3g270  | 8.59 | 0 | 0    | 2 | MASCOT | T      | PLEX8 |       |
| 9.34E-03 | 0 0 | Cs3g27030.1/Cs3g270  | 4.37 | 0 | 0    | 2 | MASCOT | T      | PLEX8 |       |
| 7.19E-06 | 0 0 | Cs3g27030.1/Cs3g270  | 4.37 | 0 | 0    | 2 | MASCOT | T      | PLEX8 |       |
| 5.63E-04 | 0 0 | Cs3g27030.1/Cs3g270  | 4.53 | 0 | 0    | 2 | MASCOT | T      |       |       |
| 2.65E-04 | 0 0 | Cs3g27030.1/Cs3g270  | 4.53 | 0 | 0    | 2 | MASCOT | T      |       |       |
| 6.89E-03 | 0 0 | Cs3g24680.1/Cs4g092  | 6    | 0 | 0    | 2 | MASCOT | T      | PLEX8 |       |
| 8.95E-02 | 0 0 | Cs3g24680.1/Cs4g092  | 6    | 0 | 0    | 2 | MASCOT | T      |       |       |
| 1.92E-01 | 0 0 | Cs3g24680.1/Cs4g092  | 6    | 0 | 0    | 2 | MASCOT | T      | PLEX8 |       |
| 1.43E-01 | 0 0 | Cs3g24680.1/Cs4g092  | 6    | 0 | 0    | 2 | MASCOT | T      |       |       |
| 1.82E-03 | 0 0 | Cs3g27030.1/Cs3g270  | 6    | 0 | 0    | 2 | MASCOT | T      | PLEX8 |       |
| 9.26E-02 | 0 0 | Cs3g27030.1/Cs3g270  | 6    | 0 | 0    | 2 | MASCOT | T      | PLEX8 |       |
| 7.40E-03 | 0 0 | Cs3g27030.1/Cs3g270  | 6    | 0 | 0    | 2 | MASCOT | T      | PLEX8 |       |
| 6.27E-02 | 0 0 | Cs3g27030.1/Cs3g270  | 6    | 0 | 0    | 2 | MASCOT | T      | PLEX8 |       |
| 7.15E-02 | 0 0 | Cs3g27030.1/Cs3g270  | 6    | 0 | 0    | 2 | MASCOT | T      | PLEX8 |       |

|          |     |                     |      |   |      |   |        |        |       |       |
|----------|-----|---------------------|------|---|------|---|--------|--------|-------|-------|
| 4.61E-03 | 0 0 | Cs3g27030.1/Cs3g270 | 6    | 0 | 0    | 2 | MASCOT | T      | PLEX8 |       |
| 5.85E-02 | 0 0 | Cs3g27030.1/Cs3g270 | 6    | 0 | 0    | 2 | MASCOT | T      |       |       |
| 9.37E-03 | 0 0 | Cs3g27030.1/Cs3g270 | 6    | 0 | 0    | 2 | MASCOT | T      |       |       |
| 1.71E-02 | 0 0 | Cs3g14220.1/Cs3g142 | 5.84 | 0 | 0    | 2 | MASCOT | T      |       |       |
| 7.40E-02 | 0 0 | Cs3g14220.1/Cs3g142 | 4.21 | 0 | 0    | 2 | MASCOT | T      | PLEX8 |       |
| 1.51E-01 | 0 0 | Cs3g14220.1/Cs3g142 | 4.21 | 0 | 0    | 2 | MASCOT | T      | PLEX8 |       |
| 4.08E-03 | 0 0 | Cs3g14220.1/Cs3g142 | 3.83 | 0 | 0    | 2 | MASCOT | T      | PLEX8 |       |
| 9.00E-04 | 0 0 | Cs3g14220.1/Cs3g142 | 5.96 | 1 | 0    | 2 | MASCOT | T      | PLEX8 |       |
| 3.00E-02 | 0 0 | Cs5g01840.1/Cs5g018 | 5.32 | 0 | 0    | 2 | MASCOT | T      | PLEX8 |       |
| 6.46E-03 | 0 0 | Cs5g01840.1/Cs5g018 | 5.32 | 0 | 0    | 2 | MASCOT | T      | PLEX8 |       |
| 1.96E-03 | 0 0 | Cs5g01840.1/Cs5g018 | 5.32 | 0 | 0    | 2 | MASCOT | T      | PLEX8 |       |
| 2.91E-03 | 0 0 | Cs5g01840.1/Cs5g018 | 5.32 | 0 | 0    | 2 | MASCOT | T      | PLEX8 |       |
| 1.11E-01 | 0 0 | Cs5g01840.1/Cs5g018 | 5.84 | 0 | 0    | 2 | MASCOT | T      | PLEX8 |       |
| 4.20E-03 | 0 0 | Cs5g01840.1/Cs5g018 | 5.84 | 0 | 0    | 2 | MASCOT | T      | PLEX8 |       |
| 1.48E-01 | 0 0 | Cs5g01840.1/Cs5g018 | 4.37 | 0 | 0    | 2 | MASCOT | T      |       |       |
| 3.92E-03 | 0 0 | Cs5g01840.1/Cs5g018 | 4.37 | 0 | 0    | 2 | MASCOT | T      |       |       |
| 1.29E-03 | 0 0 | Cs5g01840.1/Cs5g018 | 4.37 | 0 | 0    | 2 | MASCOT | T      |       |       |
| 3.79E-02 | 0 0 | Cs5g01840.1/Cs5g018 | 4.53 | 0 | 15.9 | 0 | 2      | MASCOT | T     |       |
| 2.53E-03 | 0 0 | Cs3g14220.1/Cs3g142 | 4.37 | 0 | 0    | 2 | MASCOT | T      | PLEX8 |       |
| 9.99E-05 | 0 0 | Cs3g14220.1/Cs3g142 | 4.37 | 0 | 0    | 2 | MASCOT | T      | PLEX8 |       |
| 2.21E-02 | 0 0 | Cs3g14220.1/Cs3g142 | 4.37 | 0 | 0    | 2 | MASCOT | T      | PLEX8 |       |
| 9.07E-04 | 0 0 | Cs3g14220.1/Cs3g142 | 4.37 | 0 | 0    | 2 | MASCOT | T      | PLEX8 |       |
| 3.84E-04 | 0 0 | Cs3g14220.1/Cs3g142 | 4.37 | 0 | 0    | 2 | MASCOT | T      |       |       |
| 2.48E-06 | 0 0 | Cs3g14220.1/Cs3g142 | 4.37 | 0 | 0    | 2 | MASCOT | T      |       |       |
| 6.64E-05 | 0 0 | Cs3g14220.1/Cs3g142 | 4.37 | 0 | 0    | 2 | MASCOT | T      |       |       |
| 2.69E-04 | 0 0 | Cs3g14220.1/Cs3g142 | 4.37 | 0 | 0    | 2 | MASCOT | T      |       |       |
| 5.09E-01 | 0 0 | Cs3g14220.1/Cs3g142 | 4.37 | 0 | 0    | 2 | MASCOT | T      |       |       |
| 2.27E-03 | 0 0 | Cs5g01840.1/Cs5g018 | 4.37 | 0 | 0    | 2 | MASCOT | T      |       |       |
| 1.53E-01 | 0 0 | Cs3g14220.1/Cs3g142 | 4.14 | 0 | 0    | 2 | MASCOT | T      | PLEX8 |       |
| 1.68E-04 | 0 0 | Cs5g01840.1/Cs5g018 | 6    | 0 | 0    | 2 | MASCOT | T      | PLEX8 |       |
| 8.97E-04 | 0 0 | Cs5g01840.1/Cs5g018 | 6    | 0 | 0    | 2 | MASCOT | T      | PLEX8 |       |
| 9.81E-02 | 0 0 | Cs5g01840.1/Cs5g018 | 6    | 0 | 0    | 2 | MASCOT | T      | PLEX8 |       |
| 3.47E-02 | 0 0 | Cs3g14220.1/Cs3g142 | 5.5  | 0 | 0    | 2 | MASCOT | T      | PLEX8 |       |
| 2.49E-01 | 0 0 | Cs3g14220.1/Cs3g142 | 5.5  | 0 | 0    | 2 | MASCOT | T      | PLEX8 |       |
| 3.37E-02 | 0 0 | Cs3g14220.1/Cs3g142 | 5.5  | 0 | 0    | 2 | MASCOT | T      | PLEX8 |       |
| 1.71E-02 | 0 0 | Cs3g14220.1/Cs3g142 | 5.84 | 0 | 0    | 2 | MASCOT | T      |       |       |
| 7.40E-02 | 0 0 | Cs3g14220.1/Cs3g142 | 4.21 | 0 | 0    | 2 | MASCOT | T      | PLEX8 |       |
| 1.51E-01 | 0 0 | Cs3g14220.1/Cs3g142 | 4.21 | 0 | 0    | 2 | MASCOT | T      | PLEX8 |       |
| 4.08E-03 | 0 0 | Cs3g14220.1/Cs3g142 | 3.83 | 0 | 0    | 2 | MASCOT | T      | PLEX8 |       |
| 1.21E-04 | 0 0 | Cs3g14220.1/Cs3g142 | 4.53 | 0 | 0    | 2 | MASCOT | T      | PLEX8 |       |
| 1.49E-02 | 0 0 | Cs3g14220.1/Cs3g142 | 4.17 | 0 | 0    | 2 | MASCOT | T      | PLEX8 |       |
| 9.00E-04 | 0 0 | Cs3g14220.1/Cs3g142 | 5.96 | 1 | 0    | 2 | MASCOT | T      | PLEX8 |       |
| 1.27E-02 | 0 0 | Cs3g14220.1/Cs3g142 | 6    | 0 | 0    | 2 | MASCOT | T      | PLEX8 |       |
| 2.04E-02 | 0 0 | Cs3g14220.1/Cs3g142 | 4.14 | 0 | 15.9 | 0 | 2      | MASCOT | T     | PLEX8 |
| 2.69E-05 | 0 0 | Cs3g14220.1/Cs3g142 | 4.14 | 0 | 0    | 2 | MASCOT | T      | PLEX8 |       |
| 2.53E-03 | 0 0 | Cs3g14220.1/Cs3g142 | 4.37 | 0 | 0    | 2 | MASCOT | T      | PLEX8 |       |
| 9.99E-05 | 0 0 | Cs3g14220.1/Cs3g142 | 4.37 | 0 | 0    | 2 | MASCOT | T      | PLEX8 |       |
| 2.21E-02 | 0 0 | Cs3g14220.1/Cs3g142 | 4.37 | 0 | 0    | 2 | MASCOT | T      | PLEX8 |       |
| 9.07E-04 | 0 0 | Cs3g14220.1/Cs3g142 | 4.37 | 0 | 0    | 2 | MASCOT | T      | PLEX8 |       |
| 3.84E-04 | 0 0 | Cs3g14220.1/Cs3g142 | 4.37 | 0 | 0    | 2 | MASCOT | T      |       |       |
| 2.48E-06 | 0 0 | Cs3g14220.1/Cs3g142 | 4.37 | 0 | 0    | 2 | MASCOT | T      |       |       |

|          |     |                       |      |        |   |   |        |   |       |
|----------|-----|-----------------------|------|--------|---|---|--------|---|-------|
| 6.64E-05 | 0 0 | Cs3g14220.1/Cs3g142   | 4.37 | 0      | 0 | 2 | MASCOT | T |       |
| 2.69E-04 | 0 0 | Cs3g14220.1/Cs3g142   | 4.37 | 0      | 0 | 2 | MASCOT | T |       |
| 5.09E-01 | 0 0 | Cs3g14220.1/Cs3g142   | 4.37 | 0      | 0 | 2 | MASCOT | T |       |
| 1.53E-01 | 0 0 | Cs3g14220.1/Cs3g142   | 4.14 | 0      | 0 | 2 | MASCOT | T | PLEX8 |
| 3.47E-02 | 0 0 | Cs3g14220.1/Cs3g142   | 5.5  | 0      | 0 | 2 | MASCOT | T | PLEX8 |
| 2.49E-01 | 0 0 | Cs3g14220.1/Cs3g142   | 5.5  | 0      | 0 | 2 | MASCOT | T | PLEX8 |
| 3.37E-02 | 0 0 | Cs3g14220.1/Cs3g142   | 5.5  | 0      | 0 | 2 | MASCOT | T | PLEX8 |
| 4.78E-02 | 0 0 | Cs3g14220.1/Cs3g142   | 4.37 | 0      | 0 | 2 | MASCOT | T |       |
| 3.94E-06 | 0 0 | Cs3g14220.1/Cs3g142   | 4.37 | 0      | 0 | 2 | MASCOT | T |       |
| 2.32E-02 | 0 0 | Cs3g14220.1/Cs3g142   | 4.37 | 0      | 0 | 2 | MASCOT | T |       |
| 6.87E-06 | 0 0 | Cs3g14220.1/Cs3g142   | 4.37 | 0      | 0 | 2 | MASCOT | T |       |
| 3.44E-02 | 0 0 | Cs3g14220.1/Cs3g142   | 4.37 | 0      | 0 | 2 | MASCOT | T |       |
| 1.67E-02 | 0 0 | Cs3g14220.1/Cs3g142   | 4.37 | 0      | 0 | 2 | MASCOT | T |       |
| 5.59E-02 | 0 0 | Cs3g14220.1/Cs3g142   | 4.37 | 0      | 0 | 2 | MASCOT | T |       |
| 7.82E-02 | 0 0 | Cs3g14220.1/Cs3g142   | 5.81 | 0      | 0 | 2 | MASCOT | T | PLEX8 |
| 2.38E-02 | 0 0 | orange1.1t03730.1/ora | 3.92 | 0      | 0 | 2 | MASCOT | T | PLEX8 |
| 3.55E-01 | 0 0 | orange1.1t03730.1/ora | 5.84 | 0      | 0 | 2 | MASCOT | T | PLEX8 |
| 3.22E-05 | 0 0 | orange1.1t03730.1/ora | 4.53 | 0      | 0 | 2 | MASCOT | T | PLEX8 |
| 1.06E-06 | 0 0 | orange1.1t03730.1/ora | 4.53 | 0      | 0 | 2 | MASCOT | T | PLEX8 |
| 1.04E-04 | 0 0 | orange1.1t03730.1/ora | 4.53 | 0      | 0 | 2 | MASCOT | T | PLEX8 |
| 5.81E-04 | 0 0 | orange1.1t03730.1/ora | 4.53 | 0      | 0 | 2 | MASCOT | T | PLEX8 |
| 2.90E-02 | 0 0 | orange1.1t03730.1/ora | 4.53 | 0 15.9 | 0 | 2 | MASCOT | T | PLEX8 |
| 1.81E-02 | 0 0 | orange1.1t03730.1/ora | 4.53 | 0      | 0 | 2 | MASCOT | T | PLEX8 |
| 2.53E-03 | 0 0 | orange1.1t03730.1/ora | 4.53 | 0      | 0 | 2 | MASCOT | T | PLEX8 |
| 2.22E-03 | 0 0 | orange1.1t03730.1/ora | 4.53 | 0      | 0 | 2 | MASCOT | T | PLEX8 |
| 1.34E-03 | 0 0 | orange1.1t03730.1/ora | 4.53 | 0      | 0 | 2 | MASCOT | T | PLEX8 |
| 5.80E-02 | 0 0 | orange1.1t03730.1/ora | 4.53 | 0      | 0 | 2 | MASCOT | T | PLEX8 |
| 1.62E-01 | 0 0 | orange1.1t03730.1/ora | 4.21 | 0      | 0 | 2 | MASCOT | T | PLEX8 |
| 1.86E-01 | 0 0 | orange1.1t03730.1/ora | 4.21 | 0      | 0 | 2 | MASCOT | T | PLEX8 |
| 1.05E-01 | 0 0 | orange1.1t03730.1/ora | 5.75 | 0      | 0 | 2 | MASCOT | T | PLEX8 |
| 2.04E-01 | 0 0 | Cs5g17830.1/Cs5g178   | 5.84 | 0      | 0 | 2 | MASCOT | T | PLEX8 |
| 1.51E-02 | 0 0 | Cs5g17830.1/Cs5g178   | 5.84 | 0      | 0 | 2 | MASCOT | T | PLEX8 |
| 3.30E-01 | 0 0 | Cs5g17830.1/Cs5g178   | 5.84 | 0      | 0 | 2 | MASCOT | T | PLEX8 |
| 3.45E-02 | 0 0 | Cs5g17830.1/Cs5g178   | 5.84 | 0      | 0 | 2 | MASCOT | T | PLEX8 |
| 7.64E-03 | 0 0 | orange1.1t03730.1/ora | 6    | 0      | 0 | 2 | MASCOT | T | PLEX8 |
| 1.86E-01 | 0 0 | orange1.1t03730.1/ora | 6    | 0      | 0 | 2 | MASCOT | T | PLEX8 |
| 1.54E-03 | 0 0 | orange1.1t03730.1/ora | 6    | 0      | 0 | 2 | MASCOT | T | PLEX8 |
| 2.41E-01 | 0 0 | orange1.1t03730.1/ora | 5.72 | 0      | 0 | 2 | MASCOT | T | PLEX8 |
| 3.39E-02 | 0 0 | orange1.1t03730.1/ora | 5.37 | 0      | 0 | 2 | MASCOT | T | PLEX8 |
| 1.26E-02 | 0 0 | orange1.1t03730.1/ora | 5.37 | 0      | 0 | 2 | MASCOT | T | PLEX8 |
| 1.53E-01 | 0 0 | orange1.1t03730.1/ora | 5.37 | 0      | 0 | 2 | MASCOT | T | PLEX8 |
| 1.93E-02 | 0 0 | Cs5g17830.1/Cs5g178   | 4.37 | 0      | 0 | 2 | MASCOT | T | PLEX8 |
| 8.01E-02 | 0 0 | orange1.1t03730.1/ora | 4.08 | 0      | 0 | 2 | MASCOT | T | PLEX8 |
| 3.15E-01 | 0 0 | orange1.1t03730.1/ora | 8.59 | 0      | 0 | 2 | MASCOT | T | PLEX8 |
| 2.28E-01 | 0 0 | orange1.1t03730.1/ora | 8.59 | 0      | 0 | 2 | MASCOT | T | PLEX8 |
| 4.16E-02 | 0 0 | orange1.1t03730.1/ora | 8.59 | 0      | 0 | 2 | MASCOT | T | PLEX8 |
| 4.39E-06 | 0 0 | Cs4g12660.1/Cs4g126   | 5.4  | 0      | 0 | 2 | MASCOT | T | PLEX8 |
| 8.34E-03 | 0 0 | Cs4g12660.1/Cs4g126   | 4.25 | 0      | 0 | 2 | MASCOT | T | PLEX8 |
| 2.08E-02 | 0 0 | Cs4g12660.1/Cs4g126   | 8.75 | 0      | 0 | 2 | MASCOT | T | PLEX8 |
| 4.44E-04 | 0 0 | Cs4g12660.1/Cs4g126   | 8.75 | 0      | 0 | 2 | MASCOT | T | PLEX8 |
| 1.02E-01 | 0 0 | Cs4g12660.1/Cs4g126   | 8.75 | 0      | 0 | 2 | MASCOT | T | PLEX8 |

|          |     |                     |      |   |   |   |        |   |       |
|----------|-----|---------------------|------|---|---|---|--------|---|-------|
| 1.84E-02 | 0 0 | Cs4g12660.1/Cs4g126 | 8.75 | 0 | 0 | 2 | MASCOT | T | PLEX8 |
| 4.81E-04 | 0 0 | Cs4g12660.1/Cs4g126 | 8.75 | 0 | 0 | 2 | MASCOT | T | PLEX8 |
| 1.06E-01 | 0 0 | Cs4g12660.1/Cs4g126 | 8.75 | 0 | 0 | 2 | MASCOT | T | PLEX8 |
| 1.65E-02 | 0 0 | Cs4g12660.1/Cs4g126 | 8.25 | 1 | 0 | 2 | MASCOT | T | PLEX8 |
| 7.00E-06 | 0 0 | Cs4g12660.1/Cs4g126 | 4.53 | 0 | 0 | 2 | MASCOT | T | PLEX8 |
| 3.95E-06 | 0 0 | Cs4g12660.1/Cs4g126 | 4.53 | 0 | 0 | 2 | MASCOT | T | PLEX8 |
| 5.91E-03 | 0 0 | Cs4g12660.1/Cs4g126 | 8.8  | 0 | 0 | 2 | MASCOT | T | PLEX8 |
| 1.63E-02 | 0 0 | Cs4g12660.1/Cs4g126 | 8.8  | 0 | 0 | 2 | MASCOT | T | PLEX8 |
| 6.43E-02 | 0 0 | Cs4g12660.1/Cs4g126 | 8.8  | 0 | 0 | 2 | MASCOT | T | PLEX8 |
| 1.76E-01 | 0 0 | Cs4g12660.1/Cs4g126 | 8.8  | 0 | 0 | 2 | MASCOT | T | PLEX8 |
| 4.00E-03 | 0 0 | Cs4g12660.1/Cs4g126 | 8.8  | 0 | 0 | 2 | MASCOT | T | PLEX8 |
| 3.23E-04 | 0 0 | Cs4g12660.1/Cs4g126 | 8.8  | 0 | 0 | 2 | MASCOT | T | PLEX8 |
| 4.77E-03 | 0 0 | Cs4g12660.1/Cs4g126 | 8.8  | 0 | 0 | 2 | MASCOT | T | PLEX8 |
| 1.34E-01 | 0 0 | Cs4g12660.1/Cs4g126 | 5.84 | 0 | 0 | 2 | MASCOT | T | PLEX8 |
| 4.08E-01 | 0 0 | Cs4g12660.1/Cs4g126 | 5.84 | 0 | 0 | 2 | MASCOT | T | PLEX8 |
| 1.56E-01 | 0 0 | Cs4g12660.1/Cs4g126 | 9.75 | 0 | 0 | 2 | MASCOT | T | PLEX8 |
| 1.87E-03 | 0 0 | Cs4g12660.1/Cs4g126 | 6.74 | 0 | 0 | 2 | MASCOT | T | PLEX8 |
| 5.11E-02 | 0 0 | Cs4g12660.1/Cs4g126 | 6.74 | 0 | 0 | 2 | MASCOT | T | PLEX8 |
| 9.34E-02 | 0 0 | Cs4g12660.1/Cs4g126 | 6.74 | 0 | 0 | 2 | MASCOT | T | PLEX8 |
| 5.78E-02 | 0 0 | Cs4g12660.1/Cs4g126 | 5.83 | 0 | 0 | 2 | MASCOT | T | PLEX8 |
| 1.37E-01 | 0 0 | Cs4g12660.1/Cs4g126 | 5.83 | 0 | 0 | 2 | MASCOT | T | PLEX8 |
| 3.65E-02 | 0 0 | Cs4g12660.1/Cs4g126 | 8.41 | 0 | 0 | 2 | MASCOT | T | PLEX8 |
| 2.13E-03 | 0 0 | Cs4g12660.1/Cs4g126 | 8.41 | 0 | 0 | 2 | MASCOT | T | PLEX8 |
| 5.82E-03 | 0 0 | Cs4g12660.1/Cs4g126 | 4.53 | 0 | 0 | 2 | MASCOT | T | PLEX8 |
| 3.91E-08 | 0 0 | Cs4g12660.1/Cs4g126 | 4.53 | 0 | 0 | 2 | MASCOT | T | PLEX8 |
| 5.95E-02 | 0 0 | Cs8g02310.1/Cs8g023 | 4.37 | 0 | 0 | 2 | MASCOT | T | PLEX8 |
| 4.07E-02 | 0 0 | Cs8g02310.1/Cs8g023 | 4.37 | 0 | 0 | 2 | MASCOT | T | PLEX8 |
| 1.37E-03 | 0 0 | Cs8g02310.1/Cs8g023 | 4.37 | 0 | 0 | 2 | MASCOT | T | PLEX8 |
| 1.90E-02 | 0 0 | Cs8g02310.1/Cs8g023 | 4.37 | 0 | 0 | 2 | MASCOT | T | PLEX8 |
| 5.90E-03 | 0 0 | Cs8g02310.1/Cs8g023 | 4.37 | 0 | 0 | 2 | MASCOT | T | PLEX8 |
| 7.94E-05 | 0 0 | Cs8g02310.1/Cs8g023 | 4.37 | 0 | 0 | 2 | MASCOT | T | PLEX8 |
| 4.83E-03 | 0 0 | Cs8g02310.1/Cs8g023 | 4.37 | 0 | 0 | 2 | MASCOT | T | PLEX8 |
| 2.68E-01 | 0 0 | Cs8g02310.1/Cs8g023 | 6    | 0 | 0 | 2 | MASCOT | T | PLEX8 |
| 1.07E-02 | 0 0 | Cs8g02310.1/Cs8g023 | 6    | 0 | 0 | 2 | MASCOT | T | PLEX8 |
| 7.19E-04 | 0 0 | Cs8g02310.1/Cs8g023 | 5.84 | 0 | 0 | 2 | MASCOT | T | PLEX8 |
| 1.88E-01 | 0 0 | Cs8g02310.1/Cs8g023 | 5.72 | 0 | 0 | 2 | MASCOT | T | PLEX8 |
| 2.51E-02 | 0 0 | Cs8g02310.1/Cs8g023 | 5.72 | 0 | 0 | 2 | MASCOT | T | PLEX8 |
| 1.60E-01 | 0 0 | Cs8g02310.1/Cs8g023 | 5.72 | 0 | 0 | 2 | MASCOT | T | PLEX8 |
| 1.26E-01 | 0 0 | Cs8g02310.1/Cs8g023 | 5.5  | 0 | 0 | 2 | MASCOT | T | PLEX8 |
| 3.14E-01 | 0 0 | Cs8g02310.1/Cs8g023 | 5.5  | 0 | 0 | 2 | MASCOT | T | PLEX8 |
| 1.05E-05 | 0 0 | Cs8g02310.1/Cs8g023 | 4    | 0 | 0 | 2 | MASCOT | T | PLEX8 |
| 2.94E-04 | 0 0 | Cs8g02310.1/Cs8g023 | 5.21 | 0 | 0 | 2 | MASCOT | T | PLEX8 |
| 9.98E-03 | 0 0 | Cs8g02310.1/Cs8g023 | 5.21 | 0 | 0 | 2 | MASCOT | T | PLEX8 |
| 3.82E-04 | 0 0 | Cs8g02310.1/Cs8g023 | 4.14 | 0 | 0 | 2 | MASCOT | T | PLEX8 |
| 1.31E-03 | 0 0 | Cs8g02310.1/Cs8g023 | 4.14 | 0 | 0 | 2 | MASCOT | T | PLEX8 |
| 4.49E-01 | 0 0 | Cs8g02310.1/Cs8g023 | 4.53 | 0 | 0 | 2 | MASCOT | T | PLEX8 |
| 2.01E-02 | 0 0 | Cs8g02310.1/Cs8g023 | 4.53 | 0 | 0 | 2 | MASCOT | T | PLEX8 |
| 7.50E-03 | 0 0 | Cs8g02310.1/Cs8g023 | 6.75 | 1 | 0 | 2 | MASCOT | T | PLEX8 |
| 5.96E-02 | 0 0 | Cs8g02310.1/Cs8g023 | 4.68 | 1 | 0 | 2 | MASCOT | T | PLEX8 |
| 5.26E-02 | 0 0 | Cs8g02310.1/Cs8g023 | 4.68 | 1 | 0 | 2 | MASCOT | T | PLEX8 |
| 8.58E-04 | 0 0 | Cs8g02310.1/Cs8g023 | 5.5  | 0 | 0 | 2 | MASCOT | T | PLEX8 |

|          |     |                     |      |   |   |   |        |         |
|----------|-----|---------------------|------|---|---|---|--------|---------|
| 2.88E-02 | 0 0 | Cs8g02310.1/Cs8g023 | 5.5  | 0 | 0 | 2 | MASCOT | T       |
| 3.81E-02 | 0 0 | Cs8g02310.1/Cs8g023 | 5.5  | 0 | 0 | 2 | MASCOT | T       |
| 1.91E-03 | 0 0 | Cs8g02310.1/Cs8g023 | 5.5  | 0 | 0 | 2 | MASCOT | T       |
| 4.13E-05 | 0 0 | Cs8g02310.1/Cs8g023 | 5.5  | 0 | 0 | 2 | MASCOT | T       |
| 3.73E-02 | 0 0 | Cs5g05840.1/Cs5g058 | 4.25 | 0 | 0 | 2 | MASCOT | T PLEX8 |
| 7.13E-02 | 0 0 | Cs5g05840.1/Cs5g058 | 4.25 | 0 | 0 | 2 | MASCOT | T PLEX8 |
| 8.00E-02 | 0 0 | Cs5g05840.1/Cs5g058 | 4.25 | 0 | 0 | 2 | MASCOT | T PLEX8 |
| 8.10E-02 | 0 0 | Cs5g05840.1/Cs5g058 | 4.25 | 0 | 0 | 2 | MASCOT | T PLEX8 |
| 8.65E-05 | 0 0 | Cs5g05840.1/Cs5g058 | 6.04 | 0 | 0 | 2 | MASCOT | T PLEX8 |
| 9.54E-02 | 0 0 | Cs5g05840.1/Cs5g058 | 5.4  | 0 | 0 | 2 | MASCOT | T PLEX8 |
| 1.30E-03 | 0 0 | Cs5g05840.1/Cs5g058 | 8.59 | 0 | 0 | 2 | MASCOT | T PLEX8 |
| 3.83E-03 | 0 0 | Cs5g05840.1/Cs5g058 | 8.59 | 0 | 0 | 2 | MASCOT | T PLEX8 |
| 6.16E-03 | 0 0 | Cs5g05840.1/Cs5g058 | 8.59 | 0 | 0 | 2 | MASCOT | T PLEX8 |
| 7.49E-03 | 0 0 | Cs5g05840.1/Cs5g058 | 8.59 | 0 | 0 | 2 | MASCOT | T PLEX8 |
| 2.69E-02 | 0 0 | Cs5g05840.1/Cs5g058 | 8.2  | 0 | 0 | 2 | MASCOT | T PLEX8 |
| 6.20E-03 | 0 0 | Cs5g05840.1/Cs5g058 | 8.2  | 0 | 0 | 2 | MASCOT | T PLEX8 |
| 2.64E-01 | 0 0 | Cs5g05840.1/Cs5g058 | 8.2  | 0 | 0 | 2 | MASCOT | T PLEX8 |
| 9.67E-03 | 0 0 | Cs5g05840.1/Cs5g058 | 8.2  | 0 | 0 | 2 | MASCOT | T PLEX8 |
| 1.04E-01 | 0 0 | Cs5g05840.1/Cs5g058 | 4.53 | 0 | 0 | 2 | MASCOT | T PLEX8 |
| 1.73E-01 | 0 0 | Cs5g05840.1/Cs5g058 | 4.53 | 0 | 0 | 2 | MASCOT | T PLEX8 |
| 4.04E-02 | 0 0 | Cs6g20960.1/Cs7g263 | 4.03 | 0 | 0 | 2 | MASCOT | T       |
| 5.46E-03 | 0 0 | orange1.1t02413.1   | 4.37 | 0 | 0 | 2 | MASCOT | T       |
| 2.53E-02 | 0 0 | orange1.1t02413.1   | 3.9  | 1 | 0 | 2 | MASCOT | T PLEX8 |
| 5.26E-03 | 0 0 | orange1.1t02413.1   | 3.9  | 1 | 0 | 2 | MASCOT | T       |
| 9.85E-04 | 0 0 | Cs5g05840.1/Cs5g058 | 4.48 | 0 | 0 | 2 | MASCOT | T PLEX8 |
| 3.00E-02 | 0 0 | Cs5g05840.1/Cs5g058 | 4.48 | 0 | 0 | 2 | MASCOT | T PLEX8 |
| 4.76E-05 | 0 0 | Cs5g05840.1/Cs5g058 | 4.48 | 0 | 0 | 2 | MASCOT | T       |
| 6.35E-03 | 0 0 | Cs5g05840.1/Cs5g058 | 4.48 | 0 | 0 | 2 | MASCOT | T       |
| 1.31E-01 | 0 0 | Cs5g05840.1/Cs5g058 | 4.53 | 0 | 0 | 2 | MASCOT | T       |
| 6.32E-03 | 0 0 | Cs5g05840.1/Cs5g058 | 4.53 | 0 | 0 | 2 | MASCOT | T       |
| 3.65E-03 | 0 0 | Cs8g15970.1/Cs8g159 | 4.21 | 0 | 0 | 2 | MASCOT | T PLEX8 |
| 1.47E-01 | 0 0 | Cs5g05840.1/Cs5g058 | 4.21 | 0 | 0 | 2 | MASCOT | T PLEX8 |
| 3.73E-02 | 0 0 | Cs5g05840.1/Cs5g058 | 4.25 | 0 | 0 | 2 | MASCOT | T PLEX8 |
| 7.13E-02 | 0 0 | Cs5g05840.1/Cs5g058 | 4.25 | 0 | 0 | 2 | MASCOT | T PLEX8 |
| 8.00E-02 | 0 0 | Cs5g05840.1/Cs5g058 | 4.25 | 0 | 0 | 2 | MASCOT | T PLEX8 |
| 8.10E-02 | 0 0 | Cs5g05840.1/Cs5g058 | 4.25 | 0 | 0 | 2 | MASCOT | T PLEX8 |
| 8.65E-05 | 0 0 | Cs5g05840.1/Cs5g058 | 6.04 | 0 | 0 | 2 | MASCOT | T PLEX8 |
| 9.54E-02 | 0 0 | Cs5g05840.1/Cs5g058 | 5.4  | 0 | 0 | 2 | MASCOT | T PLEX8 |
| 1.30E-03 | 0 0 | Cs5g05840.1/Cs5g058 | 8.59 | 0 | 0 | 2 | MASCOT | T PLEX8 |
| 3.83E-03 | 0 0 | Cs5g05840.1/Cs5g058 | 8.59 | 0 | 0 | 2 | MASCOT | T PLEX8 |
| 6.16E-03 | 0 0 | Cs5g05840.1/Cs5g058 | 8.59 | 0 | 0 | 2 | MASCOT | T PLEX8 |
| 7.49E-03 | 0 0 | Cs5g05840.1/Cs5g058 | 8.59 | 0 | 0 | 2 | MASCOT | T PLEX8 |
| 2.69E-02 | 0 0 | Cs5g05840.1/Cs5g058 | 8.2  | 0 | 0 | 2 | MASCOT | T PLEX8 |
| 6.20E-03 | 0 0 | Cs5g05840.1/Cs5g058 | 8.2  | 0 | 0 | 2 | MASCOT | T PLEX8 |
| 2.64E-01 | 0 0 | Cs5g05840.1/Cs5g058 | 8.2  | 0 | 0 | 2 | MASCOT | T PLEX8 |
| 9.67E-03 | 0 0 | Cs5g05840.1/Cs5g058 | 8.2  | 0 | 0 | 2 | MASCOT | T PLEX8 |
| 3.54E-02 | 0 0 | Cs5g05840.1/Cs5g058 | 3.92 | 0 | 0 | 2 | MASCOT | T       |
| 1.04E-01 | 0 0 | Cs5g05840.1/Cs5g058 | 4.53 | 0 | 0 | 2 | MASCOT | T PLEX8 |
| 1.73E-01 | 0 0 | Cs5g05840.1/Cs5g058 | 4.53 | 0 | 0 | 2 | MASCOT | T PLEX8 |
| 4.04E-02 | 0 0 | Cs6g20960.1/Cs7g263 | 4.03 | 0 | 0 | 2 | MASCOT | T       |
| 9.85E-04 | 0 0 | Cs5g05840.1/Cs5g058 | 4.48 | 0 | 0 | 2 | MASCOT | T PLEX8 |



|          |     |                     |      |   |      |   |        |        |       |       |
|----------|-----|---------------------|------|---|------|---|--------|--------|-------|-------|
| 3.00E-02 | 0 0 | Cs5g05840.1/Cs5g058 | 4.48 | 0 | 0    | 2 | MASCOT | T      | PLEX8 |       |
| 4.76E-05 | 0 0 | Cs5g05840.1/Cs5g058 | 4.48 | 0 | 0    | 2 | MASCOT | T      |       |       |
| 6.35E-03 | 0 0 | Cs5g05840.1/Cs5g058 | 4.48 | 0 | 0    | 2 | MASCOT | T      |       |       |
| 1.31E-01 | 0 0 | Cs5g05840.1/Cs5g058 | 4.53 | 0 | 0    | 2 | MASCOT | T      |       |       |
| 6.32E-03 | 0 0 | Cs5g05840.1/Cs5g058 | 4.53 | 0 | 0    | 2 | MASCOT | T      |       |       |
| 1.91E-03 | 0 0 | Cs5g05840.1/Cs5g058 | 4.21 | 0 | 0    | 2 | MASCOT | T      |       |       |
| 4.42E-01 | 0 0 | Cs5g05840.1/Cs5g058 | 5.21 | 0 | 0    | 2 | MASCOT | T      | PLEX8 |       |
| 1.47E-01 | 0 0 | Cs5g05840.1/Cs5g058 | 4.21 | 0 | 0    | 2 | MASCOT | T      | PLEX8 |       |
| 2.43E-02 | 0 0 | Cs9g10470.1         | 5.56 | 0 | 0    | 2 | MASCOT | T      | PLEX8 |       |
| 1.31E-01 | 0 0 | Cs9g10470.1/Cs9g104 | 6.78 | 0 | 0    | 2 | MASCOT | T      | PLEX8 |       |
| 4.18E-02 | 0 0 | Cs9g10470.1/Cs9g104 | 6.78 | 0 | 0    | 2 | MASCOT | T      | PLEX8 |       |
| 7.24E-02 | 0 0 | Cs9g10470.1/Cs9g104 | 6.78 | 0 | 0    | 2 | MASCOT | T      | PLEX8 |       |
| 1.25E-03 | 0 0 | Cs9g10470.1/Cs9g104 | 6.78 | 0 | 0    | 2 | MASCOT | T      | PLEX8 |       |
| 3.40E-03 | 0 0 | Cs9g10470.1/Cs9g104 | 6.78 | 0 | 0    | 2 | MASCOT | T      | PLEX8 |       |
| 2.43E-03 | 0 0 | Cs9g10470.1/Cs9g104 | 6.78 | 0 | 0    | 2 | MASCOT | T      | PLEX8 |       |
| 7.07E-02 | 0 0 | Cs1g03610.1/Cs1g036 | 6.1  | 0 | 0    | 2 | MASCOT | T      | PLEX8 |       |
| 3.80E-02 | 0 0 | Cs9g10470.1         | 4.25 | 1 | 0    | 2 | MASCOT | T      | PLEX8 |       |
| 2.75E-03 | 0 0 | Cs9g10470.1         | 3.91 | 0 | 0    | 2 | MASCOT | T      | PLEX8 |       |
| 7.51E-04 | 0 0 | Cs9g10470.1/Cs9g104 | 5.84 | 0 | 0    | 2 | MASCOT | T      | PLEX8 |       |
| 3.14E-03 | 0 0 | Cs1g03610.1/Cs1g036 | 6.74 | 0 | 0    | 2 | MASCOT | T      | PLEX8 |       |
| 4.35E-04 | 0 0 | Cs1g03610.1/Cs1g036 | 6.74 | 0 | 0    | 2 | MASCOT | T      | PLEX8 |       |
| 5.12E-03 | 0 0 | Cs1g03610.1/Cs1g036 | 6.74 | 0 | 0    | 2 | MASCOT | T      | PLEX8 |       |
| 3.36E-03 | 0 0 | Cs9g10470.1/Cs9g104 | 4.37 | 0 | 15.9 | 0 | 2      | MASCOT | T     | PLEX8 |
| 1.90E-02 | 0 0 | Cs9g10470.1/Cs9g104 | 4.37 | 0 | 15.9 | 0 | 2      | MASCOT | T     | PLEX8 |
| 4.50E-02 | 0 0 | Cs9g10470.1/Cs9g104 | 4.37 | 0 | 15.9 | 0 | 2      | MASCOT | T     | PLEX8 |
| 8.56E-03 | 0 0 | Cs9g10470.1/Cs9g104 | 4.37 | 0 | 15.9 | 0 | 2      | MASCOT | T     |       |
| 6.51E-03 | 0 0 | Cs9g10470.1/Cs9g104 | 4.37 | 0 | 0    | 2 | MASCOT | T      | PLEX8 |       |
| 3.42E-01 | 0 0 | Cs9g10470.1/Cs9g104 | 4.37 | 0 | 0    | 2 | MASCOT | T      |       |       |
| 2.74E-02 | 0 0 | Cs1g03610.1/Cs1g036 | 8.25 | 0 | 0    | 2 | MASCOT | T      | PLEX8 |       |
| 3.40E-01 | 0 0 | Cs1g03610.1/Cs1g036 | 8.59 | 0 | 0    | 2 | MASCOT | T      | PLEX8 |       |
| 4.00E-02 | 0 0 | Cs1g03610.1/Cs1g036 | 8.72 | 0 | 0    | 2 | MASCOT | T      |       |       |
| 1.43E-04 | 0 0 | Cs1g03610.1/Cs1g036 | 8.72 | 0 | 0    | 2 | MASCOT | T      |       |       |
| 1.85E-03 | 0 0 | Cs1g03610.1/Cs1g036 | 8.72 | 0 | 0    | 2 | MASCOT | T      |       |       |
| 4.80E-02 | 0 0 | Cs9g10470.1/Cs9g104 | 6.05 | 0 | 0    | 2 | MASCOT | T      | PLEX8 |       |
| 3.64E-01 | 0 0 | Cs1g03610.1/Cs1g036 | 8.75 | 0 | 0    | 2 | MASCOT | T      | PLEX8 |       |
| 4.36E-05 | 0 0 | Cs8g03010.1/Cs8g030 | 3.93 | 0 | 0    | 2 | MASCOT | T      | PLEX8 |       |
| 4.60E-02 | 0 0 | Cs8g03010.1/Cs8g030 | 5.88 | 0 | 0    | 2 | MASCOT | T      | PLEX8 |       |
| 1.07E-01 | 0 0 | Cs8g03010.1/Cs8g030 | 6.1  | 0 | 0    | 2 | MASCOT | T      | PLEX8 |       |
| 2.99E-01 | 0 0 | Cs3g04960.1/Cs3g049 | 6.1  | 0 | 0    | 2 | MASCOT | T      | PLEX8 |       |
| 3.15E-03 | 0 0 | Cs3g04960.1/Cs8g030 | 6    | 0 | 0    | 2 | MASCOT | T      | PLEX8 |       |
| 6.97E-02 | 0 0 | Cs3g04960.1/Cs8g030 | 6    | 0 | 0    | 2 | MASCOT | T      | PLEX8 |       |
| 3.57E-03 | 0 0 | Cs3g04960.1/Cs8g030 | 6    | 0 | 0    | 2 | MASCOT | T      | PLEX8 |       |
| 4.22E-02 | 0 0 | Cs3g04960.1/Cs8g030 | 6    | 0 | 0    | 2 | MASCOT | T      | PLEX8 |       |
| 1.50E-03 | 0 0 | Cs3g04960.1/Cs8g030 | 6    | 0 | 0    | 2 | MASCOT | T      | PLEX8 |       |
| 4.15E-01 | 0 0 | Cs3g04960.1/Cs3g049 | 9.76 | 0 | 0    | 2 | MASCOT | T      | PLEX8 |       |
| 3.10E-02 | 0 0 | Cs3g04960.1/Cs3g049 | 9.76 | 0 | 0    | 2 | MASCOT | T      | PLEX8 |       |
| 2.09E-01 | 0 0 | Cs3g04960.1/Cs3g049 | 9.76 | 0 | 0    | 2 | MASCOT | T      | PLEX8 |       |
| 2.52E-01 | 0 0 | Cs3g04960.1/Cs3g049 | 9.76 | 0 | 0    | 2 | MASCOT | T      | PLEX8 |       |
| 3.82E-01 | 0 0 | Cs3g04960.1/Cs3g049 | 5.55 | 0 | 0    | 2 | MASCOT | T      | PLEX8 |       |
| 5.58E-06 | 0 0 | Cs3g04960.1/Cs3g049 | 5.55 | 0 | 0    | 2 | MASCOT | T      | PLEX8 |       |
| 1.22E-04 | 0 0 | Cs8g03010.1/Cs8g030 | 6    | 0 | 0    | 2 | MASCOT | T      | PLEX8 |       |

|              |                      |      |   |   |          |   |       |
|--------------|----------------------|------|---|---|----------|---|-------|
| 1.85E-01 0 0 | Cs8g03010.1/Cs8g030  | 4.37 | 0 | 0 | 2 MASCOT | T | PLEX8 |
| 4.34E-03 0 0 | Cs8g03010.1/Cs8g030  | 4.37 | 0 | 0 | 2 MASCOT | T | PLEX8 |
| 5.65E-02 0 0 | Cs8g03010.1/Cs8g030  | 4.37 | 0 | 0 | 2 MASCOT | T | PLEX8 |
| 4.55E-02 0 0 | Cs8g03010.1/Cs8g030  | 8.75 | 0 | 0 | 2 MASCOT | T | PLEX8 |
| 3.77E-02 0 0 | Cs8g03010.1/Cs8g030  | 8.75 | 0 | 0 | 2 MASCOT | T | PLEX8 |
| 1.97E-01 0 0 | Cs8g03010.1/Cs8g030  | 4    | 0 | 0 | 2 MASCOT | T | PLEX8 |
| 2.27E-04 0 0 | Cs8g03010.1/Cs8g030  | 4    | 0 | 0 | 2 MASCOT | T | PLEX8 |
| 2.84E-02 0 0 | Cs8g03010.1/Cs8g030  | 4    | 0 | 0 | 2 MASCOT | T | PLEX8 |
| 4.01E-01 0 0 | Cs8g03010.1/Cs8g030  | 4.37 | 0 | 0 | 2 MASCOT | T | PLEX8 |
| 3.99E-02 0 0 | Cs3g04960.1/Cs8g030  | 8.41 | 0 | 0 | 2 MASCOT | T | PLEX8 |
| 3.98E-03 0 0 | Cs3g23930.1/Cs3g239  | 4.14 | 0 | 0 | 2 MASCOT | T | PLEX8 |
| 5.74E-03 0 0 | Cs3g23930.1          | 4.03 | 0 | 0 | 2 MASCOT | T | PLEX8 |
| 6.20E-03 0 0 | Cs3g23930.1          | 4.03 | 0 | 0 | 2 MASCOT | T | PLEX8 |
| 2.33E-03 0 0 | Cs3g23930.1/Cs3g239  | 4.48 | 0 | 0 | 2 MASCOT | T | PLEX8 |
| 7.09E-03 0 0 | Cs3g23930.1/Cs3g239  | 4.37 | 0 | 0 | 2 MASCOT | T |       |
| 3.59E-02 0 0 | Cs3g23930.1/Cs3g239  | 6.47 | 0 | 0 | 2 MASCOT | T | PLEX8 |
| 6.18E-02 0 0 | Cs3g23930.1/Cs3g239  | 6.47 | 0 | 0 | 2 MASCOT | T | PLEX8 |
| 6.22E-03 0 0 | Cs3g23930.1/Cs3g239  | 6.47 | 0 | 0 | 2 MASCOT | T |       |
| 1.42E-01 0 0 | Cs3g23930.1/Cs3g239  | 5.55 | 0 | 0 | 2 MASCOT | T | PLEX8 |
| 1.06E-01 0 0 | Cs3g23930.1/Cs3g239  | 5.55 | 0 | 0 | 2 MASCOT | T | PLEX8 |
| 1.17E-01 0 0 | Cs3g23930.1/Cs3g239  | 5.55 | 0 | 0 | 2 MASCOT | T | PLEX8 |
| 5.23E-02 0 0 | Cs3g23930.1          | 5.55 | 0 | 0 | 2 MASCOT | T | PLEX8 |
| 1.53E-03 0 0 | Cs3g23930.1          | 5.55 | 0 | 0 | 2 MASCOT | T | PLEX8 |
| 1.31E-01 0 0 | Cs3g23930.1/Cs3g239  | 5.81 | 0 | 0 | 2 MASCOT | T |       |
| 3.50E-01 0 0 | Cs3g23930.1/Cs3g239  | 5.21 | 0 | 0 | 2 MASCOT | T | PLEX8 |
| 5.96E-02 0 0 | Cs3g23930.1/Cs3g239  | 5.81 | 0 | 0 | 2 MASCOT | T | PLEX8 |
| 5.30E-03 0 0 | Cs3g23930.1/Cs3g239  | 5.81 | 0 | 0 | 2 MASCOT | T | PLEX8 |
| 5.65E-03 0 0 | Cs3g23930.1          | 6.74 | 0 | 0 | 2 MASCOT | T | PLEX8 |
| 3.53E-02 0 0 | Cs3g23930.1          | 6.74 | 0 | 0 | 2 MASCOT | T | PLEX8 |
| 3.42E-02 0 0 | Cs3g23930.1          | 5.66 | 0 | 0 | 2 MASCOT | T | PLEX8 |
| 6.23E-03 0 0 | Cs3g23930.1          | 5.66 | 0 | 0 | 2 MASCOT | T | PLEX8 |
| 1.02E-04 0 0 | Cs3g23930.1/Cs3g239  | 4.54 | 0 | 0 | 2 MASCOT | T | PLEX8 |
| 8.18E-02 0 0 | Cs3g23930.1/Cs3g239  | 4.54 | 0 | 0 | 2 MASCOT | T | PLEX8 |
| 1.56E-01 0 0 | Cs3g23930.1/Cs3g239  | 4.54 | 0 | 0 | 2 MASCOT | T |       |
| 3.11E-03 0 0 | Cs3g23930.1/Cs3g239  | 4.54 | 0 | 0 | 2 MASCOT | T |       |
| 4.11E-01 0 0 | Cs4g16050.1          | 4.37 | 0 | 0 | 2 MASCOT | T |       |
| 2.37E-02 0 0 | Cs6g09690.1 ! Cs4g16 | 8.75 | 0 | 0 | 2 MASCOT | T | PLEX8 |
| 1.69E-04 0 0 | Cs4g16050.1          | 5.84 | 0 | 0 | 2 MASCOT | T | PLEX8 |
| 2.51E-03 0 0 | Cs4g16050.1          | 5.84 | 0 | 0 | 2 MASCOT | T | PLEX8 |
| 4.58E-02 0 0 | Cs4g16050.1          | 6.61 | 0 | 0 | 2 MASCOT | T | PLEX8 |
| 4.84E-04 0 0 | Cs4g16050.1 ! Cs4g19 | 8.72 | 0 | 0 | 2 MASCOT | T | PLEX8 |
| 6.29E-02 0 0 | Cs4g16050.1 ! Cs4g19 | 8.72 | 0 | 0 | 2 MASCOT | T | PLEX8 |
| 2.43E-04 0 0 | Cs4g16050.1 ! Cs4g19 | 8.72 | 0 | 0 | 2 MASCOT | T | PLEX8 |
| 9.40E-05 0 0 | Cs4g16050.1/Cs4g198  | 4.37 | 0 | 0 | 2 MASCOT | T |       |
| 2.61E-03 0 0 | Cs4g16050.1          | 4.37 | 0 | 0 | 2 MASCOT | T |       |
| 2.10E-01 0 0 | Cs4g16050.1/Cs4g198  | 8.75 | 0 | 0 | 2 MASCOT | T | PLEX8 |
| 3.34E-02 0 0 | Cs4g16050.1/Cs4g198  | 8.75 | 0 | 0 | 2 MASCOT | T | PLEX8 |
| 1.04E-01 0 0 | Cs4g16050.1/Cs4g198  | 8.75 | 0 | 0 | 2 MASCOT | T | PLEX8 |
| 3.85E-02 0 0 | Cs4g16050.1          | 6.07 | 1 | 0 | 2 MASCOT | T | PLEX8 |
| 8.71E-02 0 0 | Cs4g16050.1          | 5.84 | 0 | 0 | 2 MASCOT | T |       |
| 7.10E-02 0 0 | Cs4g16050.1          | 5.84 | 0 | 0 | 2 MASCOT | T | PLEX8 |

|          |     |                        |      |   |      |   |        |        |       |       |
|----------|-----|------------------------|------|---|------|---|--------|--------|-------|-------|
| 1.53E-01 | 0 0 | Cs4g16050.1/Cs4g198    | 5.97 | 0 | 0    | 2 | MASCOT | T      | PLEX8 |       |
| 1.90E-01 | 0 0 | Cs4g16050.1/Cs4g198    | 5.97 | 0 | 0    | 2 | MASCOT | T      | PLEX8 |       |
| 1.99E-01 | 0 0 | Cs4g16050.1/Cs4g198    | 5.97 | 0 | 0    | 2 | MASCOT | T      | PLEX8 |       |
| 1.58E-01 | 0 0 | Cs4g16050.1/Cs4g198    | 8.19 | 0 | 0    | 2 | MASCOT | T      | PLEX8 |       |
| 2.85E-02 | 0 0 | Cs4g16050.1/Cs4g198    | 8.19 | 0 | 0    | 2 | MASCOT | T      | PLEX8 |       |
| 2.44E-02 | 0 0 | Cs4g16050.1/Cs4g198    | 8.19 | 0 | 0    | 2 | MASCOT | T      | PLEX8 |       |
| 1.23E-02 | 0 0 | Cs4g16050.1/Cs4g198    | 8.22 | 0 | 0    | 2 | MASCOT | T      |       |       |
| 1.93E-02 | 0 0 | Cs4g16050.1/Cs4g198    | 8.22 | 0 | 0    | 2 | MASCOT | T      |       |       |
| 1.34E-01 | 0 0 | Cs4g16050.1/Cs4g198    | 8.22 | 0 | 0    | 2 | MASCOT | T      |       |       |
| 2.58E-01 | 0 0 | Cs8g01360.1            | 9.8  | 0 | 0    | 2 | MASCOT | T      | PLEX8 |       |
| 2.19E-02 | 0 0 | Cs8g01360.1            | 9.8  | 0 | 0    | 2 | MASCOT | T      | PLEX8 |       |
| 1.32E-01 | 0 0 | Cs8g01360.1            | 3.77 | 0 | 0    | 2 | MASCOT | T      | PLEX8 |       |
| 5.16E-02 | 0 0 | Cs8g01360.1            | 3.77 | 0 | 0    | 2 | MASCOT | T      |       |       |
| 9.75E-04 | 0 0 | Cs8g01360.1            | 4.37 | 0 | 0    | 2 | MASCOT | T      | PLEX8 |       |
| 2.09E-01 | 0 0 | Cs8g01360.1            | 4.37 | 0 | 0    | 2 | MASCOT | T      |       |       |
| 9.81E-02 | 0 0 | Cs8g01360.1            | 6.92 | 0 | 15.9 | 0 | 2      | MASCOT | T     |       |
| 2.21E-01 | 0 0 | Cs8g01360.1            | 6.92 | 0 | 15.9 | 0 | 2      | MASCOT | T     | PLEX8 |
| 4.49E-02 | 0 0 | Cs8g01360.1            | 6.92 | 0 | 0    | 2 | MASCOT | T      | PLEX8 |       |
| 4.37E-02 | 0 0 | Cs8g01360.1            | 6.92 | 0 | 0    | 2 | MASCOT | T      | PLEX8 |       |
| 1.56E-02 | 0 0 | Cs8g01360.1            | 6.75 | 0 | 0    | 2 | MASCOT | T      | PLEX8 |       |
| 1.73E-03 | 0 0 | Cs8g01360.1            | 6.75 | 0 | 0    | 2 | MASCOT | T      | PLEX8 |       |
| 9.86E-04 | 0 0 | Cs8g01360.1            | 6.75 | 0 | 0    | 2 | MASCOT | T      |       |       |
| 1.46E-01 | 0 0 | Cs8g01360.1            | 4.37 | 0 | 0    | 2 | MASCOT | T      | PLEX8 |       |
| 2.48E-03 | 0 0 | Cs8g01360.1            | 4.25 | 0 | 0    | 2 | MASCOT | T      | PLEX8 |       |
| 1.47E-04 | 0 0 | Cs8g01360.1            | 4.25 | 0 | 0    | 2 | MASCOT | T      | PLEX8 |       |
| 7.23E-02 | 0 0 | Cs8g01360.1            | 4.37 | 0 | 0    | 2 | MASCOT | T      | PLEX8 |       |
| 6.91E-02 | 0 0 | Cs8g01360.1            | 9.76 | 0 | 0    | 2 | MASCOT | T      | PLEX8 |       |
| 6.10E-04 | 0 0 | Cs8g01360.1            | 9.76 | 0 | 0    | 2 | MASCOT | T      | PLEX8 |       |
| 3.45E-02 | 0 0 | Cs8g01360.1            | 9.76 | 0 | 0    | 2 | MASCOT | T      | PLEX8 |       |
| 4.78E-03 | 0 0 | Cs8g01360.1            | 9.76 | 0 | 0    | 2 | MASCOT | T      | PLEX8 |       |
| 7.12E-02 | 0 0 | Cs8g01360.1            | 3.92 | 0 | 0    | 2 | MASCOT | T      |       |       |
| 5.15E-02 | 0 0 | Cs8g01360.1            | 4.37 | 0 | 0    | 2 | MASCOT | T      | PLEX8 |       |
| 8.00E-02 | 0 0 | Cs8g01360.1            | 4.37 | 0 | 0    | 2 | MASCOT | T      | PLEX8 |       |
| 2.39E-01 | 0 0 | orange1.1t00112.1 ! C; | 8.72 | 0 | 0    | 2 | MASCOT | T      | PLEX8 |       |
| 1.30E-01 | 0 0 | Cs1g17330.2/Cs1g173    | 8.8  | 0 | 0    | 2 | MASCOT | T      | PLEX8 |       |
| 1.67E-01 | 0 0 | Cs1g17330.1/Cs1g173    | 4.53 | 0 | 15.9 | 0 | 2      | MASCOT | T     |       |
| 1.53E-03 | 0 0 | Cs1g17330.1/Cs1g173    | 4.53 | 0 | 0    | 2 | MASCOT | T      | PLEX8 |       |
| 2.90E-02 | 0 0 | Cs1g17330.1/Cs1g173    | 6.75 | 0 | 0    | 2 | MASCOT | T      | PLEX8 |       |
| 1.55E-03 | 0 0 | Cs1g17330.1/Cs1g173    | 6.75 | 0 | 0    | 2 | MASCOT | T      | PLEX8 |       |
| 6.51E-03 | 0 0 | Cs1g17330.1/Cs1g173    | 9.75 | 0 | 0    | 2 | MASCOT | T      |       |       |
| 1.38E-01 | 0 0 | Cs1g17330.1/Cs1g173    | 9.75 | 0 | 0    | 2 | MASCOT | T      |       |       |
| 1.75E-02 | 0 0 | Cs1g17330.2/Cs1g173    | 6    | 0 | 0    | 2 | MASCOT | T      | PLEX8 |       |
| 3.14E-02 | 0 0 | Cs1g17330.2/Cs1g173    | 6    | 0 | 0    | 2 | MASCOT | T      | PLEX8 |       |
| 3.62E-02 | 0 0 | Cs1g17330.2/Cs1g173    | 6    | 0 | 0    | 2 | MASCOT | T      | PLEX8 |       |
| 4.48E-02 | 0 0 | Cs1g17330.1/Cs1g173    | 4.53 | 0 | 0    | 2 | MASCOT | T      | PLEX8 |       |
| 1.42E-01 | 0 0 | Cs1g17330.1/Cs1g173    | 9.73 | 0 | 15.9 | 0 | 2      | MASCOT | T     | PLEX8 |
| 5.68E-03 | 0 0 | Cs1g17330.1/Cs1g173    | 9.73 | 0 | 15.9 | 0 | 2      | MASCOT | T     | PLEX8 |
| 1.57E-03 | 0 0 | Cs1g17330.1/Cs1g173    | 9.73 | 0 | 0    | 2 | MASCOT | T      | PLEX8 |       |
| 2.02E-01 | 0 0 | Cs1g17330.1/Cs1g173    | 4.37 | 0 | 0    | 2 | MASCOT | T      | PLEX8 |       |
| 3.25E-01 | 0 0 | Cs1g17330.1/Cs1g173    | 6    | 0 | 0    | 2 | MASCOT | T      | PLEX8 |       |
| 3.91E-02 | 0 0 | Cs1g17330.1/Cs1g173    | 6    | 0 | 0    | 2 | MASCOT | T      | PLEX8 |       |

|          |     |                     |      |   |      |   |        |        |       |       |
|----------|-----|---------------------|------|---|------|---|--------|--------|-------|-------|
| 1.89E-01 | 0 0 | Cs1g17330.1/Cs1g173 | 5.84 | 0 | 0    | 2 | MASCOT | T      | PLEX8 |       |
| 2.66E-01 | 0 0 | Cs1g17330.1/Cs1g173 | 5.72 | 0 | 0    | 2 | MASCOT | T      | PLEX8 |       |
| 6.28E-02 | 0 0 | Cs1g17330.1/Cs1g173 | 9.47 | 0 | 0    | 2 | MASCOT | T      |       |       |
| 2.84E-02 | 0 0 | Cs1g17330.1/Cs1g173 | 9.47 | 0 | 0    | 2 | MASCOT | T      |       |       |
| 5.65E-06 | 0 0 | Cs1g17330.1/Cs1g173 | 9.47 | 0 | 0    | 2 | MASCOT | T      |       |       |
| 1.14E-01 | 0 0 | Cs1g17330.1/Cs1g173 | 9.47 | 0 | 0    | 2 | MASCOT | T      |       |       |
| 8.72E-02 | 0 0 | Cs6g15740.1/Cs6g157 | 4.25 | 0 | 0    | 2 | MASCOT | T      | PLEX8 |       |
| 1.26E-01 | 0 0 | Cs6g15740.1/Cs6g157 | 5.27 | 0 | 0    | 2 | MASCOT | T      |       |       |
| 7.93E-06 | 0 0 | Cs6g15740.1/Cs6g157 | 5.84 | 0 | 0    | 2 | MASCOT | T      | PLEX8 |       |
| 1.62E-02 | 0 0 | Cs6g15740.1/Cs6g157 | 4.53 | 0 | 15.9 | 0 | 2      | MASCOT | T     |       |
| 2.04E-02 | 0 0 | Cs6g15740.1/Cs6g157 | 4.53 | 0 | 0    | 2 | MASCOT | T      |       |       |
| 6.74E-03 | 0 0 | Cs6g15740.1/Cs6g157 | 5.5  | 0 | 0    | 2 | MASCOT | T      | PLEX8 |       |
| 7.86E-05 | 0 0 | Cs6g15740.1/Cs6g157 | 4.37 | 0 | 0    | 2 | MASCOT | T      |       |       |
| 1.88E-01 | 0 0 | Cs6g15740.1/Cs6g157 | 5.83 | 0 | 0    | 2 | MASCOT | T      | PLEX8 |       |
| 6.06E-02 | 0 0 | Cs6g15740.2         | 4.37 | 0 | 0    | 2 | MASCOT | T      | PLEX8 |       |
| 3.73E-02 | 0 0 | Cs6g15740.2         | 4.37 | 0 | 0    | 2 | MASCOT | T      | PLEX8 |       |
| 4.00E-03 | 0 0 | Cs6g15740.1/Cs6g157 | 6.85 | 0 | 0    | 2 | MASCOT | T      | PLEX8 |       |
| 1.16E-02 | 0 0 | Cs6g15740.2         | 8.59 | 0 | 0    | 2 | MASCOT | T      | PLEX8 |       |
| 1.89E-02 | 0 0 | Cs6g15740.1/Cs6g157 | 4.53 | 0 | 15.9 | 0 | 2      | MASCOT | T     |       |
| 2.05E-03 | 0 0 | Cs6g15740.1/Cs6g157 | 5.72 | 0 | 0    | 2 | MASCOT | T      | PLEX8 |       |
| 3.10E-04 | 0 0 | Cs6g15740.1/Cs6g157 | 5.21 | 0 | 0    | 2 | MASCOT | T      | PLEX8 |       |
| 1.84E-02 | 0 0 | Cs4g07030.1/Cs4g070 | 8.8  | 0 | 0    | 2 | MASCOT | T      | PLEX8 |       |
| 1.66E-04 | 0 0 | Cs4g07030.1/Cs4g070 | 4.41 | 0 | 15.9 | 0 | 2      | MASCOT | T     | PLEX8 |
| 6.62E-06 | 0 0 | Cs4g07030.1/Cs4g070 | 4.41 | 0 | 15.9 | 0 | 2      | MASCOT | T     | PLEX8 |
| 2.15E-02 | 0 0 | Cs4g07030.1/Cs4g070 | 4.41 | 0 | 15.9 | 0 | 2      | MASCOT | T     | PLEX8 |
| 1.90E-03 | 0 0 | Cs4g07030.1/Cs4g070 | 4.41 | 0 | 15.9 | 0 | 2      | MASCOT | T     |       |
| 2.45E-04 | 0 0 | Cs4g07030.1/Cs4g070 | 4.41 | 0 | 15.9 | 0 | 2      | MASCOT | T     |       |
| 7.03E-05 | 0 0 | Cs4g07030.1/Cs4g070 | 4.41 | 0 | 0    | 2 | MASCOT | T      | PLEX8 |       |
| 2.33E-04 | 0 0 | Cs4g07030.1/Cs4g070 | 4.41 | 0 | 0    | 2 | MASCOT | T      | PLEX8 |       |
| 1.71E-01 | 0 0 | Cs4g07030.1/Cs4g070 | 4.41 | 0 | 0    | 2 | MASCOT | T      |       |       |
| 3.41E-02 | 0 0 | Cs4g07030.1/Cs4g070 | 5.84 | 0 | 0    | 2 | MASCOT | T      | PLEX8 |       |
| 1.29E-02 | 0 0 | Cs4g07030.1/Cs4g070 | 5.84 | 0 | 0    | 2 | MASCOT | T      | PLEX8 |       |
| 6.04E-03 | 0 0 | Cs4g07030.1/Cs4g070 | 5.84 | 0 | 0    | 2 | MASCOT | T      | PLEX8 |       |
| 2.95E-03 | 0 0 | Cs4g07030.1/Cs4g070 | 5.84 | 0 | 0    | 2 | MASCOT | T      | PLEX8 |       |
| 1.93E-02 | 0 0 | Cs4g07030.1/Cs4g070 | 5.84 | 0 | 0    | 2 | MASCOT | T      | PLEX8 |       |
| 2.16E-02 | 0 0 | Cs4g07030.1/Cs4g070 | 5.84 | 0 | 0    | 2 | MASCOT | T      | PLEX8 |       |
| 4.82E-02 | 0 0 | Cs4g07030.1/Cs4g070 | 5.84 | 0 | 0    | 2 | MASCOT | T      | PLEX8 |       |
| 1.49E-02 | 0 0 | Cs4g07030.1/Cs4g070 | 5.84 | 0 | 0    | 2 | MASCOT | T      |       |       |
| 3.77E-02 | 0 0 | Cs4g07030.1/Cs4g070 | 5.84 | 0 | 0    | 2 | MASCOT | T      |       |       |
| 1.81E-02 | 0 0 | Cs4g07030.1/Cs4g070 | 5.84 | 0 | 0    | 2 | MASCOT | T      | PLEX8 |       |
| 5.49E-02 | 0 0 | Cs4g07030.1/Cs4g070 | 5.84 | 0 | 0    | 2 | MASCOT | T      | PLEX8 |       |
| 1.05E-02 | 0 0 | Cs4g07030.1/Cs4g070 | 5.84 | 0 | 0    | 2 | MASCOT | T      | PLEX8 |       |
| 2.30E-01 | 0 0 | Cs4g07030.2/Cs4g070 | 8.5  | 0 | 0    | 2 | MASCOT | T      | PLEX8 |       |
| 1.84E-02 | 0 0 | Cs4g07030.1/Cs4g070 | 4.68 | 0 | 0    | 2 | MASCOT | T      | PLEX8 |       |
| 6.44E-02 | 0 0 | Cs4g07030.1/Cs4g070 | 4.68 | 0 | 0    | 2 | MASCOT | T      | PLEX8 |       |
| 9.11E-04 | 0 0 | Cs4g07030.1/Cs4g070 | 4.09 | 0 | 0    | 2 | MASCOT | T      | PLEX8 |       |
| 1.76E-05 | 0 0 | Cs4g07030.1/Cs4g070 | 4.09 | 0 | 0    | 2 | MASCOT | T      | PLEX8 |       |
| 9.05E-07 | 0 0 | Cs4g07030.1/Cs4g070 | 4.09 | 0 | 0    | 2 | MASCOT | T      | PLEX8 |       |
| 5.27E-01 | 0 0 | Cs4g07030.1/Cs4g070 | 4.09 | 0 | 0    | 2 | MASCOT | T      |       |       |
| 6.48E-03 | 0 0 | Cs4g07030.1/Cs4g070 | 4.09 | 0 | 0    | 2 | MASCOT | T      | PLEX8 |       |
| 1.54E-03 | 0 0 | Cs4g07030.1/Cs4g070 | 4.09 | 0 | 0    | 2 | MASCOT | T      |       |       |

|          |     |                     |      |   |      |   |        |        |       |       |
|----------|-----|---------------------|------|---|------|---|--------|--------|-------|-------|
| 5.05E-01 | 0 0 | Cs4g07030.1/Cs4g070 | 4.09 | 0 | 0    | 2 | MASCOT | T      |       |       |
| 6.02E-02 | 0 0 | Cs4g07030.1/Cs4g070 | 4.09 | 0 | 0    | 2 | MASCOT | T      |       |       |
| 5.01E-01 | 0 0 | Cs4g07030.1/Cs4g070 | 4.09 | 0 | 0    | 2 | MASCOT | T      |       |       |
| 2.02E-02 | 0 0 | Cs4g07030.1/Cs4g070 | 4.09 | 0 | 0    | 2 | MASCOT | T      |       |       |
| 5.18E-03 | 0 0 | Cs4g07030.1/Cs4g070 | 4.09 | 0 | 0    | 2 | MASCOT | T      |       |       |
| 1.31E-06 | 0 0 | Cs4g07030.1/Cs4g070 | 4.09 | 0 | 0    | 2 | MASCOT | T      |       |       |
| 2.44E-02 | 0 0 | Cs4g07030.1/Cs4g070 | 4.09 | 0 | 0    | 2 | MASCOT | T      |       |       |
| 1.43E-01 | 0 0 | Cs4g07030.1/Cs4g070 | 4.09 | 0 | 0    | 2 | MASCOT | T      |       |       |
| 9.06E-04 | 0 0 | Cs4g07030.1/Cs4g070 | 4.09 | 0 | 0    | 2 | MASCOT | T      |       |       |
| 1.44E-03 | 0 0 | Cs4g07030.1/Cs4g070 | 4.09 | 0 | 0    | 2 | MASCOT | T      |       |       |
| 6.18E-04 | 0 0 | Cs4g07030.1/Cs4g070 | 4.09 | 0 | 0    | 2 | MASCOT | T      |       |       |
| 2.05E-04 | 0 0 | Cs4g07030.1/Cs4g070 | 4.09 | 0 | 0    | 2 | MASCOT | T      |       |       |
| 1.36E-11 | 0 0 | Cs4g07030.1/Cs4g070 | 4.09 | 0 | 0    | 2 | MASCOT | T      |       |       |
| 1.67E-03 | 0 0 | Cs4g07030.1/Cs4g070 | 4.09 | 0 | 0    | 2 | MASCOT | T      |       |       |
| 1.04E-02 | 0 0 | Cs4g07030.1/Cs4g070 | 4.09 | 0 | 0    | 2 | MASCOT | T      |       |       |
| 4.37E-04 | 0 0 | Cs4g07030.1/Cs4g070 | 4.09 | 0 | 0    | 2 | MASCOT | T      |       |       |
| 1.14E-01 | 0 0 | Cs4g07030.1/Cs4g070 | 4.09 | 0 | 0    | 2 | MASCOT | T      |       |       |
| 1.40E-01 | 0 0 | Cs4g07030.1/Cs4g070 | 4.09 | 0 | 0    | 2 | MASCOT | T      |       |       |
| 3.60E-02 | 0 0 | Cs4g07030.1/Cs4g070 | 4.09 | 0 | 0    | 2 | MASCOT | T      |       |       |
| 2.74E-02 | 0 0 | Cs4g07030.1/Cs4g070 | 4.09 | 0 | 0    | 2 | MASCOT | T      |       |       |
| 1.02E-01 | 0 0 | Cs4g07030.1/Cs4g070 | 4.09 | 0 | 0    | 2 | MASCOT | T      |       |       |
| 4.08E-02 | 0 0 | Cs4g07030.1/Cs4g070 | 4.09 | 0 | 0    | 2 | MASCOT | T      |       |       |
| 1.44E-01 | 0 0 | Cs4g07030.1/Cs4g070 | 4.09 | 0 | 0    | 2 | MASCOT | T      |       |       |
| 5.18E-01 | 0 0 | Cs4g07030.1/Cs4g070 | 4.09 | 0 | 0    | 2 | MASCOT | T      |       |       |
| 3.85E-02 | 0 0 | Cs4g07030.1/Cs4g070 | 4.09 | 0 | 0    | 2 | MASCOT | T      |       |       |
| 5.43E-01 | 0 0 | Cs4g07030.1/Cs4g070 | 4.09 | 0 | 0    | 2 | MASCOT | T      |       |       |
| 7.50E-07 | 0 0 | Cs4g07030.1/Cs4g070 | 4.09 | 0 | 0    | 2 | MASCOT | T      |       |       |
| 3.51E-03 | 0 0 | Cs4g07030.1/Cs4g070 | 4.09 | 0 | 0    | 2 | MASCOT | T      |       |       |
| 4.41E-06 | 0 0 | Cs4g07030.1/Cs4g070 | 4.09 | 0 | 0    | 2 | MASCOT | T      |       |       |
| 1.14E-01 | 0 0 | Cs4g07030.1/Cs4g070 | 5.84 | 0 | 0    | 2 | MASCOT | T      | PLEX8 |       |
| 2.95E-05 | 0 0 | Cs4g07030.1/Cs4g070 | 5.4  | 0 | 0    | 2 | MASCOT | T      | PLEX8 |       |
| 2.97E-08 | 0 0 | Cs4g07030.1/Cs4g070 | 5.4  | 0 | 0    | 2 | MASCOT | T      | PLEX8 |       |
| 1.80E-01 | 0 0 | Cs4g07030.1/Cs4g070 | 5.4  | 0 | 0    | 2 | MASCOT | T      | PLEX8 |       |
| 1.43E-03 | 0 0 | Cs4g07030.1/Cs4g070 | 8.59 | 0 | 0    | 2 | MASCOT | T      | PLEX8 |       |
| 7.03E-02 | 0 0 | Cs4g07030.1/Cs4g070 | 8.59 | 0 | 0    | 2 | MASCOT | T      | PLEX8 |       |
| 3.16E-02 | 0 0 | Cs4g07030.1/Cs4g070 | 4    | 0 | 15.9 | 0 | 2      | MASCOT | T     | PLEX8 |
| 7.20E-02 | 0 0 | Cs4g07030.1/Cs4g070 | 4    | 0 | 15.9 | 0 | 2      | MASCOT | T     | PLEX8 |
| 8.49E-03 | 0 0 | Cs4g07030.1/Cs4g070 | 4    | 0 | 0    | 2 | MASCOT | T      | PLEX8 |       |
| 1.24E-02 | 0 0 | Cs4g07030.1/Cs4g070 | 4    | 0 | 0    | 2 | MASCOT | T      | PLEX8 |       |
| 2.07E-02 | 0 0 | Cs4g07030.1/Cs4g070 | 3.71 | 0 | 0    | 2 | MASCOT | T      | PLEX8 |       |
| 1.45E-01 | 0 0 | Cs4g07030.1/Cs4g070 | 9.7  | 0 | 15.9 | 0 | 2      | MASCOT | T     | PLEX8 |
| 2.40E-01 | 0 0 | Cs4g07030.1/Cs4g070 | 9.7  | 0 | 15.9 | 0 | 2      | MASCOT | T     | PLEX8 |
| 4.47E-01 | 0 0 | Cs4g07030.1/Cs4g070 | 9.7  | 0 | 15.9 | 0 | 2      | MASCOT | T     | PLEX8 |
| 1.41E-01 | 0 0 | Cs4g07030.1/Cs4g070 | 9.7  | 0 | 15.9 | 0 | 2      | MASCOT | T     | PLEX8 |
| 1.83E-01 | 0 0 | Cs4g07030.1/Cs4g070 | 9.7  | 0 | 0    | 2 | MASCOT | T      | PLEX8 |       |
| 2.35E-03 | 0 0 | Cs4g07030.1/Cs4g070 | 9.7  | 0 | 0    | 2 | MASCOT | T      | PLEX8 |       |
| 3.57E-02 | 0 0 | Cs4g07030.1/Cs4g070 | 9.7  | 0 | 0    | 2 | MASCOT | T      | PLEX8 |       |
| 4.92E-04 | 0 0 | Cs4g07030.1/Cs4g070 | 9.7  | 0 | 0    | 2 | MASCOT | T      | PLEX8 |       |
| 1.19E-03 | 0 0 | Cs4g07030.1/Cs4g070 | 9.7  | 0 | 0    | 2 | MASCOT | T      |       |       |
| 2.80E-02 | 0 0 | Cs2g24610.1/Cs5g068 | 8.8  | 0 | 0    | 2 | MASCOT | T      | PLEX8 |       |
| 3.49E-02 | 0 0 | Cs2g24610.1/Cs5g068 | 8.8  | 0 | 0    | 2 | MASCOT | T      |       |       |

|          |     |                     |      |   |      |   |        |        |       |       |
|----------|-----|---------------------|------|---|------|---|--------|--------|-------|-------|
| 1.09E-01 | 0 0 | Cs2g24610.1/Cs5g068 | 8.8  | 0 | 0    | 2 | MASCOT | T      |       |       |
| 1.70E-01 | 0 0 | Cs5g06870.1/Cs5g068 | 8.8  | 0 | 0    | 2 | MASCOT | T      | PLEX8 |       |
| 8.11E-01 | 0 0 | Cs5g06870.1/Cs5g068 | 8.8  | 0 | 0    | 2 | MASCOT | T      | PLEX8 |       |
| 2.33E-01 | 0 0 | Cs5g06870.1/Cs5g068 | 8.8  | 0 | 0    | 2 | MASCOT | T      | PLEX8 |       |
| 4.71E-01 | 0 0 | Cs5g06870.1/Cs5g068 | 8.8  | 0 | 0    | 2 | MASCOT | T      | PLEX8 |       |
| 9.13E-02 | 0 0 | Cs5g06870.1/Cs5g068 | 8.8  | 0 | 0    | 2 | MASCOT | T      | PLEX8 |       |
| 3.91E-01 | 0 0 | Cs5g06870.1/Cs5g068 | 8.8  | 0 | 0    | 2 | MASCOT | T      |       |       |
| 2.92E-01 | 0 0 | Cs5g06870.1/Cs5g068 | 8.8  | 0 | 0    | 2 | MASCOT | T      | PLEX8 |       |
| 8.75E-02 | 0 0 | Cs5g06870.1/Cs5g068 | 8.8  | 0 | 0    | 2 | MASCOT | T      | PLEX8 |       |
| 2.68E-01 | 0 0 | Cs5g06870.1/Cs5g068 | 8.8  | 0 | 0    | 2 | MASCOT | T      | PLEX8 |       |
| 2.73E-01 | 0 0 | Cs5g06870.1/Cs5g068 | 8.8  | 0 | 0    | 2 | MASCOT | T      | PLEX8 |       |
| 7.18E-01 | 0 0 | Cs5g06870.1/Cs5g068 | 8.8  | 0 | 0    | 2 | MASCOT | T      |       |       |
| 3.17E-02 | 0 0 | Cs5g06870.1/Cs5g068 | 8.8  | 0 | 0    | 2 | MASCOT | T      | PLEX8 |       |
| 2.45E-01 | 0 0 | Cs5g06870.1/Cs5g068 | 8.8  | 0 | 0    | 2 | MASCOT | T      | PLEX8 |       |
| 2.60E-01 | 0 0 | Cs5g06870.1/Cs5g068 | 8.8  | 0 | 0    | 2 | MASCOT | T      | PLEX8 |       |
| 3.55E-01 | 0 0 | Cs5g06870.1/Cs5g068 | 8.8  | 0 | 0    | 2 | MASCOT | T      |       |       |
| 1.82E-01 | 0 0 | Cs5g06870.1/Cs5g068 | 8.8  | 0 | 0    | 2 | MASCOT | T      |       |       |
| 9.95E-02 | 0 0 | Cs5g06870.1/Cs5g068 | 4.03 | 0 | 0    | 2 | MASCOT | T      | PLEX8 |       |
| 7.47E-02 | 0 0 | Cs5g06870.1/Cs5g068 | 4.03 | 0 | 0    | 2 | MASCOT | T      | PLEX8 |       |
| 1.64E-01 | 0 0 | Cs5g06870.1/Cs5g068 | 4.03 | 0 | 0    | 2 | MASCOT | T      |       |       |
| 2.21E-01 | 0 0 | Cs5g06870.1/Cs5g068 | 4.03 | 0 | 0    | 2 | MASCOT | T      | PLEX8 |       |
| 7.88E-02 | 0 0 | Cs5g06870.1/Cs5g068 | 4.03 | 0 | 0    | 2 | MASCOT | T      | PLEX8 |       |
| 1.09E-01 | 0 0 | Cs5g06870.1/Cs5g068 | 4.03 | 0 | 0    | 2 | MASCOT | T      |       |       |
| 1.57E-01 | 0 0 | Cs5g06870.1/Cs5g068 | 4.03 | 0 | 0    | 2 | MASCOT | T      | PLEX8 |       |
| 2.93E-02 | 0 0 | Cs5g06870.1/Cs5g068 | 10   | 1 | 0    | 2 | MASCOT | T      | PLEX8 |       |
| 6.91E-02 | 0 0 | Cs5g06870.1/Cs5g068 | 9.75 | 0 | 15.9 | 0 | 2      | MASCOT | T     | PLEX8 |
| 4.78E-02 | 0 0 | Cs5g06870.1/Cs5g068 | 9.75 | 0 | 15.9 | 0 | 2      | MASCOT | T     | PLEX8 |
| 3.05E-02 | 0 0 | Cs5g06870.1/Cs5g068 | 9.75 | 0 | 0    | 2 | MASCOT | T      | PLEX8 |       |
| 5.68E-03 | 0 0 | Cs5g06870.1/Cs5g068 | 8.41 | 0 | 0    | 2 | MASCOT | T      | PLEX8 |       |
| 4.50E-01 | 0 0 | Cs5g06870.1/Cs5g068 | 5.5  | 0 | 0    | 2 | MASCOT | T      | PLEX8 |       |
| 1.41E-01 | 0 0 | Cs5g06870.1/Cs5g068 | 5.5  | 0 | 0    | 2 | MASCOT | T      | PLEX8 |       |
| 2.73E-01 | 0 0 | Cs5g06870.1/Cs5g068 | 8.72 | 0 | 0    | 2 | MASCOT | T      | PLEX8 |       |
| 4.79E-02 | 0 0 | Cs5g06870.1/Cs5g068 | 8.72 | 0 | 0    | 2 | MASCOT | T      | PLEX8 |       |
| 5.28E-02 | 0 0 | Cs5g06870.1/Cs5g068 | 8.72 | 0 | 0    | 2 | MASCOT | T      | PLEX8 |       |
| 3.03E-02 | 0 0 | Cs5g06870.1/Cs5g068 | 8.72 | 0 | 0    | 2 | MASCOT | T      | PLEX8 |       |
| 1.16E-02 | 0 0 | Cs5g06870.1/Cs5g068 | 8.72 | 0 | 0    | 2 | MASCOT | T      | PLEX8 |       |
| 1.05E-01 | 0 0 | Cs5g06870.1/Cs5g068 | 8.8  | 0 | 0    | 2 | MASCOT | T      | PLEX8 |       |
| 8.04E-03 | 0 0 | Cs5g06870.1/Cs5g068 | 8.8  | 0 | 0    | 2 | MASCOT | T      | PLEX8 |       |
| 4.42E-01 | 0 0 | Cs5g06870.1/Cs5g068 | 8.8  | 0 | 0    | 2 | MASCOT | T      | PLEX8 |       |
| 4.65E-03 | 0 0 | Cs5g06870.1/Cs5g068 | 8.8  | 0 | 0    | 2 | MASCOT | T      | PLEX8 |       |
| 1.11E-02 | 0 0 | Cs5g06870.1/Cs5g068 | 8.8  | 0 | 0    | 2 | MASCOT | T      | PLEX8 |       |
| 1.75E-04 | 0 0 | Cs5g06870.1/Cs5g068 | 8.8  | 0 | 0    | 2 | MASCOT | T      | PLEX8 |       |
| 9.56E-02 | 0 0 | Cs5g06870.1/Cs5g068 | 8.8  | 0 | 0    | 2 | MASCOT | T      | PLEX8 |       |
| 1.67E-04 | 0 0 | Cs5g06870.1/Cs5g068 | 8.8  | 0 | 0    | 2 | MASCOT | T      | PLEX8 |       |
| 4.37E-02 | 0 0 | Cs5g06870.1/Cs5g068 | 8.8  | 0 | 0    | 2 | MASCOT | T      | PLEX8 |       |
| 1.41E-02 | 0 0 | Cs5g06870.1/Cs5g068 | 8.8  | 0 | 0    | 2 | MASCOT | T      | PLEX8 |       |
| 3.10E-03 | 0 0 | Cs5g06870.1/Cs5g068 | 8.8  | 0 | 0    | 2 | MASCOT | T      | PLEX8 |       |
| 1.46E-02 | 0 0 | Cs5g06870.1/Cs5g068 | 8.8  | 0 | 0    | 2 | MASCOT | T      | PLEX8 |       |
| 3.00E-03 | 0 0 | Cs5g06870.1/Cs5g068 | 8.8  | 0 | 0    | 2 | MASCOT | T      | PLEX8 |       |
| 9.09E-02 | 0 0 | Cs5g06870.1/Cs5g068 | 8.8  | 0 | 0    | 2 | MASCOT | T      |       |       |
| 1.73E-01 | 0 0 | Cs2g24610.1/Cs5g068 | 5.55 | 0 | 0    | 2 | MASCOT | T      | PLEX8 |       |

|          |     |                     |      |   |      |   |        |        |       |       |
|----------|-----|---------------------|------|---|------|---|--------|--------|-------|-------|
| 9.45E-02 | 0 0 | Cs2g24610.1/Cs5g068 | 5.55 | 0 | 0    | 2 | MASCOT | T      | PLEX8 |       |
| 1.50E-01 | 0 0 | Cs2g24610.1/Cs5g068 | 5.55 | 0 | 0    | 2 | MASCOT | T      | PLEX8 |       |
| 1.37E-01 | 0 0 | Cs2g24610.1/Cs5g068 | 5.55 | 0 | 0    | 2 | MASCOT | T      | PLEX8 |       |
| 1.85E-01 | 0 0 | Cs2g24610.1/Cs5g068 | 5.55 | 0 | 0    | 2 | MASCOT | T      | PLEX8 |       |
| 1.14E-01 | 0 0 | Cs2g24610.1/Cs5g068 | 5.55 | 0 | 0    | 2 | MASCOT | T      | PLEX8 |       |
| 1.08E-01 | 0 0 | Cs2g24610.1/Cs5g068 | 5.55 | 0 | 0    | 2 | MASCOT | T      | PLEX8 |       |
| 1.09E-01 | 0 0 | Cs2g24610.1/Cs5g068 | 5.55 | 0 | 0    | 2 | MASCOT | T      | PLEX8 |       |
| 2.61E-01 | 0 0 | Cs2g24610.1/Cs5g068 | 5.55 | 0 | 0    | 2 | MASCOT | T      | PLEX8 |       |
| 1.31E-01 | 0 0 | Cs2g24610.1/Cs5g068 | 5.55 | 0 | 0    | 2 | MASCOT | T      | PLEX8 |       |
| 1.71E-02 | 0 0 | Cs2g24610.1/Cs5g068 | 5.55 | 0 | 0    | 2 | MASCOT | T      | PLEX8 |       |
| 1.01E-01 | 0 0 | Cs2g24610.1/Cs5g068 | 5.55 | 0 | 0    | 2 | MASCOT | T      | PLEX8 |       |
| 1.32E-01 | 0 0 | Cs2g24610.1/Cs5g068 | 5.55 | 0 | 0    | 2 | MASCOT | T      |       |       |
| 1.70E-01 | 0 0 | Cs2g24610.1/Cs5g068 | 5.55 | 0 | 0    | 2 | MASCOT | T      |       |       |
| 2.97E-01 | 0 0 | Cs5g06870.1/Cs5g068 | 6.71 | 0 | 15.9 | 0 | 2      | MASCOT | T     | PLEX8 |
| 1.72E-01 | 0 0 | Cs5g06870.1/Cs5g068 | 6.71 | 0 | 15.9 | 0 | 2      | MASCOT | T     | PLEX8 |
| 1.69E-01 | 0 0 | Cs5g06870.1/Cs5g068 | 6.71 | 0 | 15.9 | 0 | 2      | MASCOT | T     | PLEX8 |
| 4.54E-03 | 0 0 | Cs5g06870.1/Cs5g068 | 6.71 | 0 | 0    | 2 | MASCOT | T      |       |       |
| 1.00E-01 | 0 0 | Cs5g06870.1/Cs5g068 | 6.71 | 0 | 0    | 2 | MASCOT | T      | PLEX8 |       |
| 1.47E-01 | 0 0 | Cs5g06870.1/Cs5g068 | 6.71 | 0 | 0    | 2 | MASCOT | T      | PLEX8 |       |
| 1.55E-02 | 0 0 | Cs6g02690.1         | 4.14 | 0 | 0    | 2 | MASCOT | T      | PLEX8 |       |
| 7.64E-05 | 0 0 | Cs6g02690.1         | 4.14 | 0 | 0    | 2 | MASCOT | T      | PLEX8 |       |
| 9.83E-04 | 0 0 | Cs6g02690.1         | 4.14 | 0 | 0    | 2 | MASCOT | T      | PLEX8 |       |
| 6.94E-03 | 0 0 | Cs6g02690.1/Cs6g026 | 5.88 | 0 | 0    | 2 | MASCOT | T      | PLEX8 |       |
| 1.46E-01 | 0 0 | Cs6g02690.1/Cs6g026 | 5.88 | 0 | 0    | 2 | MASCOT | T      | PLEX8 |       |
| 2.75E-03 | 0 0 | Cs6g02690.1         | 4.37 | 0 | 15.9 | 0 | 2      | MASCOT | T     | PLEX8 |
| 2.37E-02 | 0 0 | Cs6g02690.1         | 4.37 | 0 | 15.9 | 0 | 2      | MASCOT | T     | PLEX8 |
| 1.05E-02 | 0 0 | Cs6g02690.1         | 4.37 | 0 | 15.9 | 0 | 2      | MASCOT | T     | PLEX8 |
| 3.82E-01 | 0 0 | Cs6g02690.1         | 4.37 | 0 | 0    | 2 | MASCOT | T      | PLEX8 |       |
| 1.82E-01 | 0 0 | Cs6g02690.1         | 4.37 | 0 | 0    | 2 | MASCOT | T      | PLEX8 |       |
| 1.53E-03 | 0 0 | Cs6g02690.1         | 4.37 | 0 | 0    | 2 | MASCOT | T      | PLEX8 |       |
| 1.83E-01 | 0 0 | Cs6g02690.1         | 4.37 | 0 | 0    | 2 | MASCOT | T      | PLEX8 |       |
| 5.20E-02 | 0 0 | Cs6g02690.1         | 4.37 | 0 | 0    | 2 | MASCOT | T      | PLEX8 |       |
| 1.49E-02 | 0 0 | Cs6g02690.1         | 4.37 | 0 | 0    | 2 | MASCOT | T      | PLEX8 |       |
| 1.44E-03 | 0 0 | Cs6g02690.1         | 4.37 | 0 | 0    | 2 | MASCOT | T      | PLEX8 |       |
| 3.22E-02 | 0 0 | Cs6g02690.1         | 4.37 | 0 | 0    | 2 | MASCOT | T      | PLEX8 |       |
| 1.35E-01 | 0 0 | Cs6g02690.1         | 4.37 | 0 | 0    | 2 | MASCOT | T      | PLEX8 |       |
| 2.56E-02 | 0 0 | Cs6g02690.1/Cs6g026 | 6.75 | 0 | 0    | 2 | MASCOT | T      | PLEX8 |       |
| 3.88E-02 | 0 0 | Cs6g02690.1/Cs6g026 | 6.75 | 0 | 0    | 2 | MASCOT | T      | PLEX8 |       |
| 5.86E-06 | 0 0 | Cs6g02690.1/Cs6g026 | 6.75 | 0 | 0    | 2 | MASCOT | T      | PLEX8 |       |
| 3.00E-05 | 0 0 | Cs6g02690.1/Cs6g026 | 6.75 | 0 | 0    | 2 | MASCOT | T      | PLEX8 |       |
| 8.06E-04 | 0 0 | Cs6g02690.1/Cs6g026 | 6.75 | 0 | 0    | 2 | MASCOT | T      | PLEX8 |       |
| 1.87E-01 | 0 0 | Cs6g02690.1/Cs6g026 | 6.75 | 0 | 0    | 2 | MASCOT | T      |       |       |
| 1.79E-01 | 0 0 | Cs6g02690.1/Cs6g026 | 6.75 | 0 | 0    | 2 | MASCOT | T      |       |       |
| 4.00E-02 | 0 0 | Cs6g02690.1/Cs6g026 | 6.75 | 0 | 0    | 2 | MASCOT | T      | PLEX8 |       |
| 2.14E-05 | 0 0 | Cs6g02690.1/Cs6g026 | 6.75 | 0 | 0    | 2 | MASCOT | T      | PLEX8 |       |
| 1.24E-02 | 0 0 | Cs6g02690.1/Cs6g026 | 6.75 | 0 | 0    | 2 | MASCOT | T      | PLEX8 |       |
| 5.28E-06 | 0 0 | Cs6g02690.1/Cs6g026 | 6.75 | 0 | 0    | 2 | MASCOT | T      | PLEX8 |       |
| 1.42E-02 | 0 0 | Cs6g02690.1/Cs6g026 | 6.75 | 0 | 0    | 2 | MASCOT | T      | PLEX8 |       |
| 4.38E-05 | 0 0 | Cs6g02690.1/Cs6g026 | 8.04 | 0 | 0    | 2 | MASCOT | T      | PLEX8 |       |
| 1.85E-01 | 0 0 | Cs6g02690.1/Cs6g026 | 6    | 0 | 0    | 2 | MASCOT | T      | PLEX8 |       |
| 1.43E-01 | 0 0 | Cs6g02690.1/Cs6g026 | 6    | 0 | 0    | 2 | MASCOT | T      | PLEX8 |       |

|          |     |                     |      |   |   |   |        |   |       |
|----------|-----|---------------------|------|---|---|---|--------|---|-------|
| 1.73E-01 | 0 0 | Cs6g02690.1/Cs6g026 | 6    | 0 | 0 | 2 | MASCOT | T | PLEX8 |
| 3.67E-03 | 0 0 | Cs6g02690.1/Cs6g026 | 6    | 0 | 0 | 2 | MASCOT | T | PLEX8 |
| 1.27E-01 | 0 0 | Cs6g02690.1/Cs6g026 | 6.74 | 0 | 0 | 2 | MASCOT | T | PLEX8 |
| 9.25E-02 | 0 0 | Cs6g02690.1/Cs6g026 | 6.74 | 0 | 0 | 2 | MASCOT | T | PLEX8 |
| 1.16E-01 | 0 0 | Cs6g02690.1/Cs6g026 | 8.8  | 0 | 0 | 2 | MASCOT | T | PLEX8 |
| 2.97E-04 | 0 0 | Cs6g02690.1/Cs6g026 | 8.8  | 0 | 0 | 2 | MASCOT | T | PLEX8 |
| 1.04E-02 | 0 0 | Cs6g02690.1/Cs6g026 | 8.8  | 0 | 0 | 2 | MASCOT | T | PLEX8 |
| 1.49E-01 | 0 0 | Cs6g02690.1/Cs6g026 | 8.8  | 0 | 0 | 2 | MASCOT | T | PLEX8 |
| 1.45E-01 | 0 0 | Cs6g02690.1/Cs6g026 | 8.8  | 0 | 0 | 2 | MASCOT | T | PLEX8 |
| 5.19E-02 | 0 0 | Cs6g02690.1/Cs6g026 | 8.8  | 0 | 0 | 2 | MASCOT | T | PLEX8 |
| 1.11E-01 | 0 0 | Cs6g02690.1/Cs6g026 | 8.8  | 0 | 0 | 2 | MASCOT | T | PLEX8 |
| 4.55E-01 | 0 0 | Cs6g02690.1/Cs6g026 | 8.8  | 0 | 0 | 2 | MASCOT | T | PLEX8 |
| 1.22E-04 | 0 0 | Cs6g02690.1         | 3.92 | 0 | 0 | 2 | MASCOT | T | PLEX8 |
| 8.82E-03 | 0 0 | Cs6g02690.1         | 3.92 | 0 | 0 | 2 | MASCOT | T | PLEX8 |
| 3.79E-06 | 0 0 | Cs6g02690.1         | 3.92 | 0 | 0 | 2 | MASCOT | T | PLEX8 |
| 2.13E-04 | 0 0 | Cs6g02690.1         | 3.92 | 0 | 0 | 2 | MASCOT | T | PLEX8 |
| 1.87E-01 | 0 0 | Cs6g02690.1         | 3.92 | 0 | 0 | 2 | MASCOT | T | PLEX8 |
| 2.89E-03 | 0 0 | Cs6g02690.1         | 3.92 | 0 | 0 | 2 | MASCOT | T | PLEX8 |
| 2.20E-02 | 0 0 | Cs6g02690.1         | 3.92 | 0 | 0 | 2 | MASCOT | T | PLEX8 |
| 2.24E-03 | 0 0 | Cs6g02690.1/Cs6g026 | 4.09 | 0 | 0 | 2 | MASCOT | T | PLEX8 |
| 2.11E-05 | 0 0 | Cs6g02690.1/Cs6g026 | 4.09 | 0 | 0 | 2 | MASCOT | T | PLEX8 |
| 3.06E-07 | 0 0 | Cs6g02690.1/Cs6g026 | 4.09 | 0 | 0 | 2 | MASCOT | T | PLEX8 |
| 1.94E-04 | 0 0 | Cs6g02690.1/Cs6g026 | 4.09 | 0 | 0 | 2 | MASCOT | T | PLEX8 |
| 3.25E-02 | 0 0 | Cs6g02690.1/Cs6g026 | 4.09 | 0 | 0 | 2 | MASCOT | T | PLEX8 |
| 2.69E-02 | 0 0 | Cs6g02690.1         | 5.84 | 0 | 0 | 2 | MASCOT | T | PLEX8 |
| 9.90E-03 | 0 0 | Cs6g02690.1         | 5.84 | 0 | 0 | 2 | MASCOT | T | PLEX8 |
| 4.26E-02 | 0 0 | Cs6g02690.1         | 5.84 | 0 | 0 | 2 | MASCOT | T | PLEX8 |
| 5.96E-02 | 0 0 | Cs6g02690.1         | 5.84 | 0 | 0 | 2 | MASCOT | T | PLEX8 |
| 9.48E-02 | 0 0 | Cs6g02690.1         | 5.84 | 0 | 0 | 2 | MASCOT | T | PLEX8 |
| 4.59E-01 | 0 0 | Cs6g02690.1         | 5.84 | 0 | 0 | 2 | MASCOT | T | PLEX8 |
| 6.25E-02 | 0 0 | Cs6g02690.1         | 5.84 | 0 | 0 | 2 | MASCOT | T | PLEX8 |
| 9.41E-02 | 0 0 | Cs6g02690.1/Cs6g026 | 6.72 | 0 | 0 | 2 | MASCOT | T | PLEX8 |
| 7.83E-02 | 0 0 | Cs6g02690.1/Cs6g026 | 6.72 | 0 | 0 | 2 | MASCOT | T | PLEX8 |
| 2.80E-02 | 0 0 | Cs2g24610.1/Cs5g068 | 8.8  | 0 | 0 | 2 | MASCOT | T | PLEX8 |
| 3.49E-02 | 0 0 | Cs2g24610.1/Cs5g068 | 8.8  | 0 | 0 | 2 | MASCOT | T | PLEX8 |
| 1.09E-01 | 0 0 | Cs2g24610.1/Cs5g068 | 8.8  | 0 | 0 | 2 | MASCOT | T | PLEX8 |
| 1.70E-01 | 0 0 | Cs5g06870.1/Cs5g068 | 8.8  | 0 | 0 | 2 | MASCOT | T | PLEX8 |
| 8.11E-01 | 0 0 | Cs5g06870.1/Cs5g068 | 8.8  | 0 | 0 | 2 | MASCOT | T | PLEX8 |
| 2.33E-01 | 0 0 | Cs5g06870.1/Cs5g068 | 8.8  | 0 | 0 | 2 | MASCOT | T | PLEX8 |
| 4.71E-01 | 0 0 | Cs5g06870.1/Cs5g068 | 8.8  | 0 | 0 | 2 | MASCOT | T | PLEX8 |
| 9.13E-02 | 0 0 | Cs5g06870.1/Cs5g068 | 8.8  | 0 | 0 | 2 | MASCOT | T | PLEX8 |
| 3.91E-01 | 0 0 | Cs5g06870.1/Cs5g068 | 8.8  | 0 | 0 | 2 | MASCOT | T | PLEX8 |
| 2.92E-01 | 0 0 | Cs5g06870.1/Cs5g068 | 8.8  | 0 | 0 | 2 | MASCOT | T | PLEX8 |
| 8.75E-02 | 0 0 | Cs5g06870.1/Cs5g068 | 8.8  | 0 | 0 | 2 | MASCOT | T | PLEX8 |
| 2.68E-01 | 0 0 | Cs5g06870.1/Cs5g068 | 8.8  | 0 | 0 | 2 | MASCOT | T | PLEX8 |
| 2.73E-01 | 0 0 | Cs5g06870.1/Cs5g068 | 8.8  | 0 | 0 | 2 | MASCOT | T | PLEX8 |
| 7.18E-01 | 0 0 | Cs5g06870.1/Cs5g068 | 8.8  | 0 | 0 | 2 | MASCOT | T | PLEX8 |
| 3.17E-02 | 0 0 | Cs5g06870.1/Cs5g068 | 8.8  | 0 | 0 | 2 | MASCOT | T | PLEX8 |
| 2.45E-01 | 0 0 | Cs5g06870.1/Cs5g068 | 8.8  | 0 | 0 | 2 | MASCOT | T | PLEX8 |
| 2.60E-01 | 0 0 | Cs5g06870.1/Cs5g068 | 8.8  | 0 | 0 | 2 | MASCOT | T | PLEX8 |
| 3.55E-01 | 0 0 | Cs5g06870.1/Cs5g068 | 8.8  | 0 | 0 | 2 | MASCOT | T | PLEX8 |



|          |     |                     |      |   |      |   |        |        |       |       |
|----------|-----|---------------------|------|---|------|---|--------|--------|-------|-------|
| 1.82E-01 | 0 0 | Cs5g06870.1/Cs5g068 | 8.8  | 0 | 0    | 2 | MASCOT | T      |       |       |
| 2.72E-03 | 0 0 | Cs7g10220.1/Cs7g102 | 4.37 | 0 | 0    | 2 | MASCOT | T      | PLEX8 |       |
| 2.95E-02 | 0 0 | Cs7g10220.1/Cs7g102 | 4.25 | 0 | 0    | 2 | MASCOT | T      | PLEX8 |       |
| 2.73E-03 | 0 0 | Cs7g10220.1/Cs7g102 | 4.68 | 0 | 0    | 2 | MASCOT | T      | PLEX8 |       |
| 1.35E-01 | 0 0 | Cs2g24610.1/Cs7g102 | 5.5  | 0 | 0    | 2 | MASCOT | T      | PLEX8 |       |
| 8.17E-02 | 0 0 | Cs2g24610.1/Cs7g102 | 5.5  | 0 | 0    | 2 | MASCOT | T      | PLEX8 |       |
| 5.28E-02 | 0 0 | Cs5g06870.1/Cs5g068 | 8.72 | 0 | 0    | 2 | MASCOT | T      | PLEX8 |       |
| 3.03E-02 | 0 0 | Cs5g06870.1/Cs5g068 | 8.72 | 0 | 0    | 2 | MASCOT | T      | PLEX8 |       |
| 1.16E-02 | 0 0 | Cs5g06870.1/Cs5g068 | 8.72 | 0 | 0    | 2 | MASCOT | T      | PLEX8 |       |
| 2.36E-01 | 0 0 | Cs2g24610.1/Cs7g102 | 8.72 | 0 | 0    | 2 | MASCOT | T      | PLEX8 |       |
| 1.53E-01 | 0 0 | Cs2g24610.1/Cs7g102 | 8.72 | 0 | 0    | 2 | MASCOT | T      | PLEX8 |       |
| 1.75E-01 | 0 0 | Cs2g24610.1/Cs7g102 | 8.72 | 0 | 0    | 2 | MASCOT | T      | PLEX8 |       |
| 1.05E-01 | 0 0 | Cs5g06870.1/Cs5g068 | 8.8  | 0 | 0    | 2 | MASCOT | T      | PLEX8 |       |
| 8.04E-03 | 0 0 | Cs5g06870.1/Cs5g068 | 8.8  | 0 | 0    | 2 | MASCOT | T      | PLEX8 |       |
| 4.42E-01 | 0 0 | Cs5g06870.1/Cs5g068 | 8.8  | 0 | 0    | 2 | MASCOT | T      | PLEX8 |       |
| 4.65E-03 | 0 0 | Cs5g06870.1/Cs5g068 | 8.8  | 0 | 0    | 2 | MASCOT | T      | PLEX8 |       |
| 1.11E-02 | 0 0 | Cs5g06870.1/Cs5g068 | 8.8  | 0 | 0    | 2 | MASCOT | T      | PLEX8 |       |
| 1.75E-04 | 0 0 | Cs5g06870.1/Cs5g068 | 8.8  | 0 | 0    | 2 | MASCOT | T      | PLEX8 |       |
| 9.56E-02 | 0 0 | Cs5g06870.1/Cs5g068 | 8.8  | 0 | 0    | 2 | MASCOT | T      | PLEX8 |       |
| 1.67E-04 | 0 0 | Cs5g06870.1/Cs5g068 | 8.8  | 0 | 0    | 2 | MASCOT | T      | PLEX8 |       |
| 4.37E-02 | 0 0 | Cs5g06870.1/Cs5g068 | 8.8  | 0 | 0    | 2 | MASCOT | T      | PLEX8 |       |
| 1.41E-02 | 0 0 | Cs5g06870.1/Cs5g068 | 8.8  | 0 | 0    | 2 | MASCOT | T      | PLEX8 |       |
| 3.10E-03 | 0 0 | Cs5g06870.1/Cs5g068 | 8.8  | 0 | 0    | 2 | MASCOT | T      | PLEX8 |       |
| 1.46E-02 | 0 0 | Cs5g06870.1/Cs5g068 | 8.8  | 0 | 0    | 2 | MASCOT | T      | PLEX8 |       |
| 3.00E-03 | 0 0 | Cs5g06870.1/Cs5g068 | 8.8  | 0 | 0    | 2 | MASCOT | T      | PLEX8 |       |
| 9.09E-02 | 0 0 | Cs5g06870.1/Cs5g068 | 8.8  | 0 | 0    | 2 | MASCOT | T      |       |       |
| 4.14E-01 | 0 0 | Cs7g10220.1/Cs7g102 | 4.53 | 0 | 0    | 2 | MASCOT | T      | PLEX8 |       |
| 1.15E-01 | 0 0 | Cs7g10220.1/Cs7g102 | 4.53 | 0 | 0    | 2 | MASCOT | T      | PLEX8 |       |
| 7.76E-02 | 0 0 | Cs7g10220.1/Cs7g102 | 4.53 | 0 | 0    | 2 | MASCOT | T      | PLEX8 |       |
| 1.73E-01 | 0 0 | Cs2g24610.1/Cs5g068 | 5.55 | 0 | 0    | 2 | MASCOT | T      | PLEX8 |       |
| 9.45E-02 | 0 0 | Cs2g24610.1/Cs5g068 | 5.55 | 0 | 0    | 2 | MASCOT | T      | PLEX8 |       |
| 1.50E-01 | 0 0 | Cs2g24610.1/Cs5g068 | 5.55 | 0 | 0    | 2 | MASCOT | T      | PLEX8 |       |
| 1.37E-01 | 0 0 | Cs2g24610.1/Cs5g068 | 5.55 | 0 | 0    | 2 | MASCOT | T      | PLEX8 |       |
| 1.85E-01 | 0 0 | Cs2g24610.1/Cs5g068 | 5.55 | 0 | 0    | 2 | MASCOT | T      | PLEX8 |       |
| 1.14E-01 | 0 0 | Cs2g24610.1/Cs5g068 | 5.55 | 0 | 0    | 2 | MASCOT | T      | PLEX8 |       |
| 1.08E-01 | 0 0 | Cs2g24610.1/Cs5g068 | 5.55 | 0 | 0    | 2 | MASCOT | T      | PLEX8 |       |
| 1.09E-01 | 0 0 | Cs2g24610.1/Cs5g068 | 5.55 | 0 | 0    | 2 | MASCOT | T      | PLEX8 |       |
| 2.61E-01 | 0 0 | Cs2g24610.1/Cs5g068 | 5.55 | 0 | 0    | 2 | MASCOT | T      | PLEX8 |       |
| 1.31E-01 | 0 0 | Cs2g24610.1/Cs5g068 | 5.55 | 0 | 0    | 2 | MASCOT | T      | PLEX8 |       |
| 1.71E-02 | 0 0 | Cs2g24610.1/Cs5g068 | 5.55 | 0 | 0    | 2 | MASCOT | T      | PLEX8 |       |
| 1.01E-01 | 0 0 | Cs2g24610.1/Cs5g068 | 5.55 | 0 | 0    | 2 | MASCOT | T      | PLEX8 |       |
| 1.32E-01 | 0 0 | Cs2g24610.1/Cs5g068 | 5.55 | 0 | 0    | 2 | MASCOT | T      |       |       |
| 1.70E-01 | 0 0 | Cs2g24610.1/Cs5g068 | 5.55 | 0 | 0    | 2 | MASCOT | T      |       |       |
| 1.04E-01 | 0 0 | Cs7g10220.1/Cs7g102 | 6.71 | 0 | 15.9 | 0 | 2      | MASCOT | T     | PLEX8 |
| 9.97E-02 | 0 0 | Cs7g10220.1/Cs7g102 | 6.71 | 0 | 15.9 | 0 | 2      | MASCOT | T     | PLEX8 |
| 7.05E-03 | 0 0 | Cs7g10220.1/Cs7g102 | 6.71 | 0 | 0    | 2 | MASCOT | T      | PLEX8 |       |
| 2.02E-01 | 0 0 | Cs1g20220.1/Cs1g202 | 5.84 | 0 | 0    | 2 | MASCOT | T      |       |       |
| 9.00E-04 | 0 0 | Cs6g18830.1/Cs6g188 | 4.53 | 0 | 0    | 2 | MASCOT | T      | PLEX8 |       |
| 9.96E-03 | 0 0 | Cs6g18830.1/Cs6g188 | 4.53 | 0 | 0    | 2 | MASCOT | T      | PLEX8 |       |
| 4.59E-01 | 0 0 | Cs6g18830.1/Cs6g188 | 4.53 | 0 | 0    | 2 | MASCOT | T      | PLEX8 |       |
| 1.93E-04 | 0 0 | Cs6g18830.1/Cs6g188 | 4.53 | 0 | 0    | 2 | MASCOT | T      | PLEX8 |       |

|          |     |                     |      |   |      |   |        |        |       |       |
|----------|-----|---------------------|------|---|------|---|--------|--------|-------|-------|
| 9.96E-03 | 0 0 | Cs6g18830.1/Cs6g188 | 4.53 | 0 | 0    | 2 | MASCOT | T      | PLEX8 |       |
| 2.42E-01 | 0 0 | Cs6g18830.1/Cs6g188 | 4.53 | 0 | 0    | 2 | MASCOT | T      | PLEX8 |       |
| 2.63E-01 | 0 0 | Cs6g18830.1/Cs6g188 | 4.53 | 0 | 0    | 2 | MASCOT | T      | PLEX8 |       |
| 1.53E-01 | 0 0 | Cs1g20220.1/Cs1g202 | 4.53 | 0 | 0    | 2 | MASCOT | T      | PLEX8 |       |
| 9.50E-04 | 0 0 | Cs6g18830.1/Cs6g188 | 5.3  | 0 | 0    | 2 | MASCOT | T      | PLEX8 |       |
| 1.32E-05 | 0 0 | Cs6g18830.1/Cs6g188 | 5.3  | 0 | 0    | 2 | MASCOT | T      | PLEX8 |       |
| 3.25E-01 | 0 0 | Cs6g18830.1/Cs6g188 | 5.3  | 0 | 0    | 2 | MASCOT | T      | PLEX8 |       |
| 3.37E-05 | 0 0 | Cs6g18830.1/Cs6g188 | 5.3  | 0 | 0    | 2 | MASCOT | T      | PLEX8 |       |
| 4.87E-06 | 0 0 | Cs6g18830.1/Cs6g188 | 5.3  | 0 | 0    | 2 | MASCOT | T      |       |       |
| 2.79E-02 | 0 0 | Cs6g18830.1/Cs6g188 | 5.3  | 0 | 0    | 2 | MASCOT | T      | PLEX8 |       |
| 1.74E-03 | 0 0 | Cs6g18830.1/Cs6g188 | 5.3  | 0 | 0    | 2 | MASCOT | T      | PLEX8 |       |
| 8.25E-02 | 0 0 | Cs6g18830.1/Cs6g188 | 5.3  | 0 | 0    | 2 | MASCOT | T      | PLEX8 |       |
| 3.50E-02 | 0 0 | Cs6g18830.1/Cs6g188 | 5.3  | 0 | 0    | 2 | MASCOT | T      |       |       |
| 2.95E-04 | 0 0 | Cs6g18830.1/Cs6g188 | 5.3  | 0 | 0    | 2 | MASCOT | T      |       |       |
| 3.27E-04 | 0 0 | Cs6g18830.1/Cs6g188 | 5.3  | 0 | 0    | 2 | MASCOT | T      |       |       |
| 4.64E-04 | 0 0 | Cs6g18830.1/Cs6g188 | 5.3  | 0 | 0    | 2 | MASCOT | T      |       |       |
| 4.82E-02 | 0 0 | Cs3g17990.1/Cs6g036 | 4.53 | 0 | 0    | 2 | MASCOT | T      | PLEX8 |       |
| 1.30E-02 | 0 0 | Cs3g17990.1/Cs6g036 | 4.53 | 0 | 0    | 2 | MASCOT | T      | PLEX8 |       |
| 1.55E-01 | 0 0 | Cs3g17990.1/Cs6g036 | 4.53 | 0 | 0    | 2 | MASCOT | T      | PLEX8 |       |
| 3.80E-02 | 0 0 | Cs3g17990.1/Cs6g036 | 4.53 | 0 | 0    | 2 | MASCOT | T      | PLEX8 |       |
| 5.02E-03 | 0 0 | Cs6g18830.1/Cs6g188 | 5.32 | 0 | 0    | 2 | MASCOT | T      | PLEX8 |       |
| 5.18E-03 | 0 0 | Cs6g18830.1/Cs6g188 | 5.32 | 0 | 0    | 2 | MASCOT | T      | PLEX8 |       |
| 1.50E-01 | 0 0 | Cs1g20220.1/Cs1g202 | 6    | 0 | 0    | 2 | MASCOT | T      | PLEX8 |       |
| 4.76E-02 | 0 0 | Cs1g20220.1/Cs1g202 | 6    | 0 | 0    | 2 | MASCOT | T      | PLEX8 |       |
| 1.01E-01 | 0 0 | Cs1g20220.1/Cs1g202 | 6    | 0 | 0    | 2 | MASCOT | T      | PLEX8 |       |
| 1.31E-02 | 0 0 | Cs1g20220.1/Cs1g202 | 6    | 0 | 0    | 2 | MASCOT | T      | PLEX8 |       |
| 1.41E-01 | 0 0 | Cs1g20220.1/Cs1g202 | 6    | 0 | 0    | 2 | MASCOT | T      | PLEX8 |       |
| 5.84E-01 | 0 0 | Cs1g20220.1/Cs1g202 | 6    | 0 | 0    | 2 | MASCOT | T      | PLEX8 |       |
| 4.57E-02 | 0 0 | Cs6g18830.1/Cs6g188 | 6.14 | 1 | 0    | 2 | MASCOT | T      | PLEX8 |       |
| 2.16E-01 | 0 0 | Cs1g20220.1/Cs1g202 | 8.59 | 0 | 0    | 2 | MASCOT | T      | PLEX8 |       |
| 7.83E-03 | 0 0 | Cs1g20220.1/Cs1g202 | 8.59 | 0 | 0    | 2 | MASCOT | T      | PLEX8 |       |
| 2.11E-02 | 0 0 | Cs1g20220.1/Cs1g202 | 8.59 | 0 | 0    | 2 | MASCOT | T      | PLEX8 |       |
| 4.75E-02 | 0 0 | Cs1g20220.1/Cs1g202 | 8.59 | 0 | 0    | 2 | MASCOT | T      | PLEX8 |       |
| 2.21E-01 | 0 0 | Cs1g20220.1/Cs1g202 | 8.59 | 0 | 0    | 2 | MASCOT | T      | PLEX8 |       |
| 4.29E-03 | 0 0 | Cs1g20220.1/Cs1g202 | 8.59 | 0 | 0    | 2 | MASCOT | T      | PLEX8 |       |
| 1.78E-02 | 0 0 | Cs1g20220.1/Cs1g202 | 8.59 | 0 | 0    | 2 | MASCOT | T      | PLEX8 |       |
| 1.09E-01 | 0 0 | Cs1g20220.1/Cs1g202 | 8.59 | 0 | 0    | 2 | MASCOT | T      | PLEX8 |       |
| 4.07E-02 | 0 0 | Cs1g20220.1/Cs1g202 | 8.59 | 0 | 0    | 2 | MASCOT | T      | PLEX8 |       |
| 5.17E-02 | 0 0 | Cs1g20220.1/Cs1g202 | 8.59 | 0 | 0    | 2 | MASCOT | T      |       |       |
| 5.08E-02 | 0 0 | Cs1g20220.1/Cs1g202 | 8.59 | 0 | 0    | 2 | MASCOT | T      |       |       |
| 1.08E-01 | 0 0 | Cs3g17990.1/Cs6g188 | 4.09 | 0 | 15.9 | 0 | 2      | MASCOT | T     | PLEX8 |
| 1.11E-04 | 0 0 | Cs3g17990.1/Cs6g188 | 4.09 | 0 | 0    | 2 | MASCOT | T      | PLEX8 |       |
| 9.81E-02 | 0 0 | Cs3g17990.1/Cs6g188 | 4.09 | 0 | 0    | 2 | MASCOT | T      | PLEX8 |       |
| 2.10E-01 | 0 0 | Cs1g20220.1/Cs1g202 | 6    | 0 | 0    | 2 | MASCOT | T      |       |       |
| 3.14E-01 | 0 0 | Cs1g20220.1/Cs1g202 | 6    | 0 | 0    | 2 | MASCOT | T      |       |       |
| 2.52E-01 | 0 0 | Cs1g20220.1/Cs1g202 | 6    | 0 | 0    | 2 | MASCOT | T      |       |       |
| 2.89E-01 | 0 0 | Cs8g16990.1/Cs8g169 | 5.84 | 0 | 0    | 2 | MASCOT | T      | PLEX8 |       |
| 2.38E-01 | 0 0 | Cs7g27470.1/Cs8g169 | 6.1  | 0 | 0    | 2 | MASCOT | T      | PLEX8 |       |
| 6.51E-02 | 0 0 | Cs7g27470.1/Cs8g169 | 6.1  | 0 | 0    | 2 | MASCOT | T      | PLEX8 |       |
| 2.81E-01 | 0 0 | Cs7g27470.1/Cs8g169 | 6.1  | 0 | 0    | 2 | MASCOT | T      | PLEX8 |       |
| 6.47E-02 | 0 0 | Cs7g27470.1/Cs8g169 | 6.1  | 0 | 0    | 2 | MASCOT | T      | PLEX8 |       |

|          |     |                     |      |   |      |   |        |        |       |       |
|----------|-----|---------------------|------|---|------|---|--------|--------|-------|-------|
| 1.90E-01 | 0 0 | Cs7g27470.1/Cs8g169 | 6.1  | 0 | 0    | 2 | MASCOT | T      |       |       |
| 2.78E-02 | 0 0 | Cs7g27470.1/Cs8g169 | 9.75 | 0 | 0    | 2 | MASCOT | T      |       |       |
| 8.10E-04 | 0 0 | Cs7g27470.1/Cs8g169 | 9.75 | 0 | 0    | 2 | MASCOT | T      |       |       |
| 2.86E-02 | 0 0 | Cs7g27470.1/Cs8g169 | 9.75 | 0 | 0    | 2 | MASCOT | T      |       |       |
| 6.37E-02 | 0 0 | Cs8g16990.1/Cs8g169 | 5.82 | 0 | 15.9 | 0 | 2      | MASCOT | T     | PLEX8 |
| 1.29E-02 | 0 0 | Cs8g16990.1/Cs8g169 | 5.82 | 0 | 15.9 | 0 | 2      | MASCOT | T     | PLEX8 |
| 3.85E-01 | 0 0 | Cs8g16990.1/Cs8g169 | 5.82 | 0 | 15.9 | 0 | 2      | MASCOT | T     | PLEX8 |
| 2.08E-01 | 0 0 | Cs8g16990.1/Cs8g169 | 5.82 | 0 | 15.9 | 0 | 2      | MASCOT | T     |       |
| 2.12E-01 | 0 0 | Cs8g16990.1/Cs8g169 | 5.82 | 0 | 15.9 | 0 | 2      | MASCOT | T     | PLEX8 |
| 1.71E-01 | 0 0 | Cs8g16990.1/Cs8g169 | 5.82 | 0 | 0    | 2 | MASCOT | T      |       |       |
| 2.17E-02 | 0 0 | Cs7g27470.1/Cs8g169 | 7.96 | 0 | 0    | 2 | MASCOT | T      | PLEX8 |       |
| 6.15E-02 | 0 0 | Cs7g27470.1/Cs8g169 | 8.33 | 0 | 0    | 2 | MASCOT | T      |       |       |
| 1.19E-01 | 0 0 | Cs7g27470.1/Cs8g169 | 8.33 | 0 | 0    | 2 | MASCOT | T      |       |       |
| 6.21E-04 | 0 0 | Cs8g16990.1/Cs8g169 | 6.61 | 0 | 0    | 2 | MASCOT | T      | PLEX8 |       |
| 1.35E-01 | 0 0 | Cs7g27470.1/Cs8g169 | 6.73 | 0 | 0    | 2 | MASCOT | T      | PLEX8 |       |
| 2.83E-03 | 0 0 | Cs7g27470.1/Cs8g169 | 6.73 | 0 | 0    | 2 | MASCOT | T      | PLEX8 |       |
| 7.14E-03 | 0 0 | Cs7g27470.1/Cs8g169 | 6.73 | 0 | 0    | 2 | MASCOT | T      | PLEX8 |       |
| 7.81E-03 | 0 0 | Cs7g27470.1/Cs8g169 | 6.73 | 0 | 0    | 2 | MASCOT | T      | PLEX8 |       |
| 6.06E-03 | 0 0 | Cs7g27470.1/Cs8g169 | 6.73 | 0 | 0    | 2 | MASCOT | T      | PLEX8 |       |
| 2.45E-03 | 0 0 | Cs7g27470.1/Cs8g169 | 6.73 | 0 | 0    | 2 | MASCOT | T      |       |       |
| 3.60E-03 | 0 0 | Cs7g27470.1/Cs8g169 | 6.73 | 0 | 0    | 2 | MASCOT | T      |       |       |
| 1.01E-01 | 0 0 | Cs7g27470.1/Cs8g169 | 6.73 | 0 | 0    | 2 | MASCOT | T      |       |       |
| 4.62E-01 | 0 0 | Cs8g16990.1/Cs8g169 | 8.75 | 0 | 0    | 2 | MASCOT | T      | PLEX8 |       |
| 1.55E-01 | 0 0 | Cs8g16990.1/Cs8g169 | 8.75 | 0 | 0    | 2 | MASCOT | T      | PLEX8 |       |
| 5.43E-02 | 0 0 | Cs8g16990.1/Cs8g169 | 8.75 | 0 | 0    | 2 | MASCOT | T      | PLEX8 |       |
| 1.01E-01 | 0 0 | Cs7g27470.1/Cs8g169 | 5.84 | 0 | 0    | 2 | MASCOT | T      | PLEX8 |       |
| 1.09E-01 | 0 0 | Cs7g27470.1/Cs8g169 | 5.84 | 0 | 0    | 2 | MASCOT | T      | PLEX8 |       |
| 2.40E-01 | 0 0 | Cs7g27470.1/Cs8g169 | 5.84 | 0 | 0    | 2 | MASCOT | T      | PLEX8 |       |
| 1.53E-01 | 0 0 | Cs7g27470.1/Cs8g169 | 5.84 | 0 | 0    | 2 | MASCOT | T      | PLEX8 |       |
| 1.99E-01 | 0 0 | Cs7g27470.1/Cs8g169 | 5.84 | 0 | 0    | 2 | MASCOT | T      | PLEX8 |       |
| 1.79E-01 | 0 0 | Cs7g27470.1/Cs8g169 | 5.84 | 0 | 0    | 2 | MASCOT | T      | PLEX8 |       |
| 1.62E-01 | 0 0 | Cs7g27470.1/Cs8g169 | 5.84 | 0 | 0    | 2 | MASCOT | T      | PLEX8 |       |
| 6.18E-04 | 0 0 | Cs7g27470.1/Cs8g170 | 8.75 | 0 | 0    | 2 | MASCOT | T      | PLEX8 |       |
| 6.06E-03 | 0 0 | Cs7g27470.1/Cs8g170 | 8.75 | 0 | 0    | 2 | MASCOT | T      | PLEX8 |       |
| 3.94E-03 | 0 0 | Cs7g27470.1/Cs8g170 | 8.75 | 0 | 0    | 2 | MASCOT | T      | PLEX8 |       |
| 2.38E-01 | 0 0 | Cs7g27470.1/Cs8g170 | 8.75 | 0 | 0    | 2 | MASCOT | T      | PLEX8 |       |
| 3.83E-02 | 0 0 | Cs7g27470.1/Cs8g170 | 8.75 | 0 | 0    | 2 | MASCOT | T      | PLEX8 |       |
| 5.73E-03 | 0 0 | Cs7g27470.1/Cs8g170 | 8.75 | 0 | 0    | 2 | MASCOT | T      | PLEX8 |       |
| 7.04E-02 | 0 0 | Cs7g27470.1/Cs8g169 | 5.55 | 0 | 0    | 2 | MASCOT | T      | PLEX8 |       |
| 4.33E-03 | 0 0 | Cs7g27470.1/Cs8g169 | 5.55 | 0 | 0    | 2 | MASCOT | T      | PLEX8 |       |
| 7.02E-03 | 0 0 | Cs7g27470.1/Cs8g169 | 5.55 | 0 | 0    | 2 | MASCOT | T      | PLEX8 |       |
| 2.14E-01 | 0 0 | Cs7g27470.1/Cs8g169 | 5.55 | 0 | 0    | 2 | MASCOT | T      | PLEX8 |       |
| 2.14E-04 | 0 0 | orange1.1t02000.1   | 6.05 | 0 | 0    | 2 | MASCOT | T      | PLEX8 |       |
| 6.03E-02 | 0 0 | orange1.1t02000.1   | 6.05 | 0 | 0    | 2 | MASCOT | T      | PLEX8 |       |
| 2.56E-02 | 0 0 | orange1.1t02000.1   | 6.05 | 0 | 0    | 2 | MASCOT | T      | PLEX8 |       |
| 6.94E-03 | 0 0 | orange1.1t02000.1   | 6.05 | 0 | 0    | 2 | MASCOT | T      | PLEX8 |       |
| 9.74E-02 | 0 0 | orange1.1t02000.1   | 6.05 | 0 | 0    | 2 | MASCOT | T      | PLEX8 |       |
| 1.47E-03 | 0 0 | orange1.1t02000.1   | 6.05 | 0 | 0    | 2 | MASCOT | T      | PLEX8 |       |
| 2.74E-03 | 0 0 | orange1.1t02000.1   | 6.05 | 0 | 0    | 2 | MASCOT | T      | PLEX8 |       |
| 1.40E-01 | 0 0 | orange1.1t02000.1   | 6.05 | 0 | 0    | 2 | MASCOT | T      | PLEX8 |       |
| 2.31E-02 | 0 0 | orange1.1t02000.1   | 8.8  | 0 | 0    | 2 | MASCOT | T      | PLEX8 |       |

|          |     |                     |      |   |      |   |        |        |       |       |
|----------|-----|---------------------|------|---|------|---|--------|--------|-------|-------|
| 6.69E-03 | 0 0 | Cs3g18030.1/Cs3g180 | 8.75 | 0 | 0    | 2 | MASCOT | T      | PLEX8 |       |
| 5.35E-03 | 0 0 | Cs3g18030.1/Cs3g180 | 8.75 | 0 | 0    | 2 | MASCOT | T      | PLEX8 |       |
| 1.65E-03 | 0 0 | Cs3g18030.1/Cs3g180 | 8.75 | 0 | 0    | 2 | MASCOT | T      | PLEX8 |       |
| 1.05E-01 | 0 0 | Cs3g18030.1/Cs3g180 | 8.75 | 0 | 0    | 2 | MASCOT | T      | PLEX8 |       |
| 2.52E-02 | 0 0 | Cs3g18030.1/Cs3g180 | 8.75 | 0 | 0    | 2 | MASCOT | T      |       |       |
| 5.18E-02 | 0 0 | Cs1g19830.1/Cs1g198 | 9.76 | 0 | 0    | 2 | MASCOT | T      | PLEX8 |       |
| 1.43E-01 | 0 0 | Cs1g19830.1/Cs1g198 | 9.76 | 0 | 0    | 2 | MASCOT | T      | PLEX8 |       |
| 2.17E-01 | 0 0 | Cs1g19830.1/Cs1g198 | 9.76 | 0 | 0    | 2 | MASCOT | T      |       |       |
| 6.67E-02 | 0 0 | Cs3g18030.1/Cs3g180 | 8.79 | 0 | 15.9 | 0 | 2      | MASCOT | T     | PLEX8 |
| 1.60E-04 | 0 0 | Cs3g18030.1/Cs3g180 | 8.79 | 0 | 0    | 2 | MASCOT | T      | PLEX8 |       |
| 7.73E-03 | 0 0 | Cs3g18030.1/Cs3g180 | 8.79 | 0 | 0    | 2 | MASCOT | T      | PLEX8 |       |
| 6.89E-03 | 0 0 | orange1.1t02000.1   | 8.79 | 0 | 0    | 2 | MASCOT | T      | PLEX8 |       |
| 2.50E-01 | 0 0 | orange1.1t02000.1   | 8.79 | 0 | 0    | 2 | MASCOT | T      |       |       |
| 9.13E-03 | 0 0 | orange1.1t02000.1   | 8.79 | 0 | 0    | 2 | MASCOT | T      |       |       |
| 3.35E-02 | 0 0 | orange1.1t02000.1   | 6.74 | 0 | 0    | 2 | MASCOT | T      | PLEX8 |       |
| 2.21E-02 | 0 0 | orange1.1t02000.1   | 6.74 | 0 | 0    | 2 | MASCOT | T      | PLEX8 |       |
| 7.54E-03 | 0 0 | orange1.1t02000.1   | 8.75 | 0 | 0    | 2 | MASCOT | T      | PLEX8 |       |
| 9.80E-03 | 0 0 | orange1.1t02000.1   | 8.75 | 0 | 0    | 2 | MASCOT | T      | PLEX8 |       |
| 5.25E-03 | 0 0 | orange1.1t02000.1   | 8.75 | 0 | 0    | 2 | MASCOT | T      | PLEX8 |       |
| 1.91E-03 | 0 0 | orange1.1t02000.1   | 8.75 | 0 | 0    | 2 | MASCOT | T      | PLEX8 |       |
| 1.16E-02 | 0 0 | orange1.1t02000.1   | 8.75 | 0 | 0    | 2 | MASCOT | T      | PLEX8 |       |
| 6.64E-03 | 0 0 | orange1.1t02000.1   | 8.75 | 0 | 0    | 2 | MASCOT | T      |       |       |
| 8.62E-03 | 0 0 | orange1.1t02000.1   | 8.75 | 0 | 0    | 2 | MASCOT | T      |       |       |
| 8.51E-03 | 0 0 | orange1.1t02000.1   | 8.75 | 0 | 0    | 2 | MASCOT | T      | PLEX8 |       |
| 6.96E-02 | 0 0 | orange1.1t02000.1   | 6.74 | 0 | 15.9 | 0 | 2      | MASCOT | T     | PLEX8 |
| 3.73E-02 | 0 0 | orange1.1t02000.1   | 6.74 | 0 | 0    | 2 | MASCOT | T      | PLEX8 |       |
| 1.48E-01 | 0 0 | orange1.1t02000.1   | 6.74 | 0 | 0    | 2 | MASCOT | T      |       |       |
| 4.82E-03 | 0 0 | Cs1g19830.1/Cs1g198 | 5.32 | 0 | 0    | 2 | MASCOT | T      | PLEX8 |       |
| 1.09E-03 | 0 0 | Cs1g19830.1/Cs1g198 | 5.32 | 0 | 0    | 2 | MASCOT | T      | PLEX8 |       |
| 9.72E-03 | 0 0 | Cs1g19830.1/Cs1g198 | 5.32 | 0 | 0    | 2 | MASCOT | T      | PLEX8 |       |
| 2.14E-01 | 0 0 | Cs1g19830.1/Cs1g198 | 5.32 | 0 | 0    | 2 | MASCOT | T      |       |       |
| 4.08E-04 | 0 0 | Cs1g19830.1/Cs1g198 | 5.32 | 0 | 0    | 2 | MASCOT | T      |       |       |
| 1.05E-04 | 0 0 | orange1.1t02000.1   | 4.64 | 0 | 0    | 2 | MASCOT | T      | PLEX8 |       |
| 4.84E-02 | 0 0 | orange1.1t02000.1   | 4.64 | 0 | 0    | 2 | MASCOT | T      | PLEX8 |       |
| 2.56E-02 | 0 0 | orange1.1t02000.1   | 4.64 | 0 | 0    | 2 | MASCOT | T      | PLEX8 |       |
| 3.13E-03 | 0 0 | orange1.1t02000.1   | 4.64 | 0 | 0    | 2 | MASCOT | T      | PLEX8 |       |
| 1.17E-02 | 0 0 | Cs1g19830.1/Cs3g180 | 6.91 | 0 | 0    | 2 | MASCOT | T      | PLEX8 |       |
| 5.42E-03 | 0 0 | Cs1g19830.1/Cs3g180 | 6.91 | 0 | 0    | 2 | MASCOT | T      | PLEX8 |       |
| 9.33E-03 | 0 0 | Cs1g13530.1         | 5.87 | 0 | 0    | 2 | MASCOT | T      | PLEX8 |       |
| 1.39E-01 | 0 0 | Cs1g13530.1         | 5.87 | 0 | 0    | 2 | MASCOT | T      |       |       |
| 4.14E-04 | 0 0 | Cs1g13530.1         | 5.87 | 0 | 0    | 2 | MASCOT | T      | PLEX8 |       |
| 1.10E-04 | 0 0 | Cs1g13530.1         | 5.87 | 0 | 0    | 2 | MASCOT | T      | PLEX8 |       |
| 2.64E-02 | 0 0 | Cs1g13530.1         | 5.87 | 0 | 0    | 2 | MASCOT | T      | PLEX8 |       |
| 3.07E-03 | 0 0 | Cs1g13530.1         | 4.41 | 0 | 0    | 2 | MASCOT | T      | PLEX8 |       |
| 1.16E-01 | 0 0 | Cs1g13530.1         | 5.84 | 0 | 0    | 2 | MASCOT | T      | PLEX8 |       |
| 1.11E-02 | 0 0 | Cs1g13530.1         | 5.84 | 0 | 0    | 2 | MASCOT | T      | PLEX8 |       |
| 2.52E-02 | 0 0 | Cs1g13530.1         | 5.84 | 0 | 0    | 2 | MASCOT | T      | PLEX8 |       |
| 3.73E-02 | 0 0 | Cs1g13530.1         | 5.84 | 0 | 0    | 2 | MASCOT | T      | PLEX8 |       |
| 4.54E-01 | 0 0 | Cs1g13530.1         | 5.84 | 0 | 0    | 2 | MASCOT | T      | PLEX8 |       |
| 7.19E-03 | 0 0 | Cs1g13530.1         | 5.84 | 0 | 0    | 2 | MASCOT | T      |       |       |
| 1.45E-01 | 0 0 | Cs1g13530.1         | 3.92 | 0 | 15.9 | 0 | 2      | MASCOT | T     | PLEX8 |

|              |                     |      |   |      |   |   |        |   |       |
|--------------|---------------------|------|---|------|---|---|--------|---|-------|
| 1.01E-01 0 0 | Cs1g13530.1         | 3.92 | 0 | 15.9 | 0 | 2 | MASCOT | T | PLEX8 |
| 1.62E-01 0 0 | Cs1g13530.1         | 3.92 | 0 | 15.9 | 0 | 2 | MASCOT | T |       |
| 5.43E-03 0 0 | Cs1g13530.1         | 3.92 | 0 |      | 0 | 2 | MASCOT | T |       |
| 2.99E-04 0 0 | Cs1g13530.1         | 3.92 | 0 |      | 0 | 2 | MASCOT | T |       |
| 1.03E-02 0 0 | Cs1g13530.1         | 3.92 | 0 |      | 0 | 2 | MASCOT | T | PLEX8 |
| 1.02E-01 0 0 | Cs1g13530.1         | 8.75 | 0 |      | 0 | 2 | MASCOT | T | PLEX8 |
| 1.08E-02 0 0 | Cs1g13530.1         | 6    | 0 |      | 0 | 2 | MASCOT | T | PLEX8 |
| 3.98E-04 0 0 | Cs1g13530.1         | 6    | 0 |      | 0 | 2 | MASCOT | T | PLEX8 |
| 1.08E-02 0 0 | Cs1g13530.1         | 6    | 0 |      | 0 | 2 | MASCOT | T | PLEX8 |
| 8.04E-03 0 0 | Cs1g13530.1         | 6    | 0 |      | 0 | 2 | MASCOT | T | PLEX8 |
| 1.11E-02 0 0 | Cs1g13530.1         | 6    | 0 |      | 0 | 2 | MASCOT | T | PLEX8 |
| 1.76E-01 0 0 | Cs1g13530.1         | 9.75 | 0 |      | 0 | 2 | MASCOT | T | PLEX8 |
| 2.61E-01 0 0 | Cs1g13530.1         | 5.75 | 0 |      | 0 | 2 | MASCOT | T | PLEX8 |
| 8.23E-02 0 0 | Cs1g13530.1         | 5.75 | 0 |      | 0 | 2 | MASCOT | T | PLEX8 |
| 9.33E-02 0 0 | Cs1g13530.1         | 5.75 | 0 |      | 0 | 2 | MASCOT | T | PLEX8 |
| 7.07E-02 0 0 | Cs1g13530.1         | 5.75 | 0 |      | 0 | 2 | MASCOT | T | PLEX8 |
| 1.32E-03 0 0 | Cs1g13530.1         | 5.84 | 0 |      | 0 | 2 | MASCOT | T | PLEX8 |
| 2.04E-01 0 0 | Cs1g13530.1         | 5.84 | 0 |      | 0 | 2 | MASCOT | T | PLEX8 |
| 3.63E-03 0 0 | Cs1g13530.1         | 5.84 | 0 |      | 0 | 2 | MASCOT | T | PLEX8 |
| 5.68E-02 0 0 | Cs1g13530.1         | 5.83 | 0 |      | 0 | 2 | MASCOT | T | PLEX8 |
| 7.76E-02 0 0 | Cs1g13530.1         | 5.83 | 0 |      | 0 | 2 | MASCOT | T | PLEX8 |
| 2.24E-01 0 0 | Cs1g13530.1         | 5.83 | 0 |      | 0 | 2 | MASCOT | T | PLEX8 |
| 1.68E-01 0 0 | Cs1g13530.1         | 5.83 | 0 |      | 0 | 2 | MASCOT | T | PLEX8 |
| 4.29E-02 0 0 | Cs1g13530.1         | 5.83 | 0 |      | 0 | 2 | MASCOT | T |       |
| 1.70E-01 0 0 | Cs1g13530.1         | 5.83 | 0 |      | 0 | 2 | MASCOT | T | PLEX8 |
| 1.29E-01 0 0 | Cs1g13530.1         | 5.83 | 0 |      | 0 | 2 | MASCOT | T | PLEX8 |
| 7.77E-02 0 0 | Cs1g13530.1         | 5.83 | 0 |      | 0 | 2 | MASCOT | T | PLEX8 |
| 8.32E-02 0 0 | Cs1g13530.1         | 5.83 | 0 |      | 0 | 2 | MASCOT | T | PLEX8 |
| 2.91E-03 0 0 | Cs1g13530.1         | 5.55 | 0 |      | 0 | 2 | MASCOT | T | PLEX8 |
| 7.71E-03 0 0 | Cs1g13530.1         | 5.55 | 0 |      | 0 | 2 | MASCOT | T | PLEX8 |
| 1.22E-01 0 0 | Cs1g13530.1         | 5.55 | 0 |      | 0 | 2 | MASCOT | T |       |
| 1.24E-03 0 0 | Cs1g13530.1         | 5.55 | 0 |      | 0 | 2 | MASCOT | T |       |
| 4.58E-04 0 0 | Cs5g09210.1/Cs5g092 | 5.88 | 0 |      | 0 | 2 | MASCOT | T | PLEX8 |
| 1.05E-03 0 0 | Cs5g09210.1/Cs5g092 | 5.88 | 0 |      | 0 | 2 | MASCOT | T | PLEX8 |
| 4.05E-05 0 0 | Cs5g09210.1/Cs5g092 | 5.88 | 0 |      | 0 | 2 | MASCOT | T | PLEX8 |
| 4.28E-05 0 0 | Cs5g09210.1/Cs5g092 | 5.88 | 0 |      | 0 | 2 | MASCOT | T | PLEX8 |
| 3.16E-03 0 0 | Cs5g09210.1/Cs5g092 | 5.88 | 0 |      | 0 | 2 | MASCOT | T | PLEX8 |
| 1.61E-02 0 0 | Cs5g09210.1/Cs5g092 | 5.88 | 0 |      | 0 | 2 | MASCOT | T | PLEX8 |
| 1.37E-03 0 0 | Cs5g09210.1/Cs5g092 | 5.88 | 0 |      | 0 | 2 | MASCOT | T | PLEX8 |
| 2.38E-05 0 0 | Cs5g09210.1/Cs5g092 | 5.88 | 0 |      | 0 | 2 | MASCOT | T | PLEX8 |
| 4.08E-02 0 0 | Cs5g09210.1/Cs5g092 | 5.88 | 0 |      | 0 | 2 | MASCOT | T | PLEX8 |
| 7.54E-02 0 0 | Cs5g09210.1/Cs5g092 | 5.88 | 0 |      | 0 | 2 | MASCOT | T | PLEX8 |
| 1.58E-02 0 0 | Cs5g09210.1/Cs5g092 | 8.55 | 0 |      | 0 | 2 | MASCOT | T | PLEX8 |
| 7.00E-02 0 0 | Cs5g09210.1/Cs5g092 | 8.55 | 0 |      | 0 | 2 | MASCOT | T | PLEX8 |
| 5.32E-02 0 0 | Cs5g09210.1/Cs5g092 | 8.55 | 0 |      | 0 | 2 | MASCOT | T |       |
| 1.84E-01 0 0 | Cs5g09210.1/Cs5g092 | 4.14 | 0 |      | 0 | 2 | MASCOT | T | PLEX8 |
| 1.51E-01 0 0 | Cs5g09210.1/Cs5g092 | 4.14 | 0 |      | 0 | 2 | MASCOT | T | PLEX8 |
| 4.64E-02 0 0 | Cs5g09210.1/Cs5g092 | 4.14 | 0 |      | 0 | 2 | MASCOT | T | PLEX8 |
| 4.64E-02 0 0 | Cs5g09210.1/Cs5g092 | 4.53 | 0 |      | 0 | 2 | MASCOT | T | PLEX8 |
| 7.73E-02 0 0 | Cs5g09210.1/Cs5g092 | 6.07 | 1 |      | 0 | 2 | MASCOT | T | PLEX8 |
| 5.98E-02 0 0 | Cs5g09210.1/Cs5g092 | 6.07 | 1 |      | 0 | 2 | MASCOT | T | PLEX8 |

|          |     |                     |      |   |      |   |        |        |       |       |
|----------|-----|---------------------|------|---|------|---|--------|--------|-------|-------|
| 4.37E-02 | 0 0 | Cs5g09210.1/Cs5g092 | 6.07 | 1 | 0    | 2 | MASCOT | T      | PLEX8 |       |
| 2.54E-02 | 0 0 | Cs5g09210.1/Cs5g092 | 6.07 | 1 | 0    | 2 | MASCOT | T      | PLEX8 |       |
| 3.73E-02 | 0 0 | Cs5g09210.1/Cs5g092 | 6.71 | 0 | 0    | 2 | MASCOT | T      |       |       |
| 1.06E-01 | 0 0 | Cs5g09210.1/Cs5g092 | 4.37 | 0 | 0    | 2 | MASCOT | T      | PLEX8 |       |
| 3.88E-02 | 0 0 | Cs5g09210.1/Cs5g092 | 4.37 | 0 | 0    | 2 | MASCOT | T      | PLEX8 |       |
| 2.57E-02 | 0 0 | Cs5g09210.1/Cs5g092 | 6.74 | 0 | 0    | 2 | MASCOT | T      | PLEX8 |       |
| 4.86E-04 | 0 0 | Cs5g09210.1/Cs5g092 | 6.74 | 0 | 0    | 2 | MASCOT | T      | PLEX8 |       |
| 3.11E-01 | 0 0 | Cs5g09210.1/Cs5g092 | 6.74 | 0 | 0    | 2 | MASCOT | T      | PLEX8 |       |
| 3.50E-04 | 0 0 | Cs5g09210.1/Cs5g092 | 6.74 | 0 | 0    | 2 | MASCOT | T      | PLEX8 |       |
| 2.18E-03 | 0 0 | Cs5g09210.1/Cs5g092 | 6.74 | 0 | 0    | 2 | MASCOT | T      | PLEX8 |       |
| 5.31E-02 | 0 0 | Cs5g09210.1/Cs5g092 | 6.74 | 0 | 0    | 2 | MASCOT | T      | PLEX8 |       |
| 6.63E-04 | 0 0 | Cs5g09210.1/Cs5g092 | 6.74 | 0 | 0    | 2 | MASCOT | T      | PLEX8 |       |
| 4.21E-03 | 0 0 | Cs5g09210.1/Cs5g092 | 6.74 | 0 | 0    | 2 | MASCOT | T      | PLEX8 |       |
| 7.55E-02 | 0 0 | Cs5g09210.1/Cs5g092 | 6.74 | 0 | 0    | 2 | MASCOT | T      | PLEX8 |       |
| 7.68E-04 | 0 0 | Cs5g09210.1/Cs5g092 | 6.74 | 0 | 0    | 2 | MASCOT | T      | PLEX8 |       |
| 1.31E-01 | 0 0 | Cs5g09210.1/Cs5g092 | 8.22 | 0 | 0    | 2 | MASCOT | T      | PLEX8 |       |
| 5.89E-02 | 0 0 | Cs5g09210.1/Cs5g092 | 4.25 | 0 | 0    | 2 | MASCOT | T      |       |       |
| 2.32E-02 | 0 0 | Cs5g09210.1/Cs5g092 | 4.25 | 0 | 0    | 2 | MASCOT | T      |       |       |
| 1.25E-02 | 0 0 | Cs5g09210.1/Cs5g092 | 4.25 | 0 | 0    | 2 | MASCOT | T      |       |       |
| 1.32E-03 | 0 0 | Cs5g09210.1         | 4.21 | 0 | 15.9 | 0 | 2      | MASCOT | T     | PLEX8 |
| 2.22E-03 | 0 0 | Cs5g09210.1         | 4.21 | 0 | 0    | 2 | MASCOT | T      | PLEX8 |       |
| 9.64E-02 | 0 0 | Cs5g09210.1         | 4.21 | 0 | 0    | 2 | MASCOT | T      | PLEX8 |       |
| 5.11E-04 | 0 0 | Cs5g09210.1         | 4.21 | 0 | 0    | 2 | MASCOT | T      | PLEX8 |       |
| 6.19E-05 | 0 0 | Cs5g09210.1         | 4.21 | 0 | 0    | 2 | MASCOT | T      | PLEX8 |       |
| 8.81E-02 | 0 0 | Cs5g09210.1/Cs5g092 | 4.37 | 0 | 0    | 2 | MASCOT | T      | PLEX8 |       |
| 3.55E-04 | 0 0 | Cs1g05000.1/Cs1g050 | 4.21 | 0 | 0    | 2 | MASCOT | T      | PLEX8 |       |
| 7.36E-03 | 0 0 | Cs1g05000.1/Cs1g050 | 4.03 | 0 | 0    | 2 | MASCOT | T      | PLEX8 |       |
| 4.95E-04 | 0 0 | Cs1g05000.1/Cs1g050 | 4.03 | 0 | 0    | 2 | MASCOT | T      | PLEX8 |       |
| 4.62E-04 | 0 0 | Cs1g05000.1/Cs1g050 | 4.03 | 0 | 0    | 2 | MASCOT | T      | PLEX8 |       |
| 3.31E-04 | 0 0 | Cs1g05000.1/Cs1g050 | 4.03 | 0 | 0    | 2 | MASCOT | T      | PLEX8 |       |
| 1.10E-03 | 0 0 | Cs1g05000.1/Cs1g050 | 4.03 | 0 | 0    | 2 | MASCOT | T      | PLEX8 |       |
| 8.23E-03 | 0 0 | Cs1g05000.1/Cs1g050 | 4.03 | 0 | 0    | 2 | MASCOT | T      | PLEX8 |       |
| 1.38E-01 | 0 0 | Cs1g05000.1/Cs1g050 | 6.1  | 0 | 15.9 | 0 | 2      | MASCOT | T     | PLEX8 |
| 1.03E-01 | 0 0 | Cs1g05000.1/Cs1g050 | 6.1  | 0 | 15.9 | 0 | 2      | MASCOT | T     | PLEX8 |
| 1.06E-01 | 0 0 | Cs1g05000.1/Cs1g050 | 6.1  | 0 | 0    | 2 | MASCOT | T      | PLEX8 |       |
| 1.29E-03 | 0 0 | Cs1g05000.1/Cs1g050 | 6.1  | 0 | 0    | 2 | MASCOT | T      | PLEX8 |       |
| 1.02E-02 | 0 0 | Cs1g05000.1/Cs1g050 | 6.1  | 0 | 0    | 2 | MASCOT | T      | PLEX8 |       |
| 2.50E-02 | 0 0 | Cs1g05000.1/Cs1g050 | 6.1  | 0 | 0    | 2 | MASCOT | T      | PLEX8 |       |
| 3.24E-02 | 0 0 | Cs1g05000.1/Cs1g050 | 6.1  | 0 | 0    | 2 | MASCOT | T      | PLEX8 |       |
| 4.53E-02 | 0 0 | Cs1g05000.1/Cs1g050 | 6.1  | 0 | 0    | 2 | MASCOT | T      | PLEX8 |       |
| 4.02E-01 | 0 0 | Cs1g05000.1/Cs1g050 | 6.1  | 0 | 0    | 2 | MASCOT | T      | PLEX8 |       |
| 1.38E-06 | 0 0 | Cs1g05000.1/Cs1g050 | 4.65 | 0 | 0    | 2 | MASCOT | T      | PLEX8 |       |
| 1.15E-02 | 0 0 | Cs1g05000.1/Cs1g050 | 4.65 | 0 | 0    | 2 | MASCOT | T      | PLEX8 |       |
| 9.53E-04 | 0 0 | Cs1g05000.1/Cs1g050 | 4.65 | 0 | 0    | 2 | MASCOT | T      | PLEX8 |       |
| 6.05E-04 | 0 0 | Cs1g05000.1/Cs1g050 | 4.65 | 0 | 0    | 2 | MASCOT | T      | PLEX8 |       |
| 3.67E-04 | 0 0 | Cs1g05000.1/Cs1g050 | 4.14 | 0 | 0    | 2 | MASCOT | T      | PLEX8 |       |
| 1.30E-01 | 0 0 | Cs1g05000.1/Cs1g050 | 5.72 | 0 | 0    | 2 | MASCOT | T      | PLEX8 |       |
| 1.58E-01 | 0 0 | Cs1g05000.1/Cs1g050 | 4.31 | 0 | 15.9 | 0 | 2      | MASCOT | T     | PLEX8 |
| 1.94E-03 | 0 0 | Cs1g05000.1/Cs1g050 | 4.31 | 0 | 0    | 2 | MASCOT | T      | PLEX8 |       |
| 1.75E-01 | 0 0 | Cs1g05000.1/Cs1g050 | 4.21 | 0 | 0    | 2 | MASCOT | T      | PLEX8 |       |
| 2.35E-03 | 0 0 | Cs1g05000.1/Cs1g050 | 4.21 | 0 | 0    | 2 | MASCOT | T      | PLEX8 |       |

|          |     |                     |      |   |      |   |        |        |       |       |
|----------|-----|---------------------|------|---|------|---|--------|--------|-------|-------|
| 2.27E-03 | 0 0 | Cs1g05000.1/Cs1g050 | 4.21 | 0 | 0    | 2 | MASCOT | T      | PLEX8 |       |
| 3.09E-01 | 0 0 | Cs1g05000.1/Cs1g050 | 4.21 | 0 | 0    | 2 | MASCOT | T      | PLEX8 |       |
| 2.41E-01 | 0 0 | Cs1g05000.1/Cs1g050 | 8.75 | 0 | 0    | 2 | MASCOT | T      | PLEX8 |       |
| 3.26E-02 | 0 0 | Cs1g05000.1/Cs1g050 | 6    | 0 | 0    | 2 | MASCOT | T      | PLEX8 |       |
| 9.20E-03 | 0 0 | Cs1g05000.1/Cs1g050 | 8.76 | 0 | 15.9 | 0 | 2      | MASCOT | T     | PLEX8 |
| 1.31E-01 | 0 0 | Cs1g05000.1/Cs1g050 | 8.76 | 0 | 15.9 | 0 | 2      | MASCOT | T     | PLEX8 |
| 3.24E-02 | 0 0 | Cs1g05000.1/Cs1g050 | 8.76 | 0 | 15.9 | 0 | 2      | MASCOT | T     | PLEX8 |
| 5.05E-02 | 0 0 | Cs1g05000.1/Cs1g050 | 8.76 | 0 | 15.9 | 0 | 2      | MASCOT | T     | PLEX8 |
| 2.33E-02 | 0 0 | Cs1g05000.1/Cs1g050 | 8.76 | 0 | 0    | 2 | MASCOT | T      | PLEX8 |       |
| 2.56E-03 | 0 0 | Cs1g05000.1/Cs1g050 | 8.76 | 0 | 0    | 2 | MASCOT | T      | PLEX8 |       |
| 3.55E-04 | 0 0 | Cs1g05000.1/Cs1g050 | 8.76 | 0 | 0    | 2 | MASCOT | T      | PLEX8 |       |
| 4.98E-02 | 0 0 | Cs1g05000.1/Cs1g050 | 4.75 | 0 | 0    | 2 | MASCOT | T      | PLEX8 |       |
| 1.47E-01 | 0 0 | Cs1g05000.1/Cs1g050 | 4.75 | 0 | 0    | 2 | MASCOT | T      | PLEX8 |       |
| 3.15E-01 | 0 0 | Cs1g05000.1/Cs1g050 | 4.75 | 0 | 0    | 2 | MASCOT | T      | PLEX8 |       |
| 4.30E-01 | 0 0 | Cs1g05000.1/Cs1g050 | 4.75 | 0 | 0    | 2 | MASCOT | T      |       |       |
| 3.81E-04 | 0 0 | Cs1g05000.1/Cs1g050 | 4.75 | 0 | 0    | 2 | MASCOT | T      |       |       |
| 1.31E-01 | 0 0 | Cs2g17560.1         | 4.21 | 0 | 0    | 2 | MASCOT | T      | PLEX8 |       |
| 2.82E-02 | 0 0 | Cs2g17560.1/Cs2g175 | 6    | 0 | 0    | 2 | MASCOT | T      | PLEX8 |       |
| 1.49E-01 | 0 0 | Cs2g17560.1/Cs2g175 | 6    | 0 | 0    | 2 | MASCOT | T      | PLEX8 |       |
| 3.95E-02 | 0 0 | Cs2g17560.1/Cs2g175 | 6    | 0 | 0    | 2 | MASCOT | T      | PLEX8 |       |
| 6.40E-02 | 0 0 | Cs2g17560.1/Cs2g175 | 8.08 | 0 | 15.9 | 0 | 2      | MASCOT | T     |       |
| 2.73E-03 | 0 0 | Cs2g17560.1/Cs2g175 | 5.84 | 0 | 0    | 2 | MASCOT | T      |       |       |
| 6.31E-02 | 0 0 | Cs2g17560.1/Cs2g175 | 5.84 | 0 | 0    | 2 | MASCOT | T      |       |       |
| 4.44E-04 | 0 0 | Cs2g17560.1/Cs2g175 | 5.84 | 0 | 0    | 2 | MASCOT | T      |       |       |
| 7.30E-05 | 0 0 | Cs2g17560.1/Cs2g175 | 5.84 | 0 | 0    | 2 | MASCOT | T      |       |       |
| 7.33E-05 | 0 0 | Cs2g17560.1         | 4.21 | 0 | 0    | 2 | MASCOT | T      |       |       |
| 2.79E-01 | 0 0 | Cs2g17560.1         | 4.21 | 0 | 0    | 2 | MASCOT | T      | PLEX8 |       |
| 9.71E-02 | 0 0 | Cs2g17560.1/Cs2g175 | 5.84 | 0 | 0    | 2 | MASCOT | T      | PLEX8 |       |
| 1.34E-03 | 0 0 | Cs2g17560.1         | 4.5  | 0 | 0    | 2 | MASCOT | T      | PLEX8 |       |
| 8.74E-02 | 0 0 | Cs2g17560.1         | 4.5  | 0 | 0    | 2 | MASCOT | T      | PLEX8 |       |
| 2.42E-01 | 0 0 | Cs2g17560.1         | 4.5  | 0 | 0    | 2 | MASCOT | T      | PLEX8 |       |
| 1.67E-01 | 0 0 | Cs2g17560.1         | 4.5  | 0 | 0    | 2 | MASCOT | T      |       |       |
| 3.02E-01 | 0 0 | Cs2g17560.1         | 4.5  | 0 | 0    | 2 | MASCOT | T      |       |       |
| 4.51E-02 | 0 0 | Cs2g17560.1         | 4.5  | 0 | 0    | 2 | MASCOT | T      | PLEX8 |       |
| 3.86E-02 | 0 0 | Cs2g17560.1         | 4.5  | 0 | 0    | 2 | MASCOT | T      | PLEX8 |       |
| 2.62E-01 | 0 0 | Cs2g17560.1         | 4.5  | 0 | 0    | 2 | MASCOT | T      | PLEX8 |       |
| 3.52E-02 | 0 0 | Cs2g17560.1         | 4.5  | 0 | 0    | 2 | MASCOT | T      | PLEX8 |       |
| 1.14E-01 | 0 0 | Cs2g17560.1         | 4.5  | 0 | 0    | 2 | MASCOT | T      | PLEX8 |       |
| 1.04E-02 | 0 0 | Cs2g17560.1         | 4.5  | 0 | 0    | 2 | MASCOT | T      | PLEX8 |       |
| 1.78E-03 | 0 0 | Cs2g17560.1         | 6.79 | 0 | 0    | 2 | MASCOT | T      | PLEX8 |       |
| 2.55E-02 | 0 0 | Cs2g17560.1         | 6.79 | 0 | 0    | 2 | MASCOT | T      | PLEX8 |       |
| 1.24E-01 | 0 0 | Cs2g17560.1         | 6.79 | 0 | 0    | 2 | MASCOT | T      | PLEX8 |       |
| 3.61E-03 | 0 0 | Cs2g17560.1         | 5.38 | 1 | 0    | 2 | MASCOT | T      | PLEX8 |       |
| 4.10E-02 | 0 0 | Cs2g17560.1         | 5.38 | 1 | 0    | 2 | MASCOT | T      |       |       |
| 5.52E-03 | 0 0 | Cs2g17560.1         | 4.13 | 0 | 0    | 2 | MASCOT | T      | PLEX8 |       |
| 9.17E-04 | 0 0 | Cs2g17560.1         | 4.13 | 0 | 0    | 2 | MASCOT | T      | PLEX8 |       |
| 1.26E-05 | 0 0 | Cs2g17560.1         | 4.13 | 0 | 0    | 2 | MASCOT | T      |       |       |
| 2.69E-04 | 0 0 | Cs2g17560.1         | 4.13 | 0 | 0    | 2 | MASCOT | T      | PLEX8 |       |
| 1.57E-03 | 0 0 | Cs2g17560.1         | 4.13 | 0 | 0    | 2 | MASCOT | T      | PLEX8 |       |
| 6.52E-03 | 0 0 | Cs2g17560.1         | 4.13 | 0 | 0    | 2 | MASCOT | T      | PLEX8 |       |
| 2.65E-03 | 0 0 | Cs2g17560.1         | 4.13 | 0 | 0    | 2 | MASCOT | T      | PLEX8 |       |

|          |     |                     |      |   |      |   |        |        |       |       |
|----------|-----|---------------------|------|---|------|---|--------|--------|-------|-------|
| 2.08E-02 | 0 0 | Cs2g17560.1         | 4.13 | 0 | 0    | 2 | MASCOT | T      | PLEX8 |       |
| 5.51E-03 | 0 0 | Cs2g17560.1         | 4.13 | 0 | 0    | 2 | MASCOT | T      |       |       |
| 1.45E-03 | 0 0 | Cs2g17560.1         | 4.13 | 0 | 0    | 2 | MASCOT | T      | PLEX8 |       |
| 1.66E-02 | 0 0 | Cs2g17560.1         | 4.13 | 0 | 0    | 2 | MASCOT | T      | PLEX8 |       |
| 1.84E-02 | 0 0 | Cs2g17560.1         | 4.56 | 1 | 0    | 2 | MASCOT | T      |       |       |
| 1.84E-01 | 0 0 | Cs2g17560.1/Cs2g175 | 8.22 | 0 | 0    | 2 | MASCOT | T      | PLEX8 |       |
| 1.08E-01 | 0 0 | Cs2g17560.1/Cs2g175 | 8.22 | 0 | 0    | 2 | MASCOT | T      | PLEX8 |       |
| 1.04E-03 | 0 0 | Cs6g04140.1/Cs6g041 | 6.74 | 0 | 0    | 2 | MASCOT | T      | PLEX8 |       |
| 1.44E-03 | 0 0 | Cs6g04140.1/Cs6g041 | 6.74 | 0 | 0    | 2 | MASCOT | T      | PLEX8 |       |
| 2.89E-01 | 0 0 | Cs6g04140.1/Cs6g041 | 6.74 | 0 | 0    | 2 | MASCOT | T      | PLEX8 |       |
| 1.84E-02 | 0 0 | Cs6g04140.1/Cs6g041 | 6.74 | 0 | 0    | 2 | MASCOT | T      | PLEX8 |       |
| 2.84E-01 | 0 0 | Cs6g04140.1/Cs6g041 | 6.74 | 0 | 0    | 2 | MASCOT | T      | PLEX8 |       |
| 2.24E-02 | 0 0 | Cs6g04140.1/Cs6g041 | 4.37 | 0 | 0    | 2 | MASCOT | T      | PLEX8 |       |
| 2.51E-02 | 0 0 | Cs6g04140.1/Cs6g041 | 4.37 | 0 | 0    | 2 | MASCOT | T      | PLEX8 |       |
| 1.79E-01 | 0 0 | Cs6g04140.1/Cs6g041 | 4.37 | 0 | 0    | 2 | MASCOT | T      | PLEX8 |       |
| 5.89E-02 | 0 0 | Cs6g04140.1/Cs6g041 | 4.37 | 0 | 0    | 2 | MASCOT | T      | PLEX8 |       |
| 3.08E-02 | 0 0 | Cs6g04140.1/Cs6g041 | 4.37 | 0 | 0    | 2 | MASCOT | T      | PLEX8 |       |
| 2.03E-01 | 0 0 | Cs6g04140.1/Cs6g041 | 4.37 | 0 | 0    | 2 | MASCOT | T      | PLEX8 |       |
| 1.43E-01 | 0 0 | Cs6g04140.1/Cs6g041 | 4.37 | 0 | 0    | 2 | MASCOT | T      | PLEX8 |       |
| 2.26E-01 | 0 0 | Cs6g04140.1/Cs6g041 | 4.37 | 0 | 0    | 2 | MASCOT | T      | PLEX8 |       |
| 3.64E-02 | 0 0 | Cs6g04140.1/Cs6g041 | 4.37 | 0 | 0    | 2 | MASCOT | T      | PLEX8 |       |
| 3.47E-01 | 0 0 | Cs6g04140.1/Cs6g041 | 4.37 | 0 | 0    | 2 | MASCOT | T      |       |       |
| 1.10E-01 | 0 0 | Cs6g04140.1/Cs6g041 | 6.74 | 0 | 0    | 2 | MASCOT | T      | PLEX8 |       |
| 4.59E-02 | 0 0 | Cs6g04140.1/Cs6g041 | 6.74 | 0 | 0    | 2 | MASCOT | T      |       |       |
| 4.70E-01 | 0 0 | Cs6g04140.1/Cs6g041 | 8.26 | 0 | 0    | 2 | MASCOT | T      |       |       |
| 2.09E-02 | 0 0 | Cs6g04140.1/Cs6g041 | 3.91 | 0 | 0    | 2 | MASCOT | T      | PLEX8 |       |
| 1.18E-01 | 0 0 | Cs6g04140.1/Cs6g041 | 4.37 | 0 | 0    | 2 | MASCOT | T      | PLEX8 |       |
| 2.34E-03 | 0 0 | Cs6g04140.1/Cs6g041 | 9.41 | 0 | 0    | 2 | MASCOT | T      | PLEX8 |       |
| 2.59E-03 | 0 0 | Cs6g04140.1/Cs6g041 | 9.41 | 0 | 0    | 2 | MASCOT | T      | PLEX8 |       |
| 6.42E-02 | 0 0 | Cs6g04140.1/Cs6g041 | 9.41 | 0 | 0    | 2 | MASCOT | T      | PLEX8 |       |
| 1.38E-03 | 0 0 | Cs6g04140.1/Cs6g041 | 9.41 | 0 | 0    | 2 | MASCOT | T      | PLEX8 |       |
| 2.95E-02 | 0 0 | Cs6g04140.1/Cs6g041 | 9.41 | 0 | 0    | 2 | MASCOT | T      | PLEX8 |       |
| 1.30E-01 | 0 0 | Cs6g04140.1/Cs6g041 | 4.37 | 0 | 0    | 2 | MASCOT | T      |       |       |
| 2.04E-07 | 0 0 | Cs6g04140.1         | 4.1  | 0 | 0    | 2 | MASCOT | T      | PLEX8 |       |
| 3.35E-04 | 0 0 | Cs6g04140.1         | 4.1  | 0 | 0    | 2 | MASCOT | T      | PLEX8 |       |
| 2.96E-03 | 0 0 | Cs6g04140.1         | 4.1  | 0 | 0    | 2 | MASCOT | T      | PLEX8 |       |
| 4.55E-02 | 0 0 | Cs6g04140.1         | 4.1  | 0 | 0    | 2 | MASCOT | T      |       |       |
| 2.31E-01 | 0 0 | Cs6g04140.1/Cs6g041 | 5.21 | 0 | 15.9 | 0 | 2      | MASCOT | T     | PLEX8 |
| 2.04E-01 | 0 0 | Cs6g04140.1/Cs6g041 | 5.21 | 0 | 15.9 | 0 | 2      | MASCOT | T     | PLEX8 |
| 6.41E-03 | 0 0 | Cs6g04140.1/Cs6g041 | 4.72 | 0 | 0    | 2 | MASCOT | T      | PLEX8 |       |
| 7.32E-07 | 0 0 | Cs6g04140.1/Cs6g041 | 4.72 | 0 | 0    | 2 | MASCOT | T      | PLEX8 |       |
| 5.47E-07 | 0 0 | Cs6g04140.1/Cs6g041 | 4.72 | 0 | 0    | 2 | MASCOT | T      | PLEX8 |       |
| 1.00E-01 | 0 0 | Cs6g04140.1/Cs6g041 | 4.72 | 0 | 0    | 2 | MASCOT | T      | PLEX8 |       |
| 5.95E-02 | 0 0 | Cs6g04140.1/Cs6g041 | 4.72 | 0 | 0    | 2 | MASCOT | T      | PLEX8 |       |
| 7.76E-03 | 0 0 | Cs6g04140.1/Cs6g041 | 4.72 | 0 | 0    | 2 | MASCOT | T      | PLEX8 |       |
| 3.25E-02 | 0 0 | Cs6g04140.1/Cs6g041 | 4.72 | 0 | 0    | 2 | MASCOT | T      | PLEX8 |       |
| 6.41E-03 | 0 0 | Cs6g04140.1/Cs6g041 | 4.72 | 0 | 0    | 2 | MASCOT | T      | PLEX8 |       |
| 3.59E-02 | 0 0 | Cs6g04140.1/Cs6g041 | 6.74 | 0 | 0    | 2 | MASCOT | T      | PLEX8 |       |
| 3.48E-04 | 0 0 | Cs6g04140.1/Cs6g041 | 6.74 | 0 | 0    | 2 | MASCOT | T      | PLEX8 |       |
| 5.23E-02 | 0 0 | Cs2g03010.1/Cs2g030 | 9.8  | 0 | 0    | 2 | MASCOT | T      | PLEX8 |       |
| 1.89E-03 | 0 0 | Cs8g17280.1/Cs8g172 | 3.91 | 0 | 0    | 2 | MASCOT | T      |       |       |



|          |     |                     |      |   |   |   |        |   |       |
|----------|-----|---------------------|------|---|---|---|--------|---|-------|
| 2.03E-01 | 0 0 | Cs8g17280.1/Cs8g172 | 6.1  | 0 | 0 | 2 | MASCOT | T | PLEX8 |
| 1.04E-02 | 0 0 | Cs8g17280.1/Cs8g172 | 6    | 0 | 0 | 2 | MASCOT | T | PLEX8 |
| 6.06E-02 | 0 0 | Cs8g17280.1/Cs8g172 | 6    | 0 | 0 | 2 | MASCOT | T | PLEX8 |
| 8.22E-02 | 0 0 | Cs8g17280.1/Cs8g172 | 6    | 0 | 0 | 2 | MASCOT | T | PLEX8 |
| 1.97E-01 | 0 0 | Cs8g17280.1/Cs8g172 | 6    | 0 | 0 | 2 | MASCOT | T | PLEX8 |
| 8.80E-02 | 0 0 | Cs8g17280.1/Cs8g172 | 6    | 0 | 0 | 2 | MASCOT | T | PLEX8 |
| 3.16E-02 | 0 0 | Cs8g17280.1/Cs8g172 | 6    | 0 | 0 | 2 | MASCOT | T |       |
| 1.40E-01 | 0 0 | Cs8g17280.1/Cs8g172 | 6    | 0 | 0 | 2 | MASCOT | T | PLEX8 |
| 7.75E-02 | 0 0 | Cs8g17280.1/Cs8g172 | 6    | 0 | 0 | 2 | MASCOT | T | PLEX8 |
| 9.05E-02 | 0 0 | Cs8g17280.1/Cs8g172 | 6    | 0 | 0 | 2 | MASCOT | T | PLEX8 |
| 4.65E-04 | 0 0 | Cs8g17280.1/Cs8g172 | 6.79 | 0 | 0 | 2 | MASCOT | T | PLEX8 |
| 4.10E-05 | 0 0 | Cs8g17280.1/Cs8g172 | 6.79 | 0 | 0 | 2 | MASCOT | T | PLEX8 |
| 3.02E-04 | 0 0 | Cs8g17280.1/Cs8g172 | 6.79 | 0 | 0 | 2 | MASCOT | T |       |
| 1.85E-01 | 0 0 | Cs8g17280.1/Cs8g172 | 4.03 | 0 | 0 | 2 | MASCOT | T | PLEX8 |
| 7.39E-02 | 0 0 | Cs8g17280.1/Cs8g172 | 4.03 | 0 | 0 | 2 | MASCOT | T | PLEX8 |
| 4.65E-02 | 0 0 | Cs8g17280.1/Cs8g172 | 9.75 | 0 | 0 | 2 | MASCOT | T | PLEX8 |
| 5.40E-02 | 0 0 | Cs8g17280.1/Cs8g172 | 4.53 | 0 | 0 | 2 | MASCOT | T | PLEX8 |
| 1.15E-03 | 0 0 | Cs8g17280.1/Cs8g172 | 4.53 | 0 | 0 | 2 | MASCOT | T | PLEX8 |
| 7.19E-03 | 0 0 | Cs8g17280.1/Cs8g172 | 4.53 | 0 | 0 | 2 | MASCOT | T | PLEX8 |
| 5.19E-04 | 0 0 | Cs8g17280.1/Cs8g172 | 4.53 | 0 | 0 | 2 | MASCOT | T | PLEX8 |
| 6.18E-04 | 0 0 | Cs8g17280.1/Cs8g172 | 4.53 | 0 | 0 | 2 | MASCOT | T | PLEX8 |
| 6.11E-03 | 0 0 | Cs8g17280.1/Cs8g172 | 4.53 | 0 | 0 | 2 | MASCOT | T |       |
| 2.78E-02 | 0 0 | Cs8g17280.1/Cs8g172 | 4.53 | 0 | 0 | 2 | MASCOT | T |       |
| 2.97E-02 | 0 0 | Cs8g17280.1/Cs8g172 | 8.23 | 0 | 0 | 2 | MASCOT | T | PLEX8 |
| 3.73E-02 | 0 0 | Cs8g17280.1/Cs8g172 | 8.23 | 0 | 0 | 2 | MASCOT | T | PLEX8 |
| 2.63E-01 | 0 0 | Cs8g17280.1/Cs8g172 | 8.23 | 0 | 0 | 2 | MASCOT | T | PLEX8 |
| 3.02E-01 | 0 0 | Cs8g17280.1/Cs8g172 | 6.75 | 0 | 0 | 2 | MASCOT | T | PLEX8 |
| 2.38E-01 | 0 0 | Cs8g17280.1/Cs8g172 | 6.75 | 0 | 0 | 2 | MASCOT | T | PLEX8 |
| 1.19E-02 | 0 0 | Cs8g17280.1/Cs8g172 | 6.75 | 0 | 0 | 2 | MASCOT | T | PLEX8 |
| 5.50E-02 | 0 0 | Cs8g17280.1/Cs8g172 | 6.75 | 0 | 0 | 2 | MASCOT | T | PLEX8 |
| 2.32E-02 | 0 0 | Cs8g17280.1/Cs8g172 | 6.75 | 0 | 0 | 2 | MASCOT | T | PLEX8 |
| 7.96E-03 | 0 0 | Cs8g17280.1/Cs8g172 | 6.75 | 0 | 0 | 2 | MASCOT | T | PLEX8 |
| 2.49E-03 | 0 0 | Cs8g17280.1/Cs8g172 | 4.21 | 0 | 0 | 2 | MASCOT | T | PLEX8 |
| 8.46E-03 | 0 0 | Cs8g17280.1/Cs8g172 | 4.21 | 0 | 0 | 2 | MASCOT | T | PLEX8 |
| 2.93E-03 | 0 0 | Cs8g17280.1/Cs8g172 | 4.21 | 0 | 0 | 2 | MASCOT | T | PLEX8 |
| 8.44E-02 | 0 0 | Cs8g17280.1/Cs8g172 | 6.71 | 0 | 0 | 2 | MASCOT | T | PLEX8 |
| 2.39E-01 | 0 0 | Cs8g17280.1/Cs8g172 | 6.71 | 0 | 0 | 2 | MASCOT | T | PLEX8 |
| 5.31E-02 | 0 0 | Cs8g17280.1/Cs8g172 | 6.71 | 0 | 0 | 2 | MASCOT | T | PLEX8 |
| 2.41E-04 | 0 0 | Cs8g17280.1/Cs8g172 | 6.71 | 0 | 0 | 2 | MASCOT | T | PLEX8 |
| 3.01E-04 | 0 0 | Cs5g20740.1/Cs5g207 | 6.75 | 0 | 0 | 2 | MASCOT | T | PLEX8 |
| 4.00E-02 | 0 0 | Cs5g20740.1/Cs5g207 | 6.75 | 0 | 0 | 2 | MASCOT | T | PLEX8 |
| 3.90E-04 | 0 0 | Cs5g20740.1/Cs5g207 | 6.75 | 0 | 0 | 2 | MASCOT | T |       |
| 1.62E-01 | 0 0 | Cs5g20740.1/Cs5g207 | 6.75 | 0 | 0 | 2 | MASCOT | T |       |
| 1.03E-02 | 0 0 | Cs5g20740.1/Cs5g207 | 6.75 | 0 | 0 | 2 | MASCOT | T |       |
| 1.91E-03 | 0 0 | Cs5g20740.1/Cs5g207 | 5.84 | 0 | 0 | 2 | MASCOT | T | PLEX8 |
| 6.95E-02 | 0 0 | Cs5g20740.1/Cs5g207 | 8.75 | 0 | 0 | 2 | MASCOT | T |       |
| 1.36E-02 | 0 0 | Cs5g20740.1/Cs5g207 | 11   | 0 | 0 | 2 | MASCOT | T | PLEX8 |
| 2.82E-02 | 0 0 | Cs5g20740.1/Cs5g207 | 6.73 | 0 | 0 | 2 | MASCOT | T | PLEX8 |
| 2.22E-01 | 0 0 | Cs5g20740.1/Cs5g207 | 6.73 | 0 | 0 | 2 | MASCOT | T |       |
| 7.35E-05 | 0 0 | Cs5g20740.1/Cs5g207 | 4.37 | 0 | 0 | 2 | MASCOT | T | PLEX8 |
| 1.08E-04 | 0 0 | Cs5g20740.1/Cs5g207 | 4.37 | 0 | 0 | 2 | MASCOT | T | PLEX8 |

|          |     |                     |      |   |      |   |        |        |       |       |
|----------|-----|---------------------|------|---|------|---|--------|--------|-------|-------|
| 8.80E-02 | 0 0 | Cs5g20740.1/Cs5g207 | 4.37 | 0 | 0    | 2 | MASCOT | T      | PLEX8 |       |
| 3.32E-02 | 0 0 | Cs5g20740.1/Cs5g207 | 4.37 | 0 | 0    | 2 | MASCOT | T      | PLEX8 |       |
| 8.05E-05 | 0 0 | Cs5g20740.1/Cs5g207 | 4.37 | 0 | 0    | 2 | MASCOT | T      | PLEX8 |       |
| 8.76E-02 | 0 0 | Cs5g20740.1/Cs5g207 | 6.04 | 0 | 0    | 2 | MASCOT | T      | PLEX8 |       |
| 2.37E-04 | 0 0 | Cs5g20740.1/Cs5g207 | 6.04 | 0 | 0    | 2 | MASCOT | T      | PLEX8 |       |
| 2.26E-02 | 0 0 | Cs5g20740.1/Cs5g207 | 4.21 | 0 | 0    | 2 | MASCOT | T      | PLEX8 |       |
| 1.14E-01 | 0 0 | Cs5g20740.1/Cs5g207 | 8.75 | 0 | 15.9 | 0 | 2      | MASCOT | T     | PLEX8 |
| 2.83E-02 | 0 0 | Cs5g20740.1/Cs5g207 | 9.75 | 0 | 0    | 2 | MASCOT | T      | PLEX8 |       |
| 8.30E-02 | 0 0 | Cs5g20740.1/Cs5g207 | 9.75 | 0 | 0    | 2 | MASCOT | T      | PLEX8 |       |
| 1.96E-01 | 0 0 | Cs5g20740.1/Cs5g207 | 6    | 0 | 0    | 2 | MASCOT | T      | PLEX8 |       |
| 3.04E-01 | 0 0 | Cs5g20740.1/Cs5g207 | 6    | 0 | 0    | 2 | MASCOT | T      | PLEX8 |       |
| 3.67E-01 | 0 0 | Cs5g20740.1/Cs5g207 | 6    | 0 | 0    | 2 | MASCOT | T      | PLEX8 |       |
| 2.69E-02 | 0 0 | Cs5g20740.1/Cs5g207 | 6    | 0 | 0    | 2 | MASCOT | T      | PLEX8 |       |
| 3.96E-02 | 0 0 | Cs5g20740.1/Cs5g207 | 6    | 0 | 0    | 2 | MASCOT | T      | PLEX8 |       |
| 2.38E-01 | 0 0 | Cs5g20740.1/Cs5g207 | 6    | 0 | 0    | 2 | MASCOT | T      |       |       |
| 1.66E-01 | 0 0 | Cs5g20740.1/Cs5g207 | 6    | 0 | 0    | 2 | MASCOT | T      | PLEX8 |       |
| 9.41E-02 | 0 0 | Cs5g20740.1/Cs5g207 | 6    | 0 | 0    | 2 | MASCOT | T      | PLEX8 |       |
| 6.97E-02 | 0 0 | Cs5g20740.1/Cs5g207 | 5.97 | 0 | 15.9 | 0 | 2      | MASCOT | T     |       |
| 1.20E-03 | 0 0 | Cs5g20740.1/Cs5g207 | 5.97 | 0 | 0    | 2 | MASCOT | T      |       |       |
| 5.66E-03 | 0 0 | Cs5g20740.1/Cs5g207 | 5.97 | 0 | 0    | 2 | MASCOT | T      |       |       |
| 2.11E-01 | 0 0 | Cs7g31650.1         | 6.04 | 0 | 0    | 2 | MASCOT | T      | PLEX8 |       |
| 2.89E-01 | 0 0 | Cs7g31650.1         | 4.37 | 0 | 15.9 | 0 | 2      | MASCOT | T     | PLEX8 |
| 2.75E-02 | 0 0 | Cs7g31650.1         | 4.37 | 0 | 0    | 2 | MASCOT | T      | PLEX8 |       |
| 1.43E-03 | 0 0 | Cs7g31650.1         | 4.37 | 0 | 0    | 2 | MASCOT | T      | PLEX8 |       |
| 3.13E-02 | 0 0 | Cs7g31650.1         | 4.37 | 0 | 0    | 2 | MASCOT | T      | PLEX8 |       |
| 1.38E-01 | 0 0 | Cs7g31650.1         | 6.05 | 0 | 0    | 2 | MASCOT | T      | PLEX8 |       |
| 3.07E-01 | 0 0 | Cs7g31650.1         | 6.05 | 0 | 0    | 2 | MASCOT | T      | PLEX8 |       |
| 5.20E-02 | 0 0 | Cs7g31650.1         | 6.05 | 0 | 0    | 2 | MASCOT | T      | PLEX8 |       |
| 2.26E-01 | 0 0 | Cs7g31650.1         | 6.05 | 0 | 0    | 2 | MASCOT | T      | PLEX8 |       |
| 2.42E-02 | 0 0 | Cs7g31650.1         | 6.05 | 0 | 0    | 2 | MASCOT | T      | PLEX8 |       |
| 2.51E-01 | 0 0 | Cs7g31650.1         | 6.05 | 0 | 0    | 2 | MASCOT | T      | PLEX8 |       |
| 2.53E-01 | 0 0 | Cs7g31650.1         | 6.05 | 0 | 0    | 2 | MASCOT | T      | PLEX8 |       |
| 2.03E-01 | 0 0 | Cs7g31650.1         | 6.05 | 0 | 0    | 2 | MASCOT | T      | PLEX8 |       |
| 9.56E-03 | 0 0 | Cs7g31650.1         | 6.05 | 0 | 0    | 2 | MASCOT | T      | PLEX8 |       |
| 2.85E-02 | 0 0 | Cs7g31650.1         | 5.99 | 0 | 0    | 2 | MASCOT | T      | PLEX8 |       |
| 3.58E-02 | 0 0 | Cs7g31650.1         | 4.09 | 0 | 0    | 2 | MASCOT | T      |       |       |
| 1.41E-02 | 0 0 | Cs7g31650.1         | 8.47 | 0 | 0    | 2 | MASCOT | T      | PLEX8 |       |
| 3.82E-02 | 0 0 | Cs7g31650.1         | 8.47 | 0 | 0    | 2 | MASCOT | T      | PLEX8 |       |
| 7.68E-02 | 0 0 | Cs7g31650.1         | 4.14 | 0 | 0    | 2 | MASCOT | T      | PLEX8 |       |
| 1.10E-04 | 0 0 | Cs7g31650.1         | 4.14 | 0 | 0    | 2 | MASCOT | T      | PLEX8 |       |
| 2.13E-02 | 0 0 | Cs7g31650.1         | 4.14 | 0 | 0    | 2 | MASCOT | T      | PLEX8 |       |
| 7.44E-03 | 0 0 | Cs7g31650.1         | 4.21 | 0 | 0    | 2 | MASCOT | T      |       |       |
| 1.57E-01 | 0 0 | Cs7g31650.1         | 4.21 | 0 | 0    | 2 | MASCOT | T      |       |       |
| 2.39E-01 | 0 0 | Cs7g31650.1         | 4.09 | 0 | 0    | 2 | MASCOT | T      |       |       |
| 4.19E-01 | 0 0 | Cs7g31650.1         | 8.6  | 0 | 15.9 | 0 | 2      | MASCOT | T     | PLEX8 |
| 6.18E-02 | 0 0 | Cs7g31650.1         | 4.53 | 0 | 0    | 2 | MASCOT | T      | PLEX8 |       |
| 6.50E-05 | 0 0 | Cs7g31650.1         | 4.53 | 0 | 0    | 2 | MASCOT | T      | PLEX8 |       |
| 2.86E-02 | 0 0 | Cs7g31650.1         | 4.53 | 0 | 0    | 2 | MASCOT | T      | PLEX8 |       |
| 8.90E-03 | 0 0 | Cs7g31650.1         | 4.53 | 0 | 0    | 2 | MASCOT | T      | PLEX8 |       |
| 6.37E-02 | 0 0 | Cs7g31650.1         | 4.53 | 0 | 0    | 2 | MASCOT | T      | PLEX8 |       |
| 1.15E-02 | 0 0 | Cs7g31650.1         | 8.44 | 0 | 0    | 2 | MASCOT | T      | PLEX8 |       |

|          |     |                     |      |   |      |   |        |        |       |       |
|----------|-----|---------------------|------|---|------|---|--------|--------|-------|-------|
| 1.27E-02 | 0 0 | Cs2g23520.1/Cs2g235 | 9.75 | 0 | 0    | 2 | MASCOT | T      | PLEX8 |       |
| 1.14E-04 | 0 0 | Cs2g23520.1/Cs2g235 | 4.37 | 0 | 0    | 2 | MASCOT | T      | PLEX8 |       |
| 5.77E-05 | 0 0 | Cs2g23520.1/Cs2g235 | 4.37 | 0 | 0    | 2 | MASCOT | T      | PLEX8 |       |
| 6.17E-03 | 0 0 | Cs2g23520.1/Cs2g235 | 4.37 | 0 | 0    | 2 | MASCOT | T      | PLEX8 |       |
| 1.36E-04 | 0 0 | Cs2g23520.1/Cs2g235 | 4.37 | 0 | 0    | 2 | MASCOT | T      | PLEX8 |       |
| 3.88E-03 | 0 0 | Cs2g23520.1/Cs2g235 | 4.37 | 0 | 0    | 2 | MASCOT | T      | PLEX8 |       |
| 4.10E-02 | 0 0 | Cs2g23520.1/Cs2g235 | 8.75 | 0 | 0    | 2 | MASCOT | T      | PLEX8 |       |
| 1.07E-02 | 0 0 | Cs2g23520.1/Cs2g235 | 8.75 | 0 | 0    | 2 | MASCOT | T      | PLEX8 |       |
| 1.97E-02 | 0 0 | Cs2g23520.1/Cs2g235 | 5.55 | 0 | 0    | 2 | MASCOT | T      | PLEX8 |       |
| 1.13E-02 | 0 0 | Cs2g23520.1/Cs2g235 | 5.55 | 0 | 0    | 2 | MASCOT | T      | PLEX8 |       |
| 2.75E-02 | 0 0 | Cs2g23520.1/Cs2g235 | 5.55 | 0 | 0    | 2 | MASCOT | T      | PLEX8 |       |
| 3.81E-02 | 0 0 | Cs2g23520.1/Cs2g235 | 6.47 | 0 | 0    | 2 | MASCOT | T      | PLEX8 |       |
| 1.53E-01 | 0 0 | Cs2g23520.1/Cs2g235 | 5.66 | 0 | 0    | 2 | MASCOT | T      | PLEX8 |       |
| 1.34E-02 | 0 0 | Cs2g23520.1/Cs2g235 | 5.66 | 0 | 0    | 2 | MASCOT | T      | PLEX8 |       |
| 1.96E-03 | 0 0 | Cs2g23520.1/Cs2g235 | 5.88 | 0 | 0    | 2 | MASCOT | T      | PLEX8 |       |
| 1.79E-05 | 0 0 | Cs2g23520.1/Cs2g235 | 5.88 | 0 | 0    | 2 | MASCOT | T      | PLEX8 |       |
| 1.25E-03 | 0 0 | Cs2g23520.1/Cs2g235 | 5.88 | 0 | 0    | 2 | MASCOT | T      | PLEX8 |       |
| 1.08E-02 | 0 0 | Cs2g23520.1/Cs2g235 | 5.88 | 0 | 0    | 2 | MASCOT | T      | PLEX8 |       |
| 6.27E-05 | 0 0 | Cs2g23520.1/Cs2g235 | 5.88 | 0 | 0    | 2 | MASCOT | T      | PLEX8 |       |
| 8.78E-02 | 0 0 | Cs2g23520.2/Cs2g235 | 9.75 | 0 | 0    | 2 | MASCOT | T      | PLEX8 |       |
| 2.31E-01 | 0 0 | Cs2g23520.1/Cs2g235 | 8.6  | 0 | 0    | 2 | MASCOT | T      | PLEX8 |       |
| 8.30E-02 | 0 0 | Cs2g23520.1/Cs2g235 | 5.75 | 0 | 15.9 | 0 | 2      | MASCOT | T     | PLEX8 |
| 2.79E-02 | 0 0 | Cs2g23520.1/Cs2g235 | 5.75 | 0 | 0    | 2 | MASCOT | T      | PLEX8 |       |
| 2.13E-02 | 0 0 | Cs2g23520.1/Cs2g235 | 5.75 | 0 | 0    | 2 | MASCOT | T      | PLEX8 |       |
| 2.60E-01 | 0 0 | Cs2g23520.1/Cs2g235 | 5.75 | 0 | 0    | 2 | MASCOT | T      | PLEX8 |       |
| 6.57E-04 | 0 0 | Cs2g23520.1/Cs2g235 | 5.84 | 0 | 0    | 2 | MASCOT | T      | PLEX8 |       |
| 1.62E-01 | 0 0 | Cs2g23520.1/Cs2g235 | 5.84 | 0 | 0    | 2 | MASCOT | T      | PLEX8 |       |
| 7.64E-04 | 0 0 | Cs2g23520.1/Cs2g235 | 5.84 | 0 | 0    | 2 | MASCOT | T      | PLEX8 |       |
| 8.94E-03 | 0 0 | Cs2g23520.1/Cs2g235 | 5.84 | 0 | 0    | 2 | MASCOT | T      | PLEX8 |       |
| 3.73E-03 | 0 0 | Cs2g23520.1/Cs2g235 | 8.59 | 0 | 0    | 2 | MASCOT | T      | PLEX8 |       |
| 1.57E-02 | 0 0 | Cs7g22750.1/Cs7g227 | 5.88 | 0 | 0    | 2 | MASCOT | T      | PLEX8 |       |
| 6.07E-03 | 0 0 | Cs7g22750.1/Cs7g227 | 5.88 | 0 | 0    | 2 | MASCOT | T      | PLEX8 |       |
| 6.37E-04 | 0 0 | Cs7g22750.1/Cs7g227 | 5.88 | 0 | 0    | 2 | MASCOT | T      | PLEX8 |       |
| 1.49E-03 | 0 0 | Cs7g22750.1/Cs7g227 | 5.88 | 0 | 0    | 2 | MASCOT | T      | PLEX8 |       |
| 1.52E-02 | 0 0 | Cs7g22750.1/Cs7g227 | 4.37 | 0 | 0    | 2 | MASCOT | T      | PLEX8 |       |
| 6.48E-03 | 0 0 | Cs7g22750.1/Cs7g227 | 4.37 | 0 | 0    | 2 | MASCOT | T      | PLEX8 |       |
| 3.58E-03 | 0 0 | Cs7g22750.1/Cs7g227 | 4.37 | 0 | 0    | 2 | MASCOT | T      | PLEX8 |       |
| 5.99E-02 | 0 0 | Cs7g22750.1/Cs7g227 | 4.53 | 0 | 0    | 2 | MASCOT | T      | PLEX8 |       |
| 2.43E-02 | 0 0 | Cs7g22750.1/Cs7g227 | 4.53 | 0 | 0    | 2 | MASCOT | T      | PLEX8 |       |
| 4.10E-02 | 0 0 | Cs7g22750.1/Cs7g227 | 4.53 | 0 | 0    | 2 | MASCOT | T      | PLEX8 |       |
| 2.19E-02 | 0 0 | Cs7g22750.1/Cs7g227 | 4.53 | 0 | 0    | 2 | MASCOT | T      | PLEX8 |       |
| 4.06E-01 | 0 0 | Cs7g22750.1/Cs7g227 | 4.53 | 0 | 0    | 2 | MASCOT | T      | PLEX8 |       |
| 1.29E-03 | 0 0 | Cs7g22750.1/Cs7g227 | 4.14 | 0 | 0    | 2 | MASCOT | T      | PLEX8 |       |
| 6.37E-02 | 0 0 | Cs7g22750.1/Cs7g227 | 4.14 | 0 | 0    | 2 | MASCOT | T      |       |       |
| 1.09E-02 | 0 0 | Cs7g22750.1/Cs7g227 | 4.14 | 0 | 0    | 2 | MASCOT | T      |       |       |
| 3.15E-02 | 0 0 | Cs7g22750.10/Cs7g22 | 8.25 | 0 | 0    | 2 | MASCOT | T      |       |       |
| 5.40E-03 | 0 0 | Cs7g22750.10/Cs7g22 | 8.25 | 0 | 0    | 2 | MASCOT | T      |       |       |
| 6.36E-02 | 0 0 | Cs7g22750.1/Cs7g227 | 4.53 | 0 | 0    | 2 | MASCOT | T      | PLEX8 |       |
| 8.54E-02 | 0 0 | Cs7g22750.1/Cs7g227 | 6.46 | 0 | 0    | 2 | MASCOT | T      | PLEX8 |       |
| 6.04E-03 | 0 0 | Cs7g22750.1/Cs7g227 | 6.46 | 0 | 0    | 2 | MASCOT | T      | PLEX8 |       |
| 2.38E-01 | 0 0 | Cs7g22750.1/Cs7g227 | 5.5  | 0 | 0    | 2 | MASCOT | T      | PLEX8 |       |

|          |     |                       |      |   |      |   |   |        |   |       |
|----------|-----|-----------------------|------|---|------|---|---|--------|---|-------|
| 3.55E-01 | 0 0 | Cs7g22750.1/Cs7g227   | 9.73 | 0 | 15.9 | 0 | 2 | MASCOT | T | PLEX8 |
| 6.42E-03 | 0 0 | Cs7g22750.1/Cs7g227   | 9.73 | 0 |      | 0 | 2 | MASCOT | T | PLEX8 |
| 3.71E-02 | 0 0 | Cs7g22750.1/Cs7g227   | 4.65 | 0 | 15.9 | 0 | 2 | MASCOT | T | PLEX8 |
| 6.36E-02 | 0 0 | Cs7g22750.1/Cs7g227   | 4.65 | 0 |      | 0 | 2 | MASCOT | T | PLEX8 |
| 4.02E-05 | 0 0 | Cs7g22750.1/Cs7g227   | 4.65 | 0 |      | 0 | 2 | MASCOT | T | PLEX8 |
| 9.52E-05 | 0 0 | Cs7g22750.1/Cs7g227   | 4.65 | 0 |      | 0 | 2 | MASCOT | T | PLEX8 |
| 4.15E-04 | 0 0 | Cs7g22750.1/Cs7g227   | 5.55 | 0 |      | 0 | 2 | MASCOT | T | PLEX8 |
| 1.04E-02 | 0 0 | Cs7g22750.1/Cs7g227   | 6.41 | 0 |      | 0 | 2 | MASCOT | T |       |
| 1.93E-04 | 0 0 | Cs2g21000.1           | 3.92 | 0 | 15.9 | 0 | 2 | MASCOT | T | PLEX8 |
| 5.83E-02 | 0 0 | Cs2g21000.1           | 5.99 | 0 |      | 0 | 2 | MASCOT | T | PLEX8 |
| 1.76E-03 | 0 0 | Cs2g21000.1           | 5.99 | 0 |      | 0 | 2 | MASCOT | T | PLEX8 |
| 1.66E-05 | 0 0 | Cs2g21000.1           | 5.99 | 0 |      | 0 | 2 | MASCOT | T | PLEX8 |
| 7.74E-04 | 0 0 | Cs2g21000.1           | 5.99 | 0 |      | 0 | 2 | MASCOT | T | PLEX8 |
| 4.69E-03 | 0 0 | Cs2g21000.1           | 8.22 | 0 |      | 0 | 2 | MASCOT | T | PLEX8 |
| 4.47E-02 | 0 0 | Cs2g21000.1           | 5.84 | 0 |      | 0 | 2 | MASCOT | T | PLEX8 |
| 2.30E-01 | 0 0 | Cs2g21000.1           | 5.84 | 0 |      | 0 | 2 | MASCOT | T | PLEX8 |
| 3.81E-02 | 0 0 | Cs2g21000.1           | 6.75 | 0 |      | 0 | 2 | MASCOT | T | PLEX8 |
| 7.02E-02 | 0 0 | Cs2g21000.1           | 6.75 | 0 |      | 0 | 2 | MASCOT | T | PLEX8 |
| 4.90E-02 | 0 0 | Cs2g21000.1           | 6.75 | 0 |      | 0 | 2 | MASCOT | T |       |
| 3.25E-06 | 0 0 | Cs2g21000.1           | 5.84 | 0 |      | 0 | 2 | MASCOT | T | PLEX8 |
| 4.05E-03 | 0 0 | Cs2g21000.1           | 5.84 | 0 | 15.9 | 0 | 2 | MASCOT | T | PLEX8 |
| 9.45E-02 | 0 0 | Cs2g21000.1           | 5.84 | 0 | 15.9 | 0 | 2 | MASCOT | T | PLEX8 |
| 5.03E-04 | 0 0 | Cs2g21000.1           | 5.84 | 0 |      | 0 | 2 | MASCOT | T | PLEX8 |
| 8.89E-04 | 0 0 | Cs2g21000.1           | 5.84 | 0 |      | 0 | 2 | MASCOT | T | PLEX8 |
| 2.35E-02 | 0 0 | Cs2g21000.1           | 4.03 | 0 |      | 0 | 2 | MASCOT | T | PLEX8 |
| 1.58E-01 | 0 0 | Cs2g21000.1           | 4.37 | 0 |      | 0 | 2 | MASCOT | T | PLEX8 |
| 5.28E-02 | 0 0 | Cs2g21000.1           | 4.37 | 0 |      | 0 | 2 | MASCOT | T | PLEX8 |
| 5.51E-03 | 0 0 | Cs2g21000.1           | 4.37 | 0 |      | 0 | 2 | MASCOT | T | PLEX8 |
| 6.15E-02 | 0 0 | Cs2g21000.1           | 4.37 | 0 |      | 0 | 2 | MASCOT | T | PLEX8 |
| 2.30E-02 | 0 0 | Cs2g21000.1           | 9.75 | 0 |      | 0 | 2 | MASCOT | T |       |
| 1.73E-04 | 0 0 | Cs2g21000.1           | 4.37 | 0 |      | 0 | 2 | MASCOT | T | PLEX8 |
| 1.14E-03 | 0 0 | Cs2g21000.1           | 4.37 | 0 |      | 0 | 2 | MASCOT | T | PLEX8 |
| 9.44E-03 | 0 0 | Cs2g21000.1           | 4.37 | 0 |      | 0 | 2 | MASCOT | T | PLEX8 |
| 2.42E-03 | 0 0 | Cs2g21000.1           | 4.37 | 0 |      | 0 | 2 | MASCOT | T | PLEX8 |
| 8.67E-06 | 0 0 | Cs2g21000.1           | 4.53 | 0 |      | 0 | 2 | MASCOT | T | PLEX8 |
| 1.25E-02 | 0 0 | orange1.1t03226.1/ora | 5.4  | 0 |      | 0 | 2 | MASCOT | T | PLEX8 |
| 3.36E-02 | 0 0 | orange1.1t03226.1/ora | 5.4  | 0 |      | 0 | 2 | MASCOT | T | PLEX8 |
| 5.69E-02 | 0 0 | Cs2g27720.1/Cs2g277   | 9.7  | 1 |      | 0 | 2 | MASCOT | T | PLEX8 |
| 2.79E-02 | 0 0 | Cs2g27720.1/Cs2g277   | 9.7  | 1 |      | 0 | 2 | MASCOT | T | PLEX8 |
| 5.62E-03 | 0 0 | Cs2g27720.1/Cs2g277   | 5.72 | 0 |      | 0 | 2 | MASCOT | T | PLEX8 |
| 2.19E-01 | 0 0 | orange1.1t03226.1/ora | 5.37 | 0 |      | 0 | 2 | MASCOT | T | PLEX8 |
| 3.40E-02 | 0 0 | orange1.1t03226.1/ora | 5.37 | 0 |      | 0 | 2 | MASCOT | T | PLEX8 |
| 3.48E-03 | 0 0 | orange1.1t03226.1/ora | 5.37 | 0 |      | 0 | 2 | MASCOT | T | PLEX8 |
| 3.49E-02 | 0 0 | orange1.1t03226.1/ora | 5.37 | 0 |      | 0 | 2 | MASCOT | T | PLEX8 |
| 9.32E-03 | 0 0 | orange1.1t03226.1/ora | 5.37 | 0 |      | 0 | 2 | MASCOT | T | PLEX8 |
| 1.17E-02 | 0 0 | orange1.1t03226.1/ora | 5.37 | 0 |      | 0 | 2 | MASCOT | T | PLEX8 |
| 3.86E-02 | 0 0 | orange1.1t03226.1/ora | 5.37 | 0 |      | 0 | 2 | MASCOT | T | PLEX8 |
| 1.44E-02 | 0 0 | orange1.1t03226.1/ora | 5.37 | 0 |      | 0 | 2 | MASCOT | T | PLEX8 |
| 2.75E-04 | 0 0 | orange1.1t03226.1/ora | 5.37 | 0 |      | 0 | 2 | MASCOT | T | PLEX8 |
| 9.99E-02 | 0 0 | orange1.1t03226.1/ora | 5.37 | 0 |      | 0 | 2 | MASCOT | T | PLEX8 |
| 3.08E-04 | 0 0 | orange1.1t03226.1/ora | 5.37 | 0 |      | 0 | 2 | MASCOT | T | PLEX8 |

|          |     |                       |      |   |      |   |        |        |       |       |
|----------|-----|-----------------------|------|---|------|---|--------|--------|-------|-------|
| 1.73E-01 | 0 0 | Cs2g27720.1/Cs2g277   | 8.59 | 0 | 0    | 2 | MASCOT | T      | PLEX8 |       |
| 2.47E-01 | 0 0 | Cs2g27720.1/Cs2g277   | 8.59 | 0 | 0    | 2 | MASCOT | T      |       |       |
| 4.85E-01 | 0 0 | Cs2g27720.1/Cs2g277   | 8.59 | 0 | 0    | 2 | MASCOT | T      | PLEX8 |       |
| 2.56E-03 | 0 0 | orange1.1t03226.1/ora | 5.88 | 0 | 0    | 2 | MASCOT | T      | PLEX8 |       |
| 3.21E-01 | 0 0 | orange1.1t03226.1/ora | 6.09 | 0 | 0    | 2 | MASCOT | T      | PLEX8 |       |
| 8.50E-03 | 0 0 | Cs2g27720.1/Cs2g277   | 6.74 | 0 | 0    | 2 | MASCOT | T      |       |       |
| 1.08E-02 | 0 0 | Cs2g27720.1/Cs2g277   | 4.21 | 0 | 15.9 | 0 | 2      | MASCOT | T     |       |
| 9.03E-03 | 0 0 | Cs2g27720.1/Cs2g277   | 4.21 | 0 | 0    | 2 | MASCOT | T      | PLEX8 |       |
| 2.70E-01 | 0 0 | Cs2g27720.1/Cs2g277   | 4.21 | 0 | 0    | 2 | MASCOT | T      |       |       |
| 2.10E-01 | 0 0 | orange1.1t03226.1/ora | 4.37 | 0 | 0    | 2 | MASCOT | T      | PLEX8 |       |
| 7.24E-02 | 0 0 | Cs2g27720.1/Cs2g277   | 9.75 | 0 | 0    | 2 | MASCOT | T      | PLEX8 |       |
| 1.15E-02 | 0 0 | Cs5g09330.1           | 4.53 | 0 | 0    | 2 | MASCOT | T      | PLEX8 |       |
| 3.07E-05 | 0 0 | Cs5g09330.1           | 4.53 | 0 | 0    | 2 | MASCOT | T      | PLEX8 |       |
| 1.97E-07 | 0 0 | Cs5g09330.1           | 4.1  | 0 | 0    | 2 | MASCOT | T      | PLEX8 |       |
| 3.15E-04 | 0 0 | Cs5g09330.1           | 4.1  | 0 | 0    | 2 | MASCOT | T      |       |       |
| 2.92E-03 | 0 0 | Cs5g09330.1           | 4.1  | 0 | 0    | 2 | MASCOT | T      | PLEX8 |       |
| 1.64E-01 | 0 0 | Cs5g09330.1           | 4.03 | 0 | 0    | 2 | MASCOT | T      | PLEX8 |       |
| 6.04E-03 | 0 0 | Cs5g09330.1           | 6.74 | 0 | 0    | 2 | MASCOT | T      | PLEX8 |       |
| 1.83E-01 | 0 0 | Cs5g09330.1           | 6.74 | 0 | 0    | 2 | MASCOT | T      | PLEX8 |       |
| 8.03E-03 | 0 0 | Cs5g09330.1           | 6.74 | 0 | 0    | 2 | MASCOT | T      | PLEX8 |       |
| 2.17E-01 | 0 0 | Cs5g09330.1           | 5.84 | 0 | 0    | 2 | MASCOT | T      | PLEX8 |       |
| 1.92E-01 | 0 0 | Cs5g09330.1           | 5.32 | 0 | 0    | 2 | MASCOT | T      | PLEX8 |       |
| 1.36E-02 | 0 0 | Cs5g09330.1           | 5.32 | 0 | 0    | 2 | MASCOT | T      | PLEX8 |       |
| 8.26E-02 | 0 0 | Cs5g09330.1           | 5.32 | 0 | 0    | 2 | MASCOT | T      | PLEX8 |       |
| 4.21E-03 | 0 0 | Cs5g09330.1           | 5.81 | 0 | 0    | 2 | MASCOT | T      |       |       |
| 1.17E-01 | 0 0 | Cs5g09330.1           | 5.97 | 0 | 0    | 2 | MASCOT | T      | PLEX8 |       |
| 7.76E-03 | 0 0 | Cs5g09330.1           | 4.03 | 0 | 0    | 2 | MASCOT | T      | PLEX8 |       |
| 2.02E-02 | 0 0 | Cs5g09330.1           | 8.63 | 0 | 0    | 2 | MASCOT | T      | PLEX8 |       |
| 5.85E-02 | 0 0 | Cs5g09330.1           | 8.63 | 0 | 0    | 2 | MASCOT | T      | PLEX8 |       |
| 4.77E-02 | 0 0 | Cs5g09330.1           | 8.63 | 0 | 0    | 2 | MASCOT | T      | PLEX8 |       |
| 2.15E-03 | 0 0 | Cs5g09330.1           | 8.63 | 0 | 0    | 2 | MASCOT | T      | PLEX8 |       |
| 1.95E-02 | 0 0 | Cs5g09330.1           | 8.63 | 0 | 0    | 2 | MASCOT | T      | PLEX8 |       |
| 1.37E-01 | 0 0 | Cs5g09330.1           | 4.21 | 0 | 15.9 | 0 | 2      | MASCOT | T     | PLEX8 |
| 9.98E-02 | 0 0 | Cs5g09330.1           | 4.21 | 0 | 0    | 2 | MASCOT | T      | PLEX8 |       |
| 9.51E-02 | 0 0 | Cs5g09330.1           | 4.21 | 0 | 0    | 2 | MASCOT | T      | PLEX8 |       |
| 2.28E-01 | 0 0 | Cs5g09330.1           | 6.74 | 0 | 0    | 2 | MASCOT | T      | PLEX8 |       |
| 1.21E-02 | 0 0 | Cs5g09330.1           | 6.74 | 0 | 0    | 2 | MASCOT | T      | PLEX8 |       |
| 1.72E-01 | 0 0 | Cs5g20540.1           | 4.37 | 0 | 0    | 2 | MASCOT | T      |       |       |
| 3.47E-01 | 0 0 | Cs5g20540.1 ! Cs8g10  | 5.72 | 0 | 15.9 | 0 | 2      | MASCOT | T     | PLEX8 |
| 3.45E-02 | 0 0 | Cs5g20540.1 ! Cs8g10  | 5.72 | 0 | 0    | 2 | MASCOT | T      | PLEX8 |       |
| 2.75E-02 | 0 0 | Cs5g20540.1 ! Cs8g10  | 5.72 | 0 | 0    | 2 | MASCOT | T      | PLEX8 |       |
| 2.71E-02 | 0 0 | Cs5g20540.1 ! Cs8g10  | 5.72 | 0 | 0    | 2 | MASCOT | T      | PLEX8 |       |
| 3.56E-02 | 0 0 | Cs5g20540.1           | 5.29 | 0 | 0    | 2 | MASCOT | T      | PLEX8 |       |
| 2.23E-02 | 0 0 | Cs5g20540.1           | 5.29 | 0 | 0    | 2 | MASCOT | T      | PLEX8 |       |
| 6.76E-02 | 0 0 | Cs5g20540.1           | 4    | 0 | 0    | 2 | MASCOT | T      | PLEX8 |       |
| 2.53E-02 | 0 0 | Cs5g20540.1/Cs8g102   | 6.71 | 0 | 15.9 | 0 | 2      | MASCOT | T     | PLEX8 |
| 4.41E-02 | 0 0 | Cs5g20540.1/Cs8g102   | 6.71 | 0 | 15.9 | 0 | 2      | MASCOT | T     | PLEX8 |
| 8.40E-02 | 0 0 | Cs5g20540.1/Cs8g102   | 6.71 | 0 | 0    | 2 | MASCOT | T      |       |       |
| 7.32E-02 | 0 0 | Cs5g20540.1           | 5.8  | 0 | 0    | 2 | MASCOT | T      | PLEX8 |       |
| 2.48E-03 | 0 0 | Cs5g20540.1           | 4.53 | 0 | 0    | 2 | MASCOT | T      | PLEX8 |       |
| 5.52E-04 | 0 0 | Cs5g20540.1           | 4.53 | 0 | 0    | 2 | MASCOT | T      | PLEX8 |       |

|          |     |                       |      |   |      |   |        |        |         |
|----------|-----|-----------------------|------|---|------|---|--------|--------|---------|
| 2.19E-01 | 0 0 | Cs5g20540.1           | 5.13 | 0 | 0    | 2 | MASCOT | T      |         |
| 1.14E-01 | 0 0 | Cs5g20540.1           | 4.21 | 0 | 15.9 | 0 | 2      | MASCOT | T PLEX8 |
| 1.78E-02 | 0 0 | Cs5g20540.1           | 4.21 | 0 | 0    | 2 | MASCOT | T      | PLEX8   |
| 4.26E-02 | 0 0 | Cs5g20540.1           | 4.21 | 0 | 0    | 2 | MASCOT | T      | PLEX8   |
| 4.34E-02 | 0 0 | Cs5g20540.1           | 6.75 | 0 | 0    | 2 | MASCOT | T      | PLEX8   |
| 4.00E-02 | 0 0 | Cs5g20540.1           | 6.71 | 0 | 0    | 2 | MASCOT | T      | PLEX8   |
| 1.16E-02 | 0 0 | Cs5g20540.1           | 6.71 | 0 | 0    | 2 | MASCOT | T      | PLEX8   |
| 2.52E-03 | 0 0 | Cs5g20540.1           | 4.37 | 0 | 0    | 2 | MASCOT | T      | PLEX8   |
| 3.93E-03 | 0 0 | Cs5g20540.1           | 4.37 | 0 | 0    | 2 | MASCOT | T      | PLEX8   |
| 7.24E-02 | 0 0 | Cs5g20540.1           | 4.37 | 0 | 0    | 2 | MASCOT | T      | PLEX8   |
| 1.57E-02 | 0 0 | Cs5g20540.1           | 4.37 | 0 | 0    | 2 | MASCOT | T      | PLEX8   |
| 2.41E-01 | 0 0 | Cs5g20540.1           | 4.37 | 0 | 0    | 2 | MASCOT | T      | PLEX8   |
| 1.06E-01 | 0 0 | orange1.1t03328.1     | 6.74 | 0 | 0    | 2 | MASCOT | T      |         |
| 3.48E-02 | 0 0 | orange1.1t03328.1/ora | 7.03 | 0 | 0    | 2 | MASCOT | T      | PLEX8   |
| 2.42E-01 | 0 0 | orange1.1t03328.1/ora | 7.03 | 0 | 0    | 2 | MASCOT | T      | PLEX8   |
| 5.66E-03 | 0 0 | orange1.1t03328.1/ora | 7.03 | 0 | 0    | 2 | MASCOT | T      | PLEX8   |
| 1.19E-02 | 0 0 | orange1.1t03328.1/ora | 6.47 | 0 | 0    | 2 | MASCOT | T      | PLEX8   |
| 2.32E-01 | 0 0 | orange1.1t03328.1/ora | 9.8  | 0 | 0    | 2 | MASCOT | T      | PLEX8   |
| 5.99E-01 | 0 0 | orange1.1t03328.1/ora | 9.8  | 0 | 0    | 2 | MASCOT | T      |         |
| 2.16E-01 | 0 0 | orange1.1t03328.1/ora | 9.8  | 0 | 0    | 2 | MASCOT | T      |         |
| 9.64E-03 | 0 0 | orange1.1t03328.1/ora | 5.84 | 0 | 0    | 2 | MASCOT | T      | PLEX8   |
| 4.77E-03 | 0 0 | orange1.1t03328.1     | 4.03 | 0 | 0    | 2 | MASCOT | T      | PLEX8   |
| 2.86E-03 | 0 0 | orange1.1t03328.1     | 4.03 | 0 | 0    | 2 | MASCOT | T      | PLEX8   |
| 4.33E-02 | 0 0 | orange1.1t03328.1     | 6    | 0 | 0    | 2 | MASCOT | T      | PLEX8   |
| 4.30E-01 | 0 0 | orange1.1t03328.1     | 6    | 0 | 0    | 2 | MASCOT | T      | PLEX8   |
| 1.33E-01 | 0 0 | orange1.1t03328.1     | 6    | 0 | 0    | 2 | MASCOT | T      | PLEX8   |
| 5.97E-05 | 0 0 | orange1.1t03328.1/ora | 4.37 | 0 | 0    | 2 | MASCOT | T      |         |
| 4.12E-07 | 0 0 | orange1.1t03328.1/ora | 4.37 | 0 | 0    | 2 | MASCOT | T      |         |
| 3.15E-01 | 0 0 | orange1.1t03328.1/ora | 4.37 | 0 | 0    | 2 | MASCOT | T      | PLEX8   |
| 1.29E-01 | 0 0 | orange1.1t03328.1/ora | 4.37 | 0 | 0    | 2 | MASCOT | T      | PLEX8   |
| 1.75E-01 | 0 0 | orange1.1t03328.1/ora | 4.37 | 0 | 0    | 2 | MASCOT | T      | PLEX8   |
| 1.93E-02 | 0 0 | orange1.1t03328.1/ora | 5.21 | 0 | 0    | 2 | MASCOT | T      | PLEX8   |
| 1.95E-03 | 0 0 | orange1.1t03328.1/ora | 5.21 | 0 | 0    | 2 | MASCOT | T      | PLEX8   |
| 4.74E-02 | 0 0 | orange1.1t03328.1/ora | 5.21 | 0 | 0    | 2 | MASCOT | T      | PLEX8   |
| 2.63E-04 | 0 0 | orange1.1t03328.1/ora | 5.21 | 0 | 0    | 2 | MASCOT | T      | PLEX8   |
| 1.41E-01 | 0 0 | orange1.1t03328.1/ora | 5.55 | 0 | 0    | 2 | MASCOT | T      | PLEX8   |
| 1.75E-03 | 0 0 | orange1.1t03328.1/ora | 5.81 | 0 | 0    | 2 | MASCOT | T      | PLEX8   |
| 7.92E-04 | 0 0 | orange1.1t03328.1/ora | 5.81 | 0 | 0    | 2 | MASCOT | T      | PLEX8   |
| 5.81E-02 | 0 0 | Cs5g30520.1/Cs9g078   | 4.37 | 0 | 0    | 2 | MASCOT | T      | PLEX8   |
| 9.96E-02 | 0 0 | Cs9g07880.1 ! Cs3g26  | 5.84 | 0 | 0    | 2 | MASCOT | T      | PLEX8   |
| 1.36E-01 | 0 0 | Cs9g07880.1 ! Cs3g26  | 5.84 | 0 | 0    | 2 | MASCOT | T      | PLEX8   |
| 2.20E-02 | 0 0 | Cs9g07880.1           | 6.47 | 0 | 0    | 2 | MASCOT | T      | PLEX8   |
| 4.95E-04 | 0 0 | Cs9g07880.1           | 6.47 | 0 | 0    | 2 | MASCOT | T      | PLEX8   |
| 5.39E-02 | 0 0 | Cs9g07880.1           | 6.47 | 0 | 0    | 2 | MASCOT | T      | PLEX8   |
| 1.52E-01 | 0 0 | Cs9g07880.1           | 6.47 | 0 | 0    | 2 | MASCOT | T      | PLEX8   |
| 1.59E-02 | 0 0 | Cs9g07880.1           | 6.47 | 0 | 0    | 2 | MASCOT | T      | PLEX8   |
| 2.02E-04 | 0 0 | Cs9g07880.1           | 4.03 | 0 | 15.9 | 0 | 2      | MASCOT | T       |
| 6.28E-05 | 0 0 | Cs9g07880.1           | 4.03 | 0 | 0    | 2 | MASCOT | T      |         |
| 1.49E-01 | 0 0 | Cs8g03650.1/Cs9g078   | 4.14 | 0 | 0    | 2 | MASCOT | T      |         |
| 3.59E-02 | 0 0 | Cs8g03650.1/Cs9g078   | 4.14 | 0 | 0    | 2 | MASCOT | T      |         |
| 5.00E-05 | 0 0 | Cs8g03650.1/Cs9g078   | 4.14 | 0 | 0    | 2 | MASCOT | T      |         |

|          |     |                     |      |   |      |   |        |        |       |       |
|----------|-----|---------------------|------|---|------|---|--------|--------|-------|-------|
| 3.86E-03 | 0 0 | Cs8g03650.1/Cs9g078 | 4.14 | 0 | 0    | 2 | MASCOT | T      |       |       |
| 1.78E-03 | 0 0 | Cs8g03650.1/Cs9g078 | 4.14 | 0 | 0    | 2 | MASCOT | T      |       |       |
| 2.50E-01 | 0 0 | Cs9g07880.1         | 6.12 | 0 | 0    | 2 | MASCOT | T      | PLEX8 |       |
| 6.31E-02 | 0 0 | Cs9g07880.1         | 8.07 | 0 | 0    | 2 | MASCOT | T      | PLEX8 |       |
| 4.37E-02 | 0 0 | Cs9g07880.1         | 5.83 | 0 | 0    | 2 | MASCOT | T      |       |       |
| 8.62E-02 | 0 0 | Cs9g07880.1         | 5.83 | 0 | 0    | 2 | MASCOT | T      |       |       |
| 4.44E-02 | 0 0 | Cs9g07880.1         | 4.21 | 0 | 0    | 2 | MASCOT | T      | PLEX8 |       |
| 4.96E-03 | 0 0 | Cs9g07880.1         | 4.37 | 0 | 0    | 2 | MASCOT | T      |       |       |
| 2.11E-03 | 0 0 | Cs9g07880.1         | 4.37 | 0 | 0    | 2 | MASCOT | T      |       |       |
| 1.69E-02 | 0 0 | Cs9g07880.1         | 8.75 | 0 | 0    | 2 | MASCOT | T      | PLEX8 |       |
| 2.08E-02 | 0 0 | Cs9g07880.1         | 8.75 | 0 | 0    | 2 | MASCOT | T      | PLEX8 |       |
| 1.14E-01 | 0 0 | Cs9g07880.1         | 4.03 | 0 | 0    | 2 | MASCOT | T      |       |       |
| 7.70E-03 | 0 0 | Cs9g18710.1/Cs9g187 | 4.14 | 0 | 0    | 2 | MASCOT | T      | PLEX8 |       |
| 1.93E-04 | 0 0 | Cs9g18710.1/Cs9g187 | 4.21 | 0 | 0    | 2 | MASCOT | T      | PLEX8 |       |
| 1.57E-02 | 0 0 | Cs9g18710.1/Cs9g187 | 4.21 | 0 | 0    | 2 | MASCOT | T      | PLEX8 |       |
| 4.49E-04 | 0 0 | Cs9g18710.1         | 4.25 | 0 | 0    | 2 | MASCOT | T      |       |       |
| 9.66E-02 | 0 0 | Cs9g18710.1/Cs9g187 | 6.1  | 0 | 0    | 2 | MASCOT | T      |       |       |
| 4.91E-03 | 0 0 | Cs9g18710.1/Cs9g187 | 8.25 | 0 | 0    | 2 | MASCOT | T      |       |       |
| 1.32E-01 | 0 0 | Cs9g18710.1/Cs9g187 | 8.25 | 0 | 0    | 2 | MASCOT | T      |       |       |
| 1.44E-02 | 0 0 | Cs9g18710.1/Cs9g187 | 5.72 | 0 | 0    | 2 | MASCOT | T      | PLEX8 |       |
| 3.00E-02 | 0 0 | Cs9g18710.1/Cs9g187 | 5.72 | 0 | 0    | 2 | MASCOT | T      | PLEX8 |       |
| 1.37E-01 | 0 0 | Cs9g18710.1/Cs9g187 | 5.72 | 0 | 0    | 2 | MASCOT | T      | PLEX8 |       |
| 1.83E-01 | 0 0 | Cs9g18710.1/Cs9g187 | 5.72 | 0 | 0    | 2 | MASCOT | T      | PLEX8 |       |
| 3.57E-03 | 0 0 | Cs9g18710.1/Cs9g187 | 6.46 | 0 | 0    | 2 | MASCOT | T      | PLEX8 |       |
| 3.47E-01 | 0 0 | Cs9g18710.1/Cs9g187 | 6.46 | 0 | 0    | 2 | MASCOT | T      | PLEX8 |       |
| 2.27E-01 | 0 0 | Cs9g18710.1/Cs9g187 | 6.46 | 0 | 0    | 2 | MASCOT | T      | PLEX8 |       |
| 2.38E-03 | 0 0 | Cs9g18710.1/Cs9g187 | 5.81 | 0 | 0    | 2 | MASCOT | T      | PLEX8 |       |
| 2.91E-01 | 0 0 | Cs9g18710.1/Cs9g187 | 5.81 | 0 | 0    | 2 | MASCOT | T      | PLEX8 |       |
| 1.12E-01 | 0 0 | Cs9g18710.1/Cs9g187 | 9.73 | 0 | 15.9 | 0 | 2      | MASCOT | T     | PLEX8 |
| 6.93E-02 | 0 0 | Cs9g18710.1/Cs9g187 | 9.73 | 0 | 0    | 2 | MASCOT | T      | PLEX8 |       |
| 5.59E-02 | 0 0 | Cs9g18710.1/Cs9g187 | 9.73 | 0 | 0    | 2 | MASCOT | T      | PLEX8 |       |
| 3.71E-02 | 0 0 | Cs7g22750.1/Cs7g227 | 4.65 | 0 | 15.9 | 0 | 2      | MASCOT | T     | PLEX8 |
| 6.36E-02 | 0 0 | Cs7g22750.1/Cs7g227 | 4.65 | 0 | 0    | 2 | MASCOT | T      | PLEX8 |       |
| 4.02E-05 | 0 0 | Cs7g22750.1/Cs7g227 | 4.65 | 0 | 0    | 2 | MASCOT | T      | PLEX8 |       |
| 9.52E-05 | 0 0 | Cs7g22750.1/Cs7g227 | 4.65 | 0 | 0    | 2 | MASCOT | T      | PLEX8 |       |
| 1.16E-02 | 0 0 | Cs9g18710.1/Cs9g187 | 5.66 | 0 | 0    | 2 | MASCOT | T      |       |       |
| 1.70E-02 | 0 0 | Cs9g18710.1/Cs9g187 | 4.41 | 1 | 0    | 2 | MASCOT | T      | PLEX8 |       |
| 7.60E-03 | 0 0 | Cs4g16900.1/Cs4g169 | 4.21 | 0 | 0    | 2 | MASCOT | T      | PLEX8 |       |
| 2.24E-01 | 0 0 | Cs4g16900.1/Cs4g169 | 6    | 0 | 0    | 2 | MASCOT | T      | PLEX8 |       |
| 4.49E-02 | 0 0 | Cs4g16900.1/Cs4g169 | 8.22 | 0 | 0    | 2 | MASCOT | T      | PLEX8 |       |
| 6.34E-04 | 0 0 | Cs4g16900.1/Cs4g169 | 8.22 | 0 | 0    | 2 | MASCOT | T      | PLEX8 |       |
| 1.39E-02 | 0 0 | Cs4g16900.1/Cs4g169 | 8.22 | 0 | 0    | 2 | MASCOT | T      | PLEX8 |       |
| 6.02E-02 | 0 0 | Cs4g16900.1/Cs4g169 | 8.75 | 0 | 0    | 2 | MASCOT | T      | PLEX8 |       |
| 2.95E-01 | 0 0 | Cs4g16900.1/Cs4g169 | 8.75 | 0 | 0    | 2 | MASCOT | T      | PLEX8 |       |
| 5.07E-04 | 0 0 | Cs4g16900.1/Cs4g169 | 6    | 0 | 0    | 2 | MASCOT | T      | PLEX8 |       |
| 5.34E-04 | 0 0 | Cs4g16900.1/Cs4g169 | 6    | 0 | 0    | 2 | MASCOT | T      | PLEX8 |       |
| 1.19E-04 | 0 0 | Cs4g16900.1/Cs4g169 | 3.92 | 0 | 0    | 2 | MASCOT | T      |       |       |
| 8.56E-03 | 0 0 | Cs4g16900.1/Cs4g169 | 5.96 | 0 | 0    | 2 | MASCOT | T      | PLEX8 |       |
| 2.46E-02 | 0 0 | Cs4g16900.1/Cs4g169 | 5.96 | 0 | 0    | 2 | MASCOT | T      | PLEX8 |       |
| 3.47E-03 | 0 0 | Cs4g16900.1/Cs4g169 | 4.14 | 0 | 0    | 2 | MASCOT | T      | PLEX8 |       |
| 2.35E-02 | 0 0 | Cs4g16900.1/Cs4g169 | 4.14 | 0 | 0    | 2 | MASCOT | T      | PLEX8 |       |

|          |     |                     |      |   |      |   |        |        |       |       |
|----------|-----|---------------------|------|---|------|---|--------|--------|-------|-------|
| 1.57E-02 | 0 0 | Cs4g16900.1/Cs4g169 | 4.14 | 0 | 0    | 2 | MASCOT | T      | PLEX8 |       |
| 4.35E-02 | 0 0 | Cs4g16900.1/Cs4g169 | 5.87 | 0 | 0    | 2 | MASCOT | T      | PLEX8 |       |
| 2.88E-03 | 0 0 | Cs4g16900.1/Cs4g169 | 5.87 | 0 | 0    | 2 | MASCOT | T      | PLEX8 |       |
| 6.17E-03 | 0 0 | Cs4g16900.1/Cs4g169 | 5.87 | 0 | 0    | 2 | MASCOT | T      | PLEX8 |       |
| 2.77E-03 | 0 0 | Cs4g16900.1/Cs4g169 | 5.87 | 0 | 0    | 2 | MASCOT | T      | PLEX8 |       |
| 9.69E-02 | 0 0 | Cs4g16900.1/Cs4g169 | 5.87 | 0 | 0    | 2 | MASCOT | T      | PLEX8 |       |
| 4.38E-02 | 0 0 | Cs4g16900.1/Cs4g169 | 8.75 | 0 | 0    | 2 | MASCOT | T      | PLEX8 |       |
| 2.71E-01 | 0 0 | Cs4g16900.1/Cs4g169 | 4.53 | 0 | 0    | 2 | MASCOT | T      | PLEX8 |       |
| 7.86E-02 | 0 0 | Cs4g16900.1/Cs4g169 | 4.53 | 0 | 0    | 2 | MASCOT | T      | PLEX8 |       |
| 5.44E-04 | 0 0 | Cs4g16900.1/Cs4g169 | 4.53 | 0 | 0    | 2 | MASCOT | T      | PLEX8 |       |
| 3.36E-01 | 0 0 | Cs7g08090.1/Cs7g080 | 6.05 | 0 | 0    | 2 | MASCOT | T      | PLEX8 |       |
| 2.31E-01 | 0 0 | Cs7g08090.1/Cs7g080 | 6.05 | 0 | 0    | 2 | MASCOT | T      | PLEX8 |       |
| 2.79E-01 | 0 0 | Cs7g08090.1/Cs7g080 | 6.05 | 0 | 0    | 2 | MASCOT | T      | PLEX8 |       |
| 1.88E-01 | 0 0 | Cs7g08090.1/Cs7g080 | 6.05 | 0 | 0    | 2 | MASCOT | T      | PLEX8 |       |
| 6.90E-02 | 0 0 | Cs7g08090.1/Cs7g080 | 6.05 | 0 | 0    | 2 | MASCOT | T      | PLEX8 |       |
| 1.70E-01 | 0 0 | Cs7g08090.1/Cs7g080 | 6.05 | 0 | 0    | 2 | MASCOT | T      | PLEX8 |       |
| 2.62E-01 | 0 0 | Cs7g08090.1/Cs7g080 | 6.05 | 0 | 0    | 2 | MASCOT | T      | PLEX8 |       |
| 4.31E-05 | 0 0 | Cs7g08090.1/Cs7g080 | 4.37 | 0 | 0    | 2 | MASCOT | T      |       |       |
| 5.98E-02 | 0 0 | Cs7g08090.1/Cs7g080 | 4.37 | 0 | 0    | 2 | MASCOT | T      |       |       |
| 6.95E-03 | 0 0 | Cs7g08090.1/Cs7g080 | 4.14 | 0 | 0    | 2 | MASCOT | T      | PLEX8 |       |
| 2.01E-02 | 0 0 | Cs7g08090.1/Cs7g080 | 5.84 | 0 | 0    | 2 | MASCOT | T      | PLEX8 |       |
| 4.41E-04 | 0 0 | Cs7g08090.1/Cs7g080 | 8.76 | 0 | 0    | 2 | MASCOT | T      | PLEX8 |       |
| 4.12E-02 | 0 0 | Cs7g08090.1/Cs7g080 | 8.76 | 0 | 0    | 2 | MASCOT | T      |       |       |
| 2.97E-01 | 0 0 | Cs7g08090.1/Cs7g080 | 6.75 | 0 | 0    | 2 | MASCOT | T      | PLEX8 |       |
| 2.96E-01 | 0 0 | Cs7g08090.1/Cs7g080 | 6.75 | 0 | 0    | 2 | MASCOT | T      | PLEX8 |       |
| 2.75E-01 | 0 0 | Cs7g08090.1/Cs7g080 | 9.75 | 0 | 0    | 2 | MASCOT | T      | PLEX8 |       |
| 1.29E-03 | 0 0 | Cs7g08090.1/Cs7g080 | 5.84 | 0 | 0    | 2 | MASCOT | T      | PLEX8 |       |
| 5.33E-03 | 0 0 | Cs7g08090.1/Cs7g080 | 5.84 | 0 | 0    | 2 | MASCOT | T      | PLEX8 |       |
| 4.37E-03 | 0 0 | Cs7g08090.1/Cs7g080 | 4.37 | 0 | 0    | 2 | MASCOT | T      | PLEX8 |       |
| 6.58E-03 | 0 0 | Cs7g08090.1/Cs7g080 | 5.28 | 0 | 0    | 2 | MASCOT | T      | PLEX8 |       |
| 2.27E-01 | 0 0 | Cs7g08090.2         | 5.84 | 0 | 0    | 2 | MASCOT | T      | PLEX8 |       |
| 6.65E-02 | 0 0 | Cs7g08090.2         | 5.84 | 0 | 0    | 2 | MASCOT | T      | PLEX8 |       |
| 3.10E-03 | 0 0 | Cs7g08090.2         | 5.84 | 0 | 0    | 2 | MASCOT | T      | PLEX8 |       |
| 1.58E-04 | 0 0 | Cs7g08090.1/Cs7g080 | 6.41 | 0 | 0    | 2 | MASCOT | T      | PLEX8 |       |
| 1.07E-01 | 0 0 | Cs8g19910.1         | 8.63 | 0 | 0    | 2 | MASCOT | T      | PLEX8 |       |
| 1.32E-01 | 0 0 | Cs8g19910.1         | 8.63 | 0 | 0    | 2 | MASCOT | T      | PLEX8 |       |
| 8.19E-02 | 0 0 | Cs8g19910.1         | 8.63 | 0 | 0    | 2 | MASCOT | T      | PLEX8 |       |
| 1.23E-01 | 0 0 | Cs8g19910.1         | 8.63 | 0 | 0    | 2 | MASCOT | T      | PLEX8 |       |
| 1.73E-01 | 0 0 | Cs8g19910.1         | 5.99 | 0 | 0    | 2 | MASCOT | T      | PLEX8 |       |
| 2.14E-01 | 0 0 | Cs8g19910.1         | 6.85 | 0 | 0    | 2 | MASCOT | T      | PLEX8 |       |
| 4.69E-02 | 0 0 | Cs8g19910.1         | 6.85 | 0 | 0    | 2 | MASCOT | T      | PLEX8 |       |
| 1.26E-03 | 0 0 | Cs8g19910.1         | 5.21 | 0 | 0    | 2 | MASCOT | T      | PLEX8 |       |
| 2.91E-02 | 0 0 | Cs8g19910.1         | 5.4  | 0 | 15.9 | 0 | 2      | MASCOT | T     | PLEX8 |
| 3.84E-04 | 0 0 | Cs8g19910.1         | 5.4  | 0 | 0    | 2 | MASCOT | T      | PLEX8 |       |
| 1.25E-02 | 0 0 | Cs8g19910.1         | 5.4  | 0 | 0    | 2 | MASCOT | T      | PLEX8 |       |
| 5.85E-03 | 0 0 | Cs8g19910.1         | 4.54 | 0 | 0    | 2 | MASCOT | T      | PLEX8 |       |
| 4.77E-06 | 0 0 | Cs8g19910.1         | 4.53 | 0 | 0    | 2 | MASCOT | T      |       |       |
| 7.11E-03 | 0 0 | Cs8g19910.1         | 4.53 | 0 | 0    | 2 | MASCOT | T      |       |       |
| 3.01E-08 | 0 0 | Cs8g19910.1         | 4.53 | 0 | 0    | 2 | MASCOT | T      |       |       |
| 9.61E-05 | 0 0 | Cs8g19910.1         | 4.25 | 0 | 0    | 2 | MASCOT | T      |       |       |
| 1.47E-04 | 0 0 | Cs8g19910.1         | 5.33 | 0 | 0    | 2 | MASCOT | T      |       |       |



|              |                      |      |   |      |   |        |        |       |
|--------------|----------------------|------|---|------|---|--------|--------|-------|
| 1.07E-04 0 0 | Cs8g19910.1          | 5.33 | 0 | 0    | 2 | MASCOT | T      |       |
| 2.82E-02 0 0 | Cs8g19910.1          | 6.92 | 0 | 0    | 2 | MASCOT | T      | PLEX8 |
| 5.80E-06 0 0 | Cs8g19910.1          | 4.22 | 0 | 0    | 2 | MASCOT | T      | PLEX8 |
| 5.61E-07 0 0 | Cs8g19910.1          | 4.22 | 0 | 0    | 2 | MASCOT | T      |       |
| 2.04E-03 0 0 | Cs8g19910.1          | 6    | 0 | 0    | 2 | MASCOT | T      | PLEX8 |
| 1.92E-03 0 0 | Cs8g19910.1          | 6    | 0 | 0    | 2 | MASCOT | T      |       |
| 6.50E-02 0 0 | Cs1g12330.1          | 5.21 | 0 | 0    | 2 | MASCOT | T      | PLEX8 |
| 1.97E-01 0 0 | Cs1g12330.1          | 4.53 | 0 | 0    | 2 | MASCOT | T      | PLEX8 |
| 4.46E-01 0 0 | Cs1g12330.1          | 4.53 | 0 | 0    | 2 | MASCOT | T      | PLEX8 |
| 2.83E-01 0 0 | Cs1g12330.1          | 4.53 | 0 | 0    | 2 | MASCOT | T      | PLEX8 |
| 4.39E-04 0 0 | Cs1g12330.1          | 9.76 | 0 | 0    | 2 | MASCOT | T      | PLEX8 |
| 3.13E-04 0 0 | Cs1g12330.1          | 9.76 | 0 | 0    | 2 | MASCOT | T      | PLEX8 |
| 5.47E-03 0 0 | Cs1g12330.1          | 5.84 | 0 | 0    | 2 | MASCOT | T      |       |
| 2.86E-01 0 0 | Cs1g12330.1          | 5.84 | 0 | 0    | 2 | MASCOT | T      |       |
| 6.97E-02 0 0 | Cs1g12330.1          | 6.1  | 0 | 0    | 2 | MASCOT | T      | PLEX8 |
| 2.19E-01 0 0 | Cs1g12330.1          | 6.1  | 0 | 0    | 2 | MASCOT | T      | PLEX8 |
| 3.64E-02 0 0 | Cs1g12330.1          | 6    | 0 | 0    | 2 | MASCOT | T      | PLEX8 |
| 5.55E-02 0 0 | Cs1g12330.1          | 6    | 0 | 0    | 2 | MASCOT | T      | PLEX8 |
| 9.28E-03 0 0 | Cs1g12330.1          | 6    | 0 | 0    | 2 | MASCOT | T      | PLEX8 |
| 1.46E-03 0 0 | Cs1g12330.1          | 6    | 0 | 0    | 2 | MASCOT | T      | PLEX8 |
| 4.88E-04 0 0 | Cs1g12330.1          | 4.14 | 0 | 0    | 2 | MASCOT | T      | PLEX8 |
| 1.42E-01 0 0 | Cs1g12330.1          | 8.41 | 0 | 0    | 2 | MASCOT | T      | PLEX8 |
| 6.46E-02 0 0 | Cs1g12330.1          | 9.72 | 0 | 0    | 2 | MASCOT | T      | PLEX8 |
| 2.58E-01 0 0 | Cs1g12330.1          | 9.72 | 0 | 0    | 2 | MASCOT | T      | PLEX8 |
| 1.24E-01 0 0 | Cs1g12330.1          | 4.53 | 0 | 0    | 2 | MASCOT | T      | PLEX8 |
| 1.42E-01 0 0 | Cs1g12330.1          | 8.59 | 0 | 0    | 2 | MASCOT | T      | PLEX8 |
| 1.23E-01 0 0 | Cs8g09580.1/Cs8g095  | 6.01 | 0 | 15.9 | 0 | 2      | MASCOT | T     |
| 3.08E-02 0 0 | Cs2g15520.1/Cs8g095  | 3.96 | 1 | 0    | 2 | MASCOT | T      |       |
| 1.04E-01 0 0 | Cs8g09580.1          | 4.37 | 0 | 0    | 2 | MASCOT | T      | PLEX8 |
| 9.01E-04 0 0 | Cs8g09580.1          | 8.76 | 0 | 0    | 2 | MASCOT | T      | PLEX8 |
| 5.86E-04 0 0 | Cs8g09580.1          | 8.76 | 0 | 0    | 2 | MASCOT | T      | PLEX8 |
| 1.54E-02 0 0 | Cs8g09580.1          | 8.76 | 0 | 0    | 2 | MASCOT | T      | PLEX8 |
| 5.59E-03 0 0 | Cs8g09580.1          | 5.84 | 0 | 0    | 2 | MASCOT | T      |       |
| 1.80E-05 0 0 | Cs8g09580.1          | 5.84 | 0 | 0    | 2 | MASCOT | T      | PLEX8 |
| 1.43E-01 0 0 | Cs8g09580.1/Cs8g095  | 4.03 | 0 | 0    | 2 | MASCOT | T      |       |
| 2.98E-01 0 0 | Cs8g09580.1/Cs8g095  | 4.14 | 0 | 0    | 2 | MASCOT | T      | PLEX8 |
| 2.69E-02 0 0 | Cs8g09580.1/Cs8g095  | 4.14 | 0 | 0    | 2 | MASCOT | T      | PLEX8 |
| 1.80E-02 0 0 | Cs8g09580.1/Cs8g095  | 6.79 | 0 | 0    | 2 | MASCOT | T      | PLEX8 |
| 4.97E-03 0 0 | Cs8g09580.1/Cs8g095  | 6.79 | 0 | 0    | 2 | MASCOT | T      | PLEX8 |
| 1.88E-02 0 0 | Cs2g15520.1 ! Cs8g09 | 4.03 | 0 | 0    | 2 | MASCOT | T      | PLEX8 |
| 4.23E-04 0 0 | Cs8g09580.1          | 4.53 | 0 | 0    | 2 | MASCOT | T      |       |
| 5.66E-03 0 0 | Cs8g09580.1/Cs8g095  | 8.2  | 0 | 0    | 2 | MASCOT | T      | PLEX8 |
| 1.05E-01 0 0 | Cs8g09580.1/Cs8g095  | 8.2  | 0 | 0    | 2 | MASCOT | T      | PLEX8 |
| 1.59E-01 0 0 | Cs8g09580.1/Cs8g095  | 8.2  | 0 | 0    | 2 | MASCOT | T      | PLEX8 |
| 4.03E-03 0 0 | Cs8g09580.1/Cs8g095  | 8.2  | 0 | 0    | 2 | MASCOT | T      | PLEX8 |
| 1.01E-01 0 0 | Cs8g09580.1          | 4.53 | 0 | 0    | 2 | MASCOT | T      | PLEX8 |
| 2.29E-02 0 0 | Cs2g16990.1/Cs2g169  | 5.83 | 0 | 0    | 2 | MASCOT | T      | PLEX8 |
| 3.19E-01 0 0 | Cs2g16990.1/Cs2g169  | 5.83 | 0 | 0    | 2 | MASCOT | T      | PLEX8 |
| 3.55E-03 0 0 | Cs2g16990.1/Cs2g169  | 6.1  | 0 | 0    | 2 | MASCOT | T      | PLEX8 |
| 6.07E-02 0 0 | Cs2g16990.1/Cs2g169  | 5.84 | 0 | 0    | 2 | MASCOT | T      |       |
| 9.37E-05 0 0 | Cs2g16990.1/Cs2g169  | 4.14 | 0 | 0    | 2 | MASCOT | T      | PLEX8 |

|          |     |                     |      |   |      |   |        |        |       |       |
|----------|-----|---------------------|------|---|------|---|--------|--------|-------|-------|
| 4.70E-04 | 0 0 | Cs2g16990.1/Cs2g169 | 4.14 | 0 | 0    | 2 | MASCOT | T      | PLEX8 |       |
| 4.04E-03 | 0 0 | Cs2g16990.1/Cs2g169 | 6.47 | 0 | 0    | 2 | MASCOT | T      | PLEX8 |       |
| 2.02E-02 | 0 0 | Cs2g16990.1/Cs2g169 | 4.65 | 0 | 15.9 | 0 | 2      | MASCOT | T     | PLEX8 |
| 1.22E-06 | 0 0 | Cs2g16990.1/Cs2g169 | 4.65 | 0 | 0    | 2 | MASCOT | T      | PLEX8 |       |
| 2.91E-04 | 0 0 | Cs2g16990.1/Cs2g169 | 4.65 | 0 | 0    | 2 | MASCOT | T      | PLEX8 |       |
| 2.60E-01 | 0 0 | Cs2g16990.1/Cs2g169 | 6.05 | 0 | 0    | 2 | MASCOT | T      | PLEX8 |       |
| 1.02E-02 | 0 0 | Cs2g16990.1/Cs2g169 | 6.05 | 0 | 0    | 2 | MASCOT | T      | PLEX8 |       |
| 3.30E-02 | 0 0 | Cs2g16990.1         | 4.53 | 0 | 0    | 2 | MASCOT | T      | PLEX8 |       |
| 4.50E-02 | 0 0 | Cs2g16990.1/Cs2g169 | 4.14 | 0 | 0    | 2 | MASCOT | T      |       |       |
| 1.17E-02 | 0 0 | Cs2g16990.1/Cs2g169 | 6.75 | 0 | 0    | 2 | MASCOT | T      | PLEX8 |       |
| 5.00E-04 | 0 0 | Cs2g16990.1         | 4.53 | 0 | 0    | 2 | MASCOT | T      |       |       |
| 1.28E-05 | 0 0 | Cs2g16990.1         | 4.53 | 0 | 0    | 2 | MASCOT | T      |       |       |
| 1.83E-04 | 0 0 | Cs2g16990.1         | 4.53 | 0 | 0    | 2 | MASCOT | T      |       |       |
| 2.06E-01 | 0 0 | Cs2g16990.1         | 8.46 | 0 | 0    | 2 | MASCOT | T      | PLEX8 |       |
| 7.33E-03 | 0 0 | Cs4g02950.1         | 4.14 | 0 | 0    | 2 | MASCOT | T      | PLEX8 |       |
| 1.95E-01 | 0 0 | Cs4g02950.1         | 4.53 | 0 | 0    | 2 | MASCOT | T      | PLEX8 |       |
| 4.40E-02 | 0 0 | Cs4g02950.1         | 4.03 | 0 | 0    | 2 | MASCOT | T      | PLEX8 |       |
| 7.84E-02 | 0 0 | Cs4g02950.1         | 4.14 | 0 | 0    | 2 | MASCOT | T      | PLEX8 |       |
| 2.33E-03 | 0 0 | Cs4g02950.1         | 5.21 | 0 | 0    | 2 | MASCOT | T      | PLEX8 |       |
| 1.93E-02 | 0 0 | Cs4g02950.1         | 5.21 | 0 | 0    | 2 | MASCOT | T      | PLEX8 |       |
| 5.35E-02 | 0 0 | Cs4g02950.1         | 5.21 | 0 | 0    | 2 | MASCOT | T      | PLEX8 |       |
| 6.40E-02 | 0 0 | Cs4g02950.1         | 4.53 | 0 | 0    | 2 | MASCOT | T      | PLEX8 |       |
| 2.81E-01 | 0 0 | Cs4g02950.1         | 4.53 | 0 | 0    | 2 | MASCOT | T      | PLEX8 |       |
| 1.54E-01 | 0 0 | Cs4g02950.1         | 5.84 | 0 | 0    | 2 | MASCOT | T      |       |       |
| 3.19E-02 | 0 0 | Cs4g02950.1         | 4.37 | 0 | 0    | 2 | MASCOT | T      | PLEX8 |       |
| 1.10E-01 | 0 0 | Cs4g02950.1         | 4.37 | 0 | 0    | 2 | MASCOT | T      | PLEX8 |       |
| 8.40E-02 | 0 0 | Cs4g02950.1         | 4.03 | 0 | 0    | 2 | MASCOT | T      | PLEX8 |       |
| 1.13E-01 | 0 0 | Cs4g02950.1         | 4.03 | 0 | 0    | 2 | MASCOT | T      | PLEX8 |       |
| 4.47E-05 | 0 0 | Cs4g02950.1         | 4.37 | 0 | 0    | 2 | MASCOT | T      |       |       |
| 9.23E-05 | 0 0 | Cs4g02950.1         | 4.37 | 0 | 0    | 2 | MASCOT | T      |       |       |
| 7.65E-04 | 0 0 | Cs4g02950.1         | 4.37 | 0 | 0    | 2 | MASCOT | T      | PLEX8 |       |
| 1.67E-02 | 0 0 | Cs4g02950.1         | 4.37 | 0 | 0    | 2 | MASCOT | T      | PLEX8 |       |
| 2.91E-03 | 0 0 | Cs4g02950.1         | 4.37 | 0 | 0    | 2 | MASCOT | T      | PLEX8 |       |
| 7.60E-03 | 0 0 | Cs9g17250.1/Cs9g172 | 7.06 | 0 | 0    | 2 | MASCOT | T      | PLEX8 |       |
| 2.52E-03 | 0 0 | Cs9g17250.1/Cs9g172 | 5.32 | 0 | 0    | 2 | MASCOT | T      |       |       |
| 6.23E-02 | 0 0 | Cs9g17250.1/Cs9g172 | 4.4  | 0 | 0    | 2 | MASCOT | T      |       |       |
| 4.29E-02 | 0 0 | Cs9g17250.1/Cs9g172 | 4.4  | 0 | 0    | 2 | MASCOT | T      |       |       |
| 4.52E-02 | 0 0 | Cs9g17250.1/Cs9g172 | 4.4  | 0 | 0    | 2 | MASCOT | T      | PLEX8 |       |
| 1.02E-04 | 0 0 | Cs9g17250.1/Cs9g172 | 4.25 | 0 | 0    | 2 | MASCOT | T      | PLEX8 |       |
| 1.51E-03 | 0 0 | Cs9g17250.1/Cs9g172 | 4.25 | 0 | 0    | 2 | MASCOT | T      | PLEX8 |       |
| 4.62E-02 | 0 0 | Cs9g17250.1/Cs9g172 | 6    | 0 | 0    | 2 | MASCOT | T      | PLEX8 |       |
| 3.48E-03 | 0 0 | Cs9g17250.1/Cs9g172 | 6    | 0 | 0    | 2 | MASCOT | T      | PLEX8 |       |
| 2.22E-03 | 0 0 | Cs9g17250.1/Cs9g172 | 8.75 | 0 | 0    | 2 | MASCOT | T      | PLEX8 |       |
| 4.02E-02 | 0 0 | Cs9g17250.1/Cs9g172 | 4.68 | 0 | 0    | 2 | MASCOT | T      | PLEX8 |       |
| 2.56E-02 | 0 0 | Cs9g17250.1/Cs9g172 | 5.72 | 0 | 0    | 2 | MASCOT | T      |       |       |
| 4.63E-06 | 0 0 | Cs9g17250.1/Cs9g172 | 5.72 | 0 | 0    | 2 | MASCOT | T      |       |       |
| 1.00E-01 | 0 0 | Cs9g17250.1/Cs9g172 | 6.47 | 0 | 0    | 2 | MASCOT | T      | PLEX8 |       |
| 4.06E-06 | 0 0 | Cs9g17250.1/Cs9g172 | 4.37 | 0 | 0    | 2 | MASCOT | T      | PLEX8 |       |
| 5.75E-03 | 0 0 | Cs9g17250.1/Cs9g172 | 4.25 | 0 | 0    | 2 | MASCOT | T      | PLEX8 |       |
| 1.07E-03 | 0 0 | Cs9g17250.1/Cs9g172 | 6.05 | 0 | 0    | 2 | MASCOT | T      |       |       |
| 1.01E-02 | 0 0 | Cs9g17250.1/Cs9g172 | 6.05 | 0 | 0    | 2 | MASCOT | T      |       |       |

|              |                     |      |   |      |   |        |                |
|--------------|---------------------|------|---|------|---|--------|----------------|
| 7.01E-04 0 0 | Cs9g17250.1/Cs9g172 | 6.05 | 0 | 0    | 2 | MASCOT | T              |
| 3.26E-02 0 0 | Cs1g03170.1         | 5.88 | 0 | 0    | 2 | MASCOT | T PLEX8        |
| 1.71E-03 0 0 | Cs1g03170.1         | 5.88 | 0 | 0    | 2 | MASCOT | T PLEX8        |
| 8.66E-04 0 0 | Cs1g03170.1         | 5.88 | 0 | 0    | 2 | MASCOT | T PLEX8        |
| 3.61E-02 0 0 | Cs1g03170.1         | 5.84 | 0 | 15.9 | 0 | 2      | MASCOT T PLEX8 |
| 3.12E-03 0 0 | Cs1g03170.1         | 5.84 | 0 | 0    | 2 | MASCOT | T PLEX8        |
| 5.87E-02 0 0 | Cs1g03170.1         | 6.75 | 0 | 0    | 2 | MASCOT | T PLEX8        |
| 1.75E-03 0 0 | Cs1g03170.1         | 6.75 | 0 | 0    | 2 | MASCOT | T PLEX8        |
| 8.51E-03 0 0 | Cs1g03170.1         | 6.75 | 0 | 0    | 2 | MASCOT | T PLEX8        |
| 1.11E-02 0 0 | Cs1g03170.1         | 4    | 0 | 0    | 2 | MASCOT | T PLEX8        |
| 1.05E-02 0 0 | Cs1g03170.1         | 4    | 0 | 0    | 2 | MASCOT | T              |
| 1.42E-05 0 0 | Cs1g03170.1         | 4    | 0 | 0    | 2 | MASCOT | T              |
| 7.25E-03 0 0 | Cs1g03170.1         | 5.97 | 0 | 15.9 | 0 | 2      | MASCOT T PLEX8 |
| 8.11E-02 0 0 | Cs1g03170.1         | 6    | 0 | 0    | 2 | MASCOT | T PLEX8        |
| 2.06E-02 0 0 | Cs1g03170.1         | 6    | 0 | 0    | 2 | MASCOT | T PLEX8        |
| 1.14E-01 0 0 | Cs1g03170.1         | 8.22 | 0 | 0    | 2 | MASCOT | T PLEX8        |
| 1.14E-01 0 0 | Cs1g03170.1         | 6.07 | 1 | 0    | 2 | MASCOT | T              |
| 4.65E-03 0 0 | Cs1g03170.1         | 5.84 | 0 | 0    | 2 | MASCOT | T PLEX8        |
| 2.31E-04 0 0 | Cs1g03170.1         | 5.84 | 0 | 0    | 2 | MASCOT | T PLEX8        |
| 2.28E-01 0 0 | Cs2g19200.1/Cs2g192 | 4.25 | 0 | 0    | 2 | MASCOT | T PLEX8        |
| 6.12E-02 0 0 | Cs2g19200.1/Cs2g192 | 4.53 | 0 | 0    | 2 | MASCOT | T PLEX8        |
| 7.52E-04 0 0 | Cs2g19200.1/Cs2g192 | 6    | 0 | 0    | 2 | MASCOT | T              |
| 6.32E-03 0 0 | Cs2g19200.1/Cs2g192 | 8.75 | 0 | 0    | 2 | MASCOT | T PLEX8        |
| 4.01E-05 0 0 | Cs2g19200.1/Cs2g192 | 8.75 | 0 | 0    | 2 | MASCOT | T PLEX8        |
| 6.72E-05 0 0 | Cs2g19200.1/Cs2g192 | 8.75 | 0 | 0    | 2 | MASCOT | T PLEX8        |
| 8.95E-04 0 0 | Cs2g19200.1/Cs2g192 | 8.75 | 0 | 0    | 2 | MASCOT | T PLEX8        |
| 1.76E-03 0 0 | Cs2g19200.1/Cs2g192 | 5.96 | 1 | 0    | 2 | MASCOT | T PLEX8        |
| 2.06E-01 0 0 | Cs2g19200.1/Cs2g192 | 6.42 | 0 | 0    | 2 | MASCOT | T              |
| 1.10E-02 0 0 | Cs2g19200.1/Cs2g192 | 6.42 | 0 | 0    | 2 | MASCOT | T PLEX8        |
| 2.66E-03 0 0 | Cs2g19200.1/Cs2g192 | 4.37 | 0 | 0    | 2 | MASCOT | T PLEX8        |
| 4.53E-02 0 0 | Cs2g19200.1/Cs2g192 | 4.37 | 0 | 0    | 2 | MASCOT | T              |
| 2.02E-04 0 0 | Cs2g19200.1/Cs2g192 | 5.97 | 0 | 0    | 2 | MASCOT | T PLEX8        |
| 1.24E-01 0 0 | Cs2g19200.1/Cs2g192 | 4.14 | 0 | 0    | 2 | MASCOT | T PLEX8        |
| 2.16E-01 0 0 | Cs2g19200.1/Cs2g192 | 4.14 | 0 | 0    | 2 | MASCOT | T PLEX8        |
| 2.37E-02 0 0 | Cs2g19200.1/Cs2g192 | 6.1  | 0 | 0    | 2 | MASCOT | T PLEX8        |
| 2.65E-01 0 0 | Cs2g19200.1/Cs2g192 | 5.84 | 0 | 0    | 2 | MASCOT | T PLEX8        |
| 5.27E-01 0 0 | Cs2g19200.1/Cs2g192 | 5.97 | 0 | 0    | 2 | MASCOT | T PLEX8        |
| 9.30E-02 0 0 | Cs6g15300.1/Cs6g153 | 4.03 | 0 | 0    | 2 | MASCOT | T              |
| 2.36E-01 0 0 | Cs6g15300.1/Cs6g153 | 5.84 | 0 | 0    | 2 | MASCOT | T PLEX8        |
| 3.42E-03 0 0 | Cs1g13640.1/Cs1g136 | 4.37 | 0 | 0    | 2 | MASCOT | T PLEX8        |
| 5.55E-04 0 0 | Cs1g13640.1/Cs1g136 | 4.37 | 0 | 0    | 2 | MASCOT | T PLEX8        |
| 2.31E-02 0 0 | Cs6g15300.1/Cs6g153 | 4.54 | 0 | 0    | 2 | MASCOT | T PLEX8        |
| 1.14E-02 0 0 | Cs6g15290.1/Cs6g152 | 5.4  | 0 | 0    | 2 | MASCOT | T PLEX8        |
| 5.12E-01 0 0 | Cs6g15300.1/Cs6g153 | 8.49 | 0 | 0    | 2 | MASCOT | T PLEX8        |
| 9.28E-03 0 0 | Cs6g15290.1/Cs6g152 | 4.14 | 0 | 0    | 2 | MASCOT | T PLEX8        |
| 5.84E-02 0 0 | Cs6g15290.1/Cs6g152 | 4.37 | 0 | 0    | 2 | MASCOT | T PLEX8        |
| 1.57E-01 0 0 | Cs1g13660.1/Cs1g136 | 8.41 | 0 | 15.9 | 0 | 2      | MASCOT T PLEX8 |
| 8.79E-03 0 0 | Cs1g13620.1/Cs1g136 | 5.5  | 0 | 0    | 2 | MASCOT | T              |
| 3.47E-01 0 0 | Cs1g13660.1/Cs1g136 | 8.41 | 0 | 0    | 2 | MASCOT | T PLEX8        |
| 1.56E-01 0 0 | Cs1g13660.1/Cs1g136 | 8.41 | 0 | 0    | 2 | MASCOT | T PLEX8        |
| 5.92E-04 0 0 | Cs1g13660.1/Cs1g136 | 8.41 | 0 | 0    | 2 | MASCOT | T PLEX8        |

|          |     |                       |      |   |   |   |        |   |       |
|----------|-----|-----------------------|------|---|---|---|--------|---|-------|
| 1.74E-02 | 0 0 | Cs6g15300.1/Cs6g153   | 9.75 | 0 | 0 | 2 | MASCOT | T | PLEX8 |
| 1.21E-02 | 0 0 | Cs6g15280.1/Cs6g153   | 8.5  | 0 | 0 | 2 | MASCOT | T | PLEX8 |
| 1.43E-02 | 0 0 | Cs6g15280.1/Cs6g153   | 8.5  | 0 | 0 | 2 | MASCOT | T | PLEX8 |
| 1.34E-01 | 0 0 | Cs6g15280.1/Cs6g153   | 8.5  | 0 | 0 | 2 | MASCOT | T |       |
| 4.14E-02 | 0 0 | Cs8g12230.1/Cs8g122   | 4.21 | 0 | 0 | 2 | MASCOT | T | PLEX8 |
| 2.96E-02 | 0 0 | Cs8g12230.1/Cs8g122   | 6    | 0 | 0 | 2 | MASCOT | T | PLEX8 |
| 1.54E-02 | 0 0 | Cs8g12230.1/Cs8g122   | 4.79 | 1 | 0 | 2 | MASCOT | T | PLEX8 |
| 2.10E-04 | 0 0 | Cs8g12230.1/Cs8g122   | 4.37 | 0 | 0 | 2 | MASCOT | T | PLEX8 |
| 2.42E-02 | 0 0 | Cs8g12230.1/Cs8g122   | 4.37 | 0 | 0 | 2 | MASCOT | T | PLEX8 |
| 4.44E-02 | 0 0 | Cs8g12230.1/Cs8g122   | 4.14 | 0 | 0 | 2 | MASCOT | T | PLEX8 |
| 5.93E-02 | 0 0 | Cs8g12230.1/Cs8g122   | 8.75 | 0 | 0 | 2 | MASCOT | T | PLEX8 |
| 1.41E-04 | 0 0 | Cs8g12230.1/Cs8g122   | 4.25 | 0 | 0 | 2 | MASCOT | T | PLEX8 |
| 1.86E-01 | 0 0 | Cs8g12230.1/Cs8g122   | 5.75 | 0 | 0 | 2 | MASCOT | T | PLEX8 |
| 7.83E-02 | 0 0 | Cs8g12230.1/Cs8g122   | 4.37 | 0 | 0 | 2 | MASCOT | T |       |
| 7.14E-02 | 0 0 | Cs8g12230.1/Cs8g122   | 5.72 | 0 | 0 | 2 | MASCOT | T |       |
| 2.23E-01 | 0 0 | Cs8g12230.1/Cs8g122   | 9.72 | 0 | 0 | 2 | MASCOT | T |       |
| 1.32E-01 | 0 0 | Cs8g12230.1/Cs8g122   | 9.73 | 0 | 0 | 2 | MASCOT | T | PLEX8 |
| 5.50E-01 | 0 0 | Cs8g12230.1/Cs8g122   | 9.73 | 0 | 0 | 2 | MASCOT | T | PLEX8 |
| 2.67E-02 | 0 0 | gi 113952664/gi 11395 | 4.22 | 0 | 0 | 2 | MASCOT | T | PLEX8 |
| 2.31E-04 | 0 0 | gi 113952664/gi 11395 | 6.74 | 0 | 0 | 2 | MASCOT | T | PLEX8 |
| 2.88E-01 | 0 0 | gi 113952664/gi 11395 | 6.1  | 0 | 0 | 2 | MASCOT | T | PLEX8 |
| 7.80E-02 | 0 0 | gi 113952664/gi 11395 | 6.92 | 0 | 0 | 2 | MASCOT | T | PLEX8 |
| 2.51E-01 | 0 0 | gi 113952664/gi 11395 | 6.92 | 0 | 0 | 2 | MASCOT | T | PLEX8 |
| 5.23E-02 | 0 0 | gi 113952664/gi 11395 | 6    | 0 | 0 | 2 | MASCOT | T | PLEX8 |
| 1.82E-01 | 0 0 | gi 113952664/gi 11395 | 4.37 | 0 | 0 | 2 | MASCOT | T | PLEX8 |
| 5.60E-02 | 0 0 | gi 113952664/gi 11395 | 4.37 | 0 | 0 | 2 | MASCOT | T | PLEX8 |
| 1.55E-01 | 0 0 | gi 113952664/gi 11395 | 6    | 0 | 0 | 2 | MASCOT | T | PLEX8 |
| 3.65E-02 | 0 0 | gi 113952664/gi 11395 | 5.81 | 0 | 0 | 2 | MASCOT | T | PLEX8 |
| 6.26E-02 | 0 0 | gi 113952664/gi 11395 | 5.21 | 0 | 0 | 2 | MASCOT | T | PLEX8 |
| 4.13E-02 | 0 0 | gi 113952664/gi 11395 | 9.76 | 0 | 0 | 2 | MASCOT | T | PLEX8 |
| 6.92E-02 | 0 0 | gi 113952664/gi 11395 | 8.59 | 0 | 0 | 2 | MASCOT | T |       |
| 2.77E-01 | 0 0 | gi 113952664/gi 11395 | 8.31 | 0 | 0 | 2 | MASCOT | T | PLEX8 |
| 3.25E-01 | 0 0 | Cs7g19250.1/Cs7g192   | 5.32 | 0 | 0 | 2 | MASCOT | T | PLEX8 |
| 3.38E-01 | 0 0 | Cs7g19250.1/Cs7g192   | 5.32 | 0 | 0 | 2 | MASCOT | T | PLEX8 |
| 1.23E-02 | 0 0 | Cs7g19250.1/Cs7g192   | 5.32 | 0 | 0 | 2 | MASCOT | T | PLEX8 |
| 1.22E-01 | 0 0 | Cs7g19250.1/Cs7g192   | 5.32 | 0 | 0 | 2 | MASCOT | T | PLEX8 |
| 1.27E-02 | 0 0 | Cs7g19250.1/Cs7g192   | 5.32 | 0 | 0 | 2 | MASCOT | T | PLEX8 |
| 3.02E-01 | 0 0 | Cs7g19250.1/Cs7g192   | 5.32 | 0 | 0 | 2 | MASCOT | T | PLEX8 |
| 1.67E-01 | 0 0 | Cs7g19250.1/Cs7g192   | 5.32 | 0 | 0 | 2 | MASCOT | T | PLEX8 |
| 2.57E-03 | 0 0 | Cs7g19250.1/Cs7g192   | 6    | 0 | 0 | 2 | MASCOT | T | PLEX8 |
| 9.27E-04 | 0 0 | Cs7g19250.1/Cs7g192   | 6    | 0 | 0 | 2 | MASCOT | T | PLEX8 |
| 5.17E-03 | 0 0 | Cs7g19250.1/Cs7g192   | 6    | 0 | 0 | 2 | MASCOT | T | PLEX8 |
| 2.25E-02 | 0 0 | Cs7g19250.1/Cs7g192   | 6    | 0 | 0 | 2 | MASCOT | T | PLEX8 |
| 5.24E-03 | 0 0 | Cs7g19250.1/Cs7g192   | 6    | 0 | 0 | 2 | MASCOT | T | PLEX8 |
| 5.42E-02 | 0 0 | Cs7g19250.1/Cs7g192   | 6    | 0 | 0 | 2 | MASCOT | T | PLEX8 |
| 9.95E-02 | 0 0 | Cs7g19250.1/Cs7g192   | 6    | 0 | 0 | 2 | MASCOT | T |       |
| 1.28E-02 | 0 0 | Cs7g19250.1/Cs7g192   | 6    | 0 | 0 | 2 | MASCOT | T | PLEX8 |
| 9.55E-03 | 0 0 | Cs7g19250.1/Cs7g192   | 6    | 0 | 0 | 2 | MASCOT | T | PLEX8 |
| 9.25E-02 | 0 0 | Cs7g19250.1/Cs7g192   | 6    | 0 | 0 | 2 | MASCOT | T | PLEX8 |
| 2.61E-01 | 0 0 | Cs7g19250.1/Cs7g192   | 6    | 0 | 0 | 2 | MASCOT | T | PLEX8 |
| 1.04E-02 | 0 0 | Cs7g19250.1/Cs7g192   | 6    | 0 | 0 | 2 | MASCOT | T |       |

|          |     |                     |      |   |   |   |        |   |       |
|----------|-----|---------------------|------|---|---|---|--------|---|-------|
| 5.18E-03 | 0 0 | Cs7g19250.1/Cs7g192 | 6    | 0 | 0 | 2 | MASCOT | T |       |
| 3.26E-04 | 0 0 | Cs7g19250.1/Cs7g192 | 4.37 | 0 | 0 | 2 | MASCOT | T | PLEX8 |
| 1.66E-01 | 0 0 | Cs7g19250.1/Cs7g192 | 4.37 | 0 | 0 | 2 | MASCOT | T | PLEX8 |
| 2.71E-01 | 0 0 | Cs7g19250.1/Cs7g192 | 4.37 | 0 | 0 | 2 | MASCOT | T | PLEX8 |
| 1.70E-01 | 0 0 | Cs7g19250.1/Cs7g192 | 4.37 | 0 | 0 | 2 | MASCOT | T | PLEX8 |
| 3.62E-02 | 0 0 | Cs7g19250.1/Cs7g192 | 4.37 | 0 | 0 | 2 | MASCOT | T | PLEX8 |
| 2.31E-04 | 0 0 | Cs7g19250.1/Cs7g192 | 4.37 | 0 | 0 | 2 | MASCOT | T | PLEX8 |
| 4.00E-02 | 0 0 | Cs7g19250.1/Cs7g192 | 4.37 | 0 | 0 | 2 | MASCOT | T | PLEX8 |
| 1.80E-01 | 0 0 | Cs7g19250.1/Cs7g192 | 4.37 | 0 | 0 | 2 | MASCOT | T | PLEX8 |
| 2.68E-03 | 0 0 | Cs7g19250.1/Cs7g192 | 4.37 | 0 | 0 | 2 | MASCOT | T | PLEX8 |
| 3.34E-04 | 0 0 | Cs7g19250.1/Cs7g192 | 4.37 | 0 | 0 | 2 | MASCOT | T |       |
| 1.50E-01 | 0 0 | Cs7g19250.1/Cs7g192 | 4.37 | 0 | 0 | 2 | MASCOT | T |       |
| 4.34E-02 | 0 0 | Cs7g19250.1/Cs7g192 | 4.37 | 0 | 0 | 2 | MASCOT | T |       |
| 2.78E-01 | 0 0 | Cs7g19250.1/Cs7g192 | 4.37 | 0 | 0 | 2 | MASCOT | T | PLEX8 |
| 3.51E-03 | 0 0 | Cs7g19250.1/Cs7g192 | 4.37 | 0 | 0 | 2 | MASCOT | T | PLEX8 |
| 4.01E-03 | 0 0 | Cs7g19250.1/Cs7g192 | 4.37 | 0 | 0 | 2 | MASCOT | T | PLEX8 |
| 2.59E-05 | 0 0 | Cs7g19250.1/Cs7g192 | 4.37 | 0 | 0 | 2 | MASCOT | T | PLEX8 |
| 8.13E-04 | 0 0 | Cs7g19250.1/Cs7g192 | 4.37 | 0 | 0 | 2 | MASCOT | T | PLEX8 |
| 4.40E-02 | 0 0 | Cs7g19250.1/Cs7g192 | 4.37 | 0 | 0 | 2 | MASCOT | T | PLEX8 |
| 1.16E-05 | 0 0 | Cs7g19250.1/Cs7g192 | 4.37 | 0 | 0 | 2 | MASCOT | T |       |
| 1.91E-01 | 0 0 | Cs7g19250.1/Cs7g192 | 4.37 | 0 | 0 | 2 | MASCOT | T | PLEX8 |
| 2.68E-01 | 0 0 | Cs7g19250.1/Cs7g192 | 4.37 | 0 | 0 | 2 | MASCOT | T | PLEX8 |
| 3.15E-02 | 0 0 | Cs7g19250.1/Cs7g192 | 4.37 | 0 | 0 | 2 | MASCOT | T | PLEX8 |
| 1.85E-01 | 0 0 | Cs7g19250.1/Cs7g192 | 4.37 | 0 | 0 | 2 | MASCOT | T | PLEX8 |
| 1.62E-02 | 0 0 | Cs7g19250.1/Cs7g192 | 4.37 | 0 | 0 | 2 | MASCOT | T | PLEX8 |
| 3.51E-01 | 0 0 | Cs7g19250.1/Cs7g192 | 4.37 | 0 | 0 | 2 | MASCOT | T |       |
| 3.15E-02 | 0 0 | Cs7g19250.1/Cs7g192 | 4.37 | 0 | 0 | 2 | MASCOT | T | PLEX8 |
| 6.03E-03 | 0 0 | Cs7g19250.1/Cs7g192 | 4.37 | 0 | 0 | 2 | MASCOT | T | PLEX8 |
| 2.74E-01 | 0 0 | Cs7g19250.1/Cs7g192 | 4.37 | 0 | 0 | 2 | MASCOT | T |       |
| 1.19E-01 | 0 0 | Cs7g19250.1/Cs7g192 | 8.47 | 0 | 0 | 2 | MASCOT | T | PLEX8 |
| 1.05E-01 | 0 0 | Cs7g19250.1/Cs7g192 | 8.47 | 0 | 0 | 2 | MASCOT | T | PLEX8 |
| 1.88E-01 | 0 0 | Cs7g19250.1/Cs7g192 | 8.47 | 0 | 0 | 2 | MASCOT | T | PLEX8 |
| 9.18E-03 | 0 0 | Cs7g19250.1/Cs7g192 | 8.47 | 0 | 0 | 2 | MASCOT | T | PLEX8 |
| 9.91E-02 | 0 0 | Cs7g19250.1/Cs7g192 | 8.47 | 0 | 0 | 2 | MASCOT | T | PLEX8 |
| 2.20E-01 | 0 0 | Cs7g19250.1/Cs7g192 | 8.47 | 0 | 0 | 2 | MASCOT | T | PLEX8 |
| 1.16E-01 | 0 0 | Cs7g19250.1/Cs7g192 | 8.47 | 0 | 0 | 2 | MASCOT | T | PLEX8 |
| 1.09E-01 | 0 0 | Cs7g19250.1/Cs7g192 | 8.47 | 0 | 0 | 2 | MASCOT | T | PLEX8 |
| 1.92E-02 | 0 0 | Cs7g19250.1/Cs7g192 | 8.47 | 0 | 0 | 2 | MASCOT | T | PLEX8 |
| 3.72E-01 | 0 0 | Cs7g19250.1/Cs7g192 | 8.47 | 0 | 0 | 2 | MASCOT | T | PLEX8 |
| 3.18E-01 | 0 0 | Cs7g19250.1/Cs7g192 | 8.47 | 0 | 0 | 2 | MASCOT | T |       |
| 2.09E-01 | 0 0 | Cs7g19250.1/Cs7g192 | 8.47 | 0 | 0 | 2 | MASCOT | T |       |
| 8.52E-04 | 0 0 | Cs7g19250.1/Cs7g192 | 4.37 | 0 | 0 | 2 | MASCOT | T |       |
| 9.98E-02 | 0 0 | Cs7g19250.1/Cs7g192 | 4.37 | 0 | 0 | 2 | MASCOT | T | PLEX8 |
| 1.33E-03 | 0 0 | Cs7g19250.1/Cs7g192 | 4.37 | 0 | 0 | 2 | MASCOT | T | PLEX8 |
| 1.75E-03 | 0 0 | Cs7g19250.1/Cs7g192 | 4.37 | 0 | 0 | 2 | MASCOT | T | PLEX8 |
| 1.06E-05 | 0 0 | Cs7g19250.1/Cs7g192 | 4.37 | 0 | 0 | 2 | MASCOT | T | PLEX8 |
| 4.60E-03 | 0 0 | Cs7g19250.1/Cs7g192 | 4.37 | 0 | 0 | 2 | MASCOT | T | PLEX8 |
| 2.33E-04 | 0 0 | Cs7g19250.1/Cs7g192 | 4.37 | 0 | 0 | 2 | MASCOT | T | PLEX8 |
| 1.76E-01 | 0 0 | Cs7g19250.1/Cs7g192 | 4.37 | 0 | 0 | 2 | MASCOT | T | PLEX8 |
| 6.42E-05 | 0 0 | Cs7g19250.1/Cs7g192 | 4.37 | 0 | 0 | 2 | MASCOT | T | PLEX8 |
| 2.45E-02 | 0 0 | Cs7g19250.1/Cs7g192 | 4.37 | 0 | 0 | 2 | MASCOT | T | PLEX8 |

|          |     |                     |      |   |      |   |        |        |       |       |
|----------|-----|---------------------|------|---|------|---|--------|--------|-------|-------|
| 1.59E-01 | 0 0 | Cs7g19250.1/Cs7g192 | 4.37 | 0 | 0    | 2 | MASCOT | T      | PLEX8 |       |
| 1.76E-05 | 0 0 | Cs7g19250.1/Cs7g192 | 4.37 | 0 | 0    | 2 | MASCOT | T      |       |       |
| 3.58E-04 | 0 0 | Cs7g19250.1/Cs7g192 | 4.37 | 0 | 0    | 2 | MASCOT | T      | PLEX8 |       |
| 4.08E-01 | 0 0 | Cs7g19250.1/Cs7g192 | 4.37 | 0 | 0    | 2 | MASCOT | T      | PLEX8 |       |
| 1.88E-05 | 0 0 | Cs7g19250.1/Cs7g192 | 4.37 | 0 | 0    | 2 | MASCOT | T      |       |       |
| 4.70E-05 | 0 0 | Cs7g19250.1/Cs7g192 | 4.37 | 0 | 0    | 2 | MASCOT | T      |       |       |
| 3.63E-04 | 0 0 | Cs7g19250.1/Cs7g192 | 4.37 | 0 | 0    | 2 | MASCOT | T      | PLEX8 |       |
| 3.42E-03 | 0 0 | Cs7g19250.1/Cs7g192 | 4.56 | 1 | 0    | 2 | MASCOT | T      | PLEX8 |       |
| 1.22E-01 | 0 0 | Cs7g19250.1/Cs7g192 | 4.56 | 1 | 0    | 2 | MASCOT | T      | PLEX8 |       |
| 9.40E-02 | 0 0 | Cs7g19250.1/Cs7g192 | 4.56 | 1 | 0    | 2 | MASCOT | T      |       |       |
| 1.50E-01 | 0 0 | Cs7g19250.1/Cs7g192 | 4.56 | 1 | 0    | 2 | MASCOT | T      | PLEX8 |       |
| 6.23E-02 | 0 0 | Cs7g19250.1/Cs7g192 | 4.56 | 1 | 0    | 2 | MASCOT | T      | PLEX8 |       |
| 6.20E-03 | 0 0 | Cs7g19250.1/Cs7g192 | 4.56 | 1 | 0    | 2 | MASCOT | T      | PLEX8 |       |
| 7.19E-03 | 0 0 | Cs7g19250.1/Cs7g192 | 5.88 | 0 | 0    | 2 | MASCOT | T      | PLEX8 |       |
| 1.19E-02 | 0 0 | Cs7g19250.1/Cs7g192 | 5.88 | 0 | 0    | 2 | MASCOT | T      | PLEX8 |       |
| 2.95E-04 | 0 0 | Cs7g19250.1/Cs7g192 | 5.88 | 0 | 0    | 2 | MASCOT | T      | PLEX8 |       |
| 1.40E-02 | 0 0 | Cs7g19250.1/Cs7g192 | 5.88 | 0 | 0    | 2 | MASCOT | T      | PLEX8 |       |
| 1.19E-01 | 0 0 | Cs7g19250.1/Cs7g192 | 5.88 | 0 | 0    | 2 | MASCOT | T      | PLEX8 |       |
| 4.73E-02 | 0 0 | Cs7g19250.1/Cs7g192 | 5.88 | 0 | 0    | 2 | MASCOT | T      | PLEX8 |       |
| 4.56E-02 | 0 0 | Cs7g19250.1/Cs7g192 | 5.88 | 0 | 0    | 2 | MASCOT | T      | PLEX8 |       |
| 1.05E-02 | 0 0 | Cs7g19250.1/Cs7g192 | 5.88 | 0 | 0    | 2 | MASCOT | T      |       |       |
| 2.48E-01 | 0 0 | Cs7g19250.1/Cs7g192 | 5.88 | 0 | 0    | 2 | MASCOT | T      | PLEX8 |       |
| 1.45E-02 | 0 0 | Cs7g19250.1/Cs7g192 | 5.88 | 0 | 0    | 2 | MASCOT | T      | PLEX8 |       |
| 9.32E-03 | 0 0 | Cs7g19250.1/Cs7g192 | 5.88 | 0 | 0    | 2 | MASCOT | T      | PLEX8 |       |
| 8.41E-03 | 0 0 | Cs7g19250.1/Cs7g192 | 5.88 | 0 | 0    | 2 | MASCOT | T      | PLEX8 |       |
| 5.21E-03 | 0 0 | Cs7g19250.1/Cs7g192 | 5.88 | 0 | 0    | 2 | MASCOT | T      | PLEX8 |       |
| 1.86E-02 | 0 0 | Cs7g19250.1/Cs7g192 | 5.88 | 0 | 0    | 2 | MASCOT | T      |       |       |
| 1.78E-02 | 0 0 | Cs7g19250.1/Cs7g192 | 5.88 | 0 | 0    | 2 | MASCOT | T      |       |       |
| 2.29E-02 | 0 0 | Cs7g19250.1/Cs7g192 | 5.88 | 0 | 0    | 2 | MASCOT | T      |       |       |
| 2.85E-02 | 0 0 | Cs7g19250.1/Cs7g192 | 5.88 | 0 | 0    | 2 | MASCOT | T      |       |       |
| 4.08E-03 | 0 0 | Cs7g19250.1/Cs7g192 | 5.88 | 0 | 0    | 2 | MASCOT | T      |       |       |
| 9.72E-02 | 0 0 | Cs7g19250.1/Cs7g192 | 4.37 | 0 | 0    | 2 | MASCOT | T      | PLEX8 |       |
| 7.35E-02 | 0 0 | Cs7g19250.1/Cs7g192 | 4.37 | 0 | 0    | 2 | MASCOT | T      | PLEX8 |       |
| 7.67E-02 | 0 0 | Cs7g19250.1/Cs7g192 | 4.37 | 0 | 0    | 2 | MASCOT | T      | PLEX8 |       |
| 1.47E-01 | 0 0 | Cs7g19250.1/Cs7g192 | 4.37 | 0 | 0    | 2 | MASCOT | T      | PLEX8 |       |
| 1.73E-01 | 0 0 | Cs7g19240.1/Cs7g192 | 4.53 | 0 | 0    | 2 | MASCOT | T      | PLEX8 |       |
| 1.45E-01 | 0 0 | Cs7g19240.1/Cs7g192 | 4.53 | 0 | 0    | 2 | MASCOT | T      | PLEX8 |       |
| 2.03E-01 | 0 0 | Cs7g19240.1/Cs7g192 | 4.53 | 0 | 0    | 2 | MASCOT | T      | PLEX8 |       |
| 1.19E-01 | 0 0 | Cs7g19240.1/Cs7g192 | 4.53 | 0 | 0    | 2 | MASCOT | T      | PLEX8 |       |
| 2.44E-01 | 0 0 | Cs7g19240.1/Cs7g192 | 4.53 | 0 | 0    | 2 | MASCOT | T      | PLEX8 |       |
| 2.37E-01 | 0 0 | Cs7g19240.1/Cs7g192 | 4.53 | 0 | 0    | 2 | MASCOT | T      | PLEX8 |       |
| 1.94E-01 | 0 0 | Cs7g19240.1/Cs7g192 | 4.53 | 0 | 0    | 2 | MASCOT | T      |       |       |
| 4.66E-03 | 0 0 | Cs7g19250.1/Cs7g192 | 5.96 | 0 | 15.9 | 0 | 2      | MASCOT | T     | PLEX8 |
| 9.60E-03 | 0 0 | Cs7g19250.1/Cs7g192 | 5.96 | 0 | 15.9 | 0 | 2      | MASCOT | T     | PLEX8 |
| 1.16E-01 | 0 0 | Cs7g19250.1/Cs7g192 | 5.96 | 0 | 15.9 | 0 | 2      | MASCOT | T     | PLEX8 |
| 8.29E-02 | 0 0 | Cs7g19250.1/Cs7g192 | 5.96 | 0 | 15.9 | 0 | 2      | MASCOT | T     | PLEX8 |
| 5.64E-02 | 0 0 | Cs7g19250.1/Cs7g192 | 5.96 | 0 | 15.9 | 0 | 2      | MASCOT | T     | PLEX8 |
| 6.73E-02 | 0 0 | Cs7g19250.1/Cs7g192 | 5.96 | 0 | 15.9 | 0 | 2      | MASCOT | T     | PLEX8 |
| 7.25E-02 | 0 0 | Cs7g19250.1/Cs7g192 | 5.96 | 0 | 15.9 | 0 | 2      | MASCOT | T     | PLEX8 |
| 1.74E-02 | 0 0 | Cs7g19250.1/Cs7g192 | 5.96 | 0 | 15.9 | 0 | 2      | MASCOT | T     | PLEX8 |
| 9.29E-03 | 0 0 | Cs7g19250.1/Cs7g192 | 5.96 | 0 | 15.9 | 0 | 2      | MASCOT | T     | PLEX8 |

|          |     |                     |      |   |      |   |   |        |   |       |
|----------|-----|---------------------|------|---|------|---|---|--------|---|-------|
| 3.10E-01 | 0 0 | Cs7g19250.1/Cs7g192 | 5.96 | 0 | 15.9 | 0 | 2 | MASCOT | T | PLEX8 |
| 1.03E-02 | 0 0 | Cs7g19250.1/Cs7g192 | 5.96 | 0 | 15.9 | 0 | 2 | MASCOT | T | PLEX8 |
| 6.92E-02 | 0 0 | Cs7g19250.1/Cs7g192 | 5.96 | 0 | 15.9 | 0 | 2 | MASCOT | T | PLEX8 |
| 8.64E-03 | 0 0 | Cs7g19250.1/Cs7g192 | 5.96 | 0 | 0    | 0 | 2 | MASCOT | T | PLEX8 |
| 4.24E-02 | 0 0 | Cs7g19250.1/Cs7g192 | 5.96 | 0 | 0    | 0 | 2 | MASCOT | T | PLEX8 |
| 4.54E-01 | 0 0 | Cs7g19250.1/Cs7g192 | 5.96 | 0 | 0    | 0 | 2 | MASCOT | T |       |
| 3.02E-01 | 0 0 | Cs7g19250.1/Cs7g192 | 5.96 | 0 | 0    | 0 | 2 | MASCOT | T | PLEX8 |
| 1.49E-03 | 0 0 | Cs7g19250.1/Cs7g192 | 5.96 | 0 | 0    | 0 | 2 | MASCOT | T | PLEX8 |
| 3.17E-02 | 0 0 | Cs7g19250.1/Cs7g192 | 5.96 | 0 | 0    | 0 | 2 | MASCOT | T | PLEX8 |
| 2.73E-02 | 0 0 | Cs7g19250.1/Cs7g192 | 5.96 | 0 | 0    | 0 | 2 | MASCOT | T | PLEX8 |
| 4.98E-02 | 0 0 | Cs7g19250.1/Cs7g192 | 5.96 | 0 | 0    | 0 | 2 | MASCOT | T | PLEX8 |
| 3.65E-01 | 0 0 | Cs9g03530.1/Cs9g035 | 6.1  | 0 | 15.9 | 0 | 2 | MASCOT | T | PLEX8 |
| 2.05E-01 | 0 0 | Cs9g03530.1/Cs9g035 | 6.1  | 0 | 15.9 | 0 | 2 | MASCOT | T | PLEX8 |
| 2.11E-01 | 0 0 | Cs9g03530.1/Cs9g035 | 6.1  | 0 | 15.9 | 0 | 2 | MASCOT | T | PLEX8 |
| 4.50E-01 | 0 0 | Cs9g03530.1/Cs9g035 | 6.1  | 0 | 15.9 | 0 | 2 | MASCOT | T | PLEX8 |
| 3.17E-02 | 0 0 | Cs9g03530.1/Cs9g035 | 6.1  | 0 | 0    | 0 | 2 | MASCOT | T | PLEX8 |
| 1.01E-01 | 0 0 | Cs9g03530.1/Cs9g035 | 6.1  | 0 | 0    | 0 | 2 | MASCOT | T | PLEX8 |
| 2.04E-01 | 0 0 | Cs9g03530.1/Cs9g035 | 6.1  | 0 | 0    | 0 | 2 | MASCOT | T | PLEX8 |
| 3.55E-01 | 0 0 | Cs9g03530.1/Cs9g035 | 6.1  | 0 | 0    | 0 | 2 | MASCOT | T | PLEX8 |
| 4.65E-01 | 0 0 | Cs9g03530.1/Cs9g035 | 6.1  | 0 | 0    | 0 | 2 | MASCOT | T | PLEX8 |
| 5.46E-02 | 0 0 | Cs9g03530.1/Cs9g035 | 6.1  | 0 | 0    | 0 | 2 | MASCOT | T | PLEX8 |
| 3.68E-01 | 0 0 | Cs9g03530.1/Cs9g035 | 6.1  | 0 | 0    | 0 | 2 | MASCOT | T | PLEX8 |
| 1.51E-04 | 0 0 | Cs9g03530.1/Cs9g035 | 4.54 | 0 | 0    | 0 | 2 | MASCOT | T | PLEX8 |
| 8.15E-06 | 0 0 | Cs9g03530.1/Cs9g035 | 4.54 | 0 | 0    | 0 | 2 | MASCOT | T | PLEX8 |
| 1.30E-07 | 0 0 | Cs9g03530.1/Cs9g035 | 4.54 | 0 | 0    | 0 | 2 | MASCOT | T | PLEX8 |
| 2.58E-04 | 0 0 | Cs9g03530.1/Cs9g035 | 4.54 | 0 | 0    | 0 | 2 | MASCOT | T | PLEX8 |
| 9.86E-09 | 0 0 | Cs9g03530.1/Cs9g035 | 4.54 | 0 | 0    | 0 | 2 | MASCOT | T | PLEX8 |
| 2.47E-02 | 0 0 | Cs9g03530.1/Cs9g035 | 4.54 | 0 | 0    | 0 | 2 | MASCOT | T | PLEX8 |
| 2.75E-04 | 0 0 | Cs9g03530.1/Cs9g035 | 4.54 | 0 | 0    | 0 | 2 | MASCOT | T | PLEX8 |
| 1.79E-02 | 0 0 | Cs9g03530.1/Cs9g035 | 4.54 | 0 | 0    | 0 | 2 | MASCOT | T | PLEX8 |
| 2.65E-07 | 0 0 | Cs9g03530.1/Cs9g035 | 4.54 | 0 | 0    | 0 | 2 | MASCOT | T | PLEX8 |
| 2.04E-03 | 0 0 | Cs9g03530.1/Cs9g035 | 4.54 | 0 | 0    | 0 | 2 | MASCOT | T |       |
| 4.32E-02 | 0 0 | Cs9g03530.1/Cs9g035 | 4.54 | 0 | 0    | 0 | 2 | MASCOT | T | PLEX8 |
| 2.05E-05 | 0 0 | Cs9g03530.1/Cs9g035 | 4.54 | 0 | 0    | 0 | 2 | MASCOT | T | PLEX8 |
| 1.24E-05 | 0 0 | Cs9g03530.1/Cs9g035 | 4.54 | 0 | 0    | 0 | 2 | MASCOT | T | PLEX8 |
| 1.53E-07 | 0 0 | Cs9g03530.1/Cs9g035 | 4.54 | 0 | 0    | 0 | 2 | MASCOT | T | PLEX8 |
| 2.07E-08 | 0 0 | Cs9g03530.1/Cs9g035 | 4.54 | 0 | 0    | 0 | 2 | MASCOT | T | PLEX8 |
| 1.03E-06 | 0 0 | Cs9g03530.1/Cs9g035 | 4.54 | 0 | 0    | 0 | 2 | MASCOT | T | PLEX8 |
| 7.18E-06 | 0 0 | Cs9g03530.1/Cs9g035 | 4.54 | 0 | 0    | 0 | 2 | MASCOT | T | PLEX8 |
| 2.30E-04 | 0 0 | Cs9g03530.1/Cs9g035 | 4.54 | 0 | 0    | 0 | 2 | MASCOT | T |       |
| 2.42E-02 | 0 0 | Cs9g03530.1/Cs9g035 | 4.54 | 0 | 0    | 0 | 2 | MASCOT | T |       |
| 1.09E-04 | 0 0 | Cs9g03530.1/Cs9g035 | 4.54 | 0 | 0    | 0 | 2 | MASCOT | T |       |
| 5.91E-06 | 0 0 | Cs9g03530.1/Cs9g035 | 4.54 | 0 | 0    | 0 | 2 | MASCOT | T |       |
| 2.44E-02 | 0 0 | Cs9g03530.1/Cs9g035 | 8.22 | 0 | 0    | 0 | 2 | MASCOT | T | PLEX8 |
| 5.33E-03 | 0 0 | Cs9g03530.1/Cs9g035 | 8.22 | 0 | 0    | 0 | 2 | MASCOT | T | PLEX8 |
| 9.69E-04 | 0 0 | Cs9g03530.1/Cs9g035 | 8.22 | 0 | 0    | 0 | 2 | MASCOT | T | PLEX8 |
| 5.94E-02 | 0 0 | Cs9g03530.1/Cs9g035 | 8.22 | 0 | 0    | 0 | 2 | MASCOT | T | PLEX8 |
| 1.14E-02 | 0 0 | Cs9g03530.1/Cs9g035 | 8.22 | 0 | 0    | 0 | 2 | MASCOT | T | PLEX8 |
| 2.71E-03 | 0 0 | Cs9g03530.1/Cs9g035 | 8.22 | 0 | 0    | 0 | 2 | MASCOT | T | PLEX8 |
| 5.48E-03 | 0 0 | Cs9g03530.1/Cs9g035 | 8.22 | 0 | 0    | 0 | 2 | MASCOT | T | PLEX8 |
| 5.67E-02 | 0 0 | Cs9g03530.1/Cs9g035 | 8.22 | 0 | 0    | 0 | 2 | MASCOT | T | PLEX8 |

|          |     |                     |      |   |      |   |        |        |       |       |
|----------|-----|---------------------|------|---|------|---|--------|--------|-------|-------|
| 4.48E-02 | 0 0 | Cs9g03530.1/Cs9g035 | 8.22 | 0 | 0    | 2 | MASCOT | T      | PLEX8 |       |
| 3.46E-02 | 0 0 | Cs9g03530.1/Cs9g035 | 8.22 | 0 | 0    | 2 | MASCOT | T      |       |       |
| 1.41E-02 | 0 0 | Cs9g03530.1/Cs9g035 | 8.22 | 0 | 0    | 2 | MASCOT | T      | PLEX8 |       |
| 5.05E-03 | 0 0 | Cs9g03530.1/Cs9g035 | 8.22 | 0 | 0    | 2 | MASCOT | T      | PLEX8 |       |
| 1.77E-02 | 0 0 | Cs9g03530.1/Cs9g035 | 8.22 | 0 | 0    | 2 | MASCOT | T      | PLEX8 |       |
| 1.80E-02 | 0 0 | Cs9g03530.1/Cs9g035 | 8.22 | 0 | 0    | 2 | MASCOT | T      | PLEX8 |       |
| 1.47E-01 | 0 0 | Cs9g03530.1/Cs9g035 | 8.22 | 0 | 0    | 2 | MASCOT | T      | PLEX8 |       |
| 2.35E-01 | 0 0 | Cs9g03530.1/Cs9g035 | 8.22 | 0 | 0    | 2 | MASCOT | T      | PLEX8 |       |
| 9.77E-02 | 0 0 | Cs9g03530.1/Cs9g035 | 8.22 | 0 | 0    | 2 | MASCOT | T      | PLEX8 |       |
| 2.45E-01 | 0 0 | Cs9g03530.1/Cs9g035 | 5.99 | 0 | 0    | 2 | MASCOT | T      | PLEX8 |       |
| 2.25E-03 | 0 0 | Cs9g03530.1/Cs9g035 | 5.99 | 0 | 0    | 2 | MASCOT | T      | PLEX8 |       |
| 2.18E-04 | 0 0 | Cs9g03530.1/Cs9g035 | 5.99 | 0 | 0    | 2 | MASCOT | T      | PLEX8 |       |
| 6.96E-05 | 0 0 | Cs9g03530.1/Cs9g035 | 5.99 | 0 | 0    | 2 | MASCOT | T      | PLEX8 |       |
| 1.27E-03 | 0 0 | Cs9g03530.1/Cs9g035 | 5.99 | 0 | 0    | 2 | MASCOT | T      | PLEX8 |       |
| 5.00E-05 | 0 0 | Cs9g03530.1/Cs9g035 | 5.99 | 0 | 0    | 2 | MASCOT | T      | PLEX8 |       |
| 2.12E-03 | 0 0 | Cs9g03530.1/Cs9g035 | 5.99 | 0 | 0    | 2 | MASCOT | T      | PLEX8 |       |
| 4.51E-02 | 0 0 | Cs9g03530.1/Cs9g035 | 5.99 | 0 | 0    | 2 | MASCOT | T      | PLEX8 |       |
| 3.49E-03 | 0 0 | Cs9g03530.1/Cs9g035 | 5.99 | 0 | 0    | 2 | MASCOT | T      | PLEX8 |       |
| 2.25E-04 | 0 0 | Cs9g03530.1/Cs9g035 | 5.99 | 0 | 0    | 2 | MASCOT | T      | PLEX8 |       |
| 1.18E-01 | 0 0 | Cs9g03530.1/Cs9g035 | 5.99 | 0 | 0    | 2 | MASCOT | T      | PLEX8 |       |
| 1.02E-01 | 0 0 | Cs9g03530.1/Cs9g035 | 5.99 | 0 | 0    | 2 | MASCOT | T      | PLEX8 |       |
| 1.73E-03 | 0 0 | Cs9g03530.1/Cs9g035 | 5.99 | 0 | 0    | 2 | MASCOT | T      | PLEX8 |       |
| 1.39E-06 | 0 0 | Cs9g03530.1/Cs9g035 | 5.99 | 0 | 0    | 2 | MASCOT | T      | PLEX8 |       |
| 3.51E-02 | 0 0 | Cs9g03530.1/Cs9g035 | 5.99 | 0 | 0    | 2 | MASCOT | T      | PLEX8 |       |
| 3.36E-03 | 0 0 | Cs9g03530.1/Cs9g035 | 5.99 | 0 | 0    | 2 | MASCOT | T      | PLEX8 |       |
| 4.24E-03 | 0 0 | Cs9g03530.1/Cs9g035 | 5.99 | 0 | 0    | 2 | MASCOT | T      |       |       |
| 9.46E-02 | 0 0 | Cs9g03530.1/Cs9g035 | 5.55 | 0 | 0    | 2 | MASCOT | T      | PLEX8 |       |
| 9.18E-02 | 0 0 | Cs9g03530.1/Cs9g035 | 5.55 | 0 | 0    | 2 | MASCOT | T      | PLEX8 |       |
| 5.76E-01 | 0 0 | Cs9g03530.1/Cs9g035 | 4.37 | 0 | 0    | 2 | MASCOT | T      | PLEX8 |       |
| 3.88E-01 | 0 0 | Cs9g03530.1/Cs9g035 | 4.37 | 0 | 0    | 2 | MASCOT | T      | PLEX8 |       |
| 3.26E-01 | 0 0 | Cs9g03530.1/Cs9g035 | 4.37 | 0 | 0    | 2 | MASCOT | T      | PLEX8 |       |
| 3.34E-01 | 0 0 | Cs9g03530.1/Cs9g035 | 4.37 | 0 | 0    | 2 | MASCOT | T      |       |       |
| 4.04E-03 | 0 0 | Cs9g03530.1/Cs9g035 | 4.14 | 0 | 0    | 2 | MASCOT | T      | PLEX8 |       |
| 1.21E-05 | 0 0 | Cs9g03530.1/Cs9g035 | 4.14 | 0 | 0    | 2 | MASCOT | T      | PLEX8 |       |
| 4.93E-05 | 0 0 | Cs9g03530.1/Cs9g035 | 5.83 | 0 | 15.9 | 0 | 2      | MASCOT | T     |       |
| 6.79E-05 | 0 0 | Cs9g03530.1/Cs9g035 | 5.83 | 0 | 15.9 | 0 | 2      | MASCOT | T     |       |
| 2.76E-07 | 0 0 | Cs9g03530.1/Cs9g035 | 5.83 | 0 | 15.9 | 0 | 2      | MASCOT | T     |       |
| 6.96E-03 | 0 0 | Cs9g03530.1/Cs9g035 | 5.83 | 0 | 15.9 | 0 | 2      | MASCOT | T     |       |
| 2.64E-05 | 0 0 | Cs9g03530.1/Cs9g035 | 5.83 | 0 | 15.9 | 0 | 2      | MASCOT | T     |       |
| 4.19E-06 | 0 0 | Cs9g03530.1/Cs9g035 | 5.83 | 0 | 0    | 2 | MASCOT | T      |       |       |
| 5.19E-05 | 0 0 | Cs9g03530.1/Cs9g035 | 5.83 | 0 | 0    | 2 | MASCOT | T      |       |       |
| 4.75E-06 | 0 0 | Cs9g03530.1/Cs9g035 | 5.83 | 0 | 0    | 2 | MASCOT | T      |       |       |
| 1.04E-05 | 0 0 | Cs9g03530.1/Cs9g035 | 5.83 | 0 | 0    | 2 | MASCOT | T      | PLEX8 |       |
| 3.77E-02 | 0 0 | Cs9g03530.1/Cs9g035 | 4.68 | 1 | 15.9 | 0 | 2      | MASCOT | T     | PLEX8 |
| 2.05E-03 | 0 0 | Cs9g03530.1/Cs9g035 | 4.68 | 1 | 0    | 2 | MASCOT | T      | PLEX8 |       |
| 2.08E-01 | 0 0 | Cs9g03530.1/Cs9g035 | 4.37 | 0 | 0    | 2 | MASCOT | T      | PLEX8 |       |
| 5.40E-02 | 0 0 | Cs9g03530.1/Cs9g035 | 4.37 | 0 | 0    | 2 | MASCOT | T      | PLEX8 |       |
| 3.26E-02 | 0 0 | Cs9g03530.1/Cs9g035 | 9.47 | 0 | 0    | 2 | MASCOT | T      | PLEX8 |       |
| 4.69E-03 | 0 0 | Cs9g03530.1/Cs9g035 | 9.47 | 0 | 0    | 2 | MASCOT | T      | PLEX8 |       |
| 2.13E-02 | 0 0 | Cs7g16320.1         | 4.53 | 0 | 0    | 2 | MASCOT | T      | PLEX8 |       |
| 1.16E-03 | 0 0 | Cs7g16320.1         | 4.53 | 0 | 0    | 2 | MASCOT | T      | PLEX8 |       |



|          |     |             |      |   |   |   |        |   |       |
|----------|-----|-------------|------|---|---|---|--------|---|-------|
| 1.49E-03 | 0 0 | Cs7g16320.1 | 4.53 | 0 | 0 | 2 | MASCOT | T | PLEX8 |
| 7.69E-02 | 0 0 | Cs7g16320.1 | 4.53 | 0 | 0 | 2 | MASCOT | T | PLEX8 |
| 1.05E-03 | 0 0 | Cs7g16320.1 | 4.53 | 0 | 0 | 2 | MASCOT | T | PLEX8 |
| 1.81E-02 | 0 0 | Cs7g16320.1 | 4.53 | 0 | 0 | 2 | MASCOT | T | PLEX8 |
| 3.44E-04 | 0 0 | Cs7g16320.1 | 4.53 | 0 | 0 | 2 | MASCOT | T | PLEX8 |
| 1.63E-03 | 0 0 | Cs7g16320.1 | 4.53 | 0 | 0 | 2 | MASCOT | T | PLEX8 |
| 9.26E-03 | 0 0 | Cs7g16320.1 | 4.53 | 0 | 0 | 2 | MASCOT | T | PLEX8 |
| 3.00E-02 | 0 0 | Cs7g16320.1 | 4.53 | 0 | 0 | 2 | MASCOT | T |       |
| 3.83E-03 | 0 0 | Cs7g16320.1 | 4.53 | 0 | 0 | 2 | MASCOT | T | PLEX8 |
| 9.72E-04 | 0 0 | Cs7g16320.1 | 4.53 | 0 | 0 | 2 | MASCOT | T | PLEX8 |
| 2.39E-02 | 0 0 | Cs7g16320.1 | 4.53 | 0 | 0 | 2 | MASCOT | T | PLEX8 |
| 3.50E-04 | 0 0 | Cs7g16320.1 | 4.53 | 0 | 0 | 2 | MASCOT | T | PLEX8 |
| 2.38E-02 | 0 0 | Cs7g16320.1 | 4.53 | 0 | 0 | 2 | MASCOT | T | PLEX8 |
| 3.06E-01 | 0 0 | Cs7g16320.1 | 4.53 | 0 | 0 | 2 | MASCOT | T |       |
| 6.55E-02 | 0 0 | Cs7g16320.1 | 4.03 | 0 | 0 | 2 | MASCOT | T | PLEX8 |
| 8.20E-02 | 0 0 | Cs7g16320.1 | 4.03 | 0 | 0 | 2 | MASCOT | T | PLEX8 |
| 8.03E-02 | 0 0 | Cs7g16320.1 | 4.03 | 0 | 0 | 2 | MASCOT | T | PLEX8 |
| 5.92E-02 | 0 0 | Cs7g16320.1 | 4.03 | 0 | 0 | 2 | MASCOT | T | PLEX8 |
| 3.94E-03 | 0 0 | Cs7g16320.1 | 4.03 | 0 | 0 | 2 | MASCOT | T | PLEX8 |
| 4.73E-02 | 0 0 | Cs7g16320.1 | 4.03 | 0 | 0 | 2 | MASCOT | T | PLEX8 |
| 1.25E-02 | 0 0 | Cs7g16320.1 | 4.03 | 0 | 0 | 2 | MASCOT | T | PLEX8 |
| 1.37E-01 | 0 0 | Cs7g16320.1 | 4.03 | 0 | 0 | 2 | MASCOT | T | PLEX8 |
| 8.26E-02 | 0 0 | Cs7g16320.1 | 4.03 | 0 | 0 | 2 | MASCOT | T | PLEX8 |
| 2.04E-04 | 0 0 | Cs7g16320.1 | 8.5  | 0 | 0 | 2 | MASCOT | T | PLEX8 |
| 2.15E-03 | 0 0 | Cs7g16320.1 | 8.5  | 0 | 0 | 2 | MASCOT | T | PLEX8 |
| 1.72E-01 | 0 0 | Cs7g16320.1 | 8.5  | 0 | 0 | 2 | MASCOT | T |       |
| 4.42E-04 | 0 0 | Cs7g16320.1 | 8.5  | 0 | 0 | 2 | MASCOT | T | PLEX8 |
| 4.53E-03 | 0 0 | Cs7g16320.1 | 8.5  | 0 | 0 | 2 | MASCOT | T | PLEX8 |
| 5.85E-04 | 0 0 | Cs7g16320.1 | 8.5  | 0 | 0 | 2 | MASCOT | T | PLEX8 |
| 8.57E-03 | 0 0 | Cs7g16320.1 | 8.5  | 0 | 0 | 2 | MASCOT | T | PLEX8 |
| 3.55E-01 | 0 0 | Cs7g16320.1 | 8.5  | 0 | 0 | 2 | MASCOT | T | PLEX8 |
| 1.05E-02 | 0 0 | Cs7g16320.1 | 8.5  | 0 | 0 | 2 | MASCOT | T |       |
| 9.86E-02 | 0 0 | Cs7g16320.1 | 4.14 | 0 | 0 | 2 | MASCOT | T | PLEX8 |
| 2.32E-02 | 0 0 | Cs7g16320.1 | 4.25 | 0 | 0 | 2 | MASCOT | T | PLEX8 |
| 3.29E-01 | 0 0 | Cs7g16320.1 | 4.25 | 0 | 0 | 2 | MASCOT | T | PLEX8 |
| 2.23E-02 | 0 0 | Cs7g16320.1 | 4.25 | 0 | 0 | 2 | MASCOT | T | PLEX8 |
| 8.15E-02 | 0 0 | Cs7g16320.1 | 4.25 | 0 | 0 | 2 | MASCOT | T | PLEX8 |
| 5.35E-02 | 0 0 | Cs7g16320.1 | 4.25 | 0 | 0 | 2 | MASCOT | T |       |
| 1.11E-02 | 0 0 | Cs7g16320.1 | 4.25 | 0 | 0 | 2 | MASCOT | T |       |
| 1.18E-04 | 0 0 | Cs7g16320.1 | 4.25 | 0 | 0 | 2 | MASCOT | T |       |
| 1.70E-04 | 0 0 | Cs7g16320.1 | 4.25 | 0 | 0 | 2 | MASCOT | T |       |
| 1.08E-04 | 0 0 | Cs7g16320.1 | 4.25 | 0 | 0 | 2 | MASCOT | T |       |
| 3.21E-02 | 0 0 | Cs7g16320.1 | 4    | 1 | 0 | 2 | MASCOT | T | PLEX8 |
| 2.69E-02 | 0 0 | Cs7g16320.1 | 4.21 | 0 | 0 | 2 | MASCOT | T | PLEX8 |
| 5.14E-02 | 0 0 | Cs7g16320.1 | 4.21 | 0 | 0 | 2 | MASCOT | T | PLEX8 |
| 2.93E-02 | 0 0 | Cs7g16320.1 | 4.21 | 0 | 0 | 2 | MASCOT | T | PLEX8 |
| 8.46E-02 | 0 0 | Cs7g16320.1 | 4.21 | 0 | 0 | 2 | MASCOT | T | PLEX8 |
| 2.92E-02 | 0 0 | Cs7g16320.1 | 4.79 | 1 | 0 | 2 | MASCOT | T | PLEX8 |
| 1.23E-02 | 0 0 | Cs7g16320.1 | 4.79 | 1 | 0 | 2 | MASCOT | T | PLEX8 |
| 2.27E-02 | 0 0 | Cs7g16320.1 | 4.79 | 1 | 0 | 2 | MASCOT | T | PLEX8 |
| 3.26E-02 | 0 0 | Cs7g16320.1 | 4.37 | 0 | 0 | 2 | MASCOT | T |       |

|          |     |                     |      |   |      |   |   |        |   |       |
|----------|-----|---------------------|------|---|------|---|---|--------|---|-------|
| 2.26E-03 | 0 0 | Cs7g16320.1         | 4.53 | 0 | 15.9 | 0 | 2 | MASCOT | T |       |
| 1.62E-04 | 0 0 | Cs7g16320.1         | 4.53 | 0 | 15.9 | 0 | 2 | MASCOT | T |       |
| 1.99E-04 | 0 0 | Cs7g16320.1         | 4.53 | 0 | 15.9 | 0 | 2 | MASCOT | T |       |
| 2.53E-02 | 0 0 | Cs7g16320.1         | 4.53 | 0 |      | 0 | 2 | MASCOT | T |       |
| 1.54E-06 | 0 0 | Cs7g16320.1         | 4.53 | 0 |      | 0 | 2 | MASCOT | T |       |
| 6.63E-06 | 0 0 | Cs7g16320.1         | 4.53 | 0 |      | 0 | 2 | MASCOT | T |       |
| 2.06E-05 | 0 0 | Cs7g16320.1         | 4.53 | 0 |      | 0 | 2 | MASCOT | T |       |
| 1.38E-03 | 0 0 | Cs7g16320.1         | 4.53 | 0 |      | 0 | 2 | MASCOT | T |       |
| 2.11E-01 | 0 0 | orange1.1t03263.1   | 8.8  | 0 |      | 0 | 2 | MASCOT | T | PLEX8 |
| 2.76E-02 | 0 0 | orange1.1t03263.1   | 4.37 | 0 |      | 0 | 2 | MASCOT | T | PLEX8 |
| 1.52E-02 | 0 0 | orange1.1t03263.1   | 4.37 | 0 |      | 0 | 2 | MASCOT | T |       |
| 2.83E-02 | 0 0 | orange1.1t03263.1   | 4.37 | 0 |      | 0 | 2 | MASCOT | T | PLEX8 |
| 1.49E-03 | 0 0 | orange1.1t03263.1   | 4.37 | 0 |      | 0 | 2 | MASCOT | T | PLEX8 |
| 1.08E-01 | 0 0 | orange1.1t03263.1   | 3.71 | 0 |      | 0 | 2 | MASCOT | T | PLEX8 |
| 3.92E-02 | 0 0 | orange1.1t03263.1   | 3.71 | 0 |      | 0 | 2 | MASCOT | T |       |
| 6.91E-02 | 0 0 | Cs5g06870.1/Cs5g068 | 9.75 | 0 | 15.9 | 0 | 2 | MASCOT | T | PLEX8 |
| 4.78E-02 | 0 0 | Cs5g06870.1/Cs5g068 | 9.75 | 0 | 15.9 | 0 | 2 | MASCOT | T | PLEX8 |
| 3.05E-02 | 0 0 | Cs5g06870.1/Cs5g068 | 9.75 | 0 |      | 0 | 2 | MASCOT | T | PLEX8 |
| 1.35E-01 | 0 0 | Cs2g24610.1/Cs7g102 | 5.5  | 0 |      | 0 | 2 | MASCOT | T | PLEX8 |
| 8.17E-02 | 0 0 | Cs2g24610.1/Cs7g102 | 5.5  | 0 |      | 0 | 2 | MASCOT | T | PLEX8 |
| 5.23E-03 | 0 0 | orange1.1t03263.1   | 5.81 | 0 |      | 0 | 2 | MASCOT | T | PLEX8 |
| 9.49E-02 | 0 0 | orange1.1t03263.1   | 5.81 | 0 |      | 0 | 2 | MASCOT | T | PLEX8 |
| 1.79E-01 | 0 0 | orange1.1t03263.1   | 5.81 | 0 |      | 0 | 2 | MASCOT | T | PLEX8 |
| 5.12E-03 | 0 0 | orange1.1t03263.1   | 6    | 0 |      | 0 | 2 | MASCOT | T | PLEX8 |
| 1.60E-02 | 0 0 | orange1.1t03263.1   | 6    | 0 |      | 0 | 2 | MASCOT | T | PLEX8 |
| 2.15E-01 | 0 0 | orange1.1t03263.1   | 6    | 0 |      | 0 | 2 | MASCOT | T |       |
| 3.19E-02 | 0 0 | orange1.1t03263.1   | 6    | 0 |      | 0 | 2 | MASCOT | T |       |
| 2.36E-01 | 0 0 | orange1.1t03263.1   | 6    | 0 |      | 0 | 2 | MASCOT | T |       |
| 2.86E-02 | 0 0 | orange1.1t03263.1   | 6.74 | 0 |      | 0 | 2 | MASCOT | T | PLEX8 |
| 1.14E-01 | 0 0 | orange1.1t03263.1   | 6.74 | 0 |      | 0 | 2 | MASCOT | T | PLEX8 |
| 1.23E-03 | 0 0 | orange1.1t03263.1   | 6.74 | 0 |      | 0 | 2 | MASCOT | T | PLEX8 |
| 5.50E-02 | 0 0 | orange1.1t03263.1   | 6.74 | 0 |      | 0 | 2 | MASCOT | T | PLEX8 |
| 3.67E-03 | 0 0 | orange1.1t03263.1   | 6.74 | 0 |      | 0 | 2 | MASCOT | T | PLEX8 |
| 6.24E-03 | 0 0 | orange1.1t03263.1   | 6.74 | 0 |      | 0 | 2 | MASCOT | T | PLEX8 |
| 1.18E-01 | 0 0 | orange1.1t03263.1   | 8.75 | 0 |      | 0 | 2 | MASCOT | T | PLEX8 |
| 1.22E-03 | 0 0 | orange1.1t03263.1   | 8.75 | 0 |      | 0 | 2 | MASCOT | T | PLEX8 |
| 3.99E-05 | 0 0 | orange1.1t03263.1   | 8.75 | 0 |      | 0 | 2 | MASCOT | T | PLEX8 |
| 1.95E-02 | 0 0 | orange1.1t03263.1   | 8.75 | 0 |      | 0 | 2 | MASCOT | T | PLEX8 |
| 1.88E-03 | 0 0 | orange1.1t03263.1   | 8.75 | 0 |      | 0 | 2 | MASCOT | T | PLEX8 |
| 1.05E-05 | 0 0 | orange1.1t03263.1   | 8.75 | 0 |      | 0 | 2 | MASCOT | T | PLEX8 |
| 1.23E-01 | 0 0 | orange1.1t03263.1   | 8.75 | 0 |      | 0 | 2 | MASCOT | T | PLEX8 |
| 5.00E-01 | 0 0 | orange1.1t03263.1   | 8.75 | 0 |      | 0 | 2 | MASCOT | T | PLEX8 |
| 3.94E-04 | 0 0 | orange1.1t03263.1   | 8.75 | 0 |      | 0 | 2 | MASCOT | T | PLEX8 |
| 2.45E-04 | 0 0 | orange1.1t03263.1   | 8.75 | 0 |      | 0 | 2 | MASCOT | T | PLEX8 |
| 3.41E-01 | 0 0 | orange1.1t03263.1   | 8.75 | 0 |      | 0 | 2 | MASCOT | T | PLEX8 |
| 3.66E-03 | 0 0 | orange1.1t03263.1   | 8.75 | 0 |      | 0 | 2 | MASCOT | T | PLEX8 |
| 1.73E-01 | 0 0 | Cs2g24610.1/Cs5g068 | 5.55 | 0 |      | 0 | 2 | MASCOT | T | PLEX8 |
| 9.45E-02 | 0 0 | Cs2g24610.1/Cs5g068 | 5.55 | 0 |      | 0 | 2 | MASCOT | T | PLEX8 |
| 1.50E-01 | 0 0 | Cs2g24610.1/Cs5g068 | 5.55 | 0 |      | 0 | 2 | MASCOT | T | PLEX8 |
| 1.37E-01 | 0 0 | Cs2g24610.1/Cs5g068 | 5.55 | 0 |      | 0 | 2 | MASCOT | T | PLEX8 |
| 1.85E-01 | 0 0 | Cs2g24610.1/Cs5g068 | 5.55 | 0 |      | 0 | 2 | MASCOT | T | PLEX8 |

|          |     |                     |      |   |      |   |        |        |       |       |
|----------|-----|---------------------|------|---|------|---|--------|--------|-------|-------|
| 1.14E-01 | 0 0 | Cs2g24610.1/Cs5g068 | 5.55 | 0 | 0    | 2 | MASCOT | T      | PLEX8 |       |
| 1.08E-01 | 0 0 | Cs2g24610.1/Cs5g068 | 5.55 | 0 | 0    | 2 | MASCOT | T      | PLEX8 |       |
| 1.09E-01 | 0 0 | Cs2g24610.1/Cs5g068 | 5.55 | 0 | 0    | 2 | MASCOT | T      | PLEX8 |       |
| 2.61E-01 | 0 0 | Cs2g24610.1/Cs5g068 | 5.55 | 0 | 0    | 2 | MASCOT | T      | PLEX8 |       |
| 1.31E-01 | 0 0 | Cs2g24610.1/Cs5g068 | 5.55 | 0 | 0    | 2 | MASCOT | T      | PLEX8 |       |
| 1.71E-02 | 0 0 | Cs2g24610.1/Cs5g068 | 5.55 | 0 | 0    | 2 | MASCOT | T      | PLEX8 |       |
| 1.01E-01 | 0 0 | Cs2g24610.1/Cs5g068 | 5.55 | 0 | 0    | 2 | MASCOT | T      | PLEX8 |       |
| 1.32E-01 | 0 0 | Cs2g24610.1/Cs5g068 | 5.55 | 0 | 0    | 2 | MASCOT | T      |       |       |
| 1.70E-01 | 0 0 | Cs2g24610.1/Cs5g068 | 5.55 | 0 | 0    | 2 | MASCOT | T      |       |       |
| 1.75E-02 | 0 0 | orange1.1t03263.1   | 5.15 | 0 | 15.9 | 0 | 2      | MASCOT | T     |       |
| 6.50E-03 | 0 0 | orange1.1t03263.1   | 5.15 | 0 | 15.9 | 0 | 2      | MASCOT | T     |       |
| 1.67E-03 | 0 0 | Cs7g13170.1         | 8.27 | 0 | 15.9 | 0 | 2      | MASCOT | T     | PLEX8 |
| 1.58E-03 | 0 0 | Cs7g13170.1         | 8.27 | 0 | 15.9 | 0 | 2      | MASCOT | T     | PLEX8 |
| 1.35E-03 | 0 0 | Cs7g13170.1         | 8.27 | 0 | 15.9 | 0 | 2      | MASCOT | T     | PLEX8 |
| 6.05E-02 | 0 0 | Cs7g13170.1         | 8.27 | 0 | 15.9 | 0 | 2      | MASCOT | T     | PLEX8 |
| 1.10E-02 | 0 0 | Cs7g13170.1         | 8.27 | 0 | 15.9 | 0 | 2      | MASCOT | T     | PLEX8 |
| 2.85E-02 | 0 0 | Cs7g13170.1         | 8.27 | 0 | 15.9 | 0 | 2      | MASCOT | T     |       |
| 5.11E-04 | 0 0 | Cs7g13170.1         | 8.27 | 0 | 0    | 2 | MASCOT | T      | PLEX8 |       |
| 4.17E-02 | 0 0 | Cs7g13170.1         | 8.27 | 0 | 0    | 2 | MASCOT | T      | PLEX8 |       |
| 2.63E-01 | 0 0 | Cs7g13170.1         | 8.27 | 0 | 0    | 2 | MASCOT | T      | PLEX8 |       |
| 1.02E-04 | 0 0 | Cs7g13170.1         | 8.27 | 0 | 0    | 2 | MASCOT | T      | PLEX8 |       |
| 8.60E-05 | 0 0 | Cs7g13170.1         | 8.27 | 0 | 0    | 2 | MASCOT | T      | PLEX8 |       |
| 1.36E-02 | 0 0 | Cs7g13170.1         | 8.27 | 0 | 0    | 2 | MASCOT | T      |       |       |
| 2.60E-02 | 0 0 | Cs7g13170.1         | 8.27 | 0 | 0    | 2 | MASCOT | T      |       |       |
| 6.60E-02 | 0 0 | Cs7g13170.1         | 8.8  | 0 | 0    | 2 | MASCOT | T      | PLEX8 |       |
| 2.69E-02 | 0 0 | Cs7g13170.1         | 8.8  | 0 | 0    | 2 | MASCOT | T      | PLEX8 |       |
| 7.54E-02 | 0 0 | Cs7g13170.1         | 8.8  | 0 | 0    | 2 | MASCOT | T      | PLEX8 |       |
| 4.92E-01 | 0 0 | Cs7g13170.1         | 6.79 | 0 | 0    | 2 | MASCOT | T      | PLEX8 |       |
| 1.84E-02 | 0 0 | Cs7g13170.1         | 6.79 | 0 | 0    | 2 | MASCOT | T      | PLEX8 |       |
| 5.64E-04 | 0 0 | Cs7g13170.1         | 6.79 | 0 | 0    | 2 | MASCOT | T      | PLEX8 |       |
| 3.86E-01 | 0 0 | Cs3g22480.1/Cs7g131 | 8.75 | 0 | 15.9 | 0 | 2      | MASCOT | T     | PLEX8 |
| 1.46E-01 | 0 0 | Cs3g22480.1/Cs7g131 | 8.75 | 0 | 15.9 | 0 | 2      | MASCOT | T     | PLEX8 |
| 3.85E-02 | 0 0 | Cs3g22480.1/Cs7g131 | 8.75 | 0 | 15.9 | 0 | 2      | MASCOT | T     |       |
| 2.91E-01 | 0 0 | Cs3g22480.1/Cs7g131 | 8.75 | 0 | 15.9 | 0 | 2      | MASCOT | T     | PLEX8 |
| 1.09E-01 | 0 0 | Cs3g22480.1/Cs7g131 | 8.75 | 0 | 0    | 2 | MASCOT | T      | PLEX8 |       |
| 7.91E-05 | 0 0 | Cs3g22480.1/Cs7g131 | 8.75 | 0 | 0    | 2 | MASCOT | T      | PLEX8 |       |
| 2.05E-01 | 0 0 | Cs3g22480.1/Cs7g131 | 8.75 | 0 | 0    | 2 | MASCOT | T      | PLEX8 |       |
| 6.36E-02 | 0 0 | Cs7g13170.1         | 5.84 | 0 | 0    | 2 | MASCOT | T      | PLEX8 |       |
| 1.47E-02 | 0 0 | Cs7g13170.1         | 5.84 | 0 | 0    | 2 | MASCOT | T      | PLEX8 |       |
| 4.72E-02 | 0 0 | Cs7g13170.1         | 5.84 | 0 | 0    | 2 | MASCOT | T      | PLEX8 |       |
| 2.37E-02 | 0 0 | Cs7g13170.1         | 6.5  | 0 | 15.9 | 0 | 2      | MASCOT | T     | PLEX8 |
| 5.77E-03 | 0 0 | Cs7g13170.1         | 6.5  | 0 | 15.9 | 0 | 2      | MASCOT | T     | PLEX8 |
| 3.89E-02 | 0 0 | Cs7g13170.1         | 6.5  | 0 | 15.9 | 0 | 2      | MASCOT | T     | PLEX8 |
| 1.89E-01 | 0 0 | Cs7g13170.1         | 6.5  | 0 | 0    | 2 | MASCOT | T      | PLEX8 |       |
| 6.97E-04 | 0 0 | Cs7g13170.1         | 6.5  | 0 | 0    | 2 | MASCOT | T      | PLEX8 |       |
| 1.12E-01 | 0 0 | Cs7g13170.1         | 6.5  | 0 | 0    | 2 | MASCOT | T      | PLEX8 |       |
| 2.97E-05 | 0 0 | Cs7g13170.1         | 6.5  | 0 | 0    | 2 | MASCOT | T      | PLEX8 |       |
| 3.68E-04 | 0 0 | Cs7g13170.1         | 6    | 0 | 15.9 | 0 | 2      | MASCOT | T     |       |
| 1.48E-02 | 0 0 | Cs7g13170.1         | 6    | 0 | 0    | 2 | MASCOT | T      |       |       |
| 1.35E-01 | 0 0 | Cs7g13170.1         | 6    | 0 | 0    | 2 | MASCOT | T      |       |       |
| 9.53E-05 | 0 0 | Cs7g13170.1         | 6    | 0 | 0    | 2 | MASCOT | T      |       |       |

|              |                        |      |   |      |          |          |         |
|--------------|------------------------|------|---|------|----------|----------|---------|
| 2.66E-01 0 0 | Cs7g13170.1            | 8.26 | 0 | 0    | 2 MASCOT | T        | PLEX8   |
| 8.20E-02 0 0 | Cs7g13170.1            | 8.26 | 0 | 0    | 2 MASCOT | T        | PLEX8   |
| 6.06E-02 0 0 | Cs7g13170.1            | 5.97 | 0 | 0    | 2 MASCOT | T        | PLEX8   |
| 1.25E-02 0 0 | Cs7g13170.1            | 5.97 | 0 | 0    | 2 MASCOT | T        | PLEX8   |
| 1.80E-02 0 0 | Cs3g22480.1/Cs7g131    | 4.53 | 0 | 15.9 | 0        | 2 MASCOT | T       |
| 1.44E-03 0 0 | Cs3g22480.1/Cs7g131    | 4.53 | 0 | 0    | 0        | 2 MASCOT | T       |
| 1.31E-05 0 0 | Cs3g22480.1/Cs7g131    | 4.53 | 0 | 0    | 0        | 2 MASCOT | T       |
| 2.26E-02 0 0 | Cs7g13170.1            | 4.14 | 0 | 0    | 0        | 2 MASCOT | T PLEX8 |
| 1.21E-01 0 0 | Cs7g13170.1            | 4.14 | 0 | 0    | 0        | 2 MASCOT | T PLEX8 |
| 3.51E-02 0 0 | Cs7g13170.1            | 4.14 | 0 | 0    | 0        | 2 MASCOT | T       |
| 5.71E-02 0 0 | Cs3g04170.1/Cs3g043    | 5.84 | 0 | 0    | 0        | 2 MASCOT | T PLEX8 |
| 5.67E-03 0 0 | Cs3g04170.1/Cs3g043    | 5.84 | 0 | 0    | 0        | 2 MASCOT | T PLEX8 |
| 1.89E-01 0 0 | Cs3g04170.1/Cs3g043    | 5.84 | 0 | 0    | 0        | 2 MASCOT | T PLEX8 |
| 3.35E-02 0 0 | Cs3g04170.1/Cs3g043    | 5.84 | 0 | 0    | 0        | 2 MASCOT | T PLEX8 |
| 3.41E-04 0 0 | Cs3g04170.1/Cs3g043    | 5.84 | 0 | 0    | 0        | 2 MASCOT | T PLEX8 |
| 3.05E-01 0 0 | orange1.1t05236.1 ! C: | 4.37 | 0 | 0    | 0        | 2 MASCOT | T PLEX8 |
| 1.40E-01 0 0 | orange1.1t05236.1 ! C: | 4.37 | 0 | 0    | 0        | 2 MASCOT | T PLEX8 |
| 3.93E-01 0 0 | orange1.1t05236.1 ! C: | 4.37 | 0 | 0    | 0        | 2 MASCOT | T PLEX8 |
| 1.18E-01 0 0 | Cs3g04170.1/Cs3g043    | 8.6  | 0 | 15.9 | 0        | 2 MASCOT | T PLEX8 |
| 2.10E-01 0 0 | Cs3g04170.1/Cs3g043    | 8.6  | 0 | 15.9 | 0        | 2 MASCOT | T PLEX8 |
| 3.96E-01 0 0 | Cs3g04170.1/Cs3g043    | 8.6  | 0 | 15.9 | 0        | 2 MASCOT | T       |
| 4.20E-01 0 0 | Cs3g04170.1/Cs3g043    | 8.6  | 0 | 0    | 0        | 2 MASCOT | T       |
| 3.34E-01 0 0 | Cs3g04170.1/Cs3g043    | 8.6  | 0 | 0    | 0        | 2 MASCOT | T PLEX8 |
| 7.49E-02 0 0 | Cs3g04170.1/Cs3g043    | 8.6  | 0 | 0    | 0        | 2 MASCOT | T       |
| 4.30E-03 0 0 | Cs3g04170.1/Cs3g041    | 4.25 | 0 | 0    | 0        | 2 MASCOT | T       |
| 5.94E-04 0 0 | Cs3g04170.1/Cs3g041    | 6.75 | 0 | 0    | 0        | 2 MASCOT | T PLEX8 |
| 1.85E-03 0 0 | Cs3g04170.1/Cs3g041    | 6.75 | 0 | 0    | 0        | 2 MASCOT | T PLEX8 |
| 7.76E-02 0 0 | Cs3g04170.1/Cs3g041    | 6.75 | 0 | 0    | 0        | 2 MASCOT | T PLEX8 |
| 3.39E-03 0 0 | Cs3g04170.1/Cs3g041    | 6.75 | 0 | 0    | 0        | 2 MASCOT | T PLEX8 |
| 9.98E-03 0 0 | Cs3g04170.1/Cs3g041    | 6.75 | 0 | 0    | 0        | 2 MASCOT | T       |
| 4.59E-04 0 0 | Cs3g04170.1/Cs3g041    | 6.75 | 0 | 0    | 0        | 2 MASCOT | T       |
| 5.32E-02 0 0 | Cs3g04170.1/Cs3g041    | 6.75 | 0 | 0    | 0        | 2 MASCOT | T PLEX8 |
| 4.94E-04 0 0 | Cs3g04170.1/Cs3g041    | 6.75 | 0 | 0    | 0        | 2 MASCOT | T PLEX8 |
| 2.55E-03 0 0 | Cs3g04170.1/Cs3g041    | 6.75 | 0 | 0    | 0        | 2 MASCOT | T PLEX8 |
| 4.85E-04 0 0 | Cs3g04170.1/Cs3g041    | 6.75 | 0 | 0    | 0        | 2 MASCOT | T PLEX8 |
| 7.29E-03 0 0 | Cs3g04170.1/Cs3g043    | 4.21 | 0 | 0    | 0        | 2 MASCOT | T PLEX8 |
| 1.04E-02 0 0 | Cs3g04170.1/Cs3g043    | 4.21 | 0 | 0    | 0        | 2 MASCOT | T PLEX8 |
| 8.32E-04 0 0 | Cs3g04170.1/Cs3g041    | 4.75 | 0 | 0    | 0        | 2 MASCOT | T PLEX8 |
| 3.37E-03 0 0 | Cs3g04170.1/Cs3g041    | 4.75 | 0 | 0    | 0        | 2 MASCOT | T PLEX8 |
| 4.36E-02 0 0 | Cs3g04170.1/Cs3g043    | 4.21 | 0 | 0    | 0        | 2 MASCOT | T PLEX8 |
| 3.26E-02 0 0 | Cs3g04170.1/Cs3g043    | 6.79 | 0 | 0    | 0        | 2 MASCOT | T PLEX8 |
| 1.82E-01 0 0 | Cs3g04170.1/Cs3g043    | 6.79 | 0 | 0    | 0        | 2 MASCOT | T       |
| 6.67E-03 0 0 | Cs3g04170.1/Cs3g043    | 6.75 | 0 | 0    | 0        | 2 MASCOT | T PLEX8 |
| 5.46E-04 0 0 | Cs3g04170.1/Cs3g043    | 6.75 | 0 | 0    | 0        | 2 MASCOT | T PLEX8 |
| 1.24E-02 0 0 | Cs3g04170.1/Cs3g043    | 6.75 | 0 | 0    | 0        | 2 MASCOT | T PLEX8 |
| 2.28E-01 0 0 | Cs3g04170.1/Cs3g043    | 6.75 | 0 | 0    | 0        | 2 MASCOT | T PLEX8 |
| 1.37E-01 0 0 | Cs3g04170.1/Cs3g043    | 6.75 | 0 | 0    | 0        | 2 MASCOT | T PLEX8 |
| 2.55E-04 0 0 | Cs3g04170.1/Cs3g043    | 6.75 | 0 | 0    | 0        | 2 MASCOT | T PLEX8 |
| 3.36E-02 0 0 | Cs3g04170.1/Cs3g043    | 5.84 | 0 | 0    | 0        | 2 MASCOT | T PLEX8 |
| 5.27E-02 0 0 | Cs3g04170.1/Cs3g043    | 5.84 | 0 | 0    | 0        | 2 MASCOT | T PLEX8 |
| 4.76E-01 0 0 | Cs3g04170.1/Cs3g043    | 5.84 | 0 | 0    | 0        | 2 MASCOT | T       |

|              |                     |      |        |   |          |   |       |
|--------------|---------------------|------|--------|---|----------|---|-------|
| 4.67E-02 0 0 | Cs3g04170.1/Cs3g043 | 5.84 | 0      | 0 | 2 MASCOT | T | PLEX8 |
| 5.21E-03 0 0 | Cs3g04170.1/Cs3g043 | 5.84 | 0      | 0 | 2 MASCOT | T | PLEX8 |
| 1.94E-01 0 0 | Cs3g04170.1/Cs3g043 | 5.84 | 0      | 0 | 2 MASCOT | T |       |
| 6.98E-02 0 0 | Cs8g20810.1/Cs8g208 | 4.53 | 0      | 0 | 2 MASCOT | T | PLEX8 |
| 8.02E-04 0 0 | Cs8g20810.1/Cs8g208 | 4.53 | 0      | 0 | 2 MASCOT | T | PLEX8 |
| 1.21E-04 0 0 | Cs8g20810.1/Cs8g208 | 4.53 | 0      | 0 | 2 MASCOT | T | PLEX8 |
| 4.73E-02 0 0 | Cs8g20810.1/Cs8g208 | 4.53 | 0      | 0 | 2 MASCOT | T | PLEX8 |
| 6.84E-04 0 0 | Cs8g20810.1/Cs8g208 | 4.21 | 0 15.9 | 0 | 2 MASCOT | T | PLEX8 |
| 3.74E-02 0 0 | Cs8g20810.1/Cs8g208 | 4.21 | 0 15.9 | 0 | 2 MASCOT | T | PLEX8 |
| 1.36E-02 0 0 | Cs8g20810.1/Cs8g208 | 4.21 | 0      | 0 | 2 MASCOT | T | PLEX8 |
| 7.55E-02 0 0 | Cs8g20810.1/Cs8g208 | 4.21 | 0      | 0 | 2 MASCOT | T | PLEX8 |
| 1.26E-05 0 0 | Cs8g20810.1/Cs8g208 | 4.21 | 0      | 0 | 2 MASCOT | T | PLEX8 |
| 2.33E-02 0 0 | Cs8g20810.1/Cs8g208 | 4.53 | 0      | 0 | 2 MASCOT | T | PLEX8 |
| 3.63E-02 0 0 | Cs8g20810.1/Cs8g208 | 4.53 | 0      | 0 | 2 MASCOT | T | PLEX8 |
| 9.28E-02 0 0 | Cs8g20810.1/Cs8g208 | 4.53 | 0      | 0 | 2 MASCOT | T | PLEX8 |
| 2.72E-02 0 0 | Cs8g20810.1/Cs8g208 | 4.53 | 0      | 0 | 2 MASCOT | T | PLEX8 |
| 7.04E-02 0 0 | Cs8g20810.1/Cs8g208 | 4.53 | 0      | 0 | 2 MASCOT | T |       |
| 3.48E-01 0 0 | Cs8g20810.1/Cs8g208 | 5.72 | 0      | 0 | 2 MASCOT | T | PLEX8 |
| 1.17E-01 0 0 | Cs8g20810.1/Cs8g208 | 5.72 | 0      | 0 | 2 MASCOT | T | PLEX8 |
| 1.02E-01 0 0 | Cs8g20810.1/Cs8g208 | 8.72 | 0      | 0 | 2 MASCOT | T | PLEX8 |
| 7.86E-02 0 0 | Cs8g20810.1/Cs8g208 | 8.72 | 0      | 0 | 2 MASCOT | T |       |
| 3.23E-04 0 0 | Cs8g20810.1/Cs8g208 | 8.15 | 0      | 0 | 2 MASCOT | T | PLEX8 |
| 3.87E-05 0 0 | Cs8g20810.1/Cs8g208 | 3.77 | 0      | 0 | 2 MASCOT | T |       |
| 1.29E-02 0 0 | Cs8g20810.1/Cs8g208 | 4.37 | 0 15.9 | 0 | 2 MASCOT | T | PLEX8 |
| 1.84E-03 0 0 | Cs8g20810.1/Cs8g208 | 4.37 | 0      | 0 | 2 MASCOT | T | PLEX8 |
| 1.06E-06 0 0 | Cs8g20810.1/Cs8g208 | 4.37 | 0      | 0 | 2 MASCOT | T | PLEX8 |
| 5.98E-03 0 0 | Cs8g20810.1/Cs8g208 | 4.37 | 0      | 0 | 2 MASCOT | T | PLEX8 |
| 1.92E-06 0 0 | Cs8g20810.1/Cs8g208 | 4.37 | 0      | 0 | 2 MASCOT | T | PLEX8 |
| 2.39E-01 0 0 | Cs8g20810.1/Cs8g208 | 6.75 | 0 15.9 | 0 | 2 MASCOT | T | PLEX8 |
| 1.01E-04 0 0 | Cs8g20810.1/Cs8g208 | 6.75 | 0      | 0 | 2 MASCOT | T | PLEX8 |
| 4.94E-04 0 0 | Cs8g20810.1/Cs8g208 | 6.75 | 0      | 0 | 2 MASCOT | T |       |
| 1.18E-03 0 0 | Cs8g20810.1/Cs8g208 | 6    | 0      | 0 | 2 MASCOT | T |       |
| 4.93E-01 0 0 | Cs8g20810.1/Cs8g208 | 6    | 0      | 0 | 2 MASCOT | T |       |
| 1.86E-05 0 0 | Cs8g20810.1/Cs8g208 | 6    | 0      | 0 | 2 MASCOT | T |       |
| 2.05E-02 0 0 | Cs8g20810.1/Cs8g208 | 6    | 0      | 0 | 2 MASCOT | T |       |
| 1.05E-08 0 0 | Cs8g20810.1/Cs8g208 | 6    | 0      | 0 | 2 MASCOT | T |       |
| 3.29E-04 0 0 | Cs8g20810.1/Cs8g208 | 6    | 0      | 0 | 2 MASCOT | T |       |
| 8.06E-03 0 0 | Cs8g20810.1/Cs8g208 | 4.54 | 0 15.9 | 0 | 2 MASCOT | T | PLEX8 |
| 7.52E-03 0 0 | Cs8g20810.1/Cs8g208 | 4.54 | 0 15.9 | 0 | 2 MASCOT | T | PLEX8 |
| 3.58E-02 0 0 | Cs8g20810.1/Cs8g208 | 4.54 | 0 15.9 | 0 | 2 MASCOT | T | PLEX8 |
| 1.26E-02 0 0 | Cs8g20810.1/Cs8g208 | 4.54 | 0 15.9 | 0 | 2 MASCOT | T | PLEX8 |
| 6.38E-02 0 0 | Cs8g20810.1/Cs8g208 | 4.54 | 0 15.9 | 0 | 2 MASCOT | T | PLEX8 |
| 7.12E-03 0 0 | Cs8g20810.1/Cs8g208 | 4.54 | 0      | 0 | 2 MASCOT | T | PLEX8 |
| 1.70E-01 0 0 | Cs8g20810.1/Cs8g208 | 4.54 | 0      | 0 | 2 MASCOT | T | PLEX8 |
| 3.16E-01 0 0 | Cs8g20810.1/Cs8g208 | 4.54 | 0      | 0 | 2 MASCOT | T | PLEX8 |
| 2.28E-01 0 0 | Cs2g16200.1/Cs2g162 | 9.8  | 0      | 0 | 2 MASCOT | T | PLEX8 |
| 7.47E-02 0 0 | Cs2g16200.1/Cs2g162 | 9.8  | 0      | 0 | 2 MASCOT | T | PLEX8 |
| 3.42E-02 0 0 | Cs2g16200.1/Cs2g162 | 4.21 | 0      | 0 | 2 MASCOT | T | PLEX8 |
| 8.89E-03 0 0 | Cs2g16200.1/Cs2g162 | 4.21 | 0      | 0 | 2 MASCOT | T | PLEX8 |
| 3.97E-02 0 0 | Cs2g16200.1/Cs2g162 | 4.03 | 0      | 0 | 2 MASCOT | T | PLEX8 |
| 6.53E-03 0 0 | Cs2g16220.1/Cs2g162 | 6    | 0      | 0 | 2 MASCOT | T | PLEX8 |

|          |     |                      |      |   |   |   |        |   |       |
|----------|-----|----------------------|------|---|---|---|--------|---|-------|
| 4.49E-02 | 0 0 | Cs2g16220.1/Cs2g162  | 6    | 0 | 0 | 2 | MASCOT | T | PLEX8 |
| 9.51E-02 | 0 0 | Cs2g16220.1/Cs2g162  | 6    | 0 | 0 | 2 | MASCOT | T | PLEX8 |
| 4.37E-02 | 0 0 | Cs2g16220.1/Cs2g162  | 6    | 0 | 0 | 2 | MASCOT | T | PLEX8 |
| 9.53E-02 | 0 0 | Cs2g16200.1/Cs2g162  | 8.59 | 0 | 0 | 2 | MASCOT | T | PLEX8 |
| 8.41E-04 | 0 0 | Cs2g16200.1/Cs2g162  | 8.59 | 0 | 0 | 2 | MASCOT | T | PLEX8 |
| 6.70E-03 | 0 0 | Cs2g16200.1/Cs2g162  | 8.59 | 0 | 0 | 2 | MASCOT | T | PLEX8 |
| 2.18E-03 | 0 0 | Cs2g16260.1/Cs2g162  | 5.21 | 0 | 0 | 2 | MASCOT | T |       |
| 4.27E-02 | 0 0 | Cs2g16200.1/Cs2g162  | 6.46 | 0 | 0 | 2 | MASCOT | T | PLEX8 |
| 4.53E-02 | 0 0 | Cs2g16200.1/Cs2g162  | 6.46 | 0 | 0 | 2 | MASCOT | T | PLEX8 |
| 1.74E-01 | 0 0 | Cs2g16200.1/Cs2g162  | 6.46 | 0 | 0 | 2 | MASCOT | T | PLEX8 |
| 7.07E-02 | 0 0 | Cs2g16200.1/Cs2g162  | 6.46 | 0 | 0 | 2 | MASCOT | T | PLEX8 |
| 3.45E-01 | 0 0 | Cs2g16200.1/Cs2g162  | 6.46 | 0 | 0 | 2 | MASCOT | T | PLEX8 |
| 1.19E-02 | 0 0 | Cs2g16200.1/Cs2g162  | 6.46 | 0 | 0 | 2 | MASCOT | T | PLEX8 |
| 2.25E-03 | 0 0 | Cs2g16200.1/Cs2g162  | 6.46 | 0 | 0 | 2 | MASCOT | T | PLEX8 |
| 3.97E-03 | 0 0 | Cs2g16240.1 ! Cs2g16 | 5.81 | 0 | 0 | 2 | MASCOT | T | PLEX8 |
| 4.26E-02 | 0 0 | Cs2g16240.1 ! Cs2g16 | 5.81 | 0 | 0 | 2 | MASCOT | T | PLEX8 |
| 3.49E-02 | 0 0 | Cs2g16240.1 ! Cs2g16 | 5.81 | 0 | 0 | 2 | MASCOT | T | PLEX8 |
| 5.71E-02 | 0 0 | Cs2g16240.1 ! Cs2g16 | 5.81 | 0 | 0 | 2 | MASCOT | T | PLEX8 |
| 4.40E-02 | 0 0 | Cs2g16240.1 ! Cs2g16 | 5.81 | 0 | 0 | 2 | MASCOT | T | PLEX8 |
| 1.60E-03 | 0 0 | Cs2g16240.1 ! Cs2g16 | 5.81 | 0 | 0 | 2 | MASCOT | T | PLEX8 |
| 3.85E-01 | 0 0 | Cs2g16240.1 ! Cs2g16 | 5.81 | 0 | 0 | 2 | MASCOT | T |       |
| 8.27E-02 | 0 0 | Cs2g16240.1 ! Cs2g16 | 5.81 | 0 | 0 | 2 | MASCOT | T | PLEX8 |
| 1.18E-01 | 0 0 | Cs2g16240.1 ! Cs2g16 | 5.81 | 0 | 0 | 2 | MASCOT | T | PLEX8 |
| 1.63E-03 | 0 0 | Cs2g16240.1 ! Cs2g16 | 5.81 | 0 | 0 | 2 | MASCOT | T | PLEX8 |
| 1.00E-01 | 0 0 | Cs2g16240.1 ! Cs2g16 | 5.81 | 0 | 0 | 2 | MASCOT | T | PLEX8 |
| 5.04E-03 | 0 0 | Cs2g16240.1 ! Cs2g16 | 5.81 | 0 | 0 | 2 | MASCOT | T | PLEX8 |
| 2.20E-03 | 0 0 | Cs2g16240.1 ! Cs2g16 | 5.81 | 0 | 0 | 2 | MASCOT | T | PLEX8 |
| 2.29E-01 | 0 0 | Cs2g16260.1/Cs2g162  | 6.1  | 0 | 0 | 2 | MASCOT | T | PLEX8 |
| 2.25E-02 | 0 0 | Cs2g16260.1/Cs2g162  | 6.72 | 0 | 0 | 2 | MASCOT | T | PLEX8 |
| 1.33E-03 | 0 0 | Cs2g16260.1/Cs2g162  | 6.72 | 0 | 0 | 2 | MASCOT | T | PLEX8 |
| 7.82E-02 | 0 0 | Cs2g16260.1/Cs2g162  | 6.72 | 0 | 0 | 2 | MASCOT | T | PLEX8 |
| 8.89E-02 | 0 0 | Cs2g16260.1/Cs2g162  | 6.72 | 0 | 0 | 2 | MASCOT | T | PLEX8 |
| 1.59E-02 | 0 0 | Cs2g16260.1/Cs2g162  | 4.53 | 0 | 0 | 2 | MASCOT | T | PLEX8 |
| 6.45E-02 | 0 0 | Cs2g16260.1/Cs2g162  | 4.53 | 0 | 0 | 2 | MASCOT | T | PLEX8 |
| 6.24E-05 | 0 0 | Cs3g18200.1/Cs3g182  | 5.4  | 0 | 0 | 2 | MASCOT | T | PLEX8 |
| 2.58E-04 | 0 0 | Cs3g18200.1/Cs3g182  | 5.4  | 0 | 0 | 2 | MASCOT | T | PLEX8 |
| 2.91E-02 | 0 0 | Cs3g18200.1/Cs3g182  | 5.4  | 0 | 0 | 2 | MASCOT | T | PLEX8 |
| 1.95E-06 | 0 0 | Cs3g18200.1/Cs3g182  | 5.4  | 0 | 0 | 2 | MASCOT | T |       |
| 1.32E-07 | 0 0 | Cs3g18200.1/Cs3g182  | 5.4  | 0 | 0 | 2 | MASCOT | T | PLEX8 |
| 1.07E-07 | 0 0 | Cs3g18200.1/Cs3g182  | 5.4  | 0 | 0 | 2 | MASCOT | T | PLEX8 |
| 3.15E-04 | 0 0 | Cs3g18200.1/Cs3g182  | 5.4  | 0 | 0 | 2 | MASCOT | T | PLEX8 |
| 2.86E-01 | 0 0 | Cs3g18200.1/Cs3g182  | 5.4  | 0 | 0 | 2 | MASCOT | T |       |
| 9.69E-06 | 0 0 | Cs3g18200.1/Cs3g182  | 5.4  | 0 | 0 | 2 | MASCOT | T | PLEX8 |
| 6.43E-02 | 0 0 | Cs3g18200.1/Cs3g182  | 5.4  | 0 | 0 | 2 | MASCOT | T |       |
| 4.36E-02 | 0 0 | Cs3g18200.1/Cs3g182  | 5.4  | 0 | 0 | 2 | MASCOT | T |       |
| 1.72E-05 | 0 0 | Cs3g18200.1/Cs3g182  | 5.4  | 0 | 0 | 2 | MASCOT | T |       |
| 2.60E-06 | 0 0 | Cs3g18200.1/Cs3g182  | 5.4  | 0 | 0 | 2 | MASCOT | T |       |
| 3.77E-05 | 0 0 | Cs3g18200.1/Cs3g182  | 5.4  | 0 | 0 | 2 | MASCOT | T |       |
| 1.33E-04 | 0 0 | Cs3g18200.1/Cs3g182  | 5.4  | 0 | 0 | 2 | MASCOT | T |       |
| 2.02E-01 | 0 0 | Cs1g20220.1/Cs1g202  | 5.84 | 0 | 0 | 2 | MASCOT | T |       |
| 5.22E-02 | 0 0 | Cs3g18200.1/Cs3g182  | 5.32 | 0 | 0 | 2 | MASCOT | T | PLEX8 |

|          |     |                     |      |   |   |   |        |   |       |
|----------|-----|---------------------|------|---|---|---|--------|---|-------|
| 2.11E-02 | 0 0 | Cs3g18200.1/Cs3g182 | 5.32 | 0 | 0 | 2 | MASCOT | T | PLEX8 |
| 1.28E-01 | 0 0 | Cs3g18200.1/Cs3g182 | 5.32 | 0 | 0 | 2 | MASCOT | T | PLEX8 |
| 1.01E-01 | 0 0 | Cs3g18200.1/Cs3g182 | 6    | 0 | 0 | 2 | MASCOT | T |       |
| 1.53E-01 | 0 0 | Cs1g20220.1/Cs1g202 | 4.53 | 0 | 0 | 2 | MASCOT | T | PLEX8 |
| 1.33E-02 | 0 0 | Cs3g18200.1/Cs3g182 | 7.01 | 0 | 0 | 2 | MASCOT | T | PLEX8 |
| 1.10E-01 | 0 0 | Cs3g18200.1/Cs3g182 | 7.01 | 0 | 0 | 2 | MASCOT | T | PLEX8 |
| 7.03E-02 | 0 0 | Cs3g18200.1/Cs3g182 | 7.01 | 0 | 0 | 2 | MASCOT | T |       |
| 1.50E-01 | 0 0 | Cs1g20220.1/Cs1g202 | 6    | 0 | 0 | 2 | MASCOT | T | PLEX8 |
| 4.76E-02 | 0 0 | Cs1g20220.1/Cs1g202 | 6    | 0 | 0 | 2 | MASCOT | T | PLEX8 |
| 1.01E-01 | 0 0 | Cs1g20220.1/Cs1g202 | 6    | 0 | 0 | 2 | MASCOT | T | PLEX8 |
| 1.31E-02 | 0 0 | Cs1g20220.1/Cs1g202 | 6    | 0 | 0 | 2 | MASCOT | T | PLEX8 |
| 1.41E-01 | 0 0 | Cs1g20220.1/Cs1g202 | 6    | 0 | 0 | 2 | MASCOT | T | PLEX8 |
| 5.84E-01 | 0 0 | Cs1g20220.1/Cs1g202 | 6    | 0 | 0 | 2 | MASCOT | T | PLEX8 |
| 1.49E-01 | 0 0 | Cs3g18200.1/Cs3g182 | 8.59 | 0 | 0 | 2 | MASCOT | T | PLEX8 |
| 1.10E-01 | 0 0 | Cs3g18200.1/Cs3g182 | 8.59 | 0 | 0 | 2 | MASCOT | T | PLEX8 |
| 1.48E-01 | 0 0 | Cs3g18200.1/Cs3g182 | 8.59 | 0 | 0 | 2 | MASCOT | T | PLEX8 |
| 1.28E-01 | 0 0 | Cs3g18200.1/Cs3g182 | 4.14 | 0 | 0 | 2 | MASCOT | T | PLEX8 |
| 1.02E-03 | 0 0 | Cs3g18200.1/Cs3g182 | 4.14 | 0 | 0 | 2 | MASCOT | T | PLEX8 |
| 1.92E-03 | 0 0 | Cs3g18200.1/Cs3g182 | 4.14 | 0 | 0 | 2 | MASCOT | T | PLEX8 |
| 5.47E-02 | 0 0 | Cs3g18200.1/Cs3g182 | 4.14 | 0 | 0 | 2 | MASCOT | T | PLEX8 |
| 2.10E-01 | 0 0 | Cs1g20220.1/Cs1g202 | 6    | 0 | 0 | 2 | MASCOT | T |       |
| 3.14E-01 | 0 0 | Cs1g20220.1/Cs1g202 | 6    | 0 | 0 | 2 | MASCOT | T |       |
| 2.52E-01 | 0 0 | Cs1g20220.1/Cs1g202 | 6    | 0 | 0 | 2 | MASCOT | T |       |
| 2.67E-02 | 0 0 | Cs3g17610.1/Cs3g176 | 4.1  | 0 | 0 | 2 | MASCOT | T | PLEX8 |
| 4.47E-02 | 0 0 | Cs3g17610.1/Cs3g176 | 4.1  | 0 | 0 | 2 | MASCOT | T |       |
| 2.22E-02 | 0 0 | Cs3g17610.1/Cs3g176 | 4.1  | 0 | 0 | 2 | MASCOT | T | PLEX8 |
| 1.14E-02 | 0 0 | Cs3g17610.1/Cs3g176 | 4.1  | 0 | 0 | 2 | MASCOT | T | PLEX8 |
| 9.70E-04 | 0 0 | Cs3g17610.1/Cs3g176 | 4.1  | 0 | 0 | 2 | MASCOT | T | PLEX8 |
| 8.87E-02 | 0 0 | Cs3g17610.1/Cs3g176 | 4.1  | 0 | 0 | 2 | MASCOT | T | PLEX8 |
| 8.30E-02 | 0 0 | Cs3g17610.1/Cs3g176 | 4.1  | 0 | 0 | 2 | MASCOT | T |       |
| 1.15E-03 | 0 0 | Cs3g17610.1/Cs3g176 | 4.1  | 0 | 0 | 2 | MASCOT | T |       |
| 9.41E-02 | 0 0 | Cs3g17610.1/Cs3g176 | 6    | 0 | 0 | 2 | MASCOT | T |       |
| 4.71E-02 | 0 0 | Cs3g17610.3         | 5.32 | 0 | 0 | 2 | MASCOT | T | PLEX8 |
| 3.05E-03 | 0 0 | Cs3g17610.3         | 5.32 | 0 | 0 | 2 | MASCOT | T |       |
| 5.74E-03 | 0 0 | Cs3g17610.3         | 5.32 | 0 | 0 | 2 | MASCOT | T |       |
| 1.60E-01 | 0 0 | Cs3g17610.1/Cs3g176 | 8.75 | 0 | 0 | 2 | MASCOT | T | PLEX8 |
| 8.90E-04 | 0 0 | Cs3g17610.1/Cs3g176 | 8.75 | 0 | 0 | 2 | MASCOT | T | PLEX8 |
| 3.94E-03 | 0 0 | Cs3g17610.1/Cs3g176 | 8.75 | 0 | 0 | 2 | MASCOT | T | PLEX8 |
| 9.06E-03 | 0 0 | Cs3g17610.1/Cs3g176 | 4.03 | 0 | 0 | 2 | MASCOT | T | PLEX8 |
| 1.65E-04 | 0 0 | Cs3g17610.1/Cs3g176 | 4.03 | 0 | 0 | 2 | MASCOT | T | PLEX8 |
| 2.57E-05 | 0 0 | Cs3g17610.1/Cs3g176 | 4.03 | 0 | 0 | 2 | MASCOT | T |       |
| 4.38E-02 | 0 0 | Cs3g17610.1/Cs3g176 | 4.03 | 0 | 0 | 2 | MASCOT | T | PLEX8 |
| 7.67E-05 | 0 0 | Cs3g17610.1/Cs3g176 | 4.03 | 0 | 0 | 2 | MASCOT | T | PLEX8 |
| 5.70E-02 | 0 0 | Cs3g17610.1/Cs3g176 | 4.03 | 0 | 0 | 2 | MASCOT | T |       |
| 2.05E-02 | 0 0 | Cs3g17610.1/Cs3g176 | 4.03 | 0 | 0 | 2 | MASCOT | T |       |
| 6.74E-05 | 0 0 | Cs3g17610.1/Cs3g176 | 4.03 | 0 | 0 | 2 | MASCOT | T |       |
| 3.70E-03 | 0 0 | Cs3g17610.1/Cs3g176 | 4.14 | 0 | 0 | 2 | MASCOT | T | PLEX8 |
| 9.82E-02 | 0 0 | Cs3g17610.1/Cs3g176 | 4.14 | 0 | 0 | 2 | MASCOT | T | PLEX8 |
| 1.64E-03 | 0 0 | Cs3g17610.1/Cs3g176 | 4.14 | 0 | 0 | 2 | MASCOT | T | PLEX8 |
| 5.09E-02 | 0 0 | Cs3g17610.1/Cs3g176 | 8.75 | 0 | 0 | 2 | MASCOT | T | PLEX8 |
| 1.33E-01 | 0 0 | Cs3g17610.1/Cs3g176 | 8.75 | 0 | 0 | 2 | MASCOT | T | PLEX8 |

|          |     |                     |      |   |      |   |        |        |       |       |
|----------|-----|---------------------|------|---|------|---|--------|--------|-------|-------|
| 1.20E-01 | 0 0 | Cs3g17610.1/Cs3g176 | 5.83 | 0 | 0    | 2 | MASCOT | T      | PLEX8 |       |
| 9.44E-02 | 0 0 | Cs3g17610.1/Cs3g176 | 5.83 | 0 | 0    | 2 | MASCOT | T      | PLEX8 |       |
| 8.47E-03 | 0 0 | Cs3g17610.1/Cs3g176 | 5.83 | 0 | 0    | 2 | MASCOT | T      | PLEX8 |       |
| 1.03E-01 | 0 0 | Cs3g17610.1/Cs3g176 | 5.32 | 0 | 0    | 2 | MASCOT | T      | PLEX8 |       |
| 2.58E-02 | 0 0 | Cs3g17610.1/Cs3g176 | 5.32 | 0 | 0    | 2 | MASCOT | T      | PLEX8 |       |
| 3.59E-01 | 0 0 | Cs3g17610.1/Cs3g176 | 5.32 | 0 | 0    | 2 | MASCOT | T      | PLEX8 |       |
| 2.54E-02 | 0 0 | Cs3g17610.1/Cs3g176 | 5.32 | 0 | 0    | 2 | MASCOT | T      | PLEX8 |       |
| 1.09E-01 | 0 0 | Cs3g17610.1/Cs3g176 | 5.32 | 0 | 0    | 2 | MASCOT | T      |       |       |
| 5.43E-02 | 0 0 | Cs3g17610.1/Cs3g176 | 5.32 | 0 | 0    | 2 | MASCOT | T      | PLEX8 |       |
| 1.09E-01 | 0 0 | Cs3g17610.2/Cs3g176 | 6    | 0 | 0    | 2 | MASCOT | T      | PLEX8 |       |
| 5.16E-02 | 0 0 | Cs3g17610.1/Cs3g176 | 5.4  | 0 | 0    | 2 | MASCOT | T      |       |       |
| 2.52E-02 | 0 0 | Cs3g17990.1         | 5.32 | 0 | 0    | 2 | MASCOT | T      |       |       |
| 3.36E-05 | 0 0 | Cs3g17990.1         | 5.32 | 0 | 0    | 2 | MASCOT | T      | PLEX8 |       |
| 1.49E-01 | 0 0 | Cs3g17990.1         | 5.32 | 0 | 0    | 2 | MASCOT | T      | PLEX8 |       |
| 3.23E-07 | 0 0 | Cs3g17990.1         | 5.32 | 0 | 0    | 2 | MASCOT | T      |       |       |
| 2.02E-01 | 0 0 | Cs1g20220.1/Cs1g202 | 5.84 | 0 | 0    | 2 | MASCOT | T      |       |       |
| 1.99E-03 | 0 0 | Cs3g17990.1         | 4.53 | 0 | 0    | 2 | MASCOT | T      | PLEX8 |       |
| 1.53E-01 | 0 0 | Cs1g20220.1/Cs1g202 | 4.53 | 0 | 0    | 2 | MASCOT | T      | PLEX8 |       |
| 4.82E-02 | 0 0 | Cs3g17990.1/Cs6g036 | 4.53 | 0 | 0    | 2 | MASCOT | T      | PLEX8 |       |
| 1.30E-02 | 0 0 | Cs3g17990.1/Cs6g036 | 4.53 | 0 | 0    | 2 | MASCOT | T      | PLEX8 |       |
| 1.55E-01 | 0 0 | Cs3g17990.1/Cs6g036 | 4.53 | 0 | 0    | 2 | MASCOT | T      | PLEX8 |       |
| 3.80E-02 | 0 0 | Cs3g17990.1/Cs6g036 | 4.53 | 0 | 0    | 2 | MASCOT | T      | PLEX8 |       |
| 1.34E-02 | 0 0 | Cs3g17990.1         | 5.32 | 0 | 0    | 2 | MASCOT | T      | PLEX8 |       |
| 2.09E-01 | 0 0 | Cs3g17990.1         | 5.32 | 0 | 0    | 2 | MASCOT | T      | PLEX8 |       |
| 5.93E-03 | 0 0 | Cs3g17990.1         | 5.32 | 0 | 0    | 2 | MASCOT | T      |       |       |
| 1.50E-01 | 0 0 | Cs1g20220.1/Cs1g202 | 6    | 0 | 0    | 2 | MASCOT | T      | PLEX8 |       |
| 4.76E-02 | 0 0 | Cs1g20220.1/Cs1g202 | 6    | 0 | 0    | 2 | MASCOT | T      | PLEX8 |       |
| 1.01E-01 | 0 0 | Cs1g20220.1/Cs1g202 | 6    | 0 | 0    | 2 | MASCOT | T      | PLEX8 |       |
| 1.31E-02 | 0 0 | Cs1g20220.1/Cs1g202 | 6    | 0 | 0    | 2 | MASCOT | T      | PLEX8 |       |
| 1.41E-01 | 0 0 | Cs1g20220.1/Cs1g202 | 6    | 0 | 0    | 2 | MASCOT | T      | PLEX8 |       |
| 5.84E-01 | 0 0 | Cs1g20220.1/Cs1g202 | 6    | 0 | 0    | 2 | MASCOT | T      | PLEX8 |       |
| 9.58E-02 | 0 0 | Cs3g17990.1         | 6.14 | 1 | 0    | 2 | MASCOT | T      | PLEX8 |       |
| 2.16E-01 | 0 0 | Cs1g20220.1/Cs1g202 | 8.59 | 0 | 0    | 2 | MASCOT | T      | PLEX8 |       |
| 7.83E-03 | 0 0 | Cs1g20220.1/Cs1g202 | 8.59 | 0 | 0    | 2 | MASCOT | T      | PLEX8 |       |
| 2.11E-02 | 0 0 | Cs1g20220.1/Cs1g202 | 8.59 | 0 | 0    | 2 | MASCOT | T      | PLEX8 |       |
| 4.75E-02 | 0 0 | Cs1g20220.1/Cs1g202 | 8.59 | 0 | 0    | 2 | MASCOT | T      | PLEX8 |       |
| 2.21E-01 | 0 0 | Cs1g20220.1/Cs1g202 | 8.59 | 0 | 0    | 2 | MASCOT | T      | PLEX8 |       |
| 4.29E-03 | 0 0 | Cs1g20220.1/Cs1g202 | 8.59 | 0 | 0    | 2 | MASCOT | T      | PLEX8 |       |
| 1.78E-02 | 0 0 | Cs1g20220.1/Cs1g202 | 8.59 | 0 | 0    | 2 | MASCOT | T      | PLEX8 |       |
| 1.09E-01 | 0 0 | Cs1g20220.1/Cs1g202 | 8.59 | 0 | 0    | 2 | MASCOT | T      | PLEX8 |       |
| 4.07E-02 | 0 0 | Cs1g20220.1/Cs1g202 | 8.59 | 0 | 0    | 2 | MASCOT | T      | PLEX8 |       |
| 5.17E-02 | 0 0 | Cs1g20220.1/Cs1g202 | 8.59 | 0 | 0    | 2 | MASCOT | T      |       |       |
| 5.08E-02 | 0 0 | Cs1g20220.1/Cs1g202 | 8.59 | 0 | 0    | 2 | MASCOT | T      |       |       |
| 1.08E-01 | 0 0 | Cs3g17990.1/Cs6g188 | 4.09 | 0 | 15.9 | 0 | 2      | MASCOT | T     | PLEX8 |
| 1.11E-04 | 0 0 | Cs3g17990.1/Cs6g188 | 4.09 | 0 | 0    | 2 | MASCOT | T      | PLEX8 |       |
| 9.81E-02 | 0 0 | Cs3g17990.1/Cs6g188 | 4.09 | 0 | 0    | 2 | MASCOT | T      | PLEX8 |       |
| 2.10E-01 | 0 0 | Cs1g20220.1/Cs1g202 | 6    | 0 | 0    | 2 | MASCOT | T      |       |       |
| 3.14E-01 | 0 0 | Cs1g20220.1/Cs1g202 | 6    | 0 | 0    | 2 | MASCOT | T      |       |       |
| 2.52E-01 | 0 0 | Cs1g20220.1/Cs1g202 | 6    | 0 | 0    | 2 | MASCOT | T      |       |       |
| 2.28E-01 | 0 0 | Cs2g16200.1/Cs2g162 | 9.8  | 0 | 0    | 2 | MASCOT | T      | PLEX8 |       |
| 7.47E-02 | 0 0 | Cs2g16200.1/Cs2g162 | 9.8  | 0 | 0    | 2 | MASCOT | T      | PLEX8 |       |



|          |     |                      |      |   |   |   |        |   |       |
|----------|-----|----------------------|------|---|---|---|--------|---|-------|
| 3.42E-02 | 0 0 | Cs2g16200.1/Cs2g162  | 4.21 | 0 | 0 | 2 | MASCOT | T | PLEX8 |
| 8.89E-03 | 0 0 | Cs2g16200.1/Cs2g162  | 4.21 | 0 | 0 | 2 | MASCOT | T | PLEX8 |
| 3.97E-02 | 0 0 | Cs2g16200.1/Cs2g162  | 4.03 | 0 | 0 | 2 | MASCOT | T | PLEX8 |
| 3.86E-04 | 0 0 | Cs2g16200.1/Cs2g162  | 4.25 | 0 | 0 | 2 | MASCOT | T | PLEX8 |
| 2.08E-03 | 0 0 | Cs2g16200.1/Cs2g162  | 4.25 | 0 | 0 | 2 | MASCOT | T | PLEX8 |
| 2.38E-01 | 0 0 | Cs2g16200.1/Cs2g162  | 4.25 | 0 | 0 | 2 | MASCOT | T | PLEX8 |
| 6.18E-03 | 0 0 | Cs2g16200.1/Cs2g162  | 4.25 | 0 | 0 | 2 | MASCOT | T | PLEX8 |
| 1.17E-01 | 0 0 | Cs2g16200.1/Cs2g162  | 8.75 | 0 | 0 | 2 | MASCOT | T | PLEX8 |
| 1.14E-01 | 0 0 | Cs2g16200.1/Cs2g162  | 8.75 | 0 | 0 | 2 | MASCOT | T | PLEX8 |
| 1.75E-01 | 0 0 | Cs2g16200.1/Cs2g162  | 8.75 | 0 | 0 | 2 | MASCOT | T | PLEX8 |
| 9.53E-02 | 0 0 | Cs2g16200.1/Cs2g162  | 8.59 | 0 | 0 | 2 | MASCOT | T | PLEX8 |
| 8.41E-04 | 0 0 | Cs2g16200.1/Cs2g162  | 8.59 | 0 | 0 | 2 | MASCOT | T | PLEX8 |
| 6.70E-03 | 0 0 | Cs2g16200.1/Cs2g162  | 8.59 | 0 | 0 | 2 | MASCOT | T | PLEX8 |
| 4.45E-01 | 0 0 | Cs2g16200.1/Cs2g162  | 6.75 | 0 | 0 | 2 | MASCOT | T | PLEX8 |
| 1.74E-01 | 0 0 | Cs2g16200.1/Cs2g162  | 6.75 | 0 | 0 | 2 | MASCOT | T | PLEX8 |
| 4.98E-04 | 0 0 | Cs2g16200.1/Cs2g162  | 6.75 | 0 | 0 | 2 | MASCOT | T | PLEX8 |
| 8.04E-04 | 0 0 | Cs2g16200.1/Cs2g162  | 6.75 | 0 | 0 | 2 | MASCOT | T | PLEX8 |
| 4.27E-02 | 0 0 | Cs2g16200.1/Cs2g162  | 6.46 | 0 | 0 | 2 | MASCOT | T | PLEX8 |
| 4.53E-02 | 0 0 | Cs2g16200.1/Cs2g162  | 6.46 | 0 | 0 | 2 | MASCOT | T | PLEX8 |
| 1.74E-01 | 0 0 | Cs2g16200.1/Cs2g162  | 6.46 | 0 | 0 | 2 | MASCOT | T | PLEX8 |
| 7.07E-02 | 0 0 | Cs2g16200.1/Cs2g162  | 6.46 | 0 | 0 | 2 | MASCOT | T | PLEX8 |
| 3.45E-01 | 0 0 | Cs2g16200.1/Cs2g162  | 6.46 | 0 | 0 | 2 | MASCOT | T | PLEX8 |
| 1.19E-02 | 0 0 | Cs2g16200.1/Cs2g162  | 6.46 | 0 | 0 | 2 | MASCOT | T | PLEX8 |
| 2.25E-03 | 0 0 | Cs2g16200.1/Cs2g162  | 6.46 | 0 | 0 | 2 | MASCOT | T | PLEX8 |
| 1.83E-01 | 0 0 | Cs2g16200.1/Cs2g162  | 5.55 | 0 | 0 | 2 | MASCOT | T | PLEX8 |
| 2.10E-01 | 0 0 | Cs2g16200.1/Cs2g162  | 5.81 | 0 | 0 | 2 | MASCOT | T | PLEX8 |
| 3.57E-02 | 0 0 | Cs2g16200.1/Cs2g162  | 5.81 | 0 | 0 | 2 | MASCOT | T | PLEX8 |
| 5.21E-02 | 0 0 | Cs2g16200.1/Cs2g162  | 5.81 | 0 | 0 | 2 | MASCOT | T | PLEX8 |
| 2.48E-04 | 0 0 | Cs2g16200.1/Cs2g162  | 5.81 | 0 | 0 | 2 | MASCOT | T | PLEX8 |
| 3.31E-01 | 0 0 | Cs2g16200.1/Cs2g162  | 5.81 | 0 | 0 | 2 | MASCOT | T | PLEX8 |
| 7.43E-02 | 0 0 | Cs2g16200.1/orange1. | 4.53 | 0 | 0 | 2 | MASCOT | T | PLEX8 |
| 4.23E-02 | 0 0 | Cs2g16200.1/orange1. | 4.53 | 0 | 0 | 2 | MASCOT | T | PLEX8 |
| 2.66E-02 | 0 0 | Cs2g16200.1/orange1. | 4.53 | 0 | 0 | 2 | MASCOT | T | PLEX8 |
| 7.03E-02 | 0 0 | Cs6g06660.1/Cs6g066  | 4.53 | 0 | 0 | 2 | MASCOT | T | PLEX8 |
| 2.16E-02 | 0 0 | Cs6g06660.1/Cs6g066  | 4.53 | 0 | 0 | 2 | MASCOT | T | PLEX8 |
| 1.10E-01 | 0 0 | Cs6g06660.1/Cs6g066  | 8.75 | 0 | 0 | 2 | MASCOT | T | PLEX8 |
| 6.07E-02 | 0 0 | Cs6g06660.1/Cs6g066  | 8.75 | 0 | 0 | 2 | MASCOT | T | PLEX8 |
| 1.16E-02 | 0 0 | Cs6g06660.1/Cs6g066  | 8.75 | 0 | 0 | 2 | MASCOT | T | PLEX8 |
| 1.03E-01 | 0 0 | Cs6g06660.1/Cs6g066  | 8.75 | 0 | 0 | 2 | MASCOT | T | PLEX8 |
| 5.08E-02 | 0 0 | Cs6g06660.1/Cs6g066  | 8.75 | 0 | 0 | 2 | MASCOT | T | PLEX8 |
| 1.04E-01 | 0 0 | Cs6g06660.1/Cs6g066  | 8.75 | 0 | 0 | 2 | MASCOT | T |       |
| 2.67E-02 | 0 0 | Cs6g06660.1/Cs6g066  | 5.72 | 0 | 0 | 2 | MASCOT | T | PLEX8 |
| 1.49E-01 | 0 0 | Cs6g06660.1/Cs6g066  | 5.72 | 0 | 0 | 2 | MASCOT | T | PLEX8 |
| 2.20E-01 | 0 0 | Cs6g06660.1/Cs6g066  | 5.72 | 0 | 0 | 2 | MASCOT | T | PLEX8 |
| 1.29E-01 | 0 0 | Cs6g06660.1/Cs6g066  | 5.72 | 0 | 0 | 2 | MASCOT | T | PLEX8 |
| 1.07E-01 | 0 0 | Cs6g06660.1/Cs6g066  | 5.72 | 0 | 0 | 2 | MASCOT | T | PLEX8 |
| 2.67E-02 | 0 0 | Cs6g06660.1/Cs6g066  | 5.72 | 0 | 0 | 2 | MASCOT | T | PLEX8 |
| 1.53E-02 | 0 0 | Cs6g06660.1/Cs6g066  | 5.72 | 0 | 0 | 2 | MASCOT | T | PLEX8 |
| 1.15E-02 | 0 0 | Cs6g06660.1/Cs6g066  | 8.72 | 0 | 0 | 2 | MASCOT | T | PLEX8 |
| 4.22E-02 | 0 0 | Cs6g06660.1          | 4.03 | 0 | 0 | 2 | MASCOT | T |       |
| 4.10E-01 | 0 0 | Cs6g06660.1/Cs6g066  | 8.73 | 0 | 0 | 2 | MASCOT | T | PLEX8 |

|          |     |                       |      |   |      |   |        |        |       |       |
|----------|-----|-----------------------|------|---|------|---|--------|--------|-------|-------|
| 9.06E-02 | 0 0 | Cs6g06660.1/Cs6g066   | 8.73 | 0 | 0    | 2 | MASCOT | T      | PLEX8 |       |
| 5.85E-02 | 0 0 | Cs6g06660.1/Cs6g066   | 8.73 | 0 | 0    | 2 | MASCOT | T      | PLEX8 |       |
| 1.33E-01 | 0 0 | Cs6g06660.1/Cs6g066   | 4.53 | 0 | 0    | 2 | MASCOT | T      | PLEX8 |       |
| 9.89E-02 | 0 0 | Cs6g06660.1/Cs6g066   | 4.53 | 0 | 0    | 2 | MASCOT | T      | PLEX8 |       |
| 4.83E-04 | 0 0 | Cs6g06660.1/Cs6g066   | 3.84 | 0 | 0    | 2 | MASCOT | T      |       |       |
| 1.64E-07 | 0 0 | Cs6g06660.1/Cs6g066   | 3.84 | 0 | 0    | 2 | MASCOT | T      |       |       |
| 2.96E-04 | 0 0 | Cs6g06660.1/Cs6g066   | 3.84 | 0 | 0    | 2 | MASCOT | T      |       |       |
| 1.54E-02 | 0 0 | Cs6g06660.1/Cs6g066   | 3.84 | 0 | 0    | 2 | MASCOT | T      | PLEX8 |       |
| 3.79E-05 | 0 0 | Cs6g06660.1/Cs6g066   | 3.84 | 0 | 0    | 2 | MASCOT | T      | PLEX8 |       |
| 2.64E-03 | 0 0 | Cs6g06660.1/Cs6g066   | 3.84 | 0 | 0    | 2 | MASCOT | T      | PLEX8 |       |
| 1.77E-03 | 0 0 | Cs6g06660.1/Cs6g066   | 8.25 | 0 | 0    | 2 | MASCOT | T      | PLEX8 |       |
| 8.14E-02 | 0 0 | Cs6g06660.1/Cs6g066   | 4.53 | 0 | 15.9 | 0 | 2      | MASCOT | T     | PLEX8 |
| 1.37E-02 | 0 0 | Cs6g06660.1/Cs6g066   | 4.53 | 0 | 15.9 | 0 | 2      | MASCOT | T     | PLEX8 |
| 1.66E-04 | 0 0 | Cs6g06660.1/Cs6g066   | 4.53 | 0 | 0    | 2 | MASCOT | T      | PLEX8 |       |
| 8.42E-02 | 0 0 | Cs6g06660.1/Cs6g066   | 4.03 | 0 | 0    | 2 | MASCOT | T      | PLEX8 |       |
| 8.82E-02 | 0 0 | Cs6g06660.1/Cs6g066   | 4.03 | 0 | 0    | 2 | MASCOT | T      |       |       |
| 9.75E-02 | 0 0 | Cs6g06660.1/Cs6g066   | 4.03 | 0 | 0    | 2 | MASCOT | T      | PLEX8 |       |
| 1.99E-02 | 0 0 | orange1.1t03078.2/ora | 4.37 | 0 | 0    | 2 | MASCOT | T      | PLEX8 |       |
| 1.60E-03 | 0 0 | orange1.1t03078.2/ora | 4.37 | 0 | 0    | 2 | MASCOT | T      | PLEX8 |       |
| 3.98E-03 | 0 0 | orange1.1t03078.2/ora | 4.37 | 0 | 0    | 2 | MASCOT | T      | PLEX8 |       |
| 2.47E-04 | 0 0 | orange1.1t03078.2/ora | 4.37 | 0 | 0    | 2 | MASCOT | T      | PLEX8 |       |
| 1.62E-02 | 0 0 | orange1.1t03078.2/ora | 4.37 | 0 | 0    | 2 | MASCOT | T      | PLEX8 |       |
| 1.03E-03 | 0 0 | orange1.1t03078.2/ora | 4.37 | 0 | 0    | 2 | MASCOT | T      | PLEX8 |       |
| 1.30E-02 | 0 0 | orange1.1t03078.1/ora | 8.27 | 0 | 0    | 2 | MASCOT | T      | PLEX8 |       |
| 6.53E-02 | 0 0 | orange1.1t03078.1/ora | 4.68 | 1 | 0    | 2 | MASCOT | T      | PLEX8 |       |
| 4.33E-03 | 0 0 | orange1.1t03078.1/ora | 4.14 | 0 | 0    | 2 | MASCOT | T      | PLEX8 |       |
| 4.47E-02 | 0 0 | orange1.1t03078.1/ora | 6.84 | 0 | 0    | 2 | MASCOT | T      |       |       |
| 2.17E-03 | 0 0 | orange1.1t03078.1/ora | 6.84 | 0 | 0    | 2 | MASCOT | T      |       |       |
| 4.98E-02 | 0 0 | orange1.1t03078.1/ora | 6.84 | 0 | 0    | 2 | MASCOT | T      |       |       |
| 3.33E-02 | 0 0 | orange1.1t03078.1/ora | 6.84 | 0 | 0    | 2 | MASCOT | T      | PLEX8 |       |
| 2.23E-03 | 0 0 | orange1.1t03078.1/ora | 4.14 | 0 | 0    | 2 | MASCOT | T      | PLEX8 |       |
| 7.08E-02 | 0 0 | orange1.1t03078.1/ora | 4.14 | 0 | 0    | 2 | MASCOT | T      |       |       |
| 8.16E-03 | 0 0 | orange1.1t03078.1/ora | 4.14 | 0 | 0    | 2 | MASCOT | T      |       |       |
| 1.15E-02 | 0 0 | orange1.1t03078.1/ora | 4.14 | 0 | 0    | 2 | MASCOT | T      |       |       |
| 4.96E-03 | 0 0 | orange1.1t03078.1/ora | 4.14 | 0 | 0    | 2 | MASCOT | T      |       |       |
| 3.14E-04 | 0 0 | orange1.1t03078.1/ora | 4.14 | 0 | 0    | 2 | MASCOT | T      |       |       |
| 1.58E-03 | 0 0 | orange1.1t03078.2/ora | 4.03 | 0 | 0    | 2 | MASCOT | T      | PLEX8 |       |
| 7.98E-02 | 0 0 | orange1.1t03078.2/ora | 4.03 | 0 | 0    | 2 | MASCOT | T      | PLEX8 |       |
| 2.17E-02 | 0 0 | orange1.1t03078.2/ora | 4.03 | 0 | 0    | 2 | MASCOT | T      | PLEX8 |       |
| 1.42E-03 | 0 0 | orange1.1t03078.2/ora | 4.03 | 0 | 0    | 2 | MASCOT | T      |       |       |
| 2.79E-03 | 0 0 | orange1.1t03078.2/ora | 4.03 | 0 | 0    | 2 | MASCOT | T      |       |       |
| 1.19E-02 | 0 0 | orange1.1t03078.1/ora | 4.37 | 0 | 15.9 | 0 | 2      | MASCOT | T     |       |
| 2.56E-03 | 0 0 | orange1.1t03078.1/ora | 4.37 | 0 | 0    | 2 | MASCOT | T      |       |       |
| 1.24E-01 | 0 0 | orange1.1t03078.1/ora | 4.37 | 0 | 0    | 2 | MASCOT | T      | PLEX8 |       |
| 2.19E-03 | 0 0 | orange1.1t03078.1/ora | 4.37 | 0 | 0    | 2 | MASCOT | T      | PLEX8 |       |
| 7.33E-05 | 0 0 | orange1.1t03078.1/ora | 4.37 | 0 | 0    | 2 | MASCOT | T      | PLEX8 |       |
| 6.52E-03 | 0 0 | orange1.1t03078.1/ora | 4.37 | 0 | 0    | 2 | MASCOT | T      | PLEX8 |       |
| 2.87E-02 | 0 0 | orange1.1t03078.1/ora | 4.37 | 0 | 0    | 2 | MASCOT | T      |       |       |
| 1.14E-01 | 0 0 | orange1.1t03078.1/ora | 6.71 | 0 | 0    | 2 | MASCOT | T      | PLEX8 |       |
| 5.39E-02 | 0 0 | orange1.1t03078.1/ora | 6.71 | 0 | 0    | 2 | MASCOT | T      | PLEX8 |       |
| 5.69E-03 | 0 0 | orange1.1t03078.1/ora | 5.81 | 0 | 0    | 2 | MASCOT | T      |       |       |

|          |     |                       |      |   |      |   |        |        |       |       |
|----------|-----|-----------------------|------|---|------|---|--------|--------|-------|-------|
| 1.92E-01 | 0 0 | orange1.1t03078.1/ora | 5.81 | 0 | 0    | 2 | MASCOT | T      |       |       |
| 1.89E-02 | 0 0 | Cs1g19720.1/Cs1g197   | 4.53 | 0 | 0    | 2 | MASCOT | T      | PLEX8 |       |
| 5.40E-02 | 0 0 | Cs1g19720.1/Cs1g197   | 4.53 | 0 | 0    | 2 | MASCOT | T      | PLEX8 |       |
| 7.01E-02 | 0 0 | Cs1g19720.1/Cs1g197   | 4.53 | 0 | 0    | 2 | MASCOT | T      | PLEX8 |       |
| 3.33E-01 | 0 0 | Cs1g19720.1/Cs1g197   | 4.53 | 0 | 0    | 2 | MASCOT | T      | PLEX8 |       |
| 1.98E-02 | 0 0 | Cs1g19720.1/Cs1g197   | 4.53 | 0 | 0    | 2 | MASCOT | T      | PLEX8 |       |
| 3.06E-01 | 0 0 | Cs1g19720.1/Cs1g197   | 4.53 | 0 | 0    | 2 | MASCOT | T      | PLEX8 |       |
| 8.02E-02 | 0 0 | Cs1g19720.1/Cs1g197   | 4.18 | 1 | 0    | 2 | MASCOT | T      | PLEX8 |       |
| 4.70E-02 | 0 0 | Cs1g19720.1/Cs1g197   | 4.18 | 1 | 0    | 2 | MASCOT | T      | PLEX8 |       |
| 4.93E-04 | 0 0 | Cs1g19720.1/Cs1g197   | 4.18 | 1 | 0    | 2 | MASCOT | T      |       |       |
| 5.70E-02 | 0 0 | Cs1g19720.1/Cs1g197   | 8.75 | 0 | 0    | 2 | MASCOT | T      | PLEX8 |       |
| 4.01E-01 | 0 0 | Cs1g19720.1/Cs1g197   | 8.75 | 0 | 0    | 2 | MASCOT | T      | PLEX8 |       |
| 1.74E-01 | 0 0 | Cs1g19720.1/Cs1g197   | 8.75 | 0 | 15.9 | 0 | 2      | MASCOT | T     | PLEX8 |
| 4.78E-03 | 0 0 | Cs1g19720.1/Cs1g197   | 4.37 | 0 | 0    | 2 | MASCOT | T      |       |       |
| 4.33E-02 | 0 0 | Cs1g19720.1/Cs1g197   | 4.14 | 0 | 0    | 2 | MASCOT | T      | PLEX8 |       |
| 5.08E-03 | 0 0 | Cs1g19720.1/Cs1g197   | 4.14 | 0 | 0    | 2 | MASCOT | T      |       |       |
| 5.29E-05 | 0 0 | Cs1g19720.1/Cs1g197   | 4.14 | 0 | 0    | 2 | MASCOT | T      | PLEX8 |       |
| 1.30E-02 | 0 0 | Cs1g19720.1/Cs1g197   | 4.14 | 0 | 0    | 2 | MASCOT | T      |       |       |
| 5.07E-03 | 0 0 | Cs1g19720.1/Cs1g197   | 4.14 | 0 | 0    | 2 | MASCOT | T      | PLEX8 |       |
| 1.57E-04 | 0 0 | Cs1g19720.1/Cs1g197   | 4.14 | 0 | 0    | 2 | MASCOT | T      | PLEX8 |       |
| 8.93E-03 | 0 0 | Cs1g19720.1/Cs1g197   | 5.81 | 0 | 0    | 2 | MASCOT | T      | PLEX8 |       |
| 2.51E-03 | 0 0 | Cs1g19720.1/Cs1g197   | 5.81 | 0 | 0    | 2 | MASCOT | T      | PLEX8 |       |
| 6.31E-02 | 0 0 | Cs1g19720.1/Cs1g197   | 6    | 0 | 0    | 2 | MASCOT | T      |       |       |
| 3.13E-01 | 0 0 | Cs1g19720.1/Cs1g197   | 6    | 0 | 0    | 2 | MASCOT | T      | PLEX8 |       |
| 2.83E-01 | 0 0 | Cs1g19720.1/Cs1g197   | 6    | 0 | 0    | 2 | MASCOT | T      |       |       |
| 3.87E-01 | 0 0 | Cs1g19720.1/Cs1g197   | 5.83 | 0 | 0    | 2 | MASCOT | T      | PLEX8 |       |
| 2.43E-02 | 0 0 | Cs1g19720.1/Cs1g197   | 5.83 | 0 | 0    | 2 | MASCOT | T      | PLEX8 |       |
| 1.28E-01 | 0 0 | Cs1g19720.1/Cs1g197   | 5.83 | 0 | 0    | 2 | MASCOT | T      | PLEX8 |       |
| 3.20E-02 | 0 0 | Cs1g19720.1/Cs1g197   | 4.68 | 1 | 0    | 2 | MASCOT | T      | PLEX8 |       |
| 1.25E-02 | 0 0 | Cs1g19720.1/Cs1g197   | 4.68 | 1 | 0    | 2 | MASCOT | T      |       |       |
| 5.09E-02 | 0 0 | Cs1g19720.1/Cs1g197   | 4.68 | 1 | 0    | 2 | MASCOT | T      | PLEX8 |       |
| 2.30E-03 | 0 0 | Cs1g19720.1/Cs1g197   | 4.68 | 1 | 0    | 2 | MASCOT | T      |       |       |
| 1.32E-02 | 0 0 | Cs1g19720.1/Cs1g197   | 4.68 | 1 | 0    | 2 | MASCOT | T      | PLEX8 |       |
| 6.83E-02 | 0 0 | Cs1g19720.1/Cs1g197   | 5.97 | 0 | 0    | 2 | MASCOT | T      | PLEX8 |       |
| 4.25E-02 | 0 0 | Cs7g21650.1/Cs7g216   | 8.8  | 0 | 0    | 2 | MASCOT | T      | PLEX8 |       |
| 3.79E-02 | 0 0 | Cs7g21650.1/Cs7g216   | 8.8  | 0 | 0    | 2 | MASCOT | T      | PLEX8 |       |
| 6.63E-03 | 0 0 | Cs7g21650.1/Cs7g216   | 8.8  | 0 | 0    | 2 | MASCOT | T      | PLEX8 |       |
| 2.78E-04 | 0 0 | Cs7g21650.1/Cs7g216   | 4.22 | 0 | 0    | 2 | MASCOT | T      | PLEX8 |       |
| 3.22E-04 | 0 0 | Cs7g21650.1/Cs7g216   | 4.22 | 0 | 0    | 2 | MASCOT | T      | PLEX8 |       |
| 4.18E-02 | 0 0 | Cs7g21650.1/Cs7g216   | 4.22 | 0 | 0    | 2 | MASCOT | T      | PLEX8 |       |
| 9.79E-02 | 0 0 | Cs7g21650.1/Cs7g216   | 6.1  | 0 | 0    | 2 | MASCOT | T      | PLEX8 |       |
| 3.03E-02 | 0 0 | Cs7g21650.1/Cs7g216   | 6.1  | 0 | 0    | 2 | MASCOT | T      | PLEX8 |       |
| 1.35E-01 | 0 0 | Cs7g21650.1/Cs7g216   | 4.14 | 0 | 0    | 2 | MASCOT | T      | PLEX8 |       |
| 1.52E-03 | 0 0 | Cs7g21650.1/Cs7g216   | 5.55 | 0 | 0    | 2 | MASCOT | T      |       |       |
| 2.37E-04 | 0 0 | Cs7g21650.1/Cs7g216   | 5.55 | 0 | 0    | 2 | MASCOT | T      |       |       |
| 2.00E-02 | 0 0 | Cs7g21650.1/Cs7g216   | 5.55 | 0 | 0    | 2 | MASCOT | T      |       |       |
| 1.71E-03 | 0 0 | Cs7g21650.1/Cs7g216   | 5.55 | 0 | 0    | 2 | MASCOT | T      |       |       |
| 2.51E-09 | 0 0 | Cs7g21650.1/Cs7g216   | 5.55 | 0 | 0    | 2 | MASCOT | T      |       |       |
| 5.02E-03 | 0 0 | Cs7g21650.1/Cs7g216   | 5.18 | 0 | 0    | 2 | MASCOT | T      | PLEX8 |       |
| 4.67E-03 | 0 0 | Cs7g21650.1/Cs7g216   | 5.18 | 0 | 0    | 2 | MASCOT | T      | PLEX8 |       |
| 7.06E-04 | 0 0 | Cs7g21650.1/Cs7g216   | 5.18 | 0 | 0    | 2 | MASCOT | T      | PLEX8 |       |

|          |     |                      |      |   |      |   |        |        |       |       |
|----------|-----|----------------------|------|---|------|---|--------|--------|-------|-------|
| 1.37E-01 | 0 0 | Cs7g21650.1/Cs7g216  | 5.18 | 0 | 0    | 2 | MASCOT | T      | PLEX8 |       |
| 2.79E-04 | 0 0 | Cs7g21650.1/Cs7g216  | 5.18 | 0 | 0    | 2 | MASCOT | T      | PLEX8 |       |
| 4.74E-04 | 0 0 | Cs7g21650.1/Cs7g216  | 5.18 | 0 | 0    | 2 | MASCOT | T      | PLEX8 |       |
| 8.85E-02 | 0 0 | Cs7g21650.1/Cs7g216  | 6    | 0 | 0    | 2 | MASCOT | T      | PLEX8 |       |
| 7.04E-02 | 0 0 | Cs7g21650.1/Cs7g216  | 6    | 0 | 0    | 2 | MASCOT | T      | PLEX8 |       |
| 1.93E-01 | 0 0 | Cs7g21650.1/Cs7g216  | 6    | 0 | 0    | 2 | MASCOT | T      | PLEX8 |       |
| 4.00E-02 | 0 0 | Cs7g21650.1/Cs7g216  | 6    | 0 | 0    | 2 | MASCOT | T      | PLEX8 |       |
| 3.15E-04 | 0 0 | Cs7g21650.1/Cs7g216  | 4.37 | 0 | 0    | 2 | MASCOT | T      | PLEX8 |       |
| 2.96E-03 | 0 0 | Cs7g21650.1/Cs7g216  | 4.37 | 0 | 0    | 2 | MASCOT | T      | PLEX8 |       |
| 2.63E-02 | 0 0 | Cs7g21650.1/Cs7g216  | 4.37 | 0 | 0    | 2 | MASCOT | T      | PLEX8 |       |
| 9.86E-04 | 0 0 | Cs7g21650.1/Cs7g216  | 4.37 | 0 | 0    | 2 | MASCOT | T      | PLEX8 |       |
| 6.75E-03 | 0 0 | Cs7g21650.1/Cs7g216  | 3.93 | 0 | 0    | 2 | MASCOT | T      |       |       |
| 2.41E-02 | 0 0 | Cs7g21650.1/Cs7g216  | 3.93 | 0 | 0    | 2 | MASCOT | T      | PLEX8 |       |
| 1.13E-02 | 0 0 | Cs7g21650.1/Cs7g216  | 8.23 | 0 | 0    | 2 | MASCOT | T      |       |       |
| 1.30E-01 | 0 0 | Cs7g21650.1/Cs7g216  | 8.23 | 0 | 0    | 2 | MASCOT | T      |       |       |
| 8.48E-02 | 0 0 | Cs3g06370.1/Cs3g155  | 5.32 | 0 | 15.9 | 0 | 2      | MASCOT | T     | PLEX8 |
| 2.33E-03 | 0 0 | Cs3g06370.1/Cs3g155  | 5.32 | 0 | 15.9 | 0 | 2      | MASCOT | T     | PLEX8 |
| 7.21E-02 | 0 0 | Cs3g06370.1/Cs3g155  | 5.32 | 0 | 0    | 2 | MASCOT | T      | PLEX8 |       |
| 1.04E-01 | 0 0 | Cs3g15530.1/orange1. | 5.32 | 0 | 0    | 2 | MASCOT | T      |       |       |
| 3.58E-04 | 0 0 | Cs3g15530.1          | 4.37 | 0 | 0    | 2 | MASCOT | T      | PLEX8 |       |
| 2.40E-05 | 0 0 | Cs3g15530.1          | 4.37 | 0 | 0    | 2 | MASCOT | T      | PLEX8 |       |
| 4.93E-02 | 0 0 | Cs3g15530.1          | 4.37 | 0 | 0    | 2 | MASCOT | T      | PLEX8 |       |
| 9.33E-02 | 0 0 | Cs3g15530.1          | 6.06 | 1 | 0    | 2 | MASCOT | T      | PLEX8 |       |
| 2.22E-03 | 0 0 | Cs3g06370.1/Cs3g155  | 9.8  | 0 | 0    | 2 | MASCOT | T      | PLEX8 |       |
| 1.92E-01 | 0 0 | Cs3g06370.1/Cs3g155  | 9.8  | 0 | 0    | 2 | MASCOT | T      | PLEX8 |       |
| 4.70E-02 | 0 0 | Cs3g06370.1/Cs3g155  | 9.8  | 0 | 0    | 2 | MASCOT | T      | PLEX8 |       |
| 1.61E-03 | 0 0 | Cs3g06370.1/Cs3g155  | 9.8  | 0 | 0    | 2 | MASCOT | T      | PLEX8 |       |
| 1.33E-04 | 0 0 | Cs3g06370.1/Cs3g155  | 9.8  | 0 | 0    | 2 | MASCOT | T      | PLEX8 |       |
| 2.04E-03 | 0 0 | Cs3g06370.1/Cs3g155  | 9.8  | 0 | 0    | 2 | MASCOT | T      | PLEX8 |       |
| 4.61E-02 | 0 0 | Cs3g06370.1/Cs3g155  | 9.8  | 0 | 0    | 2 | MASCOT | T      | PLEX8 |       |
| 2.02E-01 | 0 0 | Cs3g06370.1/Cs3g155  | 9.8  | 0 | 0    | 2 | MASCOT | T      | PLEX8 |       |
| 5.64E-02 | 0 0 | Cs3g06370.1/Cs3g155  | 4.53 | 0 | 0    | 2 | MASCOT | T      | PLEX8 |       |
| 2.05E-02 | 0 0 | Cs3g15530.1          | 5.83 | 0 | 0    | 2 | MASCOT | T      | PLEX8 |       |
| 4.55E-02 | 0 0 | Cs3g15530.1          | 6.75 | 0 | 0    | 2 | MASCOT | T      | PLEX8 |       |
| 2.93E-03 | 0 0 | Cs3g15530.1          | 6.75 | 0 | 0    | 2 | MASCOT | T      |       |       |
| 2.89E-03 | 0 0 | Cs3g06370.1/Cs3g155  | 6.74 | 0 | 0    | 2 | MASCOT | T      | PLEX8 |       |
| 1.99E-02 | 0 0 | Cs3g06370.1/Cs3g155  | 6.74 | 0 | 0    | 2 | MASCOT | T      | PLEX8 |       |
| 4.32E-02 | 0 0 | Cs3g06370.1/Cs3g155  | 6.74 | 0 | 0    | 2 | MASCOT | T      |       |       |
| 6.00E-02 | 0 0 | Cs3g06370.1/Cs3g155  | 6.74 | 0 | 0    | 2 | MASCOT | T      |       |       |
| 7.72E-02 | 0 0 | Cs3g06370.1/Cs3g155  | 6.74 | 0 | 0    | 2 | MASCOT | T      | PLEX8 |       |
| 3.35E-02 | 0 0 | Cs3g06370.1/Cs3g155  | 6.74 | 0 | 0    | 2 | MASCOT | T      |       |       |
| 5.21E-02 | 0 0 | Cs3g06370.1/Cs3g155  | 6.74 | 0 | 0    | 2 | MASCOT | T      |       |       |
| 1.51E-01 | 0 0 | Cs3g15530.1/Cs3g155  | 8.59 | 0 | 0    | 2 | MASCOT | T      | PLEX8 |       |
| 2.08E-01 | 0 0 | Cs3g15530.1/Cs3g155  | 8.59 | 0 | 0    | 2 | MASCOT | T      |       |       |
| 2.67E-01 | 0 0 | Cs3g15530.1/Cs3g155  | 8.59 | 0 | 0    | 2 | MASCOT | T      | PLEX8 |       |
| 3.38E-01 | 0 0 | Cs3g06370.1/Cs3g155  | 8.46 | 0 | 0    | 2 | MASCOT | T      | PLEX8 |       |
| 1.14E-02 | 0 0 | Cs5g03610.1/Cs5g036  | 5.84 | 0 | 0    | 2 | MASCOT | T      | PLEX8 |       |
| 2.74E-01 | 0 0 | Cs5g03610.1/Cs5g036  | 6.16 | 0 | 0    | 2 | MASCOT | T      | PLEX8 |       |
| 8.80E-02 | 0 0 | Cs5g03610.1/Cs5g036  | 4.25 | 0 | 0    | 2 | MASCOT | T      |       |       |
| 3.51E-02 | 0 0 | Cs5g03610.1/Cs5g036  | 4.25 | 0 | 0    | 2 | MASCOT | T      |       |       |
| 1.03E-01 | 0 0 | Cs5g03610.1/Cs5g036  | 4.25 | 0 | 0    | 2 | MASCOT | T      |       |       |

|          |     |                     |      |   |      |   |        |        |         |
|----------|-----|---------------------|------|---|------|---|--------|--------|---------|
| 5.48E-03 | 0 0 | Cs5g03610.1/Cs5g036 | 4.25 | 0 | 0    | 2 | MASCOT | T      |         |
| 2.90E-01 | 0 0 | Cs5g03610.1/Cs5g036 | 6.75 | 0 | 15.9 | 0 | 2      | MASCOT | T PLEX8 |
| 2.51E-01 | 0 0 | Cs5g03610.1/Cs5g036 | 6.74 | 0 | 15.9 | 0 | 2      | MASCOT | T PLEX8 |
| 1.41E-01 | 0 0 | Cs5g03610.1/Cs5g036 | 6.74 | 0 | 0    | 2 | MASCOT | T      | PLEX8   |
| 5.64E-01 | 0 0 | Cs5g03610.1/Cs5g036 | 6.74 | 0 | 0    | 2 | MASCOT | T      | PLEX8   |
| 1.16E-01 | 0 0 | Cs5g03610.1/Cs5g036 | 6.74 | 0 | 0    | 2 | MASCOT | T      | PLEX8   |
| 4.01E-02 | 0 0 | Cs5g03610.1/Cs5g036 | 6.74 | 0 | 0    | 2 | MASCOT | T      | PLEX8   |
| 6.44E-03 | 0 0 | Cs5g03610.1/Cs5g036 | 5.81 | 0 | 15.9 | 0 | 2      | MASCOT | T       |
| 7.70E-03 | 0 0 | Cs5g03610.1/Cs5g036 | 4.37 | 0 | 15.9 | 0 | 2      | MASCOT | T PLEX8 |
| 1.11E-01 | 0 0 | Cs5g03610.1/Cs5g036 | 4.37 | 0 | 15.9 | 0 | 2      | MASCOT | T PLEX8 |
| 1.91E-01 | 0 0 | Cs5g03610.1/Cs5g036 | 4.37 | 0 | 15.9 | 0 | 2      | MASCOT | T PLEX8 |
| 5.20E-01 | 0 0 | Cs5g03610.1/Cs5g036 | 4.37 | 0 | 0    | 2 | MASCOT | T      | PLEX8   |
| 7.58E-04 | 0 0 | Cs5g03610.1/Cs5g036 | 4.37 | 0 | 0    | 2 | MASCOT | T      | PLEX8   |
| 3.73E-01 | 0 0 | Cs5g03610.1/Cs5g036 | 4.37 | 0 | 0    | 2 | MASCOT | T      | PLEX8   |
| 9.89E-03 | 0 0 | Cs5g03610.1/Cs5g036 | 5.83 | 0 | 0    | 2 | MASCOT | T      | PLEX8   |
| 1.84E-01 | 0 0 | Cs5g03610.1/Cs5g036 | 6.74 | 0 | 0    | 2 | MASCOT | T      | PLEX8   |
| 3.19E-03 | 0 0 | Cs5g03610.1/Cs5g036 | 6.74 | 0 | 0    | 2 | MASCOT | T      | PLEX8   |
| 7.27E-03 | 0 0 | Cs5g03610.1/Cs5g036 | 6.74 | 0 | 0    | 2 | MASCOT | T      | PLEX8   |
| 1.97E-02 | 0 0 | Cs5g03610.1/Cs5g036 | 6.74 | 0 | 0    | 2 | MASCOT | T      |         |
| 2.88E-03 | 0 0 | Cs5g03610.1/Cs5g036 | 6.74 | 0 | 0    | 2 | MASCOT | T      |         |
| 2.31E-02 | 0 0 | Cs5g03610.1/Cs5g036 | 6.74 | 0 | 0    | 2 | MASCOT | T      |         |
| 8.94E-02 | 0 0 | Cs5g03610.1/Cs5g036 | 6.74 | 0 | 0    | 2 | MASCOT | T      | PLEX8   |
| 6.02E-02 | 0 0 | Cs5g03610.1/Cs5g036 | 5.19 | 0 | 0    | 2 | MASCOT | T      | PLEX8   |
| 7.55E-02 | 0 0 | Cs5g03610.1/Cs5g036 | 5.66 | 0 | 0    | 2 | MASCOT | T      | PLEX8   |
| 3.37E-02 | 0 0 | Cs5g03610.1/Cs5g036 | 5.66 | 0 | 0    | 2 | MASCOT | T      | PLEX8   |
| 9.52E-02 | 0 0 | Cs5g03610.1/Cs5g036 | 5.66 | 0 | 0    | 2 | MASCOT | T      | PLEX8   |
| 4.13E-01 | 0 0 | Cs7g21820.1/Cs7g218 | 5.88 | 0 | 0    | 2 | MASCOT | T      | PLEX8   |
| 8.50E-02 | 0 0 | Cs7g21820.1/Cs7g218 | 5.88 | 0 | 0    | 2 | MASCOT | T      | PLEX8   |
| 2.44E-01 | 0 0 | Cs7g21820.1/Cs7g218 | 5.88 | 0 | 0    | 2 | MASCOT | T      |         |
| 2.13E-01 | 0 0 | Cs7g21820.1/Cs7g218 | 5.88 | 0 | 0    | 2 | MASCOT | T      |         |
| 3.32E-01 | 0 0 | Cs7g21820.1/Cs7g218 | 5.88 | 0 | 0    | 2 | MASCOT | T      | PLEX8   |
| 1.69E-01 | 0 0 | Cs7g21820.1/Cs7g218 | 5.88 | 0 | 0    | 2 | MASCOT | T      | PLEX8   |
| 6.13E-02 | 0 0 | Cs7g21820.1/Cs7g218 | 5.88 | 0 | 0    | 2 | MASCOT | T      | PLEX8   |
| 9.62E-02 | 0 0 | Cs7g21820.1/Cs7g218 | 5.88 | 0 | 0    | 2 | MASCOT | T      |         |
| 7.36E-02 | 0 0 | Cs7g21820.1/Cs7g218 | 9.8  | 0 | 0    | 2 | MASCOT | T      | PLEX8   |
| 2.60E-02 | 0 0 | Cs7g21820.1/Cs7g218 | 3.93 | 0 | 0    | 2 | MASCOT | T      |         |
| 4.93E-03 | 0 0 | Cs7g21820.1/Cs7g218 | 3.93 | 0 | 0    | 2 | MASCOT | T      |         |
| 1.02E-01 | 0 0 | Cs7g21820.1/Cs7g218 | 3.93 | 0 | 0    | 2 | MASCOT | T      | PLEX8   |
| 2.31E-02 | 0 0 | Cs7g21820.1/Cs7g218 | 4.03 | 0 | 0    | 2 | MASCOT | T      | PLEX8   |
| 1.20E-01 | 0 0 | Cs7g21820.1/Cs7g218 | 4.03 | 0 | 0    | 2 | MASCOT | T      | PLEX8   |
| 1.21E-03 | 0 0 | Cs7g21820.1/Cs7g218 | 4.37 | 0 | 0    | 2 | MASCOT | T      | PLEX8   |
| 9.86E-07 | 0 0 | Cs7g21820.1/Cs7g218 | 4.37 | 0 | 0    | 2 | MASCOT | T      |         |
| 1.56E-05 | 0 0 | Cs7g21820.1/Cs7g218 | 4.37 | 0 | 0    | 2 | MASCOT | T      |         |
| 6.28E-04 | 0 0 | Cs7g21820.1/Cs7g218 | 4.37 | 0 | 0    | 2 | MASCOT | T      |         |
| 1.58E-01 | 0 0 | Cs7g21820.1/Cs7g218 | 8.75 | 0 | 0    | 2 | MASCOT | T      | PLEX8   |
| 1.46E-03 | 0 0 | Cs7g21820.1/Cs7g218 | 4.25 | 0 | 0    | 2 | MASCOT | T      | PLEX8   |
| 5.30E-02 | 0 0 | Cs7g21820.1/Cs7g218 | 4.25 | 0 | 0    | 2 | MASCOT | T      | PLEX8   |
| 4.81E-03 | 0 0 | Cs7g21820.1/Cs7g218 | 4.25 | 0 | 0    | 2 | MASCOT | T      | PLEX8   |
| 4.28E-01 | 0 0 | Cs7g21820.1/Cs7g218 | 4.25 | 0 | 0    | 2 | MASCOT | T      | PLEX8   |
| 2.31E-02 | 0 0 | Cs7g21820.1/Cs7g218 | 4.25 | 0 | 0    | 2 | MASCOT | T      | PLEX8   |
| 9.94E-02 | 0 0 | Cs7g21820.1/Cs7g218 | 4.25 | 0 | 0    | 2 | MASCOT | T      | PLEX8   |

|              |                     |      |        |   |          |   |       |
|--------------|---------------------|------|--------|---|----------|---|-------|
| 2.03E-01 0 0 | Cs7g21820.1/Cs7g218 | 8.03 | 0      | 0 | 2 MASCOT | T |       |
| 7.80E-04 0 0 | Cs7g21820.1/Cs7g218 | 4.25 | 0      | 0 | 2 MASCOT | T | PLEX8 |
| 4.59E-04 0 0 | Cs7g21820.1/Cs7g218 | 4.25 | 0      | 0 | 2 MASCOT | T | PLEX8 |
| 2.84E-02 0 0 | Cs7g21820.1/Cs7g218 | 8.75 | 0      | 0 | 2 MASCOT | T | PLEX8 |
| 1.47E-03 0 0 | Cs7g21820.1/Cs7g218 | 5.55 | 0      | 0 | 2 MASCOT | T | PLEX8 |
| 4.46E-08 0 0 | Cs7g21820.1/Cs7g218 | 5.55 | 0      | 0 | 2 MASCOT | T | PLEX8 |
| 6.35E-02 0 0 | Cs3g23090.1         | 4.21 | 0      | 0 | 2 MASCOT | T |       |
| 1.49E-03 0 0 | Cs3g23090.1         | 5.21 | 0 15.9 | 0 | 2 MASCOT | T | PLEX8 |
| 5.32E-02 0 0 | Cs3g23090.1         | 5.21 | 0 15.9 | 0 | 2 MASCOT | T |       |
| 9.63E-02 0 0 | Cs3g23090.1         | 5.21 | 0 15.9 | 0 | 2 MASCOT | T |       |
| 9.40E-04 0 0 | Cs3g23090.1         | 5.21 | 0      | 0 | 2 MASCOT | T | PLEX8 |
| 2.10E-03 0 0 | Cs3g23090.1         | 5.21 | 0      | 0 | 2 MASCOT | T |       |
| 8.09E-02 0 0 | Cs3g23090.1         | 5.21 | 0      | 0 | 2 MASCOT | T |       |
| 9.37E-03 0 0 | Cs3g23090.1         | 4.37 | 0      | 0 | 2 MASCOT | T | PLEX8 |
| 1.23E-03 0 0 | Cs3g23090.1         | 4.37 | 0      | 0 | 2 MASCOT | T | PLEX8 |
| 1.25E-02 0 0 | Cs3g23090.1         | 4.37 | 0      | 0 | 2 MASCOT | T | PLEX8 |
| 7.60E-04 0 0 | Cs3g23090.1         | 4.37 | 0      | 0 | 2 MASCOT | T | PLEX8 |
| 2.20E-04 0 0 | Cs3g23090.1         | 8.75 | 0      | 0 | 2 MASCOT | T | PLEX8 |
| 1.17E-04 0 0 | Cs3g23090.1         | 8.75 | 0      | 0 | 2 MASCOT | T | PLEX8 |
| 1.12E-01 0 0 | Cs3g23090.1         | 4.37 | 0 15.9 | 0 | 2 MASCOT | T | PLEX8 |
| 1.37E-02 0 0 | Cs3g23090.1         | 4.37 | 0      | 0 | 2 MASCOT | T | PLEX8 |
| 1.41E-02 0 0 | Cs3g23090.1         | 4.37 | 0      | 0 | 2 MASCOT | T | PLEX8 |
| 2.97E-06 0 0 | Cs3g23090.1         | 4.14 | 0      | 0 | 2 MASCOT | T |       |
| 2.69E-02 0 0 | Cs3g23090.1         | 8.2  | 0      | 0 | 2 MASCOT | T | PLEX8 |
| 4.69E-02 0 0 | Cs3g23090.1         | 8.2  | 0      | 0 | 2 MASCOT | T | PLEX8 |
| 1.98E-02 0 0 | Cs3g23090.1         | 8.2  | 0      | 0 | 2 MASCOT | T | PLEX8 |
| 5.94E-04 0 0 | Cs3g23090.1         | 4.14 | 0      | 0 | 2 MASCOT | T |       |
| 8.50E-06 0 0 | Cs3g23090.1         | 4.14 | 0      | 0 | 2 MASCOT | T |       |
| 2.61E-02 0 0 | Cs3g23090.1         | 3.93 | 0      | 0 | 2 MASCOT | T |       |
| 3.42E-02 0 0 | Cs3g23090.1         | 3.93 | 0      | 0 | 2 MASCOT | T |       |
| 4.96E-03 0 0 | Cs3g23090.1         | 5.84 | 0      | 0 | 2 MASCOT | T | PLEX8 |
| 1.51E-03 0 0 | Cs3g23090.1         | 5.84 | 0      | 0 | 2 MASCOT | T | PLEX8 |
| 7.50E-03 0 0 | Cs3g23090.1         | 5.84 | 0      | 0 | 2 MASCOT | T | PLEX8 |
| 1.13E-02 0 0 | Cs3g23090.1         | 5.84 | 0      | 0 | 2 MASCOT | T | PLEX8 |
| 7.24E-03 0 0 | Cs3g23090.1         | 5.84 | 0      | 0 | 2 MASCOT | T | PLEX8 |
| 1.00E-02 0 0 | Cs3g23090.1         | 5.84 | 0      | 0 | 2 MASCOT | T | PLEX8 |
| 6.85E-02 0 0 | Cs7g28750.1         | 4.17 | 0      | 0 | 2 MASCOT | T | PLEX8 |
| 1.12E-02 0 0 | Cs7g28750.1         | 4.17 | 0      | 0 | 2 MASCOT | T | PLEX8 |
| 3.50E-03 0 0 | Cs7g28750.1         | 4.17 | 0      | 0 | 2 MASCOT | T | PLEX8 |
| 5.37E-03 0 0 | Cs7g28750.1         | 6.74 | 0      | 0 | 2 MASCOT | T | PLEX8 |
| 2.00E-02 0 0 | Cs7g28750.1         | 6.74 | 0      | 0 | 2 MASCOT | T | PLEX8 |
| 1.29E-01 0 0 | Cs5g19810.1/Cs7g287 | 4.22 | 0      | 0 | 2 MASCOT | T | PLEX8 |
| 1.99E-04 0 0 | Cs5g19810.1/Cs7g287 | 4.22 | 0      | 0 | 2 MASCOT | T | PLEX8 |
| 8.17E-02 0 0 | Cs5g19810.1/Cs7g287 | 4.22 | 0      | 0 | 2 MASCOT | T | PLEX8 |
| 2.95E-03 0 0 | Cs5g19810.1/Cs7g287 | 4.22 | 0      | 0 | 2 MASCOT | T | PLEX8 |
| 2.39E-03 0 0 | Cs5g19810.1/Cs5g198 | 5.32 | 0 15.9 | 0 | 2 MASCOT | T | PLEX8 |
| 2.06E-03 0 0 | Cs5g19810.1/Cs5g198 | 5.32 | 0 15.9 | 0 | 2 MASCOT | T | PLEX8 |
| 9.67E-05 0 0 | Cs5g19810.1/Cs5g198 | 5.32 | 0 15.9 | 0 | 2 MASCOT | T |       |
| 4.50E-04 0 0 | Cs5g19810.1/Cs5g198 | 5.32 | 0      | 0 | 2 MASCOT | T | PLEX8 |
| 1.82E-05 0 0 | Cs5g19810.1/Cs5g198 | 5.32 | 0      | 0 | 2 MASCOT | T | PLEX8 |
| 2.15E-05 0 0 | Cs5g19810.1/Cs5g198 | 5.32 | 0      | 0 | 2 MASCOT | T |       |

|          |     |                     |      |   |   |   |        |   |       |
|----------|-----|---------------------|------|---|---|---|--------|---|-------|
| 1.59E-01 | 0 0 | Cs7g28750.1         | 8.64 | 0 | 0 | 2 | MASCOT | T | PLEX8 |
| 5.29E-03 | 0 0 | Cs5g19810.1/Cs5g198 | 4.65 | 0 | 0 | 2 | MASCOT | T | PLEX8 |
| 7.67E-03 | 0 0 | Cs5g19810.1/Cs5g198 | 4.53 | 0 | 0 | 2 | MASCOT | T | PLEX8 |
| 1.00E-04 | 0 0 | Cs5g19810.1/Cs5g198 | 4.53 | 0 | 0 | 2 | MASCOT | T | PLEX8 |
| 1.49E-03 | 0 0 | Cs7g28750.1/Cs7g287 | 4.53 | 0 | 0 | 2 | MASCOT | T | PLEX8 |
| 3.79E-01 | 0 0 | Cs7g28750.1/Cs7g287 | 4.53 | 0 | 0 | 2 | MASCOT | T | PLEX8 |
| 2.51E-03 | 0 0 | Cs7g28750.1/Cs7g287 | 4.53 | 0 | 0 | 2 | MASCOT | T | PLEX8 |
| 1.64E-01 | 0 0 | Cs5g19810.1/Cs5g198 | 9.75 | 0 | 0 | 2 | MASCOT | T | PLEX8 |
| 2.17E-02 | 0 0 | Cs5g19810.1/Cs5g198 | 9.75 | 0 | 0 | 2 | MASCOT | T | PLEX8 |
| 1.50E-01 | 0 0 | Cs5g19810.1/Cs5g198 | 4.37 | 0 | 0 | 2 | MASCOT | T | PLEX8 |
| 1.64E-04 | 0 0 | Cs5g19810.1/Cs5g198 | 5.55 | 0 | 0 | 2 | MASCOT | T | PLEX8 |
| 3.73E-02 | 0 0 | Cs5g05840.1/Cs5g058 | 4.25 | 0 | 0 | 2 | MASCOT | T | PLEX8 |
| 7.13E-02 | 0 0 | Cs5g05840.1/Cs5g058 | 4.25 | 0 | 0 | 2 | MASCOT | T | PLEX8 |
| 8.00E-02 | 0 0 | Cs5g05840.1/Cs5g058 | 4.25 | 0 | 0 | 2 | MASCOT | T | PLEX8 |
| 8.10E-02 | 0 0 | Cs5g05840.1/Cs5g058 | 4.25 | 0 | 0 | 2 | MASCOT | T | PLEX8 |
| 8.65E-05 | 0 0 | Cs5g05840.1/Cs5g058 | 6.04 | 0 | 0 | 2 | MASCOT | T | PLEX8 |
| 1.30E-03 | 0 0 | Cs5g05840.1/Cs5g058 | 8.59 | 0 | 0 | 2 | MASCOT | T | PLEX8 |
| 3.83E-03 | 0 0 | Cs5g05840.1/Cs5g058 | 8.59 | 0 | 0 | 2 | MASCOT | T | PLEX8 |
| 6.16E-03 | 0 0 | Cs5g05840.1/Cs5g058 | 8.59 | 0 | 0 | 2 | MASCOT | T | PLEX8 |
| 7.49E-03 | 0 0 | Cs5g05840.1/Cs5g058 | 8.59 | 0 | 0 | 2 | MASCOT | T | PLEX8 |
| 2.69E-02 | 0 0 | Cs5g05840.1/Cs5g058 | 8.2  | 0 | 0 | 2 | MASCOT | T | PLEX8 |
| 6.20E-03 | 0 0 | Cs5g05840.1/Cs5g058 | 8.2  | 0 | 0 | 2 | MASCOT | T | PLEX8 |
| 2.64E-01 | 0 0 | Cs5g05840.1/Cs5g058 | 8.2  | 0 | 0 | 2 | MASCOT | T | PLEX8 |
| 9.67E-03 | 0 0 | Cs5g05840.1/Cs5g058 | 8.2  | 0 | 0 | 2 | MASCOT | T | PLEX8 |
| 1.04E-01 | 0 0 | Cs5g05840.1/Cs5g058 | 4.53 | 0 | 0 | 2 | MASCOT | T | PLEX8 |
| 1.73E-01 | 0 0 | Cs5g05840.1/Cs5g058 | 4.53 | 0 | 0 | 2 | MASCOT | T | PLEX8 |
| 4.04E-02 | 0 0 | Cs6g20960.1/Cs7g263 | 4.03 | 0 | 0 | 2 | MASCOT | T |       |
| 2.63E-03 | 0 0 | Cs8g15970.1/Cs8g159 | 3.8  | 1 | 0 | 2 | MASCOT | T | PLEX8 |
| 1.98E-03 | 0 0 | Cs8g15970.1/Cs8g159 | 3.8  | 1 | 0 | 2 | MASCOT | T | PLEX8 |
| 9.85E-04 | 0 0 | Cs5g05840.1/Cs5g058 | 4.48 | 0 | 0 | 2 | MASCOT | T | PLEX8 |
| 3.00E-02 | 0 0 | Cs5g05840.1/Cs5g058 | 4.48 | 0 | 0 | 2 | MASCOT | T | PLEX8 |
| 4.76E-05 | 0 0 | Cs5g05840.1/Cs5g058 | 4.48 | 0 | 0 | 2 | MASCOT | T |       |
| 6.35E-03 | 0 0 | Cs5g05840.1/Cs5g058 | 4.48 | 0 | 0 | 2 | MASCOT | T |       |
| 1.31E-01 | 0 0 | Cs5g05840.1/Cs5g058 | 4.53 | 0 | 0 | 2 | MASCOT | T |       |
| 6.32E-03 | 0 0 | Cs5g05840.1/Cs5g058 | 4.53 | 0 | 0 | 2 | MASCOT | T |       |
| 3.65E-03 | 0 0 | Cs8g15970.1/Cs8g159 | 4.21 | 0 | 0 | 2 | MASCOT | T | PLEX8 |
| 1.47E-01 | 0 0 | Cs5g05840.1/Cs5g058 | 4.21 | 0 | 0 | 2 | MASCOT | T | PLEX8 |
| 1.56E-02 | 0 0 | Cs9g01790.1/Cs9g017 | 6.79 | 0 | 0 | 2 | MASCOT | T | PLEX8 |
| 3.85E-02 | 0 0 | Cs9g01790.1/Cs9g017 | 6.79 | 0 | 0 | 2 | MASCOT | T | PLEX8 |
| 2.02E-01 | 0 0 | Cs9g01790.1/Cs9g017 | 5.84 | 0 | 0 | 2 | MASCOT | T | PLEX8 |
| 1.67E-01 | 0 0 | Cs9g01790.1/Cs9g017 | 5.84 | 0 | 0 | 2 | MASCOT | T | PLEX8 |
| 2.82E-03 | 0 0 | Cs9g01790.1/Cs9g017 | 5.84 | 0 | 0 | 2 | MASCOT | T | PLEX8 |
| 2.79E-01 | 0 0 | Cs9g01790.1/Cs9g017 | 6    | 0 | 0 | 2 | MASCOT | T | PLEX8 |
| 2.09E-03 | 0 0 | Cs9g01790.1/Cs9g017 | 6    | 0 | 0 | 2 | MASCOT | T | PLEX8 |
| 3.40E-03 | 0 0 | Cs9g01790.1/Cs9g017 | 6    | 0 | 0 | 2 | MASCOT | T | PLEX8 |
| 5.69E-04 | 0 0 | Cs9g01790.1/Cs9g017 | 4.08 | 0 | 0 | 2 | MASCOT | T |       |
| 1.46E-03 | 0 0 | Cs9g01790.1/Cs9g017 | 6.05 | 0 | 0 | 2 | MASCOT | T | PLEX8 |
| 6.37E-02 | 0 0 | Cs9g01790.1/Cs9g017 | 6.05 | 0 | 0 | 2 | MASCOT | T | PLEX8 |
| 1.01E-01 | 0 0 | Cs9g01790.1/Cs9g017 | 6.05 | 0 | 0 | 2 | MASCOT | T | PLEX8 |
| 7.22E-03 | 0 0 | Cs9g01790.1/Cs9g017 | 6.05 | 0 | 0 | 2 | MASCOT | T | PLEX8 |
| 5.09E-02 | 0 0 | Cs9g01790.1/Cs9g017 | 6.05 | 0 | 0 | 2 | MASCOT | T | PLEX8 |

|          |     |                       |      |   |      |   |   |        |   |       |
|----------|-----|-----------------------|------|---|------|---|---|--------|---|-------|
| 2.76E-03 | 0 0 | Cs9g01790.1/Cs9g017   | 5.32 | 0 | 15.9 | 0 | 2 | MASCOT | T | PLEX8 |
| 4.06E-02 | 0 0 | Cs9g01790.1/Cs9g017   | 5.32 | 0 | 15.9 | 0 | 2 | MASCOT | T | PLEX8 |
| 8.30E-03 | 0 0 | Cs9g01790.1/Cs9g017   | 5.32 | 0 | 15.9 | 0 | 2 | MASCOT | T | PLEX8 |
| 1.71E-02 | 0 0 | Cs9g01790.1/Cs9g017   | 5.32 | 0 |      | 0 | 2 | MASCOT | T | PLEX8 |
| 1.32E-04 | 0 0 | Cs9g01790.1/Cs9g017   | 5.32 | 0 |      | 0 | 2 | MASCOT | T | PLEX8 |
| 7.34E-03 | 0 0 | Cs9g01790.1/Cs9g017   | 5.32 | 0 |      | 0 | 2 | MASCOT | T | PLEX8 |
| 4.28E-02 | 0 0 | Cs9g01790.1/Cs9g017   | 4.03 | 0 |      | 0 | 2 | MASCOT | T | PLEX8 |
| 2.65E-01 | 0 0 | Cs9g01790.1/Cs9g017   | 4.03 | 0 |      | 0 | 2 | MASCOT | T | PLEX8 |
| 1.09E-01 | 0 0 | Cs9g01790.1/Cs9g017   | 5.84 | 0 |      | 0 | 2 | MASCOT | T | PLEX8 |
| 4.41E-02 | 0 0 | Cs9g01790.1/Cs9g017   | 6    | 0 |      | 0 | 2 | MASCOT | T | PLEX8 |
| 2.84E-02 | 0 0 | Cs9g01790.1/Cs9g017   | 6.89 | 0 |      | 0 | 2 | MASCOT | T |       |
| 1.32E-03 | 0 0 | Cs2g08800.1/Cs2g088   | 4.21 | 0 |      | 0 | 2 | MASCOT | T | PLEX8 |
| 2.26E-02 | 0 0 | Cs2g08800.1/Cs2g088   | 4.21 | 0 |      | 0 | 2 | MASCOT | T | PLEX8 |
| 8.83E-03 | 0 0 | Cs2g08800.1/Cs2g088   | 4.21 | 0 |      | 0 | 2 | MASCOT | T | PLEX8 |
| 1.78E-01 | 0 0 | Cs2g08800.1/Cs2g088   | 4.21 | 0 |      | 0 | 2 | MASCOT | T | PLEX8 |
| 4.25E-04 | 0 0 | Cs4g05210.1/Cs4g052   | 4.21 | 0 |      | 0 | 2 | MASCOT | T | PLEX8 |
| 3.02E-01 | 0 0 | Cs4g05210.1/Cs4g052   | 4.21 | 0 |      | 0 | 2 | MASCOT | T | PLEX8 |
| 1.68E-04 | 0 0 | orange1.1t01399.1/ora | 5.83 | 0 |      | 0 | 2 | MASCOT | T | PLEX8 |
| 2.53E-02 | 0 0 | orange1.1t01399.1/ora | 5.83 | 0 |      | 0 | 2 | MASCOT | T | PLEX8 |
| 3.76E-04 | 0 0 | orange1.1t01399.1/ora | 5.83 | 0 |      | 0 | 2 | MASCOT | T | PLEX8 |
| 1.84E-01 | 0 0 | orange1.1t01399.1/ora | 5.83 | 0 |      | 0 | 2 | MASCOT | T |       |
| 3.24E-01 | 0 0 | orange1.1t01399.1/ora | 6.75 | 0 |      | 0 | 2 | MASCOT | T | PLEX8 |
| 9.56E-03 | 0 0 | Cs4g05210.1/Cs4g052   | 5.84 | 0 |      | 0 | 2 | MASCOT | T | PLEX8 |
| 9.83E-02 | 0 0 | Cs4g05210.1/Cs4g052   | 5.84 | 0 |      | 0 | 2 | MASCOT | T | PLEX8 |
| 1.24E-02 | 0 0 | Cs4g05210.1/Cs4g052   | 8.47 | 0 |      | 0 | 2 | MASCOT | T | PLEX8 |
| 1.38E-01 | 0 0 | Cs4g05210.1/Cs4g052   | 8.47 | 0 |      | 0 | 2 | MASCOT | T | PLEX8 |
| 4.73E-02 | 0 0 | Cs4g05210.1/Cs4g052   | 5.4  | 0 |      | 0 | 2 | MASCOT | T | PLEX8 |
| 1.63E-04 | 0 0 | orange1.1t01399.1/ora | 5.88 | 0 |      | 0 | 2 | MASCOT | T | PLEX8 |
| 7.72E-03 | 0 0 | orange1.1t01399.1/ora | 5.88 | 0 |      | 0 | 2 | MASCOT | T | PLEX8 |
| 3.08E-03 | 0 0 | orange1.1t01399.1/ora | 5.88 | 0 |      | 0 | 2 | MASCOT | T | PLEX8 |
| 3.12E-02 | 0 0 | Cs4g05210.1/Cs4g052   | 4.03 | 0 |      | 0 | 2 | MASCOT | T |       |
| 3.77E-01 | 0 0 | Cs3g15070.1 ! Cs4g05  | 4.21 | 0 |      | 0 | 2 | MASCOT | T |       |
| 2.57E-02 | 0 0 | Cs3g15070.1 ! Cs4g05  | 4.21 | 0 |      | 0 | 2 | MASCOT | T |       |
| 2.97E-03 | 0 0 | Cs3g15070.1 ! Cs4g05  | 4.21 | 0 |      | 0 | 2 | MASCOT | T |       |
| 5.35E-06 | 0 0 | Cs3g15070.1 ! Cs4g05  | 4.21 | 0 |      | 0 | 2 | MASCOT | T |       |
| 1.11E-01 | 0 0 | Cs4g05210.1/Cs4g052   | 8.56 | 0 |      | 0 | 2 | MASCOT | T | PLEX8 |
| 1.32E-03 | 0 0 | Cs2g08800.1/Cs2g088   | 4.21 | 0 |      | 0 | 2 | MASCOT | T | PLEX8 |
| 2.26E-02 | 0 0 | Cs2g08800.1/Cs2g088   | 4.21 | 0 |      | 0 | 2 | MASCOT | T | PLEX8 |
| 8.83E-03 | 0 0 | Cs2g08800.1/Cs2g088   | 4.21 | 0 |      | 0 | 2 | MASCOT | T | PLEX8 |
| 1.78E-01 | 0 0 | Cs2g08800.1/Cs2g088   | 4.21 | 0 |      | 0 | 2 | MASCOT | T | PLEX8 |
| 4.25E-04 | 0 0 | Cs4g05210.1/Cs4g052   | 4.21 | 0 |      | 0 | 2 | MASCOT | T | PLEX8 |
| 3.02E-01 | 0 0 | Cs4g05210.1/Cs4g052   | 4.21 | 0 |      | 0 | 2 | MASCOT | T | PLEX8 |
| 9.56E-03 | 0 0 | Cs4g05210.1/Cs4g052   | 5.84 | 0 |      | 0 | 2 | MASCOT | T | PLEX8 |
| 9.83E-02 | 0 0 | Cs4g05210.1/Cs4g052   | 5.84 | 0 |      | 0 | 2 | MASCOT | T | PLEX8 |
| 2.23E-02 | 0 0 | Cs4g05210.1/Cs4g052   | 5.55 | 0 |      | 0 | 2 | MASCOT | T | PLEX8 |
| 1.24E-02 | 0 0 | Cs4g05210.1/Cs4g052   | 8.47 | 0 |      | 0 | 2 | MASCOT | T | PLEX8 |
| 1.38E-01 | 0 0 | Cs4g05210.1/Cs4g052   | 8.47 | 0 |      | 0 | 2 | MASCOT | T | PLEX8 |
| 4.73E-02 | 0 0 | Cs4g05210.1/Cs4g052   | 5.4  | 0 |      | 0 | 2 | MASCOT | T | PLEX8 |
| 1.09E-04 | 0 0 | Cs4g05210.1/Cs4g052   | 5.88 | 0 |      | 0 | 2 | MASCOT | T | PLEX8 |
| 1.19E-02 | 0 0 | Cs4g05210.1/Cs4g052   | 5.84 | 0 |      | 0 | 2 | MASCOT | T | PLEX8 |
| 5.61E-05 | 0 0 | Cs4g05210.1/Cs4g052   | 5.84 | 0 |      | 0 | 2 | MASCOT | T | PLEX8 |



|          |     |                      |      |   |      |   |        |        |       |       |
|----------|-----|----------------------|------|---|------|---|--------|--------|-------|-------|
| 2.15E-03 | 0 0 | Cs4g05210.1/Cs4g052  | 5.84 | 0 | 0    | 2 | MASCOT | T      | PLEX8 |       |
| 3.12E-02 | 0 0 | Cs4g05210.1/Cs4g052  | 4.03 | 0 | 0    | 2 | MASCOT | T      |       |       |
| 3.77E-01 | 0 0 | Cs3g15070.1 ! Cs4g05 | 4.21 | 0 | 0    | 2 | MASCOT | T      |       |       |
| 2.57E-02 | 0 0 | Cs3g15070.1 ! Cs4g05 | 4.21 | 0 | 0    | 2 | MASCOT | T      |       |       |
| 2.97E-03 | 0 0 | Cs3g15070.1 ! Cs4g05 | 4.21 | 0 | 0    | 2 | MASCOT | T      |       |       |
| 5.35E-06 | 0 0 | Cs3g15070.1 ! Cs4g05 | 4.21 | 0 | 0    | 2 | MASCOT | T      |       |       |
| 1.11E-01 | 0 0 | Cs4g05210.1/Cs4g052  | 8.56 | 0 | 0    | 2 | MASCOT | T      | PLEX8 |       |
| 8.40E-04 | 0 0 | Cs3g16700.1          | 4.54 | 0 | 0    | 2 | MASCOT | T      | PLEX8 |       |
| 2.46E-02 | 0 0 | Cs3g16700.1          | 4.54 | 0 | 0    | 2 | MASCOT | T      |       |       |
| 3.18E-02 | 0 0 | Cs1g20920.1/Cs1g209  | 4.65 | 0 | 15.9 | 0 | 2      | MASCOT | T     | PLEX8 |
| 1.13E-05 | 0 0 | Cs1g20920.1/Cs1g209  | 4.65 | 0 | 15.9 | 0 | 2      | MASCOT | T     | PLEX8 |
| 1.46E-05 | 0 0 | Cs1g20920.1/Cs1g209  | 4.65 | 0 | 0    | 2 | MASCOT | T      | PLEX8 |       |
| 1.60E-06 | 0 0 | Cs1g20920.1/Cs1g209  | 4.65 | 0 | 0    | 2 | MASCOT | T      |       |       |
| 2.34E-01 | 0 0 | Cs1g20920.1/Cs1g209  | 9.75 | 0 | 0    | 2 | MASCOT | T      |       |       |
| 2.74E-08 | 0 0 | Cs1g20920.1/Cs1g209  | 9.75 | 0 | 0    | 2 | MASCOT | T      |       |       |
| 3.27E-01 | 0 0 | Cs3g16700.1          | 5.29 | 0 | 0    | 2 | MASCOT | T      | PLEX8 |       |
| 7.20E-04 | 0 0 | Cs3g16700.1          | 5.29 | 0 | 0    | 2 | MASCOT | T      | PLEX8 |       |
| 1.13E-01 | 0 0 | Cs3g16700.1          | 5.29 | 0 | 0    | 2 | MASCOT | T      | PLEX8 |       |
| 1.71E-04 | 0 0 | Cs3g16700.1          | 5.29 | 0 | 0    | 2 | MASCOT | T      | PLEX8 |       |
| 4.52E-03 | 0 0 | Cs1g20920.1/Cs1g209  | 6.41 | 0 | 0    | 2 | MASCOT | T      |       |       |
| 6.55E-06 | 0 0 | Cs3g16700.1          | 4.54 | 0 | 0    | 2 | MASCOT | T      |       |       |
| 1.64E-01 | 0 0 | Cs1g20920.2/Cs1g209  | 6    | 0 | 0    | 2 | MASCOT | T      | PLEX8 |       |
| 1.12E-02 | 0 0 | Cs1g20920.1/Cs1g209  | 6.04 | 0 | 0    | 2 | MASCOT | T      | PLEX8 |       |
| 5.71E-02 | 0 0 | Cs1g20920.1/Cs1g209  | 6.04 | 0 | 0    | 2 | MASCOT | T      | PLEX8 |       |
| 3.80E-01 | 0 0 | Cs3g16700.1          | 5.32 | 0 | 0    | 2 | MASCOT | T      | PLEX8 |       |
| 1.05E-01 | 0 0 | Cs3g16700.1          | 8.75 | 0 | 0    | 2 | MASCOT | T      | PLEX8 |       |
| 1.16E-01 | 0 0 | Cs3g16700.1          | 8.75 | 0 | 0    | 2 | MASCOT | T      | PLEX8 |       |
| 1.86E-01 | 0 0 | Cs3g16700.1          | 8.47 | 0 | 0    | 2 | MASCOT | T      | PLEX8 |       |
| 5.39E-04 | 0 0 | Cs9g05070.1          | 4.37 | 0 | 0    | 2 | MASCOT | T      | PLEX8 |       |
| 1.40E-03 | 0 0 | Cs9g05070.1          | 4.37 | 0 | 0    | 2 | MASCOT | T      |       |       |
| 5.28E-04 | 0 0 | Cs9g05070.1          | 4.37 | 0 | 0    | 2 | MASCOT | T      |       |       |
| 9.16E-03 | 0 0 | Cs9g05070.1          | 4.37 | 0 | 0    | 2 | MASCOT | T      |       |       |
| 4.64E-03 | 0 0 | Cs9g05070.1/Cs9g050  | 4.03 | 0 | 0    | 2 | MASCOT | T      | PLEX8 |       |
| 5.67E-04 | 0 0 | Cs9g05070.1/Cs9g050  | 4.03 | 0 | 0    | 2 | MASCOT | T      | PLEX8 |       |
| 9.69E-03 | 0 0 | Cs9g05070.1/Cs9g050  | 4.21 | 0 | 0    | 2 | MASCOT | T      |       |       |
| 5.55E-02 | 0 0 | Cs9g05070.1/Cs9g050  | 8.75 | 0 | 0    | 2 | MASCOT | T      | PLEX8 |       |
| 2.60E-02 | 0 0 | Cs9g05070.1/Cs9g050  | 8.75 | 0 | 0    | 2 | MASCOT | T      | PLEX8 |       |
| 3.21E-05 | 0 0 | Cs9g05070.1/Cs9g050  | 8.75 | 0 | 0    | 2 | MASCOT | T      | PLEX8 |       |
| 1.79E-01 | 0 0 | Cs9g05070.1          | 5.59 | 0 | 0    | 2 | MASCOT | T      | PLEX8 |       |
| 5.67E-05 | 0 0 | Cs9g05070.1          | 4.37 | 0 | 0    | 2 | MASCOT | T      |       |       |
| 6.03E-02 | 0 0 | Cs9g05070.1/Cs9g050  | 7.96 | 0 | 0    | 2 | MASCOT | T      | PLEX8 |       |
| 2.35E-01 | 0 0 | Cs9g05070.1/Cs9g050  | 5.72 | 0 | 0    | 2 | MASCOT | T      | PLEX8 |       |
| 3.68E-02 | 0 0 | Cs9g05070.1/Cs9g050  | 5.72 | 0 | 0    | 2 | MASCOT | T      | PLEX8 |       |
| 1.09E-02 | 0 0 | Cs9g05070.1/Cs9g050  | 4.37 | 0 | 0    | 2 | MASCOT | T      | PLEX8 |       |
| 7.05E-03 | 0 0 | Cs9g05070.1/Cs9g050  | 4.37 | 0 | 0    | 2 | MASCOT | T      | PLEX8 |       |
| 9.23E-02 | 0 0 | Cs9g05070.1/Cs9g050  | 4.37 | 0 | 0    | 2 | MASCOT | T      | PLEX8 |       |
| 9.76E-04 | 0 0 | Cs9g05070.1/Cs9g050  | 5.84 | 0 | 0    | 2 | MASCOT | T      | PLEX8 |       |
| 3.07E-04 | 0 0 | Cs9g05070.1/Cs9g050  | 5.84 | 0 | 0    | 2 | MASCOT | T      | PLEX8 |       |
| 6.11E-05 | 0 0 | Cs9g05070.1/Cs9g050  | 8.75 | 0 | 0    | 2 | MASCOT | T      | PLEX8 |       |
| 6.22E-06 | 0 0 | Cs1g17970.1/Cs4g055  | 5.84 | 0 | 0    | 2 | MASCOT | T      | PLEX8 |       |
| 2.19E-04 | 0 0 | Cs1g17970.1/Cs4g055  | 5.84 | 0 | 0    | 2 | MASCOT | T      | PLEX8 |       |

|              |                      |      |   |   |   |        |   |       |
|--------------|----------------------|------|---|---|---|--------|---|-------|
| 5.84E-02 0 0 | Cs1g17970.1          | 6    | 0 | 0 | 2 | MASCOT | T | PLEX8 |
| 6.46E-03 0 0 | Cs1g17970.1/Cs4g055  | 4.68 | 1 | 0 | 2 | MASCOT | T | PLEX8 |
| 7.90E-03 0 0 | Cs1g17970.1/Cs4g055  | 4.68 | 1 | 0 | 2 | MASCOT | T | PLEX8 |
| 4.77E-02 0 0 | Cs1g17970.1/Cs4g055  | 8.23 | 0 | 0 | 2 | MASCOT | T | PLEX8 |
| 2.90E-02 0 0 | Cs1g17970.1/Cs4g055  | 8.23 | 0 | 0 | 2 | MASCOT | T | PLEX8 |
| 1.51E-03 0 0 | Cs1g17970.1/Cs4g055  | 5.88 | 0 | 0 | 2 | MASCOT | T | PLEX8 |
| 3.42E-01 0 0 | Cs1g17970.1/Cs4g055  | 5.88 | 0 | 0 | 2 | MASCOT | T | PLEX8 |
| 1.39E-03 0 0 | Cs1g17970.1/Cs4g055  | 5.88 | 0 | 0 | 2 | MASCOT | T | PLEX8 |
| 2.93E-01 0 0 | Cs1g17970.1/Cs4g055  | 5.88 | 0 | 0 | 2 | MASCOT | T | PLEX8 |
| 1.59E-02 0 0 | Cs1g17970.1/Cs4g055  | 5.88 | 0 | 0 | 2 | MASCOT | T | PLEX8 |
| 1.77E-01 0 0 | Cs1g17970.1/Cs4g055  | 5.88 | 0 | 0 | 2 | MASCOT | T |       |
| 2.49E-03 0 0 | Cs1g17970.1/Cs4g055  | 4.14 | 0 | 0 | 2 | MASCOT | T | PLEX8 |
| 1.29E-02 0 0 | Cs1g17970.1/Cs4g055  | 5.13 | 0 | 0 | 2 | MASCOT | T | PLEX8 |
| 1.30E-02 0 0 | Cs1g08640.1/Cs1g086  | 4.53 | 0 | 0 | 2 | MASCOT | T | PLEX8 |
| 3.04E-01 0 0 | Cs1g08640.1/Cs1g086  | 4.53 | 0 | 0 | 2 | MASCOT | T | PLEX8 |
| 2.46E-01 0 0 | Cs1g17970.1/Cs4g055  | 8.5  | 0 | 0 | 2 | MASCOT | T | PLEX8 |
| 2.77E-05 0 0 | Cs1g17970.1          | 9.76 | 0 | 0 | 2 | MASCOT | T | PLEX8 |
| 3.08E-02 0 0 | Cs1g17970.1/Cs4g055  | 5.96 | 1 | 0 | 2 | MASCOT | T |       |
| 1.60E-03 0 0 | Cs3g11690.1/Cs3g116  | 6.05 | 0 | 0 | 2 | MASCOT | T | PLEX8 |
| 6.41E-03 0 0 | Cs3g11690.1/Cs3g116  | 6.05 | 0 | 0 | 2 | MASCOT | T | PLEX8 |
| 7.30E-03 0 0 | Cs3g11690.1/Cs3g116  | 6.05 | 0 | 0 | 2 | MASCOT | T | PLEX8 |
| 1.15E-02 0 0 | Cs3g11690.1/Cs3g116  | 3.92 | 0 | 0 | 2 | MASCOT | T | PLEX8 |
| 1.34E-01 0 0 | Cs3g11690.1/Cs3g116  | 4.21 | 0 | 0 | 2 | MASCOT | T | PLEX8 |
| 2.19E-01 0 0 | Cs3g11690.1/Cs3g116  | 6.92 | 0 | 0 | 2 | MASCOT | T |       |
| 7.23E-02 0 0 | Cs3g11690.1/Cs3g116  | 6.92 | 0 | 0 | 2 | MASCOT | T |       |
| 9.76E-03 0 0 | Cs3g11690.1/Cs3g116  | 8.49 | 0 | 0 | 2 | MASCOT | T | PLEX8 |
| 6.75E-03 0 0 | Cs3g11690.1/Cs3g116  | 8.49 | 0 | 0 | 2 | MASCOT | T | PLEX8 |
| 2.06E-02 0 0 | Cs3g11690.1/Cs3g116  | 8.49 | 0 | 0 | 2 | MASCOT | T |       |
| 6.08E-04 0 0 | Cs3g11690.1/Cs3g116  | 4.37 | 0 | 0 | 2 | MASCOT | T | PLEX8 |
| 3.67E-02 0 0 | Cs3g11690.1/Cs3g116  | 6.73 | 0 | 0 | 2 | MASCOT | T | PLEX8 |
| 4.21E-02 0 0 | Cs3g11690.1/Cs3g116  | 6    | 0 | 0 | 2 | MASCOT | T |       |
| 3.63E-02 0 0 | Cs3g11690.1/Cs3g116  | 6    | 0 | 0 | 2 | MASCOT | T |       |
| 2.84E-03 0 0 | Cs3g11690.1/Cs3g116  | 8.25 | 0 | 0 | 2 | MASCOT | T | PLEX8 |
| 1.04E-02 0 0 | Cs3g11690.1/Cs3g116  | 5.84 | 0 | 0 | 2 | MASCOT | T | PLEX8 |
| 3.90E-02 0 0 | Cs3g11690.1/Cs3g116  | 5.84 | 0 | 0 | 2 | MASCOT | T | PLEX8 |
| 2.05E-02 0 0 | Cs3g11690.1/Cs3g116  | 8.47 | 0 | 0 | 2 | MASCOT | T | PLEX8 |
| 8.06E-02 0 0 | Cs3g11690.1/Cs3g116  | 8.47 | 0 | 0 | 2 | MASCOT | T | PLEX8 |
| 2.03E-02 0 0 | Cs3g11690.1/Cs3g116  | 8.47 | 0 | 0 | 2 | MASCOT | T | PLEX8 |
| 6.22E-02 0 0 | gi 113952629         | 6.79 | 0 | 0 | 2 | MASCOT | T | PLEX8 |
| 8.05E-03 0 0 | gi 113952629         | 6.79 | 0 | 0 | 2 | MASCOT | T | PLEX8 |
| 2.73E-02 0 0 | gi 113952629         | 4.53 | 0 | 0 | 2 | MASCOT | T | PLEX8 |
| 7.83E-02 0 0 | gi 113952629         | 4.14 | 0 | 0 | 2 | MASCOT | T | PLEX8 |
| 1.80E-02 0 0 | gi 113952629         | 4.56 | 1 | 0 | 2 | MASCOT | T |       |
| 9.21E-02 0 0 | gi 113952629/Cs2g135 | 8.75 | 0 | 0 | 2 | MASCOT | T | PLEX8 |
| 1.22E-01 0 0 | gi 113952629/Cs2g135 | 8.75 | 0 | 0 | 2 | MASCOT | T | PLEX8 |
| 1.24E-01 0 0 | gi 113952629/Cs2g135 | 8.75 | 0 | 0 | 2 | MASCOT | T | PLEX8 |
| 5.33E-03 0 0 | gi 113952629         | 5.55 | 0 | 0 | 2 | MASCOT | T |       |
| 3.05E-02 0 0 | gi 113952629         | 5.55 | 0 | 0 | 2 | MASCOT | T |       |
| 1.73E-03 0 0 | gi 113952629         | 5.55 | 0 | 0 | 2 | MASCOT | T |       |
| 2.59E-03 0 0 | gi 113952629         | 5.55 | 0 | 0 | 2 | MASCOT | T |       |
| 1.83E-02 0 0 | gi 113952629         | 5.97 | 0 | 0 | 2 | MASCOT | T |       |

|          |     |                     |      |   |      |   |        |         |         |
|----------|-----|---------------------|------|---|------|---|--------|---------|---------|
| 2.13E-01 | 0 0 | gi 113952629        | 5.81 | 0 | 0    | 2 | MASCOT | T       |         |
| 6.88E-03 | 0 0 | gi 113952629        | 5.81 | 0 | 0    | 2 | MASCOT | T       |         |
| 6.49E-03 | 0 0 | gi 113952629        | 6    | 0 | 0    | 2 | MASCOT | T       |         |
| 1.33E-02 | 0 0 | gi 113952629        | 8.75 | 0 | 0    | 2 | MASCOT | T PLEX8 |         |
| 5.84E-02 | 0 0 | gi 113952629        | 6    | 0 | 0    | 2 | MASCOT | T PLEX8 |         |
| 9.43E-03 | 0 0 | gi 113952629        | 6    | 0 | 0    | 2 | MASCOT | T PLEX8 |         |
| 1.99E-03 | 0 0 | gi 113952629        | 6    | 0 | 0    | 2 | MASCOT | T PLEX8 |         |
| 1.43E-01 | 0 0 | Cs5g29390.1         | 5.21 | 0 | 0    | 2 | MASCOT | T PLEX8 |         |
| 4.18E-02 | 0 0 | Cs5g29390.1         | 5.83 | 0 | 0    | 2 | MASCOT | T PLEX8 |         |
| 1.59E-01 | 0 0 | Cs5g29390.1         | 5.83 | 0 | 0    | 2 | MASCOT | T PLEX8 |         |
| 4.07E-01 | 0 0 | Cs5g29390.1         | 4.14 | 0 | 0    | 2 | MASCOT | T PLEX8 |         |
| 1.05E-02 | 0 0 | Cs5g29390.1         | 8.76 | 0 | 0    | 2 | MASCOT | T PLEX8 |         |
| 2.23E-04 | 0 0 | Cs5g29390.1         | 4.37 | 0 | 0    | 2 | MASCOT | T PLEX8 |         |
| 2.13E-02 | 0 0 | Cs5g29390.1         | 4.37 | 0 | 0    | 2 | MASCOT | T PLEX8 |         |
| 7.85E-02 | 0 0 | Cs5g29390.1         | 4.21 | 0 | 0    | 2 | MASCOT | T PLEX8 |         |
| 1.27E-01 | 0 0 | Cs5g29390.1         | 5.84 | 0 | 0    | 2 | MASCOT | T PLEX8 |         |
| 2.98E-02 | 0 0 | Cs5g29390.1         | 5.81 | 0 | 0    | 2 | MASCOT | T PLEX8 |         |
| 3.18E-02 | 0 0 | Cs5g29390.1         | 5.81 | 0 | 0    | 2 | MASCOT | T PLEX8 |         |
| 1.98E-02 | 0 0 | Cs5g29390.1         | 5.81 | 0 | 0    | 2 | MASCOT | T PLEX8 |         |
| 1.31E-01 | 0 0 | Cs5g29390.1         | 4.37 | 0 | 0    | 2 | MASCOT | T PLEX8 |         |
| 3.89E-02 | 0 0 | Cs5g29390.1         | 4.37 | 0 | 0    | 2 | MASCOT | T PLEX8 |         |
| 2.24E-01 | 0 0 | Cs5g29390.1         | 5.4  | 0 | 15.9 | 0 | 2      | MASCOT  | T PLEX8 |
| 8.10E-03 | 0 0 | Cs5g29390.1         | 5.4  | 0 | 15.9 | 0 | 2      | MASCOT  | T PLEX8 |
| 2.25E-01 | 0 0 | Cs5g29390.1         | 5.4  | 0 | 15.9 | 0 | 2      | MASCOT  | T PLEX8 |
| 2.35E-03 | 0 0 | Cs5g29390.1         | 5.4  | 0 | 15.9 | 0 | 2      | MASCOT  | T PLEX8 |
| 2.16E-02 | 0 0 | Cs5g29390.1         | 4.37 | 0 | 0    | 2 | MASCOT | T PLEX8 |         |
| 4.79E-03 | 0 0 | Cs6g22080.1/Cs6g220 | 4.75 | 0 | 0    | 2 | MASCOT | T PLEX8 |         |
| 5.62E-04 | 0 0 | Cs6g22080.1/Cs6g220 | 4.75 | 0 | 0    | 2 | MASCOT | T PLEX8 |         |
| 2.14E-01 | 0 0 | Cs6g22080.1/Cs6g220 | 4.37 | 0 | 0    | 2 | MASCOT | T PLEX8 |         |
| 8.75E-03 | 0 0 | Cs6g22080.1         | 4.53 | 0 | 0    | 2 | MASCOT | T PLEX8 |         |
| 1.83E-01 | 0 0 | Cs6g22080.1/Cs6g220 | 6.1  | 0 | 0    | 2 | MASCOT | T PLEX8 |         |
| 2.52E-01 | 0 0 | Cs6g22080.1         | 4.21 | 0 | 0    | 2 | MASCOT | T PLEX8 |         |
| 4.89E-02 | 0 0 | Cs6g22080.1         | 4.21 | 0 | 0    | 2 | MASCOT | T PLEX8 |         |
| 5.50E-05 | 0 0 | Cs6g22080.1/Cs6g220 | 8.5  | 0 | 0    | 2 | MASCOT | T PLEX8 |         |
| 2.25E-03 | 0 0 | Cs6g22080.1/Cs6g220 | 8.5  | 0 | 0    | 2 | MASCOT | T PLEX8 |         |
| 7.24E-04 | 0 0 | Cs6g22080.1/Cs6g220 | 8.5  | 0 | 0    | 2 | MASCOT | T PLEX8 |         |
| 2.10E-03 | 0 0 | Cs6g22080.1/Cs6g220 | 8.5  | 0 | 0    | 2 | MASCOT | T PLEX8 |         |
| 6.24E-03 | 0 0 | Cs6g22080.1         | 9.6  | 1 | 0    | 2 | MASCOT | T       |         |
| 1.68E-01 | 0 0 | Cs6g22080.1/Cs6g220 | 8.41 | 0 | 0    | 2 | MASCOT | T PLEX8 |         |
| 1.85E-01 | 0 0 | Cs6g22080.1/Cs6g220 | 8.41 | 0 | 0    | 2 | MASCOT | T PLEX8 |         |
| 8.24E-02 | 0 0 | Cs6g22080.1/Cs6g220 | 5.97 | 0 | 0    | 2 | MASCOT | T PLEX8 |         |
| 1.55E-01 | 0 0 | Cs6g22080.1/Cs6g220 | 5.97 | 0 | 0    | 2 | MASCOT | T PLEX8 |         |
| 6.71E-03 | 0 0 | Cs6g22080.1/Cs6g220 | 5.97 | 0 | 0    | 2 | MASCOT | T PLEX8 |         |
| 8.30E-03 | 0 0 | Cs6g22080.1/Cs6g220 | 4.53 | 0 | 0    | 2 | MASCOT | T       |         |
| 2.46E-02 | 0 0 | Cs6g22080.1/Cs6g220 | 4.37 | 0 | 0    | 2 | MASCOT | T PLEX8 |         |
| 4.65E-02 | 0 0 | Cs7g04310.1/Cs7g043 | 6.74 | 0 | 0    | 2 | MASCOT | T       |         |
| 1.63E-01 | 0 0 | Cs7g04310.1/Cs7g043 | 6.74 | 0 | 0    | 2 | MASCOT | T       |         |
| 3.95E-01 | 0 0 | Cs7g04310.1/Cs7g043 | 4.75 | 0 | 0    | 2 | MASCOT | T       |         |
| 1.62E-04 | 0 0 | Cs7g04310.1/Cs7g043 | 6.74 | 0 | 0    | 2 | MASCOT | T PLEX8 |         |
| 4.01E-02 | 0 0 | Cs7g04310.1/Cs7g043 | 6.74 | 0 | 0    | 2 | MASCOT | T PLEX8 |         |
| 4.26E-04 | 0 0 | Cs7g04310.1/Cs7g043 | 6.74 | 0 | 0    | 2 | MASCOT | T PLEX8 |         |

|          |     |                     |      |   |   |          |   |       |
|----------|-----|---------------------|------|---|---|----------|---|-------|
| 5.63E-05 | 0 0 | Cs7g04310.1/Cs7g043 | 6.74 | 0 | 0 | 2 MASCOT | T | PLEX8 |
| 2.17E-01 | 0 0 | Cs7g04310.1/Cs7g043 | 6.74 | 0 | 0 | 2 MASCOT | T | PLEX8 |
| 9.11E-02 | 0 0 | Cs7g04310.1/Cs7g043 | 5.4  | 0 | 0 | 2 MASCOT | T |       |
| 1.91E-04 | 0 0 | Cs7g04310.1/Cs7g043 | 4.03 | 0 | 0 | 2 MASCOT | T | PLEX8 |
| 4.86E-02 | 0 0 | Cs7g04310.1/Cs7g043 | 4.03 | 0 | 0 | 2 MASCOT | T | PLEX8 |
| 6.59E-02 | 0 0 | Cs7g04310.1/Cs7g043 | 6    | 0 | 0 | 2 MASCOT | T | PLEX8 |
| 2.84E-02 | 0 0 | Cs7g04310.1/Cs7g043 | 5.12 | 0 | 0 | 2 MASCOT | T | PLEX8 |
| 8.76E-03 | 0 0 | Cs7g04310.1/Cs7g043 | 5.12 | 0 | 0 | 2 MASCOT | T | PLEX8 |
| 3.27E-01 | 0 0 | Cs7g04310.1/Cs7g043 | 8.47 | 0 | 0 | 2 MASCOT | T | PLEX8 |
| 3.22E-02 | 0 0 | Cs7g04310.1/Cs7g043 | 8.47 | 0 | 0 | 2 MASCOT | T | PLEX8 |
| 1.72E-02 | 0 0 | Cs7g04310.1/Cs7g043 | 5.21 | 0 | 0 | 2 MASCOT | T | PLEX8 |
| 3.90E-02 | 0 0 | Cs7g04310.1/Cs7g043 | 4.03 | 0 | 0 | 2 MASCOT | T | PLEX8 |
| 4.30E-02 | 0 0 | Cs7g04310.1/Cs7g043 | 4.32 | 0 | 0 | 2 MASCOT | T | PLEX8 |
| 1.94E-02 | 0 0 | Cs7g07890.1/Cs7g078 | 6.73 | 0 | 0 | 2 MASCOT | T |       |
| 4.94E-02 | 0 0 | Cs7g07890.1/Cs7g078 | 6.1  | 0 | 0 | 2 MASCOT | T | PLEX8 |
| 1.04E-02 | 0 0 | Cs7g07890.1/Cs7g078 | 4.03 | 0 | 0 | 2 MASCOT | T | PLEX8 |
| 6.86E-03 | 0 0 | Cs7g07890.1         | 4.37 | 0 | 0 | 2 MASCOT | T |       |
| 6.54E-02 | 0 0 | Cs7g07890.1/Cs7g078 | 5.32 | 0 | 0 | 2 MASCOT | T | PLEX8 |
| 1.33E-01 | 0 0 | Cs7g07890.1/Cs7g078 | 5.32 | 0 | 0 | 2 MASCOT | T | PLEX8 |
| 3.96E-05 | 0 0 | Cs7g07890.1/Cs7g078 | 4.37 | 0 | 0 | 2 MASCOT | T |       |
| 4.25E-03 | 0 0 | Cs7g07890.1/Cs7g078 | 4.21 | 0 | 0 | 2 MASCOT | T | PLEX8 |
| 1.28E-01 | 0 0 | Cs7g07890.1/Cs7g078 | 6.74 | 0 | 0 | 2 MASCOT | T | PLEX8 |
| 6.83E-02 | 0 0 | Cs7g07890.1/Cs7g078 | 4.56 | 1 | 0 | 2 MASCOT | T | PLEX8 |
| 8.58E-04 | 0 0 | Cs7g07890.1/Cs7g078 | 4.37 | 0 | 0 | 2 MASCOT | T | PLEX8 |
| 2.23E-02 | 0 0 | Cs7g07890.1/Cs7g078 | 4.37 | 0 | 0 | 2 MASCOT | T | PLEX8 |
| 1.48E-02 | 0 0 | Cs7g07890.1/Cs7g078 | 4.37 | 0 | 0 | 2 MASCOT | T | PLEX8 |
| 3.99E-03 | 0 0 | Cs7g07890.1/Cs7g078 | 4.37 | 0 | 0 | 2 MASCOT | T | PLEX8 |
| 6.59E-02 | 0 0 | Cs7g07890.1/Cs7g078 | 6.07 | 1 | 0 | 2 MASCOT | T | PLEX8 |
| 1.02E-01 | 0 0 | Cs7g07890.1/Cs7g078 | 6.07 | 1 | 0 | 2 MASCOT | T | PLEX8 |
| 1.32E-02 | 0 0 | Cs8g12140.1/Cs8g121 | 6    | 0 | 0 | 2 MASCOT | T | PLEX8 |
| 5.98E-05 | 0 0 | Cs8g12140.1/Cs8g121 | 5.32 | 0 | 0 | 2 MASCOT | T | PLEX8 |
| 1.66E-01 | 0 0 | Cs8g12140.1/Cs8g121 | 5.32 | 0 | 0 | 2 MASCOT | T |       |
| 3.79E-02 | 0 0 | Cs8g12140.1/Cs8g121 | 5.55 | 0 | 0 | 2 MASCOT | T | PLEX8 |
| 2.84E-02 | 0 0 | Cs8g12140.1/Cs8g121 | 5.55 | 0 | 0 | 2 MASCOT | T | PLEX8 |
| 2.62E-02 | 0 0 | Cs8g12140.1/Cs8g121 | 5.88 | 0 | 0 | 2 MASCOT | T | PLEX8 |
| 2.13E-02 | 0 0 | Cs8g12140.1/Cs8g121 | 5.88 | 0 | 0 | 2 MASCOT | T | PLEX8 |
| 3.62E-02 | 0 0 | Cs8g12140.1/Cs8g121 | 6.79 | 0 | 0 | 2 MASCOT | T | PLEX8 |
| 3.14E-01 | 0 0 | Cs8g12140.1/Cs8g121 | 6.75 | 0 | 0 | 2 MASCOT | T |       |
| 6.81E-02 | 0 0 | Cs8g12140.1/Cs8g121 | 9.76 | 0 | 0 | 2 MASCOT | T | PLEX8 |
| 1.64E-02 | 0 0 | Cs8g12140.1/Cs8g121 | 8.76 | 0 | 0 | 2 MASCOT | T | PLEX8 |
| 1.06E-02 | 0 0 | Cs8g12140.1/Cs8g121 | 8.76 | 0 | 0 | 2 MASCOT | T | PLEX8 |
| 8.76E-02 | 0 0 | Cs8g12140.1/Cs8g121 | 5.81 | 0 | 0 | 2 MASCOT | T | PLEX8 |
| 2.52E-01 | 0 0 | Cs8g12140.1/Cs8g121 | 5.81 | 0 | 0 | 2 MASCOT | T | PLEX8 |
| 5.40E-02 | 0 0 | Cs8g12140.1/Cs8g121 | 5.81 | 0 | 0 | 2 MASCOT | T | PLEX8 |
| 5.88E-02 | 0 0 | Cs8g12140.1/Cs8g121 | 8.75 | 0 | 0 | 2 MASCOT | T | PLEX8 |
| 2.64E-01 | 0 0 | Cs7g13480.1/Cs7g134 | 9.8  | 0 | 0 | 2 MASCOT | T | PLEX8 |
| 8.63E-02 | 0 0 | Cs7g13480.1/Cs7g134 | 4.14 | 0 | 0 | 2 MASCOT | T | PLEX8 |
| 1.21E-02 | 0 0 | Cs2g29960.1/Cs7g134 | 6    | 0 | 0 | 2 MASCOT | T | PLEX8 |
| 2.43E-02 | 0 0 | Cs7g13480.1/Cs7g134 | 9.8  | 0 | 0 | 2 MASCOT | T | PLEX8 |
| 4.72E-04 | 0 0 | Cs7g13480.1/Cs7g134 | 4.65 | 0 | 0 | 2 MASCOT | T | PLEX8 |
| 2.32E-01 | 0 0 | Cs7g13480.1/Cs7g134 | 5.84 | 0 | 0 | 2 MASCOT | T | PLEX8 |

|          |     |                      |      |   |      |   |        |        |       |       |
|----------|-----|----------------------|------|---|------|---|--------|--------|-------|-------|
| 3.83E-01 | 0 0 | Cs7g13480.1/Cs7g134  | 4.37 | 0 | 0    | 2 | MASCOT | T      |       |       |
| 2.38E-04 | 0 0 | Cs2g29960.1/Cs7g134  | 4.53 | 0 | 0    | 2 | MASCOT | T      |       |       |
| 1.26E-01 | 0 0 | Cs2g29960.1/Cs7g134  | 4.53 | 0 | 0    | 2 | MASCOT | T      |       |       |
| 5.69E-06 | 0 0 | Cs2g29960.1/Cs7g134  | 4.53 | 0 | 0    | 2 | MASCOT | T      |       |       |
| 1.23E-01 | 0 0 | Cs7g13480.1/Cs7g134  | 6.61 | 0 | 0    | 2 | MASCOT | T      | PLEX8 |       |
| 2.17E-02 | 0 0 | Cs7g13480.1/Cs7g134  | 5.81 | 0 | 0    | 2 | MASCOT | T      | PLEX8 |       |
| 1.54E-01 | 0 0 | Cs7g13480.1/Cs7g134  | 5.81 | 0 | 0    | 2 | MASCOT | T      | PLEX8 |       |
| 1.56E-02 | 0 0 | Cs2g29960.1/Cs7g134  | 5.97 | 0 | 0    | 2 | MASCOT | T      |       |       |
| 3.22E-02 | 0 0 | Cs2g29960.1/Cs7g134  | 5.97 | 0 | 0    | 2 | MASCOT | T      |       |       |
| 1.89E-05 | 0 0 | Cs1g14510.1/orange1. | 4.14 | 0 | 0    | 2 | MASCOT | T      | PLEX8 |       |
| 1.46E-03 | 0 0 | Cs1g14510.1/orange1. | 4.32 | 0 | 0    | 2 | MASCOT | T      | PLEX8 |       |
| 4.64E-02 | 0 0 | Cs1g14510.1/orange1. | 4.53 | 0 | 0    | 2 | MASCOT | T      | PLEX8 |       |
| 2.70E-02 | 0 0 | Cs1g14510.1/orange1. | 4.53 | 0 | 0    | 2 | MASCOT | T      | PLEX8 |       |
| 1.32E-01 | 0 0 | Cs1g14510.1/orange1. | 4.53 | 0 | 0    | 2 | MASCOT | T      | PLEX8 |       |
| 1.79E-01 | 0 0 | Cs1g14510.1/orange1. | 4.53 | 0 | 0    | 2 | MASCOT | T      | PLEX8 |       |
| 6.49E-02 | 0 0 | Cs1g14510.1/orange1. | 4.79 | 1 | 0    | 2 | MASCOT | T      | PLEX8 |       |
| 1.45E-04 | 0 0 | Cs1g14510.1/orange1. | 4    | 0 | 0    | 2 | MASCOT | T      |       |       |
| 3.07E-03 | 0 0 | Cs1g14510.1/orange1. | 4.53 | 0 | 0    | 2 | MASCOT | T      | PLEX8 |       |
| 1.39E-01 | 0 0 | Cs1g14510.1/orange1. | 4.37 | 0 | 0    | 2 | MASCOT | T      | PLEX8 |       |
| 1.67E-03 | 0 0 | Cs1g14510.1/orange1. | 4.37 | 0 | 0    | 2 | MASCOT | T      | PLEX8 |       |
| 1.78E-02 | 0 0 | Cs1g14510.1/orange1. | 4.25 | 0 | 0    | 2 | MASCOT | T      | PLEX8 |       |
| 2.08E-01 | 0 0 | Cs1g14510.1/orange1. | 6.05 | 0 | 0    | 2 | MASCOT | T      | PLEX8 |       |
| 1.09E-02 | 0 0 | Cs1g14510.1/orange1. | 4.37 | 0 | 0    | 2 | MASCOT | T      | PLEX8 |       |
| 4.45E-06 | 0 0 | Cs2g09970.1/Cs3g261  | 4.14 | 0 | 0    | 2 | MASCOT | T      | PLEX8 |       |
| 4.23E-02 | 0 0 | Cs2g09970.1          | 4.72 | 0 | 0    | 2 | MASCOT | T      | PLEX8 |       |
| 2.20E-01 | 0 0 | Cs2g09970.1          | 4.72 | 0 | 0    | 2 | MASCOT | T      |       |       |
| 9.11E-03 | 0 0 | Cs2g09970.1/Cs3g261  | 9.75 | 0 | 0    | 2 | MASCOT | T      |       |       |
| 6.30E-05 | 0 0 | Cs2g09970.1          | 4.03 | 0 | 0    | 2 | MASCOT | T      |       |       |
| 4.61E-04 | 0 0 | Cs2g09970.1/Cs8g196  | 6.83 | 0 | 0    | 2 | MASCOT | T      | PLEX8 |       |
| 4.63E-03 | 0 0 | Cs2g09970.1/Cs3g261  | 5.84 | 0 | 0    | 2 | MASCOT | T      | PLEX8 |       |
| 3.27E-02 | 0 0 | Cs2g09970.1/Cs3g261  | 6    | 0 | 0    | 2 | MASCOT | T      | PLEX8 |       |
| 5.97E-02 | 0 0 | Cs2g09970.1/Cs3g261  | 11   | 1 | 0    | 2 | MASCOT | T      | PLEX8 |       |
| 1.18E-02 | 0 0 | Cs2g09970.1/Cs3g261  | 11   | 1 | 0    | 2 | MASCOT | T      |       |       |
| 2.70E-03 | 0 0 | Cs2g09970.1/Cs3g261  | 9.76 | 0 | 15.9 | 0 | 2      | MASCOT | T     |       |
| 2.19E-03 | 0 0 | Cs2g09970.1/Cs6g074  | 8.5  | 0 | 0    | 2 | MASCOT | T      | PLEX8 |       |
| 6.11E-03 | 0 0 | Cs2g09970.1/Cs3g261  | 8.75 | 0 | 0    | 2 | MASCOT | T      | PLEX8 |       |
| 8.75E-03 | 0 0 | Cs8g09880.1/Cs8g107  | 4.37 | 0 | 0    | 2 | MASCOT | T      | PLEX8 |       |
| 5.60E-02 | 0 0 | Cs8g10730.1          | 5.88 | 0 | 0    | 2 | MASCOT | T      | PLEX8 |       |
| 1.24E-01 | 0 0 | Cs8g10730.1/Cs8g107  | 6.1  | 0 | 0    | 2 | MASCOT | T      | PLEX8 |       |
| 1.63E-01 | 0 0 | Cs8g09880.1/Cs8g107  | 4.37 | 0 | 0    | 2 | MASCOT | T      | PLEX8 |       |
| 7.39E-02 | 0 0 | Cs8g10730.1          | 5.84 | 0 | 0    | 2 | MASCOT | T      | PLEX8 |       |
| 3.06E-02 | 0 0 | Cs8g09880.1/Cs8g107  | 9.75 | 0 | 0    | 2 | MASCOT | T      |       |       |
| 3.40E-01 | 0 0 | Cs8g10730.1/Cs8g107  | 4.25 | 0 | 15.9 | 0 | 2      | MASCOT | T     | PLEX8 |
| 3.12E-02 | 0 0 | Cs8g10730.1/Cs8g107  | 4.25 | 0 | 0    | 2 | MASCOT | T      | PLEX8 |       |
| 2.23E-02 | 0 0 | Cs8g10730.1/Cs8g107  | 5.84 | 0 | 0    | 2 | MASCOT | T      | PLEX8 |       |
| 6.02E-02 | 0 0 | Cs8g09880.1/Cs8g107  | 8.75 | 0 | 0    | 2 | MASCOT | T      | PLEX8 |       |
| 1.81E-04 | 0 0 | Cs8g10730.1/Cs8g107  | 5.83 | 0 | 0    | 2 | MASCOT | T      | PLEX8 |       |
| 5.74E-02 | 0 0 | Cs8g10730.1          | 4.37 | 0 | 0    | 2 | MASCOT | T      | PLEX8 |       |
| 1.95E-02 | 0 0 | Cs5g18500.1          | 4.65 | 0 | 15.9 | 0 | 2      | MASCOT | T     | PLEX8 |
| 4.09E-01 | 0 0 | Cs5g18500.1          | 4.65 | 0 | 15.9 | 0 | 2      | MASCOT | T     | PLEX8 |
| 1.23E-03 | 0 0 | Cs5g18500.1          | 4.65 | 0 | 15.9 | 0 | 2      | MASCOT | T     | PLEX8 |

|              |                      |      |   |      |   |   |        |   |       |
|--------------|----------------------|------|---|------|---|---|--------|---|-------|
| 3.64E-01 0 0 | Cs5g18500.1          | 4.65 | 0 | 15.9 | 0 | 2 | MASCOT | T | PLEX8 |
| 4.57E-02 0 0 | Cs5g18500.1          | 4.65 | 0 | 15.9 | 0 | 2 | MASCOT | T | PLEX8 |
| 4.39E-01 0 0 | Cs5g18500.1          | 4.65 | 0 | 15.9 | 0 | 2 | MASCOT | T |       |
| 1.98E-02 0 0 | Cs5g18500.1          | 4.65 | 0 | 15.9 | 0 | 2 | MASCOT | T | PLEX8 |
| 5.12E-02 0 0 | Cs5g18500.1          | 4.65 | 0 | 15.9 | 0 | 2 | MASCOT | T | PLEX8 |
| 4.47E-01 0 0 | Cs5g18500.1          | 4.65 | 0 | 15.9 | 0 | 2 | MASCOT | T | PLEX8 |
| 3.59E-01 0 0 | Cs5g18500.1          | 4.65 | 0 | 15.9 | 0 | 2 | MASCOT | T |       |
| 1.02E-01 0 0 | Cs5g18500.1          | 4.65 | 0 | 15.9 | 0 | 2 | MASCOT | T |       |
| 3.84E-03 0 0 | Cs5g18500.1          | 4.65 | 0 | 15.9 | 0 | 2 | MASCOT | T |       |
| 1.54E-02 0 0 | Cs5g18500.1          | 4.65 | 0 | 15.9 | 0 | 2 | MASCOT | T |       |
| 3.07E-06 0 0 | Cs5g18500.1          | 4.65 | 0 |      | 0 | 2 | MASCOT | T | PLEX8 |
| 2.92E-01 0 0 | Cs5g18500.1          | 4.65 | 0 |      | 0 | 2 | MASCOT | T |       |
| 2.40E-01 0 0 | Cs5g18500.1          | 4.65 | 0 |      | 0 | 2 | MASCOT | T |       |
| 4.43E-01 0 0 | Cs5g18500.1          | 4.65 | 0 |      | 0 | 2 | MASCOT | T | PLEX8 |
| 1.98E-01 0 0 | Cs5g18500.1          | 4.65 | 0 |      | 0 | 2 | MASCOT | T | PLEX8 |
| 1.91E-02 0 0 | Cs5g18500.1          | 4.65 | 0 |      | 0 | 2 | MASCOT | T |       |
| 6.61E-02 0 0 | Cs5g18500.1          | 4.65 | 0 |      | 0 | 2 | MASCOT | T |       |
| 3.29E-01 0 0 | Cs5g18500.1          | 4.65 | 0 |      | 0 | 2 | MASCOT | T |       |
| 8.66E-03 0 0 | Cs5g18500.1/orange1. | 4.25 | 0 |      | 0 | 2 | MASCOT | T | PLEX8 |
| 1.33E-02 0 0 | Cs5g18500.1/orange1. | 4.25 | 0 |      | 0 | 2 | MASCOT | T | PLEX8 |
| 1.08E-02 0 0 | Cs5g18500.1/orange1. | 4.25 | 0 |      | 0 | 2 | MASCOT | T | PLEX8 |
| 1.10E-02 0 0 | Cs5g18500.1/orange1. | 4.25 | 0 |      | 0 | 2 | MASCOT | T | PLEX8 |
| 2.20E-02 0 0 | Cs5g18500.1/orange1. | 4.25 | 0 |      | 0 | 2 | MASCOT | T | PLEX8 |
| 1.12E-01 0 0 | Cs5g18500.1          | 6    | 0 |      | 0 | 2 | MASCOT | T | PLEX8 |
| 3.41E-03 0 0 | Cs5g18500.1          | 6    | 0 |      | 0 | 2 | MASCOT | T | PLEX8 |
| 6.63E-04 0 0 | Cs5g18500.1          | 6    | 0 |      | 0 | 2 | MASCOT | T | PLEX8 |
| 3.18E-03 0 0 | Cs5g18500.1          | 6    | 0 |      | 0 | 2 | MASCOT | T | PLEX8 |
| 1.16E-03 0 0 | Cs5g18500.1          | 6    | 0 |      | 0 | 2 | MASCOT | T | PLEX8 |
| 2.12E-02 0 0 | Cs5g18500.1          | 6    | 0 |      | 0 | 2 | MASCOT | T | PLEX8 |
| 1.13E-01 0 0 | Cs5g18500.1          | 3.93 | 0 |      | 0 | 2 | MASCOT | T | PLEX8 |
| 3.71E-02 0 0 | Cs5g18500.1          | 3.93 | 0 |      | 0 | 2 | MASCOT | T | PLEX8 |
| 1.91E-01 0 0 | Cs5g18500.1          | 3.93 | 0 |      | 0 | 2 | MASCOT | T |       |
| 4.30E-03 0 0 | Cs5g18500.1          | 3.93 | 0 |      | 0 | 2 | MASCOT | T |       |
| 8.70E-03 0 0 | Cs5g18500.1          | 3.93 | 0 |      | 0 | 2 | MASCOT | T |       |
| 7.82E-03 0 0 | Cs5g18500.1          | 3.93 | 0 |      | 0 | 2 | MASCOT | T |       |
| 1.92E-02 0 0 | Cs5g18500.1          | 3.93 | 0 |      | 0 | 2 | MASCOT | T |       |
| 5.73E-03 0 0 | Cs5g18500.1          | 3.93 | 0 |      | 0 | 2 | MASCOT | T |       |
| 8.33E-03 0 0 | Cs5g18500.1          | 3.93 | 0 |      | 0 | 2 | MASCOT | T |       |
| 4.14E-02 0 0 | Cs5g18500.1          | 3.93 | 0 |      | 0 | 2 | MASCOT | T | PLEX8 |
| 1.53E-01 0 0 | Cs5g18500.1          | 5.84 | 0 |      | 0 | 2 | MASCOT | T | PLEX8 |
| 1.34E-02 0 0 | Cs5g18500.1          | 4.25 | 1 |      | 0 | 2 | MASCOT | T | PLEX8 |
| 3.18E-02 0 0 | Cs5g18500.1          | 4.25 | 1 |      | 0 | 2 | MASCOT | T | PLEX8 |
| 1.99E-02 0 0 | Cs5g18500.1          | 4.25 | 1 |      | 0 | 2 | MASCOT | T | PLEX8 |
| 3.01E-02 0 0 | Cs5g18500.1          | 4.37 | 0 | 15.9 | 0 | 2 | MASCOT | T |       |
| 5.58E-02 0 0 | Cs5g18500.1          | 4.37 | 0 |      | 0 | 2 | MASCOT | T |       |
| 7.37E-03 0 0 | Cs5g18500.1          | 4.37 | 0 |      | 0 | 2 | MASCOT | T |       |
| 1.52E-02 0 0 | Cs5g18500.1          | 4.37 | 0 |      | 0 | 2 | MASCOT | T |       |
| 3.29E-02 0 0 | Cs5g18500.1          | 4.37 | 0 |      | 0 | 2 | MASCOT | T | PLEX8 |
| 1.65E-02 0 0 | Cs5g18500.1          | 4.37 | 0 |      | 0 | 2 | MASCOT | T |       |
| 9.50E-02 0 0 | Cs5g18500.1          | 4.25 | 0 |      | 0 | 2 | MASCOT | T |       |
| 1.36E-02 0 0 | Cs5g18500.1          | 4.25 | 0 |      | 0 | 2 | MASCOT | T |       |

|          |     |                   |      |        |   |   |        |         |
|----------|-----|-------------------|------|--------|---|---|--------|---------|
| 1.13E-02 | 0 0 | Cs5g18500.1       | 4.25 | 0      | 0 | 2 | MASCOT | T       |
| 1.12E-04 | 0 0 | Cs5g18500.1       | 4.25 | 0      | 0 | 2 | MASCOT | T       |
| 2.25E-03 | 0 0 | Cs5g18500.1       | 4.25 | 0      | 0 | 2 | MASCOT | T       |
| 4.67E-03 | 0 0 | Cs5g18500.1       | 4.25 | 0      | 0 | 2 | MASCOT | T       |
| 6.33E-04 | 0 0 | Cs5g18500.1       | 4.14 | 0      | 0 | 2 | MASCOT | T PLEX8 |
| 4.98E-02 | 0 0 | Cs5g18500.1       | 4.14 | 0      | 0 | 2 | MASCOT | T PLEX8 |
| 1.73E-05 | 0 0 | Cs5g18500.1       | 4.14 | 0      | 0 | 2 | MASCOT | T PLEX8 |
| 6.11E-03 | 0 0 | Cs5g18500.1       | 4.14 | 0      | 0 | 2 | MASCOT | T PLEX8 |
| 1.00E-03 | 0 0 | Cs5g18500.1       | 4.14 | 0      | 0 | 2 | MASCOT | T PLEX8 |
| 6.87E-02 | 0 0 | Cs5g18500.1       | 4.14 | 0      | 0 | 2 | MASCOT | T PLEX8 |
| 4.46E-06 | 0 0 | Cs5g18500.1       | 4.14 | 0      | 0 | 2 | MASCOT | T PLEX8 |
| 8.83E-04 | 0 0 | Cs5g18500.1       | 4.14 | 0      | 0 | 2 | MASCOT | T PLEX8 |
| 6.95E-02 | 0 0 | Cs5g18500.1       | 4.14 | 0      | 0 | 2 | MASCOT | T PLEX8 |
| 4.19E-05 | 0 0 | Cs5g18500.1       | 4.14 | 0      | 0 | 2 | MASCOT | T PLEX8 |
| 8.29E-03 | 0 0 | Cs5g18500.1       | 4.14 | 0      | 0 | 2 | MASCOT | T PLEX8 |
| 7.01E-03 | 0 0 | orange1.1t02015.1 | 4.37 | 0      | 0 | 2 | MASCOT | T PLEX8 |
| 1.74E-01 | 0 0 | orange1.1t02015.1 | 4.37 | 0      | 0 | 2 | MASCOT | T PLEX8 |
| 2.41E-02 | 0 0 | orange1.1t02015.1 | 4.37 | 0      | 0 | 2 | MASCOT | T PLEX8 |
| 7.69E-02 | 0 0 | orange1.1t02015.1 | 4.37 | 0      | 0 | 2 | MASCOT | T PLEX8 |
| 9.30E-02 | 0 0 | orange1.1t02015.1 | 4.37 | 0      | 0 | 2 | MASCOT | T PLEX8 |
| 4.77E-02 | 0 0 | orange1.1t02015.1 | 4.37 | 0      | 0 | 2 | MASCOT | T PLEX8 |
| 1.25E-01 | 0 0 | orange1.1t02015.1 | 4.37 | 0      | 0 | 2 | MASCOT | T PLEX8 |
| 3.21E-02 | 0 0 | orange1.1t02015.1 | 4.37 | 0      | 0 | 2 | MASCOT | T PLEX8 |
| 1.54E-01 | 0 0 | orange1.1t02015.1 | 3.93 | 0      | 0 | 2 | MASCOT | T PLEX8 |
| 3.71E-02 | 0 0 | orange1.1t02015.1 | 4.41 | 1      | 0 | 2 | MASCOT | T PLEX8 |
| 8.35E-03 | 0 0 | orange1.1t02015.1 | 4.41 | 1      | 0 | 2 | MASCOT | T PLEX8 |
| 1.71E-02 | 0 0 | orange1.1t02015.1 | 4.41 | 1      | 0 | 2 | MASCOT | T       |
| 4.45E-01 | 0 0 | orange1.1t02015.1 | 4.21 | 0      | 0 | 2 | MASCOT | T PLEX8 |
| 1.92E-01 | 0 0 | orange1.1t02015.1 | 4.21 | 0      | 0 | 2 | MASCOT | T PLEX8 |
| 2.02E-02 | 0 0 | orange1.1t02015.1 | 3.92 | 0      | 0 | 2 | MASCOT | T PLEX8 |
| 3.49E-01 | 0 0 | orange1.1t02015.1 | 4.53 | 0      | 0 | 2 | MASCOT | T PLEX8 |
| 3.26E-03 | 0 0 | orange1.1t02015.1 | 4.53 | 0      | 0 | 2 | MASCOT | T PLEX8 |
| 2.92E-04 | 0 0 | orange1.1t02015.1 | 4.53 | 0      | 0 | 2 | MASCOT | T PLEX8 |
| 2.60E-04 | 0 0 | orange1.1t02015.1 | 4.53 | 0      | 0 | 2 | MASCOT | T PLEX8 |
| 4.83E-04 | 0 0 | orange1.1t02015.1 | 4.53 | 0      | 0 | 2 | MASCOT | T PLEX8 |
| 6.29E-03 | 0 0 | orange1.1t02015.1 | 4.21 | 0      | 0 | 2 | MASCOT | T       |
| 3.84E-03 | 0 0 | orange1.1t02015.1 | 8.59 | 0 15.9 | 0 | 2 | MASCOT | T PLEX8 |
| 6.06E-02 | 0 0 | orange1.1t02015.1 | 8.59 | 0 15.9 | 0 | 2 | MASCOT | T PLEX8 |
| 2.68E-01 | 0 0 | orange1.1t02015.1 | 8.59 | 0 15.9 | 0 | 2 | MASCOT | T PLEX8 |
| 3.75E-01 | 0 0 | orange1.1t02015.1 | 8.59 | 0      | 0 | 2 | MASCOT | T PLEX8 |
| 1.27E-01 | 0 0 | orange1.1t02015.1 | 8.59 | 0      | 0 | 2 | MASCOT | T PLEX8 |
| 1.73E-03 | 0 0 | orange1.1t02015.1 | 8.59 | 0      | 0 | 2 | MASCOT | T PLEX8 |
| 1.94E-03 | 0 0 | orange1.1t02015.1 | 8.59 | 0      | 0 | 2 | MASCOT | T PLEX8 |
| 1.31E-04 | 0 0 | orange1.1t02015.1 | 8.59 | 0      | 0 | 2 | MASCOT | T PLEX8 |
| 8.75E-02 | 0 0 | orange1.1t02015.1 | 8.59 | 0      | 0 | 2 | MASCOT | T PLEX8 |
| 2.00E-04 | 0 0 | orange1.1t02015.1 | 8.59 | 0      | 0 | 2 | MASCOT | T PLEX8 |
| 1.71E-01 | 0 0 | orange1.1t02015.1 | 8.59 | 0      | 0 | 2 | MASCOT | T PLEX8 |
| 2.76E-04 | 0 0 | orange1.1t02015.1 | 8.59 | 0      | 0 | 2 | MASCOT | T PLEX8 |
| 1.14E-03 | 0 0 | orange1.1t02015.1 | 4.37 | 0 15.9 | 0 | 2 | MASCOT | T       |
| 3.69E-02 | 0 0 | orange1.1t02015.1 | 4.37 | 0 15.9 | 0 | 2 | MASCOT | T       |
| 5.36E-01 | 0 0 | orange1.1t02015.1 | 4.37 | 0 15.9 | 0 | 2 | MASCOT | T       |

|          |     |                   |      |   |      |          |          |       |
|----------|-----|-------------------|------|---|------|----------|----------|-------|
| 1.98E-02 | 0 0 | orange1.1t02015.1 | 4.37 | 0 | 0    | 2 MASCOT | T        | PLEX8 |
| 2.42E-03 | 0 0 | orange1.1t02015.1 | 4.37 | 0 | 0    | 2 MASCOT | T        |       |
| 2.78E-02 | 0 0 | orange1.1t02015.1 | 4.37 | 0 | 0    | 2 MASCOT | T        | PLEX8 |
| 2.72E-01 | 0 0 | orange1.1t02015.1 | 4.37 | 0 | 0    | 2 MASCOT | T        |       |
| 1.02E-01 | 0 0 | orange1.1t02015.1 | 4.37 | 0 | 0    | 2 MASCOT | T        |       |
| 2.39E-02 | 0 0 | orange1.1t02015.1 | 4.37 | 0 | 0    | 2 MASCOT | T        |       |
| 1.42E-01 | 0 0 | orange1.1t02015.1 | 4.37 | 0 | 0    | 2 MASCOT | T        |       |
| 1.68E-01 | 0 0 | orange1.1t02015.1 | 4.37 | 0 | 0    | 2 MASCOT | T        |       |
| 1.81E-03 | 0 0 | orange1.1t02015.1 | 4.37 | 0 | 0    | 2 MASCOT | T        |       |
| 1.06E-02 | 0 0 | orange1.1t02015.1 | 4.37 | 0 | 0    | 2 MASCOT | T        |       |
| 3.72E-01 | 0 0 | orange1.1t02015.1 | 4.37 | 0 | 0    | 2 MASCOT | T        |       |
| 3.34E-02 | 0 0 | orange1.1t02015.1 | 4.37 | 0 | 0    | 2 MASCOT | T        | PLEX8 |
| 5.18E-03 | 0 0 | orange1.1t02015.1 | 4.37 | 0 | 0    | 2 MASCOT | T        | PLEX8 |
| 3.73E-01 | 0 0 | orange1.1t02015.1 | 9.72 | 0 | 0    | 2 MASCOT | T        |       |
| 1.06E-02 | 0 0 | orange1.1t02015.1 | 9.72 | 0 | 0    | 2 MASCOT | T        | PLEX8 |
| 4.16E-04 | 0 0 | orange1.1t02015.1 | 9.72 | 0 | 0    | 2 MASCOT | T        | PLEX8 |
| 8.05E-02 | 0 0 | orange1.1t02015.1 | 9.72 | 0 | 0    | 2 MASCOT | T        | PLEX8 |
| 2.38E-01 | 0 0 | orange1.1t02015.1 | 9.72 | 0 | 0    | 2 MASCOT | T        | PLEX8 |
| 9.49E-02 | 0 0 | orange1.1t02015.1 | 9.72 | 0 | 0    | 2 MASCOT | T        | PLEX8 |
| 1.75E-01 | 0 0 | orange1.1t02015.1 | 9.72 | 0 | 0    | 2 MASCOT | T        | PLEX8 |
| 8.46E-02 | 0 0 | orange1.1t02015.1 | 9.72 | 0 | 0    | 2 MASCOT | T        | PLEX8 |
| 3.81E-02 | 0 0 | orange1.1t02015.1 | 9.72 | 0 | 0    | 2 MASCOT | T        | PLEX8 |
| 1.15E-01 | 0 0 | orange1.1t02015.1 | 9.72 | 0 | 0    | 2 MASCOT | T        | PLEX8 |
| 8.79E-02 | 0 0 | orange1.1t02015.1 | 9.72 | 0 | 0    | 2 MASCOT | T        | PLEX8 |
| 7.72E-02 | 0 0 | orange1.1t02015.1 | 9.72 | 0 | 0    | 2 MASCOT | T        | PLEX8 |
| 6.80E-02 | 0 0 | orange1.1t02015.1 | 9.72 | 0 | 0    | 2 MASCOT | T        | PLEX8 |
| 1.75E-01 | 0 0 | orange1.1t02015.1 | 9.72 | 0 | 0    | 2 MASCOT | T        | PLEX8 |
| 5.17E-02 | 0 0 | orange1.1t02015.1 | 9.72 | 0 | 0    | 2 MASCOT | T        | PLEX8 |
| 6.19E-02 | 0 0 | orange1.1t02015.1 | 9.72 | 0 | 0    | 2 MASCOT | T        | PLEX8 |
| 1.47E-01 | 0 0 | orange1.1t02015.1 | 9.72 | 0 | 0    | 2 MASCOT | T        | PLEX8 |
| 1.43E-01 | 0 0 | orange1.1t02623.1 | 5.88 | 0 | 0    | 2 MASCOT | T        | PLEX8 |
| 7.71E-04 | 0 0 | orange1.1t02623.1 | 5.88 | 0 | 0    | 2 MASCOT | T        | PLEX8 |
| 5.09E-03 | 0 0 | orange1.1t02623.1 | 5.88 | 0 | 0    | 2 MASCOT | T        | PLEX8 |
| 3.27E-05 | 0 0 | orange1.1t02623.1 | 5.88 | 0 | 0    | 2 MASCOT | T        | PLEX8 |
| 8.44E-02 | 0 0 | orange1.1t02623.1 | 5.88 | 0 | 0    | 2 MASCOT | T        | PLEX8 |
| 1.60E-05 | 0 0 | orange1.1t02623.1 | 5.88 | 0 | 0    | 2 MASCOT | T        | PLEX8 |
| 1.24E-02 | 0 0 | orange1.1t02623.1 | 5.88 | 0 | 0    | 2 MASCOT | T        | PLEX8 |
| 3.10E-01 | 0 0 | orange1.1t02623.1 | 5.88 | 0 | 0    | 2 MASCOT | T        |       |
| 6.11E-04 | 0 0 | orange1.1t02623.1 | 5.88 | 0 | 0    | 2 MASCOT | T        |       |
| 2.53E-03 | 0 0 | orange1.1t02623.1 | 5.88 | 0 | 0    | 2 MASCOT | T        |       |
| 7.30E-03 | 0 0 | orange1.1t02623.1 | 5.88 | 0 | 0    | 2 MASCOT | T        |       |
| 8.11E-04 | 0 0 | orange1.1t02623.1 | 5.88 | 0 | 0    | 2 MASCOT | T        |       |
| 5.70E-07 | 0 0 | orange1.1t02623.1 | 5.88 | 0 | 0    | 2 MASCOT | T        |       |
| 1.43E-05 | 0 0 | orange1.1t02623.1 | 5.88 | 0 | 0    | 2 MASCOT | T        | PLEX8 |
| 5.94E-03 | 0 0 | orange1.1t02623.1 | 5.88 | 0 | 0    | 2 MASCOT | T        | PLEX8 |
| 2.43E-01 | 0 0 | orange1.1t02623.1 | 6.1  | 0 | 15.9 | 0        | 2 MASCOT | T     |
| 6.55E-03 | 0 0 | orange1.1t02623.1 | 6.1  | 0 | 15.9 | 0        | 2 MASCOT | T     |
| 1.47E-02 | 0 0 | orange1.1t02623.1 | 6.1  | 0 | 0    | 2 MASCOT | T        |       |
| 4.93E-02 | 0 0 | orange1.1t02623.1 | 6.1  | 0 | 0    | 2 MASCOT | T        |       |
| 1.98E-01 | 0 0 | orange1.1t02623.1 | 4.53 | 0 | 0    | 2 MASCOT | T        | PLEX8 |
| 1.83E-01 | 0 0 | orange1.1t02623.1 | 4.53 | 0 | 0    | 2 MASCOT | T        | PLEX8 |



|          |     |                     |      |   |      |   |        |        |       |
|----------|-----|---------------------|------|---|------|---|--------|--------|-------|
| 2.52E-01 | 0 0 | orange1.1t02623.1   | 5.99 | 0 | 0    | 2 | MASCOT | T      | PLEX8 |
| 7.48E-02 | 0 0 | orange1.1t02623.1   | 5.99 | 0 | 0    | 2 | MASCOT | T      | PLEX8 |
| 1.04E-02 | 0 0 | orange1.1t02623.1   | 5.99 | 0 | 0    | 2 | MASCOT | T      | PLEX8 |
| 2.08E-01 | 0 0 | orange1.1t02623.1   | 8.75 | 0 | 0    | 2 | MASCOT | T      | PLEX8 |
| 3.87E-03 | 0 0 | orange1.1t02623.1   | 8.75 | 0 | 0    | 2 | MASCOT | T      |       |
| 3.16E-02 | 0 0 | orange1.1t02623.1   | 8.75 | 0 | 0    | 2 | MASCOT | T      |       |
| 2.88E-03 | 0 0 | orange1.1t02623.1   | 4.37 | 0 | 0    | 2 | MASCOT | T      | PLEX8 |
| 5.23E-01 | 0 0 | orange1.1t02623.1   | 4.37 | 0 | 0    | 2 | MASCOT | T      | PLEX8 |
| 7.96E-02 | 0 0 | orange1.1t02623.1   | 4.37 | 0 | 0    | 2 | MASCOT | T      | PLEX8 |
| 7.17E-02 | 0 0 | orange1.1t02623.1   | 4.37 | 0 | 0    | 2 | MASCOT | T      | PLEX8 |
| 9.28E-06 | 0 0 | orange1.1t02623.1   | 4.37 | 0 | 0    | 2 | MASCOT | T      | PLEX8 |
| 1.59E-04 | 0 0 | orange1.1t02623.1   | 4.37 | 0 | 0    | 2 | MASCOT | T      |       |
| 7.76E-04 | 0 0 | orange1.1t02623.1   | 4.37 | 0 | 0    | 2 | MASCOT | T      | PLEX8 |
| 2.04E-03 | 0 0 | orange1.1t02623.1   | 4.37 | 0 | 0    | 2 | MASCOT | T      | PLEX8 |
| 1.03E-03 | 0 0 | orange1.1t02623.1   | 4.37 | 0 | 0    | 2 | MASCOT | T      | PLEX8 |
| 1.59E-03 | 0 0 | orange1.1t02623.1   | 4.37 | 0 | 0    | 2 | MASCOT | T      |       |
| 1.88E-03 | 0 0 | orange1.1t02623.1   | 4.53 | 0 | 0    | 2 | MASCOT | T      | PLEX8 |
| 4.29E-03 | 0 0 | orange1.1t02623.1   | 4.53 | 0 | 0    | 2 | MASCOT | T      | PLEX8 |
| 7.76E-04 | 0 0 | orange1.1t02623.1   | 4.53 | 0 | 0    | 2 | MASCOT | T      | PLEX8 |
| 4.65E-02 | 0 0 | orange1.1t02623.1   | 4.53 | 0 | 0    | 2 | MASCOT | T      | PLEX8 |
| 1.96E-01 | 0 0 | orange1.1t02623.1   | 4.53 | 0 | 0    | 2 | MASCOT | T      | PLEX8 |
| 4.27E-02 | 0 0 | orange1.1t02623.1   | 4.53 | 0 | 0    | 2 | MASCOT | T      | PLEX8 |
| 2.12E-04 | 0 0 | orange1.1t02623.1   | 4.53 | 0 | 0    | 2 | MASCOT | T      | PLEX8 |
| 4.04E-02 | 0 0 | orange1.1t02623.1   | 5.55 | 0 | 0    | 2 | MASCOT | T      | PLEX8 |
| 2.36E-02 | 0 0 | orange1.1t02623.1   | 5.55 | 0 | 0    | 2 | MASCOT | T      | PLEX8 |
| 1.87E-02 | 0 0 | orange1.1t02623.1   | 5.55 | 0 | 0    | 2 | MASCOT | T      | PLEX8 |
| 4.37E-03 | 0 0 | orange1.1t02623.1   | 5.55 | 0 | 0    | 2 | MASCOT | T      | PLEX8 |
| 1.26E-02 | 0 0 | orange1.1t02623.1   | 5.55 | 0 | 0    | 2 | MASCOT | T      | PLEX8 |
| 1.48E-04 | 0 0 | orange1.1t02623.1   | 5.55 | 0 | 0    | 2 | MASCOT | T      | PLEX8 |
| 3.14E-06 | 0 0 | orange1.1t02623.1   | 5.55 | 0 | 0    | 2 | MASCOT | T      | PLEX8 |
| 9.28E-03 | 0 0 | orange1.1t02623.1   | 5.55 | 0 | 0    | 2 | MASCOT | T      | PLEX8 |
| 1.58E-01 | 0 0 | orange1.1t02623.1   | 5.55 | 0 | 0    | 2 | MASCOT | T      | PLEX8 |
| 2.24E-01 | 0 0 | orange1.1t02623.1   | 5.55 | 0 | 0    | 2 | MASCOT | T      |       |
| 5.35E-03 | 0 0 | orange1.1t02623.1   | 5.55 | 0 | 0    | 2 | MASCOT | T      | PLEX8 |
| 4.32E-03 | 0 0 | orange1.1t02623.1   | 5.55 | 0 | 0    | 2 | MASCOT | T      |       |
| 9.72E-04 | 0 0 | orange1.1t02623.1   | 6    | 0 | 15.9 | 0 | 2      | MASCOT | T     |
| 1.21E-06 | 0 0 | orange1.1t02623.1   | 6    | 0 | 15.9 | 0 | 2      | MASCOT | T     |
| 2.26E-03 | 0 0 | orange1.1t02623.1   | 6    | 0 | 0    | 2 | MASCOT | T      |       |
| 2.04E-05 | 0 0 | orange1.1t02623.1   | 6    | 0 | 0    | 2 | MASCOT | T      |       |
| 7.72E-09 | 0 0 | orange1.1t02623.1   | 6    | 0 | 0    | 2 | MASCOT | T      |       |
| 1.18E-01 | 0 0 | orange1.1t02623.1   | 6.14 | 1 | 0    | 2 | MASCOT | T      | PLEX8 |
| 1.15E-01 | 0 0 | Cs1g11670.1/Cs1g116 | 6.05 | 0 | 0    | 2 | MASCOT | T      | PLEX8 |
| 9.53E-02 | 0 0 | Cs1g11670.1/Cs1g116 | 4.21 | 0 | 0    | 2 | MASCOT | T      | PLEX8 |
| 1.28E-02 | 0 0 | Cs1g11670.1/Cs1g116 | 4.21 | 0 | 0    | 2 | MASCOT | T      | PLEX8 |
| 2.56E-03 | 0 0 | Cs1g11670.1/Cs1g116 | 4.21 | 0 | 0    | 2 | MASCOT | T      | PLEX8 |
| 3.52E-01 | 0 0 | Cs1g11670.1/Cs1g116 | 4.21 | 0 | 0    | 2 | MASCOT | T      | PLEX8 |
| 2.88E-02 | 0 0 | Cs1g11670.1/Cs1g116 | 4.21 | 0 | 0    | 2 | MASCOT | T      | PLEX8 |
| 2.33E-02 | 0 0 | Cs1g11670.1/Cs1g116 | 4.21 | 0 | 0    | 2 | MASCOT | T      | PLEX8 |
| 2.80E-01 | 0 0 | Cs1g11670.1/Cs1g116 | 4.21 | 0 | 0    | 2 | MASCOT | T      | PLEX8 |
| 8.09E-02 | 0 0 | Cs1g11670.1/Cs1g116 | 4.21 | 0 | 0    | 2 | MASCOT | T      |       |
| 1.13E-01 | 0 0 | Cs1g11670.1/Cs1g116 | 8.76 | 0 | 0    | 2 | MASCOT | T      | PLEX8 |

|          |     |                     |      |   |      |   |        |        |       |       |
|----------|-----|---------------------|------|---|------|---|--------|--------|-------|-------|
| 1.30E-01 | 0 0 | Cs1g11670.1/Cs1g116 | 8.76 | 0 | 0    | 2 | MASCOT | T      | PLEX8 |       |
| 1.96E-01 | 0 0 | Cs1g11670.1/Cs1g116 | 8.76 | 0 | 0    | 2 | MASCOT | T      | PLEX8 |       |
| 2.39E-01 | 0 0 | Cs1g11670.1/Cs1g116 | 8.76 | 0 | 0    | 2 | MASCOT | T      |       |       |
| 1.73E-01 | 0 0 | Cs1g11670.1/Cs1g116 | 8.76 | 0 | 0    | 2 | MASCOT | T      | PLEX8 |       |
| 3.03E-01 | 0 0 | Cs1g11670.1/Cs1g116 | 5.83 | 0 | 0    | 2 | MASCOT | T      | PLEX8 |       |
| 5.13E-04 | 0 0 | Cs1g11670.1/Cs1g116 | 4.25 | 0 | 15.9 | 0 | 2      | MASCOT | T     | PLEX8 |
| 7.44E-04 | 0 0 | Cs1g11670.1/Cs1g116 | 4.25 | 0 | 15.9 | 0 | 2      | MASCOT | T     | PLEX8 |
| 2.67E-02 | 0 0 | Cs1g11670.1/Cs1g116 | 4.25 | 0 | 15.9 | 0 | 2      | MASCOT | T     | PLEX8 |
| 6.50E-03 | 0 0 | Cs1g11670.1/Cs1g116 | 4.25 | 0 | 0    | 2 | MASCOT | T      | PLEX8 |       |
| 7.69E-02 | 0 0 | Cs1g11670.1/Cs1g116 | 4.25 | 0 | 0    | 2 | MASCOT | T      | PLEX8 |       |
| 3.19E-03 | 0 0 | Cs1g11670.1/Cs1g116 | 4.25 | 0 | 0    | 2 | MASCOT | T      | PLEX8 |       |
| 1.68E-03 | 0 0 | Cs1g11670.1/Cs1g116 | 5.84 | 0 | 0    | 2 | MASCOT | T      | PLEX8 |       |
| 1.87E-05 | 0 0 | Cs1g11670.1/Cs1g116 | 5.84 | 0 | 0    | 2 | MASCOT | T      | PLEX8 |       |
| 5.81E-02 | 0 0 | Cs1g11670.1/Cs1g116 | 5.84 | 0 | 0    | 2 | MASCOT | T      | PLEX8 |       |
| 2.61E-06 | 0 0 | Cs1g11670.1/Cs1g116 | 5.84 | 0 | 0    | 2 | MASCOT | T      | PLEX8 |       |
| 1.77E-01 | 0 0 | Cs1g11670.1/Cs1g116 | 5.84 | 0 | 0    | 2 | MASCOT | T      | PLEX8 |       |
| 2.74E-02 | 0 0 | Cs1g11670.1/Cs1g116 | 5.84 | 0 | 0    | 2 | MASCOT | T      | PLEX8 |       |
| 1.67E-01 | 0 0 | Cs1g11670.1/Cs1g116 | 5.84 | 0 | 0    | 2 | MASCOT | T      | PLEX8 |       |
| 4.56E-01 | 0 0 | Cs1g11670.1/Cs1g116 | 5.84 | 0 | 0    | 2 | MASCOT | T      | PLEX8 |       |
| 4.80E-03 | 0 0 | Cs1g11670.1/Cs1g116 | 5.84 | 0 | 0    | 2 | MASCOT | T      | PLEX8 |       |
| 4.70E-02 | 0 0 | Cs1g11670.1/Cs1g116 | 5.84 | 0 | 0    | 2 | MASCOT | T      | PLEX8 |       |
| 2.65E-02 | 0 0 | Cs1g11670.1/Cs1g116 | 5.84 | 0 | 0    | 2 | MASCOT | T      | PLEX8 |       |
| 2.46E-04 | 0 0 | Cs1g11670.1/Cs1g116 | 5.84 | 0 | 0    | 2 | MASCOT | T      | PLEX8 |       |
| 9.90E-04 | 0 0 | Cs1g11670.1/Cs1g116 | 5.84 | 0 | 0    | 2 | MASCOT | T      | PLEX8 |       |
| 7.87E-02 | 0 0 | Cs1g11670.1/Cs1g116 | 5.84 | 0 | 0    | 2 | MASCOT | T      | PLEX8 |       |
| 2.64E-01 | 0 0 | Cs1g11670.1/Cs1g116 | 5.4  | 0 | 0    | 2 | MASCOT | T      | PLEX8 |       |
| 4.00E-03 | 0 0 | Cs1g11670.1/Cs1g116 | 5.4  | 0 | 0    | 2 | MASCOT | T      | PLEX8 |       |
| 3.29E-01 | 0 0 | Cs1g11670.1/Cs1g116 | 5.4  | 0 | 0    | 2 | MASCOT | T      | PLEX8 |       |
| 2.39E-01 | 0 0 | Cs1g11670.1/Cs1g116 | 5.4  | 0 | 0    | 2 | MASCOT | T      | PLEX8 |       |
| 1.05E-01 | 0 0 | Cs1g11670.1/Cs1g116 | 5.4  | 0 | 0    | 2 | MASCOT | T      | PLEX8 |       |
| 1.66E-02 | 0 0 | Cs1g11670.1/Cs1g116 | 5.4  | 0 | 0    | 2 | MASCOT | T      | PLEX8 |       |
| 7.32E-02 | 0 0 | Cs1g11670.1/Cs1g116 | 5.4  | 0 | 0    | 2 | MASCOT | T      | PLEX8 |       |
| 6.59E-02 | 0 0 | Cs1g11670.1/Cs1g116 | 5.4  | 0 | 0    | 2 | MASCOT | T      | PLEX8 |       |
| 2.84E-01 | 0 0 | Cs1g11670.1/Cs1g116 | 8.69 | 0 | 0    | 2 | MASCOT | T      | PLEX8 |       |
| 1.89E-03 | 0 0 | Cs1g11670.1/Cs1g116 | 8.69 | 0 | 0    | 2 | MASCOT | T      | PLEX8 |       |
| 6.80E-02 | 0 0 | Cs1g11670.1/Cs1g116 | 8.69 | 0 | 0    | 2 | MASCOT | T      | PLEX8 |       |
| 2.25E-02 | 0 0 | Cs1g11670.1/Cs1g116 | 5.5  | 0 | 0    | 2 | MASCOT | T      | PLEX8 |       |
| 3.35E-02 | 0 0 | Cs1g11670.1/Cs1g116 | 5.5  | 0 | 0    | 2 | MASCOT | T      | PLEX8 |       |
| 1.63E-02 | 0 0 | Cs1g11670.1/Cs1g116 | 5.5  | 0 | 0    | 2 | MASCOT | T      | PLEX8 |       |
| 5.50E-03 | 0 0 | Cs1g11670.1/Cs1g116 | 5.5  | 0 | 0    | 2 | MASCOT | T      | PLEX8 |       |
| 9.45E-03 | 0 0 | Cs1g11670.1/Cs1g116 | 5.5  | 0 | 0    | 2 | MASCOT | T      | PLEX8 |       |
| 1.08E-03 | 0 0 | Cs1g11670.1/Cs1g116 | 5.5  | 0 | 0    | 2 | MASCOT | T      | PLEX8 |       |
| 8.58E-02 | 0 0 | Cs1g11670.1/Cs1g116 | 5.5  | 0 | 0    | 2 | MASCOT | T      | PLEX8 |       |
| 7.28E-03 | 0 0 | Cs1g11670.1/Cs1g116 | 5.5  | 0 | 0    | 2 | MASCOT | T      | PLEX8 |       |
| 3.97E-01 | 0 0 | Cs1g11670.1/Cs1g116 | 5.5  | 0 | 0    | 2 | MASCOT | T      | PLEX8 |       |
| 8.16E-02 | 0 0 | Cs1g11670.1/Cs1g116 | 5.97 | 0 | 0    | 2 | MASCOT | T      | PLEX8 |       |
| 4.34E-02 | 0 0 | Cs1g11670.1/Cs1g116 | 5.97 | 0 | 0    | 2 | MASCOT | T      | PLEX8 |       |
| 3.97E-03 | 0 0 | Cs6g17520.1         | 9.8  | 0 | 0    | 2 | MASCOT | T      | PLEX8 |       |
| 7.59E-03 | 0 0 | Cs6g17520.1         | 6.1  | 0 | 0    | 2 | MASCOT | T      | PLEX8 |       |
| 1.11E-01 | 0 0 | Cs6g17520.1         | 6.1  | 0 | 0    | 2 | MASCOT | T      | PLEX8 |       |
| 2.30E-03 | 0 0 | Cs6g17520.1         | 6.1  | 0 | 0    | 2 | MASCOT | T      | PLEX8 |       |

|              |                     |      |        |   |          |   |       |
|--------------|---------------------|------|--------|---|----------|---|-------|
| 2.75E-02 0 0 | Cs6g17520.1         | 6.1  | 0      | 0 | 2 MASCOT | T | PLEX8 |
| 2.49E-01 0 0 | Cs6g17520.1         | 6.74 | 0 15.9 | 0 | 2 MASCOT | T | PLEX8 |
| 1.26E-01 0 0 | Cs6g17520.1         | 6.74 | 0 15.9 | 0 | 2 MASCOT | T | PLEX8 |
| 7.90E-02 0 0 | Cs6g17520.1         | 6.74 | 0      | 0 | 2 MASCOT | T | PLEX8 |
| 2.01E-01 0 0 | Cs6g17520.1         | 6.07 | 0      | 0 | 2 MASCOT | T |       |
| 8.02E-02 0 0 | Cs6g17520.1         | 6.74 | 0      | 0 | 2 MASCOT | T | PLEX8 |
| 7.55E-04 0 0 | Cs6g17520.1         | 6.74 | 0      | 0 | 2 MASCOT | T | PLEX8 |
| 5.42E-03 0 0 | Cs6g17520.1         | 6.74 | 0      | 0 | 2 MASCOT | T | PLEX8 |
| 1.46E-02 0 0 | Cs6g17520.1         | 5.5  | 0 15.9 | 0 | 2 MASCOT | T | PLEX8 |
| 2.51E-02 0 0 | Cs6g17520.1         | 5.5  | 0 15.9 | 0 | 2 MASCOT | T | PLEX8 |
| 1.91E-02 0 0 | Cs6g17520.1         | 5.5  | 0 15.9 | 0 | 2 MASCOT | T | PLEX8 |
| 5.92E-03 0 0 | Cs6g17520.1         | 5.5  | 0 15.9 | 0 | 2 MASCOT | T | PLEX8 |
| 2.51E-01 0 0 | Cs6g17520.1         | 5.5  | 0 15.9 | 0 | 2 MASCOT | T | PLEX8 |
| 2.20E-02 0 0 | Cs6g17520.1         | 5.5  | 0 15.9 | 0 | 2 MASCOT | T | PLEX8 |
| 4.65E-02 0 0 | Cs6g17520.1         | 5.5  | 0 15.9 | 0 | 2 MASCOT | T | PLEX8 |
| 2.39E-02 0 0 | Cs6g17520.1         | 5.5  | 0      | 0 | 2 MASCOT | T | PLEX8 |
| 1.13E-03 0 0 | Cs6g17520.1         | 5.5  | 0      | 0 | 2 MASCOT | T | PLEX8 |
| 1.09E-02 0 0 | Cs6g17520.1         | 5.5  | 0      | 0 | 2 MASCOT | T | PLEX8 |
| 2.06E-02 0 0 | Cs6g17520.1         | 5.5  | 0      | 0 | 2 MASCOT | T | PLEX8 |
| 9.21E-02 0 0 | Cs6g17520.1         | 5.5  | 0      | 0 | 2 MASCOT | T | PLEX8 |
| 4.43E-04 0 0 | Cs6g17520.1         | 5.5  | 0      | 0 | 2 MASCOT | T | PLEX8 |
| 9.97E-03 0 0 | Cs6g17520.1         | 5.5  | 0      | 0 | 2 MASCOT | T | PLEX8 |
| 5.32E-04 0 0 | Cs6g17520.1         | 5.81 | 0      | 0 | 2 MASCOT | T | PLEX8 |
| 1.67E-03 0 0 | Cs6g17520.1         | 5.81 | 0      | 0 | 2 MASCOT | T | PLEX8 |
| 3.58E-03 0 0 | Cs6g17520.1         | 5.81 | 0      | 0 | 2 MASCOT | T | PLEX8 |
| 1.39E-02 0 0 | Cs6g17520.1         | 5.81 | 0      | 0 | 2 MASCOT | T | PLEX8 |
| 2.46E-01 0 0 | Cs6g17520.1         | 5.81 | 0      | 0 | 2 MASCOT | T | PLEX8 |
| 1.13E-04 0 0 | Cs6g17520.1         | 5.81 | 0      | 0 | 2 MASCOT | T | PLEX8 |
| 9.95E-02 0 0 | Cs6g17520.1         | 5.81 | 0      | 0 | 2 MASCOT | T | PLEX8 |
| 6.60E-02 0 0 | Cs6g17520.1         | 5.81 | 0      | 0 | 2 MASCOT | T | PLEX8 |
| 5.74E-02 0 0 | Cs6g17520.1         | 5.81 | 0      | 0 | 2 MASCOT | T |       |
| 5.34E-03 0 0 | Cs6g17520.1         | 3.92 | 0      | 0 | 2 MASCOT | T |       |
| 2.66E-01 0 0 | Cs6g17520.1         | 6    | 0      | 0 | 2 MASCOT | T | PLEX8 |
| 1.50E-02 0 0 | Cs6g17520.1         | 6    | 0      | 0 | 2 MASCOT | T | PLEX8 |
| 1.34E-04 0 0 | Cs6g17520.1         | 6    | 0      | 0 | 2 MASCOT | T | PLEX8 |
| 4.31E-03 0 0 | Cs6g17520.1         | 6    | 0      | 0 | 2 MASCOT | T | PLEX8 |
| 7.37E-02 0 0 | Cs6g17520.1         | 4.53 | 0      | 0 | 2 MASCOT | T | PLEX8 |
| 1.40E-01 0 0 | Cs6g17520.1         | 4.53 | 0      | 0 | 2 MASCOT | T | PLEX8 |
| 1.15E-02 0 0 | Cs6g17520.1         | 4.53 | 0      | 0 | 2 MASCOT | T | PLEX8 |
| 1.14E-01 0 0 | Cs6g17520.1         | 4.53 | 0      | 0 | 2 MASCOT | T | PLEX8 |
| 1.18E-02 0 0 | Cs6g17520.1         | 4.53 | 0      | 0 | 2 MASCOT | T | PLEX8 |
| 1.16E-01 0 0 | Cs6g17520.1         | 4.53 | 0      | 0 | 2 MASCOT | T | PLEX8 |
| 2.07E-02 0 0 | Cs6g17520.1         | 4.53 | 0      | 0 | 2 MASCOT | T | PLEX8 |
| 7.14E-03 0 0 | Cs6g17520.1         | 4.53 | 0      | 0 | 2 MASCOT | T | PLEX8 |
| 5.42E-02 0 0 | Cs1g20220.1/Cs1g202 | 6.05 | 0      | 0 | 2 MASCOT | T | PLEX8 |
| 1.20E-01 0 0 | Cs1g20220.1/Cs1g202 | 6.05 | 0      | 0 | 2 MASCOT | T | PLEX8 |
| 1.59E-02 0 0 | Cs1g20220.1/Cs1g202 | 6.05 | 0      | 0 | 2 MASCOT | T | PLEX8 |
| 2.17E-01 0 0 | Cs1g20220.1/Cs1g202 | 6.05 | 0      | 0 | 2 MASCOT | T | PLEX8 |
| 4.68E-06 0 0 | Cs1g20220.1/Cs1g202 | 5.21 | 0      | 0 | 2 MASCOT | T | PLEX8 |
| 2.65E-01 0 0 | Cs1g20220.1/Cs1g202 | 5.21 | 0      | 0 | 2 MASCOT | T | PLEX8 |
| 6.28E-07 0 0 | Cs1g20220.1/Cs1g202 | 5.21 | 0      | 0 | 2 MASCOT | T | PLEX8 |

|          |     |                     |      |   |      |   |        |        |       |
|----------|-----|---------------------|------|---|------|---|--------|--------|-------|
| 2.87E-06 | 0 0 | Cs1g20220.1/Cs1g202 | 5.21 | 0 | 0    | 2 | MASCOT | T      | PLEX8 |
| 3.08E-03 | 0 0 | Cs1g20220.1/Cs1g202 | 5.21 | 0 | 0    | 2 | MASCOT | T      | PLEX8 |
| 6.04E-07 | 0 0 | Cs1g20220.1/Cs1g202 | 5.21 | 0 | 0    | 2 | MASCOT | T      |       |
| 2.82E-02 | 0 0 | Cs1g20220.1/Cs1g202 | 5.21 | 0 | 0    | 2 | MASCOT | T      |       |
| 2.02E-01 | 0 0 | Cs1g20220.1/Cs1g202 | 5.84 | 0 | 0    | 2 | MASCOT | T      |       |
| 1.53E-01 | 0 0 | Cs1g20220.1/Cs1g202 | 4.53 | 0 | 0    | 2 | MASCOT | T      | PLEX8 |
| 6.40E-03 | 0 0 | Cs1g20220.1/Cs1g202 | 5.32 | 0 | 0    | 2 | MASCOT | T      | PLEX8 |
| 6.56E-03 | 0 0 | Cs1g20220.1/Cs1g202 | 5.32 | 0 | 0    | 2 | MASCOT | T      | PLEX8 |
| 7.84E-03 | 0 0 | Cs1g20220.1/Cs1g202 | 5.32 | 0 | 0    | 2 | MASCOT | T      | PLEX8 |
| 2.55E-03 | 0 0 | Cs1g20220.1/Cs1g202 | 5.32 | 0 | 0    | 2 | MASCOT | T      | PLEX8 |
| 2.47E-03 | 0 0 | Cs1g20220.1/Cs1g202 | 5.32 | 0 | 0    | 2 | MASCOT | T      | PLEX8 |
| 8.70E-03 | 0 0 | Cs1g20220.1/Cs1g202 | 5.32 | 0 | 0    | 2 | MASCOT | T      |       |
| 1.91E-01 | 0 0 | Cs1g20220.1/Cs1g202 | 5.32 | 0 | 0    | 2 | MASCOT | T      |       |
| 6.32E-04 | 0 0 | Cs1g20220.1/Cs1g202 | 4.14 | 0 | 0    | 2 | MASCOT | T      | PLEX8 |
| 1.04E-01 | 0 0 | Cs1g20220.1/Cs1g202 | 6.1  | 0 | 0    | 2 | MASCOT | T      | PLEX8 |
| 7.05E-04 | 0 0 | Cs1g20220.1/Cs1g202 | 6.1  | 0 | 0    | 2 | MASCOT | T      | PLEX8 |
| 1.62E-02 | 0 0 | Cs1g20220.1/Cs1g202 | 6.1  | 0 | 0    | 2 | MASCOT | T      | PLEX8 |
| 6.24E-03 | 0 0 | Cs1g20220.1/Cs1g202 | 6.1  | 0 | 0    | 2 | MASCOT | T      | PLEX8 |
| 6.45E-02 | 0 0 | Cs1g20220.1/Cs1g202 | 6.1  | 0 | 0    | 2 | MASCOT | T      | PLEX8 |
| 1.50E-01 | 0 0 | Cs1g20220.1/Cs1g202 | 6    | 0 | 0    | 2 | MASCOT | T      | PLEX8 |
| 4.76E-02 | 0 0 | Cs1g20220.1/Cs1g202 | 6    | 0 | 0    | 2 | MASCOT | T      | PLEX8 |
| 1.01E-01 | 0 0 | Cs1g20220.1/Cs1g202 | 6    | 0 | 0    | 2 | MASCOT | T      | PLEX8 |
| 1.31E-02 | 0 0 | Cs1g20220.1/Cs1g202 | 6    | 0 | 0    | 2 | MASCOT | T      | PLEX8 |
| 1.41E-01 | 0 0 | Cs1g20220.1/Cs1g202 | 6    | 0 | 0    | 2 | MASCOT | T      | PLEX8 |
| 5.84E-01 | 0 0 | Cs1g20220.1/Cs1g202 | 6    | 0 | 0    | 2 | MASCOT | T      | PLEX8 |
| 2.16E-01 | 0 0 | Cs1g20220.1/Cs1g202 | 8.59 | 0 | 0    | 2 | MASCOT | T      | PLEX8 |
| 7.83E-03 | 0 0 | Cs1g20220.1/Cs1g202 | 8.59 | 0 | 0    | 2 | MASCOT | T      | PLEX8 |
| 2.11E-02 | 0 0 | Cs1g20220.1/Cs1g202 | 8.59 | 0 | 0    | 2 | MASCOT | T      | PLEX8 |
| 4.75E-02 | 0 0 | Cs1g20220.1/Cs1g202 | 8.59 | 0 | 0    | 2 | MASCOT | T      | PLEX8 |
| 2.21E-01 | 0 0 | Cs1g20220.1/Cs1g202 | 8.59 | 0 | 0    | 2 | MASCOT | T      | PLEX8 |
| 4.29E-03 | 0 0 | Cs1g20220.1/Cs1g202 | 8.59 | 0 | 0    | 2 | MASCOT | T      | PLEX8 |
| 1.78E-02 | 0 0 | Cs1g20220.1/Cs1g202 | 8.59 | 0 | 0    | 2 | MASCOT | T      | PLEX8 |
| 1.09E-01 | 0 0 | Cs1g20220.1/Cs1g202 | 8.59 | 0 | 0    | 2 | MASCOT | T      | PLEX8 |
| 4.07E-02 | 0 0 | Cs1g20220.1/Cs1g202 | 8.59 | 0 | 0    | 2 | MASCOT | T      | PLEX8 |
| 5.17E-02 | 0 0 | Cs1g20220.1/Cs1g202 | 8.59 | 0 | 0    | 2 | MASCOT | T      |       |
| 5.08E-02 | 0 0 | Cs1g20220.1/Cs1g202 | 8.59 | 0 | 0    | 2 | MASCOT | T      |       |
| 2.10E-01 | 0 0 | Cs1g20220.1/Cs1g202 | 6    | 0 | 0    | 2 | MASCOT | T      |       |
| 3.14E-01 | 0 0 | Cs1g20220.1/Cs1g202 | 6    | 0 | 0    | 2 | MASCOT | T      |       |
| 2.52E-01 | 0 0 | Cs1g20220.1/Cs1g202 | 6    | 0 | 0    | 2 | MASCOT | T      |       |
| 2.09E-03 | 0 0 | Cs5g10730.1         | 8.79 | 0 | 15.9 | 0 | 2      | MASCOT | T     |
| 4.79E-06 | 0 0 | Cs5g10730.1         | 8.79 | 0 | 15.9 | 0 | 2      | MASCOT | T     |
| 1.56E-03 | 0 0 | Cs5g10730.1         | 8.79 | 0 | 0    | 2 | MASCOT | T      |       |
| 1.31E-04 | 0 0 | Cs5g10730.1         | 8.79 | 0 | 0    | 2 | MASCOT | T      |       |
| 1.88E-04 | 0 0 | Cs5g10730.1         | 8.79 | 0 | 0    | 2 | MASCOT | T      |       |
| 5.26E-02 | 0 0 | Cs5g10730.1         | 6.19 | 0 | 0    | 2 | MASCOT | T      | PLEX8 |
| 1.84E-01 | 0 0 | Cs5g10730.1         | 6.19 | 0 | 0    | 2 | MASCOT | T      | PLEX8 |
| 7.30E-03 | 0 0 | Cs5g10730.1         | 8.75 | 0 | 0    | 2 | MASCOT | T      | PLEX8 |
| 4.26E-02 | 0 0 | Cs5g10730.1         | 8.75 | 0 | 0    | 2 | MASCOT | T      | PLEX8 |
| 6.65E-02 | 0 0 | Cs5g10730.1         | 8.75 | 0 | 0    | 2 | MASCOT | T      | PLEX8 |
| 1.40E-01 | 0 0 | Cs5g10730.1         | 8.75 | 0 | 0    | 2 | MASCOT | T      | PLEX8 |
| 1.72E-01 | 0 0 | Cs5g10730.1         | 5.84 | 0 | 0    | 2 | MASCOT | T      | PLEX8 |

|              |                     |      |        |   |          |   |       |
|--------------|---------------------|------|--------|---|----------|---|-------|
| 1.37E-02 0 0 | Cs5g10730.1         | 5.84 | 0      | 0 | 2 MASCOT | T |       |
| 5.98E-02 0 0 | Cs2g05040.1/Cs5g107 | 5.84 | 0      | 0 | 2 MASCOT | T | PLEX8 |
| 2.72E-01 0 0 | Cs2g05040.1/Cs5g107 | 5.84 | 0      | 0 | 2 MASCOT | T |       |
| 5.96E-02 0 0 | Cs2g05040.1/Cs5g107 | 5.84 | 0      | 0 | 2 MASCOT | T |       |
| 1.04E-02 0 0 | Cs2g05040.1/Cs5g107 | 5.84 | 0      | 0 | 2 MASCOT | T |       |
| 2.64E-06 0 0 | Cs2g05040.1/Cs5g107 | 5.84 | 0      | 0 | 2 MASCOT | T |       |
| 1.28E-02 0 0 | Cs2g05040.1/Cs5g107 | 5.84 | 0      | 0 | 2 MASCOT | T |       |
| 3.90E-01 0 0 | Cs5g10730.1         | 6.49 | 0 15.9 | 0 | 2 MASCOT | T |       |
| 4.52E-02 0 0 | Cs5g10730.1         | 8.8  | 0      | 0 | 2 MASCOT | T | PLEX8 |
| 1.10E-01 0 0 | Cs5g10730.1         | 8.8  | 0      | 0 | 2 MASCOT | T | PLEX8 |
| 7.03E-02 0 0 | Cs5g10730.1         | 8.8  | 0      | 0 | 2 MASCOT | T | PLEX8 |
| 4.37E-02 0 0 | Cs5g10730.1         | 8.8  | 0      | 0 | 2 MASCOT | T | PLEX8 |
| 1.54E-02 0 0 | Cs5g10730.1         | 8.8  | 0      | 0 | 2 MASCOT | T | PLEX8 |
| 1.19E-06 0 0 | Cs5g10730.1         | 4.21 | 0      | 0 | 2 MASCOT | T | PLEX8 |
| 4.47E-05 0 0 | Cs5g10730.1         | 4.21 | 0      | 0 | 2 MASCOT | T | PLEX8 |
| 1.08E-01 0 0 | Cs5g10730.1         | 4.21 | 0      | 0 | 2 MASCOT | T | PLEX8 |
| 7.84E-03 0 0 | Cs5g10730.1         | 4.21 | 0      | 0 | 2 MASCOT | T | PLEX8 |
| 1.79E-01 0 0 | Cs5g10730.1         | 6    | 0      | 0 | 2 MASCOT | T | PLEX8 |
| 3.51E-02 0 0 | Cs5g10730.1         | 6    | 0      | 0 | 2 MASCOT | T | PLEX8 |
| 8.83E-02 0 0 | Cs5g10730.1         | 4.53 | 0      | 0 | 2 MASCOT | T | PLEX8 |
| 2.90E-03 0 0 | Cs5g10730.1         | 4.53 | 0      | 0 | 2 MASCOT | T | PLEX8 |
| 1.86E-04 0 0 | Cs5g10730.1         | 4.53 | 0      | 0 | 2 MASCOT | T | PLEX8 |
| 8.86E-02 0 0 | Cs5g10730.1         | 4.53 | 0      | 0 | 2 MASCOT | T | PLEX8 |
| 5.95E-02 0 0 | Cs5g10730.1         | 4.53 | 0      | 0 | 2 MASCOT | T | PLEX8 |
| 9.20E-04 0 0 | Cs5g10730.1         | 4.53 | 0      | 0 | 2 MASCOT | T | PLEX8 |
| 4.71E-05 0 0 | Cs5g10730.1         | 4.53 | 0      | 0 | 2 MASCOT | T | PLEX8 |
| 1.91E-03 0 0 | Cs5g10730.1         | 4.53 | 0      | 0 | 2 MASCOT | T | PLEX8 |
| 2.33E-03 0 0 | Cs5g10730.1         | 4.53 | 0      | 0 | 2 MASCOT | T | PLEX8 |
| 5.94E-06 0 0 | Cs5g10730.1         | 4.53 | 0      | 0 | 2 MASCOT | T | PLEX8 |
| 2.36E-01 0 0 | Cs5g10730.1         | 4.53 | 0      | 0 | 2 MASCOT | T | PLEX8 |
| 2.66E-02 0 0 | Cs8g03710.1         | 5.88 | 0      | 0 | 2 MASCOT | T |       |
| 1.74E-04 0 0 | Cs8g03710.1         | 5.88 | 0      | 0 | 2 MASCOT | T |       |
| 8.57E-02 0 0 | Cs8g03710.1         | 4.53 | 0      | 0 | 2 MASCOT | T | PLEX8 |
| 5.39E-02 0 0 | Cs8g03710.1         | 4.53 | 0      | 0 | 2 MASCOT | T | PLEX8 |
| 8.47E-03 0 0 | Cs8g03710.1         | 4.53 | 0      | 0 | 2 MASCOT | T | PLEX8 |
| 2.99E-01 0 0 | Cs8g03710.1         | 4.53 | 0      | 0 | 2 MASCOT | T | PLEX8 |
| 2.27E-02 0 0 | Cs8g03710.1         | 4.53 | 0      | 0 | 2 MASCOT | T | PLEX8 |
| 1.20E-02 0 0 | Cs8g03710.1         | 4.53 | 0      | 0 | 2 MASCOT | T | PLEX8 |
| 4.02E-03 0 0 | Cs8g03710.1         | 6    | 0 15.9 | 0 | 2 MASCOT | T | PLEX8 |
| 7.71E-04 0 0 | Cs8g03710.1         | 6    | 0 15.9 | 0 | 2 MASCOT | T | PLEX8 |
| 3.33E-02 0 0 | Cs8g03710.1         | 6    | 0 15.9 | 0 | 2 MASCOT | T | PLEX8 |
| 4.03E-04 0 0 | Cs8g03710.1         | 6    | 0 15.9 | 0 | 2 MASCOT | T | PLEX8 |
| 9.84E-03 0 0 | Cs8g03710.1         | 6    | 0 15.9 | 0 | 2 MASCOT | T | PLEX8 |
| 2.95E-02 0 0 | Cs8g03710.1         | 6    | 0 15.9 | 0 | 2 MASCOT | T | PLEX8 |
| 2.73E-01 0 0 | Cs8g03710.1         | 6    | 0 15.9 | 0 | 2 MASCOT | T |       |
| 1.43E-04 0 0 | Cs8g03710.1         | 6    | 0      | 0 | 2 MASCOT | T | PLEX8 |
| 7.93E-04 0 0 | Cs8g03710.1         | 6    | 0      | 0 | 2 MASCOT | T | PLEX8 |
| 1.42E-02 0 0 | Cs8g03710.1         | 6    | 0      | 0 | 2 MASCOT | T | PLEX8 |
| 2.20E-02 0 0 | Cs8g03710.1         | 6    | 0      | 0 | 2 MASCOT | T | PLEX8 |
| 2.14E-05 0 0 | Cs8g03710.1         | 6    | 0      | 0 | 2 MASCOT | T | PLEX8 |
| 7.49E-02 0 0 | Cs8g03710.1         | 8.22 | 0      | 0 | 2 MASCOT | T | PLEX8 |

|              |                       |      |   |      |   |        |        |       |       |
|--------------|-----------------------|------|---|------|---|--------|--------|-------|-------|
| 4.11E-02 0 0 | Cs8g03710.1           | 8.22 | 0 | 0    | 2 | MASCOT | T      | PLEX8 |       |
| 4.26E-02 0 0 | Cs8g03710.1           | 8.22 | 0 | 0    | 2 | MASCOT | T      | PLEX8 |       |
| 5.02E-02 0 0 | Cs8g03710.1           | 8.22 | 0 | 0    | 2 | MASCOT | T      | PLEX8 |       |
| 7.44E-02 0 0 | Cs8g03710.1           | 4.14 | 0 | 15.9 | 0 | 2      | MASCOT | T     | PLEX8 |
| 1.00E-02 0 0 | Cs8g03710.1           | 4.14 | 0 | 15.9 | 0 | 2      | MASCOT | T     | PLEX8 |
| 2.13E-02 0 0 | Cs8g03710.1           | 4.14 | 0 | 15.9 | 0 | 2      | MASCOT | T     | PLEX8 |
| 4.66E-02 0 0 | Cs8g03710.1           | 4.14 | 0 | 0    | 2 | MASCOT | T      | PLEX8 |       |
| 5.78E-03 0 0 | Cs8g03710.1           | 4.14 | 0 | 0    | 2 | MASCOT | T      | PLEX8 |       |
| 1.29E-01 0 0 | Cs8g03710.1           | 4.14 | 0 | 0    | 2 | MASCOT | T      | PLEX8 |       |
| 7.04E-03 0 0 | Cs8g03710.1           | 4.37 | 0 | 15.9 | 0 | 2      | MASCOT | T     | PLEX8 |
| 6.10E-02 0 0 | Cs8g03710.1           | 4.37 | 0 | 0    | 2 | MASCOT | T      | PLEX8 |       |
| 9.93E-02 0 0 | Cs8g03710.1           | 5.84 | 0 | 0    | 2 | MASCOT | T      | PLEX8 |       |
| 6.85E-03 0 0 | Cs8g03710.1           | 5.84 | 0 | 0    | 2 | MASCOT | T      |       |       |
| 3.22E-01 0 0 | Cs8g03710.1           | 5.84 | 0 | 0    | 2 | MASCOT | T      |       |       |
| 5.81E-03 0 0 | Cs8g03710.1           | 4.53 | 0 | 0    | 2 | MASCOT | T      | PLEX8 |       |
| 8.44E-03 0 0 | Cs8g03710.1           | 4.18 | 1 | 0    | 2 | MASCOT | T      | PLEX8 |       |
| 3.61E-02 0 0 | Cs8g03710.1           | 4.18 | 1 | 0    | 2 | MASCOT | T      | PLEX8 |       |
| 1.17E-01 0 0 | Cs8g03710.1           | 4.18 | 1 | 0    | 2 | MASCOT | T      |       |       |
| 1.13E-01 0 0 | Cs8g03710.1           | 9.6  | 1 | 0    | 2 | MASCOT | T      | PLEX8 |       |
| 2.60E-02 0 0 | orange1.1t02144.1/ora | 4.37 | 0 | 0    | 2 | MASCOT | T      | PLEX8 |       |
| 3.13E-04 0 0 | orange1.1t02144.1/ora | 4.37 | 0 | 0    | 2 | MASCOT | T      | PLEX8 |       |
| 2.25E-05 0 0 | orange1.1t02144.1/ora | 4.37 | 0 | 0    | 2 | MASCOT | T      | PLEX8 |       |
| 5.47E-06 0 0 | orange1.1t02144.1/ora | 4.37 | 0 | 0    | 2 | MASCOT | T      | PLEX8 |       |
| 2.80E-03 0 0 | orange1.1t02144.1/ora | 4.37 | 0 | 0    | 2 | MASCOT | T      | PLEX8 |       |
| 2.34E-02 0 0 | orange1.1t02144.1/ora | 4.37 | 0 | 0    | 2 | MASCOT | T      | PLEX8 |       |
| 6.32E-03 0 0 | orange1.1t02144.1/ora | 8.22 | 0 | 0    | 2 | MASCOT | T      | PLEX8 |       |
| 1.46E-02 0 0 | orange1.1t02144.1/ora | 8.22 | 0 | 0    | 2 | MASCOT | T      | PLEX8 |       |
| 2.36E-01 0 0 | orange1.1t02144.1/ora | 8.22 | 0 | 0    | 2 | MASCOT | T      | PLEX8 |       |
| 1.82E-03 0 0 | orange1.1t02144.1/ora | 8.22 | 0 | 0    | 2 | MASCOT | T      | PLEX8 |       |
| 7.79E-02 0 0 | orange1.1t02144.1/ora | 8.22 | 0 | 0    | 2 | MASCOT | T      | PLEX8 |       |
| 1.60E-01 0 0 | Cs3g11490.1/orange1.  | 8.75 | 0 | 0    | 2 | MASCOT | T      | PLEX8 |       |
| 2.65E-05 0 0 | orange1.1t02144.1/ora | 4.4  | 0 | 0    | 2 | MASCOT | T      | PLEX8 |       |
| 7.83E-04 0 0 | orange1.1t02144.1/ora | 4.4  | 0 | 0    | 2 | MASCOT | T      | PLEX8 |       |
| 8.52E-02 0 0 | orange1.1t02144.1/ora | 4.4  | 0 | 0    | 2 | MASCOT | T      | PLEX8 |       |
| 1.07E-08 0 0 | orange1.1t02144.1/ora | 4.4  | 0 | 0    | 2 | MASCOT | T      | PLEX8 |       |
| 2.69E-02 0 0 | orange1.1t02144.1/ora | 4.4  | 0 | 0    | 2 | MASCOT | T      | PLEX8 |       |
| 2.59E-02 0 0 | orange1.1t02144.1/ora | 4.4  | 0 | 0    | 2 | MASCOT | T      | PLEX8 |       |
| 3.40E-08 0 0 | orange1.1t02144.1/ora | 4.4  | 0 | 0    | 2 | MASCOT | T      | PLEX8 |       |
| 4.78E-05 0 0 | orange1.1t02144.1/ora | 4.4  | 0 | 0    | 2 | MASCOT | T      | PLEX8 |       |
| 1.58E-04 0 0 | orange1.1t02144.1/ora | 4.4  | 0 | 0    | 2 | MASCOT | T      | PLEX8 |       |
| 9.02E-08 0 0 | orange1.1t02144.1/ora | 4.4  | 0 | 0    | 2 | MASCOT | T      |       |       |
| 1.47E-02 0 0 | orange1.1t02144.1/ora | 9.75 | 0 | 0    | 2 | MASCOT | T      | PLEX8 |       |
| 3.57E-04 0 0 | orange1.1t02144.1/ora | 9.75 | 0 | 0    | 2 | MASCOT | T      | PLEX8 |       |
| 4.40E-02 0 0 | orange1.1t02144.1/ora | 9.75 | 0 | 0    | 2 | MASCOT | T      | PLEX8 |       |
| 1.39E-01 0 0 | orange1.1t02144.1/ora | 4.53 | 0 | 15.9 | 0 | 2      | MASCOT | T     | PLEX8 |
| 3.17E-02 0 0 | orange1.1t02144.1/ora | 4.53 | 0 | 0    | 2 | MASCOT | T      | PLEX8 |       |
| 4.37E-02 0 0 | orange1.1t02144.1/ora | 4.53 | 0 | 0    | 2 | MASCOT | T      | PLEX8 |       |
| 6.78E-02 0 0 | orange1.1t02144.1     | 6    | 0 | 0    | 2 | MASCOT | T      |       |       |
| 1.73E-01 0 0 | orange1.1t02144.1/ora | 8.26 | 0 | 15.9 | 0 | 2      | MASCOT | T     | PLEX8 |
| 1.43E-01 0 0 | orange1.1t02144.1/ora | 8.26 | 0 | 0    | 2 | MASCOT | T      | PLEX8 |       |
| 5.05E-02 0 0 | orange1.1t02144.1/ora | 8.26 | 0 | 0    | 2 | MASCOT | T      | PLEX8 |       |

|          |     |                       |      |   |      |   |        |        |       |       |
|----------|-----|-----------------------|------|---|------|---|--------|--------|-------|-------|
| 4.59E-04 | 0 0 | orange1.1t02144.1/ora | 8.26 | 0 | 0    | 2 | MASCOT | T      | PLEX8 |       |
| 2.34E-02 | 0 0 | orange1.1t02144.1/ora | 8.26 | 0 | 0    | 2 | MASCOT | T      | PLEX8 |       |
| 1.07E-04 | 0 0 | orange1.1t02144.1/ora | 4.37 | 0 | 15.9 | 0 | 2      | MASCOT | T     | PLEX8 |
| 4.35E-02 | 0 0 | orange1.1t02144.1/ora | 4.37 | 0 | 0    | 2 | MASCOT | T      | PLEX8 |       |
| 3.72E-06 | 0 0 | orange1.1t02144.1/ora | 4.37 | 0 | 0    | 2 | MASCOT | T      | PLEX8 |       |
| 6.71E-05 | 0 0 | orange1.1t02144.1/ora | 4.37 | 0 | 0    | 2 | MASCOT | T      | PLEX8 |       |
| 3.72E-03 | 0 0 | orange1.1t02144.1/ora | 4.37 | 0 | 0    | 2 | MASCOT | T      | PLEX8 |       |
| 4.58E-04 | 0 0 | orange1.1t02144.1     | 8.75 | 0 | 0    | 2 | MASCOT | T      | PLEX8 |       |
| 1.99E-02 | 0 0 | orange1.1t03078.2/ora | 4.37 | 0 | 0    | 2 | MASCOT | T      | PLEX8 |       |
| 1.60E-03 | 0 0 | orange1.1t03078.2/ora | 4.37 | 0 | 0    | 2 | MASCOT | T      | PLEX8 |       |
| 3.98E-03 | 0 0 | orange1.1t03078.2/ora | 4.37 | 0 | 0    | 2 | MASCOT | T      | PLEX8 |       |
| 2.47E-04 | 0 0 | orange1.1t03078.2/ora | 4.37 | 0 | 0    | 2 | MASCOT | T      | PLEX8 |       |
| 1.62E-02 | 0 0 | orange1.1t03078.2/ora | 4.37 | 0 | 0    | 2 | MASCOT | T      | PLEX8 |       |
| 1.03E-03 | 0 0 | orange1.1t03078.2/ora | 4.37 | 0 | 0    | 2 | MASCOT | T      | PLEX8 |       |
| 1.30E-02 | 0 0 | orange1.1t03078.1/ora | 8.27 | 0 | 0    | 2 | MASCOT | T      | PLEX8 |       |
| 5.56E-05 | 0 0 | orange1.1t03082.1/ora | 4.25 | 0 | 0    | 2 | MASCOT | T      | PLEX8 |       |
| 2.12E-02 | 0 0 | orange1.1t03082.1/ora | 4.25 | 0 | 0    | 2 | MASCOT | T      | PLEX8 |       |
| 4.48E-02 | 0 0 | orange1.1t03082.1/ora | 4.25 | 0 | 0    | 2 | MASCOT | T      | PLEX8 |       |
| 1.04E-03 | 0 0 | orange1.1t03082.1/ora | 4.25 | 0 | 0    | 2 | MASCOT | T      | PLEX8 |       |
| 2.92E-03 | 0 0 | orange1.1t03082.1/ora | 4.25 | 0 | 0    | 2 | MASCOT | T      | PLEX8 |       |
| 4.47E-02 | 0 0 | orange1.1t03078.1/ora | 6.84 | 0 | 0    | 2 | MASCOT | T      |       |       |
| 2.17E-03 | 0 0 | orange1.1t03078.1/ora | 6.84 | 0 | 0    | 2 | MASCOT | T      |       |       |
| 4.98E-02 | 0 0 | orange1.1t03078.1/ora | 6.84 | 0 | 0    | 2 | MASCOT | T      |       |       |
| 3.33E-02 | 0 0 | orange1.1t03078.1/ora | 6.84 | 0 | 0    | 2 | MASCOT | T      | PLEX8 |       |
| 2.23E-03 | 0 0 | orange1.1t03078.1/ora | 4.14 | 0 | 0    | 2 | MASCOT | T      | PLEX8 |       |
| 7.08E-02 | 0 0 | orange1.1t03078.1/ora | 4.14 | 0 | 0    | 2 | MASCOT | T      |       |       |
| 8.16E-03 | 0 0 | orange1.1t03078.1/ora | 4.14 | 0 | 0    | 2 | MASCOT | T      |       |       |
| 1.15E-02 | 0 0 | orange1.1t03078.1/ora | 4.14 | 0 | 0    | 2 | MASCOT | T      |       |       |
| 4.96E-03 | 0 0 | orange1.1t03078.1/ora | 4.14 | 0 | 0    | 2 | MASCOT | T      |       |       |
| 3.14E-04 | 0 0 | orange1.1t03078.1/ora | 4.14 | 0 | 0    | 2 | MASCOT | T      |       |       |
| 4.70E-02 | 0 0 | orange1.1t03082.1/ora | 4.03 | 0 | 15.9 | 0 | 2      | MASCOT | T     | PLEX8 |
| 2.21E-01 | 0 0 | orange1.1t03082.1/ora | 4.03 | 0 | 0    | 2 | MASCOT | T      | PLEX8 |       |
| 1.19E-02 | 0 0 | orange1.1t03078.1/ora | 4.37 | 0 | 15.9 | 0 | 2      | MASCOT | T     |       |
| 2.56E-03 | 0 0 | orange1.1t03078.1/ora | 4.37 | 0 | 0    | 2 | MASCOT | T      |       |       |
| 1.24E-01 | 0 0 | orange1.1t03078.1/ora | 4.37 | 0 | 0    | 2 | MASCOT | T      | PLEX8 |       |
| 2.19E-03 | 0 0 | orange1.1t03078.1/ora | 4.37 | 0 | 0    | 2 | MASCOT | T      | PLEX8 |       |
| 7.33E-05 | 0 0 | orange1.1t03078.1/ora | 4.37 | 0 | 0    | 2 | MASCOT | T      | PLEX8 |       |
| 6.52E-03 | 0 0 | orange1.1t03078.1/ora | 4.37 | 0 | 0    | 2 | MASCOT | T      | PLEX8 |       |
| 2.87E-02 | 0 0 | orange1.1t03078.1/ora | 4.37 | 0 | 0    | 2 | MASCOT | T      |       |       |
| 1.14E-01 | 0 0 | orange1.1t03078.1/ora | 6.71 | 0 | 0    | 2 | MASCOT | T      | PLEX8 |       |
| 5.39E-02 | 0 0 | orange1.1t03078.1/ora | 6.71 | 0 | 0    | 2 | MASCOT | T      | PLEX8 |       |
| 5.69E-03 | 0 0 | orange1.1t03078.1/ora | 5.81 | 0 | 0    | 2 | MASCOT | T      |       |       |
| 1.92E-01 | 0 0 | orange1.1t03078.1/ora | 5.81 | 0 | 0    | 2 | MASCOT | T      |       |       |
| 9.16E-03 | 0 0 | Cs3g11180.1           | 4.21 | 0 | 0    | 2 | MASCOT | T      | PLEX8 |       |
| 4.69E-04 | 0 0 | Cs3g11180.1           | 4.21 | 0 | 0    | 2 | MASCOT | T      | PLEX8 |       |
| 3.53E-02 | 0 0 | Cs3g11090.1/Cs3g111   | 4.14 | 0 | 0    | 2 | MASCOT | T      | PLEX8 |       |
| 2.40E-01 | 0 0 | Cs3g11180.1           | 5.4  | 0 | 0    | 2 | MASCOT | T      | PLEX8 |       |
| 2.77E-01 | 0 0 | Cs3g11180.1           | 5.4  | 0 | 0    | 2 | MASCOT | T      | PLEX8 |       |
| 3.15E-02 | 0 0 | Cs3g11180.1           | 5.4  | 0 | 0    | 2 | MASCOT | T      | PLEX8 |       |
| 8.66E-02 | 0 0 | Cs3g11180.1           | 5.4  | 0 | 0    | 2 | MASCOT | T      | PLEX8 |       |
| 5.77E-02 | 0 0 | Cs3g11180.1           | 5.4  | 0 | 0    | 2 | MASCOT | T      | PLEX8 |       |

|          |     |                      |      |        |   |          |   |       |
|----------|-----|----------------------|------|--------|---|----------|---|-------|
| 1.10E-02 | 0 0 | Cs3g11180.1          | 5.4  | 0      | 0 | 2 MASCOT | T | PLEX8 |
| 8.34E-04 | 0 0 | Cs3g11010.1/Cs3g110  | 5.84 | 0      | 0 | 2 MASCOT | T |       |
| 9.72E-02 | 0 0 | Cs3g11000.1/Cs3g111  | 8.59 | 0      | 0 | 2 MASCOT | T | PLEX8 |
| 5.80E-02 | 0 0 | Cs3g11000.1/Cs3g111  | 8.59 | 0      | 0 | 2 MASCOT | T | PLEX8 |
| 4.19E-02 | 0 0 | Cs3g11000.1/Cs3g111  | 8.59 | 0      | 0 | 2 MASCOT | T | PLEX8 |
| 7.65E-03 | 0 0 | Cs3g11000.1/Cs3g111  | 8.59 | 0      | 0 | 2 MASCOT | T | PLEX8 |
| 6.36E-02 | 0 0 | Cs3g11180.1          | 5.72 | 0      | 0 | 2 MASCOT | T | PLEX8 |
| 3.78E-02 | 0 0 | Cs3g11180.1          | 5.72 | 0      | 0 | 2 MASCOT | T | PLEX8 |
| 1.82E-05 | 0 0 | Cs3g11180.1          | 4.21 | 0      | 0 | 2 MASCOT | T |       |
| 1.58E-01 | 0 0 | Cs3g11090.1/Cs3g111  | 8.8  | 0      | 0 | 2 MASCOT | T | PLEX8 |
| 2.99E-03 | 0 0 | Cs3g11090.1/Cs3g111  | 8.8  | 0      | 0 | 2 MASCOT | T | PLEX8 |
| 8.32E-02 | 0 0 | Cs3g11090.1/Cs3g111  | 8.8  | 0      | 0 | 2 MASCOT | T | PLEX8 |
| 2.06E-02 | 0 0 | Cs3g11090.1/Cs3g111  | 8.8  | 0      | 0 | 2 MASCOT | T | PLEX8 |
| 1.28E-03 | 0 0 | Cs3g11090.1/Cs3g111  | 9.76 | 0      | 0 | 2 MASCOT | T | PLEX8 |
| 5.52E-04 | 0 0 | Cs3g11090.1/Cs3g111  | 9.76 | 0      | 0 | 2 MASCOT | T | PLEX8 |
| 2.72E-01 | 0 0 | Cs3g11090.1/Cs3g111  | 9.76 | 0      | 0 | 2 MASCOT | T | PLEX8 |
| 1.54E-03 | 0 0 | Cs3g11090.1/Cs3g111  | 9.76 | 0      | 0 | 2 MASCOT | T | PLEX8 |
| 7.27E-03 | 0 0 | Cs3g11090.1 ! Cs3g11 | 8.75 | 0      | 0 | 2 MASCOT | T | PLEX8 |
| 2.22E-04 | 0 0 | Cs3g11090.1 ! Cs3g11 | 8.75 | 0      | 0 | 2 MASCOT | T | PLEX8 |
| 1.02E-03 | 0 0 | Cs3g11090.1 ! Cs3g11 | 8.75 | 0      | 0 | 2 MASCOT | T | PLEX8 |
| 9.00E-04 | 0 0 | Cs3g11090.1 ! Cs3g11 | 8.75 | 0      | 0 | 2 MASCOT | T | PLEX8 |
| 1.47E-02 | 0 0 | Cs3g11090.1 ! Cs3g11 | 8.75 | 0      | 0 | 2 MASCOT | T | PLEX8 |
| 2.36E-05 | 0 0 | Cs3g11090.1 ! Cs3g11 | 8.75 | 0      | 0 | 2 MASCOT | T | PLEX8 |
| 3.53E-02 | 0 0 | Cs3g11090.1 ! Cs3g11 | 8.75 | 0      | 0 | 2 MASCOT | T |       |
| 1.47E-01 | 0 0 | Cs5g24490.1/Cs5g244  | 5.88 | 0      | 0 | 2 MASCOT | T | PLEX8 |
| 1.56E-01 | 0 0 | Cs5g24490.1/Cs5g244  | 5.88 | 0      | 0 | 2 MASCOT | T | PLEX8 |
| 4.76E-03 | 0 0 | Cs5g24490.1/Cs5g244  | 6.04 | 0      | 0 | 2 MASCOT | T | PLEX8 |
| 1.88E-01 | 0 0 | Cs5g24490.1/Cs5g244  | 6.04 | 0      | 0 | 2 MASCOT | T | PLEX8 |
| 8.13E-02 | 0 0 | Cs5g24490.1/Cs5g244  | 6.04 | 0      | 0 | 2 MASCOT | T |       |
| 3.46E-02 | 0 0 | Cs5g24490.1/Cs5g244  | 6.04 | 0      | 0 | 2 MASCOT | T | PLEX8 |
| 2.11E-03 | 0 0 | Cs5g24490.1/Cs5g244  | 6.04 | 0      | 0 | 2 MASCOT | T | PLEX8 |
| 7.85E-04 | 0 0 | Cs5g24490.1/Cs5g244  | 4    | 0      | 0 | 2 MASCOT | T | PLEX8 |
| 5.08E-03 | 0 0 | Cs5g24490.1/Cs5g244  | 4    | 0      | 0 | 2 MASCOT | T | PLEX8 |
| 3.74E-02 | 0 0 | Cs5g24490.1/Cs5g244  | 4.09 | 0      | 0 | 2 MASCOT | T | PLEX8 |
| 4.59E-03 | 0 0 | Cs5g24490.1/Cs5g244  | 4.09 | 0      | 0 | 2 MASCOT | T | PLEX8 |
| 1.70E-04 | 0 0 | Cs5g24490.1/Cs5g244  | 4.09 | 0      | 0 | 2 MASCOT | T | PLEX8 |
| 1.90E-01 | 0 0 | Cs5g24490.1/Cs5g244  | 5.75 | 0 15.9 | 0 | 2 MASCOT | T | PLEX8 |
| 1.44E-01 | 0 0 | Cs5g24490.1/Cs5g244  | 5.75 | 0      | 0 | 2 MASCOT | T | PLEX8 |
| 7.57E-03 | 0 0 | Cs5g24490.1/Cs5g244  | 5.75 | 0      | 0 | 2 MASCOT | T | PLEX8 |
| 1.86E-04 | 0 0 | Cs5g24490.1/Cs5g244  | 4.25 | 0      | 0 | 2 MASCOT | T |       |
| 4.95E-01 | 0 0 | Cs5g24490.1/Cs5g244  | 5.88 | 0 15.9 | 0 | 2 MASCOT | T | PLEX8 |
| 2.17E-03 | 0 0 | Cs5g24490.1/Cs5g244  | 5.88 | 0      | 0 | 2 MASCOT | T | PLEX8 |
| 4.80E-03 | 0 0 | Cs5g24490.1/Cs5g244  | 5.88 | 0      | 0 | 2 MASCOT | T | PLEX8 |
| 2.41E-03 | 0 0 | Cs5g24490.1/Cs5g244  | 5.88 | 0      | 0 | 2 MASCOT | T | PLEX8 |
| 5.24E-03 | 0 0 | Cs5g24490.1/Cs5g244  | 5.88 | 0      | 0 | 2 MASCOT | T | PLEX8 |
| 4.83E-03 | 0 0 | Cs5g24490.1/Cs5g244  | 4.53 | 0 15.9 | 0 | 2 MASCOT | T | PLEX8 |
| 7.45E-02 | 0 0 | Cs5g24490.1/Cs5g244  | 4.53 | 0      | 0 | 2 MASCOT | T | PLEX8 |
| 1.73E-01 | 0 0 | Cs5g24490.1/Cs5g244  | 4.53 | 0      | 0 | 2 MASCOT | T | PLEX8 |
| 3.33E-01 | 0 0 | Cs5g24490.1/Cs5g244  | 4.53 | 0      | 0 | 2 MASCOT | T | PLEX8 |
| 1.05E-04 | 0 0 | Cs5g24490.1/Cs5g244  | 4.53 | 0      | 0 | 2 MASCOT | T | PLEX8 |
| 1.00E-01 | 0 0 | Cs5g24490.1/Cs5g244  | 4.53 | 0      | 0 | 2 MASCOT | T | PLEX8 |



|          |     |                       |      |   |      |   |        |        |       |       |
|----------|-----|-----------------------|------|---|------|---|--------|--------|-------|-------|
| 1.02E-01 | 0 0 | Cs5g24490.1/Cs5g244   | 5.32 | 0 | 0    | 2 | MASCOT | T      | PLEX8 |       |
| 8.95E-03 | 0 0 | Cs5g24490.1/Cs5g244   | 5.32 | 0 | 0    | 2 | MASCOT | T      | PLEX8 |       |
| 6.97E-02 | 0 0 | Cs5g24490.1/Cs5g244   | 5.32 | 0 | 0    | 2 | MASCOT | T      | PLEX8 |       |
| 1.08E-01 | 0 0 | Cs5g24490.1/Cs5g244   | 5.32 | 0 | 0    | 2 | MASCOT | T      | PLEX8 |       |
| 2.57E-01 | 0 0 | Cs5g24490.1/Cs5g244   | 5.32 | 0 | 0    | 2 | MASCOT | T      |       |       |
| 2.35E-01 | 0 0 | orange1.1t00423.1/ora | 4.21 | 0 | 0    | 2 | MASCOT | T      | PLEX8 |       |
| 3.78E-01 | 0 0 | orange1.1t00423.1/ora | 4.21 | 0 | 0    | 2 | MASCOT | T      | PLEX8 |       |
| 2.21E-01 | 0 0 | orange1.1t00423.1/ora | 4.21 | 0 | 0    | 2 | MASCOT | T      | PLEX8 |       |
| 3.52E-01 | 0 0 | orange1.1t00423.1/ora | 4.21 | 0 | 0    | 2 | MASCOT | T      | PLEX8 |       |
| 2.34E-01 | 0 0 | orange1.1t00423.1/ora | 4.21 | 0 | 0    | 2 | MASCOT | T      | PLEX8 |       |
| 1.80E-02 | 0 0 | orange1.1t00423.1/ora | 4.21 | 0 | 0    | 2 | MASCOT | T      | PLEX8 |       |
| 1.90E-01 | 0 0 | orange1.1t00423.1/ora | 4.21 | 0 | 0    | 2 | MASCOT | T      | PLEX8 |       |
| 5.70E-03 | 0 0 | orange1.1t00423.1/ora | 4.53 | 0 | 0    | 2 | MASCOT | T      | PLEX8 |       |
| 7.02E-03 | 0 0 | orange1.1t00423.1/ora | 4.53 | 0 | 0    | 2 | MASCOT | T      | PLEX8 |       |
| 2.64E-02 | 0 0 | orange1.1t00423.1/ora | 4.53 | 0 | 0    | 2 | MASCOT | T      | PLEX8 |       |
| 2.50E-01 | 0 0 | orange1.1t00423.1/ora | 5.4  | 0 | 0    | 2 | MASCOT | T      | PLEX8 |       |
| 3.42E-03 | 0 0 | orange1.1t00423.1/ora | 5.4  | 0 | 0    | 2 | MASCOT | T      | PLEX8 |       |
| 1.36E-03 | 0 0 | orange1.1t00423.1/ora | 5.4  | 0 | 0    | 2 | MASCOT | T      | PLEX8 |       |
| 1.24E-02 | 0 0 | orange1.1t00423.1/ora | 5.4  | 0 | 0    | 2 | MASCOT | T      |       |       |
| 4.20E-02 | 0 0 | orange1.1t00423.1/ora | 5.4  | 0 | 0    | 2 | MASCOT | T      | PLEX8 |       |
| 4.97E-02 | 0 0 | orange1.1t00423.1/ora | 5.4  | 0 | 0    | 2 | MASCOT | T      | PLEX8 |       |
| 6.70E-02 | 0 0 | orange1.1t00423.1/ora | 5.4  | 0 | 0    | 2 | MASCOT | T      |       |       |
| 3.14E-01 | 0 0 | orange1.1t00423.1/ora | 8.2  | 0 | 0    | 2 | MASCOT | T      | PLEX8 |       |
| 2.91E-02 | 0 0 | orange1.1t00423.1/ora | 8.2  | 0 | 0    | 2 | MASCOT | T      | PLEX8 |       |
| 3.46E-01 | 0 0 | orange1.1t00423.1/ora | 8.2  | 0 | 0    | 2 | MASCOT | T      | PLEX8 |       |
| 1.37E-01 | 0 0 | orange1.1t00423.1/ora | 8.2  | 0 | 0    | 2 | MASCOT | T      |       |       |
| 2.51E-03 | 0 0 | orange1.1t00423.1/ora | 5.97 | 0 | 15.9 | 0 | 2      | MASCOT | T     |       |
| 8.77E-04 | 0 0 | orange1.1t00423.1/ora | 5.97 | 0 | 0    | 2 | MASCOT | T      |       |       |
| 1.70E-06 | 0 0 | orange1.1t00423.1/ora | 5.97 | 0 | 0    | 2 | MASCOT | T      |       |       |
| 6.94E-06 | 0 0 | orange1.1t00423.1/ora | 4.03 | 0 | 0    | 2 | MASCOT | T      |       |       |
| 8.61E-02 | 0 0 | orange1.1t00423.1/ora | 6.1  | 0 | 0    | 2 | MASCOT | T      | PLEX8 |       |
| 1.50E-01 | 0 0 | orange1.1t00423.1/ora | 6.1  | 0 | 0    | 2 | MASCOT | T      | PLEX8 |       |
| 1.45E-01 | 0 0 | orange1.1t00423.1/ora | 6.1  | 0 | 0    | 2 | MASCOT | T      | PLEX8 |       |
| 6.67E-02 | 0 0 | orange1.1t00423.1/ora | 4.37 | 0 | 0    | 2 | MASCOT | T      |       |       |
| 2.44E-02 | 0 0 | orange1.1t00423.1/ora | 6    | 0 | 0    | 2 | MASCOT | T      | PLEX8 |       |
| 1.71E-01 | 0 0 | orange1.1t00423.1/ora | 6    | 0 | 0    | 2 | MASCOT | T      | PLEX8 |       |
| 1.52E-02 | 0 0 | orange1.1t00423.1/ora | 6.75 | 0 | 15.9 | 0 | 2      | MASCOT | T     | PLEX8 |
| 3.05E-01 | 0 0 | Cs9g10370.1/Cs9g103   | 4.14 | 0 | 0    | 2 | MASCOT | T      | PLEX8 |       |
| 1.76E-03 | 0 0 | Cs9g10370.1/Cs9g103   | 9.76 | 0 | 0    | 2 | MASCOT | T      |       |       |
| 8.57E-04 | 0 0 | Cs9g10370.1/Cs9g103   | 9.76 | 0 | 0    | 2 | MASCOT | T      |       |       |
| 6.94E-02 | 0 0 | Cs9g10370.1/Cs9g103   | 5.5  | 0 | 0    | 2 | MASCOT | T      | PLEX8 |       |
| 3.64E-01 | 0 0 | Cs9g10370.1/Cs9g103   | 8.72 | 0 | 0    | 2 | MASCOT | T      | PLEX8 |       |
| 1.13E-02 | 0 0 | Cs9g10370.1/Cs9g103   | 5.97 | 0 | 0    | 2 | MASCOT | T      | PLEX8 |       |
| 1.24E-04 | 0 0 | Cs9g10370.1/Cs9g103   | 5.97 | 0 | 0    | 2 | MASCOT | T      | PLEX8 |       |
| 1.17E-01 | 0 0 | Cs9g10370.1/Cs9g103   | 4.37 | 0 | 0    | 2 | MASCOT | T      | PLEX8 |       |
| 7.92E-06 | 0 0 | Cs9g10370.1/Cs9g103   | 4.37 | 0 | 0    | 2 | MASCOT | T      |       |       |
| 5.51E-02 | 0 0 | Cs9g10370.1/Cs9g103   | 5.44 | 1 | 0    | 2 | MASCOT | T      | PLEX8 |       |
| 2.72E-02 | 0 0 | Cs9g10370.1/Cs9g103   | 5.44 | 1 | 0    | 2 | MASCOT | T      | PLEX8 |       |
| 2.87E-03 | 0 0 | Cs9g10370.1/Cs9g103   | 6.07 | 0 | 0    | 2 | MASCOT | T      | PLEX8 |       |
| 3.45E-06 | 0 0 | Cs9g10370.1/Cs9g103   | 4.65 | 0 | 0    | 2 | MASCOT | T      | PLEX8 |       |
| 1.64E-01 | 0 0 | Cs9g10370.1/Cs9g103   | 4.65 | 0 | 0    | 2 | MASCOT | T      | PLEX8 |       |

|          |     |                     |      |   |      |   |        |        |       |       |
|----------|-----|---------------------|------|---|------|---|--------|--------|-------|-------|
| 2.09E-03 | 0 0 | Cs9g10370.1/Cs9g103 | 4.65 | 0 | 0    | 2 | MASCOT | T      | PLEX8 |       |
| 4.29E-03 | 0 0 | Cs9g10370.1/Cs9g103 | 4.65 | 0 | 0    | 2 | MASCOT | T      | PLEX8 |       |
| 1.31E-02 | 0 0 | Cs9g10370.1/Cs9g103 | 4.65 | 0 | 0    | 2 | MASCOT | T      |       |       |
| 1.46E-01 | 0 0 | Cs9g10370.1/Cs9g103 | 4.65 | 0 | 0    | 2 | MASCOT | T      | PLEX8 |       |
| 6.23E-06 | 0 0 | Cs9g10370.1/Cs9g103 | 4.65 | 0 | 0    | 2 | MASCOT | T      | PLEX8 |       |
| 2.45E-01 | 0 0 | Cs9g10370.1/Cs9g103 | 4.65 | 0 | 0    | 2 | MASCOT | T      | PLEX8 |       |
| 1.07E-02 | 0 0 | Cs9g10370.1/Cs9g103 | 4.65 | 0 | 0    | 2 | MASCOT | T      | PLEX8 |       |
| 6.54E-02 | 0 0 | Cs9g10370.1/Cs9g103 | 4.65 | 0 | 0    | 2 | MASCOT | T      |       |       |
| 1.58E-01 | 0 0 | Cs9g10370.1/Cs9g103 | 4.65 | 0 | 0    | 2 | MASCOT | T      |       |       |
| 4.77E-03 | 0 0 | Cs9g10370.1/Cs9g103 | 4.65 | 0 | 0    | 2 | MASCOT | T      |       |       |
| 2.06E-01 | 0 0 | Cs9g10370.1/Cs9g103 | 4.65 | 0 | 0    | 2 | MASCOT | T      |       |       |
| 8.65E-02 | 0 0 | Cs9g10370.1/Cs9g103 | 5.81 | 0 | 0    | 2 | MASCOT | T      | PLEX8 |       |
| 3.15E-01 | 0 0 | Cs9g10370.1/Cs9g103 | 5.81 | 0 | 0    | 2 | MASCOT | T      | PLEX8 |       |
| 8.79E-02 | 0 0 | Cs9g10370.1/Cs9g103 | 5.81 | 0 | 0    | 2 | MASCOT | T      | PLEX8 |       |
| 1.57E-01 | 0 0 | Cs9g10370.1/Cs9g103 | 5.81 | 0 | 0    | 2 | MASCOT | T      | PLEX8 |       |
| 1.49E-01 | 0 0 | Cs9g10370.1/Cs9g103 | 5.81 | 0 | 0    | 2 | MASCOT | T      | PLEX8 |       |
| 3.86E-01 | 0 0 | Cs3g19380.1         | 4.68 | 0 | 0    | 2 | MASCOT | T      | PLEX8 |       |
| 1.98E-02 | 0 0 | Cs3g19380.1         | 5.84 | 0 | 0    | 2 | MASCOT | T      | PLEX8 |       |
| 1.21E-01 | 0 0 | Cs3g19380.1         | 5.84 | 0 | 0    | 2 | MASCOT | T      | PLEX8 |       |
| 4.09E-02 | 0 0 | Cs3g19380.1         | 3.92 | 0 | 0    | 2 | MASCOT | T      | PLEX8 |       |
| 5.43E-03 | 0 0 | Cs3g19380.1         | 3.92 | 0 | 0    | 2 | MASCOT | T      | PLEX8 |       |
| 2.37E-01 | 0 0 | Cs3g19380.1         | 4.14 | 0 | 0    | 2 | MASCOT | T      |       |       |
| 1.01E-01 | 0 0 | Cs3g19380.1         | 5.21 | 0 | 0    | 2 | MASCOT | T      |       |       |
| 9.88E-03 | 0 0 | Cs3g19380.1         | 5.21 | 0 | 0    | 2 | MASCOT | T      | PLEX8 |       |
| 8.40E-02 | 0 0 | Cs3g19380.1         | 8.41 | 0 | 0    | 2 | MASCOT | T      | PLEX8 |       |
| 1.78E-01 | 0 0 | Cs3g19380.1         | 8.41 | 0 | 0    | 2 | MASCOT | T      | PLEX8 |       |
| 1.37E-01 | 0 0 | Cs3g19380.1         | 8.41 | 0 | 0    | 2 | MASCOT | T      | PLEX8 |       |
| 5.96E-02 | 0 0 | Cs3g19380.1         | 8.41 | 0 | 0    | 2 | MASCOT | T      | PLEX8 |       |
| 1.21E-01 | 0 0 | Cs3g19380.1         | 8.41 | 0 | 0    | 2 | MASCOT | T      | PLEX8 |       |
| 3.36E-01 | 0 0 | Cs3g19380.1         | 8.8  | 0 | 15.9 | 0 | 2      | MASCOT | T     | PLEX8 |
| 7.69E-02 | 0 0 | Cs3g19380.1         | 8.8  | 0 | 15.9 | 0 | 2      | MASCOT | T     | PLEX8 |
| 2.13E-01 | 0 0 | Cs3g19380.1         | 8.8  | 0 | 15.9 | 0 | 2      | MASCOT | T     | PLEX8 |
| 6.24E-02 | 0 0 | Cs3g19380.1         | 8.8  | 0 | 0    | 2 | MASCOT | T      | PLEX8 |       |
| 2.08E-04 | 0 0 | Cs3g19380.1         | 8.8  | 0 | 0    | 2 | MASCOT | T      | PLEX8 |       |
| 6.02E-05 | 0 0 | Cs3g19380.1         | 8.8  | 0 | 0    | 2 | MASCOT | T      | PLEX8 |       |
| 1.89E-02 | 0 0 | Cs3g19380.1         | 8.8  | 0 | 0    | 2 | MASCOT | T      | PLEX8 |       |
| 2.84E-02 | 0 0 | Cs3g19380.1         | 4.25 | 0 | 0    | 2 | MASCOT | T      | PLEX8 |       |
| 2.77E-02 | 0 0 | Cs3g19380.1         | 6.75 | 0 | 0    | 2 | MASCOT | T      | PLEX8 |       |
| 8.71E-02 | 0 0 | Cs3g19380.1         | 6.75 | 0 | 0    | 2 | MASCOT | T      | PLEX8 |       |
| 1.00E-02 | 0 0 | Cs3g19380.1         | 6.75 | 0 | 0    | 2 | MASCOT | T      | PLEX8 |       |
| 1.27E-01 | 0 0 | Cs3g19380.1         | 6.75 | 0 | 0    | 2 | MASCOT | T      | PLEX8 |       |
| 5.18E-04 | 0 0 | Cs3g19380.1         | 6.75 | 0 | 0    | 2 | MASCOT | T      | PLEX8 |       |
| 1.48E-04 | 0 0 | Cs3g19380.1         | 6.75 | 0 | 0    | 2 | MASCOT | T      | PLEX8 |       |
| 1.50E-01 | 0 0 | Cs6g15230.1         | 6.24 | 0 | 0    | 2 | MASCOT | T      | PLEX8 |       |
| 2.00E-01 | 0 0 | Cs6g15230.1         | 6    | 0 | 0    | 2 | MASCOT | T      | PLEX8 |       |
| 6.28E-02 | 0 0 | Cs6g15230.1         | 6    | 0 | 0    | 2 | MASCOT | T      | PLEX8 |       |
| 9.61E-04 | 0 0 | Cs6g15230.1         | 6    | 0 | 0    | 2 | MASCOT | T      | PLEX8 |       |
| 1.10E-02 | 0 0 | Cs6g15230.1         | 6    | 0 | 0    | 2 | MASCOT | T      | PLEX8 |       |
| 7.84E-02 | 0 0 | Cs6g15230.1         | 5.66 | 0 | 0    | 2 | MASCOT | T      | PLEX8 |       |
| 5.53E-03 | 0 0 | Cs6g15230.1         | 5.66 | 0 | 0    | 2 | MASCOT | T      | PLEX8 |       |
| 8.84E-02 | 0 0 | Cs6g15230.1         | 4.25 | 0 | 0    | 2 | MASCOT | T      |       |       |

|          |     |                     |      |   |      |   |        |        |       |       |
|----------|-----|---------------------|------|---|------|---|--------|--------|-------|-------|
| 4.78E-02 | 0 0 | Cs6g15230.1         | 4.25 | 0 | 0    | 2 | MASCOT | T      |       |       |
| 1.65E-01 | 0 0 | Cs6g15230.1         | 4.25 | 0 | 0    | 2 | MASCOT | T      |       |       |
| 5.53E-03 | 0 0 | Cs6g15230.1         | 4.25 | 0 | 0    | 2 | MASCOT | T      | PLEX8 |       |
| 9.63E-05 | 0 0 | Cs6g15230.1         | 4.25 | 0 | 0    | 2 | MASCOT | T      |       |       |
| 3.06E-01 | 0 0 | Cs6g15230.1         | 4.25 | 0 | 0    | 2 | MASCOT | T      |       |       |
| 7.47E-03 | 0 0 | Cs6g15230.1         | 4.25 | 0 | 0    | 2 | MASCOT | T      |       |       |
| 2.45E-02 | 0 0 | Cs6g15230.1         | 3.84 | 0 | 0    | 2 | MASCOT | T      | PLEX8 |       |
| 7.70E-02 | 0 0 | Cs6g15230.1         | 6.74 | 0 | 0    | 2 | MASCOT | T      | PLEX8 |       |
| 6.09E-05 | 0 0 | Cs6g15230.1         | 6.74 | 0 | 0    | 2 | MASCOT | T      | PLEX8 |       |
| 4.64E-06 | 0 0 | Cs6g15230.1         | 6.74 | 0 | 0    | 2 | MASCOT | T      | PLEX8 |       |
| 4.35E-04 | 0 0 | Cs6g15230.1         | 4.03 | 0 | 0    | 2 | MASCOT | T      | PLEX8 |       |
| 9.38E-04 | 0 0 | Cs6g15230.1         | 4.03 | 0 | 0    | 2 | MASCOT | T      | PLEX8 |       |
| 6.75E-03 | 0 0 | Cs6g15230.1         | 6.92 | 1 | 0    | 2 | MASCOT | T      | PLEX8 |       |
| 6.63E-03 | 0 0 | Cs6g15230.1         | 6.92 | 1 | 0    | 2 | MASCOT | T      | PLEX8 |       |
| 6.93E-03 | 0 0 | Cs6g15230.1         | 6.92 | 1 | 0    | 2 | MASCOT | T      |       |       |
| 7.22E-02 | 0 0 | Cs5g03080.1/Cs5g030 | 5.99 | 0 | 0    | 2 | MASCOT | T      | PLEX8 |       |
| 1.05E-02 | 0 0 | Cs5g03080.1/Cs5g030 | 5.99 | 0 | 0    | 2 | MASCOT | T      | PLEX8 |       |
| 4.89E-02 | 0 0 | Cs5g03080.1/Cs5g030 | 5.99 | 0 | 0    | 2 | MASCOT | T      |       |       |
| 1.99E-02 | 0 0 | Cs5g03080.1/Cs5g030 | 5.99 | 0 | 0    | 2 | MASCOT | T      |       |       |
| 1.27E-02 | 0 0 | Cs2g23520.1/Cs2g235 | 9.75 | 0 | 0    | 2 | MASCOT | T      | PLEX8 |       |
| 1.14E-04 | 0 0 | Cs2g23520.1/Cs2g235 | 4.37 | 0 | 0    | 2 | MASCOT | T      | PLEX8 |       |
| 5.77E-05 | 0 0 | Cs2g23520.1/Cs2g235 | 4.37 | 0 | 0    | 2 | MASCOT | T      | PLEX8 |       |
| 6.17E-03 | 0 0 | Cs2g23520.1/Cs2g235 | 4.37 | 0 | 0    | 2 | MASCOT | T      | PLEX8 |       |
| 1.36E-04 | 0 0 | Cs2g23520.1/Cs2g235 | 4.37 | 0 | 0    | 2 | MASCOT | T      | PLEX8 |       |
| 3.88E-03 | 0 0 | Cs2g23520.1/Cs2g235 | 4.37 | 0 | 0    | 2 | MASCOT | T      | PLEX8 |       |
| 3.93E-02 | 0 0 | Cs7g01840.1/Cs7g018 | 8.75 | 0 | 0    | 2 | MASCOT | T      | PLEX8 |       |
| 1.97E-02 | 0 0 | Cs2g23520.1/Cs2g235 | 5.55 | 0 | 0    | 2 | MASCOT | T      | PLEX8 |       |
| 1.13E-02 | 0 0 | Cs2g23520.1/Cs2g235 | 5.55 | 0 | 0    | 2 | MASCOT | T      | PLEX8 |       |
| 2.75E-02 | 0 0 | Cs2g23520.1/Cs2g235 | 5.55 | 0 | 0    | 2 | MASCOT | T      | PLEX8 |       |
| 2.48E-02 | 0 0 | Cs7g01840.1/Cs7g018 | 5.55 | 0 | 0    | 2 | MASCOT | T      | PLEX8 |       |
| 1.95E-03 | 0 0 | Cs7g01840.1/Cs7g018 | 5.55 | 0 | 0    | 2 | MASCOT | T      | PLEX8 |       |
| 8.24E-06 | 0 0 | Cs7g01840.1/Cs7g018 | 5.55 | 0 | 0    | 2 | MASCOT | T      | PLEX8 |       |
| 1.53E-01 | 0 0 | Cs2g23520.1/Cs2g235 | 5.66 | 0 | 0    | 2 | MASCOT | T      | PLEX8 |       |
| 1.34E-02 | 0 0 | Cs2g23520.1/Cs2g235 | 5.66 | 0 | 0    | 2 | MASCOT | T      | PLEX8 |       |
| 1.96E-03 | 0 0 | Cs2g23520.1/Cs2g235 | 5.88 | 0 | 0    | 2 | MASCOT | T      | PLEX8 |       |
| 1.79E-05 | 0 0 | Cs2g23520.1/Cs2g235 | 5.88 | 0 | 0    | 2 | MASCOT | T      | PLEX8 |       |
| 1.25E-03 | 0 0 | Cs2g23520.1/Cs2g235 | 5.88 | 0 | 0    | 2 | MASCOT | T      | PLEX8 |       |
| 1.08E-02 | 0 0 | Cs2g23520.1/Cs2g235 | 5.88 | 0 | 0    | 2 | MASCOT | T      | PLEX8 |       |
| 6.27E-05 | 0 0 | Cs2g23520.1/Cs2g235 | 5.88 | 0 | 0    | 2 | MASCOT | T      | PLEX8 |       |
| 8.78E-02 | 0 0 | Cs2g23520.2/Cs2g235 | 9.75 | 0 | 0    | 2 | MASCOT | T      | PLEX8 |       |
| 8.30E-02 | 0 0 | Cs2g23520.1/Cs2g235 | 5.75 | 0 | 15.9 | 0 | 2      | MASCOT | T     | PLEX8 |
| 2.79E-02 | 0 0 | Cs2g23520.1/Cs2g235 | 5.75 | 0 | 0    | 2 | MASCOT | T      | PLEX8 |       |
| 2.13E-02 | 0 0 | Cs2g23520.1/Cs2g235 | 5.75 | 0 | 0    | 2 | MASCOT | T      | PLEX8 |       |
| 2.60E-01 | 0 0 | Cs2g23520.1/Cs2g235 | 5.75 | 0 | 0    | 2 | MASCOT | T      | PLEX8 |       |
| 3.73E-03 | 0 0 | Cs2g23520.1/Cs2g235 | 8.59 | 0 | 0    | 2 | MASCOT | T      | PLEX8 |       |
| 7.34E-02 | 0 0 | Cs7g05580.1/Cs7g055 | 6.75 | 1 | 0    | 2 | MASCOT | T      | PLEX8 |       |
| 3.74E-01 | 0 0 | Cs7g05580.1/Cs7g055 | 8.75 | 0 | 0    | 2 | MASCOT | T      | PLEX8 |       |
| 1.93E-01 | 0 0 | Cs7g05580.1/Cs7g055 | 8.75 | 0 | 0    | 2 | MASCOT | T      | PLEX8 |       |
| 3.03E-01 | 0 0 | Cs7g05580.1/Cs7g055 | 5.72 | 0 | 0    | 2 | MASCOT | T      | PLEX8 |       |
| 4.46E-04 | 0 0 | Cs7g05580.1/Cs7g055 | 3.96 | 0 | 0    | 2 | MASCOT | T      |       |       |
| 3.12E-05 | 0 0 | Cs7g05580.1/Cs7g055 | 3.96 | 0 | 0    | 2 | MASCOT | T      |       |       |

|          |     |                       |      |   |      |   |        |        |       |       |
|----------|-----|-----------------------|------|---|------|---|--------|--------|-------|-------|
| 1.24E-02 | 0 0 | Cs7g05580.1/Cs7g055   | 9.76 | 0 | 0    | 2 | MASCOT | T      | PLEX8 |       |
| 6.23E-02 | 0 0 | Cs7g05580.1/Cs7g055   | 9.76 | 0 | 0    | 2 | MASCOT | T      | PLEX8 |       |
| 1.57E-01 | 0 0 | Cs7g05580.1/Cs7g055   | 9.76 | 0 | 0    | 2 | MASCOT | T      |       |       |
| 3.27E-02 | 0 0 | Cs7g05580.1/Cs7g055   | 5.84 | 0 | 0    | 2 | MASCOT | T      | PLEX8 |       |
| 1.54E-01 | 0 0 | Cs7g05580.1/Cs7g055   | 5.84 | 0 | 0    | 2 | MASCOT | T      | PLEX8 |       |
| 2.33E-01 | 0 0 | Cs7g05580.1/Cs7g055   | 5.84 | 0 | 0    | 2 | MASCOT | T      | PLEX8 |       |
| 1.74E-01 | 0 0 | Cs7g05580.1/Cs7g055   | 5.84 | 0 | 0    | 2 | MASCOT | T      | PLEX8 |       |
| 8.19E-02 | 0 0 | Cs7g05580.1/Cs7g055   | 9.31 | 0 | 0    | 2 | MASCOT | T      | PLEX8 |       |
| 3.24E-03 | 0 0 | Cs7g05580.1/Cs7g055   | 6.89 | 0 | 0    | 2 | MASCOT | T      | PLEX8 |       |
| 8.04E-02 | 0 0 | Cs7g05580.1/Cs7g055   | 6.89 | 0 | 0    | 2 | MASCOT | T      | PLEX8 |       |
| 6.57E-02 | 0 0 | Cs7g05580.1/Cs7g055   | 6.89 | 0 | 0    | 2 | MASCOT | T      | PLEX8 |       |
| 4.14E-01 | 0 0 | Cs7g05580.1/Cs7g055   | 6.89 | 0 | 0    | 2 | MASCOT | T      | PLEX8 |       |
| 1.38E-01 | 0 0 | Cs7g05580.1/Cs7g055   | 6.89 | 0 | 0    | 2 | MASCOT | T      | PLEX8 |       |
| 7.30E-02 | 0 0 | Cs7g05580.1/Cs7g055   | 6.89 | 0 | 0    | 2 | MASCOT | T      | PLEX8 |       |
| 1.13E-02 | 0 0 | Cs7g05580.1/Cs7g055   | 6.89 | 0 | 0    | 2 | MASCOT | T      | PLEX8 |       |
| 1.36E-01 | 0 0 | Cs7g05580.1/Cs7g055   | 6.89 | 0 | 0    | 2 | MASCOT | T      |       |       |
| 1.97E-04 | 0 0 | Cs7g05580.1/Cs7g055   | 6.89 | 0 | 0    | 2 | MASCOT | T      |       |       |
| 3.59E-01 | 0 0 | Cs7g05580.1/Cs7g055   | 6.72 | 0 | 0    | 2 | MASCOT | T      | PLEX8 |       |
| 4.18E-04 | 0 0 | Cs7g05580.1/Cs7g055   | 4.75 | 0 | 0    | 2 | MASCOT | T      | PLEX8 |       |
| 6.66E-03 | 0 0 | Cs7g05580.1/Cs7g055   | 4.75 | 0 | 0    | 2 | MASCOT | T      | PLEX8 |       |
| 1.55E-01 | 0 0 | Cs6g19310.1/Cs7g123   | 4.21 | 0 | 0    | 2 | MASCOT | T      | PLEX8 |       |
| 4.45E-02 | 0 0 | Cs6g19310.1/Cs7g123   | 4.21 | 0 | 0    | 2 | MASCOT | T      | PLEX8 |       |
| 2.23E-02 | 0 0 | Cs7g12340.1/Cs7g123   | 5.32 | 0 | 0    | 2 | MASCOT | T      | PLEX8 |       |
| 1.87E-02 | 0 0 | Cs6g19310.1/Cs7g123   | 8.22 | 0 | 15.9 | 0 | 2      | MASCOT | T     | PLEX8 |
| 9.19E-02 | 0 0 | Cs6g19310.1/Cs7g123   | 8.22 | 0 | 15.9 | 0 | 2      | MASCOT | T     | PLEX8 |
| 3.18E-01 | 0 0 | Cs7g12340.1/Cs7g123   | 5.8  | 0 | 0    | 2 | MASCOT | T      |       |       |
| 1.15E-06 | 0 0 | Cs7g12340.1/Cs7g123   | 5.8  | 0 | 0    | 2 | MASCOT | T      |       |       |
| 9.50E-03 | 0 0 | Cs6g19310.1/Cs7g123   | 4.14 | 0 | 0    | 2 | MASCOT | T      | PLEX8 |       |
| 8.69E-03 | 0 0 | Cs6g19310.1/Cs7g123   | 4.14 | 0 | 0    | 2 | MASCOT | T      |       |       |
| 8.67E-02 | 0 0 | Cs6g19310.1/Cs7g123   | 4.14 | 0 | 0    | 2 | MASCOT | T      |       |       |
| 4.88E-02 | 0 0 | Cs6g19310.1 ! Cs7g12  | 5.32 | 0 | 0    | 2 | MASCOT | T      | PLEX8 |       |
| 1.82E-02 | 0 0 | Cs6g19310.1 ! Cs7g12  | 5.32 | 0 | 0    | 2 | MASCOT | T      |       |       |
| 9.83E-02 | 0 0 | Cs5g02720.1/orange1.  | 4.21 | 0 | 0    | 2 | MASCOT | T      | PLEX8 |       |
| 1.06E-02 | 0 0 | Cs5g02720.1/orange1.  | 4.21 | 0 | 0    | 2 | MASCOT | T      | PLEX8 |       |
| 1.31E-02 | 0 0 | Cs5g02720.1/orange1.  | 4.21 | 0 | 0    | 2 | MASCOT | T      |       |       |
| 4.72E-01 | 0 0 | Cs5g02720.1/Cs6g193   | 9.75 | 0 | 0    | 2 | MASCOT | T      | PLEX8 |       |
| 2.55E-01 | 0 0 | Cs5g02720.1/Cs6g193   | 9.75 | 0 | 0    | 2 | MASCOT | T      | PLEX8 |       |
| 4.00E-04 | 0 0 | Cs5g02720.1/Cs6g193   | 9.75 | 0 | 0    | 2 | MASCOT | T      |       |       |
| 7.15E-02 | 0 0 | Cs5g02720.1/Cs6g193   | 8.59 | 0 | 0    | 2 | MASCOT | T      | PLEX8 |       |
| 3.05E-02 | 0 0 | Cs5g02720.1/Cs6g193   | 8.59 | 0 | 0    | 2 | MASCOT | T      | PLEX8 |       |
| 1.66E-01 | 0 0 | Cs5g02720.1/Cs6g193   | 8.59 | 0 | 0    | 2 | MASCOT | T      | PLEX8 |       |
| 1.52E-01 | 0 0 | Cs5g02720.1/Cs6g193   | 8.59 | 0 | 0    | 2 | MASCOT | T      |       |       |
| 7.15E-02 | 0 0 | Cs5g02720.1/Cs6g193   | 8.59 | 0 | 0    | 2 | MASCOT | T      | PLEX8 |       |
| 6.90E-02 | 0 0 | Cs5g02720.1/Cs6g193   | 8.59 | 0 | 0    | 2 | MASCOT | T      | PLEX8 |       |
| 6.39E-02 | 0 0 | Cs5g02720.1/Cs6g193   | 8.59 | 0 | 0    | 2 | MASCOT | T      |       |       |
| 2.20E-02 | 0 0 | Cs6g19310.1/Cs7g123   | 8.72 | 0 | 15.9 | 0 | 2      | MASCOT | T     | PLEX8 |
| 8.65E-04 | 0 0 | orange1.1t01622.1/ora | 4.37 | 0 | 0    | 2 | MASCOT | T      | PLEX8 |       |
| 6.40E-05 | 0 0 | Cs5g16440.1/Cs5g164   | 3.92 | 0 | 0    | 2 | MASCOT | T      | PLEX8 |       |
| 8.22E-03 | 0 0 | orange1.1t01622.1/ora | 4.83 | 1 | 0    | 2 | MASCOT | T      | PLEX8 |       |
| 7.37E-05 | 0 0 | orange1.1t01622.1/ora | 4.83 | 1 | 0    | 2 | MASCOT | T      | PLEX8 |       |
| 3.25E-02 | 0 0 | orange1.1t01622.1/ora | 4.83 | 1 | 0    | 2 | MASCOT | T      |       |       |

|          |     |                       |      |   |      |   |        |        |       |       |
|----------|-----|-----------------------|------|---|------|---|--------|--------|-------|-------|
| 5.96E-03 | 0 0 | Cs5g16440.1/Cs5g164   | 8.49 | 0 | 0    | 2 | MASCOT | T      | PLEX8 |       |
| 3.13E-03 | 0 0 | Cs5g16440.1/Cs5g164   | 8.49 | 0 | 0    | 2 | MASCOT | T      | PLEX8 |       |
| 4.95E-02 | 0 0 | Cs5g16440.1/Cs5g164   | 8.49 | 0 | 0    | 2 | MASCOT | T      | PLEX8 |       |
| 7.84E-03 | 0 0 | Cs5g16440.1/Cs5g164   | 8.49 | 0 | 0    | 2 | MASCOT | T      | PLEX8 |       |
| 4.37E-01 | 0 0 | orange1.1t01622.1/ora | 5.32 | 0 | 0    | 2 | MASCOT | T      | PLEX8 |       |
| 1.67E-03 | 0 0 | orange1.1t01622.1/ora | 5.32 | 0 | 0    | 2 | MASCOT | T      | PLEX8 |       |
| 1.87E-02 | 0 0 | orange1.1t01622.1/ora | 5.32 | 0 | 0    | 2 | MASCOT | T      | PLEX8 |       |
| 4.16E-04 | 0 0 | orange1.1t01622.1/ora | 5.32 | 0 | 0    | 2 | MASCOT | T      | PLEX8 |       |
| 2.16E-01 | 0 0 | orange1.1t01622.1/ora | 8.75 | 0 | 0    | 2 | MASCOT | T      | PLEX8 |       |
| 3.72E-02 | 0 0 | orange1.1t01622.1     | 6    | 0 | 0    | 2 | MASCOT | T      | PLEX8 |       |
| 3.10E-02 | 0 0 | orange1.1t01622.1     | 6    | 0 | 0    | 2 | MASCOT | T      | PLEX8 |       |
| 1.11E-04 | 0 0 | orange1.1t01622.1/ora | 4.4  | 0 | 0    | 2 | MASCOT | T      | PLEX8 |       |
| 8.81E-04 | 0 0 | orange1.1t01622.1/ora | 4.4  | 0 | 0    | 2 | MASCOT | T      | PLEX8 |       |
| 1.39E-01 | 0 0 | orange1.1t01622.1/ora | 4.4  | 0 | 0    | 2 | MASCOT | T      | PLEX8 |       |
| 1.58E-01 | 0 0 | orange1.1t01622.1/ora | 5.4  | 0 | 0    | 2 | MASCOT | T      | PLEX8 |       |
| 3.16E-02 | 0 0 | orange1.1t01622.1/ora | 5.4  | 0 | 0    | 2 | MASCOT | T      | PLEX8 |       |
| 2.26E-01 | 0 0 | Cs5g16440.1/Cs5g164   | 4.53 | 0 | 0    | 2 | MASCOT | T      | PLEX8 |       |
| 2.25E-01 | 0 0 | Cs5g16440.1/Cs5g164   | 4.53 | 0 | 0    | 2 | MASCOT | T      | PLEX8 |       |
| 1.96E-01 | 0 0 | Cs5g16440.1/Cs5g164   | 4.53 | 0 | 0    | 2 | MASCOT | T      | PLEX8 |       |
| 1.95E-01 | 0 0 | Cs5g16440.1/Cs5g164   | 4.53 | 0 | 0    | 2 | MASCOT | T      | PLEX8 |       |
| 2.80E-02 | 0 0 | Cs5g16440.1/Cs5g164   | 4.53 | 0 | 0    | 2 | MASCOT | T      | PLEX8 |       |
| 1.67E-01 | 0 0 | Cs5g28200.1/Cs5g282   | 4.53 | 0 | 0    | 2 | MASCOT | T      | PLEX8 |       |
| 4.66E-02 | 0 0 | Cs5g28200.1/Cs5g282   | 6.74 | 0 | 0    | 2 | MASCOT | T      | PLEX8 |       |
| 1.13E-01 | 0 0 | Cs5g28200.1/Cs5g282   | 6.74 | 0 | 0    | 2 | MASCOT | T      | PLEX8 |       |
| 6.37E-03 | 0 0 | Cs5g28200.1/Cs5g282   | 5.4  | 0 | 15.9 | 0 | 2      | MASCOT | T     | PLEX8 |
| 1.81E-02 | 0 0 | Cs5g28200.1/Cs5g282   | 5.4  | 0 | 15.9 | 0 | 2      | MASCOT | T     | PLEX8 |
| 3.49E-01 | 0 0 | Cs5g28200.1/Cs5g282   | 5.4  | 0 | 0    | 2 | MASCOT | T      | PLEX8 |       |
| 3.90E-03 | 0 0 | Cs5g28200.1/Cs5g282   | 5.4  | 0 | 0    | 2 | MASCOT | T      | PLEX8 |       |
| 9.18E-04 | 0 0 | Cs5g28200.1/Cs5g282   | 5.83 | 0 | 0    | 2 | MASCOT | T      | PLEX8 |       |
| 1.83E-01 | 0 0 | Cs5g28200.1/Cs5g282   | 5.84 | 0 | 0    | 2 | MASCOT | T      | PLEX8 |       |
| 2.13E-01 | 0 0 | Cs5g28200.1/Cs5g282   | 8.72 | 0 | 15.9 | 0 | 2      | MASCOT | T     | PLEX8 |
| 5.73E-03 | 0 0 | Cs5g28200.1/Cs5g282   | 8.72 | 0 | 0    | 2 | MASCOT | T      | PLEX8 |       |
| 2.60E-04 | 0 0 | Cs5g28200.1/Cs5g282   | 8.72 | 0 | 0    | 2 | MASCOT | T      | PLEX8 |       |
| 2.32E-03 | 0 0 | Cs5g28200.1/Cs5g282   | 8.72 | 0 | 0    | 2 | MASCOT | T      | PLEX8 |       |
| 8.73E-04 | 0 0 | Cs5g28200.1/Cs5g282   | 8.72 | 0 | 0    | 2 | MASCOT | T      | PLEX8 |       |
| 3.13E-01 | 0 0 | Cs8g07020.1/Cs8g070   | 5.97 | 0 | 0    | 2 | MASCOT | T      | PLEX8 |       |
| 1.02E-01 | 0 0 | Cs5g28200.1/Cs5g282   | 5.4  | 0 | 0    | 2 | MASCOT | T      | PLEX8 |       |
| 9.83E-03 | 0 0 | Cs5g28200.1/Cs5g282   | 5.4  | 0 | 0    | 2 | MASCOT | T      | PLEX8 |       |
| 1.15E-02 | 0 0 | Cs5g28200.1/Cs5g282   | 5.4  | 0 | 0    | 2 | MASCOT | T      | PLEX8 |       |
| 2.57E-01 | 0 0 | Cs5g28200.1/Cs5g282   | 5.4  | 0 | 0    | 2 | MASCOT | T      | PLEX8 |       |
| 3.49E-03 | 0 0 | Cs5g28200.1/Cs5g282   | 6.05 | 0 | 0    | 2 | MASCOT | T      | PLEX8 |       |
| 9.95E-03 | 0 0 | Cs5g28200.1/Cs5g282   | 6.05 | 0 | 0    | 2 | MASCOT | T      | PLEX8 |       |
| 8.81E-03 | 0 0 | Cs5g28200.1/Cs5g282   | 6.05 | 0 | 0    | 2 | MASCOT | T      | PLEX8 |       |
| 1.80E-01 | 0 0 | Cs5g28200.1/Cs5g282   | 4.37 | 0 | 0    | 2 | MASCOT | T      | PLEX8 |       |
| 1.95E-01 | 0 0 | Cs5g28200.1/Cs5g282   | 4.37 | 0 | 0    | 2 | MASCOT | T      | PLEX8 |       |
| 2.10E-01 | 0 0 | Cs5g28200.1/Cs5g282   | 4.37 | 0 | 0    | 2 | MASCOT | T      | PLEX8 |       |
| 1.46E-01 | 0 0 | orange1.1t03395.1/ora | 4.21 | 0 | 0    | 2 | MASCOT | T      | PLEX8 |       |
| 4.00E-02 | 0 0 | orange1.1t03395.1/ora | 4.21 | 0 | 0    | 2 | MASCOT | T      | PLEX8 |       |
| 6.10E-04 | 0 0 | orange1.1t03395.1/ora | 4.21 | 0 | 0    | 2 | MASCOT | T      | PLEX8 |       |
| 1.36E-04 | 0 0 | orange1.1t03395.1/ora | 4.21 | 0 | 0    | 2 | MASCOT | T      | PLEX8 |       |
| 5.97E-04 | 0 0 | orange1.1t03395.1/ora | 4.21 | 0 | 0    | 2 | MASCOT | T      | PLEX8 |       |

|          |     |                       |      |   |      |   |        |        |         |
|----------|-----|-----------------------|------|---|------|---|--------|--------|---------|
| 1.05E-01 | 0 0 | orange1.1t03395.1/ora | 4.21 | 0 | 0    | 2 | MASCOT | T      |         |
| 1.94E-01 | 0 0 | orange1.1t03395.1/ora | 4.21 | 0 | 0    | 2 | MASCOT | T      |         |
| 1.63E-01 | 0 0 | Cs7g27470.1/orange1.  | 9.47 | 0 | 0    | 2 | MASCOT | T      | PLEX8   |
| 1.21E-02 | 0 0 | orange1.1t03395.1/ora | 4.37 | 0 | 0    | 2 | MASCOT | T      | PLEX8   |
| 1.56E-01 | 0 0 | orange1.1t03395.1/ora | 5.84 | 0 | 0    | 2 | MASCOT | T      | PLEX8   |
| 2.65E-01 | 0 0 | orange1.1t03395.1/ora | 5.83 | 0 | 0    | 2 | MASCOT | T      | PLEX8   |
| 3.86E-03 | 0 0 | orange1.1t03395.1/ora | 5.83 | 0 | 0    | 2 | MASCOT | T      | PLEX8   |
| 1.21E-01 | 0 0 | Cs7g27470.1/orange1.  | 6.74 | 0 | 0    | 2 | MASCOT | T      | PLEX8   |
| 2.01E-01 | 0 0 | Cs7g27470.1/orange1.  | 8.59 | 0 | 0    | 2 | MASCOT | T      | PLEX8   |
| 2.21E-01 | 0 0 | Cs7g27470.1/orange1.  | 8.59 | 0 | 0    | 2 | MASCOT | T      | PLEX8   |
| 1.91E-01 | 0 0 | Cs7g27470.1/orange1.  | 8.59 | 0 | 0    | 2 | MASCOT | T      |         |
| 1.17E-01 | 0 0 | Cs7g27470.1/orange1.  | 8.59 | 0 | 0    | 2 | MASCOT | T      |         |
| 3.01E-02 | 0 0 | Cs7g27470.1/orange1.  | 8.59 | 0 | 0    | 2 | MASCOT | T      |         |
| 1.93E-01 | 0 0 | Cs7g27470.1/orange1.  | 6.74 | 0 | 0    | 2 | MASCOT | T      | PLEX8   |
| 6.96E-02 | 0 0 | Cs7g27470.1/orange1.  | 6.74 | 0 | 0    | 2 | MASCOT | T      | PLEX8   |
| 1.79E-01 | 0 0 | orange1.1t03395.1/ora | 5.84 | 0 | 0    | 2 | MASCOT | T      | PLEX8   |
| 2.94E-01 | 0 0 | orange1.1t03395.1/ora | 5.84 | 0 | 0    | 2 | MASCOT | T      | PLEX8   |
| 2.50E-01 | 0 0 | orange1.1t03395.1/ora | 5.84 | 0 | 0    | 2 | MASCOT | T      | PLEX8   |
| 1.49E-03 | 0 0 | Cs7g27470.1/orange1.  | 5.81 | 0 | 0    | 2 | MASCOT | T      | PLEX8   |
| 4.57E-05 | 0 0 | Cs7g27470.1/orange1.  | 5.81 | 0 | 0    | 2 | MASCOT | T      | PLEX8   |
| 3.18E-03 | 0 0 | Cs2g28210.1/Cs2g282   | 4.37 | 0 | 0    | 2 | MASCOT | T      | PLEX8   |
| 1.01E-03 | 0 0 | Cs2g28210.1/Cs2g282   | 4.37 | 0 | 0    | 2 | MASCOT | T      | PLEX8   |
| 3.92E-03 | 0 0 | Cs2g28210.1/Cs2g282   | 4.37 | 0 | 0    | 2 | MASCOT | T      |         |
| 2.21E-03 | 0 0 | Cs2g28210.1/Cs2g282   | 4.37 | 0 | 0    | 2 | MASCOT | T      |         |
| 2.02E-01 | 0 0 | Cs2g28210.1/Cs2g282   | 3.92 | 0 | 15.9 | 0 | 2      | MASCOT | T PLEX8 |
| 3.25E-03 | 0 0 | Cs2g28210.1/Cs2g282   | 4.37 | 0 | 0    | 2 | MASCOT | T      | PLEX8   |
| 6.94E-02 | 0 0 | Cs2g28210.1/Cs2g282   | 4.37 | 0 | 0    | 2 | MASCOT | T      | PLEX8   |
| 1.87E-01 | 0 0 | Cs2g28210.1/Cs2g282   | 5.21 | 0 | 0    | 2 | MASCOT | T      | PLEX8   |
| 2.08E-02 | 0 0 | Cs2g28210.1/Cs2g282   | 5.21 | 0 | 0    | 2 | MASCOT | T      | PLEX8   |
| 1.32E-03 | 0 0 | Cs2g28210.1/Cs2g282   | 4.53 | 0 | 0    | 2 | MASCOT | T      |         |
| 1.65E-01 | 0 0 | Cs2g28210.1/Cs2g282   | 9.75 | 0 | 0    | 2 | MASCOT | T      | PLEX8   |
| 1.89E-01 | 0 0 | Cs2g28210.1/Cs2g282   | 8.59 | 0 | 0    | 2 | MASCOT | T      | PLEX8   |
| 3.62E-02 | 0 0 | Cs2g28210.1/Cs2g282   | 8.59 | 0 | 0    | 2 | MASCOT | T      | PLEX8   |
| 1.95E-02 | 0 0 | Cs2g28210.1/Cs2g282   | 8.59 | 0 | 0    | 2 | MASCOT | T      | PLEX8   |
| 8.84E-02 | 0 0 | Cs2g28210.1/Cs2g282   | 8.59 | 0 | 0    | 2 | MASCOT | T      | PLEX8   |
| 3.71E-02 | 0 0 | Cs2g28210.1/Cs2g282   | 8.59 | 0 | 0    | 2 | MASCOT | T      | PLEX8   |
| 3.11E-02 | 0 0 | Cs2g28210.1/Cs2g282   | 7.91 | 0 | 0    | 2 | MASCOT | T      | PLEX8   |
| 1.31E-01 | 0 0 | Cs2g28210.1/Cs2g282   | 7.91 | 0 | 0    | 2 | MASCOT | T      | PLEX8   |
| 9.52E-02 | 0 0 | Cs2g28210.1/Cs2g282   | 7.91 | 0 | 0    | 2 | MASCOT | T      | PLEX8   |
| 2.20E-01 | 0 0 | Cs2g28210.1/Cs2g282   | 4.37 | 0 | 0    | 2 | MASCOT | T      | PLEX8   |
| 4.85E-01 | 0 0 | Cs2g28210.1/Cs2g282   | 4.37 | 0 | 0    | 2 | MASCOT | T      | PLEX8   |
| 7.16E-03 | 0 0 | Cs2g28210.1/Cs2g282   | 8.21 | 0 | 0    | 2 | MASCOT | T      | PLEX8   |
| 5.59E-02 | 0 0 | Cs2g28210.1/Cs2g282   | 8.21 | 0 | 0    | 2 | MASCOT | T      |         |
| 1.03E-02 | 0 0 | Cs2g30910.1/Cs2g309   | 5.32 | 0 | 0    | 2 | MASCOT | T      | PLEX8   |
| 5.02E-03 | 0 0 | Cs2g30910.1/Cs2g309   | 5.32 | 0 | 0    | 2 | MASCOT | T      | PLEX8   |
| 1.14E-01 | 0 0 | Cs2g30910.1/Cs2g309   | 8.59 | 0 | 0    | 2 | MASCOT | T      | PLEX8   |
| 1.54E-02 | 0 0 | Cs2g30910.1/Cs2g309   | 8.59 | 0 | 0    | 2 | MASCOT | T      | PLEX8   |
| 4.29E-01 | 0 0 | Cs2g30910.1/Cs2g309   | 8.59 | 0 | 0    | 2 | MASCOT | T      | PLEX8   |
| 4.90E-03 | 0 0 | Cs2g30910.1/Cs2g309   | 5.32 | 0 | 0    | 2 | MASCOT | T      | PLEX8   |
| 9.03E-03 | 0 0 | Cs2g30910.1/Cs2g309   | 5.32 | 0 | 0    | 2 | MASCOT | T      | PLEX8   |
| 3.18E-01 | 0 0 | Cs2g30910.1/Cs2g309   | 6    | 0 | 0    | 2 | MASCOT | T      | PLEX8   |

|          |     |                     |      |   |   |   |        |   |       |
|----------|-----|---------------------|------|---|---|---|--------|---|-------|
| 4.07E-03 | 0 0 | Cs2g30910.1/Cs2g309 | 6    | 0 | 0 | 2 | MASCOT | T | PLEX8 |
| 3.52E-06 | 0 0 | Cs2g30910.1         | 5.4  | 0 | 0 | 2 | MASCOT | T | PLEX8 |
| 1.32E-03 | 0 0 | Cs2g30910.1         | 5.4  | 0 | 0 | 2 | MASCOT | T | PLEX8 |
| 1.13E-04 | 0 0 | Cs2g30910.1         | 5.4  | 0 | 0 | 2 | MASCOT | T | PLEX8 |
| 1.11E-03 | 0 0 | Cs2g30910.1         | 5.4  | 0 | 0 | 2 | MASCOT | T | PLEX8 |
| 4.99E-06 | 0 0 | Cs2g30910.1         | 5.4  | 0 | 0 | 2 | MASCOT | T |       |
| 6.78E-03 | 0 0 | Cs2g30910.1/Cs2g309 | 5.32 | 0 | 0 | 2 | MASCOT | T | PLEX8 |
| 2.96E-03 | 0 0 | Cs2g30910.1/Cs2g309 | 5.32 | 0 | 0 | 2 | MASCOT | T | PLEX8 |
| 8.90E-02 | 0 0 | Cs2g30910.1/Cs2g309 | 4.37 | 0 | 0 | 2 | MASCOT | T |       |
| 1.69E-02 | 0 0 | Cs2g30910.1/Cs2g309 | 4.37 | 0 | 0 | 2 | MASCOT | T |       |
| 1.25E-02 | 0 0 | Cs2g30910.1/Cs2g309 | 4.37 | 0 | 0 | 2 | MASCOT | T |       |
| 6.14E-02 | 0 0 | Cs2g12130.1/Cs2g121 | 4.53 | 0 | 0 | 2 | MASCOT | T |       |
| 4.10E-02 | 0 0 | Cs2g12130.1/Cs2g121 | 4.53 | 0 | 0 | 2 | MASCOT | T |       |
| 2.40E-03 | 0 0 | Cs2g30910.1/Cs2g309 | 5.96 | 1 | 0 | 2 | MASCOT | T | PLEX8 |
| 6.95E-02 | 0 0 | Cs2g30910.1/Cs2g309 | 8.59 | 1 | 0 | 2 | MASCOT | T | PLEX8 |
| 2.23E-01 | 0 0 | Cs5g33860.1/Cs5g338 | 4.37 | 0 | 0 | 2 | MASCOT | T | PLEX8 |
| 9.83E-02 | 0 0 | Cs5g33860.1/Cs5g338 | 4.37 | 0 | 0 | 2 | MASCOT | T | PLEX8 |
| 3.40E-01 | 0 0 | Cs5g33860.1/Cs5g338 | 4.37 | 0 | 0 | 2 | MASCOT | T | PLEX8 |
| 2.04E-04 | 0 0 | Cs5g33860.1/Cs5g338 | 5.32 | 0 | 0 | 2 | MASCOT | T | PLEX8 |
| 1.71E-02 | 0 0 | Cs5g33860.1/Cs5g338 | 4.14 | 0 | 0 | 2 | MASCOT | T | PLEX8 |
| 3.04E-03 | 0 0 | Cs5g33860.1/Cs5g338 | 4.14 | 0 | 0 | 2 | MASCOT | T | PLEX8 |
| 1.48E-03 | 0 0 | Cs5g33860.1/Cs5g338 | 4.14 | 0 | 0 | 2 | MASCOT | T | PLEX8 |
| 9.01E-03 | 0 0 | Cs5g33860.1/Cs5g338 | 4.14 | 0 | 0 | 2 | MASCOT | T | PLEX8 |
| 1.61E-01 | 0 0 | Cs5g33860.1/Cs5g338 | 8.47 | 0 | 0 | 2 | MASCOT | T | PLEX8 |
| 1.15E-02 | 0 0 | Cs5g33860.1/Cs5g338 | 4.54 | 0 | 0 | 2 | MASCOT | T | PLEX8 |
| 1.15E-02 | 0 0 | Cs5g33860.1/Cs5g338 | 8.5  | 0 | 0 | 2 | MASCOT | T | PLEX8 |
| 3.92E-02 | 0 0 | Cs5g33860.1/Cs5g338 | 8.59 | 0 | 0 | 2 | MASCOT | T | PLEX8 |
| 2.66E-02 | 0 0 | Cs5g33860.1/Cs5g338 | 8.59 | 0 | 0 | 2 | MASCOT | T | PLEX8 |
| 5.10E-02 | 0 0 | Cs5g33860.1/Cs5g338 | 8.59 | 0 | 0 | 2 | MASCOT | T | PLEX8 |
| 6.49E-02 | 0 0 | Cs5g33860.1/Cs5g338 | 8.59 | 0 | 0 | 2 | MASCOT | T | PLEX8 |
| 2.42E-01 | 0 0 | Cs5g33860.1/Cs5g338 | 8.59 | 0 | 0 | 2 | MASCOT | T | PLEX8 |
| 3.23E-02 | 0 0 | Cs5g33860.1/Cs5g338 | 8.59 | 0 | 0 | 2 | MASCOT | T | PLEX8 |
| 1.25E-02 | 0 0 | Cs5g33860.1         | 6.73 | 0 | 0 | 2 | MASCOT | T | PLEX8 |
| 5.40E-03 | 0 0 | Cs5g33860.1         | 6.73 | 0 | 0 | 2 | MASCOT | T | PLEX8 |
| 1.16E-01 | 0 0 | Cs5g33860.1/Cs5g338 | 4.53 | 0 | 0 | 2 | MASCOT | T | PLEX8 |
| 4.58E-02 | 0 0 | Cs5g33860.1/Cs5g338 | 4.53 | 0 | 0 | 2 | MASCOT | T |       |
| 2.42E-02 | 0 0 | Cs5g33860.1/Cs5g338 | 4.53 | 0 | 0 | 2 | MASCOT | T |       |
| 1.13E-05 | 0 0 | Cs5g33860.1/Cs5g338 | 4.25 | 0 | 0 | 2 | MASCOT | T | PLEX8 |
| 3.51E-04 | 0 0 | Cs3g19790.1/Cs3g197 | 5.32 | 0 | 0 | 2 | MASCOT | T | PLEX8 |
| 3.52E-01 | 0 0 | Cs3g19790.1/Cs3g197 | 5.32 | 0 | 0 | 2 | MASCOT | T | PLEX8 |
| 3.45E-02 | 0 0 | Cs3g19790.1/Cs3g197 | 5.32 | 0 | 0 | 2 | MASCOT | T | PLEX8 |
| 7.52E-02 | 0 0 | Cs3g19790.1/Cs3g197 | 4.53 | 0 | 0 | 2 | MASCOT | T | PLEX8 |
| 1.54E-01 | 0 0 | Cs3g19790.1/Cs3g197 | 8.75 | 0 | 0 | 2 | MASCOT | T | PLEX8 |
| 5.43E-02 | 0 0 | Cs3g19790.1/Cs3g197 | 8.75 | 0 | 0 | 2 | MASCOT | T | PLEX8 |
| 1.69E-01 | 0 0 | Cs3g19790.1/Cs3g197 | 6    | 0 | 0 | 2 | MASCOT | T | PLEX8 |
| 4.18E-02 | 0 0 | Cs3g19790.1/Cs3g197 | 6    | 0 | 0 | 2 | MASCOT | T | PLEX8 |
| 1.04E-01 | 0 0 | Cs3g19790.1/Cs3g197 | 6    | 0 | 0 | 2 | MASCOT | T | PLEX8 |
| 5.81E-02 | 0 0 | Cs3g19790.1/Cs3g197 | 6    | 0 | 0 | 2 | MASCOT | T | PLEX8 |
| 1.97E-03 | 0 0 | Cs3g19790.1/Cs3g197 | 4.14 | 0 | 0 | 2 | MASCOT | T | PLEX8 |
| 1.07E-01 | 0 0 | Cs3g19790.1/Cs3g197 | 4.14 | 0 | 0 | 2 | MASCOT | T | PLEX8 |
| 1.58E-02 | 0 0 | Cs3g19790.1/Cs3g197 | 4.14 | 0 | 0 | 2 | MASCOT | T | PLEX8 |

|          |     |                        |      |        |   |   |        |   |       |
|----------|-----|------------------------|------|--------|---|---|--------|---|-------|
| 8.11E-03 | 0 0 | Cs3g19790.1/Cs3g197    | 4.09 | 0      | 0 | 2 | MASCOT | T | PLEX8 |
| 3.34E-02 | 0 0 | Cs3g19790.1/Cs3g197    | 4.14 | 0      | 0 | 2 | MASCOT | T | PLEX8 |
| 2.04E-02 | 0 0 | Cs3g19790.1/Cs3g197    | 4.14 | 0      | 0 | 2 | MASCOT | T | PLEX8 |
| 8.50E-03 | 0 0 | Cs3g19790.1/Cs3g197    | 4.14 | 0      | 0 | 2 | MASCOT | T | PLEX8 |
| 2.65E-01 | 0 0 | Cs3g19790.1/Cs3g197    | 4.14 | 0      | 0 | 2 | MASCOT | T | PLEX8 |
| 2.78E-01 | 0 0 | Cs3g19790.1/Cs3g197    | 4.14 | 0      | 0 | 2 | MASCOT | T | PLEX8 |
| 2.56E-01 | 0 0 | Cs3g19790.1/Cs3g197    | 4.14 | 0      | 0 | 2 | MASCOT | T |       |
| 8.18E-02 | 0 0 | Cs3g19790.1/Cs3g197    | 6    | 0      | 0 | 2 | MASCOT | T | PLEX8 |
| 5.04E-02 | 0 0 | Cs3g19790.1/Cs3g197    | 5.3  | 0      | 0 | 2 | MASCOT | T | PLEX8 |
| 8.74E-02 | 0 0 | Cs4g19830.1/Cs4g198    | 4.53 | 0      | 0 | 2 | MASCOT | T |       |
| 1.05E-03 | 0 0 | Cs4g19830.1/Cs4g198    | 4.53 | 0      | 0 | 2 | MASCOT | T | PLEX8 |
| 2.37E-02 | 0 0 | Cs6g09690.1 ! Cs4g16   | 8.75 | 0      | 0 | 2 | MASCOT | T | PLEX8 |
| 1.75E-03 | 0 0 | Cs4g19830.1/Cs4g198    | 5.84 | 0      | 0 | 2 | MASCOT | T |       |
| 6.87E-06 | 0 0 | Cs4g19830.1/Cs4g198    | 5.84 | 0      | 0 | 2 | MASCOT | T |       |
| 1.67E-01 | 0 0 | Cs4g19830.1/Cs4g198    | 5.5  | 0      | 0 | 2 | MASCOT | T | PLEX8 |
| 4.84E-04 | 0 0 | Cs4g16050.1 ! Cs4g19   | 8.72 | 0      | 0 | 2 | MASCOT | T | PLEX8 |
| 6.29E-02 | 0 0 | Cs4g16050.1 ! Cs4g19   | 8.72 | 0      | 0 | 2 | MASCOT | T | PLEX8 |
| 2.43E-04 | 0 0 | Cs4g16050.1 ! Cs4g19   | 8.72 | 0      | 0 | 2 | MASCOT | T | PLEX8 |
| 9.40E-05 | 0 0 | Cs4g16050.1/Cs4g198    | 4.37 | 0      | 0 | 2 | MASCOT | T |       |
| 2.10E-01 | 0 0 | Cs4g16050.1/Cs4g198    | 8.75 | 0      | 0 | 2 | MASCOT | T | PLEX8 |
| 3.34E-02 | 0 0 | Cs4g16050.1/Cs4g198    | 8.75 | 0      | 0 | 2 | MASCOT | T | PLEX8 |
| 1.04E-01 | 0 0 | Cs4g16050.1/Cs4g198    | 8.75 | 0      | 0 | 2 | MASCOT | T | PLEX8 |
| 1.53E-01 | 0 0 | Cs4g16050.1/Cs4g198    | 5.97 | 0      | 0 | 2 | MASCOT | T | PLEX8 |
| 1.90E-01 | 0 0 | Cs4g16050.1/Cs4g198    | 5.97 | 0      | 0 | 2 | MASCOT | T | PLEX8 |
| 1.99E-01 | 0 0 | Cs4g16050.1/Cs4g198    | 5.97 | 0      | 0 | 2 | MASCOT | T | PLEX8 |
| 1.58E-01 | 0 0 | Cs4g16050.1/Cs4g198    | 8.19 | 0      | 0 | 2 | MASCOT | T | PLEX8 |
| 2.85E-02 | 0 0 | Cs4g16050.1/Cs4g198    | 8.19 | 0      | 0 | 2 | MASCOT | T | PLEX8 |
| 2.44E-02 | 0 0 | Cs4g16050.1/Cs4g198    | 8.19 | 0      | 0 | 2 | MASCOT | T | PLEX8 |
| 1.23E-02 | 0 0 | Cs4g16050.1/Cs4g198    | 8.22 | 0      | 0 | 2 | MASCOT | T |       |
| 1.93E-02 | 0 0 | Cs4g16050.1/Cs4g198    | 8.22 | 0      | 0 | 2 | MASCOT | T |       |
| 1.34E-01 | 0 0 | Cs4g16050.1/Cs4g198    | 8.22 | 0      | 0 | 2 | MASCOT | T |       |
| 1.25E-02 | 0 0 | orange1.1t01400.1      | 4.04 | 1      | 0 | 2 | MASCOT | T |       |
| 1.69E-02 | 0 0 | orange1.1t01400.1      | 5.84 | 0      | 0 | 2 | MASCOT | T | PLEX8 |
| 2.04E-01 | 0 0 | orange1.1t01400.1      | 5.84 | 0      | 0 | 2 | MASCOT | T |       |
| 3.44E-01 | 0 0 | orange1.1t01400.1      | 5.84 | 0      | 0 | 2 | MASCOT | T | PLEX8 |
| 1.32E-01 | 0 0 | orange1.1t01400.1      | 5.84 | 0      | 0 | 2 | MASCOT | T | PLEX8 |
| 2.07E-02 | 0 0 | orange1.1t01400.1      | 4.03 | 0      | 0 | 2 | MASCOT | T | PLEX8 |
| 2.17E-02 | 0 0 | orange1.1t01400.1      | 8.75 | 0      | 0 | 2 | MASCOT | T |       |
| 1.10E-02 | 0 0 | orange1.1t01400.1      | 4.37 | 0      | 0 | 2 | MASCOT | T | PLEX8 |
| 1.14E-02 | 0 0 | orange1.1t01400.1      | 8.75 | 0 15.9 | 0 | 2 | MASCOT | T | PLEX8 |
| 2.69E-03 | 0 0 | orange1.1t01400.1      | 8.75 | 0      | 0 | 2 | MASCOT | T | PLEX8 |
| 7.04E-02 | 0 0 | orange1.1t01400.1      | 6    | 0      | 0 | 2 | MASCOT | T | PLEX8 |
| 2.41E-03 | 0 0 | orange1.1t01400.1      | 6    | 0      | 0 | 2 | MASCOT | T | PLEX8 |
| 1.52E-01 | 0 0 | orange1.1t01400.1      | 6    | 0      | 0 | 2 | MASCOT | T | PLEX8 |
| 7.67E-04 | 0 0 | orange1.1t01400.1      | 6    | 0      | 0 | 2 | MASCOT | T | PLEX8 |
| 2.56E-01 | 0 0 | orange1.1t01400.1      | 6    | 0      | 0 | 2 | MASCOT | T | PLEX8 |
| 1.13E-02 | 0 0 | orange1.1t01400.1      | 4.53 | 0 15.9 | 0 | 2 | MASCOT | T | PLEX8 |
| 2.16E-01 | 0 0 | orange1.1t01400.1      | 4.53 | 0 15.9 | 0 | 2 | MASCOT | T | PLEX8 |
| 4.14E-01 | 0 0 | orange1.1t01400.1      | 4.53 | 0      | 0 | 2 | MASCOT | T | PLEX8 |
| 8.37E-02 | 0 0 | orange1.1t01400.1      | 4.53 | 0      | 0 | 2 | MASCOT | T | PLEX8 |
| 6.51E-02 | 0 0 | orange1.1t01400.1 ! or | 4.54 | 0 15.9 | 0 | 2 | MASCOT | T | PLEX8 |



|          |     |                      |      |   |   |   |        |   |       |
|----------|-----|----------------------|------|---|---|---|--------|---|-------|
| 2.74E-03 | 0 0 | Cs4g05200.1/orange1. | 5.55 | 0 | 0 | 2 | MASCOT | T | PLEX8 |
| 2.02E-02 | 0 0 | Cs4g05200.1/orange1. | 5.55 | 0 | 0 | 2 | MASCOT | T | PLEX8 |
| 1.63E-03 | 0 0 | Cs4g02110.1          | 4    | 0 | 0 | 2 | MASCOT | T | PLEX8 |
| 1.29E-02 | 0 0 | Cs4g02110.1          | 6.75 | 0 | 0 | 2 | MASCOT | T | PLEX8 |
| 3.69E-02 | 0 0 | Cs4g02110.1          | 6.75 | 0 | 0 | 2 | MASCOT | T | PLEX8 |
| 2.23E-01 | 0 0 | Cs4g02110.1          | 5.84 | 0 | 0 | 2 | MASCOT | T | PLEX8 |
| 1.78E-02 | 0 0 | Cs4g02110.1          | 4.25 | 0 | 0 | 2 | MASCOT | T | PLEX8 |
| 9.35E-04 | 0 0 | Cs4g02110.1          | 4.25 | 0 | 0 | 2 | MASCOT | T | PLEX8 |
| 1.91E-03 | 0 0 | Cs4g02110.1          | 4.25 | 0 | 0 | 2 | MASCOT | T | PLEX8 |
| 8.68E-02 | 0 0 | Cs4g02110.1          | 4.25 | 0 | 0 | 2 | MASCOT | T | PLEX8 |
| 1.57E-01 | 0 0 | Cs4g02110.1          | 6    | 0 | 0 | 2 | MASCOT | T | PLEX8 |
| 1.49E-01 | 0 0 | Cs4g02110.1          | 6    | 0 | 0 | 2 | MASCOT | T | PLEX8 |
| 2.15E-01 | 0 0 | Cs4g02110.1          | 6    | 0 | 0 | 2 | MASCOT | T |       |
| 1.31E-02 | 0 0 | Cs4g02110.1          | 8.25 | 0 | 0 | 2 | MASCOT | T | PLEX8 |
| 1.01E-02 | 0 0 | Cs4g02110.1          | 8.25 | 0 | 0 | 2 | MASCOT | T | PLEX8 |
| 3.35E-03 | 0 0 | Cs4g02110.1          | 6    | 0 | 0 | 2 | MASCOT | T | PLEX8 |
| 1.02E-02 | 0 0 | Cs4g02110.1          | 6    | 0 | 0 | 2 | MASCOT | T | PLEX8 |
| 2.44E-03 | 0 0 | Cs4g02110.1          | 6    | 0 | 0 | 2 | MASCOT | T | PLEX8 |
| 1.39E-02 | 0 0 | Cs4g02110.1          | 6    | 0 | 0 | 2 | MASCOT | T | PLEX8 |
| 5.27E-03 | 0 0 | Cs4g02110.1          | 8.75 | 0 | 0 | 2 | MASCOT | T |       |
| 4.02E-02 | 0 0 | Cs4g02110.1          | 6    | 0 | 0 | 2 | MASCOT | T | PLEX8 |
| 2.37E-02 | 0 0 | Cs4g02110.1          | 6    | 0 | 0 | 2 | MASCOT | T | PLEX8 |
| 3.42E-03 | 0 0 | Cs4g02110.1          | 8.72 | 0 | 0 | 2 | MASCOT | T | PLEX8 |
| 2.13E-04 | 0 0 | Cs4g18400.1/Cs4g184  | 4.37 | 0 | 0 | 2 | MASCOT | T |       |
| 4.16E-01 | 0 0 | Cs4g18400.1/Cs4g184  | 4.37 | 0 | 0 | 2 | MASCOT | T |       |
| 5.26E-04 | 0 0 | Cs4g18400.1/Cs4g184  | 4.65 | 0 | 0 | 2 | MASCOT | T | PLEX8 |
| 1.76E-03 | 0 0 | Cs4g18400.1/Cs4g184  | 4.65 | 0 | 0 | 2 | MASCOT | T | PLEX8 |
| 3.31E-02 | 0 0 | Cs4g18400.1/Cs4g184  | 4.65 | 0 | 0 | 2 | MASCOT | T | PLEX8 |
| 3.92E-03 | 0 0 | Cs4g18400.1/Cs4g184  | 4.65 | 0 | 0 | 2 | MASCOT | T |       |
| 1.28E-02 | 0 0 | Cs4g18400.1/Cs4g184  | 4.65 | 0 | 0 | 2 | MASCOT | T |       |
| 5.29E-01 | 0 0 | Cs4g18400.1/Cs4g184  | 9.41 | 0 | 0 | 2 | MASCOT | T | PLEX8 |
| 2.30E-01 | 0 0 | Cs4g18400.1/Cs4g184  | 5.88 | 0 | 0 | 2 | MASCOT | T |       |
| 7.81E-04 | 0 0 | Cs4g18400.1/Cs4g184  | 5.88 | 0 | 0 | 2 | MASCOT | T |       |
| 6.65E-03 | 0 0 | Cs4g18400.1/Cs4g184  | 5.88 | 0 | 0 | 2 | MASCOT | T | PLEX8 |
| 1.76E-03 | 0 0 | Cs4g18400.1/Cs4g184  | 8.21 | 0 | 0 | 2 | MASCOT | T | PLEX8 |
| 4.13E-04 | 0 0 | Cs4g18400.1/Cs4g184  | 8.21 | 0 | 0 | 2 | MASCOT | T | PLEX8 |
| 7.25E-02 | 0 0 | Cs4g18400.1/Cs4g184  | 5.84 | 0 | 0 | 2 | MASCOT | T | PLEX8 |
| 1.93E-02 | 0 0 | Cs4g18400.1/Cs4g184  | 5.13 | 0 | 0 | 2 | MASCOT | T |       |
| 9.32E-02 | 0 0 | Cs4g18400.1/Cs4g184  | 5.13 | 0 | 0 | 2 | MASCOT | T |       |
| 1.11E-02 | 0 0 | Cs4g18400.1/Cs4g184  | 6.46 | 0 | 0 | 2 | MASCOT | T |       |
| 1.51E-02 | 0 0 | Cs4g18400.1/Cs4g184  | 4.4  | 0 | 0 | 2 | MASCOT | T | PLEX8 |
| 1.46E-03 | 0 0 | Cs4g18400.1/Cs4g184  | 4.4  | 0 | 0 | 2 | MASCOT | T | PLEX8 |
| 1.88E-01 | 0 0 | Cs4g18400.1/Cs4g184  | 4.75 | 0 | 0 | 2 | MASCOT | T | PLEX8 |
| 8.44E-02 | 0 0 | Cs4g18400.1/Cs4g184  | 4.75 | 0 | 0 | 2 | MASCOT | T | PLEX8 |
| 3.81E-02 | 0 0 | Cs1g17930.1/Cs1g179  | 4.03 | 0 | 0 | 2 | MASCOT | T |       |
| 4.61E-02 | 0 0 | Cs1g17930.1/Cs1g179  | 4.41 | 0 | 0 | 2 | MASCOT | T |       |
| 1.36E-04 | 0 0 | Cs1g17930.1/Cs1g179  | 4.41 | 0 | 0 | 2 | MASCOT | T | PLEX8 |
| 2.75E-03 | 0 0 | Cs1g17930.1/Cs1g179  | 4.41 | 0 | 0 | 2 | MASCOT | T |       |
| 8.96E-05 | 0 0 | Cs1g17930.1/Cs1g179  | 4.41 | 0 | 0 | 2 | MASCOT | T | PLEX8 |
| 3.85E-02 | 0 0 | Cs1g17930.1/Cs1g179  | 4.41 | 0 | 0 | 2 | MASCOT | T |       |
| 5.79E-05 | 0 0 | Cs1g17930.1/Cs1g179  | 4.41 | 0 | 0 | 2 | MASCOT | T |       |

|          |     |                     |      |   |      |   |        |        |       |       |
|----------|-----|---------------------|------|---|------|---|--------|--------|-------|-------|
| 4.52E-04 | 0 0 | Cs1g17930.1/Cs1g179 | 4.21 | 0 | 0    | 2 | MASCOT | T      | PLEX8 |       |
| 1.42E-01 | 0 0 | Cs1g17930.1/Cs1g179 | 4.21 | 0 | 0    | 2 | MASCOT | T      |       |       |
| 1.74E-02 | 0 0 | Cs1g17930.1/Cs1g179 | 6.1  | 0 | 0    | 2 | MASCOT | T      | PLEX8 |       |
| 2.46E-02 | 0 0 | Cs1g17930.1/Cs1g179 | 4.53 | 0 | 0    | 2 | MASCOT | T      | PLEX8 |       |
| 1.64E-02 | 0 0 | Cs1g17930.1/Cs1g179 | 4.53 | 0 | 0    | 2 | MASCOT | T      | PLEX8 |       |
| 1.36E-04 | 0 0 | Cs1g17930.1/Cs1g179 | 4.37 | 0 | 0    | 2 | MASCOT | T      | PLEX8 |       |
| 1.43E-01 | 0 0 | Cs1g17930.1/Cs1g179 | 5.84 | 0 | 0    | 2 | MASCOT | T      | PLEX8 |       |
| 1.69E-01 | 0 0 | Cs1g17930.1/Cs1g179 | 9.75 | 0 | 0    | 2 | MASCOT | T      | PLEX8 |       |
| 4.46E-05 | 0 0 | Cs1g17930.1/Cs1g179 | 6    | 0 | 0    | 2 | MASCOT | T      | PLEX8 |       |
| 1.76E-01 | 0 0 | Cs1g17930.1/Cs1g179 | 6    | 0 | 0    | 2 | MASCOT | T      | PLEX8 |       |
| 1.94E-04 | 0 0 | Cs1g17930.1/Cs1g179 | 6    | 0 | 0    | 2 | MASCOT | T      | PLEX8 |       |
| 4.98E-03 | 0 0 | Cs1g17930.1/Cs1g179 | 4.37 | 0 | 0    | 2 | MASCOT | T      | PLEX8 |       |
| 5.40E-02 | 0 0 | Cs1g17930.1/Cs1g179 | 4.37 | 0 | 0    | 2 | MASCOT | T      | PLEX8 |       |
| 2.01E-02 | 0 0 | Cs2g15180.1/Cs2g151 | 4.14 | 0 | 0    | 2 | MASCOT | T      | PLEX8 |       |
| 1.56E-02 | 0 0 | Cs2g15180.1/Cs2g151 | 4.14 | 0 | 0    | 2 | MASCOT | T      | PLEX8 |       |
| 3.81E-02 | 0 0 | Cs2g15180.1/Cs4g183 | 8.75 | 0 | 0    | 2 | MASCOT | T      | PLEX8 |       |
| 2.53E-01 | 0 0 | Cs2g15180.1/Cs4g183 | 8.75 | 0 | 0    | 2 | MASCOT | T      | PLEX8 |       |
| 4.32E-03 | 0 0 | Cs2g15180.1/Cs4g183 | 8.75 | 0 | 0    | 2 | MASCOT | T      | PLEX8 |       |
| 1.75E-02 | 0 0 | Cs2g15180.1/Cs4g183 | 8.75 | 0 | 0    | 2 | MASCOT | T      | PLEX8 |       |
| 2.56E-03 | 0 0 | Cs2g15180.1/Cs2g151 | 4.53 | 0 | 0    | 2 | MASCOT | T      | PLEX8 |       |
| 3.83E-03 | 0 0 | Cs2g15180.1/Cs2g151 | 4.53 | 0 | 0    | 2 | MASCOT | T      | PLEX8 |       |
| 7.74E-02 | 0 0 | Cs2g15180.1/Cs2g151 | 4.53 | 0 | 0    | 2 | MASCOT | T      | PLEX8 |       |
| 2.26E-01 | 0 0 | Cs2g15180.1         | 8.73 | 0 | 0    | 2 | MASCOT | T      | PLEX8 |       |
| 3.84E-01 | 0 0 | Cs2g15180.1         | 6.01 | 0 | 0    | 2 | MASCOT | T      | PLEX8 |       |
| 5.56E-02 | 0 0 | Cs2g15180.1         | 6.01 | 0 | 0    | 2 | MASCOT | T      |       |       |
| 2.73E-02 | 0 0 | Cs2g15180.1         | 4.56 | 1 | 0    | 2 | MASCOT | T      | PLEX8 |       |
| 1.04E-04 | 0 0 | Cs2g15180.1/Cs6g213 | 4.37 | 0 | 0    | 2 | MASCOT | T      | PLEX8 |       |
| 1.56E-03 | 0 0 | Cs2g15180.1/Cs6g213 | 4.37 | 0 | 0    | 2 | MASCOT | T      | PLEX8 |       |
| 5.79E-06 | 0 0 | Cs2g15180.1         | 4.21 | 0 | 0    | 2 | MASCOT | T      |       |       |
| 6.03E-02 | 0 0 | Cs2g15180.1         | 4.21 | 0 | 0    | 2 | MASCOT | T      |       |       |
| 7.68E-03 | 0 0 | Cs2g15180.1         | 8.47 | 0 | 15.9 | 0 | 2      | MASCOT | T     | PLEX8 |
| 2.27E-04 | 0 0 | Cs2g15180.1         | 5.97 | 0 | 0    | 2 | MASCOT | T      | PLEX8 |       |
| 2.09E-01 | 0 0 | Cs2g15180.1         | 5.97 | 0 | 0    | 2 | MASCOT | T      | PLEX8 |       |
| 1.28E-02 | 0 0 | Cs3g15560.1/Cs3g155 | 4.37 | 0 | 0    | 2 | MASCOT | T      | PLEX8 |       |
| 1.66E-01 | 0 0 | Cs3g15560.1/Cs3g155 | 8.75 | 0 | 0    | 2 | MASCOT | T      | PLEX8 |       |
| 1.71E-01 | 0 0 | Cs3g15560.1/Cs3g155 | 8.75 | 0 | 0    | 2 | MASCOT | T      | PLEX8 |       |
| 1.03E-03 | 0 0 | Cs3g15560.1/Cs3g155 | 5.5  | 0 | 0    | 2 | MASCOT | T      | PLEX8 |       |
| 3.72E-02 | 0 0 | Cs3g15560.1/Cs3g155 | 5.5  | 0 | 0    | 2 | MASCOT | T      |       |       |
| 7.48E-03 | 0 0 | Cs3g15560.1/Cs3g155 | 9.72 | 0 | 0    | 2 | MASCOT | T      | PLEX8 |       |
| 2.27E-01 | 0 0 | Cs3g15560.1/Cs3g155 | 9.72 | 0 | 0    | 2 | MASCOT | T      | PLEX8 |       |
| 4.33E-05 | 0 0 | Cs3g15560.1/Cs3g155 | 6.05 | 0 | 0    | 2 | MASCOT | T      |       |       |
| 5.43E-03 | 0 0 | Cs3g15560.1/Cs3g155 | 6.05 | 0 | 0    | 2 | MASCOT | T      |       |       |
| 4.85E-01 | 0 0 | Cs3g15560.1/Cs3g155 | 6.1  | 0 | 0    | 2 | MASCOT | T      | PLEX8 |       |
| 9.36E-02 | 0 0 | Cs3g15560.1/Cs3g155 | 4.53 | 0 | 0    | 2 | MASCOT | T      | PLEX8 |       |
| 2.54E-01 | 0 0 | Cs3g15560.1/Cs3g155 | 4.53 | 0 | 0    | 2 | MASCOT | T      | PLEX8 |       |
| 2.80E-01 | 0 0 | Cs3g15560.1/Cs3g155 | 8.75 | 0 | 0    | 2 | MASCOT | T      | PLEX8 |       |
| 2.88E-02 | 0 0 | Cs3g15560.1/Cs3g155 | 8.75 | 0 | 0    | 2 | MASCOT | T      | PLEX8 |       |
| 7.86E-02 | 0 0 | Cs3g15560.1/Cs3g155 | 6    | 0 | 0    | 2 | MASCOT | T      | PLEX8 |       |
| 2.51E-01 | 0 0 | Cs3g15560.1/Cs3g155 | 6    | 0 | 0    | 2 | MASCOT | T      | PLEX8 |       |
| 4.27E-01 | 0 0 | Cs3g15560.1/Cs3g155 | 6    | 0 | 0    | 2 | MASCOT | T      | PLEX8 |       |
| 8.52E-03 | 0 0 | Cs3g15560.1/Cs3g155 | 8.73 | 0 | 15.9 | 0 | 2      | MASCOT | T     | PLEX8 |

|              |                      |      |        |   |          |   |       |
|--------------|----------------------|------|--------|---|----------|---|-------|
| 2.30E-01 0 0 | Cs3g15560.1/Cs3g155  | 8.73 | 0 15.9 | 0 | 2 MASCOT | T | PLEX8 |
| 2.32E-03 0 0 | Cs3g15560.1/Cs3g155  | 8.73 | 0 15.9 | 0 | 2 MASCOT | T | PLEX8 |
| 6.18E-04 0 0 | Cs7g22130.1          | 4.75 | 0      | 0 | 2 MASCOT | T | PLEX8 |
| 3.46E-03 0 0 | Cs7g22130.1          | 4.75 | 0      | 0 | 2 MASCOT | T | PLEX8 |
| 8.77E-03 0 0 | Cs7g22130.1          | 4.75 | 0      | 0 | 2 MASCOT | T | PLEX8 |
| 1.28E-01 0 0 | Cs7g22130.1          | 4.75 | 0      | 0 | 2 MASCOT | T |       |
| 1.82E-01 0 0 | Cs7g22130.1          | 6    | 0      | 0 | 2 MASCOT | T |       |
| 3.79E-02 0 0 | Cs5g35310.1 ! Cs7g22 | 4.14 | 0      | 0 | 2 MASCOT | T |       |
| 7.14E-05 0 0 | Cs5g35310.1 ! Cs7g22 | 4.14 | 0      | 0 | 2 MASCOT | T |       |
| 8.64E-02 0 0 | Cs7g22130.1          | 4.54 | 0      | 0 | 2 MASCOT | T | PLEX8 |
| 7.85E-03 0 0 | Cs7g22130.1          | 4.54 | 0      | 0 | 2 MASCOT | T | PLEX8 |
| 1.66E-03 0 0 | Cs7g22130.1          | 6.14 | 0      | 0 | 2 MASCOT | T | PLEX8 |
| 5.87E-03 0 0 | Cs7g22130.1          | 6.14 | 0      | 0 | 2 MASCOT | T | PLEX8 |
| 1.70E-01 0 0 | Cs7g22130.1          | 8.59 | 0      | 0 | 2 MASCOT | T | PLEX8 |
| 1.24E-02 0 0 | Cs7g22130.1          | 6.79 | 0      | 0 | 2 MASCOT | T | PLEX8 |
| 1.33E-01 0 0 | Cs7g22130.1          | 6.79 | 0      | 0 | 2 MASCOT | T | PLEX8 |
| 4.71E-03 0 0 | Cs7g22130.1          | 6.79 | 0      | 0 | 2 MASCOT | T | PLEX8 |
| 2.23E-02 0 0 | Cs7g22130.1          | 4.37 | 0      | 0 | 2 MASCOT | T | PLEX8 |
| 3.47E-04 0 0 | Cs5g35310.1/Cs7g221  | 5.4  | 0      | 0 | 2 MASCOT | T | PLEX8 |
| 7.51E-02 0 0 | Cs5g35310.1/Cs7g221  | 5.4  | 0      | 0 | 2 MASCOT | T | PLEX8 |
| 1.61E-02 0 0 | Cs5g35310.1 ! Cs7g22 | 4.68 | 1      | 0 | 2 MASCOT | T | PLEX8 |
| 4.06E-03 0 0 | Cs5g35310.1 ! Cs7g22 | 4.68 | 1      | 0 | 2 MASCOT | T | PLEX8 |
| 1.36E-01 0 0 | Cs2g24910.1          | 6.1  | 0      | 0 | 2 MASCOT | T | PLEX8 |
| 2.45E-02 0 0 | Cs2g24910.1          | 4.21 | 0      | 0 | 2 MASCOT | T | PLEX8 |
| 2.50E-01 0 0 | Cs2g24910.1          | 5.84 | 0      | 0 | 2 MASCOT | T | PLEX8 |
| 4.50E-02 0 0 | Cs2g24910.1          | 8.59 | 0      | 0 | 2 MASCOT | T | PLEX8 |
| 2.03E-01 0 0 | Cs2g24910.1          | 8.59 | 0      | 0 | 2 MASCOT | T | PLEX8 |
| 2.81E-02 0 0 | Cs2g24910.1          | 4.14 | 0 15.9 | 0 | 2 MASCOT | T |       |
| 3.82E-02 0 0 | Cs2g24910.1          | 6.71 | 0      | 0 | 2 MASCOT | T |       |
| 4.96E-02 0 0 | Cs2g24910.1          | 3.92 | 0      | 0 | 2 MASCOT | T | PLEX8 |
| 2.29E-04 0 0 | Cs2g24910.1          | 3.92 | 0      | 0 | 2 MASCOT | T | PLEX8 |
| 8.70E-02 0 0 | Cs2g24910.1          | 3.92 | 0      | 0 | 2 MASCOT | T | PLEX8 |
| 1.41E-02 0 0 | Cs2g24910.1          | 3.92 | 0      | 0 | 2 MASCOT | T | PLEX8 |
| 1.26E-01 0 0 | Cs2g24910.1          | 3.92 | 0      | 0 | 2 MASCOT | T | PLEX8 |
| 2.30E-02 0 0 | Cs2g24910.1          | 5.4  | 0      | 0 | 2 MASCOT | T | PLEX8 |
| 3.26E-02 0 0 | Cs2g24910.1          | 5.4  | 0      | 0 | 2 MASCOT | T | PLEX8 |
| 6.01E-02 0 0 | Cs2g24910.1          | 8.56 | 0      | 0 | 2 MASCOT | T | PLEX8 |
| 1.98E-04 0 0 | Cs2g24910.1          | 8.56 | 0      | 0 | 2 MASCOT | T | PLEX8 |
| 5.78E-04 0 0 | Cs2g24910.1          | 8.56 | 0      | 0 | 2 MASCOT | T | PLEX8 |
| 1.47E-02 0 0 | Cs2g24910.1          | 8.59 | 0      | 0 | 2 MASCOT | T | PLEX8 |
| 1.91E-02 0 0 | Cs3g15060.1          | 4.14 | 0      | 0 | 2 MASCOT | T | PLEX8 |
| 2.58E-02 0 0 | Cs3g15060.1          | 4.14 | 0      | 0 | 2 MASCOT | T | PLEX8 |
| 6.38E-03 0 0 | Cs3g15060.1          | 4.14 | 0      | 0 | 2 MASCOT | T | PLEX8 |
| 2.70E-02 0 0 | Cs3g15060.1/Cs3g150  | 4.03 | 0      | 0 | 2 MASCOT | T | PLEX8 |
| 1.09E-01 0 0 | Cs3g15060.1/Cs3g150  | 4.37 | 0      | 0 | 2 MASCOT | T | PLEX8 |
| 2.62E-01 0 0 | Cs3g15060.1/Cs3g150  | 4.53 | 0      | 0 | 2 MASCOT | T | PLEX8 |
| 2.64E-01 0 0 | Cs3g15060.1/Cs3g150  | 4.53 | 0      | 0 | 2 MASCOT | T | PLEX8 |
| 1.11E-01 0 0 | Cs3g15060.1/Cs3g150  | 5.83 | 0      | 0 | 2 MASCOT | T | PLEX8 |
| 3.49E-02 0 0 | Cs3g15060.1/Cs3g150  | 4.37 | 0      | 0 | 2 MASCOT | T | PLEX8 |
| 1.69E-01 0 0 | Cs3g15060.1/Cs3g150  | 4.37 | 0      | 0 | 2 MASCOT | T | PLEX8 |
| 4.29E-02 0 0 | Cs3g15060.1/Cs3g150  | 4.37 | 0      | 0 | 2 MASCOT | T | PLEX8 |

|          |     |                     |      |   |      |   |        |        |       |       |
|----------|-----|---------------------|------|---|------|---|--------|--------|-------|-------|
| 3.56E-02 | 0 0 | Cs3g15060.1/Cs3g150 | 4.21 | 0 | 0    | 2 | MASCOT | T      | PLEX8 |       |
| 1.40E-02 | 0 0 | Cs3g15060.1/Cs3g150 | 6    | 0 | 0    | 2 | MASCOT | T      | PLEX8 |       |
| 1.82E-03 | 0 0 | Cs3g15060.1/Cs3g150 | 6    | 0 | 0    | 2 | MASCOT | T      | PLEX8 |       |
| 4.02E-01 | 0 0 | Cs3g15060.1/Cs3g150 | 6    | 0 | 0    | 2 | MASCOT | T      | PLEX8 |       |
| 3.17E-04 | 0 0 | Cs3g15060.1/Cs3g150 | 4.03 | 0 | 0    | 2 | MASCOT | T      | PLEX8 |       |
| 2.22E-02 | 0 0 | Cs3g15060.1/Cs3g150 | 4.53 | 0 | 0    | 2 | MASCOT | T      | PLEX8 |       |
| 6.87E-05 | 0 0 | Cs3g15060.1/Cs3g150 | 4.53 | 0 | 0    | 2 | MASCOT | T      | PLEX8 |       |
| 8.16E-05 | 0 0 | Cs6g02730.1         | 4.03 | 0 | 0    | 2 | MASCOT | T      | PLEX8 |       |
| 1.39E-05 | 0 0 | Cs6g02730.1         | 4.03 | 0 | 0    | 2 | MASCOT | T      | PLEX8 |       |
| 8.72E-04 | 0 0 | Cs6g02730.1         | 7.99 | 0 | 0    | 2 | MASCOT | T      | PLEX8 |       |
| 2.69E-01 | 0 0 | Cs6g02730.1         | 7.99 | 0 | 0    | 2 | MASCOT | T      | PLEX8 |       |
| 3.06E-05 | 0 0 | Cs6g02730.1         | 7.99 | 0 | 0    | 2 | MASCOT | T      | PLEX8 |       |
| 3.78E-02 | 0 0 | Cs6g02730.1         | 7.99 | 0 | 0    | 2 | MASCOT | T      | PLEX8 |       |
| 1.14E-01 | 0 0 | Cs6g02730.1         | 8.72 | 0 | 0    | 2 | MASCOT | T      | PLEX8 |       |
| 2.11E-01 | 0 0 | Cs6g02730.1         | 5.84 | 0 | 0    | 2 | MASCOT | T      | PLEX8 |       |
| 5.89E-02 | 0 0 | Cs6g02730.1         | 5.84 | 0 | 0    | 2 | MASCOT | T      | PLEX8 |       |
| 3.81E-02 | 0 0 | Cs6g02730.1         | 4.37 | 0 | 0    | 2 | MASCOT | T      | PLEX8 |       |
| 1.36E-02 | 0 0 | Cs6g02730.1         | 4.54 | 0 | 15.9 | 0 | 2      | MASCOT | T     | PLEX8 |
| 2.84E-02 | 0 0 | Cs6g02730.1         | 4.54 | 0 | 0    | 2 | MASCOT | T      | PLEX8 |       |
| 1.39E-03 | 0 0 | Cs6g02730.1         | 4.54 | 0 | 0    | 2 | MASCOT | T      | PLEX8 |       |
| 1.48E-01 | 0 0 | Cs6g02730.1         | 5.55 | 0 | 0    | 2 | MASCOT | T      | PLEX8 |       |
| 2.44E-01 | 0 0 | Cs6g02730.1         | 4.37 | 0 | 0    | 2 | MASCOT | T      | PLEX8 |       |
| 1.87E-02 | 0 0 | Cs6g02730.1         | 5.3  | 0 | 0    | 2 | MASCOT | T      | PLEX8 |       |
| 1.81E-01 | 0 0 | Cs6g02730.1         | 8.72 | 0 | 0    | 2 | MASCOT | T      | PLEX8 |       |
| 2.78E-01 | 0 0 | Cs6g02730.1         | 8.72 | 0 | 0    | 2 | MASCOT | T      | PLEX8 |       |
| 7.88E-04 | 0 0 | Cs2g01780.1/Cs2g017 | 4.75 | 0 | 0    | 2 | MASCOT | T      | PLEX8 |       |
| 4.20E-04 | 0 0 | Cs2g01780.1/Cs2g017 | 4.75 | 0 | 0    | 2 | MASCOT | T      | PLEX8 |       |
| 4.02E-02 | 0 0 | Cs2g01780.1/Cs2g017 | 4.53 | 0 | 0    | 2 | MASCOT | T      | PLEX8 |       |
| 9.37E-02 | 0 0 | Cs2g01780.1/Cs2g017 | 4.54 | 0 | 0    | 2 | MASCOT | T      | PLEX8 |       |
| 2.68E-03 | 0 0 | Cs2g01780.1/Cs2g017 | 6.75 | 0 | 0    | 2 | MASCOT | T      | PLEX8 |       |
| 2.04E-01 | 0 0 | Cs2g01780.1/Cs2g017 | 6.75 | 0 | 0    | 2 | MASCOT | T      | PLEX8 |       |
| 1.26E-02 | 0 0 | Cs2g01780.1/Cs2g017 | 6.75 | 0 | 0    | 2 | MASCOT | T      | PLEX8 |       |
| 4.91E-04 | 0 0 | Cs2g01780.1/Cs2g017 | 6.75 | 0 | 0    | 2 | MASCOT | T      | PLEX8 |       |
| 8.79E-04 | 0 0 | Cs2g01780.1/Cs2g017 | 3.83 | 0 | 0    | 2 | MASCOT | T      | PLEX8 |       |
| 3.36E-01 | 0 0 | Cs2g01780.1/Cs2g017 | 4.53 | 0 | 0    | 2 | MASCOT | T      | PLEX8 |       |
| 2.58E-01 | 0 0 | Cs2g01780.1/Cs2g017 | 4.53 | 0 | 0    | 2 | MASCOT | T      | PLEX8 |       |
| 1.52E-01 | 0 0 | Cs2g01780.1/Cs2g017 | 8.06 | 0 | 0    | 2 | MASCOT | T      | PLEX8 |       |
| 6.52E-03 | 0 0 | Cs2g01780.1         | 8.22 | 0 | 0    | 2 | MASCOT | T      | PLEX8 |       |
| 3.40E-02 | 0 0 | Cs2g01780.1         | 8.22 | 0 | 0    | 2 | MASCOT | T      | PLEX8 |       |
| 1.62E-01 | 0 0 | Cs2g01780.1/Cs2g017 | 5.84 | 0 | 0    | 2 | MASCOT | T      | PLEX8 |       |
| 7.01E-04 | 0 0 | Cs2g01780.1/Cs2g017 | 5.84 | 0 | 0    | 2 | MASCOT | T      | PLEX8 |       |
| 6.81E-03 | 0 0 | Cs2g01780.1         | 3.93 | 0 | 0    | 2 | MASCOT | T      | PLEX8 |       |
| 9.18E-04 | 0 0 | Cs3g02510.1         | 6.14 | 1 | 0    | 2 | MASCOT | T      | PLEX8 |       |
| 4.83E-03 | 0 0 | Cs3g02510.1         | 4.41 | 1 | 0    | 2 | MASCOT | T      | PLEX8 |       |
| 1.52E-01 | 0 0 | Cs3g02510.1         | 4.21 | 0 | 0    | 2 | MASCOT | T      | PLEX8 |       |
| 7.09E-02 | 0 0 | Cs3g02510.1         | 4.25 | 1 | 0    | 2 | MASCOT | T      | PLEX8 |       |
| 3.98E-02 | 0 0 | Cs3g02510.1         | 4.25 | 1 | 0    | 2 | MASCOT | T      | PLEX8 |       |
| 5.27E-02 | 0 0 | Cs3g02510.1         | 4.25 | 1 | 0    | 2 | MASCOT | T      | PLEX8 |       |
| 7.79E-04 | 0 0 | Cs3g02510.1         | 4.18 | 0 | 0    | 2 | MASCOT | T      | PLEX8 |       |
| 2.00E-02 | 0 0 | Cs3g02510.1         | 4.18 | 0 | 0    | 2 | MASCOT | T      | PLEX8 |       |
| 2.33E-02 | 0 0 | Cs3g02510.1         | 4.53 | 0 | 0    | 2 | MASCOT | T      | PLEX8 |       |

|              |                     |      |   |   |          |   |       |
|--------------|---------------------|------|---|---|----------|---|-------|
| 5.54E-02 0 0 | Cs3g02510.1         | 4.53 | 0 | 0 | 2 MASCOT | T | PLEX8 |
| 1.67E-01 0 0 | Cs3g02510.1         | 8.75 | 0 | 0 | 2 MASCOT | T | PLEX8 |
| 7.00E-03 0 0 | Cs3g02510.1         | 5.84 | 0 | 0 | 2 MASCOT | T | PLEX8 |
| 4.09E-02 0 0 | Cs3g02510.1         | 5.84 | 0 | 0 | 2 MASCOT | T | PLEX8 |
| 2.71E-04 0 0 | Cs3g02510.1         | 3.91 | 0 | 0 | 2 MASCOT | T | PLEX8 |
| 1.95E-01 0 0 | Cs3g02510.1         | 6    | 0 | 0 | 2 MASCOT | T | PLEX8 |
| 2.47E-01 0 0 | Cs3g02510.1         | 6    | 0 | 0 | 2 MASCOT | T | PLEX8 |
| 4.49E-01 0 0 | Cs3g02510.1         | 6    | 0 | 0 | 2 MASCOT | T | PLEX8 |
| 2.44E-01 0 0 | Cs9g18160.1/Cs9g181 | 4.53 | 0 | 0 | 2 MASCOT | T | PLEX8 |
| 1.02E-05 0 0 | Cs9g18160.1/Cs9g181 | 6    | 0 | 0 | 2 MASCOT | T | PLEX8 |
| 7.11E-05 0 0 | Cs9g18160.1/Cs9g181 | 6    | 0 | 0 | 2 MASCOT | T | PLEX8 |
| 2.02E-01 0 0 | Cs9g18160.1/Cs9g181 | 8.23 | 0 | 0 | 2 MASCOT | T | PLEX8 |
| 1.05E-01 0 0 | Cs9g18160.1/Cs9g181 | 8.23 | 0 | 0 | 2 MASCOT | T | PLEX8 |
| 2.60E-02 0 0 | Cs9g18160.1         | 5.87 | 0 | 0 | 2 MASCOT | T | PLEX8 |
| 4.97E-01 0 0 | Cs9g18160.1         | 5.87 | 0 | 0 | 2 MASCOT | T | PLEX8 |
| 6.43E-02 0 0 | Cs9g18160.1         | 5.87 | 0 | 0 | 2 MASCOT | T | PLEX8 |
| 9.04E-03 0 0 | Cs9g18160.1         | 4.53 | 0 | 0 | 2 MASCOT | T | PLEX8 |
| 2.11E-01 0 0 | Cs9g18160.1         | 5.4  | 0 | 0 | 2 MASCOT | T | PLEX8 |
| 9.38E-02 0 0 | Cs9g18160.1/Cs9g181 | 4.25 | 0 | 0 | 2 MASCOT | T | PLEX8 |
| 1.54E-02 0 0 | Cs9g18160.1/Cs9g181 | 9.41 | 0 | 0 | 2 MASCOT | T | PLEX8 |
| 4.63E-02 0 0 | Cs9g18160.1/Cs9g181 | 5.97 | 0 | 0 | 2 MASCOT | T | PLEX8 |
| 4.10E-02 0 0 | Cs9g18160.1         | 6.75 | 0 | 0 | 2 MASCOT | T | PLEX8 |
| 1.06E-01 0 0 | Cs9g18160.1         | 6.75 | 0 | 0 | 2 MASCOT | T | PLEX8 |
| 2.32E-01 0 0 | Cs9g18160.1         | 6.75 | 0 | 0 | 2 MASCOT | T | PLEX8 |
| 2.12E-02 0 0 | Cs9g18160.1         | 6.75 | 0 | 0 | 2 MASCOT | T | PLEX8 |
| 1.73E-01 0 0 | Cs7g07380.1         | 6    | 0 | 0 | 2 MASCOT | T | PLEX8 |
| 2.66E-02 0 0 | Cs7g07380.1         | 6    | 0 | 0 | 2 MASCOT | T | PLEX8 |
| 9.81E-02 0 0 | Cs7g07380.1         | 8.75 | 0 | 0 | 2 MASCOT | T |       |
| 4.19E-05 0 0 | Cs7g07380.1         | 8.75 | 0 | 0 | 2 MASCOT | T |       |
| 9.17E-05 0 0 | Cs7g07380.1         | 4    | 0 | 0 | 2 MASCOT | T | PLEX8 |
| 6.74E-02 0 0 | Cs7g07380.1         | 8.75 | 1 | 0 | 2 MASCOT | T | PLEX8 |
| 9.70E-02 0 0 | Cs7g07380.1         | 8.72 | 0 | 0 | 2 MASCOT | T | PLEX8 |
| 2.17E-01 0 0 | Cs7g07380.1         | 6    | 0 | 0 | 2 MASCOT | T | PLEX8 |
| 1.22E-02 0 0 | Cs7g07380.1         | 6    | 0 | 0 | 2 MASCOT | T | PLEX8 |
| 2.44E-01 0 0 | Cs7g07380.1         | 4.37 | 0 | 0 | 2 MASCOT | T | PLEX8 |
| 1.25E-03 0 0 | Cs7g07380.1         | 8.22 | 0 | 0 | 2 MASCOT | T | PLEX8 |
| 1.41E-02 0 0 | Cs7g07380.1         | 8.22 | 0 | 0 | 2 MASCOT | T | PLEX8 |
| 1.61E-04 0 0 | Cs7g07380.1         | 4.37 | 0 | 0 | 2 MASCOT | T | PLEX8 |
| 3.16E-03 0 0 | Cs7g07380.1         | 4.37 | 0 | 0 | 2 MASCOT | T | PLEX8 |
| 2.74E-04 0 0 | Cs7g07380.1         | 4.37 | 0 | 0 | 2 MASCOT | T | PLEX8 |
| 1.98E-01 0 0 | Cs7g07380.1         | 8.47 | 0 | 0 | 2 MASCOT | T | PLEX8 |
| 1.27E-01 0 0 | Cs1g20200.1         | 4.37 | 0 | 0 | 2 MASCOT | T | PLEX8 |
| 1.12E-02 0 0 | Cs1g20200.1         | 4.53 | 0 | 0 | 2 MASCOT | T |       |
| 1.03E-01 0 0 | Cs1g20200.1         | 4.37 | 0 | 0 | 2 MASCOT | T | PLEX8 |
| 3.90E-03 0 0 | Cs1g20200.1         | 5.99 | 0 | 0 | 2 MASCOT | T | PLEX8 |
| 7.32E-02 0 0 | Cs1g20200.1         | 5.99 | 0 | 0 | 2 MASCOT | T | PLEX8 |
| 2.42E-04 0 0 | Cs1g20200.1         | 5.99 | 0 | 0 | 2 MASCOT | T | PLEX8 |
| 2.19E-01 0 0 | Cs1g20200.1         | 8.75 | 0 | 0 | 2 MASCOT | T | PLEX8 |
| 1.78E-03 0 0 | Cs1g20200.1         | 4.14 | 0 | 0 | 2 MASCOT | T |       |
| 1.20E-01 0 0 | Cs1g20200.1         | 3.93 | 0 | 0 | 2 MASCOT | T | PLEX8 |
| 5.78E-03 0 0 | Cs1g20200.1         | 3.93 | 0 | 0 | 2 MASCOT | T | PLEX8 |

|          |     |                     |      |   |      |   |        |        |       |
|----------|-----|---------------------|------|---|------|---|--------|--------|-------|
| 2.42E-02 | 0 0 | Cs1g20200.1         | 8.72 | 0 | 0    | 2 | MASCOT | T      | PLEX8 |
| 2.49E-02 | 0 0 | Cs1g20200.1         | 8.72 | 0 | 0    | 2 | MASCOT | T      | PLEX8 |
| 2.93E-02 | 0 0 | Cs1g20200.1         | 8.72 | 0 | 0    | 2 | MASCOT | T      | PLEX8 |
| 4.08E-02 | 0 0 | Cs1g15970.1/Cs1g202 | 5.84 | 0 | 0    | 2 | MASCOT | T      |       |
| 4.21E-02 | 0 0 | Cs1g20200.1         | 6.91 | 0 | 0    | 2 | MASCOT | T      |       |
| 1.49E-01 | 0 0 | Cs8g02460.1/Cs8g024 | 8.79 | 0 | 0    | 2 | MASCOT | T      | PLEX8 |
| 3.80E-02 | 0 0 | Cs8g02460.1         | 4.08 | 0 | 15.9 | 0 | 2      | MASCOT | T     |
| 4.19E-03 | 0 0 | Cs8g02460.1         | 5.4  | 0 | 0    | 2 | MASCOT | T      | PLEX8 |
| 2.31E-02 | 0 0 | Cs8g02460.1         | 5.4  | 0 | 0    | 2 | MASCOT | T      | PLEX8 |
| 2.07E-05 | 0 0 | Cs8g02460.1/Cs8g024 | 3.71 | 0 | 0    | 2 | MASCOT | T      | PLEX8 |
| 7.64E-02 | 0 0 | Cs8g02460.1/Cs8g024 | 9.76 | 0 | 0    | 2 | MASCOT | T      | PLEX8 |
| 9.93E-02 | 0 0 | Cs8g02460.1/Cs8g024 | 9.76 | 0 | 0    | 2 | MASCOT | T      |       |
| 1.53E-02 | 0 0 | Cs8g02460.1/Cs8g024 | 4.37 | 0 | 0    | 2 | MASCOT | T      | PLEX8 |
| 3.79E-01 | 0 0 | Cs8g02460.1/Cs8g024 | 4.37 | 0 | 0    | 2 | MASCOT | T      | PLEX8 |
| 1.25E-01 | 0 0 | Cs8g02460.1/Cs8g024 | 4.37 | 0 | 0    | 2 | MASCOT | T      | PLEX8 |
| 2.23E-01 | 0 0 | Cs8g02460.1/Cs8g024 | 5.84 | 0 | 0    | 2 | MASCOT | T      | PLEX8 |
| 1.63E-01 | 0 0 | Cs8g02460.1/Cs8g024 | 4.53 | 0 | 0    | 2 | MASCOT | T      |       |
| 9.49E-02 | 0 0 | Cs8g02460.1/Cs8g024 | 4.53 | 0 | 0    | 2 | MASCOT | T      |       |
| 3.35E-02 | 0 0 | Cs8g02460.1         | 8.59 | 0 | 0    | 2 | MASCOT | T      | PLEX8 |
| 8.82E-03 | 0 0 | Cs8g02460.1/Cs8g024 | 4.53 | 0 | 0    | 2 | MASCOT | T      | PLEX8 |
| 8.84E-05 | 0 0 | Cs3g17840.1/Cs3g178 | 4.53 | 0 | 0    | 2 | MASCOT | T      | PLEX8 |
| 2.19E-02 | 0 0 | Cs3g17840.2/Cs3g178 | 8.72 | 0 | 0    | 2 | MASCOT | T      | PLEX8 |
| 4.03E-02 | 0 0 | Cs3g17840.1/Cs3g178 | 4.21 | 0 | 0    | 2 | MASCOT | T      |       |
| 1.21E-02 | 0 0 | Cs3g17840.1/Cs3g178 | 4.21 | 0 | 0    | 2 | MASCOT | T      |       |
| 1.93E-01 | 0 0 | Cs3g17840.1/Cs3g178 | 6    | 0 | 0    | 2 | MASCOT | T      | PLEX8 |
| 2.13E-02 | 0 0 | Cs3g17840.1/Cs3g178 | 8.59 | 0 | 0    | 2 | MASCOT | T      | PLEX8 |
| 5.76E-03 | 0 0 | Cs3g17840.1/Cs3g178 | 8.59 | 0 | 0    | 2 | MASCOT | T      | PLEX8 |
| 4.29E-02 | 0 0 | Cs3g17840.1/Cs3g178 | 8.59 | 0 | 0    | 2 | MASCOT | T      | PLEX8 |
| 3.70E-04 | 0 0 | Cs3g17840.1/Cs3g178 | 6.74 | 0 | 0    | 2 | MASCOT | T      |       |
| 1.36E-02 | 0 0 | Cs3g17840.1/Cs3g178 | 5.84 | 0 | 0    | 2 | MASCOT | T      | PLEX8 |
| 3.75E-02 | 0 0 | Cs3g17840.1/Cs3g178 | 5.97 | 0 | 0    | 2 | MASCOT | T      | PLEX8 |
| 2.97E-01 | 0 0 | Cs3g17840.1/Cs3g178 | 8.59 | 0 | 0    | 2 | MASCOT | T      |       |
| 4.97E-04 | 0 0 | Cs6g13880.1/Cs6g138 | 6.85 | 0 | 0    | 2 | MASCOT | T      | PLEX8 |
| 1.68E-04 | 0 0 | Cs6g13880.1/Cs6g138 | 6.85 | 0 | 0    | 2 | MASCOT | T      | PLEX8 |
| 2.76E-02 | 0 0 | Cs6g13880.1/Cs6g138 | 6.85 | 0 | 0    | 2 | MASCOT | T      | PLEX8 |
| 9.47E-05 | 0 0 | Cs6g13880.1/Cs6g138 | 6.85 | 0 | 0    | 2 | MASCOT | T      | PLEX8 |
| 6.51E-02 | 0 0 | Cs6g13880.1/Cs6g138 | 6.85 | 0 | 0    | 2 | MASCOT | T      |       |
| 4.84E-04 | 0 0 | Cs6g13880.1/Cs6g138 | 6.85 | 0 | 0    | 2 | MASCOT | T      | PLEX8 |
| 1.69E-01 | 0 0 | Cs6g13880.1/Cs6g138 | 6.85 | 0 | 0    | 2 | MASCOT | T      | PLEX8 |
| 4.71E-02 | 0 0 | Cs6g13880.1/Cs6g138 | 6.85 | 0 | 0    | 2 | MASCOT | T      | PLEX8 |
| 6.26E-07 | 0 0 | Cs6g13880.1/Cs6g138 | 6.85 | 0 | 0    | 2 | MASCOT | T      | PLEX8 |
| 2.02E-01 | 0 0 | Cs6g13880.1/Cs6g138 | 6.85 | 0 | 0    | 2 | MASCOT | T      |       |
| 1.20E-03 | 0 0 | Cs6g13880.1/Cs6g138 | 6.85 | 0 | 0    | 2 | MASCOT | T      |       |
| 2.47E-02 | 0 0 | Cs6g13880.1         | 4    | 0 | 0    | 2 | MASCOT | T      | PLEX8 |
| 5.44E-02 | 0 0 | Cs6g13880.1         | 4    | 0 | 0    | 2 | MASCOT | T      | PLEX8 |
| 2.87E-02 | 0 0 | Cs6g13880.1         | 4    | 0 | 0    | 2 | MASCOT | T      | PLEX8 |
| 2.57E-02 | 0 0 | Cs6g13880.1         | 4    | 0 | 0    | 2 | MASCOT | T      |       |
| 1.38E-02 | 0 0 | Cs6g13880.1         | 4    | 0 | 0    | 2 | MASCOT | T      |       |
| 3.57E-01 | 0 0 | Cs6g13880.1/Cs6g138 | 5.84 | 0 | 0    | 2 | MASCOT | T      | PLEX8 |
| 8.45E-02 | 0 0 | Cs6g13880.1/Cs6g138 | 5.84 | 0 | 0    | 2 | MASCOT | T      | PLEX8 |
| 5.55E-02 | 0 0 | Cs6g13880.1/Cs6g138 | 5.84 | 0 | 0    | 2 | MASCOT | T      | PLEX8 |

|          |     |                     |      |   |   |   |        |   |       |
|----------|-----|---------------------|------|---|---|---|--------|---|-------|
| 2.84E-01 | 0 0 | Cs6g13880.1/Cs6g138 | 5.84 | 0 | 0 | 2 | MASCOT | T | PLEX8 |
| 2.25E-01 | 0 0 | Cs6g13880.1/Cs6g138 | 5.84 | 0 | 0 | 2 | MASCOT | T | PLEX8 |
| 2.65E-01 | 0 0 | Cs6g13880.1/Cs6g138 | 5.84 | 0 | 0 | 2 | MASCOT | T | PLEX8 |
| 6.05E-02 | 0 0 | Cs6g13880.1/Cs6g138 | 5.84 | 0 | 0 | 2 | MASCOT | T | PLEX8 |
| 4.64E-02 | 0 0 | Cs6g13880.1/Cs6g138 | 5.84 | 0 | 0 | 2 | MASCOT | T |       |
| 4.85E-01 | 0 0 | Cs6g13880.1/Cs6g138 | 5.84 | 0 | 0 | 2 | MASCOT | T | PLEX8 |
| 5.78E-02 | 0 0 | Cs6g13880.1/Cs6g138 | 5.84 | 0 | 0 | 2 | MASCOT | T | PLEX8 |
| 2.58E-02 | 0 0 | Cs6g13880.1/Cs6g138 | 5.84 | 0 | 0 | 2 | MASCOT | T |       |
| 2.73E-01 | 0 0 | Cs6g13880.1/Cs6g138 | 5.84 | 0 | 0 | 2 | MASCOT | T |       |
| 1.61E-01 | 0 0 | Cs6g13880.1/Cs6g138 | 5.84 | 0 | 0 | 2 | MASCOT | T |       |
| 3.95E-01 | 0 0 | Cs6g13880.1/Cs6g138 | 5.55 | 0 | 0 | 2 | MASCOT | T | PLEX8 |
| 3.37E-02 | 0 0 | Cs6g13880.1/Cs6g138 | 5.55 | 0 | 0 | 2 | MASCOT | T | PLEX8 |
| 4.68E-01 | 0 0 | Cs6g13880.1/Cs6g138 | 5.55 | 0 | 0 | 2 | MASCOT | T | PLEX8 |
| 9.20E-02 | 0 0 | Cs6g13880.1/Cs6g138 | 5.55 | 0 | 0 | 2 | MASCOT | T | PLEX8 |
| 4.91E-01 | 0 0 | Cs6g13880.1/Cs6g138 | 5.55 | 0 | 0 | 2 | MASCOT | T | PLEX8 |
| 3.35E-03 | 0 0 | Cs6g13880.1/Cs6g138 | 5.55 | 0 | 0 | 2 | MASCOT | T | PLEX8 |
| 2.66E-01 | 0 0 | Cs6g13880.1/Cs6g138 | 5.55 | 0 | 0 | 2 | MASCOT | T | PLEX8 |
| 1.85E-03 | 0 0 | Cs6g13880.1/Cs6g138 | 5.55 | 0 | 0 | 2 | MASCOT | T | PLEX8 |
| 1.34E-01 | 0 0 | Cs6g13880.1/Cs6g138 | 5.55 | 0 | 0 | 2 | MASCOT | T |       |
| 5.90E-02 | 0 0 | Cs6g13880.1/Cs6g138 | 5.55 | 0 | 0 | 2 | MASCOT | T |       |
| 1.17E-02 | 0 0 | Cs6g13880.1/Cs6g138 | 5.55 | 0 | 0 | 2 | MASCOT | T | PLEX8 |
| 8.90E-04 | 0 0 | Cs6g13880.1/Cs6g138 | 5.55 | 0 | 0 | 2 | MASCOT | T | PLEX8 |
| 4.29E-02 | 0 0 | Cs6g13880.1/Cs6g138 | 5.55 | 0 | 0 | 2 | MASCOT | T | PLEX8 |
| 1.56E-02 | 0 0 | Cs6g13880.1/Cs6g138 | 5.55 | 0 | 0 | 2 | MASCOT | T | PLEX8 |
| 7.42E-02 | 0 0 | Cs6g13880.1/Cs6g138 | 5.55 | 0 | 0 | 2 | MASCOT | T | PLEX8 |
| 6.22E-04 | 0 0 | Cs6g13880.1/Cs6g138 | 5.55 | 0 | 0 | 2 | MASCOT | T | PLEX8 |
| 6.97E-04 | 0 0 | Cs6g13880.1/Cs6g138 | 5.55 | 0 | 0 | 2 | MASCOT | T | PLEX8 |
| 1.91E-01 | 0 0 | Cs6g13880.1/Cs6g138 | 5.84 | 0 | 0 | 2 | MASCOT | T | PLEX8 |
| 5.98E-03 | 0 0 | Cs6g13880.1/Cs6g138 | 5.84 | 0 | 0 | 2 | MASCOT | T | PLEX8 |
| 2.65E-02 | 0 0 | Cs6g13880.1/Cs6g138 | 5.84 | 0 | 0 | 2 | MASCOT | T | PLEX8 |
| 3.50E-02 | 0 0 | Cs6g13880.1/Cs6g138 | 5.84 | 0 | 0 | 2 | MASCOT | T | PLEX8 |
| 1.03E-02 | 0 0 | Cs6g13880.1/Cs6g138 | 5.84 | 0 | 0 | 2 | MASCOT | T | PLEX8 |
| 4.38E-02 | 0 0 | Cs6g13880.1/Cs6g138 | 5.84 | 0 | 0 | 2 | MASCOT | T | PLEX8 |
| 7.46E-03 | 0 0 | Cs6g13880.1/Cs6g138 | 5.84 | 0 | 0 | 2 | MASCOT | T | PLEX8 |
| 8.10E-03 | 0 0 | Cs6g13880.1/Cs6g138 | 5.84 | 0 | 0 | 2 | MASCOT | T | PLEX8 |
| 2.71E-01 | 0 0 | Cs6g13880.1/Cs6g138 | 5.84 | 0 | 0 | 2 | MASCOT | T | PLEX8 |
| 7.46E-02 | 0 0 | Cs6g13880.1/Cs6g138 | 5.84 | 0 | 0 | 2 | MASCOT | T | PLEX8 |
| 3.05E-01 | 0 0 | Cs6g13880.1/Cs6g138 | 5.84 | 0 | 0 | 2 | MASCOT | T | PLEX8 |
| 3.43E-02 | 0 0 | Cs6g13880.1/Cs6g138 | 5.84 | 0 | 0 | 2 | MASCOT | T | PLEX8 |
| 5.22E-02 | 0 0 | Cs6g13880.1/Cs6g138 | 5.84 | 0 | 0 | 2 | MASCOT | T |       |
| 6.29E-02 | 0 0 | Cs6g13880.1/Cs6g138 | 5.84 | 0 | 0 | 2 | MASCOT | T | PLEX8 |
| 2.81E-01 | 0 0 | Cs6g13880.1/Cs6g138 | 5.84 | 0 | 0 | 2 | MASCOT | T | PLEX8 |
| 2.04E-01 | 0 0 | Cs6g13880.1/Cs6g138 | 5.84 | 0 | 0 | 2 | MASCOT | T | PLEX8 |
| 4.90E-02 | 0 0 | Cs6g13880.1/Cs6g138 | 5.84 | 0 | 0 | 2 | MASCOT | T | PLEX8 |
| 3.37E-01 | 0 0 | Cs6g13880.1/Cs6g138 | 5.84 | 0 | 0 | 2 | MASCOT | T | PLEX8 |
| 4.70E-02 | 0 0 | Cs6g13880.1/Cs6g138 | 5.84 | 0 | 0 | 2 | MASCOT | T | PLEX8 |
| 2.79E-01 | 0 0 | Cs6g13880.1/Cs6g138 | 5.84 | 0 | 0 | 2 | MASCOT | T | PLEX8 |
| 3.04E-02 | 0 0 | Cs6g13880.1/Cs6g138 | 5.84 | 0 | 0 | 2 | MASCOT | T |       |
| 4.68E-01 | 0 0 | Cs6g13880.1/Cs6g138 | 5.84 | 0 | 0 | 2 | MASCOT | T |       |
| 3.06E-02 | 0 0 | Cs6g13880.1/Cs6g138 | 5.84 | 0 | 0 | 2 | MASCOT | T |       |
| 3.58E-01 | 0 0 | Cs6g13880.1/Cs6g138 | 5.84 | 0 | 0 | 2 | MASCOT | T | PLEX8 |

|          |     |                     |      |   |   |   |        |   |       |
|----------|-----|---------------------|------|---|---|---|--------|---|-------|
| 1.43E-01 | 0 0 | Cs6g13880.1/Cs6g138 | 5.84 | 0 | 0 | 2 | MASCOT | T | PLEX8 |
| 2.00E-02 | 0 0 | Cs6g13880.1/Cs6g138 | 5.84 | 0 | 0 | 2 | MASCOT | T |       |
| 9.72E-02 | 0 0 | Cs6g13880.1/Cs6g138 | 5.84 | 0 | 0 | 2 | MASCOT | T | PLEX8 |
| 2.20E-02 | 0 0 | Cs6g13880.1/Cs6g138 | 5.84 | 0 | 0 | 2 | MASCOT | T | PLEX8 |
| 2.10E-02 | 0 0 | Cs6g13880.1/Cs6g138 | 5.84 | 0 | 0 | 2 | MASCOT | T | PLEX8 |
| 1.26E-02 | 0 0 | Cs6g13880.1/Cs6g138 | 5.84 | 0 | 0 | 2 | MASCOT | T | PLEX8 |
| 2.10E-02 | 0 0 | Cs6g13880.1/Cs6g138 | 5.84 | 0 | 0 | 2 | MASCOT | T | PLEX8 |
| 1.12E-01 | 0 0 | Cs6g13880.1/Cs6g138 | 5.84 | 0 | 0 | 2 | MASCOT | T | PLEX8 |
| 4.32E-02 | 0 0 | Cs6g13880.1/Cs6g138 | 5.84 | 0 | 0 | 2 | MASCOT | T | PLEX8 |
| 2.85E-01 | 0 0 | Cs6g13880.1/Cs6g138 | 5.84 | 0 | 0 | 2 | MASCOT | T | PLEX8 |
| 2.12E-02 | 0 0 | Cs6g13880.1/Cs6g138 | 5.84 | 0 | 0 | 2 | MASCOT | T | PLEX8 |
| 2.00E-02 | 0 0 | Cs6g13880.1/Cs6g138 | 5.84 | 0 | 0 | 2 | MASCOT | T | PLEX8 |
| 5.11E-03 | 0 0 | Cs6g13880.1/Cs6g138 | 5.84 | 0 | 0 | 2 | MASCOT | T | PLEX8 |
| 1.82E-01 | 0 0 | Cs6g13880.1/Cs6g138 | 5.84 | 0 | 0 | 2 | MASCOT | T |       |
| 2.39E-01 | 0 0 | Cs6g13880.1/Cs6g138 | 5.84 | 0 | 0 | 2 | MASCOT | T |       |
| 1.65E-01 | 0 0 | Cs6g13880.1/Cs6g138 | 5.84 | 0 | 0 | 2 | MASCOT | T |       |
| 2.60E-02 | 0 0 | Cs6g13880.1/Cs6g138 | 5.84 | 0 | 0 | 2 | MASCOT | T | PLEX8 |
| 9.91E-02 | 0 0 | Cs6g13880.1/Cs6g138 | 5.84 | 0 | 0 | 2 | MASCOT | T | PLEX8 |
| 1.55E-02 | 0 0 | Cs6g13880.1/Cs6g138 | 5.84 | 0 | 0 | 2 | MASCOT | T | PLEX8 |
| 6.35E-04 | 0 0 | Cs6g13880.1/Cs6g138 | 5.84 | 0 | 0 | 2 | MASCOT | T | PLEX8 |
| 2.34E-02 | 0 0 | Cs6g13880.1/Cs6g138 | 5.84 | 0 | 0 | 2 | MASCOT | T | PLEX8 |
| 1.81E-01 | 0 0 | Cs6g13880.1/Cs6g138 | 5.84 | 0 | 0 | 2 | MASCOT | T | PLEX8 |
| 6.76E-02 | 0 0 | Cs6g13880.1/Cs6g138 | 5.84 | 0 | 0 | 2 | MASCOT | T | PLEX8 |
| 2.13E-01 | 0 0 | Cs6g13880.1/Cs6g138 | 5.84 | 0 | 0 | 2 | MASCOT | T | PLEX8 |
| 4.09E-02 | 0 0 | Cs6g13880.1/Cs6g138 | 5.84 | 0 | 0 | 2 | MASCOT | T | PLEX8 |
| 3.43E-02 | 0 0 | Cs6g13880.1/Cs6g138 | 5.84 | 0 | 0 | 2 | MASCOT | T | PLEX8 |
| 1.80E-01 | 0 0 | Cs6g13880.1/Cs6g138 | 5.84 | 0 | 0 | 2 | MASCOT | T | PLEX8 |
| 8.81E-02 | 0 0 | Cs6g13880.1/Cs6g138 | 5.84 | 0 | 0 | 2 | MASCOT | T | PLEX8 |
| 2.95E-02 | 0 0 | Cs6g13880.1/Cs6g138 | 5.84 | 0 | 0 | 2 | MASCOT | T | PLEX8 |
| 2.52E-02 | 0 0 | Cs6g13880.1/Cs6g138 | 5.84 | 0 | 0 | 2 | MASCOT | T | PLEX8 |
| 3.82E-02 | 0 0 | Cs6g13880.1/Cs6g138 | 5.84 | 0 | 0 | 2 | MASCOT | T | PLEX8 |
| 2.56E-02 | 0 0 | Cs6g13880.1/Cs6g138 | 5.84 | 0 | 0 | 2 | MASCOT | T | PLEX8 |
| 1.13E-01 | 0 0 | Cs6g13880.1/Cs6g138 | 5.84 | 0 | 0 | 2 | MASCOT | T | PLEX8 |
| 1.91E-02 | 0 0 | Cs6g13880.1/Cs6g138 | 5.84 | 0 | 0 | 2 | MASCOT | T | PLEX8 |
| 8.89E-02 | 0 0 | Cs6g13880.1/Cs6g138 | 5.84 | 0 | 0 | 2 | MASCOT | T | PLEX8 |
| 1.80E-02 | 0 0 | Cs6g13880.1/Cs6g138 | 5.84 | 0 | 0 | 2 | MASCOT | T | PLEX8 |
| 8.83E-03 | 0 0 | Cs6g13880.1/Cs6g138 | 5.84 | 0 | 0 | 2 | MASCOT | T | PLEX8 |
| 9.01E-02 | 0 0 | Cs6g13880.1/Cs6g138 | 5.84 | 0 | 0 | 2 | MASCOT | T | PLEX8 |
| 1.08E-01 | 0 0 | Cs6g13880.1/Cs6g138 | 5.84 | 0 | 0 | 2 | MASCOT | T |       |
| 2.90E-02 | 0 0 | Cs6g13880.1/Cs6g138 | 5.84 | 0 | 0 | 2 | MASCOT | T | PLEX8 |
| 1.84E-02 | 0 0 | Cs6g13880.1/Cs6g138 | 5.84 | 0 | 0 | 2 | MASCOT | T | PLEX8 |
| 1.94E-02 | 0 0 | Cs6g13880.1/Cs6g138 | 5.84 | 0 | 0 | 2 | MASCOT | T | PLEX8 |
| 6.70E-02 | 0 0 | Cs6g13880.1/Cs6g138 | 5.84 | 0 | 0 | 2 | MASCOT | T | PLEX8 |
| 5.54E-02 | 0 0 | Cs6g13880.1/Cs6g138 | 5.84 | 0 | 0 | 2 | MASCOT | T | PLEX8 |
| 1.35E-01 | 0 0 | Cs6g13880.1/Cs6g138 | 5.84 | 0 | 0 | 2 | MASCOT | T | PLEX8 |
| 9.67E-02 | 0 0 | Cs6g13880.1/Cs6g138 | 5.84 | 0 | 0 | 2 | MASCOT | T | PLEX8 |
| 4.20E-02 | 0 0 | Cs6g13880.1/Cs6g138 | 5.84 | 0 | 0 | 2 | MASCOT | T | PLEX8 |
| 1.20E-01 | 0 0 | Cs6g13880.1/Cs6g138 | 5.84 | 0 | 0 | 2 | MASCOT | T | PLEX8 |
| 3.54E-02 | 0 0 | Cs6g13880.1/Cs6g138 | 5.84 | 0 | 0 | 2 | MASCOT | T | PLEX8 |
| 3.23E-01 | 0 0 | Cs6g13880.1/Cs6g138 | 5.84 | 0 | 0 | 2 | MASCOT | T |       |
| 1.74E-01 | 0 0 | Cs6g13880.1/Cs6g138 | 5.84 | 0 | 0 | 2 | MASCOT | T |       |



|          |     |                     |      |   |   |   |        |   |       |
|----------|-----|---------------------|------|---|---|---|--------|---|-------|
| 9.04E-02 | 0 0 | Cs6g13880.1/Cs6g138 | 6.75 | 1 | 0 | 2 | MASCOT | T |       |
| 1.44E-01 | 0 0 | Cs6g13880.1/Cs6g138 | 4.37 | 0 | 0 | 2 | MASCOT | T | PLEX8 |
| 2.36E-01 | 0 0 | Cs6g13880.1/Cs6g138 | 4.37 | 0 | 0 | 2 | MASCOT | T | PLEX8 |
| 6.51E-02 | 0 0 | Cs6g13880.1/Cs6g138 | 4.37 | 0 | 0 | 2 | MASCOT | T | PLEX8 |
| 3.16E-02 | 0 0 | Cs6g13880.1/Cs6g138 | 4.37 | 0 | 0 | 2 | MASCOT | T | PLEX8 |
| 3.43E-02 | 0 0 | Cs6g13880.1/Cs6g138 | 4.37 | 0 | 0 | 2 | MASCOT | T | PLEX8 |
| 1.83E-01 | 0 0 | Cs6g13880.1/Cs6g138 | 4.37 | 0 | 0 | 2 | MASCOT | T | PLEX8 |
| 5.47E-02 | 0 0 | Cs6g13880.1/Cs6g138 | 4.37 | 0 | 0 | 2 | MASCOT | T | PLEX8 |
| 7.02E-03 | 0 0 | Cs6g10385.1/Cs6g103 | 4.25 | 0 | 0 | 2 | MASCOT | T | PLEX8 |
| 2.63E-02 | 0 0 | Cs6g10385.1/Cs6g103 | 4.25 | 0 | 0 | 2 | MASCOT | T | PLEX8 |
| 4.45E-05 | 0 0 | Cs6g10385.1/Cs6g103 | 4.25 | 0 | 0 | 2 | MASCOT | T | PLEX8 |
| 1.41E-02 | 0 0 | Cs6g10385.1/Cs6g103 | 4.25 | 0 | 0 | 2 | MASCOT | T | PLEX8 |
| 1.46E-02 | 0 0 | Cs6g10385.1/Cs6g103 | 4.25 | 0 | 0 | 2 | MASCOT | T | PLEX8 |
| 1.77E-05 | 0 0 | Cs6g10385.1/Cs6g103 | 4.25 | 0 | 0 | 2 | MASCOT | T | PLEX8 |
| 1.09E-01 | 0 0 | Cs6g10385.1/Cs6g103 | 4.25 | 0 | 0 | 2 | MASCOT | T | PLEX8 |
| 1.60E-03 | 0 0 | Cs6g10385.1/Cs6g103 | 4.25 | 0 | 0 | 2 | MASCOT | T | PLEX8 |
| 7.70E-03 | 0 0 | Cs6g10385.1/Cs6g103 | 4.25 | 0 | 0 | 2 | MASCOT | T | PLEX8 |
| 7.67E-05 | 0 0 | Cs6g10385.1/Cs6g103 | 4.25 | 0 | 0 | 2 | MASCOT | T | PLEX8 |
| 7.52E-03 | 0 0 | Cs6g10385.1/Cs6g103 | 4.25 | 0 | 0 | 2 | MASCOT | T | PLEX8 |
| 2.58E-05 | 0 0 | Cs6g10385.1/Cs6g103 | 4.25 | 0 | 0 | 2 | MASCOT | T | PLEX8 |
| 1.40E-05 | 0 0 | Cs6g10385.1/Cs6g103 | 4.25 | 0 | 0 | 2 | MASCOT | T | PLEX8 |
| 5.30E-02 | 0 0 | Cs6g10385.1/Cs6g103 | 4.25 | 0 | 0 | 2 | MASCOT | T | PLEX8 |
| 2.76E-03 | 0 0 | Cs6g10385.1/Cs6g103 | 4.25 | 0 | 0 | 2 | MASCOT | T | PLEX8 |
| 4.49E-05 | 0 0 | Cs6g10385.1/Cs6g103 | 4.25 | 0 | 0 | 2 | MASCOT | T | PLEX8 |
| 2.30E-01 | 0 0 | Cs6g10385.1/Cs6g103 | 4.25 | 0 | 0 | 2 | MASCOT | T | PLEX8 |
| 2.10E-04 | 0 0 | Cs6g10385.1/Cs6g103 | 4.25 | 0 | 0 | 2 | MASCOT | T | PLEX8 |
| 7.69E-06 | 0 0 | Cs6g10385.1/Cs6g103 | 4.25 | 0 | 0 | 2 | MASCOT | T | PLEX8 |
| 1.56E-02 | 0 0 | Cs6g10385.1/Cs6g103 | 4.25 | 0 | 0 | 2 | MASCOT | T | PLEX8 |
| 4.05E-02 | 0 0 | Cs6g10385.1/Cs6g103 | 4.25 | 0 | 0 | 2 | MASCOT | T | PLEX8 |
| 1.46E-04 | 0 0 | Cs6g10385.1/Cs6g103 | 4.25 | 0 | 0 | 2 | MASCOT | T | PLEX8 |
| 3.51E-04 | 0 0 | Cs6g10385.1/Cs6g103 | 4.25 | 0 | 0 | 2 | MASCOT | T | PLEX8 |
| 1.05E-01 | 0 0 | Cs6g10385.1/Cs6g103 | 4.25 | 0 | 0 | 2 | MASCOT | T | PLEX8 |
| 1.75E-03 | 0 0 | Cs6g10385.1/Cs6g103 | 4.25 | 0 | 0 | 2 | MASCOT | T | PLEX8 |
| 2.12E-06 | 0 0 | Cs6g10385.1/Cs6g103 | 4.25 | 0 | 0 | 2 | MASCOT | T | PLEX8 |
| 8.52E-06 | 0 0 | Cs6g10385.1/Cs6g103 | 4.25 | 0 | 0 | 2 | MASCOT | T | PLEX8 |
| 9.41E-07 | 0 0 | Cs6g10385.1/Cs6g103 | 4.25 | 0 | 0 | 2 | MASCOT | T | PLEX8 |
| 5.07E-03 | 0 0 | Cs6g10385.1/Cs6g103 | 4.25 | 0 | 0 | 2 | MASCOT | T | PLEX8 |
| 1.49E-01 | 0 0 | Cs6g10385.1/Cs6g103 | 4.25 | 0 | 0 | 2 | MASCOT | T | PLEX8 |
| 1.66E-04 | 0 0 | Cs6g10385.1/Cs6g103 | 4.25 | 0 | 0 | 2 | MASCOT | T | PLEX8 |
| 8.91E-07 | 0 0 | Cs6g10385.1/Cs6g103 | 4.25 | 0 | 0 | 2 | MASCOT | T | PLEX8 |
| 1.94E-03 | 0 0 | Cs6g10385.1/Cs6g103 | 4.25 | 0 | 0 | 2 | MASCOT | T |       |
| 9.72E-05 | 0 0 | Cs6g10385.1/Cs6g103 | 3.93 | 0 | 0 | 2 | MASCOT | T | PLEX8 |
| 9.39E-06 | 0 0 | Cs6g10385.1/Cs6g103 | 3.93 | 0 | 0 | 2 | MASCOT | T | PLEX8 |
| 2.99E-03 | 0 0 | Cs6g10385.1/Cs6g103 | 3.93 | 0 | 0 | 2 | MASCOT | T |       |
| 1.39E-02 | 0 0 | Cs6g10385.1/Cs6g103 | 4.02 | 0 | 0 | 2 | MASCOT | T |       |
| 4.57E-02 | 0 0 | Cs6g10385.1/Cs6g103 | 9.47 | 0 | 0 | 2 | MASCOT | T | PLEX8 |
| 1.40E-02 | 0 0 | Cs6g10385.1/Cs6g103 | 9.47 | 0 | 0 | 2 | MASCOT | T | PLEX8 |
| 6.36E-03 | 0 0 | Cs6g10385.1/Cs6g103 | 9.47 | 0 | 0 | 2 | MASCOT | T | PLEX8 |
| 1.07E-01 | 0 0 | Cs6g10385.1/Cs6g103 | 5.72 | 0 | 0 | 2 | MASCOT | T | PLEX8 |
| 4.25E-01 | 0 0 | Cs6g10385.1/Cs6g103 | 5.72 | 0 | 0 | 2 | MASCOT | T | PLEX8 |
| 9.69E-02 | 0 0 | Cs6g10385.1/Cs6g103 | 5.72 | 0 | 0 | 2 | MASCOT | T | PLEX8 |

|          |     |                     |      |   |      |   |        |        |       |       |
|----------|-----|---------------------|------|---|------|---|--------|--------|-------|-------|
| 1.03E-01 | 0 0 | Cs6g10385.1/Cs6g103 | 5.72 | 0 | 0    | 2 | MASCOT | T      | PLEX8 |       |
| 1.10E-01 | 0 0 | Cs6g10385.1/Cs6g103 | 5.72 | 0 | 0    | 2 | MASCOT | T      | PLEX8 |       |
| 4.31E-01 | 0 0 | Cs6g10385.1/Cs6g103 | 5.72 | 0 | 0    | 2 | MASCOT | T      | PLEX8 |       |
| 2.69E-01 | 0 0 | Cs6g10385.1/Cs6g103 | 5.72 | 0 | 0    | 2 | MASCOT | T      | PLEX8 |       |
| 7.38E-02 | 0 0 | Cs6g10385.1/Cs6g103 | 8.75 | 0 | 0    | 2 | MASCOT | T      | PLEX8 |       |
| 4.64E-02 | 0 0 | Cs6g10385.1/Cs6g103 | 8.75 | 0 | 0    | 2 | MASCOT | T      | PLEX8 |       |
| 1.38E-01 | 0 0 | Cs6g10385.1/Cs6g103 | 8.75 | 0 | 0    | 2 | MASCOT | T      | PLEX8 |       |
| 1.24E-01 | 0 0 | Cs6g10385.1/Cs6g103 | 8.75 | 0 | 0    | 2 | MASCOT | T      | PLEX8 |       |
| 1.16E-01 | 0 0 | Cs6g10385.1/Cs6g103 | 5.59 | 0 | 15.9 | 0 | 2      | MASCOT | T     | PLEX8 |
| 1.30E-03 | 0 0 | Cs6g10385.1/Cs6g103 | 5.59 | 0 | 15.9 | 0 | 2      | MASCOT | T     | PLEX8 |
| 2.10E-02 | 0 0 | Cs6g10385.1/Cs6g103 | 5.59 | 0 | 15.9 | 0 | 2      | MASCOT | T     | PLEX8 |
| 4.89E-04 | 0 0 | Cs6g10385.1/Cs6g103 | 5.59 | 0 | 15.9 | 0 | 2      | MASCOT | T     | PLEX8 |
| 1.36E-02 | 0 0 | Cs6g10385.1/Cs6g103 | 5.59 | 0 | 15.9 | 0 | 2      | MASCOT | T     | PLEX8 |
| 2.18E-01 | 0 0 | Cs6g10385.1/Cs6g103 | 5.59 | 0 | 15.9 | 0 | 2      | MASCOT | T     | PLEX8 |
| 2.27E-02 | 0 0 | Cs6g10385.1/Cs6g103 | 5.59 | 0 | 15.9 | 0 | 2      | MASCOT | T     | PLEX8 |
| 2.71E-01 | 0 0 | Cs6g10385.1/Cs6g103 | 5.59 | 0 | 15.9 | 0 | 2      | MASCOT | T     | PLEX8 |
| 5.35E-02 | 0 0 | Cs6g10385.1/Cs6g103 | 5.59 | 0 | 0    | 2 | MASCOT | T      | PLEX8 |       |
| 3.18E-02 | 0 0 | Cs6g10385.1/Cs6g103 | 5.59 | 0 | 0    | 2 | MASCOT | T      | PLEX8 |       |
| 1.74E-03 | 0 0 | Cs6g10385.1/Cs6g103 | 5.59 | 0 | 0    | 2 | MASCOT | T      | PLEX8 |       |
| 5.16E-03 | 0 0 | Cs6g10385.1/Cs6g103 | 5.59 | 0 | 0    | 2 | MASCOT | T      | PLEX8 |       |
| 1.91E-01 | 0 0 | Cs6g10385.1/Cs6g103 | 5.59 | 0 | 0    | 2 | MASCOT | T      | PLEX8 |       |
| 5.95E-04 | 0 0 | Cs6g10385.1/Cs6g103 | 5.59 | 0 | 0    | 2 | MASCOT | T      | PLEX8 |       |
| 3.37E-03 | 0 0 | Cs6g10385.1/Cs6g103 | 5.59 | 0 | 0    | 2 | MASCOT | T      | PLEX8 |       |
| 2.01E-01 | 0 0 | Cs6g10385.1/Cs6g103 | 5.59 | 0 | 0    | 2 | MASCOT | T      | PLEX8 |       |
| 2.16E-01 | 0 0 | Cs6g10385.1/Cs6g103 | 5.59 | 0 | 0    | 2 | MASCOT | T      | PLEX8 |       |
| 7.27E-02 | 0 0 | Cs6g10385.1/Cs6g103 | 5.81 | 0 | 0    | 2 | MASCOT | T      | PLEX8 |       |
| 8.56E-02 | 0 0 | Cs6g10385.1/Cs6g103 | 5.81 | 0 | 0    | 2 | MASCOT | T      | PLEX8 |       |
| 1.33E-01 | 0 0 | Cs6g10385.1/Cs6g103 | 6    | 0 | 0    | 2 | MASCOT | T      | PLEX8 |       |
| 2.86E-01 | 0 0 | Cs6g10385.1/Cs6g103 | 6    | 0 | 0    | 2 | MASCOT | T      | PLEX8 |       |
| 4.92E-03 | 0 0 | Cs6g10385.1/Cs6g103 | 6    | 0 | 0    | 2 | MASCOT | T      | PLEX8 |       |
| 7.34E-02 | 0 0 | Cs6g05615.1         | 5.88 | 0 | 0    | 2 | MASCOT | T      | PLEX8 |       |
| 1.77E-02 | 0 0 | Cs6g05615.1         | 5.88 | 0 | 0    | 2 | MASCOT | T      | PLEX8 |       |
| 6.72E-03 | 0 0 | Cs6g05615.1         | 5.88 | 0 | 0    | 2 | MASCOT | T      | PLEX8 |       |
| 8.39E-04 | 0 0 | Cs6g05615.1         | 5.88 | 0 | 0    | 2 | MASCOT | T      | PLEX8 |       |
| 4.89E-03 | 0 0 | Cs6g05615.1         | 5.88 | 0 | 0    | 2 | MASCOT | T      | PLEX8 |       |
| 2.49E-03 | 0 0 | Cs6g05615.1         | 5.88 | 0 | 0    | 2 | MASCOT | T      | PLEX8 |       |
| 1.01E-02 | 0 0 | Cs6g05615.1         | 6.92 | 0 | 0    | 2 | MASCOT | T      | PLEX8 |       |
| 3.27E-02 | 0 0 | Cs6g05615.1         | 6.92 | 0 | 0    | 2 | MASCOT | T      | PLEX8 |       |
| 1.01E-01 | 0 0 | Cs6g05615.1         | 6.92 | 0 | 0    | 2 | MASCOT | T      | PLEX8 |       |
| 9.56E-02 | 0 0 | Cs6g05615.1         | 6.92 | 0 | 0    | 2 | MASCOT | T      | PLEX8 |       |
| 1.39E-02 | 0 0 | Cs6g05615.1         | 6    | 0 | 0    | 2 | MASCOT | T      | PLEX8 |       |
| 2.30E-03 | 0 0 | Cs6g05615.1         | 6    | 0 | 0    | 2 | MASCOT | T      | PLEX8 |       |
| 8.57E-03 | 0 0 | Cs6g05615.1         | 6    | 0 | 0    | 2 | MASCOT | T      | PLEX8 |       |
| 1.68E-02 | 0 0 | Cs6g05615.1         | 6    | 0 | 0    | 2 | MASCOT | T      | PLEX8 |       |
| 1.43E-02 | 0 0 | Cs6g05615.1         | 6    | 0 | 0    | 2 | MASCOT | T      | PLEX8 |       |
| 4.45E-04 | 0 0 | Cs6g05615.1         | 6    | 0 | 0    | 2 | MASCOT | T      | PLEX8 |       |
| 1.82E-02 | 0 0 | Cs6g05615.1         | 6    | 0 | 0    | 2 | MASCOT | T      | PLEX8 |       |
| 1.34E-03 | 0 0 | Cs6g05615.1         | 6    | 0 | 0    | 2 | MASCOT | T      | PLEX8 |       |
| 2.12E-01 | 0 0 | Cs6g05615.1         | 6    | 0 | 0    | 2 | MASCOT | T      | PLEX8 |       |
| 1.72E-02 | 0 0 | Cs6g05615.1         | 6    | 0 | 0    | 2 | MASCOT | T      | PLEX8 |       |
| 5.96E-03 | 0 0 | Cs6g05615.1         | 6    | 0 | 0    | 2 | MASCOT | T      | PLEX8 |       |

|              |                     |      |   |   |          |   |       |
|--------------|---------------------|------|---|---|----------|---|-------|
| 3.20E-02 0 0 | Cs6g05615.1         | 6    | 0 | 0 | 2 MASCOT | T | PLEX8 |
| 1.36E-02 0 0 | Cs6g05615.1         | 6    | 0 | 0 | 2 MASCOT | T | PLEX8 |
| 1.98E-03 0 0 | Cs6g05615.1         | 6    | 0 | 0 | 2 MASCOT | T | PLEX8 |
| 4.34E-03 0 0 | Cs6g05615.1         | 6    | 0 | 0 | 2 MASCOT | T | PLEX8 |
| 4.41E-04 0 0 | Cs6g05615.1         | 6    | 0 | 0 | 2 MASCOT | T | PLEX8 |
| 1.67E-02 0 0 | Cs6g05615.1         | 4.03 | 0 | 0 | 2 MASCOT | T | PLEX8 |
| 3.35E-03 0 0 | Cs6g05615.1         | 4.03 | 0 | 0 | 2 MASCOT | T | PLEX8 |
| 3.50E-01 0 0 | Cs6g05615.1         | 4.03 | 0 | 0 | 2 MASCOT | T | PLEX8 |
| 9.08E-02 0 0 | Cs6g05615.1         | 4.03 | 0 | 0 | 2 MASCOT | T | PLEX8 |
| 6.52E-03 0 0 | Cs6g05615.1         | 4.03 | 0 | 0 | 2 MASCOT | T | PLEX8 |
| 1.65E-01 0 0 | Cs6g05615.1         | 4.37 | 0 | 0 | 2 MASCOT | T | PLEX8 |
| 3.18E-03 0 0 | Cs6g05615.1         | 4.37 | 0 | 0 | 2 MASCOT | T | PLEX8 |
| 4.53E-02 0 0 | Cs6g05615.1         | 5.21 | 0 | 0 | 2 MASCOT | T | PLEX8 |
| 1.20E-03 0 0 | Cs6g05615.1         | 5.21 | 0 | 0 | 2 MASCOT | T | PLEX8 |
| 1.15E-04 0 0 | Cs6g05615.1         | 5.21 | 0 | 0 | 2 MASCOT | T | PLEX8 |
| 5.03E-03 0 0 | Cs6g05615.1         | 5.21 | 0 | 0 | 2 MASCOT | T | PLEX8 |
| 2.54E-04 0 0 | Cs6g05615.1         | 5.21 | 0 | 0 | 2 MASCOT | T | PLEX8 |
| 4.31E-06 0 0 | Cs6g05615.1         | 5.21 | 0 | 0 | 2 MASCOT | T | PLEX8 |
| 4.30E-02 0 0 | Cs6g05615.1         | 5.21 | 0 | 0 | 2 MASCOT | T | PLEX8 |
| 1.55E-01 0 0 | Cs6g05615.1         | 5.21 | 0 | 0 | 2 MASCOT | T | PLEX8 |
| 7.80E-06 0 0 | Cs6g05615.1         | 5.21 | 0 | 0 | 2 MASCOT | T | PLEX8 |
| 1.94E-04 0 0 | Cs6g05615.1         | 5.21 | 0 | 0 | 2 MASCOT | T | PLEX8 |
| 2.30E-02 0 0 | Cs6g05615.1         | 5.21 | 0 | 0 | 2 MASCOT | T | PLEX8 |
| 3.25E-03 0 0 | Cs6g05615.1         | 5.21 | 0 | 0 | 2 MASCOT | T |       |
| 1.52E-02 0 0 | Cs6g05615.1         | 6.85 | 0 | 0 | 2 MASCOT | T | PLEX8 |
| 9.32E-02 0 0 | Cs6g05615.1         | 6.85 | 0 | 0 | 2 MASCOT | T | PLEX8 |
| 1.03E-01 0 0 | Cs6g05615.1         | 6.85 | 0 | 0 | 2 MASCOT | T | PLEX8 |
| 3.45E-02 0 0 | Cs6g05615.1         | 6.85 | 0 | 0 | 2 MASCOT | T | PLEX8 |
| 8.34E-03 0 0 | Cs6g05615.1         | 6.85 | 0 | 0 | 2 MASCOT | T | PLEX8 |
| 1.04E-02 0 0 | Cs6g05615.1         | 4.53 | 0 | 0 | 2 MASCOT | T | PLEX8 |
| 2.32E-03 0 0 | Cs6g05615.1         | 4.53 | 0 | 0 | 2 MASCOT | T | PLEX8 |
| 2.14E-02 0 0 | Cs6g05615.1         | 4.53 | 0 | 0 | 2 MASCOT | T |       |
| 7.31E-03 0 0 | Cs6g05615.1         | 4.53 | 0 | 0 | 2 MASCOT | T |       |
| 4.92E-03 0 0 | Cs6g05615.1         | 4.53 | 0 | 0 | 2 MASCOT | T | PLEX8 |
| 4.41E-02 0 0 | Cs6g05615.1         | 4.53 | 0 | 0 | 2 MASCOT | T | PLEX8 |
| 6.43E-04 0 0 | Cs6g05615.1         | 4.53 | 0 | 0 | 2 MASCOT | T | PLEX8 |
| 1.84E-02 0 0 | Cs4g10610.1         | 6.05 | 0 | 0 | 2 MASCOT | T |       |
| 4.55E-01 0 0 | Cs4g10610.1         | 6.05 | 0 | 0 | 2 MASCOT | T |       |
| 5.12E-03 0 0 | Cs4g10610.1/Cs4g106 | 8.63 | 0 | 0 | 2 MASCOT | T | PLEX8 |
| 9.03E-04 0 0 | Cs4g10610.1/Cs4g106 | 8.63 | 0 | 0 | 2 MASCOT | T | PLEX8 |
| 9.07E-03 0 0 | Cs4g10610.1/Cs4g106 | 8.63 | 0 | 0 | 2 MASCOT | T | PLEX8 |
| 5.28E-02 0 0 | Cs4g10610.1/Cs4g106 | 8.63 | 0 | 0 | 2 MASCOT | T | PLEX8 |
| 1.18E-01 0 0 | Cs4g10610.1/Cs4g106 | 8.63 | 0 | 0 | 2 MASCOT | T |       |
| 3.80E-01 0 0 | Cs4g10610.1/Cs4g106 | 8.63 | 0 | 0 | 2 MASCOT | T | PLEX8 |
| 4.14E-02 0 0 | Cs4g10610.1/Cs4g106 | 8.63 | 0 | 0 | 2 MASCOT | T | PLEX8 |
| 7.08E-02 0 0 | Cs4g10610.1/Cs4g106 | 8.63 | 0 | 0 | 2 MASCOT | T |       |
| 1.58E-02 0 0 | Cs4g10610.1/Cs4g106 | 8.63 | 0 | 0 | 2 MASCOT | T | PLEX8 |
| 1.51E-03 0 0 | Cs4g10610.1/Cs4g106 | 8.63 | 0 | 0 | 2 MASCOT | T | PLEX8 |
| 3.17E-02 0 0 | Cs4g10610.1/Cs4g106 | 8.63 | 0 | 0 | 2 MASCOT | T | PLEX8 |
| 4.72E-02 0 0 | Cs4g10610.1/Cs4g106 | 8.63 | 0 | 0 | 2 MASCOT | T | PLEX8 |
| 1.38E-03 0 0 | Cs4g10610.1/Cs4g106 | 8.63 | 0 | 0 | 2 MASCOT | T | PLEX8 |

|          |     |                     |      |   |   |   |        |   |       |
|----------|-----|---------------------|------|---|---|---|--------|---|-------|
| 3.78E-05 | 0 0 | Cs4g10610.1/Cs4g106 | 8.63 | 0 | 0 | 2 | MASCOT | T | PLEX8 |
| 1.76E-03 | 0 0 | Cs4g10610.1/Cs4g106 | 8.63 | 0 | 0 | 2 | MASCOT | T | PLEX8 |
| 6.00E-02 | 0 0 | Cs4g10610.1/Cs4g106 | 5.88 | 0 | 0 | 2 | MASCOT | T | PLEX8 |
| 8.01E-02 | 0 0 | Cs4g10610.1/Cs4g106 | 5.88 | 0 | 0 | 2 | MASCOT | T | PLEX8 |
| 1.62E-04 | 0 0 | Cs4g10610.1/Cs4g106 | 5.88 | 0 | 0 | 2 | MASCOT | T | PLEX8 |
| 2.26E-03 | 0 0 | Cs4g10610.1/Cs4g106 | 5.88 | 0 | 0 | 2 | MASCOT | T | PLEX8 |
| 3.99E-01 | 0 0 | Cs4g10610.1/Cs4g106 | 5.88 | 0 | 0 | 2 | MASCOT | T | PLEX8 |
| 3.46E-03 | 0 0 | Cs4g10610.1/Cs4g106 | 5.88 | 0 | 0 | 2 | MASCOT | T | PLEX8 |
| 2.16E-02 | 0 0 | Cs4g10610.1/Cs4g106 | 5.88 | 0 | 0 | 2 | MASCOT | T | PLEX8 |
| 1.92E-01 | 0 0 | Cs4g10610.1/Cs4g106 | 5.88 | 0 | 0 | 2 | MASCOT | T | PLEX8 |
| 1.37E-01 | 0 0 | Cs4g10610.1/Cs4g106 | 5.88 | 0 | 0 | 2 | MASCOT | T | PLEX8 |
| 1.09E-01 | 0 0 | Cs4g10610.1/Cs4g106 | 6.1  | 0 | 0 | 2 | MASCOT | T | PLEX8 |
| 1.25E-01 | 0 0 | Cs4g10610.1/Cs4g106 | 3.92 | 0 | 0 | 2 | MASCOT | T |       |
| 2.26E-01 | 0 0 | Cs4g10610.1/Cs4g106 | 3.92 | 0 | 0 | 2 | MASCOT | T |       |
| 3.82E-01 | 0 0 | Cs4g10610.1/Cs4g106 | 6    | 0 | 0 | 2 | MASCOT | T | PLEX8 |
| 4.29E-04 | 0 0 | Cs4g10610.1/Cs4g106 | 5.5  | 0 | 0 | 2 | MASCOT | T | PLEX8 |
| 9.91E-04 | 0 0 | Cs4g10610.1/Cs4g106 | 5.5  | 0 | 0 | 2 | MASCOT | T | PLEX8 |
| 5.51E-03 | 0 0 | Cs4g10610.1/Cs4g106 | 5.5  | 0 | 0 | 2 | MASCOT | T | PLEX8 |
| 4.96E-03 | 0 0 | Cs4g10610.1/Cs4g106 | 5.5  | 0 | 0 | 2 | MASCOT | T | PLEX8 |
| 4.14E-03 | 0 0 | Cs4g10610.1/Cs4g106 | 5.5  | 0 | 0 | 2 | MASCOT | T |       |
| 6.39E-03 | 0 0 | Cs4g10610.1/Cs4g106 | 5.5  | 0 | 0 | 2 | MASCOT | T | PLEX8 |
| 1.57E-01 | 0 0 | Cs4g10610.1/Cs4g106 | 5.5  | 0 | 0 | 2 | MASCOT | T |       |
| 2.25E-03 | 0 0 | Cs4g10610.1/Cs4g106 | 5.5  | 0 | 0 | 2 | MASCOT | T | PLEX8 |
| 1.60E-01 | 0 0 | Cs4g10610.1/Cs4g106 | 5.5  | 0 | 0 | 2 | MASCOT | T | PLEX8 |
| 1.73E-02 | 0 0 | Cs4g10610.1/Cs4g106 | 5.5  | 0 | 0 | 2 | MASCOT | T | PLEX8 |
| 1.07E-02 | 0 0 | Cs4g10610.1/Cs4g106 | 5.5  | 0 | 0 | 2 | MASCOT | T | PLEX8 |
| 6.22E-03 | 0 0 | Cs4g10610.1/Cs4g106 | 5.5  | 0 | 0 | 2 | MASCOT | T |       |
| 8.12E-02 | 0 0 | Cs4g10610.1/Cs4g106 | 5.5  | 0 | 0 | 2 | MASCOT | T |       |
| 3.49E-02 | 0 0 | Cs4g10610.1/Cs4g106 | 5.66 | 0 | 0 | 2 | MASCOT | T | PLEX8 |
| 2.37E-01 | 0 0 | Cs4g10610.1/Cs4g106 | 5.66 | 0 | 0 | 2 | MASCOT | T | PLEX8 |
| 5.30E-01 | 0 0 | Cs4g10610.1/Cs4g106 | 5.66 | 0 | 0 | 2 | MASCOT | T | PLEX8 |
| 4.51E-02 | 0 0 | Cs4g10610.1/Cs4g106 | 5.66 | 0 | 0 | 2 | MASCOT | T | PLEX8 |
| 1.16E-01 | 0 0 | Cs4g10610.1/Cs4g106 | 5.88 | 0 | 0 | 2 | MASCOT | T | PLEX8 |
| 5.54E-02 | 0 0 | Cs4g10610.1/Cs4g106 | 5.88 | 0 | 0 | 2 | MASCOT | T | PLEX8 |
| 1.48E-05 | 0 0 | Cs4g10610.1/Cs4g106 | 5.88 | 0 | 0 | 2 | MASCOT | T | PLEX8 |
| 1.83E-02 | 0 0 | Cs4g10610.1/Cs4g106 | 5.88 | 0 | 0 | 2 | MASCOT | T | PLEX8 |
| 9.41E-04 | 0 0 | Cs4g10610.1/Cs4g106 | 5.88 | 0 | 0 | 2 | MASCOT | T | PLEX8 |
| 7.72E-03 | 0 0 | Cs4g10610.1/Cs4g106 | 5.88 | 0 | 0 | 2 | MASCOT | T | PLEX8 |
| 9.08E-05 | 0 0 | Cs4g10610.1/Cs4g106 | 5.88 | 0 | 0 | 2 | MASCOT | T | PLEX8 |
| 7.58E-03 | 0 0 | Cs4g10610.1/Cs4g106 | 5.88 | 0 | 0 | 2 | MASCOT | T | PLEX8 |
| 1.41E-02 | 0 0 | Cs5g06190.1         | 6.85 | 0 | 0 | 2 | MASCOT | T | PLEX8 |
| 4.04E-02 | 0 0 | Cs5g06190.1         | 6.85 | 0 | 0 | 2 | MASCOT | T | PLEX8 |
| 1.53E-02 | 0 0 | Cs5g06190.1         | 6.85 | 0 | 0 | 2 | MASCOT | T | PLEX8 |
| 1.73E-01 | 0 0 | Cs5g06190.1         | 6.85 | 0 | 0 | 2 | MASCOT | T | PLEX8 |
| 1.55E-01 | 0 0 | Cs5g06190.1         | 6.85 | 0 | 0 | 2 | MASCOT | T | PLEX8 |
| 1.34E-02 | 0 0 | Cs5g06190.1         | 6.85 | 0 | 0 | 2 | MASCOT | T | PLEX8 |
| 6.79E-03 | 0 0 | Cs5g06190.1         | 4.18 | 1 | 0 | 2 | MASCOT | T | PLEX8 |
| 3.23E-02 | 0 0 | Cs5g06190.1         | 4.18 | 1 | 0 | 2 | MASCOT | T |       |
| 7.70E-03 | 0 0 | Cs5g06190.1         | 4.18 | 1 | 0 | 2 | MASCOT | T | PLEX8 |
| 4.92E-02 | 0 0 | Cs5g06190.1         | 4.18 | 1 | 0 | 2 | MASCOT | T | PLEX8 |
| 6.15E-02 | 0 0 | Cs5g06190.1         | 4.18 | 1 | 0 | 2 | MASCOT | T | PLEX8 |

|          |     |                     |      |   |      |   |        |        |       |       |
|----------|-----|---------------------|------|---|------|---|--------|--------|-------|-------|
| 4.26E-03 | 0 0 | Cs5g06190.1         | 4.18 | 1 | 0    | 2 | MASCOT | T      | PLEX8 |       |
| 2.87E-02 | 0 0 | Cs5g06190.1         | 8.75 | 0 | 15.9 | 0 | 2      | MASCOT | T     | PLEX8 |
| 2.79E-01 | 0 0 | Cs5g06190.1         | 8.75 | 0 | 0    | 0 | 2      | MASCOT | T     | PLEX8 |
| 2.87E-02 | 0 0 | Cs5g06190.1         | 8.75 | 0 | 0    | 0 | 2      | MASCOT | T     | PLEX8 |
| 9.73E-03 | 0 0 | Cs5g06190.1         | 4.37 | 0 | 0    | 0 | 2      | MASCOT | T     | PLEX8 |
| 6.51E-02 | 0 0 | Cs5g06190.1         | 4.37 | 0 | 0    | 0 | 2      | MASCOT | T     | PLEX8 |
| 3.04E-01 | 0 0 | Cs5g06190.1         | 4.37 | 0 | 0    | 0 | 2      | MASCOT | T     | PLEX8 |
| 8.75E-06 | 0 0 | Cs5g06190.1         | 4.37 | 0 | 0    | 0 | 2      | MASCOT | T     | PLEX8 |
| 4.00E-03 | 0 0 | Cs5g06190.1         | 4.37 | 0 | 0    | 0 | 2      | MASCOT | T     | PLEX8 |
| 1.43E-05 | 0 0 | Cs5g06190.1         | 4.37 | 0 | 0    | 0 | 2      | MASCOT | T     | PLEX8 |
| 7.74E-02 | 0 0 | Cs5g06190.1         | 4.37 | 0 | 0    | 0 | 2      | MASCOT | T     | PLEX8 |
| 7.65E-02 | 0 0 | Cs5g06190.1         | 4.37 | 0 | 0    | 0 | 2      | MASCOT | T     | PLEX8 |
| 2.72E-03 | 0 0 | Cs5g06190.1         | 4.37 | 0 | 0    | 0 | 2      | MASCOT | T     | PLEX8 |
| 3.61E-02 | 0 0 | Cs5g06190.1         | 4.37 | 0 | 0    | 0 | 2      | MASCOT | T     | PLEX8 |
| 2.11E-02 | 0 0 | Cs5g06190.1         | 4.37 | 0 | 0    | 0 | 2      | MASCOT | T     | PLEX8 |
| 1.48E-02 | 0 0 | Cs5g06190.1         | 4.37 | 0 | 0    | 0 | 2      | MASCOT | T     | PLEX8 |
| 3.50E-02 | 0 0 | Cs5g06190.1         | 4.37 | 0 | 0    | 0 | 2      | MASCOT | T     | PLEX8 |
| 1.53E-02 | 0 0 | Cs5g06190.1         | 4.37 | 0 | 0    | 0 | 2      | MASCOT | T     | PLEX8 |
| 6.95E-03 | 0 0 | Cs5g06190.1         | 4.37 | 0 | 0    | 0 | 2      | MASCOT | T     | PLEX8 |
| 1.99E-03 | 0 0 | Cs5g06190.1         | 4.25 | 0 | 0    | 0 | 2      | MASCOT | T     | PLEX8 |
| 3.12E-04 | 0 0 | Cs5g06190.1         | 4.25 | 0 | 0    | 0 | 2      | MASCOT | T     | PLEX8 |
| 6.96E-03 | 0 0 | Cs5g06190.1         | 4.25 | 0 | 0    | 0 | 2      | MASCOT | T     | PLEX8 |
| 9.25E-04 | 0 0 | Cs5g06190.1/Cs5g317 | 6.25 | 0 | 0    | 0 | 2      | MASCOT | T     | PLEX8 |
| 1.42E-01 | 0 0 | Cs5g06190.1/Cs5g317 | 6.25 | 0 | 0    | 0 | 2      | MASCOT | T     | PLEX8 |
| 2.77E-03 | 0 0 | Cs5g06190.1/Cs5g317 | 6.25 | 0 | 0    | 0 | 2      | MASCOT | T     | PLEX8 |
| 1.36E-02 | 0 0 | Cs5g06190.1/Cs5g317 | 6.25 | 0 | 0    | 0 | 2      | MASCOT | T     | PLEX8 |
| 6.76E-03 | 0 0 | Cs5g06190.1/Cs5g317 | 6.25 | 0 | 0    | 0 | 2      | MASCOT | T     |       |
| 9.09E-03 | 0 0 | Cs5g06190.1         | 6    | 0 | 15.9 | 0 | 2      | MASCOT | T     | PLEX8 |
| 8.01E-02 | 0 0 | Cs5g06190.1         | 6    | 0 | 15.9 | 0 | 2      | MASCOT | T     | PLEX8 |
| 8.69E-03 | 0 0 | Cs5g06190.1         | 6    | 0 | 15.9 | 0 | 2      | MASCOT | T     | PLEX8 |
| 1.50E-02 | 0 0 | Cs5g06190.1         | 6    | 0 | 15.9 | 0 | 2      | MASCOT | T     | PLEX8 |
| 1.72E-04 | 0 0 | Cs5g06190.1         | 6    | 0 | 15.9 | 0 | 2      | MASCOT | T     | PLEX8 |
| 7.76E-05 | 0 0 | Cs5g06190.1         | 6    | 0 | 0    | 0 | 2      | MASCOT | T     | PLEX8 |
| 4.39E-05 | 0 0 | Cs5g06190.1         | 6    | 0 | 0    | 0 | 2      | MASCOT | T     | PLEX8 |
| 6.96E-03 | 0 0 | Cs5g06190.1         | 6    | 0 | 0    | 0 | 2      | MASCOT | T     | PLEX8 |
| 7.13E-04 | 0 0 | Cs5g06190.1         | 6    | 0 | 0    | 0 | 2      | MASCOT | T     | PLEX8 |
| 9.04E-03 | 0 0 | Cs5g06190.1         | 6    | 0 | 0    | 0 | 2      | MASCOT | T     | PLEX8 |
| 4.80E-04 | 0 0 | Cs5g06190.1         | 6    | 0 | 0    | 0 | 2      | MASCOT | T     | PLEX8 |
| 1.39E-01 | 0 0 | Cs5g06190.1         | 5.5  | 0 | 0    | 0 | 2      | MASCOT | T     | PLEX8 |
| 5.22E-02 | 0 0 | Cs5g06190.1         | 5.5  | 0 | 0    | 0 | 2      | MASCOT | T     | PLEX8 |
| 1.03E-02 | 0 0 | Cs7g23800.1         | 8.8  | 0 | 0    | 0 | 2      | MASCOT | T     | PLEX8 |
| 7.37E-02 | 0 0 | Cs7g23800.1         | 8.8  | 0 | 0    | 0 | 2      | MASCOT | T     | PLEX8 |
| 6.68E-03 | 0 0 | Cs7g23800.1         | 8.8  | 0 | 0    | 0 | 2      | MASCOT | T     | PLEX8 |
| 2.63E-02 | 0 0 | Cs7g23800.1         | 3.98 | 0 | 15.9 | 0 | 2      | MASCOT | T     |       |
| 6.75E-03 | 0 0 | Cs7g23800.1         | 3.98 | 0 | 0    | 0 | 2      | MASCOT | T     |       |
| 2.42E-03 | 0 0 | Cs7g23800.1         | 3.98 | 0 | 0    | 0 | 2      | MASCOT | T     |       |
| 2.12E-02 | 0 0 | Cs7g23800.1         | 5.4  | 0 | 15.9 | 0 | 2      | MASCOT | T     | PLEX8 |
| 1.50E-02 | 0 0 | Cs7g23800.1         | 5.4  | 0 | 15.9 | 0 | 2      | MASCOT | T     | PLEX8 |
| 2.94E-02 | 0 0 | Cs7g23800.1         | 5.4  | 0 | 15.9 | 0 | 2      | MASCOT | T     | PLEX8 |
| 1.34E-01 | 0 0 | Cs7g23800.1         | 5.4  | 0 | 15.9 | 0 | 2      | MASCOT | T     | PLEX8 |
| 5.38E-02 | 0 0 | Cs7g23800.1         | 5.4  | 0 | 15.9 | 0 | 2      | MASCOT | T     | PLEX8 |

|          |     |                       |      |   |      |   |   |        |   |       |
|----------|-----|-----------------------|------|---|------|---|---|--------|---|-------|
| 1.92E-01 | 0 0 | Cs7g23800.1           | 5.4  | 0 | 15.9 | 0 | 2 | MASCOT | T | PLEX8 |
| 1.22E-02 | 0 0 | Cs7g23800.1           | 5.4  | 0 | 15.9 | 0 | 2 | MASCOT | T |       |
| 5.59E-04 | 0 0 | Cs7g23800.1           | 5.4  | 0 | 15.9 | 0 | 2 | MASCOT | T |       |
| 1.27E-05 | 0 0 | Cs7g23800.1           | 5.4  | 0 | 0    | 0 | 2 | MASCOT | T | PLEX8 |
| 1.10E-03 | 0 0 | Cs7g23800.1           | 5.4  | 0 | 0    | 0 | 2 | MASCOT | T | PLEX8 |
| 4.11E-01 | 0 0 | Cs7g23800.1           | 5.4  | 0 | 0    | 0 | 2 | MASCOT | T |       |
| 5.19E-03 | 0 0 | Cs7g23800.1           | 5.4  | 0 | 0    | 0 | 2 | MASCOT | T |       |
| 4.32E-02 | 0 0 | Cs7g23800.1           | 8.75 | 0 | 15.9 | 0 | 2 | MASCOT | T | PLEX8 |
| 2.16E-02 | 0 0 | Cs7g23800.1           | 8.75 | 0 | 15.9 | 0 | 2 | MASCOT | T | PLEX8 |
| 2.84E-02 | 0 0 | Cs7g23800.1           | 8.75 | 0 | 15.9 | 0 | 2 | MASCOT | T | PLEX8 |
| 1.75E-02 | 0 0 | Cs7g23800.1           | 8.75 | 0 | 15.9 | 0 | 2 | MASCOT | T | PLEX8 |
| 5.79E-02 | 0 0 | Cs7g23800.1           | 8.75 | 0 | 15.9 | 0 | 2 | MASCOT | T |       |
| 1.91E-01 | 0 0 | Cs7g23800.1           | 8.75 | 0 | 0    | 0 | 2 | MASCOT | T | PLEX8 |
| 1.51E-04 | 0 0 | Cs7g23800.1           | 8.75 | 0 | 0    | 0 | 2 | MASCOT | T | PLEX8 |
| 3.26E-04 | 0 0 | Cs7g23800.1           | 8.75 | 0 | 0    | 0 | 2 | MASCOT | T | PLEX8 |
| 1.50E-01 | 0 0 | Cs7g23800.1           | 8.75 | 0 | 0    | 0 | 2 | MASCOT | T | PLEX8 |
| 4.45E-02 | 0 0 | Cs7g23800.1           | 8.75 | 0 | 0    | 0 | 2 | MASCOT | T |       |
| 3.68E-04 | 0 0 | Cs7g23800.1           | 8.75 | 0 | 0    | 0 | 2 | MASCOT | T |       |
| 3.21E-06 | 0 0 | Cs7g23800.1           | 5.72 | 0 | 0    | 0 | 2 | MASCOT | T |       |
| 1.93E-02 | 0 0 | Cs7g23800.1           | 4.03 | 0 | 0    | 0 | 2 | MASCOT | T | PLEX8 |
| 1.66E-02 | 0 0 | Cs7g23800.1           | 4.03 | 0 | 0    | 0 | 2 | MASCOT | T | PLEX8 |
| 6.31E-02 | 0 0 | Cs7g23800.1           | 4.14 | 0 | 0    | 0 | 2 | MASCOT | T | PLEX8 |
| 6.38E-03 | 0 0 | Cs7g23800.1           | 4.14 | 0 | 0    | 0 | 2 | MASCOT | T | PLEX8 |
| 1.27E-04 | 0 0 | Cs7g23800.1           | 4.14 | 0 | 0    | 0 | 2 | MASCOT | T | PLEX8 |
| 8.74E-04 | 0 0 | Cs7g23800.1           | 4.14 | 0 | 0    | 0 | 2 | MASCOT | T | PLEX8 |
| 5.58E-04 | 0 0 | Cs7g23800.1           | 4.14 | 0 | 0    | 0 | 2 | MASCOT | T | PLEX8 |
| 1.45E-02 | 0 0 | Cs7g23800.1           | 4.14 | 0 | 0    | 0 | 2 | MASCOT | T | PLEX8 |
| 1.93E-03 | 0 0 | Cs7g23800.1           | 4.14 | 0 | 0    | 0 | 2 | MASCOT | T | PLEX8 |
| 4.35E-02 | 0 0 | Cs7g23800.1           | 4.65 | 0 | 0    | 0 | 2 | MASCOT | T | PLEX8 |
| 6.94E-02 | 0 0 | Cs7g23800.1           | 4.65 | 0 | 0    | 0 | 2 | MASCOT | T | PLEX8 |
| 4.23E-01 | 0 0 | Cs7g23800.1           | 4.65 | 0 | 0    | 0 | 2 | MASCOT | T |       |
| 1.82E-04 | 0 0 | Cs7g23800.1           | 4.65 | 0 | 0    | 0 | 2 | MASCOT | T |       |
| 1.28E-03 | 0 0 | Cs7g23800.1           | 4.53 | 0 | 0    | 0 | 2 | MASCOT | T | PLEX8 |
| 1.91E-04 | 0 0 | Cs7g23800.1           | 4.53 | 0 | 0    | 0 | 2 | MASCOT | T | PLEX8 |
| 1.04E-02 | 0 0 | Cs7g23800.1           | 4.53 | 0 | 0    | 0 | 2 | MASCOT | T | PLEX8 |
| 5.58E-04 | 0 0 | Cs7g23800.1           | 4.53 | 0 | 0    | 0 | 2 | MASCOT | T | PLEX8 |
| 4.14E-02 | 0 0 | orange1.1t01793.1/ora | 4.37 | 0 | 0    | 0 | 2 | MASCOT | T | PLEX8 |
| 4.20E-02 | 0 0 | orange1.1t01793.1/ora | 4.37 | 0 | 0    | 0 | 2 | MASCOT | T | PLEX8 |
| 4.73E-02 | 0 0 | orange1.1t01793.1/ora | 4.37 | 0 | 0    | 0 | 2 | MASCOT | T | PLEX8 |
| 4.08E-01 | 0 0 | orange1.1t01793.1/ora | 4.37 | 0 | 0    | 0 | 2 | MASCOT | T | PLEX8 |
| 4.35E-02 | 0 0 | orange1.1t01793.1/ora | 4.37 | 0 | 0    | 0 | 2 | MASCOT | T | PLEX8 |
| 7.80E-02 | 0 0 | orange1.1t01793.1/ora | 4.37 | 0 | 0    | 0 | 2 | MASCOT | T | PLEX8 |
| 5.14E-02 | 0 0 | orange1.1t01793.1/ora | 8.26 | 0 | 0    | 0 | 2 | MASCOT | T | PLEX8 |
| 5.45E-03 | 0 0 | orange1.1t01793.1/ora | 8.23 | 0 | 15.9 | 0 | 2 | MASCOT | T | PLEX8 |
| 3.25E-01 | 0 0 | orange1.1t01793.1/ora | 8.23 | 0 | 15.9 | 0 | 2 | MASCOT | T | PLEX8 |
| 5.78E-02 | 0 0 | orange1.1t01793.1/ora | 8.23 | 0 | 0    | 0 | 2 | MASCOT | T | PLEX8 |
| 1.40E-02 | 0 0 | Cs1g16250.1/Cs1g162   | 5.66 | 0 | 0    | 0 | 2 | MASCOT | T | PLEX8 |
| 2.39E-02 | 0 0 | Cs1g16250.1/Cs1g162   | 5.66 | 0 | 0    | 0 | 2 | MASCOT | T | PLEX8 |
| 6.80E-02 | 0 0 | orange1.1t01793.1/ora | 5.5  | 0 | 0    | 0 | 2 | MASCOT | T | PLEX8 |
| 2.86E-01 | 0 0 | orange1.1t01793.1/ora | 5.93 | 0 | 0    | 0 | 2 | MASCOT | T | PLEX8 |
| 1.99E-01 | 0 0 | orange1.1t01793.1/ora | 5.93 | 0 | 0    | 0 | 2 | MASCOT | T | PLEX8 |

|          |     |                       |      |   |      |   |        |        |       |       |
|----------|-----|-----------------------|------|---|------|---|--------|--------|-------|-------|
| 7.18E-03 | 0 0 | orange1.1t01793.1/ora | 5.93 | 0 | 0    | 2 | MASCOT | T      | PLEX8 |       |
| 3.13E-01 | 0 0 | orange1.1t01793.1/ora | 5.93 | 0 | 0    | 2 | MASCOT | T      |       |       |
| 1.57E-01 | 0 0 | Cs5g30600.1/Cs5g306   | 6.04 | 0 | 0    | 2 | MASCOT | T      | PLEX8 |       |
| 1.70E-01 | 0 0 | Cs5g30600.1/Cs5g306   | 6.04 | 0 | 0    | 2 | MASCOT | T      | PLEX8 |       |
| 1.53E-01 | 0 0 | Cs5g30600.1/Cs5g306   | 6.04 | 0 | 0    | 2 | MASCOT | T      | PLEX8 |       |
| 1.48E-01 | 0 0 | Cs5g30600.1/Cs5g306   | 6.04 | 0 | 0    | 2 | MASCOT | T      | PLEX8 |       |
| 8.13E-02 | 0 0 | Cs5g30600.1/Cs5g306   | 6.04 | 0 | 0    | 2 | MASCOT | T      | PLEX8 |       |
| 1.75E-01 | 0 0 | Cs5g30600.1/Cs5g306   | 6.04 | 0 | 0    | 2 | MASCOT | T      | PLEX8 |       |
| 2.97E-02 | 0 0 | orange1.1t01793.1/ora | 5.98 | 0 | 15.9 | 0 | 2      | MASCOT | T     | PLEX8 |
| 4.77E-04 | 0 0 | orange1.1t01793.1/ora | 5.98 | 0 | 15.9 | 0 | 2      | MASCOT | T     | PLEX8 |
| 6.56E-04 | 0 0 | orange1.1t01793.1/ora | 5.98 | 0 | 15.9 | 0 | 2      | MASCOT | T     | PLEX8 |
| 9.49E-03 | 0 0 | orange1.1t01793.1/ora | 5.98 | 0 | 15.9 | 0 | 2      | MASCOT | T     | PLEX8 |
| 2.74E-05 | 0 0 | orange1.1t01793.1/ora | 5.98 | 0 | 15.9 | 0 | 2      | MASCOT | T     | PLEX8 |
| 5.10E-02 | 0 0 | orange1.1t01793.1/ora | 5.98 | 0 | 15.9 | 0 | 2      | MASCOT | T     |       |
| 1.90E-01 | 0 0 | orange1.1t01793.1/ora | 5.98 | 0 | 15.9 | 0 | 2      | MASCOT | T     | PLEX8 |
| 3.32E-01 | 0 0 | orange1.1t01793.1/ora | 5.98 | 0 | 15.9 | 0 | 2      | MASCOT | T     | PLEX8 |
| 2.82E-03 | 0 0 | orange1.1t01793.1/ora | 5.98 | 0 | 15.9 | 0 | 2      | MASCOT | T     | PLEX8 |
| 4.52E-04 | 0 0 | orange1.1t01793.1/ora | 5.98 | 0 | 15.9 | 0 | 2      | MASCOT | T     | PLEX8 |
| 1.07E-02 | 0 0 | orange1.1t01793.1/ora | 5.98 | 0 | 0    | 2 | MASCOT | T      | PLEX8 |       |
| 6.05E-05 | 0 0 | orange1.1t01793.1/ora | 5.98 | 0 | 0    | 2 | MASCOT | T      | PLEX8 |       |
| 1.84E-03 | 0 0 | orange1.1t01793.1/ora | 5.98 | 0 | 0    | 2 | MASCOT | T      | PLEX8 |       |
| 1.37E-03 | 0 0 | orange1.1t01793.1/ora | 5.98 | 0 | 0    | 2 | MASCOT | T      | PLEX8 |       |
| 8.21E-04 | 0 0 | orange1.1t01793.1/ora | 5.98 | 0 | 0    | 2 | MASCOT | T      | PLEX8 |       |
| 2.42E-06 | 0 0 | orange1.1t01793.1/ora | 5.98 | 0 | 0    | 2 | MASCOT | T      | PLEX8 |       |
| 2.55E-03 | 0 0 | orange1.1t01793.1/ora | 5.84 | 0 | 15.9 | 0 | 2      | MASCOT | T     | PLEX8 |
| 3.10E-02 | 0 0 | orange1.1t01793.1/ora | 5.84 | 0 | 0    | 2 | MASCOT | T      |       |       |
| 8.40E-04 | 0 0 | Cs4g01860.1           | 6.05 | 0 | 15.9 | 0 | 2      | MASCOT | T     | PLEX8 |
| 3.96E-03 | 0 0 | Cs4g01860.1           | 6.05 | 0 | 0    | 2 | MASCOT | T      | PLEX8 |       |
| 2.38E-05 | 0 0 | Cs4g01860.1           | 6.05 | 0 | 0    | 2 | MASCOT | T      | PLEX8 |       |
| 6.76E-03 | 0 0 | Cs4g01860.1           | 6.05 | 0 | 0    | 2 | MASCOT | T      |       |       |
| 4.99E-02 | 0 0 | Cs4g01860.1           | 6.05 | 0 | 15.9 | 0 | 2      | MASCOT | T     |       |
| 9.71E-02 | 0 0 | Cs4g01860.1           | 6.05 | 0 | 15.9 | 0 | 2      | MASCOT | T     |       |
| 1.80E-04 | 0 0 | Cs4g01860.1           | 6.05 | 0 | 0    | 2 | MASCOT | T      |       |       |
| 4.95E-04 | 0 0 | Cs4g01860.1           | 6.05 | 0 | 0    | 2 | MASCOT | T      |       |       |
| 1.06E-05 | 0 0 | Cs4g01860.1           | 3.91 | 0 | 0    | 2 | MASCOT | T      | PLEX8 |       |
| 1.61E-03 | 0 0 | Cs4g01860.1           | 3.91 | 0 | 0    | 2 | MASCOT | T      |       |       |
| 2.29E-03 | 0 0 | Cs4g01860.1           | 3.91 | 0 | 0    | 2 | MASCOT | T      |       |       |
| 8.94E-02 | 0 0 | Cs4g01860.1           | 8.75 | 1 | 0    | 2 | MASCOT | T      | PLEX8 |       |
| 8.07E-04 | 0 0 | Cs4g01860.1           | 6    | 0 | 0    | 2 | MASCOT | T      | PLEX8 |       |
| 3.44E-01 | 0 0 | Cs4g01860.1           | 6    | 0 | 0    | 2 | MASCOT | T      | PLEX8 |       |
| 6.38E-02 | 0 0 | Cs4g01860.1           | 6    | 0 | 0    | 2 | MASCOT | T      | PLEX8 |       |
| 8.21E-03 | 0 0 | Cs4g01860.1           | 6    | 0 | 0    | 2 | MASCOT | T      |       |       |
| 2.03E-02 | 0 0 | Cs4g01860.1           | 6    | 0 | 0    | 2 | MASCOT | T      | PLEX8 |       |
| 1.27E-03 | 0 0 | Cs4g01860.1           | 6    | 0 | 0    | 2 | MASCOT | T      | PLEX8 |       |
| 1.16E-01 | 0 0 | Cs4g01860.1           | 8.47 | 0 | 0    | 2 | MASCOT | T      | PLEX8 |       |
| 2.23E-02 | 0 0 | Cs4g01860.1           | 9.72 | 0 | 0    | 2 | MASCOT | T      | PLEX8 |       |
| 9.98E-04 | 0 0 | Cs4g01860.1           | 9.72 | 0 | 0    | 2 | MASCOT | T      | PLEX8 |       |
| 1.29E-01 | 0 0 | Cs4g01860.1           | 9.72 | 0 | 0    | 2 | MASCOT | T      | PLEX8 |       |
| 1.86E-01 | 0 0 | Cs4g01860.1           | 9.72 | 0 | 0    | 2 | MASCOT | T      | PLEX8 |       |
| 1.05E-02 | 0 0 | Cs4g01860.1           | 9.72 | 0 | 0    | 2 | MASCOT | T      | PLEX8 |       |
| 2.22E-01 | 0 0 | Cs4g01860.1           | 9.72 | 0 | 0    | 2 | MASCOT | T      | PLEX8 |       |

|          |     |                     |      |   |      |   |   |        |         |
|----------|-----|---------------------|------|---|------|---|---|--------|---------|
| 1.93E-04 | 0 0 | Cs4g01860.1         | 4.37 | 0 | 15.9 | 0 | 2 | MASCOT | T       |
| 4.12E-03 | 0 0 | Cs4g01860.1         | 4.37 | 0 | 15.9 | 0 | 2 | MASCOT | T       |
| 3.13E-02 | 0 0 | Cs4g01860.1         | 4.37 | 0 | 15.9 | 0 | 2 | MASCOT | T       |
| 1.27E-02 | 0 0 | Cs4g01860.1         | 4.37 | 0 | 15.9 | 0 | 2 | MASCOT | T       |
| 4.23E-06 | 0 0 | Cs4g01860.1         | 4.37 | 0 | 15.9 | 0 | 2 | MASCOT | T       |
| 9.23E-04 | 0 0 | Cs4g01860.1         | 4.37 | 0 |      | 0 | 2 | MASCOT | T       |
| 3.58E-02 | 0 0 | Cs4g01860.1         | 4.09 | 0 | 15.9 | 0 | 2 | MASCOT | T PLEX8 |
| 6.47E-04 | 0 0 | Cs4g01860.1         | 4.09 | 0 |      | 0 | 2 | MASCOT | T PLEX8 |
| 6.40E-02 | 0 0 | Cs4g01860.1         | 4.09 | 0 |      | 0 | 2 | MASCOT | T PLEX8 |
| 1.43E-09 | 0 0 | Cs4g01860.1         | 4.09 | 0 |      | 0 | 2 | MASCOT | T PLEX8 |
| 6.17E-04 | 0 0 | Cs4g01860.1         | 4.09 | 0 |      | 0 | 2 | MASCOT | T PLEX8 |
| 2.59E-02 | 0 0 | Cs7g29220.1/Cs7g292 | 4.65 | 0 |      | 0 | 2 | MASCOT | T PLEX8 |
| 3.55E-04 | 0 0 | Cs1g05000.1/Cs1g050 | 4.21 | 0 |      | 0 | 2 | MASCOT | T PLEX8 |
| 7.36E-03 | 0 0 | Cs1g05000.1/Cs1g050 | 4.03 | 0 |      | 0 | 2 | MASCOT | T PLEX8 |
| 4.95E-04 | 0 0 | Cs1g05000.1/Cs1g050 | 4.03 | 0 |      | 0 | 2 | MASCOT | T PLEX8 |
| 4.62E-04 | 0 0 | Cs1g05000.1/Cs1g050 | 4.03 | 0 |      | 0 | 2 | MASCOT | T PLEX8 |
| 3.31E-04 | 0 0 | Cs1g05000.1/Cs1g050 | 4.03 | 0 |      | 0 | 2 | MASCOT | T PLEX8 |
| 1.10E-03 | 0 0 | Cs1g05000.1/Cs1g050 | 4.03 | 0 |      | 0 | 2 | MASCOT | T PLEX8 |
| 8.23E-03 | 0 0 | Cs1g05000.1/Cs1g050 | 4.03 | 0 |      | 0 | 2 | MASCOT | T PLEX8 |
| 1.38E-01 | 0 0 | Cs1g05000.1/Cs1g050 | 6.1  | 0 | 15.9 | 0 | 2 | MASCOT | T PLEX8 |
| 1.03E-01 | 0 0 | Cs1g05000.1/Cs1g050 | 6.1  | 0 | 15.9 | 0 | 2 | MASCOT | T PLEX8 |
| 1.06E-01 | 0 0 | Cs1g05000.1/Cs1g050 | 6.1  | 0 |      | 0 | 2 | MASCOT | T PLEX8 |
| 1.29E-03 | 0 0 | Cs1g05000.1/Cs1g050 | 6.1  | 0 |      | 0 | 2 | MASCOT | T PLEX8 |
| 1.02E-02 | 0 0 | Cs1g05000.1/Cs1g050 | 6.1  | 0 |      | 0 | 2 | MASCOT | T PLEX8 |
| 2.50E-02 | 0 0 | Cs1g05000.1/Cs1g050 | 6.1  | 0 |      | 0 | 2 | MASCOT | T PLEX8 |
| 3.24E-02 | 0 0 | Cs1g05000.1/Cs1g050 | 6.1  | 0 |      | 0 | 2 | MASCOT | T PLEX8 |
| 4.53E-02 | 0 0 | Cs1g05000.1/Cs1g050 | 6.1  | 0 |      | 0 | 2 | MASCOT | T PLEX8 |
| 4.02E-01 | 0 0 | Cs1g05000.1/Cs1g050 | 6.1  | 0 |      | 0 | 2 | MASCOT | T PLEX8 |
| 1.58E-01 | 0 0 | Cs1g05000.1/Cs1g050 | 4.31 | 0 | 15.9 | 0 | 2 | MASCOT | T PLEX8 |
| 1.94E-03 | 0 0 | Cs1g05000.1/Cs1g050 | 4.31 | 0 |      | 0 | 2 | MASCOT | T PLEX8 |
| 1.75E-01 | 0 0 | Cs1g05000.1/Cs1g050 | 4.21 | 0 |      | 0 | 2 | MASCOT | T PLEX8 |
| 2.35E-03 | 0 0 | Cs1g05000.1/Cs1g050 | 4.21 | 0 |      | 0 | 2 | MASCOT | T PLEX8 |
| 2.27E-03 | 0 0 | Cs1g05000.1/Cs1g050 | 4.21 | 0 |      | 0 | 2 | MASCOT | T PLEX8 |
| 3.09E-01 | 0 0 | Cs1g05000.1/Cs1g050 | 4.21 | 0 |      | 0 | 2 | MASCOT | T PLEX8 |
| 2.41E-01 | 0 0 | Cs1g05000.1/Cs1g050 | 8.75 | 0 |      | 0 | 2 | MASCOT | T PLEX8 |
| 9.20E-03 | 0 0 | Cs1g05000.1/Cs1g050 | 8.76 | 0 | 15.9 | 0 | 2 | MASCOT | T PLEX8 |
| 1.31E-01 | 0 0 | Cs1g05000.1/Cs1g050 | 8.76 | 0 | 15.9 | 0 | 2 | MASCOT | T PLEX8 |
| 3.24E-02 | 0 0 | Cs1g05000.1/Cs1g050 | 8.76 | 0 | 15.9 | 0 | 2 | MASCOT | T PLEX8 |
| 5.05E-02 | 0 0 | Cs1g05000.1/Cs1g050 | 8.76 | 0 | 15.9 | 0 | 2 | MASCOT | T PLEX8 |
| 2.33E-02 | 0 0 | Cs1g05000.1/Cs1g050 | 8.76 | 0 |      | 0 | 2 | MASCOT | T PLEX8 |
| 2.56E-03 | 0 0 | Cs1g05000.1/Cs1g050 | 8.76 | 0 |      | 0 | 2 | MASCOT | T PLEX8 |
| 3.55E-04 | 0 0 | Cs1g05000.1/Cs1g050 | 8.76 | 0 |      | 0 | 2 | MASCOT | T PLEX8 |
| 4.98E-02 | 0 0 | Cs1g05000.1/Cs1g050 | 4.75 | 0 |      | 0 | 2 | MASCOT | T PLEX8 |
| 1.47E-01 | 0 0 | Cs1g05000.1/Cs1g050 | 4.75 | 0 |      | 0 | 2 | MASCOT | T PLEX8 |
| 3.15E-01 | 0 0 | Cs1g05000.1/Cs1g050 | 4.75 | 0 |      | 0 | 2 | MASCOT | T PLEX8 |
| 4.30E-01 | 0 0 | Cs1g05000.1/Cs1g050 | 4.75 | 0 |      | 0 | 2 | MASCOT | T       |
| 3.81E-04 | 0 0 | Cs1g05000.1/Cs1g050 | 4.75 | 0 |      | 0 | 2 | MASCOT | T       |
| 3.55E-04 | 0 0 | Cs1g05000.1/Cs1g050 | 4.21 | 0 |      | 0 | 2 | MASCOT | T PLEX8 |
| 7.36E-03 | 0 0 | Cs1g05000.1/Cs1g050 | 4.03 | 0 |      | 0 | 2 | MASCOT | T PLEX8 |
| 4.95E-04 | 0 0 | Cs1g05000.1/Cs1g050 | 4.03 | 0 |      | 0 | 2 | MASCOT | T PLEX8 |
| 4.62E-04 | 0 0 | Cs1g05000.1/Cs1g050 | 4.03 | 0 |      | 0 | 2 | MASCOT | T PLEX8 |



|          |     |                       |      |   |      |   |        |        |       |       |
|----------|-----|-----------------------|------|---|------|---|--------|--------|-------|-------|
| 3.31E-04 | 0 0 | Cs1g05000.1/Cs1g050   | 4.03 | 0 | 0    | 2 | MASCOT | T      | PLEX8 |       |
| 1.10E-03 | 0 0 | Cs1g05000.1/Cs1g050   | 4.03 | 0 | 0    | 2 | MASCOT | T      | PLEX8 |       |
| 8.23E-03 | 0 0 | Cs1g05000.1/Cs1g050   | 4.03 | 0 | 0    | 2 | MASCOT | T      | PLEX8 |       |
| 1.38E-01 | 0 0 | Cs1g05000.1/Cs1g050   | 6.1  | 0 | 15.9 | 0 | 2      | MASCOT | T     | PLEX8 |
| 1.03E-01 | 0 0 | Cs1g05000.1/Cs1g050   | 6.1  | 0 | 15.9 | 0 | 2      | MASCOT | T     | PLEX8 |
| 1.06E-01 | 0 0 | Cs1g05000.1/Cs1g050   | 6.1  | 0 | 0    | 2 | MASCOT | T      | PLEX8 |       |
| 1.29E-03 | 0 0 | Cs1g05000.1/Cs1g050   | 6.1  | 0 | 0    | 2 | MASCOT | T      | PLEX8 |       |
| 1.02E-02 | 0 0 | Cs1g05000.1/Cs1g050   | 6.1  | 0 | 0    | 2 | MASCOT | T      | PLEX8 |       |
| 2.50E-02 | 0 0 | Cs1g05000.1/Cs1g050   | 6.1  | 0 | 0    | 2 | MASCOT | T      | PLEX8 |       |
| 3.24E-02 | 0 0 | Cs1g05000.1/Cs1g050   | 6.1  | 0 | 0    | 2 | MASCOT | T      | PLEX8 |       |
| 4.53E-02 | 0 0 | Cs1g05000.1/Cs1g050   | 6.1  | 0 | 0    | 2 | MASCOT | T      | PLEX8 |       |
| 4.02E-01 | 0 0 | Cs1g05000.1/Cs1g050   | 6.1  | 0 | 0    | 2 | MASCOT | T      | PLEX8 |       |
| 3.87E-01 | 0 0 | orange1.1t02699.1/ora | 5.72 | 0 | 0    | 2 | MASCOT | T      | PLEX8 |       |
| 1.58E-01 | 0 0 | Cs1g05000.1/Cs1g050   | 4.31 | 0 | 15.9 | 0 | 2      | MASCOT | T     | PLEX8 |
| 1.94E-03 | 0 0 | Cs1g05000.1/Cs1g050   | 4.31 | 0 | 0    | 2 | MASCOT | T      | PLEX8 |       |
| 1.75E-01 | 0 0 | Cs1g05000.1/Cs1g050   | 4.21 | 0 | 0    | 2 | MASCOT | T      | PLEX8 |       |
| 2.35E-03 | 0 0 | Cs1g05000.1/Cs1g050   | 4.21 | 0 | 0    | 2 | MASCOT | T      | PLEX8 |       |
| 2.27E-03 | 0 0 | Cs1g05000.1/Cs1g050   | 4.21 | 0 | 0    | 2 | MASCOT | T      | PLEX8 |       |
| 3.09E-01 | 0 0 | Cs1g05000.1/Cs1g050   | 4.21 | 0 | 0    | 2 | MASCOT | T      | PLEX8 |       |
| 2.41E-01 | 0 0 | Cs1g05000.1/Cs1g050   | 8.75 | 0 | 0    | 2 | MASCOT | T      | PLEX8 |       |
| 9.20E-03 | 0 0 | Cs1g05000.1/Cs1g050   | 8.76 | 0 | 15.9 | 0 | 2      | MASCOT | T     | PLEX8 |
| 1.31E-01 | 0 0 | Cs1g05000.1/Cs1g050   | 8.76 | 0 | 15.9 | 0 | 2      | MASCOT | T     | PLEX8 |
| 3.24E-02 | 0 0 | Cs1g05000.1/Cs1g050   | 8.76 | 0 | 15.9 | 0 | 2      | MASCOT | T     | PLEX8 |
| 5.05E-02 | 0 0 | Cs1g05000.1/Cs1g050   | 8.76 | 0 | 15.9 | 0 | 2      | MASCOT | T     | PLEX8 |
| 2.33E-02 | 0 0 | Cs1g05000.1/Cs1g050   | 8.76 | 0 | 0    | 2 | MASCOT | T      | PLEX8 |       |
| 2.56E-03 | 0 0 | Cs1g05000.1/Cs1g050   | 8.76 | 0 | 0    | 2 | MASCOT | T      | PLEX8 |       |
| 3.55E-04 | 0 0 | Cs1g05000.1/Cs1g050   | 8.76 | 0 | 0    | 2 | MASCOT | T      | PLEX8 |       |
| 4.98E-02 | 0 0 | Cs1g05000.1/Cs1g050   | 4.75 | 0 | 0    | 2 | MASCOT | T      | PLEX8 |       |
| 1.47E-01 | 0 0 | Cs1g05000.1/Cs1g050   | 4.75 | 0 | 0    | 2 | MASCOT | T      | PLEX8 |       |
| 3.15E-01 | 0 0 | Cs1g05000.1/Cs1g050   | 4.75 | 0 | 0    | 2 | MASCOT | T      | PLEX8 |       |
| 4.30E-01 | 0 0 | Cs1g05000.1/Cs1g050   | 4.75 | 0 | 0    | 2 | MASCOT | T      |       |       |
| 3.81E-04 | 0 0 | Cs1g05000.1/Cs1g050   | 4.75 | 0 | 0    | 2 | MASCOT | T      |       |       |
| 9.99E-02 | 0 0 | Cs7g29010.1/Cs8g182   | 4.4  | 0 | 0    | 2 | MASCOT | T      | PLEX8 |       |
| 1.12E-01 | 0 0 | Cs6g05890.1/Cs7g289   | 4.53 | 0 | 0    | 2 | MASCOT | T      | PLEX8 |       |
| 3.51E-03 | 0 0 | Cs8g18250.1/Cs8g182   | 4.53 | 0 | 0    | 2 | MASCOT | T      | PLEX8 |       |
| 4.85E-05 | 0 0 | Cs8g18250.1/Cs8g182   | 4.53 | 0 | 0    | 2 | MASCOT | T      | PLEX8 |       |
| 1.11E-03 | 0 0 | Cs8g18250.1/Cs8g182   | 4.53 | 0 | 0    | 2 | MASCOT | T      | PLEX8 |       |
| 2.00E-01 | 0 0 | Cs8g18250.1           | 5.84 | 0 | 0    | 2 | MASCOT | T      | PLEX8 |       |
| 7.32E-03 | 0 0 | Cs6g05890.1/Cs7g289   | 6    | 0 | 0    | 2 | MASCOT | T      | PLEX8 |       |
| 3.62E-03 | 0 0 | Cs6g05890.1/Cs7g289   | 6    | 0 | 0    | 2 | MASCOT | T      | PLEX8 |       |
| 1.07E-02 | 0 0 | Cs6g05890.1/Cs7g289   | 6    | 0 | 0    | 2 | MASCOT | T      | PLEX8 |       |
| 2.27E-03 | 0 0 | Cs6g05890.1/Cs7g289   | 6    | 0 | 0    | 2 | MASCOT | T      | PLEX8 |       |
| 6.36E-03 | 0 0 | Cs6g05890.1/Cs7g289   | 6    | 0 | 0    | 2 | MASCOT | T      | PLEX8 |       |
| 5.02E-02 | 0 0 | Cs6g05890.1/Cs7g289   | 5.84 | 0 | 0    | 2 | MASCOT | T      | PLEX8 |       |
| 2.46E-02 | 0 0 | Cs6g05890.1/Cs7g289   | 5.84 | 0 | 0    | 2 | MASCOT | T      | PLEX8 |       |
| 9.87E-03 | 0 0 | Cs6g05890.1/Cs7g289   | 5.84 | 0 | 0    | 2 | MASCOT | T      |       |       |
| 1.01E-01 | 0 0 | Cs6g05890.1/Cs7g289   | 5.84 | 0 | 0    | 2 | MASCOT | T      |       |       |
| 9.58E-04 | 0 0 | Cs6g05890.1/Cs7g289   | 5.84 | 0 | 0    | 2 | MASCOT | T      | PLEX8 |       |
| 5.56E-03 | 0 0 | Cs6g05890.1/Cs7g289   | 5.84 | 0 | 0    | 2 | MASCOT | T      | PLEX8 |       |
| 5.53E-03 | 0 0 | Cs6g05890.1/Cs8g182   | 6.46 | 0 | 0    | 2 | MASCOT | T      | PLEX8 |       |
| 3.06E-05 | 0 0 | Cs6g05890.1/Cs8g182   | 6.46 | 0 | 0    | 2 | MASCOT | T      | PLEX8 |       |

|          |     |                     |      |   |      |   |        |        |       |
|----------|-----|---------------------|------|---|------|---|--------|--------|-------|
| 6.46E-03 | 0 0 | Cs6g05890.1/Cs8g182 | 6.46 | 0 | 0    | 2 | MASCOT | T      | PLEX8 |
| 1.15E-01 | 0 0 | Cs6g05890.1/Cs8g182 | 6.46 | 0 | 0    | 2 | MASCOT | T      | PLEX8 |
| 6.94E-02 | 0 0 | Cs6g05890.1/Cs8g182 | 6.46 | 0 | 0    | 2 | MASCOT | T      | PLEX8 |
| 2.03E-01 | 0 0 | Cs6g05890.1/Cs8g182 | 6.46 | 0 | 0    | 2 | MASCOT | T      | PLEX8 |
| 2.41E-03 | 0 0 | Cs6g05890.1/Cs7g289 | 4.14 | 0 | 15.9 | 0 | 2      | MASCOT | T     |
| 1.31E-03 | 0 0 | Cs6g05890.1/Cs7g289 | 4.14 | 0 | 15.9 | 0 | 2      | MASCOT | T     |
| 4.30E-05 | 0 0 | Cs6g05890.1/Cs7g289 | 4.14 | 0 | 15.9 | 0 | 2      | MASCOT | T     |
| 2.53E-03 | 0 0 | Cs3g14220.1/Cs3g142 | 4.37 | 0 | 0    | 2 | MASCOT | T      | PLEX8 |
| 9.99E-05 | 0 0 | Cs3g14220.1/Cs3g142 | 4.37 | 0 | 0    | 2 | MASCOT | T      | PLEX8 |
| 2.21E-02 | 0 0 | Cs3g14220.1/Cs3g142 | 4.37 | 0 | 0    | 2 | MASCOT | T      | PLEX8 |
| 9.07E-04 | 0 0 | Cs3g14220.1/Cs3g142 | 4.37 | 0 | 0    | 2 | MASCOT | T      | PLEX8 |
| 3.84E-04 | 0 0 | Cs3g14220.1/Cs3g142 | 4.37 | 0 | 0    | 2 | MASCOT | T      |       |
| 2.48E-06 | 0 0 | Cs3g14220.1/Cs3g142 | 4.37 | 0 | 0    | 2 | MASCOT | T      |       |
| 6.64E-05 | 0 0 | Cs3g14220.1/Cs3g142 | 4.37 | 0 | 0    | 2 | MASCOT | T      |       |
| 2.69E-04 | 0 0 | Cs3g14220.1/Cs3g142 | 4.37 | 0 | 0    | 2 | MASCOT | T      |       |
| 5.09E-01 | 0 0 | Cs3g14220.1/Cs3g142 | 4.37 | 0 | 0    | 2 | MASCOT | T      |       |
| 1.37E-01 | 0 0 | Cs1g21190.1/Cs1g211 | 8.8  | 0 | 0    | 2 | MASCOT | T      | PLEX8 |
| 5.32E-02 | 0 0 | Cs1g21190.1         | 5.33 | 0 | 0    | 2 | MASCOT | T      | PLEX8 |
| 4.82E-03 | 0 0 | Cs1g21190.1         | 5.33 | 0 | 0    | 2 | MASCOT | T      | PLEX8 |
| 3.44E-03 | 0 0 | Cs1g21190.1         | 5.33 | 0 | 0    | 2 | MASCOT | T      |       |
| 3.01E-06 | 0 0 | Cs1g21190.1         | 5.33 | 0 | 0    | 2 | MASCOT | T      |       |
| 1.04E-02 | 0 0 | Cs1g21190.1         | 5.33 | 0 | 0    | 2 | MASCOT | T      |       |
| 6.12E-03 | 0 0 | Cs1g21190.1         | 5.33 | 0 | 0    | 2 | MASCOT | T      | PLEX8 |
| 2.02E-03 | 0 0 | Cs1g21190.1         | 5.33 | 0 | 0    | 2 | MASCOT | T      |       |
| 3.96E-03 | 0 0 | Cs1g21190.1         | 5.33 | 0 | 0    | 2 | MASCOT | T      |       |
| 1.43E-06 | 0 0 | Cs1g21190.1         | 5.33 | 0 | 0    | 2 | MASCOT | T      | PLEX8 |
| 1.43E-01 | 0 0 | Cs1g21190.1         | 5.33 | 0 | 0    | 2 | MASCOT | T      |       |
| 2.37E-01 | 0 0 | Cs1g21190.1         | 5.33 | 0 | 0    | 2 | MASCOT | T      |       |
| 2.01E-02 | 0 0 | Cs1g21190.1/Cs1g211 | 8.75 | 0 | 0    | 2 | MASCOT | T      | PLEX8 |
| 2.96E-02 | 0 0 | Cs1g21190.1/Cs1g211 | 8.75 | 0 | 0    | 2 | MASCOT | T      | PLEX8 |
| 2.69E-02 | 0 0 | Cs1g21190.1/Cs1g211 | 8.75 | 0 | 0    | 2 | MASCOT | T      | PLEX8 |
| 1.41E-01 | 0 0 | Cs1g21190.1/Cs1g211 | 9.75 | 0 | 0    | 2 | MASCOT | T      | PLEX8 |
| 8.31E-06 | 0 0 | Cs1g21190.1/Cs1g211 | 5.21 | 0 | 0    | 2 | MASCOT | T      | PLEX8 |
| 9.96E-03 | 0 0 | Cs1g21190.1/Cs1g211 | 5.21 | 0 | 0    | 2 | MASCOT | T      | PLEX8 |
| 2.72E-02 | 0 0 | Cs1g21190.1/Cs1g211 | 5.21 | 0 | 0    | 2 | MASCOT | T      | PLEX8 |
| 1.41E-02 | 0 0 | Cs1g21190.1/Cs1g211 | 5.21 | 0 | 0    | 2 | MASCOT | T      | PLEX8 |
| 2.88E-03 | 0 0 | Cs1g21190.1/Cs1g211 | 5.21 | 0 | 0    | 2 | MASCOT | T      |       |
| 9.86E-02 | 0 0 | Cs1g21190.1/Cs1g211 | 5.21 | 0 | 0    | 2 | MASCOT | T      |       |
| 2.62E-01 | 0 0 | Cs1g21190.1/Cs1g211 | 4.68 | 0 | 0    | 2 | MASCOT | T      |       |
| 2.66E-02 | 0 0 | Cs1g21190.1/Cs1g211 | 8.26 | 0 | 0    | 2 | MASCOT | T      | PLEX8 |
| 1.59E-01 | 0 0 | Cs1g21190.1/Cs1g211 | 8.26 | 0 | 0    | 2 | MASCOT | T      | PLEX8 |
| 4.55E-02 | 0 0 | Cs1g21190.1/Cs1g211 | 8.26 | 0 | 0    | 2 | MASCOT | T      | PLEX8 |
| 8.30E-04 | 0 0 | Cs1g21190.1/Cs1g211 | 8.26 | 0 | 0    | 2 | MASCOT | T      | PLEX8 |
| 1.93E-01 | 0 0 | Cs1g21190.1/Cs1g211 | 8.26 | 0 | 0    | 2 | MASCOT | T      | PLEX8 |
| 9.18E-03 | 0 0 | Cs1g21190.1/Cs1g211 | 8.26 | 0 | 0    | 2 | MASCOT | T      | PLEX8 |
| 1.50E-02 | 0 0 | Cs1g21190.1/Cs1g211 | 8.8  | 0 | 0    | 2 | MASCOT | T      | PLEX8 |
| 1.31E-02 | 0 0 | Cs1g21190.1/Cs1g211 | 8.8  | 0 | 0    | 2 | MASCOT | T      | PLEX8 |
| 1.85E-01 | 0 0 | Cs1g21190.1/Cs1g211 | 8.8  | 0 | 0    | 2 | MASCOT | T      | PLEX8 |
| 1.22E-02 | 0 0 | Cs1g21190.1/Cs1g211 | 8.8  | 0 | 0    | 2 | MASCOT | T      | PLEX8 |
| 1.10E-03 | 0 0 | Cs1g21190.1/Cs1g211 | 4.53 | 0 | 0    | 2 | MASCOT | T      | PLEX8 |
| 1.35E-03 | 0 0 | Cs3g22480.1         | 5.4  | 0 | 0    | 2 | MASCOT | T      | PLEX8 |

|              |                     |      |   |      |   |        |        |       |       |
|--------------|---------------------|------|---|------|---|--------|--------|-------|-------|
| 1.20E-01 0 0 | Cs3g22480.1         | 5.88 | 0 | 0    | 2 | MASCOT | T      | PLEX8 |       |
| 1.52E-02 0 0 | Cs3g22480.1         | 8.3  | 0 | 0    | 2 | MASCOT | T      | PLEX8 |       |
| 3.28E-01 0 0 | Cs3g22480.1         | 8.3  | 0 | 0    | 2 | MASCOT | T      | PLEX8 |       |
| 2.07E-04 0 0 | Cs3g22480.1         | 8.3  | 0 | 0    | 2 | MASCOT | T      | PLEX8 |       |
| 1.68E-04 0 0 | Cs3g22480.1         | 8.3  | 0 | 0    | 2 | MASCOT | T      |       |       |
| 3.86E-01 0 0 | Cs3g22480.1/Cs7g131 | 8.75 | 0 | 15.9 | 0 | 2      | MASCOT | T     | PLEX8 |
| 1.46E-01 0 0 | Cs3g22480.1/Cs7g131 | 8.75 | 0 | 15.9 | 0 | 2      | MASCOT | T     | PLEX8 |
| 3.85E-02 0 0 | Cs3g22480.1/Cs7g131 | 8.75 | 0 | 15.9 | 0 | 2      | MASCOT | T     |       |
| 2.91E-01 0 0 | Cs3g22480.1/Cs7g131 | 8.75 | 0 | 15.9 | 0 | 2      | MASCOT | T     | PLEX8 |
| 1.09E-01 0 0 | Cs3g22480.1/Cs7g131 | 8.75 | 0 | 0    | 2 | MASCOT | T      | PLEX8 |       |
| 7.91E-05 0 0 | Cs3g22480.1/Cs7g131 | 8.75 | 0 | 0    | 2 | MASCOT | T      | PLEX8 |       |
| 2.05E-01 0 0 | Cs3g22480.1/Cs7g131 | 8.75 | 0 | 0    | 2 | MASCOT | T      | PLEX8 |       |
| 1.45E-04 0 0 | Cs3g22480.1         | 5.4  | 0 | 0    | 2 | MASCOT | T      | PLEX8 |       |
| 4.10E-01 0 0 | Cs3g22480.1         | 5.4  | 0 | 0    | 2 | MASCOT | T      | PLEX8 |       |
| 3.63E-03 0 0 | Cs3g22480.1         | 5.4  | 0 | 0    | 2 | MASCOT | T      | PLEX8 |       |
| 1.35E-01 0 0 | Cs3g22480.1         | 5.4  | 0 | 0    | 2 | MASCOT | T      | PLEX8 |       |
| 8.16E-02 0 0 | Cs3g22480.1         | 5.4  | 0 | 0    | 2 | MASCOT | T      |       |       |
| 5.76E-02 0 0 | Cs3g22480.1         | 5.4  | 0 | 0    | 2 | MASCOT | T      |       |       |
| 9.96E-06 0 0 | Cs3g22480.1         | 5.4  | 0 | 0    | 2 | MASCOT | T      |       |       |
| 8.05E-04 0 0 | Cs3g22480.1         | 6.74 | 0 | 15.9 | 0 | 2      | MASCOT | T     | PLEX8 |
| 6.74E-03 0 0 | Cs3g22480.1         | 6.74 | 0 | 15.9 | 0 | 2      | MASCOT | T     | PLEX8 |
| 2.51E-04 0 0 | Cs3g22480.1         | 6.74 | 0 | 15.9 | 0 | 2      | MASCOT | T     | PLEX8 |
| 2.49E-02 0 0 | Cs3g22480.1         | 6.74 | 0 | 15.9 | 0 | 2      | MASCOT | T     | PLEX8 |
| 3.89E-03 0 0 | Cs3g22480.1         | 6.74 | 0 | 0    | 2 | MASCOT | T      | PLEX8 |       |
| 9.46E-02 0 0 | Cs3g22480.1         | 6.74 | 0 | 0    | 2 | MASCOT | T      | PLEX8 |       |
| 1.80E-02 0 0 | Cs3g22480.1/Cs7g131 | 4.53 | 0 | 15.9 | 0 | 2      | MASCOT | T     |       |
| 1.44E-03 0 0 | Cs3g22480.1/Cs7g131 | 4.53 | 0 | 0    | 2 | MASCOT | T      |       |       |
| 1.31E-05 0 0 | Cs3g22480.1/Cs7g131 | 4.53 | 0 | 0    | 2 | MASCOT | T      |       |       |
| 1.94E-03 0 0 | Cs3g22480.1         | 6    | 0 | 0    | 2 | MASCOT | T      |       |       |
| 1.40E-01 0 0 | Cs3g22480.1         | 6    | 0 | 0    | 2 | MASCOT | T      |       |       |
| 1.15E-01 0 0 | Cs3g22480.1         | 6    | 0 | 0    | 2 | MASCOT | T      |       |       |
| 8.65E-02 0 0 | Cs3g22480.1         | 8.72 | 0 | 0    | 2 | MASCOT | T      | PLEX8 |       |
| 2.88E-02 0 0 | Cs3g22480.1         | 8.72 | 0 | 0    | 2 | MASCOT | T      | PLEX8 |       |
| 1.20E-01 0 0 | Cs6g08840.1/Cs6g088 | 5.88 | 0 | 0    | 2 | MASCOT | T      | PLEX8 |       |
| 1.83E-02 0 0 | Cs6g08840.1/Cs6g088 | 5.88 | 0 | 0    | 2 | MASCOT | T      |       |       |
| 1.39E-02 0 0 | Cs6g08840.1/Cs6g088 | 10   | 0 | 0    | 2 | MASCOT | T      | PLEX8 |       |
| 3.74E-03 0 0 | Cs6g08840.1         | 6.73 | 1 | 0    | 2 | MASCOT | T      | PLEX8 |       |
| 4.68E-03 0 0 | Cs6g08840.1/Cs6g088 | 6.47 | 0 | 0    | 2 | MASCOT | T      | PLEX8 |       |
| 9.62E-06 0 0 | Cs6g08840.1/Cs6g088 | 6.47 | 0 | 0    | 2 | MASCOT | T      | PLEX8 |       |
| 3.72E-03 0 0 | Cs6g08840.1/Cs6g088 | 6.47 | 0 | 0    | 2 | MASCOT | T      | PLEX8 |       |
| 6.01E-05 0 0 | Cs6g08840.1/Cs6g088 | 6.47 | 0 | 0    | 2 | MASCOT | T      | PLEX8 |       |
| 2.10E-03 0 0 | Cs6g08840.1/Cs6g088 | 6.47 | 0 | 0    | 2 | MASCOT | T      | PLEX8 |       |
| 1.05E-03 0 0 | Cs6g08840.1/Cs6g088 | 6.47 | 0 | 0    | 2 | MASCOT | T      | PLEX8 |       |
| 2.56E-04 0 0 | Cs6g08840.1/Cs6g088 | 6.47 | 0 | 0    | 2 | MASCOT | T      | PLEX8 |       |
| 8.77E-06 0 0 | Cs6g08840.1/Cs6g088 | 6.47 | 0 | 0    | 2 | MASCOT | T      |       |       |
| 4.09E-03 0 0 | Cs6g08840.1/Cs6g088 | 6.47 | 0 | 0    | 2 | MASCOT | T      |       |       |
| 1.77E-02 0 0 | Cs6g08840.1/Cs6g088 | 5.99 | 0 | 0    | 2 | MASCOT | T      |       |       |
| 9.03E-03 0 0 | Cs6g08840.1/Cs6g088 | 5.99 | 0 | 0    | 2 | MASCOT | T      | PLEX8 |       |
| 9.60E-02 0 0 | Cs6g08840.1/Cs6g088 | 6    | 0 | 0    | 2 | MASCOT | T      | PLEX8 |       |
| 4.51E-02 0 0 | Cs6g08840.1/Cs6g088 | 6    | 0 | 0    | 2 | MASCOT | T      | PLEX8 |       |
| 1.78E-01 0 0 | Cs6g08840.1/Cs6g088 | 6    | 0 | 0    | 2 | MASCOT | T      | PLEX8 |       |

|          |     |                     |      |   |      |   |        |        |       |       |
|----------|-----|---------------------|------|---|------|---|--------|--------|-------|-------|
| 6.13E-02 | 0 0 | Cs6g08840.1/Cs6g088 | 6    | 0 | 0    | 2 | MASCOT | T      | PLEX8 |       |
| 4.64E-03 | 0 0 | Cs6g08840.1/Cs6g088 | 6    | 0 | 0    | 2 | MASCOT | T      | PLEX8 |       |
| 2.16E-01 | 0 0 | Cs6g08840.1/Cs6g088 | 6    | 0 | 0    | 2 | MASCOT | T      | PLEX8 |       |
| 5.12E-03 | 0 0 | Cs6g08840.1/Cs6g088 | 6    | 0 | 0    | 2 | MASCOT | T      | PLEX8 |       |
| 3.21E-02 | 0 0 | Cs6g08840.1/Cs6g088 | 6    | 0 | 0    | 2 | MASCOT | T      | PLEX8 |       |
| 2.99E-02 | 0 0 | Cs6g08840.1/Cs6g088 | 6    | 0 | 0    | 2 | MASCOT | T      | PLEX8 |       |
| 1.15E-01 | 0 0 | Cs6g08840.1/Cs6g088 | 6    | 0 | 0    | 2 | MASCOT | T      | PLEX8 |       |
| 2.87E-02 | 0 0 | Cs6g08840.1/Cs6g088 | 8.73 | 0 | 0    | 2 | MASCOT | T      | PLEX8 |       |
| 4.22E-01 | 0 0 | Cs6g08840.1/Cs6g088 | 8.73 | 0 | 0    | 2 | MASCOT | T      | PLEX8 |       |
| 2.84E-03 | 0 0 | Cs2g05050.1/Cs6g088 | 9.72 | 0 | 0    | 2 | MASCOT | T      | PLEX8 |       |
| 1.08E-01 | 0 0 | Cs2g05050.1/Cs6g088 | 9.72 | 0 | 0    | 2 | MASCOT | T      | PLEX8 |       |
| 1.92E-02 | 0 0 | Cs2g05050.1/Cs6g088 | 9.72 | 0 | 0    | 2 | MASCOT | T      | PLEX8 |       |
| 1.67E-03 | 0 0 | Cs6g08840.1/Cs6g088 | 8.19 | 0 | 15.9 | 0 | 2      | MASCOT | T     | PLEX8 |
| 1.53E-03 | 0 0 | Cs6g08840.1/Cs6g088 | 8.19 | 0 | 15.9 | 0 | 2      | MASCOT | T     | PLEX8 |
| 7.20E-05 | 0 0 | Cs2g15550.1/Cs2g155 | 4.65 | 0 | 0    | 2 | MASCOT | T      | PLEX8 |       |
| 9.28E-02 | 0 0 | Cs2g15550.1/Cs2g155 | 4.65 | 0 | 0    | 2 | MASCOT | T      |       |       |
| 3.25E-05 | 0 0 | Cs2g15550.1/Cs2g155 | 4.65 | 0 | 0    | 2 | MASCOT | T      | PLEX8 |       |
| 9.40E-05 | 0 0 | Cs2g15550.1/Cs2g155 | 4.65 | 0 | 0    | 2 | MASCOT | T      | PLEX8 |       |
| 7.51E-05 | 0 0 | Cs2g15550.1/Cs2g155 | 4.65 | 0 | 0    | 2 | MASCOT | T      | PLEX8 |       |
| 4.30E-06 | 0 0 | Cs2g15550.1/Cs2g155 | 4.65 | 0 | 0    | 2 | MASCOT | T      | PLEX8 |       |
| 8.35E-03 | 0 0 | Cs2g15550.1/Cs2g155 | 4.65 | 0 | 0    | 2 | MASCOT | T      | PLEX8 |       |
| 6.37E-04 | 0 0 | Cs2g15550.1/Cs2g155 | 4.65 | 0 | 0    | 2 | MASCOT | T      |       |       |
| 7.15E-04 | 0 0 | Cs2g15550.1/Cs2g155 | 4.65 | 0 | 0    | 2 | MASCOT | T      |       |       |
| 2.02E-01 | 0 0 | Cs1g20220.1/Cs1g202 | 5.84 | 0 | 0    | 2 | MASCOT | T      |       |       |
| 1.64E-01 | 0 0 | Cs2g15550.1/Cs2g155 | 6    | 0 | 0    | 2 | MASCOT | T      | PLEX8 |       |
| 7.57E-02 | 0 0 | Cs2g15550.1/Cs2g155 | 6    | 0 | 0    | 2 | MASCOT | T      | PLEX8 |       |
| 1.05E-01 | 0 0 | Cs2g15550.1/Cs2g155 | 6    | 0 | 0    | 2 | MASCOT | T      | PLEX8 |       |
| 1.53E-01 | 0 0 | Cs1g20220.1/Cs1g202 | 4.53 | 0 | 0    | 2 | MASCOT | T      | PLEX8 |       |
| 9.67E-02 | 0 0 | Cs2g15550.1/Cs2g155 | 6.1  | 0 | 0    | 2 | MASCOT | T      | PLEX8 |       |
| 8.70E-02 | 0 0 | Cs2g15550.1/Cs2g155 | 6.1  | 0 | 0    | 2 | MASCOT | T      | PLEX8 |       |
| 1.50E-01 | 0 0 | Cs1g20220.1/Cs1g202 | 6    | 0 | 0    | 2 | MASCOT | T      | PLEX8 |       |
| 4.76E-02 | 0 0 | Cs1g20220.1/Cs1g202 | 6    | 0 | 0    | 2 | MASCOT | T      | PLEX8 |       |
| 1.01E-01 | 0 0 | Cs1g20220.1/Cs1g202 | 6    | 0 | 0    | 2 | MASCOT | T      | PLEX8 |       |
| 1.31E-02 | 0 0 | Cs1g20220.1/Cs1g202 | 6    | 0 | 0    | 2 | MASCOT | T      | PLEX8 |       |
| 1.41E-01 | 0 0 | Cs1g20220.1/Cs1g202 | 6    | 0 | 0    | 2 | MASCOT | T      | PLEX8 |       |
| 5.84E-01 | 0 0 | Cs1g20220.1/Cs1g202 | 6    | 0 | 0    | 2 | MASCOT | T      | PLEX8 |       |
| 2.64E-01 | 0 0 | Cs2g04850.1/Cs2g048 | 8.59 | 0 | 0    | 2 | MASCOT | T      | PLEX8 |       |
| 1.40E-01 | 0 0 | Cs2g04850.1/Cs2g048 | 8.59 | 0 | 0    | 2 | MASCOT | T      | PLEX8 |       |
| 2.16E-01 | 0 0 | Cs2g04850.1/Cs2g048 | 8.59 | 0 | 0    | 2 | MASCOT | T      | PLEX8 |       |
| 2.99E-02 | 0 0 | Cs2g04850.1/Cs2g048 | 4.03 | 0 | 15.9 | 0 | 2      | MASCOT | T     | PLEX8 |
| 1.09E-01 | 0 0 | Cs2g04850.1/Cs2g048 | 4.03 | 0 | 0    | 2 | MASCOT | T      | PLEX8 |       |
| 3.06E-03 | 0 0 | Cs2g04850.1/Cs2g048 | 4.03 | 0 | 0    | 2 | MASCOT | T      | PLEX8 |       |
| 2.10E-01 | 0 0 | Cs1g20220.1/Cs1g202 | 6    | 0 | 0    | 2 | MASCOT | T      |       |       |
| 3.14E-01 | 0 0 | Cs1g20220.1/Cs1g202 | 6    | 0 | 0    | 2 | MASCOT | T      |       |       |
| 2.52E-01 | 0 0 | Cs1g20220.1/Cs1g202 | 6    | 0 | 0    | 2 | MASCOT | T      |       |       |
| 5.90E-02 | 0 0 | Cs5g34320.1/Cs5g343 | 4.53 | 0 | 0    | 2 | MASCOT | T      |       |       |
| 1.76E-01 | 0 0 | Cs5g34320.1/Cs5g343 | 4.53 | 0 | 0    | 2 | MASCOT | T      |       |       |
| 1.92E-02 | 0 0 | Cs5g34320.1/Cs5g343 | 4.53 | 0 | 0    | 2 | MASCOT | T      |       |       |
| 1.13E-01 | 0 0 | Cs5g34320.1/Cs5g343 | 4.75 | 0 | 0    | 2 | MASCOT | T      | PLEX8 |       |
| 1.74E-02 | 0 0 | Cs5g34320.1/Cs5g343 | 4.75 | 0 | 0    | 2 | MASCOT | T      | PLEX8 |       |
| 4.04E-02 | 0 0 | Cs5g34320.1/Cs5g343 | 4.75 | 0 | 0    | 2 | MASCOT | T      | PLEX8 |       |

|          |     |                     |      |   |      |   |        |        |       |       |
|----------|-----|---------------------|------|---|------|---|--------|--------|-------|-------|
| 2.55E-03 | 0 0 | Cs5g34320.1/Cs5g343 | 4.75 | 0 | 0    | 2 | MASCOT | T      | PLEX8 |       |
| 9.40E-02 | 0 0 | Cs5g34320.1/Cs5g343 | 4.21 | 0 | 0    | 2 | MASCOT | T      |       |       |
| 7.88E-02 | 0 0 | Cs5g34320.1/Cs5g343 | 4.21 | 0 | 0    | 2 | MASCOT | T      |       |       |
| 8.02E-02 | 0 0 | Cs5g34320.1/Cs5g343 | 4.21 | 0 | 0    | 2 | MASCOT | T      |       |       |
| 1.44E-01 | 0 0 | Cs5g34320.1/Cs5g343 | 4.37 | 0 | 0    | 2 | MASCOT | T      | PLEX8 |       |
| 3.06E-02 | 0 0 | Cs5g34320.1/Cs5g343 | 5.88 | 0 | 0    | 2 | MASCOT | T      |       |       |
| 1.18E-02 | 0 0 | Cs5g34320.1/Cs5g343 | 5.83 | 0 | 15.9 | 0 | 2      | MASCOT | T     |       |
| 2.94E-02 | 0 0 | Cs5g34320.1/Cs5g343 | 5.83 | 0 | 0    | 2 | MASCOT | T      |       |       |
| 4.31E-02 | 0 0 | Cs5g34320.1/Cs5g343 | 5.83 | 0 | 0    | 2 | MASCOT | T      |       |       |
| 2.13E-04 | 0 0 | Cs5g34320.1/Cs5g343 | 4.65 | 0 | 0    | 2 | MASCOT | T      | PLEX8 |       |
| 7.49E-02 | 0 0 | Cs5g34320.1/Cs5g343 | 4.65 | 0 | 0    | 2 | MASCOT | T      | PLEX8 |       |
| 1.55E-02 | 0 0 | Cs5g34320.1/Cs5g343 | 4.65 | 0 | 0    | 2 | MASCOT | T      | PLEX8 |       |
| 1.19E-03 | 0 0 | Cs5g34320.1/Cs5g343 | 4.65 | 0 | 0    | 2 | MASCOT | T      | PLEX8 |       |
| 1.25E-02 | 0 0 | Cs5g34320.1/Cs5g343 | 4.65 | 0 | 0    | 2 | MASCOT | T      | PLEX8 |       |
| 1.74E-05 | 0 0 | Cs5g34320.1/Cs5g343 | 6    | 0 | 0    | 2 | MASCOT | T      |       |       |
| 3.37E-02 | 0 0 | Cs5g34320.1/Cs5g343 | 6    | 0 | 0    | 2 | MASCOT | T      |       |       |
| 2.80E-05 | 0 0 | Cs5g34320.1/Cs5g343 | 6    | 0 | 0    | 2 | MASCOT | T      |       |       |
| 3.73E-02 | 0 0 | Cs5g34320.1/Cs5g343 | 6    | 0 | 0    | 2 | MASCOT | T      |       |       |
| 2.40E-01 | 0 0 | Cs5g34320.1/Cs5g343 | 5.84 | 0 | 0    | 2 | MASCOT | T      | PLEX8 |       |
| 8.08E-02 | 0 0 | Cs5g34320.1/Cs5g343 | 5.84 | 0 | 0    | 2 | MASCOT | T      | PLEX8 |       |
| 9.45E-02 | 0 0 | Cs5g34320.1/Cs5g343 | 5.84 | 0 | 0    | 2 | MASCOT | T      | PLEX8 |       |
| 4.36E-02 | 0 0 | Cs5g34320.1/Cs5g343 | 5.84 | 0 | 0    | 2 | MASCOT | T      | PLEX8 |       |
| 2.09E-01 | 0 0 | Cs5g34320.1/Cs5g343 | 5.84 | 0 | 0    | 2 | MASCOT | T      | PLEX8 |       |
| 4.35E-01 | 0 0 | Cs9g18330.1/Cs9g183 | 6.8  | 0 | 0    | 2 | MASCOT | T      | PLEX8 |       |
| 1.85E-03 | 0 0 | Cs9g18330.1/Cs9g183 | 5.4  | 0 | 0    | 2 | MASCOT | T      | PLEX8 |       |
| 1.33E-02 | 0 0 | Cs9g18330.1/Cs9g183 | 5.4  | 0 | 0    | 2 | MASCOT | T      | PLEX8 |       |
| 3.02E-03 | 0 0 | Cs9g18330.1/Cs9g183 | 5.4  | 0 | 0    | 2 | MASCOT | T      | PLEX8 |       |
| 2.08E-03 | 0 0 | Cs9g18330.1/Cs9g183 | 5.4  | 0 | 0    | 2 | MASCOT | T      | PLEX8 |       |
| 4.50E-03 | 0 0 | Cs9g18330.1/Cs9g183 | 5.4  | 0 | 0    | 2 | MASCOT | T      | PLEX8 |       |
| 8.53E-03 | 0 0 | Cs9g18330.1/Cs9g183 | 6.74 | 0 | 15.9 | 0 | 2      | MASCOT | T     | PLEX8 |
| 1.40E-03 | 0 0 | Cs9g18330.1/Cs9g183 | 6.74 | 0 | 0    | 2 | MASCOT | T      | PLEX8 |       |
| 1.12E-01 | 0 0 | Cs9g18330.1/Cs9g183 | 6.74 | 0 | 0    | 2 | MASCOT | T      | PLEX8 |       |
| 3.99E-03 | 0 0 | Cs9g18330.1/Cs9g183 | 6.74 | 0 | 0    | 2 | MASCOT | T      | PLEX8 |       |
| 5.21E-03 | 0 0 | Cs9g18330.1/Cs9g183 | 6    | 0 | 0    | 2 | MASCOT | T      | PLEX8 |       |
| 2.78E-04 | 0 0 | Cs9g18330.1/Cs9g183 | 5.18 | 0 | 15.9 | 0 | 2      | MASCOT | T     | PLEX8 |
| 1.42E-06 | 0 0 | Cs9g18330.1/Cs9g183 | 5.18 | 0 | 15.9 | 0 | 2      | MASCOT | T     |       |
| 8.25E-05 | 0 0 | Cs9g18330.1/Cs9g183 | 5.18 | 0 | 15.9 | 0 | 2      | MASCOT | T     |       |
| 3.98E-05 | 0 0 | Cs9g18330.1/Cs9g183 | 5.18 | 0 | 0    | 2 | MASCOT | T      | PLEX8 |       |
| 1.02E-02 | 0 0 | Cs9g18330.1/Cs9g183 | 5.18 | 0 | 0    | 2 | MASCOT | T      | PLEX8 |       |
| 2.11E-06 | 0 0 | Cs9g18330.1/Cs9g183 | 5.18 | 0 | 0    | 2 | MASCOT | T      | PLEX8 |       |
| 3.75E-02 | 0 0 | Cs9g18330.1/Cs9g183 | 5.18 | 0 | 0    | 2 | MASCOT | T      |       |       |
| 1.04E-04 | 0 0 | Cs9g18330.1/Cs9g183 | 5.18 | 0 | 0    | 2 | MASCOT | T      |       |       |
| 5.90E-04 | 0 0 | Cs9g18330.1/Cs9g183 | 4.03 | 0 | 0    | 2 | MASCOT | T      | PLEX8 |       |
| 2.84E-03 | 0 0 | Cs9g18330.1/Cs9g183 | 4.03 | 0 | 0    | 2 | MASCOT | T      | PLEX8 |       |
| 4.57E-03 | 0 0 | Cs9g18330.1/Cs9g183 | 4.03 | 0 | 0    | 2 | MASCOT | T      | PLEX8 |       |
| 1.80E-02 | 0 0 | Cs9g18330.1/Cs9g183 | 4.03 | 0 | 0    | 2 | MASCOT | T      | PLEX8 |       |
| 1.17E-03 | 0 0 | Cs9g18330.1/Cs9g183 | 4.3  | 0 | 0    | 2 | MASCOT | T      |       |       |
| 2.46E-03 | 0 0 | Cs9g18330.1/Cs9g183 | 4.3  | 0 | 0    | 2 | MASCOT | T      | PLEX8 |       |
| 1.05E-01 | 0 0 | Cs9g18330.1/Cs9g183 | 5.83 | 0 | 0    | 2 | MASCOT | T      |       |       |
| 9.10E-02 | 0 0 | Cs9g18330.1/Cs9g183 | 5.83 | 0 | 0    | 2 | MASCOT | T      |       |       |
| 4.86E-06 | 0 0 | Cs9g18330.1/Cs9g183 | 5.83 | 0 | 0    | 2 | MASCOT | T      |       |       |

|          |     |                     |      |   |      |   |        |        |         |
|----------|-----|---------------------|------|---|------|---|--------|--------|---------|
| 5.65E-02 | 0 0 | Cs9g18330.1/Cs9g183 | 4.25 | 0 | 0    | 2 | MASCOT | T      |         |
| 8.48E-02 | 0 0 | Cs3g06370.1/Cs3g155 | 5.32 | 0 | 15.9 | 0 | 2      | MASCOT | T PLEX8 |
| 2.33E-03 | 0 0 | Cs3g06370.1/Cs3g155 | 5.32 | 0 | 15.9 | 0 | 2      | MASCOT | T PLEX8 |
| 7.21E-02 | 0 0 | Cs3g06370.1/Cs3g155 | 5.32 | 0 | 0    | 2 | MASCOT | T      | PLEX8   |
| 8.02E-04 | 0 0 | Cs3g06370.1/Cs7g160 | 4.37 | 0 | 0    | 2 | MASCOT | T      | PLEX8   |
| 4.91E-02 | 0 0 | Cs3g06370.1/Cs7g160 | 6.06 | 1 | 0    | 2 | MASCOT | T      | PLEX8   |
| 2.90E-02 | 0 0 | Cs3g06370.1/Cs7g160 | 6.06 | 1 | 0    | 2 | MASCOT | T      | PLEX8   |
| 4.40E-01 | 0 0 | Cs3g06370.1/Cs3g155 | 8.59 | 0 | 0    | 2 | MASCOT | T      | PLEX8   |
| 2.22E-03 | 0 0 | Cs3g06370.1/Cs3g155 | 9.8  | 0 | 0    | 2 | MASCOT | T      | PLEX8   |
| 1.92E-01 | 0 0 | Cs3g06370.1/Cs3g155 | 9.8  | 0 | 0    | 2 | MASCOT | T      | PLEX8   |
| 4.70E-02 | 0 0 | Cs3g06370.1/Cs3g155 | 9.8  | 0 | 0    | 2 | MASCOT | T      | PLEX8   |
| 1.61E-03 | 0 0 | Cs3g06370.1/Cs3g155 | 9.8  | 0 | 0    | 2 | MASCOT | T      | PLEX8   |
| 1.33E-04 | 0 0 | Cs3g06370.1/Cs3g155 | 9.8  | 0 | 0    | 2 | MASCOT | T      | PLEX8   |
| 2.04E-03 | 0 0 | Cs3g06370.1/Cs3g155 | 9.8  | 0 | 0    | 2 | MASCOT | T      | PLEX8   |
| 4.61E-02 | 0 0 | Cs3g06370.1/Cs3g155 | 9.8  | 0 | 0    | 2 | MASCOT | T      | PLEX8   |
| 2.02E-01 | 0 0 | Cs3g06370.1/Cs3g155 | 9.8  | 0 | 0    | 2 | MASCOT | T      | PLEX8   |
| 5.64E-02 | 0 0 | Cs3g06370.1/Cs3g155 | 4.53 | 0 | 0    | 2 | MASCOT | T      | PLEX8   |
| 1.71E-03 | 0 0 | Cs3g15540.1/Cs3g155 | 6.75 | 0 | 0    | 2 | MASCOT | T      | PLEX8   |
| 7.22E-02 | 0 0 | Cs3g15540.1/Cs3g155 | 6.75 | 0 | 0    | 2 | MASCOT | T      | PLEX8   |
| 5.55E-03 | 0 0 | Cs3g15540.1/Cs3g155 | 6.75 | 0 | 0    | 2 | MASCOT | T      | PLEX8   |
| 1.26E-01 | 0 0 | Cs3g15540.1/Cs3g155 | 6.75 | 0 | 0    | 2 | MASCOT | T      |         |
| 2.89E-03 | 0 0 | Cs3g06370.1/Cs3g155 | 6.74 | 0 | 0    | 2 | MASCOT | T      | PLEX8   |
| 1.99E-02 | 0 0 | Cs3g06370.1/Cs3g155 | 6.74 | 0 | 0    | 2 | MASCOT | T      | PLEX8   |
| 4.32E-02 | 0 0 | Cs3g06370.1/Cs3g155 | 6.74 | 0 | 0    | 2 | MASCOT | T      |         |
| 6.00E-02 | 0 0 | Cs3g06370.1/Cs3g155 | 6.74 | 0 | 0    | 2 | MASCOT | T      |         |
| 7.72E-02 | 0 0 | Cs3g06370.1/Cs3g155 | 6.74 | 0 | 0    | 2 | MASCOT | T      | PLEX8   |
| 3.35E-02 | 0 0 | Cs3g06370.1/Cs3g155 | 6.74 | 0 | 0    | 2 | MASCOT | T      |         |
| 5.21E-02 | 0 0 | Cs3g06370.1/Cs3g155 | 6.74 | 0 | 0    | 2 | MASCOT | T      |         |
| 3.38E-01 | 0 0 | Cs3g06370.1/Cs3g155 | 8.46 | 0 | 0    | 2 | MASCOT | T      | PLEX8   |
| 4.79E-02 | 0 0 | Cs5g21930.1/Cs5g219 | 8.8  | 0 | 0    | 2 | MASCOT | T      | PLEX8   |
| 1.29E-01 | 0 0 | Cs5g21930.1/Cs5g219 | 5.88 | 0 | 0    | 2 | MASCOT | T      | PLEX8   |
| 8.06E-02 | 0 0 | Cs5g21930.1/Cs5g219 | 5.88 | 0 | 0    | 2 | MASCOT | T      | PLEX8   |
| 9.13E-02 | 0 0 | Cs5g21930.1/Cs5g219 | 4.14 | 0 | 0    | 2 | MASCOT | T      | PLEX8   |
| 1.97E-01 | 0 0 | Cs5g21930.1/Cs5g219 | 9.75 | 0 | 0    | 2 | MASCOT | T      | PLEX8   |
| 8.35E-04 | 0 0 | Cs5g21930.1/Cs5g219 | 9.75 | 0 | 0    | 2 | MASCOT | T      | PLEX8   |
| 1.13E-02 | 0 0 | Cs5g21930.1/Cs5g219 | 9.75 | 0 | 0    | 2 | MASCOT | T      | PLEX8   |
| 1.19E-02 | 0 0 | Cs5g21930.1/Cs5g219 | 9.75 | 0 | 0    | 2 | MASCOT | T      | PLEX8   |
| 4.97E-03 | 0 0 | Cs5g21930.1/Cs5g219 | 5.55 | 0 | 0    | 2 | MASCOT | T      | PLEX8   |
| 1.61E-04 | 0 0 | Cs5g21930.1/Cs5g219 | 5.55 | 0 | 0    | 2 | MASCOT | T      |         |
| 1.08E-02 | 0 0 | Cs5g21930.1/Cs5g219 | 5.55 | 0 | 0    | 2 | MASCOT | T      | PLEX8   |
| 6.67E-03 | 0 0 | Cs5g21930.1/Cs5g219 | 5.55 | 0 | 0    | 2 | MASCOT | T      | PLEX8   |
| 3.02E-02 | 0 0 | Cs5g21930.1/Cs5g219 | 5.55 | 0 | 0    | 2 | MASCOT | T      |         |
| 2.97E-03 | 0 0 | Cs5g21930.1/Cs5g219 | 4.14 | 0 | 0    | 2 | MASCOT | T      | PLEX8   |
| 2.00E-05 | 0 0 | Cs5g21930.1/Cs5g219 | 4.14 | 0 | 0    | 2 | MASCOT | T      | PLEX8   |
| 1.98E-02 | 0 0 | Cs5g21930.1/Cs5g219 | 4.53 | 0 | 0    | 2 | MASCOT | T      | PLEX8   |
| 4.26E-02 | 0 0 | Cs5g21930.1/Cs5g219 | 9.8  | 0 | 0    | 2 | MASCOT | T      | PLEX8   |
| 3.36E-04 | 0 0 | Cs5g21930.1/Cs5g219 | 9.8  | 0 | 0    | 2 | MASCOT | T      | PLEX8   |
| 7.93E-04 | 0 0 | Cs5g21930.1/Cs5g219 | 9.8  | 0 | 0    | 2 | MASCOT | T      | PLEX8   |
| 1.35E-01 | 0 0 | Cs5g21930.1/Cs5g219 | 9.8  | 0 | 0    | 2 | MASCOT | T      | PLEX8   |
| 9.87E-03 | 0 0 | Cs5g21930.1/Cs5g219 | 9.8  | 0 | 0    | 2 | MASCOT | T      | PLEX8   |
| 1.96E-02 | 0 0 | Cs5g21930.1/Cs5g219 | 9.8  | 0 | 0    | 2 | MASCOT | T      | PLEX8   |

|          |     |                     |      |   |      |   |        |        |       |       |
|----------|-----|---------------------|------|---|------|---|--------|--------|-------|-------|
| 5.52E-03 | 0 0 | Cs5g21930.1/Cs5g219 | 8.75 | 0 | 0    | 2 | MASCOT | T      | PLEX8 |       |
| 3.26E-02 | 0 0 | Cs5g21930.1/Cs5g219 | 8.75 | 0 | 0    | 2 | MASCOT | T      | PLEX8 |       |
| 3.30E-04 | 0 0 | Cs5g21930.1/Cs5g219 | 8.75 | 0 | 0    | 2 | MASCOT | T      | PLEX8 |       |
| 2.24E-03 | 0 0 | Cs5g21930.1/Cs5g219 | 8.75 | 0 | 0    | 2 | MASCOT | T      | PLEX8 |       |
| 9.43E-05 | 0 0 | Cs5g21930.1/Cs5g219 | 8.75 | 0 | 0    | 2 | MASCOT | T      | PLEX8 |       |
| 8.55E-02 | 0 0 | Cs7g04340.1         | 6    | 0 | 0    | 2 | MASCOT | T      | PLEX8 |       |
| 1.52E-01 | 0 0 | Cs7g04340.1         | 6    | 0 | 0    | 2 | MASCOT | T      | PLEX8 |       |
| 5.46E-02 | 0 0 | Cs7g04340.1         | 4.53 | 0 | 0    | 2 | MASCOT | T      | PLEX8 |       |
| 8.88E-03 | 0 0 | Cs7g04340.1         | 4.53 | 0 | 0    | 2 | MASCOT | T      | PLEX8 |       |
| 1.18E-01 | 0 0 | Cs7g04340.1         | 4.53 | 0 | 0    | 2 | MASCOT | T      | PLEX8 |       |
| 3.71E-03 | 0 0 | Cs7g04340.1         | 4.23 | 1 | 0    | 2 | MASCOT | T      | PLEX8 |       |
| 2.94E-03 | 0 0 | Cs7g04340.1         | 4.23 | 1 | 0    | 2 | MASCOT | T      |       |       |
| 3.05E-05 | 0 0 | Cs7g04340.1         | 4.23 | 1 | 0    | 2 | MASCOT | T      |       |       |
| 4.66E-01 | 0 0 | Cs7g04340.1         | 8.47 | 0 | 0    | 2 | MASCOT | T      | PLEX8 |       |
| 6.50E-02 | 0 0 | Cs7g04340.1         | 8.47 | 0 | 0    | 2 | MASCOT | T      | PLEX8 |       |
| 2.76E-01 | 0 0 | Cs7g04340.1         | 8.47 | 0 | 0    | 2 | MASCOT | T      |       |       |
| 9.69E-02 | 0 0 | Cs7g04340.1         | 8.47 | 0 | 0    | 2 | MASCOT | T      |       |       |
| 2.43E-02 | 0 0 | Cs7g04340.1         | 6    | 0 | 0    | 2 | MASCOT | T      | PLEX8 |       |
| 6.22E-02 | 0 0 | Cs7g04340.1         | 6    | 0 | 0    | 2 | MASCOT | T      | PLEX8 |       |
| 7.24E-04 | 0 0 | Cs7g04340.1         | 4.03 | 0 | 0    | 2 | MASCOT | T      | PLEX8 |       |
| 6.00E-02 | 0 0 | Cs7g04340.1         | 6    | 0 | 0    | 2 | MASCOT | T      | PLEX8 |       |
| 8.41E-03 | 0 0 | Cs7g04340.1         | 6    | 0 | 0    | 2 | MASCOT | T      | PLEX8 |       |
| 5.68E-02 | 0 0 | Cs7g04340.1         | 6    | 0 | 0    | 2 | MASCOT | T      | PLEX8 |       |
| 6.51E-03 | 0 0 | Cs7g04340.1         | 6    | 0 | 0    | 2 | MASCOT | T      | PLEX8 |       |
| 6.74E-03 | 0 0 | Cs7g04340.1         | 6    | 0 | 0    | 2 | MASCOT | T      | PLEX8 |       |
| 2.28E-01 | 0 0 | Cs7g04340.1         | 8.59 | 0 | 0    | 2 | MASCOT | T      |       |       |
| 3.82E-02 | 0 0 | Cs7g04340.1         | 5.66 | 0 | 15.9 | 0 | 2      | MASCOT | T     |       |
| 3.18E-05 | 0 0 | Cs7g04340.1         | 5.66 | 0 | 15.9 | 0 | 2      | MASCOT | T     |       |
| 1.08E-03 | 0 0 | Cs7g04340.1         | 5.66 | 0 | 15.9 | 0 | 2      | MASCOT | T     |       |
| 2.88E-02 | 0 0 | Cs7g04340.1         | 5.66 | 0 | 15.9 | 0 | 2      | MASCOT | T     | PLEX8 |
| 7.21E-05 | 0 0 | Cs7g04340.1         | 5.66 | 0 | 0    | 2 | MASCOT | T      |       |       |
| 1.55E-04 | 0 0 | Cs7g04340.1         | 5.66 | 0 | 0    | 2 | MASCOT | T      |       |       |
| 2.28E-01 | 0 0 | Cs2g16200.1/Cs2g162 | 9.8  | 0 | 0    | 2 | MASCOT | T      | PLEX8 |       |
| 7.47E-02 | 0 0 | Cs2g16200.1/Cs2g162 | 9.8  | 0 | 0    | 2 | MASCOT | T      | PLEX8 |       |
| 3.42E-02 | 0 0 | Cs2g16200.1/Cs2g162 | 4.21 | 0 | 0    | 2 | MASCOT | T      | PLEX8 |       |
| 8.89E-03 | 0 0 | Cs2g16200.1/Cs2g162 | 4.21 | 0 | 0    | 2 | MASCOT | T      | PLEX8 |       |
| 3.86E-04 | 0 0 | Cs2g16200.1/Cs2g162 | 4.25 | 0 | 0    | 2 | MASCOT | T      | PLEX8 |       |
| 2.08E-03 | 0 0 | Cs2g16200.1/Cs2g162 | 4.25 | 0 | 0    | 2 | MASCOT | T      | PLEX8 |       |
| 2.38E-01 | 0 0 | Cs2g16200.1/Cs2g162 | 4.25 | 0 | 0    | 2 | MASCOT | T      | PLEX8 |       |
| 6.18E-03 | 0 0 | Cs2g16200.1/Cs2g162 | 4.25 | 0 | 0    | 2 | MASCOT | T      | PLEX8 |       |
| 6.53E-03 | 0 0 | Cs2g16220.1/Cs2g162 | 6    | 0 | 0    | 2 | MASCOT | T      | PLEX8 |       |
| 4.49E-02 | 0 0 | Cs2g16220.1/Cs2g162 | 6    | 0 | 0    | 2 | MASCOT | T      | PLEX8 |       |
| 9.51E-02 | 0 0 | Cs2g16220.1/Cs2g162 | 6    | 0 | 0    | 2 | MASCOT | T      | PLEX8 |       |
| 4.37E-02 | 0 0 | Cs2g16220.1/Cs2g162 | 6    | 0 | 0    | 2 | MASCOT | T      | PLEX8 |       |
| 1.57E-04 | 0 0 | Cs2g16220.1/Cs2g162 | 4.14 | 0 | 0    | 2 | MASCOT | T      | PLEX8 |       |
| 2.09E-01 | 0 0 | Cs2g16220.1/Cs2g162 | 4.14 | 0 | 0    | 2 | MASCOT | T      |       |       |
| 6.39E-06 | 0 0 | Cs2g16220.1/Cs2g162 | 4.14 | 0 | 0    | 2 | MASCOT | T      |       |       |
| 3.30E-02 | 0 0 | Cs2g16220.1/Cs8g071 | 8.59 | 0 | 0    | 2 | MASCOT | T      | PLEX8 |       |
| 9.56E-04 | 0 0 | Cs2g16220.1/Cs8g071 | 8.59 | 0 | 0    | 2 | MASCOT | T      | PLEX8 |       |
| 2.20E-03 | 0 0 | Cs2g16220.1/Cs8g071 | 8.59 | 0 | 0    | 2 | MASCOT | T      | PLEX8 |       |
| 4.27E-02 | 0 0 | Cs2g16200.1/Cs2g162 | 6.46 | 0 | 0    | 2 | MASCOT | T      | PLEX8 |       |

|          |     |                     |      |   |   |   |        |   |       |
|----------|-----|---------------------|------|---|---|---|--------|---|-------|
| 4.53E-02 | 0 0 | Cs2g16200.1/Cs2g162 | 6.46 | 0 | 0 | 2 | MASCOT | T | PLEX8 |
| 1.74E-01 | 0 0 | Cs2g16200.1/Cs2g162 | 6.46 | 0 | 0 | 2 | MASCOT | T | PLEX8 |
| 7.07E-02 | 0 0 | Cs2g16200.1/Cs2g162 | 6.46 | 0 | 0 | 2 | MASCOT | T | PLEX8 |
| 3.45E-01 | 0 0 | Cs2g16200.1/Cs2g162 | 6.46 | 0 | 0 | 2 | MASCOT | T | PLEX8 |
| 1.19E-02 | 0 0 | Cs2g16200.1/Cs2g162 | 6.46 | 0 | 0 | 2 | MASCOT | T | PLEX8 |
| 2.25E-03 | 0 0 | Cs2g16200.1/Cs2g162 | 6.46 | 0 | 0 | 2 | MASCOT | T | PLEX8 |
| 1.13E-01 | 0 0 | Cs8g07170.1         | 6.79 | 0 | 0 | 2 | MASCOT | T | PLEX8 |
| 2.29E-01 | 0 0 | Cs2g16260.1/Cs2g162 | 6.1  | 0 | 0 | 2 | MASCOT | T | PLEX8 |
| 1.13E-02 | 0 0 | Cs8g18560.1/Cs8g185 | 4.53 | 0 | 0 | 2 | MASCOT | T | PLEX8 |
| 2.50E-02 | 0 0 | Cs8g18560.1/Cs8g185 | 4.37 | 0 | 0 | 2 | MASCOT | T |       |
| 5.17E-03 | 0 0 | Cs8g18560.1/Cs8g185 | 4.37 | 0 | 0 | 2 | MASCOT | T |       |
| 7.57E-05 | 0 0 | Cs8g18560.1/Cs8g185 | 4.37 | 0 | 0 | 2 | MASCOT | T |       |
| 3.96E-01 | 0 0 | Cs7g32500.1/Cs7g325 | 8.75 | 0 | 0 | 2 | MASCOT | T | PLEX8 |
| 7.24E-03 | 0 0 | Cs8g18560.1/Cs8g185 | 5.4  | 0 | 0 | 2 | MASCOT | T | PLEX8 |
| 1.84E-05 | 0 0 | Cs8g18560.1/Cs8g185 | 5.4  | 0 | 0 | 2 | MASCOT | T | PLEX8 |
| 2.93E-05 | 0 0 | Cs8g18560.1/Cs8g185 | 5.4  | 0 | 0 | 2 | MASCOT | T |       |
| 2.41E-01 | 0 0 | Cs8g18560.1/Cs8g185 | 5.4  | 0 | 0 | 2 | MASCOT | T |       |
| 3.13E-04 | 0 0 | Cs8g18560.1/Cs8g185 | 5.4  | 0 | 0 | 2 | MASCOT | T |       |
| 2.49E-07 | 0 0 | Cs8g18560.1/Cs8g185 | 5.4  | 0 | 0 | 2 | MASCOT | T |       |
| 1.57E-01 | 0 0 | Cs8g18560.1/Cs8g185 | 8.72 | 0 | 0 | 2 | MASCOT | T | PLEX8 |
| 2.95E-03 | 0 0 | Cs7g32500.1/Cs7g325 | 4.53 | 0 | 0 | 2 | MASCOT | T |       |
| 1.03E-05 | 0 0 | Cs7g32500.1/Cs7g325 | 4.53 | 0 | 0 | 2 | MASCOT | T |       |
| 1.69E-03 | 0 0 | Cs7g32500.1/Cs7g325 | 4.53 | 0 | 0 | 2 | MASCOT | T |       |
| 1.77E-05 | 0 0 | Cs7g32500.1/Cs7g325 | 4.53 | 0 | 0 | 2 | MASCOT | T |       |
| 3.68E-04 | 0 0 | Cs7g32500.1/Cs7g325 | 4.53 | 0 | 0 | 2 | MASCOT | T |       |
| 8.57E-06 | 0 0 | Cs7g32500.1/Cs7g325 | 4.53 | 0 | 0 | 2 | MASCOT | T |       |
| 7.28E-03 | 0 0 | Cs7g32500.1/Cs7g325 | 4.53 | 0 | 0 | 2 | MASCOT | T |       |
| 5.93E-04 | 0 0 | Cs7g32500.1/Cs7g325 | 4.53 | 0 | 0 | 2 | MASCOT | T |       |
| 8.44E-03 | 0 0 | Cs8g18560.1/Cs8g185 | 4.03 | 0 | 0 | 2 | MASCOT | T | PLEX8 |
| 1.62E-01 | 0 0 | Cs8g18560.1/Cs8g185 | 4.53 | 0 | 0 | 2 | MASCOT | T | PLEX8 |
| 7.99E-03 | 0 0 | Cs8g18560.1/Cs8g185 | 4.53 | 0 | 0 | 2 | MASCOT | T | PLEX8 |
| 1.07E-04 | 0 0 | Cs8g18560.1/Cs8g185 | 4.53 | 0 | 0 | 2 | MASCOT | T | PLEX8 |
| 5.61E-02 | 0 0 | Cs8g18560.1/Cs8g185 | 6.46 | 0 | 0 | 2 | MASCOT | T | PLEX8 |
| 2.99E-02 | 0 0 | Cs8g18560.1/Cs8g185 | 6.46 | 0 | 0 | 2 | MASCOT | T | PLEX8 |
| 3.19E-03 | 0 0 | Cs8g18560.1/Cs8g185 | 6.46 | 0 | 0 | 2 | MASCOT | T | PLEX8 |
| 5.90E-02 | 0 0 | Cs8g05720.1         | 5.99 | 0 | 0 | 2 | MASCOT | T |       |
| 1.58E-01 | 0 0 | Cs8g05720.1         | 5.99 | 0 | 0 | 2 | MASCOT | T | PLEX8 |
| 1.01E-02 | 0 0 | Cs8g05720.1         | 5.99 | 0 | 0 | 2 | MASCOT | T | PLEX8 |
| 3.45E-03 | 0 0 | Cs8g05720.1         | 5.99 | 0 | 0 | 2 | MASCOT | T | PLEX8 |
| 2.75E-01 | 0 0 | Cs8g05720.1         | 4.53 | 0 | 0 | 2 | MASCOT | T | PLEX8 |
| 2.61E-01 | 0 0 | Cs8g05720.1         | 4.53 | 0 | 0 | 2 | MASCOT | T | PLEX8 |
| 2.74E-02 | 0 0 | Cs8g05720.1         | 6    | 0 | 0 | 2 | MASCOT | T | PLEX8 |
| 1.45E-01 | 0 0 | Cs8g05720.1         | 6    | 0 | 0 | 2 | MASCOT | T | PLEX8 |
| 1.90E-01 | 0 0 | Cs8g05720.1         | 6    | 0 | 0 | 2 | MASCOT | T | PLEX8 |
| 8.33E-02 | 0 0 | Cs8g05720.1         | 5.84 | 0 | 0 | 2 | MASCOT | T |       |
| 6.05E-02 | 0 0 | Cs8g05720.1         | 5.84 | 0 | 0 | 2 | MASCOT | T |       |
| 1.07E-05 | 0 0 | Cs8g05720.1         | 5.84 | 0 | 0 | 2 | MASCOT | T |       |
| 3.29E-04 | 0 0 | Cs8g05640.1/Cs8g057 | 3.92 | 0 | 0 | 2 | MASCOT | T | PLEX8 |
| 4.41E-03 | 0 0 | Cs8g05640.1/Cs8g057 | 4.25 | 0 | 0 | 2 | MASCOT | T | PLEX8 |
| 9.21E-03 | 0 0 | Cs8g05640.1/Cs8g057 | 4.25 | 0 | 0 | 2 | MASCOT | T | PLEX8 |
| 8.31E-02 | 0 0 | Cs8g05640.1/Cs8g057 | 4.25 | 0 | 0 | 2 | MASCOT | T | PLEX8 |



|          |     |                      |      |   |   |   |        |   |       |
|----------|-----|----------------------|------|---|---|---|--------|---|-------|
| 5.98E-02 | 0 0 | Cs7g05830.1 ! Cs8g05 | 4.53 | 0 | 0 | 2 | MASCOT | T | PLEX8 |
| 1.80E-01 | 0 0 | Cs7g05830.1 ! Cs8g05 | 4.53 | 0 | 0 | 2 | MASCOT | T | PLEX8 |
| 1.71E-01 | 0 0 | Cs7g05830.1 ! Cs8g05 | 4.53 | 0 | 0 | 2 | MASCOT | T | PLEX8 |
| 1.13E-03 | 0 0 | Cs8g05720.1          | 3.84 | 0 | 0 | 2 | MASCOT | T | PLEX8 |
| 3.46E-01 | 0 0 | Cs8g05720.1          | 7.86 | 0 | 0 | 2 | MASCOT | T | PLEX8 |
| 3.43E-02 | 0 0 | Cs8g05720.1          | 7.86 | 0 | 0 | 2 | MASCOT | T | PLEX8 |
| 2.44E-02 | 0 0 | Cs8g05720.1          | 7.86 | 0 | 0 | 2 | MASCOT | T | PLEX8 |
| 1.61E-01 | 0 0 | Cs8g05720.1          | 7.86 | 0 | 0 | 2 | MASCOT | T | PLEX8 |
| 5.32E-02 | 0 0 | Cs8g05720.1          | 7.86 | 0 | 0 | 2 | MASCOT | T | PLEX8 |
| 7.80E-03 | 0 0 | Cs8g05720.1          | 7.86 | 0 | 0 | 2 | MASCOT | T | PLEX8 |
| 1.47E-01 | 0 0 | Cs1g14700.1/Cs1g147  | 4.14 | 0 | 0 | 2 | MASCOT | T | PLEX8 |
| 1.25E-01 | 0 0 | Cs1g14700.1/Cs1g147  | 4.14 | 0 | 0 | 2 | MASCOT | T |       |
| 1.50E-02 | 0 0 | Cs1g14700.1/Cs1g147  | 9.76 | 0 | 0 | 2 | MASCOT | T | PLEX8 |
| 8.22E-04 | 0 0 | Cs1g14700.1/Cs1g147  | 9.76 | 0 | 0 | 2 | MASCOT | T | PLEX8 |
| 2.18E-03 | 0 0 | Cs1g14700.1/Cs1g147  | 9.76 | 0 | 0 | 2 | MASCOT | T | PLEX8 |
| 3.95E-03 | 0 0 | Cs1g14700.1/Cs1g147  | 9.76 | 0 | 0 | 2 | MASCOT | T | PLEX8 |
| 1.33E-03 | 0 0 | Cs1g14700.1/Cs1g147  | 9.76 | 0 | 0 | 2 | MASCOT | T | PLEX8 |
| 6.15E-02 | 0 0 | Cs1g14700.1/Cs1g147  | 9.76 | 0 | 0 | 2 | MASCOT | T | PLEX8 |
| 1.57E-01 | 0 0 | Cs1g14700.1/Cs1g147  | 9.76 | 0 | 0 | 2 | MASCOT | T | PLEX8 |
| 1.73E-02 | 0 0 | Cs1g14700.1/Cs1g147  | 9.76 | 0 | 0 | 2 | MASCOT | T | PLEX8 |
| 2.96E-02 | 0 0 | Cs1g14700.1/Cs1g147  | 9.76 | 0 | 0 | 2 | MASCOT | T |       |
| 3.88E-02 | 0 0 | Cs1g14700.1/Cs1g147  | 8.76 | 0 | 0 | 2 | MASCOT | T | PLEX8 |
| 6.79E-03 | 0 0 | Cs1g14700.1/Cs1g147  | 8.76 | 0 | 0 | 2 | MASCOT | T | PLEX8 |
| 2.54E-03 | 0 0 | Cs1g14700.1/Cs1g147  | 8.76 | 0 | 0 | 2 | MASCOT | T | PLEX8 |
| 1.31E-02 | 0 0 | Cs1g14700.1/Cs1g147  | 8.59 | 0 | 0 | 2 | MASCOT | T | PLEX8 |
| 2.15E-01 | 0 0 | Cs1g14700.1/Cs1g147  | 8.59 | 0 | 0 | 2 | MASCOT | T | PLEX8 |
| 3.90E-02 | 0 0 | Cs1g14700.1/Cs1g147  | 5.81 | 0 | 0 | 2 | MASCOT | T | PLEX8 |
| 1.55E-01 | 0 0 | Cs1g14700.1/Cs1g147  | 6.1  | 0 | 0 | 2 | MASCOT | T | PLEX8 |
| 1.66E-01 | 0 0 | Cs1g14700.1/Cs1g147  | 4.53 | 0 | 0 | 2 | MASCOT | T |       |
| 4.75E-02 | 0 0 | Cs1g14700.1/Cs1g147  | 4.53 | 0 | 0 | 2 | MASCOT | T |       |
| 8.66E-03 | 0 0 | Cs1g14700.1/Cs1g147  | 8.31 | 0 | 0 | 2 | MASCOT | T | PLEX8 |
| 5.56E-03 | 0 0 | Cs1g14700.1/Cs1g147  | 8.31 | 0 | 0 | 2 | MASCOT | T | PLEX8 |
| 2.23E-03 | 0 0 | Cs1g14700.1/Cs1g147  | 8.31 | 0 | 0 | 2 | MASCOT | T | PLEX8 |
| 6.96E-02 | 0 0 | Cs1g14700.1/Cs1g147  | 4.14 | 0 | 0 | 2 | MASCOT | T | PLEX8 |
| 1.11E-02 | 0 0 | Cs3g20840.2          | 4.37 | 0 | 0 | 2 | MASCOT | T | PLEX8 |
| 6.39E-02 | 0 0 | Cs3g20840.2          | 5.98 | 0 | 0 | 2 | MASCOT | T | PLEX8 |
| 2.22E-03 | 0 0 | Cs3g06370.1/Cs3g155  | 9.8  | 0 | 0 | 2 | MASCOT | T | PLEX8 |
| 1.92E-01 | 0 0 | Cs3g06370.1/Cs3g155  | 9.8  | 0 | 0 | 2 | MASCOT | T | PLEX8 |
| 4.70E-02 | 0 0 | Cs3g06370.1/Cs3g155  | 9.8  | 0 | 0 | 2 | MASCOT | T | PLEX8 |
| 1.61E-03 | 0 0 | Cs3g06370.1/Cs3g155  | 9.8  | 0 | 0 | 2 | MASCOT | T | PLEX8 |
| 1.33E-04 | 0 0 | Cs3g06370.1/Cs3g155  | 9.8  | 0 | 0 | 2 | MASCOT | T | PLEX8 |
| 2.04E-03 | 0 0 | Cs3g06370.1/Cs3g155  | 9.8  | 0 | 0 | 2 | MASCOT | T | PLEX8 |
| 4.61E-02 | 0 0 | Cs3g06370.1/Cs3g155  | 9.8  | 0 | 0 | 2 | MASCOT | T | PLEX8 |
| 2.02E-01 | 0 0 | Cs3g06370.1/Cs3g155  | 9.8  | 0 | 0 | 2 | MASCOT | T | PLEX8 |
| 7.88E-02 | 0 0 | Cs3g20840.2          | 6.75 | 0 | 0 | 2 | MASCOT | T | PLEX8 |
| 1.83E-02 | 0 0 | Cs3g20840.2          | 4.37 | 0 | 0 | 2 | MASCOT | T | PLEX8 |
| 1.17E-02 | 0 0 | Cs3g20840.2          | 4.37 | 0 | 0 | 2 | MASCOT | T | PLEX8 |
| 1.15E-01 | 0 0 | Cs3g20840.2          | 4.37 | 0 | 0 | 2 | MASCOT | T | PLEX8 |
| 5.34E-03 | 0 0 | Cs3g20840.2          | 9.76 | 0 | 0 | 2 | MASCOT | T | PLEX8 |
| 1.94E-01 | 0 0 | Cs3g20840.2          | 4.37 | 0 | 0 | 2 | MASCOT | T | PLEX8 |
| 6.07E-02 | 0 0 | Cs3g20840.1/Cs3g208  | 8.46 | 0 | 0 | 2 | MASCOT | T |       |

|          |     |                     |      |   |      |   |        |        |       |       |
|----------|-----|---------------------|------|---|------|---|--------|--------|-------|-------|
| 7.65E-02 | 0 0 | Cs3g20840.1/Cs3g208 | 8.46 | 0 | 0    | 2 | MASCOT | T      | PLEX8 |       |
| 1.14E-01 | 0 0 | Cs3g20840.1/Cs3g208 | 4.37 | 0 | 15.9 | 0 | 2      | MASCOT | T     | PLEX8 |
| 3.04E-02 | 0 0 | Cs3g20840.1/Cs3g208 | 4.37 | 0 | 0    | 2 | MASCOT | T      | PLEX8 |       |
| 7.37E-02 | 0 0 | Cs3g20840.1/Cs3g208 | 4.37 | 0 | 0    | 2 | MASCOT | T      | PLEX8 |       |
| 3.54E-01 | 0 0 | Cs3g20840.1/Cs3g208 | 4.37 | 0 | 0    | 2 | MASCOT | T      | PLEX8 |       |
| 2.54E-02 | 0 0 | Cs3g20840.1/Cs3g208 | 4.37 | 0 | 0    | 2 | MASCOT | T      | PLEX8 |       |
| 3.14E-04 | 0 0 | Cs3g27280.1/Cs3g272 | 3.92 | 0 | 0    | 2 | MASCOT | T      | PLEX8 |       |
| 1.24E-02 | 0 0 | Cs3g27280.1/Cs3g272 | 5.21 | 0 | 0    | 2 | MASCOT | T      | PLEX8 |       |
| 3.62E-03 | 0 0 | Cs3g27280.1/Cs3g272 | 5.21 | 0 | 0    | 2 | MASCOT | T      |       |       |
| 9.22E-03 | 0 0 | Cs3g27280.1/Cs3g272 | 5.21 | 0 | 0    | 2 | MASCOT | T      |       |       |
| 6.48E-02 | 0 0 | Cs3g27280.1/Cs3g272 | 9.76 | 0 | 0    | 2 | MASCOT | T      |       |       |
| 1.99E-02 | 0 0 | Cs4g18460.1/Cs4g184 | 5.87 | 0 | 0    | 2 | MASCOT | T      | PLEX8 |       |
| 8.14E-04 | 0 0 | Cs3g27280.1/Cs3g272 | 6.75 | 0 | 0    | 2 | MASCOT | T      | PLEX8 |       |
| 1.05E-04 | 0 0 | Cs3g27280.1/Cs3g272 | 6.75 | 0 | 0    | 2 | MASCOT | T      | PLEX8 |       |
| 3.14E-03 | 0 0 | Cs3g27280.1/Cs3g272 | 6.75 | 0 | 0    | 2 | MASCOT | T      | PLEX8 |       |
| 1.77E-02 | 0 0 | Cs3g27280.1/Cs3g272 | 6.75 | 0 | 0    | 2 | MASCOT | T      | PLEX8 |       |
| 3.15E-02 | 0 0 | Cs3g27280.1/Cs3g272 | 6.75 | 0 | 0    | 2 | MASCOT | T      |       |       |
| 3.87E-02 | 0 0 | Cs3g27280.1/Cs3g272 | 4.65 | 0 | 0    | 2 | MASCOT | T      | PLEX8 |       |
| 1.73E-02 | 0 0 | Cs3g27280.1/Cs3g272 | 4.65 | 0 | 0    | 2 | MASCOT | T      | PLEX8 |       |
| 7.95E-02 | 0 0 | Cs3g27280.1/Cs3g272 | 4.65 | 0 | 0    | 2 | MASCOT | T      | PLEX8 |       |
| 2.64E-01 | 0 0 | Cs3g27280.1/Cs3g272 | 4.65 | 0 | 0    | 2 | MASCOT | T      |       |       |
| 1.50E-03 | 0 0 | Cs3g27280.1/Cs3g272 | 4.65 | 0 | 0    | 2 | MASCOT | T      |       |       |
| 3.65E-01 | 0 0 | Cs3g27280.1/Cs3g272 | 4.65 | 0 | 0    | 2 | MASCOT | T      |       |       |
| 1.07E-01 | 0 0 | Cs3g27280.1/Cs3g272 | 6.75 | 0 | 0    | 2 | MASCOT | T      | PLEX8 |       |
| 3.23E-02 | 0 0 | Cs3g27280.1/Cs3g272 | 5.84 | 0 | 0    | 2 | MASCOT | T      | PLEX8 |       |
| 5.26E-02 | 0 0 | Cs3g27280.1/Cs3g272 | 5.84 | 0 | 0    | 2 | MASCOT | T      | PLEX8 |       |
| 2.00E-01 | 0 0 | Cs3g27280.1/Cs3g272 | 6.72 | 0 | 0    | 2 | MASCOT | T      | PLEX8 |       |
| 3.39E-01 | 0 0 | Cs3g27280.1/Cs3g272 | 6.72 | 0 | 0    | 2 | MASCOT | T      |       |       |
| 6.71E-02 | 0 0 | Cs3g27280.1/Cs3g272 | 6.72 | 0 | 0    | 2 | MASCOT | T      |       |       |
| 6.55E-02 | 0 0 | Cs3g09730.1/Cs3g097 | 5.88 | 0 | 15.9 | 0 | 2      | MASCOT | T     | PLEX8 |
| 1.09E-02 | 0 0 | Cs3g09730.1/Cs3g097 | 5.88 | 0 | 0    | 2 | MASCOT | T      | PLEX8 |       |
| 2.34E-01 | 0 0 | Cs3g09730.1/Cs3g097 | 8.25 | 0 | 0    | 2 | MASCOT | T      | PLEX8 |       |
| 2.19E-02 | 0 0 | Cs3g09770.1         | 5.96 | 1 | 0    | 2 | MASCOT | T      | PLEX8 |       |
| 3.27E-03 | 0 0 | Cs3g09770.1         | 4.37 | 0 | 0    | 2 | MASCOT | T      |       |       |
| 1.45E-01 | 0 0 | Cs3g09750.1/Cs3g097 | 4.37 | 0 | 0    | 2 | MASCOT | T      | PLEX8 |       |
| 3.35E-02 | 0 0 | Cs3g09730.1/Cs3g097 | 8.76 | 0 | 0    | 2 | MASCOT | T      | PLEX8 |       |
| 1.38E-01 | 0 0 | Cs3g09730.1/Cs3g097 | 8.76 | 0 | 0    | 2 | MASCOT | T      | PLEX8 |       |
| 1.11E-01 | 0 0 | Cs3g09730.1/Cs3g097 | 8.76 | 0 | 0    | 2 | MASCOT | T      | PLEX8 |       |
| 2.64E-02 | 0 0 | Cs3g09730.1/Cs3g097 | 8.76 | 0 | 0    | 2 | MASCOT | T      | PLEX8 |       |
| 2.25E-01 | 0 0 | Cs3g09730.1/Cs3g097 | 5.4  | 0 | 0    | 2 | MASCOT | T      | PLEX8 |       |
| 6.29E-02 | 0 0 | Cs3g09730.1/Cs3g097 | 5.4  | 0 | 0    | 2 | MASCOT | T      | PLEX8 |       |
| 1.89E-01 | 0 0 | Cs3g09730.1/Cs3g097 | 5.4  | 0 | 0    | 2 | MASCOT | T      | PLEX8 |       |
| 2.38E-01 | 0 0 | Cs3g09730.1/Cs3g097 | 5.4  | 0 | 0    | 2 | MASCOT | T      | PLEX8 |       |
| 2.61E-02 | 0 0 | Cs3g09730.1/Cs3g097 | 5.4  | 0 | 0    | 2 | MASCOT | T      | PLEX8 |       |
| 1.56E-02 | 0 0 | Cs3g09730.2/Cs3g097 | 4.21 | 0 | 0    | 2 | MASCOT | T      | PLEX8 |       |
| 5.62E-03 | 0 0 | Cs3g09730.2/Cs3g097 | 4.21 | 0 | 0    | 2 | MASCOT | T      | PLEX8 |       |
| 1.99E-02 | 0 0 | Cs3g09750.1/Cs3g097 | 4.53 | 0 | 0    | 2 | MASCOT | T      | PLEX8 |       |
| 5.74E-02 | 0 0 | Cs3g09750.1/Cs3g097 | 4.53 | 0 | 0    | 2 | MASCOT | T      | PLEX8 |       |
| 1.53E-01 | 0 0 | Cs3g09750.1/Cs3g097 | 4.53 | 0 | 0    | 2 | MASCOT | T      | PLEX8 |       |
| 3.92E-03 | 0 0 | Cs3g09750.1/Cs3g097 | 4.53 | 0 | 0    | 2 | MASCOT | T      | PLEX8 |       |
| 9.80E-02 | 0 0 | Cs3g09750.1/Cs3g097 | 4.53 | 0 | 0    | 2 | MASCOT | T      | PLEX8 |       |

|          |     |                     |      |   |      |   |        |        |       |       |
|----------|-----|---------------------|------|---|------|---|--------|--------|-------|-------|
| 8.60E-02 | 0 0 | Cs3g13880.1/Cs3g138 | 4.21 | 0 | 0    | 2 | MASCOT | T      | PLEX8 |       |
| 9.24E-02 | 0 0 | Cs3g13880.1/Cs3g138 | 4.21 | 0 | 0    | 2 | MASCOT | T      | PLEX8 |       |
| 2.49E-01 | 0 0 | Cs3g13880.1/Cs3g138 | 4.21 | 0 | 0    | 2 | MASCOT | T      | PLEX8 |       |
| 5.44E-01 | 0 0 | Cs3g13880.1/Cs3g138 | 4.03 | 0 | 0    | 2 | MASCOT | T      | PLEX8 |       |
| 3.91E-02 | 0 0 | Cs3g13880.1/Cs3g138 | 5.4  | 0 | 15.9 | 0 | 2      | MASCOT | T     | PLEX8 |
| 1.30E-04 | 0 0 | Cs3g13880.1/Cs3g138 | 5.4  | 0 | 15.9 | 0 | 2      | MASCOT | T     | PLEX8 |
| 1.11E-03 | 0 0 | Cs3g13880.1/Cs3g138 | 5.4  | 0 | 0    | 2 | MASCOT | T      | PLEX8 |       |
| 3.44E-04 | 0 0 | Cs3g13880.1/Cs3g138 | 5.4  | 0 | 0    | 2 | MASCOT | T      | PLEX8 |       |
| 7.61E-02 | 0 0 | Cs3g13880.1         | 5.81 | 0 | 0    | 2 | MASCOT | T      |       |       |
| 1.02E-03 | 0 0 | Cs3g13880.1/Cs3g138 | 5.21 | 0 | 0    | 2 | MASCOT | T      | PLEX8 |       |
| 4.55E-02 | 0 0 | Cs3g13880.1/Cs3g138 | 5.21 | 0 | 0    | 2 | MASCOT | T      | PLEX8 |       |
| 2.12E-02 | 0 0 | Cs3g13880.1/Cs3g138 | 5.21 | 0 | 0    | 2 | MASCOT | T      | PLEX8 |       |
| 4.84E-04 | 0 0 | Cs3g13880.1/Cs3g138 | 5.21 | 0 | 0    | 2 | MASCOT | T      | PLEX8 |       |
| 5.21E-02 | 0 0 | Cs3g13880.1         | 6    | 0 | 0    | 2 | MASCOT | T      | PLEX8 |       |
| 9.73E-04 | 0 0 | Cs3g13880.1         | 6    | 0 | 0    | 2 | MASCOT | T      | PLEX8 |       |
| 1.43E-01 | 0 0 | Cs3g13880.1         | 6    | 0 | 0    | 2 | MASCOT | T      | PLEX8 |       |
| 3.73E-02 | 0 0 | Cs3g13880.1         | 6    | 0 | 0    | 2 | MASCOT | T      | PLEX8 |       |
| 2.84E-02 | 0 0 | Cs3g13880.1         | 6    | 0 | 0    | 2 | MASCOT | T      | PLEX8 |       |
| 1.55E-03 | 0 0 | Cs3g13880.1         | 6    | 0 | 0    | 2 | MASCOT | T      | PLEX8 |       |
| 9.50E-02 | 0 0 | Cs3g13880.1         | 6    | 0 | 0    | 2 | MASCOT | T      |       |       |
| 1.79E-01 | 0 0 | Cs3g13880.1/Cs3g138 | 6.41 | 0 | 0    | 2 | MASCOT | T      | PLEX8 |       |
| 1.70E-01 | 0 0 | Cs3g13880.1/Cs3g138 | 6    | 0 | 0    | 2 | MASCOT | T      | PLEX8 |       |
| 3.09E-01 | 0 0 | Cs6g01060.1         | 8.8  | 0 | 0    | 2 | MASCOT | T      | PLEX8 |       |
| 3.97E-03 | 0 0 | Cs6g01060.1         | 6.05 | 0 | 0    | 2 | MASCOT | T      | PLEX8 |       |
| 1.37E-01 | 0 0 | Cs6g01060.1         | 6.05 | 0 | 0    | 2 | MASCOT | T      | PLEX8 |       |
| 5.92E-02 | 0 0 | Cs6g01060.1         | 6.05 | 0 | 0    | 2 | MASCOT | T      | PLEX8 |       |
| 1.39E-02 | 0 0 | Cs6g01060.1         | 6.05 | 0 | 0    | 2 | MASCOT | T      | PLEX8 |       |
| 4.56E-02 | 0 0 | Cs6g01060.1         | 6.05 | 0 | 0    | 2 | MASCOT | T      | PLEX8 |       |
| 1.42E-01 | 0 0 | Cs6g01060.1         | 4.53 | 0 | 0    | 2 | MASCOT | T      |       |       |
| 2.65E-02 | 0 0 | Cs6g01060.1         | 4.53 | 0 | 0    | 2 | MASCOT | T      |       |       |
| 1.78E-04 | 0 0 | Cs6g01060.1         | 6.75 | 0 | 0    | 2 | MASCOT | T      | PLEX8 |       |
| 4.32E-03 | 0 0 | Cs6g01060.1         | 6.75 | 0 | 0    | 2 | MASCOT | T      | PLEX8 |       |
| 1.14E-02 | 0 0 | Cs6g01060.1         | 6.75 | 0 | 0    | 2 | MASCOT | T      | PLEX8 |       |
| 4.93E-01 | 0 0 | Cs6g01060.1         | 8.5  | 0 | 0    | 2 | MASCOT | T      | PLEX8 |       |
| 6.12E-03 | 0 0 | Cs6g01060.1         | 6.74 | 0 | 0    | 2 | MASCOT | T      | PLEX8 |       |
| 1.60E-02 | 0 0 | Cs6g01060.1         | 6.74 | 0 | 0    | 2 | MASCOT | T      | PLEX8 |       |
| 1.49E-03 | 0 0 | Cs6g01060.1         | 6.74 | 0 | 0    | 2 | MASCOT | T      | PLEX8 |       |
| 1.61E-04 | 0 0 | Cs6g01060.1         | 6    | 0 | 0    | 2 | MASCOT | T      | PLEX8 |       |
| 4.88E-02 | 0 0 | Cs6g01060.1         | 6    | 0 | 0    | 2 | MASCOT | T      |       |       |
| 3.21E-01 | 0 0 | Cs6g01060.1         | 6    | 0 | 0    | 2 | MASCOT | T      |       |       |
| 8.84E-03 | 0 0 | Cs6g01060.1         | 7.96 | 0 | 0    | 2 | MASCOT | T      | PLEX8 |       |
| 6.73E-02 | 0 0 | Cs6g01060.1         | 7.96 | 0 | 0    | 2 | MASCOT | T      | PLEX8 |       |
| 1.91E-01 | 0 0 | Cs6g01060.1         | 7.96 | 0 | 0    | 2 | MASCOT | T      | PLEX8 |       |
| 1.01E-01 | 0 0 | Cs3g25110.1         | 6.74 | 0 | 0    | 2 | MASCOT | T      |       |       |
| 3.19E-04 | 0 0 | Cs3g25110.1         | 9.75 | 0 | 0    | 2 | MASCOT | T      | PLEX8 |       |
| 4.06E-02 | 0 0 | Cs3g25110.1         | 9.75 | 0 | 0    | 2 | MASCOT | T      | PLEX8 |       |
| 2.36E-02 | 0 0 | Cs3g25110.1         | 9.75 | 0 | 0    | 2 | MASCOT | T      |       |       |
| 1.60E-04 | 0 0 | Cs3g25110.1         | 9.75 | 0 | 0    | 2 | MASCOT | T      |       |       |
| 8.95E-03 | 0 0 | Cs3g25110.1         | 5.32 | 0 | 0    | 2 | MASCOT | T      | PLEX8 |       |
| 1.36E-02 | 0 0 | Cs3g25110.1         | 5.32 | 0 | 0    | 2 | MASCOT | T      | PLEX8 |       |
| 2.45E-02 | 0 0 | Cs3g25110.1         | 5.32 | 0 | 0    | 2 | MASCOT | T      | PLEX8 |       |

|          |     |                     |      |   |      |   |        |        |       |       |
|----------|-----|---------------------|------|---|------|---|--------|--------|-------|-------|
| 3.79E-02 | 0 0 | Cs3g25110.1         | 5.32 | 0 | 0    | 2 | MASCOT | T      |       |       |
| 1.18E-01 | 0 0 | Cs3g25110.1         | 8.72 | 0 | 0    | 2 | MASCOT | T      | PLEX8 |       |
| 3.01E-02 | 0 0 | Cs3g25110.1         | 8.72 | 0 | 0    | 2 | MASCOT | T      | PLEX8 |       |
| 5.34E-04 | 0 0 | Cs3g25110.1         | 6.84 | 0 | 0    | 2 | MASCOT | T      | PLEX8 |       |
| 3.93E-04 | 0 0 | Cs3g25110.1         | 6.84 | 0 | 0    | 2 | MASCOT | T      | PLEX8 |       |
| 1.35E-01 | 0 0 | Cs3g25110.1         | 6.84 | 0 | 0    | 2 | MASCOT | T      | PLEX8 |       |
| 4.79E-02 | 0 0 | Cs3g25110.1         | 9.75 | 0 | 0    | 2 | MASCOT | T      | PLEX8 |       |
| 2.85E-02 | 0 0 | Cs3g25110.1         | 4.37 | 0 | 0    | 2 | MASCOT | T      | PLEX8 |       |
| 2.72E-07 | 0 0 | Cs3g25110.1         | 4.37 | 0 | 0    | 2 | MASCOT | T      |       |       |
| 1.01E-02 | 0 0 | Cs3g25110.1         | 5.5  | 0 | 0    | 2 | MASCOT | T      |       |       |
| 2.68E-02 | 0 0 | Cs3g25110.1         | 5.5  | 0 | 0    | 2 | MASCOT | T      |       |       |
| 1.02E-02 | 0 0 | Cs3g25110.1         | 5.5  | 0 | 0    | 2 | MASCOT | T      |       |       |
| 8.98E-03 | 0 0 | Cs6g11370.1/Cs6g113 | 4.37 | 0 | 0    | 2 | MASCOT | T      |       |       |
| 1.03E-03 | 0 0 | Cs6g11370.1/Cs6g113 | 4.37 | 0 | 0    | 2 | MASCOT | T      |       |       |
| 2.92E-03 | 0 0 | Cs6g11370.1/Cs6g113 | 4.37 | 0 | 0    | 2 | MASCOT | T      |       |       |
| 6.15E-02 | 0 0 | Cs6g11370.1/Cs6g113 | 4.37 | 0 | 0    | 2 | MASCOT | T      |       |       |
| 5.43E-02 | 0 0 | Cs6g11370.1/Cs6g113 | 4.53 | 0 | 15.9 | 0 | 2      | MASCOT | T     | PLEX8 |
| 2.34E-02 | 0 0 | Cs6g11370.1/Cs6g113 | 4.53 | 0 | 0    | 2 | MASCOT | T      | PLEX8 |       |
| 4.35E-02 | 0 0 | Cs6g11370.1/Cs6g113 | 4.37 | 0 | 0    | 2 | MASCOT | T      | PLEX8 |       |
| 3.09E-02 | 0 0 | Cs6g11370.1/Cs6g113 | 4.37 | 0 | 0    | 2 | MASCOT | T      | PLEX8 |       |
| 6.31E-07 | 0 0 | Cs6g11370.1/Cs6g113 | 4.37 | 0 | 0    | 2 | MASCOT | T      | PLEX8 |       |
| 4.21E-01 | 0 0 | Cs6g11370.1/Cs6g113 | 8.72 | 0 | 0    | 2 | MASCOT | T      | PLEX8 |       |
| 4.86E-01 | 0 0 | Cs6g11370.1/Cs6g113 | 8.72 | 0 | 0    | 2 | MASCOT | T      | PLEX8 |       |
| 2.23E-03 | 0 0 | Cs6g11370.1/Cs6g113 | 4.37 | 0 | 0    | 2 | MASCOT | T      | PLEX8 |       |
| 8.92E-02 | 0 0 | Cs6g11370.1/Cs6g113 | 5.83 | 0 | 0    | 2 | MASCOT | T      | PLEX8 |       |
| 1.10E-01 | 0 0 | Cs6g11370.1/Cs6g113 | 5.83 | 0 | 0    | 2 | MASCOT | T      | PLEX8 |       |
| 3.98E-02 | 0 0 | Cs6g11370.1/Cs6g113 | 5.83 | 0 | 0    | 2 | MASCOT | T      | PLEX8 |       |
| 9.76E-03 | 0 0 | Cs6g11370.1/Cs6g113 | 5.83 | 0 | 0    | 2 | MASCOT | T      | PLEX8 |       |
| 1.81E-02 | 0 0 | Cs6g11370.1/Cs6g113 | 5.83 | 0 | 0    | 2 | MASCOT | T      | PLEX8 |       |
| 1.43E-02 | 0 0 | Cs6g11370.1/Cs6g113 | 6    | 0 | 0    | 2 | MASCOT | T      | PLEX8 |       |
| 6.06E-03 | 0 0 | Cs6g11370.1/Cs6g113 | 4.48 | 0 | 0    | 2 | MASCOT | T      | PLEX8 |       |
| 2.75E-03 | 0 0 | Cs6g11370.1/Cs6g113 | 4.48 | 0 | 0    | 2 | MASCOT | T      | PLEX8 |       |
| 4.53E-02 | 0 0 | Cs6g17400.1/Cs6g174 | 6    | 0 | 0    | 2 | MASCOT | T      | PLEX8 |       |
| 1.57E-01 | 0 0 | Cs6g17400.1/Cs6g174 | 6    | 0 | 0    | 2 | MASCOT | T      | PLEX8 |       |
| 3.09E-04 | 0 0 | Cs6g17400.1/Cs6g174 | 6    | 0 | 0    | 2 | MASCOT | T      | PLEX8 |       |
| 1.72E-02 | 0 0 | Cs6g17400.1/Cs6g174 | 6    | 0 | 0    | 2 | MASCOT | T      | PLEX8 |       |
| 4.52E-02 | 0 0 | Cs6g17400.1/Cs6g174 | 6    | 0 | 0    | 2 | MASCOT | T      | PLEX8 |       |
| 1.46E-02 | 0 0 | Cs6g17400.1/Cs6g174 | 4.21 | 0 | 0    | 2 | MASCOT | T      | PLEX8 |       |
| 3.71E-01 | 0 0 | Cs6g17400.1/Cs6g174 | 8.76 | 0 | 0    | 2 | MASCOT | T      | PLEX8 |       |
| 2.62E-02 | 0 0 | Cs6g17400.1/Cs6g174 | 4.37 | 0 | 0    | 2 | MASCOT | T      | PLEX8 |       |
| 3.29E-02 | 0 0 | Cs6g17400.1/Cs6g174 | 4.37 | 0 | 0    | 2 | MASCOT | T      | PLEX8 |       |
| 2.69E-02 | 0 0 | Cs6g17400.1/Cs6g174 | 4.37 | 0 | 0    | 2 | MASCOT | T      |       |       |
| 8.90E-03 | 0 0 | Cs6g17400.1/Cs6g174 | 4.37 | 0 | 0    | 2 | MASCOT | T      | PLEX8 |       |
| 6.35E-04 | 0 0 | Cs6g17400.1/Cs6g174 | 4.41 | 0 | 0    | 2 | MASCOT | T      | PLEX8 |       |
| 1.34E-03 | 0 0 | Cs6g17400.1/Cs6g174 | 8.75 | 0 | 0    | 2 | MASCOT | T      | PLEX8 |       |
| 1.84E-01 | 0 0 | Cs6g17400.1/Cs6g174 | 8.75 | 0 | 0    | 2 | MASCOT | T      | PLEX8 |       |
| 5.28E-02 | 0 0 | Cs6g17400.1/Cs6g174 | 4.14 | 0 | 0    | 2 | MASCOT | T      |       |       |
| 3.15E-02 | 0 0 | Cs6g17400.1/Cs6g174 | 6.75 | 0 | 15.9 | 0 | 2      | MASCOT | T     | PLEX8 |
| 1.15E-03 | 0 0 | Cs6g17400.1/Cs6g174 | 6.75 | 0 | 0    | 2 | MASCOT | T      | PLEX8 |       |
| 2.27E-01 | 0 0 | Cs6g17400.1/Cs6g174 | 6.75 | 0 | 0    | 2 | MASCOT | T      |       |       |
| 7.99E-02 | 0 0 | Cs6g17400.1/Cs6g174 | 8.76 | 0 | 0    | 2 | MASCOT | T      | PLEX8 |       |

|          |     |                     |      |   |      |   |        |        |       |       |
|----------|-----|---------------------|------|---|------|---|--------|--------|-------|-------|
| 3.35E-02 | 0 0 | Cs6g17400.1/Cs6g174 | 8.76 | 0 | 0    | 2 | MASCOT | T      | PLEX8 |       |
| 1.63E-02 | 0 0 | Cs7g12700.1         | 4.32 | 0 | 0    | 2 | MASCOT | T      | PLEX8 |       |
| 5.47E-02 | 0 0 | Cs7g12700.1         | 4.32 | 0 | 0    | 2 | MASCOT | T      | PLEX8 |       |
| 3.07E-03 | 0 0 | Cs7g12700.1         | 4.21 | 0 | 0    | 2 | MASCOT | T      | PLEX8 |       |
| 3.02E-02 | 0 0 | Cs7g12700.1         | 6    | 0 | 0    | 2 | MASCOT | T      | PLEX8 |       |
| 5.40E-04 | 0 0 | Cs7g12700.1         | 6    | 0 | 0    | 2 | MASCOT | T      | PLEX8 |       |
| 5.56E-02 | 0 0 | Cs7g12700.1         | 6    | 0 | 0    | 2 | MASCOT | T      | PLEX8 |       |
| 4.43E-04 | 0 0 | Cs7g12700.1         | 6    | 0 | 0    | 2 | MASCOT | T      | PLEX8 |       |
| 7.37E-04 | 0 0 | Cs7g12700.1         | 6    | 0 | 0    | 2 | MASCOT | T      | PLEX8 |       |
| 3.11E-02 | 0 0 | Cs7g12700.1         | 6.74 | 0 | 0    | 2 | MASCOT | T      | PLEX8 |       |
| 4.72E-02 | 0 0 | Cs7g12700.1         | 4.37 | 0 | 0    | 2 | MASCOT | T      | PLEX8 |       |
| 3.84E-01 | 0 0 | Cs7g12700.1         | 4.37 | 0 | 0    | 2 | MASCOT | T      | PLEX8 |       |
| 6.04E-02 | 0 0 | Cs7g12700.1         | 4.37 | 0 | 0    | 2 | MASCOT | T      | PLEX8 |       |
| 2.82E-01 | 0 0 | Cs7g12700.1         | 6.05 | 0 | 0    | 2 | MASCOT | T      | PLEX8 |       |
| 2.37E-01 | 0 0 | Cs7g12700.1         | 4.53 | 0 | 0    | 2 | MASCOT | T      | PLEX8 |       |
| 2.52E-01 | 0 0 | Cs7g12700.1         | 4.53 | 0 | 0    | 2 | MASCOT | T      | PLEX8 |       |
| 1.82E-01 | 0 0 | Cs7g12700.1         | 6    | 0 | 0    | 2 | MASCOT | T      | PLEX8 |       |
| 2.38E-01 | 0 0 | Cs7g12700.1         | 6    | 0 | 0    | 2 | MASCOT | T      | PLEX8 |       |
| 2.02E-01 | 0 0 | Cs7g12700.1         | 8.75 | 0 | 0    | 2 | MASCOT | T      | PLEX8 |       |
| 4.61E-02 | 0 0 | Cs7g12700.1         | 8.75 | 0 | 0    | 2 | MASCOT | T      | PLEX8 |       |
| 2.10E-02 | 0 0 | Cs7g12700.1         | 8.75 | 0 | 0    | 2 | MASCOT | T      | PLEX8 |       |
| 1.08E-01 | 0 0 | orange1.1t04328.1   | 9.8  | 0 | 0    | 2 | MASCOT | T      | PLEX8 |       |
| 1.20E-04 | 0 0 | orange1.1t04328.1   | 6.75 | 0 | 15.9 | 0 | 2      | MASCOT | T     | PLEX8 |
| 4.75E-02 | 0 0 | orange1.1t04328.1   | 6.75 | 0 | 15.9 | 0 | 2      | MASCOT | T     | PLEX8 |
| 2.19E-06 | 0 0 | orange1.1t04328.1   | 6.75 | 0 | 15.9 | 0 | 2      | MASCOT | T     | PLEX8 |
| 7.75E-06 | 0 0 | orange1.1t04328.1   | 6.75 | 0 | 15.9 | 0 | 2      | MASCOT | T     | PLEX8 |
| 1.63E-02 | 0 0 | orange1.1t04328.1   | 4.56 | 0 | 0    | 2 | MASCOT | T      | PLEX8 |       |
| 4.22E-04 | 0 0 | orange1.1t04328.1   | 5.84 | 0 | 0    | 2 | MASCOT | T      | PLEX8 |       |
| 6.96E-02 | 0 0 | orange1.1t04328.1   | 5.84 | 0 | 0    | 2 | MASCOT | T      | PLEX8 |       |
| 1.84E-04 | 0 0 | orange1.1t04328.1   | 5.84 | 0 | 0    | 2 | MASCOT | T      | PLEX8 |       |
| 1.10E-01 | 0 0 | orange1.1t04328.1   | 5.84 | 0 | 0    | 2 | MASCOT | T      | PLEX8 |       |
| 2.21E-07 | 0 0 | orange1.1t04328.1   | 8.75 | 0 | 0    | 2 | MASCOT | T      | PLEX8 |       |
| 1.05E-02 | 0 0 | orange1.1t04328.1   | 9.76 | 0 | 0    | 2 | MASCOT | T      | PLEX8 |       |
| 7.82E-03 | 0 0 | orange1.1t04328.1   | 9.76 | 0 | 0    | 2 | MASCOT | T      | PLEX8 |       |
| 5.23E-02 | 0 0 | orange1.1t04328.1   | 9.76 | 0 | 0    | 2 | MASCOT | T      | PLEX8 |       |
| 3.10E-06 | 0 0 | orange1.1t04328.1   | 9.76 | 0 | 0    | 2 | MASCOT | T      | PLEX8 |       |
| 1.75E-01 | 0 0 | orange1.1t04328.1   | 4.53 | 0 | 0    | 2 | MASCOT | T      | PLEX8 |       |
| 4.09E-02 | 0 0 | orange1.1t04328.1   | 4.53 | 0 | 0    | 2 | MASCOT | T      | PLEX8 |       |
| 6.91E-02 | 0 0 | orange1.1t04328.1   | 8.41 | 0 | 15.9 | 0 | 2      | MASCOT | T     | PLEX8 |
| 5.13E-02 | 0 0 | orange1.1t04328.1   | 8.41 | 0 | 0    | 2 | MASCOT | T      | PLEX8 |       |
| 1.14E-01 | 0 0 | orange1.1t04328.1   | 6.73 | 0 | 0    | 2 | MASCOT | T      | PLEX8 |       |
| 9.22E-02 | 0 0 | Cs2g10870.1         | 4.25 | 0 | 0    | 2 | MASCOT | T      | PLEX8 |       |
| 2.63E-02 | 0 0 | Cs2g10870.1         | 6.07 | 1 | 0    | 2 | MASCOT | T      | PLEX8 |       |
| 1.87E-02 | 0 0 | Cs2g10870.1         | 4.37 | 0 | 0    | 2 | MASCOT | T      | PLEX8 |       |
| 1.70E-01 | 0 0 | Cs2g10870.1         | 4.37 | 0 | 0    | 2 | MASCOT | T      | PLEX8 |       |
| 5.46E-02 | 0 0 | Cs2g10870.1         | 4.37 | 0 | 0    | 2 | MASCOT | T      | PLEX8 |       |
| 2.75E-02 | 0 0 | Cs2g10870.1         | 4.37 | 0 | 0    | 2 | MASCOT | T      | PLEX8 |       |
| 3.70E-01 | 0 0 | Cs2g10870.1         | 6    | 0 | 0    | 2 | MASCOT | T      | PLEX8 |       |
| 6.40E-03 | 0 0 | Cs2g10870.1         | 4.25 | 0 | 15.9 | 0 | 2      | MASCOT | T     | PLEX8 |
| 2.23E-02 | 0 0 | Cs2g10870.1         | 6    | 0 | 0    | 2 | MASCOT | T      | PLEX8 |       |
| 2.38E-04 | 0 0 | Cs2g10870.1         | 8.25 | 0 | 0    | 2 | MASCOT | T      | PLEX8 |       |

|              |                      |      |   |      |          |          |       |       |
|--------------|----------------------|------|---|------|----------|----------|-------|-------|
| 8.62E-05 0 0 | Cs2g10870.1          | 8.25 | 0 | 0    | 2 MASCOT | T        |       |       |
| 1.75E-03 0 0 | Cs2g10870.1          | 8.75 | 0 | 0    | 2 MASCOT | T        | PLEX8 |       |
| 1.62E-02 0 0 | Cs2g10870.1          | 8.75 | 0 | 0    | 2 MASCOT | T        | PLEX8 |       |
| 1.42E-03 0 0 | Cs2g10870.1          | 8.75 | 0 | 0    | 2 MASCOT | T        | PLEX8 |       |
| 9.95E-03 0 0 | Cs2g10870.1          | 8.31 | 0 | 0    | 2 MASCOT | T        | PLEX8 |       |
| 5.38E-04 0 0 | Cs2g10870.1          | 8.31 | 0 | 0    | 2 MASCOT | T        | PLEX8 |       |
| 9.26E-02 0 0 | Cs2g10870.1          | 8.31 | 0 | 0    | 2 MASCOT | T        | PLEX8 |       |
| 4.52E-03 0 0 | Cs2g10870.1          | 8.31 | 0 | 0    | 2 MASCOT | T        | PLEX8 |       |
| 3.71E-03 0 0 | Cs2g10870.1          | 8.31 | 0 | 0    | 2 MASCOT | T        | PLEX8 |       |
| 2.33E-01 0 0 | Cs3g22150.1          | 5.21 | 0 | 0    | 2 MASCOT | T        |       |       |
| 1.95E-02 0 0 | Cs3g22150.1          | 5.5  | 0 | 0    | 2 MASCOT | T        | PLEX8 |       |
| 9.79E-04 0 0 | Cs3g22150.1          | 5.5  | 0 | 0    | 2 MASCOT | T        | PLEX8 |       |
| 1.09E-01 0 0 | Cs3g22150.1          | 8.75 | 0 | 0    | 2 MASCOT | T        | PLEX8 |       |
| 1.72E-02 0 0 | Cs3g22150.1          | 4.25 | 0 | 0    | 2 MASCOT | T        | PLEX8 |       |
| 5.77E-04 0 0 | Cs3g22150.1          | 5.84 | 0 | 0    | 2 MASCOT | T        |       |       |
| 3.12E-03 0 0 | Cs3g22150.1          | 5.84 | 0 | 0    | 2 MASCOT | T        |       |       |
| 8.42E-04 0 0 | Cs3g22150.1          | 5.84 | 0 | 0    | 2 MASCOT | T        |       |       |
| 1.80E-02 0 0 | Cs3g22150.1          | 4.53 | 0 | 0    | 2 MASCOT | T        | PLEX8 |       |
| 3.98E-02 0 0 | Cs3g22150.1          | 4.53 | 0 | 0    | 2 MASCOT | T        | PLEX8 |       |
| 2.46E-02 0 0 | Cs3g22150.1          | 4.53 | 0 | 0    | 2 MASCOT | T        | PLEX8 |       |
| 3.18E-02 0 0 | Cs3g22150.1          | 4.53 | 0 | 0    | 2 MASCOT | T        | PLEX8 |       |
| 2.97E-02 0 0 | Cs3g22150.1          | 4.53 | 0 | 0    | 2 MASCOT | T        |       |       |
| 1.23E-01 0 0 | Cs3g22150.1          | 8.75 | 0 | 0    | 2 MASCOT | T        | PLEX8 |       |
| 1.41E-01 0 0 | Cs3g22150.1          | 4.37 | 0 | 0    | 2 MASCOT | T        | PLEX8 |       |
| 2.23E-03 0 0 | Cs3g22150.1          | 4.37 | 0 | 0    | 2 MASCOT | T        | PLEX8 |       |
| 8.56E-02 0 0 | Cs3g22150.1          | 4.37 | 0 | 0    | 2 MASCOT | T        | PLEX8 |       |
| 6.95E-03 0 0 | Cs3g22150.1          | 4.43 | 0 | 0    | 2 MASCOT | T        | PLEX8 |       |
| 3.44E-03 0 0 | Cs3g22150.1          | 4.43 | 0 | 0    | 2 MASCOT | T        |       |       |
| 8.39E-03 0 0 | Cs4g15520.1          | 8.22 | 0 | 0    | 2 MASCOT | T        | PLEX8 |       |
| 1.93E-06 0 0 | Cs4g15520.1          | 5.4  | 0 | 0    | 2 MASCOT | T        | PLEX8 |       |
| 2.28E-02 0 0 | Cs4g15520.1          | 5.4  | 0 | 0    | 2 MASCOT | T        | PLEX8 |       |
| 3.03E-02 0 0 | Cs1g15840.2 ! Cs4g15 | 4.03 | 0 | 15.9 | 0        | 2 MASCOT | T     |       |
| 1.79E-03 0 0 | Cs1g15840.2 ! Cs4g15 | 4.03 | 0 | 0    | 2 MASCOT | T        |       |       |
| 2.67E-03 0 0 | Cs4g15520.1          | 5.3  | 0 | 0    | 2 MASCOT | T        | PLEX8 |       |
| 4.07E-01 0 0 | Cs4g15520.1          | 5.3  | 0 | 0    | 2 MASCOT | T        | PLEX8 |       |
| 2.74E-01 0 0 | Cs4g15520.1          | 8.8  | 0 | 0    | 2 MASCOT | T        |       |       |
| 1.26E-03 0 0 | Cs4g15520.1          | 8.75 | 0 | 0    | 2 MASCOT | T        | PLEX8 |       |
| 1.62E-01 0 0 | Cs4g15520.1          | 8.75 | 0 | 0    | 2 MASCOT | T        | PLEX8 |       |
| 4.47E-02 0 0 | Cs4g15520.1          | 8.75 | 0 | 0    | 2 MASCOT | T        | PLEX8 |       |
| 7.73E-03 0 0 | Cs4g15520.1          | 10   | 1 | 0    | 2 MASCOT | T        | PLEX8 |       |
| 3.17E-01 0 0 | Cs4g15520.1          | 5.84 | 0 | 0    | 2 MASCOT | T        | PLEX8 |       |
| 6.00E-02 0 0 | Cs4g15520.1          | 5.84 | 0 | 0    | 2 MASCOT | T        | PLEX8 |       |
| 6.48E-02 0 0 | Cs4g15520.1          | 5.84 | 0 | 0    | 2 MASCOT | T        | PLEX8 |       |
| 2.38E-03 0 0 | Cs4g15520.1          | 5.84 | 0 | 0    | 2 MASCOT | T        | PLEX8 |       |
| 2.95E-03 0 0 | Cs4g15520.1          | 5.84 | 0 | 0    | 2 MASCOT | T        | PLEX8 |       |
| 2.27E-02 0 0 | Cs4g15520.1          | 4.65 | 0 | 0    | 2 MASCOT | T        | PLEX8 |       |
| 4.80E-03 0 0 | Cs4g15520.1          | 4.65 | 0 | 0    | 2 MASCOT | T        | PLEX8 |       |
| 7.29E-04 0 0 | Cs9g06800.1/Cs9g068  | 6.73 | 0 | 0    | 2 MASCOT | T        | PLEX8 |       |
| 9.19E-02 0 0 | Cs9g06800.1/Cs9g068  | 5.84 | 0 | 0    | 2 MASCOT | T        |       |       |
| 5.07E-02 0 0 | Cs9g06800.1/Cs9g068  | 8.3  | 0 | 15.9 | 0        | 2 MASCOT | T     | PLEX8 |
| 1.39E-06 0 0 | Cs9g06800.1/Cs9g068  | 8.3  | 0 | 0    | 2 MASCOT | T        | PLEX8 |       |

|          |     |                     |      |   |   |   |        |   |       |
|----------|-----|---------------------|------|---|---|---|--------|---|-------|
| 7.15E-03 | 0 0 | Cs9g06800.1/Cs9g068 | 9.8  | 0 | 0 | 2 | MASCOT | T | PLEX8 |
| 4.11E-01 | 0 0 | Cs9g06800.1/Cs9g068 | 4.37 | 0 | 0 | 2 | MASCOT | T | PLEX8 |
| 5.14E-02 | 0 0 | Cs9g06800.1/Cs9g068 | 4.37 | 0 | 0 | 2 | MASCOT | T | PLEX8 |
| 5.58E-02 | 0 0 | Cs9g06800.1/Cs9g068 | 4.37 | 0 | 0 | 2 | MASCOT | T | PLEX8 |
| 1.26E-03 | 0 0 | Cs9g06800.1/Cs9g068 | 4.09 | 0 | 0 | 2 | MASCOT | T | PLEX8 |
| 5.53E-03 | 0 0 | Cs9g06800.1/Cs9g068 | 4.09 | 0 | 0 | 2 | MASCOT | T | PLEX8 |
| 1.60E-01 | 0 0 | Cs9g06800.1/Cs9g068 | 4.09 | 0 | 0 | 2 | MASCOT | T | PLEX8 |
| 2.15E-03 | 0 0 | Cs9g06800.1/Cs9g068 | 4.09 | 0 | 0 | 2 | MASCOT | T | PLEX8 |
| 4.45E-03 | 0 0 | Cs9g06800.1/Cs9g068 | 4.09 | 0 | 0 | 2 | MASCOT | T | PLEX8 |
| 2.11E-02 | 0 0 | Cs9g06800.1/Cs9g068 | 4.54 | 0 | 0 | 2 | MASCOT | T | PLEX8 |
| 1.83E-01 | 0 0 | Cs9g06800.1/Cs9g068 | 6.71 | 0 | 0 | 2 | MASCOT | T | PLEX8 |
| 6.43E-02 | 0 0 | Cs9g06800.1/Cs9g068 | 6.71 | 0 | 0 | 2 | MASCOT | T | PLEX8 |
| 2.37E-02 | 0 0 | Cs9g06800.1/Cs9g068 | 5.21 | 0 | 0 | 2 | MASCOT | T | PLEX8 |
| 1.51E-02 | 0 0 | Cs9g06800.1/Cs9g068 | 5.21 | 0 | 0 | 2 | MASCOT | T | PLEX8 |
| 1.50E-02 | 0 0 | Cs9g06800.1/Cs9g068 | 5.21 | 0 | 0 | 2 | MASCOT | T | PLEX8 |
| 9.84E-02 | 0 0 | Cs5g10660.1/Cs5g106 | 4.53 | 0 | 0 | 2 | MASCOT | T | PLEX8 |
| 2.84E-01 | 0 0 | Cs5g10660.1/Cs5g106 | 4.53 | 0 | 0 | 2 | MASCOT | T | PLEX8 |
| 4.36E-02 | 0 0 | Cs5g10660.1/Cs5g106 | 4.53 | 0 | 0 | 2 | MASCOT | T | PLEX8 |
| 5.73E-02 | 0 0 | Cs5g10660.1/Cs5g106 | 4.53 | 0 | 0 | 2 | MASCOT | T | PLEX8 |
| 2.00E-01 | 0 0 | Cs5g10660.1/Cs5g106 | 8.63 | 0 | 0 | 2 | MASCOT | T | PLEX8 |
| 9.54E-04 | 0 0 | Cs5g10660.1         | 4.53 | 0 | 0 | 2 | MASCOT | T | PLEX8 |
| 4.69E-02 | 0 0 | Cs5g10660.1         | 4.53 | 0 | 0 | 2 | MASCOT | T | PLEX8 |
| 4.73E-04 | 0 0 | Cs5g10660.1         | 4.53 | 0 | 0 | 2 | MASCOT | T | PLEX8 |
| 2.82E-02 | 0 0 | Cs5g10660.1         | 4.53 | 0 | 0 | 2 | MASCOT | T | PLEX8 |
| 2.56E-02 | 0 0 | Cs5g10660.1         | 6.14 | 1 | 0 | 2 | MASCOT | T | PLEX8 |
| 1.56E-03 | 0 0 | Cs5g10660.1/Cs5g106 | 4.03 | 0 | 0 | 2 | MASCOT | T | PLEX8 |
| 9.99E-03 | 0 0 | Cs5g10660.1/Cs5g106 | 5.3  | 0 | 0 | 2 | MASCOT | T | PLEX8 |
| 2.48E-03 | 0 0 | Cs5g10660.1/Cs5g106 | 5.3  | 0 | 0 | 2 | MASCOT | T | PLEX8 |
| 1.08E-03 | 0 0 | Cs5g10660.1/Cs5g106 | 5.3  | 0 | 0 | 2 | MASCOT | T | PLEX8 |
| 5.01E-02 | 0 0 | Cs5g10660.1/Cs5g106 | 6    | 0 | 0 | 2 | MASCOT | T | PLEX8 |
| 2.58E-02 | 0 0 | Cs5g10660.1/Cs5g106 | 6    | 0 | 0 | 2 | MASCOT | T | PLEX8 |
| 5.13E-02 | 0 0 | Cs5g10660.1/Cs5g106 | 4    | 0 | 0 | 2 | MASCOT | T | PLEX8 |
| 2.04E-05 | 0 0 | Cs5g10660.1/Cs5g106 | 5.84 | 0 | 0 | 2 | MASCOT | T | PLEX8 |
| 4.99E-03 | 0 0 | Cs7g01810.1         | 5.88 | 0 | 0 | 2 | MASCOT | T | PLEX8 |
| 9.43E-02 | 0 0 | Cs7g01810.1         | 4.37 | 0 | 0 | 2 | MASCOT | T | PLEX8 |
| 4.89E-03 | 0 0 | Cs7g01810.1         | 4.53 | 0 | 0 | 2 | MASCOT | T | PLEX8 |
| 1.13E-02 | 0 0 | Cs7g01810.1         | 4.53 | 0 | 0 | 2 | MASCOT | T | PLEX8 |
| 2.65E-03 | 0 0 | Cs7g01810.1         | 4.53 | 0 | 0 | 2 | MASCOT | T | PLEX8 |
| 1.52E-01 | 0 0 | Cs7g01810.1         | 4.53 | 0 | 0 | 2 | MASCOT | T | PLEX8 |
| 5.20E-02 | 0 0 | Cs7g01810.1         | 6.75 | 0 | 0 | 2 | MASCOT | T | PLEX8 |
| 6.11E-04 | 0 0 | Cs7g01810.1         | 6.75 | 0 | 0 | 2 | MASCOT | T | PLEX8 |
| 1.59E-03 | 0 0 | Cs7g01810.1         | 6.75 | 0 | 0 | 2 | MASCOT | T | PLEX8 |
| 1.74E-03 | 0 0 | Cs7g01810.1         | 6.75 | 0 | 0 | 2 | MASCOT | T | PLEX8 |
| 1.22E-01 | 0 0 | Cs7g01810.1         | 8.5  | 1 | 0 | 2 | MASCOT | T | PLEX8 |
| 3.08E-02 | 0 0 | Cs7g01810.1         | 4    | 0 | 0 | 2 | MASCOT | T | PLEX8 |
| 9.18E-03 | 0 0 | Cs7g01810.1         | 4    | 0 | 0 | 2 | MASCOT | T | PLEX8 |
| 1.96E-02 | 0 0 | Cs7g01810.1         | 6.75 | 0 | 0 | 2 | MASCOT | T | PLEX8 |
| 2.83E-02 | 0 0 | Cs7g01810.1         | 6.75 | 0 | 0 | 2 | MASCOT | T | PLEX8 |
| 2.61E-01 | 0 0 | Cs7g01810.1         | 5.84 | 0 | 0 | 2 | MASCOT | T | PLEX8 |
| 3.14E-03 | 0 0 | Cs7g01810.1         | 5.97 | 0 | 0 | 2 | MASCOT | T | PLEX8 |
| 1.97E-01 | 0 0 | Cs7g01810.1         | 5.97 | 0 | 0 | 2 | MASCOT | T | PLEX8 |

|          |     |                     |      |   |      |   |   |        |   |       |
|----------|-----|---------------------|------|---|------|---|---|--------|---|-------|
| 8.53E-02 | 0 0 | Cs7g06690.1         | 9.76 | 0 | 15.9 | 0 | 2 | MASCOT | T | PLEX8 |
| 4.10E-03 | 0 0 | Cs7g06690.1         | 9.76 | 0 |      | 0 | 2 | MASCOT | T | PLEX8 |
| 1.59E-01 | 0 0 | Cs7g06680.1/Cs7g066 | 5.84 | 0 |      | 0 | 2 | MASCOT | T | PLEX8 |
| 2.21E-01 | 0 0 | Cs7g06680.1/Cs7g066 | 5.84 | 0 |      | 0 | 2 | MASCOT | T | PLEX8 |
| 4.97E-02 | 0 0 | Cs7g06680.1/Cs7g066 | 4.37 | 0 |      | 0 | 2 | MASCOT | T | PLEX8 |
| 1.51E-02 | 0 0 | Cs7g06680.1/Cs7g066 | 4.41 | 1 |      | 0 | 2 | MASCOT | T | PLEX8 |
| 3.09E-06 | 0 0 | Cs7g06680.1/Cs7g066 | 4.41 | 1 |      | 0 | 2 | MASCOT | T | PLEX8 |
| 1.21E-02 | 0 0 | Cs7g06680.1/Cs7g066 | 4.41 | 1 |      | 0 | 2 | MASCOT | T | PLEX8 |
| 4.00E-03 | 0 0 | Cs7g06680.1/Cs7g066 | 4.41 | 1 |      | 0 | 2 | MASCOT | T | PLEX8 |
| 1.26E-01 | 0 0 | Cs7g06690.1         | 4.25 | 0 |      | 0 | 2 | MASCOT | T |       |
| 1.37E-04 | 0 0 | Cs7g06690.1         | 4.25 | 0 |      | 0 | 2 | MASCOT | T |       |
| 1.28E-01 | 0 0 | Cs7g06690.1         | 4.25 | 0 |      | 0 | 2 | MASCOT | T |       |
| 9.10E-02 | 0 0 | Cs7g06680.1/Cs7g066 | 6    | 0 |      | 0 | 2 | MASCOT | T | PLEX8 |
| 1.34E-02 | 0 0 | Cs7g06690.1         | 8.75 | 0 |      | 0 | 2 | MASCOT | T | PLEX8 |
| 3.53E-01 | 0 0 | Cs7g06680.1/Cs7g066 | 8.24 | 0 |      | 0 | 2 | MASCOT | T | PLEX8 |
| 2.12E-01 | 0 0 | Cs7g06680.1/Cs7g066 | 8.24 | 0 |      | 0 | 2 | MASCOT | T | PLEX8 |
| 2.76E-01 | 0 0 | Cs7g06680.1/Cs7g066 | 8.24 | 0 |      | 0 | 2 | MASCOT | T | PLEX8 |
| 6.39E-03 | 0 0 | Cs7g06690.1         | 4.37 | 0 |      | 0 | 2 | MASCOT | T | PLEX8 |
| 1.63E-02 | 0 0 | Cs7g22890.1         | 4.65 | 0 |      | 0 | 2 | MASCOT | T |       |
| 1.72E-01 | 0 0 | Cs7g22890.1         | 5.97 | 0 |      | 0 | 2 | MASCOT | T | PLEX8 |
| 9.65E-03 | 0 0 | Cs7g22890.1         | 4.37 | 0 |      | 0 | 2 | MASCOT | T | PLEX8 |
| 1.88E-02 | 0 0 | Cs7g22890.1         | 4.37 | 0 |      | 0 | 2 | MASCOT | T | PLEX8 |
| 1.35E-02 | 0 0 | Cs7g22890.1         | 4.37 | 0 |      | 0 | 2 | MASCOT | T | PLEX8 |
| 6.08E-03 | 0 0 | Cs7g22890.1         | 4.37 | 0 |      | 0 | 2 | MASCOT | T | PLEX8 |
| 5.46E-04 | 0 0 | Cs7g22890.1         | 4.37 | 0 |      | 0 | 2 | MASCOT | T | PLEX8 |
| 2.07E-03 | 0 0 | Cs7g22890.1         | 4.37 | 0 |      | 0 | 2 | MASCOT | T | PLEX8 |
| 9.26E-02 | 0 0 | Cs7g22890.1         | 8.61 | 0 |      | 0 | 2 | MASCOT | T | PLEX8 |
| 2.02E-03 | 0 0 | Cs7g22890.1         | 6.74 | 0 |      | 0 | 2 | MASCOT | T | PLEX8 |
| 2.31E-02 | 0 0 | Cs7g22890.1         | 8.76 | 0 |      | 0 | 2 | MASCOT | T | PLEX8 |
| 2.08E-04 | 0 0 | Cs7g22890.1         | 8.76 | 0 |      | 0 | 2 | MASCOT | T | PLEX8 |
| 5.75E-02 | 0 0 | Cs7g22890.1         | 5.72 | 0 |      | 0 | 2 | MASCOT | T | PLEX8 |
| 1.11E-01 | 0 0 | Cs7g22890.1         | 5.72 | 0 |      | 0 | 2 | MASCOT | T | PLEX8 |
| 3.58E-02 | 0 0 | Cs7g22890.1         | 5.72 | 0 |      | 0 | 2 | MASCOT | T | PLEX8 |
| 1.24E-03 | 0 0 | Cs7g22890.1         | 5.84 | 0 |      | 0 | 2 | MASCOT | T |       |
| 4.80E-03 | 0 0 | Cs7g22890.1         | 5.84 | 0 |      | 0 | 2 | MASCOT | T |       |
| 1.14E-02 | 0 0 | Cs7g22890.1         | 5.84 | 0 |      | 0 | 2 | MASCOT | T |       |
| 2.73E-02 | 0 0 | Cs3g24700.1/Cs3g247 | 7.01 | 0 |      | 0 | 2 | MASCOT | T | PLEX8 |
| 2.68E-05 | 0 0 | Cs3g24700.1/Cs3g247 | 6    | 0 |      | 0 | 2 | MASCOT | T | PLEX8 |
| 4.61E-03 | 0 0 | Cs3g24700.1/Cs3g247 | 6    | 0 |      | 0 | 2 | MASCOT | T | PLEX8 |
| 5.08E-02 | 0 0 | Cs3g24700.1/Cs3g247 | 6    | 0 |      | 0 | 2 | MASCOT | T |       |
| 3.67E-05 | 0 0 | Cs3g24700.1/Cs3g247 | 6    | 0 |      | 0 | 2 | MASCOT | T | PLEX8 |
| 2.53E-04 | 0 0 | Cs3g24700.1/Cs3g247 | 6    | 0 |      | 0 | 2 | MASCOT | T | PLEX8 |
| 1.18E-01 | 0 0 | Cs3g24700.1/Cs3g247 | 8.31 | 0 |      | 0 | 2 | MASCOT | T | PLEX8 |
| 2.55E-01 | 0 0 | Cs3g24700.1/Cs3g247 | 8.31 | 0 |      | 0 | 2 | MASCOT | T | PLEX8 |
| 1.05E-01 | 0 0 | Cs3g24700.1/Cs3g247 | 5.66 | 0 |      | 0 | 2 | MASCOT | T |       |
| 1.77E-03 | 0 0 | Cs3g24700.1/Cs3g247 | 6.05 | 0 |      | 0 | 2 | MASCOT | T | PLEX8 |
| 2.22E-02 | 0 0 | Cs3g24700.1/Cs3g247 | 6.05 | 0 |      | 0 | 2 | MASCOT | T | PLEX8 |
| 4.96E-02 | 0 0 | Cs3g24700.1/Cs3g247 | 3.93 | 0 |      | 0 | 2 | MASCOT | T |       |
| 4.37E-04 | 0 0 | Cs3g24700.1/Cs3g247 | 4.21 | 0 |      | 0 | 2 | MASCOT | T | PLEX8 |
| 1.78E-01 | 0 0 | Cs3g24700.1/Cs3g247 | 4.21 | 0 |      | 0 | 2 | MASCOT | T |       |
| 2.73E-01 | 0 0 | Cs3g24700.1/Cs3g247 | 9.49 | 0 |      | 0 | 2 | MASCOT | T | PLEX8 |



|          |     |                      |      |   |      |   |        |        |       |  |
|----------|-----|----------------------|------|---|------|---|--------|--------|-------|--|
| 9.16E-02 | 0 0 | Cs3g24700.1/Cs3g247  | 5.8  | 0 | 0    | 2 | MASCOT | T      | PLEX8 |  |
| 3.97E-02 | 0 0 | Cs3g24700.1/Cs3g247  | 5.8  | 0 | 0    | 2 | MASCOT | T      | PLEX8 |  |
| 4.44E-04 | 0 0 | Cs4g08260.1/Cs4g082  | 4.25 | 0 | 0    | 2 | MASCOT | T      | PLEX8 |  |
| 5.55E-04 | 0 0 | Cs4g08260.1/Cs4g082  | 4.25 | 0 | 0    | 2 | MASCOT | T      | PLEX8 |  |
| 1.43E-03 | 0 0 | Cs4g08260.1/Cs4g082  | 4.25 | 0 | 0    | 2 | MASCOT | T      | PLEX8 |  |
| 2.39E-03 | 0 0 | Cs4g08260.1/Cs4g082  | 4.25 | 0 | 0    | 2 | MASCOT | T      | PLEX8 |  |
| 3.16E-02 | 0 0 | Cs4g08260.1/Cs4g082  | 6.1  | 0 | 0    | 2 | MASCOT | T      | PLEX8 |  |
| 1.59E-02 | 0 0 | Cs4g08260.1/Cs4g082  | 6.75 | 0 | 0    | 2 | MASCOT | T      | PLEX8 |  |
| 2.33E-04 | 0 0 | Cs4g08260.1/Cs4g082  | 4.1  | 0 | 0    | 2 | MASCOT | T      | PLEX8 |  |
| 9.39E-05 | 0 0 | Cs4g08260.1/Cs4g082  | 4.1  | 0 | 0    | 2 | MASCOT | T      | PLEX8 |  |
| 2.17E-01 | 0 0 | Cs4g08260.1/Cs4g082  | 6.47 | 0 | 0    | 2 | MASCOT | T      | PLEX8 |  |
| 1.18E-03 | 0 0 | Cs4g08260.1/Cs4g082  | 5.81 | 0 | 0    | 2 | MASCOT | T      |       |  |
| 3.36E-02 | 0 0 | Cs4g08260.1/Cs4g082  | 4.03 | 0 | 0    | 2 | MASCOT | T      | PLEX8 |  |
| 9.05E-03 | 0 0 | Cs4g08260.1/Cs4g082  | 8.75 | 0 | 0    | 2 | MASCOT | T      | PLEX8 |  |
| 1.64E-03 | 0 0 | Cs4g08260.1/Cs4g082  | 8.75 | 0 | 0    | 2 | MASCOT | T      | PLEX8 |  |
| 1.10E-02 | 0 0 | Cs4g08260.1/Cs4g082  | 8.75 | 0 | 0    | 2 | MASCOT | T      | PLEX8 |  |
| 2.66E-01 | 0 0 | Cs4g08260.1/Cs4g082  | 5.59 | 0 | 0    | 2 | MASCOT | T      | PLEX8 |  |
| 1.21E-02 | 0 0 | Cs4g08260.1/Cs4g082  | 5.59 | 0 | 0    | 2 | MASCOT | T      | PLEX8 |  |
| 8.15E-02 | 0 0 | Cs4g08260.1/Cs4g082  | 5.59 | 0 | 0    | 2 | MASCOT | T      | PLEX8 |  |
| 3.77E-02 | 0 0 | Cs1g10550.1/Cs4g042  | 8.8  | 0 | 0    | 2 | MASCOT | T      | PLEX8 |  |
| 1.08E-01 | 0 0 | Cs1g10550.1/Cs4g042  | 8.8  | 0 | 0    | 2 | MASCOT | T      | PLEX8 |  |
| 1.52E-01 | 0 0 | Cs1g10550.1/Cs4g042  | 6.1  | 0 | 0    | 2 | MASCOT | T      | PLEX8 |  |
| 1.02E-02 | 0 0 | Cs1g10550.1/Cs4g042  | 6.1  | 0 | 0    | 2 | MASCOT | T      | PLEX8 |  |
| 2.23E-02 | 0 0 | Cs1g10550.1/Cs1g105  | 4.37 | 0 | 0    | 2 | MASCOT | T      | PLEX8 |  |
| 1.85E-01 | 0 0 | Cs1g10550.1/Cs1g105  | 5.84 | 0 | 0    | 2 | MASCOT | T      | PLEX8 |  |
| 5.28E-03 | 0 0 | Cs1g10550.1 ! Cs1g10 | 4.37 | 0 | 0    | 2 | MASCOT | T      | PLEX8 |  |
| 4.47E-02 | 0 0 | Cs1g10550.1/Cs1g105  | 4.53 | 0 | 0    | 2 | MASCOT | T      | PLEX8 |  |
| 3.93E-03 | 0 0 | Cs1g10550.1/Cs4g042  | 5.32 | 0 | 0    | 2 | MASCOT | T      | PLEX8 |  |
| 1.01E-02 | 0 0 | Cs1g10550.1/Cs4g042  | 5.32 | 0 | 0    | 2 | MASCOT | T      |       |  |
| 1.03E-01 | 0 0 | Cs1g10550.1/Cs1g105  | 8.75 | 0 | 0    | 2 | MASCOT | T      | PLEX8 |  |
| 5.74E-04 | 0 0 | Cs1g10550.1/Cs1g105  | 8.75 | 0 | 0    | 2 | MASCOT | T      | PLEX8 |  |
| 3.45E-02 | 0 0 | Cs1g10550.1/Cs1g105  | 8.75 | 0 | 0    | 2 | MASCOT | T      | PLEX8 |  |
| 2.10E-04 | 0 0 | Cs1g10550.1/Cs1g105  | 5.97 | 0 | 0    | 2 | MASCOT | T      | PLEX8 |  |
| 1.95E-02 | 0 0 | Cs1g10550.1/Cs1g105  | 5.97 | 0 | 0    | 2 | MASCOT | T      | PLEX8 |  |
| 3.56E-03 | 0 0 | Cs1g10550.1/Cs1g105  | 5.97 | 0 | 0    | 2 | MASCOT | T      | PLEX8 |  |
| 5.56E-02 | 0 0 | Cs6g17600.1          | 4.37 | 0 | 0    | 2 | MASCOT | T      | PLEX8 |  |
| 1.79E-01 | 0 0 | Cs6g17600.1          | 4.37 | 0 | 0    | 2 | MASCOT | T      | PLEX8 |  |
| 1.31E-01 | 0 0 | Cs6g17600.1          | 4.21 | 0 | 0    | 2 | MASCOT | T      | PLEX8 |  |
| 7.67E-03 | 0 0 | Cs6g17600.1          | 11   | 1 | 0    | 2 | MASCOT | T      | PLEX8 |  |
| 3.33E-03 | 0 0 | Cs6g17600.1          | 11   | 1 | 0    | 2 | MASCOT | T      | PLEX8 |  |
| 1.77E-01 | 0 0 | Cs6g17600.1          | 4.37 | 0 | 0    | 2 | MASCOT | T      |       |  |
| 1.71E-03 | 0 0 | Cs6g17600.1          | 4.37 | 0 | 0    | 2 | MASCOT | T      |       |  |
| 8.69E-03 | 0 0 | Cs6g17600.1          | 4.37 | 0 | 0    | 2 | MASCOT | T      |       |  |
| 4.83E-03 | 0 0 | Cs6g17600.1          | 4.37 | 0 | 0    | 2 | MASCOT | T      |       |  |
| 1.72E-01 | 0 0 | Cs6g17600.1          | 8.49 | 0 | 0    | 2 | MASCOT | T      | PLEX8 |  |
| 1.43E-01 | 0 0 | Cs6g17600.1          | 8.49 | 0 | 0    | 2 | MASCOT | T      | PLEX8 |  |
| 3.22E-03 | 0 0 | Cs6g17600.1          | 8.49 | 0 | 0    | 2 | MASCOT | T      | PLEX8 |  |
| 1.99E-03 | 0 0 | Cs6g17600.1          | 5.24 | 0 | 0    | 2 | MASCOT | T      |       |  |
| 7.52E-04 | 0 0 | Cs6g17600.1          | 6    | 0 | 15.9 | 0 | 2      | MASCOT | T     |  |
| 1.86E-02 | 0 0 | Cs6g17600.1          | 9.75 | 0 | 0    | 2 | MASCOT | T      |       |  |
| 1.54E-01 | 0 0 | Cs6g17600.1          | 8.75 | 0 | 0    | 2 | MASCOT | T      | PLEX8 |  |

|          |     |                       |      |   |      |   |        |                |
|----------|-----|-----------------------|------|---|------|---|--------|----------------|
| 1.93E-03 | 0 0 | Cs1g20020.1           | 4.14 | 0 | 0    | 2 | MASCOT | T              |
| 1.02E-01 | 0 0 | Cs1g20020.1/Cs1g200   | 5.84 | 0 | 0    | 2 | MASCOT | T              |
| 6.51E-03 | 0 0 | Cs1g20020.1/Cs1g200   | 5.84 | 0 | 0    | 2 | MASCOT | T              |
| 1.23E-02 | 0 0 | Cs1g20020.1           | 3.9  | 0 | 0    | 2 | MASCOT | T PLEX8        |
| 2.22E-02 | 0 0 | Cs1g20020.1/Cs1g200   | 5.84 | 0 | 0    | 2 | MASCOT | T PLEX8        |
| 1.10E-01 | 0 0 | Cs1g20020.1/Cs1g200   | 5.82 | 0 | 0    | 2 | MASCOT | T PLEX8        |
| 1.57E-01 | 0 0 | Cs1g20020.1/Cs1g200   | 6    | 0 | 15.9 | 0 | 2      | MASCOT T PLEX8 |
| 3.85E-02 | 0 0 | Cs1g20020.1/Cs1g200   | 6    | 0 | 0    | 2 | MASCOT | T              |
| 8.03E-02 | 0 0 | Cs1g20020.1/Cs1g200   | 6.75 | 0 | 15.9 | 0 | 2      | MASCOT T PLEX8 |
| 5.39E-03 | 0 0 | Cs1g20020.1/Cs1g200   | 6.75 | 0 | 0    | 2 | MASCOT | T PLEX8        |
| 4.23E-02 | 0 0 | Cs1g20020.1/Cs1g200   | 6    | 0 | 0    | 2 | MASCOT | T PLEX8        |
| 3.71E-02 | 0 0 | Cs1g20020.1/Cs1g200   | 6    | 0 | 0    | 2 | MASCOT | T PLEX8        |
| 8.39E-02 | 0 0 | Cs1g20020.1/Cs1g200   | 5.32 | 0 | 0    | 2 | MASCOT | T PLEX8        |
| 1.31E-07 | 0 0 | Cs1g20020.1/Cs1g200   | 5.32 | 0 | 0    | 2 | MASCOT | T PLEX8        |
| 1.18E-06 | 0 0 | Cs1g20020.1/Cs1g200   | 5.32 | 0 | 0    | 2 | MASCOT | T PLEX8        |
| 2.32E-01 | 0 0 | Cs2g12440.1/Cs2g124   | 6.74 | 0 | 0    | 2 | MASCOT | T PLEX8        |
| 2.40E-01 | 0 0 | Cs2g12440.1/Cs2g124   | 6    | 0 | 0    | 2 | MASCOT | T PLEX8        |
| 7.68E-02 | 0 0 | Cs2g12440.1/Cs2g124   | 6    | 0 | 0    | 2 | MASCOT | T PLEX8        |
| 1.22E-02 | 0 0 | Cs2g12440.1/Cs2g124   | 4.68 | 1 | 0    | 2 | MASCOT | T PLEX8        |
| 3.40E-03 | 0 0 | Cs2g12440.1/Cs2g124   | 4.31 | 0 | 0    | 2 | MASCOT | T PLEX8        |
| 2.22E-01 | 0 0 | Cs2g12430.1/Cs2g124   | 5.55 | 0 | 0    | 2 | MASCOT | T PLEX8        |
| 4.97E-02 | 0 0 | Cs2g12440.1/Cs2g124   | 9.76 | 0 | 0    | 2 | MASCOT | T              |
| 8.95E-02 | 0 0 | Cs2g12440.1/Cs2g124   | 9.76 | 0 | 0    | 2 | MASCOT | T              |
| 9.89E-02 | 0 0 | Cs2g12440.1/Cs2g124   | 6    | 0 | 0    | 2 | MASCOT | T PLEX8        |
| 6.46E-02 | 0 0 | Cs2g12440.1/Cs2g124   | 4.37 | 0 | 0    | 2 | MASCOT | T PLEX8        |
| 1.48E-02 | 0 0 | Cs2g12440.1/Cs2g124   | 4.37 | 0 | 0    | 2 | MASCOT | T PLEX8        |
| 1.28E-01 | 0 0 | Cs2g12440.1/Cs2g124   | 6.71 | 0 | 0    | 2 | MASCOT | T PLEX8        |
| 4.54E-07 | 0 0 | Cs2g12440.1/Cs2g124   | 6.71 | 0 | 0    | 2 | MASCOT | T PLEX8        |
| 1.01E-04 | 0 0 | Cs2g12440.1/Cs2g124   | 6.71 | 0 | 0    | 2 | MASCOT | T PLEX8        |
| 4.25E-04 | 0 0 | Cs2g12440.1/Cs2g124   | 6.71 | 0 | 0    | 2 | MASCOT | T PLEX8        |
| 2.45E-01 | 0 0 | Cs6g09520.1           | 4.53 | 0 | 0    | 2 | MASCOT | T PLEX8        |
| 4.78E-01 | 0 0 | Cs6g09520.1           | 4    | 0 | 0    | 2 | MASCOT | T PLEX8        |
| 1.76E-02 | 0 0 | Cs6g09520.1           | 4.37 | 0 | 0    | 2 | MASCOT | T              |
| 1.56E-01 | 0 0 | Cs6g09520.1           | 4.37 | 0 | 0    | 2 | MASCOT | T              |
| 4.26E-02 | 0 0 | Cs6g09520.1           | 9.73 | 0 | 0    | 2 | MASCOT | T PLEX8        |
| 1.32E-02 | 0 0 | Cs6g09520.1           | 8.75 | 0 | 0    | 2 | MASCOT | T PLEX8        |
| 2.87E-02 | 0 0 | Cs6g09520.1           | 9.8  | 0 | 0    | 2 | MASCOT | T PLEX8        |
| 3.99E-03 | 0 0 | Cs6g09520.1           | 9.8  | 0 | 0    | 2 | MASCOT | T PLEX8        |
| 3.83E-02 | 0 0 | Cs6g09520.1           | 9.8  | 0 | 0    | 2 | MASCOT | T PLEX8        |
| 1.58E-01 | 0 0 | Cs6g09520.1           | 9.8  | 0 | 0    | 2 | MASCOT | T PLEX8        |
| 1.66E-01 | 0 0 | Cs6g09520.1           | 6.75 | 0 | 0    | 2 | MASCOT | T              |
| 1.36E-01 | 0 0 | Cs6g09520.1           | 4.41 | 0 | 0    | 2 | MASCOT | T              |
| 1.55E-02 | 0 0 | Cs6g09520.1           | 4.41 | 0 | 0    | 2 | MASCOT | T              |
| 3.24E-02 | 0 0 | Cs6g09520.1           | 5.97 | 0 | 0    | 2 | MASCOT | T PLEX8        |
| 5.77E-02 | 0 0 | orange1.1t01782.1/ora | 8.8  | 0 | 0    | 2 | MASCOT | T PLEX8        |
| 3.20E-02 | 0 0 | orange1.1t01782.1/ora | 8.8  | 0 | 0    | 2 | MASCOT | T PLEX8        |
| 2.12E-02 | 0 0 | orange1.1t01782.1/ora | 5.84 | 0 | 0    | 2 | MASCOT | T              |
| 1.21E-02 | 0 0 | orange1.1t01782.1/ora | 4    | 0 | 0    | 2 | MASCOT | T              |
| 2.65E-03 | 0 0 | orange1.1t01782.1/ora | 4    | 0 | 0    | 2 | MASCOT | T              |
| 2.38E-02 | 0 0 | orange1.1t01782.1/ora | 9.76 | 0 | 0    | 2 | MASCOT | T PLEX8        |
| 3.00E-01 | 0 0 | orange1.1t01782.1/ora | 9.76 | 0 | 0    | 2 | MASCOT | T              |

|          |     |                       |      |   |   |   |        |   |       |
|----------|-----|-----------------------|------|---|---|---|--------|---|-------|
| 5.19E-02 | 0 0 | orange1.1t01782.1/ora | 9.76 | 0 | 0 | 2 | MASCOT | T | PLEX8 |
| 1.09E-01 | 0 0 | orange1.1t01782.1/ora | 9.75 | 0 | 0 | 2 | MASCOT | T | PLEX8 |
| 6.27E-02 | 0 0 | orange1.1t01782.1/ora | 4.41 | 1 | 0 | 2 | MASCOT | T | PLEX8 |
| 7.36E-03 | 0 0 | orange1.1t01782.1/ora | 6    | 0 | 0 | 2 | MASCOT | T | PLEX8 |
| 1.28E-02 | 0 0 | orange1.1t01782.1/ora | 4.14 | 0 | 0 | 2 | MASCOT | T | PLEX8 |
| 6.22E-03 | 0 0 | orange1.1t01782.1/ora | 4.14 | 0 | 0 | 2 | MASCOT | T | PLEX8 |
| 2.74E-01 | 0 0 | orange1.1t01782.1/ora | 4.14 | 0 | 0 | 2 | MASCOT | T | PLEX8 |
| 2.25E-01 | 0 0 | orange1.1t02270.1     | 8.8  | 0 | 0 | 2 | MASCOT | T | PLEX8 |
| 1.30E-02 | 0 0 | orange1.1t02270.1     | 4.53 | 0 | 0 | 2 | MASCOT | T | PLEX8 |
| 1.60E-02 | 0 0 | orange1.1t02270.1     | 4.53 | 0 | 0 | 2 | MASCOT | T | PLEX8 |
| 4.00E-01 | 0 0 | orange1.1t02270.1     | 4.53 | 0 | 0 | 2 | MASCOT | T | PLEX8 |
| 1.32E-02 | 0 0 | orange1.1t02270.1     | 6    | 0 | 0 | 2 | MASCOT | T |       |
| 9.84E-02 | 0 0 | orange1.1t02270.1/ora | 6.74 | 0 | 0 | 2 | MASCOT | T | PLEX8 |
| 1.38E-02 | 0 0 | orange1.1t02270.1/ora | 6.74 | 0 | 0 | 2 | MASCOT | T | PLEX8 |
| 2.33E-01 | 0 0 | orange1.1t02270.1/ora | 6.74 | 0 | 0 | 2 | MASCOT | T | PLEX8 |
| 5.88E-03 | 0 0 | orange1.1t02270.1     | 4.02 | 1 | 0 | 2 | MASCOT | T | PLEX8 |
| 6.51E-02 | 0 0 | orange1.1t02270.1/ora | 8.6  | 0 | 0 | 2 | MASCOT | T | PLEX8 |
| 7.91E-02 | 0 0 | orange1.1t02270.1     | 6    | 0 | 0 | 2 | MASCOT | T | PLEX8 |
| 3.82E-02 | 0 0 | orange1.1t02270.1     | 5.72 | 0 | 0 | 2 | MASCOT | T | PLEX8 |
| 7.80E-03 | 0 0 | orange1.1t02270.1     | 6.41 | 0 | 0 | 2 | MASCOT | T | PLEX8 |
| 3.32E-01 | 0 0 | orange1.1t02270.1     | 6.41 | 0 | 0 | 2 | MASCOT | T |       |
| 1.51E-02 | 0 0 | Cs2g02090.1           | 5.32 | 0 | 0 | 2 | MASCOT | T | PLEX8 |
| 1.20E-03 | 0 0 | Cs2g02090.1           | 5.32 | 0 | 0 | 2 | MASCOT | T | PLEX8 |
| 9.33E-04 | 0 0 | Cs2g02090.1           | 5.32 | 0 | 0 | 2 | MASCOT | T | PLEX8 |
| 3.20E-02 | 0 0 | Cs2g02090.1           | 4.37 | 0 | 0 | 2 | MASCOT | T | PLEX8 |
| 2.04E-03 | 0 0 | Cs2g02090.1           | 4.21 | 0 | 0 | 2 | MASCOT | T | PLEX8 |
| 2.82E-03 | 0 0 | Cs2g02090.1           | 4.21 | 0 | 0 | 2 | MASCOT | T | PLEX8 |
| 6.70E-04 | 0 0 | Cs2g02090.1           | 4.03 | 0 | 0 | 2 | MASCOT | T | PLEX8 |
| 1.55E-02 | 0 0 | Cs2g02090.1/Cs2g199   | 4.21 | 0 | 0 | 2 | MASCOT | T |       |
| 5.80E-03 | 0 0 | Cs2g02090.1           | 5.72 | 0 | 0 | 2 | MASCOT | T | PLEX8 |
| 1.97E-02 | 0 0 | Cs2g02090.1           | 5.97 | 0 | 0 | 2 | MASCOT | T | PLEX8 |
| 3.31E-02 | 0 0 | Cs2g02090.1           | 5.97 | 0 | 0 | 2 | MASCOT | T | PLEX8 |
| 1.26E-02 | 0 0 | Cs2g02090.1           | 7.74 | 0 | 0 | 2 | MASCOT | T |       |
| 4.18E-02 | 0 0 | Cs2g02090.1           | 8.73 | 0 | 0 | 2 | MASCOT | T | PLEX8 |
| 1.11E-02 | 0 0 | Cs4g15600.1/Cs4g156   | 5.32 | 0 | 0 | 2 | MASCOT | T | PLEX8 |
| 2.19E-04 | 0 0 | Cs4g15600.1/Cs4g156   | 5.88 | 0 | 0 | 2 | MASCOT | T | PLEX8 |
| 2.94E-02 | 0 0 | Cs4g15600.1/Cs4g156   | 8.6  | 0 | 0 | 2 | MASCOT | T | PLEX8 |
| 4.59E-02 | 0 0 | Cs4g15600.1/Cs4g156   | 8.75 | 0 | 0 | 2 | MASCOT | T | PLEX8 |
| 4.48E-02 | 0 0 | Cs4g15600.1/Cs4g156   | 8.75 | 0 | 0 | 2 | MASCOT | T | PLEX8 |
| 2.47E-02 | 0 0 | Cs4g15600.1/Cs4g156   | 4.53 | 0 | 0 | 2 | MASCOT | T | PLEX8 |
| 1.42E-01 | 0 0 | Cs4g15600.1/Cs4g156   | 5.81 | 0 | 0 | 2 | MASCOT | T | PLEX8 |
| 4.90E-02 | 0 0 | Cs4g15600.1/Cs4g156   | 5.81 | 0 | 0 | 2 | MASCOT | T | PLEX8 |
| 2.44E-02 | 0 0 | Cs4g15600.1/Cs4g156   | 5.81 | 0 | 0 | 2 | MASCOT | T | PLEX8 |
| 2.33E-02 | 0 0 | Cs4g15600.1/Cs4g156   | 4.53 | 0 | 0 | 2 | MASCOT | T |       |
| 1.63E-01 | 0 0 | Cs4g15600.1/Cs4g156   | 4.03 | 0 | 0 | 2 | MASCOT | T | PLEX8 |
| 4.92E-04 | 0 0 | Cs4g15600.1/Cs4g156   | 4.03 | 0 | 0 | 2 | MASCOT | T | PLEX8 |
| 5.33E-02 | 0 0 | Cs4g15600.1/Cs4g156   | 4.53 | 0 | 0 | 2 | MASCOT | T |       |
| 3.25E-01 | 0 0 | Cs5g09400.1/Cs5g094   | 8.76 | 0 | 0 | 2 | MASCOT | T | PLEX8 |
| 3.71E-01 | 0 0 | Cs5g09400.1/Cs5g094   | 5.83 | 0 | 0 | 2 | MASCOT | T | PLEX8 |
| 2.85E-02 | 0 0 | Cs5g09400.1/Cs5g094   | 5.83 | 0 | 0 | 2 | MASCOT | T | PLEX8 |
| 5.17E-03 | 0 0 | Cs5g09400.1/Cs5g094   | 8.72 | 0 | 0 | 2 | MASCOT | T | PLEX8 |

|          |     |                     |      |   |      |   |        |        |       |       |
|----------|-----|---------------------|------|---|------|---|--------|--------|-------|-------|
| 1.12E-01 | 0 0 | Cs5g09400.1/Cs5g094 | 4.53 | 0 | 0    | 2 | MASCOT | T      | PLEX8 |       |
| 6.50E-06 | 0 0 | Cs5g09400.1/Cs5g094 | 4.03 | 0 | 0    | 2 | MASCOT | T      |       |       |
| 8.12E-02 | 0 0 | Cs5g09400.1/Cs5g094 | 5.32 | 0 | 0    | 2 | MASCOT | T      | PLEX8 |       |
| 1.19E-01 | 0 0 | Cs5g09400.1/Cs5g094 | 5.32 | 0 | 0    | 2 | MASCOT | T      | PLEX8 |       |
| 2.04E-01 | 0 0 | Cs5g09400.1/Cs5g094 | 4.53 | 0 | 0    | 2 | MASCOT | T      | PLEX8 |       |
| 3.99E-01 | 0 0 | Cs5g09400.1/Cs5g094 | 4.53 | 0 | 0    | 2 | MASCOT | T      | PLEX8 |       |
| 1.18E-01 | 0 0 | Cs5g09400.1/Cs5g094 | 4.53 | 0 | 0    | 2 | MASCOT | T      | PLEX8 |       |
| 4.31E-02 | 0 0 | Cs5g09400.1/Cs5g094 | 5.4  | 0 | 0    | 2 | MASCOT | T      |       |       |
| 1.29E-01 | 0 0 | Cs5g09400.1/Cs5g094 | 6.14 | 1 | 0    | 2 | MASCOT | T      |       |       |
| 1.25E-01 | 0 0 | Cs8g20750.1/Cs8g207 | 8.54 | 0 | 0    | 2 | MASCOT | T      | PLEX8 |       |
| 1.27E-02 | 0 0 | Cs8g20750.1/Cs8g207 | 8.54 | 0 | 0    | 2 | MASCOT | T      | PLEX8 |       |
| 3.84E-02 | 0 0 | Cs8g20750.1/Cs8g207 | 8.54 | 0 | 0    | 2 | MASCOT | T      | PLEX8 |       |
| 1.34E-02 | 0 0 | Cs8g20750.1/Cs8g207 | 8.54 | 0 | 0    | 2 | MASCOT | T      | PLEX8 |       |
| 1.03E-02 | 0 0 | Cs8g20750.1/Cs8g207 | 6.74 | 0 | 0    | 2 | MASCOT | T      |       |       |
| 1.16E-01 | 0 0 | Cs8g20750.1/Cs8g207 | 5.84 | 0 | 0    | 2 | MASCOT | T      | PLEX8 |       |
| 1.63E-01 | 0 0 | Cs8g20750.1/Cs8g207 | 4.14 | 0 | 0    | 2 | MASCOT | T      | PLEX8 |       |
| 6.95E-02 | 0 0 | Cs8g20750.1/Cs8g207 | 4.14 | 0 | 0    | 2 | MASCOT | T      | PLEX8 |       |
| 1.03E-03 | 0 0 | Cs8g20750.1/Cs8g207 | 4.14 | 0 | 0    | 2 | MASCOT | T      |       |       |
| 1.29E-02 | 0 0 | Cs8g20750.1/Cs8g207 | 5.83 | 0 | 0    | 2 | MASCOT | T      |       |       |
| 4.54E-02 | 0 0 | Cs8g20750.1/Cs8g207 | 10   | 1 | 0    | 2 | MASCOT | T      |       |       |
| 2.95E-01 | 0 0 | Cs8g20750.1/Cs8g207 | 5.32 | 0 | 0    | 2 | MASCOT | T      | PLEX8 |       |
| 1.22E-01 | 0 0 | Cs8g20750.1/Cs8g207 | 6.41 | 0 | 0    | 2 | MASCOT | T      | PLEX8 |       |
| 1.75E-05 | 0 0 | Cs1g25730.1         | 4.22 | 0 | 0    | 2 | MASCOT | T      | PLEX8 |       |
| 1.38E-03 | 0 0 | Cs1g25730.1/Cs8g027 | 6.74 | 0 | 0    | 2 | MASCOT | T      | PLEX8 |       |
| 1.37E-02 | 0 0 | Cs1g25730.1         | 4.5  | 1 | 0    | 2 | MASCOT | T      |       |       |
| 1.03E-01 | 0 0 | Cs1g25730.1         | 4.37 | 0 | 0    | 2 | MASCOT | T      | PLEX8 |       |
| 1.45E-03 | 0 0 | Cs1g25730.1         | 6    | 0 | 0    | 2 | MASCOT | T      | PLEX8 |       |
| 1.35E-01 | 0 0 | Cs1g25730.1         | 4.37 | 0 | 0    | 2 | MASCOT | T      | PLEX8 |       |
| 5.07E-02 | 0 0 | Cs1g25730.1/Cs8g027 | 6.79 | 0 | 0    | 2 | MASCOT | T      |       |       |
| 9.27E-03 | 0 0 | Cs1g25730.1/Cs8g027 | 6.5  | 1 | 15.9 | 0 | 2      | MASCOT | T     |       |
| 3.54E-02 | 0 0 | Cs1g25730.1/Cs8g027 | 6.5  | 1 | 15.9 | 0 | 2      | MASCOT | T     | PLEX8 |
| 6.35E-02 | 0 0 | Cs1g25730.1         | 5.5  | 0 | 0    | 2 | MASCOT | T      | PLEX8 |       |
| 3.89E-02 | 0 0 | Cs1g25730.1         | 5.5  | 0 | 0    | 2 | MASCOT | T      |       |       |
| 9.85E-02 | 0 0 | Cs1g25730.1         | 5.5  | 0 | 0    | 2 | MASCOT | T      |       |       |
| 2.21E-02 | 0 0 | Cs4g16080.1/Cs4g160 | 6.05 | 0 | 15.9 | 0 | 2      | MASCOT | T     | PLEX8 |
| 5.73E-02 | 0 0 | Cs4g16080.1/Cs4g160 | 6.05 | 0 | 15.9 | 0 | 2      | MASCOT | T     | PLEX8 |
| 2.21E-01 | 0 0 | Cs4g16080.1/Cs4g160 | 4.53 | 0 | 0    | 2 | MASCOT | T      | PLEX8 |       |
| 1.87E-01 | 0 0 | Cs4g16080.1/Cs4g160 | 6    | 0 | 0    | 2 | MASCOT | T      | PLEX8 |       |
| 1.68E-01 | 0 0 | Cs4g16080.1/Cs4g160 | 4.53 | 0 | 0    | 2 | MASCOT | T      | PLEX8 |       |
| 2.27E-01 | 0 0 | Cs4g16080.1/Cs4g160 | 4.53 | 0 | 0    | 2 | MASCOT | T      | PLEX8 |       |
| 1.92E-01 | 0 0 | Cs4g16080.1/Cs4g160 | 6    | 0 | 0    | 2 | MASCOT | T      | PLEX8 |       |
| 5.43E-03 | 0 0 | Cs4g16080.1/Cs4g160 | 8.72 | 0 | 0    | 2 | MASCOT | T      | PLEX8 |       |
| 2.18E-03 | 0 0 | Cs4g16080.1/Cs4g160 | 8.72 | 0 | 0    | 2 | MASCOT | T      | PLEX8 |       |
| 1.72E-01 | 0 0 | Cs4g16080.1/Cs4g160 | 9.76 | 0 | 0    | 2 | MASCOT | T      | PLEX8 |       |
| 1.58E-02 | 0 0 | Cs4g16080.1/Cs4g160 | 5.55 | 0 | 0    | 2 | MASCOT | T      | PLEX8 |       |
| 2.27E-02 | 0 0 | Cs4g16080.1/Cs4g160 | 5.5  | 0 | 0    | 2 | MASCOT | T      |       |       |
| 4.71E-03 | 0 0 | Cs9g04230.1         | 5.88 | 0 | 0    | 2 | MASCOT | T      |       |       |
| 3.98E-01 | 0 0 | Cs9g04230.1         | 9.8  | 0 | 0    | 2 | MASCOT | T      | PLEX8 |       |
| 8.41E-02 | 0 0 | Cs9g04230.1         | 4.56 | 0 | 0    | 2 | MASCOT | T      | PLEX8 |       |
| 6.71E-04 | 0 0 | Cs5g33220.1/Cs9g042 | 4.37 | 0 | 0    | 2 | MASCOT | T      | PLEX8 |       |
| 1.69E-01 | 0 0 | Cs5g33220.1/Cs9g042 | 4.37 | 0 | 0    | 2 | MASCOT | T      | PLEX8 |       |

|          |     |                     |      |   |      |   |        |        |       |       |
|----------|-----|---------------------|------|---|------|---|--------|--------|-------|-------|
| 2.34E-01 | 0 0 | Cs5g33220.1/Cs9g042 | 4.37 | 0 | 0    | 2 | MASCOT | T      | PLEX8 |       |
| 1.92E-01 | 0 0 | Cs9g04230.1         | 5.84 | 0 | 0    | 2 | MASCOT | T      | PLEX8 |       |
| 6.85E-02 | 0 0 | Cs9g04230.1         | 6.75 | 0 | 0    | 2 | MASCOT | T      | PLEX8 |       |
| 3.31E-03 | 0 0 | Cs9g04230.1         | 4.65 | 0 | 15.9 | 0 | 2      | MASCOT | T     | PLEX8 |
| 8.27E-04 | 0 0 | Cs9g04230.1         | 8.75 | 0 | 0    | 2 | MASCOT | T      | PLEX8 |       |
| 9.99E-04 | 0 0 | Cs9g04230.1         | 8.75 | 0 | 0    | 2 | MASCOT | T      | PLEX8 |       |
| 3.72E-03 | 0 0 | Cs9g04230.1         | 5.84 | 0 | 0    | 2 | MASCOT | T      |       |       |
| 6.22E-03 | 0 0 | Cs1g11870.1/Cs4g013 | 5.32 | 0 | 0    | 2 | MASCOT | T      | PLEX8 |       |
| 6.52E-03 | 0 0 | Cs1g11870.1/Cs4g013 | 5.32 | 0 | 0    | 2 | MASCOT | T      | PLEX8 |       |
| 1.57E-01 | 0 0 | Cs6g20570.1/Cs6g205 | 6    | 0 | 0    | 2 | MASCOT | T      |       |       |
| 2.63E-02 | 0 0 | Cs1g11870.1/Cs1g161 | 5.59 | 0 | 0    | 2 | MASCOT | T      | PLEX8 |       |
| 1.42E-01 | 0 0 | Cs6g03470.1/Cs6g205 | 6    | 0 | 0    | 2 | MASCOT | T      | PLEX8 |       |
| 8.46E-02 | 0 0 | Cs4g03700.1/Cs4g037 | 6.71 | 0 | 0    | 2 | MASCOT | T      | PLEX8 |       |
| 3.04E-02 | 0 0 | Cs1g11870.1/Cs4g037 | 8.8  | 0 | 0    | 2 | MASCOT | T      | PLEX8 |       |
| 1.20E-02 | 0 0 | Cs1g11870.1/Cs4g037 | 8.8  | 0 | 0    | 2 | MASCOT | T      | PLEX8 |       |
| 5.19E-03 | 0 0 | Cs6g20570.1/Cs6g205 | 5.32 | 0 | 0    | 2 | MASCOT | T      | PLEX8 |       |
| 7.97E-02 | 0 0 | Cs1g11870.1/Cs4g013 | 5.32 | 0 | 0    | 2 | MASCOT | T      |       |       |
| 9.76E-02 | 0 0 | Cs1g16150.1/Cs1g161 | 4.37 | 0 | 0    | 2 | MASCOT | T      | PLEX8 |       |
| 4.49E-02 | 0 0 | Cs2g11320.1/Cs2g113 | 4.41 | 0 | 0    | 2 | MASCOT | T      | PLEX8 |       |
| 8.72E-02 | 0 0 | Cs2g11320.1/Cs2g113 | 5.96 | 0 | 0    | 2 | MASCOT | T      | PLEX8 |       |
| 2.33E-03 | 0 0 | Cs2g11320.1/Cs2g113 | 5.4  | 0 | 0    | 2 | MASCOT | T      | PLEX8 |       |
| 9.31E-02 | 0 0 | Cs2g11320.1/Cs2g113 | 6.1  | 0 | 0    | 2 | MASCOT | T      | PLEX8 |       |
| 6.75E-04 | 0 0 | Cs2g11320.1/Cs2g113 | 4.14 | 0 | 0    | 2 | MASCOT | T      |       |       |
| 4.32E-02 | 0 0 | Cs2g11320.1/Cs2g113 | 9.72 | 0 | 0    | 2 | MASCOT | T      | PLEX8 |       |
| 2.42E-03 | 0 0 | Cs2g11320.1/Cs2g113 | 8.72 | 0 | 0    | 2 | MASCOT | T      | PLEX8 |       |
| 6.62E-02 | 0 0 | Cs2g11320.1/Cs2g113 | 6    | 0 | 0    | 2 | MASCOT | T      |       |       |
| 1.01E-01 | 0 0 | Cs2g11320.1/Cs2g113 | 6    | 0 | 0    | 2 | MASCOT | T      | PLEX8 |       |
| 1.85E-01 | 0 0 | Cs2g11320.1/Cs2g113 | 5.66 | 0 | 0    | 2 | MASCOT | T      | PLEX8 |       |
| 4.45E-06 | 0 0 | Cs2g09970.1/Cs3g261 | 4.14 | 0 | 0    | 2 | MASCOT | T      | PLEX8 |       |
| 2.10E-01 | 0 0 | Cs3g26180.1         | 4.31 | 0 | 0    | 2 | MASCOT | T      |       |       |
| 9.11E-03 | 0 0 | Cs2g09970.1/Cs3g261 | 9.75 | 0 | 0    | 2 | MASCOT | T      |       |       |
| 8.31E-03 | 0 0 | Cs3g26180.1         | 4.32 | 1 | 0    | 2 | MASCOT | T      | PLEX8 |       |
| 4.63E-03 | 0 0 | Cs2g09970.1/Cs3g261 | 5.84 | 0 | 0    | 2 | MASCOT | T      | PLEX8 |       |
| 3.27E-02 | 0 0 | Cs2g09970.1/Cs3g261 | 6    | 0 | 0    | 2 | MASCOT | T      | PLEX8 |       |
| 5.97E-02 | 0 0 | Cs2g09970.1/Cs3g261 | 11   | 1 | 0    | 2 | MASCOT | T      | PLEX8 |       |
| 1.18E-02 | 0 0 | Cs2g09970.1/Cs3g261 | 11   | 1 | 0    | 2 | MASCOT | T      |       |       |
| 2.70E-03 | 0 0 | Cs2g09970.1/Cs3g261 | 9.76 | 0 | 15.9 | 0 | 2      | MASCOT | T     |       |
| 6.11E-03 | 0 0 | Cs2g09970.1/Cs3g261 | 8.75 | 0 | 0    | 2 | MASCOT | T      | PLEX8 |       |
| 4.73E-01 | 0 0 | Cs6g12870.1         | 8.75 | 0 | 0    | 2 | MASCOT | T      | PLEX8 |       |
| 2.81E-01 | 0 0 | Cs6g12870.1         | 8.75 | 0 | 0    | 2 | MASCOT | T      | PLEX8 |       |
| 1.41E-02 | 0 0 | Cs6g12870.1         | 8.75 | 0 | 0    | 2 | MASCOT | T      | PLEX8 |       |
| 5.03E-01 | 0 0 | Cs6g12870.1         | 8.75 | 0 | 0    | 2 | MASCOT | T      | PLEX8 |       |
| 2.33E-01 | 0 0 | Cs6g12870.1         | 8.75 | 0 | 0    | 2 | MASCOT | T      | PLEX8 |       |
| 9.46E-02 | 0 0 | Cs6g12870.1         | 8.75 | 0 | 0    | 2 | MASCOT | T      | PLEX8 |       |
| 3.59E-01 | 0 0 | Cs6g12870.1         | 8.75 | 0 | 0    | 2 | MASCOT | T      | PLEX8 |       |
| 5.05E-01 | 0 0 | Cs6g12870.1         | 8.75 | 0 | 0    | 2 | MASCOT | T      | PLEX8 |       |
| 3.17E-01 | 0 0 | Cs6g12870.1         | 8.75 | 0 | 0    | 2 | MASCOT | T      | PLEX8 |       |
| 7.61E-02 | 0 0 | Cs6g12870.1         | 8.75 | 0 | 0    | 2 | MASCOT | T      | PLEX8 |       |
| 1.97E-01 | 0 0 | Cs6g12870.1         | 8.75 | 0 | 0    | 2 | MASCOT | T      | PLEX8 |       |
| 3.06E-02 | 0 0 | Cs6g12870.1         | 8.75 | 0 | 0    | 2 | MASCOT | T      | PLEX8 |       |
| 5.64E-01 | 0 0 | Cs6g12870.1         | 8.75 | 0 | 0    | 2 | MASCOT | T      | PLEX8 |       |

|              |                     |      |   |   |          |   |       |
|--------------|---------------------|------|---|---|----------|---|-------|
| 9.58E-02 0 0 | Cs6g12870.1         | 8.75 | 0 | 0 | 2 MASCOT | T |       |
| 4.61E-02 0 0 | Cs6g12870.1         | 8.75 | 0 | 0 | 2 MASCOT | T | PLEX8 |
| 3.22E-02 0 0 | Cs6g12870.1         | 8.75 | 0 | 0 | 2 MASCOT | T | PLEX8 |
| 3.44E-01 0 0 | Cs6g12870.1         | 8.75 | 0 | 0 | 2 MASCOT | T | PLEX8 |
| 2.11E-01 0 0 | Cs6g12870.1         | 8.75 | 0 | 0 | 2 MASCOT | T | PLEX8 |
| 5.33E-01 0 0 | Cs6g12870.1         | 8.75 | 0 | 0 | 2 MASCOT | T | PLEX8 |
| 1.01E-01 0 0 | Cs6g12870.1         | 8.75 | 0 | 0 | 2 MASCOT | T | PLEX8 |
| 2.60E-01 0 0 | Cs6g12870.1         | 8.75 | 0 | 0 | 2 MASCOT | T | PLEX8 |
| 4.98E-01 0 0 | Cs6g12870.1         | 8.75 | 0 | 0 | 2 MASCOT | T | PLEX8 |
| 2.32E-02 0 0 | Cs6g12870.1         | 8.75 | 0 | 0 | 2 MASCOT | T |       |
| 5.26E-02 0 0 | Cs6g12870.1         | 8.75 | 0 | 0 | 2 MASCOT | T |       |
| 2.92E-02 0 0 | Cs6g12870.1         | 8.75 | 0 | 0 | 2 MASCOT | T |       |
| 2.71E-02 0 0 | Cs6g12870.1/Cs6g128 | 6    | 0 | 0 | 2 MASCOT | T | PLEX8 |
| 2.08E-01 0 0 | Cs6g12870.1/Cs6g128 | 6    | 0 | 0 | 2 MASCOT | T | PLEX8 |
| 2.54E-01 0 0 | Cs6g12870.1/Cs6g128 | 6    | 0 | 0 | 2 MASCOT | T |       |
| 2.17E-02 0 0 | Cs6g12870.1/Cs6g128 | 6    | 0 | 0 | 2 MASCOT | T |       |
| 2.10E-01 0 0 | Cs6g12870.1/Cs6g128 | 6    | 0 | 0 | 2 MASCOT | T |       |
| 5.31E-01 0 0 | Cs6g12870.1/Cs6g128 | 6    | 0 | 0 | 2 MASCOT | T | PLEX8 |
| 1.61E-01 0 0 | Cs6g12870.1/Cs6g128 | 6    | 0 | 0 | 2 MASCOT | T | PLEX8 |
| 3.95E-02 0 0 | Cs6g12870.1/Cs6g128 | 6    | 0 | 0 | 2 MASCOT | T | PLEX8 |
| 1.92E-01 0 0 | Cs6g12870.1/Cs6g128 | 6    | 0 | 0 | 2 MASCOT | T | PLEX8 |
| 2.80E-01 0 0 | Cs6g12870.1/Cs6g128 | 6    | 0 | 0 | 2 MASCOT | T | PLEX8 |
| 1.87E-01 0 0 | Cs6g12870.1/Cs6g128 | 6    | 0 | 0 | 2 MASCOT | T | PLEX8 |
| 3.01E-01 0 0 | Cs6g12870.1/Cs6g128 | 6    | 0 | 0 | 2 MASCOT | T | PLEX8 |
| 1.97E-02 0 0 | Cs6g12870.1/Cs6g128 | 6    | 0 | 0 | 2 MASCOT | T |       |
| 2.91E-01 0 0 | Cs6g12870.1         | 6.41 | 0 | 0 | 2 MASCOT | T | PLEX8 |
| 5.15E-02 0 0 | Cs6g12870.1         | 6.41 | 0 | 0 | 2 MASCOT | T | PLEX8 |
| 3.57E-02 0 0 | Cs6g12870.1         | 6.41 | 0 | 0 | 2 MASCOT | T | PLEX8 |
| 6.17E-02 0 0 | Cs6g12870.1         | 6.41 | 0 | 0 | 2 MASCOT | T | PLEX8 |
| 2.22E-01 0 0 | Cs6g12870.1         | 6.41 | 0 | 0 | 2 MASCOT | T | PLEX8 |
| 1.70E-01 0 0 | Cs6g12870.1         | 6.41 | 0 | 0 | 2 MASCOT | T | PLEX8 |
| 2.37E-01 0 0 | Cs6g12870.1         | 6.41 | 0 | 0 | 2 MASCOT | T | PLEX8 |
| 5.17E-02 0 0 | Cs6g12870.1         | 6.41 | 0 | 0 | 2 MASCOT | T | PLEX8 |
| 9.81E-03 0 0 | Cs6g12870.1         | 6.41 | 0 | 0 | 2 MASCOT | T | PLEX8 |
| 3.93E-01 0 0 | Cs6g12870.1         | 6.41 | 0 | 0 | 2 MASCOT | T | PLEX8 |
| 5.92E-02 0 0 | Cs6g12870.1         | 6.41 | 0 | 0 | 2 MASCOT | T | PLEX8 |
| 9.21E-03 0 0 | Cs6g12870.1         | 6.41 | 0 | 0 | 2 MASCOT | T | PLEX8 |
| 8.96E-02 0 0 | Cs6g12870.1         | 6.41 | 0 | 0 | 2 MASCOT | T | PLEX8 |
| 3.94E-01 0 0 | Cs6g12870.1         | 6.41 | 0 | 0 | 2 MASCOT | T | PLEX8 |
| 7.58E-02 0 0 | Cs6g12870.1         | 6.41 | 0 | 0 | 2 MASCOT | T | PLEX8 |
| 4.40E-02 0 0 | Cs6g12870.1         | 6.41 | 0 | 0 | 2 MASCOT | T | PLEX8 |
| 1.54E-02 0 0 | Cs6g12870.1         | 6.41 | 0 | 0 | 2 MASCOT | T | PLEX8 |
| 1.24E-02 0 0 | Cs6g12870.1         | 6.41 | 0 | 0 | 2 MASCOT | T | PLEX8 |
| 9.97E-03 0 0 | Cs6g12870.1         | 6.41 | 0 | 0 | 2 MASCOT | T | PLEX8 |
| 7.13E-02 0 0 | Cs6g12870.1         | 6.41 | 0 | 0 | 2 MASCOT | T | PLEX8 |
| 3.54E-03 0 0 | Cs6g12870.1         | 6.41 | 0 | 0 | 2 MASCOT | T | PLEX8 |
| 9.72E-03 0 0 | Cs6g12870.1         | 6.41 | 0 | 0 | 2 MASCOT | T | PLEX8 |
| 9.10E-02 0 0 | Cs6g12870.1         | 6.41 | 0 | 0 | 2 MASCOT | T | PLEX8 |
| 1.44E-02 0 0 | Cs6g12870.1         | 6.41 | 0 | 0 | 2 MASCOT | T |       |
| 1.14E-01 0 0 | Cs6g12870.1/Cs6g128 | 5.29 | 0 | 0 | 2 MASCOT | T | PLEX8 |
| 5.19E-03 0 0 | Cs6g12870.1/Cs6g128 | 5.29 | 0 | 0 | 2 MASCOT | T | PLEX8 |

|          |     |                     |      |   |   |   |        |   |       |
|----------|-----|---------------------|------|---|---|---|--------|---|-------|
| 4.68E-03 | 0 0 | Cs6g12870.1/Cs6g128 | 5.29 | 0 | 0 | 2 | MASCOT | T | PLEX8 |
| 1.82E-01 | 0 0 | Cs6g12870.1/Cs6g128 | 5.29 | 0 | 0 | 2 | MASCOT | T | PLEX8 |
| 3.88E-02 | 0 0 | Cs6g12870.1/Cs6g128 | 5.29 | 0 | 0 | 2 | MASCOT | T | PLEX8 |
| 6.98E-02 | 0 0 | Cs6g12870.1/Cs6g128 | 5.29 | 0 | 0 | 2 | MASCOT | T | PLEX8 |
| 2.41E-01 | 0 0 | Cs6g12870.1/Cs6g128 | 5.29 | 0 | 0 | 2 | MASCOT | T | PLEX8 |
| 6.95E-02 | 0 0 | Cs6g12870.1/Cs6g128 | 5.29 | 0 | 0 | 2 | MASCOT | T | PLEX8 |
| 1.41E-01 | 0 0 | Cs6g12870.1/Cs6g128 | 5.29 | 0 | 0 | 2 | MASCOT | T | PLEX8 |
| 1.09E-02 | 0 0 | Cs6g12870.1/Cs6g128 | 5.29 | 0 | 0 | 2 | MASCOT | T | PLEX8 |
| 7.02E-04 | 0 0 | Cs6g12870.1/Cs6g128 | 5.29 | 0 | 0 | 2 | MASCOT | T | PLEX8 |
| 5.97E-03 | 0 0 | Cs6g12870.1/Cs6g128 | 5.29 | 0 | 0 | 2 | MASCOT | T | PLEX8 |
| 4.72E-03 | 0 0 | Cs6g12870.1/Cs6g128 | 5.29 | 0 | 0 | 2 | MASCOT | T | PLEX8 |
| 3.57E-02 | 0 0 | Cs6g12870.1/Cs6g128 | 5.29 | 0 | 0 | 2 | MASCOT | T | PLEX8 |
| 2.59E-01 | 0 0 | Cs6g12870.1/Cs6g128 | 5.29 | 0 | 0 | 2 | MASCOT | T |       |
| 1.72E-01 | 0 0 | Cs6g12870.1/Cs6g128 | 5.29 | 0 | 0 | 2 | MASCOT | T |       |
| 5.82E-04 | 0 0 | Cs6g12870.1/Cs6g128 | 5.29 | 0 | 0 | 2 | MASCOT | T |       |
| 1.78E-03 | 0 0 | Cs6g12870.1/Cs6g128 | 5.29 | 0 | 0 | 2 | MASCOT | T | PLEX8 |
| 3.22E-02 | 0 0 | Cs6g12870.1/Cs6g128 | 5.29 | 0 | 0 | 2 | MASCOT | T | PLEX8 |
| 8.24E-03 | 0 0 | Cs6g12870.1/Cs6g128 | 5.29 | 0 | 0 | 2 | MASCOT | T | PLEX8 |
| 1.10E-03 | 0 0 | Cs6g12870.1/Cs6g128 | 5.29 | 0 | 0 | 2 | MASCOT | T | PLEX8 |
| 2.65E-01 | 0 0 | Cs6g12870.1/Cs6g128 | 5.29 | 0 | 0 | 2 | MASCOT | T | PLEX8 |
| 2.02E-01 | 0 0 | Cs6g12870.1/Cs6g128 | 5.29 | 0 | 0 | 2 | MASCOT | T | PLEX8 |
| 1.10E-01 | 0 0 | Cs6g12870.1/Cs6g128 | 5.29 | 0 | 0 | 2 | MASCOT | T | PLEX8 |
| 3.24E-02 | 0 0 | Cs6g12870.1/Cs6g128 | 5.29 | 0 | 0 | 2 | MASCOT | T | PLEX8 |
| 1.00E-02 | 0 0 | Cs6g12870.1/Cs6g128 | 5.29 | 0 | 0 | 2 | MASCOT | T | PLEX8 |
| 2.37E-02 | 0 0 | Cs6g12870.1/Cs6g128 | 5.29 | 0 | 0 | 2 | MASCOT | T | PLEX8 |
| 6.37E-03 | 0 0 | Cs6g12870.1/Cs6g128 | 5.29 | 0 | 0 | 2 | MASCOT | T |       |
| 5.72E-03 | 0 0 | Cs6g12870.1/Cs6g128 | 5.29 | 0 | 0 | 2 | MASCOT | T | PLEX8 |
| 6.22E-03 | 0 0 | Cs6g12870.1/Cs6g128 | 5.29 | 0 | 0 | 2 | MASCOT | T | PLEX8 |
| 5.48E-02 | 0 0 | Cs6g12870.1/Cs6g128 | 5.96 | 0 | 0 | 2 | MASCOT | T | PLEX8 |
| 1.27E-01 | 0 0 | Cs6g12870.1/Cs6g128 | 5.96 | 0 | 0 | 2 | MASCOT | T | PLEX8 |
| 2.37E-01 | 0 0 | Cs6g12870.1/Cs6g128 | 5.96 | 0 | 0 | 2 | MASCOT | T | PLEX8 |
| 3.56E-01 | 0 0 | Cs6g12870.1/Cs6g128 | 5.96 | 0 | 0 | 2 | MASCOT | T | PLEX8 |
| 2.56E-01 | 0 0 | Cs6g12870.1/Cs6g128 | 5.96 | 0 | 0 | 2 | MASCOT | T | PLEX8 |
| 3.62E-01 | 0 0 | Cs6g12870.1/Cs6g128 | 5.96 | 0 | 0 | 2 | MASCOT | T | PLEX8 |
| 2.89E-01 | 0 0 | Cs6g12870.1/Cs6g128 | 5.96 | 0 | 0 | 2 | MASCOT | T | PLEX8 |
| 6.42E-02 | 0 0 | Cs6g12870.1/Cs6g128 | 5.96 | 0 | 0 | 2 | MASCOT | T |       |
| 1.34E-01 | 0 0 | Cs6g12870.1/Cs6g128 | 5.96 | 0 | 0 | 2 | MASCOT | T |       |
| 3.29E-02 | 0 0 | Cs6g12870.1/Cs6g128 | 5.96 | 0 | 0 | 2 | MASCOT | T | PLEX8 |
| 1.23E-01 | 0 0 | Cs6g12870.1/Cs6g128 | 5.96 | 0 | 0 | 2 | MASCOT | T | PLEX8 |
| 8.96E-02 | 0 0 | Cs6g12870.1/Cs6g128 | 5.96 | 0 | 0 | 2 | MASCOT | T | PLEX8 |
| 1.51E-01 | 0 0 | Cs6g12870.1/Cs6g128 | 5.96 | 0 | 0 | 2 | MASCOT | T | PLEX8 |
| 1.74E-01 | 0 0 | Cs6g12870.1/Cs6g128 | 5.96 | 0 | 0 | 2 | MASCOT | T | PLEX8 |
| 3.14E-01 | 0 0 | Cs6g12870.1/Cs6g128 | 5.96 | 0 | 0 | 2 | MASCOT | T |       |
| 1.08E-01 | 0 0 | Cs6g12870.1/Cs6g128 | 5.96 | 0 | 0 | 2 | MASCOT | T |       |
| 1.52E-01 | 0 0 | Cs6g12870.1/Cs6g128 | 5.96 | 0 | 0 | 2 | MASCOT | T |       |
| 1.99E-03 | 0 0 | Cs6g12870.1         | 3.77 | 0 | 0 | 2 | MASCOT | T |       |
| 2.39E-03 | 0 0 | Cs6g12870.1         | 3.77 | 0 | 0 | 2 | MASCOT | T | PLEX8 |
| 3.12E-03 | 0 0 | Cs6g12870.1         | 3.77 | 0 | 0 | 2 | MASCOT | T |       |
| 3.34E-04 | 0 0 | Cs6g12870.1         | 3.77 | 0 | 0 | 2 | MASCOT | T | PLEX8 |
| 3.40E-03 | 0 0 | Cs6g12870.1         | 3.77 | 0 | 0 | 2 | MASCOT | T |       |
| 1.07E-04 | 0 0 | Cs6g12870.1         | 3.77 | 0 | 0 | 2 | MASCOT | T | PLEX8 |

|          |     |                     |      |   |      |   |        |        |       |       |
|----------|-----|---------------------|------|---|------|---|--------|--------|-------|-------|
| 1.61E-03 | 0 0 | Cs6g12870.1         | 3.77 | 0 | 0    | 2 | MASCOT | T      |       |       |
| 3.59E-03 | 0 0 | Cs6g12870.1         | 3.77 | 0 | 0    | 2 | MASCOT | T      |       |       |
| 2.95E-03 | 0 0 | Cs6g12870.1/Cs6g128 | 9.76 | 0 | 0    | 2 | MASCOT | T      | PLEX8 |       |
| 1.27E-01 | 0 0 | Cs6g12870.1/Cs6g128 | 9.76 | 0 | 0    | 2 | MASCOT | T      | PLEX8 |       |
| 4.54E-02 | 0 0 | Cs6g12870.1/Cs6g128 | 9.76 | 0 | 0    | 2 | MASCOT | T      | PLEX8 |       |
| 1.20E-01 | 0 0 | Cs6g12870.1/Cs6g128 | 9.76 | 0 | 0    | 2 | MASCOT | T      | PLEX8 |       |
| 3.00E-03 | 0 0 | Cs6g12870.1/Cs6g128 | 9.76 | 0 | 0    | 2 | MASCOT | T      | PLEX8 |       |
| 2.06E-01 | 0 0 | Cs6g12870.1/Cs6g128 | 9.76 | 0 | 0    | 2 | MASCOT | T      | PLEX8 |       |
| 5.94E-03 | 0 0 | Cs6g12870.1/Cs6g128 | 9.76 | 0 | 0    | 2 | MASCOT | T      | PLEX8 |       |
| 1.24E-01 | 0 0 | Cs6g12870.1/Cs6g128 | 9.76 | 0 | 0    | 2 | MASCOT | T      | PLEX8 |       |
| 2.15E-02 | 0 0 | Cs6g12870.1/Cs6g128 | 9.76 | 0 | 0    | 2 | MASCOT | T      | PLEX8 |       |
| 8.91E-02 | 0 0 | Cs6g12870.1/Cs6g128 | 9.76 | 0 | 0    | 2 | MASCOT | T      | PLEX8 |       |
| 2.54E-02 | 0 0 | Cs6g12870.1/Cs6g128 | 9.76 | 0 | 0    | 2 | MASCOT | T      | PLEX8 |       |
| 3.79E-02 | 0 0 | Cs6g12870.1/Cs6g128 | 9.76 | 0 | 0    | 2 | MASCOT | T      |       |       |
| 4.06E-02 | 0 0 | Cs6g12870.1         | 4.11 | 1 | 0    | 2 | MASCOT | T      |       |       |
| 5.44E-03 | 0 0 | Cs6g12870.1         | 4.11 | 1 | 0    | 2 | MASCOT | T      | PLEX8 |       |
| 8.99E-04 | 0 0 | Cs6g12870.1         | 4.11 | 1 | 0    | 2 | MASCOT | T      |       |       |
| 4.18E-05 | 0 0 | Cs6g12870.1         | 4.11 | 1 | 0    | 2 | MASCOT | T      | PLEX8 |       |
| 6.17E-05 | 0 0 | Cs6g12870.1         | 4.11 | 1 | 0    | 2 | MASCOT | T      | PLEX8 |       |
| 2.10E-02 | 0 0 | Cs6g12870.1         | 4.11 | 1 | 0    | 2 | MASCOT | T      | PLEX8 |       |
| 1.70E-05 | 0 0 | Cs6g12870.1         | 4.11 | 1 | 0    | 2 | MASCOT | T      |       |       |
| 2.71E-02 | 0 0 | Cs6g12870.1/Cs6g128 | 6    | 0 | 0    | 2 | MASCOT | T      | PLEX8 |       |
| 2.08E-01 | 0 0 | Cs6g12870.1/Cs6g128 | 6    | 0 | 0    | 2 | MASCOT | T      | PLEX8 |       |
| 2.54E-01 | 0 0 | Cs6g12870.1/Cs6g128 | 6    | 0 | 0    | 2 | MASCOT | T      |       |       |
| 2.17E-02 | 0 0 | Cs6g12870.1/Cs6g128 | 6    | 0 | 0    | 2 | MASCOT | T      |       |       |
| 2.10E-01 | 0 0 | Cs6g12870.1/Cs6g128 | 6    | 0 | 0    | 2 | MASCOT | T      |       |       |
| 5.31E-01 | 0 0 | Cs6g12870.1/Cs6g128 | 6    | 0 | 0    | 2 | MASCOT | T      | PLEX8 |       |
| 1.61E-01 | 0 0 | Cs6g12870.1/Cs6g128 | 6    | 0 | 0    | 2 | MASCOT | T      | PLEX8 |       |
| 3.95E-02 | 0 0 | Cs6g12870.1/Cs6g128 | 6    | 0 | 0    | 2 | MASCOT | T      | PLEX8 |       |
| 1.92E-01 | 0 0 | Cs6g12870.1/Cs6g128 | 6    | 0 | 0    | 2 | MASCOT | T      | PLEX8 |       |
| 2.80E-01 | 0 0 | Cs6g12870.1/Cs6g128 | 6    | 0 | 0    | 2 | MASCOT | T      | PLEX8 |       |
| 1.87E-01 | 0 0 | Cs6g12870.1/Cs6g128 | 6    | 0 | 0    | 2 | MASCOT | T      | PLEX8 |       |
| 3.01E-01 | 0 0 | Cs6g12870.1/Cs6g128 | 6    | 0 | 0    | 2 | MASCOT | T      | PLEX8 |       |
| 1.97E-02 | 0 0 | Cs6g12870.1/Cs6g128 | 6    | 0 | 0    | 2 | MASCOT | T      |       |       |
| 5.69E-02 | 0 0 | Cs6g12880.1         | 4.91 | 1 | 15.9 | 0 | 2      | MASCOT | T     | PLEX8 |
| 1.04E-02 | 0 0 | Cs6g12880.1         | 4.91 | 1 | 0    | 2 | MASCOT | T      | PLEX8 |       |
| 1.17E-01 | 0 0 | Cs6g12880.1         | 4.91 | 1 | 0    | 2 | MASCOT | T      | PLEX8 |       |
| 1.73E-02 | 0 0 | Cs6g12880.1         | 4.91 | 1 | 0    | 2 | MASCOT | T      | PLEX8 |       |
| 5.13E-03 | 0 0 | Cs6g12880.1         | 4.91 | 1 | 0    | 2 | MASCOT | T      | PLEX8 |       |
| 4.14E-02 | 0 0 | Cs6g12880.1         | 4.91 | 1 | 0    | 2 | MASCOT | T      | PLEX8 |       |
| 1.14E-01 | 0 0 | Cs6g12870.1/Cs6g128 | 5.29 | 0 | 0    | 2 | MASCOT | T      | PLEX8 |       |
| 5.19E-03 | 0 0 | Cs6g12870.1/Cs6g128 | 5.29 | 0 | 0    | 2 | MASCOT | T      | PLEX8 |       |
| 4.68E-03 | 0 0 | Cs6g12870.1/Cs6g128 | 5.29 | 0 | 0    | 2 | MASCOT | T      | PLEX8 |       |
| 1.82E-01 | 0 0 | Cs6g12870.1/Cs6g128 | 5.29 | 0 | 0    | 2 | MASCOT | T      | PLEX8 |       |
| 3.88E-02 | 0 0 | Cs6g12870.1/Cs6g128 | 5.29 | 0 | 0    | 2 | MASCOT | T      | PLEX8 |       |
| 6.98E-02 | 0 0 | Cs6g12870.1/Cs6g128 | 5.29 | 0 | 0    | 2 | MASCOT | T      | PLEX8 |       |
| 2.41E-01 | 0 0 | Cs6g12870.1/Cs6g128 | 5.29 | 0 | 0    | 2 | MASCOT | T      | PLEX8 |       |
| 6.95E-02 | 0 0 | Cs6g12870.1/Cs6g128 | 5.29 | 0 | 0    | 2 | MASCOT | T      | PLEX8 |       |
| 1.41E-01 | 0 0 | Cs6g12870.1/Cs6g128 | 5.29 | 0 | 0    | 2 | MASCOT | T      | PLEX8 |       |
| 1.09E-02 | 0 0 | Cs6g12870.1/Cs6g128 | 5.29 | 0 | 0    | 2 | MASCOT | T      | PLEX8 |       |
| 7.02E-04 | 0 0 | Cs6g12870.1/Cs6g128 | 5.29 | 0 | 0    | 2 | MASCOT | T      | PLEX8 |       |



|          |     |                     |      |   |      |   |        |        |       |       |
|----------|-----|---------------------|------|---|------|---|--------|--------|-------|-------|
| 5.97E-03 | 0 0 | Cs6g12870.1/Cs6g128 | 5.29 | 0 | 0    | 2 | MASCOT | T      | PLEX8 |       |
| 4.72E-03 | 0 0 | Cs6g12870.1/Cs6g128 | 5.29 | 0 | 0    | 2 | MASCOT | T      | PLEX8 |       |
| 3.57E-02 | 0 0 | Cs6g12870.1/Cs6g128 | 5.29 | 0 | 0    | 2 | MASCOT | T      | PLEX8 |       |
| 2.59E-01 | 0 0 | Cs6g12870.1/Cs6g128 | 5.29 | 0 | 0    | 2 | MASCOT | T      |       |       |
| 1.72E-01 | 0 0 | Cs6g12870.1/Cs6g128 | 5.29 | 0 | 0    | 2 | MASCOT | T      |       |       |
| 5.82E-04 | 0 0 | Cs6g12870.1/Cs6g128 | 5.29 | 0 | 0    | 2 | MASCOT | T      |       |       |
| 1.78E-03 | 0 0 | Cs6g12870.1/Cs6g128 | 5.29 | 0 | 0    | 2 | MASCOT | T      | PLEX8 |       |
| 3.22E-02 | 0 0 | Cs6g12870.1/Cs6g128 | 5.29 | 0 | 0    | 2 | MASCOT | T      | PLEX8 |       |
| 8.24E-03 | 0 0 | Cs6g12870.1/Cs6g128 | 5.29 | 0 | 0    | 2 | MASCOT | T      | PLEX8 |       |
| 1.10E-03 | 0 0 | Cs6g12870.1/Cs6g128 | 5.29 | 0 | 0    | 2 | MASCOT | T      | PLEX8 |       |
| 2.65E-01 | 0 0 | Cs6g12870.1/Cs6g128 | 5.29 | 0 | 0    | 2 | MASCOT | T      | PLEX8 |       |
| 2.02E-01 | 0 0 | Cs6g12870.1/Cs6g128 | 5.29 | 0 | 0    | 2 | MASCOT | T      | PLEX8 |       |
| 1.10E-01 | 0 0 | Cs6g12870.1/Cs6g128 | 5.29 | 0 | 0    | 2 | MASCOT | T      | PLEX8 |       |
| 3.24E-02 | 0 0 | Cs6g12870.1/Cs6g128 | 5.29 | 0 | 0    | 2 | MASCOT | T      | PLEX8 |       |
| 1.00E-02 | 0 0 | Cs6g12870.1/Cs6g128 | 5.29 | 0 | 0    | 2 | MASCOT | T      | PLEX8 |       |
| 2.37E-02 | 0 0 | Cs6g12870.1/Cs6g128 | 5.29 | 0 | 0    | 2 | MASCOT | T      | PLEX8 |       |
| 6.37E-03 | 0 0 | Cs6g12870.1/Cs6g128 | 5.29 | 0 | 0    | 2 | MASCOT | T      |       |       |
| 5.72E-03 | 0 0 | Cs6g12870.1/Cs6g128 | 5.29 | 0 | 0    | 2 | MASCOT | T      | PLEX8 |       |
| 6.22E-03 | 0 0 | Cs6g12870.1/Cs6g128 | 5.29 | 0 | 0    | 2 | MASCOT | T      | PLEX8 |       |
| 5.48E-02 | 0 0 | Cs6g12870.1/Cs6g128 | 5.96 | 0 | 0    | 2 | MASCOT | T      | PLEX8 |       |
| 1.27E-01 | 0 0 | Cs6g12870.1/Cs6g128 | 5.96 | 0 | 0    | 2 | MASCOT | T      | PLEX8 |       |
| 2.37E-01 | 0 0 | Cs6g12870.1/Cs6g128 | 5.96 | 0 | 0    | 2 | MASCOT | T      | PLEX8 |       |
| 3.56E-01 | 0 0 | Cs6g12870.1/Cs6g128 | 5.96 | 0 | 0    | 2 | MASCOT | T      | PLEX8 |       |
| 2.56E-01 | 0 0 | Cs6g12870.1/Cs6g128 | 5.96 | 0 | 0    | 2 | MASCOT | T      | PLEX8 |       |
| 3.62E-01 | 0 0 | Cs6g12870.1/Cs6g128 | 5.96 | 0 | 0    | 2 | MASCOT | T      | PLEX8 |       |
| 2.89E-01 | 0 0 | Cs6g12870.1/Cs6g128 | 5.96 | 0 | 0    | 2 | MASCOT | T      | PLEX8 |       |
| 6.42E-02 | 0 0 | Cs6g12870.1/Cs6g128 | 5.96 | 0 | 0    | 2 | MASCOT | T      |       |       |
| 1.34E-01 | 0 0 | Cs6g12870.1/Cs6g128 | 5.96 | 0 | 0    | 2 | MASCOT | T      |       |       |
| 3.29E-02 | 0 0 | Cs6g12870.1/Cs6g128 | 5.96 | 0 | 0    | 2 | MASCOT | T      | PLEX8 |       |
| 1.23E-01 | 0 0 | Cs6g12870.1/Cs6g128 | 5.96 | 0 | 0    | 2 | MASCOT | T      | PLEX8 |       |
| 8.96E-02 | 0 0 | Cs6g12870.1/Cs6g128 | 5.96 | 0 | 0    | 2 | MASCOT | T      | PLEX8 |       |
| 1.51E-01 | 0 0 | Cs6g12870.1/Cs6g128 | 5.96 | 0 | 0    | 2 | MASCOT | T      | PLEX8 |       |
| 1.74E-01 | 0 0 | Cs6g12870.1/Cs6g128 | 5.96 | 0 | 0    | 2 | MASCOT | T      | PLEX8 |       |
| 3.14E-01 | 0 0 | Cs6g12870.1/Cs6g128 | 5.96 | 0 | 0    | 2 | MASCOT | T      |       |       |
| 1.08E-01 | 0 0 | Cs6g12870.1/Cs6g128 | 5.96 | 0 | 0    | 2 | MASCOT | T      |       |       |
| 1.52E-01 | 0 0 | Cs6g12870.1/Cs6g128 | 5.96 | 0 | 0    | 2 | MASCOT | T      |       |       |
| 2.95E-03 | 0 0 | Cs6g12870.1/Cs6g128 | 9.76 | 0 | 0    | 2 | MASCOT | T      | PLEX8 |       |
| 1.27E-01 | 0 0 | Cs6g12870.1/Cs6g128 | 9.76 | 0 | 0    | 2 | MASCOT | T      | PLEX8 |       |
| 4.54E-02 | 0 0 | Cs6g12870.1/Cs6g128 | 9.76 | 0 | 0    | 2 | MASCOT | T      | PLEX8 |       |
| 1.20E-01 | 0 0 | Cs6g12870.1/Cs6g128 | 9.76 | 0 | 0    | 2 | MASCOT | T      | PLEX8 |       |
| 3.00E-03 | 0 0 | Cs6g12870.1/Cs6g128 | 9.76 | 0 | 0    | 2 | MASCOT | T      | PLEX8 |       |
| 2.06E-01 | 0 0 | Cs6g12870.1/Cs6g128 | 9.76 | 0 | 0    | 2 | MASCOT | T      | PLEX8 |       |
| 5.94E-03 | 0 0 | Cs6g12870.1/Cs6g128 | 9.76 | 0 | 0    | 2 | MASCOT | T      | PLEX8 |       |
| 1.24E-01 | 0 0 | Cs6g12870.1/Cs6g128 | 9.76 | 0 | 0    | 2 | MASCOT | T      | PLEX8 |       |
| 2.15E-02 | 0 0 | Cs6g12870.1/Cs6g128 | 9.76 | 0 | 0    | 2 | MASCOT | T      | PLEX8 |       |
| 8.91E-02 | 0 0 | Cs6g12870.1/Cs6g128 | 9.76 | 0 | 0    | 2 | MASCOT | T      | PLEX8 |       |
| 2.54E-02 | 0 0 | Cs6g12870.1/Cs6g128 | 9.76 | 0 | 0    | 2 | MASCOT | T      | PLEX8 |       |
| 3.79E-02 | 0 0 | Cs6g12870.1/Cs6g128 | 9.76 | 0 | 0    | 2 | MASCOT | T      |       |       |
| 3.42E-01 | 0 0 | Cs6g12880.1         | 4.48 | 0 | 15.9 | 0 | 2      | MASCOT | T     | PLEX8 |
| 2.94E-02 | 0 0 | Cs6g12880.1         | 4.48 | 0 | 15.9 | 0 | 2      | MASCOT | T     | PLEX8 |
| 3.00E-03 | 0 0 | Cs6g12880.1         | 4.48 | 0 | 15.9 | 0 | 2      | MASCOT | T     | PLEX8 |

|              |                     |      |   |      |   |   |        |   |       |
|--------------|---------------------|------|---|------|---|---|--------|---|-------|
| 2.87E-02 0 0 | Cs6g12880.1         | 4.48 | 0 | 15.9 | 0 | 2 | MASCOT | T | PLEX8 |
| 1.77E-01 0 0 | Cs6g12880.1         | 4.48 | 0 | 15.9 | 0 | 2 | MASCOT | T | PLEX8 |
| 1.24E-04 0 0 | Cs6g12880.1         | 4.48 | 0 | 15.9 | 0 | 2 | MASCOT | T | PLEX8 |
| 8.84E-04 0 0 | Cs6g12880.1         | 4.48 | 0 | 15.9 | 0 | 2 | MASCOT | T | PLEX8 |
| 3.77E-02 0 0 | Cs6g12880.1         | 4.48 | 0 | 15.9 | 0 | 2 | MASCOT | T | PLEX8 |
| 4.33E-03 0 0 | Cs6g12880.1         | 4.48 | 0 | 15.9 | 0 | 2 | MASCOT | T | PLEX8 |
| 1.31E-04 0 0 | Cs6g12880.1         | 4.48 | 0 | 15.9 | 0 | 2 | MASCOT | T | PLEX8 |
| 2.24E-01 0 0 | Cs6g12880.1         | 4.48 | 0 | 15.9 | 0 | 2 | MASCOT | T |       |
| 1.86E-01 0 0 | Cs6g12880.1         | 4.48 | 0 |      | 0 | 2 | MASCOT | T | PLEX8 |
| 1.94E-02 0 0 | Cs6g12880.1         | 4.48 | 0 |      | 0 | 2 | MASCOT | T | PLEX8 |
| 2.27E-03 0 0 | Cs6g12880.1         | 4.48 | 0 |      | 0 | 2 | MASCOT | T | PLEX8 |
| 5.29E-06 0 0 | Cs6g12880.1         | 4.48 | 0 |      | 0 | 2 | MASCOT | T | PLEX8 |
| 2.99E-03 0 0 | Cs6g12880.1         | 4.48 | 0 |      | 0 | 2 | MASCOT | T | PLEX8 |
| 5.06E-06 0 0 | Cs6g12880.1         | 4.48 | 0 |      | 0 | 2 | MASCOT | T | PLEX8 |
| 3.38E-01 0 0 | Cs6g12880.1         | 4.48 | 0 |      | 0 | 2 | MASCOT | T | PLEX8 |
| 2.16E-01 0 0 | Cs6g12880.1         | 9.47 | 0 |      | 0 | 2 | MASCOT | T | PLEX8 |
| 2.28E-03 0 0 | Cs6g12880.1         | 5.66 | 0 |      | 0 | 2 | MASCOT | T | PLEX8 |
| 3.46E-02 0 0 | Cs6g12880.1         | 5.66 | 0 |      | 0 | 2 | MASCOT | T | PLEX8 |
| 2.21E-01 0 0 | Cs6g12880.1         | 5.66 | 0 |      | 0 | 2 | MASCOT | T | PLEX8 |
| 2.37E-01 0 0 | Cs6g12880.1         | 5.66 | 0 |      | 0 | 2 | MASCOT | T | PLEX8 |
| 9.05E-02 0 0 | Cs6g12880.1         | 5.66 | 0 |      | 0 | 2 | MASCOT | T |       |
| 1.56E-02 0 0 | Cs6g12880.1         | 5.66 | 0 |      | 0 | 2 | MASCOT | T | PLEX8 |
| 3.81E-02 0 0 | Cs6g12880.1         | 5.66 | 0 |      | 0 | 2 | MASCOT | T | PLEX8 |
| 9.55E-02 0 0 | Cs6g12880.1         | 5.66 | 0 |      | 0 | 2 | MASCOT | T |       |
| 7.91E-03 0 0 | Cs6g12880.1         | 5.66 | 0 |      | 0 | 2 | MASCOT | T |       |
| 2.99E-02 0 0 | Cs6g12880.1         | 5.66 | 0 |      | 0 | 2 | MASCOT | T | PLEX8 |
| 1.33E-01 0 0 | Cs6g12880.1         | 5.66 | 0 |      | 0 | 2 | MASCOT | T | PLEX8 |
| 6.64E-02 0 0 | Cs6g12880.1         | 5.66 | 0 |      | 0 | 2 | MASCOT | T | PLEX8 |
| 1.25E-01 0 0 | Cs6g12880.1         | 5.66 | 0 |      | 0 | 2 | MASCOT | T |       |
| 2.56E-02 0 0 | Cs6g12880.1         | 5.66 | 0 |      | 0 | 2 | MASCOT | T | PLEX8 |
| 2.43E-01 0 0 | Cs6g12880.1         | 5.66 | 0 |      | 0 | 2 | MASCOT | T |       |
| 2.24E-01 0 0 | Cs6g18900.1         | 4.75 | 0 |      | 0 | 2 | MASCOT | T |       |
| 1.60E-01 0 0 | Cs3g06080.1/Cs6g189 | 8.5  | 0 |      | 0 | 2 | MASCOT | T |       |
| 1.54E-01 0 0 | Cs3g06080.1/Cs6g189 | 8.5  | 0 |      | 0 | 2 | MASCOT | T |       |
| 1.80E-01 0 0 | Cs3g06080.1/Cs6g189 | 8.5  | 0 |      | 0 | 2 | MASCOT | T | PLEX8 |
| 1.53E-03 0 0 | Cs6g18900.1         | 8.75 | 0 |      | 0 | 2 | MASCOT | T | PLEX8 |
| 3.23E-03 0 0 | Cs6g18900.1         | 8.75 | 0 |      | 0 | 2 | MASCOT | T | PLEX8 |
| 8.78E-04 0 0 | Cs6g18900.1         | 8.75 | 0 |      | 0 | 2 | MASCOT | T | PLEX8 |
| 1.74E-03 0 0 | Cs6g18900.1         | 8.75 | 0 |      | 0 | 2 | MASCOT | T |       |
| 7.61E-04 0 0 | Cs6g18900.1         | 8.75 | 0 |      | 0 | 2 | MASCOT | T | PLEX8 |
| 4.31E-03 0 0 | Cs6g18900.1         | 8.75 | 0 |      | 0 | 2 | MASCOT | T |       |
| 1.74E-01 0 0 | Cs6g18900.1         | 8.75 | 0 |      | 0 | 2 | MASCOT | T |       |
| 9.99E-02 0 0 | Cs6g18900.1         | 8.75 | 0 |      | 0 | 2 | MASCOT | T | PLEX8 |
| 1.63E-03 0 0 | Cs6g18900.1         | 8.75 | 0 |      | 0 | 2 | MASCOT | T | PLEX8 |
| 2.46E-02 0 0 | Cs6g18900.1         | 8.75 | 0 |      | 0 | 2 | MASCOT | T | PLEX8 |
| 2.82E-03 0 0 | Cs6g18900.1         | 8.75 | 0 |      | 0 | 2 | MASCOT | T | PLEX8 |
| 3.03E-01 0 0 | Cs6g18900.1/Cs7g128 | 5.84 | 0 |      | 0 | 2 | MASCOT | T | PLEX8 |
| 3.27E-01 0 0 | Cs6g18900.1/Cs7g128 | 5.84 | 0 |      | 0 | 2 | MASCOT | T | PLEX8 |
| 5.61E-02 0 0 | Cs6g18900.1/Cs7g128 | 5.84 | 0 |      | 0 | 2 | MASCOT | T | PLEX8 |
| 1.04E-02 0 0 | Cs6g18900.1/Cs7g128 | 5.84 | 0 |      | 0 | 2 | MASCOT | T | PLEX8 |
| 1.42E-01 0 0 | Cs6g18900.1/Cs7g128 | 5.84 | 0 |      | 0 | 2 | MASCOT | T | PLEX8 |

|          |     |                     |      |   |   |   |        |   |       |
|----------|-----|---------------------|------|---|---|---|--------|---|-------|
| 3.10E-01 | 0 0 | Cs6g18900.1/Cs7g128 | 5.84 | 0 | 0 | 2 | MASCOT | T | PLEX8 |
| 5.09E-02 | 0 0 | Cs6g18900.1/Cs7g128 | 5.84 | 0 | 0 | 2 | MASCOT | T | PLEX8 |
| 2.93E-01 | 0 0 | Cs6g18900.1/Cs7g128 | 5.84 | 0 | 0 | 2 | MASCOT | T | PLEX8 |
| 3.30E-01 | 0 0 | Cs6g18900.1/Cs7g128 | 5.84 | 0 | 0 | 2 | MASCOT | T | PLEX8 |
| 5.72E-02 | 0 0 | Cs6g18900.1/Cs7g128 | 5.84 | 0 | 0 | 2 | MASCOT | T | PLEX8 |
| 7.78E-02 | 0 0 | Cs6g18900.1/Cs7g128 | 5.84 | 0 | 0 | 2 | MASCOT | T | PLEX8 |
| 1.36E-04 | 0 0 | Cs6g18900.1         | 4.75 | 0 | 0 | 2 | MASCOT | T | PLEX8 |
| 5.26E-03 | 0 0 | Cs6g18900.1         | 4.75 | 0 | 0 | 2 | MASCOT | T | PLEX8 |
| 3.54E-04 | 0 0 | Cs6g18900.1         | 4.75 | 0 | 0 | 2 | MASCOT | T | PLEX8 |
| 1.76E-03 | 0 0 | Cs6g18900.1         | 4.75 | 0 | 0 | 2 | MASCOT | T | PLEX8 |
| 7.13E-05 | 0 0 | Cs6g18900.1         | 4.75 | 0 | 0 | 2 | MASCOT | T | PLEX8 |
| 2.05E-04 | 0 0 | Cs6g18900.1         | 4.75 | 0 | 0 | 2 | MASCOT | T | PLEX8 |
| 6.73E-05 | 0 0 | Cs6g18900.1         | 4.75 | 0 | 0 | 2 | MASCOT | T | PLEX8 |
| 1.35E-02 | 0 0 | Cs6g18900.1         | 4.75 | 0 | 0 | 2 | MASCOT | T | PLEX8 |
| 1.19E-03 | 0 0 | Cs6g18900.1         | 4.75 | 0 | 0 | 2 | MASCOT | T | PLEX8 |
| 9.78E-05 | 0 0 | Cs6g18900.1         | 4.75 | 0 | 0 | 2 | MASCOT | T | PLEX8 |
| 2.73E-01 | 0 0 | Cs6g18900.1         | 4.75 | 0 | 0 | 2 | MASCOT | T | PLEX8 |
| 7.72E-02 | 0 0 | Cs6g18900.1         | 4.75 | 0 | 0 | 2 | MASCOT | T | PLEX8 |
| 4.91E-04 | 0 0 | Cs6g18900.1         | 4.75 | 0 | 0 | 2 | MASCOT | T | PLEX8 |
| 2.62E-05 | 0 0 | Cs6g18900.1         | 4.75 | 0 | 0 | 2 | MASCOT | T | PLEX8 |
| 1.32E-01 | 0 0 | Cs6g18900.1         | 4.75 | 0 | 0 | 2 | MASCOT | T | PLEX8 |
| 2.44E-03 | 0 0 | Cs6g18900.1         | 4.75 | 0 | 0 | 2 | MASCOT | T | PLEX8 |
| 6.83E-04 | 0 0 | Cs6g18900.1         | 4.75 | 0 | 0 | 2 | MASCOT | T | PLEX8 |
| 3.16E-04 | 0 0 | Cs6g18900.1         | 4.75 | 0 | 0 | 2 | MASCOT | T | PLEX8 |
| 6.18E-02 | 0 0 | Cs6g18900.1         | 4.75 | 0 | 0 | 2 | MASCOT | T | PLEX8 |
| 4.40E-03 | 0 0 | Cs6g18900.1         | 4.75 | 0 | 0 | 2 | MASCOT | T | PLEX8 |
| 1.18E-04 | 0 0 | Cs6g18900.1         | 4.75 | 0 | 0 | 2 | MASCOT | T | PLEX8 |
| 2.30E-05 | 0 0 | Cs6g18900.1         | 4.75 | 0 | 0 | 2 | MASCOT | T | PLEX8 |
| 6.80E-06 | 0 0 | Cs6g18900.1         | 4.75 | 0 | 0 | 2 | MASCOT | T | PLEX8 |
| 1.70E-04 | 0 0 | Cs6g18900.1         | 4.75 | 0 | 0 | 2 | MASCOT | T | PLEX8 |
| 8.45E-03 | 0 0 | Cs6g18900.1         | 4.75 | 0 | 0 | 2 | MASCOT | T | PLEX8 |
| 3.33E-01 | 0 0 | Cs6g18900.1         | 4.75 | 0 | 0 | 2 | MASCOT | T | PLEX8 |
| 3.31E-01 | 0 0 | Cs6g18900.1         | 4.75 | 0 | 0 | 2 | MASCOT | T |       |
| 4.61E-02 | 0 0 | Cs6g18900.1         | 4.75 | 0 | 0 | 2 | MASCOT | T | PLEX8 |
| 5.09E-05 | 0 0 | Cs6g18900.1         | 4.75 | 0 | 0 | 2 | MASCOT | T | PLEX8 |
| 1.21E-05 | 0 0 | Cs6g18900.1         | 4.75 | 0 | 0 | 2 | MASCOT | T | PLEX8 |
| 2.07E-03 | 0 0 | Cs6g18900.1         | 4.75 | 0 | 0 | 2 | MASCOT | T |       |
| 5.43E-04 | 0 0 | Cs6g18900.1         | 4.75 | 0 | 0 | 2 | MASCOT | T |       |
| 2.66E-01 | 0 0 | Cs6g18900.1/Cs6g189 | 8.75 | 0 | 0 | 2 | MASCOT | T | PLEX8 |
| 1.66E-01 | 0 0 | Cs6g18900.1/Cs6g189 | 8.75 | 0 | 0 | 2 | MASCOT | T |       |
| 1.13E-01 | 0 0 | Cs6g18900.1/Cs6g189 | 8.75 | 0 | 0 | 2 | MASCOT | T | PLEX8 |
| 1.05E-01 | 0 0 | Cs6g18900.1/Cs6g189 | 8.75 | 0 | 0 | 2 | MASCOT | T | PLEX8 |
| 1.46E-01 | 0 0 | Cs6g18900.1/Cs6g189 | 8.75 | 0 | 0 | 2 | MASCOT | T | PLEX8 |
| 3.75E-02 | 0 0 | Cs6g18900.1         | 8.59 | 0 | 0 | 2 | MASCOT | T | PLEX8 |
| 3.87E-01 | 0 0 | Cs6g18900.1         | 8.59 | 0 | 0 | 2 | MASCOT | T | PLEX8 |
| 2.31E-01 | 0 0 | Cs6g18900.1         | 8.59 | 0 | 0 | 2 | MASCOT | T |       |
| 2.36E-01 | 0 0 | Cs6g18900.1         | 5.68 | 0 | 0 | 2 | MASCOT | T | PLEX8 |
| 1.16E-01 | 0 0 | Cs6g18900.1         | 5.68 | 0 | 0 | 2 | MASCOT | T | PLEX8 |
| 1.65E-01 | 0 0 | Cs7g12890.1         | 5.24 | 0 | 0 | 2 | MASCOT | T | PLEX8 |
| 1.42E-01 | 0 0 | Cs7g12890.1         | 5.24 | 0 | 0 | 2 | MASCOT | T | PLEX8 |
| 3.54E-02 | 0 0 | Cs7g12890.1         | 5.24 | 0 | 0 | 2 | MASCOT | T | PLEX8 |

|              |                     |      |   |   |          |   |       |
|--------------|---------------------|------|---|---|----------|---|-------|
| 5.17E-03 0 0 | Cs7g12890.1         | 5.24 | 0 | 0 | 2 MASCOT | T | PLEX8 |
| 1.17E-02 0 0 | Cs7g12890.1         | 5.24 | 0 | 0 | 2 MASCOT | T | PLEX8 |
| 8.14E-05 0 0 | Cs7g12890.1         | 5.24 | 0 | 0 | 2 MASCOT | T | PLEX8 |
| 4.78E-03 0 0 | Cs7g12890.1         | 5.24 | 0 | 0 | 2 MASCOT | T | PLEX8 |
| 8.28E-03 0 0 | Cs7g12890.1         | 5.24 | 0 | 0 | 2 MASCOT | T | PLEX8 |
| 1.57E-02 0 0 | Cs7g12890.1         | 5.24 | 0 | 0 | 2 MASCOT | T | PLEX8 |
| 7.51E-02 0 0 | Cs7g12890.1         | 5.24 | 0 | 0 | 2 MASCOT | T | PLEX8 |
| 1.58E-02 0 0 | Cs7g12890.1         | 5.24 | 0 | 0 | 2 MASCOT | T | PLEX8 |
| 3.63E-02 0 0 | Cs7g12890.1         | 5.24 | 0 | 0 | 2 MASCOT | T |       |
| 1.11E-02 0 0 | Cs7g12890.1         | 5.24 | 0 | 0 | 2 MASCOT | T | PLEX8 |
| 1.83E-02 0 0 | Cs7g12890.1         | 5.24 | 0 | 0 | 2 MASCOT | T | PLEX8 |
| 1.72E-03 0 0 | Cs7g12890.1         | 5.24 | 0 | 0 | 2 MASCOT | T | PLEX8 |
| 9.68E-02 0 0 | Cs7g12890.1         | 5.24 | 0 | 0 | 2 MASCOT | T | PLEX8 |
| 8.26E-03 0 0 | Cs7g12890.1         | 5.24 | 0 | 0 | 2 MASCOT | T | PLEX8 |
| 2.25E-01 0 0 | Cs7g12890.1         | 5.4  | 0 | 0 | 2 MASCOT | T | PLEX8 |
| 3.80E-01 0 0 | Cs7g12890.1         | 5.4  | 0 | 0 | 2 MASCOT | T |       |
| 8.97E-02 0 0 | Cs7g12890.1         | 5.4  | 0 | 0 | 2 MASCOT | T | PLEX8 |
| 1.60E-01 0 0 | Cs3g06080.1/Cs6g189 | 8.5  | 0 | 0 | 2 MASCOT | T |       |
| 1.54E-01 0 0 | Cs3g06080.1/Cs6g189 | 8.5  | 0 | 0 | 2 MASCOT | T |       |
| 1.80E-01 0 0 | Cs3g06080.1/Cs6g189 | 8.5  | 0 | 0 | 2 MASCOT | T | PLEX8 |
| 4.53E-02 0 0 | Cs7g12890.1         | 8.6  | 0 | 0 | 2 MASCOT | T | PLEX8 |
| 2.42E-01 0 0 | Cs7g12890.1         | 8.6  | 0 | 0 | 2 MASCOT | T | PLEX8 |
| 2.30E-01 0 0 | Cs7g12890.1         | 8.6  | 0 | 0 | 2 MASCOT | T | PLEX8 |
| 7.81E-02 0 0 | Cs7g12890.1         | 8.6  | 0 | 0 | 2 MASCOT | T | PLEX8 |
| 6.29E-02 0 0 | Cs7g12890.1         | 8.6  | 0 | 0 | 2 MASCOT | T | PLEX8 |
| 1.23E-02 0 0 | Cs7g12890.1         | 8.6  | 0 | 0 | 2 MASCOT | T | PLEX8 |
| 1.51E-01 0 0 | Cs7g12890.1         | 8.6  | 0 | 0 | 2 MASCOT | T | PLEX8 |
| 2.61E-02 0 0 | Cs7g12890.1         | 8.6  | 0 | 0 | 2 MASCOT | T |       |
| 6.05E-02 0 0 | Cs7g12890.1         | 8.6  | 0 | 0 | 2 MASCOT | T | PLEX8 |
| 2.27E-02 0 0 | Cs7g12890.1         | 8.6  | 0 | 0 | 2 MASCOT | T | PLEX8 |
| 2.83E-02 0 0 | Cs7g12890.1         | 8.6  | 0 | 0 | 2 MASCOT | T | PLEX8 |
| 2.25E-01 0 0 | Cs7g12890.1         | 8.6  | 0 | 0 | 2 MASCOT | T | PLEX8 |
| 5.94E-04 0 0 | Cs7g12890.1         | 8.6  | 0 | 0 | 2 MASCOT | T | PLEX8 |
| 2.50E-02 0 0 | Cs7g12890.1         | 8.6  | 0 | 0 | 2 MASCOT | T | PLEX8 |
| 1.40E-01 0 0 | Cs7g12890.1         | 8.6  | 0 | 0 | 2 MASCOT | T | PLEX8 |
| 2.90E-02 0 0 | Cs7g12890.1         | 8.6  | 0 | 0 | 2 MASCOT | T | PLEX8 |
| 4.32E-02 0 0 | Cs7g12890.1         | 8.6  | 0 | 0 | 2 MASCOT | T |       |
| 1.76E-01 0 0 | Cs7g12890.1         | 8.6  | 0 | 0 | 2 MASCOT | T |       |
| 2.28E-02 0 0 | Cs7g12890.1         | 8.6  | 0 | 0 | 2 MASCOT | T |       |
| 1.94E-02 0 0 | Cs7g12890.1         | 8.6  | 0 | 0 | 2 MASCOT | T |       |
| 3.68E-01 0 0 | Cs7g12890.1         | 6.75 | 0 | 0 | 2 MASCOT | T | PLEX8 |
| 3.03E-01 0 0 | Cs6g18900.1/Cs7g128 | 5.84 | 0 | 0 | 2 MASCOT | T | PLEX8 |
| 3.27E-01 0 0 | Cs6g18900.1/Cs7g128 | 5.84 | 0 | 0 | 2 MASCOT | T | PLEX8 |
| 5.61E-02 0 0 | Cs6g18900.1/Cs7g128 | 5.84 | 0 | 0 | 2 MASCOT | T | PLEX8 |
| 1.04E-02 0 0 | Cs6g18900.1/Cs7g128 | 5.84 | 0 | 0 | 2 MASCOT | T | PLEX8 |
| 1.42E-01 0 0 | Cs6g18900.1/Cs7g128 | 5.84 | 0 | 0 | 2 MASCOT | T | PLEX8 |
| 3.10E-01 0 0 | Cs6g18900.1/Cs7g128 | 5.84 | 0 | 0 | 2 MASCOT | T | PLEX8 |
| 5.09E-02 0 0 | Cs6g18900.1/Cs7g128 | 5.84 | 0 | 0 | 2 MASCOT | T | PLEX8 |
| 2.93E-01 0 0 | Cs6g18900.1/Cs7g128 | 5.84 | 0 | 0 | 2 MASCOT | T | PLEX8 |
| 3.30E-01 0 0 | Cs6g18900.1/Cs7g128 | 5.84 | 0 | 0 | 2 MASCOT | T | PLEX8 |
| 5.72E-02 0 0 | Cs6g18900.1/Cs7g128 | 5.84 | 0 | 0 | 2 MASCOT | T | PLEX8 |

|          |     |                     |      |   |   |   |        |   |       |
|----------|-----|---------------------|------|---|---|---|--------|---|-------|
| 7.78E-02 | 0 0 | Cs6g18900.1/Cs7g128 | 5.84 | 0 | 0 | 2 | MASCOT | T | PLEX8 |
| 2.95E-01 | 0 0 | Cs7g12890.1         | 4.25 | 0 | 0 | 2 | MASCOT | T | PLEX8 |
| 5.02E-04 | 0 0 | Cs7g12890.1         | 4.25 | 0 | 0 | 2 | MASCOT | T | PLEX8 |
| 1.81E-01 | 0 0 | Cs7g12890.1         | 4.25 | 0 | 0 | 2 | MASCOT | T |       |
| 2.52E-01 | 0 0 | Cs7g12890.1         | 4.25 | 0 | 0 | 2 | MASCOT | T |       |
| 1.45E-01 | 0 0 | Cs7g12890.1         | 4.25 | 0 | 0 | 2 | MASCOT | T |       |
| 1.13E-04 | 0 0 | Cs7g12890.1         | 4.25 | 0 | 0 | 2 | MASCOT | T |       |
| 1.48E-04 | 0 0 | Cs7g12890.1         | 4.25 | 0 | 0 | 2 | MASCOT | T |       |
| 1.92E-01 | 0 0 | Cs7g12890.1         | 8.75 | 0 | 0 | 2 | MASCOT | T | PLEX8 |
| 9.49E-02 | 0 0 | Cs5g28410.1/Cs5g284 | 6.74 | 0 | 0 | 2 | MASCOT | T | PLEX8 |
| 6.78E-02 | 0 0 | Cs5g28410.1/Cs5g284 | 6.74 | 0 | 0 | 2 | MASCOT | T | PLEX8 |
| 2.76E-04 | 0 0 | Cs5g28410.1/Cs5g284 | 4.03 | 0 | 0 | 2 | MASCOT | T | PLEX8 |
| 4.31E-03 | 0 0 | Cs5g28410.1/Cs5g284 | 4.03 | 0 | 0 | 2 | MASCOT | T | PLEX8 |
| 1.30E-02 | 0 0 | Cs5g28410.1/Cs5g284 | 4.03 | 0 | 0 | 2 | MASCOT | T | PLEX8 |
| 7.04E-04 | 0 0 | Cs5g28410.1/Cs5g284 | 4.03 | 0 | 0 | 2 | MASCOT | T | PLEX8 |
| 4.16E-02 | 0 0 | Cs5g28410.1/Cs5g284 | 4.03 | 0 | 0 | 2 | MASCOT | T | PLEX8 |
| 2.83E-03 | 0 0 | Cs5g28410.1/Cs5g284 | 4.03 | 0 | 0 | 2 | MASCOT | T |       |
| 1.78E-02 | 0 0 | Cs5g28400.1/Cs7g260 | 4.25 | 0 | 0 | 2 | MASCOT | T | PLEX8 |
| 5.45E-01 | 0 0 | Cs5g28410.1/Cs5g284 | 6    | 0 | 0 | 2 | MASCOT | T | PLEX8 |
| 3.19E-01 | 0 0 | Cs5g28410.1/Cs5g284 | 6    | 0 | 0 | 2 | MASCOT | T | PLEX8 |
| 9.13E-02 | 0 0 | Cs5g28410.1/Cs5g284 | 6    | 0 | 0 | 2 | MASCOT | T | PLEX8 |
| 2.01E-01 | 0 0 | Cs5g28410.1/Cs5g284 | 6    | 0 | 0 | 2 | MASCOT | T | PLEX8 |
| 1.81E-01 | 0 0 | Cs5g28410.1/Cs5g284 | 6    | 0 | 0 | 2 | MASCOT | T | PLEX8 |
| 2.51E-01 | 0 0 | Cs5g28410.1/Cs5g284 | 6    | 0 | 0 | 2 | MASCOT | T | PLEX8 |
| 2.63E-01 | 0 0 | Cs5g28410.1/Cs5g284 | 6    | 0 | 0 | 2 | MASCOT | T | PLEX8 |
| 5.20E-02 | 0 0 | Cs5g28410.1/Cs5g284 | 4.37 | 0 | 0 | 2 | MASCOT | T | PLEX8 |
| 3.30E-03 | 0 0 | Cs5g28410.1/Cs5g284 | 4.37 | 0 | 0 | 2 | MASCOT | T | PLEX8 |
| 2.86E-02 | 0 0 | Cs5g28410.1/Cs5g284 | 6    | 0 | 0 | 2 | MASCOT | T | PLEX8 |
| 1.27E-02 | 0 0 | Cs5g28410.1/Cs5g284 | 6    | 0 | 0 | 2 | MASCOT | T | PLEX8 |
| 1.63E-01 | 0 0 | Cs5g28410.1/Cs5g284 | 6    | 0 | 0 | 2 | MASCOT | T | PLEX8 |
| 1.64E-02 | 0 0 | Cs5g28410.1/Cs5g284 | 6    | 0 | 0 | 2 | MASCOT | T | PLEX8 |
| 1.27E-03 | 0 0 | Cs5g28410.1/Cs5g284 | 6    | 0 | 0 | 2 | MASCOT | T | PLEX8 |
| 1.74E-01 | 0 0 | Cs5g28410.1/Cs5g284 | 6    | 0 | 0 | 2 | MASCOT | T | PLEX8 |
| 6.01E-02 | 0 0 | Cs5g28410.1/Cs5g284 | 6    | 0 | 0 | 2 | MASCOT | T | PLEX8 |
| 4.59E-01 | 0 0 | Cs5g28410.1/Cs5g284 | 6    | 0 | 0 | 2 | MASCOT | T |       |
| 1.14E-01 | 0 0 | Cs5g28410.1/Cs5g284 | 6    | 0 | 0 | 2 | MASCOT | T | PLEX8 |
| 1.58E-01 | 0 0 | Cs5g28410.1/Cs5g284 | 6    | 0 | 0 | 2 | MASCOT | T | PLEX8 |
| 2.37E-01 | 0 0 | Cs5g28410.1/Cs5g284 | 6    | 0 | 0 | 2 | MASCOT | T | PLEX8 |
| 1.30E-02 | 0 0 | Cs5g28410.1/Cs5g284 | 6    | 0 | 0 | 2 | MASCOT | T | PLEX8 |
| 1.38E-01 | 0 0 | Cs5g28410.1/Cs5g284 | 6    | 0 | 0 | 2 | MASCOT | T | PLEX8 |
| 1.01E-01 | 0 0 | Cs5g28410.1/Cs5g284 | 6    | 0 | 0 | 2 | MASCOT | T |       |
| 1.18E-02 | 0 0 | Cs5g28410.1/Cs5g284 | 6    | 0 | 0 | 2 | MASCOT | T | PLEX8 |
| 1.15E-01 | 0 0 | Cs5g28410.1/Cs5g284 | 6    | 0 | 0 | 2 | MASCOT | T | PLEX8 |
| 2.36E-02 | 0 0 | Cs5g28410.1/Cs5g284 | 6    | 0 | 0 | 2 | MASCOT | T | PLEX8 |
| 1.96E-02 | 0 0 | Cs5g28410.1/Cs5g284 | 6    | 0 | 0 | 2 | MASCOT | T | PLEX8 |
| 2.20E-03 | 0 0 | Cs5g28410.1/Cs5g284 | 4.65 | 0 | 0 | 2 | MASCOT | T | PLEX8 |
| 3.53E-04 | 0 0 | Cs5g28410.1/Cs5g284 | 4.65 | 0 | 0 | 2 | MASCOT | T | PLEX8 |
| 2.51E-02 | 0 0 | Cs5g28410.1/Cs5g284 | 4.65 | 0 | 0 | 2 | MASCOT | T | PLEX8 |
| 7.45E-02 | 0 0 | Cs5g28410.1/Cs5g284 | 4.65 | 0 | 0 | 2 | MASCOT | T | PLEX8 |
| 8.67E-04 | 0 0 | Cs5g28410.1/Cs5g284 | 4.65 | 0 | 0 | 2 | MASCOT | T | PLEX8 |
| 8.13E-03 | 0 0 | Cs5g28410.1/Cs5g284 | 4.65 | 0 | 0 | 2 | MASCOT | T | PLEX8 |

|          |     |                     |      |   |   |   |        |   |       |
|----------|-----|---------------------|------|---|---|---|--------|---|-------|
| 2.62E-01 | 0 0 | Cs5g28410.1/Cs5g284 | 6    | 0 | 0 | 2 | MASCOT | T | PLEX8 |
| 2.87E-01 | 0 0 | Cs5g28410.1/Cs5g284 | 6    | 0 | 0 | 2 | MASCOT | T | PLEX8 |
| 1.96E-01 | 0 0 | Cs5g28410.1/Cs5g284 | 6    | 0 | 0 | 2 | MASCOT | T | PLEX8 |
| 1.72E-01 | 0 0 | Cs5g28410.1/Cs5g284 | 6    | 0 | 0 | 2 | MASCOT | T | PLEX8 |
| 1.18E-01 | 0 0 | Cs5g28410.1/Cs5g284 | 6    | 0 | 0 | 2 | MASCOT | T | PLEX8 |
| 3.57E-01 | 0 0 | Cs5g28410.1/Cs5g284 | 6    | 0 | 0 | 2 | MASCOT | T | PLEX8 |
| 2.87E-03 | 0 0 | Cs5g28410.1/Cs5g284 | 6    | 0 | 0 | 2 | MASCOT | T | PLEX8 |
| 3.43E-02 | 0 0 | Cs5g28410.1/Cs5g284 | 6    | 0 | 0 | 2 | MASCOT | T | PLEX8 |
| 1.41E-01 | 0 0 | Cs5g28410.1/Cs5g284 | 6    | 0 | 0 | 2 | MASCOT | T |       |
| 1.81E-01 | 0 0 | Cs5g28410.1/Cs5g284 | 6    | 0 | 0 | 2 | MASCOT | T | PLEX8 |
| 2.21E-01 | 0 0 | Cs5g28410.1/Cs5g284 | 6    | 0 | 0 | 2 | MASCOT | T | PLEX8 |
| 2.70E-02 | 0 0 | Cs5g28410.1/Cs5g284 | 6    | 0 | 0 | 2 | MASCOT | T | PLEX8 |
| 1.05E-01 | 0 0 | Cs5g28410.1/Cs5g284 | 6    | 0 | 0 | 2 | MASCOT | T |       |
| 1.69E-01 | 0 0 | Cs5g28410.1/Cs5g284 | 6    | 0 | 0 | 2 | MASCOT | T | PLEX8 |
| 8.27E-03 | 0 0 | Cs5g28410.1/Cs5g284 | 6    | 0 | 0 | 2 | MASCOT | T | PLEX8 |
| 2.54E-01 | 0 0 | Cs5g28410.1/Cs5g284 | 6    | 0 | 0 | 2 | MASCOT | T |       |
| 1.18E-01 | 0 0 | Cs5g28410.1/Cs5g284 | 6    | 0 | 0 | 2 | MASCOT | T |       |
| 8.08E-04 | 0 0 | Cs3g26970.1         | 4    | 0 | 0 | 2 | MASCOT | T | PLEX8 |
| 1.14E-01 | 0 0 | Cs3g26970.1         | 4    | 0 | 0 | 2 | MASCOT | T | PLEX8 |
| 3.70E-02 | 0 0 | Cs3g26970.1         | 5.24 | 0 | 0 | 2 | MASCOT | T |       |
| 1.96E-02 | 0 0 | Cs3g26970.1         | 5.24 | 0 | 0 | 2 | MASCOT | T |       |
| 7.41E-03 | 0 0 | Cs3g26970.1         | 4.68 | 0 | 0 | 2 | MASCOT | T | PLEX8 |
| 3.68E-01 | 0 0 | Cs3g26970.1         | 8.59 | 0 | 0 | 2 | MASCOT | T | PLEX8 |
| 3.35E-02 | 0 0 | Cs3g26970.1         | 8.59 | 0 | 0 | 2 | MASCOT | T |       |
| 5.56E-02 | 0 0 | Cs3g26970.1         | 4.91 | 0 | 0 | 2 | MASCOT | T | PLEX8 |
| 1.24E-01 | 0 0 | Cs3g26970.1         | 4.91 | 0 | 0 | 2 | MASCOT | T |       |
| 1.84E-04 | 0 0 | Cs3g26970.1         | 4.48 | 0 | 0 | 2 | MASCOT | T | PLEX8 |
| 1.21E-01 | 0 0 | Cs3g26970.1         | 4.48 | 0 | 0 | 2 | MASCOT | T | PLEX8 |
| 1.96E-02 | 0 0 | Cs3g26970.1         | 4.48 | 0 | 0 | 2 | MASCOT | T | PLEX8 |
| 6.43E-02 | 0 0 | Cs3g26970.1         | 4.48 | 0 | 0 | 2 | MASCOT | T | PLEX8 |
| 8.74E-02 | 0 0 | Cs3g26970.1         | 4.48 | 0 | 0 | 2 | MASCOT | T | PLEX8 |
| 1.10E-01 | 0 0 | Cs3g26970.1         | 4.48 | 0 | 0 | 2 | MASCOT | T | PLEX8 |
| 8.23E-03 | 0 0 | Cs3g26970.1         | 4.48 | 0 | 0 | 2 | MASCOT | T | PLEX8 |
| 2.60E-01 | 0 0 | Cs3g26970.1         | 4.48 | 0 | 0 | 2 | MASCOT | T | PLEX8 |
| 3.81E-02 | 0 0 | Cs3g26970.1         | 4.48 | 0 | 0 | 2 | MASCOT | T | PLEX8 |
| 3.78E-02 | 0 0 | Cs3g26970.1         | 4.48 | 0 | 0 | 2 | MASCOT | T | PLEX8 |
| 1.01E-06 | 0 0 | Cs3g26970.1         | 4.48 | 0 | 0 | 2 | MASCOT | T | PLEX8 |
| 4.03E-03 | 0 0 | Cs3g26970.1         | 4.48 | 0 | 0 | 2 | MASCOT | T | PLEX8 |
| 9.75E-03 | 0 0 | Cs3g26970.1         | 4.48 | 0 | 0 | 2 | MASCOT | T | PLEX8 |
| 5.01E-04 | 0 0 | Cs3g26970.1         | 4.48 | 0 | 0 | 2 | MASCOT | T | PLEX8 |
| 5.84E-02 | 0 0 | Cs3g26970.1         | 4.48 | 0 | 0 | 2 | MASCOT | T |       |
| 1.17E-05 | 0 0 | Cs3g26970.1         | 4.48 | 0 | 0 | 2 | MASCOT | T | PLEX8 |
| 2.05E-01 | 0 0 | Cs3g26970.1         | 6.72 | 0 | 0 | 2 | MASCOT | T | PLEX8 |
| 1.08E-02 | 0 0 | Cs3g26970.1         | 6.72 | 0 | 0 | 2 | MASCOT | T | PLEX8 |
| 9.74E-02 | 0 0 | Cs3g26970.1         | 6.72 | 0 | 0 | 2 | MASCOT | T | PLEX8 |
| 1.65E-01 | 0 0 | Cs3g26970.1         | 6.72 | 0 | 0 | 2 | MASCOT | T | PLEX8 |
| 6.92E-02 | 0 0 | Cs3g26970.1         | 6.72 | 0 | 0 | 2 | MASCOT | T | PLEX8 |
| 4.93E-02 | 0 0 | Cs3g26970.1         | 6.72 | 0 | 0 | 2 | MASCOT | T | PLEX8 |
| 3.69E-01 | 0 0 | Cs3g26970.1         | 6.72 | 0 | 0 | 2 | MASCOT | T | PLEX8 |
| 2.84E-01 | 0 0 | Cs3g26970.1         | 6.72 | 0 | 0 | 2 | MASCOT | T | PLEX8 |
| 4.15E-01 | 0 0 | Cs3g26970.1         | 6.72 | 0 | 0 | 2 | MASCOT | T | PLEX8 |

|          |     |                     |      |   |      |   |        |        |       |       |
|----------|-----|---------------------|------|---|------|---|--------|--------|-------|-------|
| 2.65E-01 | 0 0 | Cs3g26970.1         | 6.72 | 0 | 0    | 2 | MASCOT | T      | PLEX8 |       |
| 3.38E-02 | 0 0 | Cs3g26970.1         | 6.72 | 0 | 0    | 2 | MASCOT | T      | PLEX8 |       |
| 3.76E-02 | 0 0 | Cs3g26970.1         | 6.72 | 0 | 0    | 2 | MASCOT | T      | PLEX8 |       |
| 9.45E-02 | 0 0 | Cs3g26970.1         | 6.72 | 0 | 0    | 2 | MASCOT | T      | PLEX8 |       |
| 4.63E-01 | 0 0 | Cs3g26970.1         | 6.72 | 0 | 0    | 2 | MASCOT | T      |       |       |
| 5.56E-02 | 0 0 | Cs3g26970.1         | 5.84 | 0 | 15.9 | 0 | 2      | MASCOT | T     | PLEX8 |
| 3.99E-01 | 0 0 | Cs3g26970.1         | 5.84 | 0 | 15.9 | 0 | 2      | MASCOT | T     | PLEX8 |
| 2.20E-01 | 0 0 | Cs3g26970.1         | 5.84 | 0 | 15.9 | 0 | 2      | MASCOT | T     | PLEX8 |
| 2.37E-01 | 0 0 | Cs3g26970.1         | 5.84 | 0 | 15.9 | 0 | 2      | MASCOT | T     | PLEX8 |
| 2.33E-01 | 0 0 | Cs3g26970.1         | 5.84 | 0 | 15.9 | 0 | 2      | MASCOT | T     |       |
| 3.96E-01 | 0 0 | Cs3g26970.1         | 5.84 | 0 | 15.9 | 0 | 2      | MASCOT | T     |       |
| 2.75E-01 | 0 0 | Cs3g26970.1         | 5.84 | 0 | 0    | 0 | 2      | MASCOT | T     | PLEX8 |
| 6.47E-04 | 0 0 | Cs3g26970.1         | 5.84 | 0 | 0    | 0 | 2      | MASCOT | T     | PLEX8 |
| 2.85E-02 | 0 0 | Cs3g26970.1         | 5.84 | 0 | 0    | 0 | 2      | MASCOT | T     | PLEX8 |
| 9.59E-03 | 0 0 | Cs3g26970.1         | 5.84 | 0 | 0    | 0 | 2      | MASCOT | T     | PLEX8 |
| 1.39E-03 | 0 0 | Cs5g06450.1         | 4.53 | 0 | 0    | 0 | 2      | MASCOT | T     | PLEX8 |
| 1.30E-04 | 0 0 | Cs5g06450.1         | 4.53 | 0 | 0    | 0 | 2      | MASCOT | T     |       |
| 1.32E-06 | 0 0 | Cs5g06450.1         | 4.53 | 0 | 0    | 0 | 2      | MASCOT | T     |       |
| 1.37E-04 | 0 0 | Cs5g06450.1         | 4.53 | 0 | 0    | 0 | 2      | MASCOT | T     |       |
| 1.47E-03 | 0 0 | Cs5g06450.1         | 4.53 | 0 | 0    | 0 | 2      | MASCOT | T     |       |
| 8.51E-03 | 0 0 | Cs5g06450.1         | 4.53 | 0 | 0    | 0 | 2      | MASCOT | T     | PLEX8 |
| 9.28E-04 | 0 0 | Cs5g06450.1         | 4.53 | 0 | 0    | 0 | 2      | MASCOT | T     | PLEX8 |
| 4.72E-03 | 0 0 | Cs5g06450.1/Cs5g064 | 6.79 | 0 | 15.9 | 0 | 2      | MASCOT | T     |       |
| 1.60E-03 | 0 0 | Cs5g06450.1/Cs5g064 | 6.79 | 0 | 15.9 | 0 | 2      | MASCOT | T     | PLEX8 |
| 2.19E-03 | 0 0 | Cs5g06450.1/Cs5g064 | 6.79 | 0 | 15.9 | 0 | 2      | MASCOT | T     | PLEX8 |
| 5.42E-04 | 0 0 | Cs5g06450.1/Cs5g064 | 6.79 | 0 | 15.9 | 0 | 2      | MASCOT | T     | PLEX8 |
| 6.50E-04 | 0 0 | Cs5g06450.1/Cs5g064 | 6.79 | 0 | 15.9 | 0 | 2      | MASCOT | T     | PLEX8 |
| 5.79E-04 | 0 0 | Cs5g06450.1/Cs5g064 | 6.79 | 0 | 0    | 0 | 2      | MASCOT | T     | PLEX8 |
| 1.01E-02 | 0 0 | Cs5g06450.1/Cs5g064 | 6.79 | 0 | 0    | 0 | 2      | MASCOT | T     |       |
| 1.14E-03 | 0 0 | Cs5g06450.1/Cs5g064 | 6.79 | 0 | 0    | 0 | 2      | MASCOT | T     | PLEX8 |
| 5.60E-04 | 0 0 | Cs5g06450.1/Cs5g064 | 6.79 | 0 | 0    | 0 | 2      | MASCOT | T     | PLEX8 |
| 2.66E-01 | 0 0 | Cs5g06450.1/Cs5g064 | 6    | 0 | 15.9 | 0 | 2      | MASCOT | T     |       |
| 9.21E-02 | 0 0 | Cs5g06450.1/Cs5g064 | 6    | 0 | 15.9 | 0 | 2      | MASCOT | T     | PLEX8 |
| 1.58E-01 | 0 0 | Cs5g06450.1/Cs5g064 | 6    | 0 | 0    | 0 | 2      | MASCOT | T     | PLEX8 |
| 1.18E-01 | 0 0 | Cs5g06450.1/Cs5g064 | 6    | 0 | 0    | 0 | 2      | MASCOT | T     | PLEX8 |
| 8.54E-02 | 0 0 | Cs5g06450.1/Cs5g064 | 4.03 | 0 | 0    | 0 | 2      | MASCOT | T     | PLEX8 |
| 1.50E-03 | 0 0 | Cs5g06450.1/Cs5g064 | 4.03 | 0 | 0    | 0 | 2      | MASCOT | T     | PLEX8 |
| 9.35E-03 | 0 0 | Cs5g06450.1/Cs5g064 | 4.03 | 0 | 0    | 0 | 2      | MASCOT | T     |       |
| 1.38E-03 | 0 0 | Cs5g06450.1/Cs5g064 | 4.03 | 0 | 0    | 0 | 2      | MASCOT | T     |       |
| 3.17E-05 | 0 0 | Cs5g06450.1/Cs5g064 | 4.03 | 0 | 0    | 0 | 2      | MASCOT | T     |       |
| 6.45E-03 | 0 0 | Cs5g06450.1/Cs5g064 | 4.03 | 0 | 0    | 0 | 2      | MASCOT | T     |       |
| 1.69E-01 | 0 0 | Cs5g06450.1/Cs5g064 | 4.03 | 0 | 0    | 0 | 2      | MASCOT | T     |       |
| 2.17E-04 | 0 0 | Cs5g06450.1/Cs5g064 | 4.25 | 0 | 15.9 | 0 | 2      | MASCOT | T     | PLEX8 |
| 2.58E-04 | 0 0 | Cs5g06450.1/Cs5g064 | 4.25 | 0 | 15.9 | 0 | 2      | MASCOT | T     | PLEX8 |
| 4.11E-03 | 0 0 | Cs5g06450.1/Cs5g064 | 4.25 | 0 | 0    | 0 | 2      | MASCOT | T     | PLEX8 |
| 6.85E-02 | 0 0 | Cs5g06450.1/Cs5g064 | 4.25 | 0 | 0    | 0 | 2      | MASCOT | T     | PLEX8 |
| 4.00E-06 | 0 0 | Cs5g06450.1/Cs5g064 | 4.25 | 0 | 0    | 0 | 2      | MASCOT | T     | PLEX8 |
| 7.60E-02 | 0 0 | Cs5g06450.1/Cs5g064 | 4.37 | 0 | 0    | 0 | 2      | MASCOT | T     |       |
| 2.20E-01 | 0 0 | Cs5g06450.1/Cs5g064 | 4.37 | 0 | 0    | 0 | 2      | MASCOT | T     |       |
| 6.09E-03 | 0 0 | Cs5g06450.1/Cs5g064 | 4.37 | 0 | 0    | 0 | 2      | MASCOT | T     | PLEX8 |
| 6.89E-02 | 0 0 | Cs5g06450.1/Cs5g064 | 5.4  | 0 | 0    | 0 | 2      | MASCOT | T     | PLEX8 |

|          |     |                       |      |   |      |   |        |        |       |
|----------|-----|-----------------------|------|---|------|---|--------|--------|-------|
| 4.62E-02 | 0 0 | Cs5g06450.1/Cs5g064   | 5.4  | 0 | 0    | 2 | MASCOT | T      | PLEX8 |
| 1.33E-02 | 0 0 | Cs5g06450.1/Cs5g064   | 5.4  | 0 | 0    | 2 | MASCOT | T      | PLEX8 |
| 1.15E-01 | 0 0 | Cs5g06450.1/Cs5g064   | 5.4  | 0 | 0    | 2 | MASCOT | T      | PLEX8 |
| 4.92E-02 | 0 0 | Cs5g06450.1/Cs5g064   | 5.4  | 0 | 0    | 2 | MASCOT | T      | PLEX8 |
| 4.81E-02 | 0 0 | Cs5g06450.1/Cs5g064   | 5.4  | 0 | 0    | 2 | MASCOT | T      | PLEX8 |
| 6.73E-03 | 0 0 | Cs5g06450.1/Cs5g064   | 5.4  | 0 | 0    | 2 | MASCOT | T      | PLEX8 |
| 3.87E-02 | 0 0 | Cs5g06450.1/Cs5g064   | 5.4  | 0 | 0    | 2 | MASCOT | T      | PLEX8 |
| 1.00E-01 | 0 0 | Cs5g06450.1/Cs5g064   | 5.4  | 0 | 0    | 2 | MASCOT | T      | PLEX8 |
| 2.33E-02 | 0 0 | Cs5g06450.1/Cs5g064   | 5.4  | 0 | 0    | 2 | MASCOT | T      | PLEX8 |
| 5.24E-02 | 0 0 | Cs5g06450.1/Cs5g064   | 4.37 | 0 | 0    | 2 | MASCOT | T      | PLEX8 |
| 4.28E-01 | 0 0 | orange1.1t02240.1/ora | 8.8  | 0 | 0    | 2 | MASCOT | T      | PLEX8 |
| 1.50E-04 | 0 0 | orange1.1t02240.1/ora | 4.37 | 0 | 0    | 2 | MASCOT | T      | PLEX8 |
| 3.92E-05 | 0 0 | orange1.1t02240.1/ora | 4.37 | 0 | 0    | 2 | MASCOT | T      | PLEX8 |
| 5.74E-02 | 0 0 | orange1.1t02240.1/ora | 4.37 | 0 | 0    | 2 | MASCOT | T      | PLEX8 |
| 6.99E-03 | 0 0 | orange1.1t02240.1/ora | 4.37 | 0 | 0    | 2 | MASCOT | T      | PLEX8 |
| 8.20E-04 | 0 0 | orange1.1t02240.1/ora | 4.37 | 0 | 0    | 2 | MASCOT | T      | PLEX8 |
| 2.82E-02 | 0 0 | orange1.1t02240.1/ora | 4.37 | 0 | 0    | 2 | MASCOT | T      | PLEX8 |
| 1.12E-04 | 0 0 | orange1.1t02240.1/ora | 4.37 | 0 | 0    | 2 | MASCOT | T      |       |
| 5.75E-02 | 0 0 | orange1.1t02240.1/ora | 4.37 | 0 | 0    | 2 | MASCOT | T      | PLEX8 |
| 8.39E-05 | 0 0 | orange1.1t02240.1/ora | 4.37 | 0 | 0    | 2 | MASCOT | T      | PLEX8 |
| 2.19E-01 | 0 0 | orange1.1t02240.1/ora | 4.37 | 0 | 0    | 2 | MASCOT | T      | PLEX8 |
| 2.31E-01 | 0 0 | orange1.1t02240.1/ora | 4.37 | 0 | 0    | 2 | MASCOT | T      |       |
| 4.51E-02 | 0 0 | orange1.1t02240.1/ora | 6.1  | 0 | 0    | 2 | MASCOT | T      | PLEX8 |
| 5.22E-03 | 0 0 | orange1.1t02240.1/ora | 6.1  | 0 | 0    | 2 | MASCOT | T      | PLEX8 |
| 2.34E-01 | 0 0 | orange1.1t02240.1/ora | 6.1  | 0 | 0    | 2 | MASCOT | T      | PLEX8 |
| 5.84E-03 | 0 0 | orange1.1t02240.1/ora | 6.1  | 0 | 0    | 2 | MASCOT | T      | PLEX8 |
| 1.39E-01 | 0 0 | orange1.1t02240.1/ora | 6.1  | 0 | 0    | 2 | MASCOT | T      | PLEX8 |
| 2.75E-01 | 0 0 | orange1.1t02240.1/ora | 6.1  | 0 | 0    | 2 | MASCOT | T      |       |
| 5.87E-03 | 0 0 | orange1.1t02240.1/ora | 6.1  | 0 | 0    | 2 | MASCOT | T      | PLEX8 |
| 5.28E-03 | 0 0 | orange1.1t02240.1/ora | 6.1  | 0 | 0    | 2 | MASCOT | T      | PLEX8 |
| 1.42E-02 | 0 0 | orange1.1t02240.1/ora | 6    | 0 | 0    | 2 | MASCOT | T      | PLEX8 |
| 5.39E-03 | 0 0 | orange1.1t02240.1/ora | 6    | 0 | 0    | 2 | MASCOT | T      | PLEX8 |
| 2.27E-02 | 0 0 | orange1.1t02240.1/ora | 6    | 0 | 0    | 2 | MASCOT | T      | PLEX8 |
| 1.54E-01 | 0 0 | orange1.1t02240.1/ora | 6    | 0 | 0    | 2 | MASCOT | T      |       |
| 2.95E-01 | 0 0 | orange1.1t02240.1/ora | 6    | 0 | 0    | 2 | MASCOT | T      |       |
| 2.44E-02 | 0 0 | orange1.1t02240.1/ora | 6    | 0 | 0    | 2 | MASCOT | T      | PLEX8 |
| 1.50E-02 | 0 0 | orange1.1t02240.1/ora | 6    | 0 | 0    | 2 | MASCOT | T      | PLEX8 |
| 5.54E-02 | 0 0 | orange1.1t02240.1/ora | 4.37 | 0 | 15.9 | 0 | 2      | MASCOT | T     |
| 3.54E-02 | 0 0 | orange1.1t02240.1/ora | 4.37 | 0 | 15.9 | 0 | 2      | MASCOT | T     |
| 7.08E-03 | 0 0 | orange1.1t02240.1/ora | 4.37 | 0 | 15.9 | 0 | 2      | MASCOT | T     |
| 1.38E-04 | 0 0 | orange1.1t02240.1/ora | 4.37 | 0 | 15.9 | 0 | 2      | MASCOT | T     |
| 7.38E-03 | 0 0 | orange1.1t02240.1/ora | 4.37 | 0 | 15.9 | 0 | 2      | MASCOT | T     |
| 4.94E-02 | 0 0 | orange1.1t02240.1/ora | 4.37 | 0 | 15.9 | 0 | 2      | MASCOT | T     |
| 1.53E-01 | 0 0 | orange1.1t02240.1/ora | 4.37 | 0 | 0    | 2 | MASCOT | T      | PLEX8 |
| 2.52E-04 | 0 0 | orange1.1t02240.1/ora | 4.37 | 0 | 0    | 2 | MASCOT | T      | PLEX8 |
| 5.03E-03 | 0 0 | orange1.1t02240.1/ora | 4.37 | 0 | 0    | 2 | MASCOT | T      |       |
| 4.08E-02 | 0 0 | orange1.1t02240.1/ora | 4.37 | 0 | 0    | 2 | MASCOT | T      |       |
| 1.85E-04 | 0 0 | orange1.1t02240.1/ora | 4.37 | 0 | 0    | 2 | MASCOT | T      |       |
| 1.19E-01 | 0 0 | orange1.1t02240.1/ora | 5.84 | 0 | 15.9 | 0 | 2      | MASCOT | T     |
| 6.49E-02 | 0 0 | orange1.1t02240.1/ora | 9.75 | 0 | 0    | 2 | MASCOT | T      | PLEX8 |
| 1.03E-01 | 0 0 | orange1.1t02240.1/ora | 6    | 0 | 0    | 2 | MASCOT | T      | PLEX8 |



|              |                     |      |   |      |   |        |        |       |       |
|--------------|---------------------|------|---|------|---|--------|--------|-------|-------|
| 9.35E-02 0 0 | Cs3g25080.1         | 4.22 | 0 | 0    | 2 | MASCOT | T      | PLEX8 |       |
| 1.03E-02 0 0 | Cs3g25080.1         | 4.22 | 0 | 0    | 2 | MASCOT | T      | PLEX8 |       |
| 3.94E-04 0 0 | Cs3g25080.1         | 4.22 | 0 | 0    | 2 | MASCOT | T      | PLEX8 |       |
| 3.38E-02 0 0 | Cs3g25080.1         | 4.22 | 0 | 0    | 2 | MASCOT | T      | PLEX8 |       |
| 8.10E-02 0 0 | Cs3g25080.1         | 4.22 | 0 | 0    | 2 | MASCOT | T      |       |       |
| 1.27E-02 0 0 | Cs3g25080.1         | 6.78 | 0 | 15.9 | 0 | 2      | MASCOT | T     | PLEX8 |
| 5.63E-03 0 0 | Cs3g25080.1         | 6.78 | 0 | 0    | 2 | MASCOT | T      | PLEX8 |       |
| 4.31E-02 0 0 | Cs3g25080.1         | 6.78 | 0 | 0    | 2 | MASCOT | T      | PLEX8 |       |
| 5.43E-04 0 0 | Cs3g25080.1         | 6.78 | 0 | 0    | 2 | MASCOT | T      | PLEX8 |       |
| 1.81E-02 0 0 | Cs3g25080.1         | 6.78 | 0 | 0    | 2 | MASCOT | T      | PLEX8 |       |
| 1.66E-01 0 0 | Cs7g27720.1/Cs7g277 | 8.75 | 0 | 0    | 2 | MASCOT | T      | PLEX8 |       |
| 1.04E-02 0 0 | Cs3g25080.1         | 4.37 | 0 | 0    | 2 | MASCOT | T      | PLEX8 |       |
| 9.78E-03 0 0 | Cs3g25080.1         | 4.37 | 0 | 0    | 2 | MASCOT | T      | PLEX8 |       |
| 4.73E-02 0 0 | Cs3g25080.1         | 4.37 | 0 | 0    | 2 | MASCOT | T      | PLEX8 |       |
| 5.38E-02 0 0 | Cs3g25080.1         | 4.37 | 0 | 0    | 2 | MASCOT | T      | PLEX8 |       |
| 1.64E-02 0 0 | Cs3g25080.1         | 4.37 | 0 | 0    | 2 | MASCOT | T      | PLEX8 |       |
| 6.33E-03 0 0 | Cs3g25080.1         | 4.37 | 0 | 0    | 2 | MASCOT | T      | PLEX8 |       |
| 1.08E-02 0 0 | Cs3g25080.1         | 4.37 | 0 | 0    | 2 | MASCOT | T      |       |       |
| 6.07E-05 0 0 | Cs3g25080.1         | 4.37 | 0 | 0    | 2 | MASCOT | T      | PLEX8 |       |
| 8.97E-02 0 0 | Cs3g25080.1         | 6.69 | 0 | 15.9 | 0 | 2      | MASCOT | T     | PLEX8 |
| 2.33E-01 0 0 | Cs3g25080.1         | 6.69 | 0 | 15.9 | 0 | 2      | MASCOT | T     | PLEX8 |
| 1.54E-01 0 0 | Cs3g25080.1         | 6.69 | 0 | 15.9 | 0 | 2      | MASCOT | T     |       |
| 2.66E-02 0 0 | Cs3g25080.1         | 6.69 | 0 | 15.9 | 0 | 2      | MASCOT | T     | PLEX8 |
| 1.91E-01 0 0 | Cs3g25080.1         | 6.69 | 0 | 0    | 2 | MASCOT | T      | PLEX8 |       |
| 2.26E-01 0 0 | Cs3g25080.1         | 6.69 | 0 | 0    | 2 | MASCOT | T      |       |       |
| 3.74E-02 0 0 | Cs3g25080.1         | 5.21 | 0 | 0    | 2 | MASCOT | T      | PLEX8 |       |
| 4.08E-05 0 0 | Cs3g25080.1         | 5.21 | 0 | 0    | 2 | MASCOT | T      | PLEX8 |       |
| 1.82E-01 0 0 | Cs3g25080.1         | 5.21 | 0 | 0    | 2 | MASCOT | T      | PLEX8 |       |
| 3.05E-03 0 0 | Cs3g25080.1         | 5.21 | 0 | 0    | 2 | MASCOT | T      |       |       |
| 3.31E-02 0 0 | Cs3g25080.1         | 5.21 | 0 | 0    | 2 | MASCOT | T      | PLEX8 |       |
| 7.74E-06 0 0 | Cs3g25080.1         | 5.21 | 0 | 0    | 2 | MASCOT | T      | PLEX8 |       |
| 1.82E-01 0 0 | Cs3g25080.1         | 5.21 | 0 | 0    | 2 | MASCOT | T      | PLEX8 |       |
| 1.77E-01 0 0 | Cs3g25080.1         | 5.21 | 0 | 0    | 2 | MASCOT | T      | PLEX8 |       |
| 1.29E-02 0 0 | Cs3g25080.1         | 5.21 | 0 | 0    | 2 | MASCOT | T      |       |       |
| 1.69E-01 0 0 | Cs3g25080.1         | 5.84 | 0 | 0    | 2 | MASCOT | T      | PLEX8 |       |
| 1.60E-01 0 0 | Cs3g25080.1         | 5.84 | 0 | 0    | 2 | MASCOT | T      | PLEX8 |       |
| 3.66E-03 0 0 | Cs7g11140.1/Cs7g111 | 3.93 | 0 | 15.9 | 0 | 2      | MASCOT | T     | PLEX8 |
| 7.10E-02 0 0 | Cs7g11140.1/Cs7g111 | 3.93 | 0 | 15.9 | 0 | 2      | MASCOT | T     | PLEX8 |
| 2.98E-02 0 0 | Cs7g11140.1/Cs7g111 | 3.93 | 0 | 15.9 | 0 | 2      | MASCOT | T     | PLEX8 |
| 7.08E-03 0 0 | Cs7g11140.1/Cs7g111 | 3.93 | 0 | 15.9 | 0 | 2      | MASCOT | T     | PLEX8 |
| 4.10E-04 0 0 | Cs7g11140.1/Cs7g111 | 3.93 | 0 | 0    | 2 | MASCOT | T      | PLEX8 |       |
| 4.67E-04 0 0 | Cs7g11140.1/Cs7g111 | 3.93 | 0 | 0    | 2 | MASCOT | T      | PLEX8 |       |
| 1.27E-05 0 0 | Cs7g11140.1/Cs7g111 | 3.93 | 0 | 0    | 2 | MASCOT | T      | PLEX8 |       |
| 1.15E-02 0 0 | Cs7g11140.1/Cs7g111 | 3.93 | 0 | 0    | 2 | MASCOT | T      | PLEX8 |       |
| 3.41E-03 0 0 | Cs7g11140.1/Cs7g111 | 3.93 | 0 | 0    | 2 | MASCOT | T      | PLEX8 |       |
| 9.66E-02 0 0 | Cs7g11140.1/Cs7g111 | 3.93 | 0 | 0    | 2 | MASCOT | T      | PLEX8 |       |
| 9.78E-03 0 0 | Cs7g11140.1/Cs7g111 | 3.93 | 0 | 0    | 2 | MASCOT | T      |       |       |
| 2.23E-02 0 0 | Cs7g11140.1/Cs7g111 | 9.76 | 0 | 0    | 2 | MASCOT | T      | PLEX8 |       |
| 1.04E-01 0 0 | Cs7g11140.1/Cs7g111 | 9.76 | 0 | 0    | 2 | MASCOT | T      | PLEX8 |       |
| 5.07E-02 0 0 | Cs7g11140.1/Cs7g111 | 9.76 | 0 | 0    | 2 | MASCOT | T      |       |       |
| 1.27E-02 0 0 | Cs7g11140.1         | 4.14 | 1 | 0    | 2 | MASCOT | T      | PLEX8 |       |

|          |     |                      |      |   |      |   |        |        |         |
|----------|-----|----------------------|------|---|------|---|--------|--------|---------|
| 1.10E-02 | 0 0 | Cs7g11140.1          | 4.14 | 0 | 0    | 2 | MASCOT | T      |         |
| 6.35E-02 | 0 0 | Cs7g11140.1          | 4.14 | 0 | 0    | 2 | MASCOT | T      |         |
| 4.62E-02 | 0 0 | Cs7g11140.1          | 4.14 | 0 | 0    | 2 | MASCOT | T      |         |
| 1.29E-02 | 0 0 | Cs7g11140.1          | 4.14 | 0 | 0    | 2 | MASCOT | T      |         |
| 3.09E-01 | 0 0 | Cs7g11140.1 ! Cs7g11 | 8.23 | 0 | 15.9 | 0 | 2      | MASCOT | T PLEX8 |
| 1.57E-01 | 0 0 | Cs5g30600.1/Cs5g306  | 6.04 | 0 | 0    | 2 | MASCOT | T      | PLEX8   |
| 1.70E-01 | 0 0 | Cs5g30600.1/Cs5g306  | 6.04 | 0 | 0    | 2 | MASCOT | T      | PLEX8   |
| 1.53E-01 | 0 0 | Cs5g30600.1/Cs5g306  | 6.04 | 0 | 0    | 2 | MASCOT | T      | PLEX8   |
| 1.48E-01 | 0 0 | Cs5g30600.1/Cs5g306  | 6.04 | 0 | 0    | 2 | MASCOT | T      | PLEX8   |
| 8.13E-02 | 0 0 | Cs5g30600.1/Cs5g306  | 6.04 | 0 | 0    | 2 | MASCOT | T      | PLEX8   |
| 1.75E-01 | 0 0 | Cs5g30600.1/Cs5g306  | 6.04 | 0 | 0    | 2 | MASCOT | T      | PLEX8   |
| 3.62E-01 | 0 0 | Cs7g11140.1          | 5.32 | 0 | 15.9 | 0 | 2      | MASCOT | T PLEX8 |
| 4.16E-02 | 0 0 | Cs7g11140.1          | 5.32 | 0 | 15.9 | 0 | 2      | MASCOT | T PLEX8 |
| 1.39E-02 | 0 0 | Cs7g11140.1          | 5.32 | 0 | 15.9 | 0 | 2      | MASCOT | T PLEX8 |
| 1.70E-03 | 0 0 | Cs7g11140.1          | 5.32 | 0 | 15.9 | 0 | 2      | MASCOT | T       |
| 2.00E-03 | 0 0 | Cs7g11140.1          | 5.32 | 0 | 15.9 | 0 | 2      | MASCOT | T PLEX8 |
| 3.08E-05 | 0 0 | Cs7g11140.1          | 5.32 | 0 | 0    | 2 | MASCOT | T      | PLEX8   |
| 7.94E-02 | 0 0 | Cs7g11140.1          | 5.32 | 0 | 0    | 2 | MASCOT | T      | PLEX8   |
| 1.24E-04 | 0 0 | Cs7g11140.1          | 5.32 | 0 | 0    | 2 | MASCOT | T      | PLEX8   |
| 3.93E-01 | 0 0 | Cs7g11140.1          | 5.32 | 0 | 0    | 2 | MASCOT | T      |         |
| 2.07E-04 | 0 0 | Cs7g11140.1/Cs7g111  | 4.03 | 0 | 0    | 2 | MASCOT | T      |         |
| 1.66E-01 | 0 0 | Cs3g10200.1/Cs3g102  | 6.04 | 0 | 0    | 2 | MASCOT | T      | PLEX8   |
| 3.13E-01 | 0 0 | Cs3g10200.1/Cs3g102  | 6.04 | 0 | 0    | 2 | MASCOT | T      | PLEX8   |
| 4.92E-02 | 0 0 | Cs3g10200.1/Cs3g102  | 4.37 | 0 | 0    | 2 | MASCOT | T      | PLEX8   |
| 1.48E-01 | 0 0 | Cs3g10200.1/Cs3g102  | 4.37 | 0 | 0    | 2 | MASCOT | T      |         |
| 4.12E-03 | 0 0 | Cs3g10200.1/Cs3g102  | 4.37 | 0 | 0    | 2 | MASCOT | T      | PLEX8   |
| 1.53E-01 | 0 0 | Cs3g10200.1/Cs3g102  | 4.37 | 0 | 0    | 2 | MASCOT | T      | PLEX8   |
| 1.03E-02 | 0 0 | Cs3g10200.1/Cs3g102  | 4.37 | 0 | 0    | 2 | MASCOT | T      |         |
| 7.94E-02 | 0 0 | Cs3g10200.1/Cs3g102  | 4.37 | 0 | 0    | 2 | MASCOT | T      |         |
| 1.48E-01 | 0 0 | Cs3g10200.1/Cs3g102  | 4.37 | 0 | 0    | 2 | MASCOT | T      |         |
| 8.22E-02 | 0 0 | Cs3g10200.1/Cs3g102  | 4.37 | 0 | 0    | 2 | MASCOT | T      |         |
| 1.64E-02 | 0 0 | Cs3g10200.1/Cs3g102  | 4.37 | 0 | 0    | 2 | MASCOT | T      |         |
| 2.15E-02 | 0 0 | Cs3g10200.1/Cs3g102  | 4.37 | 0 | 0    | 2 | MASCOT | T      |         |
| 8.30E-03 | 0 0 | Cs3g10200.1/Cs3g102  | 4.37 | 0 | 0    | 2 | MASCOT | T      |         |
| 1.64E-02 | 0 0 | Cs3g10200.1/Cs3g102  | 4.37 | 0 | 0    | 2 | MASCOT | T      |         |
| 8.46E-02 | 0 0 | Cs3g10200.1/Cs3g102  | 4.37 | 0 | 0    | 2 | MASCOT | T      |         |
| 2.57E-02 | 0 0 | Cs3g10200.1/Cs3g102  | 6.85 | 0 | 0    | 2 | MASCOT | T      |         |
| 1.29E-01 | 0 0 | Cs3g10200.1/Cs3g102  | 6.85 | 0 | 0    | 2 | MASCOT | T      | PLEX8   |
| 1.93E-01 | 0 0 | Cs3g10200.1/Cs3g102  | 9.75 | 0 | 0    | 2 | MASCOT | T      | PLEX8   |
| 1.64E-04 | 0 0 | Cs3g10200.1/Cs3g102  | 4.37 | 0 | 0    | 2 | MASCOT | T      |         |
| 4.74E-06 | 0 0 | Cs3g10200.1/Cs3g102  | 4.37 | 0 | 0    | 2 | MASCOT | T      |         |
| 3.19E-02 | 0 0 | Cs3g10200.1/Cs3g102  | 4.37 | 0 | 0    | 2 | MASCOT | T      |         |
| 3.69E-04 | 0 0 | Cs3g10200.1/Cs3g102  | 4.37 | 0 | 0    | 2 | MASCOT | T      |         |
| 3.74E-03 | 0 0 | Cs3g10200.1/Cs3g102  | 9.75 | 0 | 0    | 2 | MASCOT | T      | PLEX8   |
| 1.30E-02 | 0 0 | Cs3g10200.1/Cs3g102  | 9.75 | 0 | 0    | 2 | MASCOT | T      | PLEX8   |
| 2.47E-02 | 0 0 | Cs3g10200.1/Cs3g102  | 3.84 | 1 | 0    | 2 | MASCOT | T      | PLEX8   |
| 2.56E-02 | 0 0 | Cs3g10200.1/Cs3g102  | 3.84 | 1 | 0    | 2 | MASCOT | T      | PLEX8   |
| 1.37E-01 | 0 0 | Cs3g10200.1/Cs3g102  | 5.72 | 0 | 0    | 2 | MASCOT | T      | PLEX8   |
| 2.72E-01 | 0 0 | Cs3g10200.1/Cs3g102  | 5.72 | 0 | 0    | 2 | MASCOT | T      | PLEX8   |
| 4.01E-01 | 0 0 | Cs3g10200.1/Cs3g102  | 5.72 | 0 | 0    | 2 | MASCOT | T      | PLEX8   |
| 8.05E-02 | 0 0 | Cs3g10200.1/Cs3g102  | 5.72 | 0 | 0    | 2 | MASCOT | T      | PLEX8   |

|          |     |                       |       |   |   |   |        |   |       |
|----------|-----|-----------------------|-------|---|---|---|--------|---|-------|
| 4.87E-02 | 0 0 | Cs3g10200.1/Cs3g102   | 5.72  | 0 | 0 | 2 | MASCOT | T | PLEX8 |
| 3.42E-02 | 0 0 | Cs2g16200.1/Cs2g162   | 4.21  | 0 | 0 | 2 | MASCOT | T | PLEX8 |
| 8.89E-03 | 0 0 | Cs2g16200.1/Cs2g162   | 4.21  | 0 | 0 | 2 | MASCOT | T | PLEX8 |
| 3.97E-02 | 0 0 | Cs2g16200.1/Cs2g162   | 4.03  | 0 | 0 | 2 | MASCOT | T | PLEX8 |
| 3.86E-04 | 0 0 | Cs2g16200.1/Cs2g162   | 4.25  | 0 | 0 | 2 | MASCOT | T | PLEX8 |
| 2.08E-03 | 0 0 | Cs2g16200.1/Cs2g162   | 4.25  | 0 | 0 | 2 | MASCOT | T | PLEX8 |
| 2.38E-01 | 0 0 | Cs2g16200.1/Cs2g162   | 4.25  | 0 | 0 | 2 | MASCOT | T | PLEX8 |
| 6.18E-03 | 0 0 | Cs2g16200.1/Cs2g162   | 4.25  | 0 | 0 | 2 | MASCOT | T | PLEX8 |
| 1.17E-01 | 0 0 | Cs2g16200.1/Cs2g162   | 8.75  | 0 | 0 | 2 | MASCOT | T | PLEX8 |
| 1.14E-01 | 0 0 | Cs2g16200.1/Cs2g162   | 8.75  | 0 | 0 | 2 | MASCOT | T | PLEX8 |
| 1.75E-01 | 0 0 | Cs2g16200.1/Cs2g162   | 8.75  | 0 | 0 | 2 | MASCOT | T | PLEX8 |
| 1.57E-04 | 0 0 | Cs2g16220.1/Cs2g162   | 4.14  | 0 | 0 | 2 | MASCOT | T | PLEX8 |
| 2.09E-01 | 0 0 | Cs2g16220.1/Cs2g162   | 4.14  | 0 | 0 | 2 | MASCOT | T |       |
| 6.39E-06 | 0 0 | Cs2g16220.1/Cs2g162   | 4.14  | 0 | 0 | 2 | MASCOT | T |       |
| 1.83E-01 | 0 0 | Cs2g16200.1/Cs2g162   | 5.55  | 0 | 0 | 2 | MASCOT | T | PLEX8 |
| 3.97E-03 | 0 0 | Cs2g16240.1 ! Cs2g16  | 5.81  | 0 | 0 | 2 | MASCOT | T | PLEX8 |
| 4.26E-02 | 0 0 | Cs2g16240.1 ! Cs2g16  | 5.81  | 0 | 0 | 2 | MASCOT | T | PLEX8 |
| 3.49E-02 | 0 0 | Cs2g16240.1 ! Cs2g16  | 5.81  | 0 | 0 | 2 | MASCOT | T | PLEX8 |
| 5.71E-02 | 0 0 | Cs2g16240.1 ! Cs2g16  | 5.81  | 0 | 0 | 2 | MASCOT | T | PLEX8 |
| 4.40E-02 | 0 0 | Cs2g16240.1 ! Cs2g16  | 5.81  | 0 | 0 | 2 | MASCOT | T | PLEX8 |
| 1.60E-03 | 0 0 | Cs2g16240.1 ! Cs2g16  | 5.81  | 0 | 0 | 2 | MASCOT | T | PLEX8 |
| 3.85E-01 | 0 0 | Cs2g16240.1 ! Cs2g16  | 5.81  | 0 | 0 | 2 | MASCOT | T |       |
| 8.27E-02 | 0 0 | Cs2g16240.1 ! Cs2g16  | 5.81  | 0 | 0 | 2 | MASCOT | T | PLEX8 |
| 1.18E-01 | 0 0 | Cs2g16240.1 ! Cs2g16  | 5.81  | 0 | 0 | 2 | MASCOT | T | PLEX8 |
| 1.63E-03 | 0 0 | Cs2g16240.1 ! Cs2g16  | 5.81  | 0 | 0 | 2 | MASCOT | T | PLEX8 |
| 1.00E-01 | 0 0 | Cs2g16240.1 ! Cs2g16  | 5.81  | 0 | 0 | 2 | MASCOT | T | PLEX8 |
| 5.04E-03 | 0 0 | Cs2g16240.1 ! Cs2g16  | 5.81  | 0 | 0 | 2 | MASCOT | T | PLEX8 |
| 2.20E-03 | 0 0 | Cs2g16240.1 ! Cs2g16  | 5.81  | 0 | 0 | 2 | MASCOT | T | PLEX8 |
| 2.44E-03 | 0 0 | Cs2g16220.1/Cs2g162   | 6.72  | 0 | 0 | 2 | MASCOT | T | PLEX8 |
| 4.55E-03 | 0 0 | Cs2g16220.1/Cs2g162   | 6.72  | 0 | 0 | 2 | MASCOT | T | PLEX8 |
| 3.18E-01 | 0 0 | Cs2g16220.1/Cs2g162   | 6.72  | 0 | 0 | 2 | MASCOT | T | PLEX8 |
| 1.01E-03 | 0 0 | orange1.1t01990.1     | 4.32  | 0 | 0 | 2 | MASCOT | T | PLEX8 |
| 1.24E-01 | 0 0 | orange1.1t01990.1     | 4.32  | 0 | 0 | 2 | MASCOT | T | PLEX8 |
| 5.61E-02 | 0 0 | orange1.1t01990.1     | 6.74  | 0 | 0 | 2 | MASCOT | T |       |
| 1.95E-02 | 0 0 | orange1.1t01990.1/ora | 4.37  | 0 | 0 | 2 | MASCOT | T | PLEX8 |
| 1.67E-02 | 0 0 | orange1.1t01990.1/ora | 4.37  | 0 | 0 | 2 | MASCOT | T | PLEX8 |
| 1.31E-02 | 0 0 | orange1.1t01990.1/ora | 4.37  | 0 | 0 | 2 | MASCOT | T | PLEX8 |
| 1.10E-01 | 0 0 | orange1.1t01990.1/ora | 4.37  | 0 | 0 | 2 | MASCOT | T | PLEX8 |
| 6.98E-02 | 0 0 | orange1.1t01990.1/ora | 4.37  | 0 | 0 | 2 | MASCOT | T |       |
| 2.74E-02 | 0 0 | orange1.1t01990.1/ora | 4.37  | 0 | 0 | 2 | MASCOT | T | PLEX8 |
| 5.97E-03 | 0 0 | orange1.1t01990.1/ora | 4.37  | 0 | 0 | 2 | MASCOT | T | PLEX8 |
| 1.35E-02 | 0 0 | orange1.1t01990.1/ora | 4.37  | 0 | 0 | 2 | MASCOT | T | PLEX8 |
| 6.09E-05 | 0 0 | orange1.1t01990.1/ora | 4.37  | 0 | 0 | 2 | MASCOT | T | PLEX8 |
| 2.58E-02 | 0 0 | orange1.1t01990.1/ora | 4.37  | 0 | 0 | 2 | MASCOT | T | PLEX8 |
| 3.32E-02 | 0 0 | orange1.1t01990.1/ora | 4.37  | 0 | 0 | 2 | MASCOT | T |       |
| 5.40E-03 | 0 0 | orange1.1t01990.1     | 5.84  | 0 | 0 | 2 | MASCOT | T |       |
| 3.82E-03 | 0 0 | orange1.1t01990.1     | 5.84  | 0 | 0 | 2 | MASCOT | T |       |
| 1.62E-01 | 0 0 | orange1.1t01990.1     | 5.84  | 0 | 0 | 2 | MASCOT | T |       |
| 1.85E-02 | 0 0 | orange1.1t01990.1     | 10.84 | 1 | 0 | 2 | MASCOT | T | PLEX8 |
| 8.57E-02 | 0 0 | orange1.1t01990.1     | 10.84 | 1 | 0 | 2 | MASCOT | T | PLEX8 |
| 1.21E-03 | 0 0 | orange1.1t01990.1     | 10.84 | 1 | 0 | 2 | MASCOT | T | PLEX8 |

|          |     |                       |      |   |      |   |   |        |   |       |
|----------|-----|-----------------------|------|---|------|---|---|--------|---|-------|
| 1.94E-01 | 0 0 | orange1.1t01990.1     | 8.75 | 0 | 15.9 | 0 | 2 | MASCOT | T | PLEX8 |
| 1.20E-01 | 0 0 | orange1.1t01990.1     | 8.75 | 0 |      | 0 | 2 | MASCOT | T | PLEX8 |
| 2.82E-01 | 0 0 | orange1.1t01990.1     | 8.75 | 0 |      | 0 | 2 | MASCOT | T | PLEX8 |
| 1.76E-06 | 0 0 | orange1.1t01990.1     | 5.97 | 0 |      | 0 | 2 | MASCOT | T | PLEX8 |
| 6.22E-04 | 0 0 | orange1.1t01990.1     | 5.97 | 0 |      | 0 | 2 | MASCOT | T | PLEX8 |
| 3.79E-01 | 0 0 | orange1.1t01990.1     | 5.97 | 0 |      | 0 | 2 | MASCOT | T | PLEX8 |
| 5.61E-03 | 0 0 | orange1.1t01990.1     | 5.97 | 0 |      | 0 | 2 | MASCOT | T | PLEX8 |
| 1.97E-04 | 0 0 | orange1.1t01990.1     | 5.97 | 0 |      | 0 | 2 | MASCOT | T | PLEX8 |
| 1.64E-01 | 0 0 | orange1.1t01990.1     | 5.84 | 0 | 15.9 | 0 | 2 | MASCOT | T |       |
| 2.43E-01 | 0 0 | orange1.1t01990.1     | 5.84 | 0 |      | 0 | 2 | MASCOT | T | PLEX8 |
| 2.02E-01 | 0 0 | Cs1g20220.1/Cs1g202   | 5.84 | 0 |      | 0 | 2 | MASCOT | T |       |
| 1.98E-02 | 0 0 | Cs4g12620.1/Cs5g079   | 4.25 | 0 |      | 0 | 2 | MASCOT | T | PLEX8 |
| 1.53E-01 | 0 0 | Cs1g20220.1/Cs1g202   | 4.53 | 0 |      | 0 | 2 | MASCOT | T | PLEX8 |
| 9.87E-02 | 0 0 | Cs5g07950.1/Cs8g058   | 5.84 | 0 |      | 0 | 2 | MASCOT | T | PLEX8 |
| 5.89E-04 | 0 0 | Cs5g07950.1/Cs8g058   | 5.84 | 0 |      | 0 | 2 | MASCOT | T | PLEX8 |
| 1.76E-02 | 0 0 | orange1.1t01991.1/ora | 5.3  | 0 |      | 0 | 2 | MASCOT | T | PLEX8 |
| 1.28E-03 | 0 0 | orange1.1t01991.1/ora | 5.3  | 0 |      | 0 | 2 | MASCOT | T | PLEX8 |
| 2.41E-02 | 0 0 | orange1.1t01991.1/ora | 5.3  | 0 |      | 0 | 2 | MASCOT | T | PLEX8 |
| 9.53E-02 | 0 0 | orange1.1t01991.1/ora | 5.3  | 0 |      | 0 | 2 | MASCOT | T |       |
| 1.66E-05 | 0 0 | orange1.1t01991.1/ora | 5.3  | 0 |      | 0 | 2 | MASCOT | T |       |
| 2.67E-02 | 0 0 | orange1.1t01991.1/ora | 5.3  | 0 |      | 0 | 2 | MASCOT | T |       |
| 4.82E-02 | 0 0 | Cs3g17990.1/Cs6g036   | 4.53 | 0 |      | 0 | 2 | MASCOT | T | PLEX8 |
| 1.30E-02 | 0 0 | Cs3g17990.1/Cs6g036   | 4.53 | 0 |      | 0 | 2 | MASCOT | T | PLEX8 |
| 1.55E-01 | 0 0 | Cs3g17990.1/Cs6g036   | 4.53 | 0 |      | 0 | 2 | MASCOT | T | PLEX8 |
| 3.80E-02 | 0 0 | Cs3g17990.1/Cs6g036   | 4.53 | 0 |      | 0 | 2 | MASCOT | T | PLEX8 |
| 2.16E-01 | 0 0 | Cs1g20220.1/Cs1g202   | 8.59 | 0 |      | 0 | 2 | MASCOT | T | PLEX8 |
| 7.83E-03 | 0 0 | Cs1g20220.1/Cs1g202   | 8.59 | 0 |      | 0 | 2 | MASCOT | T | PLEX8 |
| 2.11E-02 | 0 0 | Cs1g20220.1/Cs1g202   | 8.59 | 0 |      | 0 | 2 | MASCOT | T | PLEX8 |
| 4.75E-02 | 0 0 | Cs1g20220.1/Cs1g202   | 8.59 | 0 |      | 0 | 2 | MASCOT | T | PLEX8 |
| 2.21E-01 | 0 0 | Cs1g20220.1/Cs1g202   | 8.59 | 0 |      | 0 | 2 | MASCOT | T | PLEX8 |
| 4.29E-03 | 0 0 | Cs1g20220.1/Cs1g202   | 8.59 | 0 |      | 0 | 2 | MASCOT | T | PLEX8 |
| 1.78E-02 | 0 0 | Cs1g20220.1/Cs1g202   | 8.59 | 0 |      | 0 | 2 | MASCOT | T | PLEX8 |
| 1.09E-01 | 0 0 | Cs1g20220.1/Cs1g202   | 8.59 | 0 |      | 0 | 2 | MASCOT | T | PLEX8 |
| 4.07E-02 | 0 0 | Cs1g20220.1/Cs1g202   | 8.59 | 0 |      | 0 | 2 | MASCOT | T | PLEX8 |
| 5.17E-02 | 0 0 | Cs1g20220.1/Cs1g202   | 8.59 | 0 |      | 0 | 2 | MASCOT | T |       |
| 5.08E-02 | 0 0 | Cs1g20220.1/Cs1g202   | 8.59 | 0 |      | 0 | 2 | MASCOT | T |       |
| 2.10E-01 | 0 0 | Cs1g20220.1/Cs1g202   | 6    | 0 |      | 0 | 2 | MASCOT | T |       |
| 3.14E-01 | 0 0 | Cs1g20220.1/Cs1g202   | 6    | 0 |      | 0 | 2 | MASCOT | T |       |
| 2.52E-01 | 0 0 | Cs1g20220.1/Cs1g202   | 6    | 0 |      | 0 | 2 | MASCOT | T |       |
| 1.76E-01 | 0 0 | Cs5g03830.1/Cs5g038   | 4.37 | 0 |      | 0 | 2 | MASCOT | T | PLEX8 |
| 2.44E-01 | 0 0 | Cs5g03830.1/Cs5g038   | 4.37 | 0 |      | 0 | 2 | MASCOT | T | PLEX8 |
| 2.34E-01 | 0 0 | Cs5g03830.1/Cs5g038   | 4.37 | 0 |      | 0 | 2 | MASCOT | T | PLEX8 |
| 9.29E-02 | 0 0 | Cs5g03830.1/Cs5g038   | 4.37 | 0 |      | 0 | 2 | MASCOT | T | PLEX8 |
| 2.76E-01 | 0 0 | Cs5g03830.1/Cs5g038   | 4.37 | 0 |      | 0 | 2 | MASCOT | T | PLEX8 |
| 1.52E-01 | 0 0 | Cs5g03830.1/Cs5g038   | 4.37 | 0 |      | 0 | 2 | MASCOT | T | PLEX8 |
| 3.53E-01 | 0 0 | Cs5g03830.1/Cs5g038   | 4.37 | 0 |      | 0 | 2 | MASCOT | T | PLEX8 |
| 8.43E-02 | 0 0 | Cs5g03830.1/Cs5g038   | 4.37 | 0 |      | 0 | 2 | MASCOT | T | PLEX8 |
| 2.38E-01 | 0 0 | Cs5g03830.1/Cs5g038   | 4.37 | 0 |      | 0 | 2 | MASCOT | T | PLEX8 |
| 4.34E-01 | 0 0 | Cs5g03830.1/Cs5g038   | 4.37 | 0 |      | 0 | 2 | MASCOT | T | PLEX8 |
| 2.61E-01 | 0 0 | Cs5g03830.1/Cs5g038   | 4.37 | 0 |      | 0 | 2 | MASCOT | T | PLEX8 |
| 2.48E-01 | 0 0 | Cs5g03830.1/Cs5g038   | 4.37 | 0 |      | 0 | 2 | MASCOT | T | PLEX8 |

|          |     |                     |      |   |      |   |        |        |       |       |
|----------|-----|---------------------|------|---|------|---|--------|--------|-------|-------|
| 6.38E-02 | 0 0 | Cs5g03830.1/Cs5g038 | 4.37 | 0 | 0    | 2 | MASCOT | T      | PLEX8 |       |
| 6.36E-02 | 0 0 | Cs5g03830.1/Cs5g038 | 4.53 | 0 | 0    | 2 | MASCOT | T      | PLEX8 |       |
| 9.17E-02 | 0 0 | Cs5g03830.1/Cs5g038 | 4.53 | 0 | 0    | 2 | MASCOT | T      | PLEX8 |       |
| 7.59E-02 | 0 0 | Cs5g03830.1/Cs5g038 | 4.68 | 1 | 0    | 2 | MASCOT | T      | PLEX8 |       |
| 5.18E-02 | 0 0 | Cs5g03830.1/Cs5g038 | 5.84 | 0 | 0    | 2 | MASCOT | T      | PLEX8 |       |
| 6.60E-03 | 0 0 | Cs5g03830.1/Cs5g038 | 5.84 | 0 | 0    | 2 | MASCOT | T      | PLEX8 |       |
| 3.14E-02 | 0 0 | Cs5g03830.1/Cs5g038 | 5.84 | 0 | 0    | 2 | MASCOT | T      | PLEX8 |       |
| 3.07E-03 | 0 0 | Cs5g03830.1/Cs5g038 | 5.84 | 0 | 0    | 2 | MASCOT | T      | PLEX8 |       |
| 2.53E-03 | 0 0 | Cs5g03830.1/Cs5g038 | 5.84 | 0 | 0    | 2 | MASCOT | T      | PLEX8 |       |
| 4.89E-04 | 0 0 | Cs1g10745.1/Cs1g190 | 4.21 | 0 | 0    | 2 | MASCOT | T      | PLEX8 |       |
| 2.73E-03 | 0 0 | Cs1g10745.1/Cs1g190 | 4.21 | 0 | 0    | 2 | MASCOT | T      | PLEX8 |       |
| 4.07E-02 | 0 0 | Cs5g03830.1/Cs5g038 | 6.41 | 0 | 0    | 2 | MASCOT | T      | PLEX8 |       |
| 1.77E-05 | 0 0 | Cs5g03830.1/Cs5g038 | 4.21 | 0 | 0    | 2 | MASCOT | T      | PLEX8 |       |
| 1.73E-05 | 0 0 | Cs5g03830.1/Cs5g038 | 4.21 | 0 | 0    | 2 | MASCOT | T      | PLEX8 |       |
| 6.06E-04 | 0 0 | Cs5g03830.1         | 6    | 0 | 0    | 2 | MASCOT | T      | PLEX8 |       |
| 1.91E-03 | 0 0 | Cs5g03830.1         | 6    | 0 | 0    | 2 | MASCOT | T      | PLEX8 |       |
| 2.59E-01 | 0 0 | Cs9g16030.2/Cs9g160 | 6.85 | 0 | 0    | 2 | MASCOT | T      | PLEX8 |       |
| 1.41E-01 | 0 0 | Cs9g16030.2/Cs9g160 | 6.85 | 0 | 0    | 2 | MASCOT | T      |       |       |
| 1.19E-01 | 0 0 | Cs9g16030.2/Cs9g160 | 6.85 | 0 | 0    | 2 | MASCOT | T      |       |       |
| 1.80E-01 | 0 0 | Cs9g16030.2/Cs9g160 | 4.37 | 0 | 0    | 2 | MASCOT | T      | PLEX8 |       |
| 2.63E-01 | 0 0 | Cs9g16030.2/Cs9g160 | 4.37 | 0 | 0    | 2 | MASCOT | T      | PLEX8 |       |
| 3.76E-01 | 0 0 | Cs9g16030.2/Cs9g160 | 4.37 | 0 | 0    | 2 | MASCOT | T      | PLEX8 |       |
| 2.69E-01 | 0 0 | Cs9g16030.2/Cs9g160 | 4.37 | 0 | 0    | 2 | MASCOT | T      | PLEX8 |       |
| 5.15E-02 | 0 0 | Cs9g16030.1/Cs9g160 | 4.68 | 0 | 0    | 2 | MASCOT | T      | PLEX8 |       |
| 2.14E-01 | 0 0 | Cs9g16030.2         | 4.37 | 0 | 0    | 2 | MASCOT | T      | PLEX8 |       |
| 3.12E-01 | 0 0 | Cs9g16030.2         | 4.37 | 0 | 0    | 2 | MASCOT | T      | PLEX8 |       |
| 3.14E-04 | 0 0 | Cs9g16030.2         | 4.37 | 0 | 0    | 2 | MASCOT | T      | PLEX8 |       |
| 2.42E-04 | 0 0 | Cs9g16030.2         | 4.37 | 0 | 0    | 2 | MASCOT | T      | PLEX8 |       |
| 1.21E-02 | 0 0 | Cs9g16030.2         | 4.37 | 0 | 0    | 2 | MASCOT | T      | PLEX8 |       |
| 7.09E-03 | 0 0 | Cs9g16030.2         | 4.37 | 0 | 0    | 2 | MASCOT | T      | PLEX8 |       |
| 1.32E-02 | 0 0 | Cs9g16030.1/Cs9g160 | 4.37 | 0 | 0    | 2 | MASCOT | T      | PLEX8 |       |
| 2.72E-01 | 0 0 | Cs9g16030.1/Cs9g160 | 4.37 | 0 | 0    | 2 | MASCOT | T      | PLEX8 |       |
| 3.30E-02 | 0 0 | Cs9g16030.1/Cs9g160 | 4.37 | 0 | 0    | 2 | MASCOT | T      | PLEX8 |       |
| 6.88E-02 | 0 0 | Cs9g16030.1/Cs9g160 | 4.37 | 0 | 0    | 2 | MASCOT | T      | PLEX8 |       |
| 1.85E-01 | 0 0 | Cs9g16030.1/Cs9g160 | 4.37 | 0 | 0    | 2 | MASCOT | T      |       |       |
| 1.72E-02 | 0 0 | Cs9g16030.1/Cs9g160 | 8.8  | 0 | 0    | 2 | MASCOT | T      | PLEX8 |       |
| 1.62E-01 | 0 0 | Cs9g16030.1/Cs9g160 | 8.8  | 0 | 0    | 2 | MASCOT | T      | PLEX8 |       |
| 2.14E-01 | 0 0 | Cs9g16030.1/Cs9g160 | 8.8  | 0 | 0    | 2 | MASCOT | T      | PLEX8 |       |
| 2.93E-01 | 0 0 | Cs9g16030.1/Cs9g160 | 4.53 | 0 | 0    | 2 | MASCOT | T      | PLEX8 |       |
| 3.25E-03 | 0 0 | Cs9g16030.1/Cs9g160 | 4.53 | 0 | 15.9 | 0 | 2      | MASCOT | T     | PLEX8 |
| 1.34E-01 | 0 0 | Cs9g16030.1/Cs9g160 | 4.53 | 0 | 0    | 2 | MASCOT | T      | PLEX8 |       |
| 7.30E-02 | 0 0 | Cs9g16030.1/Cs9g160 | 4.53 | 0 | 0    | 2 | MASCOT | T      | PLEX8 |       |
| 1.39E-03 | 0 0 | Cs9g16030.1/Cs9g160 | 4.53 | 0 | 0    | 2 | MASCOT | T      | PLEX8 |       |
| 1.03E-03 | 0 0 | Cs9g16030.1/Cs9g160 | 4.53 | 0 | 0    | 2 | MASCOT | T      | PLEX8 |       |
| 9.36E-03 | 0 0 | Cs5g32800.1         | 4.65 | 0 | 0    | 2 | MASCOT | T      |       |       |
| 1.56E-01 | 0 0 | Cs5g32800.1         | 4.65 | 0 | 0    | 2 | MASCOT | T      |       |       |
| 3.78E-02 | 0 0 | Cs5g32800.1         | 4    | 0 | 15.9 | 0 | 2      | MASCOT | T     | PLEX8 |
| 6.71E-02 | 0 0 | Cs5g32800.1         | 4    | 0 | 15.9 | 0 | 2      | MASCOT | T     | PLEX8 |
| 6.38E-02 | 0 0 | Cs5g32800.1         | 4    | 0 | 0    | 2 | MASCOT | T      |       |       |
| 1.18E-03 | 0 0 | Cs5g32800.1         | 4    | 0 | 0    | 2 | MASCOT | T      |       |       |
| 5.11E-02 | 0 0 | Cs5g32800.1         | 4.14 | 0 | 0    | 2 | MASCOT | T      | PLEX8 |       |

|          |     |                     |      |   |      |   |        |        |       |       |
|----------|-----|---------------------|------|---|------|---|--------|--------|-------|-------|
| 3.44E-02 | 0 0 | Cs5g32800.1         | 4.14 | 0 | 0    | 2 | MASCOT | T      | PLEX8 |       |
| 5.51E-04 | 0 0 | Cs5g32800.1         | 4.14 | 0 | 0    | 2 | MASCOT | T      | PLEX8 |       |
| 1.19E-02 | 0 0 | Cs5g32800.1         | 4.14 | 0 | 0    | 2 | MASCOT | T      | PLEX8 |       |
| 1.96E-01 | 0 0 | Cs5g32800.1         | 4.37 | 0 | 0    | 2 | MASCOT | T      | PLEX8 |       |
| 1.27E-01 | 0 0 | Cs5g32800.1         | 4.37 | 0 | 0    | 2 | MASCOT | T      | PLEX8 |       |
| 1.38E-01 | 0 0 | Cs5g32800.1         | 4.37 | 0 | 0    | 2 | MASCOT | T      | PLEX8 |       |
| 5.67E-02 | 0 0 | Cs5g32800.1         | 9.73 | 0 | 0    | 2 | MASCOT | T      | PLEX8 |       |
| 1.45E-04 | 0 0 | Cs5g32800.1         | 9.73 | 0 | 0    | 2 | MASCOT | T      | PLEX8 |       |
| 4.49E-02 | 0 0 | Cs5g32800.1         | 9.73 | 0 | 0    | 2 | MASCOT | T      | PLEX8 |       |
| 8.61E-02 | 0 0 | Cs5g32800.1         | 8.73 | 1 | 0    | 2 | MASCOT | T      | PLEX8 |       |
| 3.69E-04 | 0 0 | Cs5g32800.1         | 4.37 | 0 | 0    | 2 | MASCOT | T      | PLEX8 |       |
| 3.62E-05 | 0 0 | Cs5g32800.1         | 4.37 | 0 | 0    | 2 | MASCOT | T      | PLEX8 |       |
| 4.30E-01 | 0 0 | Cs5g32800.1         | 4.37 | 0 | 0    | 2 | MASCOT | T      | PLEX8 |       |
| 1.19E-01 | 0 0 | Cs5g32800.1         | 5.97 | 0 | 0    | 2 | MASCOT | T      | PLEX8 |       |
| 3.15E-01 | 0 0 | Cs5g32800.1         | 5.97 | 0 | 0    | 2 | MASCOT | T      | PLEX8 |       |
| 4.50E-03 | 0 0 | Cs5g32800.1         | 5.97 | 0 | 0    | 2 | MASCOT | T      | PLEX8 |       |
| 2.93E-02 | 0 0 | Cs5g32800.1         | 5.97 | 0 | 0    | 2 | MASCOT | T      | PLEX8 |       |
| 1.54E-01 | 0 0 | Cs5g32800.1         | 5.97 | 0 | 0    | 2 | MASCOT | T      | PLEX8 |       |
| 2.50E-02 | 0 0 | Cs5g32800.1         | 5.97 | 0 | 0    | 2 | MASCOT | T      | PLEX8 |       |
| 1.14E-01 | 0 0 | Cs5g32800.1         | 5.97 | 0 | 0    | 2 | MASCOT | T      | PLEX8 |       |
| 6.05E-02 | 0 0 | Cs6g19490.1         | 4.64 | 0 | 0    | 2 | MASCOT | T      | PLEX8 |       |
| 1.16E-01 | 0 0 | Cs6g19490.1         | 4.64 | 0 | 0    | 2 | MASCOT | T      | PLEX8 |       |
| 2.90E-03 | 0 0 | Cs6g19490.1         | 4.64 | 0 | 0    | 2 | MASCOT | T      | PLEX8 |       |
| 2.10E-01 | 0 0 | Cs6g19490.1         | 4.64 | 0 | 0    | 2 | MASCOT | T      | PLEX8 |       |
| 7.38E-03 | 0 0 | Cs6g19490.1         | 4.64 | 0 | 0    | 2 | MASCOT | T      | PLEX8 |       |
| 1.59E-01 | 0 0 | Cs6g19490.1         | 3.83 | 0 | 15.9 | 0 | 2      | MASCOT | T     | PLEX8 |
| 9.14E-04 | 0 0 | Cs6g19490.1         | 3.83 | 0 | 15.9 | 0 | 2      | MASCOT | T     | PLEX8 |
| 5.71E-05 | 0 0 | Cs6g19490.1         | 3.83 | 0 | 0    | 2 | MASCOT | T      | PLEX8 |       |
| 5.76E-05 | 0 0 | Cs6g19490.1         | 4.53 | 0 | 0    | 2 | MASCOT | T      | PLEX8 |       |
| 1.38E-07 | 0 0 | Cs6g19490.1         | 4.53 | 0 | 0    | 2 | MASCOT | T      | PLEX8 |       |
| 1.02E-01 | 0 0 | Cs6g19490.1         | 6.09 | 0 | 0    | 2 | MASCOT | T      | PLEX8 |       |
| 7.91E-02 | 0 0 | Cs6g19490.1         | 8.75 | 0 | 0    | 2 | MASCOT | T      | PLEX8 |       |
| 4.87E-01 | 0 0 | Cs6g19490.1         | 6    | 0 | 0    | 2 | MASCOT | T      | PLEX8 |       |
| 6.00E-02 | 0 0 | Cs6g19490.1         | 6    | 0 | 0    | 2 | MASCOT | T      | PLEX8 |       |
| 4.69E-01 | 0 0 | Cs6g19490.1         | 6    | 0 | 0    | 2 | MASCOT | T      | PLEX8 |       |
| 2.60E-01 | 0 0 | Cs6g19490.1         | 6    | 0 | 0    | 2 | MASCOT | T      | PLEX8 |       |
| 2.46E-01 | 0 0 | Cs6g19490.1         | 6    | 0 | 0    | 2 | MASCOT | T      | PLEX8 |       |
| 3.09E-01 | 0 0 | Cs6g19490.1         | 6    | 0 | 0    | 2 | MASCOT | T      | PLEX8 |       |
| 1.50E-01 | 0 0 | Cs6g19490.1         | 6.41 | 0 | 0    | 2 | MASCOT | T      | PLEX8 |       |
| 1.44E-02 | 0 0 | Cs6g19490.1         | 6.41 | 0 | 0    | 2 | MASCOT | T      | PLEX8 |       |
| 2.12E-03 | 0 0 | Cs6g19490.1         | 6.41 | 0 | 0    | 2 | MASCOT | T      | PLEX8 |       |
| 4.43E-02 | 0 0 | Cs6g19490.1         | 6.41 | 0 | 0    | 2 | MASCOT | T      | PLEX8 |       |
| 1.79E-01 | 0 0 | Cs6g19490.1         | 6.41 | 0 | 0    | 2 | MASCOT | T      | PLEX8 |       |
| 4.82E-02 | 0 0 | Cs6g19490.1         | 6.41 | 0 | 0    | 2 | MASCOT | T      | PLEX8 |       |
| 1.39E-02 | 0 0 | Cs6g19490.1         | 8.26 | 0 | 0    | 2 | MASCOT | T      | PLEX8 |       |
| 1.74E-02 | 0 0 | Cs6g19490.1         | 8.26 | 0 | 0    | 2 | MASCOT | T      | PLEX8 |       |
| 4.33E-02 | 0 0 | Cs6g19490.1         | 8.26 | 0 | 0    | 2 | MASCOT | T      | PLEX8 |       |
| 1.50E-01 | 0 0 | Cs7g28340.1/Cs7g283 | 8.75 | 0 | 0    | 2 | MASCOT | T      | PLEX8 |       |
| 2.47E-03 | 0 0 | Cs7g28340.1/Cs7g283 | 8.59 | 1 | 0    | 2 | MASCOT | T      | PLEX8 |       |
| 2.00E-01 | 0 0 | Cs7g28340.1/Cs7g283 | 6    | 0 | 0    | 2 | MASCOT | T      | PLEX8 |       |
| 1.37E-02 | 0 0 | Cs7g28340.1/Cs7g283 | 6    | 0 | 0    | 2 | MASCOT | T      | PLEX8 |       |

|          |     |                     |      |   |      |   |        |        |       |
|----------|-----|---------------------|------|---|------|---|--------|--------|-------|
| 1.03E-01 | 0 0 | Cs7g28340.1/Cs7g283 | 6    | 0 | 0    | 2 | MASCOT | T      | PLEX8 |
| 1.24E-01 | 0 0 | Cs7g28340.1/Cs7g283 | 6    | 0 | 0    | 2 | MASCOT | T      |       |
| 3.41E-01 | 0 0 | Cs7g28340.1/Cs7g283 | 6    | 0 | 0    | 2 | MASCOT | T      | PLEX8 |
| 2.71E-02 | 0 0 | Cs7g28340.1/Cs7g283 | 8.59 | 0 | 0    | 2 | MASCOT | T      | PLEX8 |
| 2.06E-04 | 0 0 | Cs7g28340.1/Cs7g283 | 8.59 | 0 | 0    | 2 | MASCOT | T      | PLEX8 |
| 3.54E-02 | 0 0 | Cs7g28340.1/Cs7g283 | 8.59 | 0 | 0    | 2 | MASCOT | T      | PLEX8 |
| 9.75E-02 | 0 0 | Cs7g28340.1/Cs7g283 | 8.59 | 0 | 0    | 2 | MASCOT | T      | PLEX8 |
| 5.22E-02 | 0 0 | Cs7g28340.1/Cs7g283 | 4.18 | 1 | 0    | 2 | MASCOT | T      | PLEX8 |
| 1.73E-02 | 0 0 | Cs7g28340.1/Cs7g283 | 6.41 | 0 | 0    | 2 | MASCOT | T      | PLEX8 |
| 9.66E-02 | 0 0 | Cs7g28340.1/Cs7g283 | 6.41 | 0 | 0    | 2 | MASCOT | T      | PLEX8 |
| 1.03E-03 | 0 0 | Cs7g28340.1/Cs7g283 | 5.81 | 0 | 0    | 2 | MASCOT | T      | PLEX8 |
| 3.07E-03 | 0 0 | Cs7g28340.1/Cs7g283 | 5.81 | 0 | 0    | 2 | MASCOT | T      | PLEX8 |
| 2.82E-03 | 0 0 | Cs7g28340.1/Cs7g283 | 5.81 | 0 | 0    | 2 | MASCOT | T      | PLEX8 |
| 2.42E-04 | 0 0 | Cs7g28340.1/Cs7g283 | 5.81 | 0 | 0    | 2 | MASCOT | T      | PLEX8 |
| 3.79E-03 | 0 0 | Cs7g28340.1/Cs7g283 | 5.81 | 0 | 0    | 2 | MASCOT | T      | PLEX8 |
| 3.45E-03 | 0 0 | Cs7g28340.1/Cs7g283 | 5.81 | 0 | 0    | 2 | MASCOT | T      | PLEX8 |
| 3.12E-01 | 0 0 | Cs7g28340.1/Cs7g283 | 4.53 | 0 | 0    | 2 | MASCOT | T      | PLEX8 |
| 1.33E-02 | 0 0 | Cs7g28340.1/Cs7g283 | 4.53 | 0 | 0    | 2 | MASCOT | T      | PLEX8 |
| 2.91E-02 | 0 0 | Cs7g28340.1/Cs7g283 | 4.53 | 0 | 0    | 2 | MASCOT | T      | PLEX8 |
| 6.74E-02 | 0 0 | Cs7g28340.1/Cs7g283 | 4.53 | 0 | 0    | 2 | MASCOT | T      | PLEX8 |
| 6.99E-03 | 0 0 | Cs7g28340.1/Cs7g283 | 4.53 | 0 | 0    | 2 | MASCOT | T      | PLEX8 |
| 8.93E-03 | 0 0 | Cs7g28340.1/Cs7g283 | 4.53 | 0 | 0    | 2 | MASCOT | T      | PLEX8 |
| 1.21E-02 | 0 0 | Cs7g28340.1/Cs7g283 | 4.53 | 0 | 0    | 2 | MASCOT | T      | PLEX8 |
| 6.25E-02 | 0 0 | Cs5g02680.1/Cs5g026 | 3.98 | 0 | 0    | 2 | MASCOT | T      | PLEX8 |
| 2.53E-03 | 0 0 | Cs5g02680.1/Cs5g026 | 4.72 | 0 | 0    | 2 | MASCOT | T      | PLEX8 |
| 8.91E-02 | 0 0 | Cs5g02680.1/Cs5g026 | 4.72 | 0 | 0    | 2 | MASCOT | T      | PLEX8 |
| 8.67E-02 | 0 0 | Cs5g02680.1/Cs5g026 | 6.1  | 0 | 0    | 2 | MASCOT | T      | PLEX8 |
| 8.05E-03 | 0 0 | Cs5g02680.1         | 4.37 | 0 | 0    | 2 | MASCOT | T      |       |
| 4.52E-02 | 0 0 | Cs5g02680.1/Cs5g026 | 4.53 | 0 | 0    | 2 | MASCOT | T      | PLEX8 |
| 2.01E-02 | 0 0 | Cs5g02680.1/Cs5g026 | 4.53 | 0 | 0    | 2 | MASCOT | T      | PLEX8 |
| 3.73E-03 | 0 0 | Cs5g02680.1/Cs5g026 | 4.53 | 0 | 0    | 2 | MASCOT | T      | PLEX8 |
| 5.74E-03 | 0 0 | Cs5g02680.1/Cs5g026 | 4.53 | 0 | 0    | 2 | MASCOT | T      | PLEX8 |
| 2.56E-01 | 0 0 | Cs5g02680.1/Cs5g026 | 4.53 | 0 | 0    | 2 | MASCOT | T      | PLEX8 |
| 2.45E-01 | 0 0 | Cs5g02680.1/Cs5g026 | 4.53 | 0 | 0    | 2 | MASCOT | T      | PLEX8 |
| 9.39E-03 | 0 0 | Cs5g02680.1/Cs5g026 | 4.53 | 0 | 0    | 2 | MASCOT | T      | PLEX8 |
| 5.76E-02 | 0 0 | Cs5g02680.1/Cs5g026 | 4.53 | 0 | 0    | 2 | MASCOT | T      | PLEX8 |
| 1.46E-02 | 0 0 | Cs5g02680.1/Cs5g026 | 4.53 | 0 | 0    | 2 | MASCOT | T      | PLEX8 |
| 1.86E-01 | 0 0 | Cs5g02680.1/Cs5g026 | 4.53 | 0 | 0    | 2 | MASCOT | T      | PLEX8 |
| 2.51E-03 | 0 0 | Cs5g02680.1/Cs5g026 | 4.03 | 0 | 15.9 | 0 | 2      | MASCOT | T     |
| 3.26E-02 | 0 0 | Cs5g02680.1/Cs5g026 | 4.03 | 0 | 15.9 | 0 | 2      | MASCOT | T     |
| 1.71E-02 | 0 0 | Cs5g02680.1/Cs5g026 | 4.03 | 0 | 15.9 | 0 | 2      | MASCOT | T     |
| 5.38E-06 | 0 0 | Cs5g02680.1/Cs5g026 | 4.03 | 0 | 15.9 | 0 | 2      | MASCOT | T     |
| 3.84E-04 | 0 0 | Cs5g02680.1/Cs5g026 | 4.03 | 0 | 15.9 | 0 | 2      | MASCOT | T     |
| 1.88E-03 | 0 0 | Cs5g02680.1/Cs5g026 | 4.03 | 0 | 0    | 2 | MASCOT | T      |       |
| 4.66E-04 | 0 0 | Cs5g02680.1/Cs5g026 | 4.03 | 0 | 0    | 2 | MASCOT | T      |       |
| 7.97E-02 | 0 0 | Cs5g02680.1/Cs5g026 | 6.74 | 0 | 0    | 2 | MASCOT | T      | PLEX8 |
| 1.73E-01 | 0 0 | Cs5g02680.1/Cs5g026 | 6.74 | 0 | 0    | 2 | MASCOT | T      | PLEX8 |
| 2.58E-03 | 0 0 | Cs5g02680.1         | 8.75 | 1 | 0    | 2 | MASCOT | T      | PLEX8 |
| 1.37E-01 | 0 0 | orange1.1t03899.1   | 5.83 | 0 | 0    | 2 | MASCOT | T      | PLEX8 |
| 4.04E-01 | 0 0 | orange1.1t03899.1   | 5.83 | 0 | 0    | 2 | MASCOT | T      | PLEX8 |
| 2.08E-01 | 0 0 | orange1.1t03899.1   | 5.83 | 0 | 0    | 2 | MASCOT | T      | PLEX8 |

|          |     |                     |      |   |      |   |        |        |       |       |
|----------|-----|---------------------|------|---|------|---|--------|--------|-------|-------|
| 4.26E-01 | 0 0 | orange1.1t03899.1   | 5.83 | 0 | 0    | 2 | MASCOT | T      | PLEX8 |       |
| 2.72E-01 | 0 0 | orange1.1t03899.1   | 4.65 | 0 | 0    | 2 | MASCOT | T      | PLEX8 |       |
| 3.39E-04 | 0 0 | orange1.1t03899.1   | 4.65 | 0 | 0    | 2 | MASCOT | T      | PLEX8 |       |
| 3.13E-03 | 0 0 | orange1.1t03899.1   | 4.65 | 0 | 0    | 2 | MASCOT | T      | PLEX8 |       |
| 6.14E-03 | 0 0 | orange1.1t03899.1   | 4.65 | 0 | 0    | 2 | MASCOT | T      | PLEX8 |       |
| 2.94E-01 | 0 0 | orange1.1t03899.1   | 4.65 | 0 | 0    | 2 | MASCOT | T      |       |       |
| 2.01E-04 | 0 0 | orange1.1t03899.1   | 4.65 | 0 | 0    | 2 | MASCOT | T      |       |       |
| 2.60E-01 | 0 0 | orange1.1t03899.1   | 4.65 | 0 | 0    | 2 | MASCOT | T      |       |       |
| 1.26E-01 | 0 0 | orange1.1t03899.1   | 6    | 0 | 0    | 2 | MASCOT | T      | PLEX8 |       |
| 1.23E-02 | 0 0 | orange1.1t03899.1   | 6.24 | 0 | 15.9 | 0 | 2      | MASCOT | T     | PLEX8 |
| 4.39E-06 | 0 0 | orange1.1t03899.1   | 8.22 | 0 | 0    | 2 | MASCOT | T      |       |       |
| 1.04E-01 | 0 0 | orange1.1t03899.1   | 6.75 | 0 | 0    | 2 | MASCOT | T      | PLEX8 |       |
| 2.51E-02 | 0 0 | orange1.1t03899.1   | 6.75 | 0 | 0    | 2 | MASCOT | T      |       |       |
| 6.84E-02 | 0 0 | orange1.1t03899.1   | 6.75 | 0 | 0    | 2 | MASCOT | T      |       |       |
| 3.77E-02 | 0 0 | orange1.1t03899.1   | 6.75 | 0 | 0    | 2 | MASCOT | T      |       |       |
| 3.02E-02 | 0 0 | orange1.1t03899.1   | 8.75 | 0 | 0    | 2 | MASCOT | T      | PLEX8 |       |
| 4.69E-02 | 0 0 | orange1.1t03899.1   | 8.75 | 0 | 0    | 2 | MASCOT | T      | PLEX8 |       |
| 1.38E-02 | 0 0 | orange1.1t03899.1   | 4.21 | 0 | 15.9 | 0 | 2      | MASCOT | T     | PLEX8 |
| 1.09E-02 | 0 0 | orange1.1t03899.1   | 4.21 | 0 | 15.9 | 0 | 2      | MASCOT | T     | PLEX8 |
| 4.86E-02 | 0 0 | orange1.1t03899.1   | 4.21 | 0 | 15.9 | 0 | 2      | MASCOT | T     | PLEX8 |
| 1.15E-02 | 0 0 | orange1.1t03899.1   | 4.21 | 0 | 0    | 2 | MASCOT | T      | PLEX8 |       |
| 1.34E-01 | 0 0 | Cs2g03230.1/Cs2g032 | 5.88 | 0 | 0    | 2 | MASCOT | T      |       |       |
| 5.88E-05 | 0 0 | Cs2g03230.1/Cs2g032 | 5.88 | 0 | 0    | 2 | MASCOT | T      |       |       |
| 6.51E-02 | 0 0 | Cs2g03230.1/Cs2g032 | 9.6  | 1 | 0    | 2 | MASCOT | T      | PLEX8 |       |
| 1.24E-03 | 0 0 | Cs2g03230.1/Cs2g032 | 5.38 | 0 | 15.9 | 0 | 2      | MASCOT | T     |       |
| 6.78E-03 | 0 0 | Cs2g03230.1/Cs2g032 | 5.38 | 0 | 15.9 | 0 | 2      | MASCOT | T     | PLEX8 |
| 3.41E-04 | 0 0 | Cs2g03230.1/Cs2g032 | 5.38 | 0 | 15.9 | 0 | 2      | MASCOT | T     | PLEX8 |
| 1.55E-02 | 0 0 | Cs2g03230.1/Cs2g032 | 5.38 | 0 | 0    | 2 | MASCOT | T      |       |       |
| 1.27E-03 | 0 0 | Cs2g03230.1/Cs2g032 | 5.38 | 0 | 0    | 2 | MASCOT | T      | PLEX8 |       |
| 3.72E-02 | 0 0 | Cs2g03230.1/Cs2g032 | 6    | 0 | 0    | 2 | MASCOT | T      | PLEX8 |       |
| 4.62E-02 | 0 0 | Cs2g03230.1/Cs2g032 | 6    | 0 | 0    | 2 | MASCOT | T      | PLEX8 |       |
| 3.40E-01 | 0 0 | Cs2g03230.1/Cs2g032 | 6    | 0 | 0    | 2 | MASCOT | T      | PLEX8 |       |
| 1.69E-02 | 0 0 | Cs2g03230.1/Cs2g032 | 6    | 0 | 0    | 2 | MASCOT | T      | PLEX8 |       |
| 6.90E-03 | 0 0 | Cs2g03230.1/Cs2g032 | 6    | 0 | 0    | 2 | MASCOT | T      | PLEX8 |       |
| 1.54E-01 | 0 0 | Cs2g03230.1/Cs2g032 | 6    | 0 | 0    | 2 | MASCOT | T      |       |       |
| 1.53E-02 | 0 0 | Cs2g03230.1/Cs2g032 | 8.76 | 0 | 0    | 2 | MASCOT | T      | PLEX8 |       |
| 1.03E-01 | 0 0 | Cs2g03230.1/Cs2g032 | 8.76 | 0 | 0    | 2 | MASCOT | T      | PLEX8 |       |
| 1.49E-01 | 0 0 | Cs2g03230.1/Cs2g032 | 6.92 | 0 | 0    | 2 | MASCOT | T      | PLEX8 |       |
| 7.45E-03 | 0 0 | Cs2g03230.1/Cs2g032 | 6.92 | 0 | 0    | 2 | MASCOT | T      | PLEX8 |       |
| 3.43E-03 | 0 0 | Cs2g03230.1/Cs2g032 | 6.92 | 0 | 0    | 2 | MASCOT | T      | PLEX8 |       |
| 7.73E-02 | 0 0 | Cs2g03230.1/Cs2g032 | 5.84 | 0 | 0    | 2 | MASCOT | T      | PLEX8 |       |
| 1.55E-02 | 0 0 | Cs2g03230.1/Cs2g032 | 5.84 | 0 | 0    | 2 | MASCOT | T      | PLEX8 |       |
| 1.54E-01 | 0 0 | Cs2g03230.1/Cs2g032 | 5.84 | 0 | 0    | 2 | MASCOT | T      | PLEX8 |       |
| 4.75E-02 | 0 0 | Cs2g03230.1/Cs2g032 | 5.81 | 0 | 0    | 2 | MASCOT | T      |       |       |
| 5.69E-03 | 0 0 | Cs2g12010.1/Cs2g120 | 6.04 | 0 | 0    | 2 | MASCOT | T      | PLEX8 |       |
| 4.50E-03 | 0 0 | Cs2g12010.1/Cs2g120 | 6.04 | 0 | 0    | 2 | MASCOT | T      | PLEX8 |       |
| 6.82E-02 | 0 0 | Cs2g12010.1/Cs2g120 | 6.04 | 0 | 0    | 2 | MASCOT | T      | PLEX8 |       |
| 2.12E-01 | 0 0 | Cs2g12010.1/Cs2g120 | 6.05 | 0 | 0    | 2 | MASCOT | T      | PLEX8 |       |
| 2.80E-01 | 0 0 | Cs2g12010.1/Cs2g120 | 6.05 | 0 | 0    | 2 | MASCOT | T      | PLEX8 |       |
| 1.64E-01 | 0 0 | Cs2g12010.1/Cs2g120 | 6.05 | 0 | 0    | 2 | MASCOT | T      | PLEX8 |       |
| 1.53E-01 | 0 0 | Cs2g12010.1/Cs2g120 | 4.14 | 0 | 0    | 2 | MASCOT | T      | PLEX8 |       |



|          |     |                     |      |   |   |   |        |   |       |
|----------|-----|---------------------|------|---|---|---|--------|---|-------|
| 5.70E-02 | 0 0 | Cs2g12010.1/Cs2g120 | 4.14 | 0 | 0 | 2 | MASCOT | T | PLEX8 |
| 1.21E-03 | 0 0 | Cs2g12010.1/Cs2g120 | 4.14 | 0 | 0 | 2 | MASCOT | T | PLEX8 |
| 8.75E-02 | 0 0 | Cs2g12010.1/Cs2g120 | 4.25 | 0 | 0 | 2 | MASCOT | T | PLEX8 |
| 4.37E-02 | 0 0 | Cs2g12010.1/Cs2g120 | 8.76 | 0 | 0 | 2 | MASCOT | T | PLEX8 |
| 7.42E-03 | 0 0 | Cs2g12010.1/Cs2g120 | 4.53 | 0 | 0 | 2 | MASCOT | T | PLEX8 |
| 1.15E-01 | 0 0 | Cs2g12010.1/Cs2g120 | 4.53 | 0 | 0 | 2 | MASCOT | T | PLEX8 |
| 6.15E-03 | 0 0 | Cs2g12010.1/Cs2g120 | 4.53 | 0 | 0 | 2 | MASCOT | T | PLEX8 |
| 1.83E-01 | 0 0 | Cs2g12010.1/Cs2g120 | 4.53 | 0 | 0 | 2 | MASCOT | T | PLEX8 |
| 4.15E-01 | 0 0 | Cs2g12010.1/Cs2g120 | 4.53 | 0 | 0 | 2 | MASCOT | T |       |
| 8.77E-02 | 0 0 | Cs2g12010.1/Cs2g120 | 4.53 | 0 | 0 | 2 | MASCOT | T |       |
| 1.19E-01 | 0 0 | Cs2g12010.1/Cs2g120 | 4.53 | 0 | 0 | 2 | MASCOT | T | PLEX8 |
| 4.14E-01 | 0 0 | Cs2g12010.1/Cs2g120 | 4.53 | 0 | 0 | 2 | MASCOT | T | PLEX8 |
| 2.30E-01 | 0 0 | Cs2g12010.1/Cs2g120 | 4.53 | 0 | 0 | 2 | MASCOT | T | PLEX8 |
| 9.17E-03 | 0 0 | Cs2g12010.1/Cs2g120 | 4.53 | 0 | 0 | 2 | MASCOT | T | PLEX8 |
| 1.40E-01 | 0 0 | Cs2g12010.1/Cs2g120 | 4.25 | 0 | 0 | 2 | MASCOT | T | PLEX8 |
| 2.32E-06 | 0 0 | Cs2g12010.1/Cs2g120 | 4.25 | 0 | 0 | 2 | MASCOT | T | PLEX8 |
| 1.72E-01 | 0 0 | orange1.1t00032.1   | 4.03 | 0 | 0 | 2 | MASCOT | T |       |
| 2.44E-04 | 0 0 | orange1.1t00032.1   | 4.03 | 0 | 0 | 2 | MASCOT | T |       |
| 2.40E-03 | 0 0 | orange1.1t00032.1   | 4.03 | 0 | 0 | 2 | MASCOT | T | PLEX8 |
| 5.38E-01 | 0 0 | orange1.1t00032.1   | 4.37 | 0 | 0 | 2 | MASCOT | T | PLEX8 |
| 2.07E-01 | 0 0 | orange1.1t00032.1   | 4.37 | 0 | 0 | 2 | MASCOT | T | PLEX8 |
| 5.44E-01 | 0 0 | orange1.1t00032.1   | 4.37 | 0 | 0 | 2 | MASCOT | T | PLEX8 |
| 2.23E-01 | 0 0 | orange1.1t00032.1   | 4.37 | 0 | 0 | 2 | MASCOT | T | PLEX8 |
| 5.09E-02 | 0 0 | orange1.1t00032.1   | 5.99 | 0 | 0 | 2 | MASCOT | T | PLEX8 |
| 1.07E-01 | 0 0 | orange1.1t00032.1   | 5.99 | 0 | 0 | 2 | MASCOT | T | PLEX8 |
| 6.62E-02 | 0 0 | orange1.1t00032.1   | 5.99 | 0 | 0 | 2 | MASCOT | T | PLEX8 |
| 1.01E-01 | 0 0 | orange1.1t00032.1   | 5.72 | 0 | 0 | 2 | MASCOT | T | PLEX8 |
| 3.93E-04 | 0 0 | orange1.1t00032.1   | 5.72 | 0 | 0 | 2 | MASCOT | T | PLEX8 |
| 1.62E-01 | 0 0 | orange1.1t00032.1   | 5.72 | 0 | 0 | 2 | MASCOT | T | PLEX8 |
| 8.03E-03 | 0 0 | orange1.1t00032.1   | 5.72 | 0 | 0 | 2 | MASCOT | T | PLEX8 |
| 5.16E-04 | 0 0 | orange1.1t00032.1   | 4.65 | 0 | 0 | 2 | MASCOT | T | PLEX8 |
| 1.07E-02 | 0 0 | orange1.1t00032.1   | 4.65 | 0 | 0 | 2 | MASCOT | T | PLEX8 |
| 5.13E-03 | 0 0 | orange1.1t00032.1   | 4.65 | 0 | 0 | 2 | MASCOT | T |       |
| 3.58E-01 | 0 0 | orange1.1t00032.1   | 6.78 | 0 | 0 | 2 | MASCOT | T | PLEX8 |
| 1.04E-02 | 0 0 | orange1.1t00032.1   | 6.78 | 0 | 0 | 2 | MASCOT | T |       |
| 2.02E-01 | 0 0 | orange1.1t00032.1   | 4.37 | 0 | 0 | 2 | MASCOT | T | PLEX8 |
| 2.12E-01 | 0 0 | orange1.1t00032.1   | 4.37 | 0 | 0 | 2 | MASCOT | T | PLEX8 |
| 1.80E-03 | 0 0 | orange1.1t00032.1   | 5.99 | 0 | 0 | 2 | MASCOT | T | PLEX8 |
| 1.59E-02 | 0 0 | Cs2g01400.1/Cs2g014 | 6.74 | 0 | 0 | 2 | MASCOT | T | PLEX8 |
| 6.81E-02 | 0 0 | Cs2g01400.1/Cs2g014 | 6.74 | 0 | 0 | 2 | MASCOT | T | PLEX8 |
| 7.40E-04 | 0 0 | Cs2g01400.1/Cs2g014 | 4.03 | 0 | 0 | 2 | MASCOT | T | PLEX8 |
| 4.56E-04 | 0 0 | Cs2g01400.1/Cs2g014 | 4.03 | 0 | 0 | 2 | MASCOT | T |       |
| 8.03E-04 | 0 0 | Cs2g01400.1/Cs2g014 | 4.03 | 0 | 0 | 2 | MASCOT | T |       |
| 1.91E-02 | 0 0 | Cs2g01400.1/Cs2g014 | 5.55 | 0 | 0 | 2 | MASCOT | T | PLEX8 |
| 2.43E-04 | 0 0 | Cs2g01400.1/Cs2g014 | 4.53 | 0 | 0 | 2 | MASCOT | T | PLEX8 |
| 2.80E-03 | 0 0 | Cs2g01400.1/Cs2g014 | 4.53 | 0 | 0 | 2 | MASCOT | T | PLEX8 |
| 2.18E-04 | 0 0 | Cs2g01400.1/Cs2g014 | 4.53 | 0 | 0 | 2 | MASCOT | T | PLEX8 |
| 1.63E-01 | 0 0 | Cs2g01400.1/Cs2g014 | 8.72 | 0 | 0 | 2 | MASCOT | T | PLEX8 |
| 5.81E-02 | 0 0 | Cs2g01400.1/Cs2g014 | 8.72 | 0 | 0 | 2 | MASCOT | T | PLEX8 |
| 1.73E-02 | 0 0 | Cs2g01400.1/Cs2g014 | 5.84 | 0 | 0 | 2 | MASCOT | T | PLEX8 |
| 8.43E-03 | 0 0 | Cs2g01400.1/Cs2g014 | 4.25 | 0 | 0 | 2 | MASCOT | T | PLEX8 |

|          |     |                      |      |   |      |   |        |        |       |       |
|----------|-----|----------------------|------|---|------|---|--------|--------|-------|-------|
| 6.05E-03 | 0 0 | Cs2g01400.1/Cs2g014  | 4.25 | 0 | 0    | 2 | MASCOT | T      | PLEX8 |       |
| 8.46E-04 | 0 0 | Cs2g01400.1/Cs2g014  | 4.25 | 0 | 0    | 2 | MASCOT | T      | PLEX8 |       |
| 1.28E-03 | 0 0 | Cs2g01400.1/Cs2g014  | 4.25 | 0 | 0    | 2 | MASCOT | T      | PLEX8 |       |
| 3.52E-07 | 0 0 | Cs2g01400.2/Cs2g014  | 5.84 | 0 | 0    | 2 | MASCOT | T      |       |       |
| 1.01E-04 | 0 0 | Cs2g01400.2/Cs2g014  | 5.84 | 0 | 0    | 2 | MASCOT | T      |       |       |
| 4.40E-02 | 0 0 | Cs2g01400.2/Cs2g014  | 5.84 | 0 | 0    | 2 | MASCOT | T      |       |       |
| 8.54E-05 | 0 0 | Cs2g01400.2/Cs2g014  | 5.84 | 0 | 0    | 2 | MASCOT | T      | PLEX8 |       |
| 2.97E-02 | 0 0 | Cs2g01400.2/Cs2g014  | 5.84 | 0 | 0    | 2 | MASCOT | T      |       |       |
| 6.75E-02 | 0 0 | Cs2g02990.1/Cs2g029  | 5.99 | 0 | 15.9 | 0 | 2      | MASCOT | T     | PLEX8 |
| 5.70E-02 | 0 0 | Cs2g02990.1/Cs2g029  | 5.99 | 0 | 15.9 | 0 | 2      | MASCOT | T     | PLEX8 |
| 3.30E-03 | 0 0 | Cs2g02990.1/Cs2g029  | 5.99 | 0 | 0    | 2 | MASCOT | T      | PLEX8 |       |
| 7.45E-03 | 0 0 | Cs2g02990.1/Cs2g029  | 5.99 | 0 | 0    | 2 | MASCOT | T      | PLEX8 |       |
| 2.53E-03 | 0 0 | Cs2g02990.1/Cs2g029  | 5.99 | 0 | 0    | 2 | MASCOT | T      | PLEX8 |       |
| 6.50E-02 | 0 0 | Cs2g02990.1/Cs2g029  | 8.76 | 0 | 0    | 2 | MASCOT | T      | PLEX8 |       |
| 1.36E-04 | 0 0 | Cs2g02990.1/Cs2g029  | 4.21 | 0 | 0    | 2 | MASCOT | T      |       |       |
| 1.22E-02 | 0 0 | Cs2g02990.1/Cs2g029  | 4.21 | 0 | 0    | 2 | MASCOT | T      | PLEX8 |       |
| 8.75E-03 | 0 0 | Cs2g02990.1/Cs2g029  | 4.53 | 0 | 0    | 2 | MASCOT | T      | PLEX8 |       |
| 2.10E-07 | 0 0 | Cs2g02990.1/Cs2g029  | 4.53 | 0 | 0    | 2 | MASCOT | T      | PLEX8 |       |
| 8.44E-02 | 0 0 | Cs2g02990.1/Cs2g029  | 4.03 | 0 | 0    | 2 | MASCOT | T      | PLEX8 |       |
| 1.35E-02 | 0 0 | Cs2g02990.1/Cs2g029  | 4.03 | 0 | 0    | 2 | MASCOT | T      | PLEX8 |       |
| 3.86E-02 | 0 0 | Cs2g02990.1/Cs2g029  | 4.03 | 0 | 0    | 2 | MASCOT | T      | PLEX8 |       |
| 2.17E-01 | 0 0 | Cs2g02990.1/Cs2g029  | 6.1  | 0 | 0    | 2 | MASCOT | T      | PLEX8 |       |
| 1.18E-01 | 0 0 | Cs2g02990.1/Cs2g029  | 6.1  | 0 | 0    | 2 | MASCOT | T      | PLEX8 |       |
| 1.27E-01 | 0 0 | Cs2g02990.1/Cs2g029  | 6.1  | 0 | 0    | 2 | MASCOT | T      |       |       |
| 8.00E-04 | 0 0 | Cs2g02990.1/Cs2g029  | 6    | 0 | 0    | 2 | MASCOT | T      |       |       |
| 1.42E-01 | 0 0 | Cs2g02990.1/Cs2g029  | 6    | 0 | 0    | 2 | MASCOT | T      |       |       |
| 1.58E-03 | 0 0 | Cs2g02990.1/Cs2g029  | 6    | 0 | 0    | 2 | MASCOT | T      |       |       |
| 7.50E-04 | 0 0 | Cs2g02990.1/Cs2g029  | 6    | 0 | 0    | 2 | MASCOT | T      |       |       |
| 1.63E-02 | 0 0 | Cs5g31220.1          | 6    | 0 | 0    | 2 | MASCOT | T      | PLEX8 |       |
| 1.65E-02 | 0 0 | Cs5g31220.1          | 6    | 0 | 0    | 2 | MASCOT | T      | PLEX8 |       |
| 2.50E-02 | 0 0 | Cs5g31220.1          | 6    | 0 | 0    | 2 | MASCOT | T      | PLEX8 |       |
| 4.19E-02 | 0 0 | Cs5g31220.1          | 6    | 0 | 0    | 2 | MASCOT | T      | PLEX8 |       |
| 3.23E-01 | 0 0 | Cs5g31220.1          | 6    | 0 | 0    | 2 | MASCOT | T      |       |       |
| 3.17E-07 | 0 0 | Cs5g31220.1          | 4.13 | 0 | 0    | 2 | MASCOT | T      | PLEX8 |       |
| 5.43E-01 | 0 0 | Cs5g31220.1 ! Cs7g27 | 8.47 | 0 | 0    | 2 | MASCOT | T      | PLEX8 |       |
| 6.94E-01 | 0 0 | Cs5g31220.1 ! Cs7g27 | 8.47 | 0 | 0    | 2 | MASCOT | T      | PLEX8 |       |
| 3.67E-01 | 0 0 | Cs5g31220.1          | 9.41 | 0 | 0    | 2 | MASCOT | T      |       |       |
| 2.88E-02 | 0 0 | Cs5g31220.1          | 6    | 0 | 15.9 | 0 | 2      | MASCOT | T     | PLEX8 |
| 1.94E-03 | 0 0 | Cs5g31220.1          | 6    | 0 | 0    | 2 | MASCOT | T      | PLEX8 |       |
| 6.31E-03 | 0 0 | Cs5g31220.1          | 6    | 0 | 0    | 2 | MASCOT | T      | PLEX8 |       |
| 7.39E-02 | 0 0 | Cs5g31220.1          | 6    | 0 | 0    | 2 | MASCOT | T      | PLEX8 |       |
| 1.81E-04 | 0 0 | Cs5g31220.1          | 6    | 0 | 0    | 2 | MASCOT | T      | PLEX8 |       |
| 6.47E-02 | 0 0 | Cs5g31220.1          | 6    | 0 | 0    | 2 | MASCOT | T      |       |       |
| 1.44E-01 | 0 0 | Cs5g31220.1          | 6.74 | 0 | 0    | 2 | MASCOT | T      | PLEX8 |       |
| 2.81E-02 | 0 0 | Cs5g31220.1          | 8.59 | 0 | 0    | 2 | MASCOT | T      | PLEX8 |       |
| 6.32E-02 | 0 0 | Cs5g31220.1          | 8.59 | 0 | 0    | 2 | MASCOT | T      | PLEX8 |       |
| 2.58E-01 | 0 0 | Cs5g31220.1          | 8.59 | 0 | 0    | 2 | MASCOT | T      |       |       |
| 2.97E-02 | 0 0 | Cs5g31220.1          | 4.53 | 0 | 0    | 2 | MASCOT | T      | PLEX8 |       |
| 8.05E-03 | 0 0 | Cs2g04850.1/Cs2g048  | 5.4  | 0 | 0    | 2 | MASCOT | T      | PLEX8 |       |
| 2.02E-01 | 0 0 | Cs1g20220.1/Cs1g202  | 5.84 | 0 | 0    | 2 | MASCOT | T      |       |       |
| 1.53E-01 | 0 0 | Cs1g20220.1/Cs1g202  | 4.53 | 0 | 0    | 2 | MASCOT | T      | PLEX8 |       |

|          |     |                     |      |   |      |   |        |        |       |       |
|----------|-----|---------------------|------|---|------|---|--------|--------|-------|-------|
| 2.55E-01 | 0 0 | Cs2g04850.1/Cs2g048 | 6    | 0 | 0    | 2 | MASCOT | T      | PLEX8 |       |
| 1.50E-01 | 0 0 | Cs1g20220.1/Cs1g202 | 6    | 0 | 0    | 2 | MASCOT | T      | PLEX8 |       |
| 4.76E-02 | 0 0 | Cs1g20220.1/Cs1g202 | 6    | 0 | 0    | 2 | MASCOT | T      | PLEX8 |       |
| 1.01E-01 | 0 0 | Cs1g20220.1/Cs1g202 | 6    | 0 | 0    | 2 | MASCOT | T      | PLEX8 |       |
| 1.31E-02 | 0 0 | Cs1g20220.1/Cs1g202 | 6    | 0 | 0    | 2 | MASCOT | T      | PLEX8 |       |
| 1.41E-01 | 0 0 | Cs1g20220.1/Cs1g202 | 6    | 0 | 0    | 2 | MASCOT | T      | PLEX8 |       |
| 5.84E-01 | 0 0 | Cs1g20220.1/Cs1g202 | 6    | 0 | 0    | 2 | MASCOT | T      | PLEX8 |       |
| 2.64E-01 | 0 0 | Cs2g04850.1/Cs2g048 | 8.59 | 0 | 0    | 2 | MASCOT | T      | PLEX8 |       |
| 1.40E-01 | 0 0 | Cs2g04850.1/Cs2g048 | 8.59 | 0 | 0    | 2 | MASCOT | T      | PLEX8 |       |
| 2.16E-01 | 0 0 | Cs2g04850.1/Cs2g048 | 8.59 | 0 | 0    | 2 | MASCOT | T      | PLEX8 |       |
| 2.99E-02 | 0 0 | Cs2g04850.1/Cs2g048 | 4.03 | 0 | 15.9 | 0 | 2      | MASCOT | T     | PLEX8 |
| 1.09E-01 | 0 0 | Cs2g04850.1/Cs2g048 | 4.03 | 0 | 0    | 2 | MASCOT | T      | PLEX8 |       |
| 3.06E-03 | 0 0 | Cs2g04850.1/Cs2g048 | 4.03 | 0 | 0    | 2 | MASCOT | T      | PLEX8 |       |
| 2.10E-01 | 0 0 | Cs1g20220.1/Cs1g202 | 6    | 0 | 0    | 2 | MASCOT | T      |       |       |
| 3.14E-01 | 0 0 | Cs1g20220.1/Cs1g202 | 6    | 0 | 0    | 2 | MASCOT | T      |       |       |
| 2.52E-01 | 0 0 | Cs1g20220.1/Cs1g202 | 6    | 0 | 0    | 2 | MASCOT | T      |       |       |
| 4.78E-04 | 0 0 | Cs5g02150.1/Cs5g021 | 6.05 | 0 | 0    | 2 | MASCOT | T      | PLEX8 |       |
| 2.09E-03 | 0 0 | Cs5g02150.1/Cs5g021 | 6.05 | 0 | 0    | 2 | MASCOT | T      | PLEX8 |       |
| 1.66E-01 | 0 0 | Cs5g02150.1/Cs5g021 | 6.05 | 0 | 0    | 2 | MASCOT | T      | PLEX8 |       |
| 1.83E-02 | 0 0 | Cs5g02150.1/Cs5g021 | 6.05 | 0 | 0    | 2 | MASCOT | T      | PLEX8 |       |
| 1.63E-01 | 0 0 | Cs5g02150.1/Cs5g021 | 6.05 | 0 | 0    | 2 | MASCOT | T      | PLEX8 |       |
| 1.12E-03 | 0 0 | Cs5g02150.1/Cs5g021 | 6.05 | 0 | 0    | 2 | MASCOT | T      | PLEX8 |       |
| 5.75E-02 | 0 0 | Cs5g02150.1/Cs5g021 | 5.32 | 0 | 15.9 | 0 | 2      | MASCOT | T     | PLEX8 |
| 2.96E-05 | 0 0 | Cs5g02150.1/Cs5g021 | 5.32 | 0 | 0    | 2 | MASCOT | T      | PLEX8 |       |
| 1.50E-02 | 0 0 | Cs5g02150.1/Cs5g021 | 4.53 | 0 | 0    | 2 | MASCOT | T      | PLEX8 |       |
| 1.57E-01 | 0 0 | Cs5g02150.1/Cs5g021 | 5.99 | 0 | 0    | 2 | MASCOT | T      | PLEX8 |       |
| 1.13E-03 | 0 0 | Cs5g02150.1/Cs5g021 | 5.99 | 0 | 0    | 2 | MASCOT | T      | PLEX8 |       |
| 7.28E-03 | 0 0 | Cs5g02150.1/Cs5g021 | 5.99 | 0 | 0    | 2 | MASCOT | T      | PLEX8 |       |
| 1.27E-03 | 0 0 | Cs5g02150.1/Cs5g021 | 5.99 | 0 | 0    | 2 | MASCOT | T      | PLEX8 |       |
| 8.72E-02 | 0 0 | Cs5g02150.1/Cs5g021 | 5.71 | 0 | 0    | 2 | MASCOT | T      | PLEX8 |       |
| 2.35E-02 | 0 0 | Cs5g02150.1/Cs5g021 | 6.07 | 0 | 0    | 2 | MASCOT | T      | PLEX8 |       |
| 3.13E-01 | 0 0 | Cs5g02150.1/Cs5g021 | 6.07 | 0 | 0    | 2 | MASCOT | T      | PLEX8 |       |
| 2.13E-03 | 0 0 | Cs5g02150.1/Cs5g021 | 6.07 | 0 | 0    | 2 | MASCOT | T      | PLEX8 |       |
| 1.11E-01 | 0 0 | Cs5g02150.1         | 6.07 | 0 | 0    | 2 | MASCOT | T      | PLEX8 |       |
| 3.04E-02 | 0 0 | Cs5g02150.1/Cs5g021 | 8.6  | 0 | 0    | 2 | MASCOT | T      | PLEX8 |       |
| 8.56E-04 | 0 0 | Cs5g06660.1/Cs5g066 | 4    | 0 | 0    | 2 | MASCOT | T      | PLEX8 |       |
| 3.77E-02 | 0 0 | Cs5g06660.1/Cs5g066 | 4.41 | 1 | 0    | 2 | MASCOT | T      | PLEX8 |       |
| 2.92E-02 | 0 0 | Cs5g06660.1/Cs5g066 | 5.84 | 0 | 0    | 2 | MASCOT | T      |       |       |
| 5.22E-05 | 0 0 | Cs5g06660.1/Cs5g066 | 5.84 | 0 | 0    | 2 | MASCOT | T      |       |       |
| 4.51E-03 | 0 0 | Cs5g06660.1/Cs5g066 | 5.84 | 0 | 0    | 2 | MASCOT | T      |       |       |
| 7.84E-05 | 0 0 | Cs5g06660.1/Cs5g066 | 5.84 | 0 | 0    | 2 | MASCOT | T      |       |       |
| 1.96E-02 | 0 0 | Cs5g06660.1/Cs5g066 | 4.37 | 0 | 0    | 2 | MASCOT | T      | PLEX8 |       |
| 2.83E-02 | 0 0 | Cs5g06660.1/Cs5g066 | 4.37 | 0 | 0    | 2 | MASCOT | T      | PLEX8 |       |
| 1.69E-02 | 0 0 | Cs5g06660.1/Cs5g066 | 4.37 | 0 | 0    | 2 | MASCOT | T      | PLEX8 |       |
| 2.65E-01 | 0 0 | Cs5g06660.1/Cs5g066 | 4.37 | 0 | 0    | 2 | MASCOT | T      | PLEX8 |       |
| 2.07E-02 | 0 0 | Cs5g06660.1/Cs5g066 | 8.76 | 0 | 0    | 2 | MASCOT | T      | PLEX8 |       |
| 3.92E-02 | 0 0 | Cs5g06660.1/Cs5g066 | 5.97 | 0 | 0    | 2 | MASCOT | T      | PLEX8 |       |
| 2.07E-01 | 0 0 | Cs5g06660.1/Cs5g066 | 5.97 | 0 | 0    | 2 | MASCOT | T      | PLEX8 |       |
| 6.25E-02 | 0 0 | Cs5g06660.1/Cs5g066 | 5.97 | 0 | 0    | 2 | MASCOT | T      | PLEX8 |       |
| 1.40E-03 | 0 0 | Cs5g06660.1/Cs5g066 | 5.97 | 0 | 0    | 2 | MASCOT | T      | PLEX8 |       |
| 4.14E-02 | 0 0 | Cs5g06660.1/Cs5g066 | 5.84 | 0 | 0    | 2 | MASCOT | T      | PLEX8 |       |

|          |     |                       |      |   |      |   |        |        |       |       |
|----------|-----|-----------------------|------|---|------|---|--------|--------|-------|-------|
| 4.06E-02 | 0 0 | Cs5g06660.1/Cs5g066   | 5.84 | 0 | 0    | 2 | MASCOT | T      | PLEX8 |       |
| 1.64E-01 | 0 0 | Cs5g06660.1/Cs5g066   | 8.34 | 0 | 15.9 | 0 | 2      | MASCOT | T     | PLEX8 |
| 1.96E-01 | 0 0 | Cs5g06660.1/Cs5g066   | 8.34 | 0 | 0    | 2 | MASCOT | T      | PLEX8 |       |
| 5.11E-02 | 0 0 | Cs5g28880.1/Cs5g288   | 8.75 | 0 | 0    | 2 | MASCOT | T      | PLEX8 |       |
| 9.64E-02 | 0 0 | Cs5g28880.1/Cs5g288   | 8.75 | 0 | 0    | 2 | MASCOT | T      | PLEX8 |       |
| 1.02E-01 | 0 0 | Cs5g28880.1/Cs5g288   | 4.21 | 0 | 0    | 2 | MASCOT | T      | PLEX8 |       |
| 1.05E-03 | 0 0 | Cs5g28880.1/Cs5g288   | 6    | 0 | 0    | 2 | MASCOT | T      | PLEX8 |       |
| 1.51E-04 | 0 0 | Cs5g28880.1/Cs5g288   | 6    | 0 | 0    | 2 | MASCOT | T      | PLEX8 |       |
| 3.73E-03 | 0 0 | Cs5g28880.1/Cs5g288   | 6    | 0 | 0    | 2 | MASCOT | T      | PLEX8 |       |
| 2.03E-03 | 0 0 | Cs5g28880.1/Cs5g288   | 6    | 0 | 0    | 2 | MASCOT | T      | PLEX8 |       |
| 6.81E-02 | 0 0 | Cs5g28880.1/Cs5g288   | 4.4  | 0 | 15.9 | 0 | 2      | MASCOT | T     |       |
| 1.52E-01 | 0 0 | Cs5g28880.1/Cs5g288   | 4.4  | 0 | 0    | 2 | MASCOT | T      |       |       |
| 8.78E-03 | 0 0 | Cs5g28880.1/Cs5g288   | 6.77 | 0 | 0    | 2 | MASCOT | T      | PLEX8 |       |
| 1.18E-01 | 0 0 | Cs5g28880.1/Cs5g288   | 6.77 | 0 | 0    | 2 | MASCOT | T      | PLEX8 |       |
| 4.04E-02 | 0 0 | Cs5g28880.1/Cs5g288   | 5.84 | 0 | 15.9 | 0 | 2      | MASCOT | T     | PLEX8 |
| 8.72E-04 | 0 0 | Cs5g28880.1/Cs5g288   | 5.84 | 0 | 15.9 | 0 | 2      | MASCOT | T     | PLEX8 |
| 3.90E-02 | 0 0 | Cs5g28880.1/Cs5g288   | 5.84 | 0 | 15.9 | 0 | 2      | MASCOT | T     | PLEX8 |
| 1.22E-04 | 0 0 | Cs5g28880.1/Cs5g288   | 5.84 | 0 | 0    | 2 | MASCOT | T      | PLEX8 |       |
| 1.41E-01 | 0 0 | Cs5g28880.1/Cs5g288   | 5.55 | 0 | 0    | 2 | MASCOT | T      | PLEX8 |       |
| 3.46E-01 | 0 0 | Cs5g28880.1/Cs5g288   | 5.55 | 0 | 0    | 2 | MASCOT | T      | PLEX8 |       |
| 2.38E-01 | 0 0 | Cs5g28880.1/Cs5g288   | 4.21 | 0 | 0    | 2 | MASCOT | T      | PLEX8 |       |
| 6.89E-02 | 0 0 | Cs5g28880.1/Cs5g288   | 4.21 | 0 | 0    | 2 | MASCOT | T      | PLEX8 |       |
| 3.50E-01 | 0 0 | orange1.1t04780.1/ora | 5.88 | 0 | 0    | 2 | MASCOT | T      | PLEX8 |       |
| 8.03E-02 | 0 0 | orange1.1t04780.1/ora | 5.88 | 0 | 0    | 2 | MASCOT | T      | PLEX8 |       |
| 3.67E-03 | 0 0 | orange1.1t04780.1/ora | 6.74 | 0 | 0    | 2 | MASCOT | T      | PLEX8 |       |
| 4.98E-03 | 0 0 | orange1.1t04780.1/ora | 8.6  | 0 | 0    | 2 | MASCOT | T      | PLEX8 |       |
| 7.56E-02 | 0 0 | orange1.1t04780.1/ora | 8.6  | 0 | 0    | 2 | MASCOT | T      | PLEX8 |       |
| 3.72E-03 | 0 0 | orange1.1t04780.1/ora | 8.75 | 0 | 0    | 2 | MASCOT | T      | PLEX8 |       |
| 1.70E-02 | 0 0 | orange1.1t04780.1/ora | 8.75 | 0 | 0    | 2 | MASCOT | T      | PLEX8 |       |
| 3.89E-01 | 0 0 | orange1.1t04780.1/ora | 6.79 | 0 | 0    | 2 | MASCOT | T      | PLEX8 |       |
| 1.62E-02 | 0 0 | orange1.1t04780.1/ora | 6.79 | 0 | 0    | 2 | MASCOT | T      | PLEX8 |       |
| 1.70E-02 | 0 0 | orange1.1t04780.1/ora | 6.79 | 0 | 0    | 2 | MASCOT | T      | PLEX8 |       |
| 4.60E-02 | 0 0 | orange1.1t04780.1/ora | 5.32 | 0 | 15.9 | 0 | 2      | MASCOT | T     | PLEX8 |
| 1.81E-02 | 0 0 | orange1.1t04780.1/ora | 5.32 | 0 | 15.9 | 0 | 2      | MASCOT | T     | PLEX8 |
| 1.24E-02 | 0 0 | orange1.1t04780.1/ora | 5.32 | 0 | 15.9 | 0 | 2      | MASCOT | T     |       |
| 3.85E-05 | 0 0 | orange1.1t04780.1/ora | 5.32 | 0 | 0    | 2 | MASCOT | T      | PLEX8 |       |
| 1.97E-04 | 0 0 | orange1.1t04780.1/ora | 5.32 | 0 | 0    | 2 | MASCOT | T      | PLEX8 |       |
| 8.97E-02 | 0 0 | orange1.1t04780.1/ora | 5.32 | 0 | 0    | 2 | MASCOT | T      |       |       |
| 1.09E-04 | 0 0 | orange1.1t04780.1/ora | 4.75 | 0 | 0    | 2 | MASCOT | T      | PLEX8 |       |
| 6.53E-05 | 0 0 | orange1.1t04780.1/ora | 4.75 | 0 | 0    | 2 | MASCOT | T      |       |       |
| 3.78E-02 | 0 0 | orange1.1t04780.1/ora | 8.59 | 0 | 0    | 2 | MASCOT | T      | PLEX8 |       |
| 8.79E-02 | 0 0 | Cs1g01540.1           | 4.03 | 0 | 0    | 2 | MASCOT | T      | PLEX8 |       |
| 1.35E-02 | 0 0 | Cs1g01540.1           | 4.03 | 0 | 0    | 2 | MASCOT | T      | PLEX8 |       |
| 1.20E-02 | 0 0 | Cs1g01540.1           | 4.03 | 0 | 0    | 2 | MASCOT | T      | PLEX8 |       |
| 3.61E-02 | 0 0 | Cs1g01540.1           | 9.75 | 0 | 0    | 2 | MASCOT | T      |       |       |
| 4.59E-02 | 0 0 | Cs1g01540.1 ! Cs3g18  | 8.75 | 0 | 0    | 2 | MASCOT | T      | PLEX8 |       |
| 2.63E-01 | 0 0 | Cs1g01540.1 ! Cs3g18  | 8.75 | 0 | 0    | 2 | MASCOT | T      |       |       |
| 3.18E-02 | 0 0 | Cs1g01540.1           | 4.65 | 0 | 0    | 2 | MASCOT | T      | PLEX8 |       |
| 2.37E-01 | 0 0 | Cs1g01540.1           | 4.65 | 0 | 0    | 2 | MASCOT | T      | PLEX8 |       |
| 1.74E-01 | 0 0 | Cs1g01540.1           | 4.65 | 0 | 0    | 2 | MASCOT | T      |       |       |
| 1.25E-02 | 0 0 | Cs1g01540.1           | 4.37 | 0 | 0    | 2 | MASCOT | T      | PLEX8 |       |

|              |                      |      |   |      |   |        |        |       |       |
|--------------|----------------------|------|---|------|---|--------|--------|-------|-------|
| 2.21E-02 0 0 | Cs1g01540.1          | 4.37 | 0 | 0    | 2 | MASCOT | T      | PLEX8 |       |
| 3.51E-03 0 0 | Cs1g01540.1          | 4.37 | 0 | 0    | 2 | MASCOT | T      | PLEX8 |       |
| 2.02E-01 0 0 | Cs1g01540.1 ! Cs3g18 | 5.06 | 0 | 15.9 | 0 | 2      | MASCOT | T     | PLEX8 |
| 1.93E-01 0 0 | Cs1g01540.1 ! Cs3g18 | 5.06 | 0 | 15.9 | 0 | 2      | MASCOT | T     |       |
| 1.08E-01 0 0 | Cs1g01540.1 ! Cs3g18 | 5.06 | 0 | 15.9 | 0 | 2      | MASCOT | T     |       |
| 1.60E-03 0 0 | Cs1g01540.1 ! Cs3g18 | 5.06 | 0 | 0    | 2 | MASCOT | T      |       |       |
| 2.98E-01 0 0 | Cs1g01540.1          | 5.72 | 0 | 0    | 2 | MASCOT | T      |       |       |
| 2.77E-02 0 0 | Cs1g01540.1          | 5.72 | 0 | 0    | 2 | MASCOT | T      |       |       |
| 1.17E-03 0 0 | Cs3g07080.2          | 4.14 | 0 | 0    | 2 | MASCOT | T      | PLEX8 |       |
| 2.07E-03 0 0 | Cs3g07080.2          | 4.14 | 0 | 0    | 2 | MASCOT | T      | PLEX8 |       |
| 2.38E-02 0 0 | Cs3g07080.1/Cs3g070  | 5.28 | 0 | 0    | 2 | MASCOT | T      |       |       |
| 1.07E-03 0 0 | Cs3g07080.1/Cs3g070  | 5.28 | 0 | 0    | 2 | MASCOT | T      |       |       |
| 1.90E-05 0 0 | Cs3g07080.1/Cs3g070  | 5.28 | 0 | 0    | 2 | MASCOT | T      |       |       |
| 7.28E-03 0 0 | Cs3g07080.2          | 4.41 | 0 | 0    | 2 | MASCOT | T      | PLEX8 |       |
| 1.06E-01 0 0 | Cs3g07080.1/Cs3g070  | 4.53 | 0 | 0    | 2 | MASCOT | T      | PLEX8 |       |
| 2.06E-02 0 0 | Cs3g07080.1/Cs3g070  | 4.53 | 0 | 0    | 2 | MASCOT | T      | PLEX8 |       |
| 2.70E-02 0 0 | Cs3g07080.1/Cs3g070  | 4.53 | 0 | 0    | 2 | MASCOT | T      | PLEX8 |       |
| 5.73E-02 0 0 | Cs3g07080.1/Cs3g070  | 4.53 | 0 | 0    | 2 | MASCOT | T      | PLEX8 |       |
| 1.35E-03 0 0 | Cs3g07080.1/Cs3g070  | 5.21 | 0 | 0    | 2 | MASCOT | T      | PLEX8 |       |
| 1.37E-02 0 0 | Cs3g07080.2          | 6.75 | 0 | 0    | 2 | MASCOT | T      | PLEX8 |       |
| 5.82E-02 0 0 | Cs3g07080.2          | 6.75 | 0 | 0    | 2 | MASCOT | T      | PLEX8 |       |
| 2.73E-02 0 0 | Cs3g07080.1/Cs3g070  | 5.4  | 0 | 0    | 2 | MASCOT | T      | PLEX8 |       |
| 3.38E-02 0 0 | Cs3g07080.1/Cs3g070  | 5.4  | 0 | 0    | 2 | MASCOT | T      | PLEX8 |       |
| 9.83E-03 0 0 | Cs3g07080.1/Cs3g070  | 4.25 | 0 | 0    | 2 | MASCOT | T      | PLEX8 |       |
| 3.91E-03 0 0 | Cs3g07080.1/Cs3g070  | 4.25 | 0 | 0    | 2 | MASCOT | T      |       |       |
| 1.03E-04 0 0 | Cs3g07080.1/Cs3g070  | 4.25 | 0 | 0    | 2 | MASCOT | T      |       |       |
| 9.22E-03 0 0 | Cs7g08660.1/Cs7g086  | 4    | 0 | 0    | 2 | MASCOT | T      | PLEX8 |       |
| 1.45E-05 0 0 | Cs7g08660.1/Cs7g086  | 4    | 0 | 0    | 2 | MASCOT | T      | PLEX8 |       |
| 1.08E-01 0 0 | Cs5g05410.1/Cs7g086  | 5.83 | 0 | 0    | 2 | MASCOT | T      |       |       |
| 3.28E-03 0 0 | Cs5g05410.1/Cs7g086  | 5.83 | 0 | 0    | 2 | MASCOT | T      |       |       |
| 1.09E-01 0 0 | Cs7g08660.1/Cs7g086  | 6.74 | 0 | 0    | 2 | MASCOT | T      | PLEX8 |       |
| 2.85E-02 0 0 | Cs7g08660.1/Cs7g086  | 6.74 | 0 | 0    | 2 | MASCOT | T      | PLEX8 |       |
| 8.02E-02 0 0 | Cs7g08660.1/Cs7g086  | 5.84 | 0 | 0    | 2 | MASCOT | T      | PLEX8 |       |
| 2.65E-01 0 0 | Cs7g08660.1/Cs7g086  | 5.84 | 0 | 0    | 2 | MASCOT | T      | PLEX8 |       |
| 1.11E-01 0 0 | Cs7g08660.1/Cs7g086  | 5.84 | 0 | 0    | 2 | MASCOT | T      | PLEX8 |       |
| 9.29E-02 0 0 | Cs7g08660.1/Cs7g086  | 5.84 | 0 | 0    | 2 | MASCOT | T      | PLEX8 |       |
| 6.01E-02 0 0 | Cs7g08660.1/Cs7g086  | 5.84 | 0 | 0    | 2 | MASCOT | T      | PLEX8 |       |
| 1.43E-01 0 0 | Cs7g08660.1/Cs7g086  | 5.84 | 0 | 0    | 2 | MASCOT | T      | PLEX8 |       |
| 1.20E-04 0 0 | Cs7g08660.2/Cs7g086  | 4.37 | 0 | 0    | 2 | MASCOT | T      |       |       |
| 8.94E-04 0 0 | Cs7g08660.2/Cs7g086  | 4.37 | 0 | 0    | 2 | MASCOT | T      |       |       |
| 6.63E-04 0 0 | Cs7g08660.1/Cs7g086  | 6.7  | 0 | 0    | 2 | MASCOT | T      | PLEX8 |       |
| 3.18E-01 0 0 | Cs7g08660.1/Cs7g086  | 5.84 | 0 | 15.9 | 0 | 2      | MASCOT | T     | PLEX8 |
| 8.59E-03 0 0 | Cs7g08660.1/Cs7g086  | 5.84 | 0 | 0    | 2 | MASCOT | T      | PLEX8 |       |
| 1.47E-03 0 0 | Cs7g08660.1/Cs7g086  | 6.71 | 0 | 0    | 2 | MASCOT | T      |       |       |
| 1.15E-01 0 0 | Cs9g13560.1          | 8.59 | 0 | 0    | 2 | MASCOT | T      | PLEX8 |       |
| 4.68E-02 0 0 | Cs9g13560.1          | 8.59 | 0 | 0    | 2 | MASCOT | T      | PLEX8 |       |
| 6.21E-02 0 0 | Cs9g13560.1          | 8.59 | 0 | 0    | 2 | MASCOT | T      | PLEX8 |       |
| 2.38E-04 0 0 | Cs1g15970.1/Cs4g189  | 4.14 | 0 | 0    | 2 | MASCOT | T      |       |       |
| 5.99E-04 0 0 | Cs1g15970.1/Cs4g189  | 4.14 | 0 | 0    | 2 | MASCOT | T      |       |       |
| 3.11E-06 0 0 | Cs1g15970.1/Cs4g189  | 4.14 | 0 | 0    | 2 | MASCOT | T      |       |       |
| 2.93E-08 0 0 | Cs1g15970.1/Cs4g189  | 4.14 | 0 | 0    | 2 | MASCOT | T      |       |       |

|          |     |                     |      |   |      |   |        |        |       |       |
|----------|-----|---------------------|------|---|------|---|--------|--------|-------|-------|
| 7.55E-03 | 0 0 | Cs9g13560.1         | 8.31 | 0 | 0    | 2 | MASCOT | T      | PLEX8 |       |
| 2.23E-01 | 0 0 | Cs9g13560.1         | 3.93 | 0 | 0    | 2 | MASCOT | T      | PLEX8 |       |
| 5.34E-06 | 0 0 | Cs9g13560.1         | 3.93 | 0 | 0    | 2 | MASCOT | T      | PLEX8 |       |
| 6.66E-03 | 0 0 | Cs9g13560.1         | 3.93 | 0 | 0    | 2 | MASCOT | T      | PLEX8 |       |
| 1.08E-05 | 0 0 | Cs9g13560.1         | 4.75 | 0 | 0    | 2 | MASCOT | T      | PLEX8 |       |
| 4.22E-03 | 0 0 | Cs4g13070.1/Cs4g130 | 5.84 | 0 | 0    | 2 | MASCOT | T      | PLEX8 |       |
| 3.43E-05 | 0 0 | Cs4g13070.1/Cs4g130 | 5.84 | 0 | 0    | 2 | MASCOT | T      | PLEX8 |       |
| 4.35E-01 | 0 0 | Cs4g13070.1/Cs4g130 | 5.84 | 0 | 0    | 2 | MASCOT | T      | PLEX8 |       |
| 2.14E-03 | 0 0 | Cs9g13560.1         | 8.75 | 0 | 0    | 2 | MASCOT | T      | PLEX8 |       |
| 8.44E-02 | 0 0 | Cs9g13560.1         | 9.76 | 0 | 0    | 2 | MASCOT | T      | PLEX8 |       |
| 3.57E-02 | 0 0 | Cs9g13560.1         | 9.76 | 0 | 0    | 2 | MASCOT | T      | PLEX8 |       |
| 5.01E-03 | 0 0 | orange1.1t01733.1   | 4.03 | 0 | 0    | 2 | MASCOT | T      | PLEX8 |       |
| 8.32E-03 | 0 0 | orange1.1t01733.1   | 4.03 | 0 | 0    | 2 | MASCOT | T      | PLEX8 |       |
| 5.69E-04 | 0 0 | orange1.1t01733.1   | 4.03 | 0 | 0    | 2 | MASCOT | T      | PLEX8 |       |
| 5.05E-02 | 0 0 | orange1.1t01733.1   | 5.75 | 0 | 0    | 2 | MASCOT | T      | PLEX8 |       |
| 5.26E-02 | 0 0 | orange1.1t01733.1   | 5.75 | 0 | 0    | 2 | MASCOT | T      | PLEX8 |       |
| 1.73E-01 | 0 0 | orange1.1t01733.1   | 9.57 | 0 | 0    | 2 | MASCOT | T      | PLEX8 |       |
| 2.05E-05 | 0 0 | orange1.1t01733.1   | 6    | 0 | 0    | 2 | MASCOT | T      | PLEX8 |       |
| 1.19E-02 | 0 0 | orange1.1t01733.1   | 6    | 0 | 0    | 2 | MASCOT | T      | PLEX8 |       |
| 8.78E-02 | 0 0 | orange1.1t01733.1   | 6    | 0 | 0    | 2 | MASCOT | T      | PLEX8 |       |
| 9.47E-02 | 0 0 | orange1.1t01733.1   | 5.84 | 0 | 0    | 2 | MASCOT | T      | PLEX8 |       |
| 5.91E-04 | 0 0 | orange1.1t01733.1   | 4.65 | 0 | 0    | 2 | MASCOT | T      | PLEX8 |       |
| 9.18E-06 | 0 0 | orange1.1t01733.1   | 4.65 | 0 | 0    | 2 | MASCOT | T      | PLEX8 |       |
| 1.52E-04 | 0 0 | orange1.1t01733.1   | 4.65 | 0 | 0    | 2 | MASCOT | T      | PLEX8 |       |
| 1.63E-01 | 0 0 | orange1.1t01733.1   | 4.37 | 0 | 0    | 2 | MASCOT | T      | PLEX8 |       |
| 2.25E-01 | 0 0 | orange1.1t01733.1   | 4.37 | 0 | 0    | 2 | MASCOT | T      | PLEX8 |       |
| 6.88E-06 | 0 0 | orange1.1t01733.1   | 9.72 | 0 | 15.9 | 0 | 2      | MASCOT | T     | PLEX8 |
| 1.30E-03 | 0 0 | orange1.1t01733.1   | 9.72 | 0 | 0    | 2 | MASCOT | T      | PLEX8 |       |
| 2.50E-06 | 0 0 | orange1.1t01733.1   | 9.72 | 0 | 0    | 2 | MASCOT | T      | PLEX8 |       |
| 6.00E-05 | 0 0 | Cs1g23670.1         | 5.88 | 0 | 0    | 2 | MASCOT | T      | PLEX8 |       |
| 1.92E-03 | 0 0 | Cs1g23670.1         | 6    | 1 | 0    | 2 | MASCOT | T      | PLEX8 |       |
| 3.16E-05 | 0 0 | Cs1g23670.1         | 3.92 | 0 | 0    | 2 | MASCOT | T      | PLEX8 |       |
| 2.64E-02 | 0 0 | Cs1g23670.1         | 5.26 | 0 | 0    | 2 | MASCOT | T      | PLEX8 |       |
| 2.76E-03 | 0 0 | Cs1g23670.1         | 5.26 | 0 | 0    | 2 | MASCOT | T      | PLEX8 |       |
| 3.55E-04 | 0 0 | Cs1g23670.1         | 5.26 | 0 | 0    | 2 | MASCOT | T      | PLEX8 |       |
| 8.20E-03 | 0 0 | Cs1g23670.1         | 5.26 | 0 | 0    | 2 | MASCOT | T      | PLEX8 |       |
| 2.89E-02 | 0 0 | Cs1g23670.1         | 5.26 | 0 | 0    | 2 | MASCOT | T      | PLEX8 |       |
| 3.06E-01 | 0 0 | Cs1g23670.1         | 4.53 | 0 | 0    | 2 | MASCOT | T      | PLEX8 |       |
| 1.48E-01 | 0 0 | Cs1g23670.1         | 4.53 | 0 | 0    | 2 | MASCOT | T      | PLEX8 |       |
| 9.15E-02 | 0 0 | Cs1g23670.1         | 8.31 | 0 | 0    | 2 | MASCOT | T      | PLEX8 |       |
| 1.83E-01 | 0 0 | Cs1g23670.1         | 6.05 | 0 | 0    | 2 | MASCOT | T      | PLEX8 |       |
| 2.10E-01 | 0 0 | Cs1g23670.1/Cs6g174 | 8.59 | 0 | 0    | 2 | MASCOT | T      | PLEX8 |       |
| 3.75E-02 | 0 0 | Cs1g23670.1/Cs6g174 | 8.59 | 0 | 0    | 2 | MASCOT | T      | PLEX8 |       |
| 9.72E-02 | 0 0 | Cs1g23670.1/Cs6g174 | 8.59 | 0 | 0    | 2 | MASCOT | T      | PLEX8 |       |
| 2.35E-01 | 0 0 | Cs1g23670.1/Cs6g174 | 8.59 | 0 | 0    | 2 | MASCOT | T      | PLEX8 |       |
| 3.16E-01 | 0 0 | Cs1g23670.1/Cs6g174 | 8.59 | 0 | 0    | 2 | MASCOT | T      | PLEX8 |       |
| 6.38E-03 | 0 0 | Cs4g19670.1/Cs4g196 | 8.76 | 1 | 0    | 2 | MASCOT | T      | PLEX8 |       |
| 5.30E-03 | 0 0 | Cs4g19670.1/Cs4g196 | 6.75 | 0 | 0    | 2 | MASCOT | T      | PLEX8 |       |
| 6.86E-05 | 0 0 | Cs4g19670.1/Cs4g196 | 6.75 | 0 | 0    | 2 | MASCOT | T      | PLEX8 |       |
| 9.82E-03 | 0 0 | Cs4g19670.1/Cs4g196 | 6.75 | 0 | 0    | 2 | MASCOT | T      | PLEX8 |       |
| 4.07E-03 | 0 0 | Cs4g19670.1/Cs4g196 | 6.75 | 0 | 0    | 2 | MASCOT | T      | PLEX8 |       |

|          |     |                     |      |   |      |   |        |        |       |       |
|----------|-----|---------------------|------|---|------|---|--------|--------|-------|-------|
| 7.28E-02 | 0 0 | Cs4g19670.1/Cs4g196 | 5.99 | 0 | 0    | 2 | MASCOT | T      | PLEX8 |       |
| 3.04E-01 | 0 0 | Cs4g19670.1/Cs4g196 | 5.66 | 0 | 0    | 2 | MASCOT | T      | PLEX8 |       |
| 5.79E-03 | 0 0 | Cs4g19670.1/Cs4g196 | 6.04 | 0 | 0    | 2 | MASCOT | T      | PLEX8 |       |
| 1.87E-02 | 0 0 | Cs4g19670.1/Cs4g196 | 6.04 | 0 | 0    | 2 | MASCOT | T      | PLEX8 |       |
| 6.21E-02 | 0 0 | Cs4g19670.1/Cs4g196 | 6.04 | 0 | 0    | 2 | MASCOT | T      |       |       |
| 4.17E-03 | 0 0 | Cs4g19670.1/Cs4g196 | 4.21 | 0 | 0    | 2 | MASCOT | T      | PLEX8 |       |
| 4.49E-04 | 0 0 | Cs4g19670.1/Cs4g196 | 4.21 | 0 | 0    | 2 | MASCOT | T      | PLEX8 |       |
| 4.90E-02 | 0 0 | Cs4g19670.1/Cs4g196 | 4.21 | 0 | 0    | 2 | MASCOT | T      |       |       |
| 3.45E-03 | 0 0 | Cs4g19670.1/Cs4g196 | 6.75 | 0 | 0    | 2 | MASCOT | T      | PLEX8 |       |
| 1.07E-01 | 0 0 | Cs4g19670.1/Cs4g196 | 5.66 | 0 | 0    | 2 | MASCOT | T      | PLEX8 |       |
| 6.12E-02 | 0 0 | Cs4g19670.1/Cs4g196 | 5.66 | 0 | 0    | 2 | MASCOT | T      | PLEX8 |       |
| 4.56E-05 | 0 0 | Cs7g23340.1         | 6.1  | 0 | 0    | 2 | MASCOT | T      | PLEX8 |       |
| 9.38E-03 | 0 0 | Cs7g23340.1         | 8.59 | 1 | 15.9 | 0 | 2      | MASCOT | T     | PLEX8 |
| 1.06E-01 | 0 0 | Cs7g23340.1         | 8.59 | 1 | 0    | 2 | MASCOT | T      | PLEX8 |       |
| 1.06E-02 | 0 0 | Cs7g23340.1         | 8.59 | 1 | 0    | 2 | MASCOT | T      | PLEX8 |       |
| 1.16E-01 | 0 0 | Cs7g23340.1         | 8.52 | 0 | 15.9 | 0 | 2      | MASCOT | T     | PLEX8 |
| 2.82E-01 | 0 0 | Cs7g23340.1         | 8.59 | 0 | 0    | 2 | MASCOT | T      | PLEX8 |       |
| 3.64E-01 | 0 0 | Cs7g23340.1         | 5.81 | 0 | 15.9 | 0 | 2      | MASCOT | T     | PLEX8 |
| 3.94E-02 | 0 0 | Cs7g23340.1         | 5.81 | 0 | 15.9 | 0 | 2      | MASCOT | T     | PLEX8 |
| 4.67E-01 | 0 0 | Cs7g23340.1         | 5.81 | 0 | 0    | 2 | MASCOT | T      | PLEX8 |       |
| 1.31E-03 | 0 0 | Cs7g23340.1         | 5.81 | 0 | 0    | 2 | MASCOT | T      | PLEX8 |       |
| 1.43E-02 | 0 0 | Cs7g23340.1         | 5.81 | 0 | 0    | 2 | MASCOT | T      | PLEX8 |       |
| 1.94E-02 | 0 0 | Cs7g23340.1         | 6.92 | 0 | 0    | 2 | MASCOT | T      | PLEX8 |       |
| 4.99E-01 | 0 0 | Cs7g23340.1         | 6.92 | 0 | 0    | 2 | MASCOT | T      | PLEX8 |       |
| 1.00E-01 | 0 0 | Cs7g23340.1         | 6.92 | 0 | 0    | 2 | MASCOT | T      | PLEX8 |       |
| 1.03E-01 | 0 0 | Cs7g23340.1         | 5.75 | 0 | 0    | 2 | MASCOT | T      | PLEX8 |       |
| 2.01E-01 | 0 0 | Cs7g23340.1         | 9.75 | 0 | 0    | 2 | MASCOT | T      | PLEX8 |       |
| 1.07E-01 | 0 0 | Cs5g33580.1         | 4.21 | 0 | 0    | 2 | MASCOT | T      | PLEX8 |       |
| 4.57E-02 | 0 0 | Cs5g33580.1         | 4.25 | 0 | 0    | 2 | MASCOT | T      |       |       |
| 2.37E-02 | 0 0 | Cs5g33580.1         | 4.25 | 0 | 0    | 2 | MASCOT | T      |       |       |
| 1.19E-02 | 0 0 | Cs5g33580.1         | 4.25 | 0 | 0    | 2 | MASCOT | T      |       |       |
| 2.31E-01 | 0 0 | Cs5g33580.1         | 5.84 | 0 | 0    | 2 | MASCOT | T      | PLEX8 |       |
| 3.05E-03 | 0 0 | Cs5g33580.1         | 6.92 | 0 | 0    | 2 | MASCOT | T      | PLEX8 |       |
| 1.15E-01 | 0 0 | Cs5g33580.1         | 6.92 | 0 | 0    | 2 | MASCOT | T      | PLEX8 |       |
| 1.86E-02 | 0 0 | Cs5g33580.1         | 6.92 | 0 | 0    | 2 | MASCOT | T      | PLEX8 |       |
| 1.83E-02 | 0 0 | Cs5g33580.1         | 6.92 | 0 | 0    | 2 | MASCOT | T      | PLEX8 |       |
| 1.26E-02 | 0 0 | Cs5g33580.1         | 6.92 | 0 | 0    | 2 | MASCOT | T      | PLEX8 |       |
| 6.50E-02 | 0 0 | Cs5g33580.1         | 4.37 | 0 | 15.9 | 0 | 2      | MASCOT | T     | PLEX8 |
| 6.31E-03 | 0 0 | Cs5g33580.1         | 6.79 | 0 | 0    | 2 | MASCOT | T      | PLEX8 |       |
| 6.08E-03 | 0 0 | Cs5g33580.1         | 6.79 | 0 | 0    | 2 | MASCOT | T      | PLEX8 |       |
| 2.68E-01 | 0 0 | Cs5g33580.1         | 8.8  | 0 | 0    | 2 | MASCOT | T      | PLEX8 |       |
| 1.57E-02 | 0 0 | Cs5g33580.1         | 4.37 | 0 | 0    | 2 | MASCOT | T      | PLEX8 |       |
| 5.62E-04 | 0 0 | gi 113952631        | 6.75 | 0 | 0    | 2 | MASCOT | T      |       |       |
| 1.93E-03 | 0 0 | gi 113952631        | 5.83 | 0 | 0    | 2 | MASCOT | T      | PLEX8 |       |
| 7.96E-04 | 0 0 | gi 113952631        | 5.83 | 0 | 0    | 2 | MASCOT | T      | PLEX8 |       |
| 8.60E-03 | 0 0 | gi 113952631        | 5.83 | 0 | 0    | 2 | MASCOT | T      | PLEX8 |       |
| 1.19E-03 | 0 0 | gi 113952631        | 5.83 | 0 | 0    | 2 | MASCOT | T      | PLEX8 |       |
| 1.24E-02 | 0 0 | gi 113952631        | 5.83 | 0 | 0    | 2 | MASCOT | T      | PLEX8 |       |
| 1.25E-01 | 0 0 | gi 113952631        | 5.72 | 0 | 0    | 2 | MASCOT | T      | PLEX8 |       |
| 8.59E-02 | 0 0 | gi 113952631        | 4    | 0 | 0    | 2 | MASCOT | T      | PLEX8 |       |
| 1.08E-02 | 0 0 | gi 113952631        | 4.41 | 0 | 0    | 2 | MASCOT | T      | PLEX8 |       |

|          |     |                     |      |   |      |   |        |        |       |       |
|----------|-----|---------------------|------|---|------|---|--------|--------|-------|-------|
| 3.57E-02 | 0 0 | gi 113952631        | 6.73 | 0 | 0    | 2 | MASCOT | T      |       |       |
| 8.04E-05 | 0 0 | gi 113952631        | 5.75 | 0 | 0    | 2 | MASCOT | T      | PLEX8 |       |
| 2.04E-02 | 0 0 | gi 113952631        | 5.97 | 0 | 0    | 2 | MASCOT | T      | PLEX8 |       |
| 3.42E-02 | 0 0 | gi 113952631        | 5.97 | 0 | 0    | 2 | MASCOT | T      | PLEX8 |       |
| 1.47E-01 | 0 0 | gi 113952631        | 5.97 | 0 | 0    | 2 | MASCOT | T      | PLEX8 |       |
| 3.74E-02 | 0 0 | gi 113952631        | 5.97 | 0 | 0    | 2 | MASCOT | T      | PLEX8 |       |
| 8.32E-03 | 0 0 | Cs1g08550.1/Cs1g085 | 5.88 | 0 | 0    | 2 | MASCOT | T      | PLEX8 |       |
| 5.72E-02 | 0 0 | Cs1g08550.1/Cs1g085 | 5.88 | 0 | 0    | 2 | MASCOT | T      | PLEX8 |       |
| 9.33E-02 | 0 0 | Cs1g08550.1/Cs1g085 | 4.14 | 0 | 0    | 2 | MASCOT | T      |       |       |
| 1.55E-01 | 0 0 | Cs1g08550.1/Cs1g085 | 6    | 0 | 0    | 2 | MASCOT | T      | PLEX8 |       |
| 1.41E-01 | 0 0 | Cs1g08550.1/Cs1g085 | 9.76 | 0 | 0    | 2 | MASCOT | T      |       |       |
| 2.71E-01 | 0 0 | Cs1g08550.1/Cs1g085 | 8.47 | 0 | 0    | 2 | MASCOT | T      | PLEX8 |       |
| 2.56E-01 | 0 0 | Cs1g08550.1/Cs1g085 | 8.47 | 0 | 0    | 2 | MASCOT | T      | PLEX8 |       |
| 1.31E-01 | 0 0 | Cs1g08550.1/Cs1g085 | 8.47 | 0 | 0    | 2 | MASCOT | T      | PLEX8 |       |
| 3.69E-03 | 0 0 | Cs1g08550.1/Cs1g085 | 8.47 | 0 | 0    | 2 | MASCOT | T      | PLEX8 |       |
| 5.81E-03 | 0 0 | Cs1g08550.1/Cs1g085 | 4.37 | 0 | 0    | 2 | MASCOT | T      | PLEX8 |       |
| 1.50E-04 | 0 0 | Cs1g08550.1/Cs1g085 | 4.37 | 0 | 0    | 2 | MASCOT | T      | PLEX8 |       |
| 4.55E-04 | 0 0 | Cs1g08550.1/Cs1g085 | 4.37 | 0 | 0    | 2 | MASCOT | T      | PLEX8 |       |
| 7.48E-02 | 0 0 | Cs1g08550.1/Cs1g085 | 8.5  | 0 | 15.9 | 0 | 2      | MASCOT | T     | PLEX8 |
| 3.47E-01 | 0 0 | Cs1g08550.1/Cs1g085 | 9.5  | 0 | 0    | 2 | MASCOT | T      | PLEX8 |       |
| 1.56E-02 | 0 0 | Cs1g12280.2         | 5.84 | 0 | 0    | 2 | MASCOT | T      | PLEX8 |       |
| 6.61E-04 | 0 0 | Cs1g12280.2         | 5.84 | 0 | 0    | 2 | MASCOT | T      | PLEX8 |       |
| 2.84E-03 | 0 0 | Cs1g12280.2         | 5.84 | 0 | 0    | 2 | MASCOT | T      | PLEX8 |       |
| 1.12E-03 | 0 0 | Cs1g12280.1/Cs1g122 | 4.48 | 0 | 0    | 2 | MASCOT | T      | PLEX8 |       |
| 5.53E-02 | 0 0 | Cs1g12280.1/Cs1g122 | 4.32 | 1 | 0    | 2 | MASCOT | T      | PLEX8 |       |
| 3.43E-04 | 0 0 | Cs1g12280.2/Cs1g122 | 4.53 | 0 | 0    | 2 | MASCOT | T      |       |       |
| 4.52E-02 | 0 0 | Cs1g12280.1/Cs1g122 | 9.72 | 0 | 0    | 2 | MASCOT | T      |       |       |
| 2.77E-05 | 0 0 | Cs1g12280.1/Cs1g122 | 4.37 | 0 | 0    | 2 | MASCOT | T      | PLEX8 |       |
| 1.09E-05 | 0 0 | Cs1g12280.1/Cs1g122 | 4.37 | 0 | 0    | 2 | MASCOT | T      | PLEX8 |       |
| 2.18E-05 | 0 0 | Cs1g12280.1/Cs1g122 | 4.37 | 0 | 0    | 2 | MASCOT | T      | PLEX8 |       |
| 1.12E-01 | 0 0 | Cs1g12280.1/Cs1g122 | 6.74 | 0 | 0    | 2 | MASCOT | T      | PLEX8 |       |
| 8.48E-02 | 0 0 | Cs1g12280.1/Cs1g122 | 6.74 | 0 | 0    | 2 | MASCOT | T      | PLEX8 |       |
| 2.73E-02 | 0 0 | Cs1g12280.1/Cs1g122 | 4.37 | 0 | 0    | 2 | MASCOT | T      |       |       |
| 5.63E-04 | 0 0 | Cs1g12280.1/Cs1g122 | 4.37 | 0 | 0    | 2 | MASCOT | T      |       |       |
| 9.98E-03 | 0 0 | Cs5g16400.1         | 5.87 | 0 | 0    | 2 | MASCOT | T      |       |       |
| 1.87E-02 | 0 0 | Cs5g16400.1         | 5.87 | 0 | 0    | 2 | MASCOT | T      |       |       |
| 8.83E-03 | 0 0 | Cs5g16400.1         | 4.37 | 0 | 0    | 2 | MASCOT | T      | PLEX8 |       |
| 2.47E-01 | 0 0 | Cs5g16400.1         | 4.53 | 0 | 0    | 2 | MASCOT | T      | PLEX8 |       |
| 1.07E-02 | 0 0 | Cs5g16400.1         | 6.05 | 0 | 0    | 2 | MASCOT | T      | PLEX8 |       |
| 4.24E-04 | 0 0 | Cs5g16400.1         | 6.05 | 0 | 0    | 2 | MASCOT | T      | PLEX8 |       |
| 4.66E-02 | 0 0 | Cs5g16400.1         | 6.05 | 0 | 0    | 2 | MASCOT | T      | PLEX8 |       |
| 7.66E-02 | 0 0 | Cs5g16400.1         | 6.24 | 0 | 0    | 2 | MASCOT | T      | PLEX8 |       |
| 3.13E-02 | 0 0 | Cs5g16400.1         | 5.84 | 0 | 0    | 2 | MASCOT | T      |       |       |
| 8.24E-03 | 0 0 | Cs5g16400.1         | 4.37 | 0 | 0    | 2 | MASCOT | T      | PLEX8 |       |
| 3.40E-02 | 0 0 | Cs5g16400.1         | 5.29 | 0 | 0    | 2 | MASCOT | T      | PLEX8 |       |
| 5.04E-05 | 0 0 | Cs5g16400.1         | 5.29 | 0 | 0    | 2 | MASCOT | T      | PLEX8 |       |
| 8.29E-04 | 0 0 | Cs5g16400.1         | 5.29 | 0 | 0    | 2 | MASCOT | T      | PLEX8 |       |
| 9.14E-03 | 0 0 | Cs5g16400.1         | 5.29 | 0 | 0    | 2 | MASCOT | T      |       |       |
| 5.66E-02 | 0 0 | Cs6g21370.1/Cs6g213 | 5.84 | 0 | 0    | 2 | MASCOT | T      | PLEX8 |       |
| 6.09E-03 | 0 0 | Cs6g21370.1/Cs6g213 | 5.32 | 0 | 0    | 2 | MASCOT | T      | PLEX8 |       |
| 7.30E-03 | 0 0 | Cs6g21370.1/Cs6g213 | 5.32 | 0 | 0    | 2 | MASCOT | T      | PLEX8 |       |



|              |                     |      |   |   |          |   |       |
|--------------|---------------------|------|---|---|----------|---|-------|
| 1.96E-02 0 0 | Cs6g21370.1/Cs6g213 | 5.5  | 0 | 0 | 2 MASCOT | T | PLEX8 |
| 2.37E-04 0 0 | Cs6g21370.1/Cs6g213 | 5.5  | 0 | 0 | 2 MASCOT | T | PLEX8 |
| 1.74E-01 0 0 | Cs6g21370.1/Cs6g213 | 8.75 | 0 | 0 | 2 MASCOT | T | PLEX8 |
| 2.06E-01 0 0 | Cs6g21370.1/Cs6g213 | 8.75 | 0 | 0 | 2 MASCOT | T | PLEX8 |
| 6.68E-03 0 0 | Cs6g21370.1/Cs6g213 | 8.75 | 0 | 0 | 2 MASCOT | T | PLEX8 |
| 1.54E-02 0 0 | Cs6g21370.1/Cs6g213 | 9.51 | 0 | 0 | 2 MASCOT | T | PLEX8 |
| 3.85E-01 0 0 | Cs6g21370.1/Cs6g213 | 9.51 | 0 | 0 | 2 MASCOT | T |       |
| 4.19E-01 0 0 | Cs6g21370.1/Cs6g213 | 9.51 | 0 | 0 | 2 MASCOT | T | PLEX8 |
| 5.76E-02 0 0 | Cs6g21370.1/Cs6g213 | 8.41 | 0 | 0 | 2 MASCOT | T | PLEX8 |
| 1.45E-01 0 0 | Cs6g21370.1/Cs6g213 | 5.32 | 0 | 0 | 2 MASCOT | T |       |
| 2.55E-01 0 0 | Cs6g21370.1/Cs6g213 | 5.32 | 0 | 0 | 2 MASCOT | T | PLEX8 |
| 4.02E-02 0 0 | Cs6g21900.1         | 8.75 | 0 | 0 | 2 MASCOT | T | PLEX8 |
| 2.91E-02 0 0 | Cs6g21900.1         | 8.22 | 0 | 0 | 2 MASCOT | T | PLEX8 |
| 1.15E-02 0 0 | Cs6g21900.1/Cs6g219 | 4.41 | 1 | 0 | 2 MASCOT | T | PLEX8 |
| 7.19E-02 0 0 | Cs6g21900.1/Cs6g219 | 12   | 0 | 0 | 2 MASCOT | T | PLEX8 |
| 3.26E-03 0 0 | Cs6g21900.1/Cs6g219 | 4    | 0 | 0 | 2 MASCOT | T | PLEX8 |
| 5.17E-02 0 0 | Cs6g21900.1/Cs6g219 | 8.75 | 0 | 0 | 2 MASCOT | T | PLEX8 |
| 2.95E-01 0 0 | Cs6g21900.1/Cs6g219 | 8.75 | 0 | 0 | 2 MASCOT | T | PLEX8 |
| 2.66E-02 0 0 | Cs6g21900.1/Cs6g219 | 4.37 | 0 | 0 | 2 MASCOT | T | PLEX8 |
| 7.03E-04 0 0 | Cs6g21900.1/Cs6g219 | 4.37 | 0 | 0 | 2 MASCOT | T | PLEX8 |
| 3.40E-01 0 0 | Cs6g21900.1/Cs6g219 | 4.75 | 0 | 0 | 2 MASCOT | T | PLEX8 |
| 5.37E-03 0 0 | Cs6g21900.1/Cs6g219 | 4.75 | 0 | 0 | 2 MASCOT | T | PLEX8 |
| 3.45E-01 0 0 | Cs6g21900.1/Cs6g219 | 4.75 | 0 | 0 | 2 MASCOT | T | PLEX8 |
| 5.61E-06 0 0 | Cs6g21900.1/Cs6g219 | 4.75 | 0 | 0 | 2 MASCOT | T | PLEX8 |
| 1.87E-01 0 0 | Cs6g21900.1/Cs6g219 | 4.75 | 0 | 0 | 2 MASCOT | T |       |
| 5.73E-02 0 0 | Cs8g04930.1         | 4.53 | 0 | 0 | 2 MASCOT | T | PLEX8 |
| 3.27E-04 0 0 | Cs8g04930.1         | 4.53 | 0 | 0 | 2 MASCOT | T | PLEX8 |
| 2.57E-03 0 0 | Cs8g04930.1         | 4.53 | 0 | 0 | 2 MASCOT | T | PLEX8 |
| 4.42E-02 0 0 | Cs8g04930.1         | 6.75 | 0 | 0 | 2 MASCOT | T | PLEX8 |
| 6.49E-07 0 0 | Cs8g04930.1         | 6.75 | 0 | 0 | 2 MASCOT | T | PLEX8 |
| 5.00E-02 0 0 | Cs8g04930.1         | 4.37 | 0 | 0 | 2 MASCOT | T | PLEX8 |
| 6.29E-02 0 0 | Cs8g04930.1         | 5.84 | 0 | 0 | 2 MASCOT | T | PLEX8 |
| 2.41E-01 0 0 | Cs8g04930.1         | 5.84 | 0 | 0 | 2 MASCOT | T | PLEX8 |
| 2.19E-01 0 0 | Cs8g04930.1         | 8.22 | 0 | 0 | 2 MASCOT | T | PLEX8 |
| 2.06E-01 0 0 | Cs8g04930.1         | 8.22 | 0 | 0 | 2 MASCOT | T | PLEX8 |
| 1.48E-01 0 0 | Cs8g04930.1         | 5.84 | 0 | 0 | 2 MASCOT | T | PLEX8 |
| 1.19E-01 0 0 | Cs8g04930.1         | 4.75 | 1 | 0 | 2 MASCOT | T | PLEX8 |
| 1.73E-01 0 0 | Cs8g04930.1         | 4.25 | 0 | 0 | 2 MASCOT | T | PLEX8 |
| 1.10E-01 0 0 | Cs8g04930.1         | 4.25 | 0 | 0 | 2 MASCOT | T | PLEX8 |
| 4.83E-02 0 0 | Cs5g04170.1/Cs5g041 | 8.8  | 0 | 0 | 2 MASCOT | T | PLEX8 |
| 1.06E-01 0 0 | Cs5g04170.1/Cs5g041 | 4.37 | 0 | 0 | 2 MASCOT | T | PLEX8 |
| 3.88E-02 0 0 | Cs5g04170.1/Cs5g041 | 4.53 | 0 | 0 | 2 MASCOT | T | PLEX8 |
| 2.96E-03 0 0 | Cs5g04170.1/Cs5g041 | 4.37 | 0 | 0 | 2 MASCOT | T | PLEX8 |
| 2.06E-02 0 0 | Cs5g04170.1/Cs5g041 | 4.53 | 0 | 0 | 2 MASCOT | T | PLEX8 |
| 2.52E-01 0 0 | Cs5g04170.1/Cs5g041 | 4.53 | 0 | 0 | 2 MASCOT | T | PLEX8 |
| 9.67E-03 0 0 | Cs5g04170.1/Cs5g041 | 4.53 | 0 | 0 | 2 MASCOT | T | PLEX8 |
| 6.75E-04 0 0 | Cs5g04170.2/Cs5g041 | 6    | 0 | 0 | 2 MASCOT | T | PLEX8 |
| 1.56E-02 0 0 | Cs5g04170.2/Cs5g041 | 6    | 0 | 0 | 2 MASCOT | T | PLEX8 |
| 6.84E-04 0 0 | Cs5g04170.2/Cs5g041 | 6    | 0 | 0 | 2 MASCOT | T | PLEX8 |
| 2.70E-01 0 0 | Cs5g04170.2/Cs5g041 | 6    | 0 | 0 | 2 MASCOT | T | PLEX8 |
| 1.81E-01 0 0 | Cs5g04170.1/Cs5g041 | 4.22 | 0 | 0 | 2 MASCOT | T | PLEX8 |

|          |     |                     |      |   |      |   |        |        |       |       |
|----------|-----|---------------------|------|---|------|---|--------|--------|-------|-------|
| 3.33E-01 | 0 0 | Cs5g04170.1/Cs5g041 | 5.83 | 0 | 0    | 2 | MASCOT | T      | PLEX8 |       |
| 7.17E-02 | 0 0 | Cs5g31240.1/Cs5g312 | 4.53 | 0 | 0    | 2 | MASCOT | T      | PLEX8 |       |
| 7.24E-03 | 0 0 | Cs5g31240.1/Cs5g312 | 4.53 | 0 | 0    | 2 | MASCOT | T      | PLEX8 |       |
| 9.43E-05 | 0 0 | Cs5g31240.1/Cs5g312 | 4.53 | 0 | 0    | 2 | MASCOT | T      | PLEX8 |       |
| 1.30E-03 | 0 0 | Cs5g31240.1/Cs5g312 | 4.53 | 0 | 0    | 2 | MASCOT | T      | PLEX8 |       |
| 5.08E-02 | 0 0 | Cs5g31240.1/Cs5g312 | 4.37 | 0 | 0    | 2 | MASCOT | T      | PLEX8 |       |
| 1.79E-01 | 0 0 | Cs5g31240.1         | 4.37 | 0 | 15.9 | 0 | 2      | MASCOT | T     | PLEX8 |
| 1.30E-01 | 0 0 | Cs5g31240.1/Cs5g312 | 4.53 | 0 | 0    | 2 | MASCOT | T      | PLEX8 |       |
| 7.75E-02 | 0 0 | Cs5g31240.1/Cs5g312 | 4.21 | 0 | 0    | 2 | MASCOT | T      | PLEX8 |       |
| 3.80E-01 | 0 0 | Cs5g31240.1/Cs5g312 | 6    | 0 | 0    | 2 | MASCOT | T      |       |       |
| 1.00E-01 | 0 0 | Cs5g31240.1/Cs5g312 | 6    | 0 | 0    | 2 | MASCOT | T      |       |       |
| 1.29E-01 | 0 0 | Cs5g31240.1/Cs5g312 | 5.55 | 0 | 0    | 2 | MASCOT | T      | PLEX8 |       |
| 8.86E-02 | 0 0 | Cs5g31240.1/Cs5g312 | 5.55 | 0 | 0    | 2 | MASCOT | T      | PLEX8 |       |
| 6.60E-02 | 0 0 | Cs5g31240.1/Cs5g312 | 9.41 | 0 | 0    | 2 | MASCOT | T      | PLEX8 |       |
| 7.78E-03 | 0 0 | Cs1g26380.1/Cs1g263 | 4.37 | 0 | 0    | 2 | MASCOT | T      |       |       |
| 2.68E-03 | 0 0 | Cs1g26380.1/Cs1g263 | 4.37 | 0 | 0    | 2 | MASCOT | T      |       |       |
| 2.04E-04 | 0 0 | Cs8g01610.1/Cs8g016 | 9.6  | 1 | 0    | 2 | MASCOT | T      | PLEX8 |       |
| 3.57E-02 | 0 0 | Cs8g01610.1/Cs8g016 | 9.6  | 1 | 0    | 2 | MASCOT | T      | PLEX8 |       |
| 2.38E-05 | 0 0 | Cs8g01610.1/Cs8g016 | 9.41 | 0 | 0    | 2 | MASCOT | T      |       |       |
| 4.09E-03 | 0 0 | Cs8g01610.1/Cs8g016 | 9.41 | 0 | 0    | 2 | MASCOT | T      |       |       |
| 7.36E-02 | 0 0 | Cs1g26380.1/Cs1g263 | 8.73 | 0 | 0    | 2 | MASCOT | T      | PLEX8 |       |
| 2.71E-02 | 0 0 | Cs1g26380.1/Cs1g263 | 5.32 | 0 | 0    | 2 | MASCOT | T      | PLEX8 |       |
| 5.48E-02 | 0 0 | Cs1g26380.1/Cs1g263 | 5.32 | 0 | 0    | 2 | MASCOT | T      | PLEX8 |       |
| 1.44E-01 | 0 0 | Cs1g26380.1/Cs8g016 | 6.74 | 0 | 0    | 2 | MASCOT | T      | PLEX8 |       |
| 1.19E-03 | 0 0 | Cs1g26380.1/Cs8g016 | 6.74 | 0 | 0    | 2 | MASCOT | T      | PLEX8 |       |
| 1.57E-03 | 0 0 | Cs8g01610.1/Cs8g016 | 6.74 | 0 | 0    | 2 | MASCOT | T      | PLEX8 |       |
| 8.89E-02 | 0 0 | Cs8g01610.1/Cs8g016 | 5.81 | 0 | 0    | 2 | MASCOT | T      |       |       |
| 7.50E-03 | 0 0 | Cs8g16680.1/Cs8g166 | 4.54 | 0 | 0    | 2 | MASCOT | T      | PLEX8 |       |
| 5.14E-01 | 0 0 | Cs8g16680.1/Cs8g166 | 6.74 | 0 | 0    | 2 | MASCOT | T      | PLEX8 |       |
| 3.57E-01 | 0 0 | Cs8g16680.1/Cs8g166 | 4.53 | 0 | 0    | 2 | MASCOT | T      | PLEX8 |       |
| 9.13E-02 | 0 0 | Cs8g16680.1/Cs8g166 | 4.53 | 0 | 0    | 2 | MASCOT | T      | PLEX8 |       |
| 2.21E-02 | 0 0 | Cs8g16680.1/Cs8g166 | 5.95 | 0 | 15.9 | 0 | 2      | MASCOT | T     |       |
| 6.16E-04 | 0 0 | Cs8g16680.1/Cs8g166 | 5.95 | 0 | 15.9 | 0 | 2      | MASCOT | T     |       |
| 1.64E-01 | 0 0 | Cs8g16680.2/Cs8g166 | 5.55 | 0 | 0    | 2 | MASCOT | T      |       |       |
| 4.35E-03 | 0 0 | Cs8g16680.1/Cs8g166 | 4.14 | 0 | 0    | 2 | MASCOT | T      | PLEX8 |       |
| 2.34E-01 | 0 0 | Cs8g16680.1/Cs8g166 | 4.14 | 0 | 0    | 2 | MASCOT | T      | PLEX8 |       |
| 6.91E-04 | 0 0 | Cs8g16680.1/Cs8g166 | 4.53 | 0 | 0    | 2 | MASCOT | T      | PLEX8 |       |
| 2.26E-01 | 0 0 | Cs8g16680.1/Cs8g166 | 4.53 | 0 | 0    | 2 | MASCOT | T      | PLEX8 |       |
| 2.02E-02 | 0 0 | Cs8g16680.1/Cs8g166 | 5.84 | 0 | 0    | 2 | MASCOT | T      | PLEX8 |       |
| 3.05E-02 | 0 0 | Cs8g16680.1/Cs8g166 | 5.84 | 0 | 0    | 2 | MASCOT | T      | PLEX8 |       |
| 4.24E-01 | 0 0 | Cs8g17370.1/Cs8g173 | 4.56 | 0 | 0    | 2 | MASCOT | T      |       |       |
| 1.34E-02 | 0 0 | Cs8g17370.1/Cs8g173 | 4.21 | 0 | 0    | 2 | MASCOT | T      | PLEX8 |       |
| 2.95E-01 | 0 0 | Cs8g17370.1/Cs8g173 | 4.21 | 0 | 0    | 2 | MASCOT | T      | PLEX8 |       |
| 1.38E-03 | 0 0 | Cs1g25730.1/Cs8g027 | 6.74 | 0 | 0    | 2 | MASCOT | T      | PLEX8 |       |
| 7.05E-03 | 0 0 | Cs8g17370.1/Cs8g173 | 4.37 | 0 | 0    | 2 | MASCOT | T      | PLEX8 |       |
| 4.68E-03 | 0 0 | Cs8g17370.1/Cs8g173 | 6.74 | 0 | 0    | 2 | MASCOT | T      |       |       |
| 5.21E-04 | 0 0 | Cs8g17370.1/Cs8g173 | 4.1  | 0 | 0    | 2 | MASCOT | T      | PLEX8 |       |
| 9.48E-08 | 0 0 | Cs8g17370.1/Cs8g173 | 4.1  | 0 | 0    | 2 | MASCOT | T      | PLEX8 |       |
| 5.06E-04 | 0 0 | Cs8g17370.1/Cs8g173 | 5.32 | 0 | 0    | 2 | MASCOT | T      | PLEX8 |       |
| 1.20E-06 | 0 0 | Cs8g17370.1/Cs8g173 | 5.32 | 0 | 0    | 2 | MASCOT | T      | PLEX8 |       |
| 6.32E-05 | 0 0 | Cs8g17370.1/Cs8g173 | 5.32 | 0 | 0    | 2 | MASCOT | T      |       |       |

|          |     |                     |      |   |      |   |        |        |       |       |
|----------|-----|---------------------|------|---|------|---|--------|--------|-------|-------|
| 8.86E-02 | 0 0 | Cs8g17370.1/Cs8g173 | 5.32 | 0 | 0    | 2 | MASCOT | T      |       |       |
| 1.17E-03 | 0 0 | Cs8g17370.1/Cs8g173 | 5.84 | 0 | 0    | 2 | MASCOT | T      | PLEX8 |       |
| 2.58E-03 | 0 0 | Cs8g02730.1         | 4.14 | 0 | 0    | 2 | MASCOT | T      |       |       |
| 1.38E-03 | 0 0 | Cs1g25730.1/Cs8g027 | 6.74 | 0 | 0    | 2 | MASCOT | T      | PLEX8 |       |
| 8.50E-03 | 0 0 | Cs8g02730.1         | 4.14 | 0 | 0    | 2 | MASCOT | T      | PLEX8 |       |
| 1.78E-03 | 0 0 | Cs8g02730.1         | 6    | 0 | 0    | 2 | MASCOT | T      | PLEX8 |       |
| 4.80E-03 | 0 0 | Cs8g02730.1         | 6    | 0 | 0    | 2 | MASCOT | T      | PLEX8 |       |
| 5.07E-02 | 0 0 | Cs1g25730.1/Cs8g027 | 6.79 | 0 | 0    | 2 | MASCOT | T      |       |       |
| 1.58E-01 | 0 0 | Cs8g02730.1         | 6.74 | 0 | 0    | 2 | MASCOT | T      | PLEX8 |       |
| 1.54E-01 | 0 0 | Cs8g02730.1         | 6.74 | 0 | 0    | 2 | MASCOT | T      | PLEX8 |       |
| 1.35E-02 | 0 0 | Cs8g02730.1         | 6.74 | 0 | 0    | 2 | MASCOT | T      |       |       |
| 4.03E-03 | 0 0 | Cs8g02730.1         | 5.21 | 0 | 0    | 2 | MASCOT | T      | PLEX8 |       |
| 9.27E-03 | 0 0 | Cs1g25730.1/Cs8g027 | 6.5  | 1 | 15.9 | 0 | 2      | MASCOT | T     |       |
| 3.54E-02 | 0 0 | Cs1g25730.1/Cs8g027 | 6.5  | 1 | 15.9 | 0 | 2      | MASCOT | T     | PLEX8 |
| 4.15E-01 | 0 0 | Cs9g04980.1         | 8.8  | 0 | 0    | 2 | MASCOT | T      | PLEX8 |       |
| 9.81E-02 | 0 0 | Cs9g04980.1         | 8.8  | 0 | 0    | 2 | MASCOT | T      | PLEX8 |       |
| 3.25E-03 | 0 0 | Cs9g04980.1/Cs9g049 | 4.37 | 0 | 0    | 2 | MASCOT | T      |       |       |
| 4.34E-04 | 0 0 | Cs9g04980.1/Cs9g049 | 4.54 | 0 | 15.9 | 0 | 2      | MASCOT | T     | PLEX8 |
| 1.88E-02 | 0 0 | Cs9g04980.1/Cs9g049 | 4.54 | 0 | 0    | 2 | MASCOT | T      | PLEX8 |       |
| 9.83E-02 | 0 0 | Cs9g04980.1/Cs9g049 | 6.07 | 1 | 0    | 2 | MASCOT | T      | PLEX8 |       |
| 2.52E-01 | 0 0 | Cs9g04980.1         | 5.55 | 0 | 0    | 2 | MASCOT | T      | PLEX8 |       |
| 6.04E-03 | 0 0 | Cs9g04980.1/Cs9g049 | 4.53 | 0 | 0    | 2 | MASCOT | T      |       |       |
| 1.53E-04 | 0 0 | Cs9g04980.1/Cs9g049 | 4.54 | 0 | 0    | 2 | MASCOT | T      | PLEX8 |       |
| 4.53E-04 | 0 0 | Cs9g04980.1/Cs9g049 | 4.54 | 0 | 0    | 2 | MASCOT | T      | PLEX8 |       |
| 9.92E-05 | 0 0 | Cs9g04980.1         | 5.21 | 0 | 0    | 2 | MASCOT | T      | PLEX8 |       |
| 4.57E-01 | 0 0 | Cs9g04980.1         | 5.21 | 0 | 0    | 2 | MASCOT | T      |       |       |
| 4.96E-02 | 0 0 | Cs2g05790.1         | 6.1  | 0 | 0    | 2 | MASCOT | T      | PLEX8 |       |
| 1.09E-02 | 0 0 | Cs2g05790.1         | 6.1  | 0 | 0    | 2 | MASCOT | T      | PLEX8 |       |
| 1.20E-02 | 0 0 | Cs2g05790.1         | 9.75 | 0 | 0    | 2 | MASCOT | T      | PLEX8 |       |
| 1.87E-01 | 0 0 | Cs2g05790.1         | 12   | 0 | 0    | 2 | MASCOT | T      |       |       |
| 1.23E-03 | 0 0 | Cs2g05790.1         | 8.75 | 0 | 0    | 2 | MASCOT | T      | PLEX8 |       |
| 2.13E-02 | 0 0 | Cs2g05790.1         | 8.75 | 0 | 0    | 2 | MASCOT | T      | PLEX8 |       |
| 1.77E-02 | 0 0 | Cs2g05790.1         | 8.75 | 0 | 0    | 2 | MASCOT | T      | PLEX8 |       |
| 8.74E-02 | 0 0 | Cs2g05790.1         | 5.88 | 0 | 0    | 2 | MASCOT | T      | PLEX8 |       |
| 5.05E-03 | 0 0 | Cs2g05790.1         | 8.8  | 0 | 0    | 2 | MASCOT | T      | PLEX8 |       |
| 2.26E-03 | 0 0 | Cs2g05790.1         | 4.53 | 0 | 0    | 2 | MASCOT | T      | PLEX8 |       |
| 2.89E-01 | 0 0 | Cs2g05790.1         | 8.75 | 0 | 0    | 2 | MASCOT | T      | PLEX8 |       |
| 1.78E-02 | 0 0 | Cs2g09890.1         | 5.32 | 0 | 0    | 2 | MASCOT | T      | PLEX8 |       |
| 8.65E-02 | 0 0 | Cs2g09890.1         | 5.32 | 0 | 0    | 2 | MASCOT | T      | PLEX8 |       |
| 4.80E-04 | 0 0 | Cs2g09890.1         | 5.32 | 0 | 0    | 2 | MASCOT | T      |       |       |
| 1.40E-01 | 0 0 | Cs2g09890.1/Cs2g098 | 5.88 | 0 | 0    | 2 | MASCOT | T      | PLEX8 |       |
| 8.71E-03 | 0 0 | Cs2g09890.1         | 4.53 | 0 | 0    | 2 | MASCOT | T      | PLEX8 |       |
| 1.65E-01 | 0 0 | Cs2g09890.1/Cs2g098 | 5.4  | 0 | 0    | 2 | MASCOT | T      | PLEX8 |       |
| 1.58E-02 | 0 0 | Cs2g09890.1/Cs2g098 | 8.75 | 0 | 0    | 2 | MASCOT | T      | PLEX8 |       |
| 2.66E-01 | 0 0 | Cs2g09890.1/Cs2g098 | 8.47 | 0 | 0    | 2 | MASCOT | T      | PLEX8 |       |
| 2.15E-03 | 0 0 | Cs2g09890.1/Cs2g098 | 8.47 | 0 | 0    | 2 | MASCOT | T      | PLEX8 |       |
| 5.22E-02 | 0 0 | Cs2g09890.1/Cs2g098 | 6.79 | 0 | 0    | 2 | MASCOT | T      | PLEX8 |       |
| 3.38E-02 | 0 0 | Cs2g09890.1         | 5.99 | 0 | 0    | 2 | MASCOT | T      | PLEX8 |       |
| 3.72E-01 | 0 0 | Cs4g04820.1         | 4.37 | 0 | 0    | 2 | MASCOT | T      | PLEX8 |       |
| 2.13E-04 | 0 0 | Cs4g04820.1         | 4.37 | 0 | 0    | 2 | MASCOT | T      | PLEX8 |       |
| 9.11E-03 | 0 0 | Cs4g04820.1         | 6.84 | 0 | 0    | 2 | MASCOT | T      |       |       |

|          |     |                      |      |   |      |   |        |        |       |       |
|----------|-----|----------------------|------|---|------|---|--------|--------|-------|-------|
| 1.53E-01 | 0 0 | Cs4g04820.1          | 8.76 | 0 | 0    | 2 | MASCOT | T      | PLEX8 |       |
| 1.24E-01 | 0 0 | Cs4g04820.1          | 8.76 | 0 | 0    | 2 | MASCOT | T      | PLEX8 |       |
| 3.62E-03 | 0 0 | Cs4g04820.1          | 5.81 | 0 | 0    | 2 | MASCOT | T      |       |       |
| 3.31E-01 | 0 0 | Cs4g04820.1          | 5.32 | 0 | 0    | 2 | MASCOT | T      |       |       |
| 9.07E-03 | 0 0 | Cs4g04820.1          | 6    | 0 | 15.9 | 0 | 2      | MASCOT | T     | PLEX8 |
| 1.76E-04 | 0 0 | Cs4g04820.1          | 6    | 0 | 0    | 2 | MASCOT | T      | PLEX8 |       |
| 1.63E-01 | 0 0 | Cs4g04820.1          | 6.41 | 0 | 0    | 2 | MASCOT | T      | PLEX8 |       |
| 5.03E-04 | 0 0 | Cs4g04820.1          | 4.25 | 0 | 0    | 2 | MASCOT | T      | PLEX8 |       |
| 3.93E-02 | 0 0 | Cs4g05700.1/Cs4g057  | 8.63 | 0 | 0    | 2 | MASCOT | T      | PLEX8 |       |
| 5.10E-03 | 0 0 | Cs4g05700.1          | 4.37 | 0 | 0    | 2 | MASCOT | T      |       |       |
| 3.99E-03 | 0 0 | Cs4g05700.1          | 4.37 | 0 | 0    | 2 | MASCOT | T      |       |       |
| 1.11E-02 | 0 0 | Cs4g05700.1          | 4.37 | 0 | 0    | 2 | MASCOT | T      | PLEX8 |       |
| 1.38E-01 | 0 0 | Cs4g05700.1/Cs4g057  | 4.14 | 0 | 0    | 2 | MASCOT | T      | PLEX8 |       |
| 2.02E-02 | 0 0 | Cs4g05700.1/Cs4g057  | 6.74 | 0 | 0    | 2 | MASCOT | T      | PLEX8 |       |
| 4.44E-03 | 0 0 | Cs4g05700.1/Cs4g057  | 6.74 | 0 | 0    | 2 | MASCOT | T      | PLEX8 |       |
| 2.79E-02 | 0 0 | Cs4g05700.1/Cs4g057  | 6.75 | 0 | 0    | 2 | MASCOT | T      |       |       |
| 7.90E-03 | 0 0 | Cs4g05700.1/Cs4g057  | 5.4  | 0 | 0    | 2 | MASCOT | T      | PLEX8 |       |
| 3.68E-01 | 0 0 | Cs4g05700.1/Cs4g057  | 5.4  | 0 | 0    | 2 | MASCOT | T      | PLEX8 |       |
| 6.03E-02 | 0 0 | Cs4g05700.1          | 8.47 | 0 | 0    | 2 | MASCOT | T      | PLEX8 |       |
| 6.45E-03 | 0 0 | Cs5g12900.1/Cs5g129  | 4.53 | 0 | 0    | 2 | MASCOT | T      | PLEX8 |       |
| 2.68E-01 | 0 0 | Cs5g12900.1/Cs5g129  | 4.53 | 0 | 0    | 2 | MASCOT | T      | PLEX8 |       |
| 7.74E-02 | 0 0 | Cs5g12900.1/Cs5g129  | 4.53 | 0 | 0    | 2 | MASCOT | T      |       |       |
| 8.74E-05 | 0 0 | Cs5g12880.1/Cs5g128  | 6.46 | 0 | 0    | 2 | MASCOT | T      | PLEX8 |       |
| 2.27E-01 | 0 0 | Cs5g12880.1/Cs5g128  | 6.46 | 0 | 0    | 2 | MASCOT | T      | PLEX8 |       |
| 6.97E-02 | 0 0 | Cs4g12220.1/Cs5g128  | 8.41 | 0 | 0    | 2 | MASCOT | T      | PLEX8 |       |
| 1.25E-01 | 0 0 | Cs5g12900.1/Cs5g129  | 6.96 | 0 | 0    | 2 | MASCOT | T      |       |       |
| 1.68E-01 | 0 0 | Cs5g12880.1/Cs5g129  | 5.88 | 0 | 0    | 2 | MASCOT | T      | PLEX8 |       |
| 7.02E-02 | 0 0 | Cs4g11320.1 ! Cs4g11 | 6.75 | 0 | 0    | 2 | MASCOT | T      | PLEX8 |       |
| 3.08E-02 | 0 0 | Cs5g12900.1/Cs5g129  | 4.31 | 0 | 0    | 2 | MASCOT | T      | PLEX8 |       |
| 9.92E-04 | 0 0 | Cs5g12880.1/Cs5g129  | 4.14 | 0 | 0    | 2 | MASCOT | T      | PLEX8 |       |
| 1.54E-01 | 0 0 | Cs7g04570.1/Cs7g045  | 9.8  | 0 | 0    | 2 | MASCOT | T      | PLEX8 |       |
| 3.79E-04 | 0 0 | Cs7g04570.1/Cs7g045  | 4.14 | 0 | 0    | 2 | MASCOT | T      |       |       |
| 1.59E-04 | 0 0 | Cs7g04570.1/Cs7g045  | 4.14 | 0 | 0    | 2 | MASCOT | T      |       |       |
| 1.56E-01 | 0 0 | Cs7g04570.1/Cs7g045  | 8.25 | 0 | 0    | 2 | MASCOT | T      |       |       |
| 1.71E-02 | 0 0 | Cs7g04570.1/Cs7g045  | 4.37 | 0 | 0    | 2 | MASCOT | T      |       |       |
| 3.54E-02 | 0 0 | Cs7g04570.1/Cs7g045  | 5.55 | 0 | 0    | 2 | MASCOT | T      | PLEX8 |       |
| 6.07E-04 | 0 0 | Cs7g04570.1/Cs7g045  | 5.55 | 0 | 0    | 2 | MASCOT | T      | PLEX8 |       |
| 9.30E-02 | 0 0 | Cs7g04570.1          | 5.99 | 0 | 0    | 2 | MASCOT | T      | PLEX8 |       |
| 4.50E-02 | 0 0 | Cs7g04570.1/Cs7g045  | 8.26 | 0 | 0    | 2 | MASCOT | T      | PLEX8 |       |
| 1.76E-04 | 0 0 | Cs7g04570.1/Cs7g045  | 9.51 | 0 | 0    | 2 | MASCOT | T      |       |       |
| 1.20E-01 | 0 0 | Cs7g04570.1/Cs7g045  | 9.51 | 0 | 0    | 2 | MASCOT | T      |       |       |
| 7.91E-03 | 0 0 | Cs1g16570.1          | 5.5  | 0 | 0    | 2 | MASCOT | T      | PLEX8 |       |
| 2.36E-01 | 0 0 | Cs1g16570.1          | 8.64 | 0 | 0    | 2 | MASCOT | T      |       |       |
| 1.36E-01 | 0 0 | Cs1g16570.1          | 4.37 | 0 | 0    | 2 | MASCOT | T      | PLEX8 |       |
| 1.55E-01 | 0 0 | Cs1g16570.1          | 5.84 | 0 | 0    | 2 | MASCOT | T      | PLEX8 |       |
| 3.14E-02 | 0 0 | Cs1g16570.1          | 4.37 | 0 | 0    | 2 | MASCOT | T      |       |       |
| 1.57E-03 | 0 0 | Cs1g16570.1          | 4.37 | 0 | 0    | 2 | MASCOT | T      |       |       |
| 6.54E-04 | 0 0 | Cs1g16570.1          | 4.54 | 0 | 0    | 2 | MASCOT | T      | PLEX8 |       |
| 3.25E-02 | 0 0 | Cs1g16570.1          | 4.54 | 0 | 0    | 2 | MASCOT | T      | PLEX8 |       |
| 2.34E-01 | 0 0 | Cs1g16570.1          | 6    | 0 | 0    | 2 | MASCOT | T      | PLEX8 |       |
| 5.85E-07 | 0 0 | Cs1g16570.1          | 4.14 | 0 | 0    | 2 | MASCOT | T      |       |       |

|          |     |                      |      |   |      |   |        |        |       |
|----------|-----|----------------------|------|---|------|---|--------|--------|-------|
| 1.05E-01 | 0 0 | Cs3g01840.1/Cs3g018  | 5.84 | 0 | 0    | 2 | MASCOT | T      | PLEX8 |
| 8.83E-04 | 0 0 | Cs3g01840.1/Cs3g018  | 4.25 | 0 | 0    | 2 | MASCOT | T      |       |
| 3.88E-03 | 0 0 | Cs3g01840.1/Cs3g018  | 4.53 | 0 | 0    | 2 | MASCOT | T      | PLEX8 |
| 5.77E-05 | 0 0 | Cs3g01840.1/Cs3g018  | 4.53 | 0 | 0    | 2 | MASCOT | T      | PLEX8 |
| 5.16E-02 | 0 0 | Cs3g01840.1/Cs3g018  | 8.47 | 0 | 0    | 2 | MASCOT | T      | PLEX8 |
| 4.99E-01 | 0 0 | Cs3g01840.1/Cs3g018  | 8.47 | 0 | 0    | 2 | MASCOT | T      | PLEX8 |
| 4.39E-02 | 0 0 | Cs3g01840.1/Cs3g018  | 4.03 | 0 | 0    | 2 | MASCOT | T      |       |
| 1.75E-01 | 0 0 | Cs3g01840.1/Cs3g018  | 4.37 | 0 | 0    | 2 | MASCOT | T      |       |
| 3.09E-04 | 0 0 | Cs3g01840.1/Cs3g018  | 4.53 | 0 | 0    | 2 | MASCOT | T      |       |
| 1.40E-03 | 0 0 | Cs3g01840.1/Cs3g018  | 4.53 | 0 | 0    | 2 | MASCOT | T      |       |
| 1.42E-02 | 0 0 | Cs3g25680.1/Cs3g256  | 3.84 | 0 | 0    | 2 | MASCOT | T      |       |
| 4.08E-04 | 0 0 | Cs3g25680.1/Cs3g256  | 4.75 | 0 | 0    | 2 | MASCOT | T      | PLEX8 |
| 4.08E-02 | 0 0 | Cs3g25680.1/Cs3g256  | 4.75 | 0 | 0    | 2 | MASCOT | T      | PLEX8 |
| 3.72E-05 | 0 0 | Cs3g25680.2          | 4.37 | 0 | 0    | 2 | MASCOT | T      | PLEX8 |
| 1.12E-02 | 0 0 | Cs3g25680.1/Cs3g256  | 4.37 | 0 | 0    | 2 | MASCOT | T      |       |
| 2.78E-04 | 0 0 | Cs3g25680.1/Cs3g256  | 5.32 | 0 | 0    | 2 | MASCOT | T      | PLEX8 |
| 7.29E-03 | 0 0 | Cs3g25680.1/Cs3g256  | 5.32 | 0 | 0    | 2 | MASCOT | T      | PLEX8 |
| 2.53E-02 | 0 0 | Cs3g25680.2          | 4.31 | 0 | 0    | 2 | MASCOT | T      | PLEX8 |
| 2.16E-01 | 0 0 | Cs3g25680.1/Cs3g256  | 8.75 | 0 | 0    | 2 | MASCOT | T      | PLEX8 |
| 4.86E-06 | 0 0 | Cs3g25680.1/Cs3g256  | 6    | 0 | 0    | 2 | MASCOT | T      |       |
| 6.68E-04 | 0 0 | Cs5g10530.1/Cs5g105  | 6.79 | 0 | 0    | 2 | MASCOT | T      | PLEX8 |
| 3.15E-01 | 0 0 | Cs5g10530.1/Cs5g105  | 6.75 | 0 | 0    | 2 | MASCOT | T      | PLEX8 |
| 1.06E-03 | 0 0 | Cs5g10530.1/Cs5g105  | 4.53 | 0 | 15.9 | 0 | 2      | MASCOT | T     |
| 7.24E-02 | 0 0 | Cs5g10530.1/Cs5g105  | 4.53 | 0 | 0    | 2 | MASCOT | T      |       |
| 6.12E-02 | 0 0 | Cs5g10530.1          | 5.32 | 0 | 0    | 2 | MASCOT | T      | PLEX8 |
| 1.44E-02 | 0 0 | Cs5g10530.1/Cs5g105  | 8.59 | 0 | 0    | 2 | MASCOT | T      | PLEX8 |
| 6.56E-03 | 0 0 | Cs5g10530.1          | 4.54 | 0 | 0    | 2 | MASCOT | T      | PLEX8 |
| 2.36E-01 | 0 0 | Cs5g10530.1          | 4.54 | 0 | 0    | 2 | MASCOT | T      |       |
| 6.15E-02 | 0 0 | Cs5g10530.1/Cs5g105  | 5.32 | 0 | 0    | 2 | MASCOT | T      | PLEX8 |
| 1.25E-02 | 0 0 | Cs5g10530.1/Cs5g105  | 4.21 | 0 | 0    | 2 | MASCOT | T      | PLEX8 |
| 6.55E-02 | 0 0 | Cs6g21540.1          | 5.08 | 0 | 0    | 2 | MASCOT | T      |       |
| 1.67E-01 | 0 0 | Cs6g21540.1 ! Cs5g16 | 5.84 | 0 | 0    | 2 | MASCOT | T      | PLEX8 |
| 1.32E-01 | 0 0 | Cs6g21540.1          | 5.32 | 0 | 0    | 2 | MASCOT | T      | PLEX8 |
| 2.40E-02 | 0 0 | Cs6g21540.1          | 5.32 | 0 | 0    | 2 | MASCOT | T      | PLEX8 |
| 1.61E-02 | 0 0 | Cs6g21540.1          | 4.37 | 0 | 0    | 2 | MASCOT | T      | PLEX8 |
| 1.99E-01 | 0 0 | Cs6g21540.1          | 4.37 | 0 | 0    | 2 | MASCOT | T      | PLEX8 |
| 8.70E-02 | 0 0 | Cs6g21540.1          | 4.37 | 0 | 0    | 2 | MASCOT | T      | PLEX8 |
| 7.95E-03 | 0 0 | Cs6g21540.1          | 5.84 | 0 | 0    | 2 | MASCOT | T      | PLEX8 |
| 1.20E-03 | 0 0 | Cs6g21540.1          | 6    | 0 | 0    | 2 | MASCOT | T      | PLEX8 |
| 1.11E-02 | 0 0 | Cs6g21540.1          | 9.72 | 0 | 0    | 2 | MASCOT | T      | PLEX8 |
| 4.45E-06 | 0 0 | Cs2g09970.1/Cs3g261  | 4.14 | 0 | 0    | 2 | MASCOT | T      | PLEX8 |
| 7.72E-04 | 0 0 | Cs6g16900.1/Cs6g169  | 4.31 | 0 | 0    | 2 | MASCOT | T      | PLEX8 |
| 9.11E-03 | 0 0 | Cs2g09970.1/Cs3g261  | 9.75 | 0 | 0    | 2 | MASCOT | T      |       |
| 4.63E-03 | 0 0 | Cs2g09970.1/Cs3g261  | 5.84 | 0 | 0    | 2 | MASCOT | T      | PLEX8 |
| 5.97E-02 | 0 0 | Cs2g09970.1/Cs3g261  | 11   | 1 | 0    | 2 | MASCOT | T      | PLEX8 |
| 1.18E-02 | 0 0 | Cs2g09970.1/Cs3g261  | 11   | 1 | 0    | 2 | MASCOT | T      |       |
| 2.70E-03 | 0 0 | Cs2g09970.1/Cs3g261  | 9.76 | 0 | 15.9 | 0 | 2      | MASCOT | T     |
| 2.19E-03 | 0 0 | Cs2g09970.1/Cs6g074  | 8.5  | 0 | 0    | 2 | MASCOT | T      | PLEX8 |
| 6.11E-03 | 0 0 | Cs2g09970.1/Cs3g261  | 8.75 | 0 | 0    | 2 | MASCOT | T      | PLEX8 |
| 1.16E-03 | 0 0 | Cs5g02540.1/Cs5g025  | 4.53 | 0 | 0    | 2 | MASCOT | T      |       |
| 1.01E-01 | 0 0 | Cs5g02540.1/Cs5g025  | 4.25 | 0 | 0    | 2 | MASCOT | T      | PLEX8 |

|              |                      |      |   |      |          |          |       |       |
|--------------|----------------------|------|---|------|----------|----------|-------|-------|
| 3.53E-02 0 0 | Cs5g02540.1/Cs5g025  | 6    | 0 | 0    | 2 MASCOT | T        | PLEX8 |       |
| 2.02E-06 0 0 | Cs5g02540.1/Cs5g025  | 4.75 | 0 | 0    | 2 MASCOT | T        |       |       |
| 2.90E-01 0 0 | Cs5g02540.1/Cs5g025  | 4.53 | 0 | 0    | 2 MASCOT | T        | PLEX8 |       |
| 8.24E-02 0 0 | Cs5g02540.1/Cs5g025  | 4.53 | 0 | 0    | 2 MASCOT | T        | PLEX8 |       |
| 1.45E-03 0 0 | Cs5g02540.1/Cs5g025  | 4.53 | 0 | 0    | 2 MASCOT | T        | PLEX8 |       |
| 6.13E-02 0 0 | Cs5g02540.1/Cs5g025  | 4.37 | 0 | 0    | 2 MASCOT | T        | PLEX8 |       |
| 1.30E-02 0 0 | Cs2g07600.1 ! Cs4g11 | 8.8  | 0 | 0    | 2 MASCOT | T        | PLEX8 |       |
| 9.26E-02 0 0 | Cs2g07600.1 ! Cs4g11 | 8.8  | 0 | 0    | 2 MASCOT | T        | PLEX8 |       |
| 8.52E-03 0 0 | Cs2g07600.1 ! Cs4g11 | 8.8  | 0 | 0    | 2 MASCOT | T        | PLEX8 |       |
| 2.64E-02 0 0 | Cs2g07600.1 ! Cs4g11 | 8.8  | 0 | 0    | 2 MASCOT | T        | PLEX8 |       |
| 2.72E-02 0 0 | Cs2g07600.1 ! Cs4g11 | 8.8  | 0 | 0    | 2 MASCOT | T        | PLEX8 |       |
| 6.00E-02 0 0 | Cs2g07600.1 ! Cs4g11 | 8.8  | 0 | 0    | 2 MASCOT | T        | PLEX8 |       |
| 2.61E-02 0 0 | Cs2g07600.1 ! Cs4g11 | 8.8  | 0 | 0    | 2 MASCOT | T        | PLEX8 |       |
| 2.61E-02 0 0 | Cs2g07600.1 ! Cs4g11 | 8.8  | 0 | 0    | 2 MASCOT | T        | PLEX8 |       |
| 2.87E-02 0 0 | Cs2g07600.1 ! Cs4g11 | 8.8  | 0 | 0    | 2 MASCOT | T        |       |       |
| 1.44E-01 0 0 | Cs2g07600.1 ! Cs4g11 | 8.8  | 0 | 0    | 2 MASCOT | T        |       |       |
| 3.02E-01 0 0 | Cs2g07600.1 ! Cs4g11 | 8.8  | 0 | 0    | 2 MASCOT | T        |       |       |
| 1.74E-01 0 0 | Cs2g07600.1 ! Cs4g11 | 8.8  | 0 | 0    | 2 MASCOT | T        | PLEX8 |       |
| 1.72E-01 0 0 | Cs2g07600.1 ! Cs4g11 | 8.8  | 0 | 0    | 2 MASCOT | T        | PLEX8 |       |
| 4.26E-02 0 0 | Cs2g07600.1 ! Cs4g11 | 8.8  | 0 | 0    | 2 MASCOT | T        | PLEX8 |       |
| 8.07E-02 0 0 | Cs2g07600.1 ! Cs4g11 | 8.8  | 0 | 0    | 2 MASCOT | T        |       |       |
| 1.49E-01 0 0 | Cs2g07600.1 ! Cs4g11 | 8.8  | 0 | 0    | 2 MASCOT | T        |       |       |
| 3.64E-02 0 0 | Cs2g07600.1 ! Cs4g11 | 8.8  | 0 | 0    | 2 MASCOT | T        |       |       |
| 1.15E-02 0 0 | Cs2g07600.1 ! Cs4g11 | 8.8  | 0 | 0    | 2 MASCOT | T        | PLEX8 |       |
| 2.66E-02 0 0 | Cs2g07600.1 ! Cs4g11 | 8.8  | 0 | 0    | 2 MASCOT | T        | PLEX8 |       |
| 3.44E-02 0 0 | Cs4g11090.1          | 4.03 | 0 | 0    | 2 MASCOT | T        | PLEX8 |       |
| 2.62E-02 0 0 | Cs4g11090.1          | 4.03 | 0 | 0    | 2 MASCOT | T        | PLEX8 |       |
| 7.48E-02 0 0 | Cs4g11090.1          | 4.03 | 0 | 0    | 2 MASCOT | T        | PLEX8 |       |
| 7.09E-02 0 0 | Cs4g11090.1          | 4.03 | 0 | 0    | 2 MASCOT | T        | PLEX8 |       |
| 1.36E-01 0 0 | Cs4g11090.1          | 4.03 | 0 | 0    | 2 MASCOT | T        | PLEX8 |       |
| 1.05E-02 0 0 | Cs4g11090.1          | 4.03 | 0 | 0    | 2 MASCOT | T        | PLEX8 |       |
| 8.14E-02 0 0 | Cs4g11090.1          | 4.03 | 0 | 0    | 2 MASCOT | T        | PLEX8 |       |
| 9.87E-02 0 0 | Cs2g07600.1/Cs4g110  | 8.76 | 0 | 15.9 | 0        | 2 MASCOT | T     | PLEX8 |
| 4.47E-01 0 0 | Cs2g07600.1/Cs4g110  | 8.76 | 0 | 15.9 | 0        | 2 MASCOT | T     | PLEX8 |
| 7.17E-02 0 0 | Cs2g07600.1/Cs4g110  | 8.76 | 0 | 15.9 | 0        | 2 MASCOT | T     | PLEX8 |
| 1.87E-02 0 0 | Cs2g07600.1/Cs4g110  | 8.76 | 0 | 15.9 | 0        | 2 MASCOT | T     | PLEX8 |
| 9.29E-02 0 0 | Cs2g07600.1/Cs4g110  | 8.76 | 0 | 15.9 | 0        | 2 MASCOT | T     | PLEX8 |
| 1.20E-02 0 0 | Cs2g07600.1/Cs4g110  | 8.76 | 0 | 15.9 | 0        | 2 MASCOT | T     | PLEX8 |
| 4.19E-01 0 0 | Cs2g07600.1/Cs4g110  | 8.76 | 0 | 15.9 | 0        | 2 MASCOT | T     | PLEX8 |
| 1.10E-02 0 0 | Cs2g07600.1/Cs4g110  | 8.76 | 0 | 15.9 | 0        | 2 MASCOT | T     | PLEX8 |
| 7.22E-02 0 0 | Cs2g07600.1/Cs4g110  | 8.76 | 0 | 15.9 | 0        | 2 MASCOT | T     | PLEX8 |
| 3.26E-01 0 0 | Cs2g07600.1/Cs4g110  | 8.76 | 0 | 15.9 | 0        | 2 MASCOT | T     | PLEX8 |
| 1.28E-01 0 0 | Cs2g07600.1/Cs4g110  | 8.76 | 0 | 15.9 | 0        | 2 MASCOT | T     | PLEX8 |
| 2.42E-01 0 0 | Cs2g07600.1/Cs4g110  | 8.76 | 0 | 15.9 | 0        | 2 MASCOT | T     | PLEX8 |
| 1.62E-02 0 0 | Cs2g07600.1/Cs4g110  | 8.76 | 0 | 15.9 | 0        | 2 MASCOT | T     | PLEX8 |
| 1.44E-01 0 0 | Cs2g07600.1/Cs4g110  | 8.76 | 0 | 15.9 | 0        | 2 MASCOT | T     | PLEX8 |
| 5.54E-02 0 0 | Cs2g07600.1/Cs4g110  | 8.76 | 0 | 15.9 | 0        | 2 MASCOT | T     | PLEX8 |
| 4.77E-02 0 0 | Cs2g07600.1/Cs4g110  | 8.76 | 0 | 15.9 | 0        | 2 MASCOT | T     | PLEX8 |
| 7.26E-02 0 0 | Cs2g07600.1/Cs4g110  | 8.76 | 0 | 15.9 | 0        | 2 MASCOT | T     | PLEX8 |
| 3.65E-01 0 0 | Cs2g07600.1/Cs4g110  | 8.76 | 0 | 15.9 | 0        | 2 MASCOT | T     | PLEX8 |
| 4.71E-03 0 0 | Cs2g07600.1/Cs4g110  | 8.76 | 0 | 15.9 | 0        | 2 MASCOT | T     |       |

|          |     |                     |      |   |      |   |        |        |       |       |
|----------|-----|---------------------|------|---|------|---|--------|--------|-------|-------|
| 7.40E-02 | 0 0 | Cs2g07600.1/Cs4g110 | 8.76 | 0 | 0    | 2 | MASCOT | T      | PLEX8 |       |
| 4.06E-01 | 0 0 | Cs2g07600.1/Cs4g110 | 8.76 | 0 | 0    | 2 | MASCOT | T      | PLEX8 |       |
| 1.82E-02 | 0 0 | Cs2g07600.1/Cs4g110 | 8.76 | 0 | 0    | 2 | MASCOT | T      | PLEX8 |       |
| 2.67E-04 | 0 0 | Cs2g07600.1/Cs4g110 | 8.76 | 0 | 0    | 2 | MASCOT | T      | PLEX8 |       |
| 6.21E-03 | 0 0 | Cs2g07600.1/Cs4g110 | 8.76 | 0 | 0    | 2 | MASCOT | T      |       |       |
| 1.49E-01 | 0 0 | Cs2g07600.1/Cs4g110 | 8.76 | 0 | 0    | 2 | MASCOT | T      |       |       |
| 1.04E-01 | 0 0 | Cs2g07600.1/Cs4g110 | 8.76 | 0 | 0    | 2 | MASCOT | T      |       |       |
| 1.09E-03 | 0 0 | Cs2g07600.1/Cs4g110 | 8.76 | 0 | 0    | 2 | MASCOT | T      | PLEX8 |       |
| 3.16E-04 | 0 0 | Cs2g07600.1/Cs4g110 | 8.76 | 0 | 0    | 2 | MASCOT | T      | PLEX8 |       |
| 2.72E-03 | 0 0 | Cs2g07600.1/Cs4g110 | 8.76 | 0 | 0    | 2 | MASCOT | T      |       |       |
| 9.18E-03 | 0 0 | Cs2g07600.1/Cs4g110 | 8.76 | 0 | 0    | 2 | MASCOT | T      | PLEX8 |       |
| 2.63E-05 | 0 0 | Cs2g07600.1/Cs4g110 | 8.76 | 0 | 0    | 2 | MASCOT | T      |       |       |
| 2.02E-01 | 0 0 | Cs2g07600.1/Cs4g110 | 8.76 | 0 | 0    | 2 | MASCOT | T      |       |       |
| 2.53E-01 | 0 0 | Cs2g07600.1/Cs4g110 | 4.37 | 0 | 0    | 2 | MASCOT | T      |       |       |
| 2.29E-03 | 0 0 | Cs2g07600.1/Cs4g110 | 4.37 | 0 | 0    | 2 | MASCOT | T      | PLEX8 |       |
| 1.59E-07 | 0 0 | Cs2g07600.1/Cs4g110 | 4.37 | 0 | 0    | 2 | MASCOT | T      | PLEX8 |       |
| 1.61E-03 | 0 0 | Cs2g07600.1/Cs4g110 | 4.37 | 0 | 0    | 2 | MASCOT | T      | PLEX8 |       |
| 8.36E-02 | 0 0 | Cs2g07600.1/Cs4g110 | 4.37 | 0 | 0    | 2 | MASCOT | T      |       |       |
| 4.06E-04 | 0 0 | Cs2g07600.1/Cs4g110 | 4.37 | 0 | 0    | 2 | MASCOT | T      | PLEX8 |       |
| 4.20E-03 | 0 0 | Cs2g07600.1/Cs4g110 | 4.37 | 0 | 0    | 2 | MASCOT | T      | PLEX8 |       |
| 5.56E-02 | 0 0 | Cs2g07600.1/Cs4g110 | 4.37 | 0 | 0    | 2 | MASCOT | T      |       |       |
| 1.15E-01 | 0 0 | Cs2g07600.1/Cs4g110 | 4.37 | 0 | 0    | 2 | MASCOT | T      |       |       |
| 2.55E-01 | 0 0 | Cs2g07600.1/Cs4g110 | 4.37 | 0 | 0    | 2 | MASCOT | T      |       |       |
| 7.33E-03 | 0 0 | Cs2g07600.1/Cs4g110 | 4.37 | 0 | 0    | 2 | MASCOT | T      | PLEX8 |       |
| 5.78E-03 | 0 0 | Cs2g07600.1/Cs4g110 | 4.37 | 0 | 0    | 2 | MASCOT | T      |       |       |
| 2.96E-02 | 0 0 | Cs2g07600.1/Cs4g110 | 4.37 | 0 | 0    | 2 | MASCOT | T      | PLEX8 |       |
| 1.36E-02 | 0 0 | Cs2g07600.1/Cs4g110 | 4.37 | 0 | 0    | 2 | MASCOT | T      |       |       |
| 1.40E-03 | 0 0 | Cs2g07600.1/Cs4g110 | 4.37 | 0 | 0    | 2 | MASCOT | T      |       |       |
| 4.50E-02 | 0 0 | Cs4g11090.1         | 4.53 | 0 | 15.9 | 0 | 2      | MASCOT | T     | PLEX8 |
| 3.86E-01 | 0 0 | Cs4g11090.1         | 4.53 | 0 | 15.9 | 0 | 2      | MASCOT | T     | PLEX8 |
| 1.91E-02 | 0 0 | Cs4g11090.1         | 4.53 | 0 | 15.9 | 0 | 2      | MASCOT | T     | PLEX8 |
| 4.92E-02 | 0 0 | Cs4g11090.1         | 4.53 | 0 | 15.9 | 0 | 2      | MASCOT | T     | PLEX8 |
| 2.98E-02 | 0 0 | Cs4g11090.1         | 4.53 | 0 | 15.9 | 0 | 2      | MASCOT | T     | PLEX8 |
| 3.76E-01 | 0 0 | Cs4g11090.1         | 4.53 | 0 | 15.9 | 0 | 2      | MASCOT | T     | PLEX8 |
| 2.20E-03 | 0 0 | Cs4g11090.1         | 4.53 | 0 | 15.9 | 0 | 2      | MASCOT | T     | PLEX8 |
| 1.21E-01 | 0 0 | Cs4g11090.1         | 4.53 | 0 | 15.9 | 0 | 2      | MASCOT | T     | PLEX8 |
| 5.16E-02 | 0 0 | Cs4g11090.1         | 4.53 | 0 | 15.9 | 0 | 2      | MASCOT | T     | PLEX8 |
| 3.32E-01 | 0 0 | Cs4g11090.1         | 4.53 | 0 | 15.9 | 0 | 2      | MASCOT | T     | PLEX8 |
| 1.09E-02 | 0 0 | Cs4g11090.1         | 4.53 | 0 | 15.9 | 0 | 2      | MASCOT | T     | PLEX8 |
| 4.99E-02 | 0 0 | Cs4g11090.1         | 4.53 | 0 | 15.9 | 0 | 2      | MASCOT | T     | PLEX8 |
| 3.00E-01 | 0 0 | Cs4g11090.1         | 4.53 | 0 | 15.9 | 0 | 2      | MASCOT | T     | PLEX8 |
| 6.91E-02 | 0 0 | Cs4g11090.1         | 4.53 | 0 | 15.9 | 0 | 2      | MASCOT | T     | PLEX8 |
| 2.13E-02 | 0 0 | Cs4g11090.1         | 4.53 | 0 | 0    | 2 | MASCOT | T      | PLEX8 |       |
| 3.39E-02 | 0 0 | Cs4g11090.1         | 4.53 | 0 | 0    | 2 | MASCOT | T      | PLEX8 |       |
| 1.82E-01 | 0 0 | Cs4g11090.1         | 4.53 | 0 | 0    | 2 | MASCOT | T      | PLEX8 |       |
| 5.42E-03 | 0 0 | Cs4g11090.1         | 4.53 | 0 | 0    | 2 | MASCOT | T      | PLEX8 |       |
| 2.93E-02 | 0 0 | Cs4g11090.1         | 4.53 | 0 | 0    | 2 | MASCOT | T      | PLEX8 |       |
| 6.67E-02 | 0 0 | Cs4g11090.1         | 4.53 | 0 | 0    | 2 | MASCOT | T      |       |       |
| 1.99E-01 | 0 0 | Cs4g11090.1         | 4.53 | 0 | 0    | 2 | MASCOT | T      | PLEX8 |       |
| 4.58E-02 | 0 0 | Cs4g11090.1         | 4.53 | 0 | 0    | 2 | MASCOT | T      | PLEX8 |       |
| 4.62E-02 | 0 0 | Cs4g11090.1         | 6.71 | 0 | 0    | 2 | MASCOT | T      | PLEX8 |       |

|          |     |                     |      |   |      |   |        |        |       |       |
|----------|-----|---------------------|------|---|------|---|--------|--------|-------|-------|
| 2.34E-03 | 0 0 | Cs4g11090.1         | 6.71 | 0 | 0    | 2 | MASCOT | T      | PLEX8 |       |
| 4.31E-02 | 0 0 | Cs4g11090.1         | 6.71 | 0 | 0    | 2 | MASCOT | T      | PLEX8 |       |
| 3.91E-02 | 0 0 | Cs4g11090.1         | 6.71 | 0 | 0    | 2 | MASCOT | T      | PLEX8 |       |
| 5.49E-02 | 0 0 | Cs4g11090.1         | 6.71 | 0 | 0    | 2 | MASCOT | T      | PLEX8 |       |
| 3.73E-02 | 0 0 | Cs4g11090.1         | 6.71 | 0 | 0    | 2 | MASCOT | T      | PLEX8 |       |
| 1.99E-01 | 0 0 | Cs4g11090.1         | 6.71 | 0 | 0    | 2 | MASCOT | T      | PLEX8 |       |
| 1.11E-01 | 0 0 | Cs4g11090.1         | 6.71 | 0 | 0    | 2 | MASCOT | T      | PLEX8 |       |
| 1.06E-01 | 0 0 | Cs4g11090.1         | 6.71 | 0 | 0    | 2 | MASCOT | T      | PLEX8 |       |
| 6.89E-03 | 0 0 | Cs4g11090.1         | 6.71 | 0 | 0    | 2 | MASCOT | T      | PLEX8 |       |
| 7.89E-03 | 0 0 | Cs4g11090.1         | 6.71 | 0 | 0    | 2 | MASCOT | T      | PLEX8 |       |
| 4.58E-02 | 0 0 | Cs4g11090.1         | 6.71 | 0 | 0    | 2 | MASCOT | T      | PLEX8 |       |
| 9.97E-02 | 0 0 | Cs4g11090.1         | 6.71 | 0 | 0    | 2 | MASCOT | T      | PLEX8 |       |
| 2.28E-01 | 0 0 | Cs4g11090.1         | 6.71 | 0 | 0    | 2 | MASCOT | T      | PLEX8 |       |
| 4.62E-02 | 0 0 | Cs4g11090.1         | 6.71 | 0 | 0    | 2 | MASCOT | T      | PLEX8 |       |
| 6.44E-02 | 0 0 | Cs4g11090.1         | 6.71 | 0 | 0    | 2 | MASCOT | T      | PLEX8 |       |
| 1.27E-01 | 0 0 | Cs4g11090.1         | 6.71 | 0 | 0    | 2 | MASCOT | T      | PLEX8 |       |
| 1.57E-01 | 0 0 | Cs2g07600.1/Cs4g110 | 8.5  | 0 | 15.9 | 0 | 2      | MASCOT | T     | PLEX8 |
| 4.37E-03 | 0 0 | Cs2g07600.1/Cs4g110 | 8.5  | 0 | 15.9 | 0 | 2      | MASCOT | T     | PLEX8 |
| 7.16E-03 | 0 0 | Cs2g07600.1/Cs4g110 | 8.5  | 0 | 15.9 | 0 | 2      | MASCOT | T     | PLEX8 |
| 1.37E-01 | 0 0 | Cs2g07600.1/Cs4g110 | 8.5  | 0 | 15.9 | 0 | 2      | MASCOT | T     | PLEX8 |
| 2.13E-01 | 0 0 | Cs2g07600.1/Cs4g110 | 8.5  | 0 | 15.9 | 0 | 2      | MASCOT | T     | PLEX8 |
| 5.15E-03 | 0 0 | Cs2g07600.1/Cs4g110 | 8.5  | 0 | 0    | 2 | MASCOT | T      | PLEX8 |       |
| 2.69E-01 | 0 0 | Cs2g07600.1/Cs4g110 | 8.5  | 0 | 0    | 2 | MASCOT | T      | PLEX8 |       |
| 1.09E-02 | 0 0 | Cs2g07600.1/Cs4g110 | 8.5  | 0 | 0    | 2 | MASCOT | T      | PLEX8 |       |
| 9.78E-02 | 0 0 | Cs6g07320.1/Cs8g195 | 6.05 | 0 | 15.9 | 0 | 2      | MASCOT | T     | PLEX8 |
| 6.42E-04 | 0 0 | Cs6g07320.1/Cs8g195 | 6.05 | 0 | 15.9 | 0 | 2      | MASCOT | T     | PLEX8 |
| 1.04E-02 | 0 0 | Cs6g07320.1/Cs8g195 | 6.05 | 0 | 15.9 | 0 | 2      | MASCOT | T     | PLEX8 |
| 6.83E-03 | 0 0 | Cs6g07320.1/Cs8g195 | 6.05 | 0 | 15.9 | 0 | 2      | MASCOT | T     | PLEX8 |
| 7.32E-02 | 0 0 | Cs6g07320.1/Cs8g195 | 6.05 | 0 | 15.9 | 0 | 2      | MASCOT | T     | PLEX8 |
| 1.19E-01 | 0 0 | Cs6g07320.1/Cs8g195 | 6.05 | 0 | 15.9 | 0 | 2      | MASCOT | T     |       |
| 4.43E-01 | 0 0 | Cs6g07320.1/Cs8g195 | 6.05 | 0 | 0    | 2 | MASCOT | T      | PLEX8 |       |
| 2.14E-04 | 0 0 | Cs6g07320.1/Cs8g195 | 6.05 | 0 | 0    | 2 | MASCOT | T      | PLEX8 |       |
| 1.74E-01 | 0 0 | Cs6g07320.1/Cs8g195 | 6.05 | 0 | 0    | 2 | MASCOT | T      | PLEX8 |       |
| 1.17E-02 | 0 0 | Cs6g07320.1/Cs8g195 | 6.05 | 0 | 0    | 2 | MASCOT | T      | PLEX8 |       |
| 3.31E-02 | 0 0 | Cs6g07320.1/Cs8g195 | 6.05 | 0 | 0    | 2 | MASCOT | T      | PLEX8 |       |
| 8.98E-04 | 0 0 | Cs6g07320.1/Cs8g195 | 6.05 | 0 | 0    | 2 | MASCOT | T      | PLEX8 |       |
| 7.46E-03 | 0 0 | Cs6g07320.1/Cs8g195 | 6.05 | 0 | 0    | 2 | MASCOT | T      | PLEX8 |       |
| 4.89E-05 | 0 0 | Cs6g07320.1/Cs8g195 | 6.05 | 0 | 0    | 2 | MASCOT | T      | PLEX8 |       |
| 2.27E-02 | 0 0 | Cs6g07320.1/Cs8g195 | 6.05 | 0 | 0    | 2 | MASCOT | T      | PLEX8 |       |
| 2.40E-02 | 0 0 | Cs6g07320.1/Cs8g195 | 6.05 | 0 | 0    | 2 | MASCOT | T      | PLEX8 |       |
| 2.20E-04 | 0 0 | Cs6g07320.1/Cs8g195 | 6.05 | 0 | 0    | 2 | MASCOT | T      | PLEX8 |       |
| 2.81E-03 | 0 0 | Cs6g07320.1/Cs8g195 | 6.05 | 0 | 0    | 2 | MASCOT | T      | PLEX8 |       |
| 3.47E-06 | 0 0 | Cs6g07320.1/Cs8g195 | 6.05 | 0 | 0    | 2 | MASCOT | T      |       |       |
| 3.21E-02 | 0 0 | Cs6g07320.1/Cs8g195 | 6.05 | 0 | 0    | 2 | MASCOT | T      | PLEX8 |       |
| 3.60E-02 | 0 0 | Cs6g07320.1/Cs8g195 | 6.05 | 0 | 0    | 2 | MASCOT | T      | PLEX8 |       |
| 1.90E-02 | 0 0 | Cs6g07320.1/Cs8g195 | 6.05 | 0 | 0    | 2 | MASCOT | T      | PLEX8 |       |
| 9.12E-02 | 0 0 | Cs6g07320.1/Cs8g195 | 6.05 | 0 | 0    | 2 | MASCOT | T      | PLEX8 |       |
| 7.60E-06 | 0 0 | Cs6g07320.1/Cs8g195 | 6.05 | 0 | 0    | 2 | MASCOT | T      | PLEX8 |       |
| 3.96E-02 | 0 0 | Cs6g07320.1/Cs8g195 | 6.05 | 0 | 0    | 2 | MASCOT | T      | PLEX8 |       |
| 2.74E-04 | 0 0 | Cs6g07320.1/Cs8g195 | 6.05 | 0 | 0    | 2 | MASCOT | T      | PLEX8 |       |
| 6.51E-02 | 0 0 | Cs6g07320.1/Cs8g195 | 6.05 | 0 | 0    | 2 | MASCOT | T      | PLEX8 |       |



|          |     |                      |      |   |   |   |        |   |       |
|----------|-----|----------------------|------|---|---|---|--------|---|-------|
| 5.35E-03 | 0 0 | Cs6g07320.1/Cs8g195  | 6.05 | 0 | 0 | 2 | MASCOT | T | PLEX8 |
| 2.41E-01 | 0 0 | Cs6g07320.1/Cs8g195  | 6.05 | 0 | 0 | 2 | MASCOT | T |       |
| 5.87E-03 | 0 0 | Cs8g18020.1/Cs8g183  | 4.33 | 1 | 0 | 2 | MASCOT | T | PLEX8 |
| 1.61E-02 | 0 0 | Cs8g18020.1/Cs8g183  | 4.33 | 1 | 0 | 2 | MASCOT | T | PLEX8 |
| 5.66E-03 | 0 0 | Cs8g18020.1/Cs8g183  | 4.33 | 1 | 0 | 2 | MASCOT | T | PLEX8 |
| 2.47E-01 | 0 0 | Cs8g18020.1/Cs8g183  | 6.85 | 0 | 0 | 2 | MASCOT | T | PLEX8 |
| 2.19E-01 | 0 0 | Cs8g18020.1/Cs8g183  | 6.85 | 0 | 0 | 2 | MASCOT | T | PLEX8 |
| 5.37E-02 | 0 0 | Cs8g18020.1/Cs8g183  | 6.85 | 0 | 0 | 2 | MASCOT | T | PLEX8 |
| 1.63E-01 | 0 0 | Cs8g18020.1/Cs8g183  | 6.85 | 0 | 0 | 2 | MASCOT | T | PLEX8 |
| 1.20E-01 | 0 0 | Cs8g18020.1/Cs8g183  | 6.85 | 0 | 0 | 2 | MASCOT | T | PLEX8 |
| 3.60E-01 | 0 0 | Cs8g18020.1/Cs8g183  | 6.85 | 0 | 0 | 2 | MASCOT | T | PLEX8 |
| 6.80E-02 | 0 0 | Cs8g18020.1/Cs8g183  | 6.85 | 0 | 0 | 2 | MASCOT | T | PLEX8 |
| 4.03E-02 | 0 0 | Cs8g18020.1/Cs8g183  | 6.85 | 0 | 0 | 2 | MASCOT | T | PLEX8 |
| 2.35E-01 | 0 0 | Cs8g18020.1/Cs8g183  | 6.85 | 0 | 0 | 2 | MASCOT | T | PLEX8 |
| 5.74E-02 | 0 0 | Cs8g18020.1/Cs8g183  | 4.25 | 0 | 0 | 2 | MASCOT | T | PLEX8 |
| 1.02E-02 | 0 0 | Cs8g18020.1/Cs8g183  | 4.25 | 0 | 0 | 2 | MASCOT | T | PLEX8 |
| 9.10E-02 | 0 0 | Cs8g18020.1/Cs8g183  | 4.25 | 0 | 0 | 2 | MASCOT | T | PLEX8 |
| 6.06E-02 | 0 0 | Cs8g18360.1          | 6.1  | 0 | 0 | 2 | MASCOT | T | PLEX8 |
| 2.94E-02 | 0 0 | Cs8g18360.1          | 6.1  | 0 | 0 | 2 | MASCOT | T | PLEX8 |
| 8.45E-02 | 0 0 | Cs8g18360.1          | 6.1  | 0 | 0 | 2 | MASCOT | T | PLEX8 |
| 2.22E-02 | 0 0 | Cs8g18360.1          | 6.1  | 0 | 0 | 2 | MASCOT | T | PLEX8 |
| 7.13E-02 | 0 0 | Cs8g18360.1          | 6.1  | 0 | 0 | 2 | MASCOT | T | PLEX8 |
| 3.71E-02 | 0 0 | Cs8g18360.1          | 6.1  | 0 | 0 | 2 | MASCOT | T | PLEX8 |
| 1.71E-01 | 0 0 | Cs8g18360.1          | 6.1  | 0 | 0 | 2 | MASCOT | T | PLEX8 |
| 2.86E-02 | 0 0 | Cs8g18360.1          | 6.1  | 0 | 0 | 2 | MASCOT | T | PLEX8 |
| 6.20E-02 | 0 0 | Cs8g18360.1          | 6    | 0 | 0 | 2 | MASCOT | T | PLEX8 |
| 9.10E-02 | 0 0 | Cs8g18360.1          | 6    | 0 | 0 | 2 | MASCOT | T | PLEX8 |
| 1.08E-01 | 0 0 | Cs8g18360.1          | 6    | 0 | 0 | 2 | MASCOT | T | PLEX8 |
| 1.72E-01 | 0 0 | Cs8g18360.1          | 6    | 0 | 0 | 2 | MASCOT | T | PLEX8 |
| 2.17E-01 | 0 0 | Cs8g18360.1          | 6    | 0 | 0 | 2 | MASCOT | T | PLEX8 |
| 2.62E-01 | 0 0 | Cs8g18360.1          | 6    | 0 | 0 | 2 | MASCOT | T | PLEX8 |
| 1.81E-01 | 0 0 | Cs8g18360.1          | 6    | 0 | 0 | 2 | MASCOT | T | PLEX8 |
| 5.81E-02 | 0 0 | Cs8g18360.1          | 6    | 0 | 0 | 2 | MASCOT | T | PLEX8 |
| 1.80E-01 | 0 0 | Cs8g18360.1          | 6    | 0 | 0 | 2 | MASCOT | T | PLEX8 |
| 1.85E-01 | 0 0 | Cs8g18360.1          | 6    | 0 | 0 | 2 | MASCOT | T | PLEX8 |
| 1.78E-01 | 0 0 | Cs8g18360.1          | 6    | 0 | 0 | 2 | MASCOT | T | PLEX8 |
| 1.39E-01 | 0 0 | Cs8g18020.1 ! Cs8g18 | 5.84 | 0 | 0 | 2 | MASCOT | T | PLEX8 |
| 4.02E-01 | 0 0 | Cs5g03050.1/Cs5g030  | 6.1  | 0 | 0 | 2 | MASCOT | T | PLEX8 |
| 1.80E-01 | 0 0 | Cs5g03050.1/Cs5g030  | 6.1  | 0 | 0 | 2 | MASCOT | T | PLEX8 |
| 2.25E-01 | 0 0 | Cs5g03050.1/Cs5g030  | 6.1  | 0 | 0 | 2 | MASCOT | T | PLEX8 |
| 3.28E-01 | 0 0 | Cs5g03050.1/Cs5g030  | 6.1  | 0 | 0 | 2 | MASCOT | T | PLEX8 |
| 2.99E-01 | 0 0 | Cs5g03050.1/Cs5g030  | 6.1  | 0 | 0 | 2 | MASCOT | T | PLEX8 |
| 2.86E-03 | 0 0 | Cs5g03050.1/Cs5g030  | 6.1  | 0 | 0 | 2 | MASCOT | T | PLEX8 |
| 6.28E-03 | 0 0 | Cs5g03050.1/Cs5g030  | 6.1  | 0 | 0 | 2 | MASCOT | T | PLEX8 |
| 1.18E-01 | 0 0 | Cs5g03050.1/Cs5g030  | 6.1  | 0 | 0 | 2 | MASCOT | T | PLEX8 |
| 7.90E-02 | 0 0 | Cs5g03050.1/Cs5g030  | 6.1  | 0 | 0 | 2 | MASCOT | T | PLEX8 |
| 2.83E-01 | 0 0 | Cs5g03050.1/Cs5g030  | 6.1  | 0 | 0 | 2 | MASCOT | T |       |
| 3.77E-01 | 0 0 | Cs5g03050.1/Cs5g030  | 8.75 | 0 | 0 | 2 | MASCOT | T | PLEX8 |
| 7.95E-02 | 0 0 | Cs5g03050.1/Cs5g030  | 8.75 | 0 | 0 | 2 | MASCOT | T | PLEX8 |
| 1.03E-01 | 0 0 | Cs5g03050.1/Cs5g030  | 8.75 | 0 | 0 | 2 | MASCOT | T | PLEX8 |
| 4.18E-01 | 0 0 | Cs5g03050.1/Cs5g030  | 8.75 | 0 | 0 | 2 | MASCOT | T | PLEX8 |

|          |     |                     |      |   |      |   |        |        |       |       |
|----------|-----|---------------------|------|---|------|---|--------|--------|-------|-------|
| 9.82E-02 | 0 0 | Cs5g03050.1/Cs5g030 | 8.75 | 0 | 0    | 2 | MASCOT | T      | PLEX8 |       |
| 4.21E-01 | 0 0 | Cs5g03050.1/Cs5g030 | 8.75 | 0 | 0    | 2 | MASCOT | T      | PLEX8 |       |
| 1.66E-01 | 0 0 | Cs5g03050.1/Cs5g030 | 8.75 | 0 | 0    | 2 | MASCOT | T      | PLEX8 |       |
| 4.44E-02 | 0 0 | Cs5g03050.1/Cs5g030 | 8.75 | 0 | 0    | 2 | MASCOT | T      | PLEX8 |       |
| 1.08E-01 | 0 0 | Cs5g03050.1         | 4.37 | 0 | 0    | 2 | MASCOT | T      | PLEX8 |       |
| 7.56E-03 | 0 0 | Cs5g03050.1         | 4.37 | 0 | 0    | 2 | MASCOT | T      | PLEX8 |       |
| 8.13E-03 | 0 0 | Cs5g03050.1/Cs5g030 | 5.4  | 0 | 0    | 2 | MASCOT | T      | PLEX8 |       |
| 1.06E-02 | 0 0 | Cs5g03050.1/Cs5g030 | 5.4  | 0 | 0    | 2 | MASCOT | T      | PLEX8 |       |
| 6.71E-04 | 0 0 | Cs5g03050.1/Cs5g030 | 5.4  | 0 | 0    | 2 | MASCOT | T      | PLEX8 |       |
| 3.97E-02 | 0 0 | Cs5g03050.1/Cs5g030 | 5.4  | 0 | 0    | 2 | MASCOT | T      |       |       |
| 1.03E-01 | 0 0 | Cs5g03050.1/Cs5g030 | 5.4  | 0 | 0    | 2 | MASCOT | T      | PLEX8 |       |
| 8.80E-06 | 0 0 | Cs5g03050.1/Cs5g030 | 5.4  | 0 | 0    | 2 | MASCOT | T      | PLEX8 |       |
| 4.86E-03 | 0 0 | Cs5g03050.1/Cs5g030 | 5.4  | 0 | 0    | 2 | MASCOT | T      | PLEX8 |       |
| 1.19E-03 | 0 0 | Cs5g03050.1/Cs5g030 | 5.4  | 0 | 0    | 2 | MASCOT | T      |       |       |
| 1.18E-02 | 0 0 | Cs5g03050.1/Cs5g030 | 5.4  | 0 | 0    | 2 | MASCOT | T      |       |       |
| 3.70E-04 | 0 0 | Cs5g03050.1/Cs5g030 | 5.4  | 0 | 0    | 2 | MASCOT | T      |       |       |
| 3.74E-03 | 0 0 | Cs5g03050.1/Cs5g030 | 5.4  | 0 | 0    | 2 | MASCOT | T      | PLEX8 |       |
| 2.76E-04 | 0 0 | Cs5g03050.1/Cs5g030 | 5.4  | 0 | 0    | 2 | MASCOT | T      |       |       |
| 3.09E-02 | 0 0 | Cs5g03050.1/Cs5g030 | 5.4  | 0 | 0    | 2 | MASCOT | T      |       |       |
| 8.00E-05 | 0 0 | Cs5g03050.1/Cs5g030 | 5.4  | 0 | 0    | 2 | MASCOT | T      |       |       |
| 8.92E-02 | 0 0 | Cs5g03050.1/Cs5g030 | 5.4  | 0 | 0    | 2 | MASCOT | T      |       |       |
| 1.08E-04 | 0 0 | Cs5g03050.1/Cs5g030 | 5.4  | 0 | 0    | 2 | MASCOT | T      |       |       |
| 4.96E-03 | 0 0 | Cs5g03050.1/Cs5g030 | 5.4  | 0 | 0    | 2 | MASCOT | T      |       |       |
| 1.56E-01 | 0 0 | Cs5g03050.1/Cs5g030 | 5.4  | 0 | 0    | 2 | MASCOT | T      |       |       |
| 2.81E-01 | 0 0 | Cs5g03050.1         | 8.49 | 0 | 15.9 | 0 | 2      | MASCOT | T     | PLEX8 |
| 3.62E-01 | 0 0 | Cs5g03050.1         | 8.49 | 0 | 0    | 2 | MASCOT | T      | PLEX8 |       |
| 1.19E-01 | 0 0 | Cs5g03050.1         | 4.37 | 0 | 0    | 2 | MASCOT | T      | PLEX8 |       |
| 6.75E-05 | 0 0 | Cs5g03050.1         | 4.37 | 0 | 0    | 2 | MASCOT | T      |       |       |
| 1.25E-04 | 0 0 | Cs5g03050.1         | 4.37 | 0 | 0    | 2 | MASCOT | T      |       |       |
| 2.14E-02 | 0 0 | Cs5g03050.1         | 4.37 | 0 | 0    | 2 | MASCOT | T      |       |       |
| 1.58E-03 | 0 0 | Cs5g03050.1         | 4.37 | 0 | 0    | 2 | MASCOT | T      |       |       |
| 2.98E-02 | 0 0 | Cs5g03050.1/Cs5g030 | 6.89 | 0 | 0    | 2 | MASCOT | T      | PLEX8 |       |
| 1.03E-03 | 0 0 | Cs5g03050.1/Cs5g030 | 6.89 | 0 | 0    | 2 | MASCOT | T      | PLEX8 |       |
| 1.08E-02 | 0 0 | Cs5g03050.1/Cs5g030 | 6.89 | 0 | 0    | 2 | MASCOT | T      | PLEX8 |       |
| 1.89E-02 | 0 0 | Cs5g03050.1/Cs5g030 | 6.89 | 0 | 0    | 2 | MASCOT | T      | PLEX8 |       |
| 8.51E-04 | 0 0 | Cs5g03050.1/Cs5g030 | 6.89 | 0 | 0    | 2 | MASCOT | T      | PLEX8 |       |
| 2.27E-02 | 0 0 | Cs5g03050.1/Cs5g030 | 6.89 | 0 | 0    | 2 | MASCOT | T      | PLEX8 |       |
| 1.76E-02 | 0 0 | Cs5g03050.1/Cs5g030 | 6.89 | 0 | 0    | 2 | MASCOT | T      | PLEX8 |       |
| 7.06E-02 | 0 0 | Cs5g03050.1/Cs5g030 | 6.89 | 0 | 0    | 2 | MASCOT | T      |       |       |
| 3.36E-02 | 0 0 | Cs5g03050.1/Cs5g030 | 6.89 | 0 | 0    | 2 | MASCOT | T      |       |       |
| 1.50E-02 | 0 0 | Cs5g03050.1/Cs5g030 | 6.89 | 0 | 0    | 2 | MASCOT | T      |       |       |
| 4.26E-02 | 0 0 | Cs3g10480.1         | 4.37 | 0 | 0    | 2 | MASCOT | T      | PLEX8 |       |
| 8.01E-02 | 0 0 | Cs3g10480.1         | 4.37 | 0 | 0    | 2 | MASCOT | T      | PLEX8 |       |
| 3.55E-02 | 0 0 | Cs3g10480.1         | 4.37 | 0 | 0    | 2 | MASCOT | T      | PLEX8 |       |
| 3.03E-04 | 0 0 | Cs3g10480.1         | 4.37 | 0 | 0    | 2 | MASCOT | T      | PLEX8 |       |
| 3.13E-02 | 0 0 | Cs3g10480.1         | 4.37 | 0 | 0    | 2 | MASCOT | T      | PLEX8 |       |
| 3.46E-01 | 0 0 | Cs3g10480.1         | 4.37 | 0 | 0    | 2 | MASCOT | T      | PLEX8 |       |
| 2.45E-04 | 0 0 | Cs3g10480.1         | 4.37 | 0 | 0    | 2 | MASCOT | T      | PLEX8 |       |
| 1.60E-01 | 0 0 | Cs3g10480.1         | 4.37 | 0 | 0    | 2 | MASCOT | T      | PLEX8 |       |
| 1.44E-02 | 0 0 | Cs3g10480.1         | 4.37 | 0 | 0    | 2 | MASCOT | T      |       |       |
| 7.58E-03 | 0 0 | Cs3g10480.1         | 8.75 | 0 | 0    | 2 | MASCOT | T      | PLEX8 |       |

|              |                        |      |   |   |          |   |       |
|--------------|------------------------|------|---|---|----------|---|-------|
| 2.33E-02 0 0 | Cs3g10480.1            | 8.75 | 0 | 0 | 2 MASCOT | T | PLEX8 |
| 7.04E-02 0 0 | Cs3g10480.1            | 8.75 | 0 | 0 | 2 MASCOT | T | PLEX8 |
| 2.54E-01 0 0 | Cs3g10480.1            | 8.75 | 0 | 0 | 2 MASCOT | T | PLEX8 |
| 9.72E-03 0 0 | Cs3g10480.1            | 8.75 | 0 | 0 | 2 MASCOT | T | PLEX8 |
| 6.77E-03 0 0 | Cs3g10480.1            | 8.75 | 0 | 0 | 2 MASCOT | T | PLEX8 |
| 3.99E-02 0 0 | Cs3g10480.1            | 8.75 | 0 | 0 | 2 MASCOT | T | PLEX8 |
| 3.97E-02 0 0 | Cs3g10480.1            | 8.75 | 0 | 0 | 2 MASCOT | T | PLEX8 |
| 5.09E-01 0 0 | Cs3g10480.1            | 8.75 | 0 | 0 | 2 MASCOT | T |       |
| 2.63E-01 0 0 | Cs3g10480.1            | 5.75 | 0 | 0 | 2 MASCOT | T | PLEX8 |
| 2.42E-02 0 0 | Cs3g10480.1            | 4.37 | 0 | 0 | 2 MASCOT | T | PLEX8 |
| 5.45E-03 0 0 | Cs3g10480.1            | 4.37 | 0 | 0 | 2 MASCOT | T | PLEX8 |
| 1.37E-03 0 0 | Cs3g10480.1            | 4.37 | 0 | 0 | 2 MASCOT | T | PLEX8 |
| 1.40E-03 0 0 | Cs3g10480.1            | 4.37 | 0 | 0 | 2 MASCOT | T | PLEX8 |
| 1.58E-01 0 0 | Cs3g10480.1            | 4.37 | 0 | 0 | 2 MASCOT | T | PLEX8 |
| 1.26E-02 0 0 | Cs3g10480.1            | 4.37 | 0 | 0 | 2 MASCOT | T | PLEX8 |
| 6.93E-05 0 0 | Cs3g10480.1            | 4.37 | 0 | 0 | 2 MASCOT | T | PLEX8 |
| 1.69E-04 0 0 | Cs3g10480.1            | 4.37 | 0 | 0 | 2 MASCOT | T | PLEX8 |
| 1.26E-01 0 0 | Cs3g10480.1            | 4.37 | 0 | 0 | 2 MASCOT | T | PLEX8 |
| 3.68E-01 0 0 | Cs3g10480.1            | 4.37 | 0 | 0 | 2 MASCOT | T |       |
| 6.35E-02 0 0 | Cs3g10480.1            | 4.37 | 0 | 0 | 2 MASCOT | T |       |
| 1.33E-01 0 0 | Cs3g10480.1            | 5.84 | 0 | 0 | 2 MASCOT | T | PLEX8 |
| 2.28E-01 0 0 | Cs3g10480.1            | 5.84 | 0 | 0 | 2 MASCOT | T | PLEX8 |
| 7.61E-02 0 0 | Cs3g10480.1            | 5.84 | 0 | 0 | 2 MASCOT | T | PLEX8 |
| 8.86E-02 0 0 | Cs3g10480.1            | 5.84 | 0 | 0 | 2 MASCOT | T | PLEX8 |
| 1.30E-01 0 0 | Cs3g10480.1            | 5.84 | 0 | 0 | 2 MASCOT | T | PLEX8 |
| 2.32E-01 0 0 | Cs3g10480.1            | 5.84 | 0 | 0 | 2 MASCOT | T | PLEX8 |
| 8.57E-02 0 0 | Cs3g10480.1            | 5.84 | 0 | 0 | 2 MASCOT | T | PLEX8 |
| 2.70E-01 0 0 | Cs3g10480.1            | 5.84 | 0 | 0 | 2 MASCOT | T |       |
| 6.07E-02 0 0 | Cs3g10480.1            | 4.53 | 0 | 0 | 2 MASCOT | T | PLEX8 |
| 1.84E-02 0 0 | Cs3g10480.1            | 4.53 | 0 | 0 | 2 MASCOT | T | PLEX8 |
| 1.86E-02 0 0 | Cs3g10480.1            | 4.53 | 0 | 0 | 2 MASCOT | T | PLEX8 |
| 6.95E-02 0 0 | Cs3g10480.1            | 4.53 | 0 | 0 | 2 MASCOT | T | PLEX8 |
| 1.93E-01 0 0 | Cs3g10480.1            | 4.53 | 0 | 0 | 2 MASCOT | T | PLEX8 |
| 2.90E-01 0 0 | Cs3g10480.1            | 4.53 | 0 | 0 | 2 MASCOT | T | PLEX8 |
| 1.76E-01 0 0 | Cs5g03830.1/Cs5g038    | 4.37 | 0 | 0 | 2 MASCOT | T | PLEX8 |
| 2.44E-01 0 0 | Cs5g03830.1/Cs5g038    | 4.37 | 0 | 0 | 2 MASCOT | T | PLEX8 |
| 2.34E-01 0 0 | Cs5g03830.1/Cs5g038    | 4.37 | 0 | 0 | 2 MASCOT | T | PLEX8 |
| 9.29E-02 0 0 | Cs5g03830.1/Cs5g038    | 4.37 | 0 | 0 | 2 MASCOT | T | PLEX8 |
| 2.76E-01 0 0 | Cs5g03830.1/Cs5g038    | 4.37 | 0 | 0 | 2 MASCOT | T | PLEX8 |
| 1.52E-01 0 0 | Cs5g03830.1/Cs5g038    | 4.37 | 0 | 0 | 2 MASCOT | T | PLEX8 |
| 3.53E-01 0 0 | Cs5g03830.1/Cs5g038    | 4.37 | 0 | 0 | 2 MASCOT | T | PLEX8 |
| 8.43E-02 0 0 | Cs5g03830.1/Cs5g038    | 4.37 | 0 | 0 | 2 MASCOT | T | PLEX8 |
| 2.38E-01 0 0 | Cs5g03830.1/Cs5g038    | 4.37 | 0 | 0 | 2 MASCOT | T | PLEX8 |
| 4.34E-01 0 0 | Cs5g03830.1/Cs5g038    | 4.37 | 0 | 0 | 2 MASCOT | T | PLEX8 |
| 2.61E-01 0 0 | Cs5g03830.1/Cs5g038    | 4.37 | 0 | 0 | 2 MASCOT | T | PLEX8 |
| 2.48E-01 0 0 | Cs5g03830.1/Cs5g038    | 4.37 | 0 | 0 | 2 MASCOT | T | PLEX8 |
| 6.38E-02 0 0 | Cs5g03830.1/Cs5g038    | 4.37 | 0 | 0 | 2 MASCOT | T | PLEX8 |
| 2.94E-01 0 0 | Cs7g06520.1/Cs7g065    | 5.84 | 0 | 0 | 2 MASCOT | T | PLEX8 |
| 3.73E-01 0 0 | orange1.1t03689.1 ! C: | 5.55 | 0 | 0 | 2 MASCOT | T | PLEX8 |
| 1.42E-02 0 0 | orange1.1t03689.1 ! C: | 5.55 | 0 | 0 | 2 MASCOT | T | PLEX8 |
| 1.55E-01 0 0 | orange1.1t03689.1 ! C: | 5.55 | 0 | 0 | 2 MASCOT | T | PLEX8 |

|          |     |                        |      |   |   |   |        |   |       |
|----------|-----|------------------------|------|---|---|---|--------|---|-------|
| 1.72E-01 | 0 0 | orange1.1t03689.1 ! C: | 5.55 | 0 | 0 | 2 | MASCOT | T | PLEX8 |
| 7.48E-02 | 0 0 | orange1.1t03689.1 ! C: | 5.55 | 0 | 0 | 2 | MASCOT | T | PLEX8 |
| 1.61E-02 | 0 0 | orange1.1t03689.1 ! C: | 5.55 | 0 | 0 | 2 | MASCOT | T | PLEX8 |
| 1.58E-01 | 0 0 | orange1.1t03689.1 ! C: | 5.55 | 0 | 0 | 2 | MASCOT | T | PLEX8 |
| 2.10E-01 | 0 0 | orange1.1t03689.1 ! C: | 5.55 | 0 | 0 | 2 | MASCOT | T |       |
| 2.53E-01 | 0 0 | Cs7g06520.1            | 5.55 | 0 | 0 | 2 | MASCOT | T | PLEX8 |
| 5.45E-02 | 0 0 | Cs7g06520.1            | 5.55 | 0 | 0 | 2 | MASCOT | T | PLEX8 |
| 2.42E-05 | 0 0 | Cs7g06520.1            | 5.55 | 0 | 0 | 2 | MASCOT | T | PLEX8 |
| 1.45E-03 | 0 0 | Cs7g06520.1            | 5.55 | 0 | 0 | 2 | MASCOT | T | PLEX8 |
| 5.54E-03 | 0 0 | Cs7g06520.1            | 5.55 | 0 | 0 | 2 | MASCOT | T | PLEX8 |
| 3.86E-03 | 0 0 | Cs7g06520.1            | 5.55 | 0 | 0 | 2 | MASCOT | T | PLEX8 |
| 9.69E-02 | 0 0 | Cs7g06520.1            | 5.55 | 0 | 0 | 2 | MASCOT | T | PLEX8 |
| 1.18E-03 | 0 0 | Cs7g06520.1            | 5.55 | 0 | 0 | 2 | MASCOT | T | PLEX8 |
| 5.65E-02 | 0 0 | Cs7g06520.1            | 5.55 | 0 | 0 | 2 | MASCOT | T | PLEX8 |
| 1.63E-01 | 0 0 | Cs7g06520.1            | 5.55 | 0 | 0 | 2 | MASCOT | T | PLEX8 |
| 1.32E-01 | 0 0 | Cs7g06520.1            | 5.55 | 0 | 0 | 2 | MASCOT | T | PLEX8 |
| 6.41E-03 | 0 0 | Cs7g06520.1            | 5.55 | 0 | 0 | 2 | MASCOT | T |       |
| 4.05E-03 | 0 0 | Cs7g06520.1            | 5.81 | 0 | 0 | 2 | MASCOT | T | PLEX8 |
| 4.72E-04 | 0 0 | Cs7g06520.1            | 5.81 | 0 | 0 | 2 | MASCOT | T | PLEX8 |
| 5.86E-03 | 0 0 | Cs7g06520.1            | 5.81 | 0 | 0 | 2 | MASCOT | T |       |
| 1.12E-02 | 0 0 | Cs7g06520.1/Cs7g065    | 5.4  | 0 | 0 | 2 | MASCOT | T | PLEX8 |
| 4.53E-03 | 0 0 | Cs7g06520.1/Cs7g065    | 5.4  | 0 | 0 | 2 | MASCOT | T | PLEX8 |
| 8.98E-03 | 0 0 | Cs7g06520.1/Cs7g065    | 5.4  | 0 | 0 | 2 | MASCOT | T | PLEX8 |
| 2.30E-01 | 0 0 | Cs7g06520.1/Cs7g065    | 5.4  | 0 | 0 | 2 | MASCOT | T | PLEX8 |
| 2.34E-01 | 0 0 | Cs7g06520.1            | 6    | 0 | 0 | 2 | MASCOT | T | PLEX8 |
| 1.18E-03 | 0 0 | Cs7g06520.1            | 6    | 0 | 0 | 2 | MASCOT | T | PLEX8 |
| 1.41E-01 | 0 0 | Cs7g06520.1            | 6    | 0 | 0 | 2 | MASCOT | T | PLEX8 |
| 1.01E-03 | 0 0 | orange1.1t02542.1      | 6.05 | 0 | 0 | 2 | MASCOT | T | PLEX8 |
| 6.74E-02 | 0 0 | orange1.1t02542.1      | 4.41 | 0 | 0 | 2 | MASCOT | T | PLEX8 |
| 7.84E-03 | 0 0 | orange1.1t02542.1      | 4.41 | 0 | 0 | 2 | MASCOT | T | PLEX8 |
| 4.96E-02 | 0 0 | orange1.1t02542.1      | 4.41 | 0 | 0 | 2 | MASCOT | T | PLEX8 |
| 2.14E-02 | 0 0 | orange1.1t02542.1      | 4.41 | 0 | 0 | 2 | MASCOT | T | PLEX8 |
| 8.41E-03 | 0 0 | orange1.1t02542.1      | 4.41 | 0 | 0 | 2 | MASCOT | T |       |
| 7.98E-04 | 0 0 | orange1.1t02542.1      | 4.41 | 0 | 0 | 2 | MASCOT | T |       |
| 1.11E-01 | 0 0 | orange1.1t02542.1      | 4.41 | 0 | 0 | 2 | MASCOT | T |       |
| 7.45E-03 | 0 0 | orange1.1t02542.1      | 4.41 | 0 | 0 | 2 | MASCOT | T |       |
| 6.98E-03 | 0 0 | orange1.1t02542.1      | 4.14 | 0 | 0 | 2 | MASCOT | T |       |
| 5.78E-04 | 0 0 | orange1.1t02542.1      | 4.14 | 0 | 0 | 2 | MASCOT | T |       |
| 2.41E-05 | 0 0 | orange1.1t02542.1      | 3.92 | 0 | 0 | 2 | MASCOT | T |       |
| 3.54E-03 | 0 0 | orange1.1t02542.1      | 8.47 | 0 | 0 | 2 | MASCOT | T | PLEX8 |
| 1.44E-05 | 0 0 | orange1.1t02542.1      | 8.47 | 0 | 0 | 2 | MASCOT | T | PLEX8 |
| 3.00E-05 | 0 0 | orange1.1t02542.1      | 8.47 | 0 | 0 | 2 | MASCOT | T | PLEX8 |
| 5.16E-02 | 0 0 | orange1.1t02542.1      | 8.47 | 0 | 0 | 2 | MASCOT | T | PLEX8 |
| 3.01E-05 | 0 0 | orange1.1t02542.1      | 8.47 | 0 | 0 | 2 | MASCOT | T | PLEX8 |
| 7.81E-03 | 0 0 | orange1.1t02542.1      | 8.47 | 0 | 0 | 2 | MASCOT | T | PLEX8 |
| 1.08E-03 | 0 0 | orange1.1t02542.1      | 8.47 | 0 | 0 | 2 | MASCOT | T | PLEX8 |
| 3.51E-05 | 0 0 | orange1.1t02542.1      | 8.47 | 0 | 0 | 2 | MASCOT | T | PLEX8 |
| 3.12E-04 | 0 0 | orange1.1t02542.1      | 8.47 | 0 | 0 | 2 | MASCOT | T | PLEX8 |
| 2.13E-01 | 0 0 | orange1.1t02542.1      | 8.47 | 0 | 0 | 2 | MASCOT | T | PLEX8 |
| 7.52E-04 | 0 0 | orange1.1t02542.1      | 8.47 | 0 | 0 | 2 | MASCOT | T | PLEX8 |
| 2.18E-05 | 0 0 | orange1.1t02542.1      | 8.47 | 0 | 0 | 2 | MASCOT | T | PLEX8 |

|          |     |                   |      |   |      |   |        |        |       |       |
|----------|-----|-------------------|------|---|------|---|--------|--------|-------|-------|
| 3.65E-05 | 0 0 | orange1.1t02542.1 | 8.47 | 0 | 0    | 2 | MASCOT | T      | PLEX8 |       |
| 2.53E-03 | 0 0 | orange1.1t02542.1 | 8.47 | 0 | 0    | 2 | MASCOT | T      | PLEX8 |       |
| 9.59E-02 | 0 0 | orange1.1t02542.1 | 8.47 | 0 | 0    | 2 | MASCOT | T      | PLEX8 |       |
| 7.51E-02 | 0 0 | orange1.1t02542.1 | 8.47 | 0 | 0    | 2 | MASCOT | T      | PLEX8 |       |
| 1.66E-01 | 0 0 | orange1.1t02542.1 | 8.47 | 0 | 0    | 2 | MASCOT | T      | PLEX8 |       |
| 4.66E-04 | 0 0 | orange1.1t02542.1 | 8.47 | 0 | 0    | 2 | MASCOT | T      | PLEX8 |       |
| 4.30E-03 | 0 0 | orange1.1t02542.1 | 8.47 | 0 | 0    | 2 | MASCOT | T      | PLEX8 |       |
| 1.34E-01 | 0 0 | orange1.1t02542.1 | 5.32 | 0 | 0    | 2 | MASCOT | T      |       |       |
| 8.64E-02 | 0 0 | orange1.1t02542.1 | 5.32 | 0 | 0    | 2 | MASCOT | T      |       |       |
| 2.08E-03 | 0 0 | orange1.1t02542.1 | 5.32 | 0 | 0    | 2 | MASCOT | T      |       |       |
| 9.72E-02 | 0 0 | orange1.1t02542.1 | 5.32 | 0 | 0    | 2 | MASCOT | T      |       |       |
| 1.41E-03 | 0 0 | orange1.1t02542.1 | 5.32 | 0 | 0    | 2 | MASCOT | T      | PLEX8 |       |
| 3.33E-01 | 0 0 | orange1.1t02542.1 | 5.84 | 0 | 0    | 2 | MASCOT | T      | PLEX8 |       |
| 9.99E-03 | 0 0 | orange1.1t02542.1 | 5.84 | 0 | 0    | 2 | MASCOT | T      | PLEX8 |       |
| 1.18E-01 | 0 0 | orange1.1t02542.1 | 5.84 | 0 | 0    | 2 | MASCOT | T      | PLEX8 |       |
| 4.04E-02 | 0 0 | orange1.1t02542.1 | 5.84 | 0 | 0    | 2 | MASCOT | T      |       |       |
| 3.74E-01 | 0 0 | orange1.1t02542.1 | 5.84 | 0 | 0    | 2 | MASCOT | T      |       |       |
| 5.07E-02 | 0 0 | orange1.1t02542.1 | 5.84 | 0 | 0    | 2 | MASCOT | T      |       |       |
| 1.98E-02 | 0 0 | orange1.1t02542.1 | 5.84 | 0 | 0    | 2 | MASCOT | T      | PLEX8 |       |
| 4.26E-02 | 0 0 | orange1.1t02542.1 | 5.84 | 0 | 0    | 2 | MASCOT | T      |       |       |
| 9.53E-05 | 0 0 | Cs4g01600.1       | 4.37 | 0 | 0    | 2 | MASCOT | T      | PLEX8 |       |
| 9.81E-04 | 0 0 | Cs4g01600.1       | 4.37 | 0 | 0    | 2 | MASCOT | T      | PLEX8 |       |
| 2.97E-03 | 0 0 | Cs4g01600.1       | 4.37 | 0 | 0    | 2 | MASCOT | T      | PLEX8 |       |
| 1.16E-04 | 0 0 | Cs4g01600.1       | 4.37 | 0 | 0    | 2 | MASCOT | T      | PLEX8 |       |
| 6.98E-02 | 0 0 | Cs4g01600.1       | 4.53 | 0 | 0    | 2 | MASCOT | T      | PLEX8 |       |
| 2.04E-01 | 0 0 | Cs4g01600.1       | 5.32 | 0 | 0    | 2 | MASCOT | T      | PLEX8 |       |
| 3.94E-02 | 0 0 | Cs4g01600.1       | 5.32 | 0 | 0    | 2 | MASCOT | T      | PLEX8 |       |
| 1.25E-04 | 0 0 | Cs4g01600.1       | 5.32 | 0 | 0    | 2 | MASCOT | T      | PLEX8 |       |
| 1.15E-02 | 0 0 | Cs4g01600.1       | 5.32 | 0 | 0    | 2 | MASCOT | T      | PLEX8 |       |
| 2.87E-02 | 0 0 | Cs4g01600.1       | 5.32 | 0 | 0    | 2 | MASCOT | T      | PLEX8 |       |
| 1.62E-03 | 0 0 | Cs4g01600.1       | 5.32 | 0 | 0    | 2 | MASCOT | T      | PLEX8 |       |
| 7.72E-03 | 0 0 | Cs4g01600.1       | 5.32 | 0 | 0    | 2 | MASCOT | T      | PLEX8 |       |
| 2.65E-02 | 0 0 | Cs4g01600.1       | 5.32 | 0 | 0    | 2 | MASCOT | T      | PLEX8 |       |
| 1.49E-04 | 0 0 | Cs4g01600.1       | 5.32 | 0 | 0    | 2 | MASCOT | T      | PLEX8 |       |
| 1.29E-02 | 0 0 | Cs4g01600.1       | 5.32 | 0 | 0    | 2 | MASCOT | T      | PLEX8 |       |
| 6.91E-02 | 0 0 | Cs4g01600.1       | 5.32 | 0 | 0    | 2 | MASCOT | T      |       |       |
| 2.52E-02 | 0 0 | Cs4g01600.1       | 5.32 | 0 | 0    | 2 | MASCOT | T      | PLEX8 |       |
| 4.36E-05 | 0 0 | Cs4g01600.1       | 5.32 | 0 | 0    | 2 | MASCOT | T      | PLEX8 |       |
| 2.29E-05 | 0 0 | Cs4g01600.1       | 5.32 | 0 | 0    | 2 | MASCOT | T      | PLEX8 |       |
| 3.95E-04 | 0 0 | Cs4g01600.1       | 5.32 | 0 | 0    | 2 | MASCOT | T      |       |       |
| 5.88E-02 | 0 0 | Cs4g01600.1       | 4.4  | 0 | 15.9 | 0 | 2      | MASCOT | T     | PLEX8 |
| 2.42E-01 | 0 0 | Cs4g01600.1       | 4.4  | 0 | 15.9 | 0 | 2      | MASCOT | T     | PLEX8 |
| 3.01E-01 | 0 0 | Cs4g01600.1       | 4.4  | 0 | 15.9 | 0 | 2      | MASCOT | T     | PLEX8 |
| 2.13E-02 | 0 0 | Cs4g01600.1       | 4.4  | 0 | 15.9 | 0 | 2      | MASCOT | T     | PLEX8 |
| 2.86E-03 | 0 0 | Cs4g01600.1       | 4.4  | 0 | 0    | 2 | MASCOT | T      | PLEX8 |       |
| 1.30E-01 | 0 0 | Cs4g01600.1       | 4.4  | 0 | 0    | 2 | MASCOT | T      | PLEX8 |       |
| 5.37E-04 | 0 0 | Cs4g01600.1       | 4.4  | 0 | 0    | 2 | MASCOT | T      | PLEX8 |       |
| 1.81E-03 | 0 0 | Cs4g01600.1       | 4.4  | 0 | 0    | 2 | MASCOT | T      | PLEX8 |       |
| 1.87E-03 | 0 0 | Cs4g01600.1       | 4.4  | 0 | 0    | 2 | MASCOT | T      | PLEX8 |       |
| 8.67E-04 | 0 0 | Cs4g01600.1       | 4.4  | 0 | 0    | 2 | MASCOT | T      | PLEX8 |       |
| 2.65E-01 | 0 0 | Cs4g01600.1       | 6    | 0 | 0    | 2 | MASCOT | T      | PLEX8 |       |

|          |     |                     |      |   |      |   |        |        |       |
|----------|-----|---------------------|------|---|------|---|--------|--------|-------|
| 1.41E-01 | 0 0 | Cs4g01600.1         | 6    | 0 | 0    | 2 | MASCOT | T      | PLEX8 |
| 5.81E-02 | 0 0 | Cs4g01600.1         | 6    | 0 | 0    | 2 | MASCOT | T      | PLEX8 |
| 1.84E-02 | 0 0 | Cs4g01600.1         | 6    | 0 | 0    | 2 | MASCOT | T      | PLEX8 |
| 3.05E-05 | 0 0 | Cs4g01600.1         | 6    | 0 | 0    | 2 | MASCOT | T      | PLEX8 |
| 5.42E-03 | 0 0 | Cs4g01600.1         | 6    | 0 | 0    | 2 | MASCOT | T      | PLEX8 |
| 2.08E-03 | 0 0 | Cs4g01600.1         | 6    | 0 | 0    | 2 | MASCOT | T      | PLEX8 |
| 6.62E-02 | 0 0 | Cs4g01600.1         | 6    | 0 | 0    | 2 | MASCOT | T      |       |
| 9.30E-02 | 0 0 | Cs4g01600.1         | 4.37 | 0 | 0    | 2 | MASCOT | T      | PLEX8 |
| 1.81E-01 | 0 0 | Cs4g01600.1         | 4.37 | 0 | 0    | 2 | MASCOT | T      | PLEX8 |
| 3.31E-02 | 0 0 | Cs4g01600.1         | 6    | 0 | 0    | 2 | MASCOT | T      | PLEX8 |
| 7.31E-03 | 0 0 | Cs6g05890.1/Cs7g289 | 4.22 | 0 | 0    | 2 | MASCOT | T      | PLEX8 |
| 4.80E-03 | 0 0 | Cs6g05890.1/Cs7g289 | 4.22 | 0 | 0    | 2 | MASCOT | T      | PLEX8 |
| 3.22E-04 | 0 0 | Cs6g05890.1/Cs7g289 | 4.22 | 0 | 0    | 2 | MASCOT | T      | PLEX8 |
| 1.19E-03 | 0 0 | Cs6g05890.1/Cs7g289 | 4.22 | 0 | 0    | 2 | MASCOT | T      | PLEX8 |
| 2.35E-03 | 0 0 | Cs6g05890.1/Cs7g289 | 4.22 | 0 | 0    | 2 | MASCOT | T      | PLEX8 |
| 2.57E-04 | 0 0 | Cs6g05890.1/Cs7g289 | 4.22 | 0 | 0    | 2 | MASCOT | T      | PLEX8 |
| 1.20E-03 | 0 0 | Cs6g05890.1/Cs7g289 | 4.22 | 0 | 0    | 2 | MASCOT | T      | PLEX8 |
| 2.44E-05 | 0 0 | Cs6g05890.1/Cs7g289 | 4.22 | 0 | 0    | 2 | MASCOT | T      | PLEX8 |
| 3.25E-04 | 0 0 | Cs6g05890.1/Cs7g289 | 4.22 | 0 | 0    | 2 | MASCOT | T      |       |
| 6.28E-06 | 0 0 | Cs6g05890.1/Cs7g289 | 4.22 | 0 | 0    | 2 | MASCOT | T      | PLEX8 |
| 2.48E-03 | 0 0 | Cs6g05890.1/Cs7g289 | 4.22 | 0 | 0    | 2 | MASCOT | T      |       |
| 2.90E-05 | 0 0 | Cs6g05890.1/Cs7g289 | 4.22 | 0 | 0    | 2 | MASCOT | T      |       |
| 1.03E-03 | 0 0 | Cs6g05890.1/Cs7g289 | 4.22 | 0 | 0    | 2 | MASCOT | T      |       |
| 2.82E-03 | 0 0 | Cs6g05890.1/Cs7g289 | 4.22 | 0 | 0    | 2 | MASCOT | T      |       |
| 1.54E-03 | 0 0 | Cs6g05890.1/Cs7g289 | 4.22 | 0 | 0    | 2 | MASCOT | T      |       |
| 1.12E-04 | 0 0 | Cs6g05890.1/Cs7g289 | 4.22 | 0 | 0    | 2 | MASCOT | T      |       |
| 7.95E-04 | 0 0 | Cs6g05890.1/Cs7g289 | 4.22 | 0 | 0    | 2 | MASCOT | T      |       |
| 1.12E-01 | 0 0 | Cs6g05890.1/Cs7g289 | 4.53 | 0 | 0    | 2 | MASCOT | T      | PLEX8 |
| 8.98E-03 | 0 0 | orange1.1t04990.1   | 4.53 | 0 | 0    | 2 | MASCOT | T      | PLEX8 |
| 1.11E-01 | 0 0 | Cs6g05890.1/Cs7g289 | 4.53 | 0 | 0    | 2 | MASCOT | T      | PLEX8 |
| 1.48E-01 | 0 0 | Cs6g05890.1/Cs7g289 | 4.53 | 0 | 0    | 2 | MASCOT | T      | PLEX8 |
| 2.10E-02 | 0 0 | Cs6g05890.1/Cs7g289 | 4.53 | 0 | 0    | 2 | MASCOT | T      | PLEX8 |
| 6.37E-02 | 0 0 | Cs6g05890.1/Cs7g289 | 4.53 | 0 | 0    | 2 | MASCOT | T      | PLEX8 |
| 1.17E-01 | 0 0 | Cs6g05890.1/Cs7g289 | 4.53 | 0 | 0    | 2 | MASCOT | T      | PLEX8 |
| 7.03E-03 | 0 0 | Cs6g05890.1/Cs7g289 | 4.53 | 0 | 0    | 2 | MASCOT | T      | PLEX8 |
| 5.02E-02 | 0 0 | Cs6g05890.1/Cs7g289 | 5.84 | 0 | 0    | 2 | MASCOT | T      | PLEX8 |
| 2.46E-02 | 0 0 | Cs6g05890.1/Cs7g289 | 5.84 | 0 | 0    | 2 | MASCOT | T      | PLEX8 |
| 9.87E-03 | 0 0 | Cs6g05890.1/Cs7g289 | 5.84 | 0 | 0    | 2 | MASCOT | T      |       |
| 1.01E-01 | 0 0 | Cs6g05890.1/Cs7g289 | 5.84 | 0 | 0    | 2 | MASCOT | T      |       |
| 9.58E-04 | 0 0 | Cs6g05890.1/Cs7g289 | 5.84 | 0 | 0    | 2 | MASCOT | T      | PLEX8 |
| 5.56E-03 | 0 0 | Cs6g05890.1/Cs7g289 | 5.84 | 0 | 0    | 2 | MASCOT | T      | PLEX8 |
| 5.62E-04 | 0 0 | orange1.1t04990.1   | 6.46 | 0 | 0    | 2 | MASCOT | T      | PLEX8 |
| 3.74E-04 | 0 0 | orange1.1t04990.1   | 6.46 | 0 | 0    | 2 | MASCOT | T      | PLEX8 |
| 4.92E-03 | 0 0 | orange1.1t04990.1   | 6.46 | 0 | 0    | 2 | MASCOT | T      | PLEX8 |
| 1.13E-03 | 0 0 | orange1.1t04990.1   | 6.46 | 0 | 0    | 2 | MASCOT | T      | PLEX8 |
| 1.69E-02 | 0 0 | orange1.1t04990.1   | 6.46 | 0 | 0    | 2 | MASCOT | T      | PLEX8 |
| 6.81E-03 | 0 0 | orange1.1t04990.1   | 6.46 | 0 | 0    | 2 | MASCOT | T      | PLEX8 |
| 2.41E-03 | 0 0 | Cs6g05890.1/Cs7g289 | 4.14 | 0 | 15.9 | 0 | 2      | MASCOT | T     |
| 1.31E-03 | 0 0 | Cs6g05890.1/Cs7g289 | 4.14 | 0 | 15.9 | 0 | 2      | MASCOT | T     |
| 4.30E-05 | 0 0 | Cs6g05890.1/Cs7g289 | 4.14 | 0 | 15.9 | 0 | 2      | MASCOT | T     |
| 1.86E-02 | 0 0 | Cs6g21770.1/Cs6g217 | 4.03 | 0 | 0    | 2 | MASCOT | T      | PLEX8 |

|          |     |                     |      |   |      |   |        |        |       |       |
|----------|-----|---------------------|------|---|------|---|--------|--------|-------|-------|
| 2.49E-06 | 0 0 | Cs6g21770.1/Cs6g217 | 4.03 | 0 | 0    | 2 | MASCOT | T      | PLEX8 |       |
| 3.06E-06 | 0 0 | Cs6g21770.1/Cs6g217 | 4.03 | 0 | 0    | 2 | MASCOT | T      | PLEX8 |       |
| 2.46E-06 | 0 0 | Cs6g21770.1/Cs6g217 | 4.03 | 0 | 0    | 2 | MASCOT | T      | PLEX8 |       |
| 1.02E-02 | 0 0 | Cs6g21770.1/Cs6g217 | 4.03 | 0 | 0    | 2 | MASCOT | T      | PLEX8 |       |
| 4.96E-05 | 0 0 | Cs6g21770.1/Cs6g217 | 4.03 | 0 | 0    | 2 | MASCOT | T      | PLEX8 |       |
| 9.45E-02 | 0 0 | Cs6g21770.1/Cs6g217 | 4.03 | 0 | 0    | 2 | MASCOT | T      | PLEX8 |       |
| 7.60E-06 | 0 0 | Cs6g21770.1/Cs6g217 | 4.03 | 0 | 0    | 2 | MASCOT | T      | PLEX8 |       |
| 1.63E-02 | 0 0 | Cs6g21770.1/Cs6g217 | 4.03 | 0 | 0    | 2 | MASCOT | T      | PLEX8 |       |
| 6.96E-04 | 0 0 | Cs6g21770.1/Cs6g217 | 4.03 | 0 | 0    | 2 | MASCOT | T      | PLEX8 |       |
| 3.06E-03 | 0 0 | Cs6g21770.1/Cs6g217 | 4.03 | 0 | 0    | 2 | MASCOT | T      | PLEX8 |       |
| 3.90E-05 | 0 0 | Cs6g21770.1/Cs6g217 | 4.03 | 0 | 0    | 2 | MASCOT | T      | PLEX8 |       |
| 4.10E-04 | 0 0 | Cs6g21770.1/Cs6g217 | 4.03 | 0 | 0    | 2 | MASCOT | T      | PLEX8 |       |
| 6.79E-02 | 0 0 | Cs5g11720.1/Cs5g117 | 5.84 | 0 | 0    | 2 | MASCOT | T      | PLEX8 |       |
| 3.38E-03 | 0 0 | Cs5g11720.1/Cs5g117 | 5.84 | 0 | 0    | 2 | MASCOT | T      |       |       |
| 9.72E-02 | 0 0 | Cs5g11720.1/Cs5g117 | 5.84 | 0 | 0    | 2 | MASCOT | T      |       |       |
| 3.54E-01 | 0 0 | Cs7g06240.1/Cs7g062 | 5.32 | 0 | 0    | 2 | MASCOT | T      | PLEX8 |       |
| 6.12E-02 | 0 0 | Cs7g06240.1/Cs7g062 | 6    | 0 | 0    | 2 | MASCOT | T      | PLEX8 |       |
| 1.02E-03 | 0 0 | Cs7g06240.1/Cs7g062 | 6    | 0 | 0    | 2 | MASCOT | T      | PLEX8 |       |
| 6.15E-04 | 0 0 | Cs7g06240.1/Cs7g062 | 6    | 0 | 0    | 2 | MASCOT | T      | PLEX8 |       |
| 4.25E-03 | 0 0 | Cs7g06240.1/Cs7g062 | 6    | 0 | 0    | 2 | MASCOT | T      | PLEX8 |       |
| 4.20E-03 | 0 0 | Cs7g06240.1/Cs7g062 | 6    | 0 | 0    | 2 | MASCOT | T      | PLEX8 |       |
| 1.28E-01 | 0 0 | Cs7g06240.1/Cs7g062 | 6    | 0 | 0    | 2 | MASCOT | T      |       |       |
| 6.49E-04 | 0 0 | Cs7g06240.1/Cs7g062 | 6    | 0 | 0    | 2 | MASCOT | T      | PLEX8 |       |
| 3.03E-01 | 0 0 | Cs7g06240.1/Cs7g062 | 6    | 0 | 0    | 2 | MASCOT | T      |       |       |
| 1.05E-05 | 0 0 | Cs7g06240.1/Cs7g062 | 6    | 0 | 0    | 2 | MASCOT | T      | PLEX8 |       |
| 6.25E-05 | 0 0 | Cs7g06240.1/Cs7g062 | 6    | 0 | 0    | 2 | MASCOT | T      | PLEX8 |       |
| 7.74E-02 | 0 0 | Cs7g06240.1/Cs7g062 | 6    | 0 | 0    | 2 | MASCOT | T      | PLEX8 |       |
| 3.54E-02 | 0 0 | Cs7g06240.1/Cs7g062 | 6    | 0 | 0    | 2 | MASCOT | T      | PLEX8 |       |
| 6.61E-03 | 0 0 | Cs7g06240.1/Cs7g062 | 6    | 0 | 0    | 2 | MASCOT | T      |       |       |
| 4.16E-03 | 0 0 | Cs7g06240.1/Cs7g062 | 5.66 | 0 | 0    | 2 | MASCOT | T      | PLEX8 |       |
| 2.73E-01 | 0 0 | Cs7g06240.1/Cs7g062 | 5.66 | 0 | 0    | 2 | MASCOT | T      | PLEX8 |       |
| 1.81E-01 | 0 0 | Cs6g21770.1/Cs6g217 | 8.25 | 0 | 0    | 2 | MASCOT | T      | PLEX8 |       |
| 6.70E-02 | 0 0 | Cs2g14410.1/Cs2g144 | 4.14 | 0 | 15.9 | 0 | 2      | MASCOT | T     | PLEX8 |
| 6.40E-04 | 0 0 | Cs2g14410.1/Cs2g144 | 4.14 | 0 | 0    | 2 | MASCOT | T      | PLEX8 |       |
| 5.38E-02 | 0 0 | Cs2g14410.1/Cs2g144 | 4.14 | 0 | 0    | 2 | MASCOT | T      | PLEX8 |       |
| 7.92E-03 | 0 0 | Cs2g14410.1/Cs2g144 | 4.14 | 0 | 0    | 2 | MASCOT | T      | PLEX8 |       |
| 1.03E-03 | 0 0 | Cs6g14330.1         | 4.23 | 1 | 15.9 | 0 | 2      | MASCOT | T     | PLEX8 |
| 1.63E-02 | 0 0 | Cs6g14330.1         | 4.23 | 1 | 0    | 2 | MASCOT | T      | PLEX8 |       |
| 1.40E-04 | 0 0 | Cs6g14330.1         | 4.23 | 1 | 0    | 2 | MASCOT | T      |       |       |
| 2.02E-01 | 0 0 | Cs2g03510.1/Cs2g035 | 4.53 | 0 | 0    | 2 | MASCOT | T      | PLEX8 |       |
| 3.47E-02 | 0 0 | Cs2g03510.1/Cs2g035 | 4.53 | 0 | 0    | 2 | MASCOT | T      |       |       |
| 3.22E-05 | 0 0 | Cs2g03510.1/Cs2g035 | 4.53 | 0 | 0    | 2 | MASCOT | T      |       |       |
| 1.70E-01 | 0 0 | Cs4g11150.1/Cs4g111 | 4.37 | 0 | 0    | 2 | MASCOT | T      | PLEX8 |       |
| 3.50E-02 | 0 0 | Cs4g11150.1/Cs4g111 | 4.37 | 0 | 0    | 2 | MASCOT | T      | PLEX8 |       |
| 1.29E-01 | 0 0 | Cs4g11150.1/Cs4g111 | 4.37 | 0 | 0    | 2 | MASCOT | T      | PLEX8 |       |
| 1.89E-01 | 0 0 | Cs4g11150.1/Cs4g111 | 4.37 | 0 | 0    | 2 | MASCOT | T      |       |       |
| 7.91E-02 | 0 0 | Cs4g11150.1/Cs4g111 | 4.37 | 0 | 0    | 2 | MASCOT | T      |       |       |
| 7.54E-02 | 0 0 | Cs4g11150.1/Cs4g111 | 4.37 | 0 | 0    | 2 | MASCOT | T      |       |       |
| 1.76E-02 | 0 0 | Cs2g03510.1/Cs2g035 | 6.85 | 0 | 0    | 2 | MASCOT | T      | PLEX8 |       |
| 4.95E-03 | 0 0 | Cs2g03510.1/Cs2g035 | 6.85 | 0 | 0    | 2 | MASCOT | T      | PLEX8 |       |
| 5.66E-02 | 0 0 | Cs2g03510.1/Cs2g035 | 6.85 | 0 | 0    | 2 | MASCOT | T      | PLEX8 |       |

|          |     |                     |      |   |   |   |        |   |       |
|----------|-----|---------------------|------|---|---|---|--------|---|-------|
| 5.84E-02 | 0 0 | Cs1g22440.1/Cs4g111 | 6.85 | 0 | 0 | 2 | MASCOT | T | PLEX8 |
| 1.20E-02 | 0 0 | Cs1g22440.1/Cs4g111 | 6.85 | 0 | 0 | 2 | MASCOT | T | PLEX8 |
| 2.50E-03 | 0 0 | Cs1g22440.1/Cs4g111 | 6.85 | 0 | 0 | 2 | MASCOT | T | PLEX8 |
| 4.87E-02 | 0 0 | Cs1g22440.1/Cs4g111 | 6.85 | 0 | 0 | 2 | MASCOT | T | PLEX8 |
| 2.71E-03 | 0 0 | Cs1g22440.1/Cs4g111 | 6.85 | 0 | 0 | 2 | MASCOT | T | PLEX8 |
| 4.18E-02 | 0 0 | Cs1g22440.1/Cs4g111 | 6.85 | 0 | 0 | 2 | MASCOT | T | PLEX8 |
| 1.02E-02 | 0 0 | Cs1g22440.1/Cs4g111 | 6.85 | 0 | 0 | 2 | MASCOT | T | PLEX8 |
| 2.35E-02 | 0 0 | Cs1g22440.1/Cs4g111 | 6.85 | 0 | 0 | 2 | MASCOT | T | PLEX8 |
| 2.60E-01 | 0 0 | Cs1g22440.1/Cs4g111 | 6.85 | 0 | 0 | 2 | MASCOT | T | PLEX8 |
| 4.88E-03 | 0 0 | Cs1g22440.1/Cs4g111 | 6.85 | 0 | 0 | 2 | MASCOT | T | PLEX8 |
| 1.22E-01 | 0 0 | Cs2g03510.1/Cs2g035 | 9.41 | 0 | 0 | 2 | MASCOT | T | PLEX8 |
| 9.78E-02 | 0 0 | Cs2g03510.1/Cs2g035 | 9.41 | 0 | 0 | 2 | MASCOT | T | PLEX8 |
| 7.52E-03 | 0 0 | Cs2g03510.1/Cs2g035 | 9.41 | 0 | 0 | 2 | MASCOT | T | PLEX8 |
| 3.07E-01 | 0 0 | Cs1g22440.1/Cs4g111 | 5.5  | 0 | 0 | 2 | MASCOT | T | PLEX8 |
| 1.19E-01 | 0 0 | Cs1g22440.1/Cs4g111 | 5.5  | 0 | 0 | 2 | MASCOT | T | PLEX8 |
| 3.06E-02 | 0 0 | Cs1g22440.1/Cs4g111 | 5.5  | 0 | 0 | 2 | MASCOT | T | PLEX8 |
| 2.35E-02 | 0 0 | Cs1g22440.1/Cs4g111 | 5.5  | 0 | 0 | 2 | MASCOT | T | PLEX8 |
| 2.07E-02 | 0 0 | Cs1g22440.1/Cs4g111 | 5.5  | 0 | 0 | 2 | MASCOT | T | PLEX8 |
| 1.70E-01 | 0 0 | Cs1g22440.1/Cs4g111 | 5.5  | 0 | 0 | 2 | MASCOT | T | PLEX8 |
| 3.31E-02 | 0 0 | Cs1g22440.1/Cs4g111 | 5.5  | 0 | 0 | 2 | MASCOT | T | PLEX8 |
| 1.34E-01 | 0 0 | Cs1g22440.1/Cs4g111 | 5.5  | 0 | 0 | 2 | MASCOT | T | PLEX8 |
| 3.62E-03 | 0 0 | Cs3g01420.1/Cs3g014 | 4.53 | 0 | 0 | 2 | MASCOT | T | PLEX8 |
| 3.52E-04 | 0 0 | Cs3g01420.1/Cs3g014 | 4.53 | 0 | 0 | 2 | MASCOT | T | PLEX8 |
| 1.04E-01 | 0 0 | Cs3g01420.1/Cs3g014 | 4.53 | 0 | 0 | 2 | MASCOT | T | PLEX8 |
| 3.86E-03 | 0 0 | Cs3g01420.1/Cs3g014 | 4.53 | 0 | 0 | 2 | MASCOT | T | PLEX8 |
| 6.67E-03 | 0 0 | Cs3g01420.1/Cs3g014 | 4.53 | 0 | 0 | 2 | MASCOT | T | PLEX8 |
| 1.88E-02 | 0 0 | Cs3g01420.1/Cs3g014 | 4.53 | 0 | 0 | 2 | MASCOT | T | PLEX8 |
| 5.85E-03 | 0 0 | Cs3g01420.1/Cs3g014 | 3.83 | 0 | 0 | 2 | MASCOT | T |       |
| 2.02E-02 | 0 0 | Cs3g01420.1/Cs3g014 | 4.08 | 1 | 0 | 2 | MASCOT | T |       |
| 4.29E-02 | 0 0 | Cs3g01420.1/Cs3g014 | 6.75 | 0 | 0 | 2 | MASCOT | T | PLEX8 |
| 8.07E-03 | 0 0 | Cs3g01420.1/Cs3g014 | 6.75 | 0 | 0 | 2 | MASCOT | T | PLEX8 |
| 4.09E-02 | 0 0 | Cs3g01420.1/Cs3g014 | 6.75 | 0 | 0 | 2 | MASCOT | T | PLEX8 |
| 5.55E-02 | 0 0 | Cs3g01420.1/Cs3g014 | 6.75 | 0 | 0 | 2 | MASCOT | T | PLEX8 |
| 2.97E-02 | 0 0 | Cs3g01420.1/Cs3g014 | 6.75 | 0 | 0 | 2 | MASCOT | T | PLEX8 |
| 7.34E-05 | 0 0 | Cs3g01420.1/Cs3g014 | 6.75 | 0 | 0 | 2 | MASCOT | T | PLEX8 |
| 1.72E-05 | 0 0 | Cs3g01420.1/Cs3g014 | 6.75 | 0 | 0 | 2 | MASCOT | T | PLEX8 |
| 2.43E-01 | 0 0 | Cs3g01420.1/Cs3g014 | 6.75 | 0 | 0 | 2 | MASCOT | T | PLEX8 |
| 1.29E-04 | 0 0 | Cs3g01420.1         | 8.47 | 0 | 0 | 2 | MASCOT | T | PLEX8 |
| 2.21E-05 | 0 0 | Cs3g01420.1         | 8.47 | 0 | 0 | 2 | MASCOT | T | PLEX8 |
| 2.26E-02 | 0 0 | Cs3g01420.1         | 8.47 | 0 | 0 | 2 | MASCOT | T | PLEX8 |
| 2.19E-03 | 0 0 | Cs3g01420.1         | 8.47 | 0 | 0 | 2 | MASCOT | T | PLEX8 |
| 5.45E-02 | 0 0 | Cs3g01420.1         | 8.47 | 0 | 0 | 2 | MASCOT | T | PLEX8 |
| 1.67E-01 | 0 0 | Cs3g01420.1/Cs3g014 | 5.81 | 0 | 0 | 2 | MASCOT | T | PLEX8 |
| 7.20E-04 | 0 0 | Cs3g01420.1/Cs3g014 | 8.72 | 0 | 0 | 2 | MASCOT | T | PLEX8 |
| 6.72E-03 | 0 0 | Cs3g01420.1/Cs3g014 | 8.72 | 0 | 0 | 2 | MASCOT | T | PLEX8 |
| 1.74E-02 | 0 0 | Cs3g01420.1/Cs3g014 | 8.72 | 0 | 0 | 2 | MASCOT | T | PLEX8 |
| 1.65E-01 | 0 0 | Cs3g01420.1/Cs3g014 | 8.72 | 0 | 0 | 2 | MASCOT | T | PLEX8 |
| 1.23E-03 | 0 0 | Cs3g01420.1/Cs3g014 | 8.72 | 0 | 0 | 2 | MASCOT | T | PLEX8 |
| 2.57E-03 | 0 0 | Cs3g01420.1/Cs3g014 | 8.72 | 0 | 0 | 2 | MASCOT | T | PLEX8 |
| 4.97E-03 | 0 0 | Cs3g01420.1/Cs3g014 | 8.72 | 0 | 0 | 2 | MASCOT | T | PLEX8 |
| 5.22E-02 | 0 0 | Cs3g01420.1/Cs3g014 | 8.72 | 0 | 0 | 2 | MASCOT | T | PLEX8 |



|              |                     |      |        |   |          |   |       |
|--------------|---------------------|------|--------|---|----------|---|-------|
| 3.10E-02 0 0 | Cs3g01420.1/Cs3g014 | 8.72 | 0      | 0 | 2 MASCOT | T | PLEX8 |
| 9.21E-03 0 0 | Cs3g01420.1/Cs3g014 | 8.72 | 0      | 0 | 2 MASCOT | T | PLEX8 |
| 5.78E-04 0 0 | Cs3g01420.1/Cs3g014 | 8.72 | 0      | 0 | 2 MASCOT | T | PLEX8 |
| 2.78E-04 0 0 | Cs3g01420.1/Cs3g014 | 8.72 | 0      | 0 | 2 MASCOT | T | PLEX8 |
| 2.12E-01 0 0 | Cs2g10940.1         | 4.53 | 0      | 0 | 2 MASCOT | T | PLEX8 |
| 2.66E-07 0 0 | Cs2g10940.1         | 4.53 | 0      | 0 | 2 MASCOT | T | PLEX8 |
| 3.95E-03 0 0 | Cs2g10940.1         | 4.53 | 0      | 0 | 2 MASCOT | T | PLEX8 |
| 8.77E-03 0 0 | Cs2g10940.1         | 4.53 | 0      | 0 | 2 MASCOT | T | PLEX8 |
| 9.23E-05 0 0 | Cs2g10940.1         | 4.53 | 0      | 0 | 2 MASCOT | T | PLEX8 |
| 7.67E-02 0 0 | Cs2g10940.1         | 4.53 | 0      | 0 | 2 MASCOT | T | PLEX8 |
| 2.43E-03 0 0 | Cs2g10940.1         | 4.53 | 0      | 0 | 2 MASCOT | T | PLEX8 |
| 1.28E-07 0 0 | Cs2g10940.1         | 4.53 | 0      | 0 | 2 MASCOT | T | PLEX8 |
| 9.76E-03 0 0 | Cs2g10940.1         | 4.37 | 0      | 0 | 2 MASCOT | T |       |
| 7.24E-02 0 0 | Cs2g10940.1         | 4.37 | 0      | 0 | 2 MASCOT | T |       |
| 1.31E-01 0 0 | Cs2g10940.1         | 4.37 | 0      | 0 | 2 MASCOT | T |       |
| 3.06E-01 0 0 | Cs2g10940.1         | 3.93 | 0      | 0 | 2 MASCOT | T | PLEX8 |
| 7.49E-02 0 0 | Cs2g10940.1         | 3.93 | 0      | 0 | 2 MASCOT | T | PLEX8 |
| 8.01E-03 0 0 | Cs2g10940.1         | 3.93 | 0      | 0 | 2 MASCOT | T | PLEX8 |
| 2.68E-05 0 0 | Cs2g10940.1         | 3.93 | 0      | 0 | 2 MASCOT | T | PLEX8 |
| 1.48E-02 0 0 | Cs2g10940.1         | 6.74 | 0      | 0 | 2 MASCOT | T | PLEX8 |
| 2.05E-01 0 0 | Cs2g10940.1         | 6.74 | 0      | 0 | 2 MASCOT | T | PLEX8 |
| 3.37E-03 0 0 | Cs2g10940.1         | 6.74 | 0      | 0 | 2 MASCOT | T |       |
| 9.99E-02 0 0 | Cs2g10940.1         | 6.74 | 0      | 0 | 2 MASCOT | T |       |
| 1.18E-01 0 0 | Cs2g10940.1         | 5.72 | 0      | 0 | 2 MASCOT | T |       |
| 2.68E-01 0 0 | Cs2g10940.1         | 5.72 | 0      | 0 | 2 MASCOT | T |       |
| 3.10E-04 0 0 | Cs2g10940.1         | 5.72 | 0      | 0 | 2 MASCOT | T |       |
| 1.83E-02 0 0 | Cs2g10940.1         | 5.72 | 0      | 0 | 2 MASCOT | T |       |
| 1.75E-03 0 0 | Cs2g10940.1         | 5.72 | 0      | 0 | 2 MASCOT | T |       |
| 4.18E-02 0 0 | Cs2g10940.1         | 5.72 | 0      | 0 | 2 MASCOT | T |       |
| 5.83E-02 0 0 | Cs2g10940.1         | 5.74 | 0 15.9 | 0 | 2 MASCOT | T | PLEX8 |
| 2.41E-02 0 0 | Cs2g10940.1         | 5.74 | 0 15.9 | 0 | 2 MASCOT | T | PLEX8 |
| 1.43E-02 0 0 | Cs2g10940.1         | 5.74 | 0 15.9 | 0 | 2 MASCOT | T | PLEX8 |
| 9.66E-03 0 0 | Cs2g10940.1         | 5.74 | 0      | 0 | 2 MASCOT | T | PLEX8 |
| 1.47E-01 0 0 | Cs2g10940.1         | 5.74 | 0      | 0 | 2 MASCOT | T | PLEX8 |
| 3.52E-02 0 0 | Cs2g10940.1         | 8.49 | 0      | 0 | 2 MASCOT | T | PLEX8 |
| 1.40E-01 0 0 | Cs2g10940.1         | 8.49 | 0      | 0 | 2 MASCOT | T | PLEX8 |
| 1.57E-01 0 0 | Cs2g10940.1         | 8.49 | 0      | 0 | 2 MASCOT | T | PLEX8 |
| 3.33E-03 0 0 | Cs5g06840.1         | 4.65 | 0      | 0 | 2 MASCOT | T | PLEX8 |
| 1.72E-03 0 0 | Cs5g06840.1         | 4.65 | 0      | 0 | 2 MASCOT | T | PLEX8 |
| 4.07E-03 0 0 | Cs5g06840.1         | 4.65 | 0      | 0 | 2 MASCOT | T | PLEX8 |
| 4.33E-02 0 0 | Cs5g06840.1         | 4.65 | 0      | 0 | 2 MASCOT | T | PLEX8 |
| 4.82E-02 0 0 | Cs5g06840.1         | 4.65 | 0      | 0 | 2 MASCOT | T |       |
| 1.20E-02 0 0 | Cs5g06840.1         | 4.65 | 0      | 0 | 2 MASCOT | T | PLEX8 |
| 3.71E-02 0 0 | Cs5g06840.1         | 4.65 | 0      | 0 | 2 MASCOT | T | PLEX8 |
| 2.50E-03 0 0 | Cs5g06840.1         | 4.65 | 0      | 0 | 2 MASCOT | T | PLEX8 |
| 2.12E-01 0 0 | Cs5g06840.1         | 4.65 | 0      | 0 | 2 MASCOT | T | PLEX8 |
| 3.62E-01 0 0 | Cs5g06840.1/Cs5g068 | 4.37 | 0      | 0 | 2 MASCOT | T | PLEX8 |
| 1.40E-01 0 0 | Cs5g06840.1/Cs5g068 | 6.1  | 0      | 0 | 2 MASCOT | T | PLEX8 |
| 2.12E-01 0 0 | Cs5g06840.1/Cs5g068 | 6.1  | 0      | 0 | 2 MASCOT | T | PLEX8 |
| 2.46E-01 0 0 | Cs5g06840.1/Cs5g068 | 6.1  | 0      | 0 | 2 MASCOT | T | PLEX8 |
| 4.35E-04 0 0 | Cs5g06840.1/Cs5g068 | 5.84 | 0      | 0 | 2 MASCOT | T | PLEX8 |

|          |     |                       |      |   |   |   |        |   |       |
|----------|-----|-----------------------|------|---|---|---|--------|---|-------|
| 9.44E-03 | 0 0 | Cs5g06840.1/Cs5g068   | 5.84 | 0 | 0 | 2 | MASCOT | T | PLEX8 |
| 8.24E-02 | 0 0 | Cs5g06840.1/Cs5g068   | 5.84 | 0 | 0 | 2 | MASCOT | T | PLEX8 |
| 1.19E-02 | 0 0 | Cs5g06840.1/Cs8g061   | 6    | 0 | 0 | 2 | MASCOT | T |       |
| 1.97E-01 | 0 0 | Cs5g06840.1/Cs8g061   | 6    | 0 | 0 | 2 | MASCOT | T |       |
| 9.87E-02 | 0 0 | Cs5g06840.1/Cs5g068   | 6.07 | 1 | 0 | 2 | MASCOT | T | PLEX8 |
| 1.14E-01 | 0 0 | Cs5g06840.1/Cs5g068   | 6.07 | 1 | 0 | 2 | MASCOT | T | PLEX8 |
| 2.31E-06 | 0 0 | Cs5g06840.1/Cs5g068   | 6.07 | 1 | 0 | 2 | MASCOT | T | PLEX8 |
| 1.57E-05 | 0 0 | Cs5g06840.1/Cs5g068   | 6.07 | 1 | 0 | 2 | MASCOT | T | PLEX8 |
| 4.64E-02 | 0 0 | Cs5g06840.1/Cs5g068   | 6.07 | 1 | 0 | 2 | MASCOT | T |       |
| 8.49E-05 | 0 0 | Cs5g06840.1/Cs5g068   | 6.07 | 1 | 0 | 2 | MASCOT | T |       |
| 1.91E-04 | 0 0 | Cs5g06840.1/Cs5g068   | 5.32 | 0 | 0 | 2 | MASCOT | T | PLEX8 |
| 7.08E-03 | 0 0 | Cs5g06840.1/Cs5g068   | 5.32 | 0 | 0 | 2 | MASCOT | T | PLEX8 |
| 4.18E-02 | 0 0 | Cs5g06840.1/Cs5g068   | 5.32 | 0 | 0 | 2 | MASCOT | T | PLEX8 |
| 2.80E-01 | 0 0 | Cs5g06840.1/Cs5g068   | 5.32 | 0 | 0 | 2 | MASCOT | T | PLEX8 |
| 2.16E-02 | 0 0 | Cs5g06840.1/Cs5g068   | 5.32 | 0 | 0 | 2 | MASCOT | T | PLEX8 |
| 3.76E-03 | 0 0 | Cs5g06840.1/Cs5g068   | 5.32 | 0 | 0 | 2 | MASCOT | T | PLEX8 |
| 2.89E-03 | 0 0 | Cs5g06840.1/Cs5g068   | 5.32 | 0 | 0 | 2 | MASCOT | T | PLEX8 |
| 2.77E-02 | 0 0 | Cs6g06150.1           | 5.84 | 0 | 0 | 2 | MASCOT | T | PLEX8 |
| 2.18E-02 | 0 0 | Cs6g06150.1           | 5.84 | 0 | 0 | 2 | MASCOT | T | PLEX8 |
| 1.47E-01 | 0 0 | Cs6g06150.1           | 5.84 | 0 | 0 | 2 | MASCOT | T | PLEX8 |
| 1.11E-01 | 0 0 | Cs6g06150.1           | 5.84 | 0 | 0 | 2 | MASCOT | T | PLEX8 |
| 2.83E-02 | 0 0 | Cs6g06150.1           | 5.84 | 0 | 0 | 2 | MASCOT | T | PLEX8 |
| 3.06E-02 | 0 0 | Cs6g06150.1           | 5.84 | 0 | 0 | 2 | MASCOT | T | PLEX8 |
| 3.52E-01 | 0 0 | Cs6g06150.1           | 5.84 | 0 | 0 | 2 | MASCOT | T | PLEX8 |
| 6.65E-02 | 0 0 | Cs6g06150.1           | 6    | 0 | 0 | 2 | MASCOT | T | PLEX8 |
| 1.98E-01 | 0 0 | Cs6g06150.1           | 6    | 0 | 0 | 2 | MASCOT | T | PLEX8 |
| 3.91E-03 | 0 0 | Cs6g06150.1           | 6    | 0 | 0 | 2 | MASCOT | T | PLEX8 |
| 2.02E-03 | 0 0 | Cs6g06150.1           | 6    | 0 | 0 | 2 | MASCOT | T | PLEX8 |
| 8.88E-04 | 0 0 | Cs6g06150.1           | 6    | 0 | 0 | 2 | MASCOT | T | PLEX8 |
| 1.49E-01 | 0 0 | Cs6g06150.1           | 6    | 0 | 0 | 2 | MASCOT | T | PLEX8 |
| 1.79E-01 | 0 0 | Cs6g06150.1           | 5.72 | 0 | 0 | 2 | MASCOT | T | PLEX8 |
| 5.54E-02 | 0 0 | Cs6g06150.1           | 5.72 | 0 | 0 | 2 | MASCOT | T |       |
| 1.15E-03 | 0 0 | Cs6g06150.1           | 5.72 | 0 | 0 | 2 | MASCOT | T |       |
| 6.48E-03 | 0 0 | Cs6g06150.1           | 5.72 | 0 | 0 | 2 | MASCOT | T |       |
| 6.93E-05 | 0 0 | Cs6g06150.1           | 5.72 | 0 | 0 | 2 | MASCOT | T |       |
| 5.62E-03 | 0 0 | Cs6g06150.1           | 5.72 | 0 | 0 | 2 | MASCOT | T | PLEX8 |
| 1.40E-04 | 0 0 | Cs6g06150.1           | 8.5  | 0 | 0 | 2 | MASCOT | T | PLEX8 |
| 1.43E-06 | 0 0 | Cs6g06150.1           | 8.5  | 0 | 0 | 2 | MASCOT | T | PLEX8 |
| 3.39E-05 | 0 0 | Cs6g06150.1           | 8.5  | 0 | 0 | 2 | MASCOT | T | PLEX8 |
| 1.19E-03 | 0 0 | Cs6g06150.1           | 4.37 | 0 | 0 | 2 | MASCOT | T | PLEX8 |
| 8.22E-04 | 0 0 | Cs6g06150.1           | 4.37 | 0 | 0 | 2 | MASCOT | T | PLEX8 |
| 7.08E-02 | 0 0 | Cs6g06150.1           | 4.37 | 0 | 0 | 2 | MASCOT | T | PLEX8 |
| 1.77E-01 | 0 0 | Cs6g06150.1           | 8.47 | 0 | 0 | 2 | MASCOT | T | PLEX8 |
| 9.25E-03 | 0 0 | Cs6g06150.1           | 8.47 | 0 | 0 | 2 | MASCOT | T | PLEX8 |
| 2.27E-02 | 0 0 | Cs6g06150.1           | 8.47 | 0 | 0 | 2 | MASCOT | T | PLEX8 |
| 5.75E-03 | 0 0 | Cs6g06150.1           | 8.47 | 0 | 0 | 2 | MASCOT | T | PLEX8 |
| 2.42E-04 | 0 0 | Cs6g06150.1           | 4.53 | 0 | 0 | 2 | MASCOT | T | PLEX8 |
| 1.07E-02 | 0 0 | orange1.1t00333.1/ora | 5.21 | 0 | 0 | 2 | MASCOT | T | PLEX8 |
| 2.19E-01 | 0 0 | orange1.1t00333.1/ora | 5.21 | 0 | 0 | 2 | MASCOT | T | PLEX8 |
| 3.83E-02 | 0 0 | orange1.1t00333.1/ora | 5.21 | 0 | 0 | 2 | MASCOT | T | PLEX8 |
| 2.76E-01 | 0 0 | orange1.1t00333.1/ora | 5.21 | 0 | 0 | 2 | MASCOT | T | PLEX8 |

|          |     |                       |      |   |      |   |        |        |       |       |
|----------|-----|-----------------------|------|---|------|---|--------|--------|-------|-------|
| 1.04E-02 | 0 0 | orange1.1t00333.1/ora | 5.21 | 0 | 0    | 2 | MASCOT | T      | PLEX8 |       |
| 8.71E-02 | 0 0 | orange1.1t00333.1/ora | 5.21 | 0 | 0    | 2 | MASCOT | T      | PLEX8 |       |
| 7.92E-02 | 0 0 | orange1.1t00333.1/ora | 5.21 | 0 | 0    | 2 | MASCOT | T      | PLEX8 |       |
| 2.75E-02 | 0 0 | orange1.1t00333.1/ora | 5.21 | 0 | 0    | 2 | MASCOT | T      |       |       |
| 2.01E-01 | 0 0 | orange1.1t00333.1/ora | 5.21 | 0 | 0    | 2 | MASCOT | T      |       |       |
| 4.01E-03 | 0 0 | orange1.1t00333.1/ora | 6.74 | 0 | 0    | 2 | MASCOT | T      | PLEX8 |       |
| 1.83E-03 | 0 0 | orange1.1t00333.1/ora | 6.74 | 0 | 0    | 2 | MASCOT | T      | PLEX8 |       |
| 8.17E-03 | 0 0 | orange1.1t00333.1/ora | 6.74 | 0 | 0    | 2 | MASCOT | T      | PLEX8 |       |
| 1.23E-01 | 0 0 | orange1.1t00333.1/ora | 6.74 | 0 | 0    | 2 | MASCOT | T      |       |       |
| 4.89E-02 | 0 0 | orange1.1t00333.1/ora | 4.14 | 0 | 0    | 2 | MASCOT | T      |       |       |
| 1.03E-01 | 0 0 | orange1.1t00333.1/ora | 4.14 | 0 | 0    | 2 | MASCOT | T      |       |       |
| 3.99E-06 | 0 0 | orange1.1t00333.1/ora | 5.32 | 0 | 0    | 2 | MASCOT | T      | PLEX8 |       |
| 2.35E-03 | 0 0 | orange1.1t00333.1/ora | 5.32 | 0 | 0    | 2 | MASCOT | T      | PLEX8 |       |
| 2.34E-02 | 0 0 | orange1.1t00333.1/ora | 5.32 | 0 | 0    | 2 | MASCOT | T      | PLEX8 |       |
| 6.67E-04 | 0 0 | orange1.1t00333.1/ora | 5.32 | 0 | 0    | 2 | MASCOT | T      | PLEX8 |       |
| 2.52E-02 | 0 0 | orange1.1t00333.1/ora | 5.71 | 1 | 15.9 | 0 | 2      | MASCOT | T     |       |
| 1.08E-01 | 0 0 | orange1.1t00333.1/ora | 9.47 | 0 | 15.9 | 0 | 2      | MASCOT | T     |       |
| 5.37E-04 | 0 0 | orange1.1t00333.1/ora | 9.47 | 0 | 15.9 | 0 | 2      | MASCOT | T     |       |
| 1.51E-02 | 0 0 | orange1.1t00333.1/ora | 9.47 | 0 | 15.9 | 0 | 2      | MASCOT | T     |       |
| 4.35E-02 | 0 0 | orange1.1t00333.1/ora | 9.47 | 0 | 0    | 2 | MASCOT | T      |       |       |
| 2.76E-01 | 0 0 | orange1.1t00333.1/ora | 9.47 | 0 | 0    | 2 | MASCOT | T      |       |       |
| 2.65E-05 | 0 0 | orange1.1t00333.1/ora | 9.47 | 0 | 0    | 2 | MASCOT | T      |       |       |
| 2.57E-02 | 0 0 | orange1.1t00333.1/ora | 9.47 | 0 | 0    | 2 | MASCOT | T      |       |       |
| 1.24E-01 | 0 0 | orange1.1t00333.1/ora | 9.47 | 0 | 0    | 2 | MASCOT | T      |       |       |
| 1.24E-02 | 0 0 | orange1.1t00333.1/ora | 6.71 | 0 | 0    | 2 | MASCOT | T      | PLEX8 |       |
| 1.10E-02 | 0 0 | orange1.1t00333.1/ora | 6.71 | 0 | 0    | 2 | MASCOT | T      |       |       |
| 2.18E-01 | 0 0 | Cs8g09220.1/Cs8g092   | 4.37 | 0 | 0    | 2 | MASCOT | T      | PLEX8 |       |
| 2.05E-02 | 0 0 | Cs8g09220.1/Cs8g092   | 4.37 | 0 | 0    | 2 | MASCOT | T      | PLEX8 |       |
| 1.69E-01 | 0 0 | Cs8g09220.1/Cs8g092   | 4.37 | 0 | 0    | 2 | MASCOT | T      | PLEX8 |       |
| 1.85E-01 | 0 0 | Cs7g31100.1/Cs7g311   | 9.76 | 0 | 0    | 2 | MASCOT | T      | PLEX8 |       |
| 2.44E-02 | 0 0 | Cs7g31100.1/Cs7g311   | 9.76 | 0 | 0    | 2 | MASCOT | T      | PLEX8 |       |
| 7.58E-03 | 0 0 | Cs8g09220.1/orange1.  | 5.32 | 0 | 15.9 | 0 | 2      | MASCOT | T     | PLEX8 |
| 1.17E-05 | 0 0 | Cs8g09220.1/orange1.  | 5.32 | 0 | 15.9 | 0 | 2      | MASCOT | T     | PLEX8 |
| 5.54E-04 | 0 0 | Cs8g09220.1/orange1.  | 5.32 | 0 | 15.9 | 0 | 2      | MASCOT | T     | PLEX8 |
| 3.17E-05 | 0 0 | Cs8g09220.1/orange1.  | 5.32 | 0 | 15.9 | 0 | 2      | MASCOT | T     | PLEX8 |
| 7.55E-03 | 0 0 | Cs8g09220.1/orange1.  | 5.32 | 0 | 15.9 | 0 | 2      | MASCOT | T     | PLEX8 |
| 2.86E-01 | 0 0 | Cs8g09220.1/orange1.  | 5.32 | 0 | 0    | 2 | MASCOT | T      | PLEX8 |       |
| 1.78E-02 | 0 0 | Cs8g09220.1/orange1.  | 5.32 | 0 | 0    | 2 | MASCOT | T      | PLEX8 |       |
| 1.36E-01 | 0 0 | Cs8g09220.1/orange1.  | 5.32 | 0 | 0    | 2 | MASCOT | T      | PLEX8 |       |
| 4.56E-05 | 0 0 | Cs8g09220.1/orange1.  | 5.32 | 0 | 0    | 2 | MASCOT | T      | PLEX8 |       |
| 8.65E-03 | 0 0 | Cs8g09220.1/orange1.  | 5.32 | 0 | 0    | 2 | MASCOT | T      |       |       |
| 1.40E-02 | 0 0 | Cs1g16250.1/Cs1g162   | 5.66 | 0 | 0    | 2 | MASCOT | T      | PLEX8 |       |
| 2.39E-02 | 0 0 | Cs1g16250.1/Cs1g162   | 5.66 | 0 | 0    | 2 | MASCOT | T      | PLEX8 |       |
| 2.18E-01 | 0 0 | Cs8g09220.1/Cs8g092   | 4.37 | 0 | 0    | 2 | MASCOT | T      | PLEX8 |       |
| 4.33E-01 | 0 0 | Cs8g09220.1/Cs8g092   | 4.37 | 0 | 0    | 2 | MASCOT | T      | PLEX8 |       |
| 1.57E-01 | 0 0 | Cs5g30600.1/Cs5g306   | 6.04 | 0 | 0    | 2 | MASCOT | T      | PLEX8 |       |
| 1.70E-01 | 0 0 | Cs5g30600.1/Cs5g306   | 6.04 | 0 | 0    | 2 | MASCOT | T      | PLEX8 |       |
| 1.53E-01 | 0 0 | Cs5g30600.1/Cs5g306   | 6.04 | 0 | 0    | 2 | MASCOT | T      | PLEX8 |       |
| 1.48E-01 | 0 0 | Cs5g30600.1/Cs5g306   | 6.04 | 0 | 0    | 2 | MASCOT | T      | PLEX8 |       |
| 8.13E-02 | 0 0 | Cs5g30600.1/Cs5g306   | 6.04 | 0 | 0    | 2 | MASCOT | T      | PLEX8 |       |
| 1.75E-01 | 0 0 | Cs5g30600.1/Cs5g306   | 6.04 | 0 | 0    | 2 | MASCOT | T      | PLEX8 |       |

|          |     |                      |       |   |   |   |        |   |       |
|----------|-----|----------------------|-------|---|---|---|--------|---|-------|
| 9.30E-05 | 0 0 | Cs8g09220.1/orange1. | 5.5   | 0 | 0 | 2 | MASCOT | T | PLEX8 |
| 1.05E-02 | 0 0 | Cs8g09220.1/orange1. | 5.5   | 0 | 0 | 2 | MASCOT | T | PLEX8 |
| 1.51E-01 | 0 0 | Cs8g09220.1/orange1. | 5.5   | 0 | 0 | 2 | MASCOT | T | PLEX8 |
| 6.39E-02 | 0 0 | Cs8g09220.1/orange1. | 5.5   | 0 | 0 | 2 | MASCOT | T | PLEX8 |
| 3.23E-02 | 0 0 | Cs5g06580.1 ! Cs9g13 | 6     | 0 | 0 | 2 | MASCOT | T | PLEX8 |
| 6.60E-03 | 0 0 | Cs5g06580.1 ! Cs9g13 | 6     | 0 | 0 | 2 | MASCOT | T | PLEX8 |
| 7.81E-03 | 0 0 | Cs5g06580.1 ! Cs9g13 | 6     | 0 | 0 | 2 | MASCOT | T | PLEX8 |
| 6.51E-03 | 0 0 | Cs5g06580.1 ! Cs9g13 | 6     | 0 | 0 | 2 | MASCOT | T | PLEX8 |
| 1.31E-01 | 0 0 | Cs5g06580.1 ! Cs9g13 | 6     | 0 | 0 | 2 | MASCOT | T | PLEX8 |
| 1.52E-01 | 0 0 | Cs5g06580.1 ! Cs9g13 | 6     | 0 | 0 | 2 | MASCOT | T | PLEX8 |
| 2.80E-02 | 0 0 | Cs5g06580.1 ! Cs9g13 | 6     | 0 | 0 | 2 | MASCOT | T | PLEX8 |
| 4.13E-02 | 0 0 | Cs5g06580.1 ! Cs9g13 | 6     | 0 | 0 | 2 | MASCOT | T | PLEX8 |
| 6.10E-02 | 0 0 | Cs5g06580.1 ! Cs9g13 | 6     | 0 | 0 | 2 | MASCOT | T | PLEX8 |
| 7.65E-05 | 0 0 | Cs9g13760.1          | 4.8   | 0 | 0 | 2 | MASCOT | T |       |
| 9.14E-03 | 0 0 | Cs9g13760.1          | 5.4   | 0 | 0 | 2 | MASCOT | T | PLEX8 |
| 3.33E-03 | 0 0 | Cs9g13760.1          | 5.4   | 0 | 0 | 2 | MASCOT | T | PLEX8 |
| 1.63E-04 | 0 0 | Cs9g13760.1          | 5.4   | 0 | 0 | 2 | MASCOT | T | PLEX8 |
| 7.09E-06 | 0 0 | Cs9g13760.1          | 5.4   | 0 | 0 | 2 | MASCOT | T | PLEX8 |
| 8.27E-02 | 0 0 | Cs9g13760.1          | 5.4   | 0 | 0 | 2 | MASCOT | T | PLEX8 |
| 1.08E-02 | 0 0 | Cs9g13760.1          | 6.74  | 0 | 0 | 2 | MASCOT | T | PLEX8 |
| 2.78E-02 | 0 0 | Cs9g13760.1          | 6.74  | 0 | 0 | 2 | MASCOT | T | PLEX8 |
| 4.96E-02 | 0 0 | Cs9g13760.1          | 5.84  | 0 | 0 | 2 | MASCOT | T | PLEX8 |
| 6.35E-03 | 0 0 | Cs9g13760.1          | 5.84  | 0 | 0 | 2 | MASCOT | T | PLEX8 |
| 2.58E-02 | 0 0 | Cs9g13760.1          | 5.84  | 0 | 0 | 2 | MASCOT | T | PLEX8 |
| 6.01E-02 | 0 0 | Cs9g13760.1          | 5.84  | 0 | 0 | 2 | MASCOT | T | PLEX8 |
| 2.36E-02 | 0 0 | Cs9g13760.1          | 4.53  | 0 | 0 | 2 | MASCOT | T | PLEX8 |
| 5.28E-02 | 0 0 | Cs9g13760.1          | 4.53  | 0 | 0 | 2 | MASCOT | T | PLEX8 |
| 1.09E-02 | 0 0 | Cs9g13760.1          | 4.53  | 0 | 0 | 2 | MASCOT | T | PLEX8 |
| 1.61E-01 | 0 0 | Cs9g13760.1          | 4.53  | 0 | 0 | 2 | MASCOT | T | PLEX8 |
| 4.41E-02 | 0 0 | Cs9g13760.1          | 4.53  | 0 | 0 | 2 | MASCOT | T | PLEX8 |
| 2.72E-02 | 0 0 | Cs9g13760.1          | 4.53  | 0 | 0 | 2 | MASCOT | T | PLEX8 |
| 1.81E-01 | 0 0 | Cs9g13760.1          | 4.53  | 0 | 0 | 2 | MASCOT | T | PLEX8 |
| 6.67E-02 | 0 0 | Cs9g13760.1          | 8.72  | 0 | 0 | 2 | MASCOT | T | PLEX8 |
| 6.00E-03 | 0 0 | Cs2g03600.1/Cs2g036  | 4.37  | 0 | 0 | 2 | MASCOT | T | PLEX8 |
| 6.97E-03 | 0 0 | Cs2g03600.1/Cs2g036  | 4.37  | 0 | 0 | 2 | MASCOT | T | PLEX8 |
| 1.42E-03 | 0 0 | Cs2g03600.1/Cs2g036  | 8.75  | 0 | 0 | 2 | MASCOT | T | PLEX8 |
| 6.52E-04 | 0 0 | Cs2g03600.1/Cs2g036  | 3.98  | 0 | 0 | 2 | MASCOT | T | PLEX8 |
| 2.20E-01 | 0 0 | Cs2g03600.1/Cs2g036  | 3.98  | 0 | 0 | 2 | MASCOT | T | PLEX8 |
| 1.56E-04 | 0 0 | Cs2g03600.1/Cs2g036  | 3.98  | 0 | 0 | 2 | MASCOT | T | PLEX8 |
| 4.04E-03 | 0 0 | Cs2g03600.1/Cs2g036  | 3.98  | 0 | 0 | 2 | MASCOT | T | PLEX8 |
| 2.28E-01 | 0 0 | Cs2g03600.1/Cs2g036  | 10.83 | 0 | 0 | 2 | MASCOT | T | PLEX8 |
| 4.66E-01 | 0 0 | Cs2g03600.1/Cs2g036  | 4.4   | 0 | 0 | 2 | MASCOT | T |       |
| 2.00E-01 | 0 0 | Cs2g03600.1/Cs2g036  | 4.4   | 0 | 0 | 2 | MASCOT | T |       |
| 1.24E-03 | 0 0 | Cs2g03600.1/Cs2g036  | 4.4   | 0 | 0 | 2 | MASCOT | T |       |
| 3.53E-04 | 0 0 | Cs2g03600.1/Cs2g036  | 4.4   | 0 | 0 | 2 | MASCOT | T |       |
| 7.97E-03 | 0 0 | Cs2g03600.1/Cs2g036  | 6     | 0 | 0 | 2 | MASCOT | T | PLEX8 |
| 4.00E-02 | 0 0 | Cs2g03600.1/Cs2g036  | 6     | 0 | 0 | 2 | MASCOT | T | PLEX8 |
| 2.32E-02 | 0 0 | Cs2g03600.1/Cs2g036  | 6     | 0 | 0 | 2 | MASCOT | T | PLEX8 |
| 2.34E-01 | 0 0 | Cs2g03600.1/Cs2g036  | 6     | 0 | 0 | 2 | MASCOT | T |       |
| 7.92E-03 | 0 0 | Cs2g03600.1/Cs2g036  | 6     | 0 | 0 | 2 | MASCOT | T | PLEX8 |
| 5.69E-03 | 0 0 | Cs2g03600.1/Cs2g036  | 6     | 0 | 0 | 2 | MASCOT | T | PLEX8 |

|              |                     |      |        |   |          |   |       |
|--------------|---------------------|------|--------|---|----------|---|-------|
| 3.86E-02 0 0 | Cs2g03600.1/Cs2g036 | 6    | 0      | 0 | 2 MASCOT | T | PLEX8 |
| 2.31E-02 0 0 | Cs2g03600.1/Cs2g036 | 6    | 0      | 0 | 2 MASCOT | T | PLEX8 |
| 9.08E-02 0 0 | Cs2g03600.1/Cs2g036 | 4.37 | 0      | 0 | 2 MASCOT | T | PLEX8 |
| 2.68E-02 0 0 | Cs2g03600.1/Cs2g036 | 4.37 | 0      | 0 | 2 MASCOT | T | PLEX8 |
| 9.21E-04 0 0 | Cs2g03600.1/Cs2g036 | 4.37 | 0      | 0 | 2 MASCOT | T | PLEX8 |
| 6.07E-03 0 0 | Cs2g03600.1/Cs2g036 | 4.37 | 0      | 0 | 2 MASCOT | T | PLEX8 |
| 6.36E-03 0 0 | Cs2g03600.1/Cs2g036 | 4.37 | 0      | 0 | 2 MASCOT | T | PLEX8 |
| 3.22E-01 0 0 | Cs2g03600.1/Cs2g036 | 4.37 | 0      | 0 | 2 MASCOT | T | PLEX8 |
| 8.63E-05 0 0 | Cs2g03600.1/Cs2g036 | 4.37 | 0      | 0 | 2 MASCOT | T | PLEX8 |
| 1.04E-01 0 0 | Cs2g03600.1/Cs2g036 | 4.37 | 0      | 0 | 2 MASCOT | T | PLEX8 |
| 2.37E-02 0 0 | Cs7g02850.1         | 6.05 | 0      | 0 | 2 MASCOT | T | PLEX8 |
| 3.19E-03 0 0 | Cs7g02850.1         | 6.05 | 0      | 0 | 2 MASCOT | T | PLEX8 |
| 4.80E-02 0 0 | Cs7g02850.1         | 4.53 | 0      | 0 | 2 MASCOT | T | PLEX8 |
| 1.37E-03 0 0 | Cs7g02850.1         | 4.53 | 0      | 0 | 2 MASCOT | T | PLEX8 |
| 6.97E-04 0 0 | Cs7g02850.1         | 4.53 | 0      | 0 | 2 MASCOT | T | PLEX8 |
| 4.87E-03 0 0 | Cs7g02850.1         | 4.53 | 0      | 0 | 2 MASCOT | T | PLEX8 |
| 2.01E-02 0 0 | Cs7g02850.1         | 4.53 | 0      | 0 | 2 MASCOT | T | PLEX8 |
| 5.86E-03 0 0 | Cs7g02850.1         | 4.53 | 0      | 0 | 2 MASCOT | T | PLEX8 |
| 2.68E-03 0 0 | Cs7g02850.1         | 4.53 | 0      | 0 | 2 MASCOT | T | PLEX8 |
| 4.86E-02 0 0 | Cs7g02850.1         | 6.79 | 0      | 0 | 2 MASCOT | T | PLEX8 |
| 9.98E-02 0 0 | Cs7g02850.1         | 6.79 | 0      | 0 | 2 MASCOT | T | PLEX8 |
| 1.27E-02 0 0 | Cs7g02850.1         | 6.79 | 0      | 0 | 2 MASCOT | T | PLEX8 |
| 2.06E-02 0 0 | Cs7g02850.1         | 6.79 | 0      | 0 | 2 MASCOT | T | PLEX8 |
| 4.04E-02 0 0 | Cs7g02850.1         | 6.79 | 0      | 0 | 2 MASCOT | T | PLEX8 |
| 6.86E-02 0 0 | Cs7g02850.1         | 6.79 | 0      | 0 | 2 MASCOT | T |       |
| 5.56E-03 0 0 | Cs7g02850.1         | 4.37 | 0      | 0 | 2 MASCOT | T | PLEX8 |
| 2.23E-02 0 0 | Cs7g02850.1         | 4.37 | 0      | 0 | 2 MASCOT | T | PLEX8 |
| 8.90E-03 0 0 | Cs7g02850.1         | 4.37 | 0      | 0 | 2 MASCOT | T | PLEX8 |
| 6.40E-03 0 0 | Cs7g02850.1         | 4.37 | 0      | 0 | 2 MASCOT | T | PLEX8 |
| 3.71E-02 0 0 | Cs7g02850.1         | 5.66 | 0      | 0 | 2 MASCOT | T | PLEX8 |
| 3.74E-03 0 0 | Cs7g02850.1         | 8.72 | 0 15.9 | 0 | 2 MASCOT | T |       |
| 1.82E-06 0 0 | Cs7g02850.1         | 8.72 | 0 15.9 | 0 | 2 MASCOT | T |       |
| 1.26E-04 0 0 | Cs7g02850.1         | 8.72 | 0 15.9 | 0 | 2 MASCOT | T |       |
| 1.15E-01 0 0 | Cs7g02850.1         | 8.72 | 0 15.9 | 0 | 2 MASCOT | T |       |
| 1.40E-02 0 0 | Cs7g02850.1         | 8.72 | 0      | 0 | 2 MASCOT | T |       |
| 1.07E-05 0 0 | Cs7g02850.1         | 8.72 | 0      | 0 | 2 MASCOT | T |       |
| 3.43E-02 0 0 | Cs7g02850.1         | 8.76 | 0      | 0 | 2 MASCOT | T |       |
| 5.08E-02 0 0 | Cs7g02850.1         | 8.76 | 0      | 0 | 2 MASCOT | T |       |
| 7.99E-03 0 0 | Cs6g21940.1/Cs6g219 | 4.37 | 0      | 0 | 2 MASCOT | T | PLEX8 |
| 3.29E-02 0 0 | Cs6g21940.1/Cs6g219 | 4.37 | 0      | 0 | 2 MASCOT | T | PLEX8 |
| 1.88E-02 0 0 | Cs6g21940.1/Cs6g219 | 4.37 | 0      | 0 | 2 MASCOT | T | PLEX8 |
| 7.23E-03 0 0 | Cs6g21940.1/Cs6g219 | 4.37 | 0      | 0 | 2 MASCOT | T | PLEX8 |
| 2.09E-01 0 0 | Cs6g21940.1/Cs6g219 | 4.21 | 0      | 0 | 2 MASCOT | T | PLEX8 |
| 3.47E-02 0 0 | Cs6g21940.1/Cs6g219 | 4.21 | 0      | 0 | 2 MASCOT | T | PLEX8 |
| 1.28E-01 0 0 | Cs6g21940.1/Cs6g219 | 4.21 | 0      | 0 | 2 MASCOT | T | PLEX8 |
| 1.40E-02 0 0 | Cs6g21940.1/Cs6g219 | 4.21 | 0      | 0 | 2 MASCOT | T | PLEX8 |
| 1.13E-02 0 0 | Cs6g21940.1/Cs6g219 | 4.21 | 0      | 0 | 2 MASCOT | T | PLEX8 |
| 1.67E-01 0 0 | Cs6g21940.1/Cs6g219 | 4.21 | 0      | 0 | 2 MASCOT | T | PLEX8 |
| 1.28E-02 0 0 | Cs6g21940.1/Cs6g219 | 4.25 | 0 15.9 | 0 | 2 MASCOT | T |       |
| 2.62E-01 0 0 | Cs6g21940.1/Cs6g219 | 4.25 | 0 15.9 | 0 | 2 MASCOT | T |       |
| 2.08E-02 0 0 | Cs6g21940.1/Cs6g219 | 4.54 | 0      | 0 | 2 MASCOT | T |       |

|          |     |                     |      |   |      |   |        |        |       |       |
|----------|-----|---------------------|------|---|------|---|--------|--------|-------|-------|
| 1.81E-01 | 0 0 | Cs6g21940.1/Cs6g219 | 5.99 | 0 | 0    | 2 | MASCOT | T      | PLEX8 |       |
| 5.38E-02 | 0 0 | Cs6g21940.1/Cs6g219 | 5.99 | 0 | 0    | 2 | MASCOT | T      | PLEX8 |       |
| 4.45E-01 | 0 0 | Cs6g21940.1/Cs6g219 | 5.99 | 0 | 0    | 2 | MASCOT | T      | PLEX8 |       |
| 1.06E-03 | 0 0 | Cs6g21940.1/Cs6g219 | 4.14 | 0 | 0    | 2 | MASCOT | T      |       |       |
| 1.58E-02 | 0 0 | Cs6g21940.1/Cs6g219 | 4.14 | 0 | 0    | 2 | MASCOT | T      |       |       |
| 8.11E-02 | 0 0 | Cs6g21940.1/Cs6g219 | 4.14 | 0 | 15.9 | 0 | 2      | MASCOT | T     | PLEX8 |
| 8.78E-02 | 0 0 | Cs6g21940.1/Cs6g219 | 4.14 | 0 | 0    | 2 | MASCOT | T      | PLEX8 |       |
| 1.15E-01 | 0 0 | Cs6g21940.1/Cs6g219 | 4.14 | 0 | 0    | 2 | MASCOT | T      | PLEX8 |       |
| 9.52E-02 | 0 0 | Cs6g21940.1/Cs6g219 | 4.14 | 0 | 0    | 2 | MASCOT | T      | PLEX8 |       |
| 1.86E-01 | 0 0 | Cs2g21120.1/Cs2g211 | 5.88 | 0 | 0    | 2 | MASCOT | T      |       |       |
| 3.70E-02 | 0 0 | Cs2g21120.1/Cs2g211 | 5.88 | 0 | 0    | 2 | MASCOT | T      |       |       |
| 1.25E-01 | 0 0 | Cs2g21120.1         | 4.54 | 0 | 0    | 2 | MASCOT | T      | PLEX8 |       |
| 7.03E-04 | 0 0 | Cs2g21120.1         | 4.54 | 0 | 0    | 2 | MASCOT | T      | PLEX8 |       |
| 1.68E-01 | 0 0 | Cs2g21120.1         | 4.54 | 0 | 0    | 2 | MASCOT | T      | PLEX8 |       |
| 2.28E-02 | 0 0 | Cs2g21120.1/Cs2g211 | 6.74 | 0 | 0    | 2 | MASCOT | T      | PLEX8 |       |
| 2.81E-02 | 0 0 | Cs2g21120.1/Cs2g211 | 4.1  | 0 | 15.9 | 0 | 2      | MASCOT | T     | PLEX8 |
| 1.07E-02 | 0 0 | Cs2g21120.1/Cs2g211 | 4.1  | 0 | 15.9 | 0 | 2      | MASCOT | T     | PLEX8 |
| 3.25E-03 | 0 0 | Cs2g21120.1/Cs2g211 | 4.1  | 0 | 0    | 2 | MASCOT | T      | PLEX8 |       |
| 3.92E-02 | 0 0 | Cs2g21120.1/Cs2g211 | 8.75 | 0 | 0    | 2 | MASCOT | T      | PLEX8 |       |
| 1.15E-02 | 0 0 | Cs2g21120.1/Cs2g211 | 8.75 | 0 | 0    | 2 | MASCOT | T      | PLEX8 |       |
| 4.34E-03 | 0 0 | Cs2g21120.1/Cs2g211 | 8.75 | 0 | 0    | 2 | MASCOT | T      | PLEX8 |       |
| 3.11E-01 | 0 0 | Cs2g21120.1/Cs2g211 | 8.75 | 0 | 0    | 2 | MASCOT | T      | PLEX8 |       |
| 1.16E-01 | 0 0 | Cs2g21120.1/Cs2g211 | 8.75 | 0 | 0    | 2 | MASCOT | T      | PLEX8 |       |
| 7.04E-03 | 0 0 | Cs2g21120.1/Cs2g211 | 8.75 | 0 | 0    | 2 | MASCOT | T      | PLEX8 |       |
| 2.70E-02 | 0 0 | Cs2g21120.1/Cs2g211 | 8.75 | 0 | 0    | 2 | MASCOT | T      | PLEX8 |       |
| 4.78E-03 | 0 0 | Cs2g21120.1/Cs2g211 | 4.54 | 0 | 15.9 | 0 | 2      | MASCOT | T     | PLEX8 |
| 4.84E-03 | 0 0 | Cs2g21120.1/Cs2g211 | 4.54 | 0 | 15.9 | 0 | 2      | MASCOT | T     | PLEX8 |
| 2.08E-03 | 0 0 | Cs2g21120.1/Cs2g211 | 4.54 | 0 | 15.9 | 0 | 2      | MASCOT | T     | PLEX8 |
| 8.23E-03 | 0 0 | Cs2g21120.1/Cs2g211 | 3.93 | 0 | 0    | 2 | MASCOT | T      |       |       |
| 1.10E-03 | 0 0 | Cs2g21120.1/Cs2g211 | 3.93 | 0 | 0    | 2 | MASCOT | T      | PLEX8 |       |
| 2.63E-05 | 0 0 | Cs5g09700.1         | 4.02 | 1 | 0    | 2 | MASCOT | T      | PLEX8 |       |
| 2.73E-02 | 0 0 | Cs5g09700.1/Cs5g097 | 4.31 | 0 | 0    | 2 | MASCOT | T      |       |       |
| 3.05E-02 | 0 0 | Cs5g09700.1/Cs5g097 | 4.31 | 0 | 0    | 2 | MASCOT | T      |       |       |
| 9.07E-02 | 0 0 | Cs5g09700.1/Cs5g097 | 4.31 | 0 | 0    | 2 | MASCOT | T      |       |       |
| 4.96E-02 | 0 0 | Cs5g09700.1/Cs5g097 | 4.31 | 0 | 0    | 2 | MASCOT | T      |       |       |
| 2.53E-04 | 0 0 | Cs5g09700.1/Cs5g097 | 4.31 | 0 | 0    | 2 | MASCOT | T      |       |       |
| 1.03E-01 | 0 0 | Cs5g09700.1/Cs5g097 | 4.31 | 0 | 0    | 2 | MASCOT | T      |       |       |
| 1.73E-02 | 0 0 | Cs5g09700.1/Cs5g097 | 4.31 | 0 | 0    | 2 | MASCOT | T      |       |       |
| 1.10E-05 | 0 0 | Cs5g09700.1/Cs5g097 | 4.31 | 0 | 0    | 2 | MASCOT | T      |       |       |
| 9.17E-04 | 0 0 | Cs5g09700.1         | 4.37 | 0 | 0    | 2 | MASCOT | T      |       |       |
| 1.22E-03 | 0 0 | Cs5g09700.1         | 4.37 | 0 | 0    | 2 | MASCOT | T      | PLEX8 |       |
| 8.93E-04 | 0 0 | Cs5g09700.1         | 4.37 | 0 | 0    | 2 | MASCOT | T      | PLEX8 |       |
| 2.09E-02 | 0 0 | Cs5g09700.1/Cs5g097 | 4.53 | 0 | 0    | 2 | MASCOT | T      | PLEX8 |       |
| 5.89E-03 | 0 0 | Cs5g09700.1/Cs5g097 | 4.53 | 0 | 0    | 2 | MASCOT | T      | PLEX8 |       |
| 9.28E-03 | 0 0 | Cs5g09700.1/Cs5g097 | 8.8  | 0 | 0    | 2 | MASCOT | T      | PLEX8 |       |
| 1.86E-01 | 0 0 | Cs5g09700.1/Cs5g097 | 8.8  | 0 | 0    | 2 | MASCOT | T      | PLEX8 |       |
| 3.95E-04 | 0 0 | Cs5g09700.1/Cs5g097 | 5.72 | 0 | 0    | 2 | MASCOT | T      | PLEX8 |       |
| 3.14E-01 | 0 0 | Cs5g09700.1/Cs5g097 | 5.21 | 0 | 0    | 2 | MASCOT | T      | PLEX8 |       |
| 1.05E-01 | 0 0 | Cs5g09700.1/Cs5g097 | 5.21 | 0 | 0    | 2 | MASCOT | T      | PLEX8 |       |
| 2.29E-01 | 0 0 | Cs5g09700.1/Cs5g097 | 5.21 | 0 | 0    | 2 | MASCOT | T      | PLEX8 |       |
| 4.90E-03 | 0 0 | Cs5g09700.1/Cs5g097 | 5.21 | 0 | 0    | 2 | MASCOT | T      | PLEX8 |       |

|          |     |                     |      |   |      |   |        |        |       |       |
|----------|-----|---------------------|------|---|------|---|--------|--------|-------|-------|
| 4.30E-01 | 0 0 | Cs5g15190.1         | 4.53 | 0 | 0    | 2 | MASCOT | T      | PLEX8 |       |
| 2.61E-01 | 0 0 | Cs5g15190.1         | 4.53 | 0 | 0    | 2 | MASCOT | T      | PLEX8 |       |
| 7.41E-02 | 0 0 | Cs5g15190.1         | 4.53 | 0 | 0    | 2 | MASCOT | T      | PLEX8 |       |
| 2.87E-01 | 0 0 | Cs5g15190.1         | 4.53 | 0 | 0    | 2 | MASCOT | T      | PLEX8 |       |
| 9.66E-02 | 0 0 | Cs5g15190.1         | 8.75 | 0 | 0    | 2 | MASCOT | T      | PLEX8 |       |
| 2.31E-02 | 0 0 | Cs5g15190.1         | 4.53 | 0 | 0    | 2 | MASCOT | T      | PLEX8 |       |
| 6.19E-03 | 0 0 | Cs5g15190.1         | 4.53 | 0 | 0    | 2 | MASCOT | T      | PLEX8 |       |
| 2.59E-03 | 0 0 | Cs5g15190.1         | 4.53 | 0 | 0    | 2 | MASCOT | T      | PLEX8 |       |
| 2.95E-03 | 0 0 | Cs5g15190.1         | 4.53 | 0 | 0    | 2 | MASCOT | T      | PLEX8 |       |
| 1.34E-01 | 0 0 | Cs5g15160.1/Cs5g151 | 4.25 | 0 | 0    | 2 | MASCOT | T      | PLEX8 |       |
| 1.25E-01 | 0 0 | Cs5g15160.1/Cs5g151 | 4.25 | 0 | 0    | 2 | MASCOT | T      | PLEX8 |       |
| 5.50E-02 | 0 0 | Cs5g15160.1/Cs5g151 | 4.25 | 0 | 0    | 2 | MASCOT | T      | PLEX8 |       |
| 2.20E-01 | 0 0 | Cs1g08610.1/Cs7g141 | 6    | 0 | 0    | 2 | MASCOT | T      | PLEX8 |       |
| 3.40E-01 | 0 0 | Cs1g08610.1/Cs7g141 | 6    | 0 | 0    | 2 | MASCOT | T      | PLEX8 |       |
| 3.44E-03 | 0 0 | Cs5g15160.1/Cs5g151 | 8.49 | 0 | 15.9 | 0 | 2      | MASCOT | T     | PLEX8 |
| 5.17E-02 | 0 0 | Cs5g15160.1/Cs5g151 | 8.49 | 0 | 15.9 | 0 | 2      | MASCOT | T     | PLEX8 |
| 1.23E-03 | 0 0 | Cs5g15160.1/Cs5g151 | 8.49 | 0 | 15.9 | 0 | 2      | MASCOT | T     | PLEX8 |
| 3.23E-05 | 0 0 | Cs5g15160.1/Cs5g151 | 8.49 | 0 | 0    | 2 | MASCOT | T      | PLEX8 |       |
| 4.87E-02 | 0 0 | Cs5g15160.1/Cs5g151 | 8.49 | 0 | 0    | 2 | MASCOT | T      | PLEX8 |       |
| 7.80E-02 | 0 0 | Cs5g15160.1/Cs5g151 | 8.49 | 0 | 0    | 2 | MASCOT | T      | PLEX8 |       |
| 3.83E-01 | 0 0 | Cs5g15170.1/Cs5g151 | 4.21 | 0 | 0    | 2 | MASCOT | T      | PLEX8 |       |
| 1.72E-02 | 0 0 | Cs6g02920.1/Cs6g029 | 8.22 | 0 | 0    | 2 | MASCOT | T      | PLEX8 |       |
| 1.58E-01 | 0 0 | Cs6g02920.1/Cs6g029 | 4.37 | 0 | 0    | 2 | MASCOT | T      | PLEX8 |       |
| 2.00E-03 | 0 0 | Cs6g02920.1/Cs6g029 | 4.37 | 0 | 0    | 2 | MASCOT | T      | PLEX8 |       |
| 2.52E-02 | 0 0 | Cs6g02920.1/Cs6g029 | 8.47 | 0 | 0    | 2 | MASCOT | T      | PLEX8 |       |
| 5.96E-02 | 0 0 | Cs6g02920.1/Cs6g029 | 4.37 | 0 | 0    | 2 | MASCOT | T      | PLEX8 |       |
| 9.89E-03 | 0 0 | Cs6g02920.1/Cs6g029 | 4.37 | 0 | 0    | 2 | MASCOT | T      | PLEX8 |       |
| 1.19E-02 | 0 0 | Cs6g02920.1/Cs6g029 | 4.37 | 0 | 0    | 2 | MASCOT | T      | PLEX8 |       |
| 3.63E-03 | 0 0 | Cs6g02920.1/Cs6g029 | 4.37 | 0 | 0    | 2 | MASCOT | T      | PLEX8 |       |
| 1.32E-03 | 0 0 | Cs6g02920.1/Cs6g029 | 4.37 | 0 | 0    | 2 | MASCOT | T      | PLEX8 |       |
| 4.45E-02 | 0 0 | Cs6g02920.1/Cs6g029 | 4.37 | 0 | 0    | 2 | MASCOT | T      | PLEX8 |       |
| 1.24E-01 | 0 0 | Cs6g02920.1/Cs6g029 | 4.37 | 0 | 0    | 2 | MASCOT | T      | PLEX8 |       |
| 3.98E-01 | 0 0 | Cs6g02920.1/Cs6g029 | 4.37 | 0 | 0    | 2 | MASCOT | T      | PLEX8 |       |
| 2.15E-03 | 0 0 | Cs6g02920.1/Cs6g029 | 4.14 | 0 | 0    | 2 | MASCOT | T      | PLEX8 |       |
| 1.86E-04 | 0 0 | Cs6g02920.1/Cs6g029 | 4.14 | 0 | 0    | 2 | MASCOT | T      | PLEX8 |       |
| 1.39E-03 | 0 0 | Cs6g02920.1/Cs6g029 | 4.14 | 0 | 0    | 2 | MASCOT | T      | PLEX8 |       |
| 6.47E-02 | 0 0 | Cs6g02920.1/Cs6g029 | 5.72 | 0 | 0    | 2 | MASCOT | T      | PLEX8 |       |
| 1.25E-01 | 0 0 | Cs6g02920.1/Cs6g029 | 5.72 | 0 | 0    | 2 | MASCOT | T      | PLEX8 |       |
| 2.15E-02 | 0 0 | Cs6g02920.1/Cs6g029 | 5.72 | 0 | 0    | 2 | MASCOT | T      | PLEX8 |       |
| 4.81E-04 | 0 0 | Cs6g02920.1/Cs6g029 | 5.72 | 0 | 0    | 2 | MASCOT | T      | PLEX8 |       |
| 1.47E-01 | 0 0 | Cs6g02920.1/Cs6g029 | 5.72 | 0 | 0    | 2 | MASCOT | T      | PLEX8 |       |
| 3.83E-01 | 0 0 | Cs6g02920.1/Cs6g029 | 5.72 | 0 | 0    | 2 | MASCOT | T      | PLEX8 |       |
| 7.80E-04 | 0 0 | Cs6g05570.1         | 4.53 | 0 | 0    | 2 | MASCOT | T      | PLEX8 |       |
| 6.70E-02 | 0 0 | Cs6g05570.1         | 4.53 | 0 | 0    | 2 | MASCOT | T      | PLEX8 |       |
| 4.16E-08 | 0 0 | Cs6g05570.1         | 4.53 | 0 | 0    | 2 | MASCOT | T      | PLEX8 |       |
| 6.54E-04 | 0 0 | Cs6g05570.1         | 4.53 | 0 | 0    | 2 | MASCOT | T      | PLEX8 |       |
| 7.11E-02 | 0 0 | Cs6g05570.1         | 4.53 | 0 | 0    | 2 | MASCOT | T      | PLEX8 |       |
| 6.21E-02 | 0 0 | Cs6g05570.1         | 6.75 | 0 | 0    | 2 | MASCOT | T      | PLEX8 |       |
| 4.52E-02 | 0 0 | Cs6g05570.1         | 6.75 | 0 | 0    | 2 | MASCOT | T      | PLEX8 |       |
| 5.61E-03 | 0 0 | Cs6g05570.1         | 8.75 | 0 | 0    | 2 | MASCOT | T      | PLEX8 |       |
| 1.43E-02 | 0 0 | Cs6g05570.1         | 8.75 | 0 | 0    | 2 | MASCOT | T      | PLEX8 |       |

|              |                     |      |        |   |          |   |       |
|--------------|---------------------|------|--------|---|----------|---|-------|
| 1.77E-02 0 0 | Cs6g05570.1         | 8.75 | 0      | 0 | 2 MASCOT | T |       |
| 1.20E-02 0 0 | Cs6g05570.1         | 8.75 | 0      | 0 | 2 MASCOT | T | PLEX8 |
| 6.96E-02 0 0 | Cs6g05570.1         | 8.75 | 0      | 0 | 2 MASCOT | T | PLEX8 |
| 8.13E-03 0 0 | Cs6g05570.1         | 8.75 | 0      | 0 | 2 MASCOT | T | PLEX8 |
| 2.41E-02 0 0 | Cs6g05570.1         | 8.75 | 0      | 0 | 2 MASCOT | T |       |
| 7.90E-03 0 0 | Cs6g05570.1         | 4    | 0      | 0 | 2 MASCOT | T | PLEX8 |
| 4.30E-06 0 0 | Cs6g05570.1         | 4.37 | 0      | 0 | 2 MASCOT | T | PLEX8 |
| 3.36E-03 0 0 | Cs6g05570.1         | 4.37 | 0      | 0 | 2 MASCOT | T | PLEX8 |
| 6.70E-02 0 0 | Cs6g05570.1         | 4.37 | 0      | 0 | 2 MASCOT | T | PLEX8 |
| 2.07E-02 0 0 | Cs6g05570.1         | 4.54 | 0 15.9 | 0 | 2 MASCOT | T | PLEX8 |
| 9.10E-02 0 0 | Cs6g05570.1         | 4.54 | 0      | 0 | 2 MASCOT | T | PLEX8 |
| 2.66E-02 0 0 | Cs6g05570.1         | 4.54 | 0      | 0 | 2 MASCOT | T | PLEX8 |
| 9.87E-03 0 0 | Cs2g12680.1         | 4.65 | 0      | 0 | 2 MASCOT | T | PLEX8 |
| 4.77E-01 0 0 | Cs2g12680.1         | 5.4  | 0      | 0 | 2 MASCOT | T | PLEX8 |
| 4.69E-01 0 0 | Cs2g12680.1         | 5.4  | 0      | 0 | 2 MASCOT | T | PLEX8 |
| 7.68E-02 0 0 | Cs2g12680.1         | 5.4  | 0      | 0 | 2 MASCOT | T | PLEX8 |
| 1.41E-01 0 0 | Cs2g12680.1         | 5.4  | 0      | 0 | 2 MASCOT | T | PLEX8 |
| 1.07E-02 0 0 | Cs2g12680.1         | 5.4  | 0      | 0 | 2 MASCOT | T | PLEX8 |
| 1.49E-06 0 0 | Cs2g12680.1         | 4.54 | 0      | 0 | 2 MASCOT | T | PLEX8 |
| 8.33E-07 0 0 | Cs2g12680.1         | 4.54 | 0      | 0 | 2 MASCOT | T |       |
| 9.52E-02 0 0 | Cs2g12680.1         | 5.4  | 0      | 0 | 2 MASCOT | T |       |
| 5.57E-02 0 0 | Cs2g12680.1         | 5.4  | 0      | 0 | 2 MASCOT | T |       |
| 8.18E-02 0 0 | Cs2g12680.1         | 4.37 | 0      | 0 | 2 MASCOT | T | PLEX8 |
| 9.30E-03 0 0 | Cs2g12680.1         | 4.37 | 0      | 0 | 2 MASCOT | T | PLEX8 |
| 9.78E-02 0 0 | Cs2g12680.1         | 4.37 | 0      | 0 | 2 MASCOT | T |       |
| 4.56E-03 0 0 | Cs2g12680.1         | 4.37 | 0      | 0 | 2 MASCOT | T |       |
| 2.79E-02 0 0 | Cs2g12680.1         | 9.75 | 0      | 0 | 2 MASCOT | T | PLEX8 |
| 1.37E-01 0 0 | Cs2g12680.1         | 4.53 | 0      | 0 | 2 MASCOT | T | PLEX8 |
| 1.17E-01 0 0 | Cs2g12680.1         | 4.53 | 0      | 0 | 2 MASCOT | T | PLEX8 |
| 9.18E-03 0 0 | Cs2g12680.1         | 4.53 | 0      | 0 | 2 MASCOT | T | PLEX8 |
| 2.09E-01 0 0 | Cs2g12680.1         | 4.53 | 0      | 0 | 2 MASCOT | T | PLEX8 |
| 1.46E-05 0 0 | Cs2g12680.1         | 4.53 | 0      | 0 | 2 MASCOT | T | PLEX8 |
| 1.36E-01 0 0 | Cs3g06080.1/Cs6g189 | 6.12 | 0      | 0 | 2 MASCOT | T | PLEX8 |
| 3.47E-02 0 0 | Cs3g06080.1/Cs6g189 | 6.12 | 0      | 0 | 2 MASCOT | T | PLEX8 |
| 2.67E-01 0 0 | Cs3g06080.1/Cs6g189 | 6.12 | 0      | 0 | 2 MASCOT | T | PLEX8 |
| 5.26E-02 0 0 | Cs3g06080.1/Cs6g189 | 6.12 | 0      | 0 | 2 MASCOT | T | PLEX8 |
| 6.48E-03 0 0 | Cs6g18910.1         | 4.37 | 0      | 0 | 2 MASCOT | T |       |
| 3.35E-07 0 0 | Cs6g18910.1         | 4.37 | 0      | 0 | 2 MASCOT | T |       |
| 1.04E-06 0 0 | Cs6g18910.1         | 4.37 | 0      | 0 | 2 MASCOT | T |       |
| 1.48E-02 0 0 | Cs6g18910.1         | 5.84 | 0      | 0 | 2 MASCOT | T | PLEX8 |
| 1.60E-01 0 0 | Cs3g06080.1/Cs6g189 | 8.5  | 0      | 0 | 2 MASCOT | T |       |
| 1.54E-01 0 0 | Cs3g06080.1/Cs6g189 | 8.5  | 0      | 0 | 2 MASCOT | T |       |
| 1.80E-01 0 0 | Cs3g06080.1/Cs6g189 | 8.5  | 0      | 0 | 2 MASCOT | T | PLEX8 |
| 4.16E-01 0 0 | Cs6g18910.1         | 5.84 | 0      | 0 | 2 MASCOT | T |       |
| 3.63E-01 0 0 | Cs6g18910.1         | 5.84 | 0      | 0 | 2 MASCOT | T |       |
| 1.62E-01 0 0 | Cs6g18910.1         | 5.84 | 0      | 0 | 2 MASCOT | T |       |
| 6.20E-02 0 0 | Cs3g06080.1/Cs6g189 | 8.75 | 0      | 0 | 2 MASCOT | T | PLEX8 |
| 2.66E-01 0 0 | Cs6g18900.1/Cs6g189 | 8.75 | 0      | 0 | 2 MASCOT | T | PLEX8 |
| 1.66E-01 0 0 | Cs6g18900.1/Cs6g189 | 8.75 | 0      | 0 | 2 MASCOT | T |       |
| 1.13E-01 0 0 | Cs6g18900.1/Cs6g189 | 8.75 | 0      | 0 | 2 MASCOT | T | PLEX8 |
| 1.05E-01 0 0 | Cs6g18900.1/Cs6g189 | 8.75 | 0      | 0 | 2 MASCOT | T | PLEX8 |



|          |     |                     |      |   |      |   |        |        |       |       |
|----------|-----|---------------------|------|---|------|---|--------|--------|-------|-------|
| 1.46E-01 | 0 0 | Cs6g18900.1/Cs6g189 | 8.75 | 0 | 0    | 2 | MASCOT | T      | PLEX8 |       |
| 2.91E-01 | 0 0 | Cs5g15160.1/Cs5g151 | 4.37 | 0 | 0    | 2 | MASCOT | T      | PLEX8 |       |
| 1.65E-01 | 0 0 | Cs5g15160.1         | 4.53 | 0 | 0    | 2 | MASCOT | T      | PLEX8 |       |
| 1.43E-01 | 0 0 | Cs5g15160.1         | 4.53 | 0 | 0    | 2 | MASCOT | T      | PLEX8 |       |
| 1.33E-02 | 0 0 | Cs5g15160.1         | 4.53 | 0 | 0    | 2 | MASCOT | T      | PLEX8 |       |
| 6.72E-02 | 0 0 | Cs5g15160.1         | 4.53 | 0 | 0    | 2 | MASCOT | T      | PLEX8 |       |
| 5.83E-02 | 0 0 | Cs5g15160.1         | 4.53 | 0 | 0    | 2 | MASCOT | T      | PLEX8 |       |
| 7.10E-03 | 0 0 | Cs5g15160.1         | 4.53 | 0 | 0    | 2 | MASCOT | T      | PLEX8 |       |
| 1.34E-01 | 0 0 | Cs5g15160.1/Cs5g151 | 4.25 | 0 | 0    | 2 | MASCOT | T      | PLEX8 |       |
| 1.25E-01 | 0 0 | Cs5g15160.1/Cs5g151 | 4.25 | 0 | 0    | 2 | MASCOT | T      | PLEX8 |       |
| 5.50E-02 | 0 0 | Cs5g15160.1/Cs5g151 | 4.25 | 0 | 0    | 2 | MASCOT | T      | PLEX8 |       |
| 2.20E-01 | 0 0 | Cs1g08610.1/Cs7g141 | 6    | 0 | 0    | 2 | MASCOT | T      | PLEX8 |       |
| 3.40E-01 | 0 0 | Cs1g08610.1/Cs7g141 | 6    | 0 | 0    | 2 | MASCOT | T      | PLEX8 |       |
| 5.77E-02 | 0 0 | Cs5g15160.1         | 6.14 | 1 | 0    | 2 | MASCOT | T      | PLEX8 |       |
| 3.44E-03 | 0 0 | Cs5g15160.1/Cs5g151 | 8.49 | 0 | 15.9 | 0 | 2      | MASCOT | T     | PLEX8 |
| 5.17E-02 | 0 0 | Cs5g15160.1/Cs5g151 | 8.49 | 0 | 15.9 | 0 | 2      | MASCOT | T     | PLEX8 |
| 1.23E-03 | 0 0 | Cs5g15160.1/Cs5g151 | 8.49 | 0 | 15.9 | 0 | 2      | MASCOT | T     | PLEX8 |
| 3.23E-05 | 0 0 | Cs5g15160.1/Cs5g151 | 8.49 | 0 | 0    | 2 | MASCOT | T      | PLEX8 |       |
| 4.87E-02 | 0 0 | Cs5g15160.1/Cs5g151 | 8.49 | 0 | 0    | 2 | MASCOT | T      | PLEX8 |       |
| 7.80E-02 | 0 0 | Cs5g15160.1/Cs5g151 | 8.49 | 0 | 0    | 2 | MASCOT | T      | PLEX8 |       |
| 5.15E-01 | 0 0 | Cs6g08680.1         | 6    | 0 | 0    | 2 | MASCOT | T      | PLEX8 |       |
| 3.14E-01 | 0 0 | Cs6g08680.1         | 6    | 0 | 0    | 2 | MASCOT | T      | PLEX8 |       |
| 2.87E-02 | 0 0 | Cs6g08680.1         | 6    | 0 | 0    | 2 | MASCOT | T      | PLEX8 |       |
| 4.17E-02 | 0 0 | Cs6g08680.1         | 6    | 0 | 0    | 2 | MASCOT | T      | PLEX8 |       |
| 3.73E-02 | 0 0 | Cs6g08680.1         | 6    | 0 | 0    | 2 | MASCOT | T      | PLEX8 |       |
| 1.01E-01 | 0 0 | Cs6g08680.1         | 5.71 | 0 | 0    | 2 | MASCOT | T      | PLEX8 |       |
| 1.56E-03 | 0 0 | Cs6g08680.1         | 5.71 | 0 | 0    | 2 | MASCOT | T      | PLEX8 |       |
| 9.21E-03 | 0 0 | Cs6g08680.1         | 5.71 | 0 | 0    | 2 | MASCOT | T      | PLEX8 |       |
| 6.17E-03 | 0 0 | Cs6g08680.1         | 5.71 | 0 | 0    | 2 | MASCOT | T      | PLEX8 |       |
| 2.39E-01 | 0 0 | Cs6g08680.1         | 5.38 | 0 | 0    | 2 | MASCOT | T      | PLEX8 |       |
| 1.17E-02 | 0 0 | Cs6g08680.1         | 5.38 | 0 | 0    | 2 | MASCOT | T      | PLEX8 |       |
| 9.86E-02 | 0 0 | Cs6g08680.1         | 8.72 | 0 | 0    | 2 | MASCOT | T      | PLEX8 |       |
| 5.10E-01 | 0 0 | Cs6g08680.1         | 8.76 | 0 | 0    | 2 | MASCOT | T      | PLEX8 |       |
| 3.91E-03 | 0 0 | Cs6g08680.1         | 8.76 | 0 | 0    | 2 | MASCOT | T      | PLEX8 |       |
| 4.12E-03 | 0 0 | Cs6g08680.1         | 8.76 | 0 | 0    | 2 | MASCOT | T      |       |       |
| 6.75E-03 | 0 0 | Cs6g08680.1         | 7.94 | 0 | 0    | 2 | MASCOT | T      | PLEX8 |       |
| 4.35E-02 | 0 0 | Cs6g08680.1         | 7.94 | 0 | 0    | 2 | MASCOT | T      | PLEX8 |       |
| 1.36E-01 | 0 0 | Cs6g08680.1         | 8.41 | 0 | 0    | 2 | MASCOT | T      | PLEX8 |       |
| 1.56E-01 | 0 0 | Cs6g08680.1         | 8.41 | 0 | 0    | 2 | MASCOT | T      | PLEX8 |       |
| 3.31E-03 | 0 0 | Cs3g19360.1         | 4.37 | 0 | 0    | 2 | MASCOT | T      | PLEX8 |       |
| 5.28E-04 | 0 0 | Cs3g19360.1         | 4.37 | 0 | 0    | 2 | MASCOT | T      | PLEX8 |       |
| 4.13E-02 | 0 0 | Cs3g19360.1         | 4.37 | 0 | 0    | 2 | MASCOT | T      | PLEX8 |       |
| 5.42E-03 | 0 0 | Cs3g19360.1         | 5.95 | 1 | 0    | 2 | MASCOT | T      | PLEX8 |       |
| 5.76E-01 | 0 0 | Cs3g19360.1         | 4.53 | 0 | 0    | 2 | MASCOT | T      | PLEX8 |       |
| 8.06E-02 | 0 0 | Cs3g19360.1         | 8.5  | 0 | 0    | 2 | MASCOT | T      | PLEX8 |       |
| 2.23E-01 | 0 0 | Cs3g19360.1         | 8.5  | 0 | 0    | 2 | MASCOT | T      | PLEX8 |       |
| 3.46E-03 | 0 0 | Cs3g19360.1         | 4.53 | 0 | 0    | 2 | MASCOT | T      | PLEX8 |       |
| 1.97E-03 | 0 0 | Cs3g19360.1         | 4.53 | 0 | 0    | 2 | MASCOT | T      | PLEX8 |       |
| 7.45E-04 | 0 0 | Cs3g19360.1         | 4.53 | 0 | 0    | 2 | MASCOT | T      | PLEX8 |       |
| 9.59E-05 | 0 0 | Cs3g19360.1         | 4.53 | 0 | 0    | 2 | MASCOT | T      | PLEX8 |       |
| 4.62E-02 | 0 0 | Cs3g19360.1         | 4.53 | 0 | 0    | 2 | MASCOT | T      | PLEX8 |       |

|          |     |                      |      |   |      |   |        |        |       |       |
|----------|-----|----------------------|------|---|------|---|--------|--------|-------|-------|
| 3.65E-01 | 0 0 | Cs3g19360.1          | 6.85 | 0 | 0    | 2 | MASCOT | T      | PLEX8 |       |
| 8.22E-03 | 0 0 | Cs3g19360.1          | 5.32 | 0 | 0    | 2 | MASCOT | T      | PLEX8 |       |
| 2.13E-01 | 0 0 | Cs3g19360.1          | 5.32 | 0 | 0    | 2 | MASCOT | T      | PLEX8 |       |
| 1.47E-02 | 0 0 | Cs3g19360.1          | 5.32 | 0 | 0    | 2 | MASCOT | T      | PLEX8 |       |
| 8.93E-03 | 0 0 | Cs3g19360.1          | 5.32 | 0 | 0    | 2 | MASCOT | T      | PLEX8 |       |
| 6.76E-02 | 0 0 | Cs3g19360.1          | 5.32 | 0 | 0    | 2 | MASCOT | T      | PLEX8 |       |
| 1.91E-02 | 0 0 | Cs7g09280.1          | 8.75 | 1 | 0    | 2 | MASCOT | T      | PLEX8 |       |
| 5.00E-03 | 0 0 | Cs7g09280.1          | 5.4  | 0 | 0    | 2 | MASCOT | T      | PLEX8 |       |
| 2.33E-03 | 0 0 | Cs7g09280.1          | 5.4  | 0 | 0    | 2 | MASCOT | T      | PLEX8 |       |
| 2.75E-02 | 0 0 | Cs7g09280.1          | 5.4  | 0 | 0    | 2 | MASCOT | T      |       |       |
| 2.92E-04 | 0 0 | Cs7g09280.1          | 5.4  | 0 | 0    | 2 | MASCOT | T      |       |       |
| 8.88E-02 | 0 0 | Cs7g09280.1 ! Cs7g17 | 8.73 | 0 | 0    | 2 | MASCOT | T      | PLEX8 |       |
| 1.21E-02 | 0 0 | Cs7g09280.1 ! Cs7g17 | 8.73 | 0 | 0    | 2 | MASCOT | T      | PLEX8 |       |
| 1.15E-01 | 0 0 | Cs7g09280.1 ! Cs7g17 | 8.73 | 0 | 0    | 2 | MASCOT | T      | PLEX8 |       |
| 3.40E-03 | 0 0 | Cs7g09280.1 ! Cs7g17 | 8.73 | 0 | 0    | 2 | MASCOT | T      | PLEX8 |       |
| 1.44E-04 | 0 0 | Cs7g09280.1          | 5.32 | 0 | 0    | 2 | MASCOT | T      | PLEX8 |       |
| 1.34E-02 | 0 0 | Cs7g09280.1          | 5.32 | 0 | 0    | 2 | MASCOT | T      | PLEX8 |       |
| 9.12E-03 | 0 0 | Cs7g09280.1          | 5.32 | 0 | 0    | 2 | MASCOT | T      |       |       |
| 3.65E-04 | 0 0 | Cs7g09280.1          | 5.32 | 0 | 0    | 2 | MASCOT | T      |       |       |
| 5.01E-03 | 0 0 | Cs7g09280.1          | 8.76 | 0 | 0    | 2 | MASCOT | T      | PLEX8 |       |
| 2.19E-01 | 0 0 | Cs7g09280.1/Cs7g170  | 9.75 | 0 | 0    | 2 | MASCOT | T      | PLEX8 |       |
| 3.06E-01 | 0 0 | Cs7g09280.1/Cs7g170  | 9.75 | 0 | 0    | 2 | MASCOT | T      |       |       |
| 6.43E-04 | 0 0 | Cs7g09280.1          | 4.37 | 0 | 0    | 2 | MASCOT | T      |       |       |
| 4.65E-02 | 0 0 | Cs7g09280.1          | 4.37 | 0 | 0    | 2 | MASCOT | T      |       |       |
| 1.67E-01 | 0 0 | Cs5g28200.1/Cs5g282  | 4.53 | 0 | 0    | 2 | MASCOT | T      | PLEX8 |       |
| 4.66E-02 | 0 0 | Cs5g28200.1/Cs5g282  | 6.74 | 0 | 0    | 2 | MASCOT | T      | PLEX8 |       |
| 1.13E-01 | 0 0 | Cs5g28200.1/Cs5g282  | 6.74 | 0 | 0    | 2 | MASCOT | T      | PLEX8 |       |
| 3.28E-03 | 0 0 | Cs8g07030.1          | 3.93 | 0 | 0    | 2 | MASCOT | T      | PLEX8 |       |
| 3.04E-03 | 0 0 | Cs8g07030.1          | 3.93 | 0 | 0    | 2 | MASCOT | T      | PLEX8 |       |
| 2.53E-01 | 0 0 | Cs8g07030.1          | 3.93 | 0 | 0    | 2 | MASCOT | T      | PLEX8 |       |
| 2.56E-01 | 0 0 | Cs8g07030.1          | 3.93 | 0 | 0    | 2 | MASCOT | T      | PLEX8 |       |
| 4.37E-03 | 0 0 | Cs8g07030.1          | 3.93 | 0 | 0    | 2 | MASCOT | T      | PLEX8 |       |
| 6.37E-03 | 0 0 | Cs5g28200.1/Cs5g282  | 5.4  | 0 | 15.9 | 0 | 2      | MASCOT | T     | PLEX8 |
| 1.81E-02 | 0 0 | Cs5g28200.1/Cs5g282  | 5.4  | 0 | 15.9 | 0 | 2      | MASCOT | T     | PLEX8 |
| 3.49E-01 | 0 0 | Cs5g28200.1/Cs5g282  | 5.4  | 0 | 0    | 2 | MASCOT | T      | PLEX8 |       |
| 3.90E-03 | 0 0 | Cs5g28200.1/Cs5g282  | 5.4  | 0 | 0    | 2 | MASCOT | T      | PLEX8 |       |
| 9.18E-04 | 0 0 | Cs5g28200.1/Cs5g282  | 5.83 | 0 | 0    | 2 | MASCOT | T      | PLEX8 |       |
| 3.13E-01 | 0 0 | Cs8g07020.1/Cs8g070  | 5.97 | 0 | 0    | 2 | MASCOT | T      | PLEX8 |       |
| 1.02E-01 | 0 0 | Cs5g28200.1/Cs5g282  | 5.4  | 0 | 0    | 2 | MASCOT | T      | PLEX8 |       |
| 9.83E-03 | 0 0 | Cs5g28200.1/Cs5g282  | 5.4  | 0 | 0    | 2 | MASCOT | T      | PLEX8 |       |
| 1.15E-02 | 0 0 | Cs5g28200.1/Cs5g282  | 5.4  | 0 | 0    | 2 | MASCOT | T      | PLEX8 |       |
| 2.57E-01 | 0 0 | Cs5g28200.1/Cs5g282  | 5.4  | 0 | 0    | 2 | MASCOT | T      | PLEX8 |       |
| 1.27E-01 | 0 0 | orange1.1t01931.1    | 5.88 | 0 | 0    | 2 | MASCOT | T      | PLEX8 |       |
| 2.21E-02 | 0 0 | orange1.1t01931.1    | 5.88 | 0 | 0    | 2 | MASCOT | T      | PLEX8 |       |
| 2.70E-03 | 0 0 | orange1.1t01931.1    | 5.88 | 0 | 0    | 2 | MASCOT | T      | PLEX8 |       |
| 3.25E-03 | 0 0 | orange1.1t01931.1    | 4.53 | 0 | 0    | 2 | MASCOT | T      | PLEX8 |       |
| 1.08E-02 | 0 0 | orange1.1t01931.1    | 4.53 | 0 | 0    | 2 | MASCOT | T      |       |       |
| 7.48E-02 | 0 0 | orange1.1t01931.1    | 6    | 0 | 0    | 2 | MASCOT | T      | PLEX8 |       |
| 4.39E-02 | 0 0 | orange1.1t01931.1    | 6    | 0 | 0    | 2 | MASCOT | T      |       |       |
| 2.16E-03 | 0 0 | orange1.1t01931.1    | 5.21 | 0 | 0    | 2 | MASCOT | T      | PLEX8 |       |
| 6.69E-04 | 0 0 | orange1.1t01931.1    | 5.21 | 0 | 0    | 2 | MASCOT | T      | PLEX8 |       |

|          |     |                     |      |   |      |   |        |        |       |       |
|----------|-----|---------------------|------|---|------|---|--------|--------|-------|-------|
| 5.21E-05 | 0 0 | orange1.1t01931.1   | 5.21 | 0 | 0    | 2 | MASCOT | T      | PLEX8 |       |
| 1.12E-03 | 0 0 | orange1.1t01931.1   | 5.21 | 0 | 0    | 2 | MASCOT | T      | PLEX8 |       |
| 2.62E-08 | 0 0 | orange1.1t01931.1   | 5.21 | 0 | 0    | 2 | MASCOT | T      | PLEX8 |       |
| 1.15E-02 | 0 0 | orange1.1t01931.1   | 4.53 | 0 | 0    | 2 | MASCOT | T      | PLEX8 |       |
| 1.70E-05 | 0 0 | orange1.1t01931.1   | 4.53 | 0 | 0    | 2 | MASCOT | T      | PLEX8 |       |
| 1.12E-02 | 0 0 | orange1.1t01931.1   | 5.5  | 0 | 0    | 2 | MASCOT | T      | PLEX8 |       |
| 4.76E-04 | 0 0 | orange1.1t01931.1   | 6.83 | 0 | 0    | 2 | MASCOT | T      | PLEX8 |       |
| 4.32E-01 | 0 0 | orange1.1t01931.1   | 6.83 | 0 | 0    | 2 | MASCOT | T      | PLEX8 |       |
| 1.21E-01 | 0 0 | orange1.1t01931.1   | 6.83 | 0 | 0    | 2 | MASCOT | T      | PLEX8 |       |
| 1.11E-01 | 0 0 | orange1.1t03063.1   | 4.53 | 0 | 0    | 2 | MASCOT | T      | PLEX8 |       |
| 2.40E-01 | 0 0 | orange1.1t03063.1   | 4.53 | 0 | 0    | 2 | MASCOT | T      | PLEX8 |       |
| 2.18E-01 | 0 0 | orange1.1t03063.1   | 9.76 | 0 | 0    | 2 | MASCOT | T      | PLEX8 |       |
| 2.74E-02 | 0 0 | orange1.1t03063.1   | 8.72 | 0 | 0    | 2 | MASCOT | T      | PLEX8 |       |
| 3.71E-02 | 0 0 | orange1.1t03063.1   | 8.72 | 0 | 0    | 2 | MASCOT | T      | PLEX8 |       |
| 3.85E-02 | 0 0 | orange1.1t03063.1   | 8.72 | 0 | 0    | 2 | MASCOT | T      | PLEX8 |       |
| 2.30E-03 | 0 0 | orange1.1t03063.1   | 4.14 | 0 | 0    | 2 | MASCOT | T      | PLEX8 |       |
| 7.09E-03 | 0 0 | orange1.1t03063.1   | 4.14 | 0 | 0    | 2 | MASCOT | T      | PLEX8 |       |
| 2.70E-02 | 0 0 | orange1.1t03063.1   | 4.14 | 0 | 0    | 2 | MASCOT | T      | PLEX8 |       |
| 1.94E-01 | 0 0 | orange1.1t03063.1   | 6    | 0 | 15.9 | 0 | 2      | MASCOT | T     | PLEX8 |
| 6.80E-03 | 0 0 | orange1.1t03063.1   | 8.52 | 0 | 15.9 | 0 | 2      | MASCOT | T     | PLEX8 |
| 4.42E-02 | 0 0 | orange1.1t03063.1   | 8.52 | 0 | 15.9 | 0 | 2      | MASCOT | T     | PLEX8 |
| 1.15E-01 | 0 0 | orange1.1t03063.1   | 8.52 | 0 | 15.9 | 0 | 2      | MASCOT | T     | PLEX8 |
| 1.62E-01 | 0 0 | orange1.1t03063.1   | 8.52 | 0 | 15.9 | 0 | 2      | MASCOT | T     | PLEX8 |
| 4.29E-02 | 0 0 | orange1.1t03063.1   | 8.52 | 0 | 15.9 | 0 | 2      | MASCOT | T     | PLEX8 |
| 1.45E-02 | 0 0 | orange1.1t03063.1   | 8.52 | 0 | 0    | 2 | MASCOT | T      | PLEX8 |       |
| 3.21E-03 | 0 0 | orange1.1t03063.1   | 6    | 0 | 0    | 2 | MASCOT | T      | PLEX8 |       |
| 4.92E-02 | 0 0 | orange1.1t03063.1   | 6    | 0 | 0    | 2 | MASCOT | T      | PLEX8 |       |
| 3.67E-05 | 0 0 | Cs4g08130.1         | 6.05 | 0 | 0    | 2 | MASCOT | T      | PLEX8 |       |
| 3.12E-03 | 0 0 | Cs4g08130.1         | 4.25 | 0 | 0    | 2 | MASCOT | T      | PLEX8 |       |
| 2.80E-01 | 0 0 | Cs4g08130.1         | 4.25 | 0 | 0    | 2 | MASCOT | T      | PLEX8 |       |
| 7.70E-02 | 0 0 | Cs4g08130.1         | 4.03 | 0 | 0    | 2 | MASCOT | T      | PLEX8 |       |
| 7.64E-05 | 0 0 | Cs4g08130.1         | 4.03 | 0 | 0    | 2 | MASCOT | T      | PLEX8 |       |
| 2.26E-01 | 0 0 | Cs4g08130.1         | 4.03 | 0 | 0    | 2 | MASCOT | T      | PLEX8 |       |
| 6.28E-02 | 0 0 | Cs4g08130.1         | 5.97 | 0 | 0    | 2 | MASCOT | T      | PLEX8 |       |
| 2.03E-02 | 0 0 | Cs4g08130.1         | 5.97 | 0 | 0    | 2 | MASCOT | T      | PLEX8 |       |
| 1.52E-03 | 0 0 | Cs4g08130.1         | 5.97 | 0 | 0    | 2 | MASCOT | T      | PLEX8 |       |
| 3.22E-02 | 0 0 | Cs4g08130.1         | 6    | 0 | 0    | 2 | MASCOT | T      | PLEX8 |       |
| 1.66E-01 | 0 0 | Cs4g08130.1         | 6    | 0 | 0    | 2 | MASCOT | T      | PLEX8 |       |
| 4.80E-03 | 0 0 | Cs4g08130.1         | 6    | 0 | 0    | 2 | MASCOT | T      | PLEX8 |       |
| 5.28E-02 | 0 0 | Cs4g08130.1         | 6    | 0 | 0    | 2 | MASCOT | T      | PLEX8 |       |
| 9.08E-02 | 0 0 | Cs4g08130.1         | 4.21 | 0 | 0    | 2 | MASCOT | T      | PLEX8 |       |
| 1.28E-01 | 0 0 | Cs4g08130.1         | 4.21 | 0 | 0    | 2 | MASCOT | T      | PLEX8 |       |
| 1.10E-01 | 0 0 | Cs4g08130.1         | 4.21 | 0 | 0    | 2 | MASCOT | T      | PLEX8 |       |
| 1.32E-02 | 0 0 | Cs4g08130.1         | 8.75 | 0 | 0    | 2 | MASCOT | T      | PLEX8 |       |
| 6.78E-03 | 0 0 | Cs6g09150.1/Cs6g091 | 4.09 | 0 | 0    | 2 | MASCOT | T      | PLEX8 |       |
| 6.56E-03 | 0 0 | Cs6g09150.1/Cs6g091 | 4.09 | 0 | 0    | 2 | MASCOT | T      | PLEX8 |       |
| 6.65E-02 | 0 0 | Cs7g30630.1         | 6    | 0 | 0    | 2 | MASCOT | T      | PLEX8 |       |
| 6.32E-02 | 0 0 | Cs7g30630.1         | 6    | 0 | 0    | 2 | MASCOT | T      | PLEX8 |       |
| 4.36E-02 | 0 0 | Cs7g30630.1         | 6    | 0 | 0    | 2 | MASCOT | T      | PLEX8 |       |
| 2.16E-01 | 0 0 | Cs7g30630.1         | 6    | 0 | 15.9 | 0 | 2      | MASCOT | T     | PLEX8 |
| 1.06E-01 | 0 0 | Cs7g30630.1         | 6    | 0 | 0    | 2 | MASCOT | T      | PLEX8 |       |

|          |     |                       |      |   |      |   |        |        |       |       |
|----------|-----|-----------------------|------|---|------|---|--------|--------|-------|-------|
| 2.20E-01 | 0 0 | Cs7g30630.1           | 6    | 0 | 0    | 2 | MASCOT | T      | PLEX8 |       |
| 2.01E-02 | 0 0 | Cs7g30630.1           | 4.65 | 0 | 15.9 | 0 | 2      | MASCOT | T     | PLEX8 |
| 7.99E-03 | 0 0 | Cs7g30630.1           | 4.65 | 0 | 15.9 | 0 | 2      | MASCOT | T     |       |
| 1.09E-04 | 0 0 | Cs7g30630.1           | 4.65 | 0 | 15.9 | 0 | 2      | MASCOT | T     | PLEX8 |
| 5.94E-04 | 0 0 | Cs7g30630.1           | 4.53 | 0 | 0    | 0 | 2      | MASCOT | T     |       |
| 4.91E-01 | 0 0 | Cs7g30630.1           | 5.84 | 0 | 0    | 0 | 2      | MASCOT | T     | PLEX8 |
| 1.62E-01 | 0 0 | Cs7g30630.1           | 5.84 | 0 | 0    | 0 | 2      | MASCOT | T     | PLEX8 |
| 2.78E-01 | 0 0 | Cs5g28600.1/Cs5g286   | 8.76 | 0 | 0    | 0 | 2      | MASCOT | T     | PLEX8 |
| 1.32E-01 | 0 0 | Cs5g28600.1/Cs5g286   | 8.76 | 0 | 0    | 0 | 2      | MASCOT | T     |       |
| 2.23E-01 | 0 0 | Cs5g28600.1/Cs5g286   | 8.76 | 0 | 0    | 0 | 2      | MASCOT | T     | PLEX8 |
| 3.34E-03 | 0 0 | orange1.1t03081.1/ora | 4.53 | 0 | 15.9 | 0 | 2      | MASCOT | T     |       |
| 6.53E-02 | 0 0 | orange1.1t03078.1/ora | 4.68 | 1 | 0    | 0 | 2      | MASCOT | T     | PLEX8 |
| 6.09E-03 | 0 0 | orange1.1t03081.1/ora | 4.25 | 0 | 0    | 0 | 2      | MASCOT | T     | PLEX8 |
| 4.18E-01 | 0 0 | orange1.1t03081.1/ora | 4.25 | 0 | 0    | 0 | 2      | MASCOT | T     | PLEX8 |
| 4.47E-02 | 0 0 | orange1.1t03078.1/ora | 6.84 | 0 | 0    | 0 | 2      | MASCOT | T     |       |
| 2.17E-03 | 0 0 | orange1.1t03078.1/ora | 6.84 | 0 | 0    | 0 | 2      | MASCOT | T     |       |
| 4.98E-02 | 0 0 | orange1.1t03078.1/ora | 6.84 | 0 | 0    | 0 | 2      | MASCOT | T     |       |
| 3.33E-02 | 0 0 | orange1.1t03078.1/ora | 6.84 | 0 | 0    | 0 | 2      | MASCOT | T     | PLEX8 |
| 1.58E-03 | 0 0 | orange1.1t03078.2/ora | 4.03 | 0 | 0    | 0 | 2      | MASCOT | T     | PLEX8 |
| 7.98E-02 | 0 0 | orange1.1t03078.2/ora | 4.03 | 0 | 0    | 0 | 2      | MASCOT | T     | PLEX8 |
| 2.17E-02 | 0 0 | orange1.1t03078.2/ora | 4.03 | 0 | 0    | 0 | 2      | MASCOT | T     | PLEX8 |
| 1.42E-03 | 0 0 | orange1.1t03078.2/ora | 4.03 | 0 | 0    | 0 | 2      | MASCOT | T     |       |
| 2.79E-03 | 0 0 | orange1.1t03078.2/ora | 4.03 | 0 | 0    | 0 | 2      | MASCOT | T     |       |
| 1.19E-02 | 0 0 | orange1.1t03078.1/ora | 4.37 | 0 | 15.9 | 0 | 2      | MASCOT | T     |       |
| 2.56E-03 | 0 0 | orange1.1t03078.1/ora | 4.37 | 0 | 0    | 0 | 2      | MASCOT | T     |       |
| 1.14E-01 | 0 0 | orange1.1t03078.1/ora | 6.71 | 0 | 0    | 0 | 2      | MASCOT | T     | PLEX8 |
| 5.39E-02 | 0 0 | orange1.1t03078.1/ora | 6.71 | 0 | 0    | 0 | 2      | MASCOT | T     | PLEX8 |
| 3.00E-03 | 0 0 | Cs2g21190.1/Cs2g211   | 4.03 | 0 | 0    | 0 | 2      | MASCOT | T     |       |
| 8.31E-03 | 0 0 | Cs2g21190.1/Cs2g211   | 4.25 | 0 | 0    | 0 | 2      | MASCOT | T     | PLEX8 |
| 3.17E-03 | 0 0 | Cs2g21190.1/Cs2g211   | 4.25 | 0 | 0    | 0 | 2      | MASCOT | T     | PLEX8 |
| 9.19E-03 | 0 0 | Cs2g21190.1/Cs2g211   | 9.75 | 0 | 0    | 0 | 2      | MASCOT | T     | PLEX8 |
| 1.29E-01 | 0 0 | Cs2g21190.1/Cs2g211   | 8.75 | 0 | 15.9 | 0 | 2      | MASCOT | T     | PLEX8 |
| 6.16E-02 | 0 0 | Cs2g21190.1/Cs2g211   | 8.75 | 0 | 15.9 | 0 | 2      | MASCOT | T     | PLEX8 |
| 1.83E-01 | 0 0 | Cs2g21190.1/Cs2g211   | 8.75 | 0 | 0    | 0 | 2      | MASCOT | T     | PLEX8 |
| 5.81E-02 | 0 0 | Cs2g21190.1/Cs2g211   | 4.53 | 0 | 0    | 0 | 2      | MASCOT | T     | PLEX8 |
| 2.75E-05 | 0 0 | Cs2g21190.1/Cs2g211   | 4.53 | 0 | 0    | 0 | 2      | MASCOT | T     | PLEX8 |
| 2.84E-02 | 0 0 | Cs2g21190.1/Cs2g211   | 4.53 | 0 | 0    | 0 | 2      | MASCOT | T     | PLEX8 |
| 4.85E-02 | 0 0 | Cs2g21190.1/Cs2g211   | 4.53 | 0 | 0    | 0 | 2      | MASCOT | T     | PLEX8 |
| 7.36E-03 | 0 0 | Cs2g21190.1/Cs2g211   | 4.53 | 0 | 0    | 0 | 2      | MASCOT | T     | PLEX8 |
| 3.07E-07 | 0 0 | Cs2g21190.1/Cs2g211   | 4.53 | 0 | 0    | 0 | 2      | MASCOT | T     | PLEX8 |
| 5.04E-07 | 0 0 | Cs2g21190.1/Cs2g211   | 4.53 | 0 | 0    | 0 | 2      | MASCOT | T     | PLEX8 |
| 8.07E-02 | 0 0 | Cs2g21190.1/Cs2g211   | 4.53 | 0 | 0    | 0 | 2      | MASCOT | T     | PLEX8 |
| 3.96E-02 | 0 0 | Cs2g21190.1/Cs2g211   | 4.53 | 0 | 0    | 0 | 2      | MASCOT | T     | PLEX8 |
| 3.96E-02 | 0 0 | Cs3g07810.1           | 4.14 | 0 | 0    | 0 | 2      | MASCOT | T     | PLEX8 |
| 9.84E-02 | 0 0 | Cs3g07810.1/Cs3g078   | 6    | 0 | 0    | 0 | 2      | MASCOT | T     | PLEX8 |
| 8.09E-02 | 0 0 | Cs3g07810.1/Cs3g078   | 5.32 | 0 | 0    | 0 | 2      | MASCOT | T     | PLEX8 |
| 2.00E-03 | 0 0 | Cs3g07810.1/Cs3g078   | 5.32 | 0 | 0    | 0 | 2      | MASCOT | T     | PLEX8 |
| 1.06E-03 | 0 0 | Cs3g07810.1/Cs3g078   | 5.32 | 0 | 0    | 0 | 2      | MASCOT | T     | PLEX8 |
| 7.01E-02 | 0 0 | Cs3g07810.1/Cs3g078   | 5.32 | 0 | 0    | 0 | 2      | MASCOT | T     | PLEX8 |
| 2.03E-01 | 0 0 | Cs3g07810.1/Cs3g078   | 5.32 | 0 | 0    | 0 | 2      | MASCOT | T     |       |
| 4.66E-04 | 0 0 | Cs3g07810.1/Cs3g078   | 5.32 | 0 | 0    | 0 | 2      | MASCOT | T     |       |

|          |     |                     |      |   |      |   |        |        |       |       |
|----------|-----|---------------------|------|---|------|---|--------|--------|-------|-------|
| 5.99E-02 | 0 0 | Cs3g07810.1/Cs3g078 | 8.75 | 0 | 0    | 2 | MASCOT | T      | PLEX8 |       |
| 7.49E-02 | 0 0 | Cs3g07810.1/Cs3g078 | 8.75 | 0 | 0    | 2 | MASCOT | T      | PLEX8 |       |
| 1.06E-02 | 0 0 | Cs3g07810.1/Cs3g078 | 4.4  | 0 | 0    | 2 | MASCOT | T      | PLEX8 |       |
| 1.14E-01 | 0 0 | Cs3g07810.1/Cs3g078 | 4.4  | 0 | 0    | 2 | MASCOT | T      | PLEX8 |       |
| 6.24E-03 | 0 0 | Cs3g07810.1         | 4.41 | 0 | 0    | 2 | MASCOT | T      | PLEX8 |       |
| 1.54E-03 | 0 0 | Cs3g07810.1         | 4.41 | 0 | 0    | 2 | MASCOT | T      | PLEX8 |       |
| 3.36E-01 | 0 0 | Cs3g07810.1         | 4.41 | 0 | 0    | 2 | MASCOT | T      | PLEX8 |       |
| 3.72E-03 | 0 0 | Cs3g07810.1         | 3.77 | 0 | 0    | 2 | MASCOT | T      | PLEX8 |       |
| 1.85E-02 | 0 0 | Cs5g17500.1         | 4.37 | 0 | 15.9 | 0 | 2      | MASCOT | T     |       |
| 1.81E-01 | 0 0 | Cs5g17500.1         | 4.37 | 0 | 0    | 2 | MASCOT | T      |       |       |
| 2.08E-01 | 0 0 | Cs5g17500.1         | 5.99 | 0 | 0    | 2 | MASCOT | T      | PLEX8 |       |
| 5.44E-02 | 0 0 | Cs5g17500.1         | 8.75 | 0 | 0    | 2 | MASCOT | T      | PLEX8 |       |
| 5.87E-03 | 0 0 | Cs5g17500.1         | 8.75 | 0 | 0    | 2 | MASCOT | T      | PLEX8 |       |
| 3.24E-01 | 0 0 | Cs5g17500.1         | 6.74 | 0 | 0    | 2 | MASCOT | T      | PLEX8 |       |
| 3.91E-01 | 0 0 | Cs5g17500.1         | 4.53 | 0 | 0    | 2 | MASCOT | T      | PLEX8 |       |
| 9.35E-02 | 0 0 | Cs5g17500.1         | 4.53 | 0 | 0    | 2 | MASCOT | T      | PLEX8 |       |
| 5.09E-02 | 0 0 | Cs5g17500.1         | 4.53 | 0 | 0    | 2 | MASCOT | T      | PLEX8 |       |
| 2.23E-02 | 0 0 | Cs5g17500.1         | 8.75 | 1 | 0    | 2 | MASCOT | T      | PLEX8 |       |
| 8.10E-03 | 0 0 | Cs5g17500.1         | 8.47 | 0 | 0    | 2 | MASCOT | T      | PLEX8 |       |
| 5.46E-03 | 0 0 | Cs5g17500.1         | 8.47 | 0 | 0    | 2 | MASCOT | T      | PLEX8 |       |
| 8.58E-02 | 0 0 | Cs5g17500.1         | 8.47 | 0 | 0    | 2 | MASCOT | T      | PLEX8 |       |
| 3.10E-03 | 0 0 | Cs5g17500.1         | 8.47 | 0 | 0    | 2 | MASCOT | T      | PLEX8 |       |
| 8.85E-02 | 0 0 | Cs5g17500.1         | 8.47 | 0 | 0    | 2 | MASCOT | T      | PLEX8 |       |
| 2.57E-01 | 0 0 | Cs5g26700.1/Cs5g267 | 8.63 | 0 | 0    | 2 | MASCOT | T      | PLEX8 |       |
| 4.48E-02 | 0 0 | Cs5g26700.1/Cs5g267 | 8.63 | 0 | 0    | 2 | MASCOT | T      | PLEX8 |       |
| 1.82E-02 | 0 0 | Cs5g26700.1/Cs5g267 | 8.63 | 0 | 0    | 2 | MASCOT | T      | PLEX8 |       |
| 1.32E-02 | 0 0 | Cs5g26700.1/Cs5g267 | 8.63 | 0 | 0    | 2 | MASCOT | T      |       |       |
| 1.96E-02 | 0 0 | Cs5g26700.1/Cs5g267 | 8.63 | 0 | 0    | 2 | MASCOT | T      | PLEX8 |       |
| 7.93E-03 | 0 0 | Cs5g26700.1/Cs5g267 | 5.84 | 0 | 0    | 2 | MASCOT | T      | PLEX8 |       |
| 6.31E-03 | 0 0 | Cs5g26700.1/Cs5g267 | 6.75 | 0 | 0    | 2 | MASCOT | T      |       |       |
| 2.82E-02 | 0 0 | Cs5g26700.1/Cs5g267 | 4.37 | 0 | 0    | 2 | MASCOT | T      | PLEX8 |       |
| 3.03E-01 | 0 0 | Cs5g26700.1/Cs5g267 | 8.63 | 0 | 0    | 2 | MASCOT | T      | PLEX8 |       |
| 3.42E-03 | 0 0 | Cs5g26700.1/Cs5g267 | 4.54 | 0 | 0    | 2 | MASCOT | T      | PLEX8 |       |
| 2.24E-02 | 0 0 | Cs5g26700.1/Cs5g267 | 4.54 | 0 | 0    | 2 | MASCOT | T      | PLEX8 |       |
| 2.38E-02 | 0 0 | Cs5g26700.1/Cs5g267 | 8.75 | 0 | 0    | 2 | MASCOT | T      | PLEX8 |       |
| 1.21E-01 | 0 0 | Cs5g26700.1/Cs5g267 | 8.75 | 0 | 0    | 2 | MASCOT | T      | PLEX8 |       |
| 8.16E-02 | 0 0 | Cs5g26700.1/Cs5g267 | 8.75 | 0 | 0    | 2 | MASCOT | T      | PLEX8 |       |
| 9.48E-03 | 0 0 | Cs5g26700.1/Cs5g267 | 8.75 | 0 | 0    | 2 | MASCOT | T      | PLEX8 |       |
| 1.58E-03 | 0 0 | Cs6g14580.1         | 5.75 | 0 | 0    | 2 | MASCOT | T      | PLEX8 |       |
| 2.83E-02 | 0 0 | Cs6g14580.1         | 5.75 | 0 | 0    | 2 | MASCOT | T      | PLEX8 |       |
| 2.44E-01 | 0 0 | Cs6g14580.1         | 8.59 | 0 | 0    | 2 | MASCOT | T      | PLEX8 |       |
| 4.76E-02 | 0 0 | Cs6g14580.1         | 4.37 | 0 | 15.9 | 0 | 2      | MASCOT | T     | PLEX8 |
| 1.32E-01 | 0 0 | Cs6g14580.1         | 4.37 | 0 | 0    | 2 | MASCOT | T      | PLEX8 |       |
| 2.26E-04 | 0 0 | Cs6g14580.1         | 4.37 | 0 | 0    | 2 | MASCOT | T      | PLEX8 |       |
| 1.75E-02 | 0 0 | Cs6g14580.1         | 4.37 | 0 | 0    | 2 | MASCOT | T      | PLEX8 |       |
| 7.91E-03 | 0 0 | Cs6g14580.1         | 4.25 | 0 | 0    | 2 | MASCOT | T      | PLEX8 |       |
| 5.56E-02 | 0 0 | Cs6g14580.1         | 8.75 | 1 | 0    | 2 | MASCOT | T      |       |       |
| 7.64E-02 | 0 0 | Cs6g14580.1         | 8.75 | 1 | 0    | 2 | MASCOT | T      |       |       |
| 3.68E-03 | 0 0 | Cs6g14580.1         | 4.79 | 1 | 0    | 2 | MASCOT | T      | PLEX8 |       |
| 1.28E-02 | 0 0 | Cs6g14580.1         | 4.79 | 1 | 0    | 2 | MASCOT | T      |       |       |
| 6.82E-02 | 0 0 | Cs6g14580.1         | 4.79 | 1 | 0    | 2 | MASCOT | T      | PLEX8 |       |

|          |     |                      |      |        |   |   |        |   |       |
|----------|-----|----------------------|------|--------|---|---|--------|---|-------|
| 1.21E-03 | 0 0 | Cs6g14580.1          | 4.79 | 1      | 0 | 2 | MASCOT | T | PLEX8 |
| 4.86E-02 | 0 0 | Cs6g14580.1          | 5.5  | 0      | 0 | 2 | MASCOT | T | PLEX8 |
| 1.54E-01 | 0 0 | Cs7g01170.1/Cs7g011  | 5.21 | 0      | 0 | 2 | MASCOT | T | PLEX8 |
| 1.12E-02 | 0 0 | Cs7g01170.1/Cs7g011  | 5.21 | 0      | 0 | 2 | MASCOT | T | PLEX8 |
| 2.63E-02 | 0 0 | Cs7g01170.1/Cs7g011  | 6    | 0      | 0 | 2 | MASCOT | T | PLEX8 |
| 2.13E-01 | 0 0 | Cs7g01170.1/Cs7g011  | 4.37 | 0      | 0 | 2 | MASCOT | T | PLEX8 |
| 1.88E-03 | 0 0 | Cs7g01170.1/Cs7g011  | 4.37 | 0      | 0 | 2 | MASCOT | T | PLEX8 |
| 3.38E-03 | 0 0 | Cs7g01170.1/Cs7g011  | 4.37 | 0      | 0 | 2 | MASCOT | T | PLEX8 |
| 7.18E-04 | 0 0 | Cs7g01170.1/Cs7g011  | 4    | 0      | 0 | 2 | MASCOT | T | PLEX8 |
| 4.02E-03 | 0 0 | Cs7g01170.1/Cs7g011  | 9.73 | 0      | 0 | 2 | MASCOT | T | PLEX8 |
| 2.58E-04 | 0 0 | Cs7g01170.1/Cs7g011  | 9.73 | 0      | 0 | 2 | MASCOT | T | PLEX8 |
| 1.98E-02 | 0 0 | Cs7g01170.1/Cs7g011  | 9.73 | 0      | 0 | 2 | MASCOT | T | PLEX8 |
| 7.49E-03 | 0 0 | Cs7g01170.1/Cs7g011  | 5.88 | 0      | 0 | 2 | MASCOT | T | PLEX8 |
| 2.93E-02 | 0 0 | Cs7g01170.1/Cs7g011  | 5.88 | 0      | 0 | 2 | MASCOT | T | PLEX8 |
| 1.49E-01 | 0 0 | Cs7g01170.1/Cs7g011  | 5.99 | 0      | 0 | 2 | MASCOT | T | PLEX8 |
| 1.42E-01 | 0 0 | Cs7g01170.1/Cs7g011  | 5.99 | 0      | 0 | 2 | MASCOT | T | PLEX8 |
| 2.16E-01 | 0 0 | Cs7g01170.1/Cs7g011  | 5.99 | 0      | 0 | 2 | MASCOT | T | PLEX8 |
| 1.32E-03 | 0 0 | Cs7g02150.1/Cs7g021  | 5.4  | 0      | 0 | 2 | MASCOT | T | PLEX8 |
| 2.19E-03 | 0 0 | Cs7g02150.1/Cs7g021  | 5.4  | 0      | 0 | 2 | MASCOT | T | PLEX8 |
| 1.17E-05 | 0 0 | Cs7g02150.1/Cs7g021  | 5.4  | 0      | 0 | 2 | MASCOT | T | PLEX8 |
| 1.07E-01 | 0 0 | Cs7g02150.1/Cs7g021  | 4.37 | 0      | 0 | 2 | MASCOT | T | PLEX8 |
| 1.71E-01 | 0 0 | Cs7g02150.1/Cs7g021  | 5.84 | 0 15.9 | 0 | 2 | MASCOT | T | PLEX8 |
| 5.05E-02 | 0 0 | Cs7g02150.1/Cs7g021  | 5.84 | 0      | 0 | 2 | MASCOT | T | PLEX8 |
| 4.66E-04 | 0 0 | Cs7g02150.1/Cs7g021  | 3.84 | 0      | 0 | 2 | MASCOT | T | PLEX8 |
| 6.69E-02 | 0 0 | Cs7g02150.1/Cs7g021  | 8.41 | 0      | 0 | 2 | MASCOT | T | PLEX8 |
| 2.42E-01 | 0 0 | Cs7g02150.1/Cs7g021  | 8.44 | 0      | 0 | 2 | MASCOT | T | PLEX8 |
| 2.96E-01 | 0 0 | Cs7g02150.1/Cs7g021  | 8.44 | 0      | 0 | 2 | MASCOT | T | PLEX8 |
| 4.27E-01 | 0 0 | Cs7g02150.1/Cs7g021  | 8.44 | 0      | 0 | 2 | MASCOT | T | PLEX8 |
| 2.66E-01 | 0 0 | Cs7g02150.1/Cs7g021  | 8.44 | 0      | 0 | 2 | MASCOT | T | PLEX8 |
| 1.10E-02 | 0 0 | Cs7g02150.1/Cs7g021  | 5.97 | 0      | 0 | 2 | MASCOT | T | PLEX8 |
| 1.93E-02 | 0 0 | Cs7g02150.1/Cs7g021  | 5.97 | 0      | 0 | 2 | MASCOT | T | PLEX8 |
| 1.31E-01 | 0 0 | Cs7g02150.1/Cs7g021  | 5.97 | 0      | 0 | 2 | MASCOT | T | PLEX8 |
| 1.76E-01 | 0 0 | Cs7g04270.1/Cs7g042  | 6.05 | 0      | 0 | 2 | MASCOT | T | PLEX8 |
| 7.87E-03 | 0 0 | Cs7g04270.1/Cs7g042  | 6.05 | 0      | 0 | 2 | MASCOT | T | PLEX8 |
| 3.85E-02 | 0 0 | Cs7g04270.1/Cs7g042  | 6.05 | 0      | 0 | 2 | MASCOT | T | PLEX8 |
| 9.53E-02 | 0 0 | Cs7g04270.1/Cs7g042  | 6.05 | 0      | 0 | 2 | MASCOT | T | PLEX8 |
| 1.50E-02 | 0 0 | Cs7g04270.1/Cs7g042  | 6.05 | 0      | 0 | 2 | MASCOT | T | PLEX8 |
| 4.49E-02 | 0 0 | Cs7g04270.1/Cs7g042  | 5.55 | 0      | 0 | 2 | MASCOT | T | PLEX8 |
| 7.51E-04 | 0 0 | Cs7g04270.1/Cs7g042  | 5.32 | 0      | 0 | 2 | MASCOT | T | PLEX8 |
| 3.37E-03 | 0 0 | Cs7g04270.1/Cs7g042  | 5.32 | 0      | 0 | 2 | MASCOT | T | PLEX8 |
| 1.04E-02 | 0 0 | Cs7g04270.1/Cs7g042  | 4.65 | 0      | 0 | 2 | MASCOT | T | PLEX8 |
| 2.38E-01 | 0 0 | Cs7g04270.1/Cs7g042  | 4.37 | 0      | 0 | 2 | MASCOT | T | PLEX8 |
| 1.81E-03 | 0 0 | Cs7g04270.1/Cs7g042  | 4.37 | 0      | 0 | 2 | MASCOT | T | PLEX8 |
| 2.36E-02 | 0 0 | Cs7g04270.1/Cs7g042  | 4.53 | 0      | 0 | 2 | MASCOT | T | PLEX8 |
| 1.18E-01 | 0 0 | Cs7g04270.1/Cs7g042  | 4.53 | 0      | 0 | 2 | MASCOT | T | PLEX8 |
| 2.13E-02 | 0 0 | Cs7g04270.1/Cs7g042  | 4.53 | 0      | 0 | 2 | MASCOT | T | PLEX8 |
| 2.17E-03 | 0 0 | Cs7g04270.1/Cs7g042  | 8.48 | 0      | 0 | 2 | MASCOT | T | PLEX8 |
| 3.51E-01 | 0 0 | Cs1g03890.1 ! Cs4g15 | 5.88 | 0      | 0 | 2 | MASCOT | T | PLEX8 |
| 1.96E-03 | 0 0 | Cs1g03890.1 ! Cs4g15 | 5.88 | 0      | 0 | 2 | MASCOT | T | PLEX8 |
| 1.88E-02 | 0 0 | Cs1g03890.1 ! Cs4g15 | 5.88 | 0      | 0 | 2 | MASCOT | T | PLEX8 |
| 8.33E-04 | 0 0 | Cs8g06510.1          | 4.25 | 0      | 0 | 2 | MASCOT | T | PLEX8 |

|          |     |                       |      |   |      |   |        |        |       |       |
|----------|-----|-----------------------|------|---|------|---|--------|--------|-------|-------|
| 1.07E-06 | 0 0 | Cs8g06510.1           | 4.25 | 0 | 0    | 2 | MASCOT | T      | PLEX8 |       |
| 1.14E-02 | 0 0 | Cs4g15940.1/Cs4g159   | 4.14 | 0 | 0    | 2 | MASCOT | T      | PLEX8 |       |
| 1.19E-02 | 0 0 | Cs8g06510.1           | 4.21 | 0 | 0    | 2 | MASCOT | T      | PLEX8 |       |
| 9.41E-04 | 0 0 | Cs8g06510.1           | 8.26 | 0 | 0    | 2 | MASCOT | T      | PLEX8 |       |
| 6.12E-02 | 0 0 | Cs8g06510.1           | 8.26 | 0 | 0    | 2 | MASCOT | T      | PLEX8 |       |
| 4.56E-04 | 0 0 | Cs4g15940.1/Cs4g159   | 5.81 | 0 | 0    | 2 | MASCOT | T      | PLEX8 |       |
| 6.32E-03 | 0 0 | Cs4g15940.1/Cs4g159   | 5.81 | 0 | 0    | 2 | MASCOT | T      | PLEX8 |       |
| 2.33E-02 | 0 0 | Cs4g15940.1/Cs4g159   | 5.81 | 0 | 0    | 2 | MASCOT | T      | PLEX8 |       |
| 8.73E-03 | 0 0 | Cs1g03890.1 ! Cs3g22  | 6    | 0 | 0    | 2 | MASCOT | T      | PLEX8 |       |
| 3.44E-02 | 0 0 | Cs1g03890.1 ! Cs3g22  | 6    | 0 | 0    | 2 | MASCOT | T      | PLEX8 |       |
| 1.23E-01 | 0 0 | Cs1g03890.1 ! Cs3g22  | 6    | 0 | 0    | 2 | MASCOT | T      | PLEX8 |       |
| 2.03E-01 | 0 0 | orange1.1t03431.1/ora | 5.38 | 0 | 0    | 2 | MASCOT | T      | PLEX8 |       |
| 3.73E-02 | 0 0 | orange1.1t03431.1/ora | 5.38 | 0 | 0    | 2 | MASCOT | T      |       |       |
| 2.04E-01 | 0 0 | orange1.1t03431.1/ora | 4.37 | 0 | 0    | 2 | MASCOT | T      | PLEX8 |       |
| 6.75E-02 | 0 0 | orange1.1t03431.1/ora | 5.55 | 0 | 0    | 2 | MASCOT | T      | PLEX8 |       |
| 2.65E-03 | 0 0 | orange1.1t03431.1/ora | 5.55 | 0 | 0    | 2 | MASCOT | T      | PLEX8 |       |
| 5.34E-04 | 0 0 | orange1.1t03431.1/ora | 5.55 | 0 | 0    | 2 | MASCOT | T      | PLEX8 |       |
| 1.71E-01 | 0 0 | orange1.1t03431.1/ora | 5.55 | 0 | 0    | 2 | MASCOT | T      | PLEX8 |       |
| 1.41E-04 | 0 0 | orange1.1t03431.1/ora | 5.55 | 0 | 0    | 2 | MASCOT | T      | PLEX8 |       |
| 7.04E-03 | 0 0 | orange1.1t03431.1/ora | 5.55 | 0 | 0    | 2 | MASCOT | T      | PLEX8 |       |
| 1.81E-01 | 0 0 | orange1.1t03431.1/ora | 8.75 | 0 | 0    | 2 | MASCOT | T      | PLEX8 |       |
| 1.32E-03 | 0 0 | orange1.1t03431.1/ora | 4.09 | 0 | 0    | 2 | MASCOT | T      | PLEX8 |       |
| 6.63E-05 | 0 0 | orange1.1t03431.1/ora | 4.09 | 0 | 0    | 2 | MASCOT | T      | PLEX8 |       |
| 3.00E-02 | 0 0 | orange1.1t03431.1/ora | 4.53 | 0 | 0    | 2 | MASCOT | T      | PLEX8 |       |
| 1.53E-02 | 0 0 | orange1.1t03431.1/ora | 4.53 | 0 | 0    | 2 | MASCOT | T      | PLEX8 |       |
| 2.37E-01 | 0 0 | orange1.1t03431.1/ora | 6    | 0 | 0    | 2 | MASCOT | T      | PLEX8 |       |
| 2.75E-04 | 0 0 | Cs2g29250.1/Cs2g292   | 6.79 | 0 | 0    | 2 | MASCOT | T      | PLEX8 |       |
| 2.49E-03 | 0 0 | Cs2g29250.1/Cs2g292   | 6.79 | 0 | 0    | 2 | MASCOT | T      | PLEX8 |       |
| 1.03E-02 | 0 0 | Cs2g29250.1/Cs2g292   | 6.79 | 0 | 0    | 2 | MASCOT | T      |       |       |
| 1.59E-03 | 0 0 | Cs2g29250.1/Cs2g292   | 4.14 | 0 | 0    | 2 | MASCOT | T      |       |       |
| 1.35E-02 | 0 0 | Cs2g29250.1/Cs2g292   | 5.4  | 0 | 0    | 2 | MASCOT | T      | PLEX8 |       |
| 5.46E-02 | 0 0 | Cs2g29250.1/Cs2g292   | 5.4  | 0 | 0    | 2 | MASCOT | T      | PLEX8 |       |
| 2.30E-01 | 0 0 | Cs2g29250.1/Cs2g292   | 5.4  | 0 | 0    | 2 | MASCOT | T      | PLEX8 |       |
| 2.94E-02 | 0 0 | Cs2g29250.1/Cs2g292   | 7.98 | 0 | 15.9 | 0 | 2      | MASCOT | T     | PLEX8 |
| 1.87E-02 | 0 0 | Cs2g29250.1/Cs2g292   | 7.98 | 0 | 0    | 2 | MASCOT | T      | PLEX8 |       |
| 1.25E-02 | 0 0 | Cs2g29250.1/Cs2g292   | 6    | 0 | 0    | 2 | MASCOT | T      |       |       |
| 1.31E-02 | 0 0 | Cs2g29250.1/Cs2g292   | 8.64 | 0 | 0    | 2 | MASCOT | T      | PLEX8 |       |
| 5.32E-02 | 0 0 | Cs2g29250.1/Cs2g292   | 8.76 | 0 | 0    | 2 | MASCOT | T      | PLEX8 |       |
| 2.03E-01 | 0 0 | Cs2g29250.1/Cs2g292   | 8.76 | 0 | 0    | 2 | MASCOT | T      | PLEX8 |       |
| 2.85E-01 | 0 0 | Cs2g29250.1/Cs2g292   | 8.76 | 0 | 0    | 2 | MASCOT | T      |       |       |
| 1.97E-01 | 0 0 | Cs4g18980.1/Cs4g189   | 4.53 | 0 | 0    | 2 | MASCOT | T      | PLEX8 |       |
| 1.88E-01 | 0 0 | Cs1g15970.1/Cs4g130   | 4.21 | 0 | 0    | 2 | MASCOT | T      |       |       |
| 1.67E-02 | 0 0 | Cs1g15970.1/Cs4g130   | 4.21 | 0 | 0    | 2 | MASCOT | T      |       |       |
| 2.38E-04 | 0 0 | Cs1g15970.1/Cs4g189   | 4.14 | 0 | 0    | 2 | MASCOT | T      |       |       |
| 5.99E-04 | 0 0 | Cs1g15970.1/Cs4g189   | 4.14 | 0 | 0    | 2 | MASCOT | T      |       |       |
| 3.11E-06 | 0 0 | Cs1g15970.1/Cs4g189   | 4.14 | 0 | 0    | 2 | MASCOT | T      |       |       |
| 2.93E-08 | 0 0 | Cs1g15970.1/Cs4g189   | 4.14 | 0 | 0    | 2 | MASCOT | T      |       |       |
| 4.08E-02 | 0 0 | Cs1g15970.1/Cs1g202   | 5.84 | 0 | 0    | 2 | MASCOT | T      |       |       |
| 4.22E-03 | 0 0 | Cs4g13070.1/Cs4g130   | 5.84 | 0 | 0    | 2 | MASCOT | T      | PLEX8 |       |
| 3.43E-05 | 0 0 | Cs4g13070.1/Cs4g130   | 5.84 | 0 | 0    | 2 | MASCOT | T      | PLEX8 |       |
| 4.35E-01 | 0 0 | Cs4g13070.1/Cs4g130   | 5.84 | 0 | 0    | 2 | MASCOT | T      | PLEX8 |       |

|          |     |                       |      |   |   |   |        |   |       |
|----------|-----|-----------------------|------|---|---|---|--------|---|-------|
| 1.56E-01 | 0 0 | Cs4g13070.1/Cs4g130   | 9.76 | 0 | 0 | 2 | MASCOT | T | PLEX8 |
| 1.81E-01 | 0 0 | Cs4g13070.1/Cs4g130   | 9.76 | 0 | 0 | 2 | MASCOT | T | PLEX8 |
| 6.21E-03 | 0 0 | Cs4g18980.1           | 5.84 | 0 | 0 | 2 | MASCOT | T | PLEX8 |
| 2.08E-01 | 0 0 | Cs6g11970.1/Cs6g119   | 8.75 | 0 | 0 | 2 | MASCOT | T | PLEX8 |
| 3.47E-03 | 0 0 | Cs6g11970.1/Cs6g119   | 5.63 | 1 | 0 | 2 | MASCOT | T | PLEX8 |
| 3.56E-04 | 0 0 | Cs6g11970.1/Cs6g119   | 4.48 | 0 | 0 | 2 | MASCOT | T | PLEX8 |
| 4.48E-08 | 0 0 | Cs6g11970.1/Cs6g119   | 4.48 | 0 | 0 | 2 | MASCOT | T | PLEX8 |
| 2.06E-02 | 0 0 | Cs6g11970.1/Cs6g119   | 4.48 | 0 | 0 | 2 | MASCOT | T | PLEX8 |
| 3.09E-02 | 0 0 | Cs6g11970.1/Cs6g119   | 4.48 | 0 | 0 | 2 | MASCOT | T | PLEX8 |
| 1.70E-06 | 0 0 | Cs6g11970.1/Cs6g119   | 4.48 | 0 | 0 | 2 | MASCOT | T |       |
| 6.66E-07 | 0 0 | Cs6g11970.1/Cs6g119   | 4.48 | 0 | 0 | 2 | MASCOT | T |       |
| 2.01E-01 | 0 0 | Cs6g11970.1/Cs6g119   | 6    | 0 | 0 | 2 | MASCOT | T | PLEX8 |
| 2.14E-02 | 0 0 | Cs6g11970.1/Cs6g119   | 5.99 | 0 | 0 | 2 | MASCOT | T |       |
| 8.35E-02 | 0 0 | Cs6g11970.1/Cs6g119   | 6    | 0 | 0 | 2 | MASCOT | T | PLEX8 |
| 3.02E-03 | 0 0 | Cs6g11970.1/Cs6g119   | 6    | 0 | 0 | 2 | MASCOT | T | PLEX8 |
| 3.55E-01 | 0 0 | Cs6g11970.1/Cs6g119   | 6.72 | 0 | 0 | 2 | MASCOT | T | PLEX8 |
| 6.02E-02 | 0 0 | Cs6g11970.1/Cs6g119   | 6.72 | 0 | 0 | 2 | MASCOT | T | PLEX8 |
| 2.50E-03 | 0 0 | orange1.1t00096.1/ora | 6.05 | 0 | 0 | 2 | MASCOT | T | PLEX8 |
| 1.47E-04 | 0 0 | orange1.1t00096.1/ora | 6.05 | 0 | 0 | 2 | MASCOT | T | PLEX8 |
| 2.72E-02 | 0 0 | orange1.1t00096.1/ora | 6.05 | 0 | 0 | 2 | MASCOT | T | PLEX8 |
| 1.42E-04 | 0 0 | orange1.1t00096.1/ora | 6.05 | 0 | 0 | 2 | MASCOT | T | PLEX8 |
| 3.17E-01 | 0 0 | orange1.1t00096.1/ora | 4.21 | 0 | 0 | 2 | MASCOT | T | PLEX8 |
| 2.14E-02 | 0 0 | orange1.1t00096.1/ora | 4.14 | 0 | 0 | 2 | MASCOT | T | PLEX8 |
| 2.10E-02 | 0 0 | orange1.1t00096.1/ora | 4.14 | 0 | 0 | 2 | MASCOT | T |       |
| 1.12E-01 | 0 0 | orange1.1t00096.1/ora | 6.1  | 0 | 0 | 2 | MASCOT | T |       |
| 8.29E-03 | 0 0 | orange1.1t00096.1/ora | 9.76 | 0 | 0 | 2 | MASCOT | T | PLEX8 |
| 4.98E-02 | 0 0 | orange1.1t00096.1/ora | 8.47 | 0 | 0 | 2 | MASCOT | T | PLEX8 |
| 8.72E-04 | 0 0 | orange1.1t00096.1/ora | 8.47 | 0 | 0 | 2 | MASCOT | T | PLEX8 |
| 4.36E-03 | 0 0 | orange1.1t00096.1/ora | 8.47 | 0 | 0 | 2 | MASCOT | T | PLEX8 |
| 4.45E-02 | 0 0 | orange1.1t00096.1/ora | 8.47 | 0 | 0 | 2 | MASCOT | T | PLEX8 |
| 7.57E-04 | 0 0 | orange1.1t00096.1     | 5.66 | 0 | 0 | 2 | MASCOT | T | PLEX8 |
| 2.93E-01 | 0 0 | Cs1g20730.1/Cs4g060   | 4.25 | 0 | 0 | 2 | MASCOT | T | PLEX8 |
| 2.95E-04 | 0 0 | orange1.1t00168.1/ora | 6.74 | 0 | 0 | 2 | MASCOT | T | PLEX8 |
| 1.66E-02 | 0 0 | Cs1g20730.1/orange1.  | 4    | 0 | 0 | 2 | MASCOT | T |       |
| 2.17E-02 | 0 0 | Cs1g20730.1/orange1.  | 4    | 0 | 0 | 2 | MASCOT | T |       |
| 1.17E-04 | 0 0 | Cs1g20730.1/orange1.  | 4    | 0 | 0 | 2 | MASCOT | T |       |
| 5.95E-03 | 0 0 | Cs1g20730.1/orange1.  | 4    | 0 | 0 | 2 | MASCOT | T | PLEX8 |
| 1.72E-01 | 0 0 | Cs1g20730.1/orange1.  | 6.1  | 0 | 0 | 2 | MASCOT | T | PLEX8 |
| 1.19E-01 | 0 0 | Cs1g20730.1/orange1.  | 6.1  | 0 | 0 | 2 | MASCOT | T | PLEX8 |
| 2.25E-01 | 0 0 | Cs1g20730.1/orange1.  | 6    | 0 | 0 | 2 | MASCOT | T | PLEX8 |
| 1.78E-01 | 0 0 | Cs1g20730.1/Cs4g060   | 6    | 0 | 0 | 2 | MASCOT | T | PLEX8 |
| 1.64E-01 | 0 0 | Cs1g20730.1/orange1.  | 5.66 | 0 | 0 | 2 | MASCOT | T | PLEX8 |
| 5.40E-02 | 0 0 | Cs1g20730.1/orange1.  | 5.66 | 0 | 0 | 2 | MASCOT | T | PLEX8 |
| 2.05E-01 | 0 0 | Cs1g20730.1/orange1.  | 5.66 | 0 | 0 | 2 | MASCOT | T | PLEX8 |
| 8.83E-02 | 0 0 | Cs1g20730.1/orange1.  | 5.66 | 0 | 0 | 2 | MASCOT | T | PLEX8 |
| 2.00E-02 | 0 0 | Cs1g10630.1/Cs1g106   | 6.1  | 0 | 0 | 2 | MASCOT | T | PLEX8 |
| 2.30E-01 | 0 0 | Cs1g10630.1/Cs1g106   | 4.14 | 0 | 0 | 2 | MASCOT | T | PLEX8 |
| 2.15E-01 | 0 0 | Cs1g10630.1/Cs1g106   | 5.4  | 0 | 0 | 2 | MASCOT | T | PLEX8 |
| 3.75E-01 | 0 0 | Cs1g10630.1/Cs1g106   | 5.4  | 0 | 0 | 2 | MASCOT | T | PLEX8 |
| 1.47E-01 | 0 0 | Cs1g10630.1/Cs1g106   | 5.4  | 0 | 0 | 2 | MASCOT | T | PLEX8 |
| 2.45E-03 | 0 0 | Cs1g10630.1/Cs1g106   | 5.4  | 0 | 0 | 2 | MASCOT | T | PLEX8 |



|          |     |                     |      |   |      |   |        |        |       |       |
|----------|-----|---------------------|------|---|------|---|--------|--------|-------|-------|
| 7.58E-02 | 0 0 | Cs1g10630.1/Cs1g106 | 5.4  | 0 | 0    | 2 | MASCOT | T      | PLEX8 |       |
| 1.07E-01 | 0 0 | Cs1g10630.1/Cs1g106 | 6.71 | 0 | 0    | 2 | MASCOT | T      |       |       |
| 7.12E-03 | 0 0 | Cs1g10630.1/Cs1g106 | 5.84 | 0 | 0    | 2 | MASCOT | T      | PLEX8 |       |
| 7.20E-02 | 0 0 | Cs1g10630.1         | 9.75 | 0 | 0    | 2 | MASCOT | T      | PLEX8 |       |
| 1.98E-01 | 0 0 | Cs1g10630.1         | 9.75 | 0 | 0    | 2 | MASCOT | T      | PLEX8 |       |
| 1.80E-02 | 0 0 | Cs1g10630.1/Cs1g106 | 4.25 | 0 | 0    | 2 | MASCOT | T      | PLEX8 |       |
| 3.51E-01 | 0 0 | Cs1g10630.1/Cs1g106 | 4.25 | 0 | 0    | 2 | MASCOT | T      |       |       |
| 5.82E-03 | 0 0 | Cs2g11750.1         | 4.37 | 0 | 0    | 2 | MASCOT | T      | PLEX8 |       |
| 2.39E-01 | 0 0 | Cs2g11750.1         | 6    | 0 | 0    | 2 | MASCOT | T      |       |       |
| 2.21E-01 | 0 0 | Cs2g11750.1         | 8.2  | 0 | 0    | 2 | MASCOT | T      |       |       |
| 2.82E-01 | 0 0 | Cs2g11750.1         | 5.55 | 0 | 0    | 2 | MASCOT | T      | PLEX8 |       |
| 1.14E-01 | 0 0 | Cs2g11750.1         | 5.55 | 0 | 0    | 2 | MASCOT | T      |       |       |
| 2.05E-05 | 0 0 | Cs2g11750.1         | 4.65 | 0 | 0    | 2 | MASCOT | T      | PLEX8 |       |
| 3.72E-02 | 0 0 | Cs2g11750.1         | 4.65 | 0 | 0    | 2 | MASCOT | T      | PLEX8 |       |
| 1.59E-03 | 0 0 | Cs2g11750.1         | 4.65 | 0 | 0    | 2 | MASCOT | T      |       |       |
| 5.98E-02 | 0 0 | Cs2g11750.1         | 4.53 | 0 | 0    | 2 | MASCOT | T      | PLEX8 |       |
| 1.65E-01 | 0 0 | Cs2g11750.1         | 4.53 | 0 | 0    | 2 | MASCOT | T      | PLEX8 |       |
| 1.50E-01 | 0 0 | Cs2g11750.1         | 4.53 | 0 | 0    | 2 | MASCOT | T      | PLEX8 |       |
| 7.37E-02 | 0 0 | Cs2g11750.1         | 6.72 | 0 | 0    | 2 | MASCOT | T      |       |       |
| 6.01E-02 | 0 0 | Cs2g11750.1         | 6.72 | 0 | 0    | 2 | MASCOT | T      |       |       |
| 9.63E-03 | 0 0 | Cs2g28050.1/Cs2g280 | 4.14 | 0 | 0    | 2 | MASCOT | T      | PLEX8 |       |
| 1.98E-03 | 0 0 | Cs2g28050.1/Cs2g280 | 4.14 | 0 | 0    | 2 | MASCOT | T      | PLEX8 |       |
| 3.74E-01 | 0 0 | Cs2g28050.1/Cs2g280 | 9.76 | 0 | 0    | 2 | MASCOT | T      | PLEX8 |       |
| 8.20E-02 | 0 0 | Cs2g28050.1/Cs2g280 | 9.76 | 0 | 0    | 2 | MASCOT | T      |       |       |
| 7.64E-02 | 0 0 | Cs2g28050.1/Cs2g280 | 9.76 | 0 | 0    | 2 | MASCOT | T      | PLEX8 |       |
| 1.79E-02 | 0 0 | Cs2g28050.1/Cs2g280 | 5.72 | 0 | 0    | 2 | MASCOT | T      | PLEX8 |       |
| 1.13E-02 | 0 0 | Cs2g28050.1/Cs2g280 | 5.72 | 0 | 0    | 2 | MASCOT | T      | PLEX8 |       |
| 1.50E-01 | 0 0 | Cs2g28050.1         | 4.79 | 0 | 0    | 2 | MASCOT | T      | PLEX8 |       |
| 4.33E-02 | 0 0 | Cs2g28050.1/Cs2g280 | 5.84 | 0 | 0    | 2 | MASCOT | T      | PLEX8 |       |
| 1.13E-01 | 0 0 | Cs2g28050.1/Cs2g280 | 5.84 | 0 | 0    | 2 | MASCOT | T      | PLEX8 |       |
| 1.08E-01 | 0 0 | Cs2g28050.1/Cs2g280 | 5.84 | 0 | 0    | 2 | MASCOT | T      | PLEX8 |       |
| 1.22E-02 | 0 0 | Cs2g28050.1/Cs2g280 | 5.84 | 0 | 0    | 2 | MASCOT | T      | PLEX8 |       |
| 2.08E-01 | 0 0 | Cs2g28050.1/Cs2g280 | 8.22 | 0 | 0    | 2 | MASCOT | T      | PLEX8 |       |
| 2.07E-02 | 0 0 | Cs7g16620.2/Cs7g166 | 4.14 | 0 | 0    | 2 | MASCOT | T      | PLEX8 |       |
| 4.25E-02 | 0 0 | Cs7g16620.1/Cs7g166 | 6.1  | 0 | 0    | 2 | MASCOT | T      | PLEX8 |       |
| 4.90E-01 | 0 0 | Cs7g16620.1/Cs7g166 | 6.1  | 0 | 0    | 2 | MASCOT | T      | PLEX8 |       |
| 5.08E-03 | 0 0 | Cs7g16620.1/Cs7g166 | 8.75 | 0 | 0    | 2 | MASCOT | T      | PLEX8 |       |
| 3.80E-01 | 0 0 | Cs7g16620.1/Cs7g166 | 5.84 | 0 | 0    | 2 | MASCOT | T      | PLEX8 |       |
| 4.63E-01 | 0 0 | Cs7g16620.1/Cs7g166 | 5.84 | 0 | 0    | 2 | MASCOT | T      | PLEX8 |       |
| 1.32E-02 | 0 0 | Cs7g16620.1/Cs7g166 | 5.84 | 0 | 0    | 2 | MASCOT | T      | PLEX8 |       |
| 1.43E-01 | 0 0 | Cs7g16620.1/Cs7g166 | 5.84 | 0 | 0    | 2 | MASCOT | T      | PLEX8 |       |
| 1.72E-04 | 0 0 | Cs7g16620.1/Cs7g166 | 8.03 | 0 | 0    | 2 | MASCOT | T      | PLEX8 |       |
| 1.52E-01 | 0 0 | Cs7g16620.1/Cs7g166 | 8.03 | 0 | 0    | 2 | MASCOT | T      | PLEX8 |       |
| 1.62E-02 | 0 0 | Cs7g16620.1/Cs7g166 | 8.03 | 0 | 0    | 2 | MASCOT | T      | PLEX8 |       |
| 9.83E-05 | 0 0 | Cs7g16620.1/Cs7g166 | 8.03 | 0 | 0    | 2 | MASCOT | T      | PLEX8 |       |
| 4.75E-02 | 0 0 | Cs7g16620.1/Cs7g166 | 4.18 | 1 | 0    | 2 | MASCOT | T      | PLEX8 |       |
| 4.23E-03 | 0 0 | Cs9g11250.1/Cs9g112 | 5.4  | 0 | 15.9 | 0 | 2      | MASCOT | T     | PLEX8 |
| 1.27E-03 | 0 0 | Cs9g11250.1/Cs9g112 | 5.4  | 0 | 15.9 | 0 | 2      | MASCOT | T     | PLEX8 |
| 4.83E-06 | 0 0 | Cs9g11250.1/Cs9g112 | 5.4  | 0 | 0    | 2 | MASCOT | T      | PLEX8 |       |
| 5.41E-02 | 0 0 | Cs9g11250.1/Cs9g112 | 4.54 | 0 | 0    | 2 | MASCOT | T      |       |       |
| 1.59E-03 | 0 0 | Cs9g11250.1/Cs9g112 | 4.54 | 0 | 0    | 2 | MASCOT | T      | PLEX8 |       |

|          |     |                      |      |   |      |   |        |        |       |       |
|----------|-----|----------------------|------|---|------|---|--------|--------|-------|-------|
| 8.89E-02 | 0 0 | Cs9g11250.1/Cs9g112  | 4.54 | 0 | 0    | 2 | MASCOT | T      | PLEX8 |       |
| 9.82E-05 | 0 0 | Cs9g11250.1/Cs9g112  | 4.54 | 0 | 0    | 2 | MASCOT | T      | PLEX8 |       |
| 4.58E-02 | 0 0 | Cs9g11250.1/Cs9g112  | 9.76 | 0 | 0    | 2 | MASCOT | T      | PLEX8 |       |
| 4.24E-04 | 0 0 | Cs9g11250.1/Cs9g112  | 9.76 | 0 | 0    | 2 | MASCOT | T      |       |       |
| 1.68E-05 | 0 0 | Cs9g11250.1          | 4.03 | 0 | 0    | 2 | MASCOT | T      |       |       |
| 2.21E-03 | 0 0 | Cs9g11250.1/Cs9g112  | 5.38 | 1 | 0    | 2 | MASCOT | T      | PLEX8 |       |
| 2.57E-03 | 0 0 | Cs9g11250.1/Cs9g112  | 5.75 | 0 | 0    | 2 | MASCOT | T      |       |       |
| 8.95E-04 | 0 0 | Cs9g11250.1/Cs9g112  | 5.83 | 0 | 0    | 2 | MASCOT | T      | PLEX8 |       |
| 4.11E-02 | 0 0 | Cs1g04990.1/Cs1g049  | 4.14 | 0 | 0    | 2 | MASCOT | T      |       |       |
| 4.04E-02 | 0 0 | Cs1g04990.1/Cs1g049  | 4.53 | 0 | 0    | 2 | MASCOT | T      | PLEX8 |       |
| 7.11E-03 | 0 0 | Cs1g04990.1/Cs1g049  | 4.21 | 0 | 0    | 2 | MASCOT | T      |       |       |
| 1.17E-01 | 0 0 | Cs1g04990.1/Cs1g049  | 8.25 | 0 | 0    | 2 | MASCOT | T      | PLEX8 |       |
| 9.05E-02 | 0 0 | Cs1g04990.1/Cs1g049  | 4.14 | 0 | 0    | 2 | MASCOT | T      | PLEX8 |       |
| 2.40E-04 | 0 0 | Cs1g04990.1/Cs1g049  | 4.14 | 0 | 0    | 2 | MASCOT | T      |       |       |
| 7.03E-03 | 0 0 | Cs1g04990.1/orange1. | 5.32 | 0 | 0    | 2 | MASCOT | T      | PLEX8 |       |
| 2.16E-01 | 0 0 | Cs1g04990.1/orange1. | 5.32 | 0 | 0    | 2 | MASCOT | T      | PLEX8 |       |
| 4.04E-01 | 0 0 | Cs1g04990.1/Cs1g049  | 5.81 | 0 | 0    | 2 | MASCOT | T      | PLEX8 |       |
| 1.70E-01 | 0 0 | Cs1g04990.1/Cs1g049  | 5.81 | 0 | 0    | 2 | MASCOT | T      | PLEX8 |       |
| 1.12E-02 | 0 0 | Cs1g04990.1/Cs1g049  | 5.81 | 0 | 0    | 2 | MASCOT | T      | PLEX8 |       |
| 2.91E-02 | 0 0 | Cs1g04990.1/Cs1g049  | 5.81 | 0 | 0    | 2 | MASCOT | T      | PLEX8 |       |
| 3.11E-02 | 0 0 | Cs2g07970.1          | 6.85 | 0 | 0    | 2 | MASCOT | T      | PLEX8 |       |
| 2.75E-02 | 0 0 | Cs2g07970.1          | 6.85 | 0 | 0    | 2 | MASCOT | T      | PLEX8 |       |
| 1.37E-02 | 0 0 | Cs2g07970.1          | 4.37 | 0 | 0    | 2 | MASCOT | T      |       |       |
| 1.20E-03 | 0 0 | Cs2g07970.1          | 4.37 | 0 | 0    | 2 | MASCOT | T      |       |       |
| 2.09E-01 | 0 0 | Cs2g07970.1          | 5.32 | 0 | 0    | 2 | MASCOT | T      | PLEX8 |       |
| 5.22E-02 | 0 0 | Cs2g07970.1          | 5.83 | 0 | 0    | 2 | MASCOT | T      | PLEX8 |       |
| 1.58E-02 | 0 0 | Cs2g07970.1          | 8.75 | 0 | 0    | 2 | MASCOT | T      | PLEX8 |       |
| 2.67E-03 | 0 0 | Cs2g07970.1          | 4.53 | 0 | 0    | 2 | MASCOT | T      | PLEX8 |       |
| 2.89E-02 | 0 0 | Cs2g07970.1          | 4.53 | 0 | 0    | 2 | MASCOT | T      | PLEX8 |       |
| 5.21E-02 | 0 0 | Cs2g07970.1          | 5.4  | 0 | 0    | 2 | MASCOT | T      | PLEX8 |       |
| 6.60E-02 | 0 0 | Cs2g07970.1          | 5.4  | 0 | 0    | 2 | MASCOT | T      | PLEX8 |       |
| 2.60E-03 | 0 0 | Cs2g07970.1          | 5.4  | 0 | 0    | 2 | MASCOT | T      | PLEX8 |       |
| 2.07E-02 | 0 0 | Cs4g06940.1          | 4.54 | 0 | 0    | 2 | MASCOT | T      |       |       |
| 1.81E-04 | 0 0 | Cs4g06940.1          | 4.54 | 0 | 0    | 2 | MASCOT | T      |       |       |
| 1.48E-02 | 0 0 | Cs4g06940.1          | 6.06 | 0 | 0    | 2 | MASCOT | T      | PLEX8 |       |
| 3.43E-01 | 0 0 | Cs4g06940.1          | 8.75 | 0 | 0    | 2 | MASCOT | T      | PLEX8 |       |
| 1.79E-01 | 0 0 | Cs4g06940.1          | 8.75 | 0 | 0    | 2 | MASCOT | T      | PLEX8 |       |
| 3.99E-02 | 0 0 | Cs4g06940.1          | 5.32 | 0 | 0    | 2 | MASCOT | T      | PLEX8 |       |
| 1.26E-03 | 0 0 | Cs4g06940.1          | 5.32 | 0 | 0    | 2 | MASCOT | T      | PLEX8 |       |
| 1.38E-01 | 0 0 | Cs4g06940.1          | 5.32 | 0 | 0    | 2 | MASCOT | T      | PLEX8 |       |
| 2.17E-01 | 0 0 | Cs4g06940.1          | 6    | 0 | 0    | 2 | MASCOT | T      | PLEX8 |       |
| 6.80E-03 | 0 0 | Cs4g06940.1          | 4.37 | 0 | 0    | 2 | MASCOT | T      | PLEX8 |       |
| 5.44E-01 | 0 0 | Cs4g06940.1          | 5.84 | 0 | 0    | 2 | MASCOT | T      |       |       |
| 2.42E-01 | 0 0 | Cs4g06940.1          | 5.84 | 0 | 0    | 2 | MASCOT | T      |       |       |
| 6.23E-02 | 0 0 | Cs4g13050.1          | 5.84 | 0 | 0    | 2 | MASCOT | T      | PLEX8 |       |
| 4.81E-02 | 0 0 | Cs4g13050.1/Cs4g130  | 8.75 | 0 | 0    | 2 | MASCOT | T      | PLEX8 |       |
| 4.81E-02 | 0 0 | Cs4g13050.1/Cs4g130  | 8.75 | 0 | 0    | 2 | MASCOT | T      | PLEX8 |       |
| 4.44E-03 | 0 0 | Cs4g13050.1 ! Cs4g13 | 5.72 | 0 | 15.9 | 0 | 2      | MASCOT | T     | PLEX8 |
| 1.56E-01 | 0 0 | Cs4g13050.1          | 5.66 | 0 | 0    | 2 | MASCOT | T      | PLEX8 |       |
| 9.89E-04 | 0 0 | Cs1g15960.1/Cs1g159  | 4.37 | 0 | 0    | 2 | MASCOT | T      | PLEX8 |       |
| 1.07E-02 | 0 0 | Cs1g15960.1/Cs1g159  | 4.37 | 0 | 0    | 2 | MASCOT | T      | PLEX8 |       |

|          |     |                     |      |   |      |   |        |        |       |  |
|----------|-----|---------------------|------|---|------|---|--------|--------|-------|--|
| 7.60E-02 | 0 0 | Cs1g15960.1/Cs1g159 | 4.37 | 0 | 0    | 2 | MASCOT | T      | PLEX8 |  |
| 1.26E-02 | 0 0 | Cs1g15960.1/Cs1g159 | 4.37 | 0 | 0    | 2 | MASCOT | T      | PLEX8 |  |
| 2.96E-02 | 0 0 | Cs4g13050.1         | 8.6  | 0 | 0    | 2 | MASCOT | T      | PLEX8 |  |
| 8.59E-02 | 0 0 | Cs4g13050.1         | 4.37 | 0 | 15.9 | 0 | 2      | MASCOT | T     |  |
| 7.51E-02 | 0 0 | Cs4g13050.1         | 4.37 | 0 | 0    | 2 | MASCOT | T      |       |  |
| 1.35E-02 | 0 0 | Cs5g14800.2/Cs5g148 | 4.43 | 0 | 0    | 2 | MASCOT | T      | PLEX8 |  |
| 2.99E-02 | 0 0 | Cs5g14800.2/Cs5g148 | 4.43 | 0 | 0    | 2 | MASCOT | T      | PLEX8 |  |
| 7.12E-02 | 0 0 | Cs5g14800.2/Cs5g148 | 4.43 | 0 | 0    | 2 | MASCOT | T      | PLEX8 |  |
| 4.41E-03 | 0 0 | Cs5g14800.1/Cs5g148 | 8.75 | 0 | 0    | 2 | MASCOT | T      |       |  |
| 3.56E-05 | 0 0 | Cs5g14800.1/Cs5g148 | 4.14 | 0 | 0    | 2 | MASCOT | T      | PLEX8 |  |
| 1.32E-02 | 0 0 | Cs5g14800.1/Cs5g148 | 8.8  | 0 | 0    | 2 | MASCOT | T      | PLEX8 |  |
| 3.84E-02 | 0 0 | Cs5g14800.1/Cs5g148 | 8.8  | 0 | 0    | 2 | MASCOT | T      | PLEX8 |  |
| 2.93E-02 | 0 0 | Cs5g14800.1/Cs5g148 | 8.8  | 0 | 0    | 2 | MASCOT | T      | PLEX8 |  |
| 3.30E-01 | 0 0 | Cs5g14800.1/Cs5g148 | 4.75 | 0 | 0    | 2 | MASCOT | T      | PLEX8 |  |
| 1.85E-02 | 0 0 | Cs5g14800.1/Cs5g148 | 5.99 | 0 | 0    | 2 | MASCOT | T      | PLEX8 |  |
| 3.57E-01 | 0 0 | Cs5g14800.2/Cs5g148 | 8.73 | 0 | 0    | 2 | MASCOT | T      | PLEX8 |  |
| 6.71E-02 | 0 0 | Cs5g14800.2/Cs5g148 | 8.73 | 0 | 0    | 2 | MASCOT | T      | PLEX8 |  |
| 2.89E-02 | 0 0 | Cs6g09140.1/Cs6g091 | 5.27 | 0 | 0    | 2 | MASCOT | T      |       |  |
| 5.63E-06 | 0 0 | Cs6g09140.1/Cs6g091 | 5.27 | 0 | 0    | 2 | MASCOT | T      | PLEX8 |  |
| 1.14E-02 | 0 0 | Cs6g09140.1/Cs6g091 | 5.27 | 0 | 0    | 2 | MASCOT | T      |       |  |
| 1.31E-04 | 0 0 | Cs6g09140.1/Cs6g091 | 5.27 | 0 | 0    | 2 | MASCOT | T      |       |  |
| 6.41E-02 | 0 0 | Cs6g09140.1/Cs6g091 | 4.53 | 0 | 0    | 2 | MASCOT | T      | PLEX8 |  |
| 5.77E-02 | 0 0 | Cs6g09140.1/Cs6g091 | 5.5  | 0 | 0    | 2 | MASCOT | T      |       |  |
| 6.77E-02 | 0 0 | Cs6g09140.1/Cs6g091 | 6.09 | 0 | 0    | 2 | MASCOT | T      |       |  |
| 2.02E-02 | 0 0 | Cs6g09140.1/Cs6g091 | 6.1  | 0 | 0    | 2 | MASCOT | T      |       |  |
| 1.82E-01 | 0 0 | Cs6g09140.1/Cs6g091 | 6.74 | 0 | 0    | 2 | MASCOT | T      | PLEX8 |  |
| 6.35E-02 | 0 0 | Cs6g09140.1/Cs6g091 | 6.74 | 0 | 0    | 2 | MASCOT | T      | PLEX8 |  |
| 1.30E-01 | 0 0 | Cs6g09140.1/Cs6g091 | 8.47 | 0 | 0    | 2 | MASCOT | T      | PLEX8 |  |
| 1.02E-01 | 0 0 | Cs6g09140.1/Cs6g091 | 8.47 | 0 | 0    | 2 | MASCOT | T      | PLEX8 |  |
| 1.08E-02 | 0 0 | Cs6g14990.1         | 4.37 | 0 | 0    | 2 | MASCOT | T      | PLEX8 |  |
| 7.52E-04 | 0 0 | Cs6g14990.1         | 6.74 | 0 | 0    | 2 | MASCOT | T      | PLEX8 |  |
| 8.04E-02 | 0 0 | Cs6g14990.1         | 6.74 | 0 | 0    | 2 | MASCOT | T      | PLEX8 |  |
| 6.77E-02 | 0 0 | Cs6g14990.1         | 6.74 | 0 | 0    | 2 | MASCOT | T      | PLEX8 |  |
| 9.35E-05 | 0 0 | Cs6g14990.1         | 7.91 | 0 | 0    | 2 | MASCOT | T      | PLEX8 |  |
| 1.16E-02 | 0 0 | Cs6g14990.1         | 7.91 | 0 | 0    | 2 | MASCOT | T      |       |  |
| 1.59E-01 | 0 0 | Cs6g14990.1/Cs7g205 | 8.75 | 0 | 0    | 2 | MASCOT | T      | PLEX8 |  |
| 2.22E-02 | 0 0 | Cs6g14990.1/Cs7g205 | 8.75 | 0 | 0    | 2 | MASCOT | T      |       |  |
| 1.27E-02 | 0 0 | Cs6g14990.1         | 4.37 | 0 | 0    | 2 | MASCOT | T      | PLEX8 |  |
| 1.28E-02 | 0 0 | Cs6g14990.1/Cs7g205 | 9.75 | 0 | 0    | 2 | MASCOT | T      |       |  |
| 3.59E-03 | 0 0 | Cs6g14990.1         | 5.4  | 0 | 0    | 2 | MASCOT | T      | PLEX8 |  |
| 1.87E-02 | 0 0 | Cs6g14990.1         | 5.4  | 0 | 0    | 2 | MASCOT | T      |       |  |
| 1.61E-01 | 0 0 | Cs6g21580.1         | 6.07 | 0 | 0    | 2 | MASCOT | T      | PLEX8 |  |
| 4.06E-02 | 0 0 | Cs6g21580.1         | 6.07 | 0 | 0    | 2 | MASCOT | T      | PLEX8 |  |
| 5.17E-04 | 0 0 | Cs6g21580.1         | 4.79 | 0 | 0    | 2 | MASCOT | T      | PLEX8 |  |
| 1.10E-03 | 0 0 | Cs6g21580.1         | 4.79 | 0 | 0    | 2 | MASCOT | T      | PLEX8 |  |
| 5.38E-02 | 0 0 | Cs6g21580.1         | 4.49 | 0 | 0    | 2 | MASCOT | T      | PLEX8 |  |
| 5.12E-04 | 0 0 | Cs6g21580.1         | 6.14 | 0 | 0    | 2 | MASCOT | T      | PLEX8 |  |
| 3.07E-02 | 0 0 | Cs6g21580.1         | 6.14 | 0 | 0    | 2 | MASCOT | T      | PLEX8 |  |
| 5.00E-02 | 0 0 | Cs6g21580.1         | 3.92 | 0 | 0    | 2 | MASCOT | T      | PLEX8 |  |
| 2.86E-04 | 0 0 | Cs6g21580.1         | 4.53 | 0 | 0    | 2 | MASCOT | T      | PLEX8 |  |
| 7.64E-03 | 0 0 | Cs6g21580.1         | 4.53 | 0 | 0    | 2 | MASCOT | T      | PLEX8 |  |

|          |     |                     |      |   |      |   |        |        |       |       |
|----------|-----|---------------------|------|---|------|---|--------|--------|-------|-------|
| 6.01E-03 | 0 0 | Cs6g21580.1         | 4.53 | 0 | 0    | 2 | MASCOT | T      | PLEX8 |       |
| 9.65E-05 | 0 0 | Cs6g21580.1         | 4.53 | 0 | 0    | 2 | MASCOT | T      | PLEX8 |       |
| 2.47E-01 | 0 0 | Cs9g10450.1         | 8.8  | 0 | 15.9 | 0 | 2      | MASCOT | T     | PLEX8 |
| 3.05E-02 | 0 0 | Cs9g10450.1         | 8.8  | 0 | 0    | 2 | MASCOT | T      | PLEX8 |       |
| 8.41E-02 | 0 0 | Cs9g10450.1         | 4.25 | 0 | 0    | 2 | MASCOT | T      | PLEX8 |       |
| 1.64E-02 | 0 0 | Cs9g10450.1         | 4.25 | 0 | 0    | 2 | MASCOT | T      | PLEX8 |       |
| 1.68E-02 | 0 0 | Cs9g10450.1         | 4.25 | 0 | 0    | 2 | MASCOT | T      | PLEX8 |       |
| 2.31E-01 | 0 0 | Cs9g10450.1         | 4.53 | 0 | 0    | 2 | MASCOT | T      | PLEX8 |       |
| 5.87E-02 | 0 0 | Cs9g10450.1         | 8.6  | 1 | 0    | 2 | MASCOT | T      | PLEX8 |       |
| 1.66E-01 | 0 0 | Cs9g10450.1         | 6.72 | 0 | 0    | 2 | MASCOT | T      | PLEX8 |       |
| 5.54E-02 | 0 0 | Cs9g10450.1         | 4.53 | 0 | 0    | 2 | MASCOT | T      | PLEX8 |       |
| 9.41E-03 | 0 0 | Cs9g10450.1         | 6    | 0 | 0    | 2 | MASCOT | T      | PLEX8 |       |
| 1.11E-01 | 0 0 | Cs9g10450.1         | 6    | 0 | 0    | 2 | MASCOT | T      | PLEX8 |       |
| 2.13E-01 | 0 0 | Cs9g10450.1         | 6    | 0 | 0    | 2 | MASCOT | T      | PLEX8 |       |
| 7.07E-02 | 0 0 | Cs1g03610.1/Cs1g036 | 6.1  | 0 | 0    | 2 | MASCOT | T      | PLEX8 |       |
| 2.13E-01 | 0 0 | Cs1g03610.1/Cs1g036 | 6    | 0 | 0    | 2 | MASCOT | T      | PLEX8 |       |
| 3.14E-03 | 0 0 | Cs1g03610.1/Cs1g036 | 6.74 | 0 | 0    | 2 | MASCOT | T      | PLEX8 |       |
| 4.35E-04 | 0 0 | Cs1g03610.1/Cs1g036 | 6.74 | 0 | 0    | 2 | MASCOT | T      | PLEX8 |       |
| 5.12E-03 | 0 0 | Cs1g03610.1/Cs1g036 | 6.74 | 0 | 0    | 2 | MASCOT | T      | PLEX8 |       |
| 2.74E-02 | 0 0 | Cs1g03610.1/Cs1g036 | 8.25 | 0 | 0    | 2 | MASCOT | T      | PLEX8 |       |
| 3.40E-01 | 0 0 | Cs1g03610.1/Cs1g036 | 8.59 | 0 | 0    | 2 | MASCOT | T      | PLEX8 |       |
| 4.00E-02 | 0 0 | Cs1g03610.1/Cs1g036 | 8.72 | 0 | 0    | 2 | MASCOT | T      |       |       |
| 1.43E-04 | 0 0 | Cs1g03610.1/Cs1g036 | 8.72 | 0 | 0    | 2 | MASCOT | T      |       |       |
| 1.85E-03 | 0 0 | Cs1g03610.1/Cs1g036 | 8.72 | 0 | 0    | 2 | MASCOT | T      |       |       |
| 3.64E-01 | 0 0 | Cs1g03610.1/Cs1g036 | 8.75 | 0 | 0    | 2 | MASCOT | T      | PLEX8 |       |
| 2.57E-01 | 0 0 | Cs2g17060.1/Cs2g170 | 6    | 0 | 0    | 2 | MASCOT | T      | PLEX8 |       |
| 1.18E-01 | 0 0 | Cs2g17060.1/Cs2g170 | 4.37 | 0 | 0    | 2 | MASCOT | T      |       |       |
| 2.69E-02 | 0 0 | Cs2g17060.1         | 4.14 | 0 | 0    | 2 | MASCOT | T      |       |       |
| 2.16E-01 | 0 0 | Cs2g17060.1/Cs2g170 | 6    | 0 | 0    | 2 | MASCOT | T      | PLEX8 |       |
| 1.13E-01 | 0 0 | Cs2g17060.1/Cs2g170 | 6    | 0 | 0    | 2 | MASCOT | T      | PLEX8 |       |
| 8.02E-03 | 0 0 | Cs2g17060.1/Cs2g170 | 6    | 0 | 0    | 2 | MASCOT | T      | PLEX8 |       |
| 6.36E-03 | 0 0 | Cs2g17060.1/Cs2g170 | 6    | 0 | 0    | 2 | MASCOT | T      | PLEX8 |       |
| 2.40E-01 | 0 0 | Cs2g17060.1/Cs2g170 | 4.53 | 0 | 0    | 2 | MASCOT | T      |       |       |
| 1.29E-01 | 0 0 | Cs2g17060.1/Cs2g170 | 5.55 | 0 | 15.9 | 0 | 2      | MASCOT | T     | PLEX8 |
| 1.00E-01 | 0 0 | Cs2g17060.1/Cs2g170 | 4.03 | 0 | 0    | 2 | MASCOT | T      | PLEX8 |       |
| 1.56E-03 | 0 0 | Cs2g17060.1/Cs2g170 | 4.03 | 0 | 0    | 2 | MASCOT | T      | PLEX8 |       |
| 7.93E-05 | 0 0 | Cs4g10100.2         | 4.37 | 0 | 0    | 2 | MASCOT | T      | PLEX8 |       |
| 1.72E-02 | 0 0 | Cs4g10100.1/Cs4g101 | 8.8  | 0 | 0    | 2 | MASCOT | T      | PLEX8 |       |
| 9.40E-02 | 0 0 | Cs4g10100.1/Cs4g101 | 4.25 | 0 | 0    | 2 | MASCOT | T      | PLEX8 |       |
| 1.66E-02 | 0 0 | Cs4g10100.1/Cs4g101 | 4.25 | 0 | 0    | 2 | MASCOT | T      | PLEX8 |       |
| 9.19E-03 | 0 0 | Cs2g21190.1/Cs2g211 | 9.75 | 0 | 0    | 2 | MASCOT | T      | PLEX8 |       |
| 1.29E-01 | 0 0 | Cs2g21190.1/Cs2g211 | 8.75 | 0 | 15.9 | 0 | 2      | MASCOT | T     | PLEX8 |
| 6.16E-02 | 0 0 | Cs2g21190.1/Cs2g211 | 8.75 | 0 | 15.9 | 0 | 2      | MASCOT | T     | PLEX8 |
| 1.83E-01 | 0 0 | Cs2g21190.1/Cs2g211 | 8.75 | 0 | 0    | 2 | MASCOT | T      | PLEX8 |       |
| 2.48E-01 | 0 0 | Cs4g10100.1/Cs4g101 | 5.38 | 0 | 0    | 2 | MASCOT | T      | PLEX8 |       |
| 6.86E-03 | 0 0 | Cs4g10100.1/Cs4g101 | 5.38 | 0 | 0    | 2 | MASCOT | T      | PLEX8 |       |
| 3.18E-01 | 0 0 | Cs4g10100.1/Cs4g101 | 6.11 | 0 | 0    | 2 | MASCOT | T      | PLEX8 |       |
| 3.11E-02 | 0 0 | Cs5g32850.1/Cs5g328 | 6.04 | 0 | 0    | 2 | MASCOT | T      | PLEX8 |       |
| 3.34E-02 | 0 0 | Cs5g32850.1/Cs5g328 | 6.04 | 0 | 0    | 2 | MASCOT | T      | PLEX8 |       |
| 2.06E-01 | 0 0 | Cs5g32850.1/Cs5g328 | 6.04 | 0 | 0    | 2 | MASCOT | T      | PLEX8 |       |
| 2.64E-01 | 0 0 | Cs5g32850.1/Cs5g328 | 5.21 | 0 | 0    | 2 | MASCOT | T      |       |       |

|          |     |                       |      |   |      |   |        |        |       |       |
|----------|-----|-----------------------|------|---|------|---|--------|--------|-------|-------|
| 1.25E-01 | 0 0 | Cs5g32850.1/Cs5g328   | 5.21 | 0 | 0    | 2 | MASCOT | T      |       |       |
| 4.59E-01 | 0 0 | Cs5g32850.1/Cs5g328   | 5.88 | 0 | 0    | 2 | MASCOT | T      | PLEX8 |       |
| 2.18E-01 | 0 0 | Cs5g32850.1/Cs5g328   | 5.99 | 0 | 0    | 2 | MASCOT | T      | PLEX8 |       |
| 1.21E-01 | 0 0 | Cs5g32850.1/Cs5g328   | 5.4  | 0 | 0    | 2 | MASCOT | T      |       |       |
| 5.11E-01 | 0 0 | Cs5g32850.1/Cs5g328   | 4.53 | 0 | 0    | 2 | MASCOT | T      | PLEX8 |       |
| 5.44E-04 | 0 0 | Cs5g32850.1           | 4.54 | 0 | 0    | 2 | MASCOT | T      | PLEX8 |       |
| 1.13E-01 | 0 0 | Cs5g32850.1           | 4.54 | 0 | 0    | 2 | MASCOT | T      | PLEX8 |       |
| 2.01E-02 | 0 0 | Cs6g13570.1/Cs6g135   | 6.74 | 0 | 0    | 2 | MASCOT | T      | PLEX8 |       |
| 3.10E-05 | 0 0 | Cs6g13570.1/Cs6g135   | 6.74 | 0 | 0    | 2 | MASCOT | T      | PLEX8 |       |
| 1.77E-04 | 0 0 | Cs6g13570.1/Cs6g135   | 4.37 | 0 | 0    | 2 | MASCOT | T      | PLEX8 |       |
| 1.90E-02 | 0 0 | Cs6g13570.1/Cs6g135   | 5.97 | 0 | 0    | 2 | MASCOT | T      | PLEX8 |       |
| 7.32E-02 | 0 0 | Cs6g13570.1           | 8.8  | 0 | 0    | 2 | MASCOT | T      | PLEX8 |       |
| 3.62E-02 | 0 0 | Cs6g13570.1           | 8.8  | 0 | 0    | 2 | MASCOT | T      | PLEX8 |       |
| 1.23E-03 | 0 0 | Cs6g13570.1/Cs6g135   | 5.84 | 0 | 0    | 2 | MASCOT | T      | PLEX8 |       |
| 1.12E-03 | 0 0 | Cs6g13570.1/Cs6g135   | 5.84 | 0 | 0    | 2 | MASCOT | T      | PLEX8 |       |
| 4.09E-04 | 0 0 | Cs6g13570.1/Cs6g135   | 4.53 | 0 | 0    | 2 | MASCOT | T      | PLEX8 |       |
| 2.89E-06 | 0 0 | Cs6g13570.1/Cs6g135   | 4.53 | 0 | 0    | 2 | MASCOT | T      | PLEX8 |       |
| 3.38E-02 | 0 0 | Cs6g13570.1           | 6    | 0 | 0    | 2 | MASCOT | T      | PLEX8 |       |
| 3.08E-02 | 0 0 | Cs7g30260.1           | 4.14 | 0 | 15.9 | 0 | 2      | MASCOT | T     | PLEX8 |
| 3.13E-02 | 0 0 | Cs7g30260.1           | 8.07 | 0 | 0    | 2 | MASCOT | T      | PLEX8 |       |
| 2.36E-05 | 0 0 | Cs7g30260.1           | 5.99 | 0 | 0    | 2 | MASCOT | T      | PLEX8 |       |
| 2.00E-03 | 0 0 | Cs7g30260.1           | 5.99 | 0 | 0    | 2 | MASCOT | T      |       |       |
| 1.07E-01 | 0 0 | Cs7g30260.1           | 8.23 | 0 | 0    | 2 | MASCOT | T      | PLEX8 |       |
| 2.17E-01 | 0 0 | Cs7g30260.1           | 8.23 | 0 | 0    | 2 | MASCOT | T      | PLEX8 |       |
| 2.20E-06 | 0 0 | Cs7g30260.1           | 5.4  | 0 | 0    | 2 | MASCOT | T      | PLEX8 |       |
| 3.15E-02 | 0 0 | Cs7g30260.1           | 5.4  | 0 | 0    | 2 | MASCOT | T      | PLEX8 |       |
| 1.14E-02 | 0 0 | Cs7g30260.1           | 3.84 | 0 | 0    | 2 | MASCOT | T      | PLEX8 |       |
| 5.85E-02 | 0 0 | Cs7g30260.1           | 8.75 | 0 | 0    | 2 | MASCOT | T      | PLEX8 |       |
| 1.62E-02 | 0 0 | Cs7g30260.1           | 8.75 | 0 | 0    | 2 | MASCOT | T      | PLEX8 |       |
| 6.77E-02 | 0 0 | orange1.1t01871.1     | 5.32 | 0 | 0    | 2 | MASCOT | T      | PLEX8 |       |
| 3.40E-01 | 0 0 | orange1.1t01871.1     | 8.2  | 0 | 0    | 2 | MASCOT | T      |       |       |
| 5.35E-03 | 0 0 | orange1.1t01871.1     | 8.2  | 0 | 0    | 2 | MASCOT | T      |       |       |
| 1.73E-01 | 0 0 | orange1.1t01871.1     | 4.37 | 0 | 0    | 2 | MASCOT | T      | PLEX8 |       |
| 3.50E-02 | 0 0 | orange1.1t01871.1     | 4.37 | 0 | 0    | 2 | MASCOT | T      | PLEX8 |       |
| 2.59E-01 | 0 0 | orange1.1t01871.1     | 4.37 | 0 | 0    | 2 | MASCOT | T      | PLEX8 |       |
| 7.84E-02 | 0 0 | orange1.1t01871.1     | 8.8  | 0 | 0    | 2 | MASCOT | T      | PLEX8 |       |
| 1.45E-01 | 0 0 | orange1.1t01871.1     | 8.8  | 0 | 0    | 2 | MASCOT | T      | PLEX8 |       |
| 1.82E-03 | 0 0 | orange1.1t01871.1     | 9.75 | 0 | 0    | 2 | MASCOT | T      |       |       |
| 1.80E-02 | 0 0 | orange1.1t01871.1     | 5.84 | 0 | 0    | 2 | MASCOT | T      | PLEX8 |       |
| 1.24E-01 | 0 0 | orange1.1t01871.1     | 4.37 | 0 | 0    | 2 | MASCOT | T      | PLEX8 |       |
| 1.25E-02 | 0 0 | orange1.1t04032.1/ora | 4.09 | 0 | 0    | 2 | MASCOT | T      | PLEX8 |       |
| 5.53E-05 | 0 0 | orange1.1t04032.1/ora | 4.09 | 0 | 0    | 2 | MASCOT | T      | PLEX8 |       |
| 1.31E-01 | 0 0 | orange1.1t04032.1/ora | 6.14 | 1 | 0    | 2 | MASCOT | T      | PLEX8 |       |
| 4.85E-03 | 0 0 | orange1.1t04032.1/ora | 5.72 | 0 | 0    | 2 | MASCOT | T      | PLEX8 |       |
| 5.19E-02 | 0 0 | orange1.1t04032.1/ora | 5.72 | 0 | 0    | 2 | MASCOT | T      | PLEX8 |       |
| 3.79E-02 | 0 0 | orange1.1t04032.1/ora | 4.53 | 0 | 0    | 2 | MASCOT | T      | PLEX8 |       |
| 2.86E-02 | 0 0 | orange1.1t04032.1/ora | 4.53 | 0 | 0    | 2 | MASCOT | T      | PLEX8 |       |
| 1.01E-01 | 0 0 | orange1.1t04032.1/ora | 4.53 | 0 | 0    | 2 | MASCOT | T      | PLEX8 |       |
| 2.57E-02 | 0 0 | orange1.1t04032.1/ora | 5.55 | 0 | 0    | 2 | MASCOT | T      | PLEX8 |       |
| 2.88E-02 | 0 0 | orange1.1t04032.1/ora | 5.99 | 0 | 0    | 2 | MASCOT | T      | PLEX8 |       |
| 5.33E-02 | 0 0 | orange1.1t04032.1/ora | 5.99 | 0 | 0    | 2 | MASCOT | T      | PLEX8 |       |

|          |     |                       |      |   |      |   |        |        |       |       |
|----------|-----|-----------------------|------|---|------|---|--------|--------|-------|-------|
| 5.23E-02 | 0 0 | Cs2g03010.1/Cs2g030   | 9.8  | 0 | 0    | 2 | MASCOT | T      | PLEX8 |       |
| 7.81E-02 | 0 0 | Cs2g21240.1/Cs2g212   | 4.37 | 0 | 0    | 2 | MASCOT | T      | PLEX8 |       |
| 1.34E-03 | 0 0 | Cs2g21240.1/Cs2g212   | 4.37 | 0 | 0    | 2 | MASCOT | T      | PLEX8 |       |
| 2.08E-02 | 0 0 | Cs2g21240.1           | 4.37 | 0 | 0    | 2 | MASCOT | T      | PLEX8 |       |
| 6.13E-02 | 0 0 | Cs2g21240.1           | 5.55 | 0 | 0    | 2 | MASCOT | T      | PLEX8 |       |
| 3.37E-02 | 0 0 | Cs2g21240.1           | 5.55 | 0 | 0    | 2 | MASCOT | T      | PLEX8 |       |
| 1.41E-02 | 0 0 | Cs2g21240.1           | 5.55 | 0 | 0    | 2 | MASCOT | T      | PLEX8 |       |
| 4.76E-05 | 0 0 | Cs2g21240.1/Cs2g212   | 4.37 | 0 | 0    | 2 | MASCOT | T      |       |       |
| 3.61E-04 | 0 0 | Cs2g21240.1/Cs2g212   | 4.37 | 0 | 0    | 2 | MASCOT | T      |       |       |
| 2.47E-02 | 0 0 | Cs2g21240.1/Cs2g212   | 4.21 | 0 | 0    | 2 | MASCOT | T      | PLEX8 |       |
| 5.65E-02 | 0 0 | Cs3g21590.1/orange1.  | 9.8  | 0 | 15.9 | 0 | 2      | MASCOT | T     | PLEX8 |
| 3.19E-02 | 0 0 | Cs3g21590.1/orange1.  | 9.8  | 0 | 0    | 2 | MASCOT | T      | PLEX8 |       |
| 2.42E-01 | 0 0 | Cs3g21590.1/orange1.  | 9.8  | 0 | 0    | 2 | MASCOT | T      | PLEX8 |       |
| 1.16E-02 | 0 0 | Cs3g21590.1/orange1.  | 4.03 | 0 | 15.9 | 0 | 2      | MASCOT | T     | PLEX8 |
| 4.07E-04 | 0 0 | Cs3g21590.1           | 5.72 | 0 | 0    | 2 | MASCOT | T      | PLEX8 |       |
| 3.13E-02 | 0 0 | Cs3g21590.1           | 4.37 | 0 | 0    | 2 | MASCOT | T      | PLEX8 |       |
| 1.15E-01 | 0 0 | Cs3g21590.1           | 4.37 | 0 | 0    | 2 | MASCOT | T      |       |       |
| 2.76E-02 | 0 0 | Cs3g21590.1/orange1.  | 9.76 | 0 | 0    | 2 | MASCOT | T      | PLEX8 |       |
| 1.78E-01 | 0 0 | Cs3g21590.1 ! orange1 | 4.53 | 0 | 0    | 2 | MASCOT | T      | PLEX8 |       |
| 5.38E-01 | 0 0 | Cs3g21590.1/orange1.  | 9.73 | 0 | 0    | 2 | MASCOT | T      | PLEX8 |       |
| 4.05E-02 | 0 0 | Cs4g02520.1           | 5.88 | 0 | 0    | 2 | MASCOT | T      | PLEX8 |       |
| 1.26E-01 | 0 0 | Cs4g02520.1           | 6    | 0 | 0    | 2 | MASCOT | T      | PLEX8 |       |
| 1.11E-03 | 0 0 | Cs4g02520.1           | 4.09 | 0 | 0    | 2 | MASCOT | T      | PLEX8 |       |
| 2.26E-01 | 0 0 | Cs4g02520.1           | 4.53 | 0 | 0    | 2 | MASCOT | T      | PLEX8 |       |
| 8.38E-02 | 0 0 | Cs4g02520.1           | 4.53 | 0 | 0    | 2 | MASCOT | T      | PLEX8 |       |
| 2.52E-02 | 0 0 | Cs4g02520.1           | 4.14 | 0 | 0    | 2 | MASCOT | T      | PLEX8 |       |
| 7.66E-02 | 0 0 | Cs4g02520.1           | 4.21 | 0 | 0    | 2 | MASCOT | T      | PLEX8 |       |
| 6.03E-02 | 0 0 | Cs4g02520.1           | 4.21 | 0 | 0    | 2 | MASCOT | T      | PLEX8 |       |
| 1.48E-01 | 0 0 | Cs4g02520.1           | 6.75 | 0 | 0    | 2 | MASCOT | T      | PLEX8 |       |
| 1.30E-01 | 0 0 | Cs4g02520.1           | 6.75 | 0 | 0    | 2 | MASCOT | T      |       |       |
| 2.21E-02 | 0 0 | Cs5g34760.1/Cs5g347   | 3.93 | 0 | 0    | 2 | MASCOT | T      |       |       |
| 2.11E-02 | 0 0 | Cs5g34760.1/Cs5g347   | 5.97 | 0 | 0    | 2 | MASCOT | T      | PLEX8 |       |
| 2.26E-01 | 0 0 | Cs5g34760.1/Cs5g347   | 5.97 | 0 | 0    | 2 | MASCOT | T      | PLEX8 |       |
| 2.34E-01 | 0 0 | Cs5g34760.1/Cs5g347   | 9.73 | 0 | 0    | 2 | MASCOT | T      |       |       |
| 4.00E-02 | 0 0 | Cs5g34760.1/Cs5g347   | 8.8  | 0 | 0    | 2 | MASCOT | T      | PLEX8 |       |
| 1.09E-01 | 0 0 | Cs5g34760.1/Cs5g347   | 5.99 | 0 | 15.9 | 0 | 2      | MASCOT | T     | PLEX8 |
| 1.53E-02 | 0 0 | Cs5g34760.1/Cs5g347   | 5.99 | 0 | 0    | 2 | MASCOT | T      | PLEX8 |       |
| 5.03E-03 | 0 0 | Cs5g34760.1/Cs5g347   | 5.99 | 0 | 0    | 2 | MASCOT | T      | PLEX8 |       |
| 1.28E-02 | 0 0 | Cs5g34760.1/Cs5g347   | 4.03 | 0 | 0    | 2 | MASCOT | T      |       |       |
| 1.27E-04 | 0 0 | Cs5g34760.1/Cs5g347   | 5.83 | 0 | 0    | 2 | MASCOT | T      | PLEX8 |       |
| 6.17E-02 | 0 0 | Cs6g15280.1           | 8.8  | 0 | 0    | 2 | MASCOT | T      | PLEX8 |       |
| 3.42E-03 | 0 0 | Cs1g13640.1/Cs1g136   | 4.37 | 0 | 0    | 2 | MASCOT | T      | PLEX8 |       |
| 5.55E-04 | 0 0 | Cs1g13640.1/Cs1g136   | 4.37 | 0 | 0    | 2 | MASCOT | T      | PLEX8 |       |
| 2.53E-01 | 0 0 | Cs6g15280.1           | 6.75 | 0 | 0    | 2 | MASCOT | T      | PLEX8 |       |
| 8.79E-03 | 0 0 | Cs1g13620.1/Cs1g136   | 5.5  | 0 | 0    | 2 | MASCOT | T      |       |       |
| 1.21E-02 | 0 0 | Cs6g15280.1/Cs6g153   | 8.5  | 0 | 0    | 2 | MASCOT | T      | PLEX8 |       |
| 1.43E-02 | 0 0 | Cs6g15280.1/Cs6g153   | 8.5  | 0 | 0    | 2 | MASCOT | T      | PLEX8 |       |
| 1.34E-01 | 0 0 | Cs6g15280.1/Cs6g153   | 8.5  | 0 | 0    | 2 | MASCOT | T      |       |       |
| 6.79E-02 | 0 0 | Cs6g15280.1           | 8.44 | 0 | 0    | 2 | MASCOT | T      | PLEX8 |       |
| 1.07E-01 | 0 0 | Cs6g15280.1 ! Cs1g13  | 5.81 | 0 | 0    | 2 | MASCOT | T      | PLEX8 |       |
| 1.27E-01 | 0 0 | Cs7g06620.1/Cs7g066   | 6.79 | 0 | 0    | 2 | MASCOT | T      |       |       |

|          |     |                      |      |   |      |   |        |        |       |       |
|----------|-----|----------------------|------|---|------|---|--------|--------|-------|-------|
| 1.04E-03 | 0 0 | Cs7g06620.1/Cs7g066  | 8.8  | 0 | 0    | 2 | MASCOT | T      | PLEX8 |       |
| 5.37E-02 | 0 0 | Cs7g06620.1/Cs7g066  | 4.14 | 0 | 15.9 | 0 | 2      | MASCOT | T     | PLEX8 |
| 2.53E-01 | 0 0 | Cs7g06620.1/Cs7g066  | 6.71 | 0 | 0    | 2 | MASCOT | T      | PLEX8 |       |
| 3.09E-01 | 0 0 | Cs7g06620.1/Cs7g066  | 6.71 | 0 | 0    | 2 | MASCOT | T      | PLEX8 |       |
| 2.66E-02 | 0 0 | Cs7g06620.1/Cs7g066  | 6.05 | 0 | 0    | 2 | MASCOT | T      | PLEX8 |       |
| 9.85E-03 | 0 0 | Cs7g06620.1/Cs7g066  | 5.82 | 0 | 0    | 2 | MASCOT | T      | PLEX8 |       |
| 6.38E-02 | 0 0 | Cs7g06620.1/Cs7g066  | 5.82 | 0 | 0    | 2 | MASCOT | T      | PLEX8 |       |
| 1.26E-01 | 0 0 | Cs7g06620.1/Cs7g066  | 8.31 | 0 | 0    | 2 | MASCOT | T      | PLEX8 |       |
| 1.38E-01 | 0 0 | Cs7g06620.1/Cs7g066  | 8.31 | 0 | 0    | 2 | MASCOT | T      | PLEX8 |       |
| 6.48E-03 | 0 0 | Cs7g09290.1/Cs7g092  | 3.93 | 0 | 0    | 2 | MASCOT | T      | PLEX8 |       |
| 6.54E-04 | 0 0 | Cs7g09290.1          | 4.53 | 0 | 0    | 2 | MASCOT | T      | PLEX8 |       |
| 1.96E-03 | 0 0 | Cs7g09290.1          | 4.53 | 0 | 0    | 2 | MASCOT | T      | PLEX8 |       |
| 1.88E-01 | 0 0 | Cs7g09290.1/Cs7g092  | 5.81 | 0 | 0    | 2 | MASCOT | T      | PLEX8 |       |
| 3.33E-03 | 0 0 | Cs7g09290.1/Cs7g092  | 4.21 | 0 | 0    | 2 | MASCOT | T      | PLEX8 |       |
| 1.03E-01 | 0 0 | Cs7g09290.1/Cs7g092  | 4.21 | 0 | 0    | 2 | MASCOT | T      | PLEX8 |       |
| 2.54E-03 | 0 0 | Cs7g09290.1/Cs7g092  | 4.75 | 0 | 0    | 2 | MASCOT | T      | PLEX8 |       |
| 2.49E-02 | 0 0 | Cs7g09290.1          | 8.76 | 0 | 0    | 2 | MASCOT | T      | PLEX8 |       |
| 1.23E-01 | 0 0 | Cs7g09290.1          | 8.76 | 0 | 0    | 2 | MASCOT | T      | PLEX8 |       |
| 1.38E-01 | 0 0 | Cs7g09290.1/Cs7g092  | 9.47 | 0 | 0    | 2 | MASCOT | T      | PLEX8 |       |
| 2.80E-03 | 0 0 | orange1.1t03252.1    | 6.75 | 0 | 0    | 2 | MASCOT | T      | PLEX8 |       |
| 8.87E-03 | 0 0 | orange1.1t03252.1    | 6.75 | 0 | 0    | 2 | MASCOT | T      | PLEX8 |       |
| 2.02E-01 | 0 0 | orange1.1t03252.1    | 6.75 | 0 | 0    | 2 | MASCOT | T      | PLEX8 |       |
| 2.43E-02 | 0 0 | orange1.1t03252.1    | 3.93 | 0 | 0    | 2 | MASCOT | T      | PLEX8 |       |
| 4.51E-04 | 0 0 | orange1.1t03252.1    | 3.93 | 0 | 0    | 2 | MASCOT | T      | PLEX8 |       |
| 3.16E-02 | 0 0 | orange1.1t03252.1    | 4.32 | 1 | 0    | 2 | MASCOT | T      | PLEX8 |       |
| 2.38E-01 | 0 0 | orange1.1t03252.1    | 6    | 0 | 0    | 2 | MASCOT | T      | PLEX8 |       |
| 1.21E-02 | 0 0 | orange1.1t03252.1    | 4.14 | 0 | 0    | 2 | MASCOT | T      | PLEX8 |       |
| 2.53E-01 | 0 0 | orange1.1t03252.1    | 4.25 | 0 | 0    | 2 | MASCOT | T      | PLEX8 |       |
| 2.54E-02 | 0 0 | orange1.1t03252.1    | 5.5  | 0 | 0    | 2 | MASCOT | T      | PLEX8 |       |
| 1.16E-01 | 0 0 | Cs1g22280.1/Cs1g222  | 6.79 | 0 | 0    | 2 | MASCOT | T      | PLEX8 |       |
| 8.67E-03 | 0 0 | Cs1g22280.1/Cs1g222  | 5.87 | 0 | 0    | 2 | MASCOT | T      | PLEX8 |       |
| 3.81E-04 | 0 0 | Cs1g22280.1/Cs1g222  | 4.53 | 0 | 0    | 2 | MASCOT | T      | PLEX8 |       |
| 2.16E-02 | 0 0 | Cs1g22280.1/Cs1g222  | 4.53 | 0 | 0    | 2 | MASCOT | T      | PLEX8 |       |
| 2.90E-02 | 0 0 | Cs1g22280.1/Cs1g222  | 4.53 | 0 | 0    | 2 | MASCOT | T      | PLEX8 |       |
| 6.33E-03 | 0 0 | Cs1g22280.1/Cs1g222  | 9.76 | 0 | 0    | 2 | MASCOT | T      | PLEX8 |       |
| 2.74E-02 | 0 0 | Cs1g22280.1/Cs1g222  | 8.76 | 0 | 0    | 2 | MASCOT | T      | PLEX8 |       |
| 2.08E-03 | 0 0 | Cs1g22280.1/Cs1g222  | 6.14 | 0 | 0    | 2 | MASCOT | T      | PLEX8 |       |
| 2.22E-01 | 0 0 | Cs1g22280.1/Cs1g222  | 6.74 | 0 | 0    | 2 | MASCOT | T      | PLEX8 |       |
| 3.08E-02 | 0 0 | Cs2g15520.1/Cs8g095  | 3.96 | 1 | 0    | 2 | MASCOT | T      | PLEX8 |       |
| 2.08E-01 | 0 0 | Cs2g15520.1          | 4.21 | 0 | 0    | 2 | MASCOT | T      | PLEX8 |       |
| 1.83E-02 | 0 0 | Cs2g15520.1          | 4.25 | 0 | 0    | 2 | MASCOT | T      | PLEX8 |       |
| 1.17E-03 | 0 0 | Cs2g15520.1          | 4.25 | 0 | 0    | 2 | MASCOT | T      | PLEX8 |       |
| 5.06E-04 | 0 0 | Cs2g15520.1          | 6.14 | 1 | 0    | 2 | MASCOT | T      | PLEX8 |       |
| 7.59E-03 | 0 0 | Cs2g15520.1          | 9.49 | 0 | 0    | 2 | MASCOT | T      | PLEX8 |       |
| 1.88E-02 | 0 0 | Cs2g15520.1 ! Cs8g09 | 4.03 | 0 | 0    | 2 | MASCOT | T      | PLEX8 |       |
| 1.80E-01 | 0 0 | Cs2g15520.1          | 8.75 | 0 | 0    | 2 | MASCOT | T      | PLEX8 |       |
| 1.52E-01 | 0 0 | Cs2g15520.1          | 8.75 | 0 | 0    | 2 | MASCOT | T      | PLEX8 |       |
| 5.88E-02 | 0 0 | Cs2g19110.1/Cs2g191  | 4.21 | 0 | 0    | 2 | MASCOT | T      | PLEX8 |       |
| 4.60E-01 | 0 0 | Cs2g19110.1 ! Cs2g19 | 6.75 | 0 | 0    | 2 | MASCOT | T      | PLEX8 |       |
| 2.09E-01 | 0 0 | Cs2g19110.1/Cs2g191  | 8.75 | 0 | 0    | 2 | MASCOT | T      | PLEX8 |       |
| 1.24E-01 | 0 0 | Cs2g19110.1/Cs2g191  | 8.59 | 0 | 0    | 2 | MASCOT | T      | PLEX8 |       |

|          |     |                      |      |   |      |   |        |        |       |
|----------|-----|----------------------|------|---|------|---|--------|--------|-------|
| 1.45E-01 | 0 0 | Cs2g19110.1/Cs2g191  | 8.59 | 0 | 0    | 2 | MASCOT | T      | PLEX8 |
| 4.19E-02 | 0 0 | Cs2g19110.1/Cs2g191  | 8.59 | 0 | 0    | 2 | MASCOT | T      | PLEX8 |
| 1.47E-02 | 0 0 | Cs2g19110.2/Cs2g191  | 4.14 | 0 | 0    | 2 | MASCOT | T      | PLEX8 |
| 8.19E-04 | 0 0 | Cs2g19110.1/Cs2g191  | 6.78 | 0 | 0    | 2 | MASCOT | T      | PLEX8 |
| 3.93E-01 | 0 0 | Cs2g19110.1/Cs2g191  | 4.53 | 0 | 0    | 2 | MASCOT | T      | PLEX8 |
| 6.22E-03 | 0 0 | Cs1g11870.1/Cs4g013  | 5.32 | 0 | 0    | 2 | MASCOT | T      | PLEX8 |
| 6.52E-03 | 0 0 | Cs1g11870.1/Cs4g013  | 5.32 | 0 | 0    | 2 | MASCOT | T      | PLEX8 |
| 2.63E-02 | 0 0 | Cs1g11870.1/Cs1g161  | 5.59 | 0 | 0    | 2 | MASCOT | T      | PLEX8 |
| 8.46E-02 | 0 0 | Cs4g03700.1/Cs4g037  | 6.71 | 0 | 0    | 2 | MASCOT | T      | PLEX8 |
| 3.04E-02 | 0 0 | Cs1g11870.1/Cs4g037  | 8.8  | 0 | 0    | 2 | MASCOT | T      | PLEX8 |
| 1.20E-02 | 0 0 | Cs1g11870.1/Cs4g037  | 8.8  | 0 | 0    | 2 | MASCOT | T      | PLEX8 |
| 1.34E-01 | 0 0 | Cs4g03700.1/Cs4g037  | 5.32 | 0 | 0    | 2 | MASCOT | T      | PLEX8 |
| 7.97E-02 | 0 0 | Cs1g11870.1/Cs4g013  | 5.32 | 0 | 0    | 2 | MASCOT | T      |       |
| 9.76E-02 | 0 0 | Cs1g16150.1/Cs1g161  | 4.37 | 0 | 0    | 2 | MASCOT | T      | PLEX8 |
| 2.46E-02 | 0 0 | Cs6g17140.1          | 5.21 | 0 | 0    | 2 | MASCOT | T      | PLEX8 |
| 1.32E-03 | 0 0 | Cs6g17140.1          | 5.21 | 0 | 0    | 2 | MASCOT | T      | PLEX8 |
| 1.52E-02 | 0 0 | Cs6g17140.1          | 5.21 | 0 | 0    | 2 | MASCOT | T      |       |
| 2.54E-03 | 0 0 | Cs6g17140.1          | 3.8  | 0 | 0    | 2 | MASCOT | T      |       |
| 1.51E-01 | 0 0 | Cs6g17140.1          | 5.4  | 0 | 0    | 2 | MASCOT | T      | PLEX8 |
| 4.10E-03 | 0 0 | Cs6g17140.1          | 4.37 | 0 | 0    | 2 | MASCOT | T      |       |
| 1.27E-03 | 0 0 | Cs6g17140.1          | 5.81 | 0 | 0    | 2 | MASCOT | T      | PLEX8 |
| 2.30E-01 | 0 0 | Cs6g17140.1          | 6.09 | 0 | 0    | 2 | MASCOT | T      | PLEX8 |
| 2.91E-05 | 0 0 | Cs6g17140.1          | 3.83 | 0 | 0    | 2 | MASCOT | T      |       |
| 9.69E-02 | 0 0 | Cs7g07740.1          | 5.88 | 0 | 15.9 | 0 | 2      | MASCOT | T     |
| 5.26E-04 | 0 0 | Cs7g07740.1          | 5.88 | 0 | 0    | 2 | MASCOT | T      |       |
| 5.84E-06 | 0 0 | Cs7g07740.1          | 5.88 | 0 | 0    | 2 | MASCOT | T      |       |
| 1.10E-01 | 0 0 | Cs7g07740.1          | 5.84 | 0 | 0    | 2 | MASCOT | T      | PLEX8 |
| 3.58E-02 | 0 0 | Cs7g07740.1          | 6    | 0 | 0    | 2 | MASCOT | T      | PLEX8 |
| 1.77E-01 | 0 0 | Cs7g07740.1          | 6    | 0 | 0    | 2 | MASCOT | T      | PLEX8 |
| 6.92E-02 | 0 0 | Cs7g07740.1          | 9.47 | 0 | 0    | 2 | MASCOT | T      | PLEX8 |
| 4.15E-01 | 0 0 | Cs7g07740.1          | 5.5  | 0 | 0    | 2 | MASCOT | T      |       |
| 5.46E-04 | 0 0 | Cs7g07740.1          | 4.37 | 0 | 0    | 2 | MASCOT | T      |       |
| 6.01E-02 | 0 0 | Cs8g03250.1          | 4.56 | 1 | 0    | 2 | MASCOT | T      | PLEX8 |
| 5.46E-02 | 0 0 | Cs8g03250.1          | 4.4  | 0 | 0    | 2 | MASCOT | T      | PLEX8 |
| 1.23E-01 | 0 0 | Cs8g03250.1          | 4.14 | 0 | 0    | 2 | MASCOT | T      | PLEX8 |
| 3.15E-02 | 0 0 | Cs8g03250.1          | 4.21 | 0 | 0    | 2 | MASCOT | T      |       |
| 3.98E-02 | 0 0 | Cs8g03250.1          | 4.21 | 0 | 0    | 2 | MASCOT | T      |       |
| 2.92E-02 | 0 0 | Cs8g03250.1          | 9.76 | 0 | 0    | 2 | MASCOT | T      | PLEX8 |
| 2.53E-01 | 0 0 | Cs8g03250.1          | 6.75 | 0 | 0    | 2 | MASCOT | T      | PLEX8 |
| 1.70E-02 | 0 0 | Cs8g03250.1          | 5.55 | 0 | 0    | 2 | MASCOT | T      | PLEX8 |
| 2.99E-02 | 0 0 | Cs8g03250.1          | 5.55 | 0 | 0    | 2 | MASCOT | T      | PLEX8 |
| 1.61E-01 | 0 0 | Cs3g04050.1          | 6    | 0 | 0    | 2 | MASCOT | T      | PLEX8 |
| 1.01E-04 | 0 0 | Cs3g04050.1/orange1. | 8.75 | 0 | 0    | 2 | MASCOT | T      | PLEX8 |
| 2.15E-02 | 0 0 | Cs3g04050.1          | 4    | 0 | 0    | 2 | MASCOT | T      |       |
| 4.87E-02 | 0 0 | Cs3g04050.1          | 5.5  | 0 | 0    | 2 | MASCOT | T      | PLEX8 |
| 8.58E-03 | 0 0 | Cs3g04050.1          | 5.84 | 0 | 0    | 2 | MASCOT | T      | PLEX8 |
| 3.07E-02 | 0 0 | Cs3g04050.1          | 8.6  | 0 | 0    | 2 | MASCOT | T      | PLEX8 |
| 2.07E-01 | 0 0 | Cs3g04050.1          | 8.6  | 0 | 0    | 2 | MASCOT | T      | PLEX8 |
| 4.17E-01 | 0 0 | Cs3g04050.1          | 5.59 | 0 | 0    | 2 | MASCOT | T      | PLEX8 |
| 4.95E-02 | 0 0 | Cs3g20150.1/Cs3g201  | 4.14 | 0 | 0    | 2 | MASCOT | T      | PLEX8 |
| 6.36E-02 | 0 0 | Cs3g20150.1/Cs3g201  | 8.75 | 0 | 0    | 2 | MASCOT | T      | PLEX8 |



|          |     |                       |      |   |      |   |   |        |   |       |
|----------|-----|-----------------------|------|---|------|---|---|--------|---|-------|
| 1.02E-03 | 0 0 | Cs3g20150.1/Cs3g201   | 4.54 | 0 | 15.9 | 0 | 2 | MASCOT | T | PLEX8 |
| 7.34E-05 | 0 0 | Cs3g20150.1/Cs3g201   | 4.37 | 0 |      | 0 | 2 | MASCOT | T |       |
| 5.96E-03 | 0 0 | Cs3g20150.1/Cs3g201   | 5.83 | 0 |      | 0 | 2 | MASCOT | T | PLEX8 |
| 1.91E-03 | 0 0 | Cs3g20150.1/Cs3g201   | 5.83 | 0 |      | 0 | 2 | MASCOT | T | PLEX8 |
| 4.81E-03 | 0 0 | Cs3g20150.1/Cs3g201   | 4.53 | 0 |      | 0 | 2 | MASCOT | T | PLEX8 |
| 2.97E-02 | 0 0 | Cs3g20150.1/Cs3g201   | 4.53 | 0 |      | 0 | 2 | MASCOT | T | PLEX8 |
| 6.62E-02 | 0 0 | Cs5g31690.1           | 4.53 | 0 |      | 0 | 2 | MASCOT | T | PLEX8 |
| 2.90E-03 | 0 0 | Cs5g31690.1           | 5.84 | 0 |      | 0 | 2 | MASCOT | T | PLEX8 |
| 7.47E-02 | 0 0 | Cs5g31690.1           | 5.21 | 0 |      | 0 | 2 | MASCOT | T |       |
| 1.33E-02 | 0 0 | Cs5g31690.1           | 4.37 | 0 |      | 0 | 2 | MASCOT | T |       |
| 5.88E-03 | 0 0 | Cs5g31690.1           | 4.03 | 0 |      | 0 | 2 | MASCOT | T |       |
| 1.41E-04 | 0 0 | Cs5g31690.1           | 4.37 | 0 |      | 0 | 2 | MASCOT | T |       |
| 9.17E-02 | 0 0 | Cs5g31690.1           | 4.37 | 0 |      | 0 | 2 | MASCOT | T |       |
| 3.57E-02 | 0 0 | Cs5g31690.1           | 4.21 | 0 |      | 0 | 2 | MASCOT | T |       |
| 5.73E-02 | 0 0 | Cs8g04900.1/Cs8g049   | 5.21 | 0 |      | 0 | 2 | MASCOT | T |       |
| 1.74E-01 | 0 0 | Cs8g04900.2           | 5.84 | 0 |      | 0 | 2 | MASCOT | T | PLEX8 |
| 1.75E-01 | 0 0 | Cs8g04900.2           | 5.72 | 0 |      | 0 | 2 | MASCOT | T | PLEX8 |
| 1.43E-01 | 0 0 | Cs8g04900.1/Cs8g049   | 6.05 | 0 |      | 0 | 2 | MASCOT | T | PLEX8 |
| 1.29E-02 | 0 0 | Cs8g04900.1/Cs8g049   | 6.05 | 0 |      | 0 | 2 | MASCOT | T | PLEX8 |
| 2.95E-02 | 0 0 | Cs8g04900.1/Cs8g049   | 4.37 | 0 |      | 0 | 2 | MASCOT | T | PLEX8 |
| 2.40E-03 | 0 0 | Cs8g04900.1/Cs8g049   | 6    | 0 |      | 0 | 2 | MASCOT | T |       |
| 1.67E-01 | 0 0 | Cs8g04880.1/Cs8g048   | 6    | 0 |      | 0 | 2 | MASCOT | T | PLEX8 |
| 8.74E-02 | 0 0 | Cs8g08390.1/Cs8g083   | 5.84 | 0 |      | 0 | 2 | MASCOT | T | PLEX8 |
| 2.89E-02 | 0 0 | Cs8g08390.1/Cs8g083   | 8.76 | 0 |      | 0 | 2 | MASCOT | T | PLEX8 |
| 3.65E-03 | 0 0 | Cs8g08390.1/Cs8g083   | 4.03 | 0 |      | 0 | 2 | MASCOT | T | PLEX8 |
| 7.95E-02 | 0 0 | Cs8g08390.1/Cs8g083   | 6    | 0 |      | 0 | 2 | MASCOT | T | PLEX8 |
| 3.40E-02 | 0 0 | Cs8g08390.1/Cs8g083   | 5.84 | 0 |      | 0 | 2 | MASCOT | T |       |
| 1.07E-02 | 0 0 | Cs8g08390.1/Cs8g083   | 8.23 | 0 |      | 0 | 2 | MASCOT | T | PLEX8 |
| 1.67E-01 | 0 0 | Cs8g08390.1/Cs8g083   | 8.23 | 0 |      | 0 | 2 | MASCOT | T | PLEX8 |
| 3.41E-04 | 0 0 | Cs8g08390.1/Cs8g083   | 5.81 | 0 |      | 0 | 2 | MASCOT | T |       |
| 4.73E-02 | 0 0 | Cs8g19410.1           | 8.76 | 0 |      | 0 | 2 | MASCOT | T | PLEX8 |
| 4.78E-02 | 0 0 | Cs8g19410.1           | 4.53 | 0 |      | 0 | 2 | MASCOT | T | PLEX8 |
| 3.74E-02 | 0 0 | Cs6g07270.1/Cs8g194   | 5.84 | 0 | 15.9 | 0 | 2 | MASCOT | T | PLEX8 |
| 2.68E-02 | 0 0 | Cs8g19410.1           | 4.37 | 0 |      | 0 | 2 | MASCOT | T | PLEX8 |
| 2.35E-02 | 0 0 | Cs8g19410.1           | 4.68 | 1 |      | 0 | 2 | MASCOT | T | PLEX8 |
| 1.28E-02 | 0 0 | Cs8g19410.1           | 4.68 | 1 |      | 0 | 2 | MASCOT | T | PLEX8 |
| 1.34E-01 | 0 0 | Cs8g19410.1           | 9.75 | 0 |      | 0 | 2 | MASCOT | T | PLEX8 |
| 6.18E-04 | 0 0 | Cs8g19410.1           | 5.55 | 0 |      | 0 | 2 | MASCOT | T | PLEX8 |
| 4.24E-03 | 0 0 | orange1.1t03237.1/ora | 8.63 | 0 |      | 0 | 2 | MASCOT | T | PLEX8 |
| 1.42E-02 | 0 0 | orange1.1t03237.1/ora | 5.84 | 0 |      | 0 | 2 | MASCOT | T | PLEX8 |
| 3.69E-03 | 0 0 | orange1.1t03237.1/ora | 5.72 | 0 |      | 0 | 2 | MASCOT | T | PLEX8 |
| 1.41E-02 | 0 0 | orange1.1t03237.1/ora | 5.72 | 0 |      | 0 | 2 | MASCOT | T |       |
| 2.01E-04 | 0 0 | orange1.1t03237.1/ora | 4.75 | 0 |      | 0 | 2 | MASCOT | T | PLEX8 |
| 4.83E-01 | 0 0 | orange1.1t03237.1/ora | 9.76 | 0 |      | 0 | 2 | MASCOT | T | PLEX8 |
| 1.34E-02 | 0 0 | orange1.1t03237.1/ora | 4.8  | 0 |      | 0 | 2 | MASCOT | T |       |
| 1.66E-01 | 0 0 | orange1.1t03237.1/ora | 5.94 | 0 |      | 0 | 2 | MASCOT | T |       |
| 1.52E-02 | 0 0 | Cs3g26050.1           | 4.14 | 0 | 15.9 | 0 | 2 | MASCOT | T |       |
| 1.53E-01 | 0 0 | Cs3g26050.1           | 4.37 | 0 |      | 0 | 2 | MASCOT | T |       |
| 2.94E-01 | 0 0 | Cs3g26050.1           | 6.75 | 0 |      | 0 | 2 | MASCOT | T | PLEX8 |
| 3.13E-04 | 0 0 | Cs3g26050.1           | 4.37 | 0 |      | 0 | 2 | MASCOT | T | PLEX8 |
| 3.14E-05 | 0 0 | Cs3g26050.1           | 8.75 | 0 |      | 0 | 2 | MASCOT | T | PLEX8 |

|          |     |                     |      |   |      |   |        |        |       |       |
|----------|-----|---------------------|------|---|------|---|--------|--------|-------|-------|
| 6.92E-02 | 0 0 | Cs3g26050.1         | 5.55 | 0 | 0    | 2 | MASCOT | T      |       |       |
| 9.59E-02 | 0 0 | Cs3g26050.1         | 4.53 | 0 | 0    | 2 | MASCOT | T      | PLEX8 |       |
| 5.03E-02 | 0 0 | Cs4g04430.1         | 4.78 | 0 | 0    | 2 | MASCOT | T      | PLEX8 |       |
| 5.71E-03 | 0 0 | Cs4g04430.1/Cs4g044 | 4.14 | 0 | 0    | 2 | MASCOT | T      | PLEX8 |       |
| 3.36E-03 | 0 0 | Cs4g04430.1/Cs4g044 | 5.32 | 0 | 0    | 2 | MASCOT | T      | PLEX8 |       |
| 1.44E-01 | 0 0 | Cs4g04430.1/Cs4g044 | 8.06 | 0 | 0    | 2 | MASCOT | T      | PLEX8 |       |
| 1.23E-01 | 0 0 | Cs4g04430.1/Cs4g044 | 5.84 | 0 | 0    | 2 | MASCOT | T      |       |       |
| 7.32E-02 | 0 0 | Cs4g04430.1/Cs4g044 | 5.83 | 0 | 15.9 | 0 | 2      | MASCOT | T     | PLEX8 |
| 6.78E-02 | 0 0 | Cs4g04430.1/Cs4g044 | 5.32 | 0 | 0    | 2 | MASCOT | T      | PLEX8 |       |
| 1.24E-03 | 0 0 | Cs9g16780.1         | 5.32 | 0 | 0    | 2 | MASCOT | T      |       |       |
| 1.07E-02 | 0 0 | Cs9g16780.1         | 4.65 | 0 | 0    | 2 | MASCOT | T      | PLEX8 |       |
| 1.73E-03 | 0 0 | Cs9g16780.1         | 8.47 | 0 | 0    | 2 | MASCOT | T      | PLEX8 |       |
| 6.75E-02 | 0 0 | Cs9g16780.1         | 4.37 | 0 | 0    | 2 | MASCOT | T      | PLEX8 |       |
| 3.49E-02 | 0 0 | Cs9g16780.1         | 6.74 | 0 | 0    | 2 | MASCOT | T      | PLEX8 |       |
| 3.18E-01 | 0 0 | Cs9g16780.1         | 8.59 | 0 | 0    | 2 | MASCOT | T      | PLEX8 |       |
| 2.03E-03 | 0 0 | Cs1g16850.1/Cs6g202 | 9.44 | 0 | 0    | 2 | MASCOT | T      | PLEX8 |       |
| 1.07E-01 | 0 0 | Cs6g15550.1/Cs6g155 | 4.56 | 0 | 15.9 | 0 | 2      | MASCOT | T     | PLEX8 |
| 5.38E-02 | 0 0 | Cs6g15550.1/Cs6g155 | 4.56 | 0 | 15.9 | 0 | 2      | MASCOT | T     | PLEX8 |
| 4.71E-01 | 0 0 | Cs6g15550.1/Cs6g155 | 4.56 | 0 | 15.9 | 0 | 2      | MASCOT | T     | PLEX8 |
| 8.84E-02 | 0 0 | Cs6g15550.1/Cs6g155 | 4.56 | 0 | 15.9 | 0 | 2      | MASCOT | T     | PLEX8 |
| 1.26E-01 | 0 0 | Cs6g15550.1/Cs6g155 | 4.56 | 0 | 15.9 | 0 | 2      | MASCOT | T     | PLEX8 |
| 1.04E-01 | 0 0 | Cs6g15550.1/Cs6g155 | 4.56 | 0 | 15.9 | 0 | 2      | MASCOT | T     | PLEX8 |
| 5.98E-02 | 0 0 | Cs6g15550.1/Cs6g155 | 4.56 | 0 | 15.9 | 0 | 2      | MASCOT | T     | PLEX8 |
| 5.95E-03 | 0 0 | Cs6g15550.1/Cs6g155 | 4.56 | 0 | 15.9 | 0 | 2      | MASCOT | T     |       |
| 8.62E-03 | 0 0 | Cs6g15550.1/Cs6g155 | 4.56 | 0 | 15.9 | 0 | 2      | MASCOT | T     |       |
| 1.55E-02 | 0 0 | Cs6g15550.1/Cs6g155 | 4.56 | 0 | 0    | 2 | MASCOT | T      | PLEX8 |       |
| 2.95E-01 | 0 0 | Cs6g15550.1/Cs6g155 | 4.56 | 0 | 0    | 2 | MASCOT | T      | PLEX8 |       |
| 2.40E-02 | 0 0 | Cs6g15550.1/Cs6g155 | 4.56 | 0 | 0    | 2 | MASCOT | T      | PLEX8 |       |
| 1.13E-02 | 0 0 | Cs6g15550.1/Cs6g155 | 4.56 | 0 | 0    | 2 | MASCOT | T      | PLEX8 |       |
| 1.32E-01 | 0 0 | Cs6g15550.1/Cs6g155 | 4.56 | 0 | 0    | 2 | MASCOT | T      |       |       |
| 1.05E-01 | 0 0 | Cs6g15550.1/Cs6g155 | 8.27 | 0 | 0    | 2 | MASCOT | T      |       |       |
| 8.97E-04 | 0 0 | Cs6g15550.1/Cs6g155 | 8.27 | 0 | 0    | 2 | MASCOT | T      |       |       |
| 1.28E-03 | 0 0 | Cs6g15550.1/Cs6g155 | 8.27 | 0 | 0    | 2 | MASCOT | T      |       |       |
| 9.45E-03 | 0 0 | Cs6g15550.1/Cs6g155 | 8.27 | 0 | 0    | 2 | MASCOT | T      | PLEX8 |       |
| 9.67E-03 | 0 0 | Cs6g15550.1/Cs6g155 | 8.27 | 0 | 0    | 2 | MASCOT | T      |       |       |
| 2.80E-01 | 0 0 | Cs6g15550.1/Cs6g155 | 8.27 | 0 | 0    | 2 | MASCOT | T      |       |       |
| 9.62E-02 | 0 0 | Cs6g15550.1/Cs6g155 | 8.27 | 0 | 0    | 2 | MASCOT | T      |       |       |
| 1.94E-02 | 0 0 | Cs6g15550.1/Cs6g155 | 8.27 | 0 | 0    | 2 | MASCOT | T      |       |       |
| 1.62E-03 | 0 0 | Cs6g15550.1/Cs6g155 | 8.27 | 0 | 0    | 2 | MASCOT | T      |       |       |
| 1.29E-02 | 0 0 | Cs6g15550.1/Cs6g155 | 8.27 | 0 | 0    | 2 | MASCOT | T      |       |       |
| 3.12E-03 | 0 0 | Cs6g15550.1/Cs6g155 | 8.27 | 0 | 0    | 2 | MASCOT | T      |       |       |
| 2.93E-03 | 0 0 | Cs6g15550.1/Cs6g155 | 8.27 | 0 | 0    | 2 | MASCOT | T      |       |       |
| 1.20E-01 | 0 0 | Cs6g15550.1/Cs6g155 | 5.88 | 0 | 0    | 2 | MASCOT | T      | PLEX8 |       |
| 6.17E-02 | 0 0 | Cs6g15550.1/Cs6g155 | 5.88 | 0 | 0    | 2 | MASCOT | T      | PLEX8 |       |
| 6.69E-04 | 0 0 | Cs6g15550.1/Cs6g155 | 5.88 | 0 | 0    | 2 | MASCOT | T      | PLEX8 |       |
| 9.18E-02 | 0 0 | Cs6g15550.1/Cs6g155 | 6.75 | 0 | 0    | 2 | MASCOT | T      | PLEX8 |       |
| 2.20E-01 | 0 0 | Cs6g15550.1/Cs6g155 | 6.75 | 0 | 0    | 2 | MASCOT | T      | PLEX8 |       |
| 1.89E-03 | 0 0 | Cs6g15550.1/Cs6g155 | 6.75 | 0 | 0    | 2 | MASCOT | T      | PLEX8 |       |
| 1.99E-01 | 0 0 | Cs6g15550.1/Cs6g155 | 6.75 | 0 | 0    | 2 | MASCOT | T      | PLEX8 |       |
| 1.80E-01 | 0 0 | Cs6g15550.1/Cs6g155 | 6.75 | 0 | 0    | 2 | MASCOT | T      | PLEX8 |       |
| 1.58E-02 | 0 0 | Cs6g15550.1/Cs6g155 | 6.75 | 0 | 0    | 2 | MASCOT | T      | PLEX8 |       |

|          |     |                     |      |   |   |   |        |   |       |
|----------|-----|---------------------|------|---|---|---|--------|---|-------|
| 6.00E-02 | 0 0 | Cs6g15550.1/Cs6g155 | 6.75 | 0 | 0 | 2 | MASCOT | T | PLEX8 |
| 1.99E-02 | 0 0 | Cs6g15550.1/Cs6g155 | 6.75 | 0 | 0 | 2 | MASCOT | T |       |
| 3.21E-02 | 0 0 | Cs6g15550.1/Cs6g155 | 6.75 | 0 | 0 | 2 | MASCOT | T | PLEX8 |
| 5.13E-02 | 0 0 | Cs6g15550.1/Cs6g155 | 6.75 | 0 | 0 | 2 | MASCOT | T | PLEX8 |
| 2.91E-02 | 0 0 | Cs6g15550.1/Cs6g155 | 6.75 | 0 | 0 | 2 | MASCOT | T | PLEX8 |
| 2.30E-02 | 0 0 | Cs6g15550.1/Cs6g155 | 6.75 | 0 | 0 | 2 | MASCOT | T | PLEX8 |
| 4.65E-02 | 0 0 | Cs6g15550.1/Cs6g155 | 6.75 | 0 | 0 | 2 | MASCOT | T | PLEX8 |
| 1.39E-02 | 0 0 | Cs6g15550.1/Cs6g155 | 8.59 | 1 | 0 | 2 | MASCOT | T | PLEX8 |
| 2.29E-02 | 0 0 | Cs6g15550.1/Cs6g155 | 8.59 | 1 | 0 | 2 | MASCOT | T | PLEX8 |
| 3.51E-05 | 0 0 | Cs6g15550.1/Cs6g155 | 6    | 0 | 0 | 2 | MASCOT | T | PLEX8 |
| 8.26E-05 | 0 0 | Cs6g15550.1/Cs6g155 | 6    | 0 | 0 | 2 | MASCOT | T | PLEX8 |
| 2.84E-03 | 0 0 | Cs6g15550.1/Cs6g155 | 6    | 0 | 0 | 2 | MASCOT | T | PLEX8 |
| 8.82E-02 | 0 0 | Cs6g15550.1/Cs6g155 | 6    | 0 | 0 | 2 | MASCOT | T | PLEX8 |
| 8.18E-04 | 0 0 | Cs6g15550.1/Cs6g155 | 6    | 0 | 0 | 2 | MASCOT | T | PLEX8 |
| 1.02E-03 | 0 0 | Cs6g15550.1/Cs6g155 | 6    | 0 | 0 | 2 | MASCOT | T | PLEX8 |
| 2.44E-02 | 0 0 | Cs6g15550.1/Cs6g155 | 6    | 0 | 0 | 2 | MASCOT | T | PLEX8 |
| 2.17E-03 | 0 0 | Cs6g15550.1/Cs6g155 | 6    | 0 | 0 | 2 | MASCOT | T | PLEX8 |
| 5.46E-02 | 0 0 | Cs6g15550.1/Cs6g155 | 6    | 0 | 0 | 2 | MASCOT | T | PLEX8 |
| 1.58E-01 | 0 0 | Cs6g15550.1/Cs6g155 | 6    | 0 | 0 | 2 | MASCOT | T | PLEX8 |
| 8.04E-04 | 0 0 | Cs6g15550.1/Cs6g155 | 6    | 0 | 0 | 2 | MASCOT | T | PLEX8 |
| 6.44E-02 | 0 0 | Cs6g15550.1/Cs6g155 | 6    | 0 | 0 | 2 | MASCOT | T | PLEX8 |
| 4.68E-02 | 0 0 | Cs6g15550.1/Cs6g155 | 6    | 0 | 0 | 2 | MASCOT | T | PLEX8 |
| 2.53E-05 | 0 0 | Cs6g15550.1/Cs6g155 | 6    | 0 | 0 | 2 | MASCOT | T | PLEX8 |
| 3.85E-04 | 0 0 | Cs6g15550.1/Cs6g155 | 6    | 0 | 0 | 2 | MASCOT | T | PLEX8 |
| 1.95E-05 | 0 0 | Cs6g15550.1/Cs6g155 | 6    | 0 | 0 | 2 | MASCOT | T | PLEX8 |
| 4.19E-02 | 0 0 | Cs6g15550.1/Cs6g155 | 6    | 0 | 0 | 2 | MASCOT | T | PLEX8 |
| 2.58E-02 | 0 0 | Cs6g15550.1/Cs6g155 | 6    | 0 | 0 | 2 | MASCOT | T | PLEX8 |
| 1.63E-01 | 0 0 | Cs6g15550.1/Cs6g155 | 6    | 0 | 0 | 2 | MASCOT | T | PLEX8 |
| 9.34E-05 | 0 0 | Cs6g15550.1/Cs6g155 | 6    | 0 | 0 | 2 | MASCOT | T | PLEX8 |
| 6.35E-06 | 0 0 | Cs6g15550.1/Cs6g155 | 6    | 0 | 0 | 2 | MASCOT | T | PLEX8 |
| 6.26E-04 | 0 0 | Cs6g15550.1/Cs6g155 | 6    | 0 | 0 | 2 | MASCOT | T | PLEX8 |
| 5.23E-03 | 0 0 | Cs6g15550.1/Cs6g155 | 6    | 0 | 0 | 2 | MASCOT | T |       |
| 1.84E-01 | 0 0 | Cs6g15550.1/Cs6g155 | 6    | 0 | 0 | 2 | MASCOT | T |       |
| 3.34E-02 | 0 0 | Cs6g07320.1/Cs7g322 | 5.88 | 0 | 0 | 2 | MASCOT | T | PLEX8 |
| 1.70E-01 | 0 0 | Cs6g07320.1/Cs7g322 | 5.88 | 0 | 0 | 2 | MASCOT | T | PLEX8 |
| 4.79E-02 | 0 0 | Cs6g07320.1/Cs7g322 | 5.88 | 0 | 0 | 2 | MASCOT | T | PLEX8 |
| 6.04E-02 | 0 0 | Cs6g07320.1/Cs7g322 | 5.88 | 0 | 0 | 2 | MASCOT | T | PLEX8 |
| 5.30E-02 | 0 0 | Cs6g07320.1/Cs7g322 | 5.88 | 0 | 0 | 2 | MASCOT | T | PLEX8 |
| 1.88E-02 | 0 0 | Cs6g07320.1/Cs7g322 | 5.88 | 0 | 0 | 2 | MASCOT | T | PLEX8 |
| 1.29E-01 | 0 0 | Cs6g07320.1/Cs7g322 | 5.88 | 0 | 0 | 2 | MASCOT | T | PLEX8 |
| 1.69E-02 | 0 0 | Cs6g07320.1/Cs7g322 | 5.88 | 0 | 0 | 2 | MASCOT | T | PLEX8 |
| 1.20E-01 | 0 0 | Cs6g07320.1/Cs7g322 | 5.88 | 0 | 0 | 2 | MASCOT | T | PLEX8 |
| 3.26E-02 | 0 0 | Cs6g07320.1/Cs7g322 | 5.88 | 0 | 0 | 2 | MASCOT | T | PLEX8 |
| 1.80E-02 | 0 0 | Cs6g07320.1/Cs7g322 | 5.88 | 0 | 0 | 2 | MASCOT | T | PLEX8 |
| 1.31E-02 | 0 0 | Cs6g07320.1/Cs7g322 | 5.88 | 0 | 0 | 2 | MASCOT | T | PLEX8 |
| 1.84E-02 | 0 0 | Cs6g07320.1/Cs7g322 | 5.88 | 0 | 0 | 2 | MASCOT | T | PLEX8 |
| 1.31E-01 | 0 0 | Cs6g07320.1/Cs7g322 | 5.88 | 0 | 0 | 2 | MASCOT | T |       |
| 3.34E-02 | 0 0 | Cs6g07320.1/Cs7g322 | 5.88 | 0 | 0 | 2 | MASCOT | T | PLEX8 |
| 2.61E-02 | 0 0 | Cs6g07320.1/Cs7g322 | 5.88 | 0 | 0 | 2 | MASCOT | T | PLEX8 |
| 7.47E-02 | 0 0 | Cs6g07320.1/Cs7g322 | 5.88 | 0 | 0 | 2 | MASCOT | T |       |
| 1.65E-02 | 0 0 | Cs6g07320.1/Cs7g322 | 5.88 | 0 | 0 | 2 | MASCOT | T |       |

|          |     |                      |      |   |      |   |        |        |         |
|----------|-----|----------------------|------|---|------|---|--------|--------|---------|
| 2.85E-02 | 0 0 | Cs6g07320.1/Cs7g322  | 5.88 | 0 | 0    | 2 | MASCOT | T      |         |
| 9.78E-02 | 0 0 | Cs6g07320.1/Cs8g195  | 6.05 | 0 | 15.9 | 0 | 2      | MASCOT | T PLEX8 |
| 6.42E-04 | 0 0 | Cs6g07320.1/Cs8g195  | 6.05 | 0 | 15.9 | 0 | 2      | MASCOT | T PLEX8 |
| 1.04E-02 | 0 0 | Cs6g07320.1/Cs8g195  | 6.05 | 0 | 15.9 | 0 | 2      | MASCOT | T PLEX8 |
| 6.83E-03 | 0 0 | Cs6g07320.1/Cs8g195  | 6.05 | 0 | 15.9 | 0 | 2      | MASCOT | T PLEX8 |
| 7.32E-02 | 0 0 | Cs6g07320.1/Cs8g195  | 6.05 | 0 | 15.9 | 0 | 2      | MASCOT | T PLEX8 |
| 1.19E-01 | 0 0 | Cs6g07320.1/Cs8g195  | 6.05 | 0 | 15.9 | 0 | 2      | MASCOT | T       |
| 4.43E-01 | 0 0 | Cs6g07320.1/Cs8g195  | 6.05 | 0 | 0    | 0 | 2      | MASCOT | T PLEX8 |
| 2.14E-04 | 0 0 | Cs6g07320.1/Cs8g195  | 6.05 | 0 | 0    | 0 | 2      | MASCOT | T PLEX8 |
| 1.74E-01 | 0 0 | Cs6g07320.1/Cs8g195  | 6.05 | 0 | 0    | 0 | 2      | MASCOT | T PLEX8 |
| 1.17E-02 | 0 0 | Cs6g07320.1/Cs8g195  | 6.05 | 0 | 0    | 0 | 2      | MASCOT | T PLEX8 |
| 3.31E-02 | 0 0 | Cs6g07320.1/Cs8g195  | 6.05 | 0 | 0    | 0 | 2      | MASCOT | T PLEX8 |
| 8.98E-04 | 0 0 | Cs6g07320.1/Cs8g195  | 6.05 | 0 | 0    | 0 | 2      | MASCOT | T PLEX8 |
| 7.46E-03 | 0 0 | Cs6g07320.1/Cs8g195  | 6.05 | 0 | 0    | 0 | 2      | MASCOT | T PLEX8 |
| 4.89E-05 | 0 0 | Cs6g07320.1/Cs8g195  | 6.05 | 0 | 0    | 0 | 2      | MASCOT | T PLEX8 |
| 2.27E-02 | 0 0 | Cs6g07320.1/Cs8g195  | 6.05 | 0 | 0    | 0 | 2      | MASCOT | T PLEX8 |
| 2.40E-02 | 0 0 | Cs6g07320.1/Cs8g195  | 6.05 | 0 | 0    | 0 | 2      | MASCOT | T PLEX8 |
| 2.20E-04 | 0 0 | Cs6g07320.1/Cs8g195  | 6.05 | 0 | 0    | 0 | 2      | MASCOT | T PLEX8 |
| 2.81E-03 | 0 0 | Cs6g07320.1/Cs8g195  | 6.05 | 0 | 0    | 0 | 2      | MASCOT | T PLEX8 |
| 3.47E-06 | 0 0 | Cs6g07320.1/Cs8g195  | 6.05 | 0 | 0    | 0 | 2      | MASCOT | T       |
| 3.21E-02 | 0 0 | Cs6g07320.1/Cs8g195  | 6.05 | 0 | 0    | 0 | 2      | MASCOT | T PLEX8 |
| 3.60E-02 | 0 0 | Cs6g07320.1/Cs8g195  | 6.05 | 0 | 0    | 0 | 2      | MASCOT | T PLEX8 |
| 1.90E-02 | 0 0 | Cs6g07320.1/Cs8g195  | 6.05 | 0 | 0    | 0 | 2      | MASCOT | T PLEX8 |
| 9.12E-02 | 0 0 | Cs6g07320.1/Cs8g195  | 6.05 | 0 | 0    | 0 | 2      | MASCOT | T PLEX8 |
| 7.60E-06 | 0 0 | Cs6g07320.1/Cs8g195  | 6.05 | 0 | 0    | 0 | 2      | MASCOT | T PLEX8 |
| 3.96E-02 | 0 0 | Cs6g07320.1/Cs8g195  | 6.05 | 0 | 0    | 0 | 2      | MASCOT | T PLEX8 |
| 2.74E-04 | 0 0 | Cs6g07320.1/Cs8g195  | 6.05 | 0 | 0    | 0 | 2      | MASCOT | T PLEX8 |
| 6.51E-02 | 0 0 | Cs6g07320.1/Cs8g195  | 6.05 | 0 | 0    | 0 | 2      | MASCOT | T PLEX8 |
| 5.35E-03 | 0 0 | Cs6g07320.1/Cs8g195  | 6.05 | 0 | 0    | 0 | 2      | MASCOT | T PLEX8 |
| 2.41E-01 | 0 0 | Cs6g07320.1/Cs8g195  | 6.05 | 0 | 0    | 0 | 2      | MASCOT | T       |
| 8.05E-02 | 0 0 | Cs3g07660.1 ! Cs6g07 | 5.4  | 0 | 0    | 0 | 2      | MASCOT | T PLEX8 |
| 4.85E-02 | 0 0 | Cs3g07660.1 ! Cs6g07 | 5.4  | 0 | 0    | 0 | 2      | MASCOT | T PLEX8 |
| 3.50E-02 | 0 0 | Cs3g07660.1 ! Cs6g07 | 5.4  | 0 | 0    | 0 | 2      | MASCOT | T PLEX8 |
| 3.40E-02 | 0 0 | Cs3g07660.1 ! Cs6g07 | 5.4  | 0 | 0    | 0 | 2      | MASCOT | T PLEX8 |
| 9.44E-02 | 0 0 | Cs3g07660.1 ! Cs6g07 | 5.4  | 0 | 0    | 0 | 2      | MASCOT | T PLEX8 |
| 5.37E-02 | 0 0 | Cs3g07660.1 ! Cs6g07 | 5.4  | 0 | 0    | 0 | 2      | MASCOT | T       |
| 2.63E-01 | 0 0 | Cs3g07660.1 ! Cs6g07 | 5.4  | 0 | 0    | 0 | 2      | MASCOT | T PLEX8 |
| 5.79E-02 | 0 0 | Cs2g24040.1 ! Cs6g07 | 6    | 0 | 0    | 0 | 2      | MASCOT | T PLEX8 |
| 3.69E-02 | 0 0 | Cs6g07320.1/Cs7g322  | 4.14 | 0 | 0    | 0 | 2      | MASCOT | T PLEX8 |
| 1.01E-02 | 0 0 | Cs6g07320.1/Cs7g322  | 4.14 | 0 | 0    | 0 | 2      | MASCOT | T PLEX8 |
| 7.38E-03 | 0 0 | Cs2g24040.1 ! Cs6g07 | 5.97 | 0 | 0    | 0 | 2      | MASCOT | T PLEX8 |
| 6.70E-02 | 0 0 | Cs2g24040.1 ! Cs6g07 | 5.97 | 0 | 0    | 0 | 2      | MASCOT | T PLEX8 |
| 2.33E-01 | 0 0 | Cs2g24040.1 ! Cs6g07 | 5.97 | 0 | 0    | 0 | 2      | MASCOT | T PLEX8 |
| 4.76E-03 | 0 0 | Cs1g07120.1/Cs1g071  | 5.84 | 0 | 0    | 0 | 2      | MASCOT | T PLEX8 |
| 3.24E-02 | 0 0 | Cs1g07120.1/Cs1g071  | 5.84 | 0 | 0    | 0 | 2      | MASCOT | T PLEX8 |
| 8.15E-03 | 0 0 | Cs1g07120.1/Cs1g071  | 5.84 | 0 | 0    | 0 | 2      | MASCOT | T PLEX8 |
| 6.90E-02 | 0 0 | Cs1g07120.1/Cs1g071  | 5.84 | 0 | 0    | 0 | 2      | MASCOT | T PLEX8 |
| 1.38E-01 | 0 0 | Cs1g07120.1/Cs1g071  | 5.84 | 0 | 0    | 0 | 2      | MASCOT | T PLEX8 |
| 6.86E-02 | 0 0 | Cs1g07120.1/Cs1g071  | 5.84 | 0 | 0    | 0 | 2      | MASCOT | T PLEX8 |
| 3.04E-02 | 0 0 | Cs1g07120.1/Cs1g071  | 8.59 | 1 | 0    | 0 | 2      | MASCOT | T       |
| 1.40E-01 | 0 0 | Cs1g07120.1/Cs1g071  | 5.72 | 0 | 0    | 0 | 2      | MASCOT | T PLEX8 |

|          |     |                     |      |   |      |   |        |        |       |       |
|----------|-----|---------------------|------|---|------|---|--------|--------|-------|-------|
| 3.43E-01 | 0 0 | Cs1g07120.1/Cs1g071 | 5.72 | 0 | 0    | 2 | MASCOT | T      | PLEX8 |       |
| 1.88E-02 | 0 0 | Cs1g07120.1/Cs1g071 | 5.72 | 0 | 0    | 2 | MASCOT | T      | PLEX8 |       |
| 1.66E-03 | 0 0 | Cs1g07120.1/Cs1g071 | 5.72 | 0 | 0    | 2 | MASCOT | T      | PLEX8 |       |
| 4.48E-02 | 0 0 | Cs1g07120.1/Cs1g071 | 5.72 | 0 | 0    | 2 | MASCOT | T      | PLEX8 |       |
| 2.08E-01 | 0 0 | Cs1g07120.1/Cs1g071 | 5.72 | 0 | 0    | 2 | MASCOT | T      | PLEX8 |       |
| 4.69E-01 | 0 0 | Cs1g07120.1/Cs1g071 | 5.72 | 0 | 0    | 2 | MASCOT | T      | PLEX8 |       |
| 2.12E-01 | 0 0 | Cs1g07120.1/Cs1g071 | 5.72 | 0 | 0    | 2 | MASCOT | T      | PLEX8 |       |
| 1.73E-01 | 0 0 | Cs1g07120.1/Cs1g071 | 5.72 | 0 | 0    | 2 | MASCOT | T      | PLEX8 |       |
| 1.90E-01 | 0 0 | Cs1g07120.1/Cs1g071 | 5.72 | 0 | 0    | 2 | MASCOT | T      | PLEX8 |       |
| 5.45E-02 | 0 0 | Cs1g07120.1/Cs1g071 | 5.72 | 0 | 0    | 2 | MASCOT | T      | PLEX8 |       |
| 1.00E-01 | 0 0 | Cs1g07120.1/Cs1g071 | 4.37 | 0 | 0    | 2 | MASCOT | T      | PLEX8 |       |
| 3.66E-03 | 0 0 | Cs1g07120.1/Cs1g071 | 4.37 | 0 | 0    | 2 | MASCOT | T      |       |       |
| 8.79E-02 | 0 0 | Cs1g07120.1/Cs1g071 | 4.37 | 0 | 0    | 2 | MASCOT | T      |       |       |
| 1.95E-01 | 0 0 | Cs1g07120.1/Cs1g071 | 4.37 | 0 | 0    | 2 | MASCOT | T      |       |       |
| 1.45E-02 | 0 0 | Cs1g07120.1/Cs1g071 | 4.37 | 0 | 0    | 2 | MASCOT | T      |       |       |
| 1.80E-03 | 0 0 | Cs1g07120.1/Cs1g071 | 4.37 | 0 | 0    | 2 | MASCOT | T      |       |       |
| 6.61E-05 | 0 0 | Cs1g07120.1/Cs1g071 | 4.37 | 0 | 0    | 2 | MASCOT | T      |       |       |
| 1.50E-01 | 0 0 | Cs1g07120.1/Cs1g071 | 4.37 | 0 | 0    | 2 | MASCOT | T      |       |       |
| 6.49E-05 | 0 0 | Cs1g07120.1/Cs1g071 | 4.37 | 0 | 0    | 2 | MASCOT | T      |       |       |
| 5.47E-02 | 0 0 | Cs1g07120.1/Cs1g071 | 5.3  | 0 | 15.9 | 0 | 2      | MASCOT | T     | PLEX8 |
| 7.14E-02 | 0 0 | Cs1g07120.1/Cs1g071 | 5.3  | 0 | 15.9 | 0 | 2      | MASCOT | T     | PLEX8 |
| 3.13E-02 | 0 0 | Cs1g07120.1/Cs1g071 | 5.3  | 0 | 15.9 | 0 | 2      | MASCOT | T     | PLEX8 |
| 4.08E-03 | 0 0 | Cs1g07120.1/Cs1g071 | 5.3  | 0 | 15.9 | 0 | 2      | MASCOT | T     | PLEX8 |
| 6.11E-03 | 0 0 | Cs1g07120.1/Cs1g071 | 5.3  | 0 | 15.9 | 0 | 2      | MASCOT | T     | PLEX8 |
| 2.70E-02 | 0 0 | Cs1g07120.1/Cs1g071 | 5.3  | 0 | 15.9 | 0 | 2      | MASCOT | T     | PLEX8 |
| 1.39E-03 | 0 0 | Cs1g07120.1/Cs1g071 | 5.3  | 0 | 0    | 2 | MASCOT | T      | PLEX8 |       |
| 1.32E-01 | 0 0 | Cs1g07120.1/Cs1g071 | 5.3  | 0 | 0    | 2 | MASCOT | T      |       |       |
| 1.40E-01 | 0 0 | Cs1g07120.1/Cs1g071 | 5.3  | 0 | 0    | 2 | MASCOT | T      | PLEX8 |       |
| 1.79E-03 | 0 0 | Cs1g07120.1/Cs1g071 | 5.3  | 0 | 0    | 2 | MASCOT | T      | PLEX8 |       |
| 4.73E-02 | 0 0 | Cs1g07120.1/Cs1g071 | 5.3  | 0 | 0    | 2 | MASCOT | T      |       |       |
| 3.31E-02 | 0 0 | Cs1g07120.1/Cs1g071 | 5.3  | 0 | 0    | 2 | MASCOT | T      | PLEX8 |       |
| 7.51E-02 | 0 0 | Cs1g07120.1/Cs1g071 | 8.47 | 0 | 15.9 | 0 | 2      | MASCOT | T     | PLEX8 |
| 3.69E-02 | 0 0 | Cs1g07120.1/Cs1g071 | 8.47 | 0 | 15.9 | 0 | 2      | MASCOT | T     | PLEX8 |
| 6.36E-02 | 0 0 | Cs1g07120.1/Cs1g071 | 8.47 | 0 | 15.9 | 0 | 2      | MASCOT | T     | PLEX8 |
| 3.64E-01 | 0 0 | Cs1g07120.1/Cs1g071 | 8.47 | 0 | 15.9 | 0 | 2      | MASCOT | T     | PLEX8 |
| 6.02E-02 | 0 0 | Cs1g07120.1/Cs1g071 | 8.47 | 0 | 15.9 | 0 | 2      | MASCOT | T     | PLEX8 |
| 6.18E-02 | 0 0 | Cs1g07120.1/Cs1g071 | 8.47 | 0 | 15.9 | 0 | 2      | MASCOT | T     | PLEX8 |
| 1.04E-02 | 0 0 | Cs1g07120.1/Cs1g071 | 8.47 | 0 | 15.9 | 0 | 2      | MASCOT | T     | PLEX8 |
| 6.55E-02 | 0 0 | Cs1g07120.1/Cs1g071 | 8.47 | 0 | 15.9 | 0 | 2      | MASCOT | T     | PLEX8 |
| 1.08E-01 | 0 0 | Cs1g07120.1/Cs1g071 | 8.47 | 0 | 15.9 | 0 | 2      | MASCOT | T     |       |
| 3.10E-02 | 0 0 | Cs1g07120.1/Cs1g071 | 8.47 | 0 | 0    | 2 | MASCOT | T      | PLEX8 |       |
| 2.16E-02 | 0 0 | Cs1g07120.1/Cs1g071 | 8.47 | 0 | 0    | 2 | MASCOT | T      | PLEX8 |       |
| 1.33E-02 | 0 0 | Cs1g07120.1/Cs1g071 | 8.47 | 0 | 0    | 2 | MASCOT | T      | PLEX8 |       |
| 1.31E-01 | 0 0 | Cs1g07120.1/Cs1g071 | 8.47 | 0 | 0    | 2 | MASCOT | T      | PLEX8 |       |
| 2.87E-01 | 0 0 | Cs1g07120.1/Cs1g071 | 8.47 | 0 | 0    | 2 | MASCOT | T      | PLEX8 |       |
| 4.75E-03 | 0 0 | Cs1g07120.1/Cs1g071 | 8.47 | 0 | 0    | 2 | MASCOT | T      | PLEX8 |       |
| 2.76E-02 | 0 0 | Cs1g07120.1/Cs1g071 | 8.47 | 0 | 0    | 2 | MASCOT | T      |       |       |
| 1.83E-02 | 0 0 | Cs1g07120.1/Cs1g071 | 8.47 | 0 | 0    | 2 | MASCOT | T      | PLEX8 |       |
| 9.78E-02 | 0 0 | Cs6g07320.1/Cs8g195 | 6.05 | 0 | 15.9 | 0 | 2      | MASCOT | T     | PLEX8 |
| 6.42E-04 | 0 0 | Cs6g07320.1/Cs8g195 | 6.05 | 0 | 15.9 | 0 | 2      | MASCOT | T     | PLEX8 |
| 1.04E-02 | 0 0 | Cs6g07320.1/Cs8g195 | 6.05 | 0 | 15.9 | 0 | 2      | MASCOT | T     | PLEX8 |

|          |     |                      |      |   |      |   |   |        |   |       |
|----------|-----|----------------------|------|---|------|---|---|--------|---|-------|
| 6.83E-03 | 0 0 | Cs6g07320.1/Cs8g195  | 6.05 | 0 | 15.9 | 0 | 2 | MASCOT | T | PLEX8 |
| 7.32E-02 | 0 0 | Cs6g07320.1/Cs8g195  | 6.05 | 0 | 15.9 | 0 | 2 | MASCOT | T | PLEX8 |
| 1.19E-01 | 0 0 | Cs6g07320.1/Cs8g195  | 6.05 | 0 | 15.9 | 0 | 2 | MASCOT | T |       |
| 4.43E-01 | 0 0 | Cs6g07320.1/Cs8g195  | 6.05 | 0 |      | 0 | 2 | MASCOT | T | PLEX8 |
| 2.14E-04 | 0 0 | Cs6g07320.1/Cs8g195  | 6.05 | 0 |      | 0 | 2 | MASCOT | T | PLEX8 |
| 1.74E-01 | 0 0 | Cs6g07320.1/Cs8g195  | 6.05 | 0 |      | 0 | 2 | MASCOT | T | PLEX8 |
| 1.17E-02 | 0 0 | Cs6g07320.1/Cs8g195  | 6.05 | 0 |      | 0 | 2 | MASCOT | T | PLEX8 |
| 3.31E-02 | 0 0 | Cs6g07320.1/Cs8g195  | 6.05 | 0 |      | 0 | 2 | MASCOT | T | PLEX8 |
| 8.98E-04 | 0 0 | Cs6g07320.1/Cs8g195  | 6.05 | 0 |      | 0 | 2 | MASCOT | T | PLEX8 |
| 7.46E-03 | 0 0 | Cs6g07320.1/Cs8g195  | 6.05 | 0 |      | 0 | 2 | MASCOT | T | PLEX8 |
| 4.89E-05 | 0 0 | Cs6g07320.1/Cs8g195  | 6.05 | 0 |      | 0 | 2 | MASCOT | T | PLEX8 |
| 2.27E-02 | 0 0 | Cs6g07320.1/Cs8g195  | 6.05 | 0 |      | 0 | 2 | MASCOT | T | PLEX8 |
| 2.40E-02 | 0 0 | Cs6g07320.1/Cs8g195  | 6.05 | 0 |      | 0 | 2 | MASCOT | T | PLEX8 |
| 2.20E-04 | 0 0 | Cs6g07320.1/Cs8g195  | 6.05 | 0 |      | 0 | 2 | MASCOT | T | PLEX8 |
| 2.81E-03 | 0 0 | Cs6g07320.1/Cs8g195  | 6.05 | 0 |      | 0 | 2 | MASCOT | T | PLEX8 |
| 3.47E-06 | 0 0 | Cs6g07320.1/Cs8g195  | 6.05 | 0 |      | 0 | 2 | MASCOT | T |       |
| 3.21E-02 | 0 0 | Cs6g07320.1/Cs8g195  | 6.05 | 0 |      | 0 | 2 | MASCOT | T | PLEX8 |
| 3.60E-02 | 0 0 | Cs6g07320.1/Cs8g195  | 6.05 | 0 |      | 0 | 2 | MASCOT | T | PLEX8 |
| 1.90E-02 | 0 0 | Cs6g07320.1/Cs8g195  | 6.05 | 0 |      | 0 | 2 | MASCOT | T | PLEX8 |
| 9.12E-02 | 0 0 | Cs6g07320.1/Cs8g195  | 6.05 | 0 |      | 0 | 2 | MASCOT | T | PLEX8 |
| 7.60E-06 | 0 0 | Cs6g07320.1/Cs8g195  | 6.05 | 0 |      | 0 | 2 | MASCOT | T | PLEX8 |
| 3.96E-02 | 0 0 | Cs6g07320.1/Cs8g195  | 6.05 | 0 |      | 0 | 2 | MASCOT | T | PLEX8 |
| 2.74E-04 | 0 0 | Cs6g07320.1/Cs8g195  | 6.05 | 0 |      | 0 | 2 | MASCOT | T | PLEX8 |
| 6.51E-02 | 0 0 | Cs6g07320.1/Cs8g195  | 6.05 | 0 |      | 0 | 2 | MASCOT | T | PLEX8 |
| 5.35E-03 | 0 0 | Cs6g07320.1/Cs8g195  | 6.05 | 0 |      | 0 | 2 | MASCOT | T | PLEX8 |
| 2.41E-01 | 0 0 | Cs6g07320.1/Cs8g195  | 6.05 | 0 |      | 0 | 2 | MASCOT | T |       |
| 8.05E-02 | 0 0 | Cs3g07660.1 ! Cs6g07 | 5.4  | 0 |      | 0 | 2 | MASCOT | T | PLEX8 |
| 4.85E-02 | 0 0 | Cs3g07660.1 ! Cs6g07 | 5.4  | 0 |      | 0 | 2 | MASCOT | T | PLEX8 |
| 3.50E-02 | 0 0 | Cs3g07660.1 ! Cs6g07 | 5.4  | 0 |      | 0 | 2 | MASCOT | T | PLEX8 |
| 3.40E-02 | 0 0 | Cs3g07660.1 ! Cs6g07 | 5.4  | 0 |      | 0 | 2 | MASCOT | T | PLEX8 |
| 9.44E-02 | 0 0 | Cs3g07660.1 ! Cs6g07 | 5.4  | 0 |      | 0 | 2 | MASCOT | T | PLEX8 |
| 5.37E-02 | 0 0 | Cs3g07660.1 ! Cs6g07 | 5.4  | 0 |      | 0 | 2 | MASCOT | T |       |
| 2.63E-01 | 0 0 | Cs3g07660.1 ! Cs6g07 | 5.4  | 0 |      | 0 | 2 | MASCOT | T | PLEX8 |
| 5.79E-02 | 0 0 | Cs2g24040.1 ! Cs6g07 | 6    | 0 |      | 0 | 2 | MASCOT | T | PLEX8 |
| 2.01E-03 | 0 0 | Cs8g19490.1/Cs8g195  | 3.92 | 0 |      | 0 | 2 | MASCOT | T | PLEX8 |
| 1.36E-02 | 0 0 | Cs8g19490.1/Cs8g195  | 3.92 | 0 |      | 0 | 2 | MASCOT | T | PLEX8 |
| 1.18E-03 | 0 0 | Cs8g19490.1/Cs8g195  | 3.92 | 0 |      | 0 | 2 | MASCOT | T |       |
| 1.95E-03 | 0 0 | Cs8g19490.1/Cs8g195  | 3.92 | 0 |      | 0 | 2 | MASCOT | T |       |
| 2.88E-02 | 0 0 | Cs8g19490.1/Cs8g195  | 3.92 | 0 |      | 0 | 2 | MASCOT | T |       |
| 4.09E-03 | 0 0 | Cs8g19490.1/Cs8g195  | 3.92 | 0 |      | 0 | 2 | MASCOT | T |       |
| 6.88E-03 | 0 0 | Cs8g19490.1/Cs8g195  | 3.92 | 0 |      | 0 | 2 | MASCOT | T |       |
| 3.03E-03 | 0 0 | Cs8g19490.1/Cs8g195  | 3.92 | 0 |      | 0 | 2 | MASCOT | T | PLEX8 |
| 6.86E-02 | 0 0 | Cs8g19490.1/Cs8g195  | 4.32 | 1 |      | 0 | 2 | MASCOT | T |       |
| 3.72E-02 | 0 0 | Cs8g19490.1/Cs8g195  | 4.32 | 1 |      | 0 | 2 | MASCOT | T |       |
| 2.23E-02 | 0 0 | Cs8g19490.1/Cs8g195  | 9.47 | 0 | 15.9 | 0 | 2 | MASCOT | T | PLEX8 |
| 3.93E-02 | 0 0 | Cs8g19490.1/Cs8g195  | 9.47 | 0 |      | 0 | 2 | MASCOT | T | PLEX8 |
| 1.67E-02 | 0 0 | Cs8g19490.1/Cs8g195  | 9.47 | 0 |      | 0 | 2 | MASCOT | T | PLEX8 |
| 9.78E-02 | 0 0 | Cs6g07320.1/Cs8g195  | 6.05 | 0 | 15.9 | 0 | 2 | MASCOT | T | PLEX8 |
| 6.42E-04 | 0 0 | Cs6g07320.1/Cs8g195  | 6.05 | 0 | 15.9 | 0 | 2 | MASCOT | T | PLEX8 |
| 1.04E-02 | 0 0 | Cs6g07320.1/Cs8g195  | 6.05 | 0 | 15.9 | 0 | 2 | MASCOT | T | PLEX8 |
| 6.83E-03 | 0 0 | Cs6g07320.1/Cs8g195  | 6.05 | 0 | 15.9 | 0 | 2 | MASCOT | T | PLEX8 |

|          |     |                      |      |   |      |   |   |        |   |       |
|----------|-----|----------------------|------|---|------|---|---|--------|---|-------|
| 7.32E-02 | 0 0 | Cs6g07320.1/Cs8g195  | 6.05 | 0 | 15.9 | 0 | 2 | MASCOT | T | PLEX8 |
| 1.19E-01 | 0 0 | Cs6g07320.1/Cs8g195  | 6.05 | 0 | 15.9 | 0 | 2 | MASCOT | T |       |
| 4.43E-01 | 0 0 | Cs6g07320.1/Cs8g195  | 6.05 | 0 |      | 0 | 2 | MASCOT | T | PLEX8 |
| 2.14E-04 | 0 0 | Cs6g07320.1/Cs8g195  | 6.05 | 0 |      | 0 | 2 | MASCOT | T | PLEX8 |
| 1.74E-01 | 0 0 | Cs6g07320.1/Cs8g195  | 6.05 | 0 |      | 0 | 2 | MASCOT | T | PLEX8 |
| 1.17E-02 | 0 0 | Cs6g07320.1/Cs8g195  | 6.05 | 0 |      | 0 | 2 | MASCOT | T | PLEX8 |
| 3.31E-02 | 0 0 | Cs6g07320.1/Cs8g195  | 6.05 | 0 |      | 0 | 2 | MASCOT | T | PLEX8 |
| 8.98E-04 | 0 0 | Cs6g07320.1/Cs8g195  | 6.05 | 0 |      | 0 | 2 | MASCOT | T | PLEX8 |
| 7.46E-03 | 0 0 | Cs6g07320.1/Cs8g195  | 6.05 | 0 |      | 0 | 2 | MASCOT | T | PLEX8 |
| 4.89E-05 | 0 0 | Cs6g07320.1/Cs8g195  | 6.05 | 0 |      | 0 | 2 | MASCOT | T | PLEX8 |
| 2.27E-02 | 0 0 | Cs6g07320.1/Cs8g195  | 6.05 | 0 |      | 0 | 2 | MASCOT | T | PLEX8 |
| 2.40E-02 | 0 0 | Cs6g07320.1/Cs8g195  | 6.05 | 0 |      | 0 | 2 | MASCOT | T | PLEX8 |
| 2.20E-04 | 0 0 | Cs6g07320.1/Cs8g195  | 6.05 | 0 |      | 0 | 2 | MASCOT | T | PLEX8 |
| 2.81E-03 | 0 0 | Cs6g07320.1/Cs8g195  | 6.05 | 0 |      | 0 | 2 | MASCOT | T | PLEX8 |
| 3.47E-06 | 0 0 | Cs6g07320.1/Cs8g195  | 6.05 | 0 |      | 0 | 2 | MASCOT | T |       |
| 3.21E-02 | 0 0 | Cs6g07320.1/Cs8g195  | 6.05 | 0 |      | 0 | 2 | MASCOT | T | PLEX8 |
| 3.60E-02 | 0 0 | Cs6g07320.1/Cs8g195  | 6.05 | 0 |      | 0 | 2 | MASCOT | T | PLEX8 |
| 1.90E-02 | 0 0 | Cs6g07320.1/Cs8g195  | 6.05 | 0 |      | 0 | 2 | MASCOT | T | PLEX8 |
| 9.12E-02 | 0 0 | Cs6g07320.1/Cs8g195  | 6.05 | 0 |      | 0 | 2 | MASCOT | T | PLEX8 |
| 7.60E-06 | 0 0 | Cs6g07320.1/Cs8g195  | 6.05 | 0 |      | 0 | 2 | MASCOT | T | PLEX8 |
| 3.96E-02 | 0 0 | Cs6g07320.1/Cs8g195  | 6.05 | 0 |      | 0 | 2 | MASCOT | T | PLEX8 |
| 2.74E-04 | 0 0 | Cs6g07320.1/Cs8g195  | 6.05 | 0 |      | 0 | 2 | MASCOT | T | PLEX8 |
| 6.51E-02 | 0 0 | Cs6g07320.1/Cs8g195  | 6.05 | 0 |      | 0 | 2 | MASCOT | T | PLEX8 |
| 5.35E-03 | 0 0 | Cs6g07320.1/Cs8g195  | 6.05 | 0 |      | 0 | 2 | MASCOT | T | PLEX8 |
| 2.41E-01 | 0 0 | Cs6g07320.1/Cs8g195  | 6.05 | 0 |      | 0 | 2 | MASCOT | T |       |
| 5.87E-03 | 0 0 | Cs8g18020.1/Cs8g183  | 4.33 | 1 |      | 0 | 2 | MASCOT | T | PLEX8 |
| 1.61E-02 | 0 0 | Cs8g18020.1/Cs8g183  | 4.33 | 1 |      | 0 | 2 | MASCOT | T | PLEX8 |
| 5.66E-03 | 0 0 | Cs8g18020.1/Cs8g183  | 4.33 | 1 |      | 0 | 2 | MASCOT | T | PLEX8 |
| 2.47E-01 | 0 0 | Cs8g18020.1/Cs8g183  | 6.85 | 0 |      | 0 | 2 | MASCOT | T | PLEX8 |
| 2.19E-01 | 0 0 | Cs8g18020.1/Cs8g183  | 6.85 | 0 |      | 0 | 2 | MASCOT | T | PLEX8 |
| 5.37E-02 | 0 0 | Cs8g18020.1/Cs8g183  | 6.85 | 0 |      | 0 | 2 | MASCOT | T | PLEX8 |
| 1.63E-01 | 0 0 | Cs8g18020.1/Cs8g183  | 6.85 | 0 |      | 0 | 2 | MASCOT | T | PLEX8 |
| 1.20E-01 | 0 0 | Cs8g18020.1/Cs8g183  | 6.85 | 0 |      | 0 | 2 | MASCOT | T | PLEX8 |
| 3.60E-01 | 0 0 | Cs8g18020.1/Cs8g183  | 6.85 | 0 |      | 0 | 2 | MASCOT | T | PLEX8 |
| 6.80E-02 | 0 0 | Cs8g18020.1/Cs8g183  | 6.85 | 0 |      | 0 | 2 | MASCOT | T | PLEX8 |
| 4.03E-02 | 0 0 | Cs8g18020.1/Cs8g183  | 6.85 | 0 |      | 0 | 2 | MASCOT | T | PLEX8 |
| 2.35E-01 | 0 0 | Cs8g18020.1/Cs8g183  | 6.85 | 0 |      | 0 | 2 | MASCOT | T | PLEX8 |
| 5.74E-02 | 0 0 | Cs8g18020.1/Cs8g183  | 4.25 | 0 |      | 0 | 2 | MASCOT | T | PLEX8 |
| 1.02E-02 | 0 0 | Cs8g18020.1/Cs8g183  | 4.25 | 0 |      | 0 | 2 | MASCOT | T | PLEX8 |
| 9.10E-02 | 0 0 | Cs8g18020.1/Cs8g183  | 4.25 | 0 |      | 0 | 2 | MASCOT | T | PLEX8 |
| 3.36E-04 | 0 0 | Cs8g18020.1          | 4.37 | 0 |      | 0 | 2 | MASCOT | T | PLEX8 |
| 4.71E-03 | 0 0 | Cs8g18020.1          | 4.37 | 0 |      | 0 | 2 | MASCOT | T | PLEX8 |
| 1.39E-01 | 0 0 | Cs8g18020.1 ! Cs8g18 | 5.84 | 0 |      | 0 | 2 | MASCOT | T | PLEX8 |
| 2.20E-01 | 0 0 | Cs8g03160.1/Cs8g031  | 3.84 | 0 |      | 0 | 2 | MASCOT | T | PLEX8 |
| 1.52E-01 | 0 0 | Cs8g03160.1/Cs8g031  | 3.84 | 0 |      | 0 | 2 | MASCOT | T | PLEX8 |
| 1.36E-03 | 0 0 | Cs8g03160.1/Cs8g031  | 3.84 | 0 |      | 0 | 2 | MASCOT | T | PLEX8 |
| 1.49E-05 | 0 0 | Cs8g03160.1/Cs8g031  | 3.84 | 0 |      | 0 | 2 | MASCOT | T | PLEX8 |
| 1.01E-02 | 0 0 | Cs8g03160.1/Cs8g031  | 3.84 | 0 |      | 0 | 2 | MASCOT | T | PLEX8 |
| 9.83E-02 | 0 0 | Cs8g03160.1/Cs8g031  | 3.84 | 0 |      | 0 | 2 | MASCOT | T | PLEX8 |
| 3.59E-01 | 0 0 | Cs8g03160.1/Cs8g031  | 8.75 | 0 |      | 0 | 2 | MASCOT | T | PLEX8 |
| 1.02E-02 | 0 0 | Cs8g03160.1/Cs8g031  | 4.21 | 0 |      | 0 | 2 | MASCOT | T | PLEX8 |

|          |     |                     |      |   |      |   |        |        |       |       |
|----------|-----|---------------------|------|---|------|---|--------|--------|-------|-------|
| 2.27E-01 | 0 0 | Cs8g03160.1/Cs8g031 | 4.21 | 0 | 0    | 2 | MASCOT | T      | PLEX8 |       |
| 3.51E-02 | 0 0 | Cs8g03160.1/Cs8g031 | 4.21 | 0 | 0    | 2 | MASCOT | T      | PLEX8 |       |
| 5.64E-02 | 0 0 | Cs8g03160.1/Cs8g031 | 4.14 | 0 | 15.9 | 0 | 2      | MASCOT | T     | PLEX8 |
| 8.19E-02 | 0 0 | Cs8g03160.1/Cs8g031 | 4.14 | 0 | 15.9 | 0 | 2      | MASCOT | T     | PLEX8 |
| 1.56E-01 | 0 0 | Cs8g03160.1/Cs8g031 | 4.14 | 0 | 15.9 | 0 | 2      | MASCOT | T     | PLEX8 |
| 6.62E-03 | 0 0 | Cs8g03160.1/Cs8g031 | 4.14 | 0 | 15.9 | 0 | 2      | MASCOT | T     |       |
| 6.33E-05 | 0 0 | Cs8g03160.1/Cs8g031 | 4.14 | 0 | 0    | 2 | MASCOT | T      |       |       |
| 9.86E-02 | 0 0 | Cs8g03160.1         | 4.53 | 0 | 0    | 2 | MASCOT | T      | PLEX8 |       |
| 1.14E-03 | 0 0 | Cs8g03160.1         | 4.53 | 0 | 0    | 2 | MASCOT | T      | PLEX8 |       |
| 1.39E-03 | 0 0 | Cs8g03160.1         | 4.53 | 0 | 0    | 2 | MASCOT | T      | PLEX8 |       |
| 7.32E-03 | 0 0 | Cs8g03160.1         | 4.53 | 0 | 0    | 2 | MASCOT | T      | PLEX8 |       |
| 2.30E-03 | 0 0 | Cs8g03160.1         | 4.53 | 0 | 0    | 2 | MASCOT | T      | PLEX8 |       |
| 1.50E-02 | 0 0 | Cs8g03160.1/Cs8g031 | 8.72 | 0 | 0    | 2 | MASCOT | T      | PLEX8 |       |
| 2.30E-02 | 0 0 | Cs8g03160.1/Cs8g031 | 8.72 | 0 | 0    | 2 | MASCOT | T      | PLEX8 |       |
| 4.07E-03 | 0 0 | Cs8g03160.1/Cs8g031 | 8.72 | 0 | 0    | 2 | MASCOT | T      | PLEX8 |       |
| 2.39E-02 | 0 0 | Cs8g03160.1/Cs8g031 | 8.72 | 0 | 0    | 2 | MASCOT | T      | PLEX8 |       |
| 2.27E-01 | 0 0 | Cs8g03160.1/Cs8g031 | 8.72 | 0 | 0    | 2 | MASCOT | T      | PLEX8 |       |
| 4.28E-02 | 0 0 | Cs8g03160.1/Cs8g031 | 8.72 | 0 | 0    | 2 | MASCOT | T      | PLEX8 |       |
| 3.95E-01 | 0 0 | Cs8g03160.1/Cs8g031 | 8.72 | 0 | 0    | 2 | MASCOT | T      | PLEX8 |       |
| 2.71E-02 | 0 0 | Cs8g03160.1/Cs8g031 | 8.72 | 0 | 0    | 2 | MASCOT | T      | PLEX8 |       |
| 2.37E-02 | 0 0 | Cs8g03160.1/Cs8g031 | 8.72 | 0 | 0    | 2 | MASCOT | T      | PLEX8 |       |
| 1.73E-01 | 0 0 | Cs8g03160.1/Cs8g031 | 8.72 | 0 | 0    | 2 | MASCOT | T      |       |       |
| 6.62E-02 | 0 0 | Cs8g03160.1/Cs8g031 | 8.72 | 0 | 0    | 2 | MASCOT | T      |       |       |
| 8.79E-02 | 0 0 | Cs7g10260.1/Cs7g102 | 8.8  | 0 | 0    | 2 | MASCOT | T      | PLEX8 |       |
| 1.60E-02 | 0 0 | Cs7g10260.1/Cs7g102 | 8.8  | 0 | 0    | 2 | MASCOT | T      | PLEX8 |       |
| 2.82E-01 | 0 0 | Cs7g10260.1/Cs7g102 | 8.8  | 0 | 0    | 2 | MASCOT | T      | PLEX8 |       |
| 2.19E-01 | 0 0 | Cs7g10260.1/Cs7g102 | 8.8  | 0 | 0    | 2 | MASCOT | T      | PLEX8 |       |
| 1.44E-01 | 0 0 | Cs7g10260.1/Cs7g102 | 8.8  | 0 | 0    | 2 | MASCOT | T      | PLEX8 |       |
| 3.91E-03 | 0 0 | Cs7g10260.1/Cs7g102 | 8.8  | 0 | 0    | 2 | MASCOT | T      | PLEX8 |       |
| 7.41E-02 | 0 0 | Cs7g10260.1/Cs7g102 | 8.8  | 0 | 0    | 2 | MASCOT | T      | PLEX8 |       |
| 2.13E-01 | 0 0 | Cs7g10260.1/Cs7g102 | 4.14 | 0 | 15.9 | 0 | 2      | MASCOT | T     | PLEX8 |
| 4.10E-02 | 0 0 | Cs7g10260.1/Cs7g102 | 4.14 | 0 | 0    | 2 | MASCOT | T      | PLEX8 |       |
| 1.83E-03 | 0 0 | Cs7g10260.1/Cs7g102 | 4.14 | 0 | 0    | 2 | MASCOT | T      | PLEX8 |       |
| 1.97E-03 | 0 0 | Cs7g10260.1/Cs7g102 | 4.14 | 0 | 0    | 2 | MASCOT | T      | PLEX8 |       |
| 6.59E-02 | 0 0 | Cs7g10260.1/Cs7g102 | 4.14 | 0 | 0    | 2 | MASCOT | T      | PLEX8 |       |
| 3.15E-02 | 0 0 | Cs7g10260.1/Cs7g102 | 4.14 | 0 | 0    | 2 | MASCOT | T      | PLEX8 |       |
| 1.36E-01 | 0 0 | Cs7g10260.1/Cs7g102 | 4.25 | 0 | 0    | 2 | MASCOT | T      | PLEX8 |       |
| 4.29E-02 | 0 0 | Cs7g10260.1/Cs7g102 | 4.25 | 0 | 0    | 2 | MASCOT | T      | PLEX8 |       |
| 4.35E-03 | 0 0 | Cs7g10260.1/Cs7g102 | 4.14 | 0 | 0    | 2 | MASCOT | T      |       |       |
| 7.65E-05 | 0 0 | Cs7g10260.1/Cs7g102 | 4.14 | 0 | 0    | 2 | MASCOT | T      |       |       |
| 5.05E-06 | 0 0 | Cs7g10260.1/Cs7g102 | 4.14 | 0 | 0    | 2 | MASCOT | T      |       |       |
| 2.29E-02 | 0 0 | Cs7g10260.1/Cs7g102 | 8.8  | 0 | 0    | 2 | MASCOT | T      | PLEX8 |       |
| 1.33E-01 | 0 0 | Cs7g10260.1/Cs7g102 | 8.8  | 0 | 0    | 2 | MASCOT | T      | PLEX8 |       |
| 2.04E-01 | 0 0 | Cs7g10260.1/Cs7g102 | 8.8  | 0 | 0    | 2 | MASCOT | T      | PLEX8 |       |
| 5.21E-02 | 0 0 | Cs7g10260.1/Cs7g102 | 8.8  | 0 | 0    | 2 | MASCOT | T      | PLEX8 |       |
| 1.27E-02 | 0 0 | Cs7g10260.1/Cs7g102 | 8.8  | 0 | 0    | 2 | MASCOT | T      | PLEX8 |       |
| 1.78E-04 | 0 0 | Cs7g10260.1/Cs7g102 | 5.84 | 0 | 15.9 | 0 | 2      | MASCOT | T     |       |
| 1.14E-03 | 0 0 | Cs7g10260.1/Cs7g102 | 5.84 | 0 | 0    | 2 | MASCOT | T      |       |       |
| 2.69E-07 | 0 0 | Cs7g10260.1/Cs7g102 | 5.84 | 0 | 0    | 2 | MASCOT | T      |       |       |
| 1.98E-04 | 0 0 | Cs7g10260.1/Cs7g102 | 5.84 | 0 | 0    | 2 | MASCOT | T      |       |       |
| 3.51E-02 | 0 0 | Cs3g09310.1/Cs3g093 | 3.83 | 0 | 0    | 2 | MASCOT | T      | PLEX8 |       |



|          |     |                        |      |   |   |   |        |   |       |
|----------|-----|------------------------|------|---|---|---|--------|---|-------|
| 3.54E-03 | 0 0 | Cs3g09310.1/Cs3g093    | 3.83 | 0 | 0 | 2 | MASCOT | T | PLEX8 |
| 1.17E-02 | 0 0 | Cs3g09310.1/Cs3g093    | 3.83 | 0 | 0 | 2 | MASCOT | T | PLEX8 |
| 3.71E-03 | 0 0 | Cs3g09310.1/Cs3g093    | 3.83 | 0 | 0 | 2 | MASCOT | T | PLEX8 |
| 2.66E-04 | 0 0 | Cs3g09310.1/Cs3g093    | 3.98 | 0 | 0 | 2 | MASCOT | T |       |
| 4.97E-03 | 0 0 | Cs3g09310.1/Cs3g093    | 3.98 | 0 | 0 | 2 | MASCOT | T |       |
| 4.35E-02 | 0 0 | Cs3g09310.1/Cs3g093    | 3.98 | 0 | 0 | 2 | MASCOT | T |       |
| 1.79E-04 | 0 0 | Cs3g09310.1/Cs3g093    | 3.98 | 0 | 0 | 2 | MASCOT | T |       |
| 1.18E-04 | 0 0 | Cs3g09310.1/Cs3g093    | 3.98 | 0 | 0 | 2 | MASCOT | T |       |
| 5.54E-02 | 0 0 | Cs3g09310.1/Cs3g093    | 4.14 | 0 | 0 | 2 | MASCOT | T | PLEX8 |
| 4.25E-02 | 0 0 | Cs3g09310.1/Cs3g093    | 8.8  | 0 | 0 | 2 | MASCOT | T | PLEX8 |
| 4.00E-02 | 0 0 | Cs3g09310.1/Cs3g093    | 8.8  | 0 | 0 | 2 | MASCOT | T | PLEX8 |
| 1.19E-01 | 0 0 | Cs3g09310.1/Cs3g093    | 8.8  | 0 | 0 | 2 | MASCOT | T | PLEX8 |
| 4.69E-02 | 0 0 | Cs3g09310.1/Cs3g093    | 8.8  | 0 | 0 | 2 | MASCOT | T | PLEX8 |
| 1.02E-01 | 0 0 | Cs3g09310.1/Cs3g093    | 8.8  | 0 | 0 | 2 | MASCOT | T |       |
| 1.32E-01 | 0 0 | Cs3g09310.1/Cs3g093    | 4.37 | 0 | 0 | 2 | MASCOT | T |       |
| 3.06E-02 | 0 0 | Cs3g09310.1/Cs3g093    | 4.37 | 0 | 0 | 2 | MASCOT | T |       |
| 9.54E-03 | 0 0 | Cs3g09310.1/Cs3g093    | 4.37 | 0 | 0 | 2 | MASCOT | T |       |
| 1.65E-03 | 0 0 | Cs3g09310.1/Cs3g093    | 5.84 | 0 | 0 | 2 | MASCOT | T | PLEX8 |
| 6.26E-02 | 0 0 | Cs3g09310.1/Cs3g093    | 5.84 | 0 | 0 | 2 | MASCOT | T | PLEX8 |
| 6.54E-03 | 0 0 | Cs3g09310.1/Cs3g093    | 5.84 | 0 | 0 | 2 | MASCOT | T | PLEX8 |
| 4.07E-03 | 0 0 | Cs3g09310.1/Cs3g093    | 5.84 | 0 | 0 | 2 | MASCOT | T | PLEX8 |
| 1.05E-02 | 0 0 | Cs3g09310.1/Cs3g093    | 5.84 | 0 | 0 | 2 | MASCOT | T | PLEX8 |
| 5.14E-03 | 0 0 | Cs3g09310.1/Cs3g093    | 5.84 | 0 | 0 | 2 | MASCOT | T | PLEX8 |
| 2.98E-04 | 0 0 | Cs3g09310.1/Cs3g093    | 5.84 | 0 | 0 | 2 | MASCOT | T | PLEX8 |
| 3.53E-02 | 0 0 | Cs7g02160.1/Cs7g021    | 4.37 | 0 | 0 | 2 | MASCOT | T | PLEX8 |
| 2.47E-03 | 0 0 | Cs7g02160.1/Cs7g021    | 4.37 | 0 | 0 | 2 | MASCOT | T |       |
| 1.79E-01 | 0 0 | Cs7g02160.1/Cs7g021    | 5.97 | 0 | 0 | 2 | MASCOT | T | PLEX8 |
| 1.40E-03 | 0 0 | Cs7g02160.1/Cs7g021    | 5.97 | 0 | 0 | 2 | MASCOT | T | PLEX8 |
| 1.04E-05 | 0 0 | Cs7g02160.1/Cs7g021    | 5.97 | 0 | 0 | 2 | MASCOT | T | PLEX8 |
| 4.81E-03 | 0 0 | Cs7g02160.1/Cs7g021    | 5.97 | 0 | 0 | 2 | MASCOT | T | PLEX8 |
| 9.95E-05 | 0 0 | Cs7g02160.1/Cs7g021    | 5.97 | 0 | 0 | 2 | MASCOT | T | PLEX8 |
| 2.27E-04 | 0 0 | Cs7g02160.1/Cs7g021    | 5.97 | 0 | 0 | 2 | MASCOT | T | PLEX8 |
| 4.00E-03 | 0 0 | Cs7g02160.1/Cs7g021    | 5.97 | 0 | 0 | 2 | MASCOT | T | PLEX8 |
| 2.96E-02 | 0 0 | Cs7g02160.1/Cs7g021    | 5.4  | 0 | 0 | 2 | MASCOT | T | PLEX8 |
| 1.30E-01 | 0 0 | Cs7g02160.1/Cs7g021    | 5.4  | 0 | 0 | 2 | MASCOT | T | PLEX8 |
| 9.40E-03 | 0 0 | Cs7g02160.1/Cs7g021    | 5.4  | 0 | 0 | 2 | MASCOT | T | PLEX8 |
| 7.50E-02 | 0 0 | Cs7g02160.1/Cs7g021    | 5.4  | 0 | 0 | 2 | MASCOT | T | PLEX8 |
| 2.97E-01 | 0 0 | Cs7g02160.1/Cs7g021    | 5.4  | 0 | 0 | 2 | MASCOT | T | PLEX8 |
| 1.69E-02 | 0 0 | Cs2g30490.1/Cs7g021    | 4.21 | 0 | 0 | 2 | MASCOT | T | PLEX8 |
| 3.14E-04 | 0 0 | Cs2g30490.1/Cs7g021    | 4.21 | 0 | 0 | 2 | MASCOT | T | PLEX8 |
| 3.16E-02 | 0 0 | Cs2g30490.1/Cs7g021    | 4.21 | 0 | 0 | 2 | MASCOT | T |       |
| 2.05E-02 | 0 0 | Cs7g02160.1/Cs7g021    | 8.72 | 0 | 0 | 2 | MASCOT | T | PLEX8 |
| 1.00E-02 | 0 0 | Cs7g02160.1/Cs7g021    | 8.72 | 0 | 0 | 2 | MASCOT | T | PLEX8 |
| 2.14E-04 | 0 0 | Cs2g30490.1/Cs7g021    | 6    | 0 | 0 | 2 | MASCOT | T |       |
| 2.95E-02 | 0 0 | Cs2g30490.1/Cs7g021    | 6    | 0 | 0 | 2 | MASCOT | T |       |
| 1.16E-03 | 0 0 | Cs2g30490.1/Cs7g021    | 6    | 0 | 0 | 2 | MASCOT | T |       |
| 1.85E-06 | 0 0 | Cs2g30490.1/Cs7g021    | 6    | 0 | 0 | 2 | MASCOT | T |       |
| 1.72E-04 | 0 0 | Cs2g30490.1/Cs7g021    | 6    | 0 | 0 | 2 | MASCOT | T | PLEX8 |
| 9.68E-04 | 0 0 | Cs2g30490.1/Cs7g021    | 6    | 0 | 0 | 2 | MASCOT | T | PLEX8 |
| 3.05E-01 | 0 0 | orange1.1t05236.1 ! C: | 4.37 | 0 | 0 | 2 | MASCOT | T | PLEX8 |
| 1.40E-01 | 0 0 | orange1.1t05236.1 ! C: | 4.37 | 0 | 0 | 2 | MASCOT | T | PLEX8 |

|          |     |                        |      |   |      |   |        |        |       |       |
|----------|-----|------------------------|------|---|------|---|--------|--------|-------|-------|
| 3.93E-01 | 0 0 | orange1.1t05236.1 ! C: | 4.37 | 0 | 0    | 2 | MASCOT | T      | PLEX8 |       |
| 3.78E-02 | 0 0 | Cs3g04190.1/Cs3g043    | 4.53 | 0 | 0    | 2 | MASCOT | T      | PLEX8 |       |
| 1.15E-02 | 0 0 | Cs3g04190.1/Cs3g043    | 4.53 | 0 | 0    | 2 | MASCOT | T      | PLEX8 |       |
| 9.06E-03 | 0 0 | Cs3g04190.1/Cs3g043    | 4.53 | 0 | 0    | 2 | MASCOT | T      | PLEX8 |       |
| 2.72E-04 | 0 0 | Cs3g04190.1/Cs3g043    | 4.53 | 0 | 0    | 2 | MASCOT | T      | PLEX8 |       |
| 8.38E-03 | 0 0 | Cs3g04190.1/Cs3g043    | 4.53 | 0 | 0    | 2 | MASCOT | T      |       |       |
| 6.24E-04 | 0 0 | Cs3g04190.1/Cs3g043    | 4.53 | 0 | 0    | 2 | MASCOT | T      | PLEX8 |       |
| 4.30E-03 | 0 0 | Cs3g04170.1/Cs3g041    | 4.25 | 0 | 0    | 2 | MASCOT | T      |       |       |
| 5.94E-04 | 0 0 | Cs3g04170.1/Cs3g041    | 6.75 | 0 | 0    | 2 | MASCOT | T      | PLEX8 |       |
| 1.85E-03 | 0 0 | Cs3g04170.1/Cs3g041    | 6.75 | 0 | 0    | 2 | MASCOT | T      | PLEX8 |       |
| 7.76E-02 | 0 0 | Cs3g04170.1/Cs3g041    | 6.75 | 0 | 0    | 2 | MASCOT | T      | PLEX8 |       |
| 3.39E-03 | 0 0 | Cs3g04170.1/Cs3g041    | 6.75 | 0 | 0    | 2 | MASCOT | T      | PLEX8 |       |
| 9.98E-03 | 0 0 | Cs3g04170.1/Cs3g041    | 6.75 | 0 | 0    | 2 | MASCOT | T      |       |       |
| 4.59E-04 | 0 0 | Cs3g04170.1/Cs3g041    | 6.75 | 0 | 0    | 2 | MASCOT | T      |       |       |
| 5.32E-02 | 0 0 | Cs3g04170.1/Cs3g041    | 6.75 | 0 | 0    | 2 | MASCOT | T      | PLEX8 |       |
| 4.94E-04 | 0 0 | Cs3g04170.1/Cs3g041    | 6.75 | 0 | 0    | 2 | MASCOT | T      | PLEX8 |       |
| 2.55E-03 | 0 0 | Cs3g04170.1/Cs3g041    | 6.75 | 0 | 0    | 2 | MASCOT | T      | PLEX8 |       |
| 4.85E-04 | 0 0 | Cs3g04170.1/Cs3g041    | 6.75 | 0 | 0    | 2 | MASCOT | T      | PLEX8 |       |
| 8.32E-04 | 0 0 | Cs3g04170.1/Cs3g041    | 4.75 | 0 | 0    | 2 | MASCOT | T      | PLEX8 |       |
| 3.37E-03 | 0 0 | Cs3g04170.1/Cs3g041    | 4.75 | 0 | 0    | 2 | MASCOT | T      | PLEX8 |       |
| 1.22E-02 | 0 0 | Cs3g04190.1/Cs3g043    | 6.14 | 1 | 0    | 2 | MASCOT | T      | PLEX8 |       |
| 2.71E-02 | 0 0 | Cs2g24040.1            | 6.05 | 0 | 15.9 | 0 | 2      | MASCOT | T     | PLEX8 |
| 1.19E-01 | 0 0 | Cs2g24040.1            | 6.05 | 0 | 15.9 | 0 | 2      | MASCOT | T     | PLEX8 |
| 9.44E-04 | 0 0 | Cs2g24040.1            | 6.05 | 0 | 0    | 2 | MASCOT | T      | PLEX8 |       |
| 9.85E-03 | 0 0 | Cs2g24040.1            | 6.05 | 0 | 0    | 2 | MASCOT | T      | PLEX8 |       |
| 9.23E-04 | 0 0 | Cs2g24040.1            | 6.05 | 0 | 0    | 2 | MASCOT | T      | PLEX8 |       |
| 1.36E-01 | 0 0 | Cs2g24040.1            | 5.83 | 0 | 0    | 2 | MASCOT | T      | PLEX8 |       |
| 3.88E-02 | 0 0 | Cs2g24040.1            | 5.83 | 0 | 0    | 2 | MASCOT | T      | PLEX8 |       |
| 1.19E-01 | 0 0 | Cs2g24040.1            | 4.65 | 0 | 0    | 2 | MASCOT | T      | PLEX8 |       |
| 7.01E-05 | 0 0 | Cs2g24040.1            | 4.65 | 0 | 0    | 2 | MASCOT | T      | PLEX8 |       |
| 3.03E-01 | 0 0 | Cs2g24040.1            | 4.65 | 0 | 0    | 2 | MASCOT | T      | PLEX8 |       |
| 2.58E-03 | 0 0 | Cs2g24040.1            | 4.65 | 0 | 0    | 2 | MASCOT | T      | PLEX8 |       |
| 1.55E-02 | 0 0 | Cs2g24040.1            | 4.65 | 0 | 0    | 2 | MASCOT | T      | PLEX8 |       |
| 7.45E-03 | 0 0 | Cs2g24040.1            | 4.65 | 0 | 0    | 2 | MASCOT | T      |       |       |
| 2.19E-01 | 0 0 | Cs2g24040.1            | 4.65 | 0 | 0    | 2 | MASCOT | T      |       |       |
| 2.12E-01 | 0 0 | Cs2g24040.1            | 4.65 | 0 | 0    | 2 | MASCOT | T      |       |       |
| 1.22E-01 | 0 0 | Cs2g24040.1            | 4.65 | 0 | 0    | 2 | MASCOT | T      |       |       |
| 5.79E-02 | 0 0 | Cs2g24040.1 ! Cs6g07   | 6    | 0 | 0    | 2 | MASCOT | T      | PLEX8 |       |
| 9.91E-03 | 0 0 | Cs2g24040.1            | 4.14 | 0 | 0    | 2 | MASCOT | T      | PLEX8 |       |
| 9.94E-02 | 0 0 | Cs2g24040.1            | 4.14 | 0 | 0    | 2 | MASCOT | T      | PLEX8 |       |
| 7.38E-03 | 0 0 | Cs2g24040.1 ! Cs6g07   | 5.97 | 0 | 0    | 2 | MASCOT | T      | PLEX8 |       |
| 6.70E-02 | 0 0 | Cs2g24040.1 ! Cs6g07   | 5.97 | 0 | 0    | 2 | MASCOT | T      | PLEX8 |       |
| 2.33E-01 | 0 0 | Cs2g24040.1 ! Cs6g07   | 5.97 | 0 | 0    | 2 | MASCOT | T      | PLEX8 |       |
| 1.70E-01 | 0 0 | Cs2g02320.1/Cs2g023    | 9.8  | 0 | 0    | 2 | MASCOT | T      | PLEX8 |       |
| 1.67E-02 | 0 0 | Cs2g02320.1/Cs2g023    | 9.75 | 0 | 0    | 2 | MASCOT | T      | PLEX8 |       |
| 6.04E-02 | 0 0 | Cs2g02320.1/Cs2g023    | 9.75 | 0 | 0    | 2 | MASCOT | T      | PLEX8 |       |
| 2.15E-02 | 0 0 | Cs2g02320.1/Cs2g023    | 9.75 | 0 | 0    | 2 | MASCOT | T      | PLEX8 |       |
| 4.15E-03 | 0 0 | Cs2g02320.1/Cs2g023    | 9.75 | 0 | 0    | 2 | MASCOT | T      | PLEX8 |       |
| 8.91E-02 | 0 0 | Cs2g02320.1/Cs2g023    | 9.75 | 0 | 0    | 2 | MASCOT | T      | PLEX8 |       |
| 7.53E-02 | 0 0 | Cs2g02320.1/Cs2g023    | 9.75 | 0 | 0    | 2 | MASCOT | T      | PLEX8 |       |
| 9.07E-03 | 0 0 | Cs2g02320.1/Cs2g023    | 5.84 | 0 | 0    | 2 | MASCOT | T      | PLEX8 |       |

|          |     |                     |      |   |      |   |        |        |       |
|----------|-----|---------------------|------|---|------|---|--------|--------|-------|
| 9.70E-02 | 0 0 | Cs2g02320.1/Cs2g023 | 5.84 | 0 | 0    | 2 | MASCOT | T      | PLEX8 |
| 9.23E-03 | 0 0 | Cs2g02320.1/Cs2g023 | 5.84 | 0 | 0    | 2 | MASCOT | T      | PLEX8 |
| 1.56E-01 | 0 0 | Cs2g02320.1/Cs2g023 | 5.84 | 0 | 0    | 2 | MASCOT | T      | PLEX8 |
| 1.10E-01 | 0 0 | Cs2g02320.1/Cs2g023 | 5.84 | 0 | 0    | 2 | MASCOT | T      |       |
| 3.79E-01 | 0 0 | Cs2g02320.1/Cs2g023 | 8.49 | 0 | 0    | 2 | MASCOT | T      | PLEX8 |
| 7.27E-02 | 0 0 | Cs2g02320.1/Cs2g023 | 5.4  | 0 | 0    | 2 | MASCOT | T      | PLEX8 |
| 2.47E-01 | 0 0 | Cs2g02320.1/Cs2g023 | 5.4  | 0 | 0    | 2 | MASCOT | T      | PLEX8 |
| 1.38E-03 | 0 0 | Cs2g02320.1/Cs2g023 | 5.4  | 0 | 0    | 2 | MASCOT | T      | PLEX8 |
| 4.23E-02 | 0 0 | Cs2g02320.1/Cs2g023 | 5.4  | 0 | 0    | 2 | MASCOT | T      | PLEX8 |
| 2.62E-03 | 0 0 | Cs2g02320.1/Cs2g023 | 5.21 | 0 | 0    | 2 | MASCOT | T      | PLEX8 |
| 4.88E-03 | 0 0 | Cs2g02320.1/Cs2g023 | 5.21 | 0 | 0    | 2 | MASCOT | T      | PLEX8 |
| 1.13E-03 | 0 0 | Cs2g02320.1/Cs2g023 | 5.21 | 0 | 0    | 2 | MASCOT | T      | PLEX8 |
| 3.44E-02 | 0 0 | Cs2g02320.1/Cs2g023 | 5.21 | 0 | 0    | 2 | MASCOT | T      |       |
| 7.61E-03 | 0 0 | Cs7g25390.1/Cs7g253 | 4.03 | 0 | 0    | 2 | MASCOT | T      | PLEX8 |
| 4.79E-02 | 0 0 | Cs7g25390.1/Cs7g253 | 4.03 | 0 | 0    | 2 | MASCOT | T      | PLEX8 |
| 3.63E-03 | 0 0 | Cs7g25390.1/Cs7g253 | 4.03 | 0 | 0    | 2 | MASCOT | T      | PLEX8 |
| 5.98E-02 | 0 0 | Cs2g05040.1/Cs5g107 | 5.84 | 0 | 0    | 2 | MASCOT | T      | PLEX8 |
| 2.72E-01 | 0 0 | Cs2g05040.1/Cs5g107 | 5.84 | 0 | 0    | 2 | MASCOT | T      |       |
| 5.96E-02 | 0 0 | Cs2g05040.1/Cs5g107 | 5.84 | 0 | 0    | 2 | MASCOT | T      |       |
| 1.04E-02 | 0 0 | Cs2g05040.1/Cs5g107 | 5.84 | 0 | 0    | 2 | MASCOT | T      |       |
| 2.64E-06 | 0 0 | Cs2g05040.1/Cs5g107 | 5.84 | 0 | 0    | 2 | MASCOT | T      |       |
| 1.28E-02 | 0 0 | Cs2g05040.1/Cs5g107 | 5.84 | 0 | 0    | 2 | MASCOT | T      |       |
| 5.50E-03 | 0 0 | Cs7g25390.1/Cs7g253 | 8.72 | 0 | 15.9 | 0 | 2      | MASCOT | T     |
| 6.18E-06 | 0 0 | Cs1g21030.1/Cs1g210 | 4.21 | 0 | 0    | 2 | MASCOT | T      | PLEX8 |
| 1.08E-04 | 0 0 | Cs1g21030.1/Cs1g210 | 4.21 | 0 | 0    | 2 | MASCOT | T      | PLEX8 |
| 2.68E-01 | 0 0 | Cs1g21030.1/Cs1g210 | 4.21 | 0 | 0    | 2 | MASCOT | T      | PLEX8 |
| 1.49E-04 | 0 0 | Cs7g25390.1/Cs7g253 | 5.21 | 0 | 0    | 2 | MASCOT | T      | PLEX8 |
| 7.45E-08 | 0 0 | Cs7g25390.1/Cs7g253 | 5.21 | 0 | 0    | 2 | MASCOT | T      | PLEX8 |
| 1.14E-07 | 0 0 | Cs7g25390.1/Cs7g253 | 5.21 | 0 | 0    | 2 | MASCOT | T      | PLEX8 |
| 6.05E-03 | 0 0 | Cs7g25390.1/Cs7g253 | 5.21 | 0 | 0    | 2 | MASCOT | T      |       |
| 5.29E-07 | 0 0 | Cs7g25390.1/Cs7g253 | 5.21 | 0 | 0    | 2 | MASCOT | T      |       |
| 2.74E-05 | 0 0 | Cs7g25390.1/Cs7g253 | 5.21 | 0 | 0    | 2 | MASCOT | T      |       |
| 3.28E-01 | 0 0 | Cs2g05040.1/Cs7g253 | 4.14 | 0 | 0    | 2 | MASCOT | T      | PLEX8 |
| 1.36E-02 | 0 0 | Cs2g05040.1/Cs7g253 | 4.14 | 0 | 0    | 2 | MASCOT | T      | PLEX8 |
| 2.23E-02 | 0 0 | Cs7g11140.1/Cs7g111 | 9.76 | 0 | 0    | 2 | MASCOT | T      | PLEX8 |
| 1.04E-01 | 0 0 | Cs7g11140.1/Cs7g111 | 9.76 | 0 | 0    | 2 | MASCOT | T      | PLEX8 |
| 5.07E-02 | 0 0 | Cs7g11140.1/Cs7g111 | 9.76 | 0 | 0    | 2 | MASCOT | T      |       |
| 3.20E-02 | 0 0 | Cs5g30600.1/Cs5g306 | 8.76 | 0 | 0    | 2 | MASCOT | T      |       |
| 7.28E-02 | 0 0 | Cs5g30600.1/Cs5g306 | 8.76 | 0 | 0    | 2 | MASCOT | T      |       |
| 1.40E-02 | 0 0 | Cs1g16250.1/Cs1g162 | 5.66 | 0 | 0    | 2 | MASCOT | T      | PLEX8 |
| 2.39E-02 | 0 0 | Cs1g16250.1/Cs1g162 | 5.66 | 0 | 0    | 2 | MASCOT | T      | PLEX8 |
| 7.00E-03 | 0 0 | Cs8g20210.1/Cs8g202 | 5.81 | 0 | 0    | 2 | MASCOT | T      | PLEX8 |
| 2.26E-03 | 0 0 | Cs8g20210.1/Cs8g202 | 5.81 | 0 | 0    | 2 | MASCOT | T      | PLEX8 |
| 3.97E-01 | 0 0 | Cs8g20210.1/Cs8g202 | 5.81 | 0 | 0    | 2 | MASCOT | T      | PLEX8 |
| 6.75E-03 | 0 0 | Cs8g20210.1/Cs8g202 | 5.81 | 0 | 0    | 2 | MASCOT | T      | PLEX8 |
| 1.57E-01 | 0 0 | Cs5g30600.1/Cs5g306 | 6.04 | 0 | 0    | 2 | MASCOT | T      | PLEX8 |
| 1.70E-01 | 0 0 | Cs5g30600.1/Cs5g306 | 6.04 | 0 | 0    | 2 | MASCOT | T      | PLEX8 |
| 1.53E-01 | 0 0 | Cs5g30600.1/Cs5g306 | 6.04 | 0 | 0    | 2 | MASCOT | T      | PLEX8 |
| 1.48E-01 | 0 0 | Cs5g30600.1/Cs5g306 | 6.04 | 0 | 0    | 2 | MASCOT | T      | PLEX8 |
| 8.13E-02 | 0 0 | Cs5g30600.1/Cs5g306 | 6.04 | 0 | 0    | 2 | MASCOT | T      | PLEX8 |
| 1.75E-01 | 0 0 | Cs5g30600.1/Cs5g306 | 6.04 | 0 | 0    | 2 | MASCOT | T      | PLEX8 |

|              |                       |      |   |      |   |        |        |       |       |
|--------------|-----------------------|------|---|------|---|--------|--------|-------|-------|
| 1.78E-02 0 0 | Cs8g20210.1/Cs8g202   | 4.53 | 0 | 0    | 2 | MASCOT | T      | PLEX8 |       |
| 1.71E-01 0 0 | Cs8g20210.1/Cs8g202   | 4.53 | 0 | 0    | 2 | MASCOT | T      | PLEX8 |       |
| 3.38E-03 0 0 | Cs8g20210.1/Cs8g202   | 4.53 | 0 | 0    | 2 | MASCOT | T      | PLEX8 |       |
| 1.45E-02 0 0 | orange1.1t01854.1/ora | 6.74 | 0 | 15.9 | 0 | 2      | MASCOT | T     | PLEX8 |
| 7.18E-03 0 0 | orange1.1t01854.1/ora | 6.74 | 0 | 15.9 | 0 | 2      | MASCOT | T     | PLEX8 |
| 1.06E-02 0 0 | orange1.1t01854.1/ora | 6.74 | 0 | 0    | 2 | MASCOT | T      | PLEX8 |       |
| 1.57E-02 0 0 | orange1.1t01854.1/ora | 6.75 | 0 | 0    | 2 | MASCOT | T      | PLEX8 |       |
| 4.88E-02 0 0 | orange1.1t01854.1/ora | 6.75 | 0 | 0    | 2 | MASCOT | T      |       |       |
| 2.17E-01 0 0 | orange1.1t01854.1/ora | 6.75 | 0 | 0    | 2 | MASCOT | T      | PLEX8 |       |
| 3.81E-01 0 0 | orange1.1t01854.1/ora | 6.75 | 0 | 0    | 2 | MASCOT | T      |       |       |
| 1.66E-01 0 0 | orange1.1t01854.1/ora | 6.75 | 0 | 0    | 2 | MASCOT | T      | PLEX8 |       |
| 3.83E-02 0 0 | orange1.1t01854.1/ora | 6.75 | 0 | 0    | 2 | MASCOT | T      | PLEX8 |       |
| 8.51E-04 0 0 | orange1.1t01854.1/ora | 6.75 | 0 | 0    | 2 | MASCOT | T      | PLEX8 |       |
| 1.19E-01 0 0 | orange1.1t01854.1/ora | 5.84 | 0 | 0    | 2 | MASCOT | T      | PLEX8 |       |
| 9.61E-02 0 0 | orange1.1t01854.1/ora | 5.84 | 0 | 0    | 2 | MASCOT | T      | PLEX8 |       |
| 2.03E-01 0 0 | orange1.1t01854.1/ora | 5.84 | 0 | 0    | 2 | MASCOT | T      | PLEX8 |       |
| 1.49E-01 0 0 | orange1.1t01854.1/ora | 4.37 | 0 | 0    | 2 | MASCOT | T      | PLEX8 |       |
| 2.95E-01 0 0 | orange1.1t01854.1/ora | 4.37 | 0 | 0    | 2 | MASCOT | T      | PLEX8 |       |
| 8.52E-02 0 0 | orange1.1t01854.1/ora | 4.37 | 0 | 0    | 2 | MASCOT | T      | PLEX8 |       |
| 1.75E-01 0 0 | orange1.1t01854.1/ora | 4.37 | 0 | 0    | 2 | MASCOT | T      | PLEX8 |       |
| 6.77E-02 0 0 | orange1.1t01854.1/ora | 4.37 | 0 | 0    | 2 | MASCOT | T      | PLEX8 |       |
| 4.13E-02 0 0 | orange1.1t01854.1/ora | 4.37 | 0 | 0    | 2 | MASCOT | T      | PLEX8 |       |
| 1.05E-01 0 0 | orange1.1t01854.1/ora | 5.83 | 0 | 0    | 2 | MASCOT | T      | PLEX8 |       |
| 1.20E-03 0 0 | Cs7g06000.1/orange1.  | 4.53 | 0 | 0    | 2 | MASCOT | T      | PLEX8 |       |
| 1.38E-02 0 0 | Cs7g06000.1/orange1.  | 4.53 | 0 | 0    | 2 | MASCOT | T      |       |       |
| 4.40E-03 0 0 | Cs7g06000.1/orange1.  | 4.53 | 0 | 0    | 2 | MASCOT | T      | PLEX8 |       |
| 1.60E-03 0 0 | Cs7g06000.1/orange1.  | 4.53 | 0 | 0    | 2 | MASCOT | T      | PLEX8 |       |
| 7.21E-03 0 0 | Cs7g06000.1/orange1.  | 4.53 | 0 | 0    | 2 | MASCOT | T      | PLEX8 |       |
| 3.43E-02 0 0 | Cs7g06000.1/orange1.  | 4.53 | 0 | 0    | 2 | MASCOT | T      | PLEX8 |       |
| 2.12E-03 0 0 | Cs7g06000.1/orange1.  | 4.53 | 0 | 0    | 2 | MASCOT | T      | PLEX8 |       |
| 9.77E-02 0 0 | Cs7g06000.1/orange1.  | 4.53 | 0 | 0    | 2 | MASCOT | T      |       |       |
| 2.37E-02 0 0 | Cs6g09690.1 ! Cs4g16  | 8.75 | 0 | 0    | 2 | MASCOT | T      | PLEX8 |       |
| 1.00E-01 0 0 | Cs7g06000.1/orange1.  | 6.14 | 1 | 0    | 2 | MASCOT | T      | PLEX8 |       |
| 4.30E-01 0 0 | Cs7g06000.1/orange1.  | 4.37 | 0 | 0    | 2 | MASCOT | T      |       |       |
| 1.49E-02 0 0 | orange1.1t05559.1     | 9.72 | 0 | 0    | 2 | MASCOT | T      | PLEX8 |       |
| 1.83E-01 0 0 | orange1.1t05559.1     | 9.72 | 0 | 0    | 2 | MASCOT | T      | PLEX8 |       |
| 7.55E-03 0 0 | Cs7g06000.1/orange1.  | 4.14 | 0 | 0    | 2 | MASCOT | T      | PLEX8 |       |
| 6.23E-02 0 0 | Cs7g06000.1/orange1.  | 4.14 | 0 | 0    | 2 | MASCOT | T      | PLEX8 |       |
| 1.39E-02 0 0 | Cs7g06000.1/orange1.  | 4.14 | 0 | 0    | 2 | MASCOT | T      |       |       |
| 6.08E-02 0 0 | Cs7g06000.1/orange1.  | 4.14 | 0 | 0    | 2 | MASCOT | T      |       |       |
| 3.26E-04 0 0 | Cs7g06000.1/orange1.  | 4.14 | 0 | 0    | 2 | MASCOT | T      |       |       |
| 5.47E-05 0 0 | Cs7g06000.1/orange1.  | 4.14 | 0 | 0    | 2 | MASCOT | T      |       |       |
| 9.18E-04 0 0 | Cs1g21440.1           | 5.84 | 0 | 0    | 2 | MASCOT | T      | PLEX8 |       |
| 2.24E-06 0 0 | Cs1g21440.1           | 5.84 | 0 | 0    | 2 | MASCOT | T      | PLEX8 |       |
| 5.88E-04 0 0 | Cs1g21440.1           | 5.84 | 0 | 0    | 2 | MASCOT | T      | PLEX8 |       |
| 2.27E-04 0 0 | Cs1g21440.1           | 5.84 | 0 | 0    | 2 | MASCOT | T      | PLEX8 |       |
| 4.96E-03 0 0 | Cs1g21440.1           | 5.84 | 0 | 0    | 2 | MASCOT | T      | PLEX8 |       |
| 2.33E-02 0 0 | Cs1g21440.1           | 5.84 | 0 | 0    | 2 | MASCOT | T      | PLEX8 |       |
| 4.03E-02 0 0 | Cs1g21440.1           | 5.84 | 0 | 0    | 2 | MASCOT | T      | PLEX8 |       |
| 2.41E-01 0 0 | Cs1g21440.1           | 5.84 | 0 | 0    | 2 | MASCOT | T      | PLEX8 |       |
| 7.27E-02 0 0 | Cs1g21440.1           | 5.84 | 0 | 0    | 2 | MASCOT | T      | PLEX8 |       |

|          |     |                      |      |   |      |   |        |        |       |
|----------|-----|----------------------|------|---|------|---|--------|--------|-------|
| 7.79E-02 | 0 0 | Cs1g21440.1          | 5.84 | 0 | 0    | 2 | MASCOT | T      | PLEX8 |
| 2.40E-03 | 0 0 | Cs1g21440.1          | 5.84 | 0 | 0    | 2 | MASCOT | T      | PLEX8 |
| 1.73E-01 | 0 0 | Cs1g21440.1          | 6.75 | 0 | 0    | 2 | MASCOT | T      |       |
| 9.24E-02 | 0 0 | Cs1g21440.1          | 5.84 | 0 | 0    | 2 | MASCOT | T      | PLEX8 |
| 8.12E-02 | 0 0 | Cs1g21440.1          | 5.84 | 0 | 0    | 2 | MASCOT | T      | PLEX8 |
| 9.86E-02 | 0 0 | Cs1g21440.1          | 5.84 | 0 | 0    | 2 | MASCOT | T      | PLEX8 |
| 1.96E-01 | 0 0 | Cs1g21440.1          | 5.84 | 0 | 0    | 2 | MASCOT | T      |       |
| 2.72E-04 | 0 0 | Cs1g21440.1          | 4.37 | 0 | 0    | 2 | MASCOT | T      | PLEX8 |
| 2.59E-01 | 0 0 | Cs1g21440.1          | 5.32 | 0 | 0    | 2 | MASCOT | T      |       |
| 2.13E-06 | 0 0 | Cs2g12380.1          | 3.77 | 0 | 0    | 2 | MASCOT | T      |       |
| 2.80E-03 | 0 0 | Cs2g12380.1          | 4.11 | 1 | 0    | 2 | MASCOT | T      | PLEX8 |
| 7.99E-02 | 0 0 | Cs2g12380.1          | 4.11 | 1 | 0    | 2 | MASCOT | T      | PLEX8 |
| 4.28E-02 | 0 0 | Cs2g12380.1          | 4.11 | 1 | 0    | 2 | MASCOT | T      | PLEX8 |
| 4.97E-02 | 0 0 | Cs2g12380.1          | 4.11 | 1 | 0    | 2 | MASCOT | T      | PLEX8 |
| 2.29E-02 | 0 0 | Cs2g12380.1          | 4.11 | 1 | 0    | 2 | MASCOT | T      |       |
| 1.42E-02 | 0 0 | Cs2g12380.1          | 5.84 | 0 | 0    | 2 | MASCOT | T      | PLEX8 |
| 7.70E-05 | 0 0 | Cs2g12380.1          | 5.84 | 0 | 0    | 2 | MASCOT | T      | PLEX8 |
| 1.95E-01 | 0 0 | Cs2g12380.1          | 5.84 | 0 | 0    | 2 | MASCOT | T      | PLEX8 |
| 4.57E-05 | 0 0 | Cs2g12380.1          | 5.84 | 0 | 0    | 2 | MASCOT | T      | PLEX8 |
| 1.54E-04 | 0 0 | Cs2g12380.1          | 6    | 0 | 0    | 2 | MASCOT | T      | PLEX8 |
| 6.01E-03 | 0 0 | Cs2g12380.1          | 8.75 | 0 | 0    | 2 | MASCOT | T      | PLEX8 |
| 8.10E-02 | 0 0 | Cs2g12380.1          | 8.75 | 0 | 0    | 2 | MASCOT | T      | PLEX8 |
| 1.83E-04 | 0 0 | Cs2g12380.1          | 4.37 | 0 | 15.9 | 0 | 2      | MASCOT | T     |
| 1.43E-03 | 0 0 | Cs2g12380.1          | 4.37 | 0 | 15.9 | 0 | 2      | MASCOT | T     |
| 7.51E-04 | 0 0 | Cs2g12380.1          | 4.37 | 0 | 0    | 2 | MASCOT | T      |       |
| 4.26E-04 | 0 0 | Cs2g12380.1          | 4.37 | 0 | 0    | 2 | MASCOT | T      |       |
| 4.29E-02 | 0 0 | Cs2g12380.1          | 4.37 | 0 | 0    | 2 | MASCOT | T      |       |
| 1.34E-03 | 0 0 | Cs3g27290.1/Cs3g272  | 4.14 | 0 | 0    | 2 | MASCOT | T      | PLEX8 |
| 1.82E-03 | 0 0 | Cs3g27290.1/Cs3g272  | 4.14 | 0 | 0    | 2 | MASCOT | T      | PLEX8 |
| 2.21E-02 | 0 0 | Cs3g27290.1/Cs3g272  | 4.14 | 0 | 0    | 2 | MASCOT | T      | PLEX8 |
| 8.12E-03 | 0 0 | Cs3g27290.1/Cs3g272  | 4.14 | 0 | 0    | 2 | MASCOT | T      | PLEX8 |
| 3.72E-02 | 0 0 | Cs3g27290.1/Cs3g272  | 3.92 | 0 | 0    | 2 | MASCOT | T      | PLEX8 |
| 8.14E-04 | 0 0 | Cs3g27280.1/Cs3g272  | 6.75 | 0 | 0    | 2 | MASCOT | T      | PLEX8 |
| 1.05E-04 | 0 0 | Cs3g27280.1/Cs3g272  | 6.75 | 0 | 0    | 2 | MASCOT | T      | PLEX8 |
| 3.14E-03 | 0 0 | Cs3g27280.1/Cs3g272  | 6.75 | 0 | 0    | 2 | MASCOT | T      | PLEX8 |
| 1.77E-02 | 0 0 | Cs3g27280.1/Cs3g272  | 6.75 | 0 | 0    | 2 | MASCOT | T      | PLEX8 |
| 3.15E-02 | 0 0 | Cs3g27280.1/Cs3g272  | 6.75 | 0 | 0    | 2 | MASCOT | T      |       |
| 2.41E-01 | 0 0 | Cs3g27290.1/Cs3g272  | 4.65 | 0 | 0    | 2 | MASCOT | T      | PLEX8 |
| 3.10E-02 | 0 0 | Cs3g27290.1/Cs3g272  | 4.65 | 0 | 0    | 2 | MASCOT | T      | PLEX8 |
| 2.24E-01 | 0 0 | Cs3g27290.1/Cs3g272  | 4.65 | 0 | 0    | 2 | MASCOT | T      | PLEX8 |
| 2.53E-01 | 0 0 | Cs3g27290.1/Cs3g272  | 4.65 | 0 | 0    | 2 | MASCOT | T      |       |
| 1.79E-01 | 0 0 | Cs3g27290.1/Cs3g272  | 8.59 | 0 | 0    | 2 | MASCOT | T      | PLEX8 |
| 8.54E-04 | 0 0 | Cs3g27290.1/Cs3g272  | 8.59 | 0 | 0    | 2 | MASCOT | T      | PLEX8 |
| 1.54E-01 | 0 0 | Cs3g27290.1/Cs3g272  | 8.59 | 0 | 0    | 2 | MASCOT | T      | PLEX8 |
| 8.19E-02 | 0 0 | Cs3g27290.1/Cs3g272  | 6.72 | 0 | 0    | 2 | MASCOT | T      | PLEX8 |
| 3.29E-03 | 0 0 | Cs6g03310.1/Cs6g033  | 8.75 | 0 | 0    | 2 | MASCOT | T      | PLEX8 |
| 5.32E-03 | 0 0 | Cs6g03310.1/Cs6g033  | 8.75 | 0 | 0    | 2 | MASCOT | T      |       |
| 9.45E-02 | 0 0 | Cs6g03310.1/Cs6g033  | 4.53 | 0 | 0    | 2 | MASCOT | T      | PLEX8 |
| 3.04E-01 | 0 0 | Cs6g03310.1/Cs6g033  | 4.53 | 0 | 0    | 2 | MASCOT | T      | PLEX8 |
| 4.27E-02 | 0 0 | Cs6g03310.1 ! Cs6g03 | 5.95 | 0 | 0    | 2 | MASCOT | T      | PLEX8 |
| 2.53E-01 | 0 0 | Cs6g03310.1 ! Cs6g03 | 5.95 | 0 | 0    | 2 | MASCOT | T      | PLEX8 |

|          |     |                       |      |   |      |   |        |                |
|----------|-----|-----------------------|------|---|------|---|--------|----------------|
| 1.06E-01 | 0 0 | Cs6g03310.1 ! Cs6g03  | 5.95 | 0 | 0    | 2 | MASCOT | T              |
| 2.05E-01 | 0 0 | Cs6g03310.1 ! Cs6g03  | 5.95 | 0 | 0    | 2 | MASCOT | T              |
| 4.83E-01 | 0 0 | Cs6g03310.1 ! Cs6g03  | 5.95 | 0 | 0    | 2 | MASCOT | T              |
| 1.47E-01 | 0 0 | Cs6g03310.1 ! Cs6g03  | 5.95 | 0 | 0    | 2 | MASCOT | T              |
| 1.27E-02 | 0 0 | Cs6g03310.1/Cs6g033   | 6.11 | 0 | 0    | 2 | MASCOT | T PLEX8        |
| 2.02E-01 | 0 0 | Cs6g03310.1/Cs6g033   | 6.11 | 0 | 0    | 2 | MASCOT | T              |
| 2.19E-01 | 0 0 | Cs6g03310.1/Cs6g033   | 6.11 | 0 | 0    | 2 | MASCOT | T              |
| 7.75E-02 | 0 0 | Cs6g03310.1/Cs6g033   | 6.11 | 0 | 0    | 2 | MASCOT | T              |
| 1.94E-01 | 0 0 | Cs6g03310.1/Cs6g033   | 9.8  | 0 | 0    | 2 | MASCOT | T PLEX8        |
| 1.82E-01 | 0 0 | Cs6g03310.1           | 4.53 | 0 | 15.9 | 0 | 2      | MASCOT T PLEX8 |
| 2.30E-02 | 0 0 | Cs6g03310.1           | 4.53 | 0 | 15.9 | 0 | 2      | MASCOT T PLEX8 |
| 6.12E-03 | 0 0 | Cs6g03310.1           | 4.53 | 0 | 0    | 2 | MASCOT | T PLEX8        |
| 9.98E-02 | 0 0 | orange1.1t02485.1/ora | 5.33 | 0 | 15.9 | 0 | 2      | MASCOT T       |
| 1.64E-01 | 0 0 | orange1.1t02485.1/ora | 5.33 | 0 | 15.9 | 0 | 2      | MASCOT T       |
| 7.44E-03 | 0 0 | orange1.1t02485.1/ora | 4.53 | 0 | 0    | 2 | MASCOT | T PLEX8        |
| 9.96E-03 | 0 0 | orange1.1t02485.1/ora | 4.53 | 0 | 0    | 2 | MASCOT | T PLEX8        |
| 1.40E-02 | 0 0 | orange1.1t02485.1/ora | 4.53 | 0 | 0    | 2 | MASCOT | T PLEX8        |
| 1.47E-04 | 0 0 | orange1.1t02485.1/ora | 4.53 | 0 | 0    | 2 | MASCOT | T PLEX8        |
| 7.34E-04 | 0 0 | orange1.1t02485.1/ora | 4.53 | 0 | 0    | 2 | MASCOT | T PLEX8        |
| 4.81E-02 | 0 0 | orange1.1t02485.1/ora | 4.53 | 0 | 0    | 2 | MASCOT | T PLEX8        |
| 1.17E-02 | 0 0 | orange1.1t02485.1/ora | 6.14 | 1 | 0    | 2 | MASCOT | T              |
| 1.64E-01 | 0 0 | orange1.1t02485.1/ora | 9.75 | 0 | 0    | 2 | MASCOT | T PLEX8        |
| 3.72E-01 | 0 0 | orange1.1t02485.1/ora | 6    | 0 | 0    | 2 | MASCOT | T PLEX8        |
| 3.22E-01 | 0 0 | orange1.1t02485.1/ora | 6    | 0 | 0    | 2 | MASCOT | T              |
| 8.02E-02 | 0 0 | orange1.1t02485.1/ora | 8.76 | 0 | 0    | 2 | MASCOT | T PLEX8        |
| 2.69E-02 | 0 0 | orange1.1t02485.1/ora | 8.76 | 0 | 0    | 2 | MASCOT | T PLEX8        |
| 4.70E-01 | 0 0 | orange1.1t02485.1/ora | 8.76 | 0 | 0    | 2 | MASCOT | T PLEX8        |
| 5.57E-01 | 0 0 | orange1.1t02485.1/ora | 8.76 | 0 | 0    | 2 | MASCOT | T PLEX8        |
| 2.55E-01 | 0 0 | orange1.1t02485.1/ora | 8.76 | 0 | 0    | 2 | MASCOT | T PLEX8        |
| 1.28E-02 | 0 0 | orange1.1t02485.1/ora | 8.76 | 0 | 0    | 2 | MASCOT | T              |
| 3.79E-02 | 0 0 | Cs4g17360.1/Cs4g173   | 5.84 | 0 | 0    | 2 | MASCOT | T PLEX8        |
| 2.62E-03 | 0 0 | Cs4g17360.1/Cs4g173   | 6    | 0 | 0    | 2 | MASCOT | T PLEX8        |
| 1.07E-03 | 0 0 | Cs4g17360.1/Cs4g173   | 6    | 0 | 0    | 2 | MASCOT | T PLEX8        |
| 2.57E-03 | 0 0 | Cs4g17360.1/Cs4g173   | 6    | 0 | 0    | 2 | MASCOT | T PLEX8        |
| 1.55E-03 | 0 0 | Cs4g17360.1/Cs4g173   | 6    | 0 | 0    | 2 | MASCOT | T PLEX8        |
| 6.47E-03 | 0 0 | Cs4g17360.1/Cs4g173   | 6    | 0 | 0    | 2 | MASCOT | T PLEX8        |
| 5.64E-03 | 0 0 | Cs4g17360.1/Cs4g173   | 6    | 0 | 0    | 2 | MASCOT | T PLEX8        |
| 2.59E-03 | 0 0 | Cs4g17360.1/Cs4g173   | 6    | 0 | 0    | 2 | MASCOT | T PLEX8        |
| 1.96E-02 | 0 0 | Cs4g17360.1/Cs4g173   | 6    | 0 | 0    | 2 | MASCOT | T PLEX8        |
| 1.54E-02 | 0 0 | Cs4g17360.1/Cs4g173   | 9.76 | 0 | 0    | 2 | MASCOT | T PLEX8        |
| 1.49E-02 | 0 0 | Cs4g17360.1/Cs4g173   | 9.76 | 0 | 0    | 2 | MASCOT | T              |
| 2.01E-03 | 0 0 | Cs4g17360.1/Cs4g173   | 4.37 | 0 | 0    | 2 | MASCOT | T PLEX8        |
| 1.01E-01 | 0 0 | Cs4g17360.1/Cs4g173   | 5.4  | 0 | 0    | 2 | MASCOT | T PLEX8        |
| 1.25E-01 | 0 0 | Cs4g17360.1/Cs4g173   | 5.4  | 0 | 0    | 2 | MASCOT | T              |
| 4.29E-03 | 0 0 | Cs4g17360.1/Cs4g173   | 5.96 | 0 | 0    | 2 | MASCOT | T PLEX8        |
| 5.62E-04 | 0 0 | Cs4g17360.1/Cs4g173   | 5.96 | 0 | 0    | 2 | MASCOT | T PLEX8        |
| 2.57E-01 | 0 0 | Cs4g17360.1/Cs4g173   | 5.96 | 0 | 0    | 2 | MASCOT | T PLEX8        |
| 7.28E-02 | 0 0 | Cs6g11650.1/Cs6g116   | 8.76 | 0 | 0    | 2 | MASCOT | T PLEX8        |
| 4.68E-02 | 0 0 | Cs6g11650.1/Cs6g116   | 8.76 | 0 | 0    | 2 | MASCOT | T PLEX8        |
| 8.62E-02 | 0 0 | Cs6g11650.1/Cs6g116   | 8.76 | 0 | 0    | 2 | MASCOT | T              |
| 2.55E-01 | 0 0 | Cs6g11650.1/Cs6g116   | 6.92 | 0 | 0    | 2 | MASCOT | T PLEX8        |

|              |                     |      |   |      |   |        |        |       |       |
|--------------|---------------------|------|---|------|---|--------|--------|-------|-------|
| 4.42E-02 0 0 | Cs6g11650.1/Cs6g116 | 6.92 | 0 | 0    | 2 | MASCOT | T      | PLEX8 |       |
| 1.71E-02 0 0 | Cs6g11650.1/Cs6g116 | 6.92 | 0 | 0    | 2 | MASCOT | T      | PLEX8 |       |
| 1.03E-01 0 0 | Cs6g11650.1/Cs6g116 | 6.92 | 0 | 0    | 2 | MASCOT | T      | PLEX8 |       |
| 4.69E-02 0 0 | Cs6g11650.1/Cs6g116 | 5.84 | 0 | 15.9 | 0 | 2      | MASCOT | T     | PLEX8 |
| 1.20E-01 0 0 | Cs6g11650.1/Cs6g116 | 5.84 | 0 | 15.9 | 0 | 2      | MASCOT | T     | PLEX8 |
| 3.99E-06 0 0 | Cs6g11650.1/Cs6g116 | 4.37 | 0 | 0    | 2 | MASCOT | T      | PLEX8 |       |
| 3.12E-06 0 0 | Cs6g11650.1/Cs6g116 | 4.37 | 0 | 0    | 2 | MASCOT | T      | PLEX8 |       |
| 1.65E-05 0 0 | Cs6g11650.1/Cs6g116 | 4.37 | 0 | 0    | 2 | MASCOT | T      | PLEX8 |       |
| 4.99E-02 0 0 | Cs6g11650.1/Cs6g116 | 5.4  | 0 | 0    | 2 | MASCOT | T      | PLEX8 |       |
| 1.96E-03 0 0 | Cs6g11650.1/Cs6g116 | 5.4  | 0 | 0    | 2 | MASCOT | T      | PLEX8 |       |
| 1.41E-02 0 0 | Cs6g11650.1/Cs6g116 | 5.4  | 0 | 0    | 2 | MASCOT | T      | PLEX8 |       |
| 8.32E-04 0 0 | Cs6g11650.1/Cs6g116 | 6    | 0 | 0    | 2 | MASCOT | T      |       |       |
| 1.83E-04 0 0 | Cs6g11650.1/Cs6g116 | 6    | 0 | 0    | 2 | MASCOT | T      |       |       |
| 2.57E-01 0 0 | Cs1g22320.1/Cs2g279 | 9.76 | 0 | 0    | 2 | MASCOT | T      | PLEX8 |       |
| 2.41E-01 0 0 | Cs1g22320.1/Cs2g279 | 9.76 | 0 | 0    | 2 | MASCOT | T      |       |       |
| 6.11E-01 0 0 | Cs1g22320.1/Cs2g279 | 9.76 | 0 | 0    | 2 | MASCOT | T      |       |       |
| 3.55E-04 0 0 | Cs2g27930.1/Cs2g279 | 4.21 | 0 | 0    | 2 | MASCOT | T      | PLEX8 |       |
| 3.80E-04 0 0 | Cs2g27930.1/Cs2g279 | 4.21 | 0 | 0    | 2 | MASCOT | T      | PLEX8 |       |
| 5.23E-04 0 0 | Cs2g27930.1/Cs2g279 | 4.03 | 0 | 15.9 | 0 | 2      | MASCOT | T     | PLEX8 |
| 4.77E-05 0 0 | Cs2g27930.1/Cs2g279 | 4.03 | 0 | 15.9 | 0 | 2      | MASCOT | T     | PLEX8 |
| 4.71E-03 0 0 | Cs2g27930.1/Cs2g279 | 4.03 | 0 | 0    | 2 | MASCOT | T      | PLEX8 |       |
| 1.08E-03 0 0 | Cs2g27930.1/Cs2g279 | 5.84 | 0 | 0    | 2 | MASCOT | T      | PLEX8 |       |
| 4.21E-02 0 0 | Cs2g27930.1/Cs2g279 | 5.84 | 0 | 0    | 2 | MASCOT | T      | PLEX8 |       |
| 4.01E-02 0 0 | Cs2g27930.1/Cs2g279 | 5.84 | 0 | 0    | 2 | MASCOT | T      | PLEX8 |       |
| 3.12E-02 0 0 | Cs2g27930.1/Cs2g279 | 5.84 | 0 | 0    | 2 | MASCOT | T      |       |       |
| 7.07E-02 0 0 | Cs4g18040.1/Cs4g180 | 5.32 | 0 | 0    | 2 | MASCOT | T      |       |       |
| 9.50E-02 0 0 | Cs4g18040.1/Cs4g180 | 5.32 | 0 | 0    | 2 | MASCOT | T      |       |       |
| 8.79E-03 0 0 | Cs1g22320.1/Cs2g279 | 5.84 | 0 | 15.9 | 0 | 2      | MASCOT | T     | PLEX8 |
| 1.74E-02 0 0 | Cs1g22320.1/Cs2g279 | 5.84 | 0 | 0    | 2 | MASCOT | T      | PLEX8 |       |
| 1.21E-02 0 0 | Cs1g22320.1/Cs2g279 | 5.84 | 0 | 0    | 2 | MASCOT | T      | PLEX8 |       |
| 2.33E-01 0 0 | Cs7g30080.1/Cs7g300 | 8.76 | 0 | 0    | 2 | MASCOT | T      | PLEX8 |       |
| 4.27E-03 0 0 | Cs7g30080.1/Cs7g300 | 6    | 0 | 0    | 2 | MASCOT | T      | PLEX8 |       |
| 3.55E-02 0 0 | Cs7g30080.1/Cs7g300 | 5.72 | 0 | 0    | 2 | MASCOT | T      | PLEX8 |       |
| 2.82E-02 0 0 | Cs7g30080.1/Cs7g300 | 5.72 | 0 | 0    | 2 | MASCOT | T      | PLEX8 |       |
| 9.87E-02 0 0 | Cs7g30080.1/Cs7g300 | 5.72 | 0 | 0    | 2 | MASCOT | T      | PLEX8 |       |
| 5.59E-02 0 0 | Cs7g30080.1/Cs7g300 | 5.72 | 0 | 0    | 2 | MASCOT | T      | PLEX8 |       |
| 6.58E-04 0 0 | Cs7g30080.1/Cs7g300 | 4.75 | 0 | 0    | 2 | MASCOT | T      | PLEX8 |       |
| 1.09E-02 0 0 | Cs7g30080.1/Cs7g300 | 4.75 | 0 | 0    | 2 | MASCOT | T      | PLEX8 |       |
| 2.67E-01 0 0 | Cs7g30080.1/Cs7g300 | 4.75 | 0 | 0    | 2 | MASCOT | T      | PLEX8 |       |
| 8.40E-04 0 0 | Cs7g30080.1/Cs7g300 | 4.75 | 0 | 0    | 2 | MASCOT | T      | PLEX8 |       |
| 7.93E-02 0 0 | Cs7g30080.1/Cs7g300 | 4.75 | 0 | 0    | 2 | MASCOT | T      |       |       |
| 4.87E-02 0 0 | Cs7g30080.1/Cs7g300 | 9.73 | 0 | 0    | 2 | MASCOT | T      | PLEX8 |       |
| 7.14E-02 0 0 | Cs7g30080.1/Cs7g300 | 9.73 | 0 | 0    | 2 | MASCOT | T      | PLEX8 |       |
| 1.17E-01 0 0 | Cs7g30080.1/Cs7g300 | 9.73 | 0 | 0    | 2 | MASCOT | T      | PLEX8 |       |
| 1.08E-03 0 0 | Cs7g30080.1/Cs7g300 | 4    | 0 | 0    | 2 | MASCOT | T      |       |       |
| 6.36E-02 0 0 | Cs7g30080.1/Cs7g300 | 4    | 0 | 0    | 2 | MASCOT | T      |       |       |
| 4.30E-02 0 0 | Cs7g30080.1/Cs7g300 | 4    | 0 | 0    | 2 | MASCOT | T      | PLEX8 |       |
| 1.24E-01 0 0 | Cs8g18970.1/Cs8g189 | 6.1  | 0 | 0    | 2 | MASCOT | T      | PLEX8 |       |
| 3.20E-02 0 0 | Cs8g18970.1/Cs8g189 | 6.1  | 0 | 0    | 2 | MASCOT | T      | PLEX8 |       |
| 7.32E-04 0 0 | Cs8g18970.1/Cs8g189 | 4.25 | 0 | 0    | 2 | MASCOT | T      | PLEX8 |       |
| 1.07E-04 0 0 | Cs8g18970.1/Cs8g189 | 4.25 | 0 | 0    | 2 | MASCOT | T      | PLEX8 |       |

|          |     |                     |      |   |   |   |        |   |       |
|----------|-----|---------------------|------|---|---|---|--------|---|-------|
| 3.21E-01 | 0 0 | Cs8g18970.1/Cs8g189 | 4.25 | 0 | 0 | 2 | MASCOT | T | PLEX8 |
| 1.32E-03 | 0 0 | Cs8g18970.1/Cs8g189 | 4.25 | 0 | 0 | 2 | MASCOT | T | PLEX8 |
| 5.39E-03 | 0 0 | Cs8g18970.1/Cs8g189 | 4.25 | 0 | 0 | 2 | MASCOT | T | PLEX8 |
| 3.20E-01 | 0 0 | Cs8g18970.1/Cs8g189 | 4.25 | 0 | 0 | 2 | MASCOT | T |       |
| 1.01E-01 | 0 0 | Cs8g18970.1/Cs8g189 | 6    | 0 | 0 | 2 | MASCOT | T | PLEX8 |
| 5.86E-02 | 0 0 | Cs8g18970.1/Cs8g189 | 6    | 0 | 0 | 2 | MASCOT | T | PLEX8 |
| 8.52E-02 | 0 0 | Cs8g18970.1/Cs8g189 | 6    | 0 | 0 | 2 | MASCOT | T | PLEX8 |
| 1.11E-01 | 0 0 | Cs8g18970.1/Cs8g189 | 6    | 0 | 0 | 2 | MASCOT | T | PLEX8 |
| 9.47E-03 | 0 0 | Cs8g18970.1/Cs8g189 | 4.53 | 0 | 0 | 2 | MASCOT | T | PLEX8 |
| 1.72E-02 | 0 0 | Cs8g18970.1/Cs8g189 | 4    | 0 | 0 | 2 | MASCOT | T |       |
| 1.53E-04 | 0 0 | Cs8g18970.1/Cs8g189 | 4    | 0 | 0 | 2 | MASCOT | T |       |
| 2.43E-05 | 0 0 | Cs8g18970.1/Cs8g189 | 4    | 0 | 0 | 2 | MASCOT | T |       |
| 1.81E-03 | 0 0 | Cs8g18970.1/Cs8g189 | 4.37 | 0 | 0 | 2 | MASCOT | T | PLEX8 |
| 2.34E-01 | 0 0 | Cs3g09730.1/Cs3g097 | 8.25 | 0 | 0 | 2 | MASCOT | T | PLEX8 |
| 2.47E-05 | 0 0 | Cs3g09750.1/Cs3g097 | 4.53 | 0 | 0 | 2 | MASCOT | T | PLEX8 |
| 4.64E-03 | 0 0 | Cs3g09750.1/Cs3g097 | 4.53 | 0 | 0 | 2 | MASCOT | T | PLEX8 |
| 1.45E-01 | 0 0 | Cs3g09750.1/Cs3g097 | 4.37 | 0 | 0 | 2 | MASCOT | T | PLEX8 |
| 2.25E-01 | 0 0 | Cs3g09730.1/Cs3g097 | 5.4  | 0 | 0 | 2 | MASCOT | T | PLEX8 |
| 6.29E-02 | 0 0 | Cs3g09730.1/Cs3g097 | 5.4  | 0 | 0 | 2 | MASCOT | T | PLEX8 |
| 1.89E-01 | 0 0 | Cs3g09730.1/Cs3g097 | 5.4  | 0 | 0 | 2 | MASCOT | T | PLEX8 |
| 2.38E-01 | 0 0 | Cs3g09730.1/Cs3g097 | 5.4  | 0 | 0 | 2 | MASCOT | T | PLEX8 |
| 2.61E-02 | 0 0 | Cs3g09730.1/Cs3g097 | 5.4  | 0 | 0 | 2 | MASCOT | T | PLEX8 |
| 1.99E-02 | 0 0 | Cs3g09750.1/Cs3g097 | 4.53 | 0 | 0 | 2 | MASCOT | T | PLEX8 |
| 5.74E-02 | 0 0 | Cs3g09750.1/Cs3g097 | 4.53 | 0 | 0 | 2 | MASCOT | T | PLEX8 |
| 1.53E-01 | 0 0 | Cs3g09750.1/Cs3g097 | 4.53 | 0 | 0 | 2 | MASCOT | T | PLEX8 |
| 3.92E-03 | 0 0 | Cs3g09750.1/Cs3g097 | 4.53 | 0 | 0 | 2 | MASCOT | T | PLEX8 |
| 9.80E-02 | 0 0 | Cs3g09750.1/Cs3g097 | 4.53 | 0 | 0 | 2 | MASCOT | T | PLEX8 |
| 4.48E-04 | 0 0 | Cs3g09750.1/Cs3g097 | 4.25 | 0 | 0 | 2 | MASCOT | T |       |
| 9.60E-04 | 0 0 | Cs3g09750.1/Cs3g097 | 4.25 | 0 | 0 | 2 | MASCOT | T |       |
| 4.90E-01 | 0 0 | Cs1g21050.1/Cs3g166 | 5.83 | 0 | 0 | 2 | MASCOT | T |       |
| 3.21E-03 | 0 0 | Cs1g21050.1/Cs3g166 | 5.83 | 0 | 0 | 2 | MASCOT | T |       |
| 7.34E-04 | 0 0 | Cs1g21050.1/Cs3g166 | 5.84 | 0 | 0 | 2 | MASCOT | T | PLEX8 |
| 6.54E-02 | 0 0 | Cs1g21050.1/Cs3g166 | 5.84 | 0 | 0 | 2 | MASCOT | T | PLEX8 |
| 9.22E-04 | 0 0 | Cs1g21050.1/Cs3g166 | 5.84 | 0 | 0 | 2 | MASCOT | T | PLEX8 |
| 5.68E-04 | 0 0 | Cs1g21050.1/Cs3g166 | 5.84 | 0 | 0 | 2 | MASCOT | T | PLEX8 |
| 1.17E-03 | 0 0 | Cs1g21050.1/Cs3g166 | 5.84 | 0 | 0 | 2 | MASCOT | T | PLEX8 |
| 7.51E-02 | 0 0 | Cs1g21050.1/Cs3g166 | 5.84 | 0 | 0 | 2 | MASCOT | T | PLEX8 |
| 1.66E-01 | 0 0 | Cs1g21050.1/Cs3g166 | 4.14 | 0 | 0 | 2 | MASCOT | T | PLEX8 |
| 2.11E-01 | 0 0 | Cs1g21050.1/Cs3g166 | 4.14 | 0 | 0 | 2 | MASCOT | T | PLEX8 |
| 6.75E-03 | 0 0 | Cs1g21050.1/Cs3g166 | 6.75 | 0 | 0 | 2 | MASCOT | T | PLEX8 |
| 1.75E-02 | 0 0 | Cs1g21050.1/Cs3g166 | 6.75 | 0 | 0 | 2 | MASCOT | T | PLEX8 |
| 1.28E-02 | 0 0 | Cs1g21050.1/Cs3g166 | 6.75 | 0 | 0 | 2 | MASCOT | T | PLEX8 |
| 4.77E-03 | 0 0 | Cs1g21050.1/Cs3g166 | 6.75 | 0 | 0 | 2 | MASCOT | T | PLEX8 |
| 7.29E-04 | 0 0 | Cs9g03120.1         | 5.5  | 0 | 0 | 2 | MASCOT | T | PLEX8 |
| 2.24E-04 | 0 0 | Cs9g03120.1         | 5.5  | 0 | 0 | 2 | MASCOT | T | PLEX8 |
| 2.01E-01 | 0 0 | Cs2g12320.1/Cs2g123 | 6.74 | 0 | 0 | 2 | MASCOT | T | PLEX8 |
| 1.63E-06 | 0 0 | Cs2g12320.1/Cs2g123 | 6.74 | 0 | 0 | 2 | MASCOT | T | PLEX8 |
| 2.90E-05 | 0 0 | Cs2g12320.1/Cs2g123 | 6.74 | 0 | 0 | 2 | MASCOT | T | PLEX8 |
| 9.87E-06 | 0 0 | Cs2g12320.1/Cs2g123 | 6.74 | 0 | 0 | 2 | MASCOT | T |       |
| 3.57E-01 | 0 0 | Cs2g12320.1/Cs2g123 | 8.25 | 0 | 0 | 2 | MASCOT | T | PLEX8 |
| 7.27E-04 | 0 0 | Cs2g12320.1/Cs2g123 | 8.25 | 0 | 0 | 2 | MASCOT | T | PLEX8 |



|          |     |                     |      |   |      |   |        |        |       |       |
|----------|-----|---------------------|------|---|------|---|--------|--------|-------|-------|
| 1.59E-02 | 0 0 | Cs2g12320.1/Cs2g123 | 8.73 | 0 | 0    | 2 | MASCOT | T      | PLEX8 |       |
| 1.91E-01 | 0 0 | Cs2g12320.1/Cs2g123 | 4.14 | 0 | 15.9 | 0 | 2      | MASCOT | T     | PLEX8 |
| 5.75E-03 | 0 0 | Cs2g12320.1/Cs2g123 | 4.14 | 0 | 0    | 2 | MASCOT | T      | PLEX8 |       |
| 1.18E-02 | 0 0 | Cs2g12320.1/Cs2g123 | 6    | 0 | 0    | 2 | MASCOT | T      | PLEX8 |       |
| 1.48E-01 | 0 0 | Cs2g12320.1/Cs2g123 | 6    | 0 | 0    | 2 | MASCOT | T      | PLEX8 |       |
| 1.43E-01 | 0 0 | Cs2g12320.1/Cs2g123 | 6    | 0 | 0    | 2 | MASCOT | T      | PLEX8 |       |
| 8.23E-02 | 0 0 | Cs2g12320.1/Cs2g123 | 8.75 | 0 | 0    | 2 | MASCOT | T      | PLEX8 |       |
| 4.41E-02 | 0 0 | Cs2g12320.1/Cs2g123 | 8.75 | 0 | 0    | 2 | MASCOT | T      | PLEX8 |       |
| 1.20E-01 | 0 0 | Cs2g12320.1/Cs2g123 | 8.75 | 0 | 0    | 2 | MASCOT | T      | PLEX8 |       |
| 4.99E-02 | 0 0 | Cs2g19440.1/Cs2g194 | 6.05 | 0 | 0    | 2 | MASCOT | T      | PLEX8 |       |
| 1.70E-01 | 0 0 | Cs2g19440.1/Cs2g194 | 6.05 | 0 | 0    | 2 | MASCOT | T      | PLEX8 |       |
| 2.82E-01 | 0 0 | Cs2g19440.1/Cs2g194 | 4.53 | 0 | 0    | 2 | MASCOT | T      |       |       |
| 8.52E-02 | 0 0 | Cs2g19440.1/Cs2g194 | 4.53 | 0 | 0    | 2 | MASCOT | T      |       |       |
| 1.65E-01 | 0 0 | Cs2g19440.1/Cs2g194 | 4.53 | 0 | 0    | 2 | MASCOT | T      |       |       |
| 3.54E-01 | 0 0 | Cs2g19440.1/Cs2g194 | 6.74 | 0 | 0    | 2 | MASCOT | T      | PLEX8 |       |
| 2.36E-01 | 0 0 | Cs2g19440.1/Cs2g194 | 6.74 | 0 | 0    | 2 | MASCOT | T      | PLEX8 |       |
| 2.58E-02 | 0 0 | Cs2g19440.1/Cs2g194 | 6.74 | 0 | 0    | 2 | MASCOT | T      | PLEX8 |       |
| 2.35E-01 | 0 0 | Cs2g19440.1/Cs2g194 | 6.74 | 0 | 0    | 2 | MASCOT | T      | PLEX8 |       |
| 2.45E-02 | 0 0 | Cs2g19440.1/Cs2g194 | 6.74 | 0 | 0    | 2 | MASCOT | T      |       |       |
| 9.57E-03 | 0 0 | Cs2g19440.1/Cs2g194 | 4.37 | 0 | 0    | 2 | MASCOT | T      | PLEX8 |       |
| 2.60E-02 | 0 0 | Cs2g19440.1/Cs2g194 | 4.37 | 0 | 0    | 2 | MASCOT | T      | PLEX8 |       |
| 2.66E-03 | 0 0 | Cs2g19440.1/Cs2g194 | 4.14 | 0 | 0    | 2 | MASCOT | T      |       |       |
| 4.41E-03 | 0 0 | Cs2g19440.1/Cs2g194 | 4.14 | 0 | 0    | 2 | MASCOT | T      |       |       |
| 1.95E-01 | 0 0 | Cs2g19440.1/Cs2g194 | 5.84 | 0 | 15.9 | 0 | 2      | MASCOT | T     | PLEX8 |
| 5.98E-06 | 0 0 | Cs3g18030.1/Cs3g180 | 4.37 | 0 | 0    | 2 | MASCOT | T      | PLEX8 |       |
| 3.11E-02 | 0 0 | Cs3g18030.1/Cs3g180 | 6.05 | 0 | 0    | 2 | MASCOT | T      | PLEX8 |       |
| 6.69E-03 | 0 0 | Cs3g18030.1/Cs3g180 | 8.75 | 0 | 0    | 2 | MASCOT | T      | PLEX8 |       |
| 5.35E-03 | 0 0 | Cs3g18030.1/Cs3g180 | 8.75 | 0 | 0    | 2 | MASCOT | T      | PLEX8 |       |
| 1.65E-03 | 0 0 | Cs3g18030.1/Cs3g180 | 8.75 | 0 | 0    | 2 | MASCOT | T      | PLEX8 |       |
| 1.05E-01 | 0 0 | Cs3g18030.1/Cs3g180 | 8.75 | 0 | 0    | 2 | MASCOT | T      | PLEX8 |       |
| 2.52E-02 | 0 0 | Cs3g18030.1/Cs3g180 | 8.75 | 0 | 0    | 2 | MASCOT | T      |       |       |
| 5.18E-02 | 0 0 | Cs1g19830.1/Cs1g198 | 9.76 | 0 | 0    | 2 | MASCOT | T      | PLEX8 |       |
| 1.43E-01 | 0 0 | Cs1g19830.1/Cs1g198 | 9.76 | 0 | 0    | 2 | MASCOT | T      | PLEX8 |       |
| 2.17E-01 | 0 0 | Cs1g19830.1/Cs1g198 | 9.76 | 0 | 0    | 2 | MASCOT | T      |       |       |
| 6.67E-02 | 0 0 | Cs3g18030.1/Cs3g180 | 8.79 | 0 | 15.9 | 0 | 2      | MASCOT | T     | PLEX8 |
| 1.60E-04 | 0 0 | Cs3g18030.1/Cs3g180 | 8.79 | 0 | 0    | 2 | MASCOT | T      | PLEX8 |       |
| 7.73E-03 | 0 0 | Cs3g18030.1/Cs3g180 | 8.79 | 0 | 0    | 2 | MASCOT | T      | PLEX8 |       |
| 1.17E-02 | 0 0 | Cs1g19830.1/Cs3g180 | 6.91 | 0 | 0    | 2 | MASCOT | T      | PLEX8 |       |
| 5.42E-03 | 0 0 | Cs1g19830.1/Cs3g180 | 6.91 | 0 | 0    | 2 | MASCOT | T      | PLEX8 |       |
| 3.77E-02 | 0 0 | Cs1g10550.1/Cs4g042 | 8.8  | 0 | 0    | 2 | MASCOT | T      | PLEX8 |       |
| 1.08E-01 | 0 0 | Cs1g10550.1/Cs4g042 | 8.8  | 0 | 0    | 2 | MASCOT | T      | PLEX8 |       |
| 1.52E-01 | 0 0 | Cs1g10550.1/Cs4g042 | 6.1  | 0 | 0    | 2 | MASCOT | T      | PLEX8 |       |
| 1.02E-02 | 0 0 | Cs1g10550.1/Cs4g042 | 6.1  | 0 | 0    | 2 | MASCOT | T      | PLEX8 |       |
| 9.95E-02 | 0 0 | Cs4g04280.1/Cs4g042 | 6    | 0 | 0    | 2 | MASCOT | T      | PLEX8 |       |
| 3.47E-03 | 0 0 | Cs4g04280.1/Cs4g042 | 6    | 0 | 0    | 2 | MASCOT | T      | PLEX8 |       |
| 4.16E-02 | 0 0 | Cs4g04280.1/Cs4g042 | 6    | 0 | 0    | 2 | MASCOT | T      | PLEX8 |       |
| 3.93E-03 | 0 0 | Cs1g10550.1/Cs4g042 | 5.32 | 0 | 0    | 2 | MASCOT | T      | PLEX8 |       |
| 1.01E-02 | 0 0 | Cs1g10550.1/Cs4g042 | 5.32 | 0 | 0    | 2 | MASCOT | T      |       |       |
| 1.03E-01 | 0 0 | Cs1g10550.1/Cs1g105 | 8.75 | 0 | 0    | 2 | MASCOT | T      | PLEX8 |       |
| 5.74E-04 | 0 0 | Cs1g10550.1/Cs1g105 | 8.75 | 0 | 0    | 2 | MASCOT | T      | PLEX8 |       |
| 3.45E-02 | 0 0 | Cs1g10550.1/Cs1g105 | 8.75 | 0 | 0    | 2 | MASCOT | T      | PLEX8 |       |

|          |     |                     |      |   |      |   |        |        |       |       |
|----------|-----|---------------------|------|---|------|---|--------|--------|-------|-------|
| 2.10E-04 | 0 0 | Cs1g10550.1/Cs1g105 | 5.97 | 0 | 0    | 2 | MASCOT | T      | PLEX8 |       |
| 1.95E-02 | 0 0 | Cs1g10550.1/Cs1g105 | 5.97 | 0 | 0    | 2 | MASCOT | T      | PLEX8 |       |
| 3.56E-03 | 0 0 | Cs1g10550.1/Cs1g105 | 5.97 | 0 | 0    | 2 | MASCOT | T      | PLEX8 |       |
| 2.91E-01 | 0 0 | Cs5g15160.1/Cs5g151 | 4.37 | 0 | 0    | 2 | MASCOT | T      | PLEX8 |       |
| 1.68E-01 | 0 0 | Cs5g15170.1         | 4.53 | 0 | 0    | 2 | MASCOT | T      | PLEX8 |       |
| 3.53E-01 | 0 0 | Cs5g15170.1         | 4.53 | 0 | 0    | 2 | MASCOT | T      | PLEX8 |       |
| 1.34E-01 | 0 0 | Cs5g15160.1/Cs5g151 | 4.25 | 0 | 0    | 2 | MASCOT | T      | PLEX8 |       |
| 1.25E-01 | 0 0 | Cs5g15160.1/Cs5g151 | 4.25 | 0 | 0    | 2 | MASCOT | T      | PLEX8 |       |
| 5.50E-02 | 0 0 | Cs5g15160.1/Cs5g151 | 4.25 | 0 | 0    | 2 | MASCOT | T      | PLEX8 |       |
| 2.20E-01 | 0 0 | Cs1g08610.1/Cs7g141 | 6    | 0 | 0    | 2 | MASCOT | T      | PLEX8 |       |
| 3.40E-01 | 0 0 | Cs1g08610.1/Cs7g141 | 6    | 0 | 0    | 2 | MASCOT | T      | PLEX8 |       |
| 3.44E-03 | 0 0 | Cs5g15160.1/Cs5g151 | 8.49 | 0 | 15.9 | 0 | 2      | MASCOT | T     | PLEX8 |
| 5.17E-02 | 0 0 | Cs5g15160.1/Cs5g151 | 8.49 | 0 | 15.9 | 0 | 2      | MASCOT | T     | PLEX8 |
| 1.23E-03 | 0 0 | Cs5g15160.1/Cs5g151 | 8.49 | 0 | 15.9 | 0 | 2      | MASCOT | T     | PLEX8 |
| 3.23E-05 | 0 0 | Cs5g15160.1/Cs5g151 | 8.49 | 0 | 0    | 2 | MASCOT | T      | PLEX8 |       |
| 4.87E-02 | 0 0 | Cs5g15160.1/Cs5g151 | 8.49 | 0 | 0    | 2 | MASCOT | T      | PLEX8 |       |
| 7.80E-02 | 0 0 | Cs5g15160.1/Cs5g151 | 8.49 | 0 | 0    | 2 | MASCOT | T      | PLEX8 |       |
| 3.83E-01 | 0 0 | Cs5g15170.1/Cs5g151 | 4.21 | 0 | 0    | 2 | MASCOT | T      |       |       |
| 3.04E-02 | 0 0 | Cs2g30490.1         | 5.84 | 0 | 0    | 2 | MASCOT | T      | PLEX8 |       |
| 5.85E-03 | 0 0 | Cs2g30490.1         | 4.79 | 1 | 0    | 2 | MASCOT | T      | PLEX8 |       |
| 8.55E-04 | 0 0 | Cs2g30490.1         | 4.25 | 0 | 0    | 2 | MASCOT | T      | PLEX8 |       |
| 3.70E-01 | 0 0 | Cs2g30490.1         | 4.25 | 0 | 0    | 2 | MASCOT | T      | PLEX8 |       |
| 1.69E-02 | 0 0 | Cs2g30490.1/Cs7g021 | 4.21 | 0 | 0    | 2 | MASCOT | T      | PLEX8 |       |
| 3.14E-04 | 0 0 | Cs2g30490.1/Cs7g021 | 4.21 | 0 | 0    | 2 | MASCOT | T      | PLEX8 |       |
| 3.16E-02 | 0 0 | Cs2g30490.1/Cs7g021 | 4.21 | 0 | 0    | 2 | MASCOT | T      |       |       |
| 1.29E-01 | 0 0 | Cs2g30490.1         | 8.49 | 0 | 0    | 2 | MASCOT | T      |       |       |
| 2.14E-04 | 0 0 | Cs2g30490.1/Cs7g021 | 6    | 0 | 0    | 2 | MASCOT | T      |       |       |
| 2.95E-02 | 0 0 | Cs2g30490.1/Cs7g021 | 6    | 0 | 0    | 2 | MASCOT | T      |       |       |
| 1.16E-03 | 0 0 | Cs2g30490.1/Cs7g021 | 6    | 0 | 0    | 2 | MASCOT | T      |       |       |
| 1.85E-06 | 0 0 | Cs2g30490.1/Cs7g021 | 6    | 0 | 0    | 2 | MASCOT | T      |       |       |
| 1.72E-04 | 0 0 | Cs2g30490.1/Cs7g021 | 6    | 0 | 0    | 2 | MASCOT | T      | PLEX8 |       |
| 9.68E-04 | 0 0 | Cs2g30490.1/Cs7g021 | 6    | 0 | 0    | 2 | MASCOT | T      | PLEX8 |       |
| 2.14E-01 | 0 0 | Cs3g18830.1/Cs3g188 | 4    | 0 | 0    | 2 | MASCOT | T      | PLEX8 |       |
| 3.20E-02 | 0 0 | Cs3g18830.1/Cs3g188 | 4    | 0 | 0    | 2 | MASCOT | T      | PLEX8 |       |
| 4.86E-02 | 0 0 | Cs3g18830.1/Cs3g188 | 4.54 | 0 | 15.9 | 0 | 2      | MASCOT | T     | PLEX8 |
| 4.35E-02 | 0 0 | Cs3g18830.1/Cs3g188 | 4.54 | 0 | 15.9 | 0 | 2      | MASCOT | T     | PLEX8 |
| 2.49E-04 | 0 0 | Cs3g18830.1/Cs3g188 | 4.54 | 0 | 15.9 | 0 | 2      | MASCOT | T     | PLEX8 |
| 1.48E-01 | 0 0 | Cs3g18830.1/Cs3g188 | 4.54 | 0 | 15.9 | 0 | 2      | MASCOT | T     | PLEX8 |
| 6.60E-02 | 0 0 | Cs3g18830.1/Cs3g188 | 5.5  | 0 | 0    | 2 | MASCOT | T      |       |       |
| 3.82E-02 | 0 0 | Cs3g18830.1/Cs3g188 | 3.92 | 0 | 15.9 | 0 | 2      | MASCOT | T     | PLEX8 |
| 4.55E-02 | 0 0 | Cs3g18830.1/Cs3g188 | 3.92 | 0 | 15.9 | 0 | 2      | MASCOT | T     | PLEX8 |
| 4.04E-03 | 0 0 | Cs3g18830.1/Cs3g188 | 3.92 | 0 | 0    | 2 | MASCOT | T      | PLEX8 |       |
| 1.50E-02 | 0 0 | Cs3g18830.1/Cs3g188 | 3.92 | 0 | 0    | 2 | MASCOT | T      | PLEX8 |       |
| 3.82E-02 | 0 0 | Cs3g18830.2         | 4.54 | 0 | 0    | 2 | MASCOT | T      | PLEX8 |       |
| 7.62E-02 | 0 0 | Cs3g18830.2         | 4.54 | 0 | 0    | 2 | MASCOT | T      | PLEX8 |       |
| 1.05E-01 | 0 0 | Cs3g18830.2         | 3.92 | 0 | 0    | 2 | MASCOT | T      | PLEX8 |       |
| 1.66E-02 | 0 0 | Cs7g31800.1/Cs7g318 | 4.53 | 0 | 0    | 2 | MASCOT | T      |       |       |
| 1.93E-01 | 0 0 | Cs7g31800.1/Cs7g318 | 8.76 | 0 | 0    | 2 | MASCOT | T      | PLEX8 |       |
| 9.19E-02 | 0 0 | Cs7g31800.1/Cs7g318 | 8.75 | 0 | 0    | 2 | MASCOT | T      | PLEX8 |       |
| 2.67E-02 | 0 0 | Cs6g06660.1/Cs6g066 | 5.72 | 0 | 0    | 2 | MASCOT | T      | PLEX8 |       |
| 1.49E-01 | 0 0 | Cs6g06660.1/Cs6g066 | 5.72 | 0 | 0    | 2 | MASCOT | T      | PLEX8 |       |

|          |     |                     |      |   |      |   |        |        |       |       |
|----------|-----|---------------------|------|---|------|---|--------|--------|-------|-------|
| 2.20E-01 | 0 0 | Cs6g06660.1/Cs6g066 | 5.72 | 0 | 0    | 2 | MASCOT | T      | PLEX8 |       |
| 1.29E-01 | 0 0 | Cs6g06660.1/Cs6g066 | 5.72 | 0 | 0    | 2 | MASCOT | T      | PLEX8 |       |
| 1.07E-01 | 0 0 | Cs6g06660.1/Cs6g066 | 5.72 | 0 | 0    | 2 | MASCOT | T      | PLEX8 |       |
| 2.67E-02 | 0 0 | Cs6g06660.1/Cs6g066 | 5.72 | 0 | 0    | 2 | MASCOT | T      | PLEX8 |       |
| 1.53E-02 | 0 0 | Cs6g06660.1/Cs6g066 | 5.72 | 0 | 0    | 2 | MASCOT | T      | PLEX8 |       |
| 1.15E-02 | 0 0 | Cs6g06660.1/Cs6g066 | 8.72 | 0 | 0    | 2 | MASCOT | T      | PLEX8 |       |
| 8.42E-02 | 0 0 | Cs6g06660.1/Cs6g066 | 4.03 | 0 | 0    | 2 | MASCOT | T      | PLEX8 |       |
| 8.82E-02 | 0 0 | Cs6g06660.1/Cs6g066 | 4.03 | 0 | 0    | 2 | MASCOT | T      |       |       |
| 9.75E-02 | 0 0 | Cs6g06660.1/Cs6g066 | 4.03 | 0 | 0    | 2 | MASCOT | T      | PLEX8 |       |
| 4.73E-03 | 0 0 | orange1.1t01775.1   | 4.03 | 0 | 0    | 2 | MASCOT | T      | PLEX8 |       |
| 1.71E-01 | 0 0 | orange1.1t01775.1   | 4.03 | 0 | 0    | 2 | MASCOT | T      | PLEX8 |       |
| 2.38E-02 | 0 0 | orange1.1t01775.1   | 4.14 | 0 | 0    | 2 | MASCOT | T      |       |       |
| 2.09E-02 | 0 0 | orange1.1t01775.1   | 6.74 | 0 | 0    | 2 | MASCOT | T      | PLEX8 |       |
| 3.33E-03 | 0 0 | orange1.1t01775.1   | 6.74 | 0 | 0    | 2 | MASCOT | T      | PLEX8 |       |
| 2.99E-01 | 0 0 | orange1.1t01775.1   | 6.74 | 0 | 0    | 2 | MASCOT | T      | PLEX8 |       |
| 7.82E-04 | 0 0 | orange1.1t01775.1   | 6.74 | 0 | 0    | 2 | MASCOT | T      | PLEX8 |       |
| 1.63E-02 | 0 0 | orange1.1t01775.1   | 6.74 | 0 | 0    | 2 | MASCOT | T      | PLEX8 |       |
| 2.13E-04 | 0 0 | orange1.1t01775.1   | 4.14 | 0 | 0    | 2 | MASCOT | T      |       |       |
| 2.01E-03 | 0 0 | orange1.1t01775.1   | 4.14 | 0 | 0    | 2 | MASCOT | T      |       |       |
| 3.73E-01 | 0 0 | orange1.1t01775.1   | 4.54 | 0 | 0    | 2 | MASCOT | T      | PLEX8 |       |
| 3.61E-02 | 0 0 | orange1.1t01775.1   | 4.54 | 0 | 0    | 2 | MASCOT | T      | PLEX8 |       |
| 1.93E-01 | 0 0 | orange1.1t01775.1   | 4.54 | 0 | 0    | 2 | MASCOT | T      | PLEX8 |       |
| 7.13E-03 | 0 0 | orange1.1t01775.1   | 4.14 | 0 | 0    | 2 | MASCOT | T      | PLEX8 |       |
| 3.19E-01 | 0 0 | Cs1g21030.1/Cs1g210 | 6.1  | 0 | 0    | 2 | MASCOT | T      | PLEX8 |       |
| 3.46E-01 | 0 0 | Cs1g21030.1/Cs1g210 | 6.1  | 0 | 0    | 2 | MASCOT | T      | PLEX8 |       |
| 1.96E-02 | 0 0 | Cs1g21030.1/Cs1g210 | 5.66 | 0 | 0    | 2 | MASCOT | T      | PLEX8 |       |
| 2.49E-02 | 0 0 | Cs1g21030.1/Cs1g210 | 5.66 | 0 | 0    | 2 | MASCOT | T      | PLEX8 |       |
| 2.49E-01 | 0 0 | Cs1g21030.1/Cs1g210 | 5.66 | 0 | 0    | 2 | MASCOT | T      | PLEX8 |       |
| 2.98E-01 | 0 0 | Cs1g21030.1/Cs1g210 | 5.66 | 0 | 0    | 2 | MASCOT | T      | PLEX8 |       |
| 1.50E-05 | 0 0 | Cs1g21030.1/Cs1g210 | 4.37 | 0 | 0    | 2 | MASCOT | T      |       |       |
| 6.18E-06 | 0 0 | Cs1g21030.1/Cs1g210 | 4.21 | 0 | 0    | 2 | MASCOT | T      | PLEX8 |       |
| 1.08E-04 | 0 0 | Cs1g21030.1/Cs1g210 | 4.21 | 0 | 0    | 2 | MASCOT | T      | PLEX8 |       |
| 2.68E-01 | 0 0 | Cs1g21030.1/Cs1g210 | 4.21 | 0 | 0    | 2 | MASCOT | T      | PLEX8 |       |
| 6.54E-03 | 0 0 | Cs1g21030.1/Cs1g210 | 4.53 | 0 | 0    | 2 | MASCOT | T      | PLEX8 |       |
| 2.70E-01 | 0 0 | Cs1g21030.1/Cs1g210 | 5.84 | 0 | 15.9 | 0 | 2      | MASCOT | T     |       |
| 1.42E-01 | 0 0 | Cs1g21030.1/Cs1g210 | 5.84 | 0 | 0    | 2 | MASCOT | T      |       |       |
| 6.17E-02 | 0 0 | Cs2g24620.1/Cs2g246 | 9.75 | 0 | 15.9 | 0 | 2      | MASCOT | T     |       |
| 5.24E-03 | 0 0 | Cs2g24620.1/Cs2g246 | 9.75 | 0 | 0    | 2 | MASCOT | T      |       |       |
| 9.56E-03 | 0 0 | Cs2g24620.1/Cs2g246 | 9.75 | 0 | 0    | 2 | MASCOT | T      |       |       |
| 1.04E-02 | 0 0 | Cs2g24620.1/Cs2g246 | 4.53 | 0 | 0    | 2 | MASCOT | T      | PLEX8 |       |
| 2.30E-02 | 0 0 | Cs2g24620.1/Cs2g246 | 5.97 | 0 | 0    | 2 | MASCOT | T      | PLEX8 |       |
| 1.51E-01 | 0 0 | Cs2g24620.1/Cs2g246 | 5.97 | 0 | 0    | 2 | MASCOT | T      | PLEX8 |       |
| 1.98E-02 | 0 0 | Cs2g24620.1/Cs2g246 | 5.97 | 0 | 0    | 2 | MASCOT | T      | PLEX8 |       |
| 1.32E-04 | 0 0 | Cs2g24620.1/Cs2g246 | 4.09 | 0 | 0    | 2 | MASCOT | T      | PLEX8 |       |
| 1.36E-01 | 0 0 | Cs2g24620.1/Cs2g246 | 5.88 | 0 | 0    | 2 | MASCOT | T      | PLEX8 |       |
| 1.52E-01 | 0 0 | Cs2g24620.1/Cs2g246 | 5.88 | 0 | 0    | 2 | MASCOT | T      | PLEX8 |       |
| 4.09E-01 | 0 0 | Cs2g24620.1/Cs2g246 | 8.33 | 0 | 0    | 2 | MASCOT | T      | PLEX8 |       |
| 1.67E-01 | 0 0 | Cs2g24620.1/Cs2g246 | 8.33 | 0 | 0    | 2 | MASCOT | T      |       |       |
| 3.24E-01 | 0 0 | Cs2g24620.1/Cs2g246 | 8.33 | 0 | 0    | 2 | MASCOT | T      |       |       |
| 2.70E-01 | 0 0 | Cs3g19600.1/Cs3g196 | 6.1  | 0 | 0    | 2 | MASCOT | T      | PLEX8 |       |
| 1.00E-02 | 0 0 | Cs3g19600.1/Cs3g196 | 5.32 | 0 | 15.9 | 0 | 2      | MASCOT | T     | PLEX8 |

|          |     |                     |      |        |   |   |        |   |       |
|----------|-----|---------------------|------|--------|---|---|--------|---|-------|
| 5.28E-02 | 0 0 | Cs3g19600.1/Cs3g196 | 5.32 | 0      | 0 | 2 | MASCOT | T | PLEX8 |
| 1.51E-03 | 0 0 | Cs3g19600.1/Cs3g196 | 5.32 | 0      | 0 | 2 | MASCOT | T |       |
| 2.17E-02 | 0 0 | Cs3g19600.1/Cs3g196 | 6.75 | 0      | 0 | 2 | MASCOT | T | PLEX8 |
| 4.57E-02 | 0 0 | Cs3g19600.1/Cs3g196 | 6.75 | 0      | 0 | 2 | MASCOT | T | PLEX8 |
| 1.54E-04 | 0 0 | Cs3g19600.1/Cs3g196 | 4.21 | 0      | 0 | 2 | MASCOT | T |       |
| 1.15E-02 | 0 0 | Cs3g19600.1/Cs3g196 | 5.32 | 0      | 0 | 2 | MASCOT | T | PLEX8 |
| 9.51E-04 | 0 0 | Cs3g19600.1/Cs3g196 | 5.32 | 0      | 0 | 2 | MASCOT | T | PLEX8 |
| 1.25E-01 | 0 0 | Cs3g19600.1/Cs3g196 | 5.32 | 0      | 0 | 2 | MASCOT | T | PLEX8 |
| 3.62E-02 | 0 0 | Cs3g19600.1/Cs3g196 | 5.32 | 0      | 0 | 2 | MASCOT | T |       |
| 4.58E-05 | 0 0 | Cs3g19600.1/Cs3g196 | 5.32 | 0      | 0 | 2 | MASCOT | T |       |
| 5.04E-02 | 0 0 | Cs3g19600.1/Cs3g196 | 5.81 | 0      | 0 | 2 | MASCOT | T |       |
| 3.88E-01 | 0 0 | Cs3g25060.1/Cs3g250 | 6.79 | 0      | 0 | 2 | MASCOT | T | PLEX8 |
| 1.46E-01 | 0 0 | Cs3g25060.1/Cs3g250 | 7.92 | 0      | 0 | 2 | MASCOT | T | PLEX8 |
| 3.53E-01 | 0 0 | Cs3g25060.1/Cs3g250 | 7.92 | 0      | 0 | 2 | MASCOT | T | PLEX8 |
| 9.75E-02 | 0 0 | Cs3g25060.1/Cs3g250 | 7.92 | 0      | 0 | 2 | MASCOT | T | PLEX8 |
| 2.22E-01 | 0 0 | Cs3g25060.1/Cs3g250 | 4.41 | 0      | 0 | 2 | MASCOT | T | PLEX8 |
| 2.41E-02 | 0 0 | Cs3g25060.1/Cs3g250 | 4.41 | 0      | 0 | 2 | MASCOT | T | PLEX8 |
| 1.52E-05 | 0 0 | Cs3g25060.1/Cs3g250 | 4.41 | 0      | 0 | 2 | MASCOT | T | PLEX8 |
| 8.15E-03 | 0 0 | Cs3g25060.1/Cs3g250 | 4.41 | 0      | 0 | 2 | MASCOT | T | PLEX8 |
| 1.04E-02 | 0 0 | Cs3g25060.1/Cs3g250 | 4.53 | 0      | 0 | 2 | MASCOT | T | PLEX8 |
| 1.23E-02 | 0 0 | Cs3g25060.1/Cs3g250 | 4.53 | 0      | 0 | 2 | MASCOT | T | PLEX8 |
| 2.66E-02 | 0 0 | Cs3g25060.1/Cs3g250 | 4.53 | 0      | 0 | 2 | MASCOT | T | PLEX8 |
| 9.65E-02 | 0 0 | Cs3g25060.1/Cs3g250 | 5.84 | 0      | 0 | 2 | MASCOT | T | PLEX8 |
| 6.23E-02 | 0 0 | Cs3g25060.1/Cs3g250 | 5.84 | 0      | 0 | 2 | MASCOT | T | PLEX8 |
| 1.44E-02 | 0 0 | Cs7g27610.1         | 4.25 | 0      | 0 | 2 | MASCOT | T | PLEX8 |
| 1.54E-02 | 0 0 | Cs7g27610.1         | 4.25 | 0      | 0 | 2 | MASCOT | T | PLEX8 |
| 3.00E-03 | 0 0 | Cs7g27610.1         | 4.37 | 0      | 0 | 2 | MASCOT | T | PLEX8 |
| 1.08E-01 | 0 0 | Cs7g27610.1         | 4.37 | 0      | 0 | 2 | MASCOT | T |       |
| 8.23E-05 | 0 0 | Cs7g27610.1         | 4.25 | 0      | 0 | 2 | MASCOT | T | PLEX8 |
| 2.34E-03 | 0 0 | Cs7g27610.1         | 4.25 | 0      | 0 | 2 | MASCOT | T | PLEX8 |
| 2.94E-02 | 0 0 | Cs7g27610.1         | 4.25 | 0      | 0 | 2 | MASCOT | T | PLEX8 |
| 7.43E-02 | 0 0 | Cs7g27610.1         | 4.25 | 0      | 0 | 2 | MASCOT | T | PLEX8 |
| 1.21E-03 | 0 0 | Cs7g27610.1         | 4.53 | 0      | 0 | 2 | MASCOT | T | PLEX8 |
| 6.90E-02 | 0 0 | Cs7g27610.1         | 4.37 | 0      | 0 | 2 | MASCOT | T | PLEX8 |
| 1.33E-03 | 0 0 | Cs7g27610.1         | 4.37 | 0      | 0 | 2 | MASCOT | T | PLEX8 |
| 1.39E-01 | 0 0 | Cs7g27610.1         | 4.37 | 0      | 0 | 2 | MASCOT | T | PLEX8 |
| 1.01E-01 | 0 0 | Cs7g27610.1         | 4.37 | 0      | 0 | 2 | MASCOT | T | PLEX8 |
| 5.99E-02 | 0 0 | Cs9g17130.1         | 4.14 | 0      | 0 | 2 | MASCOT | T | PLEX8 |
| 2.28E-01 | 0 0 | Cs9g17130.1         | 4.14 | 0      | 0 | 2 | MASCOT | T | PLEX8 |
| 2.76E-01 | 0 0 | Cs9g17130.1         | 4.14 | 0      | 0 | 2 | MASCOT | T | PLEX8 |
| 5.45E-02 | 0 0 | Cs9g17130.1         | 4.14 | 0      | 0 | 2 | MASCOT | T | PLEX8 |
| 7.06E-02 | 0 0 | Cs9g17130.1         | 4.37 | 0      | 0 | 2 | MASCOT | T | PLEX8 |
| 6.36E-03 | 0 0 | Cs9g17130.1         | 4.37 | 0      | 0 | 2 | MASCOT | T | PLEX8 |
| 3.12E-02 | 0 0 | Cs9g17130.1         | 10   | 0      | 0 | 2 | MASCOT | T | PLEX8 |
| 5.62E-02 | 0 0 | Cs9g17130.1         | 10   | 0      | 0 | 2 | MASCOT | T | PLEX8 |
| 1.31E-01 | 0 0 | Cs9g17130.1         | 5.55 | 0      | 0 | 2 | MASCOT | T | PLEX8 |
| 8.05E-04 | 0 0 | Cs9g17130.1         | 4.14 | 0      | 0 | 2 | MASCOT | T |       |
| 4.36E-07 | 0 0 | Cs9g17130.1         | 4.14 | 0      | 0 | 2 | MASCOT | T |       |
| 3.60E-02 | 0 0 | Cs9g17130.1         | 8.25 | 0 15.9 | 0 | 2 | MASCOT | T | PLEX8 |
| 1.13E-02 | 0 0 | Cs9g17130.1         | 8.25 | 0      | 0 | 2 | MASCOT | T | PLEX8 |
| 1.52E-02 | 0 0 | gij 113952607       | 4.37 | 0      | 0 | 2 | MASCOT | T | PLEX8 |

|              |                       |      |        |   |   |        |         |
|--------------|-----------------------|------|--------|---|---|--------|---------|
| 8.11E-02 0 0 | gi 113952607          | 6.05 | 0      | 0 | 2 | MASCOT | T       |
| 1.40E-02 0 0 | gi 113952607          | 6.05 | 0      | 0 | 2 | MASCOT | T       |
| 2.68E-01 0 0 | gi 113952607          | 6.05 | 0      | 0 | 2 | MASCOT | T       |
| 1.29E-03 0 0 | gi 113952607          | 5.32 | 0      | 0 | 2 | MASCOT | T PLEX8 |
| 2.27E-04 0 0 | gi 113952607          | 5.32 | 0      | 0 | 2 | MASCOT | T PLEX8 |
| 6.46E-03 0 0 | gi 113952607          | 5.32 | 0      | 0 | 2 | MASCOT | T PLEX8 |
| 1.75E-01 0 0 | gi 113952607          | 4.37 | 0      | 0 | 2 | MASCOT | T PLEX8 |
| 4.04E-02 0 0 | gi 113952607          | 4.53 | 0      | 0 | 2 | MASCOT | T PLEX8 |
| 2.05E-01 0 0 | gi 113952607          | 8.72 | 0      | 0 | 2 | MASCOT | T PLEX8 |
| 7.89E-02 0 0 | gi 113952607          | 8.72 | 0      | 0 | 2 | MASCOT | T PLEX8 |
| 1.15E-01 0 0 | gi 113952607          | 8.72 | 0      | 0 | 2 | MASCOT | T PLEX8 |
| 4.09E-01 0 0 | gi 113952607          | 8.72 | 0      | 0 | 2 | MASCOT | T PLEX8 |
| 1.57E-01 0 0 | orange1.1t02570.1/ora | 8.63 | 0      | 0 | 2 | MASCOT | T PLEX8 |
| 3.65E-03 0 0 | orange1.1t02570.1/ora | 8.63 | 0      | 0 | 2 | MASCOT | T PLEX8 |
| 1.29E-02 0 0 | orange1.1t02570.1/ora | 8.63 | 0      | 0 | 2 | MASCOT | T PLEX8 |
| 1.09E-01 0 0 | orange1.1t02570.1/ora | 8.63 | 0      | 0 | 2 | MASCOT | T PLEX8 |
| 1.70E-04 0 0 | orange1.1t02570.1/ora | 4.25 | 1      | 0 | 2 | MASCOT | T PLEX8 |
| 2.47E-01 0 0 | orange1.1t02570.1/ora | 5.4  | 0      | 0 | 2 | MASCOT | T       |
| 1.61E-02 0 0 | orange1.1t02570.1/ora | 4.37 | 0      | 0 | 2 | MASCOT | T PLEX8 |
| 1.39E-02 0 0 | orange1.1t02570.1/ora | 4.37 | 0      | 0 | 2 | MASCOT | T PLEX8 |
| 2.15E-02 0 0 | orange1.1t02570.1/ora | 4.37 | 0      | 0 | 2 | MASCOT | T PLEX8 |
| 2.56E-02 0 0 | orange1.1t02570.1/ora | 5.99 | 0      | 0 | 2 | MASCOT | T PLEX8 |
| 2.11E-01 0 0 | orange1.1t02570.1/ora | 5.99 | 0      | 0 | 2 | MASCOT | T PLEX8 |
| 3.17E-01 0 0 | orange1.1t02570.1/ora | 4.25 | 0      | 0 | 2 | MASCOT | T PLEX8 |
| 3.67E-04 0 0 | orange1.1t02570.1/ora | 4.25 | 0      | 0 | 2 | MASCOT | T PLEX8 |
| 4.52E-03 0 0 | orange1.1t03464.1     | 4.21 | 0      | 0 | 2 | MASCOT | T       |
| 6.85E-02 0 0 | orange1.1t03464.1     | 6.1  | 0      | 0 | 2 | MASCOT | T PLEX8 |
| 5.66E-02 0 0 | orange1.1t03464.1     | 6.1  | 0      | 0 | 2 | MASCOT | T PLEX8 |
| 1.49E-01 0 0 | orange1.1t03464.1     | 6.1  | 0      | 0 | 2 | MASCOT | T PLEX8 |
| 7.71E-02 0 0 | orange1.1t03464.1     | 6.1  | 0      | 0 | 2 | MASCOT | T PLEX8 |
| 2.44E-01 0 0 | orange1.1t03464.1     | 6.1  | 0      | 0 | 2 | MASCOT | T PLEX8 |
| 2.93E-01 0 0 | orange1.1t03464.1     | 5.4  | 0      | 0 | 2 | MASCOT | T PLEX8 |
| 3.37E-04 0 0 | orange1.1t03464.1     | 5.4  | 0      | 0 | 2 | MASCOT | T PLEX8 |
| 7.19E-02 0 0 | orange1.1t03464.1     | 5.4  | 0      | 0 | 2 | MASCOT | T PLEX8 |
| 7.80E-07 0 0 | orange1.1t03464.1     | 8.07 | 0      | 0 | 2 | MASCOT | T       |
| 1.75E-01 0 0 | orange1.1t03464.1     | 4.53 | 0      | 0 | 2 | MASCOT | T PLEX8 |
| 2.18E-01 0 0 | orange1.1t03464.1     | 4.53 | 0      | 0 | 2 | MASCOT | T PLEX8 |
| 1.07E-02 0 0 | orange1.1t03464.1     | 6.74 | 0      | 0 | 2 | MASCOT | T       |
| 3.52E-02 0 0 | Cs1g08920.1           | 5.84 | 0 15.9 | 0 | 2 | MASCOT | T       |
| 1.92E-03 0 0 | Cs1g08920.1           | 5.84 | 0 15.9 | 0 | 2 | MASCOT | T       |
| 4.16E-01 0 0 | Cs1g08920.1           | 5.84 | 0      | 0 | 2 | MASCOT | T PLEX8 |
| 2.05E-02 0 0 | Cs1g08920.1           | 5.84 | 0      | 0 | 2 | MASCOT | T PLEX8 |
| 2.49E-02 0 0 | Cs1g08920.1           | 5.84 | 0      | 0 | 2 | MASCOT | T PLEX8 |
| 3.91E-01 0 0 | Cs1g08920.1           | 5.72 | 0      | 0 | 2 | MASCOT | T PLEX8 |
| 8.58E-03 0 0 | Cs1g08920.1           | 5.72 | 0      | 0 | 2 | MASCOT | T PLEX8 |
| 4.49E-02 0 0 | Cs1g08920.1           | 6.79 | 0      | 0 | 2 | MASCOT | T       |
| 7.86E-02 0 0 | Cs1g08920.1           | 5.21 | 0      | 0 | 2 | MASCOT | T PLEX8 |
| 1.75E-02 0 0 | Cs1g08920.1           | 5.21 | 0      | 0 | 2 | MASCOT | T PLEX8 |
| 3.56E-02 0 0 | Cs1g08920.1           | 4.4  | 0 15.9 | 0 | 2 | MASCOT | T PLEX8 |
| 9.84E-03 0 0 | Cs1g08920.1           | 4.4  | 0      | 0 | 2 | MASCOT | T PLEX8 |
| 9.68E-02 0 0 | Cs3g15750.1           | 6.85 | 0      | 0 | 2 | MASCOT | T       |

|          |     |                     |      |   |      |   |        |        |       |       |
|----------|-----|---------------------|------|---|------|---|--------|--------|-------|-------|
| 2.33E-01 | 0 0 | Cs3g15750.1         | 6.75 | 0 | 0    | 2 | MASCOT | T      | PLEX8 |       |
| 1.11E-01 | 0 0 | Cs3g15750.1         | 6.75 | 0 | 0    | 2 | MASCOT | T      |       |       |
| 3.61E-02 | 0 0 | Cs3g15750.1         | 6.75 | 0 | 0    | 2 | MASCOT | T      | PLEX8 |       |
| 8.26E-03 | 0 0 | Cs3g15750.1         | 6.75 | 0 | 0    | 2 | MASCOT | T      | PLEX8 |       |
| 6.25E-02 | 0 0 | Cs3g15750.1         | 6.75 | 0 | 0    | 2 | MASCOT | T      | PLEX8 |       |
| 1.25E-02 | 0 0 | Cs3g15750.1         | 6.75 | 0 | 0    | 2 | MASCOT | T      | PLEX8 |       |
| 4.51E-03 | 0 0 | Cs3g15750.1         | 4.37 | 0 | 0    | 2 | MASCOT | T      | PLEX8 |       |
| 8.05E-02 | 0 0 | Cs3g15750.1         | 5.84 | 0 | 0    | 2 | MASCOT | T      | PLEX8 |       |
| 2.51E-02 | 0 0 | Cs3g15750.1         | 5.84 | 0 | 0    | 2 | MASCOT | T      | PLEX8 |       |
| 6.42E-02 | 0 0 | Cs3g15750.1         | 4.53 | 0 | 0    | 2 | MASCOT | T      | PLEX8 |       |
| 2.33E-03 | 0 0 | Cs3g15750.1         | 4.53 | 0 | 0    | 2 | MASCOT | T      | PLEX8 |       |
| 1.17E-02 | 0 0 | Cs3g23880.1/Cs3g238 | 4.25 | 0 | 0    | 2 | MASCOT | T      | PLEX8 |       |
| 7.18E-04 | 0 0 | Cs3g23880.1/Cs3g238 | 4.25 | 0 | 0    | 2 | MASCOT | T      | PLEX8 |       |
| 2.28E-02 | 0 0 | Cs3g23880.1/Cs3g238 | 5.83 | 0 | 0    | 2 | MASCOT | T      | PLEX8 |       |
| 5.25E-03 | 0 0 | Cs3g23880.1/Cs3g238 | 5.83 | 0 | 0    | 2 | MASCOT | T      | PLEX8 |       |
| 1.85E-01 | 0 0 | Cs3g23880.1/Cs3g238 | 8.2  | 0 | 0    | 2 | MASCOT | T      | PLEX8 |       |
| 2.96E-02 | 0 0 | Cs3g23880.1/Cs3g238 | 8.2  | 0 | 0    | 2 | MASCOT | T      | PLEX8 |       |
| 3.12E-02 | 0 0 | Cs3g23880.1/Cs3g238 | 8.2  | 0 | 0    | 2 | MASCOT | T      | PLEX8 |       |
| 1.16E-02 | 0 0 | Cs3g23880.1/Cs3g238 | 6    | 0 | 0    | 2 | MASCOT | T      | PLEX8 |       |
| 2.31E-01 | 0 0 | Cs3g23880.1/Cs3g238 | 4.22 | 0 | 0    | 2 | MASCOT | T      | PLEX8 |       |
| 7.98E-04 | 0 0 | Cs3g23880.1/Cs3g238 | 4.22 | 0 | 0    | 2 | MASCOT | T      |       |       |
| 4.49E-02 | 0 0 | Cs3g23880.1/Cs3g238 | 5.99 | 0 | 0    | 2 | MASCOT | T      | PLEX8 |       |
| 6.05E-03 | 0 0 | Cs3g23880.1/Cs3g238 | 5.99 | 0 | 0    | 2 | MASCOT | T      |       |       |
| 7.45E-03 | 0 0 | Cs5g27960.1/Cs5g279 | 4.37 | 0 | 0    | 2 | MASCOT | T      | PLEX8 |       |
| 4.63E-03 | 0 0 | Cs5g27960.1/Cs5g279 | 4.37 | 0 | 0    | 2 | MASCOT | T      | PLEX8 |       |
| 1.12E-02 | 0 0 | Cs5g27960.1         | 5.84 | 0 | 0    | 2 | MASCOT | T      |       |       |
| 2.32E-04 | 0 0 | Cs5g27960.1         | 5.84 | 0 | 0    | 2 | MASCOT | T      | PLEX8 |       |
| 3.15E-03 | 0 0 | Cs5g27960.1         | 5.84 | 0 | 0    | 2 | MASCOT | T      | PLEX8 |       |
| 1.59E-02 | 0 0 | Cs5g27960.1/Cs5g279 | 8.19 | 0 | 0    | 2 | MASCOT | T      | PLEX8 |       |
| 1.85E-01 | 0 0 | Cs5g27960.1/Cs5g279 | 8.76 | 0 | 0    | 2 | MASCOT | T      | PLEX8 |       |
| 4.04E-01 | 0 0 | Cs5g27960.1/Cs5g279 | 8.76 | 0 | 0    | 2 | MASCOT | T      | PLEX8 |       |
| 1.06E-01 | 0 0 | Cs5g27960.1/Cs5g279 | 8.75 | 0 | 0    | 2 | MASCOT | T      | PLEX8 |       |
| 3.82E-02 | 0 0 | Cs5g27960.1/Cs5g279 | 5.59 | 0 | 0    | 2 | MASCOT | T      | PLEX8 |       |
| 2.18E-02 | 0 0 | Cs5g27960.1/Cs5g279 | 5.59 | 0 | 0    | 2 | MASCOT | T      | PLEX8 |       |
| 1.17E-01 | 0 0 | Cs5g27960.1/Cs5g279 | 5.59 | 0 | 0    | 2 | MASCOT | T      | PLEX8 |       |
| 7.32E-02 | 0 0 | Cs6g17920.1         | 5.88 | 0 | 0    | 2 | MASCOT | T      | PLEX8 |       |
| 8.87E-03 | 0 0 | Cs6g17920.1         | 5.88 | 0 | 0    | 2 | MASCOT | T      | PLEX8 |       |
| 2.73E-02 | 0 0 | Cs6g17920.1         | 5.45 | 1 | 0    | 2 | MASCOT | T      | PLEX8 |       |
| 7.28E-03 | 0 0 | Cs6g17920.1         | 4.65 | 0 | 0    | 2 | MASCOT | T      | PLEX8 |       |
| 1.37E-03 | 0 0 | Cs6g17920.1         | 4.03 | 0 | 0    | 2 | MASCOT | T      | PLEX8 |       |
| 1.37E-01 | 0 0 | Cs6g17920.1         | 6.85 | 0 | 0    | 2 | MASCOT | T      |       |       |
| 2.13E-01 | 0 0 | Cs6g17920.1         | 6.85 | 0 | 0    | 2 | MASCOT | T      |       |       |
| 1.79E-02 | 0 0 | Cs6g17920.1         | 8.73 | 0 | 15.9 | 0 | 2      | MASCOT | T     | PLEX8 |
| 6.81E-03 | 0 0 | Cs6g17920.1         | 8.73 | 0 | 15.9 | 0 | 2      | MASCOT | T     | PLEX8 |
| 3.16E-02 | 0 0 | Cs6g17920.1         | 8.73 | 0 | 0    | 2 | MASCOT | T      | PLEX8 |       |
| 9.15E-03 | 0 0 | Cs6g17920.1         | 8.73 | 0 | 0    | 2 | MASCOT | T      | PLEX8 |       |
| 9.43E-03 | 0 0 | Cs6g17920.1         | 8.73 | 0 | 0    | 2 | MASCOT | T      | PLEX8 |       |
| 1.59E-01 | 0 0 | Cs7g06680.1/Cs7g066 | 5.84 | 0 | 0    | 2 | MASCOT | T      | PLEX8 |       |
| 2.21E-01 | 0 0 | Cs7g06680.1/Cs7g066 | 5.84 | 0 | 0    | 2 | MASCOT | T      | PLEX8 |       |
| 4.97E-02 | 0 0 | Cs7g06680.1/Cs7g066 | 4.37 | 0 | 0    | 2 | MASCOT | T      | PLEX8 |       |
| 1.51E-02 | 0 0 | Cs7g06680.1/Cs7g066 | 4.41 | 1 | 0    | 2 | MASCOT | T      | PLEX8 |       |

|          |     |                       |      |        |   |   |        |   |       |
|----------|-----|-----------------------|------|--------|---|---|--------|---|-------|
| 3.09E-06 | 0 0 | Cs7g06680.1/Cs7g066   | 4.41 | 1      | 0 | 2 | MASCOT | T | PLEX8 |
| 1.21E-02 | 0 0 | Cs7g06680.1/Cs7g066   | 4.41 | 1      | 0 | 2 | MASCOT | T | PLEX8 |
| 4.00E-03 | 0 0 | Cs7g06680.1/Cs7g066   | 4.41 | 1      | 0 | 2 | MASCOT | T | PLEX8 |
| 4.09E-02 | 0 0 | Cs7g06680.1           | 6.72 | 0      | 0 | 2 | MASCOT | T | PLEX8 |
| 9.10E-02 | 0 0 | Cs7g06680.1/Cs7g066   | 6    | 0      | 0 | 2 | MASCOT | T | PLEX8 |
| 3.53E-01 | 0 0 | Cs7g06680.1/Cs7g066   | 8.24 | 0      | 0 | 2 | MASCOT | T | PLEX8 |
| 2.12E-01 | 0 0 | Cs7g06680.1/Cs7g066   | 8.24 | 0      | 0 | 2 | MASCOT | T | PLEX8 |
| 2.76E-01 | 0 0 | Cs7g06680.1/Cs7g066   | 8.24 | 0      | 0 | 2 | MASCOT | T | PLEX8 |
| 7.75E-04 | 0 0 | Cs7g23510.1/Cs7g235   | 4.41 | 1      | 0 | 2 | MASCOT | T | PLEX8 |
| 3.57E-04 | 0 0 | Cs7g23510.1/Cs7g235   | 4.41 | 1      | 0 | 2 | MASCOT | T | PLEX8 |
| 9.18E-03 | 0 0 | Cs7g23510.1/Cs7g235   | 4.53 | 0      | 0 | 2 | MASCOT | T | PLEX8 |
| 1.12E-01 | 0 0 | Cs7g23510.1/Cs7g235   | 4.53 | 0      | 0 | 2 | MASCOT | T | PLEX8 |
| 1.60E-01 | 0 0 | Cs1g03500.1 ! Cs7g23  | 6    | 0      | 0 | 2 | MASCOT | T | PLEX8 |
| 2.69E-02 | 0 0 | Cs1g03500.1 ! Cs7g23  | 6    | 0      | 0 | 2 | MASCOT | T | PLEX8 |
| 2.57E-01 | 0 0 | Cs1g03500.1 ! Cs7g23  | 6    | 0      | 0 | 2 | MASCOT | T | PLEX8 |
| 5.48E-02 | 0 0 | Cs1g03500.1 ! Cs7g23  | 6    | 0      | 0 | 2 | MASCOT | T | PLEX8 |
| 4.87E-02 | 0 0 | Cs1g03500.1 ! Cs7g23  | 6    | 0      | 0 | 2 | MASCOT | T | PLEX8 |
| 3.28E-03 | 0 0 | Cs7g23510.1/Cs7g235   | 3.92 | 0      | 0 | 2 | MASCOT | T | PLEX8 |
| 3.12E-01 | 0 0 | Cs7g23510.1/Cs7g235   | 5.32 | 0      | 0 | 2 | MASCOT | T | PLEX8 |
| 1.18E-01 | 0 0 | Cs7g23510.1/Cs7g235   | 6.75 | 1      | 0 | 2 | MASCOT | T | PLEX8 |
| 1.89E-02 | 0 0 | orange1.1t01588.1/ora | 4.37 | 0      | 0 | 2 | MASCOT | T | PLEX8 |
| 2.53E-04 | 0 0 | orange1.1t01588.1/ora | 4.37 | 0      | 0 | 2 | MASCOT | T | PLEX8 |
| 2.40E-02 | 0 0 | orange1.1t01588.1/ora | 4.37 | 0      | 0 | 2 | MASCOT | T | PLEX8 |
| 1.76E-05 | 0 0 | orange1.1t01588.1/ora | 8.79 | 0      | 0 | 2 | MASCOT | T | PLEX8 |
| 1.42E-01 | 0 0 | orange1.1t01588.1/ora | 8.79 | 0      | 0 | 2 | MASCOT | T | PLEX8 |
| 4.48E-02 | 0 0 | orange1.1t01588.1/ora | 3.84 | 0      | 0 | 2 | MASCOT | T | PLEX8 |
| 8.90E-02 | 0 0 | orange1.1t01588.1/ora | 6.14 | 1      | 0 | 2 | MASCOT | T | PLEX8 |
| 8.67E-02 | 0 0 | orange1.1t01588.1/ora | 9.75 | 0      | 0 | 2 | MASCOT | T | PLEX8 |
| 6.39E-03 | 0 0 | orange1.1t01588.1/ora | 6    | 0      | 0 | 2 | MASCOT | T | PLEX8 |
| 5.79E-02 | 0 0 | orange1.1t01588.1/ora | 6    | 0      | 0 | 2 | MASCOT | T | PLEX8 |
| 9.05E-04 | 0 0 | orange1.1t01588.1/ora | 6    | 0      | 0 | 2 | MASCOT | T | PLEX8 |
| 8.31E-02 | 0 0 | orange1.1t01588.1/ora | 6    | 0      | 0 | 2 | MASCOT | T | PLEX8 |
| 4.67E-04 | 0 0 | orange1.1t04543.1/ora | 5.21 | 0      | 0 | 2 | MASCOT | T | PLEX8 |
| 1.61E-01 | 0 0 | orange1.1t04543.1/ora | 5.21 | 0      | 0 | 2 | MASCOT | T | PLEX8 |
| 3.31E-03 | 0 0 | orange1.1t04543.1/ora | 8.76 | 0      | 0 | 2 | MASCOT | T | PLEX8 |
| 9.31E-04 | 0 0 | orange1.1t04543.1/ora | 8.76 | 0      | 0 | 2 | MASCOT | T | PLEX8 |
| 6.80E-02 | 0 0 | orange1.1t04543.1/ora | 8.76 | 0      | 0 | 2 | MASCOT | T | PLEX8 |
| 4.99E-02 | 0 0 | orange1.1t04543.1/ora | 4.11 | 1      | 0 | 2 | MASCOT | T | PLEX8 |
| 8.07E-03 | 0 0 | orange1.1t04543.1/ora | 4.13 | 0      | 0 | 2 | MASCOT | T | PLEX8 |
| 4.23E-02 | 0 0 | orange1.1t04543.1/ora | 4.03 | 0      | 0 | 2 | MASCOT | T | PLEX8 |
| 4.40E-02 | 0 0 | orange1.1t04543.1/ora | 4.03 | 0      | 0 | 2 | MASCOT | T | PLEX8 |
| 6.99E-03 | 0 0 | orange1.1t04543.1/ora | 4.03 | 0      | 0 | 2 | MASCOT | T | PLEX8 |
| 2.18E-02 | 0 0 | orange1.1t04543.1/ora | 4.03 | 0      | 0 | 2 | MASCOT | T | PLEX8 |
| 3.54E-03 | 0 0 | orange1.1t04543.1/ora | 4.03 | 0      | 0 | 2 | MASCOT | T | PLEX8 |
| 1.72E-01 | 0 0 | Cs2g05100.1/Cs2g051   | 5.83 | 0      | 0 | 2 | MASCOT | T | PLEX8 |
| 3.66E-02 | 0 0 | Cs2g05100.1/Cs2g051   | 6.85 | 0      | 0 | 2 | MASCOT | T | PLEX8 |
| 8.23E-02 | 0 0 | Cs2g05100.1/Cs2g051   | 6.85 | 0      | 0 | 2 | MASCOT | T | PLEX8 |
| 1.53E-01 | 0 0 | Cs2g05100.1/Cs2g051   | 9.76 | 0 15.9 | 0 | 2 | MASCOT | T | PLEX8 |
| 2.56E-02 | 0 0 | Cs2g05100.1/Cs2g051   | 5.55 | 0      | 0 | 2 | MASCOT | T | PLEX8 |
| 3.83E-01 | 0 0 | Cs2g05100.1/Cs2g051   | 5.19 | 0      | 0 | 2 | MASCOT | T | PLEX8 |
| 2.75E-03 | 0 0 | Cs2g05100.1/Cs2g051   | 5.19 | 0      | 0 | 2 | MASCOT | T | PLEX8 |

|          |     |                     |      |   |      |   |        |        |       |       |
|----------|-----|---------------------|------|---|------|---|--------|--------|-------|-------|
| 4.25E-04 | 0 0 | Cs2g05100.1/Cs2g051 | 5.19 | 0 | 0    | 2 | MASCOT | T      | PLEX8 |       |
| 1.45E-03 | 0 0 | Cs2g05100.1/Cs2g051 | 5.19 | 0 | 0    | 2 | MASCOT | T      | PLEX8 |       |
| 4.79E-04 | 0 0 | Cs2g05100.1/Cs2g051 | 5.19 | 0 | 0    | 2 | MASCOT | T      | PLEX8 |       |
| 3.23E-02 | 0 0 | Cs2g05100.1/Cs2g051 | 4.37 | 0 | 0    | 2 | MASCOT | T      | PLEX8 |       |
| 2.62E-02 | 0 0 | Cs5g08520.1         | 6    | 0 | 0    | 2 | MASCOT | T      | PLEX8 |       |
| 3.26E-01 | 0 0 | Cs5g08520.1/Cs5g085 | 8.59 | 0 | 0    | 2 | MASCOT | T      | PLEX8 |       |
| 1.29E-02 | 0 0 | Cs5g08520.1/Cs5g085 | 6.74 | 0 | 0    | 2 | MASCOT | T      | PLEX8 |       |
| 1.82E-01 | 0 0 | Cs5g08520.1/Cs5g085 | 6.74 | 0 | 0    | 2 | MASCOT | T      |       |       |
| 2.49E-02 | 0 0 | Cs5g08520.1/Cs5g085 | 6.74 | 0 | 0    | 2 | MASCOT | T      | PLEX8 |       |
| 1.95E-03 | 0 0 | Cs5g08520.1/Cs5g085 | 6.74 | 0 | 0    | 2 | MASCOT | T      |       |       |
| 6.46E-02 | 0 0 | Cs5g08520.1/Cs5g085 | 5.21 | 0 | 0    | 2 | MASCOT | T      | PLEX8 |       |
| 1.05E-03 | 0 0 | Cs5g08520.1/Cs5g085 | 5.32 | 0 | 0    | 2 | MASCOT | T      | PLEX8 |       |
| 1.34E-02 | 0 0 | Cs5g08520.1/Cs5g085 | 5.32 | 0 | 0    | 2 | MASCOT | T      | PLEX8 |       |
| 1.76E-02 | 0 0 | Cs5g08520.1/Cs5g085 | 5.32 | 0 | 0    | 2 | MASCOT | T      |       |       |
| 2.12E-03 | 0 0 | Cs5g08520.1/Cs5g085 | 5.84 | 0 | 0    | 2 | MASCOT | T      |       |       |
| 1.03E-01 | 0 0 | Cs5g14770.1/Cs5g147 | 5.21 | 0 | 0    | 2 | MASCOT | T      | PLEX8 |       |
| 4.82E-04 | 0 0 | Cs5g14770.1/Cs5g147 | 5.21 | 0 | 0    | 2 | MASCOT | T      | PLEX8 |       |
| 1.00E-02 | 0 0 | Cs5g14770.1/Cs5g147 | 5.21 | 0 | 0    | 2 | MASCOT | T      | PLEX8 |       |
| 4.70E-01 | 0 0 | Cs5g14770.1/Cs5g147 | 5.21 | 0 | 0    | 2 | MASCOT | T      | PLEX8 |       |
| 2.82E-01 | 0 0 | Cs5g14770.1/Cs5g147 | 5.21 | 0 | 0    | 2 | MASCOT | T      | PLEX8 |       |
| 8.88E-04 | 0 0 | Cs5g14770.1/Cs5g147 | 4.53 | 0 | 0    | 2 | MASCOT | T      |       |       |
| 1.66E-01 | 0 0 | Cs5g14770.1         | 5.72 | 0 | 15.9 | 0 | 2      | MASCOT | T     | PLEX8 |
| 5.29E-02 | 0 0 | Cs5g14770.1         | 5.72 | 0 | 0    | 2 | MASCOT | T      | PLEX8 |       |
| 2.57E-01 | 0 0 | Cs5g14770.1/Cs5g147 | 8.49 | 0 | 0    | 2 | MASCOT | T      | PLEX8 |       |
| 2.66E-03 | 0 0 | Cs5g14770.1/Cs5g147 | 5.32 | 0 | 0    | 2 | MASCOT | T      | PLEX8 |       |
| 1.73E-01 | 0 0 | Cs5g14770.1/Cs5g147 | 5.32 | 0 | 0    | 2 | MASCOT | T      |       |       |
| 7.17E-02 | 0 0 | Cs5g18090.1/Cs8g032 | 8.63 | 0 | 0    | 2 | MASCOT | T      | PLEX8 |       |
| 3.19E-01 | 0 0 | Cs1g21030.1/Cs1g210 | 6.1  | 0 | 0    | 2 | MASCOT | T      | PLEX8 |       |
| 3.46E-01 | 0 0 | Cs1g21030.1/Cs1g210 | 6.1  | 0 | 0    | 2 | MASCOT | T      | PLEX8 |       |
| 1.96E-02 | 0 0 | Cs1g21030.1/Cs1g210 | 5.66 | 0 | 0    | 2 | MASCOT | T      | PLEX8 |       |
| 2.49E-02 | 0 0 | Cs1g21030.1/Cs1g210 | 5.66 | 0 | 0    | 2 | MASCOT | T      | PLEX8 |       |
| 2.49E-01 | 0 0 | Cs1g21030.1/Cs1g210 | 5.66 | 0 | 0    | 2 | MASCOT | T      | PLEX8 |       |
| 2.98E-01 | 0 0 | Cs1g21030.1/Cs1g210 | 5.66 | 0 | 0    | 2 | MASCOT | T      | PLEX8 |       |
| 1.50E-05 | 0 0 | Cs1g21030.1/Cs1g210 | 4.37 | 0 | 0    | 2 | MASCOT | T      |       |       |
| 6.54E-03 | 0 0 | Cs1g21030.1/Cs1g210 | 4.53 | 0 | 0    | 2 | MASCOT | T      | PLEX8 |       |
| 2.70E-01 | 0 0 | Cs1g21030.1/Cs1g210 | 5.84 | 0 | 15.9 | 0 | 2      | MASCOT | T     |       |
| 1.42E-01 | 0 0 | Cs1g21030.1/Cs1g210 | 5.84 | 0 | 0    | 2 | MASCOT | T      |       |       |
| 3.01E-03 | 0 0 | Cs8g07530.1/Cs8g075 | 4.14 | 0 | 0    | 2 | MASCOT | T      | PLEX8 |       |
| 1.52E-01 | 0 0 | Cs8g07530.1/Cs8g075 | 4.37 | 0 | 0    | 2 | MASCOT | T      |       |       |
| 2.69E-04 | 0 0 | Cs8g07530.1/Cs8g075 | 4.37 | 0 | 0    | 2 | MASCOT | T      |       |       |
| 2.78E-05 | 0 0 | Cs8g07530.1/Cs8g075 | 5.08 | 0 | 0    | 2 | MASCOT | T      | PLEX8 |       |
| 2.77E-02 | 0 0 | Cs8g07530.1/Cs8g075 | 5.08 | 0 | 0    | 2 | MASCOT | T      |       |       |
| 1.99E-03 | 0 0 | Cs8g07530.1/Cs8g075 | 5.88 | 0 | 0    | 2 | MASCOT | T      | PLEX8 |       |
| 1.78E-06 | 0 0 | Cs8g07530.1/Cs8g075 | 5.88 | 0 | 0    | 2 | MASCOT | T      | PLEX8 |       |
| 2.05E-05 | 0 0 | Cs8g07530.1/Cs8g075 | 5.88 | 0 | 0    | 2 | MASCOT | T      | PLEX8 |       |
| 1.14E-02 | 0 0 | Cs8g07530.1/Cs8g075 | 5.88 | 0 | 0    | 2 | MASCOT | T      | PLEX8 |       |
| 3.55E-04 | 0 0 | Cs8g07530.1/Cs8g075 | 4.03 | 0 | 0    | 2 | MASCOT | T      |       |       |
| 8.89E-02 | 0 0 | Cs8g07530.1/Cs8g075 | 4.53 | 0 | 0    | 2 | MASCOT | T      | PLEX8 |       |
| 2.50E-03 | 0 0 | Cs8g10180.1         | 4.37 | 0 | 0    | 2 | MASCOT | T      |       |       |
| 3.73E-02 | 0 0 | Cs8g10110.1/Cs8g101 | 6    | 0 | 0    | 2 | MASCOT | T      | PLEX8 |       |
| 3.12E-02 | 0 0 | Cs8g10110.1/Cs8g101 | 6    | 0 | 0    | 2 | MASCOT | T      | PLEX8 |       |



|          |     |                     |      |   |      |   |        |        |       |       |
|----------|-----|---------------------|------|---|------|---|--------|--------|-------|-------|
| 1.34E-01 | 0 0 | Cs8g10180.1         | 4.53 | 0 | 0    | 2 | MASCOT | T      |       |       |
| 5.26E-02 | 0 0 | Cs8g10180.1         | 4.53 | 0 | 0    | 2 | MASCOT | T      | PLEX8 |       |
| 5.18E-03 | 0 0 | Cs8g07290.1/Cs8g072 | 6    | 0 | 0    | 2 | MASCOT | T      |       |       |
| 2.32E-01 | 0 0 | Cs8g07290.1/Cs8g072 | 6    | 0 | 0    | 2 | MASCOT | T      | PLEX8 |       |
| 1.11E-01 | 0 0 | Cs8g07290.1/Cs8g072 | 6.04 | 0 | 0    | 2 | MASCOT | T      | PLEX8 |       |
| 2.33E-01 | 0 0 | Cs8g07290.1/Cs8g072 | 6.04 | 0 | 0    | 2 | MASCOT | T      | PLEX8 |       |
| 9.30E-02 | 0 0 | Cs8g07290.1/Cs8g072 | 6.04 | 0 | 0    | 2 | MASCOT | T      | PLEX8 |       |
| 4.98E-02 | 0 0 | Cs3g10600.1/Cs3g106 | 4.41 | 0 | 0    | 2 | MASCOT | T      | PLEX8 |       |
| 2.51E-02 | 0 0 | Cs9g04170.1         | 8.8  | 0 | 0    | 2 | MASCOT | T      | PLEX8 |       |
| 4.46E-02 | 0 0 | Cs9g04170.1         | 8.8  | 0 | 0    | 2 | MASCOT | T      | PLEX8 |       |
| 4.88E-02 | 0 0 | Cs9g04170.1         | 8.8  | 0 | 0    | 2 | MASCOT | T      | PLEX8 |       |
| 3.81E-02 | 0 0 | Cs9g04170.1         | 8.8  | 0 | 0    | 2 | MASCOT | T      | PLEX8 |       |
| 5.36E-03 | 0 0 | Cs9g04170.1/Cs9g041 | 4.37 | 0 | 0    | 2 | MASCOT | T      | PLEX8 |       |
| 5.70E-02 | 0 0 | Cs9g04170.1/Cs9g041 | 4.37 | 0 | 0    | 2 | MASCOT | T      | PLEX8 |       |
| 8.52E-02 | 0 0 | Cs9g04170.1/Cs9g041 | 4.37 | 0 | 0    | 2 | MASCOT | T      | PLEX8 |       |
| 1.46E-01 | 0 0 | Cs9g04170.1/Cs9g041 | 6    | 0 | 0    | 2 | MASCOT | T      | PLEX8 |       |
| 3.37E-01 | 0 0 | Cs9g04170.1/Cs9g041 | 5.32 | 0 | 0    | 2 | MASCOT | T      | PLEX8 |       |
| 1.11E-03 | 0 0 | Cs9g04170.1/Cs9g041 | 5.32 | 0 | 0    | 2 | MASCOT | T      |       |       |
| 1.36E-02 | 0 0 | Cs9g04170.1/Cs9g041 | 4.21 | 0 | 0    | 2 | MASCOT | T      |       |       |
| 1.30E-01 | 0 0 | Cs2g14120.1         | 8.8  | 0 | 0    | 2 | MASCOT | T      | PLEX8 |       |
| 1.59E-01 | 0 0 | Cs2g14120.1         | 5.32 | 0 | 0    | 2 | MASCOT | T      | PLEX8 |       |
| 1.35E-01 | 0 0 | Cs2g14120.1         | 4.41 | 0 | 0    | 2 | MASCOT | T      |       |       |
| 1.41E-05 | 0 0 | Cs2g14120.1         | 4.41 | 0 | 0    | 2 | MASCOT | T      | PLEX8 |       |
| 7.08E-04 | 0 0 | Cs2g14120.1         | 4.41 | 0 | 0    | 2 | MASCOT | T      |       |       |
| 4.55E-03 | 0 0 | Cs2g14120.1         | 4.41 | 0 | 0    | 2 | MASCOT | T      |       |       |
| 5.58E-02 | 0 0 | Cs2g14120.1         | 9.76 | 0 | 15.9 | 0 | 2      | MASCOT | T     | PLEX8 |
| 1.79E-02 | 0 0 | Cs2g14120.1         | 8.59 | 0 | 0    | 2 | MASCOT | T      | PLEX8 |       |
| 5.77E-04 | 0 0 | Cs2g14120.1         | 4.25 | 0 | 0    | 2 | MASCOT | T      | PLEX8 |       |
| 7.24E-02 | 0 0 | Cs2g14120.1         | 4.25 | 0 | 0    | 2 | MASCOT | T      | PLEX8 |       |
| 1.35E-01 | 0 0 | Cs2g23290.1/Cs2g232 | 6.85 | 0 | 0    | 2 | MASCOT | T      | PLEX8 |       |
| 4.30E-02 | 0 0 | Cs2g23290.1/Cs2g232 | 6.85 | 0 | 0    | 2 | MASCOT | T      | PLEX8 |       |
| 1.76E-02 | 0 0 | Cs2g23290.1/Cs2g232 | 6.85 | 0 | 0    | 2 | MASCOT | T      |       |       |
| 9.66E-06 | 0 0 | Cs2g23290.1/Cs2g232 | 6.85 | 0 | 0    | 2 | MASCOT | T      | PLEX8 |       |
| 2.41E-05 | 0 0 | Cs2g23290.1/Cs2g232 | 5.32 | 0 | 0    | 2 | MASCOT | T      | PLEX8 |       |
| 2.92E-02 | 0 0 | Cs2g23290.1/Cs2g232 | 4.14 | 0 | 0    | 2 | MASCOT | T      | PLEX8 |       |
| 2.29E-01 | 0 0 | Cs2g23290.1/Cs2g232 | 4.14 | 0 | 0    | 2 | MASCOT | T      | PLEX8 |       |
| 2.66E-02 | 0 0 | Cs2g23290.1/Cs2g232 | 5.32 | 0 | 0    | 2 | MASCOT | T      | PLEX8 |       |
| 3.73E-02 | 0 0 | Cs2g23290.1/Cs2g232 | 10   | 1 | 0    | 2 | MASCOT | T      |       |       |
| 1.26E-05 | 0 0 | Cs2g23290.1/Cs2g232 | 9.75 | 0 | 0    | 2 | MASCOT | T      | PLEX8 |       |
| 6.37E-05 | 0 0 | Cs4g03750.1/Cs4g037 | 3.84 | 0 | 0    | 2 | MASCOT | T      | PLEX8 |       |
| 3.07E-01 | 0 0 | Cs4g03750.1/Cs4g037 | 5.99 | 0 | 0    | 2 | MASCOT | T      | PLEX8 |       |
| 4.44E-01 | 0 0 | Cs4g03750.1/Cs4g037 | 5.99 | 0 | 0    | 2 | MASCOT | T      | PLEX8 |       |
| 1.35E-01 | 0 0 | Cs4g03750.1/Cs4g037 | 5.99 | 0 | 0    | 2 | MASCOT | T      | PLEX8 |       |
| 4.13E-02 | 0 0 | Cs2g27270.1/Cs2g272 | 5.32 | 0 | 0    | 2 | MASCOT | T      | PLEX8 |       |
| 1.80E-02 | 0 0 | Cs2g27270.1/Cs2g272 | 5.32 | 0 | 0    | 2 | MASCOT | T      | PLEX8 |       |
| 1.73E-01 | 0 0 | Cs4g03750.1/Cs4g037 | 6.75 | 0 | 0    | 2 | MASCOT | T      |       |       |
| 2.41E-02 | 0 0 | Cs4g03750.1/Cs4g037 | 6.75 | 0 | 0    | 2 | MASCOT | T      | PLEX8 |       |
| 1.18E-01 | 0 0 | Cs4g03750.1/Cs4g037 | 4.65 | 0 | 0    | 2 | MASCOT | T      | PLEX8 |       |
| 1.80E-02 | 0 0 | Cs4g03750.1/Cs4g037 | 3.92 | 0 | 0    | 2 | MASCOT | T      |       |       |
| 2.26E-01 | 0 0 | Cs5g09380.1/Cs5g093 | 6    | 0 | 0    | 2 | MASCOT | T      | PLEX8 |       |
| 4.89E-03 | 0 0 | Cs5g09380.1/Cs5g093 | 4.03 | 0 | 15.9 | 0 | 2      | MASCOT | T     | PLEX8 |

|          |     |                      |      |   |      |   |        |        |       |       |
|----------|-----|----------------------|------|---|------|---|--------|--------|-------|-------|
| 2.89E-02 | 0 0 | Cs5g09380.1/Cs5g093  | 5.4  | 0 | 0    | 2 | MASCOT | T      | PLEX8 |       |
| 1.83E-03 | 0 0 | Cs5g09380.1/Cs5g093  | 4.53 | 0 | 0    | 2 | MASCOT | T      | PLEX8 |       |
| 1.39E-02 | 0 0 | Cs5g09380.1/Cs5g093  | 4.53 | 0 | 0    | 2 | MASCOT | T      | PLEX8 |       |
| 1.68E-01 | 0 0 | Cs5g09380.1/Cs5g093  | 4.53 | 0 | 0    | 2 | MASCOT | T      | PLEX8 |       |
| 4.44E-03 | 0 0 | Cs5g09380.1/Cs5g093  | 4.53 | 0 | 0    | 2 | MASCOT | T      | PLEX8 |       |
| 3.16E-02 | 0 0 | Cs5g09380.1/Cs5g093  | 6.75 | 0 | 0    | 2 | MASCOT | T      | PLEX8 |       |
| 1.86E-01 | 0 0 | Cs5g09380.1/Cs5g093  | 6.75 | 0 | 0    | 2 | MASCOT | T      | PLEX8 |       |
| 1.71E-05 | 0 0 | Cs5g09380.1/Cs5g093  | 4.37 | 0 | 0    | 2 | MASCOT | T      | PLEX8 |       |
| 6.06E-03 | 0 0 | Cs5g12250.1/Cs6g196  | 8.8  | 0 | 0    | 2 | MASCOT | T      | PLEX8 |       |
| 4.00E-02 | 0 0 | Cs5g12250.1/Cs6g196  | 8.8  | 0 | 0    | 2 | MASCOT | T      | PLEX8 |       |
| 3.63E-03 | 0 0 | Cs5g12250.1/Cs6g196  | 8.8  | 0 | 0    | 2 | MASCOT | T      | PLEX8 |       |
| 2.46E-02 | 0 0 | Cs5g12250.1/Cs5g122  | 5.4  | 0 | 0    | 2 | MASCOT | T      | PLEX8 |       |
| 2.70E-02 | 0 0 | Cs5g12250.1          | 6.71 | 0 | 0    | 2 | MASCOT | T      | PLEX8 |       |
| 2.42E-02 | 0 0 | Cs5g12250.1          | 6.71 | 0 | 0    | 2 | MASCOT | T      | PLEX8 |       |
| 6.43E-02 | 0 0 | Cs5g12250.1/Cs5g122  | 4.14 | 0 | 0    | 2 | MASCOT | T      | PLEX8 |       |
| 1.15E-03 | 0 0 | Cs5g12250.1/Cs5g122  | 3.93 | 0 | 0    | 2 | MASCOT | T      |       |       |
| 3.14E-01 | 0 0 | Cs5g12250.1/Cs5g122  | 5.84 | 0 | 0    | 2 | MASCOT | T      | PLEX8 |       |
| 6.48E-04 | 0 0 | Cs5g12250.1/Cs5g122  | 5.84 | 0 | 0    | 2 | MASCOT | T      | PLEX8 |       |
| 4.96E-04 | 0 0 | Cs5g15110.1          | 3.92 | 0 | 0    | 2 | MASCOT | T      | PLEX8 |       |
| 3.29E-02 | 0 0 | Cs5g15110.1          | 8.22 | 0 | 0    | 2 | MASCOT | T      | PLEX8 |       |
| 9.40E-02 | 0 0 | Cs5g15110.1          | 5.83 | 0 | 0    | 2 | MASCOT | T      |       |       |
| 2.15E-03 | 0 0 | Cs5g15110.1          | 5.83 | 0 | 0    | 2 | MASCOT | T      |       |       |
| 2.75E-02 | 0 0 | Cs5g15110.1          | 5.83 | 0 | 0    | 2 | MASCOT | T      |       |       |
| 4.10E-02 | 0 0 | Cs5g15110.1          | 5.83 | 0 | 0    | 2 | MASCOT | T      |       |       |
| 1.10E-02 | 0 0 | Cs5g15110.1          | 8.41 | 0 | 0    | 2 | MASCOT | T      | PLEX8 |       |
| 2.70E-02 | 0 0 | Cs5g15110.1          | 8.41 | 0 | 0    | 2 | MASCOT | T      | PLEX8 |       |
| 4.73E-02 | 0 0 | Cs5g15110.1          | 5.84 | 0 | 0    | 2 | MASCOT | T      | PLEX8 |       |
| 7.10E-02 | 0 0 | Cs5g15110.1          | 4.37 | 0 | 0    | 2 | MASCOT | T      | PLEX8 |       |
| 7.88E-02 | 0 0 | Cs7g04580.1/Cs7g046  | 4.03 | 0 | 0    | 2 | MASCOT | T      | PLEX8 |       |
| 2.69E-01 | 0 0 | Cs7g04600.1          | 8.75 | 0 | 0    | 2 | MASCOT | T      | PLEX8 |       |
| 1.45E-02 | 0 0 | Cs7g04600.1          | 4.37 | 0 | 0    | 2 | MASCOT | T      | PLEX8 |       |
| 3.18E-04 | 0 0 | Cs7g04600.1          | 4.37 | 0 | 0    | 2 | MASCOT | T      | PLEX8 |       |
| 2.68E-03 | 0 0 | Cs7g04580.1/Cs7g046  | 4.09 | 0 | 0    | 2 | MASCOT | T      | PLEX8 |       |
| 6.64E-05 | 0 0 | Cs7g04580.1/Cs7g046  | 4.09 | 0 | 0    | 2 | MASCOT | T      | PLEX8 |       |
| 3.34E-01 | 0 0 | Cs7g04580.1/Cs7g046  | 5.83 | 0 | 0    | 2 | MASCOT | T      | PLEX8 |       |
| 1.05E-01 | 0 0 | Cs7g04580.1/Cs7g046  | 5.83 | 0 | 0    | 2 | MASCOT | T      | PLEX8 |       |
| 1.67E-01 | 0 0 | Cs7g04580.1 ! Cs7g04 | 4.37 | 0 | 0    | 2 | MASCOT | T      | PLEX8 |       |
| 3.55E-01 | 0 0 | Cs7g04580.1 ! Cs7g04 | 4.37 | 0 | 0    | 2 | MASCOT | T      |       |       |
| 4.61E-04 | 0 0 | Cs8g17500.1/Cs8g175  | 4    | 0 | 0    | 2 | MASCOT | T      |       |       |
| 1.06E-04 | 0 0 | Cs8g17500.1          | 10   | 0 | 0    | 2 | MASCOT | T      | PLEX8 |       |
| 4.37E-04 | 0 0 | Cs8g17500.1          | 10   | 0 | 0    | 2 | MASCOT | T      | PLEX8 |       |
| 1.83E-02 | 0 0 | Cs8g17500.1/Cs8g175  | 4.53 | 0 | 15.9 | 0 | 2      | MASCOT | T     | PLEX8 |
| 5.33E-02 | 0 0 | Cs8g17500.1/Cs8g175  | 4.53 | 0 | 15.9 | 0 | 2      | MASCOT | T     | PLEX8 |
| 5.29E-02 | 0 0 | Cs8g17500.1/Cs8g175  | 4.37 | 0 | 0    | 2 | MASCOT | T      | PLEX8 |       |
| 3.27E-02 | 0 0 | Cs8g17500.1/Cs8g175  | 9.76 | 0 | 0    | 2 | MASCOT | T      | PLEX8 |       |
| 4.12E-02 | 0 0 | Cs8g17500.1/Cs8g175  | 9.76 | 0 | 0    | 2 | MASCOT | T      | PLEX8 |       |
| 7.55E-02 | 0 0 | Cs8g17500.1/Cs8g175  | 9.76 | 0 | 0    | 2 | MASCOT | T      | PLEX8 |       |
| 1.27E-01 | 0 0 | Cs8g17500.1/Cs8g175  | 8.59 | 0 | 0    | 2 | MASCOT | T      | PLEX8 |       |
| 2.89E-02 | 0 0 | Cs6g09140.1/Cs6g091  | 5.27 | 0 | 0    | 2 | MASCOT | T      |       |       |
| 5.63E-06 | 0 0 | Cs6g09140.1/Cs6g091  | 5.27 | 0 | 0    | 2 | MASCOT | T      | PLEX8 |       |
| 1.14E-02 | 0 0 | Cs6g09140.1/Cs6g091  | 5.27 | 0 | 0    | 2 | MASCOT | T      |       |       |

|          |     |                     |      |   |      |   |        |        |       |       |
|----------|-----|---------------------|------|---|------|---|--------|--------|-------|-------|
| 1.31E-04 | 0 0 | Cs6g09140.1/Cs6g091 | 5.27 | 0 | 0    | 2 | MASCOT | T      |       |       |
| 6.41E-02 | 0 0 | Cs6g09140.1/Cs6g091 | 4.53 | 0 | 0    | 2 | MASCOT | T      | PLEX8 |       |
| 5.77E-02 | 0 0 | Cs6g09140.1/Cs6g091 | 5.5  | 0 | 0    | 2 | MASCOT | T      |       |       |
| 2.02E-02 | 0 0 | Cs6g09140.1/Cs6g091 | 6.1  | 0 | 0    | 2 | MASCOT | T      |       |       |
| 2.89E-01 | 0 0 | Cs8g20680.1         | 6.74 | 0 | 0    | 2 | MASCOT | T      | PLEX8 |       |
| 1.30E-01 | 0 0 | Cs6g09140.1/Cs6g091 | 8.47 | 0 | 0    | 2 | MASCOT | T      | PLEX8 |       |
| 1.02E-01 | 0 0 | Cs6g09140.1/Cs6g091 | 8.47 | 0 | 0    | 2 | MASCOT | T      | PLEX8 |       |
| 1.39E-01 | 0 0 | Cs9g02340.1         | 5.84 | 0 | 0    | 2 | MASCOT | T      | PLEX8 |       |
| 2.40E-05 | 0 0 | Cs9g02340.1         | 8.25 | 0 | 0    | 2 | MASCOT | T      |       |       |
| 3.30E-02 | 0 0 | Cs9g02340.1         | 8.75 | 0 | 0    | 2 | MASCOT | T      | PLEX8 |       |
| 2.42E-02 | 0 0 | Cs9g02340.1         | 4.56 | 0 | 0    | 2 | MASCOT | T      | PLEX8 |       |
| 6.00E-02 | 0 0 | Cs9g02340.1         | 4.56 | 0 | 0    | 2 | MASCOT | T      |       |       |
| 3.92E-02 | 0 0 | Cs9g02340.1         | 4.65 | 0 | 0    | 2 | MASCOT | T      | PLEX8 |       |
| 2.96E-02 | 0 0 | Cs9g02340.1         | 4.65 | 0 | 0    | 2 | MASCOT | T      | PLEX8 |       |
| 9.60E-02 | 0 0 | Cs9g02340.1         | 4.65 | 0 | 0    | 2 | MASCOT | T      |       |       |
| 3.61E-03 | 0 0 | Cs9g02340.1         | 5.8  | 0 | 0    | 2 | MASCOT | T      | PLEX8 |       |
| 1.73E-05 | 0 0 | Cs9g02340.1         | 5.8  | 0 | 0    | 2 | MASCOT | T      | PLEX8 |       |
| 2.36E-01 | 0 0 | Cs1g17300.1         | 9.8  | 0 | 0    | 2 | MASCOT | T      | PLEX8 |       |
| 2.00E-01 | 0 0 | Cs1g17300.1/Cs1g173 | 6.91 | 0 | 0    | 2 | MASCOT | T      | PLEX8 |       |
| 1.92E-02 | 0 0 | Cs1g17300.1/Cs4g072 | 5.83 | 0 | 0    | 2 | MASCOT | T      | PLEX8 |       |
| 9.91E-02 | 0 0 | Cs1g17300.1/Cs1g173 | 4.25 | 0 | 0    | 2 | MASCOT | T      | PLEX8 |       |
| 1.16E-04 | 0 0 | Cs1g17300.1/Cs1g173 | 4.25 | 0 | 0    | 2 | MASCOT | T      | PLEX8 |       |
| 8.44E-04 | 0 0 | Cs1g17300.1/Cs1g173 | 4.25 | 0 | 0    | 2 | MASCOT | T      | PLEX8 |       |
| 1.50E-02 | 0 0 | Cs1g17300.1/Cs1g173 | 4.25 | 0 | 0    | 2 | MASCOT | T      | PLEX8 |       |
| 1.27E-01 | 0 0 | Cs1g17300.1/Cs1g173 | 4.37 | 0 | 15.9 | 0 | 2      | MASCOT | T     | PLEX8 |
| 2.87E-03 | 0 0 | Cs1g17300.1/Cs4g072 | 6.75 | 0 | 0    | 2 | MASCOT | T      | PLEX8 |       |
| 2.03E-02 | 0 0 | Cs4g04310.1         | 6.05 | 0 | 0    | 2 | MASCOT | T      | PLEX8 |       |
| 1.93E-02 | 0 0 | Cs4g04310.1         | 6.05 | 0 | 0    | 2 | MASCOT | T      | PLEX8 |       |
| 4.77E-03 | 0 0 | Cs4g04310.1         | 8.27 | 0 | 0    | 2 | MASCOT | T      | PLEX8 |       |
| 8.24E-03 | 0 0 | Cs4g04310.1         | 8.27 | 0 | 0    | 2 | MASCOT | T      | PLEX8 |       |
| 1.20E-02 | 0 0 | Cs4g04310.1         | 4.53 | 0 | 0    | 2 | MASCOT | T      |       |       |
| 1.46E-04 | 0 0 | Cs4g04310.1         | 4.31 | 0 | 0    | 2 | MASCOT | T      |       |       |
| 2.33E-04 | 0 0 | Cs4g04310.1         | 4.31 | 0 | 0    | 2 | MASCOT | T      |       |       |
| 1.54E-02 | 0 0 | Cs4g04310.1         | 5.99 | 0 | 0    | 2 | MASCOT | T      | PLEX8 |       |
| 6.46E-02 | 0 0 | Cs4g04310.1         | 4.53 | 0 | 0    | 2 | MASCOT | T      |       |       |
| 3.98E-04 | 0 0 | Cs5g07060.1         | 4.14 | 0 | 0    | 2 | MASCOT | T      | PLEX8 |       |
| 4.54E-02 | 0 0 | Cs5g07060.1         | 4.14 | 0 | 0    | 2 | MASCOT | T      | PLEX8 |       |
| 1.18E-02 | 0 0 | Cs5g07060.1         | 4.14 | 0 | 0    | 2 | MASCOT | T      | PLEX8 |       |
| 1.13E-01 | 0 0 | Cs5g07060.1/Cs5g070 | 8.76 | 0 | 0    | 2 | MASCOT | T      | PLEX8 |       |
| 1.38E-06 | 0 0 | Cs5g07060.1/Cs5g070 | 6.74 | 0 | 0    | 2 | MASCOT | T      | PLEX8 |       |
| 2.44E-05 | 0 0 | Cs5g07060.1/Cs5g070 | 6.74 | 0 | 0    | 2 | MASCOT | T      | PLEX8 |       |
| 1.31E-01 | 0 0 | Cs5g07060.1/Cs5g070 | 8.22 | 0 | 0    | 2 | MASCOT | T      | PLEX8 |       |
| 1.15E-01 | 0 0 | Cs5g07060.1/Cs5g070 | 5.82 | 0 | 0    | 2 | MASCOT | T      | PLEX8 |       |
| 5.25E-02 | 0 0 | Cs5g07060.1/Cs5g070 | 6    | 0 | 0    | 2 | MASCOT | T      |       |       |
| 1.12E-01 | 0 0 | Cs6g13030.1/Cs6g130 | 8.59 | 0 | 0    | 2 | MASCOT | T      | PLEX8 |       |
| 2.35E-03 | 0 0 | Cs6g13030.1/Cs6g130 | 4.14 | 0 | 0    | 2 | MASCOT | T      | PLEX8 |       |
| 1.40E-01 | 0 0 | Cs6g13030.1/Cs6g130 | 9.75 | 0 | 0    | 2 | MASCOT | T      | PLEX8 |       |
| 5.47E-02 | 0 0 | Cs6g13030.1/Cs6g130 | 9.76 | 0 | 15.9 | 0 | 2      | MASCOT | T     | PLEX8 |
| 1.02E-03 | 0 0 | Cs6g13030.1/Cs6g130 | 9.76 | 0 | 0    | 2 | MASCOT | T      | PLEX8 |       |
| 1.67E-01 | 0 0 | Cs6g13030.1/Cs6g130 | 5.84 | 0 | 0    | 2 | MASCOT | T      | PLEX8 |       |
| 1.45E-01 | 0 0 | Cs6g13030.1/Cs6g130 | 8.72 | 0 | 0    | 2 | MASCOT | T      |       |       |

|          |     |                       |      |        |   |   |        |         |
|----------|-----|-----------------------|------|--------|---|---|--------|---------|
| 5.22E-04 | 0 0 | Cs6g13030.1/Cs6g130   | 8.72 | 0      | 0 | 2 | MASCOT | T       |
| 7.30E-02 | 0 0 | Cs6g13030.1/Cs6g130   | 8.72 | 0      | 0 | 2 | MASCOT | T       |
| 2.24E-01 | 0 0 | Cs7g09890.1           | 8.8  | 0      | 0 | 2 | MASCOT | T PLEX8 |
| 3.43E-03 | 0 0 | Cs7g09890.1           | 5.4  | 0      | 0 | 2 | MASCOT | T PLEX8 |
| 2.42E-02 | 0 0 | Cs7g09890.1           | 5.4  | 0      | 0 | 2 | MASCOT | T PLEX8 |
| 1.42E-01 | 0 0 | Cs7g09890.1           | 4.37 | 0      | 0 | 2 | MASCOT | T PLEX8 |
| 1.35E-03 | 0 0 | Cs7g09890.1           | 4.37 | 0      | 0 | 2 | MASCOT | T PLEX8 |
| 8.70E-03 | 0 0 | Cs7g09890.1           | 4.48 | 0      | 0 | 2 | MASCOT | T PLEX8 |
| 1.47E-02 | 0 0 | Cs7g09890.1           | 4.48 | 0      | 0 | 2 | MASCOT | T PLEX8 |
| 1.22E-01 | 0 0 | Cs7g09890.1           | 6.1  | 0      | 0 | 2 | MASCOT | T PLEX8 |
| 2.76E-02 | 0 0 | Cs7g09890.1           | 4.35 | 1      | 0 | 2 | MASCOT | T PLEX8 |
| 5.99E-02 | 0 0 | Cs8g07230.1           | 8.18 | 0      | 0 | 2 | MASCOT | T PLEX8 |
| 3.14E-02 | 0 0 | Cs8g07230.1           | 9.75 | 0      | 0 | 2 | MASCOT | T       |
| 2.76E-01 | 0 0 | Cs8g07230.1           | 5.88 | 0      | 0 | 2 | MASCOT | T PLEX8 |
| 9.43E-05 | 0 0 | Cs8g07230.1           | 4.75 | 0      | 0 | 2 | MASCOT | T PLEX8 |
| 3.99E-03 | 0 0 | Cs8g07230.1           | 4.75 | 0      | 0 | 2 | MASCOT | T PLEX8 |
| 2.40E-02 | 0 0 | Cs8g07230.1           | 4.37 | 0      | 0 | 2 | MASCOT | T PLEX8 |
| 1.30E-01 | 0 0 | Cs8g07230.1           | 4.37 | 0      | 0 | 2 | MASCOT | T PLEX8 |
| 1.20E-02 | 0 0 | Cs8g07230.1           | 4.37 | 0      | 0 | 2 | MASCOT | T PLEX8 |
| 1.86E-01 | 0 0 | Cs8g07230.1           | 4.37 | 0      | 0 | 2 | MASCOT | T PLEX8 |
| 2.68E-03 | 0 0 | orange1.1t03287.1/ora | 8.75 | 0      | 0 | 2 | MASCOT | T PLEX8 |
| 7.17E-02 | 0 0 | orange1.1t03287.1/ora | 8.75 | 0      | 0 | 2 | MASCOT | T PLEX8 |
| 4.05E-03 | 0 0 | orange1.1t03287.1/ora | 5.55 | 0      | 0 | 2 | MASCOT | T PLEX8 |
| 3.83E-02 | 0 0 | orange1.1t03287.1/ora | 5.55 | 0      | 0 | 2 | MASCOT | T PLEX8 |
| 3.22E-01 | 0 0 | orange1.1t03287.1/ora | 6.74 | 0      | 0 | 2 | MASCOT | T PLEX8 |
| 1.04E-01 | 0 0 | orange1.1t03287.1     | 4.53 | 0      | 0 | 2 | MASCOT | T PLEX8 |
| 2.43E-02 | 0 0 | orange1.1t03287.1     | 8.75 | 0      | 0 | 2 | MASCOT | T PLEX8 |
| 4.35E-04 | 0 0 | orange1.1t03287.1     | 8.75 | 0      | 0 | 2 | MASCOT | T PLEX8 |
| 2.49E-02 | 0 0 | orange1.1t03287.1/ora | 4.41 | 0      | 0 | 2 | MASCOT | T PLEX8 |
| 4.12E-03 | 0 0 | Cs3g11310.1/Cs3g113   | 6.74 | 0      | 0 | 2 | MASCOT | T PLEX8 |
| 3.76E-02 | 0 0 | Cs3g11310.1/Cs3g113   | 4.14 | 0      | 0 | 2 | MASCOT | T PLEX8 |
| 3.27E-03 | 0 0 | Cs3g11310.1/Cs3g113   | 4.37 | 0      | 0 | 2 | MASCOT | T PLEX8 |
| 1.25E-02 | 0 0 | Cs3g11310.1/Cs3g113   | 4.37 | 0      | 0 | 2 | MASCOT | T PLEX8 |
| 2.89E-02 | 0 0 | Cs3g11320.1           | 5.72 | 0      | 0 | 2 | MASCOT | T PLEX8 |
| 4.81E-03 | 0 0 | Cs3g11310.1/Cs3g113   | 4.25 | 0      | 0 | 2 | MASCOT | T PLEX8 |
| 8.50E-03 | 0 0 | Cs3g11310.1/Cs3g113   | 4.25 | 0      | 0 | 2 | MASCOT | T PLEX8 |
| 1.95E-01 | 0 0 | Cs3g11310.1/Cs3g113   | 4.53 | 0 15.9 | 0 | 2 | MASCOT | T PLEX8 |
| 8.87E-02 | 0 0 | Cs3g18930.1/Cs3g189   | 4.37 | 0      | 0 | 2 | MASCOT | T PLEX8 |
| 9.99E-03 | 0 0 | Cs3g18930.1/Cs3g189   | 4.14 | 0      | 0 | 2 | MASCOT | T PLEX8 |
| 3.01E-02 | 0 0 | Cs3g18930.1/Cs3g189   | 4.14 | 0      | 0 | 2 | MASCOT | T PLEX8 |
| 1.08E-03 | 0 0 | Cs3g18930.1/Cs3g189   | 4.17 | 0      | 0 | 2 | MASCOT | T       |
| 6.67E-02 | 0 0 | Cs3g18930.1/Cs3g189   | 5.83 | 0      | 0 | 2 | MASCOT | T PLEX8 |
| 6.21E-02 | 0 0 | Cs3g18930.1/Cs3g189   | 9.6  | 1      | 0 | 2 | MASCOT | T       |
| 2.32E-02 | 0 0 | Cs3g18930.1/Cs3g189   | 4.14 | 0      | 0 | 2 | MASCOT | T       |
| 1.02E-03 | 0 0 | Cs3g18930.1/Cs3g189   | 4.14 | 0      | 0 | 2 | MASCOT | T       |
| 7.77E-02 | 0 0 | Cs5g02060.1           | 4.54 | 0      | 0 | 2 | MASCOT | T       |
| 1.11E-01 | 0 0 | Cs5g02060.1           | 4.53 | 0      | 0 | 2 | MASCOT | T PLEX8 |
| 8.50E-03 | 0 0 | Cs5g02060.1           | 9.75 | 0      | 0 | 2 | MASCOT | T       |
| 5.70E-02 | 0 0 | Cs5g02060.1           | 4.37 | 0      | 0 | 2 | MASCOT | T PLEX8 |
| 1.44E-01 | 0 0 | Cs5g02060.1           | 4.37 | 0      | 0 | 2 | MASCOT | T PLEX8 |
| 4.60E-02 | 0 0 | Cs5g02060.1           | 6.79 | 0 15.9 | 0 | 2 | MASCOT | T PLEX8 |

|              |                       |      |        |   |          |   |       |
|--------------|-----------------------|------|--------|---|----------|---|-------|
| 3.07E-04 0 0 | Cs5g02060.1           | 9.76 | 0      | 0 | 2 MASCOT | T | PLEX8 |
| 7.14E-04 0 0 | Cs5g02060.1           | 9.76 | 0      | 0 | 2 MASCOT | T | PLEX8 |
| 2.52E-01 0 0 | Cs6g07270.1           | 6.1  | 0      | 0 | 2 MASCOT | T | PLEX8 |
| 1.79E-03 0 0 | Cs6g07270.1           | 4.54 | 0      | 0 | 2 MASCOT | T | PLEX8 |
| 4.50E-03 0 0 | Cs6g07270.1           | 5.84 | 0      | 0 | 2 MASCOT | T | PLEX8 |
| 3.74E-02 0 0 | Cs6g07270.1/Cs8g194   | 5.84 | 0 15.9 | 0 | 2 MASCOT | T | PLEX8 |
| 3.33E-02 0 0 | Cs6g07270.1           | 5.72 | 0      | 0 | 2 MASCOT | T |       |
| 4.57E-02 0 0 | Cs6g07270.1           | 5.72 | 0      | 0 | 2 MASCOT | T |       |
| 3.97E-02 0 0 | Cs6g07270.1           | 5.72 | 0      | 0 | 2 MASCOT | T |       |
| 8.86E-04 0 0 | Cs6g07270.1           | 4.14 | 0      | 0 | 2 MASCOT | T | PLEX8 |
| 1.28E-01 0 0 | Cs7g05800.1/Cs7g058   | 8.25 | 0      | 0 | 2 MASCOT | T | PLEX8 |
| 1.72E-01 0 0 | Cs7g05800.1/Cs7g058   | 8.47 | 0      | 0 | 2 MASCOT | T | PLEX8 |
| 8.11E-02 0 0 | Cs7g05800.1/Cs7g058   | 8.47 | 0      | 0 | 2 MASCOT | T | PLEX8 |
| 3.60E-01 0 0 | Cs7g05800.1/Cs7g058   | 8.72 | 0      | 0 | 2 MASCOT | T | PLEX8 |
| 4.58E-03 0 0 | Cs7g05800.1/Cs7g058   | 8.72 | 0      | 0 | 2 MASCOT | T | PLEX8 |
| 5.40E-04 0 0 | Cs7g05800.1/Cs7g058   | 8.72 | 0      | 0 | 2 MASCOT | T | PLEX8 |
| 1.88E-02 0 0 | Cs7g05800.1/Cs7g058   | 8.27 | 0      | 0 | 2 MASCOT | T |       |
| 2.74E-01 0 0 | Cs7g05800.1/Cs7g058   | 8.6  | 0      | 0 | 2 MASCOT | T | PLEX8 |
| 6.00E-04 0 0 | Cs7g12630.1           | 4.14 | 0      | 0 | 2 MASCOT | T | PLEX8 |
| 1.20E-01 0 0 | Cs7g12630.1           | 8.8  | 0      | 0 | 2 MASCOT | T | PLEX8 |
| 4.14E-04 0 0 | Cs7g12630.1           | 5.32 | 0      | 0 | 2 MASCOT | T | PLEX8 |
| 1.04E-04 0 0 | Cs7g12630.1           | 5.32 | 0      | 0 | 2 MASCOT | T | PLEX8 |
| 2.50E-01 0 0 | Cs7g12630.1           | 6.75 | 0      | 0 | 2 MASCOT | T | PLEX8 |
| 9.62E-03 0 0 | Cs7g12630.1           | 5.32 | 0      | 0 | 2 MASCOT | T | PLEX8 |
| 9.26E-02 0 0 | Cs7g12630.1           | 5.32 | 0      | 0 | 2 MASCOT | T | PLEX8 |
| 4.32E-02 0 0 | Cs7g12630.1           | 4.53 | 0      | 0 | 2 MASCOT | T | PLEX8 |
| 7.76E-04 0 0 | Cs8g15500.1           | 8.8  | 0      | 0 | 2 MASCOT | T | PLEX8 |
| 1.25E-04 0 0 | Cs8g15500.1           | 8.8  | 0      | 0 | 2 MASCOT | T | PLEX8 |
| 2.17E-02 0 0 | Cs8g15500.1           | 4.14 | 0      | 0 | 2 MASCOT | T | PLEX8 |
| 4.73E-02 0 0 | Cs8g15500.1           | 4.37 | 0      | 0 | 2 MASCOT | T |       |
| 1.57E-01 0 0 | Cs8g15500.1           | 6.75 | 0      | 0 | 2 MASCOT | T | PLEX8 |
| 8.79E-03 0 0 | Cs8g15500.1           | 4.53 | 0      | 0 | 2 MASCOT | T | PLEX8 |
| 4.37E-03 0 0 | Cs8g15500.1           | 4.53 | 0      | 0 | 2 MASCOT | T | PLEX8 |
| 2.29E-01 0 0 | Cs8g15500.1           | 8.6  | 0      | 0 | 2 MASCOT | T | PLEX8 |
| 2.23E-01 0 0 | Cs9g03130.1/Cs9g031   | 6.11 | 0      | 0 | 2 MASCOT | T | PLEX8 |
| 1.31E-03 0 0 | Cs9g03130.1/Cs9g031   | 9.75 | 0      | 0 | 2 MASCOT | T | PLEX8 |
| 3.30E-02 0 0 | Cs9g03130.1/Cs9g031   | 6    | 0      | 0 | 2 MASCOT | T | PLEX8 |
| 4.17E-02 0 0 | Cs9g03130.1/Cs9g031   | 6    | 0      | 0 | 2 MASCOT | T | PLEX8 |
| 1.42E-02 0 0 | Cs9g03130.1           | 8.75 | 0      | 0 | 2 MASCOT | T | PLEX8 |
| 4.88E-04 0 0 | Cs9g03130.1           | 8.75 | 0      | 0 | 2 MASCOT | T | PLEX8 |
| 5.68E-04 0 0 | Cs9g03130.1/Cs9g031   | 4.37 | 0      | 0 | 2 MASCOT | T | PLEX8 |
| 3.14E-02 0 0 | Cs9g03130.1/Cs9g031   | 8.59 | 0      | 0 | 2 MASCOT | T | PLEX8 |
| 3.83E-04 0 0 | orange1.1t03206.1/ora | 4.37 | 0      | 0 | 2 MASCOT | T | PLEX8 |
| 1.25E-02 0 0 | orange1.1t03206.1/ora | 9.76 | 0      | 0 | 2 MASCOT | T | PLEX8 |
| 2.71E-01 0 0 | orange1.1t03206.1/ora | 8.75 | 0      | 0 | 2 MASCOT | T | PLEX8 |
| 2.34E-01 0 0 | orange1.1t03206.1/ora | 8.75 | 0      | 0 | 2 MASCOT | T | PLEX8 |
| 1.46E-01 0 0 | orange1.1t03206.1/ora | 9.76 | 0      | 0 | 2 MASCOT | T |       |
| 5.75E-02 0 0 | orange1.1t03206.1/ora | 5.84 | 0 15.9 | 0 | 2 MASCOT | T |       |
| 6.81E-02 0 0 | orange1.1t03206.1/ora | 8.75 | 0      | 0 | 2 MASCOT | T | PLEX8 |
| 2.68E-01 0 0 | orange1.1t03206.1/ora | 8.75 | 0      | 0 | 2 MASCOT | T | PLEX8 |
| 1.81E-02 0 0 | Cs6g11490.1           | 5.4  | 0      | 0 | 2 MASCOT | T | PLEX8 |

|              |                      |      |   |      |          |          |       |       |
|--------------|----------------------|------|---|------|----------|----------|-------|-------|
| 1.02E-02 0 0 | Cs6g11490.1          | 5.4  | 0 | 0    | 2 MASCOT | T        | PLEX8 |       |
| 8.62E-02 0 0 | Cs6g11490.1          | 4.23 | 1 | 0    | 2 MASCOT | T        |       |       |
| 4.69E-02 0 0 | Cs6g11490.1          | 3.92 | 0 | 0    | 2 MASCOT | T        | PLEX8 |       |
| 2.63E-05 0 0 | Cs6g11490.1          | 4.75 | 0 | 15.9 | 0        | 2 MASCOT | T     | PLEX8 |
| 1.80E-06 0 0 | Cs6g11490.1          | 6.74 | 0 | 0    | 2 MASCOT | T        | PLEX8 |       |
| 2.30E-01 0 0 | Cs6g11490.1          | 8.72 | 0 | 0    | 2 MASCOT | T        | PLEX8 |       |
| 3.88E-03 0 0 | Cs7g30660.1/Cs7g306  | 4.37 | 0 | 0    | 2 MASCOT | T        | PLEX8 |       |
| 4.54E-03 0 0 | Cs7g30660.1          | 4.53 | 0 | 0    | 2 MASCOT | T        | PLEX8 |       |
| 2.75E-03 0 0 | Cs7g30660.1          | 4.53 | 0 | 0    | 2 MASCOT | T        | PLEX8 |       |
| 2.63E-02 0 0 | Cs7g30660.1/Cs7g306  | 4.14 | 0 | 0    | 2 MASCOT | T        | PLEX8 |       |
| 1.15E-01 0 0 | Cs7g30660.1/Cs7g306  | 4.53 | 0 | 0    | 2 MASCOT | T        | PLEX8 |       |
| 6.47E-03 0 0 | Cs7g30660.1/Cs7g306  | 6.06 | 1 | 0    | 2 MASCOT | T        | PLEX8 |       |
| 6.35E-04 0 0 | Cs7g30660.1/Cs7g306  | 3.91 | 0 | 0    | 2 MASCOT | T        |       |       |
| 1.44E-06 0 0 | Cs8g14070.1/Cs8g140  | 4.31 | 0 | 0    | 2 MASCOT | T        | PLEX8 |       |
| 9.83E-03 0 0 | Cs6g13160.1/Cs6g131  | 3.98 | 0 | 0    | 2 MASCOT | T        | PLEX8 |       |
| 3.37E-02 0 0 | Cs8g14070.1/Cs8g140  | 3.84 | 0 | 0    | 2 MASCOT | T        | PLEX8 |       |
| 1.71E-03 0 0 | Cs6g13160.1/Cs6g131  | 4.13 | 0 | 0    | 2 MASCOT | T        | PLEX8 |       |
| 6.42E-02 0 0 | Cs6g13160.1/Cs6g131  | 6.75 | 0 | 0    | 2 MASCOT | T        | PLEX8 |       |
| 5.22E-03 0 0 | Cs8g14070.1/Cs8g140  | 9.76 | 0 | 0    | 2 MASCOT | T        |       |       |
| 5.60E-02 0 0 | Cs8g14070.1/Cs8g140  | 9.76 | 0 | 0    | 2 MASCOT | T        |       |       |
| 3.13E-02 0 0 | Cs9g17470.1/Cs9g174  | 5.84 | 0 | 0    | 2 MASCOT | T        | PLEX8 |       |
| 7.17E-02 0 0 | Cs9g17470.1/Cs9g174  | 5.84 | 0 | 0    | 2 MASCOT | T        | PLEX8 |       |
| 2.74E-01 0 0 | Cs9g17470.1/Cs9g174  | 9.75 | 0 | 0    | 2 MASCOT | T        | PLEX8 |       |
| 1.06E-03 0 0 | Cs9g17470.1/Cs9g174  | 4.37 | 0 | 0    | 2 MASCOT | T        | PLEX8 |       |
| 2.45E-03 0 0 | Cs9g17470.1          | 4.37 | 0 | 0    | 2 MASCOT | T        |       |       |
| 1.96E-02 0 0 | Cs9g17470.1/Cs9g174  | 4.1  | 0 | 0    | 2 MASCOT | T        |       |       |
| 7.57E-04 0 0 | Cs9g17470.1/Cs9g174  | 4.21 | 0 | 0    | 2 MASCOT | T        | PLEX8 |       |
| 5.53E-02 0 0 | Cs9g18420.1/Cs9g184  | 4.37 | 0 | 0    | 2 MASCOT | T        | PLEX8 |       |
| 1.28E-02 0 0 | Cs9g18420.1/Cs9g184  | 6    | 0 | 0    | 2 MASCOT | T        | PLEX8 |       |
| 1.41E-02 0 0 | Cs9g18420.1/Cs9g184  | 6.14 | 1 | 0    | 2 MASCOT | T        | PLEX8 |       |
| 3.00E-02 0 0 | Cs9g18420.1/Cs9g184  | 4.54 | 0 | 0    | 2 MASCOT | T        |       |       |
| 4.82E-05 0 0 | Cs9g18420.1/Cs9g184  | 6.74 | 0 | 0    | 2 MASCOT | T        | PLEX8 |       |
| 8.51E-05 0 0 | Cs9g18420.1/Cs9g184  | 6.74 | 0 | 0    | 2 MASCOT | T        | PLEX8 |       |
| 3.17E-03 0 0 | Cs9g18420.1/Cs9g184  | 4.53 | 0 | 0    | 2 MASCOT | T        | PLEX8 |       |
| 1.99E-03 0 0 | Cs1g09490.1/Cs1g094  | 5.88 | 0 | 0    | 2 MASCOT | T        | PLEX8 |       |
| 5.29E-02 0 0 | Cs1g09490.1/Cs1g094  | 6.47 | 0 | 0    | 2 MASCOT | T        |       |       |
| 1.29E-01 0 0 | Cs1g09490.1 ! Cs1g09 | 5.84 | 0 | 0    | 2 MASCOT | T        | PLEX8 |       |
| 1.88E-01 0 0 | Cs1g09490.1/Cs1g094  | 4.03 | 0 | 0    | 2 MASCOT | T        | PLEX8 |       |
| 5.36E-03 0 0 | Cs1g09490.1/Cs1g094  | 5.21 | 0 | 0    | 2 MASCOT | T        | PLEX8 |       |
| 1.22E-01 0 0 | Cs1g09490.1/Cs1g094  | 4.14 | 0 | 0    | 2 MASCOT | T        | PLEX8 |       |
| 3.41E-03 0 0 | Cs1g20950.1/Cs1g209  | 8.59 | 0 | 0    | 2 MASCOT | T        | PLEX8 |       |
| 3.60E-02 0 0 | Cs1g20950.1/Cs1g209  | 4.25 | 0 | 0    | 2 MASCOT | T        | PLEX8 |       |
| 7.08E-04 0 0 | Cs1g20950.1/Cs1g209  | 8.72 | 0 | 0    | 2 MASCOT | T        | PLEX8 |       |
| 1.43E-03 0 0 | Cs1g20950.1/Cs1g209  | 4.53 | 0 | 0    | 2 MASCOT | T        | PLEX8 |       |
| 1.76E-03 0 0 | Cs1g20950.1 ! Cs1g20 | 3.92 | 0 | 0    | 2 MASCOT | T        |       |       |
| 2.56E-01 0 0 | Cs6g14550.1 ! Cs5g30 | 6    | 0 | 0    | 2 MASCOT | T        | PLEX8 |       |
| 4.22E-02 0 0 | Cs3g15120.1/Cs3g151  | 8.22 | 0 | 0    | 2 MASCOT | T        | PLEX8 |       |
| 2.48E-01 0 0 | Cs3g15120.1/Cs3g151  | 6    | 0 | 0    | 2 MASCOT | T        | PLEX8 |       |
| 9.52E-02 0 0 | Cs3g15120.1/Cs3g151  | 4.14 | 0 | 0    | 2 MASCOT | T        | PLEX8 |       |
| 2.68E-02 0 0 | Cs3g15120.1/Cs3g151  | 4.03 | 0 | 0    | 2 MASCOT | T        |       |       |
| 9.31E-02 0 0 | Cs3g15120.1/Cs3g151  | 9.47 | 0 | 0    | 2 MASCOT | T        | PLEX8 |       |

|          |     |                      |      |   |      |   |        |        |       |       |
|----------|-----|----------------------|------|---|------|---|--------|--------|-------|-------|
| 1.38E-02 | 0 0 | Cs3g15120.1/Cs3g151  | 4.14 | 0 | 0    | 2 | MASCOT | T      |       |       |
| 4.04E-02 | 0 0 | Cs5g01850.1/orange1. | 6.74 | 0 | 0    | 2 | MASCOT | T      | PLEX8 |       |
| 2.35E-02 | 0 0 | Cs5g01850.1          | 3.93 | 0 | 0    | 2 | MASCOT | T      | PLEX8 |       |
| 1.69E-01 | 0 0 | Cs5g01850.1          | 4.37 | 0 | 0    | 2 | MASCOT | T      | PLEX8 |       |
| 2.55E-02 | 0 0 | Cs5g01850.1/orange1. | 8.75 | 0 | 0    | 2 | MASCOT | T      | PLEX8 |       |
| 7.69E-04 | 0 0 | Cs5g01850.1          | 4.53 | 0 | 0    | 2 | MASCOT | T      | PLEX8 |       |
| 1.22E-01 | 0 0 | Cs5g01850.1          | 5.84 | 0 | 0    | 2 | MASCOT | T      | PLEX8 |       |
| 2.66E-02 | 0 0 | Cs7g15030.1/Cs7g150  | 5.94 | 0 | 0    | 2 | MASCOT | T      | PLEX8 |       |
| 2.02E-02 | 0 0 | Cs7g15030.1/Cs7g150  | 3.93 | 0 | 0    | 2 | MASCOT | T      | PLEX8 |       |
| 1.76E-03 | 0 0 | Cs7g15030.1/Cs7g150  | 4.37 | 0 | 0    | 2 | MASCOT | T      |       |       |
| 9.65E-03 | 0 0 | Cs7g15030.1/Cs7g150  | 5.32 | 0 | 0    | 2 | MASCOT | T      | PLEX8 |       |
| 1.09E-01 | 0 0 | Cs7g15030.1/Cs7g150  | 4.03 | 0 | 0    | 2 | MASCOT | T      | PLEX8 |       |
| 1.16E-01 | 0 0 | Cs7g15030.1/Cs7g150  | 4.43 | 1 | 0    | 2 | MASCOT | T      | PLEX8 |       |
| 4.03E-01 | 0 0 | Cs8g20610.1          | 6.05 | 0 | 0    | 2 | MASCOT | T      | PLEX8 |       |
| 1.45E-02 | 0 0 | Cs8g20610.1          | 5.32 | 0 | 0    | 2 | MASCOT | T      | PLEX8 |       |
| 5.76E-03 | 0 0 | Cs8g20610.1          | 4.37 | 0 | 0    | 2 | MASCOT | T      | PLEX8 |       |
| 7.16E-02 | 0 0 | Cs8g20610.1          | 6.85 | 0 | 0    | 2 | MASCOT | T      | PLEX8 |       |
| 2.85E-02 | 0 0 | Cs8g20610.1          | 6    | 0 | 0    | 2 | MASCOT | T      | PLEX8 |       |
| 2.03E-01 | 0 0 | Cs8g20610.1          | 8.72 | 0 | 0    | 2 | MASCOT | T      | PLEX8 |       |
| 7.45E-02 | 0 0 | Cs6g09050.1/Cs6g090  | 8.75 | 0 | 0    | 2 | MASCOT | T      | PLEX8 |       |
| 2.39E-01 | 0 0 | Cs8g20660.1          | 6    | 0 | 0    | 2 | MASCOT | T      |       |       |
| 2.92E-02 | 0 0 | Cs6g09050.1/Cs6g090  | 3.84 | 0 | 0    | 2 | MASCOT | T      |       |       |
| 7.27E-02 | 0 0 | Cs6g09050.1/Cs6g090  | 8.75 | 0 | 0    | 2 | MASCOT | T      | PLEX8 |       |
| 1.98E-01 | 0 0 | Cs8g20660.1          | 9.47 | 0 | 0    | 2 | MASCOT | T      |       |       |
| 3.59E-03 | 0 0 | Cs8g20660.1          | 5.97 | 0 | 0    | 2 | MASCOT | T      |       |       |
| 7.09E-02 | 0 0 | Cs8g19540.1          | 5.88 | 0 | 0    | 2 | MASCOT | T      | PLEX8 |       |
| 9.78E-02 | 0 0 | Cs6g07320.1/Cs8g195  | 6.05 | 0 | 15.9 | 0 | 2      | MASCOT | T     | PLEX8 |
| 6.42E-04 | 0 0 | Cs6g07320.1/Cs8g195  | 6.05 | 0 | 15.9 | 0 | 2      | MASCOT | T     | PLEX8 |
| 1.04E-02 | 0 0 | Cs6g07320.1/Cs8g195  | 6.05 | 0 | 15.9 | 0 | 2      | MASCOT | T     | PLEX8 |
| 6.83E-03 | 0 0 | Cs6g07320.1/Cs8g195  | 6.05 | 0 | 15.9 | 0 | 2      | MASCOT | T     | PLEX8 |
| 7.32E-02 | 0 0 | Cs6g07320.1/Cs8g195  | 6.05 | 0 | 15.9 | 0 | 2      | MASCOT | T     | PLEX8 |
| 1.19E-01 | 0 0 | Cs6g07320.1/Cs8g195  | 6.05 | 0 | 15.9 | 0 | 2      | MASCOT | T     |       |
| 4.43E-01 | 0 0 | Cs6g07320.1/Cs8g195  | 6.05 | 0 | 0    | 2 | MASCOT | T      | PLEX8 |       |
| 2.14E-04 | 0 0 | Cs6g07320.1/Cs8g195  | 6.05 | 0 | 0    | 2 | MASCOT | T      | PLEX8 |       |
| 1.74E-01 | 0 0 | Cs6g07320.1/Cs8g195  | 6.05 | 0 | 0    | 2 | MASCOT | T      | PLEX8 |       |
| 1.17E-02 | 0 0 | Cs6g07320.1/Cs8g195  | 6.05 | 0 | 0    | 2 | MASCOT | T      | PLEX8 |       |
| 3.31E-02 | 0 0 | Cs6g07320.1/Cs8g195  | 6.05 | 0 | 0    | 2 | MASCOT | T      | PLEX8 |       |
| 8.98E-04 | 0 0 | Cs6g07320.1/Cs8g195  | 6.05 | 0 | 0    | 2 | MASCOT | T      | PLEX8 |       |
| 7.46E-03 | 0 0 | Cs6g07320.1/Cs8g195  | 6.05 | 0 | 0    | 2 | MASCOT | T      | PLEX8 |       |
| 4.89E-05 | 0 0 | Cs6g07320.1/Cs8g195  | 6.05 | 0 | 0    | 2 | MASCOT | T      | PLEX8 |       |
| 2.27E-02 | 0 0 | Cs6g07320.1/Cs8g195  | 6.05 | 0 | 0    | 2 | MASCOT | T      | PLEX8 |       |
| 2.40E-02 | 0 0 | Cs6g07320.1/Cs8g195  | 6.05 | 0 | 0    | 2 | MASCOT | T      | PLEX8 |       |
| 2.20E-04 | 0 0 | Cs6g07320.1/Cs8g195  | 6.05 | 0 | 0    | 2 | MASCOT | T      | PLEX8 |       |
| 2.81E-03 | 0 0 | Cs6g07320.1/Cs8g195  | 6.05 | 0 | 0    | 2 | MASCOT | T      | PLEX8 |       |
| 3.47E-06 | 0 0 | Cs6g07320.1/Cs8g195  | 6.05 | 0 | 0    | 2 | MASCOT | T      |       |       |
| 3.21E-02 | 0 0 | Cs6g07320.1/Cs8g195  | 6.05 | 0 | 0    | 2 | MASCOT | T      | PLEX8 |       |
| 3.60E-02 | 0 0 | Cs6g07320.1/Cs8g195  | 6.05 | 0 | 0    | 2 | MASCOT | T      | PLEX8 |       |
| 1.90E-02 | 0 0 | Cs6g07320.1/Cs8g195  | 6.05 | 0 | 0    | 2 | MASCOT | T      | PLEX8 |       |
| 9.12E-02 | 0 0 | Cs6g07320.1/Cs8g195  | 6.05 | 0 | 0    | 2 | MASCOT | T      | PLEX8 |       |
| 7.60E-06 | 0 0 | Cs6g07320.1/Cs8g195  | 6.05 | 0 | 0    | 2 | MASCOT | T      | PLEX8 |       |
| 3.96E-02 | 0 0 | Cs6g07320.1/Cs8g195  | 6.05 | 0 | 0    | 2 | MASCOT | T      | PLEX8 |       |

|          |     |                      |      |   |   |   |        |   |       |
|----------|-----|----------------------|------|---|---|---|--------|---|-------|
| 2.74E-04 | 0 0 | Cs6g07320.1/Cs8g195  | 6.05 | 0 | 0 | 2 | MASCOT | T | PLEX8 |
| 6.51E-02 | 0 0 | Cs6g07320.1/Cs8g195  | 6.05 | 0 | 0 | 2 | MASCOT | T | PLEX8 |
| 5.35E-03 | 0 0 | Cs6g07320.1/Cs8g195  | 6.05 | 0 | 0 | 2 | MASCOT | T | PLEX8 |
| 2.41E-01 | 0 0 | Cs6g07320.1/Cs8g195  | 6.05 | 0 | 0 | 2 | MASCOT | T |       |
| 8.05E-02 | 0 0 | Cs3g07660.1 ! Cs6g07 | 5.4  | 0 | 0 | 2 | MASCOT | T | PLEX8 |
| 4.85E-02 | 0 0 | Cs3g07660.1 ! Cs6g07 | 5.4  | 0 | 0 | 2 | MASCOT | T | PLEX8 |
| 3.50E-02 | 0 0 | Cs3g07660.1 ! Cs6g07 | 5.4  | 0 | 0 | 2 | MASCOT | T | PLEX8 |
| 3.40E-02 | 0 0 | Cs3g07660.1 ! Cs6g07 | 5.4  | 0 | 0 | 2 | MASCOT | T | PLEX8 |
| 9.44E-02 | 0 0 | Cs3g07660.1 ! Cs6g07 | 5.4  | 0 | 0 | 2 | MASCOT | T | PLEX8 |
| 5.37E-02 | 0 0 | Cs3g07660.1 ! Cs6g07 | 5.4  | 0 | 0 | 2 | MASCOT | T |       |
| 2.63E-01 | 0 0 | Cs3g07660.1 ! Cs6g07 | 5.4  | 0 | 0 | 2 | MASCOT | T | PLEX8 |
| 2.01E-03 | 0 0 | Cs8g19490.1/Cs8g195  | 3.92 | 0 | 0 | 2 | MASCOT | T | PLEX8 |
| 1.36E-02 | 0 0 | Cs8g19490.1/Cs8g195  | 3.92 | 0 | 0 | 2 | MASCOT | T | PLEX8 |
| 1.18E-03 | 0 0 | Cs8g19490.1/Cs8g195  | 3.92 | 0 | 0 | 2 | MASCOT | T |       |
| 1.95E-03 | 0 0 | Cs8g19490.1/Cs8g195  | 3.92 | 0 | 0 | 2 | MASCOT | T |       |
| 2.88E-02 | 0 0 | Cs8g19490.1/Cs8g195  | 3.92 | 0 | 0 | 2 | MASCOT | T |       |
| 4.09E-03 | 0 0 | Cs8g19490.1/Cs8g195  | 3.92 | 0 | 0 | 2 | MASCOT | T |       |
| 6.88E-03 | 0 0 | Cs8g19490.1/Cs8g195  | 3.92 | 0 | 0 | 2 | MASCOT | T |       |
| 3.03E-03 | 0 0 | Cs8g19490.1/Cs8g195  | 3.92 | 0 | 0 | 2 | MASCOT | T | PLEX8 |
| 6.86E-02 | 0 0 | Cs8g19490.1/Cs8g195  | 4.32 | 1 | 0 | 2 | MASCOT | T |       |
| 3.72E-02 | 0 0 | Cs8g19490.1/Cs8g195  | 4.32 | 1 | 0 | 2 | MASCOT | T |       |
| 4.84E-02 | 0 0 | Cs1g12560.1          | 4.03 | 0 | 0 | 2 | MASCOT | T | PLEX8 |
| 6.31E-03 | 0 0 | Cs1g12560.1          | 4.03 | 0 | 0 | 2 | MASCOT | T | PLEX8 |
| 6.53E-03 | 0 0 | Cs1g12560.1          | 4.03 | 0 | 0 | 2 | MASCOT | T | PLEX8 |
| 1.30E-01 | 0 0 | Cs1g12560.1          | 6.74 | 0 | 0 | 2 | MASCOT | T | PLEX8 |
| 1.99E-02 | 0 0 | Cs1g12560.1          | 6.74 | 0 | 0 | 2 | MASCOT | T | PLEX8 |
| 5.86E-03 | 0 0 | Cs1g12560.1          | 6.74 | 0 | 0 | 2 | MASCOT | T | PLEX8 |
| 2.86E-03 | 0 0 | Cs1g12560.1          | 6.74 | 0 | 0 | 2 | MASCOT | T | PLEX8 |
| 2.78E-01 | 0 0 | Cs1g12560.1          | 6.74 | 0 | 0 | 2 | MASCOT | T | PLEX8 |
| 2.24E-03 | 0 0 | Cs1g12560.1          | 6.74 | 0 | 0 | 2 | MASCOT | T | PLEX8 |
| 3.84E-03 | 0 0 | Cs1g12560.1          | 6.74 | 0 | 0 | 2 | MASCOT | T | PLEX8 |
| 3.62E-03 | 0 0 | Cs1g12560.1          | 6.74 | 0 | 0 | 2 | MASCOT | T | PLEX8 |
| 1.30E-01 | 0 0 | Cs1g12560.1          | 6.74 | 0 | 0 | 2 | MASCOT | T | PLEX8 |
| 1.74E-01 | 0 0 | Cs1g12560.1          | 6.74 | 0 | 0 | 2 | MASCOT | T |       |
| 3.02E-01 | 0 0 | Cs1g12560.1          | 6.74 | 0 | 0 | 2 | MASCOT | T | PLEX8 |
| 7.74E-04 | 0 0 | Cs1g12560.1          | 6.74 | 0 | 0 | 2 | MASCOT | T | PLEX8 |
| 5.04E-03 | 0 0 | Cs1g12560.1          | 6.74 | 0 | 0 | 2 | MASCOT | T | PLEX8 |
| 3.23E-03 | 0 0 | Cs1g12560.1          | 6.74 | 0 | 0 | 2 | MASCOT | T | PLEX8 |
| 2.95E-02 | 0 0 | Cs1g12560.1          | 6.74 | 0 | 0 | 2 | MASCOT | T | PLEX8 |
| 1.97E-02 | 0 0 | Cs1g12560.1          | 6.74 | 0 | 0 | 2 | MASCOT | T | PLEX8 |
| 8.01E-03 | 0 0 | Cs1g12560.1          | 6.74 | 0 | 0 | 2 | MASCOT | T |       |
| 1.13E-01 | 0 0 | Cs1g12560.1          | 6.74 | 0 | 0 | 2 | MASCOT | T |       |
| 3.99E-02 | 0 0 | Cs1g12560.1          | 6.74 | 0 | 0 | 2 | MASCOT | T |       |
| 7.17E-02 | 0 0 | Cs1g12560.1          | 6.74 | 0 | 0 | 2 | MASCOT | T |       |
| 1.35E-01 | 0 0 | Cs1g12560.1          | 9.75 | 0 | 0 | 2 | MASCOT | T | PLEX8 |
| 2.80E-04 | 0 0 | Cs1g12560.1          | 9.75 | 0 | 0 | 2 | MASCOT | T |       |
| 8.86E-02 | 0 0 | Cs1g12560.1          | 9.75 | 0 | 0 | 2 | MASCOT | T | PLEX8 |
| 1.09E-01 | 0 0 | Cs1g12560.1          | 4.21 | 0 | 0 | 2 | MASCOT | T | PLEX8 |
| 8.37E-02 | 0 0 | Cs1g12560.1          | 4.21 | 0 | 0 | 2 | MASCOT | T | PLEX8 |
| 3.22E-02 | 0 0 | Cs1g12560.1          | 4.21 | 0 | 0 | 2 | MASCOT | T | PLEX8 |
| 1.47E-02 | 0 0 | Cs1g12560.1          | 4.21 | 0 | 0 | 2 | MASCOT | T | PLEX8 |



|              |                      |      |        |   |   |        |   |       |
|--------------|----------------------|------|--------|---|---|--------|---|-------|
| 1.33E-03 0 0 | Cs1g12560.1          | 4.21 | 0      | 0 | 2 | MASCOT | T | PLEX8 |
| 7.66E-04 0 0 | Cs1g12560.1          | 4.21 | 0      | 0 | 2 | MASCOT | T | PLEX8 |
| 2.23E-02 0 0 | Cs1g12560.1          | 4.21 | 0      | 0 | 2 | MASCOT | T | PLEX8 |
| 9.10E-04 0 0 | Cs1g12560.1          | 4.21 | 0      | 0 | 2 | MASCOT | T | PLEX8 |
| 4.78E-07 0 0 | Cs1g12560.1          | 4.21 | 0      | 0 | 2 | MASCOT | T | PLEX8 |
| 5.51E-04 0 0 | Cs1g12560.1          | 4.21 | 0      | 0 | 2 | MASCOT | T | PLEX8 |
| 1.48E-04 0 0 | Cs1g12560.1          | 4.21 | 0      | 0 | 2 | MASCOT | T | PLEX8 |
| 2.78E-04 0 0 | Cs1g12560.1          | 4.21 | 0      | 0 | 2 | MASCOT | T | PLEX8 |
| 6.31E-02 0 0 | Cs1g12560.1          | 5.84 | 0      | 0 | 2 | MASCOT | T | PLEX8 |
| 1.12E-01 0 0 | Cs1g12560.1          | 5.84 | 0      | 0 | 2 | MASCOT | T | PLEX8 |
| 5.33E-01 0 0 | Cs1g12560.1          | 5.84 | 0      | 0 | 2 | MASCOT | T | PLEX8 |
| 6.69E-02 0 0 | Cs1g12560.1          | 5.84 | 0      | 0 | 2 | MASCOT | T | PLEX8 |
| 3.13E-01 0 0 | Cs1g12560.1          | 5.84 | 0      | 0 | 2 | MASCOT | T | PLEX8 |
| 1.39E-01 0 0 | Cs1g12560.1          | 5.84 | 0      | 0 | 2 | MASCOT | T | PLEX8 |
| 5.06E-01 0 0 | Cs1g12560.1          | 5.84 | 0      | 0 | 2 | MASCOT | T | PLEX8 |
| 2.13E-01 0 0 | Cs8g05060.1/orange1. | 5.97 | 0      | 0 | 2 | MASCOT | T | PLEX8 |
| 2.40E-02 0 0 | orange1.1t04497.1    | 4.53 | 0      | 0 | 2 | MASCOT | T | PLEX8 |
| 7.83E-03 0 0 | Cs8g05060.1/orange1. | 8.59 | 0      | 0 | 2 | MASCOT | T | PLEX8 |
| 7.31E-02 0 0 | Cs8g05060.1/orange1. | 8.59 | 0      | 0 | 2 | MASCOT | T | PLEX8 |
| 7.76E-02 0 0 | Cs8g05060.1/orange1. | 8.59 | 0      | 0 | 2 | MASCOT | T | PLEX8 |
| 1.07E-02 0 0 | Cs8g05060.1/orange1. | 8.59 | 0      | 0 | 2 | MASCOT | T | PLEX8 |
| 1.95E-01 0 0 | Cs8g05060.1/orange1. | 8.59 | 0      | 0 | 2 | MASCOT | T | PLEX8 |
| 6.93E-02 0 0 | Cs8g05060.1/orange1. | 8.59 | 0      | 0 | 2 | MASCOT | T | PLEX8 |
| 7.43E-02 0 0 | Cs8g05060.1/orange1. | 8.59 | 0      | 0 | 2 | MASCOT | T | PLEX8 |
| 6.97E-02 0 0 | Cs8g05060.1/orange1. | 8.59 | 0      | 0 | 2 | MASCOT | T | PLEX8 |
| 9.90E-03 0 0 | Cs8g05060.1/orange1. | 8.59 | 0      | 0 | 2 | MASCOT | T | PLEX8 |
| 1.48E-01 0 0 | Cs8g05060.1/orange1. | 8.59 | 0      | 0 | 2 | MASCOT | T | PLEX8 |
| 3.69E-02 0 0 | Cs8g05060.1/orange1. | 8.59 | 0      | 0 | 2 | MASCOT | T | PLEX8 |
| 2.10E-01 0 0 | Cs8g05060.1/orange1. | 8.59 | 0      | 0 | 2 | MASCOT | T | PLEX8 |
| 5.79E-03 0 0 | Cs8g05060.1/orange1. | 8.59 | 0      | 0 | 2 | MASCOT | T | PLEX8 |
| 4.08E-01 0 0 | Cs8g05060.1/orange1. | 8.59 | 0      | 0 | 2 | MASCOT | T | PLEX8 |
| 1.29E-02 0 0 | Cs8g05060.1/orange1. | 8.59 | 0      | 0 | 2 | MASCOT | T | PLEX8 |
| 6.53E-03 0 0 | Cs8g05060.1/orange1. | 8.59 | 0      | 0 | 2 | MASCOT | T | PLEX8 |
| 1.74E-01 0 0 | Cs8g05060.1/orange1. | 8.59 | 0      | 0 | 2 | MASCOT | T | PLEX8 |
| 1.60E-02 0 0 | Cs8g05060.1/orange1. | 8.59 | 0      | 0 | 2 | MASCOT | T | PLEX8 |
| 1.74E-01 0 0 | Cs8g05060.1/orange1. | 8.59 | 0      | 0 | 2 | MASCOT | T | PLEX8 |
| 1.08E-01 0 0 | Cs8g05060.1/orange1. | 8.59 | 0      | 0 | 2 | MASCOT | T | PLEX8 |
| 9.21E-03 0 0 | Cs8g05060.1/orange1. | 8.59 | 0      | 0 | 2 | MASCOT | T | PLEX8 |
| 3.09E-03 0 0 | Cs8g05060.1/orange1. | 8.59 | 0      | 0 | 2 | MASCOT | T | PLEX8 |
| 2.26E-02 0 0 | Cs8g05060.1/orange1. | 4.14 | 0      | 0 | 2 | MASCOT | T | PLEX8 |
| 6.82E-02 0 0 | Cs8g05060.1/orange1. | 4.14 | 0      | 0 | 2 | MASCOT | T | PLEX8 |
| 1.26E-02 0 0 | Cs8g05060.1/orange1. | 4.14 | 0      | 0 | 2 | MASCOT | T | PLEX8 |
| 3.54E-04 0 0 | Cs8g05060.1/orange1. | 4.14 | 0      | 0 | 2 | MASCOT | T | PLEX8 |
| 1.65E-05 0 0 | Cs8g05060.1/orange1. | 4.14 | 0      | 0 | 2 | MASCOT | T | PLEX8 |
| 9.12E-02 0 0 | Cs8g05060.1/orange1. | 4.14 | 0      | 0 | 2 | MASCOT | T | PLEX8 |
| 3.09E-02 0 0 | Cs8g05060.1/orange1. | 4.14 | 0      | 0 | 2 | MASCOT | T | PLEX8 |
| 6.71E-04 0 0 | Cs8g05060.1/orange1. | 4.14 | 0      | 0 | 2 | MASCOT | T | PLEX8 |
| 7.51E-02 0 0 | Cs8g05060.1/orange1. | 5.84 | 0 15.9 | 0 | 2 | MASCOT | T | PLEX8 |
| 6.80E-02 0 0 | Cs8g05060.1/orange1. | 5.84 | 0 15.9 | 0 | 2 | MASCOT | T | PLEX8 |
| 2.06E-01 0 0 | Cs8g05060.1/orange1. | 5.84 | 0 15.9 | 0 | 2 | MASCOT | T | PLEX8 |
| 9.14E-02 0 0 | Cs8g05060.1/orange1. | 5.84 | 0 15.9 | 0 | 2 | MASCOT | T | PLEX8 |

|          |     |                      |      |   |      |   |        |        |       |       |
|----------|-----|----------------------|------|---|------|---|--------|--------|-------|-------|
| 1.49E-02 | 0 0 | Cs8g05060.1/orange1. | 5.84 | 0 | 0    | 2 | MASCOT | T      | PLEX8 |       |
| 2.06E-02 | 0 0 | Cs8g05060.1/orange1. | 5.84 | 0 | 0    | 2 | MASCOT | T      | PLEX8 |       |
| 1.48E-02 | 0 0 | Cs8g05060.1/orange1. | 5.84 | 0 | 0    | 2 | MASCOT | T      | PLEX8 |       |
| 4.69E-02 | 0 0 | Cs8g05060.1/orange1. | 5.84 | 0 | 0    | 2 | MASCOT | T      | PLEX8 |       |
| 2.14E-01 | 0 0 | Cs8g05060.1/orange1. | 5.84 | 0 | 0    | 2 | MASCOT | T      | PLEX8 |       |
| 1.09E-01 | 0 0 | Cs8g05060.1/orange1. | 5.84 | 0 | 0    | 2 | MASCOT | T      | PLEX8 |       |
| 1.24E-02 | 0 0 | Cs1g25910.1          | 4.75 | 0 | 0    | 2 | MASCOT | T      | PLEX8 |       |
| 1.25E-02 | 0 0 | Cs1g25910.1          | 4.75 | 0 | 0    | 2 | MASCOT | T      | PLEX8 |       |
| 1.95E-02 | 0 0 | Cs1g25910.1          | 4.75 | 0 | 0    | 2 | MASCOT | T      | PLEX8 |       |
| 1.16E-02 | 0 0 | Cs1g25910.1          | 4.75 | 0 | 0    | 2 | MASCOT | T      | PLEX8 |       |
| 2.27E-05 | 0 0 | Cs1g25910.1          | 5.32 | 0 | 0    | 2 | MASCOT | T      | PLEX8 |       |
| 1.88E-05 | 0 0 | Cs1g25910.1          | 5.32 | 0 | 0    | 2 | MASCOT | T      | PLEX8 |       |
| 1.20E-02 | 0 0 | Cs1g25910.1          | 5.32 | 0 | 0    | 2 | MASCOT | T      | PLEX8 |       |
| 1.46E-02 | 0 0 | Cs1g25910.1          | 5.32 | 0 | 0    | 2 | MASCOT | T      | PLEX8 |       |
| 4.57E-03 | 0 0 | Cs1g25910.1          | 5.32 | 0 | 0    | 2 | MASCOT | T      | PLEX8 |       |
| 1.42E-05 | 0 0 | Cs1g25910.1          | 5.32 | 0 | 0    | 2 | MASCOT | T      | PLEX8 |       |
| 4.38E-02 | 0 0 | Cs1g25910.1          | 5.32 | 0 | 0    | 2 | MASCOT | T      | PLEX8 |       |
| 2.21E-04 | 0 0 | Cs1g25910.1          | 5.32 | 0 | 0    | 2 | MASCOT | T      |       |       |
| 5.55E-02 | 0 0 | Cs1g25910.1          | 5.32 | 0 | 0    | 2 | MASCOT | T      |       |       |
| 4.94E-05 | 0 0 | Cs1g25910.1          | 5.32 | 0 | 0    | 2 | MASCOT | T      |       |       |
| 4.43E-03 | 0 0 | Cs1g25910.1          | 5.32 | 0 | 0    | 2 | MASCOT | T      |       |       |
| 8.52E-04 | 0 0 | Cs1g25910.1          | 5.32 | 0 | 0    | 2 | MASCOT | T      | PLEX8 |       |
| 2.74E-02 | 0 0 | Cs1g25910.1          | 5.32 | 0 | 0    | 2 | MASCOT | T      |       |       |
| 1.51E-05 | 0 0 | Cs1g25910.1          | 5.32 | 0 | 0    | 2 | MASCOT | T      |       |       |
| 8.84E-02 | 0 0 | Cs1g25910.1          | 5.32 | 0 | 0    | 2 | MASCOT | T      |       |       |
| 4.14E-03 | 0 0 | Cs1g25910.1          | 5.32 | 0 | 0    | 2 | MASCOT | T      |       |       |
| 4.05E-02 | 0 0 | Cs1g25910.1          | 5.32 | 0 | 0    | 2 | MASCOT | T      |       |       |
| 2.41E-01 | 0 0 | Cs1g25910.1          | 5.32 | 0 | 0    | 2 | MASCOT | T      |       |       |
| 5.41E-05 | 0 0 | Cs1g25910.1          | 5.32 | 0 | 0    | 2 | MASCOT | T      |       |       |
| 9.72E-05 | 0 0 | Cs1g25910.1          | 5.32 | 0 | 0    | 2 | MASCOT | T      |       |       |
| 1.31E-05 | 0 0 | Cs1g25910.1          | 5.32 | 0 | 0    | 2 | MASCOT | T      |       |       |
| 1.85E-02 | 0 0 | Cs1g25910.1          | 8.75 | 0 | 0    | 2 | MASCOT | T      | PLEX8 |       |
| 9.20E-02 | 0 0 | Cs1g25910.1          | 8.75 | 0 | 0    | 2 | MASCOT | T      | PLEX8 |       |
| 3.46E-03 | 0 0 | Cs1g25910.1          | 8.75 | 0 | 0    | 2 | MASCOT | T      | PLEX8 |       |
| 9.84E-03 | 0 0 | Cs1g25910.1          | 8.75 | 0 | 0    | 2 | MASCOT | T      | PLEX8 |       |
| 3.29E-04 | 0 0 | Cs1g25910.1          | 8.75 | 0 | 0    | 2 | MASCOT | T      | PLEX8 |       |
| 4.77E-03 | 0 0 | Cs1g25910.1          | 5.5  | 1 | 0    | 2 | MASCOT | T      | PLEX8 |       |
| 2.66E-02 | 0 0 | Cs1g25910.1          | 5.4  | 0 | 0    | 2 | MASCOT | T      | PLEX8 |       |
| 7.72E-02 | 0 0 | Cs1g25910.1          | 5.4  | 0 | 0    | 2 | MASCOT | T      | PLEX8 |       |
| 1.41E-03 | 0 0 | Cs1g25910.1          | 5.4  | 0 | 0    | 2 | MASCOT | T      |       |       |
| 5.32E-01 | 0 0 | Cs8g19490.1/Cs8g195  | 6.05 | 0 | 15.9 | 0 | 2      | MASCOT | T     | PLEX8 |
| 1.69E-01 | 0 0 | Cs8g19490.1/Cs8g195  | 6.05 | 0 | 15.9 | 0 | 2      | MASCOT | T     | PLEX8 |
| 2.07E-01 | 0 0 | Cs8g19490.1/Cs8g195  | 6.05 | 0 | 0    | 2 | MASCOT | T      | PLEX8 |       |
| 5.44E-02 | 0 0 | Cs8g19490.1/Cs8g195  | 6.05 | 0 | 0    | 2 | MASCOT | T      | PLEX8 |       |
| 4.92E-02 | 0 0 | Cs8g19490.1/Cs8g195  | 6.05 | 0 | 0    | 2 | MASCOT | T      | PLEX8 |       |
| 1.55E-01 | 0 0 | Cs8g19490.1/Cs8g195  | 6.05 | 0 | 0    | 2 | MASCOT | T      | PLEX8 |       |
| 1.71E-01 | 0 0 | Cs8g19490.1/Cs8g195  | 6.05 | 0 | 0    | 2 | MASCOT | T      | PLEX8 |       |
| 7.79E-04 | 0 0 | Cs8g19490.1/Cs8g195  | 6.05 | 0 | 0    | 2 | MASCOT | T      | PLEX8 |       |
| 5.22E-06 | 0 0 | Cs8g19490.1/Cs8g195  | 6.05 | 0 | 0    | 2 | MASCOT | T      | PLEX8 |       |
| 4.48E-02 | 0 0 | Cs8g19490.1/Cs8g195  | 6.05 | 0 | 0    | 2 | MASCOT | T      | PLEX8 |       |
| 6.29E-04 | 0 0 | Cs8g19490.1/Cs8g195  | 6.05 | 0 | 0    | 2 | MASCOT | T      | PLEX8 |       |

|          |     |                      |      |   |      |   |        |        |       |       |
|----------|-----|----------------------|------|---|------|---|--------|--------|-------|-------|
| 8.31E-02 | 0 0 | Cs8g19490.1/Cs8g195  | 6.05 | 0 | 0    | 2 | MASCOT | T      | PLEX8 |       |
| 8.05E-02 | 0 0 | Cs3g07660.1 ! Cs6g07 | 5.4  | 0 | 0    | 2 | MASCOT | T      | PLEX8 |       |
| 4.85E-02 | 0 0 | Cs3g07660.1 ! Cs6g07 | 5.4  | 0 | 0    | 2 | MASCOT | T      | PLEX8 |       |
| 3.50E-02 | 0 0 | Cs3g07660.1 ! Cs6g07 | 5.4  | 0 | 0    | 2 | MASCOT | T      | PLEX8 |       |
| 3.40E-02 | 0 0 | Cs3g07660.1 ! Cs6g07 | 5.4  | 0 | 0    | 2 | MASCOT | T      | PLEX8 |       |
| 9.44E-02 | 0 0 | Cs3g07660.1 ! Cs6g07 | 5.4  | 0 | 0    | 2 | MASCOT | T      | PLEX8 |       |
| 5.37E-02 | 0 0 | Cs3g07660.1 ! Cs6g07 | 5.4  | 0 | 0    | 2 | MASCOT | T      |       |       |
| 2.63E-01 | 0 0 | Cs3g07660.1 ! Cs6g07 | 5.4  | 0 | 0    | 2 | MASCOT | T      | PLEX8 |       |
| 2.01E-03 | 0 0 | Cs8g19490.1/Cs8g195  | 3.92 | 0 | 0    | 2 | MASCOT | T      | PLEX8 |       |
| 1.36E-02 | 0 0 | Cs8g19490.1/Cs8g195  | 3.92 | 0 | 0    | 2 | MASCOT | T      | PLEX8 |       |
| 1.18E-03 | 0 0 | Cs8g19490.1/Cs8g195  | 3.92 | 0 | 0    | 2 | MASCOT | T      |       |       |
| 1.95E-03 | 0 0 | Cs8g19490.1/Cs8g195  | 3.92 | 0 | 0    | 2 | MASCOT | T      |       |       |
| 2.88E-02 | 0 0 | Cs8g19490.1/Cs8g195  | 3.92 | 0 | 0    | 2 | MASCOT | T      |       |       |
| 4.09E-03 | 0 0 | Cs8g19490.1/Cs8g195  | 3.92 | 0 | 0    | 2 | MASCOT | T      |       |       |
| 6.88E-03 | 0 0 | Cs8g19490.1/Cs8g195  | 3.92 | 0 | 0    | 2 | MASCOT | T      |       |       |
| 3.03E-03 | 0 0 | Cs8g19490.1/Cs8g195  | 3.92 | 0 | 0    | 2 | MASCOT | T      | PLEX8 |       |
| 6.86E-02 | 0 0 | Cs8g19490.1/Cs8g195  | 4.32 | 1 | 0    | 2 | MASCOT | T      |       |       |
| 3.72E-02 | 0 0 | Cs8g19490.1/Cs8g195  | 4.32 | 1 | 0    | 2 | MASCOT | T      |       |       |
| 2.23E-02 | 0 0 | Cs8g19490.1/Cs8g195  | 9.47 | 0 | 15.9 | 0 | 2      | MASCOT | T     | PLEX8 |
| 3.93E-02 | 0 0 | Cs8g19490.1/Cs8g195  | 9.47 | 0 | 0    | 2 | MASCOT | T      | PLEX8 |       |
| 1.67E-02 | 0 0 | Cs8g19490.1/Cs8g195  | 9.47 | 0 | 0    | 2 | MASCOT | T      | PLEX8 |       |
| 3.74E-03 | 0 0 | Cs3g09230.1          | 6    | 0 | 0    | 2 | MASCOT | T      |       |       |
| 2.90E-02 | 0 0 | Cs3g09230.1          | 6    | 0 | 0    | 2 | MASCOT | T      |       |       |
| 6.49E-05 | 0 0 | Cs3g09230.1          | 6    | 0 | 0    | 2 | MASCOT | T      |       |       |
| 1.10E-01 | 0 0 | Cs3g09230.1          | 6    | 0 | 0    | 2 | MASCOT | T      |       |       |
| 2.40E-02 | 0 0 | Cs3g09230.1          | 4.03 | 0 | 0    | 2 | MASCOT | T      |       |       |
| 2.13E-05 | 0 0 | Cs3g09230.1          | 4.03 | 0 | 0    | 2 | MASCOT | T      |       |       |
| 6.95E-03 | 0 0 | Cs3g09230.1          | 6    | 0 | 0    | 2 | MASCOT | T      | PLEX8 |       |
| 8.67E-06 | 0 0 | Cs3g09230.1          | 6    | 0 | 0    | 2 | MASCOT | T      | PLEX8 |       |
| 1.06E-05 | 0 0 | Cs3g09230.1          | 6    | 0 | 0    | 2 | MASCOT | T      | PLEX8 |       |
| 2.53E-02 | 0 0 | Cs3g09230.1          | 6    | 0 | 0    | 2 | MASCOT | T      | PLEX8 |       |
| 1.28E-01 | 0 0 | Cs3g09230.1          | 4.21 | 0 | 0    | 2 | MASCOT | T      | PLEX8 |       |
| 5.56E-02 | 0 0 | Cs3g09230.1          | 4.21 | 0 | 0    | 2 | MASCOT | T      | PLEX8 |       |
| 1.11E-02 | 0 0 | Cs3g09230.1          | 4.21 | 0 | 0    | 2 | MASCOT | T      | PLEX8 |       |
| 1.58E-04 | 0 0 | Cs3g09230.1          | 4.21 | 0 | 0    | 2 | MASCOT | T      | PLEX8 |       |
| 1.21E-03 | 0 0 | Cs3g09230.1          | 4.21 | 0 | 0    | 2 | MASCOT | T      | PLEX8 |       |
| 1.13E-01 | 0 0 | Cs3g09230.1          | 4.21 | 0 | 0    | 2 | MASCOT | T      | PLEX8 |       |
| 2.47E-01 | 0 0 | Cs3g09230.1          | 4.21 | 0 | 0    | 2 | MASCOT | T      | PLEX8 |       |
| 5.11E-03 | 0 0 | Cs3g09230.1          | 4.21 | 0 | 0    | 2 | MASCOT | T      | PLEX8 |       |
| 5.39E-02 | 0 0 | Cs3g09230.1          | 4.21 | 0 | 0    | 2 | MASCOT | T      | PLEX8 |       |
| 2.87E-02 | 0 0 | Cs3g09230.1          | 4.21 | 0 | 0    | 2 | MASCOT | T      | PLEX8 |       |
| 3.70E-03 | 0 0 | Cs3g09230.1          | 8.19 | 0 | 0    | 2 | MASCOT | T      | PLEX8 |       |
| 5.80E-05 | 0 0 | Cs3g09230.1          | 8.19 | 0 | 0    | 2 | MASCOT | T      | PLEX8 |       |
| 9.50E-04 | 0 0 | Cs3g09230.1          | 8.19 | 0 | 0    | 2 | MASCOT | T      | PLEX8 |       |
| 1.68E-02 | 0 0 | Cs3g09230.1          | 8.19 | 0 | 0    | 2 | MASCOT | T      | PLEX8 |       |
| 1.59E-01 | 0 0 | Cs3g15040.2          | 5.21 | 0 | 0    | 2 | MASCOT | T      | PLEX8 |       |
| 1.68E-01 | 0 0 | Cs3g15040.2          | 5.21 | 0 | 0    | 2 | MASCOT | T      |       |       |
| 3.48E-01 | 0 0 | Cs3g15040.2          | 5.21 | 0 | 0    | 2 | MASCOT | T      | PLEX8 |       |
| 9.04E-05 | 0 0 | Cs3g15040.2          | 6.74 | 0 | 0    | 2 | MASCOT | T      | PLEX8 |       |
| 4.67E-03 | 0 0 | Cs3g15040.2          | 6.74 | 0 | 0    | 2 | MASCOT | T      | PLEX8 |       |
| 1.90E-02 | 0 0 | Cs3g15040.2          | 6.74 | 0 | 0    | 2 | MASCOT | T      | PLEX8 |       |

|          |     |                      |      |   |      |   |        |        |       |       |
|----------|-----|----------------------|------|---|------|---|--------|--------|-------|-------|
| 5.76E-04 | 0 0 | Cs3g15040.2          | 6.74 | 0 | 0    | 2 | MASCOT | T      | PLEX8 |       |
| 2.32E-04 | 0 0 | Cs3g15040.2          | 6.74 | 0 | 0    | 2 | MASCOT | T      | PLEX8 |       |
| 3.01E-04 | 0 0 | Cs3g15040.2          | 6.74 | 0 | 0    | 2 | MASCOT | T      |       |       |
| 4.81E-04 | 0 0 | Cs3g15040.2          | 6.74 | 0 | 0    | 2 | MASCOT | T      |       |       |
| 3.21E-02 | 0 0 | Cs5g21755.1 ! Cs4g15 | 6    | 0 | 0    | 2 | MASCOT | T      | PLEX8 |       |
| 2.91E-02 | 0 0 | Cs3g15040.2          | 5.21 | 0 | 0    | 2 | MASCOT | T      | PLEX8 |       |
| 6.35E-03 | 0 0 | Cs3g15040.2          | 5.21 | 0 | 0    | 2 | MASCOT | T      | PLEX8 |       |
| 2.34E-02 | 0 0 | Cs3g15040.2          | 5.21 | 0 | 0    | 2 | MASCOT | T      | PLEX8 |       |
| 1.90E-02 | 0 0 | Cs3g15040.2          | 5.21 | 0 | 0    | 2 | MASCOT | T      | PLEX8 |       |
| 5.97E-02 | 0 0 | Cs3g15040.2          | 4.37 | 0 | 15.9 | 0 | 2      | MASCOT | T     | PLEX8 |
| 1.17E-04 | 0 0 | Cs3g15040.2          | 4.37 | 0 | 0    | 2 | MASCOT | T      | PLEX8 |       |
| 8.06E-03 | 0 0 | Cs3g15040.2          | 4.37 | 0 | 0    | 2 | MASCOT | T      | PLEX8 |       |
| 1.32E-04 | 0 0 | Cs3g15040.2          | 4.37 | 0 | 0    | 2 | MASCOT | T      | PLEX8 |       |
| 2.11E-04 | 0 0 | Cs3g15040.2          | 4.37 | 0 | 0    | 2 | MASCOT | T      | PLEX8 |       |
| 7.32E-02 | 0 0 | Cs3g15040.2          | 4.37 | 0 | 0    | 2 | MASCOT | T      | PLEX8 |       |
| 7.17E-02 | 0 0 | orange1.1t03425.1    | 4.25 | 0 | 0    | 2 | MASCOT | T      | PLEX8 |       |
| 6.55E-04 | 0 0 | orange1.1t03425.1    | 4.25 | 0 | 0    | 2 | MASCOT | T      |       |       |
| 6.56E-04 | 0 0 | orange1.1t03425.1    | 4.25 | 0 | 0    | 2 | MASCOT | T      |       |       |
| 8.44E-03 | 0 0 | orange1.1t03425.1    | 4.25 | 0 | 0    | 2 | MASCOT | T      |       |       |
| 3.61E-02 | 0 0 | orange1.1t03425.1    | 8.47 | 0 | 0    | 2 | MASCOT | T      | PLEX8 |       |
| 1.92E-05 | 0 0 | Cs2g07720.1/Cs2g077  | 5.72 | 0 | 0    | 2 | MASCOT | T      |       |       |
| 2.93E-04 | 0 0 | Cs2g07720.1/Cs2g077  | 5.72 | 0 | 0    | 2 | MASCOT | T      |       |       |
| 4.76E-03 | 0 0 | Cs2g07720.1/Cs2g077  | 8.73 | 0 | 0    | 2 | MASCOT | T      | PLEX8 |       |
| 2.61E-02 | 0 0 | Cs2g07720.1/Cs2g077  | 8.73 | 0 | 0    | 2 | MASCOT | T      | PLEX8 |       |
| 9.44E-04 | 0 0 | Cs2g07720.1/Cs2g077  | 8.73 | 0 | 0    | 2 | MASCOT | T      | PLEX8 |       |
| 4.51E-02 | 0 0 | Cs2g07720.1/Cs2g077  | 8.73 | 0 | 0    | 2 | MASCOT | T      | PLEX8 |       |
| 4.55E-02 | 0 0 | Cs2g07720.1/Cs2g077  | 8.73 | 0 | 0    | 2 | MASCOT | T      | PLEX8 |       |
| 1.24E-03 | 0 0 | Cs2g07720.1/Cs2g077  | 8.73 | 0 | 0    | 2 | MASCOT | T      | PLEX8 |       |
| 1.76E-03 | 0 0 | Cs2g07720.1/Cs2g077  | 8.73 | 0 | 0    | 2 | MASCOT | T      | PLEX8 |       |
| 3.17E-03 | 0 0 | Cs2g07720.1/Cs2g077  | 8.73 | 0 | 0    | 2 | MASCOT | T      | PLEX8 |       |
| 9.42E-03 | 0 0 | Cs2g07720.1/Cs2g077  | 8.73 | 0 | 0    | 2 | MASCOT | T      | PLEX8 |       |
| 8.19E-03 | 0 0 | Cs2g07720.1/Cs2g077  | 8.73 | 0 | 0    | 2 | MASCOT | T      |       |       |
| 2.56E-02 | 0 0 | orange1.1t03425.1    | 4.14 | 0 | 0    | 2 | MASCOT | T      | PLEX8 |       |
| 2.47E-03 | 0 0 | orange1.1t03425.1    | 4.14 | 0 | 0    | 2 | MASCOT | T      | PLEX8 |       |
| 2.56E-01 | 0 0 | orange1.1t03425.1    | 4.14 | 0 | 0    | 2 | MASCOT | T      | PLEX8 |       |
| 1.30E-01 | 0 0 | orange1.1t03425.1    | 4.14 | 0 | 0    | 2 | MASCOT | T      | PLEX8 |       |
| 1.29E-01 | 0 0 | Cs6g03820.1/Cs6g038  | 4.37 | 0 | 0    | 2 | MASCOT | T      | PLEX8 |       |
| 4.73E-03 | 0 0 | Cs6g03820.1/Cs6g038  | 4.37 | 0 | 0    | 2 | MASCOT | T      | PLEX8 |       |
| 2.80E-02 | 0 0 | Cs6g03820.1/Cs6g038  | 4.37 | 0 | 0    | 2 | MASCOT | T      | PLEX8 |       |
| 6.77E-05 | 0 0 | Cs6g03820.1/Cs6g038  | 4.37 | 0 | 0    | 2 | MASCOT | T      | PLEX8 |       |
| 1.68E-02 | 0 0 | Cs6g03820.1/Cs6g038  | 4.37 | 0 | 0    | 2 | MASCOT | T      | PLEX8 |       |
| 2.28E-01 | 0 0 | Cs6g03820.1/Cs6g038  | 4.37 | 0 | 0    | 2 | MASCOT | T      | PLEX8 |       |
| 2.37E-02 | 0 0 | Cs6g03820.1/Cs6g038  | 4.37 | 0 | 0    | 2 | MASCOT | T      | PLEX8 |       |
| 1.79E-01 | 0 0 | Cs6g03820.1/Cs6g038  | 4.37 | 0 | 0    | 2 | MASCOT | T      | PLEX8 |       |
| 6.93E-04 | 0 0 | Cs6g03820.1/Cs6g038  | 4.37 | 0 | 0    | 2 | MASCOT | T      | PLEX8 |       |
| 6.00E-03 | 0 0 | Cs6g03820.1/Cs6g038  | 4.37 | 0 | 0    | 2 | MASCOT | T      | PLEX8 |       |
| 4.86E-03 | 0 0 | Cs6g03820.1/Cs6g038  | 4.37 | 0 | 0    | 2 | MASCOT | T      | PLEX8 |       |
| 4.92E-03 | 0 0 | Cs6g03820.1/Cs6g038  | 4.37 | 0 | 0    | 2 | MASCOT | T      | PLEX8 |       |
| 8.65E-02 | 0 0 | Cs6g03820.1/Cs6g038  | 4.37 | 0 | 0    | 2 | MASCOT | T      | PLEX8 |       |
| 2.77E-02 | 0 0 | Cs6g03820.1/Cs6g038  | 6.72 | 0 | 0    | 2 | MASCOT | T      | PLEX8 |       |
| 2.01E-01 | 0 0 | Cs6g03820.1/Cs6g038  | 8.59 | 0 | 0    | 2 | MASCOT | T      | PLEX8 |       |

|          |     |                     |      |   |   |   |        |   |       |
|----------|-----|---------------------|------|---|---|---|--------|---|-------|
| 3.43E-05 | 0 0 | Cs6g03820.1/Cs6g038 | 4.11 | 1 | 0 | 2 | MASCOT | T | PLEX8 |
| 4.42E-02 | 0 0 | Cs6g03820.1/Cs6g038 | 4.11 | 1 | 0 | 2 | MASCOT | T | PLEX8 |
| 2.48E-02 | 0 0 | Cs6g03820.1/Cs6g038 | 4.11 | 1 | 0 | 2 | MASCOT | T | PLEX8 |
| 5.53E-05 | 0 0 | Cs6g03820.1/Cs6g038 | 4.11 | 1 | 0 | 2 | MASCOT | T |       |
| 1.57E-03 | 0 0 | Cs6g03820.1/Cs6g038 | 4.11 | 1 | 0 | 2 | MASCOT | T |       |
| 3.96E-01 | 0 0 | Cs7g32500.1/Cs7g325 | 8.75 | 0 | 0 | 2 | MASCOT | T | PLEX8 |
| 3.44E-03 | 0 0 | Cs7g32500.1/Cs7g325 | 5.4  | 0 | 0 | 2 | MASCOT | T | PLEX8 |
| 3.08E-02 | 0 0 | Cs7g32500.1/Cs7g325 | 5.4  | 0 | 0 | 2 | MASCOT | T |       |
| 6.85E-07 | 0 0 | Cs7g32500.1/Cs7g325 | 5.4  | 0 | 0 | 2 | MASCOT | T |       |
| 4.16E-03 | 0 0 | Cs7g32500.1/Cs7g325 | 8.56 | 0 | 0 | 2 | MASCOT | T | PLEX8 |
| 2.24E-03 | 0 0 | Cs7g32500.1/Cs7g325 | 8.56 | 0 | 0 | 2 | MASCOT | T | PLEX8 |
| 1.19E-01 | 0 0 | Cs7g32500.1/Cs7g325 | 8.56 | 0 | 0 | 2 | MASCOT | T | PLEX8 |
| 8.97E-03 | 0 0 | Cs7g32500.1/Cs7g325 | 8.56 | 0 | 0 | 2 | MASCOT | T |       |
| 2.16E-01 | 0 0 | Cs7g32500.1/Cs7g325 | 8.56 | 0 | 0 | 2 | MASCOT | T |       |
| 5.71E-03 | 0 0 | Cs7g32500.1/Cs7g325 | 8.56 | 0 | 0 | 2 | MASCOT | T | PLEX8 |
| 2.95E-03 | 0 0 | Cs7g32500.1/Cs7g325 | 4.53 | 0 | 0 | 2 | MASCOT | T |       |
| 1.03E-05 | 0 0 | Cs7g32500.1/Cs7g325 | 4.53 | 0 | 0 | 2 | MASCOT | T |       |
| 1.69E-03 | 0 0 | Cs7g32500.1/Cs7g325 | 4.53 | 0 | 0 | 2 | MASCOT | T |       |
| 1.77E-05 | 0 0 | Cs7g32500.1/Cs7g325 | 4.53 | 0 | 0 | 2 | MASCOT | T |       |
| 3.68E-04 | 0 0 | Cs7g32500.1/Cs7g325 | 4.53 | 0 | 0 | 2 | MASCOT | T |       |
| 8.57E-06 | 0 0 | Cs7g32500.1/Cs7g325 | 4.53 | 0 | 0 | 2 | MASCOT | T |       |
| 7.28E-03 | 0 0 | Cs7g32500.1/Cs7g325 | 4.53 | 0 | 0 | 2 | MASCOT | T |       |
| 5.93E-04 | 0 0 | Cs7g32500.1/Cs7g325 | 4.53 | 0 | 0 | 2 | MASCOT | T |       |
| 2.11E-02 | 0 0 | Cs7g32500.1/Cs7g325 | 4.14 | 0 | 0 | 2 | MASCOT | T | PLEX8 |
| 5.33E-05 | 0 0 | Cs7g32500.1/Cs7g325 | 4.14 | 0 | 0 | 2 | MASCOT | T | PLEX8 |
| 2.02E-01 | 0 0 | Cs1g20220.1/Cs1g202 | 5.84 | 0 | 0 | 2 | MASCOT | T |       |
| 1.53E-01 | 0 0 | Cs1g20220.1/Cs1g202 | 4.53 | 0 | 0 | 2 | MASCOT | T | PLEX8 |
| 1.04E-01 | 0 0 | Cs1g20220.1/Cs1g202 | 6.1  | 0 | 0 | 2 | MASCOT | T | PLEX8 |
| 7.05E-04 | 0 0 | Cs1g20220.1/Cs1g202 | 6.1  | 0 | 0 | 2 | MASCOT | T | PLEX8 |
| 1.62E-02 | 0 0 | Cs1g20220.1/Cs1g202 | 6.1  | 0 | 0 | 2 | MASCOT | T | PLEX8 |
| 6.24E-03 | 0 0 | Cs1g20220.1/Cs1g202 | 6.1  | 0 | 0 | 2 | MASCOT | T | PLEX8 |
| 6.45E-02 | 0 0 | Cs1g20220.1/Cs1g202 | 6.1  | 0 | 0 | 2 | MASCOT | T | PLEX8 |
| 2.16E-01 | 0 0 | Cs1g20220.1/Cs1g202 | 8.59 | 0 | 0 | 2 | MASCOT | T | PLEX8 |
| 7.83E-03 | 0 0 | Cs1g20220.1/Cs1g202 | 8.59 | 0 | 0 | 2 | MASCOT | T | PLEX8 |
| 2.11E-02 | 0 0 | Cs1g20220.1/Cs1g202 | 8.59 | 0 | 0 | 2 | MASCOT | T | PLEX8 |
| 4.75E-02 | 0 0 | Cs1g20220.1/Cs1g202 | 8.59 | 0 | 0 | 2 | MASCOT | T | PLEX8 |
| 2.21E-01 | 0 0 | Cs1g20220.1/Cs1g202 | 8.59 | 0 | 0 | 2 | MASCOT | T | PLEX8 |
| 4.29E-03 | 0 0 | Cs1g20220.1/Cs1g202 | 8.59 | 0 | 0 | 2 | MASCOT | T | PLEX8 |
| 1.78E-02 | 0 0 | Cs1g20220.1/Cs1g202 | 8.59 | 0 | 0 | 2 | MASCOT | T | PLEX8 |
| 1.09E-01 | 0 0 | Cs1g20220.1/Cs1g202 | 8.59 | 0 | 0 | 2 | MASCOT | T | PLEX8 |
| 4.07E-02 | 0 0 | Cs1g20220.1/Cs1g202 | 8.59 | 0 | 0 | 2 | MASCOT | T | PLEX8 |
| 5.17E-02 | 0 0 | Cs1g20220.1/Cs1g202 | 8.59 | 0 | 0 | 2 | MASCOT | T |       |
| 5.08E-02 | 0 0 | Cs1g20220.1/Cs1g202 | 8.59 | 0 | 0 | 2 | MASCOT | T |       |
| 5.35E-02 | 0 0 | Cs3g17470.1/Cs3g174 | 4.25 | 0 | 0 | 2 | MASCOT | T | PLEX8 |
| 1.64E-01 | 0 0 | Cs7g24780.1/Cs7g247 | 6.75 | 0 | 0 | 2 | MASCOT | T |       |
| 1.77E-02 | 0 0 | Cs7g24780.1/Cs7g247 | 6.74 | 0 | 0 | 2 | MASCOT | T | PLEX8 |
| 4.35E-02 | 0 0 | Cs7g24780.1/Cs7g247 | 6.74 | 0 | 0 | 2 | MASCOT | T | PLEX8 |
| 1.73E-01 | 0 0 | Cs7g24780.1/Cs7g247 | 6.74 | 0 | 0 | 2 | MASCOT | T | PLEX8 |
| 2.44E-03 | 0 0 | Cs7g24780.1/Cs7g247 | 6.74 | 0 | 0 | 2 | MASCOT | T | PLEX8 |
| 3.88E-03 | 0 0 | Cs7g24780.1/Cs7g247 | 6.74 | 0 | 0 | 2 | MASCOT | T |       |
| 8.16E-04 | 0 0 | Cs7g24780.1/Cs7g247 | 6.75 | 0 | 0 | 2 | MASCOT | T | PLEX8 |

|          |     |                     |      |   |   |   |        |   |       |
|----------|-----|---------------------|------|---|---|---|--------|---|-------|
| 2.02E-01 | 0 0 | Cs7g24780.1/Cs7g247 | 6.75 | 0 | 0 | 2 | MASCOT | T | PLEX8 |
| 1.38E-03 | 0 0 | Cs7g24780.1/Cs7g247 | 5.72 | 0 | 0 | 2 | MASCOT | T | PLEX8 |
| 1.22E-01 | 0 0 | Cs7g24780.1/Cs7g247 | 5.72 | 0 | 0 | 2 | MASCOT | T | PLEX8 |
| 9.41E-03 | 0 0 | Cs7g24780.1/Cs7g247 | 5.72 | 0 | 0 | 2 | MASCOT | T | PLEX8 |
| 1.07E-01 | 0 0 | Cs7g24780.1/Cs7g247 | 5.72 | 0 | 0 | 2 | MASCOT | T | PLEX8 |
| 2.42E-04 | 0 0 | Cs7g24780.1/Cs7g247 | 6.74 | 0 | 0 | 2 | MASCOT | T | PLEX8 |
| 7.07E-02 | 0 0 | Cs7g24780.1/Cs7g247 | 6.74 | 0 | 0 | 2 | MASCOT | T | PLEX8 |
| 1.11E-04 | 0 0 | Cs7g24780.1/Cs7g247 | 6.74 | 0 | 0 | 2 | MASCOT | T | PLEX8 |
| 1.46E-03 | 0 0 | Cs7g24780.1/Cs7g247 | 6.74 | 0 | 0 | 2 | MASCOT | T | PLEX8 |
| 2.62E-03 | 0 0 | Cs7g24780.1/Cs7g247 | 6.74 | 0 | 0 | 2 | MASCOT | T | PLEX8 |
| 2.77E-04 | 0 0 | Cs7g24780.1/Cs7g247 | 6.74 | 0 | 0 | 2 | MASCOT | T | PLEX8 |
| 2.13E-04 | 0 0 | Cs7g29850.1/Cs7g298 | 6.05 | 0 | 0 | 2 | MASCOT | T | PLEX8 |
| 1.28E-02 | 0 0 | Cs7g29850.1/Cs7g298 | 6.05 | 0 | 0 | 2 | MASCOT | T |       |
| 6.36E-05 | 0 0 | Cs7g29850.1/Cs7g298 | 6.05 | 0 | 0 | 2 | MASCOT | T | PLEX8 |
| 3.04E-03 | 0 0 | Cs7g29850.1/Cs7g298 | 6.05 | 0 | 0 | 2 | MASCOT | T |       |
| 2.19E-02 | 0 0 | Cs7g29850.1/Cs7g298 | 8.51 | 0 | 0 | 2 | MASCOT | T | PLEX8 |
| 9.07E-02 | 0 0 | Cs7g29850.1/Cs7g298 | 8.51 | 0 | 0 | 2 | MASCOT | T | PLEX8 |
| 2.62E-02 | 0 0 | Cs7g29850.1/Cs7g298 | 8.51 | 0 | 0 | 2 | MASCOT | T | PLEX8 |
| 4.08E-02 | 0 0 | Cs7g29850.1/Cs7g298 | 8.51 | 0 | 0 | 2 | MASCOT | T | PLEX8 |
| 2.75E-03 | 0 0 | Cs7g29850.1/Cs7g298 | 8.51 | 0 | 0 | 2 | MASCOT | T |       |
| 1.26E-02 | 0 0 | Cs7g29850.1/Cs7g298 | 5.81 | 0 | 0 | 2 | MASCOT | T |       |
| 9.26E-05 | 0 0 | Cs7g29850.1/Cs7g298 | 5.81 | 0 | 0 | 2 | MASCOT | T |       |
| 1.56E-01 | 0 0 | Cs7g29850.1/Cs7g298 | 5.81 | 0 | 0 | 2 | MASCOT | T |       |
| 3.38E-03 | 0 0 | Cs7g29850.1/Cs7g298 | 5.81 | 0 | 0 | 2 | MASCOT | T |       |
| 1.19E-01 | 0 0 | Cs7g29850.1/Cs7g298 | 5.83 | 0 | 0 | 2 | MASCOT | T | PLEX8 |
| 1.55E-01 | 0 0 | Cs7g29850.1/Cs7g298 | 5.83 | 0 | 0 | 2 | MASCOT | T |       |
| 1.32E-01 | 0 0 | Cs7g29850.1/Cs7g298 | 4.37 | 0 | 0 | 2 | MASCOT | T |       |
| 2.35E-04 | 0 0 | Cs7g29850.1/Cs7g298 | 4.37 | 0 | 0 | 2 | MASCOT | T |       |
| 2.41E-04 | 0 0 | Cs7g29850.1/Cs7g298 | 4.37 | 0 | 0 | 2 | MASCOT | T |       |
| 4.40E-02 | 0 0 | Cs9g09470.1         | 6.74 | 0 | 0 | 2 | MASCOT | T | PLEX8 |
| 6.40E-03 | 0 0 | Cs9g09470.1         | 6.74 | 0 | 0 | 2 | MASCOT | T | PLEX8 |
| 4.31E-06 | 0 0 | Cs9g09470.1         | 6.74 | 0 | 0 | 2 | MASCOT | T | PLEX8 |
| 1.59E-03 | 0 0 | Cs9g09470.1         | 6.74 | 0 | 0 | 2 | MASCOT | T | PLEX8 |
| 9.12E-06 | 0 0 | Cs9g09470.1         | 6.74 | 0 | 0 | 2 | MASCOT | T | PLEX8 |
| 2.58E-02 | 0 0 | Cs9g09470.1         | 4.37 | 0 | 0 | 2 | MASCOT | T | PLEX8 |
| 1.91E-03 | 0 0 | Cs9g09470.1         | 4.37 | 0 | 0 | 2 | MASCOT | T | PLEX8 |
| 1.10E-02 | 0 0 | Cs9g09470.1         | 4.37 | 0 | 0 | 2 | MASCOT | T | PLEX8 |
| 7.23E-02 | 0 0 | Cs9g09470.1         | 4.37 | 0 | 0 | 2 | MASCOT | T | PLEX8 |
| 2.84E-04 | 0 0 | Cs9g09470.1         | 4.37 | 0 | 0 | 2 | MASCOT | T | PLEX8 |
| 4.93E-04 | 0 0 | Cs9g09470.1         | 4.37 | 0 | 0 | 2 | MASCOT | T | PLEX8 |
| 3.16E-02 | 0 0 | Cs9g09470.1         | 4.37 | 0 | 0 | 2 | MASCOT | T | PLEX8 |
| 3.53E-01 | 0 0 | Cs9g09470.1         | 4.37 | 0 | 0 | 2 | MASCOT | T | PLEX8 |
| 3.05E-01 | 0 0 | Cs9g09470.1         | 8.72 | 0 | 0 | 2 | MASCOT | T | PLEX8 |
| 3.28E-01 | 0 0 | Cs9g09470.1         | 8.72 | 0 | 0 | 2 | MASCOT | T | PLEX8 |
| 6.73E-02 | 0 0 | Cs9g09470.1         | 8.72 | 0 | 0 | 2 | MASCOT | T | PLEX8 |
| 1.75E-02 | 0 0 | Cs9g09470.1/Cs9g094 | 5.81 | 0 | 0 | 2 | MASCOT | T | PLEX8 |
| 6.66E-03 | 0 0 | Cs9g09470.1/Cs9g094 | 5.81 | 0 | 0 | 2 | MASCOT | T | PLEX8 |
| 1.19E-01 | 0 0 | Cs3g17940.1/Cs9g098 | 5.88 | 0 | 0 | 2 | MASCOT | T | PLEX8 |
| 4.30E-01 | 0 0 | Cs9g09850.1         | 6    | 0 | 0 | 2 | MASCOT | T | PLEX8 |
| 1.22E-02 | 0 0 | Cs9g09850.1         | 6    | 0 | 0 | 2 | MASCOT | T | PLEX8 |
| 1.48E-02 | 0 0 | Cs9g09850.1         | 6    | 0 | 0 | 2 | MASCOT | T | PLEX8 |

|          |     |                     |      |        |   |   |        |   |       |
|----------|-----|---------------------|------|--------|---|---|--------|---|-------|
| 2.88E-02 | 0 0 | Cs9g09850.1         | 6    | 0      | 0 | 2 | MASCOT | T | PLEX8 |
| 5.05E-01 | 0 0 | Cs9g09850.1         | 6    | 0      | 0 | 2 | MASCOT | T | PLEX8 |
| 4.17E-04 | 0 0 | Cs3g17940.1/Cs9g098 | 4.21 | 0      | 0 | 2 | MASCOT | T | PLEX8 |
| 4.67E-02 | 0 0 | Cs3g17940.1/Cs9g098 | 4.21 | 0      | 0 | 2 | MASCOT | T | PLEX8 |
| 8.58E-03 | 0 0 | Cs3g17940.1/Cs9g098 | 4.21 | 0      | 0 | 2 | MASCOT | T | PLEX8 |
| 4.60E-03 | 0 0 | Cs3g17940.1/Cs9g098 | 4.21 | 0      | 0 | 2 | MASCOT | T | PLEX8 |
| 3.96E-01 | 0 0 | Cs3g17940.1/Cs9g098 | 4.21 | 0      | 0 | 2 | MASCOT | T | PLEX8 |
| 7.79E-04 | 0 0 | Cs3g17940.1/Cs9g098 | 4.21 | 0      | 0 | 2 | MASCOT | T | PLEX8 |
| 9.41E-02 | 0 0 | Cs3g17940.1/Cs9g098 | 4.21 | 0      | 0 | 2 | MASCOT | T | PLEX8 |
| 1.23E-02 | 0 0 | Cs3g17940.1/Cs9g098 | 4.21 | 0      | 0 | 2 | MASCOT | T | PLEX8 |
| 3.21E-01 | 0 0 | Cs3g17940.1/Cs9g098 | 8.75 | 0      | 0 | 2 | MASCOT | T | PLEX8 |
| 2.79E-03 | 0 0 | Cs3g17940.1/Cs9g098 | 8.75 | 0      | 0 | 2 | MASCOT | T | PLEX8 |
| 2.61E-03 | 0 0 | Cs3g17940.1/Cs9g098 | 8.75 | 0      | 0 | 2 | MASCOT | T | PLEX8 |
| 4.20E-03 | 0 0 | Cs9g09850.1         | 3.92 | 0      | 0 | 2 | MASCOT | T | PLEX8 |
| 9.04E-02 | 0 0 | Cs7g30370.1/Cs7g303 | 8.8  | 0      | 0 | 2 | MASCOT | T | PLEX8 |
| 6.84E-02 | 0 0 | Cs7g30370.1/Cs7g303 | 8.8  | 0      | 0 | 2 | MASCOT | T | PLEX8 |
| 3.39E-03 | 0 0 | Cs7g30370.1/Cs7g303 | 4.37 | 0      | 0 | 2 | MASCOT | T | PLEX8 |
| 1.34E-02 | 0 0 | Cs7g30370.1/Cs7g303 | 4.37 | 0      | 0 | 2 | MASCOT | T | PLEX8 |
| 1.84E-02 | 0 0 | Cs7g30370.1/Cs7g303 | 4.37 | 0      | 0 | 2 | MASCOT | T | PLEX8 |
| 4.75E-02 | 0 0 | Cs7g30370.1/Cs7g303 | 3.91 | 0      | 0 | 2 | MASCOT | T | PLEX8 |
| 3.53E-03 | 0 0 | Cs7g30370.1/Cs7g303 | 3.91 | 0      | 0 | 2 | MASCOT | T | PLEX8 |
| 1.87E-04 | 0 0 | Cs7g30370.1/Cs7g303 | 3.91 | 0      | 0 | 2 | MASCOT | T | PLEX8 |
| 5.06E-04 | 0 0 | Cs7g30370.1/Cs7g303 | 3.91 | 0      | 0 | 2 | MASCOT | T | PLEX8 |
| 9.99E-02 | 0 0 | Cs7g30370.1/Cs7g303 | 5.66 | 0      | 0 | 2 | MASCOT | T | PLEX8 |
| 4.92E-02 | 0 0 | Cs7g30370.1/Cs7g303 | 5.66 | 0      | 0 | 2 | MASCOT | T | PLEX8 |
| 2.50E-01 | 0 0 | Cs7g30370.1/Cs7g303 | 5.66 | 0      | 0 | 2 | MASCOT | T | PLEX8 |
| 1.35E-02 | 0 0 | Cs7g30370.1/Cs7g303 | 5.66 | 0      | 0 | 2 | MASCOT | T | PLEX8 |
| 3.28E-01 | 0 0 | Cs7g30370.1/Cs7g303 | 5.66 | 0      | 0 | 2 | MASCOT | T | PLEX8 |
| 3.74E-02 | 0 0 | Cs7g30370.1/Cs7g303 | 5.32 | 0 15.9 | 0 | 2 | MASCOT | T | PLEX8 |
| 1.36E-01 | 0 0 | Cs7g30370.1/Cs7g303 | 5.32 | 0      | 0 | 2 | MASCOT | T | PLEX8 |
| 1.56E-02 | 0 0 | Cs7g30370.1/Cs7g303 | 5.32 | 0      | 0 | 2 | MASCOT | T | PLEX8 |
| 4.52E-03 | 0 0 | Cs3g21500.1/Cs3g215 | 5.99 | 0      | 0 | 2 | MASCOT | T | PLEX8 |
| 3.28E-03 | 0 0 | Cs3g21500.1/Cs3g215 | 5.99 | 0      | 0 | 2 | MASCOT | T | PLEX8 |
| 9.61E-03 | 0 0 | Cs3g21500.1/Cs3g215 | 4.4  | 0      | 0 | 2 | MASCOT | T | PLEX8 |
| 4.07E-02 | 0 0 | Cs3g21500.1/Cs3g215 | 4.4  | 0      | 0 | 2 | MASCOT | T | PLEX8 |
| 1.23E-01 | 0 0 | Cs3g21500.1         | 4    | 0      | 0 | 2 | MASCOT | T | PLEX8 |
| 2.63E-02 | 0 0 | Cs3g21500.1         | 4.68 | 0      | 0 | 2 | MASCOT | T | PLEX8 |
| 3.36E-02 | 0 0 | Cs3g21500.1         | 4.68 | 0      | 0 | 2 | MASCOT | T | PLEX8 |
| 5.42E-02 | 0 0 | Cs3g21500.1         | 4.68 | 0      | 0 | 2 | MASCOT | T | PLEX8 |
| 1.25E-03 | 0 0 | Cs3g21500.1         | 4.68 | 0      | 0 | 2 | MASCOT | T | PLEX8 |
| 1.30E-02 | 0 0 | Cs3g21500.1         | 4.68 | 0      | 0 | 2 | MASCOT | T | PLEX8 |
| 1.61E-02 | 0 0 | Cs3g21500.1         | 6.18 | 1      | 0 | 2 | MASCOT | T | PLEX8 |
| 1.37E-02 | 0 0 | Cs3g21500.1         | 6.18 | 1      | 0 | 2 | MASCOT | T | PLEX8 |
| 5.71E-03 | 0 0 | Cs3g21500.1         | 6.18 | 1      | 0 | 2 | MASCOT | T | PLEX8 |
| 1.70E-02 | 0 0 | Cs3g21500.1         | 6.18 | 1      | 0 | 2 | MASCOT | T | PLEX8 |
| 2.10E-02 | 0 0 | Cs3g21500.1         | 6.18 | 1      | 0 | 2 | MASCOT | T | PLEX8 |
| 1.37E-02 | 0 0 | Cs3g21500.1         | 6.18 | 1      | 0 | 2 | MASCOT | T | PLEX8 |
| 1.67E-02 | 0 0 | Cs2g03260.1         | 5.88 | 0      | 0 | 2 | MASCOT | T | PLEX8 |
| 9.96E-03 | 0 0 | Cs2g03260.1         | 5.88 | 0      | 0 | 2 | MASCOT | T | PLEX8 |
| 7.59E-04 | 0 0 | Cs2g03260.1         | 5.88 | 0      | 0 | 2 | MASCOT | T | PLEX8 |
| 1.02E-02 | 0 0 | Cs2g03260.1         | 5.88 | 0      | 0 | 2 | MASCOT | T | PLEX8 |

|          |     |                     |      |   |      |   |        |        |       |       |
|----------|-----|---------------------|------|---|------|---|--------|--------|-------|-------|
| 5.56E-02 | 0 0 | Cs2g03260.1/Cs2g032 | 4.03 | 0 | 0    | 2 | MASCOT | T      | PLEX8 |       |
| 7.39E-03 | 0 0 | Cs2g03260.1         | 5.4  | 0 | 0    | 2 | MASCOT | T      | PLEX8 |       |
| 7.30E-02 | 0 0 | Cs2g03260.1         | 5.4  | 0 | 0    | 2 | MASCOT | T      | PLEX8 |       |
| 1.61E-01 | 0 0 | Cs2g03260.1         | 5.4  | 0 | 0    | 2 | MASCOT | T      |       |       |
| 2.97E-02 | 0 0 | Cs2g03260.1         | 5.4  | 0 | 0    | 2 | MASCOT | T      |       |       |
| 5.51E-02 | 0 0 | Cs2g03260.1         | 5.4  | 0 | 0    | 2 | MASCOT | T      |       |       |
| 1.60E-03 | 0 0 | Cs2g03260.1/Cs2g032 | 6.75 | 0 | 0    | 2 | MASCOT | T      | PLEX8 |       |
| 2.01E-03 | 0 0 | Cs2g03260.1/Cs2g032 | 6.75 | 0 | 0    | 2 | MASCOT | T      | PLEX8 |       |
| 6.88E-03 | 0 0 | Cs2g03260.1/Cs2g032 | 8.6  | 0 | 15.9 | 0 | 2      | MASCOT | T     | PLEX8 |
| 4.49E-02 | 0 0 | Cs2g03260.1/Cs2g032 | 8.6  | 0 | 15.9 | 0 | 2      | MASCOT | T     |       |
| 3.34E-03 | 0 0 | Cs2g03260.1/Cs2g032 | 8.6  | 0 | 0    | 2 | MASCOT | T      | PLEX8 |       |
| 1.11E-01 | 0 0 | Cs2g13560.1/Cs2g135 | 8.22 | 0 | 0    | 2 | MASCOT | T      | PLEX8 |       |
| 2.88E-04 | 0 0 | Cs2g13560.1/Cs2g135 | 8.22 | 0 | 0    | 2 | MASCOT | T      | PLEX8 |       |
| 4.33E-06 | 0 0 | Cs2g13560.1/Cs2g135 | 8.22 | 0 | 0    | 2 | MASCOT | T      | PLEX8 |       |
| 2.51E-02 | 0 0 | Cs2g13560.1/Cs2g135 | 6.07 | 1 | 15.9 | 0 | 2      | MASCOT | T     | PLEX8 |
| 2.49E-02 | 0 0 | Cs2g13560.1/Cs2g135 | 6.07 | 1 | 0    | 2 | MASCOT | T      | PLEX8 |       |
| 3.42E-02 | 0 0 | Cs2g13560.1/Cs2g135 | 6.07 | 1 | 0    | 2 | MASCOT | T      | PLEX8 |       |
| 1.63E-05 | 0 0 | Cs2g13560.2         | 4.09 | 0 | 15.9 | 0 | 2      | MASCOT | T     |       |
| 1.34E-04 | 0 0 | Cs2g13560.2         | 4.09 | 0 | 0    | 2 | MASCOT | T      |       |       |
| 1.11E-04 | 0 0 | Cs2g13560.1/Cs2g135 | 5.72 | 0 | 0    | 2 | MASCOT | T      | PLEX8 |       |
| 1.24E-07 | 0 0 | Cs2g13560.1/Cs2g135 | 5.72 | 0 | 0    | 2 | MASCOT | T      | PLEX8 |       |
| 7.18E-02 | 0 0 | Cs2g13560.1/Cs2g135 | 5.72 | 0 | 0    | 2 | MASCOT | T      | PLEX8 |       |
| 1.03E-02 | 0 0 | Cs2g13560.1/Cs2g135 | 5.72 | 0 | 0    | 2 | MASCOT | T      | PLEX8 |       |
| 7.79E-02 | 0 0 | Cs2g13560.1/Cs2g135 | 5.72 | 0 | 0    | 2 | MASCOT | T      | PLEX8 |       |
| 4.27E-03 | 0 0 | Cs2g13560.1/Cs2g135 | 5.72 | 0 | 0    | 2 | MASCOT | T      | PLEX8 |       |
| 2.75E-03 | 0 0 | Cs2g13560.1/Cs2g135 | 5.72 | 0 | 0    | 2 | MASCOT | T      | PLEX8 |       |
| 1.56E-02 | 0 0 | Cs3g19770.1/Cs3g197 | 6.46 | 0 | 0    | 2 | MASCOT | T      |       |       |
| 1.39E-02 | 0 0 | Cs3g19770.1/Cs3g197 | 6.46 | 0 | 0    | 2 | MASCOT | T      |       |       |
| 5.14E-02 | 0 0 | Cs3g19770.1/Cs3g197 | 4.03 | 0 | 0    | 2 | MASCOT | T      | PLEX8 |       |
| 2.27E-02 | 0 0 | Cs3g19770.1/Cs3g197 | 5.84 | 0 | 0    | 2 | MASCOT | T      | PLEX8 |       |
| 3.30E-02 | 0 0 | Cs3g19770.1/Cs3g197 | 5.84 | 0 | 0    | 2 | MASCOT | T      | PLEX8 |       |
| 5.77E-03 | 0 0 | Cs3g19770.1/Cs3g197 | 5.84 | 0 | 0    | 2 | MASCOT | T      | PLEX8 |       |
| 4.62E-02 | 0 0 | Cs3g19770.1/Cs3g197 | 4.31 | 0 | 15.9 | 0 | 2      | MASCOT | T     | PLEX8 |
| 1.81E-02 | 0 0 | Cs3g19770.1/Cs3g197 | 4.31 | 0 | 15.9 | 0 | 2      | MASCOT | T     |       |
| 1.56E-01 | 0 0 | Cs3g19770.1/Cs3g197 | 4.31 | 0 | 0    | 2 | MASCOT | T      | PLEX8 |       |
| 2.48E-03 | 0 0 | Cs3g19770.1/Cs3g197 | 4.31 | 0 | 0    | 2 | MASCOT | T      | PLEX8 |       |
| 1.19E-04 | 0 0 | Cs3g19770.1/Cs3g197 | 4.31 | 0 | 0    | 2 | MASCOT | T      |       |       |
| 9.27E-02 | 0 0 | Cs3g19770.1/Cs3g197 | 4.31 | 0 | 0    | 2 | MASCOT | T      |       |       |
| 2.84E-02 | 0 0 | Cs3g19770.1/Cs3g197 | 6.75 | 0 | 0    | 2 | MASCOT | T      | PLEX8 |       |
| 5.78E-02 | 0 0 | Cs3g19770.1/Cs3g197 | 6.75 | 0 | 0    | 2 | MASCOT | T      | PLEX8 |       |
| 2.89E-02 | 0 0 | Cs3g19770.1/Cs3g197 | 6.75 | 0 | 0    | 2 | MASCOT | T      |       |       |
| 6.83E-02 | 0 0 | Cs3g20800.1/Cs3g208 | 4.25 | 0 | 0    | 2 | MASCOT | T      | PLEX8 |       |
| 9.43E-02 | 0 0 | Cs3g20800.1/Cs3g208 | 6.75 | 0 | 0    | 2 | MASCOT | T      | PLEX8 |       |
| 1.47E-03 | 0 0 | Cs3g20800.1/Cs3g208 | 6.75 | 0 | 0    | 2 | MASCOT | T      | PLEX8 |       |
| 4.24E-01 | 0 0 | Cs3g20800.1/Cs3g208 | 6.75 | 0 | 0    | 2 | MASCOT | T      | PLEX8 |       |
| 1.78E-01 | 0 0 | Cs3g20800.1/Cs3g208 | 5.84 | 0 | 0    | 2 | MASCOT | T      | PLEX8 |       |
| 7.54E-02 | 0 0 | Cs3g20800.1/Cs3g208 | 6.41 | 0 | 15.9 | 0 | 2      | MASCOT | T     | PLEX8 |
| 4.22E-02 | 0 0 | Cs3g20800.1/Cs3g208 | 6.41 | 0 | 15.9 | 0 | 2      | MASCOT | T     | PLEX8 |
| 8.08E-03 | 0 0 | Cs3g20800.1/Cs3g208 | 6.41 | 0 | 15.9 | 0 | 2      | MASCOT | T     | PLEX8 |
| 9.51E-02 | 0 0 | Cs3g20800.1/Cs3g208 | 6.41 | 0 | 0    | 2 | MASCOT | T      | PLEX8 |       |
| 4.98E-04 | 0 0 | Cs3g20800.1/Cs3g208 | 6.41 | 0 | 0    | 2 | MASCOT | T      | PLEX8 |       |



|          |     |                       |      |   |      |   |        |        |       |       |
|----------|-----|-----------------------|------|---|------|---|--------|--------|-------|-------|
| 6.14E-02 | 0 0 | Cs3g20800.1/Cs3g208   | 4.37 | 0 | 0    | 2 | MASCOT | T      | PLEX8 |       |
| 1.98E-01 | 0 0 | Cs3g20800.1/Cs3g208   | 4.37 | 0 | 0    | 2 | MASCOT | T      | PLEX8 |       |
| 6.49E-02 | 0 0 | Cs3g20800.1/Cs3g208   | 4.37 | 0 | 0    | 2 | MASCOT | T      | PLEX8 |       |
| 6.95E-02 | 0 0 | Cs3g20800.1/Cs3g208   | 4.37 | 0 | 0    | 2 | MASCOT | T      | PLEX8 |       |
| 5.69E-02 | 0 0 | Cs3g20800.1/Cs3g208   | 4.37 | 0 | 0    | 2 | MASCOT | T      | PLEX8 |       |
| 2.46E-02 | 0 0 | Cs5g20670.1           | 4.21 | 0 | 0    | 2 | MASCOT | T      | PLEX8 |       |
| 6.03E-02 | 0 0 | Cs5g20670.1           | 4.21 | 0 | 0    | 2 | MASCOT | T      |       |       |
| 1.13E-02 | 0 0 | Cs5g20670.1           | 6.75 | 0 | 0    | 2 | MASCOT | T      | PLEX8 |       |
| 4.09E-07 | 0 0 | Cs5g20670.1           | 3.94 | 0 | 0    | 2 | MASCOT | T      | PLEX8 |       |
| 5.16E-03 | 0 0 | Cs5g20670.1           | 3.94 | 0 | 0    | 2 | MASCOT | T      |       |       |
| 5.75E-08 | 0 0 | Cs5g20670.1           | 3.94 | 0 | 0    | 2 | MASCOT | T      |       |       |
| 3.36E-03 | 0 0 | Cs5g20670.1           | 3.94 | 0 | 0    | 2 | MASCOT | T      |       |       |
| 2.93E-01 | 0 0 | Cs5g20670.1           | 8.22 | 0 | 0    | 2 | MASCOT | T      | PLEX8 |       |
| 2.67E-01 | 0 0 | Cs5g20670.1           | 8.22 | 0 | 0    | 2 | MASCOT | T      | PLEX8 |       |
| 3.39E-01 | 0 0 | Cs5g20670.1           | 8.22 | 0 | 0    | 2 | MASCOT | T      | PLEX8 |       |
| 3.17E-03 | 0 0 | Cs5g20670.1           | 11   | 0 | 0    | 2 | MASCOT | T      | PLEX8 |       |
| 2.76E-02 | 0 0 | Cs5g20670.1           | 11   | 0 | 0    | 2 | MASCOT | T      | PLEX8 |       |
| 8.86E-02 | 0 0 | Cs5g20670.1           | 11   | 0 | 0    | 2 | MASCOT | T      | PLEX8 |       |
| 6.89E-03 | 0 0 | Cs5g20670.1           | 11   | 0 | 0    | 2 | MASCOT | T      | PLEX8 |       |
| 1.70E-01 | 0 0 | Cs5g20670.1           | 11   | 0 | 0    | 2 | MASCOT | T      | PLEX8 |       |
| 6.77E-03 | 0 0 | Cs8g04260.1/Cs8g042   | 4.37 | 0 | 0    | 2 | MASCOT | T      | PLEX8 |       |
| 4.89E-03 | 0 0 | Cs8g04260.1/Cs8g042   | 4.37 | 0 | 0    | 2 | MASCOT | T      | PLEX8 |       |
| 1.40E-02 | 0 0 | Cs8g04260.1/Cs8g042   | 4.37 | 0 | 0    | 2 | MASCOT | T      | PLEX8 |       |
| 1.59E-01 | 0 0 | Cs8g04260.1/Cs8g042   | 4.37 | 0 | 0    | 2 | MASCOT | T      | PLEX8 |       |
| 1.14E-02 | 0 0 | Cs8g04260.1/Cs8g042   | 4.37 | 0 | 0    | 2 | MASCOT | T      | PLEX8 |       |
| 7.70E-04 | 0 0 | Cs8g04260.1/Cs8g042   | 4.03 | 0 | 0    | 2 | MASCOT | T      | PLEX8 |       |
| 1.68E-04 | 0 0 | Cs8g04260.1/Cs8g042   | 4.03 | 0 | 0    | 2 | MASCOT | T      | PLEX8 |       |
| 1.77E-01 | 0 0 | Cs8g04260.1/Cs8g042   | 4.03 | 0 | 0    | 2 | MASCOT | T      | PLEX8 |       |
| 3.23E-01 | 0 0 | Cs8g04260.1/Cs8g042   | 4.03 | 0 | 0    | 2 | MASCOT | T      |       |       |
| 6.50E-03 | 0 0 | Cs8g04260.1/Cs8g042   | 8.75 | 0 | 0    | 2 | MASCOT | T      |       |       |
| 1.90E-02 | 0 0 | Cs8g04260.1/Cs8g042   | 6.1  | 0 | 0    | 2 | MASCOT | T      | PLEX8 |       |
| 9.83E-02 | 0 0 | Cs8g04260.1/Cs8g042   | 6.1  | 0 | 0    | 2 | MASCOT | T      | PLEX8 |       |
| 1.96E-04 | 0 0 | Cs8g04260.1/Cs8g042   | 6.1  | 0 | 0    | 2 | MASCOT | T      | PLEX8 |       |
| 1.36E-01 | 0 0 | Cs8g04260.1/Cs8g042   | 8.75 | 0 | 0    | 2 | MASCOT | T      | PLEX8 |       |
| 5.23E-02 | 0 0 | Cs8g04260.1/Cs8g042   | 8.75 | 0 | 0    | 2 | MASCOT | T      | PLEX8 |       |
| 2.26E-03 | 0 0 | orange1.1t01419.1/ora | 4.22 | 0 | 0    | 2 | MASCOT | T      | PLEX8 |       |
| 1.25E-04 | 0 0 | orange1.1t01419.1/ora | 4.22 | 0 | 0    | 2 | MASCOT | T      | PLEX8 |       |
| 1.06E-03 | 0 0 | orange1.1t01419.1/ora | 4.22 | 0 | 0    | 2 | MASCOT | T      | PLEX8 |       |
| 9.75E-05 | 0 0 | orange1.1t01419.1/ora | 4.22 | 0 | 0    | 2 | MASCOT | T      | PLEX8 |       |
| 5.47E-03 | 0 0 | orange1.1t01416.1/ora | 4.21 | 0 | 0    | 2 | MASCOT | T      | PLEX8 |       |
| 1.34E-02 | 0 0 | orange1.1t01416.1/ora | 4.21 | 0 | 0    | 2 | MASCOT | T      | PLEX8 |       |
| 3.88E-02 | 0 0 | orange1.1t01416.1/ora | 4.21 | 0 | 0    | 2 | MASCOT | T      |       |       |
| 2.89E-03 | 0 0 | orange1.1t01419.1/ora | 4.53 | 0 | 0    | 2 | MASCOT | T      | PLEX8 |       |
| 4.72E-03 | 0 0 | orange1.1t01426.1/ora | 6.61 | 0 | 0    | 2 | MASCOT | T      | PLEX8 |       |
| 3.13E-02 | 0 0 | orange1.1t01426.1/ora | 6.61 | 0 | 0    | 2 | MASCOT | T      | PLEX8 |       |
| 2.84E-02 | 0 0 | orange1.1t01426.1/ora | 6.61 | 0 | 0    | 2 | MASCOT | T      | PLEX8 |       |
| 1.24E-02 | 0 0 | orange1.1t01426.1/ora | 6.61 | 0 | 0    | 2 | MASCOT | T      | PLEX8 |       |
| 2.15E-01 | 0 0 | orange1.1t01416.1/ora | 5.75 | 0 | 0    | 2 | MASCOT | T      | PLEX8 |       |
| 1.90E-01 | 0 0 | orange1.1t01416.1/ora | 5.75 | 0 | 0    | 2 | MASCOT | T      | PLEX8 |       |
| 7.07E-02 | 0 0 | orange1.1t01416.1/ora | 5.75 | 0 | 0    | 2 | MASCOT | T      | PLEX8 |       |
| 1.22E-01 | 0 0 | orange1.1t02665.1/ora | 6.74 | 0 | 15.9 | 0 | 2      | MASCOT | T     | PLEX8 |

|          |     |                       |      |   |      |   |   |        |   |       |
|----------|-----|-----------------------|------|---|------|---|---|--------|---|-------|
| 4.75E-02 | 0 0 | orange1.1t02665.1/ora | 6.74 | 0 | 15.9 | 0 | 2 | MASCOT | T | PLEX8 |
| 1.93E-02 | 0 0 | orange1.1t02665.1/ora | 6.74 | 0 |      | 0 | 2 | MASCOT | T | PLEX8 |
| 7.94E-03 | 0 0 | orange1.1t02665.1/ora | 6.74 | 0 |      | 0 | 2 | MASCOT | T | PLEX8 |
| 1.57E-01 | 0 0 | orange1.1t02665.1/ora | 4.41 | 0 |      | 0 | 2 | MASCOT | T |       |
| 8.55E-04 | 0 0 | orange1.1t02665.1/ora | 4.41 | 0 |      | 0 | 2 | MASCOT | T |       |
| 6.77E-02 | 0 0 | orange1.1t02665.1/ora | 8.59 | 0 |      | 0 | 2 | MASCOT | T | PLEX8 |
| 2.44E-02 | 0 0 | orange1.1t02665.1/ora | 8.59 | 0 |      | 0 | 2 | MASCOT | T | PLEX8 |
| 2.06E-02 | 0 0 | orange1.1t02665.1/ora | 8.59 | 0 |      | 0 | 2 | MASCOT | T | PLEX8 |
| 1.12E-03 | 0 0 | orange1.1t02665.1/ora | 4.75 | 0 |      | 0 | 2 | MASCOT | T | PLEX8 |
| 1.03E-01 | 0 0 | orange1.1t02665.1/ora | 4.75 | 0 |      | 0 | 2 | MASCOT | T | PLEX8 |
| 1.69E-02 | 0 0 | orange1.1t02665.1/ora | 4.75 | 0 |      | 0 | 2 | MASCOT | T | PLEX8 |
| 1.19E-03 | 0 0 | orange1.1t02665.1/ora | 4.75 | 0 |      | 0 | 2 | MASCOT | T | PLEX8 |
| 1.81E-01 | 0 0 | orange1.1t02665.1/ora | 4.75 | 0 |      | 0 | 2 | MASCOT | T | PLEX8 |
| 8.81E-05 | 0 0 | orange1.1t02665.1/ora | 6    | 0 | 15.9 | 0 | 2 | MASCOT | T |       |
| 2.43E-01 | 0 0 | Cs1g25210.1/Cs2g221   | 8.64 | 0 |      | 0 | 2 | MASCOT | T | PLEX8 |
| 4.18E-03 | 0 0 | Cs1g25210.1           | 5.32 | 0 |      | 0 | 2 | MASCOT | T | PLEX8 |
| 3.00E-05 | 0 0 | Cs1g25210.1           | 5.32 | 0 |      | 0 | 2 | MASCOT | T | PLEX8 |
| 7.08E-04 | 0 0 | Cs1g25210.1           | 5.32 | 0 |      | 0 | 2 | MASCOT | T | PLEX8 |
| 3.24E-03 | 0 0 | Cs1g25210.1           | 5.32 | 0 |      | 0 | 2 | MASCOT | T |       |
| 1.66E-01 | 0 0 | Cs1g25210.1           | 5.32 | 0 |      | 0 | 2 | MASCOT | T |       |
| 3.21E-05 | 0 0 | Cs1g25210.1           | 4.41 | 0 |      | 0 | 2 | MASCOT | T | PLEX8 |
| 2.70E-04 | 0 0 | Cs1g25210.1           | 4.41 | 0 |      | 0 | 2 | MASCOT | T | PLEX8 |
| 1.03E-04 | 0 0 | Cs1g25210.1           | 4.41 | 0 |      | 0 | 2 | MASCOT | T | PLEX8 |
| 9.57E-03 | 0 0 | Cs1g25210.1/Cs2g221   | 8.75 | 0 |      | 0 | 2 | MASCOT | T | PLEX8 |
| 8.25E-03 | 0 0 | Cs1g25210.1/Cs2g221   | 8.75 | 0 |      | 0 | 2 | MASCOT | T | PLEX8 |
| 3.69E-02 | 0 0 | Cs1g25210.1/Cs2g221   | 5.26 | 0 |      | 0 | 2 | MASCOT | T | PLEX8 |
| 8.27E-06 | 0 0 | Cs1g25210.1/Cs2g221   | 5.26 | 0 |      | 0 | 2 | MASCOT | T | PLEX8 |
| 6.62E-06 | 0 0 | Cs1g25210.1/Cs2g221   | 5.26 | 0 |      | 0 | 2 | MASCOT | T | PLEX8 |
| 6.25E-03 | 0 0 | Cs3g14290.1           | 8.63 | 0 |      | 0 | 2 | MASCOT | T |       |
| 4.70E-03 | 0 0 | Cs3g14290.1           | 8.63 | 0 |      | 0 | 2 | MASCOT | T |       |
| 3.23E-03 | 0 0 | Cs3g14290.1           | 8.63 | 0 |      | 0 | 2 | MASCOT | T | PLEX8 |
| 3.67E-02 | 0 0 | Cs3g14290.1           | 4.37 | 0 |      | 0 | 2 | MASCOT | T | PLEX8 |
| 2.79E-01 | 0 0 | Cs3g14290.1           | 4.37 | 0 |      | 0 | 2 | MASCOT | T | PLEX8 |
| 4.84E-02 | 0 0 | Cs3g14290.1           | 4.37 | 0 |      | 0 | 2 | MASCOT | T | PLEX8 |
| 8.23E-02 | 0 0 | Cs3g14290.1           | 4.37 | 0 |      | 0 | 2 | MASCOT | T | PLEX8 |
| 5.89E-02 | 0 0 | Cs3g14290.1           | 4.37 | 0 |      | 0 | 2 | MASCOT | T | PLEX8 |
| 3.73E-02 | 0 0 | Cs3g14290.1           | 4.37 | 0 |      | 0 | 2 | MASCOT | T | PLEX8 |
| 3.94E-02 | 0 0 | Cs3g14290.1           | 5.4  | 0 |      | 0 | 2 | MASCOT | T | PLEX8 |
| 2.40E-02 | 0 0 | Cs3g14290.1           | 5.4  | 0 |      | 0 | 2 | MASCOT | T | PLEX8 |
| 1.19E-02 | 0 0 | Cs3g14290.1           | 3.91 | 0 | 15.9 | 0 | 2 | MASCOT | T |       |
| 4.49E-03 | 0 0 | Cs3g14290.1           | 3.91 | 0 |      | 0 | 2 | MASCOT | T |       |
| 1.57E-02 | 0 0 | Cs3g14290.1           | 5.95 | 0 |      | 0 | 2 | MASCOT | T |       |
| 1.36E-02 | 0 0 | Cs5g07190.1/Cs5g071   | 6.05 | 0 |      | 0 | 2 | MASCOT | T | PLEX8 |
| 3.19E-03 | 0 0 | Cs5g07190.1/Cs5g071   | 4.21 | 0 |      | 0 | 2 | MASCOT | T | PLEX8 |
| 4.84E-03 | 0 0 | Cs5g07190.1/Cs5g071   | 4.21 | 0 |      | 0 | 2 | MASCOT | T | PLEX8 |
| 3.67E-02 | 0 0 | Cs5g07190.1/Cs5g071   | 4.21 | 0 |      | 0 | 2 | MASCOT | T | PLEX8 |
| 3.93E-01 | 0 0 | Cs5g07190.1/Cs5g071   | 6.74 | 0 |      | 0 | 2 | MASCOT | T | PLEX8 |
| 3.52E-01 | 0 0 | Cs5g07190.1/Cs5g071   | 8.59 | 0 |      | 0 | 2 | MASCOT | T | PLEX8 |
| 1.91E-01 | 0 0 | Cs5g07190.1/Cs5g071   | 8.59 | 0 |      | 0 | 2 | MASCOT | T | PLEX8 |
| 1.43E-01 | 0 0 | Cs5g07190.1/Cs5g071   | 8.59 | 0 |      | 0 | 2 | MASCOT | T | PLEX8 |
| 3.77E-01 | 0 0 | Cs5g07190.1/Cs5g071   | 8.59 | 0 |      | 0 | 2 | MASCOT | T | PLEX8 |

|          |     |                     |      |   |      |   |        |        |       |       |
|----------|-----|---------------------|------|---|------|---|--------|--------|-------|-------|
| 1.02E-03 | 0 0 | Cs5g07190.1/Cs5g071 | 8.22 | 0 | 0    | 2 | MASCOT | T      | PLEX8 |       |
| 6.88E-02 | 0 0 | Cs5g07190.1/Cs5g071 | 8.22 | 0 | 0    | 2 | MASCOT | T      | PLEX8 |       |
| 3.76E-02 | 0 0 | Cs5g07190.1/Cs5g071 | 8.22 | 0 | 0    | 2 | MASCOT | T      | PLEX8 |       |
| 2.38E-03 | 0 0 | Cs5g07190.1/Cs5g071 | 8.22 | 0 | 0    | 2 | MASCOT | T      | PLEX8 |       |
| 3.48E-02 | 0 0 | Cs5g07190.1/Cs5g071 | 8.22 | 0 | 0    | 2 | MASCOT | T      | PLEX8 |       |
| 1.02E-01 | 0 0 | Cs6g14710.1/Cs6g147 | 5.32 | 0 | 0    | 2 | MASCOT | T      | PLEX8 |       |
| 8.89E-05 | 0 0 | Cs6g14710.1/Cs6g147 | 9.72 | 0 | 0    | 2 | MASCOT | T      | PLEX8 |       |
| 5.08E-05 | 0 0 | Cs6g14710.1/Cs6g147 | 9.72 | 0 | 0    | 2 | MASCOT | T      | PLEX8 |       |
| 4.16E-09 | 0 0 | Cs6g14710.1/Cs6g147 | 9.72 | 0 | 0    | 2 | MASCOT | T      | PLEX8 |       |
| 4.61E-02 | 0 0 | Cs6g14710.1/Cs6g147 | 6    | 0 | 0    | 2 | MASCOT | T      | PLEX8 |       |
| 1.59E-03 | 0 0 | Cs6g14710.1/Cs6g147 | 6    | 0 | 0    | 2 | MASCOT | T      | PLEX8 |       |
| 2.15E-02 | 0 0 | Cs6g14710.1/Cs6g147 | 6    | 0 | 0    | 2 | MASCOT | T      | PLEX8 |       |
| 1.43E-04 | 0 0 | Cs6g14710.1/Cs6g147 | 6    | 0 | 15.9 | 0 | 2      | MASCOT | T     | PLEX8 |
| 6.36E-06 | 0 0 | Cs6g14710.1/Cs6g147 | 6    | 0 | 0    | 2 | MASCOT | T      | PLEX8 |       |
| 1.16E-04 | 0 0 | Cs6g14710.1/Cs6g147 | 6    | 0 | 0    | 2 | MASCOT | T      | PLEX8 |       |
| 2.52E-04 | 0 0 | Cs6g14710.1/Cs6g147 | 6    | 0 | 0    | 2 | MASCOT | T      | PLEX8 |       |
| 5.39E-06 | 0 0 | Cs6g14710.1/Cs6g147 | 6    | 0 | 0    | 2 | MASCOT | T      | PLEX8 |       |
| 2.18E-02 | 0 0 | Cs6g14710.1/Cs6g147 | 6    | 0 | 0    | 2 | MASCOT | T      | PLEX8 |       |
| 2.90E-02 | 0 0 | Cs6g14710.1/Cs6g147 | 6    | 0 | 0    | 2 | MASCOT | T      | PLEX8 |       |
| 2.66E-02 | 0 0 | Cs6g17430.1/Cs7g140 | 4.37 | 0 | 0    | 2 | MASCOT | T      | PLEX8 |       |
| 2.82E-04 | 0 0 | Cs6g17430.1/Cs7g140 | 4.37 | 0 | 0    | 2 | MASCOT | T      | PLEX8 |       |
| 2.92E-03 | 0 0 | Cs7g14020.1/Cs7g140 | 6.74 | 0 | 0    | 2 | MASCOT | T      | PLEX8 |       |
| 7.60E-02 | 0 0 | Cs7g14020.1/Cs7g140 | 6.74 | 0 | 0    | 2 | MASCOT | T      | PLEX8 |       |
| 7.36E-02 | 0 0 | Cs7g14020.1/Cs7g140 | 6.74 | 0 | 0    | 2 | MASCOT | T      | PLEX8 |       |
| 2.85E-02 | 0 0 | Cs7g14020.1/Cs7g140 | 6.74 | 0 | 0    | 2 | MASCOT | T      | PLEX8 |       |
| 3.68E-03 | 0 0 | Cs7g14020.1/Cs7g140 | 5.32 | 0 | 0    | 2 | MASCOT | T      | PLEX8 |       |
| 1.61E-02 | 0 0 | Cs7g14020.1/Cs7g140 | 5.32 | 0 | 0    | 2 | MASCOT | T      | PLEX8 |       |
| 5.12E-04 | 0 0 | Cs7g14020.1/Cs7g140 | 5.33 | 0 | 0    | 2 | MASCOT | T      | PLEX8 |       |
| 4.43E-02 | 0 0 | Cs7g14020.1/Cs7g140 | 5.33 | 0 | 0    | 2 | MASCOT | T      | PLEX8 |       |
| 3.12E-02 | 0 0 | Cs7g14020.1/Cs7g140 | 5.33 | 0 | 0    | 2 | MASCOT | T      | PLEX8 |       |
| 2.72E-03 | 0 0 | Cs7g14020.1/Cs7g140 | 5.33 | 0 | 0    | 2 | MASCOT | T      | PLEX8 |       |
| 3.52E-01 | 0 0 | Cs7g14020.1/Cs7g140 | 5.5  | 0 | 0    | 2 | MASCOT | T      | PLEX8 |       |
| 2.55E-02 | 0 0 | Cs7g14020.1/Cs7g140 | 5.5  | 0 | 0    | 2 | MASCOT | T      | PLEX8 |       |
| 2.23E-02 | 0 0 | Cs7g11140.1/Cs7g111 | 9.76 | 0 | 0    | 2 | MASCOT | T      | PLEX8 |       |
| 1.04E-01 | 0 0 | Cs7g11140.1/Cs7g111 | 9.76 | 0 | 0    | 2 | MASCOT | T      | PLEX8 |       |
| 5.07E-02 | 0 0 | Cs7g11140.1/Cs7g111 | 9.76 | 0 | 0    | 2 | MASCOT | T      | PLEX8 |       |
| 3.20E-02 | 0 0 | Cs5g30600.1/Cs5g306 | 8.76 | 0 | 0    | 2 | MASCOT | T      | PLEX8 |       |
| 7.28E-02 | 0 0 | Cs5g30600.1/Cs5g306 | 8.76 | 0 | 0    | 2 | MASCOT | T      | PLEX8 |       |
| 1.40E-02 | 0 0 | Cs1g16250.1/Cs1g162 | 5.66 | 0 | 0    | 2 | MASCOT | T      | PLEX8 |       |
| 2.39E-02 | 0 0 | Cs1g16250.1/Cs1g162 | 5.66 | 0 | 0    | 2 | MASCOT | T      | PLEX8 |       |
| 6.56E-02 | 0 0 | Cs8g12840.1         | 5.81 | 0 | 0    | 2 | MASCOT | T      | PLEX8 |       |
| 1.57E-01 | 0 0 | Cs5g30600.1/Cs5g306 | 6.04 | 0 | 0    | 2 | MASCOT | T      | PLEX8 |       |
| 1.70E-01 | 0 0 | Cs5g30600.1/Cs5g306 | 6.04 | 0 | 0    | 2 | MASCOT | T      | PLEX8 |       |
| 1.53E-01 | 0 0 | Cs5g30600.1/Cs5g306 | 6.04 | 0 | 0    | 2 | MASCOT | T      | PLEX8 |       |
| 1.48E-01 | 0 0 | Cs5g30600.1/Cs5g306 | 6.04 | 0 | 0    | 2 | MASCOT | T      | PLEX8 |       |
| 8.13E-02 | 0 0 | Cs5g30600.1/Cs5g306 | 6.04 | 0 | 0    | 2 | MASCOT | T      | PLEX8 |       |
| 1.75E-01 | 0 0 | Cs5g30600.1/Cs5g306 | 6.04 | 0 | 0    | 2 | MASCOT | T      | PLEX8 |       |
| 3.14E-02 | 0 0 | Cs2g11210.1/Cs2g112 | 4.37 | 0 | 0    | 2 | MASCOT | T      | PLEX8 |       |
| 2.21E-03 | 0 0 | Cs2g11210.1/Cs2g112 | 4.37 | 0 | 0    | 2 | MASCOT | T      | PLEX8 |       |
| 1.11E-07 | 0 0 | Cs2g11210.1/Cs2g112 | 4.37 | 0 | 0    | 2 | MASCOT | T      | PLEX8 |       |
| 7.87E-07 | 0 0 | Cs2g11210.1/Cs2g112 | 4.37 | 0 | 0    | 2 | MASCOT | T      | PLEX8 |       |

|          |     |                     |      |   |      |   |        |        |       |       |
|----------|-----|---------------------|------|---|------|---|--------|--------|-------|-------|
| 5.30E-02 | 0 0 | Cs2g11210.1/Cs2g112 | 4    | 0 | 0    | 2 | MASCOT | T      | PLEX8 |       |
| 9.70E-04 | 0 0 | Cs2g11210.1/Cs2g112 | 4    | 0 | 0    | 2 | MASCOT | T      | PLEX8 |       |
| 2.06E-01 | 0 0 | Cs2g11210.1/Cs2g112 | 5.84 | 0 | 0    | 2 | MASCOT | T      | PLEX8 |       |
| 1.15E-02 | 0 0 | Cs2g11210.1/Cs2g112 | 6.74 | 0 | 0    | 2 | MASCOT | T      | PLEX8 |       |
| 6.74E-02 | 0 0 | Cs2g11210.1/Cs2g112 | 6.74 | 0 | 0    | 2 | MASCOT | T      |       |       |
| 3.11E-03 | 0 0 | Cs2g11210.1/Cs2g112 | 6.74 | 0 | 0    | 2 | MASCOT | T      |       |       |
| 2.07E-01 | 0 0 | Cs2g11210.1/Cs2g112 | 6.91 | 0 | 0    | 2 | MASCOT | T      | PLEX8 |       |
| 1.43E-01 | 0 0 | Cs2g11210.1/Cs2g112 | 6.91 | 0 | 0    | 2 | MASCOT | T      | PLEX8 |       |
| 7.11E-03 | 0 0 | Cs2g11210.1/Cs2g112 | 6.91 | 0 | 0    | 2 | MASCOT | T      | PLEX8 |       |
| 1.75E-03 | 0 0 | Cs6g14700.1         | 4.87 | 1 | 0    | 2 | MASCOT | T      | PLEX8 |       |
| 6.86E-04 | 0 0 | Cs6g14700.1         | 8.8  | 0 | 15.9 | 0 | 2      | MASCOT | T     | PLEX8 |
| 1.88E-08 | 0 0 | Cs6g14700.1         | 8.8  | 0 | 0    | 2 | MASCOT | T      | PLEX8 |       |
| 1.83E-04 | 0 0 | Cs6g14700.1/Cs6g147 | 6.05 | 0 | 0    | 2 | MASCOT | T      | PLEX8 |       |
| 7.80E-02 | 0 0 | Cs6g14700.1/Cs6g147 | 6.05 | 0 | 0    | 2 | MASCOT | T      | PLEX8 |       |
| 2.41E-01 | 0 0 | Cs6g14700.1/Cs6g147 | 6.05 | 0 | 0    | 2 | MASCOT | T      | PLEX8 |       |
| 6.74E-02 | 0 0 | Cs6g14700.1/Cs6g147 | 6.05 | 0 | 0    | 2 | MASCOT | T      |       |       |
| 1.42E-01 | 0 0 | Cs6g14700.1/Cs6g147 | 3.93 | 0 | 0    | 2 | MASCOT | T      |       |       |
| 1.44E-01 | 0 0 | Cs6g14700.1/Cs6g147 | 3.93 | 0 | 0    | 2 | MASCOT | T      | PLEX8 |       |
| 4.11E-03 | 0 0 | Cs6g14700.1/Cs6g147 | 3.93 | 0 | 0    | 2 | MASCOT | T      |       |       |
| 2.20E-04 | 0 0 | Cs6g14700.1/Cs6g147 | 3.93 | 0 | 0    | 2 | MASCOT | T      |       |       |
| 3.38E-04 | 0 0 | Cs6g14700.1         | 4.41 | 0 | 0    | 2 | MASCOT | T      | PLEX8 |       |
| 1.83E-04 | 0 0 | Cs6g14700.1         | 4.41 | 0 | 0    | 2 | MASCOT | T      | PLEX8 |       |
| 7.17E-04 | 0 0 | Cs7g29380.1/Cs7g293 | 4    | 0 | 0    | 2 | MASCOT | T      | PLEX8 |       |
| 2.34E-04 | 0 0 | Cs7g29380.1/Cs7g293 | 4    | 0 | 0    | 2 | MASCOT | T      | PLEX8 |       |
| 1.67E-02 | 0 0 | Cs7g29380.1/Cs7g293 | 4    | 0 | 0    | 2 | MASCOT | T      |       |       |
| 9.67E-02 | 0 0 | Cs7g29380.1/Cs7g293 | 5.32 | 0 | 0    | 2 | MASCOT | T      | PLEX8 |       |
| 7.95E-03 | 0 0 | Cs7g29380.1/Cs7g293 | 8.5  | 0 | 0    | 2 | MASCOT | T      | PLEX8 |       |
| 1.90E-02 | 0 0 | Cs7g29380.1/Cs7g293 | 8.5  | 0 | 0    | 2 | MASCOT | T      | PLEX8 |       |
| 4.77E-02 | 0 0 | Cs7g29380.1/Cs7g293 | 8.5  | 0 | 0    | 2 | MASCOT | T      |       |       |
| 5.98E-04 | 0 0 | Cs7g29380.1/Cs7g293 | 6    | 0 | 0    | 2 | MASCOT | T      | PLEX8 |       |
| 1.26E-02 | 0 0 | Cs7g29380.1/Cs7g293 | 5.81 | 0 | 0    | 2 | MASCOT | T      | PLEX8 |       |
| 6.68E-02 | 0 0 | Cs7g29380.1/Cs7g293 | 5.81 | 0 | 0    | 2 | MASCOT | T      | PLEX8 |       |
| 1.16E-01 | 0 0 | Cs7g29380.1/Cs7g293 | 5.81 | 0 | 0    | 2 | MASCOT | T      | PLEX8 |       |
| 1.61E-01 | 0 0 | Cs7g29380.1/Cs7g293 | 5.81 | 0 | 0    | 2 | MASCOT | T      | PLEX8 |       |
| 5.13E-03 | 0 0 | Cs7g29380.1/Cs7g293 | 5.81 | 0 | 0    | 2 | MASCOT | T      |       |       |
| 1.42E-01 | 0 0 | Cs5g01620.1         | 5.32 | 0 | 15.9 | 0 | 2      | MASCOT | T     | PLEX8 |
| 1.79E-02 | 0 0 | Cs5g01620.1         | 5.32 | 0 | 15.9 | 0 | 2      | MASCOT | T     | PLEX8 |
| 9.19E-02 | 0 0 | Cs5g01620.1         | 5.32 | 0 | 15.9 | 0 | 2      | MASCOT | T     | PLEX8 |
| 3.42E-01 | 0 0 | Cs5g01620.1         | 5.32 | 0 | 15.9 | 0 | 2      | MASCOT | T     |       |
| 1.33E-02 | 0 0 | Cs5g01620.1         | 5.32 | 0 | 0    | 2 | MASCOT | T      |       |       |
| 1.60E-02 | 0 0 | Cs5g01620.1         | 9.76 | 0 | 0    | 2 | MASCOT | T      | PLEX8 |       |
| 9.64E-04 | 0 0 | Cs5g01620.1         | 6.74 | 0 | 15.9 | 0 | 2      | MASCOT | T     | PLEX8 |
| 2.48E-01 | 0 0 | Cs5g01620.1         | 5.99 | 0 | 0    | 2 | MASCOT | T      | PLEX8 |       |
| 1.43E-03 | 0 0 | Cs5g01620.1         | 5.99 | 0 | 0    | 2 | MASCOT | T      | PLEX8 |       |
| 2.38E-02 | 0 0 | Cs5g01620.1         | 4.37 | 0 | 0    | 2 | MASCOT | T      | PLEX8 |       |
| 3.07E-03 | 0 0 | Cs5g01620.1         | 4.37 | 0 | 0    | 2 | MASCOT | T      | PLEX8 |       |
| 3.96E-02 | 0 0 | Cs5g01620.1         | 4.37 | 0 | 0    | 2 | MASCOT | T      | PLEX8 |       |
| 3.58E-03 | 0 0 | Cs5g15660.1/Cs5g209 | 4.21 | 0 | 0    | 2 | MASCOT | T      | PLEX8 |       |
| 2.88E-02 | 0 0 | Cs5g15660.1/Cs5g209 | 4.21 | 0 | 0    | 2 | MASCOT | T      | PLEX8 |       |
| 6.70E-04 | 0 0 | Cs5g20910.1/Cs5g210 | 5.59 | 0 | 15.9 | 0 | 2      | MASCOT | T     |       |
| 2.17E-05 | 0 0 | Cs5g20910.1/Cs5g210 | 5.59 | 0 | 15.9 | 0 | 2      | MASCOT | T     |       |

|          |     |                      |      |   |      |   |   |        |         |
|----------|-----|----------------------|------|---|------|---|---|--------|---------|
| 2.48E-02 | 0 0 | Cs5g20910.1/Cs5g210  | 5.59 | 0 | 15.9 | 0 | 2 | MASCOT | T       |
| 4.70E-02 | 0 0 | Cs5g20910.1/Cs5g210  | 5.59 | 0 | 15.9 | 0 | 2 | MASCOT | T       |
| 3.52E-01 | 0 0 | Cs5g20910.1          | 8.75 | 0 |      | 0 | 2 | MASCOT | T PLEX8 |
| 1.06E-02 | 0 0 | Cs5g20910.1          | 4.53 | 0 |      | 0 | 2 | MASCOT | T PLEX8 |
| 1.27E-02 | 0 0 | Cs5g20910.1          | 4.53 | 0 |      | 0 | 2 | MASCOT | T PLEX8 |
| 3.83E-01 | 0 0 | Cs5g20910.1          | 4.53 | 0 |      | 0 | 2 | MASCOT | T PLEX8 |
| 4.01E-02 | 0 0 | Cs5g20910.1          | 5.32 | 0 |      | 0 | 2 | MASCOT | T PLEX8 |
| 3.14E-01 | 0 0 | Cs5g20910.1          | 5.32 | 0 |      | 0 | 2 | MASCOT | T PLEX8 |
| 2.26E-01 | 0 0 | Cs6g05710.1/Cs6g057  | 6    | 0 |      | 0 | 2 | MASCOT | T PLEX8 |
| 5.48E-03 | 0 0 | Cs6g05710.1/Cs6g057  | 4.37 | 0 |      | 0 | 2 | MASCOT | T PLEX8 |
| 2.09E-01 | 0 0 | Cs7g21860.1/orange1. | 5.84 | 0 |      | 0 | 2 | MASCOT | T PLEX8 |
| 2.33E-03 | 0 0 | Cs7g21860.1/orange1. | 5.84 | 0 |      | 0 | 2 | MASCOT | T PLEX8 |
| 3.35E-03 | 0 0 | Cs7g21860.1/orange1. | 5.84 | 0 |      | 0 | 2 | MASCOT | T PLEX8 |
| 3.73E-02 | 0 0 | Cs7g21860.1/orange1. | 5.84 | 0 |      | 0 | 2 | MASCOT | T PLEX8 |
| 8.18E-02 | 0 0 | Cs7g21860.1/orange1. | 5.84 | 0 |      | 0 | 2 | MASCOT | T       |
| 3.25E-09 | 0 0 | Cs6g05710.1/Cs6g057  | 5.84 | 0 |      | 0 | 2 | MASCOT | T       |
| 8.50E-03 | 0 0 | Cs6g05710.1/Cs6g057  | 4.21 | 0 |      | 0 | 2 | MASCOT | T PLEX8 |
| 3.21E-02 | 0 0 | Cs6g05710.1/Cs6g057  | 4.21 | 0 |      | 0 | 2 | MASCOT | T PLEX8 |
| 2.13E-01 | 0 0 | Cs6g05710.1/Cs6g057  | 4.21 | 0 |      | 0 | 2 | MASCOT | T PLEX8 |
| 6.55E-02 | 0 0 | Cs6g05710.1/Cs6g057  | 4.21 | 0 |      | 0 | 2 | MASCOT | T PLEX8 |
| 1.87E-02 | 0 0 | Cs6g20820.1/Cs6g208  | 4.25 | 0 |      | 0 | 2 | MASCOT | T PLEX8 |
| 4.14E-02 | 0 0 | Cs6g20820.1/Cs6g208  | 4.37 | 0 |      | 0 | 2 | MASCOT | T PLEX8 |
| 7.33E-02 | 0 0 | Cs6g20820.1/Cs6g208  | 4.37 | 0 |      | 0 | 2 | MASCOT | T PLEX8 |
| 1.64E-01 | 0 0 | Cs6g20820.1/Cs6g208  | 4.37 | 0 |      | 0 | 2 | MASCOT | T PLEX8 |
| 6.29E-02 | 0 0 | Cs6g20820.1/Cs6g208  | 4.37 | 0 |      | 0 | 2 | MASCOT | T       |
| 1.50E-02 | 0 0 | Cs6g20820.1/Cs6g208  | 4.37 | 0 |      | 0 | 2 | MASCOT | T       |
| 6.06E-02 | 0 0 | Cs6g20820.1/Cs6g208  | 4.37 | 0 |      | 0 | 2 | MASCOT | T PLEX8 |
| 1.70E-01 | 0 0 | Cs6g20820.1/Cs6g208  | 4.37 | 0 |      | 0 | 2 | MASCOT | T       |
| 3.33E-04 | 0 0 | Cs6g20820.1/Cs6g208  | 4.37 | 0 |      | 0 | 2 | MASCOT | T PLEX8 |
| 1.75E-02 | 0 0 | Cs6g20820.1/Cs6g208  | 4.37 | 0 |      | 0 | 2 | MASCOT | T PLEX8 |
| 1.44E-01 | 0 0 | Cs6g20820.1/Cs6g208  | 8.5  | 0 |      | 0 | 2 | MASCOT | T PLEX8 |
| 1.57E-02 | 0 0 | Cs6g20820.1          | 5.08 | 0 |      | 0 | 2 | MASCOT | T       |
| 2.26E-01 | 0 0 | Cs6g05710.1/Cs6g057  | 6    | 0 |      | 0 | 2 | MASCOT | T PLEX8 |
| 5.48E-03 | 0 0 | Cs6g05710.1/Cs6g057  | 4.37 | 0 |      | 0 | 2 | MASCOT | T PLEX8 |
| 2.09E-01 | 0 0 | Cs7g21860.1/orange1. | 5.84 | 0 |      | 0 | 2 | MASCOT | T PLEX8 |
| 2.33E-03 | 0 0 | Cs7g21860.1/orange1. | 5.84 | 0 |      | 0 | 2 | MASCOT | T PLEX8 |
| 3.35E-03 | 0 0 | Cs7g21860.1/orange1. | 5.84 | 0 |      | 0 | 2 | MASCOT | T PLEX8 |
| 3.73E-02 | 0 0 | Cs7g21860.1/orange1. | 5.84 | 0 |      | 0 | 2 | MASCOT | T PLEX8 |
| 8.18E-02 | 0 0 | Cs7g21860.1/orange1. | 5.84 | 0 |      | 0 | 2 | MASCOT | T       |
| 2.67E-03 | 0 0 | Cs7g28780.1          | 4.53 | 0 |      | 0 | 2 | MASCOT | T       |
| 8.50E-03 | 0 0 | Cs6g05710.1/Cs6g057  | 4.21 | 0 |      | 0 | 2 | MASCOT | T PLEX8 |
| 3.21E-02 | 0 0 | Cs6g05710.1/Cs6g057  | 4.21 | 0 |      | 0 | 2 | MASCOT | T PLEX8 |
| 2.13E-01 | 0 0 | Cs6g05710.1/Cs6g057  | 4.21 | 0 |      | 0 | 2 | MASCOT | T PLEX8 |
| 6.55E-02 | 0 0 | Cs6g05710.1/Cs6g057  | 4.21 | 0 |      | 0 | 2 | MASCOT | T PLEX8 |
| 3.73E-02 | 0 0 | Cs8g10110.1/Cs8g101  | 6    | 0 |      | 0 | 2 | MASCOT | T PLEX8 |
| 3.12E-02 | 0 0 | Cs8g10110.1/Cs8g101  | 6    | 0 |      | 0 | 2 | MASCOT | T PLEX8 |
| 8.85E-03 | 0 0 | Cs8g07290.1/Cs8g072  | 5.3  | 1 |      | 0 | 2 | MASCOT | T PLEX8 |
| 5.18E-03 | 0 0 | Cs8g07290.1/Cs8g072  | 6    | 0 |      | 0 | 2 | MASCOT | T       |
| 2.32E-01 | 0 0 | Cs8g07290.1/Cs8g072  | 6    | 0 |      | 0 | 2 | MASCOT | T PLEX8 |
| 1.11E-01 | 0 0 | Cs8g07290.1/Cs8g072  | 6.04 | 0 |      | 0 | 2 | MASCOT | T PLEX8 |
| 2.33E-01 | 0 0 | Cs8g07290.1/Cs8g072  | 6.04 | 0 |      | 0 | 2 | MASCOT | T PLEX8 |

|          |     |                       |      |   |   |   |        |   |       |
|----------|-----|-----------------------|------|---|---|---|--------|---|-------|
| 9.30E-02 | 0 0 | Cs8g07290.1/Cs8g072   | 6.04 | 0 | 0 | 2 | MASCOT | T | PLEX8 |
| 1.62E-02 | 0 0 | Cs8g10020.1 ! Cs8g10  | 4.53 | 0 | 0 | 2 | MASCOT | T |       |
| 6.60E-02 | 0 0 | Cs8g10020.1 ! Cs8g10  | 4.53 | 0 | 0 | 2 | MASCOT | T | PLEX8 |
| 1.30E-01 | 0 0 | Cs8g10020.1 ! Cs8g10  | 4.53 | 0 | 0 | 2 | MASCOT | T | PLEX8 |
| 2.27E-02 | 0 0 | Cs8g10020.1 ! Cs8g10  | 4.53 | 0 | 0 | 2 | MASCOT | T | PLEX8 |
| 1.60E-01 | 0 0 | Cs5g30590.1/Cs9g078   | 4.09 | 0 | 0 | 2 | MASCOT | T | PLEX8 |
| 5.82E-02 | 0 0 | Cs5g30590.1/Cs9g078   | 4.09 | 0 | 0 | 2 | MASCOT | T | PLEX8 |
| 3.20E-04 | 0 0 | Cs5g30590.1/Cs9g078   | 6.74 | 0 | 0 | 2 | MASCOT | T | PLEX8 |
| 6.72E-05 | 0 0 | Cs5g30590.1/Cs9g078   | 6.74 | 0 | 0 | 2 | MASCOT | T | PLEX8 |
| 3.52E-05 | 0 0 | Cs5g30590.1/Cs9g078   | 6.74 | 0 | 0 | 2 | MASCOT | T | PLEX8 |
| 5.19E-02 | 0 0 | Cs5g30590.1/Cs9g078   | 6.74 | 0 | 0 | 2 | MASCOT | T | PLEX8 |
| 2.19E-05 | 0 0 | Cs5g30590.1/Cs9g078   | 6.74 | 0 | 0 | 2 | MASCOT | T | PLEX8 |
| 6.47E-03 | 0 0 | Cs5g30590.1/Cs9g078   | 6.74 | 0 | 0 | 2 | MASCOT | T |       |
| 1.91E-01 | 0 0 | Cs5g30590.1/Cs9g078   | 8.76 | 0 | 0 | 2 | MASCOT | T | PLEX8 |
| 7.82E-03 | 0 0 | Cs9g07820.1           | 5.81 | 0 | 0 | 2 | MASCOT | T |       |
| 1.56E-06 | 0 0 | Cs9g07820.1           | 5.81 | 0 | 0 | 2 | MASCOT | T |       |
| 3.36E-02 | 0 0 | Cs5g30590.1/Cs9g078   | 4.37 | 0 | 0 | 2 | MASCOT | T | PLEX8 |
| 7.51E-02 | 0 0 | orange1.1t00601.1/ora | 8.75 | 0 | 0 | 2 | MASCOT | T | PLEX8 |
| 3.68E-01 | 0 0 | orange1.1t00601.1/ora | 8.75 | 0 | 0 | 2 | MASCOT | T | PLEX8 |
| 3.08E-03 | 0 0 | orange1.1t00601.1/ora | 5.84 | 0 | 0 | 2 | MASCOT | T | PLEX8 |
| 1.87E-03 | 0 0 | orange1.1t00601.1/ora | 4.4  | 0 | 0 | 2 | MASCOT | T | PLEX8 |
| 2.45E-02 | 0 0 | orange1.1t00601.1/ora | 4.4  | 0 | 0 | 2 | MASCOT | T | PLEX8 |
| 2.06E-02 | 0 0 | orange1.1t00601.1/ora | 4.4  | 0 | 0 | 2 | MASCOT | T | PLEX8 |
| 1.90E-01 | 0 0 | orange1.1t00601.1/ora | 4.4  | 0 | 0 | 2 | MASCOT | T |       |
| 2.16E-01 | 0 0 | orange1.1t00601.1/ora | 4.4  | 0 | 0 | 2 | MASCOT | T |       |
| 4.87E-02 | 0 0 | Cs6g10920.1/Cs6g109   | 6    | 0 | 0 | 2 | MASCOT | T | PLEX8 |
| 1.21E-01 | 0 0 | orange1.1t00601.1/ora | 5.72 | 0 | 0 | 2 | MASCOT | T | PLEX8 |
| 1.54E-01 | 0 0 | orange1.1t00601.1/ora | 5.72 | 0 | 0 | 2 | MASCOT | T | PLEX8 |
| 1.29E-01 | 0 0 | orange1.1t00601.1/ora | 5.72 | 0 | 0 | 2 | MASCOT | T | PLEX8 |
| 3.33E-02 | 0 0 | Cs1g24740.1/Cs1g247   | 4.53 | 0 | 0 | 2 | MASCOT | T | PLEX8 |
| 8.97E-03 | 0 0 | Cs1g24740.1/Cs1g247   | 6.74 | 0 | 0 | 2 | MASCOT | T |       |
| 1.03E-02 | 0 0 | Cs1g24740.1/Cs1g247   | 8.75 | 0 | 0 | 2 | MASCOT | T | PLEX8 |
| 5.37E-02 | 0 0 | Cs1g24740.1/Cs1g247   | 8.75 | 0 | 0 | 2 | MASCOT | T | PLEX8 |
| 1.99E-02 | 0 0 | Cs1g24740.1/Cs1g247   | 8.75 | 0 | 0 | 2 | MASCOT | T | PLEX8 |
| 1.23E-01 | 0 0 | Cs1g24740.1/Cs1g247   | 4.03 | 0 | 0 | 2 | MASCOT | T | PLEX8 |
| 1.81E-01 | 0 0 | Cs1g24740.1/Cs1g247   | 4.03 | 0 | 0 | 2 | MASCOT | T | PLEX8 |
| 3.44E-01 | 0 0 | Cs1g24740.1/Cs1g247   | 4.03 | 0 | 0 | 2 | MASCOT | T | PLEX8 |
| 5.87E-02 | 0 0 | Cs1g24740.1/Cs1g247   | 4.03 | 0 | 0 | 2 | MASCOT | T | PLEX8 |
| 5.90E-01 | 0 0 | Cs1g24740.1/Cs1g247   | 4.03 | 0 | 0 | 2 | MASCOT | T | PLEX8 |
| 1.01E-01 | 0 0 | Cs1g24740.1/Cs1g247   | 6    | 0 | 0 | 2 | MASCOT | T | PLEX8 |
| 3.54E-03 | 0 0 | Cs2g05050.1/Cs2g050   | 9.8  | 0 | 0 | 2 | MASCOT | T | PLEX8 |
| 5.68E-03 | 0 0 | Cs2g05050.1/Cs2g050   | 9.8  | 0 | 0 | 2 | MASCOT | T |       |
| 1.56E-01 | 0 0 | Cs2g05050.1/Cs2g050   | 5.84 | 0 | 0 | 2 | MASCOT | T |       |
| 4.87E-02 | 0 0 | Cs2g05050.1/Cs2g050   | 8.59 | 0 | 0 | 2 | MASCOT | T | PLEX8 |
| 6.39E-02 | 0 0 | Cs2g05050.1/Cs2g050   | 8.59 | 0 | 0 | 2 | MASCOT | T | PLEX8 |
| 5.16E-02 | 0 0 | Cs2g05050.1/Cs2g050   | 8.72 | 0 | 0 | 2 | MASCOT | T | PLEX8 |
| 1.62E-02 | 0 0 | Cs2g05050.1/Cs2g050   | 8.72 | 0 | 0 | 2 | MASCOT | T | PLEX8 |
| 2.04E-01 | 0 0 | Cs2g05050.1/Cs2g050   | 8.72 | 0 | 0 | 2 | MASCOT | T | PLEX8 |
| 2.84E-03 | 0 0 | Cs2g05050.1/Cs6g088   | 9.72 | 0 | 0 | 2 | MASCOT | T | PLEX8 |
| 1.08E-01 | 0 0 | Cs2g05050.1/Cs6g088   | 9.72 | 0 | 0 | 2 | MASCOT | T | PLEX8 |
| 1.92E-02 | 0 0 | Cs2g05050.1/Cs6g088   | 9.72 | 0 | 0 | 2 | MASCOT | T | PLEX8 |

|          |     |                     |      |   |      |   |        |        |       |       |
|----------|-----|---------------------|------|---|------|---|--------|--------|-------|-------|
| 9.61E-02 | 0 0 | Cs2g14330.1/Cs2g143 | 6.74 | 0 | 0    | 2 | MASCOT | T      | PLEX8 |       |
| 3.72E-02 | 0 0 | Cs2g14330.1/Cs2g143 | 6.74 | 0 | 0    | 2 | MASCOT | T      | PLEX8 |       |
| 2.28E-01 | 0 0 | Cs2g14330.1/Cs2g143 | 5.32 | 0 | 0    | 2 | MASCOT | T      | PLEX8 |       |
| 4.66E-02 | 0 0 | Cs2g14330.1/Cs2g143 | 5.32 | 0 | 0    | 2 | MASCOT | T      | PLEX8 |       |
| 1.50E-03 | 0 0 | Cs2g14330.1/Cs2g143 | 6.47 | 0 | 0    | 2 | MASCOT | T      | PLEX8 |       |
| 1.11E-01 | 0 0 | Cs2g14330.1/Cs2g143 | 6.47 | 0 | 0    | 2 | MASCOT | T      |       |       |
| 8.52E-03 | 0 0 | Cs2g14330.1/Cs2g143 | 4    | 0 | 0    | 2 | MASCOT | T      | PLEX8 |       |
| 4.14E-04 | 0 0 | Cs2g14330.1/Cs2g143 | 4    | 0 | 0    | 2 | MASCOT | T      |       |       |
| 3.51E-05 | 0 0 | Cs2g14330.1/Cs2g143 | 4    | 0 | 0    | 2 | MASCOT | T      |       |       |
| 9.88E-02 | 0 0 | Cs2g14330.1/Cs2g143 | 5.32 | 0 | 0    | 2 | MASCOT | T      | PLEX8 |       |
| 1.65E-01 | 0 0 | Cs2g14330.1/Cs2g143 | 5.32 | 0 | 0    | 2 | MASCOT | T      | PLEX8 |       |
| 5.86E-02 | 0 0 | Cs2g29530.1         | 4.37 | 0 | 0    | 2 | MASCOT | T      | PLEX8 |       |
| 2.15E-01 | 0 0 | Cs2g29530.1         | 6.5  | 0 | 15.9 | 0 | 2      | MASCOT | T     | PLEX8 |
| 1.77E-01 | 0 0 | Cs2g29530.1         | 6.5  | 0 | 0    | 2 | MASCOT | T      | PLEX8 |       |
| 2.89E-01 | 0 0 | Cs2g29530.1         | 6.5  | 0 | 0    | 2 | MASCOT | T      | PLEX8 |       |
| 1.69E-01 | 0 0 | Cs2g29530.1         | 6.5  | 0 | 0    | 2 | MASCOT | T      | PLEX8 |       |
| 1.71E-02 | 0 0 | Cs2g29530.1         | 4.65 | 0 | 0    | 2 | MASCOT | T      |       |       |
| 2.03E-01 | 0 0 | Cs2g29530.1         | 6.85 | 0 | 0    | 2 | MASCOT | T      | PLEX8 |       |
| 1.15E-04 | 0 0 | Cs2g29530.1         | 6.85 | 0 | 0    | 2 | MASCOT | T      | PLEX8 |       |
| 6.26E-03 | 0 0 | Cs2g29530.1         | 4.31 | 0 | 0    | 2 | MASCOT | T      | PLEX8 |       |
| 1.28E-04 | 0 0 | Cs2g29530.1         | 4.31 | 0 | 0    | 2 | MASCOT | T      | PLEX8 |       |
| 9.52E-03 | 0 0 | Cs2g29530.1         | 4.31 | 0 | 0    | 2 | MASCOT | T      | PLEX8 |       |
| 2.33E-04 | 0 0 | Cs3g21480.1         | 4.21 | 0 | 0    | 2 | MASCOT | T      | PLEX8 |       |
| 7.25E-05 | 0 0 | Cs3g21480.1         | 4.21 | 0 | 0    | 2 | MASCOT | T      | PLEX8 |       |
| 3.33E-03 | 0 0 | Cs3g21480.1         | 5.84 | 0 | 0    | 2 | MASCOT | T      | PLEX8 |       |
| 8.53E-02 | 0 0 | Cs3g21480.1         | 5.84 | 0 | 0    | 2 | MASCOT | T      | PLEX8 |       |
| 4.19E-01 | 0 0 | Cs3g21480.1         | 6    | 0 | 0    | 2 | MASCOT | T      | PLEX8 |       |
| 1.68E-01 | 0 0 | Cs3g21480.1         | 6    | 0 | 0    | 2 | MASCOT | T      | PLEX8 |       |
| 1.42E-01 | 0 0 | Cs3g21480.1         | 6    | 0 | 0    | 2 | MASCOT | T      | PLEX8 |       |
| 1.43E-02 | 0 0 | Cs3g21480.1         | 6    | 0 | 0    | 2 | MASCOT | T      | PLEX8 |       |
| 2.16E-01 | 0 0 | Cs3g21480.1         | 6    | 0 | 0    | 2 | MASCOT | T      | PLEX8 |       |
| 5.99E-02 | 0 0 | Cs3g21480.1         | 6    | 0 | 0    | 2 | MASCOT | T      | PLEX8 |       |
| 9.66E-02 | 0 0 | Cs3g21480.1         | 6    | 0 | 0    | 2 | MASCOT | T      | PLEX8 |       |
| 5.48E-02 | 0 0 | Cs4g06850.1/Cs4g068 | 6.83 | 0 | 0    | 2 | MASCOT | T      | PLEX8 |       |
| 3.33E-02 | 0 0 | Cs4g06850.1/Cs4g068 | 6.74 | 0 | 0    | 2 | MASCOT | T      | PLEX8 |       |
| 4.08E-02 | 0 0 | Cs4g06850.1/Cs4g068 | 6.74 | 0 | 0    | 2 | MASCOT | T      | PLEX8 |       |
| 1.13E-02 | 0 0 | Cs4g06850.1/Cs4g068 | 9.76 | 0 | 0    | 2 | MASCOT | T      | PLEX8 |       |
| 1.76E-06 | 0 0 | Cs4g06850.1/Cs4g068 | 9.76 | 0 | 0    | 2 | MASCOT | T      | PLEX8 |       |
| 3.52E-02 | 0 0 | Cs4g06850.1/Cs4g068 | 5.32 | 0 | 0    | 2 | MASCOT | T      | PLEX8 |       |
| 4.88E-02 | 0 0 | Cs4g06850.1/Cs4g068 | 5.32 | 0 | 0    | 2 | MASCOT | T      | PLEX8 |       |
| 5.29E-04 | 0 0 | Cs4g06850.1/Cs4g068 | 5.21 | 0 | 0    | 2 | MASCOT | T      | PLEX8 |       |
| 1.56E-03 | 0 0 | Cs4g06850.1/Cs4g068 | 5.21 | 0 | 0    | 2 | MASCOT | T      | PLEX8 |       |
| 7.32E-03 | 0 0 | Cs4g06850.1/Cs4g068 | 5.21 | 0 | 0    | 2 | MASCOT | T      | PLEX8 |       |
| 4.64E-01 | 0 0 | Cs4g06850.1/Cs4g068 | 5.21 | 0 | 0    | 2 | MASCOT | T      | PLEX8 |       |
| 1.09E-04 | 0 0 | Cs4g11860.1         | 4.53 | 0 | 0    | 2 | MASCOT | T      | PLEX8 |       |
| 2.08E-03 | 0 0 | Cs4g11860.1         | 4.53 | 0 | 0    | 2 | MASCOT | T      | PLEX8 |       |
| 2.89E-03 | 0 0 | Cs4g11860.1         | 4.53 | 0 | 0    | 2 | MASCOT | T      | PLEX8 |       |
| 1.31E-03 | 0 0 | Cs2g07170.1/Cs2g071 | 5.84 | 0 | 0    | 2 | MASCOT | T      |       |       |
| 1.17E-04 | 0 0 | Cs2g07170.1/Cs2g071 | 5.84 | 0 | 0    | 2 | MASCOT | T      |       |       |
| 5.16E-02 | 0 0 | Cs2g07170.1/Cs2g071 | 5.84 | 0 | 0    | 2 | MASCOT | T      |       |       |
| 1.33E-02 | 0 0 | Cs4g11860.1/Cs4g118 | 8.76 | 0 | 0    | 2 | MASCOT | T      | PLEX8 |       |

|          |     |                      |      |   |      |   |        |        |       |
|----------|-----|----------------------|------|---|------|---|--------|--------|-------|
| 1.13E-02 | 0 0 | Cs4g11860.1/Cs4g118  | 8.76 | 0 | 0    | 2 | MASCOT | T      |       |
| 2.10E-02 | 0 0 | Cs4g11860.1/Cs4g118  | 8.76 | 0 | 0    | 2 | MASCOT | T      |       |
| 3.91E-02 | 0 0 | Cs2g07170.1/Cs2g071  | 8.75 | 0 | 0    | 2 | MASCOT | T      | PLEX8 |
| 1.33E-02 | 0 0 | Cs4g11860.1/Cs4g118  | 4.75 | 0 | 0    | 2 | MASCOT | T      | PLEX8 |
| 3.51E-01 | 0 0 | Cs1g03890.1 ! Cs4g15 | 5.88 | 0 | 0    | 2 | MASCOT | T      | PLEX8 |
| 1.96E-03 | 0 0 | Cs1g03890.1 ! Cs4g15 | 5.88 | 0 | 0    | 2 | MASCOT | T      | PLEX8 |
| 1.88E-02 | 0 0 | Cs1g03890.1 ! Cs4g15 | 5.88 | 0 | 0    | 2 | MASCOT | T      | PLEX8 |
| 1.56E-03 | 0 0 | Cs4g15940.1/Cs4g159  | 4.25 | 0 | 0    | 2 | MASCOT | T      | PLEX8 |
| 1.14E-02 | 0 0 | Cs4g15940.1/Cs4g159  | 4.14 | 0 | 0    | 2 | MASCOT | T      | PLEX8 |
| 4.56E-04 | 0 0 | Cs4g15940.1/Cs4g159  | 5.81 | 0 | 0    | 2 | MASCOT | T      | PLEX8 |
| 6.32E-03 | 0 0 | Cs4g15940.1/Cs4g159  | 5.81 | 0 | 0    | 2 | MASCOT | T      | PLEX8 |
| 2.33E-02 | 0 0 | Cs4g15940.1/Cs4g159  | 5.81 | 0 | 0    | 2 | MASCOT | T      | PLEX8 |
| 8.73E-03 | 0 0 | Cs1g03890.1 ! Cs3g22 | 6    | 0 | 0    | 2 | MASCOT | T      | PLEX8 |
| 3.44E-02 | 0 0 | Cs1g03890.1 ! Cs3g22 | 6    | 0 | 0    | 2 | MASCOT | T      | PLEX8 |
| 1.23E-01 | 0 0 | Cs1g03890.1 ! Cs3g22 | 6    | 0 | 0    | 2 | MASCOT | T      | PLEX8 |
| 3.58E-03 | 0 0 | Cs5g15660.1/Cs5g209  | 4.21 | 0 | 0    | 2 | MASCOT | T      | PLEX8 |
| 2.88E-02 | 0 0 | Cs5g15660.1/Cs5g209  | 4.21 | 0 | 0    | 2 | MASCOT | T      | PLEX8 |
| 8.63E-02 | 0 0 | Cs5g21000.1          | 8.2  | 0 | 0    | 2 | MASCOT | T      | PLEX8 |
| 7.07E-03 | 0 0 | Cs5g21000.1          | 8.2  | 0 | 0    | 2 | MASCOT | T      | PLEX8 |
| 6.70E-04 | 0 0 | Cs5g20910.1/Cs5g210  | 5.59 | 0 | 15.9 | 0 | 2      | MASCOT | T     |
| 2.17E-05 | 0 0 | Cs5g20910.1/Cs5g210  | 5.59 | 0 | 15.9 | 0 | 2      | MASCOT | T     |
| 2.48E-02 | 0 0 | Cs5g20910.1/Cs5g210  | 5.59 | 0 | 15.9 | 0 | 2      | MASCOT | T     |
| 4.70E-02 | 0 0 | Cs5g20910.1/Cs5g210  | 5.59 | 0 | 15.9 | 0 | 2      | MASCOT | T     |
| 4.04E-01 | 0 0 | Cs5g21000.1          | 6.71 | 0 | 0    | 2 | MASCOT | T      | PLEX8 |
| 6.04E-05 | 0 0 | Cs5g21000.1          | 8.56 | 0 | 0    | 2 | MASCOT | T      | PLEX8 |
| 2.11E-05 | 0 0 | Cs5g21000.1          | 8.56 | 0 | 0    | 2 | MASCOT | T      | PLEX8 |
| 1.60E-01 | 0 0 | Cs5g30590.1/Cs9g078  | 4.09 | 0 | 0    | 2 | MASCOT | T      | PLEX8 |
| 5.82E-02 | 0 0 | Cs5g30590.1/Cs9g078  | 4.09 | 0 | 0    | 2 | MASCOT | T      | PLEX8 |
| 2.64E-03 | 0 0 | Cs5g30590.1          | 3.66 | 0 | 0    | 2 | MASCOT | T      |       |
| 3.20E-04 | 0 0 | Cs5g30590.1/Cs9g078  | 6.74 | 0 | 0    | 2 | MASCOT | T      | PLEX8 |
| 6.72E-05 | 0 0 | Cs5g30590.1/Cs9g078  | 6.74 | 0 | 0    | 2 | MASCOT | T      | PLEX8 |
| 3.52E-05 | 0 0 | Cs5g30590.1/Cs9g078  | 6.74 | 0 | 0    | 2 | MASCOT | T      | PLEX8 |
| 5.19E-02 | 0 0 | Cs5g30590.1/Cs9g078  | 6.74 | 0 | 0    | 2 | MASCOT | T      | PLEX8 |
| 2.19E-05 | 0 0 | Cs5g30590.1/Cs9g078  | 6.74 | 0 | 0    | 2 | MASCOT | T      | PLEX8 |
| 6.47E-03 | 0 0 | Cs5g30590.1/Cs9g078  | 6.74 | 0 | 0    | 2 | MASCOT | T      |       |
| 1.91E-01 | 0 0 | Cs5g30590.1/Cs9g078  | 8.76 | 0 | 0    | 2 | MASCOT | T      | PLEX8 |
| 3.36E-02 | 0 0 | Cs5g30590.1/Cs9g078  | 4.37 | 0 | 0    | 2 | MASCOT | T      | PLEX8 |
| 7.04E-04 | 0 0 | Cs6g20130.1/Cs6g201  | 5.82 | 0 | 0    | 2 | MASCOT | T      |       |
| 1.12E-03 | 0 0 | Cs6g20130.1/Cs6g201  | 5.82 | 0 | 0    | 2 | MASCOT | T      |       |
| 1.84E-01 | 0 0 | Cs6g20130.1/Cs6g201  | 6.74 | 0 | 0    | 2 | MASCOT | T      |       |
| 3.24E-01 | 0 0 | Cs6g20130.1/Cs6g201  | 6.74 | 0 | 0    | 2 | MASCOT | T      |       |
| 3.14E-02 | 0 0 | Cs6g20130.1/Cs6g201  | 8.47 | 0 | 0    | 2 | MASCOT | T      | PLEX8 |
| 1.28E-01 | 0 0 | Cs6g20130.1/Cs6g201  | 8.47 | 0 | 0    | 2 | MASCOT | T      | PLEX8 |
| 1.13E-01 | 0 0 | Cs6g20130.1/Cs6g201  | 8.47 | 0 | 0    | 2 | MASCOT | T      | PLEX8 |
| 4.11E-02 | 0 0 | Cs6g20130.1/Cs6g201  | 5.95 | 1 | 0    | 2 | MASCOT | T      | PLEX8 |
| 4.67E-02 | 0 0 | Cs6g20130.1/Cs6g201  | 4.21 | 0 | 0    | 2 | MASCOT | T      | PLEX8 |
| 1.64E-01 | 0 0 | Cs6g20130.1/Cs6g201  | 4.21 | 0 | 0    | 2 | MASCOT | T      | PLEX8 |
| 1.01E-01 | 0 0 | Cs6g20130.1/Cs6g201  | 4.21 | 0 | 0    | 2 | MASCOT | T      | PLEX8 |
| 2.90E-01 | 0 0 | Cs7g02910.1          | 6.05 | 0 | 0    | 2 | MASCOT | T      | PLEX8 |
| 5.03E-01 | 0 0 | Cs7g02910.1          | 6.05 | 0 | 0    | 2 | MASCOT | T      | PLEX8 |
| 6.99E-02 | 0 0 | Cs7g02910.1          | 6.05 | 0 | 0    | 2 | MASCOT | T      | PLEX8 |



|          |     |                      |      |   |   |   |        |   |       |
|----------|-----|----------------------|------|---|---|---|--------|---|-------|
| 5.29E-01 | 0 0 | Cs7g02910.1          | 6.05 | 0 | 0 | 2 | MASCOT | T | PLEX8 |
| 1.26E-02 | 0 0 | Cs7g02910.1          | 5.84 | 0 | 0 | 2 | MASCOT | T | PLEX8 |
| 4.06E-03 | 0 0 | Cs7g02910.1          | 4.53 | 0 | 0 | 2 | MASCOT | T | PLEX8 |
| 1.35E-01 | 0 0 | Cs7g02910.1          | 4.53 | 0 | 0 | 2 | MASCOT | T |       |
| 9.88E-02 | 0 0 | Cs7g02910.1          | 8.46 | 0 | 0 | 2 | MASCOT | T |       |
| 1.02E-02 | 0 0 | Cs7g02910.1          | 8.46 | 0 | 0 | 2 | MASCOT | T |       |
| 3.29E-03 | 0 0 | Cs7g02910.1          | 4.37 | 0 | 0 | 2 | MASCOT | T |       |
| 2.06E-02 | 0 0 | Cs7g02910.1          | 4.37 | 0 | 0 | 2 | MASCOT | T |       |
| 2.76E-02 | 0 0 | Cs2g14350.1/Cs2g143  | 5.83 | 0 | 0 | 2 | MASCOT | T | PLEX8 |
| 6.58E-02 | 0 0 | Cs2g14350.1/Cs2g143  | 5.83 | 0 | 0 | 2 | MASCOT | T | PLEX8 |
| 2.11E-02 | 0 0 | Cs2g14350.1          | 5.84 | 0 | 0 | 2 | MASCOT | T | PLEX8 |
| 4.29E-02 | 0 0 | Cs2g14350.1          | 5.84 | 0 | 0 | 2 | MASCOT | T | PLEX8 |
| 7.29E-02 | 0 0 | Cs2g14350.1/Cs2g143  | 8.47 | 0 | 0 | 2 | MASCOT | T | PLEX8 |
| 5.69E-04 | 0 0 | Cs2g14350.1/Cs2g143  | 8.47 | 0 | 0 | 2 | MASCOT | T | PLEX8 |
| 2.48E-04 | 0 0 | Cs2g14350.1/Cs2g143  | 8.47 | 0 | 0 | 2 | MASCOT | T | PLEX8 |
| 3.96E-03 | 0 0 | Cs2g14350.1/Cs2g143  | 8.47 | 0 | 0 | 2 | MASCOT | T | PLEX8 |
| 1.83E-04 | 0 0 | Cs2g14350.1/Cs2g143  | 4.37 | 0 | 0 | 2 | MASCOT | T | PLEX8 |
| 8.80E-02 | 0 0 | Cs2g14350.1/Cs2g143  | 5.84 | 0 | 0 | 2 | MASCOT | T | PLEX8 |
| 1.70E-01 | 0 0 | Cs2g17350.1          | 5.4  | 0 | 0 | 2 | MASCOT | T | PLEX8 |
| 2.46E-04 | 0 0 | Cs2g17350.1          | 5.84 | 0 | 0 | 2 | MASCOT | T |       |
| 1.94E-02 | 0 0 | Cs2g17350.1          | 6.74 | 0 | 0 | 2 | MASCOT | T | PLEX8 |
| 1.38E-05 | 0 0 | Cs2g17350.1          | 6.74 | 0 | 0 | 2 | MASCOT | T | PLEX8 |
| 1.59E-02 | 0 0 | Cs2g17350.1          | 4.68 | 0 | 0 | 2 | MASCOT | T | PLEX8 |
| 2.04E-01 | 0 0 | Cs2g17350.1          | 4.68 | 0 | 0 | 2 | MASCOT | T | PLEX8 |
| 1.54E-01 | 0 0 | Cs2g17350.1          | 4.68 | 0 | 0 | 2 | MASCOT | T |       |
| 6.65E-02 | 0 0 | Cs2g17350.1          | 4.68 | 0 | 0 | 2 | MASCOT | T |       |
| 4.89E-04 | 0 0 | Cs2g17350.1          | 4.68 | 0 | 0 | 2 | MASCOT | T |       |
| 1.29E-01 | 0 0 | Cs2g17350.1          | 6.74 | 0 | 0 | 2 | MASCOT | T | PLEX8 |
| 2.46E-02 | 0 0 | Cs1g03160.1/Cs1g031  | 4.14 | 0 | 0 | 2 | MASCOT | T |       |
| 3.68E-04 | 0 0 | Cs1g03160.1/Cs1g031  | 4.14 | 0 | 0 | 2 | MASCOT | T |       |
| 1.53E-01 | 0 0 | Cs1g03160.1/Cs1g031  | 5.83 | 0 | 0 | 2 | MASCOT | T | PLEX8 |
| 2.09E-01 | 0 0 | Cs7g21860.1/orange1. | 5.84 | 0 | 0 | 2 | MASCOT | T | PLEX8 |
| 2.33E-03 | 0 0 | Cs7g21860.1/orange1. | 5.84 | 0 | 0 | 2 | MASCOT | T | PLEX8 |
| 3.35E-03 | 0 0 | Cs7g21860.1/orange1. | 5.84 | 0 | 0 | 2 | MASCOT | T | PLEX8 |
| 3.73E-02 | 0 0 | Cs7g21860.1/orange1. | 5.84 | 0 | 0 | 2 | MASCOT | T | PLEX8 |
| 8.18E-02 | 0 0 | Cs7g21860.1/orange1. | 5.84 | 0 | 0 | 2 | MASCOT | T |       |
| 5.49E-02 | 0 0 | Cs1g03160.1/Cs1g031  | 5.97 | 0 | 0 | 2 | MASCOT | T | PLEX8 |
| 1.25E-01 | 0 0 | Cs5g08010.1/Cs5g080  | 6    | 0 | 0 | 2 | MASCOT | T | PLEX8 |
| 3.20E-02 | 0 0 | Cs5g16480.1          | 4.53 | 0 | 0 | 2 | MASCOT | T | PLEX8 |
| 2.09E-04 | 0 0 | Cs5g16480.1          | 4.03 | 0 | 0 | 2 | MASCOT | T | PLEX8 |
| 1.07E-02 | 0 0 | Cs5g16480.1          | 4.03 | 0 | 0 | 2 | MASCOT | T | PLEX8 |
| 1.06E-03 | 0 0 | Cs5g16480.1          | 8.75 | 0 | 0 | 2 | MASCOT | T | PLEX8 |
| 6.51E-05 | 0 0 | Cs5g16480.1          | 8.75 | 0 | 0 | 2 | MASCOT | T | PLEX8 |
| 4.40E-04 | 0 0 | Cs5g16480.1          | 8.75 | 0 | 0 | 2 | MASCOT | T | PLEX8 |
| 2.24E-03 | 0 0 | Cs5g16480.1          | 8.75 | 0 | 0 | 2 | MASCOT | T | PLEX8 |
| 1.10E-01 | 0 0 | Cs5g16480.1          | 5.96 | 1 | 0 | 2 | MASCOT | T | PLEX8 |
| 3.68E-01 | 0 0 | Cs5g16480.1          | 6.75 | 0 | 0 | 2 | MASCOT | T | PLEX8 |
| 4.68E-02 | 0 0 | Cs5g16480.1          | 6.75 | 0 | 0 | 2 | MASCOT | T | PLEX8 |
| 2.50E-02 | 0 0 | Cs5g17830.1/Cs5g178  | 4.56 | 1 | 0 | 2 | MASCOT | T | PLEX8 |
| 2.76E-01 | 0 0 | Cs5g17830.1/Cs5g178  | 5.75 | 0 | 0 | 2 | MASCOT | T | PLEX8 |
| 2.04E-01 | 0 0 | Cs5g17830.1/Cs5g178  | 5.84 | 0 | 0 | 2 | MASCOT | T | PLEX8 |

|              |                     |      |        |   |          |   |       |
|--------------|---------------------|------|--------|---|----------|---|-------|
| 1.51E-02 0 0 | Cs5g17830.1/Cs5g178 | 5.84 | 0      | 0 | 2 MASCOT | T | PLEX8 |
| 3.30E-01 0 0 | Cs5g17830.1/Cs5g178 | 5.84 | 0      | 0 | 2 MASCOT | T | PLEX8 |
| 3.45E-02 0 0 | Cs5g17830.1/Cs5g178 | 5.84 | 0      | 0 | 2 MASCOT | T | PLEX8 |
| 5.71E-04 0 0 | Cs5g17830.1/Cs5g178 | 5.38 | 0      | 0 | 2 MASCOT | T | PLEX8 |
| 3.37E-02 0 0 | Cs5g17830.1/Cs5g178 | 5.38 | 0      | 0 | 2 MASCOT | T | PLEX8 |
| 1.30E-02 0 0 | Cs5g17830.1/Cs5g178 | 5.38 | 0      | 0 | 2 MASCOT | T | PLEX8 |
| 1.93E-02 0 0 | Cs5g17830.1/Cs5g178 | 4.37 | 0      | 0 | 2 MASCOT | T | PLEX8 |
| 6.27E-02 0 0 | Cs5g26760.1         | 5.84 | 0      | 0 | 2 MASCOT | T | PLEX8 |
| 8.19E-02 0 0 | Cs5g26760.1         | 5.84 | 0      | 0 | 2 MASCOT | T | PLEX8 |
| 1.27E-01 0 0 | Cs5g26760.1/Cs6g210 | 5.84 | 0      | 0 | 2 MASCOT | T | PLEX8 |
| 6.80E-03 0 0 | Cs5g26760.1         | 5.87 | 0      | 0 | 2 MASCOT | T |       |
| 1.66E-01 0 0 | Cs1g21050.1/Cs3g166 | 4.14 | 0      | 0 | 2 MASCOT | T | PLEX8 |
| 2.11E-01 0 0 | Cs1g21050.1/Cs3g166 | 4.14 | 0      | 0 | 2 MASCOT | T | PLEX8 |
| 6.75E-03 0 0 | Cs1g21050.1/Cs3g166 | 6.75 | 0      | 0 | 2 MASCOT | T | PLEX8 |
| 1.75E-02 0 0 | Cs1g21050.1/Cs3g166 | 6.75 | 0      | 0 | 2 MASCOT | T | PLEX8 |
| 1.28E-02 0 0 | Cs1g21050.1/Cs3g166 | 6.75 | 0      | 0 | 2 MASCOT | T | PLEX8 |
| 4.77E-03 0 0 | Cs1g21050.1/Cs3g166 | 6.75 | 0      | 0 | 2 MASCOT | T | PLEX8 |
| 1.23E-02 0 0 | Cs6g15910.1/Cs6g159 | 8.59 | 0      | 0 | 2 MASCOT | T | PLEX8 |
| 6.13E-04 0 0 | Cs6g15910.1/Cs6g159 | 8.59 | 0      | 0 | 2 MASCOT | T | PLEX8 |
| 1.41E-02 0 0 | Cs6g15910.1/Cs6g159 | 8.59 | 0      | 0 | 2 MASCOT | T | PLEX8 |
| 5.88E-02 0 0 | Cs6g15910.1/Cs6g159 | 8.75 | 0      | 0 | 2 MASCOT | T | PLEX8 |
| 2.02E-04 0 0 | Cs6g15910.1/Cs6g159 | 4.53 | 0      | 0 | 2 MASCOT | T | PLEX8 |
| 2.82E-04 0 0 | Cs6g15910.1/Cs6g159 | 4.53 | 0      | 0 | 2 MASCOT | T | PLEX8 |
| 5.68E-04 0 0 | Cs6g15910.1/Cs6g159 | 4.53 | 0      | 0 | 2 MASCOT | T | PLEX8 |
| 1.05E-02 0 0 | Cs6g15910.1/Cs6g159 | 4.66 | 1      | 0 | 2 MASCOT | T |       |
| 1.56E-03 0 0 | Cs6g15910.1/Cs6g159 | 4.22 | 0      | 0 | 2 MASCOT | T | PLEX8 |
| 5.34E-02 0 0 | Cs6g15910.1/Cs6g159 | 4.22 | 0      | 0 | 2 MASCOT | T | PLEX8 |
| 1.07E-01 0 0 | Cs6g20640.1/Cs7g043 | 5.21 | 0      | 0 | 2 MASCOT | T |       |
| 8.41E-02 0 0 | Cs6g20640.1/Cs7g043 | 5.21 | 0      | 0 | 2 MASCOT | T |       |
| 2.63E-04 0 0 | Cs6g20640.1         | 8.59 | 0      | 0 | 2 MASCOT | T |       |
| 4.62E-06 0 0 | Cs6g20640.1         | 8.59 | 0      | 0 | 2 MASCOT | T |       |
| 1.24E-01 0 0 | Cs6g20640.1         | 5.84 | 0      | 0 | 2 MASCOT | T | PLEX8 |
| 4.01E-02 0 0 | Cs6g20640.1         | 5.84 | 0      | 0 | 2 MASCOT | T | PLEX8 |
| 3.94E-01 0 0 | Cs6g20640.1         | 5.84 | 0      | 0 | 2 MASCOT | T | PLEX8 |
| 1.05E-01 0 0 | Cs1g10230.1/Cs1g102 | 8.41 | 0      | 0 | 2 MASCOT | T | PLEX8 |
| 4.77E-04 0 0 | Cs6g20640.1         | 8.73 | 0      | 0 | 2 MASCOT | T | PLEX8 |
| 1.99E-04 0 0 | Cs6g20640.1         | 8.73 | 0      | 0 | 2 MASCOT | T | PLEX8 |
| 2.59E-01 0 0 | Cs7g02240.1         | 6.75 | 0      | 0 | 2 MASCOT | T | PLEX8 |
| 4.32E-01 0 0 | Cs7g02240.1         | 6.75 | 0      | 0 | 2 MASCOT | T |       |
| 3.26E-03 0 0 | Cs7g02240.1         | 4.14 | 0      | 0 | 2 MASCOT | T |       |
| 1.97E-02 0 0 | Cs7g02240.1         | 5.84 | 0      | 0 | 2 MASCOT | T | PLEX8 |
| 3.62E-02 0 0 | Cs7g02240.1         | 5.84 | 0      | 0 | 2 MASCOT | T | PLEX8 |
| 6.23E-02 0 0 | Cs7g02240.1         | 5.84 | 0      | 0 | 2 MASCOT | T | PLEX8 |
| 1.26E-02 0 0 | Cs7g02240.1         | 5.21 | 0      | 0 | 2 MASCOT | T | PLEX8 |
| 4.78E-03 0 0 | Cs7g02240.1         | 5.21 | 0      | 0 | 2 MASCOT | T | PLEX8 |
| 2.42E-02 0 0 | Cs7g02240.1         | 5.21 | 0      | 0 | 2 MASCOT | T | PLEX8 |
| 1.53E-01 0 0 | Cs7g02240.1         | 8.05 | 0      | 0 | 2 MASCOT | T | PLEX8 |
| 7.37E-03 0 0 | Cs8g02140.1         | 4.25 | 0 15.9 | 0 | 2 MASCOT | T | PLEX8 |
| 2.44E-02 0 0 | Cs8g02140.1         | 4.25 | 0      | 0 | 2 MASCOT | T | PLEX8 |
| 1.43E-02 0 0 | Cs8g02140.1         | 5.72 | 0      | 0 | 2 MASCOT | T | PLEX8 |
| 1.94E-02 0 0 | Cs8g02140.1         | 5.72 | 0      | 0 | 2 MASCOT | T | PLEX8 |

|              |                       |      |   |   |          |   |       |
|--------------|-----------------------|------|---|---|----------|---|-------|
| 3.33E-04 0 0 | Cs8g02140.1           | 5.72 | 0 | 0 | 2 MASCOT | T | PLEX8 |
| 1.41E-01 0 0 | Cs8g02140.1           | 5.72 | 0 | 0 | 2 MASCOT | T | PLEX8 |
| 4.10E-03 0 0 | Cs8g02140.1           | 5.72 | 0 | 0 | 2 MASCOT | T | PLEX8 |
| 2.33E-03 0 0 | Cs8g02140.1           | 4.53 | 0 | 0 | 2 MASCOT | T | PLEX8 |
| 9.12E-02 0 0 | Cs8g02140.1           | 4.37 | 0 | 0 | 2 MASCOT | T | PLEX8 |
| 8.70E-02 0 0 | Cs8g02140.1           | 5.97 | 0 | 0 | 2 MASCOT | T | PLEX8 |
| 5.25E-04 0 0 | Cs8g04920.1           | 4.53 | 0 | 0 | 2 MASCOT | T | PLEX8 |
| 6.86E-02 0 0 | Cs8g04920.1           | 5.99 | 0 | 0 | 2 MASCOT | T | PLEX8 |
| 3.38E-03 0 0 | Cs8g04920.1           | 5.99 | 0 | 0 | 2 MASCOT | T | PLEX8 |
| 2.96E-01 0 0 | Cs8g04920.1           | 4.37 | 0 | 0 | 2 MASCOT | T | PLEX8 |
| 1.77E-01 0 0 | Cs8g04920.1           | 4.37 | 0 | 0 | 2 MASCOT | T | PLEX8 |
| 2.28E-01 0 0 | Cs8g04920.1           | 4.37 | 0 | 0 | 2 MASCOT | T | PLEX8 |
| 3.04E-02 0 0 | Cs8g04920.1           | 4.37 | 0 | 0 | 2 MASCOT | T | PLEX8 |
| 2.24E-01 0 0 | Cs8g04920.1           | 4.03 | 0 | 0 | 2 MASCOT | T | PLEX8 |
| 1.01E-02 0 0 | Cs8g04920.1           | 4.37 | 0 | 0 | 2 MASCOT | T | PLEX8 |
| 1.63E-02 0 0 | Cs8g04920.1           | 4.37 | 0 | 0 | 2 MASCOT | T | PLEX8 |
| 3.30E-02 0 0 | Cs8g05790.1/Cs8g057   | 8.8  | 0 | 0 | 2 MASCOT | T | PLEX8 |
| 2.45E-02 0 0 | Cs8g05790.1/Cs8g057   | 8.8  | 0 | 0 | 2 MASCOT | T | PLEX8 |
| 1.77E-03 0 0 | Cs8g05790.1/Cs8g057   | 8.8  | 0 | 0 | 2 MASCOT | T | PLEX8 |
| 2.15E-02 0 0 | Cs8g05790.1/Cs8g057   | 4.53 | 0 | 0 | 2 MASCOT | T | PLEX8 |
| 9.83E-02 0 0 | Cs8g05790.1/Cs8g057   | 4.14 | 0 | 0 | 2 MASCOT | T | PLEX8 |
| 1.02E-02 0 0 | Cs8g05800.1/Cs8g058   | 4.14 | 0 | 0 | 2 MASCOT | T |       |
| 3.61E-03 0 0 | Cs8g05790.1/Cs8g057   | 8.8  | 0 | 0 | 2 MASCOT | T | PLEX8 |
| 3.29E-02 0 0 | Cs8g05790.1/Cs8g057   | 8.8  | 0 | 0 | 2 MASCOT | T | PLEX8 |
| 1.78E-01 0 0 | Cs8g05790.1/Cs8g057   | 8.8  | 0 | 0 | 2 MASCOT | T | PLEX8 |
| 6.50E-03 0 0 | Cs8g05790.1/Cs8g057   | 8.8  | 0 | 0 | 2 MASCOT | T | PLEX8 |
| 8.98E-02 0 0 | orange1.1t00569.1/ora | 6.75 | 0 | 0 | 2 MASCOT | T | PLEX8 |
| 3.51E-02 0 0 | orange1.1t00569.1/ora | 6.75 | 0 | 0 | 2 MASCOT | T | PLEX8 |
| 9.40E-02 0 0 | orange1.1t00569.1/ora | 8.1  | 0 | 0 | 2 MASCOT | T | PLEX8 |
| 1.24E-01 0 0 | orange1.1t00569.1/ora | 8.1  | 0 | 0 | 2 MASCOT | T | PLEX8 |
| 5.03E-02 0 0 | orange1.1t00569.1/ora | 8.1  | 0 | 0 | 2 MASCOT | T | PLEX8 |
| 4.81E-02 0 0 | orange1.1t00569.1/ora | 4.21 | 0 | 0 | 2 MASCOT | T |       |
| 1.86E-01 0 0 | orange1.1t00569.1/ora | 4.21 | 0 | 0 | 2 MASCOT | T |       |
| 5.29E-02 0 0 | orange1.1t00569.1/ora | 9.75 | 0 | 0 | 2 MASCOT | T | PLEX8 |
| 7.03E-02 0 0 | orange1.1t00569.1/ora | 6    | 0 | 0 | 2 MASCOT | T | PLEX8 |
| 1.03E-02 0 0 | orange1.1t00569.1/ora | 6    | 0 | 0 | 2 MASCOT | T | PLEX8 |
| 2.78E-01 0 0 | Cs1g26330.1           | 5.88 | 0 | 0 | 2 MASCOT | T | PLEX8 |
| 4.20E-04 0 0 | Cs1g26330.1           | 4.37 | 0 | 0 | 2 MASCOT | T | PLEX8 |
| 6.86E-04 0 0 | Cs1g26330.1           | 4.37 | 0 | 0 | 2 MASCOT | T | PLEX8 |
| 6.70E-03 0 0 | Cs1g26330.1           | 4.37 | 0 | 0 | 2 MASCOT | T | PLEX8 |
| 1.45E-02 0 0 | Cs1g26330.1           | 5.83 | 0 | 0 | 2 MASCOT | T | PLEX8 |
| 1.56E-02 0 0 | Cs1g26330.1           | 5.83 | 0 | 0 | 2 MASCOT | T | PLEX8 |
| 1.83E-04 0 0 | Cs1g26330.1           | 4.21 | 0 | 0 | 2 MASCOT | T | PLEX8 |
| 1.47E-02 0 0 | Cs1g26330.1           | 4.21 | 0 | 0 | 2 MASCOT | T | PLEX8 |
| 1.72E-02 0 0 | Cs1g26330.1           | 4.21 | 0 | 0 | 2 MASCOT | T |       |
| 1.12E-02 0 0 | Cs2g06360.1           | 6    | 0 | 0 | 2 MASCOT | T | PLEX8 |
| 3.72E-03 0 0 | Cs2g06360.1           | 5.97 | 0 | 0 | 2 MASCOT | T | PLEX8 |
| 7.34E-06 0 0 | Cs2g06360.1           | 5.97 | 0 | 0 | 2 MASCOT | T | PLEX8 |
| 5.81E-02 0 0 | Cs2g06360.1           | 5.97 | 0 | 0 | 2 MASCOT | T | PLEX8 |
| 6.06E-02 0 0 | Cs2g06360.1 ! Cs2g06  | 4.14 | 0 | 0 | 2 MASCOT | T | PLEX8 |
| 8.14E-02 0 0 | Cs2g06360.1 ! Cs2g06  | 4.14 | 0 | 0 | 2 MASCOT | T | PLEX8 |

|          |     |                      |      |   |      |   |   |        |   |       |
|----------|-----|----------------------|------|---|------|---|---|--------|---|-------|
| 4.45E-02 | 0 0 | Cs2g06360.1          | 9.76 | 0 | 15.9 | 0 | 2 | MASCOT | T | PLEX8 |
| 6.02E-02 | 0 0 | Cs2g06360.1/Cs2g063  | 4.53 | 0 |      | 0 | 2 | MASCOT | T | PLEX8 |
| 2.66E-01 | 0 0 | Cs2g06360.1/Cs2g063  | 4.53 | 0 |      | 0 | 2 | MASCOT | T | PLEX8 |
| 1.53E-01 | 0 0 | Cs2g24540.1/Cs2g245  | 4.41 | 0 |      | 0 | 2 | MASCOT | T | PLEX8 |
| 3.21E-02 | 0 0 | Cs2g24540.1          | 6.74 | 0 |      | 0 | 2 | MASCOT | T | PLEX8 |
| 4.27E-02 | 0 0 | Cs2g24540.1          | 4.14 | 0 |      | 0 | 2 | MASCOT | T | PLEX8 |
| 3.54E-01 | 0 0 | Cs2g19440.1/Cs2g194  | 6.74 | 0 |      | 0 | 2 | MASCOT | T | PLEX8 |
| 2.36E-01 | 0 0 | Cs2g19440.1/Cs2g194  | 6.74 | 0 |      | 0 | 2 | MASCOT | T | PLEX8 |
| 2.58E-02 | 0 0 | Cs2g19440.1/Cs2g194  | 6.74 | 0 |      | 0 | 2 | MASCOT | T | PLEX8 |
| 2.35E-01 | 0 0 | Cs2g19440.1/Cs2g194  | 6.74 | 0 |      | 0 | 2 | MASCOT | T | PLEX8 |
| 2.45E-02 | 0 0 | Cs2g19440.1/Cs2g194  | 6.74 | 0 |      | 0 | 2 | MASCOT | T |       |
| 3.12E-03 | 0 0 | Cs2g24540.1          | 4.53 | 0 |      | 0 | 2 | MASCOT | T |       |
| 5.63E-03 | 0 0 | Cs2g27470.1          | 4.53 | 0 |      | 0 | 2 | MASCOT | T | PLEX8 |
| 6.47E-04 | 0 0 | Cs2g27470.1          | 5.4  | 0 |      | 0 | 2 | MASCOT | T | PLEX8 |
| 1.69E-01 | 0 0 | Cs2g27470.1          | 5.4  | 0 |      | 0 | 2 | MASCOT | T | PLEX8 |
| 1.21E-02 | 0 0 | Cs2g27470.1          | 6    | 0 |      | 0 | 2 | MASCOT | T | PLEX8 |
| 2.04E-02 | 0 0 | Cs2g27470.1          | 6    | 0 |      | 0 | 2 | MASCOT | T | PLEX8 |
| 2.66E-01 | 0 0 | Cs2g27470.1          | 6    | 0 |      | 0 | 2 | MASCOT | T | PLEX8 |
| 1.41E-02 | 0 0 | Cs2g27470.1          | 6    | 0 |      | 0 | 2 | MASCOT | T | PLEX8 |
| 4.10E-02 | 0 0 | Cs2g27470.1          | 4.25 | 0 |      | 0 | 2 | MASCOT | T | PLEX8 |
| 9.44E-05 | 0 0 | Cs2g27470.1          | 4.37 | 0 |      | 0 | 2 | MASCOT | T | PLEX8 |
| 1.66E-01 | 0 0 | Cs3g10670.1/Cs3g106  | 4.37 | 0 |      | 0 | 2 | MASCOT | T | PLEX8 |
| 1.27E-01 | 0 0 | Cs3g10670.1/Cs3g106  | 4.37 | 0 |      | 0 | 2 | MASCOT | T |       |
| 4.71E-02 | 0 0 | Cs3g10670.1/Cs3g106  | 4.37 | 0 |      | 0 | 2 | MASCOT | T |       |
| 5.06E-04 | 0 0 | Cs3g10630.1/Cs3g106  | 4.21 | 0 |      | 0 | 2 | MASCOT | T | PLEX8 |
| 6.30E-04 | 0 0 | Cs3g10630.1/Cs3g106  | 4.21 | 0 |      | 0 | 2 | MASCOT | T | PLEX8 |
| 1.97E-01 | 0 0 | Cs3g10580.1/Cs3g105  | 8.76 | 0 |      | 0 | 2 | MASCOT | T |       |
| 4.38E-02 | 0 0 | Cs3g10630.1/Cs3g106  | 6    | 0 |      | 0 | 2 | MASCOT | T | PLEX8 |
| 3.20E-03 | 0 0 | Cs3g10630.1/Cs3g106  | 6    | 0 |      | 0 | 2 | MASCOT | T | PLEX8 |
| 1.18E-02 | 0 0 | Cs3g10630.1/Cs3g106  | 6.1  | 0 |      | 0 | 2 | MASCOT | T | PLEX8 |
| 1.08E-05 | 0 0 | Cs3g17920.1          | 4    | 0 |      | 0 | 2 | MASCOT | T | PLEX8 |
| 1.67E-05 | 0 0 | Cs3g17920.1          | 4    | 0 |      | 0 | 2 | MASCOT | T | PLEX8 |
| 3.43E-03 | 0 0 | Cs3g17920.1          | 8.41 | 0 |      | 0 | 2 | MASCOT | T | PLEX8 |
| 1.94E-02 | 0 0 | Cs3g17920.1          | 8.41 | 0 |      | 0 | 2 | MASCOT | T | PLEX8 |
| 2.96E-02 | 0 0 | Cs3g17920.1          | 8.23 | 0 |      | 0 | 2 | MASCOT | T | PLEX8 |
| 1.96E-04 | 0 0 | Cs3g17920.1          | 8.26 | 0 |      | 0 | 2 | MASCOT | T | PLEX8 |
| 3.87E-04 | 0 0 | Cs3g17920.1          | 8.26 | 0 |      | 0 | 2 | MASCOT | T | PLEX8 |
| 1.60E-04 | 0 0 | Cs3g17920.1          | 8.26 | 0 |      | 0 | 2 | MASCOT | T | PLEX8 |
| 1.14E-01 | 0 0 | Cs3g17920.1          | 5.66 | 0 |      | 0 | 2 | MASCOT | T | PLEX8 |
| 4.04E-03 | 0 0 | Cs3g24040.1/orange1. | 5.88 | 0 |      | 0 | 2 | MASCOT | T | PLEX8 |
| 7.83E-06 | 0 0 | Cs3g24040.1/orange1. | 5.88 | 0 |      | 0 | 2 | MASCOT | T | PLEX8 |
| 4.43E-04 | 0 0 | Cs3g24040.1/orange1. | 5.88 | 0 |      | 0 | 2 | MASCOT | T | PLEX8 |
| 8.62E-02 | 0 0 | Cs3g24040.1          | 4.37 | 0 |      | 0 | 2 | MASCOT | T | PLEX8 |
| 1.51E-03 | 0 0 | Cs3g24040.1/orange1. | 4.37 | 0 |      | 0 | 2 | MASCOT | T | PLEX8 |
| 6.87E-04 | 0 0 | Cs3g24040.1          | 8.59 | 0 |      | 0 | 2 | MASCOT | T | PLEX8 |
| 5.53E-03 | 0 0 | Cs3g24040.1          | 8.59 | 0 |      | 0 | 2 | MASCOT | T | PLEX8 |
| 5.72E-02 | 0 0 | Cs3g24040.1          | 8.59 | 0 |      | 0 | 2 | MASCOT | T | PLEX8 |
| 2.67E-02 | 0 0 | Cs3g24040.1          | 5.84 | 0 |      | 0 | 2 | MASCOT | T | PLEX8 |
| 7.36E-02 | 0 0 | Cs4g14530.1/Cs4g145  | 5.84 | 0 |      | 0 | 2 | MASCOT | T | PLEX8 |
| 1.57E-01 | 0 0 | Cs4g14530.1/Cs4g145  | 5.84 | 0 |      | 0 | 2 | MASCOT | T | PLEX8 |
| 6.15E-02 | 0 0 | Cs4g14530.1/Cs4g145  | 4.37 | 0 |      | 0 | 2 | MASCOT | T |       |

|          |     |                      |      |   |      |   |        |        |       |
|----------|-----|----------------------|------|---|------|---|--------|--------|-------|
| 6.53E-03 | 0 0 | Cs4g14530.1/Cs4g145  | 5.32 | 0 | 0    | 2 | MASCOT | T      | PLEX8 |
| 8.24E-02 | 0 0 | Cs4g14530.1/Cs4g145  | 5.32 | 0 | 0    | 2 | MASCOT | T      | PLEX8 |
| 5.04E-02 | 0 0 | Cs4g14530.1/Cs4g145  | 4    | 0 | 0    | 2 | MASCOT | T      |       |
| 7.20E-05 | 0 0 | Cs4g14530.1/Cs4g145  | 4    | 0 | 0    | 2 | MASCOT | T      |       |
| 4.36E-03 | 0 0 | Cs4g14530.1/Cs4g145  | 5.88 | 0 | 0    | 2 | MASCOT | T      | PLEX8 |
| 1.14E-02 | 0 0 | Cs4g14530.1/Cs4g145  | 5.88 | 0 | 0    | 2 | MASCOT | T      | PLEX8 |
| 1.40E-02 | 0 0 | Cs4g15310.1 ! Cs5g01 | 4.37 | 0 | 0    | 2 | MASCOT | T      | PLEX8 |
| 1.15E-02 | 0 0 | Cs4g15310.1 ! Cs5g01 | 4.37 | 0 | 0    | 2 | MASCOT | T      | PLEX8 |
| 8.63E-02 | 0 0 | Cs4g15310.1 ! Cs5g01 | 4.37 | 0 | 0    | 2 | MASCOT | T      | PLEX8 |
| 2.57E-02 | 0 0 | Cs4g15310.1/Cs4g153  | 4.03 | 0 | 0    | 2 | MASCOT | T      |       |
| 1.13E-02 | 0 0 | Cs4g15310.1 ! Cs5g01 | 6.07 | 1 | 0    | 2 | MASCOT | T      | PLEX8 |
| 1.88E-02 | 0 0 | Cs4g15310.1/Cs5g011  | 8.47 | 0 | 0    | 2 | MASCOT | T      | PLEX8 |
| 8.12E-03 | 0 0 | Cs4g15310.1/Cs5g011  | 8.47 | 0 | 0    | 2 | MASCOT | T      | PLEX8 |
| 6.48E-02 | 0 0 | Cs4g15310.1/Cs5g011  | 8.47 | 0 | 0    | 2 | MASCOT | T      | PLEX8 |
| 3.59E-02 | 0 0 | Cs4g15310.1/Cs4g153  | 8.44 | 0 | 0    | 2 | MASCOT | T      | PLEX8 |
| 2.80E-02 | 0 0 | Cs4g19200.1/Cs4g192  | 4.53 | 0 | 0    | 2 | MASCOT | T      | PLEX8 |
| 1.29E-03 | 0 0 | Cs4g19200.1/Cs4g192  | 4.37 | 0 | 0    | 2 | MASCOT | T      |       |
| 3.21E-02 | 0 0 | Cs5g21755.1 ! Cs4g15 | 6    | 0 | 0    | 2 | MASCOT | T      | PLEX8 |
| 2.09E-01 | 0 0 | Cs4g15270.1/Cs4g152  | 6.74 | 0 | 0    | 2 | MASCOT | T      | PLEX8 |
| 5.26E-02 | 0 0 | Cs4g15270.1/Cs4g152  | 6.74 | 0 | 0    | 2 | MASCOT | T      |       |
| 1.01E-02 | 0 0 | Cs4g15270.1/Cs4g152  | 6.74 | 0 | 0    | 2 | MASCOT | T      | PLEX8 |
| 6.01E-05 | 0 0 | Cs4g15270.1/Cs4g152  | 5.83 | 0 | 15.9 | 0 | 2      | MASCOT | T     |
| 8.36E-03 | 0 0 | Cs4g15270.1/Cs4g152  | 5.83 | 0 | 0    | 2 | MASCOT | T      |       |
| 1.76E-05 | 0 0 | Cs4g15270.1/Cs4g152  | 5.83 | 0 | 0    | 2 | MASCOT | T      |       |
| 4.42E-01 | 0 0 | Cs6g06590.1          | 9.8  | 0 | 0    | 2 | MASCOT | T      | PLEX8 |
| 1.62E-01 | 0 0 | Cs6g06590.1          | 5.84 | 0 | 0    | 2 | MASCOT | T      | PLEX8 |
| 2.39E-01 | 0 0 | Cs6g06590.1          | 5.84 | 0 | 0    | 2 | MASCOT | T      | PLEX8 |
| 8.83E-04 | 0 0 | Cs6g06590.1          | 9.47 | 0 | 0    | 2 | MASCOT | T      | PLEX8 |
| 2.23E-01 | 0 0 | Cs6g06590.1          | 9.47 | 0 | 0    | 2 | MASCOT | T      | PLEX8 |
| 1.78E-05 | 0 0 | Cs6g06590.1          | 4.18 | 1 | 0    | 2 | MASCOT | T      | PLEX8 |
| 1.48E-01 | 0 0 | Cs6g06590.1          | 4.18 | 1 | 0    | 2 | MASCOT | T      | PLEX8 |
| 1.55E-01 | 0 0 | Cs6g06590.1          | 4.18 | 1 | 0    | 2 | MASCOT | T      |       |
| 1.77E-01 | 0 0 | Cs6g06590.1          | 8.26 | 0 | 0    | 2 | MASCOT | T      | PLEX8 |
| 6.77E-03 | 0 0 | Cs7g03610.1/Cs7g036  | 6    | 0 | 0    | 2 | MASCOT | T      |       |
| 5.44E-03 | 0 0 | Cs7g03610.1/Cs7g036  | 8.59 | 1 | 0    | 2 | MASCOT | T      | PLEX8 |
| 2.12E-02 | 0 0 | Cs7g03610.1/Cs7g036  | 4.53 | 0 | 0    | 2 | MASCOT | T      | PLEX8 |
| 1.63E-01 | 0 0 | Cs7g03610.1/Cs7g036  | 4.53 | 0 | 0    | 2 | MASCOT | T      | PLEX8 |
| 2.32E-01 | 0 0 | Cs7g03610.1/Cs7g036  | 5.97 | 0 | 0    | 2 | MASCOT | T      | PLEX8 |
| 9.56E-06 | 0 0 | Cs7g03610.1/Cs7g036  | 5.97 | 0 | 0    | 2 | MASCOT | T      | PLEX8 |
| 4.31E-04 | 0 0 | Cs7g03610.1/Cs7g036  | 5.97 | 0 | 0    | 2 | MASCOT | T      | PLEX8 |
| 1.53E-03 | 0 0 | Cs7g03610.1/Cs7g036  | 8.59 | 0 | 0    | 2 | MASCOT | T      | PLEX8 |
| 1.38E-05 | 0 0 | Cs7g03610.1/Cs7g036  | 8.59 | 0 | 0    | 2 | MASCOT | T      | PLEX8 |
| 7.24E-05 | 0 0 | Cs7g09840.1/Cs7g098  | 4.37 | 0 | 0    | 2 | MASCOT | T      |       |
| 8.12E-03 | 0 0 | Cs7g09840.1/Cs7g098  | 4.37 | 0 | 0    | 2 | MASCOT | T      |       |
| 5.66E-02 | 0 0 | Cs7g09840.1          | 8.75 | 0 | 0    | 2 | MASCOT | T      | PLEX8 |
| 2.17E-01 | 0 0 | Cs7g09840.1          | 8.75 | 0 | 0    | 2 | MASCOT | T      | PLEX8 |
| 6.82E-02 | 0 0 | Cs7g09840.1          | 8.75 | 0 | 0    | 2 | MASCOT | T      | PLEX8 |
| 3.95E-01 | 0 0 | Cs7g09840.1          | 4.53 | 0 | 0    | 2 | MASCOT | T      | PLEX8 |
| 1.36E-03 | 0 0 | Cs7g09840.1          | 4.53 | 0 | 0    | 2 | MASCOT | T      | PLEX8 |
| 4.28E-02 | 0 0 | Cs7g09840.1/Cs7g098  | 9.76 | 0 | 0    | 2 | MASCOT | T      |       |
| 9.24E-04 | 0 0 | Cs7g09840.1/Cs7g098  | 5.4  | 0 | 0    | 2 | MASCOT | T      | PLEX8 |

|          |     |                       |      |   |      |   |        |        |       |       |
|----------|-----|-----------------------|------|---|------|---|--------|--------|-------|-------|
| 1.45E-02 | 0 0 | Cs7g20440.1/Cs7g204   | 4.21 | 0 | 0    | 2 | MASCOT | T      | PLEX8 |       |
| 2.45E-01 | 0 0 | Cs7g20440.1/Cs7g204   | 4.21 | 0 | 0    | 2 | MASCOT | T      | PLEX8 |       |
| 1.95E-01 | 0 0 | Cs7g20440.1/Cs7g204   | 4.21 | 0 | 0    | 2 | MASCOT | T      | PLEX8 |       |
| 2.93E-02 | 0 0 | Cs7g20440.1/Cs7g204   | 6    | 0 | 0    | 2 | MASCOT | T      | PLEX8 |       |
| 1.23E-01 | 0 0 | Cs7g20440.1/Cs7g204   | 5.84 | 0 | 15.9 | 0 | 2      | MASCOT | T     |       |
| 1.56E-02 | 0 0 | Cs7g20440.1/Cs7g204   | 5.84 | 0 | 0    | 2 | MASCOT | T      | PLEX8 |       |
| 1.03E-03 | 0 0 | Cs7g20440.1/Cs7g204   | 5.84 | 0 | 0    | 2 | MASCOT | T      | PLEX8 |       |
| 4.19E-03 | 0 0 | Cs7g20440.1/Cs7g204   | 8.75 | 0 | 0    | 2 | MASCOT | T      | PLEX8 |       |
| 3.26E-02 | 0 0 | Cs7g20440.1/Cs7g204   | 4.03 | 0 | 0    | 2 | MASCOT | T      | PLEX8 |       |
| 5.23E-03 | 0 0 | Cs7g24590.2           | 5.84 | 0 | 15.9 | 0 | 2      | MASCOT | T     | PLEX8 |
| 8.81E-02 | 0 0 | Cs7g24590.1/Cs7g245   | 5.4  | 0 | 0    | 2 | MASCOT | T      | PLEX8 |       |
| 4.53E-03 | 0 0 | Cs7g24590.1/Cs7g245   | 5.4  | 0 | 0    | 2 | MASCOT | T      | PLEX8 |       |
| 3.12E-02 | 0 0 | Cs7g24590.1/Cs7g245   | 5.8  | 0 | 0    | 2 | MASCOT | T      |       |       |
| 4.03E-01 | 0 0 | Cs7g24590.2           | 5.4  | 0 | 15.9 | 0 | 2      | MASCOT | T     | PLEX8 |
| 1.23E-01 | 0 0 | Cs7g24590.2           | 5.4  | 0 | 0    | 2 | MASCOT | T      | PLEX8 |       |
| 8.34E-02 | 0 0 | Cs7g24590.2           | 5.4  | 0 | 0    | 2 | MASCOT | T      | PLEX8 |       |
| 7.30E-05 | 0 0 | Cs7g24590.2           | 4.14 | 0 | 0    | 2 | MASCOT | T      |       |       |
| 6.31E-03 | 0 0 | Cs7g24590.2           | 4.14 | 0 | 0    | 2 | MASCOT | T      |       |       |
| 3.07E-03 | 0 0 | Cs9g07320.1           | 6.74 | 0 | 0    | 2 | MASCOT | T      | PLEX8 |       |
| 1.72E-01 | 0 0 | Cs9g07320.1           | 6    | 0 | 0    | 2 | MASCOT | T      | PLEX8 |       |
| 2.29E-01 | 0 0 | Cs9g07320.1           | 6    | 0 | 0    | 2 | MASCOT | T      | PLEX8 |       |
| 6.64E-02 | 0 0 | Cs9g07320.1           | 8.75 | 0 | 0    | 2 | MASCOT | T      | PLEX8 |       |
| 8.82E-03 | 0 0 | Cs9g07320.1           | 8.75 | 0 | 0    | 2 | MASCOT | T      | PLEX8 |       |
| 1.53E-02 | 0 0 | Cs9g07320.1           | 8.75 | 0 | 0    | 2 | MASCOT | T      | PLEX8 |       |
| 7.53E-03 | 0 0 | Cs9g07320.1           | 9.75 | 0 | 0    | 2 | MASCOT | T      |       |       |
| 9.31E-02 | 0 0 | Cs9g07320.1           | 5.97 | 0 | 0    | 2 | MASCOT | T      | PLEX8 |       |
| 2.89E-02 | 0 0 | Cs9g07320.1           | 5.97 | 0 | 0    | 2 | MASCOT | T      | PLEX8 |       |
| 1.96E-01 | 0 0 | orange1.1t02506.1     | 6    | 0 | 0    | 2 | MASCOT | T      | PLEX8 |       |
| 1.54E-03 | 0 0 | orange1.1t02506.1     | 6    | 0 | 0    | 2 | MASCOT | T      | PLEX8 |       |
| 1.02E-01 | 0 0 | orange1.1t02506.1     | 5.84 | 0 | 0    | 2 | MASCOT | T      | PLEX8 |       |
| 1.18E-01 | 0 0 | orange1.1t02506.1     | 5.84 | 0 | 0    | 2 | MASCOT | T      | PLEX8 |       |
| 2.66E-01 | 0 0 | orange1.1t02506.1     | 5.84 | 0 | 0    | 2 | MASCOT | T      | PLEX8 |       |
| 1.38E-01 | 0 0 | orange1.1t02506.1     | 5.84 | 0 | 0    | 2 | MASCOT | T      | PLEX8 |       |
| 1.58E-01 | 0 0 | orange1.1t02506.1     | 5.55 | 0 | 0    | 2 | MASCOT | T      | PLEX8 |       |
| 4.61E-01 | 0 0 | orange1.1t02506.1     | 6.79 | 0 | 0    | 2 | MASCOT | T      |       |       |
| 1.45E-03 | 0 0 | orange1.1t02506.1     | 4.54 | 0 | 0    | 2 | MASCOT | T      | PLEX8 |       |
| 7.45E-03 | 0 0 | Cs5g27960.1/Cs5g279   | 4.37 | 0 | 0    | 2 | MASCOT | T      | PLEX8 |       |
| 4.63E-03 | 0 0 | Cs5g27960.1/Cs5g279   | 4.37 | 0 | 0    | 2 | MASCOT | T      | PLEX8 |       |
| 1.59E-02 | 0 0 | Cs5g27960.1/Cs5g279   | 8.19 | 0 | 0    | 2 | MASCOT | T      | PLEX8 |       |
| 1.85E-01 | 0 0 | Cs5g27960.1/Cs5g279   | 8.76 | 0 | 0    | 2 | MASCOT | T      | PLEX8 |       |
| 4.04E-01 | 0 0 | Cs5g27960.1/Cs5g279   | 8.76 | 0 | 0    | 2 | MASCOT | T      | PLEX8 |       |
| 4.96E-02 | 0 0 | orange1.1t03290.1/ora | 6    | 0 | 0    | 2 | MASCOT | T      | PLEX8 |       |
| 3.82E-02 | 0 0 | Cs5g27960.1/Cs5g279   | 5.59 | 0 | 0    | 2 | MASCOT | T      | PLEX8 |       |
| 2.18E-02 | 0 0 | Cs5g27960.1/Cs5g279   | 5.59 | 0 | 0    | 2 | MASCOT | T      | PLEX8 |       |
| 1.17E-01 | 0 0 | Cs5g27960.1/Cs5g279   | 5.59 | 0 | 0    | 2 | MASCOT | T      | PLEX8 |       |
| 7.78E-03 | 0 0 | Cs1g26380.1/Cs1g263   | 4.37 | 0 | 0    | 2 | MASCOT | T      |       |       |
| 2.68E-03 | 0 0 | Cs1g26380.1/Cs1g263   | 4.37 | 0 | 0    | 2 | MASCOT | T      |       |       |
| 7.36E-02 | 0 0 | Cs1g26380.1/Cs1g263   | 8.73 | 0 | 0    | 2 | MASCOT | T      | PLEX8 |       |
| 2.71E-02 | 0 0 | Cs1g26380.1/Cs1g263   | 5.32 | 0 | 0    | 2 | MASCOT | T      | PLEX8 |       |
| 5.48E-02 | 0 0 | Cs1g26380.1/Cs1g263   | 5.32 | 0 | 0    | 2 | MASCOT | T      | PLEX8 |       |
| 3.19E-02 | 0 0 | Cs1g26380.1/Cs1g263   | 5.32 | 0 | 0    | 2 | MASCOT | T      | PLEX8 |       |

|          |     |                     |      |   |      |   |        |        |       |       |
|----------|-----|---------------------|------|---|------|---|--------|--------|-------|-------|
| 1.44E-01 | 0 0 | Cs1g26380.1/Cs8g016 | 6.74 | 0 | 0    | 2 | MASCOT | T      | PLEX8 |       |
| 1.19E-03 | 0 0 | Cs1g26380.1/Cs8g016 | 6.74 | 0 | 0    | 2 | MASCOT | T      | PLEX8 |       |
| 1.70E-01 | 0 0 | Cs2g02740.1/Cs2g027 | 4.53 | 0 | 0    | 2 | MASCOT | T      | PLEX8 |       |
| 5.27E-04 | 0 0 | Cs2g02740.1/Cs2g027 | 4.53 | 0 | 0    | 2 | MASCOT | T      | PLEX8 |       |
| 3.29E-03 | 0 0 | Cs2g02740.1/Cs2g027 | 4.53 | 0 | 0    | 2 | MASCOT | T      | PLEX8 |       |
| 5.95E-04 | 0 0 | Cs2g02740.1/Cs2g027 | 4.53 | 0 | 0    | 2 | MASCOT | T      | PLEX8 |       |
| 7.86E-03 | 0 0 | Cs2g02740.1/Cs2g027 | 4.25 | 0 | 0    | 2 | MASCOT | T      | PLEX8 |       |
| 8.22E-03 | 0 0 | Cs2g02740.1/Cs2g027 | 4.25 | 0 | 0    | 2 | MASCOT | T      | PLEX8 |       |
| 2.03E-02 | 0 0 | Cs2g02740.1/Cs2g027 | 6.75 | 0 | 0    | 2 | MASCOT | T      | PLEX8 |       |
| 1.25E-01 | 0 0 | Cs2g02740.1/Cs2g027 | 6.72 | 0 | 0    | 2 | MASCOT | T      | PLEX8 |       |
| 3.35E-03 | 0 0 | Cs2g26760.1         | 4.37 | 0 | 0    | 2 | MASCOT | T      | PLEX8 |       |
| 1.30E-02 | 0 0 | Cs2g26760.1         | 6.79 | 0 | 15.9 | 0 | 2      | MASCOT | T     | PLEX8 |
| 1.15E-02 | 0 0 | Cs2g26760.1         | 6.79 | 0 | 0    | 2 | MASCOT | T      | PLEX8 |       |
| 6.66E-03 | 0 0 | Cs2g26760.1         | 6.74 | 0 | 15.9 | 0 | 2      | MASCOT | T     | PLEX8 |
| 2.14E-02 | 0 0 | Cs2g26760.1         | 6.74 | 0 | 15.9 | 0 | 2      | MASCOT | T     | PLEX8 |
| 1.95E-02 | 0 0 | Cs2g26760.1         | 6.74 | 0 | 0    | 2 | MASCOT | T      | PLEX8 |       |
| 1.28E-02 | 0 0 | Cs2g26760.1         | 12   | 0 | 0    | 2 | MASCOT | T      | PLEX8 |       |
| 5.08E-05 | 0 0 | Cs2g26760.1         | 5.21 | 0 | 0    | 2 | MASCOT | T      | PLEX8 |       |
| 1.34E-02 | 0 0 | Cs3g17100.1/Cs3g171 | 5.88 | 0 | 0    | 2 | MASCOT | T      | PLEX8 |       |
| 9.10E-03 | 0 0 | Cs3g17100.1/Cs3g171 | 5.88 | 0 | 0    | 2 | MASCOT | T      | PLEX8 |       |
| 8.38E-04 | 0 0 | Cs3g17100.1/Cs3g171 | 5.88 | 0 | 0    | 2 | MASCOT | T      | PLEX8 |       |
| 7.64E-03 | 0 0 | Cs3g17100.1/Cs3g171 | 4.53 | 0 | 0    | 2 | MASCOT | T      | PLEX8 |       |
| 8.46E-02 | 0 0 | Cs3g17100.1/Cs3g171 | 4.53 | 0 | 0    | 2 | MASCOT | T      | PLEX8 |       |
| 1.12E-01 | 0 0 | Cs3g17100.1/Cs3g171 | 6.74 | 0 | 0    | 2 | MASCOT | T      | PLEX8 |       |
| 1.29E-02 | 0 0 | Cs3g17100.1/Cs3g171 | 4.14 | 0 | 0    | 2 | MASCOT | T      | PLEX8 |       |
| 7.18E-06 | 0 0 | Cs3g17100.1/Cs3g171 | 3.84 | 0 | 0    | 2 | MASCOT | T      | PLEX8 |       |
| 1.74E-03 | 0 0 | Cs4g09560.1/Cs4g095 | 4.37 | 0 | 0    | 2 | MASCOT | T      | PLEX8 |       |
| 2.64E-01 | 0 0 | Cs4g09560.1/Cs4g095 | 5.84 | 0 | 0    | 2 | MASCOT | T      | PLEX8 |       |
| 4.24E-02 | 0 0 | Cs4g09560.1/Cs4g095 | 5.84 | 0 | 0    | 2 | MASCOT | T      | PLEX8 |       |
| 6.62E-09 | 0 0 | Cs4g09560.1/Cs4g095 | 9.72 | 0 | 0    | 2 | MASCOT | T      | PLEX8 |       |
| 1.57E-01 | 0 0 | Cs4g09560.1/Cs4g095 | 9.72 | 0 | 0    | 2 | MASCOT | T      | PLEX8 |       |
| 5.96E-03 | 0 0 | Cs4g09560.1/Cs4g095 | 4.25 | 0 | 0    | 2 | MASCOT | T      | PLEX8 |       |
| 4.04E-02 | 0 0 | Cs4g09560.1/Cs4g095 | 4.25 | 0 | 0    | 2 | MASCOT | T      | PLEX8 |       |
| 3.96E-01 | 0 0 | Cs4g09560.1         | 12   | 0 | 0    | 2 | MASCOT | T      | PLEX8 |       |
| 1.26E-02 | 0 0 | Cs4g18730.1/Cs4g187 | 6.1  | 0 | 0    | 2 | MASCOT | T      | PLEX8 |       |
| 9.55E-04 | 0 0 | Cs4g18730.1/Cs4g187 | 6.1  | 0 | 0    | 2 | MASCOT | T      | PLEX8 |       |
| 5.26E-03 | 0 0 | Cs4g18730.1/Cs4g187 | 4.37 | 0 | 0    | 2 | MASCOT | T      | PLEX8 |       |
| 1.35E-02 | 0 0 | Cs4g18730.1/Cs4g187 | 4.37 | 0 | 0    | 2 | MASCOT | T      | PLEX8 |       |
| 5.68E-03 | 0 0 | Cs4g18730.1         | 4.54 | 0 | 0    | 2 | MASCOT | T      | PLEX8 |       |
| 9.55E-03 | 0 0 | Cs4g18730.1         | 4.54 | 0 | 0    | 2 | MASCOT | T      | PLEX8 |       |
| 1.05E-01 | 0 0 | Cs4g18730.1/Cs4g187 | 6.74 | 0 | 0    | 2 | MASCOT | T      | PLEX8 |       |
| 5.47E-02 | 0 0 | Cs4g18730.1/Cs4g187 | 4.53 | 0 | 0    | 2 | MASCOT | T      | PLEX8 |       |
| 3.69E-02 | 0 0 | Cs5g02290.1/Cs5g022 | 4.65 | 0 | 0    | 2 | MASCOT | T      | PLEX8 |       |
| 4.17E-02 | 0 0 | Cs5g02290.1/Cs5g022 | 4.65 | 0 | 0    | 2 | MASCOT | T      | PLEX8 |       |
| 4.86E-01 | 0 0 | Cs5g02290.1/Cs5g022 | 4.65 | 0 | 0    | 2 | MASCOT | T      | PLEX8 |       |
| 2.82E-03 | 0 0 | Cs5g02290.1/Cs5g022 | 4.65 | 0 | 0    | 2 | MASCOT | T      | PLEX8 |       |
| 8.35E-02 | 0 0 | Cs5g02290.1/Cs5g022 | 4.53 | 0 | 0    | 2 | MASCOT | T      | PLEX8 |       |
| 4.17E-02 | 0 0 | Cs5g02290.1/Cs5g022 | 4.53 | 0 | 0    | 2 | MASCOT | T      | PLEX8 |       |
| 1.10E-01 | 0 0 | Cs5g02290.1/Cs5g022 | 8.5  | 0 | 0    | 2 | MASCOT | T      | PLEX8 |       |
| 2.45E-02 | 0 0 | Cs5g02290.1/Cs5g022 | 8.59 | 0 | 0    | 2 | MASCOT | T      | PLEX8 |       |
| 1.03E-01 | 0 0 | Cs5g03400.1         | 6    | 0 | 0    | 2 | MASCOT | T      | PLEX8 |       |

|          |     |                     |      |   |   |   |        |   |       |
|----------|-----|---------------------|------|---|---|---|--------|---|-------|
| 2.08E-02 | 0 0 | Cs5g03400.1         | 8.47 | 0 | 0 | 2 | MASCOT | T | PLEX8 |
| 4.50E-01 | 0 0 | Cs5g03400.1         | 8.47 | 0 | 0 | 2 | MASCOT | T | PLEX8 |
| 1.66E-02 | 0 0 | Cs5g03400.1         | 4.37 | 0 | 0 | 2 | MASCOT | T |       |
| 2.28E-01 | 0 0 | Cs5g03400.1         | 5.84 | 0 | 0 | 2 | MASCOT | T | PLEX8 |
| 6.99E-02 | 0 0 | Cs5g03400.1         | 5.21 | 0 | 0 | 2 | MASCOT | T | PLEX8 |
| 3.87E-01 | 0 0 | Cs5g03400.1         | 5.21 | 0 | 0 | 2 | MASCOT | T | PLEX8 |
| 8.74E-02 | 0 0 | Cs5g03400.1         | 5.21 | 0 | 0 | 2 | MASCOT | T | PLEX8 |
| 6.22E-03 | 0 0 | Cs1g11870.1/Cs4g013 | 5.32 | 0 | 0 | 2 | MASCOT | T | PLEX8 |
| 6.52E-03 | 0 0 | Cs1g11870.1/Cs4g013 | 5.32 | 0 | 0 | 2 | MASCOT | T | PLEX8 |
| 1.55E-02 | 0 0 | Cs5g04360.1         | 6.75 | 0 | 0 | 2 | MASCOT | T | PLEX8 |
| 5.07E-03 | 0 0 | Cs5g04360.1         | 6.75 | 0 | 0 | 2 | MASCOT | T | PLEX8 |
| 3.04E-02 | 0 0 | Cs1g11870.1/Cs4g037 | 8.8  | 0 | 0 | 2 | MASCOT | T | PLEX8 |
| 1.20E-02 | 0 0 | Cs1g11870.1/Cs4g037 | 8.8  | 0 | 0 | 2 | MASCOT | T | PLEX8 |
| 7.97E-02 | 0 0 | Cs1g11870.1/Cs4g013 | 5.32 | 0 | 0 | 2 | MASCOT | T |       |
| 9.76E-02 | 0 0 | Cs1g16150.1/Cs1g161 | 4.37 | 0 | 0 | 2 | MASCOT | T | PLEX8 |
| 1.82E-01 | 0 0 | Cs4g01700.1/Cs5g112 | 5.88 | 0 | 0 | 2 | MASCOT | T | PLEX8 |
| 1.06E-01 | 0 0 | Cs4g01700.1/Cs5g112 | 5.88 | 0 | 0 | 2 | MASCOT | T | PLEX8 |
| 1.17E-02 | 0 0 | Cs5g11260.1         | 6.73 | 0 | 0 | 2 | MASCOT | T | PLEX8 |
| 2.00E-01 | 0 0 | Cs5g11260.1         | 6.73 | 0 | 0 | 2 | MASCOT | T | PLEX8 |
| 1.47E-01 | 0 0 | Cs5g11260.1         | 8.41 | 0 | 0 | 2 | MASCOT | T | PLEX8 |
| 1.90E-01 | 0 0 | Cs4g01700.1/Cs5g112 | 5.97 | 0 | 0 | 2 | MASCOT | T | PLEX8 |
| 2.59E-02 | 0 0 | Cs4g01700.1/Cs5g112 | 5.97 | 0 | 0 | 2 | MASCOT | T | PLEX8 |
| 1.49E-02 | 0 0 | Cs5g11260.1         | 4.37 | 0 | 0 | 2 | MASCOT | T |       |
| 3.79E-03 | 0 0 | Cs6g04070.1/Cs6g040 | 9.76 | 0 | 0 | 2 | MASCOT | T | PLEX8 |
| 2.50E-01 | 0 0 | Cs6g04070.1/Cs6g040 | 4.37 | 0 | 0 | 2 | MASCOT | T | PLEX8 |
| 2.89E-02 | 0 0 | Cs6g04070.1/Cs6g040 | 4.37 | 0 | 0 | 2 | MASCOT | T | PLEX8 |
| 9.20E-02 | 0 0 | Cs6g04070.1/Cs6g040 | 4.37 | 0 | 0 | 2 | MASCOT | T | PLEX8 |
| 1.58E-02 | 0 0 | Cs6g04070.1/Cs6g040 | 8.29 | 0 | 0 | 2 | MASCOT | T | PLEX8 |
| 1.96E-01 | 0 0 | Cs6g04070.1/Cs6g040 | 5.75 | 0 | 0 | 2 | MASCOT | T | PLEX8 |
| 5.08E-02 | 0 0 | Cs6g04070.1/Cs6g040 | 5.75 | 0 | 0 | 2 | MASCOT | T | PLEX8 |
| 2.35E-04 | 0 0 | Cs6g04070.1/Cs6g040 | 4.53 | 0 | 0 | 2 | MASCOT | T |       |
| 2.89E-02 | 0 0 | Cs7g04020.1/Cs7g040 | 9.61 | 0 | 0 | 2 | MASCOT | T |       |
| 2.24E-01 | 0 0 | Cs6g21070.1/Cs7g040 | 9.51 | 0 | 0 | 2 | MASCOT | T |       |
| 5.09E-02 | 0 0 | Cs7g04020.1/Cs7g040 | 8.75 | 0 | 0 | 2 | MASCOT | T | PLEX8 |
| 2.84E-01 | 0 0 | Cs7g04020.1/Cs7g040 | 9.75 | 0 | 0 | 2 | MASCOT | T |       |
| 1.48E-02 | 0 0 | Cs7g04020.1/Cs7g040 | 4.53 | 0 | 0 | 2 | MASCOT | T | PLEX8 |
| 1.58E-03 | 0 0 | Cs7g04020.1/Cs7g040 | 4.53 | 0 | 0 | 2 | MASCOT | T | PLEX8 |
| 1.22E-01 | 0 0 | Cs7g04020.1/Cs7g040 | 4.53 | 0 | 0 | 2 | MASCOT | T | PLEX8 |
| 1.95E-01 | 0 0 | Cs7g04020.1/Cs7g040 | 4.53 | 0 | 0 | 2 | MASCOT | T |       |
| 1.33E-01 | 0 0 | Cs1g08840.1/Cs7g294 | 6.74 | 0 | 0 | 2 | MASCOT | T |       |
| 1.13E-01 | 0 0 | Cs1g08840.1/Cs7g294 | 4.25 | 0 | 0 | 2 | MASCOT | T | PLEX8 |
| 9.80E-05 | 0 0 | Cs1g08840.1/Cs7g294 | 4.25 | 0 | 0 | 2 | MASCOT | T |       |
| 2.62E-02 | 0 0 | Cs7g29400.1         | 8.26 | 0 | 0 | 2 | MASCOT | T | PLEX8 |
| 5.34E-04 | 0 0 | Cs1g08840.1/Cs7g294 | 9.72 | 0 | 0 | 2 | MASCOT | T |       |
| 1.96E-02 | 0 0 | Cs1g08840.1/Cs7g294 | 9.73 | 0 | 0 | 2 | MASCOT | T | PLEX8 |
| 1.64E-02 | 0 0 | Cs1g08840.1/Cs7g294 | 9.73 | 0 | 0 | 2 | MASCOT | T | PLEX8 |
| 3.67E-01 | 0 0 | Cs1g08840.1/Cs7g294 | 9.73 | 0 | 0 | 2 | MASCOT | T | PLEX8 |
| 8.38E-03 | 0 0 | Cs8g07290.1/Cs8g072 | 4.53 | 0 | 0 | 2 | MASCOT | T | PLEX8 |
| 8.85E-03 | 0 0 | Cs8g07290.1/Cs8g072 | 5.3  | 1 | 0 | 2 | MASCOT | T | PLEX8 |
| 5.18E-03 | 0 0 | Cs8g07290.1/Cs8g072 | 6    | 0 | 0 | 2 | MASCOT | T |       |
| 2.32E-01 | 0 0 | Cs8g07290.1/Cs8g072 | 6    | 0 | 0 | 2 | MASCOT | T | PLEX8 |



|              |                       |      |   |   |   |        |   |       |
|--------------|-----------------------|------|---|---|---|--------|---|-------|
| 1.11E-01 0 0 | Cs8g07290.1/Cs8g072   | 6.04 | 0 | 0 | 2 | MASCOT | T | PLEX8 |
| 2.33E-01 0 0 | Cs8g07290.1/Cs8g072   | 6.04 | 0 | 0 | 2 | MASCOT | T | PLEX8 |
| 9.30E-02 0 0 | Cs8g07290.1/Cs8g072   | 6.04 | 0 | 0 | 2 | MASCOT | T | PLEX8 |
| 2.26E-01 0 0 | Cs8g07290.1/Cs8g072   | 6.75 | 0 | 0 | 2 | MASCOT | T | PLEX8 |
| 2.08E-02 0 0 | orange1.1t00028.1/ora | 8.75 | 0 | 0 | 2 | MASCOT | T | PLEX8 |
| 3.52E-03 0 0 | orange1.1t00028.1/ora | 4.21 | 0 | 0 | 2 | MASCOT | T |       |
| 1.18E-02 0 0 | orange1.1t00028.1/ora | 6.74 | 0 | 0 | 2 | MASCOT | T | PLEX8 |
| 1.04E-03 0 0 | orange1.1t00028.1/ora | 6.74 | 0 | 0 | 2 | MASCOT | T | PLEX8 |
| 9.53E-02 0 0 | orange1.1t00028.1/ora | 6.75 | 0 | 0 | 2 | MASCOT | T | PLEX8 |
| 2.22E-01 0 0 | orange1.1t00028.1/ora | 6.75 | 0 | 0 | 2 | MASCOT | T |       |
| 8.81E-02 0 0 | orange1.1t00028.1/ora | 5.99 | 0 | 0 | 2 | MASCOT | T | PLEX8 |
| 7.64E-03 0 0 | orange1.1t00028.1/ora | 5.99 | 0 | 0 | 2 | MASCOT | T | PLEX8 |
| 5.99E-02 0 0 | orange1.1t01723.1     | 4.14 | 0 | 0 | 2 | MASCOT | T |       |
| 6.02E-06 0 0 | orange1.1t01723.1     | 4.14 | 0 | 0 | 2 | MASCOT | T | PLEX8 |
| 3.26E-03 0 0 | orange1.1t01723.1     | 5.84 | 0 | 0 | 2 | MASCOT | T |       |
| 2.35E-02 0 0 | orange1.1t01723.1     | 6.79 | 0 | 0 | 2 | MASCOT | T | PLEX8 |
| 3.95E-01 0 0 | orange1.1t01723.1     | 6.79 | 0 | 0 | 2 | MASCOT | T |       |
| 1.53E-02 0 0 | orange1.1t01723.1     | 5.45 | 0 | 0 | 2 | MASCOT | T |       |
| 6.19E-02 0 0 | orange1.1t01723.1     | 4.14 | 0 | 0 | 2 | MASCOT | T | PLEX8 |
| 1.16E-01 0 0 | orange1.1t01723.1     | 4.14 | 0 | 0 | 2 | MASCOT | T | PLEX8 |
| 1.74E-01 0 0 | Cs1g15150.1           | 5.84 | 0 | 0 | 2 | MASCOT | T | PLEX8 |
| 1.57E-02 0 0 | Cs1g15150.1           | 9.41 | 0 | 0 | 2 | MASCOT | T |       |
| 2.55E-03 0 0 | Cs1g15150.1           | 4.53 | 0 | 0 | 2 | MASCOT | T |       |
| 2.27E-03 0 0 | Cs1g15150.1           | 4.53 | 0 | 0 | 2 | MASCOT | T |       |
| 4.53E-03 0 0 | Cs1g15150.1           | 4.37 | 0 | 0 | 2 | MASCOT | T | PLEX8 |
| 2.08E-03 0 0 | Cs1g15150.1           | 5.32 | 0 | 0 | 2 | MASCOT | T | PLEX8 |
| 8.18E-03 0 0 | Cs1g15150.1           | 5.32 | 0 | 0 | 2 | MASCOT | T |       |
| 4.32E-02 0 0 | Cs1g20530.1/Cs1g205   | 4.37 | 0 | 0 | 2 | MASCOT | T |       |
| 2.44E-02 0 0 | Cs1g20530.1/Cs1g205   | 6.75 | 0 | 0 | 2 | MASCOT | T | PLEX8 |
| 2.61E-02 0 0 | Cs1g20530.1/Cs1g205   | 4.21 | 0 | 0 | 2 | MASCOT | T |       |
| 1.58E-01 0 0 | Cs1g20530.1/Cs1g205   | 4.21 | 0 | 0 | 2 | MASCOT | T |       |
| 1.88E-01 0 0 | Cs1g20530.1/Cs1g205   | 4.41 | 0 | 0 | 2 | MASCOT | T | PLEX8 |
| 2.59E-02 0 0 | Cs1g20530.1/Cs1g205   | 4.41 | 0 | 0 | 2 | MASCOT | T | PLEX8 |
| 4.39E-03 0 0 | Cs1g20530.1/Cs1g205   | 4.31 | 0 | 0 | 2 | MASCOT | T | PLEX8 |
| 8.61E-04 0 0 | Cs1g24020.1           | 6.78 | 0 | 0 | 2 | MASCOT | T | PLEX8 |
| 2.98E-01 0 0 | Cs1g24020.1           | 8.79 | 0 | 0 | 2 | MASCOT | T | PLEX8 |
| 3.99E-03 0 0 | Cs1g24020.1           | 5.88 | 0 | 0 | 2 | MASCOT | T | PLEX8 |
| 3.66E-03 0 0 | Cs1g24020.1           | 5.88 | 0 | 0 | 2 | MASCOT | T | PLEX8 |
| 1.38E-03 0 0 | Cs1g24020.1           | 5.88 | 0 | 0 | 2 | MASCOT | T | PLEX8 |
| 2.46E-04 0 0 | Cs1g24020.1           | 4    | 0 | 0 | 2 | MASCOT | T | PLEX8 |
| 1.51E-01 0 0 | Cs1g24020.1           | 9.72 | 0 | 0 | 2 | MASCOT | T | PLEX8 |
| 2.00E-02 0 0 | Cs2g02260.1/Cs2g022   | 8.8  | 0 | 0 | 2 | MASCOT | T | PLEX8 |
| 4.06E-03 0 0 | Cs2g02260.1/Cs2g022   | 4.21 | 0 | 0 | 2 | MASCOT | T | PLEX8 |
| 7.02E-02 0 0 | Cs2g02260.1/Cs2g022   | 4.37 | 0 | 0 | 2 | MASCOT | T | PLEX8 |
| 1.79E-01 0 0 | Cs2g02260.1/Cs2g022   | 9.64 | 0 | 0 | 2 | MASCOT | T | PLEX8 |
| 2.21E-02 0 0 | Cs2g02260.1/Cs2g022   | 9.64 | 0 | 0 | 2 | MASCOT | T | PLEX8 |
| 1.14E-01 0 0 | Cs2g02260.1/Cs2g022   | 9.64 | 0 | 0 | 2 | MASCOT | T | PLEX8 |
| 7.30E-02 0 0 | Cs2g02260.1/Cs2g022   | 8.75 | 0 | 0 | 2 | MASCOT | T | PLEX8 |
| 3.04E-01 0 0 | Cs2g10080.1           | 4.21 | 0 | 0 | 2 | MASCOT | T | PLEX8 |
| 6.92E-03 0 0 | Cs2g10080.1           | 4.21 | 0 | 0 | 2 | MASCOT | T | PLEX8 |
| 2.08E-02 0 0 | Cs2g10080.1           | 8.59 | 0 | 0 | 2 | MASCOT | T | PLEX8 |

|              |                      |      |   |   |          |   |       |
|--------------|----------------------|------|---|---|----------|---|-------|
| 9.58E-02 0 0 | Cs2g10080.1          | 5.38 | 0 | 0 | 2 MASCOT | T | PLEX8 |
| 6.49E-04 0 0 | Cs2g10080.1          | 5.38 | 0 | 0 | 2 MASCOT | T |       |
| 2.50E-01 0 0 | Cs2g10080.1          | 6    | 0 | 0 | 2 MASCOT | T | PLEX8 |
| 2.09E-01 0 0 | Cs2g10080.1          | 4.42 | 0 | 0 | 2 MASCOT | T | PLEX8 |
| 1.24E-03 0 0 | Cs2g25350.1/Cs2g253  | 4.53 | 0 | 0 | 2 MASCOT | T | PLEX8 |
| 1.49E-01 0 0 | Cs2g25350.1/Cs2g253  | 4.53 | 0 | 0 | 2 MASCOT | T | PLEX8 |
| 6.17E-02 0 0 | Cs2g25350.1/Cs2g253  | 5.59 | 0 | 0 | 2 MASCOT | T | PLEX8 |
| 7.05E-02 0 0 | Cs2g25350.1/Cs2g253  | 6.47 | 0 | 0 | 2 MASCOT | T |       |
| 7.52E-02 0 0 | Cs2g25350.1/Cs2g253  | 6.47 | 0 | 0 | 2 MASCOT | T |       |
| 4.69E-02 0 0 | Cs2g25350.1/Cs2g253  | 6.74 | 0 | 0 | 2 MASCOT | T | PLEX8 |
| 4.27E-02 0 0 | Cs2g25350.1/Cs2g253  | 5.83 | 0 | 0 | 2 MASCOT | T | PLEX8 |
| 1.18E-01 0 0 | Cs3g11480.1          | 4.37 | 0 | 0 | 2 MASCOT | T | PLEX8 |
| 3.60E-01 0 0 | Cs3g11480.1          | 5.4  | 0 | 0 | 2 MASCOT | T | PLEX8 |
| 8.29E-02 0 0 | Cs3g11480.1          | 5.4  | 0 | 0 | 2 MASCOT | T |       |
| 2.21E-01 0 0 | Cs3g11480.1          | 5.4  | 0 | 0 | 2 MASCOT | T |       |
| 7.66E-02 0 0 | Cs3g11480.1          | 6.76 | 0 | 0 | 2 MASCOT | T |       |
| 6.11E-05 0 0 | Cs3g11480.1          | 5.66 | 0 | 0 | 2 MASCOT | T | PLEX8 |
| 1.48E-01 0 0 | Cs3g11480.1          | 6    | 0 | 0 | 2 MASCOT | T |       |
| 2.55E-02 0 0 | Cs4g06880.1/Cs4g068  | 4.53 | 0 | 0 | 2 MASCOT | T | PLEX8 |
| 5.54E-03 0 0 | Cs4g06880.1/Cs4g068  | 4.53 | 0 | 0 | 2 MASCOT | T | PLEX8 |
| 7.78E-02 0 0 | Cs4g06880.1/Cs4g068  | 4.03 | 0 | 0 | 2 MASCOT | T |       |
| 8.58E-03 0 0 | Cs4g06880.1/Cs4g068  | 4.21 | 0 | 0 | 2 MASCOT | T | PLEX8 |
| 1.19E-02 0 0 | Cs4g06880.1/Cs4g068  | 3.93 | 0 | 0 | 2 MASCOT | T | PLEX8 |
| 1.98E-01 0 0 | Cs4g06880.1/Cs4g068  | 5.32 | 0 | 0 | 2 MASCOT | T | PLEX8 |
| 2.30E-01 0 0 | Cs4g06880.1/Cs4g068  | 5.32 | 0 | 0 | 2 MASCOT | T | PLEX8 |
| 1.54E-01 0 0 | Cs2g17490.1/Cs2g174  | 5.84 | 0 | 0 | 2 MASCOT | T | PLEX8 |
| 9.89E-02 0 0 | Cs5g02140.1/Cs5g021  | 6.74 | 0 | 0 | 2 MASCOT | T | PLEX8 |
| 3.47E-01 0 0 | Cs5g02140.1/Cs5g021  | 5.72 | 0 | 0 | 2 MASCOT | T | PLEX8 |
| 1.69E-02 0 0 | Cs5g02140.1/Cs5g021  | 5.4  | 0 | 0 | 2 MASCOT | T |       |
| 1.13E-03 0 0 | Cs5g02140.1/Cs5g021  | 5.4  | 0 | 0 | 2 MASCOT | T | PLEX8 |
| 5.57E-03 0 0 | Cs5g02140.1/Cs5g021  | 5.4  | 0 | 0 | 2 MASCOT | T | PLEX8 |
| 1.47E-01 0 0 | Cs5g02140.1/Cs5g021  | 4.53 | 0 | 0 | 2 MASCOT | T | PLEX8 |
| 1.23E-01 0 0 | Cs5g06820.1          | 8.59 | 0 | 0 | 2 MASCOT | T | PLEX8 |
| 1.01E-01 0 0 | Cs5g06820.1          | 4.37 | 0 | 0 | 2 MASCOT | T |       |
| 3.27E-03 0 0 | Cs5g06820.1/orange1. | 4.54 | 0 | 0 | 2 MASCOT | T | PLEX8 |
| 8.16E-02 0 0 | Cs5g06820.1/orange1. | 4.54 | 0 | 0 | 2 MASCOT | T | PLEX8 |
| 3.76E-03 0 0 | Cs5g06820.1/orange1. | 4.54 | 0 | 0 | 2 MASCOT | T | PLEX8 |
| 1.05E-01 0 0 | Cs5g06820.1          | 5.66 | 0 | 0 | 2 MASCOT | T | PLEX8 |
| 2.95E-01 0 0 | Cs5g06820.1          | 8.6  | 0 | 0 | 2 MASCOT | T | PLEX8 |
| 1.86E-03 0 0 | Cs5g29630.1/Cs5g296  | 6.79 | 0 | 0 | 2 MASCOT | T | PLEX8 |
| 4.66E-01 0 0 | Cs5g29630.1/Cs5g296  | 6.79 | 0 | 0 | 2 MASCOT | T |       |
| 4.13E-02 0 0 | Cs5g29630.1/Cs5g296  | 5.84 | 0 | 0 | 2 MASCOT | T | PLEX8 |
| 1.52E-03 0 0 | Cs5g29630.1          | 5.72 | 0 | 0 | 2 MASCOT | T | PLEX8 |
| 2.09E-02 0 0 | Cs5g29630.1/Cs5g296  | 9.73 | 0 | 0 | 2 MASCOT | T | PLEX8 |
| 9.11E-02 0 0 | Cs5g29630.1          | 4.53 | 0 | 0 | 2 MASCOT | T | PLEX8 |
| 4.62E-03 0 0 | Cs5g29630.1          | 4.53 | 0 | 0 | 2 MASCOT | T | PLEX8 |
| 1.07E-02 0 0 | Cs6g08790.1/Cs6g087  | 4.37 | 0 | 0 | 2 MASCOT | T | PLEX8 |
| 2.43E-03 0 0 | Cs6g08790.1/Cs6g087  | 4.14 | 0 | 0 | 2 MASCOT | T |       |
| 1.80E-02 0 0 | Cs6g08790.1/Cs6g087  | 6.75 | 0 | 0 | 2 MASCOT | T | PLEX8 |
| 3.38E-04 0 0 | Cs6g08790.1/Cs6g087  | 6.75 | 0 | 0 | 2 MASCOT | T | PLEX8 |
| 6.91E-02 0 0 | Cs6g08790.1/Cs6g087  | 5.72 | 0 | 0 | 2 MASCOT | T | PLEX8 |

|          |     |                       |      |   |      |   |        |        |       |       |
|----------|-----|-----------------------|------|---|------|---|--------|--------|-------|-------|
| 3.28E-01 | 0 0 | Cs6g08790.1/Cs6g087   | 6    | 0 | 0    | 2 | MASCOT | T      | PLEX8 |       |
| 6.89E-02 | 0 0 | Cs6g08790.1/Cs6g087   | 6    | 0 | 0    | 2 | MASCOT | T      | PLEX8 |       |
| 3.03E-01 | 0 0 | Cs6g09120.1           | 6.05 | 0 | 0    | 2 | MASCOT | T      | PLEX8 |       |
| 1.48E-01 | 0 0 | Cs6g09120.1/Cs6g091   | 8.75 | 0 | 0    | 2 | MASCOT | T      | PLEX8 |       |
| 7.29E-03 | 0 0 | Cs6g09120.1/Cs6g091   | 3.91 | 0 | 0    | 2 | MASCOT | T      | PLEX8 |       |
| 2.95E-01 | 0 0 | Cs6g09120.1           | 6    | 0 | 0    | 2 | MASCOT | T      | PLEX8 |       |
| 1.02E-02 | 0 0 | Cs6g09120.1/Cs6g091   | 8.76 | 0 | 0    | 2 | MASCOT | T      | PLEX8 |       |
| 8.92E-04 | 0 0 | Cs6g09120.1/Cs6g091   | 8.76 | 0 | 0    | 2 | MASCOT | T      | PLEX8 |       |
| 7.36E-02 | 0 0 | Cs6g09120.1/Cs6g091   | 8.76 | 0 | 0    | 2 | MASCOT | T      | PLEX8 |       |
| 2.63E-02 | 0 0 | Cs6g19770.1/Cs6g197   | 6    | 0 | 0    | 2 | MASCOT | T      | PLEX8 |       |
| 2.93E-02 | 0 0 | Cs6g19770.1/Cs6g197   | 6    | 0 | 0    | 2 | MASCOT | T      | PLEX8 |       |
| 1.62E-01 | 0 0 | Cs6g10920.1/Cs6g109   | 4.53 | 0 | 0    | 2 | MASCOT | T      | PLEX8 |       |
| 2.63E-02 | 0 0 | Cs6g10920.1/Cs6g109   | 4.53 | 0 | 0    | 2 | MASCOT | T      | PLEX8 |       |
| 4.87E-02 | 0 0 | Cs6g10920.1/Cs6g109   | 6    | 0 | 0    | 2 | MASCOT | T      | PLEX8 |       |
| 5.06E-03 | 0 0 | Cs6g10920.1/Cs6g109   | 8.72 | 0 | 0    | 2 | MASCOT | T      | PLEX8 |       |
| 7.79E-04 | 0 0 | Cs6g10920.1/Cs6g109   | 4.37 | 0 | 0    | 2 | MASCOT | T      | PLEX8 |       |
| 5.18E-05 | 0 0 | Cs6g14020.1           | 4.37 | 0 | 0    | 2 | MASCOT | T      |       |       |
| 2.81E-01 | 0 0 | Cs6g14020.1           | 4.37 | 0 | 0    | 2 | MASCOT | T      |       |       |
| 1.11E-03 | 0 0 | Cs6g14020.1           | 4.21 | 0 | 0    | 2 | MASCOT | T      | PLEX8 |       |
| 1.25E-01 | 0 0 | Cs6g14020.1           | 8.59 | 0 | 0    | 2 | MASCOT | T      | PLEX8 |       |
| 6.14E-03 | 0 0 | Cs6g14020.1           | 8.59 | 0 | 0    | 2 | MASCOT | T      |       |       |
| 1.30E-03 | 0 0 | Cs6g14020.1           | 8.75 | 0 | 0    | 2 | MASCOT | T      | PLEX8 |       |
| 8.94E-02 | 0 0 | Cs6g14020.1           | 5.55 | 0 | 0    | 2 | MASCOT | T      | PLEX8 |       |
| 2.10E-01 | 0 0 | Cs7g02290.1/Cs7g022   | 8.76 | 0 | 0    | 2 | MASCOT | T      | PLEX8 |       |
| 6.01E-03 | 0 0 | Cs7g02290.1/Cs7g022   | 4.03 | 0 | 15.9 | 0 | 2      | MASCOT | T     | PLEX8 |
| 1.10E-01 | 0 0 | Cs7g02290.1/Cs7g022   | 4.03 | 0 | 0    | 2 | MASCOT | T      | PLEX8 |       |
| 2.64E-01 | 0 0 | Cs7g02290.1/Cs7g022   | 5.38 | 0 | 0    | 2 | MASCOT | T      | PLEX8 |       |
| 6.98E-03 | 0 0 | Cs7g02290.1/Cs7g022   | 5.38 | 0 | 0    | 2 | MASCOT | T      | PLEX8 |       |
| 1.54E-02 | 0 0 | Cs7g02290.1/Cs7g022   | 4.09 | 0 | 0    | 2 | MASCOT | T      | PLEX8 |       |
| 5.36E-02 | 0 0 | Cs7g02290.1/Cs7g022   | 5.84 | 0 | 0    | 2 | MASCOT | T      |       |       |
| 1.09E-01 | 0 0 | Cs7g07510.1/Cs7g075   | 5.4  | 0 | 0    | 2 | MASCOT | T      |       |       |
| 1.22E-01 | 0 0 | Cs7g07510.1/Cs7g075   | 5.4  | 0 | 0    | 2 | MASCOT | T      | PLEX8 |       |
| 1.65E-05 | 0 0 | Cs7g07510.1/Cs7g075   | 4.14 | 0 | 0    | 2 | MASCOT | T      | PLEX8 |       |
| 3.11E-01 | 0 0 | Cs7g07510.1/Cs7g075   | 4.37 | 0 | 0    | 2 | MASCOT | T      | PLEX8 |       |
| 4.51E-02 | 0 0 | Cs7g07510.1/Cs7g075   | 4.53 | 0 | 0    | 2 | MASCOT | T      | PLEX8 |       |
| 1.13E-03 | 0 0 | Cs7g07510.1/Cs7g075   | 4.53 | 0 | 0    | 2 | MASCOT | T      | PLEX8 |       |
| 1.18E-01 | 0 0 | Cs7g07510.1/Cs7g075   | 4.14 | 0 | 0    | 2 | MASCOT | T      |       |       |
| 1.56E-02 | 0 0 | Cs9g01990.1/Cs9g019   | 6.74 | 0 | 0    | 2 | MASCOT | T      |       |       |
| 2.54E-01 | 0 0 | Cs9g01990.1/Cs9g019   | 6    | 0 | 0    | 2 | MASCOT | T      | PLEX8 |       |
| 5.07E-02 | 0 0 | Cs9g01990.1/Cs9g019   | 6    | 0 | 0    | 2 | MASCOT | T      | PLEX8 |       |
| 7.87E-02 | 0 0 | Cs9g01990.1/Cs9g019   | 6.79 | 0 | 0    | 2 | MASCOT | T      | PLEX8 |       |
| 1.28E-02 | 0 0 | Cs9g01990.1/Cs9g019   | 8.75 | 0 | 0    | 2 | MASCOT | T      | PLEX8 |       |
| 5.77E-04 | 0 0 | Cs9g01990.1/Cs9g019   | 8.75 | 0 | 0    | 2 | MASCOT | T      | PLEX8 |       |
| 8.19E-04 | 0 0 | Cs9g01990.1/Cs9g019   | 8.75 | 0 | 0    | 2 | MASCOT | T      |       |       |
| 1.49E-01 | 0 0 | orange1.1t00296.1     | 8.8  | 0 | 0    | 2 | MASCOT | T      | PLEX8 |       |
| 1.87E-05 | 0 0 | orange1.1t00296.1/ora | 4.21 | 0 | 0    | 2 | MASCOT | T      |       |       |
| 3.03E-03 | 0 0 | orange1.1t00296.1/ora | 4.21 | 0 | 0    | 2 | MASCOT | T      | PLEX8 |       |
| 5.71E-03 | 0 0 | orange1.1t00296.1/ora | 4.21 | 0 | 0    | 2 | MASCOT | T      | PLEX8 |       |
| 2.56E-02 | 0 0 | orange1.1t00296.1/ora | 4.21 | 0 | 0    | 2 | MASCOT | T      |       |       |
| 2.58E-02 | 0 0 | orange1.1t00296.1     | 5.84 | 0 | 0    | 2 | MASCOT | T      | PLEX8 |       |
| 1.87E-02 | 0 0 | orange1.1t00296.1     | 5.84 | 0 | 0    | 2 | MASCOT | T      | PLEX8 |       |

|          |     |                       |      |   |      |   |        |        |       |       |
|----------|-----|-----------------------|------|---|------|---|--------|--------|-------|-------|
| 4.78E-04 | 0 0 | orange1.1t00475.1/ora | 4.03 | 0 | 0    | 2 | MASCOT | T      | PLEX8 |       |
| 1.13E-02 | 0 0 | orange1.1t00475.1/ora | 5.88 | 0 | 0    | 2 | MASCOT | T      | PLEX8 |       |
| 7.51E-02 | 0 0 | orange1.1t00475.1/ora | 4.03 | 0 | 0    | 2 | MASCOT | T      | PLEX8 |       |
| 8.60E-04 | 0 0 | orange1.1t00475.1/ora | 4.37 | 0 | 0    | 2 | MASCOT | T      | PLEX8 |       |
| 1.79E-03 | 0 0 | orange1.1t00475.1/ora | 4.37 | 0 | 0    | 2 | MASCOT | T      | PLEX8 |       |
| 2.93E-02 | 0 0 | orange1.1t00475.2/ora | 4.37 | 0 | 0    | 2 | MASCOT | T      |       |       |
| 1.09E-02 | 0 0 | orange1.1t00475.2/ora | 4.37 | 0 | 0    | 2 | MASCOT | T      |       |       |
| 2.30E-03 | 0 0 | orange1.1t01890.1/ora | 8.63 | 0 | 0    | 2 | MASCOT | T      | PLEX8 |       |
| 1.47E-02 | 0 0 | orange1.1t01890.1/ora | 8.63 | 0 | 0    | 2 | MASCOT | T      | PLEX8 |       |
| 9.84E-04 | 0 0 | orange1.1t01890.1     | 4.65 | 0 | 0    | 2 | MASCOT | T      | PLEX8 |       |
| 6.01E-03 | 0 0 | orange1.1t01890.1     | 5.82 | 0 | 0    | 2 | MASCOT | T      | PLEX8 |       |
| 1.03E-02 | 0 0 | orange1.1t01890.1     | 5.82 | 0 | 0    | 2 | MASCOT | T      | PLEX8 |       |
| 2.25E-01 | 0 0 | orange1.1t01890.1/ora | 8.22 | 0 | 0    | 2 | MASCOT | T      | PLEX8 |       |
| 1.29E-01 | 0 0 | orange1.1t01890.1     | 5.84 | 0 | 0    | 2 | MASCOT | T      |       |       |
| 3.88E-03 | 0 0 | Cs1g01600.1/Cs1g028   | 6    | 0 | 15.9 | 0 | 2      | MASCOT | T     | PLEX8 |
| 5.97E-02 | 0 0 | Cs1g01600.1/Cs1g028   | 5.84 | 0 | 0    | 2 | MASCOT | T      | PLEX8 |       |
| 2.82E-02 | 0 0 | Cs1g02840.1/Cs1g028   | 4.53 | 0 | 0    | 2 | MASCOT | T      | PLEX8 |       |
| 1.07E-02 | 0 0 | Cs1g02840.1/Cs1g028   | 5.84 | 0 | 0    | 2 | MASCOT | T      | PLEX8 |       |
| 2.65E-03 | 0 0 | Cs1g02840.1/Cs1g028   | 4.25 | 0 | 0    | 2 | MASCOT | T      | PLEX8 |       |
| 1.56E-02 | 0 0 | Cs1g02840.1/Cs1g028   | 4.25 | 0 | 0    | 2 | MASCOT | T      | PLEX8 |       |
| 3.48E-03 | 0 0 | Cs3g26720.1 ! Cs1g26  | 5.83 | 0 | 0    | 2 | MASCOT | T      |       |       |
| 1.78E-02 | 0 0 | Cs3g26720.1 ! Cs1g26  | 5.83 | 0 | 0    | 2 | MASCOT | T      |       |       |
| 5.88E-02 | 0 0 | Cs1g26100.1/Cs1g261   | 4.37 | 0 | 0    | 2 | MASCOT | T      | PLEX8 |       |
| 1.09E-01 | 0 0 | Cs1g26600.1 ! Cs1g26  | 8.6  | 0 | 0    | 2 | MASCOT | T      |       |       |
| 1.36E-03 | 0 0 | Cs1g26100.2/Cs1g261   | 6.75 | 0 | 15.9 | 0 | 2      | MASCOT | T     |       |
| 4.07E-04 | 0 0 | Cs1g26100.1/Cs1g261   | 6    | 0 | 0    | 2 | MASCOT | T      |       |       |
| 8.91E-04 | 0 0 | Cs2g19730.1/Cs2g197   | 6    | 0 | 0    | 2 | MASCOT | T      | PLEX8 |       |
| 2.46E-03 | 0 0 | Cs2g19730.1/Cs2g197   | 12   | 1 | 0    | 2 | MASCOT | T      |       |       |
| 7.39E-05 | 0 0 | Cs2g19730.1/Cs2g197   | 4.03 | 0 | 0    | 2 | MASCOT | T      | PLEX8 |       |
| 2.02E-04 | 0 0 | Cs2g19730.1/Cs2g197   | 4.03 | 0 | 0    | 2 | MASCOT | T      | PLEX8 |       |
| 1.93E-04 | 0 0 | Cs2g19730.1/Cs2g197   | 5.4  | 0 | 0    | 2 | MASCOT | T      | PLEX8 |       |
| 1.85E-01 | 0 0 | Cs2g19730.1/Cs2g197   | 8.59 | 0 | 0    | 2 | MASCOT | T      |       |       |
| 2.02E-05 | 0 0 | Cs3g21120.1           | 8.59 | 0 | 0    | 2 | MASCOT | T      | PLEX8 |       |
| 3.21E-01 | 0 0 | Cs3g21120.1           | 5.59 | 0 | 15.9 | 0 | 2      | MASCOT | T     | PLEX8 |
| 9.45E-02 | 0 0 | Cs3g21120.1           | 6.75 | 0 | 15.9 | 0 | 2      | MASCOT | T     | PLEX8 |
| 2.27E-02 | 0 0 | Cs3g21120.1           | 6.75 | 0 | 0    | 2 | MASCOT | T      | PLEX8 |       |
| 1.32E-03 | 0 0 | Cs3g21120.1           | 6    | 0 | 0    | 2 | MASCOT | T      | PLEX8 |       |
| 1.12E-01 | 0 0 | Cs3g21120.1           | 5.72 | 0 | 0    | 2 | MASCOT | T      | PLEX8 |       |
| 8.99E-03 | 0 0 | Cs4g12810.1           | 6.05 | 0 | 0    | 2 | MASCOT | T      | PLEX8 |       |
| 2.05E-02 | 0 0 | Cs4g12810.1           | 6.1  | 0 | 0    | 2 | MASCOT | T      |       |       |
| 6.15E-02 | 0 0 | Cs4g12810.1           | 4.53 | 0 | 0    | 2 | MASCOT | T      | PLEX8 |       |
| 1.12E-01 | 0 0 | Cs4g12810.1           | 4.53 | 0 | 0    | 2 | MASCOT | T      | PLEX8 |       |
| 6.20E-02 | 0 0 | Cs4g12810.1           | 6.75 | 0 | 0    | 2 | MASCOT | T      | PLEX8 |       |
| 2.07E-01 | 0 0 | Cs4g12810.1           | 5.97 | 0 | 0    | 2 | MASCOT | T      | PLEX8 |       |
| 3.56E-05 | 0 0 | Cs5g14800.1/Cs5g148   | 4.14 | 0 | 0    | 2 | MASCOT | T      | PLEX8 |       |
| 3.30E-01 | 0 0 | Cs5g14800.1/Cs5g148   | 4.75 | 0 | 0    | 2 | MASCOT | T      | PLEX8 |       |
| 1.85E-02 | 0 0 | Cs5g14800.1/Cs5g148   | 5.99 | 0 | 0    | 2 | MASCOT | T      | PLEX8 |       |
| 6.59E-03 | 0 0 | Cs5g14880.1           | 4.53 | 0 | 0    | 2 | MASCOT | T      |       |       |
| 3.57E-01 | 0 0 | Cs5g14800.2/Cs5g148   | 8.73 | 0 | 0    | 2 | MASCOT | T      | PLEX8 |       |
| 6.71E-02 | 0 0 | Cs5g14800.2/Cs5g148   | 8.73 | 0 | 0    | 2 | MASCOT | T      | PLEX8 |       |
| 2.34E-01 | 0 0 | Cs5g22920.1           | 8.22 | 0 | 0    | 2 | MASCOT | T      | PLEX8 |       |

|          |     |                     |       |   |   |   |        |   |       |
|----------|-----|---------------------|-------|---|---|---|--------|---|-------|
| 3.72E-02 | 0 0 | Cs5g22920.1         | 4.53  | 0 | 0 | 2 | MASCOT | T |       |
| 7.16E-02 | 0 0 | Cs5g22920.1         | 4.53  | 0 | 0 | 2 | MASCOT | T |       |
| 3.47E-02 | 0 0 | Cs5g22910.1/Cs5g229 | 6.74  | 0 | 0 | 2 | MASCOT | T | PLEX8 |
| 7.60E-03 | 0 0 | Cs5g22910.1/Cs5g229 | 4.37  | 0 | 0 | 2 | MASCOT | T | PLEX8 |
| 1.49E-01 | 0 0 | Cs5g22910.1/Cs5g229 | 6.47  | 0 | 0 | 2 | MASCOT | T |       |
| 2.80E-01 | 0 0 | Cs5g23180.1/Cs5g231 | 4.53  | 0 | 0 | 2 | MASCOT | T | PLEX8 |
| 1.69E-02 | 0 0 | Cs5g23180.1/Cs5g231 | 5.32  | 0 | 0 | 2 | MASCOT | T |       |
| 1.91E-02 | 0 0 | Cs5g23180.1/Cs5g231 | 5.84  | 0 | 0 | 2 | MASCOT | T |       |
| 9.83E-05 | 0 0 | Cs5g23180.1/Cs5g231 | 5.84  | 0 | 0 | 2 | MASCOT | T |       |
| 1.02E-01 | 0 0 | Cs5g23180.1/Cs5g231 | 9.75  | 0 | 0 | 2 | MASCOT | T | PLEX8 |
| 8.46E-02 | 0 0 | Cs5g23180.1/Cs5g231 | 4.37  | 0 | 0 | 2 | MASCOT | T | PLEX8 |
| 9.82E-04 | 0 0 | Cs5g23630.1         | 4.25  | 0 | 0 | 2 | MASCOT | T |       |
| 4.26E-04 | 0 0 | Cs5g23630.1         | 4.37  | 0 | 0 | 2 | MASCOT | T | PLEX8 |
| 4.97E-01 | 0 0 | Cs5g23630.1         | 10.84 | 0 | 0 | 2 | MASCOT | T | PLEX8 |
| 4.68E-02 | 0 0 | Cs5g23630.1         | 4.03  | 0 | 0 | 2 | MASCOT | T | PLEX8 |
| 5.73E-02 | 0 0 | Cs5g23630.1         | 8.59  | 0 | 0 | 2 | MASCOT | T | PLEX8 |
| 6.63E-03 | 0 0 | Cs5g23630.1         | 8.59  | 0 | 0 | 2 | MASCOT | T | PLEX8 |
| 7.47E-04 | 0 0 | Cs5g26590.1         | 4.37  | 0 | 0 | 2 | MASCOT | T | PLEX8 |
| 2.14E-02 | 0 0 | Cs5g26590.1         | 8.75  | 0 | 0 | 2 | MASCOT | T | PLEX8 |
| 1.55E-01 | 0 0 | Cs5g26590.1         | 8.75  | 0 | 0 | 2 | MASCOT | T | PLEX8 |
| 7.70E-02 | 0 0 | Cs5g26590.1         | 5.84  | 0 | 0 | 2 | MASCOT | T | PLEX8 |
| 8.59E-03 | 0 0 | Cs5g26590.1         | 4.37  | 0 | 0 | 2 | MASCOT | T |       |
| 3.60E-02 | 0 0 | Cs5g26590.1         | 4.21  | 0 | 0 | 2 | MASCOT | T | PLEX8 |
| 1.44E-03 | 0 0 | Cs5g32630.1         | 4.53  | 0 | 0 | 2 | MASCOT | T | PLEX8 |
| 3.99E-03 | 0 0 | Cs5g32630.1         | 4.53  | 0 | 0 | 2 | MASCOT | T | PLEX8 |
| 4.01E-03 | 0 0 | Cs5g32630.1/Cs5g326 | 4.14  | 0 | 0 | 2 | MASCOT | T |       |
| 1.08E-03 | 0 0 | Cs5g32630.1/Cs5g326 | 4.09  | 0 | 0 | 2 | MASCOT | T | PLEX8 |
| 2.00E-01 | 0 0 | Cs5g32630.1         | 5.66  | 0 | 0 | 2 | MASCOT | T | PLEX8 |
| 1.98E-01 | 0 0 | Cs5g32630.1/Cs5g326 | 6.72  | 0 | 0 | 2 | MASCOT | T |       |
| 3.55E-02 | 0 0 | Cs6g02040.1/Cs6g097 | 8.79  | 0 | 0 | 2 | MASCOT | T |       |
| 2.00E-02 | 0 0 | Cs6g02040.1/Cs6g097 | 8.79  | 0 | 0 | 2 | MASCOT | T |       |
| 6.00E-02 | 0 0 | Cs6g02040.1/Cs6g097 | 6     | 0 | 0 | 2 | MASCOT | T | PLEX8 |
| 1.77E-01 | 0 0 | Cs6g02040.1         | 5.5   | 0 | 0 | 2 | MASCOT | T | PLEX8 |
| 2.38E-02 | 0 0 | Cs6g02040.1/Cs6g097 | 4.37  | 0 | 0 | 2 | MASCOT | T | PLEX8 |
| 3.19E-01 | 0 0 | Cs6g02040.1/Cs6g020 | 8.22  | 0 | 0 | 2 | MASCOT | T | PLEX8 |
| 1.44E-03 | 0 0 | Cs6g02430.1         | 6.1   | 0 | 0 | 2 | MASCOT | T | PLEX8 |
| 1.52E-02 | 0 0 | Cs6g02430.1         | 5.84  | 0 | 0 | 2 | MASCOT | T | PLEX8 |
| 7.97E-03 | 0 0 | Cs6g02430.1         | 5.84  | 0 | 0 | 2 | MASCOT | T | PLEX8 |
| 1.34E-01 | 0 0 | Cs6g02430.1         | 4.53  | 0 | 0 | 2 | MASCOT | T | PLEX8 |
| 7.53E-03 | 0 0 | Cs6g02430.1         | 6.75  | 0 | 0 | 2 | MASCOT | T | PLEX8 |
| 3.14E-01 | 0 0 | Cs6g02430.1         | 6     | 0 | 0 | 2 | MASCOT | T | PLEX8 |
| 8.63E-04 | 0 0 | Cs6g16180.1/Cs6g161 | 5.88  | 0 | 0 | 2 | MASCOT | T | PLEX8 |
| 8.50E-02 | 0 0 | Cs6g16180.1/Cs6g161 | 5.32  | 0 | 0 | 2 | MASCOT | T | PLEX8 |
| 4.92E-02 | 0 0 | Cs6g16180.1/Cs6g161 | 5.32  | 0 | 0 | 2 | MASCOT | T | PLEX8 |
| 1.96E-01 | 0 0 | Cs6g16180.1/Cs6g161 | 4.25  | 0 | 0 | 2 | MASCOT | T | PLEX8 |
| 5.35E-04 | 0 0 | Cs6g16180.1/Cs6g161 | 4     | 0 | 0 | 2 | MASCOT | T | PLEX8 |
| 1.45E-01 | 0 0 | Cs6g16180.1/Cs6g161 | 6     | 0 | 0 | 2 | MASCOT | T | PLEX8 |
| 3.53E-01 | 0 0 | Cs6g21970.1/Cs6g219 | 5.72  | 0 | 0 | 2 | MASCOT | T | PLEX8 |
| 1.80E-02 | 0 0 | Cs6g21970.2/Cs6g219 | 4.37  | 0 | 0 | 2 | MASCOT | T |       |
| 1.53E-03 | 0 0 | Cs6g21970.2/Cs6g219 | 4.37  | 0 | 0 | 2 | MASCOT | T |       |
| 5.07E-02 | 0 0 | Cs6g21970.1/Cs6g219 | 3.83  | 0 | 0 | 2 | MASCOT | T | PLEX8 |

|          |     |                      |      |   |      |   |        |        |       |       |
|----------|-----|----------------------|------|---|------|---|--------|--------|-------|-------|
| 4.09E-03 | 0 0 | Cs6g21970.1/Cs6g219  | 4.53 | 0 | 0    | 2 | MASCOT | T      | PLEX8 |       |
| 1.73E-01 | 0 0 | Cs6g21970.1/Cs6g219  | 6    | 0 | 0    | 2 | MASCOT | T      |       |       |
| 3.07E-01 | 0 0 | Cs7g17770.1/Cs7g177  | 8.5  | 0 | 0    | 2 | MASCOT | T      | PLEX8 |       |
| 1.47E-01 | 0 0 | Cs7g17700.1/Cs7g177  | 9.75 | 0 | 0    | 2 | MASCOT | T      | PLEX8 |       |
| 8.24E-02 | 0 0 | Cs7g17700.1/Cs7g177  | 9.75 | 0 | 0    | 2 | MASCOT | T      | PLEX8 |       |
| 1.52E-02 | 0 0 | Cs2g16160.1/Cs7g177  | 4.53 | 0 | 0    | 2 | MASCOT | T      | PLEX8 |       |
| 8.86E-04 | 0 0 | Cs7g17770.1/Cs7g177  | 6.05 | 0 | 0    | 2 | MASCOT | T      | PLEX8 |       |
| 2.33E-03 | 0 0 | Cs7g17770.1/Cs7g177  | 8.72 | 0 | 0    | 2 | MASCOT | T      | PLEX8 |       |
| 1.11E-01 | 0 0 | Cs7g21670.1          | 6.1  | 0 | 0    | 2 | MASCOT | T      | PLEX8 |       |
| 4.05E-03 | 0 0 | Cs7g21670.1          | 4.53 | 0 | 0    | 2 | MASCOT | T      | PLEX8 |       |
| 1.00E-02 | 0 0 | Cs7g21670.1          | 4.53 | 0 | 0    | 2 | MASCOT | T      | PLEX8 |       |
| 6.25E-02 | 0 0 | Cs7g21670.1          | 4.53 | 0 | 0    | 2 | MASCOT | T      | PLEX8 |       |
| 2.13E-07 | 0 0 | Cs7g21670.1          | 4.17 | 0 | 0    | 2 | MASCOT | T      | PLEX8 |       |
| 2.57E-04 | 0 0 | Cs7g21670.1          | 4.17 | 0 | 0    | 2 | MASCOT | T      |       |       |
| 5.52E-02 | 0 0 | Cs7g25990.1/Cs7g259  | 4.37 | 0 | 0    | 2 | MASCOT | T      | PLEX8 |       |
| 2.71E-01 | 0 0 | Cs7g25990.1/Cs7g259  | 8.31 | 0 | 0    | 2 | MASCOT | T      | PLEX8 |       |
| 2.18E-02 | 0 0 | Cs7g25990.1/Cs7g259  | 5.84 | 0 | 0    | 2 | MASCOT | T      | PLEX8 |       |
| 2.06E-01 | 0 0 | Cs7g25990.1/Cs7g259  | 5.84 | 0 | 0    | 2 | MASCOT | T      |       |       |
| 1.17E-01 | 0 0 | Cs7g25990.1/Cs7g259  | 5.84 | 0 | 0    | 2 | MASCOT | T      |       |       |
| 2.13E-01 | 0 0 | Cs7g25990.1/Cs7g259  | 6.74 | 0 | 0    | 2 | MASCOT | T      |       |       |
| 2.00E-02 | 0 0 | Cs8g05340.1/Cs8g053  | 8.59 | 0 | 0    | 2 | MASCOT | T      | PLEX8 |       |
| 1.23E-01 | 0 0 | Cs8g05340.1/Cs8g053  | 8.59 | 0 | 0    | 2 | MASCOT | T      | PLEX8 |       |
| 1.59E-02 | 0 0 | Cs8g05340.1/Cs8g053  | 8.22 | 0 | 0    | 2 | MASCOT | T      | PLEX8 |       |
| 5.25E-03 | 0 0 | Cs8g05340.1/Cs8g053  | 8.75 | 0 | 0    | 2 | MASCOT | T      | PLEX8 |       |
| 1.53E-01 | 0 0 | Cs8g05340.1/Cs8g053  | 8.47 | 0 | 0    | 2 | MASCOT | T      | PLEX8 |       |
| 2.65E-01 | 0 0 | Cs8g05340.1/Cs8g053  | 5.81 | 0 | 0    | 2 | MASCOT | T      | PLEX8 |       |
| 4.19E-01 | 0 0 | Cs9g02230.1/Cs9g022  | 4.14 | 0 | 0    | 2 | MASCOT | T      | PLEX8 |       |
| 1.17E-01 | 0 0 | Cs9g02230.1/Cs9g022  | 8.75 | 0 | 0    | 2 | MASCOT | T      | PLEX8 |       |
| 1.35E-03 | 0 0 | Cs9g02230.1/Cs9g022  | 4.21 | 0 | 15.9 | 0 | 2      | MASCOT | T     |       |
| 1.06E-01 | 0 0 | Cs9g02230.1/Cs9g022  | 9.73 | 0 | 0    | 2 | MASCOT | T      | PLEX8 |       |
| 1.80E-02 | 0 0 | Cs9g02230.1/Cs9g022  | 4.14 | 0 | 0    | 2 | MASCOT | T      |       |       |
| 2.95E-03 | 0 0 | Cs9g02230.1/Cs9g022  | 4.14 | 0 | 0    | 2 | MASCOT | T      |       |       |
| 1.17E-03 | 0 0 | Cs5g26780.1/Cs5g267  | 6.05 | 0 | 0    | 2 | MASCOT | T      |       |       |
| 1.72E-01 | 0 0 | Cs9g03090.1          | 5.88 | 0 | 0    | 2 | MASCOT | T      | PLEX8 |       |
| 5.76E-02 | 0 0 | Cs5g26780.1/Cs5g267  | 5.4  | 0 | 0    | 2 | MASCOT | T      | PLEX8 |       |
| 1.92E-02 | 0 0 | Cs5g26780.1/Cs5g267  | 5.4  | 0 | 0    | 2 | MASCOT | T      |       |       |
| 1.47E-01 | 0 0 | Cs9g03090.1          | 5.83 | 0 | 0    | 2 | MASCOT | T      | PLEX8 |       |
| 2.85E-02 | 0 0 | Cs9g03090.1          | 6.47 | 0 | 0    | 2 | MASCOT | T      | PLEX8 |       |
| 1.74E-02 | 0 0 | Cs9g05370.1          | 5.88 | 0 | 0    | 2 | MASCOT | T      |       |       |
| 6.43E-02 | 0 0 | Cs9g05370.1          | 8.59 | 0 | 0    | 2 | MASCOT | T      | PLEX8 |       |
| 2.19E-03 | 0 0 | Cs9g05370.1          | 4.03 | 0 | 0    | 2 | MASCOT | T      |       |       |
| 8.90E-05 | 0 0 | Cs9g05370.1          | 4.37 | 0 | 0    | 2 | MASCOT | T      | PLEX8 |       |
| 2.22E-03 | 0 0 | Cs9g05370.1          | 4.37 | 0 | 0    | 2 | MASCOT | T      | PLEX8 |       |
| 1.36E-02 | 0 0 | Cs9g05370.1          | 4.65 | 0 | 0    | 2 | MASCOT | T      | PLEX8 |       |
| 1.37E-01 | 0 0 | Cs3g21800.1/Cs9g069  | 8.75 | 0 | 15.9 | 0 | 2      | MASCOT | T     | PLEX8 |
| 7.70E-01 | 0 0 | Cs3g21800.1/Cs9g069  | 8.41 | 0 | 0    | 2 | MASCOT | T      | PLEX8 |       |
| 2.85E-04 | 0 0 | Cs3g21800.1 ! Cs9g06 | 5.84 | 0 | 0    | 2 | MASCOT | T      | PLEX8 |       |
| 5.89E-01 | 0 0 | Cs3g21800.1/Cs9g069  | 8.22 | 0 | 0    | 2 | MASCOT | T      | PLEX8 |       |
| 2.02E-01 | 0 0 | Cs3g21800.1/Cs9g069  | 5.81 | 0 | 0    | 2 | MASCOT | T      | PLEX8 |       |
| 5.64E-02 | 0 0 | Cs3g21800.1/Cs9g069  | 5.81 | 0 | 0    | 2 | MASCOT | T      | PLEX8 |       |
| 9.51E-02 | 0 0 | Cs9g16090.1          | 4.53 | 0 | 0    | 2 | MASCOT | T      | PLEX8 |       |

|          |     |                        |      |   |      |   |        |        |       |       |
|----------|-----|------------------------|------|---|------|---|--------|--------|-------|-------|
| 7.19E-02 | 0 0 | Cs5g09790.1/Cs9g160    | 4.14 | 0 | 0    | 2 | MASCOT | T      | PLEX8 |       |
| 3.68E-01 | 0 0 | Cs9g16090.1            | 5.84 | 0 | 0    | 2 | MASCOT | T      | PLEX8 |       |
| 1.85E-01 | 0 0 | Cs9g16090.1            | 5.84 | 0 | 0    | 2 | MASCOT | T      | PLEX8 |       |
| 1.97E-01 | 0 0 | Cs9g16090.1            | 6.41 | 0 | 0    | 2 | MASCOT | T      | PLEX8 |       |
| 1.28E-01 | 0 0 | Cs9g16090.1            | 6.41 | 0 | 0    | 2 | MASCOT | T      | PLEX8 |       |
| 1.38E-02 | 0 0 | orange1.1t00362.1      | 6.74 | 0 | 0    | 2 | MASCOT | T      | PLEX8 |       |
| 2.57E-03 | 0 0 | orange1.1t00362.1      | 6.41 | 0 | 0    | 2 | MASCOT | T      | PLEX8 |       |
| 3.21E-03 | 0 0 | orange1.1t00362.1      | 6.41 | 0 | 0    | 2 | MASCOT | T      | PLEX8 |       |
| 2.32E-02 | 0 0 | orange1.1t00362.1      | 8.75 | 0 | 0    | 2 | MASCOT | T      | PLEX8 |       |
| 5.71E-05 | 0 0 | orange1.1t00362.1      | 4.65 | 0 | 0    | 2 | MASCOT | T      | PLEX8 |       |
| 1.80E-02 | 0 0 | orange1.1t00362.1      | 12   | 1 | 0    | 2 | MASCOT | T      |       |       |
| 2.62E-01 | 0 0 | orange1.1t03769.1/ora  | 4.37 | 0 | 0    | 2 | MASCOT | T      | PLEX8 |       |
| 7.74E-02 | 0 0 | orange1.1t03773.1/ora  | 6.85 | 0 | 0    | 2 | MASCOT | T      | PLEX8 |       |
| 6.54E-02 | 0 0 | orange1.1t03773.1/ora  | 6.85 | 0 | 0    | 2 | MASCOT | T      |       |       |
| 2.14E-02 | 0 0 | orange1.1t03775.1/ora  | 4.14 | 0 | 0    | 2 | MASCOT | T      |       |       |
| 5.32E-02 | 0 0 | orange1.1t03775.1/ora  | 8.75 | 0 | 0    | 2 | MASCOT | T      | PLEX8 |       |
| 8.65E-04 | 0 0 | orange1.1t03773.1 ! or | 6    | 0 | 15.9 | 0 | 2      | MASCOT | T     | PLEX8 |
| 1.57E-01 | 0 0 | Cs2g02540.1/Cs2g025    | 4.37 | 0 | 0    | 2 | MASCOT | T      | PLEX8 |       |
| 7.37E-05 | 0 0 | Cs2g02540.1/Cs2g025    | 4.03 | 0 | 0    | 2 | MASCOT | T      |       |       |
| 2.57E-01 | 0 0 | Cs2g02540.1/Cs2g025    | 6    | 0 | 0    | 2 | MASCOT | T      | PLEX8 |       |
| 7.12E-03 | 0 0 | Cs2g02540.1/Cs2g025    | 6.74 | 0 | 0    | 2 | MASCOT | T      | PLEX8 |       |
| 4.09E-03 | 0 0 | Cs2g02540.1/Cs2g025    | 6.74 | 0 | 0    | 2 | MASCOT | T      | PLEX8 |       |
| 9.97E-02 | 0 0 | Cs3g16430.1/Cs3g164    | 8.63 | 0 | 0    | 2 | MASCOT | T      | PLEX8 |       |
| 1.74E-01 | 0 0 | Cs3g02530.1/Cs3g025    | 6.75 | 0 | 0    | 2 | MASCOT | T      | PLEX8 |       |
| 6.47E-04 | 0 0 | Cs3g16430.1/Cs3g164    | 4.53 | 0 | 0    | 2 | MASCOT | T      | PLEX8 |       |
| 1.16E-02 | 0 0 | Cs3g16430.1/Cs3g164    | 8.8  | 0 | 0    | 2 | MASCOT | T      | PLEX8 |       |
| 3.58E-02 | 0 0 | Cs3g16430.1/Cs3g164    | 4.14 | 0 | 0    | 2 | MASCOT | T      | PLEX8 |       |
| 2.42E-03 | 0 0 | Cs1g24340.1 ! Cs3g25   | 4    | 0 | 0    | 2 | MASCOT | T      | PLEX8 |       |
| 2.10E-02 | 0 0 | Cs3g25040.1            | 9.76 | 0 | 15.9 | 0 | 2      | MASCOT | T     |       |
| 1.59E-01 | 0 0 | Cs1g24340.1/Cs3g250    | 6    | 0 | 0    | 2 | MASCOT | T      | PLEX8 |       |
| 4.52E-04 | 0 0 | Cs1g24340.1/Cs3g250    | 4.32 | 1 | 0    | 2 | MASCOT | T      | PLEX8 |       |
| 2.67E-02 | 0 0 | Cs1g24340.1/Cs3g250    | 5.5  | 0 | 0    | 2 | MASCOT | T      | PLEX8 |       |
| 4.42E-02 | 0 0 | Cs4g13610.1            | 6.79 | 0 | 0    | 2 | MASCOT | T      |       |       |
| 1.97E-01 | 0 0 | Cs4g13610.1            | 4.48 | 0 | 0    | 2 | MASCOT | T      |       |       |
| 3.27E-02 | 0 0 | Cs4g13610.1            | 3.92 | 0 | 0    | 2 | MASCOT | T      |       |       |
| 5.76E-02 | 0 0 | Cs4g13610.1            | 8.75 | 0 | 0    | 2 | MASCOT | T      |       |       |
| 1.47E-01 | 0 0 | Cs4g13610.1            | 4.31 | 0 | 0    | 2 | MASCOT | T      | PLEX8 |       |
| 9.59E-02 | 0 0 | Cs5g19210.1/Cs5g192    | 8.8  | 0 | 0    | 2 | MASCOT | T      | PLEX8 |       |
| 1.36E-01 | 0 0 | Cs5g19210.1/Cs5g192    | 4.37 | 0 | 0    | 2 | MASCOT | T      | PLEX8 |       |
| 8.57E-02 | 0 0 | Cs5g19210.1/Cs5g192    | 9.47 | 0 | 0    | 2 | MASCOT | T      | PLEX8 |       |
| 1.67E-01 | 0 0 | Cs5g19210.1/Cs5g192    | 9.8  | 0 | 0    | 2 | MASCOT | T      | PLEX8 |       |
| 1.50E-04 | 0 0 | Cs5g19210.1/Cs5g192    | 8.47 | 0 | 0    | 2 | MASCOT | T      | PLEX8 |       |
| 8.84E-03 | 0 0 | Cs7g32240.1            | 5.83 | 0 | 0    | 2 | MASCOT | T      | PLEX8 |       |
| 6.36E-02 | 0 0 | Cs7g32240.1            | 6.74 | 0 | 0    | 2 | MASCOT | T      | PLEX8 |       |
| 2.38E-03 | 0 0 | Cs7g32240.1            | 5.55 | 0 | 0    | 2 | MASCOT | T      | PLEX8 |       |
| 7.32E-02 | 0 0 | Cs7g32240.1            | 5.21 | 0 | 0    | 2 | MASCOT | T      |       |       |
| 2.34E-01 | 0 0 | Cs7g32240.1            | 8.59 | 0 | 0    | 2 | MASCOT | T      | PLEX8 |       |
| 3.10E-01 | 0 0 | Cs9g08590.1/Cs9g085    | 6.85 | 0 | 0    | 2 | MASCOT | T      | PLEX8 |       |
| 3.35E-01 | 0 0 | Cs9g08590.1/Cs9g085    | 4.37 | 0 | 0    | 2 | MASCOT | T      | PLEX8 |       |
| 2.89E-02 | 0 0 | Cs9g08590.1/Cs9g085    | 4.56 | 1 | 0    | 2 | MASCOT | T      |       |       |
| 9.99E-02 | 0 0 | Cs9g08590.1/Cs9g085    | 4.53 | 0 | 0    | 2 | MASCOT | T      | PLEX8 |       |

|          |     |                     |      |   |   |   |        |   |       |
|----------|-----|---------------------|------|---|---|---|--------|---|-------|
| 8.34E-02 | 0 0 | Cs9g08590.1/Cs9g085 | 4.37 | 0 | 0 | 2 | MASCOT | T |       |
| 3.84E-02 | 0 0 | orange1.1t00331.1   | 8.8  | 0 | 0 | 2 | MASCOT | T | PLEX8 |
| 2.24E-03 | 0 0 | orange1.1t00331.1   | 4.4  | 0 | 0 | 2 | MASCOT | T | PLEX8 |
| 3.88E-01 | 0 0 | orange1.1t00331.1   | 8.75 | 0 | 0 | 2 | MASCOT | T | PLEX8 |
| 5.99E-03 | 0 0 | orange1.1t00331.1   | 4.31 | 0 | 0 | 2 | MASCOT | T | PLEX8 |
| 1.57E-04 | 0 0 | orange1.1t00331.1   | 5.81 | 0 | 0 | 2 | MASCOT | T |       |
| 1.98E-01 | 0 0 | Cs2g13410.1/Cs8g087 | 8.8  | 0 | 0 | 2 | MASCOT | T | PLEX8 |
| 9.52E-02 | 0 0 | Cs2g13410.1/Cs8g087 | 8.8  | 0 | 0 | 2 | MASCOT | T | PLEX8 |
| 3.46E-02 | 0 0 | Cs2g13410.1/Cs8g087 | 8.8  | 0 | 0 | 2 | MASCOT | T | PLEX8 |
| 4.95E-04 | 0 0 | Cs2g13410.1/Cs8g087 | 8.8  | 0 | 0 | 2 | MASCOT | T | PLEX8 |
| 5.77E-03 | 0 0 | Cs2g13410.1/Cs8g087 | 8.8  | 0 | 0 | 2 | MASCOT | T | PLEX8 |
| 6.20E-02 | 0 0 | Cs2g13410.1/Cs8g087 | 8.8  | 0 | 0 | 2 | MASCOT | T | PLEX8 |
| 5.19E-03 | 0 0 | Cs2g13410.1/Cs8g087 | 8.8  | 0 | 0 | 2 | MASCOT | T | PLEX8 |
| 1.06E-02 | 0 0 | Cs2g13410.1/Cs8g087 | 8.8  | 0 | 0 | 2 | MASCOT | T | PLEX8 |
| 1.47E-02 | 0 0 | Cs2g13410.1/Cs8g087 | 8.8  | 0 | 0 | 2 | MASCOT | T | PLEX8 |
| 3.53E-02 | 0 0 | Cs2g13410.1/Cs8g087 | 8.8  | 0 | 0 | 2 | MASCOT | T | PLEX8 |
| 2.82E-03 | 0 0 | Cs2g13410.1/Cs8g087 | 8.8  | 0 | 0 | 2 | MASCOT | T | PLEX8 |
| 9.89E-02 | 0 0 | Cs2g13410.1/Cs8g087 | 8.8  | 0 | 0 | 2 | MASCOT | T | PLEX8 |
| 2.79E-01 | 0 0 | Cs2g13410.1/Cs8g087 | 8.8  | 0 | 0 | 2 | MASCOT | T | PLEX8 |
| 3.94E-01 | 0 0 | Cs2g13410.1/Cs8g087 | 8.8  | 0 | 0 | 2 | MASCOT | T | PLEX8 |
| 4.10E-02 | 0 0 | Cs2g13410.1/Cs8g087 | 8.8  | 0 | 0 | 2 | MASCOT | T | PLEX8 |
| 1.25E-02 | 0 0 | Cs2g13410.1/Cs8g087 | 8.8  | 0 | 0 | 2 | MASCOT | T | PLEX8 |
| 8.66E-02 | 0 0 | Cs2g13410.1/Cs8g087 | 8.8  | 0 | 0 | 2 | MASCOT | T | PLEX8 |
| 1.54E-01 | 0 0 | Cs2g13410.1/Cs8g087 | 8.8  | 0 | 0 | 2 | MASCOT | T | PLEX8 |
| 3.22E-02 | 0 0 | Cs2g13410.1/Cs8g087 | 8.8  | 0 | 0 | 2 | MASCOT | T | PLEX8 |
| 2.26E-02 | 0 0 | Cs2g13410.1/Cs8g087 | 8.8  | 0 | 0 | 2 | MASCOT | T | PLEX8 |
| 6.83E-03 | 0 0 | Cs2g13410.1/Cs8g087 | 8.8  | 0 | 0 | 2 | MASCOT | T | PLEX8 |
| 5.81E-01 | 0 0 | Cs2g13410.1/Cs8g087 | 8.8  | 0 | 0 | 2 | MASCOT | T | PLEX8 |
| 6.73E-02 | 0 0 | Cs2g13410.1/Cs8g087 | 8.8  | 0 | 0 | 2 | MASCOT | T | PLEX8 |
| 1.94E-02 | 0 0 | Cs2g13410.1/Cs8g087 | 8.8  | 0 | 0 | 2 | MASCOT | T | PLEX8 |
| 1.83E-03 | 0 0 | Cs2g13410.1/Cs8g087 | 8.8  | 0 | 0 | 2 | MASCOT | T | PLEX8 |
| 1.03E-03 | 0 0 | Cs2g13410.1/Cs8g087 | 8.8  | 0 | 0 | 2 | MASCOT | T | PLEX8 |
| 1.09E-03 | 0 0 | Cs2g13410.1/Cs8g087 | 8.8  | 0 | 0 | 2 | MASCOT | T | PLEX8 |
| 5.54E-01 | 0 0 | Cs2g13410.1/Cs8g087 | 8.8  | 0 | 0 | 2 | MASCOT | T |       |
| 7.57E-03 | 0 0 | Cs2g13410.1/Cs8g087 | 8.8  | 0 | 0 | 2 | MASCOT | T | PLEX8 |
| 3.72E-02 | 0 0 | Cs2g13410.1/Cs8g087 | 8.8  | 0 | 0 | 2 | MASCOT | T | PLEX8 |
| 1.96E-02 | 0 0 | Cs2g13410.1/Cs8g087 | 8.8  | 0 | 0 | 2 | MASCOT | T | PLEX8 |
| 3.97E-02 | 0 0 | Cs2g13410.1/Cs8g087 | 8.8  | 0 | 0 | 2 | MASCOT | T | PLEX8 |
| 1.32E-02 | 0 0 | Cs2g13410.1/Cs8g087 | 8.8  | 0 | 0 | 2 | MASCOT | T | PLEX8 |
| 1.70E-01 | 0 0 | Cs2g13410.1/Cs8g087 | 8.8  | 0 | 0 | 2 | MASCOT | T | PLEX8 |
| 5.19E-01 | 0 0 | Cs2g13410.1/Cs8g087 | 8.8  | 0 | 0 | 2 | MASCOT | T | PLEX8 |
| 1.34E-01 | 0 0 | Cs2g13410.1/Cs8g087 | 8.8  | 0 | 0 | 2 | MASCOT | T | PLEX8 |
| 4.69E-01 | 0 0 | Cs2g13410.1/Cs8g087 | 8.8  | 0 | 0 | 2 | MASCOT | T |       |
| 5.85E-01 | 0 0 | Cs2g13410.1/Cs8g087 | 8.8  | 0 | 0 | 2 | MASCOT | T | PLEX8 |
| 8.79E-02 | 0 0 | Cs2g13410.1/Cs8g087 | 8.8  | 0 | 0 | 2 | MASCOT | T | PLEX8 |
| 4.43E-04 | 0 0 | Cs2g13410.1/Cs8g087 | 8.8  | 0 | 0 | 2 | MASCOT | T | PLEX8 |
| 1.67E-02 | 0 0 | Cs2g13410.1/Cs8g087 | 8.8  | 0 | 0 | 2 | MASCOT | T | PLEX8 |
| 5.16E-04 | 0 0 | Cs2g13410.1/Cs8g087 | 8.8  | 0 | 0 | 2 | MASCOT | T | PLEX8 |
| 3.78E-03 | 0 0 | Cs2g13410.1/Cs8g087 | 8.8  | 0 | 0 | 2 | MASCOT | T | PLEX8 |
| 3.95E-04 | 0 0 | Cs2g13410.1/Cs8g087 | 8.8  | 0 | 0 | 2 | MASCOT | T | PLEX8 |
| 6.84E-03 | 0 0 | Cs2g13410.1/Cs8g087 | 8.8  | 0 | 0 | 2 | MASCOT | T | PLEX8 |



|          |     |                     |      |   |      |   |        |        |       |       |
|----------|-----|---------------------|------|---|------|---|--------|--------|-------|-------|
| 1.58E-01 | 0 0 | Cs2g13410.1/Cs8g087 | 8.8  | 0 | 0    | 2 | MASCOT | T      | PLEX8 |       |
| 4.04E-02 | 0 0 | Cs2g13410.1/Cs8g087 | 8.8  | 0 | 0    | 2 | MASCOT | T      | PLEX8 |       |
| 1.43E-01 | 0 0 | Cs2g13410.1/Cs8g087 | 8.8  | 0 | 0    | 2 | MASCOT | T      | PLEX8 |       |
| 5.29E-03 | 0 0 | Cs2g13410.1/Cs8g087 | 8.8  | 0 | 0    | 2 | MASCOT | T      | PLEX8 |       |
| 9.20E-03 | 0 0 | Cs2g13410.1/Cs8g087 | 8.8  | 0 | 0    | 2 | MASCOT | T      | PLEX8 |       |
| 1.23E-02 | 0 0 | Cs2g13410.1/Cs8g087 | 8.8  | 0 | 0    | 2 | MASCOT | T      | PLEX8 |       |
| 1.53E-02 | 0 0 | Cs2g13410.1/Cs8g087 | 8.8  | 0 | 0    | 2 | MASCOT | T      | PLEX8 |       |
| 9.53E-03 | 0 0 | Cs2g13410.1/Cs8g087 | 8.8  | 0 | 0    | 2 | MASCOT | T      | PLEX8 |       |
| 9.18E-02 | 0 0 | Cs2g13410.1/Cs8g087 | 8.8  | 0 | 0    | 2 | MASCOT | T      |       |       |
| 9.16E-02 | 0 0 | Cs2g13410.1/Cs8g087 | 8.8  | 0 | 0    | 2 | MASCOT | T      |       |       |
| 1.57E-03 | 0 0 | Cs2g13410.1/Cs8g087 | 8.8  | 0 | 0    | 2 | MASCOT | T      |       |       |
| 5.04E-01 | 0 0 | Cs2g13410.1/Cs8g087 | 8.8  | 0 | 0    | 2 | MASCOT | T      |       |       |
| 3.72E-02 | 0 0 | Cs2g13410.1/Cs8g087 | 8.8  | 0 | 0    | 2 | MASCOT | T      |       |       |
| 1.20E-01 | 0 0 | Cs8g08710.2/Cs8g087 | 8.27 | 0 | 0    | 2 | MASCOT | T      | PLEX8 |       |
| 1.11E-01 | 0 0 | Cs8g08710.1/Cs8g087 | 6.1  | 0 | 0    | 2 | MASCOT | T      | PLEX8 |       |
| 1.43E-01 | 0 0 | Cs8g08710.1/Cs8g087 | 6.1  | 0 | 0    | 2 | MASCOT | T      | PLEX8 |       |
| 8.41E-02 | 0 0 | Cs8g08710.1/Cs8g087 | 6.1  | 0 | 0    | 2 | MASCOT | T      | PLEX8 |       |
| 1.12E-02 | 0 0 | Cs8g08710.1/Cs8g087 | 4.53 | 0 | 0    | 2 | MASCOT | T      |       |       |
| 1.13E-02 | 0 0 | Cs8g08710.1/Cs8g087 | 4.53 | 0 | 0    | 2 | MASCOT | T      |       |       |
| 7.02E-05 | 0 0 | Cs7g08910.1/Cs7g089 | 4.65 | 0 | 15.9 | 0 | 2      | MASCOT | T     | PLEX8 |
| 1.42E-03 | 0 0 | Cs7g08910.1/Cs7g089 | 4.65 | 0 | 15.9 | 0 | 2      | MASCOT | T     |       |
| 1.70E-01 | 0 0 | Cs4g11150.1/Cs4g111 | 4.37 | 0 | 0    | 2 | MASCOT | T      | PLEX8 |       |
| 3.50E-02 | 0 0 | Cs4g11150.1/Cs4g111 | 4.37 | 0 | 0    | 2 | MASCOT | T      | PLEX8 |       |
| 1.29E-01 | 0 0 | Cs4g11150.1/Cs4g111 | 4.37 | 0 | 0    | 2 | MASCOT | T      | PLEX8 |       |
| 1.89E-01 | 0 0 | Cs4g11150.1/Cs4g111 | 4.37 | 0 | 0    | 2 | MASCOT | T      |       |       |
| 7.91E-02 | 0 0 | Cs4g11150.1/Cs4g111 | 4.37 | 0 | 0    | 2 | MASCOT | T      |       |       |
| 7.54E-02 | 0 0 | Cs4g11150.1/Cs4g111 | 4.37 | 0 | 0    | 2 | MASCOT | T      |       |       |
| 5.84E-02 | 0 0 | Cs1g22440.1/Cs4g111 | 6.85 | 0 | 0    | 2 | MASCOT | T      | PLEX8 |       |
| 1.20E-02 | 0 0 | Cs1g22440.1/Cs4g111 | 6.85 | 0 | 0    | 2 | MASCOT | T      | PLEX8 |       |
| 2.50E-03 | 0 0 | Cs1g22440.1/Cs4g111 | 6.85 | 0 | 0    | 2 | MASCOT | T      | PLEX8 |       |
| 4.87E-02 | 0 0 | Cs1g22440.1/Cs4g111 | 6.85 | 0 | 0    | 2 | MASCOT | T      | PLEX8 |       |
| 2.71E-03 | 0 0 | Cs1g22440.1/Cs4g111 | 6.85 | 0 | 0    | 2 | MASCOT | T      | PLEX8 |       |
| 4.18E-02 | 0 0 | Cs1g22440.1/Cs4g111 | 6.85 | 0 | 0    | 2 | MASCOT | T      | PLEX8 |       |
| 1.02E-02 | 0 0 | Cs1g22440.1/Cs4g111 | 6.85 | 0 | 0    | 2 | MASCOT | T      | PLEX8 |       |
| 2.35E-02 | 0 0 | Cs1g22440.1/Cs4g111 | 6.85 | 0 | 0    | 2 | MASCOT | T      | PLEX8 |       |
| 2.60E-01 | 0 0 | Cs1g22440.1/Cs4g111 | 6.85 | 0 | 0    | 2 | MASCOT | T      | PLEX8 |       |
| 4.88E-03 | 0 0 | Cs1g22440.1/Cs4g111 | 6.85 | 0 | 0    | 2 | MASCOT | T      | PLEX8 |       |
| 3.07E-01 | 0 0 | Cs1g22440.1/Cs4g111 | 5.5  | 0 | 0    | 2 | MASCOT | T      | PLEX8 |       |
| 1.19E-01 | 0 0 | Cs1g22440.1/Cs4g111 | 5.5  | 0 | 0    | 2 | MASCOT | T      | PLEX8 |       |
| 3.06E-02 | 0 0 | Cs1g22440.1/Cs4g111 | 5.5  | 0 | 0    | 2 | MASCOT | T      | PLEX8 |       |
| 2.35E-02 | 0 0 | Cs1g22440.1/Cs4g111 | 5.5  | 0 | 0    | 2 | MASCOT | T      | PLEX8 |       |
| 2.07E-02 | 0 0 | Cs1g22440.1/Cs4g111 | 5.5  | 0 | 0    | 2 | MASCOT | T      | PLEX8 |       |
| 1.70E-01 | 0 0 | Cs1g22440.1/Cs4g111 | 5.5  | 0 | 0    | 2 | MASCOT | T      | PLEX8 |       |
| 3.31E-02 | 0 0 | Cs1g22440.1/Cs4g111 | 5.5  | 0 | 0    | 2 | MASCOT | T      | PLEX8 |       |
| 1.34E-01 | 0 0 | Cs1g22440.1/Cs4g111 | 5.5  | 0 | 0    | 2 | MASCOT | T      | PLEX8 |       |
| 2.84E-04 | 0 0 | Cs5g08610.1         | 8.25 | 0 | 0    | 2 | MASCOT | T      | PLEX8 |       |
| 9.94E-04 | 0 0 | Cs5g08610.1         | 8.25 | 0 | 0    | 2 | MASCOT | T      | PLEX8 |       |
| 2.81E-05 | 0 0 | Cs5g08610.1         | 8.25 | 0 | 0    | 2 | MASCOT | T      |       |       |
| 1.45E-01 | 0 0 | Cs5g08610.1         | 8.25 | 0 | 0    | 2 | MASCOT | T      |       |       |
| 1.87E-06 | 0 0 | Cs5g08610.1         | 5.4  | 0 | 0    | 2 | MASCOT | T      | PLEX8 |       |
| 5.29E-03 | 0 0 | Cs5g08610.1         | 5.4  | 0 | 0    | 2 | MASCOT | T      | PLEX8 |       |

|          |     |                        |      |   |   |          |   |       |
|----------|-----|------------------------|------|---|---|----------|---|-------|
| 1.47E-07 | 0 0 | Cs5g08610.1            | 5.4  | 0 | 0 | 2 MASCOT | T | PLEX8 |
| 1.88E-07 | 0 0 | Cs5g08610.1            | 5.4  | 0 | 0 | 2 MASCOT | T | PLEX8 |
| 4.37E-04 | 0 0 | Cs5g08610.1            | 5.4  | 0 | 0 | 2 MASCOT | T | PLEX8 |
| 4.13E-04 | 0 0 | Cs5g08610.1            | 5.4  | 0 | 0 | 2 MASCOT | T | PLEX8 |
| 3.56E-04 | 0 0 | Cs5g08610.1            | 5.4  | 0 | 0 | 2 MASCOT | T |       |
| 5.01E-03 | 0 0 | Cs5g08610.1            | 5.4  | 0 | 0 | 2 MASCOT | T |       |
| 1.17E-01 | 0 0 | Cs5g08610.1            | 5.4  | 0 | 0 | 2 MASCOT | T | PLEX8 |
| 1.56E-09 | 0 0 | Cs5g08610.1            | 5.4  | 0 | 0 | 2 MASCOT | T | PLEX8 |
| 5.44E-03 | 0 0 | Cs5g08610.1            | 5.4  | 0 | 0 | 2 MASCOT | T |       |
| 3.26E-04 | 0 0 | Cs5g08610.1            | 5.4  | 0 | 0 | 2 MASCOT | T |       |
| 3.62E-08 | 0 0 | Cs5g08610.1            | 5.4  | 0 | 0 | 2 MASCOT | T |       |
| 1.09E-03 | 0 0 | Cs5g08610.1            | 5.4  | 0 | 0 | 2 MASCOT | T |       |
| 7.28E-03 | 0 0 | Cs5g08610.1            | 4.14 | 0 | 0 | 2 MASCOT | T | PLEX8 |
| 7.65E-02 | 0 0 | Cs5g08610.1            | 8.76 | 0 | 0 | 2 MASCOT | T | PLEX8 |
| 7.44E-02 | 0 0 | Cs5g08610.1            | 8.76 | 0 | 0 | 2 MASCOT | T | PLEX8 |
| 2.42E-01 | 0 0 | Cs5g08610.1            | 8.76 | 0 | 0 | 2 MASCOT | T | PLEX8 |
| 5.94E-02 | 0 0 | Cs5g08610.1            | 8.76 | 0 | 0 | 2 MASCOT | T |       |
| 1.76E-01 | 0 0 | Cs5g03830.1/Cs5g038    | 4.37 | 0 | 0 | 2 MASCOT | T | PLEX8 |
| 2.44E-01 | 0 0 | Cs5g03830.1/Cs5g038    | 4.37 | 0 | 0 | 2 MASCOT | T | PLEX8 |
| 2.34E-01 | 0 0 | Cs5g03830.1/Cs5g038    | 4.37 | 0 | 0 | 2 MASCOT | T | PLEX8 |
| 9.29E-02 | 0 0 | Cs5g03830.1/Cs5g038    | 4.37 | 0 | 0 | 2 MASCOT | T | PLEX8 |
| 2.76E-01 | 0 0 | Cs5g03830.1/Cs5g038    | 4.37 | 0 | 0 | 2 MASCOT | T | PLEX8 |
| 1.52E-01 | 0 0 | Cs5g03830.1/Cs5g038    | 4.37 | 0 | 0 | 2 MASCOT | T | PLEX8 |
| 3.53E-01 | 0 0 | Cs5g03830.1/Cs5g038    | 4.37 | 0 | 0 | 2 MASCOT | T | PLEX8 |
| 8.43E-02 | 0 0 | Cs5g03830.1/Cs5g038    | 4.37 | 0 | 0 | 2 MASCOT | T | PLEX8 |
| 2.38E-01 | 0 0 | Cs5g03830.1/Cs5g038    | 4.37 | 0 | 0 | 2 MASCOT | T | PLEX8 |
| 4.34E-01 | 0 0 | Cs5g03830.1/Cs5g038    | 4.37 | 0 | 0 | 2 MASCOT | T | PLEX8 |
| 2.61E-01 | 0 0 | Cs5g03830.1/Cs5g038    | 4.37 | 0 | 0 | 2 MASCOT | T | PLEX8 |
| 2.48E-01 | 0 0 | Cs5g03830.1/Cs5g038    | 4.37 | 0 | 0 | 2 MASCOT | T | PLEX8 |
| 6.38E-02 | 0 0 | Cs5g03830.1/Cs5g038    | 4.37 | 0 | 0 | 2 MASCOT | T | PLEX8 |
| 1.02E-02 | 0 0 | orange1.1t03689.1      | 4.53 | 0 | 0 | 2 MASCOT | T | PLEX8 |
| 3.73E-01 | 0 0 | orange1.1t03689.1 ! C: | 5.55 | 0 | 0 | 2 MASCOT | T | PLEX8 |
| 1.42E-02 | 0 0 | orange1.1t03689.1 ! C: | 5.55 | 0 | 0 | 2 MASCOT | T | PLEX8 |
| 1.55E-01 | 0 0 | orange1.1t03689.1 ! C: | 5.55 | 0 | 0 | 2 MASCOT | T | PLEX8 |
| 1.72E-01 | 0 0 | orange1.1t03689.1 ! C: | 5.55 | 0 | 0 | 2 MASCOT | T | PLEX8 |
| 7.48E-02 | 0 0 | orange1.1t03689.1 ! C: | 5.55 | 0 | 0 | 2 MASCOT | T | PLEX8 |
| 1.61E-02 | 0 0 | orange1.1t03689.1 ! C: | 5.55 | 0 | 0 | 2 MASCOT | T | PLEX8 |
| 1.58E-01 | 0 0 | orange1.1t03689.1 ! C: | 5.55 | 0 | 0 | 2 MASCOT | T | PLEX8 |
| 2.10E-01 | 0 0 | orange1.1t03689.1 ! C: | 5.55 | 0 | 0 | 2 MASCOT | T |       |
| 1.21E-02 | 0 0 | orange1.1t03689.1      | 8.72 | 0 | 0 | 2 MASCOT | T | PLEX8 |
| 1.11E-01 | 0 0 | Cs2g03620.1            | 3.84 | 0 | 0 | 2 MASCOT | T | PLEX8 |
| 5.62E-03 | 0 0 | Cs2g03620.1            | 3.84 | 0 | 0 | 2 MASCOT | T | PLEX8 |
| 1.93E-07 | 0 0 | Cs2g03620.1            | 3.84 | 0 | 0 | 2 MASCOT | T | PLEX8 |
| 1.01E-05 | 0 0 | Cs2g03620.1            | 3.84 | 0 | 0 | 2 MASCOT | T |       |
| 6.60E-05 | 0 0 | Cs2g03620.1            | 3.84 | 0 | 0 | 2 MASCOT | T |       |
| 1.35E-03 | 0 0 | Cs2g03620.1            | 3.84 | 0 | 0 | 2 MASCOT | T |       |
| 3.22E-03 | 0 0 | Cs2g03620.1            | 4.37 | 0 | 0 | 2 MASCOT | T | PLEX8 |
| 7.01E-04 | 0 0 | Cs2g03620.1            | 4.37 | 0 | 0 | 2 MASCOT | T | PLEX8 |
| 2.94E-04 | 0 0 | Cs2g03620.1            | 4.37 | 0 | 0 | 2 MASCOT | T | PLEX8 |
| 3.51E-01 | 0 0 | Cs2g03620.1            | 4.37 | 0 | 0 | 2 MASCOT | T | PLEX8 |
| 1.70E-01 | 0 0 | Cs2g03620.1            | 4.37 | 0 | 0 | 2 MASCOT | T | PLEX8 |

|              |                     |      |        |   |          |   |       |
|--------------|---------------------|------|--------|---|----------|---|-------|
| 1.61E-01 0 0 | Cs2g03620.1         | 4.37 | 0      | 0 | 2 MASCOT | T | PLEX8 |
| 5.50E-04 0 0 | Cs2g03620.1         | 4.37 | 0      | 0 | 2 MASCOT | T | PLEX8 |
| 1.51E-01 0 0 | Cs2g03620.1         | 4.37 | 0      | 0 | 2 MASCOT | T |       |
| 7.48E-03 0 0 | Cs2g03620.1         | 4.37 | 0      | 0 | 2 MASCOT | T | PLEX8 |
| 3.26E-02 0 0 | Cs2g03620.1         | 4.37 | 0      | 0 | 2 MASCOT | T | PLEX8 |
| 6.47E-02 0 0 | Cs2g03620.1         | 5.95 | 1      | 0 | 2 MASCOT | T |       |
| 2.70E-01 0 0 | Cs2g03620.1         | 8.2  | 0      | 0 | 2 MASCOT | T | PLEX8 |
| 7.12E-02 0 0 | Cs2g03620.1         | 8.2  | 0      | 0 | 2 MASCOT | T | PLEX8 |
| 1.53E-02 0 0 | Cs2g03620.1         | 8.2  | 0      | 0 | 2 MASCOT | T |       |
| 3.40E-01 0 0 | Cs4g05780.1         | 5.88 | 0 15.9 | 0 | 2 MASCOT | T | PLEX8 |
| 9.75E-02 0 0 | Cs4g05780.1         | 5.88 | 0 15.9 | 0 | 2 MASCOT | T | PLEX8 |
| 4.61E-02 0 0 | Cs4g05780.1         | 5.88 | 0 15.9 | 0 | 2 MASCOT | T | PLEX8 |
| 1.95E-02 0 0 | Cs4g05780.1         | 5.88 | 0 15.9 | 0 | 2 MASCOT | T | PLEX8 |
| 5.02E-02 0 0 | Cs4g05780.1         | 5.88 | 0 15.9 | 0 | 2 MASCOT | T | PLEX8 |
| 9.97E-03 0 0 | Cs4g05780.1         | 5.88 | 0      | 0 | 2 MASCOT | T | PLEX8 |
| 1.15E-01 0 0 | Cs4g05780.1         | 5.88 | 0      | 0 | 2 MASCOT | T | PLEX8 |
| 2.31E-04 0 0 | Cs4g05780.1         | 5.88 | 0      | 0 | 2 MASCOT | T | PLEX8 |
| 1.64E-02 0 0 | Cs4g05780.1         | 5.88 | 0      | 0 | 2 MASCOT | T | PLEX8 |
| 7.41E-03 0 0 | Cs4g05780.1         | 5.88 | 0      | 0 | 2 MASCOT | T | PLEX8 |
| 1.75E-01 0 0 | Cs4g05780.1         | 5.88 | 0      | 0 | 2 MASCOT | T | PLEX8 |
| 2.67E-03 0 0 | Cs4g05780.1         | 5.88 | 0      | 0 | 2 MASCOT | T | PLEX8 |
| 9.37E-02 0 0 | Cs4g05780.1         | 5.88 | 0      | 0 | 2 MASCOT | T | PLEX8 |
| 1.05E-01 0 0 | Cs4g05780.1         | 6    | 0      | 0 | 2 MASCOT | T | PLEX8 |
| 7.53E-03 0 0 | Cs4g05780.1         | 9.47 | 0      | 0 | 2 MASCOT | T | PLEX8 |
| 2.23E-01 0 0 | Cs4g05780.1         | 9.47 | 0      | 0 | 2 MASCOT | T | PLEX8 |
| 7.79E-03 0 0 | Cs4g05780.1         | 9.47 | 0      | 0 | 2 MASCOT | T | PLEX8 |
| 3.04E-05 0 0 | Cs4g05780.1         | 3.92 | 0      | 0 | 2 MASCOT | T | PLEX8 |
| 2.19E-01 0 0 | Cs4g05780.1         | 3.92 | 0      | 0 | 2 MASCOT | T | PLEX8 |
| 1.32E-01 0 0 | Cs4g03580.1/Cs4g035 | 4.37 | 0 15.9 | 0 | 2 MASCOT | T | PLEX8 |
| 1.59E-01 0 0 | Cs4g03580.1/Cs4g035 | 4.37 | 0 15.9 | 0 | 2 MASCOT | T | PLEX8 |
| 2.09E-01 0 0 | Cs4g03580.1/Cs4g035 | 4.37 | 0      | 0 | 2 MASCOT | T | PLEX8 |
| 1.80E-01 0 0 | Cs4g03580.1/Cs4g035 | 4.37 | 0      | 0 | 2 MASCOT | T |       |
| 1.28E-01 0 0 | Cs4g03580.1/Cs4g035 | 8.22 | 0 15.9 | 0 | 2 MASCOT | T | PLEX8 |
| 2.71E-01 0 0 | Cs4g03580.1/Cs4g035 | 8.22 | 0 15.9 | 0 | 2 MASCOT | T | PLEX8 |
| 1.74E-01 0 0 | Cs4g03580.1/Cs4g035 | 8.22 | 0 15.9 | 0 | 2 MASCOT | T | PLEX8 |
| 1.66E-01 0 0 | Cs4g03580.1/Cs4g035 | 8.22 | 0 15.9 | 0 | 2 MASCOT | T | PLEX8 |
| 1.56E-01 0 0 | Cs4g03580.1/Cs4g035 | 8.22 | 0      | 0 | 2 MASCOT | T | PLEX8 |
| 7.93E-02 0 0 | Cs4g03580.1/Cs4g035 | 8.22 | 0      | 0 | 2 MASCOT | T | PLEX8 |
| 5.48E-02 0 0 | Cs4g03580.1/Cs4g035 | 8.41 | 0      | 0 | 2 MASCOT | T | PLEX8 |
| 1.26E-01 0 0 | Cs4g03580.1/Cs4g035 | 8.41 | 0      | 0 | 2 MASCOT | T | PLEX8 |
| 5.67E-02 0 0 | Cs4g03580.1/Cs4g035 | 8.41 | 0      | 0 | 2 MASCOT | T | PLEX8 |
| 3.31E-02 0 0 | Cs4g03580.1/Cs4g035 | 8.22 | 0      | 0 | 2 MASCOT | T | PLEX8 |
| 3.49E-02 0 0 | Cs4g03580.1/Cs4g035 | 8.22 | 0      | 0 | 2 MASCOT | T | PLEX8 |
| 1.94E-01 0 0 | Cs4g03580.1/Cs4g035 | 8.22 | 0      | 0 | 2 MASCOT | T | PLEX8 |
| 2.70E-02 0 0 | Cs4g03580.1/Cs4g035 | 8.22 | 0      | 0 | 2 MASCOT | T | PLEX8 |
| 1.12E-02 0 0 | Cs4g03580.1/Cs4g035 | 8.22 | 0      | 0 | 2 MASCOT | T | PLEX8 |
| 2.64E-01 0 0 | Cs1g04030.1/Cs1g040 | 4.37 | 0 15.9 | 0 | 2 MASCOT | T | PLEX8 |
| 3.38E-03 0 0 | Cs1g04030.1/Cs1g040 | 4.37 | 0 15.9 | 0 | 2 MASCOT | T | PLEX8 |
| 3.64E-02 0 0 | Cs1g04030.1/Cs1g040 | 4.37 | 0 15.9 | 0 | 2 MASCOT | T | PLEX8 |
| 4.55E-02 0 0 | Cs1g04030.1/Cs1g040 | 4.37 | 0      | 0 | 2 MASCOT | T | PLEX8 |
| 4.90E-02 0 0 | Cs1g04030.1/Cs1g040 | 4.37 | 0      | 0 | 2 MASCOT | T | PLEX8 |

|          |     |                       |      |   |   |   |        |   |       |
|----------|-----|-----------------------|------|---|---|---|--------|---|-------|
| 7.97E-02 | 0 0 | Cs1g04030.1/Cs1g040   | 4.25 | 0 | 0 | 2 | MASCOT | T | PLEX8 |
| 5.46E-02 | 0 0 | Cs1g04030.1/Cs1g040   | 4.25 | 0 | 0 | 2 | MASCOT | T | PLEX8 |
| 2.85E-01 | 0 0 | Cs1g04030.1/Cs1g040   | 4.25 | 0 | 0 | 2 | MASCOT | T | PLEX8 |
| 1.83E-02 | 0 0 | Cs1g04030.1/Cs1g040   | 4.25 | 0 | 0 | 2 | MASCOT | T | PLEX8 |
| 1.53E-01 | 0 0 | Cs1g04030.1/Cs1g040   | 4.25 | 0 | 0 | 2 | MASCOT | T | PLEX8 |
| 1.67E-01 | 0 0 | Cs1g04030.1/Cs1g040   | 5.5  | 0 | 0 | 2 | MASCOT | T | PLEX8 |
| 1.03E-01 | 0 0 | Cs1g04030.1/Cs1g040   | 5.5  | 0 | 0 | 2 | MASCOT | T | PLEX8 |
| 5.91E-02 | 0 0 | Cs2g10770.1 ! Cs1g04  | 8.26 | 0 | 0 | 2 | MASCOT | T | PLEX8 |
| 1.20E-01 | 0 0 | Cs2g10770.1 ! Cs1g04  | 8.26 | 0 | 0 | 2 | MASCOT | T | PLEX8 |
| 1.54E-01 | 0 0 | Cs2g10770.1 ! Cs1g04  | 8.26 | 0 | 0 | 2 | MASCOT | T | PLEX8 |
| 1.08E-01 | 0 0 | Cs2g10770.1 ! Cs1g04  | 8.26 | 0 | 0 | 2 | MASCOT | T | PLEX8 |
| 2.55E-03 | 0 0 | Cs2g30260.1           | 5.3  | 0 | 0 | 2 | MASCOT | T | PLEX8 |
| 9.21E-03 | 0 0 | Cs2g30260.1           | 5.3  | 0 | 0 | 2 | MASCOT | T | PLEX8 |
| 1.24E-03 | 0 0 | Cs2g30260.1           | 5.3  | 0 | 0 | 2 | MASCOT | T | PLEX8 |
| 7.42E-02 | 0 0 | Cs2g30260.1           | 5.3  | 0 | 0 | 2 | MASCOT | T | PLEX8 |
| 8.52E-03 | 0 0 | Cs2g30260.1           | 5.3  | 0 | 0 | 2 | MASCOT | T | PLEX8 |
| 1.28E-02 | 0 0 | Cs2g30260.1           | 5.3  | 0 | 0 | 2 | MASCOT | T | PLEX8 |
| 2.08E-02 | 0 0 | Cs2g30260.1           | 5.55 | 0 | 0 | 2 | MASCOT | T | PLEX8 |
| 2.26E-02 | 0 0 | Cs2g30260.1           | 5.55 | 0 | 0 | 2 | MASCOT | T | PLEX8 |
| 3.25E-01 | 0 0 | Cs2g30260.1           | 5.55 | 0 | 0 | 2 | MASCOT | T | PLEX8 |
| 5.55E-02 | 0 0 | Cs2g30260.1           | 8.8  | 0 | 0 | 2 | MASCOT | T | PLEX8 |
| 3.48E-02 | 0 0 | Cs2g30260.1           | 8.8  | 0 | 0 | 2 | MASCOT | T |       |
| 1.13E-01 | 0 0 | Cs2g30260.1           | 8.8  | 0 | 0 | 2 | MASCOT | T | PLEX8 |
| 5.49E-03 | 0 0 | Cs2g30260.1           | 8.8  | 0 | 0 | 2 | MASCOT | T | PLEX8 |
| 1.08E-01 | 0 0 | Cs2g30260.1           | 8.59 | 0 | 0 | 2 | MASCOT | T | PLEX8 |
| 1.30E-01 | 0 0 | Cs2g30260.1           | 8.59 | 0 | 0 | 2 | MASCOT | T | PLEX8 |
| 1.99E-01 | 0 0 | Cs2g30260.1           | 8.59 | 0 | 0 | 2 | MASCOT | T |       |
| 2.03E-01 | 0 0 | Cs5g07850.1/Cs5g078   | 4.53 | 0 | 0 | 2 | MASCOT | T | PLEX8 |
| 4.49E-03 | 0 0 | Cs5g07850.1/Cs5g078   | 4.53 | 0 | 0 | 2 | MASCOT | T | PLEX8 |
| 9.92E-02 | 0 0 | Cs5g07850.1/Cs5g078   | 4.53 | 0 | 0 | 2 | MASCOT | T | PLEX8 |
| 4.07E-02 | 0 0 | Cs5g07850.1/Cs5g078   | 4.53 | 0 | 0 | 2 | MASCOT | T | PLEX8 |
| 2.02E-03 | 0 0 | Cs5g07850.1/Cs5g078   | 4.14 | 0 | 0 | 2 | MASCOT | T |       |
| 1.76E-03 | 0 0 | Cs5g07850.1/Cs5g078   | 4.14 | 0 | 0 | 2 | MASCOT | T |       |
| 2.86E-02 | 0 0 | Cs5g07850.1/Cs5g078   | 4.14 | 0 | 0 | 2 | MASCOT | T |       |
| 1.12E-03 | 0 0 | Cs5g07850.1/Cs5g078   | 4.14 | 0 | 0 | 2 | MASCOT | T |       |
| 1.39E-03 | 0 0 | Cs5g07850.1/Cs5g078   | 4.14 | 0 | 0 | 2 | MASCOT | T | PLEX8 |
| 1.30E-01 | 0 0 | Cs5g07850.1/Cs5g078   | 4.14 | 0 | 0 | 2 | MASCOT | T | PLEX8 |
| 2.46E-01 | 0 0 | Cs5g07850.1/Cs5g078   | 4.14 | 0 | 0 | 2 | MASCOT | T | PLEX8 |
| 6.88E-03 | 0 0 | Cs5g07850.1/Cs5g078   | 8.8  | 0 | 0 | 2 | MASCOT | T | PLEX8 |
| 2.06E-01 | 0 0 | Cs5g07850.1/Cs5g078   | 8.8  | 0 | 0 | 2 | MASCOT | T | PLEX8 |
| 7.03E-02 | 0 0 | Cs5g07850.1/Cs5g078   | 8.8  | 0 | 0 | 2 | MASCOT | T | PLEX8 |
| 8.12E-03 | 0 0 | Cs5g07850.1/Cs5g078   | 8.8  | 0 | 0 | 2 | MASCOT | T | PLEX8 |
| 1.73E-01 | 0 0 | Cs5g07850.1/Cs5g078   | 8.8  | 0 | 0 | 2 | MASCOT | T | PLEX8 |
| 2.85E-03 | 0 0 | orange1.1t00626.1/ora | 4.14 | 0 | 0 | 2 | MASCOT | T | PLEX8 |
| 3.70E-03 | 0 0 | orange1.1t00626.1/ora | 4.14 | 0 | 0 | 2 | MASCOT | T | PLEX8 |
| 3.98E-03 | 0 0 | orange1.1t00626.1/ora | 4.14 | 0 | 0 | 2 | MASCOT | T |       |
| 1.29E-01 | 0 0 | orange1.1t00626.1/ora | 4.56 | 0 | 0 | 2 | MASCOT | T |       |
| 3.60E-02 | 0 0 | orange1.1t00626.1/ora | 6    | 0 | 0 | 2 | MASCOT | T | PLEX8 |
| 2.42E-02 | 0 0 | orange1.1t00626.1/ora | 6    | 0 | 0 | 2 | MASCOT | T | PLEX8 |
| 1.05E-01 | 0 0 | orange1.1t00626.1/ora | 6    | 0 | 0 | 2 | MASCOT | T | PLEX8 |
| 1.50E-02 | 0 0 | orange1.1t00626.1/ora | 6    | 0 | 0 | 2 | MASCOT | T | PLEX8 |

|          |     |                       |      |   |   |   |        |   |       |
|----------|-----|-----------------------|------|---|---|---|--------|---|-------|
| 2.44E-02 | 0 0 | orange1.1t00626.1/ora | 6    | 0 | 0 | 2 | MASCOT | T | PLEX8 |
| 1.23E-02 | 0 0 | orange1.1t00626.1/ora | 6    | 0 | 0 | 2 | MASCOT | T | PLEX8 |
| 4.09E-02 | 0 0 | orange1.1t00626.1/ora | 6    | 0 | 0 | 2 | MASCOT | T | PLEX8 |
| 3.60E-03 | 0 0 | orange1.1t00626.1/ora | 6    | 0 | 0 | 2 | MASCOT | T | PLEX8 |
| 1.88E-03 | 0 0 | orange1.1t00626.1/ora | 6    | 0 | 0 | 2 | MASCOT | T | PLEX8 |
| 1.04E-03 | 0 0 | orange1.1t00626.1/ora | 6    | 0 | 0 | 2 | MASCOT | T | PLEX8 |
| 4.17E-03 | 0 0 | orange1.1t00626.1/ora | 6    | 0 | 0 | 2 | MASCOT | T | PLEX8 |
| 8.42E-03 | 0 0 | orange1.1t00626.1/ora | 6    | 0 | 0 | 2 | MASCOT | T | PLEX8 |
| 1.20E-01 | 0 0 | Cs2g28180.1/Cs7g086   | 6    | 0 | 0 | 2 | MASCOT | T | PLEX8 |
| 2.02E-01 | 0 0 | Cs2g28180.1/Cs7g086   | 6    | 0 | 0 | 2 | MASCOT | T | PLEX8 |
| 5.22E-01 | 0 0 | Cs2g28180.1/Cs7g086   | 6    | 0 | 0 | 2 | MASCOT | T | PLEX8 |
| 1.75E-02 | 0 0 | Cs2g28180.1/Cs7g086   | 6    | 0 | 0 | 2 | MASCOT | T | PLEX8 |
| 1.00E-01 | 0 0 | Cs2g28180.1/Cs7g086   | 6    | 0 | 0 | 2 | MASCOT | T |       |
| 1.20E-01 | 0 0 | Cs2g28180.1           | 5.81 | 0 | 0 | 2 | MASCOT | T |       |
| 7.75E-05 | 0 0 | Cs2g28180.1           | 5.81 | 0 | 0 | 2 | MASCOT | T | PLEX8 |
| 1.15E-01 | 0 0 | Cs2g28180.1 ! Cs7g08  | 4.37 | 0 | 0 | 2 | MASCOT | T | PLEX8 |
| 1.83E-01 | 0 0 | Cs2g28180.1 ! Cs7g08  | 4.37 | 0 | 0 | 2 | MASCOT | T | PLEX8 |
| 2.61E-01 | 0 0 | Cs2g28180.1 ! Cs7g08  | 4.21 | 0 | 0 | 2 | MASCOT | T | PLEX8 |
| 1.89E-01 | 0 0 | Cs2g28180.1 ! Cs7g08  | 4.21 | 0 | 0 | 2 | MASCOT | T | PLEX8 |
| 2.60E-04 | 0 0 | Cs2g28180.1 ! Cs7g08  | 4.21 | 0 | 0 | 2 | MASCOT | T | PLEX8 |
| 2.93E-04 | 0 0 | Cs2g28180.1 ! Cs7g08  | 4.21 | 0 | 0 | 2 | MASCOT | T | PLEX8 |
| 1.58E-04 | 0 0 | Cs2g28180.1 ! Cs7g08  | 4.21 | 0 | 0 | 2 | MASCOT | T | PLEX8 |
| 4.47E-04 | 0 0 | Cs2g28180.1 ! Cs7g08  | 4.21 | 0 | 0 | 2 | MASCOT | T | PLEX8 |
| 2.31E-01 | 0 0 | Cs3g12000.1/Cs3g120   | 6.05 | 0 | 0 | 2 | MASCOT | T | PLEX8 |
| 3.26E-04 | 0 0 | Cs3g12000.1/Cs3g120   | 6.05 | 0 | 0 | 2 | MASCOT | T | PLEX8 |
| 4.03E-01 | 0 0 | Cs3g12000.1/Cs3g120   | 6.05 | 0 | 0 | 2 | MASCOT | T | PLEX8 |
| 1.19E-02 | 0 0 | Cs3g12000.1/Cs3g120   | 6.05 | 0 | 0 | 2 | MASCOT | T | PLEX8 |
| 2.07E-05 | 0 0 | Cs3g12000.1/Cs3g120   | 6.05 | 0 | 0 | 2 | MASCOT | T | PLEX8 |
| 1.57E-03 | 0 0 | Cs3g12000.1/Cs3g120   | 6.05 | 0 | 0 | 2 | MASCOT | T | PLEX8 |
| 1.64E-02 | 0 0 | Cs3g12000.1/Cs3g120   | 4.4  | 0 | 0 | 2 | MASCOT | T | PLEX8 |
| 1.02E-02 | 0 0 | Cs3g12000.1/Cs3g120   | 4.4  | 0 | 0 | 2 | MASCOT | T | PLEX8 |
| 6.60E-03 | 0 0 | Cs3g12000.1/Cs3g120   | 4.4  | 0 | 0 | 2 | MASCOT | T | PLEX8 |
| 2.90E-01 | 0 0 | Cs3g12000.1/Cs3g120   | 6.75 | 0 | 0 | 2 | MASCOT | T |       |
| 6.67E-02 | 0 0 | Cs3g12000.1/Cs3g120   | 4.41 | 0 | 0 | 2 | MASCOT | T | PLEX8 |
| 9.66E-07 | 0 0 | Cs3g12000.1/Cs3g120   | 4.41 | 0 | 0 | 2 | MASCOT | T | PLEX8 |
| 4.76E-02 | 0 0 | Cs3g12000.1/Cs3g120   | 4.41 | 0 | 0 | 2 | MASCOT | T |       |
| 3.75E-01 | 0 0 | Cs3g12000.1/Cs3g120   | 4.41 | 0 | 0 | 2 | MASCOT | T |       |
| 2.11E-06 | 0 0 | Cs3g12000.1/Cs3g120   | 4.41 | 0 | 0 | 2 | MASCOT | T |       |
| 8.84E-02 | 0 0 | Cs3g24640.1           | 8.2  | 0 | 0 | 2 | MASCOT | T | PLEX8 |
| 1.63E-01 | 0 0 | Cs3g24640.1           | 8.2  | 0 | 0 | 2 | MASCOT | T | PLEX8 |
| 3.88E-02 | 0 0 | Cs3g24640.1           | 8.2  | 0 | 0 | 2 | MASCOT | T | PLEX8 |
| 4.51E-02 | 0 0 | Cs3g24640.1           | 8.2  | 0 | 0 | 2 | MASCOT | T |       |
| 3.16E-01 | 0 0 | Cs3g24640.1           | 8.2  | 0 | 0 | 2 | MASCOT | T |       |
| 3.88E-02 | 0 0 | Cs3g24640.1           | 8.63 | 0 | 0 | 2 | MASCOT | T | PLEX8 |
| 1.32E-01 | 0 0 | Cs3g24640.1           | 8.63 | 0 | 0 | 2 | MASCOT | T | PLEX8 |
| 4.91E-02 | 0 0 | Cs3g24640.1           | 8.63 | 0 | 0 | 2 | MASCOT | T | PLEX8 |
| 2.51E-01 | 0 0 | Cs3g24640.1           | 8.63 | 0 | 0 | 2 | MASCOT | T | PLEX8 |
| 1.41E-01 | 0 0 | Cs3g24640.1           | 8.63 | 0 | 0 | 2 | MASCOT | T |       |
| 1.82E-02 | 0 0 | Cs3g24640.1           | 5.84 | 0 | 0 | 2 | MASCOT | T | PLEX8 |
| 2.69E-02 | 0 0 | Cs3g24640.1           | 5.84 | 0 | 0 | 2 | MASCOT | T | PLEX8 |
| 3.40E-03 | 0 0 | Cs3g24640.1           | 5.84 | 0 | 0 | 2 | MASCOT | T | PLEX8 |

|              |                        |      |   |      |   |        |        |       |       |
|--------------|------------------------|------|---|------|---|--------|--------|-------|-------|
| 4.57E-05 0 0 | Cs3g24640.1            | 5.84 | 0 | 0    | 2 | MASCOT | T      | PLEX8 |       |
| 3.37E-01 0 0 | Cs3g24640.1            | 4.37 | 0 | 0    | 2 | MASCOT | T      | PLEX8 |       |
| 4.20E-02 0 0 | Cs8g15790.1            | 6.85 | 0 | 0    | 2 | MASCOT | T      | PLEX8 |       |
| 3.12E-02 0 0 | Cs8g15790.1            | 6.85 | 0 | 0    | 2 | MASCOT | T      | PLEX8 |       |
| 2.88E-04 0 0 | Cs8g15790.1            | 6.85 | 0 | 0    | 2 | MASCOT | T      | PLEX8 |       |
| 5.23E-02 0 0 | Cs8g15790.1            | 6.85 | 0 | 0    | 2 | MASCOT | T      | PLEX8 |       |
| 3.06E-02 0 0 | Cs8g15790.1            | 6.85 | 0 | 0    | 2 | MASCOT | T      | PLEX8 |       |
| 7.55E-02 0 0 | Cs8g15790.1            | 6.85 | 0 | 0    | 2 | MASCOT | T      | PLEX8 |       |
| 2.05E-01 0 0 | Cs8g15790.1            | 5.21 | 0 | 0    | 2 | MASCOT | T      | PLEX8 |       |
| 2.19E-04 0 0 | Cs8g15790.1            | 5.21 | 0 | 0    | 2 | MASCOT | T      | PLEX8 |       |
| 2.32E-03 0 0 | Cs8g15790.1            | 5.21 | 0 | 0    | 2 | MASCOT | T      | PLEX8 |       |
| 1.26E-01 0 0 | Cs8g15790.1            | 6    | 0 | 0    | 2 | MASCOT | T      | PLEX8 |       |
| 1.40E-01 0 0 | Cs8g15790.1            | 6    | 0 | 0    | 2 | MASCOT | T      | PLEX8 |       |
| 9.93E-02 0 0 | Cs8g15790.1            | 8.72 | 0 | 15.9 | 0 | 2      | MASCOT | T     | PLEX8 |
| 5.15E-02 0 0 | Cs8g15790.1            | 8.72 | 0 | 15.9 | 0 | 2      | MASCOT | T     | PLEX8 |
| 5.50E-02 0 0 | Cs8g15790.1            | 8.72 | 0 | 0    | 2 | MASCOT | T      | PLEX8 |       |
| 6.43E-02 0 0 | Cs8g15790.1            | 8.72 | 0 | 0    | 2 | MASCOT | T      | PLEX8 |       |
| 8.53E-04 0 0 | orange1.1t02752.1      | 6.78 | 0 | 0    | 2 | MASCOT | T      | PLEX8 |       |
| 2.99E-01 0 0 | orange1.1t02752.1      | 6.78 | 0 | 0    | 2 | MASCOT | T      | PLEX8 |       |
| 9.09E-02 0 0 | orange1.1t02752.1      | 6.78 | 0 | 0    | 2 | MASCOT | T      |       |       |
| 3.28E-04 0 0 | orange1.1t02752.1      | 6.78 | 0 | 0    | 2 | MASCOT | T      |       |       |
| 5.66E-02 0 0 | orange1.1t02752.1      | 4.31 | 0 | 0    | 2 | MASCOT | T      | PLEX8 |       |
| 5.03E-08 0 0 | orange1.1t02752.1      | 4.31 | 0 | 0    | 2 | MASCOT | T      | PLEX8 |       |
| 7.62E-02 0 0 | orange1.1t02752.1      | 4.31 | 0 | 0    | 2 | MASCOT | T      | PLEX8 |       |
| 1.12E-02 0 0 | orange1.1t02752.1      | 4.31 | 0 | 0    | 2 | MASCOT | T      |       |       |
| 6.46E-04 0 0 | orange1.1t02752.1      | 4.31 | 0 | 0    | 2 | MASCOT | T      |       |       |
| 1.91E-02 0 0 | orange1.1t02752.1      | 4.54 | 0 | 0    | 2 | MASCOT | T      | PLEX8 |       |
| 6.92E-02 0 0 | orange1.1t02752.1      | 4.54 | 0 | 0    | 2 | MASCOT | T      | PLEX8 |       |
| 5.50E-04 0 0 | orange1.1t02752.1      | 4.54 | 0 | 0    | 2 | MASCOT | T      | PLEX8 |       |
| 2.83E-03 0 0 | orange1.1t02752.1      | 4.54 | 0 | 0    | 2 | MASCOT | T      | PLEX8 |       |
| 4.91E-02 0 0 | orange1.1t02752.1      | 5.66 | 0 | 0    | 2 | MASCOT | T      | PLEX8 |       |
| 1.12E-01 0 0 | orange1.1t02752.1      | 5.66 | 0 | 0    | 2 | MASCOT | T      | PLEX8 |       |
| 1.13E-01 0 0 | orange1.1t02891.1/ora  | 8.59 | 0 | 0    | 2 | MASCOT | T      | PLEX8 |       |
| 1.37E-01 0 0 | orange1.1t02891.1/ora  | 8.59 | 0 | 0    | 2 | MASCOT | T      | PLEX8 |       |
| 3.41E-01 0 0 | orange1.1t02891.1/ora  | 8.59 | 0 | 0    | 2 | MASCOT | T      | PLEX8 |       |
| 2.87E-02 0 0 | orange1.1t02891.1/ora  | 8.59 | 0 | 0    | 2 | MASCOT | T      | PLEX8 |       |
| 1.29E-03 0 0 | orange1.1t02891.1/ora  | 8.72 | 0 | 0    | 2 | MASCOT | T      | PLEX8 |       |
| 2.51E-03 0 0 | orange1.1t02891.1/ora  | 8.72 | 0 | 0    | 2 | MASCOT | T      | PLEX8 |       |
| 1.99E-05 0 0 | orange1.1t02891.1 ! or | 6.74 | 0 | 0    | 2 | MASCOT | T      | PLEX8 |       |
| 1.15E-01 0 0 | orange1.1t02891.1 ! or | 6.74 | 0 | 0    | 2 | MASCOT | T      | PLEX8 |       |
| 1.89E-02 0 0 | orange1.1t02891.1 ! or | 6.74 | 0 | 0    | 2 | MASCOT | T      | PLEX8 |       |
| 3.09E-02 0 0 | orange1.1t02891.1 ! or | 6.74 | 0 | 0    | 2 | MASCOT | T      | PLEX8 |       |
| 7.31E-02 0 0 | orange1.1t02891.1 ! or | 6.74 | 0 | 0    | 2 | MASCOT | T      |       |       |
| 9.97E-05 0 0 | orange1.1t02891.1 ! or | 6.74 | 0 | 0    | 2 | MASCOT | T      | PLEX8 |       |
| 2.20E-01 0 0 | orange1.1t02891.1 ! or | 6.74 | 0 | 0    | 2 | MASCOT | T      |       |       |
| 1.03E-01 0 0 | orange1.1t02891.1 ! or | 6.74 | 0 | 0    | 2 | MASCOT | T      |       |       |
| 2.67E-04 0 0 | orange1.1t02891.1/ora  | 8.22 | 0 | 0    | 2 | MASCOT | T      | PLEX8 |       |
| 2.61E-03 0 0 | Cs7g18870.1/Cs7g188    | 5.4  | 0 | 15.9 | 0 | 2      | MASCOT | T     | PLEX8 |
| 1.64E-01 0 0 | Cs7g18870.1/Cs7g188    | 5.4  | 0 | 15.9 | 0 | 2      | MASCOT | T     | PLEX8 |
| 2.00E-02 0 0 | Cs7g18870.1/Cs7g188    | 5.4  | 0 | 0    | 2 | MASCOT | T      | PLEX8 |       |
| 1.02E-02 0 0 | Cs7g18870.1/Cs7g188    | 5.4  | 0 | 0    | 2 | MASCOT | T      | PLEX8 |       |

|          |     |                      |      |   |      |   |        |        |       |       |
|----------|-----|----------------------|------|---|------|---|--------|--------|-------|-------|
| 2.52E-02 | 0 0 | Cs7g18870.1/Cs7g188  | 5.4  | 0 | 0    | 2 | MASCOT | T      | PLEX8 |       |
| 1.48E-01 | 0 0 | Cs7g18870.1/Cs7g188  | 4.65 | 0 | 15.9 | 0 | 2      | MASCOT | T     | PLEX8 |
| 7.03E-04 | 0 0 | Cs7g18870.1/Cs7g188  | 4.65 | 0 | 15.9 | 0 | 2      | MASCOT | T     | PLEX8 |
| 1.44E-03 | 0 0 | Cs7g18870.1/Cs7g188  | 4.65 | 0 | 0    | 0 | 2      | MASCOT | T     | PLEX8 |
| 2.23E-02 | 0 0 | Cs7g18870.1/Cs7g188  | 4.65 | 0 | 0    | 0 | 2      | MASCOT | T     | PLEX8 |
| 2.61E-04 | 0 0 | Cs7g18870.1/Cs7g188  | 4.65 | 0 | 0    | 0 | 2      | MASCOT | T     | PLEX8 |
| 2.79E-04 | 0 0 | Cs7g18870.1/Cs7g188  | 4.14 | 0 | 0    | 0 | 2      | MASCOT | T     |       |
| 7.87E-05 | 0 0 | Cs7g18870.1/Cs7g188  | 4.14 | 0 | 0    | 0 | 2      | MASCOT | T     |       |
| 1.06E-01 | 0 0 | Cs7g18870.1/Cs7g188  | 8.05 | 0 | 0    | 0 | 2      | MASCOT | T     | PLEX8 |
| 2.08E-02 | 0 0 | Cs7g18870.1/Cs7g188  | 8.05 | 0 | 0    | 0 | 2      | MASCOT | T     | PLEX8 |
| 4.18E-03 | 0 0 | Cs4g15090.1/Cs4g150  | 4.21 | 0 | 0    | 0 | 2      | MASCOT | T     | PLEX8 |
| 2.53E-02 | 0 0 | Cs4g15090.1/Cs4g150  | 4.21 | 0 | 0    | 0 | 2      | MASCOT | T     | PLEX8 |
| 3.81E-01 | 0 0 | Cs1g17840.1/Cs4g150  | 8.26 | 0 | 0    | 0 | 2      | MASCOT | T     | PLEX8 |
| 2.43E-03 | 0 0 | Cs1g17840.1/Cs4g150  | 8.26 | 0 | 0    | 0 | 2      | MASCOT | T     | PLEX8 |
| 3.51E-01 | 0 0 | Cs1g17840.1 ! Cs4g15 | 8.44 | 0 | 0    | 0 | 2      | MASCOT | T     | PLEX8 |
| 4.25E-02 | 0 0 | Cs1g17840.1 ! Cs4g15 | 8.44 | 0 | 0    | 0 | 2      | MASCOT | T     | PLEX8 |
| 6.25E-04 | 0 0 | Cs1g17840.1 ! Cs4g15 | 8.44 | 0 | 0    | 0 | 2      | MASCOT | T     | PLEX8 |
| 2.40E-03 | 0 0 | Cs1g17840.1 ! Cs4g15 | 8.44 | 0 | 0    | 0 | 2      | MASCOT | T     | PLEX8 |
| 6.18E-03 | 0 0 | Cs1g17840.1 ! Cs4g15 | 8.44 | 0 | 0    | 0 | 2      | MASCOT | T     | PLEX8 |
| 5.47E-04 | 0 0 | Cs1g17840.1 ! Cs4g15 | 8.44 | 0 | 0    | 0 | 2      | MASCOT | T     | PLEX8 |
| 2.01E-03 | 0 0 | Cs1g17840.1 ! Cs4g15 | 8.44 | 0 | 0    | 0 | 2      | MASCOT | T     | PLEX8 |
| 6.99E-02 | 0 0 | Cs1g17840.1 ! Cs4g15 | 8.44 | 0 | 0    | 0 | 2      | MASCOT | T     |       |
| 6.00E-02 | 0 0 | Cs4g15090.1/Cs4g150  | 8.47 | 0 | 0    | 0 | 2      | MASCOT | T     | PLEX8 |
| 1.32E-02 | 0 0 | gi 113952646         | 6.74 | 0 | 0    | 0 | 2      | MASCOT | T     | PLEX8 |
| 1.40E-01 | 0 0 | gi 113952646         | 6.74 | 0 | 0    | 0 | 2      | MASCOT | T     | PLEX8 |
| 1.27E-01 | 0 0 | gi 113952646         | 6.74 | 0 | 0    | 0 | 2      | MASCOT | T     |       |
| 1.13E-01 | 0 0 | gi 113952646         | 6.1  | 0 | 15.9 | 0 | 2      | MASCOT | T     |       |
| 2.45E-02 | 0 0 | gi 113952646         | 6.1  | 0 | 15.9 | 0 | 2      | MASCOT | T     |       |
| 3.09E-03 | 0 0 | gi 113952646         | 6.1  | 0 | 0    | 0 | 2      | MASCOT | T     |       |
| 1.04E-01 | 0 0 | gi 113952646         | 9.76 | 0 | 0    | 0 | 2      | MASCOT | T     | PLEX8 |
| 1.04E-01 | 0 0 | gi 113952646         | 9.76 | 0 | 0    | 0 | 2      | MASCOT | T     | PLEX8 |
| 1.87E-01 | 0 0 | gi 113952646         | 9.76 | 0 | 0    | 0 | 2      | MASCOT | T     |       |
| 1.79E-01 | 0 0 | gi 113952646         | 9.76 | 0 | 0    | 0 | 2      | MASCOT | T     |       |
| 1.93E-01 | 0 0 | gi 113952646         | 9.76 | 0 | 0    | 0 | 2      | MASCOT | T     | PLEX8 |
| 6.51E-02 | 0 0 | gi 113952646         | 9.76 | 0 | 0    | 0 | 2      | MASCOT | T     | PLEX8 |
| 2.13E-01 | 0 0 | gi 113952646         | 4.68 | 0 | 0    | 0 | 2      | MASCOT | T     | PLEX8 |
| 3.59E-02 | 0 0 | Cs3g07460.1/Cs3g074  | 4.23 | 1 | 0    | 0 | 2      | MASCOT | T     | PLEX8 |
| 2.11E-02 | 0 0 | Cs3g07460.1/Cs3g074  | 4.23 | 1 | 0    | 0 | 2      | MASCOT | T     | PLEX8 |
| 1.11E-01 | 0 0 | Cs3g07460.1/Cs3g074  | 9.76 | 0 | 0    | 0 | 2      | MASCOT | T     | PLEX8 |
| 2.54E-03 | 0 0 | Cs3g07460.1/Cs3g074  | 9.76 | 0 | 0    | 0 | 2      | MASCOT | T     | PLEX8 |
| 1.42E-04 | 0 0 | Cs3g07460.1/Cs3g074  | 9.76 | 0 | 0    | 0 | 2      | MASCOT | T     | PLEX8 |
| 3.89E-01 | 0 0 | Cs3g07460.1/Cs3g074  | 9.76 | 0 | 0    | 0 | 2      | MASCOT | T     |       |
| 4.63E-03 | 0 0 | Cs3g07460.1/Cs3g074  | 5.75 | 0 | 15.9 | 0 | 2      | MASCOT | T     | PLEX8 |
| 2.02E-03 | 0 0 | Cs3g07460.1/Cs3g074  | 5.75 | 0 | 0    | 0 | 2      | MASCOT | T     | PLEX8 |
| 1.24E-03 | 0 0 | Cs3g07460.1/Cs3g074  | 5.75 | 0 | 0    | 0 | 2      | MASCOT | T     | PLEX8 |
| 1.12E-01 | 0 0 | Cs3g07460.1/Cs3g074  | 5.75 | 0 | 0    | 0 | 2      | MASCOT | T     | PLEX8 |
| 3.29E-03 | 0 0 | Cs3g07460.5/Cs3g074  | 4.14 | 1 | 0    | 0 | 2      | MASCOT | T     | PLEX8 |
| 1.32E-03 | 0 0 | Cs3g07460.5/Cs3g074  | 4.14 | 1 | 0    | 0 | 2      | MASCOT | T     | PLEX8 |
| 1.33E-02 | 0 0 | Cs3g25420.1          | 5.24 | 0 | 0    | 0 | 2      | MASCOT | T     | PLEX8 |
| 9.85E-02 | 0 0 | Cs3g25420.1          | 5.24 | 0 | 0    | 0 | 2      | MASCOT | T     | PLEX8 |
| 6.81E-02 | 0 0 | Cs3g25420.1          | 5.24 | 0 | 0    | 0 | 2      | MASCOT | T     |       |

|          |     |                       |      |   |      |   |        |        |       |       |
|----------|-----|-----------------------|------|---|------|---|--------|--------|-------|-------|
| 1.22E-02 | 0 0 | Cs3g25420.1           | 6    | 0 | 0    | 2 | MASCOT | T      | PLEX8 |       |
| 1.56E-03 | 0 0 | Cs3g25420.1           | 6    | 0 | 0    | 2 | MASCOT | T      | PLEX8 |       |
| 6.55E-03 | 0 0 | Cs3g25420.1           | 8.75 | 0 | 0    | 2 | MASCOT | T      | PLEX8 |       |
| 3.26E-02 | 0 0 | Cs3g25420.1           | 8.75 | 0 | 0    | 2 | MASCOT | T      | PLEX8 |       |
| 1.23E-01 | 0 0 | Cs1g24740.1/Cs1g247   | 4.03 | 0 | 0    | 2 | MASCOT | T      | PLEX8 |       |
| 1.81E-01 | 0 0 | Cs1g24740.1/Cs1g247   | 4.03 | 0 | 0    | 2 | MASCOT | T      | PLEX8 |       |
| 3.44E-01 | 0 0 | Cs1g24740.1/Cs1g247   | 4.03 | 0 | 0    | 2 | MASCOT | T      | PLEX8 |       |
| 5.87E-02 | 0 0 | Cs1g24740.1/Cs1g247   | 4.03 | 0 | 0    | 2 | MASCOT | T      | PLEX8 |       |
| 5.90E-01 | 0 0 | Cs1g24740.1/Cs1g247   | 4.03 | 0 | 0    | 2 | MASCOT | T      | PLEX8 |       |
| 1.65E-02 | 0 0 | Cs5g28130.1           | 4.53 | 0 | 0    | 2 | MASCOT | T      | PLEX8 |       |
| 2.26E-02 | 0 0 | Cs5g28130.1           | 4.53 | 0 | 0    | 2 | MASCOT | T      | PLEX8 |       |
| 5.55E-03 | 0 0 | Cs5g28130.1           | 4.53 | 0 | 0    | 2 | MASCOT | T      | PLEX8 |       |
| 4.16E-02 | 0 0 | Cs5g28130.1           | 4.53 | 0 | 0    | 2 | MASCOT | T      | PLEX8 |       |
| 2.40E-04 | 0 0 | Cs5g28130.1           | 4    | 0 | 0    | 2 | MASCOT | T      |       |       |
| 4.30E-06 | 0 0 | Cs5g28130.1           | 4    | 0 | 0    | 2 | MASCOT | T      |       |       |
| 5.04E-04 | 0 0 | Cs5g28130.1           | 4    | 0 | 0    | 2 | MASCOT | T      |       |       |
| 1.72E-01 | 0 0 | Cs5g28130.1           | 6    | 0 | 0    | 2 | MASCOT | T      | PLEX8 |       |
| 7.88E-02 | 0 0 | Cs5g28130.1           | 5.5  | 0 | 0    | 2 | MASCOT | T      | PLEX8 |       |
| 2.59E-03 | 0 0 | Cs5g28130.1           | 5.5  | 0 | 0    | 2 | MASCOT | T      | PLEX8 |       |
| 6.68E-05 | 0 0 | Cs5g28130.1           | 5.5  | 0 | 0    | 2 | MASCOT | T      | PLEX8 |       |
| 4.21E-02 | 0 0 | Cs5g28130.1           | 5.5  | 0 | 0    | 2 | MASCOT | T      |       |       |
| 5.24E-05 | 0 0 | Cs8g06360.1/Cs8g063   | 4.21 | 0 | 0    | 2 | MASCOT | T      | PLEX8 |       |
| 4.20E-04 | 0 0 | Cs8g06360.1/Cs8g063   | 4.21 | 0 | 0    | 2 | MASCOT | T      | PLEX8 |       |
| 3.56E-03 | 0 0 | Cs8g06360.1/Cs8g063   | 6.1  | 0 | 0    | 2 | MASCOT | T      | PLEX8 |       |
| 4.65E-04 | 0 0 | Cs8g06360.1/Cs8g063   | 6.1  | 0 | 0    | 2 | MASCOT | T      | PLEX8 |       |
| 6.33E-03 | 0 0 | Cs8g06360.1/Cs8g063   | 8.75 | 0 | 0    | 2 | MASCOT | T      | PLEX8 |       |
| 3.74E-03 | 0 0 | Cs8g06360.1/Cs8g063   | 8.75 | 0 | 0    | 2 | MASCOT | T      | PLEX8 |       |
| 1.40E-05 | 0 0 | Cs8g06360.1/Cs8g063   | 8.75 | 0 | 0    | 2 | MASCOT | T      | PLEX8 |       |
| 7.74E-03 | 0 0 | Cs8g06360.1/Cs8g063   | 6    | 0 | 0    | 2 | MASCOT | T      | PLEX8 |       |
| 1.90E-02 | 0 0 | Cs8g06360.1/Cs8g063   | 6    | 0 | 0    | 2 | MASCOT | T      | PLEX8 |       |
| 1.17E-01 | 0 0 | Cs8g06360.1/Cs8g063   | 6    | 0 | 0    | 2 | MASCOT | T      | PLEX8 |       |
| 4.14E-03 | 0 0 | Cs8g06360.1/Cs8g063   | 6    | 0 | 0    | 2 | MASCOT | T      | PLEX8 |       |
| 7.47E-02 | 0 0 | Cs8g06360.1/Cs8g063   | 6    | 0 | 0    | 2 | MASCOT | T      | PLEX8 |       |
| 2.78E-01 | 0 0 | orange1.1t02486.1/ora | 8.27 | 0 | 0    | 2 | MASCOT | T      | PLEX8 |       |
| 3.60E-02 | 0 0 | orange1.1t02486.1/ora | 8.27 | 0 | 0    | 2 | MASCOT | T      | PLEX8 |       |
| 3.02E-02 | 0 0 | orange1.1t02486.1/ora | 8.27 | 0 | 0    | 2 | MASCOT | T      | PLEX8 |       |
| 2.44E-02 | 0 0 | orange1.1t02486.1/ora | 5.32 | 0 | 0    | 2 | MASCOT | T      | PLEX8 |       |
| 1.24E-01 | 0 0 | orange1.1t02486.1/ora | 5.32 | 0 | 0    | 2 | MASCOT | T      | PLEX8 |       |
| 4.27E-02 | 0 0 | orange1.1t02486.1/ora | 5.32 | 0 | 0    | 2 | MASCOT | T      | PLEX8 |       |
| 8.29E-02 | 0 0 | orange1.1t02486.1/ora | 5.32 | 0 | 0    | 2 | MASCOT | T      | PLEX8 |       |
| 1.58E-02 | 0 0 | orange1.1t02486.1/ora | 5.32 | 0 | 0    | 2 | MASCOT | T      | PLEX8 |       |
| 2.49E-03 | 0 0 | orange1.1t02486.1/ora | 5.32 | 0 | 0    | 2 | MASCOT | T      | PLEX8 |       |
| 4.36E-03 | 0 0 | orange1.1t02486.1/ora | 8.23 | 0 | 15.9 | 0 | 2      | MASCOT | T     | PLEX8 |
| 1.64E-02 | 0 0 | orange1.1t02486.1/ora | 4.37 | 0 | 0    | 2 | MASCOT | T      | PLEX8 |       |
| 1.08E-01 | 0 0 | orange1.1t02486.1/ora | 4.37 | 0 | 0    | 2 | MASCOT | T      | PLEX8 |       |
| 8.23E-04 | 0 0 | Cs1g20240.1/Cs1g202   | 3.92 | 0 | 0    | 2 | MASCOT | T      |       |       |
| 6.28E-02 | 0 0 | Cs1g20240.1/Cs1g202   | 3.92 | 0 | 0    | 2 | MASCOT | T      |       |       |
| 1.80E-03 | 0 0 | Cs1g20240.1/Cs1g202   | 4.32 | 1 | 0    | 2 | MASCOT | T      | PLEX8 |       |
| 7.58E-05 | 0 0 | Cs1g20240.1/Cs1g202   | 4.32 | 1 | 0    | 2 | MASCOT | T      |       |       |
| 3.72E-02 | 0 0 | Cs1g20240.1/Cs1g202   | 4.32 | 1 | 0    | 2 | MASCOT | T      |       |       |
| 2.47E-02 | 0 0 | Cs1g20240.1/Cs1g202   | 6    | 0 | 0    | 2 | MASCOT | T      | PLEX8 |       |



|          |     |                     |      |   |   |   |        |   |       |
|----------|-----|---------------------|------|---|---|---|--------|---|-------|
| 5.26E-05 | 0 0 | Cs1g20240.1/Cs1g202 | 6    | 0 | 0 | 2 | MASCOT | T | PLEX8 |
| 3.95E-02 | 0 0 | Cs1g20240.1/Cs1g202 | 6    | 0 | 0 | 2 | MASCOT | T | PLEX8 |
| 2.31E-05 | 0 0 | Cs1g20240.1/Cs1g202 | 6    | 0 | 0 | 2 | MASCOT | T | PLEX8 |
| 3.69E-04 | 0 0 | Cs1g20240.1/Cs1g202 | 6    | 0 | 0 | 2 | MASCOT | T | PLEX8 |
| 2.66E-02 | 0 0 | Cs1g20240.1/Cs1g202 | 3.92 | 0 | 0 | 2 | MASCOT | T | PLEX8 |
| 3.98E-03 | 0 0 | Cs1g22670.1         | 5.21 | 0 | 0 | 2 | MASCOT | T |       |
| 4.39E-03 | 0 0 | Cs1g22670.1         | 5.21 | 0 | 0 | 2 | MASCOT | T |       |
| 3.65E-01 | 0 0 | Cs1g22670.1         | 5.32 | 0 | 0 | 2 | MASCOT | T |       |
| 4.63E-03 | 0 0 | Cs1g22670.1         | 6.92 | 0 | 0 | 2 | MASCOT | T | PLEX8 |
| 4.54E-02 | 0 0 | Cs1g22670.1         | 6.92 | 0 | 0 | 2 | MASCOT | T | PLEX8 |
| 4.85E-01 | 0 0 | Cs1g22670.1         | 6.92 | 0 | 0 | 2 | MASCOT | T |       |
| 1.59E-02 | 0 0 | Cs1g22670.1         | 6.92 | 0 | 0 | 2 | MASCOT | T | PLEX8 |
| 1.27E-02 | 0 0 | Cs1g22670.1         | 6.92 | 0 | 0 | 2 | MASCOT | T | PLEX8 |
| 4.64E-01 | 0 0 | Cs1g22670.1         | 6.92 | 0 | 0 | 2 | MASCOT | T |       |
| 2.53E-01 | 0 0 | Cs1g22670.1         | 6.92 | 0 | 0 | 2 | MASCOT | T |       |
| 1.68E-02 | 0 0 | Cs1g22670.1         | 9.75 | 0 | 0 | 2 | MASCOT | T | PLEX8 |
| 2.66E-01 | 0 0 | Cs2g28970.1         | 8.75 | 0 | 0 | 2 | MASCOT | T | PLEX8 |
| 3.65E-01 | 0 0 | Cs2g28970.1         | 8.75 | 0 | 0 | 2 | MASCOT | T |       |
| 4.06E-03 | 0 0 | Cs2g28970.1         | 4.32 | 1 | 0 | 2 | MASCOT | T |       |
| 5.25E-02 | 0 0 | Cs2g28970.1         | 4.53 | 0 | 0 | 2 | MASCOT | T | PLEX8 |
| 1.42E-02 | 0 0 | Cs2g28970.1         | 4.53 | 0 | 0 | 2 | MASCOT | T | PLEX8 |
| 2.06E-02 | 0 0 | Cs2g28970.1         | 4.53 | 0 | 0 | 2 | MASCOT | T | PLEX8 |
| 1.16E-02 | 0 0 | Cs2g28970.1         | 4.53 | 0 | 0 | 2 | MASCOT | T | PLEX8 |
| 1.84E-02 | 0 0 | Cs2g28970.1         | 4.53 | 0 | 0 | 2 | MASCOT | T | PLEX8 |
| 2.27E-01 | 0 0 | Cs2g28970.1         | 4.53 | 0 | 0 | 2 | MASCOT | T | PLEX8 |
| 1.36E-02 | 0 0 | Cs2g28970.1         | 4.32 | 1 | 0 | 2 | MASCOT | T | PLEX8 |
| 3.02E-02 | 0 0 | Cs2g28970.1         | 4.32 | 1 | 0 | 2 | MASCOT | T | PLEX8 |
| 3.76E-04 | 0 0 | Cs2g29230.1/Cs2g292 | 5.24 | 0 | 0 | 2 | MASCOT | T | PLEX8 |
| 1.00E-02 | 0 0 | Cs2g29230.1/Cs2g292 | 8.75 | 0 | 0 | 2 | MASCOT | T | PLEX8 |
| 1.39E-01 | 0 0 | Cs2g29230.1/Cs2g292 | 8.75 | 0 | 0 | 2 | MASCOT | T | PLEX8 |
| 6.60E-03 | 0 0 | Cs2g29230.1/Cs2g292 | 8.75 | 0 | 0 | 2 | MASCOT | T | PLEX8 |
| 3.34E-02 | 0 0 | Cs2g29230.1/Cs2g292 | 8.75 | 0 | 0 | 2 | MASCOT | T | PLEX8 |
| 7.10E-02 | 0 0 | Cs2g29230.1/Cs2g292 | 5.32 | 0 | 0 | 2 | MASCOT | T | PLEX8 |
| 2.11E-02 | 0 0 | Cs2g29230.1/Cs2g292 | 5.32 | 0 | 0 | 2 | MASCOT | T | PLEX8 |
| 4.46E-02 | 0 0 | Cs2g29230.1/Cs2g292 | 5.32 | 0 | 0 | 2 | MASCOT | T | PLEX8 |
| 5.50E-04 | 0 0 | Cs2g29230.1/Cs2g292 | 4.53 | 0 | 0 | 2 | MASCOT | T |       |
| 4.79E-06 | 0 0 | Cs2g29230.1/Cs2g292 | 4.53 | 0 | 0 | 2 | MASCOT | T |       |
| 1.92E-05 | 0 0 | Cs2g29230.1/Cs2g292 | 4.53 | 0 | 0 | 2 | MASCOT | T |       |
| 1.01E-02 | 0 0 | Cs7g24880.1         | 8.75 | 0 | 0 | 2 | MASCOT | T | PLEX8 |
| 2.24E-02 | 0 0 | Cs7g24880.1         | 8.75 | 0 | 0 | 2 | MASCOT | T | PLEX8 |
| 1.94E-02 | 0 0 | Cs7g24880.1         | 8.75 | 0 | 0 | 2 | MASCOT | T | PLEX8 |
| 6.35E-02 | 0 0 | Cs5g08750.1/Cs7g248 | 7.89 | 0 | 0 | 2 | MASCOT | T | PLEX8 |
| 3.90E-02 | 0 0 | Cs5g08750.1/Cs7g248 | 7.89 | 0 | 0 | 2 | MASCOT | T | PLEX8 |
| 1.64E-01 | 0 0 | Cs5g08750.1/Cs7g248 | 7.89 | 0 | 0 | 2 | MASCOT | T | PLEX8 |
| 1.53E-02 | 0 0 | Cs5g08750.1/Cs7g248 | 7.89 | 0 | 0 | 2 | MASCOT | T | PLEX8 |
| 4.30E-02 | 0 0 | Cs5g08750.1/Cs7g248 | 7.89 | 0 | 0 | 2 | MASCOT | T | PLEX8 |
| 4.94E-01 | 0 0 | Cs7g24880.1/Cs8g161 | 6.74 | 0 | 0 | 2 | MASCOT | T | PLEX8 |
| 1.89E-02 | 0 0 | Cs7g24880.1/Cs8g161 | 6.74 | 0 | 0 | 2 | MASCOT | T | PLEX8 |
| 2.27E-02 | 0 0 | Cs7g24880.1         | 5.83 | 0 | 0 | 2 | MASCOT | T |       |
| 9.79E-02 | 0 0 | Cs2g14600.1         | 4.65 | 0 | 0 | 2 | MASCOT | T | PLEX8 |
| 3.30E-03 | 0 0 | Cs2g14600.1         | 4.65 | 0 | 0 | 2 | MASCOT | T | PLEX8 |

|          |     |                       |      |   |      |   |        |        |       |
|----------|-----|-----------------------|------|---|------|---|--------|--------|-------|
| 3.82E-02 | 0 0 | Cs2g14600.1           | 4.65 | 0 | 0    | 2 | MASCOT | T      | PLEX8 |
| 1.03E-01 | 0 0 | Cs2g14600.1           | 5.84 | 0 | 0    | 2 | MASCOT | T      |       |
| 2.64E-01 | 0 0 | Cs2g14600.1           | 5.84 | 0 | 0    | 2 | MASCOT | T      |       |
| 1.58E-01 | 0 0 | Cs2g14600.1           | 5.84 | 0 | 0    | 2 | MASCOT | T      |       |
| 1.08E-02 | 0 0 | Cs2g14600.1           | 4.03 | 0 | 0    | 2 | MASCOT | T      |       |
| 2.25E-01 | 0 0 | Cs2g14600.1           | 4.53 | 0 | 0    | 2 | MASCOT | T      | PLEX8 |
| 1.41E-01 | 0 0 | Cs2g14600.1           | 4.53 | 0 | 0    | 2 | MASCOT | T      | PLEX8 |
| 6.39E-03 | 0 0 | Cs2g14600.1           | 4.53 | 0 | 0    | 2 | MASCOT | T      |       |
| 3.05E-02 | 0 0 | Cs3g15910.1           | 4.65 | 0 | 15.9 | 0 | 2      | MASCOT | T     |
| 8.12E-03 | 0 0 | Cs3g15910.1           | 4.65 | 0 | 0    | 2 | MASCOT | T      | PLEX8 |
| 5.72E-04 | 0 0 | Cs3g15910.1           | 4.65 | 0 | 0    | 2 | MASCOT | T      | PLEX8 |
| 2.35E-04 | 0 0 | Cs3g15910.1           | 4.65 | 0 | 0    | 2 | MASCOT | T      | PLEX8 |
| 1.22E-03 | 0 0 | Cs3g15910.1           | 4.65 | 0 | 0    | 2 | MASCOT | T      |       |
| 4.34E-04 | 0 0 | Cs3g15910.1           | 4.65 | 0 | 0    | 2 | MASCOT | T      |       |
| 3.94E-05 | 0 0 | Cs3g15910.1/Cs5g091   | 6    | 0 | 0    | 2 | MASCOT | T      |       |
| 1.88E-03 | 0 0 | Cs3g15910.1           | 4.03 | 0 | 0    | 2 | MASCOT | T      |       |
| 1.19E-02 | 0 0 | Cs3g15910.1           | 9.75 | 0 | 0    | 2 | MASCOT | T      | PLEX8 |
| 1.95E-01 | 0 0 | Cs3g15910.1           | 9.75 | 0 | 0    | 2 | MASCOT | T      | PLEX8 |
| 5.91E-02 | 0 0 | Cs3g27880.1           | 5.84 | 0 | 0    | 2 | MASCOT | T      | PLEX8 |
| 2.81E-02 | 0 0 | Cs3g27880.1           | 5.84 | 0 | 0    | 2 | MASCOT | T      | PLEX8 |
| 2.70E-01 | 0 0 | Cs3g27880.1           | 5.84 | 0 | 0    | 2 | MASCOT | T      | PLEX8 |
| 1.79E-01 | 0 0 | Cs3g27880.1           | 4.37 | 0 | 0    | 2 | MASCOT | T      | PLEX8 |
| 4.82E-02 | 0 0 | Cs3g27880.1           | 5.32 | 0 | 0    | 2 | MASCOT | T      | PLEX8 |
| 2.34E-01 | 0 0 | Cs3g27880.1           | 5.32 | 0 | 0    | 2 | MASCOT | T      | PLEX8 |
| 1.32E-02 | 0 0 | Cs3g27880.1           | 5.32 | 0 | 0    | 2 | MASCOT | T      | PLEX8 |
| 6.66E-02 | 0 0 | Cs3g27880.1           | 5.32 | 0 | 0    | 2 | MASCOT | T      | PLEX8 |
| 3.37E-01 | 0 0 | Cs3g27880.1           | 8.72 | 0 | 15.9 | 0 | 2      | MASCOT | T     |
| 6.40E-03 | 0 0 | Cs3g27880.1           | 8.72 | 0 | 0    | 2 | MASCOT | T      |       |
| 5.97E-02 | 0 0 | Cs4g16140.1/Cs8g106   | 5.84 | 0 | 0    | 2 | MASCOT | T      | PLEX8 |
| 7.09E-02 | 0 0 | Cs4g16140.1/Cs8g106   | 5.84 | 0 | 0    | 2 | MASCOT | T      | PLEX8 |
| 2.14E-01 | 0 0 | Cs4g16140.1/Cs8g106   | 5.84 | 0 | 0    | 2 | MASCOT | T      | PLEX8 |
| 3.20E-02 | 0 0 | Cs4g16140.1/Cs8g106   | 5.84 | 0 | 0    | 2 | MASCOT | T      |       |
| 1.08E-04 | 0 0 | Cs4g16140.1           | 8.19 | 0 | 0    | 2 | MASCOT | T      |       |
| 5.38E-03 | 0 0 | Cs4g16140.1           | 8.19 | 0 | 0    | 2 | MASCOT | T      |       |
| 1.43E-02 | 0 0 | Cs4g16140.1/Cs8g106   | 4.21 | 0 | 0    | 2 | MASCOT | T      |       |
| 3.69E-04 | 0 0 | Cs4g16140.1/Cs8g106   | 4.21 | 0 | 0    | 2 | MASCOT | T      | PLEX8 |
| 7.46E-02 | 0 0 | Cs4g16140.1/Cs8g106   | 4.21 | 0 | 0    | 2 | MASCOT | T      |       |
| 6.49E-02 | 0 0 | Cs4g16140.1/Cs8g106   | 5.96 | 1 | 0    | 2 | MASCOT | T      | PLEX8 |
| 1.11E-02 | 0 0 | Cs9g04300.1/Cs9g043   | 4.09 | 0 | 0    | 2 | MASCOT | T      | PLEX8 |
| 2.68E-01 | 0 0 | Cs3g14390.1/Cs9g043   | 6    | 0 | 0    | 2 | MASCOT | T      | PLEX8 |
| 3.91E-03 | 0 0 | Cs3g14390.1/Cs9g043   | 4.21 | 0 | 0    | 2 | MASCOT | T      |       |
| 6.12E-04 | 0 0 | Cs3g14390.1/Cs9g043   | 4.21 | 0 | 0    | 2 | MASCOT | T      |       |
| 1.36E-02 | 0 0 | Cs3g14390.1/Cs9g043   | 4.21 | 0 | 0    | 2 | MASCOT | T      |       |
| 4.34E-02 | 0 0 | Cs9g04300.2           | 4.37 | 0 | 0    | 2 | MASCOT | T      | PLEX8 |
| 4.71E-02 | 0 0 | Cs9g04300.2           | 4.37 | 0 | 0    | 2 | MASCOT | T      | PLEX8 |
| 4.98E-02 | 0 0 | Cs9g04300.2           | 4.37 | 0 | 0    | 2 | MASCOT | T      | PLEX8 |
| 2.22E-02 | 0 0 | Cs9g04300.2           | 4.37 | 0 | 0    | 2 | MASCOT | T      | PLEX8 |
| 5.13E-02 | 0 0 | Cs9g04300.2           | 4.37 | 0 | 0    | 2 | MASCOT | T      | PLEX8 |
| 5.73E-03 | 0 0 | orange1.1t04488.1/ora | 5.88 | 0 | 0    | 2 | MASCOT | T      | PLEX8 |
| 6.35E-03 | 0 0 | orange1.1t04488.1/ora | 5.88 | 0 | 0    | 2 | MASCOT | T      | PLEX8 |
| 4.55E-02 | 0 0 | orange1.1t04488.1/ora | 5.88 | 0 | 0    | 2 | MASCOT | T      | PLEX8 |

|          |     |                       |      |   |      |   |        |        |       |
|----------|-----|-----------------------|------|---|------|---|--------|--------|-------|
| 1.99E-01 | 0 0 | orange1.1t04488.1/ora | 8.75 | 0 | 0    | 2 | MASCOT | T      | PLEX8 |
| 1.15E-01 | 0 0 | orange1.1t04488.1/ora | 8.75 | 0 | 0    | 2 | MASCOT | T      | PLEX8 |
| 2.92E-02 | 0 0 | orange1.1t04488.1/ora | 8.75 | 0 | 0    | 2 | MASCOT | T      | PLEX8 |
| 1.23E-01 | 0 0 | Cs7g20440.1/Cs7g204   | 5.84 | 0 | 15.9 | 0 | 2      | MASCOT | T     |
| 1.56E-02 | 0 0 | Cs7g20440.1/Cs7g204   | 5.84 | 0 | 0    | 2 | MASCOT | T      | PLEX8 |
| 1.03E-03 | 0 0 | Cs7g20440.1/Cs7g204   | 5.84 | 0 | 0    | 2 | MASCOT | T      | PLEX8 |
| 9.49E-02 | 0 0 | Cs1g10480.1/orange1.  | 4.53 | 0 | 0    | 2 | MASCOT | T      | PLEX8 |
| 2.12E-02 | 0 0 | Cs1g13240.1/Cs1g132   | 5.84 | 0 | 0    | 2 | MASCOT | T      | PLEX8 |
| 2.81E-03 | 0 0 | Cs1g13240.1/Cs1g132   | 4.37 | 0 | 0    | 2 | MASCOT | T      | PLEX8 |
| 2.38E-03 | 0 0 | Cs1g13240.1/Cs1g132   | 4.37 | 0 | 0    | 2 | MASCOT | T      | PLEX8 |
| 1.14E-02 | 0 0 | Cs1g13240.1/Cs1g132   | 3.98 | 0 | 0    | 2 | MASCOT | T      | PLEX8 |
| 1.27E-02 | 0 0 | Cs1g13240.1/Cs1g132   | 3.98 | 0 | 0    | 2 | MASCOT | T      | PLEX8 |
| 1.05E-01 | 0 0 | Cs1g13240.1/Cs1g132   | 3.98 | 0 | 0    | 2 | MASCOT | T      | PLEX8 |
| 3.06E-03 | 0 0 | Cs1g13240.1/Cs1g132   | 4.65 | 0 | 0    | 2 | MASCOT | T      | PLEX8 |
| 7.72E-04 | 0 0 | Cs1g13240.1/Cs1g132   | 4.65 | 0 | 0    | 2 | MASCOT | T      | PLEX8 |
| 2.05E-03 | 0 0 | Cs1g13240.1/Cs1g132   | 4.65 | 0 | 0    | 2 | MASCOT | T      | PLEX8 |
| 2.34E-01 | 0 0 | Cs1g21340.1           | 6.05 | 0 | 0    | 2 | MASCOT | T      | PLEX8 |
| 6.13E-04 | 0 0 | Cs1g21340.1           | 8.75 | 0 | 0    | 2 | MASCOT | T      | PLEX8 |
| 9.05E-03 | 0 0 | Cs1g21340.1           | 8.75 | 0 | 0    | 2 | MASCOT | T      | PLEX8 |
| 2.25E-02 | 0 0 | Cs1g21340.1           | 8.75 | 0 | 0    | 2 | MASCOT | T      | PLEX8 |
| 6.50E-02 | 0 0 | Cs1g21340.1           | 8.75 | 0 | 0    | 2 | MASCOT | T      | PLEX8 |
| 5.64E-02 | 0 0 | Cs1g21340.1           | 8.47 | 0 | 15.9 | 0 | 2      | MASCOT | T     |
| 6.85E-03 | 0 0 | Cs1g21340.1           | 8.47 | 0 | 0    | 2 | MASCOT | T      | PLEX8 |
| 2.72E-02 | 0 0 | Cs1g21340.1           | 8.47 | 0 | 0    | 2 | MASCOT | T      | PLEX8 |
| 1.77E-01 | 0 0 | Cs1g21340.1           | 8.41 | 0 | 0    | 2 | MASCOT | T      | PLEX8 |
| 1.14E-03 | 0 0 | Cs2g27730.1           | 6.05 | 0 | 0    | 2 | MASCOT | T      | PLEX8 |
| 9.43E-03 | 0 0 | Cs2g27730.1           | 6.91 | 0 | 0    | 2 | MASCOT | T      | PLEX8 |
| 1.48E-06 | 0 0 | Cs2g27730.1           | 6.91 | 0 | 0    | 2 | MASCOT | T      |       |
| 3.06E-04 | 0 0 | Cs2g27730.1           | 6    | 0 | 0    | 2 | MASCOT | T      |       |
| 6.59E-02 | 0 0 | Cs2g27730.1           | 6    | 0 | 0    | 2 | MASCOT | T      |       |
| 2.79E-02 | 0 0 | Cs2g27730.1           | 6    | 0 | 0    | 2 | MASCOT | T      |       |
| 7.81E-03 | 0 0 | Cs2g27730.1           | 6    | 0 | 0    | 2 | MASCOT | T      |       |
| 1.93E-01 | 0 0 | Cs2g27730.1 ! Cs5g05  | 8.41 | 0 | 0    | 2 | MASCOT | T      | PLEX8 |
| 5.65E-02 | 0 0 | Cs2g27730.1 ! Cs5g05  | 8.41 | 0 | 0    | 2 | MASCOT | T      | PLEX8 |
| 1.99E-02 | 0 0 | Cs3g07550.1           | 3.93 | 0 | 0    | 2 | MASCOT | T      | PLEX8 |
| 4.12E-02 | 0 0 | Cs3g07550.1           | 3.93 | 0 | 0    | 2 | MASCOT | T      | PLEX8 |
| 1.60E-06 | 0 0 | Cs3g07550.1           | 4.22 | 0 | 0    | 2 | MASCOT | T      | PLEX8 |
| 3.03E-04 | 0 0 | Cs3g07550.1           | 4.22 | 0 | 0    | 2 | MASCOT | T      | PLEX8 |
| 4.52E-03 | 0 0 | Cs3g07550.1           | 4.22 | 0 | 0    | 2 | MASCOT | T      | PLEX8 |
| 1.98E-07 | 0 0 | Cs3g07550.1           | 4.22 | 0 | 0    | 2 | MASCOT | T      | PLEX8 |
| 2.20E-04 | 0 0 | Cs3g07550.1           | 4.22 | 0 | 0    | 2 | MASCOT | T      | PLEX8 |
| 2.14E-02 | 0 0 | Cs3g07550.1           | 4.75 | 0 | 0    | 2 | MASCOT | T      | PLEX8 |
| 1.16E-01 | 0 0 | Cs3g07550.1           | 5.72 | 0 | 0    | 2 | MASCOT | T      | PLEX8 |
| 2.69E-02 | 0 0 | Cs3g27110.1/Cs3g271   | 4.37 | 0 | 0    | 2 | MASCOT | T      | PLEX8 |
| 1.62E-02 | 0 0 | Cs3g27110.1/Cs3g271   | 4.37 | 0 | 0    | 2 | MASCOT | T      | PLEX8 |
| 1.21E-02 | 0 0 | Cs3g27110.1/Cs3g271   | 5.84 | 0 | 15.9 | 0 | 2      | MASCOT | T     |
| 9.50E-03 | 0 0 | Cs3g27110.1/Cs3g271   | 5.84 | 0 | 0    | 2 | MASCOT | T      | PLEX8 |
| 3.67E-02 | 0 0 | Cs3g27110.1/Cs3g271   | 8.72 | 0 | 0    | 2 | MASCOT | T      | PLEX8 |
| 1.86E-02 | 0 0 | Cs3g27110.1/Cs3g271   | 8.72 | 0 | 0    | 2 | MASCOT | T      | PLEX8 |
| 5.43E-03 | 0 0 | Cs3g27110.1/Cs3g271   | 8.72 | 0 | 0    | 2 | MASCOT | T      | PLEX8 |
| 9.57E-02 | 0 0 | Cs3g27110.1/Cs3g271   | 6    | 0 | 0    | 2 | MASCOT | T      | PLEX8 |

|          |     |                       |      |   |   |   |        |   |       |
|----------|-----|-----------------------|------|---|---|---|--------|---|-------|
| 6.72E-02 | 0 0 | Cs3g27110.1/Cs3g271   | 6    | 0 | 0 | 2 | MASCOT | T | PLEX8 |
| 3.13E-04 | 0 0 | Cs5g03140.1/Cs5g031   | 5.84 | 0 | 0 | 2 | MASCOT | T | PLEX8 |
| 7.43E-02 | 0 0 | Cs5g03140.1/Cs9g192   | 5.32 | 0 | 0 | 2 | MASCOT | T | PLEX8 |
| 3.11E-01 | 0 0 | Cs5g03140.1/Cs9g192   | 5.32 | 0 | 0 | 2 | MASCOT | T | PLEX8 |
| 1.01E-01 | 0 0 | Cs5g03140.1/Cs9g192   | 5.32 | 0 | 0 | 2 | MASCOT | T | PLEX8 |
| 1.23E-04 | 0 0 | Cs5g03140.1/Cs9g192   | 5.99 | 0 | 0 | 2 | MASCOT | T | PLEX8 |
| 9.15E-03 | 0 0 | Cs5g03140.1/Cs9g192   | 5.99 | 0 | 0 | 2 | MASCOT | T | PLEX8 |
| 3.56E-02 | 0 0 | Cs5g03140.1/Cs9g192   | 5.99 | 0 | 0 | 2 | MASCOT | T | PLEX8 |
| 1.41E-03 | 0 0 | Cs5g03140.1/Cs9g192   | 5.99 | 0 | 0 | 2 | MASCOT | T | PLEX8 |
| 5.66E-03 | 0 0 | Cs5g03140.1/Cs5g031   | 4.21 | 0 | 0 | 2 | MASCOT | T | PLEX8 |
| 2.26E-01 | 0 0 | Cs5g34690.1/Cs5g346   | 6.05 | 0 | 0 | 2 | MASCOT | T | PLEX8 |
| 3.17E-01 | 0 0 | Cs5g34690.1/Cs5g346   | 6.05 | 0 | 0 | 2 | MASCOT | T | PLEX8 |
| 8.13E-02 | 0 0 | Cs3g20830.1/Cs3g208   | 9.75 | 0 | 0 | 2 | MASCOT | T | PLEX8 |
| 1.28E-01 | 0 0 | Cs3g20830.1/Cs3g208   | 9.75 | 0 | 0 | 2 | MASCOT | T | PLEX8 |
| 1.15E-01 | 0 0 | Cs3g20830.1/Cs3g208   | 9.75 | 0 | 0 | 2 | MASCOT | T | PLEX8 |
| 7.13E-02 | 0 0 | Cs3g20830.1/Cs3g208   | 9.75 | 0 | 0 | 2 | MASCOT | T | PLEX8 |
| 4.54E-02 | 0 0 | Cs3g20830.1/Cs3g208   | 9.75 | 0 | 0 | 2 | MASCOT | T | PLEX8 |
| 1.78E-01 | 0 0 | Cs3g20800.1/Cs3g208   | 5.84 | 0 | 0 | 2 | MASCOT | T | PLEX8 |
| 2.00E-01 | 0 0 | Cs5g34690.1/Cs5g346   | 4.37 | 0 | 0 | 2 | MASCOT | T | PLEX8 |
| 3.19E-01 | 0 0 | Cs6g02830.1/Cs6g028   | 5.84 | 0 | 0 | 2 | MASCOT | T | PLEX8 |
| 2.20E-01 | 0 0 | Cs6g02830.1/Cs6g028   | 5.84 | 0 | 0 | 2 | MASCOT | T | PLEX8 |
| 2.98E-01 | 0 0 | Cs6g02830.1           | 6.1  | 0 | 0 | 2 | MASCOT | T | PLEX8 |
| 1.04E-01 | 0 0 | Cs6g02830.1 ! Cs6g02  | 4.37 | 0 | 0 | 2 | MASCOT | T | PLEX8 |
| 1.34E-01 | 0 0 | Cs6g02830.1 ! Cs6g02  | 4.37 | 0 | 0 | 2 | MASCOT | T | PLEX8 |
| 1.24E-02 | 0 0 | Cs6g02830.1/Cs6g028   | 5.84 | 0 | 0 | 2 | MASCOT | T | PLEX8 |
| 5.45E-02 | 0 0 | Cs6g02830.1/Cs6g028   | 5.84 | 0 | 0 | 2 | MASCOT | T | PLEX8 |
| 3.59E-01 | 0 0 | Cs6g02830.1/Cs6g028   | 5.84 | 0 | 0 | 2 | MASCOT | T | PLEX8 |
| 3.32E-02 | 0 0 | Cs6g02830.1/Cs6g028   | 5.84 | 0 | 0 | 2 | MASCOT | T | PLEX8 |
| 1.01E-02 | 0 0 | Cs7g01470.1/Cs7g014   | 4.37 | 0 | 0 | 2 | MASCOT | T | PLEX8 |
| 2.19E-02 | 0 0 | Cs7g01470.1/Cs7g014   | 4.37 | 0 | 0 | 2 | MASCOT | T | PLEX8 |
| 4.01E-04 | 0 0 | Cs7g01470.2/Cs7g014   | 8.75 | 0 | 0 | 2 | MASCOT | T |       |
| 4.70E-04 | 0 0 | Cs7g01470.2/Cs7g014   | 8.75 | 0 | 0 | 2 | MASCOT | T | PLEX8 |
| 3.39E-02 | 0 0 | Cs7g01470.2/Cs7g014   | 8.75 | 0 | 0 | 2 | MASCOT | T | PLEX8 |
| 1.50E-03 | 0 0 | Cs7g01470.1/Cs7g014   | 4.21 | 0 | 0 | 2 | MASCOT | T | PLEX8 |
| 7.83E-05 | 0 0 | Cs7g01470.1/Cs7g014   | 8.56 | 0 | 0 | 2 | MASCOT | T | PLEX8 |
| 2.29E-03 | 0 0 | Cs7g01470.1/Cs7g014   | 8.56 | 0 | 0 | 2 | MASCOT | T | PLEX8 |
| 4.92E-04 | 0 0 | Cs7g01470.1/Cs7g014   | 8.56 | 0 | 0 | 2 | MASCOT | T | PLEX8 |
| 8.15E-02 | 0 0 | Cs8g01210.1           | 5.75 | 0 | 0 | 2 | MASCOT | T | PLEX8 |
| 4.47E-01 | 0 0 | Cs8g01210.1           | 5.75 | 0 | 0 | 2 | MASCOT | T | PLEX8 |
| 1.61E-01 | 0 0 | Cs8g01210.1           | 5.75 | 0 | 0 | 2 | MASCOT | T | PLEX8 |
| 5.99E-05 | 0 0 | Cs5g34730.1/Cs8g012   | 8.22 | 0 | 0 | 2 | MASCOT | T | PLEX8 |
| 7.44E-03 | 0 0 | Cs5g34730.1/Cs8g012   | 4.65 | 0 | 0 | 2 | MASCOT | T | PLEX8 |
| 2.35E-01 | 0 0 | Cs5g34730.1/Cs8g012   | 4.65 | 0 | 0 | 2 | MASCOT | T |       |
| 3.40E-01 | 0 0 | Cs5g34730.1/Cs8g012   | 4.65 | 0 | 0 | 2 | MASCOT | T | PLEX8 |
| 8.37E-02 | 0 0 | Cs8g01210.1           | 6.05 | 0 | 0 | 2 | MASCOT | T | PLEX8 |
| 1.08E-03 | 0 0 | Cs8g01210.1           | 6.05 | 0 | 0 | 2 | MASCOT | T | PLEX8 |
| 2.10E-06 | 0 0 | orange1.1t00541.1/ora | 3.9  | 0 | 0 | 2 | MASCOT | T | PLEX8 |
| 8.54E-07 | 0 0 | orange1.1t00541.1/ora | 3.9  | 0 | 0 | 2 | MASCOT | T |       |
| 1.10E-05 | 0 0 | orange1.1t00541.1/ora | 3.9  | 0 | 0 | 2 | MASCOT | T | PLEX8 |
| 5.15E-07 | 0 0 | orange1.1t00541.1/ora | 3.9  | 0 | 0 | 2 | MASCOT | T | PLEX8 |
| 4.66E-04 | 0 0 | orange1.1t00541.1/ora | 3.9  | 0 | 0 | 2 | MASCOT | T |       |

|          |     |                       |      |   |      |   |        |        |       |       |
|----------|-----|-----------------------|------|---|------|---|--------|--------|-------|-------|
| 2.54E-02 | 0 0 | orange1.1t00541.1/ora | 5.32 | 0 | 0    | 2 | MASCOT | T      | PLEX8 |       |
| 3.79E-03 | 0 0 | orange1.1t00541.1/ora | 5.32 | 0 | 0    | 2 | MASCOT | T      | PLEX8 |       |
| 1.37E-02 | 0 0 | orange1.1t00541.1/ora | 5.32 | 0 | 0    | 2 | MASCOT | T      | PLEX8 |       |
| 3.61E-03 | 0 0 | orange1.1t00541.1/ora | 4.21 | 0 | 0    | 2 | MASCOT | T      | PLEX8 |       |
| 1.22E-01 | 0 0 | orange1.1t01687.1     | 4.21 | 0 | 0    | 2 | MASCOT | T      |       |       |
| 7.66E-03 | 0 0 | orange1.1t01687.1     | 4.21 | 0 | 0    | 2 | MASCOT | T      | PLEX8 |       |
| 7.71E-03 | 0 0 | orange1.1t01687.1     | 4.21 | 0 | 0    | 2 | MASCOT | T      |       |       |
| 3.50E-01 | 0 0 | orange1.1t01687.1     | 4.21 | 0 | 15.9 | 0 | 2      | MASCOT | T     |       |
| 8.46E-03 | 0 0 | orange1.1t01687.1     | 4.21 | 0 | 15.9 | 0 | 2      | MASCOT | T     |       |
| 1.10E-02 | 0 0 | orange1.1t01687.1     | 4.21 | 0 | 15.9 | 0 | 2      | MASCOT | T     |       |
| 1.16E-03 | 0 0 | orange1.1t01687.1     | 4.21 | 0 | 15.9 | 0 | 2      | MASCOT | T     |       |
| 1.15E-02 | 0 0 | orange1.1t01687.1     | 4.43 | 1 | 0    | 2 | MASCOT | T      | PLEX8 |       |
| 1.21E-01 | 0 0 | orange1.1t01687.1     | 5.84 | 0 | 0    | 2 | MASCOT | T      |       |       |
| 1.39E-01 | 0 0 | orange1.1t01987.1     | 4.21 | 0 | 0    | 2 | MASCOT | T      | PLEX8 |       |
| 1.27E-01 | 0 0 | orange1.1t01987.1     | 9.75 | 0 | 0    | 2 | MASCOT | T      | PLEX8 |       |
| 9.96E-03 | 0 0 | orange1.1t01987.1     | 8.8  | 0 | 0    | 2 | MASCOT | T      | PLEX8 |       |
| 5.49E-02 | 0 0 | orange1.1t01987.1     | 8.8  | 0 | 0    | 2 | MASCOT | T      | PLEX8 |       |
| 9.97E-03 | 0 0 | orange1.1t01987.1     | 8.8  | 0 | 0    | 2 | MASCOT | T      | PLEX8 |       |
| 7.75E-03 | 0 0 | orange1.1t01987.1     | 8.8  | 0 | 0    | 2 | MASCOT | T      | PLEX8 |       |
| 1.01E-02 | 0 0 | orange1.1t01987.1     | 8.8  | 0 | 0    | 2 | MASCOT | T      | PLEX8 |       |
| 1.31E-01 | 0 0 | orange1.1t01987.1     | 8.59 | 0 | 0    | 2 | MASCOT | T      | PLEX8 |       |
| 4.65E-02 | 0 0 | orange1.1t01987.1     | 8.59 | 0 | 0    | 2 | MASCOT | T      | PLEX8 |       |
| 2.33E-07 | 0 0 | orange1.1t02288.1     | 8.8  | 0 | 0    | 2 | MASCOT | T      | PLEX8 |       |
| 2.96E-09 | 0 0 | orange1.1t02288.1     | 8.8  | 0 | 0    | 2 | MASCOT | T      | PLEX8 |       |
| 1.18E-07 | 0 0 | orange1.1t02288.1     | 8.8  | 0 | 0    | 2 | MASCOT | T      | PLEX8 |       |
| 6.54E-03 | 0 0 | orange1.1t02288.1     | 5.24 | 0 | 0    | 2 | MASCOT | T      | PLEX8 |       |
| 3.18E-02 | 0 0 | orange1.1t02288.1     | 5.24 | 0 | 0    | 2 | MASCOT | T      | PLEX8 |       |
| 1.47E-02 | 0 0 | orange1.1t02288.1     | 5.99 | 0 | 0    | 2 | MASCOT | T      | PLEX8 |       |
| 3.08E-03 | 0 0 | orange1.1t02288.1     | 5.99 | 0 | 0    | 2 | MASCOT | T      | PLEX8 |       |
| 6.31E-02 | 0 0 | orange1.1t02288.1     | 5.99 | 0 | 0    | 2 | MASCOT | T      | PLEX8 |       |
| 2.52E-03 | 0 0 | orange1.1t02288.1     | 4.53 | 0 | 0    | 2 | MASCOT | T      | PLEX8 |       |
| 7.93E-02 | 0 0 | orange1.1t05835.1     | 8.47 | 0 | 0    | 2 | MASCOT | T      | PLEX8 |       |
| 3.91E-02 | 0 0 | orange1.1t05835.1     | 5.88 | 0 | 0    | 2 | MASCOT | T      | PLEX8 |       |
| 2.73E-01 | 0 0 | orange1.1t05835.1     | 6.05 | 0 | 15.9 | 0 | 2      | MASCOT | T     | PLEX8 |
| 1.48E-02 | 0 0 | orange1.1t05835.1     | 6.05 | 0 | 0    | 2 | MASCOT | T      | PLEX8 |       |
| 2.37E-01 | 0 0 | orange1.1t05835.1     | 6.05 | 0 | 0    | 2 | MASCOT | T      | PLEX8 |       |
| 1.79E-01 | 0 0 | orange1.1t05835.1     | 6.05 | 0 | 0    | 2 | MASCOT | T      | PLEX8 |       |
| 8.25E-02 | 0 0 | orange1.1t05835.1     | 6.05 | 0 | 0    | 2 | MASCOT | T      | PLEX8 |       |
| 2.42E-02 | 0 0 | orange1.1t05835.1     | 6.92 | 0 | 0    | 2 | MASCOT | T      | PLEX8 |       |
| 6.76E-02 | 0 0 | orange1.1t05835.1     | 6.92 | 0 | 0    | 2 | MASCOT | T      |       |       |
| 4.26E-03 | 0 0 | Cs2g09940.1           | 8.59 | 0 | 0    | 2 | MASCOT | T      | PLEX8 |       |
| 4.91E-02 | 0 0 | Cs2g09940.1           | 8.59 | 0 | 0    | 2 | MASCOT | T      | PLEX8 |       |
| 2.62E-01 | 0 0 | Cs2g09940.1           | 8.59 | 0 | 0    | 2 | MASCOT | T      | PLEX8 |       |
| 5.38E-03 | 0 0 | Cs2g09940.1           | 8.59 | 0 | 0    | 2 | MASCOT | T      | PLEX8 |       |
| 4.11E-04 | 0 0 | Cs2g09940.1           | 4.53 | 0 | 0    | 2 | MASCOT | T      | PLEX8 |       |
| 1.52E-01 | 0 0 | Cs2g09940.1           | 4.53 | 0 | 0    | 2 | MASCOT | T      | PLEX8 |       |
| 1.00E-01 | 0 0 | Cs2g09940.1           | 5.4  | 0 | 0    | 2 | MASCOT | T      | PLEX8 |       |
| 2.05E-02 | 0 0 | Cs2g09940.1           | 5.59 | 0 | 0    | 2 | MASCOT | T      | PLEX8 |       |
| 6.35E-02 | 0 0 | Cs2g29220.1/Cs2g292   | 8.59 | 0 | 0    | 2 | MASCOT | T      | PLEX8 |       |
| 1.09E-01 | 0 0 | Cs2g29220.1/Cs2g292   | 8.59 | 0 | 0    | 2 | MASCOT | T      | PLEX8 |       |
| 9.70E-03 | 0 0 | Cs2g29220.1/Cs2g292   | 5.55 | 0 | 0    | 2 | MASCOT | T      | PLEX8 |       |

|          |     |                     |      |   |      |   |        |        |       |       |
|----------|-----|---------------------|------|---|------|---|--------|--------|-------|-------|
| 1.14E-03 | 0 0 | Cs2g29220.1/Cs2g292 | 8.31 | 0 | 0    | 2 | MASCOT | T      | PLEX8 |       |
| 2.59E-03 | 0 0 | Cs2g29220.1/Cs2g292 | 8.31 | 0 | 0    | 2 | MASCOT | T      | PLEX8 |       |
| 1.04E-03 | 0 0 | Cs2g29220.1/Cs2g292 | 8.31 | 0 | 0    | 2 | MASCOT | T      | PLEX8 |       |
| 5.07E-01 | 0 0 | Cs2g29220.1/Cs2g292 | 5.32 | 0 | 0    | 2 | MASCOT | T      | PLEX8 |       |
| 1.27E-01 | 0 0 | Cs2g29220.1/Cs2g292 | 5.32 | 0 | 0    | 2 | MASCOT | T      | PLEX8 |       |
| 1.26E-02 | 0 0 | Cs3g04670.1/Cs3g046 | 8.27 | 0 | 15.9 | 0 | 2      | MASCOT | T     | PLEX8 |
| 2.37E-01 | 0 0 | Cs3g04670.1/Cs3g046 | 8.27 | 0 | 15.9 | 0 | 2      | MASCOT | T     |       |
| 1.26E-02 | 0 0 | Cs3g04670.1/Cs3g046 | 8.27 | 0 | 0    | 2 | MASCOT | T      | PLEX8 |       |
| 1.52E-02 | 0 0 | Cs7g02830.1/Cs9g178 | 3.84 | 0 | 0    | 2 | MASCOT | T      | PLEX8 |       |
| 1.61E-02 | 0 0 | Cs3g04670.1/Cs3g046 | 9.76 | 0 | 0    | 2 | MASCOT | T      | PLEX8 |       |
| 3.50E-02 | 0 0 | Cs3g04670.1/Cs3g046 | 9.76 | 0 | 0    | 2 | MASCOT | T      | PLEX8 |       |
| 3.08E-03 | 0 0 | Cs3g04670.1/Cs3g046 | 9.76 | 0 | 0    | 2 | MASCOT | T      | PLEX8 |       |
| 4.55E-02 | 0 0 | Cs3g04670.1/Cs3g046 | 11   | 1 | 0    | 2 | MASCOT | T      |       |       |
| 1.93E-01 | 0 0 | Cs4g05970.1/Cs4g059 | 5.21 | 0 | 0    | 2 | MASCOT | T      | PLEX8 |       |
| 1.24E-01 | 0 0 | Cs4g05970.1/Cs4g059 | 6    | 0 | 0    | 2 | MASCOT | T      | PLEX8 |       |
| 4.22E-02 | 0 0 | Cs4g05970.1/Cs4g059 | 6    | 0 | 0    | 2 | MASCOT | T      | PLEX8 |       |
| 2.92E-01 | 0 0 | Cs4g05970.1/Cs4g059 | 6    | 0 | 0    | 2 | MASCOT | T      | PLEX8 |       |
| 9.79E-02 | 0 0 | Cs4g05970.1/Cs4g059 | 6    | 0 | 0    | 2 | MASCOT | T      | PLEX8 |       |
| 4.23E-02 | 0 0 | Cs4g05970.1/Cs4g059 | 6    | 0 | 0    | 2 | MASCOT | T      | PLEX8 |       |
| 2.18E-01 | 0 0 | Cs4g05970.1/Cs4g059 | 8.8  | 0 | 0    | 2 | MASCOT | T      |       |       |
| 1.73E-01 | 0 0 | Cs4g05970.1/Cs4g059 | 9.76 | 0 | 0    | 2 | MASCOT | T      |       |       |
| 3.09E-02 | 0 0 | Cs4g13310.1         | 4.37 | 0 | 0    | 2 | MASCOT | T      | PLEX8 |       |
| 5.39E-02 | 0 0 | Cs4g13310.1         | 6.1  | 0 | 0    | 2 | MASCOT | T      | PLEX8 |       |
| 2.11E-02 | 0 0 | Cs4g13310.1         | 6.1  | 0 | 0    | 2 | MASCOT | T      | PLEX8 |       |
| 1.92E-03 | 0 0 | Cs4g13310.1         | 6.1  | 0 | 0    | 2 | MASCOT | T      | PLEX8 |       |
| 1.10E-01 | 0 0 | Cs4g13310.1         | 6.1  | 0 | 0    | 2 | MASCOT | T      | PLEX8 |       |
| 1.13E-03 | 0 0 | Cs4g13310.1         | 4.79 | 1 | 0    | 2 | MASCOT | T      | PLEX8 |       |
| 1.79E-02 | 0 0 | Cs4g13310.1         | 4.53 | 0 | 0    | 2 | MASCOT | T      | PLEX8 |       |
| 6.48E-02 | 0 0 | Cs4g13310.1         | 4.53 | 0 | 0    | 2 | MASCOT | T      | PLEX8 |       |
| 3.16E-03 | 0 0 | Cs4g17550.1         | 4.37 | 0 | 0    | 2 | MASCOT | T      | PLEX8 |       |
| 7.89E-05 | 0 0 | Cs4g17550.1         | 4.37 | 0 | 0    | 2 | MASCOT | T      | PLEX8 |       |
| 1.47E-01 | 0 0 | Cs4g17550.1         | 6.74 | 0 | 0    | 2 | MASCOT | T      | PLEX8 |       |
| 1.34E-01 | 0 0 | Cs4g17550.1         | 6.74 | 0 | 0    | 2 | MASCOT | T      | PLEX8 |       |
| 1.89E-01 | 0 0 | Cs4g17550.1         | 6.74 | 0 | 0    | 2 | MASCOT | T      | PLEX8 |       |
| 1.29E-01 | 0 0 | Cs4g17550.1         | 6.74 | 0 | 0    | 2 | MASCOT | T      | PLEX8 |       |
| 6.07E-02 | 0 0 | Cs4g17550.1         | 6.74 | 0 | 0    | 2 | MASCOT | T      | PLEX8 |       |
| 1.50E-02 | 0 0 | Cs4g17550.1         | 4.37 | 0 | 0    | 2 | MASCOT | T      | PLEX8 |       |
| 2.79E-03 | 0 0 | Cs5g09660.1/Cs5g096 | 4.14 | 0 | 0    | 2 | MASCOT | T      |       |       |
| 6.59E-05 | 0 0 | Cs5g09660.1/Cs5g096 | 4.14 | 0 | 0    | 2 | MASCOT | T      |       |       |
| 1.05E-03 | 0 0 | Cs5g09660.1/Cs5g096 | 4.14 | 0 | 0    | 2 | MASCOT | T      | PLEX8 |       |
| 9.48E-02 | 0 0 | Cs5g09660.1/Cs5g096 | 4.21 | 0 | 0    | 2 | MASCOT | T      | PLEX8 |       |
| 1.51E-02 | 0 0 | Cs5g09660.1/Cs5g096 | 4.21 | 0 | 0    | 2 | MASCOT | T      | PLEX8 |       |
| 8.76E-03 | 0 0 | Cs5g09660.1/Cs5g096 | 5.84 | 0 | 0    | 2 | MASCOT | T      |       |       |
| 1.28E-02 | 0 0 | Cs5g09660.1/Cs5g096 | 5.84 | 0 | 0    | 2 | MASCOT | T      |       |       |
| 3.09E-02 | 0 0 | Cs5g09660.1/Cs5g096 | 4.14 | 0 | 0    | 2 | MASCOT | T      | PLEX8 |       |
| 7.23E-02 | 0 0 | Cs2g29030.1/Cs6g161 | 4.21 | 0 | 0    | 2 | MASCOT | T      | PLEX8 |       |
| 7.97E-02 | 0 0 | Cs2g29030.1/Cs6g161 | 4.37 | 0 | 0    | 2 | MASCOT | T      | PLEX8 |       |
| 2.66E-01 | 0 0 | Cs2g29030.1/Cs6g161 | 4.37 | 0 | 0    | 2 | MASCOT | T      | PLEX8 |       |
| 7.00E-02 | 0 0 | Cs2g29030.1/Cs6g161 | 4.37 | 0 | 0    | 2 | MASCOT | T      | PLEX8 |       |
| 2.78E-01 | 0 0 | Cs2g29030.1/Cs6g161 | 4.37 | 0 | 0    | 2 | MASCOT | T      | PLEX8 |       |
| 1.34E-02 | 0 0 | Cs2g29030.1/Cs6g161 | 4.37 | 0 | 0    | 2 | MASCOT | T      | PLEX8 |       |

|          |     |                      |      |   |      |   |        |        |       |       |
|----------|-----|----------------------|------|---|------|---|--------|--------|-------|-------|
| 1.12E-01 | 0 0 | Cs2g29020.1/Cs2g290  | 6.1  | 0 | 0    | 2 | MASCOT | T      | PLEX8 |       |
| 6.16E-03 | 0 0 | Cs2g29020.1/Cs2g290  | 4.56 | 1 | 0    | 2 | MASCOT | T      |       |       |
| 6.15E-03 | 0 0 | Cs7g13800.1/Cs7g138  | 4.53 | 0 | 0    | 2 | MASCOT | T      | PLEX8 |       |
| 4.54E-03 | 0 0 | Cs7g13800.1/Cs7g138  | 4.53 | 0 | 0    | 2 | MASCOT | T      | PLEX8 |       |
| 3.58E-04 | 0 0 | Cs7g13800.1/Cs7g138  | 4.53 | 0 | 0    | 2 | MASCOT | T      | PLEX8 |       |
| 5.34E-02 | 0 0 | Cs7g13800.1/Cs7g138  | 6.72 | 0 | 0    | 2 | MASCOT | T      | PLEX8 |       |
| 2.96E-03 | 0 0 | Cs7g13800.1/Cs7g138  | 6.72 | 0 | 0    | 2 | MASCOT | T      | PLEX8 |       |
| 9.49E-03 | 0 0 | Cs7g13800.1/Cs7g138  | 6.73 | 0 | 0    | 2 | MASCOT | T      | PLEX8 |       |
| 1.06E-01 | 0 0 | Cs7g13800.1/Cs7g138  | 6.75 | 0 | 0    | 2 | MASCOT | T      | PLEX8 |       |
| 1.44E-01 | 0 0 | Cs7g13800.1/Cs7g138  | 6.75 | 0 | 0    | 2 | MASCOT | T      |       |       |
| 1.75E-01 | 0 0 | Cs7g17080.1/Cs7g170  | 6.49 | 0 | 0    | 2 | MASCOT | T      | PLEX8 |       |
| 8.88E-02 | 0 0 | Cs7g09280.1 ! Cs7g17 | 8.73 | 0 | 0    | 2 | MASCOT | T      | PLEX8 |       |
| 1.21E-02 | 0 0 | Cs7g09280.1 ! Cs7g17 | 8.73 | 0 | 0    | 2 | MASCOT | T      | PLEX8 |       |
| 1.15E-01 | 0 0 | Cs7g09280.1 ! Cs7g17 | 8.73 | 0 | 0    | 2 | MASCOT | T      | PLEX8 |       |
| 3.40E-03 | 0 0 | Cs7g09280.1 ! Cs7g17 | 8.73 | 0 | 0    | 2 | MASCOT | T      | PLEX8 |       |
| 3.91E-04 | 0 0 | Cs7g17080.1/Cs7g170  | 5.32 | 0 | 0    | 2 | MASCOT | T      |       |       |
| 2.19E-01 | 0 0 | Cs7g09280.1/Cs7g170  | 9.75 | 0 | 0    | 2 | MASCOT | T      | PLEX8 |       |
| 3.06E-01 | 0 0 | Cs7g09280.1/Cs7g170  | 9.75 | 0 | 0    | 2 | MASCOT | T      |       |       |
| 6.43E-02 | 0 0 | Cs7g20540.1/Cs7g205  | 8.8  | 0 | 0    | 2 | MASCOT | T      | PLEX8 |       |
| 1.37E-02 | 0 0 | Cs7g20540.1/Cs7g205  | 8.8  | 0 | 0    | 2 | MASCOT | T      | PLEX8 |       |
| 1.51E-01 | 0 0 | Cs7g20540.1/Cs7g205  | 6.1  | 0 | 0    | 2 | MASCOT | T      | PLEX8 |       |
| 1.36E-03 | 0 0 | Cs7g20540.1/Cs7g205  | 5.4  | 0 | 0    | 2 | MASCOT | T      | PLEX8 |       |
| 5.11E-06 | 0 0 | Cs7g20540.1/Cs7g205  | 5.4  | 0 | 0    | 2 | MASCOT | T      | PLEX8 |       |
| 7.52E-06 | 0 0 | Cs7g20540.1/Cs7g205  | 5.4  | 0 | 0    | 2 | MASCOT | T      | PLEX8 |       |
| 1.56E-03 | 0 0 | Cs7g20540.1/Cs7g205  | 5.4  | 0 | 0    | 2 | MASCOT | T      |       |       |
| 2.25E-01 | 0 0 | Cs7g20540.1/Cs7g205  | 8.47 | 0 | 0    | 2 | MASCOT | T      | PLEX8 |       |
| 1.28E-02 | 0 0 | Cs7g24930.1          | 8.75 | 0 | 0    | 2 | MASCOT | T      | PLEX8 |       |
| 9.11E-03 | 0 0 | Cs7g24930.1          | 8.75 | 0 | 0    | 2 | MASCOT | T      | PLEX8 |       |
| 1.54E-03 | 0 0 | Cs7g24930.1          | 8.75 | 0 | 0    | 2 | MASCOT | T      | PLEX8 |       |
| 6.93E-03 | 0 0 | Cs7g24930.1          | 4.37 | 0 | 0    | 2 | MASCOT | T      | PLEX8 |       |
| 2.92E-04 | 0 0 | Cs7g24930.1          | 4.37 | 0 | 0    | 2 | MASCOT | T      | PLEX8 |       |
| 3.94E-02 | 0 0 | Cs7g24930.1          | 4.4  | 0 | 0    | 2 | MASCOT | T      | PLEX8 |       |
| 7.13E-03 | 0 0 | Cs7g24930.1          | 4.4  | 0 | 0    | 2 | MASCOT | T      | PLEX8 |       |
| 4.70E-02 | 0 0 | Cs7g24930.1          | 4.4  | 0 | 0    | 2 | MASCOT | T      | PLEX8 |       |
| 6.71E-02 | 0 0 | Cs8g06760.1          | 5.97 | 0 | 0    | 2 | MASCOT | T      | PLEX8 |       |
| 8.25E-02 | 0 0 | Cs8g06760.1          | 5.97 | 0 | 0    | 2 | MASCOT | T      | PLEX8 |       |
| 4.30E-03 | 0 0 | Cs8g06760.1/Cs8g067  | 5.32 | 0 | 15.9 | 0 | 2      | MASCOT | T     | PLEX8 |
| 6.77E-03 | 0 0 | Cs8g06760.1          | 5.75 | 0 | 15.9 | 0 | 2      | MASCOT | T     | PLEX8 |
| 9.64E-03 | 0 0 | Cs8g06760.1          | 5.75 | 0 | 0    | 2 | MASCOT | T      | PLEX8 |       |
| 2.64E-03 | 0 0 | Cs8g06760.1          | 5.75 | 0 | 0    | 2 | MASCOT | T      | PLEX8 |       |
| 6.77E-04 | 0 0 | Cs8g06760.1          | 5.75 | 0 | 0    | 2 | MASCOT | T      | PLEX8 |       |
| 1.33E-03 | 0 0 | Cs8g06760.1/Cs8g067  | 6    | 0 | 0    | 2 | MASCOT | T      | PLEX8 |       |
| 5.53E-02 | 0 0 | Cs9g02160.1          | 6.74 | 0 | 0    | 2 | MASCOT | T      | PLEX8 |       |
| 5.95E-02 | 0 0 | Cs9g02160.1          | 5.32 | 0 | 0    | 2 | MASCOT | T      | PLEX8 |       |
| 4.35E-05 | 0 0 | Cs9g02160.1          | 5.32 | 0 | 0    | 2 | MASCOT | T      | PLEX8 |       |
| 7.79E-02 | 0 0 | Cs9g02160.1          | 5.32 | 0 | 0    | 2 | MASCOT | T      | PLEX8 |       |
| 1.79E-04 | 0 0 | Cs9g02160.1          | 5.32 | 0 | 0    | 2 | MASCOT | T      | PLEX8 |       |
| 3.92E-02 | 0 0 | Cs9g02160.1          | 8.59 | 0 | 0    | 2 | MASCOT | T      | PLEX8 |       |
| 1.18E-01 | 0 0 | Cs9g02160.1          | 5.55 | 0 | 15.9 | 0 | 2      | MASCOT | T     | PLEX8 |
| 2.54E-02 | 0 0 | Cs9g02160.1          | 5.55 | 0 | 0    | 2 | MASCOT | T      | PLEX8 |       |
| 6.62E-02 | 0 0 | Cs9g09660.1          | 5.99 | 0 | 0    | 2 | MASCOT | T      | PLEX8 |       |

|          |     |                       |      |   |      |   |        |        |       |       |
|----------|-----|-----------------------|------|---|------|---|--------|--------|-------|-------|
| 1.18E-02 | 0 0 | Cs9g09660.1           | 5.83 | 0 | 0    | 2 | MASCOT | T      | PLEX8 |       |
| 2.20E-01 | 0 0 | Cs9g09660.1           | 5.83 | 0 | 0    | 2 | MASCOT | T      | PLEX8 |       |
| 1.12E-02 | 0 0 | Cs9g09660.1           | 5.83 | 0 | 0    | 2 | MASCOT | T      | PLEX8 |       |
| 2.89E-02 | 0 0 | Cs9g09660.1           | 5.83 | 0 | 0    | 2 | MASCOT | T      | PLEX8 |       |
| 2.54E-03 | 0 0 | Cs9g09660.1           | 4.25 | 0 | 0    | 2 | MASCOT | T      | PLEX8 |       |
| 1.01E-02 | 0 0 | Cs9g09660.1           | 4.25 | 0 | 0    | 2 | MASCOT | T      | PLEX8 |       |
| 2.12E-04 | 0 0 | Cs9g09660.1           | 4    | 0 | 0    | 2 | MASCOT | T      | PLEX8 |       |
| 5.65E-02 | 0 0 | Cs9g16640.1           | 5.82 | 0 | 0    | 2 | MASCOT | T      | PLEX8 |       |
| 5.39E-02 | 0 0 | Cs9g16640.1           | 5.82 | 0 | 0    | 2 | MASCOT | T      | PLEX8 |       |
| 2.77E-01 | 0 0 | Cs8g18310.1/Cs9g166   | 8.76 | 0 | 0    | 2 | MASCOT | T      | PLEX8 |       |
| 6.28E-02 | 0 0 | Cs8g18310.1/Cs9g166   | 8.76 | 0 | 0    | 2 | MASCOT | T      | PLEX8 |       |
| 3.82E-02 | 0 0 | Cs8g18310.1/Cs9g166   | 8.76 | 0 | 0    | 2 | MASCOT | T      | PLEX8 |       |
| 2.64E-03 | 0 0 | Cs9g16640.1           | 6.85 | 0 | 0    | 2 | MASCOT | T      | PLEX8 |       |
| 1.38E-02 | 0 0 | Cs7g32220.1/Cs7g322   | 6.72 | 0 | 0    | 2 | MASCOT | T      | PLEX8 |       |
| 1.81E-02 | 0 0 | Cs7g32220.1/Cs7g322   | 6.72 | 0 | 0    | 2 | MASCOT | T      | PLEX8 |       |
| 1.78E-02 | 0 0 | orange1.1t02181.1/ora | 5.3  | 1 | 0    | 2 | MASCOT | T      | PLEX8 |       |
| 1.73E-03 | 0 0 | orange1.1t02181.1/ora | 5.3  | 1 | 0    | 2 | MASCOT | T      |       |       |
| 5.25E-04 | 0 0 | orange1.1t02181.1     | 4.03 | 0 | 0    | 2 | MASCOT | T      | PLEX8 |       |
| 2.27E-04 | 0 0 | orange1.1t02181.1     | 4.03 | 0 | 0    | 2 | MASCOT | T      | PLEX8 |       |
| 2.06E-06 | 0 0 | orange1.1t02181.1     | 4.03 | 0 | 0    | 2 | MASCOT | T      | PLEX8 |       |
| 2.78E-01 | 0 0 | Cs2g18450.1/Cs2g184   | 5.32 | 0 | 0    | 2 | MASCOT | T      | PLEX8 |       |
| 3.84E-02 | 0 0 | orange1.1t02181.1/ora | 5.88 | 0 | 0    | 2 | MASCOT | T      | PLEX8 |       |
| 1.78E-02 | 0 0 | orange1.1t02181.1/ora | 5.88 | 0 | 0    | 2 | MASCOT | T      | PLEX8 |       |
| 1.48E-03 | 0 0 | orange1.1t02826.1/ora | 6.24 | 0 | 0    | 2 | MASCOT | T      | PLEX8 |       |
| 9.52E-02 | 0 0 | Cs7g13790.1/orange1.  | 4.53 | 0 | 0    | 2 | MASCOT | T      | PLEX8 |       |
| 1.92E-01 | 0 0 | Cs7g13790.1/orange1.  | 4.53 | 0 | 0    | 2 | MASCOT | T      | PLEX8 |       |
| 2.90E-02 | 0 0 | Cs7g13790.1/orange1.  | 4.53 | 0 | 0    | 2 | MASCOT | T      | PLEX8 |       |
| 4.33E-03 | 0 0 | Cs7g13790.1/orange1.  | 4.53 | 0 | 0    | 2 | MASCOT | T      | PLEX8 |       |
| 1.84E-01 | 0 0 | orange1.1t02826.1/ora | 8.05 | 0 | 0    | 2 | MASCOT | T      | PLEX8 |       |
| 2.38E-02 | 0 0 | Cs7g13790.1/orange1.  | 8.52 | 0 | 15.9 | 0 | 2      | MASCOT | T     | PLEX8 |
| 3.76E-01 | 0 0 | Cs7g13790.1/orange1.  | 8.52 | 0 | 0    | 2 | MASCOT | T      |       |       |
| 4.31E-04 | 0 0 | orange1.1t04057.2/ora | 5.24 | 0 | 15.9 | 0 | 2      | MASCOT | T     |       |
| 2.04E-03 | 0 0 | orange1.1t04057.2/ora | 5.24 | 0 | 15.9 | 0 | 2      | MASCOT | T     |       |
| 4.42E-03 | 0 0 | orange1.1t04057.2/ora | 5.24 | 0 | 0    | 2 | MASCOT | T      | PLEX8 |       |
| 2.69E-02 | 0 0 | orange1.1t04057.1/ora | 4.14 | 0 | 0    | 2 | MASCOT | T      |       |       |
| 1.50E-01 | 0 0 | orange1.1t04057.1/ora | 4.14 | 0 | 0    | 2 | MASCOT | T      |       |       |
| 7.50E-02 | 0 0 | orange1.1t04057.2/ora | 4.21 | 0 | 0    | 2 | MASCOT | T      | PLEX8 |       |
| 8.14E-02 | 0 0 | orange1.1t04057.2/ora | 5.96 | 1 | 0    | 2 | MASCOT | T      | PLEX8 |       |
| 5.72E-02 | 0 0 | orange1.1t04057.2/ora | 5.96 | 1 | 0    | 2 | MASCOT | T      | PLEX8 |       |
| 1.26E-01 | 0 0 | Cs1g07130.1/Cs1g071   | 6.73 | 0 | 0    | 2 | MASCOT | T      | PLEX8 |       |
| 2.71E-03 | 0 0 | Cs1g07130.1/Cs1g071   | 4.22 | 0 | 0    | 2 | MASCOT | T      |       |       |
| 5.60E-02 | 0 0 | Cs1g07130.1/Cs1g071   | 5.72 | 0 | 0    | 2 | MASCOT | T      | PLEX8 |       |
| 1.97E-01 | 0 0 | Cs1g07130.1/Cs1g071   | 5.72 | 0 | 0    | 2 | MASCOT | T      | PLEX8 |       |
| 3.55E-02 | 0 0 | Cs1g07130.3           | 4.29 | 0 | 0    | 2 | MASCOT | T      | PLEX8 |       |
| 1.56E-02 | 0 0 | Cs1g07130.3           | 4.29 | 0 | 0    | 2 | MASCOT | T      | PLEX8 |       |
| 2.41E-04 | 0 0 | Cs1g07130.3           | 4.29 | 0 | 0    | 2 | MASCOT | T      | PLEX8 |       |
| 6.75E-07 | 0 0 | Cs1g08770.1           | 5.4  | 0 | 15.9 | 0 | 2      | MASCOT | T     | PLEX8 |
| 9.00E-02 | 0 0 | Cs1g08770.1           | 4.56 | 0 | 0    | 2 | MASCOT | T      | PLEX8 |       |
| 4.49E-01 | 0 0 | Cs1g08770.1/Cs1g087   | 5.33 | 0 | 0    | 2 | MASCOT | T      | PLEX8 |       |
| 3.92E-01 | 0 0 | Cs1g08770.1/Cs1g087   | 5.33 | 0 | 0    | 2 | MASCOT | T      | PLEX8 |       |
| 6.94E-03 | 0 0 | Cs1g08770.1/Cs1g087   | 8.59 | 0 | 0    | 2 | MASCOT | T      | PLEX8 |       |



|          |     |                      |      |   |      |   |        |        |       |       |
|----------|-----|----------------------|------|---|------|---|--------|--------|-------|-------|
| 6.86E-03 | 0 0 | Cs1g08770.1/Cs1g087  | 8.59 | 0 | 0    | 2 | MASCOT | T      | PLEX8 |       |
| 3.66E-03 | 0 0 | Cs1g08770.1/Cs1g087  | 8.59 | 0 | 0    | 2 | MASCOT | T      | PLEX8 |       |
| 1.06E-01 | 0 0 | Cs1g19900.1/orange1. | 4.53 | 0 | 0    | 2 | MASCOT | T      | PLEX8 |       |
| 2.87E-03 | 0 0 | Cs1g19900.1/orange1. | 8.22 | 0 | 0    | 2 | MASCOT | T      | PLEX8 |       |
| 2.25E-02 | 0 0 | Cs1g19900.1/orange1. | 8.22 | 0 | 0    | 2 | MASCOT | T      | PLEX8 |       |
| 2.33E-02 | 0 0 | Cs1g19900.1/orange1. | 8.22 | 0 | 0    | 2 | MASCOT | T      | PLEX8 |       |
| 4.87E-02 | 0 0 | Cs1g19900.1/orange1. | 8.22 | 0 | 0    | 2 | MASCOT | T      | PLEX8 |       |
| 6.24E-03 | 0 0 | Cs1g19900.1          | 4    | 0 | 0    | 2 | MASCOT | T      | PLEX8 |       |
| 1.70E-01 | 0 0 | Cs1g19900.1/orange1. | 9.75 | 0 | 0    | 2 | MASCOT | T      |       |       |
| 4.42E-02 | 0 0 | Cs1g23810.1          | 8.8  | 0 | 0    | 2 | MASCOT | T      | PLEX8 |       |
| 5.47E-02 | 0 0 | Cs1g23810.1          | 6.79 | 0 | 0    | 2 | MASCOT | T      |       |       |
| 1.72E-03 | 0 0 | Cs1g23810.1/Cs3g245  | 8.8  | 0 | 0    | 2 | MASCOT | T      | PLEX8 |       |
| 1.24E-02 | 0 0 | Cs1g23810.1/Cs3g245  | 8.8  | 0 | 0    | 2 | MASCOT | T      | PLEX8 |       |
| 5.00E-03 | 0 0 | Cs1g23810.1/Cs3g245  | 8.8  | 0 | 0    | 2 | MASCOT | T      | PLEX8 |       |
| 7.85E-04 | 0 0 | Cs1g23810.1          | 6.85 | 0 | 0    | 2 | MASCOT | T      | PLEX8 |       |
| 1.54E-02 | 0 0 | Cs1g23810.1          | 6.85 | 0 | 0    | 2 | MASCOT | T      |       |       |
| 1.34E-03 | 0 0 | Cs1g26210.1/Cs1g262  | 6.74 | 0 | 0    | 2 | MASCOT | T      | PLEX8 |       |
| 2.63E-04 | 0 0 | Cs1g26210.1/Cs1g262  | 6.74 | 0 | 0    | 2 | MASCOT | T      | PLEX8 |       |
| 1.12E-04 | 0 0 | Cs1g26210.1/Cs1g262  | 6.74 | 0 | 0    | 2 | MASCOT | T      | PLEX8 |       |
| 5.48E-04 | 0 0 | Cs1g26210.1/Cs1g262  | 5.55 | 0 | 0    | 2 | MASCOT | T      | PLEX8 |       |
| 8.02E-04 | 0 0 | Cs1g26210.1/Cs1g262  | 5.55 | 0 | 0    | 2 | MASCOT | T      | PLEX8 |       |
| 1.14E-02 | 0 0 | Cs1g26210.1/Cs1g262  | 6.74 | 0 | 0    | 2 | MASCOT | T      | PLEX8 |       |
| 1.56E-04 | 0 0 | Cs1g26210.1/Cs1g262  | 4.53 | 0 | 0    | 2 | MASCOT | T      | PLEX8 |       |
| 1.70E-01 | 0 0 | Cs2g12260.1/Cs2g122  | 8.59 | 0 | 0    | 2 | MASCOT | T      | PLEX8 |       |
| 1.94E-01 | 0 0 | Cs2g12260.1/Cs2g122  | 8.59 | 0 | 0    | 2 | MASCOT | T      | PLEX8 |       |
| 8.41E-02 | 0 0 | Cs2g12260.1/Cs2g122  | 8.73 | 0 | 0    | 2 | MASCOT | T      | PLEX8 |       |
| 1.26E-01 | 0 0 | Cs2g12260.1/Cs2g122  | 8.73 | 0 | 0    | 2 | MASCOT | T      |       |       |
| 2.98E-02 | 0 0 | Cs2g12260.1/Cs2g122  | 4.65 | 0 | 15.9 | 0 | 2      | MASCOT | T     | PLEX8 |
| 1.48E-03 | 0 0 | Cs2g12260.1/Cs2g122  | 4.65 | 0 | 0    | 2 | MASCOT | T      | PLEX8 |       |
| 2.78E-04 | 0 0 | Cs2g12260.1/Cs2g122  | 4.65 | 0 | 0    | 2 | MASCOT | T      | PLEX8 |       |
| 1.56E-01 | 0 0 | Cs2g20430.1          | 4.37 | 0 | 0    | 2 | MASCOT | T      |       |       |
| 1.68E-04 | 0 0 | Cs2g20430.1          | 4.65 | 0 | 0    | 2 | MASCOT | T      |       |       |
| 1.65E-06 | 0 0 | Cs2g20430.1          | 4.65 | 0 | 0    | 2 | MASCOT | T      |       |       |
| 1.28E-01 | 0 0 | Cs2g20430.1          | 4.54 | 0 | 0    | 2 | MASCOT | T      | PLEX8 |       |
| 3.19E-02 | 0 0 | Cs2g20430.1          | 4.54 | 0 | 0    | 2 | MASCOT | T      | PLEX8 |       |
| 3.40E-02 | 0 0 | Cs2g20430.1          | 4.54 | 0 | 0    | 2 | MASCOT | T      | PLEX8 |       |
| 1.60E-02 | 0 0 | Cs2g20430.1          | 4.75 | 0 | 0    | 2 | MASCOT | T      | PLEX8 |       |
| 2.89E-01 | 0 0 | Cs2g24100.1/Cs2g241  | 6.05 | 0 | 0    | 2 | MASCOT | T      | PLEX8 |       |
| 2.87E-01 | 0 0 | Cs2g24100.1/Cs2g241  | 4.37 | 0 | 15.9 | 0 | 2      | MASCOT | T     | PLEX8 |
| 5.00E-02 | 0 0 | Cs2g24100.1/Cs2g241  | 4.37 | 0 | 0    | 2 | MASCOT | T      | PLEX8 |       |
| 2.03E-01 | 0 0 | Cs2g24100.1/Cs2g241  | 4.37 | 0 | 0    | 2 | MASCOT | T      |       |       |
| 2.42E-02 | 0 0 | Cs2g24100.1/Cs2g241  | 4.37 | 0 | 0    | 2 | MASCOT | T      |       |       |
| 1.92E-02 | 0 0 | Cs2g24100.2          | 3.92 | 0 | 0    | 2 | MASCOT | T      | PLEX8 |       |
| 3.14E-03 | 0 0 | Cs2g24100.2          | 3.92 | 0 | 0    | 2 | MASCOT | T      | PLEX8 |       |
| 3.47E-02 | 0 0 | Cs2g31210.1/Cs2g312  | 9.75 | 0 | 0    | 2 | MASCOT | T      |       |       |
| 7.84E-03 | 0 0 | Cs2g31210.1/Cs2g312  | 6    | 0 | 0    | 2 | MASCOT | T      |       |       |
| 1.17E-03 | 0 0 | Cs2g31210.1/Cs2g312  | 6    | 0 | 0    | 2 | MASCOT | T      |       |       |
| 1.47E-02 | 0 0 | Cs2g31210.1/Cs2g312  | 8.75 | 0 | 0    | 2 | MASCOT | T      | PLEX8 |       |
| 1.65E-02 | 0 0 | Cs2g31210.1/Cs2g312  | 8.75 | 0 | 0    | 2 | MASCOT | T      | PLEX8 |       |
| 1.97E-02 | 0 0 | Cs2g31210.1/Cs2g312  | 8.75 | 0 | 0    | 2 | MASCOT | T      | PLEX8 |       |
| 7.82E-02 | 0 0 | Cs2g31210.1/Cs2g312  | 6.74 | 0 | 0    | 2 | MASCOT | T      | PLEX8 |       |

|          |     |                       |      |   |      |   |        |        |       |       |
|----------|-----|-----------------------|------|---|------|---|--------|--------|-------|-------|
| 2.58E-03 | 0 0 | Cs3g08660.1           | 5.4  | 0 | 0    | 2 | MASCOT | T      | PLEX8 |       |
| 4.94E-03 | 0 0 | Cs3g08660.1           | 5.4  | 0 | 0    | 2 | MASCOT | T      | PLEX8 |       |
| 4.07E-03 | 0 0 | Cs3g08660.1           | 9.76 | 0 | 0    | 2 | MASCOT | T      |       |       |
| 3.69E-02 | 0 0 | Cs3g08660.1           | 9.76 | 0 | 0    | 2 | MASCOT | T      | PLEX8 |       |
| 7.08E-02 | 0 0 | Cs3g08660.1           | 4.53 | 0 | 0    | 2 | MASCOT | T      | PLEX8 |       |
| 1.38E-02 | 0 0 | Cs3g08660.1           | 8.72 | 0 | 0    | 2 | MASCOT | T      | PLEX8 |       |
| 4.96E-03 | 0 0 | Cs3g08660.1           | 8.72 | 0 | 0    | 2 | MASCOT | T      | PLEX8 |       |
| 2.42E-03 | 0 0 | Cs3g22080.1/Cs3g220   | 5.84 | 0 | 0    | 2 | MASCOT | T      | PLEX8 |       |
| 7.45E-03 | 0 0 | Cs3g22080.1/Cs3g220   | 5.84 | 0 | 0    | 2 | MASCOT | T      | PLEX8 |       |
| 1.25E-01 | 0 0 | Cs3g22080.1/Cs3g220   | 10   | 0 | 0    | 2 | MASCOT | T      | PLEX8 |       |
| 2.65E-01 | 0 0 | Cs3g22080.1/Cs3g220   | 4.14 | 0 | 0    | 2 | MASCOT | T      |       |       |
| 1.93E-01 | 0 0 | Cs3g22080.1/Cs3g220   | 8.6  | 0 | 0    | 2 | MASCOT | T      | PLEX8 |       |
| 2.12E-01 | 0 0 | Cs3g22080.1/Cs3g220   | 8.6  | 0 | 0    | 2 | MASCOT | T      | PLEX8 |       |
| 4.18E-01 | 0 0 | Cs3g22080.1/Cs3g220   | 8.6  | 0 | 0    | 2 | MASCOT | T      | PLEX8 |       |
| 1.38E-05 | 0 0 | Cs4g07000.1/Cs4g070   | 8.22 | 0 | 0    | 2 | MASCOT | T      | PLEX8 |       |
| 6.41E-04 | 0 0 | Cs4g07000.1/Cs4g070   | 8.22 | 0 | 0    | 2 | MASCOT | T      | PLEX8 |       |
| 8.36E-06 | 0 0 | Cs4g07000.1/Cs4g070   | 8.22 | 0 | 0    | 2 | MASCOT | T      | PLEX8 |       |
| 1.27E-01 | 0 0 | Cs4g07000.1/Cs4g070   | 6.83 | 0 | 0    | 2 | MASCOT | T      | PLEX8 |       |
| 1.87E-02 | 0 0 | Cs4g07000.1/Cs4g070   | 5.55 | 0 | 0    | 2 | MASCOT | T      | PLEX8 |       |
| 2.71E-01 | 0 0 | Cs4g07000.1/Cs4g070   | 5.55 | 0 | 0    | 2 | MASCOT | T      | PLEX8 |       |
| 4.25E-02 | 0 0 | Cs4g07000.1/Cs4g070   | 4.54 | 0 | 0    | 2 | MASCOT | T      |       |       |
| 4.77E-02 | 0 0 | gi 113952667/gi 11395 | 5.4  | 0 | 0    | 2 | MASCOT | T      |       |       |
| 1.12E-01 | 0 0 | gi 113952667/gi 11395 | 4.37 | 0 | 0    | 2 | MASCOT | T      | PLEX8 |       |
| 6.89E-03 | 0 0 | gi 113952667/gi 11395 | 4.37 | 0 | 0    | 2 | MASCOT | T      | PLEX8 |       |
| 4.13E-03 | 0 0 | gi 113952667/gi 11395 | 4.37 | 0 | 0    | 2 | MASCOT | T      | PLEX8 |       |
| 2.83E-01 | 0 0 | gi 113952667/gi 11395 | 8.31 | 0 | 0    | 2 | MASCOT | T      | PLEX8 |       |
| 1.01E-01 | 0 0 | gi 113952667/gi 11395 | 9.8  | 0 | 0    | 2 | MASCOT | T      |       |       |
| 3.00E-02 | 0 0 | gi 113952667/gi 11395 | 9.8  | 0 | 0    | 2 | MASCOT | T      |       |       |
| 5.43E-02 | 0 0 | Cs4g17540.1           | 6.01 | 0 | 15.9 | 0 | 2      | MASCOT | T     |       |
| 3.56E-04 | 0 0 | Cs4g17540.1           | 6.01 | 0 | 0    | 2 | MASCOT | T      |       |       |
| 1.08E-03 | 0 0 | Cs4g17540.1           | 6.01 | 0 | 0    | 2 | MASCOT | T      |       |       |
| 6.02E-03 | 0 0 | Cs4g17540.1           | 6.41 | 0 | 0    | 2 | MASCOT | T      | PLEX8 |       |
| 1.09E-03 | 0 0 | Cs4g17540.1           | 4.37 | 0 | 0    | 2 | MASCOT | T      |       |       |
| 3.55E-01 | 0 0 | Cs4g17540.1           | 4.37 | 0 | 0    | 2 | MASCOT | T      |       |       |
| 2.26E-01 | 0 0 | Cs4g17540.1           | 9.75 | 0 | 0    | 2 | MASCOT | T      | PLEX8 |       |
| 3.06E-03 | 0 0 | Cs5g04880.1/Cs5g048   | 6.05 | 0 | 0    | 2 | MASCOT | T      | PLEX8 |       |
| 9.83E-03 | 0 0 | Cs5g04880.1/Cs5g048   | 4.14 | 0 | 0    | 2 | MASCOT | T      |       |       |
| 2.58E-02 | 0 0 | Cs5g04880.1/Cs5g048   | 4.14 | 0 | 0    | 2 | MASCOT | T      | PLEX8 |       |
| 8.42E-02 | 0 0 | Cs5g04880.1/Cs5g048   | 8.59 | 0 | 0    | 2 | MASCOT | T      | PLEX8 |       |
| 2.51E-02 | 0 0 | Cs5g04880.1/Cs5g048   | 8.59 | 0 | 0    | 2 | MASCOT | T      | PLEX8 |       |
| 7.54E-02 | 0 0 | Cs5g04880.1/Cs5g048   | 8.59 | 0 | 0    | 2 | MASCOT | T      | PLEX8 |       |
| 1.44E-01 | 0 0 | Cs5g04880.1/Cs5g048   | 8.59 | 0 | 0    | 2 | MASCOT | T      |       |       |
| 2.23E-03 | 0 0 | Cs5g12830.1/Cs5g128   | 4.37 | 0 | 0    | 2 | MASCOT | T      |       |       |
| 1.25E-05 | 0 0 | Cs5g12830.1/Cs5g128   | 4.37 | 0 | 0    | 2 | MASCOT | T      |       |       |
| 3.53E-04 | 0 0 | Cs5g12830.1/Cs5g128   | 5.4  | 0 | 15.9 | 0 | 2      | MASCOT | T     | PLEX8 |
| 2.42E-01 | 0 0 | Cs5g12830.1/Cs5g128   | 5.4  | 0 | 15.9 | 0 | 2      | MASCOT | T     |       |
| 5.94E-01 | 0 0 | Cs5g12830.1/Cs5g128   | 4.37 | 0 | 15.9 | 0 | 2      | MASCOT | T     | PLEX8 |
| 1.39E-04 | 0 0 | Cs5g12830.1/Cs5g128   | 4.37 | 0 | 0    | 2 | MASCOT | T      | PLEX8 |       |
| 8.16E-02 | 0 0 | Cs5g12830.2           | 5.97 | 0 | 0    | 2 | MASCOT | T      | PLEX8 |       |
| 1.53E-01 | 0 0 | Cs5g18250.1/Cs5g182   | 6.46 | 0 | 0    | 2 | MASCOT | T      | PLEX8 |       |
| 1.75E-01 | 0 0 | Cs5g18250.1/Cs5g182   | 6.74 | 0 | 0    | 2 | MASCOT | T      | PLEX8 |       |

|          |     |                     |      |   |      |   |        |        |       |       |
|----------|-----|---------------------|------|---|------|---|--------|--------|-------|-------|
| 2.06E-01 | 0 0 | Cs5g18250.1/Cs5g182 | 6.74 | 0 | 0    | 2 | MASCOT | T      | PLEX8 |       |
| 5.08E-02 | 0 0 | Cs5g18250.1/Cs5g182 | 8.76 | 0 | 0    | 2 | MASCOT | T      | PLEX8 |       |
| 4.07E-04 | 0 0 | Cs5g18250.1/Cs5g182 | 4.37 | 0 | 0    | 2 | MASCOT | T      | PLEX8 |       |
| 4.33E-04 | 0 0 | Cs5g18250.1/Cs5g182 | 4.37 | 0 | 0    | 2 | MASCOT | T      | PLEX8 |       |
| 9.39E-03 | 0 0 | Cs5g18250.1/Cs5g182 | 4.37 | 0 | 0    | 2 | MASCOT | T      | PLEX8 |       |
| 3.89E-01 | 0 0 | Cs5g25680.1/Cs5g257 | 5.88 | 0 | 0    | 2 | MASCOT | T      | PLEX8 |       |
| 2.02E-01 | 0 0 | Cs5g25680.1/Cs5g257 | 5.88 | 0 | 0    | 2 | MASCOT | T      |       |       |
| 2.17E-01 | 0 0 | Cs5g25660.1/Cs5g256 | 5.84 | 0 | 0    | 2 | MASCOT | T      | PLEX8 |       |
| 1.94E-01 | 0 0 | Cs5g25660.1/Cs5g256 | 5.84 | 0 | 0    | 2 | MASCOT | T      | PLEX8 |       |
| 1.31E-01 | 0 0 | Cs5g25740.1         | 5.84 | 0 | 0    | 2 | MASCOT | T      | PLEX8 |       |
| 1.62E-01 | 0 0 | Cs5g25740.1         | 4.43 | 0 | 0    | 2 | MASCOT | T      | PLEX8 |       |
| 1.67E-01 | 0 0 | Cs5g25740.1         | 4.43 | 0 | 0    | 2 | MASCOT | T      | PLEX8 |       |
| 8.92E-02 | 0 0 | Cs5g27720.1/Cs5g277 | 9.76 | 0 | 0    | 2 | MASCOT | T      | PLEX8 |       |
| 3.32E-02 | 0 0 | Cs5g27720.1/Cs5g277 | 5.99 | 0 | 0    | 2 | MASCOT | T      | PLEX8 |       |
| 1.95E-03 | 0 0 | Cs5g27720.1/Cs5g277 | 5.99 | 0 | 0    | 2 | MASCOT | T      | PLEX8 |       |
| 1.52E-01 | 0 0 | Cs5g27720.1/Cs5g277 | 4.53 | 0 | 0    | 2 | MASCOT | T      |       |       |
| 8.71E-02 | 0 0 | Cs5g27720.1/Cs5g277 | 4.53 | 0 | 0    | 2 | MASCOT | T      |       |       |
| 1.15E-02 | 0 0 | Cs5g27720.1/Cs5g277 | 4.53 | 0 | 0    | 2 | MASCOT | T      |       |       |
| 2.01E-01 | 0 0 | Cs5g27720.1/Cs5g277 | 6.5  | 0 | 0    | 2 | MASCOT | T      | PLEX8 |       |
| 4.07E-02 | 0 0 | Cs5g07210.1/Cs5g072 | 4.37 | 0 | 0    | 2 | MASCOT | T      | PLEX8 |       |
| 3.76E-02 | 0 0 | Cs5g07210.1/Cs5g072 | 4.37 | 0 | 0    | 2 | MASCOT | T      | PLEX8 |       |
| 7.47E-02 | 0 0 | Cs7g10590.1/Cs7g105 | 4.53 | 0 | 0    | 2 | MASCOT | T      | PLEX8 |       |
| 8.07E-02 | 0 0 | Cs7g10590.1/Cs7g105 | 4.53 | 0 | 0    | 2 | MASCOT | T      | PLEX8 |       |
| 1.13E-01 | 0 0 | Cs5g07210.1/Cs5g072 | 4.53 | 0 | 0    | 2 | MASCOT | T      | PLEX8 |       |
| 1.21E-01 | 0 0 | Cs5g07210.1/Cs5g072 | 4.53 | 0 | 0    | 2 | MASCOT | T      | PLEX8 |       |
| 2.60E-01 | 0 0 | Cs5g07210.1/Cs5g072 | 5.32 | 0 | 0    | 2 | MASCOT | T      | PLEX8 |       |
| 6.57E-02 | 0 0 | Cs7g16410.1         | 5.32 | 0 | 15.9 | 0 | 2      | MASCOT | T     | PLEX8 |
| 4.01E-02 | 0 0 | Cs7g16410.1         | 5.32 | 0 | 0    | 2 | MASCOT | T      | PLEX8 |       |
| 2.18E-01 | 0 0 | Cs7g16410.1/Cs7g164 | 4.37 | 0 | 0    | 2 | MASCOT | T      | PLEX8 |       |
| 2.06E-02 | 0 0 | Cs7g16410.1/Cs7g164 | 4.37 | 0 | 0    | 2 | MASCOT | T      | PLEX8 |       |
| 9.25E-02 | 0 0 | Cs7g16410.1/Cs7g164 | 5.81 | 0 | 0    | 2 | MASCOT | T      | PLEX8 |       |
| 4.68E-02 | 0 0 | Cs7g16410.1/Cs7g164 | 5.81 | 0 | 0    | 2 | MASCOT | T      | PLEX8 |       |
| 2.30E-01 | 0 0 | Cs7g16410.1/Cs7g164 | 5.81 | 0 | 0    | 2 | MASCOT | T      | PLEX8 |       |
| 4.77E-02 | 0 0 | Cs7g28790.1/Cs7g287 | 8.75 | 0 | 0    | 2 | MASCOT | T      | PLEX8 |       |
| 1.41E-01 | 0 0 | Cs7g28790.1/Cs7g287 | 8.75 | 0 | 0    | 2 | MASCOT | T      | PLEX8 |       |
| 4.28E-03 | 0 0 | Cs7g28790.1/Cs7g287 | 4.72 | 0 | 0    | 2 | MASCOT | T      |       |       |
| 2.87E-03 | 0 0 | Cs7g28790.1/Cs7g287 | 4.72 | 0 | 0    | 2 | MASCOT | T      |       |       |
| 3.60E-01 | 0 0 | Cs7g28790.1/Cs7g287 | 5.84 | 0 | 0    | 2 | MASCOT | T      | PLEX8 |       |
| 7.08E-02 | 0 0 | Cs7g28790.1/Cs7g287 | 5.81 | 0 | 0    | 2 | MASCOT | T      | PLEX8 |       |
| 1.64E-01 | 0 0 | Cs7g28790.1/Cs7g287 | 5.81 | 0 | 0    | 2 | MASCOT | T      | PLEX8 |       |
| 3.20E-02 | 0 0 | Cs9g01930.1/Cs9g019 | 4.4  | 0 | 0    | 2 | MASCOT | T      | PLEX8 |       |
| 2.94E-02 | 0 0 | Cs3g14920.1/Cs3g149 | 4.56 | 1 | 0    | 2 | MASCOT | T      | PLEX8 |       |
| 1.02E-01 | 0 0 | Cs3g11010.1/Cs3g111 | 6.71 | 0 | 0    | 2 | MASCOT | T      | PLEX8 |       |
| 2.76E-05 | 0 0 | Cs3g11010.1/Cs3g111 | 6.71 | 0 | 0    | 2 | MASCOT | T      | PLEX8 |       |
| 3.33E-01 | 0 0 | Cs3g11010.1/Cs3g111 | 6.71 | 0 | 0    | 2 | MASCOT | T      |       |       |
| 8.08E-02 | 0 0 | Cs3g11010.1/Cs3g111 | 6.71 | 0 | 0    | 2 | MASCOT | T      |       |       |
| 1.13E-01 | 0 0 | Cs3g14920.1/Cs3g149 | 4.14 | 0 | 0    | 2 | MASCOT | T      | PLEX8 |       |
| 5.16E-03 | 0 0 | Cs9g06570.1         | 4.53 | 0 | 0    | 2 | MASCOT | T      | PLEX8 |       |
| 1.97E-01 | 0 0 | Cs9g06570.1         | 4.53 | 0 | 0    | 2 | MASCOT | T      | PLEX8 |       |
| 1.26E-01 | 0 0 | Cs9g06570.1/Cs9g065 | 5.21 | 0 | 0    | 2 | MASCOT | T      | PLEX8 |       |
| 2.36E-02 | 0 0 | Cs9g06570.1/Cs9g065 | 5.21 | 0 | 0    | 2 | MASCOT | T      | PLEX8 |       |

|          |     |                       |      |   |   |   |        |   |       |
|----------|-----|-----------------------|------|---|---|---|--------|---|-------|
| 3.05E-02 | 0 0 | Cs9g06570.1/Cs9g065   | 8.59 | 0 | 0 | 2 | MASCOT | T | PLEX8 |
| 3.38E-03 | 0 0 | Cs9g06570.1/Cs9g065   | 8.59 | 0 | 0 | 2 | MASCOT | T | PLEX8 |
| 4.67E-02 | 0 0 | Cs9g06570.1/Cs9g065   | 6.41 | 0 | 0 | 2 | MASCOT | T | PLEX8 |
| 1.02E-01 | 0 0 | Cs1g20020.1/Cs1g200   | 5.84 | 0 | 0 | 2 | MASCOT | T |       |
| 6.51E-03 | 0 0 | Cs1g20020.1/Cs1g200   | 5.84 | 0 | 0 | 2 | MASCOT | T |       |
| 7.98E-02 | 0 0 | orange1.1t01969.1/ora | 5.84 | 0 | 0 | 2 | MASCOT | T | PLEX8 |
| 8.39E-02 | 0 0 | Cs1g20020.1/Cs1g200   | 5.32 | 0 | 0 | 2 | MASCOT | T | PLEX8 |
| 1.31E-07 | 0 0 | Cs1g20020.1/Cs1g200   | 5.32 | 0 | 0 | 2 | MASCOT | T | PLEX8 |
| 1.18E-06 | 0 0 | Cs1g20020.1/Cs1g200   | 5.32 | 0 | 0 | 2 | MASCOT | T | PLEX8 |
| 8.57E-02 | 0 0 | orange1.1t01969.1/ora | 8.72 | 0 | 0 | 2 | MASCOT | T | PLEX8 |
| 3.05E-02 | 0 0 | Cs2g25690.1/Cs2g256   | 4.53 | 0 | 0 | 2 | MASCOT | T | PLEX8 |
| 1.21E-02 | 0 0 | orange1.1t02616.1/ora | 8.75 | 0 | 0 | 2 | MASCOT | T | PLEX8 |
| 1.58E-02 | 0 0 | Cs2g25690.1/Cs2g256   | 8.75 | 0 | 0 | 2 | MASCOT | T | PLEX8 |
| 1.84E-01 | 0 0 | Cs2g25690.1/Cs2g256   | 8.75 | 0 | 0 | 2 | MASCOT | T | PLEX8 |
| 4.30E-01 | 0 0 | Cs2g25690.1/Cs2g256   | 8.75 | 0 | 0 | 2 | MASCOT | T | PLEX8 |
| 1.09E-01 | 0 0 | Cs2g25690.1/Cs2g256   | 7.89 | 0 | 0 | 2 | MASCOT | T | PLEX8 |
| 6.97E-03 | 0 0 | Cs2g25690.1/Cs2g256   | 7.89 | 0 | 0 | 2 | MASCOT | T | PLEX8 |
| 1.13E-02 | 0 0 | Cs1g16760.1/Cs1g167   | 4.37 | 0 | 0 | 2 | MASCOT | T | PLEX8 |
| 5.72E-03 | 0 0 | Cs1g16760.1/Cs1g167   | 5.84 | 0 | 0 | 2 | MASCOT | T |       |
| 1.01E-02 | 0 0 | Cs1g16760.1/Cs1g167   | 5.84 | 0 | 0 | 2 | MASCOT | T |       |
| 2.89E-04 | 0 0 | Cs1g16760.1/Cs1g167   | 5.84 | 0 | 0 | 2 | MASCOT | T | PLEX8 |
| 1.59E-03 | 0 0 | Cs1g16760.1/Cs1g167   | 5.84 | 0 | 0 | 2 | MASCOT | T | PLEX8 |
| 1.34E-02 | 0 0 | Cs1g16760.1/Cs1g167   | 5.84 | 0 | 0 | 2 | MASCOT | T | PLEX8 |
| 1.02E-01 | 0 0 | Cs1g18280.1           | 6.05 | 0 | 0 | 2 | MASCOT | T | PLEX8 |
| 6.22E-02 | 0 0 | Cs1g18280.1           | 5.83 | 0 | 0 | 2 | MASCOT | T | PLEX8 |
| 8.92E-02 | 0 0 | Cs1g18280.1           | 5.83 | 0 | 0 | 2 | MASCOT | T | PLEX8 |
| 4.28E-03 | 0 0 | Cs1g18280.1           | 4.56 | 0 | 0 | 2 | MASCOT | T | PLEX8 |
| 4.19E-03 | 0 0 | Cs1g18280.1           | 4.56 | 0 | 0 | 2 | MASCOT | T | PLEX8 |
| 1.27E-02 | 0 0 | Cs1g18280.1           | 8.76 | 0 | 0 | 2 | MASCOT | T | PLEX8 |
| 7.10E-02 | 0 0 | Cs1g12670.1/Cs1g126   | 8.8  | 0 | 0 | 2 | MASCOT | T | PLEX8 |
| 3.90E-04 | 0 0 | Cs1g22450.1/Cs1g224   | 5.88 | 0 | 0 | 2 | MASCOT | T | PLEX8 |
| 1.26E-02 | 0 0 | Cs1g22450.1/Cs1g224   | 8.75 | 0 | 0 | 2 | MASCOT | T | PLEX8 |
| 1.21E-01 | 0 0 | Cs1g22450.2/Cs1g224   | 5.84 | 0 | 0 | 2 | MASCOT | T | PLEX8 |
| 9.12E-02 | 0 0 | Cs1g22450.2/Cs1g224   | 5.84 | 0 | 0 | 2 | MASCOT | T | PLEX8 |
| 8.71E-02 | 0 0 | Cs1g22450.2/Cs1g224   | 5.84 | 0 | 0 | 2 | MASCOT | T | PLEX8 |
| 2.74E-01 | 0 0 | Cs2g14930.1           | 8.26 | 0 | 0 | 2 | MASCOT | T | PLEX8 |
| 2.20E-02 | 0 0 | Cs2g14930.1           | 8.26 | 0 | 0 | 2 | MASCOT | T | PLEX8 |
| 2.03E-01 | 0 0 | Cs2g14930.1           | 8.26 | 0 | 0 | 2 | MASCOT | T | PLEX8 |
| 7.43E-04 | 0 0 | Cs2g14930.1           | 4.37 | 0 | 0 | 2 | MASCOT | T |       |
| 2.27E-01 | 0 0 | Cs2g14930.1           | 3.84 | 0 | 0 | 2 | MASCOT | T | PLEX8 |
| 9.03E-02 | 0 0 | Cs2g14930.1           | 5.72 | 0 | 0 | 2 | MASCOT | T | PLEX8 |
| 6.25E-02 | 0 0 | Cs3g12590.1/Cs3g125   | 6.19 | 0 | 0 | 2 | MASCOT | T | PLEX8 |
| 4.36E-02 | 0 0 | Cs3g12590.1/Cs3g125   | 5.97 | 0 | 0 | 2 | MASCOT | T | PLEX8 |
| 1.01E-04 | 0 0 | Cs3g12590.1           | 4.14 | 0 | 0 | 2 | MASCOT | T | PLEX8 |
| 2.30E-06 | 0 0 | Cs3g12590.1           | 4.14 | 0 | 0 | 2 | MASCOT | T | PLEX8 |
| 2.87E-02 | 0 0 | Cs3g12590.1/Cs3g125   | 6    | 0 | 0 | 2 | MASCOT | T | PLEX8 |
| 1.60E-01 | 0 0 | Cs3g12590.1/Cs3g125   | 6    | 0 | 0 | 2 | MASCOT | T | PLEX8 |
| 1.96E-03 | 0 0 | Cs3g17480.1/Cs3g174   | 4    | 0 | 0 | 2 | MASCOT | T |       |
| 1.12E-01 | 0 0 | Cs3g17480.1/Cs3g174   | 6    | 0 | 0 | 2 | MASCOT | T | PLEX8 |
| 1.46E-04 | 0 0 | Cs3g17480.1/Cs3g174   | 5.4  | 0 | 0 | 2 | MASCOT | T | PLEX8 |
| 4.97E-05 | 0 0 | Cs3g17480.1/Cs3g174   | 5.4  | 0 | 0 | 2 | MASCOT | T | PLEX8 |

|          |     |                      |      |   |   |   |        |   |       |
|----------|-----|----------------------|------|---|---|---|--------|---|-------|
| 1.27E-01 | 0 0 | Cs3g17480.1/Cs3g174  | 5.4  | 0 | 0 | 2 | MASCOT | T |       |
| 2.62E-01 | 0 0 | Cs3g17480.1/Cs3g174  | 4.53 | 0 | 0 | 2 | MASCOT | T | PLEX8 |
| 1.34E-02 | 0 0 | Cs3g23620.1          | 4.37 | 0 | 0 | 2 | MASCOT | T | PLEX8 |
| 1.44E-02 | 0 0 | Cs3g23620.1          | 4.37 | 0 | 0 | 2 | MASCOT | T | PLEX8 |
| 1.76E-02 | 0 0 | Cs3g23620.1/Cs3g236  | 7.96 | 0 | 0 | 2 | MASCOT | T | PLEX8 |
| 2.35E-01 | 0 0 | Cs3g23620.1/Cs3g236  | 7.96 | 0 | 0 | 2 | MASCOT | T | PLEX8 |
| 1.60E-02 | 0 0 | Cs3g23620.1/Cs3g236  | 4.14 | 0 | 0 | 2 | MASCOT | T |       |
| 2.07E-01 | 0 0 | Cs3g23620.1/Cs3g236  | 8.18 | 0 | 0 | 2 | MASCOT | T | PLEX8 |
| 3.70E-05 | 0 0 | Cs4g10620.1          | 5.33 | 0 | 0 | 2 | MASCOT | T | PLEX8 |
| 2.68E-06 | 0 0 | Cs4g10620.1          | 5.33 | 0 | 0 | 2 | MASCOT | T | PLEX8 |
| 1.72E-02 | 0 0 | Cs4g10620.1          | 8.06 | 0 | 0 | 2 | MASCOT | T | PLEX8 |
| 1.27E-02 | 0 0 | Cs4g10620.1          | 8.06 | 0 | 0 | 2 | MASCOT | T | PLEX8 |
| 9.48E-02 | 0 0 | Cs4g10620.1/Cs4g110  | 4.37 | 0 | 0 | 2 | MASCOT | T |       |
| 2.13E-01 | 0 0 | Cs4g10620.1/Cs4g110  | 4.37 | 0 | 0 | 2 | MASCOT | T | PLEX8 |
| 7.98E-02 | 0 0 | Cs5g05660.1/Cs5g056  | 6.1  | 0 | 0 | 2 | MASCOT | T | PLEX8 |
| 1.93E-01 | 0 0 | Cs2g27730.1 ! Cs5g05 | 8.41 | 0 | 0 | 2 | MASCOT | T | PLEX8 |
| 5.65E-02 | 0 0 | Cs2g27730.1 ! Cs5g05 | 8.41 | 0 | 0 | 2 | MASCOT | T | PLEX8 |
| 3.18E-02 | 0 0 | Cs5g05660.1/Cs5g056  | 3.92 | 0 | 0 | 2 | MASCOT | T |       |
| 1.33E-02 | 0 0 | Cs5g05660.1/Cs5g056  | 4.21 | 0 | 0 | 2 | MASCOT | T | PLEX8 |
| 6.39E-04 | 0 0 | Cs5g05660.1/Cs5g056  | 4.21 | 0 | 0 | 2 | MASCOT | T | PLEX8 |
| 5.61E-02 | 0 0 | Cs5g16990.2          | 6    | 0 | 0 | 2 | MASCOT | T | PLEX8 |
| 5.21E-02 | 0 0 | Cs5g16990.2          | 6.85 | 0 | 0 | 2 | MASCOT | T | PLEX8 |
| 4.17E-02 | 0 0 | Cs5g16990.2          | 6.85 | 0 | 0 | 2 | MASCOT | T | PLEX8 |
| 2.95E-02 | 0 0 | Cs5g16990.1/Cs5g169  | 6.75 | 0 | 0 | 2 | MASCOT | T | PLEX8 |
| 2.52E-02 | 0 0 | Cs5g16990.1/Cs5g169  | 6.75 | 0 | 0 | 2 | MASCOT | T | PLEX8 |
| 1.19E-05 | 0 0 | Cs5g16990.1/Cs5g169  | 9.76 | 0 | 0 | 2 | MASCOT | T | PLEX8 |
| 2.05E-03 | 0 0 | Cs5g26050.1/Cs5g260  | 5.72 | 0 | 0 | 2 | MASCOT | T | PLEX8 |
| 9.84E-02 | 0 0 | Cs5g26050.1/Cs5g260  | 8.44 | 0 | 0 | 2 | MASCOT | T | PLEX8 |
| 1.03E-04 | 0 0 | Cs5g26050.1/Cs5g260  | 8.8  | 0 | 0 | 2 | MASCOT | T |       |
| 1.21E-04 | 0 0 | Cs5g26050.1/Cs5g260  | 8.8  | 0 | 0 | 2 | MASCOT | T |       |
| 2.49E-02 | 0 0 | Cs5g26050.1/Cs5g260  | 6.75 | 0 | 0 | 2 | MASCOT | T | PLEX8 |
| 1.58E-02 | 0 0 | Cs5g26050.1/Cs5g260  | 6.75 | 0 | 0 | 2 | MASCOT | T |       |
| 6.72E-02 | 0 0 | Cs5g27970.1          | 4.03 | 0 | 0 | 2 | MASCOT | T | PLEX8 |
| 9.28E-02 | 0 0 | Cs5g27970.1          | 4.37 | 0 | 0 | 2 | MASCOT | T | PLEX8 |
| 2.63E-01 | 0 0 | Cs5g27970.1          | 4.22 | 0 | 0 | 2 | MASCOT | T | PLEX8 |
| 5.45E-06 | 0 0 | Cs5g27970.1          | 5.32 | 0 | 0 | 2 | MASCOT | T | PLEX8 |
| 3.16E-03 | 0 0 | Cs5g27970.1          | 5.32 | 0 | 0 | 2 | MASCOT | T | PLEX8 |
| 4.27E-03 | 0 0 | Cs5g27970.1          | 5.32 | 0 | 0 | 2 | MASCOT | T | PLEX8 |
| 5.41E-01 | 0 0 | Cs5g33220.1          | 4.56 | 0 | 0 | 2 | MASCOT | T | PLEX8 |
| 6.71E-04 | 0 0 | Cs5g33220.1/Cs9g042  | 4.37 | 0 | 0 | 2 | MASCOT | T | PLEX8 |
| 1.69E-01 | 0 0 | Cs5g33220.1/Cs9g042  | 4.37 | 0 | 0 | 2 | MASCOT | T | PLEX8 |
| 2.34E-01 | 0 0 | Cs5g33220.1/Cs9g042  | 4.37 | 0 | 0 | 2 | MASCOT | T | PLEX8 |
| 2.40E-03 | 0 0 | Cs5g33220.1          | 5.84 | 0 | 0 | 2 | MASCOT | T | PLEX8 |
| 1.52E-02 | 0 0 | Cs5g33220.1          | 8.75 | 0 | 0 | 2 | MASCOT | T | PLEX8 |
| 1.72E-02 | 0 0 | Cs6g02920.1/Cs6g029  | 8.22 | 0 | 0 | 2 | MASCOT | T | PLEX8 |
| 2.41E-01 | 0 0 | Cs6g22090.1/Cs6g220  | 5.81 | 0 | 0 | 2 | MASCOT | T | PLEX8 |
| 1.49E-01 | 0 0 | Cs6g22090.1/Cs6g220  | 5.99 | 0 | 0 | 2 | MASCOT | T | PLEX8 |
| 2.39E-01 | 0 0 | Cs6g22090.1/Cs6g220  | 4.37 | 0 | 0 | 2 | MASCOT | T | PLEX8 |
| 5.49E-02 | 0 0 | Cs6g22090.1/Cs6g220  | 4.37 | 0 | 0 | 2 | MASCOT | T | PLEX8 |
| 1.06E-01 | 0 0 | Cs6g22090.1/Cs6g220  | 4.37 | 0 | 0 | 2 | MASCOT | T | PLEX8 |
| 8.65E-02 | 0 0 | Cs7g01710.1/Cs7g017  | 4.17 | 0 | 0 | 2 | MASCOT | T | PLEX8 |

|          |     |                      |      |   |      |   |        |        |       |       |
|----------|-----|----------------------|------|---|------|---|--------|--------|-------|-------|
| 5.21E-02 | 0 0 | Cs7g01710.1/Cs7g017  | 4.17 | 0 | 0    | 2 | MASCOT | T      | PLEX8 |       |
| 5.38E-03 | 0 0 | Cs7g01710.1/Cs7g017  | 4.17 | 0 | 0    | 2 | MASCOT | T      | PLEX8 |       |
| 1.74E-03 | 0 0 | Cs7g01710.1/Cs7g017  | 4.21 | 0 | 0    | 2 | MASCOT | T      | PLEX8 |       |
| 2.21E-02 | 0 0 | Cs7g01700.1/Cs7g017  | 6    | 0 | 0    | 2 | MASCOT | T      |       |       |
| 9.39E-02 | 0 0 | Cs7g01710.1/Cs7g017  | 5.84 | 0 | 0    | 2 | MASCOT | T      | PLEX8 |       |
| 2.70E-01 | 0 0 | Cs7g02110.1 ! Cs7g02 | 8.75 | 0 | 15.9 | 0 | 2      | MASCOT | T     | PLEX8 |
| 1.09E-01 | 0 0 | Cs7g02110.1 ! Cs7g02 | 8.75 | 0 | 15.9 | 0 | 2      | MASCOT | T     | PLEX8 |
| 2.51E-02 | 0 0 | Cs7g02110.1/Cs7g021  | 5.88 | 0 | 0    | 2 | MASCOT | T      |       |       |
| 1.21E-03 | 0 0 | Cs7g02110.1/Cs7g021  | 5.88 | 0 | 0    | 2 | MASCOT | T      |       |       |
| 4.69E-02 | 0 0 | Cs7g02110.1/Cs7g021  | 6.74 | 0 | 0    | 2 | MASCOT | T      |       |       |
| 2.68E-02 | 0 0 | Cs7g02110.1/Cs7g021  | 4.53 | 0 | 0    | 2 | MASCOT | T      | PLEX8 |       |
| 2.31E-04 | 0 0 | Cs7g13850.1          | 5.84 | 0 | 0    | 2 | MASCOT | T      | PLEX8 |       |
| 1.81E-02 | 0 0 | Cs7g13850.1          | 5.38 | 0 | 0    | 2 | MASCOT | T      | PLEX8 |       |
| 7.78E-03 | 0 0 | Cs7g13850.1          | 5.84 | 0 | 0    | 2 | MASCOT | T      |       |       |
| 1.70E-01 | 0 0 | Cs7g13850.1          | 6.75 | 0 | 0    | 2 | MASCOT | T      | PLEX8 |       |
| 4.84E-04 | 0 0 | Cs7g13850.1          | 6.75 | 0 | 0    | 2 | MASCOT | T      | PLEX8 |       |
| 1.13E-06 | 0 0 | Cs7g13850.1          | 6.75 | 0 | 0    | 2 | MASCOT | T      | PLEX8 |       |
| 6.32E-02 | 0 0 | Cs7g18970.1          | 8.75 | 0 | 0    | 2 | MASCOT | T      |       |       |
| 3.14E-03 | 0 0 | Cs7g18970.1          | 6.75 | 0 | 0    | 2 | MASCOT | T      | PLEX8 |       |
| 3.30E-02 | 0 0 | Cs7g18970.1          | 5.98 | 0 | 0    | 2 | MASCOT | T      | PLEX8 |       |
| 1.44E-01 | 0 0 | Cs7g18970.1          | 5.98 | 0 | 0    | 2 | MASCOT | T      | PLEX8 |       |
| 4.27E-02 | 0 0 | Cs7g18970.1          | 5.98 | 0 | 0    | 2 | MASCOT | T      | PLEX8 |       |
| 2.77E-01 | 0 0 | Cs7g18970.1          | 8.22 | 0 | 0    | 2 | MASCOT | T      | PLEX8 |       |
| 2.60E-01 | 0 0 | Cs7g22730.1          | 6.75 | 0 | 0    | 2 | MASCOT | T      | PLEX8 |       |
| 3.12E-05 | 0 0 | Cs7g22730.1          | 6.75 | 0 | 0    | 2 | MASCOT | T      | PLEX8 |       |
| 2.03E-03 | 0 0 | Cs7g16080.1/Cs7g160  | 4.21 | 0 | 0    | 2 | MASCOT | T      | PLEX8 |       |
| 1.16E-02 | 0 0 | Cs7g16080.1/Cs7g160  | 4.21 | 0 | 0    | 2 | MASCOT | T      | PLEX8 |       |
| 7.67E-02 | 0 0 | Cs7g16080.1/Cs7g160  | 8.59 | 0 | 0    | 2 | MASCOT | T      |       |       |
| 5.01E-02 | 0 0 | Cs7g22730.1          | 5.4  | 0 | 0    | 2 | MASCOT | T      | PLEX8 |       |
| 1.56E-02 | 0 0 | Cs7g28910.1/Cs7g289  | 4.53 | 0 | 0    | 2 | MASCOT | T      | PLEX8 |       |
| 2.90E-03 | 0 0 | Cs7g28910.1/Cs7g289  | 6.74 | 0 | 0    | 2 | MASCOT | T      | PLEX8 |       |
| 1.16E-02 | 0 0 | Cs7g28910.1/Cs7g289  | 6.74 | 0 | 0    | 2 | MASCOT | T      | PLEX8 |       |
| 3.75E-02 | 0 0 | Cs7g28910.1/Cs7g289  | 6.75 | 0 | 0    | 2 | MASCOT | T      | PLEX8 |       |
| 1.91E-01 | 0 0 | Cs7g28910.1/Cs7g289  | 6.75 | 0 | 0    | 2 | MASCOT | T      |       |       |
| 1.56E-03 | 0 0 | Cs7g28910.1/Cs7g289  | 5.32 | 0 | 15.9 | 0 | 2      | MASCOT | T     |       |
| 8.59E-02 | 0 0 | Cs8g07660.1/Cs8g076  | 5.84 | 0 | 0    | 2 | MASCOT | T      | PLEX8 |       |
| 9.38E-02 | 0 0 | Cs8g07660.1/Cs8g076  | 5.84 | 0 | 0    | 2 | MASCOT | T      | PLEX8 |       |
| 2.86E-03 | 0 0 | Cs8g07660.1/Cs8g076  | 4.21 | 0 | 0    | 2 | MASCOT | T      |       |       |
| 4.29E-04 | 0 0 | Cs8g07660.1/Cs8g076  | 5.96 | 1 | 0    | 2 | MASCOT | T      | PLEX8 |       |
| 1.33E-04 | 0 0 | Cs8g07660.1/Cs8g076  | 5.96 | 1 | 0    | 2 | MASCOT | T      | PLEX8 |       |
| 1.22E-01 | 0 0 | Cs8g07660.1/Cs8g076  | 4.53 | 0 | 0    | 2 | MASCOT | T      | PLEX8 |       |
| 1.50E-02 | 0 0 | Cs9g03990.1/Cs9g039  | 5.32 | 0 | 0    | 2 | MASCOT | T      | PLEX8 |       |
| 7.23E-03 | 0 0 | Cs9g03990.1/Cs9g039  | 6.79 | 0 | 0    | 2 | MASCOT | T      | PLEX8 |       |
| 1.35E-02 | 0 0 | Cs9g03990.1/Cs9g039  | 6.79 | 0 | 0    | 2 | MASCOT | T      | PLEX8 |       |
| 9.86E-04 | 0 0 | Cs9g03990.1/Cs9g039  | 4.54 | 0 | 0    | 2 | MASCOT | T      | PLEX8 |       |
| 1.65E-04 | 0 0 | Cs9g03990.1/Cs9g039  | 4.54 | 0 | 0    | 2 | MASCOT | T      |       |       |
| 1.38E-01 | 0 0 | Cs9g03990.1/Cs9g040  | 8.72 | 0 | 0    | 2 | MASCOT | T      | PLEX8 |       |
| 5.55E-02 | 0 0 | Cs9g10140.1/Cs9g101  | 5.84 | 0 | 0    | 2 | MASCOT | T      | PLEX8 |       |
| 6.89E-02 | 0 0 | Cs2g23270.1/Cs5g138  | 4.21 | 0 | 15.9 | 0 | 2      | MASCOT | T     |       |
| 5.26E-02 | 0 0 | Cs2g23270.1/Cs5g138  | 4.21 | 0 | 0    | 2 | MASCOT | T      |       |       |
| 3.43E-01 | 0 0 | Cs2g23270.1/Cs5g138  | 5.84 | 0 | 0    | 2 | MASCOT | T      | PLEX8 |       |

|              |                       |      |   |      |          |   |       |
|--------------|-----------------------|------|---|------|----------|---|-------|
| 1.29E-01 0 0 | Cs2g23270.1/Cs5g138   | 5.84 | 0 | 0    | 2 MASCOT | T | PLEX8 |
| 1.17E-01 0 0 | Cs2g23270.1/Cs5g138   | 8.56 | 0 | 0    | 2 MASCOT | T | PLEX8 |
| 8.01E-02 0 0 | Cs9g19340.1           | 8.8  | 0 | 0    | 2 MASCOT | T | PLEX8 |
| 8.38E-07 0 0 | Cs9g19340.1           | 8.22 | 0 | 0    | 2 MASCOT | T |       |
| 6.41E-06 0 0 | Cs9g19340.1           | 8.22 | 0 | 0    | 2 MASCOT | T |       |
| 8.65E-02 0 0 | Cs9g19340.1           | 5.55 | 0 | 0    | 2 MASCOT | T | PLEX8 |
| 8.13E-03 0 0 | Cs9g19340.1           | 5.55 | 0 | 0    | 2 MASCOT | T | PLEX8 |
| 1.35E-02 0 0 | Cs9g19340.1           | 6.46 | 0 | 0    | 2 MASCOT | T | PLEX8 |
| 7.75E-02 0 0 | orange1.1t00323.1/ora | 5.84 | 0 | 0    | 2 MASCOT | T | PLEX8 |
| 4.17E-02 0 0 | orange1.1t00323.1/ora | 5.84 | 0 | 0    | 2 MASCOT | T |       |
| 1.79E-03 0 0 | orange1.1t00323.1/ora | 4.25 | 0 | 0    | 2 MASCOT | T |       |
| 4.64E-07 0 0 | orange1.1t00323.1/ora | 4.25 | 0 | 0    | 2 MASCOT | T | PLEX8 |
| 5.68E-07 0 0 | orange1.1t00323.1/ora | 4.25 | 0 | 0    | 2 MASCOT | T |       |
| 3.45E-02 0 0 | orange1.1t00323.1/ora | 5.84 | 0 | 15.9 | 2 MASCOT | T |       |
| 1.86E-02 0 0 | orange1.1t04983.1/ora | 5.32 | 0 | 0    | 2 MASCOT | T | PLEX8 |
| 3.52E-02 0 0 | orange1.1t04983.1/ora | 6    | 0 | 0    | 2 MASCOT | T |       |
| 2.25E-02 0 0 | orange1.1t04983.1/ora | 6    | 0 | 0    | 2 MASCOT | T | PLEX8 |
| 7.13E-02 0 0 | Cs8g14890.1/orange1.  | 8.75 | 0 | 0    | 2 MASCOT | T | PLEX8 |
| 1.32E-01 0 0 | Cs9g15870.1/orange1.  | 9.76 | 0 | 0    | 2 MASCOT | T | PLEX8 |
| 1.52E-01 0 0 | Cs9g15870.1/orange1.  | 9.76 | 0 | 0    | 2 MASCOT | T | PLEX8 |
| 7.99E-04 0 0 | Cs1g05590.1/Cs1g055   | 4.4  | 0 | 0    | 2 MASCOT | T | PLEX8 |
| 1.06E-05 0 0 | Cs1g05590.1/Cs1g055   | 4.83 | 1 | 0    | 2 MASCOT | T | PLEX8 |
| 4.70E-02 0 0 | Cs1g05590.1/Cs1g055   | 5.8  | 0 | 0    | 2 MASCOT | T | PLEX8 |
| 8.89E-03 0 0 | Cs1g05590.1/Cs1g055   | 8.75 | 0 | 0    | 2 MASCOT | T | PLEX8 |
| 1.17E-02 0 0 | Cs1g05590.1/Cs1g055   | 8.75 | 0 | 0    | 2 MASCOT | T | PLEX8 |
| 2.49E-01 0 0 | Cs1g08360.1/Cs1g083   | 9.6  | 0 | 0    | 2 MASCOT | T | PLEX8 |
| 1.50E-02 0 0 | Cs1g08360.1/Cs1g083   | 5.21 | 0 | 0    | 2 MASCOT | T | PLEX8 |
| 2.21E-01 0 0 | Cs1g08360.1/Cs1g083   | 5.21 | 0 | 0    | 2 MASCOT | T |       |
| 1.73E-01 0 0 | Cs1g08360.1/Cs1g083   | 6.85 | 0 | 0    | 2 MASCOT | T |       |
| 6.86E-03 0 0 | Cs1g08360.1/Cs1g083   | 4.37 | 0 | 0    | 2 MASCOT | T |       |
| 8.79E-03 0 0 | Cs1g13620.1/Cs1g136   | 5.5  | 0 | 0    | 2 MASCOT | T |       |
| 4.42E-02 0 0 | Cs1g13720.1/Cs1g137   | 4.03 | 0 | 0    | 2 MASCOT | T |       |
| 1.70E-03 0 0 | Cs1g13690.1/Cs1g136   | 8.75 | 0 | 0    | 2 MASCOT | T |       |
| 2.72E-03 0 0 | Cs1g13690.1/Cs1g136   | 8.75 | 0 | 0    | 2 MASCOT | T | PLEX8 |
| 1.07E-01 0 0 | Cs6g15280.1 ! Cs1g13  | 5.81 | 0 | 0    | 2 MASCOT | T | PLEX8 |
| 6.50E-02 0 0 | Cs1g16580.1           | 4.53 | 0 | 0    | 2 MASCOT | T | PLEX8 |
| 6.30E-03 0 0 | Cs1g16580.1/Cs4g086   | 4.53 | 0 | 0    | 2 MASCOT | T |       |
| 1.00E-03 0 0 | Cs1g16580.1           | 6.41 | 0 | 0    | 2 MASCOT | T | PLEX8 |
| 4.27E-03 0 0 | Cs1g16580.1           | 6.72 | 0 | 0    | 2 MASCOT | T | PLEX8 |
| 7.42E-02 0 0 | Cs1g16580.1           | 6.72 | 0 | 0    | 2 MASCOT | T | PLEX8 |
| 8.85E-02 0 0 | Cs1g23730.1/Cs1g237   | 4.37 | 0 | 0    | 2 MASCOT | T | PLEX8 |
| 3.51E-02 0 0 | Cs1g23730.1/Cs1g237   | 8.72 | 0 | 0    | 2 MASCOT | T | PLEX8 |
| 1.32E-03 0 0 | Cs1g23730.1/Cs1g237   | 8.72 | 0 | 0    | 2 MASCOT | T | PLEX8 |
| 1.27E-01 0 0 | Cs1g23730.1/Cs1g237   | 5.97 | 0 | 0    | 2 MASCOT | T | PLEX8 |
| 5.44E-03 0 0 | Cs1g23730.1/Cs1g237   | 4.37 | 0 | 0    | 2 MASCOT | T | PLEX8 |
| 5.23E-02 0 0 | Cs2g03010.1/Cs2g030   | 9.8  | 0 | 0    | 2 MASCOT | T | PLEX8 |
| 3.86E-01 0 0 | Cs2g03010.1/Cs2g030   | 4.37 | 0 | 0    | 2 MASCOT | T | PLEX8 |
| 3.02E-01 0 0 | Cs2g03010.1/Cs2g030   | 4.37 | 0 | 0    | 2 MASCOT | T | PLEX8 |
| 3.63E-03 0 0 | Cs2g03010.1/Cs2g030   | 6.79 | 0 | 0    | 2 MASCOT | T | PLEX8 |
| 1.23E-01 0 0 | Cs2g03010.1/Cs2g030   | 5.97 | 0 | 0    | 2 MASCOT | T |       |
| 2.13E-01 0 0 | Cs2g04990.1           | 8.31 | 0 | 0    | 2 MASCOT | T | PLEX8 |

|          |     |                      |      |        |   |   |        |   |       |
|----------|-----|----------------------|------|--------|---|---|--------|---|-------|
| 1.83E-01 | 0 0 | Cs2g04990.1/Cs2g049  | 5.84 | 0      | 0 | 2 | MASCOT | T |       |
| 9.28E-04 | 0 0 | Cs2g04990.1/Cs2g049  | 5.84 | 0      | 0 | 2 | MASCOT | T |       |
| 6.55E-04 | 0 0 | Cs2g04990.1          | 6    | 0      | 0 | 2 | MASCOT | T | PLEX8 |
| 1.21E-01 | 0 0 | Cs2g04990.1          | 8.75 | 1      | 0 | 2 | MASCOT | T | PLEX8 |
| 1.23E-01 | 0 0 | Cs2g08320.1/Cs2g083  | 5.88 | 0      | 0 | 2 | MASCOT | T | PLEX8 |
| 6.63E-02 | 0 0 | Cs2g08320.1/Cs2g083  | 4.68 | 1      | 0 | 2 | MASCOT | T | PLEX8 |
| 2.80E-02 | 0 0 | Cs2g08320.1/Cs2g083  | 4.53 | 0      | 0 | 2 | MASCOT | T | PLEX8 |
| 6.27E-03 | 0 0 | Cs2g08320.1/Cs2g083  | 4.53 | 0      | 0 | 2 | MASCOT | T | PLEX8 |
| 2.19E-01 | 0 0 | Cs2g08320.1/Cs2g083  | 8.47 | 0      | 0 | 2 | MASCOT | T | PLEX8 |
| 2.66E-04 | 0 0 | Cs2g12550.2          | 6.23 | 1      | 0 | 2 | MASCOT | T | PLEX8 |
| 2.12E-01 | 0 0 | Cs2g12550.2          | 4.53 | 0      | 0 | 2 | MASCOT | T | PLEX8 |
| 1.37E-01 | 0 0 | Cs2g12550.2          | 4.53 | 0      | 0 | 2 | MASCOT | T | PLEX8 |
| 4.71E-02 | 0 0 | Cs2g12550.1/Cs2g125  | 8.25 | 0      | 0 | 2 | MASCOT | T | PLEX8 |
| 2.33E-01 | 0 0 | Cs2g12550.1/Cs2g125  | 9.75 | 0      | 0 | 2 | MASCOT | T | PLEX8 |
| 6.57E-04 | 0 0 | Cs2g15280.1/Cs2g152  | 6.74 | 0      | 0 | 2 | MASCOT | T | PLEX8 |
| 7.82E-03 | 0 0 | Cs2g15280.1/Cs2g152  | 3.93 | 0      | 0 | 2 | MASCOT | T | PLEX8 |
| 2.82E-03 | 0 0 | Cs2g15280.1/Cs2g152  | 4.37 | 0      | 0 | 2 | MASCOT | T | PLEX8 |
| 8.78E-02 | 0 0 | Cs2g15280.1/Cs2g152  | 4.37 | 0      | 0 | 2 | MASCOT | T | PLEX8 |
| 8.15E-02 | 0 0 | Cs2g15280.1/Cs2g152  | 4.14 | 0      | 0 | 2 | MASCOT | T | PLEX8 |
| 6.57E-02 | 0 0 | Cs2g17930.1          | 4.37 | 0      | 0 | 2 | MASCOT | T | PLEX8 |
| 2.28E-02 | 0 0 | Cs2g17930.1          | 4    | 0      | 0 | 2 | MASCOT | T | PLEX8 |
| 2.01E-02 | 0 0 | Cs2g17930.1          | 8.49 | 0      | 0 | 2 | MASCOT | T |       |
| 4.16E-02 | 0 0 | Cs2g17930.1 ! orange | 6.75 | 0      | 0 | 2 | MASCOT | T | PLEX8 |
| 1.14E-01 | 0 0 | Cs2g17930.1 ! orange | 6.75 | 0      | 0 | 2 | MASCOT | T | PLEX8 |
| 1.24E-01 | 0 0 | Cs2g19180.1/Cs2g191  | 5.84 | 0      | 0 | 2 | MASCOT | T | PLEX8 |
| 2.05E-04 | 0 0 | Cs2g19180.1/Cs2g191  | 8.79 | 0      | 0 | 2 | MASCOT | T | PLEX8 |
| 1.96E-02 | 0 0 | Cs2g19180.1/Cs2g191  | 8.79 | 0      | 0 | 2 | MASCOT | T | PLEX8 |
| 2.80E-02 | 0 0 | Cs2g01620.1/Cs2g016  | 5.83 | 0      | 0 | 2 | MASCOT | T |       |
| 4.14E-01 | 0 0 | Cs2g19180.1/Cs2g191  | 5.21 | 0      | 0 | 2 | MASCOT | T | PLEX8 |
| 7.58E-02 | 0 0 | Cs3g14710.1/Cs3g147  | 6.05 | 0      | 0 | 2 | MASCOT | T | PLEX8 |
| 4.32E-03 | 0 0 | Cs3g14710.1/Cs3g147  | 6.05 | 0      | 0 | 2 | MASCOT | T | PLEX8 |
| 8.89E-04 | 0 0 | Cs3g14710.1/Cs3g147  | 3.83 | 0      | 0 | 2 | MASCOT | T |       |
| 2.23E-02 | 0 0 | Cs3g14730.1/Cs3g147  | 5.21 | 0      | 0 | 2 | MASCOT | T | PLEX8 |
| 5.38E-04 | 0 0 | Cs3g14710.1/Cs3g147  | 4.18 | 1      | 0 | 2 | MASCOT | T | PLEX8 |
| 2.78E-01 | 0 0 | Cs3g22360.1          | 4.37 | 0      | 0 | 2 | MASCOT | T | PLEX8 |
| 1.15E-02 | 0 0 | Cs3g22360.1          | 8.41 | 0      | 0 | 2 | MASCOT | T | PLEX8 |
| 4.01E-02 | 0 0 | Cs3g22360.1          | 6    | 0      | 0 | 2 | MASCOT | T | PLEX8 |
| 1.66E-01 | 0 0 | Cs3g22360.1          | 6    | 0      | 0 | 2 | MASCOT | T | PLEX8 |
| 4.74E-01 | 0 0 | Cs3g22360.1          | 8.47 | 0      | 0 | 2 | MASCOT | T |       |
| 1.13E-03 | 0 0 | Cs4g07240.1/Cs4g072  | 8.63 | 0      | 0 | 2 | MASCOT | T | PLEX8 |
| 2.34E-01 | 0 0 | Cs4g07240.1/Cs4g072  | 4.21 | 0      | 0 | 2 | MASCOT | T | PLEX8 |
| 1.19E-01 | 0 0 | Cs4g07240.1/Cs4g072  | 5.84 | 0 15.9 | 0 | 2 | MASCOT | T |       |
| 8.59E-04 | 0 0 | Cs4g07240.1/Cs4g072  | 5.32 | 0      | 0 | 2 | MASCOT | T | PLEX8 |
| 4.91E-03 | 0 0 | Cs4g07240.1/Cs4g072  | 5.32 | 0      | 0 | 2 | MASCOT | T | PLEX8 |
| 1.31E-03 | 0 0 | Cs4g20230.1          | 3.93 | 0      | 0 | 2 | MASCOT | T | PLEX8 |
| 1.96E-01 | 0 0 | Cs4g20230.1          | 3.93 | 0      | 0 | 2 | MASCOT | T | PLEX8 |
| 1.17E-02 | 0 0 | Cs4g20230.1          | 6.1  | 0      | 0 | 2 | MASCOT | T | PLEX8 |
| 1.71E-01 | 0 0 | Cs4g20230.1          | 6.75 | 0      | 0 | 2 | MASCOT | T |       |
| 3.43E-02 | 0 0 | Cs4g20230.1          | 8.75 | 0      | 0 | 2 | MASCOT | T | PLEX8 |
| 9.63E-03 | 0 0 | Cs5g09860.1/Cs5g098  | 4.37 | 0      | 0 | 2 | MASCOT | T |       |
| 1.59E-02 | 0 0 | Cs5g09880.1          | 4.21 | 0      | 0 | 2 | MASCOT | T | PLEX8 |



|          |     |                       |      |   |      |   |        |        |       |
|----------|-----|-----------------------|------|---|------|---|--------|--------|-------|
| 3.99E-01 | 0 0 | Cs5g09880.1 ! Cs8g09  | 4.53 | 0 | 0    | 2 | MASCOT | T      | PLEX8 |
| 1.28E-01 | 0 0 | Cs4g09040.1 ! Cs8g12  | 9.76 | 0 | 0    | 2 | MASCOT | T      | PLEX8 |
| 2.09E-01 | 0 0 | Cs4g09040.1 ! Cs8g12  | 9.76 | 0 | 0    | 2 | MASCOT | T      | PLEX8 |
| 1.78E-02 | 0 0 | Cs5g28400.1/Cs7g260   | 4.25 | 0 | 0    | 2 | MASCOT | T      | PLEX8 |
| 5.29E-03 | 0 0 | Cs5g28400.1           | 6    | 0 | 0    | 2 | MASCOT | T      | PLEX8 |
| 2.68E-01 | 0 0 | Cs5g28400.1           | 5.4  | 0 | 0    | 2 | MASCOT | T      | PLEX8 |
| 6.62E-04 | 0 0 | Cs5g28400.1           | 4.25 | 0 | 0    | 2 | MASCOT | T      | PLEX8 |
| 2.66E-04 | 0 0 | Cs5g28400.1           | 4.25 | 0 | 0    | 2 | MASCOT | T      | PLEX8 |
| 3.30E-03 | 0 0 | Cs6g08310.1/Cs6g083   | 4.53 | 0 | 0    | 2 | MASCOT | T      | PLEX8 |
| 1.12E-01 | 0 0 | Cs6g08310.1/Cs6g083   | 8.75 | 0 | 0    | 2 | MASCOT | T      | PLEX8 |
| 2.16E-02 | 0 0 | Cs6g08310.1/Cs6g083   | 8.75 | 0 | 0    | 2 | MASCOT | T      | PLEX8 |
| 1.14E-01 | 0 0 | Cs6g08310.1/Cs6g083   | 4.37 | 0 | 0    | 2 | MASCOT | T      |       |
| 4.24E-01 | 0 0 | Cs6g08310.1/Cs6g083   | 8.75 | 0 | 0    | 2 | MASCOT | T      | PLEX8 |
| 1.41E-01 | 0 0 | Cs7g07630.1           | 9.8  | 0 | 0    | 2 | MASCOT | T      | PLEX8 |
| 6.44E-02 | 0 0 | Cs7g07630.1           | 5.83 | 0 | 0    | 2 | MASCOT | T      |       |
| 9.37E-02 | 0 0 | Cs7g07630.1           | 5.83 | 0 | 0    | 2 | MASCOT | T      |       |
| 1.92E-02 | 0 0 | Cs7g07630.1           | 5.84 | 0 | 0    | 2 | MASCOT | T      | PLEX8 |
| 9.59E-02 | 0 0 | Cs7g07630.1           | 5.84 | 0 | 0    | 2 | MASCOT | T      | PLEX8 |
| 1.29E-01 | 0 0 | Cs7g29340.1           | 4.53 | 0 | 0    | 2 | MASCOT | T      |       |
| 2.81E-03 | 0 0 | Cs7g29340.1           | 4.53 | 0 | 0    | 2 | MASCOT | T      | PLEX8 |
| 1.69E-04 | 0 0 | Cs7g29340.1           | 3.84 | 0 | 0    | 2 | MASCOT | T      |       |
| 9.07E-04 | 0 0 | Cs7g29340.1           | 3.84 | 0 | 0    | 2 | MASCOT | T      |       |
| 1.99E-03 | 0 0 | Cs7g29340.1           | 4.54 | 0 | 0    | 2 | MASCOT | T      | PLEX8 |
| 3.74E-01 | 0 0 | Cs8g05390.1           | 8.63 | 0 | 0    | 2 | MASCOT | T      | PLEX8 |
| 9.87E-02 | 0 0 | Cs8g05390.1           | 8.63 | 0 | 0    | 2 | MASCOT | T      | PLEX8 |
| 8.97E-04 | 0 0 | Cs8g05390.1           | 6.05 | 0 | 0    | 2 | MASCOT | T      |       |
| 2.37E-02 | 0 0 | Cs8g05390.1           | 7.86 | 0 | 0    | 2 | MASCOT | T      | PLEX8 |
| 7.56E-03 | 0 0 | Cs8g05390.1           | 5.5  | 0 | 0    | 2 | MASCOT | T      |       |
| 1.28E-02 | 0 0 | Cs8g08270.1           | 8.8  | 0 | 0    | 2 | MASCOT | T      | PLEX8 |
| 2.50E-01 | 0 0 | Cs8g08270.1           | 8.59 | 0 | 0    | 2 | MASCOT | T      | PLEX8 |
| 3.64E-02 | 0 0 | Cs8g08270.1           | 6.42 | 1 | 0    | 2 | MASCOT | T      | PLEX8 |
| 4.13E-03 | 0 0 | Cs8g08270.1           | 6.42 | 1 | 0    | 2 | MASCOT | T      | PLEX8 |
| 3.90E-03 | 0 0 | Cs8g08270.1           | 4.14 | 0 | 0    | 2 | MASCOT | T      |       |
| 2.75E-01 | 0 0 | Cs8g18140.1/Cs8g181   | 4.53 | 0 | 0    | 2 | MASCOT | T      | PLEX8 |
| 5.64E-02 | 0 0 | Cs5g33180.1/Cs8g181   | 4.53 | 0 | 0    | 2 | MASCOT | T      | PLEX8 |
| 2.90E-03 | 0 0 | Cs7g28910.1/Cs7g289   | 6.74 | 0 | 0    | 2 | MASCOT | T      | PLEX8 |
| 1.16E-02 | 0 0 | Cs7g28910.1/Cs7g289   | 6.74 | 0 | 0    | 2 | MASCOT | T      | PLEX8 |
| 1.56E-03 | 0 0 | Cs7g28910.1/Cs7g289   | 5.32 | 0 | 15.9 | 0 | 2      | MASCOT | T     |
| 1.28E-02 | 0 0 | Cs9g02530.1           | 5.32 | 0 | 0    | 2 | MASCOT | T      | PLEX8 |
| 2.18E-01 | 0 0 | Cs9g02530.1           | 4.21 | 0 | 0    | 2 | MASCOT | T      |       |
| 4.23E-02 | 0 0 | Cs9g02530.1 ! Cs9g02  | 8.47 | 0 | 0    | 2 | MASCOT | T      | PLEX8 |
| 2.65E-01 | 0 0 | Cs9g02530.1 ! Cs9g02  | 8.47 | 0 | 0    | 2 | MASCOT | T      | PLEX8 |
| 1.26E-01 | 0 0 | Cs9g02530.1 ! Cs9g02  | 9.8  | 0 | 0    | 2 | MASCOT | T      | PLEX8 |
| 1.52E-04 | 0 0 | gi 113952659          | 4.14 | 0 | 0    | 2 | MASCOT | T      | PLEX8 |
| 2.50E-03 | 0 0 | gi 113952659          | 4.14 | 0 | 0    | 2 | MASCOT | T      | PLEX8 |
| 2.69E-03 | 0 0 | gi 113952659          | 4.14 | 0 | 0    | 2 | MASCOT | T      | PLEX8 |
| 3.18E-02 | 0 0 | gi 113952659          | 6    | 0 | 0    | 2 | MASCOT | T      | PLEX8 |
| 2.86E-02 | 0 0 | gi 113952659          | 8.72 | 0 | 0    | 2 | MASCOT | T      | PLEX8 |
| 3.78E-04 | 0 0 | gi 113952662/gi 11395 | 8.22 | 0 | 0    | 2 | MASCOT | T      | PLEX8 |
| 2.99E-03 | 0 0 | gi 113952662/gi 11395 | 8.22 | 0 | 0    | 2 | MASCOT | T      | PLEX8 |
| 2.72E-04 | 0 0 | gi 113952662/gi 11395 | 4.37 | 0 | 0    | 2 | MASCOT | T      |       |

|          |     |                       |      |   |      |   |        |        |       |       |
|----------|-----|-----------------------|------|---|------|---|--------|--------|-------|-------|
| 4.84E-02 | 0 0 | gi 113952662/gi 11395 | 9.76 | 0 | 0    | 2 | MASCOT | T      | PLEX8 |       |
| 1.22E-01 | 0 0 | gi 113952662/gi 11395 | 5.32 | 0 | 0    | 2 | MASCOT | T      | PLEX8 |       |
| 1.80E-02 | 0 0 | gi 113952661/gi 11395 | 11   | 1 | 0    | 2 | MASCOT | T      | PLEX8 |       |
| 3.50E-05 | 0 0 | gi 113952661/gi 11395 | 9.76 | 0 | 0    | 2 | MASCOT | T      | PLEX8 |       |
| 1.43E-01 | 0 0 | gi 113952661/gi 11395 | 9.81 | 0 | 0    | 2 | MASCOT | T      |       |       |
| 5.50E-02 | 0 0 | gi 113952661/gi 11395 | 5.32 | 0 | 0    | 2 | MASCOT | T      | PLEX8 |       |
| 1.60E-02 | 0 0 | gi 113952661/gi 11395 | 5.32 | 0 | 0    | 2 | MASCOT | T      | PLEX8 |       |
| 1.50E-01 | 0 0 | orange1.1t00950.1/ora | 5.84 | 0 | 0    | 2 | MASCOT | T      | PLEX8 |       |
| 1.83E-01 | 0 0 | orange1.1t00950.1/ora | 5.84 | 0 | 0    | 2 | MASCOT | T      | PLEX8 |       |
| 3.34E-03 | 0 0 | orange1.1t00950.1/ora | 4.25 | 0 | 0    | 2 | MASCOT | T      |       |       |
| 3.25E-01 | 0 0 | orange1.1t00950.1/ora | 6.91 | 0 | 0    | 2 | MASCOT | T      | PLEX8 |       |
| 3.38E-02 | 0 0 | orange1.1t00950.1/ora | 4.21 | 0 | 0    | 2 | MASCOT | T      | PLEX8 |       |
| 5.06E-02 | 0 0 | orange1.1t02320.1/ora | 9.75 | 0 | 0    | 2 | MASCOT | T      | PLEX8 |       |
| 3.72E-01 | 0 0 | orange1.1t02320.1/ora | 8.47 | 0 | 0    | 2 | MASCOT | T      | PLEX8 |       |
| 7.50E-04 | 0 0 | orange1.1t02320.1/ora | 4.31 | 0 | 0    | 2 | MASCOT | T      | PLEX8 |       |
| 4.37E-06 | 0 0 | orange1.1t02320.1/ora | 4.31 | 0 | 0    | 2 | MASCOT | T      |       |       |
| 4.91E-02 | 0 0 | orange1.1t02320.1/ora | 9.76 | 0 | 0    | 2 | MASCOT | T      | PLEX8 |       |
| 2.26E-02 | 0 0 | orange1.1t03195.1/ora | 6    | 0 | 0    | 2 | MASCOT | T      |       |       |
| 1.20E-02 | 0 0 | orange1.1t03195.1/ora | 5.21 | 0 | 0    | 2 | MASCOT | T      | PLEX8 |       |
| 4.35E-02 | 0 0 | orange1.1t03195.1/ora | 5.21 | 0 | 0    | 2 | MASCOT | T      | PLEX8 |       |
| 3.55E-02 | 0 0 | orange1.1t03195.1/ora | 6    | 0 | 0    | 2 | MASCOT | T      | PLEX8 |       |
| 1.03E-02 | 0 0 | orange1.1t03195.1/ora | 5.92 | 0 | 0    | 2 | MASCOT | T      |       |       |
| 2.19E-03 | 0 0 | Cs1g01290.1/Cs1g012   | 5.83 | 0 | 0    | 2 | MASCOT | T      |       |       |
| 2.40E-02 | 0 0 | Cs1g01290.1/Cs1g012   | 5.2  | 0 | 0    | 2 | MASCOT | T      | PLEX8 |       |
| 4.04E-02 | 0 0 | Cs1g01290.1/Cs1g012   | 6.83 | 0 | 0    | 2 | MASCOT | T      | PLEX8 |       |
| 3.43E-03 | 0 0 | Cs1g01290.1/Cs1g012   | 5.84 | 0 | 0    | 2 | MASCOT | T      | PLEX8 |       |
| 5.69E-01 | 0 0 | Cs1g08300.1/Cs1g083   | 9.8  | 0 | 0    | 2 | MASCOT | T      |       |       |
| 4.81E-02 | 0 0 | Cs1g08300.1/Cs1g083   | 5.32 | 0 | 0    | 2 | MASCOT | T      | PLEX8 |       |
| 2.26E-03 | 0 0 | Cs1g08300.1/Cs1g083   | 6    | 0 | 0    | 2 | MASCOT | T      | PLEX8 |       |
| 2.66E-01 | 0 0 | Cs1g08300.1/Cs1g083   | 8.75 | 0 | 0    | 2 | MASCOT | T      | PLEX8 |       |
| 2.06E-01 | 0 0 | Cs1g15720.1/Cs1g157   | 9.52 | 0 | 0    | 2 | MASCOT | T      |       |       |
| 1.86E-02 | 0 0 | Cs1g15720.1/Cs1g157   | 5.97 | 0 | 0    | 2 | MASCOT | T      | PLEX8 |       |
| 1.03E-03 | 0 0 | Cs1g15720.1/Cs1g157   | 4.03 | 0 | 0    | 2 | MASCOT | T      | PLEX8 |       |
| 2.54E-01 | 0 0 | Cs1g15720.1/Cs1g157   | 6.73 | 0 | 15.9 | 0 | 2      | MASCOT | T     | PLEX8 |
| 3.04E-02 | 0 0 | Cs1g23450.1           | 4.03 | 0 | 0    | 2 | MASCOT | T      |       |       |
| 5.29E-02 | 0 0 | Cs1g23450.1           | 5.84 | 0 | 0    | 2 | MASCOT | T      | PLEX8 |       |
| 1.42E-01 | 0 0 | Cs1g23450.1           | 8.75 | 0 | 0    | 2 | MASCOT | T      | PLEX8 |       |
| 1.96E-01 | 0 0 | Cs1g23450.1           | 6.14 | 0 | 0    | 2 | MASCOT | T      | PLEX8 |       |
| 4.31E-01 | 0 0 | Cs2g02890.1/Cs2g028   | 8.59 | 0 | 0    | 2 | MASCOT | T      | PLEX8 |       |
| 3.70E-01 | 0 0 | Cs2g02890.1/Cs2g028   | 6.61 | 0 | 0    | 2 | MASCOT | T      | PLEX8 |       |
| 7.75E-03 | 0 0 | Cs2g02890.1/Cs2g028   | 4.53 | 0 | 0    | 2 | MASCOT | T      | PLEX8 |       |
| 1.77E-01 | 0 0 | Cs2g02890.1/Cs2g028   | 9.72 | 0 | 0    | 2 | MASCOT | T      | PLEX8 |       |
| 1.42E-02 | 0 0 | Cs3g20120.1           | 6.05 | 0 | 0    | 2 | MASCOT | T      | PLEX8 |       |
| 7.67E-02 | 0 0 | Cs3g20120.1           | 8.75 | 0 | 0    | 2 | MASCOT | T      | PLEX8 |       |
| 1.19E-01 | 0 0 | Cs3g20120.1           | 5.72 | 0 | 0    | 2 | MASCOT | T      | PLEX8 |       |
| 2.49E-01 | 0 0 | Cs3g20120.1           | 4.53 | 0 | 0    | 2 | MASCOT | T      |       |       |
| 6.01E-03 | 0 0 | Cs3g22140.1/Cs3g221   | 4.37 | 0 | 0    | 2 | MASCOT | T      |       |       |
| 5.65E-03 | 0 0 | Cs3g22140.1/Cs3g221   | 6    | 0 | 0    | 2 | MASCOT | T      | PLEX8 |       |
| 1.83E-03 | 0 0 | Cs3g22140.1/Cs3g221   | 3.84 | 0 | 0    | 2 | MASCOT | T      | PLEX8 |       |
| 8.20E-05 | 0 0 | Cs3g22140.1/Cs3g221   | 5.72 | 0 | 0    | 2 | MASCOT | T      | PLEX8 |       |
| 6.00E-03 | 0 0 | Cs4g16910.1/Cs4g169   | 4.09 | 0 | 0    | 2 | MASCOT | T      | PLEX8 |       |

|          |     |                      |      |   |      |   |        |        |       |       |
|----------|-----|----------------------|------|---|------|---|--------|--------|-------|-------|
| 1.72E-01 | 0 0 | Cs4g16910.1/Cs4g169  | 8.63 | 0 | 0    | 2 | MASCOT | T      | PLEX8 |       |
| 2.06E-03 | 0 0 | Cs4g16920.1 ! Cs4g16 | 4.21 | 0 | 0    | 2 | MASCOT | T      | PLEX8 |       |
| 9.31E-02 | 0 0 | Cs4g16910.1/Cs4g169  | 9.76 | 0 | 0    | 2 | MASCOT | T      |       |       |
| 2.32E-02 | 0 0 | Cs5g06460.1          | 6.96 | 0 | 0    | 2 | MASCOT | T      | PLEX8 |       |
| 2.08E-02 | 0 0 | Cs5g06460.1          | 8.47 | 0 | 0    | 2 | MASCOT | T      | PLEX8 |       |
| 1.24E-01 | 0 0 | Cs5g06460.1          | 8.47 | 0 | 0    | 2 | MASCOT | T      | PLEX8 |       |
| 2.29E-01 | 0 0 | Cs5g06460.1          | 8.75 | 0 | 0    | 2 | MASCOT | T      | PLEX8 |       |
| 9.55E-04 | 0 0 | Cs5g09510.1          | 3.84 | 0 | 0    | 2 | MASCOT | T      |       |       |
| 8.31E-03 | 0 0 | Cs5g09510.1          | 6    | 0 | 0    | 2 | MASCOT | T      |       |       |
| 1.79E-01 | 0 0 | Cs5g09510.1          | 5.84 | 0 | 15.9 | 0 | 2      | MASCOT | T     | PLEX8 |
| 3.08E-05 | 0 0 | Cs5g09510.1          | 8.47 | 0 | 0    | 2 | MASCOT | T      | PLEX8 |       |
| 1.21E-03 | 0 0 | Cs5g12480.1          | 4.03 | 0 | 0    | 2 | MASCOT | T      | PLEX8 |       |
| 1.39E-01 | 0 0 | Cs5g12480.1          | 5.88 | 0 | 0    | 2 | MASCOT | T      | PLEX8 |       |
| 4.28E-02 | 0 0 | Cs5g12480.1          | 4.37 | 0 | 0    | 2 | MASCOT | T      | PLEX8 |       |
| 8.68E-02 | 0 0 | Cs5g12480.1          | 5.21 | 0 | 0    | 2 | MASCOT | T      | PLEX8 |       |
| 8.99E-03 | 0 0 | Cs5g12510.1/Cs5g125  | 9.8  | 0 | 0    | 2 | MASCOT | T      | PLEX8 |       |
| 2.00E-01 | 0 0 | Cs5g12510.1/Cs5g125  | 8.49 | 0 | 0    | 2 | MASCOT | T      | PLEX8 |       |
| 1.61E-02 | 0 0 | Cs5g12510.1/Cs5g125  | 4.37 | 0 | 0    | 2 | MASCOT | T      | PLEX8 |       |
| 7.87E-02 | 0 0 | Cs5g12510.1/Cs5g125  | 4.43 | 1 | 0    | 2 | MASCOT | T      | PLEX8 |       |
| 1.02E-02 | 0 0 | Cs5g23460.1/Cs5g234  | 4.14 | 0 | 0    | 2 | MASCOT | T      | PLEX8 |       |
| 1.86E-01 | 0 0 | Cs5g23460.1/Cs5g234  | 5.84 | 0 | 0    | 2 | MASCOT | T      | PLEX8 |       |
| 5.42E-02 | 0 0 | Cs5g23460.1/Cs5g234  | 4.37 | 0 | 0    | 2 | MASCOT | T      | PLEX8 |       |
| 6.94E-04 | 0 0 | Cs5g23460.1/Cs5g234  | 4.03 | 0 | 0    | 2 | MASCOT | T      | PLEX8 |       |
| 3.39E-02 | 0 0 | Cs5g23490.1/Cs5g234  | 4.32 | 1 | 0    | 2 | MASCOT | T      | PLEX8 |       |
| 2.32E-01 | 0 0 | Cs5g23490.1/Cs5g234  | 9.72 | 0 | 0    | 2 | MASCOT | T      | PLEX8 |       |
| 1.68E-04 | 0 0 | Cs5g23490.1/Cs5g234  | 4.14 | 0 | 0    | 2 | MASCOT | T      |       |       |
| 1.21E-02 | 0 0 | Cs5g23490.1/Cs5g234  | 9.47 | 0 | 0    | 2 | MASCOT | T      | PLEX8 |       |
| 4.56E-02 | 0 0 | Cs5g29000.1/Cs5g290  | 4.53 | 0 | 0    | 2 | MASCOT | T      | PLEX8 |       |
| 7.76E-02 | 0 0 | Cs5g29000.1/Cs5g290  | 8.72 | 0 | 0    | 2 | MASCOT | T      | PLEX8 |       |
| 6.27E-03 | 0 0 | Cs5g29000.1/Cs5g290  | 6.84 | 0 | 0    | 2 | MASCOT | T      | PLEX8 |       |
| 7.86E-04 | 0 0 | Cs5g29000.1/Cs5g290  | 4.65 | 0 | 0    | 2 | MASCOT | T      | PLEX8 |       |
| 2.45E-01 | 0 0 | Cs5g34570.1/Cs5g345  | 6.04 | 0 | 0    | 2 | MASCOT | T      |       |       |
| 2.88E-02 | 0 0 | Cs5g34570.1/Cs5g345  | 4.03 | 0 | 0    | 2 | MASCOT | T      | PLEX8 |       |
| 1.65E-02 | 0 0 | Cs5g34570.1/Cs5g345  | 6    | 0 | 0    | 2 | MASCOT | T      | PLEX8 |       |
| 2.96E-01 | 0 0 | Cs5g34570.1/Cs5g345  | 8.75 | 0 | 0    | 2 | MASCOT | T      | PLEX8 |       |
| 4.54E-04 | 0 0 | Cs6g06800.1/Cs6g068  | 6.05 | 0 | 0    | 2 | MASCOT | T      |       |       |
| 1.59E-01 | 0 0 | Cs6g06800.1/Cs6g068  | 6.75 | 0 | 0    | 2 | MASCOT | T      | PLEX8 |       |
| 1.19E-01 | 0 0 | Cs6g06800.1/Cs6g068  | 8.8  | 0 | 0    | 2 | MASCOT | T      | PLEX8 |       |
| 2.93E-02 | 0 0 | Cs6g06800.1          | 4.68 | 1 | 0    | 2 | MASCOT | T      | PLEX8 |       |
| 2.85E-03 | 0 0 | Cs6g07520.1          | 6    | 0 | 0    | 2 | MASCOT | T      | PLEX8 |       |
| 5.85E-02 | 0 0 | Cs6g07520.1          | 8.76 | 0 | 0    | 2 | MASCOT | T      | PLEX8 |       |
| 4.74E-02 | 0 0 | Cs6g07520.1          | 9.76 | 0 | 0    | 2 | MASCOT | T      | PLEX8 |       |
| 3.93E-03 | 0 0 | Cs6g07520.1          | 6.47 | 0 | 0    | 2 | MASCOT | T      | PLEX8 |       |
| 1.84E-01 | 0 0 | Cs6g13160.1/Cs6g131  | 5.4  | 0 | 0    | 2 | MASCOT | T      | PLEX8 |       |
| 9.83E-03 | 0 0 | Cs6g13160.1/Cs6g131  | 3.98 | 0 | 0    | 2 | MASCOT | T      | PLEX8 |       |
| 1.71E-03 | 0 0 | Cs6g13160.1/Cs6g131  | 4.13 | 0 | 0    | 2 | MASCOT | T      | PLEX8 |       |
| 6.42E-02 | 0 0 | Cs6g13160.1/Cs6g131  | 6.75 | 0 | 0    | 2 | MASCOT | T      | PLEX8 |       |
| 6.24E-02 | 0 0 | Cs6g13340.1/Cs6g133  | 4.53 | 0 | 0    | 2 | MASCOT | T      | PLEX8 |       |
| 1.92E-02 | 0 0 | Cs6g13340.1/Cs6g133  | 6    | 0 | 0    | 2 | MASCOT | T      |       |       |
| 7.55E-02 | 0 0 | Cs6g13340.1/Cs6g133  | 4.14 | 0 | 0    | 2 | MASCOT | T      | PLEX8 |       |
| 2.44E-01 | 0 0 | Cs6g13340.1/Cs6g133  | 4.37 | 0 | 0    | 2 | MASCOT | T      | PLEX8 |       |

|          |     |                       |      |   |      |   |        |        |       |       |
|----------|-----|-----------------------|------|---|------|---|--------|--------|-------|-------|
| 1.70E-01 | 0 0 | Cs6g17180.1/Cs6g171   | 6.1  | 0 | 0    | 2 | MASCOT | T      | PLEX8 |       |
| 4.42E-02 | 0 0 | Cs6g17180.1/Cs6g171   | 4.48 | 0 | 0    | 2 | MASCOT | T      | PLEX8 |       |
| 2.54E-01 | 0 0 | Cs6g17180.1/Cs6g171   | 6    | 0 | 0    | 2 | MASCOT | T      | PLEX8 |       |
| 9.43E-02 | 0 0 | Cs6g17180.1/Cs6g171   | 8.72 | 0 | 0    | 2 | MASCOT | T      | PLEX8 |       |
| 2.05E-01 | 0 0 | Cs6g18810.1/Cs6g188   | 5.84 | 0 | 0    | 2 | MASCOT | T      | PLEX8 |       |
| 6.78E-02 | 0 0 | Cs6g18810.1/Cs6g188   | 6    | 0 | 0    | 2 | MASCOT | T      | PLEX8 |       |
| 1.15E-02 | 0 0 | Cs6g18810.1/Cs6g188   | 5.32 | 0 | 0    | 2 | MASCOT | T      | PLEX8 |       |
| 6.10E-03 | 0 0 | Cs6g18810.1/Cs6g188   | 4.37 | 0 | 0    | 2 | MASCOT | T      | PLEX8 |       |
| 7.17E-02 | 0 0 | Cs6g22050.1           | 8.75 | 0 | 0    | 2 | MASCOT | T      | PLEX8 |       |
| 4.19E-02 | 0 0 | Cs6g22050.1/Cs7g030   | 4.37 | 0 | 0    | 2 | MASCOT | T      | PLEX8 |       |
| 1.97E-01 | 0 0 | Cs5g11560.1/Cs5g115   | 4.53 | 0 | 0    | 2 | MASCOT | T      | PLEX8 |       |
| 1.42E-01 | 0 0 | Cs5g11560.1/Cs5g115   | 6    | 0 | 0    | 2 | MASCOT | T      | PLEX8 |       |
| 2.24E-03 | 0 0 | Cs7g05310.1/Cs7g053   | 6    | 0 | 0    | 2 | MASCOT | T      | PLEX8 |       |
| 1.61E-02 | 0 0 | Cs7g05310.1/Cs7g053   | 8.56 | 0 | 0    | 2 | MASCOT | T      | PLEX8 |       |
| 3.24E-03 | 0 0 | Cs7g05310.1/Cs7g053   | 4.75 | 0 | 0    | 2 | MASCOT | T      | PLEX8 |       |
| 1.57E-03 | 0 0 | Cs7g05310.1/Cs7g053   | 4.54 | 0 | 0    | 2 | MASCOT | T      | PLEX8 |       |
| 2.50E-02 | 0 0 | Cs7g15130.1/Cs7g151   | 4.37 | 0 | 0    | 2 | MASCOT | T      | PLEX8 |       |
| 6.55E-03 | 0 0 | Cs7g15130.1/Cs7g151   | 5.81 | 0 | 0    | 2 | MASCOT | T      | PLEX8 |       |
| 2.69E-02 | 0 0 | Cs7g15130.1/Cs7g151   | 4.09 | 0 | 0    | 2 | MASCOT | T      | PLEX8 |       |
| 1.81E-03 | 0 0 | Cs7g15130.1/Cs7g151   | 4.25 | 0 | 0    | 2 | MASCOT | T      | PLEX8 |       |
| 1.77E-02 | 0 0 | Cs8g06460.1           | 5.15 | 0 | 0    | 2 | MASCOT | T      | PLEX8 |       |
| 5.62E-02 | 0 0 | Cs8g06460.1/Cs8g064   | 6    | 0 | 0    | 2 | MASCOT | T      | PLEX8 |       |
| 2.27E-03 | 0 0 | Cs8g06460.1/Cs8g064   | 3.93 | 0 | 0    | 2 | MASCOT | T      | PLEX8 |       |
| 3.34E-02 | 0 0 | Cs8g06460.1/Cs8g064   | 8.2  | 0 | 0    | 2 | MASCOT | T      | PLEX8 |       |
| 3.36E-02 | 0 0 | Cs8g07590.1           | 6.07 | 1 | 0    | 2 | MASCOT | T      | PLEX8 |       |
| 6.61E-02 | 0 0 | Cs8g07590.1           | 5.84 | 0 | 0    | 2 | MASCOT | T      | PLEX8 |       |
| 4.97E-03 | 0 0 | Cs8g07590.1           | 5.21 | 0 | 0    | 2 | MASCOT | T      | PLEX8 |       |
| 1.29E-04 | 0 0 | Cs8g07590.1           | 5.55 | 0 | 0    | 2 | MASCOT | T      | PLEX8 |       |
| 4.85E-03 | 0 0 | Cs9g01720.1/Cs9g017   | 4.53 | 0 | 0    | 2 | MASCOT | T      | PLEX8 |       |
| 1.52E-03 | 0 0 | Cs9g01720.1/Cs9g017   | 6.46 | 0 | 0    | 2 | MASCOT | T      | PLEX8 |       |
| 3.89E-01 | 0 0 | Cs9g01720.1/Cs9g017   | 4.37 | 0 | 0    | 2 | MASCOT | T      | PLEX8 |       |
| 1.92E-02 | 0 0 | Cs9g01720.1/Cs9g017   | 4.21 | 0 | 0    | 2 | MASCOT | T      | PLEX8 |       |
| 2.73E-02 | 0 0 | Cs9g08070.1/Cs9g080   | 5.21 | 0 | 0    | 2 | MASCOT | T      | PLEX8 |       |
| 9.11E-02 | 0 0 | Cs9g08070.1/Cs9g080   | 8.76 | 0 | 0    | 2 | MASCOT | T      | PLEX8 |       |
| 3.70E-01 | 0 0 | Cs9g08070.1/Cs9g080   | 4.37 | 0 | 0    | 2 | MASCOT | T      | PLEX8 |       |
| 1.17E-01 | 0 0 | Cs9g08070.1/Cs9g080   | 5.84 | 0 | 0    | 2 | MASCOT | T      | PLEX8 |       |
| 1.54E-01 | 0 0 | Cs9g11110.1/Cs9g111   | 5.84 | 0 | 0    | 2 | MASCOT | T      | PLEX8 |       |
| 4.76E-03 | 0 0 | Cs9g11110.1/Cs9g111   | 5.84 | 0 | 0    | 2 | MASCOT | T      | PLEX8 |       |
| 8.48E-02 | 0 0 | Cs9g11110.1/Cs9g111   | 5.98 | 0 | 0    | 2 | MASCOT | T      | PLEX8 |       |
| 3.16E-03 | 0 0 | Cs9g11110.1/Cs9g111   | 5.5  | 0 | 0    | 2 | MASCOT | T      | PLEX8 |       |
| 5.72E-02 | 0 0 | Cs9g11870.1           | 3.92 | 0 | 0    | 2 | MASCOT | T      | PLEX8 |       |
| 1.85E-02 | 0 0 | Cs9g11870.1           | 8.63 | 0 | 0    | 2 | MASCOT | T      | PLEX8 |       |
| 1.62E-01 | 0 0 | Cs9g11870.1           | 5.59 | 0 | 0    | 2 | MASCOT | T      | PLEX8 |       |
| 3.70E-02 | 0 0 | Cs9g11870.1           | 9.47 | 0 | 0    | 2 | MASCOT | T      | PLEX8 |       |
| 2.02E-03 | 0 0 | Cs9g13160.1/Cs9g131   | 6.05 | 0 | 0    | 2 | MASCOT | T      | PLEX8 |       |
| 1.78E-01 | 0 0 | Cs9g13160.1/Cs9g131   | 6.05 | 0 | 0    | 2 | MASCOT | T      | PLEX8 |       |
| 2.97E-02 | 0 0 | Cs9g13160.1/Cs9g131   | 8.8  | 0 | 0    | 2 | MASCOT | T      | PLEX8 |       |
| 4.59E-03 | 0 0 | Cs9g13160.1/Cs9g131   | 6.05 | 0 | 0    | 2 | MASCOT | T      | PLEX8 |       |
| 2.52E-02 | 0 0 | orange1.1t00354.1/ora | 6.79 | 0 | 0    | 2 | MASCOT | T      | PLEX8 |       |
| 4.92E-02 | 0 0 | orange1.1t00354.1     | 4.53 | 0 | 0    | 2 | MASCOT | T      | PLEX8 |       |
| 2.34E-02 | 0 0 | orange1.1t00354.1     | 4.37 | 0 | 15.9 | 0 | 2      | MASCOT | T     | PLEX8 |

|          |     |                       |      |   |   |   |        |   |       |
|----------|-----|-----------------------|------|---|---|---|--------|---|-------|
| 2.74E-03 | 0 0 | orange1.1t00354.1/ora | 6.75 | 0 | 0 | 2 | MASCOT | T | PLEX8 |
| 1.80E-01 | 0 0 | orange1.1t02724.1     | 6    | 0 | 0 | 2 | MASCOT | T |       |
| 3.61E-02 | 0 0 | orange1.1t02724.1     | 6.74 | 0 | 0 | 2 | MASCOT | T | PLEX8 |
| 2.51E-02 | 0 0 | orange1.1t02724.1     | 8.8  | 0 | 0 | 2 | MASCOT | T | PLEX8 |
| 1.25E-03 | 0 0 | orange1.1t02724.1     | 4.03 | 0 | 0 | 2 | MASCOT | T |       |
| 4.37E-02 | 0 0 | orange1.1t03277.1     | 5.84 | 0 | 0 | 2 | MASCOT | T | PLEX8 |
| 1.20E-03 | 0 0 | orange1.1t03277.1     | 5.84 | 0 | 0 | 2 | MASCOT | T | PLEX8 |
| 2.35E-02 | 0 0 | orange1.1t03277.1     | 8.59 | 0 | 0 | 2 | MASCOT | T | PLEX8 |
| 4.96E-02 | 0 0 | orange1.1t03277.1     | 8.75 | 1 | 0 | 2 | MASCOT | T | PLEX8 |
| 4.06E-02 | 0 0 | Cs9g05030.1/Cs9g050   | 6.07 | 1 | 0 | 2 | MASCOT | T | PLEX8 |
| 1.87E-03 | 0 0 | Cs9g05030.1/Cs9g050   | 6.07 | 1 | 0 | 2 | MASCOT | T | PLEX8 |
| 2.19E-01 | 0 0 | Cs9g05030.1/Cs9g050   | 4.37 | 0 | 0 | 2 | MASCOT | T | PLEX8 |
| 2.19E-01 | 0 0 | Cs9g05030.1/Cs9g050   | 4.37 | 0 | 0 | 2 | MASCOT | T |       |
| 8.93E-03 | 0 0 | Cs9g05030.1/Cs9g050   | 4.37 | 0 | 0 | 2 | MASCOT | T | PLEX8 |
| 2.18E-03 | 0 0 | Cs9g05030.1/Cs9g050   | 4.37 | 0 | 0 | 2 | MASCOT | T | PLEX8 |
| 1.41E-02 | 0 0 | Cs9g05030.1/Cs9g050   | 4.37 | 0 | 0 | 2 | MASCOT | T | PLEX8 |
| 2.72E-02 | 0 0 | Cs9g05030.1/Cs9g050   | 4.37 | 0 | 0 | 2 | MASCOT | T | PLEX8 |
| 3.98E-03 | 0 0 | Cs9g05030.1/Cs9g050   | 4.37 | 0 | 0 | 2 | MASCOT | T | PLEX8 |
| 8.22E-02 | 0 0 | Cs9g05030.1/Cs9g050   | 4.37 | 0 | 0 | 2 | MASCOT | T | PLEX8 |
| 1.02E-03 | 0 0 | Cs9g05030.1/Cs9g050   | 4.37 | 0 | 0 | 2 | MASCOT | T |       |
| 3.07E-03 | 0 0 | Cs9g05030.1/Cs9g050   | 4.37 | 0 | 0 | 2 | MASCOT | T | PLEX8 |
| 1.46E-01 | 0 0 | Cs9g05030.1/Cs9g050   | 4.37 | 0 | 0 | 2 | MASCOT | T | PLEX8 |
| 1.17E-01 | 0 0 | Cs9g05030.1/Cs9g050   | 4.37 | 0 | 0 | 2 | MASCOT | T | PLEX8 |
| 1.05E-03 | 0 0 | Cs9g05030.1/Cs9g050   | 4.37 | 0 | 0 | 2 | MASCOT | T | PLEX8 |
| 9.87E-04 | 0 0 | Cs9g05030.1/Cs9g050   | 4.37 | 0 | 0 | 2 | MASCOT | T | PLEX8 |
| 9.35E-06 | 0 0 | Cs9g05030.1/Cs9g050   | 4.37 | 0 | 0 | 2 | MASCOT | T | PLEX8 |
| 5.04E-03 | 0 0 | Cs9g05030.1/Cs9g050   | 4.37 | 0 | 0 | 2 | MASCOT | T |       |
| 4.55E-01 | 0 0 | Cs9g05030.1/Cs9g050   | 4.37 | 0 | 0 | 2 | MASCOT | T |       |
| 8.47E-02 | 0 0 | Cs9g05030.1/Cs9g050   | 4.37 | 0 | 0 | 2 | MASCOT | T |       |
| 4.84E-02 | 0 0 | Cs9g05030.1/Cs9g050   | 4.37 | 0 | 0 | 2 | MASCOT | T |       |
| 1.66E-03 | 0 0 | Cs9g05030.1/Cs9g050   | 4.37 | 0 | 0 | 2 | MASCOT | T |       |
| 8.84E-03 | 0 0 | Cs9g05030.1/Cs9g050   | 4.37 | 0 | 0 | 2 | MASCOT | T |       |
| 8.41E-04 | 0 0 | Cs9g05030.1/Cs9g050   | 4.37 | 0 | 0 | 2 | MASCOT | T |       |
| 1.14E-01 | 0 0 | Cs9g05030.1/Cs9g050   | 4.37 | 0 | 0 | 2 | MASCOT | T |       |
| 8.49E-02 | 0 0 | Cs9g05030.1/Cs9g050   | 4.37 | 0 | 0 | 2 | MASCOT | T |       |
| 2.87E-03 | 0 0 | Cs9g05030.1/Cs9g050   | 4.37 | 0 | 0 | 2 | MASCOT | T |       |
| 1.11E-01 | 0 0 | Cs9g05030.1/Cs9g050   | 4.37 | 0 | 0 | 2 | MASCOT | T |       |
| 9.93E-04 | 0 0 | Cs9g05030.1/Cs9g050   | 4.37 | 0 | 0 | 2 | MASCOT | T |       |
| 1.04E-05 | 0 0 | Cs9g05030.1/Cs9g050   | 4.37 | 0 | 0 | 2 | MASCOT | T |       |
| 2.26E-04 | 0 0 | Cs9g05030.1/Cs9g050   | 4.37 | 0 | 0 | 2 | MASCOT | T |       |
| 4.79E-04 | 0 0 | Cs9g05030.1/Cs9g050   | 4.37 | 0 | 0 | 2 | MASCOT | T |       |
| 1.05E-05 | 0 0 | Cs9g05030.1/Cs9g050   | 4.37 | 0 | 0 | 2 | MASCOT | T |       |
| 1.43E-04 | 0 0 | Cs9g05030.1/Cs9g050   | 4.37 | 0 | 0 | 2 | MASCOT | T |       |
| 5.68E-02 | 0 0 | Cs9g05030.1/Cs9g050   | 4.37 | 0 | 0 | 2 | MASCOT | T |       |
| 1.11E-02 | 0 0 | Cs9g05030.1/Cs9g050   | 4.37 | 0 | 0 | 2 | MASCOT | T |       |
| 7.43E-03 | 0 0 | Cs9g05030.1/Cs9g050   | 4.37 | 0 | 0 | 2 | MASCOT | T | PLEX8 |
| 2.16E-02 | 0 0 | Cs9g05030.1/Cs9g050   | 4.37 | 0 | 0 | 2 | MASCOT | T |       |
| 2.35E-02 | 0 0 | Cs9g05030.1/Cs9g050   | 4.37 | 0 | 0 | 2 | MASCOT | T | PLEX8 |
| 5.15E-02 | 0 0 | Cs9g05030.1/Cs9g050   | 4.37 | 0 | 0 | 2 | MASCOT | T | PLEX8 |
| 4.22E-04 | 0 0 | Cs9g05030.1/Cs9g050   | 4.37 | 0 | 0 | 2 | MASCOT | T | PLEX8 |
| 1.05E-03 | 0 0 | Cs9g05030.1/Cs9g050   | 4.37 | 0 | 0 | 2 | MASCOT | T | PLEX8 |

|          |     |                      |      |   |      |   |        |        |       |       |
|----------|-----|----------------------|------|---|------|---|--------|--------|-------|-------|
| 1.80E-02 | 0 0 | Cs9g05030.1/Cs9g050  | 4.37 | 0 | 0    | 2 | MASCOT | T      | PLEX8 |       |
| 6.12E-01 | 0 0 | Cs9g05030.1/Cs9g050  | 8.19 | 0 | 0    | 2 | MASCOT | T      | PLEX8 |       |
| 4.95E-02 | 0 0 | Cs1g02870.1/Cs1g028  | 8.47 | 0 | 0    | 2 | MASCOT | T      | PLEX8 |       |
| 9.24E-02 | 0 0 | Cs1g02870.1/Cs1g028  | 8.47 | 0 | 0    | 2 | MASCOT | T      | PLEX8 |       |
| 2.16E-01 | 0 0 | Cs1g02870.1/Cs1g028  | 8.47 | 0 | 0    | 2 | MASCOT | T      | PLEX8 |       |
| 1.17E-02 | 0 0 | Cs1g02870.1/Cs1g028  | 8.47 | 0 | 0    | 2 | MASCOT | T      | PLEX8 |       |
| 5.86E-02 | 0 0 | Cs1g02870.1/Cs1g028  | 8.47 | 0 | 0    | 2 | MASCOT | T      | PLEX8 |       |
| 1.00E-01 | 0 0 | Cs1g02870.1/Cs1g028  | 8.47 | 0 | 0    | 2 | MASCOT | T      | PLEX8 |       |
| 7.32E-02 | 0 0 | Cs1g02870.1/Cs1g028  | 8.47 | 0 | 0    | 2 | MASCOT | T      | PLEX8 |       |
| 3.48E-02 | 0 0 | Cs1g02870.1/Cs1g028  | 8.47 | 0 | 0    | 2 | MASCOT | T      | PLEX8 |       |
| 1.30E-01 | 0 0 | Cs1g02870.1/Cs1g028  | 8.47 | 0 | 0    | 2 | MASCOT | T      | PLEX8 |       |
| 6.99E-02 | 0 0 | Cs1g02870.1/Cs1g028  | 8.47 | 0 | 0    | 2 | MASCOT | T      | PLEX8 |       |
| 6.78E-02 | 0 0 | Cs1g02870.1/Cs1g028  | 8.47 | 0 | 0    | 2 | MASCOT | T      | PLEX8 |       |
| 2.21E-02 | 0 0 | Cs1g02870.1/Cs1g028  | 8.47 | 0 | 0    | 2 | MASCOT | T      | PLEX8 |       |
| 1.72E-01 | 0 0 | Cs1g02870.1/Cs1g028  | 8.47 | 0 | 0    | 2 | MASCOT | T      | PLEX8 |       |
| 3.31E-02 | 0 0 | Cs1g02870.1/Cs1g028  | 8.47 | 0 | 0    | 2 | MASCOT | T      | PLEX8 |       |
| 1.35E-01 | 0 0 | Cs1g02870.1/Cs1g028  | 8.47 | 0 | 0    | 2 | MASCOT | T      | PLEX8 |       |
| 7.49E-02 | 0 0 | Cs1g02870.1/Cs1g028  | 8.47 | 0 | 0    | 2 | MASCOT | T      | PLEX8 |       |
| 1.22E-01 | 0 0 | Cs1g02870.1/Cs1g028  | 8.47 | 0 | 0    | 2 | MASCOT | T      |       |       |
| 2.83E-01 | 0 0 | Cs1g02870.1          | 8.23 | 0 | 0    | 2 | MASCOT | T      |       |       |
| 5.18E-01 | 0 0 | Cs1g02870.1          | 8.23 | 0 | 0    | 2 | MASCOT | T      |       |       |
| 9.06E-02 | 0 0 | Cs1g02870.1/Cs1g028  | 4.53 | 0 | 0    | 2 | MASCOT | T      | PLEX8 |       |
| 2.43E-01 | 0 0 | Cs1g02870.1/Cs1g028  | 4.53 | 0 | 0    | 2 | MASCOT | T      | PLEX8 |       |
| 2.68E-01 | 0 0 | Cs1g02870.1/Cs1g028  | 4.53 | 0 | 0    | 2 | MASCOT | T      | PLEX8 |       |
| 2.73E-01 | 0 0 | Cs1g02870.1/Cs1g028  | 4.53 | 0 | 0    | 2 | MASCOT | T      | PLEX8 |       |
| 1.57E-04 | 0 0 | Cs2g16220.1/Cs2g162  | 4.14 | 0 | 0    | 2 | MASCOT | T      | PLEX8 |       |
| 2.09E-01 | 0 0 | Cs2g16220.1/Cs2g162  | 4.14 | 0 | 0    | 2 | MASCOT | T      |       |       |
| 6.39E-06 | 0 0 | Cs2g16220.1/Cs2g162  | 4.14 | 0 | 0    | 2 | MASCOT | T      |       |       |
| 3.97E-03 | 0 0 | Cs2g16240.1 ! Cs2g16 | 5.81 | 0 | 0    | 2 | MASCOT | T      | PLEX8 |       |
| 4.26E-02 | 0 0 | Cs2g16240.1 ! Cs2g16 | 5.81 | 0 | 0    | 2 | MASCOT | T      | PLEX8 |       |
| 3.49E-02 | 0 0 | Cs2g16240.1 ! Cs2g16 | 5.81 | 0 | 0    | 2 | MASCOT | T      | PLEX8 |       |
| 5.71E-02 | 0 0 | Cs2g16240.1 ! Cs2g16 | 5.81 | 0 | 0    | 2 | MASCOT | T      | PLEX8 |       |
| 4.40E-02 | 0 0 | Cs2g16240.1 ! Cs2g16 | 5.81 | 0 | 0    | 2 | MASCOT | T      | PLEX8 |       |
| 1.60E-03 | 0 0 | Cs2g16240.1 ! Cs2g16 | 5.81 | 0 | 0    | 2 | MASCOT | T      | PLEX8 |       |
| 3.85E-01 | 0 0 | Cs2g16240.1 ! Cs2g16 | 5.81 | 0 | 0    | 2 | MASCOT | T      |       |       |
| 8.27E-02 | 0 0 | Cs2g16240.1 ! Cs2g16 | 5.81 | 0 | 0    | 2 | MASCOT | T      | PLEX8 |       |
| 1.18E-01 | 0 0 | Cs2g16240.1 ! Cs2g16 | 5.81 | 0 | 0    | 2 | MASCOT | T      | PLEX8 |       |
| 1.63E-03 | 0 0 | Cs2g16240.1 ! Cs2g16 | 5.81 | 0 | 0    | 2 | MASCOT | T      | PLEX8 |       |
| 1.00E-01 | 0 0 | Cs2g16240.1 ! Cs2g16 | 5.81 | 0 | 0    | 2 | MASCOT | T      | PLEX8 |       |
| 5.04E-03 | 0 0 | Cs2g16240.1 ! Cs2g16 | 5.81 | 0 | 0    | 2 | MASCOT | T      | PLEX8 |       |
| 2.20E-03 | 0 0 | Cs2g16240.1 ! Cs2g16 | 5.81 | 0 | 0    | 2 | MASCOT | T      | PLEX8 |       |
| 1.84E-02 | 0 0 | Cs2g16240.1          | 6.75 | 0 | 0    | 2 | MASCOT | T      | PLEX8 |       |
| 1.19E-01 | 0 0 | Cs2g16240.1          | 6.75 | 0 | 0    | 2 | MASCOT | T      | PLEX8 |       |
| 2.27E-02 | 0 0 | Cs2g16240.1          | 6.75 | 0 | 0    | 2 | MASCOT | T      | PLEX8 |       |
| 7.50E-02 | 0 0 | Cs2g16240.1          | 6.75 | 0 | 0    | 2 | MASCOT | T      | PLEX8 |       |
| 1.11E-01 | 0 0 | Cs5g27060.1          | 6.75 | 0 | 15.9 | 0 | 2      | MASCOT | T     | PLEX8 |
| 1.65E-01 | 0 0 | Cs5g27060.1          | 6.75 | 0 | 15.9 | 0 | 2      | MASCOT | T     | PLEX8 |
| 2.56E-02 | 0 0 | Cs5g27060.1          | 6.75 | 0 | 15.9 | 0 | 2      | MASCOT | T     | PLEX8 |
| 6.00E-02 | 0 0 | Cs5g27060.1          | 6.75 | 0 | 0    | 2 | MASCOT | T      | PLEX8 |       |
| 1.37E-01 | 0 0 | Cs5g27060.1          | 6.75 | 0 | 0    | 2 | MASCOT | T      | PLEX8 |       |
| 4.12E-02 | 0 0 | Cs5g27060.1          | 6.75 | 0 | 0    | 2 | MASCOT | T      | PLEX8 |       |

|          |     |                      |      |   |   |          |   |       |
|----------|-----|----------------------|------|---|---|----------|---|-------|
| 1.12E-02 | 0 0 | Cs5g27060.1          | 6.75 | 0 | 0 | 2 MASCOT | T | PLEX8 |
| 1.36E-01 | 0 0 | Cs5g27060.1          | 4.75 | 0 | 0 | 2 MASCOT | T | PLEX8 |
| 4.65E-02 | 0 0 | Cs5g27060.1          | 4.75 | 0 | 0 | 2 MASCOT | T | PLEX8 |
| 1.20E-02 | 0 0 | Cs5g27060.1          | 4.75 | 0 | 0 | 2 MASCOT | T | PLEX8 |
| 7.19E-02 | 0 0 | Cs5g27060.1          | 4.75 | 0 | 0 | 2 MASCOT | T | PLEX8 |
| 2.48E-03 | 0 0 | Cs5g27060.1          | 4.75 | 0 | 0 | 2 MASCOT | T | PLEX8 |
| 3.50E-01 | 0 0 | Cs5g27060.1          | 4.75 | 0 | 0 | 2 MASCOT | T |       |
| 2.03E-01 | 0 0 | Cs5g27060.1          | 4.75 | 0 | 0 | 2 MASCOT | T |       |
| 5.82E-02 | 0 0 | Cs5g27060.1          | 4.75 | 0 | 0 | 2 MASCOT | T | PLEX8 |
| 1.48E-01 | 0 0 | Cs5g27060.1          | 4.75 | 0 | 0 | 2 MASCOT | T | PLEX8 |
| 8.75E-02 | 0 0 | Cs5g27060.1          | 4.75 | 0 | 0 | 2 MASCOT | T |       |
| 1.84E-01 | 0 0 | Cs5g27060.1          | 6.54 | 0 | 0 | 2 MASCOT | T | PLEX8 |
| 8.65E-02 | 0 0 | orange1.1t03977.1    | 6    | 0 | 0 | 2 MASCOT | T | PLEX8 |
| 2.48E-02 | 0 0 | orange1.1t03977.1    | 6    | 0 | 0 | 2 MASCOT | T | PLEX8 |
| 2.85E-01 | 0 0 | orange1.1t03977.1    | 6    | 0 | 0 | 2 MASCOT | T | PLEX8 |
| 4.49E-02 | 0 0 | orange1.1t03977.1    | 6    | 0 | 0 | 2 MASCOT | T | PLEX8 |
| 2.49E-02 | 0 0 | orange1.1t03977.1    | 4.37 | 0 | 0 | 2 MASCOT | T |       |
| 4.99E-02 | 0 0 | orange1.1t03977.1    | 4.37 | 0 | 0 | 2 MASCOT | T | PLEX8 |
| 6.56E-03 | 0 0 | orange1.1t03977.1    | 4.37 | 0 | 0 | 2 MASCOT | T |       |
| 9.21E-02 | 0 0 | orange1.1t03977.1    | 4.37 | 0 | 0 | 2 MASCOT | T |       |
| 1.03E-03 | 0 0 | orange1.1t03977.1    | 4.37 | 0 | 0 | 2 MASCOT | T |       |
| 6.60E-04 | 0 0 | orange1.1t03977.1    | 4.37 | 0 | 0 | 2 MASCOT | T |       |
| 1.05E-04 | 0 0 | orange1.1t03977.1    | 4.37 | 0 | 0 | 2 MASCOT | T |       |
| 8.42E-04 | 0 0 | orange1.1t03977.1    | 4.37 | 0 | 0 | 2 MASCOT | T |       |
| 4.52E-03 | 0 0 | orange1.1t03977.1    | 4.37 | 0 | 0 | 2 MASCOT | T |       |
| 4.85E-06 | 0 0 | orange1.1t03977.1    | 4.37 | 0 | 0 | 2 MASCOT | T |       |
| 4.00E-04 | 0 0 | orange1.1t03977.1    | 5.32 | 0 | 0 | 2 MASCOT | T | PLEX8 |
| 1.31E-04 | 0 0 | orange1.1t03977.1    | 5.32 | 0 | 0 | 2 MASCOT | T |       |
| 1.91E-03 | 0 0 | orange1.1t03977.1    | 5.32 | 0 | 0 | 2 MASCOT | T |       |
| 1.83E-01 | 0 0 | Cs2g16200.1/Cs2g162  | 5.55 | 0 | 0 | 2 MASCOT | T | PLEX8 |
| 3.97E-03 | 0 0 | Cs2g16240.1 ! Cs2g16 | 5.81 | 0 | 0 | 2 MASCOT | T | PLEX8 |
| 4.26E-02 | 0 0 | Cs2g16240.1 ! Cs2g16 | 5.81 | 0 | 0 | 2 MASCOT | T | PLEX8 |
| 3.49E-02 | 0 0 | Cs2g16240.1 ! Cs2g16 | 5.81 | 0 | 0 | 2 MASCOT | T | PLEX8 |
| 5.71E-02 | 0 0 | Cs2g16240.1 ! Cs2g16 | 5.81 | 0 | 0 | 2 MASCOT | T | PLEX8 |
| 4.40E-02 | 0 0 | Cs2g16240.1 ! Cs2g16 | 5.81 | 0 | 0 | 2 MASCOT | T | PLEX8 |
| 1.60E-03 | 0 0 | Cs2g16240.1 ! Cs2g16 | 5.81 | 0 | 0 | 2 MASCOT | T | PLEX8 |
| 3.85E-01 | 0 0 | Cs2g16240.1 ! Cs2g16 | 5.81 | 0 | 0 | 2 MASCOT | T |       |
| 8.27E-02 | 0 0 | Cs2g16240.1 ! Cs2g16 | 5.81 | 0 | 0 | 2 MASCOT | T | PLEX8 |
| 1.18E-01 | 0 0 | Cs2g16240.1 ! Cs2g16 | 5.81 | 0 | 0 | 2 MASCOT | T | PLEX8 |
| 1.63E-03 | 0 0 | Cs2g16240.1 ! Cs2g16 | 5.81 | 0 | 0 | 2 MASCOT | T | PLEX8 |
| 1.00E-01 | 0 0 | Cs2g16240.1 ! Cs2g16 | 5.81 | 0 | 0 | 2 MASCOT | T | PLEX8 |
| 5.04E-03 | 0 0 | Cs2g16240.1 ! Cs2g16 | 5.81 | 0 | 0 | 2 MASCOT | T | PLEX8 |
| 2.20E-03 | 0 0 | Cs2g16240.1 ! Cs2g16 | 5.81 | 0 | 0 | 2 MASCOT | T | PLEX8 |
| 7.43E-02 | 0 0 | Cs2g16200.1/orange1. | 4.53 | 0 | 0 | 2 MASCOT | T | PLEX8 |
| 4.23E-02 | 0 0 | Cs2g16200.1/orange1. | 4.53 | 0 | 0 | 2 MASCOT | T | PLEX8 |
| 2.66E-02 | 0 0 | Cs2g16200.1/orange1. | 4.53 | 0 | 0 | 2 MASCOT | T | PLEX8 |
| 2.06E-01 | 0 0 | Cs2g02180.1/Cs2g021  | 4.53 | 0 | 0 | 2 MASCOT | T | PLEX8 |
| 9.10E-06 | 0 0 | Cs2g02180.1/Cs2g021  | 4.53 | 0 | 0 | 2 MASCOT | T | PLEX8 |
| 1.51E-02 | 0 0 | Cs2g02180.1/Cs2g021  | 4.53 | 0 | 0 | 2 MASCOT | T | PLEX8 |
| 1.83E-01 | 0 0 | Cs2g02180.1/Cs2g021  | 4.53 | 0 | 0 | 2 MASCOT | T | PLEX8 |
| 1.57E-01 | 0 0 | Cs2g02180.1/Cs2g021  | 4.53 | 0 | 0 | 2 MASCOT | T | PLEX8 |

|          |     |                     |      |   |      |   |        |        |       |       |
|----------|-----|---------------------|------|---|------|---|--------|--------|-------|-------|
| 4.13E-01 | 0 0 | Cs2g02180.1/Cs2g021 | 4.53 | 0 | 0    | 2 | MASCOT | T      | PLEX8 |       |
| 8.20E-02 | 0 0 | Cs2g02180.1/Cs2g021 | 4.53 | 0 | 0    | 2 | MASCOT | T      | PLEX8 |       |
| 5.90E-02 | 0 0 | Cs2g02180.1/Cs2g021 | 4.53 | 0 | 0    | 2 | MASCOT | T      | PLEX8 |       |
| 5.29E-01 | 0 0 | Cs2g02180.1/Cs2g021 | 4.53 | 0 | 0    | 2 | MASCOT | T      | PLEX8 |       |
| 1.35E-01 | 0 0 | Cs2g02180.1/Cs2g021 | 4.53 | 0 | 0    | 2 | MASCOT | T      | PLEX8 |       |
| 5.29E-02 | 0 0 | Cs2g02180.1/Cs2g021 | 4.53 | 0 | 0    | 2 | MASCOT | T      | PLEX8 |       |
| 3.49E-07 | 0 0 | Cs2g02180.1/Cs2g021 | 4    | 0 | 0    | 2 | MASCOT | T      | PLEX8 |       |
| 5.90E-04 | 0 0 | Cs2g02180.1/Cs2g021 | 4    | 0 | 0    | 2 | MASCOT | T      | PLEX8 |       |
| 1.19E-06 | 0 0 | Cs2g02180.1/Cs2g021 | 4    | 0 | 0    | 2 | MASCOT | T      | PLEX8 |       |
| 2.96E-02 | 0 0 | Cs2g02180.1/Cs2g021 | 4    | 0 | 0    | 2 | MASCOT | T      | PLEX8 |       |
| 3.92E-03 | 0 0 | Cs2g02180.1/Cs2g021 | 4    | 0 | 0    | 2 | MASCOT | T      | PLEX8 |       |
| 1.83E-02 | 0 0 | Cs5g01590.1/Cs5g015 | 6.05 | 0 | 0    | 2 | MASCOT | T      | PLEX8 |       |
| 7.33E-04 | 0 0 | Cs5g01590.1/Cs5g015 | 6.05 | 0 | 0    | 2 | MASCOT | T      | PLEX8 |       |
| 6.64E-03 | 0 0 | Cs5g01590.1/Cs5g015 | 6.05 | 0 | 0    | 2 | MASCOT | T      | PLEX8 |       |
| 5.33E-02 | 0 0 | Cs5g01590.1/Cs5g015 | 6.05 | 0 | 0    | 2 | MASCOT | T      | PLEX8 |       |
| 1.94E-02 | 0 0 | Cs5g01590.1/Cs5g015 | 6.05 | 0 | 0    | 2 | MASCOT | T      | PLEX8 |       |
| 2.38E-02 | 0 0 | Cs5g01590.1/Cs5g015 | 6.05 | 0 | 0    | 2 | MASCOT | T      | PLEX8 |       |
| 2.66E-01 | 0 0 | Cs5g01590.1/Cs5g015 | 4.75 | 0 | 0    | 2 | MASCOT | T      | PLEX8 |       |
| 1.83E-01 | 0 0 | Cs5g01590.1/Cs5g015 | 4.75 | 0 | 0    | 2 | MASCOT | T      | PLEX8 |       |
| 3.02E-01 | 0 0 | Cs5g01590.1/Cs5g015 | 4.75 | 0 | 0    | 2 | MASCOT | T      | PLEX8 |       |
| 7.73E-03 | 0 0 | Cs5g01590.1/Cs5g015 | 4.75 | 0 | 0    | 2 | MASCOT | T      | PLEX8 |       |
| 5.71E-05 | 0 0 | Cs5g01590.1/Cs5g015 | 5.84 | 0 | 0    | 2 | MASCOT | T      | PLEX8 |       |
| 1.73E-02 | 0 0 | Cs5g01590.1/Cs5g015 | 5.84 | 0 | 0    | 2 | MASCOT | T      | PLEX8 |       |
| 5.87E-03 | 0 0 | Cs5g01590.1/Cs5g015 | 5.84 | 0 | 0    | 2 | MASCOT | T      | PLEX8 |       |
| 1.30E-01 | 0 0 | Cs5g01590.1/Cs5g015 | 5.84 | 0 | 0    | 2 | MASCOT | T      | PLEX8 |       |
| 5.75E-05 | 0 0 | Cs5g01590.1/Cs5g015 | 5.84 | 0 | 0    | 2 | MASCOT | T      | PLEX8 |       |
| 2.19E-02 | 0 0 | Cs5g01590.1/Cs5g015 | 5.84 | 0 | 0    | 2 | MASCOT | T      | PLEX8 |       |
| 1.01E-02 | 0 0 | Cs5g19640.1/Cs5g196 | 4.53 | 0 | 15.9 | 0 | 2      | MASCOT | T     | PLEX8 |
| 6.05E-03 | 0 0 | Cs5g19640.1/Cs5g196 | 4.53 | 0 | 0    | 2 | MASCOT | T      | PLEX8 |       |
| 1.12E-02 | 0 0 | Cs3g03120.1/Cs3g031 | 5.88 | 0 | 0    | 2 | MASCOT | T      | PLEX8 |       |
| 4.61E-03 | 0 0 | Cs3g03120.1/Cs3g031 | 5.88 | 0 | 0    | 2 | MASCOT | T      | PLEX8 |       |
| 1.99E-02 | 0 0 | Cs3g03120.1/Cs3g031 | 5.88 | 0 | 0    | 2 | MASCOT | T      | PLEX8 |       |
| 2.52E-02 | 0 0 | Cs3g03120.1/Cs3g031 | 5.88 | 0 | 0    | 2 | MASCOT | T      | PLEX8 |       |
| 4.61E-03 | 0 0 | Cs3g03120.1/Cs3g031 | 5.88 | 0 | 0    | 2 | MASCOT | T      | PLEX8 |       |
| 1.07E-01 | 0 0 | Cs3g03120.1/Cs3g031 | 5.88 | 0 | 0    | 2 | MASCOT | T      |       |       |
| 1.46E-01 | 0 0 | Cs3g03120.1/Cs3g031 | 5.88 | 0 | 0    | 2 | MASCOT | T      | PLEX8 |       |
| 1.45E-02 | 0 0 | Cs3g03120.1/Cs3g031 | 5.88 | 0 | 0    | 2 | MASCOT | T      | PLEX8 |       |
| 2.74E-02 | 0 0 | Cs3g03120.1/Cs3g031 | 8.5  | 0 | 0    | 2 | MASCOT | T      | PLEX8 |       |
| 8.81E-05 | 0 0 | Cs3g03120.1/Cs3g031 | 8.5  | 0 | 0    | 2 | MASCOT | T      | PLEX8 |       |
| 1.64E-05 | 0 0 | Cs3g03120.1/Cs3g031 | 8.5  | 0 | 0    | 2 | MASCOT | T      | PLEX8 |       |
| 2.77E-01 | 0 0 | Cs3g03120.1/Cs3g031 | 8.5  | 0 | 0    | 2 | MASCOT | T      |       |       |
| 6.78E-03 | 0 0 | Cs6g09150.1/Cs6g091 | 4.09 | 0 | 0    | 2 | MASCOT | T      | PLEX8 |       |
| 6.56E-03 | 0 0 | Cs6g09150.1/Cs6g091 | 4.09 | 0 | 0    | 2 | MASCOT | T      | PLEX8 |       |
| 3.20E-02 | 0 0 | Cs6g09150.1/Cs6g091 | 6.07 | 1 | 0    | 2 | MASCOT | T      |       |       |
| 2.90E-01 | 0 0 | Cs6g09150.1/Cs6g091 | 5.27 | 0 | 15.9 | 0 | 2      | MASCOT | T     | PLEX8 |
| 4.26E-02 | 0 0 | Cs6g09150.1/Cs6g091 | 5.27 | 0 | 15.9 | 0 | 2      | MASCOT | T     | PLEX8 |
| 3.16E-01 | 0 0 | Cs6g09150.1/Cs6g091 | 5.27 | 0 | 15.9 | 0 | 2      | MASCOT | T     |       |
| 3.33E-02 | 0 0 | Cs6g09150.1/Cs6g091 | 5.27 | 0 | 15.9 | 0 | 2      | MASCOT | T     | PLEX8 |
| 4.11E-03 | 0 0 | Cs6g09150.1/Cs6g091 | 5.27 | 0 | 15.9 | 0 | 2      | MASCOT | T     | PLEX8 |
| 1.05E-01 | 0 0 | Cs6g09150.1/Cs6g091 | 5.27 | 0 | 15.9 | 0 | 2      | MASCOT | T     |       |
| 4.21E-03 | 0 0 | Cs6g09150.1/Cs6g091 | 5.27 | 0 | 0    | 2 | MASCOT | T      | PLEX8 |       |



|          |     |                     |      |   |   |   |        |   |       |
|----------|-----|---------------------|------|---|---|---|--------|---|-------|
| 2.38E-02 | 0 0 | Cs6g09150.1/Cs6g091 | 5.27 | 0 | 0 | 2 | MASCOT | T | PLEX8 |
| 2.22E-02 | 0 0 | Cs6g09150.1/Cs6g091 | 5.27 | 0 | 0 | 2 | MASCOT | T | PLEX8 |
| 1.01E-02 | 0 0 | Cs6g09150.1/Cs6g091 | 5.27 | 0 | 0 | 2 | MASCOT | T | PLEX8 |
| 8.97E-03 | 0 0 | Cs6g09150.1/Cs6g091 | 5.27 | 0 | 0 | 2 | MASCOT | T | PLEX8 |
| 4.61E-03 | 0 0 | Cs1g21090.1         | 4.14 | 0 | 0 | 2 | MASCOT | T | PLEX8 |
| 7.43E-02 | 0 0 | Cs1g21090.1         | 6    | 0 | 0 | 2 | MASCOT | T | PLEX8 |
| 9.87E-02 | 0 0 | Cs1g21090.1         | 6    | 0 | 0 | 2 | MASCOT | T | PLEX8 |
| 6.40E-02 | 0 0 | Cs1g21090.1         | 6    | 0 | 0 | 2 | MASCOT | T | PLEX8 |
| 9.60E-04 | 0 0 | Cs1g21090.1         | 6    | 0 | 0 | 2 | MASCOT | T |       |
| 1.45E-02 | 0 0 | Cs1g21090.1         | 6    | 0 | 0 | 2 | MASCOT | T |       |
| 2.30E-03 | 0 0 | Cs1g21090.1         | 6    | 0 | 0 | 2 | MASCOT | T |       |
| 2.47E-01 | 0 0 | Cs1g21090.1         | 6.75 | 0 | 0 | 2 | MASCOT | T | PLEX8 |
| 9.41E-02 | 0 0 | Cs1g21090.1         | 6.75 | 0 | 0 | 2 | MASCOT | T | PLEX8 |
| 5.80E-02 | 0 0 | Cs1g21090.1         | 6.75 | 0 | 0 | 2 | MASCOT | T | PLEX8 |
| 1.87E-01 | 0 0 | Cs1g21090.1         | 6.75 | 0 | 0 | 2 | MASCOT | T | PLEX8 |
| 6.83E-02 | 0 0 | Cs1g21090.1         | 6.75 | 0 | 0 | 2 | MASCOT | T |       |
| 3.55E-02 | 0 0 | Cs1g21090.1         | 6.75 | 0 | 0 | 2 | MASCOT | T |       |
| 6.26E-02 | 0 0 | Cs3g03120.1/Cs3g031 | 4.53 | 0 | 0 | 2 | MASCOT | T | PLEX8 |
| 1.12E-02 | 0 0 | Cs3g03120.1/Cs3g031 | 5.88 | 0 | 0 | 2 | MASCOT | T | PLEX8 |
| 4.61E-03 | 0 0 | Cs3g03120.1/Cs3g031 | 5.88 | 0 | 0 | 2 | MASCOT | T | PLEX8 |
| 1.99E-02 | 0 0 | Cs3g03120.1/Cs3g031 | 5.88 | 0 | 0 | 2 | MASCOT | T | PLEX8 |
| 2.52E-02 | 0 0 | Cs3g03120.1/Cs3g031 | 5.88 | 0 | 0 | 2 | MASCOT | T | PLEX8 |
| 4.61E-03 | 0 0 | Cs3g03120.1/Cs3g031 | 5.88 | 0 | 0 | 2 | MASCOT | T | PLEX8 |
| 1.07E-01 | 0 0 | Cs3g03120.1/Cs3g031 | 5.88 | 0 | 0 | 2 | MASCOT | T |       |
| 1.46E-01 | 0 0 | Cs3g03120.1/Cs3g031 | 5.88 | 0 | 0 | 2 | MASCOT | T | PLEX8 |
| 1.45E-02 | 0 0 | Cs3g03120.1/Cs3g031 | 5.88 | 0 | 0 | 2 | MASCOT | T | PLEX8 |
| 2.74E-02 | 0 0 | Cs3g03120.1/Cs3g031 | 8.5  | 0 | 0 | 2 | MASCOT | T | PLEX8 |
| 8.81E-05 | 0 0 | Cs3g03120.1/Cs3g031 | 8.5  | 0 | 0 | 2 | MASCOT | T | PLEX8 |
| 1.64E-05 | 0 0 | Cs3g03120.1/Cs3g031 | 8.5  | 0 | 0 | 2 | MASCOT | T | PLEX8 |
| 2.77E-01 | 0 0 | Cs3g03120.1/Cs3g031 | 8.5  | 0 | 0 | 2 | MASCOT | T |       |
| 4.40E-04 | 0 0 | Cs7g14410.1/Cs7g144 | 5.84 | 0 | 0 | 2 | MASCOT | T |       |
| 8.86E-03 | 0 0 | Cs7g14410.1/Cs7g144 | 5.84 | 0 | 0 | 2 | MASCOT | T |       |
| 1.81E-05 | 0 0 | Cs7g14410.1/Cs7g144 | 5.84 | 0 | 0 | 2 | MASCOT | T |       |
| 4.21E-05 | 0 0 | Cs7g14410.1/Cs7g144 | 5.84 | 0 | 0 | 2 | MASCOT | T |       |
| 3.38E-05 | 0 0 | Cs7g14410.1/Cs7g144 | 5.84 | 0 | 0 | 2 | MASCOT | T |       |
| 2.12E-03 | 0 0 | Cs7g14410.1/Cs7g144 | 4.68 | 0 | 0 | 2 | MASCOT | T | PLEX8 |
| 1.38E-02 | 0 0 | Cs7g14410.1/Cs7g144 | 4.68 | 0 | 0 | 2 | MASCOT | T | PLEX8 |
| 3.98E-03 | 0 0 | Cs7g14410.1/Cs7g144 | 4.14 | 0 | 0 | 2 | MASCOT | T | PLEX8 |
| 2.69E-02 | 0 0 | Cs7g14410.1/Cs7g144 | 4.14 | 0 | 0 | 2 | MASCOT | T | PLEX8 |
| 3.12E-04 | 0 0 | Cs7g14410.1/Cs7g144 | 4.14 | 0 | 0 | 2 | MASCOT | T | PLEX8 |
| 1.89E-03 | 0 0 | Cs7g14410.1/Cs7g144 | 4.14 | 0 | 0 | 2 | MASCOT | T | PLEX8 |
| 5.59E-03 | 0 0 | Cs7g14410.1/Cs7g144 | 4.14 | 0 | 0 | 2 | MASCOT | T | PLEX8 |
| 1.25E-02 | 0 0 | Cs7g14410.1/Cs7g144 | 4.14 | 0 | 0 | 2 | MASCOT | T | PLEX8 |
| 6.80E-02 | 0 0 | Cs7g19240.1/Cs7g192 | 6.05 | 0 | 0 | 2 | MASCOT | T | PLEX8 |
| 3.48E-02 | 0 0 | Cs7g19240.1/Cs7g192 | 6.05 | 0 | 0 | 2 | MASCOT | T | PLEX8 |
| 5.88E-02 | 0 0 | Cs7g19240.1/Cs7g192 | 6.05 | 0 | 0 | 2 | MASCOT | T | PLEX8 |
| 1.73E-01 | 0 0 | Cs7g19240.1/Cs7g192 | 4.53 | 0 | 0 | 2 | MASCOT | T | PLEX8 |
| 1.45E-01 | 0 0 | Cs7g19240.1/Cs7g192 | 4.53 | 0 | 0 | 2 | MASCOT | T | PLEX8 |
| 2.03E-01 | 0 0 | Cs7g19240.1/Cs7g192 | 4.53 | 0 | 0 | 2 | MASCOT | T | PLEX8 |
| 1.19E-01 | 0 0 | Cs7g19240.1/Cs7g192 | 4.53 | 0 | 0 | 2 | MASCOT | T | PLEX8 |
| 2.44E-01 | 0 0 | Cs7g19240.1/Cs7g192 | 4.53 | 0 | 0 | 2 | MASCOT | T | PLEX8 |

|          |     |                      |      |   |   |   |        |   |       |
|----------|-----|----------------------|------|---|---|---|--------|---|-------|
| 2.37E-01 | 0 0 | Cs7g19240.1/Cs7g192  | 4.53 | 0 | 0 | 2 | MASCOT | T | PLEX8 |
| 1.94E-01 | 0 0 | Cs7g19240.1/Cs7g192  | 4.53 | 0 | 0 | 2 | MASCOT | T |       |
| 4.85E-02 | 0 0 | Cs7g19240.1/Cs7g192  | 4.37 | 0 | 0 | 2 | MASCOT | T | PLEX8 |
| 2.21E-03 | 0 0 | Cs7g19240.1/Cs7g192  | 4.37 | 0 | 0 | 2 | MASCOT | T | PLEX8 |
| 3.27E-05 | 0 0 | Cs7g19240.1/Cs7g192  | 4.37 | 0 | 0 | 2 | MASCOT | T | PLEX8 |
| 9.94E-02 | 0 0 | Cs2g05530.1/Cs2g055  | 4.25 | 0 | 0 | 2 | MASCOT | T | PLEX8 |
| 1.25E-01 | 0 0 | Cs2g05530.1/Cs2g055  | 4.25 | 0 | 0 | 2 | MASCOT | T | PLEX8 |
| 3.10E-02 | 0 0 | Cs2g05530.1/Cs2g055  | 6.74 | 0 | 0 | 2 | MASCOT | T | PLEX8 |
| 1.18E-01 | 0 0 | Cs2g05530.1/Cs2g055  | 6.74 | 0 | 0 | 2 | MASCOT | T | PLEX8 |
| 2.86E-03 | 0 0 | Cs2g05530.1/Cs2g055  | 6.74 | 0 | 0 | 2 | MASCOT | T | PLEX8 |
| 1.91E-01 | 0 0 | Cs2g05530.1/Cs2g055  | 6.74 | 0 | 0 | 2 | MASCOT | T |       |
| 3.17E-01 | 0 0 | Cs2g05530.1/Cs2g055  | 6.74 | 0 | 0 | 2 | MASCOT | T |       |
| 2.49E-01 | 0 0 | Cs2g05530.1/Cs2g055  | 8.73 | 0 | 0 | 2 | MASCOT | T | PLEX8 |
| 2.64E-02 | 0 0 | Cs2g05530.1/Cs2g055  | 8.73 | 0 | 0 | 2 | MASCOT | T | PLEX8 |
| 3.77E-02 | 0 0 | Cs2g05530.1/Cs2g055  | 8.73 | 0 | 0 | 2 | MASCOT | T | PLEX8 |
| 1.95E-01 | 0 0 | Cs2g05530.1/Cs2g055  | 8.73 | 0 | 0 | 2 | MASCOT | T | PLEX8 |
| 1.63E-03 | 0 0 | Cs2g05530.1/Cs2g055  | 8.73 | 0 | 0 | 2 | MASCOT | T | PLEX8 |
| 8.34E-04 | 0 0 | Cs3g11010.1/Cs3g110  | 5.84 | 0 | 0 | 2 | MASCOT | T |       |
| 1.02E-01 | 0 0 | Cs3g11010.1/Cs3g111  | 6.71 | 0 | 0 | 2 | MASCOT | T | PLEX8 |
| 2.76E-05 | 0 0 | Cs3g11010.1/Cs3g111  | 6.71 | 0 | 0 | 2 | MASCOT | T | PLEX8 |
| 3.33E-01 | 0 0 | Cs3g11010.1/Cs3g111  | 6.71 | 0 | 0 | 2 | MASCOT | T |       |
| 8.08E-02 | 0 0 | Cs3g11010.1/Cs3g111  | 6.71 | 0 | 0 | 2 | MASCOT | T |       |
| 7.27E-03 | 0 0 | Cs3g11090.1 ! Cs3g11 | 8.75 | 0 | 0 | 2 | MASCOT | T | PLEX8 |
| 2.22E-04 | 0 0 | Cs3g11090.1 ! Cs3g11 | 8.75 | 0 | 0 | 2 | MASCOT | T | PLEX8 |
| 1.02E-03 | 0 0 | Cs3g11090.1 ! Cs3g11 | 8.75 | 0 | 0 | 2 | MASCOT | T | PLEX8 |
| 9.00E-04 | 0 0 | Cs3g11090.1 ! Cs3g11 | 8.75 | 0 | 0 | 2 | MASCOT | T | PLEX8 |
| 1.47E-02 | 0 0 | Cs3g11090.1 ! Cs3g11 | 8.75 | 0 | 0 | 2 | MASCOT | T | PLEX8 |
| 2.36E-05 | 0 0 | Cs3g11090.1 ! Cs3g11 | 8.75 | 0 | 0 | 2 | MASCOT | T | PLEX8 |
| 3.53E-02 | 0 0 | Cs3g11090.1 ! Cs3g11 | 8.75 | 0 | 0 | 2 | MASCOT | T |       |
| 2.49E-01 | 0 0 | Cs8g15520.1          | 8.8  | 0 | 0 | 2 | MASCOT | T | PLEX8 |
| 1.68E-01 | 0 0 | Cs8g15520.1          | 8.8  | 0 | 0 | 2 | MASCOT | T | PLEX8 |
| 1.82E-01 | 0 0 | Cs8g15520.1          | 8.8  | 0 | 0 | 2 | MASCOT | T | PLEX8 |
| 5.62E-02 | 0 0 | Cs8g15520.1          | 8.8  | 0 | 0 | 2 | MASCOT | T | PLEX8 |
| 2.74E-01 | 0 0 | Cs8g15520.1          | 8.8  | 0 | 0 | 2 | MASCOT | T |       |
| 3.78E-03 | 0 0 | Cs8g15520.1          | 6.75 | 0 | 0 | 2 | MASCOT | T | PLEX8 |
| 2.12E-05 | 0 0 | Cs8g15520.1          | 6.75 | 0 | 0 | 2 | MASCOT | T | PLEX8 |
| 6.66E-04 | 0 0 | Cs8g15520.1          | 6.75 | 0 | 0 | 2 | MASCOT | T | PLEX8 |
| 1.69E-03 | 0 0 | Cs8g15520.1          | 4.31 | 0 | 0 | 2 | MASCOT | T | PLEX8 |
| 1.50E-04 | 0 0 | Cs8g15520.1          | 4.31 | 0 | 0 | 2 | MASCOT | T | PLEX8 |
| 2.67E-01 | 0 0 | Cs8g15520.1          | 4.31 | 0 | 0 | 2 | MASCOT | T |       |
| 1.51E-02 | 0 0 | Cs8g15520.1          | 4.31 | 0 | 0 | 2 | MASCOT | T |       |
| 3.89E-01 | 0 0 | Cs5g25680.1/Cs5g257  | 5.88 | 0 | 0 | 2 | MASCOT | T | PLEX8 |
| 2.02E-01 | 0 0 | Cs5g25680.1/Cs5g257  | 5.88 | 0 | 0 | 2 | MASCOT | T |       |
| 2.17E-01 | 0 0 | Cs5g25660.1/Cs5g256  | 5.84 | 0 | 0 | 2 | MASCOT | T | PLEX8 |
| 1.94E-01 | 0 0 | Cs5g25660.1/Cs5g256  | 5.84 | 0 | 0 | 2 | MASCOT | T | PLEX8 |
| 2.05E-01 | 0 0 | Cs5g25680.1/Cs5g256  | 6.11 | 0 | 0 | 2 | MASCOT | T | PLEX8 |
| 3.03E-03 | 0 0 | Cs5g25680.1/Cs5g256  | 6.11 | 0 | 0 | 2 | MASCOT | T | PLEX8 |
| 1.26E-02 | 0 0 | Cs5g25680.1/Cs5g256  | 6.11 | 0 | 0 | 2 | MASCOT | T | PLEX8 |
| 1.10E-01 | 0 0 | Cs5g25680.1/Cs5g256  | 6.11 | 0 | 0 | 2 | MASCOT | T | PLEX8 |
| 5.03E-02 | 0 0 | Cs5g25680.1/Cs5g256  | 6.11 | 0 | 0 | 2 | MASCOT | T | PLEX8 |
| 6.21E-02 | 0 0 | Cs5g25680.1/Cs5g256  | 6.11 | 0 | 0 | 2 | MASCOT | T | PLEX8 |

|          |     |                       |      |   |      |   |        |        |       |       |
|----------|-----|-----------------------|------|---|------|---|--------|--------|-------|-------|
| 1.21E-01 | 0 0 | Cs5g25680.1/Cs5g256   | 6.11 | 0 | 0    | 2 | MASCOT | T      |       |       |
| 1.14E-01 | 0 0 | Cs6g05810.1/Cs8g180   | 6.75 | 0 | 0    | 2 | MASCOT | T      | PLEX8 |       |
| 2.10E-03 | 0 0 | Cs6g05810.1/Cs8g180   | 6.75 | 0 | 0    | 2 | MASCOT | T      |       |       |
| 2.99E-02 | 0 0 | Cs6g05810.1/Cs8g180   | 6.75 | 0 | 0    | 2 | MASCOT | T      |       |       |
| 4.78E-02 | 0 0 | Cs6g05810.1/Cs8g180   | 6.74 | 0 | 0    | 2 | MASCOT | T      | PLEX8 |       |
| 2.82E-02 | 0 0 | Cs6g05810.1/Cs8g180   | 6    | 0 | 0    | 2 | MASCOT | T      | PLEX8 |       |
| 8.15E-02 | 0 0 | Cs6g05810.1/Cs8g180   | 6    | 0 | 0    | 2 | MASCOT | T      | PLEX8 |       |
| 9.00E-02 | 0 0 | Cs6g05810.1/Cs8g180   | 6    | 0 | 0    | 2 | MASCOT | T      | PLEX8 |       |
| 1.28E-01 | 0 0 | Cs6g05810.1/Cs8g180   | 6    | 0 | 0    | 2 | MASCOT | T      | PLEX8 |       |
| 6.69E-02 | 0 0 | Cs6g05810.1/Cs8g180   | 6    | 0 | 0    | 2 | MASCOT | T      | PLEX8 |       |
| 1.75E-01 | 0 0 | Cs6g05810.1/Cs8g180   | 6    | 0 | 0    | 2 | MASCOT | T      | PLEX8 |       |
| 7.16E-02 | 0 0 | Cs6g05810.1/Cs8g180   | 6    | 0 | 0    | 2 | MASCOT | T      | PLEX8 |       |
| 4.94E-04 | 0 0 | Cs7g15740.1/Cs7g157   | 3.95 | 0 | 0    | 2 | MASCOT | T      | PLEX8 |       |
| 4.75E-02 | 0 0 | Cs7g15740.1/Cs7g157   | 3.95 | 0 | 0    | 2 | MASCOT | T      | PLEX8 |       |
| 1.64E-02 | 0 0 | Cs7g15740.1/Cs7g157   | 3.95 | 0 | 0    | 2 | MASCOT | T      | PLEX8 |       |
| 2.70E-03 | 0 0 | Cs7g15740.1/Cs7g157   | 3.95 | 0 | 0    | 2 | MASCOT | T      | PLEX8 |       |
| 1.36E-03 | 0 0 | Cs7g15740.1/Cs7g157   | 3.95 | 0 | 0    | 2 | MASCOT | T      |       |       |
| 1.10E-01 | 0 0 | Cs7g15740.1/Cs7g157   | 3.95 | 0 | 0    | 2 | MASCOT | T      |       |       |
| 1.88E-01 | 0 0 | Cs7g15740.1/Cs7g157   | 6.92 | 0 | 0    | 2 | MASCOT | T      | PLEX8 |       |
| 1.95E-01 | 0 0 | Cs7g15740.1/Cs7g157   | 6.92 | 0 | 0    | 2 | MASCOT | T      | PLEX8 |       |
| 3.19E-02 | 0 0 | Cs7g15740.1/Cs7g157   | 6.79 | 0 | 0    | 2 | MASCOT | T      | PLEX8 |       |
| 2.04E-01 | 0 0 | Cs7g15740.1/Cs7g157   | 6.79 | 0 | 0    | 2 | MASCOT | T      | PLEX8 |       |
| 4.02E-02 | 0 0 | Cs7g15740.1/Cs7g157   | 6.79 | 0 | 0    | 2 | MASCOT | T      | PLEX8 |       |
| 2.62E-01 | 0 0 | orange1.1t03769.1/ora | 4.37 | 0 | 0    | 2 | MASCOT | T      | PLEX8 |       |
| 2.42E-04 | 0 0 | orange1.1t03769.1/ora | 5.52 | 0 | 0    | 2 | MASCOT | T      | PLEX8 |       |
| 1.29E-03 | 0 0 | orange1.1t03769.1/ora | 5.52 | 0 | 0    | 2 | MASCOT | T      | PLEX8 |       |
| 2.43E-02 | 0 0 | orange1.1t03769.1/ora | 8.75 | 0 | 15.9 | 0 | 2      | MASCOT | T     | PLEX8 |
| 5.86E-03 | 0 0 | orange1.1t03769.1/ora | 8.75 | 0 | 0    | 2 | MASCOT | T      | PLEX8 |       |
| 6.05E-02 | 0 0 | orange1.1t03769.1/ora | 8.75 | 0 | 0    | 2 | MASCOT | T      | PLEX8 |       |
| 1.25E-05 | 0 0 | orange1.1t03769.1/ora | 8.75 | 0 | 0    | 2 | MASCOT | T      | PLEX8 |       |
| 9.46E-04 | 0 0 | orange1.1t03769.1/ora | 8.75 | 0 | 0    | 2 | MASCOT | T      | PLEX8 |       |
| 6.93E-02 | 0 0 | orange1.1t03769.1/ora | 8.75 | 0 | 0    | 2 | MASCOT | T      | PLEX8 |       |
| 9.43E-02 | 0 0 | orange1.1t03769.1/ora | 8.75 | 0 | 0    | 2 | MASCOT | T      |       |       |
| 2.00E-01 | 0 0 | orange1.1t03769.1/ora | 8.75 | 0 | 0    | 2 | MASCOT | T      |       |       |
| 1.61E-03 | 0 0 | Cs1g24260.1 ! Cs1g24  | 4.37 | 0 | 0    | 2 | MASCOT | T      | PLEX8 |       |
| 7.19E-03 | 0 0 | Cs1g24260.1 ! Cs1g24  | 4.37 | 0 | 0    | 2 | MASCOT | T      | PLEX8 |       |
| 5.18E-03 | 0 0 | Cs1g24260.1 ! Cs1g24  | 4.37 | 0 | 0    | 2 | MASCOT | T      | PLEX8 |       |
| 7.12E-03 | 0 0 | Cs1g24260.1 ! Cs1g24  | 4.37 | 0 | 0    | 2 | MASCOT | T      | PLEX8 |       |
| 1.36E-01 | 0 0 | Cs1g24260.1           | 4.53 | 0 | 0    | 2 | MASCOT | T      | PLEX8 |       |
| 1.36E-02 | 0 0 | Cs1g24260.1           | 4.53 | 0 | 0    | 2 | MASCOT | T      | PLEX8 |       |
| 1.23E-03 | 0 0 | Cs1g24260.1/Cs1g242   | 8.8  | 0 | 0    | 2 | MASCOT | T      | PLEX8 |       |
| 2.39E-02 | 0 0 | Cs1g24260.1/Cs1g242   | 8.8  | 0 | 0    | 2 | MASCOT | T      | PLEX8 |       |
| 2.64E-03 | 0 0 | Cs1g24260.1/Cs1g242   | 8.8  | 0 | 0    | 2 | MASCOT | T      | PLEX8 |       |
| 1.18E-02 | 0 0 | Cs1g24260.1/Cs1g242   | 8.8  | 0 | 0    | 2 | MASCOT | T      | PLEX8 |       |
| 1.86E-02 | 0 0 | Cs3g02050.1           | 4.25 | 0 | 0    | 2 | MASCOT | T      |       |       |
| 1.02E-02 | 0 0 | Cs3g02050.1           | 4.25 | 0 | 0    | 2 | MASCOT | T      |       |       |
| 7.34E-03 | 0 0 | Cs3g02050.1           | 4.25 | 0 | 0    | 2 | MASCOT | T      |       |       |
| 4.46E-02 | 0 0 | Cs3g02050.1           | 5.4  | 0 | 0    | 2 | MASCOT | T      | PLEX8 |       |
| 2.05E-01 | 0 0 | Cs3g02050.1           | 5.4  | 0 | 0    | 2 | MASCOT | T      | PLEX8 |       |
| 5.85E-02 | 0 0 | Cs3g02050.1           | 4    | 0 | 0    | 2 | MASCOT | T      |       |       |
| 1.51E-02 | 0 0 | Cs3g02050.1           | 4    | 0 | 0    | 2 | MASCOT | T      | PLEX8 |       |

|              |                      |      |   |   |          |   |       |
|--------------|----------------------|------|---|---|----------|---|-------|
| 1.88E-02 0 0 | Cs3g02050.1          | 4    | 0 | 0 | 2 MASCOT | T | PLEX8 |
| 1.36E-02 0 0 | Cs3g02050.1          | 4    | 0 | 0 | 2 MASCOT | T | PLEX8 |
| 5.28E-02 0 0 | Cs3g02050.1          | 4    | 0 | 0 | 2 MASCOT | T |       |
| 1.81E-02 0 0 | Cs3g09650.1/Cs3g096  | 8.5  | 0 | 0 | 2 MASCOT | T | PLEX8 |
| 5.22E-02 0 0 | Cs3g09650.1/Cs3g096  | 8.5  | 0 | 0 | 2 MASCOT | T | PLEX8 |
| 3.13E-03 0 0 | Cs3g09650.1/Cs3g096  | 4.53 | 0 | 0 | 2 MASCOT | T | PLEX8 |
| 3.03E-01 0 0 | Cs3g09650.1/Cs3g096  | 4.53 | 0 | 0 | 2 MASCOT | T | PLEX8 |
| 1.79E-02 0 0 | Cs3g09650.1/Cs3g096  | 4.53 | 0 | 0 | 2 MASCOT | T | PLEX8 |
| 2.41E-01 0 0 | Cs3g09650.1/Cs3g096  | 4.53 | 0 | 0 | 2 MASCOT | T | PLEX8 |
| 6.48E-03 0 0 | Cs3g09650.1          | 4.32 | 0 | 0 | 2 MASCOT | T | PLEX8 |
| 1.88E-03 0 0 | Cs3g09650.1          | 4.32 | 0 | 0 | 2 MASCOT | T | PLEX8 |
| 5.00E-04 0 0 | Cs3g09650.1          | 4.32 | 0 | 0 | 2 MASCOT | T | PLEX8 |
| 9.32E-06 0 0 | Cs3g09650.1          | 4.32 | 0 | 0 | 2 MASCOT | T | PLEX8 |
| 3.61E-02 0 0 | Cs7g18550.1/Cs7g185  | 8.47 | 0 | 0 | 2 MASCOT | T | PLEX8 |
| 4.52E-02 0 0 | Cs7g18550.1/Cs7g185  | 8.47 | 0 | 0 | 2 MASCOT | T | PLEX8 |
| 2.11E-01 0 0 | Cs7g18550.1/Cs7g185  | 8.47 | 0 | 0 | 2 MASCOT | T | PLEX8 |
| 2.19E-02 0 0 | Cs7g18550.1/Cs7g185  | 8.47 | 0 | 0 | 2 MASCOT | T | PLEX8 |
| 1.15E-01 0 0 | Cs7g18550.1/Cs7g185  | 5.72 | 0 | 0 | 2 MASCOT | T | PLEX8 |
| 2.28E-02 0 0 | Cs7g18550.1/Cs7g185  | 5.72 | 0 | 0 | 2 MASCOT | T | PLEX8 |
| 3.38E-02 0 0 | Cs7g18550.1/Cs7g185  | 5.72 | 0 | 0 | 2 MASCOT | T | PLEX8 |
| 2.22E-01 0 0 | Cs7g18560.1          | 5.97 | 0 | 0 | 2 MASCOT | T | PLEX8 |
| 7.43E-03 0 0 | Cs7g18560.1          | 5.97 | 0 | 0 | 2 MASCOT | T | PLEX8 |
| 2.59E-02 0 0 | Cs7g18560.1          | 5.97 | 0 | 0 | 2 MASCOT | T | PLEX8 |
| 1.43E-01 0 0 | Cs7g30990.1 ! Cs7g30 | 7.98 | 0 | 0 | 2 MASCOT | T | PLEX8 |
| 7.93E-03 0 0 | Cs7g30990.1 ! Cs7g30 | 7.98 | 0 | 0 | 2 MASCOT | T | PLEX8 |
| 2.31E-06 0 0 | Cs7g30990.1/Cs7g309  | 4.22 | 0 | 0 | 2 MASCOT | T | PLEX8 |
| 3.91E-02 0 0 | Cs7g30990.1/Cs7g309  | 4.22 | 0 | 0 | 2 MASCOT | T | PLEX8 |
| 2.22E-05 0 0 | Cs7g30990.1/Cs7g309  | 4.22 | 0 | 0 | 2 MASCOT | T | PLEX8 |
| 1.03E-04 0 0 | Cs7g30990.1/Cs7g309  | 4.22 | 0 | 0 | 2 MASCOT | T |       |
| 2.32E-03 0 0 | Cs7g30990.1/Cs7g309  | 4.22 | 0 | 0 | 2 MASCOT | T |       |
| 2.98E-04 0 0 | Cs7g30990.1/Cs7g309  | 4.22 | 0 | 0 | 2 MASCOT | T | PLEX8 |
| 1.47E-05 0 0 | Cs7g30990.1/Cs7g309  | 4.22 | 0 | 0 | 2 MASCOT | T |       |
| 1.76E-01 0 0 | Cs7g30990.1/Cs7g309  | 5.55 | 0 | 0 | 2 MASCOT | T | PLEX8 |
| 1.85E-01 0 0 | Cs7g31100.1/Cs7g311  | 9.76 | 0 | 0 | 2 MASCOT | T | PLEX8 |
| 2.44E-02 0 0 | Cs7g31100.1/Cs7g311  | 9.76 | 0 | 0 | 2 MASCOT | T | PLEX8 |
| 3.20E-02 0 0 | Cs5g30600.1/Cs5g306  | 8.76 | 0 | 0 | 2 MASCOT | T |       |
| 7.28E-02 0 0 | Cs5g30600.1/Cs5g306  | 8.76 | 0 | 0 | 2 MASCOT | T |       |
| 1.57E-01 0 0 | Cs5g30600.1/Cs5g306  | 6.04 | 0 | 0 | 2 MASCOT | T | PLEX8 |
| 1.70E-01 0 0 | Cs5g30600.1/Cs5g306  | 6.04 | 0 | 0 | 2 MASCOT | T | PLEX8 |
| 1.53E-01 0 0 | Cs5g30600.1/Cs5g306  | 6.04 | 0 | 0 | 2 MASCOT | T | PLEX8 |
| 1.48E-01 0 0 | Cs5g30600.1/Cs5g306  | 6.04 | 0 | 0 | 2 MASCOT | T | PLEX8 |
| 8.13E-02 0 0 | Cs5g30600.1/Cs5g306  | 6.04 | 0 | 0 | 2 MASCOT | T | PLEX8 |
| 1.75E-01 0 0 | Cs5g30600.1/Cs5g306  | 6.04 | 0 | 0 | 2 MASCOT | T | PLEX8 |
| 4.50E-01 0 0 | Cs9g16150.1          | 5.88 | 0 | 0 | 2 MASCOT | T | PLEX8 |
| 2.46E-01 0 0 | Cs9g16150.1          | 5.88 | 0 | 0 | 2 MASCOT | T | PLEX8 |
| 2.91E-02 0 0 | Cs9g16150.1          | 5.88 | 0 | 0 | 2 MASCOT | T | PLEX8 |
| 2.87E-02 0 0 | Cs9g16150.1          | 5.88 | 0 | 0 | 2 MASCOT | T | PLEX8 |
| 1.85E-02 0 0 | Cs9g16150.1          | 4.37 | 0 | 0 | 2 MASCOT | T | PLEX8 |
| 1.52E-01 0 0 | Cs9g16150.1          | 4.37 | 0 | 0 | 2 MASCOT | T | PLEX8 |
| 4.05E-02 0 0 | Cs9g16150.1          | 6.46 | 0 | 0 | 2 MASCOT | T | PLEX8 |
| 1.43E-01 0 0 | Cs9g16150.1          | 6.46 | 0 | 0 | 2 MASCOT | T | PLEX8 |

|          |     |                       |      |   |      |   |        |        |       |       |
|----------|-----|-----------------------|------|---|------|---|--------|--------|-------|-------|
| 8.61E-03 | 0 0 | Cs9g16150.1           | 6.46 | 0 | 0    | 2 | MASCOT | T      | PLEX8 |       |
| 6.17E-02 | 0 0 | Cs9g16150.1           | 6.46 | 0 | 0    | 2 | MASCOT | T      | PLEX8 |       |
| 3.36E-04 | 0 0 | Cs3g15160.1/Cs3g151   | 5.21 | 0 | 15.9 | 0 | 2      | MASCOT | T     | PLEX8 |
| 8.84E-04 | 0 0 | Cs3g15160.1/Cs3g151   | 5.21 | 0 | 15.9 | 0 | 2      | MASCOT | T     | PLEX8 |
| 2.40E-05 | 0 0 | Cs3g15160.1/Cs3g151   | 5.21 | 0 | 15.9 | 0 | 2      | MASCOT | T     | PLEX8 |
| 1.50E-01 | 0 0 | Cs3g15160.1/Cs3g151   | 5.21 | 0 | 15.9 | 0 | 2      | MASCOT | T     | PLEX8 |
| 1.13E-06 | 0 0 | Cs3g15160.1/Cs3g151   | 5.21 | 0 | 15.9 | 0 | 2      | MASCOT | T     | PLEX8 |
| 2.30E-02 | 0 0 | Cs3g15160.1/Cs3g151   | 5.21 | 0 | 15.9 | 0 | 2      | MASCOT | T     | PLEX8 |
| 3.95E-02 | 0 0 | Cs3g15160.1/Cs3g151   | 5.21 | 0 | 0    | 0 | 2      | MASCOT | T     | PLEX8 |
| 1.06E-01 | 0 0 | Cs3g15160.1/Cs3g151   | 9.76 | 0 | 0    | 0 | 2      | MASCOT | T     | PLEX8 |
| 1.95E-01 | 0 0 | Cs3g15160.2           | 5.73 | 0 | 0    | 0 | 2      | MASCOT | T     | PLEX8 |
| 1.51E-01 | 0 0 | Cs4g17850.1           | 4.37 | 0 | 0    | 0 | 2      | MASCOT | T     | PLEX8 |
| 2.76E-01 | 0 0 | Cs4g17850.1           | 4.37 | 0 | 0    | 0 | 2      | MASCOT | T     | PLEX8 |
| 1.49E-01 | 0 0 | Cs4g17850.1           | 4.37 | 0 | 0    | 0 | 2      | MASCOT | T     | PLEX8 |
| 1.78E-01 | 0 0 | Cs4g17850.1 ! Cs7g17  | 4.53 | 0 | 0    | 0 | 2      | MASCOT | T     | PLEX8 |
| 1.45E-01 | 0 0 | Cs4g17850.1           | 4.25 | 0 | 0    | 0 | 2      | MASCOT | T     | PLEX8 |
| 1.45E-01 | 0 0 | Cs4g17850.1           | 4.25 | 0 | 0    | 0 | 2      | MASCOT | T     | PLEX8 |
| 7.00E-02 | 0 0 | Cs4g17850.1           | 4.25 | 0 | 0    | 0 | 2      | MASCOT | T     | PLEX8 |
| 3.57E-02 | 0 0 | Cs4g17850.1           | 4.25 | 0 | 0    | 0 | 2      | MASCOT | T     | PLEX8 |
| 1.09E-02 | 0 0 | Cs4g17850.1           | 4.25 | 0 | 0    | 0 | 2      | MASCOT | T     | PLEX8 |
| 4.48E-04 | 0 0 | Cs5g20510.1/Cs5g205   | 5.21 | 0 | 15.9 | 0 | 2      | MASCOT | T     | PLEX8 |
| 6.36E-03 | 0 0 | Cs5g20510.1/Cs5g205   | 5.21 | 0 | 15.9 | 0 | 2      | MASCOT | T     | PLEX8 |
| 2.90E-02 | 0 0 | Cs5g20510.1/Cs5g205   | 5.21 | 0 | 0    | 0 | 2      | MASCOT | T     | PLEX8 |
| 4.11E-02 | 0 0 | Cs5g20510.1/Cs5g205   | 5.21 | 0 | 0    | 0 | 2      | MASCOT | T     | PLEX8 |
| 4.17E-05 | 0 0 | Cs5g20510.1/Cs5g205   | 5.21 | 0 | 0    | 0 | 2      | MASCOT | T     | PLEX8 |
| 1.35E-01 | 0 0 | Cs5g20510.1/Cs5g205   | 4.21 | 0 | 0    | 0 | 2      | MASCOT | T     | PLEX8 |
| 1.04E-01 | 0 0 | Cs5g20510.1/Cs5g205   | 4.21 | 0 | 0    | 0 | 2      | MASCOT | T     | PLEX8 |
| 1.13E-02 | 0 0 | Cs5g20510.1/Cs5g205   | 4.21 | 0 | 0    | 0 | 2      | MASCOT | T     | PLEX8 |
| 6.25E-03 | 0 0 | Cs5g20510.1/Cs5g205   | 8.59 | 0 | 0    | 0 | 2      | MASCOT | T     | PLEX8 |
| 1.70E-04 | 0 0 | Cs5g26750.1/Cs5g267   | 4.54 | 0 | 0    | 0 | 2      | MASCOT | T     | PLEX8 |
| 2.49E-02 | 0 0 | Cs5g26750.1/Cs5g267   | 4.54 | 0 | 0    | 0 | 2      | MASCOT | T     | PLEX8 |
| 2.60E-03 | 0 0 | Cs5g26750.1/Cs5g267   | 4.54 | 0 | 0    | 0 | 2      | MASCOT | T     | PLEX8 |
| 2.90E-01 | 0 0 | Cs3g12000.1/Cs3g120   | 6.75 | 0 | 0    | 0 | 2      | MASCOT | T     | PLEX8 |
| 6.67E-02 | 0 0 | Cs3g12000.1/Cs3g120   | 4.41 | 0 | 0    | 0 | 2      | MASCOT | T     | PLEX8 |
| 9.66E-07 | 0 0 | Cs3g12000.1/Cs3g120   | 4.41 | 0 | 0    | 0 | 2      | MASCOT | T     | PLEX8 |
| 4.76E-02 | 0 0 | Cs3g12000.1/Cs3g120   | 4.41 | 0 | 0    | 0 | 2      | MASCOT | T     | PLEX8 |
| 3.75E-01 | 0 0 | Cs3g12000.1/Cs3g120   | 4.41 | 0 | 0    | 0 | 2      | MASCOT | T     | PLEX8 |
| 2.11E-06 | 0 0 | Cs3g12000.1/Cs3g120   | 4.41 | 0 | 0    | 0 | 2      | MASCOT | T     | PLEX8 |
| 1.27E-02 | 0 0 | Cs7g13660.1           | 4.31 | 0 | 0    | 0 | 2      | MASCOT | T     | PLEX8 |
| 1.39E-05 | 0 0 | Cs7g13660.1           | 4.31 | 0 | 0    | 0 | 2      | MASCOT | T     | PLEX8 |
| 1.01E-02 | 0 0 | Cs7g13660.1           | 4.31 | 0 | 0    | 0 | 2      | MASCOT | T     | PLEX8 |
| 7.05E-05 | 0 0 | Cs7g13660.1           | 4.31 | 0 | 0    | 0 | 2      | MASCOT | T     | PLEX8 |
| 7.77E-02 | 0 0 | Cs7g13660.1           | 4.53 | 0 | 0    | 0 | 2      | MASCOT | T     | PLEX8 |
| 7.84E-02 | 0 0 | Cs7g13660.1           | 4.53 | 0 | 0    | 0 | 2      | MASCOT | T     | PLEX8 |
| 1.26E-02 | 0 0 | Cs7g13660.1           | 4.53 | 0 | 0    | 0 | 2      | MASCOT | T     | PLEX8 |
| 3.97E-02 | 0 0 | Cs7g13660.1           | 8.56 | 0 | 0    | 0 | 2      | MASCOT | T     | PLEX8 |
| 5.64E-02 | 0 0 | Cs7g13660.1           | 8.56 | 0 | 0    | 0 | 2      | MASCOT | T     | PLEX8 |
| 5.02E-03 | 0 0 | orange1.1t01542.1/ora | 8.75 | 0 | 0    | 0 | 2      | MASCOT | T     | PLEX8 |
| 2.65E-03 | 0 0 | orange1.1t01542.1/ora | 8.75 | 0 | 0    | 0 | 2      | MASCOT | T     | PLEX8 |
| 2.05E-04 | 0 0 | orange1.1t01542.1/ora | 8.75 | 0 | 0    | 0 | 2      | MASCOT | T     | PLEX8 |
| 1.30E-02 | 0 0 | Cs2g08850.1/orange1.  | 3.84 | 0 | 15.9 | 0 | 2      | MASCOT | T     | PLEX8 |

|          |     |                       |      |   |      |   |        |        |         |
|----------|-----|-----------------------|------|---|------|---|--------|--------|---------|
| 9.60E-03 | 0 0 | Cs2g08850.1/orange1.  | 3.84 | 0 | 0    | 2 | MASCOT | T      |         |
| 1.55E-01 | 0 0 | orange1.1t01168.1/ora | 5.96 | 0 | 15.9 | 0 | 2      | MASCOT | T PLEX8 |
| 1.30E-01 | 0 0 | orange1.1t01168.1/ora | 5.96 | 0 | 15.9 | 0 | 2      | MASCOT | T PLEX8 |
| 1.33E-05 | 0 0 | orange1.1t01168.1/ora | 5.96 | 0 | 0    | 0 | 2      | MASCOT | T PLEX8 |
| 5.50E-07 | 0 0 | orange1.1t01168.1/ora | 5.96 | 0 | 0    | 0 | 2      | MASCOT | T PLEX8 |
| 5.10E-03 | 0 0 | Cs3g04730.1           | 8.22 | 0 | 0    | 0 | 2      | MASCOT | T PLEX8 |
| 1.78E-02 | 0 0 | Cs3g04730.1           | 8.22 | 0 | 0    | 0 | 2      | MASCOT | T PLEX8 |
| 4.75E-02 | 0 0 | Cs3g04730.1           | 8.22 | 0 | 0    | 0 | 2      | MASCOT | T PLEX8 |
| 1.39E-04 | 0 0 | Cs3g04730.1           | 4.54 | 0 | 0    | 0 | 2      | MASCOT | T PLEX8 |
| 4.59E-03 | 0 0 | Cs3g04730.1           | 4.54 | 0 | 0    | 0 | 2      | MASCOT | T PLEX8 |
| 1.36E-04 | 0 0 | Cs3g04730.1           | 4.54 | 0 | 0    | 0 | 2      | MASCOT | T PLEX8 |
| 2.27E-06 | 0 0 | Cs3g04730.1           | 4.54 | 0 | 0    | 0 | 2      | MASCOT | T PLEX8 |
| 8.31E-02 | 0 0 | Cs3g04730.1           | 6.41 | 0 | 15.9 | 0 | 2      | MASCOT | T PLEX8 |
| 3.42E-02 | 0 0 | Cs2g16200.1/Cs2g162   | 4.21 | 0 | 0    | 0 | 2      | MASCOT | T PLEX8 |
| 8.89E-03 | 0 0 | Cs2g16200.1/Cs2g162   | 4.21 | 0 | 0    | 0 | 2      | MASCOT | T PLEX8 |
| 6.53E-03 | 0 0 | Cs2g16220.1/Cs2g162   | 6    | 0 | 0    | 0 | 2      | MASCOT | T PLEX8 |
| 4.49E-02 | 0 0 | Cs2g16220.1/Cs2g162   | 6    | 0 | 0    | 0 | 2      | MASCOT | T PLEX8 |
| 9.51E-02 | 0 0 | Cs2g16220.1/Cs2g162   | 6    | 0 | 0    | 0 | 2      | MASCOT | T PLEX8 |
| 4.37E-02 | 0 0 | Cs2g16220.1/Cs2g162   | 6    | 0 | 0    | 0 | 2      | MASCOT | T PLEX8 |
| 2.80E-01 | 0 0 | Cs3g15560.1/Cs3g155   | 8.75 | 0 | 0    | 0 | 2      | MASCOT | T PLEX8 |
| 2.88E-02 | 0 0 | Cs3g15560.1/Cs3g155   | 8.75 | 0 | 0    | 0 | 2      | MASCOT | T PLEX8 |
| 3.15E-01 | 0 0 | Cs5g10920.1/Cs5g109   | 4.37 | 0 | 0    | 0 | 2      | MASCOT | T PLEX8 |
| 1.75E-01 | 0 0 | Cs5g10920.1/Cs5g109   | 4.37 | 0 | 0    | 0 | 2      | MASCOT | T PLEX8 |
| 2.00E-02 | 0 0 | Cs5g10920.1/Cs5g109   | 4.37 | 0 | 0    | 0 | 2      | MASCOT | T       |
| 1.77E-01 | 0 0 | Cs5g10920.1/Cs5g109   | 4.37 | 0 | 0    | 0 | 2      | MASCOT | T       |
| 4.09E-02 | 0 0 | Cs5g10920.1/Cs5g109   | 4.37 | 0 | 0    | 0 | 2      | MASCOT | T       |
| 3.60E-05 | 0 0 | Cs5g10920.1/Cs5g109   | 4.37 | 0 | 0    | 0 | 2      | MASCOT | T PLEX8 |
| 7.39E-05 | 0 0 | Cs5g10920.1/Cs5g109   | 4.37 | 0 | 0    | 0 | 2      | MASCOT | T PLEX8 |
| 5.48E-04 | 0 0 | Cs5g10920.1/Cs5g109   | 5.55 | 0 | 0    | 0 | 2      | MASCOT | T       |
| 3.78E-03 | 0 0 | Cs5g18350.1           | 4.53 | 0 | 0    | 0 | 2      | MASCOT | T       |
| 9.43E-02 | 0 0 | Cs5g18350.1           | 5.84 | 0 | 0    | 0 | 2      | MASCOT | T PLEX8 |
| 7.90E-03 | 0 0 | Cs5g18350.1           | 5.84 | 0 | 0    | 0 | 2      | MASCOT | T PLEX8 |
| 1.53E-01 | 0 0 | Cs5g18350.1           | 5.84 | 0 | 0    | 0 | 2      | MASCOT | T PLEX8 |
| 1.14E-01 | 0 0 | Cs5g18350.1           | 5.84 | 0 | 0    | 0 | 2      | MASCOT | T PLEX8 |
| 1.06E-02 | 0 0 | Cs5g18350.1           | 5.84 | 0 | 0    | 0 | 2      | MASCOT | T PLEX8 |
| 1.61E-04 | 0 0 | Cs5g18350.1/Cs5g183   | 4.68 | 1 | 0    | 0 | 2      | MASCOT | T PLEX8 |
| 1.84E-02 | 0 0 | Cs5g18350.1/Cs5g183   | 4.68 | 1 | 0    | 0 | 2      | MASCOT | T       |
| 4.72E-03 | 0 0 | Cs6g08720.1/Cs6g087   | 8.8  | 0 | 0    | 0 | 2      | MASCOT | T PLEX8 |
| 4.83E-02 | 0 0 | Cs6g08720.1/Cs6g087   | 8.8  | 0 | 0    | 0 | 2      | MASCOT | T PLEX8 |
| 1.48E-01 | 0 0 | Cs6g08720.1/Cs6g087   | 8.8  | 0 | 0    | 0 | 2      | MASCOT | T PLEX8 |
| 7.59E-03 | 0 0 | Cs6g08720.1/Cs6g087   | 6    | 0 | 0    | 0 | 2      | MASCOT | T PLEX8 |
| 1.57E-01 | 0 0 | Cs6g08720.1/Cs6g087   | 6    | 0 | 0    | 0 | 2      | MASCOT | T PLEX8 |
| 6.63E-03 | 0 0 | Cs6g08720.1/Cs6g087   | 6    | 0 | 0    | 0 | 2      | MASCOT | T PLEX8 |
| 1.47E-03 | 0 0 | Cs6g08720.1/Cs6g087   | 6.05 | 0 | 15.9 | 0 | 2      | MASCOT | T       |
| 5.98E-05 | 0 0 | Cs6g08720.1/Cs6g087   | 6.05 | 0 | 0    | 0 | 2      | MASCOT | T       |
| 8.76E-02 | 0 0 | Cs8g01220.1/Cs8g012   | 4.37 | 0 | 0    | 0 | 2      | MASCOT | T PLEX8 |
| 1.80E-02 | 0 0 | Cs8g01220.1/Cs8g012   | 4.37 | 0 | 0    | 0 | 2      | MASCOT | T PLEX8 |
| 5.69E-03 | 0 0 | Cs8g01220.1/Cs8g012   | 4.37 | 0 | 0    | 0 | 2      | MASCOT | T PLEX8 |
| 2.10E-02 | 0 0 | Cs8g01220.1/Cs8g012   | 4.37 | 0 | 0    | 0 | 2      | MASCOT | T PLEX8 |
| 3.87E-02 | 0 0 | Cs8g01220.1/Cs8g012   | 4.65 | 0 | 15.9 | 0 | 2      | MASCOT | T       |
| 8.25E-02 | 0 0 | Cs8g01220.1/Cs8g012   | 4.65 | 0 | 0    | 0 | 2      | MASCOT | T       |

|          |     |                       |      |   |      |   |        |        |       |       |
|----------|-----|-----------------------|------|---|------|---|--------|--------|-------|-------|
| 4.66E-01 | 0 0 | Cs8g01220.1/Cs8g012   | 4.65 | 0 | 0    | 2 | MASCOT | T      |       |       |
| 2.44E-01 | 0 0 | Cs8g01220.1/Cs8g012   | 6.92 | 0 | 0    | 2 | MASCOT | T      | PLEX8 |       |
| 4.69E-04 | 0 0 | Cs9g13070.1           | 3.92 | 0 | 0    | 2 | MASCOT | T      | PLEX8 |       |
| 1.56E-04 | 0 0 | Cs9g13070.1           | 3.92 | 0 | 0    | 2 | MASCOT | T      | PLEX8 |       |
| 2.54E-01 | 0 0 | Cs9g13070.1           | 6.75 | 0 | 0    | 2 | MASCOT | T      | PLEX8 |       |
| 2.50E-02 | 0 0 | Cs9g13070.1           | 4    | 0 | 15.9 | 0 | 2      | MASCOT | T     |       |
| 1.60E-03 | 0 0 | Cs9g13070.1           | 4    | 0 | 15.9 | 0 | 2      | MASCOT | T     |       |
| 2.42E-05 | 0 0 | Cs9g13070.1           | 4    | 0 | 0    | 2 | MASCOT | T      |       |       |
| 5.78E-04 | 0 0 | Cs9g13070.1           | 4    | 0 | 0    | 2 | MASCOT | T      |       |       |
| 1.89E-04 | 0 0 | Cs9g13070.1           | 4    | 0 | 0    | 2 | MASCOT | T      |       |       |
| 1.35E-02 | 0 0 | Cs9g15890.1/Cs9g158   | 8.59 | 0 | 0    | 2 | MASCOT | T      | PLEX8 |       |
| 2.12E-01 | 0 0 | Cs9g15890.1/Cs9g158   | 8.59 | 0 | 0    | 2 | MASCOT | T      | PLEX8 |       |
| 2.62E-01 | 0 0 | Cs9g15890.1/Cs9g158   | 8.59 | 0 | 0    | 2 | MASCOT | T      | PLEX8 |       |
| 1.86E-04 | 0 0 | Cs9g15890.1/Cs9g158   | 4.03 | 0 | 0    | 2 | MASCOT | T      | PLEX8 |       |
| 1.94E-05 | 0 0 | Cs9g15890.1/Cs9g158   | 4.03 | 0 | 0    | 2 | MASCOT | T      | PLEX8 |       |
| 9.09E-03 | 0 0 | Cs9g15890.1/Cs9g158   | 6.74 | 0 | 0    | 2 | MASCOT | T      | PLEX8 |       |
| 1.05E-03 | 0 0 | Cs9g15890.1/Cs9g158   | 6.74 | 0 | 0    | 2 | MASCOT | T      | PLEX8 |       |
| 9.68E-02 | 0 0 | Cs9g15890.1/Cs9g158   | 6.74 | 0 | 0    | 2 | MASCOT | T      | PLEX8 |       |
| 2.48E-01 | 0 0 | orange1.1t00538.1     | 4.53 | 0 | 0    | 2 | MASCOT | T      | PLEX8 |       |
| 1.51E-02 | 0 0 | orange1.1t00538.1     | 4.53 | 0 | 0    | 2 | MASCOT | T      | PLEX8 |       |
| 1.58E-01 | 0 0 | orange1.1t00538.1     | 4.53 | 0 | 0    | 2 | MASCOT | T      | PLEX8 |       |
| 3.08E-01 | 0 0 | Cs8g13120.1 ! orange1 | 5.97 | 0 | 0    | 2 | MASCOT | T      | PLEX8 |       |
| 4.15E-02 | 0 0 | orange1.1t00538.1     | 4.37 | 0 | 0    | 2 | MASCOT | T      | PLEX8 |       |
| 1.02E-03 | 0 0 | orange1.1t00538.1     | 4.37 | 0 | 0    | 2 | MASCOT | T      | PLEX8 |       |
| 6.02E-04 | 0 0 | orange1.1t00538.1     | 4.37 | 0 | 0    | 2 | MASCOT | T      | PLEX8 |       |
| 3.91E-02 | 0 0 | orange1.1t00538.1     | 4.37 | 0 | 0    | 2 | MASCOT | T      | PLEX8 |       |
| 3.51E-01 | 0 0 | Cs1g03890.1 ! Cs4g15  | 5.88 | 0 | 0    | 2 | MASCOT | T      | PLEX8 |       |
| 1.96E-03 | 0 0 | Cs1g03890.1 ! Cs4g15  | 5.88 | 0 | 0    | 2 | MASCOT | T      | PLEX8 |       |
| 1.88E-02 | 0 0 | Cs1g03890.1 ! Cs4g15  | 5.88 | 0 | 0    | 2 | MASCOT | T      | PLEX8 |       |
| 3.08E-02 | 0 0 | Cs1g03890.1/Cs3g220   | 5.81 | 0 | 0    | 2 | MASCOT | T      | PLEX8 |       |
| 8.73E-03 | 0 0 | Cs1g03890.1 ! Cs3g22  | 6    | 0 | 0    | 2 | MASCOT | T      | PLEX8 |       |
| 3.44E-02 | 0 0 | Cs1g03890.1 ! Cs3g22  | 6    | 0 | 0    | 2 | MASCOT | T      | PLEX8 |       |
| 1.23E-01 | 0 0 | Cs1g03890.1 ! Cs3g22  | 6    | 0 | 0    | 2 | MASCOT | T      | PLEX8 |       |
| 3.11E-03 | 0 0 | Cs2g15050.1/Cs2g150   | 6.73 | 0 | 0    | 2 | MASCOT | T      | PLEX8 |       |
| 1.20E-01 | 0 0 | Cs2g15050.1/Cs2g150   | 6.73 | 0 | 0    | 2 | MASCOT | T      | PLEX8 |       |
| 9.74E-02 | 0 0 | Cs2g15050.1           | 4.25 | 0 | 0    | 2 | MASCOT | T      | PLEX8 |       |
| 6.91E-02 | 0 0 | Cs2g15050.1           | 4.25 | 0 | 0    | 2 | MASCOT | T      | PLEX8 |       |
| 1.43E-01 | 0 0 | Cs2g15050.1/Cs2g150   | 8.72 | 0 | 15.9 | 0 | 2      | MASCOT | T     | PLEX8 |
| 2.13E-01 | 0 0 | Cs2g15050.1/Cs2g150   | 8.72 | 0 | 0    | 2 | MASCOT | T      | PLEX8 |       |
| 6.90E-03 | 0 0 | Cs2g15050.1/Cs2g150   | 8.72 | 0 | 0    | 2 | MASCOT | T      | PLEX8 |       |
| 1.06E-01 | 0 0 | Cs2g04630.1/Cs2g046   | 6.05 | 0 | 0    | 2 | MASCOT | T      | PLEX8 |       |
| 1.76E-03 | 0 0 | Cs2g04630.1/Cs2g046   | 6.05 | 0 | 0    | 2 | MASCOT | T      | PLEX8 |       |
| 2.15E-04 | 0 0 | Cs2g04630.1/Cs2g046   | 6.05 | 0 | 0    | 2 | MASCOT | T      | PLEX8 |       |
| 7.11E-05 | 0 0 | Cs2g04630.1/Cs2g046   | 5.97 | 0 | 0    | 2 | MASCOT | T      | PLEX8 |       |
| 4.96E-03 | 0 0 | Cs2g04630.1/Cs2g046   | 5.97 | 0 | 0    | 2 | MASCOT | T      | PLEX8 |       |
| 4.26E-01 | 0 0 | Cs2g04630.1/Cs2g046   | 9.73 | 0 | 0    | 2 | MASCOT | T      | PLEX8 |       |
| 1.66E-01 | 0 0 | Cs2g04630.1/Cs2g046   | 9.73 | 0 | 0    | 2 | MASCOT | T      |       |       |
| 5.34E-02 | 0 0 | Cs3g17280.1/Cs3g172   | 4.03 | 0 | 0    | 2 | MASCOT | T      | PLEX8 |       |
| 4.42E-03 | 0 0 | Cs3g17280.1/Cs3g172   | 4.03 | 0 | 0    | 2 | MASCOT | T      | PLEX8 |       |
| 1.68E-02 | 0 0 | Cs3g17280.1/Cs3g172   | 4.03 | 0 | 0    | 2 | MASCOT | T      | PLEX8 |       |
| 1.46E-02 | 0 0 | Cs3g17280.1/Cs3g172   | 4.03 | 0 | 0    | 2 | MASCOT | T      |       |       |

|          |     |                      |      |   |      |   |        |        |       |       |
|----------|-----|----------------------|------|---|------|---|--------|--------|-------|-------|
| 3.33E-02 | 0 0 | Cs3g17280.1/Cs3g172  | 6.14 | 1 | 0    | 2 | MASCOT | T      |       |       |
| 4.59E-02 | 0 0 | Cs3g17280.1/Cs3g172  | 6.14 | 1 | 0    | 2 | MASCOT | T      | PLEX8 |       |
| 1.85E-01 | 0 0 | Cs3g17280.1/Cs3g172  | 6.4  | 0 | 0    | 2 | MASCOT | T      | PLEX8 |       |
| 1.96E-01 | 0 0 | Cs3g20550.1          | 4.37 | 0 | 0    | 2 | MASCOT | T      |       |       |
| 2.09E-01 | 0 0 | Cs7g21860.1/orange1. | 5.84 | 0 | 0    | 2 | MASCOT | T      | PLEX8 |       |
| 2.33E-03 | 0 0 | Cs7g21860.1/orange1. | 5.84 | 0 | 0    | 2 | MASCOT | T      | PLEX8 |       |
| 3.35E-03 | 0 0 | Cs7g21860.1/orange1. | 5.84 | 0 | 0    | 2 | MASCOT | T      | PLEX8 |       |
| 3.73E-02 | 0 0 | Cs7g21860.1/orange1. | 5.84 | 0 | 0    | 2 | MASCOT | T      | PLEX8 |       |
| 8.18E-02 | 0 0 | Cs7g21860.1/orange1. | 5.84 | 0 | 0    | 2 | MASCOT | T      |       |       |
| 1.12E-03 | 0 0 | Cs3g20550.1          | 4.25 | 0 | 0    | 2 | MASCOT | T      | PLEX8 |       |
| 3.58E-03 | 0 0 | Cs5g15660.1/Cs5g209  | 4.21 | 0 | 0    | 2 | MASCOT | T      | PLEX8 |       |
| 2.88E-02 | 0 0 | Cs5g15660.1/Cs5g209  | 4.21 | 0 | 0    | 2 | MASCOT | T      | PLEX8 |       |
| 1.41E-01 | 0 0 | Cs5g21010.1/Cs5g210  | 6    | 0 | 0    | 2 | MASCOT | T      |       |       |
| 6.70E-04 | 0 0 | Cs5g20910.1/Cs5g210  | 5.59 | 0 | 15.9 | 0 | 2      | MASCOT | T     |       |
| 2.17E-05 | 0 0 | Cs5g20910.1/Cs5g210  | 5.59 | 0 | 15.9 | 0 | 2      | MASCOT | T     |       |
| 2.48E-02 | 0 0 | Cs5g20910.1/Cs5g210  | 5.59 | 0 | 15.9 | 0 | 2      | MASCOT | T     |       |
| 4.70E-02 | 0 0 | Cs5g20910.1/Cs5g210  | 5.59 | 0 | 15.9 | 0 | 2      | MASCOT | T     |       |
| 1.49E-01 | 0 0 | Cs5g29140.1          | 4.53 | 0 | 0    | 2 | MASCOT | T      | PLEX8 |       |
| 1.16E-01 | 0 0 | Cs5g29140.1          | 4.41 | 0 | 15.9 | 0 | 2      | MASCOT | T     | PLEX8 |
| 3.20E-03 | 0 0 | Cs5g29140.1          | 4.41 | 0 | 0    | 2 | MASCOT | T      | PLEX8 |       |
| 2.13E-02 | 0 0 | Cs5g29140.1          | 4.41 | 0 | 0    | 2 | MASCOT | T      |       |       |
| 1.05E-01 | 0 0 | Cs5g29140.1          | 4.03 | 0 | 0    | 2 | MASCOT | T      | PLEX8 |       |
| 1.34E-01 | 0 0 | Cs5g29140.1          | 4.03 | 0 | 0    | 2 | MASCOT | T      |       |       |
| 1.67E-03 | 0 0 | Cs5g29140.1          | 4.03 | 0 | 0    | 2 | MASCOT | T      |       |       |
| 1.21E-01 | 0 0 | Cs2g10690.1/Cs9g110  | 4.37 | 0 | 0    | 2 | MASCOT | T      | PLEX8 |       |
| 7.81E-02 | 0 0 | Cs2g10690.1/Cs9g110  | 4.37 | 0 | 0    | 2 | MASCOT | T      | PLEX8 |       |
| 9.59E-02 | 0 0 | Cs2g10690.1/Cs9g110  | 4.37 | 0 | 0    | 2 | MASCOT | T      | PLEX8 |       |
| 8.01E-02 | 0 0 | Cs2g10690.1/Cs9g110  | 4.37 | 0 | 0    | 2 | MASCOT | T      | PLEX8 |       |
| 2.46E-02 | 0 0 | Cs7g05630.1/Cs7g056  | 4.43 | 1 | 0    | 2 | MASCOT | T      | PLEX8 |       |
| 1.92E-02 | 0 0 | Cs7g05630.2          | 4.37 | 0 | 0    | 2 | MASCOT | T      | PLEX8 |       |
| 1.77E-01 | 0 0 | Cs7g05630.2          | 4.37 | 0 | 0    | 2 | MASCOT | T      | PLEX8 |       |
| 2.90E-01 | 0 0 | Cs7g27880.1/Cs7g278  | 4.14 | 0 | 0    | 2 | MASCOT | T      | PLEX8 |       |
| 1.24E-01 | 0 0 | Cs7g27880.1/Cs7g278  | 5.84 | 0 | 0    | 2 | MASCOT | T      | PLEX8 |       |
| 8.42E-02 | 0 0 | Cs7g27880.1/Cs7g278  | 5.84 | 0 | 15.9 | 0 | 2      | MASCOT | T     | PLEX8 |
| 2.93E-01 | 0 0 | Cs7g27880.1/Cs7g278  | 5.84 | 0 | 15.9 | 0 | 2      | MASCOT | T     | PLEX8 |
| 3.44E-02 | 0 0 | Cs7g27880.1/Cs7g278  | 5.84 | 0 | 0    | 2 | MASCOT | T      | PLEX8 |       |
| 3.64E-01 | 0 0 | Cs7g27880.1/Cs7g278  | 5.84 | 0 | 0    | 2 | MASCOT | T      | PLEX8 |       |
| 3.53E-01 | 0 0 | Cs7g27880.1/Cs7g278  | 5.84 | 0 | 0    | 2 | MASCOT | T      | PLEX8 |       |
| 5.20E-03 | 0 0 | Cs8g06060.1/Cs8g060  | 8.8  | 0 | 0    | 2 | MASCOT | T      | PLEX8 |       |
| 4.12E-03 | 0 0 | Cs8g06060.1/Cs8g060  | 8.8  | 0 | 0    | 2 | MASCOT | T      |       |       |
| 1.35E-02 | 0 0 | Cs8g06060.1/Cs8g060  | 8.8  | 0 | 0    | 2 | MASCOT | T      | PLEX8 |       |
| 2.22E-02 | 0 0 | Cs8g06060.1/Cs8g060  | 8.8  | 0 | 0    | 2 | MASCOT | T      | PLEX8 |       |
| 1.09E-02 | 0 0 | Cs8g06060.1/Cs8g060  | 8.8  | 0 | 0    | 2 | MASCOT | T      | PLEX8 |       |
| 1.85E-02 | 0 0 | Cs8g06060.1/Cs8g060  | 4.53 | 0 | 0    | 2 | MASCOT | T      | PLEX8 |       |
| 1.94E-02 | 0 0 | Cs8g06060.1/Cs8g060  | 6.1  | 0 | 0    | 2 | MASCOT | T      | PLEX8 |       |
| 6.87E-02 | 0 0 | Cs8g12670.1/Cs8g126  | 8.75 | 0 | 0    | 2 | MASCOT | T      | PLEX8 |       |
| 2.64E-02 | 0 0 | Cs8g12670.1/Cs8g126  | 8.75 | 0 | 0    | 2 | MASCOT | T      | PLEX8 |       |
| 1.61E-01 | 0 0 | Cs8g12670.1/Cs8g126  | 8.75 | 0 | 0    | 2 | MASCOT | T      | PLEX8 |       |
| 5.93E-02 | 0 0 | Cs8g12670.1/Cs8g126  | 8.75 | 0 | 0    | 2 | MASCOT | T      | PLEX8 |       |
| 5.98E-02 | 0 0 | Cs8g12670.1/Cs8g126  | 8.75 | 0 | 0    | 2 | MASCOT | T      |       |       |
| 4.15E-01 | 0 0 | Cs8g12670.1/Cs8g126  | 6    | 0 | 0    | 2 | MASCOT | T      | PLEX8 |       |



|          |     |                       |      |   |      |   |        |        |       |       |
|----------|-----|-----------------------|------|---|------|---|--------|--------|-------|-------|
| 7.98E-03 | 0 0 | Cs8g12670.1/Cs8g126   | 4.37 | 0 | 0    | 2 | MASCOT | T      | PLEX8 |       |
| 6.80E-02 | 0 0 | orange1.1t00340.1     | 4.21 | 0 | 0    | 2 | MASCOT | T      | PLEX8 |       |
| 1.27E-05 | 0 0 | orange1.1t00340.1     | 4.21 | 0 | 0    | 2 | MASCOT | T      |       |       |
| 1.08E-01 | 0 0 | Cs9g17210.1 ! orange1 | 4.25 | 0 | 0    | 2 | MASCOT | T      | PLEX8 |       |
| 1.21E-01 | 0 0 | Cs9g17210.1 ! orange1 | 4.25 | 0 | 0    | 2 | MASCOT | T      | PLEX8 |       |
| 1.50E-02 | 0 0 | Cs9g17210.1 ! orange1 | 4.25 | 0 | 0    | 2 | MASCOT | T      | PLEX8 |       |
| 1.22E-01 | 0 0 | orange1.1t00340.1/ora | 4.14 | 0 | 0    | 2 | MASCOT | T      | PLEX8 |       |
| 9.74E-04 | 0 0 | orange1.1t00340.1/ora | 4.14 | 0 | 0    | 2 | MASCOT | T      | PLEX8 |       |
| 2.30E-02 | 0 0 | Cs1g02860.1           | 5.84 | 0 | 0    | 2 | MASCOT | T      | PLEX8 |       |
| 3.45E-01 | 0 0 | Cs1g02860.1           | 5.84 | 0 | 0    | 2 | MASCOT | T      | PLEX8 |       |
| 7.29E-02 | 0 0 | Cs1g02860.1           | 5.84 | 0 | 0    | 2 | MASCOT | T      | PLEX8 |       |
| 5.16E-03 | 0 0 | Cs1g02860.1/Cs1g028   | 5.84 | 0 | 0    | 2 | MASCOT | T      | PLEX8 |       |
| 4.31E-04 | 0 0 | Cs1g02860.1/Cs1g028   | 5.84 | 0 | 0    | 2 | MASCOT | T      | PLEX8 |       |
| 2.49E-05 | 0 0 | Cs1g02860.1/Cs1g028   | 6.45 | 0 | 0    | 2 | MASCOT | T      | PLEX8 |       |
| 3.76E-02 | 0 0 | Cs1g17190.1/Cs1g171   | 4.41 | 1 | 0    | 2 | MASCOT | T      | PLEX8 |       |
| 1.86E-01 | 0 0 | Cs1g17190.1/Cs1g171   | 6.75 | 0 | 15.9 | 0 | 2      | MASCOT | T     | PLEX8 |
| 1.00E-01 | 0 0 | Cs1g17190.1/Cs1g171   | 6.75 | 0 | 0    | 2 | MASCOT | T      | PLEX8 |       |
| 2.23E-01 | 0 0 | Cs1g17190.1/Cs1g171   | 6.75 | 0 | 0    | 2 | MASCOT | T      | PLEX8 |       |
| 7.32E-02 | 0 0 | Cs1g17190.1/Cs1g171   | 3.92 | 0 | 0    | 2 | MASCOT | T      | PLEX8 |       |
| 3.32E-01 | 0 0 | Cs1g17190.1/Cs1g171   | 3.92 | 0 | 0    | 2 | MASCOT | T      |       |       |
| 6.19E-05 | 0 0 | Cs2g15360.1           | 3.93 | 0 | 0    | 2 | MASCOT | T      |       |       |
| 1.17E-01 | 0 0 | Cs2g15360.1           | 6.74 | 0 | 0    | 2 | MASCOT | T      | PLEX8 |       |
| 8.63E-02 | 0 0 | Cs2g15360.1           | 6.74 | 0 | 0    | 2 | MASCOT | T      | PLEX8 |       |
| 9.13E-04 | 0 0 | Cs2g15360.1           | 6.74 | 0 | 0    | 2 | MASCOT | T      | PLEX8 |       |
| 1.16E-03 | 0 0 | Cs2g15360.1           | 6.74 | 0 | 0    | 2 | MASCOT | T      | PLEX8 |       |
| 2.42E-05 | 0 0 | Cs2g15360.1           | 6.72 | 0 | 0    | 2 | MASCOT | T      |       |       |
| 5.39E-04 | 0 0 | Cs2g24750.1/Cs2g247   | 9.76 | 0 | 0    | 2 | MASCOT | T      | PLEX8 |       |
| 9.08E-02 | 0 0 | Cs2g24750.1/Cs2g247   | 9.76 | 0 | 0    | 2 | MASCOT | T      | PLEX8 |       |
| 3.72E-03 | 0 0 | Cs2g24750.1/Cs2g247   | 9.76 | 0 | 0    | 2 | MASCOT | T      |       |       |
| 1.48E-01 | 0 0 | Cs2g24750.1/Cs2g247   | 9.76 | 0 | 0    | 2 | MASCOT | T      |       |       |
| 2.68E-02 | 0 0 | Cs2g24750.1/Cs2g247   | 8.59 | 0 | 0    | 2 | MASCOT | T      |       |       |
| 3.15E-01 | 0 0 | Cs2g24750.1/Cs2g247   | 9.72 | 0 | 0    | 2 | MASCOT | T      | PLEX8 |       |
| 4.89E-03 | 0 0 | Cs3g01150.1/Cs3g011   | 4.37 | 0 | 0    | 2 | MASCOT | T      | PLEX8 |       |
| 2.55E-01 | 0 0 | Cs3g01150.1/Cs3g011   | 4.37 | 0 | 0    | 2 | MASCOT | T      | PLEX8 |       |
| 2.81E-03 | 0 0 | Cs3g01150.1/Cs3g011   | 4.37 | 0 | 0    | 2 | MASCOT | T      | PLEX8 |       |
| 1.30E-01 | 0 0 | Cs3g01150.1/Cs3g011   | 4.53 | 0 | 0    | 2 | MASCOT | T      |       |       |
| 1.69E-01 | 0 0 | Cs3g01150.1/Cs3g011   | 4.53 | 0 | 0    | 2 | MASCOT | T      | PLEX8 |       |
| 6.23E-02 | 0 0 | Cs3g01150.1/Cs3g011   | 5.84 | 0 | 0    | 2 | MASCOT | T      | PLEX8 |       |
| 4.86E-03 | 0 0 | Cs3g14480.1/Cs3g144   | 4.54 | 0 | 0    | 2 | MASCOT | T      | PLEX8 |       |
| 2.80E-03 | 0 0 | Cs3g14480.1/Cs3g144   | 4.54 | 0 | 0    | 2 | MASCOT | T      | PLEX8 |       |
| 3.47E-02 | 0 0 | Cs3g14220.1/Cs3g142   | 5.5  | 0 | 0    | 2 | MASCOT | T      | PLEX8 |       |
| 2.49E-01 | 0 0 | Cs3g14220.1/Cs3g142   | 5.5  | 0 | 0    | 2 | MASCOT | T      | PLEX8 |       |
| 3.37E-02 | 0 0 | Cs3g14220.1/Cs3g142   | 5.5  | 0 | 0    | 2 | MASCOT | T      | PLEX8 |       |
| 7.82E-02 | 0 0 | Cs3g14220.1/Cs3g142   | 5.81 | 0 | 0    | 2 | MASCOT | T      | PLEX8 |       |
| 7.30E-02 | 0 0 | Cs3g17930.1/Cs3g179   | 4.14 | 0 | 0    | 2 | MASCOT | T      | PLEX8 |       |
| 4.38E-02 | 0 0 | Cs3g17930.1/Cs3g179   | 4.14 | 0 | 0    | 2 | MASCOT | T      | PLEX8 |       |
| 1.24E-01 | 0 0 | Cs3g17930.1/Cs3g179   | 4.37 | 0 | 0    | 2 | MASCOT | T      |       |       |
| 1.18E-02 | 0 0 | Cs3g17930.1/Cs3g179   | 4.37 | 0 | 0    | 2 | MASCOT | T      |       |       |
| 1.45E-02 | 0 0 | Cs3g17930.1           | 4.37 | 0 | 0    | 2 | MASCOT | T      | PLEX8 |       |
| 1.73E-02 | 0 0 | Cs3g17930.1           | 4.37 | 0 | 0    | 2 | MASCOT | T      | PLEX8 |       |
| 1.45E-01 | 0 0 | Cs3g21020.1           | 8.59 | 0 | 0    | 2 | MASCOT | T      | PLEX8 |       |

|          |     |                      |      |   |      |   |        |        |       |       |
|----------|-----|----------------------|------|---|------|---|--------|--------|-------|-------|
| 3.27E-01 | 0 0 | Cs3g21020.1          | 5.4  | 0 | 0    | 2 | MASCOT | T      | PLEX8 |       |
| 8.16E-03 | 0 0 | Cs3g21020.1          | 5.4  | 0 | 0    | 2 | MASCOT | T      | PLEX8 |       |
| 1.52E-01 | 0 0 | Cs3g21020.1          | 5.4  | 0 | 0    | 2 | MASCOT | T      | PLEX8 |       |
| 1.66E-02 | 0 0 | Cs3g21020.1          | 5.4  | 0 | 0    | 2 | MASCOT | T      | PLEX8 |       |
| 2.56E-02 | 0 0 | Cs3g21020.1          | 6    | 0 | 0    | 2 | MASCOT | T      | PLEX8 |       |
| 2.56E-02 | 0 0 | Cs4g13300.1/Cs4g133  | 5.84 | 0 | 0    | 2 | MASCOT | T      | PLEX8 |       |
| 8.09E-04 | 0 0 | Cs4g13300.1/Cs4g133  | 5.84 | 0 | 0    | 2 | MASCOT | T      | PLEX8 |       |
| 8.28E-03 | 0 0 | Cs4g13300.1/Cs4g133  | 5.84 | 0 | 0    | 2 | MASCOT | T      | PLEX8 |       |
| 8.10E-02 | 0 0 | Cs4g13300.1/Cs4g133  | 6.1  | 0 | 0    | 2 | MASCOT | T      | PLEX8 |       |
| 5.89E-02 | 0 0 | Cs4g13300.1/Cs4g133  | 6.1  | 0 | 0    | 2 | MASCOT | T      | PLEX8 |       |
| 4.61E-01 | 0 0 | Cs1g18675.1 ! Cs4g13 | 8.22 | 0 | 0    | 2 | MASCOT | T      | PLEX8 |       |
| 3.75E-04 | 0 0 | Cs5g16460.1          | 4.53 | 0 | 0    | 2 | MASCOT | T      | PLEX8 |       |
| 6.03E-03 | 0 0 | Cs5g16460.1          | 5.84 | 0 | 0    | 2 | MASCOT | T      | PLEX8 |       |
| 1.61E-01 | 0 0 | Cs5g16460.1          | 5.84 | 0 | 0    | 2 | MASCOT | T      | PLEX8 |       |
| 7.63E-02 | 0 0 | Cs5g16460.1          | 5.3  | 0 | 15.9 | 0 | 2      | MASCOT | T     | PLEX8 |
| 6.35E-02 | 0 0 | Cs5g16460.1          | 5.3  | 0 | 0    | 2 | MASCOT | T      | PLEX8 |       |
| 7.09E-02 | 0 0 | Cs5g16460.1          | 5.3  | 0 | 0    | 2 | MASCOT | T      | PLEX8 |       |
| 2.91E-03 | 0 0 | Cs5g29150.1/Cs9g093  | 8.75 | 0 | 0    | 2 | MASCOT | T      | PLEX8 |       |
| 5.38E-02 | 0 0 | Cs5g29150.1/Cs9g093  | 8.75 | 0 | 0    | 2 | MASCOT | T      | PLEX8 |       |
| 3.72E-02 | 0 0 | Cs5g29150.1/Cs5g291  | 8.59 | 0 | 0    | 2 | MASCOT | T      | PLEX8 |       |
| 7.21E-02 | 0 0 | Cs5g29150.1/Cs5g291  | 8.59 | 0 | 0    | 2 | MASCOT | T      | PLEX8 |       |
| 1.23E-01 | 0 0 | Cs5g29150.1/Cs5g291  | 8.59 | 0 | 0    | 2 | MASCOT | T      | PLEX8 |       |
| 2.98E-03 | 0 0 | Cs5g29150.1/Cs5g291  | 5.59 | 0 | 0    | 2 | MASCOT | T      | PLEX8 |       |
| 1.36E-02 | 0 0 | Cs5g30440.1/Cs5g304  | 4.25 | 0 | 0    | 2 | MASCOT | T      | PLEX8 |       |
| 1.70E-01 | 0 0 | Cs5g30440.1/Cs5g304  | 9.8  | 0 | 0    | 2 | MASCOT | T      | PLEX8 |       |
| 4.20E-02 | 0 0 | Cs5g30440.1/Cs5g304  | 5.84 | 0 | 15.9 | 0 | 2      | MASCOT | T     | PLEX8 |
| 3.26E-02 | 0 0 | Cs5g30440.1/Cs5g304  | 5.84 | 0 | 15.9 | 0 | 2      | MASCOT | T     | PLEX8 |
| 4.02E-03 | 0 0 | Cs5g30440.1/Cs5g304  | 5.84 | 0 | 0    | 2 | MASCOT | T      | PLEX8 |       |
| 8.06E-03 | 0 0 | Cs5g30440.1/Cs5g304  | 5.84 | 0 | 0    | 2 | MASCOT | T      | PLEX8 |       |
| 4.29E-01 | 0 0 | Cs6g02670.1/Cs6g026  | 9.76 | 0 | 0    | 2 | MASCOT | T      | PLEX8 |       |
| 1.44E-03 | 0 0 | Cs6g02670.1/Cs6g026  | 9.76 | 0 | 0    | 2 | MASCOT | T      | PLEX8 |       |
| 4.87E-02 | 0 0 | Cs6g02670.1/Cs6g026  | 8.75 | 0 | 0    | 2 | MASCOT | T      | PLEX8 |       |
| 1.26E-04 | 0 0 | Cs6g02670.1/Cs6g026  | 8.75 | 0 | 0    | 2 | MASCOT | T      | PLEX8 |       |
| 5.36E-02 | 0 0 | Cs6g02670.1/Cs6g026  | 5.81 | 0 | 0    | 2 | MASCOT | T      | PLEX8 |       |
| 4.57E-04 | 0 0 | Cs6g02670.1/Cs6g026  | 5.81 | 0 | 0    | 2 | MASCOT | T      | PLEX8 |       |
| 9.49E-02 | 0 0 | Cs6g08190.1/Cs6g081  | 4.03 | 0 | 0    | 2 | MASCOT | T      | PLEX8 |       |
| 8.75E-02 | 0 0 | Cs6g08190.1/Cs6g081  | 4.53 | 0 | 0    | 2 | MASCOT | T      | PLEX8 |       |
| 3.10E-02 | 0 0 | Cs6g08190.1/Cs6g081  | 4.53 | 0 | 0    | 2 | MASCOT | T      | PLEX8 |       |
| 8.86E-03 | 0 0 | Cs6g08190.1/Cs6g081  | 4.53 | 0 | 0    | 2 | MASCOT | T      | PLEX8 |       |
| 8.66E-04 | 0 0 | Cs6g08190.1/Cs6g081  | 4.03 | 0 | 0    | 2 | MASCOT | T      | PLEX8 |       |
| 3.38E-03 | 0 0 | Cs6g08190.1/Cs6g081  | 4.03 | 0 | 0    | 2 | MASCOT | T      | PLEX8 |       |
| 2.39E-02 | 0 0 | Cs6g08630.1/Cs6g086  | 6.79 | 0 | 0    | 2 | MASCOT | T      | PLEX8 |       |
| 2.17E-02 | 0 0 | Cs6g08630.1/Cs6g086  | 6.79 | 0 | 0    | 2 | MASCOT | T      | PLEX8 |       |
| 5.22E-04 | 0 0 | Cs6g08630.1/Cs6g086  | 6.79 | 0 | 0    | 2 | MASCOT | T      | PLEX8 |       |
| 1.38E-01 | 0 0 | Cs6g08650.1/Cs6g086  | 4.41 | 0 | 0    | 2 | MASCOT | T      | PLEX8 |       |
| 4.34E-02 | 0 0 | Cs6g08630.1/Cs6g086  | 4.53 | 0 | 0    | 2 | MASCOT | T      | PLEX8 |       |
| 2.63E-02 | 0 0 | Cs6g08630.1/Cs6g086  | 4.53 | 0 | 0    | 2 | MASCOT | T      | PLEX8 |       |
| 2.03E-03 | 0 0 | Cs7g16080.1/Cs7g160  | 4.21 | 0 | 0    | 2 | MASCOT | T      | PLEX8 |       |
| 1.16E-02 | 0 0 | Cs7g16080.1/Cs7g160  | 4.21 | 0 | 0    | 2 | MASCOT | T      | PLEX8 |       |
| 2.33E-03 | 0 0 | Cs7g16080.1/Cs7g160  | 6    | 0 | 0    | 2 | MASCOT | T      | PLEX8 |       |
| 1.55E-03 | 0 0 | Cs7g16080.1/Cs7g160  | 6    | 0 | 0    | 2 | MASCOT | T      | PLEX8 |       |

|          |     |                     |      |   |      |   |        |                |
|----------|-----|---------------------|------|---|------|---|--------|----------------|
| 7.51E-02 | 0 0 | Cs7g16080.1/Cs7g160 | 6    | 0 | 0    | 2 | MASCOT | T              |
| 7.67E-02 | 0 0 | Cs7g16080.1/Cs7g160 | 8.59 | 0 | 0    | 2 | MASCOT | T              |
| 1.38E-01 | 0 0 | Cs6g14000.1/Cs7g231 | 8.76 | 0 | 0    | 2 | MASCOT | T              |
| 4.86E-03 | 0 0 | Cs6g14000.1/Cs7g231 | 4.53 | 0 | 0    | 2 | MASCOT | T              |
| 1.68E-03 | 0 0 | Cs6g14000.1/Cs7g231 | 4.53 | 0 | 0    | 2 | MASCOT | T              |
| 9.67E-02 | 0 0 | Cs6g14000.1/Cs7g231 | 4.53 | 0 | 0    | 2 | MASCOT | T              |
| 1.95E-02 | 0 0 | Cs6g14000.1/Cs7g231 | 4.53 | 0 | 0    | 2 | MASCOT | T              |
| 2.25E-01 | 0 0 | Cs6g14000.1/Cs7g231 | 4.03 | 0 | 15.9 | 0 | 2      | MASCOT T PLEX8 |
| 6.91E-04 | 0 0 | Cs7g27990.1         | 4.54 | 0 | 0    | 2 | MASCOT | T              |
| 5.38E-02 | 0 0 | Cs7g27990.1         | 5.19 | 0 | 15.9 | 0 | 2      | MASCOT T PLEX8 |
| 4.27E-05 | 0 0 | Cs7g27990.1         | 5.19 | 0 | 15.9 | 0 | 2      | MASCOT T PLEX8 |
| 3.03E-04 | 0 0 | Cs7g27990.1         | 5.19 | 0 | 0    | 2 | MASCOT | T PLEX8        |
| 3.77E-03 | 0 0 | Cs7g27990.1         | 6.04 | 0 | 0    | 2 | MASCOT | T PLEX8        |
| 2.31E-03 | 0 0 | Cs7g27990.1         | 6.04 | 0 | 0    | 2 | MASCOT | T PLEX8        |
| 6.55E-02 | 0 0 | Cs7g29500.1         | 6.1  | 0 | 0    | 2 | MASCOT | T PLEX8        |
| 3.36E-01 | 0 0 | Cs7g29500.1         | 4.53 | 0 | 0    | 2 | MASCOT | T              |
| 1.15E-01 | 0 0 | Cs7g29500.1         | 4.53 | 0 | 0    | 2 | MASCOT | T              |
| 2.52E-04 | 0 0 | Cs7g29500.1         | 6    | 0 | 0    | 2 | MASCOT | T PLEX8        |
| 4.59E-03 | 0 0 | Cs7g29500.1         | 6    | 0 | 0    | 2 | MASCOT | T PLEX8        |
| 1.88E-02 | 0 0 | Cs7g29500.1         | 6    | 0 | 0    | 2 | MASCOT | T PLEX8        |
| 1.61E-02 | 0 0 | Cs7g31420.1/Cs7g314 | 8.6  | 0 | 0    | 2 | MASCOT | T PLEX8        |
| 5.32E-02 | 0 0 | Cs7g31420.1/Cs7g314 | 8.6  | 0 | 0    | 2 | MASCOT | T              |
| 3.99E-01 | 0 0 | Cs7g31420.1/Cs7g314 | 8.6  | 0 | 0    | 2 | MASCOT | T PLEX8        |
| 4.39E-03 | 0 0 | Cs7g31420.1/Cs7g314 | 8.6  | 0 | 0    | 2 | MASCOT | T PLEX8        |
| 1.46E-02 | 0 0 | Cs4g19270.1/Cs7g314 | 5.84 | 0 | 0    | 2 | MASCOT | T PLEX8        |
| 1.29E-01 | 0 0 | Cs7g31410.1/Cs7g314 | 8.31 | 0 | 0    | 2 | MASCOT | T PLEX8        |
| 1.54E-02 | 0 0 | Cs8g02770.1         | 5.21 | 0 | 0    | 2 | MASCOT | T PLEX8        |
| 7.89E-03 | 0 0 | Cs8g02770.1         | 8.72 | 0 | 0    | 2 | MASCOT | T PLEX8        |
| 3.21E-04 | 0 0 | Cs8g02770.1         | 8.72 | 0 | 0    | 2 | MASCOT | T PLEX8        |
| 3.24E-06 | 0 0 | Cs8g02770.1         | 8.72 | 0 | 0    | 2 | MASCOT | T PLEX8        |
| 1.35E-01 | 0 0 | Cs8g02770.1         | 8.5  | 0 | 0    | 2 | MASCOT | T PLEX8        |
| 4.25E-03 | 0 0 | Cs8g02770.1         | 8.5  | 0 | 0    | 2 | MASCOT | T PLEX8        |
| 1.48E-01 | 0 0 | Cs8g05140.1/Cs8g051 | 4.37 | 0 | 0    | 2 | MASCOT | T PLEX8        |
| 7.19E-02 | 0 0 | Cs8g05140.1/Cs8g051 | 4.37 | 0 | 0    | 2 | MASCOT | T PLEX8        |
| 9.51E-02 | 0 0 | Cs8g05140.1/Cs8g051 | 4.37 | 0 | 0    | 2 | MASCOT | T PLEX8        |
| 2.40E-02 | 0 0 | Cs8g05140.1         | 4.53 | 0 | 0    | 2 | MASCOT | T PLEX8        |
| 3.06E-03 | 0 0 | Cs8g05140.1         | 5.75 | 0 | 15.9 | 0 | 2      | MASCOT T PLEX8 |
| 1.21E-02 | 0 0 | Cs8g05140.1         | 5.75 | 0 | 0    | 2 | MASCOT | T PLEX8        |
| 7.66E-02 | 0 0 | Cs6g11710.1/Cs8g166 | 8.75 | 0 | 0    | 2 | MASCOT | T PLEX8        |
| 4.50E-03 | 0 0 | Cs6g11710.1/Cs8g166 | 8.72 | 0 | 0    | 2 | MASCOT | T PLEX8        |
| 9.41E-02 | 0 0 | Cs6g11710.1/Cs8g166 | 8.72 | 0 | 0    | 2 | MASCOT | T              |
| 4.08E-02 | 0 0 | Cs6g11710.1/Cs8g166 | 5.97 | 0 | 0    | 2 | MASCOT | T PLEX8        |
| 4.50E-07 | 0 0 | Cs6g11710.1/Cs8g166 | 5.97 | 0 | 0    | 2 | MASCOT | T PLEX8        |
| 1.04E-04 | 0 0 | Cs6g11710.1/Cs8g166 | 5.97 | 0 | 0    | 2 | MASCOT | T PLEX8        |
| 1.17E-01 | 0 0 | Cs8g16640.1/Cs8g166 | 4.1  | 0 | 0    | 2 | MASCOT | T              |
| 7.36E-04 | 0 0 | Cs8g16640.1/Cs8g166 | 8.31 | 0 | 0    | 2 | MASCOT | T PLEX8        |
| 1.11E-06 | 0 0 | Cs8g16640.1/Cs8g166 | 4.37 | 0 | 0    | 2 | MASCOT | T              |
| 1.29E-04 | 0 0 | Cs8g16640.1/Cs8g166 | 4.37 | 0 | 0    | 2 | MASCOT | T PLEX8        |
| 4.87E-02 | 0 0 | Cs8g16640.1/Cs8g166 | 4.37 | 0 | 0    | 2 | MASCOT | T PLEX8        |
| 2.25E-01 | 0 0 | Cs8g16640.1/Cs8g166 | 4.37 | 0 | 0    | 2 | MASCOT | T PLEX8        |
| 1.38E-02 | 0 0 | Cs8g20430.1         | 4.37 | 0 | 0    | 2 | MASCOT | T PLEX8        |

|          |     |                      |      |   |      |   |   |        |   |       |
|----------|-----|----------------------|------|---|------|---|---|--------|---|-------|
| 1.46E-01 | 0 0 | Cs8g20430.1          | 4.75 | 0 | 15.9 | 0 | 2 | MASCOT | T | PLEX8 |
| 1.89E-02 | 0 0 | Cs8g20430.1          | 5.99 | 0 |      | 0 | 2 | MASCOT | T | PLEX8 |
| 3.32E-02 | 0 0 | Cs8g20430.1          | 5.99 | 0 |      | 0 | 2 | MASCOT | T | PLEX8 |
| 1.06E-01 | 0 0 | Cs8g20430.1          | 5.99 | 0 |      | 0 | 2 | MASCOT | T | PLEX8 |
| 1.50E-02 | 0 0 | Cs8g20430.1          | 5.99 | 0 |      | 0 | 2 | MASCOT | T | PLEX8 |
| 4.44E-01 | 0 0 | Cs9g14690.1          | 5.88 | 0 |      | 0 | 2 | MASCOT | T | PLEX8 |
| 6.08E-02 | 0 0 | Cs9g14690.1          | 5.88 | 0 |      | 0 | 2 | MASCOT | T | PLEX8 |
| 8.90E-02 | 0 0 | Cs9g14690.1          | 5.88 | 0 |      | 0 | 2 | MASCOT | T | PLEX8 |
| 2.94E-02 | 0 0 | Cs9g14690.1          | 4.43 | 1 |      | 0 | 2 | MASCOT | T | PLEX8 |
| 1.71E-01 | 0 0 | Cs9g14690.1          | 5.97 | 0 |      | 0 | 2 | MASCOT | T | PLEX8 |
| 2.95E-04 | 0 0 | Cs9g14690.1          | 5.97 | 0 |      | 0 | 2 | MASCOT | T |       |
| 8.52E-03 | 0 0 | Cs9g15140.1/Cs9g151  | 5.83 | 0 |      | 0 | 2 | MASCOT | T | PLEX8 |
| 1.32E-02 | 0 0 | Cs9g15140.1/Cs9g151  | 5.83 | 0 |      | 0 | 2 | MASCOT | T | PLEX8 |
| 1.55E-02 | 0 0 | Cs9g15140.1/Cs9g151  | 5.83 | 0 |      | 0 | 2 | MASCOT | T | PLEX8 |
| 5.14E-03 | 0 0 | Cs9g15140.1/Cs9g151  | 8.75 | 1 |      | 0 | 2 | MASCOT | T | PLEX8 |
| 6.27E-04 | 0 0 | Cs9g15140.1/Cs9g151  | 8.75 | 1 |      | 0 | 2 | MASCOT | T | PLEX8 |
| 9.64E-06 | 0 0 | Cs9g15140.1/Cs9g151  | 5.99 | 0 |      | 0 | 2 | MASCOT | T |       |
| 4.22E-05 | 0 0 | Cs3g15030.1/Cs9g024  | 6.79 | 0 |      | 0 | 2 | MASCOT | T | PLEX8 |
| 7.18E-06 | 0 0 | Cs3g15030.1/Cs9g024  | 6.79 | 0 |      | 0 | 2 | MASCOT | T | PLEX8 |
| 1.89E-02 | 0 0 | Cs3g15030.1/Cs9g024  | 5.84 | 0 |      | 0 | 2 | MASCOT | T | PLEX8 |
| 4.99E-04 | 0 0 | Cs3g15030.1/Cs9g024  | 5.84 | 0 |      | 0 | 2 | MASCOT | T | PLEX8 |
| 5.78E-06 | 0 0 | Cs9g02500.1/orange1. | 5.4  | 0 |      | 0 | 2 | MASCOT | T | PLEX8 |
| 4.63E-01 | 0 0 | Cs9g02500.1/orange1. | 5.4  | 0 |      | 0 | 2 | MASCOT | T | PLEX8 |
| 2.16E-02 | 0 0 | Cs1g02320.1/Cs1g023  | 4.37 | 0 |      | 0 | 2 | MASCOT | T | PLEX8 |
| 3.13E-02 | 0 0 | Cs1g02320.1/Cs1g023  | 5.21 | 0 |      | 0 | 2 | MASCOT | T | PLEX8 |
| 2.63E-03 | 0 0 | Cs1g02320.1/Cs1g023  | 5.21 | 0 |      | 0 | 2 | MASCOT | T | PLEX8 |
| 1.88E-02 | 0 0 | Cs1g02320.1/Cs1g023  | 5.21 | 0 |      | 0 | 2 | MASCOT | T | PLEX8 |
| 9.31E-04 | 0 0 | Cs1g02320.1/Cs1g023  | 6.91 | 0 |      | 0 | 2 | MASCOT | T | PLEX8 |
| 4.62E-03 | 0 0 | Cs1g04690.1/Cs1g046  | 6.04 | 0 |      | 0 | 2 | MASCOT | T | PLEX8 |
| 2.12E-01 | 0 0 | Cs1g04690.1/Cs1g046  | 6.04 | 0 |      | 0 | 2 | MASCOT | T | PLEX8 |
| 3.64E-01 | 0 0 | Cs1g04690.1/Cs1g046  | 6.04 | 0 |      | 0 | 2 | MASCOT | T | PLEX8 |
| 1.30E-04 | 0 0 | Cs1g04690.1/Cs1g046  | 4.14 | 0 |      | 0 | 2 | MASCOT | T | PLEX8 |
| 7.96E-02 | 0 0 | Cs1g04690.1/Cs1g046  | 4.37 | 0 |      | 0 | 2 | MASCOT | T | PLEX8 |
| 2.29E-03 | 0 0 | Cs1g10530.1/Cs1g105  | 5.88 | 0 |      | 0 | 2 | MASCOT | T | PLEX8 |
| 2.60E-02 | 0 0 | Cs1g10530.1/Cs1g105  | 4.23 | 1 |      | 0 | 2 | MASCOT | T | PLEX8 |
| 2.04E-02 | 0 0 | Cs1g10530.1/Cs1g105  | 8.41 | 0 |      | 0 | 2 | MASCOT | T | PLEX8 |
| 4.86E-02 | 0 0 | Cs1g10530.1/Cs1g105  | 8.41 | 0 |      | 0 | 2 | MASCOT | T | PLEX8 |
| 7.64E-02 | 0 0 | Cs1g10530.1/Cs1g105  | 8.41 | 0 |      | 0 | 2 | MASCOT | T | PLEX8 |
| 3.42E-03 | 0 0 | Cs1g13640.1/Cs1g136  | 4.37 | 0 |      | 0 | 2 | MASCOT | T | PLEX8 |
| 5.55E-04 | 0 0 | Cs1g13640.1/Cs1g136  | 4.37 | 0 |      | 0 | 2 | MASCOT | T | PLEX8 |
| 8.79E-03 | 0 0 | Cs1g13620.1/Cs1g136  | 5.5  | 0 |      | 0 | 2 | MASCOT | T |       |
| 1.70E-03 | 0 0 | Cs1g13690.1/Cs1g136  | 8.75 | 0 |      | 0 | 2 | MASCOT | T |       |
| 2.72E-03 | 0 0 | Cs1g13690.1/Cs1g136  | 8.75 | 0 |      | 0 | 2 | MASCOT | T | PLEX8 |
| 2.25E-02 | 0 0 | Cs1g13950.1/Cs1g139  | 4.37 | 0 |      | 0 | 2 | MASCOT | T | PLEX8 |
| 3.01E-01 | 0 0 | Cs1g13950.1/Cs1g139  | 4.37 | 0 |      | 0 | 2 | MASCOT | T | PLEX8 |
| 8.54E-03 | 0 0 | Cs1g13950.1/Cs1g139  | 4.37 | 0 |      | 0 | 2 | MASCOT | T | PLEX8 |
| 1.47E-01 | 0 0 | Cs1g13950.1/Cs1g139  | 4.03 | 0 |      | 0 | 2 | MASCOT | T | PLEX8 |
| 1.68E-01 | 0 0 | Cs1g13950.1/Cs1g139  | 6    | 0 |      | 0 | 2 | MASCOT | T | PLEX8 |
| 2.19E-02 | 0 0 | Cs1g14600.1/Cs1g146  | 4.53 | 0 |      | 0 | 2 | MASCOT | T |       |
| 1.69E-03 | 0 0 | Cs1g14600.1/Cs1g146  | 5.32 | 0 |      | 0 | 2 | MASCOT | T | PLEX8 |
| 2.10E-01 | 0 0 | Cs1g14600.1/Cs1g146  | 6.05 | 0 |      | 0 | 2 | MASCOT | T | PLEX8 |

|          |     |                      |      |   |      |   |        |        |       |       |
|----------|-----|----------------------|------|---|------|---|--------|--------|-------|-------|
| 2.06E-02 | 0 0 | Cs1g14600.1/Cs1g146  | 6.05 | 0 | 0    | 2 | MASCOT | T      | PLEX8 |       |
| 2.09E-01 | 0 0 | Cs1g14600.1/Cs1g146  | 6.05 | 0 | 0    | 2 | MASCOT | T      | PLEX8 |       |
| 8.08E-02 | 0 0 | Cs1g16950.1/Cs1g171  | 9.6  | 1 | 0    | 2 | MASCOT | T      | PLEX8 |       |
| 7.03E-02 | 0 0 | Cs1g16950.1/Cs1g169  | 6    | 0 | 0    | 2 | MASCOT | T      | PLEX8 |       |
| 1.86E-02 | 0 0 | Cs1g16950.1/Cs1g169  | 6    | 0 | 0    | 2 | MASCOT | T      | PLEX8 |       |
| 1.39E-01 | 0 0 | Cs1g16950.1/Cs1g169  | 6    | 0 | 0    | 2 | MASCOT | T      | PLEX8 |       |
| 1.08E-02 | 0 0 | Cs1g16950.1/Cs1g171  | 8.47 | 0 | 0    | 2 | MASCOT | T      | PLEX8 |       |
| 1.06E-04 | 0 0 | Cs1g25620.1          | 5.99 | 0 | 0    | 2 | MASCOT | T      | PLEX8 |       |
| 4.68E-02 | 0 0 | Cs1g25620.1          | 5.99 | 0 | 0    | 2 | MASCOT | T      | PLEX8 |       |
| 7.43E-02 | 0 0 | Cs1g25620.1          | 8.75 | 0 | 0    | 2 | MASCOT | T      | PLEX8 |       |
| 2.45E-02 | 0 0 | Cs1g25620.1          | 5.81 | 0 | 0    | 2 | MASCOT | T      | PLEX8 |       |
| 7.36E-02 | 0 0 | Cs1g25620.1          | 5.81 | 0 | 0    | 2 | MASCOT | T      | PLEX8 |       |
| 2.70E-01 | 0 0 | Cs2g02400.1          | 5.84 | 0 | 0    | 2 | MASCOT | T      | PLEX8 |       |
| 1.03E-01 | 0 0 | Cs2g02400.1          | 6.46 | 0 | 0    | 2 | MASCOT | T      | PLEX8 |       |
| 4.21E-02 | 0 0 | Cs2g02400.1          | 6.46 | 0 | 0    | 2 | MASCOT | T      | PLEX8 |       |
| 2.16E-01 | 0 0 | Cs2g02400.1          | 6    | 0 | 0    | 2 | MASCOT | T      | PLEX8 |       |
| 6.18E-03 | 0 0 | Cs2g02400.1          | 6    | 0 | 0    | 2 | MASCOT | T      | PLEX8 |       |
| 6.06E-02 | 0 0 | Cs2g06360.1 ! Cs2g06 | 4.14 | 0 | 0    | 2 | MASCOT | T      | PLEX8 |       |
| 8.14E-02 | 0 0 | Cs2g06360.1 ! Cs2g06 | 4.14 | 0 | 0    | 2 | MASCOT | T      | PLEX8 |       |
| 2.11E-01 | 0 0 | Cs2g06370.1/Cs2g063  | 9.76 | 0 | 0    | 2 | MASCOT | T      | PLEX8 |       |
| 6.02E-02 | 0 0 | Cs2g06360.1/Cs2g063  | 4.53 | 0 | 0    | 2 | MASCOT | T      | PLEX8 |       |
| 2.66E-01 | 0 0 | Cs2g06360.1/Cs2g063  | 4.53 | 0 | 0    | 2 | MASCOT | T      | PLEX8 |       |
| 8.79E-02 | 0 0 | Cs2g07300.1/Cs2g073  | 4.14 | 0 | 0    | 2 | MASCOT | T      | PLEX8 |       |
| 9.59E-02 | 0 0 | Cs2g07300.1/Cs2g073  | 4.14 | 0 | 0    | 2 | MASCOT | T      | PLEX8 |       |
| 3.21E-01 | 0 0 | Cs2g07300.1/Cs2g073  | 8.75 | 0 | 0    | 2 | MASCOT | T      | PLEX8 |       |
| 3.23E-01 | 0 0 | Cs2g07300.1/Cs2g073  | 8.75 | 0 | 0    | 2 | MASCOT | T      | PLEX8 |       |
| 8.53E-04 | 0 0 | Cs2g07300.1/Cs2g073  | 4.54 | 0 | 15.9 | 0 | 2      | MASCOT | T     | PLEX8 |
| 8.80E-02 | 0 0 | Cs2g11800.1/Cs2g118  | 8.31 | 0 | 0    | 2 | MASCOT | T      | PLEX8 |       |
| 4.28E-03 | 0 0 | Cs2g11800.1/Cs2g118  | 8.22 | 0 | 0    | 2 | MASCOT | T      | PLEX8 |       |
| 2.72E-03 | 0 0 | Cs2g11800.1/Cs2g118  | 8.22 | 0 | 0    | 2 | MASCOT | T      | PLEX8 |       |
| 5.47E-02 | 0 0 | Cs2g11800.2          | 6    | 1 | 0    | 2 | MASCOT | T      | PLEX8 |       |
| 1.57E-03 | 0 0 | Cs2g11800.2          | 6    | 1 | 0    | 2 | MASCOT | T      | PLEX8 |       |
| 3.96E-02 | 0 0 | Cs2g22730.1/Cs2g227  | 8.22 | 0 | 0    | 2 | MASCOT | T      | PLEX8 |       |
| 1.84E-05 | 0 0 | Cs2g22730.1/Cs2g227  | 6    | 0 | 0    | 2 | MASCOT | T      | PLEX8 |       |
| 2.28E-03 | 0 0 | Cs2g22730.1/Cs2g227  | 4.25 | 0 | 0    | 2 | MASCOT | T      |       |       |
| 2.70E-05 | 0 0 | Cs2g22730.1/Cs2g227  | 4.25 | 0 | 0    | 2 | MASCOT | T      |       |       |
| 7.57E-05 | 0 0 | Cs2g22730.1/Cs2g227  | 4.25 | 0 | 0    | 2 | MASCOT | T      |       |       |
| 1.00E-01 | 0 0 | Cs2g28080.1/Cs2g280  | 8.76 | 0 | 0    | 2 | MASCOT | T      |       |       |
| 2.10E-03 | 0 0 | Cs2g28080.1/Cs2g280  | 8.76 | 0 | 0    | 2 | MASCOT | T      |       |       |
| 3.63E-04 | 0 0 | Cs2g28080.1/Cs2g280  | 4.43 | 1 | 0    | 2 | MASCOT | T      | PLEX8 |       |
| 1.05E-01 | 0 0 | Cs2g28080.1/Cs2g280  | 4.43 | 1 | 0    | 2 | MASCOT | T      |       |       |
| 3.66E-04 | 0 0 | Cs2g28080.1/Cs2g280  | 4.37 | 0 | 0    | 2 | MASCOT | T      |       |       |
| 5.01E-02 | 0 0 | Cs3g02950.1/Cs3g029  | 4.53 | 0 | 0    | 2 | MASCOT | T      | PLEX8 |       |
| 8.76E-06 | 0 0 | Cs3g02950.1/Cs3g029  | 5.72 | 0 | 0    | 2 | MASCOT | T      | PLEX8 |       |
| 7.19E-04 | 0 0 | Cs3g02950.1/Cs3g029  | 4.14 | 0 | 0    | 2 | MASCOT | T      |       |       |
| 1.06E-02 | 0 0 | Cs3g02950.1/Cs3g029  | 4.14 | 0 | 0    | 2 | MASCOT | T      |       |       |
| 5.73E-03 | 0 0 | Cs3g02950.1/Cs3g029  | 4.14 | 0 | 0    | 2 | MASCOT | T      |       |       |
| 3.60E-01 | 0 0 | Cs3g25280.1/Cs3g252  | 4.65 | 0 | 0    | 2 | MASCOT | T      | PLEX8 |       |
| 1.13E-01 | 0 0 | Cs3g25280.1          | 4.37 | 0 | 0    | 2 | MASCOT | T      | PLEX8 |       |
| 6.94E-03 | 0 0 | Cs1g08770.1/Cs1g087  | 8.59 | 0 | 0    | 2 | MASCOT | T      | PLEX8 |       |
| 6.86E-03 | 0 0 | Cs1g08770.1/Cs1g087  | 8.59 | 0 | 0    | 2 | MASCOT | T      | PLEX8 |       |

|          |     |                     |      |   |      |   |        |        |       |
|----------|-----|---------------------|------|---|------|---|--------|--------|-------|
| 3.66E-03 | 0 0 | Cs1g08770.1/Cs1g087 | 8.59 | 0 | 0    | 2 | MASCOT | T      | PLEX8 |
| 4.43E-03 | 0 0 | Cs4g07890.1/Cs4g078 | 5.88 | 0 | 0    | 2 | MASCOT | T      | PLEX8 |
| 5.11E-04 | 0 0 | Cs4g07890.1/Cs4g078 | 4.31 | 0 | 0    | 2 | MASCOT | T      | PLEX8 |
| 5.80E-03 | 0 0 | Cs4g07890.1/Cs4g078 | 4.31 | 0 | 0    | 2 | MASCOT | T      | PLEX8 |
| 1.06E-03 | 0 0 | Cs4g07890.1/Cs4g078 | 4.4  | 0 | 0    | 2 | MASCOT | T      | PLEX8 |
| 1.27E-04 | 0 0 | Cs4g07890.1/Cs4g078 | 4.4  | 0 | 0    | 2 | MASCOT | T      | PLEX8 |
| 4.65E-03 | 0 0 | Cs4g09840.1         | 8.8  | 0 | 0    | 2 | MASCOT | T      | PLEX8 |
| 3.14E-03 | 0 0 | Cs4g09840.1         | 8.8  | 0 | 0    | 2 | MASCOT | T      | PLEX8 |
| 6.15E-02 | 0 0 | Cs4g09810.1/Cs4g098 | 4.25 | 0 | 0    | 2 | MASCOT | T      |       |
| 2.06E-01 | 0 0 | Cs4g09810.1/Cs4g098 | 5.84 | 0 | 0    | 2 | MASCOT | T      | PLEX8 |
| 9.16E-04 | 0 0 | Cs4g09810.1/Cs4g098 | 5.84 | 0 | 0    | 2 | MASCOT | T      | PLEX8 |
| 2.31E-01 | 0 0 | Cs4g17290.1         | 5.4  | 0 | 0    | 2 | MASCOT | T      | PLEX8 |
| 6.94E-03 | 0 0 | Cs1g08770.1/Cs1g087 | 8.59 | 0 | 0    | 2 | MASCOT | T      | PLEX8 |
| 6.86E-03 | 0 0 | Cs1g08770.1/Cs1g087 | 8.59 | 0 | 0    | 2 | MASCOT | T      | PLEX8 |
| 3.66E-03 | 0 0 | Cs1g08770.1/Cs1g087 | 8.59 | 0 | 0    | 2 | MASCOT | T      | PLEX8 |
| 2.25E-01 | 0 0 | Cs4g17290.1         | 5.97 | 0 | 0    | 2 | MASCOT | T      | PLEX8 |
| 3.79E-01 | 0 0 | Cs5g09170.1         | 6.79 | 0 | 15.9 | 0 | 2      | MASCOT | T     |
| 9.93E-04 | 0 0 | Cs5g09170.1         | 6.79 | 0 | 15.9 | 0 | 2      | MASCOT | T     |
| 9.91E-02 | 0 0 | Cs5g09170.1         | 4.37 | 0 | 0    | 2 | MASCOT | T      | PLEX8 |
| 5.96E-02 | 0 0 | Cs5g09170.1         | 4.53 | 0 | 0    | 2 | MASCOT | T      | PLEX8 |
| 1.12E-01 | 0 0 | Cs5g09170.1         | 4.53 | 0 | 0    | 2 | MASCOT | T      | PLEX8 |
| 2.01E-02 | 0 0 | Cs5g10440.2/Cs5g207 | 4.37 | 0 | 0    | 2 | MASCOT | T      | PLEX8 |
| 1.28E-01 | 0 0 | Cs5g10440.1/Cs5g104 | 5.55 | 0 | 0    | 2 | MASCOT | T      | PLEX8 |
| 4.55E-04 | 0 0 | Cs5g10440.1/Cs5g104 | 5.55 | 0 | 0    | 2 | MASCOT | T      | PLEX8 |
| 2.38E-05 | 0 0 | Cs5g10440.1/Cs5g104 | 5.72 | 0 | 0    | 2 | MASCOT | T      | PLEX8 |
| 1.26E-05 | 0 0 | Cs5g10440.1/Cs5g104 | 5.72 | 0 | 0    | 2 | MASCOT | T      | PLEX8 |
| 6.06E-02 | 0 0 | Cs5g11900.1/Cs5g119 | 5.88 | 0 | 0    | 2 | MASCOT | T      |       |
| 9.64E-03 | 0 0 | Cs5g11900.1/Cs5g119 | 5.88 | 0 | 0    | 2 | MASCOT | T      | PLEX8 |
| 1.05E-01 | 0 0 | Cs5g11900.1/Cs5g119 | 4.53 | 0 | 0    | 2 | MASCOT | T      |       |
| 1.25E-02 | 0 0 | Cs5g11900.1/Cs5g119 | 4.37 | 0 | 0    | 2 | MASCOT | T      | PLEX8 |
| 4.18E-03 | 0 0 | Cs5g11900.1/Cs5g119 | 4.37 | 0 | 0    | 2 | MASCOT | T      | PLEX8 |
| 9.27E-02 | 0 0 | Cs5g15990.1/Cs5g159 | 6.05 | 0 | 0    | 2 | MASCOT | T      | PLEX8 |
| 2.98E-02 | 0 0 | Cs5g15990.1/Cs5g159 | 6.05 | 0 | 0    | 2 | MASCOT | T      | PLEX8 |
| 1.71E-01 | 0 0 | Cs5g15990.1/Cs5g159 | 6.05 | 0 | 0    | 2 | MASCOT | T      | PLEX8 |
| 3.62E-02 | 0 0 | Cs5g15990.1/Cs5g159 | 4.03 | 0 | 0    | 2 | MASCOT | T      |       |
| 2.57E-01 | 0 0 | Cs5g15990.1/Cs5g159 | 5.99 | 0 | 0    | 2 | MASCOT | T      | PLEX8 |
| 6.24E-02 | 0 0 | Cs5g18400.1         | 4.53 | 0 | 0    | 2 | MASCOT | T      | PLEX8 |
| 4.01E-02 | 0 0 | Cs5g18400.1         | 4.53 | 0 | 0    | 2 | MASCOT | T      | PLEX8 |
| 8.14E-02 | 0 0 | Cs5g18400.1         | 6.85 | 0 | 0    | 2 | MASCOT | T      | PLEX8 |
| 2.86E-03 | 0 0 | Cs5g18400.1         | 6.85 | 0 | 0    | 2 | MASCOT | T      | PLEX8 |
| 6.25E-02 | 0 0 | Cs5g18400.1         | 4.37 | 0 | 0    | 2 | MASCOT | T      |       |
| 8.72E-02 | 0 0 | Cs5g26800.1/Cs5g268 | 5.55 | 0 | 0    | 2 | MASCOT | T      | PLEX8 |
| 7.27E-02 | 0 0 | Cs5g26800.1/Cs5g268 | 5.55 | 0 | 0    | 2 | MASCOT | T      | PLEX8 |
| 6.51E-03 | 0 0 | Cs5g26800.1/Cs5g268 | 4.14 | 0 | 0    | 2 | MASCOT | T      |       |
| 1.90E-04 | 0 0 | Cs5g26800.1/Cs5g268 | 4.14 | 0 | 0    | 2 | MASCOT | T      |       |
| 5.96E-03 | 0 0 | Cs5g26800.1/Cs5g268 | 3.92 | 0 | 0    | 2 | MASCOT | T      |       |
| 5.08E-02 | 0 0 | Cs5g30450.1/Cs5g304 | 4.41 | 0 | 0    | 2 | MASCOT | T      | PLEX8 |
| 1.95E-01 | 0 0 | Cs5g30450.1/Cs5g304 | 4.37 | 0 | 0    | 2 | MASCOT | T      |       |
| 1.26E-04 | 0 0 | Cs5g30450.1/Cs5g304 | 4.37 | 0 | 0    | 2 | MASCOT | T      |       |
| 1.05E-01 | 0 0 | Cs3g10850.1/Cs5g304 | 5.5  | 0 | 0    | 2 | MASCOT | T      | PLEX8 |
| 3.97E-02 | 0 0 | Cs3g10850.1/Cs5g304 | 5.5  | 0 | 0    | 2 | MASCOT | T      | PLEX8 |

|          |     |                     |      |   |   |   |        |   |       |
|----------|-----|---------------------|------|---|---|---|--------|---|-------|
| 4.40E-02 | 0 0 | Cs6g14590.1         | 4.35 | 0 | 0 | 2 | MASCOT | T |       |
| 1.85E-02 | 0 0 | Cs6g14590.1         | 4.03 | 0 | 0 | 2 | MASCOT | T |       |
| 3.26E-04 | 0 0 | Cs6g14590.1         | 5.72 | 0 | 0 | 2 | MASCOT | T | PLEX8 |
| 1.57E-03 | 0 0 | Cs6g14590.1         | 5.72 | 0 | 0 | 2 | MASCOT | T | PLEX8 |
| 1.09E-02 | 0 0 | Cs6g14590.1         | 5.72 | 0 | 0 | 2 | MASCOT | T | PLEX8 |
| 2.15E-02 | 0 0 | Cs6g17550.1/Cs6g175 | 4.03 | 0 | 0 | 2 | MASCOT | T | PLEX8 |
| 1.69E-01 | 0 0 | Cs6g17550.1/Cs6g175 | 4.03 | 0 | 0 | 2 | MASCOT | T | PLEX8 |
| 1.57E-01 | 0 0 | Cs6g17550.1/Cs6g175 | 9.76 | 0 | 0 | 2 | MASCOT | T | PLEX8 |
| 7.22E-02 | 0 0 | Cs6g17550.1/Cs6g175 | 6    | 0 | 0 | 2 | MASCOT | T | PLEX8 |
| 9.09E-02 | 0 0 | Cs6g17550.1/Cs6g175 | 6    | 0 | 0 | 2 | MASCOT | T | PLEX8 |
| 2.05E-01 | 0 0 | Cs6g17790.1/Cs6g177 | 8.76 | 0 | 0 | 2 | MASCOT | T | PLEX8 |
| 2.04E-02 | 0 0 | Cs6g17790.1/Cs6g177 | 8.76 | 0 | 0 | 2 | MASCOT | T | PLEX8 |
| 6.60E-02 | 0 0 | Cs6g17790.1/Cs6g177 | 6    | 0 | 0 | 2 | MASCOT | T |       |
| 9.72E-02 | 0 0 | Cs6g17790.1/Cs6g177 | 6    | 0 | 0 | 2 | MASCOT | T | PLEX8 |
| 1.04E-01 | 0 0 | Cs6g17790.1/Cs6g177 | 4.21 | 0 | 0 | 2 | MASCOT | T |       |
| 1.16E-03 | 0 0 | Cs7g05570.1         | 4.25 | 0 | 0 | 2 | MASCOT | T | PLEX8 |
| 1.57E-01 | 0 0 | Cs7g05570.1         | 4.25 | 0 | 0 | 2 | MASCOT | T | PLEX8 |
| 1.45E-03 | 0 0 | Cs7g05570.1         | 4.25 | 0 | 0 | 2 | MASCOT | T | PLEX8 |
| 4.50E-02 | 0 0 | Cs7g05570.1         | 4.37 | 0 | 0 | 2 | MASCOT | T |       |
| 3.78E-01 | 0 0 | Cs7g05570.1         | 6.05 | 0 | 0 | 2 | MASCOT | T | PLEX8 |
| 1.45E-03 | 0 0 | Cs7g13070.1/Cs7g130 | 6.75 | 0 | 0 | 2 | MASCOT | T | PLEX8 |
| 4.92E-03 | 0 0 | Cs7g13070.1/Cs7g130 | 6.75 | 0 | 0 | 2 | MASCOT | T | PLEX8 |
| 5.13E-02 | 0 0 | Cs7g13070.1/Cs7g130 | 4.14 | 0 | 0 | 2 | MASCOT | T | PLEX8 |
| 6.51E-04 | 0 0 | Cs7g13070.1/Cs7g130 | 8.75 | 0 | 0 | 2 | MASCOT | T | PLEX8 |
| 1.35E-02 | 0 0 | Cs7g13070.1/Cs7g130 | 8.75 | 0 | 0 | 2 | MASCOT | T | PLEX8 |
| 2.05E-02 | 0 0 | Cs7g15310.1/Cs7g153 | 4.21 | 0 | 0 | 2 | MASCOT | T | PLEX8 |
| 1.43E-02 | 0 0 | Cs7g15310.1/Cs7g153 | 5.4  | 0 | 0 | 2 | MASCOT | T | PLEX8 |
| 3.03E-03 | 0 0 | Cs7g15310.1/Cs7g153 | 5.4  | 0 | 0 | 2 | MASCOT | T | PLEX8 |
| 1.93E-01 | 0 0 | Cs7g15310.1         | 4.37 | 0 | 0 | 2 | MASCOT | T | PLEX8 |
| 2.61E-02 | 0 0 | Cs7g15310.1         | 4.37 | 0 | 0 | 2 | MASCOT | T | PLEX8 |
| 4.05E-01 | 0 0 | Cs6g15670.1/Cs6g156 | 4.53 | 0 | 0 | 2 | MASCOT | T | PLEX8 |
| 2.39E-01 | 0 0 | Cs6g15670.1/Cs6g156 | 6    | 0 | 0 | 2 | MASCOT | T |       |
| 1.00E-03 | 0 0 | Cs6g15670.1/Cs6g156 | 6    | 0 | 0 | 2 | MASCOT | T |       |
| 2.46E-01 | 0 0 | Cs7g21120.1/Cs7g211 | 6.74 | 0 | 0 | 2 | MASCOT | T | PLEX8 |
| 2.87E-02 | 0 0 | Cs7g21120.1/Cs7g211 | 6.74 | 0 | 0 | 2 | MASCOT | T | PLEX8 |
| 7.51E-03 | 0 0 | Cs7g26540.1         | 6.75 | 0 | 0 | 2 | MASCOT | T | PLEX8 |
| 2.95E-04 | 0 0 | Cs7g26540.1         | 6.75 | 0 | 0 | 2 | MASCOT | T | PLEX8 |
| 5.13E-02 | 0 0 | Cs7g13070.1/Cs7g130 | 4.14 | 0 | 0 | 2 | MASCOT | T | PLEX8 |
| 4.96E-04 | 0 0 | Cs7g26540.1         | 5.99 | 0 | 0 | 2 | MASCOT | T | PLEX8 |
| 4.13E-05 | 0 0 | Cs7g26540.1         | 5.99 | 0 | 0 | 2 | MASCOT | T | PLEX8 |
| 2.46E-02 | 0 0 | Cs7g31080.1         | 4.03 | 0 | 0 | 2 | MASCOT | T |       |
| 8.90E-04 | 0 0 | Cs7g31080.1         | 4.03 | 0 | 0 | 2 | MASCOT | T |       |
| 7.79E-02 | 0 0 | Cs7g31080.1/Cs7g310 | 6.96 | 0 | 0 | 2 | MASCOT | T | PLEX8 |
| 8.63E-02 | 0 0 | Cs7g31080.1         | 4.37 | 0 | 0 | 2 | MASCOT | T | PLEX8 |
| 1.20E-02 | 0 0 | Cs7g31080.1         | 4.37 | 0 | 0 | 2 | MASCOT | T |       |
| 2.17E-01 | 0 0 | Cs8g01320.1/Cs8g013 | 4.37 | 0 | 0 | 2 | MASCOT | T | PLEX8 |
| 1.93E-01 | 0 0 | Cs8g01320.1/Cs8g013 | 5.88 | 0 | 0 | 2 | MASCOT | T | PLEX8 |
| 1.27E-01 | 0 0 | Cs8g01320.1/Cs8g013 | 5.88 | 0 | 0 | 2 | MASCOT | T | PLEX8 |
| 2.30E-02 | 0 0 | Cs8g01320.1/Cs8g013 | 4.17 | 0 | 0 | 2 | MASCOT | T | PLEX8 |
| 4.54E-02 | 0 0 | Cs8g01320.1/Cs8g013 | 4.17 | 0 | 0 | 2 | MASCOT | T | PLEX8 |
| 1.66E-02 | 0 0 | Cs8g02240.1         | 4.37 | 0 | 0 | 2 | MASCOT | T | PLEX8 |

|          |     |                       |      |   |      |   |        |        |       |       |
|----------|-----|-----------------------|------|---|------|---|--------|--------|-------|-------|
| 2.10E-02 | 0 0 | Cs8g02240.1           | 4.37 | 0 | 0    | 2 | MASCOT | T      | PLEX8 |       |
| 9.52E-02 | 0 0 | Cs8g02240.1           | 6.74 | 0 | 0    | 2 | MASCOT | T      | PLEX8 |       |
| 4.64E-03 | 0 0 | Cs8g02240.1           | 6.74 | 0 | 0    | 2 | MASCOT | T      | PLEX8 |       |
| 2.33E-01 | 0 0 | Cs8g02240.1           | 5.84 | 0 | 0    | 2 | MASCOT | T      | PLEX8 |       |
| 1.66E-02 | 0 0 | Cs8g04090.1           | 4.14 | 0 | 0    | 2 | MASCOT | T      | PLEX8 |       |
| 3.03E-02 | 0 0 | Cs8g04090.1           | 4.14 | 0 | 0    | 2 | MASCOT | T      | PLEX8 |       |
| 3.94E-02 | 0 0 | Cs8g04090.1           | 4.21 | 0 | 0    | 2 | MASCOT | T      |       |       |
| 1.26E-01 | 0 0 | Cs1g21530.1/Cs6g173   | 4.53 | 0 | 15.9 | 0 | 2      | MASCOT | T     | PLEX8 |
| 3.51E-03 | 0 0 | Cs1g21530.1/Cs6g173   | 4.53 | 0 | 0    | 2 | MASCOT | T      | PLEX8 |       |
| 4.22E-05 | 0 0 | Cs3g15030.1/Cs9g024   | 6.79 | 0 | 0    | 2 | MASCOT | T      | PLEX8 |       |
| 7.18E-06 | 0 0 | Cs3g15030.1/Cs9g024   | 6.79 | 0 | 0    | 2 | MASCOT | T      | PLEX8 |       |
| 1.89E-02 | 0 0 | Cs3g15030.1/Cs9g024   | 5.84 | 0 | 0    | 2 | MASCOT | T      | PLEX8 |       |
| 4.99E-04 | 0 0 | Cs3g15030.1/Cs9g024   | 5.84 | 0 | 0    | 2 | MASCOT | T      | PLEX8 |       |
| 4.75E-04 | 0 0 | Cs3g15030.1/Cs9g024   | 8.6  | 0 | 0    | 2 | MASCOT | T      | PLEX8 |       |
| 3.10E-02 | 0 0 | Cs9g12510.1           | 5.21 | 0 | 0    | 2 | MASCOT | T      | PLEX8 |       |
| 5.68E-02 | 0 0 | Cs9g12510.1           | 6.04 | 0 | 0    | 2 | MASCOT | T      | PLEX8 |       |
| 5.54E-02 | 0 0 | Cs9g12510.1           | 6.04 | 0 | 0    | 2 | MASCOT | T      | PLEX8 |       |
| 3.17E-02 | 0 0 | Cs9g12510.1           | 8.75 | 0 | 0    | 2 | MASCOT | T      | PLEX8 |       |
| 5.29E-03 | 0 0 | Cs9g12510.1           | 8.75 | 0 | 0    | 2 | MASCOT | T      | PLEX8 |       |
| 6.40E-02 | 0 0 | Cs5g30520.1 ! Cs6g13  | 9.8  | 0 | 0    | 2 | MASCOT | T      | PLEX8 |       |
| 1.07E-01 | 0 0 | Cs9g18860.1           | 4.37 | 0 | 0    | 2 | MASCOT | T      | PLEX8 |       |
| 1.25E-01 | 0 0 | Cs9g18860.1           | 4.37 | 0 | 0    | 2 | MASCOT | T      |       |       |
| 4.19E-02 | 0 0 | Cs9g18860.1           | 4.53 | 0 | 0    | 2 | MASCOT | T      |       |       |
| 2.36E-03 | 0 0 | Cs9g18860.1           | 4.53 | 0 | 0    | 2 | MASCOT | T      |       |       |
| 2.53E-03 | 0 0 | Cs9g19290.1/Cs9g192   | 4.25 | 0 | 0    | 2 | MASCOT | T      | PLEX8 |       |
| 1.57E-03 | 0 0 | Cs9g19290.1/Cs9g192   | 4.37 | 0 | 0    | 2 | MASCOT | T      |       |       |
| 1.71E-01 | 0 0 | Cs9g19290.1/Cs9g192   | 4.37 | 0 | 0    | 2 | MASCOT | T      |       |       |
| 1.31E-01 | 0 0 | Cs9g19290.1/Cs9g192   | 4.37 | 0 | 0    | 2 | MASCOT | T      |       |       |
| 9.60E-07 | 0 0 | Cs9g19290.1/Cs9g192   | 4.37 | 0 | 0    | 2 | MASCOT | T      |       |       |
| 6.69E-03 | 0 0 | orange1.1t02361.1/ora | 4.03 | 0 | 0    | 2 | MASCOT | T      |       |       |
| 4.87E-02 | 0 0 | orange1.1t02361.1/ora | 6.74 | 0 | 0    | 2 | MASCOT | T      | PLEX8 |       |
| 2.05E-01 | 0 0 | orange1.1t02361.1/ora | 6.74 | 0 | 0    | 2 | MASCOT | T      |       |       |
| 4.91E-02 | 0 0 | orange1.1t02361.1/ora | 6    | 0 | 0    | 2 | MASCOT | T      | PLEX8 |       |
| 1.27E-03 | 0 0 | orange1.1t02361.1/ora | 6    | 0 | 0    | 2 | MASCOT | T      | PLEX8 |       |
| 1.95E-03 | 0 0 | orange1.1t03059.1/ora | 5.32 | 0 | 15.9 | 0 | 2      | MASCOT | T     | PLEX8 |
| 5.27E-02 | 0 0 | Cs7g31990.1/Cs7g319   | 4.14 | 0 | 0    | 2 | MASCOT | T      | PLEX8 |       |
| 2.12E-01 | 0 0 | orange1.1t03059.1/ora | 9.73 | 0 | 0    | 2 | MASCOT | T      |       |       |
| 5.44E-02 | 0 0 | orange1.1t03059.1/ora | 9.73 | 0 | 0    | 2 | MASCOT | T      |       |       |
| 7.98E-04 | 0 0 | orange1.1t03059.1/ora | 9.73 | 0 | 0    | 2 | MASCOT | T      | PLEX8 |       |
| 1.85E-02 | 0 0 | orange1.1t03745.1/ora | 6    | 0 | 0    | 2 | MASCOT | T      |       |       |
| 4.10E-03 | 0 0 | orange1.1t03745.1/ora | 6    | 0 | 0    | 2 | MASCOT | T      | PLEX8 |       |
| 9.14E-02 | 0 0 | orange1.1t03745.1/ora | 5.4  | 0 | 0    | 2 | MASCOT | T      | PLEX8 |       |
| 7.08E-02 | 0 0 | orange1.1t03745.1/ora | 5.4  | 0 | 0    | 2 | MASCOT | T      | PLEX8 |       |
| 1.51E-01 | 0 0 | orange1.1t03745.1/ora | 4.09 | 0 | 0    | 2 | MASCOT | T      | PLEX8 |       |
| 1.03E-01 | 0 0 | Cs1g08480.1/Cs1g084   | 8.75 | 0 | 0    | 2 | MASCOT | T      | PLEX8 |       |
| 1.18E-02 | 0 0 | Cs1g08480.1/Cs1g084   | 9.76 | 0 | 0    | 2 | MASCOT | T      | PLEX8 |       |
| 1.30E-01 | 0 0 | Cs1g08480.1/Cs1g084   | 9.76 | 0 | 0    | 2 | MASCOT | T      | PLEX8 |       |
| 9.19E-02 | 0 0 | Cs1g08480.1/Cs1g084   | 4.25 | 0 | 0    | 2 | MASCOT | T      |       |       |
| 9.64E-03 | 0 0 | Cs1g21110.1           | 6.74 | 0 | 0    | 2 | MASCOT | T      | PLEX8 |       |
| 1.53E-02 | 0 0 | Cs1g21110.1           | 6.74 | 0 | 0    | 2 | MASCOT | T      | PLEX8 |       |
| 2.84E-03 | 0 0 | Cs1g21110.1           | 6.74 | 0 | 0    | 2 | MASCOT | T      | PLEX8 |       |



|              |                     |      |   |   |   |        |   |       |
|--------------|---------------------|------|---|---|---|--------|---|-------|
| 2.21E-02 0 0 | Cs1g21110.1         | 5.55 | 0 | 0 | 2 | MASCOT | T | PLEX8 |
| 2.28E-02 0 0 | Cs2g03540.1/Cs2g035 | 4.53 | 0 | 0 | 2 | MASCOT | T | PLEX8 |
| 5.04E-03 0 0 | Cs2g03540.1         | 4.65 | 0 | 0 | 2 | MASCOT | T | PLEX8 |
| 1.01E-01 0 0 | Cs2g03540.1         | 4.65 | 0 | 0 | 2 | MASCOT | T | PLEX8 |
| 6.49E-02 0 0 | Cs2g03540.1/Cs2g035 | 7.94 | 0 | 0 | 2 | MASCOT | T | PLEX8 |
| 1.21E-01 0 0 | Cs2g10840.1         | 4.21 | 0 | 0 | 2 | MASCOT | T | PLEX8 |
| 8.91E-03 0 0 | Cs2g10840.1         | 5.84 | 0 | 0 | 2 | MASCOT | T | PLEX8 |
| 5.42E-04 0 0 | Cs2g10840.1         | 5.84 | 0 | 0 | 2 | MASCOT | T | PLEX8 |
| 1.29E-03 0 0 | Cs2g10840.1         | 4.37 | 0 | 0 | 2 | MASCOT | T | PLEX8 |
| 1.90E-02 0 0 | Cs2g13730.1/Cs2g137 | 4.03 | 0 | 0 | 2 | MASCOT | T | PLEX8 |
| 1.01E-02 0 0 | Cs2g13730.1/Cs2g137 | 4.03 | 0 | 0 | 2 | MASCOT | T | PLEX8 |
| 5.54E-02 0 0 | Cs2g13730.1/Cs2g137 | 4.37 | 0 | 0 | 2 | MASCOT | T |       |
| 3.40E-02 0 0 | Cs2g13730.1/Cs2g137 | 8.75 | 0 | 0 | 2 | MASCOT | T | PLEX8 |
| 2.78E-01 0 0 | Cs2g18450.1/Cs2g184 | 5.32 | 0 | 0 | 2 | MASCOT | T | PLEX8 |
| 3.76E-02 0 0 | Cs2g18450.1/Cs2g184 | 5.88 | 0 | 0 | 2 | MASCOT | T | PLEX8 |
| 2.19E-06 0 0 | Cs2g18450.1/Cs2g184 | 4    | 0 | 0 | 2 | MASCOT | T | PLEX8 |
| 3.57E-02 0 0 | Cs2g18450.1/Cs2g184 | 4    | 0 | 0 | 2 | MASCOT | T | PLEX8 |
| 1.82E-01 0 0 | Cs2g26770.1/Cs2g267 | 5.84 | 0 | 0 | 2 | MASCOT | T | PLEX8 |
| 4.63E-02 0 0 | Cs2g26770.1/Cs2g267 | 6.74 | 0 | 0 | 2 | MASCOT | T | PLEX8 |
| 2.73E-04 0 0 | Cs2g26770.1/Cs2g267 | 6.74 | 0 | 0 | 2 | MASCOT | T | PLEX8 |
| 4.35E-01 0 0 | Cs2g26770.1/Cs2g267 | 8.75 | 0 | 0 | 2 | MASCOT | T | PLEX8 |
| 2.83E-02 0 0 | Cs2g28780.1         | 5.82 | 0 | 0 | 2 | MASCOT | T | PLEX8 |
| 1.02E-03 0 0 | Cs2g28780.1         | 5.84 | 0 | 0 | 2 | MASCOT | T | PLEX8 |
| 2.09E-02 0 0 | Cs2g28780.1         | 8.47 | 0 | 0 | 2 | MASCOT | T | PLEX8 |
| 6.17E-02 0 0 | Cs2g28780.1         | 8.47 | 0 | 0 | 2 | MASCOT | T | PLEX8 |
| 5.23E-02 0 0 | Cs3g10840.1/Cs8g026 | 9.72 | 0 | 0 | 2 | MASCOT | T |       |
| 1.50E-03 0 0 | Cs3g10840.1/Cs8g026 | 9.72 | 0 | 0 | 2 | MASCOT | T |       |
| 1.83E-02 0 0 | Cs3g10840.1/Cs3g108 | 5.99 | 0 | 0 | 2 | MASCOT | T |       |
| 1.41E-08 0 0 | Cs3g10840.1/Cs3g108 | 9.76 | 0 | 0 | 2 | MASCOT | T |       |
| 6.09E-03 0 0 | Cs3g11410.1/Cs5g311 | 6.74 | 0 | 0 | 2 | MASCOT | T | PLEX8 |
| 9.24E-04 0 0 | Cs3g11410.1/Cs5g311 | 6.74 | 0 | 0 | 2 | MASCOT | T | PLEX8 |
| 1.03E-02 0 0 | Cs3g11410.1         | 4.21 | 0 | 0 | 2 | MASCOT | T | PLEX8 |
| 4.33E-03 0 0 | Cs3g11410.1/Cs5g311 | 8.75 | 1 | 0 | 2 | MASCOT | T | PLEX8 |
| 2.32E-03 0 0 | Cs3g16830.1         | 5.72 | 0 | 0 | 2 | MASCOT | T | PLEX8 |
| 1.82E-02 0 0 | Cs3g16830.1         | 5.72 | 0 | 0 | 2 | MASCOT | T | PLEX8 |
| 4.86E-05 0 0 | Cs3g16830.1         | 6    | 0 | 0 | 2 | MASCOT | T |       |
| 2.31E-01 0 0 | Cs3g16830.1         | 8.56 | 0 | 0 | 2 | MASCOT | T | PLEX8 |
| 2.36E-04 0 0 | Cs3g22310.1/Cs3g223 | 3.91 | 0 | 0 | 2 | MASCOT | T | PLEX8 |
| 6.47E-03 0 0 | Cs3g22310.1/Cs3g223 | 4.37 | 0 | 0 | 2 | MASCOT | T | PLEX8 |
| 6.19E-03 0 0 | Cs3g22310.1/Cs3g223 | 4.37 | 0 | 0 | 2 | MASCOT | T | PLEX8 |
| 1.49E-03 0 0 | Cs3g22310.1/Cs3g223 | 4.37 | 0 | 0 | 2 | MASCOT | T |       |
| 5.94E-03 0 0 | Cs4g01980.1         | 4.03 | 1 | 0 | 2 | MASCOT | T | PLEX8 |
| 1.55E-01 0 0 | Cs4g01980.1         | 8.72 | 0 | 0 | 2 | MASCOT | T | PLEX8 |
| 2.08E-01 0 0 | Cs4g01980.1         | 8.75 | 0 | 0 | 2 | MASCOT | T | PLEX8 |
| 2.17E-03 0 0 | Cs4g01980.1         | 8.75 | 0 | 0 | 2 | MASCOT | T | PLEX8 |
| 1.55E-01 0 0 | Cs4g03450.1/Cs6g059 | 6    | 0 | 0 | 2 | MASCOT | T | PLEX8 |
| 4.02E-01 0 0 | Cs4g03450.1/Cs6g059 | 5.5  | 0 | 0 | 2 | MASCOT | T | PLEX8 |
| 3.07E-02 0 0 | Cs4g03450.1/Cs6g059 | 5.32 | 0 | 0 | 2 | MASCOT | T | PLEX8 |
| 1.76E-02 0 0 | Cs4g03450.1/Cs6g059 | 5.32 | 0 | 0 | 2 | MASCOT | T | PLEX8 |
| 9.67E-03 0 0 | Cs4g04180.1         | 4.65 | 0 | 0 | 2 | MASCOT | T | PLEX8 |
| 4.86E-03 0 0 | Cs4g04180.1         | 6.79 | 0 | 0 | 2 | MASCOT | T | PLEX8 |

|          |     |                     |      |   |      |   |        |        |       |       |
|----------|-----|---------------------|------|---|------|---|--------|--------|-------|-------|
| 4.40E-02 | 0 0 | Cs4g04180.1         | 6.79 | 0 | 0    | 2 | MASCOT | T      | PLEX8 |       |
| 1.54E-01 | 0 0 | Cs4g04180.1         | 6    | 0 | 0    | 2 | MASCOT | T      | PLEX8 |       |
| 6.57E-04 | 0 0 | Cs4g06630.1         | 4.14 | 0 | 0    | 2 | MASCOT | T      | PLEX8 |       |
| 1.16E-04 | 0 0 | Cs1g16550.1/Cs4g066 | 5.84 | 0 | 0    | 2 | MASCOT | T      | PLEX8 |       |
| 2.61E-04 | 0 0 | Cs1g16550.1/Cs4g066 | 5.84 | 0 | 0    | 2 | MASCOT | T      | PLEX8 |       |
| 8.57E-04 | 0 0 | Cs4g06630.1         | 5.84 | 0 | 0    | 2 | MASCOT | T      | PLEX8 |       |
| 7.30E-02 | 0 0 | Cs5g01930.1/Cs5g019 | 4.75 | 0 | 0    | 2 | MASCOT | T      | PLEX8 |       |
| 2.87E-04 | 0 0 | Cs5g01930.1/Cs5g019 | 4.75 | 0 | 0    | 2 | MASCOT | T      | PLEX8 |       |
| 4.46E-03 | 0 0 | Cs5g01930.1         | 4.37 | 0 | 0    | 2 | MASCOT | T      | PLEX8 |       |
| 1.50E-01 | 0 0 | Cs5g01930.1         | 5.32 | 0 | 0    | 2 | MASCOT | T      | PLEX8 |       |
| 7.38E-02 | 0 0 | Cs5g11880.1/Cs5g118 | 8.22 | 0 | 0    | 2 | MASCOT | T      | PLEX8 |       |
| 2.57E-02 | 0 0 | Cs5g11880.1/Cs5g118 | 8.59 | 1 | 0    | 2 | MASCOT | T      | PLEX8 |       |
| 7.73E-02 | 0 0 | Cs5g11880.1/Cs5g118 | 3.91 | 0 | 0    | 2 | MASCOT | T      | PLEX8 |       |
| 2.04E-02 | 0 0 | Cs5g11880.1/Cs5g118 | 3.91 | 0 | 0    | 2 | MASCOT | T      |       |       |
| 8.45E-02 | 0 0 | Cs5g15730.1         | 9.76 | 0 | 0    | 2 | MASCOT | T      |       |       |
| 3.20E-01 | 0 0 | Cs5g15730.1         | 9.76 | 0 | 0    | 2 | MASCOT | T      |       |       |
| 6.97E-05 | 0 0 | Cs5g15730.1         | 5.32 | 0 | 0    | 2 | MASCOT | T      | PLEX8 |       |
| 1.55E-01 | 0 0 | Cs5g15730.1         | 5.66 | 0 | 0    | 2 | MASCOT | T      | PLEX8 |       |
| 3.07E-01 | 0 0 | Cs2g17730.1/Cs2g177 | 4.37 | 0 | 0    | 2 | MASCOT | T      | PLEX8 |       |
| 1.28E-03 | 0 0 | Cs5g25170.1         | 4.37 | 0 | 0    | 2 | MASCOT | T      | PLEX8 |       |
| 8.24E-05 | 0 0 | Cs5g25170.1         | 4.37 | 0 | 0    | 2 | MASCOT | T      | PLEX8 |       |
| 1.07E-05 | 0 0 | Cs5g25170.1         | 5.72 | 0 | 0    | 2 | MASCOT | T      | PLEX8 |       |
| 2.22E-01 | 0 0 | Cs5g27465.1         | 6.75 | 0 | 0    | 2 | MASCOT | T      | PLEX8 |       |
| 7.03E-03 | 0 0 | Cs5g27465.1         | 4.37 | 0 | 0    | 2 | MASCOT | T      | PLEX8 |       |
| 2.92E-03 | 0 0 | Cs5g27465.1         | 4.37 | 0 | 0    | 2 | MASCOT | T      | PLEX8 |       |
| 1.64E-02 | 0 0 | Cs5g27465.1         | 4.68 | 1 | 0    | 2 | MASCOT | T      |       |       |
| 1.40E-01 | 0 0 | Cs6g06560.1/Cs6g065 | 5.84 | 0 | 0    | 2 | MASCOT | T      | PLEX8 |       |
| 2.87E-02 | 0 0 | Cs6g06560.1/Cs6g065 | 9.73 | 0 | 0    | 2 | MASCOT | T      | PLEX8 |       |
| 5.77E-01 | 0 0 | Cs6g06560.1/Cs6g065 | 9.73 | 0 | 0    | 2 | MASCOT | T      |       |       |
| 2.81E-03 | 0 0 | Cs6g06560.1/Cs6g065 | 3.92 | 0 | 0    | 2 | MASCOT | T      |       |       |
| 1.70E-02 | 0 0 | Cs6g10030.1/Cs6g100 | 4.37 | 0 | 15.9 | 0 | 2      | MASCOT | T     | PLEX8 |
| 1.49E-02 | 0 0 | Cs6g10030.1/Cs6g100 | 4.37 | 0 | 0    | 2 | MASCOT | T      | PLEX8 |       |
| 3.52E-02 | 0 0 | Cs6g10030.1/Cs6g100 | 4.37 | 0 | 0    | 2 | MASCOT | T      |       |       |
| 1.03E-02 | 0 0 | Cs6g10030.1/Cs6g100 | 4.03 | 0 | 0    | 2 | MASCOT | T      | PLEX8 |       |
| 4.44E-02 | 0 0 | Cs6g11420.1/Cs6g114 | 5.4  | 0 | 0    | 2 | MASCOT | T      | PLEX8 |       |
| 5.24E-03 | 0 0 | Cs6g11420.1/Cs6g114 | 5.4  | 0 | 0    | 2 | MASCOT | T      | PLEX8 |       |
| 1.18E-01 | 0 0 | Cs6g11420.1/Cs6g114 | 4.21 | 0 | 0    | 2 | MASCOT | T      |       |       |
| 1.16E-01 | 0 0 | Cs6g11420.1         | 8.75 | 0 | 0    | 2 | MASCOT | T      |       |       |
| 1.27E-01 | 0 0 | Cs6g12040.1         | 4.37 | 0 | 0    | 2 | MASCOT | T      | PLEX8 |       |
| 5.98E-03 | 0 0 | Cs6g12040.1         | 4.53 | 0 | 0    | 2 | MASCOT | T      |       |       |
| 5.60E-02 | 0 0 | Cs6g12040.1         | 4.25 | 0 | 0    | 2 | MASCOT | T      |       |       |
| 8.94E-04 | 0 0 | Cs6g12040.1         | 4.25 | 0 | 0    | 2 | MASCOT | T      |       |       |
| 4.18E-02 | 0 0 | Cs6g13960.1/Cs6g139 | 6.85 | 0 | 0    | 2 | MASCOT | T      | PLEX8 |       |
| 3.58E-04 | 0 0 | Cs6g13960.1/Cs6g139 | 9.41 | 0 | 0    | 2 | MASCOT | T      | PLEX8 |       |
| 3.16E-06 | 0 0 | Cs6g13960.1/Cs6g139 | 9.41 | 0 | 0    | 2 | MASCOT | T      |       |       |
| 1.24E-01 | 0 0 | Cs2g17280.1/Cs6g139 | 4.14 | 0 | 0    | 2 | MASCOT | T      | PLEX8 |       |
| 1.84E-01 | 0 0 | Cs6g19970.1         | 5.84 | 0 | 0    | 2 | MASCOT | T      |       |       |
| 4.25E-02 | 0 0 | Cs6g19970.1         | 5.84 | 0 | 0    | 2 | MASCOT | T      | PLEX8 |       |
| 4.42E-01 | 0 0 | Cs6g19970.1         | 5.32 | 0 | 0    | 2 | MASCOT | T      | PLEX8 |       |
| 3.70E-01 | 0 0 | Cs6g19970.1         | 4.53 | 0 | 0    | 2 | MASCOT | T      | PLEX8 |       |
| 2.53E-01 | 0 0 | Cs7g01430.1         | 5.4  | 0 | 0    | 2 | MASCOT | T      | PLEX8 |       |

|          |     |                     |      |   |      |   |        |        |       |       |
|----------|-----|---------------------|------|---|------|---|--------|--------|-------|-------|
| 2.95E-01 | 0 0 | Cs7g01430.1         | 5.4  | 0 | 0    | 2 | MASCOT | T      | PLEX8 |       |
| 3.72E-04 | 0 0 | Cs7g01430.1         | 4.14 | 0 | 0    | 2 | MASCOT | T      | PLEX8 |       |
| 1.02E-01 | 0 0 | Cs7g01430.1         | 8.56 | 0 | 0    | 2 | MASCOT | T      | PLEX8 |       |
| 1.06E-01 | 0 0 | Cs7g04890.1         | 6.1  | 0 | 0    | 2 | MASCOT | T      | PLEX8 |       |
| 4.71E-03 | 0 0 | Cs7g04890.1         | 6.1  | 0 | 0    | 2 | MASCOT | T      |       |       |
| 1.49E-01 | 0 0 | Cs5g01600.1/Cs5g016 | 4.37 | 0 | 0    | 2 | MASCOT | T      | PLEX8 |       |
| 3.58E-01 | 0 0 | Cs7g04890.1         | 5.84 | 0 | 15.9 | 0 | 2      | MASCOT | T     | PLEX8 |
| 3.04E-02 | 0 0 | Cs7g05690.1/Cs7g056 | 9.76 | 0 | 0    | 2 | MASCOT | T      | PLEX8 |       |
| 4.90E-02 | 0 0 | Cs7g05690.1/Cs7g056 | 9.76 | 0 | 0    | 2 | MASCOT | T      | PLEX8 |       |
| 3.01E-03 | 0 0 | Cs4g05380.1/Cs4g053 | 6.74 | 0 | 0    | 2 | MASCOT | T      | PLEX8 |       |
| 1.16E-01 | 0 0 | Cs4g05380.1/Cs4g053 | 4.21 | 0 | 0    | 2 | MASCOT | T      | PLEX8 |       |
| 2.03E-01 | 0 0 | Cs7g06710.1         | 3.92 | 0 | 0    | 2 | MASCOT | T      | PLEX8 |       |
| 3.24E-02 | 0 0 | Cs7g06710.1         | 8.75 | 0 | 0    | 2 | MASCOT | T      | PLEX8 |       |
| 2.03E-01 | 0 0 | Cs7g06710.1         | 9.44 | 0 | 0    | 2 | MASCOT | T      |       |       |
| 2.36E-03 | 0 0 | Cs7g06710.1         | 9.44 | 0 | 0    | 2 | MASCOT | T      |       |       |
| 2.32E-03 | 0 0 | Cs7g10420.1/Cs7g104 | 6.72 | 0 | 0    | 2 | MASCOT | T      |       |       |
| 1.88E-02 | 0 0 | Cs7g10420.1/Cs7g104 | 4.21 | 0 | 0    | 2 | MASCOT | T      |       |       |
| 6.25E-04 | 0 0 | Cs7g10420.1/Cs7g104 | 4.32 | 0 | 0    | 2 | MASCOT | T      |       |       |
| 1.42E-01 | 0 0 | Cs7g10420.1/Cs7g104 | 4.32 | 0 | 0    | 2 | MASCOT | T      | PLEX8 |       |
| 5.47E-03 | 0 0 | Cs7g12880.1/Cs7g128 | 5.3  | 0 | 0    | 2 | MASCOT | T      |       |       |
| 1.57E-03 | 0 0 | Cs7g12880.1/Cs7g128 | 4.25 | 0 | 0    | 2 | MASCOT | T      | PLEX8 |       |
| 1.59E-02 | 0 0 | Cs7g12880.1/Cs7g128 | 4.25 | 0 | 0    | 2 | MASCOT | T      | PLEX8 |       |
| 1.24E-03 | 0 0 | Cs7g12880.1/Cs7g128 | 8.76 | 0 | 0    | 2 | MASCOT | T      | PLEX8 |       |
| 6.02E-04 | 0 0 | Cs7g14690.1         | 6    | 0 | 0    | 2 | MASCOT | T      |       |       |
| 2.40E-02 | 0 0 | Cs7g14690.1         | 5.8  | 0 | 0    | 2 | MASCOT | T      | PLEX8 |       |
| 3.29E-01 | 0 0 | Cs7g14690.1         | 5.8  | 0 | 0    | 2 | MASCOT | T      | PLEX8 |       |
| 6.38E-02 | 0 0 | Cs7g14690.1         | 4.53 | 0 | 0    | 2 | MASCOT | T      | PLEX8 |       |
| 6.46E-03 | 0 0 | Cs1g17970.1/Cs4g055 | 4.68 | 1 | 0    | 2 | MASCOT | T      | PLEX8 |       |
| 7.90E-03 | 0 0 | Cs1g17970.1/Cs4g055 | 4.68 | 1 | 0    | 2 | MASCOT | T      | PLEX8 |       |
| 2.49E-03 | 0 0 | Cs1g17970.1/Cs4g055 | 4.14 | 0 | 0    | 2 | MASCOT | T      | PLEX8 |       |
| 2.15E-01 | 0 0 | Cs7g15110.1         | 6.85 | 0 | 0    | 2 | MASCOT | T      |       |       |
| 5.47E-02 | 0 0 | Cs7g19420.1         | 5.55 | 0 | 0    | 2 | MASCOT | T      | PLEX8 |       |
| 1.57E-02 | 0 0 | Cs7g19420.1         | 4.64 | 0 | 0    | 2 | MASCOT | T      |       |       |
| 1.99E-01 | 0 0 | Cs7g19420.1         | 4.64 | 0 | 0    | 2 | MASCOT | T      |       |       |
| 6.88E-02 | 0 0 | Cs7g19420.1         | 4.02 | 1 | 0    | 2 | MASCOT | T      | PLEX8 |       |
| 1.69E-01 | 0 0 | Cs7g26950.1/Cs7g269 | 8.8  | 0 | 0    | 2 | MASCOT | T      | PLEX8 |       |
| 1.96E-01 | 0 0 | Cs7g26950.1/Cs7g269 | 8.8  | 0 | 0    | 2 | MASCOT | T      |       |       |
| 7.09E-02 | 0 0 | Cs7g26950.1/Cs7g269 | 5.84 | 0 | 0    | 2 | MASCOT | T      |       |       |
| 1.22E-01 | 0 0 | Cs7g26950.1/Cs7g269 | 5.84 | 0 | 0    | 2 | MASCOT | T      | PLEX8 |       |
| 1.22E-01 | 0 0 | Cs8g02720.1         | 8.59 | 0 | 0    | 2 | MASCOT | T      | PLEX8 |       |
| 1.05E-02 | 0 0 | Cs8g02720.1         | 4.53 | 0 | 0    | 2 | MASCOT | T      | PLEX8 |       |
| 3.57E-02 | 0 0 | Cs8g02720.1         | 4.53 | 0 | 0    | 2 | MASCOT | T      | PLEX8 |       |
| 3.40E-01 | 0 0 | Cs3g26350.1/Cs3g263 | 6.74 | 0 | 0    | 2 | MASCOT | T      |       |       |
| 1.66E-01 | 0 0 | Cs8g19240.1/Cs8g192 | 4.09 | 0 | 0    | 2 | MASCOT | T      |       |       |
| 1.12E-02 | 0 0 | Cs7g32110.1/Cs7g321 | 5.84 | 0 | 0    | 2 | MASCOT | T      | PLEX8 |       |
| 1.25E-03 | 0 0 | Cs7g32110.1/Cs7g321 | 5.84 | 0 | 0    | 2 | MASCOT | T      | PLEX8 |       |
| 2.64E-04 | 0 0 | Cs7g32110.1/Cs7g321 | 5.84 | 0 | 0    | 2 | MASCOT | T      | PLEX8 |       |
| 3.57E-01 | 0 0 | Cs2g12320.1/Cs2g123 | 8.25 | 0 | 0    | 2 | MASCOT | T      | PLEX8 |       |
| 7.27E-04 | 0 0 | Cs2g12320.1/Cs2g123 | 8.25 | 0 | 0    | 2 | MASCOT | T      | PLEX8 |       |
| 8.40E-02 | 0 0 | Cs9g03400.1         | 8.75 | 1 | 0    | 2 | MASCOT | T      | PLEX8 |       |
| 4.26E-03 | 0 0 | Cs5g26310.1/Cs5g263 | 4.14 | 0 | 0    | 2 | MASCOT | T      | PLEX8 |       |

|          |     |                       |      |   |      |   |        |        |       |       |
|----------|-----|-----------------------|------|---|------|---|--------|--------|-------|-------|
| 5.85E-02 | 0 0 | Cs9g05180.1/Cs9g051   | 4.53 | 0 | 0    | 2 | MASCOT | T      | PLEX8 |       |
| 1.11E-02 | 0 0 | Cs9g05180.1/Cs9g051   | 5.4  | 0 | 0    | 2 | MASCOT | T      | PLEX8 |       |
| 1.88E-01 | 0 0 | Cs9g05180.1/Cs9g051   | 8.22 | 0 | 0    | 2 | MASCOT | T      | PLEX8 |       |
| 8.64E-02 | 0 0 | Cs9g05180.1/Cs9g051   | 8.22 | 0 | 0    | 2 | MASCOT | T      | PLEX8 |       |
| 4.65E-01 | 0 0 | Cs9g07640.1/Cs9g076   | 8.59 | 0 | 0    | 2 | MASCOT | T      |       |       |
| 6.15E-03 | 0 0 | Cs9g07640.1/Cs9g076   | 4.56 | 0 | 0    | 2 | MASCOT | T      | PLEX8 |       |
| 2.22E-04 | 0 0 | Cs9g07640.1/Cs9g076   | 4.21 | 0 | 0    | 2 | MASCOT | T      | PLEX8 |       |
| 9.44E-02 | 0 0 | Cs9g07640.1/Cs9g076   | 4.21 | 0 | 0    | 2 | MASCOT | T      | PLEX8 |       |
| 8.15E-02 | 0 0 | Cs9g16200.1           | 8.8  | 0 | 0    | 2 | MASCOT | T      | PLEX8 |       |
| 7.37E-02 | 0 0 | Cs9g16200.1           | 6    | 0 | 0    | 2 | MASCOT | T      | PLEX8 |       |
| 2.19E-02 | 0 0 | Cs9g16200.1           | 5.26 | 0 | 0    | 2 | MASCOT | T      |       |       |
| 1.88E-02 | 0 0 | Cs9g16200.1           | 5.26 | 0 | 0    | 2 | MASCOT | T      |       |       |
| 3.83E-02 | 0 0 | orange1.1t00222.1/ora | 5.72 | 0 | 0    | 2 | MASCOT | T      | PLEX8 |       |
| 1.60E-03 | 0 0 | orange1.1t00222.1/ora | 5.72 | 0 | 0    | 2 | MASCOT | T      | PLEX8 |       |
| 3.93E-03 | 0 0 | orange1.1t00222.1/ora | 6    | 0 | 15.9 | 0 | 2      | MASCOT | T     | PLEX8 |
| 2.50E-01 | 0 0 | orange1.1t00222.1/ora | 6    | 0 | 0    | 2 | MASCOT | T      | PLEX8 |       |
| 6.42E-03 | 0 0 | orange1.1t00477.1     | 4.37 | 0 | 0    | 2 | MASCOT | T      |       |       |
| 9.49E-02 | 0 0 | orange1.1t00477.1     | 5.84 | 0 | 0    | 2 | MASCOT | T      | PLEX8 |       |
| 6.15E-02 | 0 0 | orange1.1t00477.1     | 9.57 | 0 | 0    | 2 | MASCOT | T      | PLEX8 |       |
| 4.00E-02 | 0 0 | orange1.1t00477.1     | 9.57 | 0 | 0    | 2 | MASCOT | T      | PLEX8 |       |
| 1.10E-01 | 0 0 | orange1.1t00566.1/ora | 6.1  | 0 | 0    | 2 | MASCOT | T      | PLEX8 |       |
| 2.09E-02 | 0 0 | orange1.1t00566.1/ora | 6.05 | 0 | 0    | 2 | MASCOT | T      | PLEX8 |       |
| 1.30E-01 | 0 0 | Cs5g01280.1/orange1.  | 6    | 0 | 0    | 2 | MASCOT | T      |       |       |
| 3.34E-04 | 0 0 | Cs5g01280.1/orange1.  | 6    | 0 | 0    | 2 | MASCOT | T      |       |       |
| 5.51E-05 | 0 0 | orange1.1t00774.2     | 4.31 | 0 | 0    | 2 | MASCOT | T      | PLEX8 |       |
| 2.69E-01 | 0 0 | orange1.1t00774.2     | 8.76 | 0 | 0    | 2 | MASCOT | T      |       |       |
| 1.05E-01 | 0 0 | orange1.1t00774.1/ora | 4.37 | 0 | 0    | 2 | MASCOT | T      | PLEX8 |       |
| 5.83E-02 | 0 0 | orange1.1t00774.1/ora | 4.37 | 0 | 0    | 2 | MASCOT | T      | PLEX8 |       |
| 2.33E-04 | 0 0 | orange1.1t01276.1/ora | 4.37 | 0 | 0    | 2 | MASCOT | T      | PLEX8 |       |
| 5.70E-02 | 0 0 | orange1.1t01276.1/ora | 4.37 | 0 | 0    | 2 | MASCOT | T      | PLEX8 |       |
| 4.04E-02 | 0 0 | Cs5g01850.1/orange1.  | 6.74 | 0 | 0    | 2 | MASCOT | T      | PLEX8 |       |
| 2.55E-02 | 0 0 | Cs5g01850.1/orange1.  | 8.75 | 0 | 0    | 2 | MASCOT | T      | PLEX8 |       |
| 1.46E-01 | 0 0 | Cs6g01310.1/Cs6g013   | 6.85 | 0 | 0    | 2 | MASCOT | T      | PLEX8 |       |
| 1.17E-01 | 0 0 | Cs6g01310.1/Cs6g013   | 9.44 | 0 | 0    | 2 | MASCOT | T      | PLEX8 |       |
| 4.96E-06 | 0 0 | orange1.1t01755.2     | 4.13 | 0 | 0    | 2 | MASCOT | T      | PLEX8 |       |
| 1.05E-04 | 0 0 | orange1.1t01755.2     | 4.13 | 0 | 0    | 2 | MASCOT | T      |       |       |
| 1.59E-01 | 0 0 | orange1.1t02004.1/ora | 5.4  | 0 | 0    | 2 | MASCOT | T      | PLEX8 |       |
| 2.03E-02 | 0 0 | orange1.1t02004.1/ora | 5.4  | 0 | 0    | 2 | MASCOT | T      |       |       |
| 2.87E-04 | 0 0 | orange1.1t02004.2/ora | 6.75 | 0 | 0    | 2 | MASCOT | T      | PLEX8 |       |
| 9.82E-02 | 0 0 | orange1.1t02004.1/ora | 4.75 | 0 | 0    | 2 | MASCOT | T      | PLEX8 |       |
| 7.48E-02 | 0 0 | orange1.1t03253.1     | 4.37 | 0 | 0    | 2 | MASCOT | T      | PLEX8 |       |
| 6.13E-02 | 0 0 | orange1.1t03253.1     | 5.84 | 0 | 0    | 2 | MASCOT | T      |       |       |
| 2.90E-06 | 0 0 | orange1.1t03253.1     | 5.84 | 0 | 0    | 2 | MASCOT | T      |       |       |
| 1.40E-01 | 0 0 | orange1.1t03253.1     | 5.4  | 0 | 0    | 2 | MASCOT | T      | PLEX8 |       |
| 6.64E-03 | 0 0 | orange1.1t03561.1     | 9.8  | 0 | 0    | 2 | MASCOT | T      | PLEX8 |       |
| 3.15E-02 | 0 0 | orange1.1t03561.1     | 9.8  | 0 | 0    | 2 | MASCOT | T      | PLEX8 |       |
| 9.41E-03 | 0 0 | orange1.1t03561.1     | 9.8  | 0 | 0    | 2 | MASCOT | T      | PLEX8 |       |
| 9.89E-02 | 0 0 | orange1.1t03561.1     | 8.8  | 0 | 0    | 2 | MASCOT | T      | PLEX8 |       |
| 6.51E-02 | 0 0 | orange1.1t03956.1     | 4.25 | 0 | 0    | 2 | MASCOT | T      | PLEX8 |       |
| 1.20E-02 | 0 0 | orange1.1t03956.1     | 4.22 | 0 | 0    | 2 | MASCOT | T      | PLEX8 |       |
| 4.26E-02 | 0 0 | orange1.1t03956.1     | 4.22 | 0 | 0    | 2 | MASCOT | T      | PLEX8 |       |

|          |     |                       |      |   |      |   |        |        |       |       |
|----------|-----|-----------------------|------|---|------|---|--------|--------|-------|-------|
| 1.45E-01 | 0 0 | orange1.1t03956.1     | 5.66 | 0 | 0    | 2 | MASCOT | T      |       |       |
| 1.34E-04 | 0 0 | orange1.1t04182.1     | 4.65 | 0 | 0    | 2 | MASCOT | T      | PLEX8 |       |
| 1.31E-01 | 0 0 | orange1.1t04182.1     | 9.73 | 0 | 0    | 2 | MASCOT | T      | PLEX8 |       |
| 1.13E-07 | 0 0 | orange1.1t04182.1     | 5.32 | 0 | 0    | 2 | MASCOT | T      | PLEX8 |       |
| 1.18E-03 | 0 0 | orange1.1t04182.1     | 5.32 | 0 | 0    | 2 | MASCOT | T      |       |       |
| 1.00E-02 | 0 0 | orange1.1t05474.1     | 4.37 | 0 | 0    | 2 | MASCOT | T      |       |       |
| 2.81E-02 | 0 0 | orange1.1t05474.1     | 4.54 | 0 | 0    | 2 | MASCOT | T      | PLEX8 |       |
| 8.94E-02 | 0 0 | orange1.1t05474.1     | 4.54 | 0 | 0    | 2 | MASCOT | T      |       |       |
| 5.09E-01 | 0 0 | Cs9g16530.1 ! orange1 | 8.75 | 0 | 0    | 2 | MASCOT | T      | PLEX8 |       |
| 5.41E-04 | 0 0 | Cs1g01660.1           | 3.98 | 0 | 0    | 2 | MASCOT | T      | PLEX8 |       |
| 1.65E-03 | 0 0 | Cs1g01660.1           | 3.91 | 0 | 0    | 2 | MASCOT | T      | PLEX8 |       |
| 4.43E-02 | 0 0 | Cs1g01660.1           | 4.25 | 0 | 0    | 2 | MASCOT | T      | PLEX8 |       |
| 2.55E-01 | 0 0 | Cs1g02810.1           | 5.32 | 0 | 0    | 2 | MASCOT | T      |       |       |
| 1.44E-01 | 0 0 | Cs1g02810.1           | 4.21 | 0 | 0    | 2 | MASCOT | T      | PLEX8 |       |
| 2.61E-02 | 0 0 | Cs1g02810.1           | 4.37 | 0 | 0    | 2 | MASCOT | T      | PLEX8 |       |
| 1.11E-03 | 0 0 | Cs1g09280.1/Cs1g092   | 4.37 | 0 | 0    | 2 | MASCOT | T      | PLEX8 |       |
| 3.23E-02 | 0 0 | Cs1g09280.1/Cs1g092   | 5.84 | 0 | 0    | 2 | MASCOT | T      | PLEX8 |       |
| 6.06E-04 | 0 0 | Cs1g09280.1/Cs1g092   | 4.53 | 0 | 0    | 2 | MASCOT | T      | PLEX8 |       |
| 9.49E-04 | 0 0 | Cs1g16450.1/Cs1g164   | 4.21 | 0 | 0    | 2 | MASCOT | T      | PLEX8 |       |
| 1.84E-02 | 0 0 | Cs1g16450.1/Cs1g164   | 8.2  | 0 | 0    | 2 | MASCOT | T      | PLEX8 |       |
| 1.51E-01 | 0 0 | Cs1g16450.1/Cs1g164   | 5.97 | 0 | 0    | 2 | MASCOT | T      | PLEX8 |       |
| 1.30E-01 | 0 0 | Cs1g18720.1/Cs1g187   | 5.4  | 0 | 0    | 2 | MASCOT | T      | PLEX8 |       |
| 8.53E-04 | 0 0 | Cs1g18720.1           | 4.75 | 0 | 0    | 2 | MASCOT | T      | PLEX8 |       |
| 1.13E-01 | 0 0 | Cs5g01500.1 ! Cs7g11  | 6.75 | 0 | 0    | 2 | MASCOT | T      | PLEX8 |       |
| 1.34E-01 | 0 0 | Cs1g25690.1/Cs8g027   | 6    | 0 | 15.9 | 0 | 2      | MASCOT | T     | PLEX8 |
| 2.12E-03 | 0 0 | Cs1g25690.1/Cs8g027   | 4.53 | 0 | 0    | 2 | MASCOT | T      | PLEX8 |       |
| 7.05E-02 | 0 0 | Cs1g25690.1           | 4.37 | 0 | 0    | 2 | MASCOT | T      | PLEX8 |       |
| 1.16E-02 | 0 0 | Cs2g06330.1           | 4.25 | 0 | 0    | 2 | MASCOT | T      |       |       |
| 7.14E-02 | 0 0 | Cs2g06330.1           | 8.8  | 0 | 0    | 2 | MASCOT | T      | PLEX8 |       |
| 9.21E-02 | 0 0 | Cs2g06330.1           | 6    | 0 | 0    | 2 | MASCOT | T      | PLEX8 |       |
| 9.02E-03 | 0 0 | Cs2g08060.1/Cs2g080   | 4.03 | 0 | 0    | 2 | MASCOT | T      | PLEX8 |       |
| 2.03E-01 | 0 0 | Cs2g08060.1/Cs2g080   | 8.76 | 0 | 0    | 2 | MASCOT | T      | PLEX8 |       |
| 6.48E-04 | 0 0 | Cs2g08060.1/Cs2g080   | 4.37 | 0 | 0    | 2 | MASCOT | T      | PLEX8 |       |
| 2.11E-03 | 0 0 | Cs2g09530.1/Cs2g095   | 4.48 | 0 | 0    | 2 | MASCOT | T      | PLEX8 |       |
| 5.60E-02 | 0 0 | Cs2g09530.1/Cs2g095   | 4.37 | 0 | 0    | 2 | MASCOT | T      | PLEX8 |       |
| 1.70E-02 | 0 0 | Cs2g09530.1/Cs2g095   | 4.14 | 0 | 0    | 2 | MASCOT | T      | PLEX8 |       |
| 8.61E-03 | 0 0 | Cs2g09720.1/Cs2g097   | 3.92 | 0 | 0    | 2 | MASCOT | T      |       |       |
| 1.60E-01 | 0 0 | Cs2g09720.1/Cs2g097   | 6.5  | 0 | 0    | 2 | MASCOT | T      | PLEX8 |       |
| 1.68E-01 | 0 0 | Cs2g09720.1/Cs2g097   | 4.37 | 0 | 0    | 2 | MASCOT | T      |       |       |
| 2.25E-02 | 0 0 | Cs2g12460.1           | 4.09 | 0 | 0    | 2 | MASCOT | T      | PLEX8 |       |
| 1.32E-02 | 0 0 | Cs2g12460.1           | 4.37 | 0 | 0    | 2 | MASCOT | T      |       |       |
| 2.08E-01 | 0 0 | Cs2g12460.1           | 4.37 | 0 | 0    | 2 | MASCOT | T      | PLEX8 |       |
| 3.49E-01 | 0 0 | Cs2g12590.1           | 5.99 | 0 | 0    | 2 | MASCOT | T      | PLEX8 |       |
| 3.71E-03 | 0 0 | Cs2g12590.1           | 4.08 | 0 | 0    | 2 | MASCOT | T      | PLEX8 |       |
| 1.76E-01 | 0 0 | Cs2g12590.1           | 5.32 | 0 | 0    | 2 | MASCOT | T      | PLEX8 |       |
| 8.59E-03 | 0 0 | Cs2g14110.1           | 3.91 | 0 | 0    | 2 | MASCOT | T      | PLEX8 |       |
| 2.36E-02 | 0 0 | Cs2g14110.1           | 3.98 | 0 | 0    | 2 | MASCOT | T      | PLEX8 |       |
| 2.41E-03 | 0 0 | Cs2g14110.1           | 6.74 | 0 | 0    | 2 | MASCOT | T      | PLEX8 |       |
| 1.52E-02 | 0 0 | Cs2g16160.1/Cs7g177   | 4.53 | 0 | 0    | 2 | MASCOT | T      | PLEX8 |       |
| 1.71E-01 | 0 0 | Cs2g16160.1           | 8.72 | 0 | 0    | 2 | MASCOT | T      | PLEX8 |       |
| 1.59E-01 | 0 0 | Cs2g16160.1           | 6.85 | 0 | 0    | 2 | MASCOT | T      | PLEX8 |       |

|          |     |                     |      |   |      |   |        |        |       |       |
|----------|-----|---------------------|------|---|------|---|--------|--------|-------|-------|
| 1.50E-02 | 0 0 | Cs2g26660.1/Cs2g266 | 6.74 | 0 | 0    | 2 | MASCOT | T      | PLEX8 |       |
| 2.44E-01 | 0 0 | Cs2g26660.1/Cs2g266 | 5.82 | 0 | 15.9 | 0 | 2      | MASCOT | T     | PLEX8 |
| 1.17E-01 | 0 0 | Cs2g26660.1/Cs2g266 | 4.21 | 0 | 0    | 2 | MASCOT | T      | PLEX8 |       |
| 2.17E-04 | 0 0 | Cs2g27630.1/Cs2g276 | 5.83 | 0 | 0    | 2 | MASCOT | T      | PLEX8 |       |
| 6.74E-04 | 0 0 | Cs2g27630.1         | 5.21 | 0 | 0    | 2 | MASCOT | T      | PLEX8 |       |
| 1.11E-01 | 0 0 | Cs2g27630.1/Cs2g276 | 4.75 | 0 | 0    | 2 | MASCOT | T      | PLEX8 |       |
| 5.38E-01 | 0 0 | Cs3g03100.1         | 6.85 | 0 | 0    | 2 | MASCOT | T      | PLEX8 |       |
| 9.69E-03 | 0 0 | Cs3g03100.1         | 6.14 | 1 | 0    | 2 | MASCOT | T      | PLEX8 |       |
| 7.58E-03 | 0 0 | Cs3g03100.1         | 5.32 | 0 | 0    | 2 | MASCOT | T      | PLEX8 |       |
| 6.47E-03 | 0 0 | Cs3g03730.1/Cs3g037 | 5.88 | 0 | 0    | 2 | MASCOT | T      | PLEX8 |       |
| 4.94E-04 | 0 0 | Cs3g03730.1/Cs3g037 | 5.21 | 0 | 0    | 2 | MASCOT | T      | PLEX8 |       |
| 1.98E-02 | 0 0 | Cs3g03730.1/Cs3g037 | 5.97 | 0 | 0    | 2 | MASCOT | T      |       |       |
| 4.03E-03 | 0 0 | Cs3g08940.1/Cs3g089 | 4.37 | 0 | 0    | 2 | MASCOT | T      | PLEX8 |       |
| 1.75E-03 | 0 0 | Cs3g08940.1/Cs3g089 | 5.84 | 0 | 0    | 2 | MASCOT | T      |       |       |
| 7.23E-02 | 0 0 | Cs3g08940.1/Cs3g089 | 4.37 | 0 | 0    | 2 | MASCOT | T      | PLEX8 |       |
| 3.73E-01 | 0 0 | Cs3g09190.1/Cs3g091 | 4.65 | 0 | 15.9 | 0 | 2      | MASCOT | T     | PLEX8 |
| 6.21E-02 | 0 0 | Cs3g09190.1/Cs3g091 | 8.49 | 0 | 0    | 2 | MASCOT | T      | PLEX8 |       |
| 2.77E-02 | 0 0 | Cs3g09190.2/Cs3g091 | 4.37 | 0 | 0    | 2 | MASCOT | T      |       |       |
| 1.03E-01 | 0 0 | Cs3g10590.1/Cs3g106 | 8.75 | 0 | 0    | 2 | MASCOT | T      | PLEX8 |       |
| 1.97E-01 | 0 0 | Cs3g10580.1/Cs3g105 | 8.76 | 0 | 0    | 2 | MASCOT | T      |       |       |
| 4.98E-02 | 0 0 | Cs3g10600.1/Cs3g106 | 4.41 | 0 | 0    | 2 | MASCOT | T      | PLEX8 |       |
| 2.85E-05 | 0 0 | Cs3g13010.1/Cs3g130 | 4.54 | 0 | 0    | 2 | MASCOT | T      | PLEX8 |       |
| 5.62E-02 | 0 0 | Cs3g13010.1/Cs3g130 | 4.53 | 0 | 0    | 2 | MASCOT | T      | PLEX8 |       |
| 9.81E-02 | 0 0 | Cs3g13010.1/Cs3g130 | 4.53 | 0 | 0    | 2 | MASCOT | T      | PLEX8 |       |
| 6.45E-03 | 0 0 | Cs3g16730.1/Cs3g167 | 5.37 | 0 | 0    | 2 | MASCOT | T      | PLEX8 |       |
| 1.82E-02 | 0 0 | Cs3g16730.1/Cs3g167 | 6.5  | 0 | 0    | 2 | MASCOT | T      |       |       |
| 4.38E-04 | 0 0 | Cs3g16730.1/Cs3g167 | 4.37 | 0 | 0    | 2 | MASCOT | T      |       |       |
| 3.55E-02 | 0 0 | Cs3g19090.1         | 8.26 | 0 | 0    | 2 | MASCOT | T      | PLEX8 |       |
| 1.45E-01 | 0 0 | Cs3g19090.1/Cs3g190 | 5.84 | 0 | 0    | 2 | MASCOT | T      | PLEX8 |       |
| 2.82E-01 | 0 0 | Cs3g19090.1/Cs3g190 | 5.97 | 0 | 0    | 2 | MASCOT | T      | PLEX8 |       |
| 1.03E-01 | 0 0 | Cs1g08480.1/Cs1g084 | 8.75 | 0 | 0    | 2 | MASCOT | T      | PLEX8 |       |
| 4.60E-03 | 0 0 | Cs3g19820.1/Cs3g198 | 9.76 | 0 | 0    | 2 | MASCOT | T      | PLEX8 |       |
| 1.68E-01 | 0 0 | Cs3g19820.1/Cs3g198 | 4.14 | 0 | 0    | 2 | MASCOT | T      |       |       |
| 2.70E-01 | 0 0 | Cs3g23550.1/Cs3g235 | 8.59 | 0 | 0    | 2 | MASCOT | T      | PLEX8 |       |
| 6.16E-02 | 0 0 | Cs3g23550.1/Cs3g235 | 6.74 | 0 | 0    | 2 | MASCOT | T      |       |       |
| 1.04E-03 | 0 0 | Cs3g23550.1/Cs3g235 | 4.37 | 0 | 0    | 2 | MASCOT | T      | PLEX8 |       |
| 9.38E-02 | 0 0 | Cs3g26890.1/Cs3g268 | 4.14 | 0 | 0    | 2 | MASCOT | T      | PLEX8 |       |
| 3.22E-02 | 0 0 | Cs3g26890.1/Cs3g268 | 8.26 | 0 | 0    | 2 | MASCOT | T      | PLEX8 |       |
| 1.57E-02 | 0 0 | Cs3g26890.1/Cs3g268 | 4    | 0 | 0    | 2 | MASCOT | T      | PLEX8 |       |
| 1.32E-01 | 0 0 | Cs4g03340.1         | 5.21 | 0 | 0    | 2 | MASCOT | T      | PLEX8 |       |
| 1.14E-02 | 0 0 | Cs4g03340.1/Cs4g033 | 4.37 | 0 | 0    | 2 | MASCOT | T      | PLEX8 |       |
| 6.05E-02 | 0 0 | Cs4g03340.1         | 5.81 | 0 | 0    | 2 | MASCOT | T      | PLEX8 |       |
| 1.60E-01 | 0 0 | Cs4g06560.1         | 4.31 | 0 | 0    | 2 | MASCOT | T      | PLEX8 |       |
| 5.51E-02 | 0 0 | Cs4g06560.1         | 4.75 | 0 | 0    | 2 | MASCOT | T      | PLEX8 |       |
| 9.37E-02 | 0 0 | Cs4g06560.1         | 6.05 | 0 | 0    | 2 | MASCOT | T      | PLEX8 |       |
| 2.11E-02 | 0 0 | Cs2g25070.1/Cs2g250 | 5.21 | 0 | 0    | 2 | MASCOT | T      |       |       |
| 1.04E-01 | 0 0 | Cs4g08160.1/Cs4g081 | 5.18 | 0 | 0    | 2 | MASCOT | T      | PLEX8 |       |
| 3.70E-02 | 0 0 | Cs2g25070.1/Cs2g250 | 6    | 0 | 0    | 2 | MASCOT | T      | PLEX8 |       |
| 5.22E-02 | 0 0 | Cs4g10860.1         | 4.14 | 0 | 0    | 2 | MASCOT | T      |       |       |
| 3.24E-01 | 0 0 | Cs4g10860.1/Cs4g109 | 8.75 | 0 | 0    | 2 | MASCOT | T      | PLEX8 |       |
| 6.12E-04 | 0 0 | Cs4g10860.1         | 4.53 | 0 | 0    | 2 | MASCOT | T      | PLEX8 |       |

|          |     |                      |      |        |   |   |        |   |       |
|----------|-----|----------------------|------|--------|---|---|--------|---|-------|
| 7.34E-03 | 0 0 | Cs4g17410.1/Cs4g174  | 4.21 | 0      | 0 | 2 | MASCOT | T | PLEX8 |
| 1.86E-02 | 0 0 | Cs4g17410.1/Cs4g174  | 5.55 | 0      | 0 | 2 | MASCOT | T | PLEX8 |
| 1.97E-02 | 0 0 | Cs4g17410.1/Cs4g174  | 8.27 | 0      | 0 | 2 | MASCOT | T | PLEX8 |
| 4.33E-02 | 0 0 | Cs4g19400.1/Cs4g194  | 4    | 0      | 0 | 2 | MASCOT | T | PLEX8 |
| 1.95E-01 | 0 0 | Cs4g19400.1/Cs4g194  | 4.21 | 0      | 0 | 2 | MASCOT | T | PLEX8 |
| 2.03E-03 | 0 0 | Cs4g19400.1/Cs4g194  | 5.4  | 0      | 0 | 2 | MASCOT | T | PLEX8 |
| 2.82E-04 | 0 0 | Cs5g01610.1          | 4.72 | 0      | 0 | 2 | MASCOT | T |       |
| 9.81E-02 | 0 0 | Cs5g01610.1          | 4.48 | 0      | 0 | 2 | MASCOT | T | PLEX8 |
| 2.27E-02 | 0 0 | Cs5g01610.1          | 8.59 | 0      | 0 | 2 | MASCOT | T | PLEX8 |
| 1.31E-01 | 0 0 | Cs5g02180.1          | 5.84 | 0      | 0 | 2 | MASCOT | T | PLEX8 |
| 1.11E-02 | 0 0 | Cs5g02180.1/Cs5g021  | 6    | 0      | 0 | 2 | MASCOT | T |       |
| 1.76E-02 | 0 0 | Cs5g02180.1/Cs5g021  | 8.41 | 0      | 0 | 2 | MASCOT | T | PLEX8 |
| 1.20E-01 | 0 0 | Cs5g07070.1/Cs5g070  | 5.5  | 0      | 0 | 2 | MASCOT | T |       |
| 2.12E-01 | 0 0 | Cs5g07070.1/Cs5g070  | 4.37 | 0      | 0 | 2 | MASCOT | T | PLEX8 |
| 7.54E-02 | 0 0 | Cs5g07070.2          | 8.75 | 0      | 0 | 2 | MASCOT | T | PLEX8 |
| 1.50E-02 | 0 0 | Cs5g09890.1/Cs5g098  | 5.97 | 0      | 0 | 2 | MASCOT | T |       |
| 3.30E-01 | 0 0 | Cs5g09890.1/Cs5g098  | 5.99 | 0      | 0 | 2 | MASCOT | T | PLEX8 |
| 5.65E-02 | 0 0 | Cs5g09890.1/Cs5g098  | 5.32 | 0      | 0 | 2 | MASCOT | T | PLEX8 |
| 2.49E-01 | 0 0 | Cs5g10110.1 ! Cs5g13 | 4.53 | 0      | 0 | 2 | MASCOT | T | PLEX8 |
| 8.80E-03 | 0 0 | Cs5g10110.1          | 4.53 | 0      | 0 | 2 | MASCOT | T | PLEX8 |
| 1.66E-01 | 0 0 | Cs5g10110.1/Cs7g169  | 4.37 | 0      | 0 | 2 | MASCOT | T | PLEX8 |
| 3.27E-02 | 0 0 | Cs5g24860.1/Cs5g248  | 6.75 | 0      | 0 | 2 | MASCOT | T | PLEX8 |
| 1.86E-04 | 0 0 | Cs5g24860.1/Cs5g248  | 4.48 | 0      | 0 | 2 | MASCOT | T | PLEX8 |
| 6.19E-01 | 0 0 | Cs5g24860.1/Cs5g248  | 5.84 | 0      | 0 | 2 | MASCOT | T | PLEX8 |
| 2.41E-02 | 0 0 | Cs5g29840.1          | 9.75 | 0      | 0 | 2 | MASCOT | T | PLEX8 |
| 3.19E-01 | 0 0 | Cs5g29840.1          | 9.8  | 0      | 0 | 2 | MASCOT | T | PLEX8 |
| 3.63E-01 | 0 0 | Cs5g29840.1          | 5.5  | 0      | 0 | 2 | MASCOT | T | PLEX8 |
| 1.30E-02 | 0 0 | Cs5g30370.1          | 4.03 | 0      | 0 | 2 | MASCOT | T | PLEX8 |
| 6.94E-04 | 0 0 | Cs5g30370.1          | 8.76 | 0      | 0 | 2 | MASCOT | T | PLEX8 |
| 1.10E-04 | 0 0 | Cs5g30370.1          | 8.75 | 0      | 0 | 2 | MASCOT | T | PLEX8 |
| 1.31E-02 | 0 0 | Cs6g02460.1/Cs6g024  | 9.76 | 0      | 0 | 2 | MASCOT | T | PLEX8 |
| 4.78E-04 | 0 0 | Cs6g02460.1/Cs6g024  | 6.75 | 0      | 0 | 2 | MASCOT | T | PLEX8 |
| 1.73E-02 | 0 0 | Cs6g02460.1/Cs6g024  | 6    | 0      | 0 | 2 | MASCOT | T | PLEX8 |
| 1.76E-01 | 0 0 | Cs6g06690.1/Cs6g066  | 6.14 | 0      | 0 | 2 | MASCOT | T |       |
| 4.29E-04 | 0 0 | Cs6g06690.1/Cs6g066  | 4.25 | 0      | 0 | 2 | MASCOT | T | PLEX8 |
| 2.83E-02 | 0 0 | Cs6g06690.1/Cs6g066  | 8.26 | 0      | 0 | 2 | MASCOT | T | PLEX8 |
| 9.02E-03 | 0 0 | Cs6g10350.1          | 8.75 | 0      | 0 | 2 | MASCOT | T | PLEX8 |
| 6.15E-03 | 0 0 | Cs6g10350.1          | 4.53 | 0      | 0 | 2 | MASCOT | T | PLEX8 |
| 1.00E-03 | 0 0 | Cs6g10350.1          | 4.14 | 0      | 0 | 2 | MASCOT | T | PLEX8 |
| 4.53E-03 | 0 0 | Cs6g15570.1          | 4.14 | 0      | 0 | 2 | MASCOT | T |       |
| 1.74E-01 | 0 0 | Cs6g15570.1          | 4.54 | 0      | 0 | 2 | MASCOT | T | PLEX8 |
| 2.04E-02 | 0 0 | Cs6g15570.1          | 5.32 | 0      | 0 | 2 | MASCOT | T | PLEX8 |
| 3.59E-02 | 0 0 | Cs7g11440.1/Cs7g114  | 4.53 | 0      | 0 | 2 | MASCOT | T | PLEX8 |
| 3.40E-01 | 0 0 | Cs7g11440.1/Cs7g114  | 6.92 | 0      | 0 | 2 | MASCOT | T | PLEX8 |
| 5.98E-04 | 0 0 | Cs7g11440.1/Cs7g114  | 4.09 | 0      | 0 | 2 | MASCOT | T | PLEX8 |
| 1.30E-03 | 0 0 | Cs7g12740.1          | 8.25 | 0      | 0 | 2 | MASCOT | T |       |
| 3.60E-04 | 0 0 | Cs7g12740.1          | 4.14 | 0      | 0 | 2 | MASCOT | T |       |
| 2.28E-01 | 0 0 | Cs7g12740.1          | 8.73 | 0      | 0 | 2 | MASCOT | T | PLEX8 |
| 1.17E-02 | 0 0 | Cs7g18370.1/Cs7g183  | 4    | 0      | 0 | 2 | MASCOT | T |       |
| 2.57E-01 | 0 0 | Cs7g18370.2 ! Cs7g18 | 8.5  | 0      | 0 | 2 | MASCOT | T | PLEX8 |
| 3.33E-01 | 0 0 | Cs6g07040.1/Cs6g070  | 5.59 | 0 15.9 | 0 | 2 | MASCOT | T | PLEX8 |

|          |     |                        |      |   |   |   |        |   |       |
|----------|-----|------------------------|------|---|---|---|--------|---|-------|
| 2.38E-01 | 0 0 | Cs7g27600.1            | 5.72 | 0 | 0 | 2 | MASCOT | T | PLEX8 |
| 1.29E-02 | 0 0 | Cs7g27600.1            | 4.53 | 0 | 0 | 2 | MASCOT | T | PLEX8 |
| 9.45E-04 | 0 0 | Cs7g27600.1            | 5.97 | 0 | 0 | 2 | MASCOT | T | PLEX8 |
| 5.53E-03 | 0 0 | Cs8g01250.1/Cs8g012    | 5.79 | 1 | 0 | 2 | MASCOT | T | PLEX8 |
| 2.83E-01 | 0 0 | Cs8g01250.1/Cs8g012    | 4.37 | 0 | 0 | 2 | MASCOT | T |       |
| 6.90E-02 | 0 0 | Cs8g01250.1/Cs8g012    | 5.97 | 0 | 0 | 2 | MASCOT | T | PLEX8 |
| 2.84E-03 | 0 0 | Cs8g01280.1/Cs8g012    | 5.88 | 0 | 0 | 2 | MASCOT | T |       |
| 1.18E-02 | 0 0 | Cs8g01280.2/Cs8g012    | 6.75 | 0 | 0 | 2 | MASCOT | T | PLEX8 |
| 1.38E-03 | 0 0 | Cs8g01280.1/Cs8g012    | 6    | 0 | 0 | 2 | MASCOT | T | PLEX8 |
| 2.01E-01 | 0 0 | Cs8g06490.1/Cs8g064    | 6    | 0 | 0 | 2 | MASCOT | T | PLEX8 |
| 9.39E-03 | 0 0 | Cs8g06490.1/Cs8g064    | 4.53 | 0 | 0 | 2 | MASCOT | T | PLEX8 |
| 3.22E-03 | 0 0 | Cs8g06490.1/Cs8g064    | 8.47 | 0 | 0 | 2 | MASCOT | T |       |
| 2.58E-01 | 0 0 | Cs8g06920.1/Cs8g069    | 4.21 | 0 | 0 | 2 | MASCOT | T |       |
| 4.45E-04 | 0 0 | Cs8g06920.1/Cs8g069    | 4.53 | 0 | 0 | 2 | MASCOT | T | PLEX8 |
| 1.92E-03 | 0 0 | Cs8g06920.1/Cs8g069    | 4.14 | 0 | 0 | 2 | MASCOT | T |       |
| 7.99E-02 | 0 0 | Cs8g12790.1            | 3.84 | 0 | 0 | 2 | MASCOT | T |       |
| 6.02E-03 | 0 0 | Cs8g12790.1            | 5.84 | 0 | 0 | 2 | MASCOT | T |       |
| 1.68E-01 | 0 0 | Cs8g12790.1            | 5.84 | 0 | 0 | 2 | MASCOT | T | PLEX8 |
| 2.95E-01 | 0 0 | Cs8g19900.1/Cs8g199    | 5.32 | 0 | 0 | 2 | MASCOT | T | PLEX8 |
| 6.72E-02 | 0 0 | Cs8g19900.1/Cs8g199    | 4.21 | 0 | 0 | 2 | MASCOT | T |       |
| 3.56E-02 | 0 0 | Cs8g19900.1/Cs8g199    | 4.21 | 0 | 0 | 2 | MASCOT | T |       |
| 1.70E-03 | 0 0 | Cs9g01210.1            | 9.8  | 0 | 0 | 2 | MASCOT | T |       |
| 4.16E-03 | 0 0 | Cs9g01210.1            | 4.21 | 0 | 0 | 2 | MASCOT | T | PLEX8 |
| 3.05E-02 | 0 0 | Cs9g01210.1            | 4    | 0 | 0 | 2 | MASCOT | T | PLEX8 |
| 2.55E-02 | 0 0 | Cs9g01330.1/Cs9g013    | 8.76 | 0 | 0 | 2 | MASCOT | T | PLEX8 |
| 9.17E-02 | 0 0 | Cs9g01330.1/Cs9g013    | 4.37 | 0 | 0 | 2 | MASCOT | T | PLEX8 |
| 1.94E-01 | 0 0 | Cs9g01330.1/Cs9g013    | 5.84 | 0 | 0 | 2 | MASCOT | T | PLEX8 |
| 1.45E-01 | 0 0 | Cs9g15930.1            | 6.92 | 0 | 0 | 2 | MASCOT | T | PLEX8 |
| 5.18E-02 | 0 0 | Cs9g15930.1            | 4.03 | 0 | 0 | 2 | MASCOT | T | PLEX8 |
| 1.13E-01 | 0 0 | Cs9g15930.1            | 4.14 | 0 | 0 | 2 | MASCOT | T | PLEX8 |
| 7.88E-05 | 0 0 | orange1.1t00043.1      | 4    | 0 | 0 | 2 | MASCOT | T | PLEX8 |
| 1.65E-01 | 0 0 | orange1.1t00043.1      | 5.84 | 0 | 0 | 2 | MASCOT | T | PLEX8 |
| 1.37E-01 | 0 0 | orange1.1t00043.1      | 5.84 | 0 | 0 | 2 | MASCOT | T | PLEX8 |
| 2.63E-01 | 0 0 | orange1.1t00383.1/ora  | 4.21 | 0 | 0 | 2 | MASCOT | T | PLEX8 |
| 4.09E-01 | 0 0 | orange1.1t00383.1/ora  | 5.84 | 0 | 0 | 2 | MASCOT | T | PLEX8 |
| 9.80E-03 | 0 0 | orange1.1t00383.1/ora  | 5.84 | 0 | 0 | 2 | MASCOT | T |       |
| 7.19E-02 | 0 0 | orange1.1t00409.1      | 4.53 | 0 | 0 | 2 | MASCOT | T | PLEX8 |
| 9.68E-07 | 0 0 | orange1.1t00409.1      | 5.83 | 0 | 0 | 2 | MASCOT | T | PLEX8 |
| 8.51E-02 | 0 0 | orange1.1t00409.1      | 5.4  | 0 | 0 | 2 | MASCOT | T | PLEX8 |
| 1.68E-01 | 0 0 | orange1.1t01058.1/ora  | 4.53 | 0 | 0 | 2 | MASCOT | T | PLEX8 |
| 1.23E-01 | 0 0 | orange1.1t01058.1/ora  | 8.8  | 0 | 0 | 2 | MASCOT | T | PLEX8 |
| 5.89E-03 | 0 0 | orange1.1t01058.1/ora  | 5.84 | 0 | 0 | 2 | MASCOT | T | PLEX8 |
| 1.35E-02 | 0 0 | orange1.1t01617.1      | 4.25 | 0 | 0 | 2 | MASCOT | T | PLEX8 |
| 1.23E-03 | 0 0 | orange1.1t01617.1      | 8.75 | 0 | 0 | 2 | MASCOT | T | PLEX8 |
| 1.38E-03 | 0 0 | orange1.1t01617.1      | 6.73 | 0 | 0 | 2 | MASCOT | T | PLEX8 |
| 1.24E-03 | 0 0 | orange1.1t01676.1      | 4.4  | 0 | 0 | 2 | MASCOT | T | PLEX8 |
| 5.47E-04 | 0 0 | orange1.1t01676.1      | 4.03 | 0 | 0 | 2 | MASCOT | T | PLEX8 |
| 9.28E-02 | 0 0 | orange1.1t01676.1      | 4.21 | 0 | 0 | 2 | MASCOT | T | PLEX8 |
| 3.64E-03 | 0 0 | orange1.1t02094.1 ! or | 4.54 | 0 | 0 | 2 | MASCOT | T |       |
| 8.48E-04 | 0 0 | orange1.1t02094.1      | 5.4  | 0 | 0 | 2 | MASCOT | T | PLEX8 |
| 3.54E-03 | 0 0 | orange1.1t02094.1/ora  | 8.18 | 0 | 0 | 2 | MASCOT | T | PLEX8 |



|          |     |                       |      |   |   |   |        |   |       |
|----------|-----|-----------------------|------|---|---|---|--------|---|-------|
| 1.76E-01 | 0 0 | orange1.1t02373.1/ora | 5.99 | 0 | 0 | 2 | MASCOT | T | PLEX8 |
| 6.91E-03 | 0 0 | orange1.1t02373.1/ora | 4.54 | 0 | 0 | 2 | MASCOT | T | PLEX8 |
| 5.77E-04 | 0 0 | orange1.1t02373.1/ora | 6.46 | 0 | 0 | 2 | MASCOT | T |       |
| 2.90E-01 | 0 0 | orange1.1t04550.1     | 4.37 | 0 | 0 | 2 | MASCOT | T | PLEX8 |
| 4.45E-03 | 0 0 | orange1.1t04550.1     | 5.84 | 0 | 0 | 2 | MASCOT | T |       |
| 7.40E-02 | 0 0 | orange1.1t04550.1     | 8.73 | 0 | 0 | 2 | MASCOT | T | PLEX8 |
| 1.57E-02 | 0 0 | Cs2g11170.1/Cs2g111   | 8.75 | 0 | 0 | 2 | MASCOT | T | PLEX8 |
| 8.03E-02 | 0 0 | Cs2g11170.1/Cs2g111   | 8.75 | 0 | 0 | 2 | MASCOT | T | PLEX8 |
| 8.10E-02 | 0 0 | Cs2g11170.1/Cs2g111   | 8.75 | 0 | 0 | 2 | MASCOT | T | PLEX8 |
| 1.68E-02 | 0 0 | Cs2g11170.1/Cs2g111   | 8.75 | 0 | 0 | 2 | MASCOT | T | PLEX8 |
| 3.60E-02 | 0 0 | Cs2g11170.1/Cs2g111   | 8.75 | 0 | 0 | 2 | MASCOT | T | PLEX8 |
| 1.93E-01 | 0 0 | Cs2g11170.1/Cs2g111   | 8.75 | 0 | 0 | 2 | MASCOT | T | PLEX8 |
| 2.43E-01 | 0 0 | Cs2g11170.1/Cs2g111   | 8.75 | 0 | 0 | 2 | MASCOT | T | PLEX8 |
| 4.38E-02 | 0 0 | Cs2g11170.1/Cs2g111   | 8.75 | 0 | 0 | 2 | MASCOT | T | PLEX8 |
| 1.87E-01 | 0 0 | Cs2g11170.1/Cs2g111   | 8.75 | 0 | 0 | 2 | MASCOT | T | PLEX8 |
| 2.71E-02 | 0 0 | Cs2g11170.1/Cs2g111   | 8.75 | 0 | 0 | 2 | MASCOT | T | PLEX8 |
| 3.11E-02 | 0 0 | Cs2g11170.1/Cs2g111   | 8.75 | 0 | 0 | 2 | MASCOT | T | PLEX8 |
| 1.40E-01 | 0 0 | Cs2g11170.1/Cs2g111   | 8.75 | 0 | 0 | 2 | MASCOT | T | PLEX8 |
| 2.99E-02 | 0 0 | Cs2g11170.1/Cs2g111   | 8.75 | 0 | 0 | 2 | MASCOT | T | PLEX8 |
| 1.17E-01 | 0 0 | Cs2g11170.1/Cs2g111   | 8.75 | 0 | 0 | 2 | MASCOT | T | PLEX8 |
| 2.15E-02 | 0 0 | Cs2g11170.1/Cs2g111   | 8.75 | 0 | 0 | 2 | MASCOT | T | PLEX8 |
| 1.17E-02 | 0 0 | Cs2g11170.1/Cs2g111   | 8.75 | 0 | 0 | 2 | MASCOT | T | PLEX8 |
| 3.31E-02 | 0 0 | Cs2g11170.1/Cs2g111   | 8.75 | 0 | 0 | 2 | MASCOT | T | PLEX8 |
| 1.39E-02 | 0 0 | Cs2g11170.1/Cs2g111   | 8.75 | 0 | 0 | 2 | MASCOT | T | PLEX8 |
| 4.93E-02 | 0 0 | Cs2g11170.1/Cs2g111   | 8.75 | 0 | 0 | 2 | MASCOT | T | PLEX8 |
| 8.03E-03 | 0 0 | Cs2g11170.1/Cs2g111   | 8.75 | 0 | 0 | 2 | MASCOT | T | PLEX8 |
| 8.57E-02 | 0 0 | Cs2g11170.1/Cs2g111   | 8.75 | 0 | 0 | 2 | MASCOT | T | PLEX8 |
| 2.69E-01 | 0 0 | Cs2g11170.1/Cs2g111   | 8.75 | 0 | 0 | 2 | MASCOT | T | PLEX8 |
| 7.93E-02 | 0 0 | Cs2g11170.1/Cs2g111   | 8.75 | 0 | 0 | 2 | MASCOT | T | PLEX8 |
| 1.09E-01 | 0 0 | Cs2g11170.1/Cs2g111   | 8.75 | 0 | 0 | 2 | MASCOT | T | PLEX8 |
| 8.37E-02 | 0 0 | Cs2g11170.1/Cs2g111   | 8.75 | 0 | 0 | 2 | MASCOT | T | PLEX8 |
| 4.27E-02 | 0 0 | Cs2g11170.1/Cs2g111   | 8.75 | 0 | 0 | 2 | MASCOT | T | PLEX8 |
| 1.12E-02 | 0 0 | Cs2g11170.1/Cs2g111   | 8.75 | 0 | 0 | 2 | MASCOT | T | PLEX8 |
| 2.33E-01 | 0 0 | Cs2g11170.1/Cs2g111   | 8.75 | 0 | 0 | 2 | MASCOT | T | PLEX8 |
| 2.44E-01 | 0 0 | Cs2g11170.1/Cs2g111   | 8.75 | 0 | 0 | 2 | MASCOT | T | PLEX8 |
| 2.80E-01 | 0 0 | Cs2g11170.1/Cs2g111   | 8.75 | 0 | 0 | 2 | MASCOT | T | PLEX8 |
| 3.91E-01 | 0 0 | Cs2g11170.1/Cs2g111   | 8.75 | 0 | 0 | 2 | MASCOT | T | PLEX8 |
| 1.33E-01 | 0 0 | Cs2g11170.1/Cs2g111   | 8.75 | 0 | 0 | 2 | MASCOT | T |       |
| 1.01E-01 | 0 0 | Cs2g11170.1/Cs2g111   | 8.75 | 0 | 0 | 2 | MASCOT | T | PLEX8 |
| 2.66E-02 | 0 0 | Cs2g11170.1/Cs2g111   | 8.75 | 0 | 0 | 2 | MASCOT | T | PLEX8 |
| 1.68E-01 | 0 0 | Cs2g11170.1/Cs2g111   | 8.75 | 0 | 0 | 2 | MASCOT | T | PLEX8 |
| 8.85E-04 | 0 0 | Cs7g20350.1           | 8.18 | 0 | 0 | 2 | MASCOT | T | PLEX8 |
| 1.01E-02 | 0 0 | Cs7g20350.1           | 8.18 | 0 | 0 | 2 | MASCOT | T | PLEX8 |
| 3.50E-02 | 0 0 | Cs7g20350.1           | 8.18 | 0 | 0 | 2 | MASCOT | T | PLEX8 |
| 2.47E-01 | 0 0 | Cs7g20350.1           | 8.18 | 0 | 0 | 2 | MASCOT | T | PLEX8 |
| 2.39E-01 | 0 0 | Cs7g20350.1           | 8.18 | 0 | 0 | 2 | MASCOT | T | PLEX8 |
| 2.97E-04 | 0 0 | Cs7g20350.1           | 8.18 | 0 | 0 | 2 | MASCOT | T | PLEX8 |
| 1.63E-04 | 0 0 | Cs7g20350.1           | 8.18 | 0 | 0 | 2 | MASCOT | T | PLEX8 |
| 2.25E-01 | 0 0 | Cs7g20350.1           | 8.18 | 0 | 0 | 2 | MASCOT | T | PLEX8 |
| 2.84E-01 | 0 0 | Cs7g20350.1           | 8.18 | 0 | 0 | 2 | MASCOT | T | PLEX8 |
| 9.60E-05 | 0 0 | Cs7g20350.1           | 8.18 | 0 | 0 | 2 | MASCOT | T | PLEX8 |

|              |                     |      |   |      |          |          |       |       |
|--------------|---------------------|------|---|------|----------|----------|-------|-------|
| 1.29E-02 0 0 | Cs7g20350.1         | 8.18 | 0 | 0    | 2 MASCOT | T        | PLEX8 |       |
| 3.14E-02 0 0 | Cs7g20350.1         | 8.18 | 0 | 0    | 2 MASCOT | T        | PLEX8 |       |
| 9.43E-03 0 0 | Cs7g20350.1         | 8.18 | 0 | 0    | 2 MASCOT | T        | PLEX8 |       |
| 1.04E-01 0 0 | Cs7g20350.1         | 6.46 | 0 | 0    | 2 MASCOT | T        | PLEX8 |       |
| 1.26E-01 0 0 | Cs7g20350.1         | 6.46 | 0 | 0    | 2 MASCOT | T        | PLEX8 |       |
| 2.02E-01 0 0 | Cs7g20350.1         | 6.46 | 0 | 0    | 2 MASCOT | T        | PLEX8 |       |
| 7.54E-03 0 0 | Cs7g20350.1         | 6.46 | 0 | 0    | 2 MASCOT | T        | PLEX8 |       |
| 1.19E-01 0 0 | Cs7g20350.1         | 6.46 | 0 | 0    | 2 MASCOT | T        | PLEX8 |       |
| 2.63E-02 0 0 | Cs7g20350.1         | 6.46 | 0 | 0    | 2 MASCOT | T        | PLEX8 |       |
| 3.83E-01 0 0 | Cs7g20350.1         | 6.46 | 0 | 0    | 2 MASCOT | T        | PLEX8 |       |
| 1.19E-02 0 0 | Cs7g20350.1         | 6.46 | 0 | 0    | 2 MASCOT | T        | PLEX8 |       |
| 2.64E-01 0 0 | Cs7g20350.1         | 6.46 | 0 | 0    | 2 MASCOT | T        | PLEX8 |       |
| 2.44E-02 0 0 | Cs7g20350.1         | 6.46 | 0 | 0    | 2 MASCOT | T        | PLEX8 |       |
| 3.52E-04 0 0 | Cs7g20350.1         | 6.46 | 0 | 0    | 2 MASCOT | T        | PLEX8 |       |
| 4.40E-02 0 0 | Cs7g20350.1         | 6.46 | 0 | 0    | 2 MASCOT | T        | PLEX8 |       |
| 2.36E-03 0 0 | Cs7g20350.1         | 6.46 | 0 | 0    | 2 MASCOT | T        | PLEX8 |       |
| 1.14E-03 0 0 | Cs7g20350.1         | 6.46 | 0 | 0    | 2 MASCOT | T        | PLEX8 |       |
| 3.03E-02 0 0 | Cs7g20350.1         | 6.46 | 0 | 0    | 2 MASCOT | T        |       |       |
| 3.85E-04 0 0 | orange1.1t03005.1   | 5.32 | 0 | 0    | 2 MASCOT | T        | PLEX8 |       |
| 3.01E-01 0 0 | orange1.1t03005.1   | 5.32 | 0 | 0    | 2 MASCOT | T        | PLEX8 |       |
| 8.78E-02 0 0 | orange1.1t03005.1   | 5.32 | 0 | 0    | 2 MASCOT | T        | PLEX8 |       |
| 6.86E-03 0 0 | orange1.1t03005.1   | 9.76 | 0 | 0    | 2 MASCOT | T        | PLEX8 |       |
| 8.09E-02 0 0 | orange1.1t03005.1   | 9.76 | 0 | 0    | 2 MASCOT | T        | PLEX8 |       |
| 1.86E-01 0 0 | orange1.1t03005.1   | 9.76 | 0 | 0    | 2 MASCOT | T        | PLEX8 |       |
| 2.68E-02 0 0 | orange1.1t03005.1   | 9.76 | 0 | 0    | 2 MASCOT | T        | PLEX8 |       |
| 7.15E-03 0 0 | orange1.1t03005.1   | 9.76 | 0 | 0    | 2 MASCOT | T        | PLEX8 |       |
| 5.67E-03 0 0 | orange1.1t03005.1   | 9.76 | 0 | 0    | 2 MASCOT | T        | PLEX8 |       |
| 5.64E-03 0 0 | orange1.1t03005.1   | 9.76 | 0 | 0    | 2 MASCOT | T        | PLEX8 |       |
| 6.41E-03 0 0 | orange1.1t03005.1   | 9.76 | 0 | 0    | 2 MASCOT | T        | PLEX8 |       |
| 8.42E-03 0 0 | orange1.1t03005.1   | 9.76 | 0 | 0    | 2 MASCOT | T        | PLEX8 |       |
| 5.55E-03 0 0 | orange1.1t03005.1   | 9.76 | 0 | 0    | 2 MASCOT | T        | PLEX8 |       |
| 2.46E-02 0 0 | orange1.1t03005.1   | 9.76 | 0 | 0    | 2 MASCOT | T        | PLEX8 |       |
| 3.27E-02 0 0 | orange1.1t03005.1   | 9.76 | 0 | 0    | 2 MASCOT | T        |       |       |
| 4.30E-02 0 0 | orange1.1t03005.1   | 9.76 | 0 | 0    | 2 MASCOT | T        | PLEX8 |       |
| 1.72E-02 0 0 | orange1.1t03005.1   | 9.76 | 0 | 0    | 2 MASCOT | T        | PLEX8 |       |
| 5.28E-02 0 0 | Cs8g07730.1         | 5.21 | 0 | 15.9 | 0        | 2 MASCOT | T     | PLEX8 |
| 1.96E-02 0 0 | Cs8g07730.1         | 5.21 | 0 | 15.9 | 0        | 2 MASCOT | T     | PLEX8 |
| 2.26E-01 0 0 | Cs8g07730.1         | 5.21 | 0 | 15.9 | 0        | 2 MASCOT | T     | PLEX8 |
| 9.31E-03 0 0 | Cs8g07730.1         | 5.21 | 0 | 15.9 | 0        | 2 MASCOT | T     | PLEX8 |
| 2.03E-03 0 0 | Cs8g07730.1         | 5.21 | 0 | 15.9 | 0        | 2 MASCOT | T     |       |
| 5.32E-04 0 0 | Cs8g07730.1         | 5.21 | 0 | 0    | 2 MASCOT | T        | PLEX8 |       |
| 1.02E-02 0 0 | Cs8g07730.1         | 5.21 | 0 | 0    | 2 MASCOT | T        | PLEX8 |       |
| 7.66E-04 0 0 | Cs8g07730.1         | 5.21 | 0 | 0    | 2 MASCOT | T        |       |       |
| 8.18E-02 0 0 | Cs8g07730.1         | 8.59 | 0 | 0    | 2 MASCOT | T        | PLEX8 |       |
| 1.05E-03 0 0 | Cs8g07730.1         | 8.59 | 0 | 0    | 2 MASCOT | T        | PLEX8 |       |
| 1.94E-01 0 0 | Cs8g07730.1         | 8.59 | 0 | 0    | 2 MASCOT | T        | PLEX8 |       |
| 1.63E-02 0 0 | Cs8g07730.1         | 8.59 | 0 | 0    | 2 MASCOT | T        | PLEX8 |       |
| 3.29E-02 0 0 | Cs8g07730.1         | 8.59 | 0 | 0    | 2 MASCOT | T        |       |       |
| 2.58E-03 0 0 | Cs1g15890.1/Cs1g158 | 4.65 | 0 | 0    | 2 MASCOT | T        | PLEX8 |       |
| 8.97E-03 0 0 | Cs1g15890.1/Cs1g158 | 4.65 | 0 | 0    | 2 MASCOT | T        |       |       |
| 5.61E-03 0 0 | Cs1g15890.1/Cs1g158 | 4.65 | 0 | 0    | 2 MASCOT | T        |       |       |

|          |     |                      |      |   |      |   |        |        |         |
|----------|-----|----------------------|------|---|------|---|--------|--------|---------|
| 1.32E-04 | 0 0 | Cs1g15890.1/Cs1g158  | 4.65 | 0 | 0    | 2 | MASCOT | T      |         |
| 2.04E-01 | 0 0 | Cs1g15890.1/Cs1g158  | 6    | 0 | 15.9 | 0 | 2      | MASCOT | T       |
| 1.53E-02 | 0 0 | Cs1g15890.1/Cs1g158  | 6    | 0 | 15.9 | 0 | 2      | MASCOT | T PLEX8 |
| 6.50E-03 | 0 0 | Cs1g15890.1/Cs1g158  | 6    | 0 | 0    | 2 | MASCOT | T      | PLEX8   |
| 2.13E-02 | 0 0 | Cs1g15890.1/Cs1g158  | 6    | 0 | 0    | 2 | MASCOT | T      |         |
| 2.22E-02 | 0 0 | Cs1g15890.1/Cs1g158  | 6    | 0 | 0    | 2 | MASCOT | T      |         |
| 1.83E-02 | 0 0 | Cs1g15890.1/Cs1g158  | 6    | 0 | 0    | 2 | MASCOT | T      |         |
| 1.76E-01 | 0 0 | Cs1g15890.1/Cs1g158  | 6    | 0 | 0    | 2 | MASCOT | T      |         |
| 1.15E-02 | 0 0 | Cs1g15890.1/Cs1g158  | 6    | 0 | 0    | 2 | MASCOT | T      | PLEX8   |
| 1.69E-03 | 0 0 | Cs7g20280.1          | 6.05 | 0 | 0    | 2 | MASCOT | T      | PLEX8   |
| 2.64E-02 | 0 0 | Cs7g20280.1          | 6.05 | 0 | 0    | 2 | MASCOT | T      | PLEX8   |
| 1.77E-03 | 0 0 | Cs7g20280.1          | 6.05 | 0 | 0    | 2 | MASCOT | T      | PLEX8   |
| 1.04E-01 | 0 0 | Cs7g20280.1          | 6.05 | 0 | 0    | 2 | MASCOT | T      | PLEX8   |
| 6.54E-04 | 0 0 | Cs7g20280.1          | 6.05 | 0 | 0    | 2 | MASCOT | T      | PLEX8   |
| 1.52E-03 | 0 0 | Cs7g20280.1          | 6.05 | 0 | 0    | 2 | MASCOT | T      | PLEX8   |
| 4.71E-02 | 0 0 | Cs7g20280.1          | 6.05 | 0 | 0    | 2 | MASCOT | T      | PLEX8   |
| 1.60E-03 | 0 0 | Cs7g20280.1          | 6.05 | 0 | 0    | 2 | MASCOT | T      |         |
| 1.51E-02 | 0 0 | Cs7g20280.1          | 6.05 | 0 | 0    | 2 | MASCOT | T      | PLEX8   |
| 2.12E-01 | 0 0 | Cs7g20280.1          | 4.25 | 0 | 0    | 2 | MASCOT | T      | PLEX8   |
| 3.50E-02 | 0 0 | Cs7g20280.1          | 4.25 | 0 | 0    | 2 | MASCOT | T      | PLEX8   |
| 1.87E-01 | 0 0 | Cs7g20280.1          | 4.25 | 0 | 0    | 2 | MASCOT | T      | PLEX8   |
| 3.23E-02 | 0 0 | Cs5g06580.1 ! Cs9g13 | 6    | 0 | 0    | 2 | MASCOT | T      | PLEX8   |
| 6.60E-03 | 0 0 | Cs5g06580.1 ! Cs9g13 | 6    | 0 | 0    | 2 | MASCOT | T      | PLEX8   |
| 7.81E-03 | 0 0 | Cs5g06580.1 ! Cs9g13 | 6    | 0 | 0    | 2 | MASCOT | T      | PLEX8   |
| 6.51E-03 | 0 0 | Cs5g06580.1 ! Cs9g13 | 6    | 0 | 0    | 2 | MASCOT | T      | PLEX8   |
| 1.31E-01 | 0 0 | Cs5g06580.1 ! Cs9g13 | 6    | 0 | 0    | 2 | MASCOT | T      | PLEX8   |
| 1.52E-01 | 0 0 | Cs5g06580.1 ! Cs9g13 | 6    | 0 | 0    | 2 | MASCOT | T      | PLEX8   |
| 2.80E-02 | 0 0 | Cs5g06580.1 ! Cs9g13 | 6    | 0 | 0    | 2 | MASCOT | T      | PLEX8   |
| 4.13E-02 | 0 0 | Cs5g06580.1 ! Cs9g13 | 6    | 0 | 0    | 2 | MASCOT | T      | PLEX8   |
| 6.10E-02 | 0 0 | Cs5g06580.1 ! Cs9g13 | 6    | 0 | 0    | 2 | MASCOT | T      | PLEX8   |
| 3.49E-02 | 0 0 | Cs5g06580.1          | 6.74 | 0 | 0    | 2 | MASCOT | T      | PLEX8   |
| 8.05E-02 | 0 0 | Cs3g07660.1 ! Cs6g07 | 5.4  | 0 | 0    | 2 | MASCOT | T      | PLEX8   |
| 4.85E-02 | 0 0 | Cs3g07660.1 ! Cs6g07 | 5.4  | 0 | 0    | 2 | MASCOT | T      | PLEX8   |
| 3.50E-02 | 0 0 | Cs3g07660.1 ! Cs6g07 | 5.4  | 0 | 0    | 2 | MASCOT | T      | PLEX8   |
| 3.40E-02 | 0 0 | Cs3g07660.1 ! Cs6g07 | 5.4  | 0 | 0    | 2 | MASCOT | T      | PLEX8   |
| 9.44E-02 | 0 0 | Cs3g07660.1 ! Cs6g07 | 5.4  | 0 | 0    | 2 | MASCOT | T      | PLEX8   |
| 5.37E-02 | 0 0 | Cs3g07660.1 ! Cs6g07 | 5.4  | 0 | 0    | 2 | MASCOT | T      |         |
| 2.63E-01 | 0 0 | Cs3g07660.1 ! Cs6g07 | 5.4  | 0 | 0    | 2 | MASCOT | T      | PLEX8   |
| 5.27E-02 | 0 0 | Cs3g07660.1          | 4.37 | 0 | 0    | 2 | MASCOT | T      |         |
| 3.02E-01 | 0 0 | Cs3g07660.1          | 4.37 | 0 | 0    | 2 | MASCOT | T      | PLEX8   |
| 1.59E-01 | 0 0 | Cs1g18870.1/Cs1g188  | 4.53 | 0 | 0    | 2 | MASCOT | T      | PLEX8   |
| 2.09E-01 | 0 0 | Cs1g18870.1/Cs1g188  | 4.53 | 0 | 0    | 2 | MASCOT | T      | PLEX8   |
| 7.30E-02 | 0 0 | Cs1g18870.1/Cs1g188  | 4.53 | 0 | 0    | 2 | MASCOT | T      | PLEX8   |
| 3.26E-04 | 0 0 | Cs1g18870.1/Cs1g188  | 5.84 | 0 | 0    | 2 | MASCOT | T      | PLEX8   |
| 8.58E-04 | 0 0 | Cs1g18870.1/Cs1g188  | 5.84 | 0 | 0    | 2 | MASCOT | T      |         |
| 5.63E-04 | 0 0 | Cs1g18870.1/Cs1g188  | 5.84 | 0 | 0    | 2 | MASCOT | T      |         |
| 3.80E-02 | 0 0 | Cs1g18870.1/Cs1g188  | 5.84 | 0 | 0    | 2 | MASCOT | T      |         |
| 4.89E-05 | 0 0 | Cs1g18870.1/Cs1g188  | 5.84 | 0 | 0    | 2 | MASCOT | T      | PLEX8   |
| 1.72E-01 | 0 0 | Cs8g19800.1          | 6.74 | 0 | 0    | 2 | MASCOT | T      |         |
| 8.61E-04 | 0 0 | Cs8g19800.1          | 6.74 | 0 | 0    | 2 | MASCOT | T      | PLEX8   |
| 1.55E-03 | 0 0 | Cs6g22020.1/Cs6g220  | 5.37 | 0 | 0    | 2 | MASCOT | T      | PLEX8   |

|          |     |                     |      |        |   |   |        |   |       |
|----------|-----|---------------------|------|--------|---|---|--------|---|-------|
| 1.58E-01 | 0 0 | Cs6g22020.1/Cs6g220 | 5.37 | 0      | 0 | 2 | MASCOT | T | PLEX8 |
| 1.42E-01 | 0 0 | Cs6g22020.1/Cs6g220 | 5.37 | 0      | 0 | 2 | MASCOT | T | PLEX8 |
| 4.31E-02 | 0 0 | Cs6g22020.1/Cs6g220 | 5.37 | 0      | 0 | 2 | MASCOT | T | PLEX8 |
| 1.79E-01 | 0 0 | Cs6g22020.1/Cs6g220 | 5.37 | 0      | 0 | 2 | MASCOT | T |       |
| 4.45E-02 | 0 0 | Cs6g22020.1/Cs6g220 | 5.37 | 0      | 0 | 2 | MASCOT | T |       |
| 7.23E-02 | 0 0 | Cs9g05920.1/Cs9g059 | 8.47 | 0      | 0 | 2 | MASCOT | T | PLEX8 |
| 2.99E-01 | 0 0 | Cs9g05920.1/Cs9g059 | 8.47 | 0      | 0 | 2 | MASCOT | T | PLEX8 |
| 1.03E-01 | 0 0 | Cs9g05920.1/Cs9g059 | 8.47 | 0      | 0 | 2 | MASCOT | T | PLEX8 |
| 2.76E-02 | 0 0 | Cs9g05920.1/Cs9g059 | 8.47 | 0      | 0 | 2 | MASCOT | T | PLEX8 |
| 1.35E-04 | 0 0 | Cs9g05920.1/Cs9g059 | 4.14 | 0      | 0 | 2 | MASCOT | T | PLEX8 |
| 1.68E-03 | 0 0 | Cs9g05920.1/Cs9g059 | 4.14 | 0      | 0 | 2 | MASCOT | T | PLEX8 |
| 4.67E-04 | 0 0 | Cs9g05920.1/Cs9g059 | 4.14 | 0      | 0 | 2 | MASCOT | T | PLEX8 |
| 2.02E-01 | 0 0 | Cs9g05920.1/Cs9g059 | 4.14 | 0      | 0 | 2 | MASCOT | T | PLEX8 |
| 2.63E-01 | 0 0 | Cs1g26180.1         | 8.76 | 0      | 0 | 2 | MASCOT | T | PLEX8 |
| 3.10E-01 | 0 0 | Cs1g26180.1         | 8.76 | 0      | 0 | 2 | MASCOT | T |       |
| 2.01E-01 | 0 0 | Cs1g26180.1         | 8.76 | 0      | 0 | 2 | MASCOT | T |       |
| 3.79E-03 | 0 0 | Cs1g26180.1         | 4.37 | 0      | 0 | 2 | MASCOT | T |       |
| 1.91E-03 | 0 0 | Cs1g26180.1         | 4.37 | 0      | 0 | 2 | MASCOT | T |       |
| 2.62E-03 | 0 0 | Cs1g26180.1         | 4.37 | 0      | 0 | 2 | MASCOT | T | PLEX8 |
| 3.38E-03 | 0 0 | Cs1g26180.1         | 4.37 | 0      | 0 | 2 | MASCOT | T | PLEX8 |
| 8.58E-03 | 0 0 | Cs2g16760.1/Cs2g167 | 4.54 | 0      | 0 | 2 | MASCOT | T | PLEX8 |
| 3.19E-02 | 0 0 | Cs2g16760.1/Cs2g167 | 4.54 | 0      | 0 | 2 | MASCOT | T | PLEX8 |
| 5.99E-04 | 0 0 | Cs2g16760.1/Cs2g167 | 4.54 | 0      | 0 | 2 | MASCOT | T | PLEX8 |
| 2.74E-02 | 0 0 | Cs2g16760.1/Cs2g167 | 4.54 | 0      | 0 | 2 | MASCOT | T | PLEX8 |
| 8.12E-03 | 0 0 | Cs2g16760.1/Cs2g167 | 4.54 | 0      | 0 | 2 | MASCOT | T |       |
| 1.39E-01 | 0 0 | Cs2g16760.1/Cs2g167 | 5.66 | 0      | 0 | 2 | MASCOT | T | PLEX8 |
| 4.67E-04 | 0 0 | Cs2g16760.1/Cs2g167 | 5.66 | 0      | 0 | 2 | MASCOT | T | PLEX8 |
| 8.91E-03 | 0 0 | Cs5g27470.1         | 8.75 | 0      | 0 | 2 | MASCOT | T | PLEX8 |
| 3.13E-03 | 0 0 | Cs5g27470.1         | 8.75 | 0      | 0 | 2 | MASCOT | T | PLEX8 |
| 2.40E-03 | 0 0 | Cs5g27470.1         | 8.75 | 0      | 0 | 2 | MASCOT | T | PLEX8 |
| 1.22E-01 | 0 0 | Cs5g27470.1         | 8.75 | 0      | 0 | 2 | MASCOT | T |       |
| 1.76E-01 | 0 0 | Cs5g27450.1/Cs5g274 | 4.03 | 0      | 0 | 2 | MASCOT | T | PLEX8 |
| 4.71E-06 | 0 0 | Cs5g27450.1/Cs5g274 | 4.03 | 0      | 0 | 2 | MASCOT | T | PLEX8 |
| 1.79E-03 | 0 0 | Cs5g27450.1/Cs5g274 | 4.03 | 0      | 0 | 2 | MASCOT | T | PLEX8 |
| 6.92E-02 | 0 0 | Cs7g13380.1         | 5.32 | 0      | 0 | 2 | MASCOT | T | PLEX8 |
| 2.80E-01 | 0 0 | Cs7g13380.1         | 5.32 | 0      | 0 | 2 | MASCOT | T | PLEX8 |
| 3.57E-02 | 0 0 | Cs7g13380.1         | 5.32 | 0      | 0 | 2 | MASCOT | T | PLEX8 |
| 1.36E-03 | 0 0 | Cs7g13380.1         | 4.65 | 0 15.9 | 0 | 2 | MASCOT | T | PLEX8 |
| 7.78E-04 | 0 0 | Cs7g13380.1         | 4.65 | 0 15.9 | 0 | 2 | MASCOT | T |       |
| 4.55E-03 | 0 0 | Cs7g13380.1         | 4.65 | 0 15.9 | 0 | 2 | MASCOT | T | PLEX8 |
| 5.11E-02 | 0 0 | Cs7g13380.1         | 4.65 | 0      | 0 | 2 | MASCOT | T |       |
| 2.65E-03 | 0 0 | Cs7g31340.1         | 5.84 | 0      | 0 | 2 | MASCOT | T |       |
| 7.62E-04 | 0 0 | Cs7g31340.1         | 5.84 | 0      | 0 | 2 | MASCOT | T |       |
| 1.88E-01 | 0 0 | Cs7g31340.1/Cs7g313 | 5.97 | 0      | 0 | 2 | MASCOT | T | PLEX8 |
| 4.44E-01 | 0 0 | Cs7g31340.1/Cs7g313 | 5.97 | 0      | 0 | 2 | MASCOT | T | PLEX8 |
| 3.22E-02 | 0 0 | Cs7g31340.1/Cs7g313 | 5.97 | 0      | 0 | 2 | MASCOT | T | PLEX8 |
| 4.21E-02 | 0 0 | Cs7g31340.1/Cs7g313 | 5.97 | 0      | 0 | 2 | MASCOT | T | PLEX8 |
| 8.02E-02 | 0 0 | Cs7g31340.1/Cs7g313 | 5.97 | 0      | 0 | 2 | MASCOT | T | PLEX8 |
| 6.35E-02 | 0 0 | Cs2g29220.1/Cs2g292 | 8.59 | 0      | 0 | 2 | MASCOT | T | PLEX8 |
| 1.09E-01 | 0 0 | Cs2g29220.1/Cs2g292 | 8.59 | 0      | 0 | 2 | MASCOT | T | PLEX8 |
| 1.02E-03 | 0 0 | Cs5g07190.1/Cs5g071 | 8.22 | 0      | 0 | 2 | MASCOT | T | PLEX8 |

|              |                     |      |   |   |   |        |   |       |
|--------------|---------------------|------|---|---|---|--------|---|-------|
| 6.88E-02 0 0 | Cs5g07190.1/Cs5g071 | 8.22 | 0 | 0 | 2 | MASCOT | T | PLEX8 |
| 3.76E-02 0 0 | Cs5g07190.1/Cs5g071 | 8.22 | 0 | 0 | 2 | MASCOT | T | PLEX8 |
| 2.38E-03 0 0 | Cs5g07190.1/Cs5g071 | 8.22 | 0 | 0 | 2 | MASCOT | T | PLEX8 |
| 3.48E-02 0 0 | Cs5g07190.1/Cs5g071 | 8.22 | 0 | 0 | 2 | MASCOT | T | PLEX8 |
| 1.39E-03 0 0 | Cs1g03110.1/Cs1g031 | 5.84 | 0 | 0 | 2 | MASCOT | T | PLEX8 |
| 4.55E-02 0 0 | Cs1g03110.1/Cs1g031 | 5.84 | 0 | 0 | 2 | MASCOT | T | PLEX8 |
| 6.43E-02 0 0 | Cs1g03110.1/Cs1g031 | 5.84 | 0 | 0 | 2 | MASCOT | T |       |
| 3.49E-05 0 0 | Cs1g03110.1/Cs1g031 | 5.32 | 0 | 0 | 2 | MASCOT | T | PLEX8 |
| 5.42E-03 0 0 | Cs1g03110.1/Cs1g031 | 5.32 | 0 | 0 | 2 | MASCOT | T | PLEX8 |
| 2.14E-03 0 0 | Cs1g03110.1/Cs1g031 | 5.32 | 0 | 0 | 2 | MASCOT | T | PLEX8 |
| 1.02E-01 0 0 | Cs5g17070.1         | 4.09 | 0 | 0 | 2 | MASCOT | T | PLEX8 |
| 7.83E-02 0 0 | Cs5g17070.1         | 4.09 | 0 | 0 | 2 | MASCOT | T | PLEX8 |
| 3.07E-04 0 0 | Cs5g17070.1         | 4.09 | 0 | 0 | 2 | MASCOT | T | PLEX8 |
| 7.06E-06 0 0 | Cs5g17070.1         | 4.09 | 0 | 0 | 2 | MASCOT | T | PLEX8 |
| 4.41E-03 0 0 | Cs5g17070.1         | 4.14 | 1 | 0 | 2 | MASCOT | T | PLEX8 |
| 4.47E-02 0 0 | Cs5g17070.1         | 4.14 | 1 | 0 | 2 | MASCOT | T | PLEX8 |
| 3.20E-02 0 0 | Cs5g19690.1/Cs5g196 | 6.1  | 0 | 0 | 2 | MASCOT | T | PLEX8 |
| 2.54E-01 0 0 | Cs5g19690.1/Cs5g196 | 6.1  | 0 | 0 | 2 | MASCOT | T | PLEX8 |
| 1.04E-01 0 0 | Cs5g19690.1/Cs5g196 | 6.1  | 0 | 0 | 2 | MASCOT | T | PLEX8 |
| 4.45E-01 0 0 | Cs5g19690.1/Cs5g196 | 4.37 | 0 | 0 | 2 | MASCOT | T | PLEX8 |
| 1.53E-02 0 0 | Cs5g19690.1/Cs5g196 | 4.37 | 0 | 0 | 2 | MASCOT | T | PLEX8 |
| 1.23E-01 0 0 | Cs5g19690.1/Cs5g196 | 4.37 | 0 | 0 | 2 | MASCOT | T | PLEX8 |
| 8.33E-03 0 0 | Cs6g03010.1         | 5.84 | 0 | 0 | 2 | MASCOT | T | PLEX8 |
| 4.28E-02 0 0 | Cs6g03010.1         | 5.84 | 0 | 0 | 2 | MASCOT | T | PLEX8 |
| 2.68E-02 0 0 | Cs6g03010.1         | 5.84 | 0 | 0 | 2 | MASCOT | T | PLEX8 |
| 4.98E-02 0 0 | Cs6g03010.1         | 5.84 | 0 | 0 | 2 | MASCOT | T | PLEX8 |
| 3.08E-02 0 0 | Cs6g03010.1         | 8.75 | 0 | 0 | 2 | MASCOT | T | PLEX8 |
| 3.08E-02 0 0 | Cs6g03010.1         | 8.75 | 0 | 0 | 2 | MASCOT | T | PLEX8 |
| 2.30E-02 0 0 | Cs6g12035.1         | 4.68 | 1 | 0 | 2 | MASCOT | T | PLEX8 |
| 6.86E-02 0 0 | Cs6g12035.1         | 4.68 | 1 | 0 | 2 | MASCOT | T | PLEX8 |
| 1.05E-02 0 0 | Cs6g12035.1         | 5.83 | 0 | 0 | 2 | MASCOT | T | PLEX8 |
| 1.94E-03 0 0 | Cs6g12035.1         | 5.83 | 0 | 0 | 2 | MASCOT | T |       |
| 3.29E-05 0 0 | Cs6g12035.1         | 5.83 | 0 | 0 | 2 | MASCOT | T |       |
| 5.47E-03 0 0 | Cs6g12035.1         | 5.83 | 0 | 0 | 2 | MASCOT | T | PLEX8 |
| 3.57E-03 0 0 | Cs6g14660.1         | 6.07 | 1 | 0 | 2 | MASCOT | T | PLEX8 |
| 9.08E-03 0 0 | Cs6g14660.1/Cs6g146 | 5.72 | 0 | 0 | 2 | MASCOT | T | PLEX8 |
| 5.75E-03 0 0 | Cs6g14660.1/Cs6g146 | 5.72 | 0 | 0 | 2 | MASCOT | T | PLEX8 |
| 1.54E-01 0 0 | Cs6g14660.1/Cs6g146 | 5.72 | 0 | 0 | 2 | MASCOT | T | PLEX8 |
| 2.55E-02 0 0 | Cs6g14660.1/Cs6g146 | 5.72 | 0 | 0 | 2 | MASCOT | T | PLEX8 |
| 8.49E-02 0 0 | Cs6g14660.1/Cs6g146 | 5.72 | 0 | 0 | 2 | MASCOT | T | PLEX8 |
| 2.08E-01 0 0 | Cs6g18490.1         | 8.31 | 0 | 0 | 2 | MASCOT | T | PLEX8 |
| 1.36E-01 0 0 | Cs6g18490.1         | 8.31 | 0 | 0 | 2 | MASCOT | T | PLEX8 |
| 7.33E-02 0 0 | Cs6g18490.1         | 8.31 | 0 | 0 | 2 | MASCOT | T | PLEX8 |
| 6.31E-02 0 0 | Cs6g18490.1         | 8.31 | 0 | 0 | 2 | MASCOT | T | PLEX8 |
| 3.36E-02 0 0 | Cs6g18490.1         | 8.31 | 0 | 0 | 2 | MASCOT | T | PLEX8 |
| 1.02E-01 0 0 | Cs6g18490.1         | 4.25 | 0 | 0 | 2 | MASCOT | T | PLEX8 |
| 3.14E-02 0 0 | Cs7g10910.1         | 5.32 | 0 | 0 | 2 | MASCOT | T | PLEX8 |
| 6.03E-04 0 0 | Cs7g10910.1         | 5.32 | 0 | 0 | 2 | MASCOT | T | PLEX8 |
| 1.87E-03 0 0 | Cs7g10910.1         | 5.32 | 0 | 0 | 2 | MASCOT | T | PLEX8 |
| 2.10E-02 0 0 | Cs7g10910.1         | 5.32 | 0 | 0 | 2 | MASCOT | T | PLEX8 |
| 3.02E-01 0 0 | Cs7g10910.1         | 8.75 | 0 | 0 | 2 | MASCOT | T | PLEX8 |

|          |     |                     |      |   |      |   |        |        |       |       |
|----------|-----|---------------------|------|---|------|---|--------|--------|-------|-------|
| 1.81E-01 | 0 0 | Cs7g10910.1         | 8.75 | 0 | 0    | 2 | MASCOT | T      | PLEX8 |       |
| 6.89E-02 | 0 0 | Cs8g18490.1         | 9.47 | 0 | 0    | 2 | MASCOT | T      | PLEX8 |       |
| 1.43E-02 | 0 0 | Cs8g18490.1         | 9.47 | 0 | 0    | 2 | MASCOT | T      | PLEX8 |       |
| 2.96E-02 | 0 0 | Cs8g18490.1         | 9.47 | 0 | 0    | 2 | MASCOT | T      | PLEX8 |       |
| 3.07E-03 | 0 0 | Cs8g18490.1         | 4.37 | 0 | 0    | 2 | MASCOT | T      | PLEX8 |       |
| 2.94E-05 | 0 0 | Cs8g18490.1         | 4.37 | 0 | 0    | 2 | MASCOT | T      | PLEX8 |       |
| 2.37E-05 | 0 0 | Cs8g18490.1         | 4.37 | 0 | 0    | 2 | MASCOT | T      | PLEX8 |       |
| 5.47E-03 | 0 0 | Cs9g01190.1         | 4.37 | 0 | 0    | 2 | MASCOT | T      |       |       |
| 3.77E-02 | 0 0 | Cs9g01190.1         | 4.37 | 0 | 0    | 2 | MASCOT | T      |       |       |
| 1.28E-02 | 0 0 | Cs9g01190.1         | 6    | 0 | 0    | 2 | MASCOT | T      | PLEX8 |       |
| 1.02E-01 | 0 0 | Cs9g01190.1         | 6    | 0 | 0    | 2 | MASCOT | T      | PLEX8 |       |
| 1.03E-02 | 0 0 | Cs9g01190.1         | 6    | 0 | 0    | 2 | MASCOT | T      | PLEX8 |       |
| 5.50E-02 | 0 0 | Cs9g01190.1         | 6    | 0 | 0    | 2 | MASCOT | T      | PLEX8 |       |
| 5.79E-04 | 0 0 | orange1.1t01675.1   | 3.92 | 0 | 0    | 2 | MASCOT | T      | PLEX8 |       |
| 8.09E-05 | 0 0 | orange1.1t01675.1   | 3.92 | 0 | 0    | 2 | MASCOT | T      |       |       |
| 1.36E-01 | 0 0 | orange1.1t01675.1   | 4.03 | 0 | 0    | 2 | MASCOT | T      | PLEX8 |       |
| 2.50E-02 | 0 0 | orange1.1t01675.1   | 4.03 | 0 | 0    | 2 | MASCOT | T      | PLEX8 |       |
| 1.44E-01 | 0 0 | orange1.1t01675.1   | 4.03 | 0 | 0    | 2 | MASCOT | T      | PLEX8 |       |
| 4.93E-02 | 0 0 | orange1.1t01675.1   | 4.03 | 0 | 0    | 2 | MASCOT | T      | PLEX8 |       |
| 2.56E-01 | 0 0 | Cs1g01010.1/Cs1g010 | 5.32 | 0 | 0    | 2 | MASCOT | T      | PLEX8 |       |
| 1.85E-02 | 0 0 | Cs1g01010.1/Cs1g010 | 5.32 | 0 | 0    | 2 | MASCOT | T      | PLEX8 |       |
| 7.04E-02 | 0 0 | Cs1g01010.1/Cs1g010 | 5.32 | 0 | 0    | 2 | MASCOT | T      | PLEX8 |       |
| 7.45E-02 | 0 0 | Cs1g01010.1/Cs1g010 | 4.21 | 0 | 0    | 2 | MASCOT | T      | PLEX8 |       |
| 1.66E-02 | 0 0 | Cs1g01010.1/Cs1g010 | 4.21 | 0 | 0    | 2 | MASCOT | T      | PLEX8 |       |
| 6.39E-01 | 0 0 | Cs1g01010.1/Cs1g010 | 4.21 | 0 | 0    | 2 | MASCOT | T      | PLEX8 |       |
| 1.51E-03 | 0 0 | orange1.1t05358.1   | 4.53 | 0 | 0    | 2 | MASCOT | T      | PLEX8 |       |
| 6.66E-03 | 0 0 | orange1.1t05358.1   | 4.53 | 0 | 0    | 2 | MASCOT | T      | PLEX8 |       |
| 7.98E-02 | 0 0 | orange1.1t05358.1   | 4.53 | 0 | 0    | 2 | MASCOT | T      | PLEX8 |       |
| 5.26E-02 | 0 0 | orange1.1t05358.1   | 4.53 | 0 | 0    | 2 | MASCOT | T      | PLEX8 |       |
| 1.35E-02 | 0 0 | orange1.1t05358.1   | 4.53 | 0 | 0    | 2 | MASCOT | T      | PLEX8 |       |
| 9.80E-02 | 0 0 | orange1.1t05358.1   | 4.53 | 0 | 0    | 2 | MASCOT | T      | PLEX8 |       |
| 1.47E-03 | 0 0 | Cs2g11720.1/Cs2g117 | 4.21 | 0 | 0    | 2 | MASCOT | T      |       |       |
| 1.75E-03 | 0 0 | Cs2g11720.1/Cs2g117 | 4.21 | 0 | 0    | 2 | MASCOT | T      |       |       |
| 3.13E-01 | 0 0 | Cs2g11720.1/Cs2g117 | 8.85 | 0 | 0    | 2 | MASCOT | T      | PLEX8 |       |
| 1.03E-03 | 0 0 | Cs2g11720.1/Cs2g117 | 8.85 | 0 | 0    | 2 | MASCOT | T      | PLEX8 |       |
| 1.74E-01 | 0 0 | Cs2g11720.1/Cs2g117 | 8.85 | 0 | 0    | 2 | MASCOT | T      | PLEX8 |       |
| 4.41E-01 | 0 0 | Cs2g25340.1/Cs2g253 | 6.01 | 0 | 15.9 | 0 | 2      | MASCOT | T     | PLEX8 |
| 2.85E-01 | 0 0 | Cs2g25340.1/Cs2g253 | 6.01 | 0 | 15.9 | 0 | 2      | MASCOT | T     | PLEX8 |
| 5.11E-02 | 0 0 | Cs2g25340.1/Cs2g253 | 6.01 | 0 | 0    | 2 | MASCOT | T      | PLEX8 |       |
| 9.96E-02 | 0 0 | Cs2g25340.1/Cs2g253 | 6.01 | 0 | 0    | 2 | MASCOT | T      | PLEX8 |       |
| 1.72E-03 | 0 0 | Cs2g25340.1/Cs2g253 | 6.75 | 0 | 0    | 2 | MASCOT | T      | PLEX8 |       |
| 6.74E-02 | 0 0 | Cs2g27000.1/Cs2g270 | 4.37 | 0 | 0    | 2 | MASCOT | T      | PLEX8 |       |
| 3.00E-02 | 0 0 | Cs2g27000.1/Cs2g270 | 8.72 | 0 | 0    | 2 | MASCOT | T      | PLEX8 |       |
| 4.68E-03 | 0 0 | Cs2g27000.1/Cs2g270 | 8.72 | 0 | 0    | 2 | MASCOT | T      | PLEX8 |       |
| 3.38E-02 | 0 0 | Cs2g27000.1/Cs2g270 | 8.72 | 0 | 0    | 2 | MASCOT | T      |       |       |
| 5.34E-03 | 0 0 | Cs2g27000.1/Cs2g270 | 8.72 | 0 | 0    | 2 | MASCOT | T      | PLEX8 |       |
| 7.67E-03 | 0 0 | Cs3g16860.1/Cs3g168 | 5.97 | 0 | 0    | 2 | MASCOT | T      | PLEX8 |       |
| 4.07E-05 | 0 0 | Cs3g16860.1/Cs3g168 | 5.97 | 0 | 0    | 2 | MASCOT | T      | PLEX8 |       |
| 2.48E-03 | 0 0 | Cs3g16860.1/Cs3g168 | 5.97 | 0 | 0    | 2 | MASCOT | T      | PLEX8 |       |
| 3.62E-03 | 0 0 | Cs3g16860.1/Cs3g168 | 5.97 | 0 | 0    | 2 | MASCOT | T      | PLEX8 |       |
| 1.00E-01 | 0 0 | Cs3g16860.1/Cs3g168 | 4    | 0 | 0    | 2 | MASCOT | T      | PLEX8 |       |

|          |     |                      |      |   |      |   |        |        |       |
|----------|-----|----------------------|------|---|------|---|--------|--------|-------|
| 1.32E-01 | 0 0 | Cs3g19700.1          | 8.8  | 0 | 0    | 2 | MASCOT | T      | PLEX8 |
| 1.87E-01 | 0 0 | Cs3g19700.1          | 8.8  | 0 | 0    | 2 | MASCOT | T      | PLEX8 |
| 6.76E-02 | 0 0 | Cs3g19700.1          | 8.8  | 0 | 0    | 2 | MASCOT | T      |       |
| 2.39E-04 | 0 0 | Cs3g19700.1          | 4.14 | 0 | 0    | 2 | MASCOT | T      | PLEX8 |
| 2.90E-03 | 0 0 | Cs3g19700.1          | 4.14 | 0 | 0    | 2 | MASCOT | T      | PLEX8 |
| 8.06E-02 | 0 0 | Cs3g27530.1/Cs3g275  | 5.88 | 0 | 0    | 2 | MASCOT | T      | PLEX8 |
| 5.34E-02 | 0 0 | Cs3g27530.1/Cs3g275  | 4.14 | 0 | 0    | 2 | MASCOT | T      | PLEX8 |
| 7.62E-02 | 0 0 | Cs3g27530.1/Cs3g275  | 4.14 | 0 | 0    | 2 | MASCOT | T      | PLEX8 |
| 3.88E-02 | 0 0 | Cs3g27530.1/Cs3g275  | 4.14 | 0 | 0    | 2 | MASCOT | T      | PLEX8 |
| 3.02E-02 | 0 0 | Cs3g27530.1/Cs3g275  | 4.14 | 0 | 0    | 2 | MASCOT | T      |       |
| 2.82E-01 | 0 0 | Cs4g19780.1/Cs4g197  | 8.31 | 0 | 0    | 2 | MASCOT | T      | PLEX8 |
| 1.25E-01 | 0 0 | Cs4g19780.1/Cs4g197  | 8.31 | 0 | 0    | 2 | MASCOT | T      | PLEX8 |
| 3.94E-04 | 0 0 | Cs4g19780.1/Cs4g197  | 8.31 | 0 | 0    | 2 | MASCOT | T      | PLEX8 |
| 9.57E-03 | 0 0 | Cs4g19780.1/Cs4g197  | 4.53 | 0 | 0    | 2 | MASCOT | T      | PLEX8 |
| 1.17E-02 | 0 0 | Cs4g19780.1/Cs4g197  | 4.53 | 0 | 0    | 2 | MASCOT | T      | PLEX8 |
| 1.07E-02 | 0 0 | Cs5g05570.1/Cs5g055  | 8.73 | 0 | 0    | 2 | MASCOT | T      | PLEX8 |
| 1.63E-02 | 0 0 | Cs5g05570.1/Cs5g055  | 8.73 | 0 | 0    | 2 | MASCOT | T      | PLEX8 |
| 1.46E-02 | 0 0 | Cs5g05570.2          | 8.2  | 0 | 0    | 2 | MASCOT | T      | PLEX8 |
| 2.09E-02 | 0 0 | Cs5g05570.2          | 8.2  | 0 | 0    | 2 | MASCOT | T      | PLEX8 |
| 5.85E-02 | 0 0 | Cs5g05570.2          | 8.2  | 0 | 0    | 2 | MASCOT | T      | PLEX8 |
| 5.41E-03 | 0 0 | Cs6g11900.1/Cs6g119  | 9.75 | 0 | 0    | 2 | MASCOT | T      | PLEX8 |
| 3.78E-02 | 0 0 | Cs6g11900.1/Cs6g119  | 9.75 | 0 | 0    | 2 | MASCOT | T      | PLEX8 |
| 2.80E-02 | 0 0 | Cs6g11900.1/Cs6g119  | 9.72 | 0 | 0    | 2 | MASCOT | T      | PLEX8 |
| 6.23E-02 | 0 0 | Cs6g11900.1/Cs6g119  | 9.72 | 0 | 0    | 2 | MASCOT | T      | PLEX8 |
| 1.84E-02 | 0 0 | Cs6g11900.1/Cs6g119  | 9.72 | 0 | 0    | 2 | MASCOT | T      | PLEX8 |
| 4.88E-01 | 0 0 | Cs7g03150.1/Cs7g031  | 8.41 | 0 | 0    | 2 | MASCOT | T      | PLEX8 |
| 1.32E-01 | 0 0 | Cs7g03150.1/Cs7g031  | 8.41 | 0 | 0    | 2 | MASCOT | T      | PLEX8 |
| 2.97E-02 | 0 0 | Cs7g03150.1/Cs7g031  | 8.41 | 0 | 0    | 2 | MASCOT | T      | PLEX8 |
| 3.05E-02 | 0 0 | Cs7g03150.1/Cs7g031  | 4.53 | 0 | 0    | 2 | MASCOT | T      | PLEX8 |
| 8.24E-02 | 0 0 | Cs7g03150.1/Cs7g031  | 4.53 | 0 | 0    | 2 | MASCOT | T      | PLEX8 |
| 1.89E-04 | 0 0 | Cs7g13550.1/Cs7g135  | 4.53 | 0 | 0    | 2 | MASCOT | T      | PLEX8 |
| 1.77E-04 | 0 0 | Cs7g13550.1/Cs7g135  | 4.53 | 0 | 0    | 2 | MASCOT | T      | PLEX8 |
| 7.05E-04 | 0 0 | Cs7g13550.1/Cs7g135  | 4.53 | 0 | 0    | 2 | MASCOT | T      | PLEX8 |
| 6.50E-05 | 0 0 | Cs7g13550.1/Cs7g135  | 4.53 | 0 | 0    | 2 | MASCOT | T      | PLEX8 |
| 1.99E-02 | 0 0 | Cs7g13550.1/Cs7g135  | 5.94 | 0 | 0    | 2 | MASCOT | T      | PLEX8 |
| 1.17E-02 | 0 0 | Cs9g01690.1/Cs9g016  | 4.03 | 0 | 0    | 2 | MASCOT | T      | PLEX8 |
| 1.61E-03 | 0 0 | Cs9g01690.1/Cs9g016  | 4.03 | 0 | 0    | 2 | MASCOT | T      | PLEX8 |
| 2.21E-02 | 0 0 | Cs9g01690.1/Cs9g016  | 4.03 | 0 | 0    | 2 | MASCOT | T      | PLEX8 |
| 1.56E-02 | 0 0 | Cs9g01690.2          | 8.56 | 0 | 0    | 2 | MASCOT | T      | PLEX8 |
| 2.17E-02 | 0 0 | Cs9g01690.2          | 8.56 | 0 | 0    | 2 | MASCOT | T      | PLEX8 |
| 5.43E-02 | 0 0 | Cs9g17210.1          | 4.53 | 0 | 0    | 2 | MASCOT | T      | PLEX8 |
| 5.29E-02 | 0 0 | Cs9g17210.1          | 4.53 | 0 | 0    | 2 | MASCOT | T      | PLEX8 |
| 1.08E-01 | 0 0 | Cs9g17210.1 ! orange | 4.25 | 0 | 0    | 2 | MASCOT | T      | PLEX8 |
| 1.21E-01 | 0 0 | Cs9g17210.1 ! orange | 4.25 | 0 | 0    | 2 | MASCOT | T      | PLEX8 |
| 1.50E-02 | 0 0 | Cs9g17210.1 ! orange | 4.25 | 0 | 0    | 2 | MASCOT | T      | PLEX8 |
| 2.68E-02 | 0 0 | gi 113952657         | 6.5  | 0 | 15.9 | 0 | 2      | MASCOT | T     |
| 7.44E-03 | 0 0 | gi 113952657         | 6.5  | 0 | 0    | 2 | MASCOT | T      | PLEX8 |
| 1.73E-03 | 0 0 | gi 113952657         | 6.5  | 0 | 0    | 2 | MASCOT | T      |       |
| 2.42E-03 | 0 0 | gi 113952657         | 4.22 | 0 | 0    | 2 | MASCOT | T      | PLEX8 |
| 1.82E-04 | 0 0 | gi 113952657         | 4.22 | 0 | 0    | 2 | MASCOT | T      |       |
| 5.50E-02 | 0 0 | Cs5g02880.1/orange1. | 5.84 | 0 | 0    | 2 | MASCOT | T      | PLEX8 |

|          |     |                       |      |   |      |   |        |        |       |       |
|----------|-----|-----------------------|------|---|------|---|--------|--------|-------|-------|
| 4.57E-02 | 0 0 | Cs5g02880.1/orange1.  | 5.84 | 0 | 0    | 2 | MASCOT | T      |       |       |
| 2.07E-02 | 0 0 | Cs5g02880.1/orange1.  | 5.84 | 0 | 0    | 2 | MASCOT | T      | PLEX8 |       |
| 2.44E-02 | 0 0 | Cs5g02880.1/orange1.  | 5.84 | 0 | 0    | 2 | MASCOT | T      | PLEX8 |       |
| 2.38E-01 | 0 0 | orange1.1t00429.1     | 6.75 | 0 | 0    | 2 | MASCOT | T      | PLEX8 |       |
| 1.11E-02 | 0 0 | orange1.1t03901.1/ora | 8.06 | 0 | 15.9 | 0 | 2      | MASCOT | T     | PLEX8 |
| 1.05E-02 | 0 0 | orange1.1t03901.1/ora | 8.06 | 0 | 0    | 2 | MASCOT | T      | PLEX8 |       |
| 2.16E-05 | 0 0 | orange1.1t03901.1/ora | 8.06 | 0 | 0    | 2 | MASCOT | T      | PLEX8 |       |
| 1.33E-03 | 0 0 | orange1.1t03901.1/ora | 8.06 | 0 | 0    | 2 | MASCOT | T      | PLEX8 |       |
| 2.73E-02 | 0 0 | orange1.1t03901.1     | 9.75 | 0 | 0    | 2 | MASCOT | T      |       |       |
| 3.21E-01 | 0 0 | Cs1g08260.1           | 4.53 | 0 | 0    | 2 | MASCOT | T      | PLEX8 |       |
| 4.31E-05 | 0 0 | Cs1g08260.1           | 4.53 | 0 | 0    | 2 | MASCOT | T      | PLEX8 |       |
| 8.43E-05 | 0 0 | Cs1g08260.1           | 4.53 | 0 | 0    | 2 | MASCOT | T      | PLEX8 |       |
| 2.94E-04 | 0 0 | Cs1g08260.1           | 9.75 | 0 | 0    | 2 | MASCOT | T      | PLEX8 |       |
| 1.62E-01 | 0 0 | Cs1g13080.1           | 4.65 | 0 | 0    | 2 | MASCOT | T      | PLEX8 |       |
| 1.75E-02 | 0 0 | Cs1g13080.1           | 6    | 0 | 0    | 2 | MASCOT | T      | PLEX8 |       |
| 1.06E-02 | 0 0 | Cs1g13080.1           | 6    | 0 | 0    | 2 | MASCOT | T      | PLEX8 |       |
| 7.41E-03 | 0 0 | Cs1g13080.1           | 6    | 0 | 0    | 2 | MASCOT | T      | PLEX8 |       |
| 8.49E-02 | 0 0 | Cs1g13260.1/Cs1g132   | 6.74 | 0 | 0    | 2 | MASCOT | T      |       |       |
| 2.07E-02 | 0 0 | Cs1g13260.1/Cs1g132   | 4    | 0 | 0    | 2 | MASCOT | T      | PLEX8 |       |
| 2.99E-03 | 0 0 | Cs1g13260.1/Cs1g132   | 4    | 0 | 0    | 2 | MASCOT | T      |       |       |
| 6.57E-04 | 0 0 | Cs1g13260.1/Cs1g132   | 4    | 0 | 0    | 2 | MASCOT | T      | PLEX8 |       |
| 2.46E-03 | 0 0 | Cs1g19310.1           | 6    | 0 | 0    | 2 | MASCOT | T      |       |       |
| 1.16E-01 | 0 0 | Cs1g19310.1           | 6    | 0 | 0    | 2 | MASCOT | T      |       |       |
| 1.01E-04 | 0 0 | Cs1g19310.1           | 4.22 | 0 | 0    | 2 | MASCOT | T      | PLEX8 |       |
| 4.21E-04 | 0 0 | Cs1g19310.1           | 4.22 | 0 | 0    | 2 | MASCOT | T      | PLEX8 |       |
| 9.22E-02 | 0 0 | Cs1g26170.1           | 6    | 0 | 0    | 2 | MASCOT | T      |       |       |
| 2.37E-02 | 0 0 | Cs1g26170.1           | 6    | 0 | 0    | 2 | MASCOT | T      |       |       |
| 2.42E-02 | 0 0 | Cs1g26170.1           | 6.89 | 0 | 0    | 2 | MASCOT | T      | PLEX8 |       |
| 5.33E-02 | 0 0 | Cs1g26170.1           | 6.89 | 0 | 0    | 2 | MASCOT | T      | PLEX8 |       |
| 1.14E-01 | 0 0 | Cs2g08850.1           | 5.84 | 0 | 0    | 2 | MASCOT | T      | PLEX8 |       |
| 1.75E-03 | 0 0 | Cs2g08850.1           | 5.84 | 0 | 0    | 2 | MASCOT | T      | PLEX8 |       |
| 1.30E-02 | 0 0 | Cs2g08850.1/orange1.  | 3.84 | 0 | 15.9 | 0 | 2      | MASCOT | T     |       |
| 9.60E-03 | 0 0 | Cs2g08850.1/orange1.  | 3.84 | 0 | 0    | 2 | MASCOT | T      |       |       |
| 4.51E-05 | 0 0 | Cs2g16410.1/Cs2g164   | 6.91 | 0 | 0    | 2 | MASCOT | T      | PLEX8 |       |
| 2.23E-03 | 0 0 | Cs2g16410.1/Cs2g164   | 6.91 | 0 | 0    | 2 | MASCOT | T      | PLEX8 |       |
| 1.22E-01 | 0 0 | Cs2g16410.1 ! Cs2g16  | 8.41 | 0 | 0    | 2 | MASCOT | T      | PLEX8 |       |
| 4.35E-02 | 0 0 | Cs2g16410.1 ! Cs2g16  | 8.41 | 0 | 0    | 2 | MASCOT | T      | PLEX8 |       |
| 3.01E-02 | 0 0 | Cs3g07610.1           | 8.76 | 0 | 0    | 2 | MASCOT | T      | PLEX8 |       |
| 2.57E-01 | 0 0 | Cs3g07610.1           | 8.6  | 0 | 15.9 | 0 | 2      | MASCOT | T     | PLEX8 |
| 1.57E-01 | 0 0 | Cs3g07610.1           | 8.6  | 0 | 15.9 | 0 | 2      | MASCOT | T     |       |
| 3.66E-02 | 0 0 | Cs3g07610.1           | 8.6  | 0 | 0    | 2 | MASCOT | T      |       |       |
| 2.51E-02 | 0 0 | Cs3g11440.1           | 5.99 | 0 | 0    | 2 | MASCOT | T      |       |       |
| 6.85E-02 | 0 0 | Cs3g11440.1           | 5.99 | 0 | 0    | 2 | MASCOT | T      |       |       |
| 6.19E-03 | 0 0 | Cs3g11440.1           | 5.99 | 0 | 0    | 2 | MASCOT | T      | PLEX8 |       |
| 1.01E-02 | 0 0 | Cs3g11440.1           | 5.99 | 0 | 0    | 2 | MASCOT | T      | PLEX8 |       |
| 2.78E-03 | 0 0 | Cs3g14360.1/Cs3g143   | 6.04 | 0 | 0    | 2 | MASCOT | T      |       |       |
| 6.94E-03 | 0 0 | Cs1g08770.1/Cs1g087   | 8.59 | 0 | 0    | 2 | MASCOT | T      | PLEX8 |       |
| 6.86E-03 | 0 0 | Cs1g08770.1/Cs1g087   | 8.59 | 0 | 0    | 2 | MASCOT | T      | PLEX8 |       |
| 3.66E-03 | 0 0 | Cs1g08770.1/Cs1g087   | 8.59 | 0 | 0    | 2 | MASCOT | T      | PLEX8 |       |
| 2.52E-01 | 0 0 | Cs3g18460.1/Cs3g184   | 6.74 | 0 | 0    | 2 | MASCOT | T      |       |       |
| 2.12E-01 | 0 0 | Cs3g18460.1/Cs3g184   | 6.74 | 0 | 0    | 2 | MASCOT | T      |       |       |



|          |     |                     |      |   |      |   |        |        |       |
|----------|-----|---------------------|------|---|------|---|--------|--------|-------|
| 1.67E-02 | 0 0 | Cs3g18460.1/Cs3g184 | 5.32 | 0 | 0    | 2 | MASCOT | T      | PLEX8 |
| 3.62E-02 | 0 0 | Cs3g18460.1/Cs3g184 | 5.32 | 0 | 0    | 2 | MASCOT | T      | PLEX8 |
| 1.88E-02 | 0 0 | Cs3g24320.1         | 9.8  | 0 | 0    | 2 | MASCOT | T      | PLEX8 |
| 5.33E-02 | 0 0 | Cs3g24320.1         | 9.8  | 0 | 0    | 2 | MASCOT | T      | PLEX8 |
| 1.32E-02 | 0 0 | Cs3g24320.1         | 5.97 | 0 | 0    | 2 | MASCOT | T      | PLEX8 |
| 4.43E-02 | 0 0 | Cs3g24320.1         | 5.97 | 0 | 0    | 2 | MASCOT | T      | PLEX8 |
| 1.09E-02 | 0 0 | Cs3g25120.1         | 4.54 | 0 | 0    | 2 | MASCOT | T      | PLEX8 |
| 5.56E-04 | 0 0 | Cs3g25120.1         | 4.03 | 0 | 0    | 2 | MASCOT | T      | PLEX8 |
| 1.09E-05 | 0 0 | Cs3g25120.1         | 4.03 | 0 | 0    | 2 | MASCOT | T      | PLEX8 |
| 2.25E-02 | 0 0 | Cs3g25120.1         | 4.03 | 0 | 0    | 2 | MASCOT | T      | PLEX8 |
| 5.82E-02 | 0 0 | Cs4g09580.1         | 8.75 | 0 | 0    | 2 | MASCOT | T      | PLEX8 |
| 1.70E-01 | 0 0 | Cs4g09580.1         | 8.75 | 0 | 0    | 2 | MASCOT | T      | PLEX8 |
| 3.18E-03 | 0 0 | Cs4g09580.1         | 3.97 | 0 | 0    | 2 | MASCOT | T      | PLEX8 |
| 1.54E-04 | 0 0 | Cs4g09580.1         | 3.97 | 0 | 0    | 2 | MASCOT | T      | PLEX8 |
| 5.82E-03 | 0 0 | Cs5g01690.1         | 4.53 | 0 | 0    | 2 | MASCOT | T      | PLEX8 |
| 6.58E-02 | 0 0 | Cs5g01690.1         | 6    | 0 | 0    | 2 | MASCOT | T      | PLEX8 |
| 6.48E-05 | 0 0 | Cs5g01690.1         | 6    | 0 | 0    | 2 | MASCOT | T      | PLEX8 |
| 1.72E-01 | 0 0 | Cs5g01690.1         | 6    | 0 | 0    | 2 | MASCOT | T      | PLEX8 |
| 1.41E-01 | 0 0 | Cs5g04830.1         | 6.75 | 0 | 0    | 2 | MASCOT | T      | PLEX8 |
| 2.78E-02 | 0 0 | Cs5g04830.1         | 4.25 | 0 | 0    | 2 | MASCOT | T      | PLEX8 |
| 5.29E-05 | 0 0 | Cs5g04830.1         | 4.25 | 0 | 0    | 2 | MASCOT | T      | PLEX8 |
| 6.55E-03 | 0 0 | Cs5g04830.1         | 4.25 | 0 | 0    | 2 | MASCOT | T      | PLEX8 |
| 4.98E-01 | 0 0 | Cs5g07930.1/Cs5g079 | 5.84 | 0 | 15.9 | 0 | 2      | MASCOT | T     |
| 3.81E-01 | 0 0 | Cs5g07930.1/Cs5g079 | 5.84 | 0 | 0    | 2 | MASCOT | T      | PLEX8 |
| 5.33E-02 | 0 0 | Cs5g07930.1/Cs5g079 | 4.41 | 0 | 0    | 2 | MASCOT | T      | PLEX8 |
| 5.53E-04 | 0 0 | Cs5g07930.1/Cs5g079 | 4.41 | 0 | 0    | 2 | MASCOT | T      | PLEX8 |
| 1.13E-01 | 0 0 | Cs3g14920.1/Cs3g149 | 4.14 | 0 | 0    | 2 | MASCOT | T      | PLEX8 |
| 2.14E-03 | 0 0 | Cs5g33750.1/Cs5g337 | 6.71 | 0 | 0    | 2 | MASCOT | T      | PLEX8 |
| 1.59E-03 | 0 0 | Cs5g33750.1/Cs5g337 | 6.71 | 0 | 0    | 2 | MASCOT | T      | PLEX8 |
| 4.00E-05 | 0 0 | Cs5g33750.1/Cs5g337 | 6.71 | 0 | 0    | 2 | MASCOT | T      | PLEX8 |
| 1.62E-01 | 0 0 | Cs5g34680.1         | 8.8  | 0 | 0    | 2 | MASCOT | T      | PLEX8 |
| 3.25E-01 | 0 0 | Cs5g34680.1         | 8.8  | 0 | 0    | 2 | MASCOT | T      | PLEX8 |
| 4.18E-01 | 0 0 | Cs5g34680.1         | 8.8  | 0 | 0    | 2 | MASCOT | T      | PLEX8 |
| 1.12E-01 | 0 0 | Cs5g34680.1         | 4.68 | 0 | 0    | 2 | MASCOT | T      | PLEX8 |
| 2.78E-04 | 0 0 | Cs6g11260.1/Cs6g112 | 4.53 | 0 | 0    | 2 | MASCOT | T      | PLEX8 |
| 1.05E-04 | 0 0 | Cs6g11260.1/Cs6g112 | 4.53 | 0 | 0    | 2 | MASCOT | T      | PLEX8 |
| 3.65E-04 | 0 0 | Cs6g11260.1/Cs6g112 | 4.53 | 0 | 0    | 2 | MASCOT | T      | PLEX8 |
| 7.91E-02 | 0 0 | Cs6g11260.1/Cs6g112 | 4.14 | 0 | 0    | 2 | MASCOT | T      | PLEX8 |
| 1.67E-01 | 0 0 | Cs6g12510.1         | 8.57 | 0 | 0    | 2 | MASCOT | T      | PLEX8 |
| 7.20E-02 | 0 0 | Cs6g12510.1         | 8.57 | 0 | 0    | 2 | MASCOT | T      | PLEX8 |
| 1.35E-03 | 0 0 | Cs6g12510.1         | 4.37 | 0 | 0    | 2 | MASCOT | T      | PLEX8 |
| 3.20E-02 | 0 0 | Cs6g12510.1         | 4.37 | 0 | 0    | 2 | MASCOT | T      | PLEX8 |
| 4.44E-02 | 0 0 | Cs6g15340.1/Cs6g153 | 4.25 | 0 | 0    | 2 | MASCOT | T      | PLEX8 |
| 1.39E-03 | 0 0 | Cs6g15340.1/Cs6g153 | 4.25 | 0 | 0    | 2 | MASCOT | T      | PLEX8 |
| 5.32E-02 | 0 0 | Cs6g15340.1/Cs6g153 | 4.25 | 0 | 0    | 2 | MASCOT | T      | PLEX8 |
| 4.00E-02 | 0 0 | Cs6g15340.1/Cs6g153 | 9.73 | 0 | 0    | 2 | MASCOT | T      | PLEX8 |
| 4.65E-02 | 0 0 | Cs6g16050.1         | 5.32 | 0 | 0    | 2 | MASCOT | T      | PLEX8 |
| 6.18E-02 | 0 0 | Cs6g16050.1         | 5.32 | 0 | 0    | 2 | MASCOT | T      | PLEX8 |
| 1.90E-01 | 0 0 | Cs6g16050.1         | 5.32 | 0 | 0    | 2 | MASCOT | T      | PLEX8 |
| 8.97E-02 | 0 0 | Cs6g16050.1         | 6.74 | 0 | 0    | 2 | MASCOT | T      | PLEX8 |
| 1.39E-02 | 0 0 | Cs6g18640.1/Cs6g186 | 6    | 0 | 0    | 2 | MASCOT | T      | PLEX8 |

|          |     |                      |      |   |      |   |        |        |       |       |
|----------|-----|----------------------|------|---|------|---|--------|--------|-------|-------|
| 5.97E-03 | 0 0 | Cs6g18640.1/Cs6g186  | 6    | 0 | 0    | 2 | MASCOT | T      | PLEX8 |       |
| 4.00E-02 | 0 0 | Cs6g18640.1/Cs6g186  | 8.75 | 0 | 0    | 2 | MASCOT | T      | PLEX8 |       |
| 1.29E-01 | 0 0 | Cs6g18640.1/Cs6g186  | 8.75 | 0 | 0    | 2 | MASCOT | T      | PLEX8 |       |
| 1.34E-03 | 0 0 | Cs7g05430.1          | 4.03 | 0 | 15.9 | 0 | 2      | MASCOT | T     | PLEX8 |
| 1.75E-05 | 0 0 | Cs7g05430.1          | 4.03 | 0 | 0    | 2 | MASCOT | T      | PLEX8 |       |
| 1.33E-01 | 0 0 | Cs7g05430.1/Cs7g054  | 3.92 | 0 | 0    | 2 | MASCOT | T      | PLEX8 |       |
| 1.26E-01 | 0 0 | Cs7g05430.1/Cs7g054  | 3.92 | 0 | 0    | 2 | MASCOT | T      | PLEX8 |       |
| 1.52E-02 | 0 0 | Cs7g02830.1/Cs9g178  | 3.84 | 0 | 0    | 2 | MASCOT | T      | PLEX8 |       |
| 2.04E-02 | 0 0 | Cs1g10530.1/Cs1g105  | 8.41 | 0 | 0    | 2 | MASCOT | T      | PLEX8 |       |
| 4.86E-02 | 0 0 | Cs1g10530.1/Cs1g105  | 8.41 | 0 | 0    | 2 | MASCOT | T      | PLEX8 |       |
| 7.64E-02 | 0 0 | Cs1g10530.1/Cs1g105  | 8.41 | 0 | 0    | 2 | MASCOT | T      | PLEX8 |       |
| 4.10E-02 | 0 0 | Cs7g07310.1          | 5.32 | 0 | 0    | 2 | MASCOT | T      | PLEX8 |       |
| 2.20E-04 | 0 0 | Cs7g07310.1          | 5.32 | 0 | 0    | 2 | MASCOT | T      | PLEX8 |       |
| 2.73E-02 | 0 0 | Cs7g07310.1          | 8.75 | 0 | 0    | 2 | MASCOT | T      | PLEX8 |       |
| 4.53E-02 | 0 0 | Cs7g07310.1          | 8.75 | 0 | 0    | 2 | MASCOT | T      | PLEX8 |       |
| 6.06E-03 | 0 0 | Cs5g12250.1/Cs6g196  | 8.8  | 0 | 0    | 2 | MASCOT | T      | PLEX8 |       |
| 4.00E-02 | 0 0 | Cs5g12250.1/Cs6g196  | 8.8  | 0 | 0    | 2 | MASCOT | T      | PLEX8 |       |
| 3.63E-03 | 0 0 | Cs5g12250.1/Cs6g196  | 8.8  | 0 | 0    | 2 | MASCOT | T      | PLEX8 |       |
| 1.16E-01 | 0 0 | Cs7g11730.1          | 5.84 | 0 | 0    | 2 | MASCOT | T      | PLEX8 |       |
| 5.21E-02 | 0 0 | Cs7g15380.1/Cs7g153  | 4.53 | 0 | 0    | 2 | MASCOT | T      | PLEX8 |       |
| 3.69E-01 | 0 0 | Cs7g15380.1/Cs7g153  | 4.53 | 0 | 0    | 2 | MASCOT | T      | PLEX8 |       |
| 5.75E-02 | 0 0 | Cs7g15380.1/Cs7g153  | 8.75 | 0 | 0    | 2 | MASCOT | T      | PLEX8 |       |
| 6.23E-02 | 0 0 | Cs7g15380.1/Cs7g153  | 8.75 | 0 | 0    | 2 | MASCOT | T      | PLEX8 |       |
| 1.47E-01 | 0 0 | Cs7g17700.1/Cs7g177  | 9.75 | 0 | 0    | 2 | MASCOT | T      | PLEX8 |       |
| 8.24E-02 | 0 0 | Cs7g17700.1/Cs7g177  | 9.75 | 0 | 0    | 2 | MASCOT | T      | PLEX8 |       |
| 3.19E-01 | 0 0 | Cs7g17700.1/orange1. | 6.1  | 0 | 0    | 2 | MASCOT | T      | PLEX8 |       |
| 1.69E-01 | 0 0 | Cs7g17700.1/orange1. | 6.1  | 0 | 0    | 2 | MASCOT | T      | PLEX8 |       |
| 2.25E-03 | 0 0 | Cs7g29830.1          | 5.21 | 0 | 0    | 2 | MASCOT | T      | PLEX8 |       |
| 1.71E-05 | 0 0 | Cs7g29830.1          | 6.5  | 0 | 15.9 | 0 | 2      | MASCOT | T     | PLEX8 |
| 1.13E-05 | 0 0 | Cs7g29830.1          | 6.5  | 0 | 0    | 2 | MASCOT | T      | PLEX8 |       |
| 2.49E-03 | 0 0 | Cs7g29830.1          | 6.5  | 0 | 0    | 2 | MASCOT | T      | PLEX8 |       |
| 7.33E-04 | 0 0 | Cs8g10040.1/Cs8g101  | 4.31 | 0 | 0    | 2 | MASCOT | T      | PLEX8 |       |
| 3.66E-05 | 0 0 | Cs8g10040.1/Cs8g101  | 4.31 | 0 | 0    | 2 | MASCOT | T      | PLEX8 |       |
| 6.08E-03 | 0 0 | Cs8g10040.1/Cs8g101  | 4.53 | 0 | 0    | 2 | MASCOT | T      | PLEX8 |       |
| 3.92E-02 | 0 0 | Cs8g10040.1/Cs8g101  | 4.53 | 0 | 0    | 2 | MASCOT | T      | PLEX8 |       |
| 6.22E-02 | 0 0 | Cs7g28810.1/Cs8g180  | 8.34 | 0 | 0    | 2 | MASCOT | T      | PLEX8 |       |
| 3.90E-04 | 0 0 | Cs8g18060.1/Cs8g180  | 4.03 | 0 | 0    | 2 | MASCOT | T      | PLEX8 |       |
| 7.75E-05 | 0 0 | Cs8g18060.1/Cs8g180  | 4.03 | 0 | 0    | 2 | MASCOT | T      | PLEX8 |       |
| 1.08E-03 | 0 0 | Cs8g18060.1/Cs8g180  | 4.03 | 0 | 0    | 2 | MASCOT | T      | PLEX8 |       |
| 4.08E-02 | 0 0 | Cs1g15970.1/Cs1g202  | 5.84 | 0 | 0    | 2 | MASCOT | T      | PLEX8 |       |
| 1.47E-01 | 0 0 | Cs9g13570.1          | 8.75 | 0 | 0    | 2 | MASCOT | T      | PLEX8 |       |
| 6.01E-02 | 0 0 | Cs9g13570.1          | 8.75 | 0 | 0    | 2 | MASCOT | T      | PLEX8 |       |
| 3.45E-01 | 0 0 | Cs9g13570.1          | 8.75 | 0 | 0    | 2 | MASCOT | T      | PLEX8 |       |
| 2.32E-03 | 0 0 | Cs9g19270.2/Cs9g192  | 3.9  | 0 | 0    | 2 | MASCOT | T      | PLEX8 |       |
| 1.69E-05 | 0 0 | Cs9g19270.2/Cs9g192  | 3.9  | 0 | 0    | 2 | MASCOT | T      | PLEX8 |       |
| 5.86E-03 | 0 0 | Cs9g19270.2/Cs9g192  | 3.9  | 0 | 0    | 2 | MASCOT | T      | PLEX8 |       |
| 8.14E-05 | 0 0 | Cs9g19270.2/Cs9g192  | 8.75 | 1 | 0    | 2 | MASCOT | T      | PLEX8 |       |
| 1.07E-01 | 0 0 | orange1.1t00071.1    | 6    | 0 | 0    | 2 | MASCOT | T      | PLEX8 |       |
| 2.45E-02 | 0 0 | orange1.1t00071.1    | 6    | 0 | 0    | 2 | MASCOT | T      | PLEX8 |       |
| 5.18E-03 | 0 0 | orange1.1t00071.1    | 4.53 | 0 | 0    | 2 | MASCOT | T      | PLEX8 |       |
| 2.08E-02 | 0 0 | orange1.1t00071.1    | 4.53 | 0 | 0    | 2 | MASCOT | T      | PLEX8 |       |

|          |     |                        |      |   |      |   |   |        |   |       |
|----------|-----|------------------------|------|---|------|---|---|--------|---|-------|
| 6.40E-02 | 0 0 | orange1.1t01036.1/ora  | 4.53 | 0 | 15.9 | 0 | 2 | MASCOT | T |       |
| 1.84E-02 | 0 0 | orange1.1t01036.1/ora  | 4.53 | 0 |      | 0 | 2 | MASCOT | T |       |
| 1.42E-01 | 0 0 | orange1.1t01036.1/ora  | 5.84 | 0 |      | 0 | 2 | MASCOT | T | PLEX8 |
| 1.00E-01 | 0 0 | orange1.1t01036.1/ora  | 5.84 | 0 |      | 0 | 2 | MASCOT | T | PLEX8 |
| 8.82E-02 | 0 0 | orange1.1t01182.1 ! or | 8.75 | 0 |      | 0 | 2 | MASCOT | T | PLEX8 |
| 1.62E-01 | 0 0 | orange1.1t01182.1 ! or | 8.75 | 0 |      | 0 | 2 | MASCOT | T | PLEX8 |
| 1.05E-02 | 0 0 | orange1.1t01182.1      | 8.75 | 0 |      | 0 | 2 | MASCOT | T | PLEX8 |
| 9.12E-03 | 0 0 | orange1.1t01182.1      | 8.75 | 0 |      | 0 | 2 | MASCOT | T | PLEX8 |
| 2.37E-02 | 0 0 | orange1.1t01202.1      | 4.14 | 0 |      | 0 | 2 | MASCOT | T | PLEX8 |
| 9.96E-02 | 0 0 | orange1.1t01202.1      | 4.14 | 0 |      | 0 | 2 | MASCOT | T | PLEX8 |
| 4.26E-01 | 0 0 | orange1.1t01202.1      | 8.5  | 0 |      | 0 | 2 | MASCOT | T | PLEX8 |
| 5.30E-02 | 0 0 | orange1.1t01202.1      | 8.5  | 0 |      | 0 | 2 | MASCOT | T | PLEX8 |
| 1.22E-05 | 0 0 | orange1.1t02047.1/ora  | 5.84 | 0 |      | 0 | 2 | MASCOT | T |       |
| 2.70E-02 | 0 0 | orange1.1t02047.1/ora  | 5.84 | 0 |      | 0 | 2 | MASCOT | T |       |
| 5.87E-02 | 0 0 | orange1.1t02047.1/ora  | 6.04 | 0 |      | 0 | 2 | MASCOT | T | PLEX8 |
| 2.07E-02 | 0 0 | orange1.1t02047.1/ora  | 6.04 | 0 |      | 0 | 2 | MASCOT | T | PLEX8 |
| 8.33E-04 | 0 0 | orange1.1t03433.1      | 4.37 | 0 |      | 0 | 2 | MASCOT | T | PLEX8 |
| 1.60E-01 | 0 0 | orange1.1t03433.1      | 8.63 | 0 |      | 0 | 2 | MASCOT | T | PLEX8 |
| 1.94E-01 | 0 0 | orange1.1t03433.1      | 8.63 | 0 |      | 0 | 2 | MASCOT | T | PLEX8 |
| 1.57E-02 | 0 0 | orange1.1t03433.1      | 8.63 | 0 |      | 0 | 2 | MASCOT | T | PLEX8 |
| 3.55E-01 | 0 0 | orange1.1t04985.1      | 9.73 | 0 |      | 0 | 2 | MASCOT | T | PLEX8 |
| 9.90E-04 | 0 0 | orange1.1t04985.1      | 4.21 | 0 |      | 0 | 2 | MASCOT | T |       |
| 8.51E-02 | 0 0 | orange1.1t04985.1      | 4.21 | 0 |      | 0 | 2 | MASCOT | T | PLEX8 |
| 6.09E-04 | 0 0 | orange1.1t04985.1      | 4.21 | 0 |      | 0 | 2 | MASCOT | T |       |
| 7.07E-02 | 0 0 | Cs1g02770.1/Cs1g027    | 4.14 | 0 |      | 0 | 2 | MASCOT | T | PLEX8 |
| 7.46E-02 | 0 0 | Cs1g02770.1/Cs1g027    | 3.92 | 0 |      | 0 | 2 | MASCOT | T |       |
| 3.66E-02 | 0 0 | Cs1g02770.1/Cs1g027    | 3.92 | 0 |      | 0 | 2 | MASCOT | T |       |
| 2.94E-02 | 0 0 | Cs1g06530.5/Cs1g065    | 5.24 | 0 |      | 0 | 2 | MASCOT | T |       |
| 1.40E-02 | 0 0 | Cs1g06530.1/Cs1g065    | 4.37 | 0 |      | 0 | 2 | MASCOT | T | PLEX8 |
| 2.73E-03 | 0 0 | Cs1g06530.1/Cs1g065    | 4.37 | 0 |      | 0 | 2 | MASCOT | T | PLEX8 |
| 1.46E-01 | 0 0 | Cs1g07500.1/Cs1g075    | 4.54 | 0 |      | 0 | 2 | MASCOT | T | PLEX8 |
| 1.56E-02 | 0 0 | Cs1g07500.1/Cs1g075    | 4.54 | 0 |      | 0 | 2 | MASCOT | T | PLEX8 |
| 2.37E-02 | 0 0 | Cs1g07500.1/Cs1g075    | 8.59 | 0 |      | 0 | 2 | MASCOT | T | PLEX8 |
| 3.11E-02 | 0 0 | Cs1g08640.1/Cs1g086    | 4.8  | 0 |      | 0 | 2 | MASCOT | T |       |
| 1.30E-02 | 0 0 | Cs1g08640.1/Cs1g086    | 4.53 | 0 |      | 0 | 2 | MASCOT | T | PLEX8 |
| 3.04E-01 | 0 0 | Cs1g08640.1/Cs1g086    | 4.53 | 0 |      | 0 | 2 | MASCOT | T | PLEX8 |
| 4.13E-01 | 0 0 | Cs1g10910.1/Cs1g109    | 6.5  | 0 |      | 0 | 2 | MASCOT | T |       |
| 2.00E-01 | 0 0 | Cs1g10910.1/Cs1g109    | 6.5  | 0 |      | 0 | 2 | MASCOT | T |       |
| 5.20E-02 | 0 0 | Cs1g10970.1/Cs1g109    | 6.75 | 0 |      | 0 | 2 | MASCOT | T | PLEX8 |
| 1.32E-01 | 0 0 | Cs1g11360.1            | 4.37 | 0 |      | 0 | 2 | MASCOT | T | PLEX8 |
| 2.93E-02 | 0 0 | Cs1g11360.1            | 6.75 | 0 |      | 0 | 2 | MASCOT | T | PLEX8 |
| 1.69E-02 | 0 0 | Cs1g11360.1            | 6.75 | 0 |      | 0 | 2 | MASCOT | T |       |
| 2.77E-05 | 0 0 | Cs1g15410.1            | 4.37 | 0 |      | 0 | 2 | MASCOT | T | PLEX8 |
| 2.84E-07 | 0 0 | Cs1g15410.1            | 4.37 | 0 |      | 0 | 2 | MASCOT | T | PLEX8 |
| 1.89E-02 | 0 0 | Cs1g15410.1            | 8.25 | 0 |      | 0 | 2 | MASCOT | T |       |
| 6.87E-03 | 0 0 | Cs1g16240.1            | 4.75 | 0 |      | 0 | 2 | MASCOT | T | PLEX8 |
| 1.20E-01 | 0 0 | Cs1g16240.1            | 4.75 | 0 |      | 0 | 2 | MASCOT | T | PLEX8 |
| 9.60E-02 | 0 0 | Cs1g16240.1            | 8.75 | 0 |      | 0 | 2 | MASCOT | T | PLEX8 |
| 4.61E-02 | 0 0 | Cs1g16550.1            | 4.54 | 0 |      | 0 | 2 | MASCOT | T | PLEX8 |
| 1.16E-04 | 0 0 | Cs1g16550.1/Cs4g066    | 5.84 | 0 |      | 0 | 2 | MASCOT | T | PLEX8 |
| 2.61E-04 | 0 0 | Cs1g16550.1/Cs4g066    | 5.84 | 0 |      | 0 | 2 | MASCOT | T | PLEX8 |

|          |     |                      |      |   |   |   |        |   |       |
|----------|-----|----------------------|------|---|---|---|--------|---|-------|
| 3.94E-03 | 0 0 | Cs1g16880.1/Cs1g168  | 4.65 | 0 | 0 | 2 | MASCOT | T |       |
| 9.17E-02 | 0 0 | Cs1g16880.1/Cs1g168  | 4.53 | 0 | 0 | 2 | MASCOT | T | PLEX8 |
| 4.36E-01 | 0 0 | Cs1g16880.1/Cs1g168  | 4.53 | 0 | 0 | 2 | MASCOT | T | PLEX8 |
| 2.36E-01 | 0 0 | Cs1g17680.1/Cs1g176  | 6.75 | 0 | 0 | 2 | MASCOT | T | PLEX8 |
| 2.95E-02 | 0 0 | Cs1g17680.1/Cs1g176  | 9.49 | 0 | 0 | 2 | MASCOT | T |       |
| 3.94E-02 | 0 0 | Cs1g17680.1/Cs1g176  | 9.49 | 0 | 0 | 2 | MASCOT | T |       |
| 3.99E-02 | 0 0 | Cs1g18210.1          | 8.75 | 0 | 0 | 2 | MASCOT | T | PLEX8 |
| 2.98E-02 | 0 0 | Cs1g18210.1          | 8.75 | 0 | 0 | 2 | MASCOT | T | PLEX8 |
| 3.05E-01 | 0 0 | Cs1g18210.1          | 4.53 | 0 | 0 | 2 | MASCOT | T | PLEX8 |
| 1.64E-01 | 0 0 | Cs1g19360.1          | 6.1  | 0 | 0 | 2 | MASCOT | T | PLEX8 |
| 9.49E-04 | 0 0 | Cs1g19360.1          | 4.37 | 0 | 0 | 2 | MASCOT | T | PLEX8 |
| 1.05E-05 | 0 0 | Cs1g19360.1          | 4.37 | 0 | 0 | 2 | MASCOT | T | PLEX8 |
| 1.74E-02 | 0 0 | Cs1g21570.2          | 5.55 | 0 | 0 | 2 | MASCOT | T | PLEX8 |
| 3.48E-02 | 0 0 | Cs1g21570.1/Cs1g215  | 8.41 | 0 | 0 | 2 | MASCOT | T | PLEX8 |
| 2.02E-02 | 0 0 | Cs1g21570.1/Cs1g215  | 8.41 | 0 | 0 | 2 | MASCOT | T | PLEX8 |
| 7.01E-03 | 0 0 | Cs1g21580.1/Cs1g215  | 4.37 | 0 | 0 | 2 | MASCOT | T |       |
| 2.59E-01 | 0 0 | Cs1g21580.1/Cs1g215  | 6.74 | 0 | 0 | 2 | MASCOT | T | PLEX8 |
| 1.60E-01 | 0 0 | Cs1g21580.1/Cs1g215  | 6.74 | 0 | 0 | 2 | MASCOT | T | PLEX8 |
| 9.05E-02 | 0 0 | Cs2g02100.2/Cs2g021  | 6    | 0 | 0 | 2 | MASCOT | T | PLEX8 |
| 2.52E-03 | 0 0 | Cs2g02100.1/Cs2g021  | 5.4  | 0 | 0 | 2 | MASCOT | T | PLEX8 |
| 2.10E-03 | 0 0 | Cs2g02100.1/Cs2g021  | 5.4  | 0 | 0 | 2 | MASCOT | T | PLEX8 |
| 3.77E-02 | 0 0 | Cs2g06690.1          | 5.66 | 0 | 0 | 2 | MASCOT | T | PLEX8 |
| 9.28E-02 | 0 0 | Cs2g06690.1          | 5.66 | 0 | 0 | 2 | MASCOT | T | PLEX8 |
| 8.54E-02 | 0 0 | Cs2g06690.1          | 4.53 | 0 | 0 | 2 | MASCOT | T | PLEX8 |
| 1.09E-03 | 0 0 | Cs2g07350.1          | 9.6  | 1 | 0 | 2 | MASCOT | T | PLEX8 |
| 2.14E-01 | 0 0 | Cs2g07350.1          | 5.84 | 0 | 0 | 2 | MASCOT | T | PLEX8 |
| 2.00E-01 | 0 0 | Cs2g07350.1          | 5.84 | 0 | 0 | 2 | MASCOT | T | PLEX8 |
| 2.47E-01 | 0 0 | Cs2g11590.1          | 5.55 | 0 | 0 | 2 | MASCOT | T |       |
| 9.82E-02 | 0 0 | Cs2g11590.1          | 5.84 | 0 | 0 | 2 | MASCOT | T | PLEX8 |
| 1.18E-02 | 0 0 | Cs2g11590.1          | 5.84 | 0 | 0 | 2 | MASCOT | T | PLEX8 |
| 6.62E-02 | 0 0 | Cs2g12100.1/Cs2g121  | 4.14 | 0 | 0 | 2 | MASCOT | T | PLEX8 |
| 1.44E-02 | 0 0 | Cs2g07740.1/Cs7g237  | 4.21 | 0 | 0 | 2 | MASCOT | T | PLEX8 |
| 4.81E-02 | 0 0 | Cs2g07740.1/Cs7g237  | 4.21 | 0 | 0 | 2 | MASCOT | T | PLEX8 |
| 1.22E-01 | 0 0 | Cs2g12670.1          | 4.65 | 0 | 0 | 2 | MASCOT | T | PLEX8 |
| 7.98E-02 | 0 0 | Cs2g12670.1          | 4.53 | 0 | 0 | 2 | MASCOT | T | PLEX8 |
| 3.08E-01 | 0 0 | Cs2g12670.1          | 4.53 | 0 | 0 | 2 | MASCOT | T | PLEX8 |
| 4.23E-02 | 0 0 | Cs2g15140.1          | 6.79 | 0 | 0 | 2 | MASCOT | T | PLEX8 |
| 7.83E-04 | 0 0 | Cs2g15140.1          | 6.79 | 0 | 0 | 2 | MASCOT | T |       |
| 2.07E-02 | 0 0 | Cs2g15140.1          | 5.84 | 0 | 0 | 2 | MASCOT | T |       |
| 1.12E-02 | 0 0 | Cs7g32110.1/Cs7g321  | 5.84 | 0 | 0 | 2 | MASCOT | T | PLEX8 |
| 1.57E-04 | 0 0 | Cs2g04510.1 ! Cs2g15 | 5.32 | 0 | 0 | 2 | MASCOT | T | PLEX8 |
| 1.17E-03 | 0 0 | Cs2g04510.1 ! Cs2g15 | 5.32 | 0 | 0 | 2 | MASCOT | T | PLEX8 |
| 1.37E-01 | 0 0 | Cs2g03780.1/Cs2g196  | 6    | 0 | 0 | 2 | MASCOT | T | PLEX8 |
| 9.02E-03 | 0 0 | Cs2g19680.1          | 5.4  | 0 | 0 | 2 | MASCOT | T | PLEX8 |
| 7.15E-03 | 0 0 | Cs2g19680.1          | 5.4  | 0 | 0 | 2 | MASCOT | T | PLEX8 |
| 3.40E-02 | 0 0 | Cs2g25310.1/Cs2g253  | 5.88 | 0 | 0 | 2 | MASCOT | T | PLEX8 |
| 8.84E-02 | 0 0 | Cs2g25310.1          | 9.76 | 0 | 0 | 2 | MASCOT | T | PLEX8 |
| 9.99E-02 | 0 0 | Cs2g25310.1          | 9.76 | 0 | 0 | 2 | MASCOT | T | PLEX8 |
| 2.70E-03 | 0 0 | Cs2g30470.1          | 5.32 | 0 | 0 | 2 | MASCOT | T | PLEX8 |
| 9.37E-03 | 0 0 | Cs2g30470.1          | 5.29 | 0 | 0 | 2 | MASCOT | T | PLEX8 |
| 2.15E-02 | 0 0 | Cs2g30470.1          | 5.29 | 0 | 0 | 2 | MASCOT | T | PLEX8 |

|              |                      |      |   |      |   |        |        |       |       |
|--------------|----------------------|------|---|------|---|--------|--------|-------|-------|
| 2.05E-02 0 0 | Cs3g01690.1          | 5.84 | 0 | 0    | 2 | MASCOT | T      | PLEX8 |       |
| 8.91E-03 0 0 | Cs3g01690.1          | 5.84 | 0 | 0    | 2 | MASCOT | T      | PLEX8 |       |
| 7.07E-04 0 0 | Cs3g01690.1          | 6    | 0 | 15.9 | 0 | 2      | MASCOT | T     | PLEX8 |
| 6.92E-02 0 0 | Cs3g01750.1/Cs3g017  | 5.4  | 0 | 15.9 | 0 | 2      | MASCOT | T     | PLEX8 |
| 6.10E-03 0 0 | Cs3g01750.1/Cs3g017  | 5.4  | 0 | 0    | 2 | MASCOT | T      | PLEX8 |       |
| 1.12E-01 0 0 | Cs3g01750.1/Cs9g096  | 5.81 | 0 | 0    | 2 | MASCOT | T      | PLEX8 |       |
| 2.75E-03 0 0 | Cs3g07570.1/Cs3g075  | 5.84 | 0 | 0    | 2 | MASCOT | T      | PLEX8 |       |
| 5.15E-02 0 0 | Cs3g07570.1/Cs3g075  | 4.14 | 0 | 0    | 2 | MASCOT | T      | PLEX8 |       |
| 2.98E-03 0 0 | Cs3g07570.1/Cs3g075  | 4.14 | 0 | 0    | 2 | MASCOT | T      | PLEX8 |       |
| 2.10E-01 0 0 | Cs3g11760.1/Cs3g117  | 6.75 | 0 | 0    | 2 | MASCOT | T      | PLEX8 |       |
| 1.18E-01 0 0 | Cs3g06780.1 ! Cs3g06 | 6.85 | 0 | 0    | 2 | MASCOT | T      | PLEX8 |       |
| 1.42E-01 0 0 | Cs3g06780.1 ! Cs3g06 | 6.85 | 0 | 0    | 2 | MASCOT | T      |       |       |
| 4.53E-03 0 0 | Cs3g14420.1          | 5.39 | 1 | 0    | 2 | MASCOT | T      | PLEX8 |       |
| 1.81E-02 0 0 | Cs3g14420.1          | 5.39 | 1 | 0    | 2 | MASCOT | T      | PLEX8 |       |
| 1.61E-01 0 0 | Cs3g14420.1/Cs3g144  | 6.1  | 0 | 0    | 2 | MASCOT | T      | PLEX8 |       |
| 1.85E-01 0 0 | Cs3g16440.1/Cs3g164  | 8.63 | 0 | 0    | 2 | MASCOT | T      | PLEX8 |       |
| 2.44E-01 0 0 | Cs3g16440.1/Cs3g164  | 8.63 | 0 | 0    | 2 | MASCOT | T      | PLEX8 |       |
| 1.94E-01 0 0 | Cs3g16440.1/Cs3g164  | 4.21 | 0 | 15.9 | 0 | 2      | MASCOT | T     |       |
| 2.61E-01 0 0 | Cs3g18390.1          | 5.87 | 0 | 0    | 2 | MASCOT | T      | PLEX8 |       |
| 1.30E-02 0 0 | Cs3g18390.1/Cs3g183  | 6    | 0 | 0    | 2 | MASCOT | T      | PLEX8 |       |
| 3.84E-02 0 0 | Cs3g18390.1/Cs3g183  | 6    | 0 | 0    | 2 | MASCOT | T      | PLEX8 |       |
| 5.45E-03 0 0 | Cs3g20740.1          | 3.84 | 0 | 0    | 2 | MASCOT | T      | PLEX8 |       |
| 2.29E-02 0 0 | Cs3g20740.1          | 5.4  | 0 | 0    | 2 | MASCOT | T      | PLEX8 |       |
| 3.41E-01 0 0 | Cs3g20740.1          | 5.4  | 0 | 0    | 2 | MASCOT | T      |       |       |
| 1.56E-01 0 0 | Cs3g23560.1          | 8.63 | 0 | 0    | 2 | MASCOT | T      | PLEX8 |       |
| 2.39E-02 0 0 | Cs3g23560.1/Cs3g235  | 6.74 | 0 | 0    | 2 | MASCOT | T      | PLEX8 |       |
| 1.85E-04 0 0 | Cs3g23560.1/Cs3g235  | 6.74 | 0 | 0    | 2 | MASCOT | T      | PLEX8 |       |
| 3.71E-02 0 0 | Cs3g26630.1          | 4.37 | 0 | 0    | 2 | MASCOT | T      | PLEX8 |       |
| 2.69E-02 0 0 | Cs3g26630.1          | 4.37 | 0 | 0    | 2 | MASCOT | T      | PLEX8 |       |
| 1.36E-01 0 0 | Cs3g26630.1          | 9.8  | 0 | 0    | 2 | MASCOT | T      |       |       |
| 3.25E-02 0 0 | Cs3g26880.1/Cs3g268  | 5.32 | 0 | 0    | 2 | MASCOT | T      | PLEX8 |       |
| 9.33E-04 0 0 | Cs3g26880.1/Cs3g268  | 6.46 | 0 | 0    | 2 | MASCOT | T      | PLEX8 |       |
| 1.65E-02 0 0 | Cs3g26880.1/Cs3g268  | 6.46 | 0 | 0    | 2 | MASCOT | T      | PLEX8 |       |
| 1.10E-02 0 0 | Cs3g27230.1/Cs3g272  | 6.72 | 0 | 0    | 2 | MASCOT | T      | PLEX8 |       |
| 2.91E-01 0 0 | Cs3g27230.1/Cs3g272  | 5.84 | 0 | 0    | 2 | MASCOT | T      |       |       |
| 1.60E-01 0 0 | Cs3g27230.1/Cs3g272  | 5.84 | 0 | 0    | 2 | MASCOT | T      |       |       |
| 6.76E-02 0 0 | Cs4g01520.1/Cs4g015  | 6.75 | 0 | 0    | 2 | MASCOT | T      |       |       |
| 2.75E-02 0 0 | Cs4g01520.1/Cs4g015  | 6.71 | 0 | 0    | 2 | MASCOT | T      | PLEX8 |       |
| 7.19E-02 0 0 | Cs4g01520.1/Cs4g015  | 6.71 | 0 | 0    | 2 | MASCOT | T      |       |       |
| 8.23E-05 0 0 | Cs4g03690.1/Cs4g036  | 4.65 | 0 | 0    | 2 | MASCOT | T      | PLEX8 |       |
| 8.70E-04 0 0 | Cs4g03690.1/Cs4g036  | 4.65 | 0 | 0    | 2 | MASCOT | T      | PLEX8 |       |
| 3.79E-01 0 0 | Cs4g03690.1/Cs4g036  | 6    | 0 | 0    | 2 | MASCOT | T      | PLEX8 |       |
| 2.87E-02 0 0 | Cs4g06830.1/Cs4g068  | 5.32 | 0 | 0    | 2 | MASCOT | T      |       |       |
| 3.76E-05 0 0 | Cs4g06830.1/Cs4g068  | 5.66 | 0 | 0    | 2 | MASCOT | T      | PLEX8 |       |
| 5.73E-05 0 0 | Cs4g06830.1/Cs4g068  | 5.66 | 0 | 0    | 2 | MASCOT | T      | PLEX8 |       |
| 3.43E-03 0 0 | Cs4g08230.1/Cs4g082  | 5.4  | 0 | 0    | 2 | MASCOT | T      | PLEX8 |       |
| 2.37E-03 0 0 | Cs4g08230.1/Cs4g082  | 5.4  | 0 | 0    | 2 | MASCOT | T      | PLEX8 |       |
| 1.53E-01 0 0 | Cs2g01320.1/Cs2g013  | 4.21 | 0 | 0    | 2 | MASCOT | T      | PLEX8 |       |
| 1.44E-01 0 0 | Cs4g08565.1/Cs4g085  | 6.92 | 0 | 0    | 2 | MASCOT | T      | PLEX8 |       |
| 1.79E-03 0 0 | Cs4g08565.1/Cs4g085  | 5.21 | 0 | 0    | 2 | MASCOT | T      | PLEX8 |       |
| 2.60E-04 0 0 | Cs4g08565.1/Cs4g085  | 5.21 | 0 | 0    | 2 | MASCOT | T      | PLEX8 |       |

|          |     |                     |      |   |      |   |        |        |       |       |
|----------|-----|---------------------|------|---|------|---|--------|--------|-------|-------|
| 7.98E-02 | 0 0 | Cs4g16850.1/Cs4g168 | 5.84 | 0 | 0    | 2 | MASCOT | T      | PLEX8 |       |
| 3.37E-02 | 0 0 | Cs4g16850.1/Cs4g168 | 4.65 | 0 | 0    | 2 | MASCOT | T      | PLEX8 |       |
| 1.32E-03 | 0 0 | Cs4g16850.1/Cs4g168 | 4.65 | 0 | 0    | 2 | MASCOT | T      |       |       |
| 1.77E-01 | 0 0 | Cs5g01600.1/Cs5g016 | 4.37 | 0 | 0    | 2 | MASCOT | T      | PLEX8 |       |
| 2.56E-01 | 0 0 | Cs5g01600.1/Cs5g016 | 4.37 | 0 | 0    | 2 | MASCOT | T      | PLEX8 |       |
| 1.49E-01 | 0 0 | Cs5g01600.1/Cs5g016 | 4.37 | 0 | 0    | 2 | MASCOT | T      | PLEX8 |       |
| 2.77E-03 | 0 0 | Cs5g03490.1         | 4.14 | 0 | 15.9 | 0 | 2      | MASCOT | T     | PLEX8 |
| 5.49E-02 | 0 0 | Cs5g03490.1         | 6.74 | 0 | 0    | 2 | MASCOT | T      | PLEX8 |       |
| 1.06E-02 | 0 0 | Cs5g03490.1         | 6.74 | 0 | 0    | 2 | MASCOT | T      |       |       |
| 9.63E-03 | 0 0 | Cs5g09860.1/Cs5g098 | 4.37 | 0 | 0    | 2 | MASCOT | T      |       |       |
| 4.74E-01 | 0 0 | Cs4g14140.1/Cs8g093 | 9.76 | 0 | 0    | 2 | MASCOT | T      | PLEX8 |       |
| 2.60E-01 | 0 0 | Cs4g14140.1/Cs8g093 | 9.76 | 0 | 0    | 2 | MASCOT | T      | PLEX8 |       |
| 2.39E-03 | 0 0 | Cs5g13060.1         | 8.8  | 0 | 0    | 2 | MASCOT | T      | PLEX8 |       |
| 4.63E-02 | 0 0 | Cs5g13060.1         | 8.8  | 0 | 0    | 2 | MASCOT | T      | PLEX8 |       |
| 1.42E-02 | 0 0 | Cs5g13060.1         | 8.72 | 0 | 0    | 2 | MASCOT | T      | PLEX8 |       |
| 8.61E-03 | 0 0 | Cs5g20790.1/Cs5g207 | 5.21 | 0 | 0    | 2 | MASCOT | T      | PLEX8 |       |
| 6.99E-02 | 0 0 | Cs5g20790.2         | 5.24 | 0 | 0    | 2 | MASCOT | T      | PLEX8 |       |
| 5.34E-02 | 0 0 | Cs5g20790.2         | 5.24 | 0 | 0    | 2 | MASCOT | T      | PLEX8 |       |
| 2.68E-02 | 0 0 | Cs5g21340.1         | 4.37 | 0 | 0    | 2 | MASCOT | T      |       |       |
| 4.53E-02 | 0 0 | Cs5g21340.1         | 4.37 | 0 | 0    | 2 | MASCOT | T      |       |       |
| 2.64E-01 | 0 0 | Cs5g21340.1/Cs5g213 | 6    | 0 | 0    | 2 | MASCOT | T      | PLEX8 |       |
| 1.24E-01 | 0 0 | Cs5g25450.1/Cs5g254 | 6.74 | 0 | 0    | 2 | MASCOT | T      | PLEX8 |       |
| 1.34E-01 | 0 0 | Cs5g25450.1/Cs5g254 | 6.74 | 0 | 0    | 2 | MASCOT | T      | PLEX8 |       |
| 9.29E-04 | 0 0 | Cs5g25450.1/Cs5g254 | 6.74 | 0 | 0    | 2 | MASCOT | T      |       |       |
| 3.77E-01 | 0 0 | Cs1g13340.1/Cs4g172 | 8.76 | 0 | 0    | 2 | MASCOT | T      | PLEX8 |       |
| 1.82E-04 | 0 0 | Cs1g13340.1/Cs4g172 | 3.92 | 0 | 0    | 2 | MASCOT | T      | PLEX8 |       |
| 1.11E-02 | 0 0 | Cs1g13340.1/Cs4g172 | 3.92 | 0 | 0    | 2 | MASCOT | T      | PLEX8 |       |
| 1.87E-01 | 0 0 | Cs5g31640.1         | 5.99 | 0 | 0    | 2 | MASCOT | T      | PLEX8 |       |
| 2.30E-02 | 0 0 | Cs5g31640.1/Cs5g316 | 5.97 | 0 | 0    | 2 | MASCOT | T      | PLEX8 |       |
| 1.85E-02 | 0 0 | Cs5g31640.1/Cs5g316 | 5.97 | 0 | 0    | 2 | MASCOT | T      | PLEX8 |       |
| 2.41E-01 | 0 0 | Cs5g33050.1/Cs5g330 | 4.53 | 0 | 0    | 2 | MASCOT | T      | PLEX8 |       |
| 2.84E-02 | 0 0 | Cs5g33050.1/Cs5g330 | 5.72 | 0 | 0    | 2 | MASCOT | T      | PLEX8 |       |
| 7.90E-02 | 0 0 | Cs5g33050.1/Cs5g330 | 5.72 | 0 | 0    | 2 | MASCOT | T      | PLEX8 |       |
| 1.05E-01 | 0 0 | Cs5g33060.1/Cs5g330 | 6    | 0 | 0    | 2 | MASCOT | T      | PLEX8 |       |
| 3.18E-02 | 0 0 | Cs4g09120.1/Cs4g091 | 8.75 | 0 | 0    | 2 | MASCOT | T      | PLEX8 |       |
| 1.84E-02 | 0 0 | Cs4g09120.1/Cs4g091 | 8.75 | 0 | 0    | 2 | MASCOT | T      | PLEX8 |       |
| 4.04E-02 | 0 0 | Cs5g34420.1/Cs5g344 | 6.74 | 0 | 0    | 2 | MASCOT | T      | PLEX8 |       |
| 6.19E-05 | 0 0 | Cs5g34420.1/Cs5g344 | 6.74 | 0 | 0    | 2 | MASCOT | T      | PLEX8 |       |
| 1.52E-02 | 0 0 | Cs5g34420.1/Cs5g344 | 5.66 | 0 | 0    | 2 | MASCOT | T      | PLEX8 |       |
| 4.02E-02 | 0 0 | Cs6g04000.1/Cs6g040 | 4.56 | 1 | 15.9 | 0 | 2      | MASCOT | T     |       |
| 1.46E-01 | 0 0 | Cs6g04000.1/Cs6g040 | 5.84 | 0 | 0    | 2 | MASCOT | T      | PLEX8 |       |
| 1.16E-01 | 0 0 | Cs6g04000.1/Cs6g040 | 5.84 | 0 | 0    | 2 | MASCOT | T      | PLEX8 |       |
| 6.64E-05 | 0 0 | Cs6g05110.1/Cs6g051 | 4.37 | 0 | 0    | 2 | MASCOT | T      | PLEX8 |       |
| 1.05E-02 | 0 0 | Cs6g05110.1/Cs6g051 | 4.37 | 0 | 0    | 2 | MASCOT | T      | PLEX8 |       |
| 1.34E-02 | 0 0 | Cs2g01280.1/Cs2g012 | 6.09 | 0 | 0    | 2 | MASCOT | T      |       |       |
| 8.38E-02 | 0 0 | Cs6g07040.1/Cs6g070 | 4.37 | 0 | 0    | 2 | MASCOT | T      | PLEX8 |       |
| 8.50E-04 | 0 0 | Cs6g07040.1/Cs6g070 | 4.37 | 0 | 0    | 2 | MASCOT | T      | PLEX8 |       |
| 3.33E-01 | 0 0 | Cs6g07040.1/Cs6g070 | 5.59 | 0 | 15.9 | 0 | 2      | MASCOT | T     | PLEX8 |
| 1.87E-02 | 0 0 | Cs6g07550.1         | 4.21 | 0 | 0    | 2 | MASCOT | T      | PLEX8 |       |
| 5.15E-01 | 0 0 | Cs6g07550.1         | 4.21 | 0 | 0    | 2 | MASCOT | T      | PLEX8 |       |
| 2.70E-04 | 0 0 | Cs6g07550.1         | 4.37 | 0 | 0    | 2 | MASCOT | T      | PLEX8 |       |

|          |     |                     |      |   |      |   |        |        |       |       |
|----------|-----|---------------------|------|---|------|---|--------|--------|-------|-------|
| 8.44E-02 | 0 0 | Cs6g09310.1/Cs6g093 | 6    | 0 | 0    | 2 | MASCOT | T      | PLEX8 |       |
| 1.76E-01 | 0 0 | Cs6g09310.1/Cs6g093 | 8.64 | 0 | 0    | 2 | MASCOT | T      | PLEX8 |       |
| 1.05E-01 | 0 0 | Cs6g09310.1/Cs6g093 | 8.64 | 0 | 0    | 2 | MASCOT | T      | PLEX8 |       |
| 6.52E-05 | 0 0 | Cs6g11320.1         | 4.21 | 0 | 0    | 2 | MASCOT | T      | PLEX8 |       |
| 6.53E-02 | 0 0 | Cs6g11320.1         | 8.75 | 0 | 15.9 | 0 | 2      | MASCOT | T     | PLEX8 |
| 3.54E-02 | 0 0 | Cs6g11320.1         | 8.75 | 0 | 0    | 2 | MASCOT | T      | PLEX8 |       |
| 1.30E-01 | 0 0 | Cs6g13950.1         | 6.05 | 0 | 0    | 2 | MASCOT | T      | PLEX8 |       |
| 1.09E-01 | 0 0 | Cs6g13950.1         | 6.05 | 0 | 0    | 2 | MASCOT | T      | PLEX8 |       |
| 7.71E-02 | 0 0 | Cs6g13950.1         | 8.22 | 1 | 0    | 2 | MASCOT | T      |       |       |
| 6.99E-02 | 0 0 | Cs6g14030.1         | 6    | 0 | 0    | 2 | MASCOT | T      | PLEX8 |       |
| 9.72E-04 | 0 0 | Cs6g14030.1         | 6    | 0 | 0    | 2 | MASCOT | T      |       |       |
| 3.33E-01 | 0 0 | Cs6g14030.1         | 8.72 | 0 | 0    | 2 | MASCOT | T      | PLEX8 |       |
| 2.51E-03 | 0 0 | Cs6g18590.1         | 3.42 | 0 | 0    | 2 | MASCOT | T      |       |       |
| 1.08E-02 | 0 0 | Cs6g18590.1         | 5.84 | 0 | 0    | 2 | MASCOT | T      |       |       |
| 1.21E-01 | 0 0 | Cs6g18590.1         | 5.84 | 0 | 0    | 2 | MASCOT | T      |       |       |
| 2.63E-02 | 0 0 | Cs6g19770.1/Cs6g197 | 6    | 0 | 0    | 2 | MASCOT | T      | PLEX8 |       |
| 2.93E-02 | 0 0 | Cs6g19770.1/Cs6g197 | 6    | 0 | 0    | 2 | MASCOT | T      | PLEX8 |       |
| 3.14E-01 | 0 0 | Cs6g19770.1/Cs6g197 | 9.76 | 0 | 0    | 2 | MASCOT | T      | PLEX8 |       |
| 4.40E-02 | 0 0 | Cs6g20630.1/Cs6g206 | 6.46 | 0 | 0    | 2 | MASCOT | T      |       |       |
| 5.11E-03 | 0 0 | Cs5g04260.1/Cs5g042 | 6.05 | 0 | 0    | 2 | MASCOT | T      | PLEX8 |       |
| 4.47E-03 | 0 0 | Cs5g04260.1/Cs5g042 | 6.05 | 0 | 0    | 2 | MASCOT | T      | PLEX8 |       |
| 1.07E-01 | 0 0 | Cs6g20640.1/Cs7g043 | 5.21 | 0 | 0    | 2 | MASCOT | T      |       |       |
| 8.41E-02 | 0 0 | Cs6g20640.1/Cs7g043 | 5.21 | 0 | 0    | 2 | MASCOT | T      |       |       |
| 3.92E-03 | 0 0 | Cs7g04320.1         | 5.55 | 0 | 0    | 2 | MASCOT | T      |       |       |
| 5.11E-03 | 0 0 | Cs5g04260.1/Cs5g042 | 6.05 | 0 | 0    | 2 | MASCOT | T      | PLEX8 |       |
| 4.47E-03 | 0 0 | Cs5g04260.1/Cs5g042 | 6.05 | 0 | 0    | 2 | MASCOT | T      | PLEX8 |       |
| 6.37E-02 | 0 0 | Cs7g04330.1/Cs7g043 | 5.55 | 0 | 0    | 2 | MASCOT | T      |       |       |
| 5.36E-02 | 0 0 | Cs7g04430.1         | 8.75 | 0 | 0    | 2 | MASCOT | T      | PLEX8 |       |
| 1.99E-01 | 0 0 | Cs7g04430.1         | 8.8  | 0 | 0    | 2 | MASCOT | T      | PLEX8 |       |
| 1.73E-01 | 0 0 | Cs7g04430.1         | 8.8  | 0 | 0    | 2 | MASCOT | T      | PLEX8 |       |
| 7.66E-02 | 0 0 | Cs7g05170.1         | 4.37 | 0 | 0    | 2 | MASCOT | T      | PLEX8 |       |
| 3.18E-03 | 0 0 | Cs7g05170.1         | 4.37 | 0 | 0    | 2 | MASCOT | T      | PLEX8 |       |
| 4.77E-02 | 0 0 | Cs4g17690.1/Cs7g051 | 5.66 | 0 | 0    | 2 | MASCOT | T      |       |       |
| 9.57E-02 | 0 0 | Cs7g09930.1         | 4.21 | 0 | 0    | 2 | MASCOT | T      | PLEX8 |       |
| 2.16E-01 | 0 0 | Cs7g09930.1         | 8.47 | 0 | 0    | 2 | MASCOT | T      | PLEX8 |       |
| 1.67E-02 | 0 0 | Cs7g09930.1         | 8.47 | 0 | 0    | 2 | MASCOT | T      | PLEX8 |       |
| 2.84E-02 | 0 0 | Cs7g12920.1         | 8.72 | 0 | 0    | 2 | MASCOT | T      | PLEX8 |       |
| 2.06E-02 | 0 0 | Cs7g12920.1         | 5.55 | 0 | 0    | 2 | MASCOT | T      | PLEX8 |       |
| 2.48E-01 | 0 0 | Cs7g12920.1         | 5.55 | 0 | 0    | 2 | MASCOT | T      | PLEX8 |       |
| 4.69E-01 | 0 0 | Cs7g15890.1         | 5.55 | 0 | 0    | 2 | MASCOT | T      | PLEX8 |       |
| 2.13E-02 | 0 0 | Cs7g15890.1         | 8.73 | 0 | 0    | 2 | MASCOT | T      | PLEX8 |       |
| 2.52E-01 | 0 0 | Cs7g15890.1         | 8.73 | 0 | 0    | 2 | MASCOT | T      |       |       |
| 6.73E-03 | 0 0 | Cs2g20100.1/Cs7g159 | 4.53 | 0 | 0    | 2 | MASCOT | T      | PLEX8 |       |
| 2.15E-02 | 0 0 | Cs7g15930.1         | 4.53 | 0 | 0    | 2 | MASCOT | T      | PLEX8 |       |
| 5.19E-02 | 0 0 | Cs7g15930.1         | 4.53 | 0 | 0    | 2 | MASCOT | T      | PLEX8 |       |
| 1.54E-01 | 0 0 | Cs7g16040.1         | 6.1  | 0 | 0    | 2 | MASCOT | T      | PLEX8 |       |
| 2.22E-02 | 0 0 | Cs7g16040.1         | 6.1  | 0 | 0    | 2 | MASCOT | T      | PLEX8 |       |
| 1.14E-03 | 0 0 | Cs7g16040.1         | 4.37 | 0 | 0    | 2 | MASCOT | T      | PLEX8 |       |
| 3.50E-02 | 0 0 | Cs7g16820.1         | 8.75 | 0 | 0    | 2 | MASCOT | T      | PLEX8 |       |
| 2.03E-02 | 0 0 | Cs7g16820.1         | 8.75 | 0 | 0    | 2 | MASCOT | T      | PLEX8 |       |
| 2.97E-01 | 0 0 | Cs7g16820.1         | 5.84 | 0 | 0    | 2 | MASCOT | T      | PLEX8 |       |

|          |     |                      |      |   |      |   |        |        |       |       |
|----------|-----|----------------------|------|---|------|---|--------|--------|-------|-------|
| 5.23E-01 | 0 0 | Cs6g16010.1/Cs6g160  | 4.37 | 0 | 0    | 2 | MASCOT | T      | PLEX8 |       |
| 2.59E-01 | 0 0 | Cs7g17050.1/Cs7g170  | 6    | 0 | 0    | 2 | MASCOT | T      | PLEX8 |       |
| 1.41E-01 | 0 0 | Cs7g17050.1/Cs7g170  | 6    | 0 | 0    | 2 | MASCOT | T      | PLEX8 |       |
| 7.41E-03 | 0 0 | Cs7g17170.1/Cs7g171  | 9.76 | 0 | 0    | 2 | MASCOT | T      | PLEX8 |       |
| 1.37E-04 | 0 0 | Cs7g17170.1/Cs7g171  | 4.65 | 0 | 0    | 2 | MASCOT | T      | PLEX8 |       |
| 1.35E-02 | 0 0 | Cs7g17170.1/Cs7g171  | 4.65 | 0 | 0    | 2 | MASCOT | T      | PLEX8 |       |
| 6.22E-03 | 0 0 | Cs4g08590.1/Cs7g211  | 8.47 | 0 | 0    | 2 | MASCOT | T      | PLEX8 |       |
| 4.41E-03 | 0 0 | Cs4g08590.1/Cs7g211  | 8.47 | 0 | 0    | 2 | MASCOT | T      | PLEX8 |       |
| 1.42E-03 | 0 0 | Cs7g21100.1          | 4.56 | 0 | 0    | 2 | MASCOT | T      | PLEX8 |       |
| 1.51E-02 | 0 0 | Cs5g18790.1/Cs5g187  | 4.53 | 0 | 0    | 2 | MASCOT | T      | PLEX8 |       |
| 5.82E-02 | 0 0 | Cs5g18790.1/Cs5g187  | 4.53 | 0 | 0    | 2 | MASCOT | T      | PLEX8 |       |
| 2.00E-01 | 0 0 | Cs5g18790.1/Cs5g187  | 5.72 | 0 | 0    | 2 | MASCOT | T      | PLEX8 |       |
| 2.77E-01 | 0 0 | Cs7g29350.1/Cs7g293  | 4.53 | 0 | 0    | 2 | MASCOT | T      | PLEX8 |       |
| 2.69E-01 | 0 0 | Cs7g29350.1/Cs7g293  | 6.1  | 0 | 0    | 2 | MASCOT | T      | PLEX8 |       |
| 5.77E-02 | 0 0 | Cs7g29350.1/Cs7g293  | 6.1  | 0 | 0    | 2 | MASCOT | T      | PLEX8 |       |
| 9.79E-02 | 0 0 | Cs8g02570.1          | 6.75 | 0 | 0    | 2 | MASCOT | T      | PLEX8 |       |
| 5.12E-03 | 0 0 | Cs8g02570.1          | 9.41 | 0 | 0    | 2 | MASCOT | T      | PLEX8 |       |
| 1.38E-02 | 0 0 | Cs8g02570.1          | 9.41 | 0 | 0    | 2 | MASCOT | T      | PLEX8 |       |
| 3.38E-03 | 0 0 | Cs8g09390.1/orange1. | 4.14 | 0 | 0    | 2 | MASCOT | T      | PLEX8 |       |
| 4.74E-01 | 0 0 | Cs4g14140.1/Cs8g093  | 9.76 | 0 | 0    | 2 | MASCOT | T      | PLEX8 |       |
| 2.60E-01 | 0 0 | Cs4g14140.1/Cs8g093  | 9.76 | 0 | 0    | 2 | MASCOT | T      | PLEX8 |       |
| 3.99E-01 | 0 0 | Cs5g09880.1 ! Cs8g09 | 4.53 | 0 | 0    | 2 | MASCOT | T      | PLEX8 |       |
| 4.74E-01 | 0 0 | Cs4g14140.1/Cs8g093  | 9.76 | 0 | 0    | 2 | MASCOT | T      | PLEX8 |       |
| 2.60E-01 | 0 0 | Cs4g14140.1/Cs8g093  | 9.76 | 0 | 0    | 2 | MASCOT | T      | PLEX8 |       |
| 9.45E-03 | 0 0 | Cs1g16250.1/Cs1g162  | 4.21 | 0 | 0    | 2 | MASCOT | T      | PLEX8 |       |
| 1.40E-02 | 0 0 | Cs1g16250.1/Cs1g162  | 5.66 | 0 | 0    | 2 | MASCOT | T      | PLEX8 |       |
| 2.39E-02 | 0 0 | Cs1g16250.1/Cs1g162  | 5.66 | 0 | 0    | 2 | MASCOT | T      | PLEX8 |       |
| 9.33E-02 | 0 0 | Cs8g10710.1          | 4.68 | 1 | 15.9 | 0 | 2      | MASCOT | T     | PLEX8 |
| 1.96E-02 | 0 0 | Cs8g10710.1          | 4.14 | 0 | 0    | 2 | MASCOT | T      | PLEX8 |       |
| 2.38E-04 | 0 0 | Cs8g10710.1          | 4.14 | 0 | 0    | 2 | MASCOT | T      | PLEX8 |       |
| 1.66E-01 | 0 0 | Cs8g12150.1/Cs8g121  | 6.74 | 0 | 0    | 2 | MASCOT | T      | PLEX8 |       |
| 1.77E-02 | 0 0 | Cs8g12150.1/Cs8g121  | 6.74 | 0 | 0    | 2 | MASCOT | T      | PLEX8 |       |
| 2.96E-01 | 0 0 | Cs8g12150.1/Cs8g121  | 6.74 | 0 | 0    | 2 | MASCOT | T      | PLEX8 |       |
| 5.57E-04 | 0 0 | Cs8g07240.1/Cs8g072  | 5.84 | 0 | 0    | 2 | MASCOT | T      | PLEX8 |       |
| 9.94E-02 | 0 0 | Cs8g07240.1/Cs8g072  | 6    | 0 | 0    | 2 | MASCOT | T      | PLEX8 |       |
| 9.68E-02 | 0 0 | Cs8g07240.1/Cs8g072  | 6    | 0 | 0    | 2 | MASCOT | T      | PLEX8 |       |
| 5.71E-02 | 0 0 | Cs8g17860.1          | 8.75 | 0 | 0    | 2 | MASCOT | T      | PLEX8 |       |
| 6.61E-02 | 0 0 | Cs8g17860.1          | 8.72 | 0 | 0    | 2 | MASCOT | T      | PLEX8 |       |
| 7.33E-02 | 0 0 | Cs8g17860.1          | 8.72 | 0 | 0    | 2 | MASCOT | T      | PLEX8 |       |
| 3.63E-01 | 0 0 | Cs9g02390.2          | 9.76 | 0 | 0    | 2 | MASCOT | T      | PLEX8 |       |
| 3.61E-01 | 0 0 | Cs9g02390.2          | 9.76 | 0 | 0    | 2 | MASCOT | T      | PLEX8 |       |
| 1.66E-01 | 0 0 | Cs9g02390.1/Cs9g023  | 4.75 | 0 | 15.9 | 0 | 2      | MASCOT | T     | PLEX8 |
| 8.05E-02 | 0 0 | Cs9g02500.1          | 5.84 | 0 | 0    | 2 | MASCOT | T      | PLEX8 |       |
| 5.78E-06 | 0 0 | Cs9g02500.1/orange1. | 5.4  | 0 | 0    | 2 | MASCOT | T      | PLEX8 |       |
| 4.63E-01 | 0 0 | Cs9g02500.1/orange1. | 5.4  | 0 | 0    | 2 | MASCOT | T      | PLEX8 |       |
| 6.93E-02 | 0 0 | Cs9g03390.1/Cs9g033  | 5.4  | 0 | 0    | 2 | MASCOT | T      | PLEX8 |       |
| 8.11E-02 | 0 0 | Cs9g03390.1/Cs9g033  | 5.4  | 0 | 0    | 2 | MASCOT | T      | PLEX8 |       |
| 1.74E-02 | 0 0 | Cs9g03390.1/Cs9g033  | 4.09 | 0 | 0    | 2 | MASCOT | T      | PLEX8 |       |
| 2.94E-01 | 0 0 | Cs9g04620.1/Cs9g046  | 4.53 | 0 | 0    | 2 | MASCOT | T      | PLEX8 |       |
| 3.28E-02 | 0 0 | Cs9g04620.1/Cs9g046  | 4.53 | 0 | 0    | 2 | MASCOT | T      | PLEX8 |       |
| 2.88E-05 | 0 0 | Cs5g32680.1/Cs5g326  | 4.53 | 0 | 0    | 2 | MASCOT | T      | PLEX8 |       |



|          |     |                       |      |   |      |   |        |        |       |       |
|----------|-----|-----------------------|------|---|------|---|--------|--------|-------|-------|
| 8.05E-04 | 0 0 | Cs9g04960.2/Cs9g049   | 6.74 | 0 | 0    | 2 | MASCOT | T      | PLEX8 |       |
| 1.29E-02 | 0 0 | Cs9g04960.2/Cs9g049   | 6.74 | 0 | 0    | 2 | MASCOT | T      | PLEX8 |       |
| 2.73E-01 | 0 0 | Cs9g04960.2/Cs9g049   | 4.37 | 0 | 0    | 2 | MASCOT | T      | PLEX8 |       |
| 5.39E-03 | 0 0 | Cs9g05510.1           | 4.53 | 0 | 0    | 2 | MASCOT | T      | PLEX8 |       |
| 1.26E-03 | 0 0 | Cs9g05510.1           | 4.53 | 0 | 0    | 2 | MASCOT | T      | PLEX8 |       |
| 1.70E-01 | 0 0 | Cs9g05510.1           | 8.24 | 0 | 0    | 2 | MASCOT | T      | PLEX8 |       |
| 2.80E-02 | 0 0 | Cs9g06270.1/Cs9g062   | 5.5  | 0 | 0    | 2 | MASCOT | T      | PLEX8 |       |
| 1.12E-01 | 0 0 | Cs9g06270.1/Cs9g062   | 5.5  | 0 | 0    | 2 | MASCOT | T      | PLEX8 |       |
| 1.10E-01 | 0 0 | Cs9g06270.1/Cs9g062   | 8.59 | 0 | 0    | 2 | MASCOT | T      | PLEX8 |       |
| 5.70E-02 | 0 0 | Cs9g06450.1           | 4.65 | 0 | 0    | 2 | MASCOT | T      | PLEX8 |       |
| 1.30E-02 | 0 0 | Cs9g06450.1           | 4.65 | 0 | 0    | 2 | MASCOT | T      | PLEX8 |       |
| 2.32E-01 | 0 0 | Cs9g06450.1           | 7.98 | 0 | 0    | 2 | MASCOT | T      | PLEX8 |       |
| 2.72E-03 | 0 0 | Cs5g27810.1/orange1.  | 4.25 | 0 | 0    | 2 | MASCOT | T      | PLEX8 |       |
| 2.97E-02 | 0 0 | Cs9g11530.1           | 4.53 | 0 | 0    | 2 | MASCOT | T      |       |       |
| 1.29E-01 | 0 0 | Cs9g11530.1           | 4.53 | 0 | 0    | 2 | MASCOT | T      |       |       |
| 1.84E-03 | 0 0 | Cs9g12440.1/Cs9g124   | 4.31 | 0 | 0    | 2 | MASCOT | T      | PLEX8 |       |
| 4.47E-01 | 0 0 | Cs9g12440.1/Cs9g124   | 6.92 | 0 | 0    | 2 | MASCOT | T      | PLEX8 |       |
| 7.34E-02 | 0 0 | Cs9g12440.1/Cs9g124   | 6.92 | 0 | 0    | 2 | MASCOT | T      | PLEX8 |       |
| 3.97E-02 | 0 0 | Cs2g22300.1/Cs3g021   | 8.75 | 0 | 0    | 2 | MASCOT | T      | PLEX8 |       |
| 3.72E-01 | 0 0 | Cs2g22300.1/Cs3g021   | 8.75 | 0 | 0    | 2 | MASCOT | T      | PLEX8 |       |
| 2.51E-01 | 0 0 | Cs2g22300.1/Cs3g021   | 4.53 | 0 | 0    | 2 | MASCOT | T      | PLEX8 |       |
| 1.23E-03 | 0 0 | gi 113952625          | 4.54 | 0 | 15.9 | 0 | 2      | MASCOT | T     | PLEX8 |
| 8.46E-02 | 0 0 | gi 113952625          | 4.54 | 0 | 0    | 2 | MASCOT | T      |       |       |
| 1.84E-01 | 0 0 | gi 113952625          | 8.75 | 0 | 0    | 2 | MASCOT | T      | PLEX8 |       |
| 3.11E-02 | 0 0 | gi 113952680          | 8.59 | 0 | 0    | 2 | MASCOT | T      | PLEX8 |       |
| 4.81E-03 | 0 0 | gi 113952680          | 6.92 | 0 | 0    | 2 | MASCOT | T      | PLEX8 |       |
| 2.02E-03 | 0 0 | gi 113952680          | 6.92 | 0 | 0    | 2 | MASCOT | T      | PLEX8 |       |
| 5.51E-03 | 0 0 | orange1.1t00006.1     | 8.27 | 0 | 0    | 2 | MASCOT | T      | PLEX8 |       |
| 4.51E-03 | 0 0 | orange1.1t00006.1     | 6.75 | 0 | 0    | 2 | MASCOT | T      | PLEX8 |       |
| 3.06E-01 | 0 0 | orange1.1t00006.1     | 6.75 | 0 | 0    | 2 | MASCOT | T      | PLEX8 |       |
| 5.76E-04 | 0 0 | orange1.1t00149.1/ora | 6.75 | 0 | 0    | 2 | MASCOT | T      | PLEX8 |       |
| 3.75E-02 | 0 0 | orange1.1t00149.1/ora | 5.38 | 0 | 0    | 2 | MASCOT | T      | PLEX8 |       |
| 7.46E-03 | 0 0 | orange1.1t00149.1/ora | 5.38 | 0 | 0    | 2 | MASCOT | T      | PLEX8 |       |
| 7.16E-05 | 0 0 | orange1.1t00195.1/ora | 6.75 | 0 | 0    | 2 | MASCOT | T      | PLEX8 |       |
| 6.35E-03 | 0 0 | orange1.1t00195.1/ora | 5.84 | 1 | 0    | 2 | MASCOT | T      | PLEX8 |       |
| 1.39E-02 | 0 0 | orange1.1t00195.1/ora | 5.84 | 1 | 0    | 2 | MASCOT | T      |       |       |
| 2.44E-01 | 0 0 | orange1.1t00196.1     | 8.75 | 0 | 0    | 2 | MASCOT | T      | PLEX8 |       |
| 3.45E-02 | 0 0 | orange1.1t00196.1     | 4.14 | 0 | 0    | 2 | MASCOT | T      | PLEX8 |       |
| 2.58E-01 | 0 0 | orange1.1t00196.1     | 4.14 | 0 | 0    | 2 | MASCOT | T      | PLEX8 |       |
| 2.00E-04 | 0 0 | Cs8g09850.1/Cs8g099   | 5.32 | 0 | 0    | 2 | MASCOT | T      | PLEX8 |       |
| 9.30E-02 | 0 0 | Cs8g09850.1/Cs8g099   | 5.32 | 0 | 0    | 2 | MASCOT | T      |       |       |
| 5.29E-02 | 0 0 | orange1.1t00235.1/ora | 5.8  | 0 | 0    | 2 | MASCOT | T      | PLEX8 |       |
| 9.61E-02 | 0 0 | Cs1g24330.1/Cs1g243   | 6.85 | 0 | 0    | 2 | MASCOT | T      | PLEX8 |       |
| 1.59E-01 | 0 0 | Cs5g25050.1/orange1.  | 4.03 | 0 | 0    | 2 | MASCOT | T      | PLEX8 |       |
| 1.61E-01 | 0 0 | Cs5g25050.1/orange1.  | 4.03 | 0 | 0    | 2 | MASCOT | T      | PLEX8 |       |
| 5.28E-03 | 0 0 | orange1.1t01602.1     | 5.83 | 0 | 0    | 2 | MASCOT | T      | PLEX8 |       |
| 9.58E-03 | 0 0 | orange1.1t01602.1     | 5.83 | 0 | 0    | 2 | MASCOT | T      |       |       |
| 1.80E-02 | 0 0 | orange1.1t01602.1     | 4.03 | 0 | 0    | 2 | MASCOT | T      | PLEX8 |       |
| 3.40E-05 | 0 0 | orange1.1t02538.1/ora | 4.03 | 0 | 0    | 2 | MASCOT | T      | PLEX8 |       |
| 1.20E-04 | 0 0 | orange1.1t02538.1/ora | 4.03 | 0 | 0    | 2 | MASCOT | T      |       |       |
| 5.85E-03 | 0 0 | orange1.1t02538.1/ora | 6    | 0 | 0    | 2 | MASCOT | T      | PLEX8 |       |

|          |     |                     |      |   |      |   |        |        |       |       |
|----------|-----|---------------------|------|---|------|---|--------|--------|-------|-------|
| 1.72E-01 | 0 0 | Cs1g02660.1/Cs1g026 | 8.3  | 0 | 0    | 2 | MASCOT | T      | PLEX8 |       |
| 2.17E-03 | 0 0 | Cs1g02660.1/Cs1g026 | 4.21 | 0 | 0    | 2 | MASCOT | T      | PLEX8 |       |
| 8.82E-03 | 0 0 | Cs1g06850.1/Cs1g068 | 6.85 | 0 | 0    | 2 | MASCOT | T      | PLEX8 |       |
| 9.84E-02 | 0 0 | Cs1g06850.1/Cs1g068 | 4.21 | 0 | 0    | 2 | MASCOT | T      | PLEX8 |       |
| 2.20E-02 | 0 0 | Cs1g08140.1/Cs1g081 | 5.88 | 0 | 0    | 2 | MASCOT | T      | PLEX8 |       |
| 1.75E-01 | 0 0 | Cs1g08140.1         | 5.84 | 0 | 0    | 2 | MASCOT | T      | PLEX8 |       |
| 4.60E-02 | 0 0 | Cs1g08540.1/Cs1g085 | 5.55 | 0 | 0    | 2 | MASCOT | T      |       |       |
| 2.26E-02 | 0 0 | Cs1g08540.1/Cs1g085 | 6    | 0 | 0    | 2 | MASCOT | T      | PLEX8 |       |
| 7.43E-02 | 0 0 | Cs1g12830.1/Cs1g128 | 4.65 | 0 | 15.9 | 0 | 2      | MASCOT | T     | PLEX8 |
| 2.12E-01 | 0 0 | Cs1g12830.1/Cs1g128 | 6.1  | 0 | 0    | 2 | MASCOT | T      | PLEX8 |       |
| 6.66E-03 | 0 0 | Cs1g15190.1         | 9.47 | 0 | 0    | 2 | MASCOT | T      |       |       |
| 1.59E-01 | 0 0 | Cs1g15190.1         | 5.66 | 0 | 0    | 2 | MASCOT | T      | PLEX8 |       |
| 1.66E-02 | 0 0 | Cs1g15270.1         | 6    | 0 | 0    | 2 | MASCOT | T      | PLEX8 |       |
| 3.13E-03 | 0 0 | Cs1g15270.1         | 5.83 | 0 | 0    | 2 | MASCOT | T      | PLEX8 |       |
| 9.37E-02 | 0 0 | Cs1g15540.1/Cs1g155 | 4.14 | 0 | 0    | 2 | MASCOT | T      | PLEX8 |       |
| 1.81E-01 | 0 0 | Cs1g15540.1/Cs1g155 | 6.74 | 0 | 0    | 2 | MASCOT | T      |       |       |
| 2.82E-01 | 0 0 | Cs1g19780.1         | 8.19 | 0 | 0    | 2 | MASCOT | T      | PLEX8 |       |
| 4.74E-03 | 0 0 | Cs1g19780.1         | 6.74 | 0 | 0    | 2 | MASCOT | T      | PLEX8 |       |
| 4.71E-02 | 0 0 | Cs1g19820.1         | 5.84 | 0 | 0    | 2 | MASCOT | T      | PLEX8 |       |
| 1.86E-01 | 0 0 | Cs1g19820.1         | 4.21 | 0 | 0    | 2 | MASCOT | T      | PLEX8 |       |
| 2.28E-01 | 0 0 | Cs1g21450.1         | 9.8  | 0 | 0    | 2 | MASCOT | T      | PLEX8 |       |
| 4.71E-02 | 0 0 | Cs1g21450.1         | 6.75 | 0 | 0    | 2 | MASCOT | T      | PLEX8 |       |
| 2.02E-01 | 0 0 | Cs1g22790.1/Cs1g227 | 5.18 | 0 | 0    | 2 | MASCOT | T      | PLEX8 |       |
| 1.95E-03 | 0 0 | Cs1g22790.1         | 6.89 | 0 | 0    | 2 | MASCOT | T      |       |       |
| 2.53E-02 | 0 0 | Cs1g22900.1         | 6.79 | 0 | 0    | 2 | MASCOT | T      | PLEX8 |       |
| 1.87E-01 | 0 0 | Cs1g22900.1         | 5.84 | 0 | 0    | 2 | MASCOT | T      |       |       |
| 6.39E-02 | 0 0 | Cs1g22940.1/Cs1g229 | 4.37 | 0 | 0    | 2 | MASCOT | T      |       |       |
| 6.96E-02 | 0 0 | Cs1g22940.1/Cs1g229 | 5.84 | 0 | 0    | 2 | MASCOT | T      |       |       |
| 9.93E-02 | 0 0 | Cs1g25190.1         | 4.37 | 0 | 0    | 2 | MASCOT | T      | PLEX8 |       |
| 9.85E-02 | 0 0 | Cs1g25190.1         | 8.8  | 0 | 0    | 2 | MASCOT | T      | PLEX8 |       |
| 2.86E-01 | 0 0 | Cs1g25510.1/Cs1g255 | 7.89 | 0 | 0    | 2 | MASCOT | T      | PLEX8 |       |
| 5.31E-03 | 0 0 | Cs1g25510.1/Cs1g255 | 4.53 | 0 | 0    | 2 | MASCOT | T      | PLEX8 |       |
| 5.94E-02 | 0 0 | Cs1g26450.1         | 6.74 | 0 | 0    | 2 | MASCOT | T      |       |       |
| 4.25E-02 | 0 0 | Cs1g26450.1         | 6.91 | 0 | 0    | 2 | MASCOT | T      |       |       |
| 8.18E-03 | 0 0 | Cs1g26810.1         | 5.55 | 0 | 0    | 2 | MASCOT | T      |       |       |
| 7.35E-04 | 0 0 | Cs1g26810.1         | 6.72 | 0 | 0    | 2 | MASCOT | T      | PLEX8 |       |
| 1.16E-02 | 0 0 | Cs2g01510.1/Cs2g015 | 4.21 | 0 | 0    | 2 | MASCOT | T      | PLEX8 |       |
| 9.21E-05 | 0 0 | Cs2g01510.1/Cs2g015 | 5.66 | 0 | 0    | 2 | MASCOT | T      | PLEX8 |       |
| 3.50E-02 | 0 0 | Cs2g02460.1         | 8.3  | 0 | 0    | 2 | MASCOT | T      | PLEX8 |       |
| 1.05E-02 | 0 0 | Cs2g02460.1         | 4.31 | 0 | 0    | 2 | MASCOT | T      |       |       |
| 4.26E-06 | 0 0 | Cs2g02720.1         | 4.4  | 0 | 0    | 2 | MASCOT | T      | PLEX8 |       |
| 2.25E-01 | 0 0 | Cs2g02720.1         | 5.4  | 0 | 0    | 2 | MASCOT | T      | PLEX8 |       |
| 8.16E-02 | 0 0 | Cs2g03360.1/Cs2g033 | 4.53 | 0 | 0    | 2 | MASCOT | T      | PLEX8 |       |
| 9.39E-02 | 0 0 | Cs2g03360.1/Cs2g033 | 5.84 | 0 | 0    | 2 | MASCOT | T      | PLEX8 |       |
| 1.37E-01 | 0 0 | Cs2g03780.1/Cs2g196 | 6    | 0 | 0    | 2 | MASCOT | T      | PLEX8 |       |
| 8.95E-02 | 0 0 | Cs2g03780.1         | 5.4  | 0 | 0    | 2 | MASCOT | T      | PLEX8 |       |
| 1.41E-01 | 0 0 | Cs2g03870.1         | 4.37 | 0 | 0    | 2 | MASCOT | T      | PLEX8 |       |
| 2.27E-02 | 0 0 | Cs2g03870.1         | 5.72 | 0 | 0    | 2 | MASCOT | T      | PLEX8 |       |
| 1.11E-02 | 0 0 | Cs2g04050.1/Cs2g040 | 5.4  | 0 | 0    | 2 | MASCOT | T      | PLEX8 |       |
| 1.30E-01 | 0 0 | Cs2g04050.1/Cs2g040 | 5.97 | 0 | 0    | 2 | MASCOT | T      | PLEX8 |       |
| 2.65E-02 | 0 0 | Cs2g04620.1         | 4.37 | 0 | 0    | 2 | MASCOT | T      | PLEX8 |       |

|          |     |                      |      |   |   |   |   |        |   |       |
|----------|-----|----------------------|------|---|---|---|---|--------|---|-------|
| 2.22E-03 | 0 0 | Cs2g04620.1          | 5.97 | 0 | 0 | 0 | 2 | MASCOT | T |       |
| 1.56E-02 | 0 0 | Cs2g05470.1/Cs2g054  | 6.75 | 0 | 0 | 0 | 2 | MASCOT | T | PLEX8 |
| 6.60E-02 | 0 0 | Cs2g05470.1/Cs2g054  | 6.05 | 0 | 0 | 0 | 2 | MASCOT | T | PLEX8 |
| 2.07E-01 | 0 0 | Cs2g06050.1          | 5.4  | 0 | 0 | 0 | 2 | MASCOT | T | PLEX8 |
| 1.88E-03 | 0 0 | Cs2g06050.1          | 5.4  | 0 | 0 | 0 | 2 | MASCOT | T | PLEX8 |
| 1.99E-03 | 0 0 | Cs2g07620.1          | 6.85 | 0 | 0 | 0 | 2 | MASCOT | T | PLEX8 |
| 5.34E-04 | 0 0 | Cs2g07620.1          | 5.32 | 0 | 0 | 0 | 2 | MASCOT | T | PLEX8 |
| 5.66E-04 | 0 0 | Cs2g10420.1/Cs2g104  | 5.84 | 0 | 0 | 0 | 2 | MASCOT | T |       |
| 2.03E-01 | 0 0 | Cs2g10420.1/Cs2g104  | 5.55 | 0 | 0 | 0 | 2 | MASCOT | T | PLEX8 |
| 5.55E-02 | 0 0 | Cs9g10140.1/Cs9g101  | 5.84 | 0 | 0 | 0 | 2 | MASCOT | T | PLEX8 |
| 3.66E-01 | 0 0 | Cs2g11470.1/Cs2g114  | 9.75 | 0 | 0 | 0 | 2 | MASCOT | T |       |
| 2.37E-01 | 0 0 | Cs2g13080.1/Cs2g130  | 5.84 | 0 | 0 | 0 | 2 | MASCOT | T | PLEX8 |
| 1.20E-01 | 0 0 | Cs2g13080.1/Cs2g130  | 4.53 | 0 | 0 | 0 | 2 | MASCOT | T |       |
| 1.05E-03 | 0 0 | Cs2g14630.1/Cs2g146  | 3.95 | 1 | 0 | 0 | 2 | MASCOT | T | PLEX8 |
| 1.18E-01 | 0 0 | Cs2g14630.1/Cs2g146  | 4.37 | 0 | 0 | 0 | 2 | MASCOT | T |       |
| 8.31E-04 | 0 0 | Cs2g16010.1/Cs2g160  | 6.05 | 0 | 0 | 0 | 2 | MASCOT | T | PLEX8 |
| 5.41E-04 | 0 0 | Cs2g16010.1/Cs2g160  | 8.75 | 0 | 0 | 0 | 2 | MASCOT | T | PLEX8 |
| 1.70E-02 | 0 0 | Cs2g19940.1          | 5.4  | 0 | 0 | 0 | 2 | MASCOT | T | PLEX8 |
| 5.70E-02 | 0 0 | Cs2g19940.1          | 5.32 | 0 | 0 | 0 | 2 | MASCOT | T | PLEX8 |
| 1.19E-01 | 0 0 | Cs2g21530.1/Cs2g215  | 6    | 0 | 0 | 0 | 2 | MASCOT | T |       |
| 1.11E-01 | 0 0 | Cs2g21530.1/Cs2g215  | 4.53 | 0 | 0 | 0 | 2 | MASCOT | T | PLEX8 |
| 3.77E-02 | 0 0 | Cs2g24810.1          | 6.75 | 0 | 0 | 0 | 2 | MASCOT | T |       |
| 8.16E-03 | 0 0 | Cs2g24810.1 ! Cs4g08 | 8.76 | 0 | 0 | 0 | 2 | MASCOT | T | PLEX8 |
| 3.76E-01 | 0 0 | Cs2g26630.1/Cs5g043  | 6    | 0 | 0 | 0 | 2 | MASCOT | T | PLEX8 |
| 1.03E-02 | 0 0 | Cs2g26630.1          | 4.21 | 0 | 0 | 0 | 2 | MASCOT | T | PLEX8 |
| 3.47E-03 | 0 0 | Cs2g27980.1          | 6    | 0 | 0 | 0 | 2 | MASCOT | T | PLEX8 |
| 1.70E-01 | 0 0 | Cs2g27980.1          | 6.75 | 0 | 0 | 0 | 2 | MASCOT | T |       |
| 7.91E-02 | 0 0 | Cs2g28690.1/Cs2g286  | 8.59 | 0 | 0 | 0 | 2 | MASCOT | T | PLEX8 |
| 1.29E-01 | 0 0 | Cs2g28690.1/Cs2g286  | 8.41 | 0 | 0 | 0 | 2 | MASCOT | T | PLEX8 |
| 3.51E-03 | 0 0 | Cs2g29390.1          | 4    | 0 | 0 | 0 | 2 | MASCOT | T |       |
| 3.24E-02 | 0 0 | Cs2g29390.1          | 12   | 1 | 0 | 0 | 2 | MASCOT | T |       |
| 6.86E-02 | 0 0 | Cs2g30210.1/Cs2g302  | 4.37 | 0 | 0 | 0 | 2 | MASCOT | T |       |
| 1.36E-02 | 0 0 | Cs2g30210.1/Cs2g302  | 6.41 | 0 | 0 | 0 | 2 | MASCOT | T | PLEX8 |
| 7.96E-02 | 0 0 | Cs3g01610.1          | 4.14 | 0 | 0 | 0 | 2 | MASCOT | T | PLEX8 |
| 1.73E-04 | 0 0 | Cs3g01610.1          | 8.72 | 0 | 0 | 0 | 2 | MASCOT | T | PLEX8 |
| 7.56E-03 | 0 0 | Cs3g03070.1/Cs3g030  | 5.88 | 0 | 0 | 0 | 2 | MASCOT | T | PLEX8 |
| 1.21E-03 | 0 0 | Cs3g03070.1/Cs3g030  | 4.13 | 0 | 0 | 0 | 2 | MASCOT | T |       |
| 4.06E-01 | 0 0 | Cs3g03840.1          | 6.75 | 0 | 0 | 0 | 2 | MASCOT | T | PLEX8 |
| 4.94E-02 | 0 0 | Cs3g03840.1          | 9.73 | 0 | 0 | 0 | 2 | MASCOT | T | PLEX8 |
| 3.59E-05 | 0 0 | Cs3g06360.1          | 5.88 | 0 | 0 | 0 | 2 | MASCOT | T |       |
| 4.54E-01 | 0 0 | Cs3g06360.1          | 8.75 | 0 | 0 | 0 | 2 | MASCOT | T | PLEX8 |
| 2.54E-01 | 0 0 | Cs3g13760.1/Cs3g137  | 6.8  | 0 | 0 | 0 | 2 | MASCOT | T |       |
| 1.19E-02 | 0 0 | Cs3g13760.1/Cs3g137  | 4.25 | 0 | 0 | 0 | 2 | MASCOT | T | PLEX8 |
| 2.22E-01 | 0 0 | Cs3g14820.1/Cs3g148  | 4.25 | 0 | 0 | 0 | 2 | MASCOT | T | PLEX8 |
| 7.46E-04 | 0 0 | Cs3g14820.1/Cs3g148  | 4.23 | 0 | 0 | 0 | 2 | MASCOT | T | PLEX8 |
| 3.21E-03 | 0 0 | Cs3g17550.1          | 5.5  | 0 | 0 | 0 | 2 | MASCOT | T |       |
| 6.81E-02 | 0 0 | Cs3g17550.1          | 8.72 | 0 | 0 | 0 | 2 | MASCOT | T | PLEX8 |
| 5.76E-02 | 0 0 | Cs3g17570.1/Cs3g175  | 5.88 | 0 | 0 | 0 | 2 | MASCOT | T |       |
| 1.68E-02 | 0 0 | Cs3g17570.1/Cs3g175  | 8.5  | 0 | 0 | 0 | 2 | MASCOT | T |       |
| 7.25E-03 | 0 0 | Cs3g18880.1/Cs3g188  | 5.21 | 0 | 0 | 0 | 2 | MASCOT | T | PLEX8 |
| 5.24E-01 | 0 0 | Cs3g18880.1/Cs3g188  | 8.76 | 0 | 0 | 0 | 2 | MASCOT | T | PLEX8 |

|          |     |                      |      |        |   |   |        |   |       |
|----------|-----|----------------------|------|--------|---|---|--------|---|-------|
| 1.17E-02 | 0 0 | Cs3g19470.1/Cs3g194  | 6.74 | 0      | 0 | 2 | MASCOT | T | PLEX8 |
| 5.68E-02 | 0 0 | Cs3g19470.1/Cs3g194  | 6    | 0      | 0 | 2 | MASCOT | T |       |
| 1.67E-01 | 0 0 | Cs3g22800.1          | 4.53 | 0      | 0 | 2 | MASCOT | T | PLEX8 |
| 7.12E-04 | 0 0 | Cs3g22800.1          | 5.08 | 0      | 0 | 2 | MASCOT | T | PLEX8 |
| 2.06E-01 | 0 0 | Cs3g22840.1          | 4.53 | 0      | 0 | 2 | MASCOT | T | PLEX8 |
| 3.86E-02 | 0 0 | Cs3g22840.1          | 4.32 | 1      | 0 | 2 | MASCOT | T | PLEX8 |
| 8.78E-02 | 0 0 | Cs3g23770.1          | 5.81 | 0      | 0 | 2 | MASCOT | T | PLEX8 |
| 8.93E-04 | 0 0 | Cs3g23770.1          | 5.88 | 0      | 0 | 2 | MASCOT | T |       |
| 2.70E-01 | 0 0 | Cs3g24180.1          | 6.75 | 0      | 0 | 2 | MASCOT | T | PLEX8 |
| 2.39E-02 | 0 0 | Cs3g24180.1          | 8.79 | 0      | 0 | 2 | MASCOT | T | PLEX8 |
| 1.45E-01 | 0 0 | Cs3g24240.2/Cs3g242  | 6.05 | 0      | 0 | 2 | MASCOT | T | PLEX8 |
| 4.81E-02 | 0 0 | Cs3g24240.2/Cs3g242  | 8.59 | 0      | 0 | 2 | MASCOT | T | PLEX8 |
| 1.25E-02 | 0 0 | Cs3g24510.1/Cs3g245  | 8.75 | 0      | 0 | 2 | MASCOT | T | PLEX8 |
| 1.33E-02 | 0 0 | Cs3g24510.1/Cs3g245  | 4.37 | 0      | 0 | 2 | MASCOT | T | PLEX8 |
| 7.81E-03 | 0 0 | Cs3g25430.1          | 4.54 | 0      | 0 | 2 | MASCOT | T | PLEX8 |
| 1.42E-01 | 0 0 | Cs3g25430.1          | 8.59 | 0      | 0 | 2 | MASCOT | T | PLEX8 |
| 4.10E-02 | 0 0 | Cs3g25780.1/Cs5g259  | 6.75 | 0      | 0 | 2 | MASCOT | T | PLEX8 |
| 2.37E-02 | 0 0 | Cs3g25780.1 ! Cs4g09 | 4.21 | 0      | 0 | 2 | MASCOT | T | PLEX8 |
| 5.32E-02 | 0 0 | Cs4g01970.1/Cs4g019  | 4.37 | 0      | 0 | 2 | MASCOT | T | PLEX8 |
| 6.01E-02 | 0 0 | Cs4g01970.1/Cs4g019  | 5.84 | 0      | 0 | 2 | MASCOT | T | PLEX8 |
| 1.02E-01 | 0 0 | Cs4g02960.1/Cs4g029  | 5.4  | 0      | 0 | 2 | MASCOT | T |       |
| 1.06E-01 | 0 0 | Cs4g02960.1/Cs4g029  | 6    | 0      | 0 | 2 | MASCOT | T | PLEX8 |
| 2.12E-02 | 0 0 | Cs4g08980.1          | 8.41 | 0      | 0 | 2 | MASCOT | T | PLEX8 |
| 1.05E-01 | 0 0 | Cs4g08980.1          | 6.75 | 0      | 0 | 2 | MASCOT | T |       |
| 2.66E-03 | 0 0 | Cs4g09010.1          | 8.75 | 0      | 0 | 2 | MASCOT | T | PLEX8 |
| 2.37E-02 | 0 0 | Cs3g25780.1 ! Cs4g09 | 4.21 | 0      | 0 | 2 | MASCOT | T | PLEX8 |
| 2.23E-01 | 0 0 | Cs4g10900.1 ! Cs4g10 | 6.41 | 0      | 0 | 2 | MASCOT | T | PLEX8 |
| 3.24E-01 | 0 0 | Cs4g10860.1/Cs4g109  | 8.75 | 0      | 0 | 2 | MASCOT | T | PLEX8 |
| 3.02E-03 | 0 0 | Cs4g13220.1/Cs4g132  | 3.93 | 0      | 0 | 2 | MASCOT | T | PLEX8 |
| 7.84E-02 | 0 0 | Cs4g13220.1/Cs4g132  | 4.25 | 0 15.9 | 0 | 2 | MASCOT | T | PLEX8 |
| 8.55E-02 | 0 0 | Cs4g13470.1/Cs4g134  | 6    | 0      | 0 | 2 | MASCOT | T | PLEX8 |
| 5.26E-02 | 0 0 | Cs4g13470.1/Cs4g134  | 4.53 | 0      | 0 | 2 | MASCOT | T | PLEX8 |
| 2.02E-04 | 0 0 | Cs4g13510.1          | 4.75 | 0      | 0 | 2 | MASCOT | T | PLEX8 |
| 3.62E-03 | 0 0 | Cs4g13510.1          | 5.32 | 0      | 0 | 2 | MASCOT | T | PLEX8 |
| 2.03E-01 | 0 0 | Cs4g13930.1          | 8.57 | 0      | 0 | 2 | MASCOT | T |       |
| 9.06E-02 | 0 0 | Cs4g13930.1          | 4.75 | 0      | 0 | 2 | MASCOT | T | PLEX8 |
| 3.43E-02 | 0 0 | Cs4g14970.1          | 6.74 | 0      | 0 | 2 | MASCOT | T |       |
| 1.92E-03 | 0 0 | Cs4g14970.1          | 6.07 | 1      | 0 | 2 | MASCOT | T | PLEX8 |
| 7.42E-05 | 0 0 | Cs4g16260.1/Cs4g162  | 4.37 | 0      | 0 | 2 | MASCOT | T | PLEX8 |
| 2.04E-01 | 0 0 | Cs4g16260.1/orange1. | 4.68 | 0      | 0 | 2 | MASCOT | T | PLEX8 |
| 7.42E-05 | 0 0 | Cs4g16260.1/Cs4g162  | 4.37 | 0      | 0 | 2 | MASCOT | T | PLEX8 |
| 3.91E-02 | 0 0 | Cs4g16270.1/orange1. | 4.03 | 0      | 0 | 2 | MASCOT | T |       |
| 2.80E-03 | 0 0 | Cs4g18700.1/Cs4g187  | 4.21 | 0      | 0 | 2 | MASCOT | T |       |
| 3.03E-01 | 0 0 | Cs4g18700.1/Cs4g187  | 5.66 | 0      | 0 | 2 | MASCOT | T | PLEX8 |
| 1.03E-01 | 0 0 | Cs5g01110.1/Cs5g011  | 8.75 | 0      | 0 | 2 | MASCOT | T | PLEX8 |
| 2.32E-02 | 0 0 | Cs5g01110.1/Cs5g011  | 6.75 | 0      | 0 | 2 | MASCOT | T | PLEX8 |
| 1.72E-01 | 0 0 | Cs5g02780.1/Cs5g027  | 4.03 | 0      | 0 | 2 | MASCOT | T |       |
| 3.50E-03 | 0 0 | Cs5g02780.1/Cs5g027  | 4.25 | 0      | 0 | 2 | MASCOT | T | PLEX8 |
| 1.57E-02 | 0 0 | Cs5g05430.1          | 5.88 | 0      | 0 | 2 | MASCOT | T | PLEX8 |
| 1.89E-02 | 0 0 | Cs5g05430.1          | 4    | 0      | 0 | 2 | MASCOT | T | PLEX8 |
| 8.43E-02 | 0 0 | Cs5g05650.1/Cs5g056  | 4.53 | 0      | 0 | 2 | MASCOT | T |       |

|          |     |                      |      |   |   |   |        |   |       |
|----------|-----|----------------------|------|---|---|---|--------|---|-------|
| 1.42E-02 | 0 0 | Cs5g05650.1/Cs5g056  | 5.97 | 0 | 0 | 2 | MASCOT | T |       |
| 2.18E-01 | 0 0 | Cs5g06830.2          | 9.73 | 0 | 0 | 2 | MASCOT | T | PLEX8 |
| 3.97E-02 | 0 0 | Cs5g06830.1 ! Cs5g06 | 6.04 | 0 | 0 | 2 | MASCOT | T | PLEX8 |
| 1.17E-01 | 0 0 | Cs5g07150.1/Cs5g071  | 4.37 | 0 | 0 | 2 | MASCOT | T | PLEX8 |
| 1.69E-01 | 0 0 | Cs5g07150.1/Cs5g071  | 4.03 | 0 | 0 | 2 | MASCOT | T | PLEX8 |
| 8.11E-02 | 0 0 | Cs5g11460.1          | 8.75 | 0 | 0 | 2 | MASCOT | T | PLEX8 |
| 2.27E-03 | 0 0 | Cs5g11460.1          | 4    | 0 | 0 | 2 | MASCOT | T |       |
| 1.59E-03 | 0 0 | Cs5g12440.1/Cs5g124  | 6    | 0 | 0 | 2 | MASCOT | T | PLEX8 |
| 1.86E-01 | 0 0 | Cs5g12440.1/Cs5g124  | 9.75 | 0 | 0 | 2 | MASCOT | T | PLEX8 |
| 2.49E-01 | 0 0 | Cs5g10110.1 ! Cs5g13 | 4.53 | 0 | 0 | 2 | MASCOT | T | PLEX8 |
| 3.97E-01 | 0 0 | Cs5g13300.1/Cs5g133  | 4.53 | 0 | 0 | 2 | MASCOT | T | PLEX8 |
| 5.97E-06 | 0 0 | Cs5g16100.1/Cs5g161  | 4.25 | 0 | 0 | 2 | MASCOT | T | PLEX8 |
| 2.64E-01 | 0 0 | Cs5g16100.1/Cs5g161  | 6.74 | 0 | 0 | 2 | MASCOT | T | PLEX8 |
| 8.49E-02 | 0 0 | Cs1g13260.1/Cs1g132  | 6.74 | 0 | 0 | 2 | MASCOT | T |       |
| 1.45E-06 | 0 0 | Cs5g17270.1          | 3.92 | 0 | 0 | 2 | MASCOT | T |       |
| 1.92E-01 | 0 0 | Cs5g20800.1          | 8.8  | 0 | 0 | 2 | MASCOT | T | PLEX8 |
| 2.69E-02 | 0 0 | Cs5g20800.1          | 5.32 | 0 | 0 | 2 | MASCOT | T | PLEX8 |
| 1.89E-01 | 0 0 | Cs5g20950.1/Cs5g209  | 6.92 | 0 | 0 | 2 | MASCOT | T |       |
| 3.26E-01 | 0 0 | Cs5g20950.2/Cs5g209  | 4.78 | 0 | 0 | 2 | MASCOT | T |       |
| 2.11E-03 | 0 0 | Cs5g25190.1/Cs5g251  | 5.4  | 0 | 0 | 2 | MASCOT | T | PLEX8 |
| 1.26E-01 | 0 0 | Cs5g25190.1/Cs5g251  | 9.41 | 0 | 0 | 2 | MASCOT | T | PLEX8 |
| 1.28E-02 | 0 0 | Cs5g25880.1/Cs5g259  | 4.21 | 0 | 0 | 2 | MASCOT | T | PLEX8 |
| 2.23E-03 | 0 0 | Cs5g25880.1          | 4.31 | 0 | 0 | 2 | MASCOT | T | PLEX8 |
| 4.10E-02 | 0 0 | Cs3g25780.1/Cs5g259  | 6.75 | 0 | 0 | 2 | MASCOT | T | PLEX8 |
| 1.28E-02 | 0 0 | Cs5g25880.1/Cs5g259  | 4.21 | 0 | 0 | 2 | MASCOT | T | PLEX8 |
| 4.35E-03 | 0 0 | Cs5g27940.1          | 8.8  | 0 | 0 | 2 | MASCOT | T | PLEX8 |
| 1.05E-01 | 0 0 | Cs5g27940.1 ! Cs5g27 | 4.21 | 0 | 0 | 2 | MASCOT | T | PLEX8 |
| 6.40E-02 | 0 0 | Cs5g30520.1 ! Cs6g13 | 9.8  | 0 | 0 | 2 | MASCOT | T | PLEX8 |
| 5.81E-02 | 0 0 | Cs5g30520.1/Cs9g078  | 4.37 | 0 | 0 | 2 | MASCOT | T | PLEX8 |
| 5.22E-01 | 0 0 | Cs5g31700.1/Cs5g317  | 4.54 | 0 | 0 | 2 | MASCOT | T | PLEX8 |
| 3.77E-03 | 0 0 | Cs5g31700.1/Cs5g317  | 3.98 | 0 | 0 | 2 | MASCOT | T | PLEX8 |
| 1.34E-04 | 0 0 | Cs5g33720.1          | 4.31 | 0 | 0 | 2 | MASCOT | T |       |
| 5.55E-02 | 0 0 | Cs5g33720.1          | 4.65 | 0 | 0 | 2 | MASCOT | T | PLEX8 |
| 1.60E-01 | 0 0 | Cs5g23200.1/Cs6g035  | 5.84 | 0 | 0 | 2 | MASCOT | T | PLEX8 |
| 3.19E-01 | 0 0 | Cs5g23200.1/Cs6g035  | 6.75 | 0 | 0 | 2 | MASCOT | T | PLEX8 |
| 2.17E-03 | 0 0 | Cs3g09200.1/Cs6g047  | 6.74 | 0 | 0 | 2 | MASCOT | T | PLEX8 |
| 4.33E-02 | 0 0 | Cs3g09200.1/Cs6g047  | 8.31 | 0 | 0 | 2 | MASCOT | T | PLEX8 |
| 9.61E-02 | 0 0 | Cs1g24330.1/Cs1g243  | 6.85 | 0 | 0 | 2 | MASCOT | T | PLEX8 |
| 2.95E-01 | 0 0 | Cs6g05740.1          | 6.41 | 0 | 0 | 2 | MASCOT | T | PLEX8 |
| 3.25E-04 | 0 0 | Cs6g05950.1/Cs7g288  | 4.14 | 0 | 0 | 2 | MASCOT | T | PLEX8 |
| 1.16E-02 | 0 0 | Cs6g05950.1/Cs7g288  | 9.75 | 0 | 0 | 2 | MASCOT | T | PLEX8 |
| 2.09E-04 | 0 0 | Cs6g07490.1          | 4.14 | 0 | 0 | 2 | MASCOT | T | PLEX8 |
| 1.57E-02 | 0 0 | Cs6g07490.1          | 8.75 | 0 | 0 | 2 | MASCOT | T | PLEX8 |
| 3.12E-04 | 0 0 | Cs6g07600.3/Cs6g076  | 4.53 | 0 | 0 | 2 | MASCOT | T |       |
| 1.71E-02 | 0 0 | Cs6g07600.3/Cs6g076  | 5.08 | 0 | 0 | 2 | MASCOT | T |       |
| 3.60E-02 | 0 0 | Cs6g07870.1/Cs6g078  | 4.37 | 0 | 0 | 2 | MASCOT | T | PLEX8 |
| 9.13E-02 | 0 0 | Cs6g07870.1/Cs6g078  | 8.72 | 0 | 0 | 2 | MASCOT | T | PLEX8 |
| 1.72E-02 | 0 0 | Cs6g08400.1/Cs6g084  | 4.65 | 0 | 0 | 2 | MASCOT | T | PLEX8 |
| 1.22E-02 | 0 0 | Cs6g08400.1/Cs6g084  | 4    | 0 | 0 | 2 | MASCOT | T | PLEX8 |
| 3.24E-02 | 0 0 | Cs6g08440.1          | 5.84 | 0 | 0 | 2 | MASCOT | T | PLEX8 |
| 5.20E-02 | 0 0 | Cs6g08440.1          | 9.75 | 0 | 0 | 2 | MASCOT | T | PLEX8 |

|              |                      |      |   |   |   |        |   |       |
|--------------|----------------------|------|---|---|---|--------|---|-------|
| 1.56E-01 0 0 | Cs6g08710.1/Cs6g087  | 4.11 | 0 | 0 | 2 | MASCOT | T |       |
| 4.53E-02 0 0 | Cs6g08710.1/Cs6g087  | 6    | 0 | 0 | 2 | MASCOT | T | PLEX8 |
| 3.40E-02 0 0 | Cs6g10670.1/Cs6g106  | 6.75 | 0 | 0 | 2 | MASCOT | T | PLEX8 |
| 2.07E-04 0 0 | Cs6g10670.1/Cs6g106  | 5.21 | 0 | 0 | 2 | MASCOT | T | PLEX8 |
| 2.47E-03 0 0 | Cs6g14550.1          | 4.75 | 0 | 0 | 2 | MASCOT | T |       |
| 2.56E-01 0 0 | Cs6g14550.1 ! Cs5g30 | 6    | 0 | 0 | 2 | MASCOT | T | PLEX8 |
| 9.10E-03 0 0 | Cs6g17710.1          | 5.4  | 0 | 0 | 2 | MASCOT | T | PLEX8 |
| 1.43E-02 0 0 | Cs6g17710.1/Cs6g177  | 4.37 | 0 | 0 | 2 | MASCOT | T |       |
| 3.08E-02 0 0 | Cs6g18870.1/Cs6g188  | 4.25 | 0 | 0 | 2 | MASCOT | T | PLEX8 |
| 1.80E-02 0 0 | Cs6g18870.1/Cs6g188  | 4.03 | 0 | 0 | 2 | MASCOT | T |       |
| 2.15E-01 0 0 | Cs6g19560.1          | 4.65 | 0 | 0 | 2 | MASCOT | T | PLEX8 |
| 3.88E-01 0 0 | Cs6g19560.1          | 4.4  | 0 | 0 | 2 | MASCOT | T |       |
| 3.44E-02 0 0 | Cs6g21230.1          | 6.73 | 0 | 0 | 2 | MASCOT | T | PLEX8 |
| 1.34E-06 0 0 | Cs6g21230.1          | 4.75 | 0 | 0 | 2 | MASCOT | T |       |
| 3.57E-02 0 0 | Cs6g21610.1/Cs6g216  | 4.37 | 0 | 0 | 2 | MASCOT | T | PLEX8 |
| 3.57E-03 0 0 | Cs6g21610.1/Cs6g216  | 5.99 | 0 | 0 | 2 | MASCOT | T | PLEX8 |
| 2.07E-01 0 0 | Cs6g21870.1/Cs6g218  | 6.74 | 0 | 0 | 2 | MASCOT | T | PLEX8 |
| 2.86E-02 0 0 | Cs6g21870.1/Cs6g218  | 8.72 | 0 | 0 | 2 | MASCOT | T | PLEX8 |
| 2.13E-03 0 0 | Cs6g22070.1          | 4.37 | 0 | 0 | 2 | MASCOT | T | PLEX8 |
| 1.71E-01 0 0 | Cs5g11590.1/Cs5g115  | 4.21 | 0 | 0 | 2 | MASCOT | T | PLEX8 |
| 5.99E-02 0 0 | Cs6g22370.1          | 6.72 | 0 | 0 | 2 | MASCOT | T | PLEX8 |
| 3.93E-02 0 0 | Cs6g22370.1          | 8.8  | 0 | 0 | 2 | MASCOT | T |       |
| 1.78E-02 0 0 | Cs7g02960.1          | 4.37 | 0 | 0 | 2 | MASCOT | T |       |
| 2.48E-02 0 0 | Cs7g02960.1          | 4.53 | 0 | 0 | 2 | MASCOT | T | PLEX8 |
| 3.05E-03 0 0 | Cs7g03270.1          | 4.03 | 0 | 0 | 2 | MASCOT | T |       |
| 1.22E-01 0 0 | Cs7g03270.1          | 9.75 | 0 | 0 | 2 | MASCOT | T |       |
| 2.61E-02 0 0 | Cs7g03440.1          | 4.68 | 1 | 0 | 2 | MASCOT | T | PLEX8 |
| 2.51E-01 0 0 | Cs7g03440.1          | 5.99 | 0 | 0 | 2 | MASCOT | T |       |
| 1.46E-02 0 0 | Cs7g03930.1          | 4.37 | 0 | 0 | 2 | MASCOT | T |       |
| 6.42E-02 0 0 | Cs7g03930.1          | 4.53 | 0 | 0 | 2 | MASCOT | T | PLEX8 |
| 6.83E-03 0 0 | Cs7g05950.1          | 4.03 | 0 | 0 | 2 | MASCOT | T |       |
| 7.94E-02 0 0 | Cs7g05950.1          | 6.72 | 0 | 0 | 2 | MASCOT | T | PLEX8 |
| 5.95E-03 0 0 | Cs7g07180.1/Cs7g071  | 4.14 | 0 | 0 | 2 | MASCOT | T | PLEX8 |
| 3.55E-02 0 0 | Cs7g07180.1/Cs7g071  | 4.37 | 0 | 0 | 2 | MASCOT | T | PLEX8 |
| 1.62E-01 0 0 | Cs7g07440.1          | 5.81 | 0 | 0 | 2 | MASCOT | T | PLEX8 |
| 1.09E-01 0 0 | Cs7g07440.1          | 4.21 | 0 | 0 | 2 | MASCOT | T |       |
| 4.99E-02 0 0 | Cs7g08340.1/Cs7g083  | 4.03 | 0 | 0 | 2 | MASCOT | T |       |
| 3.18E-02 0 0 | Cs7g08340.1/Cs7g083  | 6    | 0 | 0 | 2 | MASCOT | T |       |
| 8.07E-02 0 0 | Cs7g09120.1          | 8.76 | 0 | 0 | 2 | MASCOT | T | PLEX8 |
| 1.32E-01 0 0 | Cs7g09120.1          | 5.72 | 0 | 0 | 2 | MASCOT | T | PLEX8 |
| 2.25E-02 0 0 | Cs7g10710.1          | 3.93 | 0 | 0 | 2 | MASCOT | T |       |
| 3.61E-02 0 0 | Cs7g10710.1          | 6.79 | 0 | 0 | 2 | MASCOT | T | PLEX8 |
| 8.01E-02 0 0 | Cs7g14000.1          | 4.03 | 0 | 0 | 2 | MASCOT | T |       |
| 5.64E-03 0 0 | Cs7g14000.1/Cs7g140  | 4    | 0 | 0 | 2 | MASCOT | T | PLEX8 |
| 4.70E-05 0 0 | Cs7g14490.1          | 9.75 | 0 | 0 | 2 | MASCOT | T |       |
| 1.55E-01 0 0 | Cs7g14490.1          | 8.22 | 0 | 0 | 2 | MASCOT | T |       |
| 3.45E-02 0 0 | Cs7g14530.1          | 7.96 | 0 | 0 | 2 | MASCOT | T | PLEX8 |
| 1.33E-02 0 0 | Cs7g14530.1          | 5.52 | 0 | 0 | 2 | MASCOT | T |       |
| 1.36E-03 0 0 | Cs7g15980.1          | 8.47 | 0 | 0 | 2 | MASCOT | T | PLEX8 |
| 7.52E-02 0 0 | Cs7g15980.1          | 6.41 | 0 | 0 | 2 | MASCOT | T | PLEX8 |
| 3.97E-01 0 0 | Cs5g13300.1/Cs5g133  | 4.53 | 0 | 0 | 2 | MASCOT | T | PLEX8 |

|          |     |                      |      |   |   |   |        |   |       |
|----------|-----|----------------------|------|---|---|---|--------|---|-------|
| 1.66E-01 | 0 0 | Cs5g10110.1/Cs7g169  | 4.37 | 0 | 0 | 2 | MASCOT | T | PLEX8 |
| 9.00E-02 | 0 0 | Cs7g18780.1          | 5.81 | 0 | 0 | 2 | MASCOT | T | PLEX8 |
| 4.37E-02 | 0 0 | Cs7g18780.1          | 4.03 | 0 | 0 | 2 | MASCOT | T | PLEX8 |
| 1.58E-02 | 0 0 | Cs7g21180.1/Cs7g212  | 5.72 | 0 | 0 | 2 | MASCOT | T | PLEX8 |
| 1.81E-02 | 0 0 | Cs7g21200.1          | 8.41 | 0 | 0 | 2 | MASCOT | T |       |
| 2.78E-01 | 0 0 | Cs7g21910.1/Cs7g219  | 8.76 | 0 | 0 | 2 | MASCOT | T | PLEX8 |
| 1.62E-02 | 0 0 | Cs7g21910.1/Cs7g219  | 4.37 | 0 | 0 | 2 | MASCOT | T | PLEX8 |
| 1.06E-02 | 0 0 | Cs7g24750.1          | 6.79 | 0 | 0 | 2 | MASCOT | T | PLEX8 |
| 1.68E-01 | 0 0 | Cs7g24750.1          | 4.53 | 0 | 0 | 2 | MASCOT | T | PLEX8 |
| 1.70E-01 | 0 0 | Cs7g28200.1          | 5.81 | 0 | 0 | 2 | MASCOT | T | PLEX8 |
| 5.03E-02 | 0 0 | Cs7g28200.1/Cs8g178  | 8.75 | 0 | 0 | 2 | MASCOT | T |       |
| 2.48E-02 | 0 0 | Cs7g28620.1/Cs7g286  | 6    | 0 | 0 | 2 | MASCOT | T | PLEX8 |
| 8.22E-03 | 0 0 | Cs7g28620.1/Cs7g286  | 4.14 | 0 | 0 | 2 | MASCOT | T |       |
| 6.22E-02 | 0 0 | Cs7g28810.1/Cs8g180  | 8.34 | 0 | 0 | 2 | MASCOT | T | PLEX8 |
| 1.93E-01 | 0 0 | Cs7g28810.1          | 6    | 0 | 0 | 2 | MASCOT | T | PLEX8 |
| 1.01E-01 | 0 0 | Cs7g30090.2/Cs7g300  | 8.75 | 0 | 0 | 2 | MASCOT | T | PLEX8 |
| 1.10E-01 | 0 0 | Cs7g30090.1/Cs7g300  | 6.92 | 0 | 0 | 2 | MASCOT | T | PLEX8 |
| 4.43E-02 | 0 0 | Cs7g31540.1          | 4.37 | 0 | 0 | 2 | MASCOT | T | PLEX8 |
| 1.69E-02 | 0 0 | Cs7g31540.1          | 5.72 | 0 | 0 | 2 | MASCOT | T | PLEX8 |
| 2.65E-02 | 0 0 | Cs8g01490.1/Cs8g014  | 8.63 | 0 | 0 | 2 | MASCOT | T | PLEX8 |
| 1.61E-01 | 0 0 | Cs8g01490.1/Cs8g014  | 8.56 | 0 | 0 | 2 | MASCOT | T | PLEX8 |
| 1.00E-03 | 0 0 | Cs8g02350.1/Cs8g023  | 4.53 | 0 | 0 | 2 | MASCOT | T | PLEX8 |
| 1.25E-01 | 0 0 | Cs8g02350.1/Cs8g023  | 8.75 | 0 | 0 | 2 | MASCOT | T | PLEX8 |
| 1.64E-01 | 0 0 | Cs8g02940.1          | 9.75 | 0 | 0 | 2 | MASCOT | T | PLEX8 |
| 3.27E-02 | 0 0 | Cs8g02940.1          | 8.2  | 0 | 0 | 2 | MASCOT | T | PLEX8 |
| 3.06E-04 | 0 0 | Cs8g03720.1/Cs8g037  | 4.03 | 0 | 0 | 2 | MASCOT | T |       |
| 5.88E-03 | 0 0 | Cs8g03720.1/Cs8g037  | 4.1  | 0 | 0 | 2 | MASCOT | T |       |
| 2.87E-02 | 0 0 | Cs8g09610.1/Cs8g096  | 4.25 | 0 | 0 | 2 | MASCOT | T | PLEX8 |
| 1.46E-01 | 0 0 | Cs2g15560.1/Cs2g155  | 5.83 | 0 | 0 | 2 | MASCOT | T | PLEX8 |
| 3.38E-03 | 0 0 | Cs8g09390.1/orange1. | 4.14 | 0 | 0 | 2 | MASCOT | T |       |
| 9.36E-02 | 0 0 | Cs8g09780.1          | 9.76 | 0 | 0 | 2 | MASCOT | T | PLEX8 |
| 9.11E-02 | 0 0 | Cs8g12490.1/Cs8g124  | 6.05 | 0 | 0 | 2 | MASCOT | T | PLEX8 |
| 1.51E-02 | 0 0 | Cs8g12490.1/Cs8g124  | 6.85 | 0 | 0 | 2 | MASCOT | T | PLEX8 |
| 9.05E-03 | 0 0 | Cs8g14580.1          | 6.05 | 0 | 0 | 2 | MASCOT | T | PLEX8 |
| 2.74E-01 | 0 0 | Cs8g14580.1          | 4.25 | 0 | 0 | 2 | MASCOT | T | PLEX8 |
| 3.45E-01 | 0 0 | Cs8g14970.1          | 5.4  | 0 | 0 | 2 | MASCOT | T | PLEX8 |
| 8.61E-03 | 0 0 | Cs8g14970.1          | 4.4  | 0 | 0 | 2 | MASCOT | T | PLEX8 |
| 3.53E-01 | 0 0 | Cs8g17360.1/Cs8g173  | 5.95 | 0 | 0 | 2 | MASCOT | T | PLEX8 |
| 2.88E-01 | 0 0 | Cs8g17360.1/Cs8g173  | 9.76 | 0 | 0 | 2 | MASCOT | T | PLEX8 |
| 7.43E-02 | 0 0 | Cs8g01040.1/Cs8g010  | 5.84 | 0 | 0 | 2 | MASCOT | T | PLEX8 |
| 2.67E-01 | 0 0 | Cs8g17540.1/Cs8g175  | 6.05 | 0 | 0 | 2 | MASCOT | T | PLEX8 |
| 3.87E-02 | 0 0 | Cs8g19810.1/Cs8g198  | 11   | 0 | 0 | 2 | MASCOT | T | PLEX8 |
| 1.72E-01 | 0 0 | Cs8g19810.1/Cs8g198  | 4.53 | 0 | 0 | 2 | MASCOT | T | PLEX8 |
| 1.02E-01 | 0 0 | Cs9g01010.1          | 4.53 | 0 | 0 | 2 | MASCOT | T | PLEX8 |
| 4.04E-05 | 0 0 | Cs9g01010.1          | 4.03 | 0 | 0 | 2 | MASCOT | T | PLEX8 |
| 3.20E-02 | 0 0 | Cs9g01930.1/Cs9g019  | 4.4  | 0 | 0 | 2 | MASCOT | T | PLEX8 |
| 1.10E-02 | 0 0 | Cs3g15350.1/Cs9g019  | 4.03 | 0 | 0 | 2 | MASCOT | T |       |
| 1.97E-01 | 0 0 | Cs9g03210.1          | 3.92 | 0 | 0 | 2 | MASCOT | T | PLEX8 |
| 5.72E-04 | 0 0 | Cs9g03210.1          | 5.84 | 0 | 0 | 2 | MASCOT | T | PLEX8 |
| 5.56E-01 | 0 0 | Cs9g06280.1          | 8.8  | 0 | 0 | 2 | MASCOT | T | PLEX8 |
| 2.81E-02 | 0 0 | Cs9g06280.1/Cs9g062  | 6.1  | 0 | 0 | 2 | MASCOT | T | PLEX8 |

|          |     |                        |      |   |   |   |        |   |       |
|----------|-----|------------------------|------|---|---|---|--------|---|-------|
| 2.32E-01 | 0 0 | Cs9g06890.1/Cs9g068    | 6.1  | 0 | 0 | 2 | MASCOT | T | PLEX8 |
| 4.69E-03 | 0 0 | Cs9g06890.1            | 4.37 | 0 | 0 | 2 | MASCOT | T | PLEX8 |
| 1.82E-02 | 0 0 | Cs9g07750.1            | 4.37 | 0 | 0 | 2 | MASCOT | T | PLEX8 |
| 1.30E-01 | 0 0 | Cs9g07750.1/Cs9g077    | 8.75 | 0 | 0 | 2 | MASCOT | T | PLEX8 |
| 3.36E-03 | 0 0 | Cs9g10710.1            | 4.14 | 0 | 0 | 2 | MASCOT | T |       |
| 1.93E-01 | 0 0 | Cs9g10710.1            | 4.37 | 0 | 0 | 2 | MASCOT | T | PLEX8 |
| 9.25E-02 | 0 0 | Cs9g13060.1            | 4.14 | 0 | 0 | 2 | MASCOT | T | PLEX8 |
| 6.62E-06 | 0 0 | Cs9g13060.1            | 3.91 | 0 | 0 | 2 | MASCOT | T |       |
| 1.11E-01 | 0 0 | Cs9g16270.1            | 9.76 | 0 | 0 | 2 | MASCOT | T | PLEX8 |
| 1.00E-01 | 0 0 | Cs9g16270.1            | 5.32 | 0 | 0 | 2 | MASCOT | T | PLEX8 |
| 1.87E-01 | 0 0 | Cs9g17720.1            | 8.69 | 0 | 0 | 2 | MASCOT | T | PLEX8 |
| 6.37E-02 | 0 0 | Cs9g17720.1/Cs9g177    | 6    | 0 | 0 | 2 | MASCOT | T | PLEX8 |
| 4.19E-03 | 0 0 | Cs9g19050.1/Cs9g190    | 5.84 | 0 | 0 | 2 | MASCOT | T | PLEX8 |
| 2.53E-02 | 0 0 | Cs9g19050.1/Cs9g190    | 4.37 | 0 | 0 | 2 | MASCOT | T |       |
| 9.43E-02 | 0 0 | Cs9g19060.1            | 6.07 | 1 | 0 | 2 | MASCOT | T | PLEX8 |
| 4.95E-02 | 0 0 | Cs9g19060.1            | 6.1  | 0 | 0 | 2 | MASCOT | T | PLEX8 |
| 2.55E-02 | 0 0 | Cs9g19090.1            | 4.21 | 0 | 0 | 2 | MASCOT | T | PLEX8 |
| 1.31E-01 | 0 0 | Cs9g19090.1            | 5.97 | 0 | 0 | 2 | MASCOT | T | PLEX8 |
| 6.42E-04 | 0 0 | gi 113952651           | 9.75 | 0 | 0 | 2 | MASCOT | T | PLEX8 |
| 9.99E-03 | 0 0 | gi 113952651           | 4.03 | 0 | 0 | 2 | MASCOT | T |       |
| 3.91E-02 | 0 0 | Cs4g16270.1/orange1.   | 4.03 | 0 | 0 | 2 | MASCOT | T |       |
| 2.04E-01 | 0 0 | Cs4g16260.1/orange1.   | 4.68 | 0 | 0 | 2 | MASCOT | T | PLEX8 |
| 2.53E-01 | 0 0 | orange1.1t00183.1      | 4.37 | 0 | 0 | 2 | MASCOT | T |       |
| 8.19E-03 | 0 0 | orange1.1t00183.1/ora  | 4.14 | 0 | 0 | 2 | MASCOT | T |       |
| 1.08E-01 | 0 0 | orange1.1t00302.1/ora  | 6    | 0 | 0 | 2 | MASCOT | T | PLEX8 |
| 1.05E-01 | 0 0 | orange1.1t00302.1/ora  | 8.63 | 0 | 0 | 2 | MASCOT | T | PLEX8 |
| 9.38E-02 | 0 0 | orange1.1t00386.2      | 6    | 0 | 0 | 2 | MASCOT | T | PLEX8 |
| 2.08E-02 | 0 0 | orange1.1t00386.1/ora  | 4.21 | 0 | 0 | 2 | MASCOT | T |       |
| 4.31E-02 | 0 0 | orange1.1t00407.1/ora  | 4.53 | 0 | 0 | 2 | MASCOT | T | PLEX8 |
| 4.82E-02 | 0 0 | orange1.1t00407.1/ora  | 6.05 | 0 | 0 | 2 | MASCOT | T | PLEX8 |
| 2.67E-02 | 0 0 | orange1.1t00628.1      | 4.03 | 0 | 0 | 2 | MASCOT | T |       |
| 2.47E-02 | 0 0 | orange1.1t00628.1      | 4.31 | 0 | 0 | 2 | MASCOT | T | PLEX8 |
| 1.47E-02 | 0 0 | orange1.1t00903.1/ora  | 6.85 | 0 | 0 | 2 | MASCOT | T | PLEX8 |
| 3.71E-03 | 0 0 | orange1.1t00903.1/ora  | 4.65 | 0 | 0 | 2 | MASCOT | T | PLEX8 |
| 2.65E-01 | 0 0 | orange1.1t01092.1 ! or | 8.76 | 0 | 0 | 2 | MASCOT | T |       |
| 7.57E-03 | 0 0 | orange1.1t01092.1      | 5.81 | 0 | 0 | 2 | MASCOT | T |       |
| 1.26E-01 | 0 0 | orange1.1t01197.1/ora  | 9.8  | 0 | 0 | 2 | MASCOT | T | PLEX8 |
| 2.59E-04 | 0 0 | orange1.1t01197.1/ora  | 4.03 | 0 | 0 | 2 | MASCOT | T |       |
| 1.01E-02 | 0 0 | orange1.1t01249.1/ora  | 6    | 0 | 0 | 2 | MASCOT | T | PLEX8 |
| 5.16E-03 | 0 0 | orange1.1t01249.1/ora  | 6.75 | 0 | 0 | 2 | MASCOT | T |       |
| 9.52E-02 | 0 0 | orange1.1t01269.1/ora  | 8.63 | 0 | 0 | 2 | MASCOT | T | PLEX8 |
| 1.07E-01 | 0 0 | orange1.1t01269.1/ora  | 5.55 | 0 | 0 | 2 | MASCOT | T | PLEX8 |
| 2.74E-04 | 0 0 | orange1.1t01559.1      | 6.79 | 0 | 0 | 2 | MASCOT | T | PLEX8 |
| 6.92E-02 | 0 0 | orange1.1t01559.1      | 9.73 | 0 | 0 | 2 | MASCOT | T | PLEX8 |
| 1.10E-02 | 0 0 | orange1.1t01862.1/ora  | 9.76 | 0 | 0 | 2 | MASCOT | T |       |
| 2.33E-02 | 0 0 | orange1.1t01862.1/ora  | 4.37 | 0 | 0 | 2 | MASCOT | T | PLEX8 |
| 1.80E-02 | 0 0 | orange1.1t02013.1/ora  | 5.84 | 0 | 0 | 2 | MASCOT | T | PLEX8 |
| 1.57E-01 | 0 0 | orange1.1t02013.1/ora  | 4.37 | 0 | 0 | 2 | MASCOT | T | PLEX8 |
| 4.86E-02 | 0 0 | orange1.1t02219.1/ora  | 4.53 | 0 | 0 | 2 | MASCOT | T | PLEX8 |
| 6.50E-02 | 0 0 | orange1.1t02219.1/ora  | 4.14 | 0 | 0 | 2 | MASCOT | T |       |
| 2.17E-01 | 0 0 | orange1.1t02254.1      | 5.55 | 0 | 0 | 2 | MASCOT | T | PLEX8 |



|          |     |                       |      |   |      |   |        |        |       |       |
|----------|-----|-----------------------|------|---|------|---|--------|--------|-------|-------|
| 9.77E-03 | 0 0 | orange1.1t02254.1     | 9.72 | 0 | 0    | 2 | MASCOT | T      |       |       |
| 1.27E-01 | 0 0 | orange1.1t02384.1     | 7.94 | 0 | 0    | 2 | MASCOT | T      | PLEX8 |       |
| 9.33E-02 | 0 0 | orange1.1t02384.1     | 5.88 | 0 | 0    | 2 | MASCOT | T      | PLEX8 |       |
| 7.14E-02 | 0 0 | orange1.1t02824.1/ora | 9.76 | 0 | 0    | 2 | MASCOT | T      |       |       |
| 5.99E-02 | 0 0 | orange1.1t02824.1/ora | 8.75 | 0 | 0    | 2 | MASCOT | T      | PLEX8 |       |
| 2.03E-01 | 0 0 | orange1.1t03691.1     | 6.74 | 0 | 0    | 2 | MASCOT | T      | PLEX8 |       |
| 6.11E-03 | 0 0 | orange1.1t03691.1     | 6    | 0 | 0    | 2 | MASCOT | T      | PLEX8 |       |
| 1.53E-01 | 0 0 | orange1.1t04023.1/ora | 8.59 | 0 | 0    | 2 | MASCOT | T      | PLEX8 |       |
| 2.95E-03 | 0 0 | orange1.1t04023.1/ora | 5.8  | 0 | 0    | 2 | MASCOT | T      | PLEX8 |       |
| 1.73E-02 | 0 0 | orange1.1t04406.1     | 4.14 | 0 | 0    | 2 | MASCOT | T      | PLEX8 |       |
| 2.71E-04 | 0 0 | Cs9g05730.1/Cs9g057   | 4.37 | 0 | 0    | 2 | MASCOT | T      | PLEX8 |       |
| 1.90E-01 | 0 0 | orange1.1t02742.1/ora | 4.37 | 0 | 0    | 2 | MASCOT | T      | PLEX8 |       |
| 9.20E-02 | 0 0 | orange1.1t02742.1/ora | 5.29 | 0 | 0    | 2 | MASCOT | T      | PLEX8 |       |
| 3.38E-03 | 0 0 | Cs8g09390.1/orange1.  | 4.14 | 0 | 0    | 2 | MASCOT | T      |       |       |
| 4.10E-02 | 0 0 | Cs3g25780.1/Cs5g259   | 6.75 | 0 | 0    | 2 | MASCOT | T      | PLEX8 |       |
| 5.49E-04 | 0 0 | orange1.1t05709.1     | 5.4  | 0 | 0    | 2 | MASCOT | T      | PLEX8 |       |
| 9.49E-05 | 0 0 | orange1.1t05709.1     | 4.31 | 0 | 0    | 2 | MASCOT | T      | PLEX8 |       |
| 1.01E-03 | 0 0 | Cs8g14960.1           | 8.1  | 0 | 0    | 2 | MASCOT | T      | PLEX8 |       |
| 2.84E-03 | 0 0 | Cs8g14960.1           | 8.1  | 0 | 0    | 2 | MASCOT | T      | PLEX8 |       |
| 4.47E-03 | 0 0 | Cs8g14960.1           | 8.1  | 0 | 0    | 2 | MASCOT | T      | PLEX8 |       |
| 5.83E-03 | 0 0 | Cs8g14960.1           | 8.1  | 0 | 0    | 2 | MASCOT | T      | PLEX8 |       |
| 9.46E-03 | 0 0 | Cs8g14960.1           | 8.1  | 0 | 0    | 2 | MASCOT | T      |       |       |
| 7.10E-04 | 0 0 | Cs8g14960.1           | 8.1  | 0 | 0    | 2 | MASCOT | T      | PLEX8 |       |
| 1.01E-03 | 0 0 | Cs8g14960.1           | 8.1  | 0 | 0    | 2 | MASCOT | T      | PLEX8 |       |
| 1.18E-03 | 0 0 | Cs8g14960.1           | 8.1  | 0 | 0    | 2 | MASCOT | T      | PLEX8 |       |
| 4.54E-03 | 0 0 | Cs8g14960.1           | 8.1  | 0 | 0    | 2 | MASCOT | T      | PLEX8 |       |
| 5.15E-03 | 0 0 | Cs8g14960.1           | 8.1  | 0 | 0    | 2 | MASCOT | T      | PLEX8 |       |
| 4.20E-03 | 0 0 | Cs8g14960.1           | 8.1  | 0 | 0    | 2 | MASCOT | T      |       |       |
| 1.16E-02 | 0 0 | Cs8g14960.1           | 8.1  | 0 | 0    | 2 | MASCOT | T      |       |       |
| 8.82E-05 | 0 0 | Cs5g05030.1           | 4.21 | 0 | 0    | 2 | MASCOT | T      | PLEX8 |       |
| 2.24E-03 | 0 0 | Cs5g05030.1           | 4.21 | 0 | 0    | 2 | MASCOT | T      | PLEX8 |       |
| 2.60E-03 | 0 0 | Cs5g05030.1           | 4.21 | 0 | 0    | 2 | MASCOT | T      | PLEX8 |       |
| 1.07E-02 | 0 0 | Cs5g05030.1           | 4.21 | 0 | 0    | 2 | MASCOT | T      | PLEX8 |       |
| 1.95E-03 | 0 0 | Cs5g05030.1           | 4.21 | 0 | 0    | 2 | MASCOT | T      | PLEX8 |       |
| 1.04E-02 | 0 0 | orange1.1t02589.1     | 5.84 | 0 | 0    | 2 | MASCOT | T      | PLEX8 |       |
| 2.15E-03 | 0 0 | orange1.1t02589.1     | 5.84 | 0 | 0    | 2 | MASCOT | T      | PLEX8 |       |
| 2.76E-02 | 0 0 | orange1.1t02589.1     | 5.84 | 0 | 0    | 2 | MASCOT | T      | PLEX8 |       |
| 1.16E-03 | 0 0 | orange1.1t02589.1     | 5.84 | 0 | 0    | 2 | MASCOT | T      | PLEX8 |       |
| 2.29E-02 | 0 0 | orange1.1t02589.1     | 5.84 | 0 | 0    | 2 | MASCOT | T      | PLEX8 |       |
| 3.80E-04 | 0 0 | orange1.1t03905.1     | 4.75 | 0 | 15.9 | 0 | 2      | MASCOT | T     | PLEX8 |
| 5.59E-04 | 0 0 | orange1.1t03905.1     | 4.75 | 0 | 15.9 | 0 | 2      | MASCOT | T     | PLEX8 |
| 5.63E-05 | 0 0 | orange1.1t03905.1     | 4.75 | 0 | 15.9 | 0 | 2      | MASCOT | T     | PLEX8 |
| 2.83E-03 | 0 0 | orange1.1t03905.1     | 4.75 | 0 | 15.9 | 0 | 2      | MASCOT | T     | PLEX8 |
| 5.67E-03 | 0 0 | orange1.1t03905.1     | 4.75 | 0 | 0    | 2 | MASCOT | T      | PLEX8 |       |
| 3.30E-03 | 0 0 | Cs4g07710.1/Cs4g077   | 6.1  | 0 | 0    | 2 | MASCOT | T      | PLEX8 |       |
| 1.21E-02 | 0 0 | Cs4g07710.1/Cs4g077   | 6.1  | 0 | 0    | 2 | MASCOT | T      | PLEX8 |       |
| 3.01E-02 | 0 0 | Cs4g07710.1/Cs4g077   | 6.1  | 0 | 0    | 2 | MASCOT | T      | PLEX8 |       |
| 4.83E-05 | 0 0 | Cs4g07710.1/Cs4g077   | 6.1  | 0 | 0    | 2 | MASCOT | T      | PLEX8 |       |
| 6.11E-03 | 0 0 | Cs1g13120.1           | 4.14 | 0 | 0    | 2 | MASCOT | T      | PLEX8 |       |
| 1.26E-07 | 0 0 | Cs1g13120.1           | 4.14 | 0 | 0    | 2 | MASCOT | T      | PLEX8 |       |
| 4.20E-03 | 0 0 | Cs1g13120.1           | 4.14 | 0 | 0    | 2 | MASCOT | T      | PLEX8 |       |

|          |     |                     |      |   |   |   |        |   |       |
|----------|-----|---------------------|------|---|---|---|--------|---|-------|
| 2.84E-03 | 0 0 | Cs2g14090.1         | 5.4  | 0 | 0 | 2 | MASCOT | T | PLEX8 |
| 2.87E-02 | 0 0 | Cs2g14090.1         | 5.4  | 0 | 0 | 2 | MASCOT | T | PLEX8 |
| 2.87E-02 | 0 0 | Cs2g14090.1         | 5.4  | 0 | 0 | 2 | MASCOT | T |       |
| 1.95E-04 | 0 0 | Cs5g24870.1         | 4.25 | 0 | 0 | 2 | MASCOT | T | PLEX8 |
| 1.21E-03 | 0 0 | Cs5g24870.1         | 4.25 | 0 | 0 | 2 | MASCOT | T | PLEX8 |
| 2.63E-04 | 0 0 | Cs5g24870.1         | 4.25 | 0 | 0 | 2 | MASCOT | T | PLEX8 |
| 7.03E-03 | 0 0 | gi 113952637        | 4.53 | 0 | 0 | 2 | MASCOT | T | PLEX8 |
| 9.78E-03 | 0 0 | gi 113952637        | 4.53 | 0 | 0 | 2 | MASCOT | T | PLEX8 |
| 1.69E-05 | 0 0 | gi 113952637        | 4.53 | 0 | 0 | 2 | MASCOT | T |       |
| 6.77E-04 | 0 0 | orange1.1t00450.1   | 4.14 | 0 | 0 | 2 | MASCOT | T | PLEX8 |
| 1.51E-04 | 0 0 | orange1.1t00450.1   | 4.14 | 0 | 0 | 2 | MASCOT | T | PLEX8 |
| 4.72E-04 | 0 0 | orange1.1t00450.1   | 4.14 | 0 | 0 | 2 | MASCOT | T | PLEX8 |
| 5.87E-03 | 0 0 | Cs1g01940.1/Cs1g019 | 4    | 0 | 0 | 2 | MASCOT | T |       |
| 1.63E-04 | 0 0 | Cs1g01940.1/Cs1g019 | 4    | 0 | 0 | 2 | MASCOT | T |       |
| 4.96E-03 | 0 0 | Cs1g13150.1/Cs1g131 | 4.65 | 0 | 0 | 2 | MASCOT | T | PLEX8 |
| 9.09E-03 | 0 0 | Cs1g13150.1/Cs1g131 | 4.65 | 0 | 0 | 2 | MASCOT | T |       |
| 2.71E-02 | 0 0 | Cs1g19010.1         | 4.21 | 0 | 0 | 2 | MASCOT | T |       |
| 9.31E-03 | 0 0 | Cs1g19010.1         | 4.21 | 0 | 0 | 2 | MASCOT | T | PLEX8 |
| 1.11E-03 | 0 0 | Cs1g24470.1         | 6.71 | 0 | 0 | 2 | MASCOT | T | PLEX8 |
| 3.52E-03 | 0 0 | Cs1g24470.1         | 6.71 | 0 | 0 | 2 | MASCOT | T | PLEX8 |
| 3.65E-04 | 0 0 | Cs1g25010.1/Cs1g250 | 4.09 | 0 | 0 | 2 | MASCOT | T | PLEX8 |
| 2.13E-03 | 0 0 | Cs1g25010.1/Cs1g250 | 4.09 | 0 | 0 | 2 | MASCOT | T |       |
| 2.22E-02 | 0 0 | Cs2g28260.1         | 4.53 | 0 | 0 | 2 | MASCOT | T | PLEX8 |
| 2.64E-04 | 0 0 | Cs2g28260.1         | 4.53 | 0 | 0 | 2 | MASCOT | T | PLEX8 |
| 8.66E-02 | 0 0 | Cs2g31130.1         | 5.84 | 0 | 0 | 2 | MASCOT | T |       |
| 1.17E-01 | 0 0 | Cs2g31130.1         | 5.84 | 0 | 0 | 2 | MASCOT | T |       |
| 1.05E-02 | 0 0 | Cs3g05350.1         | 5.84 | 0 | 0 | 2 | MASCOT | T | PLEX8 |
| 7.76E-03 | 0 0 | Cs3g05350.1         | 5.84 | 0 | 0 | 2 | MASCOT | T | PLEX8 |
| 2.63E-03 | 0 0 | Cs3g14260.1/Cs3g142 | 3.93 | 0 | 0 | 2 | MASCOT | T | PLEX8 |
| 2.31E-04 | 0 0 | Cs3g14260.1/Cs3g142 | 3.93 | 0 | 0 | 2 | MASCOT | T |       |
| 7.22E-03 | 0 0 | Cs3g14560.1/Cs3g145 | 8.76 | 0 | 0 | 2 | MASCOT | T | PLEX8 |
| 3.75E-04 | 0 0 | Cs3g14560.1/Cs3g145 | 8.76 | 0 | 0 | 2 | MASCOT | T | PLEX8 |
| 2.88E-04 | 0 0 | Cs3g16640.1/Cs3g166 | 5.88 | 0 | 0 | 2 | MASCOT | T | PLEX8 |
| 3.94E-04 | 0 0 | Cs3g16640.1/Cs3g166 | 5.88 | 0 | 0 | 2 | MASCOT | T | PLEX8 |
| 2.28E-03 | 0 0 | Cs3g16900.1/Cs3g169 | 5.32 | 0 | 0 | 2 | MASCOT | T | PLEX8 |
| 6.84E-04 | 0 0 | Cs3g16900.1/Cs3g169 | 5.32 | 0 | 0 | 2 | MASCOT | T |       |
| 7.36E-03 | 0 0 | Cs4g05880.1         | 4.37 | 0 | 0 | 2 | MASCOT | T | PLEX8 |
| 6.77E-03 | 0 0 | Cs4g05880.1         | 4.37 | 0 | 0 | 2 | MASCOT | T | PLEX8 |
| 1.05E-02 | 0 0 | Cs4g06330.1         | 6.07 | 0 | 0 | 2 | MASCOT | T | PLEX8 |
| 2.20E-02 | 0 0 | Cs4g06330.1         | 6.07 | 0 | 0 | 2 | MASCOT | T |       |
| 7.13E-03 | 0 0 | Cs4g09390.1         | 6.75 | 0 | 0 | 2 | MASCOT | T | PLEX8 |
| 4.08E-03 | 0 0 | Cs4g09390.1         | 6.75 | 0 | 0 | 2 | MASCOT | T | PLEX8 |
| 1.07E-03 | 0 0 | Cs4g13900.1/Cs4g139 | 5.21 | 0 | 0 | 2 | MASCOT | T | PLEX8 |
| 1.06E-02 | 0 0 | Cs4g13900.1/Cs4g139 | 5.21 | 0 | 0 | 2 | MASCOT | T |       |
| 8.87E-03 | 0 0 | Cs4g19010.1/Cs4g190 | 5.32 | 0 | 0 | 2 | MASCOT | T | PLEX8 |
| 1.46E-03 | 0 0 | Cs4g19010.1/Cs4g190 | 5.32 | 0 | 0 | 2 | MASCOT | T | PLEX8 |
| 1.72E-05 | 0 0 | Cs5g10290.1         | 4.37 | 0 | 0 | 2 | MASCOT | T | PLEX8 |
| 3.96E-04 | 0 0 | Cs5g10290.1         | 4.37 | 0 | 0 | 2 | MASCOT | T | PLEX8 |
| 3.90E-03 | 0 0 | Cs5g18610.1/Cs5g186 | 6.92 | 0 | 0 | 2 | MASCOT | T | PLEX8 |
| 1.85E-02 | 0 0 | Cs5g18610.1/Cs5g186 | 6.92 | 0 | 0 | 2 | MASCOT | T |       |
| 7.05E-03 | 0 0 | Cs5g19650.1         | 6.75 | 0 | 0 | 2 | MASCOT | T | PLEX8 |

|          |     |                       |      |   |      |   |        |        |       |       |
|----------|-----|-----------------------|------|---|------|---|--------|--------|-------|-------|
| 1.26E-03 | 0 0 | Cs5g19650.1           | 6.75 | 0 | 0    | 2 | MASCOT | T      | PLEX8 |       |
| 6.81E-03 | 0 0 | Cs5g31340.1           | 9.73 | 0 | 0    | 2 | MASCOT | T      | PLEX8 |       |
| 5.21E-03 | 0 0 | Cs5g31340.1           | 9.73 | 0 | 0    | 2 | MASCOT | T      | PLEX8 |       |
| 6.62E-03 | 0 0 | Cs6g01210.1/Cs6g012   | 8.59 | 0 | 0    | 2 | MASCOT | T      | PLEX8 |       |
| 1.19E-03 | 0 0 | Cs6g01210.1/Cs6g012   | 8.59 | 0 | 0    | 2 | MASCOT | T      | PLEX8 |       |
| 1.89E-02 | 0 0 | Cs6g05140.1           | 6.17 | 1 | 0    | 2 | MASCOT | T      | PLEX8 |       |
| 3.69E-02 | 0 0 | Cs6g05140.1           | 6.17 | 1 | 0    | 2 | MASCOT | T      | PLEX8 |       |
| 2.27E-03 | 0 0 | Cs6g14310.1/Cs6g143   | 4.37 | 0 | 0    | 2 | MASCOT | T      |       |       |
| 1.63E-05 | 0 0 | Cs6g14310.1/Cs6g143   | 4.37 | 0 | 0    | 2 | MASCOT | T      |       |       |
| 5.48E-03 | 0 0 | Cs6g16060.1           | 4.54 | 0 | 0    | 2 | MASCOT | T      | PLEX8 |       |
| 1.50E-03 | 0 0 | Cs6g16060.1           | 4.54 | 0 | 0    | 2 | MASCOT | T      | PLEX8 |       |
| 3.12E-03 | 0 0 | Cs6g16360.1/Cs6g163   | 9.5  | 0 | 0    | 2 | MASCOT | T      |       |       |
| 1.12E-02 | 0 0 | Cs6g16360.1/Cs6g163   | 9.5  | 0 | 0    | 2 | MASCOT | T      |       |       |
| 1.11E-04 | 0 0 | Cs6g16960.1           | 6.72 | 0 | 0    | 2 | MASCOT | T      | PLEX8 |       |
| 2.66E-04 | 0 0 | Cs6g16960.1           | 6.72 | 0 | 0    | 2 | MASCOT | T      | PLEX8 |       |
| 6.63E-05 | 0 0 | Cs7g20730.1           | 6.71 | 0 | 0    | 2 | MASCOT | T      | PLEX8 |       |
| 1.26E-04 | 0 0 | Cs7g20730.1           | 6.71 | 0 | 0    | 2 | MASCOT | T      | PLEX8 |       |
| 3.88E-04 | 0 0 | Cs7g22640.1           | 4.53 | 0 | 0    | 2 | MASCOT | T      |       |       |
| 3.41E-04 | 0 0 | Cs7g22640.1           | 4.53 | 0 | 0    | 2 | MASCOT | T      |       |       |
| 1.71E-02 | 0 0 | Cs7g25330.1/Cs7g253   | 4.54 | 0 | 0    | 2 | MASCOT | T      | PLEX8 |       |
| 4.39E-03 | 0 0 | Cs7g25330.1/Cs7g253   | 4.54 | 0 | 0    | 2 | MASCOT | T      | PLEX8 |       |
| 1.09E-02 | 0 0 | Cs7g26170.1/Cs7g261   | 5.8  | 0 | 0    | 2 | MASCOT | T      | PLEX8 |       |
| 2.05E-03 | 0 0 | Cs7g26170.1/Cs7g261   | 5.8  | 0 | 0    | 2 | MASCOT | T      | PLEX8 |       |
| 2.81E-03 | 0 0 | Cs7g28650.1           | 5.32 | 0 | 0    | 2 | MASCOT | T      | PLEX8 |       |
| 1.44E-02 | 0 0 | Cs7g28650.1           | 5.32 | 0 | 0    | 2 | MASCOT | T      |       |       |
| 7.59E-03 | 0 0 | Cs8g14110.1           | 4.54 | 0 | 0    | 2 | MASCOT | T      | PLEX8 |       |
| 3.96E-06 | 0 0 | Cs8g14110.1           | 4.54 | 0 | 0    | 2 | MASCOT | T      |       |       |
| 1.05E-02 | 0 0 | Cs9g17220.1           | 6    | 0 | 0    | 2 | MASCOT | T      | PLEX8 |       |
| 3.84E-03 | 0 0 | Cs9g17220.1           | 6    | 0 | 0    | 2 | MASCOT | T      | PLEX8 |       |
| 8.15E-04 | 0 0 | gi 113952647          | 6.71 | 0 | 0    | 2 | MASCOT | T      | PLEX8 |       |
| 1.65E-03 | 0 0 | gi 113952647          | 6.71 | 0 | 0    | 2 | MASCOT | T      | PLEX8 |       |
| 3.44E-03 | 0 0 | gi 113952663/gi 11395 | 9.73 | 0 | 15.9 | 0 | 2      | MASCOT | T     | PLEX8 |
| 8.66E-06 | 0 0 | gi 113952663/gi 11395 | 9.73 | 0 | 0    | 2 | MASCOT | T      | PLEX8 |       |
| 4.96E-03 | 0 0 | orange1.1t00912.1     | 4.37 | 0 | 0    | 2 | MASCOT | T      | PLEX8 |       |
| 6.35E-03 | 0 0 | orange1.1t00912.1     | 4.37 | 0 | 0    | 2 | MASCOT | T      | PLEX8 |       |
| 1.31E-03 | 0 0 | orange1.1t00946.1     | 4.53 | 0 | 0    | 2 | MASCOT | T      | PLEX8 |       |
| 5.05E-05 | 0 0 | orange1.1t00946.1     | 4.53 | 0 | 0    | 2 | MASCOT | T      | PLEX8 |       |
| 1.14E-02 | 0 0 | orange1.1t02107.1     | 6.75 | 0 | 0    | 2 | MASCOT | T      | PLEX8 |       |
| 2.69E-02 | 0 0 | orange1.1t02107.1     | 6.75 | 0 | 0    | 2 | MASCOT | T      | PLEX8 |       |
| 1.05E-01 | 0 0 | orange1.1t02201.1     | 6.72 | 0 | 0    | 2 | MASCOT | T      | PLEX8 |       |
| 1.18E-01 | 0 0 | orange1.1t02201.1     | 6.72 | 0 | 0    | 2 | MASCOT | T      | PLEX8 |       |
| 6.30E-04 | 0 0 | orange1.1t02644.1     | 5.4  | 0 | 0    | 2 | MASCOT | T      | PLEX8 |       |
| 8.67E-04 | 0 0 | orange1.1t02644.1     | 5.4  | 0 | 0    | 2 | MASCOT | T      |       |       |
| 4.66E-04 | 0 0 | orange1.1t04496.1     | 5.84 | 0 | 0    | 2 | MASCOT | T      | PLEX8 |       |
| 3.72E-03 | 0 0 | orange1.1t04496.1     | 5.84 | 0 | 0    | 2 | MASCOT | T      | PLEX8 |       |
| 1.85E-02 | 0 0 | Cs1g01370.1           | 5.84 | 0 | 0    | 2 | MASCOT | T      | PLEX8 |       |
| 3.93E-02 | 0 0 | Cs1g02800.1/Cs1g028   | 5.32 | 0 | 0    | 2 | MASCOT | T      | PLEX8 |       |
| 1.02E-02 | 0 0 | Cs1g02850.1           | 5.21 | 0 | 0    | 2 | MASCOT | T      |       |       |
| 2.18E-02 | 0 0 | Cs1g03240.1/Cs1g032   | 5.32 | 0 | 0    | 2 | MASCOT | T      | PLEX8 |       |
| 3.48E-03 | 0 0 | Cs1g03350.1           | 5.84 | 0 | 0    | 2 | MASCOT | T      |       |       |
| 2.11E-02 | 0 0 | Cs1g09420.1/Cs1g094   | 5.81 | 0 | 0    | 2 | MASCOT | T      | PLEX8 |       |

|              |                      |      |   |   |          |   |       |
|--------------|----------------------|------|---|---|----------|---|-------|
| 2.04E-03 0 0 | Cs1g09520.1          | 5.97 | 0 | 0 | 2 MASCOT | T | PLEX8 |
| 1.23E-03 0 0 | Cs1g09990.1          | 5.32 | 0 | 0 | 2 MASCOT | T | PLEX8 |
| 2.51E-04 0 0 | Cs1g12430.1          | 5.84 | 0 | 0 | 2 MASCOT | T | PLEX8 |
| 1.91E-02 0 0 | Cs1g13190.1/Cs1g131  | 4.14 | 0 | 0 | 2 MASCOT | T | PLEX8 |
| 8.27E-03 0 0 | Cs1g13230.1/Cs2g285  | 4.37 | 0 | 0 | 2 MASCOT | T | PLEX8 |
| 2.98E-03 0 0 | Cs1g13870.1/Cs1g138  | 4.54 | 0 | 0 | 2 MASCOT | T | PLEX8 |
| 3.79E-04 0 0 | Cs1g14610.1          | 4.65 | 0 | 0 | 2 MASCOT | T | PLEX8 |
| 9.60E-05 0 0 | Cs1g15210.1          | 4.53 | 0 | 0 | 2 MASCOT | T | PLEX8 |
| 2.76E-03 0 0 | Cs1g18140.1/Cs1g181  | 4.53 | 0 | 0 | 2 MASCOT | T | PLEX8 |
| 1.79E-02 0 0 | Cs1g19370.1          | 4.53 | 0 | 0 | 2 MASCOT | T | PLEX8 |
| 1.25E-02 0 0 | Cs1g19490.1          | 9.8  | 0 | 0 | 2 MASCOT | T |       |
| 8.79E-03 0 0 | Cs1g20160.1/Cs1g201  | 6    | 0 | 0 | 2 MASCOT | T | PLEX8 |
| 3.81E-04 0 0 | Cs1g21640.1          | 5.28 | 0 | 0 | 2 MASCOT | T | PLEX8 |
| 2.37E-03 0 0 | Cs1g22680.1          | 4.25 | 0 | 0 | 2 MASCOT | T |       |
| 8.54E-03 0 0 | Cs1g22930.1          | 9.76 | 0 | 0 | 2 MASCOT | T | PLEX8 |
| 4.61E-03 0 0 | Cs1g23750.1          | 4.48 | 0 | 0 | 2 MASCOT | T | PLEX8 |
| 6.76E-04 0 0 | Cs1g24180.1/Cs1g241  | 3.92 | 0 | 0 | 2 MASCOT | T |       |
| 1.28E-01 0 0 | Cs1g24380.1          | 4.03 | 0 | 0 | 2 MASCOT | T | PLEX8 |
| 4.08E-03 0 0 | Cs1g26370.1/Cs1g263  | 5.84 | 0 | 0 | 2 MASCOT | T | PLEX8 |
| 7.62E-03 0 0 | Cs2g03270.1          | 6.74 | 0 | 0 | 2 MASCOT | T | PLEX8 |
| 7.29E-03 0 0 | Cs2g04790.1          | 5.32 | 0 | 0 | 2 MASCOT | T | PLEX8 |
| 4.42E-04 0 0 | Cs2g04930.1          | 4.54 | 0 | 0 | 2 MASCOT | T |       |
| 3.38E-02 0 0 | Cs2g05120.1          | 9.76 | 0 | 0 | 2 MASCOT | T | PLEX8 |
| 3.62E-02 0 0 | Cs2g07010.1/Cs2g070  | 8.47 | 0 | 0 | 2 MASCOT | T | PLEX8 |
| 3.18E-02 0 0 | Cs2g07069.1          | 9.75 | 0 | 0 | 2 MASCOT | T |       |
| 4.18E-03 0 0 | Cs2g08190.1/Cs2g081  | 4.53 | 0 | 0 | 2 MASCOT | T | PLEX8 |
| 6.28E-03 0 0 | Cs2g08280.1          | 4.37 | 0 | 0 | 2 MASCOT | T | PLEX8 |
| 3.81E-02 0 0 | Cs2g10360.1/Cs2g103  | 5.84 | 0 | 0 | 2 MASCOT | T | PLEX8 |
| 3.32E-04 0 0 | Cs2g10860.1/Cs2g108  | 4.75 | 0 | 0 | 2 MASCOT | T | PLEX8 |
| 2.83E-03 0 0 | Cs2g11150.1/Cs2g111  | 5.5  | 0 | 0 | 2 MASCOT | T | PLEX8 |
| 8.88E-03 0 0 | Cs2g11200.1/Cs2g112  | 4.37 | 0 | 0 | 2 MASCOT | T |       |
| 7.03E-03 0 0 | Cs2g12120.1/Cs2g121  | 3.84 | 0 | 0 | 2 MASCOT | T | PLEX8 |
| 1.87E-02 0 0 | Cs2g12710.1/Cs2g127  | 5.32 | 0 | 0 | 2 MASCOT | T | PLEX8 |
| 1.67E-02 0 0 | Cs2g13580.1/Cs2g135  | 5.21 | 0 | 0 | 2 MASCOT | T | PLEX8 |
| 3.71E-04 0 0 | Cs2g14830.1/Cs2g148  | 4.37 | 0 | 0 | 2 MASCOT | T | PLEX8 |
| 1.79E-03 0 0 | Cs2g15670.1/Cs2g156  | 9.76 | 0 | 0 | 2 MASCOT | T | PLEX8 |
| 2.66E-02 0 0 | Cs2g15990.1/Cs2g159  | 3.93 | 0 | 0 | 2 MASCOT | T |       |
| 1.53E-02 0 0 | Cs2g17050.1          | 5.84 | 0 | 0 | 2 MASCOT | T | PLEX8 |
| 1.60E-02 0 0 | Cs2g17390.1/Cs2g173  | 6.74 | 0 | 0 | 2 MASCOT | T | PLEX8 |
| 1.22E-02 0 0 | Cs2g17700.1/Cs2g177  | 8.25 | 0 | 0 | 2 MASCOT | T | PLEX8 |
| 1.27E-02 0 0 | Cs2g18040.1 ! Cs5g19 | 6.85 | 0 | 0 | 2 MASCOT | T | PLEX8 |
| 4.96E-03 0 0 | Cs2g20010.1          | 4    | 0 | 0 | 2 MASCOT | T |       |
| 6.52E-03 0 0 | Cs2g21740.1/Cs2g217  | 4.25 | 0 | 0 | 2 MASCOT | T |       |
| 5.53E-03 0 0 | Cs2g22040.1          | 4.03 | 0 | 0 | 2 MASCOT | T | PLEX8 |
| 5.78E-03 0 0 | Cs2g22400.1/Cs2g224  | 4.65 | 0 | 0 | 2 MASCOT | T | PLEX8 |
| 5.40E-03 0 0 | Cs2g24710.1/Cs2g247  | 4.37 | 0 | 0 | 2 MASCOT | T |       |
| 1.07E-02 0 0 | Cs2g26060.1/orange1. | 5.84 | 0 | 0 | 2 MASCOT | T | PLEX8 |
| 4.61E-03 0 0 | Cs2g29070.1/Cs2g290  | 5.83 | 0 | 0 | 2 MASCOT | T | PLEX8 |
| 3.08E-02 0 0 | Cs2g30420.1/Cs2g304  | 8.75 | 0 | 0 | 2 MASCOT | T | PLEX8 |
| 2.27E-02 0 0 | Cs2g30570.1          | 6    | 0 | 0 | 2 MASCOT | T | PLEX8 |
| 2.61E-05 0 0 | Cs2g30990.1/Cs2g309  | 6.05 | 0 | 0 | 2 MASCOT | T |       |

|          |     |                     |      |   |      |   |        |         |         |
|----------|-----|---------------------|------|---|------|---|--------|---------|---------|
| 2.72E-02 | 0 0 | Cs3g02970.1/Cs3g030 | 4.14 | 0 | 0    | 2 | MASCOT | T       |         |
| 5.67E-03 | 0 0 | Cs3g05720.1/Cs3g057 | 4.21 | 0 | 0    | 2 | MASCOT | T       |         |
| 7.28E-05 | 0 0 | Cs3g06340.1/Cs3g063 | 4.14 | 0 | 0    | 2 | MASCOT | T       |         |
| 6.17E-06 | 0 0 | Cs3g06880.1         | 5.37 | 0 | 0    | 2 | MASCOT | T PLEX8 |         |
| 1.80E-03 | 0 0 | Cs3g10390.1         | 5.84 | 0 | 0    | 2 | MASCOT | T       |         |
| 2.43E-02 | 0 0 | Cs3g10540.1         | 6.74 | 0 | 0    | 2 | MASCOT | T PLEX8 |         |
| 2.61E-05 | 0 0 | Cs3g10570.1/Cs3g105 | 5.32 | 0 | 0    | 2 | MASCOT | T PLEX8 |         |
| 5.56E-03 | 0 0 | Cs3g13490.1/Cs3g134 | 4.03 | 0 | 0    | 2 | MASCOT | T PLEX8 |         |
| 4.86E-03 | 0 0 | Cs3g15360.1/Cs3g153 | 8.26 | 0 | 0    | 2 | MASCOT | T PLEX8 |         |
| 3.58E-03 | 0 0 | Cs3g16320.1         | 4.21 | 0 | 0    | 2 | MASCOT | T PLEX8 |         |
| 1.52E-01 | 0 0 | Cs3g16420.1/Cs3g164 | 5.84 | 0 | 0    | 2 | MASCOT | T PLEX8 |         |
| 2.30E-02 | 0 0 | Cs3g16790.1         | 8.25 | 1 | 0    | 2 | MASCOT | T       |         |
| 2.76E-03 | 0 0 | Cs3g17620.1         | 4.75 | 0 | 0    | 2 | MASCOT | T PLEX8 |         |
| 4.34E-03 | 0 0 | Cs3g19910.1         | 5.83 | 0 | 0    | 2 | MASCOT | T PLEX8 |         |
| 2.49E-05 | 0 0 | Cs3g20460.1/Cs3g204 | 4.37 | 0 | 0    | 2 | MASCOT | T       |         |
| 7.00E-03 | 0 0 | Cs3g23290.1/Cs3g232 | 9.76 | 0 | 0    | 2 | MASCOT | T PLEX8 |         |
| 1.56E-02 | 0 0 | Cs3g23570.1/Cs8g059 | 8.76 | 0 | 0    | 2 | MASCOT | T PLEX8 |         |
| 2.81E-02 | 0 0 | Cs3g25840.1/Cs3g258 | 8.63 | 0 | 0    | 2 | MASCOT | T PLEX8 |         |
| 4.95E-03 | 0 0 | Cs3g25910.1/Cs3g259 | 3.93 | 0 | 0    | 2 | MASCOT | T       |         |
| 1.23E-02 | 0 0 | Cs3g26510.1         | 3.93 | 0 | 0    | 2 | MASCOT | T PLEX8 |         |
| 1.54E-02 | 0 0 | Cs3g26640.1/Cs3g266 | 6.74 | 0 | 0    | 2 | MASCOT | T       |         |
| 3.65E-03 | 0 0 | Cs2g14940.1/Cs2g149 | 8.8  | 0 | 0    | 2 | MASCOT | T PLEX8 |         |
| 5.68E-03 | 0 0 | Cs3g27580.1/Cs3g275 | 8.76 | 0 | 0    | 2 | MASCOT | T PLEX8 |         |
| 9.20E-04 | 0 0 | Cs3g27610.1/Cs3g276 | 6    | 0 | 0    | 2 | MASCOT | T PLEX8 |         |
| 3.99E-03 | 0 0 | Cs4g02720.1/Cs4g027 | 4.37 | 0 | 15.9 | 0 | 2      | MASCOT  | T PLEX8 |
| 4.10E-03 | 0 0 | Cs4g04020.1         | 4.4  | 0 | 0    | 2 | MASCOT | T PLEX8 |         |
| 1.38E-02 | 0 0 | Cs4g04170.1/Cs4g041 | 6    | 0 | 0    | 2 | MASCOT | T PLEX8 |         |
| 3.54E-02 | 0 0 | Cs4g05290.1         | 9.76 | 0 | 0    | 2 | MASCOT | T PLEX8 |         |
| 6.41E-03 | 0 0 | Cs4g06730.1/Cs4g067 | 4.53 | 0 | 0    | 2 | MASCOT | T PLEX8 |         |
| 4.65E-04 | 0 0 | Cs4g07120.1/Cs4g094 | 4.65 | 0 | 0    | 2 | MASCOT | T PLEX8 |         |
| 8.82E-03 | 0 0 | Cs4g08250.1/Cs4g082 | 4.53 | 0 | 0    | 2 | MASCOT | T PLEX8 |         |
| 1.34E-03 | 0 0 | Cs4g09460.1/Cs4g094 | 4.03 | 0 | 0    | 2 | MASCOT | T PLEX8 |         |
| 1.08E-02 | 0 0 | Cs4g10980.1/Cs4g109 | 5.21 | 0 | 0    | 2 | MASCOT | T PLEX8 |         |
| 9.17E-03 | 0 0 | Cs4g11170.1         | 3.91 | 0 | 0    | 2 | MASCOT | T PLEX8 |         |
| 4.30E-03 | 0 0 | Cs4g11910.1/Cs4g119 | 4.37 | 0 | 0    | 2 | MASCOT | T PLEX8 |         |
| 2.77E-02 | 0 0 | Cs4g12280.1         | 8.76 | 0 | 0    | 2 | MASCOT | T PLEX8 |         |
| 1.25E-02 | 0 0 | Cs4g12310.1         | 8.25 | 0 | 0    | 2 | MASCOT | T PLEX8 |         |
| 5.59E-03 | 0 0 | Cs4g13230.1         | 4.48 | 0 | 0    | 2 | MASCOT | T PLEX8 |         |
| 1.36E-02 | 0 0 | Cs1g18740.1/Cs4g132 | 8.75 | 0 | 0    | 2 | MASCOT | T PLEX8 |         |
| 3.57E-03 | 0 0 | Cs4g13250.1         | 6.75 | 0 | 0    | 2 | MASCOT | T PLEX8 |         |
| 3.05E-03 | 0 0 | Cs4g14500.1/Cs4g145 | 4.54 | 0 | 0    | 2 | MASCOT | T PLEX8 |         |
| 1.13E-03 | 0 0 | Cs4g15120.1/Cs5g161 | 4.75 | 0 | 0    | 2 | MASCOT | T       |         |
| 2.82E-03 | 0 0 | Cs4g15220.1         | 5.84 | 0 | 0    | 2 | MASCOT | T       |         |
| 1.19E-03 | 0 0 | Cs4g17820.1         | 5.88 | 0 | 0    | 2 | MASCOT | T PLEX8 |         |
| 9.47E-04 | 0 0 | Cs4g19000.1/Cs4g190 | 4.37 | 0 | 0    | 2 | MASCOT | T PLEX8 |         |
| 3.75E-02 | 0 0 | Cs4g19440.1         | 6    | 0 | 0    | 2 | MASCOT | T PLEX8 |         |
| 2.54E-03 | 0 0 | Cs4g19800.1         | 5.18 | 0 | 0    | 2 | MASCOT | T PLEX8 |         |
| 2.80E-03 | 0 0 | Cs4g20300.1/Cs4g203 | 4.03 | 0 | 0    | 2 | MASCOT | T       |         |
| 8.46E-03 | 0 0 | Cs5g04870.1/Cs5g048 | 4.37 | 0 | 0    | 2 | MASCOT | T PLEX8 |         |
| 1.13E-02 | 0 0 | Cs5g06010.1/Cs7g091 | 6    | 0 | 0    | 2 | MASCOT | T PLEX8 |         |
| 1.41E-02 | 0 0 | Cs5g06640.1         | 4.22 | 0 | 0    | 2 | MASCOT | T       |         |

|              |                      |      |   |   |          |   |       |
|--------------|----------------------|------|---|---|----------|---|-------|
| 1.65E-02 0 0 | Cs5g06900.1          | 6.74 | 0 | 0 | 2 MASCOT | T |       |
| 1.74E-02 0 0 | Cs5g07020.1          | 8.8  | 0 | 0 | 2 MASCOT | T | PLEX8 |
| 1.76E-03 0 0 | Cs5g07530.1/Cs5g075  | 4.37 | 0 | 0 | 2 MASCOT | T | PLEX8 |
| 8.18E-04 0 0 | Cs5g09160.1          | 5.84 | 0 | 0 | 2 MASCOT | T |       |
| 1.99E-03 0 0 | Cs5g11140.1          | 4.41 | 0 | 0 | 2 MASCOT | T | PLEX8 |
| 3.31E-03 0 0 | Cs5g12050.1          | 4.25 | 0 | 0 | 2 MASCOT | T | PLEX8 |
| 2.97E-02 0 0 | Cs2g27440.1 ! Cs5g12 | 9.44 | 0 | 0 | 2 MASCOT | T | PLEX8 |
| 1.68E-02 0 0 | Cs2g07430.1/Cs2g074  | 6    | 0 | 0 | 2 MASCOT | T | PLEX8 |
| 6.42E-03 0 0 | Cs5g21830.1          | 6.73 | 0 | 0 | 2 MASCOT | T | PLEX8 |
| 3.26E-02 0 0 | Cs5g23300.1          | 6    | 0 | 0 | 2 MASCOT | T | PLEX8 |
| 7.64E-05 0 0 | Cs5g24310.1          | 6.47 | 0 | 0 | 2 MASCOT | T |       |
| 5.56E-04 0 0 | Cs5g24800.1          | 4.37 | 0 | 0 | 2 MASCOT | T | PLEX8 |
| 1.15E-03 0 0 | Cs5g25110.1/Cs5g251  | 4.53 | 0 | 0 | 2 MASCOT | T | PLEX8 |
| 8.60E-04 0 0 | Cs5g26110.1/Cs5g261  | 4.14 | 0 | 0 | 2 MASCOT | T | PLEX8 |
| 1.15E-03 0 0 | Cs5g26220.1          | 6.1  | 0 | 0 | 2 MASCOT | T | PLEX8 |
| 3.94E-03 0 0 | Cs5g26540.1          | 4.21 | 0 | 0 | 2 MASCOT | T | PLEX8 |
| 1.77E-02 0 0 | Cs5g27665.1          | 5.59 | 0 | 0 | 2 MASCOT | T |       |
| 1.94E-02 0 0 | Cs5g29620.1/Cs5g296  | 6.75 | 0 | 0 | 2 MASCOT | T | PLEX8 |
| 2.78E-03 0 0 | Cs5g29930.2          | 6.85 | 0 | 0 | 2 MASCOT | T | PLEX8 |
| 6.70E-03 0 0 | Cs5g30270.1/Cs5g302  | 6.74 | 0 | 0 | 2 MASCOT | T | PLEX8 |
| 1.45E-02 0 0 | Cs5g30410.1          | 5.86 | 0 | 0 | 2 MASCOT | T | PLEX8 |
| 7.23E-03 0 0 | Cs5g31290.1          | 5.32 | 0 | 0 | 2 MASCOT | T | PLEX8 |
| 5.76E-02 0 0 | Cs3g13120.1/Cs4g122  | 9.76 | 0 | 0 | 2 MASCOT | T | PLEX8 |
| 3.82E-03 0 0 | Cs5g32410.1          | 4.37 | 0 | 0 | 2 MASCOT | T |       |
| 8.23E-05 0 0 | Cs6g02590.1          | 5.32 | 0 | 0 | 2 MASCOT | T | PLEX8 |
| 5.21E-03 0 0 | Cs6g04650.1          | 9.8  | 0 | 0 | 2 MASCOT | T | PLEX8 |
| 1.98E-03 0 0 | Cs6g04920.1          | 5.84 | 0 | 0 | 2 MASCOT | T |       |
| 1.34E-02 0 0 | Cs6g07500.1          | 9.8  | 0 | 0 | 2 MASCOT | T | PLEX8 |
| 1.12E-02 0 0 | Cs6g07690.1/orange1. | 4.37 | 0 | 0 | 2 MASCOT | T | PLEX8 |
| 7.87E-03 0 0 | Cs6g08000.1          | 9.72 | 0 | 0 | 2 MASCOT | T |       |
| 7.36E-03 0 0 | Cs6g08210.1          | 5.4  | 0 | 0 | 2 MASCOT | T |       |
| 1.45E-02 0 0 | Cs6g13000.1/Cs6g130  | 4.03 | 0 | 0 | 2 MASCOT | T | PLEX8 |
| 3.47E-03 0 0 | Cs6g13025.1          | 8.76 | 0 | 0 | 2 MASCOT | T | PLEX8 |
| 2.35E-02 0 0 | Cs6g14050.1/Cs6g140  | 4.53 | 0 | 0 | 2 MASCOT | T |       |
| 1.70E-02 0 0 | Cs3g07500.1/Cs3g075  | 4.37 | 0 | 0 | 2 MASCOT | T |       |
| 2.44E-02 0 0 | Cs6g15840.1/Cs6g158  | 4.14 | 0 | 0 | 2 MASCOT | T |       |
| 1.64E-03 0 0 | Cs6g15860.1/Cs6g158  | 5.88 | 0 | 0 | 2 MASCOT | T | PLEX8 |
| 1.93E-02 0 0 | Cs6g18180.1          | 6.74 | 0 | 0 | 2 MASCOT | T | PLEX8 |
| 3.51E-03 0 0 | Cs6g18650.1          | 5.21 | 0 | 0 | 2 MASCOT | T | PLEX8 |
| 1.94E-03 0 0 | Cs6g18680.1          | 8.22 | 0 | 0 | 2 MASCOT | T | PLEX8 |
| 1.06E-02 0 0 | Cs6g18840.1          | 9.76 | 0 | 0 | 2 MASCOT | T | PLEX8 |
| 2.29E-02 0 0 | Cs6g19130.1          | 5.37 | 0 | 0 | 2 MASCOT | T | PLEX8 |
| 6.47E-03 0 0 | Cs6g19410.1/Cs6g194  | 5.88 | 0 | 0 | 2 MASCOT | T | PLEX8 |
| 4.15E-04 0 0 | Cs6g21060.1          | 4.37 | 0 | 0 | 2 MASCOT | T |       |
| 3.43E-03 0 0 | Cs7g01480.1/Cs7g014  | 5.81 | 0 | 0 | 2 MASCOT | T | PLEX8 |
| 1.40E-03 0 0 | Cs7g02020.1/Cs7g020  | 5.84 | 0 | 0 | 2 MASCOT | T | PLEX8 |
| 8.29E-03 0 0 | Cs7g03460.1          | 4.14 | 0 | 0 | 2 MASCOT | T | PLEX8 |
| 2.45E-02 0 0 | Cs7g03860.1/Cs7g038  | 4    | 0 | 0 | 2 MASCOT | T | PLEX8 |
| 1.08E-02 0 0 | Cs7g06260.1          | 6    | 0 | 0 | 2 MASCOT | T | PLEX8 |
| 3.88E-04 0 0 | Cs7g08430.1/Cs7g084  | 5.81 | 0 | 0 | 2 MASCOT | T |       |
| 3.40E-03 0 0 | Cs7g08630.1/Cs7g086  | 4.53 | 0 | 0 | 2 MASCOT | T | PLEX8 |

|              |                     |      |   |   |          |   |       |
|--------------|---------------------|------|---|---|----------|---|-------|
| 1.62E-02 0 0 | Cs7g09630.1         | 9.76 | 0 | 0 | 2 MASCOT | T | PLEX8 |
| 1.78E-02 0 0 | Cs7g11030.1         | 8.63 | 0 | 0 | 2 MASCOT | T | PLEX8 |
| 1.40E-03 0 0 | Cs7g11210.1/Cs7g112 | 5.84 | 0 | 0 | 2 MASCOT | T | PLEX8 |
| 1.73E-04 0 0 | Cs7g11670.1/Cs7g116 | 4.54 | 0 | 0 | 2 MASCOT | T |       |
| 7.12E-03 0 0 | Cs7g12490.1         | 4.37 | 0 | 0 | 2 MASCOT | T | PLEX8 |
| 6.31E-03 0 0 | Cs7g13580.1         | 8.8  | 0 | 0 | 2 MASCOT | T | PLEX8 |
| 2.71E-02 0 0 | Cs7g13640.1/Cs7g136 | 4.37 | 0 | 0 | 2 MASCOT | T | PLEX8 |
| 1.60E-03 0 0 | Cs7g14990.1         | 5.4  | 0 | 0 | 2 MASCOT | T | PLEX8 |
| 4.00E-05 0 0 | Cs7g15240.1         | 6.75 | 0 | 0 | 2 MASCOT | T | PLEX8 |
| 6.67E-03 0 0 | Cs7g18000.1         | 5.97 | 0 | 0 | 2 MASCOT | T |       |
| 2.77E-02 0 0 | Cs7g18350.1         | 6.75 | 0 | 0 | 2 MASCOT | T | PLEX8 |
| 2.41E-03 0 0 | Cs5g07820.1/Cs5g078 | 4.17 | 0 | 0 | 2 MASCOT | T | PLEX8 |
| 3.01E-02 0 0 | Cs7g19230.1         | 6    | 0 | 0 | 2 MASCOT | T |       |
| 8.31E-03 0 0 | Cs7g19290.1/Cs7g192 | 6.74 | 0 | 0 | 2 MASCOT | T | PLEX8 |
| 8.11E-03 0 0 | Cs7g19570.1/Cs7g195 | 4.09 | 0 | 0 | 2 MASCOT | T | PLEX8 |
| 4.74E-03 0 0 | Cs7g20360.1/Cs7g203 | 6.72 | 0 | 0 | 2 MASCOT | T | PLEX8 |
| 1.24E-03 0 0 | Cs7g21300.1         | 8.75 | 0 | 0 | 2 MASCOT | T | PLEX8 |
| 2.90E-03 0 0 | Cs7g22380.1         | 5.55 | 0 | 0 | 2 MASCOT | T | PLEX8 |
| 2.49E-03 0 0 | Cs7g24480.1         | 5.72 | 0 | 0 | 2 MASCOT | T | PLEX8 |
| 3.61E-03 0 0 | Cs7g25610.1         | 8.31 | 0 | 0 | 2 MASCOT | T | PLEX8 |
| 1.41E-02 0 0 | Cs7g25630.1/Cs7g256 | 4.21 | 0 | 0 | 2 MASCOT | T | PLEX8 |
| 1.35E-02 0 0 | Cs7g26340.1/Cs7g263 | 5.4  | 0 | 0 | 2 MASCOT | T |       |
| 1.11E-02 0 0 | Cs7g28630.1/Cs7g286 | 6.74 | 0 | 0 | 2 MASCOT | T | PLEX8 |
| 5.19E-03 0 0 | Cs7g28900.1         | 4.65 | 0 | 0 | 2 MASCOT | T | PLEX8 |
| 1.32E-02 0 0 | Cs7g29360.1/Cs7g293 | 6.75 | 0 | 0 | 2 MASCOT | T | PLEX8 |
| 8.70E-03 0 0 | Cs7g29540.1         | 6.05 | 0 | 0 | 2 MASCOT | T | PLEX8 |
| 9.86E-03 0 0 | Cs7g31130.1/Cs7g311 | 5.88 | 0 | 0 | 2 MASCOT | T |       |
| 1.87E-02 0 0 | Cs7g31290.1         | 5.84 | 0 | 0 | 2 MASCOT | T | PLEX8 |
| 1.65E-02 0 0 | Cs8g01680.1         | 5.99 | 0 | 0 | 2 MASCOT | T | PLEX8 |
| 9.08E-06 0 0 | Cs8g01970.1         | 5.32 | 0 | 0 | 2 MASCOT | T | PLEX8 |
| 2.01E-03 0 0 | Cs8g02450.1/Cs8g024 | 6    | 0 | 0 | 2 MASCOT | T | PLEX8 |
| 9.56E-03 0 0 | Cs8g04340.1         | 8.23 | 0 | 0 | 2 MASCOT | T | PLEX8 |
| 2.79E-02 0 0 | Cs8g05030.1/Cs8g050 | 9.6  | 1 | 0 | 2 MASCOT | T |       |
| 2.89E-03 0 0 | Cs8g05070.1/Cs8g050 | 4.53 | 0 | 0 | 2 MASCOT | T |       |
| 1.45E-02 0 0 | Cs8g06410.1/Cs8g064 | 5.97 | 0 | 0 | 2 MASCOT | T | PLEX8 |
| 1.97E-02 0 0 | Cs8g06890.1         | 4.37 | 0 | 0 | 2 MASCOT | T | PLEX8 |
| 1.82E-02 0 0 | Cs8g07200.1/Cs8g072 | 5.83 | 0 | 0 | 2 MASCOT | T | PLEX8 |
| 2.26E-01 0 0 | Cs8g07480.1/Cs8g074 | 5.32 | 0 | 0 | 2 MASCOT | T | PLEX8 |
| 1.68E-03 0 0 | Cs8g07970.1         | 4    | 0 | 0 | 2 MASCOT | T |       |
| 2.90E-03 0 0 | Cs8g08740.1/Cs8g087 | 4.41 | 0 | 0 | 2 MASCOT | T | PLEX8 |
| 6.91E-03 0 0 | Cs8g08770.2/Cs8g087 | 4.09 | 0 | 0 | 2 MASCOT | T | PLEX8 |
| 2.93E-03 0 0 | Cs8g09960.1         | 4.49 | 1 | 0 | 2 MASCOT | T | PLEX8 |
| 6.83E-03 0 0 | Cs1g01980.1/Cs1g019 | 4.53 | 0 | 0 | 2 MASCOT | T | PLEX8 |
| 1.18E-03 0 0 | Cs8g11350.1         | 4.21 | 0 | 0 | 2 MASCOT | T | PLEX8 |
| 1.62E-03 0 0 | Cs8g13645.1         | 6.75 | 0 | 0 | 2 MASCOT | T |       |
| 6.42E-03 0 0 | Cs8g15660.1         | 4.21 | 0 | 0 | 2 MASCOT | T | PLEX8 |
| 7.57E-03 0 0 | Cs6g04950.1/Cs8g172 | 6.74 | 0 | 0 | 2 MASCOT | T | PLEX8 |
| 2.00E-02 0 0 | Cs8g18200.1         | 6.05 | 0 | 0 | 2 MASCOT | T | PLEX8 |
| 8.90E-03 0 0 | Cs8g18870.1         | 9.76 | 0 | 0 | 2 MASCOT | T | PLEX8 |
| 1.18E-02 0 0 | Cs8g19680.1/Cs8g196 | 6.74 | 0 | 0 | 2 MASCOT | T | PLEX8 |
| 1.58E-02 0 0 | Cs8g20040.1/Cs8g200 | 4.37 | 0 | 0 | 2 MASCOT | T |       |

|          |     |                       |      |   |   |   |        |   |       |
|----------|-----|-----------------------|------|---|---|---|--------|---|-------|
| 3.72E-03 | 0 0 | Cs9g04840.1           | 5.97 | 0 | 0 | 2 | MASCOT | T | PLEX8 |
| 1.03E-03 | 0 0 | Cs9g06330.1/Cs9g063   | 5.84 | 0 | 0 | 2 | MASCOT | T |       |
| 9.90E-03 | 0 0 | Cs9g06370.1           | 3.92 | 0 | 0 | 2 | MASCOT | T | PLEX8 |
| 4.52E-03 | 0 0 | Cs9g07700.1           | 4.25 | 0 | 0 | 2 | MASCOT | T | PLEX8 |
| 7.31E-03 | 0 0 | Cs9g07710.1           | 5.84 | 0 | 0 | 2 | MASCOT | T | PLEX8 |
| 6.89E-04 | 0 0 | Cs9g07870.1/Cs9g078   | 5.21 | 0 | 0 | 2 | MASCOT | T |       |
| 4.07E-04 | 0 0 | Cs9g08900.1/Cs9g089   | 6.79 | 0 | 0 | 2 | MASCOT | T | PLEX8 |
| 2.04E-02 | 0 0 | Cs9g09680.1           | 8.59 | 0 | 0 | 2 | MASCOT | T | PLEX8 |
| 1.84E-03 | 0 0 | Cs9g09730.1/Cs9g097   | 5.87 | 0 | 0 | 2 | MASCOT | T |       |
| 2.00E-02 | 0 0 | Cs9g10120.1/Cs9g101   | 5.84 | 0 | 0 | 2 | MASCOT | T | PLEX8 |
| 1.05E-02 | 0 0 | Cs9g13420.1/Cs9g134   | 9.76 | 0 | 0 | 2 | MASCOT | T | PLEX8 |
| 1.18E-02 | 0 0 | Cs9g14610.1           | 4.4  | 0 | 0 | 2 | MASCOT | T | PLEX8 |
| 5.15E-03 | 0 0 | Cs9g16800.1/Cs9g168   | 4.53 | 0 | 0 | 2 | MASCOT | T | PLEX8 |
| 8.10E-03 | 0 0 | Cs9g17270.1/Cs9g172   | 5.81 | 0 | 0 | 2 | MASCOT | T | PLEX8 |
| 1.28E-03 | 0 0 | Cs9g17340.1/Cs9g173   | 6    | 0 | 0 | 2 | MASCOT | T |       |
| 2.53E-04 | 0 0 | Cs9g18000.1           | 9.47 | 0 | 0 | 2 | MASCOT | T |       |
| 1.80E-03 | 0 0 | Cs9g19100.1           | 5.32 | 0 | 0 | 2 | MASCOT | T | PLEX8 |
| 2.00E-02 | 0 0 | Cs9g19390.1           | 4.75 | 0 | 0 | 2 | MASCOT | T | PLEX8 |
| 7.69E-04 | 0 0 | gi 113952602          | 4.75 | 0 | 0 | 2 | MASCOT | T |       |
| 1.64E-04 | 0 0 | gi 113952618          | 8.75 | 0 | 0 | 2 | MASCOT | T | PLEX8 |
| 7.13E-04 | 0 0 | gi 113952628          | 4.14 | 0 | 0 | 2 | MASCOT | T | PLEX8 |
| 1.26E-04 | 0 0 | gi 113952656          | 6    | 0 | 0 | 2 | MASCOT | T | PLEX8 |
| 2.93E-04 | 0 0 | orange1.1t00105.1     | 5.15 | 0 | 0 | 2 | MASCOT | T |       |
| 2.91E-04 | 0 0 | orange1.1t00179.1/ora | 4.03 | 0 | 0 | 2 | MASCOT | T |       |
| 1.21E-03 | 0 0 | orange1.1t00285.1     | 4.09 | 0 | 0 | 2 | MASCOT | T | PLEX8 |
| 8.76E-03 | 0 0 | orange1.1t00358.1/ora | 8.72 | 0 | 0 | 2 | MASCOT | T | PLEX8 |
| 5.77E-03 | 0 0 | orange1.1t00372.1/ora | 6.75 | 0 | 0 | 2 | MASCOT | T | PLEX8 |
| 1.17E-02 | 0 0 | orange1.1t00552.1/ora | 5.84 | 0 | 0 | 2 | MASCOT | T |       |
| 9.45E-04 | 0 0 | orange1.1t00673.1/ora | 6    | 0 | 0 | 2 | MASCOT | T |       |
| 2.72E-03 | 0 0 | Cs5g17140.1/orange1.  | 4.31 | 0 | 0 | 2 | MASCOT | T | PLEX8 |
| 1.20E-02 | 0 0 | orange1.1t01102.1     | 6    | 0 | 0 | 2 | MASCOT | T |       |
| 3.46E-03 | 0 0 | orange1.1t01131.1     | 4.09 | 0 | 0 | 2 | MASCOT | T | PLEX8 |
| 2.56E-03 | 0 0 | orange1.1t01677.1     | 4.37 | 0 | 0 | 2 | MASCOT | T | PLEX8 |
| 1.34E-02 | 0 0 | orange1.1t01746.1/ora | 8.75 | 0 | 0 | 2 | MASCOT | T | PLEX8 |
| 2.36E-02 | 0 0 | orange1.1t01814.1     | 4    | 0 | 0 | 2 | MASCOT | T | PLEX8 |
| 1.97E-03 | 0 0 | orange1.1t02113.1     | 8.47 | 0 | 0 | 2 | MASCOT | T | PLEX8 |
| 1.06E-03 | 0 0 | orange1.1t02213.1     | 4.37 | 0 | 0 | 2 | MASCOT | T | PLEX8 |
| 1.96E-03 | 0 0 | orange1.1t02553.1     | 4.59 | 0 | 0 | 2 | MASCOT | T | PLEX8 |
| 4.66E-03 | 0 0 | Cs7g02400.1/Cs7g024   | 5.4  | 0 | 0 | 2 | MASCOT | T | PLEX8 |
| 8.07E-03 | 0 0 | orange1.1t03228.1     | 6    | 0 | 0 | 2 | MASCOT | T | PLEX8 |
| 1.48E-03 | 0 0 | orange1.1t03235.1     | 4.54 | 0 | 0 | 2 | MASCOT | T | PLEX8 |
| 4.53E-03 | 0 0 | orange1.1t03873.1     | 8.75 | 0 | 0 | 2 | MASCOT | T |       |
| 2.42E-02 | 0 0 | orange1.1t04013.1     | 6    | 0 | 0 | 2 | MASCOT | T | PLEX8 |
| 2.26E-02 | 0 0 | orange1.1t04378.1/ora | 4.37 | 0 | 0 | 2 | MASCOT | T | PLEX8 |
| 7.53E-03 | 0 0 | orange1.1t04875.1     | 6.05 | 0 | 0 | 2 | MASCOT | T | PLEX8 |
| 1.71E-02 | 0 0 | Cs6g07950.1/orange1.  | 5.32 | 0 | 0 | 2 | MASCOT | T | PLEX8 |
| 3.46E-03 | 0 0 | Cs2g11070.1/orange1.  | 4.53 | 0 | 0 | 2 | MASCOT | T |       |



| I113     | I114     | I115     | I116     | I117     | I118     | I119     | I121     | IValid |
|----------|----------|----------|----------|----------|----------|----------|----------|--------|
| 33180.7  | 30476.9  | 25967.6  | 12868    | 35572.9  | 27959.7  | 25726.7  | 32034.3  | TRUE   |
| 103726.1 | 78151.4  | 53063.5  | 65314.4  | 76361.2  | 56279.4  | 81172.8  | 89536.7  | TRUE   |
| 964340.9 | 865901.9 | 1026278  | 1301623  | 1469038  | 1132284  | 1305096  | 1359900  | TRUE   |
| 2113148  | 2012893  | 2270553  | 2853859  | 3029737  | 2365787  | 2879827  | 3081840  | TRUE   |
| 55238.2  | 108653.6 | 66644.3  | 77202.7  | 100857.6 | 43132.9  | 51384.9  | 42976.8  | TRUE   |
| 76685.7  | 105658.7 | 75025.7  | 106496.6 | 94210.7  | 69185.7  | 103907.5 | 82227.6  | TRUE   |
| 75266.2  | 83142.3  | 60465.9  | 103465.3 | 88148.2  | 49471.2  | 75337.8  | 80174.3  | TRUE   |
| 40589.4  | 97859    | 57625.2  | 107621.1 | 119951   | 17399.8  | 21692.4  | 28470    | TRUE   |
| 78711.9  | 95142.6  | 68837.9  | 101390.9 | 105761.4 | 56166.2  | 58482.2  | 70073.5  | TRUE   |
| 26067.2  | 22957.1  | 23427.7  | 33921.3  | 27359.2  | 23361    | 34492.6  | 22602.9  | TRUE   |
| 47286    | 77998.8  | 70697.6  | 81935.9  | 79327.2  | 52236    | 35283.8  | 49048.8  | TRUE   |
| 30019.3  | 78486.3  | 69696.1  | 63678    | 78808.7  | 34717.1  | 12206.9  | 16054.4  | TRUE   |
| 46452.2  | 27712.3  | 40155.8  | 43200.5  | 35305.2  | 48143.3  | 40620.7  | 43536.9  | TRUE   |
| 145599.9 | 144408   | 151006.8 | 175695.4 | 175937.6 | 163265.9 | 165349.3 | 154004.8 | TRUE   |
| 135032.8 | 138690.3 | 136555.4 | 148830.7 | 140023.8 | 143740.9 | 170205.5 | 144764.2 | TRUE   |
| 155988.4 | 159975.9 | 148347.8 | 164468.2 | 152221.3 | 138429.7 | 182501.8 | 173364.7 | TRUE   |
| 149786.5 | 132607.2 | 128260   | 139542.5 | 145311.2 | 135548.8 | 150223.3 | 150722.8 | TRUE   |
| 138529.2 | 159903.8 | 108483.9 | 153797.1 | 125888   | 151589.4 | 157821.9 | 168711.2 | TRUE   |
| 130508.6 | 129909.9 | 90574.3  | 84813.1  | 106674.5 | 92946    | 99738.9  | 104735.7 | TRUE   |
| 194169.7 | 171370   | 163671.3 | 205125.8 | 200048.9 | 164706.5 | 175039.7 | 215912.5 | TRUE   |
| 240416.8 | 244923.6 | 216343.7 | 228145.5 | 258833   | 199454.6 | 220146.7 | 239978.4 | TRUE   |
| 441609.7 | 368858.1 | 368966.2 | 432017.3 | 486947.6 | 411998.3 | 430065.3 | 483848   | TRUE   |
| 373877.7 | 373068.2 | 296909.5 | 374923.1 | 500636.4 | 354228.9 | 377679.4 | 488071.1 | TRUE   |
| 199980.1 | 204683.3 | 223388.5 | 208104.7 | 209392   | 227520.3 | 241014.3 | 223787.9 | TRUE   |
| 417966.8 | 400546.2 | 321370.7 | 404517.4 | 413004.2 | 354034   | 389237.2 | 381420.8 | TRUE   |
| 581150.9 | 588502.7 | 528042.9 | 593602.7 | 648464.4 | 528107.1 | 594613.7 | 626622.6 | TRUE   |
| 148777.2 | 143445.4 | 156376.6 | 180455.9 | 158865.5 | 193510.7 | 174665.4 | 183825.4 | TRUE   |
| 294375.3 | 322399   | 286707.6 | 341183.2 | 356911.2 | 307564.7 | 355592.9 | 359013.5 | TRUE   |
| 44348    | 96185    | 51665.4  | 75332.9  | 93527.7  | 29800.7  | 16160.7  | 40806.1  | TRUE   |
| 2190321  | 2027520  | 1866892  | 2054011  | 1834553  | 2188317  | 2242175  | 2287845  | TRUE   |
| 1458239  | 1378893  | 1251430  | 1454433  | 1249118  | 1425045  | 1589750  | 1583852  | TRUE   |
| 43287.9  | 74501.6  | 68303.2  | 69003.9  | 91970.6  | 32716    | 27863    | 40975.3  | TRUE   |
| 157032.8 | 205130.8 | 164167.2 | 181116.8 | 142927   | 128177.4 | 207486.5 | 128861.6 | TRUE   |
| 389656   | 390078.6 | 299530.2 | 372194.4 | 411828   | 294154.9 | 417974.6 | 382322   | TRUE   |
| 2165617  | 1906886  | 1415214  | 1860269  | 2058577  | 1589639  | 1884501  | 2041526  | TRUE   |
| 872452.3 | 753777.4 | 821171.9 | 896991   | 712248   | 875351.7 | 815683.1 | 788458.7 | TRUE   |
| 1595301  | 1486165  | 1645943  | 1720610  | 1343430  | 1612258  | 1597817  | 1457073  | TRUE   |
| 95205.7  | 97990.9  | 120816.7 | 101706.1 | 100436.3 | 87000    | 118244   | 109191.8 | TRUE   |
| 124877.6 | 93251.8  | 146224.4 | 148288   | 142141.7 | 126997.7 | 134935.6 | 141770.4 | TRUE   |
| 80474    | 82179    | 88848    | 108539.6 | 96990.1  | 81815.7  | 111418.7 | 100501.7 | TRUE   |
| 36925.5  | 37610.8  | 35330.2  | 45874.9  | 46935.2  | 48950.3  | 54836.5  | 50435.9  | TRUE   |
| 154389   | 135931.1 | 139701.5 | 117057.9 | 119033.7 | 174570.8 | 152125   | 163283.5 | TRUE   |
| 148903.5 | 133076.3 | 128817.1 | 118953.3 | 119725.3 | 108782.5 | 130356.6 | 155677.6 | TRUE   |
| 44276.2  | 38455.9  | 23076.3  | 43489.5  | 33966.3  | 40512.9  | 43590.1  | 57793.7  | TRUE   |

|          |          |          |          |          |          |          |          |      |
|----------|----------|----------|----------|----------|----------|----------|----------|------|
| 94942.5  | 74013.3  | 67987.5  | 79263.6  | 93063.7  | 97889.8  | 95006.7  | 102101.9 | TRUE |
| 22531.9  | 28131.8  | 25661.6  | 31195.6  | 19563.5  | 24354.1  | 27008.7  | 27456.8  | TRUE |
| 215535.2 | 194412.5 | 245396.3 | 252990.6 | 323754.8 | 233663.7 | 273401.9 | 252273.4 | TRUE |
| 32300.9  | 42887    | 12803.2  | 107266.6 | 31011.5  | 14283    | 43256.3  | 33728.1  | TRUE |
| 1857545  | 1647446  | 1177009  | 1716521  | 2026013  | 1525127  | 2080856  | 2198781  | TRUE |
| 52144.9  | 114224   | 50973.6  | 139560.2 | 106047   | 39498.8  | 54985.9  | 43486.6  | TRUE |
| 668394.9 | 908449.6 | 1063529  | 987214.7 | 647529   | 1012872  | 979225.6 | 976433.5 | TRUE |
| 547394.7 | 475690.5 | 561119   | 677216.5 | 467486.2 | 719003   | 755366.3 | 708859.8 | TRUE |
| 335949.8 | 282075.8 | 389157.6 | 378991.2 | 269332.5 | 453074.6 | 413177.2 | 435948.9 | TRUE |
| 101387.3 | 74949.8  | 80413.2  | 102979   | 105644.4 | 91386    | 106443.5 | 123803.5 | TRUE |
| 326595.5 | 270161.2 | 253411   | 310084.1 | 283956.9 | 380798.1 | 320778.2 | 404416.2 | TRUE |
| 83569.6  | 62654.4  | 70603.4  | 72584.3  | 72089.6  | 82696.4  | 81071.4  | 94515.4  | TRUE |
| 165177.1 | 201390.5 | 181186.6 | 164993.5 | 186443.4 | 192150.1 | 208851.7 | 186023.5 | TRUE |
| 159080.6 | 158632   | 134806.2 | 171952.2 | 148184.2 | 163343   | 170387   | 168634.8 | TRUE |
| 157423.1 | 146970.6 | 154898   | 178335.3 | 169455   | 153640.9 | 161816.6 | 184133.2 | TRUE |
| 131691   | 115899.2 | 148066.7 | 158808.7 | 190370.1 | 149688.8 | 162618.3 | 182401.6 | TRUE |
| 47065    | 74204.5  | 52514.2  | 62014.4  | 76173.3  | 63700.1  | 78676.2  | 62509.1  | TRUE |
| 170672.3 | 177513.4 | 137833.1 | 182049.5 | 177814.6 | 116738.7 | 130283.1 | 130486.8 | TRUE |
| 389014   | 312116.7 | 428102   | 434005.7 | 372460.2 | 436078   | 410531.6 | 401647.3 | TRUE |
| 319953.1 | 310776   | 318769.2 | 379928.8 | 320878.8 | 379655   | 374202   | 355315.1 | TRUE |
| 19690.5  | 20218.6  | 11251.9  | 10167.6  | 21444.7  | 26203.6  | 10227.3  | 20007.3  | TRUE |
| 138981.1 | 114925.1 | 127489.2 | 165097.4 | 155108.7 | 121789   | 99601.9  | 114168.8 | TRUE |
| 210443.9 | 197796.2 | 207752.4 | 178483.5 | 222164.7 | 180744.2 | 181354.9 | 214197.6 | TRUE |
| 18832.3  | 9195.9   | 14007.2  | 8844     | 20234.1  | 18076.6  | 21883.9  | 20791.4  | TRUE |
| 58069.4  | 69944    | 77879.1  | 75738.1  | 58371    | 84340.6  | 73287.4  | 64896.9  | TRUE |
| 264077.8 | 238013.1 | 258025.1 | 277533.1 | 242598.1 | 290807.1 | 248770.4 | 263208.8 | TRUE |
| 2024199  | 1760187  | 2114484  | 2146754  | 2362697  | 2102234  | 2037355  | 2059274  | TRUE |
| 282580.8 | 251991   | 289743.8 | 332104.4 | 410756   | 285627.1 | 338650.6 | 369504.1 | TRUE |
| 1051425  | 1164479  | 949277.6 | 1207314  | 1027445  | 1106228  | 1158873  | 1088804  | TRUE |
| 102852.4 | 121687.2 | 87158    | 107510.5 | 117978.9 | 116947.7 | 117860.8 | 126526.7 | TRUE |
| 486275.3 | 542036.9 | 517940.4 | 533560.9 | 430532.1 | 500068.4 | 603494.7 | 548224.9 | TRUE |
| 142419.7 | 104684.7 | 163146   | 124317.9 | 104120.8 | 127395.5 | 128194.1 | 99387.8  | TRUE |
| 213162.1 | 122822.7 | 147799.8 | 167125.2 | 189645   | 184616.3 | 171473   | 235829.2 | TRUE |

|          |          |          |          |          |          |          |          |      |
|----------|----------|----------|----------|----------|----------|----------|----------|------|
| 44173.2  | 44555.3  | 53465    | 45932    | 79489.1  | 53677.3  | 56631.5  | 75791.7  | TRUE |
| 59779.6  | 48600.8  | 28409.2  | 12924.3  | 22202.8  | 43588.1  | 48849.7  | 39811.5  | TRUE |
| 94013.2  | 51742.5  | 77069    | 76246.6  | 85827.3  | 89704.5  | 75161.8  | 97848.1  | TRUE |
| 84981.8  | 105079   | 78939    | 92361.9  | 123351.3 | 80983.7  | 99979.1  | 108539.9 | TRUE |
| 351981.8 | 318588.7 | 276346.1 | 309272.3 | 368368.7 | 282032.1 | 382245   | 390726.2 | TRUE |
| 449655.4 | 512899.3 | 302846.4 | 584317.2 | 644456.4 | 302446.3 | 588553.1 | 627061.1 | TRUE |
| 1962720  | 2084266  | 1210469  | 2033873  | 2457033  | 1297813  | 2235780  | 2682932  | TRUE |
| 55640.5  | 64338.7  | 41994.1  | 39376.1  | 61789.9  | 38291.7  | 83207.5  | 59856.5  | TRUE |
| 140220.9 | 151831.6 | 133032.2 | 172762.3 | 176027.1 | 123744.9 | 164494.7 | 156018.4 | TRUE |
| 110390.4 | 109183.7 | 77883.6  | 144400.1 | 161203.6 | 87002.4  | 153612.4 | 164888.8 | TRUE |
| 3175582  | 3954006  | 2046464  | 3861610  | 4634093  | 2070125  | 4207453  | 4698142  | TRUE |
| 127954.1 | 141611.9 | 113722.7 | 158695.6 | 174486.5 | 120188.1 | 149599.5 | 170569.7 | TRUE |
| 99523.1  | 178054.8 | 111311.6 | 139191.6 | 123429.2 | 67283.9  | 88020.6  | 89693.4  | TRUE |
| 85260.5  | 73318    | 67700.2  | 70095.5  | 91191.8  | 66189.2  | 61092.5  | 78165.4  | TRUE |
| 134452.3 | 132942   | 98952.8  | 135490.6 | 141217.3 | 101527.1 | 118635.9 | 110892.2 | TRUE |
| 479072.7 | 408374.9 | 381396.4 | 379259.4 | 473058.6 | 363565.2 | 389123.1 | 480462.5 | TRUE |
| 92635.2  | 92525.9  | 99220.5  | 93266    | 95471.1  | 90414.7  | 103807.8 | 101512.5 | TRUE |
| 31686.4  | 30091.9  | 18864.1  | 28472.4  | 23833.3  | 25767.6  | 29124.2  | 26918.7  | TRUE |
| 119198.5 | 85919.3  | 100137.3 | 126185.5 | 67815.2  | 209194.3 | 104821.5 | 207018.1 | TRUE |
| 26199.2  | 27151.5  | 23139.7  | 22461.4  | 28175.4  | 21539.5  | 28962.8  | 33898.9  | TRUE |
| 111562.6 | 103998.9 | 79118.8  | 120525.2 | 120958.1 | 91713.8  | 114698.9 | 129070.6 | TRUE |
| 30634.7  | 30345.9  | 18731.3  | 38418.7  | 20441.7  | 29667.6  | 23147.1  | 24816.2  | TRUE |
| 68737.3  | 81025.3  | 63817.7  | 66030.2  | 51628.5  | 68451.2  | 61017.8  | 61579    | TRUE |
| 483547.3 | 450828.6 | 308319.7 | 395625.8 | 427010.3 | 334991.5 | 408732.8 | 397045   | TRUE |
| 460175.4 | 402338.7 | 327380   | 394333.8 | 359577.2 | 302847.8 | 356198.3 | 358967.5 | TRUE |
| 639214   | 633751.9 | 610461.1 | 662463.9 | 660796.6 | 626148.9 | 689102.7 | 708939.1 | TRUE |
| 2359145  | 2333903  | 2222996  | 2803368  | 2809267  | 2407217  | 2719779  | 2804643  | TRUE |
| 93389.6  | 83523.8  | 100170.5 | 105986.1 | 107991   | 132225.2 | 118621.8 | 113756.5 | TRUE |
| 141056.3 | 207332   | 151680.6 | 220825.6 | 256925.1 | 132657.7 | 109704.9 | 123309.3 | TRUE |
| 35225.7  | 76622.1  | 42259.1  | 51248    | 62051.7  | 20441    | 20100.8  | 11354.9  | TRUE |
| 2897529  | 2691397  | 2570753  | 2775859  | 2452464  | 2792476  | 2951280  | 3034034  | TRUE |
| 817659.4 | 839018.4 | 715523   | 865760.5 | 724441.3 | 817791.8 | 898914.4 | 870068.2 | TRUE |
| 619389.6 | 540965.1 | 475783.7 | 598544.9 | 525043.3 | 570277.8 | 563794.9 | 639186   | TRUE |
| 573806.2 | 660896.6 | 492316.2 | 620566.6 | 540724.7 | 523784.8 | 562092.5 | 596978.7 | TRUE |

|          |          |          |          |          |          |          |          |      |
|----------|----------|----------|----------|----------|----------|----------|----------|------|
| 1618861  | 1766627  | 1530468  | 1733605  | 1529493  | 1859250  | 1855775  | 1792198  | TRUE |
| 130926.7 | 179671.3 | 122737.8 | 96965    | 103232.1 | 118011.7 | 133682.1 | 112827.4 | TRUE |
| 92104.4  | 125335.2 | 83972.3  | 85590.9  | 85267.7  | 84430.4  | 107549.6 | 95040.3  | TRUE |
| 135932.8 | 126957.8 | 127126.3 | 153952.3 | 139318.4 | 136571.6 | 156671.8 | 139156.9 | TRUE |
| 72985.8  | 76039.5  | 61319.3  | 82344.2  | 87936.4  | 63800    | 81090.8  | 94200.4  | TRUE |
| 41055.6  | 26679.2  | 38899.8  | 28767.7  | 49865.5  | 28656.5  | 40073.5  | 42738.6  | TRUE |

|          |          |          |          |          |          |          |          |      |
|----------|----------|----------|----------|----------|----------|----------|----------|------|
| 269209.4 | 252636.7 | 159705.8 | 175952.5 | 228102.4 | 167358.4 | 212627.2 | 236757.2 | TRUE |
| 44108.7  | 43127.7  | 39609.7  | 53553.8  | 68699.4  | 49807.6  | 66626.9  | 60375.8  | TRUE |
| 226926.4 | 209653.1 | 189743.6 | 265912.6 | 319277.1 | 217703.5 | 260543.6 | 313568.4 | TRUE |
| 165430.1 | 191534.2 | 121004.4 | 194296.4 | 204726.7 | 140860.7 | 197275.2 | 192955.3 | TRUE |
| 139468.5 | 152219.7 | 111346.2 | 158016.3 | 117151.1 | 102391.8 | 133560.6 | 121833.9 | TRUE |
| 179071.9 | 173943.9 | 178078.5 | 246351.9 | 213780.9 | 182328.4 | 202170.2 | 219981.4 | TRUE |
| 1157417  | 1243478  | 1174059  | 1239479  | 1016474  | 1266454  | 1166004  | 1122314  | TRUE |
| 334225.6 | 399251   | 362734.6 | 387805.6 | 368374.2 | 341511.3 | 389545.8 | 416423.4 | TRUE |
| 148523.1 | 111419.1 | 130249.3 | 130375.9 | 121546.3 | 134549.4 | 122122.5 | 122865.7 | TRUE |
| 192415.5 | 140893   | 134122   | 145179.5 | 156137.7 | 114446   | 167690   | 144957.4 | TRUE |
| 141294.8 | 120068.5 | 93674.7  | 85065.8  | 96964.8  | 86532.9  | 97381.1  | 84098.2  | TRUE |
| 103757.8 | 111660.2 | 98842.7  | 80723.6  | 82168.4  | 79351    | 79010.3  | 119921.3 | TRUE |
| 2098123  | 1827022  | 1795216  | 2111476  | 2441065  | 1774178  | 2052428  | 2273247  | TRUE |
| 281793.3 | 312179.6 | 249540.5 | 293744.4 | 315416.7 | 265085.3 | 301803.9 | 323001.6 | TRUE |
| 63987.7  | 98251.6  | 69647.7  | 98988.9  | 97016.4  | 48094.9  | 55559.7  | 43356.2  | TRUE |
| 3985946  | 3584042  | 3998528  | 4169012  | 3372825  | 4179686  | 4281976  | 4221082  | TRUE |
| 1734008  | 1839485  | 1791626  | 1877044  | 1533978  | 1972212  | 1907321  | 1932116  | TRUE |
| 65355.1  | 75714.9  | 71425.7  | 70901.4  | 73209.9  | 61495.1  | 64624.1  | 66666.3  | TRUE |
| 127284.8 | 118985.1 | 107088.3 | 154027.8 | 145480.9 | 193797.2 | 127020.7 | 134004.4 | TRUE |
| 429081.3 | 498177.1 | 426895.9 | 537770.2 | 523937   | 439727.7 | 470655.9 | 450673.1 | TRUE |
| 68414.4  | 90534.6  | 71209.6  | 88938.9  | 96875.9  | 117734.3 | 88562    | 79486.7  | TRUE |
| 872313.4 | 868208.5 | 783366.1 | 882531.9 | 859925.6 | 785755.5 | 827452.6 | 837719.1 | TRUE |
| 169139.2 | 161270.5 | 106950.3 | 133323.8 | 115967.3 | 83808    | 104022.9 | 89240.7  | TRUE |
| 2450307  | 2614065  | 2250704  | 2179285  | 1947946  | 2578640  | 2377024  | 2448570  | TRUE |
| 369599.4 | 332860.3 | 282406.1 | 315252.5 | 260809.9 | 323836.9 | 342876.4 | 260958.1 | TRUE |
| 167730.8 | 152342.5 | 140076   | 219691.2 | 129972.4 | 496680.7 | 213689.5 | 164879.7 | TRUE |
| 77270.5  | 92757.6  | 97097.7  | 102702.5 | 79318.9  | 64870.1  | 74561.2  | 69432.5  | TRUE |

|          |          |          |          |          |          |          |          |      |
|----------|----------|----------|----------|----------|----------|----------|----------|------|
| 52953.6  | 55737    | 58249.9  | 51852.2  | 38665.8  | 64233.7  | 48395.9  | 45754.3  | TRUE |
| 50432.8  | 33580.6  | 34511.9  | 36517.3  | 27386    | 65564.6  | 63812.5  | 49411.7  | TRUE |
| 360014.5 | 254874.5 | 350989.7 | 357130.1 | 436604   | 374879.9 | 292765   | 322222.2 | TRUE |
| 296587.4 | 242016.9 | 317008.6 | 286659.4 | 397547.4 | 415073.1 | 426528.8 | 334268.7 | TRUE |
| 190586.4 | 171492.3 | 226430.1 | 190248.9 | 228044.6 | 338287.9 | 343000.5 | 259341.4 | TRUE |
| 128070.6 | 160431.9 | 138507.1 | 134164.6 | 139335.5 | 113223.1 | 115121.6 | 120936.7 | TRUE |
| 141728.5 | 162119.1 | 118656.5 | 124723.8 | 99457.1  | 110899.9 | 124833.5 | 104559.7 | TRUE |
| 184276   | 161110.3 | 219809   | 230337.3 | 147753.9 | 188280.2 | 177274   | 152046.8 | TRUE |
| 194095.6 | 155295   | 225125.3 | 223298.8 | 243183.8 | 214081.6 | 163502.1 | 205578.3 | TRUE |
| 380086.6 | 366712   | 381338.5 | 407750.5 | 432074.6 | 359209.6 | 297161   | 362712.9 | TRUE |

|          |          |          |          |          |          |          |          |      |
|----------|----------|----------|----------|----------|----------|----------|----------|------|
| 347293.8 | 266410.5 | 331692.6 | 330803.5 | 289146.5 | 360822   | 299044.2 | 289237.7 | TRUE |
| 168658.9 | 143269.6 | 201990.8 | 150769.2 | 127715.3 | 204335.5 | 177656   | 148586.6 | TRUE |
| 154500.7 | 160174.4 | 187565.4 | 170697.7 | 138852.6 | 179912.3 | 162417.9 | 142709.1 | TRUE |
| 258834.3 | 298244.8 | 256354.4 | 281634.1 | 243366.8 | 277217   | 306748.2 | 258340.6 | TRUE |
| 180176.8 | 121311.4 | 183258.3 | 182115.4 | 209484.2 | 193489   | 142144   | 161795.5 | TRUE |
| 566969.1 | 581911.6 | 689148.9 | 624061   | 512884.1 | 558536.1 | 615525.6 | 609914.2 | TRUE |
| 239965.6 | 341419.7 | 264727.6 | 204760.1 | 188932   | 275380.9 | 266417.4 | 203442.2 | TRUE |
| 78494.6  | 54325.4  | 69518.6  | 61872.4  | 48636.3  | 58459.1  | 57191.4  | 66195.4  | TRUE |
| 144624.1 | 143547.6 | 168785   | 181447.4 | 162064.7 | 172900   | 168329   | 149247.9 | TRUE |
| 59428.6  | 85032.5  | 66439.5  | 61785    | 73615.1  | 86934.2  | 74627.5  | 72057    | TRUE |
| 444969.5 | 408767.7 | 409726.7 | 372924.5 | 433417.8 | 414388.6 | 448654   | 464044   | TRUE |
| 594007.8 | 580186.9 | 779553.6 | 513537.4 | 497648.8 | 1200959  | 674194.8 | 538837.8 | TRUE |
| 383705   | 310122.7 | 434732.8 | 383458.5 | 302987   | 499717.4 | 336509.4 | 319927.7 | TRUE |
| 642031.4 | 562655.5 | 610420.6 | 617667.1 | 854729   | 690029   | 512147   | 691855.3 | TRUE |
| 19054.2  | 18786.3  | 22057.1  | 18897.8  | 18651.5  | 21382.2  | 10429    | 9819.5   | TRUE |
| 147601.7 | 106430.4 | 141166   | 146008.6 | 93339.1  | 165143.6 | 114169.1 | 119874.1 | TRUE |
| 41033.9  | 34119.8  | 42949    | 53445.7  | 35219.3  | 61145.8  | 38136.9  | 58810    | TRUE |
| 926086.4 | 690980.2 | 929552.4 | 923661.7 | 1089290  | 858647.4 | 737709   | 902433.9 | TRUE |
| 121703.4 | 128329.7 | 145627.7 | 133662.8 | 136282.9 | 135178.2 | 132909.1 | 130786.1 | TRUE |
| 691983.3 | 602733.8 | 781666.9 | 736081.2 | 859824.6 | 708805.6 | 672162   | 672922.8 | TRUE |
| 376383   | 329826.3 | 407223.2 | 363119.3 | 431471.1 | 361758.3 | 336254.2 | 350424.1 | TRUE |
| 145765.6 | 154973.9 | 158173   | 121627.7 | 141826.8 | 164617.4 | 140567.4 | 123823.4 | TRUE |
| 229115.5 | 230265.8 | 260991.5 | 243917.8 | 163350.6 | 247717.8 | 261094.7 | 178133.9 | TRUE |
| 172843.2 | 110969.8 | 180483.5 | 173759.6 | 215456.7 | 165636.8 | 133606.3 | 155462.8 | TRUE |
| 382097.5 | 367024.6 | 369988.5 | 366502   | 374112.9 | 364665.9 | 321600.2 | 370726.5 | TRUE |
| 170555.3 | 135128.1 | 169570.8 | 135006.7 | 108740.5 | 184733.4 | 151557.4 | 114031.6 | TRUE |
| 232248.8 | 206482.9 | 333033.8 | 242022.8 | 194777.1 | 344079.2 | 219687.5 | 191628.8 | TRUE |
| 34558.5  | 26019.6  | 42876.8  | 31872.4  | 29259    | 32351.2  | 46673.4  | 21878.1  | TRUE |
| 52755.6  | 73106.4  | 50708    | 65428.1  | 44479.2  | 66568.1  | 75023.9  | 45075.2  | TRUE |
| 250116.5 | 234983.4 | 262219.9 | 223863.9 | 235281   | 273497   | 231532.2 | 207876.1 | TRUE |
| 208152.2 | 239370   | 277053.3 | 214485.6 | 194854.8 | 277220.8 | 211053.9 | 191776.7 | TRUE |
| 41953.3  | 30130.3  | 31195.7  | 31141.4  | 46379    | 29982.5  | 31984    | 32091    | TRUE |
| 265557.2 | 299666.1 | 275057.8 | 281611.6 | 224731.4 | 312754.1 | 269839   | 263042.2 | TRUE |
| 556265.7 | 423161.5 | 540416.9 | 609680.3 | 598540.3 | 525038.6 | 484345.4 | 540197.8 | TRUE |
| 184201.1 | 160879.9 | 173706.2 | 166419   | 132765.8 | 211465.2 | 195908.2 | 168668.5 | TRUE |
| 21664.4  | 29350.1  | 34523.3  | 10131.9  | 30850.1  | 38749.8  | 36495.8  | 14128.6  | TRUE |
| 226646.5 | 211983.8 | 279678.9 | 235491.6 | 167655.5 | 316996.9 | 214573   | 181036.4 | TRUE |
| 345023.7 | 302412.8 | 368553.6 | 297345   | 216247.8 | 416331.7 | 358219.9 | 259247.9 | TRUE |
| 108915.8 | 109188.4 | 130236.1 | 217939.2 | 143628   | 158091.4 | 133773.2 | 98483.3  | TRUE |
| 152634   | 96872.5  | 107466.4 | 138345.6 | 100406.6 | 180216.3 | 160391.8 | 129645.1 | TRUE |
| 109162.1 | 58292.4  | 81527.7  | 107850.5 | 108682.3 | 90669.8  | 87506.9  | 115129.9 | TRUE |

|          |          |          |          |          |          |          |          |      |
|----------|----------|----------|----------|----------|----------|----------|----------|------|
| 63413.3  | 65998.2  | 54744.5  | 65616.5  | 60914.8  | 56186.8  | 53314.6  | 53321.9  | TRUE |
| 89250.3  | 109313.4 | 125361.7 | 78920.7  | 65007.3  | 113635.4 | 103496.1 | 75351.7  | TRUE |
| 155246.6 | 182030.9 | 145844.3 | 173528   | 169479   | 115608.3 | 153198   | 113001.5 | TRUE |
| 53188.9  | 61841.9  | 58618.4  | 71061.5  | 71908.4  | 47301.6  | 67534.8  | 65343.6  | TRUE |
| 50174.9  | 50810.9  | 35272.4  | 64361.3  | 50093    | 46279.9  | 47438.3  | 54305.2  | TRUE |
| 33799.6  | 34154.1  | 22686.4  | 32498.8  | 37859.4  | 42219.4  | 45399.5  | 48381.8  | TRUE |
| 55047.5  | 44790.5  | 37545    | 64899    | 50342.5  | 53950.8  | 51405.9  | 54552.6  | TRUE |
| 188292.7 | 150376.9 | 73476.6  | 98611.1  | 105941.4 | 96565.9  | 134224.1 | 112765.4 | TRUE |
| 178837.9 | 165400.2 | 200378   | 211335.5 | 220343.6 | 209830.4 | 196778.9 | 204255.3 | TRUE |
| 111933.5 | 101226.6 | 102955.7 | 109015.1 | 120932.7 | 132099.7 | 126937.3 | 102503.5 | TRUE |
| 49267.4  | 41760.2  | 38607.5  | 45018.9  | 37557.5  | 55868.2  | 40585.3  | 46339.9  | TRUE |
| 208484.7 | 214675.4 | 224879.4 | 249610.1 | 273433.5 | 203855   | 250731.1 | 255076   | TRUE |
| 909799.5 | 949922.8 | 935714.1 | 1016690  | 703794.4 | 799948.8 | 944521.6 | 932018.1 | TRUE |
| 170515.7 | 133338.2 | 132131.8 | 139052   | 107519.5 | 173451.8 | 165839.9 | 169330.9 | TRUE |
| 74470.1  | 67893.1  | 40821.8  | 53616.1  | 62021    | 57809.8  | 83015    | 71923.8  | TRUE |
| 191814.5 | 204342   | 175913.9 | 197864.2 | 167408.6 | 168021.9 | 208273.9 | 160245.1 | TRUE |
| 106710.9 | 121233.3 | 109449.2 | 110105   | 126982.2 | 98831.7  | 110130.9 | 125532.6 | TRUE |
| 155027.3 | 155924.2 | 132020.6 | 153355.7 | 165766.1 | 131577.7 | 161882.9 | 156958.2 | TRUE |
| 82672.1  | 79238.3  | 68565    | 76014.1  | 72286.6  | 84305.5  | 73021    | 75977.1  | TRUE |
| 260607.2 | 247693.4 | 163698.9 | 203763.1 | 237676.7 | 174609.5 | 233511.8 | 240407.2 | TRUE |
| 278452.7 | 246040.2 | 251020.5 | 299302.2 | 279571.3 | 272237.5 | 300012   | 284770.7 | TRUE |
| 64503.5  | 46983.5  | 38504.8  | 75411.4  | 105046.9 | 53432.1  | 97715.9  | 88443.9  | TRUE |
| 169147.4 | 160781.3 | 169072   | 206471   | 125025.9 | 170189.8 | 193779.9 | 194640   | TRUE |
| 104076.2 | 111881.3 | 86783.4  | 93431.5  | 95698.8  | 100974.8 | 120683.3 | 97426.8  | TRUE |
| 69487.7  | 59167.7  | 88194.5  | 75279.9  | 63054.6  | 49400.2  | 61199    | 51237.3  | TRUE |
| 203581.1 | 188115.1 | 131359.8 | 186451.2 | 142613.9 | 173517.8 | 187538.3 | 185747.1 | TRUE |
| 43085.5  | 35509.9  | 36201.8  | 46335.9  | 44206.2  | 34035.1  | 28165.3  | 33705.5  | TRUE |
| 182432.4 | 150790.8 | 121872.4 | 130000.7 | 161410.5 | 133046.5 | 186942   | 182306   | TRUE |
| 55483.3  | 51811.6  | 50379.4  | 44010.7  | 66910.4  | 49324.1  | 53292.6  | 42649.4  | TRUE |
| 37437.4  | 38635.3  | 23426.5  | 33380.7  | 56342.3  | 24465.6  | 49144    | 56858.1  | TRUE |
| 20513.4  | 6187.5   | 7896.1   | 9800.6   | 12972.6  | 4666.6   | 12993.5  | 24663.9  | TRUE |
| 166221.1 | 167191.7 | 159184.4 | 181476   | 132254.9 | 134397.5 | 165952.2 | 167073.9 | TRUE |
| 184406.2 | 176368.2 | 115670.5 | 116736.6 | 108447.6 | 114880.5 | 121450.3 | 108280.2 | TRUE |
| 308816.4 | 296077.6 | 255627   | 331555.1 | 307819.5 | 273215.8 | 313656.6 | 284814   | TRUE |
| 669029.4 | 579400.7 | 675565   | 614874.6 | 562246.2 | 645346.2 | 624214.9 | 637308.6 | TRUE |
| 56305    | 46006    | 69543.5  | 41487.2  | 45449.3  | 35507.8  | 44747.6  | 39279.3  | TRUE |
| 134268.2 | 137832.8 | 133269.2 | 128652.2 | 125601.9 | 126662.2 | 129516.6 | 127464.2 | TRUE |
| 142488.2 | 142001.9 | 138207   | 123184.9 | 155478.8 | 132304.8 | 133473.9 | 144783.8 | TRUE |
| 68836    | 77880.9  | 66055.8  | 59297.1  | 57825.2  | 56106.6  | 71225.7  | 65171.9  | TRUE |
| 32539.2  | 43094.2  | 27935    | 31440.3  | 39785.2  | 41561    | 42940.3  | 46951.7  | TRUE |
| 46803.1  | 45931.4  | 61745    | 56392.2  | 46501.2  | 35949.8  | 53480.7  | 36714.8  | TRUE |

|          |          |          |          |          |          |          |          |      |
|----------|----------|----------|----------|----------|----------|----------|----------|------|
| 45797.1  | 60292.3  | 36710.5  | 42232    | 55333.4  | 59474.7  | 72546.9  | 53716.6  | TRUE |
| 18059.4  | 23849.8  | 36658.1  | 24857.9  | 21162.7  | 25663.2  | 35370.4  | 18608.9  | TRUE |
| 91097.1  | 116624.9 | 93179.7  | 95491.9  | 113544.1 | 107086.3 | 118504.7 | 125016.8 | TRUE |
| 94967.8  | 102388.3 | 92955.3  | 68996.8  | 90530.5  | 97187.9  | 149425.6 | 104526.1 | TRUE |
| 18273.8  | 25883.4  | 13978.3  | 8212.4   | 28523.4  | 19100.6  | 46247.7  | 38328.4  | TRUE |
| 44001.3  | 50365.5  | 57953.6  | 62809.2  | 41066.9  | 50531    | 64718.9  | 59992.4  | TRUE |
| 192324.5 | 225019.3 | 160491   | 179617.7 | 191338.7 | 162236.1 | 179028.7 | 178742.6 | TRUE |
| 778236.4 | 697417.2 | 806806   | 797483.1 | 707054.5 | 740731.7 | 780622.6 | 721834.7 | TRUE |
| 20664.5  | 28953.1  | 15277.2  | 35107.6  | 37240.9  | 18926    | 40059.4  | 34186.8  | TRUE |
| 901757.6 | 838558.8 | 826289.6 | 878004   | 809471   | 888103.6 | 904177.8 | 853318.8 | TRUE |
| 24818.2  | 27012    | 20096.4  | 28238.3  | 32546.3  | 30378.6  | 34318.4  | 39717.2  | TRUE |
| 25607.6  | 28374.8  | 29679.5  | 31633.4  | 26793.2  | 49526.8  | 42172.8  | 40473.6  | TRUE |
| 1931747  | 2093812  | 1448429  | 1580760  | 2274864  | 1502801  | 2136928  | 2325314  | TRUE |
| 2583295  | 3104179  | 2931509  | 2975142  | 2195673  | 2207160  | 3184508  | 2238238  | TRUE |
| 127236.1 | 117027.1 | 96486.1  | 106570.2 | 126756.7 | 94457.5  | 132724.6 | 116953.5 | TRUE |
| 167064.8 | 182641.5 | 151831.3 | 184551.6 | 189179.1 | 114730.1 | 198442.5 | 196852.1 | TRUE |
| 99105.4  | 100330.7 | 72702.3  | 91658.6  | 108173.1 | 90084.1  | 107106.8 | 111790.3 | TRUE |
| 1223223  | 1370346  | 977586.2 | 1433344  | 1390112  | 1059520  | 1435252  | 1449186  | TRUE |
| 526385.7 | 470267   | 412919.8 | 485427.2 | 560271.8 | 453252.3 | 567686.2 | 608851.1 | TRUE |
| 45629.1  | 45682.5  | 43341.5  | 60111.9  | 53895.7  | 38969.7  | 32183.9  | 44752.9  | TRUE |
| 1103708  | 755341.7 | 1171032  | 1248469  | 1062593  | 1264984  | 817741.4 | 1060404  | TRUE |
| 132341.6 | 118708.8 | 142153.5 | 124172.7 | 102355.2 | 133571.1 | 119482.6 | 103084.1 | TRUE |
| 37290.8  | 45789.3  | 50321    | 51294.7  | 40390.9  | 52323.4  | 46309.9  | 38908.1  | TRUE |
| 25994.5  | 39819.2  | 39195.9  | 65900.4  | 63935.1  | 15092.8  | 5610.3   | 7171.5   | TRUE |
| 529191   | 292210.8 | 548629.4 | 483773.5 | 456765   | 554192   | 368052.7 | 500165   | TRUE |
| 2297289  | 2119501  | 1712482  | 1801927  | 2469841  | 2415092  | 2185558  | 2352962  | TRUE |
| 41277.2  | 46120.8  | 48832.8  | 44429.8  | 55668.9  | 6813.3   | 34643.8  | 21845.8  | TRUE |
| 159404   | 124509.2 | 110303.9 | 106789   | 162425.6 | 149295.8 | 141501.2 | 164282.4 | TRUE |
| 38523.3  | 28979.3  | 36249.7  | 32463.4  | 34450.2  | 40461    | 34514.9  | 35399    | TRUE |
| 325005.3 | 260019.7 | 208201.7 | 231102.9 | 241618.7 | 580867.3 | 312617.5 | 614777.2 | TRUE |
| 72045    | 53275.6  | 78622.5  | 60128.7  | 53182.3  | 88608.6  | 61416.6  | 59380.7  | TRUE |
| 83177.8  | 73616.4  | 120174.3 | 127442.4 | 115281.7 | 129628.4 | 80559.1  | 102960.2 | TRUE |
| 172563.7 | 123645.4 | 138086   | 127445   | 115109.1 | 184616   | 133335.3 | 176836   | TRUE |

|          |          |          |          |          |          |          |          |      |
|----------|----------|----------|----------|----------|----------|----------|----------|------|
| 112393   | 96860.8  | 104003.3 | 125001.1 | 108745.3 | 105895.6 | 108059.7 | 109381.2 | TRUE |
| 134565.4 | 116751.8 | 118311.2 | 78912.7  | 106923.9 | 109118.5 | 136328.9 | 121143   | TRUE |
| 50357.9  | 25641.5  | 30721.5  | 41151.7  | 39202.7  | 55070.6  | 37404.8  | 51672.8  | TRUE |
| 25890.2  | 8781.7   | 8581.7   | 13278.5  | 22738.8  | 38933.8  | 16784.9  | 21827.9  | TRUE |
| 253654.6 | 118705.4 | 174603.8 | 247124.6 | 227337.7 | 315276   | 214420   | 298393.2 | TRUE |
| 8910.8   | 8937.5   | 17296.4  | 7461.7   | 5533.3   | 20914.1  | 9191     | 7480.3   | TRUE |
| 151725.9 | 110271.5 | 168442.9 | 178550.4 | 145580.2 | 168508.1 | 110407.6 | 144447.2 | TRUE |
| 859028.4 | 591763.9 | 914750.1 | 938790.7 | 898964.4 | 1015594  | 628726   | 784513.8 | TRUE |
| 700273.9 | 428567   | 775318.1 | 784204.4 | 687138.1 | 842298   | 523745.2 | 679349.4 | TRUE |
| 663356.2 | 423682.7 | 751726   | 737369.7 | 647363.3 | 803765.3 | 465973.4 | 669141.4 | TRUE |
| 254442.6 | 230184.8 | 261478.9 | 247657.9 | 258331.5 | 305375.5 | 237170.1 | 273222.5 | TRUE |
| 137189.3 | 127891.2 | 121335.8 | 123678.4 | 151183.9 | 137781.4 | 127051.8 | 140151.9 | TRUE |
| 164596.9 | 175250.6 | 161095.3 | 180336.9 | 164817.8 | 179448.8 | 151617   | 169219.1 | TRUE |
| 145557.6 | 124932.5 | 132883.3 | 145961.1 | 135756.4 | 137507.7 | 115209   | 138324.6 | TRUE |
| 564334.5 | 478633.8 | 693929.3 | 683623.3 | 635737.6 | 735304.7 | 476752.3 | 629062.9 | TRUE |
| 148290   | 98165    | 131288.2 | 139852.7 | 123548.6 | 178810   | 116977.3 | 113519.2 | TRUE |
| 109812.9 | 153798.1 | 210450   | 266499.4 | 298561.3 | 127260.5 | 66267.6  | 79913.2  | TRUE |
| 123420.5 | 84048.8  | 96089.4  | 116092.9 | 113219.2 | 135713.4 | 94124.1  | 126743.4 | TRUE |
| 119365.2 | 56932.6  | 114612.5 | 125133.5 | 98118.1  | 112593.3 | 85050.7  | 118886.4 | TRUE |
| 47820.5  | 36430.6  | 67420.5  | 56399.2  | 47517.2  | 59661.9  | 39699.4  | 57748.9  | TRUE |
| 1978469  | 1772280  | 1549521  | 1496268  | 2292025  | 2048613  | 1815004  | 1945929  | TRUE |
| 2079627  | 1984236  | 1356976  | 1441977  | 2437567  | 2172837  | 2009361  | 2112723  | TRUE |
| 222846.1 | 475674.4 | 214142   | 342529.7 | 632743   | 145094.1 | 127127.4 | 149808.4 | TRUE |
| 238771.2 | 221191.9 | 173521.5 | 160716.2 | 233234   | 231284   | 255449.7 | 238643.1 | TRUE |
| 80627    | 66223.3  | 60524    | 71719.9  | 63971.1  | 140304.2 | 91418.6  | 151528.6 | TRUE |
| 21935.5  | 16830.7  | 16745.5  | 6235.2   | 17398.6  | 14156.5  | 18382.7  | 5362     | TRUE |
| 372704   | 219393.2 | 470765.5 | 391364.8 | 360905.6 | 485919.5 | 263417.1 | 384126.2 | TRUE |
| 246380.1 | 237135.6 | 174360.7 | 181669.9 | 297553   | 295336.5 | 253118   | 267816   | TRUE |
| 399109.9 | 362535.3 | 288722.9 | 925448   | 338658.4 | 324347.3 | 307575.9 | 353196.3 | TRUE |
| 1097957  | 823110.9 | 1069259  | 1083845  | 848888.2 | 3017697  | 1024813  | 2587691  | TRUE |
| 1508445  | 970115.5 | 1683868  | 1006068  | 1722524  | 1777901  | 1062040  | 1868898  | TRUE |
| 26101    | 44035.8  | 56314.2  | 46117.8  | 89525.5  | 21524    | 9820.1   | 27807.6  | TRUE |



|          |          |          |          |          |          |          |          |      |
|----------|----------|----------|----------|----------|----------|----------|----------|------|
| 682855.6 | 542726.3 | 995545   | 755185.1 | 561221.6 | 885736.4 | 553479.9 | 606878   | TRUE |
| 843727.1 | 752987.7 | 620000.4 | 710274.7 | 1082832  | 900922.9 | 737877.7 | 834917.3 | TRUE |
| 36559.1  | 33502.1  | 45641.7  | 47121.6  | 48581.6  | 47194.6  | 32079.7  | 44388.5  | TRUE |
| 62855.8  | 79553.8  | 84923.2  | 69404.8  | 69576.4  | 78362.1  | 69891.6  | 76789.7  | TRUE |
| 76582.7  | 43838.5  | 73756.7  | 87949.9  | 62010.8  | 89636.8  | 48804.5  | 55114.8  | TRUE |
| 191109.5 | 107189.5 | 213552   | 170796.7 | 203501.4 | 203793.2 | 129972   | 171422.4 | TRUE |
| 36319.2  | 24390.2  | 42880.9  | 40301.4  | 45073.5  | 39646    | 32864    | 32137.3  | TRUE |
| 144087.4 | 92696.2  | 153222.2 | 116285.6 | 241206.3 | 135083.4 | 97934.5  | 256540.1 | TRUE |
| 739022.5 | 762798.9 | 600960.4 | 609638.9 | 857813   | 820169.6 | 838345.2 | 917924.4 | TRUE |
| 1074154  | 890159   | 1223213  | 985860.8 | 898961.1 | 1178387  | 872924.3 | 931271   | TRUE |
| 3983395  | 2986590  | 4364333  | 4504743  | 4036076  | 4874358  | 3502037  | 4402059  | TRUE |
| 1215896  | 881654.6 | 938681.3 | 1123776  | 1007017  | 1396623  | 964169.1 | 1262085  | TRUE |
| 198571.1 | 120411   | 254203.2 | 208978   | 177096.6 | 286279.5 | 128297.4 | 206032.8 | TRUE |
| 85697.4  | 90826.1  | 87479.7  | 122635   | 122412.3 | 57359.4  | 81129.6  | 52557.2  | TRUE |
| 29471.6  | 12236    | 33243.8  | 22849.7  | 24615.3  | 28716.6  | 14069.1  | 29966.8  | TRUE |
| 69820.5  | 52721.6  | 72611.7  | 69653.5  | 73939.3  | 72600.5  | 52274    | 86831.8  | TRUE |
| 69386.6  | 49421.2  | 84375    | 83312.4  | 102087.6 | 91332.6  | 62249.4  | 81736.2  | TRUE |
| 16640.2  | 11836.3  | 20629    | 30708.1  | 30882.8  | 21356.5  | 21304.2  | 27229.6  | TRUE |
| 114167.4 | 79190.9  | 146049   | 118522   | 97430.7  | 140668   | 109328.7 | 115875.5 | TRUE |
| 98044    | 65284.8  | 103806.7 | 108147.2 | 91035.1  | 119268.9 | 85604.3  | 101797.8 | TRUE |
| 325643.9 | 268665   | 446660.2 | 403027.9 | 419308.2 | 429586.2 | 301630.6 | 419105.3 | TRUE |
| 167895.6 | 125249.7 | 230008.5 | 188218.5 | 201064.1 | 219695.9 | 144130.2 | 205522.1 | TRUE |
| 48643.9  | 58139.2  | 65511.6  | 83602.6  | 60999.9  | 82102.8  | 59980.8  | 61335.4  | TRUE |
| 30387.1  | 25837.5  | 32965.9  | 35835.2  | 31093.8  | 34432    | 31504.8  | 39068.3  | TRUE |
| 55570.8  | 37392.2  | 72524.8  | 69493.7  | 76079.9  | 72638    | 44908.7  | 70881.5  | TRUE |
| 61971.1  | 95432.3  | 134863   | 124348.2 | 161929.2 | 51524.7  | 35044.6  | 56153.7  | TRUE |
| 62072.5  | 73490.9  | 83707.6  | 66581.3  | 68644    | 85423.7  | 48055.5  | 60051.4  | TRUE |
| 81884.4  | 60598.1  | 89039.3  | 92848.1  | 80055    | 88445.4  | 71425.7  | 81661.9  | TRUE |
| 1539448  | 913070.6 | 1795310  | 1689185  | 1424568  | 1901731  | 1119955  | 1384793  | TRUE |
| 480902   | 294826.4 | 596791   | 483919.6 | 446377.9 | 579166   | 368954.8 | 503031.9 | TRUE |
| 138338.3 | 124360   | 131169.5 | 175052   | 153594.2 | 147047   | 125990.4 | 133971.8 | TRUE |
| 324814.5 | 301693.5 | 298672.4 | 293439.1 | 298199.6 | 328527.2 | 305404.2 | 304549   | TRUE |
| 68067.4  | 62737.6  | 58531.5  | 59923.9  | 68212.1  | 64057.7  | 62461.6  | 60226.9  | TRUE |
| 80516.4  | 115613.7 | 146951.5 | 197618.8 | 194357.6 | 57216.9  | 23222.8  | 65130    | TRUE |
| 706385.5 | 601828.2 | 514627.2 | 556651.5 | 904203.9 | 804842.1 | 677432.8 | 776832.5 | TRUE |
| 1204449  | 1151104  | 968237.5 | 1042932  | 1540923  | 1390143  | 1400691  | 1278048  | TRUE |

|          |          |          |          |          |          |          |          |      |
|----------|----------|----------|----------|----------|----------|----------|----------|------|
| 63895.7  | 51231.2  | 51441.8  | 55197.1  | 53295.5  | 79186.3  | 53502.6  | 65651.6  | TRUE |
| 829810   | 649129.2 | 584340.5 | 830035.5 | 757776.6 | 760808.5 | 799028   | 985683.1 | TRUE |
| 241242.6 | 143759.7 | 166425.2 | 235414.4 | 132332.8 | 191432   | 143978.5 | 205420.5 | TRUE |
| 89494.8  | 79034.2  | 71744.6  | 101453.4 | 87005.4  | 88119.3  | 82588.8  | 96316.4  | TRUE |
| 33182.5  | 28652.4  | 42331.6  | 50285.3  | 30415.6  | 58325.2  | 36604.2  | 53741.9  | TRUE |
| 172166   | 174323.9 | 205954.3 | 225767.5 | 210277.4 | 236769.2 | 144503.8 | 194959.5 | TRUE |
| 177584.9 | 90658.2  | 190419.5 | 188930.6 | 188411   | 298896.8 | 179883.7 | 227685.2 | TRUE |
| 74081    | 67010.2  | 57601.3  | 62027.4  | 62156.9  | 64381.4  | 69094.6  | 60574.6  | TRUE |
| 159040.8 | 157203.1 | 182846.7 | 155091.9 | 154279.9 | 171150.8 | 154858.2 | 157358.5 | TRUE |
| 240686.4 | 224565   | 216151.6 | 255730.8 | 270420.2 | 215754.1 | 294902.6 | 226104.1 | TRUE |
| 255083.1 | 216961.8 | 256477.3 | 279179.9 | 289939.8 | 299986.5 | 234203.7 | 325540.5 | TRUE |
| 47269.6  | 22726.4  | 23594    | 34777.9  | 40974.1  | 48043.9  | 36340.8  | 47040    | TRUE |
| 654822.9 | 452979.1 | 480661.3 | 524444.7 | 659204.8 | 620239.2 | 473288.4 | 752350.3 | TRUE |
| 319124.5 | 167934.7 | 312095.7 | 261435.8 | 214006   | 327943   | 157542.1 | 246147   | TRUE |
| 235101.5 | 144680.9 | 410372.5 | 350658.8 | 275001.7 | 453687.3 | 212005.8 | 317342.3 | TRUE |
| 670626.8 | 347039.4 | 1085031  | 1000772  | 784422.1 | 1289959  | 578924   | 830708.8 | TRUE |
| 44039.2  | 35269.1  | 29486.8  | 39574.1  | 37337.4  | 36278.8  | 29376.1  | 37306.3  | TRUE |
| 115774   | 92182.7  | 110419.1 | 114266.2 | 116955.3 | 121004.5 | 78537    | 111581.9 | TRUE |
| 25218.3  | 9396.8   | 17256.4  | 17269.8  | 26435    | 18166.3  | 24448.7  | 24383.9  | TRUE |
| 724587.8 | 609920.7 | 1001581  | 968760.3 | 853432   | 1064388  | 724057.9 | 936675.6 | TRUE |
| 325998.7 | 301552.7 | 335652.4 | 384424.8 | 357799.7 | 371921.3 | 296360   | 361652.7 | TRUE |
| 26940.6  | 41361.6  | 31840.7  | 43771.1  | 58950    | 21523    | 27209.5  | 26249.1  | TRUE |
| 40858.4  | 32433    | 39719.9  | 49594.4  | 46456.7  | 51451.1  | 43469.4  | 57525.6  | TRUE |
| 75616.4  | 51815.5  | 44599.2  | 60013.5  | 83863.6  | 87073.1  | 86803.8  | 88472.7  | TRUE |
| 305882.3 | 217172.6 | 341905.3 | 355794.2 | 333614.5 | 343400.1 | 240994.7 | 349276.4 | TRUE |
| 158984.9 | 128512.9 | 157044.8 | 172980.4 | 141286.4 | 136485.2 | 144271.3 | 160426.1 | TRUE |
| 310910.2 | 282132.2 | 329744.4 | 293031.2 | 275833.7 | 271786.3 | 237831.7 | 260182.4 | TRUE |

|          |          |          |          |          |          |          |          |      |
|----------|----------|----------|----------|----------|----------|----------|----------|------|
| 295559   | 283260.7 | 334194.3 | 369650   | 357205.8 | 440007.6 | 286032.7 | 330766.4 | TRUE |
| 1652578  | 487239   | 729179.8 | 712076.8 | 672818.9 | 748653.3 | 558118.4 | 628581.2 | TRUE |
| 116895.5 | 100522.4 | 121986   | 117576.3 | 114823.4 | 148271.2 | 87482.2  | 105522.2 | TRUE |
| 237753.2 | 159962.6 | 182002.6 | 188085.4 | 194243.6 | 213601.6 | 182201.6 | 173296   | TRUE |
| 272626.8 | 167190.2 | 156972.2 | 197787.8 | 218806.5 | 238754.1 | 246653.9 | 235065   | TRUE |

|          |          |          |          |          |          |          |          |      |
|----------|----------|----------|----------|----------|----------|----------|----------|------|
| 45881.4  | 39270    | 59136.9  | 56752    | 52064.5  | 56762.7  | 35538.1  | 47538.5  | TRUE |
| 118207.2 | 102506.1 | 141464   | 186155.7 | 122158.4 | 135803.1 | 113248   | 136770.5 | TRUE |
| 60466.9  | 46640.9  | 63928.7  | 54643.8  | 61540.8  | 62163.2  | 97161.5  | 63329.9  | TRUE |
| 68215.6  | 68268.2  | 94020.7  | 91251.9  | 91922.9  | 96327.8  | 76893.4  | 71794.6  | TRUE |
| 160383.1 | 121232   | 165455.4 | 150894.9 | 160883.9 | 178625.7 | 111687.3 | 158551.5 | TRUE |
| 38639.8  | 38253.6  | 27031.2  | 54785.7  | 43852.1  | 38312.8  | 45629.3  | 55460.5  | TRUE |
| 17334.2  | 8373.6   | 19676.5  | 10235.6  | 17466.7  | 30198.2  | 17981.4  | 16595.9  | TRUE |
| 165176.6 | 125504   | 206086.4 | 191179.3 | 191769.5 | 233241.9 | 156879.2 | 208680.2 | TRUE |
| 229946.3 | 189743.6 | 262613.3 | 217494.8 | 234847.2 | 280037.3 | 192713.9 | 261130.8 | TRUE |
| 152068.6 | 126914.2 | 118846.6 | 121548.5 | 167068   | 199360   | 197609.1 | 201531.8 | TRUE |
| 159180.3 | 158930.9 | 130420.7 | 157342.7 | 224156.2 | 207086.1 | 185463.4 | 183324.5 | TRUE |
| 2781355  | 2394284  | 3155278  | 3279269  | 2888444  | 3369335  | 2455040  | 2954561  | TRUE |
| 3074912  | 2734800  | 2105886  | 2019982  | 3383033  | 2948881  | 2677845  | 2939619  | TRUE |
| 7871727  | 5703032  | 9195047  | 9094817  | 8414078  | 9754547  | 6504459  | 8149535  | TRUE |
| 104795.8 | 146307.1 | 149043.2 | 229980.7 | 208392.9 | 100597.3 | 74806.1  | 88838    | TRUE |
| 6337213  | 5946417  | 4816688  | 5243398  | 6746345  | 7052337  | 6312404  | 6785962  | TRUE |
| 86023    | 82294.8  | 55187.7  | 54404.7  | 89320.7  | 64121.7  | 79707    | 91966.7  | TRUE |
| 41474.8  | 39267.4  | 22075.5  | 25482.3  | 44912.4  | 45563.3  | 40542.3  | 45067.1  | TRUE |
| 33722.5  | 21422.8  | 26372.8  | 11325.5  | 23473.5  | 42649.9  | 36443.6  | 43304.5  | TRUE |
| 408526.1 | 381775.1 | 402095.9 | 400495.8 | 601340.1 | 623743.2 | 515920.1 | 561933.6 | TRUE |
| 37159.5  | 50275.7  | 68062.8  | 39382.5  | 41065    | 42467.7  | 40453.7  | 33051.2  | TRUE |
| 46992.2  | 48691.7  | 56411.1  | 71250.2  | 67496    | 70810.4  | 74460.9  | 73313.4  | TRUE |
| 55507.3  | 61030.4  | 63645.5  | 56497.3  | 63935.8  | 54382.1  | 61862.3  | 52008.4  | TRUE |
| 98988.9  | 72903.8  | 88572.9  | 100563.8 | 84720.9  | 166006.2 | 120200.1 | 97241.9  | TRUE |
| 18977.1  | 8116.7   | 24431.5  | 8106     | 24516.1  | 27877.2  | 8719.2   | 11348.4  | TRUE |
| 24125.9  | 10690.4  | 18891.8  | 24961.7  | 22992.3  | 29035.6  | 14510    | 29485.3  | TRUE |
| 38158.7  | 28931.8  | 36268.7  | 40022    | 45290.6  | 36111.6  | 43018.2  | 47175.2  | TRUE |
| 91176.8  | 98220.5  | 97922    | 83122.5  | 111458.3 | 114930.3 | 94267.3  | 78252.3  | TRUE |
| 138543.3 | 182092.6 | 150994.7 | 178141.6 | 146291.8 | 118969.3 | 119699.2 | 133997.1 | TRUE |
| 214722.8 | 240039.5 | 198929.9 | 237556.2 | 245326.4 | 213943.6 | 196594.1 | 172349.3 | TRUE |

|          |          |          |          |          |          |          |          |      |
|----------|----------|----------|----------|----------|----------|----------|----------|------|
| 57418.8  | 39615.5  | 40988.5  | 31301.7  | 37546.9  | 41191.6  | 41337.6  | 39023.2  | TRUE |
| 123354.6 | 98191    | 128805   | 118690.3 | 127275.3 | 211076.3 | 119372.6 | 146353   | TRUE |
| 79232.2  | 51032.4  | 96063.6  | 93814.6  | 94716.3  | 163489.2 | 73722.7  | 149427   | TRUE |
| 105308.5 | 73822.5  | 117146.3 | 104777.5 | 79918.5  | 131247.3 | 69506    | 55268.9  | TRUE |
| 86613    | 76680.5  | 97539.3  | 82454.1  | 96796    | 105779.1 | 93962.7  | 94703    | TRUE |
| 36495.7  | 26800.3  | 41552    | 57864.4  | 54946.6  | 72586.7  | 35222.7  | 67097.7  | TRUE |
| 77159.3  | 90052.4  | 102009.6 | 95339.9  | 84584.5  | 71338.7  | 68187.2  | 72491.5  | TRUE |
| 69317.1  | 113763.5 | 71213.7  | 75874.2  | 111685   | 85827    | 72685.4  | 93224.3  | TRUE |
| 186930.8 | 260862.2 | 180256.4 | 164523.1 | 263232.4 | 175454.7 | 141811.9 | 164539.4 | TRUE |

|          |          |          |          |          |          |          |          |      |
|----------|----------|----------|----------|----------|----------|----------|----------|------|
| 140968.2 | 83997.6  | 175609.2 | 167526.9 | 145629.1 | 178118.4 | 98740.5  | 144769.5 | TRUE |
| 123152   | 98154.4  | 157017.9 | 138146.1 | 111938.3 | 141965.6 | 95518.2  | 111958.9 | TRUE |
| 70644.1  | 61930.5  | 68067.1  | 66404.2  | 99073    | 92529.2  | 69519.8  | 81251.5  | TRUE |
| 393933.3 | 393534   | 275788.9 | 277379.8 | 435071.3 | 433425.8 | 390128.6 | 442992.1 | TRUE |
| 124663.7 | 116078   | 94983.5  | 84979.8  | 145227.5 | 105831.5 | 99318.7  | 120644.1 | TRUE |
| 306415.4 | 271450.5 | 229570.6 | 223087.8 | 270216.5 | 268694.5 | 242149.5 | 267621.8 | TRUE |
| 192554.4 | 112650   | 211370.7 | 194579.1 | 151550.6 | 218541.5 | 122250.1 | 167713.6 | TRUE |
| 461194   | 351636.5 | 545459.8 | 479239   | 480801.9 | 578358.1 | 370998.5 | 426694   | TRUE |
| 200749.6 | 166572.4 | 242995.9 | 231700.2 | 187031.8 | 240782.7 | 172529.3 | 192646   | TRUE |
| 375109.6 | 250102.8 | 472552.5 | 436630.8 | 350353.2 | 458140.1 | 242042.8 | 338026.5 | TRUE |
| 378810.4 | 346500   | 480661.6 | 440647   | 422624.2 | 422136.8 | 366726.6 | 405696.2 | TRUE |
| 61734.8  | 63110.1  | 33557.6  | 61027.8  | 105747.1 | 88271.2  | 65018.8  | 67635.4  | TRUE |
| 4658511  | 4009369  | 3277471  | 3578143  | 6016556  | 4696282  | 4180948  | 4752822  | TRUE |
| 99922.4  | 82662.5  | 83418.2  | 98947.9  | 82888.3  | 67036.4  | 73090.1  | 84593.8  | TRUE |
| 475077.7 | 351651.4 | 308949.1 | 304518.7 | 325498.7 | 343364.3 | 259601.9 | 344100.8 | TRUE |
| 2242480  | 1778052  | 2497673  | 2741882  | 2449559  | 2673053  | 1884463  | 2503935  | TRUE |
| 953217.6 | 816107.2 | 1065217  | 1048172  | 995807.4 | 1115066  | 897464.3 | 1040612  | TRUE |
| 523548.3 | 475828.6 | 544204.7 | 618148.9 | 575845.2 | 588871.5 | 469471.2 | 642107.5 | TRUE |
| 46159.6  | 64393.9  | 65322.7  | 111095.4 | 103488   | 28870.9  | 31410.6  | 26517.5  | TRUE |
| 1990921  | 1869310  | 1630140  | 1490771  | 2187847  | 2256135  | 1967445  | 2090075  | TRUE |
| 388558.4 | 414596.4 | 364304.1 | 367552.3 | 460185.3 | 512384.9 | 467508.7 | 525681.8 | TRUE |
| 217523.8 | 261802.5 | 121236.2 | 170477.8 | 291669.1 | 52614.2  | 39014.5  | 50759.4  | TRUE |
| 90801.5  | 86060.8  | 72090.7  | 107082.2 | 99127.1  | 76821.9  | 104722.6 | 85387.1  | TRUE |
| 226027.2 | 170468.7 | 182943.1 | 180369.3 | 222553.3 | 177366.7 | 181492.7 | 222122.4 | TRUE |
| 472699.3 | 332599.2 | 358671.7 | 452759.6 | 415686   | 377617.7 | 312854.2 | 439218.2 | TRUE |
| 207675.8 | 194075.5 | 162900.3 | 197204.4 | 218252.4 | 191530.5 | 205917.7 | 221368.9 | TRUE |
| 1078452  | 982504.2 | 747966.4 | 748037.1 | 1056767  | 1160941  | 1043527  | 1054728  | TRUE |
| 332091.5 | 310746.4 | 309433.1 | 347784.1 | 348622.9 | 316295.7 | 336601.3 | 316938.6 | TRUE |
| 49438.8  | 51897.2  | 65828.2  | 64853.5  | 68613.4  | 56660    | 63377.5  | 50957.2  | TRUE |
| 60831.1  | 64744.4  | 45470.9  | 70090.9  | 64277.6  | 30981.5  | 45608    | 35818    | TRUE |
| 754130.3 | 669498.8 | 676931.5 | 670860.5 | 766890.7 | 866786.9 | 764502.1 | 868939.4 | TRUE |
| 458008.4 | 381935.7 | 412803   | 402190.2 | 426421.3 | 594227.5 | 454760.5 | 527841.2 | TRUE |
| 190461.9 | 158042.7 | 160969.2 | 169600.7 | 182219.9 | 194011.5 | 164457.1 | 214370.5 | TRUE |
| 461139.5 | 457022.5 | 409014   | 461088.9 | 467722.4 | 490073.8 | 491591   | 451298.9 | TRUE |
| 295106.2 | 258990.8 | 266584.1 | 341905.9 | 298265.5 | 289699.8 | 267505.9 | 301855.7 | TRUE |
| 539724.5 | 541578.8 | 580956.3 | 589354.2 | 569103.6 | 734474   | 646729.9 | 707006.1 | TRUE |
| 697923.2 | 692782.7 | 649017.7 | 641708.6 | 666362.2 | 814417.1 | 726551.7 | 782527.8 | TRUE |
| 25170    | 6512.9   | 22918.6  | 13048    | 22983.4  | 33795.9  | 35926    | 27548.1  | TRUE |
| 31256    | 35223.7  | 33805.3  | 31221.6  | 37919.1  | 34754.4  | 43276.4  | 39650.5  | TRUE |
| 176462   | 188953   | 129037.6 | 177254.5 | 160373.1 | 179377.7 | 177457.6 | 168479.7 | TRUE |
| 949744.8 | 758646.6 | 966418.8 | 1267425  | 1055906  | 916610.2 | 870793.6 | 980021.7 | TRUE |
| 118803.3 | 136272.4 | 155440.1 | 135944.1 | 125212.9 | 113943.6 | 92294.4  | 89217.4  | TRUE |
| 1334900  | 1156297  | 1200606  | 1214877  | 1371083  | 1365865  | 1227626  | 1253867  | TRUE |
| 86105.1  | 69042.2  | 82119.2  | 64304.3  | 99853.3  | 86185.3  | 77132.9  | 91373.4  | TRUE |

|          |          |          |          |          |          |          |          |      |
|----------|----------|----------|----------|----------|----------|----------|----------|------|
| 174961   | 165735.3 | 112289.9 | 135585.6 | 167781.3 | 130388.7 | 125067.9 | 172059.2 | TRUE |
| 164898.2 | 140549.4 | 142392.9 | 200329.8 | 218850.8 | 165508.1 | 168046.7 | 219505.9 | TRUE |
| 91182    | 62623.6  | 71061.7  | 85256.7  | 120645   | 96388.8  | 110344.6 | 135732.7 | TRUE |
| 128446.9 | 152197.4 | 150500.7 | 150066.8 | 111186.3 | 137496   | 179106.4 | 102248.1 | TRUE |
| 219333.1 | 242743.3 | 186992   | 203436.8 | 233938.8 | 230435.4 | 263551.7 | 232319.4 | TRUE |
| 30057.4  | 28156.5  | 26024.1  | 43566.6  | 26344.9  | 17641.7  | 28099.6  | 32432    | TRUE |
| 44723.8  | 34333.3  | 46083.9  | 63706.6  | 53574.3  | 66206.9  | 41853.5  | 49129.1  | TRUE |
| 52329.5  | 41805.5  | 81855.3  | 63496.4  | 102002.6 | 65886.9  | 45216.1  | 71228.1  | TRUE |
| 244342.4 | 152259.4 | 199495.4 | 253508   | 174051.2 | 255090.4 | 186965.7 | 181029.4 | TRUE |
| 579746.3 | 358429.5 | 333233.3 | 414693.7 | 595416.6 | 649229.9 | 370347.4 | 615582.6 | TRUE |
| 145844.2 | 126877.7 | 136456.2 | 154995.4 | 132986.8 | 154297.8 | 115992.2 | 153408.2 | TRUE |
| 691975   | 689087.2 | 597789.9 | 832068.4 | 710773.7 | 678967.8 | 727322.2 | 677788.4 | TRUE |
| 1012467  | 1014662  | 811244.4 | 1104825  | 980678.1 | 931298.9 | 1028371  | 964742.7 | TRUE |
| 26127.2  | 7945.1   | 30748.9  | 27556.2  | 20603.6  | 32609.6  | 10470    | 13528.1  | TRUE |
| 197221.6 | 164344.3 | 210960   | 218196.3 | 129791.5 | 220206.8 | 168018.7 | 141439.6 | TRUE |
| 158059.3 | 123666   | 132481.8 | 161333.8 | 184802.9 | 183854.3 | 134921.2 | 178703.2 | TRUE |
| 46173.6  | 34635.1  | 55752.2  | 37280.8  | 62408.3  | 46413.3  | 30968.9  | 49402.6  | TRUE |
| 18238.3  | 18058.6  | 14521.6  | 19261.1  | 17469.4  | 5905.2   | 6640.8   | 8249.3   | TRUE |
| 52327.1  | 29748.1  | 36642.5  | 46695.5  | 35765.4  | 29658.9  | 42831.2  | 51022.6  | TRUE |
| 44823.4  | 34340.9  | 44556.6  | 54963.7  | 50650.3  | 44340.7  | 37347.5  | 45131    | TRUE |
| 35746.8  | 33423.6  | 33963.1  | 29920.1  | 33462.9  | 29080.5  | 15249.4  | 24170.4  | TRUE |
| 822239.2 | 1117300  | 903069.7 | 972747.8 | 465119   | 1314438  | 1208744  | 1256663  | TRUE |
| 38174.2  | 38707.8  | 30367.3  | 38342.3  | 39043.9  | 45112.9  | 41229.3  | 46159.9  | TRUE |
| 84909.9  | 89250.7  | 72388.7  | 103201   | 82204.2  | 86983.2  | 92987.7  | 81554.1  | TRUE |
| 67844.3  | 68135.9  | 58060    | 72352.4  | 77411.5  | 63578.1  | 64870.3  | 61031.4  | TRUE |
| 16772.5  | 19161.8  | 16658.4  | 22039.6  | 15079.4  | 21633.7  | 21533    | 22610.4  | TRUE |
| 80889.4  | 61208    | 52286.3  | 101844.8 | 75459.4  | 80536.5  | 85372.6  | 115025.2 | TRUE |
| 28005.7  | 38207.7  | 25156.5  | 35215    | 33780.4  | 36106.1  | 34165.9  | 26353.4  | TRUE |
| 62554.7  | 63023.4  | 44057.9  | 61706    | 56387.6  | 57661.5  | 42662.2  | 59331.2  | TRUE |
| 77196.9  | 81933.7  | 87427.4  | 81562.7  | 86599.2  | 100854.7 | 112820.9 | 98904.4  | TRUE |
| 221007.7 | 167353.6 | 158831.6 | 193199.5 | 170301.3 | 267651.9 | 237531.1 | 271079.4 | TRUE |
| 576496.6 | 533225.1 | 436716.5 | 512980.8 | 480899.3 | 781174.1 | 672856.8 | 864317.5 | TRUE |
| 519093.9 | 438705.8 | 410343   | 495651.2 | 464660.9 | 662488.4 | 547660.1 | 608088.1 | TRUE |
| 140414.3 | 110823.8 | 188271.9 | 122789.4 | 144858.9 | 207449.5 | 117472.8 | 179958.6 | TRUE |
| 165487   | 160300.4 | 125268.6 | 194004.9 | 251113.9 | 130080.1 | 186176.3 | 143099   | TRUE |
| 77284.8  | 58353.2  | 66483    | 60997.6  | 69849.3  | 59147.8  | 62538.8  | 73441.4  | TRUE |
| 93451.2  | 118644.8 | 82165.3  | 112338.5 | 88588.1  | 100577.1 | 107290.1 | 116236.3 | TRUE |
| 91847.8  | 71633.1  | 102210.4 | 70162.6  | 98825    | 96421.6  | 92774.4  | 91749.9  | TRUE |
| 53120.2  | 58305.7  | 47136.9  | 57002.5  | 46253.2  | 65768.1  | 55612.4  | 50530.2  | TRUE |
| 401897.5 | 370650.1 | 304984.3 | 382560.5 | 363651.8 | 402016.4 | 420565.5 | 366805.1 | TRUE |

|          |          |          |          |          |          |          |          |      |
|----------|----------|----------|----------|----------|----------|----------|----------|------|
| 742015.4 | 638823   | 600591.3 | 840809.2 | 746843.2 | 659904.9 | 790084.9 | 761305.9 | TRUE |
| 243856.4 | 246882.1 | 247952.6 | 281584.5 | 248403.5 | 264769.1 | 271408.1 | 264074.1 | TRUE |
| 622410.2 | 590319.8 | 627248.2 | 683043   | 589917   | 667246.3 | 617431.9 | 630095.5 | TRUE |
| 337628.9 | 315909.6 | 301767.4 | 332817.9 | 324259.2 | 358389.7 | 337234.3 | 339590.8 | TRUE |
| 593630.7 | 464245.3 | 521809.7 | 578101   | 579530.8 | 517991.5 | 479162.5 | 505337.6 | TRUE |
| 162860.9 | 118293.1 | 187130.2 | 247340.7 | 196657.3 | 190047.8 | 150518.1 | 179278   | TRUE |
| 144833.1 | 102477.5 | 170297   | 228525.3 | 183852.3 | 192022.2 | 184725   | 200310   | TRUE |
| 65885.8  | 55526.5  | 67783.6  | 61311.2  | 86358.5  | 49799.9  | 61472.2  | 95679    | TRUE |
| 33927.9  | 55728.9  | 46179.2  | 54980    | 56101.9  | 25626.5  | 26976.9  | 24561    | TRUE |
| 51459.1  | 101183.3 | 69014.9  | 98527.3  | 95178.9  | 38423.2  | 37560.4  | 45040.6  | TRUE |
| 57954.7  | 39363.6  | 47537.6  | 50079.7  | 35594    | 52699.3  | 33550.4  | 46565.1  | TRUE |
| 79609.7  | 73955.4  | 77925.5  | 89764.4  | 75942.4  | 86028.2  | 77975.7  | 85307.1  | TRUE |
| 188500.7 | 155669.5 | 149524.3 | 163508.1 | 194471.8 | 218851.3 | 196719.8 | 220231.9 | TRUE |
| 327830.9 | 385727.4 | 292504.1 | 407313.8 | 324775.3 | 427637.3 | 394928.2 | 454493.4 | TRUE |
| 132320.6 | 148215.6 | 135311.5 | 162307.2 | 144314.1 | 141983.5 | 141888.7 | 152226.4 | TRUE |
| 76620.1  | 74363.3  | 64585.1  | 52848.6  | 59683.8  | 82926    | 74128.4  | 87638.5  | TRUE |
| 55143    | 51536.4  | 36950.1  | 40912.9  | 39362.2  | 68098.9  | 54846.4  | 48306.8  | TRUE |
| 664092   | 682386.5 | 458660   | 523649.8 | 526252.9 | 599564.8 | 522721.5 | 568891.7 | TRUE |
| 525724.6 | 464032.7 | 558721.8 | 580940.7 | 530371.1 | 579922.9 | 530663.6 | 497406.1 | TRUE |
| 949397.6 | 779981.4 | 891960.7 | 956310.3 | 843601.7 | 978006.7 | 883701.7 | 855692.3 | TRUE |
| 1716692  | 1357539  | 1451934  | 1481176  | 1838721  | 1774217  | 1502646  | 1777383  | TRUE |
| 943009.8 | 806516.8 | 915056.5 | 855743.2 | 943369.7 | 1114784  | 885429.4 | 1008136  | TRUE |
| 19836.3  | 12515.5  | 7471.5   | 9267.2   | 19872.6  | 24311.9  | 11659.1  | 14542.3  | TRUE |
| 46667    | 31065.6  | 38975    | 46955.8  | 46936    | 49677.9  | 35814.5  | 49074.6  | TRUE |
| 41851.7  | 42265.8  | 30283.1  | 39780.4  | 57693    | 31053.2  | 54948    | 59765.9  | TRUE |
| 189397.5 | 178026.8 | 203186.1 | 161950.9 | 214793.8 | 221855.3 | 194389.1 | 227907   | TRUE |
| 130060.9 | 124615.8 | 121702.6 | 132277.8 | 142998.8 | 136223.1 | 114764.6 | 142131.6 | TRUE |
| 94983.3  | 76898.2  | 48501.9  | 80326    | 65790.5  | 83842.5  | 70252.5  | 109097   | TRUE |
| 742975.3 | 553959   | 510305.8 | 463365.8 | 568845   | 783953.3 | 780638.8 | 955801.4 | TRUE |
| 482099.1 | 460061.4 | 473079.6 | 478884.5 | 410908.7 | 664527.5 | 438460.2 | 556542   | TRUE |
| 147976.9 | 101181.7 | 113072.4 | 118623.1 | 95962.7  | 296270.6 | 108057.7 | 243973   | TRUE |
| 83698.4  | 77472.3  | 57196.7  | 70745.4  | 72829.1  | 48501.7  | 73338.5  | 37669.6  | TRUE |
| 88201.4  | 61157    | 51687.6  | 39716.2  | 32099.8  | 39309.7  | 42796.6  | 41182.8  | TRUE |
| 156144   | 123413.2 | 144393.5 | 167469   | 146079.6 | 169355.8 | 146699.8 | 160477.5 | TRUE |
| 422889.2 | 343856   | 639083.6 | 343443.6 | 265580.7 | 637523.8 | 369262.9 | 351846.5 | TRUE |
| 108194.1 | 104259.6 | 97107.2  | 115442.2 | 122982.9 | 112607.7 | 94958.7  | 99510.3  | TRUE |
| 236536.9 | 228886.1 | 213797.3 | 242887.2 | 301358   | 297289.9 | 264541.4 | 311783.8 | TRUE |
| 62826.8  | 57094.8  | 51231    | 54991.4  | 57408.8  | 56438.3  | 65566.6  | 55917.2  | TRUE |
| 66933.1  | 86640.4  | 78462.1  | 105641.8 | 100464.4 | 71536.2  | 98980.1  | 54478.6  | TRUE |
| 1008549  | 830928.6 | 944398.8 | 1181168  | 892115.6 | 998099.6 | 851884.8 | 937679.2 | TRUE |
| 26252.2  | 35209.7  | 38708    | 23546.6  | 37928.3  | 32305.3  | 26864.6  | 35117.5  | TRUE |
| 44954.2  | 54830    | 46603.9  | 56857.6  | 51944.3  | 71584.1  | 46073.6  | 70521.2  | TRUE |
| 28816.8  | 27015.4  | 23306    | 25090.4  | 27579.7  | 9655.5   | 16864.4  | 30439.4  | TRUE |
| 103130.7 | 100613.1 | 85505.5  | 114923.7 | 111990   | 96209.9  | 91660.5  | 113814.5 | TRUE |

|          |          |          |          |          |          |          |          |      |
|----------|----------|----------|----------|----------|----------|----------|----------|------|
| 271240.3 | 230635.9 | 196149.2 | 163685.2 | 141792.3 | 195113.3 | 158393.3 | 183219.4 | TRUE |
| 149499.9 | 121130.6 | 135816.2 | 135847.2 | 171599.9 | 157427.4 | 147312.5 | 163862.2 | TRUE |
| 95047.1  | 96781.5  | 101353.4 | 95276.5  | 93366.7  | 92509.3  | 85458    | 83822    | TRUE |
| 339830.2 | 314990.3 | 398307.8 | 460316.9 | 424688.2 | 383720.8 | 354206.9 | 342746.5 | TRUE |
| 152094.8 | 152968.7 | 146666.5 | 157934.5 | 173656.3 | 152061.5 | 182529   | 168901.9 | TRUE |
| 88945.3  | 90301.7  | 97829.9  | 79690.3  | 106402.8 | 96621.2  | 101202   | 95860.5  | TRUE |
| 153516.1 | 128773.6 | 161798.4 | 151640.6 | 146705.8 | 151929   | 153932.5 | 170736.6 | TRUE |
| 98383    | 109437.5 | 113828.9 | 115480.6 | 113918.1 | 104760.6 | 128769.5 | 140177.4 | TRUE |
| 43962    | 67647.2  | 54727.5  | 64200.1  | 83529    | 21579.3  | 32596.8  | 38168.5  | TRUE |
| 32761.9  | 60904.5  | 67547    | 82760.7  | 85091.5  | 33950.1  | 29443.6  | 36619.2  | TRUE |
| 689857.3 | 623267.2 | 436877.6 | 698353   | 814536.2 | 493702.3 | 677647.2 | 815195.2 | TRUE |
| 93478.2  | 116727.5 | 97396.1  | 111489.1 | 87267.5  | 127056.3 | 102544.3 | 130377.3 | TRUE |
| 74787.1  | 66422.4  | 76342.2  | 80321.4  | 66069.4  | 68776.4  | 102076.2 | 70520.7  | TRUE |
| 150459.9 | 168150.3 | 132256.5 | 137815.5 | 142141.8 | 148485   | 174847   | 153752.7 | TRUE |
| 23697.3  | 9555.6   | 16786.9  | 7121     | 17316.1  | 26985.5  | 8824.7   | 14455.2  | TRUE |
| 35171.2  | 32321    | 37629.2  | 37397.8  | 27728    | 31938.7  | 12739.1  | 29522.3  | TRUE |
| 223540.8 | 176712.9 | 237079.5 | 207959.6 | 287545.5 | 274812.5 | 214254.4 | 284124.3 | TRUE |
| 127997.9 | 103116.2 | 102631   | 143658.5 | 109733   | 114891.3 | 94734.9  | 116627.1 | TRUE |
| 273985.2 | 286214.3 | 252731.8 | 273105.6 | 243672.1 | 312068.2 | 295761.2 | 372712.9 | TRUE |
| 184706.7 | 195600.9 | 167648.3 | 266669.3 | 182893.3 | 213509.6 | 228949.5 | 211657.5 | TRUE |
| 174092.7 | 147153.2 | 131284.8 | 170721.9 | 150500.8 | 158787.2 | 159908.5 | 166848   | TRUE |
| 7119.2   | 11547.1  | 7829.4   | 17694.5  | 19124.7  | 2709.5   | 10584.9  | 7468.8   | TRUE |
| 185843.4 | 184579   | 156434   | 175179.2 | 131756.1 | 174302.3 | 190131.9 | 151328   | TRUE |
| 163720.4 | 191591.3 | 175773.6 | 177999.1 | 180641.6 | 169638.9 | 208082.3 | 152109.5 | TRUE |
| 303065.9 | 349960.7 | 273184.2 | 269735   | 277774.6 | 267424.3 | 297350.2 | 258188.3 | TRUE |
| 31195.4  | 45832.3  | 30488.4  | 20357.7  | 27933.1  | 37699.4  | 28873.9  | 29286.3  | TRUE |
| 20593.6  | 25204.9  | 29128.4  | 30392.8  | 23453.8  | 35585.9  | 19007.8  | 33255.4  | TRUE |
| 264211.2 | 247397   | 253114.3 | 251518.9 | 278463.2 | 263004   | 231296.8 | 266297.3 | TRUE |
| 408255.4 | 355560.6 | 388725   | 372206   | 413156.6 | 410755.8 | 371677.3 | 430139.7 | TRUE |
| 904119.4 | 810132.5 | 855130.6 | 986346   | 943939.4 | 878604.8 | 759580.8 | 934020.9 | TRUE |
| 902348.5 | 950629.8 | 761812.6 | 785457.5 | 837899.5 | 881296.1 | 858794.4 | 878222.6 | TRUE |
| 480937.8 | 484183.4 | 480534.9 | 523358.4 | 608996.1 | 609705.8 | 577744.8 | 641280.7 | TRUE |
| 620820.9 | 597699   | 551456   | 626714.8 | 698043.1 | 719662.7 | 725293.3 | 727774.6 | TRUE |
| 56178.4  | 60809.5  | 57402.8  | 61029.1  | 78290.9  | 64653.9  | 60350.8  | 52336.6  | TRUE |
| 75351.5  | 76601.9  | 68505.8  | 92425    | 76414.4  | 91645.4  | 70888.1  | 78509.4  | TRUE |
| 86543    | 86565.7  | 82093.3  | 79874.4  | 98161.7  | 91659.5  | 82491.9  | 90483.1  | TRUE |
| 382403.3 | 292199.4 | 383806.7 | 405211.4 | 356473.8 | 399852.7 | 322445.5 | 368613.1 | TRUE |
| 549384.6 | 444272.6 | 607195.5 | 598925.5 | 601222.5 | 583064.8 | 523742.3 | 560617.6 | TRUE |
| 29868.4  | 25503.2  | 45455.1  | 50256.9  | 32830.2  | 38931.9  | 30768.6  | 33225.9  | TRUE |
| 31948.4  | 6956.7   | 43724    | 50540.5  | 35346.8  | 43658.3  | 24114.5  | 27912.6  | TRUE |
| 774857   | 674370.9 | 740353.6 | 731764.3 | 857643.8 | 795735.1 | 756875.4 | 752627.3 | TRUE |
| 469263.6 | 441641.3 | 449934.6 | 468724.2 | 558168.3 | 504560.7 | 507722.9 | 505970.9 | TRUE |
| 2181863  | 1774044  | 2469461  | 2575104  | 2285519  | 2467570  | 1880113  | 2222753  | TRUE |
| 268124.8 | 179472.5 | 210802.1 | 240651.9 | 199911.1 | 226874.8 | 202568.5 | 213757.1 | TRUE |
| 715684.7 | 719739.5 | 679563.2 | 621076.3 | 754301.7 | 791886.8 | 775250.1 | 814485.3 | TRUE |
| 616865.7 | 473335.1 | 512107.9 | 467805.7 | 613986.9 | 584164.8 | 522315.5 | 603059.7 | TRUE |
| 27645    | 25361.3  | 24413.3  | 25648.5  | 25440.5  | 23215.8  | 30390.3  | 10790.7  | TRUE |

|          |          |          |          |          |          |          |          |      |
|----------|----------|----------|----------|----------|----------|----------|----------|------|
| 326008.2 | 264041.5 | 293733.4 | 316085.9 | 380121.9 | 336837.7 | 298442.7 | 348706.8 | TRUE |
| 58700.8  | 60433.5  | 47737.8  | 49780    | 34654.2  | 45787.7  | 47419.8  | 33019.6  | TRUE |
| 98762.2  | 94363.8  | 83186.2  | 82381.7  | 99322.3  | 101327.4 | 104555.8 | 102323.3 | TRUE |
| 70082.8  | 55290.6  | 76019.9  | 77548.3  | 59104.6  | 83946.7  | 68607.5  | 91932.5  | TRUE |
| 489864.8 | 491196   | 362809.6 | 421031.7 | 515212.6 | 584315   | 594771.3 | 655100.5 | TRUE |
| 6412.4   | 14400.5  | 13208.6  | 24226.5  | 9295.3   | 17860.1  | 14902.6  | 24587    | TRUE |
| 18761.1  | 28948.2  | 18954.7  | 27647.7  | 28870.2  | 30997.9  | 11974.4  | 36891.4  | TRUE |
| 5587.7   | 8307.9   | 7147.2   | 9738.9   | 4300     | 6753.9   | 4652     | 7046.4   | TRUE |
| 21924.9  | 10094.1  | 29221.4  | 28779.6  | 21411.4  | 19026    | 25910.6  | 10859.7  | TRUE |

|          |          |          |          |          |          |          |          |      |
|----------|----------|----------|----------|----------|----------|----------|----------|------|
| 309718.3 | 206487   | 279322.9 | 270654.4 | 341618.1 | 277151.5 | 213802.7 | 370826.8 | TRUE |
| 299846.8 | 216783.4 | 285985.6 | 252641.1 | 246165.8 | 265490.8 | 240851   | 235635   | TRUE |
| 469511.1 | 389335.1 | 458152.7 | 423750.6 | 469962.6 | 506897.3 | 422806.9 | 460476.9 | TRUE |
| 18493.5  | 8810.7   | 23884.9  | 23422.1  | 6283.2   | 22376.6  | 11604.4  | 10919.6  | TRUE |
| 23690.6  | 8356.2   | 7006.9   | 12653.6  | 4598     | 7853.4   | 10286.5  | 14109    | TRUE |

|          |          |          |          |          |          |          |          |      |
|----------|----------|----------|----------|----------|----------|----------|----------|------|
| 46125.5  | 30517.2  | 24544.6  | 31453.4  | 39552.9  | 57170.3  | 41415.9  | 44379    | TRUE |
| 899668.2 | 897433.1 | 774131.4 | 885919   | 887703.6 | 782177.3 | 946225.7 | 909881.2 | TRUE |
| 754505.7 | 743111.3 | 785047.2 | 774278.7 | 764620.7 | 673283   | 707347.6 | 741202.7 | TRUE |
| 244212.2 | 260823.6 | 326459.3 | 251958.6 | 246640.8 | 240918.1 | 247089.4 | 271469.9 | TRUE |
| 982399.7 | 953299.7 | 702423.1 | 901794.7 | 950211.9 | 811021.5 | 967010   | 937411.6 | TRUE |
| 540357   | 458336.1 | 451496.4 | 524614.4 | 414634.3 | 441690   | 499064.3 | 440078.2 | TRUE |
| 469419.9 | 460335.1 | 503385.1 | 581186.2 | 417357   | 558137.2 | 497627.3 | 514874.2 | TRUE |
| 324225.1 | 313716.6 | 311982.4 | 339385.9 | 269005.2 | 372147.3 | 354308.9 | 325108.6 | TRUE |

|          |          |          |          |          |          |          |          |      |
|----------|----------|----------|----------|----------|----------|----------|----------|------|
| 122299.8 | 170428.1 | 137981.7 | 169202.4 | 186166.1 | 117777.1 | 118092.5 | 94097.5  | TRUE |
| 83198.1  | 82042.1  | 80973.2  | 82235.8  | 73482.5  | 103573.2 | 102606.6 | 109613.1 | TRUE |
| 149810.4 | 213589.3 | 146613   | 219421.8 | 184378.3 | 130753.1 | 151558.3 | 153765.8 | TRUE |
| 130579.9 | 105227.5 | 92439.4  | 141813.4 | 135266   | 134383.6 | 121615.4 | 145490.7 | TRUE |
| 50965.9  | 57943.9  | 39657.4  | 57068    | 56022.8  | 66009.9  | 82211.8  | 81525    | TRUE |
| 125283.6 | 103677   | 111303   | 123792.2 | 109762.3 | 130190.6 | 135995.2 | 118847.9 | TRUE |
| 677098.7 | 681752.9 | 449297.4 | 566506.6 | 602532.9 | 465530.3 | 597545.9 | 612840.5 | TRUE |

|          |          |          |          |          |          |          |          |      |
|----------|----------|----------|----------|----------|----------|----------|----------|------|
| 32376.1  | 35681.3  | 18945.9  | 32675.3  | 26052.3  | 26298.6  | 25464.5  | 27176.5  | TRUE |
| 584770.3 | 616395.7 | 377886.7 | 525093.3 | 651460.6 | 339516.7 | 622764.1 | 624505.4 | TRUE |
| 649226.8 | 499619.7 | 656163.2 | 634970   | 634764.5 | 571739.1 | 534361.5 | 594279.2 | TRUE |
| 585169   | 591230.2 | 603777.3 | 595295.3 | 470855.7 | 601581.4 | 542813.8 | 574744.4 | TRUE |
| 178875.9 | 185314.5 | 150405.7 | 191092.7 | 159230   | 153535.2 | 170593.9 | 136313.7 | TRUE |
| 81764.2  | 57300.9  | 71116.6  | 81247.3  | 82665.8  | 80711.5  | 75434.9  | 66999.8  | TRUE |
| 180178.1 | 116105.6 | 207738.3 | 151834.5 | 152159.2 | 180001.7 | 157612.5 | 185841.2 | TRUE |



|          |          |          |          |          |          |          |          |      |
|----------|----------|----------|----------|----------|----------|----------|----------|------|
| 39686.1  | 38881.7  | 34919.5  | 35531.7  | 46631.3  | 54425.6  | 41774.8  | 40166.3  | TRUE |
| 30456.4  | 44008    | 33515.5  | 53868.8  | 68063.3  | 60142.2  | 69334.5  | 61430.3  | TRUE |
| 130836.4 | 151964.9 | 125026.9 | 123669.9 | 124717.4 | 68986.4  | 180246   | 96748.2  | TRUE |
| 131234.9 | 117448.9 | 134465.5 | 129540.7 | 124275.6 | 170637   | 150894.3 | 155451.6 | TRUE |
| 55166.1  | 69779.3  | 57742.7  | 70899.2  | 69594.3  | 38085.7  | 88201.8  | 58976.3  | TRUE |
| 51734    | 65883.3  | 38854.3  | 65149.6  | 60444.7  | 36855.6  | 52263.7  | 54459.5  | TRUE |
| 269891.7 | 247774.3 | 199450.1 | 231930.6 | 269765.2 | 219122.3 | 314988   | 243584   | TRUE |
| 129247   | 102567.4 | 109406.1 | 112502.9 | 106559.2 | 139379.3 | 115899.4 | 92065.2  | TRUE |
| 212094.9 | 159812.3 | 150454.4 | 178643.3 | 169208.2 | 208720.7 | 209304   | 207502   | TRUE |
| 103208.9 | 92329    | 98015.5  | 124139.9 | 95367.1  | 119722.6 | 86348.9  | 83262.4  | TRUE |
| 62710.7  | 55593.6  | 63221.4  | 57757.9  | 53625.3  | 79335.1  | 69877    | 85318.6  | TRUE |
| 523682.7 | 470061.9 | 481828.2 | 420095.4 | 309197.1 | 385613   | 396721.6 | 436162.7 | TRUE |
| 221158   | 188552   | 150705.5 | 206464.1 | 158113.8 | 205400.4 | 160348.7 | 224277.5 | TRUE |
| 172483.4 | 177787.3 | 166421.9 | 176430.4 | 152241.3 | 170975.3 | 162753.4 | 168868.5 | TRUE |
| 121941.7 | 124061.4 | 104479.1 | 124925.3 | 113783.8 | 130683.8 | 130172.6 | 122863.3 | TRUE |
| 18320.1  | 28226.7  | 8416.5   | 7279     | 17793.2  | 27628.5  | 30594.6  | 18272.9  | TRUE |
| 65785.4  | 78249.1  | 68347.3  | 51310.8  | 43994.8  | 44646.6  | 43296    | 40538    | TRUE |
| 54309.4  | 58845.2  | 41633.6  | 52265.4  | 66169.9  | 59818.8  | 54458.4  | 52610.5  | TRUE |
| 128676   | 104722.9 | 125144.2 | 130241.5 | 116748.9 | 136510.4 | 149407.9 | 128007.9 | TRUE |
| 155222.2 | 76162.5  | 105865.3 | 101184   | 117467.6 | 85517.4  | 103410.7 | 89441.4  | TRUE |
| 135481.9 | 216399.1 | 141778.8 | 190589.8 | 159276.4 | 122435.2 | 139333.4 | 142037.1 | TRUE |
| 98716.5  | 55863.8  | 56522.3  | 73619.8  | 86726.5  | 90231.5  | 53827    | 95200.5  | TRUE |
| 473472.8 | 457246   | 492110.1 | 521837.2 | 404085.4 | 514776.2 | 547726.1 | 503725.1 | TRUE |
| 76948.7  | 95438.4  | 59384.1  | 64901.8  | 81280.9  | 48574.1  | 87036.9  | 76284.3  | TRUE |
| 80823.9  | 88719.4  | 101572.6 | 108056.6 | 58416.1  | 61350    | 99199    | 83307    | TRUE |
| 65402.3  | 27886.3  | 47933    | 49965.2  | 42566.1  | 49883.1  | 60282.4  | 59941.7  | TRUE |
| 76085.8  | 72842.4  | 61767.4  | 71479.8  | 72364.2  | 88110    | 98512.8  | 74559.5  | TRUE |
| 235784.4 | 221975.7 | 205997.5 | 244912   | 194382.2 | 248784.7 | 231539.6 | 203043.8 | TRUE |
| 138902.6 | 121655.5 | 94763.8  | 129223.5 | 114299.1 | 153990.4 | 146455   | 155433.7 | TRUE |
| 85745.5  | 64039.5  | 56820.5  | 77962.1  | 81314.3  | 96523.7  | 112256   | 91823.9  | TRUE |
| 165875.5 | 132549.9 | 122412.4 | 143411.4 | 132817.6 | 191777.6 | 175237.2 | 157699.5 | TRUE |
| 238236.8 | 202698.2 | 206002   | 221046.7 | 215984.6 | 197336.9 | 190870.9 | 199972.5 | TRUE |
| 44539.4  | 43021.2  | 48970.5  | 34785.3  | 77538.4  | 47411.4  | 67900.8  | 60600.4  | TRUE |
| 522537.1 | 533584.7 | 428189.5 | 504003.2 | 551762.8 | 438439.2 | 542997.9 | 513977.5 | TRUE |
| 1062040  | 1033068  | 1152474  | 1103013  | 969050.7 | 1148681  | 1110354  | 1119306  | TRUE |
| 163470.4 | 183921.2 | 116120.7 | 121697.1 | 133826.1 | 151597.9 | 175708.6 | 177731.9 | TRUE |
| 15721.7  | 9187.2   | 8780.2   | 11208.6  | 21549.1  | 11995    | 10248.3  | 12500.7  | TRUE |
| 21221.5  | 22892.1  | 8752     | 7553.1   | 21054.3  | 10184.4  | 11370.9  | 11830    | TRUE |
| 29513    | 32831.5  | 7387.4   | 42457    | 25639.7  | 29944.2  | 49473.2  | 37375.3  | TRUE |
| 19987    | 10894.1  | 4486.4   | 9331.5   | 27671.1  | 8700.4   | 15866.8  | 28741.4  | TRUE |
| 752884.9 | 790640.8 | 751462.1 | 883760.4 | 895717   | 771352.5 | 915233.6 | 883458.6 | TRUE |
| 469811.3 | 444877.2 | 478781.9 | 443533   | 408082.4 | 457378   | 419452.2 | 434159.4 | TRUE |
| 101292.9 | 125250.4 | 61729.8  | 154948.3 | 103824.7 | 75515.5  | 97532.4  | 108315.9 | TRUE |
| 151548.3 | 152105.1 | 140334.7 | 147753.2 | 191842.4 | 140884.5 | 158701.8 | 157497.3 | TRUE |

|          |          |          |          |          |          |          |          |      |
|----------|----------|----------|----------|----------|----------|----------|----------|------|
| 146917.2 | 170766.5 | 137705   | 162328.6 | 139822.2 | 150119.1 | 151202.2 | 152319   | TRUE |
| 220908.6 | 196717.1 | 230258   | 212652.2 | 183456.3 | 164955.4 | 214724.3 | 189793   | TRUE |
| 102837.5 | 102751.7 | 119421.8 | 119176.8 | 115928.5 | 94670.3  | 153730.7 | 97350.1  | TRUE |
| 7515.7   | 7612.1   | 14279.6  | 8216.7   | 33836.2  | 10632.1  | 11756.4  | 12405.1  | TRUE |
| 38214.6  | 59693.2  | 78870.3  | 103613.3 | 106394.3 | 29613.8  | 24851.4  | 30145.2  | TRUE |
| 100411   | 109473.8 | 116308.2 | 113004.5 | 116982.2 | 96070.1  | 97300.1  | 89167.3  | TRUE |
| 58939.7  | 31504.5  | 47528.7  | 52793.9  | 50409.6  | 65203.2  | 57431.4  | 70149.8  | TRUE |
| 83246.6  | 59411.4  | 68002.4  | 76701.5  | 66193.5  | 99773.9  | 84996.1  | 105176.6 | TRUE |
| 81783.8  | 75830.2  | 67342    | 79544.1  | 94312.2  | 75689.8  | 83220.8  | 94567    | TRUE |
| 56201.3  | 51442.7  | 60991.8  | 86855.4  | 60930.4  | 53845.3  | 92191.5  | 82283.6  | TRUE |
| 509073.8 | 439515.6 | 439965.9 | 539289.5 | 444287.5 | 645874.4 | 670410.8 | 683771.3 | TRUE |
| 846560.4 | 694950.5 | 678541.9 | 1028385  | 944440.6 | 1191401  | 1094368  | 1111222  | TRUE |
| 463387.3 | 494081.8 | 407494.4 | 695929.5 | 671787.9 | 557542.7 | 590494.4 | 601277.4 | TRUE |
| 169198.8 | 152553.4 | 182584.2 | 181228.8 | 251618.4 | 251995   | 279695   | 290884.8 | TRUE |
| 383908.2 | 330488.1 | 276308.5 | 322507.5 | 359998.4 | 268626.2 | 316356.7 | 343724.7 | TRUE |
| 198624.3 | 141893.4 | 140511.7 | 126194.5 | 163373.7 | 123395.3 | 130116.4 | 193214.8 | TRUE |
| 107624.5 | 106240.2 | 79453.3  | 95607.8  | 91026    | 84110.6  | 86408.4  | 93185.7  | TRUE |
| 281233.3 | 301009.7 | 228392.9 | 212918.7 | 257280.4 | 220296.8 | 239476   | 248440.3 | TRUE |
| 174535.9 | 140347.5 | 211149.9 | 204292.8 | 177209.8 | 256982   | 165758.8 | 199318.7 | TRUE |
| 103520.1 | 82571.3  | 128143.6 | 129920.9 | 131793   | 111913.3 | 111140   | 147562.2 | TRUE |
| 267068.6 | 205074.9 | 312236.4 | 274567.4 | 269155.6 | 265291.2 | 267803.5 | 277040.9 | TRUE |
| 162303.2 | 140576.8 | 187068.4 | 212554.4 | 214011.8 | 210103.8 | 192133.4 | 209836.2 | TRUE |
| 147560.7 | 138319.5 | 136277.7 | 125431.4 | 127860.9 | 114440.9 | 133182.6 | 116913.4 | TRUE |
| 118392.7 | 142597.6 | 124701.2 | 126277.2 | 123876.7 | 111199.3 | 120777.8 | 121480.5 | TRUE |
| 55167.9  | 36460    | 48515.2  | 46809.1  | 45287    | 40181.8  | 54896.6  | 39838.4  | TRUE |
| 84809.7  | 71754.2  | 74723.7  | 98709.8  | 90985.6  | 99492.7  | 81414.8  | 104608.1 | TRUE |
| 303270.1 | 259527.5 | 317757.1 | 323214.3 | 287288.7 | 310482.3 | 306386.8 | 309786.2 | TRUE |
| 130901.1 | 105316.6 | 150771.2 | 161360   | 198429.9 | 156237.2 | 162024.9 | 157845.9 | TRUE |
| 225976.2 | 223286.2 | 253092.9 | 292741.6 | 292104.2 | 270812.8 | 263324.8 | 264420.5 | TRUE |
| 106366.1 | 179498.3 | 134993.3 | 150026.3 | 191527.9 | 100012.2 | 89418.3  | 107222.6 | TRUE |
| 270359.6 | 205864.6 | 294872.4 | 321687.1 | 308486.9 | 379258.5 | 317702.4 | 347390.4 | TRUE |
| 161187.7 | 191158.1 | 185121.8 | 182627.8 | 182781.5 | 149011.1 | 191511.2 | 129678.5 | TRUE |
| 139358.2 | 285184   | 213068   | 257331.3 | 213793   | 102077.2 | 115728.1 | 132430   | TRUE |
| 53855.3  | 46515.7  | 47071    | 37648.6  | 43045.2  | 66244.2  | 68789.1  | 70977.2  | TRUE |
| 626024   | 508242.7 | 633525.1 | 790205.5 | 840711.4 | 730035.3 | 625656.1 | 833171.9 | TRUE |
| 669209.6 | 629377.2 | 757545   | 849325.9 | 846879.6 | 795862.4 | 784212   | 814040.2 | TRUE |
| 790194.1 | 776727.3 | 841949.7 | 944443.5 | 966591.1 | 853357.8 | 852971.1 | 861251.9 | TRUE |
| 65784.8  | 65295.9  | 63068.5  | 56232.5  | 62981.9  | 61870.2  | 67084.3  | 74405.1  | TRUE |
| 55687.3  | 47411.6  | 69326.4  | 46789.6  | 48712.4  | 62467.9  | 62074.7  | 63006.9  | TRUE |
| 84777.5  | 112646.4 | 96155.3  | 142643   | 157996.4 | 56187.3  | 38103.7  | 32668.7  | TRUE |
| 134935.1 | 100762.6 | 98163    | 131907.4 | 134633.6 | 158224.2 | 156393.2 | 169280.8 | TRUE |
| 30728.3  | 57356    | 57819.5  | 74179    | 77528.5  | 34549.1  | 34945.2  | 36444.5  | TRUE |
| 96477.3  | 155486.6 | 124911.3 | 205835.4 | 203363.5 | 72207.8  | 62235.4  | 65950.6  | TRUE |
| 28176561 | 26262901 | 24852204 | 26458346 | 26130048 | 30320722 | 29387979 | 30356615 | TRUE |
| 110932.6 | 97378.6  | 84745.7  | 89127.9  | 89410.6  | 130445.9 | 126059.1 | 104131.1 | TRUE |
| 93652.1  | 79359.4  | 77839.9  | 80549    | 81635.4  | 76954.1  | 96739.3  | 87855.7  | TRUE |
| 109032.5 | 112462.5 | 86009.2  | 107902.9 | 86637.8  | 112825.9 | 107151.5 | 110992   | TRUE |

|          |          |          |          |          |          |          |          |      |
|----------|----------|----------|----------|----------|----------|----------|----------|------|
| 66599.4  | 69635.1  | 44101.4  | 65509.5  | 60516.7  | 57168    | 54077.4  | 76468    | TRUE |
| 129167.4 | 107496.4 | 121299.9 | 86188.2  | 111742.6 | 127044.1 | 125102.7 | 103570.4 | TRUE |
| 89436    | 87571.8  | 65296.5  | 70649.5  | 80884.5  | 84138.9  | 92039    | 78619.4  | TRUE |
| 75321.2  | 68227.5  | 69612.7  | 51896.1  | 69415.9  | 61514.7  | 66861    | 68244.5  | TRUE |
| 43430.9  | 36757.4  | 38038    | 36259.9  | 38590.5  | 46897.1  | 52203.4  | 37700.5  | TRUE |
| 32252.9  | 39602.5  | 22583.9  | 43342.4  | 33753.3  | 44250.2  | 39419.7  | 31465.7  | TRUE |
| 163135   | 243452.3 | 219676.6 | 267754.8 | 225456.7 | 181024.6 | 167459.4 | 163113.9 | TRUE |
| 52241.3  | 124086.6 | 57694.7  | 77756.9  | 116086.6 | 38320.5  | 41177.6  | 18896.5  | TRUE |
| 104475.1 | 104738.8 | 80670.4  | 101696.5 | 98572.2  | 89480.3  | 74176.6  | 79486.1  | TRUE |
| 75764.7  | 75052.8  | 72566.5  | 71192.6  | 97249.8  | 39917.4  | 46346.1  | 41825.3  | TRUE |
| 1256555  | 1285917  | 978848   | 1531262  | 1403361  | 1092814  | 1219562  | 1444986  | TRUE |
| 169272.1 | 180032.5 | 140984.5 | 187979.9 | 170672.5 | 150893.1 | 177282.2 | 165341.2 | TRUE |
| 123250.7 | 122962.5 | 122395.6 | 98606.8  | 129817.4 | 99920.8  | 102938   | 133281.4 | TRUE |
| 57944.3  | 87904.7  | 63822    | 73259.9  | 66177.6  | 53479.3  | 65640.8  | 60661.6  | TRUE |
| 607332.5 | 640463.9 | 479419.9 | 640650.3 | 559671.7 | 528142   | 583316.5 | 579096.4 | TRUE |
| 792767   | 816101.5 | 650767.1 | 905952.2 | 815531.9 | 670687.2 | 819498.1 | 836096   | TRUE |
| 272062.5 | 275806.2 | 225711.3 | 284008.5 | 293462.4 | 235675.7 | 264718.8 | 288228.8 | TRUE |
| 153601   | 152445.9 | 144643.3 | 172939.3 | 146925.5 | 156631   | 158809.2 | 165536.7 | TRUE |
| 132684   | 113784   | 98309.5  | 141906.9 | 122939.1 | 116504.1 | 142415.7 | 129287.9 | TRUE |
| 100441.8 | 111096.3 | 126732.9 | 100391.7 | 106626.7 | 91492    | 110300.5 | 105751.5 | TRUE |
| 128806.3 | 115739.7 | 116850.7 | 130792.6 | 108080.1 | 110572.3 | 128838.8 | 121186.5 | TRUE |
| 924373.5 | 889039.1 | 829374.7 | 894704.4 | 805672.3 | 1016903  | 1007778  | 1036475  | TRUE |
| 150168.4 | 159989.4 | 148828.7 | 159363.7 | 133398   | 145422.8 | 147065.7 | 156502.4 | TRUE |
| 25607    | 26997.2  | 25668.6  | 26847.4  | 19438.5  | 23549.6  | 21347    | 27650    | TRUE |
| 68392.9  | 52859.3  | 50933.6  | 57868.7  | 63374    | 67209.1  | 72745.1  | 82116.2  | TRUE |
| 60556.7  | 35782.8  | 35419.9  | 32909.5  | 39256.5  | 53597.1  | 38088.2  | 43574.6  | TRUE |
| 126716.5 | 98849.8  | 74443.1  | 120556.5 | 119011.2 | 108702.7 | 125556.4 | 155637   | TRUE |
| 103707.6 | 81649.4  | 75875    | 118232.6 | 102289.6 | 118539.3 | 101455.7 | 142890.2 | TRUE |
| 49116.7  | 32068.6  | 37685.1  | 64772.5  | 48246.7  | 46590.5  | 42262.1  | 70513.2  | TRUE |
| 137103.1 | 113295.1 | 112802.3 | 124293.6 | 116035.3 | 174783.9 | 144722.4 | 176122.5 | TRUE |
| 3856354  | 3273177  | 3252412  | 4119470  | 3954443  | 3391267  | 3402408  | 3454024  | TRUE |
| 304284.7 | 247321.1 | 235600.1 | 280351.6 | 301504.5 | 255540.8 | 268437.6 | 293684.6 | TRUE |
| 915575.8 | 808191.7 | 741426.2 | 826702.7 | 962213.3 | 781201.2 | 826173.5 | 1008983  | TRUE |
| 69076.2  | 159923.7 | 101685.6 | 141162.3 | 154311.1 | 59956.8  | 61641.8  | 54598.1  | TRUE |
| 1805926  | 1362196  | 1695106  | 1591765  | 2559694  | 1511870  | 1537660  | 1565422  | TRUE |
| 59638.1  | 52658.6  | 50332.4  | 51073.9  | 51231    | 63577.1  | 65034.8  | 60607.6  | TRUE |
| 65788.2  | 73009.4  | 35845    | 39368    | 51659.5  | 43934.6  | 45788    | 40742.6  | TRUE |
| 326279.8 | 287100.8 | 258267.6 | 284940   | 302148.7 | 254519.4 | 258162.5 | 284565.7 | TRUE |
| 117753.7 | 101704.2 | 100882.6 | 91663.7  | 80754.4  | 89233.5  | 103252.2 | 91002.3  | TRUE |
| 148141.6 | 136024.7 | 139362.3 | 127204.5 | 145162.8 | 107831.4 | 134894.1 | 117470.2 | TRUE |
| 406582.9 | 313013.7 | 393948.2 | 541011.5 | 468122.9 | 380078.6 | 456278.3 | 526502.5 | TRUE |
| 357566.3 | 327329.6 | 333240.1 | 429538.6 | 445404   | 368876.3 | 385921.1 | 465182.3 | TRUE |
| 287715.3 | 283693.6 | 278509.8 | 330117.4 | 313999.7 | 311636.2 | 264661.3 | 303157.9 | TRUE |
| 486014.4 | 405252.7 | 474991.5 | 627388.9 | 587975.1 | 533064.9 | 509105.9 | 565779.5 | TRUE |

|          |          |          |          |          |          |          |          |      |
|----------|----------|----------|----------|----------|----------|----------|----------|------|
| 42749.5  | 59531.8  | 59509.8  | 70162.1  | 69840.9  | 46348.3  | 52775.2  | 49010.1  | TRUE |
| 70791.6  | 66718.9  | 30302.3  | 59894.9  | 67269.2  | 67048.4  | 54663.2  | 58664.7  | TRUE |
| 292174.5 | 273580.5 | 218871.5 | 204525.1 | 235727   | 234118.4 | 207600.4 | 223507.5 | TRUE |
| 101808   | 90299.1  | 48659    | 70297.5  | 80576.7  | 68191.5  | 73433.6  | 84955.6  | TRUE |
| 213223.6 | 161117.9 | 172819   | 183372.1 | 156672.2 | 156338.3 | 164087.7 | 147010.3 | TRUE |
| 447913.7 | 426141.7 | 340858.2 | 360573.2 | 347132.3 | 343597.5 | 340850.5 | 340254.2 | TRUE |
| 369683.9 | 343231.7 | 351583.8 | 398437.1 | 372903.3 | 354213.6 | 362592.4 | 386311.3 | TRUE |
| 386514.6 | 323169.4 | 358550.4 | 414194.7 | 406216.1 | 393680   | 386619.9 | 406081.9 | TRUE |
| 668132.4 | 541483.5 | 662275.9 | 812416   | 783900.7 | 742541.2 | 686390.9 | 702559.5 | TRUE |
| 443772.6 | 390228.5 | 449790.4 | 441703   | 499089.7 | 433094   | 459720.2 | 452336.7 | TRUE |
| 168320.2 | 134802.2 | 143793   | 158050.1 | 166859.3 | 159079.2 | 180994.6 | 175090.8 | TRUE |
| 62773.5  | 52516.7  | 51208.5  | 58488.4  | 77848.5  | 61242.1  | 58348.2  | 60872.3  | TRUE |
| 83560.5  | 103736.6 | 116495.7 | 113682.1 | 132742.2 | 64953.8  | 71379    | 78454.9  | TRUE |
| 194244.5 | 192012.8 | 200970   | 192239.9 | 207134.6 | 283255.5 | 225160   | 270975.6 | TRUE |
| 223232.2 | 251015.7 | 264294.5 | 254476.4 | 242144   | 260574.5 | 253971.8 | 233075.4 | TRUE |
| 40491.5  | 77119.2  | 53185.8  | 83109.8  | 91146.9  | 37313.4  | 29810    | 16737.6  | TRUE |
|          |          |          |          |          |          |          |          |      |
| 112271.4 | 88807.2  | 108880.8 | 96032.9  | 94803.1  | 104499   | 98419.6  | 94723.4  | TRUE |
| 101656.7 | 67030.5  | 59832.5  | 101334.8 | 86038.4  | 95165.7  | 77123.1  | 92642.4  | TRUE |
| 239323.8 | 166867.8 | 178637.9 | 213774.2 | 228927.1 | 169309.6 | 162145.3 | 240256.4 | TRUE |
| 118102.6 | 117536.5 | 109215.1 | 127899.3 | 130946.3 | 137776   | 109842.4 | 105773.5 | TRUE |
| 734501.4 | 703912   | 678580.8 | 825398.2 | 718460.1 | 726323   | 702413.8 | 715674.5 | TRUE |
| 209254.7 | 175974.9 | 151550.9 | 171087.2 | 164160.3 | 155256.7 | 192474.8 | 181434.6 | TRUE |
| 122533.9 | 108496   | 117981.2 | 139970.1 | 135489   | 121468.6 | 128261   | 119052.6 | TRUE |
| 407615.9 | 458824.7 | 434549.4 | 415547.8 | 373125.5 | 508525.2 | 442298.7 | 379071.4 | TRUE |
| 125670.3 | 113099.9 | 96626.8  | 147017.7 | 109289.3 | 94752.6  | 124073.9 | 100145.8 | TRUE |
| 79087.6  | 73809.7  | 91820.2  | 74305.8  | 75988    | 103844.8 | 89078.2  | 88380.6  | TRUE |
| 99751.5  | 157199.6 | 184534.5 | 155147.1 | 168294.1 | 62674.5  | 62837.3  | 78687.5  | TRUE |
| 64504.7  | 61960.3  | 63978.3  | 80298.2  | 57577    | 58645.9  | 73723.1  | 75873    | TRUE |
| 72332    | 58522.9  | 52310.3  | 82540.6  | 87707.9  | 62031.1  | 66509.6  | 86153.5  | TRUE |
| 224849   | 249526.2 | 238690.5 | 247785.5 | 279088.2 | 284385.5 | 250379.6 | 254733.4 | TRUE |
| 3740590  | 3312613  | 3784123  | 3922430  | 3887454  | 4247438  | 3615575  | 3772596  | TRUE |
| 67491.8  | 57842.4  | 62728.8  | 78227    | 61099.3  | 62588.7  | 63506.5  | 67898.9  | TRUE |
|          |          |          |          |          |          |          |          |      |
| 200801.3 | 225567.6 | 214663.4 | 220840.1 | 225058.4 | 227842.8 | 204069.1 | 214340.5 | TRUE |
| 37438.8  | 52607.6  | 36671    | 40834    | 39340.2  | 51750.9  | 57644.1  | 49201.7  | TRUE |
| 23497.5  | 20469.5  | 11255.6  | 9636.7   | 21367.4  | 12757.4  | 25815.6  | 28071.6  | TRUE |
|          |          |          |          |          |          |          |          |      |
| 195823.5 | 181506.6 | 219127.7 | 219585.8 | 212899.1 | 184404.8 | 201058.3 | 206897.3 | TRUE |
| 45546.5  | 33779.2  | 34017.1  | 35902.9  | 37678.8  | 31026.2  | 28490.8  | 31876.1  | TRUE |
| 81195.7  | 53600    | 51024.1  | 81831.4  | 52922.7  | 66571.1  | 77901.3  | 78113.1  | TRUE |

|          |          |          |          |          |          |          |          |      |
|----------|----------|----------|----------|----------|----------|----------|----------|------|
| 44971.5  | 38208.1  | 47947.9  | 55606.9  | 45810.3  | 49913.4  | 45146.8  | 45954.8  | TRUE |
| 238268.2 | 232106.5 | 162726.6 | 207754.1 | 242203.4 | 199969.6 | 178280.5 | 227457.3 | TRUE |
| 528569.1 | 590392.6 | 487665.5 | 557226.7 | 475954.7 | 1032706  | 536559.3 | 513160.1 | TRUE |
| 873733.6 | 997586.6 | 755462.5 | 858903   | 838545.5 | 1029059  | 937092.2 | 874272.4 | TRUE |
| 90742.9  | 79178.2  | 61785.4  | 85688.2  | 80741.4  | 68082.5  | 78408    | 76075.7  | TRUE |
| 25098.5  | 26483.6  | 23863.2  | 27510.9  | 23262    | 21077.4  | 27885.1  | 25788.3  | TRUE |
| 109956.8 | 84667.9  | 95142.4  | 85625.3  | 95672.6  | 83399.8  | 85161.9  | 97072.4  | TRUE |
| 31113.2  | 24796    | 28143.9  | 19832.7  | 19314.3  | 28020.5  | 16164    | 23754.2  | TRUE |
| 1126248  | 974842.3 | 1005008  | 1162649  | 1133994  | 1000701  | 1084161  | 1098917  | TRUE |
| 252834.2 | 208672.3 | 244729.5 | 254981.8 | 311339.1 | 218233.9 | 208780.9 | 224492.9 | TRUE |
| 505650.9 | 475398.9 | 442476.6 | 564221.8 | 555840.3 | 490434.8 | 522627.7 | 532205.5 | TRUE |
| 1350347  | 1286315  | 1277557  | 1266591  | 966822.3 | 1360880  | 1344717  | 1273592  | TRUE |
| 916811.9 | 910196.2 | 1038095  | 1128080  | 907245.5 | 1155465  | 1132810  | 1123010  | TRUE |
| 151949.7 | 152845   | 142192.7 | 148745.9 | 143592.3 | 137039.7 | 149445.3 | 151677.2 | TRUE |
| 908661.5 | 755942.7 | 486884.1 | 557200.9 | 623198.1 | 493803   | 547968   | 697575.2 | TRUE |
| 928403.9 | 858762.1 | 418614.7 | 506376.9 | 621761.8 | 395376   | 560465.1 | 644179.2 | TRUE |
| 874431.5 | 805951.8 | 731388.6 | 1026706  | 1038776  | 829578   | 937211   | 1028173  | TRUE |
| 714866.5 | 587209.7 | 573432.9 | 688996.5 | 733848.7 | 618690.3 | 662376.4 | 760949.7 | TRUE |
| 303315.2 | 305387.3 | 295860.8 | 320697.9 | 356596.2 | 255829.9 | 314685.7 | 373490.2 | TRUE |
| 87927.4  | 103200.7 | 73437.4  | 104262.6 | 84269.3  | 89011    | 88140.1  | 101689.8 | TRUE |
| 79458.8  | 68936.3  | 50802.4  | 63557    | 86248.8  | 78477.6  | 91418.7  | 92370    | TRUE |
| 31880.5  | 67860.3  | 42460.3  | 79091.1  | 92800.2  | 19245.3  | 32197.3  | 20737.5  | TRUE |
| 95254.4  | 210714.8 | 144801.1 | 292705.8 | 356290.6 | 69484.8  | 67316.6  | 88674.8  | TRUE |
| 42887    | 43648.4  | 32478.7  | 50271.8  | 52281.2  | 44253.5  | 44612.6  | 53181.6  | TRUE |
| 57099.8  | 32714    | 26809.6  | 36055.7  | 39951.2  | 26862    | 39462.2  | 49731.1  | TRUE |
| 63663    | 129319.4 | 109616.8 | 170590.8 | 145956.2 | 59920.4  | 59694.2  | 63561    | TRUE |
| 76113.5  | 233422.1 | 138129.5 | 249162.9 | 219930.6 | 60723.9  | 43121.8  | 38942.7  | TRUE |
| 206386.7 | 143898.7 | 153688.3 | 177814   | 140307.8 | 191473.5 | 172850.2 | 166377.1 | TRUE |
| 1575332  | 1266537  | 2425799  | 1787462  | 1789973  | 1573195  | 1412382  | 1672645  | TRUE |
| 312078.8 | 239826.6 | 326650.3 | 307232.1 | 309014.2 | 317433.4 | 241870.7 | 278073.6 | TRUE |
| 6338169  | 5731948  | 15943554 | 4648855  | 5811676  | 6240855  | 6291196  | 6507318  | TRUE |
| 77298.9  | 113121.3 | 81143.9  | 115084.1 | 93550.9  | 69154.9  | 65425.6  | 61631.6  | TRUE |
| 20476749 | 19127956 | 17619619 | 21169506 | 23310164 | 18070062 | 20394137 | 22688061 | TRUE |
| 2541304  | 2279269  | 2125437  | 2331769  | 2729100  | 2152366  | 2462051  | 2681876  | TRUE |
| 368380.2 | 329069.2 | 323256.7 | 390390.8 | 397172.7 | 305126.7 | 335331.6 | 397615.1 | TRUE |
| 191466.6 | 159969.4 | 200043.1 | 210532.4 | 190492.4 | 178194.8 | 163701.9 | 202259.5 | TRUE |
| 79934.1  | 64589.5  | 50997.5  | 68750.4  | 70221.8  | 69395.8  | 72618.3  | 88728.7  | TRUE |
| 103457.8 | 87057.7  | 92626.5  | 103274.1 | 107936.7 | 109668.3 | 111614.8 | 113476   | TRUE |
| 44153.8  | 49132.6  | 42768.8  | 40366.8  | 37739.1  | 44396.8  | 45863.5  | 38146.8  | TRUE |
| 116762.6 | 69695.9  | 101763.4 | 105685.7 | 116851.8 | 121038.6 | 100258.4 | 109898.8 | TRUE |
| 61082    | 77808.5  | 75397.1  | 79223.5  | 85193.5  | 58980.7  | 69742.5  | 66681    | TRUE |
| 70164.3  | 111245.3 | 114423.5 | 140030.1 | 172536.2 | 80317.5  | 72951.5  | 62976.2  | TRUE |
| 18442.4  | 25366.4  | 26821.6  | 28845.1  | 28547.8  | 7792     | 8649.6   | 9020     | TRUE |

|          |          |          |          |          |          |          |          |      |
|----------|----------|----------|----------|----------|----------|----------|----------|------|
| 299754.9 | 234403.4 | 263679.5 | 286261   | 291012   | 356657.5 | 348764   | 369725.5 | TRUE |
| 237801.6 | 180694.8 | 181733.1 | 203646.5 | 195457.3 | 178982.8 | 179246   | 206464.5 | TRUE |
| 467648   | 421606.4 | 403840.9 | 448391.9 | 416999.8 | 399802.2 | 399950.1 | 439174.7 | TRUE |
| 270489.9 | 265283.6 | 316980.7 | 407649.1 | 370534.9 | 320056   | 349564.2 | 335548.7 | TRUE |
| 622173.4 | 617471.7 | 670469.6 | 740612.3 | 817923.5 | 694412.5 | 775929.2 | 835066.8 | TRUE |
| 334788.5 | 299710.3 | 411515   | 535244   | 482458.1 | 479162.3 | 433498.2 | 509238.1 | TRUE |
| 697503.8 | 603053.8 | 892061.5 | 1078143  | 1069805  | 920591   | 909764.1 | 1064182  | TRUE |
| 34387.5  | 36478.8  | 30735.2  | 28306.9  | 50778.8  | 31394.1  | 30369.7  | 35976.1  | TRUE |
| 315962.8 | 251171.9 | 259802.7 | 302283.5 | 326970.9 | 288011.9 | 315298.9 | 328623.5 | TRUE |
| 105957.7 | 293250.5 | 182794.7 | 326260.3 | 358921   | 46196.2  | 48854.9  | 52178.4  | TRUE |
| 123689.5 | 373524.2 | 199609.7 | 364912.4 | 409967.5 | 47657.9  | 23249.3  | 56071.8  | TRUE |
| 298383.3 | 271407.9 | 307303.6 | 313911.4 | 286976.8 | 330638.6 | 319268.6 | 343510.1 | TRUE |
| 316752.1 | 305410.9 | 310435.1 | 316290.2 | 278617   | 316754.6 | 298216.9 | 307706.8 | TRUE |
| 3311578  | 3065129  | 2778854  | 3085376  | 3186874  | 3770180  | 3612440  | 3796757  | TRUE |
| 1792746  | 1741910  | 1692718  | 1690234  | 1724869  | 1998171  | 1922437  | 2148432  | TRUE |
| 170558.3 | 153003.9 | 154199   | 142327.3 | 153008.5 | 166409.8 | 162213.9 | 184149.3 | TRUE |
| 78711.8  | 231544.2 | 134265   | 233424.7 | 227504.2 | 34034.6  | 38963.3  | 38414    | TRUE |
| 55749.3  | 171411.4 | 74585.6  | 191636.1 | 192592.9 | 26187.5  | 20888.7  | 14008.4  | TRUE |
| 426698.7 | 366976.8 | 478068.7 | 345525.2 | 420262.8 | 540740.3 | 371267.4 | 433927.8 | TRUE |

|          |          |         |         |         |          |          |          |      |
|----------|----------|---------|---------|---------|----------|----------|----------|------|
| 6692407  | 5709024  | 6673973 | 8255463 | 7494320 | 6939663  | 6956958  | 6910821  | TRUE |
| 106108.2 | 112576.1 | 91995.6 | 105143  | 104883  | 104354.6 | 121712.8 | 106298.7 | TRUE |
| 2176711  | 1985001  | 2155186 | 2137837 | 2017563 | 2225484  | 2098768  | 2079307  | TRUE |

|          |          |          |          |          |          |          |          |      |
|----------|----------|----------|----------|----------|----------|----------|----------|------|
| 176243.1 | 172989.1 | 199548.6 | 186875   | 187149.1 | 218817.6 | 176678.9 | 188938.9 | TRUE |
| 308635.6 | 294969.6 | 321717.3 | 317711.2 | 323238.2 | 332332.9 | 317236.9 | 328557.4 | TRUE |
| 7916531  | 7726234  | 7415579  | 7532327  | 7854380  | 8034329  | 8295951  | 9240446  | TRUE |
| 1052755  | 938651.2 | 722004.4 | 720803   | 931153.1 | 694613.9 | 668447.2 | 925988.4 | TRUE |
| 1037917  | 1099969  | 1069362  | 936432.1 | 1016283  | 1102813  | 1036331  | 1013258  | TRUE |
| 99090.6  | 98858.3  | 104597   | 90724.6  | 100458.1 | 110376   | 106083.1 | 109944   | TRUE |
| 135714.2 | 114679.6 | 115555.7 | 118253.3 | 120257.3 | 146562.6 | 118287.1 | 141040.2 | TRUE |
| 162524.5 | 133355.3 | 147197.6 | 147407.2 | 171122.8 | 143588.9 | 140636.5 | 142294.8 | TRUE |
| 272545.4 | 248898.7 | 230472.9 | 295677.3 | 265495.7 | 272763.2 | 256697.6 | 273040.6 | TRUE |
| 382280.2 | 306280.7 | 350357   | 449080.7 | 371834.4 | 388130.5 | 359686.7 | 416650.4 | TRUE |
| 288852.1 | 234619.3 | 253171.8 | 325082.1 | 276939   | 303385.5 | 298662.3 | 281788.9 | TRUE |
| 223658.3 | 193155.7 | 207233.3 | 264345.6 | 230378.7 | 229830.5 | 255161.3 | 262243.3 | TRUE |
| 278064   | 192963.7 | 261378.5 | 297081.5 | 296121.4 | 272733.1 | 268690.2 | 271844.5 | TRUE |

|          |          |          |          |          |          |          |          |      |
|----------|----------|----------|----------|----------|----------|----------|----------|------|
| 874571.2 | 675668.4 | 767049.4 | 953032.1 | 878190.5 | 844411.8 | 793843.3 | 858081.6 | TRUE |
| 32755.4  | 32210.2  | 29256.6  | 32846.9  | 33149.2  | 37529.7  | 37718.9  | 41437.6  | TRUE |
| 383435.7 | 334131.4 | 346322.9 | 461681.7 | 352446.6 | 383062.4 | 341273.6 | 385918.5 | TRUE |
| 1063487  | 886018.3 | 913637.5 | 1109942  | 1033585  | 997520.8 | 980874   | 979500.3 | TRUE |
| 141002.6 | 87846.8  | 146784.3 | 176864.4 | 145450.5 | 132106.2 | 135217.3 | 141566.7 | TRUE |
| 95915.5  | 173959.2 | 160450.8 | 154322.5 | 125714.5 | 114416.6 | 92554.4  | 102059.9 | TRUE |
| 113077.3 | 252680   | 141711.3 | 259403.9 | 262979.1 | 38909.9  | 40468.6  | 57718.9  | TRUE |
| 34430.5  | 44049.8  | 27845    | 53571    | 45223.2  | 32624.8  | 40773.7  | 40947    | TRUE |
| 50256.3  | 52670.4  | 43756.3  | 67508.6  | 65276.6  | 43901.3  | 46410.2  | 53874.1  | TRUE |
| 59007.5  | 109646.9 | 44957.3  | 65539.2  | 85343.5  | 83801.5  | 83696.2  | 92586.1  | TRUE |
| 23635.2  | 43670.9  | 22429    | 41399    | 32227.1  | 25440.2  | 38247.7  | 43544    | TRUE |
| 107294.9 | 103804.8 | 133054.5 | 95714.5  | 107619.9 | 144031.9 | 127877.6 | 149910.2 | TRUE |
| 76126.2  | 68877.6  | 50120.8  | 97459.4  | 101152.5 | 70758.5  | 88227    | 112740.3 | TRUE |
| 196695.5 | 221600.6 | 251664.1 | 217234.2 | 166110.4 | 188605.8 | 251350.8 | 221554.1 | TRUE |
| 455562   | 449630.2 | 309187   | 264623   | 249660.4 | 364593.3 | 340875.8 | 266944.5 | TRUE |
| 91439.3  | 60538.2  | 76978.3  | 42552.4  | 61987.6  | 69502.8  | 60350.8  | 52777.4  | TRUE |
| 451891.9 | 364434.2 | 514830.9 | 436872.2 | 403189   | 534873.9 | 459796.6 | 386517   | TRUE |
| 806412.1 | 654387.2 | 994675.2 | 894822   | 649088.6 | 1082148  | 789752.4 | 651816.9 | TRUE |
| 1445995  | 1272735  | 1733028  | 2157603  | 1225662  | 2065275  | 1546110  | 1352411  | TRUE |
| 227073.6 | 184653.9 | 226151.6 | 222874.5 | 173589.4 | 243594.2 | 224961.2 | 207974.4 | TRUE |
| 328804.3 | 229216.9 | 271611.3 | 246128.8 | 362916.3 | 270613.3 | 269150.2 | 266156.1 | TRUE |
| 791624.4 | 520349.8 | 672950.3 | 619828.2 | 995386.8 | 765652.8 | 587833.1 | 669529.9 | TRUE |
| 3075451  | 2022649  | 2633875  | 2426970  | 3429984  | 2904707  | 2322565  | 2764958  | TRUE |
| 146530.4 | 175744.9 | 162031.3 | 182747   | 263268.5 | 121162.3 | 98066.7  | 140585.9 | TRUE |
| 49230    | 32281    | 37730.3  | 46792.7  | 42934.3  | 59645.3  | 49369.7  | 62224.7  | TRUE |
| 131108.4 | 95608.5  | 79687.6  | 76916.2  | 136156.7 | 130961.5 | 134616.4 | 144668.6 | TRUE |
| 1895744  | 2960386  | 803525.2 | 902833.8 | 1258418  | 676717.3 | 2512708  | 1293301  | TRUE |
| 294051.1 | 501209.6 | 185290.3 | 208878   | 242117.4 | 152965.6 | 657763.9 | 270090.6 | TRUE |
| 865963.2 | 1414763  | 414402   | 616477.8 | 788117.2 | 420477.9 | 1999523  | 782041.7 | TRUE |
| 14331.4  | 8497.8   | 5069.7   | 12195.5  | 17529    | 5213.1   | 12483.4  | 19431.5  | TRUE |
| 53867.6  | 233141.9 | 26600.3  | 75948.5  | 85359.3  | 17746.9  | 38240.7  | 28358.9  | TRUE |
| 47861.1  | 233015.8 | 35293    | 69968.4  | 99025.2  | 19562    | 13018.2  | 46808.8  | TRUE |
| 811082.7 | 608370.4 | 1572534  | 1556395  | 421173.7 | 523186.5 | 691698.2 | 559459.1 | TRUE |
| 242359.4 | 188665.1 | 291845.1 | 300511.7 | 148360.2 | 130179.9 | 187746   | 163190.8 | TRUE |
| 49698.1  | 46960.3  | 69166.7  | 91932.7  | 30575.2  | 37733.4  | 40837.8  | 45139.6  | TRUE |
| 53844.6  | 34350.5  | 78976.8  | 103543.5 | 17942.7  | 13250.9  | 31244.7  | 29086.6  | TRUE |
| 42319.2  | 28399.2  | 17785.1  | 12250.6  | 30135.4  | 16921.5  | 57977.6  | 38859.8  | TRUE |
| 353312.7 | 233914.1 | 608572.8 | 717992.7 | 195234.7 | 260056.5 | 344714.6 | 252489.8 | TRUE |
| 196769.4 | 266948.2 | 195267.4 | 213581.6 | 222419.5 | 214257.7 | 288481.9 | 208484.9 | TRUE |
| 68439.7  | 90381.6  | 46859.5  | 50935    | 65295.2  | 75041    | 97879.9  | 58152.6  | TRUE |
| 337325   | 652339.4 | 160936.6 | 281988.8 | 367296   | 183055.5 | 660203.5 | 375222.2 | TRUE |
| 63602.6  | 105669   | 54521.1  | 72427.1  | 71554.2  | 61591    | 113736.3 | 77003.7  | TRUE |
| 127173   | 195604.2 | 90108.2  | 114068   | 128110.2 | 95542.1  | 218576.5 | 138246.2 | TRUE |
| 39632.3  | 80339.6  | 29915    | 30399.6  | 34396.2  | 21899.3  | 28616.3  | 11558.2  | TRUE |

|          |          |          |          |          |          |          |          |      |
|----------|----------|----------|----------|----------|----------|----------|----------|------|
| 60653.1  | 59181.9  | 44815.6  | 61952.8  | 61069.8  | 42928.7  | 74235.7  | 67809.2  | TRUE |
| 622734   | 558955.9 | 1359541  | 1354371  | 310258.4 | 427193.7 | 630898.4 | 497259.1 | TRUE |
| 188958.5 | 165008.6 | 330807.9 | 342916.2 | 97507.3  | 130221.2 | 179506   | 151066.2 | TRUE |
| 37572.8  | 48821.6  | 66818.8  | 99184.9  | 40771.7  | 48870.8  | 43888.7  | 51280.8  | TRUE |
| 53689.9  | 52717.7  | 102413.7 | 128291.9 | 50391    | 24178.4  | 32324.5  | 34617.8  | TRUE |
| 70255.3  | 70236.4  | 74498.1  | 73911.5  | 67103.7  | 65861.4  | 75002.7  | 71839.8  | TRUE |
| 48006.4  | 35613.3  | 72790.4  | 60681.6  | 46064.1  | 39653.3  | 44984.8  | 26616.6  | TRUE |
| 51350.5  | 85686.8  | 28518.5  | 60370.6  | 79148.6  | 31946.2  | 110153.5 | 76628.7  | TRUE |
| 58366.9  | 33750.3  | 64299.2  | 79553.6  | 20735.1  | 32132.7  | 35127.1  | 37497.4  | TRUE |
| 424241   | 256716.7 | 668621.7 | 976616.3 | 168274.3 | 247639   | 363394.5 | 277567.3 | TRUE |
| 2461987  | 1677565  | 4016147  | 4457570  | 1047397  | 1425228  | 1774218  | 1403827  | TRUE |
| 442452.4 | 824642.3 | 209564.6 | 261860.1 | 389511.9 | 220623   | 832569.8 | 338082.8 | TRUE |
| 505997.6 | 828328   | 298888.4 | 329179.1 | 464415.4 | 301019.5 | 874012   | 461231   | TRUE |
| 1000385  | 1748467  | 325060.2 | 542984.7 | 763724.2 | 375563.7 | 1871771  | 746019.3 | TRUE |
| 656562   | 1266890  | 198202.1 | 372622.4 | 481772.1 | 246522.8 | 1307500  | 522933.6 | TRUE |
| 290858   | 396745.4 | 183437.8 | 209687   | 237697.7 | 203576   | 384818.1 | 272507.3 | TRUE |
| 134234.6 | 234501.9 | 90299.7  | 113235.9 | 144918.4 | 97288.7  | 206283.5 | 134061.5 | TRUE |
| 110067.1 | 256277.3 | 93626.1  | 94873.4  | 133435.9 | 76461.7  | 93853    | 84470.5  | TRUE |
| 2650713  | 1524008  | 3983442  | 3881244  | 3272000  | 1560124  | 1710801  | 1658322  | TRUE |
| 2389811  | 1589648  | 4609423  | 4781195  | 1109980  | 1245971  | 1818440  | 1293646  | TRUE |
| 373053.9 | 227906.5 | 664122.7 | 708055.6 | 198746.8 | 224936   | 303917.5 | 219088.6 | TRUE |
| 509983.7 | 370984.6 | 927318.8 | 903677.6 | 243192.6 | 309610.8 | 373409   | 348294.4 | TRUE |
| 49083.4  | 28734.1  | 52090.7  | 61030    | 34064.7  | 40257.5  | 33384.6  | 26958.3  | TRUE |
| 61142.1  | 84285.8  | 133966.3 | 244407.4 | 63094    | 12220.5  | 13413.6  | 14361.2  | TRUE |
| 424553.1 | 730903.9 | 186163   | 266880.7 | 282246.2 | 188572.6 | 694875.3 | 301351.7 | TRUE |
| 659535.5 | 1219301  | 227797.2 | 324277.6 | 447568.9 | 275430.3 | 1046506  | 463930.5 | TRUE |
| 383480.9 | 628672.6 | 165660.2 | 259263.3 | 286388.8 | 218522.6 | 488427.5 | 340228.4 | TRUE |
| 1186593  | 1944418  | 632441.1 | 977070.8 | 1116922  | 695974.7 | 2534178  | 1164495  | TRUE |
| 86110    | 235639.7 | 81021.3  | 129691.9 | 133631.4 | 97733.8  | 87681.8  | 88847.8  | TRUE |
| 481556.6 | 506990.7 | 880800.3 | 765078.3 | 288037.7 | 314809.6 | 377337.3 | 306224   | TRUE |
| 1265533  | 816534.2 | 2259985  | 2286132  | 499670.7 | 631008.8 | 849074.1 | 743783.2 | TRUE |
| 429104.1 | 316519.6 | 754662.5 | 770136.7 | 243293.9 | 306553.3 | 354813.8 | 322811.3 | TRUE |
| 591518.9 | 1075610  | 265864.6 | 398372.3 | 481805.9 | 340200.3 | 1062003  | 520399.3 | TRUE |
| 728644.9 | 1396161  | 358467.8 | 520942.6 | 614308.7 | 386291.7 | 1310688  | 570820.5 | TRUE |
| 1029148  | 1855875  | 443153.9 | 720519.5 | 922413.5 | 496184.2 | 1815636  | 876429.3 | TRUE |
| 350998   | 464356.4 | 259216.2 | 370451.8 | 339612.2 | 265559.5 | 487689.4 | 355524.3 | TRUE |
| 44121.9  | 121885   | 53160.9  | 51972.2  | 63974.9  | 28634.6  | 30341.5  | 28484.8  | TRUE |



|          |          |          |          |          |          |          |          |      |
|----------|----------|----------|----------|----------|----------|----------|----------|------|
| 1612189  | 1266081  | 2747907  | 2620110  | 904310.5 | 1202707  | 1304490  | 1156392  | TRUE |
| 195929.2 | 171121.4 | 183171.3 | 207187.2 | 157793.4 | 171048.8 | 207079.3 | 200252   | TRUE |
| 264368.5 | 178459.6 | 267135.9 | 346285.3 | 193904   | 225773.7 | 270204.4 | 235891.7 | TRUE |
| 198015.7 | 245921.9 | 167330.1 | 175197.1 | 177921.7 | 178117.2 | 288280.1 | 199967.6 | TRUE |
| 390142.8 | 322625   | 502546.5 | 649167.5 | 228186.2 | 283717   | 399278.4 | 339884.9 | TRUE |
| 134582.7 | 168861.2 | 94574.8  | 104166.2 | 117901   | 113614.1 | 176040.8 | 114207.8 | TRUE |
| 78837.9  | 116231.7 | 45959.2  | 33022.9  | 71678.8  | 36536.3  | 124946   | 75894.5  | TRUE |
| 99168.2  | 166167   | 45826.9  | 70409    | 68876.9  | 58918.2  | 167386.8 | 62934.6  | TRUE |
| 95066.4  | 154930.4 | 48624.8  | 56034.7  | 66887.1  | 52409.1  | 190720.8 | 72948    | TRUE |
| 37177.3  | 72957.7  | 131316.5 | 135285.3 | 42513.4  | 13646.9  | 11731.4  | 11052.8  | TRUE |
| 33303.4  | 38560    | 4168.7   | 5456.4   | 28410.1  | 4928.3   | 54180.1  | 25743.3  | TRUE |
| 80891.4  | 87038.8  | 63159.7  | 57595.7  | 86083.7  | 58797.8  | 105242.6 | 83228.7  | TRUE |
| 115371.1 | 121151.8 | 79443.6  | 99915.6  | 96918.7  | 92333    | 136082.5 | 117448.4 | TRUE |
| 56124.5  | 54266.7  | 54162.2  | 67388.6  | 56629.9  | 54372.5  | 43673.3  | 65449.6  | TRUE |
| 88523    | 56524.8  | 89082    | 94064.2  | 55868.1  | 98277.8  | 73347.2  | 87919.5  | TRUE |
| 366069   | 611422.3 | 229299.5 | 284742.9 | 352717.1 | 235035.3 | 611324.9 | 385096.5 | TRUE |
| 183559.1 | 147398.5 | 396527   | 371709.2 | 68244.6  | 114460.7 | 157877.4 | 116157.5 | TRUE |
| 876523.1 | 787304.5 | 1658902  | 1640786  | 568658.3 | 638684.7 | 840743.5 | 844139.8 | TRUE |
| 132673.7 | 275877.3 | 52395.4  | 56248.5  | 99953.6  | 50200.6  | 214677.5 | 108411   | TRUE |
| 1065181  | 2079516  | 393060.1 | 564439.3 | 811757.5 | 366960   | 2007668  | 711113.8 | TRUE |
| 51190.7  | 78021.3  | 20857.2  | 27479.3  | 39399.5  | 22762.6  | 72779.3  | 38645.4  | TRUE |
| 1367307  | 942566.6 | 733884   | 903126.7 | 787370.2 | 768892.1 | 551691   | 787347.9 | TRUE |
| 150478.5 | 151949.3 | 118928.1 | 136549.7 | 116255.9 | 130019.8 | 123180.5 | 118201.5 | TRUE |
| 5644944  | 4064442  | 4636765  | 6560908  | 6938193  | 4801609  | 4440245  | 6687626  | TRUE |
| 1855155  | 1332745  | 1675296  | 2138123  | 2003679  | 1797983  | 1421838  | 1965665  | TRUE |
| 228577.3 | 159906.8 | 180756.9 | 234569.7 | 223482.7 | 268933   | 176965   | 265913.4 | TRUE |
| 45148.8  | 89017.9  | 70979.7  | 102874   | 127101.3 | 24981.3  | 26388.3  | 26969.6  | TRUE |
| 26272.5  | 36406.1  | 45149.7  | 76339.7  | 67261    | 20897.6  | 12280.1  | 16568.9  | TRUE |
| 8688159  | 8985300  | 4770173  | 5076852  | 7050207  | 8925986  | 8644245  | 9031646  | TRUE |
| 136726.3 | 151861.3 | 106301.3 | 139994   | 115758.6 | 145314.5 | 139475.2 | 130885.2 | TRUE |
| 4855717  | 6288321  | 3691177  | 4051295  | 4691221  | 7230343  | 7213249  | 6631079  | TRUE |
| 149180.7 | 270559   | 262055.8 | 482808.6 | 376941.2 | 108069.5 | 103002   | 106069.1 | TRUE |
| 110577   | 162377   | 122668.4 | 178292.5 | 188878.9 | 106718.9 | 97288.3  | 111833.8 | TRUE |
| 236552.3 | 341667.8 | 282353.7 | 275210.1 | 384278.2 | 229657   | 182271.2 | 196949.6 | TRUE |
| 36604.6  | 33890    | 34359.1  | 38768.3  | 38141.3  | 42672.4  | 12747.6  | 37726.6  | TRUE |
| 113956.7 | 91809.5  | 64128.6  | 84739.3  | 96130.1  | 70233    | 67740.1  | 77340.5  | TRUE |
| 259117.9 | 187113.9 | 264346.2 | 340643.7 | 321302.4 | 242145.7 | 193631.6 | 273274.3 | TRUE |
| 1445050  | 1124532  | 1258780  | 1836685  | 1450358  | 1522853  | 1238519  | 1527179  | TRUE |
| 57626.9  | 138796   | 100886   | 229249.9 | 235442.6 | 25500.9  | 12645.2  | 30995    | TRUE |
| 93626.9  | 156946.4 | 117793.5 | 196472.3 | 219511.2 | 66711.6  | 53995.8  | 71448.3  | TRUE |
| 128490   | 143655.8 | 141553.7 | 153522.5 | 173642.5 | 233360.5 | 194963.5 | 212518.6 | TRUE |
| 45895.1  | 40470.8  | 41098.6  | 55721.6  | 52389.3  | 42686.1  | 23985.4  | 44201.9  | TRUE |

|          |          |          |          |          |          |          |          |      |
|----------|----------|----------|----------|----------|----------|----------|----------|------|
| 124680.7 | 171019.8 | 167662.1 | 228458.6 | 210196.4 | 102304   | 102037.6 | 102900   | TRUE |
| 51612.2  | 74305.1  | 63858.2  | 51915.7  | 68016    | 42487.3  | 58020.2  | 60666.7  | TRUE |
| 97196.8  | 54001.3  | 84731.2  | 107986.9 | 94667.1  | 114609.5 | 95942.2  | 143345   | TRUE |
| 59598.1  | 27349.3  | 46069    | 40496.5  | 31733.6  | 90039.5  | 35156.2  | 66315.2  | TRUE |
| 1027243  | 683976.9 | 662556.3 | 697817.3 | 692898.5 | 637534.7 | 466410.1 | 608363.9 | TRUE |
| 333935.3 | 294688.1 | 317354.3 | 347854.7 | 309348.4 | 358516.6 | 265674.5 | 301592.5 | TRUE |
| 3414534  | 2416224  | 4018567  | 4554830  | 3383915  | 3838926  | 2501177  | 3299966  | TRUE |
| 987237.1 | 665237.3 | 1069975  | 1261646  | 998723.2 | 1015337  | 814090.7 | 982315.8 | TRUE |
| 149405.6 | 92791.4  | 115892   | 120707.1 | 93353.5  | 137400.9 | 136321.5 | 113224   | TRUE |
| 290307.9 | 182773.8 | 250249.7 | 325466.3 | 230684.4 | 292954.5 | 246292   | 296445.5 | TRUE |
| 99050.2  | 156379.3 | 148961.5 | 255656.6 | 232102.1 | 75684    | 60525.8  | 77131.5  | TRUE |
| 63996.2  | 87091.6  | 91377.2  | 122333   | 109223.9 | 54842.1  | 52163.4  | 55166    | TRUE |
| 3620298  | 3357528  | 2771213  | 2777937  | 3883014  | 4340293  | 3336942  | 3835762  | TRUE |
| 2774446  | 2028657  | 2575346  | 3119616  | 2330239  | 2848342  | 2253358  | 2745368  | TRUE |
| 449018.8 | 372263.2 | 458312.4 | 518272.4 | 485312.4 | 521848.1 | 403041   | 496256.8 | TRUE |
| 429580.9 | 318922.3 | 417740.4 | 477461.4 | 406211.2 | 428400.4 | 377232.7 | 424018.6 | TRUE |
| 111545.8 | 85645.3  | 90801.6  | 104533.2 | 99842.7  | 110983.5 | 85340.6  | 127007.7 | TRUE |
| 83929.4  | 150019.8 | 116703.4 | 198093.9 | 185378   | 67797.4  | 53375    | 56462.3  | TRUE |
| 106410.3 | 175642   | 138788.3 | 260329.9 | 255002.6 | 56141.3  | 38559.5  | 49939.5  | TRUE |
| 12501338 | 11016189 | 8925931  | 9309872  | 11030131 | 14261639 | 12043074 | 14113049 | TRUE |
| 49388.8  | 42465.1  | 43746    | 46396.6  | 44845    | 55237.5  | 42150.5  | 49805.3  | TRUE |
| 64010.5  | 61747.4  | 54677.7  | 66781.6  | 62912.9  | 89181.6  | 74398.4  | 77525.9  | TRUE |
| 120133.1 | 290411.1 | 172906.3 | 220617.7 | 328601.9 | 81519.1  | 69476.8  | 84828    | TRUE |
| 304474.9 | 553586.6 | 285669.4 | 435910   | 515517.7 | 164983.7 | 189508.5 | 172788.9 | TRUE |
| 23468.5  | 24194.9  | 35192.6  | 34886.3  | 38512    | 29077.7  | 41360.8  | 31355.3  | TRUE |
| 53053.2  | 52912.9  | 61707.2  | 49548.8  | 45446.9  | 54700    | 53614.1  | 53315.3  | TRUE |
| 79889.6  | 54840.3  | 66404.6  | 62322.2  | 58687.9  | 67681.4  | 45485.1  | 64287    | TRUE |
| 1929772  | 1359937  | 1744228  | 1755018  | 1809243  | 1677825  | 1275805  | 1797862  | TRUE |
| 1165849  | 791125.3 | 938130.2 | 1014026  | 916155.9 | 955551.5 | 764957.4 | 957040.4 | TRUE |
| 94297.6  | 103115.6 | 112519.6 | 127542.1 | 118584.9 | 113239.5 | 84710.7  | 99383.8  | TRUE |
| 539890.6 | 336185.6 | 670049.9 | 803301   | 668306.5 | 698912.4 | 544630.9 | 635200.5 | TRUE |
| 609216.5 | 446813.6 | 790295   | 886551.9 | 829480.7 | 828736   | 572367   | 815916.6 | TRUE |
| 163550.3 | 135164.6 | 179996.9 | 163387.3 | 162621.6 | 184742.7 | 138525.6 | 174470.1 | TRUE |
| 118575.1 | 141616   | 134794.2 | 131820.7 | 142392   | 102767   | 117457.2 | 135098.8 | TRUE |
| 68625.1  | 52615.9  | 70286.4  | 70226.7  | 68899.3  | 83692.7  | 57813.2  | 76676.8  | TRUE |
| 46060.4  | 43941    | 66526.3  | 94579.6  | 98623.7  | 44716.1  | 35824.5  | 31114.6  | TRUE |
| 70557.1  | 111826.3 | 155021.1 | 173922.9 | 164947.7 | 72657.2  | 58136.3  | 60395.7  | TRUE |
| 367371.2 | 358254   | 304030.4 | 318768.3 | 444814.9 | 504651.1 | 435394.7 | 506221.2 | TRUE |
| 739263.3 | 841931.9 | 711468.1 | 760174.1 | 730665.2 | 829440.9 | 876873.4 | 918880.6 | TRUE |
| 1098175  | 1010365  | 952673.5 | 876265.8 | 1240827  | 1399932  | 1161097  | 1461303  | TRUE |
| 163088   | 265737.1 | 176712.3 | 239864.2 | 340362.4 | 201358.9 | 170354.8 | 181854.6 | TRUE |
| 71644.3  | 167208.7 | 100313.4 | 155109.2 | 231978.4 | 56153.2  | 40401.7  | 56384.7  | TRUE |
| 88872.9  | 67106.8  | 78859.4  | 87732.6  | 106251.9 | 92344.2  | 65223.6  | 89524.8  | TRUE |
| 33744.5  | 25155.6  | 43386.5  | 46107.9  | 50854.9  | 35916.9  | 49197.3  | 45485.4  | TRUE |

|          |          |          |          |          |          |          |          |      |
|----------|----------|----------|----------|----------|----------|----------|----------|------|
| 272402.4 | 206961.1 | 248854.7 | 338315.8 | 332598.7 | 224703.2 | 240314.5 | 334499.4 | TRUE |
| 99894.1  | 101868.2 | 73027    | 135258.2 | 119883.5 | 83160.3  | 104486   | 158173.5 | TRUE |
| 45912.6  | 37195.1  | 36069.4  | 65586.4  | 69463.6  | 40839.5  | 44119.9  | 56094.1  | TRUE |
| 14518.8  | 7427.7   | 15365.9  | 11398.2  | 23091.2  | 16024    | 18248.8  | 19710.3  | TRUE |
| 18064.3  | 6255     | 4799.2   | 23011.9  | 18696.9  | 17462.2  | 10879.6  | 27479.1  | TRUE |
| 458252.6 | 341504.5 | 375878.1 | 528883.7 | 298766.9 | 402668.7 | 336314.3 | 314922   | TRUE |
| 138857.8 | 84939.8  | 158693.9 | 146769.3 | 110110.9 | 167968.6 | 105769.2 | 121031.7 | TRUE |
| 462213.2 | 599228.5 | 494728.3 | 494075.9 | 481063.1 | 493183.3 | 398605   | 448186.7 | TRUE |
| 123007.9 | 87545.5  | 131156.5 | 138636.3 | 127706.5 | 147595   | 101005.9 | 118925.7 | TRUE |
| 104183.4 | 75996.6  | 114635.2 | 93514.6  | 94000.1  | 120973.1 | 94932.4  | 90360.1  | TRUE |
| 107135.6 | 115767.4 | 93523.6  | 114024   | 118120.6 | 123969.6 | 102630.3 | 130174.5 | TRUE |
| 1280629  | 1136544  | 1177206  | 1104309  | 1330553  | 1440439  | 1063756  | 1392558  | TRUE |
| 144443.6 | 160073.5 | 123478.8 | 114115.6 | 157609.4 | 188023.6 | 145558.5 | 191282.3 | TRUE |
| 282975.9 | 159545.4 | 138312.7 | 210172.9 | 158507.9 | 156939.3 | 105457   | 154110.3 | TRUE |
| 674022.4 | 447547.2 | 741142.9 | 771844.4 | 659199   | 761645.6 | 450080.8 | 644480.7 | TRUE |
| 940617.4 | 885361.3 | 1080426  | 1146725  | 941664.4 | 1138153  | 894603.4 | 1036255  | TRUE |
| 170263.1 | 128458.9 | 184038.8 | 136967.8 | 162369.6 | 171161.8 | 126358.2 | 166989.8 | TRUE |
| 3559127  | 3059952  | 2247536  | 2167867  | 4003059  | 3824920  | 3175827  | 3955556  | TRUE |
| 3691555  | 3210667  | 2134904  | 2240642  | 4155878  | 3751666  | 3297644  | 4157087  | TRUE |
| 169332   | 117401.3 | 124856   | 144820.6 | 180508   | 243842.9 | 159636.8 | 188613.9 | TRUE |
| 454404.4 | 264165.7 | 438495.4 | 473127.3 | 292403.2 | 474365   | 250119.1 | 257356.5 | TRUE |
| 984814.9 | 542148.6 | 1014137  | 1248058  | 671123.1 | 1063993  | 615947.6 | 771995.1 | TRUE |
| 1159414  | 748733   | 1417034  | 1582577  | 908410.4 | 1539181  | 902538.3 | 926158.2 | TRUE |
| 1039468  | 547309.9 | 672011.1 | 570313.5 | 1070043  | 1194397  | 635773.2 | 1066903  | TRUE |
| 11157083 | 8031248  | 5945495  | 8815940  | 8650450  | 6290251  | 6057015  | 8702788  | TRUE |
| 1260381  | 1015623  | 1223018  | 1563098  | 1487027  | 1301381  | 1129974  | 1490289  | TRUE |
| 93071.2  | 145624.7 | 134469.3 | 171168.5 | 212132.5 | 60251.6  | 57030.6  | 54175.2  | TRUE |
| 114684.3 | 101467.9 | 109766   | 135321.4 | 123797.7 | 98824.7  | 100105.7 | 122841.9 | TRUE |
| 325828   | 171463.7 | 260886.4 | 248523.6 | 197721.3 | 224753.7 | 177659   | 279213.3 | TRUE |
| 139194.5 | 97974.6  | 157270.1 | 212125.6 | 174334.2 | 195467.1 | 136421.2 | 144752.8 | TRUE |
| 1663243  | 1197786  | 1613677  | 2143720  | 1786468  | 2275849  | 1589466  | 1929108  | TRUE |
| 152046.6 | 150285.1 | 277635.6 | 259884.9 | 386084.2 | 354168   | 185009.3 | 262173.3 | TRUE |
| 574225.6 | 502193   | 478055.4 | 558512.8 | 651114.5 | 702635   | 505862.5 | 541153   | TRUE |
| 170095.7 | 285531.8 | 185921.2 | 269670.8 | 339177.4 | 304019.9 | 388546.3 | 166970.6 | TRUE |
| 40794.9  | 33650.4  | 44291.9  | 59263.1  | 61399.9  | 53339.2  | 43049.2  | 54741.1  | TRUE |
| 109989.5 | 99204.1  | 91890.3  | 117978.3 | 109140.7 | 99558.4  | 97961.1  | 108122.2 | TRUE |

|          |          |          |          |          |          |          |          |      |
|----------|----------|----------|----------|----------|----------|----------|----------|------|
| 42084    | 131967.7 | 89391    | 83730.6  | 106062.6 | 34354.2  | 48622    | 39806.2  | TRUE |
| 1655892  | 1260789  | 1041915  | 1161104  | 1285382  | 1080725  | 972414.7 | 1173211  | TRUE |
| 6302495  | 4198685  | 6157144  | 7794927  | 7123455  | 6583094  | 4738409  | 7371266  | TRUE |
| 144475.8 | 159329.8 | 129328.6 | 176807   | 165591   | 167591.8 | 122017.9 | 154127.9 | TRUE |
| 63322    | 49094.2  | 52826.6  | 57997.6  | 67480.2  | 59602    | 45966.1  | 71232.4  | TRUE |
| 30835.4  | 48749.3  | 43885    | 82701.2  | 75408.5  | 21248    | 25344.3  | 25269.4  | TRUE |
| 184742.7 | 152205.3 | 186540.7 | 220114.7 | 213678   | 194238.2 | 188693.1 | 215155.6 | TRUE |
| 62866.6  | 51757.6  | 56318.4  | 52874.3  | 43219.5  | 52578.2  | 62454    | 54617.5  | TRUE |
| 105598.3 | 81684.3  | 73290.9  | 64885.5  | 72609.7  | 95628.4  | 116781.6 | 94956.4  | TRUE |
| 79781.4  | 83462    | 41198.2  | 53573    | 60458.6  | 71687.5  | 62236.6  | 75494.9  | TRUE |
| 61918.5  | 68984.9  | 73895.6  | 99333.3  | 84249.3  | 94211.6  | 65565.5  | 61110.6  | TRUE |
| 395219.6 | 332095   | 217248.7 | 278033.1 | 354939   | 397580.7 | 373398   | 404369.9 | TRUE |
| 136155   | 103826.2 | 76587    | 111357   | 131356.1 | 159625.6 | 127683.4 | 134568.6 | TRUE |
| 57078.1  | 49539.4  | 58257.7  | 52510.5  | 73206.6  | 70845.7  | 52415.5  | 68851.6  | TRUE |
| 58477.9  | 28568.8  | 36681.2  | 26517.5  | 65220.4  | 70775.4  | 59711.1  | 88126.6  | TRUE |
| 231319.1 | 155384.1 | 172004.9 | 225161.7 | 222350.5 | 161121.9 | 172982.9 | 182883.2 | TRUE |
| 1033095  | 837845.9 | 637895.6 | 965609.4 | 1012526  | 754003.2 | 757649.9 | 1027939  | TRUE |
| 1192447  | 944715.8 | 1131493  | 1717829  | 1612414  | 1070624  | 1160558  | 1596997  | TRUE |
| 283414.3 | 282311.6 | 257158.1 | 283460.9 | 300759.4 | 285380.9 | 289345.9 | 293214.6 | TRUE |
| 243068.1 | 216249.9 | 262865   | 274402.5 | 231679   | 315271.4 | 198629.7 | 244084.3 | TRUE |
| 88707.9  | 45735.1  | 116726.9 | 105528.9 | 90009.5  | 106872.6 | 64032.1  | 88404.3  | TRUE |
| 183628.4 | 112628   | 215374.5 | 233199   | 162460.4 | 220426.4 | 124846.4 | 152454.5 | TRUE |
| 162118.6 | 102895.6 | 153609.6 | 150555.3 | 155020.2 | 162708.4 | 120753   | 176610.7 | TRUE |
| 121661.5 | 118274.7 | 105390.2 | 113076.5 | 109694   | 135671.4 | 104739.5 | 114989.6 | TRUE |
| 96673.9  | 45769.1  | 74056.4  | 78639.6  | 62395.2  | 121417.9 | 67714.6  | 88306.7  | TRUE |
| 33774.4  | 6160.6   | 40887.8  | 44439.4  | 46965    | 38044.7  | 31381.4  | 46789.6  | TRUE |
| 68745.4  | 49208.1  | 89257.7  | 73445.7  | 75328.2  | 87774.8  | 67079.2  | 104749.7 | TRUE |
| 33292.1  | 27765.2  | 40452.6  | 30316.1  | 29701.9  | 48551    | 25051.5  | 31604.6  | TRUE |
| 84405.5  | 60724.2  | 44568.5  | 39231.6  | 82843.4  | 59584.6  | 59570.8  | 79981.9  | TRUE |
| 88262.9  | 85373.2  | 59569.3  | 52822.6  | 92783.3  | 88481.1  | 86812.3  | 117371.2 | TRUE |
| 449348   | 280390.2 | 409510.5 | 444159.5 | 421577   | 529275.1 | 361508.3 | 537211.6 | TRUE |
| 79139.8  | 138630.4 | 71629.1  | 102320.6 | 155570.6 | 69529.9  | 61928.1  | 47259.2  | TRUE |
| 22456.9  | 9924.3   | 7473     | 11102.2  | 32624.7  | 29474.1  | 12310.3  | 30688.8  | TRUE |
| 1785259  | 1287402  | 1930881  | 2129309  | 1834682  | 1866742  | 1429522  | 1722116  | TRUE |
| 1590493  | 1120463  | 1684534  | 1913552  | 1724462  | 1721474  | 1255164  | 1719356  | TRUE |
| 173339   | 163119.9 | 161368.5 | 185049   | 187118.5 | 198065.3 | 201359.9 | 190779.7 | TRUE |
| 91456.1  | 111584.6 | 75790.4  | 104813   | 79785.4  | 85058.6  | 75646.9  | 90704.5  | TRUE |
| 4796372  | 4288540  | 3659926  | 3804423  | 4586637  | 5532693  | 4488351  | 5192835  | TRUE |
| 474092   | 449611.4 | 442013.2 | 469713.8 | 507484.6 | 618433.3 | 506106.9 | 538899.5 | TRUE |
| 255391.5 | 256205.8 | 228223.4 | 256678.4 | 262583.1 | 342364.9 | 287280.4 | 311777.3 | TRUE |

|          |          |          |          |          |          |          |          |      |
|----------|----------|----------|----------|----------|----------|----------|----------|------|
| 52962.1  | 38640.3  | 44700.4  | 56806.5  | 56995.9  | 37507.6  | 37491.8  | 52262.7  | TRUE |
| 184003.6 | 174003.3 | 159766.6 | 221760.3 | 203822   | 173889.4 | 170355.5 | 212740   | TRUE |
| 25322.2  | 25239    | 28832    | 11296.3  | 30007.1  | 36860.4  | 36072.7  | 41306.5  | TRUE |
| 25250.4  | 28634.1  | 24719.6  | 33597.6  | 28931.9  | 38844.4  | 16048.2  | 29748.2  | TRUE |
| 48320.8  | 47066.5  | 52752.8  | 46669.6  | 60791.4  | 33134.7  | 36903.5  | 50658.6  | TRUE |
| 177993.5 | 155315.4 | 129334.2 | 104598   | 153885   | 189048.9 | 212814.2 | 207748   | TRUE |
| 150634.6 | 148430.6 | 93331.8  | 122695.3 | 143847.1 | 198398.1 | 184480.9 | 181299.2 | TRUE |
| 978935.7 | 777601.7 | 998301   | 1002115  | 929569.5 | 925747   | 783667.2 | 872650.8 | TRUE |
| 406168.7 | 329643.6 | 405510.4 | 439468.4 | 389540.8 | 470040.7 | 334710.6 | 454599.3 | TRUE |
| 2668992  | 2524351  | 2138691  | 2729739  | 2636036  | 2325842  | 2922082  | 2552667  | TRUE |
| 1927763  | 1691943  | 1521448  | 2063801  | 1809042  | 1643357  | 1856105  | 1868051  | TRUE |
| 203456   | 195033.8 | 202163.6 | 177393.9 | 247253.1 | 209128.3 | 199997.6 | 278984.8 | TRUE |
| 383902.2 | 293685.9 | 366058.6 | 419264.3 | 432302.2 | 356643.7 | 341656.6 | 412061.4 | TRUE |
| 93076.4  | 91624.7  | 98926.2  | 105138.7 | 91750.1  | 124833.8 | 91071.3  | 95939.6  | TRUE |
| 79285.8  | 127946.4 | 123205.9 | 216105.4 | 216643.8 | 52001.8  | 29240.6  | 40821.9  | TRUE |
| 98162.2  | 65545.8  | 69568.9  | 96953.4  | 87731.3  | 101144.4 | 81310.5  | 84507.3  | TRUE |
| 2298652  | 2132356  | 1854922  | 1902159  | 2251183  | 2638073  | 2218819  | 2536653  | TRUE |
| 3388552  | 2943937  | 3334229  | 3262300  | 2930130  | 3557203  | 3258664  | 3349890  | TRUE |
| 849565   | 824763.5 | 740285.9 | 705086.7 | 837524   | 926823   | 887184.1 | 921022.8 | TRUE |
| 540870.1 | 453655.2 | 435390.5 | 421820.3 | 503351.1 | 559470.8 | 523302.1 | 573286   | TRUE |
| 65965.7  | 62003.7  | 59411.6  | 55609.4  | 66037    | 69573.3  | 68736.1  | 75057.8  | TRUE |
| 116176.4 | 105305.7 | 84899.8  | 101504.9 | 122818.6 | 166286.2 | 126482.7 | 112858.6 | TRUE |
| 147392.9 | 265948.8 | 155821.6 | 229117.9 | 257612.9 | 148816.3 | 142172.7 | 135621.6 | TRUE |
| 88175.7  | 156956.7 | 127643.9 | 148529.6 | 165922.1 | 105358.9 | 71560.6  | 88888.2  | TRUE |
| 174799.8 | 310909.6 | 217568.5 | 231184.5 | 343864.3 | 160306.8 | 127034.5 | 134576.3 | TRUE |
| 301789.2 | 365131.8 | 235080.7 | 294045.4 | 344332.3 | 267018.7 | 318879.7 | 339780.4 | TRUE |
| 361426.1 | 312611.9 | 286587.6 | 367626.4 | 403937   | 320249.2 | 338074.6 | 389310.7 | TRUE |
| 858066.4 | 761522.1 | 690704.6 | 776763.7 | 852083.8 | 733325.4 | 735271.1 | 976324.3 | TRUE |
| 166417.3 | 161637.3 | 160868.8 | 149379.4 | 208584.5 | 151630.6 | 170813.2 | 238142.1 | TRUE |
| 63779.9  | 55315.8  | 66147    | 66764.2  | 61288.3  | 46648    | 61094.9  | 58064.8  | TRUE |
| 580289.5 | 571940   | 540156.3 | 548220.1 | 536163.7 | 577234.6 | 607730.7 | 615399.1 | TRUE |
| 417926.1 | 415505.3 | 387147.5 | 381880.9 | 432404.6 | 432616.9 | 454936.5 | 429390.5 | TRUE |
| 1368773  | 1100245  | 1336891  | 1370556  | 1406944  | 1427063  | 1236890  | 1426653  | TRUE |
| 3015788  | 2938200  | 2323574  | 2431083  | 2974691  | 2889500  | 3168749  | 2961605  | TRUE |
| 1137560  | 1119965  | 945174.7 | 967895   | 1061290  | 1120695  | 1149075  | 1136910  | TRUE |
| 213134.2 | 231859   | 91143.9  | 194898.4 | 259625.9 | 88090.9  | 165410.5 | 232148.9 | TRUE |
| 103641   | 122534.5 | 58759    | 105618.3 | 108608.5 | 71580.4  | 100472.1 | 110824.5 | TRUE |
| 500985   | 665840.4 | 382712.1 | 673277.7 | 726751.6 | 386990.7 | 557340   | 734290   | TRUE |
| 812973.4 | 1210379  | 521535.8 | 1341010  | 1371516  | 519777.1 | 1033287  | 1375017  | TRUE |
| 103443   | 78449.3  | 79879.3  | 97005.9  | 135999.3 | 71426.2  | 115627.8 | 135268.9 | TRUE |
| 67707    | 91163.5  | 69776    | 105591.3 | 116708.3 | 50757.8  | 42921.6  | 48688.9  | TRUE |
| 428052.6 | 399075.5 | 416507.6 | 417409.9 | 377289.9 | 510451.5 | 466713.1 | 444502.8 | TRUE |
| 861373.3 | 828264.4 | 797941.1 | 770979.8 | 684452.5 | 938690.8 | 925955.1 | 891912.6 | TRUE |
| 63344.1  | 107718.2 | 71469.6  | 76266.2  | 93196.8  | 42151.8  | 61718.5  | 49290.3  | TRUE |

|          |          |          |          |          |          |          |          |      |
|----------|----------|----------|----------|----------|----------|----------|----------|------|
| 106311.7 | 75726.2  | 121794.3 | 121831.9 | 107601.2 | 121133   | 98676.5  | 116459.8 | TRUE |
| 33927.3  | 44652.5  | 32585.3  | 36839.1  | 69350.3  | 44110.8  | 59422.1  | 73838.5  | TRUE |
| 277248   | 353817.8 | 250438.9 | 312763.9 | 309405.6 | 311049.1 | 319031.6 | 345796.8 | TRUE |
| 80362.7  | 73883.3  | 85142.1  | 68426.5  | 94944.1  | 76391.9  | 95674.8  | 76327.2  | TRUE |
| 65147.3  | 59849.1  | 64271.8  | 66980.4  | 63877    | 58979.8  | 56276.6  | 63263.6  | TRUE |
| 76774.8  | 65835.9  | 65006.5  | 96418.9  | 111356.5 | 68741    | 92630.7  | 104960.6 | TRUE |
| 194891   | 207344.2 | 142346.1 | 182351.7 | 165302.7 | 214681.4 | 208153   | 220369.8 | TRUE |
| 181961   | 135628.4 | 210357.9 | 179147.6 | 202739   | 227137.2 | 189023.8 | 213444.2 | TRUE |
| 36883.1  | 43910.8  | 39350.4  | 29960.1  | 39273.4  | 33966.1  | 36312.2  | 39518.6  | TRUE |
| 57673.6  | 34602.3  | 56297.2  | 51189.5  | 136376   | 62095.9  | 35393.1  | 134360.9 | TRUE |
| 38077.3  | 31124.1  | 40469.6  | 18216.6  | 32487.2  | 26152.5  | 24677    | 38691.4  | TRUE |
| 21568.6  | 18926.6  | 17160.1  | 20586.2  | 19862.3  | 22101.6  | 18495.7  | 20709.9  | TRUE |
| 23521.6  | 20504.4  | 25408    | 18306    | 20401.4  | 31312.5  | 37158.1  | 26045.8  | TRUE |
| 37314.5  | 37346.3  | 33966.1  | 44878.4  | 44236.8  | 30464.6  | 82249.2  | 35759.8  | TRUE |
| 444658.1 | 479936.8 | 485146.8 | 453048.5 | 489481.6 | 498867.6 | 543326.4 | 501987.1 | TRUE |
| 163782.7 | 163570.7 | 161395.8 | 174432.3 | 190107.9 | 197797.4 | 179835.8 | 198569.7 | TRUE |
| 319166.1 | 287850.7 | 255562.3 | 316936.1 | 282107.6 | 320436.1 | 336274.2 | 307733.1 | TRUE |
| 91189.2  | 62651    | 54856.9  | 52248.5  | 72784.6  | 86233.9  | 82348.3  | 84914.4  | TRUE |
| 90852.9  | 77921.3  | 93020.6  | 104264.8 | 97569.1  | 111594.9 | 116193.4 | 100499.5 | TRUE |
| 160458.9 | 159769.5 | 158818   | 179587.1 | 159765.5 | 157625.1 | 154220   | 165848.9 | TRUE |
| 1507409  | 1226110  | 1665060  | 1959522  | 1955351  | 1802687  | 1613838  | 2025259  | TRUE |
| 78764.8  | 93925.9  | 89958    | 111126   | 127318.7 | 60029.1  | 62385.5  | 73387.8  | TRUE |
| 37529.2  | 115848.6 | 58549.4  | 100422.2 | 108742.8 | 27365.2  | 28392.6  | 31844.1  | TRUE |
| 364336.8 | 378741.7 | 365531.5 | 309797   | 384460.7 | 396683.9 | 391124.3 | 345301.7 | TRUE |
| 499828.3 | 460148.9 | 488624.6 | 477466.4 | 478013.9 | 513377.9 | 521554.2 | 514983.2 | TRUE |
| 44228    | 49297.5  | 58929.9  | 69730.1  | 75022.7  | 61168.5  | 56308.2  | 71836.9  | TRUE |
| 1004841  | 1016151  | 804090.2 | 991018.2 | 1103227  | 789362.1 | 920412   | 1101537  | TRUE |
| 9413135  | 10216716 | 8330300  | 8550806  | 7977626  | 9729610  | 10279425 | 10041254 | TRUE |
| 203502.1 | 214474.3 | 179146.7 | 226880.4 | 219025.7 | 213241.4 | 232381.4 | 201783.3 | TRUE |
| 65678.4  | 156064.1 | 79817.6  | 148937.3 | 116678.7 | 32169.5  | 40571.3  | 46153.9  | TRUE |
| 131236.7 | 81217.2  | 101286.3 | 72967.2  | 57793.8  | 107460.3 | 103194.3 | 112256.5 | TRUE |
| 37350.3  | 39752.3  | 28148.9  | 36754.7  | 30728.8  | 7215.3   | 36745.7  | 11559.7  | TRUE |
| 18816.6  | 23887.5  | 17708.9  | 9525.9   | 20671.1  | 9684.7   | 25686.7  | 9804.8   | TRUE |
| 714342.2 | 623651.2 | 716825.7 | 772819   | 726264.2 | 730025   | 641839.9 | 692646.9 | TRUE |
| 392819.6 | 352302.5 | 349964   | 328583   | 354326   | 390690.9 | 324584.5 | 358564.9 | TRUE |
| 766791.1 | 606766.2 | 663095.8 | 636355.4 | 695008.1 | 686574.9 | 685979.5 | 760687.3 | TRUE |
| 441202.7 | 412601.1 | 420788.8 | 446431.1 | 379041.2 | 421145.3 | 385571.3 | 430356.1 | TRUE |

|          |          |          |          |          |          |          |          |      |
|----------|----------|----------|----------|----------|----------|----------|----------|------|
| 79796.2  | 132447   | 101265.3 | 115985.2 | 60042.1  | 103860.3 | 144390.6 | 97096.8  | TRUE |
| 76594.2  | 63261.9  | 60725    | 79406.2  | 83200.2  | 49769.5  | 66314    | 67388.8  | TRUE |
| 48804.7  | 43575.9  | 37291.8  | 57330.1  | 62442.8  | 47152.4  | 38691.2  | 59537.4  | TRUE |
| 93060.4  | 91004.9  | 96620    | 115952.6 | 120737.6 | 91135.6  | 103972.9 | 132257.7 | TRUE |
| 50009.9  | 64750.3  | 61579.4  | 57380.9  | 61864.1  | 42376.6  | 65342.1  | 65345.5  | TRUE |
| 24678.6  | 5624.1   | 16115.2  | 3839.9   | 28042.2  | 13871.3  | 22212.7  | 26015.9  | TRUE |
| 15210.6  | 21219.1  | 26152.7  | 20835.6  | 22580.3  | 18946.9  | 13290.1  | 11870.8  | TRUE |
| 14185.8  | 10387.2  | 13203.3  | 12442.6  | 27593.3  | 5846.4   | 7530     | 8512.6   | TRUE |
| 59141.2  | 62409.5  | 59127.4  | 51331.1  | 46616.9  | 57032.5  | 65971.6  | 54690.8  | TRUE |
| 40726.5  | 39000.2  | 43068.2  | 40897.7  | 31465.7  | 66557.7  | 48663.4  | 57807.2  | TRUE |
| 29776.8  | 21495    | 31055.8  | 14537.9  | 17658.3  | 30460    | 28072.6  | 31638.2  | TRUE |
| 88136.6  | 62257.3  | 77765.9  | 93690.7  | 87186.1  | 83530.2  | 86377.9  | 77081.6  | TRUE |
| 428656.1 | 356815.9 | 414515.4 | 484497.3 | 532692.9 | 387472.8 | 444010.3 | 486967.2 | TRUE |
| 775300.8 | 729498.8 | 683603.6 | 885842.7 | 973079.3 | 751005.5 | 812608.6 | 950487.9 | TRUE |
| 1396072  | 1394224  | 1260396  | 1331996  | 1388504  | 1507052  | 1514983  | 1413815  | TRUE |
| 1455751  | 1499019  | 1277663  | 1383880  | 1361557  | 1519389  | 1581557  | 1486859  | TRUE |
| 162995.5 | 176244.2 | 140999.7 | 158926   | 146826.1 | 155960.1 | 184810.4 | 148185.5 | TRUE |
| 51522.9  | 45933.1  | 39095.2  | 62475.2  | 70234    | 38003.9  | 45885.5  | 65133.2  | TRUE |
| 1077381  | 1182556  | 1129053  | 1022058  | 1049990  | 1173980  | 1127388  | 1055028  | TRUE |
| 1543477  | 1630262  | 1376593  | 1384618  | 1634702  | 1405741  | 1656601  | 1473115  | TRUE |
| 142836.3 | 171647.8 | 151543   | 141101.8 | 192631   | 159500.1 | 182426.1 | 147025.4 | TRUE |
| 176883.1 | 177975.6 | 154583.5 | 201288.2 | 188383.7 | 168527   | 195134.9 | 185421.3 | TRUE |
| 54050.1  | 122045   | 76678.1  | 90266.8  | 121790.3 | 27857.7  | 20865.7  | 28189.7  | TRUE |
| 3189911  | 2680688  | 3358766  | 3135560  | 3179465  | 2741469  | 2901372  | 2723888  | TRUE |
| 2206158  | 1985423  | 2282630  | 2375884  | 1986575  | 1995324  | 2015761  | 1924359  | TRUE |
| 96530.6  | 86396.5  | 37207.7  | 46662.4  | 54743.5  | 51495.5  | 56865.2  | 48974.8  | TRUE |
| 204106.2 | 223320.4 | 97345.8  | 132564.5 | 142685.7 | 115768.7 | 184541.6 | 143577.6 | TRUE |
| 182359.3 | 184176.6 | 195507.1 | 230285.5 | 145337.7 | 198873.6 | 194856.2 | 157891   | TRUE |
| 363643.8 | 341728   | 481637   | 453965.8 | 319958.5 | 401810.7 | 376824.9 | 369047.9 | TRUE |
| 31479.2  | 34432.6  | 41896.3  | 51061    | 41668.5  | 10894.7  | 10298.9  | 10979.5  | TRUE |
| 17772.5  | 32661.8  | 15535.7  | 38624.7  | 30964    | 22821.2  | 28840.7  | 41120    | TRUE |
| 80337.6  | 70305.8  | 57924.2  | 63341.2  | 62964.6  | 59917.2  | 54113.8  | 68730.5  | TRUE |
| 170070.3 | 168726.3 | 159478.6 | 193446.4 | 195265.8 | 162213.7 | 202298.1 | 208163.6 | TRUE |
| 87750.3  | 95782.5  | 86146    | 90984.3  | 92837.8  | 94131.7  | 108439.5 | 98141.3  | TRUE |
| 446977.9 | 397721.4 | 335435.6 | 368064.5 | 386986.1 | 365204.2 | 391585.5 | 435062.2 | TRUE |
| 128465.1 | 126244.4 | 148498.2 | 174036.1 | 130729   | 134357.2 | 147884.9 | 125505.7 | TRUE |
| 44747.4  | 68128    | 68361.9  | 50823.8  | 67868    | 61161.6  | 66034.9  | 56247.8  | TRUE |
| 28423.8  | 30199.4  | 20758.4  | 8583     | 37202.1  | 26426.7  | 31934.7  | 23591.2  | TRUE |
| 2803080  | 3837339  | 2147118  | 3238601  | 3411301  | 2364870  | 3980354  | 3284772  | TRUE |
| 68122.8  | 108899.8 | 66837.3  | 66684.1  | 83671.1  | 19023.1  | 30785.7  | 28768.5  | TRUE |

|          |          |          |          |          |          |          |          |      |
|----------|----------|----------|----------|----------|----------|----------|----------|------|
| 261660.1 | 217133.4 | 183562.8 | 199664.9 | 256240   | 209526.8 | 277572   | 265451.2 | TRUE |
| 887811.8 | 850767.5 | 892042.8 | 941396.9 | 802510.7 | 790316.7 | 882890.2 | 759027.1 | TRUE |
| 140915.7 | 155823   | 130525.9 | 162357.4 | 153983.8 | 141330   | 172262   | 168718.5 | TRUE |
| 275210   | 256562.8 | 245416.5 | 227794.3 | 282786.6 | 231612.8 | 315498.9 | 253303.5 | TRUE |
| 991807.8 | 1062918  | 896319.1 | 955447.1 | 965841.2 | 920864.1 | 1307541  | 1065229  | TRUE |

|          |          |          |          |          |          |          |          |      |
|----------|----------|----------|----------|----------|----------|----------|----------|------|
| 709353.8 | 396514.9 | 464394.3 | 639977.9 | 655943.6 | 691959.4 | 493482.3 | 713741.9 | TRUE |
| 117626.5 | 118959.2 | 85501.9  | 97413.7  | 111916.4 | 104109.1 | 125468.3 | 106148.2 | TRUE |
| 343267.5 | 433477.4 | 319062   | 334873.7 | 292124.4 | 303149.3 | 357337.7 | 338949.3 | TRUE |
| 73562.3  | 78222.4  | 84781.9  | 90764.3  | 59242.3  | 80173.5  | 75456.8  | 67599.7  | TRUE |
| 73097.3  | 74023.6  | 65784.3  | 70169.2  | 65095.2  | 50101.9  | 69558.8  | 57198.1  | TRUE |
| 719215.4 | 651949.3 | 750343.2 | 858867.3 | 761157.2 | 730280.6 | 670844.4 | 733960.2 | TRUE |
| 22135.3  | 14785.6  | 28517.9  | 13878.3  | 29117.1  | 23179.8  | 16721.8  | 31727.7  | TRUE |
| 125149.9 | 131244.6 | 115717.7 | 104760.9 | 111910.9 | 132703.2 | 178292.8 | 123235.6 | TRUE |

|        |          |          |          |          |          |          |          |      |
|--------|----------|----------|----------|----------|----------|----------|----------|------|
| 129277 | 113638.9 | 182076.3 | 126113.1 | 121059.4 | 179594.6 | 134005.8 | 121656.7 | TRUE |
|--------|----------|----------|----------|----------|----------|----------|----------|------|

|          |          |          |          |        |        |          |          |      |
|----------|----------|----------|----------|--------|--------|----------|----------|------|
| 214486.8 | 233652.7 | 173919.4 | 278721.3 | 266361 | 192964 | 313663.7 | 255941.1 | TRUE |
|----------|----------|----------|----------|--------|--------|----------|----------|------|

|          |          |          |          |          |          |          |          |      |
|----------|----------|----------|----------|----------|----------|----------|----------|------|
| 216625   | 210397.8 | 195480.6 | 190263   | 204881.9 | 205440   | 206604.4 | 201442.4 | TRUE |
| 10435.8  | 7961.5   | 11296.9  | 7441.3   | 8140.1   | 17289.7  | 9089.6   | 22608    | TRUE |
| 7780.7   | 12981.9  | 10198.3  | 13681.3  | 23649.7  | 24265.1  | 13510.8  | 21406.1  | TRUE |
| 35823.4  | 33279.4  | 35839.7  | 37435.3  | 34182.7  | 24778.5  | 58011.1  | 30765.3  | TRUE |
| 55103.9  | 53991.4  | 47365.3  | 47406.2  | 57503.1  | 39880.9  | 54261.1  | 51678.5  | TRUE |
| 104984.2 | 83766.6  | 74980.7  | 98711.7  | 98778.9  | 98123.6  | 107791.3 | 110291.5 | TRUE |
| 83776.8  | 70976.3  | 103230.9 | 143717.8 | 65607.5  | 92624.5  | 108039.3 | 127055.3 | TRUE |
| 958866.7 | 1004122  | 779978   | 881228.4 | 886736.4 | 827023.5 | 1067988  | 841054.7 | TRUE |
| 1114144  | 1211289  | 928388.3 | 1046754  | 1100998  | 955560   | 1297778  | 1098671  | TRUE |
| 48209.3  | 98705.2  | 97411.8  | 71513.2  | 87279.6  | 30643.7  | 38963.2  | 33730.6  | TRUE |
| 1231158  | 1130804  | 1426855  | 1376231  | 1046681  | 1264516  | 1268964  | 1189438  | TRUE |
| 1513610  | 1355666  | 1652402  | 1551256  | 1435343  | 1431746  | 1478655  | 1434944  | TRUE |
| 5551.4   | 9225.3   | 6736.3   | 11201.7  | 9526.5   | 6722.7   | 10897.5  | 10189.5  | TRUE |

|          |          |          |          |          |          |          |          |      |
|----------|----------|----------|----------|----------|----------|----------|----------|------|
| 54000.6  | 6685.6   | 35079.5  | 44333.6  | 40994.8  | 50048    | 26217.5  | 34942.1  | TRUE |
| 71009    | 42986    | 51962    | 72456.3  | 82626.1  | 62309    | 59143.6  | 88074.3  | TRUE |
| 376674.8 | 471066.9 | 344157.8 | 385609.2 | 370400.9 | 386591.9 | 482115.8 | 420775.5 | TRUE |

|         |         |       |          |         |         |       |         |      |
|---------|---------|-------|----------|---------|---------|-------|---------|------|
| 79495.5 | 63948.2 | 84887 | 110421.2 | 91454.7 | 77600.6 | 73571 | 90927.7 | TRUE |
|---------|---------|-------|----------|---------|---------|-------|---------|------|



|          |          |          |          |          |          |          |          |      |
|----------|----------|----------|----------|----------|----------|----------|----------|------|
| 582114.6 | 434064.3 | 466612   | 658101.9 | 532527.2 | 503859.7 | 445448.1 | 610357.8 | TRUE |
| 97139.4  | 90530.1  | 73083    | 90850.4  | 94110.6  | 79316    | 82361.2  | 85126.4  | TRUE |
| 59627.7  | 53390.8  | 51850.9  | 72805.7  | 66541.8  | 56100.4  | 51546.3  | 66809.2  | TRUE |
| 51322    | 89979.1  | 71069.5  | 152906.7 | 141149.7 | 29574.3  | 10128.4  | 34797.2  | TRUE |
| 22078.5  | 8921.6   | 18319    | 18475.9  | 18374    | 20221    | 24429.6  | 9264.5   | TRUE |
| 83385.3  | 100015.9 | 87457.1  | 92241.9  | 84463.3  | 109988.1 | 104540   | 109710   | TRUE |
| 218666   | 206964.6 | 167876.4 | 204703.9 | 259289.8 | 311751.9 | 266141.1 | 318728.4 | TRUE |
| 44654.2  | 24386.9  | 21679.8  | 32361.5  | 26644.5  | 62663    | 22641.8  | 42068.5  | TRUE |
| 49308.2  | 41809.5  | 40045.2  | 58071.2  | 48493    | 63648    | 39839.4  | 51530    | TRUE |
| 44093.9  | 29321.2  | 39485.4  | 42721.8  | 55192.7  | 40563.6  | 42837.3  | 46367.3  | TRUE |
| 140414.7 | 130953   | 124273   | 161412.4 | 176093.7 | 116801.4 | 134676   | 171151.2 | TRUE |
| 144466.2 | 143386.1 | 110584.4 | 142645.1 | 178560.2 | 138748.1 | 134932.3 | 168269.7 | TRUE |
| 198800.5 | 156299.6 | 137305.3 | 201064.6 | 232521.4 | 152685.9 | 147873.9 | 281349.4 | TRUE |
| 377677   | 357578.3 | 315827.9 | 454960.5 | 466153.8 | 334227.8 | 305770.1 | 517815.9 | TRUE |
| 174574.1 | 206857.4 | 187220.3 | 228902.9 | 219589.6 | 206110.8 | 216268.4 | 231975.6 | TRUE |
| 109378   | 100477.6 | 106794.7 | 110662.6 | 117888.9 | 99714.7  | 124797.5 | 119394.5 | TRUE |
| 55446.1  | 29249.9  | 51781.8  | 49487.4  | 44567.9  | 50010    | 33344.8  | 39366.6  | TRUE |
| 25603.4  | 11299.1  | 9685.9   | 11135.8  | 8408     | 19861.4  | 13168.9  | 7938.5   | TRUE |
| 100832.9 | 84063.7  | 94277.6  | 106594   | 96517.7  | 89234.2  | 79729.6  | 88780.7  | TRUE |
| 82410.4  | 58520.2  | 60189.2  | 74932.4  | 85849.7  | 77052.6  | 63672.9  | 74210.8  | TRUE |
| 211857.6 | 139799.9 | 209326.2 | 216897   | 207624   | 227430.8 | 131714.3 | 201955.2 | TRUE |
| 29332.5  | 5335.1   | 31759.3  | 49507.9  | 37451.3  | 23820.1  | 14074.9  | 33711.2  | TRUE |
| 52181.7  | 68107.5  | 75991.3  | 90916.8  | 75635.8  | 85234.1  | 48530    | 78055.7  | TRUE |
| 95419.3  | 71116.1  | 127526.4 | 180635.8 | 132022   | 161534.2 | 108344.8 | 136419.8 | TRUE |
| 118788.3 | 120068.3 | 165979.6 | 218803.9 | 174696.5 | 201942.1 | 169536.1 | 195082.9 | TRUE |
| 75914.2  | 82996    | 85605.9  | 128627.1 | 126249   | 64628.7  | 54738.5  | 69842.3  | TRUE |
| 47581.5  | 46209.9  | 63600.5  | 58176.2  | 58948.6  | 52869.5  | 45368    | 45956.2  | TRUE |
| 38677.8  | 32738    | 35046.5  | 43409.2  | 48824.2  | 27748.7  | 27557.5  | 43077.5  | TRUE |
| 28554.6  | 24947.1  | 28362.8  | 34392    | 47190.6  | 42669    | 41624.3  | 39357.5  | TRUE |
| 33015.4  | 33653.9  | 26308.9  | 38755.7  | 43915.5  | 39566.5  | 27782.8  | 42127.2  | TRUE |
| 28726.8  | 15412.1  | 24092.2  | 49772    | 52643.4  | 25779.4  | 38509.4  | 42752    | TRUE |
| 7837.6   | 7689.1   | 16416.3  | 22314.4  | 31577.9  | 20735.7  | 21685.8  | 34619.6  | TRUE |
| 59199.6  | 55604    | 44722.6  | 218376.5 | 77731.1  | 35514.2  | 48077    | 66802.1  | TRUE |
| 2011740  | 1240914  | 2016086  | 2238828  | 2033409  | 2063297  | 1403216  | 2157964  | TRUE |
| 71953.7  | 176041.8 | 173724.9 | 325144.9 | 314888.9 | 36554.9  | 12566.9  | 24570.2  | TRUE |
| 102265.8 | 399049.8 | 175295.6 | 172860.2 | 335691.2 | 40802.6  | 39431.3  | 56462.9  | TRUE |
| 555129   | 407869   | 570403.7 | 631328.4 | 635216.5 | 560671.4 | 493516.9 | 594042.8 | TRUE |
| 340357.6 | 240243.1 | 353090.3 | 414924.6 | 383901   | 365146.8 | 297818.2 | 377515.1 | TRUE |
| 503487   | 646354.9 | 671574.8 | 400547.8 | 460780.7 | 681740.8 | 672391.5 | 450809.9 | TRUE |
| 793802.9 | 898772.4 | 894804.6 | 658148.5 | 614120.4 | 997056.5 | 967015.9 | 689225.1 | TRUE |
| 702266.1 | 542557   | 759501.5 | 824221   | 877598.7 | 797925.1 | 704599.2 | 826059.8 | TRUE |
| 34329.8  | 32394.4  | 32740.8  | 33695    | 41989    | 42246.7  | 24991.9  | 40245.2  | TRUE |
| 141079.1 | 169982.5 | 128246.3 | 215433.1 | 216022.5 | 81939    | 77365.3  | 92333.9  | TRUE |
| 92999.2  | 201608.9 | 135980.4 | 249579.7 | 276632.9 | 30368.3  | 10825.3  | 32628.9  | TRUE |

|          |          |          |          |          |          |          |          |      |
|----------|----------|----------|----------|----------|----------|----------|----------|------|
| 27064.6  | 42191    | 40589.2  | 40364    | 44131.6  | 24578.7  | 32800    | 35829.8  | TRUE |
| 54579.1  | 26011.6  | 44696.3  | 35380.8  | 46341.7  | 44452.8  | 53330.6  | 44184.4  | TRUE |
| 99423.7  | 85218.6  | 95342.9  | 100916.4 | 98103.9  | 104384.9 | 87403.3  | 97875.1  | TRUE |
| 1261112  | 1302416  | 1006141  | 1101186  | 1286440  | 1493222  | 1415376  | 1484829  | TRUE |
| 1663256  | 1240202  | 1865747  | 1866474  | 2042725  | 1398955  | 1264342  | 1409433  | TRUE |
| 45992.7  | 42635    | 31999.6  | 40112.2  | 48315.3  | 59147.1  | 42095.5  | 60475.4  | TRUE |
| 129038.9 | 154186.1 | 98806.9  | 138232   | 152829.4 | 188115.4 | 151956.9 | 169946.3 | TRUE |
| 181234.6 | 187864.7 | 133221.6 | 138844.8 | 177359.9 | 219746   | 189975.5 | 184872.5 | TRUE |
| 121633.7 | 115245.8 | 82954.8  | 95079.8  | 108088.5 | 122240.5 | 108065   | 129174.2 | TRUE |
| 216777.4 | 228757.7 | 167361.8 | 177985.6 | 205381.4 | 265766.8 | 241043.7 | 231527   | TRUE |
| 154964.7 | 148077   | 123726   | 118452   | 143368.9 | 168561.2 | 162174.5 | 176367.5 | TRUE |
| 200183.8 | 187311.4 | 121806.3 | 165150.8 | 184538.2 | 251251.7 | 210606.5 | 244773.7 | TRUE |
| 85209.6  | 109061.6 | 79142.1  | 74521.7  | 92999.1  | 121658.9 | 109186.7 | 108627.7 | TRUE |
| 123533   | 125204.4 | 101323.9 | 91358.7  | 99143    | 152087.9 | 133369.7 | 128421.8 | TRUE |
| 67532.1  | 91415.7  | 57502.6  | 81951.3  | 83048.8  | 92275.9  | 73969.9  | 93992.1  | TRUE |
| 75495.3  | 91553.6  | 68616.6  | 76191.5  | 72590.7  | 92225.5  | 82582.7  | 109505   | TRUE |
| 82788.6  | 83252.3  | 68439.2  | 78772.5  | 66639.1  | 106117.2 | 80956.5  | 93495.4  | TRUE |
| 109454.6 | 107643.3 | 91621.3  | 87143.1  | 104672.3 | 124877.5 | 123337.2 | 126444.7 | TRUE |
| 82595.6  | 85490.7  | 53023    | 61612.4  | 87233.8  | 90740.7  | 76067.1  | 95702.8  | TRUE |
| 49121.6  | 38392.7  | 32203.9  | 39279.3  | 36917.1  | 46208.8  | 35015.2  | 50854.3  | TRUE |
| 86958.5  | 131033.3 | 102194.2 | 95107.3  | 127055.8 | 93874.7  | 65056.1  | 96539.5  | TRUE |
| 49567.1  | 44207.2  | 40023.8  | 44557.1  | 54461.8  | 45435.1  | 51601.3  | 39332.4  | TRUE |
| 129294.6 | 106864.2 | 92957.7  | 89512.5  | 112714.9 | 116120.2 | 115157   | 99466    | TRUE |
| 39018    | 52917.9  | 58683.3  | 28471.8  | 50764.1  | 49954.7  | 56996.7  | 42353.5  | TRUE |
| 74443.2  | 77948.1  | 63917.7  | 49063.5  | 73262.8  | 56796.8  | 54230.4  | 74120.5  | TRUE |
| 127325.5 | 119416   | 98572.6  | 102304.4 | 84943.6  | 122966.7 | 112666.3 | 129629.7 | TRUE |
| 331066.1 | 309043.4 | 209604   | 260284.4 | 273770.5 | 314002.1 | 316855.9 | 324566.8 | TRUE |
| 111407.4 | 113176.2 | 35161.1  | 61300.1  | 57927.5  | 87036.5  | 91100.3  | 101719.6 | TRUE |
| 156612.5 | 138401.2 | 105060.9 | 147911   | 169075.7 | 144235.4 | 145744.2 | 160413   | TRUE |
| 129378.6 | 116597.9 | 75439.7  | 121752   | 140352.2 | 147069.5 | 130072.8 | 164946.7 | TRUE |
| 931617.4 | 1184969  | 775908.5 | 844311.1 | 959920.8 | 1330145  | 1234886  | 1287615  | TRUE |
| 95409.2  | 93012.2  | 95179.2  | 100367.9 | 98121.6  | 116431.2 | 122636.9 | 117899.4 | TRUE |
| 135430.3 | 178681.5 | 236227.1 | 224641.5 | 263070.9 | 128690.6 | 131774   | 117047.5 | TRUE |
| 153704.8 | 352754.8 | 183343.6 | 241057.3 | 313801.4 | 152718.9 | 123566.7 | 141488.6 | TRUE |
| 42359.6  | 10836.2  | 25219.8  | 40039.6  | 27386    | 45262.9  | 42420.9  | 37271.6  | TRUE |
| 58848.7  | 63815.4  | 39953    | 56100.4  | 64795.7  | 47729.7  | 53885.3  | 58009.9  | TRUE |

|          |          |          |          |          |          |          |          |      |
|----------|----------|----------|----------|----------|----------|----------|----------|------|
| 150533.7 | 127837.3 | 155402.1 | 208396.8 | 218526.1 | 156176.7 | 169957.3 | 206583.3 | TRUE |
| 60904.9  | 49594.9  | 64066    | 93625.9  | 78419.3  | 59598.4  | 64539.2  | 92923.4  | TRUE |
| 193800   | 165201   | 197619   | 293496.9 | 277922.2 | 222065.8 | 192960.8 | 276421.7 | TRUE |
| 115450.3 | 84351.6  | 116154.9 | 200517.1 | 177303.1 | 142823.1 | 108803.3 | 208166.6 | TRUE |
| 89147.4  | 103705.3 | 80429    | 81439.8  | 78828.1  | 85050.7  | 94800    | 107677.4 | TRUE |
| 343049.9 | 339800.3 | 295269.2 | 327158.8 | 283213.6 | 310290.5 | 287362.6 | 293201.1 | TRUE |
| 457287.4 | 271706.4 | 505071.6 | 600733   | 489081.4 | 515733.4 | 385725.5 | 507709.3 | TRUE |
| 710397.9 | 685728.9 | 680310.5 | 653465.9 | 915473.2 | 811958.8 | 675107.9 | 780692.7 | TRUE |
| 826015.3 | 830322.6 | 607656.8 | 613563.7 | 917988.4 | 1096608  | 868032.3 | 1065490  | TRUE |
| 477363.8 | 413906.5 | 455163   | 386454.7 | 375506.6 | 466273.1 | 401820.9 | 361708.7 | TRUE |
| 921775.5 | 671335.9 | 683143.1 | 710959.4 | 657929.1 | 694237.2 | 594542.8 | 673762.8 | TRUE |
| 315966.3 | 260313.1 | 357540   | 397970.8 | 333388.4 | 367633.6 | 321893.7 | 329602.3 | TRUE |
| 965065.2 | 704114.8 | 1043500  | 1181789  | 1130951  | 1069966  | 825430.1 | 1054794  | TRUE |
| 67686.3  | 63947.3  | 61116.3  | 66568.6  | 75295.1  | 48008.9  | 54640.7  | 49927.3  | TRUE |
| 1387661  | 1254117  | 999089.3 | 1057704  | 1384730  | 1586075  | 1295748  | 1427400  | TRUE |
| 10791554 | 10408452 | 7840521  | 7806326  | 10384853 | 11571852 | 11266311 | 12301203 | TRUE |
| 509476.1 | 490848.6 | 398879.4 | 674039.5 | 696878.5 | 436995.1 | 504059.9 | 693901.1 | TRUE |
| 1421965  | 1333961  | 926173.4 | 2292037  | 2590801  | 1032018  | 1601074  | 2426153  | TRUE |
| 217096.7 | 193872.8 | 146863.9 | 243390.3 | 244950.3 | 168412.9 | 186648.3 | 263243.7 | TRUE |
| 140790.6 | 106020   | 91914.3  | 139014   | 146457   | 109533.8 | 114429.3 | 146955   | TRUE |
| 313693.9 | 301917.9 | 224997.9 | 451257.7 | 408078.5 | 276844.4 | 334842.5 | 455749.3 | TRUE |
| 159250.8 | 152537.8 | 145392.1 | 219999.4 | 216548.7 | 133574.9 | 181309.1 | 222375.8 | TRUE |
| 119902.2 | 114487.4 | 111249.5 | 184063.9 | 199976.3 | 115750.8 | 117416.9 | 178876   | TRUE |
| 54283.5  | 37195.4  | 30033.1  | 54410    | 58339.2  | 35592.7  | 50432.9  | 76293.7  | TRUE |
| 92096.6  | 54588.2  | 38311.4  | 95497.2  | 77918.6  | 46844.6  | 57358    | 77213.3  | TRUE |
| 27822.1  | 61469.9  | 40476.7  | 114831.1 | 135706.7 | 4579     | 9418.4   | 23345.3  | TRUE |
| 75928.4  | 150802.1 | 64694.2  | 226120.5 | 276236.4 | 43199.3  | 43511.3  | 70680    | TRUE |
| 68468.9  | 35808.3  | 17359    | 50785.1  | 44545.8  | 28746.3  | 32542.7  | 61227.3  | TRUE |
| 150329.5 | 86608.3  | 49419.6  | 119404.5 | 108159.4 | 83874.3  | 83065.9  | 116503.3 | TRUE |
| 17101.1  | 5599.9   | 6110.1   | 8796.8   | 18545    | 6296.6   | 8252.9   | 20517.6  | TRUE |
| 1320110  | 1903913  | 1227758  | 1360476  | 873319.3 | 1974352  | 2005315  | 1831953  | TRUE |
| 7638367  | 11382205 | 6622471  | 7164604  | 5173489  | 11637991 | 11607431 | 11055534 | TRUE |
| 112797.7 | 94724.5  | 117345.3 | 119286.5 | 115586.7 | 104620.5 | 122794.8 | 121940.5 | TRUE |
| 26525.8  | 27646.4  | 9444.5   | 24239.5  | 17475    | 24991.3  | 28973.1  | 25978.8  | TRUE |
| 39031.6  | 68031.2  | 56244.6  | 60398.5  | 49107    | 33734.1  | 12477.9  | 14160.7  | TRUE |
| 148325.5 | 437690.5 | 180689.7 | 257646.1 | 188681.3 | 104388   | 97867.5  | 89891.6  | TRUE |
| 201597.2 | 68899.1  | 63994.5  | 67843.5  | 85594    | 89161.4  | 81975.6  | 72444.9  | TRUE |
| 1338374  | 799379.8 | 1193752  | 1556691  | 1363944  | 1284382  | 961581.2 | 1415154  | TRUE |
| 289195.5 | 258052.6 | 234305.7 | 324204.6 | 306651.8 | 271634   | 286062.1 | 330775   | TRUE |
| 122248   | 128419.2 | 110659.9 | 170985.6 | 164710.9 | 130802.2 | 126214.2 | 155439.5 | TRUE |
| 60955.1  | 45531.6  | 83510.7  | 114960.8 | 90274.9  | 100666.8 | 87782.4  | 100071.3 | TRUE |

|          |          |          |          |          |          |          |          |      |
|----------|----------|----------|----------|----------|----------|----------|----------|------|
| 12849.1  | 11379.3  | 22743.6  | 13686.7  | 21584.5  | 20166.6  | 15154.2  | 9292.4   | TRUE |
| 257874   | 223145.6 | 247450.6 | 300745.2 | 290720.9 | 303399.9 | 232709.8 | 315432.9 | TRUE |
| 110325.1 | 51408.6  | 91817.6  | 136442.8 | 121847.9 | 114795.9 | 115754.8 | 147121.1 | TRUE |
| 84443    | 76121    | 70720.5  | 80208.6  | 94351    | 93909.8  | 89486.4  | 90630.7  | TRUE |
| 2782233  | 2575725  | 3445231  | 2281637  | 2951680  | 3322338  | 2841361  | 3186589  | TRUE |
| 20321.9  | 39723.1  | 36818.7  | 37751.9  | 62294.3  | 9163.1   | 13312.3  | 12962.6  | TRUE |
| 52366.5  | 53420.6  | 60218.1  | 66557.5  | 55557.1  | 65784.2  | 53636.5  | 58820.4  | TRUE |
| 37678.3  | 23988    | 28164.4  | 15269    | 26146    | 51847.7  | 14227    | 40712.3  | TRUE |
| 209169.4 | 171606.2 | 139292.5 | 151257.2 | 170581.3 | 227128.8 | 210723.7 | 253646.5 | TRUE |
| 275691.4 | 255864   | 149072.4 | 162776.2 | 210860.1 | 320096.7 | 282116.8 | 330897.2 | TRUE |
| 32249.3  | 42310.7  | 33889.2  | 35474.8  | 40593.9  | 57663.1  | 48052.9  | 54258.3  | TRUE |
| 14582823 | 9222540  | 13867890 | 16083903 | 14352730 | 15310956 | 9967203  | 14666678 | TRUE |
| 483265.3 | 366225.7 | 495858.1 | 675680.8 | 510221.3 | 555119.7 | 451414.7 | 508124.6 | TRUE |
| 186422.9 | 203891.8 | 215170.9 | 382397.3 | 372650   | 95891.7  | 55746.7  | 94388.8  | TRUE |
| 6568661  | 5954771  | 4801475  | 4813774  | 6690725  | 8334059  | 6890393  | 7409582  | TRUE |
| 7114416  | 6745995  | 5116827  | 4960298  | 7533998  | 8695819  | 7173591  | 8738032  | TRUE |
| 136380.5 | 282086   | 135985.1 | 188374.6 | 292567.6 | 109825.9 | 74381.4  | 88291.7  | TRUE |
| 22528    | 7382.2   | 12704.9  | 11172.5  | 8897     | 25465.9  | 8852.6   | 25849.2  | TRUE |
| 248694.9 | 195849   | 194444.6 | 222530.7 | 193091   | 196187.5 | 133216.3 | 202809.7 | TRUE |
| 190109.8 | 175563.9 | 158769   | 184159.7 | 173838.1 | 168203.9 | 134397.7 | 181922.9 | TRUE |
| 497014.2 | 338618.5 | 434766.6 | 513351.5 | 406039.7 | 410708.8 | 287750.3 | 407844.7 | TRUE |
| 475838.4 | 354538.9 | 491095.7 | 643504.3 | 522021.1 | 578939.7 | 426815.7 | 534027.4 | TRUE |
| 891167.6 | 611548.9 | 1026870  | 1229960  | 1077162  | 1045062  | 820469.9 | 1073691  | TRUE |
| 127109.7 | 94648.8  | 140831.3 | 127010.4 | 133589   | 109548   | 114887.7 | 137816.7 | TRUE |
| 76848.4  | 61912.3  | 98001.8  | 116252.5 | 107861.8 | 102472.5 | 77403.8  | 85033.9  | TRUE |
| 233992.7 | 186359.5 | 246930.4 | 311044.5 | 261506.4 | 293043.6 | 232082.1 | 278721.4 | TRUE |
| 94490.9  | 79542.2  | 99934.9  | 138319.2 | 121302.7 | 108421   | 108514.5 | 116398.9 | TRUE |
| 79180.2  | 47325.2  | 79468.6  | 104655.4 | 91629    | 82357.7  | 79816.1  | 83865.4  | TRUE |
| 174059   | 151329.8 | 155783.3 | 180353.9 | 153179   | 183436.3 | 167219.7 | 195146.7 | TRUE |
| 42976.3  | 52666.1  | 57932.8  | 64215.5  | 66820.1  | 40593.1  | 41854    | 46096.1  | TRUE |
| 27219.6  | 33641.6  | 50403.1  | 53051.4  | 65888.5  | 6259.5   | 10297.7  | 22614.9  | TRUE |
| 42748.3  | 44936.1  | 32459    | 69845.6  | 68701.5  | 49826.5  | 40965.2  | 56201.4  | TRUE |
| 73710.9  | 41601.8  | 45402.1  | 67551.3  | 63394.8  | 54837.2  | 60689.8  | 65948.2  | TRUE |
| 43919.9  | 53814.7  | 49670.2  | 80671.9  | 76985.5  | 34908.6  | 37236.5  | 34542.6  | TRUE |
| 238876   | 245494   | 293584.4 | 270306.9 | 298472   | 275826   | 260332.8 | 285616.5 | TRUE |
| 480163.8 | 321904   | 486025.5 | 482201.6 | 443518.8 | 487534.3 | 412371.8 | 512986.9 | TRUE |
| 246304   | 244240.3 | 240400.9 | 204911.8 | 312611.7 | 340109.6 | 320597.4 | 341036.3 | TRUE |
| 87197.1  | 109657.5 | 91919.1  | 82181.7  | 113607.6 | 105556.8 | 101821.6 | 87371.4  | TRUE |
| 63063.6  | 87955.1  | 67016.8  | 97325.6  | 103742.9 | 39467    | 62901.3  | 48171.2  | TRUE |
| 43338.4  | 42422.1  | 52082.5  | 50509.1  | 66435.7  | 68382    | 43703.7  | 60882.7  | TRUE |
| 6829748  | 4154344  | 6618990  | 7464187  | 6722909  | 6526292  | 4707977  | 6226196  | TRUE |
| 1653062  | 1159171  | 1460150  | 1669460  | 1580865  | 1524515  | 1144780  | 1383767  | TRUE |
| 13262115 | 12180207 | 9180145  | 9483328  | 13289297 | 14858393 | 13123545 | 15027394 | TRUE |
| 5299551  | 5072481  | 3519501  | 3628762  | 5727087  | 6663159  | 5373083  | 6494138  | TRUE |
| 157678.1 | 156493.2 | 151607.6 | 153558.6 | 154235.7 | 181326.8 | 202689.7 | 171320.4 | TRUE |
| 88225.5  | 78501.4  | 55586.6  | 88704.8  | 70357.7  | 74382.4  | 96632.6  | 82836.9  | TRUE |

|          |          |          |          |          |          |          |          |      |
|----------|----------|----------|----------|----------|----------|----------|----------|------|
| 12800.7  | 14279.7  | 5927.9   | 16632.7  | 6380.4   | 23002.1  | 11143    | 12517.5  | TRUE |
| 39892.8  | 54176.6  | 35508.2  | 34074    | 46494.6  | 38424.2  | 63629.9  | 48163.4  | TRUE |
| 93463.8  | 71231.3  | 101124.3 | 113516.2 | 73150.6  | 93226.1  | 92612.5  | 99118.3  | TRUE |
| 99608    | 96561.7  | 100832.1 | 84631.5  | 96962.4  | 88145.5  | 98446    | 97156.3  | TRUE |
| 108421.7 | 94417    | 83411.5  | 92282.2  | 85793.4  | 104809.3 | 98594.8  | 100700   | TRUE |
| 33022.9  | 31265    | 21641    | 9430.8   | 23785.6  | 23153    | 37958.8  | 33164    | TRUE |
| 52462.6  | 49081.9  | 55297.5  | 46076.8  | 44249.6  | 51530.6  | 51975.5  | 55418    | TRUE |
| 139390.5 | 168648.2 | 167270.9 | 135590   | 132808   | 133056.4 | 156184.8 | 134778.4 | TRUE |
| 111708.8 | 84900.7  | 94664.3  | 110550.2 | 81898.4  | 87624.1  | 105936.3 | 107075.4 | TRUE |
| 73427.3  | 45811.3  | 44328.1  | 62068.8  | 49261.6  | 69221.8  | 71330.8  | 65382.7  | TRUE |
| 66432.4  | 60657.7  | 49892.5  | 78319.1  | 56215.3  | 71847.2  | 58468.7  | 70852.8  | TRUE |
| 190299.5 | 163844.8 | 143089.7 | 197935   | 200159   | 138201.3 | 222634.7 | 174398.7 | TRUE |
| 374501.4 | 316740.8 | 355936.2 | 397861   | 256683.9 | 325105.1 | 363788.7 | 328250.6 | TRUE |
| 1112181  | 910080.7 | 972054.5 | 1178734  | 818847.4 | 1085650  | 1081985  | 1095783  | TRUE |
| 257798.1 | 363190.4 | 122576.9 | 243963.5 | 348371.6 | 136378.7 | 356340.4 | 311211.1 | TRUE |
| 350310.5 | 539348.4 | 194193.6 | 381496.4 | 453572.9 | 194340.1 | 427841.5 | 447659.4 | TRUE |
| 182985.3 | 242877.8 | 145508.2 | 283951.2 | 311406   | 154230.7 | 366653.6 | 344648.2 | TRUE |
| 121646.5 | 188014.7 | 85377    | 177132.3 | 258282.3 | 115162.2 | 219743.4 | 228526   | TRUE |
| 24170.7  | 68301.8  | 33346.8  | 36472.7  | 67180.8  | 7560.6   | 9097.7   | 9433.8   | TRUE |
| 91421.7  | 120662.3 | 112952.1 | 139110.9 | 95154.5  | 123771.7 | 118816.4 | 122761.2 | TRUE |
| 49477.2  | 71126.7  | 89145.1  | 80362.4  | 38417.9  | 79258.3  | 87241.8  | 58998    | TRUE |
| 666670.7 | 639294.2 | 494933.1 | 568046.2 | 697620.7 | 522192.8 | 774341.1 | 657519.2 | TRUE |
| 243700.3 | 261623.5 | 205799.2 | 274483.5 | 276241.1 | 204308   | 283755.9 | 266439.6 | TRUE |
| 296072.4 | 291874.3 | 257796.1 | 318751.9 | 310388.7 | 269027.2 | 352182   | 360777.7 | TRUE |
| 72856.3  | 52981.9  | 63650    | 76451.9  | 82139.1  | 62533.3  | 80337.9  | 75912.7  | TRUE |
| 83176.6  | 73040.9  | 74593.4  | 82096.7  | 92338.9  | 86986.3  | 100730.5 | 93146.9  | TRUE |
| 38385.3  | 48282    | 33103    | 32010.7  | 53996.8  | 33401.2  | 44142.2  | 47254.3  | TRUE |
| 73344.3  | 99656.1  | 68905.8  | 76600.8  | 82978.9  | 74889.3  | 84167.8  | 86506.4  | TRUE |
| 31392.7  | 39794.9  | 28879.1  | 52249    | 51660.1  | 6397.2   | 12649.3  | 26025.1  | TRUE |
| 237733.9 | 214459.9 | 191839.1 | 243412.6 | 261386.7 | 204620.6 | 258451.5 | 254689.4 | TRUE |
| 483265.6 | 463159.4 | 507748   | 493653.7 | 383205.9 | 460745.7 | 479362.1 | 459397.8 | TRUE |
| 347580   | 316103.9 | 369487.5 | 376449   | 286458.3 | 341840.9 | 315129.9 | 335524.7 | TRUE |
| 26435.6  | 28721.7  | 26525.4  | 30819.5  | 25742.2  | 24672.3  | 30821.6  | 29937.1  | TRUE |
| 169938.4 | 163557.8 | 153392.9 | 204540.8 | 192297.7 | 154297.9 | 210076.3 | 185325   | TRUE |
| 258465.1 | 271397.6 | 245300.6 | 252819.9 | 277516.7 | 239291.3 | 304465.5 | 331022.8 | TRUE |
| 92404.4  | 71560.1  | 114943.6 | 113581.9 | 66907.3  | 84369.5  | 86052.8  | 100869.7 | TRUE |
| 50651.9  | 69521.1  | 52030.1  | 58291.7  | 78672.2  | 42142.9  | 56753.2  | 44275.4  | TRUE |
| 196906.2 | 235640.2 | 150462.2 | 168723.5 | 192470.4 | 147070.1 | 237719.6 | 210117.7 | TRUE |
| 79697.1  | 91770.3  | 86665.5  | 73678    | 63472.6  | 71724.2  | 72597.7  | 53901.9  | TRUE |
| 60255.4  | 59027.6  | 84639.5  | 74291.7  | 59774.1  | 60445.3  | 65284.5  | 71042.4  | TRUE |
| 379555.7 | 489016.1 | 311552.2 | 356730.1 | 355582.4 | 358331.8 | 395893.1 | 429631.2 | TRUE |
| 436708.3 | 435352.9 | 491607.1 | 552341.9 | 545200.7 | 462921.9 | 446453.3 | 457362   | TRUE |
| 1684475  | 1390683  | 1603505  | 1612923  | 1287009  | 1495544  | 1426969  | 1440256  | TRUE |
| 246913.8 | 322706.3 | 233227   | 196344.9 | 213171.7 | 191682.8 | 273849.9 | 216427.3 | TRUE |
| 154399.6 | 166293   | 119669   | 140591.8 | 142606.5 | 159366.2 | 165393.7 | 149776.9 | TRUE |
| 215861   | 209483.9 | 221859.3 | 234488   | 243140.1 | 239803.1 | 256109.4 | 247489.5 | TRUE |

|          |          |          |          |          |          |          |          |      |
|----------|----------|----------|----------|----------|----------|----------|----------|------|
| 207446.7 | 209033.9 | 220508.6 | 238831.2 | 272976.8 | 245291   | 239075.5 | 245971.1 | TRUE |
| 107352.5 | 150886.6 | 77422.7  | 113109.8 | 122481   | 88243.7  | 126538.4 | 123278.1 | TRUE |
| 295626.8 | 301654   | 171580.9 | 268813.2 | 268307.8 | 228770.8 | 352719   | 309104.4 | TRUE |
| 26917.1  | 22059.2  | 21151.2  | 17003.5  | 22125.7  | 24849.1  | 38257.5  | 19282.9  | TRUE |
| 30894.3  | 5767.7   | 14671.3  | 9727.4   | 19268.6  | 17432.3  | 12483.6  | 16397.3  | TRUE |
| 383083.4 | 302899   | 399794.4 | 407496.8 | 417673.9 | 357452.5 | 389914.2 | 408205.8 | TRUE |
| 524718   | 514349.5 | 422016.9 | 543164.4 | 664813.9 | 454259.9 | 545304.9 | 651124.5 | TRUE |
| 434421.3 | 412648.5 | 427497.5 | 413612.4 | 329183.9 | 379554.3 | 489580.9 | 412911   | TRUE |
| 412628.2 | 416720.4 | 457220.6 | 459800.7 | 382367.2 | 431824.6 | 484555.7 | 453124   | TRUE |
| 30325    | 37656.7  | 19437.3  | 10352.4  | 7965.2   | 20193.8  | 16704.7  | 29110.9  | TRUE |
| 64222.6  | 68506.9  | 52728.7  | 78536.8  | 80389.4  | 87415.7  | 100150.6 | 98468    | TRUE |
| 106694   | 105974.5 | 91782.3  | 97787.2  | 117541.8 | 112545.7 | 148539.6 | 106142.4 | TRUE |
| 80173.3  | 90410.1  | 84453.6  | 78049.1  | 80055.3  | 101343.3 | 116057.2 | 101518.2 | TRUE |
| 57030.1  | 58094.5  | 45727.8  | 53029.9  | 50385.3  | 45471.9  | 44223.7  | 47124    | TRUE |
| 108224.8 | 97636.7  | 66608.3  | 113014.1 | 102736.4 | 89472.9  | 111202.9 | 120677.4 | TRUE |
| 49097.6  | 74906.3  | 61425.4  | 67391.1  | 70959    | 55551.3  | 70561.9  | 66935.5  | TRUE |
| 231256.5 | 245235.8 | 179864.9 | 248560.1 | 211397.8 | 211711   | 269858   | 232936.3 | TRUE |
| 79650.6  | 92644.6  | 42934.5  | 62840.2  | 67838    | 58790    | 84059.2  | 78539.4  | TRUE |
| 82055.8  | 116140.1 | 49482.2  | 99270.8  | 88377.6  | 63892.2  | 96716.3  | 84500.7  | TRUE |
| 23176.9  | 20225.8  | 21935.1  | 20498.7  | 10043.5  | 22385    | 22138.1  | 21439.7  | TRUE |
| 299530.7 | 202724.5 | 231988.4 | 224577   | 249574.9 | 356910.3 | 308886.4 | 357886.9 | TRUE |
| 51019.9  | 83987.4  | 47951    | 58929.9  | 44628.7  | 55225.7  | 82094.7  | 45139.5  | TRUE |
| 55180.6  | 51316.6  | 67508.1  | 75739.6  | 57560    | 73320.9  | 73464.5  | 70535.1  | TRUE |
| 23615.4  | 37406.9  | 32526.8  | 30563.5  | 50669.8  | 48061.1  | 50757.8  | 44358.1  | TRUE |
| 80006.3  | 84906    | 99640.3  | 90216.1  | 114564.5 | 102572.5 | 124683.6 | 122732   | TRUE |
| 64982.3  | 100914.8 | 55822.5  | 75491.7  | 88280.9  | 46665.4  | 83264.5  | 66079.7  | TRUE |
| 68736.2  | 74039.3  | 62223.9  | 68325    | 71798.5  | 50937.4  | 83132.9  | 72126.6  | TRUE |
| 291372.4 | 275930.3 | 213348.2 | 354483.5 | 243153.4 | 248289.2 | 297169   | 254252.2 | TRUE |
| 242022.2 | 210490   | 320882.7 | 299518.9 | 229233.3 | 293333   | 236522   | 255773.1 | TRUE |
| 510455.2 | 493559.4 | 542566.8 | 588396.7 | 413177.4 | 564057   | 512169.9 | 442203.5 | TRUE |
| 270492.6 | 223373.8 | 263967   | 251181.2 | 217454.4 | 258192.9 | 255037.4 | 201807.2 | TRUE |
| 142655.7 | 115333.5 | 177701.9 | 143429.6 | 97603.7  | 157414   | 150832.8 | 117160.8 | TRUE |
| 750636.5 | 747239.2 | 878792.7 | 852422.3 | 652155   | 817112.1 | 789669.9 | 553066.6 | TRUE |
| 149843.2 | 154800.9 | 157767.3 | 173013   | 165226.9 | 153682.3 | 176114.8 | 157238   | TRUE |
| 33450.1  | 47250.5  | 34817.7  | 30533.6  | 35441.6  | 29757.1  | 22914.5  | 36516.4  | TRUE |
| 25801.3  | 6730.7   | 23296.2  | 13743.1  | 12971.8  | 29050.5  | 32870.2  | 30282.3  | TRUE |
| 16279.3  | 50386.7  | 30154.6  | 41583.4  | 34900.2  | 7207.1   | 8172.9   | 5972.5   | TRUE |
| 302541.7 | 239154.2 | 240325.3 | 256937.8 | 178303.5 | 209891.8 | 293234.6 | 231181.9 | TRUE |
| 64343.1  | 176258.5 | 206321.7 | 124004.9 | 136527.1 | 45797.9  | 52805    | 54863.8  | TRUE |
| 748848.7 | 762552.7 | 771271.5 | 828306.1 | 700613.8 | 748720.3 | 780075.4 | 688837.3 | TRUE |
| 205518.7 | 195751   | 230610.5 | 203751.7 | 170765   | 212414.7 | 197021   | 178318.1 | TRUE |

|          |          |          |          |          |          |          |          |      |
|----------|----------|----------|----------|----------|----------|----------|----------|------|
| 189970.2 | 161209.8 | 225827   | 164842.5 | 160385.8 | 187981.3 | 166081.5 | 196431.3 | TRUE |
| 1731388  | 1792905  | 1700579  | 1830942  | 1229069  | 1776857  | 1748653  | 1323190  | TRUE |
| 350454.1 | 343160   | 298507.7 | 318740.1 | 266274.9 | 355409.8 | 369003.2 | 289783.4 | TRUE |
| 3317744  | 2463962  | 3583303  | 3367636  | 3526532  | 3480199  | 2661323  | 3192393  | TRUE |
| 42009.9  | 39451.9  | 32579.1  | 52737.6  | 29950.9  | 55811.9  | 36705.1  | 44925.9  | TRUE |
| 19145.8  | 11541.2  | 28256.6  | 31735.5  | 32998.6  | 23332.8  | 25456.2  | 35980.7  | TRUE |
| 1941299  | 1818529  | 1530361  | 1842394  | 1551746  | 1556559  | 1758126  | 1508652  | TRUE |
| 7312515  | 6961393  | 5789574  | 6518300  | 4735461  | 6145690  | 6384438  | 4756555  | TRUE |
| 2613757  | 2365474  | 3097473  | 3691396  | 2598637  | 3333692  | 3364666  | 2654573  | TRUE |
| 1489711  | 1352876  | 1562682  | 1946617  | 1642820  | 1780849  | 1588399  | 1670277  | TRUE |
| 100385   | 260898.8 | 157326.9 | 208163.4 | 203677.2 | 81446.6  | 69535.8  | 48237.2  | TRUE |
| 371179.1 | 376558.8 | 341185.3 | 580309.2 | 333583.9 | 347630   | 439284.5 | 356418.8 | TRUE |
| 131995.2 | 149668.6 | 81301.9  | 188878.1 | 114254.1 | 107760.1 | 207972.1 | 115169.4 | TRUE |
| 179716.6 | 172105.5 | 133494.1 | 133824.9 | 125024.6 | 141578.5 | 203137.5 | 171461.6 | TRUE |
| 622316.6 | 576866.1 | 526841   | 539185.2 | 565057.8 | 516368.3 | 686407.3 | 625670.9 | TRUE |
| 2303477  | 2138785  | 1959999  | 2277080  | 2386932  | 2196764  | 2558454  | 2497662  | TRUE |
| 30777.9  | 53568.2  | 36484    | 45053.4  | 39584.7  | 38307.2  | 48616.7  | 58485.8  | TRUE |
| 485868.4 | 413920.1 | 445916.6 | 563801.5 | 474479.4 | 521938.7 | 558705.6 | 607234.8 | TRUE |
| 303596.3 | 236779.4 | 303620.7 | 386728.7 | 296797.4 | 317795.6 | 361677.7 | 353510.5 | TRUE |
| 381437.5 | 333020.3 | 257004.9 | 419330.4 | 200332.3 | 465159.4 | 488089.4 | 305082   | TRUE |
| 340778.6 | 276754.8 | 203854.3 | 335380.3 | 202056.6 | 363878.1 | 400253.2 | 290810.5 | TRUE |
| 157803.3 | 178687.2 | 133139.6 | 195519.8 | 154279.3 | 109577.2 | 167395.9 | 130473.2 | TRUE |
| 238493.2 | 199132.5 | 215486   | 227976.3 | 175285.1 | 242012.9 | 210462.5 | 228753.1 | TRUE |
| 214090.8 | 234775.5 | 249485.2 | 163423.4 | 155448.4 | 236258.1 | 178850.6 | 176848.4 | TRUE |
| 579345.2 | 549098.4 | 615486.2 | 602518.7 | 519144.7 | 661636.9 | 628285.9 | 535945.3 | TRUE |
| 1035836  | 996692.9 | 1119529  | 1137402  | 967522.5 | 1192089  | 1139698  | 903171.3 | TRUE |
| 791106.3 | 663747.3 | 755587.7 | 662829.2 | 843565.1 | 666531.8 | 588075.4 | 627322.2 | TRUE |
| 58673.8  | 54239.8  | 54250.5  | 55782    | 49321.5  | 57285.3  | 40653.5  | 39033.8  | TRUE |
| 264909.7 | 224907.8 | 280490   | 301489.9 | 313027.5 | 297560.4 | 231662.7 | 273882.8 | TRUE |
| 390474.2 | 295080.4 | 408798.2 | 417071.8 | 416311.9 | 379719.8 | 333441.3 | 373189.9 | TRUE |
| 151445.8 | 134968.3 | 119305.9 | 181845.9 | 143977   | 172894.8 | 146442.5 | 135651.2 | TRUE |
| 209771.2 | 234476.1 | 221057.9 | 217978.9 | 197204   | 226732.7 | 219506.3 | 204177.4 | TRUE |
| 72354.3  | 89291.1  | 64540.6  | 84121.9  | 64050.4  | 66782    | 59851.1  | 64284.5  | TRUE |
| 802255.3 | 717272.1 | 971971.1 | 903559.8 | 669848.4 | 878892.8 | 724101.9 | 862281.4 | TRUE |
| 55564.4  | 42185.5  | 54957.7  | 51904.8  | 55738.3  | 65559.5  | 58925    | 47134.5  | TRUE |

|          |          |          |          |          |          |          |          |      |
|----------|----------|----------|----------|----------|----------|----------|----------|------|
| 61419.8  | 45113.4  | 96296.1  | 54879.2  | 44233.2  | 76526.1  | 54393.9  | 42855.2  | TRUE |
| 30744    | 13553.9  | 33697.5  | 24479.8  | 26912.4  | 33725.4  | 47888.7  | 13385.2  | TRUE |
| 21286.8  | 30385.2  | 30079.1  | 38292.4  | 27606.7  | 33413.7  | 43939.5  | 21914.2  | TRUE |
| 55902.9  | 61190.9  | 47178.6  | 51757.6  | 36701    | 52329    | 63961    | 64489.6  | TRUE |
| 55118.5  | 82738.8  | 79033.1  | 62210.7  | 72201    | 46388    | 60191.9  | 43989.7  | TRUE |
| 47995.4  | 48720.2  | 109676.2 | 45039.9  | 44662.6  | 42777    | 41510.2  | 42000.5  | TRUE |
| 31825    | 52559.4  | 40669.2  | 39975.3  | 46644.1  | 40174.9  | 36013.8  | 37483.1  | TRUE |
| 28101.2  | 19240    | 35713    | 24191.7  | 7511.4   | 30388.7  | 15234.6  | 25263    | TRUE |
| 24646.7  | 40305.1  | 36806.5  | 32982.4  | 40313.5  | 25609.1  | 19896.5  | 10664.9  | TRUE |
| 1362293  | 1375769  | 1322687  | 1484990  | 1101917  | 1487375  | 1480177  | 1103790  | TRUE |
| 1744498  | 1610475  | 1812066  | 1757358  | 1548294  | 1774242  | 1837519  | 1566823  | TRUE |
| 35384.9  | 75563    | 59518.4  | 78582.1  | 79621.1  | 23137.8  | 21521.6  | 28360.6  | TRUE |
| 2357124  | 1856524  | 2716468  | 2444577  | 2384643  | 2475253  | 2000859  | 2431495  | TRUE |
| 9673546  | 7286901  | 10176350 | 10060858 | 9777607  | 10148874 | 8073405  | 10335473 | TRUE |
| 118157.1 | 96733.8  | 114344.6 | 94737.9  | 100374.4 | 99123.4  | 111700.5 | 120652.5 | TRUE |
| 108203.2 | 87765.3  | 82838.8  | 88547.1  | 87555.9  | 79354.2  | 77282.6  | 105945.9 | TRUE |
| 51113.4  | 30021    | 30667    | 49807.7  | 52667    | 52233    | 47900.8  | 53477.4  | TRUE |
| 51657.1  | 43860.5  | 48653.1  | 56063.7  | 53148.3  | 53528.3  | 42469.9  | 61294.1  | TRUE |
| 26652.2  | 25498.2  | 36424.2  | 26834.9  | 34424.1  | 38769    | 30304.8  | 26560.4  | TRUE |
| 22068.7  | 16001.9  | 10031    | 9081.5   | 19689    | 28038.1  | 9906.4   | 20063.4  | TRUE |
| 508915.8 | 480768.1 | 626025.6 | 495171.6 | 379536.7 | 700067.9 | 449392   | 419337.7 | TRUE |
| 1129812  | 1137318  | 1386521  | 1070243  | 767449.9 | 1469349  | 1215349  | 775303.1 | TRUE |
| 416266.7 | 431371.5 | 339063.5 | 330878.2 | 273557.1 | 343531.7 | 386715.1 | 307505.7 | TRUE |
| 77558.7  | 42346.5  | 55429.7  | 75362.3  | 65004.7  | 67801.2  | 49158.7  | 60080    | TRUE |
| 65114.5  | 45037.7  | 48290.6  | 39145.4  | 47530.7  | 49157.6  | 58306.1  | 53253.5  | TRUE |
| 61611.1  | 125525.5 | 73764.2  | 90010.3  | 115475.1 | 48922.3  | 58026.4  | 52192.7  | TRUE |
| 56470.7  | 33988.3  | 43139.7  | 57774.7  | 44173.4  | 78545.8  | 51610.2  | 52441.3  | TRUE |
| 64938    | 67081    | 41974.7  | 32746    | 51924.5  | 46309.7  | 51305.1  | 32419.9  | TRUE |
| 509201.4 | 417060.3 | 431717.7 | 375588.4 | 311966.4 | 500938.7 | 428538.6 | 293808.3 | TRUE |
| 243016.3 | 274378.6 | 305940.9 | 365740.5 | 269637.5 | 327651.6 | 311153.1 | 291925.4 | TRUE |
| 241935.6 | 215825.6 | 273628.3 | 337956.3 | 250805.8 | 289626   | 299926.2 | 246684.8 | TRUE |
| 29180.5  | 33978.9  | 18930.9  | 26368.7  | 29105.8  | 36514.8  | 31195.6  | 34525.6  | TRUE |
| 62331.8  | 68220.5  | 57772.8  | 81956.1  | 43823.2  | 79213.2  | 75924.8  | 50787.4  | TRUE |
| 177004.6 | 124863.9 | 155137.7 | 130808.9 | 150555.8 | 206118.1 | 183730.7 | 189406.1 | TRUE |
| 34427.9  | 55498.6  | 66321.3  | 48437.6  | 36299.1  | 53648    | 34402.3  | 40920.6  | TRUE |
| 66933.5  | 49962    | 146630.4 | 89091.4  | 129742   | 95973.4  | 87734.3  | 140163.9 | TRUE |



|          |          |          |          |          |          |          |          |      |
|----------|----------|----------|----------|----------|----------|----------|----------|------|
| 67115.3  | 55421    | 55592.7  | 60574.5  | 56870.6  | 49063.6  | 53555.8  | 62757.4  | TRUE |
| 64190.4  | 74459.4  | 48066.2  | 57439.7  | 63985.4  | 67828.3  | 75486.7  | 72637.3  | TRUE |
| 135844.1 | 129293.4 | 105609   | 136755.4 | 100244.6 | 128242.8 | 136940.4 | 135104.5 | TRUE |
| 101916.8 | 98236.2  | 98033.7  | 104583.8 | 132784.8 | 109308.1 | 114512   | 102498.3 | TRUE |
| 799469.6 | 629107.7 | 671293.3 | 740608.5 | 685644.9 | 778158.3 | 830676.9 | 835942.2 | TRUE |
| 165629.6 | 184689   | 134878.1 | 177511.2 | 186282.7 | 212217.9 | 200226   | 203868.8 | TRUE |
| 278299.3 | 212066.9 | 310220.5 | 330027   | 243009.2 | 512706.7 | 218120.4 | 451188.4 | TRUE |
| 2508992  | 2532324  | 2725319  | 1498780  | 2605647  | 2745482  | 2517805  | 2601903  | TRUE |
| 1274371  | 1161134  | 1274972  | 642366.7 | 1244689  | 1314747  | 1248544  | 1283722  | TRUE |
| 86489.1  | 61259    | 88455.6  | 68932.6  | 99683.1  | 92070.3  | 94892.7  | 113187   | TRUE |
| 678811.8 | 656751.5 | 635824.4 | 577918.7 | 452673.1 | 512362.8 | 520151   | 528072.4 | TRUE |
| 270960.2 | 268107.7 | 295240.9 | 365251.5 | 181001   | 238128.5 | 267640.3 | 232593.7 | TRUE |
| 455772.9 | 452168.3 | 511232.6 | 471690.2 | 481798.3 | 428996.4 | 456193.2 | 460632.4 | TRUE |
| 435574.2 | 426300.8 | 513947.5 | 519363.8 | 453355.1 | 473304.9 | 474420.5 | 493428.5 | TRUE |
| 2223045  | 2254054  | 2578257  | 2499785  | 2395346  | 2170832  | 2327483  | 2246275  | TRUE |
| 1752040  | 1449371  | 1448546  | 1384091  | 1210338  | 1664543  | 1435951  | 1287825  | TRUE |
| 553415.1 | 541496.5 | 665245.3 | 539506.9 | 560938.4 | 683326.7 | 560220.2 | 641821.4 | TRUE |
| 416773.8 | 438249.8 | 530426.4 | 508328.3 | 416918.6 | 577824   | 498966.7 | 424917.1 | TRUE |
| 268432.2 | 275233.6 | 298768.5 | 287886   | 256289.8 | 315759.5 | 292022.1 | 276159.9 | TRUE |
| 61204.8  | 57299    | 68376.8  | 67490.3  | 54623.1  | 71595.2  | 62423    | 65831.6  | TRUE |
| 43724.3  | 95708.1  | 69618.3  | 94600.1  | 73796.8  | 51928.8  | 47362.4  | 44682.6  | TRUE |
| 3078787  | 1903519  | 2777643  | 2677746  | 3105498  | 2929115  | 2087073  | 2901025  | TRUE |
| 135070.4 | 164698   | 128208.8 | 145414.8 | 144717.5 | 124144.3 | 154464.2 | 165359.6 | TRUE |
| 133699   | 135125.6 | 88786.4  | 124362.2 | 128027.1 | 125447.9 | 180955   | 138064.4 | TRUE |
| 385271.9 | 253813.3 | 308627.4 | 349790.1 | 320357.9 | 369275.7 | 317872.5 | 357961.5 | TRUE |
| 1929471  | 1288381  | 1279435  | 1534621  | 1234505  | 1502825  | 1455710  | 1750642  | TRUE |
| 2196500  | 1844467  | 2441613  | 2957983  | 2444240  | 2258154  | 2261474  | 2486992  | TRUE |
| 600902.2 | 567839.4 | 483442.3 | 452852.5 | 421551.1 | 560144.3 | 558625.4 | 426269.7 | TRUE |
| 485866.3 | 553324.9 | 415209.1 | 382358   | 421028.2 | 431677.9 | 497117.5 | 426395.1 | TRUE |
| 361306.2 | 432381.9 | 416469   | 393489.2 | 420243.9 | 437514.9 | 457607.8 | 432326.9 | TRUE |
| 131746.2 | 117995.7 | 106630.5 | 101074.1 | 120889.3 | 129741.4 | 126872.9 | 126707.5 | TRUE |
| 365545.1 | 376239.6 | 373835.7 | 306032.7 | 314038.1 | 373612   | 425043.8 | 336134.9 | TRUE |
| 1172743  | 923915.9 | 1180585  | 1218114  | 1119074  | 1077307  | 1029030  | 1056610  | TRUE |
| 890594.7 | 860214.2 | 1034380  | 1026809  | 933164.1 | 911513.3 | 863308.2 | 845749.1 | TRUE |
| 353406.7 | 399654.9 | 341480.6 | 369176.8 | 365763.4 | 306743.7 | 329014   | 320295.9 | TRUE |
| 137217.5 | 125585.2 | 79181.6  | 89208.4  | 88152.8  | 85550.4  | 100213.1 | 91405.3  | TRUE |
| 287307.4 | 319898.1 | 337830.3 | 298483.7 | 301996.1 | 375448.6 | 318307.2 | 283318.7 | TRUE |
| 173563.3 | 168200.1 | 209458   | 217965.6 | 181453.4 | 210992.9 | 190844.1 | 187256.1 | TRUE |
| 189097.9 | 162292.8 | 205982.9 | 219986.7 | 219998.2 | 199427.9 | 251128.2 | 204774.3 | TRUE |
| 2715660  | 2436674  | 2900802  | 3206499  | 2834910  | 2542958  | 2566602  | 2619254  | TRUE |
| 138393.2 | 108019.2 | 106665.8 | 110936.9 | 113560.9 | 116525.7 | 97431.6  | 130500.9 | TRUE |
| 74575.5  | 84712.9  | 45617.5  | 70188.7  | 61923    | 77397.6  | 84218.6  | 99668.6  | TRUE |
| 68474.9  | 69683.5  | 45800.1  | 69701.6  | 67117.5  | 62233.9  | 61743.8  | 72000.5  | TRUE |

|          |          |          |          |          |          |          |          |      |
|----------|----------|----------|----------|----------|----------|----------|----------|------|
| 227115.3 | 235173.4 | 221698.4 | 218719.4 | 267867.8 | 226603.9 | 235878.9 | 255722.9 | TRUE |
| 488001.3 | 523793.3 | 453263.8 | 492228.1 | 437499.1 | 445578.2 | 480509.2 | 434540.7 | TRUE |
| 90420.9  | 122676.8 | 138404.7 | 153785.4 | 117853.8 | 115926.4 | 121307.9 | 109651.5 | TRUE |
| 396078   | 402221.3 | 313297.7 | 386596.6 | 390345   | 385201.1 | 392884.8 | 403596.5 | TRUE |
| 683318.6 | 712500.1 | 379935.2 | 569809.1 | 768780   | 419770.6 | 855714.2 | 717267.6 | TRUE |
| 165699.4 | 190230.2 | 169931.8 | 201581.8 | 168685.3 | 183515.4 | 184054.1 | 190333.7 | TRUE |
| 290099   | 236096.9 | 259536.2 | 265970.1 | 255868.3 | 282436.6 | 278026.4 | 254316.4 | TRUE |
| 663486   | 592809.4 | 602576.5 | 657269.2 | 539003.4 | 600006.5 | 584855.9 | 645578.3 | TRUE |
| 52612.5  | 78998.6  | 49658.7  | 40206    | 55008.8  | 40835.1  | 149797.7 | 62697.8  | TRUE |
| 19309.5  | 39926    | 21532.5  | 30511.2  | 23722.8  | 16325.6  | 44828.5  | 24216.4  | TRUE |
| 129435.1 | 104108.3 | 123910.2 | 146452.1 | 121205.6 | 119962   | 142449.5 | 145076.2 | TRUE |
| 530801.9 | 513526.4 | 512516.9 | 570323   | 454417.3 | 554825.6 | 537832.7 | 604768.3 | TRUE |
| 70255.3  | 70236.4  | 74498.1  | 73911.5  | 67103.7  | 65861.4  | 75002.7  | 71839.8  | TRUE |
| 48006.4  | 35613.3  | 72790.4  | 60681.6  | 46064.1  | 39653.3  | 44984.8  | 26616.6  | TRUE |
| 87255.4  | 110106.1 | 67733.3  | 105111.6 | 132745.2 | 82182.7  | 119934.8 | 135281.8 | TRUE |
| 83147.6  | 119494.8 | 110987.5 | 114075.2 | 74260.3  | 103228.9 | 118699.7 | 111023.1 | TRUE |
| 44648.2  | 44336.8  | 31396.1  | 31072.9  | 22480    | 29242.4  | 32095.6  | 33399.1  | TRUE |
| 186581.8 | 205034.8 | 186030.3 | 214805   | 293535.1 | 207706.3 | 232545.1 | 264641.1 | TRUE |
| 99116.6  | 94801.2  | 94466.8  | 135011.9 | 76195.1  | 103136.9 | 148697   | 140703.9 | TRUE |
| 868597.9 | 792647.4 | 994129.7 | 834656   | 766644.4 | 819066.6 | 784445.7 | 757639.9 | TRUE |
| 87530.3  | 95951.1  | 89052.4  | 83895    | 81279.7  | 89009.4  | 121839.3 | 85203    | TRUE |
| 870068.7 | 814616.5 | 750667.4 | 807686.5 | 911616.4 | 790509   | 849242.1 | 933931.9 | TRUE |
| 97688.4  | 81358.1  | 71628.5  | 59347    | 66622.1  | 80442.5  | 71466.8  | 81596.5  | TRUE |
| 124243.8 | 116862.5 | 134325.6 | 153568.1 | 183225.6 | 181745.1 | 143333.5 | 159949.4 | TRUE |
| 150096.9 | 97222.2  | 154426.6 | 164665.7 | 182736   | 149446.1 | 150003.3 | 191089.1 | TRUE |
| 115556.5 | 124453.9 | 139289   | 139583.4 | 133123   | 140328.2 | 139530.6 | 138452.1 | TRUE |
| 41066.8  | 37790    | 33019.3  | 40232.7  | 50811.1  | 37901.4  | 42969.4  | 37158.7  | TRUE |
| 154523.1 | 158761   | 194782.6 | 158710.1 | 183241.8 | 194060.3 | 168280.1 | 173347.8 | TRUE |
| 265237.9 | 228014.2 | 254178.7 | 240638   | 318918   | 271384.4 | 277257.4 | 283851.5 | TRUE |
| 659201.2 | 638136.1 | 552703.4 | 590224.1 | 646523.5 | 574911.2 | 587084.3 | 584059.7 | TRUE |
| 989350.3 | 1022840  | 851996.8 | 997544.1 | 970584.3 | 856435   | 1003203  | 1060899  | TRUE |
| 247523.2 | 253009.8 | 251093.3 | 276330.9 | 270043.5 | 252825.9 | 307071.2 | 288460.9 | TRUE |
| 61934.2  | 73286.1  | 46278    | 71775.3  | 73036.9  | 51898.7  | 78419.7  | 63130.5  | TRUE |
| 140476.9 | 111306   | 64256    | 68067.8  | 75647.9  | 72375.3  | 85881.1  | 74115.2  | TRUE |
| 117470.5 | 138747   | 128520.1 | 215523   | 122744.2 | 156155   | 145702.9 | 117194.7 | TRUE |
| 117892.8 | 122994.9 | 89621.9  | 269325.1 | 125087.3 | 128678.9 | 155111.2 | 99513.7  | TRUE |
| 74751.8  | 79588.5  | 74667.7  | 72879.9  | 87994.5  | 45971.6  | 65447    | 57117.6  | TRUE |
| 99586.7  | 66793    | 58378.5  | 108124.2 | 74200.8  | 86207    | 107204.5 | 98231    | TRUE |

|          |          |          |          |          |          |          |          |      |
|----------|----------|----------|----------|----------|----------|----------|----------|------|
| 281621.7 | 251081.9 | 201980.8 | 290278.2 | 275184.1 | 270335.2 | 289857.9 | 301493.4 | TRUE |
| 84188.5  | 86425.2  | 61161.6  | 93203.8  | 100103.1 | 106973.4 | 106510.3 | 126089.5 | TRUE |
| 110817.7 | 66534.1  | 62946.4  | 81241.6  | 96415.4  | 90171.3  | 108068.5 | 98286    | TRUE |
| 328585.9 | 291717.4 | 282612.2 | 367093.1 | 277987.9 | 378047.7 | 348118.8 | 374721.5 | TRUE |
| 127613.1 | 125072.7 | 97504.7  | 110061.5 | 122024.6 | 162145.2 | 157730.7 | 143941.5 | TRUE |
| 587617.3 | 610884.2 | 544502.8 | 593159.2 | 673609.8 | 566127.6 | 656875.3 | 702854   | TRUE |
| 51560.3  | 53433.9  | 38305.7  | 49292.1  | 50254.8  | 58576.9  | 39033.9  | 42311.8  | TRUE |
| 574532.1 | 630794.1 | 575760.9 | 641937.4 | 562685   | 664366.3 | 723673.9 | 630585.6 | TRUE |
| 89038.2  | 96852.8  | 75201.6  | 94112.6  | 97007.7  | 71141.8  | 71190.8  | 76643.7  | TRUE |
| 25347.3  | 31099.4  | 27980.5  | 32726.6  | 28663.4  | 25756.3  | 26987.6  | 29884    | TRUE |
| 18180.2  | 29189.3  | 25163.4  | 32819.2  | 25205.2  | 20889.9  | 33251.7  | 26824    | TRUE |
| 131833.7 | 127788.4 | 166233.8 | 152685.2 | 119494.8 | 222843.5 | 148768.6 | 133498.8 | TRUE |
| 108965.2 | 112116.3 | 117175.9 | 69614    | 95775.8  | 76602.3  | 83124.7  | 71284.8  | TRUE |
| 86296.8  | 90120.2  | 78384.9  | 54336.8  | 73243.1  | 74715.1  | 98216.5  | 94988.7  | TRUE |
| 47190    | 43456.8  | 42326.9  | 46980.5  | 47595.7  | 56592    | 44414.3  | 57684.3  | TRUE |
| 159217.9 | 146337   | 132902.3 | 163352.1 | 148544   | 144739.5 | 151499.7 | 152323.5 | TRUE |
| 171754   | 170674.5 | 134872.6 | 168966.1 | 168329.8 | 181916.1 | 206523.3 | 163343.3 | TRUE |
| 52739.2  | 40177.6  | 87112.4  | 33582.8  | 28675.3  | 112212.3 | 39031.3  | 44778.9  | TRUE |
| 55649.9  | 59779.4  | 44138.9  | 49707.5  | 52871.7  | 58349.5  | 37920.1  | 56185.8  | TRUE |
| 212425.2 | 168798.8 | 165742.4 | 157964.9 | 167506.4 | 191869.5 | 151969.9 | 187731.2 | TRUE |
| 114401.2 | 92015.2  | 120270.3 | 91410.4  | 102289.7 | 127529.2 | 89784.3  | 104153.5 | TRUE |
| 361930.1 | 246780   | 351023.7 | 313821.1 | 249868.1 | 429210.3 | 265819.6 | 241490.3 | TRUE |
| 73930.1  | 69408.3  | 58022.4  | 62456.8  | 78870.3  | 73118.1  | 81860.9  | 65207.6  | TRUE |
| 229995.9 | 222695.3 | 221826.4 | 251122.8 | 196170.3 | 237293.1 | 304164.8 | 206292.9 | TRUE |
| 97245.2  | 99514.2  | 93728.5  | 78526.6  | 72916.5  | 88127.9  | 101813.5 | 87388.7  | TRUE |
| 122163.9 | 129435.8 | 136103.6 | 153684.9 | 148277.7 | 136956.7 | 156160.3 | 136662.9 | TRUE |
| 146403.5 | 159441   | 110119.1 | 138500.8 | 138034.1 | 129716.8 | 166659.4 | 166321.8 | TRUE |
| 65495.7  | 67989.3  | 56471.5  | 45472.4  | 59308.5  | 64143    | 68192.2  | 47289.4  | TRUE |
| 70051.6  | 46005.8  | 35165.8  | 56404.8  | 47198.6  | 63155.6  | 73340.8  | 62332.3  | TRUE |
| 86637.4  | 51286.6  | 66024.7  | 110635.2 | 78944.9  | 92131    | 80337.7  | 100419   | TRUE |
| 389930.1 | 410950.5 | 173003.8 | 327786   | 437319.6 | 305560   | 560946.5 | 647281.5 | TRUE |
| 382058.7 | 417899.2 | 395342.7 | 379725.8 | 416819.1 | 407716.9 | 491767.3 | 369737.9 | TRUE |
| 404047   | 408475.6 | 368976.7 | 340818.2 | 405913.9 | 394815.3 | 436647.7 | 355733.7 | TRUE |
| 28251.5  | 29072.9  | 21063.4  | 32077.4  | 23017.2  | 26426.3  | 30190.5  | 25733.2  | TRUE |
| 160812.5 | 150242   | 174621.1 | 200947.7 | 154172.9 | 167040   | 174785.3 | 170255   | TRUE |
| 34909.9  | 41128.4  | 30742    | 37666.1  | 31875.5  | 32037.6  | 39256.5  | 39338.6  | TRUE |
| 120551.6 | 129479.1 | 117308.4 | 115123.4 | 130628   | 103394.6 | 152599.3 | 123396.4 | TRUE |
| 294599   | 256115.7 | 248260.3 | 241749.8 | 254699.7 | 284479.5 | 323650   | 274451.6 | TRUE |
| 357907.2 | 335096.7 | 283976.4 | 275089.6 | 258232.4 | 283170.8 | 368913.2 | 293407.8 | TRUE |
| 294291.1 | 270627.4 | 324077.6 | 345887.8 | 358475.8 | 265305   | 249262.8 | 254774.8 | TRUE |
| 315575.3 | 300507.7 | 387614.7 | 355985.7 | 334935.1 | 287954.9 | 297147.8 | 290113.1 | TRUE |
| 42043.3  | 54510.9  | 49398.5  | 54266.4  | 49113.4  | 58273.6  | 62166.1  | 53531    | TRUE |
| 165824.3 | 178410.4 | 100711.6 | 95206.5  | 88636.3  | 97443.1  | 127862.7 | 110282.5 | TRUE |
| 381201.3 | 357892.7 | 357959.3 | 303937   | 555974.9 | 382330.1 | 354242.9 | 558148.4 | TRUE |

|          |          |          |          |          |          |          |          |      |
|----------|----------|----------|----------|----------|----------|----------|----------|------|
| 320117.3 | 346899.2 | 339085.7 | 273721.9 | 307848.7 | 314619.8 | 376857.3 | 329518.9 | TRUE |
| 100673.1 | 110028.7 | 93693.4  | 101590   | 97917.7  | 106139.5 | 115177.6 | 107195.8 | TRUE |
| 49964.7  | 53496.7  | 52704.9  | 29660.6  | 47434.6  | 59859.1  | 51627.5  | 55425.7  | TRUE |
| 89606.6  | 81362.8  | 34000.8  | 65666.6  | 52261    | 48767.9  | 115035.4 | 106022.5 | TRUE |
| 24275.1  | 54836.6  | 26319.3  | 21041.6  | 33299.7  | 18071    | 33807.9  | 13221.4  | TRUE |
| 22014.3  | 20438.8  | 16226.4  | 26683.6  | 23695.3  | 18898.5  | 32137.3  | 23118.8  | TRUE |
| 21077.2  | 25230.9  | 31582.5  | 25595.2  | 24826.8  | 14191.1  | 26792.6  | 16115.7  | TRUE |
| 11131    | 12697.5  | 7841.3   | 12048.9  | 22333.7  | 9761.8   | 10253.5  | 12385.7  | TRUE |
| 7577.9   | 7758.4   | 17795    | 13359.3  | 12410.1  | 10429    | 10555.9  | 24249.2  | TRUE |
| 6778.2   | 5265.3   | 6983.3   | 6234.5   | 8418.8   | 4260.6   | 7150.1   | 7089.9   | TRUE |
| 270155.3 | 241545.4 | 219619.3 | 241722.2 | 213534.2 | 240348.8 | 234667.3 | 218831.1 | TRUE |
| 65416.8  | 52663.1  | 30581.8  | 54339.4  | 47351.1  | 49234.2  | 65613.7  | 57648.5  | TRUE |
| 1216333  | 1086528  | 1317024  | 1358926  | 1173261  | 1074059  | 1052359  | 1045732  | TRUE |
| 80087.7  | 78236.7  | 59424.9  | 59792    | 62497.4  | 41691.3  | 70092.7  | 65813.2  | TRUE |
| 113050.2 | 114521.8 | 83182    | 107650   | 81783.5  | 67885.1  | 105226.4 | 116765.3 | TRUE |
| 45283.2  | 39324.6  | 54062.8  | 37880.7  | 48283.9  | 39465.2  | 44911    | 46334.1  | TRUE |
| 43026.1  | 38127.4  | 27626.8  | 43072.8  | 42605.1  | 36911.7  | 41677.8  | 52742.9  | TRUE |
| 160673.7 | 123271.5 | 119510.7 | 178581.5 | 176456.3 | 186845.2 | 206026.5 | 156451.5 | TRUE |
| 121860.5 | 80628    | 88171.1  | 75364    | 93248.3  | 108754.8 | 90195.5  | 144124   | TRUE |
| 291155.8 | 242903.1 | 255478.2 | 393522.4 | 298815.2 | 361037.5 | 331031   | 317715.9 | TRUE |
| 332698.4 | 301057.8 | 301235.6 | 422179.9 | 365608.9 | 437636.9 | 337067.8 | 420903.5 | TRUE |
| 709548.3 | 757952.7 | 608160.9 | 761676   | 722329.9 | 621737.9 | 751550.6 | 793530.1 | TRUE |
| 94635.6  | 121568   | 76236.7  | 94608.7  | 88489.7  | 84507.7  | 98807.7  | 130271.3 | TRUE |
| 374329.8 | 465865   | 261740   | 302498.2 | 338713.4 | 262442.9 | 340290.8 | 310553   | TRUE |
| 282539.1 | 277588.1 | 226592.9 | 303988.2 | 275400.1 | 225835.7 | 321417.9 | 315867.9 | TRUE |
| 191545   | 175635.9 | 155883   | 184374.8 | 204152   | 154889.9 | 196821.8 | 167296   | TRUE |
| 96816.1  | 99349.6  | 76941.7  | 95398.8  | 104140.4 | 63346.5  | 110043.2 | 92984.6  | TRUE |
| 821785.6 | 1117761  | 458472.3 | 1004576  | 1074275  | 541941.2 | 1020331  | 1107773  | TRUE |
| 40831.3  | 30143.7  | 46687.6  | 57743.3  | 19418.2  | 34884.7  | 48910    | 36651.7  | TRUE |
| 184155.5 | 201440.4 | 217718.8 | 198110.6 | 178930.2 | 200076.8 | 189010.6 | 196279   | TRUE |
| 68565.1  | 107582.4 | 61617    | 127935   | 101469.3 | 48096.2  | 32132.6  | 35762.2  | TRUE |
| 627984.8 | 611290.1 | 444349   | 597114.1 | 563073.1 | 497063   | 606644.1 | 585776.2 | TRUE |
| 251084   | 239965.7 | 202605.1 | 239894   | 239573.8 | 202163   | 269170   | 249189.9 | TRUE |
| 44649.3  | 42929.7  | 44161.2  | 48445.1  | 41176.1  | 57146.2  | 55012.6  | 44618.3  | TRUE |
| 481838.4 | 419549.9 | 455823.5 | 554637.2 | 397036.8 | 464071.2 | 459703.9 | 530529.2 | TRUE |
| 37901.1  | 43965.4  | 19254.9  | 14294.9  | 24164.4  | 6348.1   | 32434.5  | 34426.9  | TRUE |
| 103008.2 | 110889.3 | 98550.8  | 108963.2 | 137525   | 78402.6  | 119072.8 | 148431.5 | TRUE |
| 236052   | 249445.3 | 204308.2 | 247917.5 | 266470.7 | 167435.9 | 262002.6 | 268907   | TRUE |

|          |          |          |          |          |          |          |          |      |
|----------|----------|----------|----------|----------|----------|----------|----------|------|
| 220184.9 | 261107.1 | 292693.2 | 292583.5 | 155631.4 | 247818.7 | 304160.3 | 215750.3 | TRUE |
| 231734   | 169109.6 | 92354    | 110597.3 | 105905   | 156420.7 | 154161.4 | 127381.6 | TRUE |
| 151977.2 | 108419.5 | 104811.8 | 168399.9 | 103744.4 | 168060.6 | 182570.1 | 163894.3 | TRUE |
| 6709903  | 7256895  | 6151509  | 7538817  | 8866428  | 6254321  | 7328337  | 9253980  | TRUE |
| 8759937  | 10533701 | 9951132  | 9716145  | 8035478  | 9456874  | 10832163 | 9687886  | TRUE |
| 94264.2  | 126840.1 | 120168.7 | 102390   | 99166.6  | 130379.3 | 124168.3 | 118212.4 | TRUE |
| 87928.2  | 93769.3  | 61370.8  | 97496.8  | 87183.9  | 55281    | 72907.6  | 85796.1  | TRUE |
| 84900.1  | 91647.8  | 120834.1 | 96747.9  | 96615.5  | 99708.1  | 107044   | 91340.4  | TRUE |
| 72451.9  | 79984.7  | 74780.2  | 94613    | 84560.8  | 65507.5  | 75882    | 75974    | TRUE |
| 388185   | 407659.1 | 264268.3 | 326332   | 297015.4 | 254827.3 | 320152.8 | 353347.3 | TRUE |
| 347684.4 | 330365.5 | 269048.6 | 373756.1 | 329627   | 293997.5 | 341849.2 | 343318.4 | TRUE |
| 182399.3 | 182980.4 | 175815.2 | 177510.8 | 186781.1 | 188301.6 | 167346   | 185374.5 | TRUE |
| 139726.9 | 126886.3 | 153310.5 | 136631.7 | 103413   | 130260   | 138249.1 | 130091.5 | TRUE |
| 120925.4 | 104378.3 | 91199.2  | 117966.3 | 126752.5 | 91203.1  | 111327.7 | 112609.7 | TRUE |
| 500568   | 432912   | 413052.4 | 485953.3 | 406082.3 | 512189.2 | 422987   | 454047   | TRUE |
| 239093.6 | 196058.1 | 288065.6 | 297017   | 222767.9 | 288809.6 | 242945.3 | 277867.9 | TRUE |
| 730598.1 | 621860   | 760557   | 811209.9 | 700155.2 | 656726.1 | 639658.4 | 702056.1 | TRUE |
| 31084.3  | 33280.5  | 9083.1   | 34470.9  | 28172.7  | 25368.8  | 45017.8  | 31062.6  | TRUE |
| 27192.5  | 104883.9 | 48827.1  | 86807    | 150052   | 16509.7  | 36489.1  | 29962.4  | TRUE |
| 193063.7 | 291882   | 135038.3 | 244102.6 | 354047.4 | 141844.5 | 256869   | 318278   | TRUE |
| 188866.8 | 192140.5 | 165467.5 | 179711.6 | 137294.3 | 212637.3 | 243806.4 | 286197.9 | TRUE |
| 1801155  | 2985442  | 2287701  | 2893617  | 1609624  | 2152913  | 2954872  | 2264833  | TRUE |
| 678042   | 734846.9 | 484967   | 652321.7 | 798628.3 | 492808.7 | 738347.7 | 784851.4 | TRUE |
| 58795.9  | 78025.9  | 79990.2  | 83117.9  | 90295.9  | 68451    | 52062.8  | 58069.4  | TRUE |
| 100703.7 | 93913.4  | 89408.5  | 74532.6  | 90279.5  | 110248.9 | 112591.5 | 88023.9  | TRUE |
| 78360.3  | 139884.9 | 130076.1 | 147086.5 | 163872.4 | 91252    | 53463.4  | 77104.7  | TRUE |
| 125704.7 | 91839.5  | 103042.3 | 92931.6  | 134331.7 | 133068   | 105836.4 | 142191.4 | TRUE |
| 201085.7 | 166654.2 | 161179.9 | 191179.2 | 181037.1 | 188023.8 | 198811.3 | 203926.2 | TRUE |
| 97896.8  | 60226.6  | 74160.4  | 79971.7  | 81892.3  | 81405.8  | 86429.1  | 77688.4  | TRUE |
| 17965.2  | 11247.3  | 28842.8  | 27400.7  | 23553.1  | 21146.6  | 10763.5  | 27176.7  | TRUE |
| 23351.4  | 22489.2  | 20495.5  | 29463.7  | 32849.3  | 25025.2  | 30791.3  | 43142.9  | TRUE |
| 34438.9  | 28272.9  | 9470.2   | 31761.2  | 34330.4  | 17611    | 39177.4  | 39769.8  | TRUE |
| 136755.4 | 125476.8 | 120847.2 | 138850.4 | 148144.4 | 112253.9 | 152881.3 | 160172.3 | TRUE |
| 78495.6  | 78997.4  | 63072.9  | 52333.4  | 78058.7  | 99301.9  | 108485.2 | 87760.5  | TRUE |
| 223287.1 | 333532.9 | 254837.4 | 368427.3 | 291551.6 | 203300.9 | 283011   | 205171.3 | TRUE |
| 31532.6  | 34526.7  | 29483.6  | 25541.3  | 34963.6  | 41200.5  | 33091.8  | 37822.1  | TRUE |
| 29264.5  | 20338    | 28142.7  | 19988.1  | 30991.5  | 34461.6  | 22733.9  | 25169.8  | TRUE |
| 381575.7 | 391488.3 | 326417.6 | 286663.7 | 321909   | 237287.9 | 304366.8 | 343918   | TRUE |
| 50320.8  | 103136.2 | 48278.3  | 76283.8  | 96674    | 44435.1  | 37536.8  | 48106.5  | TRUE |
| 1404616  | 1236114  | 1517573  | 1516244  | 1217959  | 1406987  | 1452753  | 1388074  | TRUE |

|          |          |          |          |          |          |          |          |      |
|----------|----------|----------|----------|----------|----------|----------|----------|------|
| 51353.5  | 39259    | 47316.8  | 77078.9  | 75477.2  | 67964.1  | 72785.8  | 77706.3  | TRUE |
| 59419.2  | 68559.7  | 52078.2  | 87091.6  | 58817.9  | 64841.2  | 71020    | 68863.3  | TRUE |
| 111090.7 | 87032.2  | 103978.4 | 101881.6 | 76570.2  | 110779.5 | 103339.2 | 103071.7 | TRUE |
| 548608.1 | 607286.9 | 566753.6 | 515913.2 | 400177   | 570799.2 | 614955   | 407994   | TRUE |
| 2928298  | 3060823  | 2936782  | 2561026  | 2545328  | 3064138  | 3443072  | 2581521  | TRUE |
| 535769   | 504254.7 | 464048.2 | 494077.5 | 469990   | 519085.3 | 580012.5 | 547099.6 | TRUE |
| 135688.8 | 165005.4 | 135269.6 | 147956.5 | 151513.4 | 170418.9 | 183521.5 | 141725.1 | TRUE |
| 203455.7 | 268166.8 | 249906.6 | 239449.1 | 224986.2 | 216916   | 241665.3 | 196253.3 | TRUE |
| 196927.3 | 156631.8 | 281821.2 | 262520.3 | 179327.6 | 178750.9 | 165863.3 | 167638.9 | TRUE |
| 872309.2 | 691622.5 | 956182.6 | 943992.7 | 887501.1 | 759905.4 | 724045.5 | 809254.3 | TRUE |
| 316969.7 | 235315.6 | 338731   | 337542.4 | 328797.5 | 275009.2 | 250768.7 | 309058.1 | TRUE |
| 243120.9 | 260179   | 224207   | 237136.2 | 229776.4 | 245107.8 | 243385.6 | 215241.7 | TRUE |
| 47339.5  | 43214.9  | 37855.6  | 40734.4  | 39604.8  | 40389.3  | 46373    | 45185.4  | TRUE |
| 42918.8  | 39410.4  | 32392.1  | 36630.7  | 37196.6  | 33825    | 47099.2  | 32591.7  | TRUE |
| 51689.7  | 55597.5  | 70538.6  | 57049.6  | 53204.8  | 78116    | 76106    | 66748    | TRUE |
| 41117.3  | 78626.7  | 61445.5  | 85939.3  | 66068.6  | 30398.9  | 31153    | 30907.1  | TRUE |
| 427544.6 | 414562.3 | 384751.9 | 403813.3 | 353320.6 | 427489.9 | 451071.5 | 336779.6 | TRUE |
| 562319.3 | 456086.8 | 667907.5 | 628130.2 | 533610.5 | 580152.1 | 496209.5 | 571775.8 | TRUE |
| 831444.8 | 640192   | 938999.9 | 928656.5 | 804221.4 | 770693   | 618162.8 | 817400.1 | TRUE |
| 144387   | 139584.9 | 113078.9 | 140448.2 | 118359.1 | 150731.8 | 150418.2 | 110600.9 | TRUE |
| 217665.7 | 209917.7 | 212088.5 | 201398   | 169649.8 | 211192.4 | 244144.5 | 189403.7 | TRUE |
| 84333.4  | 80232.8  | 69472    | 79663.4  | 67004.9  | 97857.8  | 94639.9  | 88400.5  | TRUE |
| 54390.4  | 38933    | 48658.4  | 53340.2  | 47510.4  | 54018.7  | 56390.6  | 51718.5  | TRUE |
| 549653.9 | 590617.8 | 552775.8 | 555823.1 | 455657.4 | 599471.7 | 594960.8 | 478304.7 | TRUE |
| 309821.3 | 335286.1 | 307081.1 | 300557.2 | 263878.1 | 337672   | 350095.3 | 268094.6 | TRUE |
| 910796.1 | 607551.1 | 955910.3 | 844901.4 | 959184.4 | 785575.3 | 632293.6 | 851185.1 | TRUE |
| 1902235  | 1223834  | 2016737  | 1984642  | 1983541  | 1714775  | 1306725  | 1733058  | TRUE |
| 170192.2 | 101318.4 | 204758.9 | 221269.6 | 199790.2 | 176394.6 | 146382   | 173716.5 | TRUE |
| 117843.3 | 95491.9  | 118037.4 | 147648.6 | 117912.2 | 105801.9 | 109320.8 | 114645   | TRUE |
| 36940.7  | 52823.9  | 71145.3  | 32889    | 39195.5  | 50415.9  | 57202.8  | 47904.2  | TRUE |
| 1651401  | 2085725  | 1606269  | 1557809  | 1453813  | 1713931  | 2113204  | 1580571  | TRUE |
| 36741.2  | 33404.4  | 29602.5  | 39436    | 29282.6  | 47751.1  | 63015.8  | 40794    | TRUE |
| 9592.3   | 10878.2  | 7204.4   | 10180.8  | 9062     | 5572.5   | 7182.7   | 8802.1   | TRUE |
| 113610.1 | 75896.7  | 106906.2 | 141745   | 108523.4 | 103661.2 | 76111.1  | 84257.7  | TRUE |
| 48897.9  | 27842    | 44642.3  | 48276.6  | 45018.9  | 47566.9  | 36866.9  | 51260.3  | TRUE |
| 31414    | 20191.8  | 29918.4  | 10412.4  | 28282.4  | 26692.5  | 21478.3  | 28432.2  | TRUE |
| 64833.4  | 45801.1  | 41882.6  | 68752.2  | 41835.8  | 57744.8  | 48268.4  | 66535.9  | TRUE |
| 58577.5  | 57587    | 62862.2  | 82564.1  | 62360.7  | 52047.9  | 72111.8  | 40479.5  | TRUE |
| 38570    | 25488.8  | 22807.5  | 28781.7  | 22769.4  | 51974.3  | 38943.8  | 38409.5  | TRUE |
| 449616.9 | 365236.3 | 317152.6 | 360948.5 | 303145   | 543156.2 | 520999.9 | 416370.6 | TRUE |
| 672853.9 | 424165   | 620362.8 | 777768.5 | 764061.6 | 753093.2 | 561440.2 | 652934.6 | TRUE |
| 75836.1  | 49791.6  | 59978.3  | 77728.7  | 74908.1  | 91307.6  | 77594    | 76090.7  | TRUE |

|          |          |          |          |          |          |          |          |      |
|----------|----------|----------|----------|----------|----------|----------|----------|------|
| 116667.7 | 106996.2 | 116767.8 | 105251.4 | 104175.8 | 113001   | 105797.2 | 97909    | TRUE |
| 83631.3  | 87119.1  | 74933.9  | 85030.2  | 65995.8  | 89453.1  | 75907.1  | 77957.5  | TRUE |
| 55639.9  | 69805.7  | 73498.4  | 57641.4  | 59862.6  | 73573.3  | 78019    | 56247.2  | TRUE |
| 1198552  | 841307.6 | 1381934  | 1359917  | 1120467  | 1115766  | 915004.1 | 1089200  | TRUE |
| 272332.2 | 282795.4 | 262348.3 | 269004.2 | 215123.2 | 289214.6 | 279196.1 | 217405.5 | TRUE |
| 239669.5 | 192631.4 | 208997.4 | 173334.5 | 155371.1 | 214387.1 | 235657.3 | 172214.5 | TRUE |
| 133451.5 | 145786.1 | 88973.5  | 72691.8  | 83978.6  | 97911.8  | 76490.8  | 57956.7  | TRUE |
| 90803.6  | 79201.3  | 70012.6  | 80484.9  | 67849.3  | 60779    | 94876.2  | 69964.2  | TRUE |
| 186275.1 | 222571.9 | 225720.7 | 206394.6 | 175997.7 | 199882.8 | 198902.9 | 153077.4 | TRUE |
| 94487.4  | 79995    | 91198.4  | 67965.5  | 76928    | 90124.8  | 101066.1 | 78089.7  | TRUE |
| 97144.5  | 128263   | 105240.7 | 117030.8 | 101979.8 | 93822.8  | 144058.5 | 77196.8  | TRUE |
| 83264.9  | 111639.8 | 110464.7 | 83107.2  | 95445.4  | 73747.3  | 80030.3  | 76314.1  | TRUE |
| 115034.1 | 117649.3 | 90125.8  | 84032    | 82711.2  | 58121    | 68588.3  | 57600.5  | TRUE |
| 250594.1 | 246651.5 | 258764.8 | 287832.2 | 286711.2 | 247010.7 | 253020.4 | 258617.5 | TRUE |
| 532697.7 | 528791.2 | 455617   | 495062   | 437678.4 | 480164.1 | 562092.8 | 428368.8 | TRUE |
| 258848.1 | 192743.1 | 254026.5 | 265304.5 | 219255.3 | 262355.6 | 193081.3 | 266445.1 | TRUE |
| 1013594  | 1134879  | 918867.6 | 990325.3 | 883641.9 | 1000135  | 1280256  | 862947.1 | TRUE |
| 3240855  | 2488708  | 4067355  | 3897869  | 2762846  | 2988310  | 2660608  | 2803663  | TRUE |
| 1454895  | 1049157  | 1714781  | 1745405  | 1244571  | 1351418  | 1160732  | 1341833  | TRUE |
| 41295.1  | 47151.1  | 39261.7  | 35056.2  | 46272.4  | 31299.8  | 28095.2  | 36402.6  | TRUE |
| 38205.7  | 46212.7  | 35168.3  | 31497.5  | 32706.3  | 30203.8  | 34683.8  | 58215.9  | TRUE |
| 38308.9  | 28147    | 36534.1  | 29909.2  | 39538.1  | 67643.9  | 49149.7  | 50085.5  | TRUE |
| 38395.9  | 27497.5  | 34742    | 30926.9  | 28866.1  | 46454.9  | 52156.7  | 30850.1  | TRUE |
| 561127.6 | 448576.6 | 362893   | 387182   | 375008.5 | 378923.2 | 314453   | 411886.8 | TRUE |
| 831851   | 596324   | 519962.9 | 565799.2 | 606717.9 | 555801.1 | 507105.9 | 632072.2 | TRUE |
| 1531106  | 980987.3 | 1663746  | 1917861  | 1921411  | 1729513  | 1531339  | 1904876  | TRUE |
| 32408.4  | 68391    | 35276.5  | 63738.2  | 81115.8  | 27638.8  | 31492.3  | 24460.1  | TRUE |
| 2100354  | 1951611  | 1845315  | 1786662  | 2034434  | 2415664  | 2302200  | 2318914  | TRUE |
| 2387910  | 2364319  | 1950955  | 2122892  | 2182717  | 2738549  | 2503549  | 2773658  | TRUE |
| 37657.3  | 95149.1  | 64415.9  | 85440.8  | 98814.1  | 31633.1  | 14851.6  | 15894.1  | TRUE |
| 552522.9 | 365961   | 569220   | 661991.5 | 527756.8 | 589722   | 441258.7 | 511951   | TRUE |
| 177831.5 | 194074.8 | 111675.4 | 231683.4 | 219387.4 | 113620.8 | 209158.7 | 263017.2 | TRUE |
| 67335    | 63750.5  | 72417    | 85911.2  | 90666.1  | 56454.6  | 72773.4  | 92411.5  | TRUE |
| 23837    | 20135.1  | 22035.4  | 36991.6  | 33370.9  | 24850    | 27619.7  | 33249.2  | TRUE |
| 45182.4  | 33254.1  | 38723.9  | 35027    | 50800.3  | 59307.6  | 43894.3  | 53727.8  | TRUE |
| 100990.1 | 40451.8  | 58250.1  | 66300.5  | 121844.4 | 128510.7 | 78418    | 139584.6 | TRUE |
| 324590.4 | 286854.5 | 261889.3 | 339993.9 | 311993.6 | 306388.5 | 286823.2 | 311636.9 | TRUE |
| 474454   | 479136.4 | 430648.1 | 442733.8 | 427036.5 | 539914.8 | 482435.3 | 521315.6 | TRUE |
| 87492.8  | 41430.6  | 61262.6  | 52305.5  | 31448.1  | 93874.2  | 51971    | 45814.6  | TRUE |
| 29278.7  | 26847.3  | 12054.9  | 29764.8  | 45854.8  | 11058.9  | 33788.3  | 47551.3  | TRUE |
| 34590.1  | 24916.6  | 21970.8  | 31637.8  | 39318.6  | 38820.2  | 28602.8  | 29150.3  | TRUE |

|          |          |          |          |          |          |          |          |      |
|----------|----------|----------|----------|----------|----------|----------|----------|------|
| 82901.5  | 45442.7  | 48192.3  | 72556.2  | 62932.1  | 86124.7  | 69061.9  | 78631.7  | TRUE |
| 38431    | 37671.5  | 30733.9  | 59836.2  | 33734.9  | 58897.8  | 38808.6  | 32728.2  | TRUE |
| 91669.4  | 71436.7  | 54993.9  | 85539.6  | 87874.7  | 112649.9 | 72029.8  | 114800.5 | TRUE |
| 25568.1  | 24093.8  | 26820.5  | 13038.8  | 22611.5  | 33813    | 43652.3  | 17836    | TRUE |
| 223703   | 188918.9 | 185143.9 | 259701   | 224884.7 | 208570   | 210949.9 | 220396.1 | TRUE |
| 126531.5 | 151099.5 | 136019.2 | 124354.6 | 136701.8 | 161557.6 | 138258.2 | 149966.3 | TRUE |
| 184732.4 | 172045.3 | 145643.3 | 134162.8 | 182042.6 | 228544.2 | 217235.7 | 238040.5 | TRUE |
| 152083.8 | 114657.4 | 136634.6 | 174169.1 | 126179.4 | 215388.9 | 106511.6 | 126118   | TRUE |
| 95660.1  | 96999    | 86393.8  | 93865.1  | 95170.7  | 111538.5 | 88216.9  | 107583.8 | TRUE |
| 80194.8  | 64610    | 61340.2  | 53145.3  | 67520.7  | 78954.4  | 54082.1  | 55414.9  | TRUE |
| 222422.4 | 197546.1 | 231710.9 | 247655   | 262785.9 | 253115.9 | 209365   | 290939.4 | TRUE |
| 70662.6  | 67386.2  | 89778.5  | 100305.1 | 85093.1  | 107801.3 | 66246.2  | 83111.3  | TRUE |
| 74323.7  | 95976.3  | 84244.5  | 87716.7  | 85398.9  | 90784    | 92345.6  | 84039    | TRUE |
| 96584.3  | 102117   | 93345.6  | 121631.2 | 93155.9  | 113459.6 | 91794.4  | 100124.4 | TRUE |
| 456845.5 | 346905.7 | 480603.3 | 516774.4 | 467854.5 | 455735.8 | 383002.6 | 506392.9 | TRUE |
| 440101.1 | 926181.4 | 2994089  | 203668.1 | 351727.3 | 498485.7 | 458383.7 | 475446.2 | TRUE |
| 30558.7  | 26697.5  | 37029.9  | 36639.1  | 33176    | 39733.3  | 27905.2  | 27775    | TRUE |
| 190697.7 | 113595.3 | 201748.1 | 214052.6 | 204525.8 | 230099.2 | 149567.7 | 205485.1 | TRUE |
| 168180.9 | 184224.3 | 151426.2 | 164883.6 | 164648.4 | 207248.8 | 194245.4 | 224770.5 | TRUE |
| 195109.9 | 158641.1 | 141523.3 | 215191.5 | 188073.6 | 155061.3 | 153685   | 170416.7 | TRUE |
| 35820.9  | 21844.4  | 22297.3  | 29998.4  | 27528.2  | 30284.5  | 28607.5  | 38177.3  | TRUE |
| 46225.9  | 30625.3  | 47818.6  | 51835.7  | 58324.7  | 39922    | 31519.6  | 40610.1  | TRUE |
| 78151.1  | 73823.9  | 75014.4  | 75604.7  | 79789.9  | 66595.2  | 52178.4  | 61962.6  | TRUE |
| 504648.4 | 413144.9 | 485531.4 | 562428.2 | 395041.1 | 532455.1 | 422392.9 | 407570.5 | TRUE |
| 324390.8 | 303546.2 | 273249.5 | 293438.6 | 243232.7 | 258046.2 | 318138.1 | 239689.8 | TRUE |
| 252817.5 | 272656.5 | 232240.1 | 252567.8 | 233235.7 | 243330.3 | 255129.5 | 249127.2 | TRUE |
| 464469.2 | 312316.3 | 508362   | 511558.5 | 455619.3 | 457353.2 | 425038.5 | 431016.7 | TRUE |
| 35982.2  | 29826.8  | 33832.2  | 35864.3  | 34952.3  | 21645    | 30616    | 42003.9  | TRUE |
| 102491.8 | 105530.5 | 100707.2 | 105339.8 | 85966.8  | 107922.5 | 87427.7  | 106393.9 | TRUE |
| 112479.6 | 123415   | 97076.8  | 97635.4  | 75796.6  | 88459.1  | 135267.9 | 94538    | TRUE |
| 36238.7  | 50545.5  | 42505.3  | 13587.5  | 10289.4  | 32295.7  | 39459.2  | 22285.6  | TRUE |
| 126000.7 | 155068.8 | 149096.3 | 137307.2 | 130335.8 | 162797.2 | 175614.6 | 132674.9 | TRUE |
| 129242   | 141276.4 | 122526.3 | 148824.8 | 121143.2 | 140149.6 | 156650.3 | 124818.9 | TRUE |
| 170838.2 | 183691   | 175887.9 | 195082.5 | 158866.2 | 189149.9 | 204381.3 | 155844.7 | TRUE |
| 147175.1 | 157903.7 | 154353   | 160840   | 109514.6 | 171922.7 | 145603.5 | 121832.5 | TRUE |
| 238677.1 | 201701   | 192799.4 | 237285.5 | 194255.1 | 191985.1 | 242121.4 | 188719   | TRUE |
| 287703.3 | 264324.2 | 251700.9 | 242475.6 | 221784.9 | 244818.3 | 283959.7 | 194905.5 | TRUE |
| 773327   | 574469.9 | 668290.7 | 725494.5 | 748369.7 | 762347.9 | 542555.2 | 766090.9 | TRUE |
| 94506.9  | 76180.4  | 108821.4 | 82411.7  | 69154.5  | 102614.7 | 79326    | 65243.4  | TRUE |
| 208137.9 | 210036.6 | 188624   | 207140.8 | 193622.6 | 208200.9 | 225390.1 | 190290.4 | TRUE |
| 88714.4  | 113268   | 47272.2  | 75752.3  | 80861.1  | 45452.6  | 95289.8  | 88819.8  | TRUE |
| 91276.8  | 88455    | 72313.6  | 62644.3  | 56631.5  | 72484.5  | 87583.1  | 51118.2  | TRUE |



|          |          |          |          |          |          |          |          |      |
|----------|----------|----------|----------|----------|----------|----------|----------|------|
| 73017.9  | 113218.5 | 117590.2 | 127292   | 125935.4 | 93642.5  | 87785.5  | 84367.4  | TRUE |
| 264435   | 241461.9 | 240912.4 | 290709.2 | 281956.1 | 297419.3 | 263329.5 | 326312.1 | TRUE |
| 572016.8 | 1496075  | 989464.9 | 2308936  | 749213.7 | 585659.3 | 545379   | 584872.5 | TRUE |
| 141010   | 164314.5 | 134773.2 | 160266.9 | 137757.5 | 141036   | 176711.8 | 154497.6 | TRUE |
| 764063.7 | 743653.2 | 691346.6 | 828209   | 760534.3 | 734785.7 | 857804.8 | 789443.2 | TRUE |
| 441256.6 | 458827.7 | 391114.1 | 495977.8 | 443663.6 | 419956.2 | 502278.3 | 426328.6 | TRUE |
| 493995.2 | 445726.6 | 539650.2 | 530090.1 | 516673.4 | 501372   | 519508   | 554283.4 | TRUE |
| 4765.4   | 7267.1   | 14826.3  | 4592.6   | 7707.7   | 7417.7   | 9094.6   | 5550.2   | TRUE |
| 77009.5  | 113079.3 | 70518.1  | 122911   | 97595.5  | 119160   | 123807.5 | 127047.9 | TRUE |
| 46490.7  | 41895.6  | 64400    | 71556.6  | 45079.6  | 40916.7  | 47064.6  | 49540.3  | TRUE |
| 128425.8 | 123971.4 | 138769.2 | 144222.8 | 110826.6 | 184832.5 | 140562.6 | 148079.9 | TRUE |
| 150652.6 | 158003.7 | 165452.1 | 172893.7 | 179176.7 | 167711.2 | 180608.2 | 164290.8 | TRUE |
| 41113.7  | 42568.2  | 33298    | 42243.6  | 39142.1  | 39545.4  | 52699.2  | 45195.8  | TRUE |
| 13059.1  | 20406.1  | 11354.4  | 11021.6  | 17383.7  | 20275.9  | 22492.8  | 23738.6  | TRUE |
| 284142.3 | 211425.1 | 282508.8 | 302628.9 | 275478.8 | 343858.1 | 187012.5 | 264920.9 | TRUE |
| 647885.6 | 570401.1 | 608963.7 | 645913.5 | 627629.3 | 673716.6 | 525306.1 | 615048.4 | TRUE |
| 100796.5 | 104671.3 | 83083.2  | 78552    | 69860    | 89166.9  | 112365.9 | 99498.1  | TRUE |
| 76168.4  | 53267.9  | 61511.7  | 69898.7  | 70256.6  | 57463    | 64708.8  | 63792.1  | TRUE |
| 535269.6 | 500546.2 | 513064.9 | 578028.8 | 428757.2 | 530818.8 | 447884.6 | 474646.7 | TRUE |
| 349752.7 | 293383.5 | 361026.4 | 326520.1 | 284483.7 | 328513.7 | 275333   | 326858.6 | TRUE |
| 276666.1 | 211749.6 | 331217.7 | 344927.3 | 268403.2 | 339785.1 | 266333.6 | 319054   | TRUE |
| 181339.2 | 165424.2 | 154099.5 | 129796.3 | 134106.1 | 141163.2 | 174853.5 | 123555   | TRUE |
| 153167.9 | 156572.5 | 148462.7 | 150657.4 | 163632.9 | 153584.6 | 158575.4 | 156204.6 | TRUE |
| 155739.4 | 107026   | 137926.4 | 167479.8 | 118846.9 | 159079.2 | 140203.2 | 159177.4 | TRUE |
| 92960    | 79834.4  | 75644    | 89238.4  | 112694.1 | 83366.5  | 94092    | 92181.4  | TRUE |
| 135798.9 | 167203.9 | 142888.5 | 162551.5 | 121840.9 | 161975.9 | 190364.1 | 155872.8 | TRUE |
| 38828.5  | 46830.5  | 43882.3  | 37393.2  | 57406.3  | 36895.4  | 46596.9  | 48988.5  | TRUE |
| 254259.8 | 253724.9 | 196336.3 | 256984.4 | 273210.5 | 177371   | 290078.4 | 275542.4 | TRUE |
| 79081    | 82320.7  | 92011.2  | 79062.1  | 97162.8  | 98300.9  | 111415.6 | 93249.5  | TRUE |
| 143079.4 | 116284.3 | 126052.7 | 130571.5 | 99897.5  | 113861.1 | 114567.3 | 117938.2 | TRUE |
| 466959.4 | 416368.7 | 501397.3 | 497783.6 | 469567.7 | 458742.6 | 436941.4 | 481722.1 | TRUE |
| 479464.3 | 445257.3 | 490297.5 | 485996.6 | 438026.4 | 458773.1 | 424150.7 | 448299.5 | TRUE |
| 592579.9 | 521914.4 | 389241.9 | 439994   | 598298.2 | 400508.3 | 540247.9 | 654017.5 | TRUE |
| 1062116  | 989327.9 | 1070267  | 1193378  | 961067.9 | 1090054  | 1094196  | 1052226  | TRUE |
| 126306.8 | 125737.2 | 76477.9  | 122115   | 134577.9 | 136355.8 | 147520.7 | 175537.9 | TRUE |
| 289626.8 | 265603.2 | 281187.2 | 231549.3 | 255002.9 | 286390.1 | 255517.4 | 257190.1 | TRUE |
| 288615.8 | 549613.6 | 386448.7 | 720381.5 | 435714.1 | 363594.4 | 297393.2 | 340930.2 | TRUE |
| 365024.7 | 449850.7 | 331254.5 | 364187.9 | 359429.9 | 345181.7 | 425998   | 348434   | TRUE |
| 208272.4 | 227940.5 | 230424.8 | 314054.7 | 204034.8 | 205725.8 | 208247.2 | 227559.6 | TRUE |
| 468579.5 | 497565.3 | 596300.1 | 591144.2 | 503840.6 | 587518.4 | 528441.7 | 569643.3 | TRUE |
| 535766.4 | 564065.6 | 461901.5 | 493288.2 | 511223.9 | 469658.2 | 585716.9 | 478962.7 | TRUE |
| 400650.9 | 383937.5 | 371875.3 | 401106.8 | 398744.7 | 369108.5 | 436004.2 | 365501   | TRUE |

|          |          |          |          |          |          |          |          |      |
|----------|----------|----------|----------|----------|----------|----------|----------|------|
| 1785824  | 1673886  | 1840472  | 1953807  | 1574816  | 1769143  | 1889028  | 1840361  | TRUE |
| 1869038  | 1599435  | 1910124  | 1973918  | 1598119  | 1728216  | 1863280  | 1890572  | TRUE |
| 20580.7  | 18599.8  | 15773.5  | 20838.9  | 18415.7  | 18628.3  | 11339.5  | 14880.5  | TRUE |
| 547959.4 | 452190.5 | 487626.3 | 467438.8 | 545395.9 | 450166.2 | 524490.9 | 518955.2 | TRUE |
| 248815.2 | 259099.5 | 123070.9 | 288990.4 | 255270.5 | 190186.8 | 338208.6 | 332292.4 | TRUE |
| 33362.4  | 54099.5  | 18388.1  | 56360.1  | 47161.3  | 31708.2  | 66633.7  | 62625    | TRUE |
| 136246.7 | 132846.2 | 127980.6 | 157950.4 | 113965.5 | 173848.6 | 182338   | 191210.8 | TRUE |
| 369174.3 | 448423.5 | 287051.5 | 328843   | 425602.1 | 294256.6 | 479190.4 | 391375.7 | TRUE |
| 124346.6 | 121515.4 | 136815   | 115491.4 | 136511.6 | 130784.5 | 134224.9 | 141103.7 | TRUE |
| 200322.4 | 211181.8 | 226699.9 | 175133.7 | 281529.2 | 217678.8 | 230706   | 253418.7 | TRUE |
| 201089   | 212019.9 | 224789.7 | 187833   | 257984.2 | 213282.3 | 256809.8 | 243368.1 | TRUE |
| 96473.6  | 108957.9 | 135980.5 | 161622.3 | 103386.5 | 103594.6 | 147975.2 | 112093.7 | TRUE |
| 65519.8  | 77958.4  | 96254.9  | 79098.8  | 80900.6  | 64106.6  | 92654.1  | 55622.7  | TRUE |
| 2282822  | 2463294  | 1736253  | 2230464  | 2239171  | 1953853  | 2684732  | 2349065  | TRUE |
| 78607.8  | 54074.9  | 79904.8  | 75277.3  | 74818.3  | 75557.1  | 91520.9  | 84529.1  | TRUE |
| 716217.8 | 632429.3 | 689849.8 | 833688.5 | 660213.2 | 734832   | 649311   | 724239.6 | TRUE |
| 701304.8 | 630959.1 | 791279.7 | 859375.6 | 650891.2 | 695000.8 | 635836.5 | 668750.2 | TRUE |
| 91662.1  | 102591.5 | 72572    | 87360.6  | 110993.4 | 93057.9  | 112476.3 | 103167.6 | TRUE |
| 100146.7 | 96554.5  | 77281.8  | 90999.9  | 98321.2  | 91380.3  | 115137.4 | 105553.7 | TRUE |
| 165120.6 | 127846   | 185945.6 | 186333.6 | 123364.7 | 139740   | 154427.6 | 134693.1 | TRUE |
| 461945.5 | 447383.6 | 502182.7 | 472073.5 | 434231.7 | 462028.6 | 502282.1 | 511546.9 | TRUE |
| 66696.3  | 53307.9  | 58699.4  | 43736.6  | 92801.9  | 51677.5  | 72495.9  | 83235.2  | TRUE |
| 45034.3  | 65846.2  | 45450.1  | 39510.4  | 64684.9  | 59196.3  | 73127.2  | 68776.3  | TRUE |
| 34729.5  | 38378.6  | 38946.3  | 24104.1  | 37339.4  | 29684.1  | 35467.9  | 20525.8  | TRUE |
| 332216.6 | 319834.4 | 291621.7 | 294348.1 | 311140.3 | 321409.6 | 359568.3 | 328929.6 | TRUE |
| 151647.8 | 182829.3 | 169065.5 | 202652.5 | 179948.5 | 151685.2 | 190619.9 | 166258.8 | TRUE |
| 215045   | 168104   | 482653.6 | 156228   | 153106.2 | 423501.3 | 193161.7 | 151692.9 | TRUE |
| 268586.9 | 241182.4 | 220619.1 | 224247.7 | 487393.7 | 252339.9 | 228843.9 | 237505.3 | TRUE |
| 313098.4 | 317801.2 | 476321.4 | 295206.1 | 251906.3 | 477698.6 | 303045.8 | 264118.8 | TRUE |
| 241159.4 | 173468.8 | 679191   | 154568.4 | 106665.3 | 716245.5 | 201207   | 102905.9 | TRUE |
| 161587.6 | 76644.7  | 160045.6 | 135642.3 | 293817.4 | 149513.9 | 93641.1  | 129961.4 | TRUE |
| 60734    | 43675.7  | 130372.5 | 50008.5  | 33116.3  | 137840.3 | 48862.9  | 36077.3  | TRUE |
| 40507.5  | 25238.4  | 109705.5 | 24520.7  | 18885.8  | 105138.5 | 38046.3  | 22678.2  | TRUE |
| 179775   | 124871.2 | 217474.1 | 121919.1 | 110753.6 | 240044.4 | 126155.9 | 144789.5 | TRUE |
| 138430.2 | 85718.5  | 164696.1 | 102913.4 | 83453.7  | 162505.6 | 93410.3  | 112381.9 | TRUE |
| 37884.8  | 25739.2  | 56230.7  | 20953.6  | 21826.9  | 130714.3 | 33099.9  | 30777.3  | TRUE |
| 145017.2 | 85063    | 178295.1 | 105177.1 | 59954.8  | 330633.8 | 115812.4 | 109338.4 | TRUE |
| 156237.6 | 97214.9  | 174227.4 | 73573.7  | 78420.7  | 318408.1 | 107612.9 | 109835.4 | TRUE |
| 273005.6 | 114410.2 | 179259.3 | 202679.4 | 610952.7 | 201223.7 | 149209   | 261316.5 | TRUE |
| 158549   | 80419.8  | 88538.9  | 101828.6 | 400147.8 | 95290.6  | 84507    | 117532.4 | TRUE |
| 176589   | 114445.8 | 241693.4 | 108190.2 | 107452.7 | 297778   | 148036   | 127607.7 | TRUE |
| 51150.3  | 29562    | 80722    | 38946.1  | 25569    | 145092.9 | 42914.8  | 29538    | TRUE |
| 158350.2 | 126953.5 | 157177.1 | 141779.9 | 102512.7 | 235841.2 | 175280   | 145241.5 | TRUE |
| 65332.5  | 37470.7  | 50107    | 44433    | 67098.2  | 54992    | 61168.5  | 61396.4  | TRUE |
| 136561.9 | 113248.7 | 250519.9 | 103343.8 | 78059.2  | 278672.9 | 108127.2 | 88733    | TRUE |
| 138081.2 | 240129.4 | 279514   | 103182.9 | 125999.7 | 161505.1 | 109743.3 | 94330.9  | TRUE |
| 152188.7 | 100607.1 | 190609   | 126586.3 | 99452.8  | 193850.3 | 107898.3 | 121705.2 | TRUE |

|          |          |          |          |          |          |          |          |      |
|----------|----------|----------|----------|----------|----------|----------|----------|------|
| 75808.7  | 85410.9  | 113919.9 | 102226.6 | 79600.3  | 115328.9 | 108525.6 | 71897.2  | TRUE |
| 211129.8 | 145722.4 | 207314.8 | 188179.2 | 331305.7 | 183749.9 | 174916.5 | 192730.3 | TRUE |
| 235297.5 | 149741   | 220591.1 | 191775.2 | 374213.3 | 213883.4 | 184031.3 | 194954.3 | TRUE |
| 24598.9  | 6331.9   | 58443.4  | 10261.5  | 9260.9   | 67357.9  | 10336.8  | 10821.7  | TRUE |
| 92068.6  | 60846    | 172098.6 | 58171.9  | 49889.7  | 192258.9 | 67084.8  | 70620.1  | TRUE |
| 197727.6 | 175282.7 | 335068.2 | 155811.2 | 119567.9 | 343360.2 | 208289   | 144298.3 | TRUE |
| 62745.8  | 72142.9  | 77480.6  | 54177.3  | 41620.3  | 81122.3  | 48310.9  | 67715.2  | TRUE |
| 135439.8 | 86782.1  | 103403.2 | 120635.4 | 183935.7 | 85833.9  | 100890.8 | 101208.8 | TRUE |
| 86494.6  | 68362.7  | 175956.4 | 82256.2  | 55838.5  | 182831.3 | 88019    | 80239.3  | TRUE |
| 289843.1 | 241689.7 | 562795.9 | 244281.1 | 207055.8 | 576725.3 | 255713.5 | 187120.6 | TRUE |
| 43310    | 28112.9  | 55695.6  | 44016.5  | 14438.4  | 102409.3 | 34851.6  | 16201.6  | TRUE |
| 88003.9  | 26709.1  | 65062.5  | 52107.8  | 202903.2 | 62633.3  | 53266    | 86122.7  | TRUE |
| 24025.8  | 19534.9  | 39611.2  | 24311.8  | 8857.4   | 59133.7  | 9191.1   | 12010.1  | TRUE |
| 87982.4  | 78494.4  | 112045.8 | 99081.4  | 74487.6  | 130258.3 | 100002.3 | 91320.6  | TRUE |
| 55463.2  | 62403.8  | 94606.9  | 47841.5  | 54823.4  | 97850.3  | 60517.4  | 60078.8  | TRUE |
| 27564    | 7346.5   | 31734.8  | 8513.7   | 13203.7  | 37595.5  | 20954.4  | 20452.9  | TRUE |
| 1293835  | 911454   | 2697685  | 883405.3 | 608164.9 | 3012969  | 957430.1 | 735842.2 | TRUE |
| 859692.8 | 509379.9 | 595374.7 | 620495.8 | 2003298  | 630660.1 | 546032.6 | 733264.9 | TRUE |
| 34708.9  | 31015.7  | 73775.8  | 25642.8  | 11906.2  | 82575    | 32463.9  | 23690.2  | TRUE |
| 91294.8  | 83430.8  | 242109.5 | 53727    | 50346.7  | 253705.7 | 77025.7  | 48449.8  | TRUE |
| 28291.1  | 5673.3   | 22075.9  | 27085.7  | 8156.7   | 31808.4  | 13244    | 9001.5   | TRUE |
| 55464.3  | 63910.5  | 55467.5  | 54224.8  | 55034.6  | 50961    | 75925.1  | 40281.4  | TRUE |
| 71607.6  | 54384    | 54884    | 49634.2  | 46608.5  | 78131.9  | 60918.8  | 44578.1  | TRUE |
| 266250.6 | 352678   | 234177.7 | 290113.8 | 291948.6 | 261329.8 | 353345.7 | 297508.5 | TRUE |
| 435959.6 | 501223.5 | 557369.2 | 483309   | 408061.7 | 418352.5 | 519783.8 | 472713   | TRUE |
| 42178.5  | 36081.4  | 53641.4  | 57294.4  | 49787.4  | 38353.4  | 44346.6  | 33541.2  | TRUE |
| 220003   | 196312.1 | 263423.4 | 280290.2 | 284987.4 | 236531.2 | 199808.7 | 222463.3 | TRUE |
| 167387.7 | 175901.1 | 233858.8 | 174274.5 | 155079.1 | 287982.7 | 195611.5 | 146331.2 | TRUE |
| 335513.4 | 288622.4 | 366569.3 | 407607.2 | 343404   | 365987.5 | 320712.2 | 344819.1 | TRUE |
| 68633.3  | 46723    | 58781.3  | 41795.9  | 46947.3  | 79370.7  | 62787    | 48585.5  | TRUE |
| 347494.7 | 293074.5 | 320463.4 | 369706.9 | 377813.5 | 320086   | 334560.3 | 327692.3 | TRUE |
| 148753   | 120011.6 | 121533.4 | 112395.7 | 121569.9 | 168894.7 | 146988.2 | 192893.3 | TRUE |
| 264626.9 | 240420   | 288145.1 | 288787   | 374371.1 | 297331.1 | 226447.3 | 292174.3 | TRUE |
| 143061.8 | 173653.1 | 176641.7 | 148604.8 | 122273.5 | 178620.3 | 143075.3 | 130848.1 | TRUE |
| 272975.6 | 193019.1 | 298620.5 | 259536.5 | 331520.1 | 326885.8 | 207793.5 | 290936.9 | TRUE |
| 882525.5 | 759817.2 | 839619   | 830212.6 | 949316.8 | 903539.4 | 753588.1 | 857880.5 | TRUE |
| 190154.5 | 191059.8 | 196696.7 | 180309.5 | 163851.1 | 170838.7 | 184191.4 | 175386.7 | TRUE |
| 567896.8 | 505672   | 537899.8 | 649557.4 | 699292.5 | 538023.5 | 493502.8 | 578397.4 | TRUE |
| 102030.9 | 96235.2  | 71028.9  | 94702.9  | 84075.2  | 103591.4 | 95068    | 106633.5 | TRUE |
| 52592.1  | 30573.2  | 41228.6  | 41600.2  | 40008.3  | 51876.5  | 52104.9  | 35807.8  | TRUE |
| 82134.5  | 88625.6  | 90025.8  | 122060.2 | 89173.6  | 103077.2 | 117995   | 102539.7 | TRUE |
| 229595.2 | 182492.2 | 213434.8 | 236452.5 | 272503.6 | 255900.8 | 243187   | 253750.9 | TRUE |

|          |          |          |          |          |          |          |          |      |
|----------|----------|----------|----------|----------|----------|----------|----------|------|
| 121114.5 | 123919   | 128019.5 | 149650.3 | 136083.3 | 138016.7 | 129856.9 | 102253.7 | TRUE |
| 207836.2 | 170599.5 | 239195.4 | 215523.4 | 261388.6 | 184789.1 | 182871   | 232358.6 | TRUE |
| 37552.8  | 37531.1  | 58180.5  | 45529.9  | 37685    | 41899.5  | 39614.7  | 42947.7  | TRUE |
| 24705.3  | 10734.1  | 33713.7  | 28514.1  | 29741.2  | 38117.7  | 34241.2  | 24342.4  | TRUE |
| 48420.5  | 59958.5  | 76984.4  | 47366.8  | 65378.5  | 56447.2  | 53693.4  | 46799.3  | TRUE |
| 311343.1 | 254970.8 | 307814.7 | 361900.1 | 403044.2 | 320717.1 | 266087.6 | 315762   | TRUE |
| 502224.3 | 628305.4 | 532092.7 | 524665.3 | 475198.2 | 526720.2 | 559119.3 | 447734.9 | TRUE |
| 65532.3  | 49680.8  | 64524.5  | 71687    | 64066.8  | 92035.6  | 83872.2  | 65753.8  | TRUE |
| 72293.6  | 72103.6  | 58219    | 63404.6  | 91514.2  | 76364.3  | 56384    | 69360.2  | TRUE |
| 84358.2  | 94330.4  | 119686.5 | 107548.9 | 89252.4  | 95972.5  | 85016.4  | 102073.9 | TRUE |
| 75284.4  | 91164.8  | 96110.3  | 93764    | 92539    | 83009.9  | 93138.3  | 102910.6 | TRUE |
| 96324.3  | 66104.2  | 58330.3  | 86304.8  | 81856.4  | 91033.8  | 89447.5  | 106214   | TRUE |
| 151955.8 | 146722.6 | 128946   | 138577.3 | 113907.1 | 111486.5 | 118883.6 | 156051.1 | TRUE |
| 159251.3 | 130037   | 120433.9 | 125116.7 | 145908   | 182018.6 | 195393.8 | 222729.6 | TRUE |
| 337718   | 199221.2 | 220635.2 | 236984   | 255017.7 | 220941.8 | 241700.5 | 252956.8 | TRUE |
| 255016.8 | 217452.5 | 256666.5 | 231612.6 | 269921.5 | 251085.4 | 233764.7 | 307318.4 | TRUE |
| 249757.7 | 252483   | 230825   | 328050.3 | 286638.2 | 301576.8 | 288111.4 | 295876.9 | TRUE |
| 40943.8  | 41276.6  | 47126.4  | 38127.3  | 52148.7  | 55248.9  | 45922.1  | 58278.2  | TRUE |
| 800095.9 | 651017.2 | 687138   | 646477.3 | 766707   | 802669.4 | 767014   | 837909.3 | TRUE |
| 288347.3 | 267798.4 | 268283.4 | 247728.7 | 284599.9 | 316735.6 | 286043.7 | 307584.5 | TRUE |
| 62910.6  | 72918.2  | 66877.2  | 80973.3  | 67146.5  | 84698.5  | 58065.1  | 92559.2  | TRUE |
| 726960.6 | 616426.4 | 498467.2 | 721751.1 | 619223   | 808455.5 | 762942.8 | 914468.2 | TRUE |
| 51165.5  | 47166.6  | 32107.3  | 36251.5  | 32960    | 47529.4  | 51190.4  | 66170.6  | TRUE |
| 123676.1 | 105386.7 | 160922.8 | 196564.3 | 185222.2 | 157217.9 | 141890.3 | 162853.6 | TRUE |
| 226464.7 | 220640.5 | 215736   | 228924.5 | 211090.3 | 259113.2 | 206077.5 | 238849.6 | TRUE |
| 570984.5 | 494938.9 | 543208.2 | 605307.9 | 587317   | 584530.9 | 501931.9 | 555789.5 | TRUE |
| 1281231  | 1261340  | 1105479  | 1150418  | 1218900  | 1397724  | 1247172  | 1333789  | TRUE |
| 153064.6 | 114027.9 | 87971    | 153360.9 | 93141.1  | 133686.7 | 119480.2 | 118889.6 | TRUE |
| 104412.2 | 86071.3  | 73587.8  | 75803.9  | 74280.9  | 78754.9  | 71918.4  | 107665.3 | TRUE |
| 95399.8  | 69893.7  | 55275.7  | 104456.3 | 87657    | 72855.2  | 100181.6 | 126187.6 | TRUE |

|          |          |          |          |          |          |          |          |      |
|----------|----------|----------|----------|----------|----------|----------|----------|------|
| 43341.4  | 35627.8  | 23185.4  | 36964.7  | 32803.5  | 41773.9  | 48176.7  | 63049.3  | TRUE |
| 150830.4 | 120147.1 | 200931.6 | 140763.1 | 119968.5 | 111099.5 | 137917.4 | 200620.3 | TRUE |
| 60420.9  | 31469.3  | 31145.2  | 32204.3  | 37249.5  | 45265.7  | 42845.5  | 53956.9  | TRUE |
| 138348.8 | 114240.6 | 169281.9 | 135337.4 | 144611.2 | 141018.9 | 140372.5 | 147496.4 | TRUE |
| 59630.7  | 66976.1  | 65921.3  | 83946.3  | 89481.8  | 97870.6  | 93218.3  | 107814.9 | TRUE |
| 495333.8 | 328710.2 | 368684.9 | 631220.3 | 659928.8 | 644621.7 | 578380.4 | 765601.4 | TRUE |
| 118062.4 | 141553.7 | 127179.8 | 94829.2  | 90600.4  | 92927.5  | 112871.6 | 101302.8 | TRUE |
| 1307138  | 1509638  | 1016833  | 1474935  | 1284763  | 1580898  | 1921321  | 1456910  | TRUE |
| 261564.8 | 342487.4 | 223321.7 | 337016.2 | 291422.5 | 357520   | 448537.2 | 303188.7 | TRUE |
|          |          |          |          |          |          |          |          |      |
| 759341.3 | 718329.3 | 627338.7 | 572145.3 | 750909.4 | 719083.5 | 699570.9 | 670373.6 | TRUE |
| 1695931  | 1635615  | 1424583  | 1513368  | 1569144  | 1649399  | 1681172  | 1661879  | TRUE |
| 156799.2 | 134766.2 | 190269.9 | 166019.5 | 164233.1 | 170802.2 | 167254   | 165988   | TRUE |
| 190286.7 | 178206.4 | 294050.7 | 195179.7 | 148676.4 | 224144.4 | 176182.8 | 164466.6 | TRUE |
| 103535.6 | 89029.4  | 114149.7 | 94581.2  | 95683.4  | 106440.8 | 87334.2  | 93687.9  | TRUE |
| 77139    | 49598.2  | 87910.2  | 87787.1  | 69594.4  | 78551.7  | 62640.3  | 71553.6  | TRUE |
|          |          |          |          |          |          |          |          |      |
| 330593   | 253182.4 | 348340.7 | 316743.7 | 366244.3 | 337412.2 | 269256.6 | 328151.9 | TRUE |
| 38708.5  | 32994.9  | 16423.8  | 33711.3  | 29394    | 46059.3  | 35466.9  | 47633.7  | TRUE |
| 170943.4 | 104064.3 | 110524   | 148085.8 | 116025.4 | 178561.3 | 147553.1 | 185309   | TRUE |
| 19972.3  | 6923     | 21587.4  | 6265     | 22696.4  | 14894.9  | 6639.8   | 19513.8  | TRUE |
| 55887    | 77013.1  | 52454.7  | 90186.7  | 104844.4 | 23537.3  | 30344.4  | 23697.4  | TRUE |
| 339866.8 | 297453.1 | 307425.4 | 374174.7 | 378301.2 | 301097.6 | 322505.6 | 384192.4 | TRUE |
| 197774.7 | 190148   | 126878.8 | 206470.5 | 193995.3 | 126296.5 | 195672.1 | 185922.1 | TRUE |
| 22570.9  | 19554    | 16600.9  | 24390.2  | 21983.8  | 21022.2  | 18897.5  | 22312.6  | TRUE |
| 25362.3  | 28680.6  | 18535.6  | 9301.9   | 20891    | 20622.1  | 22494.2  | 17627.5  | TRUE |
| 55951.9  | 40256.4  | 38636.7  | 47758.5  | 48435.1  | 36655.6  | 40471.3  | 44453.4  | TRUE |
| 61516.7  | 76524.1  | 42169.8  | 72421.2  | 66335.6  | 41128.9  | 67897.5  | 74431.6  | TRUE |
| 171860   | 166897.4 | 106148   | 149318.7 | 166794.3 | 135316.9 | 148154.6 | 170394.5 | TRUE |
| 32950.7  | 42370.6  | 34177.4  | 36606.4  | 52938.4  | 33891.4  | 41891.5  | 48148.4  | TRUE |
| 44550    | 48690    | 33740.7  | 48119.9  | 43919.3  | 31664.5  | 39294.6  | 30467.5  | TRUE |
| 56813.5  | 56929.1  | 45658.5  | 55993.1  | 61405.8  | 44742.7  | 47469.8  | 49419.9  | TRUE |
|          |          |          |          |          |          |          |          |      |
| 59349.6  | 150778.4 | 88900.1  | 123019.6 | 102879.3 | 36215.1  | 36805.8  | 39925    | TRUE |
|          |          |          |          |          |          |          |          |      |
| 163243   | 149828.2 | 147862.9 | 199171.9 | 160043.1 | 165335.5 | 167263.3 | 179301.7 | TRUE |
| 154365.1 | 159309.1 | 115910   | 129971.9 | 149515   | 132844.8 | 152828.8 | 138886.3 | TRUE |
| 199329.6 | 190971.5 | 182853.1 | 197993.4 | 178362.3 | 170441.9 | 185081   | 182588.9 | TRUE |
| 108650.5 | 92292.4  | 90467.9  | 128812.7 | 117947.9 | 105648.7 | 80655.8  | 129116.4 | TRUE |
| 221083.9 | 230529.2 | 206453.4 | 212009.5 | 204249.1 | 215033.1 | 193945.8 | 203921.7 | TRUE |
| 147916.2 | 148272.2 | 137847.4 | 181256.9 | 152570.2 | 154787   | 145148.7 | 179693.1 | TRUE |
| 136042.8 | 142929.8 | 109515.7 | 121364.6 | 128557   | 117511.3 | 109355.6 | 119927.4 | TRUE |
| 64676.3  | 48997.2  | 62901.5  | 71863.4  | 82690.5  | 72283.8  | 64553.2  | 75141.7  | TRUE |
| 76328.7  | 68982.4  | 80640.5  | 72573.9  | 77791.5  | 81828.1  | 69402.7  | 79019    | TRUE |
| 114970   | 83561.7  | 104686.6 | 109363.4 | 91830.9  | 80470.8  | 111623.5 | 117756   | TRUE |
| 377551   | 351696.8 | 333235.3 | 343950.9 | 398200.2 | 353825.7 | 376755.8 | 372814.4 | TRUE |
| 158153.5 | 153355.5 | 125207.3 | 129088.6 | 172729   | 142480.1 | 173455.4 | 181220   | TRUE |

|          |          |          |          |          |          |          |          |      |
|----------|----------|----------|----------|----------|----------|----------|----------|------|
| 419166.4 | 413977.5 | 454165.7 | 426359.9 | 461095.5 | 476140.3 | 437408.5 | 453017.6 | TRUE |
| 186033.6 | 185280.2 | 174849.3 | 180539.9 | 198031.8 | 246503.9 | 200665.5 | 198032.3 | TRUE |
| 152280.8 | 138225.4 | 127973.6 | 143516.4 | 131833.7 | 151495   | 181532   | 158854   | TRUE |
| 101080   | 158012.6 | 95148.6  | 122642.2 | 146621.6 | 89266.7  | 69209.3  | 68020.5  | TRUE |
| 28872.8  | 24625.2  | 20534.5  | 21718.8  | 18708.4  | 30819.2  | 21517    | 13446.4  | TRUE |
| 1605871  | 1184025  | 1473271  | 1517045  | 1183682  | 1721143  | 1303201  | 1366497  | TRUE |
| 57068.3  | 100519.1 | 116856.8 | 109762.6 | 114478.4 | 39966.2  | 50333.3  | 49199.6  | TRUE |
| 393070.4 | 252624.1 | 313871.6 | 381039.4 | 323101.1 | 398932.5 | 329734.7 | 406947.7 | TRUE |
| 339115.7 | 289454.8 | 235821.4 | 317408.1 | 302507.3 | 312719.4 | 279782.7 | 328883.1 | TRUE |
| 2192981  | 1771040  | 1661929  | 1863820  | 1991895  | 2263425  | 1829694  | 2149389  | TRUE |
| 63270.1  | 54332    | 63901.9  | 59874.5  | 61120.4  | 75969.9  | 72051    | 67937.6  | TRUE |
| 46660.9  | 37100.1  | 50736.5  | 32756.6  | 36384.8  | 76854.2  | 44731.1  | 39033.7  | TRUE |
| 38192.1  | 22758.3  | 43455.7  | 10074    | 7019.9   | 40061.3  | 24918.9  | 9179.5   | TRUE |
| 140738.1 | 63092.8  | 75297.9  | 97857.7  | 66060.2  | 125861.7 | 91914.7  | 67666.7  | TRUE |
| 65953.3  | 25005.9  | 56590.7  | 77442.3  | 38930.7  | 104044.6 | 52577.3  | 35870.8  | TRUE |
| 50991.9  | 37934.6  | 49900.1  | 20759.8  | 22670.7  | 72856.4  | 32496.8  | 30160.9  | TRUE |
| 65034.6  | 34025.7  | 66769.7  | 45687.7  | 35787.3  | 110366.5 | 45001.1  | 37673.5  | TRUE |
| 132368.2 | 42455.3  | 158005.3 | 25565.7  | 68688.4  | 266802.3 | 75232.5  | 92018.9  | TRUE |
| 389869   | 370226.1 | 303443.1 | 350575.5 | 328017.4 | 325971.6 | 325401.6 | 297627.9 | TRUE |
| 6986285  | 5943815  | 3999905  | 4610520  | 4825094  | 4156261  | 4086809  | 4649040  | TRUE |
| 4912076  | 4702850  | 4639622  | 5647410  | 5652822  | 5015892  | 4906157  | 5742688  | TRUE |
| 2859854  | 2495352  | 2597439  | 3138602  | 3083799  | 3098486  | 2808891  | 3461483  | TRUE |
| 327360   | 283299.4 | 266879.1 | 366362.6 | 336230   | 376882.6 | 343643.3 | 391817.1 | TRUE |
| 81745.4  | 117885.7 | 72169.3  | 112025   | 115025.1 | 56225.3  | 61539.5  | 48064.2  | TRUE |
| 125905   | 286866.9 | 117541.1 | 239536.8 | 279579.9 | 62226.1  | 45774.7  | 89617.1  | TRUE |
| 62174.3  | 46068.8  | 52153.7  | 58006.5  | 58964.3  | 55413.8  | 47760.9  | 47729.3  | TRUE |
| 78753.5  | 161662.4 | 122606.4 | 213321.3 | 189495.1 | 71032.8  | 81679    | 74739.5  | TRUE |
| 2395595  | 2242923  | 2160353  | 2313354  | 2432644  | 2157784  | 2197434  | 2181753  | TRUE |
| 19360403 | 18474292 | 15482365 | 16637611 | 17872600 | 20116539 | 19793325 | 21921067 | TRUE |
| 543334.9 | 517863.3 | 488855.8 | 461885.1 | 493607.1 | 455558.3 | 509277.8 | 475699.6 | TRUE |
| 518741   | 468149.3 | 561254.6 | 486499   | 521976.8 | 472660.8 | 441577.5 | 506960.9 | TRUE |
| 466019.8 | 531413.6 | 437599.9 | 405660.6 | 596402   | 408635.7 | 504949   | 433222.3 | TRUE |
| 372833.5 | 324706.2 | 404583.7 | 416614.5 | 511024.7 | 507198.7 | 434772.3 | 476723.7 | TRUE |
| 217475.8 | 170994.3 | 192378.9 | 255266.1 | 244712.5 | 235114.3 | 222303   | 241387   | TRUE |
| 145793.7 | 132860   | 136796.5 | 151091.6 | 170118.7 | 155637.4 | 143370.3 | 175366.7 | TRUE |
| 366460.4 | 326771.3 | 228133.1 | 235957.6 | 265879   | 239349.3 | 253947   | 250420.6 | TRUE |
| 793044.6 | 667580.2 | 483146.8 | 466627.3 | 537425.2 | 478064.2 | 422613.1 | 497816.4 | TRUE |
| 300831.4 | 285935.8 | 355771.4 | 378959.3 | 355530.4 | 345459.6 | 340548.7 | 339478   | TRUE |
| 280946.8 | 225342   | 274934.3 | 319869.4 | 326653.4 | 288553   | 265047.5 | 315116.4 | TRUE |
| 9098068  | 6912872  | 8268367  | 10258634 | 9331918  | 9784025  | 8171099  | 10400898 | TRUE |
| 8861207  | 6628472  | 8211280  | 9750219  | 8695730  | 8544407  | 8119227  | 9552061  | TRUE |
| 925069.2 | 684328.5 | 768356   | 894339.9 | 893254.1 | 871576.4 | 829184.5 | 956864.5 | TRUE |
| 246023.2 | 246509.6 | 214466.6 | 274653.8 | 292928.1 | 251309.8 | 238835.1 | 273472.7 | TRUE |
| 158365.7 | 134491.4 | 146582.8 | 164403.7 | 185664.7 | 160009.5 | 130332.7 | 174154.2 | TRUE |
| 79227.4  | 73536.9  | 81958.3  | 85785.4  | 88164.3  | 84752.9  | 77636    | 80284.3  | TRUE |
| 171396.9 | 137751   | 175201   | 169496.8 | 146604.3 | 183835.6 | 155185.6 | 159930.3 | TRUE |
| 74700.2  | 189187.1 | 88975.7  | 166268.4 | 153310.2 | 44811    | 58009.2  | 49272.9  | TRUE |
| 245422.3 | 427920   | 245558   | 405069.1 | 467946.6 | 161920.5 | 130858.2 | 247853.1 | TRUE |

|          |          |          |          |          |          |          |          |      |
|----------|----------|----------|----------|----------|----------|----------|----------|------|
| 97772.6  | 78729.6  | 67483.1  | 99074.2  | 80112.2  | 106375.4 | 81326.4  | 104227.2 | TRUE |
| 173275   | 167866.3 | 131990.8 | 188253.7 | 183255.6 | 155329.6 | 168792   | 182807.3 | TRUE |
| 76476.8  | 157523.4 | 190331   | 239068.5 | 346016.2 | 41509.1  | 23147.7  | 55917.3  | TRUE |
| 100607.7 | 164682   | 170863.6 | 249912.2 | 326097.1 | 73045.5  | 70948.2  | 70336.6  | TRUE |
| 124543   | 79831.9  | 81002.7  | 139302.8 | 88318.1  | 131529.5 | 106238   | 148813.4 | TRUE |
| 102875.9 | 84185.2  | 91824.8  | 101337.8 | 106844.1 | 91557.5  | 102462.9 | 103734.6 | TRUE |
| 319310.1 | 280793.5 | 319199.7 | 327446.1 | 325938.1 | 383609.4 | 336897   | 407143.6 | TRUE |
| 380181.5 | 326505.4 | 399852.9 | 355806.8 | 364807.2 | 426575.9 | 366355   | 372142.2 | TRUE |
| 8173637  | 7824063  | 6682339  | 7644316  | 8116938  | 8803231  | 8782206  | 9469515  | TRUE |
| 3392817  | 3143464  | 3337294  | 3173839  | 3622505  | 3823214  | 3694783  | 4139533  | TRUE |
| 95318    | 91560.5  | 83588.6  | 92995.6  | 98751.3  | 123280.4 | 106793.6 | 94952.7  | TRUE |
| 26821.5  | 76873.7  | 50970.8  | 83492.2  | 103437.7 | 9629.7   | 8081.3   | 32086.5  | TRUE |
| 84126.8  | 260323.7 | 171877.4 | 233516.3 | 261118.4 | 38527.8  | 57814.9  | 47368.2  | TRUE |
| 171878.3 | 517380.6 | 252753.5 | 469671.7 | 557009.6 | 94088.4  | 46212.1  | 76783.5  | TRUE |
| 41191    | 41520.8  | 35610.6  | 40339.3  | 32354.1  | 50636.7  | 32121.2  | 50063.3  | TRUE |
| 69359.2  | 99218.2  | 82585.4  | 104388.4 | 106109.9 | 87361.6  | 64338.3  | 63272.9  | TRUE |
| 47059.9  | 51330    | 47770.8  | 47547.3  | 53292    | 63457.6  | 64382.8  | 59276    | TRUE |
| 196503.6 | 202164.2 | 153276.8 | 180024.4 | 156469.4 | 203615.6 | 184442.5 | 199878.8 | TRUE |
| 500803.1 | 467667.6 | 432380   | 484567.2 | 468976.8 | 534511.1 | 553715   | 552625.3 | TRUE |
| 137253.9 | 111327.1 | 124755.8 | 145639.2 | 136359.2 | 119684.2 | 116821.8 | 131284.4 | TRUE |
| 163999.2 | 140996.9 | 166631.7 | 161554.2 | 196509.5 | 158789.4 | 155733.3 | 200893   | TRUE |
| 579725.9 | 523566.5 | 635641.1 | 541365.4 | 606823   | 646570.5 | 484195   | 606369.9 | TRUE |
| 606193.9 | 530190   | 673558   | 633475.4 | 742701.7 | 625584.7 | 608385.4 | 702285.5 | TRUE |
| 2218455  | 1979460  | 2301293  | 2340169  | 2447553  | 2417814  | 2136055  | 2319283  | TRUE |
| 442725.1 | 429617.4 | 409664.6 | 416211.5 | 481989   | 446515.1 | 409048.5 | 456582.4 | TRUE |
| 154272.7 | 138719.7 | 165325   | 166101.2 | 204770.4 | 174855.6 | 179362.4 | 200059.9 | TRUE |
| 243022.3 | 200330.2 | 250813.5 | 287358.4 | 296835.8 | 255638   | 256284.2 | 266485.2 | TRUE |
| 52072.3  | 45216.6  | 67106.1  | 62018    | 70803.6  | 74547.4  | 64222.3  | 61133.9  | TRUE |
| 964585.5 | 884970.9 | 875584.4 | 1082021  | 907889.7 | 954334   | 866604.5 | 889331.3 | TRUE |
| 83249.9  | 99907.5  | 96588.7  | 125625.4 | 148839.3 | 58823.7  | 47828.3  | 77273.1  | TRUE |
| 30545.3  | 12003.3  | 8396.5   | 25857    | 29204.9  | 28616.3  | 18318.1  | 39798.7  | TRUE |
| 138811.2 | 105897.9 | 116051.3 | 129215.4 | 163452.2 | 128363.9 | 113642   | 131846.5 | TRUE |
| 61649.1  | 73613.5  | 53540    | 52466.4  | 77720.9  | 64625.8  | 58005.3  | 79530.2  | TRUE |
| 235255.7 | 230421.2 | 200307.6 | 187914.2 | 209374.8 | 229815.3 | 256878   | 235066   | TRUE |
| 2138315  | 2035849  | 2076835  | 2016738  | 2281351  | 2373088  | 2140634  | 2322750  | TRUE |
| 422695   | 404468.2 | 414662.7 | 387375.8 | 467680.9 | 523970.1 | 484780.5 | 446309.9 | TRUE |
| 122214.6 | 153596.6 | 156606.8 | 119404.9 | 135636.7 | 136235.1 | 141826.1 | 121637.1 | TRUE |
| 367955.9 | 361126.3 | 417418   | 392568   | 307313.3 | 363243.6 | 396906.7 | 341365.6 | TRUE |
| 73754.2  | 55495.3  | 62806.4  | 69202    | 63821.4  | 84078.3  | 65246.9  | 80773.3  | TRUE |
| 122126.5 | 106192.8 | 127265.3 | 127178.7 | 126326.6 | 152950.7 | 119798.8 | 161912.6 | TRUE |
| 37798.2  | 45815.4  | 25943.5  | 47216.4  | 46740.1  | 53166.3  | 44657.9  | 40096.7  | TRUE |
| 143878.8 | 281145.1 | 188872.8 | 235395.7 | 289476.6 | 123104.9 | 111009.5 | 124247.5 | TRUE |
| 51454.6  | 46432.2  | 51852.2  | 41393.7  | 48259.2  | 37877.2  | 61950.3  | 44005.7  | TRUE |
| 65465.5  | 58294.2  | 38217.2  | 39987.5  | 82460.1  | 41066.7  | 48356.5  | 43208.4  | TRUE |
| 197553.4 | 168697.3 | 203262   | 198251.6 | 229674.4 | 215289.6 | 234398.4 | 235435.2 | TRUE |
| 456435.6 | 412654.9 | 400148.6 | 450539.1 | 417069.5 | 446432.4 | 453949.7 | 438056.6 | TRUE |
| 353832.1 | 317792.4 | 311520.2 | 232382.5 | 275664.5 | 325929.8 | 264280.8 | 249217.1 | TRUE |

|          |          |          |          |          |          |          |          |      |
|----------|----------|----------|----------|----------|----------|----------|----------|------|
| 545640.3 | 552827.2 | 464141.1 | 517798.8 | 462628.9 | 434458   | 492703.6 | 524171.6 | TRUE |
| 616131.4 | 607722.4 | 487190.2 | 511309.4 | 484311.6 | 502478.1 | 496257.5 | 516322.8 | TRUE |
| 122851.5 | 107279.2 | 106501.8 | 128112.1 | 141070.2 | 134741.9 | 155532.4 | 129418.2 | TRUE |
| 537272.6 | 508662.9 | 566721.5 | 657552.3 | 681785.7 | 581572.5 | 580289.3 | 619454.5 | TRUE |
| 458003.5 | 388477.4 | 419811   | 482265.8 | 479112   | 412534.9 | 433065.7 | 478656.5 | TRUE |
| 393802.8 | 354561.3 | 364598.5 | 427520.2 | 508376.1 | 377187.8 | 377510.8 | 517411.7 | TRUE |
| 266848.2 | 260069   | 226111.2 | 260502   | 234642.1 | 241713.3 | 224005.2 | 291559.7 | TRUE |
| 321651.9 | 273721.2 | 325078.3 | 387074.9 | 358284.3 | 365831.9 | 318507.3 | 404341.9 | TRUE |
| 126060.1 | 112606.4 | 107864.5 | 129037.4 | 127453.4 | 121831   | 118560.2 | 107661.2 | TRUE |
| 47773.7  | 129840.8 | 67671.9  | 127439.5 | 117999   | 25827.7  | 30838.4  | 41234.4  | TRUE |
| 160294.9 | 272710.3 | 207212.3 | 258522.1 | 275838.3 | 101373.1 | 90770.8  | 123027.8 | TRUE |
| 44056.1  | 61717    | 47520.4  | 43226.3  | 52325.2  | 46935.3  | 49362.9  | 57459.1  | TRUE |
| 26244.3  | 36634.3  | 36756.7  | 58260.3  | 74697.4  | 19778.2  | 27426.1  | 10990.8  | TRUE |
| 67221.6  | 30731.8  | 33058.6  | 46957.6  | 49428.4  | 66100.2  | 56072.5  | 60506.3  | TRUE |
| 89759.8  | 73668    | 89866.7  | 117151.7 | 105754.1 | 114646.5 | 101157.3 | 112827.8 | TRUE |
| 146980.2 | 113306.2 | 160623.5 | 124970.6 | 99314.4  | 172049.9 | 114779.3 | 117288.7 | TRUE |
| 1320311  | 1296746  | 1173225  | 1220738  | 1269663  | 1330500  | 1402576  | 1407947  | TRUE |
| 351809.5 | 351233.6 | 346856.9 | 295172.9 | 336476.4 | 324539.8 | 340977.1 | 340910.4 | TRUE |
| 185481.2 | 213012.2 | 186494   | 186672.8 | 215720.6 | 220485.9 | 223191.6 | 204905.8 | TRUE |
| 260810.3 | 262861.1 | 203178.4 | 229784.4 | 239008.3 | 270078.5 | 286561.3 | 309045.5 | TRUE |
| 193305.4 | 164710.5 | 122268.4 | 157924.7 | 149014.6 | 196268.7 | 183327.7 | 196909.7 | TRUE |
| 181457.7 | 150625.9 | 143534.2 | 178659.6 | 141429   | 195950.4 | 176385.2 | 185117   | TRUE |
| 133066.4 | 115189   | 84880.4  | 113272.4 | 123292.3 | 123978.3 | 151699.9 | 135860.3 | TRUE |
| 183495.7 | 204347.9 | 153994.5 | 176182.7 | 190411.1 | 183844.9 | 204068.3 | 191982.3 | TRUE |
| 106821.2 | 122824.6 | 116226.7 | 103623.6 | 87655.2  | 112375.6 | 106445.3 | 116281.3 | TRUE |
| 54062.4  | 50260.8  | 35478.2  | 39589.1  | 31830.6  | 54444    | 43195.2  | 42596.5  | TRUE |
| 146113.4 | 150915.7 | 158663.1 | 153512.3 | 142837.5 | 175567.2 | 187459.7 | 153001.9 | TRUE |
| 90416    | 90033.7  | 77562    | 82697.8  | 94979.5  | 100124.4 | 99006.3  | 87244.5  | TRUE |
| 151342.6 | 153545.4 | 145419.4 | 162694   | 164595.6 | 213087.3 | 172596   | 180237.1 | TRUE |
| 93594.5  | 87227.6  | 74440.9  | 87488.5  | 90105.4  | 115760.8 | 97871.4  | 84311.2  | TRUE |
| 50138.3  | 47423.2  | 40750.4  | 42349.6  | 41545.7  | 57739.8  | 50218    | 62144.5  | TRUE |
| 19264.6  | 24855.1  | 14630.5  | 10372.8  | 29953.6  | 17574.1  | 14375.8  | 14897.1  | TRUE |
| 47627.9  | 101373.2 | 48655    | 98434.1  | 94120.5  | 40024.8  | 41506.9  | 33442.3  | TRUE |
| 144897.5 | 362655.8 | 240323.4 | 338451.1 | 354047.4 | 121564.9 | 110444.5 | 125610   | TRUE |
| 91301.3  | 73898.1  | 72812.4  | 71308.7  | 77778.6  | 108296.5 | 85749.6  | 99950.5  | TRUE |
| 65077.2  | 59199.4  | 80008.3  | 58719    | 72831.1  | 54144.4  | 67222.6  | 68771.6  | TRUE |
| 101349.5 | 97303    | 53041.1  | 72383    | 70809.2  | 79032    | 111502.7 | 70390.8  | TRUE |
| 1401349  | 1676601  | 913934.2 | 1292699  | 1150720  | 901103.9 | 1885118  | 1180506  | TRUE |
| 69124.2  | 75827.3  | 51050.3  | 58618.1  | 77026    | 69778    | 101276.7 | 72116    | TRUE |
| 23634.7  | 14663.8  | 12146.5  | 17106.3  | 28142.6  | 30489.8  | 39387.6  | 15072.8  | TRUE |
| 283665.6 | 320830.4 | 242324.2 | 318892.5 | 273787.5 | 249196   | 376128.1 | 304255.5 | TRUE |
| 357302.2 | 288465.7 | 352265.5 | 355298.2 | 278870.3 | 329805.9 | 366931.2 | 374982.8 | TRUE |



|          |          |          |          |          |          |          |          |      |
|----------|----------|----------|----------|----------|----------|----------|----------|------|
| 573387.2 | 639046.5 | 384545.7 | 514437.9 | 514841.9 | 465012.1 | 642738.3 | 503950.4 | TRUE |
| 395790   | 500330.1 | 318040.3 | 384890.6 | 416569.7 | 304961.9 | 542094.2 | 435913.3 | TRUE |
| 119717.6 | 103786.5 | 50216.6  | 77099.1  | 57322.1  | 47131.6  | 86996.3  | 88240.8  | TRUE |
| 825956.8 | 858621.5 | 666375.1 | 908213.5 | 803689.5 | 742167.1 | 993081.3 | 893192.8 | TRUE |
| 164232.8 | 201379.2 | 138381.4 | 167833.5 | 157583.7 | 146637.5 | 235717.8 | 173324   | TRUE |
| 56842.5  | 60630.8  | 57680.5  | 64614.9  | 49545.7  | 49685.4  | 46046.3  | 59095.1  | TRUE |
| 1479898  | 1316204  | 1343275  | 1640293  | 1162880  | 1434293  | 1327309  | 1532236  | TRUE |
| 77420.7  | 53322    | 90399.3  | 118383.6 | 86022.5  | 81626.4  | 99404    | 104996.2 | TRUE |
| 856116.5 | 1027100  | 874203.1 | 890355   | 757575.2 | 879376.6 | 1062060  | 755644   | TRUE |
| 1413538  | 1032690  | 1481825  | 1533977  | 1405580  | 1327281  | 1219393  | 1562791  | TRUE |
| 36940.7  | 52823.9  | 71145.3  | 32889    | 39195.5  | 50415.9  | 57202.8  | 47904.2  | TRUE |
| 106036   | 119323.8 | 75905.3  | 77797.3  | 79010.6  | 88134.2  | 115737.1 | 82372.4  | TRUE |
| 43377.9  | 60092.3  | 44774.3  | 44440.4  | 48204.2  | 58297.5  | 61801.8  | 43162.3  | TRUE |
| 71832.2  | 67770.6  | 72388.6  | 62488.6  | 67118.1  | 49279.8  | 77247.6  | 64061.3  | TRUE |
| 140827.5 | 159922.2 | 139249.3 | 158315.9 | 151597.4 | 123060.6 | 196405.3 | 161598.4 | TRUE |
| 63314.3  | 79515.3  | 86050.7  | 79824.4  | 87372.2  | 79559    | 90990.4  | 66207.6  | TRUE |
| 193159.8 | 250447.1 | 193828.5 | 185096.7 | 210788.8 | 168433.1 | 234774.3 | 178459.2 | TRUE |
| 190203.3 | 152600.5 | 217403.5 | 217647.2 | 182901.3 | 159053.1 | 147998.3 | 143316.6 | TRUE |
| 31414    | 20191.8  | 29918.4  | 10412.4  | 28282.4  | 26692.5  | 21478.3  | 28432.2  | TRUE |
| 64833.4  | 45801.1  | 41882.6  | 68752.2  | 41835.8  | 57744.8  | 48268.4  | 66535.9  | TRUE |
| 58577.5  | 57587    | 62862.2  | 82564.1  | 62360.7  | 52047.9  | 72111.8  | 40479.5  | TRUE |
| 3408173  | 3982351  | 2377745  | 3056304  | 2801202  | 2541060  | 4255801  | 2816648  | TRUE |
| 692492.3 | 794858   | 587049.7 | 598585.6 | 650370.7 | 563821.3 | 788993.4 | 646209.7 | TRUE |
| 517900.6 | 428545.9 | 640766.3 | 681076.4 | 438647.7 | 514277.5 | 445197   | 457626.5 | TRUE |
| 1303699  | 1126461  | 1492225  | 1672111  | 1076832  | 1213173  | 1112464  | 1135570  | TRUE |
| 389688.9 | 336288   | 446340.3 | 489102.1 | 365200   | 428201.2 | 382653   | 386059.1 | TRUE |
| 261788.9 | 214281.4 | 249040.9 | 243354.4 | 205277.2 | 282824.2 | 212377.6 | 238755.1 | TRUE |
| 265413.7 | 275609.1 | 246505.1 | 257138.9 | 214936.3 | 203110.1 | 307583.1 | 222522.5 | TRUE |
| 244192.2 | 328551.1 | 234065.1 | 295854.5 | 267903.7 | 247443   | 348319.4 | 250267.1 | TRUE |
| 360335.5 | 310011.8 | 438963.5 | 439728   | 345243.3 | 336390.9 | 334855.8 | 351437.8 | TRUE |
| 90801.2  | 67272.3  | 99400    | 116876.9 | 81618.4  | 94225.9  | 119278.7 | 104127.2 | TRUE |
| 663757.4 | 496998.7 | 654546.4 | 867626.1 | 481388.2 | 617143.2 | 634903.6 | 632694.9 | TRUE |
| 92302.3  | 100806.6 | 80910    | 110193.8 | 99823.2  | 104965.6 | 87020.3  | 75772.4  | TRUE |
| 51972.2  | 64524.7  | 41452    | 51750.3  | 64451.3  | 51243.2  | 68249.3  | 61077.3  | TRUE |
| 311402.2 | 337080.7 | 298901   | 324738.2 | 227049.7 | 309477.5 | 331307.4 | 228800   | TRUE |
| 159904.7 | 107233.2 | 159656.5 | 171006.2 | 179008.4 | 148268.3 | 148615.9 | 158942.7 | TRUE |
| 133451.5 | 145786.1 | 88973.5  | 72691.8  | 83978.6  | 97911.8  | 76490.8  | 57956.7  | TRUE |
| 90803.6  | 79201.3  | 70012.6  | 80484.9  | 67849.3  | 60779    | 94876.2  | 69964.2  | TRUE |
| 186275.1 | 222571.9 | 225720.7 | 206394.6 | 175997.7 | 199882.8 | 198902.9 | 153077.4 | TRUE |
| 94487.4  | 79995    | 91198.4  | 67965.5  | 76928    | 90124.8  | 101066.1 | 78089.7  | TRUE |
| 97144.5  | 128263   | 105240.7 | 117030.8 | 101979.8 | 93822.8  | 144058.5 | 77196.8  | TRUE |
| 83264.9  | 111639.8 | 110464.7 | 83107.2  | 95445.4  | 73747.3  | 80030.3  | 76314.1  | TRUE |
| 115034.1 | 117649.3 | 90125.8  | 84032    | 82711.2  | 58121    | 68588.3  | 57600.5  | TRUE |

|          |          |          |          |          |          |          |          |      |
|----------|----------|----------|----------|----------|----------|----------|----------|------|
| 250594.1 | 246651.5 | 258764.8 | 287832.2 | 286711.2 | 247010.7 | 253020.4 | 258617.5 | TRUE |
| 532697.7 | 528791.2 | 455617   | 495062   | 437678.4 | 480164.1 | 562092.8 | 428368.8 | TRUE |
| 258848.1 | 192743.1 | 254026.5 | 265304.5 | 219255.3 | 262355.6 | 193081.3 | 266445.1 | TRUE |
|          |          |          |          |          |          |          |          |      |
| 101349.5 | 97303    | 53041.1  | 72383    | 70809.2  | 79032    | 111502.7 | 70390.8  | TRUE |
| 1401349  | 1676601  | 913934.2 | 1292699  | 1150720  | 901103.9 | 1885118  | 1180506  | TRUE |
| 196564.7 | 272859.1 | 142203   | 148970.7 | 181359.2 | 149594.2 | 264692.1 | 190114.6 | TRUE |
| 191947.2 | 207787.1 | 117427.9 | 144958.7 | 170610.4 | 130415.1 | 245177.2 | 144088.2 | TRUE |
| 120683.6 | 105065.8 | 194922.2 | 193706.7 | 66589.7  | 96258.9  | 105322.5 | 95576.8  | TRUE |
| 69124.2  | 75827.3  | 51050.3  | 58618.1  | 77026    | 69778    | 101276.7 | 72116    | TRUE |
| 23634.7  | 14663.8  | 12146.5  | 17106.3  | 28142.6  | 30489.8  | 39387.6  | 15072.8  | TRUE |
| 126248.5 | 212138.9 | 59765.4  | 94041    | 91201.3  | 80713.8  | 155797   | 103550.3 | TRUE |
| 140715.9 | 197174.6 | 125886.3 | 150868.3 | 163054.8 | 139202.5 | 223075.1 | 154768.5 | TRUE |
| 134731.9 | 144167.2 | 119643.2 | 154186.2 | 144590.4 | 110174.3 | 219556.7 | 140522.5 | TRUE |
|          |          |          |          |          |          |          |          |      |
| 42918.8  | 39410.4  | 32392.1  | 36630.7  | 37196.6  | 33825    | 47099.2  | 32591.7  | TRUE |
| 51689.7  | 55597.5  | 70538.6  | 57049.6  | 53204.8  | 78116    | 76106    | 66748    | TRUE |
|          |          |          |          |          |          |          |          |      |
| 41117.3  | 78626.7  | 61445.5  | 85939.3  | 66068.6  | 30398.9  | 31153    | 30907.1  | TRUE |
| 573387.2 | 639046.5 | 384545.7 | 514437.9 | 514841.9 | 465012.1 | 642738.3 | 503950.4 | TRUE |
| 395790   | 500330.1 | 318040.3 | 384890.6 | 416569.7 | 304961.9 | 542094.2 | 435913.3 | TRUE |
| 119717.6 | 103786.5 | 50216.6  | 77099.1  | 57322.1  | 47131.6  | 86996.3  | 88240.8  | TRUE |
|          |          |          |          |          |          |          |          |      |
| 75582.7  | 83239    | 39962.5  | 53240.5  | 59886.3  | 57257.9  | 91781.9  | 66216.4  | TRUE |
| 22507.6  | 8267.4   | 24731.3  | 38943.5  | 26108.5  | 33374.4  | 28487.3  | 20344.8  | TRUE |
| 856116.5 | 1027100  | 874203.1 | 890355   | 757575.2 | 879376.6 | 1062060  | 755644   | TRUE |
| 1413538  | 1032690  | 1481825  | 1533977  | 1405580  | 1327281  | 1219393  | 1562791  | TRUE |
|          |          |          |          |          |          |          |          |      |
| 36940.7  | 52823.9  | 71145.3  | 32889    | 39195.5  | 50415.9  | 57202.8  | 47904.2  | TRUE |
| 63314.3  | 79515.3  | 86050.7  | 79824.4  | 87372.2  | 79559    | 90990.4  | 66207.6  | TRUE |
| 193159.8 | 250447.1 | 193828.5 | 185096.7 | 210788.8 | 168433.1 | 234774.3 | 178459.2 | TRUE |
| 190203.3 | 152600.5 | 217403.5 | 217647.2 | 182901.3 | 159053.1 | 147998.3 | 143316.6 | TRUE |
|          |          |          |          |          |          |          |          |      |
| 31414    | 20191.8  | 29918.4  | 10412.4  | 28282.4  | 26692.5  | 21478.3  | 28432.2  | TRUE |
| 64833.4  | 45801.1  | 41882.6  | 68752.2  | 41835.8  | 57744.8  | 48268.4  | 66535.9  | TRUE |
| 58577.5  | 57587    | 62862.2  | 82564.1  | 62360.7  | 52047.9  | 72111.8  | 40479.5  | TRUE |
| 3408173  | 3982351  | 2377745  | 3056304  | 2801202  | 2541060  | 4255801  | 2816648  | TRUE |
| 692492.3 | 794858   | 587049.7 | 598585.6 | 650370.7 | 563821.3 | 788993.4 | 646209.7 | TRUE |
| 517900.6 | 428545.9 | 640766.3 | 681076.4 | 438647.7 | 514277.5 | 445197   | 457626.5 | TRUE |
| 1303699  | 1126461  | 1492225  | 1672111  | 1076832  | 1213173  | 1112464  | 1135570  | TRUE |
| 389688.9 | 336288   | 446340.3 | 489102.1 | 365200   | 428201.2 | 382653   | 386059.1 | TRUE |
| 90801.2  | 67272.3  | 99400    | 116876.9 | 81618.4  | 94225.9  | 119278.7 | 104127.2 | TRUE |
| 663757.4 | 496998.7 | 654546.4 | 867626.1 | 481388.2 | 617143.2 | 634903.6 | 632694.9 | TRUE |
| 320795.4 | 445636   | 262347   | 282378.7 | 354674   | 303260.2 | 459193   | 354916.5 | TRUE |
| 663734.9 | 699414.9 | 760458   | 809529.9 | 486759.3 | 592463.2 | 711850.2 | 604451.7 | TRUE |
| 89179.8  | 96895.8  | 47509.1  | 56501.5  | 67285.8  | 61473.1  | 94042.1  | 88636.3  | TRUE |

|          |          |          |          |          |          |          |          |      |
|----------|----------|----------|----------|----------|----------|----------|----------|------|
| 141965.8 | 114252.2 | 167189.5 | 179339.6 | 105112.9 | 144674.8 | 113416.4 | 151517.5 | TRUE |
| 133451.5 | 145786.1 | 88973.5  | 72691.8  | 83978.6  | 97911.8  | 76490.8  | 57956.7  | TRUE |
| 90803.6  | 79201.3  | 70012.6  | 80484.9  | 67849.3  | 60779    | 94876.2  | 69964.2  | TRUE |
| 186275.1 | 222571.9 | 225720.7 | 206394.6 | 175997.7 | 199882.8 | 198902.9 | 153077.4 | TRUE |
| 94487.4  | 79995    | 91198.4  | 67965.5  | 76928    | 90124.8  | 101066.1 | 78089.7  | TRUE |
| 97144.5  | 128263   | 105240.7 | 117030.8 | 101979.8 | 93822.8  | 144058.5 | 77196.8  | TRUE |
| 83264.9  | 111639.8 | 110464.7 | 83107.2  | 95445.4  | 73747.3  | 80030.3  | 76314.1  | TRUE |
| 115034.1 | 117649.3 | 90125.8  | 84032    | 82711.2  | 58121    | 68588.3  | 57600.5  | TRUE |
| 250594.1 | 246651.5 | 258764.8 | 287832.2 | 286711.2 | 247010.7 | 253020.4 | 258617.5 | TRUE |
| 336800.8 | 315665.1 | 413614   | 478286.5 | 407480.7 | 363348.1 | 352751   | 339154.3 | TRUE |
| 1013594  | 1134879  | 918867.6 | 990325.3 | 883641.9 | 1000135  | 1280256  | 862947.1 | TRUE |
| 3240855  | 2488708  | 4067355  | 3897869  | 2762846  | 2988310  | 2660608  | 2803663  | TRUE |
| 1454895  | 1049157  | 1714781  | 1745405  | 1244571  | 1351418  | 1160732  | 1341833  | TRUE |
| 70831.7  | 66811.4  | 73140.5  | 78630.9  | 88090    | 61811.2  | 64532    | 55766.8  | TRUE |
| 42487.3  | 10752.4  | 26899.1  | 38530.1  | 27728.7  | 35455.9  | 17115.6  | 29536.6  | TRUE |
| 27453.4  | 24623.1  | 10124.5  | 14446.6  | 39119.9  | 44643    | 40449.1  | 38077    | TRUE |
| 394783.5 | 309887.4 | 216421.9 | 264448.5 | 370090   | 494381.9 | 417239   | 508806.8 | TRUE |
| 231890.2 | 186559.1 | 132776.8 | 110047.8 | 192206.5 | 249901.7 | 229953.9 | 283628.3 | TRUE |
| 344806.8 | 308454.7 | 239311.9 | 242130   | 326116   | 470708.8 | 339421.8 | 374479   | TRUE |
| 6859.5   | 10631.5  | 15105.9  | 8851.9   | 5843.1   | 7186.3   | 7314.7   | 7646.8   | TRUE |
| 43117.9  | 31496.5  | 46406.3  | 48052.3  | 35531.3  | 47552.3  | 29619.4  | 27562.3  | TRUE |
| 144118.3 | 87492.1  | 98384.8  | 86096.7  | 172191.2 | 148798.8 | 97211.7  | 167218.2 | TRUE |
| 63046.7  | 38800.4  | 46557.5  | 28268.1  | 23911.3  | 37789.4  | 20767.3  | 27630.8  | TRUE |
| 18591.2  | 6220.8   | 7927.3   | 10538.6  | 17300.2  | 3999.4   | 9656.1   | 6430.6   | TRUE |
| 49783    | 46363.1  | 81109.8  | 77379.7  | 70424.6  | 82198.7  | 45349.9  | 57189.6  | TRUE |
| 433729.5 | 438909.3 | 317544.9 | 342357.7 | 498101.5 | 533924.4 | 445378.9 | 533183.4 | TRUE |
| 139685   | 88428.4  | 80429.5  | 83357.5  | 179350.8 | 161428.5 | 122012.3 | 189149.4 | TRUE |
| 80491    | 79648.1  | 65882.5  | 72716.4  | 76275.1  | 77676.5  | 77452.9  | 91254.1  | TRUE |
| 57242.3  | 8460.5   | 45408.6  | 57217.3  | 46619.9  | 38680.4  | 33761.5  | 44187    | TRUE |
| 85196.7  | 81348.6  | 64416.4  | 55395    | 84983.3  | 112555.2 | 102785.3 | 125929.3 | TRUE |
| 41107.7  | 28109.7  | 42727.7  | 61358.6  | 48118.8  | 38347.4  | 27079.6  | 53155.2  | TRUE |
| 56696.1  | 44415.2  | 47759.1  | 70090.6  | 46962.8  | 61984.2  | 57528.2  | 70920.6  | TRUE |
| 63241.6  | 53028    | 59476.2  | 61112.7  | 66263.5  | 81271.8  | 72571.4  | 76771.2  | TRUE |
| 28975.1  | 21930.2  | 40491.8  | 11858.1  | 29670    | 52669.4  | 14435.5  | 38252.7  | TRUE |
| 2537098  | 1833026  | 2656262  | 3076610  | 2790728  | 2790735  | 1922370  | 2735194  | TRUE |
| 1135909  | 1077736  | 926871.9 | 1063424  | 1203661  | 1396360  | 1133714  | 1321264  | TRUE |
| 544247.8 | 509835.6 | 441597.8 | 433260.9 | 582743.1 | 766800.5 | 591532.9 | 650304.2 | TRUE |
| 645521.3 | 566834.8 | 441795.6 | 451440.2 | 709337   | 655970.3 | 532270.6 | 664519.6 | TRUE |
| 58447.7  | 68585.3  | 33242.7  | 61146.9  | 66084.9  | 91077.4  | 129040.5 | 94937.8  | TRUE |
| 284598.2 | 269986.9 | 305642.3 | 303751.6 | 278780.1 | 309144.5 | 256676.2 | 266714.3 | TRUE |
| 33627    | 24900.4  | 31423.5  | 20738.7  | 13240    | 23765.2  | 17302.2  | 20201.3  | TRUE |
| 113473.4 | 99056.3  | 127281.1 | 150206.6 | 130680   | 132315.5 | 106960.7 | 140252.6 | TRUE |
| 41768.7  | 35118.7  | 46691.1  | 72293.4  | 56203.1  | 67595.5  | 37323.3  | 59007.2  | TRUE |

|          |          |          |          |          |          |          |          |      |
|----------|----------|----------|----------|----------|----------|----------|----------|------|
| 266147   | 185489.7 | 121317.7 | 154756.6 | 236334.6 | 311163.6 | 273527.7 | 336904.9 | TRUE |
| 611437.6 | 427254.6 | 299883.4 | 350657.3 | 576176.5 | 806908.2 | 646047.8 | 883878.1 | TRUE |
| 35535.4  | 14484.7  | 45177.5  | 44043.7  | 10451.5  | 59696.5  | 28886.1  | 32689.4  | TRUE |
| 59660    | 36052    | 110376.5 | 63550.9  | 72046.6  | 102952.8 | 66036    | 78576.4  | TRUE |
| 19745    | 43891.6  | 37367.5  | 51463.4  | 42849.7  | 13027.2  | 26601.4  | 28089.9  | TRUE |
|          |          |          |          |          |          |          |          |      |
| 127335.9 | 116753.8 | 97308.7  | 105986.8 | 89417.5  | 103313.3 | 126551.6 | 99376.6  | TRUE |
| 174279.8 | 166374.2 | 150618.5 | 150547.7 | 155016.5 | 153958.5 | 176674   | 152246.5 | TRUE |
| 651545.5 | 644489.8 | 503553.1 | 580963.6 | 537492.1 | 520652.3 | 706331.1 | 562967.8 | TRUE |
|          |          |          |          |          |          |          |          |      |
| 128897.6 | 139845.7 | 117536.7 | 128760   | 143655.4 | 109670.1 | 145649.4 | 120971.6 | TRUE |
| 34139.8  | 46485.4  | 32005.4  | 45727.1  | 42583.1  | 28645.3  | 52314.4  | 47685    | TRUE |
| 35226    | 26949.7  | 27651.1  | 33510.4  | 38101.9  | 33871    | 29004.1  | 40545.9  | TRUE |
| 28396.1  | 31040    | 18172.8  | 32244.7  | 26075.9  | 42231.8  | 33421.3  | 33737.2  | TRUE |
| 100660.9 | 96009.3  | 80463.9  | 120828.1 | 87306    | 145083.9 | 115836.1 | 100302.1 | TRUE |
|          |          |          |          |          |          |          |          |      |
| 232232.4 | 189471   | 216980.4 | 314070.4 | 161239.3 | 224594.6 | 236367.4 | 221706.8 | TRUE |
| 473820.7 | 462403.3 | 397858   | 475145.2 | 405010.3 | 430846.9 | 517790.1 | 418279   | TRUE |
| 151453   | 170456   | 112894.1 | 159256   | 140796   | 107241.4 | 141690.9 | 142149.1 | TRUE |
| 173538.1 | 219918.7 | 164799.4 | 197013.3 | 246031.6 | 153245.4 | 172250.6 | 194524.5 | TRUE |
|          |          |          |          |          |          |          |          |      |
| 117111.2 | 123797.9 | 124195.4 | 114675.1 | 106619.1 | 122300.2 | 118633.9 | 114300.6 | TRUE |
|          |          |          |          |          |          |          |          |      |
| 332647.9 | 395919.3 | 450819.4 | 460872.2 | 214624.6 | 367405.4 | 415666.8 | 374757.3 | TRUE |
| 145367.5 | 177467.4 | 166351.6 | 166630.7 | 107839.5 | 168757.5 | 176865.7 | 165631.6 | TRUE |
| 263393.9 | 229678   | 350346.2 | 317697.2 | 228784.7 | 316068.7 | 237725.1 | 289836.9 | TRUE |
| 27281.4  | 23882.7  | 28513.8  | 27047.3  | 22274.8  | 9802.4   | 26663.1  | 27850.4  | TRUE |
| 117182.4 | 143145.1 | 94485    | 121967   | 131251.8 | 105247.9 | 152249.3 | 144163   | TRUE |
| 182123.9 | 227024.8 | 191626.4 | 223127.6 | 181227.5 | 166725   | 183396.9 | 196133.4 | TRUE |
| 151067   | 133037.4 | 174722.7 | 194429.6 | 101745.3 | 148262.5 | 135180.7 | 151918.5 | TRUE |
|          |          |          |          |          |          |          |          |      |
| 64994.5  | 72777.6  | 47024.3  | 59582.5  | 59345.2  | 52109    | 70676.9  | 55146.1  | TRUE |
| 107163.3 | 109716.7 | 88915.4  | 117359.5 | 108981.8 | 95025.6  | 136697.2 | 110192.4 | TRUE |
| 183647.6 | 192267.6 | 183716.1 | 190554   | 221525.7 | 154767   | 221978.7 | 191911.9 | TRUE |
| 106479.5 | 103645.2 | 83127    | 116260   | 113250.9 | 96994.1  | 134829.3 | 108889.5 | TRUE |
| 86740    | 96687.5  | 79532.6  | 140281.1 | 111164.8 | 111008.7 | 147227.7 | 140269.3 | TRUE |
| 208188.3 | 264944.7 | 202010.7 | 295346.3 | 247313.3 | 216788   | 279203.3 | 221432   | TRUE |
| 527272.8 | 604387.5 | 334774.8 | 526081.3 | 567776.8 | 334933.6 | 695699.8 | 583755.5 | TRUE |
| 257549.2 | 217685.6 | 305450   | 304649.7 | 211300.2 | 270456.7 | 273615.7 | 285507.6 | TRUE |
| 318045.3 | 219166   | 315023.7 | 329155.1 | 274195   | 300627.8 | 242393   | 307060.9 | TRUE |
| 47471.3  | 57237.7  | 33127    | 39385.5  | 34659.6  | 43907    | 54080.9  | 50369.4  | TRUE |
| 27632.3  | 15958.4  | 25457.3  | 33615.6  | 57991.3  | 33126.9  | 35685.4  | 48403.9  | TRUE |
| 385943.7 | 358591.5 | 448325.1 | 504076.3 | 487102.9 | 454446.9 | 466926.4 | 470275.2 | TRUE |
| 107525.6 | 112130.7 | 103697.8 | 122461.3 | 116377.4 | 104732.7 | 114232.7 | 131023.5 | TRUE |
| 61716.3  | 64817    | 58049.6  | 55884.1  | 65141.6  | 57478.6  | 62336.9  | 71889.1  | TRUE |
| 454389.9 | 404035.8 | 432365.2 | 472380.4 | 457464.6 | 443508.2 | 446338.2 | 439018.1 | TRUE |
| 378045.6 | 348366.4 | 358890.5 | 380861.5 | 331646.6 | 362905   | 355954.6 | 334881.3 | TRUE |

|          |          |          |          |          |          |          |          |      |
|----------|----------|----------|----------|----------|----------|----------|----------|------|
| 587828.5 | 531365.1 | 587846.1 | 743020.3 | 641866.3 | 729489.1 | 713117.4 | 710274.8 | TRUE |
| 247195.8 | 145965.9 | 261781.4 | 320405.7 | 257331.9 | 281321.7 | 187967.1 | 249431.4 | TRUE |
| 35461.2  | 28419.7  | 29130.7  | 14867.6  | 28770.9  | 19106.8  | 14215.8  | 30282.6  | TRUE |
| 31164.8  | 37285.7  | 31329.4  | 35953.5  | 42288.6  | 37608.6  | 39867.2  | 43453.4  | TRUE |
| 36939.6  | 9419.9   | 25982.5  | 37345.2  | 31781.9  | 31258.4  | 38679    | 39187.2  | TRUE |
| 20987.3  | 13465.2  | 22822.8  | 24894    | 16659.2  | 22801.5  | 13008    | 21983.6  | TRUE |
| 23782.8  | 26787.9  | 33934.2  | 32896.2  | 35061    | 20317.5  | 10670.8  | 22209.2  | TRUE |
| 21412.6  | 19196.2  | 4615.1   | 12199.7  | 19475.2  | 9050.2   | 10124    | 13895.8  | TRUE |
| 6492826  | 6212622  | 5483758  | 6333282  | 6748732  | 5763977  | 6437094  | 6793570  | TRUE |
| 199501.3 | 222437.7 | 204978.8 | 253946.2 | 213188.8 | 211673.9 | 205387.5 | 222906.6 | TRUE |
| 143817.3 | 136919.5 | 97345.1  | 151899.2 | 150616.7 | 148848.5 | 160043.6 | 172288.1 | TRUE |
| 68515.2  | 111321.7 | 78602.7  | 125050.2 | 163261.8 | 59216.7  | 38552.1  | 54984.6  | TRUE |
| 133254.3 | 93550.9  | 87947.9  | 132428.3 | 109902.4 | 114570.3 | 129773.2 | 151959.3 | TRUE |
| 561608   | 518652.1 | 588224.4 | 586401.2 | 533981.4 | 529442.6 | 525480.2 | 515349   | TRUE |
| 21484127 | 20427761 | 20784527 | 21094280 | 18584708 | 23181956 | 21534666 | 22338411 | TRUE |
| 79312.8  | 231042.6 | 120036.9 | 206613.1 | 207577   | 52908.5  | 43647.4  | 70517.6  | TRUE |
| 71468.2  | 131484.3 | 92907.8  | 137702   | 122675.4 | 48429.9  | 33500.5  | 36021.1  | TRUE |
| 154126.9 | 176490.4 | 103832.8 | 151529.9 | 154100.9 | 108041.7 | 170038.2 | 186497.7 | TRUE |
| 2649275  | 2495854  | 2113954  | 2499363  | 2792563  | 2288143  | 2546639  | 2913892  | TRUE |
| 215677.1 | 240477   | 192379.9 | 214361.5 | 239811.9 | 186680.4 | 175730.8 | 221063   | TRUE |
| 1288927  | 1235374  | 938917   | 1219961  | 1290349  | 1048010  | 1254183  | 1393433  | TRUE |
| 2049464  | 1817184  | 1548555  | 1823931  | 2045137  | 1612087  | 1992360  | 2164268  | TRUE |
| 1993213  | 1964229  | 1462167  | 1860857  | 2179587  | 1682474  | 2013045  | 2150383  | TRUE |
| 353831.5 | 379442   | 262071.3 | 353069.5 | 377113.9 | 329063.5 | 352262.9 | 371274.2 | TRUE |
| 729920.4 | 778981.8 | 844713.3 | 1112278  | 1172825  | 960843.5 | 1023215  | 1173610  | TRUE |
| 7142.4   | 11642.3  | 6618.8   | 7063.5   | 6696.6   | 16051.5  | 20266.5  | 10014.7  | TRUE |
| 88077.8  | 89480.3  | 71849    | 93130.5  | 111714.6 | 82828.9  | 92803.3  | 102512.5 | TRUE |
| 39816.6  | 35323.4  | 27119.3  | 44522.3  | 41193.4  | 42160.8  | 30507.3  | 45042.3  | TRUE |
| 67700.9  | 140245.1 | 82470.6  | 135715.4 | 146941.4 | 55046.2  | 33654.7  | 58012.7  | TRUE |
| 48802.1  | 143162.4 | 67539    | 122996.9 | 148184.8 | 17537.2  | 13163.2  | 22572.2  | TRUE |
| 79494.7  | 68027.2  | 58136.4  | 81412.3  | 85730.6  | 73665.4  | 112028.6 | 90421.8  | TRUE |
| 67161.2  | 72391.2  | 52282.4  | 55694.2  | 72151.4  | 63472.8  | 81209.9  | 92444.1  | TRUE |
| 981915.2 | 955316.7 | 999168.8 | 1050748  | 900398.2 | 998727   | 1077923  | 953392.8 | TRUE |
| 2296404  | 2169551  | 2356420  | 2357978  | 2078747  | 2380537  | 2507002  | 2284576  | TRUE |
| 770848   | 807666.4 | 813284.3 | 797840.8 | 633463.9 | 842629.8 | 868928.1 | 806726.9 | TRUE |
| 1637748  | 1687170  | 1551388  | 1762253  | 1388378  | 1652881  | 1889513  | 1729476  | TRUE |
| 410601.3 | 456435   | 394182.6 | 450112.9 | 375715.6 | 428324.8 | 447990.5 | 449751.4 | TRUE |
| 49474.3  | 114076   | 65029.3  | 98887.2  | 71275.2  | 38985.7  | 24929.3  | 28388.2  | TRUE |
| 180133.8 | 187659.4 | 165646.7 | 190113.7 | 218507.2 | 165362.8 | 176799.3 | 178830.1 | TRUE |
| 20535255 | 21168786 | 21775222 | 20533060 | 19493024 | 21844043 | 21727318 | 21158954 | TRUE |
| 440922.8 | 468375.2 | 501186.3 | 595800.1 | 574946.6 | 506568.2 | 528221.5 | 572674.6 | TRUE |
| 614194.1 | 643300.3 | 599380   | 596478.8 | 697188.3 | 616926.3 | 655039.9 | 672291.9 | TRUE |
| 533420.8 | 484093.4 | 492882.1 | 536020.9 | 517672.6 | 454754.5 | 549844.6 | 530336.4 | TRUE |
| 2428870  | 2459094  | 2301515  | 2380963  | 2266351  | 2333526  | 2377434  | 2314176  | TRUE |

|          |          |          |          |          |          |          |          |      |
|----------|----------|----------|----------|----------|----------|----------|----------|------|
| 152493.7 | 175830.3 | 131687.8 | 132980.1 | 177016   | 139469   | 171617.9 | 188622.3 | TRUE |
| 190116.8 | 175525   | 206122.2 | 195388.4 | 393646.2 | 361836.6 | 313748.9 | 356551.2 | TRUE |
| 130355.5 | 196642.4 | 96860.8  | 188405.2 | 156073.6 | 117089.2 | 268225   | 83658.1  | TRUE |
| 97373.1  | 74346.8  | 65196.8  | 76167.5  | 73573.8  | 63254.4  | 84996.7  | 81819.4  | TRUE |
| 127913   | 107412.1 | 155343.9 | 165926.8 | 162671.2 | 165834.9 | 160871.3 | 180276.5 | TRUE |
| 68225.6  | 47713.6  | 62064.5  | 50472.5  | 49950.3  | 47481.6  | 63401.1  | 54178.5  | TRUE |
| 101519.5 | 99197.8  | 86199.2  | 97628.2  | 107631.7 | 121254   | 93054.5  | 91715.3  | TRUE |
| 695806.1 | 560582.7 | 615287.4 | 541014.8 | 619735.1 | 651047.3 | 597319.5 | 663630.3 | TRUE |
| 303904.6 | 284071.9 | 265019.7 | 330944.2 | 365679.9 | 281301.1 | 295913.2 | 320477.9 | TRUE |
| 127848.6 | 119928.5 | 168815.7 | 185422.5 | 202602.5 | 190726.8 | 182767.6 | 169207.7 | TRUE |
| 78310.4  | 69489.9  | 110253.4 | 102365.7 | 100889.9 | 99863.6  | 106219.9 | 93471.5  | TRUE |
| 44650    | 97425.6  | 70042.5  | 90445.5  | 111608.1 | 20642.1  | 32711.8  | 24076.7  | TRUE |
| 63958.6  | 44047.5  | 53160.2  | 67068.8  | 54047.3  | 55667.4  | 72074    | 55262.4  | TRUE |
| 127290.7 | 119102.5 | 133580.2 | 128870.1 | 136850.9 | 138997.6 | 130428.1 | 143958.4 | TRUE |
| 36771.7  | 35453.3  | 46921.6  | 51708    | 34365.6  | 9403.5   | 23057.4  | 10920.3  | TRUE |
| 127280.9 | 139761.5 | 94282.6  | 114173.2 | 116736.1 | 98255.5  | 133799   | 128341.7 | TRUE |
| 48265.4  | 41762.8  | 43017.2  | 33756.1  | 41974.9  | 33702.7  | 41617.7  | 48237.4  | TRUE |
| 136524   | 95634.4  | 85208.8  | 160285.6 | 126722.2 | 158889   | 154436.7 | 177399.8 | TRUE |
| 103536.3 | 102759.1 | 111059   | 120640.7 | 89905.1  | 183417.3 | 146388.7 | 123326.5 | TRUE |
| 109819.5 | 78012.9  | 67745.8  | 90463.7  | 89669.5  | 73883    | 91595.6  | 98546.2  | TRUE |
| 758631.9 | 763516.8 | 644523.7 | 804313.7 | 966431.6 | 666651.8 | 776109   | 942386   | TRUE |
| 108097.2 | 123443.6 | 91085    | 110233.3 | 132767.2 | 109834.6 | 121146.9 | 112993.7 | TRUE |
| 507751.2 | 465267   | 422112.3 | 494762.2 | 565978.3 | 441621.6 | 515095   | 572786.1 | TRUE |
| 88550.9  | 80772.1  | 74712.7  | 82644.7  | 96691.7  | 73170.5  | 91829    | 109841.5 | TRUE |
| 121269   | 107564.8 | 97672    | 89737.9  | 127624.8 | 96249.2  | 114136.8 | 96078.7  | TRUE |
| 105412   | 110185.4 | 128928.5 | 93386.2  | 109284.4 | 138839.7 | 116868.2 | 103714.7 | TRUE |
| 32043.2  | 51001.5  | 35953.6  | 27113.1  | 60329.5  | 12177.1  | 12490.6  | 8054.7   | TRUE |
| 44906.5  | 101165.7 | 46491.2  | 70824.9  | 95005.6  | 18048.3  | 14337.4  | 31313.4  | TRUE |
| 47680.7  | 37513.4  | 33100.9  | 53565.2  | 43062    | 40510.4  | 40553.9  | 48589.5  | TRUE |
| 16218.9  | 22153.8  | 24878.7  | 36740.8  | 46909.8  | 19178.4  | 6154.9   | 8298.9   | TRUE |
| 134164   | 103128.4 | 81224.5  | 115253.4 | 120167.4 | 117348.1 | 144600.8 | 158024.7 | TRUE |
| 22934.2  | 30570.4  | 18192.8  | 7235.8   | 26257.4  | 20870.1  | 26829.9  | 38095.3  | TRUE |
| 169816   | 183537.5 | 177448.4 | 157947.6 | 144504.8 | 159444.9 | 178043.6 | 156744.9 | TRUE |
| 437088   | 506156.4 | 481338.6 | 479555.2 | 372792   | 429631.9 | 488661.7 | 442464.3 | TRUE |
| 56232.3  | 40771    | 38453.6  | 47122.2  | 51336.4  | 70640.8  | 41970.9  | 66380    | TRUE |
| 25568.4  | 32908.7  | 20642.9  | 33037.8  | 12699.4  | 36728.7  | 27161.4  | 22805.1  | TRUE |
| 14152.3  | 18760    | 9340.9   | 10239    | 15622.9  | 7647.6   | 17837    | 12081.4  | TRUE |
| 201379.6 | 252045.8 | 133211.2 | 150344.9 | 186539.8 | 148846.3 | 175599.6 | 189843.4 | TRUE |
| 239255.4 | 327506.4 | 193322.9 | 222851.4 | 238138.5 | 173379.9 | 321463   | 254536.6 | TRUE |
| 3409207  | 3757455  | 3339634  | 4126192  | 5047524  | 3516765  | 4136579  | 4529032  | TRUE |
| 6185016  | 7260381  | 6952981  | 6923476  | 5675384  | 6296303  | 7665648  | 6620999  | TRUE |
| 40620.8  | 35462.2  | 51980.3  | 31924.7  | 25729    | 37432.2  | 41542    | 38275.1  | TRUE |
| 138029.1 | 120850.8 | 89475.9  | 273501.5 | 136801.8 | 89380.8  | 158731.5 | 109793.3 | TRUE |
| 88014.8  | 100876.1 | 49562.6  | 224680.1 | 94942.8  | 49674.7  | 112235.3 | 94460.8  | TRUE |
| 60833.2  | 68879.5  | 49976.2  | 58418.2  | 66595.9  | 62966.3  | 57738.4  | 74991.3  | TRUE |

|          |          |          |          |          |          |          |          |      |
|----------|----------|----------|----------|----------|----------|----------|----------|------|
| 41680.9  | 75949.2  | 36239.7  | 85051.4  | 72632.9  | 27455.5  | 45034    | 42181.9  | TRUE |
| 97406.6  | 75970.7  | 95971.6  | 94993.5  | 62656.9  | 126428.6 | 93831.3  | 142578.7 | TRUE |
| 43090.6  | 46596    | 57492.9  | 56202.6  | 42979.7  | 62585.4  | 44811.7  | 61795.7  | TRUE |
| 113459.9 | 119346.3 | 113233.8 | 65668.3  | 95916.2  | 69112    | 69645.1  | 82426.2  | TRUE |
| 92723.9  | 73355.8  | 48233.2  | 48645.4  | 52991.8  | 60542.2  | 62230    | 79147    | TRUE |
| 180146.1 | 164619.1 | 179553.9 | 129764   | 238125.5 | 182606.7 | 181240.6 | 219298.4 | TRUE |
| 294961.1 | 274308.4 | 297183.6 | 124003.2 | 399676.7 | 305478.2 | 299999.6 | 383440.9 | TRUE |

|         |         |         |         |         |         |         |         |      |
|---------|---------|---------|---------|---------|---------|---------|---------|------|
| 27727.4 | 31271.4 | 37170.3 | 40899.4 | 31987.2 | 40515.3 | 45691.3 | 29686.4 | TRUE |
| 27910.3 | 26611.4 | 24838.4 | 24195.2 | 22259.2 | 26294.6 | 35593.7 | 29770.6 | TRUE |

|         |         |         |         |         |         |         |         |      |
|---------|---------|---------|---------|---------|---------|---------|---------|------|
| 41609.7 | 35497.5 | 49806.7 | 56092.2 | 55156.1 | 48661.6 | 56139.3 | 42429.7 | TRUE |
| 27259.7 | 41674.3 | 27937   | 36385.5 | 28466.7 | 32764.4 | 26797.1 | 28648.2 | TRUE |
| 28563.6 | 26723.5 | 31171.7 | 32237.6 | 21600.1 | 33101.1 | 34890.3 | 27070.5 | TRUE |

|          |          |          |          |          |          |          |          |      |
|----------|----------|----------|----------|----------|----------|----------|----------|------|
| 219728.5 | 285120.7 | 149786.8 | 232528.4 | 203276.6 | 158659.1 | 251834.1 | 191191   | TRUE |
| 90239.2  | 113898.8 | 104778.9 | 95396.6  | 111375.5 | 122027.6 | 129881.8 | 111435.8 | TRUE |

|          |          |          |          |          |          |          |          |      |
|----------|----------|----------|----------|----------|----------|----------|----------|------|
| 38214.6  | 59693.2  | 78870.3  | 103613.3 | 106394.3 | 29613.8  | 24851.4  | 30145.2  | TRUE |
| 100411   | 109473.8 | 116308.2 | 113004.5 | 116982.2 | 96070.1  | 97300.1  | 89167.3  | TRUE |
| 58939.7  | 31504.5  | 47528.7  | 52793.9  | 50409.6  | 65203.2  | 57431.4  | 70149.8  | TRUE |
| 83246.6  | 59411.4  | 68002.4  | 76701.5  | 66193.5  | 99773.9  | 84996.1  | 105176.6 | TRUE |
| 81783.8  | 75830.2  | 67342    | 79544.1  | 94312.2  | 75689.8  | 83220.8  | 94567    | TRUE |
| 56201.3  | 51442.7  | 60991.8  | 86855.4  | 60930.4  | 53845.3  | 92191.5  | 82283.6  | TRUE |
| 509073.8 | 439515.6 | 439965.9 | 539289.5 | 444287.5 | 645874.4 | 670410.8 | 683771.3 | TRUE |
| 846560.4 | 694950.5 | 678541.9 | 1028385  | 944440.6 | 1191401  | 1094368  | 1111222  | TRUE |
| 463387.3 | 494081.8 | 407494.4 | 695929.5 | 671787.9 | 557542.7 | 590494.4 | 601277.4 | TRUE |
| 169198.8 | 152553.4 | 182584.2 | 181228.8 | 251618.4 | 251995   | 279695   | 290884.8 | TRUE |
| 410859.7 | 343753.1 | 270805.9 | 302815   | 464785.3 | 479273.6 | 418137.4 | 475605.3 | TRUE |
| 1212992  | 1026115  | 1080146  | 1027661  | 1575875  | 1271586  | 1135266  | 1255088  | TRUE |
| 177328.4 | 131713.2 | 189432.1 | 217647.5 | 184603.8 | 196851.1 | 133637   | 176685.9 | TRUE |
| 44451.9  | 47735.4  | 51026.3  | 28602.7  | 40752.8  | 38362.6  | 41479.2  | 46571.7  | TRUE |
| 56181.8  | 53549.2  | 40807.3  | 32521.9  | 55522.2  | 37340.4  | 38270.7  | 44683.5  | TRUE |
| 83524.5  | 77811.6  | 67186.1  | 86969.5  | 85568.5  | 85565    | 90746.1  | 82022    | TRUE |

|          |          |          |          |          |          |          |          |      |
|----------|----------|----------|----------|----------|----------|----------|----------|------|
| 49216.1  | 9500.6   | 26148.5  | 30950.1  | 43799.9  | 43938.5  | 47002.7  | 50025.5  | TRUE |
| 66331.5  | 48698.8  | 45815.8  | 75726.6  | 66643.4  | 76318.5  | 63366.9  | 75099.3  | TRUE |
| 48895    | 37069.4  | 42112.6  | 52671.6  | 40363.1  | 76220.3  | 38764.7  | 50731.7  | TRUE |
| 2763396  | 1684062  | 3115340  | 2949538  | 2749683  | 3346878  | 1886115  | 2591024  | TRUE |
| 693007.6 | 499744.1 | 783193.3 | 663664.2 | 653228   | 823701.7 | 532440.7 | 698909   | TRUE |
| 1854551  | 1516264  | 1354417  | 1378121  | 2199993  | 1939267  | 1856151  | 1975166  | TRUE |
| 79679.2  | 56085    | 73174    | 70860.2  | 69084.7  | 85976.2  | 39771.1  | 89356.6  | TRUE |
| 154862   | 126347.4 | 184977.2 | 173304.8 | 166853   | 191112.3 | 151619.7 | 142851.8 | TRUE |
| 95764.9  | 72170.3  | 112153.6 | 110654.1 | 74070.8  | 101620.2 | 89437.5  | 89490.5  | TRUE |
| 176196.5 | 149989.4 | 188848.4 | 188980.5 | 184172.3 | 222596.2 | 138828.3 | 174688.9 | TRUE |
| 160138.3 | 81175.9  | 170346.6 | 192651   | 143168.6 | 183320.1 | 129524.7 | 134576   | TRUE |
| 430197.5 | 308482.5 | 490752.7 | 451855.5 | 468864.2 | 506848.9 | 393333.4 | 491366.4 | TRUE |
| 687602.8 | 588606.1 | 597404.5 | 564188.3 | 890842.5 | 631433.9 | 602857.3 | 798079.9 | TRUE |
| 325868.5 | 286500.6 | 233344.5 | 271428   | 423680   | 323253.3 | 350985.1 | 383356.5 | TRUE |
| 109917.4 | 109073   | 91761.5  | 116415.7 | 135143.8 | 76194.6  | 80871    | 86138.5  | TRUE |
| 195823.5 | 181506.6 | 219127.7 | 219585.8 | 212899.1 | 184404.8 | 201058.3 | 206897.3 | TRUE |
| 45546.5  | 33779.2  | 34017.1  | 35902.9  | 37678.8  | 31026.2  | 28490.8  | 31876.1  | TRUE |
| 81195.7  | 53600    | 51024.1  | 81831.4  | 52922.7  | 66571.1  | 77901.3  | 78113.1  | TRUE |
| 238268.2 | 232106.5 | 162726.6 | 207754.1 | 242203.4 | 199969.6 | 178280.5 | 227457.3 | TRUE |
| 528569.1 | 590392.6 | 487665.5 | 557226.7 | 475954.7 | 1032706  | 536559.3 | 513160.1 | TRUE |
| 873733.6 | 997586.6 | 755462.5 | 858903   | 838545.5 | 1029059  | 937092.2 | 874272.4 | TRUE |
| 116590.7 | 85023.3  | 104774.4 | 131209   | 105062.5 | 105996.6 | 96705.9  | 108219.9 | TRUE |
| 648165.9 | 598377   | 770108.1 | 715390.2 | 607687.8 | 782936   | 639591   | 682317.8 | TRUE |
| 74830.1  | 90481.9  | 94209.9  | 115364.9 | 89047.5  | 94876.1  | 91959.6  | 90050.7  | TRUE |
| 206386.7 | 143898.7 | 153688.3 | 177814   | 140307.8 | 191473.5 | 172850.2 | 166377.1 | TRUE |
| 1575332  | 1266537  | 2425799  | 1787462  | 1789973  | 1573195  | 1412382  | 1672645  | TRUE |
| 312078.8 | 239826.6 | 326650.3 | 307232.1 | 309014.2 | 317433.4 | 241870.7 | 278073.6 | TRUE |
| 6338169  | 5731948  | 15943554 | 4648855  | 5811676  | 6240855  | 6291196  | 6507318  | TRUE |
| 77298.9  | 113121.3 | 81143.9  | 115084.1 | 93550.9  | 69154.9  | 65425.6  | 61631.6  | TRUE |
| 70305.5  | 46455.2  | 78898.4  | 67242.3  | 83932.9  | 77541.2  | 58922    | 73307.9  | TRUE |
| 1507847  | 1534113  | 1276226  | 1247211  | 1835617  | 1928507  | 1651110  | 1832737  | TRUE |
| 237801.6 | 180694.8 | 181733.1 | 203646.5 | 195457.3 | 178982.8 | 179246   | 206464.5 | TRUE |
| 467648   | 421606.4 | 403840.9 | 448391.9 | 416999.8 | 399802.2 | 399950.1 | 439174.7 | TRUE |
| 270489.9 | 265283.6 | 316980.7 | 407649.1 | 370534.9 | 320056   | 349564.2 | 335548.7 | TRUE |
| 622173.4 | 617471.7 | 670469.6 | 740612.3 | 817923.5 | 694412.5 | 775929.2 | 835066.8 | TRUE |
| 334788.5 | 299710.3 | 411515   | 535244   | 482458.1 | 479162.3 | 433498.2 | 509238.1 | TRUE |
| 697503.8 | 603053.8 | 892061.5 | 1078143  | 1069805  | 920591   | 909764.1 | 1064182  | TRUE |



|          |          |          |          |          |          |          |          |      |
|----------|----------|----------|----------|----------|----------|----------|----------|------|
| 34387.5  | 36478.8  | 30735.2  | 28306.9  | 50778.8  | 31394.1  | 30369.7  | 35976.1  | TRUE |
| 315962.8 | 251171.9 | 259802.7 | 302283.5 | 326970.9 | 288011.9 | 315298.9 | 328623.5 | TRUE |
| 105957.7 | 293250.5 | 182794.7 | 326260.3 | 358921   | 46196.2  | 48854.9  | 52178.4  | TRUE |
| 123689.5 | 373524.2 | 199609.7 | 364912.4 | 409967.5 | 47657.9  | 23249.3  | 56071.8  | TRUE |
| 298383.3 | 271407.9 | 307303.6 | 313911.4 | 286976.8 | 330638.6 | 319268.6 | 343510.1 | TRUE |
| 316752.1 | 305410.9 | 310435.1 | 316290.2 | 278617   | 316754.6 | 298216.9 | 307706.8 | TRUE |
| 3311578  | 3065129  | 2778854  | 3085376  | 3186874  | 3770180  | 3612440  | 3796757  | TRUE |
| 1792746  | 1741910  | 1692718  | 1690234  | 1724869  | 1998171  | 1922437  | 2148432  | TRUE |
| 170558.3 | 153003.9 | 154199   | 142327.3 | 153008.5 | 166409.8 | 162213.9 | 184149.3 | TRUE |
| 78711.8  | 231544.2 | 134265   | 233424.7 | 227504.2 | 34034.6  | 38963.3  | 38414    | TRUE |
| 55749.3  | 171411.4 | 74585.6  | 191636.1 | 192592.9 | 26187.5  | 20888.7  | 14008.4  | TRUE |

|          |          |          |          |          |          |          |          |      |
|----------|----------|----------|----------|----------|----------|----------|----------|------|
| 3588493  | 3189698  | 2619220  | 2728132  | 3994796  | 3664211  | 3286061  | 3646359  | TRUE |
| 176243.1 | 172989.1 | 199548.6 | 186875   | 187149.1 | 218817.6 | 176678.9 | 188938.9 | TRUE |
| 1052755  | 938651.2 | 722004.4 | 720803   | 931153.1 | 694613.9 | 668447.2 | 925988.4 | TRUE |
| 1037917  | 1099969  | 1069362  | 936432.1 | 1016283  | 1102813  | 1036331  | 1013258  | TRUE |
| 99090.6  | 98858.3  | 104597   | 90724.6  | 100458.1 | 110376   | 106083.1 | 109944   | TRUE |
| 135714.2 | 114679.6 | 115555.7 | 118253.3 | 120257.3 | 146562.6 | 118287.1 | 141040.2 | TRUE |
| 162524.5 | 133355.3 | 147197.6 | 147407.2 | 171122.8 | 143588.9 | 140636.5 | 142294.8 | TRUE |
| 272545.4 | 248898.7 | 230472.9 | 295677.3 | 265495.7 | 272763.2 | 256697.6 | 273040.6 | TRUE |
| 382280.2 | 306280.7 | 350357   | 449080.7 | 371834.4 | 388130.5 | 359686.7 | 416650.4 | TRUE |
| 288852.1 | 234619.3 | 253171.8 | 325082.1 | 276939   | 303385.5 | 298662.3 | 281788.9 | TRUE |
| 223658.3 | 193155.7 | 207233.3 | 264345.6 | 230378.7 | 229830.5 | 255161.3 | 262243.3 | TRUE |
| 278064   | 192963.7 | 261378.5 | 297081.5 | 296121.4 | 272733.1 | 268690.2 | 271844.5 | TRUE |
| 874571.2 | 675668.4 | 767049.4 | 953032.1 | 878190.5 | 844411.8 | 793843.3 | 858081.6 | TRUE |
| 32755.4  | 32210.2  | 29256.6  | 32846.9  | 33149.2  | 37529.7  | 37718.9  | 41437.6  | TRUE |
| 383435.7 | 334131.4 | 346322.9 | 461681.7 | 352446.6 | 383062.4 | 341273.6 | 385918.5 | TRUE |
| 1063487  | 886018.3 | 913637.5 | 1109942  | 1033585  | 997520.8 | 980874   | 979500.3 | TRUE |
| 141002.6 | 87846.8  | 146784.3 | 176864.4 | 145450.5 | 132106.2 | 135217.3 | 141566.7 | TRUE |
| 95915.5  | 173959.2 | 160450.8 | 154322.5 | 125714.5 | 114416.6 | 92554.4  | 102059.9 | TRUE |
| 113077.3 | 252680   | 141711.3 | 259403.9 | 262979.1 | 38909.9  | 40468.6  | 57718.9  | TRUE |
| 34430.5  | 44049.8  | 27845    | 53571    | 45223.2  | 32624.8  | 40773.7  | 40947    | TRUE |
| 50256.3  | 52670.4  | 43756.3  | 67508.6  | 65276.6  | 43901.3  | 46410.2  | 53874.1  | TRUE |
| 59007.5  | 109646.9 | 44957.3  | 65539.2  | 85343.5  | 83801.5  | 83696.2  | 92586.1  | TRUE |
| 23635.2  | 43670.9  | 22429    | 41399    | 32227.1  | 25440.2  | 38247.7  | 43544    | TRUE |
| 107294.9 | 103804.8 | 133054.5 | 95714.5  | 107619.9 | 144031.9 | 127877.6 | 149910.2 | TRUE |
| 76126.2  | 68877.6  | 50120.8  | 97459.4  | 101152.5 | 70758.5  | 88227    | 112740.3 | TRUE |
| 196695.5 | 221600.6 | 251664.1 | 217234.2 | 166110.4 | 188605.8 | 251350.8 | 221554.1 | TRUE |

|          |          |          |          |          |          |          |          |      |
|----------|----------|----------|----------|----------|----------|----------|----------|------|
| 455562   | 449630.2 | 309187   | 264623   | 249660.4 | 364593.3 | 340875.8 | 266944.5 | TRUE |
| 91439.3  | 60538.2  | 76978.3  | 42552.4  | 61987.6  | 69502.8  | 60350.8  | 52777.4  | TRUE |
| 451891.9 | 364434.2 | 514830.9 | 436872.2 | 403189   | 534873.9 | 459796.6 | 386517   | TRUE |

|          |          |          |          |          |          |          |          |      |
|----------|----------|----------|----------|----------|----------|----------|----------|------|
| 806412.1 | 654387.2 | 994675.2 | 894822   | 649088.6 | 1082148  | 789752.4 | 651816.9 | TRUE |
| 1445995  | 1272735  | 1733028  | 2157603  | 1225662  | 2065275  | 1546110  | 1352411  | TRUE |
| 227073.6 | 184653.9 | 226151.6 | 222874.5 | 173589.4 | 243594.2 | 224961.2 | 207974.4 | TRUE |
| 328804.3 | 229216.9 | 271611.3 | 246128.8 | 362916.3 | 270613.3 | 269150.2 | 266156.1 | TRUE |
| 791624.4 | 520349.8 | 672950.3 | 619828.2 | 995386.8 | 765652.8 | 587833.1 | 669529.9 | TRUE |
| 3075451  | 2022649  | 2633875  | 2426970  | 3429984  | 2904707  | 2322565  | 2764958  | TRUE |
| 146530.4 | 175744.9 | 162031.3 | 182747   | 263268.5 | 121162.3 | 98066.7  | 140585.9 | TRUE |
| 146342.8 | 130067.9 | 152219.8 | 250836.7 | 160915.7 | 144443   | 174048.4 | 157659   | TRUE |
| 726028.2 | 577337   | 500104.3 | 528044.5 | 540250.5 | 468590.7 | 499883.9 | 586353.7 | TRUE |
| 476185.9 | 468744   | 330600.7 | 333228.2 | 328931.5 | 323175.3 | 346780.6 | 353409.9 | TRUE |
| 649029.8 | 552435.1 | 689471.6 | 700433.6 | 653736.7 | 758075.9 | 598631.6 | 616288.4 | TRUE |
| 102998.1 | 71111    | 81374.7  | 102595.8 | 78352.1  | 107598.2 | 100266.1 | 94296.5  | TRUE |
| 1081708  | 1011057  | 1044350  | 1106401  | 1097520  | 1090016  | 1110374  | 1015819  | TRUE |
| 726692.8 | 720097.4 | 732603.4 | 682782.5 | 718924.9 | 761768.6 | 706544.5 | 742315.4 | TRUE |
| 123099.2 | 91362.3  | 94840.6  | 137449.2 | 116789.9 | 90840.5  | 86511.5  | 111272.6 | TRUE |
| 28133.1  | 14944.5  | 20419    | 42461.5  | 36952.9  | 24478    | 28087    | 42437.1  | TRUE |
| 188592.2 | 174057.2 | 224627.3 | 189611   | 197327.6 | 218763.9 | 207412.9 | 200155.4 | TRUE |
| 205683.2 | 207107.4 | 210621.2 | 249286.7 | 198691.2 | 222665.4 | 255698.3 | 233089.7 | TRUE |
| 91560.6  | 105366.4 | 119921.1 | 97201.6  | 104370.2 | 122070   | 101909.2 | 101697.3 | TRUE |
| 11869.5  | 13773.6  | 25106.7  | 9373.4   | 9081.2   | 12087.3  | 10909.7  | 29120.4  | TRUE |
| 123563   | 130505.9 | 143166   | 90055    | 117759.4 | 116281.9 | 129304.4 | 109111.4 | TRUE |
| 83950.1  | 80488.2  | 107235.7 | 82903.5  | 91541.2  | 91095    | 99277.4  | 95440.4  | TRUE |
| 188383.2 | 199305.8 | 228090.1 | 207218.2 | 217277.1 | 226220.1 | 205490.1 | 200002.3 | TRUE |
| 104549.5 | 81370.7  | 118950   | 123742.4 | 126738   | 135633.1 | 101539.3 | 123943.8 | TRUE |
| 59040.4  | 36872.4  | 49311.4  | 58335    | 71958.6  | 78074.2  | 93961    | 75475.6  | TRUE |
| 138382.2 | 102855.4 | 110163.9 | 171559.8 | 150552   | 151764.8 | 134323.3 | 168104.2 | TRUE |
| 398900.2 | 388942.5 | 297290.6 | 312053   | 365238.6 | 409711.4 | 364085.6 | 433811.6 | TRUE |
| 30254    | 24398.8  | 22360.2  | 26476.6  | 17545.5  | 42777.6  | 39723.6  | 36532.2  | TRUE |
| 80616    | 59571.8  | 44273.8  | 42007.4  | 43883.6  | 72902    | 79224.8  | 74398.7  | TRUE |
| 944958.9 | 840363.4 | 890297.3 | 921401.1 | 852590.8 | 901533.4 | 839742.8 | 784900.5 | TRUE |
| 24676    | 6839.2   | 32131.4  | 22930.9  | 30800.3  | 28736.1  | 31519.7  | 28839.9  | TRUE |
| 477096.2 | 425165.2 | 411133.8 | 404833.2 | 409658.4 | 387196.1 | 387999.8 | 378930.1 | TRUE |
| 150861.7 | 97330    | 107242.9 | 142711.1 | 119129.8 | 167038.1 | 173554   | 184676.6 | TRUE |
| 190558.2 | 169250.1 | 148143.1 | 210343.4 | 200543.9 | 252723.3 | 229450.6 | 233965.8 | TRUE |
| 189780.4 | 129845.8 | 251648.4 | 187794.5 | 544787.7 | 314674   | 169041.9 | 534679.9 | TRUE |
| 324458.6 | 265650.9 | 289320.8 | 316959.4 | 266485.9 | 318888.9 | 312786.3 | 268319.5 | TRUE |
| 553307.3 | 468870   | 410758.8 | 411988.7 | 429233.2 | 435701.1 | 478521.5 | 437378.4 | TRUE |
| 147845.3 | 150220.3 | 142619.3 | 175653.7 | 152458.4 | 156714.5 | 137095.6 | 133214   | TRUE |

|          |          |          |          |          |          |          |          |      |
|----------|----------|----------|----------|----------|----------|----------|----------|------|
| 213751.9 | 197932.3 | 222637.5 | 178120.4 | 179197.3 | 209790.3 | 204810.1 | 204585.3 | TRUE |
| 79944.7  | 74340.3  | 98849.4  | 97755.8  | 96535.7  | 119937.8 | 133981.1 | 100527.1 | TRUE |
| 39944    | 13978.3  | 40331.4  | 48661.8  | 51139.2  | 36553.8  | 43668    | 45151.3  | TRUE |
| 264282.7 | 244862.2 | 345709.5 | 354117.3 | 335990.9 | 392690.9 | 321108.7 | 362818.6 | TRUE |
| 36606.5  | 84543.8  | 59685.9  | 86543.8  | 84407.7  | 13769.9  | 24961    | 9360.7   | TRUE |
| 97927.1  | 90952.7  | 90174.3  | 82580    | 73740.9  | 87851.1  | 71645    | 63949.3  | TRUE |
| 20566.1  | 22374.6  | 25864.3  | 38500.9  | 30968.4  | 5664.8   | 26315.6  | 14723.3  | TRUE |
| 1445784  | 1290143  | 1338061  | 1395023  | 1410089  | 1337713  | 1316372  | 1321734  | TRUE |
| 404825.7 | 373834.3 | 471723.5 | 395612.8 | 413793.2 | 415408.3 | 415844.1 | 412982.8 | TRUE |
| 1418415  | 1310519  | 1490627  | 1693894  | 1538936  | 1820944  | 1608005  | 1757723  | TRUE |
| 843273.1 | 784244.6 | 800472.1 | 931246.9 | 873597.6 | 837503.1 | 863082.3 | 880334.7 | TRUE |
| 348583.2 | 284433.2 | 308965.4 | 403764   | 340894.8 | 355886   | 354324.9 | 331883.8 | TRUE |
| 270990.7 | 237240.6 | 264523   | 285900.4 | 251678.4 | 309755.9 | 283387.6 | 272254.3 | TRUE |
| 433965.5 | 435953.2 | 431802   | 449682.7 | 425175.9 | 472703.1 | 423885.3 | 426396.9 | TRUE |
| 73747    | 51105.7  | 59491.3  | 65957.8  | 73229.2  | 73142.8  | 64341.3  | 73642.3  | TRUE |
| 26512.2  | 12855.7  | 29567.6  | 11604.7  | 27140.2  | 28458.1  | 16503.9  | 26248.1  | TRUE |
| 63086.5  | 55011.1  | 53083.3  | 47551.6  | 55018.5  | 52428.5  | 68202.1  | 59159.8  | TRUE |
| 16814    | 21871.3  | 10564.3  | 11694.4  | 24893.1  | 31640.7  | 33700.8  | 28302.4  | TRUE |
| 28402.2  | 20915.5  | 11700.8  | 17075.4  | 30544.8  | 20581.9  | 14068.8  | 33492    | TRUE |
| 65411.2  | 58953.8  | 110532.2 | 95064.8  | 104203.7 | 103155.1 | 76364.4  | 138116.1 | TRUE |
| 23498.3  | 6410.3   | 27818    | 36127    | 8117.8   | 25091    | 12158    | 13397    | TRUE |
| 72627.9  | 68943.8  | 66763.2  | 68131.8  | 66614.7  | 82680.3  | 85177    | 63615.6  | TRUE |
| 17805.2  | 8182.3   | 9575.3   | 13137.9  | 9791.9   | 17541.5  | 26253.4  | 12651.3  | TRUE |
| 54106.7  | 54533.1  | 98161.9  | 42796    | 60097.3  | 55590    | 51255.3  | 60488.8  | TRUE |
| 36231.9  | 34416.6  | 37459.1  | 33666.4  | 36935.3  | 29102.3  | 31490.9  | 33771.2  | TRUE |
| 183818.1 | 154634   | 166881.6 | 172500.3 | 149953.4 | 168950.5 | 173819.9 | 167461.5 | TRUE |
| 17793.9  | 5899.4   | 20403.1  | 5568     | 9680.8   | 18993.6  | 11780.3  | 10204    | TRUE |
| 20438    | 24432.2  | 20025.4  | 10730.8  | 11496.4  | 6893.6   | 5985.8   | 6621     | TRUE |
| 53479.6  | 52764.3  | 35966    | 56669.7  | 46524.9  | 50895    | 52934.6  | 48154    | TRUE |
| 38371.7  | 36171.4  | 37786.4  | 25689.5  | 40501.9  | 37735.5  | 37804.4  | 33371.5  | TRUE |
| 105024.3 | 97117.9  | 84905.4  | 75141.4  | 85477.8  | 102634.7 | 95901.7  | 89031.6  | TRUE |
| 344387.2 | 334766.5 | 316262.2 | 500111.7 | 335725.6 | 347901.2 | 304318.4 | 316103.4 | TRUE |
| 179030.6 | 139042.8 | 210985.7 | 257930.8 | 187027.3 | 215285.9 | 193626.7 | 190206.1 | TRUE |
| 3517149  | 3520742  | 3322343  | 3744725  | 3580190  | 3967150  | 3788596  | 3954286  | TRUE |
| 771294.8 | 679860.6 | 735438.7 | 804296.8 | 760272.1 | 746464.4 | 728052.7 | 664423.6 | TRUE |
| 607765.3 | 595146.6 | 516844.7 | 627319.7 | 571634.4 | 575926.5 | 569358.2 | 659168.2 | TRUE |
| 129479.1 | 105617   | 118140.3 | 128289.3 | 107242.1 | 149260.9 | 137292   | 123408.8 | TRUE |
| 1419976  | 1170999  | 1351422  | 1413580  | 1490622  | 1340752  | 1254393  | 1438640  | TRUE |
| 3620763  | 3034844  | 3162318  | 3278919  | 3330835  | 3686271  | 3402717  | 3823889  | TRUE |
| 100626.6 | 99360.3  | 85844.6  | 84984.1  | 83994.8  | 96011    | 92641.9  | 91494.5  | TRUE |
| 47167.9  | 42986.2  | 33021.2  | 25995.9  | 26237.8  | 31157.2  | 31449.7  | 24438.6  | TRUE |
| 56102.4  | 72715.5  | 78965.3  | 51221.6  | 50395.6  | 65159.5  | 55066.8  | 53517.1  | TRUE |
| 68854.4  | 82062    | 117228.7 | 87437.1  | 81559.7  | 64399.7  | 69941.1  | 63195.5  | TRUE |
| 32543.3  | 25486.6  | 28671.6  | 45659.5  | 32173.4  | 44577    | 40947.3  | 31901.6  | TRUE |
| 109173.5 | 101013   | 73997.4  | 85139.6  | 72768.2  | 103919.6 | 121751.3 | 100438   | TRUE |
| 171521.6 | 149337.4 | 168965.9 | 190019.1 | 188823.2 | 175344.6 | 183016.9 | 210693.9 | TRUE |

|          |          |          |          |          |          |          |          |      |
|----------|----------|----------|----------|----------|----------|----------|----------|------|
| 36698.6  | 32610.7  | 39213.4  | 44160.6  | 52971.5  | 31191.5  | 39885.5  | 41476.1  | TRUE |
| 101916.8 | 98236.2  | 98033.7  | 104583.8 | 132784.8 | 109308.1 | 114512   | 102498.3 | TRUE |
| 799469.6 | 629107.7 | 671293.3 | 740608.5 | 685644.9 | 778158.3 | 830676.9 | 835942.2 | TRUE |
| 165629.6 | 184689   | 134878.1 | 177511.2 | 186282.7 | 212217.9 | 200226   | 203868.8 | TRUE |
| 20068.8  | 12851.5  | 12576.1  | 7670.4   | 18954.3  | 9009.3   | 9929.3   | 23669.8  | TRUE |
| 165180.1 | 168565.4 | 169860.1 | 178079.1 | 164378.5 | 191558.7 | 175192.5 | 153433.1 | TRUE |
| 82208.9  | 44661.2  | 73016.7  | 58285.4  | 52948.6  | 73992.6  | 65597.4  | 53849.2  | TRUE |
| 278299.3 | 212066.9 | 310220.5 | 330027   | 243009.2 | 512706.7 | 218120.4 | 451188.4 | TRUE |
| 2508992  | 2532324  | 2725319  | 1498780  | 2605647  | 2745482  | 2517805  | 2601903  | TRUE |
| 1274371  | 1161134  | 1274972  | 642366.7 | 1244689  | 1314747  | 1248544  | 1283722  | TRUE |
| 86489.1  | 61259    | 88455.6  | 68932.6  | 99683.1  | 92070.3  | 94892.7  | 113187   | TRUE |
| 89737.2  | 104001.9 | 108033   | 101117.5 | 87917.1  | 118641.5 | 103422.8 | 82028.5  | TRUE |
| 174592.5 | 116602.9 | 206987.2 | 159971.2 | 196409.2 | 163684   | 130073.8 | 166788.3 | TRUE |
| 2223045  | 2254054  | 2578257  | 2499785  | 2395346  | 2170832  | 2327483  | 2246275  | TRUE |
| 62861.3  | 54531.3  | 52354.5  | 57397.4  | 56327.3  | 62889.1  | 71527.9  | 60484    | TRUE |
| 1752040  | 1449371  | 1448546  | 1384091  | 1210338  | 1664543  | 1435951  | 1287825  | TRUE |
| 553415.1 | 541496.5 | 665245.3 | 539506.9 | 560938.4 | 683326.7 | 560220.2 | 641821.4 | TRUE |
| 416773.8 | 438249.8 | 530426.4 | 508328.3 | 416918.6 | 577824   | 498966.7 | 424917.1 | TRUE |
| 268432.2 | 275233.6 | 298768.5 | 287886   | 256289.8 | 315759.5 | 292022.1 | 276159.9 | TRUE |
| 61204.8  | 57299    | 68376.8  | 67490.3  | 54623.1  | 71595.2  | 62423    | 65831.6  | TRUE |
| 43724.3  | 95708.1  | 69618.3  | 94600.1  | 73796.8  | 51928.8  | 47362.4  | 44682.6  | TRUE |
| 3078787  | 1903519  | 2777643  | 2677746  | 3105498  | 2929115  | 2087073  | 2901025  | TRUE |
| 117200.9 | 98240    | 130862.7 | 101679.6 | 103434.3 | 125117.3 | 118336.1 | 100500.3 | TRUE |
| 232468.6 | 165673.6 | 248665.4 | 268278.2 | 257378.7 | 200004.1 | 189011   | 170107.4 | TRUE |
| 324572.1 | 273915.2 | 341112.3 | 306394.8 | 388154.4 | 268583.3 | 267575.6 | 272068.4 | TRUE |
| 385271.9 | 253813.3 | 308627.4 | 349790.1 | 320357.9 | 369275.7 | 317872.5 | 357961.5 | TRUE |
| 1929471  | 1288381  | 1279435  | 1534621  | 1234505  | 1502825  | 1455710  | 1750642  | TRUE |
| 2196500  | 1844467  | 2441613  | 2957983  | 2444240  | 2258154  | 2261474  | 2486992  | TRUE |
| 600902.2 | 567839.4 | 483442.3 | 452852.5 | 421551.1 | 560144.3 | 558625.4 | 426269.7 | TRUE |
| 485866.3 | 553324.9 | 415209.1 | 382358   | 421028.2 | 431677.9 | 497117.5 | 426395.1 | TRUE |
| 361306.2 | 432381.9 | 416469   | 393489.2 | 420243.9 | 437514.9 | 457607.8 | 432326.9 | TRUE |
| 131746.2 | 117995.7 | 106630.5 | 101074.1 | 120889.3 | 129741.4 | 126872.9 | 126707.5 | TRUE |
| 365545.1 | 376239.6 | 373835.7 | 306032.7 | 314038.1 | 373612   | 425043.8 | 336134.9 | TRUE |
| 1172743  | 923915.9 | 1180585  | 1218114  | 1119074  | 1077307  | 1029030  | 1056610  | TRUE |
| 890594.7 | 860214.2 | 1034380  | 1026809  | 933164.1 | 911513.3 | 863308.2 | 845749.1 | TRUE |
| 353406.7 | 399654.9 | 341480.6 | 369176.8 | 365763.4 | 306743.7 | 329014   | 320295.9 | TRUE |
| 137217.5 | 125585.2 | 79181.6  | 89208.4  | 88152.8  | 85550.4  | 100213.1 | 91405.3  | TRUE |
| 287307.4 | 319898.1 | 337830.3 | 298483.7 | 301996.1 | 375448.6 | 318307.2 | 283318.7 | TRUE |
| 173563.3 | 168200.1 | 209458   | 217965.6 | 181453.4 | 210992.9 | 190844.1 | 187256.1 | TRUE |
| 189097.9 | 162292.8 | 205982.9 | 219986.7 | 219998.2 | 199427.9 | 251128.2 | 204774.3 | TRUE |
| 2715660  | 2436674  | 2900802  | 3206499  | 2834910  | 2542958  | 2566602  | 2619254  | TRUE |
| 200575.6 | 183379.3 | 215624.8 | 221269.6 | 181461.9 | 225546.1 | 259567.2 | 187475.6 | TRUE |
| 315524.9 | 372687.9 | 314191.8 | 280848.9 | 266718.6 | 317209.6 | 329861.3 | 280436   | TRUE |
| 330178.9 | 319748.2 | 298996.9 | 238089.7 | 288511.9 | 309773   | 305483.2 | 283233.7 | TRUE |

|          |          |          |          |          |          |          |          |      |
|----------|----------|----------|----------|----------|----------|----------|----------|------|
| 98912.4  | 105637.1 | 101859.5 | 90846.4  | 110897.5 | 117749.3 | 109819.8 | 110986.2 | TRUE |
| 126821.3 | 151257.8 | 112808.4 | 115501.4 | 126029.9 | 144217.3 | 178226.1 | 145928.5 | TRUE |
| 95356.6  | 83289.3  | 96020.9  | 76870.2  | 98250.4  | 114765.3 | 94347.9  | 104890.8 | TRUE |
| 497853.4 | 483422.1 | 557657.7 | 601811.5 | 569165.9 | 442774.2 | 456744.9 | 422599.3 | TRUE |
| 644781.6 | 608284.4 | 773324   | 746535.9 | 757784   | 549622.8 | 630695.9 | 545763.9 | TRUE |
| 46109.6  | 40298.2  | 74098.3  | 66349.7  | 66337    | 42759.2  | 61979.6  | 36331.5  | TRUE |
| 58546.4  | 38647.1  | 44396    | 42533.3  | 63866.2  | 49259.8  | 31838.6  | 53278.1  | TRUE |
| 1426507  | 1609060  | 1654067  | 1229607  | 1175002  | 1673344  | 1573478  | 1192900  | TRUE |
| 1656528  | 1470961  | 1890030  | 1818933  | 2057488  | 1505005  | 1633368  | 1582483  | TRUE |
| 204740.8 | 190277.8 | 249450.7 | 188784.9 | 215237.9 | 239813.2 | 201597.2 | 155601.6 | TRUE |
| 224100.2 | 205388.9 | 259952.3 | 235046.7 | 264837.1 | 204507.8 | 204786.9 | 244017.6 | TRUE |
| 33270.4  | 39244.9  | 20612.9  | 55298.7  | 31964.1  | 20704.7  | 46371.5  | 22267.9  | TRUE |
| 23999    | 18268.9  | 13886    | 47109.1  | 12122.3  | 7697.5   | 42259.9  | 12328.9  | TRUE |
| 22639    | 11899.3  | 27662.7  | 11921.1  | 30945.3  | 30856.7  | 5656.8   | 27646.1  | TRUE |
| 52612.5  | 78998.6  | 49658.7  | 40206    | 55008.8  | 40835.1  | 149797.7 | 62697.8  | TRUE |
| 19309.5  | 39926    | 21532.5  | 30511.2  | 23722.8  | 16325.6  | 44828.5  | 24216.4  | TRUE |
| 46641.7  | 42679.1  | 44016.1  | 33218.7  | 20174.5  | 43426.4  | 50058.1  | 42892.7  | TRUE |
| 81695.9  | 71443.2  | 84990.1  | 98666.4  | 89283.7  | 101938.8 | 88775.8  | 96688.8  | TRUE |
| 271983.1 | 283237.2 | 301163   | 199480.7 | 189078.1 | 295063.2 | 241114.4 | 186718.2 | TRUE |
| 182729.1 | 145081.5 | 145966.5 | 186301.9 | 181992.4 | 151427   | 155835.4 | 171306.4 | TRUE |
| 75205.9  | 62845.8  | 72476.8  | 94569.4  | 64757.6  | 84037.6  | 49850.2  | 88494.9  | TRUE |
| 246400.9 | 254211.1 | 223104.8 | 124602   | 146753.3 | 242110.5 | 202076.4 | 155561   | TRUE |
| 234710.9 | 206576   | 273250.9 | 202743.8 | 212223   | 271774.5 | 253001.4 | 233834.2 | TRUE |
| 252924.6 | 276824.5 | 314742.1 | 243104.3 | 206890.7 | 339762   | 323707.6 | 200029   | TRUE |
| 258144.5 | 341136.3 | 276327.3 | 289311.6 | 301933.4 | 304451.9 | 322719.9 | 281477   | TRUE |
| 384061.1 | 465362.4 | 511288.2 | 310446.3 | 295046.8 | 519264.2 | 490069   | 316858.1 | TRUE |
| 209344.6 | 177216   | 281312.3 | 269808   | 302130.4 | 237502.2 | 194543.5 | 224503.3 | TRUE |
| 1082125  | 904369.7 | 1115782  | 1134269  | 1145252  | 1064697  | 1449212  | 1031477  | TRUE |
| 27353.1  | 14352.3  | 30925    | 6486.7   | 24186.7  | 30985.2  | 42014.2  | 30958.1  | TRUE |
| 226993.8 | 213145.4 | 319602.4 | 309668.4 | 218335.4 | 199004.2 | 234532.3 | 226705.2 | TRUE |
| 555129   | 407869   | 570403.7 | 631328.4 | 635216.5 | 560671.4 | 493516.9 | 594042.8 | TRUE |
| 340357.6 | 240243.1 | 353090.3 | 414924.6 | 383901   | 365146.8 | 297818.2 | 377515.1 | TRUE |
| 503487   | 646354.9 | 671574.8 | 400547.8 | 460780.7 | 681740.8 | 672391.5 | 450809.9 | TRUE |
| 793802.9 | 898772.4 | 894804.6 | 658148.5 | 614120.4 | 997056.5 | 967015.9 | 689225.1 | TRUE |
| 702266.1 | 542557   | 759501.5 | 824221   | 877598.7 | 797925.1 | 704599.2 | 826059.8 | TRUE |
| 34329.8  | 32394.4  | 32740.8  | 33695    | 41989    | 42246.7  | 24991.9  | 40245.2  | TRUE |
| 141079.1 | 169982.5 | 128246.3 | 215433.1 | 216022.5 | 81939    | 77365.3  | 92333.9  | TRUE |
| 92999.2  | 201608.9 | 135980.4 | 249579.7 | 276632.9 | 30368.3  | 10825.3  | 32628.9  | TRUE |
| 27064.6  | 42191    | 40589.2  | 40364    | 44131.6  | 24578.7  | 32800    | 35829.8  | TRUE |

|          |          |          |          |          |          |          |          |      |
|----------|----------|----------|----------|----------|----------|----------|----------|------|
| 54579.1  | 26011.6  | 44696.3  | 35380.8  | 46341.7  | 44452.8  | 53330.6  | 44184.4  | TRUE |
| 99423.7  | 85218.6  | 95342.9  | 100916.4 | 98103.9  | 104384.9 | 87403.3  | 97875.1  | TRUE |
| 1261112  | 1302416  | 1006141  | 1101186  | 1286440  | 1493222  | 1415376  | 1484829  | TRUE |
| 1663256  | 1240202  | 1865747  | 1866474  | 2042725  | 1398955  | 1264342  | 1409433  | TRUE |
| 45992.7  | 42635    | 31999.6  | 40112.2  | 48315.3  | 59147.1  | 42095.5  | 60475.4  | TRUE |
| 129038.9 | 154186.1 | 98806.9  | 138232   | 152829.4 | 188115.4 | 151956.9 | 169946.3 | TRUE |
| 181234.6 | 187864.7 | 133221.6 | 138844.8 | 177359.9 | 219746   | 189975.5 | 184872.5 | TRUE |
| 121633.7 | 115245.8 | 82954.8  | 95079.8  | 108088.5 | 122240.5 | 108065   | 129174.2 | TRUE |
| 216777.4 | 228757.7 | 167361.8 | 177985.6 | 205381.4 | 265766.8 | 241043.7 | 231527   | TRUE |
| 154964.7 | 148077   | 123726   | 118452   | 143368.9 | 168561.2 | 162174.5 | 176367.5 | TRUE |
| 200183.8 | 187311.4 | 121806.3 | 165150.8 | 184538.2 | 251251.7 | 210606.5 | 244773.7 | TRUE |
| 85209.6  | 109061.6 | 79142.1  | 74521.7  | 92999.1  | 121658.9 | 109186.7 | 108627.7 | TRUE |
| 123533   | 125204.4 | 101323.9 | 91358.7  | 99143    | 152087.9 | 133369.7 | 128421.8 | TRUE |
| 67532.1  | 91415.7  | 57502.6  | 81951.3  | 83048.8  | 92275.9  | 73969.9  | 93992.1  | TRUE |
| 75495.3  | 91553.6  | 68616.6  | 76191.5  | 72590.7  | 92225.5  | 82582.7  | 109505   | TRUE |
| 82788.6  | 83252.3  | 68439.2  | 78772.5  | 66639.1  | 106117.2 | 80956.5  | 93495.4  | TRUE |
| 109454.6 | 107643.3 | 91621.3  | 87143.1  | 104672.3 | 124877.5 | 123337.2 | 126444.7 | TRUE |
| 82595.6  | 85490.7  | 53023    | 61612.4  | 87233.8  | 90740.7  | 76067.1  | 95702.8  | TRUE |
| 49121.6  | 38392.7  | 32203.9  | 39279.3  | 36917.1  | 46208.8  | 35015.2  | 50854.3  | TRUE |
| 86958.5  | 131033.3 | 102194.2 | 95107.3  | 127055.8 | 93874.7  | 65056.1  | 96539.5  | TRUE |
| 49567.1  | 44207.2  | 40023.8  | 44557.1  | 54461.8  | 45435.1  | 51601.3  | 39332.4  | TRUE |
| 129294.6 | 106864.2 | 92957.7  | 89512.5  | 112714.9 | 116120.2 | 115157   | 99466    | TRUE |
| 279989.5 | 270404.1 | 387089.1 | 281485   | 218246.2 | 434630.1 | 380863.8 | 247221   | TRUE |
| 443192.6 | 471881.8 | 586675.1 | 396477.5 | 390567.2 | 588092.4 | 548347.4 | 385881.2 | TRUE |
| 333918.1 | 391639   | 407254.4 | 321254.6 | 292408.8 | 429406.5 | 399546.3 | 284979.8 | TRUE |
| 452730.9 | 330142.9 | 567159.8 | 535355.9 | 616958.2 | 406365.8 | 348067.6 | 405464.9 | TRUE |
| 468269.3 | 354729.8 | 600511.8 | 589232.3 | 633758.5 | 414925.6 | 372355.8 | 388996.8 | TRUE |
| 883465.1 | 1014183  | 1192408  | 677623.5 | 741056.5 | 1340676  | 1037093  | 741077.2 | TRUE |
| 63144.2  | 53085.1  | 46906.6  | 49283.8  | 39130.6  | 61340.9  | 45218    | 42897.2  | TRUE |
| 76851.4  | 81124.1  | 120419   | 58485.7  | 60447.4  | 123360.4 | 84180.1  | 83040.5  | TRUE |
| 58179.1  | 67094.4  | 89424.1  | 41470.3  | 64017.8  | 85520.6  | 75208.7  | 59280.4  | TRUE |
| 11083.3  | 5350.1   | 17579.5  | 10868.6  | 22048.9  | 9940     | 14396.1  | 11764.5  | TRUE |
| 189482   | 182821.5 | 205843.7 | 144726.9 | 173513.9 | 203228.4 | 184726   | 164617.7 | TRUE |
| 289047.3 | 254798.7 | 316510.2 | 383139.3 | 396373.5 | 245988   | 296268   | 245402.1 | TRUE |
| 324472.7 | 297701.7 | 326052.2 | 329229.7 | 421194.5 | 227660.8 | 311593   | 262093.5 | TRUE |
| 65523.7  | 58790.5  | 91361.9  | 75940.6  | 61925.8  | 95901.4  | 78877.5  | 39410.9  | TRUE |
| 62736.2  | 58950.2  | 82822.2  | 50419.2  | 42639.7  | 98356.5  | 79457.9  | 60064.4  | TRUE |
| 161208.8 | 110663.5 | 139796.7 | 136149.2 | 228838.4 | 118541.3 | 104632.5 | 131920.5 | TRUE |
| 401021.5 | 368270.3 | 462721   | 422293.7 | 499916.5 | 346352.7 | 381698.4 | 435776   | TRUE |
| 37891.7  | 46584.5  | 46838.4  | 26651.2  | 40676.5  | 58373.4  | 40568.1  | 38805.1  | TRUE |
| 162438.4 | 207787.2 | 157978.6 | 140005.9 | 144563.3 | 150877.5 | 195608.8 | 177597.8 | TRUE |
| 50857.8  | 70272.8  | 39574.1  | 44860.4  | 37085.3  | 40617.6  | 58806    | 39619.6  | TRUE |
| 51664.3  | 65601.3  | 60711.4  | 44992.9  | 61573.6  | 69047.8  | 76719    | 53876.8  | TRUE |
| 33471.9  | 46164.3  | 33702.9  | 30321.9  | 35147.2  | 38649.6  | 55644.4  | 33741.2  | TRUE |
| 89228.9  | 96042.4  | 127481   | 110777.4 | 96745.2  | 95390.9  | 101841.1 | 108446.6 | TRUE |
| 77097.5  | 76611.2  | 103039.9 | 109669.4 | 80174.2  | 51978    | 73060.5  | 82742.8  | TRUE |
| 82887.1  | 60370    | 110267.1 | 100630.1 | 113529.8 | 80962.3  | 76834.5  | 73281.8  | TRUE |
| 2445806  | 1796253  | 2360008  | 2323508  | 2709393  | 2648364  | 2021096  | 2590990  | TRUE |
| 321787.9 | 257707.7 | 259131.7 | 265428.3 | 243681.6 | 267014.5 | 252768   | 213814.7 | TRUE |
| 180131.3 | 176041.8 | 157141.1 | 172863.3 | 138453.4 | 179822.5 | 169463.3 | 158323.2 | TRUE |

|          |          |          |          |          |          |          |          |      |
|----------|----------|----------|----------|----------|----------|----------|----------|------|
| 448373.9 | 393966.4 | 296787.8 | 388342.5 | 290678.2 | 355853.1 | 334491.2 | 328938   | TRUE |
| 392231.1 | 277977.9 | 236926.4 | 286164.1 | 242863.4 | 269604.4 | 257569.2 | 267464.9 | TRUE |
| 161063.6 | 153304.8 | 166939.8 | 175206   | 160757.7 | 174298.1 | 156208.2 | 152373.6 | TRUE |
| 64341.3  | 59463    | 62884.6  | 91792.3  | 82402.5  | 45877.9  | 47181.6  | 51573.8  | TRUE |
| 360644.5 | 362914.9 | 294493.6 | 343242.5 | 332597.8 | 331215.4 | 249137.6 | 349882.6 | TRUE |
| 351421.3 | 312223.8 | 372513.2 | 345828.8 | 355638.5 | 372614.1 | 304891.4 | 383335.3 | TRUE |
| 504965.9 | 425625.7 | 434883.6 | 473649.2 | 465892.6 | 574710.3 | 418120.7 | 596731.3 | TRUE |
| 209106   | 185936.9 | 164130.6 | 195629.7 | 172298.8 | 211488   | 186529.3 | 239224.5 | TRUE |
| 107505.1 | 99268.2  | 94108.7  | 78903.3  | 99690.2  | 112546.4 | 103826   | 131366.3 | TRUE |
| 42627.2  | 42978.3  | 41227.6  | 42996.1  | 54291.7  | 27263.1  | 49044.1  | 53515.5  | TRUE |
| 67086.6  | 49433.8  | 67944.5  | 75493.8  | 62595.1  | 76030.5  | 88378.2  | 83784.4  | TRUE |
| 95195.5  | 88436.7  | 85252.4  | 121537.1 | 92272.8  | 84168.5  | 88816.5  | 88751.8  | TRUE |
| 244477.4 | 223011.7 | 224552   | 296362   | 217833.2 | 218226.2 | 241660.3 | 199505.5 | TRUE |
| 525463   | 536106.1 | 476001.5 | 626545.8 | 497560.3 | 496246.9 | 519167.7 | 484040.4 | TRUE |
| 318664.2 | 262987.5 | 360917   | 341197.5 | 288081.2 | 369466.3 | 298832.9 | 345670.8 | TRUE |
| 493950.6 | 441826.7 | 501574   | 572005.9 | 484197.7 | 511830.7 | 440208.2 | 506786.9 | TRUE |
| 38577.1  | 14188.1  | 32970.4  | 47317.1  | 28021.8  | 35631.4  | 34068.8  | 28498.8  | TRUE |
| 68256.6  | 50806    | 48823.5  | 64944.1  | 47090.4  | 55281.2  | 60233.2  | 45735.1  | TRUE |
| 45879.6  | 86496.4  | 74752.1  | 51357.3  | 67436.4  | 50862.8  | 35214.5  | 64850.4  | TRUE |
| 19878.6  | 26152.5  | 15350.8  | 10421.7  | 8524.5   | 25365.1  | 32788    | 13876    | TRUE |
| 35034.2  | 13300.9  | 19312.9  | 32003.6  | 13439.2  | 25800.7  | 34130.8  | 9622.1   | TRUE |
| 31096.9  | 22921.2  | 19178.3  | 25700.8  | 18965.5  | 39413.5  | 38930    | 23930.5  | TRUE |
| 92860.8  | 60339.7  | 86357.4  | 86127.6  | 65853    | 96996.4  | 77144    | 73719.7  | TRUE |
| 332515.5 | 316890.9 | 277482.2 | 275671.2 | 250422.4 | 318287.3 | 261457.4 | 235042.4 | TRUE |
| 709098.4 | 517507.2 | 670039.4 | 682436.6 | 706235.5 | 644055.5 | 538730.3 | 689263.5 | TRUE |
| 163442.2 | 73028.3  | 128382.9 | 120339.1 | 165176.9 | 142623.9 | 96135.7  | 120589.5 | TRUE |
| 208099   | 226564   | 174994.1 | 236139.1 | 162831.4 | 201250.6 | 193628.3 | 185933.4 | TRUE |
| 750335.6 | 594509   | 767873.2 | 758235.1 | 750367.1 | 879990.9 | 572974.2 | 814476.6 | TRUE |
| 589300.3 | 541503.2 | 674718.7 | 663601.3 | 584379.7 | 639824.8 | 518913.6 | 636992.5 | TRUE |
| 76382.5  | 64823.7  | 66829.3  | 52993.5  | 59842.8  | 86715.8  | 68152.1  | 54998.4  | TRUE |
| 174746.8 | 180256.8 | 206219.9 | 142024.7 | 156155   | 201409.8 | 203080.3 | 161183.5 | TRUE |
| 604031.8 | 557371.8 | 630372.4 | 605419.7 | 510688   | 664120   | 611815.2 | 497015.2 | TRUE |
| 185786.1 | 132210.9 | 177800.2 | 197109.4 | 204641.5 | 175898.8 | 154784.6 | 212940.8 | TRUE |
| 72290.3  | 53066.4  | 58937.2  | 64179.6  | 48747.5  | 53407.5  | 47066.7  | 46484.7  | TRUE |
| 153348.8 | 167677.1 | 122955.3 | 139568.4 | 111101.9 | 126550.6 | 145881.8 | 116601.2 | TRUE |
| 166493.9 | 196517   | 160850.2 | 201982.1 | 152073.9 | 175828.8 | 183216.3 | 143700.6 | TRUE |
| 274287.1 | 241182.6 | 280279.9 | 308148.4 | 236405.3 | 321615.3 | 253150.4 | 219586.1 | TRUE |
| 127516.3 | 78756.3  | 155089.9 | 135397.6 | 157998.6 | 156244.3 | 125069.1 | 152351.7 | TRUE |
| 73476    | 99568.4  | 77177.1  | 94074.8  | 104269.8 | 78640.3  | 67597.4  | 81146    | TRUE |
| 128768.9 | 118910.2 | 140422.1 | 163924.8 | 138014   | 132710.1 | 140722.5 | 150411.2 | TRUE |
| 46845.3  | 46720.6  | 42357.3  | 50878.3  | 44521.4  | 37482    | 51345.8  | 39808.1  | TRUE |
| 16251.6  | 32616.8  | 43580.9  | 25932.5  | 28446.3  | 15332.9  | 9277.3   | 10411    | TRUE |
| 34303.8  | 32296.4  | 20101.3  | 27865.8  | 41387.9  | 37292.5  | 53586.4  | 36316.9  | TRUE |

|          |          |          |          |          |          |          |          |      |
|----------|----------|----------|----------|----------|----------|----------|----------|------|
| 24842.1  | 17807    | 20546.7  | 36139    | 23961.5  | 26624.2  | 43540    | 35706.9  | TRUE |
| 21150.4  | 5359.5   | 15160.4  | 10523.6  | 8560.7   | 21902.5  | 31952.4  | 13215.1  | TRUE |
| 110903.6 | 109736.9 | 90977.7  | 99828.7  | 109321.2 | 114143.2 | 139305.4 | 148110.4 | TRUE |
| 96919.7  | 110364.6 | 83672.7  | 114701.5 | 89800    | 116662.6 | 136039.6 | 103017   | TRUE |
| 209474.9 | 184667.8 | 180256.1 | 221628.6 | 225242.3 | 191637.7 | 177765.3 | 214912.7 | TRUE |
| 115697   | 108848.7 | 112801.8 | 113426.8 | 103776.8 | 126143   | 124759.6 | 132671.8 | TRUE |
| 156804.8 | 115858.2 | 126494.8 | 156338   | 115498.7 | 212430.4 | 151871.9 | 170844.4 | TRUE |
| 32117.9  | 8813.9   | 24362.5  | 17883.8  | 9858.6   | 24902.1  | 11898.9  | 14973.4  | TRUE |
| 351576.6 | 247397.3 | 365613.2 | 349848.2 | 367717   | 354212.7 | 307378.6 | 382328.1 | TRUE |
| 62990.1  | 74300.2  | 75797.4  | 80232.4  | 87070.8  | 78137.8  | 74524.4  | 84682.9  | TRUE |
| 38285.8  | 44153.1  | 51455.8  | 58026.4  | 53467.4  | 82665.1  | 54261.4  | 53220.7  | TRUE |
| 545139.3 | 476372.8 | 557917.1 | 530185.5 | 543227.9 | 629506.2 | 464477.3 | 620400.7 | TRUE |
| 116321.5 | 98564.6  | 131114.6 | 128056.8 | 140475.1 | 82318.4  | 63360.9  | 84764.1  | TRUE |
| 67634    | 98844.2  | 83684    | 120102.3 | 114840.9 | 38105.4  | 34765.7  | 32498.6  | TRUE |
| 39360.3  | 39028    | 25049.8  | 39739.4  | 34674.3  | 35241.4  | 35766.5  | 53234.7  | TRUE |
| 254957.9 | 208676   | 206716.6 | 256288.8 | 237467.8 | 302257.6 | 247666.8 | 295260.5 | TRUE |
| 295458.9 | 333681.5 | 343018.8 | 307102.8 | 264036.7 | 316096   | 302379.8 | 197911   | TRUE |
| 1649246  | 1257445  | 2015362  | 1842993  | 1850080  | 1714049  | 1337991  | 1746413  | TRUE |
| 397688   | 373223.9 | 395456   | 337443   | 328073.5 | 341389.6 | 367000.7 | 317398.9 | TRUE |
| 1305090  | 1005187  | 1245505  | 1200482  | 1268833  | 1307450  | 1152859  | 1314837  | TRUE |
| 215535.2 | 194412.5 | 245396.3 | 252990.6 | 323754.8 | 233663.7 | 273401.9 | 252273.4 | TRUE |
| 165177.1 | 201390.5 | 181186.6 | 164993.5 | 186443.4 | 192150.1 | 208851.7 | 186023.5 | TRUE |
| 159080.6 | 158632   | 134806.2 | 171952.2 | 148184.2 | 163343   | 170387   | 168634.8 | TRUE |
| 157423.1 | 146970.6 | 154898   | 178335.3 | 169455   | 153640.9 | 161816.6 | 184133.2 | TRUE |
| 131691   | 115899.2 | 148066.7 | 158808.7 | 190370.1 | 149688.8 | 162618.3 | 182401.6 | TRUE |
| 47065    | 74204.5  | 52514.2  | 62014.4  | 76173.3  | 63700.1  | 78676.2  | 62509.1  | TRUE |
| 170672.3 | 177513.4 | 137833.1 | 182049.5 | 177814.6 | 116738.7 | 130283.1 | 130486.8 | TRUE |
| 389014   | 312116.7 | 428102   | 434005.7 | 372460.2 | 436078   | 410531.6 | 401647.3 | TRUE |
| 319953.1 | 310776   | 318769.2 | 379928.8 | 320878.8 | 379655   | 374202   | 355315.1 | TRUE |
| 19690.5  | 20218.6  | 11251.9  | 10167.6  | 21444.7  | 26203.6  | 10227.3  | 20007.3  | TRUE |
| 138981.1 | 114925.1 | 127489.2 | 165097.4 | 155108.7 | 121789   | 99601.9  | 114168.8 | TRUE |
| 83406.2  | 67689.1  | 96162.6  | 95950.2  | 84250.7  | 87168.5  | 60716.5  | 84137.8  | TRUE |
| 20348.2  | 6317.5   | 18369.2  | 19529.7  | 15573.6  | 17803.6  | 10838.8  | 20007.7  | TRUE |
| 36541.4  | 43472    | 33250.2  | 40226.7  | 47517.2  | 32791.3  | 39386.6  | 44469    | TRUE |
| 78360.1  | 67033.7  | 82165.9  | 67903.7  | 58953.9  | 76274.6  | 79830.8  | 68465.3  | TRUE |
| 72675.3  | 81599.7  | 68220.4  | 84479.5  | 65101.2  | 73718    | 75601.8  | 64386.3  | TRUE |
| 538522.3 | 485998.3 | 548380.6 | 530266.2 | 537377.6 | 574787.3 | 430338.8 | 672627.2 | TRUE |
| 168104.2 | 165759.3 | 163489.2 | 193474.1 | 179208   | 234893.2 | 199863.9 | 221306.1 | TRUE |
| 28631.9  | 26476.5  | 6490.7   | 28277.1  | 24735.5  | 24031.3  | 37761.6  | 13317.2  | TRUE |
| 13288    | 8360.3   | 16368.1  | 5326.7   | 14699.5  | 16259.8  | 8782     | 9530.6   | TRUE |
| 461722.9 | 481204.7 | 420967   | 437647.2 | 340875.3 | 456804   | 423013.9 | 338857   | TRUE |
| 888391.1 | 1011255  | 1046131  | 841652   | 623853.1 | 1000672  | 1080458  | 654976.3 | TRUE |
| 705144.5 | 592992.5 | 757882.7 | 800400.9 | 734592.3 | 729105.5 | 592214.9 | 717175   | TRUE |



|          |          |          |          |          |          |          |          |      |
|----------|----------|----------|----------|----------|----------|----------|----------|------|
| 1165280  | 1055975  | 1278943  | 1282623  | 1335272  | 1104672  | 982416.5 | 1193119  | TRUE |
| 166179.8 | 154564   | 198114.3 | 156117   | 111315   | 185012.6 | 181077.4 | 130868   | TRUE |
| 115958.4 | 95780.8  | 103780   | 93529.5  | 97424.1  | 141083.4 | 136756   | 122980   | TRUE |
| 90971.7  | 68904.1  | 95388.8  | 76530    | 74911.6  | 89398.1  | 71896.9  | 99629.9  | TRUE |
| 55665.9  | 69403.7  | 70078.2  | 75366.9  | 65949.8  | 73050.4  | 60297.6  | 55190.7  | TRUE |
| 1706559  | 1903617  | 1745068  | 1820087  | 1461052  | 1818401  | 1957054  | 1523266  | TRUE |
| 66794.2  | 89797.2  | 61695.3  | 69814    | 58985.6  | 68796.6  | 86720.5  | 64153    | TRUE |
| 129604.3 | 80765.6  | 89383.9  | 119697.4 | 96871.7  | 117073.3 | 80119.8  | 122746   | TRUE |
| 66187.6  | 93168.2  | 84786.9  | 55902.1  | 58343.2  | 81746.5  | 76414.6  | 66111.2  | TRUE |
| 313445.9 | 267920.2 | 348083.5 | 348735.4 | 320925.7 | 297155.5 | 312918.4 | 276800   | TRUE |
| 319522.8 | 278504.5 | 355111.3 | 369343   | 335362.4 | 292531.9 | 306343.9 | 291595   | TRUE |
| 455178   | 413590.1 | 482589.2 | 474539.7 | 456364.8 | 383525.3 | 409779.4 | 402158.9 | TRUE |
| 434565   | 561499.6 | 357097.3 | 472585.6 | 632881.9 | 344973.3 | 483928.3 | 577550.1 | TRUE |
| 179056.7 | 226504.8 | 231447.6 | 226702.9 | 162810.7 | 239716.3 | 234905.5 | 250103.6 | TRUE |
| 92915.8  | 114993.4 | 95411.7  | 94520.9  | 60484.9  | 67681.9  | 103680.3 | 92927.5  | TRUE |
| 164092.2 | 147559.3 | 130695.9 | 212369.6 | 119158.6 | 178260.4 | 186393.2 | 183212.2 | TRUE |
| 152357.7 | 185755.6 | 224363.5 | 240395.8 | 168901.4 | 176480.7 | 248301.3 | 190605.4 | TRUE |
| 188702   | 222095.2 | 156463   | 209503.6 | 192037.5 | 169339.6 | 209121.6 | 202565.8 | TRUE |
| 147898.5 | 196472.3 | 148002.3 | 154675.8 | 130397.5 | 120473.5 | 160142.9 | 127047.3 | TRUE |
| 11226.7  | 10187.2  | 6478.3   | 7531.7   | 14013.6  | 18558.3  | 12489.9  | 14678.9  | TRUE |
| 119091.9 | 122975   | 103420.5 | 132508.1 | 118254.6 | 123491.4 | 92060.2  | 120266.9 | TRUE |
| 52620    | 55584.3  | 40809.1  | 43282    | 42042.8  | 49742.2  | 40069.8  | 49232.8  | TRUE |
| 94809.7  | 86752.3  | 96310.8  | 71661.6  | 108830.2 | 92936.2  | 101988.4 | 106962.1 | TRUE |
| 32896    | 14118.2  | 42531    | 47969.5  | 50296.4  | 35517.9  | 32851.9  | 40142.8  | TRUE |
| 38918    | 27287.5  | 23138.3  | 29900.1  | 28481.5  | 32179.4  | 33780.8  | 42807.3  | TRUE |

|          |          |          |          |          |          |          |          |      |
|----------|----------|----------|----------|----------|----------|----------|----------|------|
| 48598.3  | 54662.1  | 46297.6  | 50974.2  | 58902.2  | 52669.6  | 43768.9  | 37153.4  | TRUE |
| 33821.7  | 28780.6  | 30669.7  | 36534.2  | 32516.8  | 36477    | 46598.4  | 37352.1  | TRUE |
| 28985.6  | 10742.5  | 23790.9  | 43902.4  | 26812.4  | 36474.9  | 38066    | 30940    | TRUE |
| 361338.7 | 372529.4 | 349745   | 408021   | 328775.9 | 365982.4 | 356322.3 | 371738   | TRUE |
| 73019.8  | 66033    | 55985.1  | 71886.8  | 85066.7  | 64042.8  | 90147.1  | 99984.6  | TRUE |
| 249815.5 | 234476.3 | 224014.2 | 252881.4 | 250765.6 | 251428.7 | 254424.5 | 261088.7 | TRUE |
| 168863.5 | 194906.2 | 192933   | 168474   | 203445.1 | 180188.1 | 197532.2 | 183266.5 | TRUE |
| 41040.6  | 46563.1  | 28782.6  | 45566    | 39376.8  | 38400.9  | 58692.4  | 65743.1  | TRUE |
| 148949.1 | 181317.7 | 154346.7 | 147863.7 | 159832.2 | 123904.5 | 144801.8 | 156701   | TRUE |
| 45487.7  | 68455.1  | 45519.2  | 50072.3  | 66867.5  | 43422.2  | 51658.6  | 48071.8  | TRUE |
| 120567.5 | 166064.1 | 142878.8 | 134549   | 186212.8 | 113012.3 | 125194.7 | 125593.7 | TRUE |
| 269389.5 | 283960.1 | 176901.8 | 345004.6 | 286728.5 | 217954.7 | 301033.3 | 325162.1 | TRUE |
| 32713.4  | 37766.8  | 5134.5   | 34776    | 28558.7  | 9786.7   | 36206.7  | 34301.2  | TRUE |
| 147260.7 | 103011.1 | 64122.9  | 137869.1 | 146257.7 | 147479.7 | 156515   | 185802.4 | TRUE |
| 396790.8 | 346116.2 | 208279.8 | 381335.5 | 382656.4 | 363336.5 | 440339.1 | 518867.8 | TRUE |
| 147361.3 | 104776.6 | 118241.6 | 151588.7 | 117244.5 | 118174.3 | 171066.3 | 151535.3 | TRUE |
| 21289.1  | 36292.4  | 25412.2  | 30013.8  | 42524.5  | 6992.8   | 27833    | 30698.3  | TRUE |
| 183967.4 | 221678.7 | 154422.2 | 186126.1 | 160820.5 | 168152.5 | 243923.6 | 208680.7 | TRUE |
| 371995   | 376875.4 | 260780.7 | 289748   | 373185.9 | 276218.6 | 341619.6 | 403061.7 | TRUE |
| 195294.2 | 173966.9 | 201712.1 | 265322.9 | 316449   | 246625.2 | 301497.2 | 306213.7 | TRUE |
| 173109.5 | 173073   | 189355.9 | 186302.3 | 157600.4 | 168927.2 | 203705.9 | 178345.7 | TRUE |
| 50382.1  | 39631    | 56449.4  | 25318.4  | 34402.1  | 82191.3  | 53899.1  | 44393.9  | TRUE |
| 70356.1  | 82945.2  | 63728.1  | 77679.4  | 96027.6  | 72190.4  | 71795.6  | 80395.2  | TRUE |
| 59701    | 68762.7  | 59304.8  | 56083.6  | 62920.3  | 47974.5  | 51243    | 66101.6  | TRUE |
| 130191.1 | 113901.5 | 108745   | 154195.5 | 148109.8 | 108934.2 | 132350.2 | 146470.4 | TRUE |
| 63841.8  | 75899.5  | 40170.2  | 71082.1  | 70501.5  | 50054.4  | 70178.9  | 66724.8  | TRUE |
| 221252.6 | 216677   | 150605.8 | 200538.2 | 258120.2 | 151180.7 | 208893.1 | 253989.9 | TRUE |
| 88534.4  | 81590.7  | 57067    | 97442.9  | 93632    | 56057.9  | 75695.5  | 90428    | TRUE |
| 121771.9 | 118777.9 | 86623.6  | 110322.6 | 137266   | 84620    | 119977.4 | 149661.9 | TRUE |
| 58200.2  | 48212.1  | 43973.5  | 74021.7  | 68949.4  | 53728    | 57178.2  | 74433.9  | TRUE |
| 148260.9 | 190128.7 | 118597.9 | 216669   | 233278.7 | 101208   | 176936.9 | 283588.9 | TRUE |
| 8539.6   | 12310.8  | 9163.5   | 9078.6   | 9880.8   | 19472.1  | 8794.2   | 10725.8  | TRUE |
| 43606.9  | 48706.5  | 32473.5  | 60234.8  | 34174.5  | 35618.5  | 60100.9  | 51911.6  | TRUE |
| 608523.1 | 723674.1 | 569096.8 | 613351.3 | 498087.1 | 654852   | 664044.6 | 654440   | TRUE |
| 56013.5  | 51362.3  | 46688.2  | 55533.2  | 58021.5  | 51103.9  | 58439    | 82026.2  | TRUE |
| 197528.2 | 174982.9 | 111646.1 | 191245.4 | 206792.7 | 196342.8 | 208718.1 | 248997.8 | TRUE |
| 130564.4 | 103825.4 | 86570.4  | 104679.7 | 104207.2 | 118227.3 | 136878.6 | 143430.6 | TRUE |
| 170144.6 | 179677.1 | 114635   | 148300.6 | 136605.4 | 129440.4 | 120611.4 | 126109.2 | TRUE |
| 90625    | 103651.4 | 55065.8  | 79084.3  | 93283.5  | 58220.7  | 75805.5  | 97397.2  | TRUE |
| 423652   | 410205.7 | 286348.9 | 492206.7 | 408827   | 296111.3 | 397225.7 | 435393.8 | TRUE |
| 407624   | 387089.7 | 353160.7 | 472944.2 | 468372.6 | 391655.4 | 495923.8 | 497466.9 | TRUE |
| 79534.1  | 71816.7  | 72754.1  | 124818.9 | 121867.2 | 69679.5  | 101668.4 | 128824.1 | TRUE |
| 67990.4  | 63310.4  | 54134.1  | 67244.6  | 56772.9  | 49817.9  | 74700.2  | 70108.3  | TRUE |

|          |          |          |          |          |          |          |          |      |
|----------|----------|----------|----------|----------|----------|----------|----------|------|
| 82797    | 79781.4  | 71160.9  | 79544.4  | 89326.1  | 134373.9 | 84558.2  | 88601.2  | TRUE |
| 123049.1 | 119383   | 135092.1 | 130789.2 | 86614.4  | 136652.6 | 113281.8 | 117958.8 | TRUE |
| 95335.7  | 71675.3  | 95709.9  | 88228.9  | 95351.7  | 86791.7  | 89509.8  | 103430.4 | TRUE |
| 593812.9 | 528655.4 | 479434.8 | 671958.5 | 756002.4 | 525927.8 | 582122.4 | 712710.9 | TRUE |
| 436085   | 370864.9 | 329607.4 | 400346.9 | 368191   | 372606.2 | 366683   | 397313.5 | TRUE |
| 446014.3 | 438853   | 393707   | 585756.5 | 522822.1 | 390067.9 | 400398.5 | 482199.3 | TRUE |
| 128684.2 | 144277.1 | 146068.3 | 133346.1 | 171268.5 | 132473.2 | 134759.6 | 147733.9 | TRUE |
| 52000.3  | 64972    | 61113.8  | 50037.8  | 54274.6  | 50651.5  | 49602.9  | 69143.6  | TRUE |
| 555201.3 | 512283   | 478039.1 | 553098   | 496778.4 | 562810.3 | 552951.4 | 586290   | TRUE |
| 979105.9 | 899530.3 | 782842.3 | 1503750  | 1451619  | 1010324  | 894286.2 | 1022699  | TRUE |
| 178854   | 146516.8 | 166073.8 | 171462.5 | 164976.4 | 178943.3 | 179019.1 | 194815   | TRUE |
| 64100.6  | 52945.7  | 55949.1  | 62598.4  | 59444.7  | 66251.4  | 74678.7  | 87153.9  | TRUE |
| 50605    | 66361.4  | 60586.7  | 63062.6  | 56673.7  | 78064    | 67286.7  | 74779.6  | TRUE |
| 654682.1 | 571382.7 | 536361.9 | 684879.6 | 676998.3 | 538520   | 607365.7 | 649630.6 | TRUE |
| 2004625  | 2025734  | 1775765  | 1865977  | 1500820  | 2168951  | 2097816  | 1969418  | TRUE |
| 553056.7 | 489421   | 371969.3 | 445693.9 | 527027.9 | 401674.5 | 468889.4 | 510102.5 | TRUE |
| 37427.4  | 38807.5  | 27406.8  | 37586.7  | 38518.5  | 40770.7  | 48152    | 41857.3  | TRUE |
| 145562.5 | 109577.2 | 144017   | 142261.9 | 113540.4 | 138283.5 | 172274   | 123800.2 | TRUE |
| 52954.4  | 74578.8  | 45658.4  | 60982.6  | 90048.4  | 54436.3  | 58881.5  | 62623.1  | TRUE |
| 37307.6  | 34632.4  | 22349.9  | 37758.7  | 26891.7  | 28110.2  | 41760.3  | 37121.5  | TRUE |
| 497366.7 | 479941.8 | 504050.2 | 463917.2 | 487616.1 | 520851.5 | 483802.5 | 456337.7 | TRUE |
| 1098677  | 1099015  | 997295.9 | 976089.1 | 890933.1 | 1126350  | 1203693  | 1099266  | TRUE |
| 239256.2 | 201180.2 | 216448.1 | 218255.6 | 188846.4 | 218244.6 | 225869.2 | 233525.4 | TRUE |
| 93702.8  | 82710.5  | 93866.8  | 116455.4 | 94636.2  | 85475.4  | 104810.7 | 110335.3 | TRUE |
| 172478.8 | 150927.1 | 111243.2 | 139329.3 | 154060.3 | 139133   | 126777   | 153154.9 | TRUE |
| 161053.6 | 134742.5 | 167122.2 | 214406.5 | 229907.9 | 190571.9 | 196182.6 | 253074.4 | TRUE |
| 699599   | 659997.7 | 714690.7 | 744588.8 | 628453.1 | 754426.3 | 718613.1 | 714768.9 | TRUE |
| 72374.2  | 57746    | 52811.2  | 60788.9  | 55780.7  | 66463.8  | 61455.2  | 54269.8  | TRUE |
| 107319.2 | 131909.6 | 81455.9  | 101185.9 | 73902    | 83458.4  | 116543.5 | 79867.1  | TRUE |
| 85147.6  | 70293.9  | 74359.9  | 101805.7 | 81394.6  | 101759.3 | 108566.6 | 102119.3 | TRUE |
| 32821.4  | 27723.5  | 24495    | 24192.8  | 24277.9  | 38027.1  | 27928.1  | 37567.6  | TRUE |
| 260797.1 | 232439.7 | 175144.2 | 233363.5 | 200761.6 | 278265.6 | 276689.9 | 268724.7 | TRUE |
| 59937.1  | 48589.4  | 42718.4  | 60486.5  | 47849    | 74995.9  | 63799.8  | 74581.2  | TRUE |
| 105208.9 | 140202.6 | 124702.9 | 159567.2 | 95586.1  | 153816.1 | 147341.7 | 109253   | TRUE |
| 142098.3 | 121869.6 | 106819.1 | 126053.6 | 113940.2 | 150877.1 | 149079.5 | 117338.2 | TRUE |
| 156369   | 178306.5 | 194615.3 | 194847.7 | 255449.3 | 124737.9 | 136426.5 | 148827.9 | TRUE |
| 2580456  | 2269983  | 2795667  | 3062100  | 2119286  | 2987371  | 2899203  | 2319871  | TRUE |
| 78026.9  | 71901.2  | 73750    | 79924    | 93693.5  | 70020.4  | 96434.8  | 87867    | TRUE |
| 78236.6  | 69632.8  | 67595.8  | 79250.5  | 72245.3  | 72834.6  | 93047.9  | 84266.7  | TRUE |

|          |          |          |          |          |          |          |          |      |
|----------|----------|----------|----------|----------|----------|----------|----------|------|
| 38598.9  | 38591    | 21876.7  | 21897.7  | 18127.6  | 24459.6  | 19355.4  | 18782.1  | TRUE |
| 94383.9  | 76297.7  | 98046.1  | 92353.3  | 77763.4  | 113201.5 | 92603.4  | 107739.1 | TRUE |
| 81116.4  | 81522.2  | 89221.4  | 93598.2  | 100969.9 | 93572.9  | 101451.5 | 94535.7  | TRUE |
| 93033.4  | 90636.4  | 177971.4 | 103953.6 | 93004.4  | 65725.3  | 97052    | 121776.3 | TRUE |
| 249374.9 | 283268.4 | 116913.9 | 330565   | 308178.8 | 170092.9 | 316030.7 | 363323.9 | TRUE |
| 79176    | 74060.9  | 43727.2  | 107375.1 | 80816    | 75530.6  | 110744.2 | 100222.4 | TRUE |
| 66500.4  | 60218.9  | 75875    | 100537.5 | 53568.9  | 114722.3 | 90477.3  | 101651.9 | TRUE |
| 1306953  | 1072935  | 803538.1 | 1199388  | 641442.7 | 1292190  | 1250858  | 1229381  | TRUE |
| 62122.1  | 53647.8  | 42479    | 42023.9  | 31729.4  | 39239.2  | 45975.7  | 34925.9  | TRUE |
| 148098.6 | 138717.9 | 128933.3 | 138863.4 | 152656.3 | 141398   | 133021.4 | 123899.3 | TRUE |
| 594882.5 | 574601.1 | 574354.5 | 578853.1 | 453024.7 | 533504.9 | 568111.3 | 521119.1 | TRUE |
| 500849   | 419014   | 418031.1 | 506226.4 | 484894.7 | 447093.2 | 504198.8 | 496478.2 | TRUE |
| 1589341  | 1599991  | 1479798  | 1650997  | 1549197  | 1581276  | 1851853  | 1643363  | TRUE |
| 35737.7  | 62080.4  | 39470.7  | 57804.8  | 40751.2  | 39902.3  | 42461.6  | 49686.9  | TRUE |
| 10790.2  | 15845.7  | 33344.6  | 38021.8  | 39785.6  | 18624.9  | 13872.2  | 10852.1  | TRUE |
| 47547    | 101797.6 | 65366.6  | 90519.1  | 77120.4  | 38670.4  | 57878.6  | 43270.9  | TRUE |
| 41598.1  | 36576.6  | 30389.3  | 31582.8  | 37272.8  | 37674.5  | 29000.4  | 37477.6  | TRUE |
| 144755.8 | 144721.4 | 155216.5 | 164654.8 | 180714.3 | 182822.1 | 124054.8 | 177438.7 | TRUE |
| 337274.4 | 300254   | 234307   | 186556.8 | 187391   | 217686.8 | 214615.5 | 207975.7 | TRUE |
| 389037.6 | 372027.5 | 424123.8 | 438308.7 | 359066   | 445012.8 | 404630.9 | 336359.7 | TRUE |
| 486443.6 | 503128.6 | 491911.8 | 521238.3 | 420485.9 | 534563   | 461901.4 | 423026.8 | TRUE |
| 147400.2 | 117187.7 | 109707.1 | 128357.4 | 112879.8 | 126035.3 | 136573.7 | 125944.2 | TRUE |
| 925570.2 | 711349.8 | 890023.8 | 819944   | 932316.1 | 876133.2 | 779391.3 | 789137.6 | TRUE |
| 1530244  | 1208685  | 1472928  | 1520412  | 1407812  | 1538931  | 1225505  | 1431875  | TRUE |
| 63697.7  | 38469.5  | 38072.1  | 60869.7  | 43945.9  | 70999.8  | 63919.6  | 74214.1  | TRUE |
| 361718   | 286681.2 | 342530   | 279270.5 | 208852.2 | 527918.5 | 390218.1 | 299887.1 | TRUE |
| 139175.1 | 82324.8  | 120608.4 | 131086.1 | 109839.5 | 127935.1 | 121348.2 | 155278.5 | TRUE |
| 627901.4 | 390734.1 | 616695.9 | 644070.7 | 909353.3 | 587121.3 | 534792.8 | 663353.3 | TRUE |
| 212808.5 | 222232.7 | 148598.6 | 145681.4 | 141047.1 | 154142.4 | 181988.3 | 136409.4 | TRUE |
| 280674.7 | 275221.1 | 263836.8 | 282144.5 | 232411.6 | 277313.8 | 273601.8 | 209793.2 | TRUE |
| 567705   | 586630.3 | 514444.5 | 535695.9 | 451347.6 | 524423.5 | 607397.2 | 461884.4 | TRUE |
| 378303.9 | 304352.2 | 436019.3 | 394696.6 | 375160.8 | 381784.5 | 338606.9 | 335046.9 | TRUE |
| 41610.7  | 42432.6  | 38941.2  | 49594.4  | 27280    | 53150.3  | 42542    | 34894.2  | TRUE |
| 124836.7 | 123935.7 | 130800.4 | 127379.5 | 105904.2 | 146360.3 | 136734.3 | 121526   | TRUE |
| 124419.6 | 134914.2 | 129246.8 | 152654.5 | 159825   | 123696.6 | 166617.8 | 184003.3 | TRUE |
| 13512.2  | 32501.9  | 30937.5  | 9737.2   | 7816.3   | 36391.8  | 34651.7  | 26929.8  | TRUE |
| 35045.5  | 44872.4  | 47634.4  | 34790.3  | 20757.3  | 5694.3   | 59192.9  | 41194.1  | TRUE |
| 37406.4  | 61870.3  | 58741    | 63625.3  | 48389.2  | 51025.7  | 48639.2  | 54334.3  | TRUE |
| 51038.6  | 48956.4  | 56629.6  | 65151.7  | 74000.4  | 79642.2  | 86610.2  | 41917.1  | TRUE |
| 80459.8  | 70624.9  | 105130.4 | 62296.3  | 71416.3  | 74300.2  | 64128.3  | 65161.5  | TRUE |
| 101985.1 | 72131    | 87840    | 101786   | 95788.2  | 108803.4 | 102651.5 | 89666.6  | TRUE |
| 69349.1  | 45515.6  | 88718.9  | 69031.8  | 82364.3  | 116723.6 | 99162.5  | 75371.4  | TRUE |
| 48475.5  | 38338.3  | 50053.6  | 53192.9  | 43963.3  | 46709.5  | 54921.6  | 40704.3  | TRUE |
| 21319.8  | 28926    | 32569.8  | 10080.4  | 30207.4  | 18739.5  | 12314.7  | 6060.6   | TRUE |

|          |          |          |          |          |          |          |          |      |
|----------|----------|----------|----------|----------|----------|----------|----------|------|
| 55416.5  | 63320.8  | 46644.9  | 67103.9  | 55332.8  | 59927.5  | 72934.4  | 70383    | TRUE |
| 29802.2  | 19950.5  | 25408.5  | 5135.9   | 23461.5  | 20484.1  | 31839.9  | 11082    | TRUE |
| 195535.3 | 194598.7 | 184379.6 | 205129.9 | 157666.2 | 163723.2 | 213931.7 | 190798.7 | TRUE |
| 169036.1 | 191773.2 | 170368.4 | 193219.5 | 171857.2 | 159071.8 | 210859.5 | 209858.6 | TRUE |
| 21134.1  | 16946.2  | 19935.9  | 38632    | 24072.5  | 21739.2  | 28490.8  | 12068.2  | TRUE |
| 87946.6  | 91777.4  | 110820.6 | 91860.7  | 96746.5  | 92953.3  | 93168.7  | 96326.5  | TRUE |
| 81953    | 65433    | 60231.7  | 53293.3  | 48877    | 80518.3  | 82000.4  | 66792.3  | TRUE |
| 203070.1 | 157843.7 | 150625.7 | 200295.4 | 162850.5 | 189184.2 | 181346.4 | 170841.4 | TRUE |
| 290457.7 | 212402.1 | 213123.1 | 270930   | 229584.7 | 323828.2 | 281044.5 | 352702.7 | TRUE |
| 200624.9 | 227206.3 | 221499.1 | 218700.8 | 230970.4 | 222064.5 | 203040.1 | 232492.1 | TRUE |
| 354348.7 | 311297.4 | 300108.4 | 304770.4 | 344231.7 | 300104.3 | 340598.3 | 381571.6 | TRUE |
| 47458    | 42221.6  | 40212.5  | 42703.9  | 34310.8  | 38406.6  | 34235.7  | 44200.1  | TRUE |
| 1039959  | 872028.5 | 686172.5 | 773147.2 | 904452   | 755693.9 | 948532   | 964230.6 | TRUE |
| 54964.6  | 65300.5  | 78186    | 87538.3  | 82358.6  | 95166    | 88703.6  | 86170.3  | TRUE |
| 85651.4  | 57070.7  | 87696    | 104845.6 | 109890.1 | 81861    | 86887.3  | 109192.2 | TRUE |
| 190602.1 | 185429.5 | 230631.2 | 261534.2 | 292591.3 | 250649.4 | 253825.5 | 275632.1 | TRUE |
| 16955.6  | 23442.2  | 30634    | 24934.1  | 27327.2  | 20434.9  | 9557.6   | 16280.6  | TRUE |
| 29788.1  | 45415.2  | 28576.2  | 41709.6  | 23887.8  | 33331.6  | 32723.3  | 41093.4  | TRUE |
| 9338     | 7682.3   | 6073.6   | 7994.4   | 6782.2   | 6515.8   | 8041.8   | 11283.9  | TRUE |
| 404236.4 | 365393.3 | 338446.6 | 355105.5 | 330415.4 | 307242.8 | 346580.4 | 299119.4 | TRUE |
| 2710115  | 2549651  | 1848042  | 2218115  | 2205269  | 1848369  | 2227085  | 2199027  | TRUE |
| 170509   | 154934   | 95944    | 85231.1  | 123157.2 | 81920    | 119361.9 | 94660.7  | TRUE |
| 301374.5 | 298687.8 | 184608.6 | 190865   | 239707.4 | 177496.3 | 206548.6 | 238654.1 | TRUE |
| 159936.8 | 147366.7 | 174247.6 | 185253.8 | 206643.7 | 142831.9 | 179287   | 166172.2 | TRUE |
| 206782.8 | 194662.7 | 193468.7 | 188306.7 | 236001.1 | 191808.1 | 200549.7 | 202419.3 | TRUE |
| 149911.4 | 148442.5 | 130004.2 | 148555.2 | 155594.5 | 119153.2 | 184938.4 | 169098.6 | TRUE |
| 206391.6 | 206554.5 | 180512.3 | 221117.4 | 229569.5 | 189466   | 228301.9 | 213647.5 | TRUE |
| 64817.5  | 157423.2 | 64759.6  | 112725.1 | 124206.3 | 43865.1  | 44363.1  | 49000.5  | TRUE |
| 512390.6 | 529078   | 548912.6 | 573418.7 | 406932   | 571375.7 | 581523   | 508734.9 | TRUE |
| 2059242  | 2024564  | 2309579  | 2303522  | 1700304  | 2185667  | 2447980  | 2273191  | TRUE |
| 415651   | 370077.1 | 443934.3 | 403203.4 | 407702.3 | 371481   | 409471.8 | 410035   | TRUE |
| 63381.2  | 157278.9 | 113158.1 | 139260.3 | 112688.6 | 40312.7  | 52183.1  | 44900.4  | TRUE |
| 50381.2  | 70688.1  | 59931.6  | 76619.4  | 77963.4  | 49080.7  | 35900.2  | 49545.6  | TRUE |
| 15269.7  | 8021.8   | 12929.2  | 18154.3  | 18960.8  | 6990.6   | 20197.4  | 20747.1  | TRUE |
| 894092   | 870062.7 | 715664.3 | 954922   | 1231285  | 720601.3 | 1147421  | 1151263  | TRUE |

|         |         |       |         |         |         |       |         |      |
|---------|---------|-------|---------|---------|---------|-------|---------|------|
| 50367.2 | 50076.5 | 54446 | 57010.6 | 78748.7 | 48013.5 | 52698 | 56089.3 | TRUE |
| 8129.3  | 29459.4 | 25244 | 25963   | 32201.5 | 7205.6  | 6323  | 7540    | TRUE |

|          |          |          |          |          |          |          |          |      |
|----------|----------|----------|----------|----------|----------|----------|----------|------|
| 71911.6  | 64447.8  | 57045.8  | 82909.9  | 77369.5  | 72853.9  | 106649   | 71722.1  | TRUE |
| 139146.5 | 156597.1 | 137085.7 | 147309.4 | 159019.1 | 139323.5 | 195866.5 | 152660.5 | TRUE |
| 19946.2  | 13979.6  | 9103.5   | 42468.9  | 30546.5  | 21032.9  | 37777    | 28496.6  | TRUE |
| 96469.5  | 115313.7 | 90124.5  | 105595   | 95994.1  | 88297    | 124912   | 92808.4  | TRUE |
| 154970.3 | 281243.4 | 229891.2 | 272526.3 | 317298.5 | 101668.9 | 109766.9 | 123216.5 | TRUE |
| 50919.2  | 51014.9  | 29573.9  | 35960.1  | 35675.9  | 42594.1  | 45167.4  | 44623.1  | TRUE |

|          |          |          |          |          |          |          |          |      |
|----------|----------|----------|----------|----------|----------|----------|----------|------|
| 450569   | 314687.6 | 233992.3 | 268361.4 | 184124   | 237411.1 | 234486.9 | 196631.8 | TRUE |
| 142865.3 | 178878.4 | 138949.9 | 157861.8 | 147761.6 | 152897   | 158227.4 | 179898.7 | TRUE |

|          |         |          |          |          |          |          |          |      |
|----------|---------|----------|----------|----------|----------|----------|----------|------|
| 35762.3  | 50341.8 | 20096.7  | 39191.8  | 53248.2  | 15420    | 53135.2  | 52933.5  | TRUE |
| 163743.9 | 164983  | 133871.5 | 148430.4 | 151305.5 | 109779.6 | 141680.3 | 141894.5 | TRUE |

|        |        |        |          |          |          |          |          |      |
|--------|--------|--------|----------|----------|----------|----------|----------|------|
| 194479 | 190770 | 198489 | 271574.4 | 185820.3 | 214288.1 | 237856.3 | 232137.1 | TRUE |
|--------|--------|--------|----------|----------|----------|----------|----------|------|

|          |          |          |          |          |          |          |          |      |
|----------|----------|----------|----------|----------|----------|----------|----------|------|
| 129124   | 107380.1 | 70326.3  | 86781.6  | 88770.7  | 72167.5  | 85175.2  | 93230.5  | TRUE |
| 272011.7 | 332674.1 | 256618.9 | 269828.3 | 276306.5 | 242393.5 | 257144.3 | 286714.4 | TRUE |
| 485022.3 | 476208.8 | 473861.4 | 496294   | 488916.1 | 481942   | 459391.7 | 473858.4 | TRUE |
| 1521536  | 1457618  | 1246467  | 1568113  | 1621551  | 1316008  | 1624179  | 1671156  | TRUE |
| 706880.6 | 673460.1 | 637836.9 | 725667.8 | 741569.9 | 643206   | 787501.9 | 771192.7 | TRUE |
| 56036.5  | 58169.2  | 45872    | 56144.8  | 54443.7  | 39276.3  | 49072.4  | 58685.7  | TRUE |
| 57481.6  | 81331.2  | 61681.2  | 64992.5  | 67872.5  | 49845.1  | 37858.3  | 32914.9  | TRUE |
| 676682.2 | 815683.3 | 653732.1 | 648940.7 | 591368.8 | 631419   | 596579   | 666703.1 | TRUE |
| 3565954  | 2859162  | 3819074  | 3688660  | 3082147  | 3543984  | 3717994  | 3721098  | TRUE |
| 2697206  | 2348442  | 2783010  | 2785688  | 2380535  | 2742134  | 2882939  | 2672437  | TRUE |
| 66247.4  | 62622    | 39612.7  | 60146.7  | 58879.7  | 44609.8  | 57845.2  | 63890.1  | TRUE |
| 52606.7  | 128374.6 | 82554.8  | 142169.2 | 124412.8 | 27736.8  | 35059.4  | 34289.5  | TRUE |
| 260828.3 | 281586.8 | 249323.8 | 229886.2 | 256038.9 | 198433.4 | 239145.6 | 272572.3 | TRUE |
| 411808.6 | 411838.6 | 370799.7 | 414697.1 | 458838.7 | 385738.6 | 448818.5 | 399514.8 | TRUE |
| 669685.5 | 600836.3 | 534791.5 | 789478.9 | 813530.3 | 564361.8 | 645098.2 | 850952.9 | TRUE |
| 103360.9 | 88891.9  | 83983.4  | 98513    | 116254.7 | 92307    | 111816.2 | 104996.3 | TRUE |
| 25531.8  | 47864.4  | 29085.3  | 64249.7  | 62679.8  | 26689.3  | 15591    | 11823.1  | TRUE |
| 618740.2 | 662154.3 | 630028.1 | 622338.3 | 604673.7 | 705025.5 | 712670.4 | 702244.9 | TRUE |
| 739928.7 | 692846.1 | 856173.1 | 843884   | 721008.1 | 761763.7 | 775693.1 | 778893.7 | TRUE |

|          |          |          |          |          |          |          |          |      |
|----------|----------|----------|----------|----------|----------|----------|----------|------|
| 64227.5  | 45396.2  | 64344.6  | 38150.8  | 66395.1  | 63950.4  | 69498.5  | 57342.8  | TRUE |
| 268159.3 | 153457.8 | 387279.8 | 273030.7 | 278626.2 | 565842.9 | 323177.8 | 260438   | TRUE |
| 57018.3  | 71894.3  | 37997.3  | 62538.6  | 27739.1  | 39933.7  | 63455.8  | 59782.3  | TRUE |
| 677361.9 | 664555.6 | 562750.4 | 621720.9 | 586499.5 | 561077.2 | 607693.5 | 563621.2 | TRUE |
| 442679.1 | 403774.1 | 468739   | 482333.6 | 479720.6 | 466784.6 | 442089.5 | 451200.7 | TRUE |
| 509834.5 | 444612.4 | 453537.8 | 528192.8 | 527911.4 | 490389.5 | 440208.1 | 486509.4 | TRUE |
| 38490.2  | 24843    | 34167.6  | 31437.4  | 27325.9  | 40555    | 29651.5  | 41553    | TRUE |
| 103320.6 | 98263.3  | 79333.1  | 100843.7 | 105176.9 | 101278.2 | 112500.3 | 77316.6  | TRUE |
| 414416   | 378446.2 | 335791.2 | 386843   | 353785.8 | 421737.2 | 442087.5 | 404098.7 | TRUE |
| 212964.1 | 179432   | 194025   | 204103.9 | 160484.7 | 166312.7 | 175461.6 | 171359.7 | TRUE |
| 36017.4  | 33372.8  | 16408.3  | 26366.9  | 36345.5  | 23154.8  | 38624.8  | 46343.1  | TRUE |
| 137870.2 | 112592.5 | 91447.4  | 125526.8 | 138460.2 | 112843.7 | 159830.9 | 186875.6 | TRUE |
| 20926.1  | 12606.2  | 8446.3   | 11116.6  | 23103.1  | 9142.6   | 38881.5  | 34674    | TRUE |
| 79814.3  | 72765.9  | 67395.5  | 86221.8  | 105922   | 89127.3  | 106132.1 | 104814.1 | TRUE |
| 49607.1  | 45682.4  | 37631.9  | 49579    | 36409    | 40296.1  | 40074.6  | 42504.9  | TRUE |
| 481574.5 | 415701.2 | 284702.3 | 462078.6 | 457363.9 | 455454.8 | 551379.9 | 622186.6 | TRUE |
| 272664.7 | 203404.3 | 208444.2 | 221939.4 | 189117   | 280768.7 | 295436.3 | 304517.8 | TRUE |
| 58122.7  | 44946.1  | 37928.3  | 81567    | 42796.3  | 49679.9  | 70736.2  | 65495.6  | TRUE |
| 37050.6  | 24491.4  | 38702.4  | 31958.9  | 18344.6  | 74564.3  | 35864.1  | 68065.8  | TRUE |
| 287055.2 | 290718.9 | 215196.5 | 222462.5 | 329744.3 | 220601.4 | 298673.5 | 303035.1 | TRUE |
| 114779.3 | 133870.7 | 128538.2 | 166950.7 | 89474.8  | 97208.9  | 143663.5 | 96810.3  | TRUE |
| 16171.9  | 11379.2  | 8794.5   | 11678.6  | 20910.2  | 5927.2   | 13059.1  | 8768.2   | TRUE |
| 136502.8 | 138421.4 | 220209.8 | 190569.3 | 117299.9 | 332837.2 | 163730.5 | 295171.6 | TRUE |
| 48072.8  | 36794.9  | 37280.4  | 36942.4  | 32813.2  | 57867.7  | 67388.8  | 59899.7  | TRUE |
| 93455    | 50577.8  | 106444.4 | 87757.1  | 46293.1  | 109874.8 | 63292.8  | 49726.6  | TRUE |
| 10731692 | 10547393 | 9600420  | 10504609 | 11042983 | 9382652  | 11584729 | 11802176 | TRUE |
| 506659.5 | 311037.4 | 352130.1 | 437315.1 | 393822.9 | 465348.8 | 394866.7 | 473305.4 | TRUE |
| 372664.4 | 354075.6 | 247593.2 | 356626.6 | 316550.8 | 308343.7 | 362187.1 | 409946.3 | TRUE |
| 109291.5 | 100700.1 | 98520.2  | 110037.6 | 100109.4 | 109521.7 | 101306.9 | 103085.5 | TRUE |
| 86282.4  | 112908   | 135427.1 | 89391.2  | 77412.9  | 73105.2  | 90874.9  | 59832.2  | TRUE |
| 193186.8 | 154653.3 | 163970.9 | 197873.5 | 164190.4 | 136358.5 | 164622.3 | 170019.9 | TRUE |
| 128578.1 | 111924.5 | 119198.3 | 115821.5 | 111610.1 | 133623.5 | 116360.7 | 104521.6 | TRUE |
| 21622.5  | 17905.4  | 20446.2  | 11469    | 19410.2  | 5031.7   | 22269.5  | 28583.4  | TRUE |
| 176038   | 159014.5 | 165689.7 | 179249.4 | 154466.4 | 182851.7 | 191651.2 | 167528.3 | TRUE |
| 74816.4  | 72968.8  | 72603.1  | 96390.3  | 79198.5  | 86711.8  | 91657.6  | 69582.5  | TRUE |
| 98433.5  | 72292.2  | 81581.8  | 106476.5 | 114157.9 | 94197.5  | 98971.4  | 100596.6 | TRUE |
| 125593.7 | 129970.2 | 152534.8 | 149686.2 | 176686.7 | 365257.6 | 153262.5 | 169397.4 | TRUE |
| 114430.1 | 124558.9 | 109802   | 137639.1 | 126438.1 | 129738.7 | 165411.6 | 105091.8 | TRUE |
| 91225.6  | 98985.2  | 102487.5 | 121006.5 | 88589.4  | 99161.1  | 109366   | 105240.9 | TRUE |
| 53587.5  | 62241.3  | 74357.6  | 65827    | 72182.8  | 57985.9  | 55583.6  | 50074.9  | TRUE |

|          |          |          |          |          |          |          |          |      |
|----------|----------|----------|----------|----------|----------|----------|----------|------|
| 59247.8  | 75846    | 82055.6  | 77983.3  | 55344.1  | 56456.6  | 84438.1  | 66235    | TRUE |
| 81733.7  | 79580.2  | 61316.7  | 89635.3  | 76357.1  | 71372.1  | 78989.4  | 90301.3  | TRUE |
| 86146.3  | 88024    | 147646.9 | 80195.6  | 69617.8  | 72797    | 68780.9  | 61297    | TRUE |
| 188593.7 | 150209.9 | 160827.9 | 175410.6 | 177080.1 | 197216.8 | 212121.7 | 194325.2 | TRUE |
| 44632.2  | 58328.1  | 44484.2  | 42859.6  | 41272.5  | 39843    | 55526.5  | 48967.1  | TRUE |
| 42896.4  | 34447.7  | 41099.8  | 48351.1  | 59463    | 49354.7  | 55328.6  | 53674.5  | TRUE |
| 109494.4 | 126292.3 | 91330.2  | 138614.4 | 110990.8 | 155707.9 | 133472.1 | 153418.2 | TRUE |
| 10109.6  | 21896.4  | 20711.5  | 7870.5   | 21440.7  | 7208.4   | 21401.6  | 17139.2  | TRUE |
| 344928.4 | 316397.5 | 297531   | 377499.8 | 320215.6 | 363123.5 | 365015.7 | 372304.3 | TRUE |
| 295234.3 | 299547.4 | 179608.3 | 212585   | 203906   | 197182.1 | 263729.7 | 219448.7 | TRUE |
|          |          |          |          |          |          |          |          |      |
| 160965.3 | 147350.6 | 119138.1 | 125742.2 | 131501.5 | 98891    | 136066.1 | 120930.4 | TRUE |
| 3505445  | 3220674  | 3187193  | 4084305  | 3819616  | 3271037  | 3974867  | 3809372  | TRUE |
|          |          |          |          |          |          |          |          |      |
| 5909.8   | 79281    | 3081.3   | 6060     | 9048.7   | 7001.9   | 7581.3   | 17193.1  | TRUE |
| 271018.6 | 293349.9 | 197635   | 302210.2 | 322801.2 | 239132.2 | 321356.9 | 337748.9 | TRUE |
|          |          |          |          |          |          |          |          |      |
| 2478532  | 2391397  | 2082060  | 2452924  | 2149080  | 2074454  | 2346847  | 2171527  | TRUE |
| 951421.8 | 973655.4 | 781118.2 | 939808.4 | 886254.2 | 840698.9 | 899279.2 | 880190.9 | TRUE |
| 123987.2 | 100721.8 | 120232.7 | 119397.6 | 101681.2 | 125252.8 | 130262.3 | 116776.7 | TRUE |
|          |          |          |          |          |          |          |          |      |
| 2003037  | 1749994  | 2069473  | 2174847  | 1836900  | 2160774  | 1748353  | 2063106  | TRUE |
| 858500.8 | 940865.9 | 900299.1 | 945482.7 | 816578.3 | 819820.7 | 738571.5 | 852212.8 | TRUE |
|          |          |          |          |          |          |          |          |      |
| 160989.3 | 173513.1 | 127913.9 | 167457.5 | 203448   | 138656.1 | 189313.5 | 167775.8 | TRUE |
| 450099.4 | 449155.6 | 384398.8 | 418093.9 | 548401.5 | 388677.3 | 468525.5 | 504072.1 | TRUE |
| 181112.5 | 224305.9 | 152808.9 | 182591.3 | 198607.9 | 162809.1 | 226241.1 | 223719.4 | TRUE |
| 137225.7 | 143288.8 | 173516.2 | 180265.3 | 124573.5 | 126367.2 | 149107   | 112280.4 | TRUE |
| 1238805  | 1293197  | 1302130  | 1310867  | 1050405  | 1160130  | 1420243  | 1114626  | TRUE |
| 334927.6 | 401368.5 | 375993.9 | 388108.3 | 315137.4 | 350469.8 | 396770.2 | 360466.4 | TRUE |
| 70719.2  | 133027.8 | 61889.6  | 122279.5 | 106395.9 | 25274.4  | 18362.7  | 28603.9  | TRUE |
| 693053.5 | 549654.9 | 811351   | 766800.3 | 632566.8 | 710324   | 514024.6 | 696789.2 | TRUE |
| 2278010  | 3711693  | 1318460  | 1673809  | 1996760  | 1417379  | 3692502  | 1883862  | TRUE |
| 2392405  | 1938336  | 3609181  | 3733632  | 1478597  | 1621360  | 1885635  | 1693797  | TRUE |
| 1061441  | 834672.6 | 1551125  | 1617251  | 663062.3 | 760016.9 | 849755.5 | 695593.1 | TRUE |
| 668038.9 | 613669.8 | 1089072  | 1306925  | 535898.3 | 649962.1 | 661338.4 | 587625   | TRUE |
|          |          |          |          |          |          |          |          |      |
| 249217.6 | 129211.1 | 263698.4 | 285920.6 | 286993   | 209645   | 170326.9 | 172910.5 | TRUE |
| 88846.1  | 98507.3  | 77583.4  | 86654.7  | 97003.9  | 59519.6  | 98729.9  | 94512.8  | TRUE |
| 15861.8  | 21914.5  | 4745.5   | 9413.3   | 9552     | 8328.8   | 25978    | 6980.6   | TRUE |



|          |          |          |          |          |          |          |          |      |
|----------|----------|----------|----------|----------|----------|----------|----------|------|
| 94563.4  | 110936.5 | 90160.3  | 106043.4 | 94898.5  | 90073.9  | 124380.3 | 95415.3  | TRUE |
| 60444.8  | 67294.1  | 85623.2  | 44535.4  | 59033.2  | 70702.3  | 75721.5  | 59110.3  | TRUE |
| 45330    | 42752.1  | 51395.6  | 30165.3  | 41244.7  | 34827.2  | 48055.5  | 44195.2  | TRUE |
| 176149   | 336566.9 | 193249.6 | 285960.4 | 291336.2 | 168260   | 105613.2 | 115069   | TRUE |
| 175506.5 | 153083.6 | 184339.9 | 190780.5 | 138950.1 | 282867.3 | 200254.5 | 165065.9 | TRUE |
| 567518   | 321970.9 | 494245   | 637320   | 679578.5 | 544986.6 | 428047.3 | 526502.5 | TRUE |
|          |          |          |          |          |          |          |          |      |
| 90871.4  | 59568.7  | 37816    | 62997.3  | 62997.2  | 75161.3  | 75435.4  | 66957    | TRUE |
| 263135.8 | 319318.4 | 170398.8 | 230644.4 | 176795.6 | 182083   | 212359.9 | 220819.4 | TRUE |
| 286435.3 | 311890.2 | 298225.3 | 238471.7 | 287575   | 346835.3 | 304351.8 | 286309.5 | TRUE |
|          |          |          |          |          |          |          |          |      |
| 323823.7 | 377410.8 | 264173.1 | 276636.8 | 251715.2 | 304973   | 401030.5 | 274352.2 | TRUE |
|          |          |          |          |          |          |          |          |      |
| 263413.7 | 312671.3 | 173259.8 | 239032.2 | 231209   | 195028.6 | 318365.8 | 288139.1 | TRUE |
| 2453093  | 2530687  | 2536401  | 2956441  | 1864935  | 2389116  | 2570727  | 2460227  | TRUE |
| 539656   | 568276.2 | 478576.2 | 522038.3 | 398983.5 | 516212.6 | 613338   | 374493.5 | TRUE |
| 569138.3 | 617456.5 | 505958.2 | 598413.3 | 442941   | 603532.7 | 684858.7 | 461513.2 | TRUE |
| 90757.3  | 102994.9 | 104252.6 | 98140.6  | 94656.2  | 85468    | 124159.1 | 96943    | TRUE |
| 1042580  | 730583.7 | 1125341  | 1120586  | 991238.3 | 1199809  | 787354.9 | 1147527  | TRUE |
| 680359.1 | 505125.1 | 683501.7 | 705495.5 | 652844.7 | 793999   | 531809.2 | 727554.2 | TRUE |
| 672213.3 | 513914.5 | 717391.8 | 774164.8 | 616921.4 | 753297.8 | 489899.9 | 708107.3 | TRUE |
| 666199.3 | 529454.1 | 686863.9 | 730492.5 | 627412.3 | 725111.5 | 550681.3 | 754569   | TRUE |
| 581421.2 | 507279.8 | 583471.7 | 640842.8 | 486898.8 | 573787.8 | 571311.7 | 464060.2 | TRUE |
| 443705   | 487936.4 | 424003.8 | 479033.3 | 353928.1 | 448180.6 | 497699.6 | 364792.9 | TRUE |
| 104817.1 | 173795.2 | 111083.2 | 188820.7 | 184574   | 70442.9  | 86487.3  | 91749.7  | TRUE |
| 94655.7  | 165260.4 | 99284.9  | 168588.4 | 166396.3 | 89638.8  | 88182.8  | 104718.6 | TRUE |
| 788095.4 | 1180663  | 682959.1 | 720636.1 | 816413.8 | 1138842  | 1377807  | 848581.8 | TRUE |
| 749036.9 | 774707.2 | 750527.1 | 781584.1 | 783998.8 | 786581.1 | 820270.4 | 706236.1 | TRUE |
| 392629.8 | 410201.9 | 336554.3 | 429210   | 310021.4 | 380201.4 | 425524.4 | 330221.3 | TRUE |
| 1983714  | 1259336  | 1733908  | 1812931  | 1494968  | 1636056  | 1225471  | 1652377  | TRUE |
| 174925.2 | 114332.8 | 239889.4 | 251165.4 | 190750.1 | 205821.2 | 148115.9 | 203005.3 | TRUE |
| 866831   | 574364.6 | 1042101  | 1119405  | 912160   | 990156.4 | 700340.1 | 958271.9 | TRUE |
| 42126.1  | 49847.4  | 29144.1  | 39545.3  | 48804.3  | 35786.9  | 59222.9  | 39103.9  | TRUE |
| 44942.6  | 43932    | 30707.2  | 36697.8  | 49376    | 49234.9  | 50020.8  | 51655.8  | TRUE |
| 25070.5  | 20535.6  | 15809.4  | 26409.5  | 19091.9  | 23259.7  | 44683.4  | 14937.8  | TRUE |
| 125535   | 89913.5  | 84489.2  | 110318.6 | 94167.1  | 118803.2 | 139973.5 | 136264.5 | TRUE |
|          |          |          |          |          |          |          |          |      |
| 116816.5 | 137394.6 | 92623.6  | 112875.6 | 137420.5 | 91096.2  | 176940.7 | 146818   | TRUE |
| 128444.8 | 164416.3 | 82949.8  | 99003.3  | 127757.8 | 85406.9  | 141375.6 | 126228.9 | TRUE |
|          |          |          |          |          |          |          |          |      |
| 52569.3  | 64299.6  | 47881.1  | 61025.2  | 51746.6  | 44562    | 55409    | 46829    | TRUE |
| 63216.5  | 63925.8  | 49973.7  | 65012.7  | 63877.5  | 54737.7  | 52047.3  | 57725.8  | TRUE |
| 80949.8  | 50313    | 62524.1  | 84465.1  | 70293.2  | 71866.5  | 76232.9  | 59883.2  | TRUE |

|          |          |          |          |          |          |          |          |      |
|----------|----------|----------|----------|----------|----------|----------|----------|------|
| 324691.1 | 223358.4 | 261794.7 | 353097.7 | 345241.7 | 329918.3 | 304926.5 | 391828.2 | TRUE |
| 41267.1  | 82493.3  | 50810    | 51076.5  | 60249.4  | 40450.9  | 57152.2  | 39541    | TRUE |
| 100552.9 | 75616.6  | 125234.2 | 99721.2  | 91421.8  | 117346.2 | 98688.5  | 113791.3 | TRUE |
| 207494.7 | 174759.8 | 156429.4 | 184269.1 | 188001.6 | 184630.4 | 197222.7 | 204716.2 | TRUE |
| 105458.5 | 72108.7  | 70409.3  | 99979.3  | 84876.1  | 96096.6  | 97045.8  | 83557.5  | TRUE |
| 213442.5 | 228708.4 | 213362.5 | 230289.1 | 202161.8 | 235437.2 | 258851.3 | 198391   | TRUE |
| 75800.6  | 74064.5  | 91476.7  | 75179.7  | 76444.4  | 90431.7  | 77553.3  | 86814.4  | TRUE |
| 192591.8 | 184234.9 | 157664.8 | 184959.5 | 142286.6 | 167555.6 | 179362.1 | 181486.7 | TRUE |
| 61782.7  | 80318.7  | 54158.3  | 50521.9  | 51333.2  | 53589    | 65229    | 45244.9  | TRUE |
| 165533.4 | 133774.7 | 143943.4 | 162120.3 | 149536   | 160295   | 164481.2 | 144551.2 | TRUE |
| 205888.7 | 147147.8 | 197914.8 | 153502.1 | 169368.1 | 320473.8 | 206754.5 | 189835.9 | TRUE |
| 46806    | 50459.6  | 68488.6  | 47076.9  | 42803    | 42295.2  | 72363.7  | 39972.1  | TRUE |
| 111395.5 | 110406.2 | 160777.5 | 124353.1 | 137673.6 | 94075.2  | 77270.8  | 73591.5  | TRUE |
| 80567.5  | 118970.7 | 87376.4  | 107130.1 | 134514.3 | 64653.8  | 55798.2  | 51958.9  | TRUE |
| 57265.1  | 77890    | 88079.9  | 55113.4  | 51002.3  | 84224.3  | 77012.3  | 57538.6  | TRUE |
| 68328.3  | 73780.5  | 131825.8 | 55312.8  | 57827.2  | 210223.8 | 135042.5 | 126628.4 | TRUE |
| 75932.7  | 105088.1 | 86663.9  | 104749.6 | 105102.1 | 94713.8  | 73187.6  | 52232.3  | TRUE |
| 101790.6 | 111328.2 | 115676.4 | 129672.2 | 130001.8 | 117783.7 | 119434.9 | 107908.6 | TRUE |
| 193265.9 | 175518.8 | 185908.2 | 193640.7 | 203787.8 | 300492.3 | 247611.3 | 206977   | TRUE |
| 43020.2  | 57948.2  | 51643.4  | 56618.4  | 58690.9  | 47964.6  | 53803.4  | 53967    | TRUE |
| 70328.6  | 78592.5  | 58069.4  | 83036.3  | 75754.7  | 102950.6 | 92568.6  | 77927.2  | TRUE |
| 155907.3 | 181975.5 | 145454.6 | 172983.2 | 177552   | 147867.4 | 162160.3 | 176496.1 | TRUE |
| 169093.1 | 158024.1 | 141416.6 | 151411.8 | 185379   | 135565.8 | 160487.5 | 193634.5 | TRUE |
| 354028.4 | 355527.9 | 371990.2 | 334216.2 | 383338.1 | 339365.7 | 342913.2 | 325212   | TRUE |
| 155299.4 | 168051.8 | 148102.9 | 146556.4 | 141596.6 | 133634.3 | 165317.3 | 126590.9 | TRUE |
| 680793.3 | 636993.8 | 619925.8 | 737543.7 | 637010.3 | 663368.4 | 630148.3 | 718100.6 | TRUE |
| 170380.3 | 164044.7 | 140837.2 | 191391.3 | 150495.4 | 157378.9 | 161322.8 | 171028.8 | TRUE |
| 159107.8 | 177067.8 | 178562.5 | 166303.2 | 146189.2 | 157532.7 | 146547   | 151142.7 | TRUE |
| 110012.4 | 97210.2  | 104201.7 | 121031   | 84165.5  | 126936.5 | 98937.8  | 96046.3  | TRUE |
| 328013.8 | 280100.6 | 367666.4 | 351013.6 | 319479.7 | 437300.5 | 289037.8 | 350665.4 | TRUE |
| 184792.4 | 128463.3 | 174497.4 | 154738.2 | 213518.4 | 236207   | 145037.8 | 215272.1 | TRUE |
| 93000.2  | 152652   | 104211   | 131227.6 | 98781.3  | 106914.1 | 95925.2  | 103723.3 | TRUE |
| 155087   | 153716   | 153704.8 | 148316.4 | 102741.7 | 199921.7 | 143683.9 | 124261.3 | TRUE |
| 158488.1 | 129390.5 | 250555.7 | 219409.2 | 127708.7 | 261252.5 | 190660.8 | 158868.6 | TRUE |
| 244432.2 | 274396   | 138105.8 | 237977.3 | 194149   | 160145.5 | 227374.4 | 176886.8 | TRUE |
| 22893.5  | 10911.9  | 36913.6  | 11203.3  | 20414.6  | 38962.2  | 10070.5  | 24603.9  | TRUE |
| 322603.4 | 319890.9 | 248268.9 | 291274.4 | 247776.8 | 269568.8 | 298343.2 | 273081.2 | TRUE |
| 75562.6  | 68575.4  | 53591.1  | 68179.2  | 72882    | 50502.8  | 73941.4  | 61786.2  | TRUE |
| 93262.6  | 101331.7 | 111008.2 | 103435.6 | 87711.4  | 91015.2  | 103463.3 | 91427.7  | TRUE |
| 149411.2 | 167209   | 145872.1 | 143756.8 | 115975.8 | 128714.5 | 163917   | 142643.9 | TRUE |
| 275532.8 | 279831   | 223759.8 | 286825   | 264402.8 | 272759.9 | 299484.2 | 251154.1 | TRUE |
| 44750.9  | 42814.7  | 37768.1  | 32525.1  | 45993    | 54065.6  | 64602    | 68222.9  | TRUE |
| 51266.4  | 51499.1  | 47746.9  | 51244.3  | 53031.3  | 37554.6  | 76533.6  | 52202.3  | TRUE |
| 226776.8 | 240405.2 | 159210.6 | 188150.5 | 193476.5 | 136458.5 | 263300   | 205596.5 | TRUE |
| 212060.2 | 219290.5 | 156138.2 | 171754.7 | 192795.8 | 164980.9 | 229677.6 | 209863.7 | TRUE |

|          |          |          |          |          |          |          |          |      |
|----------|----------|----------|----------|----------|----------|----------|----------|------|
| 76088.1  | 67122.8  | 72012.8  | 80770    | 75834.2  | 73245.8  | 72658.3  | 82697    | TRUE |
| 85362.3  | 100228.4 | 87234.7  | 84547.7  | 80120.7  | 109575.5 | 125382.8 | 117080.1 | TRUE |
| 228346.1 | 186518.2 | 202023.6 | 229502.8 | 233761.6 | 203630.4 | 260628.1 | 230175.6 | TRUE |
| 137433.2 | 87177.9  | 70851    | 71852    | 86521.7  | 72816.8  | 116501.1 | 97090.5  | TRUE |
| 200375.4 | 174004   | 115595.3 | 164723.7 | 160372.4 | 137379.5 | 170298.6 | 184411.2 | TRUE |
| 119111   | 94510.2  | 79218.2  | 127877.5 | 114350.7 | 133814.1 | 99232.3  | 109552.1 | TRUE |

|          |          |          |          |          |          |          |          |      |
|----------|----------|----------|----------|----------|----------|----------|----------|------|
| 96976.5  | 77366.1  | 84401.2  | 75026.9  | 52839.7  | 68437    | 92090.7  | 54037.7  | TRUE |
| 244308.7 | 223017.5 | 218600.7 | 327258   | 184675.3 | 321442.5 | 256220.3 | 288196.5 | TRUE |
| 61632.9  | 57307.4  | 60628    | 60703    | 61029.9  | 69767.6  | 71212.3  | 69476.7  | TRUE |
| 224517.4 | 215255.6 | 250545.4 | 249276.5 | 223004.9 | 253716.6 | 282996.2 | 255626.3 | TRUE |
| 94714.9  | 113999.8 | 101864.8 | 100082.4 | 90833.1  | 62569.3  | 121102.3 | 87819.3  | TRUE |
| 702833.7 | 592837.7 | 737261   | 792555.2 | 666795.6 | 719090   | 663664.7 | 723860.6 | TRUE |
| 116645   | 107558.6 | 108951   | 132196.2 | 80067.1  | 96190.6  | 106298.6 | 91342.1  | TRUE |
| 68792.3  | 71114    | 44906.4  | 75790.4  | 61694.7  | 61961    | 84009    | 76939.6  | TRUE |
| 252870.1 | 226830   | 278013.6 | 254742.3 | 195590   | 230803.5 | 237501.2 | 263386.4 | TRUE |
| 26460.9  | 19685.3  | 27383.9  | 28365.4  | 21418    | 32447.8  | 30263.8  | 25159.6  | TRUE |
| 1302625  | 1342059  | 1067484  | 1407060  | 1262993  | 1125089  | 1545032  | 1346176  | TRUE |
| 119775.4 | 117040.5 | 96212.3  | 112236.5 | 118769.6 | 143819.6 | 128461.4 | 134663.1 | TRUE |
| 259402.9 | 231229.9 | 283419   | 311115.3 | 259168.5 | 329136.9 | 243901.2 | 298866.6 | TRUE |
| 54756.7  | 52503.6  | 33981.2  | 68931.3  | 50725.7  | 47796.9  | 68689.4  | 50145    | TRUE |
| 136569.7 | 129049.5 | 60858.1  | 106659.4 | 121973.1 | 108703.7 | 158929.2 | 130001.6 | TRUE |
| 99395.3  | 80131.3  | 75009.2  | 103914.8 | 111916.6 | 100059   | 129152.3 | 112151.4 | TRUE |
| 62049.1  | 58334.1  | 49980.2  | 60862    | 56438.9  | 53923.2  | 88028.4  | 83427    | TRUE |

|          |          |          |          |          |          |          |          |      |
|----------|----------|----------|----------|----------|----------|----------|----------|------|
| 465035.9 | 343889.5 | 295995.8 | 381327.1 | 292155   | 274064.5 | 276112.5 | 334252.5 | TRUE |
| 929998.1 | 802007.9 | 634312.5 | 694084.2 | 661327.4 | 681169.1 | 658637.7 | 658815.8 | TRUE |
| 2361780  | 1918324  | 1956957  | 2535839  | 2138163  | 2017680  | 1834140  | 2082354  | TRUE |
| 855607.1 | 646288.2 | 874769.5 | 1054727  | 988389.1 | 779551.1 | 821093.9 | 869405.1 | TRUE |
| 948988.6 | 822298.2 | 925062.4 | 1142122  | 958671.5 | 938351.1 | 974165   | 880532.7 | TRUE |
| 47584.5  | 93828.7  | 80208.3  | 150634   | 148419.3 | 42546.1  | 13311.9  | 15578.4  | TRUE |
| 565391.3 | 495756.4 | 479737.1 | 535263.2 | 474017.1 | 627419.4 | 598467.1 | 572139   | TRUE |
| 1995797  | 2084961  | 1572134  | 1678182  | 1798166  | 2058566  | 2035163  | 2169016  | TRUE |
| 185136.7 | 174883.9 | 176481.9 | 194888.4 | 211202.1 | 247318.5 | 222323.1 | 236843   | TRUE |

|         |          |          |          |          |         |         |         |      |
|---------|----------|----------|----------|----------|---------|---------|---------|------|
| 61371.5 | 123556.5 | 101488.4 | 137777.5 | 170907.7 | 39367.7 | 22542.3 | 44563.9 | TRUE |
|---------|----------|----------|----------|----------|---------|---------|---------|------|

|          |          |          |          |          |          |          |          |      |
|----------|----------|----------|----------|----------|----------|----------|----------|------|
| 120354.8 | 105212   | 121225.4 | 114358.5 | 143891.3 | 132663.1 | 120329.1 | 135623.4 | TRUE |
| 89204.2  | 246300.9 | 243452.5 | 268590.1 | 371707.8 | 54837.9  | 58823.7  | 72233.8  | TRUE |
| 64009.7  | 64554.8  | 76748.8  | 51675.4  | 69633    | 54203.2  | 55603.1  | 58167.2  | TRUE |

|          |          |          |          |          |          |          |          |      |
|----------|----------|----------|----------|----------|----------|----------|----------|------|
| 40424.2  | 26379.4  | 32122.1  | 35540.9  | 43809.6  | 52590.6  | 38342.9  | 55466    | TRUE |
| 45637.2  | 49298.2  | 53476.3  | 45766.2  | 51831.5  | 85684.4  | 41238.6  | 63253.2  | TRUE |
| 74771.5  | 53031.4  | 72572    | 79381.8  | 57936.6  | 61977    | 74994.9  | 69091.9  | TRUE |
| 52538.6  | 55837.3  | 46472.5  | 68077.6  | 46795    | 58776.9  | 52416    | 72353    | TRUE |
| 97533.8  | 72037.5  | 122783.8 | 86159.1  | 71773.7  | 100739.6 | 70651.5  | 88726.6  | TRUE |
| 109707.3 | 40885.1  | 29680.2  | 56371.4  | 45686    | 52849.6  | 51789.3  | 56569.8  | TRUE |
| 52025.3  | 80375.4  | 110429   | 53857.5  | 45986.5  | 81440.8  | 67661.7  | 68159.3  | TRUE |
| 49503.3  | 42601.6  | 34052.8  | 46147.9  | 37197.3  | 50615.6  | 38764.6  | 50943.5  | TRUE |
| 77020.9  | 55726.7  | 56305.4  | 76752.2  | 61592.5  | 68447.6  | 63354.5  | 72872.5  | TRUE |
| 84194.7  | 59767.2  | 56771.8  | 75494    | 78781.1  | 70427    | 82266.3  | 95534.1  | TRUE |
| 104432.6 | 88086    | 81452    | 86344    | 109665.7 | 108768.7 | 103196.7 | 133272.2 | TRUE |
| 288667.6 | 254405.8 | 183735.7 | 248496.4 | 254682.5 | 345705.4 | 266516.8 | 366011   | TRUE |
| 34971.3  | 39015    | 31739    | 33735    | 32687.1  | 43619.9  | 32849.5  | 38147.3  | TRUE |
| 111533   | 99397.6  | 118559.3 | 105803.2 | 98695.6  | 149895.1 | 99095    | 115152.4 | TRUE |
| 108996.5 | 82720.8  | 73766.1  | 90120.5  | 81092.9  | 101138.5 | 90354.9  | 100230.8 | TRUE |
| 115521.1 | 133504.3 | 82133    | 104377.6 | 99954    | 111499.1 | 94929.6  | 91587.9  | TRUE |
| 105998.5 | 72044.1  | 77043    | 75169.1  | 92962.1  | 97948.8  | 77292.7  | 106314.5 | TRUE |
| 475507.8 | 406128.3 | 334286.5 | 408706.1 | 406241.2 | 449791.3 | 462053.2 | 488998.5 | TRUE |
| 70965.9  | 35285.8  | 10467.5  | 49783.6  | 62613.5  | 81072.4  | 54566.9  | 65691.2  | TRUE |
| 101938.6 | 104011.2 | 90549.4  | 104137.6 | 120151.7 | 108005.3 | 95990.1  | 117195.1 | TRUE |
| 96219.7  | 79884.8  | 67942.4  | 86702.4  | 82560.9  | 95719.3  | 74351.9  | 80576.1  | TRUE |
| 9141815  | 11111480 | 8369303  | 9575193  | 8081373  | 10290786 | 11299477 | 10459724 | TRUE |
| 37647.7  | 13621.6  | 21358.7  | 27810.7  | 32920.5  | 25865    | 11161.9  | 8464.4   | TRUE |
| 83807.8  | 86922.2  | 69542    | 88072.4  | 68573.3  | 64333.4  | 78707.9  | 94420.2  | TRUE |
| 139304.5 | 108452.1 | 107662   | 142864.2 | 151314.4 | 138818.9 | 106604.5 | 131434   | TRUE |
| 280191.1 | 237730.5 | 282022.5 | 354736.1 | 364301.6 | 301383.8 | 306931.6 | 358111.1 | TRUE |
| 432923.7 | 345979.9 | 424932.6 | 564715.1 | 514922.4 | 484902.2 | 458791.2 | 555171.1 | TRUE |
| 43844    | 80375.8  | 73374.7  | 78694.9  | 70751.3  | 27667.3  | 31304.5  | 24849.9  | TRUE |
| 43128    | 44944.9  | 45226.6  | 43321.3  | 50295.7  | 48729.8  | 39647.7  | 48209    | TRUE |
| 42921.5  | 53540.3  | 40036.9  | 43412.9  | 47529.4  | 51512.6  | 42080.8  | 55479.8  | TRUE |
| 57018.2  | 53698.1  | 37001.5  | 36787.5  | 59097.3  | 42858    | 65284.7  | 71450.2  | TRUE |
| 60369.5  | 56466.1  | 74348.9  | 63647.9  | 47846.7  | 80947.4  | 49330    | 80023.7  | TRUE |
| 52796    | 59555.5  | 57018.5  | 62566.1  | 39366.3  | 64436.8  | 37411.6  | 55690.1  | TRUE |
| 169189.3 | 155859.4 | 113022.8 | 150632.8 | 109224.7 | 155039   | 171973.9 | 167070.6 | TRUE |
| 235177   | 191445   | 146414.1 | 177813   | 190160.3 | 173614.2 | 227671.9 | 229350.9 | TRUE |
| 142324.6 | 112506.4 | 117380.1 | 96616.3  | 107174.9 | 135746.1 | 155708.5 | 135286.5 | TRUE |
| 397617.2 | 338689.1 | 338003   | 333271.3 | 334646.2 | 406115   | 425975.9 | 437991.2 | TRUE |
| 44691.3  | 34895.2  | 41094.5  | 37416    | 35453    | 46162.8  | 40284.1  | 47880    | TRUE |
| 108276.8 | 128715.9 | 131902.1 | 94995.6  | 61140.4  | 114346.6 | 114236.9 | 67782.9  | TRUE |
| 319766.5 | 329649.9 | 392328.5 | 292115.6 | 339931.2 | 354397.2 | 297616.6 | 323616   | TRUE |
| 338562.9 | 368806.9 | 350612.7 | 299163.5 | 453946.5 | 356281.1 | 372014.7 | 450861.5 | TRUE |
| 30635.1  | 17496.9  | 35064    | 14094.7  | 14194.5  | 55078.3  | 22108    | 9451.5   | TRUE |
| 175269.7 | 171887.3 | 198527.3 | 208372.4 | 137980.1 | 216802.9 | 219210.7 | 200748.7 | TRUE |
| 110929   | 118245.2 | 180306.4 | 111331.8 | 124129.3 | 106081.8 | 103341.2 | 132911.1 | TRUE |
| 37884.9  | 38031.9  | 24983.5  | 44994.5  | 39059.1  | 39588.7  | 58103.4  | 45605.7  | TRUE |

|          |          |          |          |          |          |          |          |      |
|----------|----------|----------|----------|----------|----------|----------|----------|------|
| 173831.9 | 129267   | 156342.4 | 147673.9 | 150715.9 | 186086.3 | 151161.6 | 176332.3 | TRUE |
| 530923.8 | 354520.4 | 393030.8 | 481838.9 | 557697.2 | 588409.7 | 491144.4 | 695359.8 | TRUE |
| 48931.3  | 34026.3  | 37955.5  | 65488.9  | 58846.6  | 60227    | 53854.8  | 83035.4  | TRUE |
| 277504.7 | 284549   | 271164.9 | 290228.6 | 325893   | 314270.9 | 275029.8 | 327369.4 | TRUE |
| 148880.7 | 105233.6 | 179083.7 | 171223.4 | 157565.9 | 143894.5 | 107682.7 | 150340.6 | TRUE |
| 161379.6 | 134794   | 154586   | 169356.8 | 180235.7 | 175191.6 | 164539.7 | 193768.6 | TRUE |
| 118838.7 | 137397.3 | 140230.7 | 160022.5 | 135435.2 | 133458.1 | 138612.5 | 148376.3 | TRUE |
| 88128.8  | 81388.2  | 88241.8  | 85749.2  | 78943.2  | 88199.9  | 75948.7  | 102620   | TRUE |
| 57356.8  | 51259.1  | 54436.1  | 53325.9  | 53260.3  | 57638.7  | 66964.6  | 59403.4  | TRUE |
| 134433.5 | 144176.7 | 159948.5 | 154725.1 | 160518.1 | 146459   | 157306.9 | 180656.5 | TRUE |
| 71052    | 40236.4  | 78645.3  | 80100.8  | 58076.6  | 72864    | 53491.4  | 60218.6  | TRUE |
| 110251.9 | 98472.3  | 88034.6  | 93538.1  | 107422.2 | 109262.6 | 106091.3 | 105814.3 | TRUE |
| 80968.9  | 95285.3  | 82911    | 70986    | 85318    | 110416.5 | 104659.1 | 109992.4 | TRUE |
| 148192.6 | 128783.4 | 116371.9 | 117255.5 | 131058.7 | 156408.7 | 148812.5 | 156951.3 | TRUE |
| 57438.7  | 44691    | 47617.6  | 44357.6  | 58407.9  | 56414.5  | 60356.1  | 65581.9  | TRUE |
| 62356.1  | 57739.7  | 51513.2  | 56357.4  | 68263.1  | 58942.5  | 64999.2  | 63565.3  | TRUE |
| 49115.6  | 38703.7  | 37066.3  | 29173.4  | 33900.2  | 45338.7  | 47704.9  | 49755.7  | TRUE |
| 34090.7  | 33248.3  | 32685.1  | 18303.8  | 40714.9  | 52040.9  | 31907.6  | 55045.8  | TRUE |
| 20139.7  | 16671.8  | 18839.6  | 3784.1   | 17352.3  | 27876.2  | 24144.3  | 29471.7  | TRUE |
| 61471.5  | 54103.2  | 50494.5  | 56150.6  | 49878.1  | 51401.3  | 53473.5  | 71434.3  | TRUE |
| 432235.6 | 327225.2 | 316038.5 | 366528.9 | 368422   | 320304   | 332596.9 | 422574.7 | TRUE |
| 30197.6  | 30071.1  | 27099.1  | 34045.3  | 34049.6  | 28387    | 24835.7  | 35505.4  | TRUE |
| 42607.3  | 33016    | 31701.7  | 34235    | 34502    | 17819.5  | 21994.5  | 9619     | TRUE |
| 138560.1 | 113881.8 | 141625.3 | 158890.5 | 172250.6 | 147488.6 | 123500.6 | 177199.1 | TRUE |
| 116361.3 | 108561.8 | 122806.2 | 118206.8 | 137211.5 | 102067.8 | 101298.5 | 125991.7 | TRUE |
| 313201.5 | 307541.8 | 223602.3 | 250147.6 | 245344.7 | 265984.6 | 294184.3 | 284973.6 | TRUE |
| 706130.6 | 676762.5 | 461119.9 | 535082.9 | 571703.3 | 539549.3 | 641420.7 | 689960.8 | TRUE |
| 22449.8  | 41997.2  | 31061.4  | 24920.4  | 47943.9  | 13846.3  | 40189.5  | 20915.8  | TRUE |
| 739593.6 | 621301.5 | 674419.6 | 702356.6 | 719561.7 | 681444.8 | 555970.7 | 759448.8 | TRUE |
| 174054.6 | 143700   | 137767.8 | 175542.2 | 157150.8 | 166828.3 | 127836.1 | 182820.9 | TRUE |
| 84740.4  | 80668.7  | 63491.9  | 73904.4  | 75424.3  | 63164.4  | 77234.7  | 67857.1  | TRUE |
| 195349.2 | 194109.1 | 123211.3 | 152895.5 | 177885.9 | 145989.6 | 181423.1 | 177336.8 | TRUE |
| 167669.8 | 162336.7 | 159704.5 | 155824.2 | 164143.5 | 149098.6 | 154918.7 | 174373.3 | TRUE |
| 137356.2 | 132612.1 | 119091   | 148868.8 | 124736.8 | 159927.7 | 145301.2 | 156292.4 | TRUE |
| 47611.9  | 31011.7  | 43960.1  | 59318.9  | 46561.3  | 87529    | 41759.7  | 62273.7  | TRUE |
| 240119.8 | 204851   | 289881.6 | 220939   | 255012.1 | 361221.8 | 213753.4 | 243444.2 | TRUE |
| 80366.1  | 61209.1  | 50298.3  | 76386.8  | 72348.8  | 74296.8  | 69235.3  | 65761    | TRUE |
| 48827    | 56998.5  | 40725.6  | 50090.4  | 51287.4  | 44138    | 49786.9  | 41201.4  | TRUE |
| 269386.7 | 242500.2 | 259023.1 | 238548.2 | 264975   | 257440   | 311558.3 | 301834.5 | TRUE |
| 21162.4  | 29348.3  | 22738.8  | 27557.5  | 21148.3  | 23244    | 9496.7   | 34521.9  | TRUE |
| 12671.9  | 19963.4  | 21417.8  | 22321.8  | 9524.1   | 26148.3  | 12182.4  | 10074.5  | TRUE |
| 42973.4  | 64323.3  | 171818.6 | 77895    | 40816    | 54148.5  | 39271    | 47578    | TRUE |
| 35355.6  | 106378.8 | 51411.2  | 74332.5  | 91220.2  | 1785.3   | 8297.7   | 8419.2   | TRUE |
| 106978.6 | 90265.2  | 86722    | 103116.3 | 89975    | 99743.7  | 90008.5  | 102410.2 | TRUE |
| 343250.2 | 368914.7 | 255073.2 | 289546.4 | 375239.4 | 325759   | 329120.1 | 319491.2 | TRUE |
| 133292   | 99220.5  | 66938    | 169374.5 | 103037.3 | 338358.3 | 143251   | 155685.9 | TRUE |
| 128230.3 | 106887   | 80687.2  | 157699.6 | 97572    | 343908.3 | 130792.5 | 156495.2 | TRUE |
| 298189.1 | 276094.6 | 198128.9 | 258978.2 | 321530.1 | 336817.8 | 363057.9 | 366323.8 | TRUE |
| 18933.4  | 14691.6  | 8064     | 10600.3  | 18533.3  | 34704.6  | 17186.5  | 17835.1  | TRUE |
| 112905.4 | 124185.3 | 133344.4 | 84213.1  | 103463.6 | 96532.1  | 123885.6 | 103203.3 | TRUE |

|          |          |          |          |          |          |          |          |      |
|----------|----------|----------|----------|----------|----------|----------|----------|------|
| 31637.7  | 38221.3  | 31530.5  | 32621.2  | 24367.5  | 10671.9  | 30783    | 34519.7  | TRUE |
| 93403    | 88143.4  | 102753.9 | 91330    | 104325.7 | 101010.4 | 97045.5  | 108423.9 | TRUE |
| 81040.4  | 66069.1  | 75981.4  | 135732.9 | 76550.6  | 265067.1 | 82567.5  | 103591.6 | TRUE |
| 778380.7 | 764943.7 | 705339.8 | 930048.4 | 998316.5 | 721774.5 | 719638.7 | 942416.8 | TRUE |
| 8038743  | 6430498  | 6035625  | 8230514  | 9336520  | 6610984  | 7031626  | 9838691  | TRUE |
| 1522417  | 2030835  | 1408662  | 1488297  | 1374520  | 1653225  | 1836401  | 1565327  | TRUE |
| 2136392  | 2572909  | 1786509  | 1902765  | 1813230  | 2348463  | 2685681  | 2283404  | TRUE |
| 207842.6 | 106185.7 | 188111.9 | 152096.3 | 140083.6 | 332521.8 | 156319.1 | 201806.4 | TRUE |
| 513129.5 | 427015.6 | 444796.9 | 526099.1 | 472037.8 | 442192.3 | 457238   | 502453.7 | TRUE |
| 1030038  | 886467.9 | 897999.1 | 1061141  | 1152250  | 969576.7 | 814539.6 | 1095179  | TRUE |
| 217737.9 | 175212.4 | 225609.5 | 219605.1 | 251454   | 209057   | 237713.6 | 257675.9 | TRUE |
| 181178.9 | 182767.5 | 168526.6 | 197736.6 | 177568.3 | 170557.4 | 174465.5 | 195153.7 | TRUE |
| 3271403  | 3091568  | 2439610  | 2630389  | 2851350  | 3482494  | 3322442  | 3654949  | TRUE |
| 981649.8 | 1016226  | 854472.8 | 860737.3 | 894828.3 | 1042270  | 1021685  | 1059509  | TRUE |
| 89840.2  | 76397.3  | 66201    | 72737.7  | 68932.6  | 81865.1  | 86926.9  | 83688.8  | TRUE |
| 362113   | 338294.1 | 271192.1 | 364410.6 | 347865.7 | 278406.2 | 315631.5 | 342876.8 | TRUE |
| 114435.3 | 79438.2  | 89563.7  | 114818.8 | 91563    | 89137.3  | 113548.7 | 123594.8 | TRUE |
| 79990.9  | 98062    | 88432.6  | 120448.2 | 102114.4 | 117887.4 | 129560   | 102502.9 | TRUE |
| 159823.5 | 98941.1  | 157067.1 | 224947.3 | 257085.2 | 264331   | 209898   | 248058.4 | TRUE |
| 23540.1  | 7062.1   | 21307.5  | 48542.5  | 35780.1  | 52606.3  | 37891.5  | 40435.3  | TRUE |
| 126127   | 140019.4 | 105794.4 | 125669.9 | 101150.7 | 113202   | 132333   | 114766.7 | TRUE |
| 164965.2 | 132649   | 136670.4 | 145795.2 | 128930.8 | 192182.6 | 164899   | 200250.7 | TRUE |
| 498065   | 458267.4 | 291779.7 | 417152   | 415211.2 | 564652.6 | 551797   | 635379   | TRUE |
| 304477.6 | 246766.8 | 181937.7 | 218291.9 | 241302.5 | 320327.7 | 325064.1 | 349010.9 | TRUE |
| 431475.9 | 336951.7 | 448354.7 | 386962.9 | 452733.3 | 418992.2 | 371934.7 | 477826   | TRUE |
| 112687.7 | 106499.9 | 134449.2 | 136947   | 94408.3  | 98081.8  | 169220   | 111772.4 | TRUE |
| 72374.2  | 57746    | 52811.2  | 60788.9  | 55780.7  | 66463.8  | 61455.2  | 54269.8  | TRUE |
| 107319.2 | 131909.6 | 81455.9  | 101185.9 | 73902    | 83458.4  | 116543.5 | 79867.1  | TRUE |
| 85147.6  | 70293.9  | 74359.9  | 101805.7 | 81394.6  | 101759.3 | 108566.6 | 102119.3 | TRUE |
| 32821.4  | 27723.5  | 24495    | 24192.8  | 24277.9  | 38027.1  | 27928.1  | 37567.6  | TRUE |
| 260797.1 | 232439.7 | 175144.2 | 233363.5 | 200761.6 | 278265.6 | 276689.9 | 268724.7 | TRUE |
| 59937.1  | 48589.4  | 42718.4  | 60486.5  | 47849    | 74995.9  | 63799.8  | 74581.2  | TRUE |
| 105208.9 | 140202.6 | 124702.9 | 159567.2 | 95586.1  | 153816.1 | 147341.7 | 109253   | TRUE |
| 142098.3 | 121869.6 | 106819.1 | 126053.6 | 113940.2 | 150877.1 | 149079.5 | 117338.2 | TRUE |
| 156369   | 178306.5 | 194615.3 | 194847.7 | 255449.3 | 124737.9 | 136426.5 | 148827.9 | TRUE |

|          |          |          |          |          |          |          |          |      |
|----------|----------|----------|----------|----------|----------|----------|----------|------|
| 2580456  | 2269983  | 2795667  | 3062100  | 2119286  | 2987371  | 2899203  | 2319871  | TRUE |
| 74840.3  | 97684.6  | 49168.7  | 99728.2  | 118227.3 | 52462.5  | 126891.1 | 117829.6 | TRUE |
| 365259.7 | 708828.6 | 161143.2 | 699552.2 | 761637.5 | 162021.2 | 725536.6 | 757642.8 | TRUE |
| 417175.4 | 781302   | 202291.1 | 705707.2 | 868231.2 | 205214.6 | 823592.3 | 839035.5 | TRUE |
| 62122.1  | 53647.8  | 42479    | 42023.9  | 31729.4  | 39239.2  | 45975.7  | 34925.9  | TRUE |
| 148098.6 | 138717.9 | 128933.3 | 138863.4 | 152656.3 | 141398   | 133021.4 | 123899.3 | TRUE |
| 594882.5 | 574601.1 | 574354.5 | 578853.1 | 453024.7 | 533504.9 | 568111.3 | 521119.1 | TRUE |
| 500849   | 419014   | 418031.1 | 506226.4 | 484894.7 | 447093.2 | 504198.8 | 496478.2 | TRUE |
| 1589341  | 1599991  | 1479798  | 1650997  | 1549197  | 1581276  | 1851853  | 1643363  | TRUE |
| 35737.7  | 62080.4  | 39470.7  | 57804.8  | 40751.2  | 39902.3  | 42461.6  | 49686.9  | TRUE |
| 10790.2  | 15845.7  | 33344.6  | 38021.8  | 39785.6  | 18624.9  | 13872.2  | 10852.1  | TRUE |
| 47547    | 101797.6 | 65366.6  | 90519.1  | 77120.4  | 38670.4  | 57878.6  | 43270.9  | TRUE |
| 41598.1  | 36576.6  | 30389.3  | 31582.8  | 37272.8  | 37674.5  | 29000.4  | 37477.6  | TRUE |
| 337274.4 | 300254   | 234307   | 186556.8 | 187391   | 217686.8 | 214615.5 | 207975.7 | TRUE |
| 389037.6 | 372027.5 | 424123.8 | 438308.7 | 359066   | 445012.8 | 404630.9 | 336359.7 | TRUE |
| 486443.6 | 503128.6 | 491911.8 | 521238.3 | 420485.9 | 534563   | 461901.4 | 423026.8 | TRUE |
| 147400.2 | 117187.7 | 109707.1 | 128357.4 | 112879.8 | 126035.3 | 136573.7 | 125944.2 | TRUE |
| 925570.2 | 711349.8 | 890023.8 | 819944   | 932316.1 | 876133.2 | 779391.3 | 789137.6 | TRUE |
| 1530244  | 1208685  | 1472928  | 1520412  | 1407812  | 1538931  | 1225505  | 1431875  | TRUE |
| 988218.2 | 876013.5 | 1157341  | 993831.1 | 721935.5 | 1197678  | 875199   | 722217.6 | TRUE |
| 224563.4 | 194494.8 | 249465.7 | 178461.1 | 159590.4 | 245189   | 203065.1 | 198129.3 | TRUE |
| 480707.4 | 282388.7 | 426895.1 | 449878.7 | 547873.4 | 403153.6 | 320226.7 | 388552.9 | TRUE |
| 144739.5 | 90105    | 120298   | 122006.9 | 166870.6 | 128696.2 | 89734.6  | 151270.9 | TRUE |
| 29278.7  | 25447.6  | 45850.2  | 20694.3  | 42193.4  | 19361.7  | 31046.6  | 24821.5  | TRUE |
| 63697.7  | 38469.5  | 38072.1  | 60869.7  | 43945.9  | 70999.8  | 63919.6  | 74214.1  | TRUE |
| 361718   | 286681.2 | 342530   | 279270.5 | 208852.2 | 527918.5 | 390218.1 | 299887.1 | TRUE |
| 139175.1 | 82324.8  | 120608.4 | 131086.1 | 109839.5 | 127935.1 | 121348.2 | 155278.5 | TRUE |
| 627901.4 | 390734.1 | 616695.9 | 644070.7 | 909353.3 | 587121.3 | 534792.8 | 663353.3 | TRUE |
| 53980.1  | 50075.1  | 56624.1  | 54413.6  | 52727.4  | 55797.9  | 61989.7  | 52668.2  | TRUE |
| 28721.8  | 30190.2  | 24395.9  | 44835.5  | 37482.1  | 34827.5  | 29785.5  | 23238    | TRUE |
| 176851.9 | 164058.1 | 157540.6 | 164785.7 | 159284.5 | 196822.1 | 196827.1 | 157872.8 | TRUE |
| 82540.4  | 93283.7  | 80706.6  | 110294.6 | 78296.7  | 96836.5  | 84148.7  | 70630.3  | TRUE |
| 121031.4 | 127368.6 | 112031.5 | 109095   | 111633.5 | 124108.8 | 105132.8 | 76302.1  | TRUE |
| 22379.1  | 13833.5  | 11811.8  | 17460    | 32253.2  | 11915.2  | 18928.9  | 11623.7  | TRUE |
| 86896.1  | 58682.7  | 84750    | 54204.9  | 77263.3  | 79039.5  | 65364.3  | 62500.5  | TRUE |
| 452907.4 | 395987.8 | 484385   | 474313.3 | 390067.9 | 475101   | 449483.2 | 353147.1 | TRUE |
| 497457.2 | 481704   | 592284.2 | 667098   | 699030   | 582713.1 | 547762   | 572614.9 | TRUE |
| 44500    | 43080.5  | 61169.8  | 64425.9  | 78651.3  | 87609.6  | 57061.4  | 77563.2  | TRUE |
| 135847.9 | 237314   | 83345.5  | 281619.2 | 207590.6 | 118080.8 | 198482   | 197262.8 | TRUE |
| 56997.7  | 72862.2  | 32983.4  | 83708.2  | 79116.6  | 41019.4  | 66678.7  | 79301.2  | TRUE |
| 81461.5  | 145132.8 | 55094.5  | 134306.5 | 168559.2 | 44958.9  | 157324.6 | 165080.9 | TRUE |
| 68111.2  | 90608.2  | 41679.2  | 90384.9  | 119256.4 | 26568.1  | 104084.6 | 145421.1 | TRUE |
| 23029.9  | 12971.2  | 18631.3  | 34074.2  | 27246.1  | 22195.2  | 48099    | 40628.4  | TRUE |
| 153443.3 | 147103.5 | 175476.4 | 139747.5 | 145866.1 | 158169.8 | 139446.8 | 151397.7 | TRUE |

|          |          |         |          |          |         |          |          |      |
|----------|----------|---------|----------|----------|---------|----------|----------|------|
| 112443.9 | 101880.8 | 94663.6 | 74930.3  | 82867.4  | 87118.3 | 120212.7 | 99674.7  | TRUE |
| 61572.8  | 58469.6  | 72289.1 | 47029.2  | 47496.6  | 82603.3 | 81978.1  | 64022.3  | TRUE |
| 63459.2  | 61691.7  | 60346.8 | 63322.7  | 66529.6  | 68082.7 | 54588.7  | 67315.9  | TRUE |
| 101903.7 | 98684.3  | 80778.8 | 91905.5  | 96483.4  | 73538.9 | 98317.3  | 75551.2  | TRUE |
| 105849.1 | 100572.6 | 87912.8 | 125046.5 | 101514.2 | 105914  | 94537.9  | 111044.6 | TRUE |
| 133923.6 | 129983.9 | 60224.9 | 111931.9 | 166019.3 | 94820.1 | 203381.6 | 219527.5 | TRUE |
| 166503.9 | 127055.1 | 61108.5 | 116677.9 | 174637.6 | 96593.7 | 199783.6 | 259402.5 | TRUE |

|         |         |         |         |         |          |         |         |      |
|---------|---------|---------|---------|---------|----------|---------|---------|------|
| 45147.5 | 51066.5 | 41844.7 | 91727.5 | 56896.4 | 47641.2  | 66310.8 | 53160.6 | TRUE |
| 69349.1 | 45515.6 | 88718.9 | 69031.8 | 82364.3 | 116723.6 | 99162.5 | 75371.4 | TRUE |
| 48475.5 | 38338.3 | 50053.6 | 53192.9 | 43963.3 | 46709.5  | 54921.6 | 40704.3 | TRUE |
| 21319.8 | 28926   | 32569.8 | 10080.4 | 30207.4 | 18739.5  | 12314.7 | 6060.6  | TRUE |
| 55416.5 | 63320.8 | 46644.9 | 67103.9 | 55332.8 | 59927.5  | 72934.4 | 70383   | TRUE |

|          |          |          |          |          |          |          |          |      |
|----------|----------|----------|----------|----------|----------|----------|----------|------|
| 38101    | 31563.3  | 36694.8  | 56398.5  | 42072.6  | 53917.3  | 53158.3  | 45858.5  | TRUE |
| 79646.9  | 76636.2  | 90190.2  | 83490.8  | 92153.1  | 103415.5 | 90580.3  | 96590    | TRUE |
| 132999   | 120544.5 | 157601.4 | 166806.7 | 142392   | 167668.8 | 165969.8 | 151011.1 | TRUE |
| 1107636  | 959650.9 | 1002745  | 1047174  | 921496.1 | 1285277  | 918342.8 | 1365450  | TRUE |
| 130369.5 | 113890.5 | 200066.4 | 224026   | 199236.8 | 134517.8 | 177040.9 | 223015.4 | TRUE |
| 57067.6  | 71201.6  | 91437    | 77895.1  | 63627.8  | 57135.9  | 55621.8  | 60335.7  | TRUE |
| 87946.6  | 91777.4  | 110820.6 | 91860.7  | 96746.5  | 92953.3  | 93168.7  | 96326.5  | TRUE |
| 81953    | 65433    | 60231.7  | 53293.3  | 48877    | 80518.3  | 82000.4  | 66792.3  | TRUE |
| 203070.1 | 157843.7 | 150625.7 | 200295.4 | 162850.5 | 189184.2 | 181346.4 | 170841.4 | TRUE |
| 290457.7 | 212402.1 | 213123.1 | 270930   | 229584.7 | 323828.2 | 281044.5 | 352702.7 | TRUE |

|          |          |          |          |          |          |          |          |      |
|----------|----------|----------|----------|----------|----------|----------|----------|------|
| 175945.6 | 155266.2 | 172559.3 | 195038.5 | 188438.4 | 137526.8 | 210347.2 | 190791.3 | TRUE |
| 244009.9 | 262619.9 | 255192.8 | 300721.2 | 303087.8 | 252173.5 | 292194.8 | 311380.2 | TRUE |
| 435627.1 | 421243.5 | 452303.2 | 455477.1 | 404759   | 429058.3 | 488655   | 454082.8 | TRUE |
| 55948.2  | 50469.4  | 47871.2  | 41651.8  | 55517.4  | 49400    | 53798.5  | 50964.7  | TRUE |
| 37429.2  | 75377.3  | 36790.8  | 53541.9  | 59196.5  | 37034    | 8566.9   | 39800.1  | TRUE |
| 59175.3  | 93260.2  | 76168.5  | 80491.3  | 70994.7  | 45291.1  | 55401.3  | 55138    | TRUE |
| 440791.6 | 404974.4 | 523298.5 | 490740.7 | 356894.1 | 479406.5 | 429673.4 | 437984.5 | TRUE |

|          |          |          |          |          |          |          |          |      |
|----------|----------|----------|----------|----------|----------|----------|----------|------|
| 16441    | 17450.5  | 28248.8  | 22473.5  | 18845.8  | 10982.4  | 21393    | 20837.3  | TRUE |
| 312674.6 | 340764.4 | 314263.3 | 361064.7 | 333420   | 334762.5 | 337212   | 351696.3 | TRUE |
| 153532.2 | 111742.5 | 152193   | 173489.3 | 139350.5 | 157446.2 | 150179.2 | 176037.7 | TRUE |

|          |          |         |          |          |          |          |          |      |
|----------|----------|---------|----------|----------|----------|----------|----------|------|
| 1230608  | 1108027  | 1089032 | 1279204  | 1167644  | 1194911  | 1112544  | 1194076  | TRUE |
| 161999.2 | 188597.1 | 177578  | 197702.6 | 237814.9 | 173928.1 | 242539.2 | 234225.7 | TRUE |



|          |          |          |          |          |          |          |          |      |
|----------|----------|----------|----------|----------|----------|----------|----------|------|
| 246896.2 | 251295.2 | 212627.9 | 276724.9 | 321867.9 | 241138.2 | 344715.8 | 340032.1 | TRUE |
| 132565.1 | 105855.7 | 87067.9  | 87892    | 115440.6 | 61857.4  | 86785.4  | 105993.5 | TRUE |
| 436492.1 | 485148.5 | 492741.2 | 530075.5 | 345157.3 | 454611.9 | 471233.9 | 431217.4 | TRUE |
| 515971.5 | 559647.7 | 587868.7 | 600305   | 426420.4 | 516288.2 | 570095.5 | 502399.1 | TRUE |
| 89044.9  | 93198.8  | 127618.2 | 85485.7  | 78837.1  | 80120.5  | 91449.2  | 96574.4  | TRUE |
| 118344.7 | 105441.7 | 114527.2 | 124205.6 | 90031.8  | 79518.5  | 109759.2 | 115162.1 | TRUE |
| 55041.9  | 56105    | 45273.3  | 58517.2  | 49197.6  | 55472.7  | 59792.1  | 60426    | TRUE |
| 174460.5 | 206993.4 | 113856.3 | 113995.7 | 158233.9 | 104946   | 161506.5 | 250409.1 | TRUE |
| 70662.4  | 119609   | 81717.6  | 86841.7  | 92884.5  | 106653.7 | 94732.4  | 155355.8 | TRUE |
| 57574.2  | 77927.2  | 67426.2  | 82009.1  | 67040.4  | 72895.1  | 79415.6  | 58341.6  | TRUE |
| 2019213  | 2127664  | 2226959  | 2351140  | 1596558  | 1673221  | 2084495  | 1689103  | TRUE |
| 10064.1  | 14433.5  | 8620.4   | 11301.1  | 9926.9   | 10631.8  | 10995.3  | 24320.4  | TRUE |
| 284905.4 | 326779.4 | 111976.7 | 159665.2 | 225674.3 | 139918.6 | 230147.7 | 216791.2 | TRUE |
| 72534.6  | 83911.6  | 58828.5  | 103938.8 | 89526.5  | 87153.7  | 108340.6 | 100115.5 | TRUE |
| 85113.4  | 91868.6  | 94933.5  | 102183.7 | 104548.4 | 75185.7  | 95463.8  | 105863.4 | TRUE |
| 51486.3  | 35948.8  | 46906.8  | 67841.6  | 54102.8  | 56270.8  | 52259.9  | 60345.7  | TRUE |
| 37109.6  | 40812.5  | 36146    | 61775.6  | 49547.4  | 34693.6  | 39334.3  | 38510.4  | TRUE |
| 26513.2  | 41492.8  | 28613.6  | 41634.6  | 54822.3  | 7513.9   | 14182.2  | 21128    | TRUE |
| 64217.5  | 49842.9  | 41166    | 63127.9  | 48449.4  | 51393.7  | 90314.3  | 66896.4  | TRUE |
| 76107.4  | 63557.9  | 40163.9  | 50810    | 60599.7  | 63302.4  | 88257.3  | 60599.7  | TRUE |
| 28654.5  | 36580.9  | 28863.5  | 29553.4  | 36025    | 24998.4  | 40599    | 54558.9  | TRUE |
| 39087.7  | 39464.9  | 34888.3  | 34086.9  | 30562.9  | 45698.8  | 35010.8  | 30999.2  | TRUE |
| 98602.5  | 85587.6  | 55990.6  | 99438.2  | 53926.8  | 89353    | 101163   | 79053    | TRUE |
| 274730.8 | 229102.3 | 210486.1 | 246211.3 | 203703.8 | 276738.8 | 301558.6 | 296292.6 | TRUE |
| 48683.8  | 32469.3  | 51627    | 50984.4  | 36155    | 51905.4  | 53410.4  | 62395.4  | TRUE |
| 189126   | 195137.7 | 163401.4 | 192211   | 262127.4 | 177497.2 | 246166.9 | 236293.3 | TRUE |
| 409886.6 | 415739.8 | 354656.9 | 443564.4 | 433394   | 358902.5 | 466971.2 | 422313.1 | TRUE |
| 288777.8 | 320868.2 | 283684.7 | 303128.3 | 319451.9 | 284743.1 | 308217.1 | 353470.4 | TRUE |
| 159325.3 | 153543   | 132998.6 | 147902.8 | 158819.2 | 168383.6 | 165624.7 | 180999.4 | TRUE |
| 230283.4 | 277709.5 | 367392.1 | 423336.8 | 291344.7 | 231005.6 | 248039.7 | 236472   | TRUE |
| 731626.4 | 777836   | 1045865  | 1088030  | 917490.8 | 741040.7 | 724024.9 | 765676   | TRUE |
| 66355.4  | 68180.2  | 62035.4  | 77527.6  | 52128    | 75725.4  | 89144.7  | 78887.3  | TRUE |
| 555329.6 | 691400.1 | 461970.3 | 635370.3 | 712639.3 | 468882.9 | 759665.2 | 684557.5 | TRUE |
| 116525.1 | 135265.8 | 94581.8  | 103613.5 | 115238   | 104121.1 | 112590.3 | 122359.3 | TRUE |
| 19900.8  | 9072.3   | 16242.2  | 13154.3  | 10184.7  | 18567.5  | 26013.4  | 25343    | TRUE |
| 65096    | 59414.2  | 70077.6  | 45415.6  | 73568.7  | 58671.3  | 50321.6  | 79895.4  | TRUE |
| 880710.5 | 981207.9 | 714050.7 | 859262.6 | 899139.9 | 708857.7 | 999924.5 | 918008.7 | TRUE |
| 965848.7 | 904367.2 | 1050680  | 1135758  | 859548.1 | 981276.2 | 996551.6 | 930388.3 | TRUE |
| 99820.6  | 178465.6 | 122633.1 | 232505.5 | 158524.8 | 83133.1  | 71339.2  | 88229.7  | TRUE |
| 53111.5  | 71470.9  | 26443.3  | 45175.2  | 60242.3  | 46076.2  | 91696    | 95430.3  | TRUE |
| 43714.9  | 41782    | 30169    | 29970.1  | 35870.9  | 23339.1  | 47549.9  | 40826.3  | TRUE |
| 82195.7  | 85715.3  | 74474.7  | 76060.1  | 78866    | 65224    | 81209.2  | 81725.9  | TRUE |
| 156549.8 | 147838.9 | 145922.2 | 167985.8 | 156738.9 | 101843.9 | 158353.9 | 149526.5 | TRUE |

|          |          |          |          |          |          |          |          |      |
|----------|----------|----------|----------|----------|----------|----------|----------|------|
| 53561.9  | 44828.3  | 52224.3  | 49875.9  | 53789.2  | 46756.2  | 63621.5  | 54629.1  | TRUE |
| 148762.1 | 156833.3 | 201593.6 | 182995.9 | 147207.2 | 157285.8 | 167900.5 | 159044.4 | TRUE |
| 92672.6  | 74374    | 69032.7  | 80301.7  | 49941.5  | 63490.8  | 85873.5  | 65742.7  | TRUE |
| 42843.3  | 29385.5  | 25382.2  | 47258.6  | 48122.6  | 26998    | 35310.5  | 56408.6  | TRUE |
| 1153709  | 1476092  | 775651.6 | 1177352  | 1016822  | 848964.4 | 1348928  | 1051580  | TRUE |
| 2282654  | 2598601  | 1997366  | 2043223  | 1849559  | 2360940  | 2728385  | 2134067  | TRUE |
| 160734.5 | 147779.7 | 148960.7 | 200222.1 | 109043.2 | 135148.7 | 164436.2 | 164506   | TRUE |
| 102553.9 | 103449   | 51790.8  | 90649.9  | 99827.3  | 61610.5  | 86614.5  | 86467    | TRUE |
| 154578   | 181178.2 | 229738.8 | 173215.9 | 129909   | 199873.4 | 180913.5 | 199727.7 | TRUE |
| 195634.4 | 175452.7 | 190025.8 | 180032.1 | 183650.9 | 171748.5 | 195594.9 | 195154.4 | TRUE |
| 324739.8 | 337058.7 | 251637.2 | 248131.8 | 351088.5 | 245475.6 | 345224.6 | 338575.8 | TRUE |
| 90566.1  | 86135.7  | 82994.3  | 85845.6  | 81746    | 84882.2  | 89236.3  | 103369.5 | TRUE |
| 214434.2 | 220339.1 | 212950.9 | 201057.1 | 206744.2 | 169480.8 | 206234.9 | 173248.8 | TRUE |
| 192047.9 | 231807.5 | 198065.3 | 232097.8 | 178093.6 | 159166.6 | 242658.7 | 168726.3 | TRUE |
| 397627.9 | 418907.1 | 449874.5 | 411412.5 | 366622.2 | 347060.7 | 403684.6 | 328354.7 | TRUE |
| 829353.1 | 861708.8 | 493208.9 | 614032.8 | 735520.5 | 504525   | 787784.9 | 692160.6 | TRUE |
| 274989.9 | 299315.1 | 292405.9 | 348896.1 | 376221.2 | 281575.9 | 352007.8 | 306249.5 | TRUE |
| 88161    | 75113.2  | 76764    | 104186   | 96155.8  | 88150    | 103150   | 100175.4 | TRUE |
| 40239.3  | 98265.9  | 52266.8  | 66942.1  | 76942.8  | 32115.5  | 25865.7  | 29695    | TRUE |
| 39842.3  | 82585.4  | 42791.9  | 77603.9  | 85475    | 34723.8  | 38863.9  | 39329.2  | TRUE |
| 4484011  | 4014911  | 4831003  | 5037612  | 3384797  | 4012198  | 4189883  | 3991996  | TRUE |
| 150081.1 | 184199.1 | 109044.7 | 188365.7 | 194746.7 | 163576.7 | 212733.5 | 175698.7 | TRUE |
| 177435.5 | 147829.2 | 196266   | 237050.8 | 156488.3 | 162996.6 | 179644   | 169282.9 | TRUE |
| 84582.7  | 78866.3  | 60915.9  | 60653.4  | 81895.3  | 104524.8 | 105144.4 | 98671.7  | TRUE |
| 26725.4  | 29930.5  | 32261.7  | 33827.8  | 32462.6  | 29979.4  | 27576.5  | 39161.5  | TRUE |
| 113637.3 | 138422.6 | 184885.1 | 137313.5 | 111415.7 | 130153   | 117543.3 | 120506.9 | TRUE |
| 85465.2  | 72418.6  | 69321.4  | 70202.6  | 69014.9  | 75510.7  | 72371.7  | 80035.9  | TRUE |
| 134225.9 | 145427.3 | 85783.2  | 108519.5 | 112697.8 | 92678.5  | 115324.4 | 125837.8 | TRUE |
| 190361.5 | 194628.5 | 197965.1 | 236052   | 204264.3 | 179858.6 | 230854.2 | 204213   | TRUE |
| 76896.9  | 75080.2  | 47421.8  | 87098.2  | 71749.3  | 64883.7  | 96507.2  | 100710.9 | TRUE |
| 1183897  | 1137762  | 1114564  | 1145898  | 1062703  | 1215509  | 1244849  | 1313597  | TRUE |
| 60956.6  | 65003.7  | 86453.6  | 78292.7  | 72863.3  | 87015.2  | 64956.8  | 75431.6  | TRUE |
| 39835.6  | 43227.4  | 51442.5  | 48048    | 50595    | 32492.9  | 43826.1  | 44828.9  | TRUE |
| 2123830  | 1995964  | 1770447  | 2105079  | 2151022  | 1826977  | 1979525  | 2070162  | TRUE |
| 1180015  | 819712.7 | 885076.6 | 1046671  | 927038.3 | 1326108  | 1006896  | 1388765  | TRUE |
| 94805.5  | 56454.4  | 71692.5  | 57621.1  | 68075.6  | 96310.6  | 82435.2  | 89717.9  | TRUE |
| 89745.8  | 92834.5  | 77563.4  | 95768.3  | 88665    | 69665.6  | 105203.6 | 104421.8 | TRUE |
| 1899646  | 1901306  | 2059314  | 2124956  | 1891729  | 2295362  | 2062387  | 2239522  | TRUE |
| 37658.4  | 40315.2  | 38698.5  | 39832.8  | 54677.1  | 51171.7  | 42887    | 50092.2  | TRUE |
| 112478.8 | 110873.5 | 127456.3 | 170100.7 | 160416.3 | 166968   | 191736.5 | 190585.6 | TRUE |
| 86616.2  | 91390.4  | 94561.7  | 120439.4 | 147614.5 | 142088.9 | 144288.7 | 131047.8 | TRUE |
| 42907.9  | 55235.5  | 35091.3  | 68557.8  | 40247.5  | 44772.3  | 50720.7  | 43897.1  | TRUE |
| 141848.2 | 99137.2  | 105598.2 | 95127.9  | 96485.9  | 118066.1 | 133282.4 | 159393   | TRUE |
| 211175.8 | 206551.7 | 173693.6 | 221679.3 | 221260.6 | 196957.5 | 193705   | 248852.3 | TRUE |

|          |          |          |          |          |          |          |          |      |
|----------|----------|----------|----------|----------|----------|----------|----------|------|
| 432952.9 | 378292.7 | 427625.7 | 496550.4 | 459340.4 | 446505.3 | 443649.6 | 506138.7 | TRUE |
| 361684.6 | 325787   | 310104.3 | 378522.5 | 399376.9 | 329072.8 | 353783.3 | 414272   | TRUE |
| 128329.9 | 93772.4  | 113245   | 135534   | 113266.1 | 113858.1 | 142242.1 | 123885.8 | TRUE |
| 745686.3 | 759891.4 | 758369.8 | 754370.7 | 695096.3 | 843011.3 | 798668.1 | 897710.6 | TRUE |
| 589209.8 | 578174.6 | 543663.6 | 501610.9 | 541678.5 | 633017.5 | 596743.1 | 609289.9 | TRUE |
| 85187.9  | 154275   | 104591.6 | 158011.3 | 134599.1 | 86917.6  | 79278    | 87607.8  | TRUE |
| 323704.1 | 365307   | 265242.5 | 305146.4 | 252006.4 | 368784.3 | 328386.6 | 329930.7 | TRUE |
| 479993   | 476680.3 | 461168.2 | 473763.7 | 427761.2 | 509063.7 | 503349.8 | 494774.3 | TRUE |
| 264391.5 | 258315.8 | 231704.5 | 269990   | 267427   | 240734.1 | 256465.6 | 326379.2 | TRUE |
| 275566.5 | 284867.2 | 325856.7 | 279222.8 | 244727.9 | 349342.7 | 239887.8 | 270854.2 | TRUE |
| 157459.4 | 177242   | 149965.5 | 138871.4 | 179728.2 | 145395.7 | 141388.9 | 147013.4 | TRUE |
| 675242.9 | 569576.9 | 547939.7 | 629249.2 | 677057.6 | 565182.8 | 543478.3 | 639435.3 | TRUE |
| 91932.9  | 98846.8  | 104933.7 | 134155.6 | 96514.1  | 128004.3 | 140193.9 | 109868.5 | TRUE |
| 141282   | 142746   | 123270   | 137748   | 122066.4 | 139605.6 | 152779.9 | 166484.9 | TRUE |
| 510957.4 | 481700.2 | 461429.1 | 504382   | 523851   | 496167.7 | 528100.4 | 545573.6 | TRUE |
| 514304.1 | 471242.6 | 435943.4 | 499153.4 | 496193.9 | 563745   | 491988.5 | 544805   | TRUE |

|          |          |          |          |          |          |          |          |      |
|----------|----------|----------|----------|----------|----------|----------|----------|------|
| 21616.7  | 10993.6  | 19837.7  | 27003.8  | 18027.9  | 14976.3  | 12853.7  | 23449.2  | TRUE |
| 196973.9 | 211959.7 | 140290.2 | 430690.8 | 212181.7 | 142174   | 236906.2 | 221010.4 | TRUE |
| 223516.5 | 214799.9 | 171887.8 | 490438.7 | 276885.4 | 187866.1 | 241190.7 | 271872   | TRUE |
| 70408.5  | 85168.8  | 72831.4  | 69114.1  | 96534.6  | 59106.6  | 71029.1  | 104678.2 | TRUE |
| 23014.3  | 29769.7  | 15874.1  | 23362.3  | 19895.8  | 24639.5  | 19586.1  | 24192.4  | TRUE |

|          |          |          |          |          |          |          |          |      |
|----------|----------|----------|----------|----------|----------|----------|----------|------|
| 24886.6  | 32472    | 29598.9  | 7838.8   | 27839.3  | 18877.7  | 26166.7  | 26934.3  | TRUE |
| 65089.8  | 81013    | 45752.2  | 64138    | 68921.2  | 46972.2  | 54870.4  | 59270.7  | TRUE |
| 64462.1  | 58762.9  | 42708.7  | 40346.4  | 57823.8  | 43215    | 51502    | 57422.8  | TRUE |
| 112696.9 | 92804.3  | 109289.5 | 119653.1 | 137655.6 | 111064.5 | 110818.2 | 138537.6 | TRUE |
| 62622.9  | 75772.2  | 57255.1  | 49674.7  | 83259.7  | 53378.3  | 65764    | 88791.8  | TRUE |
| 46525.4  | 44748    | 57407.5  | 51787.6  | 37015.7  | 41193.1  | 53588.2  | 48931.1  | TRUE |
| 35448.8  | 30107.3  | 18108.5  | 21603.2  | 21574.2  | 19040.1  | 35418    | 32368.1  | TRUE |
| 167627.3 | 175663.8 | 174435.2 | 188070.2 | 200587.7 | 164234.2 | 157102   | 185508.6 | TRUE |
| 795923.9 | 700553.6 | 628531.9 | 728139.6 | 796755.5 | 689534.8 | 750853.2 | 828598   | TRUE |
| 3835699  | 3391333  | 3576309  | 3623173  | 3256016  | 3870562  | 3910097  | 4080371  | TRUE |
| 323172   | 246162.3 | 172703.8 | 250519.1 | 292488.8 | 231611.4 | 328013.1 | 324852.1 | TRUE |
| 332563.1 | 415908.4 | 334912   | 459483   | 300955.6 | 421527.1 | 518224.3 | 436424.4 | TRUE |

|          |          |          |          |          |          |          |          |      |
|----------|----------|----------|----------|----------|----------|----------|----------|------|
| 1082619  | 965288.3 | 724433.5 | 908540.8 | 925174   | 729373.6 | 866298.9 | 928231.9 | TRUE |
| 548342.6 | 528484.5 | 425890.1 | 481903.3 | 556496.7 | 409954   | 454519.4 | 518585   | TRUE |
| 293335.9 | 296062.3 | 306855.8 | 287782.5 | 339356.9 | 375616.4 | 307527.3 | 301355   | TRUE |
| 1574202  | 1459994  | 1465008  | 1336984  | 1449050  | 1530509  | 1651803  | 1558058  | TRUE |

|          |          |          |          |          |          |          |          |      |
|----------|----------|----------|----------|----------|----------|----------|----------|------|
| 171829   | 153257   | 112767.2 | 110531.1 | 120768.6 | 121392.7 | 111054.3 | 137380   | TRUE |
| 42813.5  | 46862.4  | 45950.4  | 45790.2  | 27045.2  | 46336.4  | 36894.2  | 23112.7  | TRUE |
| 200961.5 | 203333.1 | 146598   | 165887.2 | 174931.9 | 145607.7 | 151392.5 | 167771.8 | TRUE |

|          |          |          |          |          |          |          |          |      |
|----------|----------|----------|----------|----------|----------|----------|----------|------|
| 136981.6 | 140218.8 | 112088.7 | 161764.9 | 132104.3 | 119055.4 | 136966.5 | 153794.2 | TRUE |
| 235190.6 | 228986.4 | 236663.3 | 227608   | 253453.4 | 205474.7 | 251763.4 | 240147.7 | TRUE |
| 170842.1 | 131416.6 | 167509.5 | 228839   | 204246.1 | 169990   | 166583.3 | 179309.1 | TRUE |
| 69218.6  | 71209.6  | 60381.6  | 94951.7  | 78889    | 62500.2  | 60879.9  | 65800.3  | TRUE |
| 38807.1  | 62176    | 57418.3  | 70223.9  | 60959.8  | 39762.6  | 47466.4  | 43800.2  | TRUE |
| 243430   | 234577.8 | 256976   | 284551.2 | 250243.8 | 308289.7 | 292861   | 271318.2 | TRUE |
| 1130230  | 1091714  | 1031978  | 1147046  | 1018990  | 1253579  | 1260716  | 1316922  | TRUE |
| 36753.4  | 48341.1  | 30799.2  | 55492.2  | 50112.2  | 11435.7  | 8474.9   | 8724     | TRUE |
| 442393.5 | 439199.8 | 395574   | 386214.7 | 523605.3 | 381186.1 | 374390.5 | 394582   | TRUE |
| 50796.8  | 31414.7  | 51120.8  | 48769.2  | 34276.6  | 71738    | 51440.7  | 52722.2  | TRUE |
| 74404.9  | 72667.1  | 72133.5  | 79135.1  | 85661.1  | 89279.3  | 62504.4  | 73250.7  | TRUE |
| 650358.6 | 579284.5 | 590936   | 761790.8 | 721234.4 | 663062.1 | 553386   | 705147.6 | TRUE |
| 88413    | 102654.1 | 77916.3  | 91887.5  | 87316.4  | 82643.3  | 81455.4  | 95483.5  | TRUE |
| 210628.7 | 213210.9 | 181389.7 | 207521.3 | 241592.2 | 234542.9 | 216066.9 | 218794.6 | TRUE |
| 598682.6 | 600976.8 | 518810.3 | 527305.3 | 652056.8 | 677796.6 | 577679.5 | 708859.7 | TRUE |
| 238169.4 | 216000   | 214094.4 | 208678.6 | 240817.9 | 238842.3 | 254795.5 | 278978.8 | TRUE |
| 1146350  | 969692.4 | 1298845  | 1403103  | 1220991  | 1269416  | 1137599  | 1188790  | TRUE |
| 90380.2  | 73596.4  | 71923.3  | 94583.4  | 89259.5  | 82303.9  | 77389.1  | 96737.2  | TRUE |
| 646417.4 | 495985.9 | 601937.8 | 684969   | 618228   | 689732.2 | 531992.7 | 645589.7 | TRUE |
| 402066.8 | 346278.1 | 340126.8 | 410774.9 | 390713.4 | 388230.6 | 319896.3 | 391392.7 | TRUE |
| 47489.9  | 49115.9  | 51396    | 50426.9  | 65108.9  | 61941.5  | 52306.7  | 69882.7  | TRUE |
| 88367.8  | 106422.4 | 52903.6  | 110357   | 222866.6 | 60877.1  | 101707.2 | 214659.2 | TRUE |
| 47552    | 90480.2  | 47609.1  | 64733.1  | 22695.9  | 67135.6  | 85381.5  | 57219.8  | TRUE |
| 115484.7 | 75053.5  | 82130.5  | 50434.3  | 113847.1 | 69627.8  | 77453    | 89383    | TRUE |
| 88650.4  | 92098.3  | 63231.2  | 122184.9 | 164123   | 66427.1  | 88342.8  | 131439   | TRUE |
| 116232.8 | 125993.9 | 97478.3  | 115880.6 | 198607   | 97502.1  | 109353.6 | 190216.5 | TRUE |
| 33362.2  | 26343.9  | 24004.9  | 30114.5  | 45754.2  | 29366.5  | 33040.1  | 47501.6  | TRUE |
| 72130.2  | 96590.4  | 88151.6  | 78644.7  | 63299.7  | 73409.8  | 94289.3  | 81243.2  | TRUE |
| 332153.3 | 400862.5 | 312259.1 | 338582   | 312591.1 | 319924.6 | 392660.5 | 323412   | TRUE |
| 29918.4  | 45467.2  | 50854.2  | 45143    | 19257    | 25734.4  | 42764.9  | 27990.2  | TRUE |
| 41522.5  | 23832.1  | 26759.5  | 33323.9  | 34932.7  | 29584    | 13874.9  | 40400.2  | TRUE |
| 172840   | 153678.2 | 143088.6 | 163547.7 | 185676.4 | 161724.9 | 132307.8 | 197041.8 | TRUE |
| 76650.1  | 45843.8  | 93052.3  | 101169.2 | 101156.9 | 99270    | 67035.1  | 111194.4 | TRUE |
| 168320.3 | 152622.7 | 123879.6 | 138233   | 169923.5 | 193918.7 | 172822.4 | 169310.2 | TRUE |
| 19641.9  | 25385.7  | 21527.5  | 24910.7  | 22091.8  | 18859.4  | 19200.3  | 19914.5  | TRUE |
| 217105.3 | 186265   | 208268.9 | 233141.4 | 227564.2 | 222152.3 | 183478.1 | 217242.3 | TRUE |
| 477259.3 | 377110.2 | 466919.3 | 504171.9 | 492198.2 | 473963.3 | 449070.8 | 517451.4 | TRUE |
| 481920.8 | 429166   | 408301.1 | 410086.5 | 525351   | 517248.8 | 475996.2 | 508620.1 | TRUE |
| 439378.5 | 428166.2 | 317431.2 | 351961.9 | 424972.7 | 488304.9 | 437311.3 | 466593.5 | TRUE |
| 57346.3  | 48651    | 55015    | 67299.7  | 53506.5  | 63415.3  | 64410.7  | 55459.4  | TRUE |
| 60506.1  | 59944.4  | 73060.3  | 64864.5  | 76656.3  | 72777.7  | 73892.5  | 84232.3  | TRUE |
| 55729.5  | 32757.3  | 51950.9  | 49253.9  | 58432.8  | 58911.1  | 60403.4  | 56297.7  | TRUE |
| 48342.2  | 58019.6  | 53671.5  | 60843.9  | 54157.4  | 51758.2  | 41347.9  | 58394.9  | TRUE |
| 509899.9 | 403202.7 | 484869.5 | 518121.8 | 578955.6 | 508869.3 | 442228.8 | 555577.4 | TRUE |
| 128618.1 | 107218   | 141707.1 | 118452.9 | 122844.3 | 134636.8 | 126162.6 | 117137.5 | TRUE |
| 186839.8 | 144219.1 | 196197   | 191674   | 158437.1 | 190774.1 | 173031.4 | 164823.2 | TRUE |
| 324330.4 | 259708.2 | 279291.8 | 311584.6 | 331837.4 | 332941.9 | 251791.4 | 306105.1 | TRUE |
| 87791.1  | 69666.5  | 102435   | 64500.3  | 69884    | 119798.5 | 57664.1  | 72536.5  | TRUE |
| 194236.4 | 213459.8 | 169012.1 | 181703.4 | 196921.5 | 214307.3 | 197312.4 | 222407.1 | TRUE |
| 639428.3 | 721851.2 | 460742.3 | 574089   | 626668.4 | 555872.3 | 697646   | 629637.1 | TRUE |

|          |          |          |          |          |          |          |          |      |
|----------|----------|----------|----------|----------|----------|----------|----------|------|
| 188398.2 | 158734.5 | 144792   | 147598.2 | 149308.7 | 178862.9 | 143798.7 | 204399.8 | TRUE |
| 34018.1  | 30550.4  | 20306.6  | 34116    | 25521.8  | 43320.9  | 38653.6  | 40222    | TRUE |
| 16788.5  | 18890.3  | 18000.8  | 23475.8  | 18732.4  | 21113.2  | 20990.3  | 19832.6  | TRUE |
| 89098.1  | 91363.1  | 90200.2  | 66410.4  | 56361.5  | 94454.5  | 111590.7 | 85073.4  | TRUE |
| 78635.7  | 79361.6  | 75948    | 84920.3  | 90882.7  | 77654.2  | 102811.8 | 80109.5  | TRUE |
| 43231.8  | 57641.7  | 54445.4  | 59437.7  | 60061.6  | 143600.3 | 79929.6  | 57525.5  | TRUE |
| 169341.3 | 203977.2 | 181204   | 131451.2 | 148889.2 | 187328.8 | 252986.8 | 140848.9 | TRUE |
| 303862.5 | 402127.3 | 334338.9 | 231310.2 | 268887.8 | 328500.2 | 466600   | 282427.4 | TRUE |
| 516519.4 | 435657.1 | 722893.6 | 680007.7 | 566818.4 | 385598.8 | 491049.7 | 439276.2 | TRUE |
| 63157.1  | 91008.2  | 63170.2  | 35607.6  | 53804.4  | 57753.2  | 60931.8  | 35011.9  | TRUE |
| 163763.7 | 191715.1 | 148880.4 | 145390.3 | 149360.4 | 186816.4 | 213298.7 | 155773.2 | TRUE |
| 64960.6  | 76581.9  | 81672.2  | 46371.7  | 54222.3  | 68927.1  | 69008.1  | 55253.2  | TRUE |
| 123041.4 | 161856.9 | 157649.8 | 88593.8  | 78215    | 153548.2 | 175526.8 | 84468.8  | TRUE |
| 258244.6 | 281291.6 | 305407.5 | 181655.9 | 183824.7 | 317106.7 | 310382   | 188454.1 | TRUE |
| 199859.5 | 119971.2 | 297535   | 286369.2 | 248209.8 | 137417.2 | 159279.5 | 151169.5 | TRUE |
| 104210.7 | 81149.8  | 142798.1 | 166162.9 | 138299.1 | 87628.5  | 108279.6 | 215025.1 | TRUE |
| 238204.9 | 286743.4 | 258845.8 | 200894.4 | 198953.4 | 256301.8 | 299727.6 | 174483.4 | TRUE |
| 19704.3  | 27598.8  | 23796.5  | 7015.8   | 19408.8  | 36340.4  | 27494.3  | 8836.9   | TRUE |
| 104393.8 | 152915.1 | 83764.9  | 55515.7  | 74635.1  | 88151    | 142061   | 74214    | TRUE |
| 942988.7 | 643446.8 | 1138658  | 1217945  | 1129905  | 631219.1 | 686537.9 | 641994.9 | TRUE |
| 202172.6 | 154130.7 | 238042.2 | 287392.5 | 264370.3 | 182231.9 | 159893.2 | 177282.5 | TRUE |
| 89991.3  | 117613   | 97974.8  | 55605    | 64114.4  | 97609.3  | 121659.6 | 64536.8  | TRUE |
| 145974.2 | 132143.3 | 136491.7 | 128305.3 | 103854.1 | 156312.7 | 158088.3 | 127000.6 | TRUE |
| 92533.2  | 95005    | 120020.7 | 65468.9  | 80840.5  | 126240.4 | 111550.4 | 73559.2  | TRUE |
| 48305    | 60697.3  | 50845    | 43874    | 53323    | 72615    | 76660.3  | 37049    | TRUE |
| 74409.8  | 125084.5 | 101909.3 | 69510.9  | 121112.9 | 107972.8 | 120040.1 | 96959.2  | TRUE |
| 61526.4  | 86148.1  | 96566.5  | 57294.2  | 60029.6  | 65793    | 90806.6  | 60828.2  | TRUE |
| 205584.3 | 195842.4 | 204509.1 | 200896.5 | 184787.4 | 227700.2 | 221047.2 | 181967.7 | TRUE |
| 97873.2  | 118031.9 | 73146.6  | 75193.8  | 71361.2  | 92012.3  | 107212.1 | 74702.2  | TRUE |
| 25033.5  | 28896.8  | 26878.4  | 11248.2  | 27497.4  | 19741.2  | 34614.4  | 6701.5   | TRUE |
| 216688   | 215215.2 | 213221.6 | 177800.5 | 199287.9 | 223679.9 | 214159.7 | 182418.8 | TRUE |
| 800817.6 | 630794.4 | 1037367  | 1054330  | 876778.3 | 621265.6 | 631738.7 | 609330.1 | TRUE |
| 85806.8  | 110737.2 | 63826.1  | 115326.8 | 97411.4  | 55704.6  | 110920.5 | 111363.1 | TRUE |
| 137517.7 | 169253.2 | 91143.6  | 126047.3 | 87699.1  | 116039.3 | 126405.9 | 91327.4  | TRUE |
| 145742.2 | 130317.1 | 170776.2 | 147740.6 | 111397.7 | 168681.9 | 152679.7 | 130988.6 | TRUE |
| 53832    | 55087.2  | 55062.4  | 42157.3  | 54615.4  | 43818.3  | 57591.7  | 43505.2  | TRUE |
| 26927.6  | 11927.5  | 22936.6  | 39015.4  | 9316.2   | 28906.3  | 31864.5  | 26209.2  | TRUE |
| 93332.9  | 126662.3 | 205669.8 | 170650.3 | 140649.4 | 99115.6  | 131704.3 | 98047.6  | TRUE |
| 34442.8  | 34493.1  | 40033.2  | 37614.9  | 26990.2  | 32312.8  | 35287.3  | 33578.2  | TRUE |
| 1698869  | 1336736  | 1998974  | 2014713  | 1719220  | 1709991  | 1399876  | 1637175  | TRUE |
| 106106   | 143459.6 | 87240    | 88632.8  | 119034.4 | 103693.4 | 129019   | 125896.9 | TRUE |
| 80595.4  | 76703.2  | 71451    | 87111.8  | 79908.9  | 75008.2  | 90321.2  | 72910.9  | TRUE |

|          |          |          |          |          |          |          |          |      |
|----------|----------|----------|----------|----------|----------|----------|----------|------|
| 40178.4  | 65801.5  | 32408    | 42215.5  | 50528.1  | 42344.4  | 42455.8  | 48007.1  | TRUE |
| 360491.9 | 262127.6 | 399864.9 | 425980.9 | 405659.5 | 449220.1 | 313849.3 | 374325.7 | TRUE |
| 564660.7 | 478187.5 | 544793.2 | 585920.7 | 615551.2 | 598976.3 | 525886.7 | 554914.1 | TRUE |
| 511399.8 | 291192.7 | 543284.3 | 513233.4 | 549903   | 463071.1 | 335330.3 | 432632.3 | TRUE |
| 494174.5 | 391691.8 | 459034.4 | 457627.7 | 544934.6 | 463346.5 | 337801.2 | 391228   | TRUE |
| 21312.3  | 18189    | 21227.8  | 16775.1  | 19154.5  | 20566.2  | 20913.6  | 8078.2   | TRUE |
| 590563   | 582347.1 | 438710.9 | 445829.6 | 377951.8 | 463753.8 | 490446.6 | 390170.8 | TRUE |
| 91685.3  | 106096   | 87227.1  | 66866.5  | 70221.6  | 60520.2  | 79023    | 63850.2  | TRUE |
| 74860.2  | 68922.2  | 78312.2  | 84684.8  | 83933.4  | 61872.8  | 60470.8  | 46827.7  | TRUE |
| 131137   | 146446.8 | 141430.7 | 134268.5 | 139894.8 | 162918   | 151474.3 | 133422.2 | TRUE |
| 81686.3  | 78785.9  | 84951.1  | 70776.7  | 87873.2  | 90761.6  | 75762.1  | 72625.6  | TRUE |
| 252984.5 | 199139.9 | 287264.7 | 230439   | 293053.4 | 227949.5 | 199503.4 | 235454.7 | TRUE |
| 522441.3 | 440666.9 | 599559.1 | 580396.5 | 546725.4 | 525870.4 | 444973   | 550284.3 | TRUE |
| 111108.3 | 116367.6 | 83188.1  | 149356.7 | 95601.9  | 79497.3  | 105539.2 | 95649.8  | TRUE |
| 44192.4  | 48551.3  | 38933.2  | 31564.5  | 48865.9  | 42063.7  | 63300    | 48521    | TRUE |
| 51836.2  | 53387.3  | 52735.5  | 40789.6  | 48828.5  | 46894.3  | 60632.5  | 38688.5  | TRUE |
| 122958   | 127513.9 | 157985.1 | 144406.8 | 128932.1 | 162684.6 | 133737.6 | 140390.8 | TRUE |
| 79356.9  | 66499.5  | 95370.1  | 98020.3  | 125855.6 | 129613.2 | 116591.2 | 104452.6 | TRUE |
| 48864.9  | 56556.5  | 51283.6  | 43237.6  | 40865.7  | 55929.6  | 46710.3  | 45133.7  | TRUE |
| 44258.9  | 33891.7  | 34358.8  | 25973.4  | 39905.1  | 32274.3  | 23710.9  | 31782.8  | TRUE |
| 53166.7  | 75899.3  | 45743.9  | 54862.1  | 53557.2  | 49613.1  | 48626.5  | 36762.3  | TRUE |
| 56461.4  | 59475.2  | 63382    | 90592.4  | 53386.1  | 61384.7  | 54051.8  | 72221.6  | TRUE |
| 209948.7 | 206109.1 | 252301   | 273084.3 | 258676.9 | 300576.1 | 237185.8 | 237316.6 | TRUE |
| 85202.4  | 94300.4  | 98052.3  | 78112.2  | 89116.3  | 89387.2  | 94763.9  | 109583.5 | TRUE |
| 634460.1 | 526102.4 | 560304.7 | 566393.2 | 700803.3 | 634008.4 | 547467.3 | 698045.6 | TRUE |
| 126479.2 | 114990.6 | 94285.2  | 89149.1  | 89673.7  | 80960.5  | 110913.1 | 92131.6  | TRUE |
| 158463.7 | 166672.6 | 83630.3  | 142179.5 | 157927.4 | 89358.9  | 183229.2 | 123937.4 | TRUE |
| 42319.9  | 49326.7  | 67805.1  | 65647    | 75431.1  | 72683.5  | 53166.1  | 84891.5  | TRUE |
| 140607.4 | 155837   | 136610.4 | 118299.2 | 229256.2 | 172865.1 | 130000.2 | 141248   | TRUE |
| 106568.7 | 88381    | 98103.5  | 93248.8  | 80819.3  | 109142.6 | 90347.4  | 80011.7  | TRUE |
| 69800.5  | 84203.4  | 128103   | 87087.6  | 99841    | 59770.9  | 55202    | 63318.3  | TRUE |
| 28981.9  | 25402.3  | 30822.9  | 32509.3  | 32687.1  | 31343.6  | 34847.5  | 30400.7  | TRUE |
| 496930.8 | 531050.3 | 478483.2 | 496187.2 | 547919.5 | 597556.8 | 545452.1 | 537370.1 | TRUE |
| 516203.8 | 443959.1 | 474485.6 | 517426.7 | 688892.4 | 464375   | 467271.5 | 499615.9 | TRUE |
| 321312.7 | 255056.8 | 177791.9 | 244533.8 | 270142.6 | 306940.5 | 261311   | 361405.4 | TRUE |
| 851542.5 | 828091.9 | 836690.1 | 965180.5 | 868071.9 | 916675.5 | 865653.5 | 966784.1 | TRUE |
| 34802.2  | 42902    | 68363.8  | 49575.8  | 35474.1  | 58815    | 39275    | 39005.6  | TRUE |
| 40782.2  | 26761.7  | 38394.7  | 54322.2  | 43288.7  | 35903.5  | 43006.2  | 35973.5  | TRUE |
| 433064   | 419620.7 | 356655.1 | 482966   | 305227.3 | 367520.5 | 500550.5 | 345263.7 | TRUE |
| 384845.8 | 285623.9 | 382149.3 | 405213.3 | 338567.6 | 452615   | 297834.9 | 399621.9 | TRUE |

|          |          |          |          |          |          |          |          |      |
|----------|----------|----------|----------|----------|----------|----------|----------|------|
| 209221.7 | 269855.7 | 190747.6 | 252097   | 343236.6 | 220447.8 | 293976   | 329940.1 | TRUE |
| 256668.2 | 211938   | 174871   | 236836.5 | 145451.1 | 166839.4 | 233138.9 | 182132.9 | TRUE |
| 78291.7  | 115186.8 | 57170.3  | 71768    | 71998.9  | 60613.8  | 78181.5  | 76982.8  | TRUE |
| 230310.3 | 215306.1 | 186545.8 | 225289.7 | 250964   | 208697.6 | 290034.2 | 263849.4 | TRUE |
| 172701.9 | 177514   | 125025.4 | 215160.8 | 178265.5 | 115965.6 | 218669.8 | 187669.4 | TRUE |
| 203393.7 | 201585.1 | 150202.5 | 203310.8 | 236389.1 | 168678.9 | 240091.7 | 223034.5 | TRUE |
| 210508.3 | 200388.9 | 171747.6 | 186895.1 | 256377.8 | 173140.4 | 233482.6 | 235572.7 | TRUE |
| 1156371  | 1221140  | 787551.7 | 1025368  | 1285076  | 907508.2 | 1282707  | 1336260  | TRUE |
| 939873.8 | 1028067  | 688049.2 | 862067.7 | 1069889  | 771663.8 | 1114130  | 1124130  | TRUE |
| 140126.8 | 132591   | 106644.1 | 162426.2 | 167443.8 | 131806.4 | 129979.5 | 135869.5 | TRUE |
| 75921.4  | 65393.7  | 58540.7  | 59443.7  | 75475.4  | 54717.9  | 59175.6  | 61703.5  | TRUE |
| 185310.6 | 235278.8 | 150317.3 | 166984.6 | 192395.4 | 160540.5 | 225521.6 | 185690.5 | TRUE |
| 35007.6  | 37228.2  | 39663.4  | 31734    | 44357.6  | 29808.8  | 30900.2  | 30402.7  | TRUE |
| 33312.2  | 32421.5  | 31812.5  | 35190.6  | 44182.9  | 23049.4  | 39909.5  | 32054.8  | TRUE |
| 29040.9  | 35821.3  | 21403.5  | 37692.6  | 27526    | 20666.4  | 28856.2  | 12288.4  | TRUE |
| 75793.9  | 73011.2  | 63303.6  | 74663.7  | 75980.2  | 65359.9  | 46715.5  | 77897    | TRUE |
| 59124.1  | 53376.7  | 44990.5  | 52153    | 66748.2  | 49312.9  | 61797.3  | 79006.9  | TRUE |
| 180318.9 | 192048.3 | 237499.5 | 199664.2 | 164888.4 | 207373.9 | 213371.2 | 204317.2 | TRUE |
| 1227282  | 1274944  | 1386620  | 1465468  | 969026.8 | 1131216  | 1367723  | 1163513  | TRUE |
| 34865.3  | 65395.1  | 67879.7  | 54816.4  | 55476.4  | 42162.9  | 44409.4  | 36136.8  | TRUE |
| 32627.8  | 94122.4  | 57219.1  | 87981    | 75596.4  | 6786.2   | 11846.4  | 13452.5  | TRUE |
| 42949.3  | 35644.5  | 49476.7  | 37549.8  | 34693.1  | 22040.6  | 35499.3  | 41183.9  | TRUE |
| 541147.2 | 557409.1 | 432830.5 | 627700.4 | 607187.6 | 505296.7 | 576645   | 642114.2 | TRUE |
| 124685.1 | 155559.8 | 140092.8 | 135703.2 | 121053.1 | 141791.6 | 111975.9 | 158090.7 | TRUE |
| 82243.3  | 106956.5 | 108612.7 | 99053.1  | 96962.7  | 59167.6  | 85815.7  | 80379.9  | TRUE |
| 65904.6  | 71025.1  | 67383    | 74178.6  | 52501.3  | 66049.8  | 57998.4  | 57029.9  | TRUE |
| 94183.8  | 83208.7  | 82969.6  | 98253.4  | 89327.2  | 78933    | 104640.2 | 102898.8 | TRUE |
| 67408.9  | 62944.1  | 58120.9  | 76703.1  | 63126.4  | 84103.9  | 84197.3  | 88136    | TRUE |
| 49481.4  | 50448.7  | 33212.2  | 46911.9  | 67942.8  | 41526.5  | 50758.3  | 52225.7  | TRUE |
| 81381.1  | 87275.9  | 97719.2  | 84575.7  | 98206.9  | 68488.1  | 77648.6  | 65238.8  | TRUE |
| 234662.3 | 234337.9 | 254005   | 295425.5 | 192390.3 | 231455.3 | 245219.8 | 250486.2 | TRUE |
| 66451.2  | 67282.2  | 109854   | 75481.1  | 71778.6  | 69408.2  | 72168.1  | 80086.4  | TRUE |
| 198652.3 | 184364.3 | 165748.4 | 192556.7 | 193322.1 | 152374.5 | 271565.4 | 174996   | TRUE |
| 26213.3  | 20297.1  | 18797.5  | 11843.8  | 25142.6  | 24265.7  | 39047.6  | 39487.1  | TRUE |
| 73680.3  | 165101.6 | 298211.3 | 110493.4 | 108036.8 | 77688.3  | 153782.5 | 84947.1  | TRUE |
| 63271    | 52110.4  | 55353.7  | 61031.1  | 63171.8  | 51290    | 70221.3  | 72004.6  | TRUE |
| 39308.7  | 41429.9  | 28490.6  | 39265.3  | 49480.9  | 42995.1  | 58329.1  | 44479    | TRUE |
| 97658.6  | 93727.3  | 85526    | 103057.1 | 97203.1  | 108697.9 | 97386.6  | 122775.6 | TRUE |

|          |          |          |          |          |          |          |          |      |
|----------|----------|----------|----------|----------|----------|----------|----------|------|
| 61863    | 58623    | 62792.7  | 71344.7  | 73606.1  | 70022.5  | 71752.4  | 67899.7  | TRUE |
| 32014.5  | 42503.7  | 35016.4  | 38182.3  | 42660.7  | 41450.5  | 32786.5  | 42636.4  | TRUE |
| 21457.4  | 18618.4  | 18538.6  | 18277.8  | 26063.2  | 21800.1  | 21554.6  | 26221.5  | TRUE |
| 136344.6 | 122704.9 | 122452   | 123386.3 | 93920.4  | 131745.1 | 127200   | 138463.3 | TRUE |
| 279109.6 | 183192.6 | 192870.1 | 243973.7 | 186835.6 | 216887.5 | 228323.3 | 271822   | TRUE |
| 281738.5 | 248324.3 | 274240.5 | 330939.3 | 202404.4 | 304043.8 | 314145.1 | 313415.5 | TRUE |
| 110803.7 | 95970.7  | 59814.9  | 76104.1  | 103943.3 | 84152    | 117380.7 | 153897.5 | TRUE |
| 305046   | 231859.1 | 291292.1 | 231152.2 | 266935.2 | 340264.5 | 309313.3 | 318744   | TRUE |
| 93488.5  | 102341.8 | 101892.4 | 117001.9 | 87685.1  | 120989.7 | 105175.8 | 120416.3 | TRUE |
| 111065.6 | 163691.5 | 146407.2 | 163250.5 | 177149.6 | 122896.6 | 168182.1 | 91240.8  | TRUE |
| 54786.4  | 60102.5  | 46552.1  | 44200.7  | 57041.9  | 55711.3  | 69613.8  | 42741.6  | TRUE |
| 193661.8 | 210046.9 | 209120.6 | 230563.6 | 129305.7 | 139122.3 | 183586.6 | 147284   | TRUE |
| 80274.9  | 66185.3  | 53521.2  | 52506.3  | 106797.6 | 62374.5  | 91252.8  | 90066.9  | TRUE |
| 125696   | 133143.3 | 117642.9 | 87147.4  | 143753.6 | 104889.4 | 128336.5 | 120427.6 | TRUE |
| 23734.9  | 24179.5  | 28880.1  | 6819.4   | 25521.9  | 30774.6  | 37819.1  | 30988    | TRUE |
| 42706.9  | 138005.1 | 47610.3  | 104396   | 169773.3 | 18879.1  | 10182.1  | 26704.3  | TRUE |
| 963355.9 | 1179432  | 1440138  | 1292928  | 691606.6 | 853476   | 1227693  | 825469.8 | TRUE |
| 4117568  | 5026971  | 5661546  | 5357713  | 3131224  | 3685655  | 5489534  | 3618742  | TRUE |
| 12587814 | 12386845 | 13901167 | 14748983 | 9880263  | 12004698 | 13073563 | 11975098 | TRUE |
| 750367   | 762231.9 | 560831.6 | 638170.5 | 747079.3 | 589658.7 | 786053.7 | 722003.6 | TRUE |
| 260411.2 | 278796.5 | 188483.2 | 264886   | 252920.8 | 207963.2 | 275549   | 234694.8 | TRUE |
| 815695.2 | 841979.4 | 603991.6 | 670702.9 | 811535.4 | 613607   | 783968.6 | 814705.2 | TRUE |
| 250853.9 | 284983.3 | 225515.7 | 251055.6 | 261059.9 | 223206.4 | 260491.2 | 243779.8 | TRUE |
| 86073    | 182490.5 | 84683.9  | 190324.2 | 186074.7 | 58989.8  | 45324.7  | 75325    | TRUE |
| 78497    | 170743.7 | 88436    | 142109.3 | 164633.4 | 71178    | 67391.3  | 73451.1  | TRUE |
| 3396276  | 3094965  | 4333278  | 4514210  | 2847968  | 3310699  | 3745505  | 3373553  | TRUE |
| 2402479  | 2188179  | 2906183  | 2997569  | 2027930  | 2254907  | 2557921  | 2418373  | TRUE |
| 37650.3  | 29472.8  | 40511.5  | 49696.3  | 27671.3  | 36114.5  | 37225.6  | 34746.8  | TRUE |
| 18317.5  | 21604    | 18323    | 29040.8  | 7892.9   | 11211    | 25773.1  | 11215.7  | TRUE |
| 58286    | 67514.1  | 70000.2  | 88162.9  | 48279.6  | 63430.6  | 56645.5  | 44424.1  | TRUE |
| 28200.5  | 25071    | 30343.8  | 29059.3  | 31390.8  | 47209.2  | 28749.6  | 22836.8  | TRUE |
| 59521.1  | 67258.3  | 55010.2  | 71433.7  | 48577.3  | 64909.2  | 48937.5  | 70569.6  | TRUE |
| 75006    | 57874.5  | 74213.1  | 73030.7  | 51075.4  | 63083.4  | 72984.1  | 68182.4  | TRUE |
| 41993    | 48732.9  | 58511    | 51813.3  | 43952.5  | 55545.3  | 48454.8  | 43935.3  | TRUE |
| 35230.3  | 22795.5  | 30607.5  | 33242.9  | 27697.5  | 24581.1  | 27377.9  | 27855.8  | TRUE |
| 60049.1  | 48664.2  | 37803.2  | 58494.5  | 52377    | 78035.1  | 59248.9  | 69675.5  | TRUE |
| 8549.4   | 5331.7   | 8140.7   | 11330.8  | 14102.4  | 8054.2   | 9267.3   | 6574.5   | TRUE |
| 96434.6  | 114470.6 | 104889.6 | 149534.7 | 119092.3 | 81977.9  | 64417.9  | 61393.8  | TRUE |
| 75538.6  | 145550.4 | 125191.4 | 216895.7 | 166316.8 | 58888.9  | 56667.5  | 59035.8  | TRUE |
| 213958.2 | 254849.5 | 173523.9 | 168032.7 | 245285.7 | 173682.8 | 239783   | 197208.9 | TRUE |
| 225155.5 | 230985.8 | 262497   | 257042.5 | 177922.3 | 176361.8 | 209020.4 | 184953   | TRUE |
| 372769   | 431664.7 | 271204.8 | 326051.3 | 392978.8 | 315105.3 | 426294   | 396583.2 | TRUE |
| 39535.1  | 68191.4  | 46967    | 54908    | 78590    | 43036.7  | 69115.4  | 63161.1  | TRUE |
| 133605.5 | 163570.4 | 132618   | 115377   | 143396.1 | 120165.2 | 149395   | 137984.3 | TRUE |
| 260249   | 364133.9 | 224032.2 | 247263.4 | 263683.4 | 213565.3 | 291010.1 | 263274.1 | TRUE |
| 46619.7  | 89146.4  | 46514.2  | 64967.5  | 77657.4  | 28654.7  | 29000.3  | 31120.9  | TRUE |
| 83740.5  | 93530.1  | 91224.2  | 64196.3  | 79401.7  | 66048.2  | 70500.9  | 86684.5  | TRUE |



|          |          |          |          |          |          |          |          |      |
|----------|----------|----------|----------|----------|----------|----------|----------|------|
| 42903.1  | 62336.4  | 47596.7  | 44174.7  | 39196.5  | 29267.5  | 48336    | 48431.9  | TRUE |
| 63584.8  | 162631.2 | 62736.6  | 136299.1 | 152352.3 | 36141.9  | 42370.5  | 42662.7  | TRUE |
| 66023.7  | 74785.8  | 59855.8  | 75181    | 74341.8  | 62382.3  | 96617.2  | 85516.7  | TRUE |
| 43560.8  | 43064.2  | 40226.5  | 43895.8  | 43917.5  | 42952.3  | 49866.9  | 29943.9  | TRUE |
| 45930.8  | 42903.8  | 43639.1  | 29643    | 47961.8  | 28237.5  | 44397    | 41983.3  | TRUE |
| 74075.3  | 97744.8  | 63180.6  | 80941.6  | 102600.5 | 56356.6  | 109321.8 | 101672.1 | TRUE |
| 372953.8 | 395700.6 | 266858.5 | 301028.5 | 386460.9 | 237985.5 | 426286.8 | 419551.2 | TRUE |
| 373260   | 388871.4 | 413930   | 439135.1 | 349405.9 | 350167.8 | 405188   | 359457.4 | TRUE |
| 451078.3 | 509774.6 | 541848.3 | 531516.7 | 367116.5 | 422983.1 | 468432.9 | 404163.4 | TRUE |
| 74525.2  | 175849.4 | 122438.5 | 161018.2 | 109926.1 | 59230.9  | 51646    | 47015.1  | TRUE |
| 81500.1  | 198123.2 | 127501.8 | 219361.7 | 152090.7 | 52988.6  | 52944.5  | 57334    | TRUE |
| 41623.5  | 58404.8  | 71764.5  | 52360    | 56533    | 60483.5  | 80764.9  | 58346.4  | TRUE |
| 225020   | 219127.9 | 253731.6 | 291882.4 | 171275.1 | 199602.7 | 264750   | 210047.4 | TRUE |
| 155469.7 | 156899.3 | 114768.8 | 144340.5 | 130856.3 | 176392.4 | 142362.1 | 125015.5 | TRUE |
| 112340.4 | 106370   | 141720.9 | 131523.4 | 79652.1  | 95082.2  | 103891.5 | 93162.3  | TRUE |
| 35829.8  | 35136.4  | 22213.3  | 38036.4  | 33164.3  | 23056.8  | 31162.3  | 60342.9  | TRUE |
| 39308.1  | 37994.7  | 24849.7  | 31528.5  | 34183.3  | 32308.8  | 44881.8  | 52382    | TRUE |
| 6856898  | 7117658  | 4989324  | 5410135  | 7041477  | 5121160  | 8170029  | 6892701  | TRUE |
| 323395.8 | 337873   | 250892.7 | 283886.7 | 277945.5 | 280914.4 | 346811.1 | 289874.3 | TRUE |
| 234647.8 | 535405.3 | 332162.4 | 406742.7 | 586800.4 | 182129.2 | 174043.2 | 211703.7 | TRUE |
| 77324.2  | 75648.9  | 75269.9  | 86388.6  | 70228.3  | 85357.8  | 91588.6  | 81295.8  | TRUE |
| 143281   | 333397.4 | 294066.5 | 406151.5 | 312393   | 69997    | 103135.9 | 98648.5  | TRUE |
| 121299.6 | 135285.8 | 224942.6 | 125903.6 | 111810.6 | 134012.7 | 175246   | 177873.2 | TRUE |
| 85336.9  | 76892.2  | 69346.6  | 66680.4  | 67760.6  | 89722.4  | 91947.4  | 85623.3  | TRUE |
| 42539.9  | 69893.2  | 53432.8  | 34199.7  | 48386.8  | 52874.5  | 48162.9  | 40459.7  | TRUE |
| 58921.9  | 60182.4  | 57333.5  | 48248.2  | 68719.8  | 74649.6  | 69480.9  | 80954.4  | TRUE |
| 79069.3  | 66764.5  | 70371.6  | 78019.4  | 67188    | 74784.3  | 71999.1  | 60819.1  | TRUE |
| 92198    | 103767.6 | 75401.7  | 72673.4  | 87186.4  | 131272.3 | 147628.1 | 119637.4 | TRUE |
| 165815.6 | 264250.6 | 96892.2  | 175704.6 | 194674.1 | 90063.8  | 192729.5 | 207795.9 | TRUE |
| 325037.3 | 479035.4 | 136283.8 | 329009.5 | 460998.7 | 148442.9 | 402241.3 | 424938.6 | TRUE |
| 206736.3 | 325461.6 | 95001.2  | 186818   | 307558.3 | 106063   | 229774.5 | 261887.4 | TRUE |
| 171545.8 | 220346.9 | 153722.7 | 196255.6 | 224481.7 | 164186.6 | 222138.6 | 219656   | TRUE |
| 154419.7 | 227717.4 | 125961.5 | 207618.7 | 226094.5 | 143257.4 | 237056   | 230564.7 | TRUE |
| 93087.3  | 138137.8 | 76012.3  | 162078.9 | 183261.2 | 84228.2  | 182213.1 | 155856.1 | TRUE |
| 192097.8 | 297257.4 | 124518.2 | 228405.4 | 350593.3 | 139415.1 | 353335.9 | 357462.6 | TRUE |
| 82838.8  | 83258    | 69522.8  | 93505.7  | 116561.1 | 84686.9  | 110318.7 | 104694.6 | TRUE |
| 138901.2 | 160073.6 | 126489.4 | 179348.6 | 204181.1 | 133022.3 | 219841.3 | 220780.7 | TRUE |
| 65409.2  | 83920.5  | 45146.1  | 75920.5  | 76484.2  | 56468.3  | 82833.7  | 81458.8  | TRUE |
| 69610.2  | 82942.9  | 60497.9  | 67672.8  | 83602.2  | 60179.7  | 67664    | 72513.3  | TRUE |
| 37951.6  | 77347.6  | 31104.5  | 64132.1  | 62034.9  | 25375.4  | 46110.5  | 67844    | TRUE |
| 33592.8  | 70140.2  | 27903    | 59385    | 75039.4  | 22468    | 25368.7  | 29008.7  | TRUE |

|          |          |          |          |          |          |          |          |      |
|----------|----------|----------|----------|----------|----------|----------|----------|------|
| 40991.9  | 44779.8  | 22300.8  | 57822.8  | 72778.1  | 15362.5  | 30730.1  | 31789.8  | TRUE |
| 34982.4  | 37273.5  | 28321.7  | 34896    | 29905.6  | 22078.5  | 31606.9  | 38036.1  | TRUE |
| 61618.5  | 51153.6  | 47135.1  | 51858.4  | 44046    | 35221.5  | 42733.7  | 48566.1  | TRUE |
| 25757.2  | 27567.4  | 26856.3  | 28692.4  | 39002.8  | 32638.3  | 35527.8  | 36053.3  | TRUE |
| 307720   | 337383.8 | 349730.8 | 409284.1 | 244469.9 | 320095.5 | 348360   | 294344.6 | TRUE |
| 131108.6 | 210594.2 | 227403.3 | 229448.3 | 95805.2  | 173971.3 | 229185.3 | 167298.7 | TRUE |
| 1055342  | 1306170  | 1451376  | 1505282  | 790782.2 | 1024407  | 1444637  | 1038353  | TRUE |
| 91118.4  | 139437.7 | 136740.9 | 164071.4 | 77667.6  | 104083.8 | 141842.7 | 115184.6 | TRUE |
| 166276.8 | 218792   | 222339.9 | 235800.6 | 152715.7 | 176572.8 | 242523.5 | 187218.5 | TRUE |
| 49510.3  | 136679.5 | 112473.1 | 148392.1 | 76007.5  | 28124.9  | 32494.5  | 14198.2  | TRUE |
| 24807.6  | 26313    | 23138.2  | 34565.1  | 32475.9  | 32129.5  | 37434.6  | 33334.6  | TRUE |
| 68163.2  | 60856.2  | 56340.6  | 59633.2  | 72018.7  | 48955    | 62493.3  | 96429.4  | TRUE |
| 190820.6 | 212086.1 | 159707   | 155745.5 | 199222.1 | 141214.5 | 207528   | 193906.2 | TRUE |
| 276401   | 273971.2 | 272338.6 | 230518.4 | 236902.4 | 218334.8 | 286108.9 | 246097.4 | TRUE |
| 253946.1 | 244744.7 | 228371.6 | 232007.5 | 244865.1 | 230551.6 | 221197.1 | 244023.5 | TRUE |
| 224533.2 | 249241.7 | 206253.8 | 231935.6 | 256985.7 | 216484.4 | 216728.1 | 227172.4 | TRUE |
| 594874.9 | 633028.6 | 568616.4 | 606910   | 632391.2 | 595251.5 | 612601.4 | 611026.7 | TRUE |
| 169991.6 | 181989.9 | 154172.1 | 170570.6 | 190919.2 | 136200.7 | 188846.8 | 193435.5 | TRUE |
| 388825.5 | 393100.9 | 359464.5 | 498162   | 534217.4 | 416338.4 | 569412.5 | 494783.7 | TRUE |
| 103349.4 | 235167.4 | 116012.1 | 239031.6 | 259348.8 | 82177    | 92741.7  | 109560.5 | TRUE |
| 2938047  | 2588787  | 3415915  | 3513724  | 2629795  | 2619046  | 2854445  | 2535843  | TRUE |
| 1367135  | 1245488  | 1287427  | 1375749  | 1025666  | 1157236  | 1356752  | 1284535  | TRUE |
| 163896.5 | 161671.4 | 174395.6 | 157094   | 195533.4 | 177933.5 | 164015.5 | 146305.3 | TRUE |
| 176772.7 | 157384   | 190257.5 | 181462.2 | 170200.7 | 175411.6 | 183072.4 | 179241.3 | TRUE |
| 223291.2 | 241482.3 | 185193.8 | 192856.9 | 217694.1 | 211365   | 225634.9 | 224359.7 | TRUE |
| 142660.9 | 163588   | 97666.8  | 151311.9 | 141630.3 | 87433.5  | 143282.2 | 149393.7 | TRUE |
| 150989.1 | 139189.8 | 145338.2 | 156198.1 | 127962.4 | 156460.7 | 182561.9 | 170688   | TRUE |
| 323378.6 | 294984.7 | 343450.6 | 344840.7 | 293152.9 | 307768.3 | 329908.8 | 295286.5 | TRUE |
| 66587.7  | 86459.4  | 40372.2  | 48350.7  | 50000.5  | 49721.2  | 59320.2  | 41609    | TRUE |
| 247821.2 | 231746.5 | 197589.2 | 227410.1 | 223210.1 | 207500.7 | 267486.5 | 212032.7 | TRUE |
| 1202309  | 1253509  | 877388.2 | 1162079  | 1147812  | 923083.9 | 1275853  | 1114128  | TRUE |
| 125649.5 | 126868.3 | 100655.6 | 138617.8 | 115422   | 88130.8  | 126963.5 | 139615.9 | TRUE |
| 506568.8 | 502941.7 | 581587.8 | 570860.7 | 490191.8 | 530579.4 | 556234.1 | 531316.9 | TRUE |
| 127000.3 | 188453.5 | 123148.8 | 156289.2 | 155780.9 | 102692   | 165321.7 | 94627.1  | TRUE |
| 1247965  | 1175336  | 1273122  | 1347491  | 1096887  | 1204712  | 1096640  | 1167380  | TRUE |
| 1199792  | 1181880  | 999913.3 | 1133789  | 1084424  | 1073455  | 1197731  | 1030743  | TRUE |
| 323420.9 | 255528.5 | 340569   | 351495.5 | 367575.7 | 326066.3 | 357302.3 | 331012.3 | TRUE |
| 788947.8 | 694577.1 | 790463   | 773615.2 | 675381.9 | 746473.3 | 702985.7 | 736466   | TRUE |
| 4709902  | 4434235  | 5295854  | 5372601  | 4333008  | 4997983  | 4887308  | 4930317  | TRUE |
| 79769.5  | 154717.5 | 138438.3 | 164165   | 158135.6 | 48740.5  | 44157.9  | 45207.4  | TRUE |
| 899365   | 767982.4 | 746046.9 | 748240.9 | 687891.8 | 776728.6 | 693592.4 | 754937.8 | TRUE |
| 338877.8 | 347025.4 | 302300.5 | 365570.9 | 401203.2 | 317088.7 | 354708   | 361189.3 | TRUE |
| 593388   | 594184.7 | 440610.2 | 471554.3 | 635242.1 | 484586.3 | 586588.7 | 624347.7 | TRUE |
| 118156.7 | 138860.8 | 132671.9 | 131975.4 | 137839.3 | 127797.4 | 131738.9 | 130306.5 | TRUE |
| 317740.2 | 300738.8 | 310340.3 | 294847.5 | 328136.4 | 297028.5 | 310739.2 | 298836.4 | TRUE |
| 174322.8 | 197298.7 | 176360.5 | 181739.9 | 167305.4 | 156506.9 | 201533.3 | 150774.9 | TRUE |

|          |          |          |          |          |          |          |          |      |
|----------|----------|----------|----------|----------|----------|----------|----------|------|
| 852868.6 | 846125.2 | 809614.3 | 860029.8 | 892694.8 | 915741.3 | 964134.4 | 828848.8 | TRUE |
| 33509.6  | 32140.8  | 30253.6  | 26708.3  | 34010.5  | 28461.7  | 34379.9  | 30809.8  | TRUE |
| 63925.8  | 39936.7  | 49641.3  | 67107.2  | 77160.1  | 57047.5  | 73865    | 64086    | TRUE |
| 51232.2  | 78763.1  | 73952.5  | 87030.3  | 71235.3  | 57643.3  | 48195.5  | 57706.8  | TRUE |
| 20158.5  | 26324.7  | 40808.7  | 28767.1  | 23610.6  | 42754.1  | 34966.2  | 35634.5  | TRUE |
| 25646    | 7590.2   | 24372.7  | 10670.3  | 12408.2  | 29360.9  | 34462.4  | 18144.9  | TRUE |
| 42348.8  | 48841.8  | 42518.5  | 56560.1  | 47314.3  | 44524.5  | 45962.7  | 44496.2  | TRUE |
| 37303.5  | 23180.8  | 36930.8  | 27560.6  | 30651.7  | 51668.3  | 43580.1  | 40620.3  | TRUE |
| 68094.5  | 46170.1  | 54423.9  | 42375.1  | 34130.5  | 90938.7  | 79136.9  | 61453.5  | TRUE |
| 100580   | 81865.1  | 78153.8  | 122395.7 | 111179.4 | 134070.6 | 116355   | 107177.8 | TRUE |
| 295143.1 | 283353.8 | 236213.3 | 242868.5 | 211077.3 | 231224.2 | 255838.2 | 224208.3 | TRUE |
| 139918.5 | 126762.8 | 65747.8  | 94548.3  | 77835    | 82100.9  | 103665.5 | 83438.2  | TRUE |
| 171148   | 143177.7 | 138393.3 | 190685.7 | 183494.2 | 169384.8 | 156265.2 | 167809.4 | TRUE |
| 751884.3 | 700872.1 | 651390.7 | 763271.2 | 745301.5 | 708249.9 | 767084   | 806288.3 | TRUE |
| 2654697  | 2640459  | 2235695  | 2685072  | 2570481  | 2554012  | 2810761  | 2698547  | TRUE |
| 88758.7  | 94723.8  | 83808.2  | 59462.1  | 64782.3  | 76084    | 71669.4  | 68962.6  | TRUE |
| 58625.7  | 50173.7  | 55806    | 42480.9  | 48345.8  | 45014.9  | 58098.1  | 47702.5  | TRUE |
| 56493.8  | 111964.1 | 70867.4  | 99121.9  | 133207.4 | 39707.4  | 56328.6  | 50846.8  | TRUE |
| 74179.6  | 48947.3  | 57779.2  | 53188    | 59236.3  | 70260.3  | 53661.1  | 73345.5  | TRUE |
| 2782727  | 2457288  | 3264094  | 3271644  | 2770220  | 3033890  | 2854409  | 3125853  | TRUE |
| 99685.3  | 158204.7 | 129213.3 | 207143.3 | 180519.2 | 93551    | 80571.1  | 54910.5  | TRUE |
| 37148.4  | 87089.5  | 67198.7  | 90012.4  | 115905.7 | 35558.1  | 44512.7  | 17215.6  | TRUE |
| 130440.6 | 182574.7 | 136415.1 | 174405.5 | 214065.7 | 89470.9  | 88514.2  | 97702.9  | TRUE |
| 169088.5 | 161504.7 | 153415.3 | 186600.9 | 160289.6 | 194755.9 | 201220.3 | 219640.8 | TRUE |
| 49733    | 53189.2  | 52753.5  | 75076.5  | 49248.1  | 65431.7  | 56617.5  | 48494.4  | TRUE |
| 43362.2  | 52356.9  | 64083.2  | 49895.7  | 37403.9  | 48537.9  | 59372.9  | 52600    | TRUE |
| 50449.1  | 53859.3  | 51166.5  | 43801.3  | 29847.5  | 42108.1  | 65840.8  | 58643.4  | TRUE |
| 256587.4 | 306488   | 177329.8 | 328683.6 | 400139.7 | 172649.7 | 353916.4 | 375708.2 | TRUE |
| 192297.1 | 264300.4 | 115758   | 262854.2 | 285212.9 | 118350.3 | 294175.4 | 291366.2 | TRUE |
| 24354.5  | 51935.2  | 33031.3  | 38977.4  | 74827.2  | 32813.3  | 12832.6  | 24541.3  | TRUE |
| 22409.9  | 25114.3  | 21174.5  | 11417.7  | 28849.2  | 7735.3   | 22362.7  | 15099.4  | TRUE |
| 60544.3  | 40302.2  | 64562.7  | 60579    | 45972.1  | 44419    | 53307    | 50049.3  | TRUE |
| 216739.7 | 218315.2 | 183911.3 | 221535.4 | 237430.8 | 189793.7 | 244225.4 | 254432.4 | TRUE |
| 455449.1 | 602620.8 | 388915.1 | 444170   | 570951   | 396769.4 | 650333.7 | 538832.8 | TRUE |
| 321372.8 | 392003.2 | 290975.6 | 358223.8 | 434331.6 | 314521.4 | 392721.2 | 411459.5 | TRUE |
| 363026.3 | 471238.9 | 315153.4 | 507844.7 | 532413.2 | 399651.9 | 491095.2 | 451344.1 | TRUE |
| 383864.3 | 463897.1 | 343439.8 | 677297.2 | 686563.8 | 460863.2 | 607204.5 | 515225.5 | TRUE |
| 160504.2 | 141063.8 | 142752   | 140199.5 | 184315.1 | 144319.7 | 178918.4 | 160146.6 | TRUE |
| 169496.9 | 226016.9 | 171902.1 | 198396.4 | 230621.3 | 173377.1 | 217504.7 | 223856.3 | TRUE |
| 33304    | 26949    | 33955.8  | 31656.8  | 42142.9  | 34561.6  | 30503.1  | 39914    | TRUE |
| 35157.7  | 80112.3  | 38085.3  | 50086.4  | 79886.4  | 24067    | 25549.1  | 30475.4  | TRUE |
| 125176.6 | 105259.8 | 103676.9 | 105738.2 | 132762.6 | 96041.3  | 151738.9 | 120949.3 | TRUE |
| 73958.6  | 71904.2  | 69482.7  | 59745.3  | 86091.5  | 73569.6  | 83292    | 102332.4 | TRUE |
| 247420.8 | 301588.7 | 284686.7 | 291384.8 | 222941.5 | 248473   | 313763.8 | 246037.5 | TRUE |
| 319138.8 | 348966.3 | 396455.1 | 379489.3 | 263556.2 | 295337.8 | 409811.5 | 287427.8 | TRUE |

|          |          |          |          |          |          |          |          |      |
|----------|----------|----------|----------|----------|----------|----------|----------|------|
| 627921.3 | 679676.9 | 714520   | 699887.1 | 514447.7 | 671982.7 | 698924.5 | 615725.7 | TRUE |
| 959422.5 | 964507.3 | 1179142  | 1281056  | 861237.1 | 806800.8 | 1044654  | 927663.8 | TRUE |
| 972419.6 | 990660.6 | 1127894  | 1192273  | 901233.1 | 882073.6 | 1047203  | 938908.7 | TRUE |
| 460362.6 | 499385.6 | 463405.5 | 590092.7 | 395159.9 | 442149.3 | 517001.4 | 458172.3 | TRUE |
| 1646875  | 1703709  | 1538834  | 1783491  | 1480597  | 1581805  | 1781786  | 1726668  | TRUE |
| 43331.6  | 63832.8  | 52319    | 68141    | 52988.1  | 39892.4  | 36051.5  | 25363.1  | TRUE |
| 67812.8  | 93834.9  | 81940.3  | 82146.2  | 84973.2  | 59481.9  | 42594.8  | 40226.6  | TRUE |
| 46537.9  | 64171.3  | 68294    | 66491.6  | 36088.5  | 53613.9  | 74156    | 49187.8  | TRUE |
| 27325.7  | 26348.2  | 13006.6  | 16945.3  | 23272    | 9079.7   | 29721.5  | 15889.9  | TRUE |
| 28766.5  | 36260.1  | 32292.7  | 26945.9  | 31643.3  | 27944    | 32250.4  | 10690.4  | TRUE |
| 117603.6 | 127370   | 165387.7 | 153271   | 156166.8 | 105497.8 | 92976.1  | 95031.2  | TRUE |
| 85367.9  | 108829.4 | 89946.1  | 95088    | 101928.1 | 93206.4  | 89975.8  | 95558.3  | TRUE |
| 145565.6 | 126913.8 | 145976.1 | 161034.3 | 140673   | 173146.6 | 150715.7 | 167408.3 | TRUE |
| 54599.2  | 64751.2  | 63212.9  | 66748.8  | 58988.2  | 51053.6  | 56503.6  | 59072.1  | TRUE |
| 154940.8 | 145184.8 | 110501   | 145116.8 | 141897.6 | 125232.7 | 162574.2 | 143637.3 | TRUE |
| 59631    | 50191.5  | 50818.1  | 63965.5  | 67395    | 69475.9  | 74134.7  | 67540.2  | TRUE |
| 135950.3 | 155642.6 | 147831.5 | 175889.6 | 163898.9 | 175816.6 | 164129.3 | 159600.9 | TRUE |
| 68057.9  | 62587.5  | 83123.4  | 55748.5  | 60464.4  | 58017.2  | 75272.7  | 37293.1  | TRUE |
| 156435.1 | 149741.2 | 132961.6 | 151855.7 | 152950.7 | 155283.5 | 148230.8 | 203345.6 | TRUE |
| 83995.6  | 92059.4  | 86568.8  | 131834.7 | 104326.8 | 87989.1  | 103991.6 | 94776.9  | TRUE |
| 233344.7 | 228453.9 | 260288   | 224938.4 | 256983.5 | 264339.2 | 238089.6 | 273687.9 | TRUE |
| 114171.3 | 104693.8 | 151381.9 | 139528.9 | 158251.4 | 146075.6 | 171925.2 | 158804.9 | TRUE |
| 21421.5  | 13721.4  | 7955.6   | 14893    | 10295.1  | 20116.6  | 10341.4  | 18473    | TRUE |
| 15726.6  | 6876.7   | 8031.6   | 5593.1   | 24712.3  | 8488.7   | 7463.7   | 5330.8   | TRUE |
| 123766   | 96672.2  | 118981.6 | 128914.6 | 100508.7 | 190644.2 | 112477.4 | 215111.9 | TRUE |
| 488249.7 | 457410.1 | 377328.1 | 311690.8 | 441376.9 | 373881.8 | 424215.3 | 399151.4 | TRUE |
| 507745.1 | 427976.7 | 434904.6 | 369109.8 | 408712.6 | 429038.1 | 437562.5 | 399541.9 | TRUE |
| 153878.4 | 155293.3 | 131362.2 | 113662.5 | 124572.1 | 130202.9 | 153453.7 | 135963.5 | TRUE |
| 65727.2  | 79639.3  | 62075.4  | 58618.4  | 61546    | 63486.9  | 60699.9  | 70041.1  | TRUE |
| 77128.1  | 90141.6  | 70163.9  | 54660    | 81253.7  | 66538.3  | 62651.2  | 67822.7  | TRUE |
| 96526.9  | 103021.2 | 111413.9 | 115980.5 | 117670.5 | 114659.2 | 132685.6 | 122321.4 | TRUE |
| 113959.3 | 110817.7 | 118973.9 | 106981   | 133547.9 | 144725.9 | 160329.6 | 209362.3 | TRUE |
| 51578.2  | 51357.4  | 70551.4  | 74879.7  | 63240.2  | 56688.8  | 77189.5  | 52637.8  | TRUE |
| 23866.5  | 28072.9  | 23642.7  | 23127.3  | 30275.7  | 24192.2  | 21966.5  | 21626.4  | TRUE |
| 30182.3  | 24627.6  | 29226    | 25524.7  | 26531.9  | 25193    | 36343.9  | 22539.2  | TRUE |
| 40342.2  | 18127.6  | 37837    | 41391.3  | 23373.2  | 45143.8  | 49497.2  | 38046.5  | TRUE |
| 60201.3  | 38493.4  | 57645.5  | 68874.5  | 55208.3  | 48929.1  | 56283.3  | 59108    | TRUE |
| 38264.8  | 21734.7  | 34363.2  | 29744.9  | 37763.5  | 22330.6  | 34371    | 35474.4  | TRUE |
| 45036.5  | 42287.2  | 43066.5  | 41133.2  | 63372.7  | 44941.5  | 37310.5  | 60020.7  | TRUE |
| 43504    | 52553.6  | 28528.3  | 43599    | 71769.5  | 40801.8  | 41899    | 49158.8  | TRUE |
| 186057.2 | 201931.9 | 195515.3 | 196470.8 | 223529.6 | 215816.4 | 257317.5 | 235054.6 | TRUE |
| 31392.6  | 36102    | 39607.1  | 36043.8  | 45899    | 30759.1  | 40905.6  | 41482.9  | TRUE |
| 97645.4  | 132834.7 | 91585.7  | 93506.3  | 112045.3 | 89990.3  | 119518.6 | 100655.5 | TRUE |
| 24517.9  | 10783.5  | 12381    | 20544.8  | 6924.8   | 27992.2  | 27765.6  | 40172.8  | TRUE |
| 34089.3  | 23358.4  | 33311.7  | 36868.9  | 29512.2  | 27098.2  | 27909.6  | 32278.3  | TRUE |

|          |          |          |          |          |          |          |          |      |
|----------|----------|----------|----------|----------|----------|----------|----------|------|
| 39638.1  | 112903.5 | 53840.3  | 88504    | 95762.8  | 36764    | 26586.2  | 23536.8  | TRUE |
| 30652.7  | 40569    | 31661.5  | 34504.7  | 31435.4  | 24519.3  | 40122    | 43296.5  | TRUE |
| 299530.7 | 202724.5 | 231988.4 | 224577   | 249574.9 | 356910.3 | 308886.4 | 357886.9 | TRUE |
| 7362298  | 6755050  | 5712157  | 7348968  | 7911881  | 6346301  | 7013315  | 8431439  | TRUE |
| 110818.7 | 85204.6  | 84042.3  | 125274.6 | 99822.1  | 137914.2 | 112963.3 | 139095.9 | TRUE |
| 33592.4  | 63098.4  | 41888.6  | 75745.7  | 71785.6  | 11660.9  | 25950.8  | 23121.8  | TRUE |
| 541627.4 | 623876.4 | 491391.5 | 497095.5 | 478131.5 | 617733.8 | 655845.8 | 673449.6 | TRUE |
| 1072802  | 1170424  | 998918.6 | 1112631  | 933977   | 1114843  | 1177354  | 1158976  | TRUE |
| 472496.8 | 500751.9 | 398303.2 | 486509.9 | 539602.2 | 463701.1 | 504545.6 | 575436.7 | TRUE |
| 161205.7 | 107378.3 | 99007.1  | 130898.5 | 102428.4 | 86537.3  | 121509.5 | 132424.1 | TRUE |
| 659779.6 | 487596.9 | 336594.6 | 520316   | 471950.9 | 421593   | 555740.4 | 610332.6 | TRUE |
| 220668.3 | 227435.3 | 214538   | 262150.4 | 285905.2 | 260641.5 | 204477.2 | 242402   | TRUE |
| 474336.9 | 419000.1 | 416351   | 512507.1 | 639960.1 | 478048.9 | 488517.7 | 493968.8 | TRUE |
| 470204.1 | 356865.2 | 520933.9 | 431073.4 | 682009.9 | 510267.6 | 400665.7 | 614797.3 | TRUE |
| 254991.2 | 247704.3 | 189301.8 | 233894.1 | 205457   | 247337.2 | 268076.6 | 341742.9 | TRUE |
| 805095.3 | 785460.6 | 645731.6 | 792019.2 | 727911.4 | 793213.1 | 763482.9 | 714186.5 | TRUE |
| 182704.2 | 179875.8 | 188590.8 | 159275.8 | 175313.4 | 191286.7 | 183232   | 182497.8 | TRUE |
| 44462.6  | 48810.8  | 32162.5  | 47600.2  | 52206.2  | 40197.1  | 35232.9  | 38695.5  | TRUE |
| 494224   | 456229.3 | 412209.4 | 489103   | 482491.5 | 427256.9 | 410235.1 | 456624.3 | TRUE |
| 723955.1 | 665803.7 | 507905.3 | 668263.9 | 651620   | 562540.8 | 600606.8 | 637652.6 | TRUE |
| 155046.4 | 166559.9 | 151517   | 196440.5 | 188426.4 | 173352.3 | 180195.7 | 179463.9 | TRUE |
| 550596.7 | 551690.5 | 612372   | 574155.5 | 583189.1 | 598419.7 | 573482.5 | 624957.7 | TRUE |
| 341162.1 | 302961.9 | 363798.5 | 339672.4 | 375847.3 | 405048.2 | 346276.4 | 399742.5 | TRUE |
| 706546.9 | 705961.8 | 723882.8 | 676939.9 | 707775.5 | 781707.6 | 740409   | 775818.6 | TRUE |
| 2786493  | 2640909  | 2496507  | 2565136  | 2370084  | 2747323  | 2780419  | 2641905  | TRUE |
| 107732.8 | 72643.8  | 66506.6  | 114668.2 | 111501.2 | 127650.8 | 123985.3 | 137706   | TRUE |
| 86396.2  | 56032.9  | 55504.5  | 86162.2  | 59249.7  | 94779.8  | 95812.5  | 103560.9 | TRUE |
| 118713.9 | 85482.4  | 101099.9 | 83102.3  | 98544.8  | 128815   | 96119.1  | 141125.1 | TRUE |
| 102532.1 | 75097    | 80002.5  | 115138.3 | 78479.6  | 78961    | 91758.6  | 75014.1  | TRUE |
| 107098.3 | 121736   | 88164.3  | 91942.8  | 100003.6 | 75506.8  | 131257.5 | 86926.7  | TRUE |
| 920921.8 | 711795   | 740969.8 | 969763.5 | 778094.8 | 812246.4 | 796531.5 | 748775.7 | TRUE |
| 894290.4 | 606081.7 | 662952.4 | 697824.6 | 755446.4 | 917443.7 | 662962.7 | 908333   | TRUE |
| 209771.2 | 234476.1 | 221057.9 | 217978.9 | 197204   | 226732.7 | 219506.3 | 204177.4 | TRUE |
| 72354.3  | 89291.1  | 64540.6  | 84121.9  | 64050.4  | 66782    | 59851.1  | 64284.5  | TRUE |
| 38113.9  | 39701.1  | 42298.4  | 33977    | 36088.1  | 35844.6  | 51468.5  | 40140.3  | TRUE |
| 710514   | 589486.6 | 566635.7 | 672264.8 | 716257.5 | 637008.2 | 626557.9 | 721736.6 | TRUE |
| 155162.6 | 136688.5 | 125414.1 | 165501.6 | 149484.6 | 145620.1 | 156208.3 | 156246.9 | TRUE |
| 60421.1  | 48582.2  | 47159.5  | 60755.1  | 61072.6  | 65709.8  | 66877.8  | 95614.6  | TRUE |
| 116529   | 80618.5  | 90898.8  | 75129.1  | 108061   | 131602.4 | 131177.6 | 155520.3 | TRUE |

|          |          |          |          |          |          |          |          |      |
|----------|----------|----------|----------|----------|----------|----------|----------|------|
| 15150.1  | 12010.9  | 18058.6  | 13056.4  | 9885.1   | 15006.2  | 18821.3  | 14626.8  | TRUE |
| 513939.4 | 498215.9 | 409951.5 | 458873.5 | 469385.2 | 463169.3 | 498511.8 | 458255.9 | TRUE |
| 115089.2 | 104201.6 | 65697.6  | 71085.4  | 91215.5  | 73019.5  | 76135.1  | 99814.5  | TRUE |
| 189309   | 170119.1 | 171721.1 | 223437.4 | 195032.6 | 199263.6 | 230710   | 218838.7 | TRUE |
| 59313.8  | 60150.5  | 74537.5  | 120207.3 | 82625.9  | 75783.2  | 87682.9  | 98663.3  | TRUE |
| 41369.6  | 28660.5  | 57155.2  | 60838.1  | 49729.8  | 40229.6  | 43589.1  | 62661.6  | TRUE |
| 29689    | 28946.5  | 26602.9  | 38140.5  | 33576.3  | 34949.4  | 40919    | 39230.8  | TRUE |
| 8425.7   | 12175.8  | 9683.6   | 9719.8   | 9439     | 8541.6   | 10347.6  | 9269.9   | TRUE |
| 127173.9 | 311033.3 | 204269.5 | 260910.2 | 294396.3 | 87589.4  | 78156.5  | 110385.2 | TRUE |
| 114967.7 | 117726.6 | 133393.1 | 133918.8 | 115061.9 | 142218.2 | 156392.2 | 176182.5 | TRUE |
| 198763.5 | 254426.9 | 175713.8 | 266172.1 | 180099.6 | 237432.4 | 270100.7 | 221601.8 | TRUE |
| 66601.4  | 62508.7  | 48053.4  | 64061.2  | 91121.2  | 69206.3  | 89246.4  | 75705.1  | TRUE |
| 34212.2  | 43206.5  | 31942    | 37973.4  | 46422.8  | 43542.7  | 31890.9  | 57484.3  | TRUE |
| 295873.9 | 378631   | 271722.1 | 395587.6 | 263448   | 309244.3 | 551479   | 349731.9 | TRUE |
| 3117402  | 2941508  | 2651294  | 3316092  | 3422780  | 2913668  | 2913863  | 3288528  | TRUE |
| 325392.4 | 264432.2 | 325419.7 | 346970   | 371569.4 | 364491.4 | 283476.2 | 359123.1 | TRUE |
| 327202.5 | 264837.5 | 308176.6 | 378124.9 | 375234.9 | 374402   | 296398.9 | 380812.9 | TRUE |
| 430740.3 | 306938   | 449872.6 | 473418.7 | 428816.3 | 499419.4 | 342098.5 | 473390.2 | TRUE |
| 43917.7  | 45832.3  | 35196    | 30645.9  | 41127.4  | 33672.8  | 55946.2  | 40077.5  | TRUE |
| 137966.3 | 130854.4 | 115686.8 | 121155.9 | 144171.6 | 145116.3 | 138004.9 | 161674.5 | TRUE |
| 96362.6  | 108618.9 | 68456.5  | 71050.7  | 77464.2  | 99383.2  | 112738.6 | 124407.6 | TRUE |
| 170473.6 | 140324.4 | 174482.2 | 193847.3 | 192448.7 | 203742.8 | 128227.4 | 193597.4 | TRUE |
| 112052.3 | 109234.3 | 114222.8 | 67718.1  | 125894.9 | 131745.5 | 111783.9 | 152057.2 | TRUE |
| 39410.5  | 20924.7  | 15490    | 34310.7  | 26577.6  | 23482.8  | 11504.9  | 35569.3  | TRUE |
| 40578.6  | 36710    | 34180.4  | 53491.3  | 50874.6  | 44299.7  | 48147.8  | 43033.2  | TRUE |
| 122383.2 | 115261.3 | 107957.8 | 102488.9 | 117435.6 | 107777.2 | 123029.6 | 131072.5 | TRUE |
| 19779.7  | 10433.4  | 28693.5  | 9187     | 10070.8  | 17266.6  | 8756.2   | 8781.8   | TRUE |
| 23887.7  | 19557.9  | 19108    | 27914.5  | 20212.8  | 28685.6  | 27944    | 13426.1  | TRUE |
| 19288.9  | 6392     | 14227.4  | 11197.8  | 17698.7  | 19326.8  | 8254.6   | 24405.3  | TRUE |
| 47157    | 48817.2  | 52733.5  | 46309.8  | 46198.3  | 45850.1  | 33127.3  | 37571.1  | TRUE |
| 101974   | 79686.4  | 107027.4 | 86633.2  | 103385.8 | 116316.7 | 75602    | 91620.2  | TRUE |
| 274091   | 173035.6 | 237761.8 | 213059.5 | 158485.6 | 214856.4 | 163883.5 | 167556.6 | TRUE |
| 331511.7 | 246946.6 | 438596.9 | 478293.6 | 327449.7 | 415813.4 | 317344.6 | 353467.1 | TRUE |
| 609064.2 | 524340.9 | 439771.7 | 513303.4 | 674012.2 | 601998.4 | 533145.7 | 642170.4 | TRUE |

|          |          |          |          |          |          |          |          |      |
|----------|----------|----------|----------|----------|----------|----------|----------|------|
| 70808.5  | 59534.3  | 48022.8  | 63902.3  | 57972.1  | 77496.6  | 87365.7  | 65097.4  | TRUE |
| 87890.1  | 48387.5  | 53186.9  | 97215.9  | 71844    | 97647.5  | 73415.7  | 86717.8  | TRUE |
| 86736.6  | 105362.4 | 136855.2 | 79499    | 86561.1  | 95055.9  | 95838.1  | 91680.1  | TRUE |
| 105424.6 | 60586    | 95558.9  | 87405.1  | 105781.1 | 142098   | 120175.8 | 163572.2 | TRUE |
| 151582.3 | 134439   | 98638.8  | 133033.4 | 106498   | 123457.5 | 122709.3 | 129511.4 | TRUE |
| 1298141  | 994649.8 | 1371122  | 1349145  | 1490935  | 1383238  | 1127645  | 1419141  | TRUE |
| 217222.9 | 154897.9 | 170915.6 | 177802.8 | 162839.8 | 193259.4 | 192151.8 | 211873.2 | TRUE |
| 168101   | 107715.4 | 141333.7 | 150837.6 | 156239.9 | 176211.5 | 158044.8 | 199712.4 | TRUE |
| 121896.9 | 67984    | 110318.9 | 117390.7 | 130299.9 | 149074.3 | 134108.5 | 138016.6 | TRUE |
| 343803.4 | 292467.2 | 246389.8 | 294320.7 | 317439.7 | 346016.8 | 355129.4 | 359612.6 | TRUE |
| 214354.2 | 148295.4 | 158059.6 | 163544.4 | 193894.9 | 341413.3 | 243146.5 | 237953.9 | TRUE |
| 582790.8 | 380776.8 | 318832.5 | 347433.2 | 668811.6 | 661773.1 | 500711.1 | 696966.6 | TRUE |
| 226874.8 | 214507.6 | 244492.3 | 218907.6 | 219719.9 | 245199.5 | 232600.3 | 205655.7 | TRUE |
| 80804.2  | 79275.3  | 71246.9  | 78613.2  | 77491.9  | 82269.1  | 67601.4  | 97711.5  | TRUE |
| 131344.3 | 107129.4 | 84626.9  | 99941.2  | 134561.6 | 145187.6 | 137122.7 | 148169.9 | TRUE |
| 257160.3 | 244838.1 | 203773.2 | 196325.8 | 235351.5 | 280141.1 | 242761.2 | 271172.1 | TRUE |
| 164376.3 | 141017.9 | 109930   | 122131.6 | 184394.5 | 189424.1 | 192026.3 | 202824.4 | TRUE |
| 1216942  | 466860.7 | 1208355  | 549923.2 | 580491.6 | 665102.4 | 596175   | 486283   | TRUE |
| 734272.9 | 486126.7 | 742473.4 | 623796.3 | 524177.4 | 645385.6 | 467475.1 | 454517.9 | TRUE |
| 114824.8 | 88557.6  | 119483.6 | 129915   | 118676.7 | 113867.6 | 88566.6  | 118288.3 | TRUE |
| 84770.2  | 33298.3  | 96843    | 85193.8  | 44565.9  | 96734.9  | 67595.8  | 62268.6  | TRUE |
| 109645   | 88472.8  | 86123.9  | 80417.9  | 128694.8 | 126767   | 79296.3  | 128744.3 | TRUE |
| 32542.3  | 11196.7  | 29270.1  | 29331.1  | 22038.6  | 36894.1  | 33676.3  | 32452.7  | TRUE |
| 377816.6 | 261943.4 | 370621.1 | 395151.7 | 364470   | 416132   | 336304.8 | 420791.7 | TRUE |
| 52475.7  | 55192.6  | 65309.2  | 63360.3  | 70750.1  | 62679.4  | 50943    | 52806.3  | TRUE |
| 98962.3  | 58826.5  | 80064.3  | 98983.9  | 103857.5 | 92397.7  | 94944.8  | 92713.4  | TRUE |
| 86852.7  | 78704.5  | 100433.7 | 84623.1  | 87385.9  | 89278.8  | 88875.8  | 93467.9  | TRUE |
| 90013.2  | 94231.4  | 86358.3  | 93837.8  | 94141.6  | 96194.4  | 90731.9  | 87606    | TRUE |
| 83230.4  | 59450.3  | 72621.2  | 71834.8  | 68812.2  | 76849    | 78290.5  | 57232.8  | TRUE |
| 30056.8  | 23698.9  | 32439.8  | 14611.7  | 27608.3  | 32744.3  | 30440.2  | 38725.2  | TRUE |
| 5797833  | 5353199  | 4529870  | 4587057  | 5756117  | 5926109  | 5622059  | 6179537  | TRUE |
| 3289489  | 2592661  | 2275771  | 2351671  | 3317502  | 3552010  | 2884744  | 3605316  | TRUE |
| 101218.7 | 62093.4  | 89944.5  | 102556.5 | 95818.6  | 78227.7  | 76118.7  | 73751.2  | TRUE |
| 64531.8  | 56051.8  | 43349    | 53866    | 51680.2  | 53624.5  | 44477.5  | 58251.1  | TRUE |
| 59185.9  | 40265.7  | 29199.8  | 45013.5  | 46362.9  | 38238.7  | 30844.6  | 35424.7  | TRUE |
| 63271.5  | 85393.9  | 50743.8  | 71119.5  | 64642.4  | 56861.5  | 77090.5  | 57810.9  | TRUE |
| 106615.6 | 69588.1  | 83806.8  | 105866.9 | 91293.1  | 103592.7 | 93125.9  | 96779.5  | TRUE |
| 15299.4  | 8629.8   | 14919.8  | 5944.9   | 10993.8  | 17694.1  | 10456.8  | 6685     | TRUE |
| 22902.2  | 21072.8  | 17400.4  | 13053.9  | 22399.3  | 19889    | 28442.1  | 33646.5  | TRUE |

|          |          |          |          |          |          |          |          |      |
|----------|----------|----------|----------|----------|----------|----------|----------|------|
| 463865.3 | 399946.9 | 409009.5 | 362846.6 | 341661.7 | 406225.8 | 336839.1 | 311674.1 | TRUE |
| 337267.9 | 321981.1 | 442788.2 | 485282.1 | 436641.4 | 459312.7 | 358997   | 431061.1 | TRUE |
| 95531.3  | 84697.4  | 99344.4  | 85809.4  | 75556.5  | 91473.8  | 86017.9  | 92782.4  | TRUE |
| 55253.7  | 68506.8  | 50830.8  | 64213.6  | 60027.2  | 32804.1  | 43899.4  | 33702.7  | TRUE |
| 676165.4 | 641461.3 | 622102.9 | 624170.1 | 758553.9 | 761647.8 | 634663.3 | 693472   | TRUE |
| 2550980  | 2324513  | 2255868  | 2289824  | 2566901  | 2886931  | 2551572  | 2851150  | TRUE |
| 2950874  | 2709231  | 2199630  | 2287851  | 2862101  | 3116275  | 2893513  | 3315094  | TRUE |
| 20378.8  | 18770.6  | 11356.8  | 26243.1  | 21150.9  | 22094.1  | 10228.2  | 23058.8  | TRUE |
| 322046.7 | 277726.2 | 306617.2 | 343250   | 299670.4 | 309511.9 | 311603.2 | 310534.1 | TRUE |
| 3900263  | 3376149  | 3152527  | 3205140  | 3621257  | 4357019  | 3690874  | 4243419  | TRUE |
| 205082   | 226659.5 | 258035.2 | 219573.9 | 202712.7 | 222663   | 234923.9 | 194453.6 | TRUE |
| 68911.9  | 51176.6  | 77392.5  | 63932.9  | 65519.6  | 85823.5  | 61167.2  | 61980.8  | TRUE |
| 173033.6 | 187949.3 | 189860.8 | 179559.1 | 221353.9 | 200907.6 | 164744.1 | 175870.2 | TRUE |
| 123404.6 | 137569.1 | 87613.7  | 134412.1 | 145233.3 | 153452.9 | 142609.9 | 130910.9 | TRUE |
| 677184   | 524897.2 | 615188.6 | 689776.5 | 560492.7 | 603681.9 | 512441.1 | 578427.8 | TRUE |
| 114188.3 | 111783.1 | 121775.6 | 137752.5 | 124173.5 | 111329.4 | 99831.8  | 120631.7 | TRUE |
| 2309258  | 1596073  | 2822458  | 3181639  | 2719534  | 2947194  | 2214676  | 2854738  | TRUE |
| 122450.1 | 107809.7 | 138038.9 | 134280.5 | 139144.7 | 176655.8 | 119613.8 | 195127.5 | TRUE |
| 115119.3 | 99418.3  | 108078.1 | 161202.3 | 97252.2  | 122347.2 | 97411.7  | 115909.6 | TRUE |
| 89825.3  | 96550.2  | 99447.1  | 107554.1 | 122805   | 96232    | 98715.4  | 107472.7 | TRUE |
| 43980.2  | 49429.8  | 46238.1  | 50066.9  | 86114.6  | 53176.7  | 50384.5  | 64020.2  | TRUE |
| 124235.9 | 103426   | 179444   | 204799.9 | 195295   | 260773.6 | 146894.6 | 197552.4 | TRUE |
| 87337.4  | 126289.6 | 143708.3 | 77823.5  | 83221    | 60908.6  | 80454.6  | 53262.9  | TRUE |
| 323369.9 | 308358.9 | 215872.3 | 275132.8 | 326192.7 | 356711.3 | 341862.8 | 321615.4 | TRUE |
| 620506.3 | 523637   | 389153.6 | 548533.5 | 523738   | 667229.4 | 682571.7 | 689641.9 | TRUE |
| 86215.6  | 84765.9  | 75131.2  | 77031.7  | 80663.1  | 83030.9  | 91336.9  | 99413.1  | TRUE |
| 49021.7  | 48349.3  | 48748.7  | 47075.2  | 44213.8  | 34963.5  | 43816.7  | 55811.8  | TRUE |
| 72952.1  | 77843.1  | 93844.7  | 59379.1  | 61411.5  | 67452.8  | 71535.6  | 66707.1  | TRUE |
| 67254.4  | 43214.4  | 33307.6  | 50077    | 52505.2  | 64185.1  | 53769.8  | 73630.3  | TRUE |
| 830552.7 | 1114504  | 499753.1 | 646487.8 | 760943.2 | 594892.1 | 1195196  | 762207.8 | TRUE |
| 30211.2  | 72443.7  | 30400.9  | 45383.6  | 53916.9  | 13961.2  | 7197.5   | 10112    | TRUE |
| 1914195  | 1502853  | 2452516  | 2580209  | 1209193  | 1551271  | 1736982  | 1589286  | TRUE |
| 5050417  | 4055409  | 6794025  | 6857881  | 3438433  | 4243601  | 4742030  | 4517669  | TRUE |
| 27548.8  | 36772.5  | 39124.4  | 43075    | 18272.6  | 24135.8  | 41294.7  | 24869.1  | TRUE |
| 1847783  | 2625240  | 1032662  | 1292625  | 1534121  | 1141810  | 2301851  | 1497538  | TRUE |



|          |          |          |          |          |          |          |          |      |
|----------|----------|----------|----------|----------|----------|----------|----------|------|
| 177713.4 | 172771.8 | 126078.2 | 167787   | 166223.6 | 122094.7 | 169715.6 | 147525.5 | TRUE |
| 169825.4 | 165431.3 | 151872.5 | 156010.3 | 138030.2 | 137091   | 157014.7 | 168597.8 | TRUE |
| 112725.1 | 120223.1 | 178533.1 | 98063.1  | 95837.4  | 92861.9  | 82345.9  | 72575.6  | TRUE |
| 566883.3 | 714850.2 | 437060.9 | 502282.3 | 512976.6 | 460091.1 | 746124.9 | 541084.4 | TRUE |
| 701285   | 594045.1 | 848617.9 | 930751.1 | 543612.7 | 627776.9 | 595376.7 | 627144.1 | TRUE |
| 37291.3  | 45190.8  | 26890.4  | 40929.8  | 41552.5  | 36824.4  | 48303.9  | 42818.8  | TRUE |
| 16255.2  | 27286.8  | 17421.2  | 23926.4  | 28090.4  | 18808    | 34104.5  | 31729.6  | TRUE |
| 36898.7  | 30407.5  | 32186.7  | 33599.5  | 42184.2  | 29949.2  | 41202.4  | 36247.5  | TRUE |
| 26152    | 36065.3  | 33177.6  | 12305.2  | 34225.1  | 24486.5  | 32117.6  | 33746.1  | TRUE |
| 29506.8  | 36799.6  | 10526.9  | 17566    | 26305.9  | 26143.1  | 36463    | 14618.2  | TRUE |
| 80511.1  | 102223   | 86419.4  | 89882.4  | 101749.8 | 70419.2  | 76807.9  | 84365.1  | TRUE |
| 389310.7 | 385609.5 | 305646.9 | 762007.4 | 514289.2 | 391478.6 | 431559.4 | 422921.6 | TRUE |
| 47814.6  | 79916.3  | 137192.2 | 51965.9  | 45135    | 38378.6  | 49352.6  | 86921.6  | TRUE |
| 82111.7  | 86559.1  | 65684.7  | 66779.3  | 60344.7  | 71217.9  | 84632.7  | 74992.7  | TRUE |
| 46239.5  | 56536.7  | 54818    | 84517.4  | 43916.6  | 74874.1  | 71324.6  | 72261.6  | TRUE |
| 307094.6 | 282786.4 | 319874.1 | 399130.2 | 266278.5 | 310049.2 | 340680.4 | 345232.9 | TRUE |
| 146846.8 | 163591.5 | 143854.1 | 157762.2 | 136828.7 | 122331.8 | 177861.9 | 127965.6 | TRUE |
| 145495.5 | 199559   | 152626.2 | 91295.4  | 152501.5 | 138135.1 | 171015.7 | 144272.8 | TRUE |
| 265352   | 201754.5 | 304014.3 | 392017   | 254164.8 | 274398.9 | 222931.6 | 261623.6 | TRUE |
| 127154.4 | 185370.2 | 114763.4 | 133914   | 144330.8 | 136361.9 | 153583.3 | 118514.9 | TRUE |
| 212503.9 | 175690.9 | 235661.6 | 272240.5 | 169212.9 | 191691.2 | 224114.9 | 219510.1 | TRUE |
| 293270.8 | 287610.2 | 293749.6 | 412001.2 | 235593.8 | 220048.1 | 235611.6 | 228633.6 | TRUE |
| 200832.1 | 169088.9 | 183674.4 | 218844.9 | 205258.2 | 142004.1 | 282675.6 | 146308.3 | TRUE |
| 59606.1  | 45059.9  | 61366.1  | 88116.8  | 49579.3  | 41900.8  | 90241.2  | 36850.5  | TRUE |
| 189189.4 | 223968.9 | 166907.1 | 183193.8 | 227805.2 | 175043.4 | 234391.9 | 190702.8 | TRUE |
| 269590.4 | 289624.6 | 203179.5 | 214336.3 | 243022.1 | 225558.9 | 294982.6 | 240277.1 | TRUE |
| 2179518  | 1911065  | 2687728  | 2678358  | 1820509  | 1925144  | 2060345  | 1911869  | TRUE |
| 2203132  | 1923362  | 2657078  | 2590033  | 1865770  | 2091931  | 2009946  | 2029417  | TRUE |
| 60363.2  | 76405    | 19933.7  | 45992.3  | 55894.4  | 34510.6  | 69778.4  | 50717.8  | TRUE |
| 95298.6  | 109938.4 | 69172    | 84891.8  | 95336.2  | 61981.6  | 124104.8 | 90171.4  | TRUE |
| 2532643  | 1594145  | 1998468  | 1930083  | 4398853  | 2240759  | 1542659  | 2343790  | TRUE |
| 226848.8 | 197195.2 | 286595.3 | 212409.5 | 206076.7 | 269342.6 | 212058.7 | 222347.3 | TRUE |
| 308405.5 | 333813   | 243416.8 | 252383.5 | 358040.1 | 230496.1 | 351321.9 | 303502.7 | TRUE |
| 597440.4 | 629772.8 | 878087.8 | 652330.3 | 619664.4 | 778632.9 | 581371.2 | 550496.4 | TRUE |
| 1792133  | 1762431  | 1725296  | 1869077  | 2315750  | 1775818  | 1581660  | 1722268  | TRUE |
| 302043.9 | 288508.7 | 467563.2 | 288270.9 | 232906.9 | 466385.6 | 278940.7 | 246544.2 | TRUE |
| 153542.2 | 132628.5 | 208895.1 | 152989.1 | 138698.3 | 231331.9 | 150055   | 147654.8 | TRUE |
| 259071.6 | 218298.3 | 320833.2 | 246789.8 | 219386.1 | 364804.5 | 238916.7 | 258845.1 | TRUE |
| 43200.5  | 52186.1  | 46112    | 42413.7  | 34825.8  | 51433.2  | 42493    | 39628.9  | TRUE |
| 50891.8  | 50364.1  | 60420.2  | 36816    | 35412.8  | 56938.4  | 48975.8  | 45458.3  | TRUE |
| 273430.4 | 217558.9 | 256428   | 248816.6 | 368296.4 | 213329.4 | 249379.2 | 231303.8 | TRUE |

|          |          |          |          |          |          |          |          |      |
|----------|----------|----------|----------|----------|----------|----------|----------|------|
| 231126.2 | 178744.6 | 229041   | 201435.2 | 401622.4 | 218409.5 | 186554.6 | 219921.6 | TRUE |
| 20668.6  | 9142.2   | 11330.2  | 13451.8  | 18594.9  | 11123.5  | 20238.7  | 10196.6  | TRUE |
| 53945.3  | 39981.3  | 65033.6  | 65406.8  | 63789.7  | 45617.4  | 63413    | 75583.1  | TRUE |
| 125685   | 80928.2  | 83805.4  | 105969   | 179132.4 | 118666.6 | 102685.2 | 127895.7 | TRUE |
| 44229.3  | 32761.4  | 69551.2  | 52348.8  | 32582.8  | 65240    | 41504.9  | 43020.9  | TRUE |
| 225936.3 | 174500.7 | 157235.1 | 184820.5 | 263832.4 | 227842.2 | 175866.5 | 229904.4 | TRUE |
| 26664.4  | 15921.1  | 25956    | 21808.2  | 24610.4  | 21011.4  | 17906.4  | 23893.9  | TRUE |
| 554795.4 | 487837.4 | 822258.9 | 513981   | 413611.1 | 825455.1 | 546490   | 435916.7 | TRUE |
| 51143    | 42923    | 65325.3  | 46890.7  | 55446.5  | 57967.2  | 44598.6  | 37998.4  | TRUE |
| 178492.4 | 183278.9 | 242118.2 | 190151.6 | 136887.6 | 253407.2 | 188461.6 | 157367.3 | TRUE |
| 69494.6  | 48467.5  | 69131.8  | 54603.7  | 81600    | 81752.4  | 50293.2  | 89401    | TRUE |
| 188541.1 | 161477.5 | 153112.6 | 192978.6 | 212032.4 | 229043.7 | 200831.7 | 250729   | TRUE |
| 94656.4  | 73991.4  | 60577.2  | 70739.1  | 106672.2 | 86417.4  | 107275.4 | 95757.1  | TRUE |
| 52614.2  | 23492.1  | 33928.4  | 44766.8  | 91578.7  | 44165.5  | 30939.5  | 46296.8  | TRUE |
| 61680    | 51708.3  | 73874.6  | 62108.8  | 54621.2  | 72500    | 62554.3  | 44836.5  | TRUE |
| 33384.1  | 10138.2  | 49830.7  | 11380.5  | 11537.4  | 59511.7  | 14296    | 11484.5  | TRUE |
| 75394.3  | 59299.8  | 112313.1 | 78530.4  | 42234    | 139892.3 | 67579.8  | 66327.5  | TRUE |
| 83273.1  | 49398.7  | 99515.6  | 59642.5  | 46568.5  | 146577.9 | 77305.8  | 65122.3  | TRUE |
| 77826.5  | 89921.5  | 148256.4 | 68318.3  | 67944    | 123203.7 | 83282.8  | 94262.1  | TRUE |
| 62136.5  | 43626.3  | 40246    | 60210.3  | 46483.8  | 87224    | 59818.6  | 57578.1  | TRUE |
| 79774.5  | 64813.2  | 77923.6  | 58220    | 66354.9  | 114858   | 94298    | 100344.4 | TRUE |
| 75552.8  | 55231    | 78160    | 56482    | 91841.2  | 62570.1  | 85975.8  | 110567.8 | TRUE |
| 41422.3  | 33198.2  | 36359.7  | 35708.2  | 36958    | 66081.5  | 42488.1  | 41037    | TRUE |
| 118852.5 | 91796.4  | 132690.1 | 113483.5 | 81051    | 217371.6 | 121254.6 | 119025.2 | TRUE |
| 30408.5  | 5509.6   | 30556    | 28773.1  | 18043.9  | 26291.5  | 22234.9  | 42384.3  | TRUE |
| 141574.3 | 88931    | 97582.4  | 98578    | 193054.3 | 160767.4 | 113195.5 | 139780.5 | TRUE |
| 299764.5 | 223009.9 | 223996.9 | 284500.2 | 371567.8 | 317533.5 | 281191.9 | 340782.4 | TRUE |
| 78003.8  | 64914.3  | 59518.4  | 66855    | 79156    | 84964.3  | 57534.4  | 90079.1  | TRUE |
| 56374.6  | 50956.7  | 56847.4  | 45624.3  | 42618.4  | 58720    | 46007.5  | 61253.7  | TRUE |
| 235003   | 151638   | 187302.3 | 205486.9 | 293452.9 | 287695.3 | 198593.5 | 309176.6 | TRUE |
| 152521.3 | 126012.7 | 156231.7 | 133652.2 | 203468   | 171037.7 | 148582.1 | 169347.3 | TRUE |
| 647543.3 | 372862.4 | 542928   | 602929.9 | 383034.2 | 917366.8 | 570189.3 | 556336.6 | TRUE |

|          |          |          |          |          |          |          |          |      |
|----------|----------|----------|----------|----------|----------|----------|----------|------|
| 44820.2  | 40044.3  | 40026.8  | 44142.3  | 36740.4  | 74849.7  | 48040    | 54516.3  | TRUE |
| 280470.1 | 173888.5 | 227676.4 | 248442.9 | 356512.3 | 296843   | 237607   | 312939.6 | TRUE |
| 217563.9 | 261277.3 | 238912   | 346594.9 | 221234   | 239957.5 | 241490.1 | 190330.9 | TRUE |
| 84745.8  | 60873    | 62100.2  | 120631.1 | 108856.8 | 104768   | 87741.6  | 105292.5 | TRUE |
| 244647   | 238958   | 189096.3 | 436194.1 | 280618.4 | 194267.5 | 272894.9 | 282449.5 | TRUE |
| 555648.8 | 406373.3 | 679320.2 | 656369.6 | 541380.4 | 711026.5 | 488877.4 | 539204.8 | TRUE |
| 26538.3  | 25129.2  | 27465.2  | 32429.9  | 24055.8  | 21814.9  | 29690.5  | 33521    | TRUE |
| 383598.2 | 323188.4 | 417065.9 | 418674.3 | 298794   | 460988.4 | 344701.4 | 332187.2 | TRUE |
| 1170786  | 797057.5 | 1034473  | 939510.5 | 1437158  | 1266253  | 915739.1 | 1287818  | TRUE |
| 416305.8 | 459519.9 | 389770.7 | 434400   | 402512.2 | 445869.5 | 454326.3 | 479446   | TRUE |
| 339514.8 | 305548.1 | 414537.3 | 366063.8 | 283566.6 | 454113.9 | 330177   | 276021.3 | TRUE |
| 416122.5 | 344147.1 | 450454.6 | 402608.4 | 596852.7 | 536320.9 | 398798.6 | 515446.3 | TRUE |
| 634715.9 | 592883.3 | 847829.2 | 1017957  | 579435.3 | 902602.6 | 643445   | 562195.6 | TRUE |
| 1049775  | 1148365  | 993164.8 | 1431558  | 1294934  | 1093993  | 867122.4 | 1068386  | TRUE |
| 92264    | 60513.2  | 129742.8 | 112176.3 | 75214.4  | 124128.1 | 96013.9  | 63081.5  | TRUE |
| 135778.2 | 133018.3 | 122525.9 | 160762.8 | 103680.4 | 152094.5 | 140838.2 | 140100   | TRUE |
| 30169.9  | 29097    | 28264.6  | 37021.4  | 34227.6  | 28860    | 32291.1  | 23436.3  | TRUE |
| 140191.7 | 126304   | 139759.1 | 140761.6 | 131491.8 | 194014.9 | 134363.7 | 190678.3 | TRUE |
| 58297    | 46491.4  | 48528.5  | 51790.8  | 34744    | 68244.4  | 55693    | 61320.5  | TRUE |
| 84422.3  | 61623.1  | 53347.8  | 91644.4  | 87292.9  | 83081.3  | 85120    | 97296.1  | TRUE |
| 548434.3 | 327264.8 | 497772.9 | 487549.1 | 596816.3 | 589834.7 | 410593.5 | 628160.5 | TRUE |
| 166840.5 | 151911.7 | 107932.1 | 173196.7 | 154079.2 | 163013.4 | 132291.3 | 156704.3 | TRUE |
| 184206.6 | 169897.2 | 193239.9 | 163680.5 | 133960.2 | 197298.1 | 153187.3 | 145444.5 | TRUE |
| 80347.9  | 51259.5  | 84797.1  | 94867.4  | 77749.5  | 76619.1  | 76353.3  | 91395.5  | TRUE |
| 100546   | 88235.2  | 110831.6 | 106808.9 | 87658.5  | 124710.1 | 109213.9 | 103022.9 | TRUE |
| 14462.3  | 19774    | 5253.3   | 10491.4  | 13692.8  | 18114.7  | 7577.7   | 10737.5  | TRUE |
| 22447.2  | 24836.6  | 20364.5  | 22672.3  | 24100.5  | 16891.1  | 19942    | 28341.9  | TRUE |
| 108768.2 | 87576.1  | 118335.7 | 120932.7 | 103636.2 | 123921.3 | 113335.6 | 104543.8 | TRUE |
| 420798.9 | 384246.7 | 410316.4 | 469193.7 | 390299.2 | 450228.7 | 388752.1 | 401132.9 | TRUE |
| 253606.3 | 268387.5 | 312415.8 | 347811.7 | 229116.5 | 378785.5 | 302139   | 244224   | TRUE |
| 63677.1  | 51038.9  | 43761.9  | 53572.7  | 32868.5  | 71302.2  | 55557.7  | 50450    | TRUE |
| 43958.2  | 45661    | 44483.9  | 56974.5  | 34838.1  | 42313.4  | 41737    | 32740.2  | TRUE |
| 144606.8 | 134338.3 | 131334.7 | 150186.4 | 103830.8 | 127961   | 153370.8 | 148575.7 | TRUE |
| 21260.8  | 31857.7  | 27331    | 31291.2  | 18258.8  | 22670.8  | 26096.3  | 29377.4  | TRUE |
| 86759.4  | 78640    | 60544.1  | 92100.9  | 73942.9  | 100067.3 | 95188.7  | 114163.9 | TRUE |
| 24985.5  | 19175.7  | 25500.5  | 13474.9  | 31767.7  | 31017.1  | 27483.9  | 39907.4  | TRUE |
| 435141.1 | 311934.8 | 379782   | 402598.8 | 540753.7 | 434322.8 | 346605.6 | 476563.6 | TRUE |

|          |          |          |          |          |          |          |          |      |
|----------|----------|----------|----------|----------|----------|----------|----------|------|
| 104900.9 | 99941.7  | 90968    | 92949.9  | 69967.7  | 99039.5  | 97962.5  | 73436.4  | TRUE |
| 233899   | 169574.4 | 212665.6 | 227496.3 | 205165.2 | 218804.2 | 196071.1 | 212504   | TRUE |
| 93876.7  | 114110.3 | 100911   | 109812.4 | 80161.1  | 107159.9 | 101417.5 | 91016.7  | TRUE |
| 285560.2 | 278179.8 | 284397.1 | 281608.6 | 292729.5 | 277723.3 | 307073.7 | 260635.1 | TRUE |
| 288689.8 | 254814.1 | 262834.6 | 256796.2 | 249293.8 | 281430.8 | 262882.9 | 296964.6 | TRUE |
| 35916.9  | 37219.9  | 48152    | 54759.7  | 42533.9  | 49809.1  | 48468.5  | 56086.5  | TRUE |
| 80370.2  | 85015.9  | 85542.9  | 100796   | 88615.1  | 111875.9 | 97297.3  | 106187.8 | TRUE |
| 70556.7  | 68811.2  | 80919.5  | 84026.7  | 85373.5  | 74397    | 83146.2  | 68475.9  | TRUE |
| 29483.4  | 20422.1  | 25263.5  | 22159.4  | 20417.6  | 20940.8  | 23540.8  | 29163.2  | TRUE |
| 236505.5 | 354254.3 | 417624.6 | 356723.3 | 150313.8 | 405364.4 | 383958.2 | 389617.6 | TRUE |
| 120986.8 | 117735.9 | 151650.3 | 120423.9 | 91965.1  | 148470.7 | 92133.4  | 142018.4 | TRUE |
| 121223.7 | 107500   | 121952   | 101193.5 | 125438.5 | 138787.2 | 129233.9 | 128791.5 | TRUE |
| 720784.5 | 736273.7 | 593516.2 | 749999   | 767319.7 | 669423.7 | 722740.5 | 730728.8 | TRUE |
|          |          |          |          |          |          |          |          |      |
| 14836.9  | 10936.1  | 8968.7   | 10286.8  | 4659.5   | 7154.2   | 32680.7  | 18238    | TRUE |
| 52098.5  | 48134.5  | 50133.6  | 48749.1  | 48865.5  | 45063.6  | 51808.5  | 57991.3  | TRUE |
|          |          |          |          |          |          |          |          |      |
| 94666.3  | 98162.4  | 89195.2  | 115351.6 | 93264    | 89363.7  | 100202.9 | 85094.1  | TRUE |
|          |          |          |          |          |          |          |          |      |
| 44916.3  | 44560.8  | 34316.4  | 44779.3  | 37537.4  | 49882.4  | 53659.2  | 60322.1  | TRUE |
| 40232.8  | 36875.8  | 42367.6  | 68291.8  | 36109.9  | 58011.7  | 61132.9  | 50804.7  | TRUE |
|          |          |          |          |          |          |          |          |      |
| 43282.3  | 43981    | 38633.6  | 27027.3  | 51511.9  | 44724.8  | 44143.9  | 49199.9  | TRUE |
| 273073.8 | 260626.8 | 253513.4 | 280114.5 | 212073.4 | 250317.5 | 280806.7 | 217321.7 | TRUE |
|          |          |          |          |          |          |          |          |      |
| 389061.8 | 384925.5 | 467089.6 | 482793.8 | 407968.9 | 461136.7 | 487159.1 | 446313   | TRUE |
| 170258.3 | 177932.6 | 211589.5 | 237251.8 | 198821.3 | 196603.3 | 200455   | 200256.7 | TRUE |
| 1300492  | 1118997  | 1269175  | 1262698  | 1290170  | 1398293  | 1163450  | 1418943  | TRUE |
| 299770.6 | 278218.3 | 225611   | 285143.9 | 309568.6 | 275314.8 | 307683.9 | 318218.2 | TRUE |
| 318707.1 | 293940.3 | 247315.6 | 324408.5 | 309763.5 | 286037.9 | 332084.1 | 369993.6 | TRUE |
|          |          |          |          |          |          |          |          |      |
| 27214.5  | 8356     | 10623    | 25808.7  | 19270.2  | 20422.6  | 19806.1  | 8556.1   | TRUE |
| 18677.6  | 23755.2  | 13441.6  | 16607    | 17570.7  | 16844.4  | 20492.4  | 8866     | TRUE |
| 35276    | 25475.3  | 42120.3  | 32785.8  | 38955.8  | 41433.9  | 40190.9  | 28813.5  | TRUE |
| 74183.4  | 95015.9  | 46276.3  | 94972.7  | 69319.2  | 68075.8  | 67079.3  | 67391.4  | TRUE |
| 129627.8 | 99065.5  | 114591.9 | 166340.1 | 153038.1 | 220912.5 | 184476.1 | 170681.3 | TRUE |
|          |          |          |          |          |          |          |          |      |
| 65829.9  | 62641    | 51825.3  | 49506.5  | 56749.4  | 60832.2  | 78899.8  | 71332.8  | TRUE |
|          |          |          |          |          |          |          |          |      |
| 785382.2 | 816832.5 | 841694.3 | 796208.3 | 766736.2 | 882681.6 | 828094.9 | 816323.8 | TRUE |
| 507858.8 | 489204.4 | 503202   | 517842.6 | 468016.5 | 440343.7 | 478145.2 | 446375.4 | TRUE |
| 8312.3   | 11865.2  | 7368.7   | 10456.4  | 17062.9  | 6843.8   | 11679.4  | 9809.7   | TRUE |
| 272425.3 | 236159.3 | 180128.7 | 165272.1 | 186782.1 | 181818.6 | 211521.1 | 199727.5 | TRUE |
| 274573.6 | 281927.9 | 272955.4 | 278427.3 | 276641.2 | 302373.5 | 336340.5 | 271504.6 | TRUE |

|          |          |          |          |          |          |          |          |      |
|----------|----------|----------|----------|----------|----------|----------|----------|------|
| 341323.5 | 377375.4 | 356522.9 | 360354.4 | 367052.9 | 343933.1 | 422923.4 | 374817.7 | TRUE |
| 426048.6 | 398130.1 | 438429   | 451631.2 | 411268.8 | 422242.7 | 406420.5 | 471551.6 | TRUE |

|          |          |          |          |          |          |          |          |      |
|----------|----------|----------|----------|----------|----------|----------|----------|------|
| 232411.6 | 202800.7 | 179255.2 | 205351.1 | 192223.6 | 220957.6 | 254673.1 | 203423.7 | TRUE |
| 232414.1 | 262936.8 | 232031.1 | 240255.3 | 241677.3 | 234546.8 | 239322.4 | 178142.8 | TRUE |
| 226556.9 | 244475.5 | 143227.3 | 199411.5 | 189721.4 | 184437.5 | 209638.5 | 217425.7 | TRUE |
| 329594.3 | 295144.9 | 354994.2 | 353441.2 | 292163.5 | 320856.3 | 304909.5 | 273187.6 | TRUE |
| 152664.1 | 145792.7 | 199480   | 142179.1 | 205176.6 | 215837.7 | 232338.6 | 183149.9 | TRUE |
| 907378   | 873997.5 | 837913   | 775444.1 | 1025288  | 873415.1 | 964088.9 | 1134810  | TRUE |
| 361626.4 | 367674.2 | 319506.7 | 350522.2 | 392880.4 | 333295.3 | 375479.6 | 409015.1 | TRUE |
| 867742.5 | 793962.5 | 855038.9 | 895341.3 | 852365.5 | 882438.9 | 798986.9 | 961388.7 | TRUE |
| 1749150  | 1601177  | 1863949  | 1834684  | 1561261  | 1661824  | 1607997  | 1731257  | TRUE |
| 343761.2 | 316778.1 | 335107.5 | 360208.6 | 301353   | 336398   | 369519.2 | 320918.3 | TRUE |
| 35459.4  | 62798.5  | 33868.9  | 71662.5  | 41702.4  | 38670.7  | 53652.9  | 51356.8  | TRUE |
| 34448.6  | 52324.5  | 24723.3  | 16458.3  | 37058.8  | 23197.7  | 47585.1  | 34194.1  | TRUE |
| 143853   | 150379.5 | 126336.8 | 159984   | 145324.2 | 149339.9 | 166615.6 | 144156.2 | TRUE |
| 284488.7 | 275008.2 | 236048.8 | 225378.9 | 324948.3 | 311677.8 | 290820.5 | 255282.9 | TRUE |
| 21443.6  | 27106.7  | 31005.9  | 31889.2  | 32050    | 30447.3  | 42062.7  | 25606.9  | TRUE |
| 69819    | 47573.6  | 54471.1  | 59425    | 58950.3  | 32174    | 55473.9  | 70068.7  | TRUE |
| 78389.2  | 71178.4  | 59367.5  | 59437.3  | 50587.4  | 72661.1  | 76355.6  | 79851.2  | TRUE |
| 246562.3 | 187148.8 | 170729.2 | 225207   | 225150.5 | 201738.8 | 203506.4 | 266852.2 | TRUE |
| 59973.2  | 49959    | 25359.1  | 58534.7  | 37430.3  | 34717.7  | 42529.7  | 54629.8  | TRUE |
| 278483.3 | 211568.5 | 223400.3 | 240674.4 | 223624.3 | 285743.6 | 245389.7 | 257545.5 | TRUE |
| 45925    | 29004.9  | 30625.4  | 47438    | 38223.1  | 26321.9  | 41421.8  | 40168.1  | TRUE |
| 153261.8 | 117271.1 | 97919.9  | 113150   | 122484.7 | 93567.6  | 93139.1  | 164726.4 | TRUE |

|          |          |          |          |          |          |          |          |      |
|----------|----------|----------|----------|----------|----------|----------|----------|------|
| 77294    | 68825.9  | 92593.9  | 86213.7  | 73484.4  | 72832.4  | 64695.9  | 84626    | TRUE |
| 24895.3  | 28687    | 28860.6  | 43912.1  | 34546.5  | 24441.4  | 26983.5  | 26993.9  | TRUE |
| 69295.8  | 52531.8  | 50326.8  | 61339.9  | 65539.3  | 42549.9  | 77524.2  | 62512.9  | TRUE |
| 97667.8  | 79925.2  | 68496.8  | 61828.1  | 65300.1  | 45207.7  | 51921.7  | 67147.8  | TRUE |
| 450839.8 | 432118.3 | 241571.8 | 372711.4 | 320695.9 | 262512.9 | 316833.3 | 379503.6 | TRUE |
| 9233.1   | 40014.1  | 22669.3  | 42597.6  | 25203.9  | 33966.4  | 11562.4  | 26661.1  | TRUE |
| 465758.1 | 453152.5 | 401413.2 | 709153.4 | 481325.4 | 519771.9 | 453442.2 | 641396.2 | TRUE |
| 12260.3  | 31575.7  | 30982.8  | 10885.2  | 70506.4  | 61970    | 19706.6  | 51439.6  | TRUE |
| 102993.2 | 110592.6 | 127840   | 201736.3 | 119971.2 | 80063    | 107378.3 | 126249   | TRUE |
| 186154.1 | 132680.9 | 156888.8 | 273454.5 | 280927.7 | 328033.6 | 232668.2 | 349855   | TRUE |
| 226279.6 | 170574.8 | 417262.7 | 305911   | 335593.6 | 348389.1 | 267771.5 | 435071.4 | TRUE |
| 193051.6 | 116336   | 147125.3 | 312415   | 379200.8 | 275545.1 | 216355.8 | 420722.2 | TRUE |
| 8692.1   | 11246    | 19668.4  | 34930.1  | 27547.7  | 28389.9  | 29693    | 39037.7  | TRUE |
| 125609.7 | 171395.5 | 131941.6 | 198711.2 | 200606.6 | 130631.1 | 130143.5 | 171689.7 | TRUE |
| 46108.5  | 38893    | 34476    | 70909    | 78591.8  | 70346.5  | 32375.7  | 79177.2  | TRUE |
| 132268.6 | 97331.6  | 109440.4 | 166390.3 | 175711.1 | 160379.6 | 156234.5 | 209966.3 | TRUE |

|          |          |          |          |          |          |          |          |      |
|----------|----------|----------|----------|----------|----------|----------|----------|------|
| 42272.8  | 32145.5  | 33611.8  | 51638.2  | 76959.6  | 57697.3  | 56455.7  | 105177.6 | TRUE |
| 101476.6 | 89365.3  | 93277.1  | 154013.9 | 173028.6 | 180971.6 | 138740.9 | 201200.9 | TRUE |
| 23048.2  | 12541.8  | 22724.5  | 14331.9  | 53798.6  | 35574.9  | 19186.8  | 41754    | TRUE |
| 193438.6 | 196478.2 | 196448.6 | 344277.3 | 403460.2 | 362186   | 274045.2 | 461107.3 | TRUE |
| 137949.7 | 84016.2  | 137604   | 196753.7 | 274609.6 | 228170.9 | 198921   | 303545.9 | TRUE |
| 1461327  | 1059561  | 1412103  | 2292102  | 3165126  | 2815358  | 1895883  | 3327571  | TRUE |
| 39196.9  | 35987.5  | 50816.8  | 52632    | 52365    | 59405.2  | 58073.5  | 64279.2  | TRUE |
| 333152.4 | 244515.4 | 294714.8 | 485648.2 | 665859.8 | 561011   | 436301.1 | 762856.6 | TRUE |
| 34770.7  | 13283.6  | 32394.1  | 44094.7  | 74548    | 59586.8  | 34388.7  | 95388    | TRUE |
| 28446.5  | 27887.1  | 25739.1  | 34282.9  | 46022.9  | 46551.9  | 34469    | 50177.9  | TRUE |
| 32987.6  | 23258.7  | 41383.8  | 35695.8  | 43675    | 42741.2  | 28772.2  | 32085.5  | TRUE |
| 22375    | 44482.3  | 50816.5  | 60065.1  | 52848.4  | 37070.1  | 15336.7  | 31477    | TRUE |
| 46809.4  | 52057.2  | 41834.8  | 61693.5  | 66895.1  | 54178.9  | 46730.1  | 38880.5  | TRUE |
| 27516.7  | 28368.7  | 30860.7  | 38997.6  | 36052    | 41489.4  | 36259.3  | 35292.1  | TRUE |
| 9119.5   | 7168.4   | 7023     | 13326.3  | 8557     | 7228.5   | 14334.9  | 9628     | TRUE |
| 17721.6  | 8736.7   | 25474.4  | 12068.1  | 24578.6  | 27002.4  | 15688.1  | 34117.6  | TRUE |
| 30935.3  | 7984.1   | 22181.9  | 25265.4  | 29721.1  | 8077.1   | 11495.8  | 14294.9  | TRUE |
| 49877.2  | 89411.1  | 68902.6  | 82290.5  | 92276.8  | 70267.1  | 65791.8  | 76335.4  | TRUE |
| 25700.8  | 30640.8  | 23060.7  | 33919.7  | 31724.1  | 31254.4  | 27060.2  | 44914.9  | TRUE |
| 70604.9  | 62191.7  | 53270.8  | 78303.9  | 92258.4  | 71258.1  | 65718.6  | 123801.8 | TRUE |
| 10078.7  | 9153.6   | 7345.9   | 8882.9   | 26161.5  | 9394     | 13971.4  | 10869.7  | TRUE |
| 27647.7  | 24374.5  | 31106.6  | 33041.1  | 49583.9  | 38751.8  | 50704.6  | 57777.8  | TRUE |
| 53097    | 55865.1  | 54513.8  | 58846.6  | 63819.7  | 56451.1  | 51201.7  | 46994.9  | TRUE |
| 22250.4  | 23210.1  | 37883.4  | 43962.9  | 85662.6  | 15940.6  | 7175     | 13290.1  | TRUE |
| 68577.3  | 176810.1 | 97487.3  | 113400.3 | 170475.2 | 69724.5  | 69695.7  | 48960.6  | TRUE |
| 43880.5  | 49070.1  | 35874.3  | 51835.1  | 45155.7  | 51090.8  | 55090.9  | 84183.1  | TRUE |
| 46369.3  | 122201.3 | 143415.3 | 228035.6 | 423522.1 | 53265.3  | 47215.1  | 60595.5  | TRUE |
| 54554.1  | 59096.5  | 51521.8  | 84604.3  | 74315.6  | 46123.8  | 53722.1  | 61161.2  | TRUE |
| 31646.6  | 31527.5  | 17960.4  | 32502.3  | 21192.2  | 38970.9  | 32473.8  | 40064.8  | TRUE |
| 29772.3  | 32288.4  | 34953.8  | 21915.5  | 26877.6  | 25562.4  | 30111.6  | 30520    | TRUE |
| 77858.9  | 79301.7  | 51217.7  | 43250.6  | 46511.8  | 93743.8  | 73755.8  | 85816.6  | TRUE |
| 130797.7 | 107452.8 | 90425.3  | 118125.7 | 97600.1  | 140924.6 | 149616.4 | 149864.2 | TRUE |
| 586558.8 | 610914.2 | 311261   | 451390.7 | 433948.5 | 640570.4 | 725787.2 | 682296.8 | TRUE |
| 239505   | 199073.1 | 131803   | 157277.1 | 153171.5 | 268260   | 232069.2 | 298406.2 | TRUE |
| 71242.5  | 53436.2  | 44584.5  | 63989.3  | 37692.1  | 85865.9  | 92533    | 107094.8 | TRUE |
| 70510.9  | 72307.3  | 35039.3  | 53542.5  | 69829.4  | 101775.3 | 85395.3  | 92591.4  | TRUE |
| 400117.7 | 404937.1 | 305924.8 | 353795.7 | 322506.5 | 535171.4 | 531693.2 | 543753   | TRUE |
| 170702.6 | 182237.8 | 69491.6  | 130503.4 | 120193.7 | 236923.8 | 218101   | 229795.1 | TRUE |
| 1423122  | 1317115  | 647758.4 | 973474.9 | 953686.5 | 1706417  | 1650014  | 1642454  | TRUE |
| 54639.7  | 64189.8  | 47750    | 59681.2  | 77702.2  | 61296.8  | 47324.2  | 46108.4  | TRUE |
| 33967.4  | 29371.9  | 26987.1  | 28346    | 24595.5  | 53133.1  | 33008.5  | 59047.5  | TRUE |
| 146871.8 | 125424   | 102335.2 | 112983.9 | 143864.4 | 228965.2 | 215397.3 | 224322.8 | TRUE |

|          |          |          |          |          |          |          |          |      |
|----------|----------|----------|----------|----------|----------|----------|----------|------|
| 29326.5  | 34963.6  | 26061.1  | 37150.7  | 30345.3  | 80500.8  | 68578.3  | 60139.2  | TRUE |
| 141933.5 | 113943.9 | 81001.4  | 76047.9  | 80913.4  | 134043.2 | 147595.3 | 218958.7 | TRUE |
| 200805.8 | 179902   | 108468.1 | 172848.4 | 152911.7 | 230668.3 | 195180.9 | 290141.8 | TRUE |
| 497593.7 | 472895.9 | 219110.5 | 397947.4 | 390898.7 | 650825   | 542278.6 | 752565.2 | TRUE |
| 53331.6  | 50432.2  | 41335    | 40485.7  | 54733.5  | 83966.2  | 79287.4  | 74437.2  | TRUE |
| 503871.4 | 513970.4 | 257218.2 | 370193.3 | 388641   | 617086   | 639525.5 | 704017.7 | TRUE |
| 437239.5 | 398396.9 | 217149.9 | 311385.2 | 345070.2 | 520842.7 | 451528.6 | 624420   | TRUE |
| 533482.8 | 404040   | 309803.4 | 317754.3 | 306490.9 | 550056.7 | 478150.4 | 796868.2 | TRUE |
| 175548.9 | 166721.1 | 110014   | 118567.2 | 137972.3 | 217394.2 | 197462.6 | 203619.3 | TRUE |
| 153828   | 116624.9 | 66860.3  | 69032.8  | 89735.4  | 184251.1 | 140550.7 | 243341   | TRUE |
| 132328.7 | 136367.9 | 75007.5  | 116957.3 | 79995.8  | 154222.6 | 157075   | 198717.5 | TRUE |
| 81658.2  | 123710.1 | 90522    | 122370.1 | 114009.2 | 74241.2  | 74021.9  | 73118.4  | TRUE |
| 90934.9  | 82973.8  | 93903.2  | 103823.8 | 117274.6 | 81826.1  | 103964.3 | 100586.1 | TRUE |
| 41463.5  | 36102.9  | 26853.3  | 36988    | 46748.3  | 45307.9  | 55040.5  | 42033.7  | TRUE |
| 144878   | 148601   | 129568.6 | 169997.8 | 154469.2 | 206005.9 | 213390.4 | 204815.5 | TRUE |
| 62894.8  | 219419.5 | 101548.9 | 131599.4 | 138021.7 | 46422.3  | 47419.8  | 38142    | TRUE |
| 58008.2  | 81381    | 57216.8  | 64666.7  | 64041.4  | 41790.6  | 42107.3  | 47022.8  | TRUE |
| 21088.2  | 29524.3  | 25566.6  | 11335.9  | 21935.8  | 23749.8  | 24106.9  | 19865.6  | TRUE |
| 44763.3  | 65018.4  | 34760.5  | 50508.6  | 58092.5  | 39663.5  | 26201.9  | 35566.6  | TRUE |
| 19981    | 12047.2  | 6431.6   | 10094.8  | 18623.3  | 10396    | 22356.1  | 26219.2  | TRUE |
| 1021796  | 760509.7 | 801078   | 1243232  | 1403553  | 835946.1 | 795453.2 | 1283934  | TRUE |
| 3027405  | 2787013  | 2279822  | 3296152  | 3506582  | 2517154  | 2909280  | 3266521  | TRUE |
| 2942725  | 2250620  | 2015644  | 3019237  | 3456773  | 2220749  | 2371169  | 3916298  | TRUE |
| 263454.4 | 575341.9 | 372174   | 685875.9 | 953804.9 | 115925.5 | 110900.1 | 158221.3 | TRUE |
| 1164712  | 1249879  | 937036.4 | 938725.5 | 907636.2 | 1156396  | 1280508  | 1064717  | TRUE |
| 3005094  | 3705926  | 2420295  | 2565206  | 2423637  | 3580229  | 4008793  | 3188041  | TRUE |
| 3523177  | 4343737  | 2449005  | 2499455  | 2510229  | 3719274  | 4654113  | 3773459  | TRUE |

|          |          |          |          |          |          |          |          |      |
|----------|----------|----------|----------|----------|----------|----------|----------|------|
| 822657.9 | 847723.6 | 670346.8 | 807780.5 | 795925.8 | 1002932  | 1154817  | 1011687  | TRUE |
| 686324   | 477114.1 | 598321.9 | 610488.5 | 493821.8 | 527809.9 | 355256.9 | 463698.8 | TRUE |
| 239376.3 | 210033.1 | 267202.5 | 267023.4 | 291114.7 | 290112.4 | 221086.7 | 279611.3 | TRUE |
| 141112.1 | 123408.4 | 154167.4 | 164078.2 | 165577.7 | 153371.9 | 131476.8 | 148430   | TRUE |
| 219461.7 | 279782.5 | 270703.9 | 290891.1 | 290299.9 | 303915.7 | 279792.4 | 298205.6 | TRUE |
| 9804403  | 5927727  | 11516936 | 11839990 | 10391762 | 12500255 | 7183766  | 10401554 | TRUE |
| 7273559  | 4531098  | 8002682  | 8230406  | 8089108  | 8571020  | 5026241  | 7409673  | TRUE |
| 40062695 | 23687803 | 43293216 | 41834619 | 39670982 | 46037910 | 26531548 | 41286481 | TRUE |
| 31522002 | 19700105 | 35726569 | 34133091 | 32367434 | 38506920 | 22221911 | 33812406 | TRUE |
| 1565519  | 940692.7 | 1515146  | 1484925  | 1590050  | 1770205  | 992387   | 1649761  | TRUE |
| 570834.6 | 355552.6 | 579257.8 | 589480.8 | 604595.4 | 639201.9 | 437799.3 | 587122.2 | TRUE |
| 275444.4 | 172616.9 | 311413.4 | 320611.9 | 290361.5 | 329826   | 192949.3 | 265828.6 | TRUE |
| 458968.9 | 289732.3 | 486962.8 | 465697.7 | 552523.1 | 529884.8 | 362855.7 | 532747.3 | TRUE |
| 1585335  | 962525.2 | 1747057  | 1625941  | 1549085  | 1728346  | 1135131  | 1652758  | TRUE |
| 129591.7 | 108104.7 | 131445.7 | 132567.5 | 132388   | 124892.8 | 132085.4 | 153667.8 | TRUE |
| 54824.2  | 45795    | 54791.4  | 57499.9  | 60985.3  | 58383.4  | 54686.6  | 67670.4  | TRUE |
| 124657.5 | 101307.2 | 121791   | 112895.9 | 136853.7 | 124652.4 | 106241.8 | 137742.8 | TRUE |
| 54987.3  | 38796.1  | 57103    | 79460.5  | 48520.2  | 49762    | 40471.1  | 52993.7  | TRUE |
| 49485.6  | 21073.8  | 40878    | 46815.3  | 47231.3  | 38170    | 30678.9  | 47455.7  | TRUE |
| 33465.2  | 33482.9  | 51013.6  | 49931.8  | 34513.7  | 46557.3  | 26275.6  | 38720.9  | TRUE |
| 53268.6  | 32122.8  | 49880.2  | 55930.4  | 38775.9  | 63933.4  | 45622.3  | 58281.3  | TRUE |
| 38826.8  | 46664.1  | 38588.2  | 34682.3  | 51637.5  | 33863.9  | 37350.1  | 59024    | TRUE |
| 9035.6   | 6579.5   | 15965.9  | 10634.8  | 8989.1   | 6180.1   | 9906     | 9106.6   | TRUE |
| 44195.2  | 30128    | 44695    | 45066.7  | 43556.1  | 33674.1  | 36021.4  | 34917.7  | TRUE |
| 20932    | 6220.6   | 23280.7  | 24175.7  | 31644.1  | 27550.1  | 24515.7  | 22856.3  | TRUE |
| 106253.4 | 67076.1  | 102394   | 123822.1 | 88754    | 74198.9  | 59038.2  | 94305.2  | TRUE |
| 90696.9  | 53405.7  | 78256.7  | 74784.4  | 86983.2  | 89055.1  | 55543.2  | 77222.1  | TRUE |
| 8912411  | 14896854 | 11288936 | 17218503 | 20618273 | 7454376  | 4687642  | 7022538  | TRUE |
| 2329697  | 2940448  | 2784675  | 3483642  | 4082300  | 2117790  | 1394655  | 1983391  | TRUE |
| 46284.7  | 46356.3  | 51227    | 78778.1  | 70247    | 26947.1  | 30532.3  | 30499.2  | TRUE |
| 83942.2  | 141802.4 | 191561.4 | 254460.8 | 315939   | 48363.7  | 38591.9  | 45272.3  | TRUE |
| 88973.6  | 183176.1 | 205679.1 | 280987.7 | 315354.3 | 50954.6  | 31839.5  | 48149    | TRUE |
| 38139.6  | 71364.7  | 57931.3  | 87761.2  | 68904.4  | 19013.5  | 12674.9  | 10143    | TRUE |
| 81888.7  | 125530.9 | 97689.2  | 169829.4 | 168359.7 | 59316.1  | 40935.3  | 64105.2  | TRUE |
| 24038.7  | 48311.8  | 79560.4  | 100088.6 | 139956.8 | 29585.6  | 22293.8  | 25863.1  | TRUE |
| 47794.8  | 70208.2  | 127403.9 | 197033.6 | 226498.9 | 55095.2  | 36871.3  | 43599.7  | TRUE |
| 532350.2 | 294294.2 | 408288.8 | 586960.5 | 546742.9 | 631971.5 | 363594.2 | 585322.7 | TRUE |
| 75660.9  | 48927.1  | 64917.5  | 71841.2  | 78837.8  | 70462.3  | 47158.4  | 54937.2  | TRUE |
| 198712.9 | 124052.5 | 173631.1 | 226821.8 | 202061.3 | 210105.6 | 139242.6 | 168672.9 | TRUE |
| 63131    | 35099.2  | 67914.5  | 62262.8  | 61394.5  | 55142.2  | 58258.5  | 63133.6  | TRUE |
| 445972.5 | 262171.7 | 436810.9 | 394682.3 | 443257.8 | 459429.9 | 334482.1 | 476982.1 | TRUE |
| 81943.5  | 54439.2  | 78121.7  | 79428.7  | 74372.4  | 80939.2  | 55048    | 81588.2  | TRUE |
| 46546.1  | 32237.1  | 53257.9  | 50709.6  | 43338.9  | 52112.2  | 48473.3  | 59164.6  | TRUE |
| 30724.7  | 10893.2  | 32545    | 29549.6  | 30201.2  | 33011.4  | 31491.5  | 42799.3  | TRUE |
| 42796    | 53450.7  | 39605.7  | 42094.6  | 28102.5  | 53507.6  | 38299    | 46702.7  | TRUE |



|          |          |          |          |          |          |          |          |      |
|----------|----------|----------|----------|----------|----------|----------|----------|------|
| 86317.3  | 59971.6  | 99609    | 93572.9  | 75058.9  | 94794.2  | 73857.4  | 89740.1  | TRUE |
| 369484.7 | 422995.3 | 297480.5 | 330362.6 | 392232.8 | 361699.7 | 370112.2 | 391167.1 | TRUE |
| 242551.4 | 295616   | 281284.5 | 273992.1 | 313072.5 | 304293.2 | 360583.3 | 306674.3 | TRUE |
| 2321241  | 1991759  | 1762295  | 1747738  | 2565350  | 2553186  | 2108838  | 2093590  | TRUE |
| 1579146  | 1403491  | 1161433  | 1136030  | 1823620  | 1819266  | 1499997  | 1618153  | TRUE |
| 12074246 | 10490811 | 6939063  | 7645992  | 12053141 | 12164584 | 11041362 | 11095959 | TRUE |
| 3774494  | 3184357  | 2145493  | 2228122  | 3775908  | 3689256  | 3219476  | 3571593  | TRUE |
| 4653356  | 3887410  | 2820036  | 2677504  | 4516787  | 4622979  | 3960227  | 4398756  | TRUE |
| 386392.8 | 350056   | 286393.4 | 335160.3 | 398803.8 | 398244.4 | 377987.9 | 391433.5 | TRUE |
| 146960.8 | 142823.8 | 101730.3 | 105721.6 | 149449.9 | 163182.9 | 144124.8 | 147812.3 | TRUE |
| 120153.9 | 122662.7 | 119736   | 80110.9  | 111890.6 | 124705.9 | 120556.8 | 110823.5 | TRUE |
| 58570.8  | 59479.1  | 49151.6  | 51514.2  | 56077.7  | 80554.8  | 54012    | 50123.1  | TRUE |
| 46082.3  | 46344.6  | 57547.1  | 27545.9  | 36137.2  | 72232.6  | 41214.8  | 62494    | TRUE |
| 60219.3  | 49285.1  | 57087.9  | 51574.7  | 52261.2  | 48944.1  | 60957.6  | 46926.1  | TRUE |
| 36148.2  | 9170.8   | 12515.5  | 14115.5  | 24582.3  | 27882.3  | 32821.2  | 29925    | TRUE |
| 29954.3  | 43643.6  | 25870.7  | 45437.5  | 37186.4  | 26681.5  | 45269.4  | 38443.3  | TRUE |
| 47413.2  | 50416.7  | 36198.2  | 35955.4  | 44753.7  | 50725.5  | 43225.5  | 43641.8  | TRUE |
| 22172.4  | 21885.2  | 12407.3  | 14344.8  | 6979.2   | 15397    | 20615    | 13032.9  | TRUE |
| 37064.9  | 34568.5  | 20695.2  | 49234.5  | 38920.9  | 44138.4  | 32532.4  | 41385.4  | TRUE |
| 50531.9  | 45760.3  | 30811.4  | 30099.4  | 42059.5  | 43841    | 50370.7  | 34744.1  | TRUE |
| 25866.6  | 34891.6  | 26331.9  | 7127.5   | 22339.1  | 26712.7  | 21523.7  | 32119.5  | TRUE |
| 19388.4  | 22726.8  | 10011.8  | 6569.9   | 20990.9  | 10914.6  | 9435.4   | 12080.9  | TRUE |
| 17456.1  | 5790.8   | 9898     | 8836.4   | 16877.7  | 4868.7   | 21914.6  | 11049.7  | TRUE |
| 65862.4  | 119882.3 | 69554    | 87809.4  | 139182.4 | 41373.9  | 30179.4  | 47730.6  | TRUE |
| 60535    | 73786.1  | 110598.5 | 60028.3  | 51417.7  | 57508.2  | 35118.4  | 28183.5  | TRUE |
| 25234.8  | 46790.6  | 19264.7  | 42229.6  | 56313.2  | 27598.8  | 19455.3  | 13604.3  | TRUE |
| 32140.6  | 61722.6  | 38361    | 62747.9  | 93387.9  | 15460.1  | 10347.3  | 8586.4   | TRUE |
| 421336   | 1321453  | 413903.8 | 873681.2 | 1499829  | 141350.2 | 91959.9  | 134029.7 | TRUE |
| 834178.7 | 460638.2 | 702444.8 | 749937.5 | 682873.7 | 1302925  | 611861.5 | 857986.3 | TRUE |
| 255611.7 | 255889.3 | 212169.8 | 262722.8 | 296513.7 | 343127.4 | 182934.6 | 263092.8 | TRUE |
| 73430.1  | 81526.1  | 72478.7  | 64555.2  | 70153.1  | 70967    | 84032.6  | 69715.9  | TRUE |
| 108429.9 | 75219.5  | 86182.5  | 75570.8  | 99414.1  | 116715.3 | 77391.5  | 82287.8  | TRUE |
| 486069.2 | 353992.7 | 339819.2 | 386172.9 | 463796.2 | 576136.4 | 375547.1 | 743298   | TRUE |
| 46580.6  | 41196.5  | 45753.5  | 43885.1  | 40672.8  | 51613.8  | 47297.6  | 54520.5  | TRUE |
| 22385.6  | 21267.6  | 24471.4  | 11782.9  | 38091.2  | 34397.8  | 13001.9  | 38419.4  | TRUE |
| 100242.8 | 87634    | 56586.8  | 55459.2  | 88926.2  | 90947.7  | 89192.8  | 108234.3 | TRUE |
| 1272394  | 996436.8 | 809322.7 | 731921   | 1090417  | 1302262  | 1197410  | 1286264  | TRUE |

|          |          |          |          |          |          |          |          |      |
|----------|----------|----------|----------|----------|----------|----------|----------|------|
| 431694.6 | 357345.8 | 263158.5 | 225662.3 | 367128.8 | 463339.5 | 392905.5 | 467052.5 | TRUE |
| 76731.1  | 67114.2  | 69152.1  | 46542.7  | 62322.8  | 63061.3  | 70581.2  | 70641.5  | TRUE |
| 50447    | 38326.3  | 46928.8  | 48727.3  | 63762.7  | 46083.8  | 56458.1  | 52828.4  | TRUE |
| 29639.8  | 27230.1  | 8615.5   | 32305.4  | 24407.3  | 18939.9  | 30222.7  | 38586.5  | TRUE |
| 19816.5  | 9676.7   | 18010.6  | 5927.6   | 18264.6  | 11859.3  | 17955.3  | 12781.4  | TRUE |
| 75515.8  | 56944.6  | 84943.6  | 73038.3  | 91394.6  | 65838.7  | 71671.8  | 62471.6  | TRUE |
| 32156.7  | 26549.2  | 40721.9  | 31656.6  | 42558.1  | 18260.8  | 38640.6  | 37189.2  | TRUE |
| 95104.7  | 92690.9  | 79030.9  | 69962.1  | 88998.7  | 64842.3  | 78985.3  | 89410.4  | TRUE |
| 52845.5  | 39011.1  | 89679.2  | 93862.1  | 84319.3  | 86475.4  | 73050.5  | 88935.7  | TRUE |
| 11439.6  | 6186.5   | 11325.6  | 7667.8   | 24229.4  | 7549.9   | 11767.5  | 25124.6  | TRUE |
| 35218.2  | 39698.7  | 34572.6  | 25686.8  | 22838.5  | 32503.7  | 26111.5  | 30219.8  | TRUE |
| 211937.1 | 145215.3 | 132442.9 | 142393.5 | 170286.7 | 142514.6 | 104380.5 | 143432.9 | TRUE |
| 159772   | 100235.6 | 87275.9  | 94542.2  | 131481.3 | 91035.3  | 78460    | 107978.2 | TRUE |
| 21182.1  | 15456.8  | 5639.1   | 9315.8   | 11137.7  | 8778.8   | 27811.8  | 24924.7  | TRUE |
| 46597.5  | 36735.9  | 27774.3  | 30120.6  | 30391.2  | 28632.8  | 20645.4  | 26126.2  | TRUE |
| 33582.8  | 27241.2  | 9823.4   | 16220.5  | 23293.2  | 18143.3  | 24257.7  | 12892.3  | TRUE |
| 38834.9  | 42220    | 32903.4  | 39293.8  | 30156.7  | 36798.3  | 32753    | 41416.3  | TRUE |
| 279024.7 | 278117.4 | 282809.4 | 391658.6 | 373603.1 | 298225.2 | 297382.7 | 333782.7 | TRUE |
| 147530.2 | 112609.1 | 132992.6 | 173029.5 | 181836.8 | 161504   | 156722.7 | 183287.4 | TRUE |
| 81130.3  | 70906.3  | 83723.3  | 94886.4  | 124334.7 | 90423.1  | 97815.5  | 125534.8 | TRUE |
| 646208.4 | 391917.8 | 702060.2 | 847521.6 | 896563.1 | 731064.6 | 572502.3 | 857834.8 | TRUE |
| 1365386  | 936977.6 | 1652585  | 1851254  | 1956434  | 1586611  | 1272788  | 1761370  | TRUE |
| 2172819  | 1526442  | 2308731  | 2706596  | 2880030  | 2378682  | 2057109  | 3066693  | TRUE |
| 2006391  | 1276979  | 1986098  | 2353915  | 2636699  | 2129526  | 1729772  | 2698503  | TRUE |
| 336614.6 | 246751.6 | 373567.4 | 423471.5 | 434393.8 | 400531.5 | 345521.5 | 467424   | TRUE |
| 133215.9 | 86470.9  | 114237.4 | 169054.3 | 164058.1 | 127281.8 | 96974.9  | 165226   | TRUE |
| 365129.5 | 275628.9 | 400340.2 | 501222.6 | 484827.8 | 403468.6 | 395659.1 | 491793.5 | TRUE |
| 120870.6 | 71034    | 139114.9 | 148667.9 | 163014.6 | 144567.4 | 123478.1 | 180061.9 | TRUE |
| 284942.6 | 184894.1 | 266759.2 | 308229.6 | 321474.5 | 294663.4 | 216740.3 | 340466.5 | TRUE |
| 130231.9 | 112997.9 | 148987.7 | 160045.3 | 171516.9 | 159607.7 | 124186.8 | 178633   | TRUE |
| 166570.2 | 97572.6  | 160280.6 | 186329   | 189885.2 | 170544   | 159142.1 | 213561.2 | TRUE |
| 130248.3 | 105593.2 | 127875.2 | 163207.3 | 166056.8 | 163432.3 | 118649.7 | 173312.4 | TRUE |
| 182886.9 | 134200.1 | 184960.1 | 214813.9 | 238555.2 | 190418.5 | 156984.1 | 244301.4 | TRUE |
| 107094.8 | 63887.7  | 128407.5 | 112054.2 | 134522.5 | 131887.6 | 89602.3  | 139101.3 | TRUE |
| 76060.6  | 53971.6  | 71129.6  | 82966    | 84477.4  | 40755.3  | 56484.5  | 109725.4 | TRUE |
| 106162   | 86820.2  | 108288.5 | 136125.2 | 119341   | 115699.6 | 109288.2 | 121509.6 | TRUE |
| 161928.8 | 170036.3 | 159594.7 | 159882.2 | 194592.7 | 170310.3 | 181440.4 | 210670.6 | TRUE |
| 22652.1  | 13116.6  | 30336.7  | 15696.9  | 42795.6  | 21289.2  | 29047.3  | 43807    | TRUE |
| 88799.4  | 91664.5  | 93998    | 110946.2 | 129916.3 | 104471.6 | 92054.8  | 121895.4 | TRUE |
| 71149.9  | 68022.7  | 73929.4  | 103534.6 | 110974.8 | 89597.4  | 82163.2  | 97497.7  | TRUE |
| 63893.4  | 50469.2  | 64368.9  | 61561.3  | 75421.9  | 64473.2  | 74025.9  | 89340.8  | TRUE |

|         |         |         |         |          |         |         |          |      |
|---------|---------|---------|---------|----------|---------|---------|----------|------|
| 60851.6 | 48685.5 | 68403.2 | 86483.8 | 85381.7  | 62690.6 | 74885.6 | 83687.6  | TRUE |
| 30598.1 | 29212.8 | 38983.1 | 45765.5 | 42136.9  | 39851.7 | 42183.3 | 52578.7  | TRUE |
| 67405.3 | 50699.1 | 83336   | 65078.3 | 77674.2  | 73216.4 | 62069.2 | 76687.7  | TRUE |
| 38083.5 | 27161.1 | 35070.6 | 34513.5 | 44747.8  | 36996.1 | 24785.1 | 55366.5  | TRUE |
| 54516.5 | 45678   | 55703.6 | 84251.4 | 75042.6  | 68748.6 | 52849.5 | 86245.4  | TRUE |
| 32755.8 | 40678.3 | 46498.1 | 46805.6 | 49674.3  | 45256.7 | 36459.9 | 42094.7  | TRUE |
| 76722.3 | 51245.7 | 72507.8 | 89477.9 | 94471.3  | 81111.3 | 52071   | 100458.8 | TRUE |
| 26247.2 | 5839.7  | 32944.4 | 28961.1 | 44922.9  | 20666.6 | 23131.1 | 34073.5  | TRUE |
| 43238.1 | 19505.2 | 54052.1 | 58067.2 | 58914.2  | 44159.2 | 38010.1 | 48677.3  | TRUE |
| 32360.1 | 14205.1 | 12239.8 | 42892.3 | 24207.8  | 31033.3 | 10628.1 | 34741.1  | TRUE |
| 40689.2 | 54315   | 31575.1 | 57782.4 | 54416.6  | 45919.6 | 35503.9 | 59914.9  | TRUE |
| 32178.9 | 28482.2 | 24494.1 | 30486.9 | 46035.8  | 23508.1 | 32769   | 34925.9  | TRUE |
| 31753.2 | 23802.6 | 28082.1 | 37084   | 56587.9  | 28825.5 | 34943.5 | 50479.6  | TRUE |
| 68289.2 | 65835.8 | 49651.5 | 84373.8 | 107736.2 | 81048.1 | 56156.8 | 102469.8 | TRUE |
| 49965.1 | 31403.9 | 54579.1 | 60584.2 | 65127.1  | 55756.5 | 35232.6 | 54656.4  | TRUE |
| 21736.7 | 10008.1 | 12343.1 | 36343.8 | 37798.2  | 30538.7 | 12068   | 36339.9  | TRUE |
| 42054.5 | 32096.1 | 55304.1 | 54567.3 | 66188.9  | 53621.9 | 39240.1 | 61226.3  | TRUE |
| 26984.5 | 6357.7  | 31066.2 | 27739.8 | 38910.9  | 23496.9 | 10263.8 | 34719.2  | TRUE |
| 35796.9 | 26213   | 37763.9 | 44796.6 | 63655.3  | 29584.6 | 46884.5 | 56471.3  | TRUE |
| 24293.6 | 6061.6  | 18836   | 11848.4 | 29024.4  | 19555.1 | 6650.1  | 19415.3  | TRUE |
| 8401.6  | 13356.1 | 8215.4  | 10118.3 | 22922.5  | 22047.1 | 12121.7 | 28471.5  | TRUE |
| 10865.7 | 7591.6  | 12111.7 | 13954.5 | 10794.1  | 23265.1 | 10443.5 | 23518.6  | TRUE |
| 24753.7 | 20481   | 22764   | 25270.4 | 18236.8  | 24875.4 | 22090   | 26004    | TRUE |
| 11292.6 | 6298    | 10840.3 | 10696.5 | 25858.4  | 10242.3 | 13904.8 | 25734.8  | TRUE |
| 8040.7  | 6030.5  | 10679.1 | 11464.2 | 21481.9  | 16623.2 | 8002.5  | 11465.5  | TRUE |
| 9429.2  | 5181    | 25597.5 | 23264.9 | 26244.3  | 17926.4 | 11072   | 23014.8  | TRUE |
| 4937.3  | 6493    | 20081.7 | 6533.1  | 18234.8  | 7872.1  | 11145.8 | 7781.5   | TRUE |
| 8406.9  | 4095.9  | 21277.2 | 12084.8 | 18558    | 14838.4 | 7541.7  | 19606    | TRUE |
| 17467.6 | 10476.8 | 19441.7 | 8241.3  | 5399.8   | 18369.3 | 6071.5  | 9352.2   | TRUE |
| 16269.7 | 4420.2  | 25921.5 | 11890.1 | 22814.2  | 21441.3 | 19710.3 | 29179    | TRUE |
| 6732.1  | 4872.4  | 20420.2 | 10409.9 | 23496.2  | 14771.2 | 10398.8 | 17915.2  | TRUE |
| 14148.4 | 8926.2  | 5788.4  | 10806.6 | 9577.8   | 18941.9 | 10601.5 | 7353.8   | TRUE |

|          |          |          |          |          |          |          |          |      |
|----------|----------|----------|----------|----------|----------|----------|----------|------|
| 71929.4  | 49404.9  | 63259    | 76369.6  | 101676.3 | 67660.8  | 65440.6  | 90884.7  | TRUE |
| 140245.1 | 97890.1  | 133106.8 | 142378   | 193019.6 | 138753.6 | 124581.3 | 164627   | TRUE |
| 100789.9 | 81848.8  | 93988.1  | 116186.2 | 121887.4 | 106068.4 | 97983.3  | 147708.1 | TRUE |
| 93218.6  | 83351.7  | 101135.6 | 135171.1 | 123250.8 | 103160.5 | 91320.5  | 138310.2 | TRUE |
| 62846    | 54055.6  | 55696.6  | 69253.9  | 75998.3  | 58788.8  | 53333    | 67621    | TRUE |
| 43450.8  | 10321.1  | 53583.4  | 36780.2  | 43164.6  | 29385.7  | 50090.7  | 51661.1  | TRUE |
| 53733.9  | 69632.6  | 54504.3  | 67547.8  | 66258    | 52844.2  | 56242.4  | 77525.8  | TRUE |
| 35181.6  | 69189.7  | 66272.6  | 91051.7  | 107761.5 | 30412.4  | 8669.4   | 28260.7  | TRUE |
| 113657   | 159715.7 | 138041.2 | 149557.8 | 191224.8 | 115205.5 | 101946.6 | 109539.1 | TRUE |
| 70149.1  | 57832.8  | 69534.4  | 86325.7  | 68588.2  | 52288.5  | 52849    | 71518    | TRUE |
| 153844.3 | 170262.1 | 199096.8 | 126265.1 | 134023.4 | 160142.5 | 156222.8 | 143925.9 | TRUE |
| 36135.4  | 91840.6  | 90079.4  | 109463.1 | 130807.5 | 20081    | 14039.6  | 32058.7  | TRUE |
| 93034.7  | 187414.3 | 174517.4 | 263206.4 | 349193.5 | 85794.9  | 39822.5  | 82059.7  | TRUE |
| 27409.4  | 82007.6  | 276582.4 | 34269.3  | 57594.3  | 8772     | 9671.6   | 12509    | TRUE |
| 347764.1 | 244954.7 | 348034.6 | 412136.5 | 418359.6 | 353020.7 | 299721.6 | 430887.5 | TRUE |
| 162130.9 | 99174.2  | 138808.2 | 157792.3 | 188527.8 | 146827.2 | 125752.2 | 199636.6 | TRUE |
| 90279.2  | 102699.5 | 120502.5 | 105618.2 | 100904.1 | 81521.7  | 85275.2  | 85445.8  | TRUE |
| 49632    | 48713.7  | 68587.6  | 60105.6  | 60063.1  | 52982.5  | 38310    | 61135.5  | TRUE |
| 74292.9  | 79882.3  | 77807.3  | 77947.9  | 76174.9  | 51378.4  | 73300.7  | 67646    | TRUE |
| 23712    | 23387.6  | 28592.1  | 34899.2  | 25810.1  | 25928.9  | 22290.6  | 24344    | TRUE |
| 33319.7  | 49403.1  | 64063.1  | 55350.6  | 49886.7  | 56436.3  | 50217.8  | 45826    | TRUE |
| 58646.8  | 62693    | 65379.5  | 67241.6  | 65731.7  | 46829.8  | 47778.6  | 47390.6  | TRUE |
| 41818.3  | 51339.4  | 44306.4  | 36905.3  | 57510.4  | 32036    | 28274.3  | 38145.7  | TRUE |
| 16787    | 34608.3  | 28461    | 35875.5  | 34461.6  | 21395.6  | 11825.5  | 19359.9  | TRUE |
| 20760.5  | 14595.4  | 24254.1  | 32714.4  | 29113.3  | 24414.1  | 10184.6  | 28106.9  | TRUE |
| 7121.3   | 16173.4  | 29860.2  | 59844    | 70732.4  | 5442.7   | 9004.5   | 10527.9  | TRUE |
| 44406.7  | 131416.7 | 154470.8 | 175919.5 | 257150   | 29317.1  | 11103.7  | 37322.2  | TRUE |
| 144152.5 | 119160.9 | 130274.1 | 188712.9 | 199233.3 | 154914.5 | 125452.4 | 189381   | TRUE |

|          |          |          |          |          |          |          |          |      |
|----------|----------|----------|----------|----------|----------|----------|----------|------|
| 817043.8 | 576671.9 | 668047.7 | 1055235  | 1059825  | 835368.4 | 695957   | 1044012  | TRUE |
| 32983.1  | 49448.1  | 53860.9  | 110851   | 108406.1 | 35246    | 28536.5  | 40930.6  | TRUE |
| 33731.8  | 62411.4  | 54956.3  | 89347.4  | 96984.1  | 25998.2  | 35200.2  | 32393.2  | TRUE |
| 36036.1  | 25493.1  | 27588.6  | 24799    | 41415.1  | 15247.2  | 26759.5  | 34313.7  | TRUE |
| 75153.2  | 68643    | 50821.8  | 74868.7  | 102186.3 | 66038.7  | 83766.6  | 96937.2  | TRUE |
| 35435.7  | 81144.3  | 62413.5  | 110767.6 | 123734   | 28704.5  | 8264.1   | 28966.5  | TRUE |
| 24348.9  | 24975.6  | 16994.8  | 22413.5  | 35134.8  | 19390.4  | 12374.5  | 31097.5  | TRUE |
| 381016.2 | 208169.8 | 252791.2 | 414625.3 | 313943.7 | 401479.6 | 333214.6 | 453056.3 | TRUE |
| 35661.8  | 22132.7  | 18208.4  | 20486.5  | 34748.7  | 34211.4  | 31498.9  | 45672.3  | TRUE |
| 42591.4  | 46711.1  | 33370.3  | 36238.8  | 39259.6  | 32781.6  | 37452.8  | 40840.7  | TRUE |
| 15443.3  | 7173.1   | 6393     | 8205.6   | 17089.3  | 7826.6   | 8140.4   | 13087.3  | TRUE |
| 73330.7  | 154710.6 | 106841.8 | 193842.3 | 253485.9 | 77777.2  | 88919.2  | 74018.5  | TRUE |
| 3775.2   | 35049.8  | 16211.4  | 32612.5  | 41656.7  | 8093.4   | 11702.8  | 5702.3   | TRUE |
| 29423.5  | 41840.2  | 37156.7  | 47773.2  | 48862.3  | 35224.3  | 25754.5  | 30306.3  | TRUE |
| 455571.8 | 194727.9 | 297628.1 | 317046.6 | 349581.9 | 327357.6 | 322990.6 | 408454.5 | TRUE |
| 237737.3 | 100790.6 | 147339.1 | 155616.1 | 181891.6 | 198370.5 | 173819.1 | 225276.9 | TRUE |
| 24929.9  | 49964.8  | 39937.5  | 50572.1  | 61791.5  | 13334.5  | 9814.3   | 27933.5  | TRUE |
| 67673.9  | 53401.3  | 71620    | 82082.6  | 69668.6  | 87118.7  | 56890.3  | 66282.5  | TRUE |
| 129307.2 | 113312.5 | 96563.3  | 178730.5 | 189304.5 | 148688.1 | 120334   | 176981.7 | TRUE |
| 26841    | 34118.9  | 30743.1  | 25932.3  | 9134.6   | 27631.7  | 43681.8  | 28006.4  | TRUE |

|          |          |          |          |          |          |          |          |      |
|----------|----------|----------|----------|----------|----------|----------|----------|------|
| 144333.2 | 188325.8 | 154734.6 | 198058.4 | 200548.4 | 127282.6 | 133623.1 | 137172.7 | TRUE |
| 123581.6 | 281946.2 | 157736.3 | 180324.5 | 263849.3 | 80787.8  | 91124.9  | 87842.2  | TRUE |
| 48927.7  | 256674.7 | 423737.3 | 46543.4  | 56648.2  | 50608.2  | 63706.3  | 37912.5  | TRUE |
| 89886.2  | 95901.8  | 87111.6  | 72274.5  | 89096.6  | 102682.7 | 94867.8  | 93346.9  | TRUE |
| 135961.3 | 222848.3 | 179402.8 | 175691.6 | 150040.6 | 202778.8 | 241361.3 | 182734.5 | TRUE |
| 18883.3  | 25603.3  | 26363.9  | 29077.3  | 35003.5  | 8637.9   | 25753.5  | 26195.2  | TRUE |
| 58687    | 107392.2 | 46965.5  | 80684.7  | 82564.1  | 60864.2  | 69915.6  | 47160.7  | TRUE |

|          |          |          |          |          |          |          |          |      |
|----------|----------|----------|----------|----------|----------|----------|----------|------|
| 112676.2 | 271442.8 | 288947.2 | 134904.2 | 182219.1 | 110344.4 | 103699.9 | 112952.6 | TRUE |
| 9824.1   | 13217.6  | 15256.6  | 12277.7  | 10273.7  | 49708.8  | 7739.1   | 28459.7  | TRUE |
| 101015.7 | 128521   | 107059.6 | 95993.9  | 77817.7  | 115208.2 | 85645.2  | 103607.5 | TRUE |
| 84300    | 73891.3  | 81419.9  | 102376.1 | 94016.2  | 142047.3 | 75387.1  | 140203.1 | TRUE |
| 58202.7  | 46091.6  | 51206.6  | 52159    | 42904.3  | 84324    | 44942.5  | 56708.8  | TRUE |
| 46698.6  | 25336.3  | 44507.8  | 51018.5  | 35551.2  | 76065.3  | 35231.8  | 53001.9  | TRUE |
| 241614.7 | 159445.6 | 287200.3 | 260047.5 | 231498.6 | 391117.3 | 223881.4 | 341768.2 | TRUE |
| 85161.5  | 171011.8 | 98144    | 128316.1 | 171663.5 | 78235.8  | 91074.2  | 104893.2 | TRUE |
| 351788.3 | 309977.1 | 253049.1 | 247011.1 | 271550.6 | 358069.9 | 329491.8 | 337559.6 | TRUE |

|          |          |          |          |          |          |          |          |      |
|----------|----------|----------|----------|----------|----------|----------|----------|------|
| 88478.8  | 95112.1  | 78909.8  | 67709.8  | 79968.7  | 78968.3  | 102783.9 | 80730.1  | TRUE |
| 35427.3  | 33455.6  | 14550.4  | 29212.4  | 28293.3  | 32055.2  | 36973.5  | 40502.6  | TRUE |
| 10947.8  | 30335.2  | 15833.6  | 15815.9  | 14850.8  | 14308.2  | 24364.1  | 30381.7  | TRUE |
| 147043.9 | 86147.9  | 81121.2  | 150716.5 | 101423.1 | 130063.2 | 126411   | 112919.6 | TRUE |
| 212972.5 | 95734.1  | 116231.7 | 248208.3 | 140743.9 | 206842.8 | 142639.8 | 200889.4 | TRUE |
| 181570.8 | 99106.8  | 77541.9  | 100353.1 | 118651.8 | 223578.8 | 141130.1 | 225968.6 | TRUE |
| 25735.3  | 28035.1  | 35534.1  | 54187.9  | 33311.4  | 39765.3  | 32683.5  | 28551.9  | TRUE |
| 26184.5  | 28062.9  | 34966.4  | 30538.4  | 19319.7  | 48789    | 65224    | 24524.8  | TRUE |
| 37540.3  | 43460    | 48774    | 46630.6  | 40929.1  | 50375.9  | 42757.9  | 40159.2  | TRUE |
| 36192.7  | 26413    | 32097.6  | 46822.3  | 36726.4  | 32920.6  | 30567.6  | 41770.3  | TRUE |
| 102574.4 | 86079.2  | 127621.1 | 90772.1  | 77392.9  | 102230.7 | 93772.1  | 66676.2  | TRUE |
| 36078.4  | 31418.6  | 35243.8  | 37296.7  | 30244    | 26478.7  | 38197.3  | 38471.9  | TRUE |
| 36970.2  | 35095.1  | 35220.5  | 30914.4  | 45025.2  | 39950.7  | 39943.2  | 39946.1  | TRUE |
| 76654.5  | 100272.1 | 88009.6  | 85970.3  | 88429.2  | 69814.6  | 65698.1  | 70072.4  | TRUE |
| 39503.4  | 24440.8  | 30168.3  | 37070.2  | 27639.3  | 36852.2  | 37193.8  | 37610.4  | TRUE |
| 177462   | 220726.8 | 159455.1 | 150957.4 | 169731.4 | 162991   | 189657.6 | 171839.4 | TRUE |
| 24780.3  | 14111.1  | 11006.4  | 40972.2  | 33284.9  | 33576.1  | 7580     | 29283.6  | TRUE |
| 8267.4   | 9459     | 42776.9  | 13340.7  | 40185.9  | 33958.6  | 32463.9  | 35328.4  | TRUE |
| 83586.7  | 69930.3  | 70103.7  | 71709.4  | 80197.4  | 58441.1  | 82435.4  | 89185.3  | TRUE |
| 105203.2 | 87375.2  | 126557.5 | 111532.6 | 110639.9 | 125149.6 | 82600.1  | 94083.5  | TRUE |
| 89499.2  | 87737    | 90114    | 84659.5  | 96022.8  | 90944.1  | 83034.3  | 81520.3  | TRUE |
| 49450.1  | 24566.5  | 38527.9  | 75210.4  | 58155.4  | 51534    | 37132.2  | 48062.7  | TRUE |
| 269227.1 | 257921.9 | 284055   | 243636.9 | 251424.3 | 322054.9 | 296069.9 | 228398.1 | TRUE |
| 133845.8 | 96026    | 129621.4 | 149781.2 | 153793.4 | 157237.4 | 109246.4 | 159384.2 | TRUE |
| 298687.4 | 280036.8 | 300413.4 | 300599.8 | 312540.5 | 318844.3 | 298725.4 | 287855.3 | TRUE |
| 118294.7 | 107380.6 | 129326.6 | 133777.8 | 147970.2 | 105137.1 | 98591.2  | 133679.8 | TRUE |
| 31783.1  | 13524    | 26000.3  | 39729.6  | 33478.4  | 38564.9  | 23960.1  | 38912.4  | TRUE |
| 155886.4 | 112555.6 | 134563.9 | 129401.6 | 123729.3 | 141292.1 | 118380.1 | 120777.2 | TRUE |
| 84208.1  | 67892.2  | 73632.1  | 84930.2  | 90575    | 97108    | 83172.7  | 96786    | TRUE |
| 160635.7 | 127287.5 | 143727.5 | 198297.3 | 175984   | 183984.3 | 112846.4 | 156578.3 | TRUE |
| 81996.8  | 57025.1  | 69844.2  | 89949.1  | 75929.8  | 77893.2  | 64789.9  | 77182    | TRUE |
| 78787.3  | 58387.9  | 75105.3  | 70753.8  | 77063.4  | 75643.9  | 66933.8  | 81034.5  | TRUE |
| 228359.2 | 196221.4 | 243855.9 | 246234.5 | 242066.7 | 219193.8 | 234255.7 | 233943.4 | TRUE |
| 106558   | 136812   | 137950.8 | 128401.3 | 127574.1 | 143138.9 | 126068.7 | 132285.2 | TRUE |
| 101488.7 | 72990.1  | 110281.3 | 110195   | 111750.8 | 108511.6 | 76397.2  | 88719.4  | TRUE |
| 223723.5 | 189858.9 | 183497.8 | 188752.2 | 170045.3 | 189820.8 | 168449.6 | 147744.5 | TRUE |
| 132041.3 | 91749    | 126520.3 | 163549.4 | 174746.5 | 124946.7 | 104350.1 | 159715.7 | TRUE |
| 51015    | 47941.6  | 70067.3  | 87536.9  | 84784.4  | 45072.7  | 39909.4  | 52629.5  | TRUE |
| 64569.2  | 52584.4  | 56707.4  | 88176.7  | 104453.8 | 56739.3  | 54195.1  | 85913    | TRUE |
| 402838.6 | 313281.5 | 445037.6 | 528978.4 | 506572   | 465182.8 | 453428.6 | 479980.9 | TRUE |
| 174384.7 | 157777.8 | 171720.3 | 183543.1 | 138982.9 | 186315.4 | 177588.7 | 145612.1 | TRUE |
| 215742.1 | 195509.7 | 195715.5 | 206458.5 | 202340.1 | 202046.3 | 215798.8 | 201009.3 | TRUE |
| 83672.4  | 184166.5 | 172200.3 | 235781.7 | 291568.1 | 58490.9  | 42036.3  | 55415.9  | TRUE |
| 355736.7 | 415399.5 | 484232.6 | 502014.1 | 496109.7 | 426775.4 | 288127.2 | 314807.6 | TRUE |
| 113134.8 | 110583.2 | 138037.3 | 147240.6 | 147890.8 | 134372.6 | 99708.1  | 135293.3 | TRUE |
| 543928.3 | 652988   | 675342.8 | 586952.1 | 581471.7 | 532722.4 | 509024.5 | 469987.5 | TRUE |
| 68179    | 67040.8  | 72889.4  | 89323.8  | 90254    | 77573.8  | 65915.6  | 73096.1  | TRUE |
| 581827.6 | 647805.2 | 704540   | 973388.8 | 757790.7 | 694529.3 | 610427.9 | 555837.4 | TRUE |

|          |          |          |          |          |          |          |          |      |
|----------|----------|----------|----------|----------|----------|----------|----------|------|
| 383818.5 | 456027.8 | 521060.9 | 531020.1 | 516172.3 | 406838.2 | 358936.5 | 376994.9 | TRUE |
| 139732.5 | 311546.5 | 319881.9 | 488728.3 | 606689   | 83598.6  | 49523.5  | 60146    | TRUE |
| 99748.1  | 70099    | 87434.5  | 86556.7  | 113773.1 | 71880.9  | 65370.6  | 75399.5  | TRUE |
| 591896.1 | 501201.6 | 586821.1 | 584479.6 | 532652.9 | 541595.6 | 545230.5 | 568332.4 | TRUE |
| 54972.8  | 120123.8 | 113655.1 | 188726.5 | 195171.1 | 49530.8  | 37885.9  | 34154.6  | TRUE |
| 490668.8 | 519288.3 | 403760.3 | 531164   | 635029.3 | 354209.7 | 497608   | 452880.8 | TRUE |
| 906943.1 | 641788.7 | 915883.7 | 1003507  | 1015156  | 853653.6 | 729921.3 | 983416.1 | TRUE |
| 77250.5  | 64497.4  | 80328.5  | 77656.7  | 75560.2  | 94659.7  | 79660.3  | 65893.6  | TRUE |
| 97547    | 86845.4  | 87165.8  | 113133.4 | 99847.8  | 104112.8 | 116474.1 | 169137.7 | TRUE |
| 101050.3 | 103939.4 | 86241.3  | 88003.2  | 97826.5  | 108312   | 125537.3 | 103322.9 | TRUE |
| 57765.8  | 30955.1  | 34568.3  | 53604.9  | 49293    | 52210.2  | 48288.1  | 62415    | TRUE |
| 476442.9 | 193368.3 | 125271.2 | 171948.5 | 138933.4 | 172347.4 | 193342.1 | 154391.9 | TRUE |
| 49785.1  | 35802    | 47032.4  | 46301.8  | 54476.7  | 54965.7  | 41347.3  | 56606.9  | TRUE |
| 122895.2 | 126620.7 | 109981.4 | 126467.8 | 135850.8 | 108552   | 98168.9  | 106303.1 | TRUE |
| 67233.2  | 110197.4 | 55698.8  | 109095.3 | 145129.4 | 45854.9  | 30173.2  | 57225.5  | TRUE |
| 106663.7 | 107419.2 | 121159.4 | 119232.9 | 106350.8 | 172697.8 | 117681.7 | 124166.6 | TRUE |
| 91380    | 68449.2  | 63014.4  | 89529    | 95523.7  | 79936    | 90255.8  | 85966.9  | TRUE |
| 88289.7  | 83208.7  | 99802.5  | 86344.2  | 117666.2 | 87145.1  | 105218.2 | 123560.7 | TRUE |
| 42221.5  | 27625.1  | 66336.5  | 52366.5  | 50044.4  | 44341.5  | 34866.1  | 44268.1  | TRUE |
| 46653.8  | 40082.3  | 34190.5  | 47350.3  | 35111.7  | 38706.1  | 33209.7  | 45169.3  | TRUE |
| 149724.2 | 94925.3  | 128808.2 | 155077.6 | 125738.7 | 134564.1 | 124141.4 | 179675.1 | TRUE |
| 122864.1 | 135201.7 | 132900.4 | 134026.9 | 111500.3 | 127468.5 | 147406.1 | 105032.1 | TRUE |
| 38270    | 28445.1  | 39142.6  | 26535.9  | 45717.7  | 36662.7  | 27873.8  | 53747.3  | TRUE |
| 41686.2  | 58211.5  | 43273.9  | 52011.9  | 76915.1  | 36385.2  | 36674.1  | 46666.1  | TRUE |
| 52368.4  | 48413.7  | 103135.9 | 51751.6  | 45782.3  | 49262.8  | 45876.5  | 64187.4  | TRUE |
| 51568.5  | 48236.5  | 61059    | 49460.6  | 62820.7  | 64862.4  | 52165.1  | 51400.7  | TRUE |
| 33581.5  | 24331.2  | 38324.8  | 30509.9  | 33764.1  | 53122.1  | 43998.2  | 53311.6  | TRUE |
| 223288.9 | 46210.3  | 41643.7  | 52578.5  | 50751.7  | 55301.9  | 62857    | 63073    | TRUE |
| 41060.1  | 53428.6  | 84376.5  | 60556.7  | 65797.8  | 41049    | 38773.6  | 26365.2  | TRUE |
| 45772    | 56753.4  | 61129.9  | 79859.4  | 46960.1  | 42076.7  | 65558.5  | 44467.2  | TRUE |
| 33346.7  | 46855    | 39428    | 36560.9  | 54020    | 35926.8  | 34381.3  | 22892.9  | TRUE |
| 82270.1  | 68108.3  | 93892.4  | 84331.4  | 90624.8  | 62923.3  | 101881   | 83041.6  | TRUE |
| 369241.4 | 214608.4 | 298579.5 | 364213.7 | 348976.6 | 347927   | 324238.2 | 421833.3 | TRUE |
| 40408.3  | 37695.2  | 28754.1  | 44242.5  | 33119.3  | 36924.5  | 42971.6  | 25870.2  | TRUE |
| 52934.3  | 55145.3  | 52186.3  | 57646    | 131254.2 | 50241    | 45136.2  | 58355.2  | TRUE |
| 177882.8 | 157851.1 | 121390.6 | 158443.4 | 179401.7 | 152213.1 | 153723   | 163948.4 | TRUE |
| 73649.9  | 59135.6  | 55307.1  | 60158.3  | 62170    | 87753.3  | 62520.3  | 70229    | TRUE |
| 59446.6  | 63388.9  | 151361.3 | 61639.4  | 61369.8  | 50442.6  | 52625.4  | 68736.3  | TRUE |
| 89011    | 64415.7  | 49641.7  | 75223    | 67196.5  | 97389.7  | 82740.8  | 94471.8  | TRUE |
| 47311.8  | 77928.3  | 49482.1  | 57538.8  | 62656.8  | 42984.9  | 43411.8  | 61863.2  | TRUE |
| 65738.7  | 55346.5  | 98867.9  | 71471.2  | 79155.7  | 74574.3  | 66030.9  | 83397.1  | TRUE |
| 42945.7  | 33660.9  | 30721.3  | 45132.4  | 45755.5  | 30709.4  | 33898    | 58282.2  | TRUE |
| 70325    | 34949.1  | 40114.5  | 37867.6  | 52378.1  | 64955.3  | 46379.7  | 89944.1  | TRUE |
| 119522.4 | 69087.3  | 76054.6  | 91643    | 115326.6 | 107816.1 | 80905.2  | 105329.3 | TRUE |
| 37689.7  | 10223.4  | 26399.8  | 11787.1  | 20549.8  | 33090.5  | 16335.1  | 36314.1  | TRUE |
| 42008.8  | 52679.9  | 55821.4  | 58758.7  | 54366.2  | 59020.2  | 63968.2  | 59902.1  | TRUE |
| 192360.3 | 152749.3 | 168197.7 | 235904.6 | 303670.4 | 158674   | 156710.5 | 245365.2 | TRUE |
| 61915.4  | 41255.4  | 70938.6  | 87468.1  | 70228.9  | 65632    | 58760.6  | 70694.5  | TRUE |
| 33663.8  | 11286.1  | 28402.9  | 32258.3  | 26603    | 34516.5  | 31605.5  | 40411.1  | TRUE |
| 102182.4 | 86250.6  | 94772.6  | 85112.9  | 104193.8 | 93048    | 112507.5 | 74732    | TRUE |
| 1964845  | 1203172  | 1215593  | 1473949  | 1416333  | 1848102  | 1399446  | 2069190  | TRUE |

|          |          |          |          |          |          |          |          |      |
|----------|----------|----------|----------|----------|----------|----------|----------|------|
| 62337.4  | 52322.7  | 63140.1  | 61426.5  | 66879.3  | 76218.4  | 66999.7  | 50195.8  | TRUE |
| 137967.2 | 121427.1 | 51270.6  | 58792.4  | 61541.1  | 59543.2  | 65501.6  | 59770.3  | TRUE |
| 40245.6  | 35766.3  | 40791.8  | 31793.7  | 42492.4  | 28285.9  | 12953.4  | 48485.1  | TRUE |
| 147526.6 | 134592.1 | 142665.1 | 159873.9 | 172035.1 | 142130.3 | 139713.3 | 182151.5 | TRUE |
| 49221    | 40068    | 40122.4  | 48155.3  | 44262.4  | 42204.8  | 59208.2  | 59843.9  | TRUE |
| 155799.9 | 160124.7 | 141629.4 | 151425.1 | 154414   | 145888   | 149064.8 | 139777   | TRUE |
| 35553.1  | 25999.8  | 26980.2  | 38122.2  | 32562.4  | 39469    | 14110.1  | 37194.1  | TRUE |
| 130791.2 | 83838    | 108229.5 | 112442.5 | 130146.4 | 125386.7 | 111151.5 | 132434.3 | TRUE |
| 748770.4 | 687396.1 | 700671.1 | 820100.9 | 1010670  | 825625.2 | 709889.5 | 970922   | TRUE |
| 55785    | 47827.4  | 77992.5  | 64854.5  | 81468    | 68138.8  | 34175.8  | 57491.8  | TRUE |
| 189243.5 | 145751.9 | 194110.1 | 208581.3 | 222320   | 155503.9 | 163253.6 | 213111.4 | TRUE |
| 218176.5 | 233942.9 | 170988.9 | 206186.2 | 217185.6 | 211738.2 | 213603.1 | 241161.4 | TRUE |









|          |          |          |          |          |          |          |          |      |
|----------|----------|----------|----------|----------|----------|----------|----------|------|
| 93285.5  | 131827.8 | 86302.3  | 119162.5 | 127467.8 | 78587.6  | 62749.3  | 67234.2  | TRUE |
| 106752   | 296347   | 144620.2 | 168831.1 | 237431.1 | 93965.7  | 68624.7  | 74355.8  | TRUE |
| 400503.4 | 536933.1 | 562037   | 555072.6 | 420854.7 | 376339.2 | 430945.5 | 405212.2 | TRUE |
| 143708.2 | 167725.8 | 133119.2 | 264553.1 | 201848.6 | 258070.6 | 220011.2 | 165302.8 | TRUE |
| 108089.2 | 127365.3 | 97198.8  | 111987.4 | 112404   | 71590.9  | 89422.3  | 110435.1 | TRUE |
| 68009.7  | 102266.1 | 109334.1 | 81224.3  | 92406.3  | 85128.5  | 97223.9  | 82217.3  | TRUE |
| 71332.2  | 82602.6  | 122345.3 | 80451.9  | 75975    | 94122.8  | 79875.1  | 105501.4 | TRUE |
| 83586.6  | 135164.3 | 69644.4  | 104699.7 | 118806.7 | 96932.3  | 96714.3  | 109033.5 | TRUE |
| 201411.2 | 276207.5 | 280053   | 278496.6 | 326581.1 | 260434   | 201360   | 232529.5 | TRUE |
| 471905.1 | 490513.5 | 409360.9 | 587605.4 | 632678.1 | 522925.1 | 396815   | 545003.6 | TRUE |
| 112782   | 120127.3 | 144531.4 | 76916.4  | 100588   | 78119.6  | 90269.5  | 94559.3  | TRUE |
| 26316.9  | 89003.8  | 43617.8  | 69870.9  | 94148.2  | 35573.2  | 24757.3  | 13238    | TRUE |
| 28549.4  | 52273.6  | 62672    | 41110.9  | 46179.3  | 17129.6  | 30116.9  | 7942.9   | TRUE |
| 94691.5  | 137724.9 | 146441.1 | 94663.4  | 130537.4 | 88775.1  | 78088.1  | 74610.4  | TRUE |
| 183325.6 | 266442.7 | 177981   | 197108.6 | 279145.1 | 189129.3 | 213279.1 | 197511.5 | TRUE |
| 419748.6 | 543888.8 | 522724   | 501753.1 | 471717.4 | 452149.9 | 404549.9 | 381530.1 | TRUE |
| 36817.7  | 113802.9 | 43736.1  | 71514.6  | 93674.1  | 12193.1  | 26453.3  | 36043.2  | TRUE |
| 757006.2 | 851137.2 | 825229.7 | 870556.5 | 1020709  | 751072.8 | 624495.2 | 760354.5 | TRUE |
| 71735    | 303708.5 | 114447.5 | 191570.7 | 289737.5 | 41123.2  | 12543.2  | 32735.9  | TRUE |
| 36367.9  | 100464.8 | 52624.8  | 85165.6  | 76906.2  | 9389.4   | 13297.7  | 8782.6   | TRUE |
| 711206.5 | 1009613  | 809843.6 | 1049506  | 953225.7 | 661951.3 | 734639.8 | 777940   | TRUE |
| 2226961  | 10165570 | 3777852  | 5864275  | 8706468  | 600001.3 | 462511.6 | 677200.4 | TRUE |
| 122404.9 | 160389.5 | 111730.6 | 98987.5  | 161036.1 | 155388.7 | 187034   | 172662.1 | TRUE |
| 73875.1  | 64790    | 69486.7  | 68969.1  | 72891.9  | 81967.5  | 79449    | 95855.4  | TRUE |
| 101910.3 | 100785.4 | 131468.4 | 95707.3  | 90783.2  | 147317.3 | 119600.1 | 140140.5 | TRUE |
| 143231.4 | 157200.9 | 139812.1 | 147327.3 | 160675.7 | 212629.7 | 182563.6 | 213811.3 | TRUE |
| 60799.2  | 48572.8  | 63325.5  | 68300.1  | 55328.1  | 100651.6 | 62045.1  | 82743.1  | TRUE |
| 318530.8 | 138971.1 | 112968.8 | 141059.9 | 142304.8 | 209898.2 | 156586.1 | 229045.6 | TRUE |
| 84202.5  | 39999.9  | 54399.5  | 54158.6  | 55274    | 104003.1 | 73807    | 115699   | TRUE |
| 140063.5 | 130005.1 | 129132.5 | 148442.5 | 182465.8 | 146344.1 | 137134.8 | 152770.8 | TRUE |
| 130381.6 | 89229.4  | 149767   | 105186.8 | 129619.2 | 148086.4 | 104416.9 | 130037.5 | TRUE |
| 87558.8  | 84650.1  | 76906.3  | 87583.1  | 95336.9  | 91269.6  | 91091.6  | 77351.4  | TRUE |
| 137514.1 | 88382.4  | 97991.5  | 109640.1 | 156704.3 | 171472.8 | 120190.8 | 153318.5 | TRUE |
| 36681.2  | 47975.4  | 31889.8  | 47632.7  | 43845.9  | 59824    | 38086.7  | 57878.3  | TRUE |
| 58385.6  | 73511.3  | 63219.4  | 58253.1  | 66414.4  | 66265.3  | 81315.1  | 52395.1  | TRUE |
| 85970.3  | 68055.9  | 85895.6  | 81229.8  | 85609.5  | 82967.2  | 83613.6  | 74048.3  | TRUE |
| 107639.8 | 147739.3 | 120155.8 | 81191.3  | 103795.3 | 119954.3 | 112609.6 | 119035.8 | TRUE |
| 84233.2  | 97380.5  | 78980.8  | 86577.6  | 98781.2  | 89992.8  | 91602.4  | 104332   | TRUE |
| 124206.8 | 128526.2 | 77084.8  | 85197.8  | 110334.8 | 143926.2 | 159170.6 | 160102.4 | TRUE |
| 170670.9 | 160701.1 | 145078.5 | 140538.9 | 160508.8 | 181192.7 | 179272.8 | 191201   | TRUE |
| 54729.2  | 70729.7  | 55553.4  | 48278.5  | 38364.6  | 72375.3  | 76657.3  | 56091.4  | TRUE |
| 136215.6 | 120188   | 87024.2  | 91269.8  | 100308.4 | 123255.9 | 171771.7 | 189666.6 | TRUE |
| 642458.7 | 589019.1 | 383302.8 | 396588.6 | 473263.8 | 737282.9 | 788283.7 | 756478.3 | TRUE |
| 138319.7 | 128597.1 | 94145    | 122345.5 | 125588   | 144688.2 | 150474.7 | 181367   | TRUE |
| 44608.7  | 49819.4  | 31735.7  | 27596.8  | 35382.4  | 53508.8  | 60563.6  | 47098.1  | TRUE |
| 62399.8  | 67925.7  | 68946.6  | 67414.9  | 69398.4  | 73367.4  | 66425.1  | 61288.8  | TRUE |
| 99950    | 110489.4 | 78310.5  | 90320.9  | 71049.2  | 92778    | 103670.3 | 106192.1 | TRUE |
| 215115.4 | 173853.1 | 145187.7 | 139244.2 | 145553.5 | 276662.5 | 229426.6 | 274929.3 | TRUE |

|          |          |          |          |          |          |          |          |      |
|----------|----------|----------|----------|----------|----------|----------|----------|------|
| 178892.9 | 192026.9 | 159942.6 | 206051.7 | 160561.7 | 186282.8 | 261685.3 | 219841.2 | TRUE |
| 114131.6 | 113263.8 | 106854.5 | 113723.5 | 85814    | 164086.8 | 125409.8 | 140297.8 | TRUE |
| 226039.7 | 225851.8 | 164802   | 160572.3 | 193692.8 | 267478   | 305764.3 | 275361.5 | TRUE |
| 202755.7 | 190032.1 | 156518.9 | 157259.8 | 184185.6 | 226020.8 | 249267.6 | 264274.5 | TRUE |
| 125916.9 | 112797.8 | 75607.4  | 65799.7  | 105797.1 | 147638.9 | 156714.9 | 166902.8 | TRUE |
| 202812.9 | 180901   | 142289.8 | 197518.4 | 188993.1 | 254149.1 | 238867   | 245570.4 | TRUE |
| 203349.5 | 170157.6 | 160288.5 | 141252.5 | 175752.3 | 248169.8 | 261255.2 | 236616.5 | TRUE |
| 38012.3  | 37270.8  | 48879.3  | 46888.7  | 38116.7  | 42859.4  | 59147    | 46642    | TRUE |
| 157733.7 | 167512.5 | 114181.4 | 134139.6 | 132164.7 | 185480.9 | 249352.2 | 217129.6 | TRUE |
| 5548784  | 5148896  | 3466009  | 3217827  | 4368024  | 6556855  | 6598671  | 7288787  | TRUE |
| 50910.8  | 54467.5  | 45132.6  | 45617.4  | 54499.4  | 72519.8  | 63045.4  | 70892.3  | TRUE |
| 94974.2  | 92181.1  | 55851.8  | 64909.1  | 70041    | 77323.3  | 123213.2 | 135028.9 | TRUE |
| 72835.9  | 75661    | 67867.2  | 71771.3  | 68433.3  | 69944.9  | 87442.9  | 80195.6  | TRUE |
| 200183   | 175469.1 | 166270.6 | 238800.5 | 192685.8 | 166343.8 | 221480   | 267150.9 | TRUE |
| 83400.6  | 65629.2  | 44934.6  | 74840.9  | 60856.5  | 79138.8  | 90274.6  | 80090.2  | TRUE |
| 70486.2  | 63289.9  | 57044.8  | 63225    | 56829.4  | 78527.7  | 51350.2  | 68809.3  | TRUE |
| 157814.1 | 155102.4 | 113657   | 132959.9 | 137659.4 | 175375.6 | 213647.9 | 190850.5 | TRUE |
| 221257.1 | 190253.2 | 175991.5 | 208124.9 | 172270.2 | 184702.1 | 198977   | 222082.9 | TRUE |
| 83657.6  | 87232.5  | 57939.9  | 71392.6  | 70804.1  | 114132.7 | 116254.3 | 143077.6 | TRUE |
| 76073.7  | 88368.8  | 72679.3  | 51162    | 83333.4  | 106044   | 112855.5 | 115886.8 | TRUE |
| 176585.5 | 223943.1 | 247265.8 | 183411   | 202971.7 | 185852.5 | 190453.6 | 227871   | TRUE |
| 83065.7  | 83097.3  | 74972.4  | 82068.7  | 86094.1  | 81284.4  | 90225.9  | 97840.4  | TRUE |
| 75834.7  | 76343.2  | 65156.1  | 99988.1  | 79993.1  | 79208.7  | 80507.5  | 72658.9  | TRUE |
| 23555.6  | 25087    | 8337.4   | 16609.7  | 22644.5  | 30745.4  | 40305.8  | 27721.5  | TRUE |
| 39129.8  | 32200.8  | 11576.5  | 15719.6  | 33081.7  | 57285.4  | 43212.2  | 53576    | TRUE |
| 39878.1  | 34232    | 42139.9  | 25159.2  | 38587    | 33256.5  | 54194.1  | 49307.1  | TRUE |
| 36423.2  | 26422.2  | 23207.9  | 23245.9  | 27441.7  | 36478.1  | 22138.8  | 24251    | TRUE |
| 26824.5  | 23556.7  | 25383    | 11803.2  | 24532.3  | 8782.5   | 24988    | 14705.8  | TRUE |
| 41792.4  | 41429.2  | 44155.3  | 38469.7  | 34574.1  | 38808    | 35119.4  | 43451    | TRUE |
| 44574.8  | 56452.1  | 45446    | 36055.9  | 42301.7  | 47505.3  | 67527.5  | 53753.5  | TRUE |
| 85803.9  | 76682.5  | 107016.2 | 99772.8  | 92255.1  | 118667.4 | 116372.9 | 95844.3  | TRUE |
| 63425    | 78958.2  | 71834.5  | 88815.6  | 70444    | 75111.1  | 86850.2  | 72856.8  | TRUE |
| 27358.9  | 26265    | 9944     | 15551.8  | 30284.3  | 31945.9  | 28805.4  | 34330.6  | TRUE |
| 58291.8  | 46729.4  | 60657.8  | 63806.5  | 51667.6  | 68416.2  | 69670.3  | 77746.6  | TRUE |
| 31143    | 42385.5  | 32056.3  | 42172    | 38127.7  | 50093    | 44961    | 46505.1  | TRUE |
| 150463.3 | 153193.5 | 145495.3 | 148003.4 | 120775.4 | 219816.2 | 189500.6 | 237008   | TRUE |
| 18976.9  | 8514     | 10921.2  | 9614.2   | 18038    | 30099.8  | 23712.3  | 22417.2  | TRUE |
| 53433.3  | 43339.5  | 64006.3  | 43681.9  | 60740.4  | 53457.8  | 53941.5  | 43955.3  | TRUE |
| 269232   | 248515.7 | 269111.9 | 263854.9 | 308158.6 | 357398.7 | 344808.2 | 404122.6 | TRUE |

|          |          |          |          |          |          |          |          |      |
|----------|----------|----------|----------|----------|----------|----------|----------|------|
| 29079.4  | 20203    | 12515.9  | 12377.9  | 44082.8  | 24682.3  | 23565.2  | 13350.5  | TRUE |
| 33825.2  | 40341.3  | 33292.1  | 10942.7  | 57858.6  | 38481.7  | 40747.3  | 41153.5  | TRUE |
| 270273.9 | 235402.8 | 187412.1 | 189580.8 | 211900.8 | 243213.4 | 261571.7 | 246270   | TRUE |
|          |          |          |          |          |          |          |          |      |
| 10500310 | 7067592  | 6241136  | 8506249  | 8545101  | 6801676  | 5615697  | 9223167  | TRUE |
| 929570.5 | 644447.8 | 611611.9 | 774893.5 | 793080.9 | 614599   | 519185.2 | 784089.2 | TRUE |
| 223141   | 169976.2 | 147242.1 | 164000.4 | 184077.1 | 135360.1 | 124673.5 | 199998.4 | TRUE |
| 531825.5 | 435850.6 | 354659.1 | 425207   | 462459.2 | 368728.6 | 296852   | 459137.6 | TRUE |
| 364744.9 | 279036.8 | 249865.7 | 324147.5 | 359291.3 | 272671   | 198607   | 337646.2 | TRUE |
| 210239.1 | 84386.4  | 210933.2 | 69137.5  | 105371   | 77442    | 96593.2  | 58808.2  | TRUE |
| 69997.5  | 23351.5  | 59685.9  | 44366.2  | 74688.1  | 64172.5  | 49348.2  | 66516.2  | TRUE |
| 1582099  | 937922   | 1803721  | 1977104  | 1677979  | 1666764  | 1014584  | 1474362  | TRUE |
| 144696.8 | 114591.8 | 130694.8 | 168670.2 | 122197.1 | 171395.1 | 124351.8 | 167948.9 | TRUE |
| 372825.7 | 566451.8 | 736878.6 | 1491596  | 1500871  | 217375.6 | 104784.8 | 253321.5 | TRUE |
| 50625.1  | 7310.7   | 37348.5  | 65567.6  | 57952.5  | 59971.2  | 24650.7  | 55776.6  | TRUE |
| 79210.9  | 96500.3  | 58931.2  | 78533.8  | 100574.5 | 92167    | 89282.2  | 108490.9 | TRUE |
| 1008711  | 1050834  | 698901.8 | 700131.4 | 981795.6 | 924875.8 | 903232.1 | 1020344  | TRUE |
| 2004306  | 2087718  | 1112281  | 1125692  | 1979366  | 2070322  | 1869827  | 1909073  | TRUE |
| 106756.5 | 280312.6 | 137942.6 | 174045   | 381153.8 | 65229.5  | 49496.7  | 78083.7  | TRUE |
|          |          |          |          |          |          |          |          |      |
| 4079065  | 2930124  | 3463421  | 6206353  | 5147723  | 3597564  | 3039864  | 4667721  | TRUE |
| 10519712 | 7277401  | 8176338  | 14612772 | 12197888 | 9249355  | 7504356  | 14156399 | TRUE |
| 491764.7 | 346629.8 | 440626.7 | 552494   | 540708.9 | 488852.9 | 316416.3 | 584932.1 | TRUE |
| 148905.1 | 134680.5 | 141891.8 | 165156.1 | 168556.8 | 138639.6 | 130672.7 | 173004.6 | TRUE |
| 662010.5 | 496776   | 616234.7 | 792345.5 | 758107.2 | 626869   | 534039.9 | 723224.4 | TRUE |
| 370354.1 | 340971.2 | 373019.8 | 450709.8 | 397634.8 | 381447   | 319016.6 | 403848.1 | TRUE |
| 811391.4 | 646862.1 | 780978.9 | 1021676  | 905353   | 775153   | 651182.6 | 911196.1 | TRUE |
| 1515126  | 1047262  | 1309482  | 2010944  | 1838052  | 1417842  | 1162998  | 1807861  | TRUE |
| 1609456  | 1075124  | 1539429  | 1779150  | 2006862  | 1623732  | 1222808  | 1945878  | TRUE |
| 2320633  | 1612320  | 2186888  | 2547104  | 2798338  | 2396195  | 1661459  | 2829792  | TRUE |
| 1066987  | 840585.4 | 976004.2 | 1312027  | 1386216  | 1123278  | 862168   | 1316354  | TRUE |
| 660699.8 | 481839.5 | 683905.2 | 749479.9 | 862451.9 | 743859.3 | 488041   | 903959   | TRUE |
| 7355379  | 4367258  | 6693311  | 7320066  | 8348517  | 7166854  | 5017699  | 8259187  | TRUE |
| 595105.1 | 409757.7 | 564928.9 | 607282.4 | 637001.9 | 628505.4 | 398433.6 | 680528   | TRUE |
| 4464004  | 2861119  | 4469217  | 4785057  | 5011392  | 4683057  | 3146676  | 5477579  | TRUE |
| 2938027  | 1953558  | 2680067  | 3180894  | 3313786  | 3031797  | 2211038  | 3517560  | TRUE |
| 8260168  | 4981662  | 7148565  | 7816681  | 9122042  | 7507433  | 5417069  | 9412016  | TRUE |
| 884287.9 | 584976.8 | 840641.4 | 974513.2 | 1010150  | 893246.3 | 594023.6 | 1065218  | TRUE |
| 254074.3 | 198490.1 | 276771.4 | 302414.5 | 298498.8 | 287613.5 | 244268.5 | 300319.3 | TRUE |
| 637803.1 | 485434.5 | 644912.1 | 644986.7 | 777212.8 | 689212.7 | 512325.1 | 816446.9 | TRUE |
| 2569977  | 1720630  | 2387766  | 2945772  | 3036546  | 2629920  | 1934065  | 3087496  | TRUE |
| 478034.5 | 330764.7 | 458183.6 | 465302.4 | 572124.8 | 438244.2 | 359039.3 | 541272.6 | TRUE |

|          |          |          |          |          |          |          |          |      |
|----------|----------|----------|----------|----------|----------|----------|----------|------|
| 4104211  | 2936145  | 4014752  | 4454688  | 5072737  | 4268218  | 2914731  | 5119663  | TRUE |
| 2202440  | 1380045  | 1996420  | 2419504  | 2538353  | 2160960  | 1604219  | 2520882  | TRUE |
| 3281009  | 2235955  | 2965770  | 3553389  | 3844009  | 3131319  | 2560584  | 3865303  | TRUE |
| 1447244  | 1020697  | 1292505  | 1523305  | 1711087  | 1453532  | 1129137  | 1740305  | TRUE |
| 3227571  | 2310347  | 3020325  | 3523099  | 3742285  | 3155000  | 2389412  | 3721241  | TRUE |
| 4824419  | 3034900  | 4708235  | 5029912  | 5901028  | 4823537  | 3428788  | 6006920  | TRUE |
| 37086.4  | 28079.3  | 41574.6  | 33367.1  | 38607.9  | 34393.3  | 39357.7  | 41127.3  | TRUE |
| 39053.6  | 32683.1  | 32249    | 37803.1  | 28272.5  | 35295.2  | 31621.9  | 32431.9  | TRUE |
| 149352.1 | 116119.2 | 140030   | 180146   | 180205.9 | 140082   | 118884.8 | 187835.9 | TRUE |
| 79447    | 49121    | 90764.8  | 94600    | 105731.9 | 82067.6  | 66538.8  | 78454.1  | TRUE |
| 173146.7 | 136481.8 | 186370.1 | 175214.7 | 235136.3 | 187691.2 | 151301.1 | 198182.8 | TRUE |
| 70041    | 56670.7  | 65322.6  | 78167    | 81257.6  | 71489.2  | 77242    | 100354.7 | TRUE |
| 373008.4 | 295617.3 | 377860.4 | 482627.5 | 440888.5 | 358517.1 | 330796   | 445791.6 | TRUE |
| 2419489  | 1772789  | 2123854  | 3116084  | 2768934  | 2297437  | 1822917  | 3004794  | TRUE |
| 203989.5 | 182551.7 | 226997.8 | 228611.3 | 252888.7 | 221099.8 | 187065   | 210703.2 | TRUE |
| 146975.5 | 110540   | 159538.8 | 160789.6 | 172474.6 | 144595.5 | 139609.1 | 158241.6 | TRUE |
| 284251   | 241534.9 | 327528.1 | 329366   | 353761.7 | 281507.7 | 233405.9 | 353168.9 | TRUE |
| 24594.2  | 22051.5  | 19186.6  | 29418.2  | 28700.3  | 20563.4  | 27013.6  | 24175.2  | TRUE |
| 195057.8 | 125090.4 | 152954.4 | 362454.2 | 302906.2 | 367504.2 | 196904.7 | 227737.3 | TRUE |
| 498481.8 | 346216.7 | 543814.4 | 540527.1 | 559990.9 | 543832.2 | 419905.3 | 699200.4 | TRUE |
| 214577   | 139006.8 | 154181.8 | 212570.5 | 205413.8 | 235007.6 | 165976.3 | 260149.3 | TRUE |
| 90675.2  | 74306.8  | 78428.7  | 82214.3  | 91139.1  | 75711.5  | 69976    | 70645.8  | TRUE |
| 201560.4 | 122101   | 139631.3 | 214686.1 | 217160.1 | 206370.2 | 142678.9 | 198149.8 | TRUE |
| 54757.6  | 115895.6 | 146011.8 | 216558.3 | 293253   | 38647    | 13238.3  | 35161.8  | TRUE |
| 304841.6 | 705657.8 | 405651.7 | 865526.5 | 1105617  | 126284.5 | 40745.6  | 157609.9 | TRUE |
| 110597.1 | 255867.7 | 132858.6 | 288210.8 | 325866.1 | 42515.3  | 10697.4  | 43245.6  | TRUE |
| 190971.8 | 126745.7 | 234768.7 | 187721.2 | 203930.8 | 212445.7 | 137738   | 302069   | TRUE |
| 425553.8 | 243447.4 | 348887.2 | 414221.7 | 444130.3 | 499442.9 | 313530.9 | 637103.1 | TRUE |
| 157188.5 | 204895.6 | 212166.9 | 321935.9 | 388274.8 | 101824.4 | 75746.8  | 114087.8 | TRUE |
| 38839    | 73804.1  | 52139    | 102388.2 | 112279.6 | 33580.7  | 12276    | 31018    | TRUE |
| 162131.2 | 240465.9 | 220278.6 | 357241.6 | 469726   | 101640.6 | 49655.8  | 113146.4 | TRUE |
| 54482.8  | 82765.2  | 82116.8  | 124172.2 | 151302.3 | 32267.1  | 39028.2  | 49594.1  | TRUE |
| 24250.8  | 40466.3  | 52334.4  | 61281    | 79092.2  | 23914    | 12453    | 19106.2  | TRUE |
| 86406.3  | 93473.5  | 94236.7  | 93339.8  | 130528.2 | 73707    | 85367.5  | 98711.6  | TRUE |
| 246876.9 | 206321.1 | 347776.6 | 285623.7 | 293367   | 251543.6 | 253333   | 321755.2 | TRUE |
| 406267.2 | 348952.6 | 353445.4 | 395011.6 | 469236.5 | 378355.6 | 349029.4 | 512161.2 | TRUE |
| 708289.4 | 735752   | 644015   | 624390.3 | 736768.8 | 832171.9 | 782579.7 | 774106.3 | TRUE |
| 66038398 | 74863217 | 44688189 | 48709861 | 64249506 | 1.03E+08 | 85521732 | 98850686 | TRUE |
| 898132.3 | 1101625  | 665455.7 | 659974.1 | 890648.8 | 1176945  | 1114177  | 1189354  | TRUE |
| 659321.9 | 722393.4 | 435907.8 | 467350.1 | 697287.6 | 787635.1 | 810739.1 | 782729.8 | TRUE |
| 378948.8 | 400586.6 | 293972.6 | 282175.1 | 389567.7 | 419473.1 | 411018.9 | 413777.9 | TRUE |
| 474794   | 526065.4 | 432983.4 | 452729.3 | 525336.7 | 555762.6 | 569991.5 | 529431   | TRUE |
| 460855   | 493748.7 | 339865.1 | 343172.5 | 477288.5 | 536702.8 | 520067.2 | 533085.8 | TRUE |
| 1125925  | 1258455  | 794792   | 777010.6 | 1228701  | 1325972  | 1414831  | 1323876  | TRUE |
| 590722.4 | 665289   | 418347.4 | 449469.4 | 685570.4 | 706188.5 | 745568.4 | 710933.8 | TRUE |
| 1188225  | 1248528  | 832944.4 | 816517.2 | 1397700  | 1312947  | 1376055  | 1263109  | TRUE |
| 287763.5 | 369741.4 | 241057.8 | 241120.3 | 300459.8 | 333158.2 | 357479.6 | 325821.9 | TRUE |
| 26631.5  | 22301.7  | 21510.8  | 31201.8  | 25405.9  | 48666.8  | 31133    | 31277.2  | TRUE |
| 27711.1  | 29654.7  | 24401.1  | 9501.4   | 19507    | 37519.3  | 32217.7  | 25809    | TRUE |

|          |          |          |          |          |          |          |          |      |
|----------|----------|----------|----------|----------|----------|----------|----------|------|
| 15117.3  | 17952.9  | 27449.5  | 12107.8  | 8008.4   | 22229.7  | 25733    | 21480.9  | TRUE |
| 15329.6  | 18679.6  | 12947.9  | 7734.1   | 20733.8  | 7210.3   | 19278.8  | 11428.9  | TRUE |
| 18745.6  | 21024.8  | 7128.5   | 9793.9   | 17827.6  | 11577.9  | 19972.1  | 22806.8  | TRUE |
| 16288.5  | 8722     | 9670.6   | 7343.1   | 14021.8  | 10306    | 25779.3  | 12087.9  | TRUE |
| 158415.8 | 165298.3 | 115240.1 | 130457.5 | 150979.2 | 196607   | 188472   | 173543.3 | TRUE |
| 172543.3 | 175603.8 | 114718.9 | 105266.4 | 178791   | 204237.2 | 202147.7 | 198507.1 | TRUE |
| 307662.6 | 334054.5 | 203659.9 | 217209.8 | 317910.9 | 430323   | 374559.5 | 407145   | TRUE |
| 264851.9 | 305634.5 | 196941.8 | 225650.3 | 289470.8 | 397629.7 | 366522.8 | 384883.9 | TRUE |
| 147001.1 | 157186.2 | 98283.2  | 132838.8 | 136304.1 | 205663.6 | 158573.8 | 168318.5 | TRUE |
| 199431.9 | 204120.1 | 145080.2 | 139077.2 | 196423.8 | 252678.6 | 236835.3 | 299502.1 | TRUE |
| 167149.8 | 210504.6 | 143043.8 | 164833.3 | 170050.4 | 215398.3 | 195173.9 | 261089.2 | TRUE |
| 250379.5 | 257938.4 | 158639.2 | 186524.9 | 230717.5 | 301457   | 288660.6 | 336441.1 | TRUE |
| 211145.3 | 216320.2 | 140151   | 148276.1 | 230075.1 | 297391.5 | 256627.5 | 326772.4 | TRUE |
| 94868.2  | 107327   | 62954.5  | 94544.1  | 100750.3 | 123640.7 | 105088.9 | 131573   | TRUE |
| 140336.9 | 174492.4 | 107983.2 | 102868.2 | 123892.8 | 191024.9 | 195301.2 | 213505.5 | TRUE |
| 231379.5 | 253858.8 | 139689.8 | 174624   | 209938   | 360629.5 | 298190.8 | 367767.5 | TRUE |
| 86860.9  | 89455.1  | 63405.6  | 63731    | 82712.9  | 127248.9 | 108698.1 | 132893.4 | TRUE |
| 237425.9 | 241767   | 152550   | 159750.3 | 225188.6 | 365623.8 | 283274.1 | 350279.8 | TRUE |
| 111961.2 | 113018.2 | 66343.8  | 95810.3  | 97887.1  | 152296.5 | 135318.3 | 164617.5 | TRUE |
| 160003   | 336773.9 | 204375.6 | 227906   | 327514.6 | 105152.4 | 120416   | 105872.5 | TRUE |
| 332780.9 | 961348.9 | 401024.9 | 584957.1 | 802322.6 | 225546.2 | 247618.5 | 234144.8 | TRUE |
| 63526    | 94446.8  | 82424.8  | 94380    | 90503.4  | 85821.3  | 53333.4  | 58451.4  | TRUE |
| 31331.8  | 64265.7  | 37653.9  | 40575    | 64119.6  | 11161.2  | 25737.6  | 28988.2  | TRUE |
| 51009.3  | 180737.8 | 54177.3  | 85618.4  | 122684.2 | 19511.4  | 8118.1   | 26648    | TRUE |
| 109394.3 | 303646.8 | 107045.5 | 169331.4 | 283726.1 | 72016.5  | 69223.5  | 96188.3  | TRUE |
| 72827.3  | 143958.8 | 73180.5  | 105656.3 | 129857.8 | 46166.3  | 43122.4  | 43472.8  | TRUE |
| 114793.2 | 71538.2  | 80047.7  | 43184.3  | 61628.7  | 74703.3  | 90426.4  | 60117.1  | TRUE |
| 461607.1 | 228395   | 321984.4 | 167228.7 | 215670.1 | 256492.4 | 334168.5 | 212012.4 | TRUE |
| 205867   | 221359.6 | 156433   | 156450.9 | 196400.9 | 193829.9 | 207800.1 | 227818.1 | TRUE |
| 94936.3  | 73030.4  | 51721    | 72507.7  | 80707.5  | 64212.2  | 51206.8  | 64714.2  | TRUE |
| 43620184 | 29079451 | 42656289 | 49634861 | 53397063 | 45182102 | 35099905 | 53689976 | TRUE |
| 13311619 | 8780522  | 11543830 | 13167123 | 14869666 | 12833884 | 9039054  | 16569271 | TRUE |
| 399873.8 | 922714.6 | 616211.2 | 1327392  | 1561057  | 137461.3 | 63504.4  | 176908.2 | TRUE |
| 356740.9 | 863757.8 | 453610.2 | 1024211  | 1224063  | 114681.2 | 35485    | 167992.9 | TRUE |
| 52026.3  | 106283.4 | 76784.7  | 105266.3 | 195706   | 36130    | 56256.1  | 92655.1  | TRUE |
| 54471    | 42509.5  | 54545.2  | 42651.7  | 65009    | 47744.7  | 44367.7  | 62747.8  | TRUE |
| 1.53E+08 | 1.64E+08 | 1.05E+08 | 1.1E+08  | 1.59E+08 | 1.69E+08 | 1.89E+08 | 1.76E+08 | TRUE |
| 37223678 | 38765074 | 22309175 | 26132828 | 38143947 | 41131996 | 46398280 | 43326075 | TRUE |
| 7780195  | 8596247  | 5373421  | 5931970  | 8277290  | 8331178  | 9883648  | 9735812  | TRUE |
| 62743.4  | 47472.5  | 42567.6  | 48721.5  | 63507.6  | 49800.4  | 63955.4  | 52552.9  | TRUE |
| 716540.4 | 2627811  | 878840.6 | 1637894  | 2524499  | 247308.7 | 217922.4 | 324751.2 | TRUE |
| 93618.5  | 353399.9 | 251385   | 255826.7 | 360936.9 | 61006    | 44400.6  | 51005.8  | TRUE |
| 2947322  | 11211731 | 2407854  | 5338906  | 8691267  | 764912.5 | 606502.6 | 992538.6 | TRUE |
| 749516   | 2770880  | 568099.2 | 1330641  | 2071935  | 201891   | 149774.4 | 241344.9 | TRUE |



|          |          |          |          |          |          |          |          |      |
|----------|----------|----------|----------|----------|----------|----------|----------|------|
| 54084.8  | 127143.8 | 55467.6  | 87705.1  | 118512.4 | 38576.1  | 32822.1  | 36865.4  | TRUE |
| 106567.9 | 121592.8 | 70471.3  | 53367.5  | 81870.5  | 107299.1 | 123067.3 | 100087.6 | TRUE |
| 94275.1  | 85107.5  | 76252.7  | 97153.9  | 97837.6  | 76969.2  | 86833.4  | 104940.3 | TRUE |
| 291632.2 | 224448   | 328496.3 | 274228.7 | 348139.4 | 331098.1 | 254389.8 | 313497.1 | TRUE |
| 198575.2 | 144232.8 | 203675.1 | 178769.7 | 240001.9 | 197340.3 | 155125.7 | 243132.4 | TRUE |
| 424417   | 366528.8 | 406985   | 341511.2 | 581982.3 | 443869.7 | 375294.9 | 558412.5 | TRUE |
| 145077.1 | 133473.8 | 151220.7 | 113575.8 | 176718.6 | 155779.4 | 139153.7 | 138803.6 | TRUE |
| 10986343 | 7010161  | 9674986  | 6929360  | 10072173 | 9286630  | 5759788  | 10089107 | TRUE |
| 85751    | 55730.9  | 70733.5  | 54988.4  | 69681.3  | 63188.4  | 52103.1  | 81943.7  | TRUE |
| 416155.7 | 296035.1 | 384735.3 | 293886.7 | 353367.9 | 389023.7 | 309570.3 | 359390.1 | TRUE |
| 95679.8  | 135596.9 | 182570.6 | 122347.4 | 128135.8 | 125645.7 | 92114.8  | 141666.4 | TRUE |
| 74392.8  | 75701.4  | 113555.9 | 94360.1  | 120731.1 | 91591.7  | 72355.6  | 99371.9  | TRUE |
| 11279729 | 6985501  | 14800182 | 11565767 | 15974546 | 15766368 | 8870756  | 16347627 | TRUE |
| 199511.8 | 201867.5 | 229691   | 158750.8 | 208407.3 | 252548.1 | 243573.6 | 187094.8 | TRUE |
| 61005.1  | 47605.2  | 78598.9  | 63379.5  | 91804.1  | 60365.8  | 51825.3  | 86866.8  | TRUE |
| 92582.7  | 61237.9  | 103093.9 | 98930.6  | 99242.6  | 99266.5  | 49824.8  | 113315   | TRUE |
| 67965.7  | 55418.9  | 93488.1  | 63088    | 114881.3 | 100347.7 | 65368.9  | 109428.3 | TRUE |
| 42899.1  | 38669.5  | 50943.4  | 38760.1  | 54145.7  | 55851.4  | 30675.3  | 54960.4  | TRUE |
| 7343.4   | 6495.8   | 50666.3  | 2598.7   | 20517    | 20651.2  | 6320     | 10173.9  | TRUE |
| 12949.2  | 3824.9   | 16552.6  | 8579.7   | 8757.3   | 15417.9  | 7198.3   | 10276.9  | TRUE |
| 28071.1  | 23793.3  | 30524.9  | 26534.3  | 37187.4  | 25521.8  | 10359.6  | 34179.8  | TRUE |
| 29297    | 22644.8  | 23293.2  | 24163.3  | 37881.8  | 38227.5  | 7149.7   | 38171.7  | TRUE |
| 36819.9  | 29901.7  | 43201.5  | 37626.2  | 43222.3  | 42632.3  | 32837.7  | 35690.5  | TRUE |
| 52388.7  | 37468.9  | 49298.1  | 52739.7  | 55086.8  | 64569.9  | 36167.3  | 45937.1  | TRUE |
| 94733.2  | 124023.8 | 109813.4 | 175862.5 | 203903.8 | 78092    | 74510    | 87321    | TRUE |
| 450226.4 | 967013.8 | 1133018  | 1424516  | 2419314  | 262854.5 | 100604   | 252729.2 | TRUE |
| 61889.7  | 118470.5 | 76708.3  | 115729.6 | 138806.9 | 29013    | 59228.2  | 47614.6  | TRUE |
| 195058.8 | 133261.2 | 153915.1 | 233619.3 | 302981   | 340999.6 | 181830.6 | 297567   | TRUE |
| 29979.4  | 61535.8  | 46259.6  | 46211.7  | 82990.1  | 27070.7  | 8135.1   | 39687.3  | TRUE |
| 52978.8  | 48726.1  | 45143.9  | 66196.6  | 79484.2  | 28244    | 39220.2  | 34798.8  | TRUE |
| 25251.8  | 47887    | 33501.3  | 56289.6  | 66945.3  | 31006.8  | 14076.7  | 37095.5  | TRUE |
| 433058   | 655043.2 | 801677.4 | 313690.4 | 443020.1 | 450712.2 | 527005.6 | 424211.2 | TRUE |
| 705465.3 | 838672.4 | 626723.8 | 661666.6 | 738574.8 | 740445.3 | 909403.8 | 768039.5 | TRUE |
| 164045.4 | 185332.2 | 118633.1 | 175593.5 | 190991.1 | 207369.7 | 193345.8 | 200480.7 | TRUE |
| 130583.8 | 127063   | 125217.5 | 149803.5 | 136084.5 | 116123.1 | 125804.9 | 125708.1 | TRUE |
| 1475482  | 1622139  | 948136.1 | 878087.1 | 1676518  | 1161351  | 1816730  | 1502352  | TRUE |
| 132250.5 | 153259   | 116899.6 | 108767.1 | 160614   | 134923.7 | 172535.8 | 131796.9 | TRUE |
| 23658.6  | 34959.8  | 26412.7  | 10803.4  | 30522.6  | 27508.2  | 44232.4  | 12766.4  | TRUE |
| 19070.6  | 27558.9  | 30916.8  | 40046.8  | 29791.8  | 29493.1  | 28743.2  | 30142.8  | TRUE |
| 139150.4 | 151185.8 | 138026   | 148311.8 | 184043   | 162015.4 | 176776.2 | 138716.3 | TRUE |
| 24850.4  | 30467.9  | 31383.6  | 33299.8  | 35580.2  | 26175.9  | 30827.1  | 27434.9  | TRUE |
| 41709.2  | 73293.3  | 28530.2  | 44208.7  | 55854.1  | 20360.9  | 20088.8  | 13056.8  | TRUE |
| 114203.8 | 351767.6 | 169786.2 | 166737.2 | 382063.4 | 16243.2  | 38792    | 46771.7  | TRUE |

|          |          |          |          |          |          |          |          |      |
|----------|----------|----------|----------|----------|----------|----------|----------|------|
| 17432.3  | 22953.9  | 20438    | 36433.7  | 25649.5  | 46582.3  | 28434.7  | 10865.3  | TRUE |
| 57470.6  | 57043.2  | 49743.1  | 44374.3  | 56003.4  | 49970.3  | 52426.7  | 62103.6  | TRUE |
| 81311.5  | 52642.6  | 73653.3  | 71962.5  | 80591.8  | 72747.7  | 70668.4  | 75580.8  | TRUE |
| 26391.7  | 23957.1  | 27826    | 27434    | 37473.9  | 33053.9  | 25792.6  | 43124.7  | TRUE |
| 359753.6 | 186048.8 | 364764.3 | 461377.5 | 448502.1 | 405598.5 | 282293.5 | 461096.2 | TRUE |
| 85722    | 75841.2  | 117775   | 113058.2 | 134996.5 | 103433   | 69581    | 118271.1 | TRUE |
| 336145.5 | 257488.3 | 321570.2 | 363431.8 | 412101.5 | 365662.1 | 257287.7 | 380405.4 | TRUE |
| 1130872  | 3385272  | 3553694  | 4978425  | 6354687  | 505381.4 | 274243.5 | 560446.1 | TRUE |
| 269730.3 | 233509.7 | 285722.9 | 369186.2 | 333964.7 | 302734.2 | 235231.1 | 291643.3 | TRUE |
| 55774.7  | 160318.9 | 208369.5 | 263185.7 | 350174.3 | 38931    | 22604.5  | 42623.7  | TRUE |
| 81587.6  | 73572    | 99423.9  | 121673.6 | 118678.9 | 97258.9  | 67304.6  | 113728.5 | TRUE |
| 51260.1  | 35667    | 66809.9  | 57118.6  | 47990.6  | 49432    | 38716.4  | 50610.4  | TRUE |
| 42702    | 60163.4  | 70131.4  | 53566.9  | 52362.9  | 40840.1  | 41377.9  | 42369.8  | TRUE |
| 164957.8 | 57224.2  | 113562.4 | 110332.7 | 116178.1 | 119844.7 | 105644.4 | 138508.1 | TRUE |
| 68996    | 50249    | 51877.2  | 69604.8  | 61821.7  | 66338    | 50569    | 72000.3  | TRUE |
| 116534.8 | 84862.6  | 80876    | 119662.5 | 118158.7 | 122992.7 | 129390.8 | 131682.7 | TRUE |
| 323501.8 | 205563.1 | 201543.8 | 335321   | 295007.4 | 321139.8 | 283037.6 | 421648.7 | TRUE |
| 132866.1 | 77077.4  | 89774    | 131253   | 133298.5 | 142942.5 | 139185.3 | 148952.2 | TRUE |
| 45908.3  | 36179.8  | 34559.2  | 33713.7  | 28496.7  | 36472    | 31203.6  | 43331.6  | TRUE |
| 123705.7 | 69185.5  | 83638.9  | 115276.9 | 144755.6 | 116706.8 | 114290.7 | 170030.3 | TRUE |
| 23518    | 7927.9   | 13424.4  | 22309    | 14901.6  | 15492.1  | 23975.1  | 21681    | TRUE |

|          |          |          |          |          |          |          |          |      |
|----------|----------|----------|----------|----------|----------|----------|----------|------|
| 212220.8 | 912020.9 | 306093.6 | 423555.7 | 617366.5 | 111929.2 | 119687.7 | 126862.6 | TRUE |
| 65519.9  | 276303.3 | 128296.5 | 126059.2 | 198846.8 | 50771.8  | 46061.8  | 45040.2  | TRUE |
| 128018.7 | 91721.3  | 147170.1 | 129717.7 | 107586.2 | 139527.1 | 122322.8 | 134314.1 | TRUE |
| 99754.4  | 78883.6  | 93118.9  | 125644.8 | 93938.6  | 154821.9 | 108032.2 | 157223.3 | TRUE |
| 120908.5 | 140055.2 | 133953.9 | 107593.1 | 125964.3 | 177000.2 | 167341.8 | 153692.4 | TRUE |
| 143856.9 | 156074.4 | 116060.9 | 142571.6 | 138965   | 182514.1 | 170006.8 | 171243.6 | TRUE |
| 149699.3 | 144607.1 | 99873.3  | 162546.2 | 115146   | 147872.7 | 173292.7 | 161305   | TRUE |
| 176142.9 | 185838.8 | 174214.4 | 175769.5 | 139756.7 | 226615.6 | 252575.4 | 261070.7 | TRUE |
| 562563.9 | 435275.8 | 639011.4 | 835911   | 772239.5 | 686011.8 | 490662.4 | 767844.9 | TRUE |

|          |          |          |          |          |          |          |          |      |
|----------|----------|----------|----------|----------|----------|----------|----------|------|
| 87047.2  | 50259.3  | 55947.1  | 97807.1  | 95305.5  | 85926.4  | 76458.3  | 84448    | TRUE |
| 430963.6 | 460283.5 | 425523.7 | 568117.1 | 522727.1 | 434938.3 | 461887.1 | 473483.9 | TRUE |
| 696196.4 | 624254.6 | 725563.3 | 778684.9 | 810848.2 | 724522.2 | 621964.9 | 769430.6 | TRUE |
| 187060.3 | 159380.2 | 193179.1 | 184493.8 | 203070.2 | 182446.4 | 165529.7 | 216678.4 | TRUE |
| 796282.9 | 578047.7 | 782387.9 | 908523.4 | 1030616  | 854288.8 | 585416.8 | 946732.9 | TRUE |
| 135356.5 | 145170.3 | 139290.4 | 165925.9 | 150591.4 | 137195.1 | 132628.1 | 160155.6 | TRUE |
| 99072.4  | 134070   | 152131.3 | 186595.4 | 212566.2 | 79506.5  | 85070.8  | 105305.3 | TRUE |
| 161224.6 | 442398.1 | 365764.8 | 469717.9 | 681886.5 | 50852    | 33069.9  | 56522.7  | TRUE |
| 183158   | 129760.6 | 271162.5 | 277042.4 | 272947.5 | 253608.6 | 186005.6 | 264900.3 | TRUE |
| 71173.3  | 93189.2  | 98644.2  | 116712.1 | 157485.1 | 49317.2  | 60905.2  | 65744.2  | TRUE |
| 59079.6  | 92473.4  | 121602.2 | 172718.7 | 171770   | 52431.1  | 48162.4  | 48686    | TRUE |
| 67295.2  | 103620.5 | 108098.8 | 156717   | 172416.8 | 62500.5  | 47105.9  | 67215.6  | TRUE |
| 56200.4  | 85247.1  | 171564   | 69621.1  | 78847.2  | 76819.5  | 59331.3  | 65140.1  | TRUE |
| 246142.5 | 162357.9 | 181882.1 | 264291.3 | 245809.2 | 226864.6 | 228353.7 | 356737.6 | TRUE |
| 74210.1  | 67948.1  | 51643.3  | 83607.2  | 77093.4  | 84513.8  | 89564.1  | 101481   | TRUE |
| 123448.2 | 78067.8  | 81356.6  | 121232   | 113310.8 | 119180.2 | 105371.1 | 148747.8 | TRUE |
| 442565.7 | 230102.1 | 305267   | 421287.5 | 436042.5 | 458713.1 | 358056.4 | 598926.9 | TRUE |
| 43656.9  | 40737.9  | 24915.7  | 55495.2  | 28778.1  | 50049.2  | 26986.1  | 50057    | TRUE |
| 80898.9  | 54780.1  | 78295.1  | 97888.7  | 98449.2  | 88318.6  | 70319.9  | 106281.8 | TRUE |

|          |          |          |          |          |          |          |          |      |
|----------|----------|----------|----------|----------|----------|----------|----------|------|
| 340322.6 | 1707308  | 392764.4 | 483344.1 | 1061304  | 79881    | 77225.9  | 119322.1 | TRUE |
| 150801.1 | 181298.5 | 132072.5 | 186939.5 | 200335.5 | 312498.1 | 228314.3 | 173286.9 | TRUE |
| 42311.4  | 26705.5  | 11347.3  | 13408.6  | 20224.1  | 31606.7  | 23413.3  | 34793.4  | TRUE |
| 110497.1 | 194899.3 | 139346.9 | 124300.4 | 181012.5 | 101491.2 | 79641.4  | 75013.1  | TRUE |
| 128751.8 | 699186.3 | 293487.1 | 427877.5 | 744110   | 66586.9  | 45372.4  | 53335    | TRUE |
| 20336    | 34769.8  | 10552.4  | 26789.3  | 30779.8  | 8402     | 27927.1  | 23436.5  | TRUE |
| 75334.9  | 104985.8 | 129390.8 | 106494.7 | 114648.8 | 105524   | 68476.3  | 88535.7  | TRUE |
| 134400.5 | 128603.6 | 122289.1 | 120558.4 | 117872.4 | 167826.7 | 146561.1 | 150834.1 | TRUE |
| 131713.1 | 130458.1 | 105424.7 | 143666.1 | 132747.9 | 164668.7 | 157931.1 | 153733.3 | TRUE |
| 101239.4 | 132153.1 | 82497.5  | 193374   | 110420.6 | 132094.7 | 144294.7 | 99742    | TRUE |
| 931734.9 | 929402.9 | 559546.4 | 677051.4 | 752874.6 | 1200359  | 1170915  | 1268453  | TRUE |
| 27222.9  | 58700.8  | 10992.4  | 30866.6  | 37913.4  | 12362    | 36236.1  | 31749.4  | TRUE |
| 65561.3  | 51853.9  | 48894.8  | 54618.2  | 70222    | 57196.5  | 40938.7  | 63753.8  | TRUE |
| 747268.1 | 623642.2 | 653832.5 | 680134.8 | 877510   | 648365.9 | 621933.2 | 803558.9 | TRUE |
| 7400938  | 4507215  | 5609957  | 7567594  | 9865991  | 5267329  | 5380062  | 9039863  | TRUE |
| 7399999  | 4724983  | 6269754  | 8846005  | 10496899 | 5823829  | 5540144  | 8904188  | TRUE |
| 2063308  | 1584517  | 1846463  | 2549343  | 3016300  | 1766881  | 1728453  | 2669066  | TRUE |
| 26615588 | 17940714 | 19517904 | 29915048 | 36509959 | 22898106 | 20939817 | 36904355 | TRUE |
| 17353571 | 11926798 | 12893820 | 18332835 | 24110235 | 14584731 | 13864749 | 24842463 | TRUE |
| 31511021 | 21401972 | 25077814 | 34565556 | 44528515 | 24492723 | 24912934 | 49638158 | TRUE |
| 1622229  | 1098861  | 1382291  | 2101010  | 2455311  | 1603150  | 1407639  | 2451592  | TRUE |
| 3575285  | 2574849  | 2725589  | 4006501  | 4910561  | 3092044  | 2801607  | 4811347  | TRUE |
| 1316631  | 1065384  | 1113829  | 1476342  | 1838085  | 1250845  | 1170120  | 1876223  | TRUE |
| 5989382  | 4061228  | 4838612  | 6881801  | 8658320  | 5110283  | 4446600  | 8726616  | TRUE |
| 2533105  | 1973688  | 2122572  | 2805974  | 3597132  | 2256615  | 1986430  | 3443189  | TRUE |
| 1004075  | 743559.4 | 765888.8 | 1116896  | 1247258  | 790902   | 786806.3 | 1264846  | TRUE |
| 1086747  | 978593.4 | 1018908  | 1276212  | 1535959  | 982594.3 | 1056836  | 1380297  | TRUE |
| 184491.8 | 195841.4 | 183508.3 | 243652.2 | 280471.5 | 186934.5 | 165235.5 | 285398.9 | TRUE |
| 228938.1 | 237694.1 | 212536.1 | 271286.2 | 310948.8 | 204319.6 | 248390.8 | 288031.4 | TRUE |
| 296212.6 | 238958.1 | 224619.7 | 320972.5 | 353599   | 249791.7 | 297158.1 | 367089.5 | TRUE |
| 133769   | 87067.3  | 98382.1  | 135732.6 | 169958.6 | 109750.7 | 95786    | 175732.6 | TRUE |
| 218035   | 162447.2 | 202118.6 | 226395.3 | 286030.7 | 197932.1 | 197967.5 | 263634.9 | TRUE |
| 97033.6  | 65137.5  | 75372.4  | 108027.7 | 135026.9 | 69178.8  | 71836.8  | 121269.6 | TRUE |
| 76108.7  | 73097    | 52334.6  | 90891.8  | 98691.1  | 75501.8  | 59686.7  | 102664.5 | TRUE |
| 111776.5 | 105119.8 | 97444    | 124527.2 | 145506.1 | 88618.6  | 112919.6 | 127786.4 | TRUE |
| 263543.1 | 200432.9 | 197516.7 | 296687.8 | 319835.2 | 180340.4 | 231592.1 | 338801.6 | TRUE |
| 325047   | 302137.5 | 307587.2 | 384521.8 | 384815.4 | 313426.5 | 349501.7 | 398078.7 | TRUE |
| 34008.3  | 31352.8  | 26910.5  | 45920.5  | 45849.8  | 33612.7  | 39399.9  | 34457    | TRUE |
| 494157.6 | 346421.4 | 409803.8 | 619331.2 | 642131.2 | 430785.9 | 428574.6 | 518135.2 | TRUE |
| 2331482  | 1735331  | 2076571  | 3100719  | 3137820  | 2156403  | 1935185  | 3338673  | TRUE |
| 6262215  | 4092204  | 4629090  | 7045064  | 8552568  | 5438963  | 5204321  | 9405138  | TRUE |
| 94520.9  | 66574.4  | 75531.7  | 82155.7  | 119315.7 | 78564.7  | 72893.1  | 105119.2 | TRUE |
| 732806.2 | 595510.6 | 665949.8 | 888473.4 | 1023055  | 655931.6 | 643019.4 | 1040685  | TRUE |
| 596295.9 | 502435.2 | 505994.4 | 697865.7 | 855583   | 561454   | 499158.1 | 801877.1 | TRUE |

|          |          |          |          |          |          |          |          |      |
|----------|----------|----------|----------|----------|----------|----------|----------|------|
| 275268.4 | 244220.5 | 238782.4 | 323141.1 | 374994.7 | 271846.1 | 252371.2 | 374332.8 | TRUE |
| 314707.3 | 254713   | 274727.6 | 385375.1 | 337834.8 | 290157.2 | 288566.7 | 377740.3 | TRUE |
| 195510.2 | 180629.1 | 159217.3 | 204039.6 | 245881.1 | 178299   | 169349.5 | 233377.9 | TRUE |
| 90139    | 240391.8 | 134681   | 253929.5 | 386890.9 | 42466.4  | 35620.9  | 51820    | TRUE |
| 216020.1 | 185428.6 | 170359.9 | 276840   | 292232.4 | 172100.1 | 149031.9 | 197942.3 | TRUE |
| 157518.4 | 152083.1 | 174282.4 | 184445.4 | 218831.3 | 124270.1 | 139366   | 191574.3 | TRUE |
| 62899    | 129656.3 | 117175.4 | 240518.9 | 302501.1 | 33377.5  | 27134.7  | 55844.5  | TRUE |
| 100350.9 | 201349.9 | 166246.3 | 330344.8 | 429255.3 | 83803    | 60380.8  | 63884.9  | TRUE |
| 34280.2  | 53256.4  | 27653.4  | 50910.1  | 69364.5  | 17774.4  | 19341.8  | 11630.6  | TRUE |
| 385380.3 | 861125.8 | 394810.7 | 1036726  | 1407761  | 133621.6 | 66039.5  | 209900.2 | TRUE |
| 227865.2 | 386317.7 | 240816.5 | 607062   | 735308.1 | 130549.8 | 95691.9  | 161366.4 | TRUE |
| 421429.2 | 331031.9 | 288893.1 | 588908   | 682170.3 | 352275   | 274885.4 | 566173.7 | TRUE |
| 48356.6  | 73854.5  | 61241.6  | 93422.3  | 128802.6 | 39078.2  | 37365    | 64996.1  | TRUE |
| 38767.8  | 68086.8  | 53559.3  | 96051    | 113293.4 | 20909.9  | 10073.5  | 35265.3  | TRUE |
| 54535.2  | 111156.7 | 61151.9  | 143513.6 | 204481   | 15467.5  | 11997.7  | 42752.3  | TRUE |
| 111741.9 | 152043.2 | 113587.8 | 200951.5 | 301370   | 79584.9  | 68157.9  | 87703.2  | TRUE |
| 107483   | 66053.1  | 71876.2  | 101498.5 | 99325.3  | 77373.2  | 83191.7  | 127927.2 | TRUE |
| 167206.2 | 103772.2 | 156367.1 | 192994.9 | 211558.4 | 165518   | 116490.2 | 221074   | TRUE |
| 8383420  | 10582970 | 6290759  | 6765929  | 7194653  | 9773183  | 11423061 | 8941460  | TRUE |
| 46479079 | 55100267 | 33526213 | 35610146 | 37599945 | 52864735 | 63281065 | 53260749 | TRUE |
| 369958   | 559352.4 | 889411.4 | 162906.5 | 289021.9 | 327354.5 | 407321.1 | 350437   | TRUE |
| 71359343 | 90907162 | 52444616 | 51685370 | 60390283 | 85732564 | 1.01E+08 | 83503092 | TRUE |
| 189435.2 | 251979.4 | 187174.5 | 148319.2 | 173946.1 | 212699.9 | 290299.9 | 232801.1 | TRUE |
| 17215801 | 21413070 | 11242799 | 12013739 | 14069978 | 19823099 | 23316299 | 20895085 | TRUE |
| 33773712 | 41247295 | 20217395 | 23565940 | 25925136 | 37315249 | 43192852 | 37802432 | TRUE |
| 2237920  | 2897407  | 1605549  | 1923332  | 2244664  | 2333380  | 3200139  | 2588724  | TRUE |
| 3455915  | 4557127  | 2877790  | 3405143  | 3070111  | 3587961  | 5117028  | 3891895  | TRUE |
| 1806468  | 2296157  | 1288814  | 1392378  | 1566708  | 2072153  | 2407341  | 2115465  | TRUE |
| 431776.8 | 595213.5 | 402910.2 | 470470.5 | 435836.7 | 495472.5 | 589294.4 | 527937.1 | TRUE |
| 1969072  | 2409023  | 1313946  | 1433373  | 1650477  | 2312248  | 2674624  | 2347542  | TRUE |
| 3100707  | 3775116  | 2107898  | 2357280  | 2434523  | 3300383  | 4027259  | 3534436  | TRUE |
| 234489.6 | 298928.1 | 176443.7 | 229816.3 | 208625.6 | 289990.8 | 311272.1 | 267498.4 | TRUE |
| 222874.8 | 301473.6 | 185215.2 | 230749.4 | 219444.1 | 303078.6 | 303001.5 | 311851.7 | TRUE |
| 30592    | 34919.2  | 15115.7  | 13651.1  | 28327.1  | 28115    | 40836    | 32468.6  | TRUE |
| 19619.4  | 20890.9  | 10610    | 5503.6   | 14302.9  | 23789.4  | 8530.5   | 8466.1   | TRUE |
| 283073.4 | 332287.5 | 202792.4 | 205326.6 | 230405.2 | 313631.7 | 346922.2 | 325739.9 | TRUE |
| 125911.7 | 161419.8 | 91505.1  | 113713.4 | 120440.5 | 134408.4 | 194106.4 | 171916.7 | TRUE |
| 56720.9  | 68320.5  | 37101    | 42653.1  | 46871.5  | 61259.8  | 79836.9  | 79115.9  | TRUE |
| 75818.6  | 68758.5  | 57653.2  | 50888.5  | 55950.5  | 109063   | 98321.6  | 84644.1  | TRUE |
| 299644.4 | 400378.5 | 195199.8 | 250477.2 | 260334.8 | 388305.2 | 422845.7 | 338796.3 | TRUE |
| 188654.5 | 201330.1 | 109615.7 | 142332   | 147741.2 | 231086.2 | 218488.5 | 226705.6 | TRUE |
| 170259.9 | 209908.6 | 111134.2 | 143691.9 | 142452.6 | 229879.6 | 215720.2 | 194379.2 | TRUE |
| 208258.5 | 247238.9 | 153911.1 | 164941   | 175169.3 | 235055.5 | 275567.1 | 226077.6 | TRUE |
| 142213.4 | 171594   | 98919.9  | 106926.2 | 116557.9 | 172152.8 | 182282.7 | 166971   | TRUE |
| 261934.1 | 345955.5 | 176947.2 | 179000.5 | 203517.8 | 320019.2 | 315660.8 | 288807.5 | TRUE |
| 392178.3 | 491331.1 | 317491.4 | 349596.7 | 319166.7 | 523309.3 | 548120.8 | 440247.1 | TRUE |
| 211715.6 | 250115.9 | 135380   | 170935.7 | 203091.4 | 221075.9 | 261482.2 | 245513.6 | TRUE |
| 351915.1 | 454308.6 | 204042.9 | 252621.2 | 292705.6 | 418010.4 | 482747.2 | 400686.4 | TRUE |
| 243567.6 | 356369   | 177844.2 | 189501.1 | 231077.5 | 334817   | 329912.6 | 299972.7 | TRUE |

|          |          |          |          |          |          |          |          |      |
|----------|----------|----------|----------|----------|----------|----------|----------|------|
| 336721.9 | 433103.1 | 271045.1 | 286518.5 | 297245.5 | 431712.4 | 506228.8 | 405990.7 | TRUE |
| 216160.6 | 234474.9 | 168031.2 | 178059.6 | 168299.6 | 264682.9 | 283660.2 | 266380.5 | TRUE |
| 464325.4 | 620313.6 | 304486.3 | 342478.8 | 384109.1 | 545943.3 | 659413   | 575219.8 | TRUE |
| 141226.1 | 182412.8 | 81781.5  | 109468.4 | 118368.4 | 197782.7 | 189864.9 | 154964.8 | TRUE |
| 169508.1 | 207050.1 | 114337.1 | 148466.8 | 133395.3 | 214416.5 | 239153.3 | 241387.2 | TRUE |
| 206854.7 | 244744.8 | 170160.8 | 148371.4 | 181654.7 | 231682.5 | 271747.7 | 248941.7 | TRUE |
| 148780   | 197884.5 | 108764.7 | 132559.7 | 117801.2 | 219085   | 215025.7 | 182412.2 | TRUE |
| 89508.5  | 91499.4  | 62061.8  | 59980.5  | 71490.9  | 90919.2  | 90665.4  | 91702.6  | TRUE |
| 132562.8 | 210576.1 | 118289   | 146354.6 | 148424.8 | 184748   | 228363.6 | 177922.2 | TRUE |
| 35049.3  | 38146.1  | 30853.6  | 25001.4  | 39126.1  | 36432.2  | 57890    | 49421    | TRUE |
| 25844.9  | 25901.1  | 12175.5  | 9659.5   | 19986.8  | 34712.7  | 27024.7  | 26963.6  | TRUE |
| 117088.5 | 486490.6 | 158136.2 | 249918.5 | 281174.1 | 63254.5  | 62306.9  | 52676.2  | TRUE |
| 151198.3 | 266618.2 | 132874   | 155848.2 | 203363.1 | 159210.1 | 153375.6 | 125944.7 | TRUE |
| 198324.3 | 254138.7 | 138957.1 | 148380.2 | 177484.1 | 257008.2 | 275127   | 212807.5 | TRUE |
| 55444    | 167627.7 | 70777.6  | 166436.7 | 174640.4 | 32951.1  | 49517.1  | 38958.6  | TRUE |
| 128783   | 222711.2 | 169039.7 | 194116   | 248260.3 | 117280.7 | 106337.4 | 87880.1  | TRUE |
| 1213457  | 5060727  | 952711.9 | 2140510  | 2567283  | 486343.7 | 261340.8 | 469497.8 | TRUE |
| 265069.4 | 834268   | 295674.1 | 410674.7 | 500402.1 | 190310.4 | 147116.8 | 138179.2 | TRUE |
| 203267.1 | 852932.8 | 195424.8 | 418266   | 467715.1 | 92715.1  | 75751.8  | 101791.8 | TRUE |

|          |         |          |          |          |          |          |          |      |
|----------|---------|----------|----------|----------|----------|----------|----------|------|
| 79751.8  | 56951.8 | 77041.9  | 104218.4 | 105116   | 96160.4  | 66959.9  | 84837.7  | TRUE |
| 2060703  | 1332520 | 2114739  | 2326772  | 2418967  | 1930535  | 1528211  | 2365119  | TRUE |
| 129609.3 | 84206.8 | 157075.4 | 160539.5 | 141525.7 | 155920.2 | 118300.5 | 162884.8 | TRUE |
| 97943.6  | 69087.9 | 103521.8 | 109821.3 | 112276.7 | 94575.2  | 94061.6  | 90746    | TRUE |

|          |          |          |          |          |          |          |          |      |
|----------|----------|----------|----------|----------|----------|----------|----------|------|
| 302849   | 210823.6 | 301230.5 | 372264.2 | 321010   | 335020   | 237417.4 | 294503.1 | TRUE |
| 5916665  | 3531055  | 6074180  | 7054553  | 6492542  | 6368531  | 4793318  | 7001196  | TRUE |
| 460765.9 | 303927.6 | 478533.8 | 556346.2 | 523450.7 | 496073.5 | 317010.2 | 520438.9 | TRUE |
| 248173.8 | 177562.4 | 278491.1 | 311050.2 | 303453.3 | 295518.7 | 208928.5 | 316033.7 | TRUE |
| 157211.6 | 97574.1  | 153875.9 | 179042.1 | 182134.6 | 151437.9 | 113721.7 | 158910.5 | TRUE |
| 65521.6  | 57115.8  | 65322.4  | 79751.8  | 81645.7  | 75821.5  | 77096.7  | 81298.3  | TRUE |
| 42698    | 24526.3  | 33621.9  | 48586.3  | 56248.9  | 28727.7  | 29600.3  | 39813.3  | TRUE |
| 59446.2  | 59564.2  | 56054.3  | 69766.5  | 67046.9  | 63218.4  | 48923.4  | 58527.2  | TRUE |
| 20146.6  | 19786.3  | 20575.7  | 32129.1  | 34545.5  | 27939.9  | 25258.4  | 27327.4  | TRUE |
| 99395.1  | 96617.9  | 110010.5 | 117108   | 123018.5 | 93794.7  | 82986.9  | 82764    | TRUE |
| 990410.9 | 951126.3 | 918854.2 | 1186647  | 1085629  | 922446.7 | 903719.3 | 1098233  | TRUE |
| 106999.4 | 180698.1 | 127089.3 | 162697.3 | 201275.5 | 58178    | 51296.9  | 63181.8  | TRUE |

|          |          |          |          |          |          |          |          |      |
|----------|----------|----------|----------|----------|----------|----------|----------|------|
| 400141.9 | 946962.7 | 1202328  | 1944689  | 2189656  | 263259.6 | 183788.8 | 281565   | TRUE |
| 231449.2 | 178692.4 | 231742.7 | 227586.1 | 230813.3 | 337279.1 | 226190.7 | 294633   | TRUE |
| 27024.3  | 26829.5  | 22750.8  | 23313.3  | 25975.7  | 27500.4  | 12935.8  | 24053.3  | TRUE |
| 29204.2  | 22115.7  | 25720.6  | 33100    | 19030.9  | 30052.5  | 12319.7  | 29206.7  | TRUE |
| 28307.3  | 25558.8  | 25013.9  | 36740.4  | 37736.2  | 30295.7  | 30242.9  | 55978.6  | TRUE |
| 29879    | 23940.4  | 28181.6  | 31945.1  | 31398    | 39366.7  | 15177    | 38119.5  | TRUE |
| 38398.6  | 33065.8  | 39159    | 51548.5  | 41538.5  | 57574.6  | 40130.8  | 44241.5  | TRUE |
| 454443.8 | 110686.3 | 410838.3 | 413522.9 | 57095.9  | 742927.4 | 166808.9 | 108551.7 | TRUE |
| 39189.5  | 8167.2   | 50308.5  | 42471.1  | 17005.5  | 78316.5  | 14072.3  | 11946.1  | TRUE |
| 82545.4  | 23479.9  | 102896.9 | 32013.1  | 18082.8  | 163870.3 | 28923.4  | 8590.1   | TRUE |
| 8759.9   | 9489.9   | 24162.2  | 10331.3  | 6043     | 29741.3  | 13293.1  | 9160.8   | TRUE |
| 28148.9  | 8423.3   | 21956    | 22181.8  | 17310.7  | 46740.9  | 14892.8  | 24213.7  | TRUE |
| 28626.2  | 1675.6   | 34622.7  | 3548.3   | 4692.2   | 56209.7  | 7506.6   | 7209.9   | TRUE |
| 260236.2 | 38996    | 380581   | 98720.7  | 30192    | 666717.6 | 100681   | 85711.6  | TRUE |
| 43648.3  | 3674     | 51598.1  | 11905    | 2334     | 105796   | 8715.5   | 6863.1   | TRUE |
| 35882.3  | 39461    | 27229.5  | 50256.8  | 31803.9  | 45574.4  | 41543.3  | 41286.8  | TRUE |
| 25759.8  | 22051.3  | 34897.6  | 5119.6   | 20635.5  | 58661.1  | 40469    | 33762.1  | TRUE |



|          |          |          |          |          |          |          |          |      |
|----------|----------|----------|----------|----------|----------|----------|----------|------|
| 75753.4  | 104417.4 | 103095.9 | 154462   | 145719.1 | 52325.7  | 72407.7  | 70061.9  | TRUE |
| 31735.2  | 37938.6  | 30053.7  | 46704.8  | 39908.8  | 21939.8  | 35026    | 27395.4  | TRUE |
| 15689.8  | 8034.2   | 14645.5  | 11108.2  | 7428.1   | 8642.5   | 13512.5  | 9733     | TRUE |
| 20459.3  | 9112.3   | 13711    | 28229    | 9169.2   | 22043.8  | 10562.7  | 14779.9  | TRUE |
| 24981.5  | 8845.5   | 32515.5  | 35893.8  | 28328    | 17021.1  | 12433.9  | 20107.3  | TRUE |
| 29170.3  | 25245.3  | 20774.2  | 15225.5  | 25243.5  | 22433    | 25476.4  | 18928.1  | TRUE |
| 8045.6   | 26788.5  | 15411.2  | 9261.6   | 30634.1  | 4084.2   | 7230     | 7554.6   | TRUE |
| 776944.7 | 611732.4 | 813067.9 | 779689.3 | 836067.4 | 780481.8 | 659841.5 | 745922.3 | TRUE |
| 324822.4 | 332032.8 | 333436.2 | 351702   | 377202.6 | 311771.1 | 315711.7 | 377450.7 | TRUE |
| 479235.3 | 366888.5 | 440171.1 | 485859.2 | 646110.9 | 438711   | 414641.3 | 565893   | TRUE |
| 16508307 | 13277862 | 14226345 | 16672491 | 16247511 | 15176420 | 13643688 | 17295599 | TRUE |
| 9213462  | 7091346  | 8009034  | 9790044  | 10020538 | 8819299  | 7747365  | 9672793  | TRUE |
| 1118436  | 1054962  | 966961.6 | 1151289  | 1140502  | 966194   | 1000370  | 1163487  | TRUE |
| 1297117  | 1132344  | 1212564  | 1354567  | 1345193  | 1241569  | 1178762  | 1324466  | TRUE |
| 1024290  | 885838.2 | 887675.4 | 1080925  | 1061229  | 956859.6 | 851985.3 | 1073509  | TRUE |
| 911954.6 | 826543.3 | 827969.4 | 1154689  | 1035889  | 769789.5 | 885012.3 | 1009439  | TRUE |
| 1232838  | 1178668  | 1053153  | 1257866  | 1228661  | 1118621  | 1116952  | 1255594  | TRUE |
| 443504.5 | 380165.1 | 405623.7 | 458617.7 | 413874.7 | 407020.4 | 426649.3 | 425894.4 | TRUE |
| 519867.4 | 468531.7 | 478831.4 | 525395.7 | 499370.9 | 495150.3 | 464999   | 524980   | TRUE |
| 248372.7 | 243713.7 | 258700.3 | 314401.4 | 273367.9 | 246457.9 | 242339   | 251978.5 | TRUE |
| 176247.7 | 172144.1 | 150615.6 | 172507.5 | 146488.3 | 164479.7 | 154554.4 | 173975.2 | TRUE |
| 262459   | 305562.8 | 322929.2 | 255410.1 | 293799.5 | 253062.7 | 225988.1 | 304106.8 | TRUE |
| 28904.4  | 22512.3  | 14191.7  | 37119.5  | 15585.5  | 27398.2  | 8008     | 38457.3  | TRUE |
| 19203.4  | 18518.7  | 3836.5   | 22070.9  | 14488.1  | 21161.4  | 8870.7   | 29695.7  | TRUE |
| 7902     | 5124     | 4508.8   | 5942.6   | 7504.5   | 8109.6   | 9799.2   | 10501.4  | TRUE |
| 137885.3 | 102434   | 120336.9 | 147825.2 | 163606.3 | 128649.4 | 113467.5 | 148393.9 | TRUE |
| 58062.7  | 60330.1  | 63602.1  | 66399    | 62717.4  | 56620.4  | 55581.7  | 63039.1  | TRUE |
| 237103   | 169459   | 175707.4 | 239016.2 | 201905.2 | 267322.5 | 226869   | 289000.8 | TRUE |
| 90464.1  | 155552.4 | 106592.8 | 149274.2 | 159764.7 | 98858.3  | 84315.2  | 103115.8 | TRUE |
| 63142.2  | 95263.9  | 82583.8  | 124372.6 | 154309.2 | 39757.2  | 54513    | 50862.7  | TRUE |
| 90600.7  | 137976   | 140249.5 | 193390.8 | 215682.9 | 88083.4  | 62980.3  | 61772.2  | TRUE |
| 287517.3 | 772709.2 | 421675.8 | 933409.1 | 1010928  | 124427.3 | 76536.9  | 132741.2 | TRUE |
| 302758.1 | 586615.2 | 328454   | 636180.6 | 658565.3 | 197766.5 | 159060.3 | 207863.3 | TRUE |
| 178034.9 | 131869.1 | 134782.8 | 195140.6 | 171175.7 | 179987   | 177189.1 | 197184.6 | TRUE |

|          |          |          |          |          |          |          |          |      |
|----------|----------|----------|----------|----------|----------|----------|----------|------|
| 6765683  | 6538949  | 4768324  | 4904878  | 5132350  | 5929796  | 6089146  | 6238558  | TRUE |
| 4940154  | 4957205  | 3181673  | 3391741  | 3581614  | 4027259  | 4304225  | 4424583  | TRUE |
| 487201.1 | 468930.3 | 377655.5 | 395045.7 | 397733.5 | 434790.2 | 449868   | 476956   | TRUE |
| 78548.4  | 123271.3 | 83685    | 66794.5  | 110859.2 | 67880.9  | 113965   | 113072.9 | TRUE |
| 90287.4  | 99388.6  | 91749.2  | 57841.5  | 104044.4 | 81902.8  | 112670.4 | 104096.3 | TRUE |
| 50835.9  | 58898.2  | 46579.8  | 47863.2  | 59795    | 59888.5  | 50805.2  | 65624.7  | TRUE |
| 53279.4  | 53503.8  | 45584    | 57140.5  | 51506.6  | 53855.7  | 50482.9  | 55834.7  | TRUE |
| 57783.4  | 45694    | 45623.1  | 49373.1  | 44171.3  | 57996.2  | 52948.9  | 72117.1  | TRUE |
| 1577835  | 1614811  | 1304688  | 1287222  | 1569170  | 1672374  | 1635981  | 1530669  | TRUE |
| 462000.9 | 486041.7 | 392720.3 | 438354.8 | 488310.6 | 517107   | 509935.9 | 503871.1 | TRUE |
| 279580.6 | 334001.2 | 279093.9 | 260770.3 | 298119.2 | 315844.9 | 317915.9 | 299488.4 | TRUE |
| 645335.2 | 935140.4 | 515709.3 | 575311.6 | 757300.9 | 639824.6 | 996501   | 607914.9 | TRUE |
| 13890539 | 14123099 | 10777913 | 11742595 | 13214709 | 15582320 | 15116790 | 16095574 | TRUE |
| 15378353 | 16433154 | 11882720 | 13432115 | 14958906 | 19200580 | 17456442 | 18209369 | TRUE |
| 396262   | 397202.4 | 359832.5 | 394926.1 | 401223.5 | 487896   | 417261.2 | 430059.2 | TRUE |
| 1236703  | 1238996  | 1014106  | 1108809  | 1152142  | 1333722  | 1304276  | 1397640  | TRUE |
| 616385.6 | 647966.4 | 585057.8 | 625848.3 | 599055.8 | 670250   | 756568.3 | 684123.6 | TRUE |
| 262990.3 | 265676.9 | 238523.9 | 273842.9 | 251587.2 | 321160.9 | 316180   | 291931.7 | TRUE |
| 6966.5   | 4747.1   | 5142.8   | 9838.2   | 7136.3   | 6769     | 8416.4   | 7108.7   | TRUE |
| 80887.3  | 60851.8  | 49867.6  | 74473.6  | 75785.2  | 96354.9  | 114024.7 | 98051    | TRUE |
| 153863.6 | 136205.2 | 114592.5 | 152096   | 131567   | 208474.6 | 175325.1 | 199438.5 | TRUE |
| 21177.7  | 24065.4  | 20661.8  | 23242.4  | 25516.5  | 37991.1  | 31680.6  | 28372.4  | TRUE |
| 92350.5  | 80645.5  | 76547.1  | 77058.2  | 68466.8  | 92760.8  | 107990.2 | 104844.2 | TRUE |
| 120764.8 | 96833.4  | 117995.5 | 103835.6 | 106958   | 146933.2 | 130460.2 | 125915.7 | TRUE |
| 17582831 | 12264366 | 13102261 | 16162347 | 15628213 | 14777327 | 13764352 | 17334494 | TRUE |
| 2332183  | 1758753  | 1890795  | 2327826  | 2238562  | 2078914  | 1921509  | 2323303  | TRUE |
| 71626.7  | 56577.4  | 64981.9  | 67167.9  | 72618.3  | 70158.5  | 64043.2  | 78672.2  | TRUE |
| 2501825  | 1870613  | 2730356  | 3392923  | 3081822  | 3220006  | 2836211  | 3604515  | TRUE |
| 278587.6 | 705775.5 | 445650.2 | 853647   | 995392.9 | 137906.5 | 93734.8  | 157076.3 | TRUE |
| 30319239 | 26778738 | 24501637 | 24615712 | 28518235 | 32306679 | 29992084 | 30578780 | TRUE |
| 6447763  | 6017824  | 5057231  | 4835222  | 5845956  | 6500082  | 6160492  | 6613260  | TRUE |
| 3010832  | 2714634  | 2503556  | 2551595  | 2853728  | 3198191  | 2831577  | 3000247  | TRUE |
| 57625.4  | 42631.5  | 56469.3  | 31103.3  | 31227.2  | 42606.3  | 54445.3  | 25876.5  | TRUE |
| 102996.3 | 85034.9  | 86347.1  | 134560.7 | 115072.5 | 79327.6  | 96855.1  | 108792.5 | TRUE |
| 414931.8 | 450079.4 | 393452.1 | 403290.8 | 408505.7 | 422624.4 | 443608.2 | 445190.5 | TRUE |
| 40820.1  | 35186.2  | 28446.6  | 39054.5  | 46926.7  | 18618.6  | 29052.8  | 42986.7  | TRUE |
| 2245886  | 1662610  | 2069455  | 2475758  | 2376507  | 2086623  | 1886052  | 2255007  | TRUE |
| 87580.8  | 61145.9  | 76113    | 75191.5  | 78728.1  | 73321.8  | 68385.3  | 95255.8  | TRUE |
| 198881.2 | 163473.3 | 146182.5 | 176632.7 | 194545.4 | 161196.8 | 164787.9 | 201293.4 | TRUE |
| 114601   | 102657.8 | 141462.2 | 153178.9 | 168629.8 | 156344.2 | 131412.7 | 134506   | TRUE |
| 433261   | 439148.3 | 355486.9 | 401871   | 446073.1 | 454043.1 | 434837.2 | 388587.4 | TRUE |
| 128362   | 152909.6 | 113531.3 | 117003.9 | 125107.9 | 127288.7 | 131657.1 | 130381.9 | TRUE |
| 126531.7 | 119239.1 | 108741.9 | 115023.2 | 121893.8 | 118502.5 | 112937.2 | 105044.4 | TRUE |

|          |          |          |          |          |          |          |          |      |
|----------|----------|----------|----------|----------|----------|----------|----------|------|
| 212691   | 237793.4 | 179974   | 166487.7 | 200098.7 | 254575.4 | 207029.3 | 237841.3 | TRUE |
| 88582.5  | 77171.4  | 92030.5  | 75955.5  | 94247.3  | 89301.3  | 85198.5  | 82668.7  | TRUE |
| 124178.5 | 116020.9 | 88117.5  | 90466.1  | 102542.2 | 126843.8 | 136778   | 129058.9 | TRUE |
| 30378.6  | 57528.9  | 25950    | 76622.1  | 37693.4  | 23807    | 33304.3  | 34961.1  | TRUE |
| 521090.6 | 451247.5 | 532560.8 | 573278.1 | 561062.2 | 519532.6 | 460598.1 | 520274.9 | TRUE |
| 557910.1 | 433018   | 431196.1 | 571366.3 | 557627.8 | 500600.1 | 431974   | 645354.4 | TRUE |
| 472653.4 | 362106.4 | 471378.6 | 603517.5 | 598274.9 | 574687.2 | 491933.4 | 598078   | TRUE |
| 88377    | 67491.1  | 84917.7  | 107008.3 | 85989.9  | 104368.4 | 87973.7  | 98892.6  | TRUE |
| 210229.6 | 171776.5 | 157180.2 | 199455.7 | 167005.2 | 223935.8 | 194353.9 | 225662.8 | TRUE |
| 31065.6  | 63630.8  | 48097.3  | 95572.3  | 114296.1 | 23915.2  | 12528.4  | 30785.6  | TRUE |
| 97232    | 135225.8 | 108134.8 | 197286   | 222936.3 | 90768.6  | 70996.4  | 96659.5  | TRUE |
| 48590.5  | 26301.7  | 67570.5  | 43477.9  | 45214.7  | 27375    | 34632.3  | 48250.8  | TRUE |
| 40911.8  | 23342.9  | 20232.3  | 28446.3  | 26591.9  | 38381.6  | 37412    | 47632.7  | TRUE |
| 233477.6 | 204958.6 | 204832   | 192106.3 | 237156.8 | 229413.2 | 227793   | 247765.6 | TRUE |
| 276400.2 | 212171.1 | 262641.9 | 275609   | 298561.7 | 266686.1 | 253708.1 | 317383.7 | TRUE |
| 306732   | 263708.1 | 212051   | 256056.8 | 265691.6 | 315010.7 | 269157.1 | 262381.3 | TRUE |
| 405883.2 | 419712.2 | 302494.6 | 355397.6 | 384081   | 403435.4 | 434703   | 437402.2 | TRUE |
| 307178.9 | 290588.1 | 219649.1 | 225370.7 | 302393.4 | 318261.4 | 283104.2 | 345236.1 | TRUE |
| 273797.2 | 628101.5 | 263743.9 | 453109.4 | 550340.5 | 148724   | 183705.3 | 190802.7 | TRUE |
| 151390.7 | 470644.6 | 126189.6 | 287463.4 | 417823.2 | 46016.8  | 29998.9  | 46381.3  | TRUE |
| 1162401  | 1175582  | 561231.3 | 687728.4 | 698812.9 | 787067.9 | 995612.9 | 930633.8 | TRUE |
| 304106.5 | 236635.5 | 264512.5 | 347016   | 285113.2 | 485850.7 | 336298.4 | 417999   | TRUE |
| 398905.7 | 351727.6 | 310433.3 | 1034577  | 497657.6 | 386751.2 | 483029.3 | 545175.3 | TRUE |
| 51336.9  | 45650.8  | 45601.5  | 80298.5  | 55368    | 46141.5  | 51686.4  | 52853.8  | TRUE |
| 1209930  | 1050484  | 1184888  | 1300294  | 795704.3 | 2625978  | 1013272  | 2456419  | TRUE |
| 236948.4 | 159124.2 | 146842.4 | 185322.7 | 148702.4 | 325075.3 | 178102.3 | 369201   | TRUE |
| 30747.6  | 32286.8  | 28054.2  | 26560.2  | 26393.4  | 21445.1  | 28631.5  | 20896.7  | TRUE |
| 27571.6  | 89554.2  | 39577.3  | 70655.3  | 32494.3  | 20883.6  | 40923.6  | 30051.2  | TRUE |
| 454572.5 | 442099.5 | 391673.7 | 322571.6 | 554072   | 350468   | 339613.5 | 448385   | TRUE |
| 204126.8 | 201176.3 | 174587.6 | 145367.1 | 266514.2 | 169799.2 | 168265.8 | 192862.4 | TRUE |
| 8916616  | 7229161  | 6605738  | 4992328  | 10347206 | 7249152  | 6892948  | 10136847 | TRUE |
| 3519051  | 3035708  | 2493547  | 2077295  | 3957890  | 2834475  | 2610052  | 3866962  | TRUE |
| 1380699  | 1110294  | 999033.1 | 791591.2 | 1487334  | 1100736  | 1067269  | 1633472  | TRUE |
| 708362   | 740795.4 | 564968.2 | 473856.1 | 864680.2 | 641666.6 | 636471.5 | 844614.7 | TRUE |
| 143032.6 | 120199.1 | 171787.4 | 134995   | 212719.5 | 175202.1 | 153587.6 | 217400.5 | TRUE |
| 285460.6 | 277354.1 | 372101.3 | 333920.2 | 426854.6 | 357156.5 | 287999.2 | 399657.3 | TRUE |
| 303099.7 | 301971.3 | 340857.3 | 328076.9 | 539307.8 | 413252.8 | 392413.3 | 562458.6 | TRUE |
| 492850.9 | 429397.3 | 573545.6 | 467908   | 824430.6 | 593991.6 | 558829.8 | 757288.9 | TRUE |
| 78453.5  | 68439.8  | 64041.3  | 48494    | 96502.9  | 84072.4  | 69197.5  | 114305.4 | TRUE |
| 28116.3  | 73873    | 53537.4  | 72421.2  | 135404   | 15909.1  | 10618.1  | 23020.5  | TRUE |
| 125961.4 | 314750.9 | 181397.1 | 251619.8 | 532465.1 | 79451.5  | 63769    | 96848.4  | TRUE |
| 132738.6 | 118043.4 | 120266.7 | 90037.9  | 155931.8 | 138895.2 | 125685.9 | 158932.5 | TRUE |
| 22143.1  | 44774.8  | 49380.9  | 45062    | 88927.9  | 20792.1  | 13174.6  | 12124.7  | TRUE |
| 157597.3 | 147041.9 | 118769   | 133543.2 | 176334.8 | 157137.6 | 183061.9 | 182906   | TRUE |
| 118184.3 | 81657.2  | 76301.4  | 81917.9  | 135959   | 110063.1 | 125600.2 | 160072.3 | TRUE |
| 72074    | 46488    | 66217.1  | 54974.5  | 67686.1  | 69741.4  | 69935.1  | 76883    | TRUE |

|          |          |          |          |          |          |          |          |      |
|----------|----------|----------|----------|----------|----------|----------|----------|------|
| 147597.2 | 115693.4 | 144423.5 | 134642.7 | 188752.2 | 142120.4 | 139579.7 | 197567.1 | TRUE |
| 704277.4 | 810300.5 | 656661.8 | 651477.6 | 687872.9 | 567707.7 | 856769.7 | 501978.3 | TRUE |
| 9881597  | 11679081 | 7294221  | 8036032  | 9171273  | 6425095  | 11979304 | 7507314  | TRUE |
| 1012974  | 1332389  | 795774.3 | 844250.6 | 973677.9 | 669264.7 | 1293288  | 819926.8 | TRUE |
| 863074.5 | 1012344  | 741692   | 763845.9 | 799444.3 | 616319.3 | 1010086  | 667054.5 | TRUE |
| 114151.3 | 139102.1 | 123082.6 | 118977.7 | 129186.9 | 94814.9  | 175418.9 | 123729.3 | TRUE |
| 41452.8  | 67728.3  | 44630.3  | 51977.4  | 47985.2  | 25659.2  | 23260.7  | 23971.2  | TRUE |
| 155148.9 | 194311   | 134297.8 | 136469.5 | 145912.5 | 112821.7 | 181002.8 | 125737.2 | TRUE |
| 113089.1 | 159019.4 | 89204.7  | 82314.9  | 107990.6 | 68955.1  | 158358.9 | 86875.3  | TRUE |
| 48285.5  | 54604.9  | 32035.4  | 22682.7  | 29453.6  | 30611.1  | 56044    | 44807.8  | TRUE |
| 149560.5 | 152099.4 | 118827.6 | 120852.1 | 117420.4 | 98896.7  | 133219.5 | 111163.7 | TRUE |
| 299768   | 226188.5 | 328605.6 | 276993.6 | 282095.4 | 336218.4 | 265970.2 | 281480.8 | TRUE |
| 593787.9 | 531227.1 | 430328.1 | 454287.8 | 486118.8 | 426388.7 | 402943.4 | 447977.3 | TRUE |
| 844063   | 700927.9 | 851455.1 | 633904.4 | 543406.2 | 821075.4 | 580086.2 | 569708.2 | TRUE |
| 5310334  | 4526287  | 2833959  | 3431775  | 3956601  | 3059539  | 3012117  | 4076121  | TRUE |
| 826179.6 | 774327.4 | 585726.5 | 633571   | 705648.7 | 605119.8 | 584913.7 | 746238.5 | TRUE |
| 375930.2 | 335207.8 | 254850   | 292142.4 | 326280.1 | 268521.8 | 257729.8 | 348778.4 | TRUE |
| 563630.8 | 491932.5 | 584147.2 | 630677.5 | 634988.7 | 604223.6 | 537078   | 582961.6 | TRUE |
| 381087.2 | 331293.1 | 425980   | 382861.5 | 431342.2 | 374958.5 | 345228.2 | 365996.9 | TRUE |
| 509052.2 | 420908.9 | 535910.2 | 627530.5 | 633448.3 | 550445.6 | 499179.6 | 606031.5 | TRUE |
| 9885198  | 7941309  | 8904548  | 11849857 | 11953254 | 10268542 | 9422366  | 12926924 | TRUE |
| 825521.5 | 698891.2 | 776554.9 | 1059513  | 1030803  | 862220.8 | 804621.1 | 1083446  | TRUE |
| 1356661  | 1130871  | 1410092  | 1725252  | 1538943  | 1455426  | 1323479  | 1614189  | TRUE |
| 1113625  | 970778.5 | 1066856  | 1161582  | 1154852  | 1093714  | 1070576  | 1184085  | TRUE |
| 895031.9 | 773363.4 | 958375.1 | 1060514  | 1052081  | 959541.1 | 913215.4 | 1042570  | TRUE |
| 958872.8 | 877131.8 | 915784.5 | 1335640  | 1067287  | 1006893  | 990165.9 | 1119295  | TRUE |
| 330062.9 | 306379.6 | 343063.2 | 424880.3 | 360434.5 | 319860.4 | 349919.3 | 380415.7 | TRUE |
| 34218.9  | 35738.1  | 32117.7  | 42379.3  | 56609.1  | 41543.7  | 31241.5  | 43635.2  | TRUE |
| 176665.5 | 167720.7 | 186436.2 | 215329.1 | 187829.5 | 205583.3 | 205598.5 | 205592.4 | TRUE |
| 137894.5 | 248130.6 | 143291.2 | 310899   | 346031.7 | 80973.5  | 65832.1  | 88482.5  | TRUE |
| 91965.8  | 218724.5 | 119910.9 | 231204.2 | 261425.6 | 58762.4  | 34981.5  | 57087    | TRUE |
| 101248.4 | 97516    | 87623.6  | 99306.4  | 110895.3 | 107185.3 | 76508    | 99836.9  | TRUE |
| 53165.2  | 69287.6  | 93078.4  | 54586    | 51637.9  | 45487.2  | 50906.2  | 61962.6  | TRUE |
| 94182    | 123770.9 | 152298.7 | 178781.5 | 206509.5 | 98132.7  | 65261.5  | 100651.2 | TRUE |
| 58146.5  | 105377.2 | 89604.2  | 148032.4 | 170941.1 | 24205.3  | 36287.7  | 37714.9  | TRUE |
| 129881.6 | 102409.6 | 116340.5 | 120179.9 | 94880.9  | 116190.9 | 131091.7 | 111037.2 | TRUE |
| 73132.3  | 62700.8  | 55587.7  | 65730    | 69522.2  | 57623    | 58855.7  | 71588.9  | TRUE |
| 1066787  | 1090647  | 886868.2 | 914062   | 961495.8 | 1098955  | 1170411  | 1057571  | TRUE |
| 11011353 | 11459873 | 7707339  | 8171520  | 9218666  | 10329977 | 10882431 | 11517432 | TRUE |
| 2748037  | 3107690  | 1927471  | 2061889  | 2346163  | 2733760  | 2831081  | 3125807  | TRUE |
| 909390.2 | 948469.8 | 698369.1 | 737286   | 812822.6 | 965056.7 | 958460.4 | 1015060  | TRUE |
| 680443.8 | 692012.5 | 607157.6 | 644008.5 | 709874.7 | 693333.7 | 709445.9 | 687592.3 | TRUE |
| 1003613  | 1044565  | 817953.5 | 870884   | 900853   | 1062822  | 1038481  | 1047478  | TRUE |
| 794505.1 | 793096.7 | 904030.1 | 919520.5 | 936351.2 | 1136997  | 1060705  | 1031367  | TRUE |
| 3754945  | 4147581  | 3823683  | 4392074  | 4312140  | 4984829  | 4726118  | 4555870  | TRUE |

|          |          |          |          |          |          |          |          |      |
|----------|----------|----------|----------|----------|----------|----------|----------|------|
| 5680792  | 6161219  | 5493714  | 5431769  | 6831186  | 7782181  | 7639678  | 8115212  | TRUE |
| 2720995  | 2886360  | 2502798  | 2841576  | 3182957  | 3811854  | 3626295  | 3738866  | TRUE |
| 530834.8 | 565756.6 | 536663.5 | 571987.4 | 597058.1 | 759157.3 | 728415.9 | 771493.2 | TRUE |
| 924774.7 | 990835.5 | 910387.5 | 998203.1 | 1072212  | 1336697  | 1173590  | 1219165  | TRUE |
| 444064.3 | 461953.4 | 391296   | 457293.3 | 426487.4 | 511192.6 | 520485   | 533604.2 | TRUE |
| 57305.9  | 58665.6  | 39754.6  | 75052.3  | 71533.6  | 90294.5  | 96443.6  | 87447.1  | TRUE |
| 40207.2  | 27013.2  | 23431.2  | 42512.9  | 28713    | 52183.4  | 50798.6  | 40764.1  | TRUE |
| 21974.2  | 22580.7  | 20465.6  | 29487.5  | 32261.7  | 43947.8  | 35780    | 39904.1  | TRUE |
|          |          |          |          |          |          |          |          |      |
| 119958.8 | 99916.2  | 90268.8  | 85233.9  | 99774.9  | 85742.3  | 79363.6  | 107428.2 | TRUE |
| 104890.2 | 104329.9 | 121049.2 | 164186   | 102784.6 | 127945.7 | 101477.1 | 125803.2 | TRUE |
| 59204.1  | 33241.8  | 58339    | 49333.4  | 65944.9  | 48895    | 50448.5  | 56294.8  | TRUE |
| 99164.1  | 83977.6  | 106679.4 | 139410.8 | 103314.1 | 85476.3  | 88984.2  | 109539.9 | TRUE |
| 290741.8 | 195614.5 | 268947.8 | 275521.5 | 280794.9 | 260616.2 | 238621.8 | 282076.2 | TRUE |
| 1206835  | 813464.1 | 1083476  | 1138859  | 1251506  | 1212817  | 973094.5 | 1242559  | TRUE |
| 82637.2  | 56239.7  | 75261    | 93056.3  | 76274.3  | 84403.2  | 72781.5  | 69643.1  | TRUE |
| 229021   | 163855.8 | 234061.6 | 233916.4 | 245492.5 | 224341.4 | 213612.4 | 240814.3 | TRUE |
| 941977.1 | 623019.7 | 973057.4 | 941009.3 | 950953.7 | 995221.3 | 821127.7 | 928126.5 | TRUE |
| 5497835  | 4111023  | 5404394  | 5848151  | 6080764  | 5577411  | 4556238  | 6008244  | TRUE |
| 147655.6 | 114422.7 | 141353.2 | 142836.7 | 162973.9 | 152128   | 126020.8 | 151560.8 | TRUE |
| 99019.3  | 105898.5 | 111322.7 | 142363.7 | 103328.6 | 105796.9 | 85870.3  | 109898.3 | TRUE |
| 210029.3 | 183381.8 | 183387.3 | 207420.2 | 215336.4 | 200286.2 | 186017.9 | 223104.9 | TRUE |
| 73254.5  | 68310.6  | 65366.9  | 69779.3  | 78338    | 92231.9  | 52030.5  | 74870.8  | TRUE |
| 207737.6 | 188927.1 | 178890.6 | 234966.3 | 216657.4 | 207546.3 | 181850.9 | 216519.1 | TRUE |
| 282492.7 | 225296.9 | 277320.1 | 299649.2 | 320562.1 | 304976   | 265814.6 | 296136.2 | TRUE |
| 169071.7 | 141230.6 | 189348.9 | 227017.7 | 193694.9 | 221813.9 | 203830.2 | 229669.1 | TRUE |
| 102417.5 | 68186.5  | 113581   | 124053   | 118674.4 | 94942.3  | 102713.5 | 116759.3 | TRUE |
| 75907    | 109646.2 | 78599.2  | 122750.6 | 117705   | 72449.8  | 82449.3  | 68248.8  | TRUE |
| 112682.9 | 185753   | 147195.9 | 202692.3 | 226524.9 | 85270.8  | 65400.3  | 73036    | TRUE |
| 74405.4  | 71246.4  | 74289.5  | 86224.6  | 93744.6  | 56670.7  | 70614    | 62750.4  | TRUE |
| 145864.5 | 240186.2 | 189538.5 | 251067.5 | 313659   | 102461.4 | 114498.5 | 141361.6 | TRUE |
| 44347.4  | 68062.8  | 41796.9  | 71780.1  | 85334    | 40380.3  | 39288.3  | 44435.7  | TRUE |
| 62448.3  | 54216.1  | 54805.3  | 72456.4  | 52684.2  | 72338.6  | 55481.4  | 76513.8  | TRUE |
|          |          |          |          |          |          |          |          |      |
| 115972.6 | 93066.8  | 78449    | 129006.7 | 113588.9 | 109714.3 | 92234.4  | 137793.2 | TRUE |
| 40852.3  | 21943.7  | 23630.7  | 28928.5  | 25148.3  | 36675.5  | 17337.9  | 30864.4  | TRUE |
| 74684.3  | 28803.3  | 60014.8  | 43552.4  | 63151.8  | 56945    | 75638.7  | 84134.1  | TRUE |
|          |          |          |          |          |          |          |          |      |
| 38623.7  | 173406.4 | 78973.7  | 135065.9 | 197215.6 | 2966.4   | 8008.2   | 7822.1   | TRUE |
|          |          |          |          |          |          |          |          |      |
| 109908.4 | 108890.7 | 86480.7  | 114114.8 | 97262.8  | 146627.2 | 113131.6 | 130574.6 | TRUE |
| 12836.6  | 8668.1   | 11778    | 13158.6  | 11810    | 16540.3  | 8613.6   | 14454    | TRUE |
| 104955.7 | 63498.6  | 90118.2  | 94908.6  | 74907.2  | 150984.8 | 80162.2  | 114294.5 | TRUE |
|          |          |          |          |          |          |          |          |      |
| 45049.7  | 42987.9  | 41072.5  | 54110.6  | 61155    | 45132.1  | 31903.8  | 55060.3  | TRUE |

|          |          |          |          |          |          |          |          |      |
|----------|----------|----------|----------|----------|----------|----------|----------|------|
| 69480    | 87704.5  | 84690.3  | 87723.7  | 84490.8  | 88819.6  | 80582.6  | 82717.4  | TRUE |
| 479572.7 | 447127.7 | 488493.8 | 535791.9 | 545070.1 | 519482.4 | 431651.2 | 548319.7 | TRUE |
| 99862.2  | 205082.2 | 275894.1 | 326833   | 367559.8 | 87843.2  | 80072.4  | 75841.3  | TRUE |

|          |          |          |          |          |          |          |          |      |
|----------|----------|----------|----------|----------|----------|----------|----------|------|
| 34456.7  | 159588.3 | 92897.7  | 95294.3  | 107515.1 | 31499.2  | 33394.7  | 34603.1  | TRUE |
| 96689    | 166893.7 | 113462.5 | 130000.2 | 121948   | 105559.4 | 92028.1  | 95006.3  | TRUE |
| 83235.5  | 73603.3  | 68026.6  | 78331.3  | 68471.5  | 109024.4 | 72213.2  | 101692   | TRUE |
| 2072227  | 1964524  | 1262899  | 2256976  | 2345742  | 1193989  | 1990810  | 2121675  | TRUE |
| 6574117  | 6741751  | 3776164  | 7205081  | 7844639  | 3827755  | 6349349  | 7742273  | TRUE |
| 386702.3 | 408576.6 | 382215.9 | 501933.9 | 505971.9 | 345480.7 | 443463.7 | 440067.1 | TRUE |
| 99723.7  | 97952.6  | 82163.1  | 100952   | 118070   | 77834.9  | 118185.2 | 117745.8 | TRUE |
| 98128.1  | 175228.8 | 74701.1  | 194274.1 | 220472.1 | 34306.3  | 43769.5  | 34270.3  | TRUE |
| 50899.1  | 89914    | 67179.8  | 142776.6 | 137392.6 | 46456.6  | 45080.3  | 39006.6  | TRUE |
| 14246600 | 16597445 | 14570281 | 15460833 | 9699451  | 18870364 | 18112403 | 17631173 | TRUE |
| 10522307 | 11770163 | 9868088  | 10036625 | 7068078  | 13490928 | 13615101 | 13770166 | TRUE |

|          |          |         |          |          |          |          |          |      |
|----------|----------|---------|----------|----------|----------|----------|----------|------|
| 108580.7 | 84374.9  | 93304.9 | 107658.9 | 107574.2 | 106258.8 | 104740.3 | 100071.6 | TRUE |
| 67930.6  | 57199.8  | 89258.4 | 52871.6  | 62513.6  | 58535.5  | 78231    | 61463.6  | TRUE |
| 56227.9  | 46943.3  | 64255.1 | 56622.7  | 66164.6  | 53745.5  | 55264.5  | 57264.4  | TRUE |
| 63733.1  | 65660.3  | 67911.2 | 80362.7  | 60484    | 58923.6  | 78428.7  | 74800.2  | TRUE |
| 1361783  | 1131995  | 1165342 | 1425802  | 1473265  | 1401433  | 1186487  | 1575609  | TRUE |
| 353676   | 249082.1 | 315420  | 381310   | 376005.8 | 354229.7 | 348396.6 | 395441.9 | TRUE |
| 57608.7  | 50044.5  | 53644.9 | 61501    | 76800.4  | 49446.9  | 50498.9  | 56356.4  | TRUE |

|          |         |          |          |          |          |          |          |      |
|----------|---------|----------|----------|----------|----------|----------|----------|------|
| 303514.7 | 233227  | 308476.5 | 348626.9 | 321892   | 302332.5 | 284478   | 317815.6 | TRUE |
| 90689.5  | 62950.6 | 84911.3  | 82370.8  | 93305.1  | 95468.5  | 83674    | 104474   | TRUE |
| 59838.2  | 48983.4 | 55523.1  | 50844.9  | 61901.7  | 56357.3  | 53481.6  | 67945.3  | TRUE |
| 105818.6 | 76372.7 | 99179.9  | 127711.1 | 103936.9 | 104349.5 | 110496.3 | 108460.7 | TRUE |
| 42234.4  | 59255.1 | 37313.5  | 58540.4  | 50458.2  | 36018.5  | 32384.9  | 39283.4  | TRUE |

|          |          |          |          |          |          |          |          |      |
|----------|----------|----------|----------|----------|----------|----------|----------|------|
| 275064.9 | 242216.7 | 322611.6 | 450009.7 | 404065.3 | 347521.7 | 297464.8 | 323823.2 | TRUE |
| 157796   | 152639.2 | 169799.8 | 170460.7 | 169802.3 | 199807.9 | 177242   | 160281.6 | TRUE |
| 256472.8 | 239789.7 | 317994.9 | 363953.4 | 350647.9 | 338226.1 | 339791.1 | 359055.8 | TRUE |
| 68938.1  | 57315    | 70833.3  | 116684.3 | 100083.9 | 88891.9  | 78147.4  | 91641.5  | TRUE |
| 20603.2  | 8316.4   | 19982.3  | 10509.5  | 30125.6  | 18369    | 12685.9  | 26154.6  | TRUE |
| 262739.4 | 279202.6 | 243855.2 | 256584   | 235731.4 | 236715.2 | 239517.2 | 286549.1 | TRUE |
| 105487.1 | 72787.1  | 92954.1  | 96547    | 94082.1  | 91354.4  | 87446.4  | 105242.2 | TRUE |
| 46802.7  | 36862.1  | 29720.4  | 40478.4  | 47299.4  | 57010.2  | 34523.5  | 54547.9  | TRUE |
| 99790.5  | 147240.4 | 166418.4 | 127319.4 | 182379.2 | 107985.4 | 90564.4  | 99276.2  | TRUE |
| 22659.8  | 95146.8  | 67502.9  | 79620.2  | 123735.1 | 7274.5   | 7820.3   | 6199.9   | TRUE |
| 22179.9  | 12580.3  | 10879    | 14578.7  | 29990.6  | 11411.1  | 17579.4  | 13500.2  | TRUE |
| 41785.9  | 49619.5  | 50894.7  | 40638.4  | 41434.4  | 41032.7  | 44280.1  | 64090    | TRUE |
| 38876.8  | 63737.6  | 44173.9  | 60893.6  | 63900.2  | 30849.2  | 31715.2  | 47691.2  | TRUE |
| 53034.3  | 42063.7  | 41965    | 61963.6  | 51835.6  | 52124    | 51628.1  | 48441.3  | TRUE |
| 48663.9  | 38520.2  | 33926.1  | 51878.5  | 44127.9  | 38700.8  | 41070.3  | 51019.8  | TRUE |
| 64064.1  | 36519.7  | 44713.3  | 42158.1  | 41371.8  | 48133.7  | 62795.2  | 70523.9  | TRUE |
| 143204.3 | 90995.7  | 93130.6  | 154089.7 | 113055.5 | 151507   | 145598.9 | 146698.4 | TRUE |
| 40382.1  | 34930.4  | 51262.6  | 43916.6  | 48092.7  | 44245    | 52238.7  | 52609.2  | TRUE |
| 250660.2 | 700652.4 | 362116.1 | 409441.8 | 530989.6 | 205390.7 | 300857.2 | 189436.3 | TRUE |
| 32135.4  | 22215    | 39394.8  | 45715.6  | 33231.3  | 52672.2  | 39949.6  | 41781.9  | TRUE |
| 28952.7  | 15368.5  | 23539    | 37977.2  | 27852.9  | 35033.5  | 17813.4  | 31388.9  | TRUE |
| 116744   | 111820.1 | 136917.5 | 169397   | 136682.8 | 153898.4 | 133715.2 | 128485.9 | TRUE |
| 125049.7 | 91610.5  | 122446.1 | 150324.4 | 125811   | 147009.6 | 120316.9 | 124813.2 | TRUE |
| 93007.9  | 94292.2  | 65888.5  | 116256.5 | 92315.8  | 78914.3  | 80629.9  | 97137.6  | TRUE |
| 93952    | 129755.7 | 131408.9 | 122968.7 | 109847.2 | 105417.6 | 115126.7 | 115022.8 | TRUE |
| 107075   | 90948.1  | 72668.3  | 100131   | 118535.5 | 88543.4  | 105930.9 | 127069   | TRUE |
| 80453.9  | 85174.6  | 75497.1  | 102272.5 | 103642.8 | 105949   | 80026.5  | 124223.5 | TRUE |
| 186518.8 | 203639.5 | 150767.3 | 186071.1 | 180899.8 | 161634.7 | 195134.8 | 207003.5 | TRUE |
| 117127.7 | 116092.3 | 99265.9  | 96105.4  | 115397.7 | 102075.5 | 119184   | 101480.6 | TRUE |
| 80800.1  | 74625.4  | 68032.9  | 92986.7  | 56607.1  | 60155    | 76505.5  | 63406.2  | TRUE |
| 133707.6 | 140727.1 | 161406   | 212030.5 | 166094.6 | 172098.1 | 188781.3 | 191239.1 | TRUE |
| 72700.2  | 61536.1  | 73817.4  | 62078.8  | 92165.5  | 94712.6  | 88283.7  | 103866.2 | TRUE |
| 88279.1  | 64472.1  | 76920.3  | 99812.6  | 69026.8  | 68331.7  | 76648.6  | 79864.1  | TRUE |
| 84180    | 77838.3  | 90135.1  | 67846    | 70610.7  | 65080.8  | 76729.6  | 78955.1  | TRUE |
| 38196.5  | 34468.8  | 37434.7  | 28582.2  | 35394.3  | 55452.8  | 32288.6  | 58219.3  | TRUE |
| 64960.4  | 51833.5  | 41045.8  | 49187.3  | 49079.5  | 78907.1  | 52435.9  | 78719.2  | TRUE |

|          |          |          |          |          |          |          |          |      |
|----------|----------|----------|----------|----------|----------|----------|----------|------|
| 60005.9  | 67674.6  | 48890.6  | 54180.2  | 64064.6  | 68884.8  | 61362.9  | 74354.5  | TRUE |
| 115933.6 | 138430.3 | 128200.1 | 117609   | 113297.8 | 134702.3 | 147909.7 | 124650.4 | TRUE |
| 199324.9 | 267643.3 | 142476.6 | 215472.3 | 207323.2 | 152428.8 | 296483.9 | 165081.3 | TRUE |
| 174324.9 | 175799.9 | 170175.5 | 193823.1 | 144009.9 | 175951.9 | 171015.4 | 177153.5 | TRUE |
| 97906.1  | 85682.2  | 90892.2  | 65480.5  | 89307.9  | 95224.2  | 84863.1  | 100594.8 | TRUE |
| 74222.4  | 83545.2  | 74502.4  | 76040.7  | 72782.7  | 82715.8  | 68803.6  | 93516.8  | TRUE |
| 82208.7  | 61042.7  | 64978.5  | 69700.4  | 82430.7  | 61138.5  | 66816.7  | 89512.4  | TRUE |
| 97837.6  | 85709.1  | 104052.2 | 96869.7  | 88598.9  | 122808.1 | 96926.2  | 99013.4  | TRUE |
| 250869.9 | 205856   | 281591   | 254613.7 | 308279.1 | 305389.6 | 248061   | 287446.2 | TRUE |
| 29413    | 12485.1  | 29459.5  | 14468.9  | 25940    | 28302.8  | 15587.1  | 13249.4  | TRUE |
| 33430    | 19692.7  | 41324.1  | 53802.5  | 50460.7  | 46952.8  | 44045.4  | 48042.9  | TRUE |
| 25552.9  | 32559    | 60402.3  | 39283.6  | 53417.9  | 72416    | 47703.6  | 64691.7  | TRUE |
| 39884.9  | 27133.7  | 19960.4  | 36849.9  | 19651.2  | 22923.3  | 33229.7  | 33179.5  | TRUE |
| 53201.6  | 34189.1  | 58965.3  | 49530.9  | 37349.9  | 80274.1  | 56502.2  | 55494.7  | TRUE |
| 118709.6 | 68028.4  | 105373.1 | 101105   | 76206.9  | 174373.6 | 112961.1 | 102431.7 | TRUE |
| 122802.8 | 140872.5 | 97850.1  | 94011.2  | 105171.7 | 79287.3  | 96175.2  | 100883   | TRUE |
| 46048.9  | 29298.1  | 39256.3  | 53662.9  | 75768.5  | 52524.1  | 55073.1  | 59056.4  | TRUE |
| 47515.1  | 39215.2  | 45442.4  | 39773.4  | 29949.4  | 49662.2  | 42258    | 44714.9  | TRUE |
| 34493    | 36429.5  | 29905    | 40101.6  | 33296.5  | 24429.7  | 36129.2  | 32909.6  | TRUE |
| 106337.8 | 86566.9  | 95945.1  | 65430.7  | 77829.2  | 88225.5  | 68699.5  | 75307.2  | TRUE |
| 310901.2 | 291659.3 | 408653.5 | 275072.3 | 339894.3 | 412075.6 | 287926   | 303184.4 | TRUE |
| 51909.8  | 43975    | 57149.6  | 56634.4  | 51643.6  | 53726.9  | 41277.3  | 39319.8  | TRUE |
| 65504.7  | 54474.2  | 70402.3  | 53812.4  | 60388.1  | 77686.3  | 55329.6  | 50593.7  | TRUE |
| 1059563  | 969326.4 | 1274087  | 1173171  | 1207363  | 1310057  | 1081616  | 1145702  | TRUE |
| 39005.3  | 42576.9  | 48577.3  | 33279.6  | 37321.1  | 42483    | 41253.1  | 36528.2  | TRUE |
| 6184629  | 5387683  | 8510871  | 6259689  | 6815066  | 9108420  | 6530194  | 6933703  | TRUE |
| 106232.9 | 112381.6 | 99459.7  | 133371.9 | 140709.1 | 115240.5 | 114675.5 | 111504.7 | TRUE |
| 112215.6 | 152006.6 | 130891.1 | 150299.8 | 128829.8 | 115619.4 | 128704.9 | 151309.5 | TRUE |
| 423665   | 393314.5 | 379003.4 | 514325.4 | 492839.3 | 413570.3 | 429222.2 | 508694.3 | TRUE |
| 75570.9  | 74468.1  | 76554.1  | 117327.1 | 87561.7  | 99638.9  | 78639.8  | 104001.2 | TRUE |
| 45309.3  | 31495.5  | 37019.4  | 39247.7  | 43185    | 41917.7  | 55033.9  | 46305.3  | TRUE |
| 59044.7  | 50239.6  | 59946.1  | 59318.8  | 80204.3  | 74614.3  | 74011    | 80116.2  | TRUE |
| 40092.9  | 55920.8  | 38353.8  | 51633.6  | 47464.8  | 45509.5  | 53823.2  | 54276.4  | TRUE |
| 276928.9 | 313842.6 | 334674.1 | 324619.6 | 355256   | 360866.9 | 284757   | 358513.2 | TRUE |
| 66050.2  | 50644.7  | 65891.1  | 64024.5  | 71319.6  | 72652.5  | 79940.7  | 87491.3  | TRUE |
| 41563.5  | 37056.3  | 40261.7  | 45007.1  | 52836    | 44772    | 42790.9  | 49679    | TRUE |
| 100079.9 | 95955.5  | 135544.6 | 98436.8  | 145168.4 | 136886.5 | 112010.1 | 141006.1 | TRUE |
| 443587.8 | 437485.4 | 417398.2 | 383114.8 | 390788.5 | 419830.6 | 433740   | 425190.9 | TRUE |
| 124616.2 | 137756.6 | 140649.2 | 125569.8 | 125221.8 | 117670.3 | 121422.6 | 119036.8 | TRUE |
| 274039.1 | 279170.3 | 255444   | 268037.5 | 322394.1 | 223628.9 | 222000.5 | 201593.9 | TRUE |
| 179568.6 | 180404.2 | 153154.5 | 184074   | 177177.3 | 238453.8 | 220784.6 | 278390.7 | TRUE |
| 477318.1 | 418501.3 | 344038.7 | 455068.3 | 541690.3 | 503040.4 | 447008.1 | 528126.8 | TRUE |
| 152808.4 | 151038.2 | 150021.1 | 190329.3 | 181260.7 | 379511.1 | 186112.9 | 119160.9 | TRUE |
| 71631.8  | 73918.3  | 66728.6  | 59479.1  | 67549.7  | 47548.6  | 61530.6  | 66127.8  | TRUE |



|          |          |          |          |          |          |          |          |      |
|----------|----------|----------|----------|----------|----------|----------|----------|------|
| 38620.3  | 34480.9  | 42937    | 40576.7  | 35809.4  | 30110.1  | 25913.1  | 29723.4  | TRUE |
| 758703.4 | 678362.7 | 692300.3 | 677638   | 851395.6 | 753983.6 | 652595.2 | 704387.6 | TRUE |
| 39572.3  | 43236.6  | 49196.4  | 58294.6  | 44425.3  | 47614.4  | 49323    | 42032.3  | TRUE |
| 9589     | 13003.4  | 7317.3   | 8072.1   | 31434.5  | 22607    | 29603    | 37429.8  | TRUE |
| 33237.4  | 34232.3  | 28476.5  | 28698.9  | 37948.3  | 33764.6  | 38698.8  | 36309.9  | TRUE |
| 74180.8  | 57716.8  | 55166.2  | 74621.5  | 59391.1  | 72869.5  | 84029.2  | 72034.1  | TRUE |
| 55317.6  | 43308.6  | 34951.5  | 55995.9  | 54893    | 54868.2  | 49598.9  | 59317.1  | TRUE |
| 34959.8  | 38096.8  | 20778    | 37297.7  | 44395.5  | 38212.7  | 38464.4  | 61686.9  | TRUE |
| 109030.8 | 104367.9 | 102368.7 | 109475.7 | 119694.6 | 134872.8 | 121070.8 | 129084.4 | TRUE |
| 50251.5  | 36242.5  | 49344    | 60127.7  | 55775.1  | 27488.4  | 45378.2  | 26951.4  | TRUE |
| 52718    | 44953.8  | 69520.9  | 82952    | 50931    | 123098.3 | 57080.5  | 65224.1  | TRUE |
| 62185    | 44419.7  | 95150.1  | 94033.5  | 59492.8  | 121198.3 | 94583.4  | 60825.2  | TRUE |
| 47932.6  | 44964.4  | 77876.1  | 59339.7  | 50706.2  | 110820.3 | 46138.1  | 43552.7  | TRUE |
| 81197    | 61067.4  | 81712.9  | 68762    | 51666    | 131710.1 | 59490    | 43876    | TRUE |
| 53954.8  | 48324.8  | 56803.3  | 52469.7  | 35890.5  | 113385.7 | 44788.5  | 47008.9  | TRUE |
| 167118.3 | 113700.2 | 160144.7 | 132971.3 | 113058.9 | 205271.8 | 139192.4 | 110403.1 | TRUE |
| 73436.7  | 41997.4  | 77937.2  | 60370.9  | 45400.3  | 101171.4 | 63506.9  | 50308.5  | TRUE |
| 43863.7  | 37661.9  | 47854.4  | 69054.2  | 73191.9  | 56765.5  | 55745    | 59179.8  | TRUE |
| 49554.8  | 40157.8  | 49767.3  | 34778.1  | 37920.4  | 49950.9  | 52425.1  | 27677.8  | TRUE |
| 50785.4  | 28652.5  | 67882.8  | 51937.4  | 40786.6  | 116160.7 | 62874.7  | 60049.8  | TRUE |
| 88106.5  | 62176.4  | 88621.8  | 57088.8  | 54984.4  | 123945.8 | 70937.6  | 69204.1  | TRUE |
| 151598.3 | 91452.2  | 123535.6 | 105549.3 | 239702.7 | 124861.8 | 109163.4 | 149642.4 | TRUE |
| 81257.5  | 54483.6  | 45585.7  | 54216.2  | 102977.7 | 84388.4  | 63609.6  | 75240.2  | TRUE |
| 117567.5 | 125199.4 | 101592   | 98248.7  | 127950.6 | 110022.4 | 161118.5 | 106220.5 | TRUE |
| 157103.5 | 131145.7 | 189807.6 | 148081.2 | 161456.8 | 161647.4 | 157217   | 132874.4 | TRUE |
| 540668.6 | 416864.9 | 613657   | 385484.7 | 424966.1 | 623773.6 | 398820.3 | 449854.5 | TRUE |
| 1333076  | 1385052  | 1708801  | 1525841  | 1542359  | 2060933  | 1631712  | 1693873  | TRUE |
| 152201.3 | 367551.3 | 294751.1 | 332047.7 | 427574   | 108837.7 | 87863    | 103214.4 | TRUE |
| 54853.4  | 106381.7 | 74839.5  | 79672    | 98373.7  | 30476    | 41776.4  | 20135.5  | TRUE |
| 98393.2  | 165282.3 | 149597.3 | 174559.9 | 238123.9 | 82303.9  | 64886.4  | 71302.4  | TRUE |
| 102062.8 | 95503.1  | 56077.1  | 73389.1  | 96560.9  | 90239.9  | 80483.2  | 101765.8 | TRUE |
| 223166.1 | 236890.6 | 181757.6 | 187422.5 | 283311.2 | 228193.2 | 271842.4 | 229686.6 | TRUE |
| 59317.7  | 69287.8  | 48939.3  | 47736.1  | 81369.5  | 65094.7  | 57047.9  | 77394    | TRUE |
| 65265.7  | 64740.6  | 56776.5  | 59077.8  | 86514.9  | 71536.3  | 74772.1  | 75368    | TRUE |
| 74242.9  | 81098.9  | 56398.6  | 72353    | 79538.2  | 54069.6  | 59178.6  | 64761.8  | TRUE |
| 153847.9 | 190221.1 | 154329.6 | 158794.4 | 159539.7 | 143311   | 194987.6 | 204923   | TRUE |
| 2449161  | 3010368  | 2665833  | 2887945  | 1746545  | 2467281  | 2923990  | 2535658  | TRUE |
| 203002   | 217353   | 158283.3 | 159181.6 | 219068.7 | 172765.3 | 221781.1 | 212526.8 | TRUE |
| 137289.6 | 142449.2 | 112309.4 | 123776.3 | 138120   | 94207.4  | 143602.7 | 141265.5 | TRUE |
| 113593.1 | 122102.9 | 112982.7 | 123623.3 | 135020.2 | 104265.5 | 124001.9 | 104491.6 | TRUE |
| 249804.8 | 242070.6 | 242644.1 | 268717.9 | 293452.3 | 248338.9 | 256010.2 | 292615.6 | TRUE |

|          |          |          |          |          |          |          |          |      |
|----------|----------|----------|----------|----------|----------|----------|----------|------|
| 258249.7 | 283230.6 | 226090.5 | 311399.9 | 342598.4 | 291418.6 | 312711.4 | 337623.6 | TRUE |
| 214435.7 | 181428.6 | 188775.5 | 205109.6 | 253269.3 | 196140.8 | 233785   | 259086.7 | TRUE |
| 78028    | 79148.7  | 89578.6  | 90604.9  | 99292    | 77876.4  | 75695.6  | 80212.7  | TRUE |
| 61792.3  | 84008.2  | 74333    | 81335    | 82511.6  | 88494.6  | 85505.2  | 75502.7  | TRUE |
| 45743    | 94612.2  | 53150.9  | 83314.9  | 107487.4 | 26123.9  | 28085.6  | 25806.5  | TRUE |
| 58150.8  | 102034.4 | 66344.2  | 86738.7  | 142854.8 | 42701.9  | 29938.6  | 38699.9  | TRUE |
| 52427.6  | 38109.5  | 46063    | 43348.6  | 38933.2  | 41151.9  | 34432.9  | 48126.4  | TRUE |
| 28070.9  | 27775    | 18104.5  | 25935.2  | 23858    | 27689.1  | 34295.5  | 29834.9  | TRUE |
| 123628.3 | 120745.9 | 129631.7 | 114677.6 | 115214.8 | 137001.3 | 123973.4 | 102306.4 | TRUE |
| 181965.1 | 178406.4 | 201112.6 | 215603.9 | 181602.3 | 184753.1 | 215323.7 | 184461.6 | TRUE |
| 320024   | 315021.6 | 417002.1 | 376911.9 | 279023.5 | 348261   | 378987.7 | 376339.9 | TRUE |
| 384061.2 | 148936.9 | 115018   | 180003.4 | 155968.3 | 25923.1  | 57156.8  | 39305    | TRUE |
| 69288.5  | 159319.8 | 94972.7  | 147870.7 | 147455.4 | 43641.6  | 39979.2  | 66491.4  | TRUE |
| 41124.2  | 48669    | 46757    | 48958.2  | 57326.2  | 29980.9  | 23132.6  | 12909.6  | TRUE |
| 42889.2  | 52323.3  | 50777.2  | 57604.5  | 44872.4  | 64797.8  | 47640.9  | 54282.1  | TRUE |
| 75692.7  | 70459.2  | 71430.4  | 64723.3  | 81415.9  | 102115.3 | 81455.1  | 103090.9 | TRUE |
| 957653.3 | 922771.4 | 755689.9 | 984448.9 | 1112955  | 781001.8 | 919842.1 | 986220   | TRUE |
| 630162.4 | 625903.5 | 514468.1 | 483467.9 | 506429.9 | 523100.1 | 541782.4 | 501042.7 | TRUE |
| 233550.1 | 244864.7 | 218834   | 222542.5 | 222749   | 214427.7 | 246056.9 | 225504.7 | TRUE |
| 2527615  | 2214941  | 2800344  | 2902500  | 2669972  | 2567843  | 2733031  | 2501845  | TRUE |
| 266806.4 | 259948.2 | 207161.2 | 224207.2 | 201848.1 | 227339   | 211875.3 | 229861.5 | TRUE |
| 79693.3  | 69222.1  | 50906.7  | 49534.4  | 55181.8  | 49264.5  | 61763.4  | 62665.5  | TRUE |
| 140054.1 | 117436.3 | 90468.6  | 95322.3  | 114107.7 | 102719.8 | 106467.7 | 115028.4 | TRUE |
| 1503140  | 1440072  | 940464.1 | 875951.3 | 1178869  | 948104.1 | 1003632  | 1165296  | TRUE |
| 359526.7 | 375510.8 | 400373.3 | 336878.9 | 376009.7 | 406999.2 | 370586.3 | 386818.3 | TRUE |
| 461245.6 | 361739.9 | 540631.7 | 522547.9 | 422347.5 | 609461   | 377736.7 | 393726.6 | TRUE |
| 103987.1 | 102595.1 | 110174.1 | 129171.6 | 127515.3 | 123897.4 | 115828.9 | 140434.6 | TRUE |
| 634878.7 | 609006.5 | 577104.4 | 697995.8 | 807845.5 | 658870.4 | 769572   | 871602.4 | TRUE |
| 168173.1 | 191058.5 | 210649.8 | 157971.4 | 167399.7 | 157016.6 | 186968.2 | 134040.4 | TRUE |
| 37699.5  | 41457.8  | 43608.6  | 42795.1  | 42072.4  | 43757.7  | 48422.1  | 57109.2  | TRUE |
| 53619.7  | 78355.2  | 66977    | 64122.7  | 65786.2  | 34586.7  | 55884.9  | 37059.6  | TRUE |
| 63535.7  | 90638.8  | 109274.6 | 82697.1  | 81262.3  | 75881.7  | 101495.2 | 83909.2  | TRUE |
| 38153.4  | 40143.9  | 64956.5  | 73212.2  | 75245.9  | 46424.7  | 34732.5  | 37771.9  | TRUE |
| 225579.9 | 213598.4 | 240239.5 | 271437.5 | 232229.4 | 237617.2 | 261228.6 | 234516.8 | TRUE |
| 1452949  | 1198753  | 1304855  | 1401207  | 1548442  | 1527489  | 1488730  | 1572942  | TRUE |
| 199238.2 | 216071.1 | 193467   | 194949.2 | 201150   | 214723.1 | 243812   | 240789.2 | TRUE |
| 196244.7 | 206024.1 | 198719   | 166794.2 | 193092.7 | 221146.8 | 223808.9 | 204993.8 | TRUE |
| 105155.3 | 129212   | 132827.3 | 152700.2 | 141560.6 | 69415.4  | 80292.5  | 86098.1  | TRUE |
| 70412.3  | 52896.9  | 65540.1  | 59631    | 58861.5  | 67706.1  | 73783.6  | 61149.9  | TRUE |
| 299251   | 248507.7 | 154032.2 | 203609.7 | 266356.9 | 164263.6 | 212475.7 | 260421.5 | TRUE |
| 601673.5 | 546426   | 339802.7 | 350069.7 | 490796.7 | 315534.4 | 428080.8 | 549943.3 | TRUE |
| 282719.9 | 286689.9 | 181867.1 | 204362.9 | 256203.2 | 213702.8 | 243967.6 | 264320.1 | TRUE |
| 606039.1 | 521768.5 | 509115.7 | 539370.7 | 721738.7 | 546831.2 | 649654.5 | 691639.2 | TRUE |
| 168093.3 | 167866.2 | 150346.3 | 182197.5 | 252605.6 | 150197.5 | 187727.3 | 222346.5 | TRUE |
| 145625.9 | 170343.1 | 156573.9 | 185707   | 201101.3 | 129902.2 | 174958.2 | 198368.9 | TRUE |
| 104886.6 | 110732.8 | 93084.8  | 102735.9 | 124202.4 | 98950.2  | 110831.9 | 144517.6 | TRUE |
| 40625.7  | 25254    | 15011.9  | 9756.2   | 34786.6  | 33229.2  | 38385.4  | 36648.6  | TRUE |
| 36063.5  | 16091.7  | 10727.5  | 9462.4   | 22924.1  | 25773.1  | 12415    | 30075.8  | TRUE |
| 16941    | 31129.4  | 26711    | 31975.8  | 57876.4  | 4110.2   | 5444.8   | 21893.9  | TRUE |
| 1741703  | 1817438  | 1515966  | 1610368  | 1335298  | 1539637  | 2027914  | 1683096  | TRUE |

|          |          |          |          |          |          |          |          |      |
|----------|----------|----------|----------|----------|----------|----------|----------|------|
| 489658.3 | 563107.4 | 490594.5 | 525396.8 | 466578.1 | 465687.9 | 553474.7 | 517640.7 | TRUE |
| 137920.1 | 117665.5 | 127174.9 | 137328.2 | 118925.1 | 125922.6 | 154216.3 | 126667.1 | TRUE |
| 195723.8 | 193311.4 | 233874.4 | 187595.9 | 296802.1 | 216687.7 | 205450.3 | 281708.8 | TRUE |
| 219884.3 | 182484   | 193096.5 | 230856.1 | 235066.8 | 203776.6 | 233685.4 | 260287   | TRUE |
| 220796.9 | 629937.1 | 396897.6 | 693148.4 | 606495.5 | 168066.3 | 108341.4 | 137593   | TRUE |
| 5081282  | 5021565  | 4391004  | 6282942  | 6131548  | 4379608  | 5848718  | 5837753  | TRUE |
| 7597588  | 7457799  | 7852785  | 7698015  | 5868107  | 7702223  | 7733302  | 8084921  | TRUE |
| 82277.5  | 62042.8  | 45392.7  | 76021.8  | 60435.2  | 77314.7  | 71408.3  | 76905.3  | TRUE |
| 21128.6  | 22206.8  | 13081.6  | 23910.2  | 20238.9  | 20757.1  | 14381.9  | 23422.2  | TRUE |
| 987526.6 | 898689.2 | 668272.5 | 843234.9 | 997400.3 | 645377.2 | 942913.8 | 962840.6 | TRUE |
| 163252.8 | 152263.8 | 145865.3 | 180843.6 | 186082.3 | 153674.7 | 175380.4 | 209225.3 | TRUE |
| 76327.4  | 59303.3  | 87094.3  | 48715.8  | 58166.5  | 99867.1  | 71192.7  | 74616.9  | TRUE |
| 37198.1  | 38538.4  | 24292.4  | 48809    | 29951.3  | 53667.9  | 31838.4  | 53637.6  | TRUE |
| 64462.7  | 55920.8  | 57026.5  | 42252.2  | 54185.6  | 49434.1  | 46559    | 55819.1  | TRUE |
| 44237.9  | 35327.5  | 31431.1  | 65369.6  | 41583.6  | 59184.7  | 53481.7  | 61022.2  | TRUE |
| 86623.1  | 67535.8  | 76110.8  | 111042   | 65495.9  | 108277.9 | 110247.5 | 112476   | TRUE |
| 220937.9 | 208805.3 | 176389.1 | 236028   | 220214.7 | 179641.5 | 219040.6 | 221358.1 | TRUE |
| 94230.2  | 84585.6  | 94030.8  | 115472.4 | 106653.3 | 101146   | 106234.1 | 113887.2 | TRUE |
| 91418.4  | 95626    | 86713.6  | 116796.1 | 98827.4  | 108244.3 | 107174.8 | 101761.8 | TRUE |
| 190717.9 | 149936.6 | 154521.4 | 193357.9 | 219053.1 | 173769.1 | 180243.7 | 229820.8 | TRUE |
| 33194.9  | 76154.7  | 47515.1  | 45542.7  | 68394.4  | 21713    | 29090.2  | 21342.8  | TRUE |
| 49777    | 48097.6  | 43852.2  | 60607.2  | 59980.9  | 48707.8  | 57622.7  | 61453.8  | TRUE |
| 37890.5  | 32689.4  | 41106.9  | 46243.3  | 16697.7  | 41908.9  | 28781.1  | 45173.6  | TRUE |
| 394442   | 373749.8 | 313664.9 | 394378.3 | 453161.3 | 349268.5 | 391072.7 | 463734.7 | TRUE |
| 1393807  | 1318246  | 1217184  | 1406141  | 1600436  | 1144968  | 1619740  | 1522026  | TRUE |
| 189483.3 | 247499.3 | 219992.9 | 178914.6 | 158297.7 | 191945.4 | 250816   | 174118.6 | TRUE |
| 332166.4 | 322304.5 | 342058   | 286269.2 | 341367.4 | 345815.7 | 388863   | 339039.3 | TRUE |
| 114785.2 | 109123.8 | 117070.6 | 148482.8 | 158693   | 136467.9 | 161630.9 | 167578.4 | TRUE |
| 27011.3  | 17881.2  | 20938.8  | 29382.1  | 27476.6  | 7381.3   | 11769.8  | 25489.8  | TRUE |
| 132151.2 | 138025.3 | 152764.9 | 174214.2 | 185138.9 | 166014.5 | 180088.3 | 159318.8 | TRUE |
| 15248.2  | 24383.3  | 18414.2  | 23652.8  | 22519.9  | 21294.7  | 21115.6  | 23285.5  | TRUE |
| 22679.1  | 8403.9   | 13901.7  | 4477.3   | 9082.4   | 5774.7   | 25713.6  | 23284.2  | TRUE |
| 540621   | 617691.5 | 772956.4 | 776048.4 | 612511.6 | 600446.1 | 691500.6 | 630591.9 | TRUE |
| 16016.1  | 8550     | 6846     | 10567.9  | 7391.6   | 14087.4  | 10903.4  | 13960.1  | TRUE |

|          |          |          |          |          |          |          |          |      |
|----------|----------|----------|----------|----------|----------|----------|----------|------|
| 164824.7 | 173213   | 184280.9 | 200844.1 | 180358.1 | 196183   | 182959.7 | 186207   | TRUE |
| 282930.2 | 214027.2 | 317616.6 | 309919.1 | 258605.2 | 311956.4 | 240245.8 | 274588.3 | TRUE |
| 51450.5  | 44701    | 62966.8  | 46822.7  | 60402.1  | 62226.9  | 46893    | 76759.7  | TRUE |
| 25129.2  | 36034.1  | 32516.5  | 43519.2  | 44576.1  | 14412.7  | 12623.3  | 24442.9  | TRUE |
| 159805.1 | 145448.8 | 168574.2 | 134028.2 | 184991.7 | 202849.6 | 169133   | 214230.6 | TRUE |
| 50326.2  | 46146.3  | 55548.6  | 37113.9  | 53999.6  | 34343.1  | 42167    | 29745.9  | TRUE |
| 92070.2  | 59848.8  | 80501    | 77050.4  | 78219.3  | 74124.5  | 64829.8  | 76145    | TRUE |
| 109964.3 | 70518    | 92587.6  | 81485.8  | 80825.5  | 78632.7  | 66950.6  | 91418.4  | TRUE |
| 326902   | 251134.5 | 411951.5 | 359885.8 | 334043.7 | 471052.1 | 299023.8 | 294553.3 | TRUE |
| 745255.8 | 574042.7 | 821855.3 | 768642.1 | 696275.3 | 908350.8 | 625958.7 | 669989.7 | TRUE |
| 99347.8  | 74857.2  | 104329.2 | 92131.2  | 99476.3  | 102667.9 | 80612    | 94465.7  | TRUE |
| 23166.4  | 23191.7  | 25499.6  | 21744.5  | 25394.9  | 26548.3  | 19798.8  | 28831.5  | TRUE |
| 13419.9  | 17075.6  | 24314.2  | 9767.7   | 19430.8  | 6133.7   | 5384.4   | 5830.9   | TRUE |
| 618154.1 | 557376.4 | 541866.6 | 524494.1 | 728909.7 | 732002.2 | 633131.8 | 677683.5 | TRUE |
| 18882.6  | 44723.2  | 34122.1  | 35649.9  | 49669.6  | 5066.2   | 16307.7  | 6296.3   | TRUE |
| 22252.9  | 14262.7  | 14645.6  | 8321.5   | 24179    | 9909.7   | 9716     | 11910.8  | TRUE |
| 77706    | 44836.4  | 57202.3  | 75858.7  | 55422.1  | 81432.2  | 50959.4  | 89830    | TRUE |
| 28175.7  | 21864.8  | 19070.8  | 32594.2  | 28587.9  | 30324.4  | 40025    | 30097.3  | TRUE |
| 69868.2  | 60774.4  | 35808.2  | 50713.3  | 68271.5  | 59218.2  | 67525.1  | 90756.6  | TRUE |
| 27501.2  | 8575.2   | 8474.6   | 14241.5  | 22458.8  | 10756.2  | 16179.8  | 14943.3  | TRUE |
| 35034.3  | 21552.3  | 34981.7  | 40602.1  | 37595.4  | 33719.6  | 25210.9  | 34774.8  | TRUE |
| 19860.3  | 27448.5  | 25734.8  | 22979.8  | 34938.3  | 27482.1  | 11582.7  | 25153    | TRUE |
| 16624.1  | 9352.7   | 19177.3  | 12617.4  | 7225     | 16934.1  | 12129.6  | 24454.2  | TRUE |
| 28394.6  | 20364.1  | 29966.1  | 23378    | 18271.1  | 33220    | 47089.4  | 24187    | TRUE |
| 146706.2 | 104964.6 | 124591.2 | 151773   | 119156.8 | 146546   | 103878.3 | 131566.3 | TRUE |
| 302637.2 | 281530.1 | 333347.9 | 332711   | 282669.4 | 333329.8 | 278150   | 295425.5 | TRUE |
| 1172797  | 759503.5 | 1289913  | 1304848  | 1096182  | 1195226  | 850239.9 | 1044129  | TRUE |
| 57652    | 80557.2  | 75934.6  | 108825.2 | 118040.3 | 32172.3  | 29629.2  | 32247    | TRUE |
| 42812.1  | 30325.4  | 41446.6  | 36983.7  | 31294.4  | 42098.6  | 37181.9  | 26565.6  | TRUE |
| 68884.6  | 64511.8  | 70081.3  | 76550.9  | 70364    | 65536    | 68443.3  | 58775.8  | TRUE |
| 91590.9  | 85744.6  | 95860.2  | 107813.6 | 84306.3  | 98688.9  | 78440.5  | 99358.2  | TRUE |
| 42559.9  | 48587.7  | 39008.5  | 35865.4  | 36772.3  | 34489.7  | 32523.7  | 27725.3  | TRUE |
| 83605    | 87625.9  | 106886.3 | 86070.3  | 95097.5  | 111039.7 | 84255.2  | 117328.9 | TRUE |
| 261597.7 | 214420.2 | 319474.1 | 277027.4 | 282845.5 | 298587.1 | 229227.1 | 267085.1 | TRUE |
| 53730.5  | 58147    | 63182.8  | 77147.1  | 93058.8  | 67650.9  | 68467    | 76967.4  | TRUE |
| 63102.8  | 78151.8  | 101752.8 | 65063.1  | 64073.6  | 32047.2  | 35938.7  | 40579.5  | TRUE |
| 2949752  | 2154140  | 3471505  | 2773727  | 2751240  | 3542273  | 2286422  | 2848088  | TRUE |
| 200322.2 | 158879   | 196994.8 | 172511.6 | 186795.2 | 200441.8 | 163727.5 | 163705.8 | TRUE |
| 2667351  | 2139236  | 2009081  | 2028040  | 3100314  | 2520267  | 2545022  | 2715787  | TRUE |
| 82228.9  | 123584.9 | 83284.8  | 92944.4  | 139144.3 | 55956.9  | 50719    | 69113.6  | TRUE |

|          |          |          |          |          |          |          |          |      |
|----------|----------|----------|----------|----------|----------|----------|----------|------|
| 201210.5 | 144709   | 139746.3 | 143141.7 | 198386   | 198836.3 | 194309.9 | 236977.6 | TRUE |
| 231495.6 | 215970.5 | 210006.6 | 225048.7 | 189810.9 | 158250.7 | 203966.5 | 216555.1 | TRUE |
| 75202.3  | 67085.8  | 80503.9  | 66176.7  | 86243.5  | 93970.6  | 64398.4  | 76376.8  | TRUE |
| 214563.5 | 186382.6 | 231212.5 | 223554.1 | 231296   | 242271.7 | 184135.1 | 250914.4 | TRUE |
| 723259.3 | 626666.1 | 660904   | 730990.7 | 735834.9 | 794037.6 | 644751.6 | 862629.8 | TRUE |
| 101715.5 | 82519.4  | 74742.2  | 87066    | 113947.8 | 127366   | 104011.2 | 142707.8 | TRUE |
| 51752.1  | 45250.9  | 32817.8  | 38321.7  | 41595.9  | 34465    | 50065.6  | 57465.4  | TRUE |
| 44840    | 51516.9  | 33076.4  | 50225.2  | 48605    | 65876.3  | 51173.1  | 50514.1  | TRUE |
| 192518.2 | 176610   | 207109.4 | 212991.9 | 176521   | 281754.8 | 173580.7 | 196084.3 | TRUE |
| 57507.2  | 54871.8  | 68995.3  | 64096.9  | 51935.7  | 73558.8  | 50083.4  | 59695    | TRUE |
| 1170398  | 996865.1 | 1161007  | 1182018  | 1260301  | 1357926  | 1045117  | 1284292  | TRUE |
| 50622.2  | 57899.1  | 36241.8  | 45115    | 50573.5  | 50853.9  | 55041.3  | 53036.5  | TRUE |
| 30045.8  | 52579.7  | 22420    | 28955.9  | 39372    | 35364.7  | 38753.3  | 12652.7  | TRUE |
| 48922.4  | 61027.6  | 37851.2  | 52810.7  | 57418.7  | 56483.2  | 57801.6  | 47272    | TRUE |
| 36824.2  | 57554.6  | 31617.3  | 42104.7  | 41063.1  | 37466.1  | 49667    | 49341.4  | TRUE |
| 51537.6  | 41368.1  | 31246.2  | 34642.3  | 54434.8  | 45493.2  | 50797.8  | 57848.2  | TRUE |
| 35800.9  | 41705.3  | 9821.8   | 29915.9  | 37563.4  | 26776.6  | 49728.9  | 30087.1  | TRUE |
| 172406.4 | 152640.1 | 230060.7 | 198639.6 | 200673.4 | 215689   | 157245.1 | 166672.1 | TRUE |
| 5375758  | 3959771  | 5958916  | 5728904  | 4849919  | 6225310  | 4314917  | 4944062  | TRUE |
| 42868.1  | 39843.1  | 49413.6  | 48035.1  | 57292.9  | 46736.4  | 52838.6  | 56713.3  | TRUE |
| 40243    | 36334.6  | 42053.1  | 44606    | 40689.1  | 38273.2  | 55229    | 50184.6  | TRUE |
| 114645.8 | 86594.5  | 119651.1 | 100468.6 | 111075.9 | 144220   | 98774.1  | 116968.6 | TRUE |
| 230229.8 | 183106.2 | 260650.7 | 223649.7 | 204548.2 | 248843.7 | 184626   | 212069.4 | TRUE |
| 26825.3  | 16596.2  | 23039.9  | 43081.1  | 31625.8  | 9389.1   | 30255.1  | 25333.3  | TRUE |
| 27333.8  | 26330.7  | 30113.7  | 36096.7  | 36747.8  | 21091.2  | 34964.8  | 38416.4  | TRUE |
| 65960.4  | 67247.8  | 69344.7  | 60006.7  | 94248    | 69264.5  | 73972.1  | 87849.5  | TRUE |
| 248097.3 | 201561.2 | 303247.7 | 303988   | 280900.2 | 322838.7 | 240236.2 | 259607   | TRUE |
| 152694.9 | 147156.2 | 203928.7 | 186484.6 | 168774.4 | 202300.8 | 143379.3 | 174297.1 | TRUE |
| 174216.8 | 184000.6 | 195015.7 | 203976.4 | 199319.6 | 196668.4 | 159857.7 | 194425   | TRUE |
| 328402.8 | 291652.1 | 342414.7 | 359070.6 | 303808.5 | 394659.3 | 290585.1 | 297706.2 | TRUE |
| 199111.5 | 168484.4 | 193477   | 232622.9 | 198802.1 | 212290.6 | 170084.9 | 191250.9 | TRUE |
| 608924.5 | 502508   | 576214.1 | 606820.9 | 565849.6 | 654207.5 | 535979.9 | 604459.5 | TRUE |
| 243398   | 217584.6 | 264502.9 | 231073.8 | 254702.1 | 230667.8 | 204449.5 | 216907.1 | TRUE |
| 151552.3 | 108851.1 | 140991.5 | 150736   | 141799   | 138066.8 | 121528.5 | 149699.1 | TRUE |
| 121236.8 | 114106.8 | 131992.2 | 159194.8 | 137592   | 147446.5 | 113712.1 | 138007.4 | TRUE |
| 42460.7  | 81480.3  | 58429.2  | 82560.5  | 96520.2  | 28129.6  | 29588    | 36165.5  | TRUE |
| 144938.4 | 173410.5 | 148154.7 | 178602.1 | 193440.2 | 188562.4 | 187236.1 | 205463.8 | TRUE |
| 240250.2 | 290924.4 | 251646.7 | 272049.4 | 252216.7 | 250202.5 | 265639   | 237937.2 | TRUE |
| 282466.1 | 293869.3 | 215969.3 | 279556.4 | 320749.6 | 305953.9 | 318206.8 | 316687.2 | TRUE |
| 446466.3 | 445363.2 | 395689.6 | 379135.6 | 517216.1 | 484136.7 | 448372   | 520935.6 | TRUE |
| 343343.7 | 318867.7 | 304649.2 | 330992.5 | 362925.4 | 404217.2 | 351770.1 | 390096.4 | TRUE |
| 609364.6 | 630001.6 | 469183.3 | 583905.7 | 655763.8 | 721502.2 | 738439.6 | 742319.2 | TRUE |
| 268380   | 249388.4 | 234185.6 | 243362.8 | 256904.1 | 263561.1 | 269562.6 | 290592.6 | TRUE |
| 181867.1 | 132609.7 | 253882   | 96717.8  | 118995.5 | 193909.7 | 81772    | 100055.5 | TRUE |

|          |          |          |          |          |          |          |          |      |
|----------|----------|----------|----------|----------|----------|----------|----------|------|
| 475704.6 | 474126.3 | 500136.2 | 466509.3 | 560311.1 | 456786   | 491964.7 | 498578.7 | TRUE |
| 1356857  | 1365685  | 1570045  | 1396018  | 1287802  | 1369499  | 1339588  | 1247859  | TRUE |
| 483202.7 | 487791.1 | 407323.5 | 424122.7 | 512613.8 | 382890.7 | 472222.2 | 498447.6 | TRUE |
| 2867387  | 2541926  | 2266761  | 2474098  | 2906837  | 2377541  | 2674273  | 2773370  | TRUE |
| 2164478  | 2052999  | 1695128  | 2092061  | 2132193  | 1771559  | 2024997  | 2078147  | TRUE |
| 481886   | 488497.4 | 517098.5 | 601679.4 | 614883.4 | 595832.5 | 611869.6 | 624276.9 | TRUE |
| 61073.4  | 48244.9  | 56472.6  | 62823    | 62642.9  | 61115.4  | 70380.8  | 77798.6  | TRUE |
| 69764.6  | 114139.5 | 77487.8  | 121075.9 | 136891.1 | 50801.3  | 103875.9 | 54329.3  | TRUE |
| 61254.3  | 91260.1  | 56586.7  | 117391.8 | 136709.6 | 41456.8  | 36013.1  | 31118.5  | TRUE |
| 4615314  | 4270195  | 4604651  | 4471718  | 4097564  | 4461381  | 4738619  | 4132367  | TRUE |
| 4415165  | 4325312  | 4371838  | 4450177  | 4142756  | 4471797  | 4645464  | 4358699  | TRUE |
| 27460.1  | 32124.5  | 36087.1  | 35154.8  | 32545.3  | 37690.2  | 35166.8  | 44907.6  | TRUE |
| 40134.4  | 30536    | 38584.1  | 30999.2  | 35851.9  | 42254.6  | 26025.6  | 46438.3  | TRUE |
| 701246.6 | 713434.2 | 482829.2 | 615703.5 | 687257.7 | 541060.5 | 714609.4 | 729295.7 | TRUE |
| 3720333  | 3591980  | 3242846  | 3484606  | 3019711  | 3654902  | 3713941  | 3881165  | TRUE |
| 110001.8 | 118607.6 | 65794.5  | 72156.4  | 95902.3  | 82530.4  | 91873    | 75790.6  | TRUE |
| 6072132  | 5761997  | 5127522  | 5818646  | 5934219  | 5641239  | 6245406  | 6082444  | TRUE |
| 453192.5 | 459791.5 | 393810.2 | 464174   | 530174.2 | 438106.5 | 520329.1 | 544727   | TRUE |
| 118050.1 | 229907.2 | 123573.8 | 229158.6 | 251927   | 74717.2  | 63565    | 78878.6  | TRUE |
| 2326978  | 2093128  | 2726675  | 2530631  | 2184429  | 2570956  | 2591192  | 2480058  | TRUE |
| 94872.5  | 176299.2 | 176243.4 | 233539.5 | 163104.1 | 54760.2  | 48914.4  | 62480.7  | TRUE |
| 56032.7  | 77130.7  | 82346.1  | 43211.9  | 51701.6  | 58653    | 69367.1  | 57133.2  | TRUE |
| 83561    | 92605.4  | 83644.7  | 73864.1  | 59535.4  | 63859.4  | 69376.5  | 67541.9  | TRUE |
| 19933745 | 21150106 | 19664856 | 21419782 | 16979292 | 19452665 | 22607466 | 20306446 | TRUE |
| 9172713  | 9661189  | 8953572  | 9087041  | 7880027  | 8896614  | 10070855 | 9276758  | TRUE |
| 71241.4  | 109499   | 67540.2  | 105109.1 | 107737.5 | 54154    | 51183.8  | 53620.7  | TRUE |
| 95827.6  | 97894.8  | 59659.8  | 93181.4  | 92185    | 54954.2  | 92402.1  | 95821.1  | TRUE |
| 88148.8  | 73110.5  | 64572.3  | 80118.5  | 51486.1  | 64601    | 67599.6  | 69008.2  | TRUE |
| 432007   | 276212   | 332430.7 | 337839.2 | 333044.9 | 299140.4 | 290663.1 | 363394.4 | TRUE |
| 595822   | 618627.6 | 536589   | 649842.2 | 732688.2 | 573772.1 | 601280   | 670839.6 | TRUE |
| 113844.7 | 113053.8 | 105751.5 | 124532.5 | 112034.1 | 94171.2  | 118507.2 | 138505.4 | TRUE |
| 1404092  | 1519082  | 1414454  | 1447851  | 1256782  | 1306909  | 1593191  | 1242856  | TRUE |
| 1572192  | 1602839  | 1648147  | 1571774  | 1364324  | 1510661  | 1616199  | 1404649  | TRUE |
| 145417.2 | 161859.9 | 140098.9 | 144192.4 | 138516.9 | 121387.4 | 151460.1 | 162785.6 | TRUE |
| 5699336  | 5700159  | 4200349  | 6056213  | 6180014  | 4770347  | 6057326  | 5957612  | TRUE |
| 3812579  | 3971256  | 3545110  | 3965639  | 3514586  | 3755815  | 3953264  | 3744554  | TRUE |
| 64530.4  | 70199.9  | 62967.7  | 59957.6  | 72683    | 65702.4  | 73046.9  | 69374.4  | TRUE |
| 969572.3 | 848826.4 | 660544   | 808814.4 | 851707.1 | 742360.7 | 774761.1 | 859534.5 | TRUE |
| 1923749  | 1762873  | 1458073  | 1872954  | 1864291  | 1521406  | 1829902  | 1992818  | TRUE |
| 105823.5 | 153332.3 | 82304.9  | 154805.2 | 164308.3 | 64820.6  | 57556.2  | 75542    | TRUE |
| 86101.1  | 84103.6  | 115462.2 | 58788.1  | 78749.4  | 70617.8  | 60298.9  | 71684.4  | TRUE |

|          |          |          |          |          |          |          |          |      |
|----------|----------|----------|----------|----------|----------|----------|----------|------|
| 1794440  | 1549741  | 1729764  | 1715542  | 1557769  | 1832732  | 1782055  | 1832772  | TRUE |
| 3302992  | 3011757  | 3104720  | 3382629  | 2796886  | 3385993  | 3175018  | 3356937  | TRUE |
| 152244.8 | 260785.1 | 195269.9 | 269383.9 | 267085.9 | 123399.2 | 117701.1 | 127224.8 | TRUE |
| 117584.9 | 198078.1 | 135905.1 | 165023.9 | 181932.7 | 72395.9  | 75771.4  | 75642.1  | TRUE |
| 187529.5 | 195118.1 | 181651.9 | 178986.8 | 190598.9 | 226367.4 | 186810.2 | 205458.3 | TRUE |
| 230428.3 | 216386.2 | 183949.9 | 256341   | 292675.1 | 164347.1 | 232152.3 | 252359   | TRUE |
| 57520.5  | 68520.6  | 46463.7  | 77881.3  | 74835.6  | 46756.6  | 40134.5  | 51079.1  | TRUE |
| 24969.4  | 48847.4  | 19532.1  | 43734.8  | 58933.4  | 6357     | 7075.1   | 7517.6   | TRUE |
| 70445.3  | 100619.9 | 69926.5  | 88533.9  | 111311.1 | 65231.9  | 95810.9  | 111542.8 | TRUE |
| 352950.7 | 375624   | 202581.5 | 415945.2 | 413856.6 | 245443.7 | 404763.1 | 435533.6 | TRUE |
| 123300.5 | 150512.5 | 86848.3  | 141236.6 | 203063.9 | 87566.3  | 137911.1 | 191675.6 | TRUE |
| 119506.5 | 126442.4 | 89137.6  | 108869.4 | 138382.5 | 98081    | 134438.9 | 155673   | TRUE |
| 24896.5  | 23260.5  | 22824.6  | 28298.6  | 33963.3  | 25202.3  | 31136.9  | 30957    | TRUE |
| 54624.2  | 64919.3  | 41960.1  | 70973.2  | 83780.1  | 38309.3  | 62201    | 67689.5  | TRUE |
| 32371.6  | 50647.2  | 26800.9  | 46612.7  | 40326.6  | 29276.7  | 37512.6  | 30064.9  | TRUE |
| 729661.1 | 640292.7 | 561289.9 | 545245.8 | 531563.3 | 542916.5 | 665365.7 | 620677.4 | TRUE |
| 213828.6 | 228279.5 | 195293.1 | 201362.2 | 212234.4 | 186359.3 | 231079.5 | 184573.8 | TRUE |
| 77394.6  | 126451.6 | 78851.5  | 112424.6 | 172186.8 | 107666.4 | 100908.6 | 164906   | TRUE |
| 53696.3  | 81449.8  | 65350.4  | 76480.7  | 82779.5  | 51422.5  | 66651.5  | 49150.1  | TRUE |
| 1477341  | 1325604  | 1581706  | 1470428  | 1199315  | 1396551  | 1412225  | 1341189  | TRUE |
| 183120.2 | 155983.7 | 170351.8 | 135276.4 | 124653.6 | 127104.1 | 142729.1 | 132320.7 | TRUE |
| 105628   | 99304.1  | 98332.4  | 135547.3 | 109634.8 | 99921.4  | 90797.4  | 120293.7 | TRUE |
| 164537.9 | 145735.3 | 97440.5  | 162921.6 | 165194.7 | 179976   | 210578   | 202939.4 | TRUE |
| 28279.1  | 10105.3  | 20895.4  | 36475.2  | 22948.6  | 28672.5  | 31820.8  | 45102.9  | TRUE |
| 48552.5  | 65516.1  | 50661.8  | 58843.1  | 55824.3  | 60769.1  | 67666.4  | 49370.4  | TRUE |
| 131032.5 | 110680.2 | 102435.8 | 132650.3 | 132424.4 | 129882.1 | 136933.8 | 162016.5 | TRUE |
| 48999.2  | 48316.9  | 44213.4  | 40255.4  | 48789.1  | 56345.9  | 68801    | 63772.8  | TRUE |
| 164383.5 | 138044   | 144297.4 | 132742.6 | 174853.3 | 139968.4 | 178256.7 | 144225.5 | TRUE |
| 85727.1  | 75081.9  | 80770    | 82992.6  | 92014.3  | 81605.8  | 99881.3  | 88984.4  | TRUE |
| 571969.7 | 463727   | 503845.7 | 607675.9 | 466638.4 | 599447.1 | 633015.1 | 593544.4 | TRUE |
| 28288.3  | 31499.7  | 11123.1  | 16948.6  | 29284.4  | 16439.8  | 39991.6  | 14861.3  | TRUE |
| 100606   | 88402.2  | 99221.7  | 105402.3 | 103770.7 | 101895.4 | 124606   | 103155   | TRUE |
| 165076.9 | 134268.7 | 148161.2 | 123751.1 | 150792.8 | 176975.4 | 162921.5 | 179918.1 | TRUE |
| 20102.1  | 6737.1   | 16424    | 11669.7  | 9875     | 6036.8   | 16890.7  | 12672.9  | TRUE |
| 13132.8  | 19420.8  | 11314.8  | 19710.5  | 33334.3  | 8014.6   | 19153    | 16295.6  | TRUE |
| 108458.5 | 142433.4 | 81723.9  | 123463.5 | 175443.3 | 88801.6  | 146655.4 | 157254   | TRUE |
| 19079    | 28475.3  | 22857.3  | 29699.9  | 29296.9  | 20210.2  | 27087    | 12732.3  | TRUE |
| 284421.2 | 348641.6 | 285098.7 | 347973.2 | 322101.5 | 262704.8 | 267143.6 | 286505.5 | TRUE |
| 213584   | 414957.7 | 209084.4 | 193747.2 | 198517.3 | 157261.2 | 221285.5 | 192098.5 | TRUE |
| 84469.9  | 74468.8  | 60291.7  | 87439.2  | 74813.8  | 77411.5  | 67917.1  | 78380.8  | TRUE |
| 127502.6 | 127886.8 | 88810.4  | 147455.9 | 158806.4 | 101904.6 | 147788.7 | 130109.4 | TRUE |
| 1750426  | 1785206  | 1264465  | 1836175  | 1860194  | 1350405  | 1762819  | 1698180  | TRUE |
| 241058.3 | 174941.8 | 192108.7 | 178003.3 | 167142.9 | 185795   | 170387.9 | 191544.7 | TRUE |

|          |          |          |          |          |          |          |          |      |
|----------|----------|----------|----------|----------|----------|----------|----------|------|
| 280602.8 | 258441.2 | 222361.6 | 234521.6 | 183946.7 | 247764.9 | 275949.3 | 265376.7 | TRUE |
| 248397.5 | 336861.4 | 272710.7 | 411603.5 | 371016.8 | 238848.5 | 213117.9 | 237799.4 | TRUE |
| 81553.3  | 89343.4  | 124497.5 | 75418.9  | 77239.5  | 104206.9 | 69141    | 90767.2  | TRUE |
| 24913.3  | 21392.1  | 26000.9  | 24438.8  | 23485.6  | 16513.2  | 19837.3  | 27651.9  | TRUE |
| 84219.1  | 74120.3  | 57150.7  | 86826.5  | 83215.2  | 52107.1  | 71701.2  | 73131.6  | TRUE |
| 33880.9  | 63172.2  | 80844.1  | 25104.3  | 32619.9  | 26210    | 38568.9  | 35398.3  | TRUE |
| 76208    | 69177.3  | 48097.1  | 64258.7  | 72004.7  | 51683.3  | 66577.7  | 72716.9  | TRUE |
| 58686.7  | 59117.3  | 59541.8  | 58950.8  | 81311.7  | 59390.4  | 64225.5  | 65908.8  | TRUE |
| 19186.2  | 33656.7  | 70243.3  | 37077.3  | 24437.4  | 20975.6  | 19702.3  | 21991.5  | TRUE |
| 50155.6  | 58016.7  | 58456.8  | 75338.8  | 69752.9  | 67824.9  | 75415.2  | 66813.5  | TRUE |
| 73543    | 74145.6  | 56370.7  | 79432.1  | 90516.4  | 81424.1  | 93130.2  | 98301.7  | TRUE |
| 83245.3  | 76105.6  | 62119.1  | 92512.8  | 99446.1  | 89995    | 94070    | 138960.1 | TRUE |
| 186325   | 176296   | 153304.3 | 202273.5 | 153060.2 | 198044.2 | 238012.1 | 178523.5 | TRUE |
| 5622476  | 5598049  | 4286022  | 5573155  | 5789381  | 4572271  | 5387615  | 5567216  | TRUE |
| 2031349  | 1954579  | 2031757  | 2072120  | 1709230  | 1969036  | 2074273  | 1952891  | TRUE |
| 71071.9  | 151665.8 | 76226.7  | 137274.7 | 139209   | 61924.2  | 63742.1  | 63742.2  | TRUE |
| 421024.3 | 475639.7 | 332882.4 | 414977.4 | 491879.1 | 335586.1 | 501590.5 | 510171.8 | TRUE |
| 94221.2  | 100478.3 | 49421.2  | 96055.2  | 117890.2 | 64417.7  | 103891.5 | 106640.2 | TRUE |
| 97053.9  | 121774.7 | 82502.2  | 134589.7 | 122153.4 | 66690.5  | 111148.5 | 132853.4 | TRUE |
| 29700.4  | 28682.9  | 28832    | 27056.8  | 32477.4  | 38025.7  | 29051.7  | 38546.4  | TRUE |
| 1057160  | 1192828  | 1166486  | 1469660  | 840174.9 | 1164195  | 1284543  | 1189188  | TRUE |
| 238828.5 | 295033.9 | 270507.2 | 298324.5 | 164339.2 | 301896.4 | 300241.2 | 291449   | TRUE |
| 8927418  | 9227141  | 7208724  | 9584473  | 10303621 | 7941914  | 9086523  | 9946454  | TRUE |
| 724280.6 | 698442.5 | 597606.1 | 709007.7 | 755677.9 | 658055.9 | 740400.1 | 841416.4 | TRUE |
| 575033.4 | 579860.1 | 480717.3 | 573078.6 | 604746.2 | 484098.3 | 614025.9 | 589096.7 | TRUE |
| 99568.8  | 117710   | 87714.8  | 102606.6 | 99850.7  | 97144.7  | 109339.8 | 106755.6 | TRUE |
| 90963.9  | 95247    | 84243.2  | 123939.8 | 173868.9 | 150773.2 | 148026.8 | 156871.3 | TRUE |
| 104575.2 | 112512.8 | 127235.1 | 116162.9 | 91599.7  | 136479.6 | 146893.6 | 100893.3 | TRUE |
| 99234.4  | 60289.8  | 57307.7  | 93869.6  | 110457.8 | 62882.1  | 84660.4  | 106546.3 | TRUE |
| 158843.4 | 131519   | 132001.8 | 153305.7 | 142410.3 | 131872.3 | 136534.9 | 151718.8 | TRUE |
| 114401   | 104709.7 | 116841.3 | 141162.1 | 118197.6 | 112182.8 | 117945.5 | 126027.8 | TRUE |
| 182827.2 | 135343   | 137759.7 | 146940.4 | 196806.4 | 153056.5 | 192936.6 | 213509.2 | TRUE |
| 247251.7 | 247701   | 258191.7 | 269807.1 | 240088.3 | 255046.9 | 307276   | 297928.4 | TRUE |
| 46529.6  | 47225.3  | 48119.8  | 55128.7  | 50591.1  | 50783.3  | 54472    | 42417.2  | TRUE |
| 147673.7 | 126926.9 | 135435.9 | 153848.6 | 130750.1 | 170656.6 | 193377.6 | 171916.3 | TRUE |
| 1218527  | 1269958  | 840421.1 | 1388979  | 1171546  | 776582.9 | 1282662  | 1151050  | TRUE |
| 115757.3 | 121043.4 | 125420.9 | 106961.8 | 97252    | 137910.4 | 98027.8  | 88166.6  | TRUE |
| 65790.3  | 61356.7  | 53143.6  | 58954.2  | 66947.2  | 70015.6  | 56744.9  | 66984    | TRUE |
| 131628.1 | 116893.6 | 97579.1  | 111759.4 | 110839.5 | 134001.1 | 127057.5 | 135410.8 | TRUE |
| 55644    | 41467    | 48829.9  | 48141.1  | 61122.3  | 50826.6  | 48184.9  | 51037    | TRUE |
| 78244.7  | 78570.2  | 99255.3  | 96233.7  | 91569.5  | 67458.8  | 99723.6  | 82754.7  | TRUE |
| 241078.6 | 197577   | 98769.4  | 207571.2 | 230292   | 149330.6 | 289216.4 | 319238.8 | TRUE |



|          |          |          |          |          |          |          |          |      |
|----------|----------|----------|----------|----------|----------|----------|----------|------|
| 22339.8  | 18531.4  | 17392.9  | 23099.6  | 17895.1  | 21674.4  | 9138.4   | 22030.7  | TRUE |
| 8744.1   | 10820.4  | 14196.2  | 10109.1  | 8591.6   | 14756.9  | 8854.1   | 12187.9  | TRUE |
| 84831.2  | 102166.4 | 111274.2 | 113414.3 | 126495.6 | 98296.7  | 94977.9  | 90711.4  | TRUE |
| 100344   | 132502.2 | 155116.8 | 138658.9 | 118589.3 | 118781.9 | 116320   | 113930.1 | TRUE |
| 112594.4 | 90870.5  | 75292.5  | 154660.7 | 138975.3 | 137191.4 | 147149.6 | 146442.7 | TRUE |
| 187432.8 | 173965.6 | 143223.4 | 155663.3 | 192035.9 | 214749.5 | 218366.9 | 250101.6 | TRUE |
| 94896.6  | 97428.8  | 100903.4 | 121285   | 119981   | 92173.5  | 116880.7 | 121331   | TRUE |
| 120926.7 | 95411.6  | 98251.9  | 144342.7 | 120636.1 | 141496.1 | 115599.8 | 124136   | TRUE |
| 59442.1  | 35908.9  | 26389.5  | 54430.1  | 46311.2  | 53351.9  | 58471.6  | 62671.2  | TRUE |
| 10800.4  | 8212.9   | 6109.9   | 9269.9   | 18296.5  | 7648.6   | 27870.9  | 14476.5  | TRUE |
| 174131.3 | 146506.8 | 114939.5 | 124628.7 | 169076.5 | 166508.5 | 189950.7 | 170847.8 | TRUE |
| 97958.9  | 116855.8 | 81126.3  | 114894.4 | 100600.1 | 112226.6 | 121363.8 | 113973.4 | TRUE |
| 47718.3  | 44188.5  | 46948.1  | 62431.2  | 41757.2  | 54987.8  | 46101.2  | 52117.9  | TRUE |
| 88004.3  | 55455.4  | 47677.1  | 76649.5  | 69360    | 83449.5  | 63390.5  | 97838.2  | TRUE |
| 141399.6 | 141041   | 92946.6  | 116296.4 | 143273.6 | 180738.9 | 152684.3 | 204414.2 | TRUE |
| 1696523  | 1087862  | 1587358  | 1504959  | 1915996  | 1801829  | 1172128  | 1755534  | TRUE |
| 1140134  | 848236.9 | 1015629  | 975917.7 | 1222470  | 1115759  | 888356.3 | 1143505  | TRUE |
| 59321.5  | 44259.2  | 42048    | 60473.6  | 31862.1  | 74028.9  | 68612.8  | 45604    | TRUE |
| 58097.9  | 68716.5  | 86903.3  | 42009    | 38560.7  | 59093.8  | 53103    | 39333.4  | TRUE |
| 91460.4  | 86686.3  | 105920.1 | 90258.2  | 70010.4  | 106807.7 | 91948.8  | 82368.3  | TRUE |
| 64585.2  | 49971.4  | 64256.6  | 67330.2  | 52637.8  | 68750    | 52611.4  | 59680.8  | TRUE |
| 34223.1  | 34319.1  | 37846.1  | 31598.1  | 27909.2  | 37773    | 31399.6  | 21360.1  | TRUE |
| 102629.8 | 84776.9  | 145466.4 | 119080   | 103642.1 | 126126.6 | 127010.9 | 93844.3  | TRUE |
| 110962.8 | 103478.1 | 160508.5 | 150745   | 98208.5  | 157334.2 | 114319.3 | 96783.4  | TRUE |
| 205512.8 | 150188.4 | 204972.2 | 214067.2 | 266929.3 | 258596.1 | 191890.1 | 245846   | TRUE |
| 39975.4  | 40052    | 29235.4  | 46947.7  | 36960.6  | 49114    | 35751.1  | 36126.1  | TRUE |
| 32682    | 22591.5  | 30412.7  | 30870.3  | 30468.7  | 45075.3  | 33311.7  | 42058.8  | TRUE |
| 73102.1  | 60285.4  | 41893.3  | 70322.6  | 43501    | 60993.6  | 69991.7  | 55265.6  | TRUE |
| 65682.9  | 94697.6  | 66349.3  | 90977.4  | 84530.3  | 76831.9  | 58660.2  | 86179.9  | TRUE |
| 45868.4  | 60468.1  | 49339.6  | 49443.5  | 50555.8  | 56611.7  | 48436.6  | 53712.6  | TRUE |
| 93989.1  | 97287.2  | 84907.5  | 97865.9  | 86152.7  | 84740.8  | 90185.7  | 100875.9 | TRUE |
| 275392.5 | 260652.7 | 191167.5 | 217567.7 | 178159.6 | 217715.4 | 199779.8 | 170843.3 | TRUE |
| 201631.4 | 197228.6 | 219581.2 | 264410.6 | 220059.7 | 257216.5 | 230263   | 231498.1 | TRUE |
| 207129.2 | 202788.8 | 242499.4 | 267499.9 | 207564.1 | 262510.9 | 232206.2 | 242196.1 | TRUE |
| 281453.5 | 203007.6 | 283498.2 | 303826.8 | 320102   | 287764.7 | 242578.5 | 318065.9 | TRUE |
| 191372.8 | 135511.6 | 189568.2 | 208473.4 | 217532.5 | 208477   | 196208.3 | 227164.5 | TRUE |
| 51450.8  | 42127.8  | 25693.1  | 52621.9  | 49280.6  | 78564.4  | 50317.7  | 39291.3  | TRUE |

|          |          |          |          |          |          |          |          |      |
|----------|----------|----------|----------|----------|----------|----------|----------|------|
| 101545.9 | 89343.4  | 100907.2 | 116055.5 | 99121.2  | 147221.9 | 128584.3 | 98338.5  | TRUE |
| 56028.7  | 49281.9  | 49627.4  | 63306.5  | 51989.4  | 81647.2  | 61974    | 41217.6  | TRUE |
| 73193.1  | 33447.2  | 60598.6  | 62408.6  | 71818.5  | 68405    | 44316.3  | 86970.1  | TRUE |
| 37285    | 37028.3  | 23004.6  | 51106.1  | 38468.1  | 43273.4  | 40613.7  | 33363.3  | TRUE |
| 87384.4  | 79509.9  | 84361.2  | 70815.9  | 93376.6  | 88773.5  | 93822.9  | 92649.9  | TRUE |
| 106630.9 | 93639.3  | 76050.4  | 109861.6 | 103245.5 | 130726.7 | 133939.7 | 137124.4 | TRUE |
| 90273.1  | 77345    | 66036.4  | 89944.6  | 77882.1  | 100471.4 | 101773.7 | 88548.9  | TRUE |
| 163602.7 | 157810.2 | 144225.9 | 203509.8 | 147164.8 | 182382.4 | 170907.4 | 173675.1 | TRUE |
| 75801.6  | 61158.7  | 53040.1  | 76381.6  | 40520.8  | 75641.5  | 70872.3  | 59362.7  | TRUE |
| 356890.9 | 276918   | 332557.8 | 337171.6 | 347131.7 | 390448.5 | 341373   | 400329.6 | TRUE |
| 762273.6 | 762893.5 | 721454.8 | 785054.3 | 712006.4 | 820184.6 | 755281.3 | 705852.9 | TRUE |
| 134236.9 | 155756.8 | 139437.6 | 139936.6 | 108618.2 | 146924.8 | 138829.7 | 133749.7 | TRUE |
| 1167375  | 1006671  | 1124837  | 1209046  | 1277578  | 1312933  | 1092315  | 1238082  | TRUE |
| 386421.6 | 350111   | 459585.4 | 506108.2 | 346290   | 434837.6 | 368165   | 385498.4 | TRUE |
| 26721.8  | 32575.9  | 18079.8  | 24441.4  | 21798.4  | 13820.5  | 22404.4  | 23033.3  | TRUE |
| 56963.4  | 57924.7  | 53573.8  | 43346.5  | 43592.4  | 45053.2  | 46318.4  | 32627.6  | TRUE |
| 42832.5  | 55832    | 60283.1  | 56511.3  | 48461.1  | 55785.4  | 50094.9  | 61920.9  | TRUE |
| 19962.9  | 32134.7  | 23322.8  | 20982.2  | 12868.3  | 28267    | 35918.2  | 20372.4  | TRUE |
| 91772.9  | 27812.7  | 42319.3  | 42783.2  | 29547.1  | 53220.6  | 31706.7  | 34266.5  | TRUE |
| 43845.2  | 27534.1  | 41989.1  | 34362.2  | 43878.1  | 42198.5  | 34300.1  | 31822.6  | TRUE |
| 95220.2  | 71067    | 90808.4  | 83171.6  | 98343.4  | 82166    | 69389.1  | 90067.3  | TRUE |
| 305486   | 244850.3 | 312609.4 | 300362.5 | 414895.6 | 268791.2 | 270785   | 293262.8 | TRUE |
| 361826.1 | 463062.7 | 346054.9 | 311704.2 | 335254.5 | 355607.2 | 318035.9 | 277431.6 | TRUE |
| 350996.7 | 306696.3 | 295213.9 | 279899   | 197980.1 | 337585.5 | 256824.5 | 201181.2 | TRUE |
| 171716.6 | 192924.8 | 247597   | 242420.6 | 165132.7 | 216993.8 | 204849.3 | 139763.4 | TRUE |
| 368454.7 | 355920.9 | 375133.1 | 363845.5 | 338435.3 | 390413.5 | 375561.2 | 311324.3 | TRUE |
| 167894.3 | 165700.5 | 153355.8 | 158852.9 | 118452.8 | 196028.8 | 175190.5 | 147079.9 | TRUE |
| 50855.4  | 67085.8  | 63185.6  | 54978.9  | 59833.1  | 80826.7  | 46521.3  | 84380.3  | TRUE |
| 61586    | 38247.9  | 65932.1  | 46970    | 50264.3  | 61233.3  | 47751.6  | 50059.5  | TRUE |
| 106584.8 | 72761.1  | 103778.5 | 86206.5  | 65294.9  | 92879.6  | 96305.6  | 78454.5  | TRUE |
| 287824.4 | 250448.7 | 274184.2 | 252066.6 | 213354.6 | 301038.2 | 255206.4 | 243352.6 | TRUE |
| 135693.2 | 130814   | 136553.2 | 165036.8 | 116016.5 | 163976.4 | 118811.1 | 110310.1 | TRUE |
| 46423.1  | 42387.2  | 55581.5  | 75497.6  | 45889.1  | 48320.3  | 55576.2  | 47598.8  | TRUE |
| 86042.7  | 58924.3  | 59551.3  | 66053.5  | 67679.4  | 49077.6  | 67848    | 60757.6  | TRUE |
| 37253.6  | 32768.2  | 51636.5  | 36457.6  | 43498.6  | 49925.7  | 44273.5  | 48378.2  | TRUE |
| 198066   | 182481.3 | 184637.5 | 199314.4 | 168561   | 200575.4 | 185158.7 | 186957   | TRUE |
| 126326.5 | 88798.8  | 146892.2 | 118198.4 | 120367.1 | 149280.6 | 121508.8 | 142419.6 | TRUE |
| 636620.7 | 573683.8 | 545066.3 | 686713.5 | 643492.9 | 567829.4 | 664528.7 | 639345.2 | TRUE |
| 555205.5 | 460136.4 | 592049.8 | 576423.6 | 539143.2 | 650051.9 | 570145.5 | 613600.5 | TRUE |
| 261099.1 | 236611.9 | 230084   | 249592   | 278610.6 | 234603.3 | 250232.9 | 276644.5 | TRUE |
| 2074743  | 2042576  | 1803220  | 2049773  | 2134995  | 1908412  | 2188553  | 2225054  | TRUE |
| 20197.1  | 26777.8  | 18641.2  | 27980.3  | 26717.2  | 16184.5  | 7089.1   | 7401.9   | TRUE |
| 209896.9 | 224976.8 | 242169.9 | 258399.9 | 235427.9 | 234852.4 | 225234.6 | 198798.8 | TRUE |
| 182907.8 | 189381.3 | 179897.1 | 185368.3 | 173634.1 | 180532.8 | 200625.1 | 168186.6 | TRUE |
| 209201.4 | 193492.7 | 207818.6 | 224228   | 187610.5 | 220129.4 | 190806.2 | 203202.6 | TRUE |
| 120271.7 | 90658.9  | 99039.7  | 97130.7  | 79694.6  | 111724.5 | 100649.7 | 97406.2  | TRUE |
| 59843.4  | 94926.1  | 72184    | 67292.7  | 82810.5  | 62446.9  | 55983.3  | 66094.5  | TRUE |
| 297594.2 | 284601.8 | 290396.1 | 375686.1 | 303864.9 | 292218.2 | 286552   | 323167   | TRUE |
| 803988.4 | 736460.4 | 664422.2 | 918660.4 | 817060.8 | 744666.2 | 705539.5 | 818863.3 | TRUE |

|          |          |          |          |          |          |          |          |      |
|----------|----------|----------|----------|----------|----------|----------|----------|------|
| 63324.9  | 57661.5  | 61835.1  | 61872.3  | 70299    | 63125.3  | 57670.7  | 92749.7  | TRUE |
| 304820.4 | 280113   | 260612.4 | 308721.9 | 301570.1 | 359948.1 | 338170   | 373939.7 | TRUE |
| 953729.9 | 987099.8 | 897905.9 | 922071.7 | 930569.9 | 1045581  | 1040212  | 1087550  | TRUE |
| 241795.3 | 206019.4 | 204211.3 | 239527.3 | 228046.9 | 258986.1 | 248629.8 | 286080.6 | TRUE |
| 200240.2 | 193571.9 | 200360.7 | 199176.7 | 197551.4 | 237970.1 | 189241.8 | 224305.6 | TRUE |
|          |          |          |          |          |          |          |          |      |
| 81484    | 76152.7  | 92201.9  | 110791.4 | 111444.8 | 98925.8  | 99236.7  | 103593.6 | TRUE |
|          |          |          |          |          |          |          |          |      |
| 47125.9  | 55189.2  | 45718.2  | 69994.6  | 47271.6  | 44881    | 72565.9  | 42352.2  | TRUE |
|          |          |          |          |          |          |          |          |      |
| 386531.4 | 382488.9 | 298896.5 | 304771.7 | 380844.8 | 546459.6 | 432385.3 | 476104.6 | TRUE |
|          |          |          |          |          |          |          |          |      |
| 31700.6  | 29052    | 16255.6  | 44529.7  | 16618.7  | 32373    | 35662.2  | 35441.2  | TRUE |
| 135786.5 | 148241.4 | 131712.3 | 166302.8 | 162123.6 | 144403.2 | 137233.4 | 176111.6 | TRUE |
| 593262.3 | 551274.1 | 596973.9 | 721409.5 | 656081.3 | 613666.1 | 641981.4 | 607939   | TRUE |
|          |          |          |          |          |          |          |          |      |
| 257932.5 | 228340.7 | 271818.4 | 256436.9 | 247514.7 | 247201   | 274549.8 | 259210.9 | TRUE |
|          |          |          |          |          |          |          |          |      |
| 37425.7  | 62149.2  | 36697.7  | 53644.2  | 34772    | 49375.5  | 49261.8  | 50904.1  | TRUE |
| 158401.8 | 167381.6 | 212481.3 | 164686.5 | 150663.9 | 129513   | 144856.8 | 154668.1 | TRUE |
| 1430703  | 1184383  | 1236173  | 1505739  | 1349939  | 1388764  | 1445481  | 1462502  | TRUE |
| 544684.7 | 602514.3 | 585319.7 | 649787.2 | 557290.2 | 603506.8 | 548000.8 | 551964.6 | TRUE |
| 434658.5 | 411332.8 | 451969.2 | 422138.8 | 405233   | 471712   | 442596.2 | 433595.2 | TRUE |
| 16748.2  | 23664.3  | 16412.3  | 9968.8   | 20260.3  | 25442.1  | 24087.8  | 22416.3  | TRUE |
| 96832.1  | 105209   | 77812.7  | 103481.2 | 125987.6 | 73689.6  | 111535.1 | 107098.3 | TRUE |
| 31476.6  | 22896.7  | 17138    | 29642.3  | 32797.1  | 25262.8  | 31737.2  | 23456.8  | TRUE |
|          |          |          |          |          |          |          |          |      |
| 59343.9  | 47825.7  | 61923.3  | 60913.3  | 61044.6  | 66021.7  | 61619.1  | 57562.3  | TRUE |
| 1537062  | 1457203  | 1370790  | 1403479  | 1636173  | 1714039  | 1448186  | 1686352  | TRUE |
|          |          |          |          |          |          |          |          |      |
| 101528.7 | 89181.9  | 104679.9 | 85135.3  | 89782.5  | 82348.4  | 72573    | 85842.5  | TRUE |
| 158969.8 | 128007.9 | 179940.3 | 218647.9 | 217165.9 | 219954.7 | 163366.3 | 220652.7 | TRUE |
| 51361.5  | 49792.1  | 43262.8  | 45003.2  | 75477.1  | 47210.3  | 58161.4  | 55010    | TRUE |
| 34999.5  | 22570.1  | 23338.4  | 31844.4  | 20719.9  | 31122.1  | 28510.2  | 11570.6  | TRUE |
|          |          |          |          |          |          |          |          |      |
| 79490.7  | 65421.5  | 76215.4  | 79009.3  | 74144.9  | 91786.1  | 86996.5  | 80447.6  | TRUE |
| 89363.6  | 80996.1  | 73816    | 62641.5  | 64018.5  | 68502.8  | 71370.2  | 74367.7  | TRUE |
| 97505.6  | 102424.6 | 97502.6  | 100187.3 | 100101.7 | 112314.9 | 94512.3  | 85948.8  | TRUE |
| 64360.4  | 47901.6  | 84059    | 65224.7  | 83296.7  | 97394    | 69557    | 59971.9  | TRUE |
| 52237.2  | 46315.6  | 46327.8  | 50578.7  | 49616.5  | 51690.4  | 56780    | 51851.8  | TRUE |
| 48726.2  | 39578.7  | 25157.2  | 50262.8  | 41151.6  | 48139.6  | 47987.7  | 65745    | TRUE |

|          |          |          |          |          |          |          |          |      |
|----------|----------|----------|----------|----------|----------|----------|----------|------|
| 70544    | 66015.7  | 64705.1  | 69881.5  | 67406.6  | 69052.8  | 74582.1  | 63562.7  | TRUE |
| 187443.2 | 149413.7 | 157309.4 | 160275.2 | 192703.3 | 231756.2 | 182987.6 | 213615.9 | TRUE |
| 56729.8  | 52789.9  | 62121.3  | 64899.5  | 59208    | 52834.4  | 46586.9  | 58208.6  | TRUE |
| 70443.9  | 64673.5  | 64771.5  | 60515.2  | 68001.7  | 67391.5  | 82447.7  | 71836.5  | TRUE |
| 264793.9 | 254423.9 | 238039.1 | 246960.9 | 270813.1 | 237670.7 | 269628.2 | 285108.1 | TRUE |
| 246497.8 | 253499.7 | 230744.6 | 253960.3 | 279026.3 | 266471.3 | 263308   | 271280.8 | TRUE |
| 187386.7 | 149454   | 180828.5 | 160961.4 | 169793.8 | 194418.3 | 188944.1 | 205957.9 | TRUE |
| 348368.1 | 324300.3 | 326037.8 | 398873.9 | 371532.7 | 341519.4 | 349575.3 | 387627.3 | TRUE |
| 148496.7 | 111708.5 | 128738.2 | 126012.4 | 127431.4 | 127387.9 | 123877.3 | 142537.1 | TRUE |
| 345677.4 | 240710.1 | 253742.4 | 291623.1 | 273088   | 331066.9 | 318116.7 | 352672.7 | TRUE |
| 940963.9 | 819676.7 | 730822.9 | 1009583  | 1116388  | 1022843  | 922590.9 | 1040713  | TRUE |
| 262030.6 | 222883.2 | 199593.9 | 205784.3 | 210228.3 | 239775.9 | 192040   | 241993.9 | TRUE |
| 584533.6 | 432455.3 | 615684.4 | 646829.8 | 628243   | 705805.6 | 518924.6 | 640019.4 | TRUE |
| 330030.3 | 261113.5 | 360369.9 | 372143   | 348502.3 | 435279.4 | 337438.5 | 354013.2 | TRUE |
| 104751.7 | 81681    | 103469.4 | 98856    | 123604   | 110334.4 | 95989.2  | 122931.7 | TRUE |
| 214373.1 | 230646.4 | 217824.1 | 211176.7 | 262632.1 | 263269   | 225072.7 | 262913.8 | TRUE |
| 34478.4  | 11009.6  | 41093.6  | 38048.5  | 38372.7  | 43509.7  | 27365.3  | 48652.6  | TRUE |
| 68892.4  | 52970.2  | 49675.1  | 69592.5  | 64210.6  | 72684.2  | 80265.9  | 70065.5  | TRUE |
| 108133.4 | 95222.3  | 106009.5 | 117366.9 | 93767    | 102371.7 | 90172    | 111069   | TRUE |
| 17747.5  | 7058.7   | 33943.8  | 23869.6  | 9900.1   | 22381.2  | 8984.2   | 9867     | TRUE |
| 77059    | 76585.1  | 85319.9  | 82920.7  | 64728.6  | 69565.6  | 80802.2  | 54193.5  | TRUE |
| 896895.9 | 786664.2 | 937215   | 929290.6 | 667472.3 | 904054   | 900901.9 | 649353.2 | TRUE |
| 35590.4  | 37287.7  | 41424.9  | 38943.4  | 27506    | 34467.4  | 25067    | 27259.3  | TRUE |
| 151886.1 | 146587.2 | 146571   | 162295   | 155316.2 | 170575.9 | 166474.2 | 158227.5 | TRUE |
| 746604.4 | 598012.4 | 626687.2 | 599861.4 | 927060.4 | 523513.8 | 517145.1 | 571745   | TRUE |
| 651006.2 | 456417.1 | 691087.4 | 646118.8 | 737794.5 | 750252.7 | 577716.4 | 678728.8 | TRUE |
| 224746.4 | 227562.6 | 252106   | 277568.7 | 252205   | 308363.8 | 231195.2 | 286307.4 | TRUE |
| 248607.6 | 290695.8 | 277316.9 | 397622.3 | 321876.7 | 300134.7 | 400054.9 | 310011.1 | TRUE |
| 169557.4 | 136357   | 146096.3 | 125673.8 | 184659.9 | 154388.8 | 134863.7 | 143221.8 | TRUE |
| 27667.3  | 55451.9  | 42085.3  | 43289.1  | 44491.1  | 20563    | 51552.9  | 43406.9  | TRUE |
| 45789.4  | 77906.8  | 95598.4  | 58790.9  | 45931.2  | 92761.3  | 79047.4  | 82748.5  | TRUE |
| 260454.9 | 277826.1 | 289913.6 | 362574.5 | 201966.2 | 337688.8 | 351112.8 | 358142.2 | TRUE |
| 244796.6 | 235041.5 | 256032.2 | 271271.2 | 159429.8 | 295749.5 | 196040.7 | 173498.4 | TRUE |
| 292117.8 | 311272   | 332832.9 | 333822.1 | 242697.7 | 291156.8 | 312809.7 | 253604.2 | TRUE |
| 136950.1 | 117134.7 | 174437.4 | 151135.9 | 126243.6 | 150465.5 | 117829.8 | 94391.4  | TRUE |
| 609232.3 | 359870.2 | 504554.3 | 523519   | 603872.7 | 627167.7 | 399315.8 | 621188.8 | TRUE |
| 46912.4  | 28554.8  | 39309.2  | 55166.1  | 37848.6  | 59765.2  | 78024.8  | 62230.5  | TRUE |
| 86336.8  | 101759.1 | 117301.4 | 96538.5  | 105533.8 | 105873.7 | 113004.3 | 88095.2  | TRUE |
| 114239.2 | 110369.8 | 117119.1 | 101182.4 | 97002.3  | 106914.3 | 105964.9 | 76800.6  | TRUE |
| 132470   | 76859.5  | 120373.6 | 127652.8 | 135554   | 129588   | 140640   | 129927.5 | TRUE |

|          |          |          |          |          |          |          |          |      |
|----------|----------|----------|----------|----------|----------|----------|----------|------|
| 60449.2  | 33195.5  | 36473.1  | 25703.1  | 24843.2  | 46851.4  | 44450.1  | 31181.8  | TRUE |
| 125924.4 | 91158.1  | 83909.5  | 100573.8 | 85800.6  | 100474.1 | 99138.9  | 86559.2  | TRUE |
| 268465.5 | 206347.1 | 275276.5 | 266102.9 | 194520.5 | 279894.6 | 232710.6 | 213688.1 | TRUE |
| 30002.5  | 32944.3  | 39360.8  | 37253.4  | 41107    | 41600.7  | 42200.6  | 40155.8  | TRUE |
| 66327.8  | 53566.9  | 41798    | 60973.2  | 64063.4  | 69428.9  | 58801.7  | 89722.5  | TRUE |
| 73706.1  | 48726.9  | 57132.6  | 65857.8  | 56953.4  | 91239.1  | 104078.2 | 68993.4  | TRUE |
| 96328.6  | 90845.5  | 71353.8  | 75222    | 56380    | 99183.4  | 101449.3 | 96814.7  | TRUE |
| 83709    | 70201.3  | 73360.5  | 87679    | 80527.4  | 50196.8  | 52425.8  | 61029.6  | TRUE |
| 26742.3  | 27479.8  | 36469.5  | 27043.8  | 20934.7  | 38112.3  | 17454.2  | 31995.4  | TRUE |
| 27889.2  | 30568.6  | 44928.1  | 36117.8  | 38314.5  | 48102.1  | 39863.2  | 40152.1  | TRUE |
| 159943.7 | 158589.8 | 119641.2 | 153342.5 | 118442   | 119379.5 | 167358.2 | 142819.3 | TRUE |
| 151646.3 | 127826   | 137650.5 | 167104.7 | 105496.8 | 138792.2 | 147578.6 | 161708.1 | TRUE |
| 502689.2 | 351558.3 | 537368   | 532831.7 | 433561.5 | 511642.1 | 385608.4 | 479537.3 | TRUE |
| 85524.9  | 79614.7  | 53544.5  | 74592.9  | 72213.3  | 52529.8  | 78472.6  | 68179    | TRUE |
| 29676.6  | 43811.8  | 50199.8  | 37234    | 44903.7  | 38538.4  | 38999.6  | 39670.4  | TRUE |
| 27800.7  | 21982.9  | 30241.4  | 45638.3  | 8514.8   | 12712.5  | 24557.4  | 12795.8  | TRUE |
| 1578481  | 1543285  | 1366361  | 1871859  | 1452307  | 1459383  | 1697777  | 1384164  | TRUE |
| 1385701  | 1386365  | 1206747  | 1544071  | 1216623  | 1299384  | 1491610  | 1301377  | TRUE |
| 1684665  | 1320109  | 1751046  | 1889129  | 1611226  | 1946624  | 1514179  | 1877383  | TRUE |
| 112419.3 | 140505.3 | 83204.7  | 151860   | 140586.4 | 119744.2 | 131260.5 | 157878.8 | TRUE |
| 75279.6  | 86411    | 62114.3  | 90025.1  | 93337.2  | 91796.5  | 97814.5  | 78727.9  | TRUE |
| 34666.9  | 34644.4  | 26079.8  | 39759.2  | 29922.1  | 40818.4  | 42627.3  | 46811    | TRUE |
| 60382    | 56779.3  | 97621.1  | 80897.2  | 54489.2  | 92288.2  | 82785.1  | 80466.9  | TRUE |
| 348572.5 | 316688.1 | 281150.5 | 390128.4 | 315857.5 | 420527.4 | 359931.7 | 422224.4 | TRUE |
| 68821.4  | 65571.4  | 77772.9  | 90276    | 96846.7  | 76823.5  | 96163.4  | 100729.5 | TRUE |
| 225459.6 | 245683   | 234161.6 | 254257.3 | 204310.8 | 204345.1 | 258838   | 187330.1 | TRUE |
| 81463.1  | 55032.4  | 59248.9  | 68451.4  | 76968.5  | 125247.9 | 58451    | 86154.7  | TRUE |
| 713783.9 | 581033.6 | 760660.8 | 797745.5 | 591942   | 741034.6 | 667540.4 | 700413.1 | TRUE |
| 181540.8 | 179909.1 | 183198.9 | 183306.6 | 197703.3 | 231471.5 | 193653.8 | 175819.5 | TRUE |
| 571883.6 | 506173.5 | 613073.6 | 611609.9 | 644132.2 | 610047.8 | 526444.1 | 597809.4 | TRUE |
| 49117    | 44456.8  | 51262.3  | 55548.2  | 59356.7  | 51372.8  | 41386.3  | 52594.5  | TRUE |
| 71330.5  | 56282.6  | 62576.9  | 95193.9  | 64121.8  | 77442    | 68407    | 56456.8  | TRUE |
| 28119.3  | 31751.9  | 41630.3  | 49330.7  | 42171.3  | 38425.1  | 15782.1  | 31949.6  | TRUE |
| 548581.3 | 554888.9 | 538834.7 | 611471   | 528029.2 | 529335.6 | 517005.7 | 543884.7 | TRUE |
| 2089392  | 1802687  | 1956300  | 2435967  | 2134228  | 1949663  | 1995709  | 2034985  | TRUE |
| 2013287  | 1677818  | 1830886  | 1745072  | 1849919  | 2159715  | 1862904  | 2064647  | TRUE |
| 2359786  | 2191337  | 2186872  | 2164986  | 2160881  | 2560102  | 2428227  | 2664049  | TRUE |
| 32272.4  | 27182.3  | 25151.1  | 24920.7  | 37508.3  | 37495.2  | 25185.4  | 39523.2  | TRUE |
| 33994.5  | 31805.8  | 25320.9  | 46012.1  | 28891.3  | 31666.7  | 40535.7  | 34226.9  | TRUE |

|          |          |          |          |          |          |          |          |      |
|----------|----------|----------|----------|----------|----------|----------|----------|------|
| 130383.8 | 173617.9 | 77023.2  | 257749.4 | 169031   | 90175    | 215101.9 | 166981.6 | TRUE |
| 119249.5 | 128861.1 | 94934.6  | 83770.9  | 151253.1 | 94515.6  | 144728.6 | 170511.8 | TRUE |
| 195793.2 | 222118.3 | 256949.4 | 270190.8 | 173448   | 441261   | 212076.1 | 398128   | TRUE |
| 239956.6 | 260543   | 266021.1 | 290513.4 | 119954.4 | 529182.4 | 255432.2 | 503131   | TRUE |
| 80983.5  | 71109.7  | 56151.4  | 68170.7  | 107813.3 | 61086.9  | 90059.3  | 119630.1 | TRUE |
| 92631.9  | 142701.3 | 100824   | 118218.9 | 64403.6  | 89069.3  | 145421.8 | 86261.9  | TRUE |
| 91378.4  | 69476.4  | 61582.9  | 69804.7  | 76250.8  | 88769.8  | 73343.1  | 86796.8  | TRUE |
| 24386.8  | 11309.8  | 20389.4  | 33366.5  | 30367.2  | 26584.3  | 26128.3  | 27231.3  | TRUE |
| 36230.9  | 27925.6  | 33162.5  | 47015    | 39360.3  | 29408.6  | 33153.9  | 42338.5  | TRUE |
| 65977.7  | 29849.7  | 25778.2  | 46122    | 32970.5  | 42077.5  | 61469.1  | 40198.9  | TRUE |
| 35723.3  | 47083.6  | 39035.5  | 45383.6  | 32337.2  | 36880.2  | 33414.6  | 40133.9  | TRUE |
| 49428.5  | 38707.7  | 45343.9  | 51935.5  | 72427.4  | 50287.3  | 49965.3  | 56364.8  | TRUE |
| 52407.2  | 49870.5  | 61212.9  | 109764.3 | 84104.3  | 90831.5  | 71354.9  | 71232.8  | TRUE |
| 72074.1  | 64852.8  | 87399.5  | 113473.4 | 77148    | 103617   | 88651.3  | 99675.5  | TRUE |
| 26834.8  | 15706.3  | 43838.9  | 48789.4  | 41422.7  | 44257.2  | 48977.8  | 56319.7  | TRUE |
| 653970.2 | 519740.1 | 595392.8 | 688502.2 | 468019.7 | 634671.6 | 557902.8 | 420842.4 | TRUE |
| 895789.9 | 476647.5 | 689958.8 | 655205.3 | 832512.1 | 924253   | 532461.7 | 872719.8 | TRUE |
| 873464.6 | 847652.5 | 825322.4 | 991725   | 1005590  | 914104.1 | 911682.2 | 944775.3 | TRUE |
| 197299.5 | 145590.9 | 234144.9 | 250504   | 236223.5 | 216781.8 | 220732.2 | 232755.1 | TRUE |
| 442637.2 | 372400.9 | 473391   | 525662.8 | 524622.4 | 525597.7 | 488847.2 | 559710.7 | TRUE |
| 258644.5 | 218557.4 | 216186   | 253964.7 | 267410.4 | 263465   | 253058.1 | 304251.4 | TRUE |
| 36078.6  | 84469.9  | 45261.9  | 61486.6  | 88237.2  | 21436    | 21246.4  | 23497    | TRUE |
| 20022.1  | 11649.8  | 39634.4  | 27969.6  | 35532.5  | 33051    | 35659.8  | 31877.7  | TRUE |
| 108103.1 | 90948.7  | 94995.9  | 108603.5 | 128103.4 | 140030.1 | 130388.2 | 120245.8 | TRUE |
| 245073.4 | 262788.7 | 200764.9 | 218331.3 | 176058.9 | 195223.7 | 317669   | 249574.5 | TRUE |
| 73452.9  | 78088.7  | 67322.7  | 81957.3  | 79774.8  | 75999.4  | 87500.5  | 88921.6  | TRUE |
| 8711.6   | 9425.7   | 11852.8  | 11507.3  | 16124    | 29520.8  | 8314.9   | 9243.5   | TRUE |
| 755296   | 671141.4 | 609376.1 | 756896.6 | 663751.3 | 575685.2 | 598397.6 | 649065.3 | TRUE |
| 4495900  | 3663357  | 3543504  | 4077538  | 4059915  | 3448230  | 3550174  | 4016222  | TRUE |
| 180817.3 | 157492.7 | 187333.5 | 217057.2 | 184114.9 | 184107.1 | 162133.1 | 203361   | TRUE |
| 84862.6  | 79305    | 72584.8  | 87126.5  | 89838.7  | 72832.1  | 75354.9  | 79769.7  | TRUE |
| 96625.5  | 31577.8  | 38832.7  | 38171.2  | 44410.4  | 16102.3  | 9639.6   | 18480.1  | TRUE |
| 60622.5  | 123078.8 | 78384.4  | 145991.4 | 146101.4 | 16535.4  | 11843.3  | 9355.2   | TRUE |
| 120108.3 | 299022.4 | 156775.7 | 315786.5 | 301151.1 | 62721.3  | 55756.2  | 63247.7  | TRUE |
| 57056.6  | 69230.1  | 41969.3  | 51105.8  | 56298.4  | 51652.6  | 64341.1  | 67709.8  | TRUE |
| 81983.9  | 75006.6  | 56408.7  | 88521.8  | 81136.7  | 76768.4  | 95533.3  | 110825.3 | TRUE |
| 33522    | 18054.6  | 25549.3  | 30400.2  | 28462.4  | 27259.1  | 39598.5  | 25975.9  | TRUE |
| 65924.2  | 70203.7  | 74212.6  | 87035.6  | 72765.2  | 76634.1  | 80995.6  | 91605.7  | TRUE |
| 66891.8  | 54695.6  | 62347.6  | 67492.1  | 63493.3  | 61750.3  | 65743.1  | 75557.8  | TRUE |
| 1417192  | 1311967  | 1391829  | 1491557  | 1494992  | 1721802  | 1599006  | 1699789  | TRUE |
| 2438961  | 2227563  | 2505035  | 2446746  | 2465449  | 2914772  | 2724755  | 2985561  | TRUE |
| 80501.3  | 110212.3 | 119877.7 | 129376.1 | 109110.3 | 50514.4  | 58260.5  | 55778.9  | TRUE |
| 84333.9  | 50100    | 69937.8  | 82548.3  | 70124.2  | 86920.7  | 70816.8  | 71687.7  | TRUE |
| 100583.9 | 64712.4  | 77040.3  | 116238   | 95990.9  | 136824   | 97543    | 122681.3 | TRUE |
| 106746.6 | 101205   | 115412.4 | 129164.5 | 99488.3  | 118453.3 | 101539   | 125431.1 | TRUE |
| 37419    | 42961.2  | 46556.2  | 49917.6  | 37475.8  | 69123.8  | 54753.7  | 63654.5  | TRUE |

|          |          |          |          |          |          |          |          |      |
|----------|----------|----------|----------|----------|----------|----------|----------|------|
| 55950.2  | 68498.9  | 54972    | 67055.9  | 65447.1  | 56164.4  | 58256.4  | 65462.4  | TRUE |
| 78809.1  | 68223.6  | 62819.4  | 64467.3  | 62046.6  | 59939.6  | 76830.6  | 76883.8  | TRUE |
| 62743.1  | 67989.3  | 50745.5  | 50558.1  | 58378.3  | 56650    | 49952.5  | 58398    | TRUE |
| 100190.4 | 107812.4 | 123417.4 | 110345.6 | 78360.3  | 109156.6 | 102625.5 | 81040.9  | TRUE |
| 96221.7  | 104366.7 | 99042.1  | 84927    | 74875.7  | 93230.1  | 91133.9  | 86502.6  | TRUE |
| 109864.2 | 89525.5  | 122898.4 | 110236.4 | 107349.4 | 118426.1 | 85489.5  | 127433.7 | TRUE |
| 216643.4 | 120031.1 | 172674.6 | 182101.2 | 289640.8 | 296900   | 156499   | 267074.3 | TRUE |
| 138095   | 95394.3  | 122210.9 | 120635.4 | 111262.7 | 143793.8 | 104705.7 | 143720.4 | TRUE |
| 202434.2 | 115945.6 | 171367.6 | 144963.4 | 200969.9 | 235097.2 | 154242.8 | 215692.6 | TRUE |
| 64836    | 57111.4  | 66079.4  | 80922.1  | 79773.4  | 66514    | 68018.1  | 71854.4  | TRUE |
| 176908.7 | 148509.8 | 162810.3 | 189462.1 | 185428.7 | 148440.8 | 183567.8 | 191661.8 | TRUE |
| 40041.3  | 37872.4  | 37249.2  | 65016.4  | 57596    | 55930.7  | 44081.3  | 57605.6  | TRUE |
| 54175.5  | 70379.2  | 44625.7  | 59656    | 100747.4 | 63697.3  | 245199.8 | 58890.4  | TRUE |
| 73799.4  | 78504.3  | 91355.7  | 88652.8  | 78489.2  | 70258.9  | 86259.1  | 70898.5  | TRUE |
| 22875    | 20563.4  | 21231    | 21161.4  | 25240.3  | 24805.6  | 14821.4  | 26455.3  | TRUE |
| 30159.8  | 13812.5  | 24890.6  | 23928.3  | 27684.5  | 31924.5  | 25226.7  | 24475.6  | TRUE |
| 89214.7  | 61577.7  | 73177.3  | 87061.1  | 63748    | 90298.9  | 81942.8  | 108090.4 | TRUE |
| 22610.4  | 32957.7  | 17533    | 23057.7  | 23821.1  | 16279.3  | 12136.7  | 24367.6  | TRUE |
| 78487.1  | 74839.1  | 82870.2  | 99351.5  | 95723.7  | 85758.9  | 73300.5  | 90822    | TRUE |
| 68059.3  | 63098.2  | 72211.3  | 72279.4  | 66900.9  | 65474.7  | 65103.9  | 66146    | TRUE |
| 170930.3 | 174525.9 | 180292.8 | 213698.3 | 187316.1 | 163301.2 | 165357.5 | 206324.4 | TRUE |
| 67960.6  | 60111.7  | 77335.2  | 93194.5  | 74786.8  | 77818.5  | 68139.1  | 65575.1  | TRUE |
| 174914.7 | 135557.5 | 207200   | 163647.6 | 139290.4 | 198277.5 | 181421.6 | 139973.7 | TRUE |
| 324420.2 | 336745.3 | 270415.4 | 342947.6 | 275921.6 | 314422.1 | 305171.3 | 294923.4 | TRUE |
| 162936.8 | 180702.6 | 169925.2 | 176963.3 | 185984.2 | 156251.6 | 154017.7 | 150591.4 | TRUE |
| 709119.1 | 610126.8 | 699691.6 | 910326.5 | 786241.4 | 711242.5 | 706780.7 | 857669.2 | TRUE |
| 327925   | 370954.6 | 336471.4 | 510830.2 | 358234.1 | 327757.8 | 303723.5 | 347130.9 | TRUE |
| 262829.8 | 196016.1 | 224942.5 | 189452.7 | 237194.2 | 249757.2 | 264566.6 | 221371   | TRUE |
| 619896.1 | 626144.4 | 628516.6 | 749899.9 | 650199.1 | 591229.7 | 607102.2 | 579724.7 | TRUE |
| 865463.4 | 819492.8 | 862925.2 | 819649.6 | 815865.7 | 959724.9 | 879650.3 | 889416.6 | TRUE |
| 144611.7 | 122459.8 | 126679.1 | 173192.5 | 157175.1 | 192835   | 153519.5 | 202747.3 | TRUE |
| 472086.9 | 466740.3 | 316732.1 | 302001.4 | 378673.8 | 344666.6 | 389804.8 | 337183   | TRUE |
| 86156.3  | 60796.2  | 79120.4  | 77233.1  | 87011.8  | 70985.5  | 86880.2  | 86317.7  | TRUE |
| 58134.8  | 47439    | 61833.4  | 72536.6  | 60668.9  | 50841.6  | 53715.2  | 66518.4  | TRUE |
| 323640.8 | 333342.1 | 261584.4 | 375909.3 | 357748.9 | 293188.2 | 315511.1 | 310165.1 | TRUE |
| 115962.8 | 87212.4  | 98816.1  | 87437    | 111776.4 | 105879.1 | 85199.8  | 103145.6 | TRUE |
| 174154.1 | 143565.8 | 141138.6 | 163551.3 | 142391.4 | 128104.4 | 142608.2 | 156024.2 | TRUE |
| 55659.2  | 35917.3  | 37050.1  | 34907.3  | 52710.8  | 30943    | 38621.5  | 46850.4  | TRUE |
| 70502.5  | 58765.9  | 86935.8  | 106757.6 | 88733.1  | 101344.2 | 78766.3  | 102465.3 | TRUE |
| 297457.8 | 273989   | 330417.8 | 405032.7 | 322417.3 | 367845.4 | 334607.9 | 307811.3 | TRUE |
| 70373.5  | 63796.9  | 78025.9  | 70529    | 72764.3  | 76211.7  | 72299    | 77831.7  | TRUE |
| 235852.8 | 212005   | 173232.4 | 207494.1 | 182147.9 | 199995.7 | 220408.3 | 218444.6 | TRUE |
| 659869.1 | 511687.8 | 570864.6 | 502240.2 | 535929.9 | 691589.3 | 698205.4 | 755581.4 | TRUE |

|          |          |          |          |          |          |          |          |      |
|----------|----------|----------|----------|----------|----------|----------|----------|------|
| 470948.9 | 409044.5 | 619628.8 | 323293.5 | 252901.9 | 686103.2 | 359985   | 260433.6 | TRUE |
| 268758   | 259615.8 | 349578.3 | 283372.8 | 219991.4 | 387986.3 | 226805.4 | 209964   | TRUE |
| 37996.8  | 42523.5  | 65214.9  | 56972.5  | 54421.2  | 44394.3  | 42108.6  | 42533.5  | TRUE |
| 122544.5 | 77997.3  | 170509.5 | 104005.3 | 96126.9  | 157725.8 | 95495.4  | 113384.4 | TRUE |
| 81644    | 64053.6  | 124661.9 | 55981    | 48415.9  | 120279.7 | 82710.2  | 68858.4  | TRUE |
| 357393.2 | 236515.8 | 306388.2 | 288369.7 | 579434.6 | 310127.3 | 231067   | 273797.6 | TRUE |
| 3193200  | 1907868  | 2577400  | 2529208  | 5609151  | 2378596  | 1910381  | 2717666  | TRUE |
| 153840.5 | 127307.2 | 134206.4 | 172913.3 | 239841.7 | 154840.7 | 126665   | 157251   | TRUE |
| 85498.6  | 46981    | 113699.6 | 96920.4  | 226759.3 | 85990.1  | 72143.7  | 92107.4  | TRUE |
| 111049.8 | 81779.7  | 83015.8  | 80286.2  | 151437.6 | 113457.5 | 104809.6 | 97081.8  | TRUE |
| 292636   | 227626.7 | 501711.1 | 242953   | 185425.6 | 529433.1 | 235370.9 | 177871.7 | TRUE |
| 229752   | 227151.6 | 349312.7 | 223552.8 | 167132.4 | 315212.7 | 266570.8 | 182059.8 | TRUE |
| 81453    | 136698.3 | 195666.5 | 195015.1 | 379281.4 | 17093.7  | 28557    | 48762.1  | TRUE |
| 277329   | 228548   | 377565.7 | 212008.1 | 211581.4 | 351033.7 | 257989.7 | 214757.7 | TRUE |
| 177326.5 | 163705.3 | 294699.8 | 192324.2 | 149059.6 | 315034.6 | 183383.9 | 159800.6 | TRUE |
| 292344.2 | 261698.1 | 453397.6 | 296627.3 | 265965.1 | 442096.8 | 290326.6 | 257557   | TRUE |
| 25985.6  | 51777.3  | 66869.5  | 46647.6  | 20668.3  | 41254.6  | 48206.6  | 28233.1  | TRUE |
| 57298.8  | 59458.1  | 123164.4 | 76387.2  | 52222    | 130057.7 | 80682.6  | 39460.9  | TRUE |
| 83253.4  | 68153.6  | 165916.1 | 72277.4  | 45888.6  | 148884   | 86479.7  | 59581.7  | TRUE |
| 55053.9  | 44399    | 58962.9  | 48383.2  | 31173.7  | 64502.3  | 52103.5  | 33508.9  | TRUE |
| 92499.4  | 71297.2  | 178267.3 | 60575.7  | 40280.6  | 165130.8 | 75965.1  | 56212.4  | TRUE |
| 278818.8 | 204138.7 | 596438.1 | 244768.1 | 187273.2 | 570557.4 | 258214.3 | 191653.2 | TRUE |
| 150212.1 | 58878.8  | 84702.1  | 97205.4  | 276012.7 | 125353.9 | 81768.9  | 115523.6 | TRUE |
| 180979.7 | 177548.5 | 262611   | 249208.1 | 190120.2 | 330410   | 246739.6 | 289347   | TRUE |
| 48390.4  | 40459.8  | 48991.2  | 50441.1  | 34544.1  | 70028    | 42335.3  | 51162.9  | TRUE |
| 23505.2  | 28413.3  | 32483.9  | 15652.4  | 8509.4   | 43958    | 14646.2  | 26712.5  | TRUE |
| 29217.6  | 10021.9  | 43634.6  | 41344    | 20091.5  | 57742.4  | 45402.5  | 28717.4  | TRUE |
| 143434.7 | 145700.6 | 138745.6 | 159615.2 | 202261.3 | 144330.9 | 173031   | 151628.4 | TRUE |
| 155449.8 | 136328.5 | 137372.5 | 178811.8 | 218339.7 | 167897.9 | 150982.5 | 167000.8 | TRUE |
| 386643.9 | 395408.7 | 572755.9 | 310246.2 | 298330.9 | 596928.7 | 335406.3 | 301581.9 | TRUE |
| 2825971  | 1585469  | 2338862  | 2334231  | 5423294  | 2154011  | 1758048  | 2441769  | TRUE |
| 403415.1 | 381857.7 | 635121.4 | 366927   | 281253.5 | 661684.8 | 374261.7 | 300371.6 | TRUE |
| 610381.2 | 482909.1 | 1056547  | 519832.9 | 360003.2 | 1172216  | 534616.5 | 424403.4 | TRUE |
| 235763.3 | 199239.5 | 208619.1 | 212462.9 | 180395.8 | 217074.7 | 220042.8 | 213821.1 | TRUE |
| 159213.5 | 164600.2 | 192582.7 | 143100.6 | 161427.3 | 227409   | 157322.5 | 156917.7 | TRUE |
| 117017.6 | 123190.9 | 181672.2 | 105543.3 | 100558.8 | 140342.6 | 94349.4  | 80683.3  | TRUE |
| 155235.7 | 198944.7 | 217970.1 | 158059.1 | 138894.7 | 195401.2 | 141104.7 | 162946.5 | TRUE |
| 41606.2  | 48172.1  | 57342.4  | 59132.5  | 53126.2  | 33432.3  | 34742    | 33425.5  | TRUE |
| 38267.2  | 67949.3  | 65697.3  | 68468.3  | 58989.6  | 51483.9  | 38988.3  | 44129.3  | TRUE |



|          |          |          |          |          |          |          |          |      |
|----------|----------|----------|----------|----------|----------|----------|----------|------|
| 63035.8  | 54638.7  | 49373.8  | 65058.6  | 49898.3  | 60803.4  | 41214.7  | 60040.4  | TRUE |
| 1093717  | 696614.2 | 1244680  | 1307929  | 1418285  | 880048.3 | 760619.1 | 959347.8 | TRUE |
| 313609   | 225926.9 | 283721.9 | 295357.9 | 458487.6 | 268363.7 | 250257.9 | 288356.2 | TRUE |
| 531328.3 | 495873   | 597276.7 | 643232.2 | 755214.3 | 523185.6 | 549160.5 | 540937   | TRUE |
| 41730.6  | 31649.6  | 47208.6  | 40789.8  | 58605.9  | 44387.2  | 47006.7  | 45439.5  | TRUE |
| 75841.4  | 65866    | 82291.1  | 60022.1  | 110437.3 | 71828.8  | 67678.7  | 74724.7  | TRUE |
| 42838    | 68700.8  | 49325.7  | 79300.7  | 167736.9 | 45024.5  | 39471.3  | 39998.8  | TRUE |
| 40852.1  | 60425.1  | 55727.1  | 82966.7  | 106347.3 | 30459.9  | 39431.7  | 17117.5  | TRUE |
| 121770.3 | 156909.7 | 222357.7 | 183805.7 | 266007.3 | 92159.8  | 99621.1  | 116118.4 | TRUE |
| 44030.3  | 63360.2  | 68480    | 81692.3  | 56219.5  | 72532.5  | 61482    | 50482.4  | TRUE |
|          |          |          |          |          |          |          |          |      |
| 828675.5 | 654515.1 | 1410657  | 714914   | 460784.5 | 1640722  | 696539.3 | 495916   | TRUE |
| 246140.1 | 183519.9 | 500918.9 | 221824   | 123130.3 | 595930.2 | 237540.2 | 150951.1 | TRUE |
| 529286.5 | 334140.8 | 811336   | 564637.1 | 406748.9 | 909581.6 | 387631.9 | 443873.2 | TRUE |
| 81227.6  | 74926.6  | 117626.8 | 95208.2  | 83896.5  | 134923.4 | 98772.2  | 108303.4 | TRUE |
| 346338.6 | 213013.6 | 245560.2 | 270174   | 276831.5 | 255411.8 | 252345.9 | 262727.7 | TRUE |
|          |          |          |          |          |          |          |          |      |
| 194301.1 | 147979   | 261650.9 | 161219.7 | 158672.1 | 268648.4 | 219794.8 | 154940.4 | TRUE |
| 58084.8  | 89197.3  | 173514.2 | 70706.4  | 74690.5  | 63310.8  | 42754.6  | 45371.5  | TRUE |
| 24699.8  | 71026.6  | 88912.6  | 49552    | 53586.2  | 33129.9  | 9445.2   | 9051.6   | TRUE |
| 32330.4  | 28326.1  | 29633.1  | 22102.2  | 29395.3  | 34749.2  | 30114.3  | 39192.5  | TRUE |
| 448354.6 | 422117.1 | 382836.1 | 377417   | 428217.5 | 386502.6 | 429034.5 | 378762.3 | TRUE |
| 685735.8 | 599081   | 643014.5 | 633520   | 584017.5 | 611246.1 | 569404.7 | 549818.3 | TRUE |
|          |          |          |          |          |          |          |          |      |
| 22065.4  | 32711.1  | 22791.1  | 23256.2  | 31874.8  | 17477.3  | 28375.7  | 23642.6  | TRUE |
| 19497.4  | 34505.7  | 29423    | 35705.6  | 26919.3  | 26689.5  | 27361.1  | 20574.9  | TRUE |
|          |          |          |          |          |          |          |          |      |
| 47501.3  | 30824.5  | 56927.5  | 52342.8  | 37934.7  | 77200.7  | 50820.5  | 53690.1  | TRUE |
|          |          |          |          |          |          |          |          |      |
| 14967.9  | 18932.6  | 7406.2   | 29859.4  | 7356.5   | 13596.2  | 6836.9   | 8604.8   | TRUE |
|          |          |          |          |          |          |          |          |      |
| 20683.6  | 7616.5   | 9584.5   | 18374    | 5060.8   | 27729.2  | 19430.1  | 11442.4  | TRUE |
|          |          |          |          |          |          |          |          |      |
| 20017.8  | 31537.3  | 26162.6  | 24307.2  | 17618.6  | 10342.7  | 35878.4  | 31914.3  | TRUE |
|          |          |          |          |          |          |          |          |      |
| 151923.5 | 93506    | 103881.6 | 136550.6 | 114859.7 | 124661.7 | 143932.2 | 129890.2 | TRUE |
| 374620.1 | 360832.8 | 361063.5 | 353889.2 | 381475   | 362192.7 | 400161.1 | 343631.5 | TRUE |
| 436933.5 | 422531.8 | 429100.4 | 406296.3 | 477181.8 | 402292.4 | 418324.8 | 399044   | TRUE |
| 229435.8 | 227217.5 | 283969.4 | 286807.5 | 284825.9 | 272739.1 | 270926.4 | 251767.2 | TRUE |
| 471958.8 | 440966.8 | 559098.5 | 573569.4 | 554704.4 | 601423.5 | 492830.4 | 565807.9 | TRUE |
| 98546.1  | 100375.8 | 88421.1  | 90137.4  | 67676.8  | 99328.8  | 76564.3  | 61808.8  | TRUE |

|          |          |          |          |          |          |          |          |      |
|----------|----------|----------|----------|----------|----------|----------|----------|------|
| 270449.8 | 237679.8 | 262974.2 | 242478.3 | 239199.9 | 239490.3 | 287142.2 | 225793.3 | TRUE |
| 46993    | 50838.6  | 47730.1  | 49443.2  | 49527.2  | 45170.3  | 61573.3  | 48439.1  | TRUE |
| 319031.3 | 331400.2 | 307004.7 | 344053   | 334523.3 | 303060.9 | 347388.8 | 378346.2 | TRUE |
| 80135.9  | 64888.8  | 76249.1  | 80462.8  | 70567.1  | 70306    | 71306.3  | 73930.1  | TRUE |
| 153818.3 | 202090.3 | 98951.7  | 126289.5 | 154426.8 | 132668.7 | 156961.4 | 172001.2 | TRUE |
| 79514.7  | 77593.1  | 95948.4  | 104739.1 | 101497   | 95721.1  | 120051.3 | 93286.6  | TRUE |
| 146082.8 | 113320.1 | 121844.5 | 99288    | 116043.9 | 141053.6 | 144401.5 | 157460.3 | TRUE |
| 391195.4 | 346346.2 | 353343.6 | 381470.2 | 377685.5 | 412291.3 | 462239.7 | 408949.1 | TRUE |
| 278905.9 | 275196.7 | 261953.1 | 274876.1 | 320601.9 | 289628.5 | 318168.6 | 337159.5 | TRUE |
| 1553157  | 1742307  | 1845382  | 2127260  | 1558914  | 1626003  | 1943751  | 1609677  | TRUE |
| 396764.4 | 429034.4 | 300559.6 | 431424.7 | 551000.4 | 321657.6 | 489691   | 530654.6 | TRUE |
| 335613.9 | 399211.1 | 212332.9 | 352678.4 | 516330.9 | 225780.4 | 417184.5 | 462651.5 | TRUE |
| 91313.4  | 89626.3  | 97249.6  | 105384.6 | 115089.2 | 97381.6  | 93519.6  | 88717.1  | TRUE |
| 200535.6 | 190401.7 | 173314.4 | 153382.6 | 198981.8 | 175458.3 | 186724.8 | 224932   | TRUE |
| 350034   | 333168.6 | 274189.9 | 322284.3 | 311941.7 | 284428.1 | 344587   | 352533.8 | TRUE |
| 91973.6  | 85386.9  | 99321.5  | 90063.8  | 110114.2 | 102148.3 | 107992.1 | 107818.5 | TRUE |
| 543320.4 | 566191.4 | 434927   | 472309.7 | 520927.2 | 491680.7 | 528766.9 | 517961.6 | TRUE |
| 794864.4 | 695795.2 | 537251.7 | 646469.8 | 728996.3 | 657114   | 715910.5 | 687664.8 | TRUE |
| 61078    | 84056.3  | 83001    | 94446.4  | 70538.1  | 91289    | 78640.2  | 82359.4  | TRUE |
| 392167.6 | 335043.2 | 418525.7 | 333863.5 | 394921.8 | 366318.5 | 350769.2 | 349481.7 | TRUE |
| 100682.7 | 96581.1  | 113404.3 | 95189.7  | 95872    | 113594   | 96557.4  | 100224.8 | TRUE |
| 567249   | 500865.1 | 482042.9 | 415671.8 | 508810.6 | 466681.1 | 586334.8 | 500874.3 | TRUE |
| 127063   | 121251   | 171731.8 | 125546.5 | 149664.4 | 192824.9 | 150033   | 154802.7 | TRUE |
| 142477.6 | 174337.9 | 128349.6 | 109693.2 | 123840.1 | 130522.1 | 132420.9 | 147778.8 | TRUE |
| 665553   | 721574.9 | 515479.1 | 597125.7 | 620561.3 | 539671.1 | 649296.8 | 617109.9 | TRUE |
| 175213.9 | 147296.2 | 207177.7 | 209473   | 183025.2 | 197327.3 | 214701.6 | 197300.8 | TRUE |
| 370573.9 | 375850.5 | 383195.7 | 435415.2 | 426811.5 | 402693.3 | 438293.9 | 411445.5 | TRUE |
| 189739.4 | 181367.1 | 150469.3 | 156928.4 | 148622.8 | 166758.2 | 159978   | 195779.7 | TRUE |
| 1412451  | 1348052  | 1335046  | 1466100  | 1259239  | 1169105  | 1371793  | 1210087  | TRUE |
| 145528.7 | 190395.6 | 154843.9 | 162316.5 | 176297.3 | 128800.5 | 128791   | 117233   | TRUE |
| 456930.1 | 423202.4 | 439459.9 | 497862.1 | 420682.4 | 460137.2 | 427181.7 | 464135   | TRUE |
| 339748.6 | 321023.8 | 311145.2 | 307657   | 334448.9 | 319732.5 | 357650.6 | 356512.6 | TRUE |
| 106030.4 | 137642.4 | 335554.8 | 103607   | 132245.2 | 56038.8  | 47727.6  | 49787.4  | TRUE |
| 44408.5  | 75493    | 70903.8  | 92623.8  | 96518.3  | 47607    | 27802.1  | 38900    | TRUE |
| 43248.9  | 68673    | 69016.7  | 79782.3  | 63311.5  | 57401.1  | 45251.5  | 42498.4  | TRUE |
| 50537.1  | 85525.7  | 80548    | 59568.5  | 73903    | 37132.1  | 38706.7  | 27553.7  | TRUE |
| 735722   | 539504.2 | 712162.1 | 690685.9 | 607922.9 | 768863.6 | 692096.7 | 771071.5 | TRUE |

|          |          |          |          |          |          |          |          |      |
|----------|----------|----------|----------|----------|----------|----------|----------|------|
| 760337.9 | 715991.8 | 719801.7 | 801428.5 | 747594.5 | 828818.2 | 810333.5 | 816997.9 | TRUE |
| 120386.9 | 205857.2 | 187533.4 | 168238.6 | 184276.1 | 83676.2  | 90540.8  | 96226.4  | TRUE |
| 62318.6  | 116338.4 | 119518.2 | 102953.9 | 99980.6  | 46892.8  | 54187.3  | 56817    | TRUE |
| 292920   | 249146.3 | 277800.3 | 261548.7 | 292681.9 | 285237.8 | 293472.8 | 280924.6 | TRUE |
| 435517.5 | 388701   | 372197.5 | 396048.3 | 460419.7 | 423484.3 | 432543.8 | 425798.5 | TRUE |
| 34436.8  | 60918.4  | 43053.7  | 58952.5  | 54860.6  | 30308.6  | 35526    | 36707.7  | TRUE |
| 50835.5  | 46418.2  | 43157.5  | 43103.7  | 46474.1  | 42456.4  | 56630.8  | 42064.1  | TRUE |
| 33665.8  | 36061.4  | 27570.2  | 32021.1  | 29964.2  | 36268.4  | 45355.9  | 37372.1  | TRUE |
| 121241.8 | 90767.6  | 83140.8  | 107108.7 | 98626.5  | 120828.4 | 106718.4 | 141138.1 | TRUE |
| 143900   | 107025   | 118043.6 | 128370.9 | 123289.3 | 150417.4 | 143187   | 166087.2 | TRUE |
| 144794.5 | 85858.2  | 126960.7 | 100412.2 | 115153.8 | 201484.4 | 149274.1 | 159628.2 | TRUE |
| 888467   | 883944.1 | 570162.5 | 647112.5 | 733688.1 | 643691.5 | 704132   | 682497.9 | TRUE |
| 194546.8 | 191938.9 | 183360.2 | 228549.5 | 207590.7 | 217994.4 | 196255.8 | 218917.2 | TRUE |
| 1112437  | 1171260  | 1074011  | 1328896  | 1270490  | 1132665  | 1302203  | 1247169  | TRUE |
| 3703770  | 3696356  | 3622162  | 3825393  | 3400578  | 3644870  | 3721423  | 3738132  | TRUE |
| 1424276  | 1307851  | 1268990  | 1415434  | 1277781  | 1279903  | 1366321  | 1321436  | TRUE |
| 40511.5  | 36397.2  | 29687.1  | 30156.8  | 47160    | 34219.6  | 34582.4  | 26863.4  | TRUE |
| 117007.2 | 129945.4 | 120244.1 | 132751.7 | 96156.2  | 184429.6 | 129195.2 | 107140.6 | TRUE |
| 6980.7   | 6569.2   | 6944.2   | 7796.5   | 7458.9   | 7212.2   | 3935.2   | 8052.5   | TRUE |
| 31552.8  | 33012.3  | 22431.4  | 29758.4  | 33675.1  | 26126.7  | 28960.2  | 30995.8  | TRUE |
| 51901.8  | 43837.7  | 52389.6  | 60580.4  | 64066.9  | 52981.9  | 63332.2  | 54521.1  | TRUE |
| 300736.9 | 221469.3 | 209868.7 | 284560.3 | 283864.7 | 283206.1 | 307661.2 | 312221.2 | TRUE |
| 422636.1 | 322952.5 | 237680.2 | 321743.4 | 356890.1 | 379331   | 470766.7 | 468034.6 | TRUE |
| 798091.7 | 572170.4 | 621284.7 | 670443.3 | 679628.4 | 759312.9 | 692038.2 | 866857.9 | TRUE |
| 41942.9  | 32978.2  | 35309.9  | 23803.9  | 22380.3  | 21666.9  | 25427.7  | 25755.9  | TRUE |
| 81466.1  | 94982.2  | 69942.7  | 82374.4  | 84212.2  | 82231.9  | 79147.3  | 68216.5  | TRUE |
| 135315.4 | 144100.9 | 129377.6 | 152177.2 | 207406.6 | 122776.5 | 160760.4 | 195668   | TRUE |
| 180373   | 153542.4 | 139780.8 | 167827.3 | 169288.5 | 141315.6 | 190823.8 | 184915.8 | TRUE |
| 355575.1 | 339196.5 | 352551   | 336914.8 | 318523.3 | 339304.7 | 369644.5 | 345029.1 | TRUE |
| 219431.3 | 223966.4 | 158088.2 | 224237.1 | 229848.8 | 189271.7 | 214183   | 222984.7 | TRUE |
| 55817.1  | 47621.1  | 64373.2  | 78915.6  | 77248.9  | 60288.9  | 52615    | 55037.2  | TRUE |
| 41264.9  | 39799.4  | 41261.3  | 37658.6  | 49670.2  | 43201.5  | 57244.2  | 46875.2  | TRUE |
| 129863.1 | 194735.1 | 178937.2 | 160296.7 | 177728.9 | 134609.2 | 168833.4 | 140878.6 | TRUE |
| 15664.5  | 9150.4   | 10457.6  | 24511.7  | 14564.3  | 8225.5   | 11662.1  | 7139.2   | TRUE |
| 62778.5  | 47701.5  | 42090.6  | 59815.7  | 48891.7  | 53757.2  | 82063.4  | 64234    | TRUE |
| 343205.1 | 310381.7 | 200435.9 | 309167.9 | 266650.2 | 220073   | 298315.9 | 305988.9 | TRUE |
| 89745.7  | 93892.2  | 102935.5 | 147527.1 | 138701.5 | 104884   | 135077   | 144888.6 | TRUE |
| 88831.3  | 72247.8  | 98359.4  | 114000.8 | 112705.5 | 111633   | 122750.8 | 110654.9 | TRUE |

|          |          |          |          |          |          |          |          |      |
|----------|----------|----------|----------|----------|----------|----------|----------|------|
| 815564.4 | 867977.2 | 597364.5 | 990485.6 | 1078486  | 896116   | 1104711  | 1088840  | TRUE |
| 153742.4 | 117493.8 | 123137.3 | 108978.9 | 160419.5 | 115669.3 | 161336.9 | 163815.6 | TRUE |
| 110546.9 | 157857.1 | 114965.6 | 108516.9 | 157673.3 | 119268.8 | 170029   | 133392.3 | TRUE |
| 22843.2  | 24977.8  | 38342.7  | 15240.3  | 25223.2  | 8657.6   | 22281.3  | 10666.6  | TRUE |
| 765280.5 | 792644.7 | 775405.4 | 780327.7 | 615178.4 | 438817.1 | 764077.3 | 529592.2 | TRUE |
| 699764.4 | 598694.8 | 726192.3 | 774124.5 | 659049.1 | 684452.8 | 633462   | 693026.5 | TRUE |
| 957181.7 | 787641.8 | 953797   | 940282.3 | 921318.4 | 944323.5 | 769090.4 | 931565.8 | TRUE |
| 197056.9 | 149761.4 | 131057   | 155579.5 | 138819.4 | 174784.6 | 246375.4 | 146031.4 | TRUE |
| 182217.5 | 143564.3 | 129860.9 | 159937.7 | 147441.7 | 184237.4 | 214176.3 | 208999.2 | TRUE |
| 803022.7 | 552804.2 | 647087.2 | 703237.4 | 728842.7 | 756967.9 | 681218.1 | 772199.4 | TRUE |
| 38657.6  | 41448.3  | 31825.1  | 44438.1  | 37134.4  | 45732    | 41272.7  | 45174    | TRUE |
| 33493.2  | 12892.9  | 23178.6  | 58776.2  | 38023.4  | 49110.3  | 49517.9  | 46219.8  | TRUE |
| 47544.3  | 41837.3  | 53315.4  | 60947.3  | 64184.8  | 55175.9  | 47662.6  | 51741.2  | TRUE |
| 101749.5 | 69677.1  | 112621.1 | 116710.1 | 107447.6 | 108023.4 | 93171.3  | 103791   | TRUE |
| 60307.2  | 30248.3  | 44620.5  | 72545.1  | 52411.8  | 64113.4  | 59716.3  | 86763.9  | TRUE |
| 2706731  | 2802722  | 2645811  | 2600515  | 2040409  | 2772871  | 2742159  | 2150940  | TRUE |
| 261979.3 | 292974.4 | 377425.3 | 255731   | 262656.3 | 248665.8 | 240549.8 | 264300.2 | TRUE |
| 81239    | 103694.2 | 83141.6  | 56116.3  | 86630    | 94607.2  | 106263.7 | 90308    | TRUE |
| 145580.8 | 88228.6  | 162433.1 | 167780.9 | 145422.9 | 153147.9 | 107163.6 | 165716.3 | TRUE |
| 179889.8 | 204284.7 | 211354.5 | 188307.6 | 177879.6 | 236169.6 | 216787.3 | 276878.2 | TRUE |
| 145917.5 | 127857.6 | 130386.8 | 168918.1 | 135858.8 | 147119.2 | 162672.8 | 151555.1 | TRUE |
| 321200.5 | 291060.7 | 260783   | 292878.2 | 282159.9 | 297377.9 | 345716.2 | 286144   | TRUE |
| 133381.1 | 101767.9 | 107682.5 | 118123.3 | 74102.9  | 88860.3  | 109442.5 | 87558.9  | TRUE |
| 277223.4 | 279259.8 | 281538.4 | 333237.4 | 300499.4 | 343912   | 311288.8 | 299021.4 | TRUE |
| 102434.3 | 81601.9  | 120911.1 | 154573.9 | 96288.5  | 112748.9 | 99110.5  | 125121.3 | TRUE |
| 367757.7 | 331879.3 | 340586.6 | 352179.4 | 361739.1 | 334823.2 | 330605   | 302243.3 | TRUE |
| 376965.5 | 379587.2 | 361246.5 | 362619.6 | 262747.3 | 378547.6 | 352915   | 268034.6 | TRUE |
| 50289.5  | 56512    | 52328.1  | 66603.8  | 72570.5  | 66446.6  | 51967    | 66735.2  | TRUE |
| 178185.7 | 210291.8 | 110074.7 | 185869.8 | 149400.9 | 119169.7 | 188415   | 139221.1 | TRUE |
| 231967.2 | 241246.6 | 235631.1 | 216595.9 | 199393.6 | 259243.5 | 233646.2 | 211600.5 | TRUE |
| 92282.8  | 82931.7  | 102827.5 | 93113.2  | 109732.3 | 105885.9 | 93725.9  | 91558.4  | TRUE |
| 890097.5 | 642077.1 | 909082.7 | 837000.9 | 820688.7 | 974581   | 774499.5 | 884270.2 | TRUE |
| 35794.7  | 28765.4  | 41220.1  | 42659.3  | 37530.4  | 38022    | 35151.2  | 34718.2  | TRUE |
| 1699815  | 1660315  | 1572110  | 1700304  | 1347697  | 1716411  | 1832654  | 1395150  | TRUE |
| 769564   | 559775.3 | 867480.7 | 907963.2 | 802921.2 | 950036.1 | 678921.9 | 875095.3 | TRUE |
| 960735.8 | 773161.7 | 1103742  | 1143406  | 1076884  | 1017153  | 915259.8 | 1103429  | TRUE |
| 115179.8 | 115085.4 | 130848.8 | 147620.6 | 138556.3 | 88726.9  | 83297.7  | 73884.9  | TRUE |
| 346504.8 | 341226.4 | 331365.6 | 410997.1 | 263275.5 | 334360.2 | 390616.3 | 270122.9 | TRUE |
| 241796.6 | 217890.3 | 231874.5 | 266998.3 | 230380.3 | 238474.6 | 281229.1 | 229053.5 | TRUE |
| 183867   | 155399.9 | 227085.3 | 188641.5 | 177449   | 199560.8 | 135091.1 | 177214.1 | TRUE |
| 274163.3 | 244219.3 | 333733.3 | 325526   | 262107   | 313917.6 | 263179.4 | 279475.9 | TRUE |
| 216039.9 | 184853.7 | 243334.8 | 229139.6 | 226270.8 | 213219.2 | 198953.6 | 233777.9 | TRUE |
| 104651.4 | 110614   | 75251.3  | 101898.2 | 77485.5  | 92450.6  | 114107.7 | 80700.7  | TRUE |
| 93130.2  | 72519.2  | 88175.3  | 128893.6 | 78707.7  | 84664.2  | 92792.7  | 76324.9  | TRUE |

|          |          |          |          |          |          |          |          |      |
|----------|----------|----------|----------|----------|----------|----------|----------|------|
| 33127.2  | 44789    | 39469.6  | 48144.2  | 36831.7  | 37503.9  | 44840.7  | 40571.6  | TRUE |
| 107560.6 | 120715.5 | 95364.5  | 114928   | 87190.9  | 100257.8 | 129820.9 | 80024.1  | TRUE |
| 360926.3 | 331190.9 | 369343.7 | 428319.5 | 409594.5 | 367573.4 | 366800.8 | 408909.8 | TRUE |
| 94020.2  | 112399   | 80051.3  | 141074.3 | 110393.9 | 104647.2 | 118333.3 | 118743.4 | TRUE |
| 395308.2 | 398037.5 | 384299.9 | 382132.1 | 404464.4 | 416161.8 | 496757.4 | 366288.7 | TRUE |
| 35974.6  | 35838.4  | 31739.6  | 37259.4  | 31421.7  | 33300    | 48614.6  | 28820.2  | TRUE |
| 215279.2 | 232350.4 | 229723.1 | 214340.2 | 161541.4 | 245008.6 | 254946.4 | 188307.6 | TRUE |
| 121081.5 | 115746.1 | 118696.1 | 106439   | 121820.6 | 121568.6 | 128459.5 | 118166.5 | TRUE |
| 35356.5  | 31369.6  | 29065.4  | 40788.9  | 34477    | 49967.2  | 47002.5  | 39556.8  | TRUE |
| 530568   | 601457.5 | 314159.3 | 494515.6 | 633097.5 | 364264.9 | 675366   | 657760.6 | TRUE |
| 794808.7 | 789167.8 | 1009104  | 1020971  | 605911.4 | 755405.8 | 817256.4 | 787951.5 | TRUE |
| 60744.2  | 73585.7  | 39921.1  | 62550.8  | 66210.2  | 78806.3  | 94283    | 89830.2  | TRUE |
| 78751.2  | 97876.8  | 74313.9  | 100062.2 | 86771.3  | 84185.1  | 99150.4  | 132256.9 | TRUE |
| 365571.5 | 388395.9 | 188700   | 229660.9 | 290286.9 | 216688.1 | 306958.5 | 292872.8 | TRUE |
| 326843.5 | 388081.6 | 310108.3 | 252898.2 | 266453.1 | 211215.3 | 318068.4 | 302680.1 | TRUE |
| 145006   | 150404.1 | 119221   | 138863.1 | 188005.7 | 121933.3 | 175423.4 | 147686.8 | TRUE |
| 179181.2 | 219651.2 | 164277.8 | 221589.3 | 223121.7 | 174458.2 | 220041.4 | 200923.8 | TRUE |
| 136860.5 | 167450.2 | 133048.9 | 144022.2 | 138652.2 | 155580   | 152085.9 | 165040.7 | TRUE |
| 1039791  | 1089113  | 1327672  | 1299302  | 889886.1 | 963196.7 | 1095042  | 944033.4 | TRUE |
| 220025.8 | 197941.5 | 293980.8 | 271015.3 | 238463.7 | 236147.6 | 302894.9 | 281539.9 | TRUE |

|          |          |          |          |          |          |          |          |      |
|----------|----------|----------|----------|----------|----------|----------|----------|------|
| 138561.4 | 162336.9 | 142563.9 | 141334.8 | 147958.1 | 122066.8 | 159209.3 | 123623.7 | TRUE |
| 2369384  | 2133434  | 2528643  | 2475826  | 1728480  | 1924204  | 2151123  | 2014756  | TRUE |
| 571674.7 | 465714.9 | 547595.9 | 600404.6 | 435135.3 | 512970.5 | 587228.9 | 567700.2 | TRUE |
| 22960.5  | 12681.1  | 23689.5  | 34042.6  | 35080.4  | 27100.9  | 46554.6  | 38083.9  | TRUE |

|          |          |          |          |          |          |          |          |      |
|----------|----------|----------|----------|----------|----------|----------|----------|------|
| 127515.4 | 152109.3 | 97764.1  | 134556.1 | 184935.9 | 95547.5  | 127706.1 | 173201.9 | TRUE |
| 84973.2  | 157408.8 | 123952.3 | 158322.8 | 62393.1  | 92507.7  | 139632.4 | 96925.5  | TRUE |
| 212805.3 | 297895.2 | 235197.4 | 247170.3 | 176523   | 194896.8 | 287396.2 | 227234.6 | TRUE |
| 292737.8 | 352787.7 | 217389.2 | 324640.4 | 311106.3 | 245028.7 | 386543   | 350007.9 | TRUE |
| 212689.6 | 213024.1 | 161501.9 | 219328.4 | 221599.6 | 170228   | 258400.1 | 229618.4 | TRUE |
| 282384.9 | 312616.4 | 363424.1 | 352397.6 | 214443   | 289791.5 | 310432.5 | 301609.5 | TRUE |
| 648534   | 674146.6 | 721187.1 | 773417.5 | 546534.5 | 602293.7 | 719781.1 | 698883.5 | TRUE |
| 35726.9  | 29118.8  | 7360.7   | 16892    | 23715.1  | 23889.3  | 12052.1  | 10954.7  | TRUE |
| 154142.6 | 161759.7 | 110533.7 | 130649.8 | 107371.8 | 109629.2 | 150012.7 | 104936.7 | TRUE |
| 126758.7 | 146358.6 | 122529.6 | 130331.9 | 155596.6 | 144287.1 | 177880.5 | 130358.6 | TRUE |

|          |          |          |          |          |          |          |          |      |
|----------|----------|----------|----------|----------|----------|----------|----------|------|
| 107434.7 | 94857.7  | 116078.3 | 120193.2 | 74350.5  | 127603.8 | 133159.2 | 131183.5 | TRUE |
| 91327.9  | 109056.6 | 83036.2  | 67388    | 102182.5 | 82582.8  | 103522.2 | 92467.3  | TRUE |
| 127787.5 | 140658.3 | 92806.7  | 88514.5  | 121718.5 | 100959.7 | 119712.5 | 127003.8 | TRUE |
| 167788.9 | 191766.5 | 114809.3 | 152485.2 | 156948.4 | 128994   | 186719.1 | 160302.9 | TRUE |
| 135918.4 | 133607.3 | 121755.2 | 140881   | 134060.4 | 90419.6  | 158319.8 | 123921.8 | TRUE |

|          |          |          |          |          |          |          |          |      |
|----------|----------|----------|----------|----------|----------|----------|----------|------|
| 120035.2 | 105436.4 | 120603.8 | 145425.1 | 159991.6 | 132148.7 | 172566   | 169905.3 | TRUE |
| 116805.8 | 129282.6 | 118043.9 | 155932.8 | 169504.6 | 129561.2 | 219408.7 | 193489.2 | TRUE |
| 115094.2 | 136101.5 | 127639.5 | 170568.9 | 199006.1 | 131091.9 | 202014.7 | 181660.5 | TRUE |
| 29396.1  | 68492.2  | 41987.9  | 52160.2  | 67543.3  | 12475.6  | 8140.6   | 19039.1  | TRUE |
| 167787   | 191517.4 | 213867.2 | 220042.6 | 142535.4 | 189778.6 | 220204.7 | 189741.6 | TRUE |
| 126212.6 | 127212.7 | 151794.2 | 164509.5 | 109624.3 | 143135.7 | 166402.7 | 125652   | TRUE |
| 283208.5 | 295230.5 | 231386.2 | 210980.4 | 249500.2 | 236997.4 | 292466.7 | 265942.6 | TRUE |
| 1864362  | 1848895  | 1931203  | 2180166  | 1409449  | 1805301  | 1884244  | 1696437  | TRUE |
| 50610.3  | 60622.8  | 51555.6  | 41781.1  | 51338.9  | 43738.7  | 46203.9  | 66873.3  | TRUE |
| 53331.8  | 61943.6  | 52558.2  | 46297.3  | 60874.7  | 46033.2  | 59691.5  | 61148.8  | TRUE |
| 64324.9  | 75477    | 65275.5  | 56562    | 76599.9  | 66705.1  | 73499.9  | 63768    | TRUE |

|          |          |          |          |          |          |          |          |      |
|----------|----------|----------|----------|----------|----------|----------|----------|------|
| 163457.9 | 178610.1 | 236146.2 | 177609.9 | 174075.4 | 268955.2 | 167752.1 | 162339.3 | TRUE |
| 130922.8 | 128263   | 170098.8 | 118863.5 | 147004.8 | 211642.3 | 119629.2 | 161912.4 | TRUE |
| 132929   | 134621.2 | 200919   | 116177.7 | 125073.1 | 196538.3 | 131691.9 | 120771.5 | TRUE |
| 892319.4 | 925686.1 | 848818.6 | 847476.4 | 885135.7 | 898926.3 | 1075055  | 895116.9 | TRUE |
| 47614.2  | 153317.4 | 64427    | 105290.1 | 138375.1 | 34814    | 21005.2  | 25053.6  | TRUE |
| 47478.5  | 60920.6  | 65078.2  | 88763.9  | 78045.7  | 40916.7  | 28123.3  | 32651.1  | TRUE |
| 2293015  | 1618427  | 2299443  | 2092144  | 3656625  | 1761287  | 1829701  | 1930676  | TRUE |
| 25249.2  | 27733.5  | 41801.7  | 27307.8  | 23112.9  | 34636.6  | 27293.7  | 24798.8  | TRUE |
| 19576.5  | 30174.1  | 39300.6  | 30755.4  | 18948    | 56891.8  | 41833    | 22456.5  | TRUE |
| 107220.1 | 102984   | 121290.1 | 118788.1 | 92084.2  | 165598.9 | 111328.3 | 85614.6  | TRUE |
| 23349.2  | 11528.6  | 21446.2  | 31400.2  | 33840.9  | 25378.7  | 21486.9  | 9587     | TRUE |
| 184222.3 | 162487.3 | 132686   | 167319.3 | 173204.8 | 83890.3  | 97809.2  | 107603.3 | TRUE |

|       |         |         |         |         |         |       |         |      |
|-------|---------|---------|---------|---------|---------|-------|---------|------|
| 36186 | 28150.3 | 35548.2 | 48216.3 | 29243.2 | 46938.7 | 60567 | 48147.2 | TRUE |
|-------|---------|---------|---------|---------|---------|-------|---------|------|

|          |          |          |          |         |          |          |          |      |
|----------|----------|----------|----------|---------|----------|----------|----------|------|
| 362067.8 | 366588.3 | 401915.5 | 349251.2 | 329237  | 413373.4 | 361516.3 | 359672   | TRUE |
| 977377.2 | 861152.1 | 1487477  | 702800.5 | 628366  | 1737913  | 1006418  | 659419.8 | TRUE |
| 2031702  | 1336945  | 1901496  | 1961754  | 3142901 | 1386822  | 1423334  | 1471627  | TRUE |
| 1438642  | 880803.7 | 1334458  | 1377589  | 2317007 | 1033861  | 947167.1 | 1172945  | TRUE |

|          |          |          |          |          |          |          |          |      |
|----------|----------|----------|----------|----------|----------|----------|----------|------|
| 53690.8  | 40653.7  | 51120.2  | 31443.7  | 36782    | 44684.5  | 50467.9  | 32622.1  | TRUE |
| 392009.9 | 435445.6 | 733460.6 | 319798.6 | 311939.1 | 772145   | 518277.1 | 333894.4 | TRUE |
| 26108.2  | 5710.3   | 17240.4  | 6021.4   | 23646.6  | 7273.9   | 11846.4  | 31616.9  | TRUE |
| 35992.6  | 29417.4  | 21658.1  | 14069.2  | 29190.7  | 32446.8  | 40225.4  | 18132.1  | TRUE |
| 96881.9  | 116869.1 | 109233.5 | 97176    | 70999.9  | 169026.1 | 125345.4 | 104595.8 | TRUE |

|         |         |         |         |         |          |         |         |      |
|---------|---------|---------|---------|---------|----------|---------|---------|------|
| 89301.7 | 73669.6 | 89966.7 | 53643.7 | 49215.6 | 128109.4 | 81969.8 | 74667.4 | TRUE |
|---------|---------|---------|---------|---------|----------|---------|---------|------|

|         |         |         |         |         |          |         |         |      |
|---------|---------|---------|---------|---------|----------|---------|---------|------|
| 9124.1  | 10169.7 | 16669.3 | 7632.4  | 6627.7  | 33634.1  | 26855.2 | 9180.2  | TRUE |
| 46107.5 | 37796.5 | 45965   | 8837.3  | 23779.6 | 100826.8 | 54516.6 | 37704.2 | TRUE |
| 31100.2 | 27405.5 | 35701.9 | 16479.6 | 27805.8 | 54069.1  | 43429.2 | 28815.4 | TRUE |
| 38154.5 | 24947.2 | 22275.2 | 39466.5 | 24770.5 | 33538.8  | 30633.2 | 36461   | TRUE |

|          |         |          |          |          |          |          |          |      |
|----------|---------|----------|----------|----------|----------|----------|----------|------|
| 118304.6 | 88335.5 | 66734.1  | 88178    | 64580    | 119920.6 | 136028.1 | 98534.7  | TRUE |
| 122497.1 | 71975.7 | 111117.5 | 134288.8 | 137328.1 | 111162.6 | 98139.8  | 119039.7 | TRUE |
| 419798.9 | 276756  | 394808.9 | 455735.8 | 567108   | 384971.8 | 382359   | 365515.4 | TRUE |

|          |          |          |          |          |          |          |          |      |
|----------|----------|----------|----------|----------|----------|----------|----------|------|
| 1020502  | 1077286  | 887010.1 | 848759.7 | 1141640  | 858897.2 | 1218842  | 1154334  | TRUE |
| 204032.4 | 276585.3 | 159093.5 | 167587.8 | 254638.3 | 165057.3 | 273911.1 | 263637.3 | TRUE |
| 340744.2 | 324280.4 | 366336.7 | 386362.9 | 288760.8 | 260642.1 | 397642.2 | 308471.5 | TRUE |
| 117351.2 | 125514.5 | 78309.7  | 87888.7  | 139388   | 76136.1  | 118001.4 | 140118.1 | TRUE |
| 137211.2 | 162457   | 88613.9  | 93318    | 123735   | 95158.1  | 115291.5 | 113881.1 | TRUE |
| 136766.6 | 142898.8 | 97378.9  | 110088.8 | 131503.4 | 106260.9 | 138987.4 | 123450.5 | TRUE |
| 245994.8 | 280902   | 238389.4 | 224077.3 | 319364.8 | 232932.8 | 292845.6 | 315155.9 | TRUE |
| 185071.6 | 183583.7 | 255082.3 | 251054.9 | 168458.8 | 209820.3 | 212281.5 | 166182.7 | TRUE |
| 232787.2 | 233395.6 | 266460.4 | 259626.7 | 197190.6 | 173059.9 | 248807.5 | 185329.9 | TRUE |
| 274352.9 | 310037.5 | 326335.1 | 323362.2 | 257883.9 | 226371.8 | 339033.7 | 225505.8 | TRUE |
| 217229.7 | 237776.9 | 250381.1 | 244868.7 | 198513.7 | 204701.1 | 250532.9 | 196945.5 | TRUE |
| 100736.6 | 88415.1  | 40849.2  | 49855.5  | 71640.2  | 77744.2  | 101898.4 | 84322    | TRUE |
| 82931.7  | 89128    | 51955.6  | 50531.5  | 86184.7  | 63550.4  | 78868.6  | 111069.8 | TRUE |
| 173818.9 | 145066.8 | 174943.3 | 204508.8 | 158202.4 | 135010.1 | 203069.3 | 169003.7 | TRUE |
| 251297.6 | 237746.4 | 262319.6 | 319361.4 | 221236.2 | 268276.3 | 289413.8 | 273223.4 | TRUE |
| 367226.3 | 260368.4 | 323366.7 | 328649.5 | 240763.6 | 350980.9 | 364065.3 | 369269.7 | TRUE |
| 99571.9  | 101627.3 | 112015.6 | 97635.3  | 76797    | 87701.6  | 109454.1 | 103883.8 | TRUE |

|          |          |          |          |          |         |          |          |      |
|----------|----------|----------|----------|----------|---------|----------|----------|------|
| 40473.4  | 50725    | 58835.7  | 61557    | 45525.5  | 42012.4 | 48514.1  | 51199.2  | TRUE |
| 78135.2  | 114758.8 | 113104.9 | 142635.3 | 66656    | 64122.6 | 116922.9 | 64784.2  | TRUE |
| 15156.9  | 23778.4  | 26561.2  | 25982.4  | 7750.3   | 7793.4  | 17892.5  | 11687.4  | TRUE |
| 111874.2 | 198313.2 | 66391.1  | 109210.2 | 205634.3 | 58631.5 | 203082.3 | 212115.4 | TRUE |
| 85108.8  | 123901.7 | 43236.3  | 64223.7  | 129712.8 | 35089.2 | 146954.6 | 132180.1 | TRUE |

|          |          |         |          |          |          |          |          |      |
|----------|----------|---------|----------|----------|----------|----------|----------|------|
| 714285.4 | 808117.4 | 961661  | 958775.9 | 611177.1 | 577255.6 | 799433.3 | 587595.3 | TRUE |
| 35874.9  | 40027    | 34757.9 | 42731.7  | 47118.4  | 32600.1  | 48185.2  | 48925.6  | TRUE |

|          |          |          |          |          |          |          |          |      |
|----------|----------|----------|----------|----------|----------|----------|----------|------|
| 282790.1 | 342612.4 | 214149.6 | 198229.1 | 279350.3 | 185090.5 | 365425.9 | 285279.9 | TRUE |
| 208683.2 | 301521.3 | 176776   | 223011.3 | 260242.7 | 172227.1 | 273734.2 | 263286.7 | TRUE |
| 113611.5 | 120685.7 | 82586.4  | 63105.1  | 119029.6 | 82584.1  | 125059.1 | 117804.8 | TRUE |
| 412582.5 | 484237.2 | 504782.9 | 540774.3 | 343569.4 | 383131.8 | 482172.8 | 383223   | TRUE |
| 275018.9 | 286112.9 | 271807.5 | 331448.1 | 238667.2 | 253063.7 | 313131.4 | 291181.3 | TRUE |
| 69040.6  | 80296.9  | 71988.1  | 62053    | 53149    | 65465.2  | 86650.1  | 63549.1  | TRUE |
| 51983.1  | 254895.2 | 26742.5  | 70967.8  | 69487.2  | 42760.5  | 51023.6  | 68790    | TRUE |

|          |          |          |          |          |          |          |          |      |
|----------|----------|----------|----------|----------|----------|----------|----------|------|
| 175952.4 | 123075.3 | 186147.4 | 200551.8 | 177276.8 | 191511.8 | 154133.3 | 183183   | TRUE |
| 259928.4 | 220919.2 | 266211.3 | 309493.3 | 284797.8 | 251764.6 | 254434.1 | 308041.9 | TRUE |
| 98044.2  | 74860.8  | 82380.5  | 98795.8  | 83931.2  | 96667.7  | 66569.7  | 106053   | TRUE |
| 238128   | 249102.8 | 195658.3 | 183610.6 | 253868   | 266453.4 | 235779   | 292929.3 | TRUE |
| 1265131  | 1005791  | 1359057  | 1223470  | 1323137  | 1308928  | 1197728  | 1374774  | TRUE |
| 45195.7  | 46338.3  | 32714.8  | 52783.8  | 52963.6  | 44681.7  | 37186.2  | 42548.4  | TRUE |
| 1351235  | 915084.2 | 1352843  | 1519848  | 1434634  | 1441210  | 1031263  | 1293021  | TRUE |
| 208191.7 | 186294.5 | 302784.7 | 348881.7 | 270785.9 | 282711.4 | 201611.8 | 257270   | TRUE |
| 4091731  | 3802748  | 3047340  | 3087296  | 4324543  | 4885067  | 4148332  | 4852974  | TRUE |
| 106218.9 | 82108.4  | 57921.9  | 70287.3  | 99355.2  | 117630.9 | 117505.2 | 102986.8 | TRUE |
| 169560.4 | 151135.1 | 128315.5 | 159669.7 | 191043.2 | 205219.6 | 133909.4 | 189943.5 | TRUE |
| 399063.7 | 362352.7 | 334011.8 | 321737.2 | 407618.6 | 442010   | 336943.2 | 433890.2 | TRUE |
| 47731.2  | 57368.6  | 49850.8  | 49790    | 51443.9  | 31711.2  | 47662.1  | 39401.1  | TRUE |
| 112838.7 | 54789.5  | 136663.1 | 122270.6 | 117498.8 | 136310.1 | 76038.2  | 95216.5  | TRUE |
| 56448.5  | 66905    | 53385.5  | 72991.8  | 69315.8  | 71968.7  | 64324.6  | 79987.9  | TRUE |
| 246419.3 | 161507.2 | 284778.1 | 295101   | 288653.5 | 276304   | 223985.6 | 322789.1 | TRUE |
| 25925.2  | 26202.7  | 12189.1  | 12221.1  | 24228.2  | 11626.4  | 26455.4  | 30463.3  | TRUE |
| 89188.8  | 68076.8  | 74997.2  | 83271.1  | 73471    | 80589.3  | 80016    | 79027.4  | TRUE |
| 49424    | 50467.5  | 39868.9  | 55639.3  | 52289.8  | 58653    | 58628    | 62866.4  | TRUE |
| 17497.3  | 10600.1  | 6266.6   | 6694.7   | 7544.1   | 4825.7   | 9423.2   | 8666     | TRUE |
| 69189.3  | 58879.4  | 75909.9  | 71483.4  | 81549.3  | 65682.7  | 67117.7  | 74065    | TRUE |
| 2343964  | 2311573  | 1715752  | 1886695  | 2389429  | 2672181  | 2306154  | 2516151  | TRUE |
| 832291.2 | 779723   | 629567.3 | 666869.7 | 905602.1 | 926651.5 | 775804.7 | 854014   | TRUE |
| 577404.9 | 548603.9 | 476710.2 | 512017.7 | 582201.8 | 669115.5 | 595116   | 669546.6 | TRUE |
| 60295.8  | 40119.3  | 31929.7  | 36387.9  | 48767.3  | 64945.8  | 57423.8  | 64134.2  | TRUE |
| 58892.8  | 41047.1  | 74329.4  | 52232    | 65866    | 69816.3  | 48027.5  | 57193.8  | TRUE |
| 25621.5  | 36207.4  | 27438.1  | 29369.4  | 34648.5  | 20989.2  | 32825.3  | 25303    | TRUE |
| 173455.2 | 160149.7 | 180247.3 | 194038.5 | 169714.5 | 199124.3 | 177374.3 | 174558.6 | TRUE |
| 211788.4 | 209093.8 | 209828   | 228041.5 | 204812.9 | 226531.7 | 170166.4 | 196527.4 | TRUE |
| 475505   | 445177.5 | 351519.5 | 321794.7 | 385828.7 | 382183.4 | 374149.1 | 391686.4 | TRUE |
| 115979.9 | 85551.6  | 78883.4  | 101635   | 104998.2 | 83010.6  | 96768.3  | 92911.9  | TRUE |
| 472726.3 | 477576.3 | 429663.6 | 429237.6 | 406499.1 | 482767.2 | 457358.8 | 435020.7 | TRUE |
| 255764.7 | 254202.1 | 251398.4 | 254977.7 | 254053.9 | 231927.8 | 249757.7 | 249493.5 | TRUE |
| 627360.8 | 602173.8 | 499894.7 | 459261.2 | 576799.6 | 583835.6 | 541610.2 | 525020.6 | TRUE |
| 126301   | 103929.3 | 112947.3 | 120715.6 | 130545.2 | 117771.2 | 115984   | 97282.5  | TRUE |
| 215239.2 | 202281.2 | 170866.4 | 204235.4 | 206597.2 | 212105   | 198668.5 | 224357.6 | TRUE |
| 152277.6 | 132099.3 | 128957   | 144678.5 | 154327.4 | 191401.8 | 147000.2 | 172386   | TRUE |
| 59705.1  | 78684    | 85113.7  | 62911.9  | 82273    | 81991.4  | 66609.9  | 60189.2  | TRUE |
| 45171.9  | 31254.5  | 22354.4  | 49861    | 46878.2  | 46713    | 46720.2  | 65740    | TRUE |
| 154464.5 | 135089.8 | 120701.1 | 132230.6 | 156067.8 | 144499.6 | 140404.9 | 160798.6 | TRUE |
| 144799.3 | 153127.4 | 131158.2 | 144073.5 | 159968.1 | 157833.3 | 170592.1 | 150805   | TRUE |
| 229651.9 | 207545.5 | 251259   | 251469.4 | 223358.6 | 279103.9 | 251323.3 | 241164.9 | TRUE |
| 149723.9 | 102132.3 | 168787.8 | 160032   | 159523.2 | 151722.5 | 129120.3 | 175023.9 | TRUE |
| 37985.1  | 40497.1  | 42034    | 24939.4  | 38328.6  | 39404    | 34430.2  | 50463.4  | TRUE |



|          |          |          |          |          |          |          |          |      |
|----------|----------|----------|----------|----------|----------|----------|----------|------|
| 895639.3 | 836489.9 | 1182127  | 951837.1 | 791507.5 | 1116704  | 910441.3 | 789997.2 | TRUE |
| 147394.5 | 164672.5 | 180771.1 | 169986.9 | 167743.9 | 153247.4 | 166263   | 167209   | TRUE |
| 105380   | 87031.9  | 76279    | 111208.1 | 99481.3  | 105480.7 | 89852.4  | 125509.5 | TRUE |
| 257579.7 | 266316.9 | 256002.6 | 282714.1 | 311109.1 | 268620.7 | 297225.7 | 330331.6 | TRUE |
| 206293.7 | 222685.3 | 222392.7 | 234442.9 | 252601.5 | 224737.3 | 216704.4 | 260105.8 | TRUE |
| 178443.2 | 149339   | 179772.2 | 192241.3 | 191459.6 | 179557.4 | 172244.1 | 210581.1 | TRUE |
| 313907.8 | 229191.3 | 374753.5 | 267360.1 | 326248.7 | 374380.3 | 248961.3 | 326569.2 | TRUE |
| 277836.5 | 300639.2 | 294297.2 | 273312.2 | 311517.6 | 343944.7 | 326182.6 | 271669.5 | TRUE |
| 378077.6 | 399532.7 | 331352.5 | 335438.2 | 474794.6 | 368724.7 | 431071.3 | 365244.3 | TRUE |
| 562798.5 | 576392.5 | 488922.1 | 521874.3 | 594585.5 | 547177.7 | 602610.9 | 611855.4 | TRUE |
| 58990.6  | 55743.4  | 68837    | 55280.9  | 47760    | 61862.9  | 48662.2  | 47296    | TRUE |
| 123170.2 | 122894.1 | 111794.4 | 138155   | 161986.3 | 110358.2 | 77866.3  | 103051.2 | TRUE |
| 79802.6  | 71198    | 97358.9  | 74151.1  | 66736.7  | 84395.1  | 72430.3  | 73560.7  | TRUE |
| 117885.2 | 102380.1 | 88900.2  | 116782.2 | 110827   | 111604.4 | 124333.7 | 141407.2 | TRUE |
| 340390.2 | 315477.9 | 430556.8 | 307472.6 | 295721.9 | 416257.9 | 275791.2 | 304149.2 | TRUE |
| 175790.9 | 171884.6 | 169684.7 | 174439.6 | 158662.4 | 193737.5 | 149300.9 | 178044   | TRUE |
| 1253988  | 1087777  | 1054315  | 1058153  | 1551353  | 1318983  | 1177156  | 1292108  | TRUE |
| 152919.1 | 180340.1 | 134762.8 | 163545.2 | 195445.1 | 158468.7 | 160021.9 | 182816.2 | TRUE |
| 136838.6 | 138410.6 | 132492.3 | 125035.1 | 179875.9 | 181703.1 | 174903.4 | 181162   | TRUE |
| 203340.4 | 230653.4 | 241935.7 | 260369.8 | 232987.5 | 283916.1 | 246341.9 | 297156.4 | TRUE |
| 17696.9  | 22379.2  | 8595.9   | 8937     | 10128.5  | 15594.4  | 29025.1  | 20869.8  | TRUE |
| 77191.9  | 85187.6  | 88719.4  | 65362.4  | 57407.7  | 78879.2  | 72896.3  | 64485.3  | TRUE |
| 59528.6  | 73560    | 96453.3  | 81589.7  | 73087.5  | 99509    | 95419.1  | 72829.7  | TRUE |
| 263579.5 | 224228.2 | 245755.3 | 218776.2 | 214613.4 | 251460.4 | 290255.2 | 205874.4 | TRUE |
| 1107980  | 838927.1 | 1207008  | 1179806  | 1183394  | 923806.2 | 941414.1 | 998942.8 | TRUE |
| 1712426  | 1312119  | 1691036  | 1813420  | 1676164  | 1410455  | 1358352  | 1509651  | TRUE |
| 253771.3 | 260607.5 | 231279.5 | 243877.5 | 253883.8 | 284460.1 | 251163.8 | 257900.7 | TRUE |
| 132360.5 | 111636.6 | 111607   | 115709.3 | 113439.3 | 131945   | 129316.6 | 110417.3 | TRUE |
| 384522.9 | 393358.5 | 352775.5 | 408695.4 | 346696.4 | 397900.7 | 483208   | 351549.4 | TRUE |
| 313686.2 | 288889.8 | 390511.5 | 393228.4 | 308144.7 | 317466.7 | 329696.6 | 331503.8 | TRUE |
| 954288.8 | 964158.9 | 1059411  | 1224110  | 971903.7 | 1009998  | 994544.9 | 1119985  | TRUE |
| 243629.6 | 233713.3 | 199845.4 | 244634.8 | 220640.8 | 247914.5 | 269499.4 | 247283.9 | TRUE |
| 148065.8 | 156472.4 | 141363   | 134303.9 | 135240.2 | 145876.2 | 166524.2 | 137498.5 | TRUE |
| 495741.9 | 397229.2 | 574618.9 | 544984.1 | 523762   | 395425.5 | 477200   | 411391.8 | TRUE |
| 58062    | 70086    | 57333.7  | 69004.4  | 51181.8  | 80003.3  | 77462.9  | 86004.2  | TRUE |
| 21499.1  | 11724.9  | 17891    | 10196.6  | 11479.6  | 20649    | 15891.3  | 14460    | TRUE |
| 25477.5  | 10545.6  | 16838.4  | 29238.9  | 24705.4  | 9349.6   | 28872.6  | 41699.2  | TRUE |
| 70675    | 78571.8  | 61203    | 74399.6  | 70227.1  | 115050.3 | 119307.3 | 84702.5  | TRUE |
| 49912.8  | 48996.8  | 31619.5  | 56258.4  | 34685.9  | 60795.2  | 62943.7  | 54058.5  | TRUE |
| 30413.6  | 45592.1  | 35519    | 10661.3  | 12025.9  | 29638.4  | 33161.2  | 29441.1  | TRUE |
| 48010.4  | 55414.9  | 66674.5  | 69614.3  | 52113.7  | 69745.8  | 75658.8  | 62669.5  | TRUE |
| 149171.4 | 175443.9 | 181972.7 | 131207.7 | 151952   | 200900.4 | 226291.8 | 146273.9 | TRUE |
| 34214.8  | 10609.1  | 39389.3  | 33975.8  | 32531.4  | 44385.8  | 43873    | 23635.4  | TRUE |
| 193508   | 196250.4 | 169378.7 | 229119.3 | 177670.7 | 182820.2 | 198914.9 | 191305.2 | TRUE |

|          |          |          |          |          |          |          |          |      |
|----------|----------|----------|----------|----------|----------|----------|----------|------|
| 1261717  | 940431.2 | 1310504  | 1357123  | 1306635  | 1071006  | 1125998  | 1235740  | TRUE |
| 202507.2 | 232676.3 | 142789.4 | 150422.3 | 160227.1 | 182520.3 | 169303.7 | 154790.8 | TRUE |
| 53287.2  | 57518.2  | 86882.2  | 77834.2  | 57976.5  | 51630.7  | 57687.5  | 49012.1  | TRUE |
| 1175328  | 1037316  | 1303889  | 1405879  | 1125188  | 1055585  | 1119704  | 1085095  | TRUE |
| 397986.7 | 301291.5 | 517457.7 | 461310.7 | 395924   | 362465.2 | 349553.8 | 382411.2 | TRUE |
| 40192.4  | 47307.6  | 38480.2  | 42637.9  | 30316.3  | 36262.5  | 41553    | 29277.6  | TRUE |
| 10465.8  | 14207.1  | 13707.6  | 8113.9   | 10327.5  | 11139.3  | 29295    | 28358.6  | TRUE |
| 117811.7 | 101642.2 | 126386.7 | 129345.9 | 98883.5  | 138968.2 | 134354   | 101764.1 | TRUE |
| 5538.7   | 6341.5   | 7117.8   | 5704     | 4559.6   | 15271.7  | 7289.1   | 6148.2   | TRUE |
| 7395.3   | 12054.9  | 3404.8   | 8964     | 16123.6  | 10186.5  | 3971.7   | 4790.8   | TRUE |
| 152721.6 | 135904.1 | 158609.1 | 142084.2 | 120999.2 | 157122.5 | 109615.8 | 112105.7 | TRUE |
| 93060.4  | 83304.1  | 87123    | 63931.2  | 58626    | 82119.2  | 69290.5  | 67299.3  | TRUE |
| 61494.6  | 36950.5  | 43564.5  | 60674.5  | 50323.3  | 65053.1  | 77284.7  | 54018.2  | TRUE |
| 76418.1  | 59870    | 79544.8  | 78472.4  | 80814.4  | 98409.3  | 82378.9  | 76739.1  | TRUE |
| 26677.9  | 24018.5  | 44054.8  | 34951.3  | 33440.9  | 33468.3  | 49444.7  | 35556    | TRUE |
| 119800.6 | 158883   | 137492.3 | 112961.1 | 131422.5 | 160252.7 | 126323.4 | 131181.3 | TRUE |
| 214559.6 | 241431.9 | 258908.4 | 239388.9 | 221531.4 | 271466   | 255177.7 | 228138.1 | TRUE |
| 76690.3  | 77143.7  | 90160.4  | 71739.3  | 72721.4  | 85581.2  | 85944.2  | 60359.1  | TRUE |
| 285403.8 | 287720.7 | 304229.6 | 341100.9 | 355449.6 | 315852.5 | 278374.3 | 321043.4 | TRUE |
| 199211.7 | 156846.7 | 212236.7 | 222844.6 | 207419.1 | 208850.5 | 195009.1 | 226683.4 | TRUE |
| 1071316  | 1179967  | 1207907  | 1387028  | 852418.8 | 1184101  | 1042127  | 878009.5 | TRUE |
| 1213500  | 950400.5 | 1209358  | 1256944  | 1467968  | 1425504  | 1079632  | 1403236  | TRUE |
| 113490.9 | 120179.9 | 101154.8 | 133462.9 | 115016.1 | 123600.8 | 104392.5 | 82618    | TRUE |
| 54291.9  | 35235.1  | 47092.3  | 45571.6  | 41018.3  | 52968.8  | 57100.4  | 48677.1  | TRUE |
| 43385.3  | 47257.1  | 38369.5  | 64356.7  | 62296.3  | 54471.4  | 59147.6  | 79368.7  | TRUE |
| 27257.8  | 31268.6  | 29802.3  | 43503.1  | 30878.3  | 27085.1  | 42085.8  | 42436.6  | TRUE |
| 23006.9  | 12840.2  | 19630.8  | 14326    | 26476.3  | 29411.1  | 36738    | 24600.9  | TRUE |
| 111772.4 | 139171.9 | 148580.5 | 103687.3 | 119107   | 148969.5 | 124485.1 | 132702.6 | TRUE |
| 69416.1  | 76334.5  | 102245.1 | 75771.1  | 86710.4  | 114270   | 123975.6 | 98834    | TRUE |
| 88286    | 97180.6  | 108871.2 | 102098.4 | 90420.3  | 120655.2 | 105444.2 | 107159.4 | TRUE |
| 59988.7  | 62104.6  | 136911   | 46685.1  | 39011.2  | 86545.3  | 74833.1  | 69536.2  | TRUE |
| 176144.9 | 119482.3 | 125715.6 | 155162.7 | 155504.9 | 159454.5 | 212277.9 | 165722.5 | TRUE |
| 29782.5  | 25848.1  | 17382.5  | 22496    | 23746.6  | 29055.3  | 21900.2  | 26639.6  | TRUE |
| 91416.4  | 77064.5  | 105706.9 | 115505.6 | 76471.2  | 140002.4 | 111235.6 | 79169.2  | TRUE |
| 23636.7  | 6847.4   | 11959.8  | 9864.2   | 17543.5  | 14392.4  | 12827.5  | 9941.8   | TRUE |
| 68165    | 46435.1  | 68618.7  | 76294.4  | 55887.4  | 62430.6  | 47085.7  | 67536    | TRUE |
| 524623.1 | 527727.1 | 445833.1 | 467862.7 | 489896.2 | 497583.3 | 505479   | 484711.1 | TRUE |
| 880616.8 | 899065.1 | 703914.3 | 835927.9 | 777210.4 | 719614.4 | 913928.8 | 789233.7 | TRUE |
| 894665.6 | 879978.2 | 1033580  | 1077087  | 818500.6 | 950051.9 | 895921.1 | 910336.8 | TRUE |
| 39656.3  | 49147.8  | 41812.5  | 41822.5  | 54087.7  | 48524.5  | 73384.3  | 57611.1  | TRUE |
| 99818.6  | 122517.4 | 76825    | 99029.2  | 84006.5  | 95629.6  | 90706.6  | 89518.3  | TRUE |
| 107485.7 | 78341.8  | 68586.7  | 83065.2  | 85148    | 122284   | 120116.6 | 145913.6 | TRUE |
| 120312.8 | 104877.1 | 96369.2  | 103007.5 | 91609.4  | 116307.4 | 141301.5 | 115513.6 | TRUE |

|          |          |          |          |          |          |          |          |      |
|----------|----------|----------|----------|----------|----------|----------|----------|------|
| 84726.4  | 62189.7  | 63495.1  | 66558.3  | 73168.3  | 78680.8  | 110478.4 | 81938.9  | TRUE |
| 36766.8  | 35123.1  | 46501.8  | 51411.2  | 39166.9  | 33940.4  | 48872.5  | 54823.8  | TRUE |
| 72370.5  | 57749.9  | 59415.6  | 76427.5  | 72399.6  | 64374.4  | 77366.3  | 69644.1  | TRUE |
| 54566.9  | 75206.6  | 31565.4  | 36564.5  | 40237.7  | 36905.4  | 41367.1  | 38266.6  | TRUE |
| 455644.3 | 504888.2 | 433441.4 | 496076.5 | 486173.7 | 409409   | 541137.7 | 540557.9 | TRUE |
| 336281.2 | 482166.3 | 249360.3 | 296832.1 | 287878.6 | 240481.3 | 417301   | 308545.7 | TRUE |
| 110509.2 | 128483.6 | 115396.7 | 107165.5 | 127585.9 | 97700.7  | 154421.7 | 141832.1 | TRUE |
| 163545.1 | 225248.5 | 159442.7 | 182339   | 204989.6 | 163423.1 | 217641.2 | 189380.3 | TRUE |
| 164539   | 292284.8 | 205169.3 | 209321.1 | 130384.8 | 153701.4 | 183396.6 | 149857.1 | TRUE |
| 472206.4 | 558845.2 | 603714.5 | 511077.2 | 504066.7 | 485375.7 | 526993.7 | 459055.3 | TRUE |
| 38464.4  | 50875.2  | 45873.5  | 49373.5  | 41188.4  | 42847.5  | 47936    | 50058.8  | TRUE |
| 306036.9 | 301670.6 | 241730.5 | 282369   | 281617.1 | 258694.7 | 322604.3 | 248827.1 | TRUE |
| 701599.2 | 627219.6 | 780408.6 | 820963.6 | 712576.8 | 711535.8 | 720364.7 | 728902   | TRUE |
| 224558.2 | 231965.8 | 198074.1 | 181090.3 | 234653.9 | 203540.1 | 243743.8 | 209343.2 | TRUE |
| 275050.1 | 308536.5 | 193663.5 | 233180.3 | 289627   | 189897.8 | 319561   | 247794.6 | TRUE |
| 107332.9 | 69687.4  | 46240.8  | 76232    | 78786    | 58212.5  | 84676.7  | 67592.5  | TRUE |
| 218805.4 | 244855.6 | 224559   | 252979.4 | 189015.3 | 217046.3 | 217405.3 | 231555.8 | TRUE |
| 30577.9  | 9948.1   | 11812.4  | 21518.7  | 17132.7  | 22704.2  | 53554.4  | 28292.7  | TRUE |
| 106382.7 | 89724.6  | 82413.5  | 89458.9  | 111661.4 | 104852.1 | 111424.5 | 105321.3 | TRUE |
| 108886.4 | 111458.9 | 99670.9  | 112205.9 | 104097.2 | 108349.9 | 112348.5 | 100765.9 | TRUE |
| 65849.9  | 75341.9  | 42882.9  | 60740.3  | 53523.9  | 75975.9  | 82855.4  | 90122.9  | TRUE |
| 216387.6 | 180541.5 | 198392.7 | 194104   | 168365.1 | 237905.1 | 215039.6 | 259770.4 | TRUE |
| 78669.3  | 65077.1  | 64028.3  | 79349.8  | 74197.4  | 87862.9  | 99967.7  | 88478.7  | TRUE |
| 175709.9 | 174608.2 | 137098.6 | 174490.4 | 181640.8 | 166987.2 | 187641.9 | 172884.2 | TRUE |
| 241376.4 | 231107.4 | 217824.5 | 231646.2 | 222217.1 | 211799.9 | 236160.4 | 256468.4 | TRUE |
| 256438.1 | 263476.3 | 243551.9 | 232419   | 259746.6 | 227284.1 | 287886.1 | 266497.2 | TRUE |
| 101958.1 | 55850.6  | 71075.8  | 97743.7  | 72301.1  | 116846   | 75352.3  | 96781.1  | TRUE |
| 201333.4 | 163691.1 | 147252.1 | 212804.1 | 225748   | 254572.3 | 196901.6 | 263965.5 | TRUE |
| 147590.3 | 122191.8 | 141608.7 | 174980.3 | 149354   | 140213.7 | 154378.8 | 145306.6 | TRUE |
| 164616.4 | 155218   | 177572.4 | 152099.4 | 146270.9 | 197633.8 | 147034.3 | 157874.1 | TRUE |
| 6709903  | 7256895  | 6151509  | 7538817  | 8866428  | 6254321  | 7328337  | 9253980  | TRUE |
| 8759937  | 10533701 | 9951132  | 9716145  | 8035478  | 9456874  | 10832163 | 9687886  | TRUE |
| 94264.2  | 126840.1 | 120168.7 | 102390   | 99166.6  | 130379.3 | 124168.3 | 118212.4 | TRUE |
| 42440.6  | 39079.3  | 30595.6  | 39510    | 36010    | 54402.1  | 40732    | 41107.9  | TRUE |
| 312495.3 | 265197.5 | 280348.3 | 286478.1 | 286628.7 | 351357.8 | 277499.7 | 342695.8 | TRUE |
| 883410.3 | 784643.5 | 877521.3 | 870395   | 869550.4 | 877093.8 | 792296.9 | 896010.1 | TRUE |
| 185157.6 | 147627.2 | 184894.3 | 195182.4 | 155595.6 | 196164.3 | 142043.6 | 155084.3 | TRUE |
| 178747.9 | 145827.9 | 102791.6 | 134577.9 | 176133.7 | 154894.8 | 160485.4 | 196630.6 | TRUE |
| 228947   | 196714.4 | 189405.4 | 177468.8 | 199601.3 | 245859.1 | 243379.5 | 264539.5 | TRUE |
| 100652.3 | 89486.2  | 142282.9 | 140939.5 | 103247.3 | 122931.4 | 73539.1  | 99077.8  | TRUE |
| 62266.7  | 41222.6  | 75312.7  | 76529.5  | 41157.7  | 85490    | 42417.6  | 28591    | TRUE |
| 112758.8 | 111614.2 | 145173.5 | 119187.5 | 118479.8 | 143055.1 | 110858.3 | 122535   | TRUE |
| 59279.9  | 49584.2  | 66299.9  | 56049.4  | 47832.8  | 52997.2  | 47321.5  | 38621.5  | TRUE |

|          |          |          |          |          |          |          |          |      |
|----------|----------|----------|----------|----------|----------|----------|----------|------|
| 96368.2  | 78110.6  | 134070.5 | 113885.7 | 107448.1 | 129488.8 | 83393.4  | 85369.5  | TRUE |
| 22811    | 34819.1  | 75106.4  | 23802    | 34779.1  | 24707.1  | 31586    | 28569.4  | TRUE |
| 35904.8  | 38462    | 53437.8  | 57565    | 48537.9  | 36588    | 15613.5  | 36103.9  | TRUE |
| 26239.9  | 40064.5  | 10402.3  | 30417.7  | 36807    | 28396.6  | 42863.1  | 33660.9  | TRUE |
| 165774.9 | 119168.1 | 119128   | 143951.3 | 131162.3 | 182172.3 | 144075.9 | 177698.8 | TRUE |
| 293776.8 | 285166.2 | 306035   | 289340   | 245489.4 | 309052.7 | 296107   | 317839.3 | TRUE |
| 327963.9 | 319695.3 | 292487.4 | 328004.3 | 363466.6 | 374245.6 | 314778.7 | 329108.3 | TRUE |
| 28072.9  | 6853     | 28272    | 9771.9   | 24107.8  | 30551.8  | 24342.6  | 11281.5  | TRUE |
| 23719.9  | 20491.3  | 31188.5  | 36536.9  | 26305.2  | 10991.1  | 32075    | 29518.9  | TRUE |
| 141931.3 | 123649.7 | 139873.4 | 150711.6 | 154358.3 | 149367.5 | 164675.4 | 149712.7 | TRUE |
| 255904   | 231442.6 | 266474   | 247182   | 247877.8 | 254942.6 | 237484.1 | 274024   | TRUE |
| 99544.7  | 106259.8 | 84088.5  | 88222    | 87929.6  | 131520.2 | 110024.3 | 122874.6 | TRUE |
| 447179.1 | 315030.2 | 326936.4 | 418581.7 | 446956.5 | 436730.6 | 391489.2 | 460985   | TRUE |
| 166607   | 131186   | 114545.3 | 123638.1 | 165458.4 | 156472.5 | 137479.2 | 158395.6 | TRUE |
| 549214.9 | 410336.9 | 509248.7 | 456501.5 | 479086.2 | 542689.9 | 450915.3 | 524747.2 | TRUE |
| 60792.9  | 66676.2  | 89090    | 65117.5  | 58798.4  | 56809.6  | 58852    | 59238.4  | TRUE |
| 169427.1 | 122883.7 | 129020.2 | 136813.3 | 151227.3 | 148008.4 | 146915.3 | 159585.7 | TRUE |
| 246660   | 219712.2 | 239787   | 262626.4 | 219459.3 | 236558.3 | 217759.8 | 200704.1 | TRUE |
| 43189.9  | 45274.4  | 56841.8  | 33146.7  | 33794.6  | 34428.1  | 55443.8  | 52905.2  | TRUE |
| 157369.5 | 151195.7 | 149793.9 | 144645.7 | 147662.1 | 181058.5 | 135307.2 | 117872.8 | TRUE |
| 234849.9 | 204032   | 280402.9 | 278830.7 | 270782.3 | 287672.5 | 236489.2 | 257379.7 | TRUE |
| 72648.9  | 46621.4  | 73864.2  | 61238.1  | 67920.4  | 66612.9  | 60805.4  | 60266.8  | TRUE |
| 75490.7  | 53740.6  | 60263.2  | 75443.7  | 87525.6  | 77479.6  | 79925.6  | 75029.6  | TRUE |
| 200325.3 | 162615.5 | 151209.1 | 232637.8 | 220617.6 | 174196.4 | 184907.9 | 202692.4 | TRUE |
| 612799.5 | 520073   | 500324.5 | 633284.7 | 584862.2 | 495873   | 530518.2 | 597814.8 | TRUE |
| 1266675  | 1164842  | 1092485  | 1120648  | 1172143  | 1384994  | 1224088  | 1410990  | TRUE |
| 538292.1 | 516800.1 | 436488.6 | 452402.2 | 442310.9 | 612538.1 | 576544.4 | 599262.9 | TRUE |
| 26742.3  | 27479.8  | 36469.5  | 27043.8  | 20934.7  | 38112.3  | 17454.2  | 31995.4  | TRUE |
| 157990.8 | 165404.8 | 153207.2 | 153849.7 | 141600.1 | 180219.5 | 158155.2 | 148870.4 | TRUE |
| 85524.9  | 79614.7  | 53544.5  | 74592.9  | 72213.3  | 52529.8  | 78472.6  | 68179    | TRUE |
| 29676.6  | 43811.8  | 50199.8  | 37234    | 44903.7  | 38538.4  | 38999.6  | 39670.4  | TRUE |
| 27800.7  | 21982.9  | 30241.4  | 45638.3  | 8514.8   | 12712.5  | 24557.4  | 12795.8  | TRUE |
| 1578481  | 1543285  | 1366361  | 1871859  | 1452307  | 1459383  | 1697777  | 1384164  | TRUE |
| 1385701  | 1386365  | 1206747  | 1544071  | 1216623  | 1299384  | 1491610  | 1301377  | TRUE |
| 1684665  | 1320109  | 1751046  | 1889129  | 1611226  | 1946624  | 1514179  | 1877383  | TRUE |

|          |          |          |          |          |          |          |          |      |
|----------|----------|----------|----------|----------|----------|----------|----------|------|
| 35623.4  | 25402    | 29731.8  | 39988.9  | 32728.4  | 54309.7  | 31788.4  | 48363.3  | TRUE |
| 138817.4 | 133609.6 | 94337.4  | 146178.9 | 144952.9 | 152148.1 | 176029   | 175220.4 | TRUE |
| 68821.4  | 65571.4  | 77772.9  | 90276    | 96846.7  | 76823.5  | 96163.4  | 100729.5 | TRUE |
| 225459.6 | 245683   | 234161.6 | 254257.3 | 204310.8 | 204345.1 | 258838   | 187330.1 | TRUE |
| 81463.1  | 55032.4  | 59248.9  | 68451.4  | 76968.5  | 125247.9 | 58451    | 86154.7  | TRUE |
| 181540.8 | 179909.1 | 183198.9 | 183306.6 | 197703.3 | 231471.5 | 193653.8 | 175819.5 | TRUE |
| 571883.6 | 506173.5 | 613073.6 | 611609.9 | 644132.2 | 610047.8 | 526444.1 | 597809.4 | TRUE |
| 85806.8  | 110737.2 | 63826.1  | 115326.8 | 97411.4  | 55704.6  | 110920.5 | 111363.1 | TRUE |
| 137517.7 | 169253.2 | 91143.6  | 126047.3 | 87699.1  | 116039.3 | 126405.9 | 91327.4  | TRUE |
| 145742.2 | 130317.1 | 170776.2 | 147740.6 | 111397.7 | 168681.9 | 152679.7 | 130988.6 | TRUE |
| 93332.9  | 126662.3 | 205669.8 | 170650.3 | 140649.4 | 99115.6  | 131704.3 | 98047.6  | TRUE |
| 34442.8  | 34493.1  | 40033.2  | 37614.9  | 26990.2  | 32312.8  | 35287.3  | 33578.2  | TRUE |
| 1698869  | 1336736  | 1998974  | 2014713  | 1719220  | 1709991  | 1399876  | 1637175  | TRUE |
| 106106   | 143459.6 | 87240    | 88632.8  | 119034.4 | 103693.4 | 129019   | 125896.9 | TRUE |
| 80595.4  | 76703.2  | 71451    | 87111.8  | 79908.9  | 75008.2  | 90321.2  | 72910.9  | TRUE |
| 40178.4  | 65801.5  | 32408    | 42215.5  | 50528.1  | 42344.4  | 42455.8  | 48007.1  | TRUE |
| 360491.9 | 262127.6 | 399864.9 | 425980.9 | 405659.5 | 449220.1 | 313849.3 | 374325.7 | TRUE |
| 564660.7 | 478187.5 | 544793.2 | 585920.7 | 615551.2 | 598976.3 | 525886.7 | 554914.1 | TRUE |
| 21312.3  | 18189    | 21227.8  | 16775.1  | 19154.5  | 20566.2  | 20913.6  | 8078.2   | TRUE |
| 590563   | 582347.1 | 438710.9 | 445829.6 | 377951.8 | 463753.8 | 490446.6 | 390170.8 | TRUE |
| 91685.3  | 106096   | 87227.1  | 66866.5  | 70221.6  | 60520.2  | 79023    | 63850.2  | TRUE |
| 74860.2  | 68922.2  | 78312.2  | 84684.8  | 83933.4  | 61872.8  | 60470.8  | 46827.7  | TRUE |
| 131137   | 146446.8 | 141430.7 | 134268.5 | 139894.8 | 162918   | 151474.3 | 133422.2 | TRUE |
| 81686.3  | 78785.9  | 84951.1  | 70776.7  | 87873.2  | 90761.6  | 75762.1  | 72625.6  | TRUE |
| 252984.5 | 199139.9 | 287264.7 | 230439   | 293053.4 | 227949.5 | 199503.4 | 235454.7 | TRUE |
| 522441.3 | 440666.9 | 599559.1 | 580396.5 | 546725.4 | 525870.4 | 444973   | 550284.3 | TRUE |
| 27587    | 43533.3  | 31938.6  | 30478.5  | 21807.2  | 29546.1  | 36009.5  | 33229.2  | TRUE |
| 79356.9  | 66499.5  | 95370.1  | 98020.3  | 125855.6 | 129613.2 | 116591.2 | 104452.6 | TRUE |
| 48864.9  | 56556.5  | 51283.6  | 43237.6  | 40865.7  | 55929.6  | 46710.3  | 45133.7  | TRUE |
| 204459.8 | 119276.3 | 214150.8 | 220355.7 | 164931.3 | 187510.1 | 118254.8 | 163404.9 | TRUE |
| 245373   | 224412.5 | 241133.3 | 271069.8 | 286583.5 | 169703.6 | 239086.5 | 182528.7 | TRUE |
| 28490.6  | 25037.7  | 45842.4  | 34692.7  | 30637.4  | 49563.5  | 37550.1  | 36475.2  | TRUE |
| 280684.3 | 279278.3 | 309484.6 | 237650.6 | 220634   | 325833.5 | 271772.5 | 264132.6 | TRUE |
| 125623.8 | 127357.4 | 174379.2 | 177030.7 | 133199.5 | 187714   | 142748.3 | 141943.3 | TRUE |
| 455288.4 | 334089.4 | 445070.1 | 461021.2 | 534631.4 | 448923.7 | 379388   | 450700.9 | TRUE |
| 650898.4 | 500615.8 | 657274.5 | 627021.9 | 753910.4 | 586563.7 | 546224.3 | 593065.6 | TRUE |
| 481242.7 | 406281.2 | 502807.3 | 532034   | 558094   | 472252.2 | 417798.7 | 446622.3 | TRUE |
| 45451.3  | 59449.8  | 58156.9  | 43142.4  | 61346.3  | 56018.9  | 57816.8  | 55866.5  | TRUE |
| 1013728  | 835369.8 | 1128935  | 928254.3 | 1140526  | 1020666  | 883165.9 | 980071.1 | TRUE |
| 448382.2 | 401543.8 | 498530.3 | 482269.8 | 582796   | 439654.4 | 425021.7 | 469005.7 | TRUE |
| 283305.1 | 274209.7 | 238559.8 | 260378.4 | 275377.2 | 281935.3 | 284641.4 | 251721.4 | TRUE |
| 6353.5   | 10469.8  | 11542.4  | 8334.1   | 6486.3   | 8268.8   | 13082.5  | 11375.4  | TRUE |

|          |          |          |          |          |          |          |          |      |
|----------|----------|----------|----------|----------|----------|----------|----------|------|
| 350132.5 | 283240.1 | 385521.5 | 378653   | 381186.2 | 292437.8 | 246618   | 281857.1 | TRUE |
| 234048.5 | 256158.3 | 431523.9 | 240598.7 | 358673.7 | 249159.8 | 189757.5 | 223461.8 | TRUE |
| 23536.8  | 5978.8   | 14342.3  | 3760     | 20985    | 17651.4  | 27578.3  | 21976.3  | TRUE |
| 108994.7 | 101554.1 | 84978.7  | 96044.3  | 98142.1  | 103151.6 | 99787.9  | 86715.9  | TRUE |
| 53175.4  | 74584.5  | 62759.2  | 66989.9  | 57004.1  | 59486.3  | 56452.4  | 46852.5  | TRUE |
| 105196.2 | 82193.6  | 104516.4 | 72369.4  | 47678.6  | 87209.1  | 84321.5  | 72563.3  | TRUE |
| 386955.1 | 329824.8 | 459004.3 | 337504.5 | 289309.9 | 449166.4 | 372414.1 | 307366.2 | TRUE |
| 267052.6 | 238660.8 | 336965.3 | 290410.8 | 336617.9 | 279136.4 | 251058.7 | 263373.8 | TRUE |
| 19853.2  | 24458.9  | 22746.9  | 19362.9  | 21666.2  | 21378.5  | 11937.2  | 10296.9  | TRUE |
| 40987.7  | 38859.5  | 48940.8  | 42757.5  | 40977    | 45327.8  | 35393.5  | 35289    | TRUE |
| 89095.2  | 73895.7  | 84494    | 85042.1  | 94869.1  | 89368.7  | 85327    | 117733.3 | TRUE |
| 130049.2 | 166034.7 | 141690.7 | 162765.5 | 181512.2 | 115253.2 | 127533.7 | 134307.6 | TRUE |
| 46551.3  | 42014    | 45624.6  | 37195.6  | 44077.5  | 38375.9  | 37842.3  | 49296.8  | TRUE |
| 229522.7 | 230062.3 | 162507.8 | 180710.3 | 214086.8 | 224149.1 | 263046.1 | 282290.7 | TRUE |
| 307862.3 | 297889   | 283381.8 | 242322.5 | 286279.6 | 323706.7 | 367686.5 | 372833.7 | TRUE |
| 127420.2 | 90981.4  | 146751.1 | 161099.7 | 153397   | 152014.4 | 149599.7 | 181928.5 | TRUE |
| 156922.4 | 137315.7 | 165122.7 | 197794.5 | 211444.2 | 192103.8 | 235061.6 | 229548.6 | TRUE |

|          |          |          |          |          |          |          |          |      |
|----------|----------|----------|----------|----------|----------|----------|----------|------|
| 157783.2 | 225651.3 | 212350.5 | 209813.8 | 185355   | 115056.9 | 128154   | 133407.7 | TRUE |
| 62373.6  | 106276.4 | 109875.5 | 111991   | 116676.4 | 42992.5  | 43956.5  | 53166.3  | TRUE |
| 59258.8  | 66801.9  | 99842.2  | 82666.6  | 71820    | 83418.6  | 53647.4  | 52990.2  | TRUE |
| 298170.2 | 319383.3 | 253994.2 | 281009.4 | 291927.3 | 326300.1 | 427539.1 | 336209.8 | TRUE |
| 343220   | 296246.2 | 214155.6 | 231101.7 | 215655.5 | 264545.1 | 323741.8 | 293050   | TRUE |
| 415287.5 | 358811.7 | 371915.1 | 335049.5 | 282456.4 | 416649   | 381924.3 | 420450.3 | TRUE |
| 579362   | 514090.9 | 510743.4 | 570053.8 | 497379.1 | 594949.4 | 697951.2 | 617259.5 | TRUE |
| 89341.8  | 99884.6  | 66919.2  | 92452.5  | 92176    | 72699.8  | 114272.3 | 102502.9 | TRUE |
| 3035117  | 2921622  | 3281834  | 3160427  | 2588604  | 3197792  | 3811531  | 3669252  | TRUE |

|          |          |          |          |          |          |          |          |      |
|----------|----------|----------|----------|----------|----------|----------|----------|------|
| 44003.6  | 44124.1  | 33165.7  | 38211.3  | 43329.3  | 27034.4  | 50227.4  | 52733.7  | TRUE |
| 300028   | 297069.3 | 142456.2 | 199795.9 | 323837.9 | 142104.6 | 244769.2 | 291947.8 | TRUE |
| 107713.1 | 108177.3 | 75002.6  | 78606.1  | 99263.6  | 79430.3  | 99673.9  | 103792.4 | TRUE |
| 34952.5  | 46565.1  | 24349.8  | 15639.7  | 38551    | 34624.3  | 43059.5  | 54000.5  | TRUE |
| 140289   | 115537.8 | 94092.3  | 140275.1 | 126642.3 | 128069.8 | 121134.1 | 120354.9 | TRUE |
| 256210.4 | 257168.4 | 235329.8 | 402356.6 | 473014   | 253723.1 | 411280.6 | 468166.7 | TRUE |
| 934277.1 | 829146.8 | 824423.1 | 1192960  | 1518634  | 907489.3 | 1284210  | 1398096  | TRUE |
| 91371.4  | 112130.3 | 91545.6  | 90583.5  | 105552.6 | 77012.2  | 92731.9  | 119668.8 | TRUE |
| 52682.7  | 105066   | 75992    | 91708.8  | 108419.2 | 44737.6  | 59163    | 57732.3  | TRUE |
| 70997.7  | 54561.1  | 56726.4  | 68631.1  | 56497.5  | 51779.2  | 70675.5  | 76482.1  | TRUE |
| 107497.5 | 85587.9  | 75629.7  | 113351.3 | 105826.1 | 98562.6  | 101815.1 | 119481.8 | TRUE |
| 160543.3 | 348289.5 | 214915   | 256685.3 | 224592.9 | 105651   | 122881   | 118215   | TRUE |
| 66361.5  | 62031    | 79847.2  | 69481.8  | 79025.4  | 69060    | 70983.8  | 75832    | TRUE |
| 76377.8  | 79311.9  | 40672.4  | 191179.3 | 60816.5  | 44784.4  | 101277.6 | 55442.6  | TRUE |
| 50098.7  | 64049.2  | 50549.7  | 390854.7 | 75154    | 54016.8  | 41456.9  | 56400.3  | TRUE |
| 46351.3  | 47200.2  | 46775.5  | 226412.2 | 41511.1  | 41291.6  | 51911.2  | 47151.6  | TRUE |
| 22392    | 41447.9  | 19073.7  | 37943.1  | 36969.3  | 30231.9  | 33638.7  | 35308.7  | TRUE |
| 106549.7 | 92892.5  | 99916.8  | 80007.2  | 137351   | 81866.8  | 106111.6 | 110868.6 | TRUE |
| 814147.9 | 742376.5 | 538155.2 | 619466.9 | 767020.8 | 528115.4 | 580451   | 739363.9 | TRUE |
| 111539.6 | 123185   | 83799.4  | 96451    | 93475.5  | 80081.4  | 78556.6  | 99334.3  | TRUE |
| 618535.6 | 528835.6 | 497328.7 | 625303.5 | 822170.6 | 527786.5 | 732567.3 | 817032.7 | TRUE |
| 1914403  | 1780056  | 1555927  | 2149177  | 2708547  | 1699438  | 2201599  | 2523694  | TRUE |
| 262446.6 | 245635.4 | 258927.3 | 279585   | 286175.3 | 233267.7 | 279278.3 | 287138.4 | TRUE |
| 161813   | 386460.7 | 171355.4 | 265817.2 | 359946.1 | 92915.5  | 90702    | 98679.7  | TRUE |
| 119417.6 | 91808.2  | 73293.7  | 99657.9  | 135146.8 | 79727.5  | 115731.5 | 154128.9 | TRUE |
| 139681.2 | 169516.6 | 113129   | 157129.9 | 169664.9 | 115833.2 | 199959.9 | 181307.4 | TRUE |
| 63376.3  | 93727.7  | 82589.2  | 97867.3  | 136740.3 | 42324.5  | 50027    | 42363.1  | TRUE |
| 108425.9 | 282361.6 | 135541.4 | 306335.2 | 453322.7 | 53596.1  | 31419.8  | 75240.9  | TRUE |
| 65028.8  | 63303.1  | 56847.8  | 76926.4  | 93580.2  | 60978.7  | 56653.6  | 84708.6  | TRUE |
| 110339.3 | 99615.3  | 64611.5  | 100722.3 | 108174.3 | 88917.5  | 120687.2 | 152986.9 | TRUE |
| 331224.6 | 381772.5 | 391181.2 | 408103   | 281178   | 372880.8 | 410092.2 | 378532.4 | TRUE |
| 462457.7 | 456511.3 | 503919.9 | 521225.1 | 397984.7 | 484010.6 | 550546.6 | 492226.6 | TRUE |
| 233591.1 | 596425.1 | 325842.2 | 624569   | 477366.1 | 181229.7 | 152434.1 | 168832.6 | TRUE |
| 146769.2 | 110347.7 | 123004.4 | 143950   | 142131   | 116242.1 | 134677.2 | 137238.9 | TRUE |
| 62282.2  | 52320.7  | 73144.5  | 78945.5  | 94218.4  | 96462.7  | 94846.3  | 112138.9 | TRUE |
| 186637.5 | 184237.2 | 94856.2  | 135104.5 | 157564.2 | 119862.4 | 133776.1 | 152063.4 | TRUE |
| 108441.5 | 109318.1 | 102028.6 | 80492.2  | 81311.7  | 102498.5 | 114368.4 | 92185.9  | TRUE |
| 170219.7 | 178136.8 | 119373.7 | 119764.9 | 126271.3 | 109872.6 | 139110.3 | 141342.4 | TRUE |
| 265601.7 | 210314.8 | 177042.3 | 214134.4 | 243306   | 173481.9 | 207539.5 | 214534.8 | TRUE |
| 95859.5  | 117567   | 66198.4  | 90666.3  | 82885.9  | 78094.5  | 97383.9  | 98060.1  | TRUE |
| 44096.5  | 62066.3  | 33537.5  | 37588.7  | 46112.9  | 33325.3  | 15592    | 33257.5  | TRUE |
| 300520.8 | 258555   | 181602.5 | 196168.6 | 222621.6 | 176021.3 | 215093.1 | 268374.6 | TRUE |
| 249213.5 | 204117   | 182129.1 | 149327.5 | 190863.1 | 168028.4 | 187774.4 | 203495   | TRUE |
| 288535.1 | 261437.7 | 171332.8 | 201347.2 | 247631.2 | 186931.2 | 241794.2 | 247659.9 | TRUE |
| 68253.1  | 68398.9  | 43538    | 63739.6  | 69833.5  | 73278.5  | 56892.5  | 85633.5  | TRUE |
| 156859.8 | 118661.6 | 118857   | 155016.4 | 133481.6 | 201624.5 | 141432.8 | 183739.2 | TRUE |

|          |          |          |          |          |          |          |          |      |
|----------|----------|----------|----------|----------|----------|----------|----------|------|
| 24359    | 15900.3  | 37989.5  | 6465.8   | 32951.1  | 49708.1  | 39102    | 45788.7  | TRUE |
| 38116.4  | 36120.4  | 21632.5  | 28089    | 33514.3  | 25760.4  | 29373.2  | 35490.7  | TRUE |
| 93428.9  | 132633.9 | 115728.4 | 107020.1 | 102178.2 | 91072.9  | 90656.8  | 99514.8  | TRUE |
| 183558.4 | 216502.3 | 181974.9 | 140771.9 | 155876.6 | 201502.5 | 182683.6 | 165058.6 | TRUE |
| 100929.5 | 113558.5 | 105971.7 | 120550.7 | 122270   | 113027.9 | 138194.5 | 131239.2 | TRUE |
| 202916.5 | 202786.4 | 207892.3 | 226446.5 | 251023.6 | 216843.3 | 214075.3 | 259425.2 | TRUE |
| 195894.1 | 205523.4 | 227106.4 | 235881.9 | 272725.1 | 214679.3 | 239440.6 | 253371.2 | TRUE |
| 688792.3 | 806059.1 | 748088.2 | 887983.8 | 1023530  | 820456   | 978516.4 | 1016779  | TRUE |
| 52416.4  | 33671.2  | 55882.6  | 76029.8  | 78618.1  | 52172.5  | 80902    | 61983.9  | TRUE |
| 152976.7 | 145522.9 | 146682.3 | 179720.4 | 179539.5 | 184809.3 | 192605.5 | 185023.1 | TRUE |
| 218150.6 | 188559.1 | 229727.3 | 231842.3 | 248688.3 | 247384.3 | 264816.1 | 246293.7 | TRUE |
| 89561.6  | 97562.2  | 100727.4 | 122355.4 | 122053.4 | 118585.2 | 102921.6 | 139522.8 | TRUE |
| 113051.6 | 104831.6 | 152119.5 | 154973   | 174962.3 | 128091.2 | 154472.2 | 170172.3 | TRUE |
| 164494   | 161101.9 | 156704.3 | 211550.9 | 207671.5 | 172676.1 | 234540.8 | 239639.3 | TRUE |
| 168829.5 | 147216.5 | 180119.5 | 193799.4 | 180975   | 198868.6 | 183530.5 | 186015.8 | TRUE |
| 34468.3  | 38962    | 37383    | 35660.8  | 28336.1  | 17477.2  | 35236.7  | 36916    | TRUE |
| 16789.6  | 10833.8  | 22549.9  | 24610.4  | 6432.1   | 8399.5   | 8449     | 12051.7  | TRUE |
| 200296.4 | 183984.7 | 159342.9 | 212495.4 | 242199.8 | 185748.1 | 245399.3 | 260308.4 | TRUE |
| 226647.6 | 387201.8 | 254572.7 | 296744.1 | 325027.1 | 183372.8 | 231227.6 | 182816.8 | TRUE |
| 73167.1  | 98639.4  | 93606.3  | 94843.8  | 89320.2  | 97850.7  | 100549.7 | 105472.5 | TRUE |
| 87447.3  | 286614.5 | 174879.2 | 307106.4 | 363374.1 | 73020.9  | 60249.7  | 73917.4  | TRUE |
| 38720.7  | 63777.4  | 56884.5  | 65379.5  | 76613.3  | 36577.8  | 35940.9  | 38813.6  | TRUE |
| 62598.5  | 53220.9  | 61911.6  | 66504.6  | 66943.8  | 69977.8  | 59031.2  | 80850.4  | TRUE |
| 45614.2  | 61686    | 57507.6  | 51768.1  | 38897.5  | 58798.6  | 58280.8  | 57939.8  | TRUE |
| 40191.2  | 30357.6  | 22137.2  | 42325.5  | 36627.7  | 37741.5  | 32193.3  | 37139.8  | TRUE |
| 31531.6  | 11154.3  | 14618.8  | 10516.4  | 24749.3  | 21770.9  | 13515.4  | 34558.7  | TRUE |
| 98552.1  | 72870.9  | 82953.9  | 101234.7 | 69781.6  | 103911.1 | 84171.2  | 80257.6  | TRUE |
| 31805.6  | 25818.7  | 24984.5  | 36133.3  | 23837.9  | 38666.8  | 50578.1  | 37936    | TRUE |
| 211279.8 | 172596.8 | 169375.5 | 182845.6 | 147459.1 | 230605.1 | 244186.7 | 208080.6 | TRUE |
| 288290.5 | 268913.9 | 221701.8 | 215444   | 296721.1 | 211980.2 | 255384.2 | 253908.9 | TRUE |
| 5296157  | 4973782  | 3819541  | 4938501  | 5127253  | 4305171  | 4876951  | 5592119  | TRUE |
| 389092.5 | 409459.6 | 323423.7 | 365289.1 | 418083.8 | 362702   | 428134.3 | 398493.5 | TRUE |
| 72688.5  | 66897.9  | 53307.4  | 73713.3  | 56770.6  | 77607.2  | 63728.1  | 87261.6  | TRUE |
| 47796.4  | 47235.3  | 47931.3  | 53413.9  | 54486.3  | 47770.6  | 51842.7  | 41155    | TRUE |
| 40702.9  | 49773.9  | 53653.3  | 55922.5  | 54025.9  | 45911.9  | 47857.5  | 67850.1  | TRUE |
| 134624.5 | 137490.2 | 149429   | 157475   | 183665.4 | 168200.7 | 201494.7 | 190053.4 | TRUE |
| 19559.4  | 31379.8  | 33448.2  | 39661.5  | 30586.8  | 29975.4  | 33427.9  | 28078.4  | TRUE |
| 38208.4  | 28452    | 29293.9  | 27803.6  | 43235    | 38799.2  | 40010.5  | 44113.4  | TRUE |
| 16305    | 13226.6  | 15174.5  | 13687.3  | 23445.1  | 23790.9  | 31762.2  | 31925    | TRUE |
| 14547.1  | 9747.6   | 14269.2  | 23242.4  | 23272.7  | 25791.5  | 19626.1  | 37408.2  | TRUE |
| 17213.5  | 9199.4   | 14674.1  | 17811.2  | 23839    | 18223.9  | 24870.8  | 26713.6  | TRUE |
| 51110.5  | 37758.1  | 41773.8  | 49389.4  | 38236.6  | 52412.3  | 64697.4  | 56881.6  | TRUE |
| 37935.2  | 38812.3  | 28244.6  | 31110.6  | 51943.9  | 30958.4  | 37894    | 41828.9  | TRUE |
| 102353.4 | 70316.9  | 79556.8  | 98991.8  | 101251.1 | 96218.8  | 104490.6 | 116984.8 | TRUE |
| 156384.8 | 474211   | 202443.2 | 481325.6 | 538762.4 | 51074.9  | 28476.4  | 51107.6  | TRUE |
| 703576.4 | 2096732  | 757110.1 | 1756251  | 2089824  | 214907.7 | 136363.3 | 247005.6 | TRUE |



|          |          |          |          |          |          |          |          |      |
|----------|----------|----------|----------|----------|----------|----------|----------|------|
| 21398.5  | 67819.3  | 46882    | 79242.6  | 105442.9 | 17783.7  | 19358.1  | 23937.7  | TRUE |
| 35851.9  | 103443.2 | 48915.3  | 111725.2 | 120810   | 21707.7  | 22692.6  | 27192.9  | TRUE |
| 33623.1  | 17174.5  | 30924.7  | 24974.8  | 27794.3  | 26438.7  | 18921.3  | 31571.6  | TRUE |
| 767450.4 | 810372.6 | 808679.4 | 872509.8 | 732900.3 | 880998.9 | 883804.1 | 747716.1 | TRUE |
| 19144850 | 17715130 | 17420954 | 17972446 | 16949465 | 20935891 | 20923049 | 19784998 | TRUE |
| 56443.7  | 43059.7  | 46451.6  | 86401.6  | 43659.8  | 67162.9  | 49524    | 65862    | TRUE |
| 32870.5  | 39825.3  | 31293.8  | 29717.8  | 42497.6  | 40464.5  | 36084.3  | 38392.4  | TRUE |
| 54040.5  | 40056.3  | 44120.2  | 47277.5  | 61139.4  | 43729.9  | 38063.4  | 49922.7  | TRUE |
| 35239.9  | 83092.5  | 47950.7  | 64917.3  | 69176.7  | 10887.3  | 11343.5  | 7637.5   | TRUE |
| 398379.3 | 1315045  | 613581   | 1144406  | 1139167  | 108984.5 | 81066.8  | 144535.2 | TRUE |
| 265151.1 | 782643.9 | 335767.5 | 604364.5 | 644091.3 | 74512.5  | 45182.8  | 98002.7  | TRUE |
| 31121.9  | 43757.6  | 49639.8  | 58239.7  | 64342.4  | 51164.2  | 58324.3  | 64768.3  | TRUE |
| 98835.9  | 92399.5  | 127498.3 | 135690.5 | 129835.8 | 129465.6 | 129714.6 | 147514.1 | TRUE |
| 155260.4 | 153003.8 | 177081.8 | 224439.5 | 226295.2 | 193199.9 | 220697   | 232109.3 | TRUE |
| 35487    | 29916.9  | 42736.5  | 40765.9  | 50978.6  | 39042    | 35275.3  | 37461    | TRUE |
| 30546.6  | 19995    | 27489.4  | 29158.2  | 29695.3  | 35517    | 28572.5  | 42214.4  | TRUE |
| 63778.1  | 38318.1  | 58615.6  | 79586.2  | 68168.7  | 72815.8  | 77923.9  | 78794.9  | TRUE |
| 20779.2  | 22816.6  | 20538.3  | 13681.3  | 12093.9  | 18233.3  | 30041.1  | 27562.3  | TRUE |
| 183014.9 | 147023   | 175296.6 | 183496.1 | 180105.1 | 203025.6 | 183808   | 198385   | TRUE |
| 30214.3  | 44453.9  | 37870.4  | 52114.9  | 32731.7  | 38090.8  | 36087.2  | 44886.8  | TRUE |
| 16812    | 12656.9  | 19114.1  | 26319.8  | 23875.2  | 20487.1  | 23306.7  | 22914.5  | TRUE |
| 270518.3 | 239483.5 | 214217   | 298546.6 | 321042.6 | 214046.5 | 272312   | 333143.3 | TRUE |
| 44032.2  | 99359.3  | 57035.9  | 91181.8  | 106481   | 41886.5  | 28904    | 26896.8  | TRUE |
| 42951.8  | 96502.2  | 71655.6  | 69163.5  | 104809.6 | 29472.4  | 25833.6  | 26921.8  | TRUE |
| 68114.1  | 91387.4  | 75702.3  | 92256.4  | 90396.3  | 64465.1  | 54665.1  | 49652.3  | TRUE |
| 32909.1  | 72694.2  | 48581.7  | 60639.7  | 74220.7  | 39705.6  | 36816.5  | 34538.2  | TRUE |
| 32089.5  | 32892.5  | 26922.7  | 36595.8  | 49645.4  | 18367.8  | 10614.3  | 21876    | TRUE |
| 64523.6  | 65515.4  | 48414.2  | 61506.1  | 61223.1  | 67544.6  | 69340.9  | 72243.2  | TRUE |
| 101226   | 75692.1  | 70770.9  | 88596.2  | 73509.9  | 94934.2  | 96736.4  | 105506.5 | TRUE |
| 85123.8  | 64617.3  | 82203.1  | 80225    | 98398.7  | 141680.9 | 110986.1 | 113984.1 | TRUE |
| 21163    | 12705.5  | 5687.8   | 8812.3   | 7655.2   | 31748.2  | 14093.7  | 29750.9  | TRUE |

|          |          |          |          |          |          |          |          |      |
|----------|----------|----------|----------|----------|----------|----------|----------|------|
| 80308.4  | 79550.6  | 88385.3  | 102570.3 | 81578.3  | 155569.5 | 114014.3 | 72449.6  | TRUE |
| 43189.7  | 117787.6 | 64020    | 124895.4 | 111658.8 | 21505    | 22141.3  | 21723.2  | TRUE |
| 7047     | 8098.1   | 12287.3  | 7599.1   | 17724.4  | 12522.1  | 7862.5   | 14146.5  | TRUE |
| 99270.7  | 112209.8 | 68358.5  | 83506    | 83305.9  | 69360.6  | 85730.6  | 81053.3  | TRUE |
| 224837.8 | 192031.8 | 187721   | 232414.8 | 214824   | 186404.1 | 218473.3 | 205934.9 | TRUE |
| 2977751  | 2667654  | 2800709  | 3091084  | 3410865  | 3015918  | 2843947  | 3142531  | TRUE |
| 872301.1 | 741423   | 669972.1 | 823341.5 | 940964.9 | 742245.8 | 891219.5 | 996814.6 | TRUE |
| 236834   | 212442.1 | 229179.7 | 256706.6 | 244095.5 | 253068.8 | 233374.5 | 266553.2 | TRUE |
| 196586.8 | 164318.3 | 189488.9 | 199636.8 | 211448.3 | 200368.5 | 232334.1 | 201549.6 | TRUE |
| 347689.5 | 323851.6 | 267083.2 | 334749.3 | 312352.5 | 309293.1 | 352479.8 | 371407.9 | TRUE |
| 863832.4 | 836000.1 | 715588.2 | 806965   | 794473.5 | 816161.9 | 846043.4 | 842538.4 | TRUE |
| 673754.1 | 595413.9 | 511974.5 | 667660.3 | 595854.8 | 604347.7 | 638973.8 | 631220.7 | TRUE |
| 990841.2 | 886919.1 | 837374.9 | 1058356  | 1053185  | 965659.5 | 1001192  | 1105920  | TRUE |
| 133453   | 133248.6 | 100242.7 | 111732.7 | 137687.2 | 116368.9 | 116283.2 | 133885.5 | TRUE |
| 707579.5 | 600807.3 | 575467.3 | 659136.4 | 730074   | 627204.2 | 688851.9 | 747701.3 | TRUE |
| 234584.4 | 219941.4 | 225271   | 216742.2 | 254714   | 203563.9 | 244718.4 | 244586.9 | TRUE |
| 1457035  | 1543427  | 1341200  | 1615884  | 1615048  | 1430011  | 1543158  | 1727451  | TRUE |
| 97435    | 102137.1 | 86558.1  | 95252.5  | 109642.4 | 84024.7  | 95555.2  | 97373    | TRUE |
| 221201.3 | 197573.2 | 259326.5 | 232146.8 | 196537.8 | 283950.3 | 233716.3 | 213371.9 | TRUE |
| 100832.6 | 110269.7 | 128287.9 | 102531.1 | 124900.5 | 97790.7  | 92861.8  | 80720.9  | TRUE |
| 105371.8 | 321274.9 | 159691.3 | 243279.7 | 317959.2 | 75990.7  | 41360.3  | 61966.4  | TRUE |
| 78181.8  | 71817.7  | 66944.7  | 67481.9  | 74947.3  | 92548.8  | 84330.7  | 87771.5  | TRUE |
| 112370.4 | 326250.8 | 241211   | 403609.3 | 555912.7 | 74215.9  | 53276.1  | 77772.5  | TRUE |
| 104652.8 | 62183.7  | 88811.3  | 72886    | 50378.9  | 65455.4  | 94707.8  | 79563.6  | TRUE |
| 132191   | 145371.2 | 119337.9 | 143261.2 | 124608.5 | 130096.3 | 146514.2 | 157569.7 | TRUE |
| 382121.6 | 389278.9 | 363017.8 | 473948.8 | 442225.9 | 425489   | 496049.3 | 476874   | TRUE |
| 329103   | 380595.5 | 356473.7 | 380941   | 353709   | 337534.7 | 392860.5 | 392953.5 | TRUE |
| 2092989  | 2858833  | 1936211  | 1965337  | 2107757  | 1863939  | 2856666  | 1841902  | TRUE |
| 6705577  | 6199672  | 6165023  | 6314687  | 5956652  | 6678445  | 6936442  | 6783615  | TRUE |
| 510757.4 | 477083.7 | 532568.2 | 555464   | 415259.8 | 508530   | 494693.6 | 508145.1 | TRUE |
| 71847.4  | 67461.6  | 52053.1  | 74410.2  | 69771.8  | 58951.4  | 68748.7  | 71362.1  | TRUE |
| 55368.9  | 47305.2  | 51496.4  | 48370.2  | 53695.9  | 49444.6  | 41637.8  | 45675.6  | TRUE |
| 152689.3 | 154594.4 | 160799.4 | 135927.2 | 162290.4 | 161314.7 | 165707.2 | 161994.9 | TRUE |
| 149547.1 | 357480.3 | 200106.9 | 257276.6 | 305318.7 | 124429.4 | 92982.6  | 106907   | TRUE |
| 117764.1 | 120140.2 | 106504.5 | 127289.4 | 112511.7 | 144010.1 | 116300.1 | 117626.2 | TRUE |
| 82222.6  | 80057    | 64094.7  | 72953.1  | 61124.2  | 70186.1  | 73918.5  | 84122.3  | TRUE |
| 459291.7 | 312306.3 | 491745.2 | 648535.7 | 718499.1 | 577585.8 | 459456.6 | 703507.2 | TRUE |
| 354947.1 | 285155.9 | 359616.6 | 457497.1 | 462357.6 | 399672   | 329489.7 | 496671.2 | TRUE |
| 364745.4 | 367298.9 | 377051.1 | 359496.3 | 367379.4 | 413473.8 | 388876.5 | 367173.4 | TRUE |

|          |          |          |          |          |          |          |          |      |
|----------|----------|----------|----------|----------|----------|----------|----------|------|
| 181509.4 | 154194.6 | 183715.1 | 224086.9 | 186163.7 | 250849.3 | 193098.8 | 172740.5 | TRUE |
| 41063.4  | 26843.3  | 28586.9  | 36150.1  | 35664.4  | 29258.1  | 38237    | 45813.1  | TRUE |
| 955109   | 928785.9 | 943331.3 | 1062202  | 1143753  | 941998.8 | 1156300  | 1140541  | TRUE |
| 1522425  | 1485895  | 1205222  | 1453271  | 1715077  | 1364116  | 1640665  | 1772688  | TRUE |
| 382350.8 | 421928.9 | 344703.8 | 376422.9 | 396473.1 | 322151.4 | 404571.6 | 479487.8 | TRUE |
| 81312.4  | 72964.8  | 86318.9  | 79132.3  | 84158.6  | 67380.5  | 77402.2  | 83454.7  | TRUE |
| 51153    | 51900.9  | 31128.4  | 58953.4  | 50544.6  | 38958.1  | 62236.5  | 63570.7  | TRUE |
| 46872.5  | 39290.9  | 48351.3  | 44379.5  | 60754.7  | 40049.7  | 62661.6  | 69816.8  | TRUE |
| 22800.1  | 25765.3  | 20955.7  | 15722.4  | 22169.9  | 28222.1  | 13345.3  | 13183.2  | TRUE |
| 56727.8  | 70266.9  | 59986.5  | 50445.2  | 65777.7  | 66343.9  | 55450    | 70442.2  | TRUE |
| 40978.4  | 34538.4  | 35976.4  | 33255.3  | 23799.2  | 25670.2  | 24813.5  | 23875    | TRUE |
| 30178.9  | 23407.3  | 22656.9  | 24665.3  | 22722.1  | 16387.3  | 29941.9  | 28258.8  | TRUE |
| 28132.2  | 34178.2  | 27561.3  | 32466.5  | 30734.8  | 23223.8  | 26819.8  | 38089.9  | TRUE |
|          |          |          |          |          |          |          |          |      |
| 156249.4 | 120098   | 182152.9 | 235873.6 | 232529.4 | 197942   | 236458.5 | 222185.3 | TRUE |
| 92046.2  | 82720.6  | 108215   | 117902.8 | 150736.9 | 131437   | 130727.9 | 138185.8 | TRUE |
| 37949.3  | 27446.1  | 40374.9  | 38223.8  | 42514.1  | 22265.6  | 30908.1  | 47098.7  | TRUE |
| 43739.8  | 157118.9 | 94334.9  | 177510.6 | 218104.5 | 27593.6  | 25255.7  | 82184.3  | TRUE |
|          |          |          |          |          |          |          |          |      |
| 36589    | 106710.6 | 48078.3  | 74937.5  | 94577.8  | 12124.9  | 7627.8   | 34684.3  | TRUE |
| 74882    | 81716.1  | 66407.3  | 89574.6  | 95535.1  | 72163.1  | 75905.2  | 108889.4 | TRUE |
| 35369.9  | 37685.5  | 34734.3  | 26170.6  | 29128.4  | 47240.2  | 57403.4  | 53373    | TRUE |
|          |          |          |          |          |          |          |          |      |
| 22785.2  | 21994.4  | 12098.5  | 7896.4   | 9513.6   | 7440.1   | 11150.6  | 12951.9  | TRUE |
| 30346.3  | 26846.8  | 25294.2  | 30287.7  | 31217.6  | 28845.2  | 37082.8  | 35295.1  | TRUE |
| 21878.5  | 32170.6  | 20435.6  | 7364.8   | 30445.9  | 20001.1  | 11209    | 26669.4  | TRUE |
|          |          |          |          |          |          |          |          |      |
| 39017.5  | 29685.2  | 71988.2  | 65384.9  | 53938.4  | 60248.4  | 55482.5  | 58286.2  | TRUE |
| 103609   | 96272.8  | 137544.6 | 146263.2 | 125149.6 | 139510.3 | 139924.6 | 135536.1 | TRUE |
| 25369.9  | 55140.5  | 33004.6  | 21225.8  | 40264.1  | 10523.7  | 7185.6   | 10882.1  | TRUE |
|          |          |          |          |          |          |          |          |      |
| 22819.9  | 17372.1  | 18025.2  | 25943.1  | 22378    | 44100.9  | 27818.3  | 33758.7  | TRUE |
| 22831.2  | 8588.1   | 31950.3  | 36845.8  | 19055.9  | 12479.9  | 20369.2  | 25695    | TRUE |
|          |          |          |          |          |          |          |          |      |
| 11581    | 14567.6  | 13353.1  | 12050.1  | 9934.1   | 12806.4  | 16907.6  | 10252.9  | TRUE |
| 96332.9  | 81204.8  | 79145.2  | 116063.6 | 94686.6  | 91774.1  | 105002.4 | 101948.8 | TRUE |
|          |          |          |          |          |          |          |          |      |
| 5380.4   | 8963.8   | 4949.2   | 5992.7   | 9535.3   | 6526.5   | 9538     | 7283     | TRUE |
| 117059   | 102114.2 | 110834.6 | 108380.6 | 123237.3 | 97408    | 106049.1 | 98657    | TRUE |
| 140055.5 | 124437.9 | 103393.4 | 118482.8 | 112960.5 | 103111.5 | 114715.2 | 106936.7 | TRUE |
| 550804.9 | 487723.1 | 450589.7 | 542907.5 | 599903.4 | 474647.7 | 511783.4 | 592372   | TRUE |
| 198383.5 | 167054.2 | 183102.1 | 197602.6 | 176681.6 | 184253.6 | 184379.5 | 209189.3 | TRUE |

|          |          |          |          |          |          |          |          |      |
|----------|----------|----------|----------|----------|----------|----------|----------|------|
| 337629.2 | 317397.8 | 309804.3 | 326673.7 | 366063.5 | 313051.7 | 375987.4 | 396507.4 | TRUE |
| 334470   | 312240.1 | 331018.3 | 372185.4 | 364526.7 | 350190.3 | 372140.8 | 348344.7 | TRUE |
| 76084    | 71102.6  | 75976.8  | 80115.8  | 72873    | 72885.1  | 73328.7  | 90251.7  | TRUE |
| 83160.5  | 80890.9  | 92819    | 91296.3  | 87601.5  | 86377.2  | 82335.7  | 98579.2  | TRUE |
| 182919.7 | 146912.7 | 159265.2 | 158523.3 | 171638.6 | 192489.5 | 185227   | 164392.5 | TRUE |
| 349903.3 | 280726.7 | 277187.7 | 326624.2 | 339631.3 | 310399.7 | 315611.6 | 347133.9 | TRUE |
| 577958.5 | 522296   | 541420.1 | 580604.7 | 665696.8 | 555969.4 | 602165.9 | 651689.5 | TRUE |
| 253827.3 | 258649.3 | 282678.4 | 285090.1 | 330432.3 | 300707.6 | 323338.8 | 341160.6 | TRUE |
| 243776   | 179468.3 | 213996.6 | 228098.2 | 250447.8 | 276783.8 | 248647.8 | 258295.8 | TRUE |
| 211561.7 | 208379.2 | 244639.1 | 223765.8 | 217730.3 | 210984.8 | 209021.4 | 229364.3 | TRUE |
| 213956.5 | 191517.4 | 184864.7 | 224967.2 | 219477.2 | 178103.9 | 235117.1 | 212535.7 | TRUE |
| 642486.6 | 548188   | 477745   | 554020.4 | 615171.8 | 538658.4 | 573386.3 | 630186.6 | TRUE |
| 136790   | 168167.5 | 125887.3 | 125815.5 | 162787.2 | 138264.6 | 150465.7 | 176015.8 | TRUE |
| 281481.6 | 364597.5 | 296586.8 | 314679.5 | 304805.3 | 277286.3 | 268897.5 | 287642.5 | TRUE |
| 124886.5 | 117421.9 | 129785.9 | 129560.3 | 130094.4 | 113777.1 | 143371   | 141170.5 | TRUE |
| 162758.1 | 242513.7 | 184026.4 | 198339.4 | 215579.5 | 133367.9 | 136394   | 141132.5 | TRUE |
| 74172.1  | 94334.5  | 82806    | 86259.4  | 107897.5 | 66492.8  | 78743.9  | 65333.1  | TRUE |
| 86363.7  | 84702.7  | 103694.7 | 100360   | 130945.6 | 97462.2  | 102525.2 | 96149.5  | TRUE |
| 162214.3 | 306783.2 | 234590.7 | 366892.2 | 377645.4 | 168234.7 | 129529.1 | 173040.5 | TRUE |
| 50122.4  | 75213.3  | 67568.8  | 65846.4  | 80118.8  | 52191.4  | 59603.4  | 51324.7  | TRUE |
| 63902.6  | 63376.8  | 77874.7  | 78847.8  | 75337.5  | 70034.2  | 64508.8  | 75470.3  | TRUE |
| 67192.4  | 55322.5  | 42876.4  | 58256.2  | 63646    | 71965.7  | 75095.9  | 76350.9  | TRUE |
| 80287.8  | 59054.4  | 55781.2  | 43804    | 58535    | 83685.1  | 69565.6  | 89245.2  | TRUE |
| 434581.6 | 388505.8 | 451647.6 | 404707.1 | 575342.8 | 409430   | 445208   | 416096.8 | TRUE |
| 281626.2 | 312346.3 | 316104.2 | 314785.2 | 306566.3 | 319894.3 | 351327   | 309267.1 | TRUE |
| 132251.7 | 177675.7 | 206325.5 | 212631.6 | 167315.5 | 196897.2 | 219040.8 | 178731.6 | TRUE |
| 911995.4 | 891753.8 | 1219436  | 1306196  | 1215174  | 1279189  | 1307763  | 1310603  | TRUE |
| 271624.5 | 256557.4 | 332974   | 354385.6 | 345971.4 | 331186.9 | 396669.5 | 417379.4 | TRUE |
| 61066.5  | 124355.4 | 101582.4 | 179841.1 | 170356.6 | 40654.7  | 46437    | 60860.2  | TRUE |
| 66831.2  | 81164.4  | 83455.4  | 104807.4 | 75846    | 120312.9 | 94314    | 106848   | TRUE |
| 31327.6  | 22313.8  | 15470.3  | 10288.5  | 11640.2  | 44801.2  | 13849.1  | 18363.1  | TRUE |
| 162246.9 | 173860.9 | 144289.9 | 142497.3 | 138602   | 169067.2 | 163988.3 | 164781.1 | TRUE |
| 144463   | 114921.2 | 93079.3  | 103825.1 | 87573.3  | 111994.6 | 141678.5 | 128483.7 | TRUE |
| 58246.7  | 54687.3  | 67147    | 76259.4  | 60912.4  | 69640.4  | 66713.8  | 49780.6  | TRUE |
| 589095.3 | 578793.3 | 533473.6 | 565570.1 | 601633.6 | 556043.9 | 614344.5 | 626542.9 | TRUE |
| 1633143  | 1350599  | 1392387  | 1600164  | 1656067  | 1370618  | 1658579  | 1635102  | TRUE |
| 183551.3 | 184611.2 | 172649.6 | 214823.1 | 218152.7 | 159005.3 | 195819.7 | 174063.6 | TRUE |
| 5729041  | 4965931  | 4801976  | 5587120  | 5894393  | 4700893  | 5468987  | 5985796  | TRUE |
| 92290.1  | 100201.6 | 100760   | 78825.6  | 106093.3 | 96006.8  | 92905.4  | 104351.4 | TRUE |
| 83037.9  | 85418.3  | 101994.7 | 81250.1  | 91264.9  | 66565.6  | 80912.2  | 73582    | TRUE |
| 5596720  | 5028219  | 4727775  | 5286723  | 5621722  | 4868825  | 5368421  | 5931665  | TRUE |
| 131243.8 | 152125.1 | 124152.5 | 124083.8 | 124193   | 153667.2 | 142514.7 | 111382.4 | TRUE |
| 274188.2 | 241205.1 | 269478.4 | 290937.8 | 256524.2 | 258951.5 | 265103.1 | 262331.2 | TRUE |
| 349868.3 | 354741.8 | 360081.3 | 387435.8 | 370196   | 334975.9 | 348104.8 | 337966.8 | TRUE |
| 179554.1 | 150682.2 | 223480   | 216628.1 | 215536.9 | 181193.5 | 195723.4 | 179304.4 | TRUE |
| 70511.8  | 98169.9  | 79539.1  | 89246.9  | 84831.5  | 45762.4  | 68511.6  | 71109.8  | TRUE |
| 2334044  | 2253493  | 2224439  | 2119890  | 2225036  | 2295227  | 2026353  | 2178502  | TRUE |

|          |          |          |          |          |          |          |          |      |
|----------|----------|----------|----------|----------|----------|----------|----------|------|
| 1517040  | 1334911  | 1427143  | 1511996  | 1591261  | 1320197  | 1325124  | 1317670  | TRUE |
| 15270603 | 15284268 | 15110107 | 15074888 | 13809309 | 15695487 | 15181252 | 16985339 | TRUE |
| 1045351  | 924038.2 | 970158.9 | 928051.7 | 893729.7 | 1018006  | 998992.2 | 1020975  | TRUE |
| 2449161  | 2324690  | 2330269  | 2317619  | 2187176  | 2498342  | 2362885  | 2342022  | TRUE |
| 208837.1 | 171910.8 | 213138.2 | 272755.4 | 195503.5 | 363971.8 | 234659.4 | 242124   | TRUE |
| 394465.3 | 371113.7 | 368060.9 | 390156   | 517182.5 | 406177   | 400462.6 | 466788   | TRUE |
| 7144663  | 7393731  | 5774837  | 9778754  | 10642849 | 5559196  | 7605481  | 11190042 | TRUE |
| 225712.1 | 203671.7 | 207593.3 | 346237.7 | 414939   | 209694.2 | 280712.1 | 413605.4 | TRUE |
| 4097189  | 5531503  | 3640222  | 4132811  | 3233220  | 5323530  | 5907424  | 5273759  | TRUE |
| 332650.3 | 282846.1 | 301442.8 | 462270.6 | 365463.5 | 317320.4 | 348027.2 | 374775   | TRUE |
| 152966.9 | 171645.2 | 201337.7 | 267189.1 | 217658.4 | 219688.2 | 168470   | 213565.2 | TRUE |
| 123961.5 | 113068   | 127804.5 | 139464.9 | 138661.3 | 130579.6 | 123195   | 140051.2 | TRUE |
| 244640.4 | 182545.5 | 217827.4 | 286256.1 | 311213.6 | 241762.6 | 240143.8 | 328567.7 | TRUE |
| 351600.9 | 341407.6 | 374422.3 | 385397.5 | 346085.8 | 469726.7 | 338900.7 | 464407.4 | TRUE |
| 132475.6 | 115782.8 | 110792.7 | 110170.9 | 121917.5 | 145395.4 | 138210.8 | 125988.3 | TRUE |
| 62892.5  | 65512.4  | 45515.3  | 57152.5  | 45942.1  | 53017.6  | 71232.5  | 54531.8  | TRUE |
| 759974.9 | 676087.2 | 657562.5 | 762804.4 | 792877.3 | 711880.9 | 770351.4 | 828638.5 | TRUE |
| 581854.2 | 521243.1 | 475414.8 | 550754.7 | 678386.7 | 559924   | 549071.8 | 654518.1 | TRUE |
| 538453.7 | 474251.4 | 500727.2 | 527258   | 589412.8 | 514034.5 | 510115.6 | 617131   | TRUE |
| 852293.9 | 678107.6 | 700479.7 | 733182.5 | 880347.7 | 754673.2 | 726214.2 | 886689.7 | TRUE |
| 839946.5 | 705114.2 | 698269.4 | 846468.5 | 924521   | 792334.7 | 747611.5 | 944952.7 | TRUE |
| 966190.7 | 809626   | 746268.1 | 875073.8 | 1002550  | 834223.2 | 861018   | 1034226  | TRUE |
| 229740.3 | 172782.1 | 192211.6 | 217945.5 | 223091.5 | 198262.2 | 179989.7 | 220314.4 | TRUE |
| 184553.9 | 155207.6 | 180990.5 | 197907.3 | 216070.4 | 182952   | 203588.1 | 240577   | TRUE |
| 49614.6  | 59197.5  | 68098.4  | 52242.9  | 46525.1  | 56187    | 52317.9  | 58174.4  | TRUE |
| 83769.2  | 149246.1 | 84575    | 148435.4 | 177963.4 | 62993.4  | 62689.6  | 51977.5  | TRUE |
| 176076   | 153623.2 | 188438.3 | 141768.9 | 199389.3 | 164907.6 | 184826   | 204302.9 | TRUE |
| 239402.6 | 185952.1 | 228530.7 | 202817.1 | 270835.5 | 228042.7 | 223981.9 | 263287.2 | TRUE |
| 1344211  | 1448548  | 1248943  | 1523778  | 1371410  | 1470540  | 1555393  | 1435647  | TRUE |
| 1008417  | 992722.6 | 961603.7 | 1038908  | 1035838  | 1020251  | 1112985  | 980516.5 | TRUE |
| 924992.4 | 864431.1 | 789710.9 | 862658.2 | 799302.5 | 906985   | 923696.1 | 918104.8 | TRUE |
| 921276   | 881486.6 | 792835   | 841223.7 | 872970   | 929836.8 | 908412.2 | 934087.4 | TRUE |
| 1198867  | 1179440  | 986831.7 | 1132184  | 1088974  | 1025053  | 1213340  | 1151825  | TRUE |
| 1019767  | 1006615  | 852588.1 | 895329.4 | 935426.2 | 946794.4 | 1049563  | 1018204  | TRUE |
| 48772.9  | 45828.8  | 38661    | 14541.9  | 46424.4  | 41267.3  | 59713.9  | 47843.8  | TRUE |
| 157046.7 | 172105.3 | 142541   | 181607.1 | 121700.2 | 137420   | 187298.7 | 123304   | TRUE |
| 103668.4 | 74786.1  | 73647.7  | 141455.1 | 138796.7 | 86008.6  | 96089.1  | 144714.3 | TRUE |
| 15189.9  | 5248.1   | 17512.5  | 30672.1  | 31408.2  | 5847.6   | 10197.7  | 23548.9  | TRUE |
| 5692.3   | 8937     | 8060.7   | 7153.6   | 7467.1   | 19932.3  | 9657.8   | 13335.2  | TRUE |
| 134571.9 | 89726.3  | 87897.3  | 122409.4 | 96009.4  | 89397    | 85035.7  | 108577.1 | TRUE |
| 56519.8  | 69775.3  | 66715.1  | 74858.6  | 84931.5  | 59488.2  | 69949.1  | 88735.5  | TRUE |
| 167184.9 | 137296   | 140596.9 | 176160.8 | 204893.6 | 140497.9 | 184381.3 | 203265   | TRUE |
| 79352.9  | 56167.4  | 62888.8  | 106834.5 | 120226.1 | 63429.4  | 104771.6 | 114830.5 | TRUE |

|          |          |          |          |          |          |          |          |      |
|----------|----------|----------|----------|----------|----------|----------|----------|------|
| 71370.1  | 53060.3  | 54531.5  | 59940.6  | 53425.4  | 66822.3  | 67123.5  | 74154.2  | TRUE |
| 32908.4  | 39628.1  | 42585.3  | 59884.4  | 62335.8  | 26350.2  | 44405.5  | 38706    | TRUE |
| 100483.8 | 96538.7  | 73820.6  | 94674.4  | 108947.2 | 100804.7 | 121883.5 | 155756   | TRUE |
| 258523.7 | 231890.7 | 208331   | 252441.6 | 230703.6 | 285790.8 | 275400.2 | 309464.2 | TRUE |
| 253851.1 | 239374.9 | 206845.4 | 221826.5 | 200167.2 | 293662.4 | 335631.4 | 290539   | TRUE |
| 45804.5  | 40744    | 27810.3  | 15802    | 31288.4  | 41745.2  | 39034.3  | 42604.8  | TRUE |
| 147552.7 | 158464   | 134871.3 | 145477   | 142902.6 | 154253.8 | 180652.5 | 184069.6 | TRUE |
| 1206959  | 967596.1 | 1047029  | 1032311  | 1232025  | 1055779  | 988372.3 | 1181292  | TRUE |
| 1501393  | 1272390  | 1227856  | 1498941  | 1500014  | 1368185  | 1430496  | 1490972  | TRUE |
| 282981.3 | 284268.4 | 353265.6 | 450789.8 | 374189.7 | 459264.9 | 402363.7 | 425627.4 | TRUE |
| 1986344  | 1699246  | 1336272  | 1683066  | 1767752  | 1438390  | 1545807  | 1902710  | TRUE |
| 3247147  | 2755905  | 3555978  | 4424614  | 4231995  | 3918489  | 3823454  | 4264223  | TRUE |
| 9226512  | 8976605  | 7691426  | 7893481  | 8116711  | 10108298 | 9154495  | 10163252 | TRUE |
| 17145.6  | 7749.4   | 4715.2   | 12750.5  | 7690.7   | 17061.7  | 8773.6   | 10856.1  | TRUE |
| 24064.4  | 10927.7  | 6705.1   | 8940.3   | 18777.4  | 16807.5  | 8874.9   | 7689.7   | TRUE |
| 1202537  | 1170869  | 1153117  | 1416098  | 1456074  | 1384111  | 1401268  | 1518669  | TRUE |
| 77733.5  | 75026.1  | 89117.4  | 80115.5  | 82101.5  | 70002    | 83202.1  | 79185.1  | TRUE |
| 213338.2 | 164937.5 | 214411.1 | 259501.6 | 262105.8 | 216324.1 | 240929.4 | 252679.5 | TRUE |
| 94077.8  | 79080.9  | 79182.8  | 118103.6 | 72252.8  | 78831.9  | 69887.1  | 89088.5  | TRUE |
| 95340.9  | 110389.2 | 87790.6  | 113740.7 | 112864   | 100489.2 | 95211.8  | 116551.8 | TRUE |
| 38386.1  | 39109.6  | 34568.8  | 37911.8  | 34019    | 30702.7  | 28374.7  | 39684.4  | TRUE |
| 30272.5  | 33428.2  | 31433.2  | 21117.6  | 38793.7  | 17431.7  | 10122.1  | 17155.2  | TRUE |
| 61485.6  | 55966    | 63680.8  | 50153.7  | 57881.5  | 42858.2  | 51416.1  | 56763.6  | TRUE |
| 9659.1   | 64931.7  | 34832.4  | 56919.8  | 84198.8  | 8382.7   | 8753.3   | 7921     | TRUE |
| 13369.6  | 27939.6  | 21038.6  | 36671.2  | 37903.4  | 5743.4   | 8364.7   | 7984.4   | TRUE |
| 28531.9  | 4071.7   | 11183.4  | 34819.7  | 22974    | 21509.5  | 12182    | 25442.7  | TRUE |
| 57472.5  | 40451.9  | 39531.6  | 67097.8  | 78209.6  | 64081.9  | 65396.1  | 93247.8  | TRUE |
| 133104.7 | 130057.1 | 82736.8  | 188398.3 | 188376.6 | 173752.2 | 166154   | 246695.1 | TRUE |
| 84032.6  | 75717.7  | 94712.5  | 94367.3  | 96008.2  | 100350.7 | 75562.2  | 87816.1  | TRUE |
| 26487.2  | 11112.5  | 6507.7   | 11560    | 19597.6  | 22805.1  | 20755.6  | 27153.6  | TRUE |
| 373949.9 | 251015.8 | 304404.8 | 591350.7 | 392533.1 | 373113.8 | 251918.9 | 396609.6 | TRUE |
| 53480    | 50964.4  | 32172.2  | 28059    | 43832.9  | 50277.1  | 51344.6  | 63836.1  | TRUE |
| 213540.6 | 98609.5  | 168627.6 | 313092.9 | 220074.4 | 174780.8 | 107515.8 | 197969.3 | TRUE |
| 189032.9 | 144604   | 165619.5 | 234149.6 | 213423.2 | 204694.7 | 139301.4 | 189446.8 | TRUE |
| 107326.5 | 71833.5  | 106704.1 | 143289.9 | 125805.1 | 127929.7 | 61222.2  | 127970.3 | TRUE |
| 372644.8 | 199025.7 | 327452.2 | 507705   | 320542.6 | 380023.7 | 222570.4 | 364048.9 | TRUE |
| 249248.4 | 126948.7 | 284689.7 | 356477.7 | 258116.4 | 277939.3 | 129810.7 | 241001.1 | TRUE |
| 52068.8  | 48838.2  | 50069.6  | 80681.1  | 67397.8  | 35002.1  | 37337.5  | 36638.5  | TRUE |
| 49106.8  | 45970.9  | 28497.4  | 15180.1  | 48840.7  | 62037.1  | 56923    | 83626.8  | TRUE |
| 873919.5 | 574161.7 | 773123.6 | 865261   | 818752.6 | 727155.7 | 740182.2 | 862843.3 | TRUE |
| 2609859  | 2079353  | 2241967  | 5942072  | 2445899  | 2231197  | 2294547  | 2543841  | TRUE |
| 387613.1 | 351940.7 | 324716.8 | 524848.7 | 364642.8 | 370739   | 402717.4 | 408318.1 | TRUE |
| 175696.6 | 188084.7 | 162578.7 | 205015.4 | 196665.8 | 141509.6 | 189784.7 | 182845.7 | TRUE |
| 139566.3 | 111212.7 | 105094.8 | 109967   | 116674   | 114910.6 | 111404.8 | 139079.3 | TRUE |
| 70438.9  | 81715.6  | 67410.8  | 92288.5  | 74692.2  | 76410.2  | 75413.4  | 86316.1  | TRUE |

|          |          |          |          |          |          |          |          |      |
|----------|----------|----------|----------|----------|----------|----------|----------|------|
| 923913.5 | 742761.3 | 1040699  | 1979268  | 1274766  | 1249801  | 1123397  | 1353763  | TRUE |
| 149934.1 | 184575.7 | 134208.8 | 175439.2 | 180639   | 130766.2 | 127807.9 | 134576.8 | TRUE |
| 134255.8 | 189071.8 | 142050   | 197407.7 | 204792.2 | 177155.5 | 127150   | 125616.8 | TRUE |
| 1420148  | 1359491  | 1418472  | 1484515  | 1499224  | 1793598  | 1717768  | 1731861  | TRUE |
| 144690.2 | 227438.6 | 199921.3 | 247226.7 | 251856.2 | 166387.6 | 167426   | 144247.4 | TRUE |
| 58693.8  | 184587.9 | 117378.4 | 190218.6 | 218149   | 51184.2  | 44964.3  | 45748.2  | TRUE |
| 634430.3 | 594198.9 | 529341.8 | 558366   | 602676.3 | 651403.5 | 602796.1 | 603331.4 | TRUE |
| 438812.7 | 473488   | 414150.1 | 394996   | 432624.5 | 422232.9 | 431596.2 | 469192.7 | TRUE |
| 148824   | 159802.7 | 115265.9 | 219657.6 | 136688.5 | 112594.3 | 149207.6 | 130392.7 | TRUE |
| 94746    | 86159.9  | 44283.6  | 116343.9 | 50715.4  | 46612.5  | 70916.9  | 64328.5  | TRUE |
| 29306.6  | 35794.7  | 29047.3  | 21128.1  | 36297    | 23114.7  | 32727.1  | 35533.3  | TRUE |
| 152804.1 | 131230.8 | 123338.5 | 191458.1 | 108281.3 | 329986.7 | 173924.3 | 330385.4 | TRUE |
| 84750.3  | 76160    | 65808    | 75751.9  | 75352.8  | 51528.4  | 99460.2  | 68484.9  | TRUE |
| 28544.6  | 51385.4  | 29589.8  | 36167.1  | 30657.5  | 29566.2  | 56243.5  | 11618.7  | TRUE |
| 33929.3  | 32519    | 33131.4  | 32118.2  | 48840.5  | 36500.5  | 35736.8  | 46764.5  | TRUE |
| 59080.2  | 59284.4  | 53470.4  | 65103.2  | 46405.8  | 30999.7  | 81930.2  | 37477.6  | TRUE |
| 32522.9  | 42990.7  | 29057.4  | 26433.1  | 29220.9  | 33898.4  | 37255.4  | 30085.9  | TRUE |
| 118047.9 | 175233.5 | 94334.5  | 131719.3 | 129163.7 | 51832.4  | 179949.1 | 74122.3  | TRUE |
| 7058038  | 6233305  | 5585473  | 6847245  | 6939066  | 6049347  | 6068852  | 6461214  | TRUE |
| 59173    | 44078.9  | 87068.3  | 60945.1  | 68970.4  | 89655.1  | 66576.4  | 76981.1  | TRUE |
| 229386.6 | 167409.9 | 133668   | 119048.3 | 149692.9 | 137346.7 | 137487.5 | 168935.5 | TRUE |
| 1476908  | 1465124  | 1299079  | 1452073  | 1318890  | 1633147  | 1494723  | 1480877  | TRUE |
| 367865.4 | 308178.4 | 282981.6 | 296328.2 | 317638   | 414616.6 | 335182.7 | 395335.7 | TRUE |
| 26807.1  | 20003.8  | 11484    | 16037.1  | 23651.5  | 24863.9  | 10184.8  | 27621.1  | TRUE |
| 72374.2  | 57746    | 52811.2  | 60788.9  | 55780.7  | 66463.8  | 61455.2  | 54269.8  | TRUE |
| 107319.2 | 131909.6 | 81455.9  | 101185.9 | 73902    | 83458.4  | 116543.5 | 79867.1  | TRUE |
| 85147.6  | 70293.9  | 74359.9  | 101805.7 | 81394.6  | 101759.3 | 108566.6 | 102119.3 | TRUE |
| 32821.4  | 27723.5  | 24495    | 24192.8  | 24277.9  | 38027.1  | 27928.1  | 37567.6  | TRUE |
| 260797.1 | 232439.7 | 175144.2 | 233363.5 | 200761.6 | 278265.6 | 276689.9 | 268724.7 | TRUE |
| 59937.1  | 48589.4  | 42718.4  | 60486.5  | 47849    | 74995.9  | 63799.8  | 74581.2  | TRUE |
| 105208.9 | 140202.6 | 124702.9 | 159567.2 | 95586.1  | 153816.1 | 147341.7 | 109253   | TRUE |
| 142098.3 | 121869.6 | 106819.1 | 126053.6 | 113940.2 | 150877.1 | 149079.5 | 117338.2 | TRUE |
| 156369   | 178306.5 | 194615.3 | 194847.7 | 255449.3 | 124737.9 | 136426.5 | 148827.9 | TRUE |

|          |          |          |          |          |          |          |          |      |
|----------|----------|----------|----------|----------|----------|----------|----------|------|
| 2580456  | 2269983  | 2795667  | 3062100  | 2119286  | 2987371  | 2899203  | 2319871  | TRUE |
| 333175   | 278764.3 | 360751.6 | 372492.6 | 269981.4 | 443734.9 | 351605.3 | 288925.4 | TRUE |
| 242978.8 | 196872.7 | 274005.3 | 234929.3 | 211394.7 | 289207.2 | 246280.9 | 212443.1 | TRUE |
| 337274.4 | 300254   | 234307   | 186556.8 | 187391   | 217686.8 | 214615.5 | 207975.7 | TRUE |
| 389037.6 | 372027.5 | 424123.8 | 438308.7 | 359066   | 445012.8 | 404630.9 | 336359.7 | TRUE |
| 486443.6 | 503128.6 | 491911.8 | 521238.3 | 420485.9 | 534563   | 461901.4 | 423026.8 | TRUE |
| 147400.2 | 117187.7 | 109707.1 | 128357.4 | 112879.8 | 126035.3 | 136573.7 | 125944.2 | TRUE |
| 925570.2 | 711349.8 | 890023.8 | 819944   | 932316.1 | 876133.2 | 779391.3 | 789137.6 | TRUE |
| 1530244  | 1208685  | 1472928  | 1520412  | 1407812  | 1538931  | 1225505  | 1431875  | TRUE |
| 988218.2 | 876013.5 | 1157341  | 993831.1 | 721935.5 | 1197678  | 875199   | 722217.6 | TRUE |
| 224563.4 | 194494.8 | 249465.7 | 178461.1 | 159590.4 | 245189   | 203065.1 | 198129.3 | TRUE |
| 480707.4 | 282388.7 | 426895.1 | 449878.7 | 547873.4 | 403153.6 | 320226.7 | 388552.9 | TRUE |
| 144739.5 | 90105    | 120298   | 122006.9 | 166870.6 | 128696.2 | 89734.6  | 151270.9 | TRUE |
| 29278.7  | 25447.6  | 45850.2  | 20694.3  | 42193.4  | 19361.7  | 31046.6  | 24821.5  | TRUE |
| 63697.7  | 38469.5  | 38072.1  | 60869.7  | 43945.9  | 70999.8  | 63919.6  | 74214.1  | TRUE |
| 361718   | 286681.2 | 342530   | 279270.5 | 208852.2 | 527918.5 | 390218.1 | 299887.1 | TRUE |
| 139175.1 | 82324.8  | 120608.4 | 131086.1 | 109839.5 | 127935.1 | 121348.2 | 155278.5 | TRUE |
| 627901.4 | 390734.1 | 616695.9 | 644070.7 | 909353.3 | 587121.3 | 534792.8 | 663353.3 | TRUE |
| 53980.1  | 50075.1  | 56624.1  | 54413.6  | 52727.4  | 55797.9  | 61989.7  | 52668.2  | TRUE |
| 28721.8  | 30190.2  | 24395.9  | 44835.5  | 37482.1  | 34827.5  | 29785.5  | 23238    | TRUE |
| 176851.9 | 164058.1 | 157540.6 | 164785.7 | 159284.5 | 196822.1 | 196827.1 | 157872.8 | TRUE |
| 82540.4  | 93283.7  | 80706.6  | 110294.6 | 78296.7  | 96836.5  | 84148.7  | 70630.3  | TRUE |
| 121031.4 | 127368.6 | 112031.5 | 109095   | 111633.5 | 124108.8 | 105132.8 | 76302.1  | TRUE |
| 22379.1  | 13833.5  | 11811.8  | 17460    | 32253.2  | 11915.2  | 18928.9  | 11623.7  | TRUE |
| 86896.1  | 58682.7  | 84750    | 54204.9  | 77263.3  | 79039.5  | 65364.3  | 62500.5  | TRUE |
| 452907.4 | 395987.8 | 484385   | 474313.3 | 390067.9 | 475101   | 449483.2 | 353147.1 | TRUE |
| 497457.2 | 481704   | 592284.2 | 667098   | 699030   | 582713.1 | 547762   | 572614.9 | TRUE |
| 44500    | 43080.5  | 61169.8  | 64425.9  | 78651.3  | 87609.6  | 57061.4  | 77563.2  | TRUE |
| 28659.7  | 23698.1  | 48430    | 31841.1  | 37794.7  | 42487.7  | 23565.9  | 35789.5  | TRUE |
| 43810.6  | 43770.1  | 50502.5  | 51138.3  | 37856.1  | 60322.1  | 33067.7  | 38828.4  | TRUE |
| 49909.7  | 40829.4  | 34696.7  | 47899.2  | 30373.5  | 67441.9  | 55958.5  | 55996.4  | TRUE |
| 74329    | 99801.4  | 168540.2 | 88389.1  | 60725.6  | 85522.3  | 58861.4  | 65617.4  | TRUE |
| 44789.7  | 33915.2  | 68551.1  | 64917.4  | 49355.6  | 118660.7 | 61573    | 78616.3  | TRUE |
| 69349.1  | 45515.6  | 88718.9  | 69031.8  | 82364.3  | 116723.6 | 99162.5  | 75371.4  | TRUE |
| 48475.5  | 38338.3  | 50053.6  | 53192.9  | 43963.3  | 46709.5  | 54921.6  | 40704.3  | TRUE |
| 21319.8  | 28926    | 32569.8  | 10080.4  | 30207.4  | 18739.5  | 12314.7  | 6060.6   | TRUE |
| 55416.5  | 63320.8  | 46644.9  | 67103.9  | 55332.8  | 59927.5  | 72934.4  | 70383    | TRUE |
| 38101    | 31563.3  | 36694.8  | 56398.5  | 42072.6  | 53917.3  | 53158.3  | 45858.5  | TRUE |



|          |          |          |          |          |          |          |          |      |
|----------|----------|----------|----------|----------|----------|----------|----------|------|
| 79646.9  | 76636.2  | 90190.2  | 83490.8  | 92153.1  | 103415.5 | 90580.3  | 96590    | TRUE |
| 132999   | 120544.5 | 157601.4 | 166806.7 | 142392   | 167668.8 | 165969.8 | 151011.1 | TRUE |
| 1107636  | 959650.9 | 1002745  | 1047174  | 921496.1 | 1285277  | 918342.8 | 1365450  | TRUE |
| 130369.5 | 113890.5 | 200066.4 | 224026   | 199236.8 | 134517.8 | 177040.9 | 223015.4 | TRUE |
| 57067.6  | 71201.6  | 91437    | 77895.1  | 63627.8  | 57135.9  | 55621.8  | 60335.7  | TRUE |
| 190912.1 | 213647.4 | 113991.8 | 171188.8 | 189063.1 | 139559.2 | 228679.8 | 200322.7 | TRUE |
| 1755047  | 1581055  | 1625044  | 2125689  | 1412645  | 1553677  | 1715092  | 1725376  | TRUE |
| 60044    | 49765.6  | 58102.4  | 50048.5  | 48428.2  | 60709.1  | 67338.8  | 68022.4  | TRUE |
| 20468.2  | 8667.5   | 6227.2   | 16097.6  | 28248.6  | 21271.9  | 16852.8  | 13041.6  | TRUE |
| 64456.9  | 69810.6  | 77733.7  | 80330.4  | 99428.5  | 75596.3  | 103152.3 | 81295.1  | TRUE |
| 83156.9  | 66886    | 63105.1  | 74864.6  | 113765.6 | 80433.2  | 94877.8  | 94899.7  | TRUE |
| 74697.7  | 75333.4  | 69819.1  | 85768.9  | 93787.1  | 89003.3  | 107124.4 | 120425.2 | TRUE |
| 31946.4  | 22775.3  | 26212.3  | 32651.7  | 40611.6  | 25812.6  | 31011.5  | 24971.2  | TRUE |
| 30968.1  | 33770.1  | 33935.1  | 36075.1  | 45435.1  | 26068.5  | 48148.9  | 42456.3  | TRUE |
| 79469.8  | 85968.3  | 87352    | 98253.1  | 84935.4  | 83959.5  | 82290.4  | 74096.2  | TRUE |
| 31745.1  | 13145.3  | 19655.9  | 9820.8   | 10505.7  | 21573.5  | 30923.3  | 17912.9  | TRUE |
| 182094.8 | 208773.3 | 178804.4 | 249764.5 | 175266.1 | 222099.7 | 236518.1 | 215278.1 | TRUE |
| 67640.8  | 84900.1  | 78192.6  | 92717.2  | 76291.3  | 72496.5  | 79249.5  | 76050.7  | TRUE |
| 29633.7  | 11010    | 24755.5  | 50741.3  | 25063.8  | 33200.2  | 56691.8  | 48082.5  | TRUE |
| 518257.1 | 426317.2 | 455167.9 | 528535.2 | 539045.5 | 435802.9 | 499317.5 | 519794.1 | TRUE |
| 447023.9 | 459159.8 | 351176.7 | 420268.4 | 485663.8 | 402231.1 | 519225.3 | 490486.8 | TRUE |
| 50131.6  | 69790.2  | 62783.6  | 69268.3  | 99118    | 63676    | 45702.8  | 63065.2  | TRUE |
| 66821.5  | 41706.5  | 54227    | 68102.2  | 34261.7  | 71476.7  | 64004.1  | 59821.2  | TRUE |
| 152984.4 | 140196.1 | 120813.2 | 156094.8 | 123497.9 | 160764.2 | 172168.9 | 169953.1 | TRUE |
| 138138.5 | 141872.4 | 75713.3  | 110839.9 | 104377.2 | 98412.7  | 96380.9  | 98428.3  | TRUE |
| 33603.1  | 41096.4  | 34973    | 48613.5  | 60278.6  | 19559.1  | 23342    | 11029.2  | TRUE |
| 48638.1  | 78570.4  | 74434.5  | 81641.9  | 67421.7  | 48382.8  | 32682    | 31135.9  | TRUE |
| 98077.4  | 200972.3 | 164149.3 | 236338   | 159080.5 | 89741.9  | 60183.4  | 102752.3 | TRUE |
| 281747.2 | 277412.5 | 217870   | 263724.3 | 236737.5 | 248389.3 | 237357.7 | 242983.4 | TRUE |
| 57139.9  | 51032.1  | 46912.1  | 48247.6  | 57265.1  | 44866.4  | 50406.5  | 67510.7  | TRUE |
| 134665.9 | 99838.1  | 95666.8  | 66026.8  | 114631   | 89180.1  | 110474.3 | 137522.5 | TRUE |
| 123274.3 | 114915.7 | 100884.3 | 115542.1 | 117554.8 | 96571.3  | 126516.9 | 142134.9 | TRUE |
| 172434.5 | 183610.2 | 142644.1 | 158251.6 | 184654.6 | 140553.7 | 196199.9 | 173411.5 | TRUE |
| 81261.9  | 80395.3  | 96854    | 86944.6  | 94513.1  | 73869.6  | 95092    | 76258.2  | TRUE |
| 243310.9 | 259109.3 | 221522.4 | 251699.4 | 198581.1 | 245519.1 | 248692.4 | 262228.7 | TRUE |
| 196529.1 | 214663.6 | 193448.8 | 278539.4 | 192960.4 | 240187.1 | 228394.8 | 221280.3 | TRUE |

|          |          |          |          |          |          |          |          |      |
|----------|----------|----------|----------|----------|----------|----------|----------|------|
| 26488.9  | 28271.7  | 27521.9  | 38437.6  | 24166    | 38085.6  | 32594.5  | 29660.7  | TRUE |
| 26212    | 23746.2  | 38965.3  | 34763.3  | 29623.5  | 27009.7  | 34075.2  | 38408    | TRUE |
| 83810.3  | 67891.1  | 53484.8  | 66460.7  | 78371.1  | 59643    | 65553    | 54019.3  | TRUE |
| 75211.1  | 87381.3  | 73492.3  | 105848.7 | 120157.7 | 74173.5  | 72181.3  | 79446.3  | TRUE |
| 93970    | 145153.9 | 131428.1 | 136640.1 | 138621.8 | 111129.1 | 114329.6 | 105959.5 | TRUE |
| 62294.7  | 68496.6  | 47079.4  | 60460.8  | 59394.5  | 80336.1  | 83250    | 56276.8  | TRUE |
| 40339.3  | 36094.9  | 47476.3  | 31895.6  | 31557.8  | 44991.2  | 34319.5  | 24723    | TRUE |
| 190518.6 | 167110.1 | 158936.5 | 201031.5 | 174193.5 | 216986.6 | 212544.4 | 199032.1 | TRUE |
| 255340.2 | 250066.7 | 215846.2 | 253476.1 | 229787.3 | 278201.3 | 276642.2 | 352693.1 | TRUE |
| 140634.3 | 114264.3 | 119682.3 | 142278.3 | 125427.9 | 134917.2 | 148520.2 | 181918.2 | TRUE |
| 289282.5 | 219676.5 | 257464.4 | 312247   | 249772.9 | 304969.4 | 293880   | 306338.3 | TRUE |
| 208318.7 | 151096.7 | 184376   | 204525.8 | 162206.9 | 209175.4 | 202280.4 | 239423.5 | TRUE |
| 149499.1 | 140344.7 | 97815.4  | 138222.7 | 130349.4 | 170398.3 | 160000.3 | 183201.3 | TRUE |
| 237438.7 | 260187.6 | 281342.7 | 268623.1 | 188207.9 | 309198.1 | 232453.9 | 296017.8 | TRUE |
| 68999.5  | 82461.6  | 58621.1  | 58247.4  | 73466.9  | 43617.5  | 75043.8  | 80867.4  | TRUE |
| 91993    | 100854.4 | 87267.4  | 53951.5  | 132878.5 | 83186.6  | 104855.2 | 142316.3 | TRUE |
| 71626.1  | 92704.5  | 58582.9  | 93210.4  | 98121.9  | 51474.3  | 60101.4  | 54002    | TRUE |
| 169958.7 | 183851.1 | 139056.4 | 180583   | 159465.9 | 131222   | 169109.6 | 177327.8 | TRUE |
| 58885.2  | 45704.4  | 44820.9  | 50123.2  | 53506.3  | 44989.1  | 52538.3  | 73269    | TRUE |
| 199880.1 | 177948.4 | 139718   | 177843.3 | 194961   | 145370.2 | 193737.2 | 222967   | TRUE |
| 131002.3 | 133750.2 | 100533.3 | 119019.5 | 126738.7 | 103082.9 | 147150.2 | 158464.2 | TRUE |
| 56952.3  | 42121    | 48555.8  | 54225.9  | 42003.1  | 43590.3  | 53013    | 48123.8  | TRUE |
| 507715.9 | 495441.7 | 514647.6 | 575657   | 428196   | 500665.6 | 494592.3 | 626134.3 | TRUE |
| 500514.7 | 432151.9 | 484445   | 598374.9 | 499258.7 | 502844.4 | 500851.4 | 507102.4 | TRUE |
| 542380.7 | 537156   | 417636.7 | 532835.1 | 521557.1 | 425665.6 | 589740.6 | 562904.1 | TRUE |
| 476106.4 | 483437.8 | 570129.5 | 563614.3 | 428216.9 | 527221.8 | 488874.4 | 470471.6 | TRUE |
| 468759.9 | 424028.1 | 500272.1 | 497408.2 | 458683.7 | 489973.5 | 468185.4 | 441057.3 | TRUE |
| 46233.8  | 41968.3  | 43418.9  | 35450.6  | 35240.5  | 39308.6  | 43941.6  | 39998.7  | TRUE |
| 41447    | 45938.1  | 36194.5  | 41389.3  | 33295.2  | 51578.8  | 32665.4  | 53033.4  | TRUE |
| 54789.1  | 43627.3  | 29108.9  | 41892.9  | 41712    | 48017.4  | 51853.2  | 60753.4  | TRUE |
| 77394    | 59370.8  | 68131.7  | 74425.2  | 72605.5  | 81571    | 59594.3  | 99873.8  | TRUE |
| 1411123  | 931292.9 | 1456593  | 2060078  | 1958528  | 1522681  | 1120682  | 1919486  | TRUE |
| 234936.3 | 223862   | 264743.8 | 305247.1 | 312490.7 | 295937.3 | 249474.1 | 303746.5 | TRUE |
| 209796.4 | 217586.8 | 192026.7 | 187527.5 | 226465.1 | 290141.9 | 271180.7 | 256648.8 | TRUE |
| 477854.9 | 508025   | 345053.9 | 426835   | 643006.4 | 697718.3 | 595697.3 | 674111   | TRUE |
| 218187.8 | 41221.7  | 56967.6  | 65439.5  | 50495.9  | 71785.3  | 61005.7  | 64919.3  | TRUE |
| 72717.5  | 138278   | 195812.3 | 121825.9 | 126090.3 | 50211.5  | 54584    | 57189.3  | TRUE |
| 77116.7  | 57750.9  | 47867    | 48231.5  | 67452.2  | 75443    | 64537.2  | 86848    | TRUE |
| 541753.8 | 508143.2 | 320604.3 | 356694.6 | 587532.6 | 585750.6 | 562564.4 | 653976.8 | TRUE |
| 336030.4 | 369484.4 | 268285.9 | 327085.6 | 316664.6 | 421044.5 | 394304.6 | 393304.4 | TRUE |
| 58838.1  | 75718.3  | 116853.1 | 60184.4  | 68920.8  | 53286    | 72288.9  | 65062.3  | TRUE |
| 50683.4  | 61632.5  | 49331.6  | 48750.4  | 71711.7  | 47332.5  | 51408.6  | 60017.2  | TRUE |
| 481226   | 413877.4 | 448766.8 | 567465.9 | 552562.1 | 499070.2 | 443814.8 | 570380.1 | TRUE |
| 111885.1 | 66151.4  | 105878.5 | 106303.2 | 109594.9 | 111369.2 | 104515.8 | 95352    | TRUE |
| 76295.9  | 101300.3 | 62266.5  | 72051    | 82223.8  | 90027.5  | 76818.6  | 95373.5  | TRUE |
| 183318.8 | 146492   | 131608.8 | 153957.4 | 181769   | 169131.6 | 162833.5 | 171654.5 | TRUE |

|          |          |          |          |          |          |          |          |      |
|----------|----------|----------|----------|----------|----------|----------|----------|------|
| 107717.6 | 84847.2  | 88378.3  | 101891.8 | 110147.2 | 96787.5  | 97752.5  | 105908   | TRUE |
| 710936   | 369663.2 | 662541   | 619784.5 | 534281.5 | 679637.1 | 384560.2 | 581809.8 | TRUE |
| 1347444  | 663787.7 | 1845639  | 1710727  | 1381360  | 1868677  | 936736   | 1487952  | TRUE |
| 59272.6  | 63210.3  | 70287.8  | 51811.6  | 62219    | 72509.3  | 67863.6  | 67201.3  | TRUE |
| 162131.1 | 143647.9 | 180849.5 | 164206.6 | 165265.7 | 183996.9 | 139011.4 | 189249.7 | TRUE |
| 259431.9 | 145992.8 | 278561.5 | 276418.4 | 245278.5 | 301778.8 | 155614.6 | 266067.6 | TRUE |
| 174390.2 | 143915.2 | 113978.6 | 155838.6 | 179335.2 | 193200.9 | 156869.7 | 186835.5 | TRUE |
| 198160.1 | 190770.7 | 208373.2 | 240064.3 | 316286.9 | 290875.4 | 229695.7 | 279412.7 | TRUE |
| 227648.6 | 113913.9 | 183416.2 | 223583.4 | 197286.8 | 282613.3 | 143082.6 | 252600.6 | TRUE |
| 35358.5  | 7021.3   | 24807.7  | 38167.6  | 28825.2  | 52658.6  | 32207.5  | 37864.3  | TRUE |
| 84012.5  | 62260    | 62102.5  | 81994.9  | 68454.1  | 111638.9 | 70821.4  | 95202.7  | TRUE |
| 78825.4  | 59107.7  | 68634.5  | 46322.1  | 85357.9  | 88460.1  | 77422.2  | 105957.4 | TRUE |
| 46454.5  | 24455.6  | 12583.5  | 12245.4  | 34999.1  | 34294.3  | 39334.7  | 43050.4  | TRUE |
| 454938.9 | 369012.4 | 560881.1 | 572319.1 | 471515.9 | 560921.8 | 374987.7 | 446479.5 | TRUE |
| 544574.3 | 545919.6 | 416473   | 403882.3 | 695206.2 | 510746.5 | 527267.7 | 478764   | TRUE |
| 2289378  | 2080653  | 1451355  | 1580658  | 2724797  | 2624170  | 2188952  | 2480815  | TRUE |
| 121050.3 | 64723.2  | 132596.4 | 139519.8 | 112124.2 | 116757.3 | 68468.7  | 112774.4 | TRUE |
| 24956.7  | 28617.1  | 17839.2  | 30385.4  | 29087.3  | 33946.3  | 43802    | 30625.6  | TRUE |
| 404526   | 390068.2 | 167978   | 202239.3 | 389118.5 | 325848.2 | 364588.3 | 366679.1 | TRUE |
| 452205.3 | 353568.6 | 402073.5 | 417103.6 | 392033.9 | 433363.4 | 379821.4 | 393369.6 | TRUE |
| 69199.3  | 61841.8  | 82817.6  | 85384.5  | 65657.7  | 86066.4  | 64567.4  | 78975.5  | TRUE |
| 75936.1  | 41004    | 88322.9  | 82636.1  | 74746.8  | 116862.1 | 67493.5  | 103097.1 | TRUE |
| 156158.4 | 103688.7 | 228250.9 | 232124.3 | 206441.8 | 234636.2 | 153595.9 | 214870.4 | TRUE |
| 113182.1 | 77478.6  | 143073.7 | 180860.5 | 138626.2 | 152235.7 | 103469.9 | 148383.6 | TRUE |
| 36062.6  | 57197.9  | 53785.7  | 63165.4  | 58514.8  | 27041.2  | 31448.6  | 36670    | TRUE |
| 129120.2 | 110454.9 | 99739.2  | 107105.1 | 193476   | 142993.2 | 132965.2 | 132917.3 | TRUE |
| 63518.1  | 44969    | 47536.4  | 62795.5  | 55920.8  | 85339.1  | 65418    | 79357    | TRUE |
| 80837.7  | 53713.7  | 63194    | 76207    | 73643.5  | 83487.4  | 55310.1  | 97318.1  | TRUE |
| 112228.4 | 63919.6  | 88577    | 133868.4 | 99377.2  | 167660   | 96668.7  | 145734.4 | TRUE |
| 17868.3  | 8399.7   | 19196.1  | 29029.1  | 25465.4  | 36407.7  | 8771.8   | 27062.6  | TRUE |
| 132491   | 167921.7 | 137236.9 | 146337.8 | 155035.2 | 123933.9 | 128199.9 | 127737.7 | TRUE |
| 106041.3 | 140352.3 | 98519.4  | 128312.9 | 122889.1 | 116199.4 | 106415.7 | 150582.1 | TRUE |
| 25819.6  | 24545.1  | 7318.2   | 11691.9  | 17283.7  | 12450.6  | 24750.9  | 25502.1  | TRUE |
| 87669.6  | 66642.9  | 35678.8  | 46606.1  | 93048.5  | 113058.7 | 106903.6 | 102108.2 | TRUE |
| 38880.1  | 28645.2  | 35047.8  | 43814.1  | 40638.8  | 47957.2  | 41920.6  | 51530.3  | TRUE |
| 91922.8  | 96405.3  | 103310.6 | 142025.3 | 98612.7  | 118429.9 | 90881.2  | 101506   | TRUE |
| 46692.9  | 32930.3  | 43419.1  | 76503.7  | 41468.7  | 53016.4  | 38437.9  | 38258.7  | TRUE |
| 32781.1  | 39900.6  | 45153.4  | 39138.9  | 40040    | 42771.7  | 34202.9  | 44512.8  | TRUE |
| 105297.2 | 63630.7  | 143175.6 | 103336.4 | 104504.4 | 138021.5 | 87300.1  | 109025.6 | TRUE |
| 56994.4  | 49586.9  | 61741.6  | 63123.6  | 57855.6  | 64476.6  | 58475.9  | 48741.9  | TRUE |
| 138859.8 | 133376   | 83836.6  | 103874.4 | 148419.5 | 143230.7 | 144199.8 | 149128.3 | TRUE |
| 40353.8  | 45090.4  | 35660.9  | 52975.4  | 36204.2  | 35943.6  | 43816.3  | 34470.9  | TRUE |
| 62059.8  | 72143.6  | 73170.9  | 74858.3  | 70292.3  | 56519.4  | 87038.3  | 64827    | TRUE |
| 77993.1  | 105540.8 | 63383.1  | 109069.9 | 70682    | 81579.2  | 89485.8  | 60753.7  | TRUE |
| 52921.6  | 80284    | 56054.6  | 53403.7  | 57433.3  | 56084    | 70769.5  | 65442.1  | TRUE |

|          |          |          |          |          |          |          |          |      |
|----------|----------|----------|----------|----------|----------|----------|----------|------|
| 20661.5  | 22271.5  | 12940.3  | 36930.5  | 21273.5  | 23254.4  | 25149.2  | 31398.8  | TRUE |
| 2340688  | 3043993  | 1740793  | 1802735  | 2493007  | 1834727  | 3090058  | 2080687  | TRUE |
| 419551.3 | 409777.5 | 465824.4 | 460378.6 | 388466.3 | 435026.1 | 478457.2 | 387953.4 | TRUE |
| 159468.8 | 127787.6 | 186711.9 | 191990.2 | 156560.7 | 168339.3 | 172936.1 | 156447.6 | TRUE |
| 663431.6 | 492037.3 | 673273.1 | 588911   | 600834.6 | 718259.9 | 512742.4 | 664352.6 | TRUE |
| 1630925  | 1227133  | 1784628  | 1710933  | 1576545  | 1699536  | 1328505  | 1715296  | TRUE |
| 102468.4 | 131186   | 167900.6 | 128356.2 | 145044   | 87365.9  | 79860    | 78696.1  | TRUE |
| 99434.4  | 49124.2  | 113556.4 | 148006.1 | 51399.5  | 221344.4 | 94837.9  | 226699.7 | TRUE |
| 71911.6  | 64447.8  | 57045.8  | 82909.9  | 77369.5  | 72853.9  | 106649   | 71722.1  | TRUE |
| 139146.5 | 156597.1 | 137085.7 | 147309.4 | 159019.1 | 139323.5 | 195866.5 | 152660.5 | TRUE |
| 19946.2  | 13979.6  | 9103.5   | 42468.9  | 30546.5  | 21032.9  | 37777    | 28496.6  | TRUE |
| 96469.5  | 115313.7 | 90124.5  | 105595   | 95994.1  | 88297    | 124912   | 92808.4  | TRUE |
| 154970.3 | 281243.4 | 229891.2 | 272526.3 | 317298.5 | 101668.9 | 109766.9 | 123216.5 | TRUE |
| 50919.2  | 51014.9  | 29573.9  | 35960.1  | 35675.9  | 42594.1  | 45167.4  | 44623.1  | TRUE |

|          |          |          |          |          |          |          |          |      |
|----------|----------|----------|----------|----------|----------|----------|----------|------|
| 141552.8 | 124993.6 | 96199.2  | 130660   | 164182.4 | 129587.3 | 103360.1 | 149486.2 | TRUE |
| 1005026  | 736845.5 | 988417.7 | 992748.7 | 817089.1 | 1045847  | 753486.1 | 1078874  | TRUE |
| 887600   | 735810.2 | 954444.6 | 974993.9 | 841094.7 | 1257977  | 871429.3 | 1163041  | TRUE |
| 139173.9 | 150318.1 | 168326.7 | 137531.4 | 116403.5 | 153818.9 | 163784.4 | 131784.1 | TRUE |
| 50533.3  | 41382.8  | 42681.2  | 44779.4  | 42865.3  | 48150.5  | 44797    | 37709.3  | TRUE |
| 32830    | 26098.8  | 32075.7  | 13314.2  | 26296.8  | 41667.1  | 30272.8  | 26877.1  | TRUE |
| 288692.5 | 272939.2 | 250398.6 | 266623.5 | 276970.2 | 275749.4 | 309497.3 | 257976.3 | TRUE |
| 121264.6 | 91389.8  | 154235   | 183603   | 115258.8 | 186940.9 | 134263.4 | 132497.8 | TRUE |
| 414378.4 | 402654   | 373163.7 | 424053.1 | 318089.2 | 398368.2 | 380651.3 | 338471   | TRUE |
| 503396.2 | 511182.1 | 500032.4 | 513126.2 | 579293.9 | 518128   | 563028.9 | 628679.7 | TRUE |
| 468981.7 | 442524   | 423390.9 | 539613.3 | 440516.7 | 475523.7 | 468999.2 | 415950.2 | TRUE |
| 937630.8 | 851047.4 | 986130.5 | 1093370  | 971852.5 | 950817   | 895812.9 | 945001.9 | TRUE |
| 1192310  | 897887.2 | 1178115  | 1251477  | 1427964  | 1258157  | 985495.4 | 1378371  | TRUE |
| 64227.5  | 45396.2  | 64344.6  | 38150.8  | 66395.1  | 63950.4  | 69498.5  | 57342.8  | TRUE |
| 268159.3 | 153457.8 | 387279.8 | 273030.7 | 278626.2 | 565842.9 | 323177.8 | 260438   | TRUE |
| 321565.9 | 198678.9 | 279101.8 | 376210.9 | 267917.7 | 551479.1 | 305384.5 | 549727.7 | TRUE |
| 502190   | 520871.2 | 506123.5 | 347327.6 | 436111.5 | 488751.9 | 513530.1 | 444113.6 | TRUE |
| 376091.7 | 306931.4 | 383943.5 | 366191.2 | 376409.3 | 331518.7 | 399351.6 | 332571.5 | TRUE |
| 677361.9 | 664555.6 | 562750.4 | 621720.9 | 586499.5 | 561077.2 | 607693.5 | 563621.2 | TRUE |
| 442679.1 | 403774.1 | 468739   | 482333.6 | 479720.6 | 466784.6 | 442089.5 | 451200.7 | TRUE |
| 509834.5 | 444612.4 | 453537.8 | 528192.8 | 527911.4 | 490389.5 | 440208.1 | 486509.4 | TRUE |
| 38490.2  | 24843    | 34167.6  | 31437.4  | 27325.9  | 40555    | 29651.5  | 41553    | TRUE |

|          |          |          |          |          |          |          |          |      |
|----------|----------|----------|----------|----------|----------|----------|----------|------|
| 281866.6 | 265322.1 | 243252.7 | 277578.1 | 232914.5 | 299420.7 | 287693.2 | 263213.4 | TRUE |
| 199895.4 | 215166.8 | 166237.5 | 190723.3 | 118796.6 | 245810.7 | 226174.8 | 139636.4 | TRUE |
| 60075.1  | 67460.4  | 68801.5  | 91685.7  | 60201.9  | 63180.2  | 70342.5  | 52661.6  | TRUE |
| 63259.5  | 32994.2  | 66678.5  | 45177.2  | 59521.8  | 58270.6  | 47203.4  | 48736.1  | TRUE |
| 25343.5  | 10886    | 32917.5  | 11606.6  | 17431.2  | 33264.3  | 19897.6  | 26819.8  | TRUE |

|         |         |       |         |       |         |         |         |      |
|---------|---------|-------|---------|-------|---------|---------|---------|------|
| 31984.4 | 25905.6 | 23128 | 27834.7 | 30963 | 24847.2 | 19957.5 | 19137.6 | TRUE |
|---------|---------|-------|---------|-------|---------|---------|---------|------|

|          |          |          |          |          |          |          |          |      |
|----------|----------|----------|----------|----------|----------|----------|----------|------|
| 93186    | 104746.6 | 105431.6 | 142669.5 | 121362.7 | 100101.7 | 114675.1 | 113082.9 | TRUE |
| 15933.5  | 9586.6   | 12191.4  | 24431.8  | 16986.6  | 6500.3   | 17421.4  | 10505.4  | TRUE |
| 65614.2  | 84830.1  | 67446.9  | 53012.4  | 56518.2  | 72729.9  | 75762.2  | 64870.8  | TRUE |
| 93007.9  | 94292.2  | 65888.5  | 116256.5 | 92315.8  | 78914.3  | 80629.9  | 97137.6  | TRUE |
| 93952    | 129755.7 | 131408.9 | 122968.7 | 109847.2 | 105417.6 | 115126.7 | 115022.8 | TRUE |
| 107075   | 90948.1  | 72668.3  | 100131   | 118535.5 | 88543.4  | 105930.9 | 127069   | TRUE |
| 80453.9  | 85174.6  | 75497.1  | 102272.5 | 103642.8 | 105949   | 80026.5  | 124223.5 | TRUE |
| 186518.8 | 203639.5 | 150767.3 | 186071.1 | 180899.8 | 161634.7 | 195134.8 | 207003.5 | TRUE |
| 117127.7 | 116092.3 | 99265.9  | 96105.4  | 115397.7 | 102075.5 | 119184   | 101480.6 | TRUE |
| 80800.1  | 74625.4  | 68032.9  | 92986.7  | 56607.1  | 60155    | 76505.5  | 63406.2  | TRUE |
| 133707.6 | 140727.1 | 161406   | 212030.5 | 166094.6 | 172098.1 | 188781.3 | 191239.1 | TRUE |
| 72700.2  | 61536.1  | 73817.4  | 62078.8  | 92165.5  | 94712.6  | 88283.7  | 103866.2 | TRUE |
| 88279.1  | 64472.1  | 76920.3  | 99812.6  | 69026.8  | 68331.7  | 76648.6  | 79864.1  | TRUE |
| 84180    | 77838.3  | 90135.1  | 67846    | 70610.7  | 65080.8  | 76729.6  | 78955.1  | TRUE |
| 38196.5  | 34468.8  | 37434.7  | 28582.2  | 35394.3  | 55452.8  | 32288.6  | 58219.3  | TRUE |
| 64960.4  | 51833.5  | 41045.8  | 49187.3  | 49079.5  | 78907.1  | 52435.9  | 78719.2  | TRUE |
| 60005.9  | 67674.6  | 48890.6  | 54180.2  | 64064.6  | 68884.8  | 61362.9  | 74354.5  | TRUE |
| 115933.6 | 138430.3 | 128200.1 | 117609   | 113297.8 | 134702.3 | 147909.7 | 124650.4 | TRUE |
| 199324.9 | 267643.3 | 142476.6 | 215472.3 | 207323.2 | 152428.8 | 296483.9 | 165081.3 | TRUE |
| 174324.9 | 175799.9 | 170175.5 | 193823.1 | 144009.9 | 175951.9 | 171015.4 | 177153.5 | TRUE |
| 156632.2 | 180067.9 | 196243.5 | 150891.1 | 142878.1 | 226946.3 | 170368.8 | 166872.6 | TRUE |
| 213110.1 | 171236.2 | 154401.7 | 181189.6 | 165388.1 | 228919.4 | 235977   | 264071.3 | TRUE |
| 353681.5 | 227997.7 | 284134.3 | 330657.3 | 380003   | 332273.1 | 311546.9 | 355986.6 | TRUE |
| 218551.2 | 255035.7 | 257229.4 | 189466.8 | 224374.1 | 208503.5 | 240365.7 | 240686.2 | TRUE |
| 474168.9 | 450575.2 | 615782.9 | 524846.9 | 474751.4 | 431683.2 | 418497   | 424385.6 | TRUE |
| 889394   | 833497.4 | 948910.2 | 951235.9 | 838148.8 | 855631.5 | 952626.4 | 815225.7 | TRUE |
| 100079.9 | 95955.5  | 135544.6 | 98436.8  | 145168.4 | 136886.5 | 112010.1 | 141006.1 | TRUE |
| 443587.8 | 437485.4 | 417398.2 | 383114.8 | 390788.5 | 419830.6 | 433740   | 425190.9 | TRUE |
| 124616.2 | 137756.6 | 140649.2 | 125569.8 | 125221.8 | 117670.3 | 121422.6 | 119036.8 | TRUE |
| 274039.1 | 279170.3 | 255444   | 268037.5 | 322394.1 | 223628.9 | 222000.5 | 201593.9 | TRUE |
| 179568.6 | 180404.2 | 153154.5 | 184074   | 177177.3 | 238453.8 | 220784.6 | 278390.7 | TRUE |
| 477318.1 | 418501.3 | 344038.7 | 455068.3 | 541690.3 | 503040.4 | 447008.1 | 528126.8 | TRUE |
| 152808.4 | 151038.2 | 150021.1 | 190329.3 | 181260.7 | 379511.1 | 186112.9 | 119160.9 | TRUE |
| 71631.8  | 73918.3  | 66728.6  | 59479.1  | 67549.7  | 47548.6  | 61530.6  | 66127.8  | TRUE |
| 38620.3  | 34480.9  | 42937    | 40576.7  | 35809.4  | 30110.1  | 25913.1  | 29723.4  | TRUE |
| 758703.4 | 678362.7 | 692300.3 | 677638   | 851395.6 | 753983.6 | 652595.2 | 704387.6 | TRUE |
| 24725.2  | 21248.8  | 23295.6  | 30789.1  | 24174    | 21261.7  | 28623.6  | 27156.1  | TRUE |
| 63548.3  | 78642.4  | 81963.2  | 81741.8  | 45537.2  | 76161.1  | 63455.3  | 55981.1  | TRUE |
| 157103.5 | 131145.7 | 189807.6 | 148081.2 | 161456.8 | 161647.4 | 157217   | 132874.4 | TRUE |
| 540668.6 | 416864.9 | 613657   | 385484.7 | 424966.1 | 623773.6 | 398820.3 | 449854.5 | TRUE |
| 1333076  | 1385052  | 1708801  | 1525841  | 1542359  | 2060933  | 1631712  | 1693873  | TRUE |
| 152201.3 | 367551.3 | 294751.1 | 332047.7 | 427574   | 108837.7 | 87863    | 103214.4 | TRUE |
| 54853.4  | 106381.7 | 74839.5  | 79672    | 98373.7  | 30476    | 41776.4  | 20135.5  | TRUE |

|          |          |          |          |          |          |          |          |      |
|----------|----------|----------|----------|----------|----------|----------|----------|------|
| 98393.2  | 165282.3 | 149597.3 | 174559.9 | 238123.9 | 82303.9  | 64886.4  | 71302.4  | TRUE |
| 153847.9 | 190221.1 | 154329.6 | 158794.4 | 159539.7 | 143311   | 194987.6 | 204923   | TRUE |
| 2449161  | 3010368  | 2665833  | 2887945  | 1746545  | 2467281  | 2923990  | 2535658  | TRUE |
| 120977.2 | 97744.4  | 138145.8 | 182103.1 | 132269.8 | 143959.5 | 125111.8 | 153200.3 | TRUE |
| 59757.2  | 50908.1  | 49383.8  | 66561.8  | 74568.4  | 75697.4  | 43069.3  | 67610.7  | TRUE |
| 24693.9  | 44368.9  | 62409.2  | 53521.4  | 60893.1  | 20015.4  | 10042.8  | 13023.9  | TRUE |
| 28966.2  | 26430.9  | 24633    | 28062.8  | 29767.9  | 15133.3  | 23477.4  | 29015.1  | TRUE |
| 102555.4 | 101026.2 | 74594.3  | 101534.5 | 104387.8 | 106191   | 123900.3 | 145826.2 | TRUE |
| 164047.7 | 136569   | 130264.7 | 149424.5 | 220357.1 | 146095.5 | 157875   | 205927.3 | TRUE |
| 262510.4 | 284672.5 | 263908.2 | 258644.6 | 244601.5 | 289611.1 | 322500.1 | 344964.2 | TRUE |
| 617929.3 | 536729.8 | 474952.6 | 656951.3 | 650139.5 | 526477.4 | 569858.4 | 692987.4 | TRUE |
| 775761.9 | 876773   | 722648.5 | 686727.1 | 746887.9 | 816403.9 | 899850   | 899337.7 | TRUE |
| 117866.5 | 80238.7  | 108605.5 | 128921.8 | 108877   | 102390.5 | 105699.5 | 133853   | TRUE |
| 85248.9  | 65125.1  | 70059.4  | 96630.5  | 87565.2  | 73413.7  | 63972.6  | 78946.5  | TRUE |
| 507053.3 | 808906.8 | 416968.7 | 358492.2 | 419267.7 | 449041.4 | 437090.5 | 489157.7 | TRUE |
| 492319.2 | 332662.4 | 351277.4 | 434787.2 | 422394.3 | 386274.3 | 330924.5 | 401812.8 | TRUE |
| 1939907  | 1547370  | 1581790  | 1957949  | 1885002  | 1658770  | 1557771  | 1987187  | TRUE |
| 148288.6 | 127767.3 | 147520.3 | 162361.8 | 174026.2 | 141645.9 | 158328.1 | 185339.3 | TRUE |
| 180437.9 | 187349.1 | 168122   | 211692.7 | 222473.4 | 180460.4 | 198403.1 | 219251.6 | TRUE |
| 281533.3 | 290909.6 | 259355.4 | 258634.2 | 292089.8 | 284672.8 | 263912.4 | 329835.8 | TRUE |
| 44126.4  | 45881.8  | 59045.2  | 35139.5  | 42413.9  | 13726.1  | 11175    | 8895.8   | TRUE |
| 1210491  | 1176937  | 925346.8 | 1056108  | 1244947  | 1370303  | 1270619  | 1442599  | TRUE |
| 1654384  | 1629166  | 1442511  | 1449632  | 1779253  | 1930413  | 1816150  | 2031545  | TRUE |
| 338057.8 | 342160.9 | 283106.3 | 283912.8 | 308801.8 | 350991.8 | 327119.1 | 336768.7 | TRUE |
| 260427.8 | 297908.1 | 272092.6 | 260384.2 | 261034.5 | 296592.9 | 291255.7 | 308327.2 | TRUE |
| 44212.7  | 69842.7  | 37290.3  | 91564.7  | 68034.8  | 35410.2  | 31654.9  | 43256.4  | TRUE |
| 382533   | 335349.3 | 424547.6 | 443638.3 | 383463.5 | 372214.6 | 311375.9 | 351608   | TRUE |
| 516662.4 | 512026.2 | 479982   | 498720.1 | 540717.6 | 637386.4 | 557460.3 | 644484.7 | TRUE |
| 10239.1  | 11885.6  | 22928.2  | 15649.2  | 8809.4   | 27660.2  | 11086.9  | 12258.1  | TRUE |
| 32625.9  | 34151.3  | 36290.5  | 47641.4  | 31860.1  | 36784.9  | 28120.6  | 27944.4  | TRUE |
| 34275.4  | 15008    | 19033.2  | 38670.5  | 21919.1  | 34387.8  | 14195.5  | 14178.6  | TRUE |
| 966345.1 | 744666.8 | 878272.7 | 1056937  | 950135   | 1008355  | 848501.3 | 1022593  | TRUE |
| 3421712  | 3063461  | 3034649  | 2790726  | 3397968  | 3756371  | 3203999  | 3660025  | TRUE |
| 1315506  | 1049971  | 1153622  | 1467840  | 1327748  | 1283936  | 1085733  | 1250756  | TRUE |
| 54554.2  | 82263.4  | 53540.3  | 83079.4  | 76267.3  | 32720.8  | 43781.9  | 31449.3  | TRUE |
| 84368    | 81609.7  | 88912.1  | 100359.7 | 86951.8  | 92245    | 76003.8  | 93668    | TRUE |
| 1257276  | 1167446  | 1098856  | 1124760  | 1300519  | 1414505  | 1214170  | 1380493  | TRUE |
| 10286.6  | 28796.3  | 19168.8  | 29039.8  | 35622.2  | 26523.7  | 12743.7  | 24967.5  | TRUE |
| 46494.8  | 38519.5  | 32192.5  | 47967.1  | 38862.9  | 62056.3  | 56387.2  | 79284.5  | TRUE |
| 19717.1  | 9477     | 26291.1  | 8829.8   | 8562.4   | 10592.5  | 10154.2  | 29389.7  | TRUE |

|          |          |          |          |          |          |          |          |      |
|----------|----------|----------|----------|----------|----------|----------|----------|------|
| 48825.3  | 39798.9  | 45462.1  | 36673.3  | 30607.3  | 38506.8  | 44123.9  | 40547.3  | TRUE |
| 79266.3  | 125450.4 | 79470.8  | 96192.9  | 60923.1  | 100720.3 | 101294.5 | 72762.7  | TRUE |
| 73678.8  | 76859.9  | 98071.3  | 82117.8  | 74219.3  | 96753.9  | 90684.8  | 96628.6  | TRUE |
| 2025265  | 1955409  | 1996303  | 2009690  | 1896246  | 990515.4 | 1983665  | 1095145  | TRUE |
| 387512.3 | 483241.7 | 224769.1 | 306400.7 | 368496.3 | 259436.7 | 410261.7 | 342631.9 | TRUE |
| 456992.2 | 495645.7 | 369096.6 | 565364.6 | 591237.4 | 358574.9 | 661290.2 | 511051.5 | TRUE |
| 177575.2 | 176058.5 | 146963.8 | 149500.1 | 190166.6 | 142683.2 | 223606.5 | 197595.1 | TRUE |
| 70023.7  | 116117.9 | 49950.7  | 82366.3  | 103735.2 | 62401.2  | 119765   | 107351.8 | TRUE |
| 69659.2  | 126406   | 78112    | 83866.4  | 104208.5 | 65517.2  | 115209.8 | 89247.1  | TRUE |
| 43326.7  | 72669.8  | 33572.2  | 52150.5  | 62090    | 37824.7  | 64628.3  | 65448.2  | TRUE |
| 291297.7 | 438197.8 | 230002.5 | 336392.9 | 414409.7 | 238561.4 | 417210.5 | 373580.1 | TRUE |
| 212790.6 | 226179   | 270284.2 | 355298.6 | 205866.9 | 224201.3 | 219308.9 | 282805.3 | TRUE |
| 1536034  | 1404645  | 1687457  | 1695014  | 1432983  | 1425680  | 1454265  | 1332371  | TRUE |
| 570171.4 | 483587.8 | 561013.9 | 620747.8 | 521153.7 | 542489.5 | 552936.6 | 567451   | TRUE |
| 244071.2 | 215856.2 | 103318.1 | 208614   | 224982.9 | 183911.1 | 335422.6 | 311698.3 | TRUE |
| 2531985  | 2468311  | 1516344  | 2429983  | 1796076  | 1027316  | 1267077  | 1223453  | TRUE |
| 228219   | 206155.6 | 215900   | 288911.3 | 184284.7 | 190022.9 | 240261.1 | 240357   | TRUE |
| 338977.7 | 325293.7 | 241745.9 | 250833.4 | 319395   | 266011.1 | 382198.4 | 372211   | TRUE |
| 113616.3 | 99684.5  | 101007.8 | 134781.6 | 96518.6  | 96922.8  | 106073.7 | 95323.1  | TRUE |
| 191308.2 | 141929.7 | 155077.7 | 197758.5 | 137810.8 | 187541   | 200633   | 187856.7 | TRUE |
| 70943    | 58313.4  | 62599.1  | 58430.6  | 86350    | 61590    | 64585.9  | 74719    | TRUE |
| 85082    | 80535    | 109860.3 | 106590   | 103709.6 | 123347.6 | 126548.2 | 126896.6 | TRUE |
| 111450.9 | 127003.1 | 111634.5 | 159935.5 | 153732.1 | 125540.3 | 189056.5 | 164629.3 | TRUE |
| 269385.1 | 255170.4 | 312780.8 | 359597.8 | 385474.1 | 300733   | 358512.8 | 338001.7 | TRUE |
| 65305.7  | 63120.9  | 75131    | 94813.8  | 92166.9  | 67805.1  | 78915.9  | 84164.5  | TRUE |
| 42582.5  | 33005.3  | 45457.1  | 68160.7  | 90451.4  | 60284.1  | 83217.9  | 74724.9  | TRUE |
| 304418.1 | 327025.2 | 272685.8 | 287128   | 339835.2 | 332258.3 | 336339.4 | 329284.7 | TRUE |
| 137835.3 | 126787.2 | 82208    | 107097.7 | 92212.7  | 89405.4  | 136347.2 | 116615.5 | TRUE |
| 200259.9 | 177136.3 | 148519.7 | 177816.1 | 194581.4 | 150068.9 | 197723.2 | 206631.9 | TRUE |
| 489232.2 | 491372.9 | 397134.5 | 447888.9 | 494254.8 | 372783   | 478219.5 | 512340.5 | TRUE |
| 280497.6 | 291879.9 | 301381.1 | 330111.6 | 264064.1 | 282810.2 | 308695.7 | 325159.1 | TRUE |
| 204656.3 | 227921.6 | 157058.1 | 209868   | 191069.7 | 185784.2 | 210261.1 | 191945   | TRUE |
| 53110.6  | 143171.3 | 81458.1  | 116767   | 135495.6 | 53649    | 53057    | 63211.5  | TRUE |
| 302932.2 | 290409.3 | 298878.3 | 346290.3 | 229641   | 276393.6 | 299863.5 | 316370.1 | TRUE |
| 2108272  | 1940648  | 2055735  | 2037775  | 1652342  | 1901427  | 1971275  | 1819171  | TRUE |
| 105995.2 | 104367   | 77134.3  | 97591.6  | 107458.9 | 74069.5  | 117957.5 | 120037.4 | TRUE |

|          |          |          |          |          |          |          |          |      |
|----------|----------|----------|----------|----------|----------|----------|----------|------|
| 20828    | 24879.9  | 16413.6  | 26323.6  | 22793.8  | 20728.3  | 16266.9  | 20900.1  | TRUE |
| 180008.2 | 188637.9 | 202244.8 | 158380.8 | 185700.7 | 190859.7 | 183369.3 | 189430.5 | TRUE |
| 1037563  | 1082178  | 1183095  | 1135931  | 887865.5 | 925515   | 1068826  | 1002132  | TRUE |
| 113702.1 | 100368   | 84487    | 104085.5 | 102654.2 | 135261.8 | 127926.7 | 130974.1 | TRUE |
| 35370.4  | 12245.6  | 34235.5  | 32382.9  | 32391.5  | 39795.7  | 41872.7  | 51251.2  | TRUE |
| 275572.5 | 251371.5 | 225424.6 | 293261.8 | 242342.3 | 267432.7 | 299000.3 | 335163.1 | TRUE |
| 45867.6  | 44694.2  | 35500.5  | 51317.7  | 48981    | 53986.3  | 46637.5  | 66576.1  | TRUE |
| 86381.4  | 108693.7 | 55150.5  | 90053    | 102665   | 55914.9  | 110468.2 | 101586.2 | TRUE |
| 317410.3 | 329166.7 | 276606.2 | 222976.4 | 243704.5 | 240325.5 | 248926.6 | 289238.5 | TRUE |
| 284560.6 | 246864.9 | 306828.9 | 306474.6 | 373658.1 | 283267.4 | 308879.9 | 345425.8 | TRUE |
| 179832.2 | 211016   | 154641.6 | 202833   | 233601   | 166218.8 | 202337.3 | 229401.1 | TRUE |
| 135980.3 | 139114.7 | 121355.6 | 144887.1 | 177102.9 | 143264.4 | 149515.2 | 155677   | TRUE |
| 84708.5  | 96941.1  | 93893.9  | 101744.6 | 111484.5 | 74306.7  | 88932    | 103869.7 | TRUE |
| 284178.5 | 283565.5 | 328655.2 | 328827   | 284497   | 280152.5 | 324374   | 235239.5 | TRUE |
| 173190.5 | 171280.5 | 168820.8 | 155875.2 | 121091.9 | 122083   | 207105.2 | 142627   | TRUE |
| 192514   | 203459.3 | 202817.3 | 174903.7 | 183302.2 | 172027.8 | 173169.3 | 200807.1 | TRUE |
| 18049.5  | 25751.5  | 19177.4  | 22899.8  | 23249.9  | 9464.9   | 25806.8  | 22441.6  | TRUE |
| 48043.4  | 32598.7  | 42421.7  | 41676    | 38828.4  | 41168.6  | 43594    | 34250.2  | TRUE |
| 56139    | 41210.3  | 43284.1  | 74008.1  | 54768.1  | 63742.3  | 84182.1  | 72240.4  | TRUE |
| 388895   | 420121.8 | 424289.5 | 533120.7 | 574753.1 | 461871.2 | 560091.9 | 593019.6 | TRUE |
| 36373.6  | 42061.4  | 28022    | 34674.7  | 42472.7  | 42580    | 46056.1  | 43619.7  | TRUE |
| 70043.4  | 66444.5  | 55084.8  | 69781.4  | 59609.1  | 90971.6  | 92026.3  | 73261.5  | TRUE |
| 243020.9 | 249197.1 | 184040   | 234239.9 | 260196.1 | 186289.4 | 247088.9 | 225238.3 | TRUE |
| 123173.1 | 128862.1 | 122379.2 | 145992.5 | 146823.7 | 138585.6 | 161147.7 | 156658.9 | TRUE |
| 781724.5 | 819292   | 729307.2 | 933282.2 | 1031593  | 839897.7 | 1034555  | 1037217  | TRUE |
| 164592.3 | 197625.9 | 155533.7 | 199005.3 | 150448.6 | 144038.1 | 168673.8 | 145683.9 | TRUE |
| 201443.9 | 222309.6 | 182435   | 209638.8 | 190231.4 | 180491.3 | 187582.3 | 159514.7 | TRUE |
| 219457.2 | 199376.4 | 211062.4 | 231948.6 | 177565.8 | 203054.8 | 192195.7 | 202743.5 | TRUE |
| 199829.8 | 186110.2 | 196232.5 | 219301.6 | 169531.2 | 187801.5 | 170079.7 | 210316.6 | TRUE |
| 19157.6  | 16229    | 24881.5  | 31271.1  | 33701.3  | 30417.1  | 29557.2  | 25267.3  | TRUE |
| 48499.5  | 43264.4  | 42338.2  | 47316.5  | 49673.8  | 40321.2  | 40955.4  | 53667.1  | TRUE |
| 71521.2  | 61039    | 62561    | 53343.1  | 66656    | 61536.2  | 57847.2  | 69457.6  | TRUE |
| 123086.2 | 116753.7 | 110791   | 130905.4 | 126023.4 | 121739.5 | 123736.5 | 121250.6 | TRUE |
| 180268   | 197271.9 | 187004.6 | 180908.3 | 183612   | 201646.5 | 210149.9 | 196952.5 | TRUE |
| 36256.8  | 12313.4  | 40380.7  | 58375.5  | 41557.3  | 56503.4  | 48473.9  | 41853.3  | TRUE |
| 187603.5 | 161845.6 | 170151   | 154728   | 152831   | 167548.1 | 172807.1 | 161379.6 | TRUE |
| 214476.8 | 226547.5 | 187261.4 | 178751.6 | 205369.6 | 214617.5 | 231993.8 | 218211.3 | TRUE |
| 126372.6 | 100701.9 | 97711.8  | 101532.6 | 118309.3 | 138286.6 | 152045.1 | 147317.6 | TRUE |
| 80617.7  | 84039.5  | 66648.2  | 91893.2  | 88203.8  | 96143    | 102805.8 | 119350.3 | TRUE |
| 9277.2   | 8083     | 8007.5   | 15301.3  | 15291.1  | 8136     | 18896.2  | 11355.8  | TRUE |
| 39026.2  | 53790    | 48955.4  | 47868.7  | 55232.4  | 42351.7  | 64427.5  | 52640.8  | TRUE |



|          |          |          |          |          |          |          |          |      |
|----------|----------|----------|----------|----------|----------|----------|----------|------|
| 204948   | 209626.3 | 191778.5 | 191697.4 | 157875.9 | 212303.6 | 244210.7 | 216877.9 | TRUE |
| 374701.5 | 297847.4 | 408316.7 | 460291.7 | 425569.8 | 470763.9 | 379546.2 | 438389.2 | TRUE |
| 80357.8  | 78012.9  | 35486.4  | 51795    | 86153.7  | 83528.3  | 63025.3  | 84072.1  | TRUE |
| 136868.3 | 81118.9  | 185526.5 | 139883.7 | 119858.9 | 149993.2 | 88579.2  | 112713.7 | TRUE |
| 96232.5  | 102145   | 69142.4  | 68301.2  | 123033.1 | 123052.6 | 96798.6  | 120872.6 | TRUE |
| 1096084  | 621124.4 | 1340233  | 1196484  | 1049433  | 1403829  | 690878.8 | 1054257  | TRUE |
| 111673.2 | 103307.3 | 143345.5 | 123315.2 | 130844.9 | 131487.5 | 93890.8  | 131854.3 | TRUE |
| 198412.3 | 152451.2 | 227610.3 | 182414.2 | 194912.1 | 208378.7 | 161038.6 | 206029.4 | TRUE |
| 110681.6 | 95615.4  | 139440.9 | 102239.4 | 110853.7 | 122670.1 | 99537.1  | 115229.6 | TRUE |
| 42742.2  | 56971.2  | 47677.8  | 52257.8  | 58496.5  | 61835.8  | 52605    | 51920.3  | TRUE |
| 2402101  | 2233055  | 1829794  | 1881286  | 2759341  | 2559988  | 2345854  | 2600505  | TRUE |
| 4268111  | 4062412  | 2491752  | 2680064  | 5427109  | 4747148  | 4106884  | 4770036  | TRUE |
| 49680.2  | 89549.4  | 44052.5  | 52476.3  | 77937.8  | 44754.9  | 42230.6  | 51915.9  | TRUE |
| 43122.4  | 43497.8  | 46698.5  | 52825.5  | 37914    | 48120    | 42333    | 50626.1  | TRUE |
| 265332.8 | 229157.7 | 164390.9 | 223405.9 | 268094.6 | 283080.8 | 303478.5 | 340241.8 | TRUE |
| 173181.8 | 134730.1 | 146324.3 | 161825.2 | 147436.3 | 187619.7 | 180688.3 | 168872.8 | TRUE |
| 368363.7 | 311842.6 | 318510.8 | 371006.2 | 326928.1 | 410991.7 | 358380.9 | 390737.4 | TRUE |
| 165952.3 | 135835.2 | 114320.2 | 174220.7 | 190640.1 | 160619.3 | 159251.2 | 164827.8 | TRUE |
| 186114.5 | 77217.6  | 58173.2  | 78376.8  | 276575.7 | 207578.9 | 111153.4 | 188106.9 | TRUE |
| 820313.5 | 794751.2 | 509397.7 | 550190.7 | 1023736  | 983005.2 | 790895.4 | 895139   | TRUE |
| 30389.4  | 4581.3   | 48373.8  | 4201.3   | 6369.8   | 81946.8  | 24296.8  | 11756.7  | TRUE |
| 253248   | 140244.5 | 275277.8 | 231783.9 | 247103.1 | 281896.5 | 146702.2 | 224620.1 | TRUE |
| 260327.5 | 196522.4 | 340443.3 | 283683.3 | 220666.8 | 325471   | 203152.3 | 232573.7 | TRUE |
| 448543.2 | 208553.4 | 525375.9 | 427368.2 | 407419.6 | 578645.7 | 265605.3 | 413859.5 | TRUE |
| 178644.5 | 152317.3 | 197300.3 | 204843.2 | 177039.3 | 180329.1 | 148313.1 | 189573.7 | TRUE |
| 42195.5  | 29520.1  | 52103.8  | 72612.5  | 46394.1  | 78632.1  | 45122.2  | 47275.5  | TRUE |
| 59585.8  | 46538.8  | 22366.7  | 11505.9  | 63302.5  | 64919.8  | 56959.2  | 81658.4  | TRUE |
| 64279.1  | 55039.4  | 56825.2  | 42777.2  | 85139.9  | 80580.6  | 48180.2  | 64164.5  | TRUE |
| 775593.9 | 680563.9 | 635865.5 | 563240.7 | 861597.7 | 927163.7 | 690476   | 755466.5 | TRUE |
| 185266.5 | 125144.3 | 215982.2 | 191486.3 | 176939   | 235915.7 | 115540.1 | 194947   | TRUE |
| 195254.1 | 185805.9 | 265995.4 | 274000.3 | 248139.9 | 270644   | 174604.9 | 210883.5 | TRUE |
| 94145.6  | 86535.9  | 112768.4 | 103602   | 87926.6  | 124698.4 | 81520.8  | 111589.3 | TRUE |
| 42552.2  | 45276.7  | 46663.3  | 67881.3  | 51874.8  | 19139.8  | 10101    | 12641.6  | TRUE |
| 170512.3 | 166677.1 | 160014.2 | 134247.7 | 220170.1 | 170449.5 | 180537.1 | 199184   | TRUE |
| 385336   | 324612.9 | 230108.2 | 246122   | 482276.7 | 452675.3 | 395431.9 | 488053.6 | TRUE |
| 49543.9  | 84192.4  | 81772.7  | 43797.2  | 90696.9  | 31898.6  | 26515    | 30007.5  | TRUE |
| 2164829  | 1519581  | 2412284  | 2415724  | 1948738  | 2626537  | 1515959  | 2098519  | TRUE |
| 347637.7 | 251313   | 470112.7 | 548724.8 | 400059.8 | 541540.7 | 318411.3 | 442062.3 | TRUE |
| 64755.1  | 97917.8  | 85609.6  | 117846.1 | 150490.3 | 45915.8  | 52537.9  | 44012.8  | TRUE |
| 132881.2 | 112912.1 | 146927   | 121626.1 | 120284.8 | 154108   | 129518.4 | 139911.9 | TRUE |
| 1319527  | 1189682  | 1045243  | 972374.9 | 1422082  | 1404573  | 1184943  | 1344177  | TRUE |

|          |          |          |          |          |          |          |          |      |
|----------|----------|----------|----------|----------|----------|----------|----------|------|
| 89881.2  | 77378.5  | 73419.5  | 70713.3  | 69793.8  | 93810.2  | 78946.9  | 115769.4 | TRUE |
| 187827.9 | 116187   | 116919.2 | 160676.6 | 121484   | 163890.6 | 168603.8 | 171848.5 | TRUE |
| 220625.2 | 185075.8 | 140573.2 | 209668.4 | 221962.6 | 223107.9 | 227027.8 | 267605.6 | TRUE |
| 62951.3  | 48497.6  | 61006.5  | 61536.4  | 71414    | 47776.4  | 83042.7  | 89767    | TRUE |
| 82707.7  | 84049.1  | 66480.6  | 90457    | 106038.8 | 56700.1  | 92590.6  | 106256.4 | TRUE |
| 89171.8  | 64928.8  | 74045.6  | 80276.9  | 72398.1  | 80142.5  | 90886.5  | 102746.1 | TRUE |
| 129847.1 | 93739.8  | 122468.2 | 114577.5 | 109560.8 | 161038.7 | 122165   | 145655.2 | TRUE |
| 321035.2 | 285788.4 | 272174.1 | 341484.4 | 287215   | 347187.7 | 384523.3 | 350698.4 | TRUE |
| 207494.7 | 174759.8 | 156429.4 | 184269.1 | 188001.6 | 184630.4 | 197222.7 | 204716.2 | TRUE |
| 105458.5 | 72108.7  | 70409.3  | 99979.3  | 84876.1  | 96096.6  | 97045.8  | 83557.5  | TRUE |
| 295730   | 269156.3 | 261846.1 | 324218.4 | 324618.1 | 263338.9 | 322143   | 318821.2 | TRUE |
| 45524.6  | 45538.6  | 26641.8  | 34750.3  | 47518.7  | 35983.2  | 38660.4  | 54970.3  | TRUE |
| 134022   | 137738.1 | 138633.3 | 117627   | 150288.4 | 124482.1 | 150207.8 | 141653.7 | TRUE |
| 136032.1 | 131535.1 | 137877.1 | 148764.9 | 145830.3 | 159391.8 | 144943.8 | 159033.8 | TRUE |
| 89942.7  | 86529.4  | 82985.9  | 91154.1  | 97827    | 99986.6  | 103350.7 | 104929.6 | TRUE |
| 36786.8  | 46749.2  | 43842.7  | 63057.1  | 41793.4  | 55476.2  | 47729.1  | 64363.9  | TRUE |
| 165533.4 | 133774.7 | 143943.4 | 162120.3 | 149536   | 160295   | 164481.2 | 144551.2 | TRUE |
| 205888.7 | 147147.8 | 197914.8 | 153502.1 | 169368.1 | 320473.8 | 206754.5 | 189835.9 | TRUE |
| 46806    | 50459.6  | 68488.6  | 47076.9  | 42803    | 42295.2  | 72363.7  | 39972.1  | TRUE |
| 111395.5 | 110406.2 | 160777.5 | 124353.1 | 137673.6 | 94075.2  | 77270.8  | 73591.5  | TRUE |
| 80567.5  | 118970.7 | 87376.4  | 107130.1 | 134514.3 | 64653.8  | 55798.2  | 51958.9  | TRUE |
| 57265.1  | 77890    | 88079.9  | 55113.4  | 51002.3  | 84224.3  | 77012.3  | 57538.6  | TRUE |
| 68328.3  | 73780.5  | 131825.8 | 55312.8  | 57827.2  | 210223.8 | 135042.5 | 126628.4 | TRUE |
| 75932.7  | 105088.1 | 86663.9  | 104749.6 | 105102.1 | 94713.8  | 73187.6  | 52232.3  | TRUE |
| 101790.6 | 111328.2 | 115676.4 | 129672.2 | 130001.8 | 117783.7 | 119434.9 | 107908.6 | TRUE |
| 193265.9 | 175518.8 | 185908.2 | 193640.7 | 203787.8 | 300492.3 | 247611.3 | 206977   | TRUE |
| 43020.2  | 57948.2  | 51643.4  | 56618.4  | 58690.9  | 47964.6  | 53803.4  | 53967    | TRUE |
| 70328.6  | 78592.5  | 58069.4  | 83036.3  | 75754.7  | 102950.6 | 92568.6  | 77927.2  | TRUE |
| 155907.3 | 181975.5 | 145454.6 | 172983.2 | 177552   | 147867.4 | 162160.3 | 176496.1 | TRUE |
| 169093.1 | 158024.1 | 141416.6 | 151411.8 | 185379   | 135565.8 | 160487.5 | 193634.5 | TRUE |
| 354028.4 | 355527.9 | 371990.2 | 334216.2 | 383338.1 | 339365.7 | 342913.2 | 325212   | TRUE |
| 155299.4 | 168051.8 | 148102.9 | 146556.4 | 141596.6 | 133634.3 | 165317.3 | 126590.9 | TRUE |
| 680793.3 | 636993.8 | 619925.8 | 737543.7 | 637010.3 | 663368.4 | 630148.3 | 718100.6 | TRUE |
| 70480.4  | 73393.7  | 64119.9  | 76434    | 78126.6  | 90489.3  | 85226.7  | 80186    | TRUE |
| 22893.5  | 10911.9  | 36913.6  | 11203.3  | 20414.6  | 38962.2  | 10070.5  | 24603.9  | TRUE |
| 371678.5 | 251167.9 | 476690.4 | 321150.3 | 403763.3 | 545443   | 336835.4 | 445579.4 | TRUE |
| 62868.6  | 60894.5  | 62252.3  | 55128.4  | 61822.4  | 74073    | 94283.6  | 84305.4  | TRUE |
| 75562.6  | 68575.4  | 53591.1  | 68179.2  | 72882    | 50502.8  | 73941.4  | 61786.2  | TRUE |
| 169783.5 | 129571.4 | 149664.4 | 192312.2 | 162278.2 | 129613.8 | 125534.5 | 149646.1 | TRUE |
| 72310    | 52674.1  | 64059    | 67845.5  | 83079.4  | 54673.8  | 73642    | 72421.4  | TRUE |
| 137063.2 | 109797.4 | 118503.8 | 135515.3 | 131977.5 | 124520   | 118456   | 158663.1 | TRUE |
| 163261.1 | 154960.5 | 159280.2 | 168784.8 | 152246   | 145281.9 | 187213.1 | 170027.1 | TRUE |

|          |          |          |          |          |          |          |          |      |
|----------|----------|----------|----------|----------|----------|----------|----------|------|
| 81642.9  | 61100.3  | 57085.7  | 84230.4  | 69715.1  | 75603.3  | 88711.8  | 95003.7  | TRUE |
| 80844.4  | 81319.5  | 65107.4  | 85382.7  | 79630.7  | 104896.2 | 74771.7  | 119755.8 | TRUE |
| 84497.6  | 122170.9 | 69769    | 111499.4 | 81929.5  | 97285.2  | 72758.9  | 101104.7 | TRUE |
| 279273.9 | 354299.3 | 238551.6 | 377037.8 | 253497.4 | 296450.1 | 328459.6 | 272168   | TRUE |
| 60579.9  | 51113.6  | 50787.2  | 64593.7  | 48522    | 73156.1  | 68232.5  | 61784.8  | TRUE |
| 380524.3 | 348382.1 | 327593.1 | 331432.3 | 353467.1 | 417150   | 480726.4 | 437654.3 | TRUE |
| 392729   | 408256.1 | 291834.5 | 414163.5 | 344062   | 457549.9 | 427115   | 464349.6 | TRUE |
| 30644.8  | 23390.3  | 20383    | 31261.8  | 23807.1  | 25012.5  | 26545.5  | 36682.1  | TRUE |
| 195469.7 | 162901   | 185714.9 | 228140.1 | 203036.6 | 178271.5 | 169915.5 | 212616.5 | TRUE |
| 127812.8 | 111725.2 | 102760.8 | 138476.5 | 127279.2 | 138500.6 | 145775.5 | 132687.1 | TRUE |
| 365602.1 | 313960.8 | 415767.9 | 389238.7 | 332806.4 | 645982.5 | 328167.6 | 580935.7 | TRUE |
| 97204.8  | 97741.3  | 83299.5  | 77627.6  | 100895   | 78575.4  | 113005.7 | 108355.4 | TRUE |
| 144950.6 | 159236.9 | 132054.2 | 131376.8 | 171847.6 | 149152.6 | 142555.1 | 156428.2 | TRUE |
| 71929.8  | 81103.5  | 56689.6  | 73110.7  | 43981.7  | 71444.3  | 72361.3  | 52007.6  | TRUE |
| 195650.1 | 124734.2 | 205143.6 | 160703.6 | 160548   | 144986.7 | 133449.3 | 182900.7 | TRUE |
| 81915.2  | 80808.8  | 64748.3  | 99516.9  | 74806.1  | 95384.3  | 88487.4  | 103732.4 | TRUE |
| 190890.4 | 184818.7 | 132996   | 210789.3 | 215077   | 226416.9 | 267462.6 | 318896.8 | TRUE |
| 34676.5  | 19083.9  | 30391.9  | 37030.1  | 25619.9  | 36069.9  | 24307.8  | 36809.2  | TRUE |
| 102966.7 | 83834.6  | 80168.8  | 89759.9  | 92145.2  | 119042.4 | 130945.9 | 109884.8 | TRUE |
| 24125.8  | 34260.5  | 26910.3  | 43431.8  | 31664.6  | 27746.4  | 29129.6  | 42189.7  | TRUE |
| 40236.4  | 40785    | 41353.8  | 28268.2  | 40166.4  | 36076.5  | 38880.2  | 30734.4  | TRUE |
| 88993    | 92052.2  | 91324.4  | 86722    | 102023.1 | 127865   | 107244   | 115860.5 | TRUE |
| 35680.6  | 37815.6  | 25655.3  | 7405.8   | 39799.1  | 40566    | 36903.3  | 50038.8  | TRUE |
| 224187.7 | 195843.8 | 172953   | 227062.4 | 217378.3 | 185150.1 | 231381   | 181523.4 | TRUE |
| 431908   | 421747.4 | 444557.1 | 477706.4 | 453760.4 | 449008.6 | 475861.7 | 487756.8 | TRUE |
| 71356.4  | 110495   | 68884.1  | 82411.7  | 87300.9  | 69778.7  | 88170.4  | 88774.8  | TRUE |
| 119876.8 | 123007.7 | 94547.6  | 202696.5 | 134944.8 | 130709.4 | 118039   | 153063.4 | TRUE |
| 69041.2  | 56253.8  | 64587    | 49370.4  | 80305    | 62035.1  | 63484    | 78138.5  | TRUE |
| 174668.9 | 183395.1 | 194261.6 | 194618.4 | 172567.7 | 248944.4 | 171619.5 | 231211.9 | TRUE |
| 48886.2  | 53528.3  | 53944.2  | 44336.5  | 50096.4  | 45756.3  | 54209.2  | 29138.9  | TRUE |
| 131686.3 | 152275.6 | 146353.5 | 141312.4 | 193143.5 | 188892   | 166617.9 | 168088.7 | TRUE |
| 44213.4  | 43806.7  | 41923.8  | 42137.8  | 43322.5  | 50342.9  | 33397.5  | 49573.8  | TRUE |
| 61712.1  | 85513.3  | 65718.6  | 62547.9  | 83007    | 81011.6  | 71601    | 89841.1  | TRUE |
| 103013.8 | 80103.2  | 94220.8  | 104776.3 | 91026.4  | 78329.1  | 85404.3  | 67613.1  | TRUE |
| 51036.5  | 48310    | 62843.1  | 54470.8  | 47257.8  | 52397.3  | 54070.6  | 58771.2  | TRUE |
| 44786.2  | 68067.7  | 53933.2  | 61420    | 74099.5  | 37658.5  | 98234.7  | 71478.4  | TRUE |
| 28232.5  | 13007.9  | 19997.5  | 11258.5  | 9143.5   | 15717.2  | 32525.7  | 12967    | TRUE |
| 103057.6 | 89323.7  | 108748.6 | 130512.9 | 80152    | 126165.7 | 95667.1  | 86878.9  | TRUE |
| 133291   | 133417.4 | 159844.2 | 153248   | 116927.5 | 71822.6  | 128238.9 | 80220.6  | TRUE |
| 71922.2  | 58606.5  | 92551.9  | 81414.8  | 62335.7  | 68463.6  | 85892    | 66792.4  | TRUE |
| 312365.4 | 289402.2 | 286781.5 | 390842.5 | 317986.1 | 289615.8 | 318085.1 | 323521.8 | TRUE |

|          |          |          |          |          |          |          |          |      |
|----------|----------|----------|----------|----------|----------|----------|----------|------|
| 166793.4 | 132578.7 | 172700.6 | 177872.3 | 111631.7 | 130647.2 | 151451.1 | 126444.2 | TRUE |
| 205307.1 | 167174.6 | 181949.2 | 193607   | 149808   | 221877.8 | 179347.1 | 199824   | TRUE |
| 121985.9 | 169012.2 | 121293.3 | 145194.9 | 169673.1 | 114073.5 | 154253.5 | 159373   | TRUE |
| 178171.3 | 226952.7 | 86444.5  | 116165.2 | 195913.8 | 96120.9  | 219610.3 | 175665.9 | TRUE |
| 197011.9 | 225649.3 | 165462.4 | 174378.2 | 210110   | 192448.8 | 254852.5 | 212692.3 | TRUE |
| 146821.7 | 145262.5 | 137052   | 167180.1 | 182070.5 | 144092.6 | 167554.9 | 199029.9 | TRUE |
| 146608.6 | 162605.3 | 116556.7 | 170181.6 | 163300.7 | 123947.6 | 198218   | 178424.7 | TRUE |
| 245126.8 | 254836.9 | 260608.3 | 273867.2 | 217672.9 | 244552.1 | 261296.4 | 220322.9 | TRUE |
| 325078   | 405805.7 | 456578.2 | 513721.3 | 253551.7 | 345181.4 | 431007.4 | 328295.5 | TRUE |
| 216757.4 | 257848.7 | 287778.4 | 330376.7 | 154089.4 | 237770.5 | 294673   | 212169.8 | TRUE |
| 133575   | 167051.7 | 86818.6  | 118319.1 | 137687.9 | 101041.7 | 158089.3 | 148119.1 | TRUE |
| 284628.5 | 357366.4 | 159130.8 | 230119.4 | 343563.4 | 178659.8 | 394254.1 | 314261.1 | TRUE |
| 92112.3  | 123235.4 | 41305.7  | 63840.5  | 89893.7  | 59098.9  | 141280.6 | 99157.7  | TRUE |
| 35855.8  | 20229.3  | 19970.2  | 21239.5  | 38894.6  | 20001.2  | 21828.5  | 25310.3  | TRUE |
| 150179.9 | 199887.4 | 105326   | 138329.3 | 179921.5 | 106200.6 | 200501   | 179237.3 | TRUE |
| 196598.1 | 291497.8 | 122518.7 | 171718.4 | 242116.9 | 113783.2 | 308399   | 272297.9 | TRUE |
| 842459.4 | 908351.7 | 1192150  | 1247286  | 622138   | 698323.3 | 983623.6 | 809331.7 | TRUE |
| 113258.1 | 123966.3 | 86506.5  | 92739.8  | 119556.5 | 98536.5  | 118798.6 | 115072.2 | TRUE |
| 42562.8  | 35009    | 25479.9  | 14365.1  | 47362.9  | 39983.2  | 55268    | 32430.2  | TRUE |
| 61327.8  | 103910.5 | 42094.2  | 68804.5  | 92872.8  | 57288.4  | 81334.6  | 89245.8  | TRUE |
| 140704.4 | 168051.1 | 112160   | 154746.2 | 185127.5 | 165846.5 | 182644.6 | 159912.8 | TRUE |
| 255495.9 | 294863.1 | 179995.4 | 205344   | 264774.1 | 171575.6 | 282280.1 | 270183.9 | TRUE |
| 682193.6 | 717885.5 | 764796.7 | 715913.2 | 498020.5 | 673811.1 | 688715.3 | 625157.2 | TRUE |
| 57326.2  | 61137.7  | 49546.7  | 62044.7  | 28096    | 62208.4  | 73552.6  | 64519.4  | TRUE |
| 56854.8  | 76968.3  | 22242.1  | 53312.7  | 73610.9  | 33854.7  | 83577.1  | 68666.4  | TRUE |
| 23589.6  | 44018.3  | 34669.2  | 41748.9  | 6687.8   | 17475.1  | 35682.6  | 12294.2  | TRUE |
| 213327   | 262243.4 | 125421.8 | 173798.1 | 221721.3 | 130782.2 | 251937.1 | 209637.1 | TRUE |
| 406712.6 | 455917.2 | 261805   | 373503.6 | 389297.7 | 273840.6 | 469148.6 | 461606.3 | TRUE |
| 143223.4 | 129792.7 | 116934.9 | 129326.6 | 156514.8 | 127115   | 149665.2 | 168961.8 | TRUE |
| 106820.2 | 119793.5 | 87637.6  | 89924    | 104745.1 | 96776.2  | 120215.4 | 162244.6 | TRUE |
| 68914.9  | 85848.7  | 79785.8  | 92578.6  | 56345.2  | 81506.8  | 111547.8 | 98198.1  | TRUE |
| 309779.1 | 314321.2 | 238867.2 | 326169.8 | 388156   | 235815.2 | 300815   | 352314.7 | TRUE |
| 179011.1 | 163605.2 | 148041.2 | 177888.8 | 180435   | 142249.7 | 195290.5 | 196811.4 | TRUE |
| 41542.8  | 42319.9  | 31976.4  | 58140.3  | 39880.7  | 20963.5  | 9130.2   | 21116.3  | TRUE |
| 450571.6 | 451594.3 | 456642.7 | 419156.8 | 327083.9 | 425897.5 | 492323.4 | 433611.6 | TRUE |
| 360175.5 | 360462.1 | 325713.6 | 329170.9 | 246488.9 | 314425.8 | 415485.6 | 356268.5 | TRUE |
| 2279444  | 2234433  | 1802666  | 2230719  | 2400758  | 1754559  | 2357480  | 2418698  | TRUE |
| 48523.4  | 65913.1  | 43034.7  | 47341.2  | 58260.6  | 42596.6  | 58653.8  | 54405    | TRUE |
| 24535    | 57481.4  | 20784.8  | 19402.7  | 25666    | 20333.1  | 24160    | 27459.9  | TRUE |
| 405009   | 300135.7 | 154929.2 | 285931.6 | 320008.4 | 273265.9 | 338527.3 | 426427.8 | TRUE |
| 699070.7 | 701108   | 559333   | 743800.5 | 780732.7 | 541192   | 786264.9 | 759618   | TRUE |

|          |          |          |          |          |          |          |          |      |
|----------|----------|----------|----------|----------|----------|----------|----------|------|
| 321812.4 | 330263.1 | 241694.3 | 353506.6 | 363812.4 | 252717.8 | 370339.9 | 341450.4 | TRUE |
| 718735.5 | 757059.4 | 841636.1 | 807413   | 599824.7 | 717098   | 769811.1 | 694993   | TRUE |
| 1520512  | 1758636  | 1752186  | 1729584  | 1155968  | 1604102  | 1783757  | 1604899  | TRUE |
| 99924.4  | 116622.6 | 79842.2  | 149251.2 | 93138.2  | 93615.6  | 89577    | 110414.5 | TRUE |
| 308710.2 | 298145.5 | 317156   | 245149.7 | 379077.6 | 300969.9 | 334187.7 | 395398.8 | TRUE |
| 1030008  | 1052558  | 1060637  | 1024370  | 856483.5 | 686176.4 | 1057187  | 732484.4 | TRUE |
| 681277   | 712488.5 | 610578.6 | 662491.2 | 559738.3 | 473020.6 | 726766.5 | 488874.3 | TRUE |
| 135220.2 | 101045   | 113582.5 | 125843.8 | 85282.9  | 161814.8 | 101531   | 147594.6 | TRUE |
| 243988.8 | 250139.9 | 175111   | 212852.3 | 276179.7 | 236646.9 | 251287   | 269295.5 | TRUE |
| 237311.2 | 265847.4 | 212443.3 | 253388   | 192603.2 | 201266.7 | 244939.8 | 204244.3 | TRUE |
| 39809.4  | 46823.8  | 6604.7   | 63565.8  | 43357.5  | 9875.5   | 58812.1  | 67252.8  | TRUE |
| 29570.5  | 10959.4  | 5649.4   | 12825.4  | 37091.2  | 10417.6  | 34722.9  | 40159.8  | TRUE |
| 75782.8  | 82582    | 56138.4  | 90409    | 112730.2 | 68522.6  | 94107    | 107831.4 | TRUE |
| 86555.2  | 63603.9  | 62722.5  | 84771.8  | 107297.1 | 73128.8  | 76798.3  | 93063    | TRUE |
| 57843.6  | 57511.4  | 35252    | 78101.7  | 51751.1  | 52688.8  | 65220.2  | 53892.4  | TRUE |
| 28310.2  | 35364.8  | 20694.1  | 38171.4  | 19589.1  | 28127.5  | 48165.4  | 33005.6  | TRUE |
| 20770.5  | 23901.9  | 21811.8  | 19941.1  | 20274.4  | 40100.8  | 39772.1  | 27347.9  | TRUE |
| 58745.7  | 23553.1  | 40078    | 48889.5  | 44866.2  | 71086.9  | 60973    | 47790.2  | TRUE |
| 309775.6 | 277732.3 | 298482.4 | 288845   | 220236.5 | 332975.8 | 374049.4 | 251423.3 | TRUE |
| 22039.1  | 38584.5  | 23425.7  | 33482.8  | 28235.1  | 28084.7  | 42358.3  | 39265.4  | TRUE |
| 125813.3 | 170768.1 | 125057.4 | 180771.7 | 168411.6 | 136149.4 | 213385.5 | 171805.8 | TRUE |
| 77878.3  | 63134    | 86916.2  | 111024.4 | 72347.9  | 73566.7  | 60435.3  | 63555.1  | TRUE |
| 187710.8 | 151710   | 229496.3 | 219576   | 165010.2 | 171406.3 | 172516.1 | 168932.6 | TRUE |
| 1040673  | 938097.4 | 1245640  | 1553262  | 1001709  | 962860.1 | 968845.1 | 1045950  | TRUE |
| 725758.5 | 648362.7 | 831740.7 | 851911.4 | 751356.8 | 704619.8 | 624773.7 | 743908.4 | TRUE |
| 567056.7 | 391647.2 | 586245.2 | 609979.5 | 554766.6 | 545878.4 | 415456.3 | 484110.8 | TRUE |
| 45162.2  | 12243.8  | 26275.2  | 14675.1  | 22958.4  | 39942.2  | 46199.3  | 19287.7  | TRUE |
| 307503.6 | 383044.7 | 314846.1 | 259699   | 258617.3 | 262633.8 | 296507.4 | 255289.8 | TRUE |
| 327676.3 | 261169.8 | 351717   | 412253.8 | 385374.4 | 319348.8 | 370354.1 | 279069.2 | TRUE |
| 193738.7 | 136989.8 | 147607.7 | 197972.1 | 181873.1 | 181755.6 | 181368.9 | 162766.7 | TRUE |
| 37164.6  | 37351.9  | 33845.6  | 33246.4  | 25525.7  | 35517.6  | 35651.7  | 35900    | TRUE |
| 31683.1  | 42716.2  | 36392.3  | 29259.5  | 26373.9  | 31796.3  | 32950.4  | 24822    | TRUE |
| 127621.5 | 126996.1 | 108783.4 | 110454.1 | 80443.7  | 115064.2 | 150688.9 | 95162.3  | TRUE |
| 664058.7 | 498690.6 | 739465.6 | 724418.4 | 681227.8 | 753379.5 | 511616   | 739252.7 | TRUE |
| 600564.3 | 493623.6 | 531874.4 | 518480.3 | 432863.3 | 495096.8 | 429637   | 507144.4 | TRUE |
| 32081.4  | 26442.4  | 50046    | 57746    | 59858.9  | 35147.3  | 44416    | 55541.6  | TRUE |

|          |          |          |          |          |          |          |          |      |
|----------|----------|----------|----------|----------|----------|----------|----------|------|
| 360124.7 | 422960.4 | 334643.2 | 364611.6 | 322536.2 | 354148.9 | 379121.9 | 295422.7 | TRUE |
| 244895.7 | 279125.7 | 186438.7 | 222424.8 | 186255.5 | 218267.4 | 282586.5 | 192705.7 | TRUE |
| 150330   | 148646.2 | 183519.7 | 175884.8 | 158257   | 182220.8 | 210448   | 127186.1 | TRUE |
| 48729.3  | 116194   | 42399.7  | 93797.6  | 78955.1  | 30036.7  | 28983.7  | 30166.3  | TRUE |
| 127102.5 | 128807.6 | 114012.8 | 113447.6 | 111193.9 | 126940.6 | 125040.8 | 124659   | TRUE |
| 36568.8  | 36363.3  | 37475.4  | 30672.5  | 23332.2  | 29517.4  | 28846.5  | 25966.7  | TRUE |
| 53554.1  | 58311.1  | 53626.8  | 53742.6  | 70772.2  | 58629.8  | 50303.4  | 48968.8  | TRUE |
| 93548.8  | 108761.4 | 122721   | 124330.4 | 106675.9 | 105586.1 | 109609.8 | 97726.6  | TRUE |
| 294922.9 | 215392   | 281962.1 | 315551.8 | 278303.1 | 313838.5 | 293544.7 | 313804.5 | TRUE |
| 98867.4  | 110120   | 117343.6 | 113391.8 | 110245.3 | 102551.3 | 106737.4 | 110366.2 | TRUE |
| 39565.3  | 15477.9  | 36903    | 39476.2  | 49558    | 49817.6  | 50291    | 31428.4  | TRUE |
| 324473.1 | 249717.8 | 281374.6 | 269439.6 | 186870.4 | 306503   | 287854.4 | 246370.3 | TRUE |
| 7654.3   | 12328.9  | 16450.1  | 10221.5  | 7588.3   | 17961.6  | 14346    | 7770.1   | TRUE |
| 213407.5 | 217368.2 | 210252.1 | 240412.3 | 212643.8 | 209329.7 | 225441.2 | 224363.3 | TRUE |
| 48709.8  | 49863.2  | 51148.4  | 69608.3  | 46013.3  | 48234.9  | 51173    | 44779.2  | TRUE |
| 488489.6 | 463017.7 | 525309.6 | 477596   | 480646.4 | 610021.2 | 549440.1 | 516550.6 | TRUE |
| 36397.1  | 47712.9  | 42508    | 58060.1  | 55204    | 28376.4  | 12544.4  | 10842.9  | TRUE |
| 464232.3 | 501134.7 | 612567.6 | 562004.5 | 504431.3 | 447383.5 | 532602   | 517053.6 | TRUE |
| 53004.3  | 95199.6  | 108104.6 | 81415    | 104645.2 | 47205.8  | 72616    | 43111.6  | TRUE |
| 189329.4 | 166687.1 | 159460.1 | 195342.9 | 199980.3 | 153679.2 | 203257.6 | 173715.2 | TRUE |
| 133505.3 | 130534   | 113570.2 | 128153.1 | 141741.1 | 168238.6 | 134257.3 | 154986   | TRUE |
| 19960.6  | 25445.5  | 14453    | 38171.8  | 28728.1  | 46033.3  | 29311.3  | 42167.4  | TRUE |
| 31611.9  | 27032.6  | 22515.1  | 33607.4  | 22308    | 13115.6  | 28142.9  | 35489.5  | TRUE |
| 14609.3  | 4785.7   | 17489.6  | 6402     | 18544.5  | 15761.4  | 23629.2  | 9841.3   | TRUE |
| 175212.4 | 183444.3 | 159020.9 | 187454.4 | 200773.8 | 115901.6 | 200481.2 | 140251.3 | TRUE |
| 23501.5  | 26070.1  | 17060.6  | 30513.7  | 22186.8  | 31396.1  | 15595    | 32032.5  | TRUE |
| 141847.7 | 170705.5 | 130061.1 | 157715.8 | 160891.3 | 130773.4 | 156350.5 | 150472.7 | TRUE |
| 90907.3  | 60273.1  | 63423.7  | 65839.3  | 95963    | 68634    | 76397.7  | 82927.8  | TRUE |
| 282543.3 | 292343.1 | 289315.6 | 332276   | 354681.4 | 270068.4 | 338852.3 | 346208.6 | TRUE |
| 38659.8  | 52536    | 41009.4  | 67961.6  | 58306.9  | 37898.2  | 34254.5  | 33443.5  | TRUE |
| 247681.9 | 203307.5 | 272666.5 | 251808.6 | 213985.2 | 290270.9 | 306965   | 238161.9 | TRUE |
| 292812.7 | 280188.3 | 311614.6 | 332196.6 | 296277.8 | 366602.5 | 299304.2 | 313097.4 | TRUE |
| 1471211  | 1233795  | 1392233  | 1509430  | 1593525  | 1580042  | 1381780  | 1507780  | TRUE |
| 109323.7 | 129422.3 | 156410   | 116539.3 | 133317.5 | 136208.7 | 128317.3 | 97894.7  | TRUE |
| 336358.8 | 288126.7 | 520576.7 | 293568.6 | 205274.7 | 584607.4 | 353106.7 | 254121   | TRUE |
| 386895.2 | 362308.5 | 572151.2 | 337262.6 | 301337.6 | 588274.1 | 374355.5 | 335797.3 | TRUE |
| 45597.1  | 32323.8  | 41023    | 43917.7  | 26752.3  | 64552.2  | 45107.4  | 39308    | TRUE |
| 129846.2 | 113810.6 | 132399.9 | 141175.8 | 106543.2 | 244874.8 | 188354.4 | 141838.3 | TRUE |
| 75409.3  | 67783.9  | 81868.4  | 73490.2  | 71440.7  | 115425.8 | 91490    | 74569.2  | TRUE |
| 179182   | 121979.2 | 163839.5 | 237264.7 | 258638.7 | 178367.2 | 178641.3 | 201218.1 | TRUE |
| 92907.1  | 81407.7  | 121955.7 | 105440.4 | 100546.2 | 130234   | 97362.8  | 109675.9 | TRUE |
| 38154.2  | 51132.3  | 63941.2  | 42164.6  | 40385.7  | 80520.5  | 43748.3  | 27404.8  | TRUE |

|          |          |          |          |          |          |          |          |      |
|----------|----------|----------|----------|----------|----------|----------|----------|------|
| 80142.1  | 88664    | 76616.9  | 81475.8  | 94352.3  | 94206.6  | 73516    | 104919.7 | TRUE |
| 119284.9 | 104281.5 | 138097.7 | 125264.6 | 94480.7  | 144688.3 | 110729.2 | 114188.9 | TRUE |
| 108484   | 134463.4 | 85389.4  | 158404.9 | 97330.4  | 98891.3  | 91752.2  | 92953    | TRUE |
| 10136.1  | 6294.5   | 27923.2  | 6104     | 4727     | 42250.3  | 10682.5  | 11620.4  | TRUE |
| 17301.3  | 30070    | 25338.1  | 31813.5  | 18838.4  | 14754.7  | 13048.4  | 7955.4   | TRUE |
| 38905.5  | 35575    | 40494.5  | 49665.4  | 42453.1  | 60544    | 46666.7  | 42930.9  | TRUE |
| 64010.6  | 32364.7  | 50698    | 60057.1  | 95022.3  | 67996.3  | 48363.9  | 43099.3  | TRUE |
| 83908.5  | 90125.5  | 103888.3 | 87258.2  | 69292.7  | 121522.1 | 88930    | 79515.5  | TRUE |
| 60357.2  | 48555.2  | 76332.2  | 49067.9  | 30079.5  | 82259.1  | 54382.8  | 45578.7  | TRUE |
| 141995   | 110883.7 | 161135.5 | 106987.8 | 89546    | 170043.5 | 126566.3 | 102607.8 | TRUE |
| 90649.4  | 117913   | 166781.6 | 90472.9  | 90859.2  | 166957.4 | 115799.9 | 91498.6  | TRUE |
| 86382.7  | 90778.5  | 141571   | 100962.4 | 109835.3 | 183018.8 | 99451.6  | 87860.4  | TRUE |
| 146606.1 | 137994.3 | 141710.2 | 145970.9 | 183880.2 | 126202.9 | 139619.2 | 138441.7 | TRUE |
| 252012.6 | 199878.5 | 262221.5 | 282134.1 | 318513.1 | 217041.6 | 209404.1 | 246130   | TRUE |
| 134376.3 | 130941.9 | 177940.6 | 125759.4 | 108902.7 | 172798.5 | 124022.1 | 100863.6 | TRUE |
| 251620.8 | 225158.1 | 204682.1 | 122332.5 | 206739.2 | 332035.9 | 246459.5 | 293276.7 | TRUE |
| 223108   | 214453.7 | 310992.4 | 165038.1 | 132456.6 | 304515.5 | 184306.3 | 137147.7 | TRUE |
| 316108.3 | 229086.1 | 316561.3 | 281555.4 | 583614.4 | 232391.3 | 221450.5 | 279653.8 | TRUE |
| 552384.8 | 491561   | 226041.1 | 283767.4 | 333523.9 | 239148.1 | 320871.2 | 336101.7 | TRUE |
| 188403.9 | 166658.1 | 141648   | 162821.2 | 180217.7 | 175436.6 | 149085.7 | 216547.6 | TRUE |
| 1259148  | 1110632  | 1095723  | 1287075  | 1448766  | 1139313  | 1347809  | 1360983  | TRUE |
| 545390.2 | 454267.8 | 458073.5 | 601168   | 703280.7 | 496454.9 | 582820.6 | 627455.7 | TRUE |
| 3239014  | 2612403  | 2847179  | 3583256  | 4176361  | 2814338  | 3175647  | 3704158  | TRUE |
| 8965578  | 7809455  | 6761462  | 9006946  | 10783968 | 7302024  | 7812782  | 10497432 | TRUE |
| 360779.9 | 320770.2 | 303918   | 341295.7 | 421259.7 | 314169.7 | 365538.7 | 429220.9 | TRUE |
| 240570   | 216099.7 | 205772.8 | 261105.2 | 286125.9 | 211106.5 | 229528.6 | 285278   | TRUE |
| 84064.8  | 83354.2  | 54624.4  | 88040.2  | 94254.2  | 71334.8  | 86448.5  | 79006.9  | TRUE |
| 118478.4 | 122646.4 | 145541.9 | 140432.2 | 117506.5 | 168364.9 | 123264.1 | 116981.8 | TRUE |
| 29124.4  | 24848.6  | 27107.1  | 28007.5  | 36582.9  | 28260.1  | 29483.4  | 25055.3  | TRUE |
| 48542.9  | 53742.6  | 39498.4  | 41932.4  | 53313.4  | 34857.4  | 53651.9  | 51770.3  | TRUE |
| 69755.5  | 69385.5  | 39127    | 82294.9  | 69646.2  | 46143.9  | 58239.8  | 88286.8  | TRUE |
| 28963.7  | 21081.6  | 27663.6  | 29450.3  | 31637.9  | 22029.6  | 37513.4  | 29489.3  | TRUE |
| 45964.6  | 47598    | 22923.4  | 34795.1  | 33607.8  | 35474.9  | 26873.5  | 33762.9  | TRUE |
| 47702.4  | 46042.9  | 33465.2  | 42804.5  | 47257.6  | 42072.4  | 51567.3  | 56595.6  | TRUE |
| 489318.4 | 422985.4 | 391269.4 | 536259.2 | 609208.3 | 427703.6 | 423445.1 | 573347.8 | TRUE |
| 393766.7 | 391538   | 342893.8 | 461999.4 | 565758.2 | 388826.2 | 434126.2 | 511238.7 | TRUE |
| 75927    | 819139.3 | 2694595  | 59770.8  | 221336.3 | 27608.4  | 28399.1  | 15781.4  | TRUE |
| 309263.8 | 315825   | 229275.1 | 327994.2 | 358634.6 | 274417.1 | 329813.4 | 363810.8 | TRUE |
| 23448.9  | 28131.7  | 41184.1  | 28483.6  | 33713.3  | 23054    | 13112.7  | 31073.4  | TRUE |
| 20574.5  | 45817.2  | 91584    | 43918.5  | 34278.8  | 24523.9  | 11659.6  | 26922.6  | TRUE |
| 11069.7  | 30682.8  | 57041.2  | 9439.6   | 13182.2  | 11055.2  | 9872.5   | 11192.6  | TRUE |
| 469348.7 | 1659376  | 1585336  | 1742589  | 2410576  | 130995.9 | 106053.2 | 197683.5 | TRUE |
| 355441   | 1280546  | 1152812  | 1057669  | 1564406  | 100690.1 | 56291.3  | 145519.6 | TRUE |
| 25719.6  | 31865    | 35577.3  | 30212    | 41523    | 7599.7   | 9962.8   | 5853.5   | TRUE |
| 37881.2  | 64426.1  | 125447.5 | 71562.3  | 97710.4  | 22389.9  | 34664.5  | 32621    | TRUE |
| 211187.2 | 212392.1 | 158443.9 | 247662   | 257118.8 | 176829.6 | 186499.3 | 227373.5 | TRUE |
| 90371.9  | 68491.3  | 61933.5  | 92410.3  | 104780.8 | 80475    | 102995.3 | 106101.5 | TRUE |

|          |          |          |          |          |          |          |          |      |
|----------|----------|----------|----------|----------|----------|----------|----------|------|
| 52969.9  | 36593.8  | 25787.8  | 48499.3  | 38091.4  | 43579.4  | 60644.5  | 51113.4  | TRUE |
| 121468.5 | 68285.2  | 65405.3  | 79067.3  | 86298.8  | 100307.3 | 99814.3  | 100946.9 | TRUE |
| 114382.4 | 102129.3 | 112935.2 | 154534.3 | 143750.9 | 115069.8 | 151333.7 | 180246.8 | TRUE |
| 91759.6  | 118004.1 | 99630.4  | 80457.3  | 80963    | 109584   | 117612.6 | 102734.1 | TRUE |
| 10024.9  | 49872.5  | 53584    | 31687.3  | 35790.9  | 9416.9   | 11747.9  | 8367.7   | TRUE |
| 44644.8  | 91491.6  | 60242.5  | 58825.2  | 61186.5  | 19090.4  | 32082    | 30313.5  | TRUE |
| 38562.3  | 29011.4  | 39047.8  | 29033.9  | 34389.5  | 30754.4  | 40953.3  | 49152.2  | TRUE |
| 260906.3 | 217722.2 | 219722.7 | 227217.4 | 195305.3 | 297019.1 | 334579.4 | 300564.3 | TRUE |
| 27020.7  | 41866.9  | 35142.5  | 26349.2  | 33496.2  | 34938.5  | 43368.4  | 45912    | TRUE |
| 73366.1  | 73526.9  | 83353.7  | 71798.5  | 67209.6  | 103850   | 99952    | 75187.7  | TRUE |
| 29180.9  | 30273.2  | 11011.2  | 9732.9   | 26933.4  | 37425.4  | 40746.9  | 48306.7  | TRUE |
| 48682.7  | 39392.2  | 37644.1  | 35156    | 29615.4  | 62014    | 49494.4  | 54042.5  | TRUE |
| 6009.2   | 23277.2  | 13461.6  | 16033.3  | 6487.2   | 14611.5  | 22308.5  | 32388.8  | TRUE |
| 10399078 | 8851684  | 7930023  | 10916191 | 11371187 | 8618143  | 9167938  | 11216165 | TRUE |
| 148055.5 | 131710.2 | 125479.6 | 171118.7 | 172389.9 | 126544.8 | 172039.9 | 192524.6 | TRUE |
| 14479186 | 15771362 | 11103975 | 13610980 | 12021413 | 15351588 | 15905153 | 16752789 | TRUE |
| 53060.2  | 13738.2  | 10428.1  | 14033    | 142080   | 2225.7   | 19017.8  | 21654.3  | TRUE |
| 57328.6  | 31478.5  | 131848.8 | 33110.3  | 24369.3  | 140593.4 | 33713.3  | 36747.4  | TRUE |
| 113202.9 | 188657.7 | 139854.9 | 204382.5 | 333108.7 | 77955.3  | 63212.4  | 90386.5  | TRUE |
| 340523.8 | 197111.8 | 189079.1 | 201219.1 | 295519.4 | 260873.8 | 209046.2 | 274485.2 | TRUE |
| 226645   | 187541.1 | 166536.2 | 174230.8 | 322833   | 231823   | 168986.3 | 215612.8 | TRUE |
| 21689.6  | 50598.7  | 31957.8  | 80480.5  | 100838.2 | 7948.8   | 18421.8  | 15633.2  | TRUE |
| 77913    | 193893.3 | 104733.9 | 182248.4 | 236364.9 | 65051.7  | 75041.1  | 58889.6  | TRUE |
| 101241.3 | 91572.8  | 73077.2  | 97041.3  | 102318.7 | 105339.6 | 122524   | 166618.6 | TRUE |
| 116231.7 | 122902.2 | 66659.6  | 80215.9  | 91579.9  | 121823.9 | 121127.4 | 124582.3 | TRUE |
| 60539.7  | 88051    | 62128    | 83294.6  | 85831.7  | 46522.1  | 55539.7  | 50352.7  | TRUE |
| 76151.1  | 74617.4  | 63344.9  | 82006.1  | 57555.1  | 92117.5  | 98713.4  | 105909.7 | TRUE |
| 102695.5 | 85791.6  | 96154.6  | 90329.2  | 105281.5 | 114761.5 | 81683.5  | 97341.5  | TRUE |
| 1603718  | 1379237  | 1214533  | 1510341  | 1423744  | 1246167  | 1255169  | 1334690  | TRUE |
| 203021.1 | 180179.5 | 149126   | 207474.3 | 220740.6 | 187223.6 | 196352   | 208957.2 | TRUE |
| 3729258  | 3559142  | 3373490  | 3535662  | 3218303  | 3601086  | 3645911  | 3377624  | TRUE |
| 22306.8  | 28157.7  | 18391.5  | 15090.4  | 16782    | 16652.6  | 48336.6  | 6329.4   | TRUE |
| 64655.9  | 60415.8  | 69554.7  | 35918.6  | 58266.2  | 53356.7  | 61696.3  | 47166.3  | TRUE |
| 539004.8 | 551002.1 | 559907.2 | 520511.8 | 553533.7 | 440086.6 | 502352.1 | 486345.2 | TRUE |
| 557210.9 | 626608.8 | 433470.7 | 500282.3 | 411511.8 | 378549.8 | 464814.6 | 461917.4 | TRUE |
| 423432.7 | 466437.2 | 368800.8 | 436381.4 | 453383.5 | 344166.5 | 412015.5 | 440462.2 | TRUE |
| 1292427  | 1288183  | 982714.3 | 1193427  | 1274103  | 1005817  | 1165782  | 1360807  | TRUE |
| 71063.3  | 75326.1  | 72638.6  | 62065.9  | 73868.7  | 82945    | 73018.4  | 75170.6  | TRUE |
| 144974   | 126539.3 | 153367   | 118047.5 | 197264.3 | 182789.2 | 176550.5 | 179065.1 | TRUE |
| 40497.5  | 80389.2  | 72920.3  | 119338.5 | 167635.4 | 42996.8  | 44895    | 42305.1  | TRUE |



|          |          |          |          |          |          |          |          |      |
|----------|----------|----------|----------|----------|----------|----------|----------|------|
| 43640.2  | 45015.6  | 54892.4  | 54968.6  | 64709.9  | 49846.3  | 120281.4 | 100076.4 | TRUE |
| 79631.4  | 180419   | 134362.3 | 213626.8 | 139977.3 | 54647.8  | 73677    | 71055.6  | TRUE |
| 76163.8  | 91602.3  | 84120.5  | 94786    | 142623.3 | 82713.9  | 87269.5  | 105556.2 | TRUE |
| 646460.1 | 637191.5 | 805303.9 | 1007079  | 1301449  | 870961.5 | 882091.2 | 876603.3 | TRUE |
| 6290429  | 5887772  | 8850653  | 9962087  | 14407355 | 9031261  | 8550403  | 10464185 | TRUE |
| 36591.4  | 44826.8  | 40286.1  | 56059.8  | 56050.9  | 43226.9  | 52660.9  | 40550.8  | TRUE |
| 103572.8 | 119234   | 113614.7 | 118136.5 | 177204.6 | 111947.9 | 121348.4 | 108391.9 | TRUE |
| 732443   | 968501.9 | 814324.5 | 848911.3 | 1132652  | 808644   | 926222.5 | 903265.2 | TRUE |
| 102886.3 | 151307.4 | 140662.9 | 145944.6 | 167653.3 | 116304.6 | 143736.2 | 128695.6 | TRUE |
| 331945.3 | 430606.9 | 426668.4 | 407027.1 | 532709.5 | 366855.1 | 413161.3 | 402877.8 | TRUE |
| 204743.5 | 257698.8 | 238422.7 | 234704.1 | 387234.7 | 200180.8 | 269237.2 | 258682.4 | TRUE |
| 140472.1 | 159941.3 | 142840.7 | 171613.7 | 208991.3 | 147467.9 | 143069.2 | 150134.4 | TRUE |
| 78847.7  | 122142.8 | 107238.4 | 90248.2  | 109878.2 | 83778.6  | 85201.7  | 97873.4  | TRUE |
| 64655    | 73831.9  | 70624.7  | 87284.3  | 75180.6  | 88731.7  | 72040.1  | 70577.2  | TRUE |
| 172897.2 | 129755.5 | 126440.1 | 128233.2 | 162167.5 | 164944.3 | 176225.4 | 225032.9 | TRUE |
| 205395.9 | 185947.7 | 175797.5 | 183601.2 | 168789.9 | 213231.1 | 221050.2 | 257503.8 | TRUE |
| 327289.9 | 309392.9 | 275454.5 | 258939.7 | 243625.6 | 368467.9 | 398589   | 355610   | TRUE |
| 84853.3  | 109317.3 | 100359.5 | 114181.4 | 76200.6  | 70495    | 112689.2 | 84840    | TRUE |
| 642169.9 | 768085.8 | 627905.7 | 617564.5 | 506405   | 678786.6 | 754379.7 | 561786.9 | TRUE |
| 1353471  | 1906228  | 1357872  | 1888842  | 1470307  | 1425436  | 2155488  | 1079717  | TRUE |
| 1049138  | 1519558  | 969489.7 | 1551649  | 1241310  | 1256206  | 1847835  | 963719.7 | TRUE |
| 62142.5  | 78304    | 65823.9  | 82580.7  | 67379.3  | 59704.8  | 95335.7  | 56874.6  | TRUE |
| 117696.4 | 140491.1 | 116953.8 | 140033.2 | 109538.3 | 93725.7  | 117277.3 | 102544.4 | TRUE |
| 140704.2 | 120264.3 | 128392.6 | 169047.4 | 148868.5 | 163459.7 | 176746.5 | 189856.8 | TRUE |
| 95918.2  | 93766.3  | 59250.3  | 84543.4  | 116094.9 | 72618    | 70587.2  | 96066.7  | TRUE |
| 64777.6  | 34064.4  | 31404.1  | 43439.3  | 53351    | 32369.7  | 34319.5  | 36861.4  | TRUE |
| 212952.7 | 169613.9 | 93746.3  | 192127.8 | 175472.2 | 132610.5 | 126980.8 | 155500   | TRUE |
| 1301842  | 1140744  | 1284247  | 1532654  | 1623849  | 1315875  | 1488533  | 1453762  | TRUE |
| 927458.3 | 977728.8 | 777300.9 | 982730.3 | 1189710  | 860434.5 | 1180332  | 1271180  | TRUE |
| 358945.2 | 292244.6 | 281664.4 | 393447.1 | 449172.5 | 314367.9 | 373511.8 | 449666.4 | TRUE |
| 39598.9  | 35653.9  | 18182    | 36153.7  | 31899.7  | 24184    | 34992.7  | 17736.3  | TRUE |
| 90991.1  | 96053.5  | 86558.8  | 116869   | 122504.2 | 79869.6  | 107609   | 111763   | TRUE |
| 140691   | 132742.9 | 132256.7 | 170484.8 | 202836.5 | 126499.1 | 163932.9 | 186559   | TRUE |
| 103062.7 | 208550.7 | 147430.3 | 172362.9 | 217610.7 | 82174.8  | 74576.4  | 102356.2 | TRUE |
| 78132.8  | 269285.4 | 172533.3 | 225454   | 313219.3 | 33331.9  | 38777.8  | 45924.2  | TRUE |
| 133546   | 87796.2  | 102286.5 | 160412.7 | 142499.2 | 117439.1 | 93560.2  | 136943.5 | TRUE |
| 30546.6  | 62672.9  | 50047.1  | 81773    | 95150.5  | 25128.5  | 38022.6  | 66404.2  | TRUE |
| 134659.7 | 131518.8 | 115497.1 | 158063   | 185715.1 | 102611.6 | 115834.5 | 118789.7 | TRUE |

|          |          |          |          |          |          |          |          |      |
|----------|----------|----------|----------|----------|----------|----------|----------|------|
| 261755.4 | 262524.3 | 152572.7 | 321175.2 | 318626.2 | 202981.8 | 261735.7 | 306204.1 | TRUE |
| 41735.4  | 68558.7  | 59555.8  | 45137.2  | 99479.8  | 33755.5  | 42767.6  | 60714.8  | TRUE |
| 158309.1 | 100728.4 | 76707.2  | 125693.4 | 136931.9 | 132746.8 | 161235.7 | 169746.6 | TRUE |
| 107210.3 | 104962.3 | 86660.4  | 114796   | 98873.1  | 107744.8 | 131525.1 | 112142.1 | TRUE |
| 56500.7  | 29761.2  | 45031.3  | 65116.2  | 71625.4  | 52184.5  | 41190.8  | 61737.8  | TRUE |
| 105837.5 | 113547.2 | 99987.6  | 114294.4 | 120347.1 | 129874   | 115648   | 136108.2 | TRUE |
| 79512.4  | 236905   | 170228.4 | 207830.5 | 204446.2 | 47382.3  | 47430.2  | 58682.9  | TRUE |
| 132964.8 | 89420    | 108189.6 | 131883.2 | 102556.4 | 169976.1 | 124889.6 | 174036.8 | TRUE |
| 71111.3  | 73330.1  | 61526.1  | 67851.9  | 89729.3  | 53253.4  | 80803.3  | 88143.8  | TRUE |
| 382263.9 | 295318.8 | 255155.3 | 363195.9 | 437477.5 | 316746.8 | 358230.3 | 425853.6 | TRUE |
| 174981.2 | 136508.4 | 116740.6 | 145970.3 | 188036.7 | 132143.8 | 164270.7 | 178400.2 | TRUE |
| 48099.2  | 36510.3  | 50258.8  | 54192.5  | 57263.9  | 47600.7  | 45884.9  | 47246.8  | TRUE |
| 21120.9  | 58024.2  | 31591.4  | 45324    | 62907.8  | 13498.1  | 9880     | 8119.5   | TRUE |
| 273558.9 | 251410.4 | 184196.5 | 236590.3 | 253822.7 | 206022.3 | 190687.8 | 252430.9 | TRUE |
| 2262705  | 1883433  | 1676055  | 2294160  | 2441153  | 1795905  | 1966929  | 2376721  | TRUE |
| 329710   | 305817.7 | 267096.3 | 374379.4 | 450251.7 | 296983.4 | 364625.1 | 423174.2 | TRUE |
| 8126712  | 7193874  | 5896872  | 8386989  | 8551197  | 6349380  | 7463711  | 9158654  | TRUE |
| 531698.4 | 471193.7 | 478163   | 553269.8 | 618996.9 | 505308.3 | 515411.3 | 616481.3 | TRUE |
| 1072620  | 1278077  | 806944.1 | 1025250  | 1317023  | 888882.8 | 1167985  | 1330577  | TRUE |
| 1037622  | 1120874  | 792990.7 | 950405.7 | 1212597  | 788345.9 | 959720.9 | 1143078  | TRUE |
| 190425.6 | 167889.4 | 166662.8 | 191440.1 | 206335.4 | 180979.4 | 170932.9 | 199900.8 | TRUE |
| 326980.1 | 275337   | 289749.5 | 315095.4 | 355435.2 | 308556.5 | 322906.2 | 346438.7 | TRUE |
| 268612.4 | 233257.2 | 252252.8 | 276885.7 | 272189.1 | 272044.6 | 270131.6 | 268063.3 | TRUE |
| 231864.9 | 219101.6 | 159756.8 | 293816   | 296140.4 | 242390.3 | 387799   | 281033.4 | TRUE |
| 61695.1  | 56929.8  | 68242.3  | 61626.6  | 87046.4  | 54509.6  | 72624.6  | 95676.6  | TRUE |
| 511310.1 | 544074   | 356790   | 592751.5 | 824180.5 | 481818   | 734207.5 | 926000.5 | TRUE |
| 151423.1 | 163589.3 | 136358.1 | 135001.2 | 204479.7 | 111421.1 | 207632.3 | 269496.5 | TRUE |
| 107814.7 | 77068.4  | 60121.7  | 61759.7  | 94815.5  | 49290.1  | 71523.6  | 72024    | TRUE |
| 1803211  | 1753315  | 1512848  | 1542652  | 1470319  | 1493339  | 1626306  | 1535742  | TRUE |
| 54008    | 47081.5  | 49265.2  | 44404.2  | 45011.4  | 56751.5  | 57784.9  | 60583.7  | TRUE |
| 146318.6 | 152388.6 | 160740.9 | 87697.5  | 114793.6 | 147340.7 | 123765.1 | 134354.1 | TRUE |
| 1995847  | 1863214  | 2078540  | 2047869  | 1491598  | 1845309  | 1726562  | 1810123  | TRUE |
| 235896.3 | 248026.9 | 195371.8 | 199334.1 | 197672.7 | 249237.8 | 223383.8 | 259792.1 | TRUE |
| 780863.4 | 754455.4 | 679539.1 | 741125.5 | 600014.4 | 800352.1 | 724727.5 | 739527.4 | TRUE |
| 2452541  | 3023568  | 2201340  | 2312774  | 1916202  | 2529002  | 2654791  | 2312639  | TRUE |
| 5429475  | 5829584  | 4983933  | 5373557  | 4559362  | 5795198  | 5876313  | 5110556  | TRUE |
| 1770061  | 1932698  | 1488855  | 1575898  | 1453841  | 1900903  | 2019563  | 2028240  | TRUE |
| 967801.1 | 1190321  | 861213.6 | 790279.3 | 835153.1 | 971098.8 | 1054669  | 980081.3 | TRUE |
| 2392277  | 2627362  | 1978037  | 2147706  | 1932132  | 2445755  | 2444989  | 2369833  | TRUE |
| 696845.8 | 757244.5 | 644756.1 | 710568.8 | 568311.4 | 787115.3 | 786120.3 | 817555.1 | TRUE |

|          |          |          |          |          |          |          |          |      |
|----------|----------|----------|----------|----------|----------|----------|----------|------|
| 314666.4 | 324027.5 | 269060.5 | 284376   | 221621.6 | 346953   | 325798.6 | 333230.9 | TRUE |
| 322942.4 | 311306.2 | 260389.9 | 312794   | 244213.3 | 363882.8 | 305892.2 | 339975.7 | TRUE |
| 129009   | 124024.4 | 93869.8  | 114474.3 | 116610.6 | 156931   | 166118.2 | 176993.7 | TRUE |
| 124758.6 | 469045.5 | 244757.9 | 285568.3 | 210310.6 | 100858.4 | 98083.7  | 79473.7  | TRUE |

|         |         |         |          |         |         |         |         |      |
|---------|---------|---------|----------|---------|---------|---------|---------|------|
| 25097.1 | 9662.7  | 21446.9 | 10829.2  | 18419.6 | 20602.4 | 12253.8 | 41251.1 | TRUE |
| 22185.9 | 7903    | 9193.4  | 10039.3  | 10076.4 | 15075.4 | 8316.2  | 17615.9 | TRUE |
| 35236.1 | 40358.4 | 31186   | 37701.2  | 39358.7 | 36533.8 | 37247.7 | 41716.6 | TRUE |
| 57286.9 | 61980.5 | 56087.9 | 52626.9  | 49046.4 | 52594.8 | 52931.7 | 50444.2 | TRUE |
| 76082.3 | 67134.3 | 68733.5 | 101474.6 | 85012.7 | 78540.5 | 93537.6 | 79268.8 | TRUE |
| 35817.3 | 33646.5 | 23353.9 | 34765    | 38881.3 | 32190.5 | 36018.4 | 27654.3 | TRUE |
| 29009.5 | 25467.6 | 38117.1 | 30786.2  | 27873.5 | 27032.7 | 20405.2 | 23483.6 | TRUE |
| 67858.1 | 79524.3 | 64523.5 | 124726.2 | 74435.5 | 56559.8 | 53979.6 | 67782.2 | TRUE |
| 34958.8 | 42954.5 | 32331.4 | 40769.9  | 28352.2 | 35518.8 | 30231.3 | 35021.4 | TRUE |
| 60722   | 56921.7 | 56886.4 | 46649.5  | 61968.6 | 49579.2 | 43842.8 | 70771.5 | TRUE |
| 42930.5 | 53974.7 | 48052.4 | 56456.2  | 54390.7 | 59209.1 | 39859.1 | 62781.3 | TRUE |
| 44842.7 | 42000.7 | 42437.6 | 40454    | 49924.5 | 43848.4 | 38010.5 | 43848.1 | TRUE |
| 25343.5 | 19660.9 | 32053.7 | 31703.4  | 35005.5 | 27761.7 | 27865.7 | 34428.2 | TRUE |
| 38053.9 | 35127.9 | 39345.6 | 33834.6  | 35868.7 | 48000.3 | 32043   | 38476.3 | TRUE |
| 32077.2 | 33462.6 | 35579.1 | 27010.4  | 32667.2 | 33250.3 | 27882.2 | 26176.6 | TRUE |
| 32218.7 | 22562.9 | 15241.9 | 22612.8  | 24833.6 | 28292.8 | 12405.1 | 28492.3 | TRUE |
| 52093   | 57599.3 | 69923.4 | 31749.5  | 49890.9 | 67960   | 54875.8 | 48704.8 | TRUE |
| 26476.9 | 24433.1 | 23965.5 | 26692.2  | 20054.6 | 37266.1 | 33046   | 20871.4 | TRUE |
| 20354.7 | 11636.5 | 22034.8 | 27931.5  | 20880.9 | 25552.2 | 12143.1 | 31145.8 | TRUE |

|         |         |          |          |          |          |          |          |      |
|---------|---------|----------|----------|----------|----------|----------|----------|------|
| 280642  | 226285  | 208438.4 | 257184.7 | 298242.2 | 270824.6 | 228843.1 | 296905.9 | TRUE |
| 49021.9 | 53032.2 | 37405.8  | 51833    | 43660.6  | 43479.1  | 47371.5  | 45792.7  | TRUE |
| 40812.8 | 27067.8 | 43528.4  | 34396.7  | 33742.1  | 39819.6  | 44191.5  | 43947.2  | TRUE |
| 44746.8 | 42152.2 | 45877.1  | 43553.8  | 42888.3  | 46339.4  | 47632.8  | 43054.9  | TRUE |
| 77422.4 | 57744.7 | 74166.7  | 74170.8  | 85960    | 71163.7  | 67482.3  | 82715.9  | TRUE |
| 22711.1 | 25467.6 | 30427.6  | 24228.6  | 23932    | 33159.8  | 23458.2  | 28801.3  | TRUE |

|          |          |          |          |          |          |          |          |      |
|----------|----------|----------|----------|----------|----------|----------|----------|------|
| 56397.7  | 52960    | 48738    | 41011.5  | 44928.6  | 54919.3  | 38721.2  | 44872.4  | TRUE |
| 76763.1  | 87180.5  | 64716.9  | 73902.7  | 67855.3  | 72958.8  | 83692.9  | 88707.5  | TRUE |
| 377744.5 | 362381.6 | 354656.3 | 428970.3 | 476171.8 | 350022.8 | 376944.4 | 458754.4 | TRUE |

|          |          |          |          |          |          |         |          |      |
|----------|----------|----------|----------|----------|----------|---------|----------|------|
| 41604.8  | 39594.6  | 55370.1  | 55239.3  | 49377.5  | 49663.6  | 45251.5 | 54059.3  | TRUE |
| 84885.3  | 92869.1  | 75764.6  | 123312.4 | 124187.9 | 89303.3  | 75059.8 | 97761.1  | TRUE |
| 401484.8 | 284873.8 | 307532.7 | 359970.2 | 425446   | 303110.6 | 339052  | 389685.8 | TRUE |
| 78918.8  | 58611.9  | 70818.9  | 72066.1  | 81329.7  | 53404.1  | 73682.3 | 75444.7  | TRUE |

|          |          |          |          |          |          |          |          |      |
|----------|----------|----------|----------|----------|----------|----------|----------|------|
| 56897.2  | 67036.6  | 47801.9  | 46372.8  | 54492.6  | 37450.8  | 61969.8  | 50067.7  | TRUE |
| 51244.4  | 34601.9  | 34231.3  | 51379.8  | 35471.8  | 37052.4  | 28959.6  | 37593.9  | TRUE |
| 67652.5  | 70825.5  | 62042.8  | 71135.4  | 68030.8  | 50135.9  | 61320.6  | 60500.7  | TRUE |
| 31434.4  | 9028.1   | 21034.4  | 27031.5  | 34237.9  | 22399.9  | 13772    | 32694.8  | TRUE |
| 39293.4  | 40149.5  | 33487.3  | 39371.1  | 35897.2  | 32683.9  | 34542.9  | 30256.7  | TRUE |
| 507819.4 | 474924.1 | 390213.1 | 542069.1 | 503596.1 | 437770.7 | 445391.9 | 523746.2 | TRUE |
| 74453.5  | 67002.1  | 67455.3  | 73399.9  | 76774.6  | 64170.7  | 72953.1  | 79046.8  | TRUE |
| 101600.5 | 89894    | 89075.7  | 113265.6 | 86729.1  | 111044.3 | 111607.7 | 123649.5 | TRUE |
| 60845.4  | 71523    | 46663.2  | 50208.6  | 70101.1  | 52946.9  | 53959.2  | 58718    | TRUE |
| 97739    | 86972.4  | 92655.5  | 110567   | 106465.3 | 105114.5 | 65412.6  | 121128.1 | TRUE |
| 37460.6  | 38278.8  | 41327.2  | 36705    | 37292.9  | 39267.8  | 33189.3  | 40894.7  | TRUE |
| 151523   | 203378.7 | 130625.8 | 194655   | 155380.9 | 127042.7 | 162524.6 | 154206.2 | TRUE |
| 212783.6 | 202508.2 | 190132.5 | 244559.7 | 255294.2 | 180418.6 | 184610.4 | 253593.8 | TRUE |
| 26364.7  | 5812.8   | 19283.4  | 11482.8  | 21393.8  | 20021.9  | 24370.5  | 9018.6   | TRUE |
| 44320.5  | 41770    | 28198.2  | 31604.1  | 30257.7  | 33950.9  | 34766.5  | 34149.8  | TRUE |
| 118129.8 | 103753.7 | 87806.4  | 115400.1 | 117028.6 | 86484.4  | 95237.5  | 107213.6 | TRUE |
|          |          |          |          |          |          |          |          |      |
| 195312.6 | 157145.3 | 273227.5 | 211159.1 | 176267.9 | 249448.4 | 173119.9 | 193618.1 | TRUE |
| 47416.4  | 36009.3  | 43288    | 46359.7  | 49872.2  | 39693    | 58188.1  | 53087.7  | TRUE |
| 187055.9 | 125402.7 | 180237.1 | 172896.6 | 196959.9 | 180425.9 | 155270   | 202475.8 | TRUE |
| 110322   | 80094.1  | 98575.2  | 113113.8 | 113687.1 | 88866.1  | 107601.6 | 123735.9 | TRUE |
| 65754.8  | 86108.6  | 57216.7  | 97487.7  | 58805.1  | 63968.7  | 56566.4  | 75305.7  | TRUE |
| 54560.1  | 50854.7  | 51319.8  | 66864.8  | 51720.5  | 66043.1  | 42656.9  | 50322.3  | TRUE |
| 27472.9  | 21926.7  | 29271.1  | 29948.7  | 33715    | 26950.4  | 28247    | 30288.6  | TRUE |
| 897535.3 | 944104   | 886979.1 | 914520.9 | 1103734  | 795563.3 | 818692   | 1114650  | TRUE |
| 81758.9  | 58399.1  | 74802    | 85317.2  | 83976.7  | 58523.9  | 68990.8  | 85715    | TRUE |
| 94650.1  | 88796.8  | 64059.7  | 53097.8  | 74530    | 61984.7  | 70914.3  | 74254.1  | TRUE |
| 44409.4  | 38657    | 37987.4  | 51445.4  | 51883.2  | 46438.2  | 41107.5  | 69372.9  | TRUE |
| 48792.3  | 46100.9  | 53377.8  | 38935.4  | 53781.7  | 47320.2  | 44333.3  | 40985.2  | TRUE |
| 62096.1  | 71621.4  | 59747.5  | 44432.8  | 58884.3  | 66684.6  | 46017.1  | 63154.6  | TRUE |
| 55637.5  | 52148.6  | 39919.5  | 48104.4  | 53429.3  | 47613.1  | 35748    | 59907.7  | TRUE |
| 48214.3  | 47616.2  | 50219.2  | 58581.9  | 43736.7  | 37917.2  | 55120.9  | 51439    | TRUE |
| 37118.8  | 37768.2  | 38982.9  | 48737.5  | 54529    | 39870.6  | 36377.9  | 41913.5  | TRUE |
| 31132.7  | 36168.5  | 28016.7  | 42395.4  | 43585.1  | 24449    | 14614.9  | 29818.3  | TRUE |
| 59868.3  | 51945.4  | 50933.4  | 67989.4  | 52109.9  | 49598    | 45312.5  | 54092    | TRUE |
| 65507.4  | 68061.7  | 66963.7  | 64143.3  | 72382.7  | 63380.4  | 57247.6  | 72745.6  | TRUE |
| 49383.7  | 62954.7  | 51947.7  | 66583.6  | 57482.9  | 50152.6  | 52272    | 63747.5  | TRUE |
| 40973.7  | 54119.6  | 31604.2  | 30033.2  | 39633    | 29704.1  | 40151.4  | 67493.5  | TRUE |
| 36784.8  | 32291.4  | 32703.4  | 33150.7  | 34378.2  | 30344.8  | 28432.4  | 51614.5  | TRUE |
| 38136.1  | 45650.5  | 36082.8  | 43790    | 45401.7  | 29128.1  | 50591.4  | 47801.9  | TRUE |
| 206605.2 | 163414.1 | 173210.7 | 179999.9 | 231320.7 | 147761.1 | 193728.8 | 217863.2 | TRUE |
| 400639.3 | 348688.7 | 312398.3 | 390481.2 | 462298   | 364379.6 | 348578.8 | 405677.5 | TRUE |
| 42329.7  | 53629.6  | 38428    | 58074.1  | 66622.2  | 34083.9  | 60552.1  | 80835.8  | TRUE |
| 6772903  | 5690306  | 6055874  | 6718580  | 7908311  | 5953331  | 5631182  | 7603442  | TRUE |
| 55371.9  | 42795.9  | 59339.3  | 49372.8  | 53892.2  | 50879.4  | 43485.4  | 60066.4  | TRUE |
| 28987.3  | 36386.9  | 54945.1  | 40272.2  | 45438.4  | 28966.2  | 30061.1  | 30877.9  | TRUE |
| 166753.2 | 142274.2 | 164055.6 | 165290.9 | 166814.6 | 154057.9 | 134695.4 | 208368.4 | TRUE |
| 83566    | 66540    | 66692.1  | 99866.3  | 81904    | 77868.7  | 66007.6  | 74350.8  | TRUE |

|          |          |          |          |          |          |          |          |      |
|----------|----------|----------|----------|----------|----------|----------|----------|------|
| 30997.6  | 70060.2  | 88193.2  | 99371.5  | 120103   | 30512.6  | 11565.5  | 21383.7  | TRUE |
| 128735   | 120172.1 | 80353.8  | 117897   | 93621.4  | 120313.6 | 143499.3 | 136554.6 | TRUE |
| 107859.8 | 114908.3 | 117020.2 | 132498.1 | 110562.8 | 107127   | 145711.4 | 116369.3 | TRUE |
| 49433.9  | 50682.9  | 30380.4  | 54291.1  | 44168.6  | 41166.6  | 38721.2  | 55369.6  | TRUE |
| 539941.2 | 469460.8 | 304550.1 | 379405.4 | 456630.5 | 305031.5 | 366894   | 449656   | TRUE |
| 290902.6 | 244278.6 | 270903   | 369183.3 | 428013.1 | 261039.5 | 332248.1 | 403887.1 | TRUE |
| 1870961  | 1655617  | 1522937  | 2313436  | 2680708  | 1630324  | 1986965  | 2647649  | TRUE |
| 76758.3  | 116618.5 | 87799.6  | 101135.4 | 84605.9  | 56263.2  | 93114.7  | 90713.4  | TRUE |
| 949372.8 | 744865.7 | 855957.9 | 1214808  | 1229336  | 832145.1 | 1010738  | 1169766  | TRUE |
| 1061328  | 958572.7 | 978219.4 | 1395176  | 1384485  | 1033879  | 1147229  | 1403155  | TRUE |
| 168904.3 | 227134.7 | 167561.8 | 237254.7 | 302672.9 | 147187.1 | 205512.5 | 199890.6 | TRUE |
| 116472.9 | 85729.8  | 101766.1 | 144312.7 | 147746.5 | 101689.7 | 120516.9 | 136344.6 | TRUE |
| 286812.1 | 264075.5 | 237593.3 | 375723.8 | 395255.1 | 272803.4 | 331858.1 | 426830.7 | TRUE |
| 224113.8 | 161313.7 | 187534.7 | 233940.1 | 251462.3 | 197440.4 | 213635.1 | 297867.7 | TRUE |
| 58115.7  | 65455.9  | 66061    | 70309.5  | 67687.3  | 64219.3  | 45541.4  | 83212.6  | TRUE |
| 248194.3 | 222801.5 | 250317.4 | 299538.3 | 295792   | 259343   | 271162.5 | 294662.6 | TRUE |
| 138342.2 | 312688.3 | 181086.9 | 260174.9 | 349873.3 | 94223.4  | 103048.8 | 123456.3 | TRUE |
| 127360   | 128053.2 | 99898.8  | 103778.5 | 147840.4 | 105492   | 145371.3 | 139366.5 | TRUE |
| 98560.7  | 295136.4 | 97532.7  | 222216.4 | 313186.9 | 33419.6  | 23269.5  | 45029.5  | TRUE |
| 59304.7  | 70435.1  | 69018    | 59199.3  | 61843.3  | 58328.7  | 47219    | 80970.6  | TRUE |
| 50626.1  | 65043.6  | 57945.2  | 55232.7  | 89293.8  | 26642.3  | 34693.9  | 36844.9  | TRUE |
| 54831.1  | 65606.6  | 71692.8  | 105714.5 | 112367.4 | 70597.8  | 54570.2  | 48696.2  | TRUE |
| 64342.7  | 46110.3  | 56397.3  | 87170.6  | 84618.1  | 76648.6  | 81959.8  | 97675.2  | TRUE |
| 31623.3  | 79472.6  | 58452    | 101009.9 | 158642.5 | 27738.8  | 48911.5  | 38532.6  | TRUE |
| 20989.3  | 20226.9  | 16144    | 10579.4  | 24664.2  | 17334.7  | 10277.9  | 12893.2  | TRUE |
| 31566    | 35585.1  | 30064.8  | 36895.3  | 38270.7  | 23408.4  | 21337    | 30041    | TRUE |
| 29169.4  | 21605.3  | 14034.8  | 18473.9  | 29410.8  | 20879.2  | 30349.8  | 27776.2  | TRUE |
| 76893.1  | 91659.5  | 78304.9  | 72404.9  | 91472.8  | 75519.1  | 75019.7  | 90932.1  | TRUE |
| 433632.7 | 434412.4 | 430084.3 | 367632.8 | 319944.8 | 563580.1 | 539222.6 | 493954   | TRUE |
| 43752.9  | 52172.9  | 44978.2  | 52230    | 45593.6  | 50944.4  | 50649.1  | 52695.9  | TRUE |
| 92956.6  | 119302.1 | 96392.5  | 101885.7 | 92441    | 121506.9 | 141624   | 122784.1 | TRUE |
| 62074.7  | 59503    | 44896.7  | 68254.9  | 53629.1  | 67375.6  | 76134.9  | 54893.9  | TRUE |
| 53965.6  | 73819.3  | 66140.4  | 55702.9  | 44918.6  | 78801    | 72308.1  | 69857.9  | TRUE |
| 58409.4  | 86402.3  | 55491.3  | 73792.7  | 62584.4  | 75044.1  | 99605.7  | 75799.4  | TRUE |
| 62893.5  | 84484.8  | 65083.1  | 68449.9  | 56100.7  | 75752.1  | 75665.4  | 80035.3  | TRUE |
| 48954.6  | 66326.2  | 33666.8  | 38706.6  | 41419.1  | 50230.3  | 78946.6  | 77515.9  | TRUE |
| 173636.3 | 213789.1 | 149313.8 | 156732.1 | 164651.6 | 205883.5 | 220010.1 | 220261.3 | TRUE |
| 26214.6  | 38665.3  | 29162.2  | 39972    | 35377.3  | 50691    | 61222.3  | 56606.5  | TRUE |
| 78133.8  | 77339.9  | 63311.3  | 57271.3  | 47806.4  | 87476.7  | 92229.3  | 82691.4  | TRUE |
| 261496.2 | 461671.1 | 243152.8 | 365992.3 | 343980.2 | 154877.8 | 328329.2 | 151648.2 | TRUE |
| 161223.5 | 180314.3 | 174582.9 | 220315.6 | 179181.7 | 210666.6 | 171004.9 | 196900   | TRUE |
| 120117.2 | 288461.5 | 174204.6 | 247453.9 | 226349.2 | 87949    | 69731.1  | 94324.3  | TRUE |
| 53313.6  | 79645.3  | 63768.3  | 47205.2  | 55627.3  | 64303.4  | 50400    | 65772.8  | TRUE |
| 45291.6  | 38965.6  | 50543.3  | 28415.8  | 36931.2  | 26553.3  | 25896.5  | 28962.8  | TRUE |
| 118897.1 | 92657.2  | 93724.1  | 85735.9  | 74565.3  | 118222.7 | 90166.3  | 74134.1  | TRUE |

|          |          |          |          |          |          |          |          |      |
|----------|----------|----------|----------|----------|----------|----------|----------|------|
| 262026   | 254259   | 133183.4 | 161703.7 | 211827.3 | 137629.1 | 164139.1 | 208799.3 | TRUE |
| 668187.8 | 573376.9 | 352770.3 | 460877.8 | 503619.6 | 363693.8 | 437392.8 | 473377   | TRUE |
| 1647833  | 1470070  | 788531.2 | 1068609  | 1347553  | 795103.7 | 980447.6 | 1270840  | TRUE |
| 280308.2 | 249643.7 | 150985.8 | 185024.2 | 202910   | 131571.8 | 197062.7 | 258607.1 | TRUE |
| 253848.8 | 199545.6 | 124076.7 | 161875.7 | 164878.2 | 135161   | 150988.2 | 212427.5 | TRUE |
| 271865.2 | 276520   | 278424.7 | 349170.1 | 337051.6 | 282105.4 | 281877   | 322191.8 | TRUE |
| 764572.7 | 659091   | 643633.6 | 869579   | 1081953  | 685256.5 | 790129.3 | 1008920  | TRUE |
| 1068332  | 1013863  | 1032986  | 1367215  | 1587464  | 1070500  | 1293292  | 1558080  | TRUE |
| 1816382  | 1742917  | 1504308  | 2073879  | 2519313  | 1657954  | 1947041  | 2697163  | TRUE |
| 1412980  | 1126815  | 1100200  | 1572827  | 1818298  | 1209427  | 1441527  | 1959947  | TRUE |
| 158258.1 | 154150.9 | 155132.2 | 247991.8 | 221052.1 | 171374.9 | 166799.5 | 217701.6 | TRUE |
| 262748.6 | 235121.9 | 227143.3 | 346554.2 | 363796.2 | 240013.1 | 268424.5 | 346906.6 | TRUE |
| 40203.2  | 44552.9  | 35649.8  | 21576.7  | 35168    | 35030.5  | 33148.3  | 37721.2  | TRUE |
| 320495.9 | 315408.6 | 282239.2 | 379038.5 | 438023.1 | 289140.6 | 344583.8 | 419496.8 | TRUE |
| 663695.6 | 576204   | 535472   | 732257.4 | 903835.8 | 564001.5 | 688092.1 | 919811.7 | TRUE |
| 211291.8 | 187028.5 | 202700.8 | 261534.1 | 300127   | 222433.6 | 249590.8 | 325043.5 | TRUE |
| 115574.6 | 107254.4 | 129303.8 | 110829.2 | 167355.1 | 101016.7 | 107493.1 | 156399.3 | TRUE |
| 125153.7 | 119333.9 | 128187.6 | 168529.9 | 156487.7 | 126430.1 | 137247   | 149681.9 | TRUE |
| 221146.8 | 209341.6 | 220385.2 | 269896.7 | 316420   | 230573.6 | 252761.2 | 340242.2 | TRUE |
| 39049.9  | 23220.6  | 35779.3  | 29393.8  | 33571.2  | 29765.7  | 29311.7  | 36829.2  | TRUE |
| 257489.4 | 815283.4 | 418132   | 899711   | 1299924  | 115829.3 | 87672.2  | 169550.7 | TRUE |
| 31125.6  | 38349.5  | 34857.4  | 32093.6  | 52867.1  | 35097.7  | 27140.7  | 38990.3  | TRUE |
| 60599.3  | 56982.5  | 41079.4  | 78733.6  | 77253.7  | 41256.4  | 53037    | 67740.7  | TRUE |
| 16846.3  | 40429    | 34824.4  | 54457.3  | 66779.6  | 23567.5  | 11686.8  | 33876    | TRUE |
| 42892.4  | 72179.5  | 51282.5  | 126935   | 138812.7 | 51699.1  | 57608.7  | 64973.6  | TRUE |
| 17601.6  | 18523.8  | 9950.6   | 21398.6  | 17395.9  | 20341.5  | 11455    | 28024.1  | TRUE |
| 96203    | 79358.5  | 56040.7  | 87770    | 88190.8  | 82272.1  | 95089.8  | 132235.5 | TRUE |
| 79888.1  | 66009    | 55316.7  | 67438.5  | 73201.9  | 73741.3  | 92459    | 102682   | TRUE |
| 28837.8  | 7590.3   | 28970.8  | 26420    | 26802.3  | 18339    | 28722.4  | 18829    | TRUE |
| 104939.3 | 87191.1  | 79661.8  | 124691.9 | 119287   | 84330.2  | 83924.3  | 131567.3 | TRUE |
| 393821.7 | 441361.4 | 362571.9 | 398381.8 | 372508.4 | 399522.2 | 467423.5 | 392825   | TRUE |
| 956461.8 | 1108171  | 1115957  | 958780.7 | 874453.6 | 1041457  | 1258297  | 996266.4 | TRUE |
| 1143973  | 1259130  | 1198140  | 1238167  | 983615.3 | 1355222  | 1462175  | 1207854  | TRUE |
| 2927234  | 3370576  | 2662691  | 2783159  | 2368057  | 3127844  | 3633379  | 3205925  | TRUE |
| 2204589  | 2392823  | 2059169  | 2156237  | 1691471  | 2432815  | 2702615  | 2552666  | TRUE |
| 737028.6 | 783751.2 | 781512.7 | 896826.4 | 594763   | 758296   | 880524   | 784982.7 | TRUE |
| 402281.6 | 489921   | 418778.8 | 533220.8 | 349896.9 | 428425.2 | 533556.2 | 490901.4 | TRUE |
| 13477.3  | 9298.5   | 5574.9   | 6988.3   | 11010.5  | 6249.1   | 10652.3  | 11802.1  | TRUE |
| 70772.2  | 63196.3  | 50550    | 60088.9  | 63843.3  | 61068.9  | 87303.2  | 68573.6  | TRUE |
| 42095.2  | 45945.6  | 43349.6  | 28820.4  | 21929.8  | 50246.3  | 36403.7  | 40350.9  | TRUE |
| 495232   | 2008500  | 822724.9 | 1644068  | 1459320  | 220617.2 | 170711.7 | 212604.3 | TRUE |
| 34917.4  | 49695.8  | 58160.9  | 43328.9  | 39689.7  | 24876.6  | 32427.3  | 24075.7  | TRUE |
| 52695.1  | 40783.1  | 34493.6  | 36467.2  | 32144.9  | 39886.5  | 31894.6  | 37069    | TRUE |
| 28779.7  | 29071.7  | 29139.5  | 10958    | 18281.6  | 33980.9  | 28826.1  | 17097.2  | TRUE |
| 99768.2  | 79476.8  | 89397    | 84188.2  | 64016.1  | 66520.8  | 106465.8 | 77652.3  | TRUE |
| 135279   | 107283.1 | 111124.8 | 99308.1  | 70321.6  | 121156.5 | 112713.1 | 112011.1 | TRUE |
| 120641.3 | 112752.1 | 115083.7 | 125614.9 | 107620.5 | 123947.7 | 136113.3 | 123716.6 | TRUE |
| 47694.6  | 75440.6  | 49124.6  | 55158.1  | 52285.3  | 79357.6  | 90692.7  | 54787.7  | TRUE |
| 264086.8 | 263220.9 | 244143.4 | 253814.7 | 204876   | 248444.2 | 261289.8 | 262785.1 | TRUE |

|          |          |          |          |          |          |          |          |      |
|----------|----------|----------|----------|----------|----------|----------|----------|------|
| 166913.5 | 135482.6 | 191649.6 | 161501.5 | 109799.7 | 175747.4 | 125418   | 109349.1 | TRUE |
| 799937.7 | 714929   | 875907   | 767964.1 | 553850.5 | 927051.6 | 645726.6 | 556456.1 | TRUE |
| 131981   | 100571.3 | 182814.7 | 127453.9 | 96235.6  | 173785.4 | 111443.8 | 107734.4 | TRUE |
| 501476.6 | 466730.5 | 653582.7 | 643230.9 | 457722.5 | 680815.4 | 524726   | 485033.6 | TRUE |
| 164060.3 | 164743.6 | 175376.5 | 141619.8 | 190401.5 | 179993.3 | 132958.6 | 195207.9 | TRUE |
| 649507.5 | 549091.8 | 541318.9 | 575143.6 | 708041.3 | 731618.6 | 527730.8 | 674307.3 | TRUE |
| 560164.2 | 370697.5 | 486709   | 464547.4 | 780974.1 | 608368.7 | 397128.6 | 564876.7 | TRUE |
| 1986914  | 1373653  | 1708007  | 1668573  | 2525186  | 2044008  | 1398069  | 2059999  | TRUE |
| 169870.3 | 150988.2 | 154401.1 | 174120.8 | 168884.5 | 155146   | 141683.8 | 157542.9 | TRUE |
| 41044.5  | 22615.8  | 11238.1  | 32183.3  | 44759.9  | 12770.9  | 27164    | 27439    | TRUE |
| 4731205  | 3152115  | 3974407  | 3741504  | 7125539  | 4265561  | 3203152  | 4259792  | TRUE |
| 75201.3  | 54991.4  | 75109    | 69593.2  | 47466.5  | 89595.7  | 65120.1  | 54677.7  | TRUE |
| 6266816  | 4163232  | 8478566  | 5924898  | 3437174  | 8455004  | 4338709  | 3652255  | TRUE |
| 174023.3 | 151386.1 | 193218.2 | 181480.9 | 142358.2 | 204971.8 | 175281   | 158015   | TRUE |
| 703750   | 603853.8 | 643260   | 614299.3 | 617046.5 | 655130   | 637489.8 | 667029.7 | TRUE |
| 567056.4 | 504894   | 693988   | 705591.7 | 577204.7 | 744666.4 | 566652.8 | 576743   | TRUE |
| 63090.5  | 45015.8  | 54941.4  | 49449.7  | 39847.4  | 63223.2  | 67032.6  | 47754.1  | TRUE |
| 50068.8  | 77739.5  | 69110.5  | 92364.8  | 70336.7  | 39116.8  | 8170.5   | 20654.6  | TRUE |
| 97502.2  | 173009.3 | 144837.4 | 205231   | 173226.8 | 83708.6  | 68361.8  | 74606    | TRUE |
| 23408.9  | 28091.3  | 28227.2  | 19742.6  | 26898.5  | 31045.1  | 26650.8  | 27044.9  | TRUE |
| 102586.7 | 78747.5  | 63541.6  | 95595.7  | 94027.3  | 92790.3  | 85431.9  | 112044.9 | TRUE |
| 55502.8  | 47785.2  | 51781.9  | 66622.4  | 73937    | 65061.6  | 59392.7  | 67926.3  | TRUE |
| 127253.8 | 103502.7 | 97981.1  | 92248.4  | 141911.4 | 135607.1 | 100210.7 | 132516.2 | TRUE |
| 92375    | 74965    | 74958.5  | 86892    | 69863    | 100945.6 | 76945.4  | 68811.7  | TRUE |
| 35417.2  | 27374.7  | 31088.5  | 36984.6  | 28153.8  | 55450.5  | 35293.9  | 32035.7  | TRUE |
| 33221.7  | 23028.4  | 58109.9  | 44914.6  | 48401.7  | 119187.9 | 42094.6  | 40925    | TRUE |
| 58989.6  | 37886.5  | 57497.7  | 69087.3  | 91515.2  | 63162.1  | 74459.3  | 58087.8  | TRUE |
| 132208.1 | 80559.5  | 84848.7  | 75070.4  | 77934.4  | 87909.1  | 72406.4  | 74012.3  | TRUE |
| 150491.5 | 96163.7  | 123166.6 | 84330.7  | 79883.2  | 108614.3 | 92664.2  | 75873.7  | TRUE |
| 27889.2  | 30264.4  | 12503.4  | 12538.5  | 10172.9  | 35464.1  | 10525.8  | 11375.6  | TRUE |
| 387770.6 | 338277.1 | 522488   | 427202   | 375656.6 | 538239.1 | 380678.3 | 310133   | TRUE |
| 162219.6 | 110394.9 | 228870.2 | 178304.2 | 140598.6 | 211011.5 | 141317   | 135798.3 | TRUE |
| 355358.7 | 274553.3 | 451122.7 | 373645.7 | 313987.1 | 457405.3 | 336043.6 | 321787.6 | TRUE |
| 380948.3 | 256861.1 | 486260.1 | 421074.3 | 227948.8 | 538997   | 332316.6 | 277262.8 | TRUE |
| 264271.1 | 353342.3 | 310803.8 | 389088   | 349046.2 | 181954.1 | 242276.4 | 228808.8 | TRUE |
| 317008.4 | 274604.9 | 295897.1 | 295837.3 | 293078.7 | 307674   | 260445.1 | 333763.7 | TRUE |
| 633323.2 | 541358.4 | 961450.1 | 844712.2 | 528007.6 | 1080468  | 664923.6 | 567019.5 | TRUE |
| 102768.2 | 103535.9 | 133015.4 | 121290.3 | 98240.9  | 122456.2 | 108839.5 | 93437.5  | TRUE |
| 367105.8 | 360831.5 | 358277.3 | 309518.3 | 278367.9 | 345241.6 | 316973.9 | 283177.4 | TRUE |
| 529030.5 | 524908.3 | 429234   | 475781.2 | 565211.3 | 509630   | 602143.9 | 544203.4 | TRUE |
| 2880096  | 2464708  | 2587977  | 2735765  | 3325005  | 2772650  | 2603720  | 2885012  | TRUE |
| 103412.3 | 75088.8  | 83233.3  | 89551.6  | 100773.8 | 90934.5  | 82527.3  | 95932.8  | TRUE |
| 91445.7  | 87601.5  | 73698.8  | 107334.8 | 66155.7  | 97088.3  | 72351    | 70984.2  | TRUE |
| 77173.2  | 64149.9  | 82346.5  | 70670.7  | 43322.6  | 86759.5  | 65507.4  | 61430.8  | TRUE |

|          |          |          |          |          |          |          |          |      |
|----------|----------|----------|----------|----------|----------|----------|----------|------|
| 122257.2 | 106862.1 | 93081.7  | 91900    | 104971.1 | 129825.3 | 96908.1  | 82240.3  | TRUE |
| 77293.3  | 100146.6 | 85385.2  | 109741.4 | 90009.7  | 68480.1  | 66349.8  | 63114.6  | TRUE |
| 39665.3  | 27528.1  | 40401    | 26050    | 20433.8  | 40812.4  | 25302.7  | 34249.6  | TRUE |
| 60229.3  | 57733    | 96634.4  | 73528.9  | 56221.2  | 69399.6  | 66847.2  | 61791.4  | TRUE |
| 110510.3 | 99259.8  | 108717.1 | 111931.7 | 107629.6 | 117686.4 | 113105.5 | 128864.8 | TRUE |
| 281124.2 | 173293   | 216006.3 | 242167.2 | 242976   | 275124.7 | 231035   | 316050.6 | TRUE |
| 262688.4 | 211774   | 225157.3 | 257345.1 | 255789.2 | 279201.1 | 250551.2 | 250328.3 | TRUE |
| 912213   | 740919.1 | 831815.6 | 772651.4 | 557361.3 | 907217.1 | 727359.7 | 564633.3 | TRUE |
| 89927.3  | 94281    | 92727    | 96500    | 79855.3  | 93237.5  | 101341.5 | 85495.4  | TRUE |
| 130763.6 | 109329.6 | 161333.6 | 111747   | 97578.1  | 141876.4 | 114896.7 | 91440    | TRUE |
| 473332.4 | 383100.5 | 582614.6 | 451585   | 342319   | 590696.1 | 381404.1 | 358536.4 | TRUE |
| 1498917  | 969924.2 | 1319960  | 1326849  | 1973992  | 1594697  | 1098533  | 1558913  | TRUE |
| 833663.9 | 701129.8 | 937323   | 804175.1 | 584329.3 | 976835.5 | 687872.4 | 622050.7 | TRUE |
| 638604.7 | 669044.3 | 694463.2 | 655661   | 495391   | 691357.4 | 581638.5 | 507597.6 | TRUE |
| 102494.3 | 107597.2 | 114203   | 125699   | 123243.3 | 145031.1 | 123363.7 | 111122.8 | TRUE |
| 1449125  | 857791.3 | 1788007  | 1650822  | 1218592  | 1266764  | 846821.6 | 1188017  | TRUE |
| 1085077  | 723963.6 | 1048759  | 1026156  | 997115.5 | 975706.7 | 789240.9 | 991896.5 | TRUE |
| 839835.3 | 933521.7 | 732915.4 | 796888.3 | 917205.8 | 815036.2 | 811903.3 | 792809.2 | TRUE |
| 2341330  | 1907373  | 1986048  | 2246279  | 2624525  | 2492522  | 1975404  | 2410463  | TRUE |
| 272665.5 | 250206.9 | 278361.9 | 326749.4 | 322372.3 | 314632.4 | 246348.9 | 279646.4 | TRUE |
| 259864.7 | 202844.8 | 329992.6 | 233009.8 | 138979.5 | 451419.7 | 250552.4 | 195201.1 | TRUE |
| 203438.2 | 186741.2 | 260319.2 | 199954.6 | 139815.4 | 253446.2 | 184011.9 | 156507   | TRUE |
| 323066.2 | 316304.7 | 360207.8 | 375482.1 | 284732.6 | 402252.6 | 309276.4 | 298699.4 | TRUE |
| 101398   | 67674.5  | 86914.5  | 92563.9  | 110645.1 | 142472.5 | 87101.7  | 139280   | TRUE |
| 254083.7 | 184648.6 | 309391   | 257686.3 | 205401.3 | 284896.7 | 205031.3 | 221190.1 | TRUE |
| 826978.7 | 782639   | 918800.3 | 778719.2 | 801628.6 | 917894.2 | 857115.2 | 787597.8 | TRUE |
| 62913.6  | 62422.4  | 88373.4  | 64221.8  | 50550.7  | 72201.1  | 60556.3  | 47864.8  | TRUE |
| 80640.7  | 86926.2  | 106107.3 | 80495    | 66849.1  | 88845.1  | 98521.4  | 69240    | TRUE |
| 101820.5 | 96997.5  | 102938.3 | 93078.6  | 131834.5 | 107200.3 | 91458.8  | 113846.7 | TRUE |
| 4419980  | 4359227  | 4170887  | 4795297  | 4117583  | 4638294  | 4518990  | 4585086  | TRUE |
| 163448.2 | 117399.2 | 149887.8 | 118023.9 | 186593   | 160982.4 | 102235   | 179555.4 | TRUE |
| 196665.9 | 158059   | 164454   | 178197.4 | 217550.1 | 174011.5 | 159316.4 | 182508.3 | TRUE |
| 275569.7 | 243567   | 287860.2 | 252878.4 | 227365.4 | 304943.2 | 260490.4 | 243912.7 | TRUE |
| 808076.2 | 686518.5 | 853985.5 | 743816.5 | 621394.4 | 1036041  | 708396.9 | 629483   | TRUE |
| 91423.3  | 133748.3 | 120525.4 | 145132.7 | 126115.6 | 88769    | 82314.1  | 100313.5 | TRUE |
| 242714.4 | 188528.5 | 198190   | 174290.8 | 189154.4 | 197565.6 | 195450   | 165255.4 | TRUE |
| 92360.3  | 85919.4  | 106984   | 73331    | 76316    | 92836.5  | 76878.2  | 87768.1  | TRUE |
| 28644.6  | 25960.4  | 26765.1  | 29875.3  | 36132.2  | 25927.9  | 28923.9  | 43531.1  | TRUE |
| 372875.3 | 296731.1 | 367171.2 | 398029.3 | 457994   | 382206.6 | 350910.7 | 380206   | TRUE |



|          |          |          |          |          |          |          |          |      |
|----------|----------|----------|----------|----------|----------|----------|----------|------|
| 958827.2 | 838662.9 | 820775   | 889427.2 | 1311657  | 1028431  | 779123.2 | 1006782  | TRUE |
| 2109183  | 1513584  | 1728800  | 1740865  | 2725415  | 1962815  | 1581018  | 2129746  | TRUE |
| 394465.3 | 371113.7 | 368060.9 | 390156   | 517182.5 | 406177   | 400462.6 | 466788   | TRUE |
| 7144663  | 7393731  | 5774837  | 9778754  | 10642849 | 5559196  | 7605481  | 11190042 | TRUE |
| 225712.1 | 203671.7 | 207593.3 | 346237.7 | 414939   | 209694.2 | 280712.1 | 413605.4 | TRUE |
| 4097189  | 5531503  | 3640222  | 4132811  | 3233220  | 5323530  | 5907424  | 5273759  | TRUE |
| 332650.3 | 282846.1 | 301442.8 | 462270.6 | 365463.5 | 317320.4 | 348027.2 | 374775   | TRUE |
| 152966.9 | 171645.2 | 201337.7 | 267189.1 | 217658.4 | 219688.2 | 168470   | 213565.2 | TRUE |
| 123961.5 | 113068   | 127804.5 | 139464.9 | 138661.3 | 130579.6 | 123195   | 140051.2 | TRUE |
| 244640.4 | 182545.5 | 217827.4 | 286256.1 | 311213.6 | 241762.6 | 240143.8 | 328567.7 | TRUE |
| 351600.9 | 341407.6 | 374422.3 | 385397.5 | 346085.8 | 469726.7 | 338900.7 | 464407.4 | TRUE |
| 132475.6 | 115782.8 | 110792.7 | 110170.9 | 121917.5 | 145395.4 | 138210.8 | 125988.3 | TRUE |
| 62892.5  | 65512.4  | 45515.3  | 57152.5  | 45942.1  | 53017.6  | 71232.5  | 54531.8  | TRUE |
| 759974.9 | 676087.2 | 657562.5 | 762804.4 | 792877.3 | 711880.9 | 770351.4 | 828638.5 | TRUE |
| 581854.2 | 521243.1 | 475414.8 | 550754.7 | 678386.7 | 559924   | 549071.8 | 654518.1 | TRUE |
| 538453.7 | 474251.4 | 500727.2 | 527258   | 589412.8 | 514034.5 | 510115.6 | 617131   | TRUE |
| 852293.9 | 678107.6 | 700479.7 | 733182.5 | 880347.7 | 754673.2 | 726214.2 | 886689.7 | TRUE |
| 839946.5 | 705114.2 | 698269.4 | 846468.5 | 924521   | 792334.7 | 747611.5 | 944952.7 | TRUE |
| 966190.7 | 809626   | 746268.1 | 875073.8 | 1002550  | 834223.2 | 861018   | 1034226  | TRUE |
| 229740.3 | 172782.1 | 192211.6 | 217945.5 | 223091.5 | 198262.2 | 179989.7 | 220314.4 | TRUE |
| 184553.9 | 155207.6 | 180990.5 | 197907.3 | 216070.4 | 182952   | 203588.1 | 240577   | TRUE |
| 49614.6  | 59197.5  | 68098.4  | 52242.9  | 46525.1  | 56187    | 52317.9  | 58174.4  | TRUE |
| 83769.2  | 149246.1 | 84575    | 148435.4 | 177963.4 | 62993.4  | 62689.6  | 51977.5  | TRUE |
| 176076   | 153623.2 | 188438.3 | 141768.9 | 199389.3 | 164907.6 | 184826   | 204302.9 | TRUE |
| 239402.6 | 185952.1 | 228530.7 | 202817.1 | 270835.5 | 228042.7 | 223981.9 | 263287.2 | TRUE |
| 1344211  | 1448548  | 1248943  | 1523778  | 1371410  | 1470540  | 1555393  | 1435647  | TRUE |
| 1008417  | 992722.6 | 961603.7 | 1038908  | 1035838  | 1020251  | 1112985  | 980516.5 | TRUE |
| 924992.4 | 864431.1 | 789710.9 | 862658.2 | 799302.5 | 906985   | 923696.1 | 918104.8 | TRUE |
| 921276   | 881486.6 | 792835   | 841223.7 | 872970   | 929836.8 | 908412.2 | 934087.4 | TRUE |
| 1198867  | 1179440  | 986831.7 | 1132184  | 1088974  | 1025053  | 1213340  | 1151825  | TRUE |
| 1019767  | 1006615  | 852588.1 | 895329.4 | 935426.2 | 946794.4 | 1049563  | 1018204  | TRUE |
| 48772.9  | 45828.8  | 38661    | 14541.9  | 46424.4  | 41267.3  | 59713.9  | 47843.8  | TRUE |
| 157046.7 | 172105.3 | 142541   | 181607.1 | 121700.2 | 137420   | 187298.7 | 123304   | TRUE |
| 103668.4 | 74786.1  | 73647.7  | 141455.1 | 138796.7 | 86008.6  | 96089.1  | 144714.3 | TRUE |
| 15189.9  | 5248.1   | 17512.5  | 30672.1  | 31408.2  | 5847.6   | 10197.7  | 23548.9  | TRUE |
| 5692.3   | 8937     | 8060.7   | 7153.6   | 7467.1   | 19932.3  | 9657.8   | 13335.2  | TRUE |
| 1206959  | 967596.1 | 1047029  | 1032311  | 1232025  | 1055779  | 988372.3 | 1181292  | TRUE |
| 1501393  | 1272390  | 1227856  | 1498941  | 1500014  | 1368185  | 1430496  | 1490972  | TRUE |
| 282981.3 | 284268.4 | 353265.6 | 450789.8 | 374189.7 | 459264.9 | 402363.7 | 425627.4 | TRUE |
| 209488.5 | 173515.6 | 135281.6 | 189280.5 | 196125.9 | 209018.6 | 223636.2 | 247208.7 | TRUE |
| 53302.9  | 55027.2  | 49096.7  | 55119    | 54540    | 64605.7  | 60485.7  | 85385.6  | TRUE |

|          |          |          |          |          |          |          |          |      |
|----------|----------|----------|----------|----------|----------|----------|----------|------|
| 32834.7  | 24251.8  | 24379.5  | 30598.3  | 20484.6  | 31519.1  | 32824.3  | 44015.2  | TRUE |
| 78113.1  | 83921.9  | 65564.4  | 78972.8  | 80552.6  | 59294.8  | 82759.2  | 68351.9  | TRUE |
| 24194.4  | 9117.7   | 6608.8   | 23794.4  | 32585.1  | 20169    | 12428.5  | 27211    | TRUE |
| 36196.8  | 27540.2  | 32253.7  | 48161    | 33535.6  | 39360.9  | 29831.7  | 42638.6  | TRUE |
| 131832.3 | 114534.6 | 137162.6 | 159913.5 | 130461.6 | 126288.3 | 122924.2 | 127590.8 | TRUE |
| 873919.5 | 574161.7 | 773123.6 | 865261   | 818752.6 | 727155.7 | 740182.2 | 862843.3 | TRUE |
| 2609859  | 2079353  | 2241967  | 5942072  | 2445899  | 2231197  | 2294547  | 2543841  | TRUE |
| 387613.1 | 351940.7 | 324716.8 | 524848.7 | 364642.8 | 370739   | 402717.4 | 408318.1 | TRUE |
| 175696.6 | 188084.7 | 162578.7 | 205015.4 | 196665.8 | 141509.6 | 189784.7 | 182845.7 | TRUE |
| 139566.3 | 111212.7 | 105094.8 | 109967   | 116674   | 114910.6 | 111404.8 | 139079.3 | TRUE |
| 70438.9  | 81715.6  | 67410.8  | 92288.5  | 74692.2  | 76410.2  | 75413.4  | 86316.1  | TRUE |
| 923913.5 | 742761.3 | 1040699  | 1979268  | 1274766  | 1249801  | 1123397  | 1353763  | TRUE |
| 149934.1 | 184575.7 | 134208.8 | 175439.2 | 180639   | 130766.2 | 127807.9 | 134576.8 | TRUE |
| 134255.8 | 189071.8 | 142050   | 197407.7 | 204792.2 | 177155.5 | 127150   | 125616.8 | TRUE |
| 1420148  | 1359491  | 1418472  | 1484515  | 1499224  | 1793598  | 1717768  | 1731861  | TRUE |
| 144690.2 | 227438.6 | 199921.3 | 247226.7 | 251856.2 | 166387.6 | 167426   | 144247.4 | TRUE |
| 58693.8  | 184587.9 | 117378.4 | 190218.6 | 218149   | 51184.2  | 44964.3  | 45748.2  | TRUE |
| 634430.3 | 594198.9 | 529341.8 | 558366   | 602676.3 | 651403.5 | 602796.1 | 603331.4 | TRUE |
| 438812.7 | 473488   | 414150.1 | 394996   | 432624.5 | 422232.9 | 431596.2 | 469192.7 | TRUE |
| 148824   | 159802.7 | 115265.9 | 219657.6 | 136688.5 | 112594.3 | 149207.6 | 130392.7 | TRUE |
| 94746    | 86159.9  | 44283.6  | 116343.9 | 50715.4  | 46612.5  | 70916.9  | 64328.5  | TRUE |
| 29306.6  | 35794.7  | 29047.3  | 21128.1  | 36297    | 23114.7  | 32727.1  | 35533.3  | TRUE |
| 152804.1 | 131230.8 | 123338.5 | 191458.1 | 108281.3 | 329986.7 | 173924.3 | 330385.4 | TRUE |
| 84750.3  | 76160    | 65808    | 75751.9  | 75352.8  | 51528.4  | 99460.2  | 68484.9  | TRUE |
| 28544.6  | 51385.4  | 29589.8  | 36167.1  | 30657.5  | 29566.2  | 56243.5  | 11618.7  | TRUE |
| 33929.3  | 32519    | 33131.4  | 32118.2  | 48840.5  | 36500.5  | 35736.8  | 46764.5  | TRUE |
| 59080.2  | 59284.4  | 53470.4  | 65103.2  | 46405.8  | 30999.7  | 81930.2  | 37477.6  | TRUE |
| 32522.9  | 42990.7  | 29057.4  | 26433.1  | 29220.9  | 33898.4  | 37255.4  | 30085.9  | TRUE |
| 118047.9 | 175233.5 | 94334.5  | 131719.3 | 129163.7 | 51832.4  | 179949.1 | 74122.3  | TRUE |
| 375865.3 | 283991.2 | 290825.8 | 304202   | 296567.6 | 398896.7 | 394928.2 | 368565   | TRUE |
| 177821.2 | 175196.3 | 146308.4 | 284355.7 | 216734.2 | 173466.7 | 211706.4 | 251687.7 | TRUE |
| 235413.6 | 201152.8 | 218732.3 | 311059.1 | 284549.3 | 231526.4 | 235319.5 | 297242.9 | TRUE |
| 193110.1 | 218834.8 | 229945.4 | 222852.5 | 192213.8 | 260794.5 | 222090.1 | 276430.5 | TRUE |
| 565351.6 | 649725.1 | 518389.4 | 657802.1 | 541330   | 752102.8 | 639844.7 | 746685   | TRUE |
| 254032   | 274726.9 | 301082   | 312232.1 | 350340.7 | 273848.3 | 319708.4 | 354341.3 | TRUE |
| 212394.5 | 208443.7 | 204696.6 | 224633.8 | 264565.5 | 233110.7 | 262100.7 | 271384.4 | TRUE |
| 187114.5 | 204838.2 | 135525.2 | 166731.8 | 173843.3 | 127907.3 | 168177.5 | 169697.3 | TRUE |
| 176054.8 | 215805.1 | 178991.2 | 216798.2 | 259069.6 | 178859.9 | 238149.2 | 230340.6 | TRUE |
| 221512.6 | 236360.8 | 247444.1 | 252300.2 | 190413.9 | 219286.7 | 268263.9 | 217191.9 | TRUE |

|          |          |          |          |          |          |          |          |      |
|----------|----------|----------|----------|----------|----------|----------|----------|------|
| 89484    | 116520.1 | 97028.5  | 126849.2 | 118783   | 72266.8  | 65882.3  | 88904.1  | TRUE |
| 267605.2 | 296890.3 | 197280.7 | 272603.4 | 293874.3 | 205021.4 | 267178.6 | 258786.5 | TRUE |
| 121624.4 | 162766.2 | 92587    | 151704   | 123956.5 | 66167.5  | 102602.3 | 95811.5  | TRUE |
| 162187.8 | 113306.8 | 132937.3 | 123340.7 | 180730.6 | 143296.7 | 147020.8 | 180055.2 | TRUE |
| 361376.8 | 354594.3 | 270035.1 | 340350   | 432917.9 | 313555.5 | 386939.6 | 438265   | TRUE |
| 69968.9  | 80930.1  | 59305.6  | 65377.1  | 95813.8  | 57702.7  | 70916.3  | 82443    | TRUE |
| 63442.1  | 70633.7  | 71568.4  | 63600.5  | 132532.3 | 88922.1  | 80849.4  | 133106.1 | TRUE |
| 139928.5 | 98961    | 164018.9 | 151982.5 | 248326.5 | 163270.6 | 176866.7 | 298100.1 | TRUE |
| 68765.6  | 74042.8  | 57932.8  | 75330.2  | 101999.6 | 65685.6  | 93299.3  | 105626.1 | TRUE |
| 87006.3  | 100272.5 | 74148.4  | 70297.8  | 54843.6  | 78323.4  | 87280.9  | 90836.6  | TRUE |
| 26798.9  | 26073.7  | 32296.2  | 35488.3  | 30499    | 27505.2  | 28755.5  | 33774.1  | TRUE |
| 31477.1  | 33070.1  | 37184    | 10966.2  | 35025.1  | 27622.4  | 36509.3  | 42164.1  | TRUE |
| 215408.6 | 217828.8 | 248305.7 | 191546.8 | 214659.8 | 210964.6 | 193441.7 | 194986   | TRUE |
| 2203533  | 2270523  | 1920848  | 2303120  | 2498856  | 1811586  | 2232184  | 2330294  | TRUE |
| 1435307  | 1410371  | 1585732  | 1723964  | 1432391  | 1670066  | 1621327  | 1545769  | TRUE |

|          |          |          |          |          |          |          |          |      |
|----------|----------|----------|----------|----------|----------|----------|----------|------|
| 66776.5  | 97336.7  | 90209.9  | 96010    | 129150   | 57593.4  | 40517.9  | 57080.4  | TRUE |
| 37003    | 29855.6  | 33682.7  | 44990    | 34773.2  | 48758.6  | 45603.4  | 37326.9  | TRUE |
| 298645   | 287158   | 312006.8 | 280727.4 | 301814.9 | 291207.7 | 253445.6 | 266578.6 | TRUE |
| 122849.4 | 138195.6 | 118104.5 | 124964   | 135738.8 | 113440.8 | 132727.9 | 129673.6 | TRUE |
| 71632.1  | 175053.2 | 92497    | 165343.6 | 208086.8 | 44885.4  | 37017.8  | 43344.3  | TRUE |
| 534932   | 536151.3 | 602334.2 | 512821.1 | 605151.8 | 559290.1 | 533877.8 | 477781.8 | TRUE |
| 531696.9 | 550379.1 | 476079.3 | 517461.4 | 498509.6 | 572156   | 594861.4 | 603778.1 | TRUE |
| 34192.3  | 36843.7  | 32233.5  | 46368.1  | 33199.7  | 35855.4  | 41902.4  | 39299.4  | TRUE |
| 88809.8  | 81289.5  | 60465.5  | 68737.7  | 78896.6  | 87737.4  | 64700    | 88303.6  | TRUE |
| 125325.4 | 118799.3 | 68117.4  | 70563.6  | 73494.8  | 60578.2  | 94612.5  | 96848.9  | TRUE |

|          |          |          |          |          |          |          |          |      |
|----------|----------|----------|----------|----------|----------|----------|----------|------|
| 53774.5  | 45517.4  | 100260   | 53183.1  | 42321.7  | 74071    | 55909    | 56126.4  | TRUE |
| 216456.3 | 167765.1 | 106624.1 | 120228.8 | 123141.7 | 105447.4 | 118981.5 | 129124.9 | TRUE |
| 183169.9 | 173509.4 | 170572   | 211451.5 | 196201.1 | 220127.3 | 177624.8 | 227965.9 | TRUE |
| 6875     | 9287.4   | 7846.9   | 5774.2   | 8225.1   | 6264.1   | 8235.9   | 10186    | TRUE |
| 25833.1  | 23900.2  | 30555    | 10816.5  | 29419.9  | 30042.8  | 25202.3  | 28647.5  | TRUE |
| 123915.4 | 133508.8 | 142089.2 | 136735.8 | 172917.6 | 143438   | 151548   | 178259.7 | TRUE |
| 100106.6 | 94412    | 65679.9  | 121432.7 | 105136.3 | 93945.8  | 128808.2 | 139841.4 | TRUE |
| 49935.8  | 51607.5  | 33030.9  | 58849.8  | 45897.3  | 53461.4  | 75135.2  | 65044.8  | TRUE |
| 160681   | 158537.1 | 115930.8 | 197054.1 | 190506.5 | 170108.6 | 194391.5 | 190912.4 | TRUE |
| 275533.8 | 282955.1 | 243467   | 406662.7 | 258460.8 | 320866.1 | 353944   | 351447.3 | TRUE |
| 57201.2  | 45691.3  | 49317.4  | 69893.3  | 57413.3  | 55823.5  | 68544.4  | 73430.7  | TRUE |
| 99819.8  | 113415.9 | 114655.5 | 115575.3 | 137500.1 | 107300.8 | 117306.5 | 131458.6 | TRUE |
| 88559.7  | 71731.8  | 91706.8  | 78431.4  | 79613.9  | 75364.6  | 69501.7  | 93171.8  | TRUE |
| 89040.8  | 92855.8  | 80942    | 78319    | 95567.2  | 80258.5  | 89964.4  | 98552.1  | TRUE |
| 226841.6 | 226348   | 179823.2 | 249030.1 | 221427.3 | 195469.5 | 175144.9 | 223693.4 | TRUE |
| 85833.8  | 102648.8 | 76880.8  | 108572.4 | 77651.1  | 109976.2 | 83288.2  | 115749.5 | TRUE |
| 167099.1 | 149171   | 154497.8 | 158462.9 | 168706   | 155332.4 | 178833.1 | 183824.3 | TRUE |
| 299196.1 | 331696.8 | 311926.4 | 286227.6 | 261941.3 | 397287.5 | 282849   | 340561.6 | TRUE |
| 729330.8 | 751499.7 | 774236.2 | 702179.6 | 621793.6 | 945764.3 | 707019   | 897271   | TRUE |

|          |          |          |          |          |          |          |          |      |
|----------|----------|----------|----------|----------|----------|----------|----------|------|
| 359326.6 | 332555   | 238309.6 | 256316.8 | 303600.7 | 263519.4 | 279113.8 | 276267.9 | TRUE |
| 235185.8 | 245277.7 | 130067.9 | 136674.7 | 179961.5 | 137261.7 | 179749.1 | 188769.9 | TRUE |
| 456576.5 | 500300   | 484321.6 | 487457.4 | 487914.8 | 423466   | 571241.4 | 502956.3 | TRUE |
| 460527.9 | 496795.7 | 459104.3 | 474761.8 | 397826.2 | 382936.7 | 541382.4 | 407715.4 | TRUE |
| 106107.1 | 108638.1 | 105221.9 | 99980.7  | 95692.7  | 97933.1  | 113782.1 | 113289.1 | TRUE |
| 3404616  | 2814079  | 3163275  | 3253265  | 3371892  | 3366383  | 2861133  | 3426181  | TRUE |
| 1723518  | 1639744  | 1443916  | 1589225  | 1574825  | 1856210  | 1573168  | 1932276  | TRUE |
| 199619.8 | 205137.1 | 113469.3 | 121008.8 | 99639.5  | 125842.9 | 143643.6 | 118542.3 | TRUE |
| 284154.4 | 253913   | 274311.1 | 335720.5 | 263223.9 | 266947.2 | 294824.1 | 221768.9 | TRUE |
| 244886.9 | 205542.7 | 241225.6 | 223120.2 | 181761   | 231213.9 | 179707.7 | 211652   | TRUE |
| 976126.1 | 805019.1 | 884735.5 | 909172.8 | 890738   | 843557.4 | 824199   | 879999.7 | TRUE |
| 164617.5 | 188124.6 | 148570.5 | 170950.5 | 189130.8 | 153571.2 | 221158   | 171689.3 | TRUE |
| 331892   | 348415.8 | 273294.1 | 361564.8 | 406023.1 | 284225.4 | 334313.4 | 387525.2 | TRUE |
| 51516    | 48005.4  | 37789    | 60816.4  | 75028.5  | 46178.7  | 69380.3  | 73569    | TRUE |
| 796580.2 | 817456   | 888081.8 | 886795.1 | 709521.3 | 764520.4 | 836191.1 | 747616.4 | TRUE |
| 1232829  | 1202020  | 1314241  | 1279992  | 1081865  | 1156342  | 1262837  | 1157457  | TRUE |
| 247475.5 | 265282   | 366694.5 | 344153.9 | 246490.9 | 362036.2 | 383754.2 | 310522   | TRUE |
| 53191.9  | 60846.2  | 55983.3  | 74839.7  | 62546.4  | 52178.3  | 73930.2  | 70075.6  | TRUE |
| 181833.9 | 213116.2 | 150696.5 | 183425.1 | 208140.3 | 182161.2 | 212473   | 176693.3 | TRUE |
| 66791.4  | 70272.4  | 40594.1  | 91667.1  | 58592.6  | 58053.6  | 69855.8  | 77890.7  | TRUE |
| 121242.9 | 142760.8 | 112319.4 | 126907.9 | 142378.8 | 128403.2 | 161074   | 145531.7 | TRUE |
| 56029.7  | 63418    | 59921.2  | 87576.7  | 62194.9  | 73260.4  | 54938.6  | 65257.2  | TRUE |
| 300168.9 | 333918.8 | 244455.5 | 272038.7 | 244827.1 | 255980.7 | 315641.4 | 249904.6 | TRUE |
| 197997.9 | 212672.8 | 171216.1 | 172460   | 194243   | 179970   | 213312.9 | 207439.4 | TRUE |
| 599939.8 | 521137.8 | 451628.2 | 472671.5 | 492952.5 | 421552.5 | 521945.4 | 505000.6 | TRUE |
| 230509   | 265866.1 | 247687.5 | 248272   | 229856.8 | 255328.1 | 263951   | 262661.4 | TRUE |
| 576280.6 | 568152.9 | 559657.7 | 690321.3 | 637631.2 | 584184.5 | 644791.4 | 658370.3 | TRUE |
| 58818.9  | 126298.8 | 58971.1  | 104667.9 | 111390.5 | 35706.5  | 48228    | 33371.7  | TRUE |
| 262828.1 | 268881.4 | 289415   | 258393.2 | 237231.5 | 249430.1 | 275845.5 | 275429   | TRUE |
| 448948.6 | 451786.9 | 525149.2 | 433676.9 | 420243.6 | 485570.6 | 429119.7 | 488927.8 | TRUE |
| 1751928  | 1578616  | 1894616  | 1784065  | 1435563  | 1716642  | 1637311  | 1675749  | TRUE |
| 1145277  | 1033960  | 1169228  | 1123628  | 1257193  | 1100134  | 1080920  | 1137797  | TRUE |
| 166814.7 | 152302   | 191464.7 | 195669.4 | 165694.7 | 192669.4 | 194882.3 | 198511.4 | TRUE |
| 199721.9 | 193373.6 | 255245.7 | 231026.2 | 189799.9 | 233925   | 244677.9 | 232446.7 | TRUE |

|          |          |          |          |          |          |          |          |      |
|----------|----------|----------|----------|----------|----------|----------|----------|------|
| 271160.5 | 241787.1 | 171669.2 | 137914   | 171339.9 | 160706.7 | 161398.9 | 144447.8 | TRUE |
| 342230.5 | 351767.2 | 330709.5 | 324469.2 | 387565.8 | 289771.3 | 389254.6 | 368516.7 | TRUE |
| 100292.5 | 91702.8  | 113677.7 | 117904.3 | 124986.8 | 119571   | 117327.9 | 141014.9 | TRUE |
| 323650.7 | 315429.8 | 300930.3 | 377537.6 | 360722   | 328597.6 | 353297.4 | 330061.1 | TRUE |
| 482738.5 | 502034   | 422102.6 | 521294.7 | 498495.7 | 448887.9 | 516217.4 | 489647.3 | TRUE |
| 215517.3 | 222664.7 | 156850.6 | 232042.3 | 222518.6 | 196972.4 | 248940.1 | 256720.6 | TRUE |
| 121981.7 | 131606.9 | 131563.9 | 149542   | 142615.7 | 144178.6 | 172387.8 | 150425.4 | TRUE |
| 167661.4 | 144084.3 | 186501.6 | 191221.2 | 177213.2 | 201585.6 | 190295.6 | 179385.4 | TRUE |
| 670023.1 | 667551.6 | 743519.4 | 722035.6 | 747643.8 | 734851.9 | 632522.7 | 703373.2 | TRUE |
| 255096.7 | 272009.9 | 304209.8 | 259402.3 | 267384.3 | 304715.4 | 289722.7 | 318275.7 | TRUE |
| 152151.7 | 146456.6 | 152763.5 | 178754.6 | 184585.9 | 145317.1 | 174633.5 | 166818.2 | TRUE |
| 462749.8 | 452412.8 | 550661.1 | 524327   | 405567.1 | 518293.1 | 510979.3 | 464519.5 | TRUE |
| 1479390  | 1499848  | 1155349  | 1387096  | 1410044  | 1246644  | 1565712  | 1509727  | TRUE |
| 932038.2 | 880609.3 | 725203.5 | 866555.4 | 828564   | 765926.1 | 902303.9 | 800485.6 | TRUE |
| 85564.4  | 78567.3  | 69031.2  | 83822.9  | 73643.7  | 76031.1  | 102595   | 81025.6  | TRUE |
| 177074.2 | 175096.6 | 172189.8 | 178184.1 | 179598.8 | 192991.9 | 165794.9 | 185571.4 | TRUE |
| 2445546  | 2294931  | 2163053  | 2502771  | 1983208  | 2550504  | 2349104  | 2222008  | TRUE |
| 403867   | 356079.4 | 360538.4 | 379277.1 | 385471.1 | 358682.2 | 385811.3 | 414007.4 | TRUE |
| 72973.1  | 62280    | 35973.4  | 51785.9  | 42302.3  | 47348.3  | 49766.5  | 59108.1  | TRUE |
| 151596.4 | 199431.8 | 122945.8 | 129718.8 | 144180.1 | 120701.6 | 170773.9 | 153478   | TRUE |
| 687877   | 706686   | 668982.2 | 578209.7 | 572714.2 | 672524.4 | 648281.2 | 584378.1 | TRUE |
| 330021.3 | 387413.5 | 363750.3 | 409525.8 | 366272   | 489904.8 | 418052.5 | 419542.9 | TRUE |
| 425689.4 | 486955.2 | 455857.5 | 537311.6 | 521527.1 | 451615.5 | 505976.1 | 549412.6 | TRUE |
| 114360.5 | 146319.5 | 110092.8 | 126853.3 | 154569.5 | 144762.3 | 126830   | 139196.3 | TRUE |
| 269411.8 | 262452.4 | 272006.6 | 283725.8 | 247277.4 | 274045.5 | 265340.1 | 283264.1 | TRUE |
| 77851.8  | 89358.1  | 69049.7  | 81075.1  | 82479.2  | 59048.2  | 116659.4 | 109273.2 | TRUE |
| 100429.3 | 156830.1 | 59043.7  | 152156.2 | 136499.9 | 70675    | 157680.6 | 174431.9 | TRUE |
| 34243.5  | 41431.6  | 17950.6  | 32053.6  | 38958.4  | 17964.4  | 45786.5  | 51310.5  | TRUE |
| 185067.9 | 197885.4 | 162678.2 | 203556.1 | 121167.3 | 187324.4 | 231637.5 | 200638   | TRUE |
| 274926   | 369133.5 | 281897.4 | 419722.3 | 101901.7 | 278273.6 | 341575.7 | 322283.8 | TRUE |
| 106801.3 | 125713   | 164706.3 | 198123.6 | 74246.5  | 163496.8 | 156075.2 | 153869.3 | TRUE |
| 48987.5  | 69464.3  | 61236    | 59282.9  | 37370.2  | 56451.8  | 59444.3  | 49631    | TRUE |
| 30321    | 13241.1  | 20985.9  | 8797.8   | 36804.9  | 9503.1   | 31202.3  | 23445.9  | TRUE |
| 118803.7 | 107862.7 | 87764    | 106711.7 | 111022.1 | 94055.4  | 135977.3 | 102066.3 | TRUE |
| 22167.6  | 23982.3  | 24264    | 35633.2  | 29099    | 16851.6  | 10419.5  | 14606.8  | TRUE |
| 59388.6  | 57715    | 62952.1  | 63459    | 58234.4  | 52286.2  | 44203.6  | 50500.3  | TRUE |
| 97174.1  | 84261.2  | 71174.2  | 83220.4  | 73925.3  | 76948.5  | 103322.3 | 89252.7  | TRUE |
| 273615.4 | 293246.9 | 242978.3 | 240397.8 | 246682.8 | 217888.1 | 303547.4 | 258524.6 | TRUE |
| 546238.7 | 529665.1 | 345248.1 | 493977.7 | 472856.8 | 380448.5 | 529660.2 | 453273.9 | TRUE |
| 287584   | 290396.2 | 297255.8 | 388644.2 | 396715.4 | 337968   | 429900   | 375647   | TRUE |
| 14655.8  | 9379     | 9192.7   | 6351.3   | 8462.7   | 5379.6   | 18579.8  | 21938    | TRUE |

|          |          |          |          |          |          |          |          |      |
|----------|----------|----------|----------|----------|----------|----------|----------|------|
| 65621.7  | 49730    | 48123.4  | 56967.2  | 50934.3  | 55935.9  | 65096.7  | 60685    | TRUE |
| 94869.4  | 88820.8  | 62751.6  | 80683.3  | 81898    | 89538    | 138216.4 | 92568.7  | TRUE |
| 42721.6  | 45711.5  | 21061.5  | 35146.5  | 22189.3  | 48740.5  | 83374.5  | 41473.4  | TRUE |
| 115339   | 93636.5  | 75020    | 101178.6 | 90936.5  | 123298.6 | 120341.7 | 122039.8 | TRUE |
| 18022.8  | 26024.6  | 21318.5  | 10878.3  | 19978.8  | 7937.4   | 10852.6  | 13030.1  | TRUE |
| 124589.3 | 117914.1 | 111923.9 | 113172.6 | 131621.3 | 161254.8 | 113041.2 | 148020.3 | TRUE |
| 143021.5 | 135679.7 | 151419.2 | 152898.4 | 117776.9 | 126938.2 | 149123.5 | 150144.3 | TRUE |
| 121133.5 | 121693   | 114827.5 | 113488.3 | 110528.9 | 125015.2 | 123402.9 | 129919.6 | TRUE |
| 47210.2  | 31397.1  | 45967    | 55636.4  | 29652.2  | 36545.4  | 39406.2  | 32544    | TRUE |
| 81436.2  | 69274.1  | 73892.9  | 65470.3  | 77413.5  | 91082.7  | 69665.3  | 84127.6  | TRUE |
| 593395.5 | 642614   | 389821.6 | 489634.8 | 618201.6 | 482155.8 | 593746.3 | 581964   | TRUE |
| 893172.7 | 955839.3 | 608693.8 | 774534.9 | 940721   | 600583.5 | 922237.4 | 875865.3 | TRUE |
| 276219.2 | 286317.9 | 221058.6 | 349780.8 | 270500.5 | 255730.8 | 344510   | 305329.3 | TRUE |
| 396379   | 446576   | 398069.7 | 457133.9 | 522975.3 | 390620.5 | 506021.9 | 483283.5 | TRUE |
| 26034.9  | 40676.1  | 34894.3  | 44786.7  | 46076.4  | 13314.7  | 24524.1  | 11262.4  | TRUE |
| 93541.2  | 128534.8 | 71118.4  | 78277    | 112134.3 | 73603    | 109997.8 | 123662.8 | TRUE |
| 861588.7 | 999635.2 | 989031.6 | 1041090  | 777985.3 | 749193.3 | 998664.3 | 812217.8 | TRUE |
| 1116200  | 1269120  | 1338667  | 1419283  | 1028136  | 1336545  | 1630937  | 1105360  | TRUE |
| 116032.9 | 120989.8 | 170710.3 | 175008   | 112510.5 | 147301.3 | 149991.8 | 157082   | TRUE |
| 47906.5  | 60220.6  | 56513.9  | 60759.4  | 47549    | 47000.9  | 56877.3  | 53205.9  | TRUE |
| 63094.6  | 64643.9  | 75869    | 69905.1  | 58135    | 55318.2  | 70564.9  | 68832.2  | TRUE |
| 1230766  | 1336265  | 1010471  | 1167043  | 1278302  | 972351.5 | 1380410  | 1285264  | TRUE |
| 160953.5 | 140241.5 | 116165.7 | 176012.5 | 148028.3 | 170006.7 | 185636.6 | 158019.7 | TRUE |
| 1539050  | 1404765  | 1450345  | 1660612  | 1235352  | 1301984  | 1367097  | 1295515  | TRUE |
| 2664200  | 2441026  | 2771111  | 2893446  | 2003277  | 2330453  | 2375559  | 2402368  | TRUE |
| 414104.6 | 358233.9 | 476226.3 | 508100.1 | 417065.9 | 474689.9 | 419106.4 | 412845.3 | TRUE |
| 60453.3  | 81488.4  | 58988.9  | 49217.5  | 65128.7  | 65388.1  | 68914.1  | 64992.3  | TRUE |
| 632469.6 | 796385.7 | 382067.5 | 521980.3 | 720796.3 | 421250.2 | 736431.3 | 717803.8 | TRUE |
| 227370.8 | 186789.2 | 262802.1 | 274582.7 | 155014.6 | 195937.6 | 233016   | 183197.8 | TRUE |
| 701915.9 | 656198.6 | 871516.8 | 856340.8 | 590448.8 | 717597.7 | 804658.7 | 715728.8 | TRUE |
| 4400108  | 4340243  | 5192843  | 5357801  | 3563631  | 4306513  | 4546656  | 4480199  | TRUE |
| 91298.1  | 95420.2  | 89407.1  | 99514.3  | 84686.7  | 87197.5  | 105986.7 | 91353.8  | TRUE |
| 41317.9  | 68412    | 17637.9  | 8550.8   | 37544.6  | 19460.1  | 36523.3  | 32002.4  | TRUE |
| 95153.5  | 98528.1  | 90407.9  | 92783.3  | 96014.5  | 152224.7 | 111972.9 | 100289.8 | TRUE |
| 45277.3  | 47001.2  | 47874.2  | 47610.1  | 49002.7  | 45128.7  | 39954.5  | 54976.6  | TRUE |
| 49072.7  | 56877.4  | 57087.7  | 62583.9  | 51960.7  | 61302    | 43351.3  | 45765.1  | TRUE |
| 38717.3  | 28114.4  | 32886.6  | 29617.1  | 27355.2  | 59810.6  | 13362.7  | 44473.5  | TRUE |
| 46738.8  | 27272.4  | 30224.9  | 67812.4  | 33651.3  | 38491.7  | 36862    | 42192.9  | TRUE |
| 35989.6  | 46652.3  | 39504.2  | 34070.2  | 60739.8  | 40624.1  | 55402.6  | 47204    | TRUE |
| 167306.5 | 158599.8 | 159134.8 | 158872.6 | 161097.3 | 139843.6 | 113045.9 | 134702.6 | TRUE |
| 39645.3  | 31771.6  | 24924.7  | 37503.4  | 31814.4  | 22563.5  | 34021.7  | 43244.1  | TRUE |
| 126861.7 | 73973.1  | 154007.9 | 152417.1 | 172239.6 | 143324.1 | 111055.3 | 137345.8 | TRUE |
| 799574.9 | 827472.9 | 745659.5 | 746265   | 813183.8 | 791175.5 | 891144   | 803049.9 | TRUE |
| 456506.1 | 420392.2 | 323342.9 | 325870.8 | 480443.2 | 512263.9 | 603118.6 | 487782   | TRUE |
| 34547.7  | 35926.6  | 31967.3  | 41992.6  | 42531.3  | 55239.6  | 43898    | 36513.4  | TRUE |
| 85297.2  | 53904.6  | 73594    | 88198.9  | 84760.9  | 81497.7  | 74483.5  | 89283.5  | TRUE |
| 43892.7  | 11310.3  | 40423.6  | 49270.2  | 41810.7  | 45975.7  | 27501.5  | 47306.1  | TRUE |
| 14471.6  | 20550.2  | 16118.7  | 7855.9   | 10519.7  | 12750.9  | 11213.5  | 20538.2  | TRUE |

|          |          |          |          |          |          |          |          |      |
|----------|----------|----------|----------|----------|----------|----------|----------|------|
| 128110.3 | 125665.3 | 103690.3 | 134364.8 | 105325.6 | 125370.9 | 135551.6 | 148966.3 | TRUE |
| 599112.2 | 521821   | 481108.1 | 621379.2 | 547859.8 | 515136.5 | 442876.6 | 527232.5 | TRUE |
| 132349.7 | 86938.7  | 117076.3 | 115772.5 | 106865.9 | 150607.6 | 117891.3 | 135318.3 | TRUE |
| 148049.7 | 153691.9 | 162627   | 98313.3  | 167951.6 | 123925.4 | 177066.7 | 113319.3 | TRUE |
| 232106.5 | 215657.5 | 160127.9 | 296678.8 | 345623.4 | 162645.1 | 242764.8 | 309710   | TRUE |
| 23057    | 32019    | 17785.5  | 35618.8  | 33500.1  | 16061.4  | 36834.4  | 37055.8  | TRUE |
| 24527.3  | 21645    | 12257.7  | 27079.5  | 29922.7  | 16059.6  | 22664.1  | 31806.3  | TRUE |
| 55895.5  | 46139.8  | 49719.1  | 46453.2  | 61437.9  | 43777.4  | 55533.9  | 64676.8  | TRUE |
| 23553.3  | 35469    | 25201.1  | 32361.2  | 15266.9  | 43690    | 35998.9  | 27170.8  | TRUE |
| 264537.3 | 318235.2 | 273743.4 | 269230   | 156907.7 | 348114.7 | 370977.7 | 313576.3 | TRUE |
| 27585.4  | 34432.4  | 29852.2  | 10355.4  | 21152.6  | 29569    | 40134.7  | 38536.3  | TRUE |
| 146227.5 | 139124.4 | 121055.9 | 117779.8 | 127374.9 | 169747.8 | 163913.4 | 171142.5 | TRUE |
| 98017.5  | 86838.1  | 92094.3  | 102688.7 | 112169.8 | 105312.9 | 91847    | 125392.6 | TRUE |
| 36518.9  | 28914.4  | 47495.9  | 32536.9  | 37649.7  | 38580.1  | 26550.1  | 35528.2  | TRUE |
| 82044.1  | 136912.6 | 117218.1 | 90198.8  | 129181.3 | 90547.3  | 85968    | 73583.7  | TRUE |
| 103532.4 | 133002.5 | 90705.9  | 149842.1 | 143384.7 | 80249    | 102603.1 | 96539.7  | TRUE |
| 410858.8 | 324342.7 | 434296.2 | 434827.5 | 476893.8 | 462553.8 | 306644.7 | 456353.2 | TRUE |
| 205686.9 | 270464   | 149721.6 | 169718.7 | 222353.3 | 224469.8 | 289702.5 | 268017.1 | TRUE |
| 1497690  | 1456233  | 903572   | 1031922  | 1630154  | 1484436  | 1679944  | 1658249  | TRUE |
| 54269.6  | 40218.2  | 39886.4  | 46032    | 59276.1  | 66448.7  | 46973.3  | 62552.6  | TRUE |
| 53185.7  | 45114.5  | 49610.8  | 65557.8  | 70657.4  | 82464.1  | 59717.7  | 84844.1  | TRUE |
| 891970.1 | 605409.3 | 1136233  | 974759.3 | 1011567  | 1160473  | 707428.5 | 984259.6 | TRUE |
| 1868013  | 1251730  | 2026709  | 2007745  | 2043166  | 2412544  | 1501153  | 2311785  | TRUE |
| 352041.8 | 306560.9 | 143710.1 | 194349   | 272963.4 | 312740.1 | 293800.6 | 310956.7 | TRUE |
| 45869.4  | 48087.4  | 51659.9  | 37549.7  | 48894.8  | 42870.9  | 53576.5  | 60993.3  | TRUE |
| 109352.7 | 100283.3 | 80823.8  | 115047.6 | 117816.3 | 125644.5 | 95399.8  | 134216.8 | TRUE |
| 65955.8  | 50257.2  | 53008.6  | 68978.3  | 81157.6  | 61222.5  | 53482.7  | 64126.6  | TRUE |
| 166541   | 150493.4 | 104487.8 | 117115.5 | 136258   | 178915.2 | 146179.3 | 170073   | TRUE |
| 17947.9  | 25802    | 5851     | 25388.5  | 16968.5  | 29543.5  | 11450.5  | 28027.9  | TRUE |
| 94912    | 107825.2 | 75853    | 108468.8 | 117500   | 128269.1 | 133686.1 | 136156   | TRUE |
| 165588.9 | 132915.2 | 142230.4 | 114765.5 | 146220.3 | 116219   | 118227.1 | 124119.3 | TRUE |
| 52321    | 40792.1  | 74509.1  | 59179    | 57106.5  | 70391.3  | 51488.8  | 71208    | TRUE |
| 680768.8 | 725315.4 | 564549.7 | 549536.3 | 774600.2 | 727916.8 | 781623.4 | 730127.6 | TRUE |
| 682568.5 | 762401.1 | 442852.6 | 490359.5 | 747906.6 | 783581.3 | 741634.7 | 753321.2 | TRUE |
| 20731.3  | 24144.4  | 27950.4  | 34339.3  | 55705.2  | 44095.7  | 34734.7  | 33704    | TRUE |
| 81327.4  | 100912.6 | 71383    | 110356.1 | 112269.4 | 95260.5  | 126668.5 | 69986.6  | TRUE |
| 51005.7  | 52321.7  | 43864.7  | 44568.2  | 39714.7  | 53905.4  | 53318.7  | 34886.5  | TRUE |
| 531503.1 | 423936   | 450187.6 | 460094.5 | 611631.2 | 652922.1 | 432261.5 | 654802   | TRUE |
| 65399    | 57186.3  | 64704.5  | 77977.6  | 74367.3  | 50165.6  | 74158    | 73194.5  | TRUE |
| 233613.6 | 105344.9 | 271291.8 | 221260.4 | 185673   | 304693.8 | 146962.2 | 160935.8 | TRUE |

|          |          |          |          |          |          |          |          |      |
|----------|----------|----------|----------|----------|----------|----------|----------|------|
| 211989   | 166073.9 | 223653.3 | 214567.3 | 185605.8 | 236038.4 | 152062.4 | 194995   | TRUE |
| 332197.4 | 253982.9 | 384318.1 | 316972.4 | 300855.9 | 408525.8 | 307657.6 | 319095   | TRUE |
| 56274.5  | 87992.7  | 39183.1  | 45202    | 67649.7  | 62323.9  | 59780.5  | 63858    | TRUE |
| 1089256  | 547019.9 | 1261392  | 1342239  | 809553.6 | 1335701  | 704150.9 | 853179.3 | TRUE |
| 2285811  | 1102501  | 2683538  | 2933217  | 1701774  | 2838400  | 1318911  | 1849081  | TRUE |
| 973376.6 | 462686.2 | 413977.9 | 406613.4 | 782996.8 | 809603.5 | 515253.6 | 788339.4 | TRUE |
| 48031.6  | 91659.6  | 90642.3  | 59428.9  | 79966.4  | 38259.5  | 33676.1  | 38440.6  | TRUE |
| 2069378  | 1617477  | 2135698  | 2355941  | 1849862  | 2235272  | 1842518  | 1921386  | TRUE |
| 2291734  | 1902540  | 1827204  | 1820606  | 2318655  | 2728518  | 1962025  | 2566211  | TRUE |
| 531147.7 | 449199.3 | 553577.6 | 537656.5 | 594315.4 | 600422.8 | 504390.6 | 631472.1 | TRUE |
| 61280    | 50610.7  | 45975.6  | 63909.2  | 43586    | 63585.5  | 59296.5  | 71486.9  | TRUE |

|          |          |          |          |          |          |          |          |      |
|----------|----------|----------|----------|----------|----------|----------|----------|------|
| 181621.2 | 134026.2 | 238913.3 | 190904.7 | 178405.9 | 234426.5 | 139717.1 | 204842.5 | TRUE |
| 215876.6 | 165657.3 | 236443.6 | 253227.7 | 260311.9 | 218961.1 | 171469.3 | 248714.5 | TRUE |
| 95278.2  | 95697.1  | 110370.3 | 111412   | 107159.5 | 114241.5 | 83118.2  | 120160.6 | TRUE |
| 220708.4 | 266087.4 | 404862.4 | 215894.1 | 195596.8 | 242499.6 | 183280.9 | 195174.5 | TRUE |
| 29138.6  | 9763.9   | 22565.1  | 5165.3   | 17783.4  | 42365.4  | 12649.9  | 15324.1  | TRUE |
| 71551.3  | 60622.3  | 60485    | 57565.1  | 59339.6  | 80103.8  | 74531.7  | 84802.2  | TRUE |
| 180178.9 | 180888.9 | 173241.6 | 170969.3 | 185538.3 | 223798   | 209886.6 | 207311.1 | TRUE |
| 568808.5 | 427476.1 | 642127.6 | 845956.7 | 577107.6 | 776609.9 | 534762.1 | 610522.6 | TRUE |
| 344898.6 | 287305.3 | 424259.1 | 518182.6 | 389837.7 | 484426   | 300705.5 | 412867.6 | TRUE |
| 183101.2 | 128624.7 | 187983.2 | 228903.7 | 175259.2 | 222749.2 | 166353   | 190567.6 | TRUE |
| 93499.7  | 87573.4  | 56119.7  | 81883.3  | 112610.7 | 124572   | 86292.1  | 116847.6 | TRUE |
| 91750.7  | 81378.4  | 55497.7  | 74534.9  | 114338.5 | 120751.2 | 96581.5  | 106839.3 | TRUE |
| 211392.8 | 205983.9 | 172888.6 | 216753   | 277808.5 | 299315.7 | 226720.5 | 303313.6 | TRUE |
| 313282.3 | 292043.4 | 220124.6 | 262537.8 | 414199   | 438878.4 | 326781   | 421517.9 | TRUE |
| 212872.5 | 153987.7 | 215036   | 252245.1 | 174078.5 | 239591.4 | 168793.8 | 170929.1 | TRUE |
| 37331.7  | 35680    | 31740.1  | 45058.8  | 38434.3  | 53105.1  | 35946.4  | 45636    | TRUE |
| 923033.1 | 758174.1 | 914467.3 | 1243132  | 938715.4 | 1072844  | 872048   | 1013401  | TRUE |
| 1105866  | 976276.8 | 910548.7 | 934984.9 | 1301833  | 1423872  | 1154666  | 1405929  | TRUE |
| 1137116  | 1032970  | 964643.6 | 980663.6 | 1440459  | 1488265  | 1161435  | 1476138  | TRUE |
| 44838.3  | 70098.8  | 53502.1  | 62955.7  | 70236.8  | 51387.4  | 51159.8  | 33213.6  | TRUE |
| 242592.2 | 241154.2 | 237621.6 | 260991.5 | 189911.1 | 259807.3 | 224574.7 | 225043.3 | TRUE |
| 256922.1 | 191124.5 | 184623.4 | 220935.8 | 162896.1 | 193256.4 | 173507.7 | 171701.3 | TRUE |
| 280221.4 | 238331.5 | 340608.3 | 347681.9 | 245264.8 | 361100.3 | 236962.8 | 276483.9 | TRUE |
| 896263.2 | 702776.6 | 816157.6 | 880311.3 | 696015.6 | 881708   | 719643.5 | 798131.9 | TRUE |
| 582510.7 | 635341.5 | 1069804  | 568619.3 | 643525.5 | 615018.3 | 492152.9 | 619006.9 | TRUE |
| 102292.9 | 82522.6  | 124336.1 | 98674.5  | 121778.2 | 127189.2 | 80190.8  | 117568.8 | TRUE |
| 415765.3 | 318545.6 | 390683.1 | 526833.6 | 459211.9 | 680600.3 | 558792.6 | 615407.8 | TRUE |
| 290230.1 | 271494   | 263008.5 | 226287.8 | 266661.7 | 289386   | 269826   | 318031.3 | TRUE |
| 662240.6 | 645671.5 | 547444.5 | 769926.9 | 697862.4 | 666995.4 | 711528.1 | 699622.4 | TRUE |
| 704029.6 | 964779.4 | 629303.3 | 652962   | 823303.1 | 669530.9 | 706095.2 | 784475.5 | TRUE |
| 463149.3 | 526950.8 | 417144.6 | 479124.6 | 527906.8 | 400026.3 | 493491   | 549860.1 | TRUE |
| 42530.5  | 82358.5  | 56975.3  | 70494.7  | 99143.3  | 28316.6  | 65570.1  | 34703.9  | TRUE |
| 844886.3 | 771658.7 | 937703.3 | 866751.4 | 712604.6 | 771279.5 | 844190.9 | 763363.6 | TRUE |
| 2316926  | 2359840  | 2651161  | 2397518  | 2086575  | 2259258  | 2289452  | 2127441  | TRUE |
| 646398.4 | 615184   | 675642.2 | 701435   | 574928.8 | 698057.7 | 766875.4 | 720966.2 | TRUE |
| 20926.4  | 19943.5  | 12176.4  | 8111.9   | 17746.6  | 10644.6  | 18788    | 8678.4   | TRUE |
| 145377.7 | 144775.5 | 126186.7 | 146530.1 | 127274.8 | 170077.2 | 174934.9 | 161069.6 | TRUE |



|          |          |          |          |          |          |          |          |      |
|----------|----------|----------|----------|----------|----------|----------|----------|------|
| 337719.8 | 301464.4 | 237064.8 | 292248.5 | 247128   | 255216.3 | 300348   | 302412.7 | TRUE |
| 85587.5  | 39052.9  | 39776.5  | 46227.2  | 91692.1  | 65932.3  | 45014.2  | 55901.8  | TRUE |
| 31551.7  | 24007.9  | 26827.3  | 22435.3  | 23179.5  | 25047.3  | 26815.3  | 36895.5  | TRUE |
| 141560   | 181816.7 | 98761.7  | 189453.7 | 235484   | 130676.8 | 180788.4 | 220801.9 | TRUE |
| 86791.3  | 81796.7  | 65313.6  | 95281    | 129362.2 | 79141.6  | 117351.5 | 144961.1 | TRUE |
| 472138.5 | 382029.6 | 404612.9 | 530326.8 | 432118.9 | 486039.7 | 492263.8 | 471025.5 | TRUE |
| 145621.5 | 142789.9 | 151237.5 | 220701.8 | 135743.5 | 191992.3 | 238635.5 | 158971.6 | TRUE |
| 1409376  | 1297390  | 958292.9 | 1378929  | 1402832  | 907514.5 | 1410194  | 1372815  | TRUE |
| 221250.3 | 194404.9 | 235927.9 | 335814.1 | 283625.1 | 262797.8 | 272898.7 | 278661.9 | TRUE |
| 1241015  | 1257626  | 1135163  | 1507646  | 959076.8 | 1324505  | 1348771  | 1349303  | TRUE |
| 24736.2  | 28788    | 34457.8  | 45149.4  | 41209    | 30883.1  | 45432.8  | 40029.9  | TRUE |
| 31426.5  | 40826    | 29668.6  | 46233    | 47427    | 30778.7  | 36907.7  | 37111.9  | TRUE |
| 65988.7  | 48292.8  | 49124.2  | 67162.7  | 66311.2  | 45433.7  | 43230.9  | 72385.4  | TRUE |
| 1058187  | 885411.5 | 888548.3 | 1004546  | 1271461  | 969358.4 | 980381.1 | 1302486  | TRUE |
| 618967.3 | 593322.5 | 463951.6 | 540770   | 631427.4 | 499352   | 611459.1 | 693776.8 | TRUE |
| 313627.6 | 311248.2 | 223813.5 | 286572.2 | 325334.6 | 228531.4 | 310966   | 341430.3 | TRUE |
| 173440   | 176203.9 | 175687.6 | 228057.7 | 230123.7 | 196807.6 | 207743.1 | 235120.9 | TRUE |
| 674692.5 | 769915.3 | 736487.3 | 816037   | 540588.4 | 724979.2 | 802830.1 | 714214.9 | TRUE |
| 2263440  | 2467113  | 2353813  | 2484839  | 1754016  | 2333073  | 2658476  | 2277039  | TRUE |
| 97743.2  | 82197.1  | 98241.8  | 120647.1 | 98244    | 120709.3 | 112460.8 | 100737.5 | TRUE |
| 33645.8  | 41789.4  | 36866.9  | 26332.4  | 42015.1  | 28386.5  | 44242.3  | 47589.5  | TRUE |
| 202517   | 242191.5 | 110737.3 | 229990.3 | 357027.5 | 102601.4 | 226016   | 277418.6 | TRUE |
| 98049.8  | 105508.9 | 100381.2 | 83288.1  | 105358.7 | 116864.5 | 106188.9 | 95394.4  | TRUE |
| 19552.4  | 11037.3  | 22788.6  | 35988.2  | 46927.4  | 22178.7  | 33491.9  | 27772.1  | TRUE |
| 46240.4  | 79116    | 52373.1  | 73148.5  | 75253.6  | 67125.3  | 60077    | 95155.6  | TRUE |
| 82069.9  | 78622.6  | 108767.9 | 77926.2  | 98778.8  | 116936.7 | 89223.9  | 91453    | TRUE |
| 145899   | 136063   | 198642.2 | 116432.1 | 161438.8 | 202180.4 | 103198.1 | 168811   | TRUE |
| 42076.5  | 24851.3  | 31436.4  | 43112    | 52661.4  | 19262.8  | 36223.4  | 22728.9  | TRUE |
| 60027.8  | 58143.9  | 56602    | 61267.6  | 71991.7  | 56663.5  | 69553.8  | 63116.2  | TRUE |
| 145293.8 | 131837.9 | 137264.5 | 139565.7 | 140698.2 | 203570.5 | 153944.9 | 163754.6 | TRUE |
| 258950   | 235440   | 276202.5 | 290257.5 | 306049   | 278020.9 | 285157.4 | 293576.1 | TRUE |
| 295706.8 | 301012.2 | 310576.9 | 306623.2 | 366019.8 | 303643.8 | 360017.8 | 320527.4 | TRUE |
| 341954.6 | 356235.1 | 321174.7 | 367444.2 | 457051.3 | 329870.1 | 381743.8 | 513258.1 | TRUE |
| 1138036  | 1319420  | 1283948  | 1249731  | 1035625  | 1225210  | 1454831  | 1100588  | TRUE |
| 57079.2  | 67426.7  | 160468.8 | 86922.6  | 59029.8  | 55723.6  | 37940    | 48139.1  | TRUE |
| 756824.2 | 650175.4 | 656377.8 | 721942.2 | 842902.7 | 707846.4 | 769414.3 | 789794.4 | TRUE |
| 2286305  | 1986007  | 1912448  | 1899145  | 2440032  | 2135996  | 2146971  | 2062770  | TRUE |
| 65332.2  | 65347.6  | 79029.9  | 87893.7  | 83172.1  | 77232.7  | 69847    | 73355.5  | TRUE |

|          |          |          |          |          |          |          |          |      |
|----------|----------|----------|----------|----------|----------|----------|----------|------|
| 653683.5 | 563749.8 | 546390.6 | 582383.1 | 666220.6 | 569461.9 | 616534.6 | 671627.9 | TRUE |
| 64817.4  | 52381.7  | 52340.2  | 37149.1  | 37894.9  | 57703.2  | 56553.4  | 60617.9  | TRUE |
| 10017.2  | 8367.7   | 21626.9  | 7308.9   | 13163.3  | 10694.1  | 12180.1  | 9126.6   | TRUE |
| 31465    | 28817.3  | 27283.3  | 31762.6  | 42858.4  | 32572.4  | 36761    | 32832.2  | TRUE |
| 360620   | 314055.7 | 336631.8 | 358944.1 | 318099.7 | 354224.7 | 312838.4 | 310244.3 | TRUE |
| 176156.1 | 151714.7 | 137435.6 | 130611.3 | 136905.4 | 201352.7 | 128703.1 | 158981.8 | TRUE |
| 133029   | 134497.5 | 130964.1 | 133214.4 | 121601.8 | 156238.4 | 127670.8 | 136097.2 | TRUE |
| 407622.7 | 374437.9 | 375162.4 | 363324.8 | 351330.2 | 415627.5 | 344561.8 | 316532.1 | TRUE |
| 128824.7 | 120604.7 | 142685.5 | 151799.1 | 136089.7 | 151551.9 | 125538.9 | 156284.7 | TRUE |
| 100453.7 | 77188.8  | 121143.8 | 117173.6 | 97828.1  | 124851.1 | 91209.4  | 108938.8 | TRUE |
| 566443.5 | 545614.6 | 546432.4 | 552551.2 | 551672.7 | 544960.5 | 534359   | 553945   | TRUE |
| 350150.4 | 327428.3 | 267843.9 | 297605.7 | 420603.8 | 341311.8 | 310886.2 | 369292.3 | TRUE |
| 426250.8 | 398296.2 | 441338   | 362612.4 | 409948.6 | 434697.1 | 406467.5 | 429281.5 | TRUE |
| 443005.5 | 450627.9 | 346734.6 | 435815.9 | 438162.4 | 378089.3 | 390392.7 | 471457.2 | TRUE |
| 7329486  | 6619417  | 5513263  | 6849895  | 7737233  | 6494699  | 6663475  | 7650843  | TRUE |
| 83237.7  | 98846.7  | 91213.7  | 56999.7  | 100645.9 | 74477    | 90857.6  | 85512.5  | TRUE |
| 156464.9 | 198619.9 | 197928.6 | 165399.4 | 162525.8 | 208152.4 | 186208.4 | 131886.3 | TRUE |
| 91981.3  | 94654.9  | 104492.9 | 75513.8  | 61473.7  | 107694.6 | 114391.4 | 71950.4  | TRUE |
| 84082    | 83625.7  | 137467.4 | 74477.1  | 61770.3  | 150897.8 | 96170.1  | 53711.5  | TRUE |
| 281581   | 137822.2 | 281415.1 | 260920.1 | 504004.2 | 183655.1 | 177987.4 | 199850.8 | TRUE |
| 91673.9  | 99593.9  | 161028.6 | 107785.4 | 76455    | 151264.6 | 108948.7 | 89417.5  | TRUE |
| 119163.9 | 123242   | 187389.4 | 93787.4  | 87055.3  | 191079   | 138138.5 | 78420.2  | TRUE |
| 139395.9 | 153844.8 | 232841   | 172127.2 | 125993.3 | 259749.1 | 190022.9 | 146566.9 | TRUE |
| 206913.5 | 212904.4 | 339817.6 | 239972.7 | 225781.4 | 376769.3 | 292788.4 | 208945.3 | TRUE |
| 68709    | 66629.2  | 90378.5  | 49102    | 54509    | 74943.1  | 66905.1  | 45362.2  | TRUE |
| 147729.2 | 178290.3 | 201907.5 | 174891.5 | 148720.6 | 181754.6 | 197187.9 | 145280.2 | TRUE |
| 100007.5 | 76793.1  | 76659.1  | 132055.4 | 134249.4 | 90807.4  | 65907.6  | 109990.5 | TRUE |
| 691298.1 | 885818.2 | 831891.8 | 534210.7 | 461420   | 936724.5 | 880284.3 | 521939.7 | TRUE |
| 53220.3  | 69441.6  | 58334.7  | 44136.1  | 54904.8  | 58759.3  | 59317.7  | 42014.5  | TRUE |
| 683701.4 | 665011.3 | 790408   | 739757.4 | 899483.2 | 490876.1 | 660205.6 | 507218.3 | TRUE |
| 76403.4  | 74371    | 124092.9 | 43845.6  | 68746.6  | 104138.3 | 69095.2  | 119695.8 | TRUE |
| 70553.9  | 64076.5  | 52307.5  | 71171.2  | 51906.5  | 100163.7 | 68701.2  | 75281.6  | TRUE |
| 64337    | 34658.8  | 46502.9  | 94188.5  | 85713.3  | 40895.6  | 53813.6  | 37746.6  | TRUE |
| 25968.1  | 31151.5  | 29823.3  | 48069.3  | 50442.9  | 4318.7   | 26090.9  | 25560.3  | TRUE |
| 301673.2 | 332706   | 456884.4 | 315769.3 | 285955.3 | 519389.1 | 356276.7 | 240420.9 | TRUE |
| 562390.4 | 424731.1 | 606103.6 | 632442.6 | 682924.2 | 457944.4 | 450830.4 | 450718.8 | TRUE |

|          |          |          |          |          |          |          |          |      |
|----------|----------|----------|----------|----------|----------|----------|----------|------|
| 154678   | 107471.9 | 144090.5 | 183710.4 | 164622.2 | 112254.1 | 114521.2 | 115610.4 | TRUE |
| 202775.2 | 221198.7 | 309613.9 | 171890.6 | 158838.2 | 348361.1 | 231257.7 | 134193.4 | TRUE |
| 274882.7 | 339816.5 | 339518.5 | 246998.4 | 248665   | 484243.8 | 324805.1 | 242962.8 | TRUE |
| 31839    | 25349.1  | 7794.7   | 35207.9  | 33073.2  | 8773.2   | 30433.8  | 21130    | TRUE |
| 47925    | 27132.1  | 42993    | 49700.8  | 74466.2  | 21860    | 33208.3  | 22672.6  | TRUE |
| 179512.1 | 161211.9 | 262969   | 181789.6 | 208094.4 | 291686.7 | 187307.3 | 166332.9 | TRUE |
| 128881.6 | 98049.6  | 93370.4  | 108127.8 | 150239   | 72461.5  | 69466.8  | 99692    | TRUE |
| 247382.3 | 230873.7 | 333232.7 | 237533.8 | 313723.3 | 327874.8 | 245848.7 | 335264.1 | TRUE |
| 88247.2  | 86169.7  | 116255.7 | 85075.7  | 60159.9  | 111222.8 | 60324.1  | 63374.3  | TRUE |
| 103702.1 | 73954.1  | 138889.4 | 87408.6  | 191462.7 | 72599.9  | 73461.3  | 74800.2  | TRUE |
| 636169.1 | 591791.1 | 586437.3 | 656867.3 | 971542.8 | 479582.7 | 538914.6 | 525150   | TRUE |
| 56015.4  | 47568.1  | 49234.2  | 44055    | 39352.7  | 52706.3  | 39006.4  | 42311.2  | TRUE |
| 156572.9 | 150884.3 | 143120.1 | 177059.2 | 159063.5 | 174315.4 | 149041.4 | 171909.5 | TRUE |
| 708842.3 | 583409.3 | 723183.5 | 731174.4 | 937520.8 | 781304.8 | 597707.2 | 787724.8 | TRUE |
| 1106283  | 925599.1 | 964265.4 | 1100979  | 774002.5 | 1057693  | 931491.8 | 867467   | TRUE |
| 384872.8 | 356809.6 | 352973.5 | 410560.8 | 387768.8 | 422190   | 304156.8 | 405758.8 | TRUE |

|          |          |          |          |          |          |          |          |      |
|----------|----------|----------|----------|----------|----------|----------|----------|------|
| 414206.5 | 619982.6 | 391767.4 | 1212656  | 398859   | 423951.6 | 407496.3 | 333427   | TRUE |
| 422378.4 | 426077   | 487678.2 | 390697.2 | 407251.5 | 444054.6 | 496546.7 | 428750.5 | TRUE |
| 190486.1 | 184232.9 | 236007.4 | 201502.7 | 145437.5 | 233096.4 | 185739.2 | 157761.9 | TRUE |
| 70033.2  | 48710.9  | 59455.7  | 55960.5  | 41023.5  | 55078.2  | 50895.8  | 63247    | TRUE |

|         |         |         |       |         |          |         |         |      |
|---------|---------|---------|-------|---------|----------|---------|---------|------|
| 93865.5 | 73557.7 | 64702.1 | 74765 | 54338.7 | 108859.6 | 89485.3 | 95909.4 | TRUE |
|---------|---------|---------|-------|---------|----------|---------|---------|------|

|        |          |          |          |          |        |          |          |      |
|--------|----------|----------|----------|----------|--------|----------|----------|------|
| 387514 | 303498.6 | 380463.1 | 425788.7 | 321355.2 | 435930 | 365305.4 | 460982.5 | TRUE |
|--------|----------|----------|----------|----------|--------|----------|----------|------|

|          |          |          |          |          |          |          |          |      |
|----------|----------|----------|----------|----------|----------|----------|----------|------|
| 436052.6 | 403808   | 440089   | 429650.8 | 418050.6 | 456147.7 | 439282.3 | 383944.1 | TRUE |
| 221641.3 | 229923   | 233598.8 | 226365.4 | 243838.3 | 247135.1 | 251119.6 | 210506.4 | TRUE |
| 924542   | 763829.2 | 1009388  | 969261.1 | 984265.1 | 859463.7 | 777842.9 | 857260.1 | TRUE |
| 733541.5 | 575637.6 | 734600.5 | 683775.1 | 737403.6 | 710375.3 | 618211.3 | 703102.4 | TRUE |
| 57778.8  | 56245.2  | 54319.5  | 55682.3  | 47693    | 60243.6  | 58446.9  | 47236.5  | TRUE |

|          |          |          |          |          |          |          |          |      |
|----------|----------|----------|----------|----------|----------|----------|----------|------|
| 162954.5 | 145792.4 | 131529.4 | 155101.4 | 131837.5 | 214933.7 | 159298.8 | 175390.7 | TRUE |
| 102947.5 | 74042    | 77412.4  | 94782.4  | 82567.1  | 131495.3 | 106609.6 | 99022.4  | TRUE |
| 105208.1 | 100179.3 | 75944.1  | 107186.8 | 111031.2 | 143665.1 | 112835.8 | 140611.8 | TRUE |
| 172949.1 | 176946.1 | 208688.5 | 374034   | 292193.7 | 230387.8 | 246838.8 | 181503.6 | TRUE |
| 57186.5  | 57408.2  | 73822.1  | 84660.3  | 45536    | 70971.4  | 87212.7  | 62153.6  | TRUE |
| 61964.8  | 58581.5  | 65288.6  | 71300.2  | 56365.7  | 57952.5  | 51753.3  | 46928.5  | TRUE |
| 50122.5  | 37163.6  | 49499.3  | 54846.7  | 54650.5  | 98166.2  | 43889.1  | 53896.1  | TRUE |
| 52311.4  | 36301    | 53761.6  | 50644.1  | 64277.6  | 62043.1  | 41849.3  | 42044.4  | TRUE |
| 103930.3 | 103695.8 | 87442.2  | 111090.5 | 124603.6 | 79309    | 132039.8 | 120365.5 | TRUE |
| 212277.6 | 205398.9 | 264467   | 252738.3 | 178026.1 | 265449.9 | 201973.3 | 223002.7 | TRUE |
| 606099.4 | 562513.2 | 576970.7 | 603812.9 | 496471.9 | 573255.9 | 553839.4 | 658697.6 | TRUE |

|          |          |          |          |          |          |          |          |      |
|----------|----------|----------|----------|----------|----------|----------|----------|------|
| 977275.2 | 825833.7 | 702538.5 | 937291.9 | 939437   | 781119.5 | 928657.9 | 1050253  | TRUE |
| 436476.1 | 364715.3 | 418018   | 390307.9 | 413480.1 | 426638   | 403088.1 | 383936.1 | TRUE |
| 435711.5 | 374623.2 | 388550   | 443653.2 | 409016.2 | 369081.8 | 446892.1 | 411931.7 | TRUE |
| 538603.8 | 506734.2 | 579646.9 | 568614   | 502791.9 | 558407.8 | 565544.3 | 548004.3 | TRUE |
| 90071.2  | 71096.5  | 103921.7 | 67450.8  | 78337.7  | 122154.8 | 83695.7  | 84364    | TRUE |
| 48328.2  | 48985.8  | 40951.8  | 51473.1  | 41473.8  | 38982.3  | 48403.2  | 47602.7  | TRUE |
| 32168    | 39187    | 34858.1  | 63089.7  | 31490.3  | 33649.6  | 45731.3  | 42331.6  | TRUE |
| 79944    | 346994.2 | 78849.8  | 90685.3  | 93428.3  | 87800.2  | 86579.4  | 90332.2  | TRUE |
| 2059350  | 1996542  | 1809133  | 2137376  | 2071865  | 1917110  | 2011470  | 2197063  | TRUE |
| 923506.8 | 880822.9 | 854900.6 | 898937.4 | 951244.4 | 861096   | 914797.3 | 989479.4 | TRUE |
| 21196.1  | 23845.8  | 24074.2  | 7218.4   | 32766.7  | 18571.2  | 9100.5   | 28989.9  | TRUE |
| 29404.5  | 29798.5  | 41112.9  | 38752.6  | 38838.6  | 22461.6  | 42779.1  | 39864.5  | TRUE |
| 408391   | 176977   | 201350.7 | 370149.7 | 137517.5 | 293575.1 | 292803.8 | 228978.7 | TRUE |
| 40904.2  | 27711.7  | 48944.6  | 33035.7  | 27828    | 32935.1  | 41473.7  | 31399.4  | TRUE |
| 158901.5 | 147760.2 | 137593.4 | 173642.3 | 138186.5 | 149547.8 | 145659.4 | 176080.2 | TRUE |
| 1238933  | 403836.1 | 554574.3 | 729007.4 | 835396.2 | 1447318  | 598200.4 | 1558833  | TRUE |
| 220805.7 | 170286.3 | 187378.6 | 191020.9 | 210449.8 | 215558.1 | 210062.8 | 250117.5 | TRUE |
| 132023.3 | 119628.1 | 118312.4 | 117419.5 | 106247.3 | 127919.2 | 135859.9 | 140364   | TRUE |
| 82720    | 87561.2  | 71783.7  | 91352.4  | 70514.7  | 57016.8  | 92397.3  | 93792.8  | TRUE |
| 130439.2 | 92434.8  | 104348   | 116084.2 | 98079.9  | 144023.1 | 98520.3  | 130117.5 | TRUE |
| 171701.3 | 138057.5 | 142130.3 | 172718   | 133066.3 | 181460.2 | 128821.5 | 181200.4 | TRUE |
| 425124.7 | 407321.5 | 202909.1 | 232534   | 290145.8 | 224301.9 | 249385.7 | 311300.4 | TRUE |
| 37435.8  | 31359.3  | 19575    | 22578.3  | 19859.8  | 29070.4  | 31802.8  | 20547.3  | TRUE |
| 49666.2  | 53147.8  | 47156.5  | 54194.2  | 50266    | 44364.2  | 54152.4  | 65017.8  | TRUE |
| 92305.5  | 88094.2  | 89597.8  | 78641.7  | 89643.7  | 112644.5 | 110892.2 | 103071.9 | TRUE |
| 379163.3 | 267788   | 191589.7 | 269820.7 | 286273.7 | 319864   | 372563.8 | 391104   | TRUE |
| 38061.9  | 30974.4  | 21316    | 31668.4  | 28315.4  | 28024.8  | 51427.1  | 53651.8  | TRUE |
| 40735.1  | 32767.6  | 22187.1  | 32440.2  | 26601.1  | 32052    | 51271.8  | 48195.4  | TRUE |
| 1072730  | 956267.5 | 1057393  | 1192030  | 929784.6 | 1247195  | 1207689  | 1413503  | TRUE |
| 123187.2 | 122610.8 | 93931    | 116273.4 | 112406.8 | 147606.3 | 146560.2 | 157276.1 | TRUE |
| 742288.7 | 642361.6 | 726234.1 | 781458.3 | 912471.3 | 668674.9 | 663954.1 | 686727.1 | TRUE |
| 153099.3 | 133415.4 | 203646.9 | 124818.2 | 124116.2 | 200627.4 | 150553.5 | 113337.3 | TRUE |
| 263907.4 | 296140.5 | 340112.3 | 288335.8 | 279621.9 | 337350.2 | 319796.2 | 303644.2 | TRUE |
| 178189.6 | 172253.5 | 254408.9 | 237991.7 | 182168.1 | 286461   | 236844.7 | 212849.4 | TRUE |
| 186735.8 | 116392.8 | 157083.6 | 156512.4 | 262402.9 | 127039.3 | 130241.5 | 156645.7 | TRUE |
| 256512.4 | 211501.9 | 209884.1 | 227815.9 | 304520.3 | 197349.3 | 188603   | 201474.8 | TRUE |
| 294947.8 | 284190.8 | 372029.6 | 281416.3 | 254154.4 | 388491.3 | 301599.7 | 244532.7 | TRUE |
| 246417.3 | 258660.1 | 261343.8 | 177268.2 | 188240.9 | 257397.7 | 218057.6 | 171386.9 | TRUE |
| 175354.6 | 154741.8 | 149500.2 | 152392.2 | 130614.2 | 169528.5 | 151358.7 | 155619.3 | TRUE |
| 447547   | 398545.3 | 611263.2 | 515145.8 | 474663.6 | 609934   | 483434.7 | 475305.5 | TRUE |
| 429009.5 | 366652.5 | 724857.6 | 452317.6 | 389052.8 | 812424   | 505906.6 | 451601.2 | TRUE |
| 81153.1  | 66054.6  | 66753.2  | 60635.9  | 59810.1  | 68320    | 75439    | 52399.9  | TRUE |
| 395581.8 | 364426.7 | 423870.4 | 496537.1 | 510700.4 | 407654.9 | 390430   | 429671.7 | TRUE |
| 624061.1 | 445237.9 | 560229.3 | 630640.1 | 885440.3 | 620170.2 | 546139.8 | 515440.8 | TRUE |

|          |          |          |          |          |          |          |          |      |
|----------|----------|----------|----------|----------|----------|----------|----------|------|
| 81756.1  | 84714.6  | 114485.4 | 124400.7 | 117771.6 | 64343.7  | 83166.4  | 98628.4  | TRUE |
| 77640.8  | 83085.6  | 98259.9  | 66008.2  | 59445.4  | 92608.2  | 60324.4  | 66222.6  | TRUE |
| 412187.3 | 395745.2 | 564034.4 | 343330.8 | 281859.1 | 535782.3 | 415293.9 | 280097.2 | TRUE |
| 562081.4 | 494754.9 | 777722.9 | 393856.5 | 347233.3 | 806860.3 | 527091.9 | 359800.3 | TRUE |
| 81300.3  | 70004.7  | 71136.7  | 69805.2  | 75523.5  | 118625.7 | 81773.9  | 76963.4  | TRUE |
| 92862.4  | 84724.1  | 83138.8  | 110958.6 | 109827.9 | 145347.5 | 113321.9 | 130702.5 | TRUE |
| 155650   | 141549.4 | 163985   | 165101.4 | 201238.9 | 157914.4 | 130577.2 | 160899.7 | TRUE |
| 157884.5 | 145844.7 | 214743.3 | 123350.5 | 100878.6 | 236257.2 | 175555.4 | 137846.1 | TRUE |
| 63513.1  | 54311.3  | 88092.2  | 57780.4  | 39949.4  | 80500.2  | 71197.9  | 51492.7  | TRUE |
| 38170    | 34545.6  | 37599.7  | 32310.9  | 30774.2  | 51832.3  | 37344    | 23656.4  | TRUE |
| 124948   | 118933.7 | 173114.3 | 95219.4  | 98448.3  | 182600.4 | 122462.5 | 113601.8 | TRUE |
| 43509.5  | 30657.2  | 54482.9  | 34987.7  | 50249.4  | 51951.6  | 41445.1  | 37741.5  | TRUE |
| 1560828  | 1054631  | 1564132  | 1501977  | 2277791  | 1270091  | 1130352  | 1337174  | TRUE |
| 725375   | 482340.9 | 756766.4 | 691280.8 | 1082636  | 614065.9 | 509488.9 | 649679.1 | TRUE |
| 129293.3 | 137169.9 | 152671   | 138609.2 | 91682.5  | 176221.1 | 108090.9 | 115478.5 | TRUE |
| 264697.5 | 261489.9 | 294828.5 | 320399.9 | 318362.7 | 286983.8 | 314347.5 | 307333.2 | TRUE |
| 105812.2 | 102607.2 | 149909.3 | 85343.3  | 79981.3  | 146377.8 | 107867.7 | 73141.4  | TRUE |
| 35951.1  | 29410.7  | 14181.5  | 24473.7  | 19285.3  | 17570.6  | 24313.5  | 25671.1  | TRUE |
| 119266   | 113502.3 | 98636.4  | 98995.1  | 113791.5 | 109771.8 | 121201   | 126412   | TRUE |
| 60390.2  | 80348    | 58197    | 64622.4  | 78567.9  | 52964.2  | 80571.3  | 60047.2  | TRUE |
| 98325.5  | 93283.5  | 110239.2 | 74881.7  | 92256    | 83982.7  | 101900.4 | 87305.2  | TRUE |
| 142583.7 | 192447.1 | 82860.3  | 156638.6 | 161160.9 | 117195   | 215774.4 | 213787.8 | TRUE |
| 336623.5 | 343866.1 | 226017.1 | 348618.3 | 328499.9 | 303952.1 | 400188   | 381468.8 | TRUE |
| 34218.9  | 38010.3  | 50241.1  | 53148.8  | 24783.8  | 35160.2  | 40780.1  | 37410    | TRUE |
| 73142.4  | 96401.8  | 90561.3  | 79893.3  | 63687.8  | 68047.4  | 79817.5  | 86606.4  | TRUE |
| 203933.6 | 252652.1 | 166857.9 | 217247.7 | 232804.8 | 189765.1 | 248266.3 | 243034.2 | TRUE |
| 303166.2 | 259726.8 | 282516.5 | 323789.4 | 238776.6 | 238933.7 | 299758.2 | 258329.4 | TRUE |
| 204454.2 | 160582.6 | 212188.5 | 260918.4 | 168528.9 | 209429.7 | 196438.3 | 188136.5 | TRUE |
| 78045.3  | 83190.4  | 99454.8  | 70439.2  | 117787.7 | 101140   | 105379.2 | 123862.5 | TRUE |
| 290808.1 | 315281.7 | 321837.4 | 327739.8 | 204979.9 | 252969.9 | 272424.9 | 260324.9 | TRUE |
| 429034.3 | 433933.7 | 490857.3 | 510597.2 | 355076.3 | 468376.5 | 489955.7 | 451372.2 | TRUE |
| 118328.7 | 182817.3 | 136854.1 | 163629.5 | 153235.5 | 98406.2  | 145334.9 | 140122.5 | TRUE |
| 224908.9 | 268616.5 | 325942.1 | 277651.8 | 201832.9 | 212672.9 | 265603.1 | 201755.6 | TRUE |
| 185058.3 | 204762.7 | 254257.2 | 229450.7 | 133294.6 | 159959.7 | 216825.8 | 140825.4 | TRUE |
| 931541   | 870092.1 | 1090697  | 1119385  | 745840.8 | 847512.4 | 966689.8 | 862858.1 | TRUE |
| 97152.2  | 99511.6  | 116787.9 | 91662.7  | 78727.1  | 94115.3  | 118881.5 | 91157.8  | TRUE |
| 89784.3  | 96149.9  | 48887.8  | 105709   | 71270.8  | 98255.8  | 111247.2 | 112601.4 | TRUE |
| 191898.3 | 190366.4 | 228075.9 | 211686   | 158828.4 | 176365.4 | 270379.3 | 197006.7 | TRUE |
| 129651.8 | 106984   | 97396.2  | 117364.2 | 100618.4 | 132538.1 | 119739.1 | 133423.6 | TRUE |

|          |          |          |          |          |          |          |          |      |
|----------|----------|----------|----------|----------|----------|----------|----------|------|
| 17870.2  | 23076.4  | 24200    | 20272    | 16180.7  | 23359.7  | 26737.9  | 33561.4  | TRUE |
| 24345.4  | 28423.6  | 9888.9   | 12946.3  | 16461.7  | 29343.8  | 11119.1  | 15392.1  | TRUE |
| 95645.3  | 76381.4  | 108860.3 | 114226.4 | 80077.3  | 101423   | 101393.6 | 64668.8  | TRUE |
| 52471.8  | 58795.7  | 57850.7  | 62415.2  | 74316.2  | 54156.1  | 58390.2  | 60187.1  | TRUE |
| 116643.6 | 100977.2 | 145605.6 | 124924.7 | 157181.1 | 121441.3 | 100731.4 | 123652.7 | TRUE |
| 147217   | 116778.6 | 181569.7 | 137280.6 | 93301.2  | 193745.5 | 135317.6 | 114006.7 | TRUE |
| 23033.3  | 8580.1   | 26124    | 27968    | 11563    | 30973.7  | 39093.3  | 12010.4  | TRUE |
| 56345.6  | 48525.7  | 40963    | 51170.2  | 35155.1  | 70547    | 41036.6  | 46590.4  | TRUE |
| 137179.4 | 96261    | 115070.8 | 123382.3 | 80384.5  | 176622.6 | 130698.7 | 106644   | TRUE |
| 41246.8  | 24014.4  | 30768.3  | 17670.3  | 21465.5  | 34317    | 27030.4  | 36135.5  | TRUE |
| 166345.7 | 107265.7 | 157904.3 | 150235.6 | 92620.9  | 177023   | 127280.9 | 96239.2  | TRUE |
| 26790.9  | 5650.5   | 24046.4  | 11717.7  | 8899.2   | 25538.5  | 12618.6  | 11025.4  | TRUE |
| 206546.9 | 265216   | 192001.9 | 223919.6 | 245345.3 | 218654.1 | 258811.1 | 277885.4 | TRUE |
| 117410.9 | 130544.8 | 132423   | 132786.9 | 130721.1 | 118613.8 | 131925.3 | 113283.3 | TRUE |
| 36916.8  | 47765.9  | 64141.2  | 48797.6  | 34168.9  | 54264.1  | 44736.2  | 40790.4  | TRUE |
| 9615     | 13149.7  | 9666.9   | 13794.6  | 10116    | 23693.4  | 6645.8   | 6520.4   | TRUE |
| 144516.2 | 122120.4 | 175052.2 | 157455.6 | 99723.2  | 189589.4 | 127268.1 | 101791.8 | TRUE |
| 34828.4  | 43216.2  | 40861.3  | 31533.3  | 30398.3  | 45629.7  | 47266.1  | 32327.5  | TRUE |
| 27481.5  | 27484.7  | 46744.1  | 36121.3  | 36542.6  | 30546.8  | 30455.8  | 38166.4  | TRUE |
| 33754.4  | 27743.6  | 38432.9  | 35288.1  | 35504    | 42257    | 35225.9  | 28169.3  | TRUE |
| 45482.8  | 40870.7  | 57513.5  | 40679.1  | 48321.1  | 69736.6  | 50130.5  | 61618.6  | TRUE |
| 69100    | 98701.3  | 139142.2 | 76650.5  | 63051.7  | 110856.4 | 99598.8  | 36888.7  | TRUE |
| 85384.5  | 55546.9  | 108382.5 | 95131.5  | 126257.1 | 67067.4  | 68173.4  | 77797.1  | TRUE |
| 92887    | 70755.9  | 86428.7  | 100377   | 149001.7 | 85928.5  | 93700.9  | 114003.5 | TRUE |
| 234350.7 | 157722.7 | 241067.3 | 308107.5 | 320859.5 | 228209.2 | 200943.4 | 209584.4 | TRUE |
| 154206.5 | 113464.6 | 132761.8 | 169852.4 | 183872.9 | 136535.4 | 149523.7 | 144917.1 | TRUE |
| 210032.3 | 216574.5 | 213714.5 | 181652.6 | 216623.9 | 247848.3 | 222793.4 | 211503   | TRUE |
| 557247   | 449551.7 | 551980.3 | 613381.4 | 686669.2 | 453389   | 473307   | 545759.8 | TRUE |
| 266622.5 | 230227.9 | 378631.2 | 292674.8 | 319764.8 | 233212.4 | 207345.5 | 221657.3 | TRUE |
| 61764.3  | 70691.9  | 94007.4  | 43017.9  | 60328    | 70288.4  | 64849.3  | 42306.4  | TRUE |
| 580268.3 | 606910.4 | 751341.1 | 437263.1 | 362045.6 | 804108   | 650284.8 | 426368.3 | TRUE |
| 285981.9 | 222539.1 | 315953.3 | 309238.4 | 393484.8 | 275354.3 | 228245.5 | 249351.1 | TRUE |
| 179039.6 | 120975.5 | 190074.2 | 209386.8 | 203163.8 | 157732.5 | 158888   | 148294.7 | TRUE |
| 426827.2 | 332032.8 | 519510.6 | 518179.1 | 615660.1 | 434414.9 | 335013   | 413657.6 | TRUE |
| 231419.6 | 166007.6 | 289729.8 | 280334.7 | 322154.5 | 159331.3 | 189007.9 | 210678.8 | TRUE |
| 61799.5  | 57996.6  | 64308.6  | 49484.6  | 53674.8  | 70371.5  | 68278.8  | 62785.1  | TRUE |
| 28897.8  | 21957.3  | 51900.7  | 29547.5  | 41089.8  | 29854.6  | 32830.8  | 25352.8  | TRUE |
| 258017.7 | 254981.2 | 271721.2 | 261190.1 | 244430.3 | 289035.8 | 255145.7 | 254110.7 | TRUE |
| 55515.9  | 38565.5  | 42802.6  | 47985.5  | 41799.1  | 51004.4  | 32077.8  | 44173.8  | TRUE |
| 17162.8  | 38838.8  | 43914.6  | 31741.6  | 46306.1  | 26293.7  | 34684.1  | 39333.3  | TRUE |
| 318208.2 | 291350.6 | 254970.4 | 317509.1 | 271798.2 | 313792.6 | 317838   | 322269.6 | TRUE |
| 1675332  | 1582053  | 1489538  | 1659406  | 1524048  | 1787397  | 1617535  | 1734119  | TRUE |

|          |          |          |          |          |          |          |          |      |
|----------|----------|----------|----------|----------|----------|----------|----------|------|
| 46794.5  | 40968.3  | 39733.1  | 27762.3  | 40644.8  | 50960.7  | 60943.7  | 25032.9  | TRUE |
| 366239.4 | 372618.2 | 378398.6 | 298024.7 | 285220   | 420429.2 | 396332.8 | 283301.7 | TRUE |
| 492240.6 | 472653.8 | 760642.5 | 467696.3 | 433915.8 | 723324.7 | 454793.5 | 468711.7 | TRUE |
| 46881.8  | 37503.6  | 60069.1  | 39505.8  | 43089.7  | 58927.1  | 56479.1  | 39378    | TRUE |
| 31700    | 35522.4  | 33241.8  | 33875.2  | 37312.6  | 42155.5  | 34100.8  | 36597    | TRUE |
| 230233.8 | 167753.7 | 473158.9 | 212438.2 | 127131.8 | 451218.2 | 196268.6 | 150190.7 | TRUE |
| 43887.8  | 40110.3  | 60105.5  | 44356.7  | 36633    | 65030.7  | 32424.1  | 43145.9  | TRUE |
| 43143.4  | 36751.7  | 55315.6  | 46175.9  | 43937.3  | 56604.5  | 20942.7  | 36448.6  | TRUE |
| 45785.8  | 54491.6  | 66444.7  | 58855.1  | 60889.8  | 58546.1  | 58196.8  | 60375.1  | TRUE |
| 181366.4 | 95594.2  | 174428.2 | 194973.6 | 222137.9 | 188320.7 | 146503.2 | 194840.6 | TRUE |
| 382892.5 | 265449.3 | 300296.5 | 335823.8 | 597968.4 | 436752.7 | 369226.9 | 416643.5 | TRUE |
| 95114    | 105887.2 | 83049.6  | 99182.4  | 107711.8 | 85883.7  | 85627.3  | 108109.2 | TRUE |
| 154899.3 | 123382.5 | 243761.4 | 175042.9 | 118271.4 | 223164   | 156145.8 | 111033.3 | TRUE |
| 157231.5 | 131294.3 | 164459.6 | 135382.2 | 104488   | 200236.7 | 129993.4 | 128291.7 | TRUE |
| 87167.8  | 70098.1  | 142715.5 | 61998.1  | 79362.8  | 156986.5 | 87098.2  | 71351.2  | TRUE |
| 60569.2  | 53614.6  | 48767.6  | 51901.8  | 70369.5  | 48870.8  | 55159.9  | 43860.5  | TRUE |
| 22942.6  | 26727.1  | 33276.4  | 29585.2  | 23507.4  | 23197.5  | 28091.8  | 30518.7  | TRUE |
| 251262.3 | 217302.7 | 486772.1 | 239820.9 | 170475.5 | 497284.4 | 199223.7 | 203941.1 | TRUE |
| 480894.3 | 298361.4 | 414726.5 | 392016.9 | 937364.4 | 445814.9 | 350820.3 | 495553.8 | TRUE |
| 223542.7 | 172837.6 | 152789.6 | 188984.8 | 180628.1 | 239467.2 | 224752.2 | 224044.5 | TRUE |
| 202242.4 | 176691.9 | 241259.9 | 196182.8 | 225605.1 | 205112.3 | 201131.1 | 205389.3 | TRUE |
| 163363.2 | 209467.3 | 191864   | 163472.2 | 182884.1 | 152357.8 | 177649.4 | 153412.9 | TRUE |
| 142658.9 | 150630.4 | 148789.8 | 168585.5 | 137512.2 | 155073.5 | 138732   | 153162.4 | TRUE |
| 137811.2 | 104052.3 | 149799.7 | 150923   | 143270.5 | 162212.8 | 133336.7 | 153316   | TRUE |
| 15862.8  | 28372.2  | 18065.6  | 25512.3  | 24470.6  | 4793.1   | 6290.7   | 7814.7   | TRUE |
| 202455.8 | 203225.7 | 209151.3 | 164909.3 | 206695.6 | 237076.6 | 228490.7 | 224932.3 | TRUE |
| 186214.9 | 182312.5 | 179231   | 169118.9 | 204069.1 | 203343.2 | 182850.2 | 201526.2 | TRUE |
| 174842.9 | 174810.4 | 157386.6 | 164797.7 | 176628.6 | 205005.5 | 196476.3 | 212056.4 | TRUE |
| 306157.2 | 318197   | 219072.6 | 236644.8 | 257976.8 | 275922.4 | 302325.3 | 296302.1 | TRUE |
| 194843.5 | 189224.5 | 211446.6 | 239903.3 | 204925.5 | 236757.4 | 186835   | 219759.8 | TRUE |
| 125490.6 | 102799.3 | 90065.2  | 139948.1 | 138542   | 137158.6 | 116336.3 | 118541.8 | TRUE |
| 234331   | 189884.9 | 223252.8 | 214883.7 | 240368.9 | 326786.4 | 214527.6 | 252999.7 | TRUE |
| 25935.7  | 26834.7  | 37446.6  | 30259.5  | 37089.1  | 47533.2  | 33245.7  | 41890.9  | TRUE |
| 20910.9  | 31107.5  | 17383.4  | 18255.3  | 25273    | 11584.1  | 5689.1   | 22896.6  | TRUE |
| 56520.2  | 48476    | 60330.9  | 63435    | 52954.2  | 47390.1  | 52879    | 60127.2  | TRUE |
| 116607.3 | 124291.2 | 128139.1 | 134378.7 | 129488.8 | 129291.6 | 133846.5 | 123634.7 | TRUE |
| 625496.3 | 596495.4 | 565059.6 | 642720.7 | 629808.4 | 677561.2 | 727768.1 | 597712.9 | TRUE |
| 85549    | 67494.6  | 94811    | 91589.6  | 110369.9 | 93465.2  | 93496.8  | 78516.6  | TRUE |
| 207924.2 | 163471.8 | 153080.5 | 179620.6 | 181853.4 | 200110.6 | 211093.1 | 223027.2 | TRUE |
| 57934.6  | 51551.7  | 47599.9  | 47730.1  | 49434.6  | 61770    | 54183.1  | 58788.8  | TRUE |

|          |          |          |          |          |          |          |          |      |
|----------|----------|----------|----------|----------|----------|----------|----------|------|
| 220030.1 | 181511.1 | 226663.1 | 225221.6 | 253870.4 | 235308.9 | 225444.9 | 235192.1 | TRUE |
| 26742.3  | 27479.8  | 36469.5  | 27043.8  | 20934.7  | 38112.3  | 17454.2  | 31995.4  | TRUE |
| 27889.2  | 30568.6  | 44928.1  | 36117.8  | 38314.5  | 48102.1  | 39863.2  | 40152.1  | TRUE |
| 159943.7 | 158589.8 | 119641.2 | 153342.5 | 118442   | 119379.5 | 167358.2 | 142819.3 | TRUE |
| 151646.3 | 127826   | 137650.5 | 167104.7 | 105496.8 | 138792.2 | 147578.6 | 161708.1 | TRUE |
| 270614.2 | 182025.4 | 304031   | 323559   | 276967.2 | 248899.2 | 217480.3 | 257452.7 | TRUE |
| 438412   | 464021.5 | 448661   | 511489.4 | 439579.4 | 453157.3 | 376027.3 | 499272.2 | TRUE |
| 502689.2 | 351558.3 | 537368   | 532831.7 | 433561.5 | 511642.1 | 385608.4 | 479537.3 | TRUE |
| 85524.9  | 79614.7  | 53544.5  | 74592.9  | 72213.3  | 52529.8  | 78472.6  | 68179    | TRUE |
| 29676.6  | 43811.8  | 50199.8  | 37234    | 44903.7  | 38538.4  | 38999.6  | 39670.4  | TRUE |
| 27800.7  | 21982.9  | 30241.4  | 45638.3  | 8514.8   | 12712.5  | 24557.4  | 12795.8  | TRUE |
| 1578481  | 1543285  | 1366361  | 1871859  | 1452307  | 1459383  | 1697777  | 1384164  | TRUE |
| 1385701  | 1386365  | 1206747  | 1544071  | 1216623  | 1299384  | 1491610  | 1301377  | TRUE |
| 1684665  | 1320109  | 1751046  | 1889129  | 1611226  | 1946624  | 1514179  | 1877383  | TRUE |
| 68821.4  | 65571.4  | 77772.9  | 90276    | 96846.7  | 76823.5  | 96163.4  | 100729.5 | TRUE |
| 225459.6 | 245683   | 234161.6 | 254257.3 | 204310.8 | 204345.1 | 258838   | 187330.1 | TRUE |
| 81463.1  | 55032.4  | 59248.9  | 68451.4  | 76968.5  | 125247.9 | 58451    | 86154.7  | TRUE |
| 713783.9 | 581033.6 | 760660.8 | 797745.5 | 591942   | 741034.6 | 667540.4 | 700413.1 | TRUE |
| 165351.2 | 166320.7 | 158131.1 | 162088   | 141894.1 | 188084   | 173879.5 | 160762.3 | TRUE |
| 354377.4 | 322079.1 | 333040.5 | 356414.9 | 369031.6 | 350147.8 | 365824.1 | 390622.4 | TRUE |
| 39053.5  | 9396.2   | 17274.9  | 27184.1  | 23719.8  | 42330.1  | 30560    | 38357.5  | TRUE |
| 205584.9 | 186794.9 | 147895.2 | 191196.5 | 256365.2 | 158250.4 | 151395.6 | 228850.5 | TRUE |
| 174732.7 | 190341.2 | 176103.4 | 183811.8 | 190182   | 187383.8 | 193066.3 | 190948.1 | TRUE |
| 172128   | 165399.9 | 200486   | 210165   | 179273.8 | 146827.6 | 211794.8 | 174754.8 | TRUE |
| 1499440  | 1348975  | 1214640  | 1519512  | 1515521  | 1343270  | 1377117  | 1458522  | TRUE |
| 162418.8 | 160754.8 | 116670.8 | 169209.4 | 169222.4 | 172175.7 | 181554.1 | 175200.8 | TRUE |
| 45916.8  | 63985.7  | 67704.5  | 55338.9  | 76829.3  | 56675.5  | 72532.1  | 78483.5  | TRUE |
| 131970.4 | 170071.1 | 105490.4 | 158267.7 | 150078.4 | 108183.5 | 155252.6 | 145898.5 | TRUE |
| 156498.1 | 186675   | 162529.2 | 196324.6 | 136466.5 | 159239.2 | 180321.8 | 154865.1 | TRUE |
| 76320.2  | 83798.5  | 96795.3  | 67748.5  | 90309.3  | 75202    | 91175.3  | 75044.9  | TRUE |
| 84288.1  | 86871.9  | 75278.9  | 89385.6  | 94103.9  | 88830.7  | 98049.5  | 96600.1  | TRUE |
| 87807.7  | 95445.9  | 64597.3  | 82284.9  | 85083    | 93704.6  | 87092.1  | 95599.4  | TRUE |
| 36518.5  | 28036.6  | 33170.2  | 24269.3  | 31015.5  | 32515.7  | 11948    | 28988.3  | TRUE |
| 96545.2  | 72261.9  | 111558.9 | 80362    | 72676.4  | 126222.6 | 96443.1  | 91933.8  | TRUE |
| 241053   | 231354.7 | 307599.4 | 187919.4 | 251597.7 | 335336.6 | 259277.2 | 250263.1 | TRUE |
| 53005.4  | 61447.7  | 62973.9  | 51800.9  | 64102.3  | 58280.8  | 67134    | 43961.2  | TRUE |
| 47007.1  | 39153.1  | 52567.5  | 45602.4  | 41247.7  | 32185.2  | 36429.5  | 40641.2  | TRUE |
| 69469.1  | 71004.8  | 58879.4  | 57360.2  | 73954    | 63432.8  | 60095.7  | 68719.6  | TRUE |
| 827821.7 | 625254.7 | 779270.5 | 886784.1 | 943573.5 | 712278.2 | 610518.9 | 832931.9 | TRUE |
| 142170.2 | 128199.7 | 111136.3 | 134541.4 | 90820.8  | 128306   | 111432.7 | 118096.3 | TRUE |



|          |          |          |          |          |          |          |          |      |
|----------|----------|----------|----------|----------|----------|----------|----------|------|
| 26113.6  | 45571.1  | 39110.1  | 62775.9  | 33785.8  | 41958.7  | 36860.3  | 32105.4  | TRUE |
| 40596    | 38138.7  | 38618.5  | 65285.7  | 59690.3  | 47056.1  | 46879.6  | 49275.9  | TRUE |
| 41644.4  | 49445.5  | 49707.9  | 39768.4  | 33077.2  | 50169.6  | 45937.8  | 44960.6  | TRUE |
| 85507    | 97738.9  | 82608.5  | 88359.9  | 79266.3  | 100266.6 | 95483.1  | 84544    | TRUE |
| 85660.9  | 74896.9  | 94931.6  | 78336.1  | 65623    | 85443.2  | 92500.5  | 69207.3  | TRUE |
| 86698.6  | 37383.6  | 62203.6  | 73077.4  | 46548.2  | 88190.4  | 63172.7  | 57604.2  | TRUE |
| 60805.5  | 53637    | 53856.7  | 61021.6  | 60049.4  | 78000.4  | 77297.3  | 70888.2  | TRUE |
| 721909.5 | 561698.5 | 817100.7 | 821339   | 695433.5 | 680766.6 | 586995.6 | 618426   | TRUE |
| 107337.1 | 95935    | 111037.9 | 101807.1 | 75902.8  | 157412.3 | 132019.8 | 146593.5 | TRUE |
| 159350.2 | 196337.2 | 186863   | 182173.1 | 160387.5 | 168239.8 | 167414.6 | 156222.8 | TRUE |
| 160997.4 | 223820.8 | 146091.1 | 220501.9 | 145282   | 171207.8 | 180580   | 150513.7 | TRUE |
| 102147   | 96596.5  | 117739.7 | 103381.7 | 103874.4 | 133258.1 | 106499   | 104536.5 | TRUE |
| 105345.3 | 104117.4 | 98366.1  | 104246.5 | 92850.3  | 129981.3 | 92731.1  | 100307.1 | TRUE |
| 19929.6  | 11052.6  | 9952.6   | 10028.5  | 27138.1  | 21255.7  | 29838.8  | 32596.3  | TRUE |
| 926781.6 | 920489.6 | 996092.8 | 1176476  | 869281.8 | 980958.5 | 867307.6 | 933108.1 | TRUE |
| 100098.7 | 71947.1  | 94335.1  | 100510.3 | 120367.8 | 110136.3 | 128578.6 | 116671.6 | TRUE |
| 141630.5 | 132027.4 | 117237.6 | 156393   | 140114.4 | 153098   | 132777.2 | 144531.4 | TRUE |
| 102663.2 | 125150.2 | 105439.9 | 109906.1 | 109566.6 | 108812.8 | 139817.4 | 126181.2 | TRUE |
| 422300.4 | 401627.9 | 332784.3 | 447028.2 | 484069.7 | 367097.3 | 409740.3 | 468984.4 | TRUE |
| 299307.4 | 279598.6 | 202667.3 | 292180.1 | 352298.5 | 218821   | 327868.9 | 360440.8 | TRUE |
| 168463.4 | 177231.8 | 183129.7 | 163365.5 | 161154.7 | 166879   | 196691.5 | 210191.3 | TRUE |
| 117502.9 | 143843.9 | 105218.7 | 148172.1 | 96227.4  | 108744.6 | 135982.2 | 135622.8 | TRUE |
| 279397.1 | 277319.1 | 282016.2 | 273857.1 | 256330.6 | 275608.2 | 262025.4 | 291849.4 | TRUE |
| 55967.6  | 48684.8  | 51530    | 59847    | 54530.5  | 64560.7  | 46895.2  | 56996.1  | TRUE |
| 153358.6 | 125459.9 | 97264.3  | 152266.1 | 150468   | 141243.6 | 139589.3 | 191689.9 | TRUE |
| 150317.2 | 149714.5 | 110583.6 | 129951.2 | 129859.5 | 168065.4 | 162669.2 | 197252.3 | TRUE |
| 65372.7  | 67136.1  | 58017.9  | 88144.1  | 72784.4  | 74975    | 90772.6  | 72539.7  | TRUE |
| 32602    | 40018.2  | 21321.3  | 39325.5  | 31079.3  | 23054.8  | 38903.7  | 32483.8  | TRUE |
| 17183.9  | 4142.9   | 9556.5   | 28999.5  | 7561.7   | 6569.9   | 8293.9   | 18870.9  | TRUE |
| 19919.8  | 10135.9  | 24775.5  | 16280.8  | 22723.4  | 29679.1  | 29020.3  | 33140    | TRUE |
| 187009.1 | 188833.7 | 153881   | 166068.6 | 181257.4 | 165016.4 | 189730.4 | 195960.3 | TRUE |
| 762631.6 | 651283.7 | 660739.3 | 617642.3 | 821164.2 | 688318.6 | 642778.3 | 715343   | TRUE |
| 126387.3 | 130369.9 | 133545   | 126873.2 | 176243.2 | 154350.5 | 129234.2 | 148116.5 | TRUE |
| 111977.2 | 94387.9  | 101498   | 108954.2 | 133863.1 | 129532.3 | 96676    | 119385.2 | TRUE |
| 12567.8  | 10756.9  | 14284    | 37563.1  | 31391.7  | 30476.9  | 31637.6  | 27489    | TRUE |
| 34154.8  | 46393.4  | 37734.3  | 31198.8  | 48059.1  | 18197.7  | 27693    | 30647.5  | TRUE |
| 28534.5  | 67261.5  | 64823    | 60138.4  | 90345.7  | 27226.6  | 31451.1  | 32897.1  | TRUE |
| 36224.8  | 50044    | 29938.4  | 51604.1  | 40732.4  | 32616.8  | 51834.1  | 42112.2  | TRUE |
| 100890.2 | 91971.5  | 96578.4  | 105554.5 | 88740.8  | 99761.6  | 110301.1 | 133130.8 | TRUE |
| 97843.2  | 87495.7  | 98289.2  | 85019.9  | 101869   | 79112.7  | 98702.9  | 92706.4  | TRUE |
| 34460.4  | 49397.1  | 29366.5  | 28419.9  | 33961.2  | 33322.1  | 40503.6  | 36161.2  | TRUE |
| 4504120  | 3871304  | 3656861  | 4063097  | 4847358  | 4082454  | 3853657  | 4341610  | TRUE |
| 94947.3  | 91694.4  | 114084.2 | 130733.9 | 130556.7 | 115631.9 | 127719.4 | 124052.3 | TRUE |
| 90774.4  | 55874.7  | 86632.4  | 61227.9  | 79327.5  | 106624.8 | 67564.7  | 111172.4 | TRUE |
| 130930   | 118088.3 | 126148   | 101005.2 | 91412.5  | 129572.9 | 126523.4 | 120012.4 | TRUE |

|          |          |          |          |          |          |          |          |      |
|----------|----------|----------|----------|----------|----------|----------|----------|------|
| 139385.4 | 131329.8 | 143100.5 | 128445.1 | 182469.1 | 184022.1 | 150913.7 | 154447.6 | TRUE |
| 1072903  | 836112.2 | 713734.8 | 777123.8 | 744161.6 | 671836.6 | 674022.1 | 717985.6 | TRUE |
| 1690792  | 1446440  | 1114678  | 1197406  | 1173597  | 1122947  | 1087374  | 1105532  | TRUE |
| 539067.6 | 473070.4 | 690864.2 | 694196.1 | 630793.9 | 630537.1 | 583123.7 | 579256.8 | TRUE |
| 1038907  | 1091517  | 1027113  | 1189819  | 1094289  | 1138303  | 1103184  | 1097286  | TRUE |
| 179041.1 | 151274.7 | 164062.8 | 181107.2 | 180775.7 | 197223.6 | 159817.4 | 198411.1 | TRUE |
| 73000.5  | 49480.7  | 44933.2  | 62875    | 59267    | 66316.4  | 52877.2  | 68373.6  | TRUE |
| 79176.3  | 138682.5 | 131993.6 | 141972.3 | 163010.6 | 52560.9  | 52897.5  | 52016.8  | TRUE |
| 2458968  | 2117780  | 2181435  | 2210396  | 2346199  | 2317083  | 2374211  | 2219555  | TRUE |
| 5529632  | 4904736  | 4989299  | 5046989  | 5149429  | 5528909  | 5532818  | 4987805  | TRUE |
| 816938.1 | 787892.2 | 713954.4 | 719571.9 | 844975.2 | 865277.5 | 821392.4 | 835652.1 | TRUE |
| 42871.8  | 28267.8  | 43239.2  | 40028.5  | 47021.1  | 45020.7  | 30484.5  | 30682.9  | TRUE |
| 186912.1 | 149241.7 | 315018.8 | 174621.1 | 158085.9 | 257825.8 | 163902.9 | 221280   | TRUE |
| 210170.7 | 177804.1 | 163155.6 | 138072.6 | 248290   | 152669.5 | 157295.9 | 205647.1 | TRUE |
| 153668.3 | 123813.9 | 113596.3 | 75330.4  | 144350.9 | 97773.8  | 100600.2 | 152759.5 | TRUE |
| 151773.4 | 159104.9 | 162838.3 | 142527.6 | 173858   | 190799.8 | 152398.3 | 190481.6 | TRUE |
| 193588.7 | 207297   | 238898.2 | 184277.7 | 226822.6 | 228265.7 | 195403.2 | 227593.6 | TRUE |
| 103646.9 | 97638.9  | 91884.8  | 102313.7 | 132468.8 | 109879.2 | 95049.2  | 110591.1 | TRUE |
| 241728   | 234218.7 | 231033.1 | 228556.1 | 333407   | 251035.4 | 272818.6 | 304095.5 | TRUE |
| 167880   | 130430.8 | 157768   | 140484   | 191616.4 | 177123.9 | 152745.9 | 183317   | TRUE |
| 87404.3  | 62328.4  | 75888    | 73049.1  | 94801.1  | 85973.3  | 55602.1  | 102659   | TRUE |
| 94179.6  | 88878.5  | 83850.1  | 89391.5  | 97926.5  | 103682.3 | 80009    | 96348.8  | TRUE |
| 98767.1  | 89775.1  | 90728.5  | 82687.3  | 105798.7 | 122907.9 | 106998.5 | 131253.6 | TRUE |
| 383309.3 | 283984   | 341037.2 | 387202.5 | 397663.3 | 319556.2 | 364117.8 | 385557.6 | TRUE |
| 106698   | 72422    | 96890.2  | 118582.8 | 116703.5 | 100482.1 | 96353.5  | 115714.4 | TRUE |
| 105478.8 | 90575.7  | 70212.5  | 107487.2 | 100076.6 | 98668.1  | 100839.6 | 108707.6 | TRUE |
| 106876.4 | 92870.7  | 96835.4  | 116665.4 | 92128.6  | 104899.5 | 102339.2 | 110719.4 | TRUE |
| 73063.1  | 63023.6  | 74260    | 73830.2  | 72456.5  | 72321.7  | 73416.9  | 71597.2  | TRUE |
| 37395.5  | 14191.8  | 26769.5  | 15241.2  | 24508.3  | 35276.7  | 10842.6  | 38522.8  | TRUE |
| 25273.7  | 12772.4  | 9577.4   | 14456.2  | 25050.9  | 25393.8  | 13056.9  | 27236.9  | TRUE |
| 42765.1  | 59986.7  | 44757.4  | 63159.8  | 67301.8  | 28193.1  | 37243.5  | 25973.3  | TRUE |
| 42200.7  | 45695.8  | 31823.5  | 54520.1  | 50508.3  | 57414.6  | 49815.5  | 54261.2  | TRUE |
| 433098.3 | 454780.4 | 403108.7 | 464894.7 | 420832.1 | 441957.4 | 412273.6 | 461185.7 | TRUE |
| 299725.1 | 342194.4 | 408923.5 | 334808.3 | 306888.5 | 312257.6 | 338659.1 | 322926.8 | TRUE |
| 96797.9  | 106434.6 | 112186.5 | 101948.1 | 131509.5 | 112351   | 97826.9  | 129158.3 | TRUE |
| 868296.8 | 816322.4 | 752649.3 | 910315   | 921372.9 | 784941.1 | 849991.6 | 1013290  | TRUE |
| 276094.7 | 252267.9 | 256061.5 | 277764.7 | 292569.1 | 255712.2 | 261612.9 | 330998.6 | TRUE |
| 529045.5 | 412838.9 | 477026.8 | 552063.5 | 677217.9 | 519946.3 | 509748.9 | 601892.7 | TRUE |

|          |          |          |          |          |          |          |          |      |
|----------|----------|----------|----------|----------|----------|----------|----------|------|
| 2829166  | 2434424  | 2484203  | 2959933  | 3504794  | 2528054  | 2812289  | 3016233  | TRUE |
| 403563.5 | 410298.9 | 394980.4 | 460638.8 | 444204.3 | 422224   | 401786.5 | 487103.2 | TRUE |
| 500730.3 | 408229.9 | 387119.9 | 522802.9 | 552488.5 | 486790.6 | 439931.8 | 553640   | TRUE |
| 480000.8 | 482071.7 | 451827.1 | 541151.2 | 520488.3 | 466498.6 | 474256.1 | 537648   | TRUE |
| 91193.1  | 69355.6  | 73199.4  | 74208.5  | 105662.4 | 106422.4 | 82946.7  | 97245    | TRUE |
| 188107.1 | 177423.5 | 168541.5 | 183941.4 | 222916.3 | 187812.3 | 202316.9 | 248870   | TRUE |
| 67425.8  | 75815.5  | 57711.7  | 79297    | 78875.1  | 64231.8  | 53214.5  | 72155.2  | TRUE |
| 89184.3  | 128661.9 | 73017.3  | 107867.1 | 125307.9 | 70315.9  | 73683.9  | 71274.6  | TRUE |
| 90714.6  | 121202   | 77864.1  | 103507.6 | 114067.9 | 48264.6  | 40558.7  | 56648.3  | TRUE |
| 32197.3  | 28971.7  | 34238.5  | 32439.8  | 38650    | 30076.2  | 40159.4  | 47655.9  | TRUE |
| 136426.6 | 101482.2 | 86865.2  | 104798   | 108886.4 | 96831.9  | 108444.3 | 111878   | TRUE |
| 101998.4 | 208600.9 | 129105.7 | 255727.8 | 279267.5 | 65474    | 35284.4  | 63668.1  | TRUE |
| 83940.2  | 135098   | 81494.9  | 178870.8 | 207393.8 | 47237.9  | 32724.7  | 50414    | TRUE |
| 65128.3  | 74750    | 73136.9  | 66560.7  | 79293.5  | 49112.6  | 45091.6  | 51697.1  | TRUE |
| 39580.3  | 31968.2  | 23028.3  | 41033.1  | 49606.8  | 31903.3  | 50774.8  | 53363.4  | TRUE |
| 57040.8  | 48912.3  | 56995.7  | 67914.3  | 52045.7  | 77861.1  | 80638.5  | 72127.7  | TRUE |
| 94524.5  | 53193.5  | 65581.1  | 97240.6  | 92094.2  | 79257.5  | 86073.1  | 108882.4 | TRUE |
| 735760   | 722114.5 | 644432.8 | 649515.9 | 672459.4 | 691891.6 | 727026.5 | 722102.6 | TRUE |
| 131347.7 | 158278.5 | 176661.6 | 157824.8 | 150654.8 | 168848.5 | 179960.2 | 132338.9 | TRUE |
| 184336.5 | 216059.8 | 178880.9 | 212884.4 | 169801.2 | 219611.3 | 237043.3 | 186334.6 | TRUE |
| 3390220  | 3278690  | 3435978  | 3292906  | 3053775  | 3392278  | 3496354  | 3282335  | TRUE |
| 539287.7 | 552092.9 | 411980.4 | 467139.4 | 452530.2 | 542897   | 559319   | 573075.7 | TRUE |
| 509952.7 | 515965.4 | 487926   | 527008.2 | 481946.4 | 550163.6 | 523123.2 | 539800.3 | TRUE |
| 477707.3 | 511234.3 | 385479.3 | 450011.1 | 452447.7 | 496344.1 | 518813.7 | 496996.2 | TRUE |
| 94416.2  | 85284.5  | 75711.8  | 90369.8  | 98575.9  | 79348.9  | 78153.8  | 90104.1  | TRUE |
| 38747.2  | 28066.1  | 28085.9  | 24728.4  | 36824.4  | 33616.3  | 34298.6  | 27302.3  | TRUE |
| 34345.8  | 30332.3  | 31525.9  | 36143.4  | 37124.8  | 49929.5  | 42440.9  | 37405.9  | TRUE |
| 74270.5  | 65979.1  | 74042    | 81201.7  | 91796.1  | 83301    | 67185.6  | 83783.9  | TRUE |
| 104261   | 90417    | 91076.9  | 75256.2  | 127329.4 | 96958.6  | 105482.5 | 114924.1 | TRUE |
| 63915.6  | 68915.6  | 48063.9  | 61018.2  | 68721.7  | 63186.4  | 67449.3  | 53081.1  | TRUE |
| 80379.1  | 73164.7  | 82741.4  | 76612.6  | 108285   | 71937    | 76512.6  | 97070.3  | TRUE |
| 43148.6  | 38304.5  | 43767.2  | 46394.4  | 61896.3  | 59075.4  | 44552.8  | 52891.3  | TRUE |
| 181953.9 | 443967.8 | 282869.2 | 350727.6 | 392834   | 121275.3 | 86177.2  | 115426.9 | TRUE |
| 76168.2  | 191973.5 | 94546.4  | 152740.5 | 176652.7 | 42045.7  | 28178.1  | 51240.6  | TRUE |
| 182483.7 | 294572.5 | 238654.1 | 273822.1 | 289890.1 | 178184.3 | 173541.5 | 180873.8 | TRUE |
| 20188    | 13274.1  | 10734.5  | 14396.5  | 16425.7  | 13519.9  | 29894.3  | 16514.8  | TRUE |

|          |          |          |          |          |          |          |          |      |
|----------|----------|----------|----------|----------|----------|----------|----------|------|
| 93994.1  | 77872.8  | 76523.4  | 105127.3 | 83560.1  | 80385    | 83324.6  | 100425.3 | TRUE |
| 1187798  | 905739.7 | 1006941  | 1153424  | 1035009  | 1079706  | 981951.6 | 1221477  | TRUE |
| 83255.2  | 43626.5  | 63272.2  | 69161.6  | 75874.1  | 72672.7  | 47595.4  | 73841.5  | TRUE |
| 134314.5 | 138626   | 176920.7 | 165934   | 164076.9 | 165458.7 | 154323.3 | 156578.6 | TRUE |
| 443817   | 415691.3 | 475026.6 | 542638.8 | 586745.1 | 496172.9 | 630628.3 | 603808.1 | TRUE |
| 58084.2  | 47172.6  | 66447.8  | 76650.7  | 81234.4  | 67859.5  | 51963.6  | 87851.5  | TRUE |
| 170927.8 | 233596.9 | 195404.4 | 248364.2 | 295904.3 | 139580.4 | 150497.9 | 126368.6 | TRUE |
| 486103.1 | 734005.5 | 534301.5 | 739548.8 | 745705.5 | 477675.7 | 479625.3 | 503248.3 | TRUE |
| 51670.7  | 143611.6 | 102538.7 | 95563.6  | 135889.4 | 27938.5  | 28926.7  | 14262.2  | TRUE |
| 147830.3 | 117389.6 | 109388.2 | 151504.3 | 132012.1 | 301410.9 | 159226.3 | 185704.7 | TRUE |
| 317043.2 | 272347.8 | 263791.7 | 312536.3 | 361275.8 | 268686   | 306153.9 | 359582   | TRUE |
| 201419.7 | 195044.6 | 174481.7 | 175362.4 | 244138.4 | 182174.8 | 200101.7 | 211576   | TRUE |

|          |          |          |          |          |          |          |          |      |
|----------|----------|----------|----------|----------|----------|----------|----------|------|
| 203125.8 | 183268.3 | 148192.9 | 141979.5 | 177628.9 | 137436   | 191775.7 | 212947.4 | TRUE |
| 234304.5 | 200695.5 | 263857.8 | 286735.2 | 339454.2 | 277764.8 | 312803.9 | 345793.8 | TRUE |
| 102020.7 | 105952.9 | 121613.6 | 113687.6 | 105587.8 | 91941.9  | 129204.6 | 85987    | TRUE |
| 341013.3 | 342688.1 | 330837.5 | 328909.2 | 313852   | 320607.9 | 354760.3 | 262970.3 | TRUE |
| 241050.3 | 231370.9 | 204211.4 | 186265.6 | 197558.5 | 205089.5 | 238726.1 | 199438   | TRUE |
| 193428.3 | 195874.2 | 201667.2 | 240418.7 | 200694.5 | 209081.8 | 248774.7 | 228374   | TRUE |
| 88735    | 115371.2 | 102076.9 | 115265.2 | 105510.2 | 114943.7 | 151972   | 123120.1 | TRUE |
| 453574.3 | 386471.7 | 429948.8 | 508827.1 | 494386.1 | 402164.6 | 464692.6 | 471518.6 | TRUE |
| 13604280 | 11643192 | 11109783 | 13940825 | 14293581 | 12166699 | 12598622 | 14158709 | TRUE |
| 346410.6 | 278567.7 | 267206.3 | 385548.5 | 381999.2 | 323868   | 312052   | 391389.7 | TRUE |
| 140242.2 | 124288.9 | 148601.4 | 141045.6 | 152736.7 | 132105.4 | 144253.1 | 149068.9 | TRUE |
| 53873.2  | 31674.6  | 39344.2  | 44269    | 48670.4  | 43489.3  | 47982.9  | 47110.6  | TRUE |
| 88332.6  | 134494.8 | 115134.1 | 159378.9 | 197988   | 72537    | 60228.6  | 76537.3  | TRUE |
| 104371.5 | 277257.5 | 135038.1 | 267089.2 | 341409.7 | 30941.7  | 27554.6  | 49953.9  | TRUE |
| 231998.5 | 177134.4 | 163552.1 | 229250.5 | 229438.4 | 238445.2 | 237107.7 | 303209.3 | TRUE |
| 1044802  | 1028212  | 1053167  | 973203.5 | 1028852  | 1181946  | 1135391  | 1090537  | TRUE |
| 1549875  | 1536523  | 1553733  | 1550885  | 1520864  | 1907110  | 1807998  | 1689597  | TRUE |
| 1942788  | 1843037  | 1771144  | 1790211  | 1792639  | 2027032  | 2005803  | 2015321  | TRUE |
| 903365.7 | 895094.6 | 832288.4 | 823436.8 | 826862.1 | 1026056  | 925352.2 | 958741.5 | TRUE |
| 237298   | 628797.3 | 314111.3 | 500308.1 | 538495.8 | 193236.9 | 157237.5 | 166811.8 | TRUE |
| 62441    | 54961.7  | 42316.4  | 73274.3  | 71935.6  | 63963.5  | 75926.9  | 62021    | TRUE |
| 44979    | 42469.3  | 33568    | 58691.2  | 46945.7  | 41685.2  | 48256.9  | 57933.3  | TRUE |
| 42519.3  | 45955.1  | 45652.3  | 43592.4  | 50712.9  | 34994.8  | 47848.3  | 55249.1  | TRUE |
| 72465.5  | 68722.6  | 124883.2 | 67027.9  | 52502.3  | 92421.3  | 74612    | 76062.5  | TRUE |
| 20937.9  | 9427.3   | 11691.3  | 11767.4  | 11675.8  | 10900.9  | 28106.4  | 20799.3  | TRUE |
| 109213.8 | 145456   | 64657.2  | 147206.9 | 196107.6 | 80363.1  | 121186.3 | 187114.1 | TRUE |
| 247213.9 | 197773.4 | 192637.6 | 206945.4 | 231157.4 | 243054.4 | 235393.3 | 267036.5 | TRUE |
| 66510.7  | 51395.1  | 46341.6  | 54022.3  | 47464.7  | 46362.5  | 54659    | 44240.5  | TRUE |
| 140793.4 | 115065.3 | 177571.8 | 137441.5 | 136452.6 | 109435.2 | 107230.9 | 93693.8  | TRUE |
| 1022600  | 983634.8 | 949214.7 | 972003.3 | 1026404  | 994906.2 | 1032713  | 983629.7 | TRUE |
| 157506.7 | 154869   | 168882.2 | 108062   | 116979.6 | 133686.8 | 107636.6 | 115715.5 | TRUE |
| 82174.9  | 65466.7  | 62601.1  | 69849.4  | 88485.9  | 77022.2  | 62878.9  | 93542.3  | TRUE |
| 273621.5 | 291118.7 | 267465.3 | 222356.7 | 313033.7 | 253195.5 | 269679.8 | 298039.2 | TRUE |
| 130431.6 | 145298.3 | 120625.9 | 170313.2 | 173286.1 | 138297   | 115615   | 147348.7 | TRUE |
| 363350.4 | 309240.7 | 305475.5 | 304526.9 | 324269.1 | 300799.4 | 294545.4 | 345559.6 | TRUE |

|          |          |          |          |          |          |          |          |      |
|----------|----------|----------|----------|----------|----------|----------|----------|------|
| 55967.2  | 49911.4  | 50997.8  | 76500.7  | 61354.9  | 57564    | 62574.3  | 54163.5  | TRUE |
| 51258    | 100822.2 | 71387.8  | 85581.6  | 96408    | 51806.1  | 42177.1  | 65611.9  | TRUE |
| 158564.9 | 121188.1 | 198834.1 | 158093.1 | 124161.5 | 223352.5 | 157229.7 | 157460.8 | TRUE |
| 569553   | 498933.8 | 507868   | 502890.3 | 601099.3 | 519503.9 | 632075.2 | 534325.8 | TRUE |
| 569205   | 610604.4 | 524685.5 | 412707   | 493725.5 | 455985.9 | 504117.9 | 516619.8 | TRUE |
| 38769.1  | 44466.2  | 12819.6  | 26795.5  | 25182.2  | 30936.7  | 29707.9  | 25861.6  | TRUE |
| 28103    | 24419.3  | 23651.1  | 39801.2  | 38131    | 31509.5  | 33883.2  | 43876.9  | TRUE |
| 85643.6  | 59405.9  | 56341.4  | 86845    | 50332.9  | 81447.6  | 58376.5  | 80982.4  | TRUE |
| 1140236  | 1081622  | 876617   | 946509.2 | 946831.3 | 922390.6 | 890244.5 | 967101.2 | TRUE |
| 2290702  | 1773054  | 1637730  | 1981455  | 1894526  | 1673019  | 1558554  | 1933964  | TRUE |
| 925646.4 | 854445.9 | 1005902  | 1072869  | 1011935  | 1037615  | 987025.2 | 1037690  | TRUE |
| 1064316  | 883924.2 | 1212980  | 1488051  | 1451655  | 1370042  | 1212639  | 1389625  | TRUE |
| 1015932  | 815630.3 | 1043728  | 1413916  | 1287503  | 1187439  | 1151437  | 1299475  | TRUE |
| 56186.4  | 53321.6  | 49840.1  | 69150    | 50635.5  | 66979.8  | 66706.7  | 61334.5  | TRUE |
| 87900.9  | 52149.9  | 68535.2  | 86909.1  | 91841.3  | 92237.5  | 83450.2  | 90810.7  | TRUE |
| 65121.7  | 109745.7 | 69496.5  | 99924.9  | 111532   | 41374.8  | 46546.5  | 47978.5  | TRUE |
| 61085.1  | 53099.6  | 48058.9  | 46712.8  | 49209.1  | 44939.4  | 47526.1  | 49148.1  | TRUE |
| 56537.2  | 62965.3  | 61985.6  | 109088.5 | 87563.1  | 59257.6  | 51474.3  | 59484.3  | TRUE |
| 2599490  | 2396329  | 2215489  | 2257656  | 2428623  | 2655859  | 2527038  | 2524066  | TRUE |
| 10298711 | 9543519  | 8658761  | 8605135  | 10040148 | 10532221 | 10553299 | 10834696 | TRUE |
| 2104468  | 1700355  | 2098806  | 2453565  | 2373433  | 2261751  | 2272635  | 2603320  | TRUE |
| 1185563  | 1064511  | 1082880  | 1408783  | 1441074  | 1252228  | 1170235  | 1457113  | TRUE |
| 77794.2  | 59703.8  | 68658.2  | 76857.6  | 85975.2  | 72169.3  | 72511.6  | 63293.1  | TRUE |
| 88578.3  | 86897.1  | 85497.4  | 118470.6 | 108803.5 | 106846.4 | 87810.2  | 118723   | TRUE |
| 87246.3  | 75948.9  | 106731   | 82012.8  | 81126.7  | 103478.9 | 77430.3  | 87411.6  | TRUE |
| 81926.8  | 43686.3  | 79753.5  | 75336.2  | 74867.6  | 62742.2  | 59982.6  | 80440.1  | TRUE |
| 25885.2  | 62462.2  | 44720.5  | 54202.2  | 87658.4  | 21148    | 13017    | 7721.8   | TRUE |
| 38916.4  | 76496.9  | 34911.3  | 45313.8  | 54638.1  | 15871.4  | 7172.1   | 22462.3  | TRUE |
| 41407.9  | 35373.9  | 33910.4  | 37581.7  | 38165    | 40618.1  | 28681.4  | 47460.3  | TRUE |
| 18199.8  | 23829.5  | 25536    | 28736.4  | 34057.9  | 20911.5  | 13430.3  | 25324.9  | TRUE |
| 34482.5  | 9827.2   | 14865.2  | 34748.7  | 29136.2  | 29136.9  | 33283.9  | 35766    | TRUE |
| 245644.8 | 237731.2 | 237446.5 | 234000.6 | 253394.1 | 308852.5 | 272298.3 | 300129   | TRUE |
| 26711.6  | 71217.7  | 63888.1  | 59297.2  | 74325    | 7495.9   | 12873.5  | 13436.6  | TRUE |
| 792282.6 | 677905.8 | 604605.6 | 661228.8 | 827769.5 | 617707.9 | 647425.3 | 794433.1 | TRUE |
| 180851.8 | 165295.7 | 183102.2 | 180023.6 | 221531.4 | 176745.4 | 181362.9 | 227504.4 | TRUE |
| 127487.9 | 114064.3 | 109092.4 | 127925.8 | 130788.2 | 115675.1 | 112022.1 | 140667.3 | TRUE |
| 181762.9 | 199518   | 172713.7 | 168738.1 | 185320.1 | 170874.9 | 218437.4 | 202415.4 | TRUE |
| 81350.6  | 61180.1  | 38963.5  | 41213.4  | 41870.5  | 54126.4  | 45582.9  | 50450.8  | TRUE |
| 9009.7   | 25661.7  | 18681.2  | 13143.3  | 32350.7  | 26198.8  | 15188.7  | 26947.1  | TRUE |
| 22485.7  | 31475.6  | 40735.5  | 40738    | 44306.5  | 19455    | 11881.5  | 20547.8  | TRUE |

|          |          |          |          |          |          |          |          |      |
|----------|----------|----------|----------|----------|----------|----------|----------|------|
| 33366    | 23449.1  | 38720.1  | 34461.4  | 35444.9  | 46169.4  | 32074.5  | 48756.3  | TRUE |
| 155247.1 | 185146.1 | 191275.9 | 200454.8 | 215062.8 | 202567.6 | 135838.5 | 154005.5 | TRUE |
| 60053    | 67232.9  | 76205.5  | 59332.5  | 72903.3  | 70532.3  | 45498.5  | 44320.3  | TRUE |
| 1266568  | 971640.1 | 698262.3 | 824861.8 | 909849.2 | 1211093  | 1178010  | 1165972  | TRUE |
| 655194.9 | 412495.5 | 592031   | 553324.4 | 373496   | 661209.6 | 480943.3 | 384280.6 | TRUE |
| 714392.7 | 342625.6 | 478197.5 | 448251.5 | 748929.2 | 598415.1 | 386325.8 | 580690   | TRUE |
| 97930    | 86264.5  | 108898.5 | 89494.2  | 95938.4  | 113935.9 | 100593.4 | 82814.5  | TRUE |
| 96437.9  | 87514.4  | 85848.9  | 92297.7  | 90119.3  | 75243.9  | 100449.3 | 105608   | TRUE |
| 144664.3 | 105996.1 | 145158   | 158491.1 | 154391.9 | 157907.9 | 128864   | 129133.2 | TRUE |
| 191739   | 193325.4 | 188411.2 | 215443.9 | 211862.8 | 195298.5 | 223175.2 | 222217.9 | TRUE |
| 31115    | 30016.3  | 27559.9  | 24575.1  | 26173    | 20955    | 27499.3  | 23919.5  | TRUE |
|          |          |          |          |          |          |          |          |      |
| 108188.2 | 98754.2  | 106682.1 | 118883.6 | 91144.1  | 116222   | 93510.4  | 110992.1 | TRUE |
| 246383.4 | 264332.3 | 266742.6 | 287202.1 | 190175   | 225024.5 | 268484.9 | 227482   | TRUE |
| 100886.8 | 97488.9  | 86632.5  | 83599.8  | 108748.2 | 90351.5  | 85450.9  | 99015.5  | TRUE |
| 96612.5  | 85778.2  | 92389.1  | 125917.8 | 112167.2 | 99556.9  | 101165.4 | 101856.7 | TRUE |
|          |          |          |          |          |          |          |          |      |
| 84170.7  | 253637.3 | 135120.9 | 226429   | 268727.2 | 48995.3  | 35590.4  | 47444.3  | TRUE |
| 184448.7 | 152932.4 | 119377.3 | 161011.5 | 129527   | 134124.3 | 148310.8 | 156819.2 | TRUE |
| 30582.2  | 37214.6  | 20653.5  | 61042.7  | 24784.6  | 23555.5  | 32817.9  | 21451    | TRUE |
| 108688.3 | 84660.9  | 84022    | 108070.9 | 126734.8 | 104620.6 | 93507.7  | 124759.1 | TRUE |
| 140977.2 | 135348.3 | 125542   | 133522.1 | 157185.1 | 137247.9 | 129033.6 | 158491.8 | TRUE |
| 513905.9 | 421519.7 | 453056.5 | 558901.4 | 615532   | 499231.9 | 509061.2 | 573193.4 | TRUE |
| 168782.1 | 151612.4 | 151032.4 | 192249.6 | 191468.6 | 170860.7 | 211762.3 | 218663.6 | TRUE |
| 96700.8  | 181160.7 | 105229.2 | 126202   | 137535.3 | 62436.6  | 71539.3  | 70110    | TRUE |
| 35539.8  | 55446.3  | 37000.4  | 75405.7  | 60222.7  | 22819.3  | 24608.7  | 25480.6  | TRUE |
| 31103.6  | 40087.9  | 32967.5  | 49093.1  | 44543.5  | 43530.3  | 51645.5  | 45746.1  | TRUE |
| 24783.2  | 25832.2  | 16577.9  | 26712.6  | 32578.8  | 35911.7  | 26459.7  | 29141.1  | TRUE |
| 2653690  | 2665147  | 1914984  | 2827873  | 3087983  | 2186465  | 2904553  | 3235327  | TRUE |
| 1225152  | 1148070  | 859512.6 | 1316429  | 1324412  | 948065.7 | 1289522  | 1431844  | TRUE |
| 416659.3 | 392478.2 | 405293.9 | 418154.3 | 408692.2 | 384451.2 | 404306.1 | 413275.6 | TRUE |
| 1375734  | 1345705  | 1699633  | 1728674  | 1279221  | 1723308  | 1702838  | 1687179  | TRUE |
| 452923.1 | 489490.5 | 497918.9 | 515193.3 | 441111.3 | 524011.7 | 502935.3 | 523102.9 | TRUE |
| 25816.5  | 24219.2  | 31854.5  | 42756    | 26960.7  | 22561.1  | 29156    | 29168.2  | TRUE |
| 36956.7  | 41608.8  | 35536.7  | 43642.3  | 32466.1  | 53472.2  | 37454.2  | 46655.5  | TRUE |
| 25605.7  | 29550    | 36841    | 47070.1  | 34671.6  | 50444.6  | 37280.8  | 51992.4  | TRUE |
| 45940    | 43528    | 46738.2  | 47689.1  | 45554    | 51915.7  | 51388.9  | 56581.5  | TRUE |
| 99805.9  | 158143.6 | 169836.7 | 150444   | 138775.8 | 74173.5  | 88047.7  | 87311.4  | TRUE |
|          |          |          |          |          |          |          |          |      |
| 548376.7 | 582525.9 | 554638.8 | 616480.6 | 564231.9 | 498286.7 | 505529   | 506380.5 | TRUE |
| 347040.2 | 264468.2 | 400673.5 | 501626.3 | 372572.1 | 422294.1 | 389948.1 | 416752.5 | TRUE |
| 6463169  | 6418769  | 5889024  | 6205012  | 5478691  | 6263555  | 6742438  | 6421019  | TRUE |
| 743510   | 676384.5 | 643052.1 | 675415.4 | 670433   | 705876.6 | 684715.6 | 724006.8 | TRUE |
| 85582.6  | 67092.2  | 79383.8  | 76023.4  | 67285    | 75914.3  | 86854.5  | 89680.7  | TRUE |
| 25062.2  | 35814.7  | 35018.1  | 35486.1  | 48068.6  | 18583.8  | 26175.7  | 12031.4  | TRUE |

|          |          |          |          |          |          |          |          |      |
|----------|----------|----------|----------|----------|----------|----------|----------|------|
| 28354.8  | 30123.3  | 24802    | 32734.1  | 26165    | 18638.1  | 9899.6   | 13448.1  | TRUE |
| 1974752  | 1721358  | 2041993  | 1923236  | 2511605  | 2264741  | 2045273  | 2463478  | TRUE |
| 1782693  | 1632072  | 1609810  | 1750331  | 1938416  | 1818781  | 1859961  | 2125319  | TRUE |
| 285373.1 | 342752   | 305481.4 | 332627.5 | 388838.1 | 337143.8 | 340827.4 | 364737.2 | TRUE |
| 186365.5 | 238154.6 | 232204.3 | 242452.4 | 278113.6 | 166495.5 | 150652.6 | 155338.4 | TRUE |
| 54821.3  | 116885.6 | 83941.3  | 128630.2 | 159388.5 | 26644.3  | 33352    | 39288.5  | TRUE |
| 1879634  | 1754371  | 1834716  | 1960787  | 2210815  | 1915101  | 2089299  | 1907802  | TRUE |
| 48102.9  | 142339.2 | 99838.1  | 122596.3 | 149850.3 | 42572.8  | 15941.5  | 16065.6  | TRUE |
| 98692.1  | 50308    | 58990.2  | 63456    | 59905.7  | 67999    | 56806.6  | 73663.7  | TRUE |
| 84873.4  | 74116.9  | 69672.9  | 78675    | 64174.6  | 66322    | 82762.1  | 72836.9  | TRUE |
| 136324.9 | 124840.4 | 142421.4 | 153317.8 | 110359.5 | 145074.8 | 131369.3 | 127489.7 | TRUE |
| 64139.9  | 51745    | 82917.3  | 49371.5  | 55984.9  | 48736    | 61885.6  | 68486.7  | TRUE |
| 189671.1 | 252040.9 | 182664.7 | 332199.7 | 344990.3 | 126876   | 109752.5 | 149649.8 | TRUE |
| 48221.7  | 38261.8  | 33450.3  | 61649.5  | 40845.9  | 34551.5  | 36783.8  | 39630.6  | TRUE |
| 37971.6  | 36508.3  | 50614    | 39868.2  | 36242.2  | 38500    | 31852.6  | 38745.7  | TRUE |
| 57421.7  | 58995.4  | 46342    | 56005.1  | 54289.8  | 53528.9  | 58851.4  | 51840.6  | TRUE |
| 44074.6  | 33601.4  | 56138.6  | 26448.7  | 28541.4  | 27323.6  | 31717.2  | 39172.5  | TRUE |
| 8920.7   | 10653.7  | 19216.8  | 5528     | 9496.1   | 9313.6   | 14279.6  | 7851.3   | TRUE |
| 55213.3  | 45240.6  | 55774.7  | 60437.4  | 50330    | 69707.9  | 57304.5  | 56573.1  | TRUE |
| 119403.4 | 162670.6 | 148875.3 | 163206.9 | 185227.3 | 101537.8 | 93588.8  | 113256.8 | TRUE |
| 260711.5 | 262666.8 | 291362.4 | 232795.8 | 409063.2 | 285193.4 | 206446.7 | 389731.3 | TRUE |
| 323645.6 | 340033.2 | 253120.3 | 300994.4 | 357991.8 | 212942.2 | 300232.3 | 358330.3 | TRUE |
| 81493.1  | 86833    | 66517.9  | 80275.5  | 65211    | 59152.8  | 84518.3  | 60211.3  | TRUE |
| 27436    | 7825.6   | 21529.1  | 21502.7  | 37637    | 24543.8  | 20168.3  | 25959.3  | TRUE |
| 416917.6 | 480218.5 | 452541.8 | 577494.5 | 431668.3 | 445392.5 | 520940.6 | 486591.8 | TRUE |
| 30597.1  | 14905.2  | 27151    | 29987.7  | 24304.5  | 20971.5  | 18983.9  | 21071.8  | TRUE |
| 161708.6 | 158618.9 | 105628.8 | 148777.5 | 133836.3 | 168379.3 | 126940.7 | 153060.2 | TRUE |
| 54422.6  | 99408.5  | 75147.7  | 100990.7 | 104951.1 | 34750.6  | 42341.2  | 44933.1  | TRUE |
| 105589.5 | 197834.5 | 159962.7 | 213181.2 | 195504.7 | 78989.9  | 72558.7  | 76197.7  | TRUE |
| 340726.2 | 280306.1 | 264443.6 | 323289.1 | 283363.7 | 361454.2 | 359597.7 | 384769.5 | TRUE |
| 713476   | 569925.8 | 461071.3 | 602526.7 | 559995.3 | 698364.5 | 751517.3 | 790824.1 | TRUE |
| 163030.1 | 122864.5 | 113686.1 | 154329.2 | 107686   | 140701.1 | 165097.2 | 157949.5 | TRUE |
| 38699.9  | 25597.5  | 28138.4  | 38041.5  | 27303    | 41451.7  | 34657.6  | 37944    | TRUE |
| 60258.3  | 50735.2  | 63949.7  | 81041.1  | 61164.4  | 74685.5  | 62247.9  | 102242.6 | TRUE |
| 144601.1 | 107466.4 | 74056    | 115954.8 | 99055.1  | 92186.2  | 101970.8 | 104042.2 | TRUE |
| 281126.3 | 264799.4 | 268510.7 | 289242.1 | 335670.1 | 259424   | 322772.2 | 327722.6 | TRUE |
| 151208.6 | 179078.2 | 171794.8 | 183303   | 195251.1 | 170039.7 | 171673.6 | 180069   | TRUE |
| 259123.6 | 225464.7 | 266259.2 | 276207.3 | 240233.4 | 232233.8 | 267198   | 242790.5 | TRUE |

|          |          |          |          |          |          |          |          |      |
|----------|----------|----------|----------|----------|----------|----------|----------|------|
| 146029.7 | 135419.2 | 157836.4 | 178035.7 | 129254.5 | 188361.3 | 161466.1 | 146583.4 | TRUE |
| 35644.1  | 56325.7  | 36639.9  | 50738.4  | 61447.8  | 35487.6  | 36236.6  | 44895.9  | TRUE |
| 78526.9  | 71091.8  | 80051.9  | 82335.5  | 67361.4  | 84999.2  | 72563.8  | 57401    | TRUE |
| 135574.3 | 132595.9 | 116067.4 | 144332.1 | 127971.5 | 138615.4 | 123603.8 | 133198.4 | TRUE |
| 89350.9  | 85564.3  | 87220    | 105400.5 | 63673.8  | 68380.3  | 83706.2  | 73931.7  | TRUE |
| 171173.1 | 129591.2 | 146466   | 157948.7 | 135213.5 | 146563   | 156578.1 | 116480   | TRUE |
| 271982.9 | 252335.2 | 300607.5 | 218436.4 | 251943.5 | 409172.4 | 308193.5 | 315406.1 | TRUE |
| 148172.3 | 128658.2 | 122791   | 135628.9 | 152807.9 | 119109.5 | 127328.1 | 106227.4 | TRUE |
| 283016   | 224483.7 | 142577.2 | 246545.6 | 216553   | 228228   | 348518.3 | 312634.5 | TRUE |
| 4501107  | 3767037  | 2494908  | 3897692  | 3363045  | 4033670  | 5758578  | 4687961  | TRUE |
| 195756.8 | 183207   | 134044.5 | 156465.1 | 158751.2 | 130221.2 | 190090.4 | 164129.5 | TRUE |
| 37421.7  | 39514.3  | 26909    | 34573.1  | 41995    | 28555.9  | 25457.8  | 31754.7  | TRUE |
| 630081.2 | 696130.5 | 407428.8 | 566078.1 | 577803.6 | 400357.8 | 688831.4 | 562039.4 | TRUE |
| 809290.7 | 754273.1 | 449220.1 | 663300.6 | 672708.1 | 401252.7 | 749954.3 | 679382.3 | TRUE |
| 236913.2 | 385600.7 | 263934.5 | 470270.1 | 350260.1 | 254100.8 | 345657.7 | 306615.4 | TRUE |
| 35265.9  | 56106.8  | 41780.9  | 56747.6  | 54872    | 23418.6  | 26437.4  | 24796.9  | TRUE |
| 328914   | 372763.3 | 249785.9 | 314639   | 321383.7 | 252819.4 | 328494.6 | 306546.7 | TRUE |
| 119426   | 117229.3 | 100445.2 | 111086.9 | 119759   | 93527.9  | 136851   | 102343.3 | TRUE |
| 98937.5  | 86587.1  | 85344.3  | 68564.7  | 106243.3 | 75450.9  | 96581.4  | 101070.8 | TRUE |
| 32344.9  | 103653.5 | 65606.7  | 73247    | 95775.7  | 22583.7  | 20586    | 19928.2  | TRUE |
| 288338.1 | 282925.5 | 379088.5 | 367300.9 | 327594.1 | 309265.8 | 320019.4 | 296485.1 | TRUE |
| 237781.5 | 229665   | 252303   | 294127.1 | 219215.3 | 257071.6 | 266299.4 | 245833.1 | TRUE |
| 27823.4  | 51147.1  | 59837.9  | 75186.7  | 51263.8  | 3423.5   | 51980    | 26854.1  | TRUE |
| 43521.2  | 33334    | 37616.9  | 43022.1  | 33486.7  | 61889.3  | 34664.6  | 43414.4  | TRUE |
| 46716.9  | 52656.2  | 71847    | 63596.9  | 63697.1  | 46028.2  | 45000.4  | 47817.9  | TRUE |
| 35390.8  | 53822.8  | 55908.1  | 39257.6  | 57593.6  | 51236.7  | 45934.5  | 45749.3  | TRUE |
| 29773.6  | 24909    | 23207.1  | 23653.9  | 24924.6  | 37814.3  | 33834.6  | 11690.3  | TRUE |
| 75678.8  | 71858.1  | 62243.1  | 86406.4  | 68655.9  | 116509.4 | 84026.6  | 90990.6  | TRUE |
| 26141.9  | 7456     | 9376.6   | 15254.1  | 8713.9   | 30383.4  | 17448.1  | 42923.6  | TRUE |
| 33097.6  | 38083.8  | 39656.8  | 39034.5  | 25845.3  | 44751.5  | 45796.1  | 36773.3  | TRUE |
| 76510.8  | 58399.8  | 63685.9  | 60425.9  | 67936.5  | 65443.8  | 81056.9  | 64523.3  | TRUE |
| 93676.9  | 93034.5  | 69378.8  | 72872.9  | 72065.2  | 105641.8 | 95606.6  | 103560.2 | TRUE |
| 36497.9  | 26185.8  | 42747.8  | 38545.7  | 31466.2  | 42570.9  | 43230    | 31548    | TRUE |
| 155210.1 | 182277.1 | 299583.9 | 159674.3 | 186406.5 | 202519.5 | 148416   | 182146.4 | TRUE |
| 76352.2  | 81703.8  | 111857.8 | 59246.7  | 68775.4  | 73994.4  | 55502.4  | 64528.8  | TRUE |
| 69663.7  | 76351.6  | 77283.6  | 90442.5  | 72212.7  | 63924.2  | 60101.3  | 76376.2  | TRUE |
| 250591.8 | 166552.4 | 219038.6 | 239028.7 | 166998.1 | 257508   | 206030.8 | 285098.1 | TRUE |
| 56353    | 45118.9  | 47777.3  | 36969.6  | 52429.7  | 48302.6  | 69818    | 69105.9  | TRUE |
| 55653.3  | 50861.2  | 52295.6  | 63519.3  | 70795.3  | 63843    | 70945    | 71154    | TRUE |
| 214990.8 | 233776.9 | 219874.1 | 196241.3 | 269678.4 | 220178.1 | 264756.3 | 234175.6 | TRUE |
| 266758.5 | 233261.3 | 253281   | 234516.2 | 295441.1 | 268884.7 | 320927.9 | 244605   | TRUE |
| 463803.5 | 494267.6 | 361895.9 | 439535.7 | 524740.5 | 396019.3 | 522204   | 556586.4 | TRUE |
| 756268.5 | 758935.8 | 558660.1 | 684631   | 856586.1 | 627691   | 811073   | 965034.2 | TRUE |



|          |          |          |          |          |          |          |          |      |
|----------|----------|----------|----------|----------|----------|----------|----------|------|
| 134313.5 | 130273.9 | 140801.1 | 133845.8 | 133258.1 | 121037.3 | 119994.8 | 128956.7 | TRUE |
| 93330.7  | 123149.1 | 85448.9  | 115822.3 | 97261.4  | 98466.7  | 72329.6  | 86453.2  | TRUE |
| 29053.2  | 47180.4  | 41216.9  | 47495.3  | 55265.9  | 29436.6  | 35917.3  | 25109.3  | TRUE |
| 51920.8  | 48435.4  | 36173.8  | 48884.6  | 35846.3  | 51092.3  | 55121.7  | 42248.5  | TRUE |
| 254370.8 | 254310   | 318748.8 | 244384.2 | 216809.4 | 227570.1 | 304259.1 | 231924.2 | TRUE |
| 1376223  | 1448987  | 1649719  | 1702800  | 1103875  | 1283436  | 1499288  | 1216417  | TRUE |
| 59519.9  | 90933.7  | 78293.3  | 93031.2  | 93581.4  | 52317    | 58949.2  | 77006.2  | TRUE |
| 104815.1 | 152907.8 | 126455.7 | 149017.9 | 146309.8 | 109674.2 | 93074.3  | 122443.2 | TRUE |
| 51806.4  | 46164.5  | 40704.3  | 72179.8  | 63972    | 62392.1  | 58619.5  | 61759.9  | TRUE |
| 244794.9 | 261302.7 | 156642.7 | 236357.4 | 248661.5 | 189446   | 284209.6 | 259191.8 | TRUE |
| 362861.8 | 394840.9 | 224796.8 | 290081.6 | 401792.8 | 241886.3 | 393440.5 | 380235.4 | TRUE |
| 57830    | 59958    | 58823    | 57745.4  | 67889.2  | 50250.2  | 77472.5  | 66126.9  | TRUE |
| 980225.3 | 1164839  | 614245   | 848902.9 | 1091228  | 686156.1 | 1103706  | 1094799  | TRUE |
| 211385.6 | 243104.1 | 200987.3 | 331454.9 | 377301.1 | 245566   | 373145.4 | 333947.7 | TRUE |
| 304736.4 | 306643.4 | 250615   | 427143.4 | 513943.2 | 317913.1 | 521639.3 | 450249.1 | TRUE |
| 25638.2  | 40939.5  | 24571.2  | 16646.4  | 39010.7  | 22822.5  | 42767.5  | 37799    | TRUE |
| 94274.6  | 103894.4 | 112546.7 | 113989.8 | 118271.1 | 89176.9  | 85186    | 102922.6 | TRUE |
| 77505.9  | 105694.3 | 52640.8  | 103468.7 | 86452.4  | 64935.9  | 92941.9  | 87832.3  | TRUE |
| 56098.7  | 69206.6  | 34106.4  | 61518.4  | 61952.8  | 50544.4  | 66619.5  | 83714.3  | TRUE |
| 49111.4  | 83344.9  | 48875.8  | 66369.2  | 111444   | 32359.2  | 34583.5  | 33332    | TRUE |
| 58189.9  | 63438.2  | 51488.5  | 57804.8  | 58838.9  | 55702.8  | 62592.4  | 77178.4  | TRUE |
| 208930.9 | 218701.4 | 344352.6 | 341087.7 | 219699   | 279784.9 | 280174   | 250062.3 | TRUE |
| 109835.5 | 125877   | 131440.2 | 170756   | 101486   | 138284.4 | 179792.6 | 116177.5 | TRUE |
| 21588.8  | 25749.7  | 23017.7  | 37613.7  | 26452.1  | 11289.4  | 9399.8   | 8796.9   | TRUE |
| 102617.9 | 65750.5  | 85022.7  | 89958.9  | 75804.9  | 120393.9 | 87623.2  | 102697.3 | TRUE |
| 20988954 | 21093411 | 18735213 | 20864013 | 18655427 | 21263702 | 22405022 | 20101883 | TRUE |
| 37621284 | 33122190 | 39748626 | 40176247 | 30056578 | 35208206 | 35066957 | 34862018 | TRUE |
| 12522051 | 15239973 | 15516911 | 15765158 | 7933979  | 11933171 | 16092757 | 12785906 | TRUE |
| 110101   | 102662.2 | 84871.5  | 96896.9  | 96188.3  | 99841    | 131860   | 117164.9 | TRUE |
| 98312.9  | 230293.6 | 99897.6  | 145146.7 | 173986.4 | 42621.6  | 47692.8  | 41180.5  | TRUE |
| 846495.7 | 738314.2 | 948193   | 949387   | 687033.9 | 784339.2 | 792528.4 | 744774.1 | TRUE |
| 131151.6 | 139470   | 82308    | 137033.8 | 132369.5 | 87769.2  | 131468.7 | 112852.2 | TRUE |
| 140626.2 | 120968   | 97301.7  | 150952.6 | 115906.2 | 110625.9 | 138672.6 | 113210.5 | TRUE |
| 129919.3 | 114275.7 | 124677.5 | 125242   | 99413.6  | 138494.9 | 120965.8 | 137776.8 | TRUE |
| 155209.1 | 156254   | 98707.1  | 157757.5 | 158965.7 | 138144.1 | 153770.3 | 142974.5 | TRUE |
| 115165   | 117414.4 | 116504.7 | 153423.4 | 100450.3 | 101077.1 | 102295.9 | 93398.1  | TRUE |
| 125477.2 | 169239   | 97613.5  | 125931.6 | 179934.2 | 113676.8 | 151392.4 | 164451.1 | TRUE |
| 570826.8 | 661430.2 | 448593.1 | 506242.5 | 598579.7 | 443410.8 | 666849.6 | 593535   | TRUE |
| 144274.1 | 156266   | 107425.7 | 117432.6 | 132139.2 | 104122.7 | 133167.3 | 129126   | TRUE |
| 650261.8 | 580980.6 | 720033.3 | 753249.6 | 416204   | 506310.6 | 583205.4 | 479614.4 | TRUE |
| 1232810  | 1178693  | 1134435  | 1328574  | 1171699  | 1154792  | 1145365  | 1109133  | TRUE |

|          |          |          |          |          |          |          |          |      |
|----------|----------|----------|----------|----------|----------|----------|----------|------|
| 13806818 | 11408588 | 11475035 | 13182872 | 12181305 | 12738125 | 12821382 | 12771281 | TRUE |
| 227122.7 | 204287.9 | 204988.9 | 229369.1 | 211273.2 | 216561.9 | 228715.2 | 226005.9 | TRUE |
| 276690.5 | 261033   | 239155.7 | 225501.4 | 228023.6 | 262882.6 | 264934   | 266363.8 | TRUE |
| 735431.2 | 674730.7 | 666572.3 | 703940.4 | 686404.3 | 734237   | 678261.8 | 748804.2 | TRUE |
| 164735.5 | 145228.1 | 159859.1 | 190746.9 | 174500.3 | 199748.5 | 200316.3 | 198253.1 | TRUE |
| 71739.9  | 161507.4 | 94055.8  | 176858.8 | 196576.6 | 42102.6  | 48740.5  | 42426.5  | TRUE |
| 1873925  | 1697565  | 2047345  | 2015943  | 1764685  | 1764499  | 1717499  | 1723145  | TRUE |
| 98708.5  | 74773.8  | 82334.2  | 89536.5  | 87450.5  | 111226.4 | 79858.7  | 95447.7  | TRUE |
| 26493.8  | 39169.8  | 26108.3  | 28214.6  | 38374.1  | 25894    | 27309.6  | 33748.5  | TRUE |
| 113274.9 | 110829.9 | 108502.5 | 107500.9 | 90926.8  | 111117.7 | 105083   | 135364.8 | TRUE |
| 65669.7  | 63918.1  | 58336.8  | 53898.9  | 57602.2  | 60156.7  | 62485.2  | 56835.4  | TRUE |
| 182070.1 | 264554.6 | 209920   | 300430.1 | 329451.1 | 125577.2 | 132082.2 | 128673.6 | TRUE |
| 319739.2 | 641188.6 | 388065.9 | 698740   | 758485.4 | 157821.4 | 172965.8 | 232776.3 | TRUE |
| 2578318  | 2492389  | 2264822  | 2265606  | 2256076  | 2573655  | 2678229  | 2643869  | TRUE |
| 1039144  | 1070351  | 1002249  | 1123629  | 1012751  | 1040187  | 1096577  | 982919.2 | TRUE |
| 369183.5 | 372634.5 | 345177.5 | 390401   | 329709.1 | 383342.6 | 377058.6 | 328353.7 | TRUE |
| 862432.4 | 737766   | 827288   | 901803.3 | 947947.8 | 959480.6 | 821703.3 | 901359.9 | TRUE |
| 1208274  | 1129559  | 1273820  | 1240489  | 1161316  | 1295630  | 1151137  | 1243997  | TRUE |
| 555010.9 | 461829.1 | 420145.2 | 493832.5 | 521565.2 | 578868.9 | 509063.9 | 655406   | TRUE |
| 304277.7 | 276035   | 211124.8 | 234652.6 | 224075.6 | 221218.7 | 213759.9 | 187338.2 | TRUE |
| 5769066  | 5061124  | 5070090  | 5529455  | 4840166  | 5538591  | 5049946  | 5214380  | TRUE |
| 46792.8  | 131394   | 90381.1  | 121426.6 | 147736.4 | 37729.2  | 33900    | 33945.4  | TRUE |
| 58244.8  | 85749.1  | 82232.5  | 90595.6  | 92542.4  | 42914.2  | 33156.5  | 43724.3  | TRUE |
| 1382084  | 1182399  | 1134193  | 1205171  | 1493565  | 1312979  | 1510392  | 1415059  | TRUE |
| 84482.1  | 80926.8  | 83650    | 77882.9  | 67836.8  | 81207.9  | 86207.7  | 73546.8  | TRUE |
| 108922   | 92851.6  | 96437.4  | 128763.9 | 107516.6 | 98212.2  | 94569.5  | 99534.9  | TRUE |
| 87382.1  | 61279.7  | 75919.5  | 84754.8  | 81962.5  | 84977.7  | 78197.9  | 63585.7  | TRUE |
| 78996.2  | 87305.9  | 84462.4  | 94360.2  | 96184.6  | 85774.8  | 65483.9  | 121540.7 | TRUE |
| 29201.5  | 25749.8  | 28715.7  | 12390.8  | 34023.8  | 39869.4  | 46335.7  | 41698    | TRUE |
| 72736.3  | 73973.4  | 86295.6  | 66229.5  | 59810.1  | 95282.4  | 60513.8  | 70071.9  | TRUE |
| 153415   | 149522.9 | 122932.5 | 134898.4 | 134757   | 156665.4 | 133571.1 | 136443.8 | TRUE |
| 375344.4 | 366085.7 | 375231   | 353600   | 351669.1 | 395464.3 | 323649   | 365091.4 | TRUE |
| 121430.6 | 119657   | 115169.3 | 121967.4 | 134875   | 143431.8 | 107660.2 | 117135   | TRUE |
| 99417.4  | 86176.3  | 107246.3 | 101741.6 | 90109.6  | 106591   | 121656.5 | 92584.2  | TRUE |
| 177815.8 | 192666.5 | 227665.9 | 245200.9 | 165467.3 | 249057   | 211418.7 | 195420.1 | TRUE |
| 36217.7  | 33839    | 56371.7  | 55289    | 49474.5  | 73740.3  | 48904.4  | 62056.1  | TRUE |
| 33670.7  | 52167.4  | 45094.2  | 50803.5  | 36621.6  | 26160.9  | 11546.4  | 25298    | TRUE |
| 31068.8  | 69476.2  | 59708.4  | 60404    | 62260.2  | 33453.8  | 14133.5  | 30215.6  | TRUE |
| 108594.3 | 89396.4  | 102121.4 | 91381.5  | 95237.9  | 100666.6 | 115904.6 | 108171.6 | TRUE |
| 7120.5   | 7508.1   | 22532.3  | 5881.6   | 18371.5  | 9505.9   | 11414    | 10510.8  | TRUE |
| 423252.5 | 388469   | 393339.2 | 439881.7 | 462091.5 | 370782.3 | 450903.8 | 418810.6 | TRUE |
| 2881265  | 2916198  | 2717866  | 3220676  | 3129122  | 2824500  | 3101719  | 3040764  | TRUE |
| 2063262  | 2266987  | 2164308  | 1919522  | 2289315  | 1791416  | 2287225  | 1826382  | TRUE |
| 63821.3  | 75287.8  | 59818.5  | 85714.1  | 68832.7  | 92486.4  | 61267.6  | 71108.1  | TRUE |
| 223404.1 | 168525.5 | 125677.9 | 138970.3 | 149309.2 | 124422.8 | 123365.8 | 138751.1 | TRUE |
| 1174745  | 1069615  | 1127977  | 1270492  | 1067387  | 1148971  | 1109278  | 1044650  | TRUE |
| 46751.1  | 119917.1 | 65430.7  | 125736.7 | 148923.7 | 6372.7   | 9503.5   | 14164.4  | TRUE |
| 529881.7 | 437385.5 | 484032.6 | 485806.3 | 522739.5 | 487051.4 | 473311   | 491083.7 | TRUE |
| 191372.4 | 171423.4 | 177431   | 148773.2 | 172940.2 | 157551   | 135213.4 | 141024.5 | TRUE |
| 1544895  | 1379214  | 1599229  | 1482584  | 1496342  | 1457084  | 1461003  | 1250241  | TRUE |

|          |          |          |          |          |          |          |          |      |
|----------|----------|----------|----------|----------|----------|----------|----------|------|
| 162910.5 | 136664.2 | 152259.3 | 156284.7 | 147161.9 | 129800.8 | 136543.2 | 144265.8 | TRUE |
| 57379.2  | 53877.8  | 51199.8  | 56160    | 49860.3  | 41113.9  | 62504.9  | 51638.7  | TRUE |
| 163730.2 | 161515.7 | 181299   | 179405.2 | 142094   | 169973.6 | 162078.3 | 198228.3 | TRUE |
| 180483.4 | 157005.6 | 164170.8 | 154332.2 | 162093.5 | 156706.2 | 154688.3 | 184195.6 | TRUE |
| 100532.5 | 95266.9  | 101202.5 | 90966    | 99595.3  | 106831.4 | 105706.3 | 118281.5 | TRUE |
| 266589.3 | 253426.7 | 232732.6 | 262212.6 | 246779   | 267252.2 | 270110.5 | 255007.5 | TRUE |
| 256877.5 | 209799.9 | 232217.1 | 248373.3 | 234427.9 | 272782.1 | 240131.4 | 239902.4 | TRUE |
| 191253.5 | 200524.4 | 192471.9 | 186789.1 | 177862.2 | 208585.6 | 184065.8 | 179437   | TRUE |
| 41975.9  | 36010.9  | 65475    | 75127.5  | 86782.5  | 55613.4  | 71376.7  | 70307.5  | TRUE |
| 35463.2  | 33921.1  | 36969.5  | 17034.7  | 24363    | 43236.9  | 40790.3  | 33431.9  | TRUE |
| 145666.5 | 105499.2 | 149421.8 | 161443.7 | 132776   | 160217.6 | 122011.2 | 138360   | TRUE |
| 444545.1 | 413381.1 | 478078.7 | 490342.2 | 491200.7 | 546548.9 | 475298.8 | 538545.9 | TRUE |
| 165942.1 | 154594.3 | 164298.7 | 198784   | 218444.1 | 211173.9 | 201922.2 | 236206.6 | TRUE |
| 68440.1  | 60018.2  | 56086.7  | 53859.2  | 64370.5  | 62932.7  | 80995.9  | 70585.7  | TRUE |
| 102310.2 | 108155   | 79911    | 112956.6 | 98319.7  | 122654.1 | 109065.1 | 123301.4 | TRUE |
|          |          |          |          |          |          |          |          |      |
| 273741.3 | 239340   | 210215   | 284576.2 | 255159.2 | 244271.4 | 254764.1 | 237424.8 | TRUE |
| 1053176  | 973535.1 | 1024644  | 932744.1 | 1031932  | 1019658  | 951300.5 | 945425.8 | TRUE |
| 2843956  | 2502818  | 2530285  | 2524558  | 2834759  | 2260016  | 2594812  | 2203055  | TRUE |
| 48747.3  | 51400.5  | 35831.6  | 54995.2  | 44141.2  | 58480.3  | 47971    | 58395.9  | TRUE |
| 232519.9 | 182175.7 | 250031.8 | 204920.4 | 220731.7 | 251688.1 | 196723.9 | 216004.2 | TRUE |
|          |          |          |          |          |          |          |          |      |
| 72374.2  | 57746    | 52811.2  | 60788.9  | 55780.7  | 66463.8  | 61455.2  | 54269.8  | TRUE |
| 107319.2 | 131909.6 | 81455.9  | 101185.9 | 73902    | 83458.4  | 116543.5 | 79867.1  | TRUE |
| 85147.6  | 70293.9  | 74359.9  | 101805.7 | 81394.6  | 101759.3 | 108566.6 | 102119.3 | TRUE |
| 32821.4  | 27723.5  | 24495    | 24192.8  | 24277.9  | 38027.1  | 27928.1  | 37567.6  | TRUE |
| 260797.1 | 232439.7 | 175144.2 | 233363.5 | 200761.6 | 278265.6 | 276689.9 | 268724.7 | TRUE |
| 59937.1  | 48589.4  | 42718.4  | 60486.5  | 47849    | 74995.9  | 63799.8  | 74581.2  | TRUE |
| 105208.9 | 140202.6 | 124702.9 | 159567.2 | 95586.1  | 153816.1 | 147341.7 | 109253   | TRUE |
| 142098.3 | 121869.6 | 106819.1 | 126053.6 | 113940.2 | 150877.1 | 149079.5 | 117338.2 | TRUE |
|          |          |          |          |          |          |          |          |      |
| 156369   | 178306.5 | 194615.3 | 194847.7 | 255449.3 | 124737.9 | 136426.5 | 148827.9 | TRUE |
|          |          |          |          |          |          |          |          |      |
|          |          |          |          |          |          |          |          |      |
| 2580456  | 2269983  | 2795667  | 3062100  | 2119286  | 2987371  | 2899203  | 2319871  | TRUE |
|          |          |          |          |          |          |          |          |      |
| 333175   | 278764.3 | 360751.6 | 372492.6 | 269981.4 | 443734.9 | 351605.3 | 288925.4 | TRUE |
| 242978.8 | 196872.7 | 274005.3 | 234929.3 | 211394.7 | 289207.2 | 246280.9 | 212443.1 | TRUE |
| 337274.4 | 300254   | 234307   | 186556.8 | 187391   | 217686.8 | 214615.5 | 207975.7 | TRUE |
| 389037.6 | 372027.5 | 424123.8 | 438308.7 | 359066   | 445012.8 | 404630.9 | 336359.7 | TRUE |
| 486443.6 | 503128.6 | 491911.8 | 521238.3 | 420485.9 | 534563   | 461901.4 | 423026.8 | TRUE |
| 147400.2 | 117187.7 | 109707.1 | 128357.4 | 112879.8 | 126035.3 | 136573.7 | 125944.2 | TRUE |
| 925570.2 | 711349.8 | 890023.8 | 819944   | 932316.1 | 876133.2 | 779391.3 | 789137.6 | TRUE |

|          |          |          |          |          |          |          |          |      |
|----------|----------|----------|----------|----------|----------|----------|----------|------|
| 1530244  | 1208685  | 1472928  | 1520412  | 1407812  | 1538931  | 1225505  | 1431875  | TRUE |
| 988218.2 | 876013.5 | 1157341  | 993831.1 | 721935.5 | 1197678  | 875199   | 722217.6 | TRUE |
| 224563.4 | 194494.8 | 249465.7 | 178461.1 | 159590.4 | 245189   | 203065.1 | 198129.3 | TRUE |
| 480707.4 | 282388.7 | 426895.1 | 449878.7 | 547873.4 | 403153.6 | 320226.7 | 388552.9 | TRUE |
| 144739.5 | 90105    | 120298   | 122006.9 | 166870.6 | 128696.2 | 89734.6  | 151270.9 | TRUE |
| 29278.7  | 25447.6  | 45850.2  | 20694.3  | 42193.4  | 19361.7  | 31046.6  | 24821.5  | TRUE |
| 63697.7  | 38469.5  | 38072.1  | 60869.7  | 43945.9  | 70999.8  | 63919.6  | 74214.1  | TRUE |
| 361718   | 286681.2 | 342530   | 279270.5 | 208852.2 | 527918.5 | 390218.1 | 299887.1 | TRUE |
|          |          |          |          |          |          |          |          |      |
| 139175.1 | 82324.8  | 120608.4 | 131086.1 | 109839.5 | 127935.1 | 121348.2 | 155278.5 | TRUE |
| 627901.4 | 390734.1 | 616695.9 | 644070.7 | 909353.3 | 587121.3 | 534792.8 | 663353.3 | TRUE |
| 43810.6  | 43770.1  | 50502.5  | 51138.3  | 37856.1  | 60322.1  | 33067.7  | 38828.4  | TRUE |
| 49909.7  | 40829.4  | 34696.7  | 47899.2  | 30373.5  | 67441.9  | 55958.5  | 55996.4  | TRUE |
| 74329    | 99801.4  | 168540.2 | 88389.1  | 60725.6  | 85522.3  | 58861.4  | 65617.4  | TRUE |
| 44789.7  | 33915.2  | 68551.1  | 64917.4  | 49355.6  | 118660.7 | 61573    | 78616.3  | TRUE |
|          |          |          |          |          |          |          |          |      |
| 69349.1  | 45515.6  | 88718.9  | 69031.8  | 82364.3  | 116723.6 | 99162.5  | 75371.4  | TRUE |
| 48475.5  | 38338.3  | 50053.6  | 53192.9  | 43963.3  | 46709.5  | 54921.6  | 40704.3  | TRUE |
| 21319.8  | 28926    | 32569.8  | 10080.4  | 30207.4  | 18739.5  | 12314.7  | 6060.6   | TRUE |
| 55416.5  | 63320.8  | 46644.9  | 67103.9  | 55332.8  | 59927.5  | 72934.4  | 70383    | TRUE |
|          |          |          |          |          |          |          |          |      |
| 38101    | 31563.3  | 36694.8  | 56398.5  | 42072.6  | 53917.3  | 53158.3  | 45858.5  | TRUE |
| 79646.9  | 76636.2  | 90190.2  | 83490.8  | 92153.1  | 103415.5 | 90580.3  | 96590    | TRUE |
| 132999   | 120544.5 | 157601.4 | 166806.7 | 142392   | 167668.8 | 165969.8 | 151011.1 | TRUE |
| 1107636  | 959650.9 | 1002745  | 1047174  | 921496.1 | 1285277  | 918342.8 | 1365450  | TRUE |
| 130369.5 | 113890.5 | 200066.4 | 224026   | 199236.8 | 134517.8 | 177040.9 | 223015.4 | TRUE |
| 57067.6  | 71201.6  | 91437    | 77895.1  | 63627.8  | 57135.9  | 55621.8  | 60335.7  | TRUE |
| 87946.6  | 91777.4  | 110820.6 | 91860.7  | 96746.5  | 92953.3  | 93168.7  | 96326.5  | TRUE |
| 81953    | 65433    | 60231.7  | 53293.3  | 48877    | 80518.3  | 82000.4  | 66792.3  | TRUE |
| 203070.1 | 157843.7 | 150625.7 | 200295.4 | 162850.5 | 189184.2 | 181346.4 | 170841.4 | TRUE |
| 290457.7 | 212402.1 | 213123.1 | 270930   | 229584.7 | 323828.2 | 281044.5 | 352702.7 | TRUE |
|          |          |          |          |          |          |          |          |      |
| 72374.2  | 57746    | 52811.2  | 60788.9  | 55780.7  | 66463.8  | 61455.2  | 54269.8  | TRUE |
| 107319.2 | 131909.6 | 81455.9  | 101185.9 | 73902    | 83458.4  | 116543.5 | 79867.1  | TRUE |
| 85147.6  | 70293.9  | 74359.9  | 101805.7 | 81394.6  | 101759.3 | 108566.6 | 102119.3 | TRUE |
| 32821.4  | 27723.5  | 24495    | 24192.8  | 24277.9  | 38027.1  | 27928.1  | 37567.6  | TRUE |
| 260797.1 | 232439.7 | 175144.2 | 233363.5 | 200761.6 | 278265.6 | 276689.9 | 268724.7 | TRUE |
| 59937.1  | 48589.4  | 42718.4  | 60486.5  | 47849    | 74995.9  | 63799.8  | 74581.2  | TRUE |

|          |          |          |          |          |          |          |          |      |
|----------|----------|----------|----------|----------|----------|----------|----------|------|
| 105208.9 | 140202.6 | 124702.9 | 159567.2 | 95586.1  | 153816.1 | 147341.7 | 109253   | TRUE |
| 142098.3 | 121869.6 | 106819.1 | 126053.6 | 113940.2 | 150877.1 | 149079.5 | 117338.2 | TRUE |
| 156369   | 178306.5 | 194615.3 | 194847.7 | 255449.3 | 124737.9 | 136426.5 | 148827.9 | TRUE |
| 2580456  | 2269983  | 2795667  | 3062100  | 2119286  | 2987371  | 2899203  | 2319871  | TRUE |
| 333175   | 278764.3 | 360751.6 | 372492.6 | 269981.4 | 443734.9 | 351605.3 | 288925.4 | TRUE |
| 242978.8 | 196872.7 | 274005.3 | 234929.3 | 211394.7 | 289207.2 | 246280.9 | 212443.1 | TRUE |
| 337274.4 | 300254   | 234307   | 186556.8 | 187391   | 217686.8 | 214615.5 | 207975.7 | TRUE |
| 389037.6 | 372027.5 | 424123.8 | 438308.7 | 359066   | 445012.8 | 404630.9 | 336359.7 | TRUE |
| 486443.6 | 503128.6 | 491911.8 | 521238.3 | 420485.9 | 534563   | 461901.4 | 423026.8 | TRUE |
| 147400.2 | 117187.7 | 109707.1 | 128357.4 | 112879.8 | 126035.3 | 136573.7 | 125944.2 | TRUE |
| 925570.2 | 711349.8 | 890023.8 | 819944   | 932316.1 | 876133.2 | 779391.3 | 789137.6 | TRUE |
| 1530244  | 1208685  | 1472928  | 1520412  | 1407812  | 1538931  | 1225505  | 1431875  | TRUE |
| 988218.2 | 876013.5 | 1157341  | 993831.1 | 721935.5 | 1197678  | 875199   | 722217.6 | TRUE |
| 224563.4 | 194494.8 | 249465.7 | 178461.1 | 159590.4 | 245189   | 203065.1 | 198129.3 | TRUE |
| 480707.4 | 282388.7 | 426895.1 | 449878.7 | 547873.4 | 403153.6 | 320226.7 | 388552.9 | TRUE |
| 144739.5 | 90105    | 120298   | 122006.9 | 166870.6 | 128696.2 | 89734.6  | 151270.9 | TRUE |
| 29278.7  | 25447.6  | 45850.2  | 20694.3  | 42193.4  | 19361.7  | 31046.6  | 24821.5  | TRUE |
| 63697.7  | 38469.5  | 38072.1  | 60869.7  | 43945.9  | 70999.8  | 63919.6  | 74214.1  | TRUE |
| 361718   | 286681.2 | 342530   | 279270.5 | 208852.2 | 527918.5 | 390218.1 | 299887.1 | TRUE |
| 139175.1 | 82324.8  | 120608.4 | 131086.1 | 109839.5 | 127935.1 | 121348.2 | 155278.5 | TRUE |
| 627901.4 | 390734.1 | 616695.9 | 644070.7 | 909353.3 | 587121.3 | 534792.8 | 663353.3 | TRUE |
| 28659.7  | 23698.1  | 48430    | 31841.1  | 37794.7  | 42487.7  | 23565.9  | 35789.5  | TRUE |
| 153443.3 | 147103.5 | 175476.4 | 139747.5 | 145866.1 | 158169.8 | 139446.8 | 151397.7 | TRUE |
| 112443.9 | 101880.8 | 94663.6  | 74930.3  | 82867.4  | 87118.3  | 120212.7 | 99674.7  | TRUE |
| 61572.8  | 58469.6  | 72289.1  | 47029.2  | 47496.6  | 82603.3  | 81978.1  | 64022.3  | TRUE |
| 63459.2  | 61691.7  | 60346.8  | 63322.7  | 66529.6  | 68082.7  | 54588.7  | 67315.9  | TRUE |
| 101903.7 | 98684.3  | 80778.8  | 91905.5  | 96483.4  | 73538.9  | 98317.3  | 75551.2  | TRUE |
| 105849.1 | 100572.6 | 87912.8  | 125046.5 | 101514.2 | 105914   | 94537.9  | 111044.6 | TRUE |
| 69349.1  | 45515.6  | 88718.9  | 69031.8  | 82364.3  | 116723.6 | 99162.5  | 75371.4  | TRUE |
| 48475.5  | 38338.3  | 50053.6  | 53192.9  | 43963.3  | 46709.5  | 54921.6  | 40704.3  | TRUE |
| 21319.8  | 28926    | 32569.8  | 10080.4  | 30207.4  | 18739.5  | 12314.7  | 6060.6   | TRUE |
| 55416.5  | 63320.8  | 46644.9  | 67103.9  | 55332.8  | 59927.5  | 72934.4  | 70383    | TRUE |

|          |          |          |          |          |          |          |          |      |
|----------|----------|----------|----------|----------|----------|----------|----------|------|
| 38101    | 31563.3  | 36694.8  | 56398.5  | 42072.6  | 53917.3  | 53158.3  | 45858.5  | TRUE |
| 79646.9  | 76636.2  | 90190.2  | 83490.8  | 92153.1  | 103415.5 | 90580.3  | 96590    | TRUE |
| 132999   | 120544.5 | 157601.4 | 166806.7 | 142392   | 167668.8 | 165969.8 | 151011.1 | TRUE |
| 1107636  | 959650.9 | 1002745  | 1047174  | 921496.1 | 1285277  | 918342.8 | 1365450  | TRUE |
| 130369.5 | 113890.5 | 200066.4 | 224026   | 199236.8 | 134517.8 | 177040.9 | 223015.4 | TRUE |
| 57067.6  | 71201.6  | 91437    | 77895.1  | 63627.8  | 57135.9  | 55621.8  | 60335.7  | TRUE |
| 998837.5 | 1018522  | 852953.8 | 915720.2 | 861673.8 | 956414   | 970376   | 1013762  | TRUE |
| 1398059  | 1190046  | 1069209  | 1171590  | 1366366  | 1382955  | 1314506  | 1533080  | TRUE |
| 1511724  | 1453891  | 1108784  | 1358804  | 1474906  | 1152609  | 1421442  | 1517073  | TRUE |
| 206628.3 | 206650.3 | 226104.2 | 236817.3 | 217799.8 | 251601.1 | 299103.9 | 213319.5 | TRUE |
| 255023.4 | 287096.1 | 257676.6 | 299066.9 | 244979.1 | 253800   | 305195.9 | 250065.1 | TRUE |
| 350598.8 | 365614.2 | 286709.5 | 281325.3 | 281679   | 281941.7 | 318837.1 | 311281.5 | TRUE |
| 17745.1  | 19528.4  | 21623.8  | 26568.4  | 23795.2  | 19850.3  | 28262    | 17440.4  | TRUE |
| 182243   | 169895.4 | 167326.1 | 158551.5 | 152550.2 | 140928.2 | 150061.2 | 163302.8 | TRUE |
| 21918.7  | 38139.3  | 36333.1  | 24795.6  | 20313.6  | 27688.8  | 29549.7  | 22243.6  | TRUE |
| 18811.2  | 32864.1  | 29227    | 15140.3  | 8350.8   | 19725.5  | 29524.2  | 33107.4  | TRUE |
| 36794.4  | 44118.4  | 48122.7  | 27319    | 33435.7  | 52565.8  | 48012.4  | 41154.9  | TRUE |
| 250927.6 | 269556.6 | 300089.4 | 233785.3 | 215065   | 190603   | 270816.4 | 200840.6 | TRUE |
| 1258251  | 1386355  | 856075.2 | 1239400  | 1436169  | 984570.1 | 1478682  | 1463511  | TRUE |
| 272006.5 | 298281.7 | 240537   | 308168.2 | 327874.1 | 241017.6 | 301482   | 311538.3 | TRUE |
| 2161771  | 2286203  | 2445397  | 2460644  | 1738148  | 2232841  | 2412351  | 2400485  | TRUE |
| 58458.9  | 96405.2  | 82935.3  | 76630.1  | 79522.8  | 79453.9  | 89459.3  | 72160.4  | TRUE |
| 149532.7 | 152350.4 | 109266.4 | 153298.8 | 150308.4 | 114477.8 | 156119.2 | 151077.2 | TRUE |
| 501917.8 | 467311   | 336111.2 | 490658.2 | 543518.2 | 469112.6 | 671962.9 | 783983.8 | TRUE |
| 172849.6 | 152911.8 | 130050.5 | 184249.3 | 172058.8 | 147867.8 | 218614.8 | 204019.1 | TRUE |
| 84489.9  | 114008.2 | 95165.2  | 113265.9 | 136113.3 | 102617.7 | 105368.4 | 88425.6  | TRUE |
| 66734    | 90425.3  | 93476.4  | 72148.1  | 79057    | 72046.3  | 118555.8 | 73100.5  | TRUE |
| 61209.7  | 70261.1  | 56242.1  | 65396.7  | 44588.1  | 58298.9  | 74347    | 64923.3  | TRUE |
| 161249.5 | 156380.3 | 143398.9 | 160405.4 | 128539.2 | 164431.4 | 193333.3 | 159921.5 | TRUE |
| 120566   | 120128   | 101548.5 | 123645.8 | 91860.5  | 155986.9 | 140419.3 | 138179.1 | TRUE |
| 109672.6 | 89509.7  | 86680.7  | 110375.9 | 67122.5  | 105345.3 | 126241.6 | 118461.5 | TRUE |
| 2327022  | 2414548  | 1414608  | 1553974  | 1653788  | 1242931  | 1567458  | 1661520  | TRUE |
| 5084754  | 4698232  | 4605816  | 4544248  | 4182513  | 4546388  | 4627187  | 4496180  | TRUE |
| 3159029  | 3260828  | 2837218  | 3062761  | 2699512  | 3080423  | 3287767  | 3199343  | TRUE |
| 84579.8  | 72884.8  | 65444.2  | 73322.3  | 89312.4  | 83652.1  | 82031.9  | 80791.3  | TRUE |
| 62336    | 59499.2  | 44940.6  | 53226.6  | 72849.6  | 50371.2  | 68265.8  | 68264.6  | TRUE |
| 220820.3 | 205527.2 | 269673.6 | 218300.5 | 247093.4 | 276846.5 | 233785.9 | 291408.7 | TRUE |
| 53370.7  | 18335.8  | 29949.4  | 16779.1  | 22597.1  | 25311.8  | 37452.9  | 25931.9  | TRUE |
| 34464.4  | 27209.4  | 20047.5  | 8357.7   | 26122.2  | 33437    | 40405.3  | 47479.6  | TRUE |
| 12281.8  | 15406.8  | 10209.5  | 8627.8   | 7212.4   | 16781    | 7529.5   | 5342.1   | TRUE |

|          |          |          |          |          |          |          |          |      |
|----------|----------|----------|----------|----------|----------|----------|----------|------|
| 22022.4  | 20016.5  | 15624.8  | 19807.9  | 19200.5  | 16557.8  | 10717.8  | 10089.3  | TRUE |
| 28888.6  | 27967.8  | 27596    | 32989.4  | 24831.1  | 26822.2  | 36065.1  | 28333.7  | TRUE |
| 18856.7  | 27162.9  | 19944    | 7262.7   | 23165.9  | 17941.2  | 20373.9  | 24574.6  | TRUE |
| 47722.3  | 62484.5  | 59625.5  | 58830.7  | 48011.1  | 46306.1  | 54345.4  | 42442.5  | TRUE |
| 136812.1 | 144421.7 | 95567.1  | 116110.9 | 122264.9 | 94086.5  | 101027.5 | 100186.9 | TRUE |
| 1136704  | 1046130  | 883686.9 | 1086528  | 1181777  | 974596.7 | 1208595  | 1134366  | TRUE |
| 4040532  | 3712836  | 2999959  | 3725627  | 4229021  | 3365711  | 4104717  | 4168953  | TRUE |
| 167537   | 155812.5 | 146315.8 | 204698.9 | 173947.7 | 132876.2 | 184353.9 | 177897.5 | TRUE |
| 34653.4  | 45321.2  | 48422.6  | 58918.5  | 46626.1  | 30339.8  | 29560.2  | 26527.6  | TRUE |
| 49435.3  | 55495.8  | 47998.9  | 52282.7  | 60193.4  | 51244.2  | 42115.7  | 43313.4  | TRUE |
| 68097.4  | 66782.1  | 55541.7  | 50658.4  | 64712.6  | 50731.9  | 66868.8  | 88307.5  | TRUE |
| 22004.5  | 23671.9  | 23473    | 27928.3  | 23752.5  | 25434.9  | 27618.9  | 24611.8  | TRUE |
| 191220.9 | 152618.6 | 181838.7 | 206527.6 | 209551.1 | 175745.5 | 182451.9 | 176158.6 | TRUE |
| 58669.9  | 54866.7  | 60109.9  | 53784.8  | 50706.8  | 47824.7  | 69580.7  | 63455.3  | TRUE |
| 63127.9  | 43561.3  | 39866.7  | 62227.3  | 56688.4  | 65466.1  | 70707.3  | 87013.1  | TRUE |
| 43802.2  | 33639    | 41118    | 43825.8  | 50345.4  | 39421    | 50899.5  | 54627.5  | TRUE |
| 24357.9  | 35088    | 9191.7   | 49192.7  | 29235.5  | 26948.6  | 29515.9  | 27437.4  | TRUE |
| 35112.3  | 34707    | 39644.8  | 69625.2  | 35145.8  | 43554.3  | 61590.7  | 65028.7  | TRUE |
| 388079   | 402020.6 | 320445.7 | 421733.3 | 495754.4 | 330654.9 | 422668.2 | 422331.6 | TRUE |
| 48168.8  | 33407.7  | 21251.3  | 14658.1  | 30126.6  | 25019.5  | 28230.8  | 14448.8  | TRUE |
| 486419.9 | 443861.3 | 384003.9 | 469379.1 | 432211.3 | 396769.5 | 471201.3 | 475613.9 | TRUE |
| 211541.1 | 204318.4 | 246189.7 | 221981.1 | 230446.8 | 269565.5 | 211146.2 | 224560.7 | TRUE |
| 43059.6  | 77611.5  | 59621.9  | 73439.9  | 62526.1  | 25436.2  | 38230.2  | 33918.9  | TRUE |
| 355212.2 | 252616.1 | 274294.8 | 261428.7 | 293092.1 | 352741.8 | 299255.8 | 355214.3 | TRUE |
| 118594.6 | 86812.3  | 73687.2  | 104041.7 | 102936.8 | 128251   | 129689.3 | 157146.1 | TRUE |
| 64871.1  | 57355.3  | 47475.2  | 70269.5  | 44039.3  | 72233    | 73297.4  | 66098.8  | TRUE |
| 61959.6  | 57390.8  | 58457.7  | 68950.8  | 62383    | 83229.6  | 76476    | 92926    | TRUE |
| 1388428  | 1079461  | 1443268  | 1333572  | 1323990  | 1438669  | 1190700  | 1305560  | TRUE |
| 2955255  | 2916323  | 2872891  | 2867258  | 2535315  | 2958960  | 3225421  | 3148131  | TRUE |
| 75915.1  | 71868.3  | 48376.6  | 64846.9  | 74676.4  | 52788.6  | 78517.2  | 92826.2  | TRUE |
| 28953.3  | 11929.2  | 30834.6  | 40550.9  | 47477.7  | 22819.2  | 29759.4  | 38422.1  | TRUE |
| 79305.9  | 73356    | 42902.9  | 47569.3  | 46418.4  | 39441    | 55550.6  | 56854    | TRUE |
| 266557.9 | 285278.9 | 227193.7 | 241001.9 | 284706.1 | 258214.3 | 325634.8 | 298701.4 | TRUE |
| 352181.2 | 336919.9 | 285584.8 | 385730.9 | 384037.5 | 298196   | 384934.8 | 377655.1 | TRUE |
| 107907.7 | 94768    | 86607.7  | 120955.7 | 116675.3 | 89710.5  | 108269.9 | 115830.9 | TRUE |
| 436940.8 | 399851.8 | 397232.6 | 504667.6 | 479048.2 | 426630.2 | 432720.3 | 474390.2 | TRUE |
| 61174.7  | 96114.1  | 82484.8  | 82892.1  | 101308.2 | 52022.9  | 52028.1  | 62868.1  | TRUE |
| 17178.5  | 20740.9  | 27323.2  | 10299.1  | 9876.3   | 14577.1  | 10253.6  | 24697.9  | TRUE |
| 93609    | 125770.9 | 92280.5  | 92347.4  | 89400    | 53091.7  | 58789.6  | 58698.3  | TRUE |

|          |          |          |          |          |          |          |          |      |
|----------|----------|----------|----------|----------|----------|----------|----------|------|
| 36020.7  | 26125.5  | 36420.6  | 32142.2  | 30100.1  | 43191    | 35849.3  | 31201.6  | TRUE |
| 6980182  | 5571042  | 5413703  | 6692495  | 6951345  | 5791270  | 6407979  | 7292512  | TRUE |
| 124787.2 | 203517.3 | 113596.8 | 173664.5 | 170185.5 | 103728.6 | 74676.8  | 114115.7 | TRUE |
| 117946.8 | 88514.3  | 65710.3  | 74685.7  | 60027.9  | 63866.8  | 77819.7  | 70898.8  | TRUE |
| 80652.9  | 50043.2  | 56227.9  | 72671.2  | 63882    | 55512.5  | 57947.7  | 53902.8  | TRUE |
| 258415.8 | 259114.8 | 259571.9 | 267140.9 | 267997.5 | 295176.5 | 258693.1 | 264736.9 | TRUE |
| 2488957  | 1873600  | 2342944  | 2193224  | 2093335  | 2699449  | 2002628  | 2622693  | TRUE |
| 83693.7  | 140869.1 | 84181.5  | 107692.3 | 137013.9 | 68824.2  | 63395.7  | 68313.1  | TRUE |
| 69131.1  | 56202.2  | 77598.2  | 73901.8  | 61312.2  | 80854.5  | 54075.6  | 63675.4  | TRUE |
| 231910.3 | 209443.5 | 193894.4 | 234567.8 | 245330.9 | 198433.4 | 226463.5 | 254098.6 | TRUE |
| 78802.5  | 63538.3  | 63218.1  | 95031.5  | 91114.1  | 42999.4  | 72687.2  | 78144.6  | TRUE |
| 78337.7  | 78476.9  | 67694.6  | 107020.4 | 91333.4  | 72111.4  | 71804.8  | 81892    | TRUE |
| 460479.5 | 426038.3 | 382034.6 | 501294.7 | 512434.3 | 467618.6 | 479422.3 | 485308.6 | TRUE |
| 50700.3  | 79771.1  | 61105.8  | 94389.2  | 61087.9  | 51567    | 56190.3  | 51471.8  | TRUE |
| 953320.3 | 916802.6 | 852718.7 | 1071458  | 1144067  | 901851.6 | 1034501  | 1127450  | TRUE |
| 1528624  | 1584915  | 1475225  | 1524465  | 1332839  | 1613244  | 1536319  | 1474761  | TRUE |
| 101308.2 | 79209.2  | 92191.6  | 75005.6  | 87025.2  | 87765.4  | 92908.5  | 76405    | TRUE |
| 135277   | 167292.3 | 150799.5 | 131928.5 | 121173.5 | 122465.4 | 142630   | 153663.7 | TRUE |
| 79403    | 85603    | 79308.7  | 85408.2  | 61316.8  | 78841.2  | 84570.1  | 75964.8  | TRUE |
| 19453.7  | 30331.6  | 7850.5   | 7946     | 18903.2  | 6403.8   | 10803.4  | 19988.2  | TRUE |
| 128008.4 | 116624.7 | 78496.5  | 183815.2 | 220611.6 | 66632.4  | 167593   | 206712.8 | TRUE |
| 199607.3 | 221342   | 158649.7 | 213471.1 | 256643.4 | 126427.4 | 261417.9 | 256301.8 | TRUE |
| 1050593  | 1013401  | 903160.1 | 1026260  | 908790.2 | 857961.9 | 865767.5 | 942356.7 | TRUE |
| 1727334  | 1648263  | 1975663  | 2414825  | 2113685  | 2007824  | 1961197  | 2106062  | TRUE |
| 88478.3  | 92558.2  | 70976.5  | 112884.6 | 98216    | 80936.7  | 86940.5  | 88518.4  | TRUE |
| 31871.1  | 21356.2  | 25996.7  | 13873.5  | 23797.6  | 27765.2  | 26895.4  | 38018    | TRUE |
| 93629.8  | 99680.6  | 85676.9  | 71146.9  | 61282.1  | 94932.3  | 88693.2  | 60544.6  | TRUE |
| 187227.3 | 157608.5 | 133241.4 | 133383.1 | 161397   | 149068.6 | 146739.4 | 168016.5 | TRUE |
| 1343555  | 1576359  | 1830622  | 2032030  | 993421.6 | 910715.7 | 1616780  | 976396.7 | TRUE |
| 667586.2 | 808105.9 | 731847.1 | 756690.8 | 587936.7 | 533133.6 | 847885.2 | 547285.6 | TRUE |
| 67564.7  | 32990.6  | 55929.8  | 60029.7  | 45538.8  | 53686.9  | 60314.7  | 53817.6  | TRUE |
| 324451   | 311281.5 | 325568.7 | 386391   | 342343   | 386527.2 | 345942.7 | 332200.6 | TRUE |
| 82182.4  | 64454.9  | 78335.2  | 110589.8 | 79556.8  | 92456.6  | 103424.9 | 89412.8  | TRUE |
| 389815.3 | 339479.7 | 328289.5 | 326534.1 | 379093.5 | 364720.4 | 354758.7 | 397143.2 | TRUE |
| 235751.8 | 243970.1 | 237603.7 | 241527   | 207186.5 | 268809.1 | 270803.7 | 257790.6 | TRUE |
| 121669   | 126018.3 | 143840   | 151147.2 | 91916.2  | 106898.6 | 151185.5 | 139349.5 | TRUE |
| 284617.7 | 241449.9 | 205399.7 | 267568   | 286091.2 | 275411.7 | 310221.4 | 318990.8 | TRUE |
| 203251.4 | 206564.7 | 192161.2 | 224681.1 | 178039.2 | 207073.8 | 219853.8 | 226128.2 | TRUE |
| 68959.8  | 85638    | 55758.8  | 70172.8  | 58484    | 65511    | 59232.6  | 49297.6  | TRUE |
| 136164.6 | 203963.1 | 283607.6 | 284751   | 264383.3 | 326752.2 | 271777.5 | 239166.4 | TRUE |
| 63302.6  | 63203    | 79278.6  | 72377.9  | 86526.7  | 115962.9 | 72707.4  | 117463.2 | TRUE |
| 112971.2 | 99707.3  | 102471.4 | 110951.4 | 133477   | 154561.4 | 145985.7 | 123298.2 | TRUE |
| 776017.8 | 793088.1 | 614518.9 | 882267.1 | 904789.2 | 839260.6 | 1123818  | 699535.9 | TRUE |
| 239630.1 | 230430.8 | 222558.6 | 243653.7 | 223776.7 | 252864.5 | 232718.4 | 223014.3 | TRUE |
| 317626.7 | 415075.6 | 197378.4 | 263529.8 | 258870.5 | 228005.3 | 224844.2 | 242541.6 | TRUE |
| 526773.8 | 492817.5 | 499231.7 | 518050.6 | 526251.6 | 509323.1 | 505611.9 | 526092.6 | TRUE |
| 256313.3 | 254228.9 | 216546.8 | 272360.5 | 281957.9 | 240388.2 | 218259.3 | 273647.6 | TRUE |



|          |          |          |          |          |          |          |          |      |
|----------|----------|----------|----------|----------|----------|----------|----------|------|
| 445923.7 | 397709.6 | 373215.4 | 452133.7 | 447282   | 404758   | 421199.6 | 441140   | TRUE |
| 251580.9 | 257383.1 | 202609.7 | 269345.6 | 228053.6 | 251042.7 | 224729.4 | 232394.2 | TRUE |
| 363101.1 | 352857.7 | 337595.9 | 334196.1 | 337141   | 368775.8 | 380587.6 | 339254.1 | TRUE |
| 538413.5 | 526959.4 | 442798.9 | 515802.9 | 505455.1 | 561096.8 | 545857.6 | 560842.1 | TRUE |
| 470161.3 | 469226.9 | 549963.2 | 393120.9 | 455622.1 | 462153.3 | 478183.1 | 489583.8 | TRUE |
| 27287.1  | 10111.1  | 39042    | 38531.7  | 49732.3  | 29155    | 28309.3  | 44163.6  | TRUE |
| 29972.8  | 37264.5  | 45305.2  | 46678.9  | 51907.7  | 58293    | 54067.1  | 48417.8  | TRUE |
| 97186    | 66834.8  | 80143.9  | 80141.2  | 95184.5  | 130057.7 | 120376.7 | 127770   | TRUE |
| 45846.1  | 44046    | 31978.5  | 49524.3  | 45344.9  | 57195    | 47907.1  | 67593.6  | TRUE |
| 96595.6  | 85621.5  | 92711.4  | 125260.9 | 111097   | 132212.9 | 106669.6 | 119161.7 | TRUE |
| 86206.7  | 50963    | 72203.8  | 65724.6  | 70092.4  | 88854.8  | 87915    | 75716.4  | TRUE |
| 137462.5 | 94245.9  | 92421    | 142976   | 122162.7 | 193852.5 | 168475.3 | 165013.2 | TRUE |
| 14237.2  | 16937.2  | 22168.7  | 35026.1  | 25332.4  | 35177.2  | 40155.7  | 47335.3  | TRUE |
| 152513.2 | 117638.7 | 136263.1 | 153102.8 | 139176.5 | 138198.3 | 116113.1 | 141519.5 | TRUE |
| 206277.9 | 188942.4 | 175747.3 | 195143   | 201944.2 | 184697.6 | 169752.1 | 185758.9 | TRUE |
| 519721.5 | 556138.3 | 595594.1 | 618369.4 | 559584.9 | 666298.1 | 623868.4 | 551445.2 | TRUE |
| 43205.6  | 72127.3  | 76362    | 55901.1  | 72214.8  | 37087.5  | 40536    | 39177.6  | TRUE |
| 44798.7  | 59077.6  | 61240.8  | 71531.3  | 54299    | 28990.2  | 39617.7  | 34910.8  | TRUE |
| 463014   | 398434.9 | 413891   | 402366.5 | 470127.8 | 548052.1 | 424774.9 | 521994.7 | TRUE |
| 861489.1 | 751023.8 | 833319.4 | 861275   | 820928.7 | 810674.4 | 808017.9 | 867304.6 | TRUE |
| 46697.7  | 45181.5  | 48131.4  | 44809.5  | 44771.2  | 45036.3  | 57262.1  | 43953.1  | TRUE |
| 174578   | 207130.2 | 140167.1 | 205166.6 | 173106.2 | 173921.6 | 163662.3 | 155098.4 | TRUE |
| 797422.5 | 817018.1 | 697864.6 | 690385.3 | 681340.7 | 748024.2 | 863696.6 | 690285.1 | TRUE |
| 401556.2 | 422907.5 | 372958.9 | 485706.7 | 464852.1 | 435448.9 | 448391.2 | 471960.4 | TRUE |
| 154733.7 | 139815   | 127515.1 | 158165.6 | 167920.4 | 124046.4 | 161213.7 | 172544.2 | TRUE |
| 58722.3  | 61591    | 52596.1  | 70189.2  | 49930.5  | 84667.4  | 79936.4  | 73971.6  | TRUE |
| 16331.5  | 9580.7   | 13707.9  | 23862.6  | 9530.3   | 7595     | 22242    | 13298.3  | TRUE |
| 37043    | 28384.4  | 40985.2  | 38040.8  | 31378.6  | 33204.8  | 35631.7  | 35115.1  | TRUE |
| 49446.3  | 30821.7  | 16529.5  | 37104.6  | 23479.9  | 28238.2  | 40980.7  | 41326.8  | TRUE |
| 39659.3  | 40260.8  | 33123.8  | 55589.9  | 41589.1  | 52828.5  | 61215    | 51909.6  | TRUE |
| 54022.2  | 63648.3  | 48541    | 44195.3  | 46506    | 45886.3  | 65848.9  | 64317.4  | TRUE |
| 78493.3  | 71551.2  | 77184    | 98499.9  | 84161.8  | 80768.5  | 83057.2  | 90909.8  | TRUE |
| 58169    | 81567.4  | 72439.4  | 88497.4  | 71959    | 82953.6  | 80056.8  | 77425.1  | TRUE |
| 154647.6 | 149818.3 | 150336.9 | 157102.2 | 175774.4 | 166937.6 | 166054.4 | 160445.6 | TRUE |
| 138377.6 | 137917.6 | 144183.2 | 141971.6 | 161040.9 | 184274.1 | 141523.9 | 155303.8 | TRUE |
| 84973.4  | 79924.4  | 76267.8  | 71034.7  | 101567.8 | 79185.3  | 82293.5  | 80118.3  | TRUE |
| 82963    | 58534.6  | 59657.8  | 88605.2  | 84111.4  | 62859.2  | 74599.1  | 75779.9  | TRUE |
| 240172.7 | 247275.2 | 185844.7 | 310082.4 | 246555.1 | 212470.2 | 252464.6 | 255409.2 | TRUE |
| 52303.6  | 61167.4  | 68400.3  | 74387.7  | 80393.3  | 70583.7  | 65314.7  | 82925    | TRUE |
| 117558.4 | 110971   | 89942.2  | 97301.3  | 94955.4  | 136409.8 | 93598.7  | 143099.2 | TRUE |
| 55419.4  | 40023.1  | 33973.6  | 41090.5  | 47248.3  | 70100.9  | 71540    | 61481.1  | TRUE |
| 114931.1 | 118967.6 | 115383.7 | 141317.9 | 118793.2 | 115168.4 | 129137.6 | 123253.6 | TRUE |

|          |          |          |          |          |          |          |          |      |
|----------|----------|----------|----------|----------|----------|----------|----------|------|
| 153367.8 | 123448.4 | 116730.4 | 163634.6 | 128497.9 | 200570.8 | 214137.5 | 193691.1 | TRUE |
| 230552.4 | 256681.7 | 191393.5 | 229486.9 | 223696.6 | 233747.5 | 271873.8 | 245850.1 | TRUE |
| 191226.1 | 205604.7 | 202535.2 | 219581.2 | 216201.1 | 195557.4 | 239983.3 | 186294.6 | TRUE |
| 565741.1 | 444684.5 | 421028.3 | 559643.5 | 500913.4 | 649537.9 | 575745.4 | 584036.9 | TRUE |
| 29427.2  | 29278.9  | 18853.5  | 19994.3  | 29009.2  | 27843.3  | 27710.7  | 32282.1  | TRUE |
| 215369.2 | 178715.7 | 143900.8 | 144560.8 | 163654.2 | 148276.7 | 175934.7 | 176240.6 | TRUE |
| 524960.5 | 523680.7 | 331808.3 | 460876.5 | 461043.5 | 359000.9 | 509970   | 472625   | TRUE |
| 48882.1  | 44853.6  | 53387.1  | 61884.3  | 64086.6  | 51647.5  | 49412.3  | 65287.4  | TRUE |
| 775126.3 | 777673.4 | 745695.8 | 1014780  | 1004892  | 855266.8 | 1032296  | 1029578  | TRUE |
| 21154.3  | 79146.2  | 29461.3  | 43010.2  | 48862    | 13633.3  | 9889.4   | 4721.2   | TRUE |
| 742635.5 | 706082.6 | 764602.3 | 787904   | 634718.7 | 707380.1 | 766950.2 | 671508   | TRUE |
| 1387456  | 1352917  | 1337713  | 1406998  | 1159593  | 1282399  | 1384520  | 1433197  | TRUE |
| 50956    | 35656.5  | 35496.7  | 42090.9  | 40062.7  | 55349.2  | 54946.4  | 58932    | TRUE |
| 69830.3  | 90231.6  | 73799.7  | 89358.7  | 109135.1 | 67907.2  | 93802.6  | 81207.1  | TRUE |
| 82272.6  | 128025.7 | 92849.1  | 123984.4 | 92489    | 85821.8  | 106674.1 | 93990    | TRUE |
| 59843.9  | 85545.6  | 100602.8 | 71626.8  | 87996.7  | 56566.6  | 57626.6  | 59884.9  | TRUE |
| 270651.2 | 265438.7 | 175702.6 | 297531.6 | 294831.5 | 309173.7 | 364176.1 | 350368.1 | TRUE |
| 47621.6  | 68519.8  | 40324.6  | 26068.7  | 44147.1  | 27713.3  | 38977    | 46994.5  | TRUE |
| 103992.5 | 106407.8 | 111972.3 | 124847.4 | 141203.4 | 112878.1 | 153130   | 132165.5 | TRUE |
| 207458.3 | 205677.3 | 225624   | 252392.5 | 268849.6 | 202605.5 | 269201   | 268523.2 | TRUE |
| 47996.9  | 38933.9  | 35830.7  | 54070.8  | 40316.4  | 37826    | 41049.1  | 42974.8  | TRUE |
| 38585.5  | 86056.8  | 34411.6  | 61552    | 66109.8  | 32638.6  | 31114.9  | 28529.5  | TRUE |
| 963401.8 | 1564957  | 1097450  | 1698635  | 965496.2 | 936635.5 | 980427.4 | 955716.9 | TRUE |
| 1538497  | 3149707  | 1833849  | 2962069  | 1540190  | 1374567  | 1505327  | 1585922  | TRUE |
| 54919.4  | 60633.1  | 35664.1  | 40620.3  | 52857.6  | 37659.1  | 47467.9  | 57968    | TRUE |
| 107686.5 | 108750.7 | 87902.9  | 96799.9  | 100613   | 84877.1  | 88016.2  | 79861.9  | TRUE |
| 230663.4 | 204097.1 | 100106.8 | 157535.6 | 161631.4 | 146656   | 194442.9 | 212809.4 | TRUE |
| 297223.6 | 277007.9 | 277013.6 | 272088.9 | 276757   | 311470.3 | 312529.3 | 340331.7 | TRUE |
| 101012.3 | 96805.5  | 73569.8  | 97317.1  | 75567.7  | 123219   | 113972.9 | 96263.9  | TRUE |
| 397883.4 | 375819.1 | 354457.5 | 431913.1 | 302080.1 | 442066.9 | 435383.4 | 452415.8 | TRUE |
| 333234.9 | 389393.3 | 288244.8 | 357193.2 | 367177.2 | 293333.5 | 325806.5 | 344828   | TRUE |
| 115937.3 | 108458.5 | 121915.9 | 102909.5 | 90683.3  | 94866    | 102061.3 | 94212.3  | TRUE |
| 1112356  | 1133771  | 1240544  | 1416785  | 916746.7 | 1126703  | 1387109  | 1069716  | TRUE |
| 75323.2  | 65578    | 58598.5  | 61934.6  | 78085.2  | 70431.7  | 83938.6  | 96765.4  | TRUE |
| 86231.7  | 79146.7  | 81732    | 67138    | 69065.4  | 91041.3  | 89004.6  | 89928.9  | TRUE |

|          |          |          |          |          |          |          |          |      |
|----------|----------|----------|----------|----------|----------|----------|----------|------|
| 39537.1  | 48806.3  | 41379.4  | 47086.6  | 49085.9  | 47722.1  | 35782.7  | 70532.8  | TRUE |
| 24158.8  | 31852.9  | 14504.7  | 27740.6  | 20976.2  | 24517.8  | 25678.9  | 20280.6  | TRUE |
| 29902    | 26423.5  | 15514.7  | 16502.1  | 6783.5   | 35313    | 20852.2  | 15547.2  | TRUE |
| 43510.5  | 38113.7  | 42898.1  | 41398.9  | 41306.1  | 66406.3  | 54027.9  | 30351.2  | TRUE |
| 37303.3  | 39408.7  | 42440.1  | 44867.7  | 57094.8  | 50179.9  | 69910.9  | 61541.1  | TRUE |
| 45171    | 23761    | 48548.4  | 37760.6  | 51532.8  | 59751.3  | 43055    | 59872.9  | TRUE |
| 941229.5 | 679928.9 | 877515.8 | 882662.7 | 959064.1 | 893473.5 | 737131.3 | 918788.1 | TRUE |
| 197992.5 | 191224.2 | 143768.6 | 222663.5 | 175917.3 | 180946.1 | 202931.7 | 192513.1 | TRUE |
| 161630.7 | 161859.9 | 154158.1 | 182743.5 | 189596.4 | 176577.4 | 207362.9 | 194285.6 | TRUE |
| 93241.2  | 73204.5  | 94050.2  | 85123.4  | 90039.6  | 88712    | 82699.8  | 95473.4  | TRUE |
| 215318.8 | 187744.6 | 276387.8 | 250329.6 | 239554.9 | 275811.9 | 184952.6 | 274021.8 | TRUE |
| 42482.5  | 34512.8  | 44893.8  | 45207.2  | 36214.1  | 50001.4  | 34746.6  | 42958.9  | TRUE |
| 166068.1 | 140250.8 | 113851.7 | 176499.5 | 132131.2 | 164735.3 | 188799.9 | 157651   | TRUE |
| 164412   | 112446.3 | 137361.9 | 179295.7 | 164348.3 | 175310   | 155219.5 | 169721.1 | TRUE |
| 593710.7 | 1460632  | 580930.7 | 627750.5 | 563347.3 | 628041.7 | 745608.8 | 563769.7 | TRUE |
| 40741.6  | 50948.2  | 36724.8  | 30840.6  | 32995.1  | 43960.2  | 56695.8  | 32327.5  | TRUE |
| 1811709  | 2021441  | 1744766  | 1800498  | 1622917  | 1784369  | 2019538  | 1652933  | TRUE |
| 60113    | 45507.2  | 66778.9  | 58952.5  | 50652.5  | 48595.4  | 71014.6  | 55904.8  | TRUE |
| 421226.4 | 449509.9 | 449282.8 | 466360.8 | 404611   | 424645.7 | 418719.2 | 440527.4 | TRUE |
| 1050616  | 1004893  | 940416.8 | 1045776  | 966156   | 1012857  | 1084171  | 983406.1 | TRUE |
| 2164395  | 1679834  | 2216112  | 2132321  | 2524969  | 2110937  | 1863990  | 2108800  | TRUE |
| 8050     | 9327.4   | 12088.5  | 9618.6   | 7436     | 9114.6   | 18172.5  | 11413.8  | TRUE |
| 114094.7 | 192528.5 | 125920.5 | 178587.9 | 176637.8 | 118909.5 | 107288   | 89867.8  | TRUE |
| 175416.4 | 189481.7 | 151997.8 | 139714.8 | 158772.6 | 170793.3 | 184329.7 | 144075.9 | TRUE |
| 55586    | 42987.6  | 71657    | 69427.1  | 73743.9  | 74384.5  | 59408.8  | 78825.8  | TRUE |
| 84652.8  | 93901.4  | 108236.2 | 99467.1  | 87569.8  | 104621.1 | 99484.8  | 102463.8 | TRUE |
| 65813.3  | 57113.5  | 80202.4  | 77843.5  | 65475.1  | 85384.6  | 63468    | 78729.8  | TRUE |
| 101263.3 | 74121.4  | 85697.9  | 98337.8  | 89503.2  | 89276.8  | 75594.9  | 105589.3 | TRUE |
| 132026.8 | 111336.8 | 131983.7 | 129976.6 | 108491.9 | 128736   | 137292.8 | 100387   | TRUE |
| 100625.1 | 78657.9  | 93276.8  | 105468.5 | 98077    | 102291.9 | 74489    | 96160.6  | TRUE |
| 38573.1  | 42228.9  | 26428.5  | 30790.3  | 18077.6  | 35680.1  | 24514.7  | 30985.4  | TRUE |
| 477710.9 | 479434.7 | 342033.7 | 350631.3 | 320811.1 | 364228.1 | 398904.1 | 334602   | TRUE |
| 198535.7 | 221988.2 | 169526.8 | 211724.8 | 179853   | 177496.1 | 203499   | 176112.8 | TRUE |
| 476566.2 | 538230   | 495843.7 | 517857.4 | 446810.4 | 528990.1 | 521103.1 | 443174.1 | TRUE |
| 504115.8 | 439735   | 608780.4 | 639441.1 | 489479.6 | 537449.7 | 443481.6 | 510261.8 | TRUE |
| 568372.4 | 582359.5 | 777582.8 | 859176.9 | 657338.2 | 686957.1 | 547519.4 | 664304.5 | TRUE |
| 458127.4 | 419404.2 | 405540.5 | 420072.2 | 474112.3 | 439245.4 | 434604.8 | 454112.5 | TRUE |
| 795744   | 770562.2 | 967085.7 | 951719.9 | 763121.7 | 650576.9 | 813002.9 | 660289.8 | TRUE |
| 800495   | 775908.2 | 978862.3 | 995270.2 | 811493.7 | 702271.7 | 840857.9 | 697361.1 | TRUE |
| 84025.1  | 75581.6  | 74602.1  | 58480.4  | 62662.2  | 57129.8  | 69960.3  | 72753.1  | TRUE |
| 82820.3  | 83321.7  | 92425.6  | 94521.7  | 104589.6 | 85056.5  | 107928.7 | 95942.1  | TRUE |
| 41479    | 53208.4  | 51959.7  | 45725.5  | 42659.2  | 34718.5  | 44669.1  | 53660.4  | TRUE |
| 19606.7  | 6716.1   | 25750.3  | 14482.6  | 23860.3  | 26676.5  | 10660.6  | 15083.2  | TRUE |

|          |          |          |          |          |          |          |          |      |
|----------|----------|----------|----------|----------|----------|----------|----------|------|
| 1278537  | 1300948  | 1336046  | 1382208  | 1152594  | 1217352  | 1387475  | 1214425  | TRUE |
| 89366.3  | 98122.1  | 85422    | 81128    | 90837.4  | 84603.6  | 99555.2  | 91616.4  | TRUE |
| 70565.2  | 70577.8  | 70010.2  | 76522.4  | 52953    | 56796.3  | 73145.9  | 56984.9  | TRUE |
| 481238.5 | 625351.9 | 370506.3 | 523134.8 | 627745.4 | 388212.1 | 607792   | 602267.6 | TRUE |
| 1276922  | 1536652  | 1552528  | 1569833  | 1052307  | 1461785  | 1704105  | 1436820  | TRUE |
| 907019.5 | 1119416  | 1041444  | 1021375  | 736290.2 | 921610   | 1265783  | 970205.3 | TRUE |
| 162228   | 219642.4 | 222306.4 | 162864.4 | 181867.1 | 161825.4 | 203712.5 | 162116.6 | TRUE |
| 106113   | 115043.6 | 117082.9 | 103433.6 | 83158.7  | 96773.3  | 102614.8 | 84829.2  | TRUE |
| 830469.2 | 865823.3 | 697363.9 | 770378.6 | 724347.5 | 811728.8 | 854731.9 | 789540.6 | TRUE |
| 397169.5 | 443769.4 | 389030.1 | 439906   | 380638   | 400669.5 | 409224.8 | 430895   | TRUE |
| 1738956  | 1482861  | 1843395  | 1771369  | 1742375  | 1559008  | 1632724  | 1577950  | TRUE |
| 97599.9  | 96623    | 100462.3 | 84503.4  | 83141    | 142608.8 | 93938.2  | 104761.4 | TRUE |
| 39524    | 42308.1  | 53642    | 40024.8  | 43417.1  | 30408.4  | 49349.1  | 36340.7  | TRUE |
| 36577    | 31662.5  | 48792.2  | 44171.8  | 30623    | 30608.5  | 35175.6  | 44896.7  | TRUE |
| 29895.8  | 30792.4  | 34525.5  | 34191.2  | 30084.8  | 30046.1  | 32016.9  | 32559.4  | TRUE |
| 54125.7  | 62226.6  | 45189.3  | 46605.2  | 48096    | 62870.5  | 56710.5  | 59500    | TRUE |
| 33191.1  | 11340.2  | 34669.2  | 29468.4  | 26584.2  | 31897.8  | 36001.5  | 39144    | TRUE |
| 38983.6  | 48971.2  | 50514.2  | 38161.3  | 49253.9  | 61562.6  | 63907.4  | 65589.7  | TRUE |
| 87825    | 48479.9  | 49685    | 46641.2  | 57037    | 82615    | 63643.3  | 72560.8  | TRUE |
| 58916    | 42853.1  | 33184    | 36486.3  | 37029.7  | 29897.8  | 30252.3  | 50890    | TRUE |
| 109109.2 | 111122.6 | 106101.2 | 105938.6 | 105119.2 | 100673.5 | 92992.1  | 111851.3 | TRUE |
| 63041.4  | 88698.2  | 71748.2  | 83222.4  | 91273.7  | 55989.3  | 52839.5  | 51625.2  | TRUE |
| 186897.8 | 207256   | 268305.1 | 248182.8 | 190110.5 | 238627.4 | 186978.1 | 189265.4 | TRUE |
| 767260.9 | 698037.1 | 803121.1 | 741496.8 | 914074.5 | 742777.7 | 725695.2 | 742153.1 | TRUE |
| 135607.2 | 165170.4 | 125036.6 | 172168.9 | 162547   | 109872.3 | 133378.1 | 126640.9 | TRUE |
| 56076.8  | 40404.6  | 53911.7  | 53927.5  | 55101.7  | 39749    | 43125.4  | 53053.5  | TRUE |
| 107294   | 124019.2 | 101095.2 | 139492   | 106824.2 | 114928.1 | 109807.7 | 89907.4  | TRUE |
| 97593.6  | 65995.4  | 87851.5  | 86412    | 91178.5  | 125844.6 | 111467.8 | 105003.7 | TRUE |
| 301689.4 | 332820.3 | 481689.5 | 376219.4 | 374834.3 | 254630.2 | 290643.7 | 291901.3 | TRUE |
| 622159.3 | 500914   | 489522   | 592784.4 | 662254.9 | 553727   | 500376.3 | 609361.3 | TRUE |
| 53004.1  | 63038.4  | 37094.8  | 35540.8  | 50681.8  | 59385.3  | 33767.4  | 49462.7  | TRUE |
| 77661.2  | 66835.3  | 49760.3  | 64213.9  | 78269.2  | 73543.1  | 104603.3 | 108688.9 | TRUE |
| 94989.8  | 58798.1  | 85244    | 101883.2 | 72341.9  | 105644   | 104583.9 | 88968.7  | TRUE |
| 42797.4  | 42423.2  | 43287.5  | 47873.7  | 32311.6  | 59288.7  | 39681.1  | 45759.6  | TRUE |

|          |          |          |          |          |          |          |          |      |
|----------|----------|----------|----------|----------|----------|----------|----------|------|
| 1138506  | 1075708  | 1199003  | 1296735  | 1043333  | 1216830  | 1199165  | 1169407  | TRUE |
| 1105759  | 999569.6 | 1100047  | 1196577  | 942562.5 | 1104970  | 1080113  | 1124688  | TRUE |
| 743403.8 | 691974.7 | 835727   | 865868.3 | 694851.5 | 800295.2 | 831428   | 761683.7 | TRUE |
| 373779.1 | 323314.7 | 322120.4 | 306812   | 327663.8 | 291304.1 | 349948.2 | 336485.9 | TRUE |
| 298812.3 | 321251.1 | 195673.9 | 247775.9 | 239846.7 | 222845.3 | 273102.4 | 244007.8 | TRUE |
| 783466.5 | 642713.1 | 848067.9 | 831714.5 | 723752.8 | 846265.9 | 708795.3 | 740593.9 | TRUE |
| 350301.8 | 324855.5 | 196853   | 345587.3 | 301741   | 243108.3 | 375873.3 | 327245.6 | TRUE |
| 302056   | 268955.6 | 287848.1 | 371513.4 | 236791.7 | 374040   | 325274.6 | 388957.1 | TRUE |
| 314988.3 | 271404.7 | 195885.3 | 268453.8 | 275980.3 | 277054.4 | 305394.8 | 298067.5 | TRUE |
| 73565    | 60551.8  | 47664.2  | 62281.1  | 62604.8  | 53523    | 81934.5  | 83672.8  | TRUE |
| 22912.4  | 31855.9  | 28654.5  | 43256.4  | 38357.4  | 52552.1  | 32386    | 35463.1  | TRUE |
| 91398.6  | 62156.5  | 66898.4  | 70442.1  | 67293.2  | 81203    | 77194.4  | 71660.1  | TRUE |
| 186835.1 | 151696.4 | 170958.1 | 169007.8 | 143467.2 | 202947.3 | 175804.2 | 195694   | TRUE |
| 418785.4 | 409915.4 | 404629.4 | 396936.2 | 398360.6 | 386410.4 | 415851.2 | 411649   | TRUE |
| 270144.3 | 288842.6 | 238372   | 223660.5 | 252790.2 | 313685.7 | 264469.3 | 274173.6 | TRUE |
| 882298.8 | 884939.2 | 851835.3 | 917487.5 | 726184.8 | 817146   | 879129.7 | 844166.3 | TRUE |
| 263789.9 | 211723.6 | 220749.8 | 219753.3 | 177840.1 | 191865   | 189232.5 | 216326.6 | TRUE |
| 253231   | 220601.2 | 274840.1 | 307699.5 | 227240.5 | 258512.1 | 248316.8 | 252430.4 | TRUE |
| 109295.9 | 87843.9  | 127665.7 | 123791.3 | 89214.7  | 110953.6 | 110265.8 | 120910.8 | TRUE |
| 316993.2 | 315463.1 | 343688.9 | 408016.4 | 277094.1 | 369807.5 | 283037.6 | 424854.8 | TRUE |
| 65796.7  | 87040.7  | 52129.1  | 54637.3  | 41866.7  | 63219.7  | 87416.6  | 59611.1  | TRUE |
| 450488.2 | 441556   | 415181.1 | 439667.7 | 345375.7 | 391457.2 | 426991.5 | 375989.4 | TRUE |
| 232176.8 | 288228.6 | 230567.7 | 244118.7 | 192716.8 | 247643   | 223313.8 | 186566.3 | TRUE |
| 278299.3 | 212066.9 | 310220.5 | 330027   | 243009.2 | 512706.7 | 218120.4 | 451188.4 | TRUE |
| 2508992  | 2532324  | 2725319  | 1498780  | 2605647  | 2745482  | 2517805  | 2601903  | TRUE |
| 1274371  | 1161134  | 1274972  | 642366.7 | 1244689  | 1314747  | 1248544  | 1283722  | TRUE |
| 86489.1  | 61259    | 88455.6  | 68932.6  | 99683.1  | 92070.3  | 94892.7  | 113187   | TRUE |
| 98172.1  | 93209.4  | 123720.5 | 124435.3 | 92843.2  | 129447.6 | 123692.6 | 92651.4  | TRUE |
| 97168.2  | 97929.5  | 119679.4 | 125780.8 | 109423   | 162832.9 | 85200.2  | 140336.7 | TRUE |
| 2223045  | 2254054  | 2578257  | 2499785  | 2395346  | 2170832  | 2327483  | 2246275  | TRUE |
| 1752040  | 1449371  | 1448546  | 1384091  | 1210338  | 1664543  | 1435951  | 1287825  | TRUE |
| 553415.1 | 541496.5 | 665245.3 | 539506.9 | 560938.4 | 683326.7 | 560220.2 | 641821.4 | TRUE |
| 416773.8 | 438249.8 | 530426.4 | 508328.3 | 416918.6 | 577824   | 498966.7 | 424917.1 | TRUE |
| 268432.2 | 275233.6 | 298768.5 | 287886   | 256289.8 | 315759.5 | 292022.1 | 276159.9 | TRUE |
| 61204.8  | 57299    | 68376.8  | 67490.3  | 54623.1  | 71595.2  | 62423    | 65831.6  | TRUE |
| 43724.3  | 95708.1  | 69618.3  | 94600.1  | 73796.8  | 51928.8  | 47362.4  | 44682.6  | TRUE |
| 3078787  | 1903519  | 2777643  | 2677746  | 3105498  | 2929115  | 2087073  | 2901025  | TRUE |
| 385271.9 | 253813.3 | 308627.4 | 349790.1 | 320357.9 | 369275.7 | 317872.5 | 357961.5 | TRUE |
| 1929471  | 1288381  | 1279435  | 1534621  | 1234505  | 1502825  | 1455710  | 1750642  | TRUE |
| 2196500  | 1844467  | 2441613  | 2957983  | 2444240  | 2258154  | 2261474  | 2486992  | TRUE |
| 284285.8 | 289286.5 | 280445.6 | 342726.4 | 255610.8 | 290130.3 | 283892.9 | 263078.2 | TRUE |
| 174688.3 | 194051.9 | 175244.3 | 175881.1 | 152757.5 | 168507.9 | 199208.2 | 151736.7 | TRUE |
| 855114   | 700748   | 888200.5 | 846631.4 | 910884   | 897709.4 | 812899   | 899569.8 | TRUE |
| 702681.5 | 543158.7 | 617828.1 | 661613.5 | 639574.6 | 625727.7 | 573524.4 | 568275.7 | TRUE |
| 353406.7 | 399654.9 | 341480.6 | 369176.8 | 365763.4 | 306743.7 | 329014   | 320295.9 | TRUE |
| 137217.5 | 125585.2 | 79181.6  | 89208.4  | 88152.8  | 85550.4  | 100213.1 | 91405.3  | TRUE |
| 287307.4 | 319898.1 | 337830.3 | 298483.7 | 301996.1 | 375448.6 | 318307.2 | 283318.7 | TRUE |
| 173563.3 | 168200.1 | 209458   | 217965.6 | 181453.4 | 210992.9 | 190844.1 | 187256.1 | TRUE |
| 189097.9 | 162292.8 | 205982.9 | 219986.7 | 219998.2 | 199427.9 | 251128.2 | 204774.3 | TRUE |
| 2715660  | 2436674  | 2900802  | 3206499  | 2834910  | 2542958  | 2566602  | 2619254  | TRUE |

|          |          |          |          |          |          |          |          |      |
|----------|----------|----------|----------|----------|----------|----------|----------|------|
| 166330.5 | 153635.7 | 191065   | 205638.6 | 160731.7 | 197416.1 | 159307   | 166161.9 | TRUE |
| 142256.7 | 112585.9 | 92936.1  | 120776.7 | 113968.3 | 169091.4 | 160240.6 | 138121.1 | TRUE |
| 232514.5 | 208556.7 | 246663.9 | 220344.4 | 233947   | 240235.1 | 180146.8 | 233816.9 | TRUE |
| 52612.5  | 78998.6  | 49658.7  | 40206    | 55008.8  | 40835.1  | 149797.7 | 62697.8  | TRUE |
| 19309.5  | 39926    | 21532.5  | 30511.2  | 23722.8  | 16325.6  | 44828.5  | 24216.4  | TRUE |
| 94298.2  | 83984.8  | 56973.2  | 88848.1  | 98806.7  | 64758.4  | 87890.2  | 75920    | TRUE |
| 157018.5 | 143906.5 | 139918.9 | 172152.5 | 160509.1 | 141218.3 | 180901.1 | 176399.3 | TRUE |
| 25958.8  | 32532.1  | 11161.5  | 21364.6  | 23631.9  | 15403.1  | 33034.4  | 34529.2  | TRUE |
| 96993.1  | 158599.9 | 42144    | 83705.8  | 133135.7 | 45892.2  | 130050.8 | 121057.2 | TRUE |
| 46976.2  | 63107.4  | 33785.6  | 55199.3  | 59259    | 32080.6  | 72657.6  | 66675.6  | TRUE |
| 113274.2 | 116727.1 | 136163.5 | 155042.2 | 57653.9  | 91216.7  | 117619.7 | 96874.4  | TRUE |
| 181635.4 | 169163.9 | 239273.9 | 257929.8 | 206654.3 | 206013.8 | 229359.5 | 215167.9 | TRUE |
| 80239.1  | 83762.3  | 93292    | 109429.3 | 93413.2  | 88735.2  | 93157.1  | 96882.3  | TRUE |
| 112507.2 | 94472.1  | 71178.3  | 93160.5  | 86458.8  | 96675.7  | 124702.7 | 105557.7 | TRUE |
| 187084.3 | 161580.9 | 185415.4 | 231520   | 152148.6 | 214753.3 | 205337.4 | 223981.3 | TRUE |
| 146820.6 | 160433.9 | 109472.2 | 145462.5 | 120768.5 | 131009.4 | 163903.8 | 159932.9 | TRUE |
| 264446.5 | 374468.4 | 359388.9 | 288171   | 278903.3 | 222508.7 | 285340.7 | 260351.6 | TRUE |
| 48282.8  | 64222.4  | 50659.5  | 59218.6  | 60411.4  | 53163.2  | 67017.5  | 72974.2  | TRUE |
| 108341.7 | 127824.5 | 127576.3 | 155399.7 | 123745.6 | 127404.5 | 152522   | 124353.1 | TRUE |
| 1370938  | 1442790  | 747798   | 862191.3 | 991324.5 | 759130.1 | 1133456  | 1026196  | TRUE |
| 99219.2  | 112596.1 | 108405.5 | 129990   | 155420.2 | 122640.3 | 121817.9 | 122124.7 | TRUE |
| 25288.1  | 38642.5  | 10799.6  | 58646.9  | 55908.3  | 20805.5  | 43538.3  | 33603.4  | TRUE |
| 521040.9 | 626908.6 | 323267.7 | 527603   | 522114   | 345214.2 | 563162.7 | 516063.7 | TRUE |
| 146291.9 | 144768.6 | 82504.8  | 159495.3 | 117124.9 | 150093.7 | 168261.2 | 125233.8 | TRUE |
| 109243   | 110250.7 | 77606.7  | 99219.5  | 90465.3  | 107579.8 | 112936.6 | 111952   | TRUE |
| 32789.1  | 41803.9  | 36544.5  | 44864.6  | 25979.5  | 24683.5  | 28342.3  | 24577.1  | TRUE |
| 130790.8 | 156826   | 107182.2 | 134737   | 141938.4 | 127345.8 | 203800.4 | 142279.9 | TRUE |
| 76230.3  | 89474.7  | 63395.2  | 77737.8  | 94687.4  | 69725.4  | 124499   | 97240.9  | TRUE |
| 169405   | 125919.8 | 137540.4 | 140597.3 | 116890   | 163849   | 116144.6 | 105021   | TRUE |
| 193871.7 | 178147.6 | 228542.6 | 229848.2 | 169432.5 | 242333.1 | 209781.7 | 208975.9 | TRUE |
| 239007.5 | 205847.9 | 264166.7 | 232694.4 | 258708.9 | 261007   | 249961.8 | 268447.2 | TRUE |
| 85080.4  | 59395.4  | 82106.4  | 86070.2  | 63251.6  | 89798.8  | 65578.9  | 70582.6  | TRUE |
| 379299   | 361565.4 | 248757.6 | 323744.6 | 292454.7 | 269832.7 | 321072.4 | 306855.9 | TRUE |
| 16171.9  | 11379.2  | 8794.5   | 11678.6  | 20910.2  | 5927.2   | 13059.1  | 8768.2   | TRUE |
| 136502.8 | 138421.4 | 220209.8 | 190569.3 | 117299.9 | 332837.2 | 163730.5 | 295171.6 | TRUE |
| 276426.1 | 242531.5 | 284312.6 | 287218.6 | 204501.3 | 312260   | 252397.9 | 223219   | TRUE |
| 56018.4  | 43201.5  | 74845.5  | 64792.4  | 48587.8  | 79601.2  | 61835    | 52056.1  | TRUE |
| 393915.9 | 354183.3 | 362101.4 | 377410.6 | 437779.6 | 375203.4 | 341467.1 | 427697.5 | TRUE |
| 234633.8 | 199255.8 | 236023.1 | 260497.9 | 233835.4 | 239226   | 283182.3 | 218026.8 | TRUE |

|          |          |          |          |          |          |          |          |      |
|----------|----------|----------|----------|----------|----------|----------|----------|------|
| 101135.4 | 102009.4 | 132589.1 | 143157.2 | 103016   | 145529.9 | 105554.2 | 89229    | TRUE |
| 10731692 | 10547393 | 9600420  | 10504609 | 11042983 | 9382652  | 11584729 | 11802176 | TRUE |
| 158352.4 | 152577.2 | 185435.6 | 186660.9 | 142511.3 | 216360.9 | 167717.5 | 147955.3 | TRUE |
| 160965.3 | 147350.6 | 119138.1 | 125742.2 | 131501.5 | 98891    | 136066.1 | 120930.4 | TRUE |
| 3505445  | 3220674  | 3187193  | 4084305  | 3819616  | 3271037  | 3974867  | 3809372  | TRUE |
| 5909.8   | 79281    | 3081.3   | 6060     | 9048.7   | 7001.9   | 7581.3   | 17193.1  | TRUE |
| 271018.6 | 293349.9 | 197635   | 302210.2 | 322801.2 | 239132.2 | 321356.9 | 337748.9 | TRUE |
| 2478532  | 2391397  | 2082060  | 2452924  | 2149080  | 2074454  | 2346847  | 2171527  | TRUE |
| 951421.8 | 973655.4 | 781118.2 | 939808.4 | 886254.2 | 840698.9 | 899279.2 | 880190.9 | TRUE |
| 123987.2 | 100721.8 | 120232.7 | 119397.6 | 101681.2 | 125252.8 | 130262.3 | 116776.7 | TRUE |
| 2003037  | 1749994  | 2069473  | 2174847  | 1836900  | 2160774  | 1748353  | 2063106  | TRUE |
| 858500.8 | 940865.9 | 900299.1 | 945482.7 | 816578.3 | 819820.7 | 738571.5 | 852212.8 | TRUE |
| 13336.9  | 10755.6  | 20323.9  | 6226.8   | 7913     | 16729.3  | 17770    | 9308.1   | TRUE |
| 55711.9  | 35999.4  | 37079    | 36887.1  | 35804.5  | 48207.7  | 50809.7  | 40388.7  | TRUE |
| 180159.8 | 145151.8 | 196378.3 | 213835.8 | 197482.8 | 182038   | 170941.3 | 202599.4 | TRUE |
| 485165.5 | 443168.2 | 372674.5 | 529349.5 | 550014.9 | 411986.5 | 376493.4 | 507312.4 | TRUE |
| 909902   | 890138.6 | 896667.2 | 965701.8 | 863405.4 | 884058.1 | 943847.9 | 933946.6 | TRUE |
| 139140.6 | 116053.7 | 215049   | 110646.5 | 100250.7 | 226914.5 | 127782.8 | 92829.3  | TRUE |
| 12808.3  | 15805.5  | 4283.4   | 7240.4   | 17750.3  | 5049.9   | 7508.7   | 7181.8   | TRUE |
| 641308.4 | 550905.6 | 686509.4 | 635921.2 | 604066.6 | 617982.3 | 588976.8 | 641069.7 | TRUE |
| 44195.6  | 37873.9  | 33923.2  | 54134.9  | 30772.1  | 43085.7  | 52574.9  | 39718.8  | TRUE |
| 196125.1 | 171448   | 148030.9 | 240772.1 | 171966.3 | 186903.8 | 232341   | 216057.5 | TRUE |
| 46625.3  | 44459.8  | 56205.8  | 46121.7  | 35805.2  | 43190.8  | 45675.4  | 45864.2  | TRUE |
| 99221.9  | 78618.1  | 103874.2 | 105428.3 | 82423.2  | 88685.2  | 92543.6  | 90988.8  | TRUE |
| 457860   | 453488.2 | 459998   | 478060.9 | 440154.6 | 475296.8 | 499791.7 | 457353.3 | TRUE |
| 1744530  | 1544840  | 1670633  | 1902989  | 1972004  | 1831882  | 1697263  | 1670497  | TRUE |
| 71516.1  | 84083.7  | 88025.5  | 102385.6 | 87009.4  | 89449.4  | 86261.3  | 87305    | TRUE |
| 1115346  | 1023397  | 1155426  | 1176432  | 1111071  | 1070996  | 1025262  | 1120789  | TRUE |
| 76311.4  | 77300.6  | 68221.4  | 85440.1  | 79880.2  | 83002.9  | 84926.8  | 94726.1  | TRUE |
| 41376.6  | 39627.3  | 39356.3  | 40463.2  | 35593.8  | 37448.6  | 35876.8  | 30193.3  | TRUE |
| 36666.3  | 41864.4  | 46536    | 41854.8  | 34064.3  | 47063.4  | 32723.1  | 36615.9  | TRUE |
| 80187.8  | 48777.3  | 66456.3  | 71772.1  | 67080.7  | 69218.1  | 67971.6  | 74043.4  | TRUE |
| 116246.6 | 117303.2 | 101689.1 | 132711.9 | 112465.8 | 102416.5 | 124357.1 | 134683   | TRUE |
| 233679.9 | 206433.4 | 220604.8 | 237329.8 | 220525.2 | 222677.1 | 246804.4 | 207981.4 | TRUE |
| 268550   | 269254.7 | 305157.7 | 251836.5 | 271626   | 278657.4 | 277053.4 | 275697.5 | TRUE |

|          |          |          |          |          |          |          |          |      |
|----------|----------|----------|----------|----------|----------|----------|----------|------|
| 359843.6 | 307642.1 | 384210.9 | 356807.6 | 370149.1 | 356705.8 | 328413.6 | 352867.4 | TRUE |
| 75303.3  | 73375.3  | 64912.4  | 64034.8  | 67117.8  | 89076.6  | 120140.4 | 89806.2  | TRUE |
| 82670    | 67099.6  | 77740    | 59090.7  | 84713.4  | 106302.3 | 97417.9  | 86256.8  | TRUE |
| 232029.5 | 214422.5 | 219601.2 | 172548.5 | 143263.4 | 204803.4 | 239972.2 | 167897.6 | TRUE |
| 54101.5  | 51899.9  | 52694.3  | 24078.1  | 48415.2  | 100528.1 | 71793.6  | 67384.3  | TRUE |
| 7433.2   | 9592.5   | 16568.4  | 10885.8  | 8669.6   | 23527.1  | 7605     | 12240.8  | TRUE |
| 74964.7  | 67272.5  | 92185.6  | 42053.6  | 58859.9  | 37446    | 57298.6  | 30694.2  | TRUE |
| 36062.1  | 7649.7   | 33446.9  | 37425.1  | 43513.3  | 35457.4  | 38048.4  | 33775.5  | TRUE |
| 81523.5  | 75776.6  | 109064.1 | 98824.9  | 80302.9  | 68752.3  | 63752.6  | 64107    | TRUE |
| 36018.3  | 38706.7  | 54646.8  | 21031.9  | 27988.5  | 45171.9  | 42575.9  | 24470.6  | TRUE |
| 186434.3 | 227115.4 | 304217   | 170040.6 | 144237.8 | 322687.5 | 283129.1 | 144226.6 | TRUE |
| 69349.1  | 45515.6  | 88718.9  | 69031.8  | 82364.3  | 116723.6 | 99162.5  | 75371.4  | TRUE |
| 48475.5  | 38338.3  | 50053.6  | 53192.9  | 43963.3  | 46709.5  | 54921.6  | 40704.3  | TRUE |
| 21319.8  | 28926    | 32569.8  | 10080.4  | 30207.4  | 18739.5  | 12314.7  | 6060.6   | TRUE |
| 55416.5  | 63320.8  | 46644.9  | 67103.9  | 55332.8  | 59927.5  | 72934.4  | 70383    | TRUE |
| 365525.7 | 438101.4 | 438926.1 | 238421.3 | 237390.8 | 472796.2 | 391475.4 | 261928   | TRUE |
| 97504.9  | 120330.6 | 143152.4 | 66083.7  | 69829.8  | 153818.8 | 120817.5 | 91829.3  | TRUE |
| 229041.3 | 219794.5 | 279834.3 | 126674.7 | 145573.7 | 259515.7 | 246193   | 173793.7 | TRUE |
| 151614.3 | 143031.7 | 155230.6 | 159337.2 | 209792.4 | 138812.8 | 129413.7 | 122592.9 | TRUE |
| 874665.5 | 925809.8 | 1146830  | 777768.8 | 780575.1 | 1137892  | 992348.2 | 746356.7 | TRUE |
| 151107.8 | 180667.6 | 205413.4 | 112527.3 | 104457.8 | 223125.5 | 208242.5 | 116737.1 | TRUE |
| 2277314  | 1614304  | 2439058  | 2322211  | 3008105  | 1920452  | 1780290  | 1981318  | TRUE |
| 75303.3  | 73375.3  | 64912.4  | 64034.8  | 67117.8  | 89076.6  | 120140.4 | 89806.2  | TRUE |
| 82670    | 67099.6  | 77740    | 59090.7  | 84713.4  | 106302.3 | 97417.9  | 86256.8  | TRUE |
| 232029.5 | 214422.5 | 219601.2 | 172548.5 | 143263.4 | 204803.4 | 239972.2 | 167897.6 | TRUE |
| 37908.2  | 36284.5  | 62635.3  | 12530.5  | 36160.2  | 51111.9  | 26099.5  | 38483.7  | TRUE |
| 41001    | 41031.4  | 39516.4  | 41625    | 47753.6  | 32352.7  | 14118.7  | 18008.9  | TRUE |
| 54101.5  | 51899.9  | 52694.3  | 24078.1  | 48415.2  | 100528.1 | 71793.6  | 67384.3  | TRUE |
| 78015.1  | 68117.6  | 139064.2 | 64061.4  | 58992.1  | 152297.4 | 88421.9  | 70629.2  | TRUE |
| 32490.5  | 46684.3  | 37858.7  | 38505.5  | 43652    | 44209.6  | 40464.4  | 29351.3  | TRUE |
| 69151.9  | 75298.8  | 73568.8  | 31133.7  | 48868.8  | 72820    | 55891.1  | 50486.7  | TRUE |
| 69349.1  | 45515.6  | 88718.9  | 69031.8  | 82364.3  | 116723.6 | 99162.5  | 75371.4  | TRUE |
| 48475.5  | 38338.3  | 50053.6  | 53192.9  | 43963.3  | 46709.5  | 54921.6  | 40704.3  | TRUE |
| 21319.8  | 28926    | 32569.8  | 10080.4  | 30207.4  | 18739.5  | 12314.7  | 6060.6   | TRUE |
| 55416.5  | 63320.8  | 46644.9  | 67103.9  | 55332.8  | 59927.5  | 72934.4  | 70383    | TRUE |



|          |          |          |          |          |          |          |          |      |
|----------|----------|----------|----------|----------|----------|----------|----------|------|
| 365525.7 | 438101.4 | 438926.1 | 238421.3 | 237390.8 | 472796.2 | 391475.4 | 261928   | TRUE |
| 874665.5 | 925809.8 | 1146830  | 777768.8 | 780575.1 | 1137892  | 992348.2 | 746356.7 | TRUE |
| 151107.8 | 180667.6 | 205413.4 | 112527.3 | 104457.8 | 223125.5 | 208242.5 | 116737.1 | TRUE |
| 2277314  | 1614304  | 2439058  | 2322211  | 3008105  | 1920452  | 1780290  | 1981318  | TRUE |

|          |          |          |          |          |          |          |          |      |
|----------|----------|----------|----------|----------|----------|----------|----------|------|
| 101327   | 82407.8  | 105971.9 | 115373.3 | 148500.2 | 90765.4  | 95775.8  | 91002.7  | TRUE |
| 146829.4 | 133141.4 | 149823.6 | 139471.4 | 95036.5  | 122606.7 | 145504   | 117626   | TRUE |
| 863539.9 | 583144.4 | 775407.2 | 819229.4 | 879928.6 | 892861.4 | 622242.6 | 870871.5 | TRUE |
| 254452.9 | 263781.4 | 246337.4 | 266177.1 | 225415   | 275123.1 | 265161.3 | 258301.1 | TRUE |
| 183147.3 | 179681.5 | 204299.3 | 203861.1 | 129284   | 204769.7 | 204204.4 | 150600.6 | TRUE |
| 123036.1 | 159211.1 | 129520.6 | 180481.4 | 162052.2 | 155902.3 | 161956.1 | 134212.3 | TRUE |
| 84396.6  | 66763.4  | 108608.5 | 139706.9 | 94558.7  | 135104.8 | 131295.3 | 98090.5  | TRUE |
| 145432.8 | 154086.8 | 140740.5 | 165716.3 | 172986.2 | 164846   | 190659   | 171378   | TRUE |
| 171310   | 159849   | 156686.4 | 126111.7 | 126516.2 | 181876.5 | 134196.4 | 155059.5 | TRUE |
| 39377.7  | 62397.3  | 78037.2  | 46085.1  | 40703.9  | 65524.3  | 73432.1  | 66394.8  | TRUE |
| 141532.2 | 97528.7  | 142008.1 | 179039.6 | 124958.9 | 168617.8 | 143248.9 | 116091.8 | TRUE |
| 200321.1 | 197731.3 | 196607   | 187205.9 | 229608   | 211074.7 | 182136.1 | 212830.5 | TRUE |
| 44415.3  | 23999.1  | 39881.2  | 42734.6  | 46307.4  | 44339.5  | 48321.6  | 45937.9  | TRUE |
| 318309.4 | 283927.5 | 419113   | 330327.3 | 350486.2 | 379885.8 | 282754   | 340036.8 | TRUE |
| 113218.6 | 91989.3  | 116147.2 | 129615.5 | 114087.5 | 115266.8 | 87395    | 109783.3 | TRUE |
| 215828.7 | 187951.6 | 208971.9 | 222469.3 | 221465.8 | 230234.7 | 214259.5 | 255327   | TRUE |
| 143629   | 125079.9 | 131069.1 | 132716.4 | 127013.1 | 159370.6 | 150456.4 | 97519.2  | TRUE |
| 80657.3  | 70020.5  | 80440.7  | 93996.7  | 57571.2  | 98420    | 83725.8  | 59766.1  | TRUE |
| 58444.1  | 64021.2  | 46826.2  | 65214.2  | 39506.2  | 67212.2  | 65178.4  | 57490.9  | TRUE |
| 16772.4  | 24237.2  | 23206.4  | 7416.9   | 28406.8  | 16172.2  | 8196.2   | 8835.6   | TRUE |
| 28261.1  | 10800.5  | 19377.2  | 31122.4  | 10030.5  | 23149.3  | 30250.4  | 26617.7  | TRUE |
| 121762.6 | 137412.7 | 125981.6 | 116781.2 | 98893.3  | 129162.8 | 100948.8 | 90765.6  | TRUE |
| 529604.2 | 378937.1 | 552690.9 | 572776.5 | 584855.1 | 551684.8 | 410324   | 539381   | TRUE |
| 325164.9 | 310552.6 | 302551   | 337751.8 | 278238.2 | 309147.7 | 308216.7 | 300355.3 | TRUE |
| 140233   | 127743.1 | 163236.7 | 150853.9 | 161375.5 | 195033.2 | 185748.3 | 170099.5 | TRUE |
| 171114.4 | 139575.2 | 146421.6 | 159336.3 | 151519.7 | 166407.7 | 189121.4 | 173888.3 | TRUE |
| 128000.9 | 100064   | 112234.1 | 146491.4 | 138106.7 | 148753   | 117358.8 | 145380.5 | TRUE |
| 45951.8  | 56964.3  | 31286.8  | 34958.4  | 9318.1   | 42483.6  | 49725.7  | 34008.3  | TRUE |
| 132811   | 108240.5 | 103685.2 | 140136.1 | 84377.6  | 194986.9 | 164375   | 163773.5 | TRUE |
| 102411.9 | 85632.8  | 85981.6  | 116956.8 | 122457.1 | 95776    | 92314.2  | 82779.8  | TRUE |
| 177617.9 | 150619.1 | 174946.7 | 215660   | 161442.6 | 155183.1 | 162120.6 | 168356.9 | TRUE |
| 119994.4 | 104741.4 | 148698.5 | 117107.9 | 123279.5 | 107055.6 | 109817   | 133203.9 | TRUE |
| 27125.9  | 17336    | 20476.9  | 4803.2   | 22297.3  | 10635.9  | 13866    | 25137.7  | TRUE |
| 1074230  | 779561   | 1094067  | 1387701  | 1289001  | 1178538  | 1069941  | 1414826  | TRUE |
| 137956.4 | 152272.2 | 123799.5 | 222075.6 | 274199.4 | 133733.9 | 179749.7 | 225641.3 | TRUE |
| 124424.2 | 143439.5 | 94162.4  | 179137.9 | 251337.4 | 109214.1 | 167909.8 | 230933.3 | TRUE |
| 35547.5  | 57303.8  | 14539.4  | 31644.5  | 48016.8  | 7802.4   | 21833.8  | 21290.8  | TRUE |

|          |          |          |          |          |          |          |          |      |
|----------|----------|----------|----------|----------|----------|----------|----------|------|
| 237069.6 | 370511.3 | 327584.2 | 320354.4 | 191486.2 | 356684.6 | 389830.6 | 326522.5 | TRUE |
| 121039.5 | 246355.9 | 191400   | 176432.5 | 85611.7  | 239398.8 | 248639.5 | 196776.2 | TRUE |
| 99309    | 81831.7  | 81285.5  | 106959.4 | 127798.9 | 77908.7  | 96649.9  | 120174.6 | TRUE |
| 112743.5 | 88221.4  | 143273.1 | 90783.3  | 94482.6  | 155794   | 97248.7  | 92802.2  | TRUE |
| 44177.8  | 32830.2  | 38046.9  | 48329.1  | 50610.5  | 65754.3  | 64336.3  | 54712.5  | TRUE |
| 131350.5 | 104551.4 | 70978.2  | 62716.1  | 88569.8  | 68223.1  | 68915.9  | 77902.1  | TRUE |
| 170393.9 | 157048.6 | 113063.8 | 98775.6  | 117608.6 | 126029.3 | 125668.5 | 122591.4 | TRUE |
| 302978.4 | 411477   | 280794.7 | 313017.7 | 357277.9 | 305188.9 | 278372.1 | 347047.5 | TRUE |
| 69395.9  | 76432.9  | 57448    | 76612.6  | 73167.6  | 50262.5  | 45780.1  | 59512.3  | TRUE |
| 582679.5 | 556873.2 | 544975.6 | 539233.2 | 521131.3 | 598149.5 | 608174.1 | 569899.6 | TRUE |
| 1879244  | 1656190  | 1634172  | 1538351  | 1755470  | 1940437  | 1786549  | 1880087  | TRUE |
| 115854.9 | 151837.4 | 108642.5 | 163422.5 | 138279.2 | 141359.8 | 124705.6 | 95185.6  | TRUE |
| 250939.3 | 292505   | 250945.2 | 235035.9 | 248158   | 264326.2 | 237724.9 | 264929   | TRUE |
| 583402.2 | 541253.9 | 542446.2 | 599219.8 | 665491.3 | 557595.9 | 578040.2 | 623784.2 | TRUE |
| 1709705  | 1562267  | 1636136  | 1895375  | 1757460  | 1592730  | 1489946  | 1654663  | TRUE |
| 192992.3 | 152638.9 | 135004.8 | 122553.1 | 128380.1 | 131666.1 | 133485.3 | 153931   | TRUE |
| 64686.7  | 67817.4  | 68646.7  | 66822.7  | 63595.5  | 59885.5  | 59826.2  | 54900.7  | TRUE |
| 233226.1 | 164135.6 | 254223.5 | 213934.2 | 195917.8 | 230582.9 | 151802.8 | 209494.2 | TRUE |
| 198010   | 175918.1 | 187289   | 243015.1 | 232180.9 | 195050.6 | 206572.9 | 249533.9 | TRUE |
| 1044087  | 1141562  | 1009343  | 964344.9 | 1055015  | 1032935  | 1293688  | 965005.6 | TRUE |
| 264775.5 | 240224.2 | 235904.2 | 284119.4 | 346845.2 | 264087.9 | 253293.6 | 338646   | TRUE |
| 109611.6 | 82513.5  | 91107.8  | 95390.2  | 97164.4  | 86714.5  | 87729.4  | 106855   | TRUE |
| 81455.9  | 57830.1  | 80800.5  | 67590    | 58218.5  | 89655.7  | 81332.1  | 69233.5  | TRUE |
| 28497.8  | 8983.7   | 33007.4  | 21866.6  | 24852.6  | 45170.6  | 11970.2  | 23253.5  | TRUE |
| 45191.5  | 43711.9  | 71017.3  | 46220.1  | 35874.9  | 75161.3  | 38220.8  | 35644.5  | TRUE |
| 64140.8  | 53806.3  | 74587    | 66475    | 67054.9  | 72580.1  | 41624.5  | 59863.4  | TRUE |
| 30752.3  | 5261.9   | 34500.6  | 15215.5  | 10886.6  | 33500.7  | 9971.6   | 9751.8   | TRUE |
| 46679.8  | 54818.3  | 58737.5  | 47591.1  | 34268.8  | 58944.3  | 55510.4  | 38109.6  | TRUE |
| 203960.7 | 177776.4 | 278954.7 | 172061.4 | 164180.6 | 255559.9 | 158987   | 160340.4 | TRUE |
| 68982.7  | 62327.4  | 95317.6  | 59684.2  | 54863.7  | 111918.3 | 74166.6  | 62122.2  | TRUE |
| 884213.1 | 590192.2 | 1237757  | 863487.9 | 590708.1 | 1321172  | 683092.5 | 571892.8 | TRUE |
| 53938.5  | 60242.6  | 82762.3  | 48347.7  | 54830.6  | 60830.8  | 56351.7  | 57606.3  | TRUE |
| 64382.8  | 58209.7  | 115101.4 | 51872.8  | 58456.1  | 110885.3 | 57184.6  | 50345.7  | TRUE |
| 1821505  | 1236949  | 1525895  | 1509287  | 2799640  | 1627524  | 1247034  | 1778315  | TRUE |
| 112494   | 100174   | 162005.7 | 112858.7 | 99277    | 159548.3 | 118447.7 | 100647.4 | TRUE |
| 174032.1 | 121686.4 | 338873.1 | 143926.9 | 100636.9 | 326987.8 | 106693.3 | 96131.1  | TRUE |
| 139044.2 | 93106.1  | 144701.4 | 132934.9 | 92189.3  | 244900   | 124950.1 | 148108   | TRUE |
| 101747.5 | 67109.1  | 112348.6 | 100040.1 | 71528.9  | 182224.2 | 112016.6 | 99652.4  | TRUE |
| 247063.1 | 189457.3 | 312738.3 | 220409.3 | 208122.3 | 322792.6 | 203344.7 | 212692.5 | TRUE |
| 395584.1 | 369958   | 535930.9 | 450251.3 | 347110.8 | 568567.9 | 358927   | 401288   | TRUE |
| 65366.8  | 57723.7  | 75320.1  | 78135.2  | 53473.9  | 63606.4  | 61228.7  | 53169.2  | TRUE |
| 439416.8 | 326076.8 | 617659.1 | 445351.1 | 382814.9 | 650562.1 | 422281.5 | 393967.5 | TRUE |
| 28411.6  | 30169.2  | 46616    | 10440.1  | 30360.3  | 48284.3  | 27544.1  | 24930.9  | TRUE |
| 66199.7  | 53527.5  | 120685.2 | 55286.3  | 50600    | 146110.8 | 59982.1  | 42195.7  | TRUE |
| 406507.1 | 280151   | 268532.7 | 371497.7 | 704799.7 | 348151.1 | 278968.4 | 352590   | TRUE |

|          |          |          |          |          |          |          |          |      |
|----------|----------|----------|----------|----------|----------|----------|----------|------|
| 227148   | 218689.2 | 239938.4 | 216917   | 225401.6 | 239604.8 | 208260.8 | 210025.5 | TRUE |
| 747267.9 | 645220.2 | 705745.1 | 712354.6 | 555514.7 | 751558.6 | 729531.5 | 560898.1 | TRUE |
| 781523.5 | 663556.7 | 686125.4 | 781741   | 755202.3 | 685780.2 | 643948.3 | 749754.1 | TRUE |
| 371904.6 | 290001   | 342677.3 | 516606.9 | 361008.6 | 361850.3 | 347875.6 | 365838.7 | TRUE |
| 39993.3  | 14911.5  | 50564.7  | 17683.3  | 7204.5   | 70335.8  | 29857.6  | 30214.9  | TRUE |
| 73424.8  | 72306.1  | 84294.7  | 66376.5  | 93962.5  | 64797.9  | 75971.2  | 72387.4  | TRUE |
| 241000   | 274995.7 | 368911.1 | 310782   | 261606.4 | 362200.2 | 323686.7 | 268558.4 | TRUE |
| 256747.6 | 285451   | 306147.7 | 305375.1 | 280801.3 | 347003   | 294168   | 304139.2 | TRUE |
| 289926.8 | 296384   | 289637.2 | 327741.8 | 357144   | 302439.4 | 292440.9 | 310602.3 | TRUE |
| 333748.8 | 266854.1 | 361086.2 | 383492.3 | 460688   | 346589.7 | 328819   | 352749.4 | TRUE |
| 42829.4  | 11887.9  | 39175.9  | 28381.3  | 37855.6  | 38553    | 31623.5  | 38494.8  | TRUE |
| 67137.1  | 82495.8  | 63103.8  | 50195    | 51076    | 70197.8  | 77128.9  | 68560.2  | TRUE |
| 466819.9 | 423054.2 | 470155   | 505902.8 | 492146.8 | 433399.5 | 464109.3 | 439421.3 | TRUE |
| 225785.8 | 170771.8 | 206837.1 | 214542.3 | 254893   | 203905.3 | 201380.3 | 213331.3 | TRUE |
| 189573.3 | 182787.9 | 239444.7 | 173507.2 | 164409.5 | 250560   | 182875   | 158932.8 | TRUE |
| 1321229  | 1078946  | 1371735  | 1308151  | 1423449  | 1280961  | 1140309  | 1272634  | TRUE |
| 74775.6  | 46067    | 66907.1  | 69164.1  | 49834.6  | 76536.8  | 94642    | 56356.4  | TRUE |
| 70267.1  | 55633.2  | 38488.3  | 58158.7  | 43599.9  | 61806.4  | 62616.9  | 52549.2  | TRUE |
| 68374.9  | 53473.3  | 50774.9  | 62058.5  | 70909.9  | 39968.8  | 59141.4  | 58314.2  | TRUE |
| 17689.5  | 11666.3  | 34301.5  | 22402.3  | 21011.4  | 30369.3  | 26673.2  | 7051.4   | TRUE |
| 93462.1  | 80575.9  | 85303.2  | 79361.1  | 59916.2  | 102255.7 | 87484.1  | 71974.7  | TRUE |
| 227148   | 218689.2 | 239938.4 | 216917   | 225401.6 | 239604.8 | 208260.8 | 210025.5 | TRUE |
| 747267.9 | 645220.2 | 705745.1 | 712354.6 | 555514.7 | 751558.6 | 729531.5 | 560898.1 | TRUE |
| 781523.5 | 663556.7 | 686125.4 | 781741   | 755202.3 | 685780.2 | 643948.3 | 749754.1 | TRUE |
| 371904.6 | 290001   | 342677.3 | 516606.9 | 361008.6 | 361850.3 | 347875.6 | 365838.7 | TRUE |
| 39993.3  | 14911.5  | 50564.7  | 17683.3  | 7204.5   | 70335.8  | 29857.6  | 30214.9  | TRUE |
| 73424.8  | 72306.1  | 84294.7  | 66376.5  | 93962.5  | 64797.9  | 75971.2  | 72387.4  | TRUE |
| 241000   | 274995.7 | 368911.1 | 310782   | 261606.4 | 362200.2 | 323686.7 | 268558.4 | TRUE |
| 256747.6 | 285451   | 306147.7 | 305375.1 | 280801.3 | 347003   | 294168   | 304139.2 | TRUE |
| 289926.8 | 296384   | 289637.2 | 327741.8 | 357144   | 302439.4 | 292440.9 | 310602.3 | TRUE |
| 333748.8 | 266854.1 | 361086.2 | 383492.3 | 460688   | 346589.7 | 328819   | 352749.4 | TRUE |
| 42829.4  | 11887.9  | 39175.9  | 28381.3  | 37855.6  | 38553    | 31623.5  | 38494.8  | TRUE |
| 67137.1  | 82495.8  | 63103.8  | 50195    | 51076    | 70197.8  | 77128.9  | 68560.2  | TRUE |
| 466819.9 | 423054.2 | 470155   | 505902.8 | 492146.8 | 433399.5 | 464109.3 | 439421.3 | TRUE |
| 225785.8 | 170771.8 | 206837.1 | 214542.3 | 254893   | 203905.3 | 201380.3 | 213331.3 | TRUE |
| 189573.3 | 182787.9 | 239444.7 | 173507.2 | 164409.5 | 250560   | 182875   | 158932.8 | TRUE |
| 1321229  | 1078946  | 1371735  | 1308151  | 1423449  | 1280961  | 1140309  | 1272634  | TRUE |
| 70267.1  | 55633.2  | 38488.3  | 58158.7  | 43599.9  | 61806.4  | 62616.9  | 52549.2  | TRUE |

|          |          |          |          |          |          |          |          |      |
|----------|----------|----------|----------|----------|----------|----------|----------|------|
| 68374.9  | 53473.3  | 50774.9  | 62058.5  | 70909.9  | 39968.8  | 59141.4  | 58314.2  | TRUE |
| 64914.5  | 32576.8  | 48177.9  | 40211.1  | 41282.7  | 64440.8  | 69187.4  | 54254.5  | TRUE |
| 93462.1  | 80575.9  | 85303.2  | 79361.1  | 59916.2  | 102255.7 | 87484.1  | 71974.7  | TRUE |
| 105953.8 | 96919.6  | 133443.7 | 89570.1  | 107024.3 | 92672.3  | 115009.4 | 89592.6  | TRUE |
| 49079.9  | 63405.8  | 54647.3  | 33071    | 47006.7  | 27668.3  | 36018.8  | 51639    | TRUE |
| 68059.2  | 76037.3  | 48204.4  | 67019.5  | 54940.1  | 48654.6  | 55678.3  | 54991.2  | TRUE |
| 23661.8  | 31123.3  | 28155.2  | 34305    | 28670.6  | 32844.6  | 12128.6  | 25059.4  | TRUE |
| 122614.2 | 94436.1  | 96400.4  | 121384.4 | 96669.8  | 166074   | 180681   | 122895.1 | TRUE |
| 49681.6  | 52500.2  | 57549.8  | 60908.6  | 66233.7  | 81822.2  | 64498.2  | 51596.6  | TRUE |
| 161148.3 | 210040   | 232159.7 | 229596.1 | 216973.5 | 177019.7 | 159900.8 | 165841.1 | TRUE |
| 1994432  | 1572196  | 2067198  | 1867560  | 1894015  | 2093250  | 1762708  | 2123105  | TRUE |
| 48024.9  | 55478.8  | 51918.2  | 53183.8  | 52198.8  | 58221.8  | 81137.4  | 61301.7  | TRUE |
| 151861.9 | 126308.4 | 146630.8 | 157019.4 | 148791.2 | 172402.4 | 143396.7 | 156543.1 | TRUE |
| 689616.4 | 676706.5 | 754171.8 | 822341.4 | 794196.1 | 800312.5 | 706234.2 | 741448.9 | TRUE |
| 27742.5  | 37271.3  | 31065.3  | 40697.7  | 59160.9  | 29360.9  | 42337.2  | 38601.5  | TRUE |
| 69005.8  | 94284.4  | 61017.8  | 90069.7  | 93877.7  | 66476.1  | 75536    | 68755.3  | TRUE |
| 124556.3 | 104462.9 | 121870.1 | 111282.9 | 120079.8 | 114632.7 | 121934.1 | 113110.7 | TRUE |
| 21718    | 11902.8  | 26305.6  | 22849.6  | 34595.1  | 22050.2  | 19928.6  | 23502.2  | TRUE |
| 17313    | 5855.7   | 19844    | 28182.3  | 11768.1  | 6966.3   | 24716.9  | 7715.2   | TRUE |
| 6288.2   | 5388.5   | 7378     | 6589.1   | 7816.3   | 6344.8   | 7033     | 8230.9   | TRUE |
| 17193.6  | 7371.7   | 21227.1  | 4684     | 18149.8  | 7406.8   | 22765.7  | 10354.6  | TRUE |
| 106584.8 | 137963.6 | 95132.9  | 117667.8 | 104021.1 | 76619.9  | 106059   | 84962.3  | TRUE |
| 408567.9 | 377033.7 | 370710.4 | 425046.6 | 321524.4 | 400744.1 | 431431.4 | 327815.5 | TRUE |
| 1749777  | 1373202  | 1726805  | 1628531  | 1890680  | 1502603  | 1273173  | 1552276  | TRUE |
| 961272.8 | 747604.9 | 868131   | 995473.7 | 890583.4 | 1040493  | 767370.4 | 992816.9 | TRUE |
| 263537.1 | 255402   | 331036.6 | 266863.2 | 221415.3 | 366826.1 | 302028.1 | 191605.4 | TRUE |
| 48771.3  | 33260.9  | 34600    | 44042.7  | 42462    | 60088.8  | 42955.4  | 56518.1  | TRUE |
| 573950.4 | 495770.3 | 526108.8 | 509728   | 713798.4 | 483446.3 | 525351.9 | 608040.6 | TRUE |
| 47391.3  | 59601.8  | 76331.7  | 55391.2  | 42680.2  | 59832    | 61911.8  | 38518.8  | TRUE |
| 69422.2  | 90777.1  | 75618.6  | 52238.3  | 53390.9  | 75696.3  | 58248.6  | 73474.7  | TRUE |
| 229287.1 | 205784.4 | 264953.7 | 192535.8 | 211993.2 | 245108.6 | 255840.6 | 211276.4 | TRUE |
| 520051.5 | 517878.6 | 502674.1 | 476321.9 | 480850.9 | 550994.1 | 533290.9 | 516257.6 | TRUE |
| 739981.1 | 673645.1 | 743377.5 | 654075.2 | 755080.6 | 600476.4 | 636621.9 | 622210.3 | TRUE |
| 608078.6 | 467152.1 | 606554.5 | 593215.2 | 705636.8 | 505736.5 | 536751.4 | 567146.4 | TRUE |
| 48329    | 55416.5  | 50901.9  | 27407.8  | 40089.4  | 50667.5  | 50652.7  | 39911.8  | TRUE |
| 85151    | 122793.2 | 106224.2 | 53195.5  | 62100.6  | 115093.6 | 97767.1  | 66027.9  | TRUE |
| 46933.9  | 25871.5  | 34147.6  | 52373.4  | 51600.9  | 39271.3  | 41248.5  | 44061.1  | TRUE |
| 52863.8  | 42184.9  | 76214.1  | 65737.4  | 61657.7  | 54029.1  | 53550.4  | 44986.6  | TRUE |
| 49902.5  | 32362.4  | 48160.3  | 42933.5  | 35096.6  | 36580.1  | 37186.3  | 37779.5  | TRUE |
| 53627.3  | 61866.8  | 78511    | 42141.9  | 59627.2  | 70191    | 70573.5  | 49255.5  | TRUE |
| 48263.8  | 46900.4  | 45664.9  | 48464.3  | 43066.2  | 67713    | 58837.6  | 38103.1  | TRUE |

|          |          |          |          |          |          |          |          |      |
|----------|----------|----------|----------|----------|----------|----------|----------|------|
| 162186.1 | 158725.8 | 185727.8 | 141881.5 | 146326.4 | 188854.9 | 169436.3 | 163784.6 | TRUE |
| 115300.5 | 121288.7 | 152813.7 | 101623.4 | 77802.9  | 178352.4 | 140375.7 | 95830.4  | TRUE |
| 76883.3  | 47618.5  | 84762.9  | 65787.2  | 90553.5  | 79894.7  | 51347.7  | 47215.1  | TRUE |
| 86739.5  | 100062.4 | 103595.2 | 64501.3  | 63983.5  | 118428.4 | 103693.3 | 87042.5  | TRUE |
| 63899.9  | 43505.9  | 97462.1  | 105729.5 | 93722.8  | 55978    | 53719.3  | 54599.3  | TRUE |
| 216858   | 235811.6 | 205491   | 185065.1 | 185898   | 237327.5 | 210773.7 | 188447.2 | TRUE |
| 131555.5 | 139049.3 | 174499.2 | 119779.4 | 106328.4 | 193847   | 173723.6 | 112767.1 | TRUE |
| 159450.2 | 136683.5 | 214382   | 196208.8 | 205032.1 | 180558.5 | 137283.4 | 158871.8 | TRUE |
| 688824.4 | 830824.3 | 792003.3 | 578787.4 | 465472.2 | 865775.7 | 801917.3 | 561290.5 | TRUE |
| 218291.3 | 237725   | 256514   | 224799.3 | 188284.2 | 267992.4 | 263402   | 196756.9 | TRUE |
| 24134.2  | 29942    | 9001.1   | 28818.3  | 31690.1  | 25014.4  | 24026.5  | 22621.3  | TRUE |
| 43739.5  | 47317.5  | 47873.1  | 37785.6  | 37325.6  | 38589.7  | 37744.7  | 38308.3  | TRUE |
| 178399.9 | 206346.3 | 158020   | 206743.5 | 143482.9 | 156069   | 193209.9 | 144346   | TRUE |
| 83159.2  | 77009.2  | 58882.2  | 82464.5  | 77879.3  | 92542.2  | 109361.2 | 89082.7  | TRUE |
| 131192.7 | 431407.1 | 186577.8 | 276645.8 | 295215.6 | 79616.6  | 88241.3  | 63306.3  | TRUE |
| 81572.6  | 60388.5  | 105954.1 | 149288.1 | 107069.8 | 52635.5  | 62749.4  | 77072.4  | TRUE |
| 136328.9 | 147713.7 | 112566.2 | 129549.2 | 112152.4 | 102681.6 | 131873.6 | 121642.7 | TRUE |
| 347508.3 | 400352.1 | 278186.2 | 378701.6 | 306068   | 285919.5 | 387080.2 | 305491   | TRUE |
| 1161853  | 903537.5 | 1282051  | 1350326  | 959918.3 | 1206921  | 1100597  | 1136158  | TRUE |
| 179966.3 | 176469.5 | 175308.9 | 198579.4 | 182552.7 | 166667.2 | 180374.1 | 177788.5 | TRUE |
| 47767    | 63391.5  | 39962.5  | 45861.6  | 54890.6  | 57040.8  | 57719.1  | 45331.8  | TRUE |
| 170299.7 | 210432   | 175651.1 | 203575.8 | 185313.2 | 186725.7 | 223902.9 | 178084.7 | TRUE |
| 134184.9 | 123768.1 | 145280.3 | 177828.2 | 160073.4 | 130722.3 | 147493.8 | 178191.2 | TRUE |
| 132286.4 | 145065.6 | 160807.7 | 155794.7 | 130941.7 | 158641.4 | 146058.6 | 153655.4 | TRUE |
| 61271.7  | 61419.3  | 85424    | 67841.1  | 52169.8  | 57505.8  | 54006.4  | 66805.5  | TRUE |
| 84407.3  | 57301.1  | 80434.8  | 92509.9  | 57628.8  | 66289.7  | 58005.7  | 72876    | TRUE |
| 66143.4  | 88236.2  | 87387.9  | 61252.8  | 56552.9  | 65999.4  | 70371.3  | 57715.7  | TRUE |
| 347662   | 274010.3 | 375793.2 | 374730.1 | 315776.4 | 315018.8 | 304141.1 | 311116.9 | TRUE |
| 79493.3  | 73006.4  | 36344.2  | 71593    | 64975    | 76768.1  | 94779.9  | 91684.4  | TRUE |
| 22841    | 23024.7  | 11373.3  | 23965.3  | 20866.6  | 23817.3  | 32336.3  | 26926.3  | TRUE |
| 154126.9 | 176490.4 | 103832.8 | 151529.9 | 154100.9 | 108041.7 | 170038.2 | 186497.7 | TRUE |
| 228054.2 | 214303.3 | 283019.4 | 243002.2 | 172718.1 | 287945.7 | 210811.6 | 160610   | TRUE |
| 263525   | 235656.6 | 333060.5 | 272663   | 185901.3 | 346884.4 | 264361.4 | 201791.2 | TRUE |
| 58398.9  | 60781.6  | 60348.1  | 81313.7  | 64968.3  | 58200.9  | 59947.5  | 53425.4  | TRUE |
| 161531   | 209755.5 | 227720.9 | 126554.9 | 139225.7 | 239719.9 | 202623.2 | 142656   | TRUE |
| 64378.5  | 49799.4  | 78167.5  | 68936    | 76032.8  | 44798.1  | 49543.7  | 78247.3  | TRUE |
| 49576    | 22197.6  | 72065.8  | 45920.1  | 55117.1  | 36748.5  | 37269.8  | 30851.1  | TRUE |
| 300003.7 | 341845.7 | 305836.7 | 257468.3 | 210050.4 | 315370.3 | 346495   | 259343.6 | TRUE |
| 637932.9 | 435841.8 | 724254.9 | 752178.8 | 890252.9 | 488977.4 | 469012.9 | 482925.2 | TRUE |
| 615518.7 | 428575.1 | 680595.6 | 728590.2 | 747813.8 | 509675.1 | 480789.9 | 522487.3 | TRUE |
| 91849.2  | 79617.7  | 75192.6  | 99594.9  | 99406.5  | 88443.6  | 72822.7  | 98780.5  | TRUE |
| 76464.7  | 65435.2  | 70755.8  | 78433.4  | 56097.4  | 62149.1  | 85936.3  | 65587.4  | TRUE |

|          |          |          |          |          |          |          |          |      |
|----------|----------|----------|----------|----------|----------|----------|----------|------|
| 775859.2 | 869630.3 | 1020301  | 654249.6 | 499442.8 | 960375.6 | 961288.8 | 528212.4 | TRUE |
| 695981.2 | 751937.7 | 802444   | 648948.1 | 520666.7 | 851976.8 | 838748.7 | 531771.7 | TRUE |
| 703845.8 | 533621.1 | 875265.8 | 830327.3 | 875372.7 | 657322   | 518598.3 | 728384.5 | TRUE |
| 328535.8 | 376076.2 | 325561.7 | 293467.6 | 248251.8 | 365016   | 343383.8 | 280622.8 | TRUE |
| 238982.2 | 222096.9 | 268122.8 | 247858.3 | 266548.5 | 281456.7 | 276038.4 | 215868.3 | TRUE |
| 501100   | 399146.1 | 484317.3 | 427230   | 524724.8 | 529836.8 | 438983.5 | 450348.1 | TRUE |
| 78070.4  | 101012.6 | 233547   | 94110.4  | 69438    | 62923    | 72005.4  | 59964.9  | TRUE |
| 27138.5  | 34264.1  | 38810.4  | 39547.4  | 25470.8  | 93130.7  | 31663.6  | 28352.7  | TRUE |
| 34953.9  | 30633.9  | 43914.3  | 52076.7  | 27034.2  | 28228.8  | 35000    | 41704.4  | TRUE |
| 21617.3  | 9918.7   | 16993.9  | 9331.9   | 19542.9  | 16633.5  | 21165.8  | 9947.1   | TRUE |
| 29025    | 27760.1  | 20165.5  | 31489.3  | 25408.1  | 37464.4  | 19870.5  | 41577.2  | TRUE |
| 60213.6  | 43179.1  | 55486.4  | 42055    | 56567.7  | 69312.2  | 62272.3  | 66509.6  | TRUE |
| 31232.9  | 29007.5  | 22219    | 29770.9  | 33324    | 23599.5  | 41656.7  | 37487.7  | TRUE |
| 56899.5  | 62742.9  | 48488.1  | 60176.6  | 54548.4  | 66956.2  | 49378.5  | 65891.1  | TRUE |
| 101235.9 | 76259.3  | 80307.4  | 58685.7  | 115962.6 | 108250.6 | 113079.8 | 111207.6 | TRUE |
| 218076.4 | 262773.5 | 214119.8 | 223969   | 205385.8 | 238685.6 | 265509.2 | 272473.4 | TRUE |
| 190032.4 | 165026.8 | 248350.9 | 227222.9 | 143603.6 | 238990.8 | 165888.2 | 180085   | TRUE |
| 198378.6 | 200732.5 | 207266.8 | 199144.4 | 286898.8 | 258325   | 160662.8 | 225195.1 | TRUE |
| 357510.1 | 300362.4 | 360084.1 | 301523.8 | 430560.5 | 430620.2 | 321190.1 | 366729.4 | TRUE |
| 337488.5 | 282397.8 | 460230.5 | 252365.9 | 298932.3 | 621632.3 | 379755.2 | 346567   | TRUE |
| 142047.1 | 131252.2 | 135353.5 | 151149.1 | 155759.3 | 136441.7 | 150534.4 | 140951.1 | TRUE |
| 71000.7  | 96564    | 101644.2 | 106140.7 | 94894.7  | 104037   | 96085    | 101023.7 | TRUE |
| 225687.8 | 193802.1 | 185026.8 | 246271.6 | 182134.7 | 266826.1 | 215671   | 254801.8 | TRUE |
| 224836.4 | 217109.7 | 258029.3 | 248766.5 | 249833.8 | 240449.9 | 220251.2 | 241426.7 | TRUE |
| 717821   | 647904.8 | 699851.6 | 691378.2 | 722987.6 | 764328.9 | 646493.1 | 764418.3 | TRUE |
| 935454.5 | 933015.2 | 786649.4 | 817261.9 | 907743.9 | 879225.3 | 926249.1 | 956460.8 | TRUE |
| 44171.5  | 29008.7  | 33758.3  | 47125.3  | 34118.2  | 56159.8  | 37549    | 36159.7  | TRUE |
| 656182.5 | 488594.3 | 515858.7 | 510875   | 769369.6 | 796581   | 514524.1 | 820883.1 | TRUE |
| 83849.9  | 78356.3  | 97965.8  | 87018.4  | 86390.9  | 90059    | 84797.9  | 85894    | TRUE |
| 128735   | 115930.1 | 118759.2 | 125361.1 | 118082.4 | 136623.2 | 123947.9 | 145915.4 | TRUE |
| 33829.4  | 33964.4  | 51035.6  | 60373.9  | 30900.2  | 34800.5  | 32300.7  | 42118.8  | TRUE |
| 84521.9  | 60902.5  | 88143    | 70993.5  | 79672.9  | 77856.6  | 66635.2  | 64249.3  | TRUE |
| 114643.5 | 106903.8 | 103444.5 | 106800.9 | 130091.8 | 111027.6 | 103517.1 | 114568.9 | TRUE |
| 144804.9 | 107531.9 | 170529.1 | 187505.1 | 129521.8 | 193048.7 | 126414.7 | 125504.1 | TRUE |
| 124391.2 | 123086.7 | 132339.3 | 135031.6 | 280406.3 | 158330   | 69619    | 258079.2 | TRUE |
| 41715.3  | 36135.6  | 32056.9  | 45195.5  | 41828.6  | 43820.5  | 41000.2  | 43545.5  | TRUE |
| 259292.3 | 213459.8 | 193789.9 | 234894.8 | 242440.5 | 302622.4 | 270327.5 | 302795.8 | TRUE |
| 272886.4 | 227068.1 | 252982.9 | 210124.5 | 326478.7 | 301365.5 | 228024.2 | 281358.9 | TRUE |
| 84035.3  | 73556.7  | 72763.8  | 65279.6  | 74687.9  | 90110.3  | 56431.8  | 84219.5  | TRUE |
| 240623.6 | 194790.1 | 204430.3 | 201089.9 | 270343.9 | 239916.8 | 208691.4 | 256787.2 | TRUE |

|          |          |          |          |          |          |          |          |      |
|----------|----------|----------|----------|----------|----------|----------|----------|------|
| 410787.3 | 389263.3 | 368660.1 | 528658.4 | 414079.7 | 365109.2 | 381731.2 | 393546.7 | TRUE |
| 315462.2 | 344451.3 | 251746.1 | 266166.3 | 362592   | 291490.7 | 315884.3 | 359712.4 | TRUE |
| 39226.5  | 49278.6  | 51316.6  | 28213.1  | 33241.7  | 46077.7  | 41687.8  | 27273.2  | TRUE |
| 148589.2 | 161028.7 | 210963.3 | 149880.6 | 154539.6 | 222203.7 | 148980.2 | 151715.2 | TRUE |
| 197555.5 | 177255.8 | 180868.5 | 164323.3 | 273915   | 200528.2 | 179297.5 | 208452.2 | TRUE |
| 742487   | 722489.1 | 721056.4 | 715929.2 | 877101.7 | 702286.5 | 720228.6 | 733765.8 | TRUE |
| 90767    | 96724.1  | 103506.9 | 80021.1  | 80617.1  | 135152.8 | 85002.3  | 79455.3  | TRUE |
| 123285.8 | 140824   | 174009.6 | 132278.1 | 120163.5 | 184965.2 | 141613.7 | 127172.7 | TRUE |
| 38461.6  | 43431    | 33697    | 34656.4  | 23771.4  | 33870.5  | 37005.4  | 28845.6  | TRUE |
| 242895.4 | 253097.1 | 253773.4 | 240736.5 | 345475.2 | 157054   | 226939   | 159598.7 | TRUE |
| 31930    | 37772.8  | 40231.7  | 36431.8  | 25646.2  | 41518.4  | 45602    | 38228.3  | TRUE |
| 152290.3 | 105489.5 | 130046.2 | 125636   | 142457.2 | 199680.9 | 172695.6 | 167350.2 | TRUE |
| 132059.1 | 134004.6 | 152248.4 | 136705.5 | 129662.6 | 149967.9 | 122998.8 | 130253.2 | TRUE |
| 22014.4  | 22464.8  | 11837.4  | 13604.2  | 18773.2  | 20496.4  | 11190.1  | 24075.9  | TRUE |
| 46666.5  | 35247    | 21265.3  | 56968.6  | 45903.8  | 31193.8  | 37995.8  | 58873.5  | TRUE |
| 20753.9  | 10693.6  | 7117.3   | 6365.2   | 19511.8  | 8426     | 24209.8  | 29585.6  | TRUE |
| 39677.5  | 47232.2  | 30669.9  | 49746.8  | 53758.7  | 53926.3  | 66658.9  | 81457.1  | TRUE |
| 21270.3  | 9020.3   | 11837.2  | 13142.7  | 17123.4  | 19556.2  | 32805.9  | 26241.9  | TRUE |
| 724162.6 | 629561.1 | 711011.6 | 764472.9 | 782771.3 | 762493.6 | 662707.6 | 774208.8 | TRUE |
| 422383.9 | 367992.1 | 358543.2 | 433887.9 | 411191.1 | 431637.3 | 372101.3 | 431261   | TRUE |
| 121945.5 | 102280.6 | 91656.6  | 114385.9 | 119234.2 | 105745.8 | 100600.3 | 109676.8 | TRUE |
| 31463.1  | 36573.2  | 36363.9  | 32803    | 41398.3  | 34501.4  | 36449.6  | 38987.8  | TRUE |
| 175416.1 | 146559.4 | 186851.6 | 203996.3 | 198783.4 | 175706.9 | 169027.5 | 182105.2 | TRUE |
| 154507.2 | 146529.1 | 160631.9 | 160838.5 | 164080   | 132264.1 | 157826.6 | 175102.1 | TRUE |
| 537673.1 | 539186.6 | 422616.4 | 588502.5 | 493128.3 | 445807.7 | 508531.3 | 554956.9 | TRUE |
| 136356.8 | 150025.2 | 153368.5 | 149745.9 | 126131   | 188156.9 | 151905.2 | 129287.6 | TRUE |
| 23824.9  | 18470.1  | 24224.9  | 24947.2  | 27112.7  | 28548.1  | 22987.7  | 29348.8  | TRUE |
| 291217.1 | 310355.8 | 247857.9 | 328315.8 | 285844.9 | 304604.1 | 322551.3 | 318867.9 | TRUE |
| 91979.6  | 56456.8  | 52709.6  | 72890.8  | 68228.5  | 69933.7  | 84576.3  | 81045.3  | TRUE |
| 20323.2  | 6115.5   | 8567     | 26787.3  | 10758.2  | 20170.9  | 11067.7  | 6478.4   | TRUE |
| 36914.5  | 32122.5  | 20931.7  | 35103.8  | 39219.1  | 46791.2  | 27681.6  | 46054.7  | TRUE |
| 22068.6  | 97349.5  | 48936.9  | 95527.4  | 30351    | 21290.7  | 25361    | 13431.1  | TRUE |
| 55218.5  | 70032.4  | 72012.5  | 91282.8  | 55868.6  | 49299.8  | 52899.5  | 65875.3  | TRUE |
| 10195.7  | 38273    | 26725.2  | 40380.8  | 41026.8  | 14629.8  | 6504.5   | 11372.3  | TRUE |
| 22853.8  | 29197.9  | 16915.7  | 39863.9  | 29600.9  | 45591.6  | 14968.3  | 35641.3  | TRUE |

|          |          |          |          |          |          |          |          |      |
|----------|----------|----------|----------|----------|----------|----------|----------|------|
| 7279912  | 6517695  | 5450917  | 6201381  | 6682604  | 7280012  | 6401313  | 7139698  | TRUE |
| 69829.3  | 70164.1  | 57521.2  | 75378.3  | 58401.9  | 67081.9  | 69141.2  | 81942.6  | TRUE |
| 310176.1 | 220449.9 | 185967.3 | 311038.3 | 250684.5 | 325527.7 | 292796.2 | 328819.2 | TRUE |
| 31656.8  | 11647.1  | 23083.7  | 35920.5  | 26055    | 30229    | 17709.8  | 40626.1  | TRUE |
| 167622.4 | 117174.3 | 160876.7 | 154410.6 | 203541.6 | 178373.7 | 171532   | 202031.7 | TRUE |
| 1308214  | 1296264  | 998419.9 | 1317727  | 1207210  | 1219554  | 1336888  | 1381478  | TRUE |
| 19166.9  | 7656.6   | 18956.5  | 8950     | 19895.3  | 17034.4  | 29592.9  | 21584.8  | TRUE |
| 33656.5  | 40638.4  | 29762.1  | 38565.5  | 26583.9  | 39097.5  | 34249    | 33456.3  | TRUE |
| 32390    | 33721.3  | 29269.2  | 39469    | 41136.2  | 33008.7  | 40948    | 27136.5  | TRUE |
| 64858.7  | 51064    | 54312.6  | 81528.9  | 69771.3  | 83703.8  | 57414.1  | 62009    | TRUE |
| 56165.7  | 81649.7  | 77467.5  | 81039.5  | 74392.1  | 41799.2  | 37659.2  | 38036.4  | TRUE |
| 130877   | 97266.2  | 80829.3  | 94646.9  | 98764    | 130909.8 | 123904.6 | 136773.9 | TRUE |
| 315128.7 | 244196   | 265181   | 296494.7 | 225630   | 529607   | 288260.7 | 513853.1 | TRUE |
| 141591.7 | 118658.7 | 120930.3 | 123306.9 | 118386.8 | 210707.5 | 138805   | 194507.7 | TRUE |
| 377061.4 | 312599.1 | 235523.8 | 266998.8 | 352600.1 | 305514.3 | 431539.5 | 307697.4 | TRUE |
| 100485.3 | 73928.7  | 67065.8  | 72843.7  | 97192.6  | 145643.1 | 114169.3 | 137992.9 | TRUE |
| 238088.6 | 182420.4 | 153809.7 | 146657.5 | 231270   | 246286.6 | 274275.7 | 353291   | TRUE |
| 292516.6 | 269148.7 | 212726.9 | 261230.1 | 283192.9 | 210697.9 | 298253.6 | 234485.1 | TRUE |
| 784040.7 | 625289.9 | 481087.8 | 642645.5 | 641351.5 | 493364.3 | 838995.5 | 556077.2 | TRUE |
| 1109458  | 1116307  | 576422.5 | 647274   | 518525.9 | 618289   | 681103   | 617143.3 | TRUE |



|          |          |          |          |          |          |          |          |      |
|----------|----------|----------|----------|----------|----------|----------|----------|------|
| 40887.6  | 40491.1  | 37698.5  | 39891.2  | 38316.3  | 44487.7  | 48174.1  | 48308.6  | TRUE |
| 31742.9  | 61663.7  | 31634.5  | 58117.8  | 71959.1  | 20014.3  | 12045    | 19661.7  | TRUE |
| 994048.7 | 747396.8 | 970967.5 | 886999.2 | 960987.5 | 1064488  | 761332.3 | 992451.8 | TRUE |
| 13221.8  | 19073.2  | 16764.7  | 8707.6   | 17673.5  | 4886.3   | 8461.1   | 7546.2   | TRUE |
| 30179.2  | 28375.2  | 26022.5  | 30116.6  | 28165.5  | 20730.2  | 30472.3  | 30877    | TRUE |
| 72431.9  | 66402.4  | 76450.3  | 88503.9  | 75882.5  | 78429    | 65746.5  | 83419.2  | TRUE |
| 20375.9  | 18378.6  | 7954.9   | 24090.1  | 18354.6  | 21071.6  | 17246    | 16134    | TRUE |
| 115463.4 | 95027.8  | 112782.7 | 107222   | 103009.8 | 118936.6 | 86443.2  | 112170.2 | TRUE |
| 14605.3  | 16450.3  | 10015    | 21053.7  | 13486.4  | 25702.6  | 8307.2   | 8505     | TRUE |
| 39403.7  | 31983.7  | 28261.5  | 41504.6  | 43830.1  | 49096.7  | 33466.5  | 50864.2  | TRUE |
| 222891.8 | 245237.5 | 242374.3 | 264078.2 | 244429.8 | 260659.2 | 225974   | 327186.3 | TRUE |
| 1558445  | 1152777  | 1826024  | 1884658  | 1903811  | 2287870  | 1557779  | 2029092  | TRUE |
| 246754.1 | 246809.8 | 279225.3 | 283151.2 | 213331.2 | 278751.3 | 248551.9 | 240388.8 | TRUE |
| 3741436  | 3216648  | 3221356  | 4054176  | 2637540  | 3447028  | 3424196  | 2661233  | TRUE |
| 466453   | 384524.7 | 516550.3 | 485146.4 | 485812.3 | 564039.3 | 424543.4 | 516194.1 | TRUE |
| 122730.3 | 201318.2 | 145173.3 | 289314.7 | 268505.4 | 72341.4  | 36576.7  | 83549.9  | TRUE |
| 51169.2  | 24246.3  | 23642.1  | 25401    | 33361.7  | 45238.2  | 23246.4  | 45391.3  | TRUE |
| 164093.6 | 148456.4 | 214379.2 | 170643   | 149432.6 | 214900.9 | 189587.6 | 158015.8 | TRUE |
| 105828.8 | 119763.5 | 60783.9  | 183908.8 | 76295.7  | 77410.9  | 105623.2 | 85460.6  | TRUE |
| 73413.8  | 66431.3  | 61158.4  | 43672    | 49322.5  | 63841.8  | 50144    | 51600.9  | TRUE |
| 154136.1 | 158549.4 | 155111.3 | 105769.6 | 160605.4 | 137398.6 | 144953.1 | 132751.9 | TRUE |
| 112317   | 107982.1 | 47104.6  | 119918.8 | 78862.9  | 95420.5  | 183431.6 | 129358.4 | TRUE |
| 447450.1 | 442624.8 | 508423.2 | 491419.2 | 371733.6 | 464120.8 | 435518.3 | 387393   | TRUE |
| 336851.6 | 253407.2 | 377663.7 | 304374.7 | 339285.3 | 376906.9 | 246315.5 | 340163.6 | TRUE |
| 94636.9  | 142631.8 | 153291.4 | 182363.1 | 166943.7 | 94758.2  | 51477.3  | 55368.7  | TRUE |
| 100172.6 | 154615   | 135311.3 | 187117.8 | 165399.5 | 75066.4  | 61136.9  | 74718.2  | TRUE |
| 367713.3 | 282028.3 | 337354.6 | 347676.9 | 216907.9 | 346812.4 | 282700.1 | 209948.4 | TRUE |
| 1336245  | 1107151  | 1319223  | 1421944  | 669003.9 | 1379695  | 1108006  | 757763.6 | TRUE |
| 463404.9 | 350483.1 | 403712.7 | 431814.4 | 225268.8 | 450671.4 | 333742.8 | 245302.9 | TRUE |
| 98264.6  | 108755.5 | 98069.4  | 86341.6  | 97085.6  | 115354.9 | 92144.5  | 87027.7  | TRUE |
| 487730.7 | 367129.7 | 432623.8 | 471675.1 | 366890   | 511830.6 | 430324.3 | 412435.6 | TRUE |
| 86083.4  | 92300.3  | 90906.1  | 104294.3 | 98208.6  | 106419.5 | 104604.9 | 90644.2  | TRUE |
| 398307.9 | 330807.4 | 359216.2 | 406217.5 | 279618   | 433048.1 | 371959.6 | 304465.1 | TRUE |
| 76117.6  | 49582.9  | 66434    | 66104.3  | 54549.2  | 88130.3  | 78316.6  | 54234.8  | TRUE |
| 149841.9 | 154797   | 149245.7 | 167701.6 | 136158.7 | 154114.2 | 154563.7 | 124050.2 | TRUE |
| 97465    | 94818.2  | 77594.6  | 98164.9  | 100310.6 | 86149.6  | 98610.5  | 89949.4  | TRUE |
| 29915.3  | 57280.2  | 35660.2  | 54892.6  | 49513.8  | 32990.4  | 11308.7  | 21448.6  | TRUE |
| 37878.6  | 46086.6  | 67852.8  | 51767.4  | 28363.1  | 45702.1  | 44610.5  | 39779.3  | TRUE |
| 82890.3  | 55653.4  | 116473   | 82590.3  | 104273.9 | 142200.4 | 91250.2  | 123691.8 | TRUE |
| 682193.3 | 852702.4 | 1023721  | 1029957  | 661568.9 | 819812.4 | 920278.9 | 810146.7 | TRUE |
| 145103.4 | 126057.1 | 112218.1 | 123735.9 | 123395.7 | 193011.4 | 146668.6 | 153645.9 | TRUE |
| 208012.6 | 184372.7 | 158964.1 | 188419.6 | 201285.3 | 177840.7 | 219319.3 | 241579   | TRUE |
| 476542.2 | 413090.9 | 435729.1 | 528234.3 | 378524.6 | 422715.9 | 516090.7 | 367731.3 | TRUE |

|          |          |          |          |          |          |          |          |      |
|----------|----------|----------|----------|----------|----------|----------|----------|------|
| 4694744  | 4501192  | 4115431  | 4314568  | 3900993  | 4279458  | 4722994  | 3896233  | TRUE |
| 413149.5 | 422091.2 | 344027.5 | 424347.9 | 351363.8 | 387193.6 | 428789.4 | 377649.2 | TRUE |
| 173503.6 | 136572.3 | 129711.7 | 152225.1 | 159233.3 | 175087.1 | 177830.8 | 166296.3 | TRUE |
| 101668.8 | 78911.8  | 68427    | 80856.9  | 81250.1  | 106023.9 | 90044.3  | 100907.7 | TRUE |
| 29011.7  | 50887    | 37452.6  | 58240    | 53851.7  | 16283.6  | 5442.7   | 25579.6  | TRUE |
| 471815.9 | 369346   | 482767.5 | 452409   | 430329.8 | 489543.3 | 373009.9 | 482071.4 | TRUE |
| 2858607  | 2239921  | 2437536  | 2562684  | 2538427  | 2702429  | 2365551  | 2858079  | TRUE |
| 986469.4 | 745339.7 | 857721   | 833336.2 | 940024.7 | 880299.4 | 809180   | 972854.2 | TRUE |
| 524785.2 | 491478.3 | 456534.4 | 476908.8 | 519666.9 | 514779.9 | 547637.7 | 520686.3 | TRUE |
| 728867.8 | 567746.8 | 834445.7 | 883278.5 | 763550.5 | 865585.6 | 717311   | 806553.2 | TRUE |
| 2059498  | 1602730  | 2378709  | 2517114  | 2285422  | 2588123  | 1994741  | 2485909  | TRUE |
| 52181.9  | 47281.4  | 54146.6  | 98942.5  | 66612.3  | 51669.4  | 44932.5  | 33581    | TRUE |
| 6878.2   | 7144.9   | 10843.1  | 3948.8   | 9476.3   | 8873     | 12911.3  | 8823.1   | TRUE |
| 49800.9  | 40962.9  | 28465.2  | 47259    | 32162.7  | 41869.9  | 51852.4  | 44018.7  | TRUE |
| 17286.5  | 8740.7   | 5942.7   | 5743.4   | 16973.9  | 18100.8  | 23371    | 28868.8  | TRUE |
| 53141.3  | 50115.1  | 47591.2  | 60407.5  | 57618.5  | 52236.5  | 54460.9  | 42557.9  | TRUE |
| 559580.5 | 538660   | 494207   | 672737.1 | 672478.2 | 545261.4 | 728207   | 691132.6 | TRUE |
| 1404454  | 1225808  | 1342926  | 1433382  | 1024429  | 1261107  | 1264014  | 1269851  | TRUE |
| 1893441  | 1636161  | 1892164  | 2004464  | 1371668  | 1887684  | 1864421  | 1967238  | TRUE |
| 515126.1 | 550318.6 | 429350.6 | 442509.3 | 472664.6 | 463944.9 | 547987.5 | 502918.8 | TRUE |
| 1027901  | 919838.9 | 948988.7 | 921964.3 | 929266.1 | 933487.7 | 1010438  | 1044083  | TRUE |
| 326638.1 | 296092.7 | 267249.1 | 308772.9 | 321624.6 | 297277   | 332065.4 | 348727.4 | TRUE |
| 24035.4  | 47171    | 30561.6  | 32676.8  | 40702.5  | 7924     | 22381.9  | 23052.5  | TRUE |
| 509915.3 | 558881.1 | 530219   | 530127.4 | 483329.9 | 505910.2 | 576209.2 | 491013.7 | TRUE |
| 1406742  | 1416884  | 1190964  | 1387368  | 1533219  | 1265699  | 1627331  | 1603094  | TRUE |
| 341092.1 | 341974.4 | 290752.5 | 316102.2 | 378063.7 | 324111.1 | 358440.7 | 323990.9 | TRUE |
| 412474.4 | 373731.3 | 372385.4 | 396213.6 | 432016.9 | 403634.7 | 436241.6 | 437898.2 | TRUE |
| 55477.7  | 109595   | 65870.8  | 73164.4  | 101481.5 | 44018.5  | 69324    | 45239.9  | TRUE |
| 40884.3  | 96793.8  | 70044.3  | 98296.4  | 100557   | 25183.1  | 22918.4  | 26544.7  | TRUE |
| 347305.6 | 290139.2 | 402042.8 | 377308   | 350092.9 | 356517.7 | 314911.3 | 327546.7 | TRUE |
| 259153.8 | 214477.7 | 284974.1 | 242187.6 | 250497.8 | 253272.8 | 268990.1 | 241952.5 | TRUE |
| 88739.1  | 157868.2 | 115992.2 | 152288.8 | 141866.6 | 49492.3  | 63832.8  | 62538.2  | TRUE |
| 33995.7  | 61224.2  | 54156.7  | 86892.8  | 65373.5  | 27366.4  | 25385.7  | 13636    | TRUE |
| 29488.1  | 27990    | 14728.9  | 30421.3  | 21481.2  | 14367.4  | 24446.4  | 27770.1  | TRUE |
| 65125.5  | 56093.5  | 47374.2  | 54030.2  | 69424.8  | 62368.1  | 84435.3  | 90160.7  | TRUE |
| 34027.5  | 23969.9  | 18487.9  | 24630    | 27802.2  | 30239.3  | 37178.1  | 34745.3  | TRUE |
| 33901.8  | 26873    | 16197.6  | 22587.1  | 26386.7  | 27682.8  | 36353.2  | 27017.6  | TRUE |
| 19204.9  | 23164.9  | 13259    | 7264.4   | 29789.3  | 11479.3  | 25168.8  | 20621.8  | TRUE |
| 176157.5 | 147596   | 139317   | 178937.3 | 115910.6 | 157236.9 | 158836.4 | 169202.6 | TRUE |
| 48014.5  | 56878.7  | 65437.5  | 74496.8  | 37108.1  | 47526.6  | 62889    | 46180    | TRUE |
| 574719   | 496676.1 | 530938.6 | 597587.2 | 430371.7 | 532485.7 | 622792.5 | 553138.9 | TRUE |
| 355165.1 | 355921.6 | 333752.5 | 458203.1 | 258271.9 | 321686   | 449879.6 | 364064.4 | TRUE |
| 19841.6  | 20065.1  | 16880.3  | 8405.9   | 12332.2  | 27491.4  | 25689.8  | 21021.6  | TRUE |
| 40454.5  | 32371.5  | 18992    | 37753.4  | 58922.5  | 25647.6  | 59990.2  | 76954.3  | TRUE |
| 1246028  | 1776686  | 850498.6 | 1462312  | 2052611  | 814143.6 | 1834490  | 2010848  | TRUE |
| 15558.5  | 9541.4   | 9456.5   | 11145.6  | 15794.7  | 10512.2  | 20301.1  | 10330.7  | TRUE |

|          |          |          |          |          |          |          |          |      |
|----------|----------|----------|----------|----------|----------|----------|----------|------|
| 486747.2 | 736845.4 | 693186.1 | 677070.5 | 317331.7 | 499558.8 | 752704.7 | 545952.6 | TRUE |
| 29069    | 37130.2  | 35852.9  | 39205    | 18949    | 24400    | 43844    | 25652.5  | TRUE |
| 90322.1  | 66148.9  | 75830.2  | 97845.7  | 101045.7 | 73405.4  | 70986.2  | 87249.7  | TRUE |
| 24407.5  | 39291.5  | 22481.6  | 46033.7  | 40775.4  | 21521.4  | 32180.2  | 44591.1  | TRUE |
| 179829.3 | 239428.8 | 75044.9  | 211466.7 | 308162.9 | 81009.7  | 222667.8 | 268442.7 | TRUE |
| 15701    | 5076.2   | 18165.2  | 10738.4  | 18983.9  | 7630     | 22247.3  | 11148.1  | TRUE |
| 48977.9  | 52678.9  | 61302.8  | 57887.1  | 35534.8  | 59145.6  | 68292.7  | 56256    | TRUE |
| 21743.7  | 19622.7  | 25153.9  | 13634.7  | 6214.9   | 10748.1  | 20600.3  | 12905.2  | TRUE |
| 57809.2  | 50014.1  | 36491.7  | 36732.7  | 51425.6  | 60359    | 89028.7  | 83011.2  | TRUE |
| 63526.4  | 39509    | 56207.2  | 58189.3  | 71621.1  | 48788.3  | 49991    | 59669.8  | TRUE |
| 58085.6  | 30538.2  | 42074    | 54908.4  | 52621.8  | 48589.3  | 56475.1  | 58249.4  | TRUE |
| 1224241  | 1649509  | 539897.9 | 1142421  | 1681808  | 596234.5 | 1598996  | 1733521  | TRUE |
| 55285.4  | 104637.2 | 29094.1  | 56369.2  | 88686.1  | 38675.8  | 86108.7  | 107829.9 | TRUE |
| 27958.4  | 41349.8  | 19135.2  | 32598.6  | 44120.8  | 24907.4  | 40995.1  | 48571.6  | TRUE |
| 24098    | 20007.9  | 32726.8  | 33625.5  | 21731.1  | 30001    | 31729.3  | 9097.8   | TRUE |
| 3863664  | 4320596  | 2195378  | 3276388  | 3943523  | 2451004  | 3777420  | 3690414  | TRUE |
| 1109458  | 1116307  | 576422.5 | 647274   | 518525.9 | 618289   | 681103   | 617143.3 | TRUE |
| 40887.6  | 40491.1  | 37698.5  | 39891.2  | 38316.3  | 44487.7  | 48174.1  | 48308.6  | TRUE |
| 31742.9  | 61663.7  | 31634.5  | 58117.8  | 71959.1  | 20014.3  | 12045    | 19661.7  | TRUE |
| 994048.7 | 747396.8 | 970967.5 | 886999.2 | 960987.5 | 1064488  | 761332.3 | 992451.8 | TRUE |
| 13221.8  | 19073.2  | 16764.7  | 8707.6   | 17673.5  | 4886.3   | 8461.1   | 7546.2   | TRUE |
| 30179.2  | 28375.2  | 26022.5  | 30116.6  | 28165.5  | 20730.2  | 30472.3  | 30877    | TRUE |
| 72431.9  | 66402.4  | 76450.3  | 88503.9  | 75882.5  | 78429    | 65746.5  | 83419.2  | TRUE |
| 20375.9  | 18378.6  | 7954.9   | 24090.1  | 18354.6  | 21071.6  | 17246    | 16134    | TRUE |
| 115463.4 | 95027.8  | 112782.7 | 107222   | 103009.8 | 118936.6 | 86443.2  | 112170.2 | TRUE |
| 14605.3  | 16450.3  | 10015    | 21053.7  | 13486.4  | 25702.6  | 8307.2   | 8505     | TRUE |
| 39403.7  | 31983.7  | 28261.5  | 41504.6  | 43830.1  | 49096.7  | 33466.5  | 50864.2  | TRUE |
| 222891.8 | 245237.5 | 242374.3 | 264078.2 | 244429.8 | 260659.2 | 225974   | 327186.3 | TRUE |
| 1558445  | 1152777  | 1826024  | 1884658  | 1903811  | 2287870  | 1557779  | 2029092  | TRUE |

|          |          |          |          |          |          |          |          |      |
|----------|----------|----------|----------|----------|----------|----------|----------|------|
| 172976.9 | 112144.1 | 217752.9 | 190545.4 | 163159.7 | 182461.8 | 177214.3 | 154998.9 | TRUE |
| 177709.3 | 184908.5 | 203677   | 184289.3 | 155329.9 | 190705.9 | 159157.5 | 144759.8 | TRUE |
| 41518.9  | 7359.8   | 46742.1  | 31333.2  | 7093.8   | 66841    | 36109.1  | 11852.4  | TRUE |
| 419850.6 | 423742.9 | 424571.7 | 364192.9 | 335480.2 | 379912.7 | 397837.5 | 381096.6 | TRUE |
| 1599762  | 1344457  | 1687131  | 1747005  | 1551397  | 1560316  | 1370387  | 1489598  | TRUE |
| 367713.3 | 282028.3 | 337354.6 | 347676.9 | 216907.9 | 346812.4 | 282700.1 | 209948.4 | TRUE |
| 1336245  | 1107151  | 1319223  | 1421944  | 669003.9 | 1379695  | 1108006  | 757763.6 | TRUE |
| 463404.9 | 350483.1 | 403712.7 | 431814.4 | 225268.8 | 450671.4 | 333742.8 | 245302.9 | TRUE |
| 100409.5 | 80161.9  | 68323.7  | 60621.5  | 57691.4  | 56684.4  | 63615    | 55348.4  | TRUE |
| 870502.7 | 735367.7 | 973146.8 | 922326.9 | 705565.6 | 809152.6 | 880488.2 | 610078.5 | TRUE |
| 1251398  | 931513.8 | 1268796  | 1256262  | 1197900  | 1474625  | 978758.4 | 1402326  | TRUE |
| 98264.6  | 108755.5 | 98069.4  | 86341.6  | 97085.6  | 115354.9 | 92144.5  | 87027.7  | TRUE |
| 487730.7 | 367129.7 | 432623.8 | 471675.1 | 366890   | 511830.6 | 430324.3 | 412435.6 | TRUE |
| 86083.4  | 92300.3  | 90906.1  | 104294.3 | 98208.6  | 106419.5 | 104604.9 | 90644.2  | TRUE |
| 398307.9 | 330807.4 | 359216.2 | 406217.5 | 279618   | 433048.1 | 371959.6 | 304465.1 | TRUE |
| 76117.6  | 49582.9  | 66434    | 66104.3  | 54549.2  | 88130.3  | 78316.6  | 54234.8  | TRUE |
| 149841.9 | 154797   | 149245.7 | 167701.6 | 136158.7 | 154114.2 | 154563.7 | 124050.2 | TRUE |
| 97465    | 94818.2  | 77594.6  | 98164.9  | 100310.6 | 86149.6  | 98610.5  | 89949.4  | TRUE |
| 29915.3  | 57280.2  | 35660.2  | 54892.6  | 49513.8  | 32990.4  | 11308.7  | 21448.6  | TRUE |
| 37878.6  | 46086.6  | 67852.8  | 51767.4  | 28363.1  | 45702.1  | 44610.5  | 39779.3  | TRUE |
| 82890.3  | 55653.4  | 116473   | 82590.3  | 104273.9 | 142200.4 | 91250.2  | 123691.8 | TRUE |
| 682193.3 | 852702.4 | 1023721  | 1029957  | 661568.9 | 819812.4 | 920278.9 | 810146.7 | TRUE |
| 145103.4 | 126057.1 | 112218.1 | 123735.9 | 123395.7 | 193011.4 | 146668.6 | 153645.9 | TRUE |
| 208012.6 | 184372.7 | 158964.1 | 188419.6 | 201285.3 | 177840.7 | 219319.3 | 241579   | TRUE |
| 335000.1 | 287869.2 | 349185.8 | 401284.6 | 359241.5 | 376103.5 | 307061   | 327123   | TRUE |
| 280229.8 | 221614.5 | 246717.7 | 226072.1 | 355301.1 | 321203.2 | 246967.4 | 288972.5 | TRUE |
| 1290106  | 1037846  | 1014157  | 1147512  | 1469432  | 1527958  | 1158687  | 1471707  | TRUE |
| 476542.2 | 413090.9 | 435729.1 | 528234.3 | 378524.6 | 422715.9 | 516090.7 | 367731.3 | TRUE |
| 4694744  | 4501192  | 4115431  | 4314568  | 3900993  | 4279458  | 4722994  | 3896233  | TRUE |
| 413149.5 | 422091.2 | 344027.5 | 424347.9 | 351363.8 | 387193.6 | 428789.4 | 377649.2 | TRUE |
| 173503.6 | 136572.3 | 129711.7 | 152225.1 | 159233.3 | 175087.1 | 177830.8 | 166296.3 | TRUE |
| 101668.8 | 78911.8  | 68427    | 80856.9  | 81250.1  | 106023.9 | 90044.3  | 100907.7 | TRUE |
| 29011.7  | 50887    | 37452.6  | 58240    | 53851.7  | 16283.6  | 5442.7   | 25579.6  | TRUE |
| 471815.9 | 369346   | 482767.5 | 452409   | 430329.8 | 489543.3 | 373009.9 | 482071.4 | TRUE |
| 2858607  | 2239921  | 2437536  | 2562684  | 2538427  | 2702429  | 2365551  | 2858079  | TRUE |
| 986469.4 | 745339.7 | 857721   | 833336.2 | 940024.7 | 880299.4 | 809180   | 972854.2 | TRUE |
| 524785.2 | 491478.3 | 456534.4 | 476908.8 | 519666.9 | 514779.9 | 547637.7 | 520686.3 | TRUE |
| 728867.8 | 567746.8 | 834445.7 | 883278.5 | 763550.5 | 865585.6 | 717311   | 806553.2 | TRUE |
| 2059498  | 1602730  | 2378709  | 2517114  | 2285422  | 2588123  | 1994741  | 2485909  | TRUE |
| 131603.2 | 62496.3  | 95054.3  | 134049.8 | 95690.1  | 325180   | 86919    | 327173.5 | TRUE |
| 19044.3  | 9062.4   | 8962.9   | 27766.1  | 22742.5  | 22496.4  | 8513.8   | 6005.1   | TRUE |
| 34265.2  | 21173.7  | 20379.6  | 30385.8  | 37243.5  | 25802.3  | 30240.3  | 11391.8  | TRUE |
| 199217.4 | 195709.4 | 202896   | 204548.9 | 180752.9 | 234700.6 | 239801.5 | 174360.4 | TRUE |
| 476011.2 | 564330.1 | 461921   | 526659.1 | 482845.2 | 498423.7 | 594410.7 | 471560.1 | TRUE |
| 95997.3  | 67500.9  | 98796.8  | 85997.1  | 75149.6  | 104563   | 97702.1  | 89461.6  | TRUE |
| 263156.3 | 205781.6 | 253454.9 | 263567.4 | 271349.3 | 290107.8 | 199407.8 | 285443.6 | TRUE |

|          |          |          |          |          |          |          |          |      |
|----------|----------|----------|----------|----------|----------|----------|----------|------|
| 491280.5 | 429880.3 | 498075.8 | 493742   | 518897.9 | 525026.8 | 402488.6 | 566315.3 | TRUE |
| 52651.2  | 53480.5  | 36918.2  | 56255.8  | 53056.1  | 52732.4  | 42084.6  | 37640.6  | TRUE |
| 1303155  | 949365.4 | 1405757  | 1294860  | 1849544  | 1159371  | 1025397  | 1218150  | TRUE |
| 20761805 | 14347319 | 21987839 | 21746841 | 22075302 | 21257302 | 15419051 | 21675326 | TRUE |
| 58278    | 68483.9  | 63545.5  | 80891.4  | 61459.4  | 52240.7  | 88657.7  | 72514.7  | TRUE |
| 37547.8  | 38058.6  | 32214.2  | 26062.2  | 21548.1  | 29415.8  | 50418.9  | 33237.2  | TRUE |
| 42073.1  | 36786.5  | 38797    | 45704.4  | 40292.2  | 39238.5  | 25757.2  | 46360.8  | TRUE |
| 108853.3 | 92650.2  | 108733.7 | 119813.9 | 98553.7  | 138971.6 | 125665.4 | 97207.6  | TRUE |
| 8496.2   | 6311.2   | 11426    | 10221.6  | 8355.9   | 5700.8   | 7530.9   | 7342     | TRUE |
| 90921.2  | 87028.4  | 55799    | 88816.7  | 75247.9  | 60231    | 76449    | 69711.7  | TRUE |
| 43742.8  | 33654.7  | 31543.3  | 33947.2  | 46004.7  | 32371.2  | 34239.9  | 40103.9  | TRUE |
| 391174.8 | 422814   | 395369.3 | 381948.9 | 326659.6 | 415314.6 | 378968   | 313965.6 | TRUE |
| 165159.1 | 156226.5 | 235460.9 | 221770.1 | 164375.7 | 226595.7 | 175150.7 | 137854   | TRUE |
| 327333.7 | 264630.4 | 376120.3 | 321915.7 | 271687.6 | 390811.2 | 298351.8 | 315244.1 | TRUE |
| 340628.4 | 254806.7 | 366168.6 | 395517   | 351373.1 | 359374   | 296705.7 | 351663.7 | TRUE |
| 177416.5 | 154458.3 | 163506.7 | 180614.1 | 133074.1 | 215223.7 | 168756.4 | 140982.9 | TRUE |
| 88751.1  | 55077.7  | 45267.4  | 62576.3  | 61796.4  | 64743.2  | 44059.9  | 83964    | TRUE |
| 510268.6 | 513569.4 | 475125   | 448038.3 | 370492.3 | 542898.1 | 520520.7 | 437356.4 | TRUE |
| 248277.4 | 207683.8 | 255846.2 | 288804.4 | 214458.1 | 254491.9 | 234050.7 | 227156.8 | TRUE |
| 144205.3 | 171018.5 | 161102   | 187244.4 | 181453.6 | 186320.2 | 215569.4 | 149490.3 | TRUE |
| 337009.6 | 384511.5 | 451857.1 | 486685.7 | 405407.1 | 517545.4 | 532474.1 | 408992.7 | TRUE |
| 184915.9 | 195800   | 207081.3 | 189273.1 | 160683.8 | 158592.4 | 147476   | 142598.8 | TRUE |
| 239844.6 | 228307.6 | 322976.9 | 258382.5 | 259599.9 | 290563.9 | 239242.5 | 266455.2 | TRUE |
| 39841.8  | 8287.9   | 35150.1  | 48385.4  | 49238.1  | 39432.8  | 34095.9  | 42789.5  | TRUE |
| 599951.3 | 588677.2 | 430053.7 | 482776.5 | 478349.4 | 452881.1 | 507253.7 | 491654.5 | TRUE |
| 341603.7 | 330291.6 | 369707   | 395680.1 | 338526.3 | 393592.6 | 342783.4 | 308590.7 | TRUE |
| 161799   | 177906   | 169855.2 | 170021.5 | 157890.9 | 162968.5 | 192707.4 | 155955.7 | TRUE |
| 46037.6  | 59193.6  | 29632.5  | 35151.6  | 51777.5  | 35401.4  | 60029.4  | 43529.3  | TRUE |
| 61669.2  | 69633.5  | 169233.9 | 53528.9  | 74936.9  | 66127    | 89818.8  | 61637.5  | TRUE |
| 2731088  | 2256391  | 2441366  | 2519721  | 2627554  | 2536931  | 2090035  | 2519132  | TRUE |
| 2249326  | 1829517  | 1873429  | 2001110  | 2114790  | 2091493  | 1687916  | 2158209  | TRUE |
| 112124.4 | 99335.3  | 132868.2 | 144262.9 | 115733.2 | 146920.1 | 121666.3 | 126890.9 | TRUE |
| 395030.8 | 313655.1 | 451222.5 | 510343.5 | 476019.9 | 481886.7 | 400437.1 | 412660.3 | TRUE |
| 117479.7 | 106595.4 | 111619.5 | 115590.1 | 105234.6 | 119443.1 | 120708.9 | 107037.2 | TRUE |
| 96032.4  | 80245.7  | 114857.6 | 112606.1 | 83498.2  | 123436.5 | 78039    | 104587.3 | TRUE |
| 8049.7   | 20094.1  | 24843    | 25702.7  | 26458.7  | 7079.8   | 24111.6  | 11503    | TRUE |
| 881085.6 | 542487.3 | 880891.3 | 799789.9 | 879592   | 872536.6 | 618370.7 | 920007.9 | TRUE |
| 2278010  | 3711693  | 1318460  | 1673809  | 1996760  | 1417379  | 3692502  | 1883862  | TRUE |
| 2392405  | 1938336  | 3609181  | 3733632  | 1478597  | 1621360  | 1885635  | 1693797  | TRUE |
| 1061441  | 834672.6 | 1551125  | 1617251  | 663062.3 | 760016.9 | 849755.5 | 695593.1 | TRUE |
| 668038.9 | 613669.8 | 1089072  | 1306925  | 535898.3 | 649962.1 | 661338.4 | 587625   | TRUE |

|          |          |          |          |          |          |          |          |      |
|----------|----------|----------|----------|----------|----------|----------|----------|------|
| 66230.7  | 60921.6  | 50702.4  | 71297.3  | 51041.4  | 48144.7  | 73985.5  | 51087.8  | TRUE |
| 18186.3  | 6726.1   | 14634    | 4380.8   | 7136.8   | 8042.8   | 6758.7   | 5594.4   | TRUE |
| 34926.9  | 28808.7  | 33432.8  | 26302    | 33840.5  | 36682.2  | 45027.9  | 32900.9  | TRUE |
| 68603.1  | 48725.3  | 47890.2  | 56296.3  | 51299.4  | 55778.5  | 82288.4  | 44949.7  | TRUE |
| 249217.6 | 129211.1 | 263698.4 | 285920.6 | 286993   | 209645   | 170326.9 | 172910.5 | TRUE |
| 120386.5 | 107568.8 | 133593.7 | 170906.8 | 183477.8 | 122981.3 | 138096.1 | 132198.1 | TRUE |
| 60444.8  | 67294.1  | 85623.2  | 44535.4  | 59033.2  | 70702.3  | 75721.5  | 59110.3  | TRUE |
| 45330    | 42752.1  | 51395.6  | 30165.3  | 41244.7  | 34827.2  | 48055.5  | 44195.2  | TRUE |
| 176149   | 336566.9 | 193249.6 | 285960.4 | 291336.2 | 168260   | 105613.2 | 115069   | TRUE |
| 175506.5 | 153083.6 | 184339.9 | 190780.5 | 138950.1 | 282867.3 | 200254.5 | 165065.9 | TRUE |
| 567518   | 321970.9 | 494245   | 637320   | 679578.5 | 544986.6 | 428047.3 | 526502.5 | TRUE |
| 272326.4 | 355253.1 | 275611.4 | 250694.4 | 247177.1 | 259382.2 | 271362.1 | 276686.8 | TRUE |
| 171949.2 | 159486.7 | 176745.7 | 143839.2 | 108183.8 | 212790.5 | 218339.4 | 160850.5 | TRUE |
| 68773.6  | 197510.9 | 85660.6  | 155404.1 | 130120.5 | 44926.3  | 49671.7  | 43358.5  | TRUE |
| 539656   | 568276.2 | 478576.2 | 522038.3 | 398983.5 | 516212.6 | 613338   | 374493.5 | TRUE |
| 569138.3 | 617456.5 | 505958.2 | 598413.3 | 442941   | 603532.7 | 684858.7 | 461513.2 | TRUE |
| 90757.3  | 102994.9 | 104252.6 | 98140.6  | 94656.2  | 85468    | 124159.1 | 96943    | TRUE |
| 1042580  | 730583.7 | 1125341  | 1120586  | 991238.3 | 1199809  | 787354.9 | 1147527  | TRUE |
| 680359.1 | 505125.1 | 683501.7 | 705495.5 | 652844.7 | 793999   | 531809.2 | 727554.2 | TRUE |
| 672213.3 | 513914.5 | 717391.8 | 774164.8 | 616921.4 | 753297.8 | 489899.9 | 708107.3 | TRUE |
| 666199.3 | 529454.1 | 686863.9 | 730492.5 | 627412.3 | 725111.5 | 550681.3 | 754569   | TRUE |
| 581421.2 | 507279.8 | 583471.7 | 640842.8 | 486898.8 | 573787.8 | 571311.7 | 464060.2 | TRUE |
| 443705   | 487936.4 | 424003.8 | 479033.3 | 353928.1 | 448180.6 | 497699.6 | 364792.9 | TRUE |
| 104817.1 | 173795.2 | 111083.2 | 188820.7 | 184574   | 70442.9  | 86487.3  | 91749.7  | TRUE |
| 94655.7  | 165260.4 | 99284.9  | 168588.4 | 166396.3 | 89638.8  | 88182.8  | 104718.6 | TRUE |
| 788095.4 | 1180663  | 682959.1 | 720636.1 | 816413.8 | 1138842  | 1377807  | 848581.8 | TRUE |
| 749036.9 | 774707.2 | 750527.1 | 781584.1 | 783998.8 | 786581.1 | 820270.4 | 706236.1 | TRUE |
| 392629.8 | 410201.9 | 336554.3 | 429210   | 310021.4 | 380201.4 | 425524.4 | 330221.3 | TRUE |
| 1983714  | 1259336  | 1733908  | 1812931  | 1494968  | 1636056  | 1225471  | 1652377  | TRUE |
| 174925.2 | 114332.8 | 239889.4 | 251165.4 | 190750.1 | 205821.2 | 148115.9 | 203005.3 | TRUE |
| 866831   | 574364.6 | 1042101  | 1119405  | 912160   | 990156.4 | 700340.1 | 958271.9 | TRUE |
| 156623.9 | 194396.2 | 60866.2  | 103593.2 | 153136.9 | 84000.4  | 113470.4 | 145885.1 | TRUE |
| 214843.4 | 252432.2 | 155883.9 | 210765.9 | 194747.6 | 166464   | 189920.3 | 192261.3 | TRUE |
| 228549.3 | 240635   | 155836.7 | 241847.4 | 265459.7 | 169689.8 | 303413.9 | 229489.7 | TRUE |
| 150738.8 | 193322.6 | 132850.6 | 167390.9 | 166760.3 | 149664   | 191180.9 | 164270   | TRUE |
| 66809.8  | 85406.2  | 61821.8  | 67742.5  | 69944.9  | 48520.7  | 57412    | 55219.4  | TRUE |
| 636917.8 | 656565.1 | 843266.4 | 881527.1 | 508415.7 | 674087.8 | 733515.3 | 630167.3 | TRUE |
| 341048.1 | 348497.6 | 406046.2 | 494187.8 | 267855.7 | 303815   | 388138   | 364073.7 | TRUE |
| 88263.4  | 93397.1  | 106467.6 | 109394.3 | 79302.5  | 71069    | 119872.6 | 99754.3  | TRUE |
| 392521.9 | 426572   | 335494.1 | 345342.8 | 364927.1 | 337310.9 | 438940.6 | 394476.1 | TRUE |

|          |          |          |          |          |          |          |          |      |
|----------|----------|----------|----------|----------|----------|----------|----------|------|
| 711823.3 | 753028.1 | 524770.8 | 621264.2 | 694897.2 | 570374.8 | 711363.6 | 673608.1 | TRUE |
| 1520954  | 1347976  | 1797178  | 1783499  | 1379197  | 1206546  | 1574225  | 1318371  | TRUE |
| 854512.2 | 829564.4 | 902465.3 | 957199.7 | 734975.4 | 741871.1 | 864004   | 748693.1 | TRUE |
| 57837.9  | 48062.9  | 52301.4  | 59822.8  | 51861.6  | 49701.8  | 44839.7  | 52598.2  | TRUE |
| 65416.3  | 112375.2 | 31107.5  | 74094.1  | 121368.2 | 45648.5  | 97864.4  | 105078.2 | TRUE |
| 64405.8  | 111685.5 | 47811.6  | 91967.4  | 107170.4 | 50159.9  | 104001.5 | 108771.8 | TRUE |
| 243578.6 | 276866.5 | 303541.2 | 279729.5 | 226028.2 | 271377.9 | 248793   | 259388.8 | TRUE |
| 56511.7  | 62494.5  | 81174    | 52391.7  | 51821    | 74457.6  | 71775.4  | 57362.4  | TRUE |
| 95891.3  | 98874.1  | 76634.6  | 60121.4  | 80708.5  | 97723.5  | 103135.7 | 84124.9  | TRUE |
| 72756.8  | 76656.4  | 70104.7  | 85575.7  | 87355.9  | 70321.9  | 97722.4  | 87423.9  | TRUE |
| 52358.2  | 66660.9  | 32487.8  | 52803.6  | 54021.5  | 36319.6  | 62624.4  | 54865.8  | TRUE |
| 38776.8  | 52671.3  | 55801.9  | 65647    | 33846.7  | 37947.7  | 48590.4  | 46254.9  | TRUE |
| 25602.8  | 47873.6  | 12877.3  | 9433.6   | 21801.7  | 15753.3  | 22159.5  | 25698.1  | TRUE |
| 87990.1  | 104289.1 | 80805.2  | 66670.7  | 117256.1 | 104885.7 | 120785   | 100052.5 | TRUE |
| 22870.5  | 51074.9  | 28717.5  | 25308.6  | 48481.9  | 16284.3  | 20491.8  | 20553.3  | TRUE |
| 76194.8  | 94590    | 91166.3  | 99841.8  | 96835.1  | 66926.7  | 137518.3 | 80614.9  | TRUE |
| 110658.8 | 115904.6 | 132362.9 | 140597.1 | 88776.5  | 98628.1  | 114635.2 | 105861.2 | TRUE |
| 15403.1  | 5871.2   | 6437.6   | 8211.5   | 13617.6  | 3013.4   | 132670.1 | 7349.1   | TRUE |
| 117284.3 | 166304.1 | 49646.8  | 99897.2  | 118012.5 | 98379.9  | 195696.7 | 141182.3 | TRUE |
| 26732.9  | 9264.6   | 13271.4  | 29764.1  | 23848.1  | 20081.6  | 32245.7  | 34469.6  | TRUE |
| 166830.4 | 185433.7 | 130309.5 | 163739.4 | 162955.1 | 164190   | 228625.9 | 196944.4 | TRUE |
| 161619.7 | 150722.1 | 168525.2 | 189246.4 | 160887.2 | 167115.2 | 195423.5 | 161506.3 | TRUE |
| 714196.1 | 651564   | 751778   | 864609.6 | 601142.7 | 680285.4 | 817269.5 | 761426.1 | TRUE |
| 38732.5  | 69138.2  | 27991.8  | 42548.7  | 44445.9  | 37411.8  | 59136.5  | 58129.7  | TRUE |
| 29449.5  | 53346.4  | 43247.4  | 30772.1  | 31184.5  | 25294.9  | 44105.5  | 28168.7  | TRUE |
| 50876.6  | 33056.5  | 40498.9  | 34881.3  | 35154.4  | 31516.9  | 38786.1  | 34683.8  | TRUE |
| 28036.8  | 32562.2  | 8936.7   | 28841.4  | 18930.8  | 10863.2  | 20460    | 30314.8  | TRUE |
| 15853.3  | 26474.9  | 21681.7  | 14226.5  | 22059.7  | 23093.4  | 23143.6  | 11726.4  | TRUE |
| 50177.7  | 52209.9  | 52108.1  | 48237.2  | 63013.1  | 42117.6  | 48717.8  | 45527.3  | TRUE |
| 29136.9  | 41974.4  | 15606.4  | 11732.8  | 17341    | 26159.9  | 24843.3  | 20804.7  | TRUE |
| 242463   | 148906   | 296754.4 | 197312   | 236368.4 | 330785.3 | 170530   | 214427.9 | TRUE |
| 2171330  | 1630148  | 2705853  | 2045408  | 2343640  | 3058257  | 1613766  | 2188191  | TRUE |
| 21692.9  | 32389.5  | 45835.4  | 51094.5  | 38842.6  | 7964.5   | 8108.5   | 10198.3  | TRUE |
| 40631.9  | 39299.9  | 34602    | 33081.7  | 53133.6  | 43936    | 45075.7  | 55071.3  | TRUE |
| 166476.5 | 218919.2 | 366521.5 | 146523.3 | 159222.8 | 179455   | 130996.4 | 148031.2 | TRUE |
| 409786.7 | 309921.6 | 477418.7 | 328407.9 | 333344.6 | 438830.7 | 263326.9 | 311680.3 | TRUE |
| 89779.9  | 74102.3  | 101936.7 | 63740.3  | 74416.7  | 92973.9  | 64224.6  | 88238.1  | TRUE |
| 516465.1 | 389702.3 | 764414.2 | 733718.7 | 675063.8 | 845145.5 | 520229.3 | 723079.9 | TRUE |
| 328985.9 | 334635.7 | 289542.1 | 293421.7 | 406041.4 | 369204.2 | 362001.5 | 401558.7 | TRUE |
| 83017.4  | 84234.2  | 147686   | 93318.8  | 118783.3 | 155602.2 | 95896.2  | 118175.9 | TRUE |

|          |          |          |          |          |          |          |          |      |
|----------|----------|----------|----------|----------|----------|----------|----------|------|
| 40989.5  | 40576.4  | 51293.1  | 45251.5  | 46969.3  | 48650.8  | 46498.9  | 59193.3  | TRUE |
| 101139.8 | 86895.8  | 54984.5  | 60994    | 90624.1  | 115496.6 | 111235.7 | 88203.3  | TRUE |
| 130891.5 | 188909.3 | 201541.3 | 132343.2 | 104661.9 | 179592.2 | 178108.2 | 168505.5 | TRUE |
| 85549.7  | 66477.6  | 89596.8  | 46752.7  | 66177.3  | 96495.6  | 51667.4  | 48325.3  | TRUE |
| 268499.6 | 155311.1 | 403859.1 | 260359   | 206649.9 | 393827.2 | 233583.4 | 235832.1 | TRUE |
| 250571.8 | 170830.3 | 198194.2 | 183409   | 337496.2 | 233250.1 | 223404.9 | 255035.9 | TRUE |
| 35111.8  | 23256.9  | 18380.6  | 8704.3   | 19616.3  | 14550.3  | 7051.1   | 22264.4  | TRUE |
| 45050.4  | 33995.6  | 46402.7  | 53667.5  | 65556.9  | 47222    | 34457.2  | 47232.8  | TRUE |
| 33037.1  | 34152.2  | 20042.3  | 24679.6  | 34340.1  | 18466.6  | 27039.2  | 38216.4  | TRUE |
| 142576.9 | 145710.4 | 180558.9 | 160360.3 | 139710.9 | 176903.4 | 141349.3 | 132161.6 | TRUE |
| 437999.5 | 302168.2 | 630853.8 | 476523.8 | 489187   | 613590.6 | 404581   | 457372.9 | TRUE |
| 609292.2 | 539522.7 | 489161.2 | 479773.1 | 820472.3 | 603750.9 | 546890.4 | 567495.7 | TRUE |
| 158128.2 | 159875.2 | 174399.8 | 144193.6 | 211784.8 | 176287.5 | 156696.8 | 173438.7 | TRUE |
| 151956.4 | 152776.7 | 156026.5 | 135112.2 | 217684.7 | 178272.4 | 144529.2 | 203962.3 | TRUE |
| 50042    | 56730.8  | 63759.6  | 48082.5  | 48599.1  | 62093.7  | 37486.1  | 59984.3  | TRUE |
| 37398.7  | 39863.2  | 59127    | 47434.7  | 58738.2  | 65225.9  | 66996.4  | 59786.8  | TRUE |
| 189620.2 | 190047.6 | 187257.7 | 192091.6 | 208558.3 | 223518.3 | 171157.3 | 175496.3 | TRUE |
| 362455.6 | 280981.3 | 314815.6 | 307941.2 | 340071.5 | 364800.3 | 268709.6 | 323474.8 | TRUE |
| 152658.6 | 146614.1 | 148654   | 158246.1 | 146823.8 | 161116.6 | 156396.4 | 156796.9 | TRUE |
| 104280.2 | 71316.9  | 94904.2  | 73742.7  | 78509.6  | 95504.7  | 67888.6  | 81301.6  | TRUE |
| 367910.1 | 315516.2 | 249069.4 | 257062.8 | 384115.2 | 363712.2 | 326236.9 | 353105.3 | TRUE |
| 277463.8 | 291280.2 | 263176.7 | 255196.7 | 330425   | 315149.7 | 288964.2 | 326563.4 | TRUE |
| 460594.6 | 490273.3 | 358686.8 | 372979.5 | 575393.2 | 511843.3 | 477239.7 | 494717.9 | TRUE |
| 492233.3 | 444853.4 | 378602.6 | 362282.4 | 532928.1 | 455965.9 | 478489.4 | 441625.1 | TRUE |
| 25791.2  | 27268.1  | 25824.5  | 27367    | 27925.6  | 37597.9  | 30796.6  | 25530.2  | TRUE |
| 21628.1  | 26972    | 36368.6  | 33245.4  | 30611.3  | 28338.8  | 33233.7  | 34713.7  | TRUE |
| 111013.4 | 112272.4 | 79791    | 83845.6  | 77858.4  | 99325    | 77899.6  | 108110.1 | TRUE |
| 285780.4 | 324555.5 | 212058.3 | 242678.9 | 233820.8 | 196047.4 | 247031   | 247559.6 | TRUE |
| 1451001  | 1251296  | 1428477  | 1598357  | 1713020  | 1493491  | 1526917  | 1665796  | TRUE |
| 1438042  | 1305453  | 1287901  | 1563917  | 1538397  | 1346830  | 1532541  | 1603227  | TRUE |
| 133449.9 | 130476.8 | 129106.5 | 153886.9 | 126356.4 | 131114.9 | 128841.9 | 131221.9 | TRUE |
| 97617.8  | 93301.3  | 86131.8  | 105899.7 | 91291.4  | 96635.3  | 85346.4  | 82963.4  | TRUE |
| 772518.1 | 792003.3 | 766063.9 | 808222.3 | 830246.2 | 940799.9 | 860802.1 | 877003.8 | TRUE |
| 2229171  | 2113319  | 2181447  | 2009247  | 2064834  | 2484112  | 2443895  | 2639681  | TRUE |
| 96064.1  | 148462.9 | 117285.6 | 202170   | 175312.7 | 80057.5  | 75233.5  | 67998.8  | TRUE |
| 85446.9  | 89026    | 137532.5 | 69683.1  | 51456.7  | 73014    | 65228.8  | 67092.8  | TRUE |
| 464276.8 | 430928.9 | 360715   | 503947.8 | 430644.8 | 519139.7 | 510479.9 | 477797.2 | TRUE |
| 236581.5 | 232431.3 | 180999.5 | 246868   | 236922.8 | 268751.1 | 333876.7 | 282637.7 | TRUE |
| 79139.1  | 75921.6  | 75655.7  | 78082.2  | 62765.9  | 91790.5  | 89677.8  | 68704.9  | TRUE |
| 532513.1 | 407773.1 | 456757.5 | 534339   | 507826.1 | 486663.9 | 418336.8 | 483479.6 | TRUE |
| 616031.1 | 521378.9 | 502091.8 | 589346.9 | 549091.2 | 544846.2 | 551954.9 | 562892.7 | TRUE |
| 118877.8 | 85059.1  | 78848.1  | 91261.6  | 91445.1  | 82716.1  | 78605.6  | 78617.6  | TRUE |
| 132567.6 | 144679   | 142972.8 | 137428.9 | 136160.8 | 155326.6 | 148874.9 | 146106.5 | TRUE |
| 42656.9  | 37719.9  | 64357.2  | 69146    | 53194.9  | 68173.6  | 60869.7  | 81698.7  | TRUE |



|          |          |          |          |          |          |          |          |      |
|----------|----------|----------|----------|----------|----------|----------|----------|------|
| 105038.3 | 100386.4 | 105336.3 | 107204.9 | 123740.9 | 57339.1  | 97608.3  | 70060.5  | TRUE |
| 297477   | 228197.4 | 220559.5 | 261717.8 | 259828.8 | 345702   | 284655.1 | 339516.8 | TRUE |
| 62755.7  | 42755.9  | 42169.9  | 47545.7  | 40714.7  | 48786.7  | 49254.6  | 45782.7  | TRUE |
| 154070.5 | 128545.7 | 101748.6 | 119914.6 | 120347.7 | 106889.8 | 111014.5 | 131512.7 | TRUE |
| 217662.6 | 172475.1 | 170148.2 | 233267.7 | 213157.1 | 207547.7 | 229291.9 | 232282.5 | TRUE |
| 156299.6 | 130520.3 | 107362.3 | 112644.1 | 123321.8 | 137683.6 | 144661   | 149394.7 | TRUE |
| 53637.8  | 73013.6  | 45144.3  | 73515.8  | 70580.3  | 63112.1  | 64197.5  | 80854.7  | TRUE |
| 66339.4  | 49279.7  | 44712.4  | 55303.6  | 59456.2  | 61181.2  | 65340.7  | 51810.8  | TRUE |
| 51704.9  | 75425.3  | 49744.7  | 54268.6  | 55006.3  | 55324.8  | 76973.8  | 47762    | TRUE |
| 28406    | 75556.5  | 69370.7  | 83814.8  | 64888.6  | 36289.4  | 34785.9  | 38109.4  | TRUE |
| 251240.8 | 252470.7 | 228666.2 | 274724.3 | 233272.9 | 281219.6 | 299028.7 | 295312.9 | TRUE |
| 207059.8 | 164981   | 162893.4 | 183883.2 | 177894.7 | 210136.4 | 191624   | 195461   | TRUE |
| 41095.8  | 28014.4  | 38280.5  | 34712    | 32191.3  | 49171.2  | 33775.3  | 46465.4  | TRUE |
| 39298.9  | 30744    | 36183.9  | 36954.2  | 30320.8  | 46104.2  | 35584.2  | 38574.2  | TRUE |
| 174945.9 | 174074.9 | 159628.9 | 181421.8 | 184399.7 | 162955   | 177091.1 | 203927.5 | TRUE |
| 87222.9  | 92044.9  | 71618.7  | 75848.1  | 78532.3  | 91304.7  | 97035.1  | 88522.6  | TRUE |
| 79129.7  | 81389    | 83661.1  | 70269.2  | 63689    | 82369.8  | 79141.8  | 81650.3  | TRUE |
| 72610    | 59216.9  | 80513.4  | 71007.5  | 72754.6  | 72330    | 61647.8  | 80930.7  | TRUE |
| 52631.4  | 52941.2  | 56044.1  | 47327.3  | 49505.8  | 55416.2  | 52103.1  | 52307.5  | TRUE |
| 241996.5 | 182562.1 | 213500.9 | 193824.9 | 232101.4 | 228345.2 | 237322.8 | 263625.3 | TRUE |
| 313481.9 | 276485.9 | 307986.8 | 342334.1 | 316547   | 275312.8 | 277300   | 280589.8 | TRUE |
| 1359618  | 1357472  | 1484463  | 1277181  | 889947.7 | 1472334  | 1414653  | 957293.7 | TRUE |
| 36281.9  | 31271.8  | 29038.2  | 38752.8  | 11022.4  | 30291.2  | 36636.7  | 24749.6  | TRUE |
| 198404.7 | 188107.4 | 167207.5 | 139595.8 | 122072   | 186015.8 | 168175   | 130028.7 | TRUE |
| 1099617  | 302823.7 | 401627.3 | 370917.1 | 311143.4 | 394968.4 | 425835.3 | 335907.5 | TRUE |
| 262435.8 | 214395.8 | 343275.1 | 332690.5 | 249483.3 | 361528.5 | 326312.9 | 243592.4 | TRUE |
| 54710.8  | 38333.3  | 54089.1  | 32154.8  | 32505    | 54479.3  | 50900.6  | 46127.5  | TRUE |
| 145168.8 | 150221.6 | 156181.4 | 111061.8 | 92745.7  | 141728.3 | 149353.8 | 110588.1 | TRUE |
| 208885.2 | 210524.3 | 221772.5 | 206547   | 165427.8 | 223611.9 | 196355.6 | 179063.8 | TRUE |
| 438612.1 | 410273.3 | 445745.8 | 439136.1 | 448583.4 | 464193.2 | 448074   | 436137.9 | TRUE |
| 46755.5  | 56025.8  | 38098.5  | 49590.5  | 50494.4  | 53764.3  | 52926.4  | 39726.7  | TRUE |
| 611984.3 | 580533.5 | 702206.4 | 615772.6 | 504602.3 | 703518.4 | 706429.4 | 501586   | TRUE |
| 143149.4 | 123282.7 | 160464.1 | 170964.3 | 166580.3 | 166272.8 | 159479.6 | 138299.1 | TRUE |
| 151122.3 | 119315.7 | 130692.9 | 147107.8 | 145165.1 | 152300.4 | 165846   | 135265   | TRUE |
| 45728.6  | 69624.7  | 54363.9  | 49696.2  | 41713.6  | 34966.1  | 48843.6  | 41638.1  | TRUE |
| 247426.7 | 199507.9 | 299488.5 | 304754.1 | 304841.5 | 280176.5 | 214824.7 | 280957.6 | TRUE |
| 99169.7  | 82544.5  | 101961.3 | 101938.3 | 114302.4 | 92972.1  | 79971.7  | 110977.7 | TRUE |
| 116722.7 | 122134.3 | 130656.7 | 129141.3 | 106121.7 | 154937.3 | 146211.7 | 128973.3 | TRUE |
| 61057.3  | 58225.9  | 81868.5  | 54982.4  | 52514.1  | 58304.4  | 85130.1  | 51106.4  | TRUE |
| 102604.7 | 101456.2 | 104056.8 | 113596.9 | 100411.6 | 65677.5  | 75533    | 58015.5  | TRUE |
| 39747.6  | 29907.4  | 42062.4  | 29403.3  | 36668.7  | 30984.4  | 36565.4  | 30370.8  | TRUE |
| 58234.2  | 78765.5  | 53612.8  | 64205    | 55237.3  | 62895.5  | 73246.6  | 74390.2  | TRUE |
| 2078761  | 1378334  | 1893112  | 2132790  | 2192399  | 1981283  | 1406324  | 2098103  | TRUE |
| 69183.8  | 74733.5  | 64447.6  | 69603.2  | 61916.8  | 66426.5  | 86698.7  | 82407.6  | TRUE |
| 92862.5  | 112780.5 | 83815.3  | 126749.7 | 92403.6  | 119647.5 | 135816   | 85137.3  | TRUE |
| 160131.6 | 160512.5 | 151642   | 137096.7 | 95723.8  | 140650.4 | 162571.7 | 106610.8 | TRUE |
| 599856.8 | 568691.1 | 507212.1 | 461710.8 | 361941.1 | 514405.2 | 470183.4 | 381220.6 | TRUE |

|          |          |          |          |          |          |          |          |      |
|----------|----------|----------|----------|----------|----------|----------|----------|------|
| 1139976  | 1119383  | 1413205  | 1461476  | 993508.7 | 1512629  | 1426484  | 1056439  | TRUE |
| 565535.3 | 578263.9 | 712664.8 | 775530.9 | 561216.9 | 732078   | 795990.4 | 536630.1 | TRUE |
| 339180.3 | 283192.9 | 471721.5 | 454310.4 | 347153.3 | 422367.6 | 341029.9 | 419409.7 | TRUE |
| 166904   | 155552.1 | 158886.1 | 115654.8 | 126043.4 | 146191.5 | 173535.2 | 116378.4 | TRUE |
| 204898.2 | 206045.3 | 201704.1 | 289445.2 | 195195.5 | 222417.1 | 212595.6 | 209708   | TRUE |
| 227589.3 | 237102.1 | 232087.2 | 189208.1 | 186904.6 | 244991.1 | 236512.5 | 187663.6 | TRUE |
| 195329.5 | 218226.8 | 206997.3 | 220016.2 | 264223.1 | 164155   | 191655.3 | 182951.8 | TRUE |
| 89484.1  | 95186.9  | 68882    | 98218.9  | 80290.3  | 136696.6 | 124720.8 | 142996.9 | TRUE |
| 297662.4 | 266354.9 | 301566.6 | 229018   | 250997.6 | 303615.2 | 239880.6 | 244412.5 | TRUE |
| 88938.1  | 74437.3  | 102281   | 55988.5  | 75076.9  | 83317.8  | 80884    | 85717.7  | TRUE |
| 266817.9 | 197859.2 | 257854.1 | 320566.6 | 299138.9 | 192737.4 | 232133.3 | 249066.5 | TRUE |
| 90825.2  | 98196.9  | 75572.3  | 99433.1  | 82013.1  | 94450.9  | 105221   | 57664.9  | TRUE |
| 61755.6  | 90194.3  | 67506    | 79690.3  | 64164.9  | 63799.1  | 55578    | 41363.4  | TRUE |
| 23636.1  | 25824.4  | 8567.8   | 16117.3  | 28469.5  | 13034.8  | 12393.9  | 16746    | TRUE |
| 102100   | 120838.9 | 75874.9  | 101230.8 | 120804.4 | 73414.7  | 114098.2 | 112880   | TRUE |
| 2099275  | 1972591  | 1470458  | 2186383  | 2134700  | 1540340  | 2150025  | 2066293  | TRUE |
| 9732894  | 9505427  | 6935760  | 9325079  | 10139825 | 7181943  | 10286232 | 10242620 | TRUE |
| 96629.4  | 130339.6 | 95168.1  | 112357   | 98690.9  | 103992.9 | 107054.5 | 116291   | TRUE |
| 139251.9 | 106213.7 | 99493.1  | 142494.4 | 146655   | 153638.6 | 150400.6 | 164283.9 | TRUE |
| 571604.4 | 468523.3 | 586448.6 | 584102.8 | 562142.9 | 540039.1 | 518178   | 518434   | TRUE |
| 86380.6  | 64302.6  | 48534.3  | 58463.4  | 51456.4  | 54616.9  | 56009    | 57025.7  | TRUE |
| 70269.6  | 58852.7  | 58548.9  | 69269.5  | 81892.8  | 84704.2  | 88926.2  | 90584.6  | TRUE |
| 62823.8  | 63787.9  | 49390.8  | 85872.3  | 75483.4  | 70872.3  | 67874    | 66543.7  | TRUE |
| 100583   | 98694.7  | 99326.2  | 133597.2 | 97902.7  | 112850.8 | 108932.3 | 95359.5  | TRUE |
| 64141.2  | 63581.7  | 58477.1  | 67047.8  | 65084.9  | 66557.1  | 73377.3  | 66604.2  | TRUE |
| 51020.2  | 24434    | 26766.5  | 29206.7  | 29871    | 47995.6  | 25894.4  | 32267.7  | TRUE |
| 268607.9 | 229302.7 | 263794.1 | 340446.8 | 253207.7 | 295921   | 311879   | 295278   | TRUE |
| 66717.7  | 59188.1  | 54518.4  | 71557.6  | 45509.3  | 72397.8  | 64007.9  | 58577.8  | TRUE |
| 82177.1  | 43616.6  | 54155.3  | 89571.5  | 60928.7  | 81030.7  | 67667.9  | 84970.5  | TRUE |
| 135953.7 | 169715.7 | 105900.2 | 135490.7 | 175865.1 | 115831.5 | 177371.3 | 207529.5 | TRUE |
| 11189.8  | 12715.5  | 17772.3  | 9580.7   | 28351.7  | 11209.7  | 18015.9  | 38073.3  | TRUE |
| 181058.8 | 168191.4 | 185772.3 | 194383.4 | 204384.3 | 177674.7 | 212192.5 | 231358.4 | TRUE |
| 128130.9 | 116964.2 | 131075.6 | 100732.8 | 136180.6 | 111681.4 | 135123   | 119028.2 | TRUE |
| 64637.2  | 69111.2  | 71003.5  | 76456    | 67473    | 64545    | 67045    | 72746    | TRUE |
| 31913.3  | 36048.7  | 40773.2  | 41743.2  | 49480.4  | 42743.3  | 43880.5  | 48349.7  | TRUE |
| 28840.9  | 34745.6  | 32825.4  | 24020.8  | 36374.6  | 17136.1  | 36474.9  | 31408.6  | TRUE |
| 30491.9  | 61202    | 75678.4  | 48422.8  | 48708.7  | 44249.9  | 51205.3  | 47868.2  | TRUE |
| 40210.1  | 36482.7  | 34053.3  | 41342.1  | 44609.9  | 57121.2  | 49871.5  | 55292.7  | TRUE |
| 110932.8 | 98853.1  | 70146.9  | 89417.5  | 80274.4  | 83019    | 81447.9  | 122644.9 | TRUE |

|          |          |          |          |          |          |          |          |      |
|----------|----------|----------|----------|----------|----------|----------|----------|------|
| 32824.9  | 34950.6  | 41966    | 40740.6  | 48251.7  | 43898.6  | 27365.1  | 16935.6  | TRUE |
| 44246.2  | 39569.1  | 42885.8  | 55044.8  | 46351.7  | 62765.2  | 60546.7  | 62805.5  | TRUE |
| 17005    | 24052.6  | 84177.9  | 36699.5  | 18525.7  | 27715.4  | 26033.4  | 31865    | TRUE |
| 88223.8  | 89976.7  | 71293.6  | 73889.1  | 94010.5  | 66945.4  | 71446.3  | 111261.2 | TRUE |
| 382736.2 | 421977.5 | 342780.4 | 443828.4 | 338341.7 | 337772   | 371494.2 | 393908.5 | TRUE |
| 28535.8  | 26433    | 24646.1  | 19779    | 23633.9  | 16830.2  | 43174.1  | 29596.8  | TRUE |
| 74258.7  | 80699.1  | 43526.3  | 90681.7  | 66248.7  | 63237.7  | 81759.1  | 74580.5  | TRUE |
| 96964.8  | 80141    | 70311.3  | 103406.4 | 125695.6 | 97419.6  | 122039.1 | 115355.1 | TRUE |
| 379438.6 | 287577.9 | 312911.6 | 365881.7 | 278393.3 | 332899.9 | 359159.5 | 334030.7 | TRUE |
| 251483   | 248933.8 | 218675.5 | 272435.2 | 177718.6 | 242964.6 | 363878.9 | 265942.4 | TRUE |
| 374406.4 | 362176.5 | 333767.6 | 337537.4 | 296529.4 | 286217.8 | 340129.1 | 283004.3 | TRUE |
| 251972.3 | 250629.7 | 229601.5 | 223215.9 | 195398.5 | 221477.6 | 223367.6 | 196771.2 | TRUE |
| 139246.4 | 115262.2 | 152665.7 | 198721.5 | 133542.1 | 183038.6 | 164538.8 | 171635.2 | TRUE |
| 85465.7  | 76188.1  | 108869   | 121774.9 | 81422.2  | 108593.9 | 102012.9 | 81852.6  | TRUE |
| 73344.4  | 81705.8  | 73901.5  | 66290.3  | 76037.2  | 62992.4  | 93290.7  | 77578.2  | TRUE |
| 93295.4  | 109091.2 | 103972.2 | 93448    | 106343.9 | 100197.2 | 100093.5 | 105775   | TRUE |
| 31229.1  | 23698    | 28053.3  | 24791.2  | 26867.8  | 21018.9  | 12432.6  | 19080.5  | TRUE |
| 137991.6 | 125462.7 | 175077.6 | 162781   | 148743.3 | 136781.3 | 164239.9 | 156299.1 | TRUE |
| 145492   | 142026.7 | 194449.7 | 195221.9 | 181439.9 | 173512.2 | 173137.1 | 174683   | TRUE |
| 381858.3 | 343899.5 | 81863    | 83863.3  | 70332.2  | 97085.7  | 125439.1 | 66399.7  | TRUE |
| 33422.2  | 38950.5  | 38162.4  | 38664    | 28828.9  | 28331.8  | 29065.8  | 38645.6  | TRUE |
| 21528    | 25198.7  | 26138.9  | 27071    | 22243.2  | 29302.7  | 26607.8  | 24719    | TRUE |
| 100553.9 | 111578.7 | 95294.9  | 119444.1 | 95362.9  | 87353    | 103196.7 | 83624.4  | TRUE |
| 81890.3  | 94083.5  | 73348.7  | 91700.4  | 71883.1  | 74123.4  | 82313.2  | 76141.1  | TRUE |
| 73662.9  | 96034.6  | 83756    | 83603.3  | 92911.5  | 69817.4  | 88851.4  | 76027.1  | TRUE |
| 324783.3 | 283100.9 | 320806.7 | 301441   | 271850   | 370478.5 | 273944.1 | 304717.1 | TRUE |
| 401358.9 | 391611.5 | 326612.7 | 344665.3 | 365111.4 | 317511.4 | 412259.9 | 331697   | TRUE |
| 82419    | 68536.9  | 48619.8  | 100757   | 77168.7  | 97870.4  | 87550.8  | 92877.8  | TRUE |
| 31150.2  | 26020.3  | 12456.6  | 34470.3  | 29451.5  | 42481.5  | 33191.7  | 35644.9  | TRUE |
| 24215.2  | 26924.2  | 21614.1  | 27624.8  | 21047.6  | 39553.7  | 21627.3  | 32981.8  | TRUE |
| 298649.5 | 261821.6 | 273953.3 | 282912.3 | 211085.8 | 360166   | 322150.4 | 382952.6 | TRUE |
| 328185   | 302812.6 | 293440.8 | 371616.4 | 261695.4 | 354298.3 | 365280.9 | 363293.4 | TRUE |
| 92736.1  | 103925.7 | 101973.4 | 177907.3 | 109441   | 118037.5 | 141571.6 | 103538.4 | TRUE |
| 81090.2  | 79423.4  | 75708.1  | 106351.6 | 70519.8  | 71232.5  | 103637.6 | 90664.8  | TRUE |
| 92027.2  | 88586    | 77185.5  | 76456.5  | 55118.7  | 76933    | 83561.1  | 87045.3  | TRUE |
| 43107.6  | 29722.4  | 23222.5  | 55035.3  | 10125.6  | 45481.3  | 40217.8  | 36175.5  | TRUE |
| 66599.1  | 70194.5  | 73582.2  | 70766    | 93026.6  | 40653.3  | 64469.1  | 48321.4  | TRUE |
| 76127.1  | 107676.6 | 95043.6  | 95406.1  | 103075.2 | 87390    | 81949.1  | 93153    | TRUE |
| 33408.4  | 9150.8   | 13474    | 41852.4  | 21088.1  | 21415.5  | 29908.1  | 40919.8  | TRUE |
| 82395.2  | 88787.1  | 77220.1  | 102582.4 | 77580.1  | 73369.2  | 85744.6  | 80372.9  | TRUE |
| 54104.6  | 70528.2  | 66302.5  | 76230.3  | 87053.7  | 60924.4  | 71528.8  | 73725.8  | TRUE |
| 147766.9 | 125282.2 | 131415.8 | 131744   | 130565.9 | 127760.8 | 139086.7 | 157373.7 | TRUE |
| 223298.5 | 205951.5 | 239701.7 | 232626.7 | 195733.8 | 226897.5 | 230238.6 | 197034.1 | TRUE |

|          |          |          |          |          |          |          |          |      |
|----------|----------|----------|----------|----------|----------|----------|----------|------|
| 66292    | 91608.2  | 62538.8  | 98436.5  | 102092.2 | 70367.7  | 96074.9  | 99985.3  | TRUE |
| 203258.4 | 153947.8 | 183187.3 | 165507.8 | 160395.7 | 121839.3 | 118380.4 | 140477.4 | TRUE |
| 335807.5 | 300730.4 | 254985.7 | 301290.4 | 312984.1 | 270810.4 | 284248.4 | 314645.4 | TRUE |
| 113634.5 | 138393.9 | 135306.7 | 131992   | 157123.4 | 118997.9 | 134467.1 | 147429.8 | TRUE |
| 33174.8  | 39907.9  | 40585.2  | 33991.8  | 38357.2  | 14930.2  | 24713.1  | 10659.7  | TRUE |
| 143433.8 | 119483.3 | 120958.9 | 118211.3 | 159121   | 109774.5 | 126630.8 | 138261.4 | TRUE |
| 549433.2 | 563591.3 | 541533   | 505636.2 | 491794.3 | 545171   | 562429.3 | 515431.1 | TRUE |
| 27349.3  | 37041.8  | 25202.3  | 15597.3  | 9311.5   | 10665.2  | 26065.6  | 29435.6  | TRUE |
| 114612.9 | 93083.8  | 88340.3  | 74649.8  | 73700.2  | 105075.3 | 90894.6  | 91775.5  | TRUE |
| 34140.2  | 26897.4  | 14890.3  | 34273.7  | 34066.7  | 29830.3  | 25900.2  | 27173.4  | TRUE |
| 44774.1  | 37703.4  | 29375.5  | 42052.9  | 37444.3  | 47546.3  | 47200.9  | 44745.6  | TRUE |
| 186146.6 | 168997.8 | 193939.2 | 175056.1 | 191380.2 | 173275.4 | 198079.8 | 148892.9 | TRUE |
| 52262.4  | 41427.1  | 43688.7  | 63239.6  | 52845.7  | 44437.1  | 54683.6  | 51721.2  | TRUE |
| 570115   | 531273.1 | 551226.5 | 299297.2 | 799631   | 519996.7 | 578986   | 749866.7 | TRUE |
| 93323.8  | 79505.4  | 72025.1  | 55072.9  | 57869.6  | 60493.3  | 60448.5  | 48182    | TRUE |
| 464448.5 | 361299.2 | 331590.8 | 406132.2 | 399565.1 | 336522.2 | 375803.5 | 407821.9 | TRUE |
| 64050.6  | 60307.6  | 56060.5  | 56286.3  | 61304.9  | 59211    | 65090.4  | 61175.8  | TRUE |
| 247128   | 213345.4 | 252378   | 246642.4 | 244612.1 | 256754.7 | 224662.1 | 233376.1 | TRUE |
| 2136850  | 2104150  | 1427592  | 1549322  | 1816691  | 1813048  | 1865357  | 2021466  | TRUE |
| 41380.6  | 73703.5  | 50066.9  | 59463.3  | 77993.2  | 47198.7  | 44863.4  | 48065.3  | TRUE |
| 342175.4 | 320668.6 | 304010.4 | 295397.7 | 336473.6 | 280147   | 364604.3 | 337437   | TRUE |
| 45525.4  | 49274.1  | 53878.7  | 60812.7  | 52025.4  | 52009.4  | 52570.3  | 46525.9  | TRUE |
| 148728.7 | 143416.3 | 123058   | 97819.8  | 134900.6 | 132795.5 | 157113.5 | 125961.7 | TRUE |
| 462930.6 | 456263.6 | 405976.1 | 418289.8 | 434267.2 | 429189.2 | 501212.7 | 479114   | TRUE |
| 78998.7  | 53560.3  | 51052.4  | 55244.3  | 50219.4  | 49868.6  | 49272.6  | 55937.6  | TRUE |
| 644452.6 | 563713.4 | 661007.7 | 668505.5 | 598530.9 | 578213.4 | 532452.3 | 589320.6 | TRUE |
| 292639.5 | 249600   | 289392   | 355275.9 | 267010.7 | 280604.5 | 255044.4 | 303077   | TRUE |
| 296151.1 | 239477   | 274546.3 | 340531   | 286702.1 | 267001.4 | 273686   | 336160.9 | TRUE |
| 276777.1 | 204146.4 | 191892.2 | 243136.6 | 241816.1 | 206021.2 | 219895.6 | 226263.9 | TRUE |
| 177593.6 | 144816.8 | 186132.9 | 199507.6 | 213436.9 | 208179.3 | 186910.6 | 229209.1 | TRUE |
| 265224.2 | 267997.1 | 275041   | 261480.6 | 267873.7 | 332584.2 | 311200.3 | 340669.5 | TRUE |
| 75444.4  | 60300.7  | 50061.3  | 66321.9  | 68542.7  | 83112.5  | 74514.7  | 101363.2 | TRUE |
| 169678.7 | 217001.9 | 148092.4 | 186954.8 | 211290.1 | 114448.8 | 119112.3 | 138886   | TRUE |
| 146115.7 | 117721   | 114010.6 | 129632.5 | 138759.5 | 168206.3 | 167592.2 | 168288.8 | TRUE |
| 170992.1 | 131507.3 | 101340.2 | 156786.9 | 144693   | 160047.7 | 157314   | 155620.1 | TRUE |
| 495549.1 | 469627.9 | 328553.7 | 400589   | 411429.7 | 392183   | 391019.7 | 447939.7 | TRUE |
| 129722.1 | 118855.4 | 76029.6  | 84487.8  | 114898.9 | 100457.9 | 77235.4  | 101333.4 | TRUE |
| 284298.1 | 287861.5 | 247691.3 | 237100   | 302092.6 | 227625.4 | 314322.9 | 324199.7 | TRUE |
| 56090.4  | 62237    | 61575.6  | 70516.7  | 77722.5  | 62366.2  | 58694.7  | 80150.4  | TRUE |
| 240039.1 | 151458.4 | 145578.1 | 186319.5 | 205958.4 | 202438   | 258671.1 | 333874.1 | TRUE |
| 211321.2 | 179236.8 | 137979.1 | 213848   | 224098.3 | 149368.4 | 218123.6 | 226927.9 | TRUE |
| 208036.7 | 222632.5 | 154142.1 | 229867.7 | 242295.5 | 152782.9 | 263386.9 | 263807   | TRUE |

|          |          |          |          |          |          |          |          |      |
|----------|----------|----------|----------|----------|----------|----------|----------|------|
| 32313.5  | 52135.6  | 30140.4  | 48732.1  | 51735.6  | 36009.7  | 46336.2  | 35134.3  | TRUE |
| 317782.7 | 293662.4 | 299192.9 | 370424.7 | 262511.2 | 335145.6 | 276341.6 | 345395.3 | TRUE |
| 180625.7 | 174823.8 | 163588   | 167324   | 146866.4 | 194273.8 | 224317   | 198305.5 | TRUE |
| 92809.4  | 89633.5  | 75687.5  | 70817.3  | 89128.4  | 99415.3  | 79327.1  | 91941.8  | TRUE |
| 66466.8  | 36543.6  | 63092.8  | 57294.7  | 74850.1  | 79089.5  | 45855.3  | 66787.3  | TRUE |
| 589655.7 | 531385.2 | 508760.7 | 622052.8 | 606481.8 | 501545.6 | 506614.7 | 584364.9 | TRUE |
| 134464.2 | 110084.1 | 142263.5 | 142907   | 108561.2 | 196106.5 | 107042.9 | 200221.4 | TRUE |
| 45552.4  | 47748.5  | 50515.7  | 60589.9  | 50581.6  | 43700.3  | 55721.3  | 39629.9  | TRUE |
| 44999.8  | 46401.9  | 52008.6  | 51237.2  | 32991.7  | 40242.2  | 44538.1  | 40243.6  | TRUE |
| 761287.2 | 1144120  | 509079.1 | 600302.3 | 673161.8 | 567251   | 597790.6 | 668064.9 | TRUE |
| 138051.8 | 112537.6 | 126440.9 | 147283.2 | 144396.7 | 143921.1 | 124124.1 | 149828.9 | TRUE |
| 33510.4  | 30371.5  | 21031.2  | 23718.5  | 37742.4  | 28329.4  | 32651.8  | 39673.4  | TRUE |
| 968744.8 | 998424.9 | 854771.5 | 828308.7 | 890986.2 | 998621.1 | 989624.4 | 1034271  | TRUE |
| 4860558  | 4689087  | 4088782  | 4150751  | 4302831  | 4612251  | 5013585  | 4969267  | TRUE |
| 104960.1 | 96817.3  | 90984.7  | 94530.8  | 87478    | 74567.6  | 108683   | 99750.1  | TRUE |
| 28828.8  | 39803.8  | 30393.2  | 27983.7  | 30132.1  | 30913.7  | 32289.1  | 38121.9  | TRUE |
| 560157.9 | 609137.5 | 487852.6 | 631505   | 755696   | 498967.8 | 633092   | 775104.7 | TRUE |
| 101637.1 | 83007.5  | 102470   | 110851.8 | 82869.9  | 99611.3  | 78403.5  | 111299.5 | TRUE |
| 70012.2  | 51803.3  | 70487.3  | 61283.1  | 70388.3  | 63163.5  | 60456.5  | 79119.7  | TRUE |
| 74590.1  | 54086.5  | 106395.9 | 116537.6 | 110216.7 | 103353.7 | 78514.9  | 86629.6  | TRUE |
| 90650.3  | 71522.1  | 86116.9  | 87658.1  | 85699.2  | 98572.8  | 83926.1  | 83568.6  | TRUE |
| 160216.7 | 121088.1 | 120477.1 | 154037.9 | 156707.9 | 131305.3 | 99605.7  | 151065.1 | TRUE |
| 50351.2  | 55674.3  | 40168    | 46817.6  | 57923.2  | 33471.9  | 49839.8  | 45243.9  | TRUE |
| 81147.7  | 67857.3  | 112394.9 | 91435    | 102776.6 | 84477.5  | 76344.9  | 99083    | TRUE |
| 36856    | 25050.8  | 41732.2  | 40722.9  | 27279.4  | 35069.6  | 33022    | 39641.6  | TRUE |
| 40146.9  | 47272.2  | 59048.2  | 36408.2  | 45128.5  | 43412.6  | 51479.3  | 47607.8  | TRUE |
| 21142.3  | 24835.4  | 15608.7  | 9179.6   | 19875.8  | 23136    | 19739.8  | 23084.2  | TRUE |
| 157640.3 | 201838.9 | 130457.9 | 136453.2 | 153090.6 | 160542.5 | 163502.7 | 162200.3 | TRUE |
| 92334.4  | 79718.2  | 75931.3  | 76787.3  | 89049.8  | 93077.5  | 91131.6  | 97567.4  | TRUE |
| 20785.2  | 31965.3  | 3935.1   | 10032.6  | 14905.9  | 5384.9   | 9761.5   | 10439.7  | TRUE |
| 190090.9 | 144488.1 | 209204.1 | 191151.7 | 172000.1 | 228262.9 | 157238.1 | 184797.7 | TRUE |
| 781161.8 | 813217.4 | 709667   | 738159.8 | 784165.5 | 899501.3 | 874098.4 | 834287.7 | TRUE |
| 745686.8 | 861955.7 | 648505.3 | 730341.6 | 780819.1 | 824992.6 | 878564.1 | 862487.6 | TRUE |
| 38113.1  | 48554.9  | 62468.4  | 46447.6  | 40847.5  | 47489    | 58669.8  | 50095.6  | TRUE |
| 74129.6  | 60643    | 86742.3  | 100878   | 85359.2  | 77135.4  | 66703.4  | 91415.4  | TRUE |
| 40257.4  | 25406.9  | 55077.9  | 56620.4  | 47286.6  | 49247.8  | 33243.4  | 48946.1  | TRUE |
| 68154.8  | 73739.3  | 63469.4  | 70975.9  | 49226    | 67952.2  | 67524.9  | 74815    | TRUE |
| 228005.6 | 246075.8 | 229791.5 | 254286.2 | 209061.8 | 242336.1 | 249977   | 206344.7 | TRUE |
| 93912.9  | 91794.2  | 77156    | 91371.7  | 95044.9  | 83895.1  | 78393.5  | 89480    | TRUE |
| 171969.3 | 147499.9 | 165153.8 | 190782.3 | 211177.5 | 208489.3 | 174398.8 | 201549.6 | TRUE |
| 81148.1  | 80825.4  | 131819.8 | 100519.1 | 131361.8 | 106279.2 | 106760.4 | 116786.8 | TRUE |
| 91924.8  | 99051.3  | 109282.7 | 81715.1  | 100108.4 | 124224.8 | 138906.1 | 134376.2 | TRUE |
| 36230.9  | 50865.1  | 39659.5  | 35445.8  | 47531.9  | 51367.8  | 48941.9  | 52795.2  | TRUE |

|          |          |          |          |          |          |          |          |      |
|----------|----------|----------|----------|----------|----------|----------|----------|------|
| 6778898  | 4306826  | 6735843  | 6668960  | 13928585 | 4313892  | 4373268  | 4847077  | TRUE |
| 641290.9 | 530869.5 | 1142919  | 399383.8 | 393545.7 | 1155896  | 618809.5 | 382513.2 | TRUE |
| 376868.7 | 357740.9 | 745980.1 | 248763.5 | 203326.9 | 736301.6 | 350289.5 | 256895.8 | TRUE |
| 207591   | 234073.8 | 225148.2 | 174898.9 | 170628   | 252549.2 | 209476.5 | 169757.1 | TRUE |
| 57483.1  | 81992.2  | 153579.3 | 71798.8  | 66674.9  | 169993.2 | 102320.6 | 68294.9  | TRUE |
| 101905.1 | 61222.4  | 140243.5 | 93078.3  | 198641.3 | 98598.6  | 87522.7  | 103508.9 | TRUE |
| 7054.4   | 22480.6  | 4658.3   | 5046.6   | 8201.8   | 3708.2   | 9945     | 18620.1  | TRUE |
| 20304.6  | 27700.1  | 24305.2  | 26921    | 7728.3   | 14259    | 19488.6  | 12905    | TRUE |
| 66637.4  | 47264.3  | 107848.5 | 42844.2  | 33901.1  | 106933.9 | 66393.4  | 43311.4  | TRUE |
| 692777.8 | 633984.1 | 1420848  | 518041.1 | 502564.6 | 1412525  | 759542.2 | 603788.1 | TRUE |
| 488689.5 | 345960.1 | 526892.6 | 519326.2 | 911366.5 | 377772.3 | 388452.8 | 411652.9 | TRUE |
| 219940.1 | 260090.8 | 226554.4 | 308338.8 | 369392.2 | 203909.7 | 218924.3 | 210328.5 | TRUE |
| 57442.6  | 52919    | 106553.3 | 52786.4  | 46951.4  | 79847.3  | 58472.6  | 69452.7  | TRUE |
| 140964.8 | 100027.4 | 126635.6 | 150281.4 | 201453.9 | 82586.1  | 85047.1  | 79804.5  | TRUE |
| 106140.4 | 160188.2 | 92840    | 120930.8 | 136764.3 | 84938.9  | 151779.3 | 131429.2 | TRUE |
| 444654.4 | 508383.1 | 502780.1 | 398075.1 | 441654.5 | 501546.8 | 590237.4 | 483179.5 | TRUE |
| 115229.3 | 144442.1 | 181222.8 | 177073.2 | 203758.7 | 149650.2 | 177615.9 | 182153.3 | TRUE |
| 336584.8 | 318427.6 | 343491.8 | 393647.1 | 410934.2 | 452525   | 341403.3 | 433494.2 | TRUE |
| 133661   | 151779.7 | 188215.5 | 188853.7 | 136060   | 142330   | 161644.5 | 169511   | TRUE |
| 458919.2 | 456245.3 | 851991.1 | 407769.1 | 300620.2 | 884075.7 | 468606.9 | 331652.1 | TRUE |
| 368444.9 | 447770.4 | 417852.8 | 257187.8 | 251882.4 | 491279.7 | 464950.6 | 272656.3 | TRUE |
| 195255.1 | 216667.8 | 221261.3 | 196315.8 | 158834.4 | 231163.8 | 209221   | 170351.1 | TRUE |
| 225859.2 | 184067.4 | 347981.6 | 193790.3 | 183913.4 | 382641.9 | 223154.8 | 210378.8 | TRUE |
| 543824   | 463062.3 | 468295.4 | 481912.4 | 813144.2 | 460251.2 | 489068.4 | 505159.8 | TRUE |
| 351947   | 305137.2 | 329754.6 | 368552.2 | 523961.9 | 370002   | 456426.4 | 372509.7 | TRUE |
| 159784.1 | 157609   | 235989.1 | 178927.5 | 130899.8 | 248603.3 | 194116.4 | 132783.3 | TRUE |
| 521762.4 | 585238.9 | 604914.5 | 569332.1 | 558353.9 | 697411.7 | 671478.8 | 583118.6 | TRUE |
| 192918.7 | 125347.2 | 232174.6 | 234231.2 | 332727.4 | 201066.9 | 119987.4 | 202094.6 | TRUE |
| 316649.3 | 266702.1 | 330081.1 | 320988.7 | 400303.9 | 281058.1 | 276699.2 | 337051.8 | TRUE |
| 39451.1  | 58861.9  | 43250    | 48095.9  | 75985.2  | 33555.7  | 77342.6  | 64303    | TRUE |
| 309646.6 | 267052.3 | 326875.6 | 303973.1 | 327739.4 | 311841.1 | 299835.1 | 329413.8 | TRUE |
| 134376   | 117002.9 | 112979.6 | 119866.6 | 126591.5 | 126035.3 | 118982.6 | 136505.2 | TRUE |
| 306790.9 | 280160.4 | 250199.4 | 270298.1 | 349596.1 | 307150.6 | 335634   | 292618   | TRUE |
| 195083.6 | 184975.2 | 187787.2 | 187362.9 | 210903.2 | 232690.1 | 207887   | 218519.7 | TRUE |
| 49047.9  | 56677.6  | 60532.5  | 52074.2  | 39424.6  | 61532.6  | 53890.7  | 51115.3  | TRUE |
| 210492.4 | 164640.7 | 203495.6 | 175999.3 | 132427   | 204522.7 | 140428   | 168915.4 | TRUE |
| 434043.2 | 342482.8 | 449032.2 | 524154.9 | 433254.4 | 461278.3 | 436015   | 414416.8 | TRUE |
| 112362.1 | 95852.3  | 108128.6 | 91607.6  | 104691.3 | 117447.8 | 112858.6 | 117006.9 | TRUE |
| 248144.8 | 229951.2 | 233265.1 | 266220.8 | 256065   | 258914.8 | 223620.3 | 279312.7 | TRUE |
| 255524.5 | 193053.2 | 254794.4 | 273170.9 | 244813.2 | 240658.1 | 240235.8 | 251876   | TRUE |
| 140320.8 | 137612   | 137477.6 | 128909.6 | 132735.8 | 148791.5 | 149566.6 | 147704.5 | TRUE |
| 385409   | 386063   | 309626.6 | 327421.7 | 387491.3 | 342955.4 | 382812   | 429443.2 | TRUE |
| 234952.3 | 207209.5 | 243440.4 | 289309.5 | 234796.6 | 260631.7 | 230819.8 | 263612.2 | TRUE |
| 528559.9 | 472322   | 511189.3 | 480470   | 534749.4 | 520876   | 496119.9 | 535005.2 | TRUE |
| 41392.5  | 32600.3  | 17868.8  | 16200    | 9997.2   | 20999.5  | 16961.3  | 14631.4  | TRUE |
| 52952.6  | 57350.6  | 47383.2  | 51367.8  | 53372.2  | 71237.2  | 62889.1  | 78622.3  | TRUE |
| 1927224  | 1758637  | 1721353  | 1744508  | 1907464  | 1906613  | 1889142  | 2062154  | TRUE |

|          |          |          |          |          |          |          |          |      |
|----------|----------|----------|----------|----------|----------|----------|----------|------|
| 126248.5 | 121769.8 | 115634.7 | 147034.9 | 109243.9 | 161302.4 | 125319.5 | 142763.7 | TRUE |
| 127406   | 135247.4 | 126702.5 | 147826.7 | 135950.2 | 108416.1 | 143437   | 106823   | TRUE |
| 64013.2  | 42353.8  | 47405.9  | 57664.4  | 62292    | 67048    | 73376.6  | 61442    | TRUE |
| 64412.3  | 67731.1  | 48924.9  | 84024.1  | 77898    | 63282.5  | 65355.3  | 69726.1  | TRUE |
| 46200.4  | 35945    | 33341.9  | 46278.3  | 29267    | 46325.7  | 49486.3  | 54671    | TRUE |
| 56337    | 55475.1  | 40514.2  | 47935.2  | 57550.5  | 45307.6  | 47550    | 42984.1  | TRUE |
| 353345.9 | 282621.8 | 337391.9 | 360930.4 | 388233.4 | 379705.8 | 339798.7 | 367351.6 | TRUE |
| 32823.7  | 64569.5  | 34092.3  | 39622.3  | 52247    | 26143.1  | 50769.6  | 53333.3  | TRUE |
| 160679.7 | 173329.4 | 158802.9 | 152911.6 | 144643.4 | 153350.9 | 167638.8 | 189836.1 | TRUE |
| 308197.1 | 319854.4 | 287423.4 | 308527.7 | 326861.1 | 333785.6 | 359382.7 | 327607.3 | TRUE |
| 269272.1 | 255929.4 | 260124.8 | 297816.9 | 209189.9 | 241309.6 | 248643.5 | 222285.3 | TRUE |
| 628099.6 | 577520.9 | 719618.1 | 657617.6 | 563113   | 609413.5 | 672746.6 | 570447.7 | TRUE |
| 185982.4 | 235069   | 260631.7 | 257597.2 | 180903.8 | 177781.9 | 241577.1 | 185468.4 | TRUE |
| 136104.4 | 139423.9 | 126904.8 | 161178.8 | 186069.6 | 136432.6 | 182247   | 186740.5 | TRUE |
| 307881.2 | 290597.4 | 244951.8 | 299057.8 | 342192.4 | 236698.9 | 351031   | 366681.4 | TRUE |
| 164375.5 | 187801.9 | 160558.7 | 136727   | 168566.2 | 164353.4 | 178896.8 | 146674.5 | TRUE |
| 80945.3  | 77658.2  | 65882    | 59428.8  | 57008.6  | 70236.5  | 83928.9  | 74810.1  | TRUE |
| 22412.1  | 34736    | 16357.3  | 30046.6  | 33971.7  | 24498    | 31595.2  | 39450.6  | TRUE |
| 40174.8  | 38843.7  | 32711.2  | 33385    | 47133.3  | 41302.6  | 39060.7  | 47471.5  | TRUE |
| 12314.4  | 36677.6  | 21753.7  | 15127.8  | 38995.4  | 31440.1  | 16299.7  | 30301.6  | TRUE |
| 297259.7 | 321333.7 | 264816.6 | 294520.7 | 324371.5 | 264004.5 | 378613   | 361124.6 | TRUE |
| 177729.3 | 213880.3 | 114440.7 | 190435.7 | 189552.8 | 148863   | 236577.1 | 176709.5 | TRUE |
| 1042982  | 1549384  | 1404522  | 1177810  | 1208257  | 813735.1 | 1192436  | 1068454  | TRUE |
| 683121.5 | 845309.9 | 620432.7 | 713794.3 | 738768.1 | 645534   | 827467.2 | 728665.8 | TRUE |
| 174923.2 | 197887.5 | 137362.8 | 199111.7 | 208173.4 | 143084.1 | 295733.6 | 193114.2 | TRUE |
| 855358.7 | 820576.4 | 1003468  | 940089.5 | 670679.6 | 829883.8 | 908130.1 | 807003.2 | TRUE |
| 546737.9 | 499180.1 | 670392.6 | 715811.9 | 394989.5 | 589391.3 | 559266.3 | 546800.9 | TRUE |
| 373790.2 | 366948.2 | 247040.1 | 261091   | 347172.1 | 279378.3 | 332208.6 | 304597.6 | TRUE |
| 207694.6 | 227797.8 | 225913.8 | 270240.8 | 252777   | 258279.2 | 271006   | 290025.4 | TRUE |
| 105396.8 | 84679.9  | 90205.7  | 108998.3 | 109298.4 | 87335.2  | 96027.7  | 124157.1 | TRUE |
| 143655.2 | 152799.6 | 174535.4 | 165317.4 | 145479.3 | 164964.9 | 156486.6 | 155227.3 | TRUE |
| 58701.2  | 51186.5  | 47883.1  | 61271.3  | 77329.2  | 39126.1  | 54093.4  | 65519.8  | TRUE |
| 41267.1  | 82493.3  | 50810    | 51076.5  | 60249.4  | 40450.9  | 57152.2  | 39541    | TRUE |
| 100552.9 | 75616.6  | 125234.2 | 99721.2  | 91421.8  | 117346.2 | 98688.5  | 113791.3 | TRUE |
| 207494.7 | 174759.8 | 156429.4 | 184269.1 | 188001.6 | 184630.4 | 197222.7 | 204716.2 | TRUE |
| 105458.5 | 72108.7  | 70409.3  | 99979.3  | 84876.1  | 96096.6  | 97045.8  | 83557.5  | TRUE |
| 165533.4 | 133774.7 | 143943.4 | 162120.3 | 149536   | 160295   | 164481.2 | 144551.2 | TRUE |
| 205888.7 | 147147.8 | 197914.8 | 153502.1 | 169368.1 | 320473.8 | 206754.5 | 189835.9 | TRUE |
| 46806    | 50459.6  | 68488.6  | 47076.9  | 42803    | 42295.2  | 72363.7  | 39972.1  | TRUE |
| 111395.5 | 110406.2 | 160777.5 | 124353.1 | 137673.6 | 94075.2  | 77270.8  | 73591.5  | TRUE |
| 80567.5  | 118970.7 | 87376.4  | 107130.1 | 134514.3 | 64653.8  | 55798.2  | 51958.9  | TRUE |
| 57265.1  | 77890    | 88079.9  | 55113.4  | 51002.3  | 84224.3  | 77012.3  | 57538.6  | TRUE |
| 68328.3  | 73780.5  | 131825.8 | 55312.8  | 57827.2  | 210223.8 | 135042.5 | 126628.4 | TRUE |
| 75932.7  | 105088.1 | 86663.9  | 104749.6 | 105102.1 | 94713.8  | 73187.6  | 52232.3  | TRUE |
| 101790.6 | 111328.2 | 115676.4 | 129672.2 | 130001.8 | 117783.7 | 119434.9 | 107908.6 | TRUE |
| 193265.9 | 175518.8 | 185908.2 | 193640.7 | 203787.8 | 300492.3 | 247611.3 | 206977   | TRUE |
| 43020.2  | 57948.2  | 51643.4  | 56618.4  | 58690.9  | 47964.6  | 53803.4  | 53967    | TRUE |
| 70328.6  | 78592.5  | 58069.4  | 83036.3  | 75754.7  | 102950.6 | 92568.6  | 77927.2  | TRUE |

|          |          |          |          |          |          |          |          |      |
|----------|----------|----------|----------|----------|----------|----------|----------|------|
| 155299.4 | 168051.8 | 148102.9 | 146556.4 | 141596.6 | 133634.3 | 165317.3 | 126590.9 | TRUE |
| 680793.3 | 636993.8 | 619925.8 | 737543.7 | 637010.3 | 663368.4 | 630148.3 | 718100.6 | TRUE |
| 48971.3  | 69352.7  | 43287.7  | 29403    | 32151.8  | 38874.5  | 52082.1  | 30176.5  | TRUE |
| 244432.2 | 274396   | 138105.8 | 237977.3 | 194149   | 160145.5 | 227374.4 | 176886.8 | TRUE |
| 22893.5  | 10911.9  | 36913.6  | 11203.3  | 20414.6  | 38962.2  | 10070.5  | 24603.9  | TRUE |
| 322603.4 | 319890.9 | 248268.9 | 291274.4 | 247776.8 | 269568.8 | 298343.2 | 273081.2 | TRUE |
| 75562.6  | 68575.4  | 53591.1  | 68179.2  | 72882    | 50502.8  | 73941.4  | 61786.2  | TRUE |
| 288954.1 | 279634.6 | 340407.9 | 338749   | 335608.4 | 350875.8 | 392610   | 338091.5 | TRUE |
| 84460.7  | 94500.2  | 81456.1  | 79087.9  | 82707.2  | 91508.4  | 95939.7  | 91939.2  | TRUE |
| 77732    | 68710.4  | 75189.1  | 86631.9  | 75434.8  | 67519    | 82885.4  | 83480.9  | TRUE |
| 19364    | 14001.7  | 21351.2  | 24338.6  | 25653.4  | 23844.1  | 15590.9  | 24424    | TRUE |
| 64006.4  | 46329.8  | 56400.5  | 86516    | 69302.6  | 66760.6  | 49643.4  | 57858.6  | TRUE |
| 173483.6 | 121193.8 | 119238   | 175832.5 | 132962.2 | 184250   | 153438.4 | 169405.1 | TRUE |
| 114489.7 | 90410.1  | 85599.3  | 117912.4 | 87360.1  | 125925.8 | 100453.5 | 129988.7 | TRUE |
| 141899.6 | 110931.7 | 106559.3 | 115559   | 111625.1 | 131909.7 | 153013.7 | 158734.8 | TRUE |
| 1084465  | 1091508  | 772117.1 | 776477   | 978032   | 1086409  | 1064917  | 1206735  | TRUE |
| 86761.2  | 97884.9  | 120296.7 | 83440.1  | 96742.5  | 87309.5  | 102539.5 | 93630.4  | TRUE |
| 186616.8 | 170747.1 | 164106.5 | 153974   | 174822.1 | 245283.2 | 233628.7 | 345953.2 | TRUE |
| 105627.6 | 108394.7 | 97967.3  | 87161.4  | 108296.2 | 198123.4 | 132979.6 | 153349.5 | TRUE |
| 55591.8  | 36548.6  | 53246.4  | 62882.1  | 55711    | 50299.4  | 41062.5  | 54126.8  | TRUE |
| 107811.3 | 80804.8  | 100871.7 | 116100.3 | 94075.3  | 104340   | 83707.3  | 115923.9 | TRUE |
| 75106.6  | 53529.1  | 63249    | 67111.2  | 92208.6  | 63235    | 68232.3  | 86058.2  | TRUE |
| 41102.3  | 28968.8  | 32472.5  | 41342    | 53892    | 39683.3  | 50654.3  | 55378.2  | TRUE |
| 165179.4 | 208318.5 | 151593.6 | 140690.5 | 172570.4 | 135483.5 | 193512.3 | 161572.3 | TRUE |
| 193617   | 231713   | 181782.1 | 164586.2 | 233599   | 163164.7 | 240842.6 | 157876.9 | TRUE |
| 60632.1  | 70074.9  | 61174.6  | 62034.1  | 68654    | 51337.2  | 77672.2  | 50196.7  | TRUE |
| 127832.6 | 127751   | 147781.8 | 141309.2 | 154698.4 | 169532.9 | 113719.3 | 156926.1 | TRUE |
| 135304.3 | 110864.7 | 131879.2 | 142332.6 | 165931.8 | 146507.9 | 116880.2 | 130639.2 | TRUE |
| 227907.8 | 171197.2 | 202734   | 216104.6 | 246488.5 | 225023.7 | 197753.1 | 258018.4 | TRUE |
| 81272.2  | 79004.4  | 63353.9  | 91015.5  | 80582.5  | 89146.7  | 70259.1  | 95918.2  | TRUE |
| 333437.1 | 288164.2 | 236686.4 | 276796.4 | 353818.3 | 392691.5 | 382523.5 | 367260.5 | TRUE |
| 34628.2  | 33902.1  | 44327.9  | 35786.3  | 32210.8  | 44490.9  | 35190.4  | 40243.6  | TRUE |
| 66994.3  | 73477.6  | 78483.8  | 63382.5  | 52963.8  | 70735.1  | 67541.3  | 59450.3  | TRUE |
| 105013.6 | 94676.4  | 92243.2  | 96273.7  | 80876.8  | 131548.2 | 102882.8 | 84128.8  | TRUE |
| 246253.7 | 234673.3 | 313431   | 272949.8 | 336079.2 | 239090.1 | 243149.1 | 229951.4 | TRUE |
| 218343.5 | 192662.8 | 190207.7 | 191181.8 | 136016   | 209756.7 | 225595.6 | 188285.3 | TRUE |
| 53562    | 46636.2  | 45788.9  | 64524.9  | 73366.2  | 39766.2  | 50625.3  | 40032.1  | TRUE |
| 602038.6 | 607294.3 | 649416   | 541142.4 | 515768.2 | 704190.6 | 538357.3 | 511085.3 | TRUE |
| 23618    | 26841    | 37249.8  | 17735.2  | 25853.6  | 33099.8  | 22327.7  | 27530.4  | TRUE |
| 19524.6  | 20755.9  | 26839.6  | 19323.7  | 23651.6  | 8323.1   | 16763.5  | 17577.3  | TRUE |
| 96101.1  | 91448.4  | 104856.8 | 87392.9  | 80785.2  | 132004.1 | 103435.3 | 70202.3  | TRUE |
| 324899   | 323461.3 | 352086   | 344744.8 | 329915.9 | 363578.7 | 388604.6 | 303193.9 | TRUE |
| 137141.2 | 140772.8 | 153735.5 | 111420.2 | 107525.1 | 175564.9 | 146349.6 | 99628.5  | TRUE |



|          |          |          |          |          |          |          |          |      |
|----------|----------|----------|----------|----------|----------|----------|----------|------|
| 108504.1 | 107730.6 | 160063.9 | 121166.1 | 109788.1 | 157286.1 | 129049.1 | 132087.8 | TRUE |
| 168140.4 | 167240.7 | 218168.6 | 169699.6 | 124326.9 | 238936.2 | 177557   | 163332.8 | TRUE |
| 181126.5 | 159739.8 | 216927.7 | 195833.3 | 247544.5 | 222658.8 | 180142.9 | 223849.6 | TRUE |
| 36097.6  | 41330.3  | 36840    | 24340    | 35513.1  | 29958.4  | 28635.1  | 32485.1  | TRUE |
| 204172.2 | 197450.9 | 167153.6 | 165689.7 | 164311.6 | 239440.2 | 217831.5 | 182204.4 | TRUE |
| 106160.8 | 89719    | 80586.4  | 86069.3  | 62965.4  | 116867.4 | 78495.4  | 91620.3  | TRUE |
| 179839.7 | 188321.1 | 233175   | 189031.9 | 121134.3 | 252551.9 | 161081.2 | 151021   | TRUE |
| 344184.3 | 296565.3 | 374575.3 | 293089.1 | 256954   | 378236.5 | 334893.7 | 264688.4 | TRUE |
| 105640.5 | 125146.5 | 127286.3 | 138112.9 | 124466.9 | 134047.9 | 136657.2 | 135973.9 | TRUE |
| 64439.6  | 66858.3  | 51481.1  | 58591.8  | 56611.1  | 72856.3  | 87913.7  | 66497.9  | TRUE |
| 262159.3 | 199194.5 | 268266.3 | 252569   | 387825.4 | 246211.1 | 207630   | 262609.3 | TRUE |
| 31452.7  | 35041.4  | 35369.4  | 54866.3  | 39946.7  | 42280.7  | 33101.1  | 40604.1  | TRUE |
| 231686.2 | 218153.4 | 188930.9 | 273715.3 | 267140.2 | 187194.8 | 203751.4 | 295058.7 | TRUE |
| 248487.7 | 235010.9 | 206012.9 | 209988   | 209796.5 | 295216   | 237690.9 | 232440.3 | TRUE |
| 542058   | 494939.1 | 358754.2 | 613257   | 634797.9 | 364993.3 | 537132.2 | 641654.4 | TRUE |
| 83876.9  | 60149.3  | 55278.4  | 73355.6  | 74403.9  | 64284.3  | 74234    | 84483.5  | TRUE |
| 52536.8  | 44422    | 47114.3  | 80790.7  | 60163.1  | 44215    | 53453.5  | 59622.4  | TRUE |
| 157983.9 | 150918.3 | 141688.8 | 155081.5 | 146426.6 | 147322.5 | 140734.7 | 157036.7 | TRUE |
| 385008   | 350813   | 292145.8 | 297554   | 297501.6 | 323469.7 | 391105   | 401055.7 | TRUE |
| 80753.7  | 75040    | 41713.5  | 67207.6  | 61831.9  | 55758.8  | 59964    | 59141.7  | TRUE |
| 61933.9  | 51767    | 47787.7  | 41117.5  | 61948.1  | 54057.3  | 62402.4  | 74085    | TRUE |
| 62230    | 56700.6  | 48203.8  | 98912.8  | 76754.2  | 74869.5  | 94816.1  | 100117   | TRUE |
| 59774.4  | 36655.3  | 63719.6  | 41496    | 49835.8  | 65649.3  | 54669    | 41984.1  | TRUE |
| 1282128  | 1026013  | 1071584  | 1324898  | 1196764  | 1163013  | 1130783  | 1230947  | TRUE |
| 341397   | 306369.9 | 292430.7 | 349961.2 | 351507.2 | 413740.7 | 339451.8 | 395455.7 | TRUE |
| 56004.4  | 53190.5  | 67660.8  | 61292    | 54017    | 48940.3  | 43024.4  | 55105.4  | TRUE |
| 77700.7  | 45653.8  | 56197.5  | 74142.3  | 47865.1  | 75762.8  | 65946.2  | 78709.4  | TRUE |
| 9585.6   | 10555.1  | 8540.8   | 11619.3  | 20471.8  | 27988.5  | 11269.6  | 28011    | TRUE |
| 47526.6  | 30204.8  | 34769.2  | 33661.8  | 50883.8  | 47197.8  | 46016.7  | 48123.6  | TRUE |
| 139817   | 168166.3 | 160414.5 | 169054.4 | 116103.5 | 187513.4 | 173397.1 | 164859.2 | TRUE |
| 172257.8 | 220913.6 | 179066.4 | 205178.2 | 151196.5 | 181130.2 | 238209   | 183103.7 | TRUE |
| 93747.5  | 122343.5 | 116029.2 | 110449   | 90093.4  | 104910.2 | 137886.1 | 126119.2 | TRUE |
| 1590829  | 1480178  | 1585173  | 1513092  | 1577593  | 1605453  | 1552861  | 1595791  | TRUE |
| 297463.4 | 310066.5 | 264485.6 | 267246.2 | 267635.7 | 271898.4 | 266493.9 | 274362.2 | TRUE |
| 430845   | 384270   | 380683.5 | 416932.6 | 429047.9 | 448360.8 | 416132.1 | 416954   | TRUE |
| 428279.8 | 354644   | 408293   | 524451.1 | 461306.3 | 443150.1 | 440968   | 488497   | TRUE |
| 138271.7 | 126633.4 | 149383.7 | 156482.4 | 143733.7 | 161000.8 | 125302   | 158804.1 | TRUE |
| 140576.6 | 130799.3 | 94835.1  | 122148.2 | 126688.2 | 125384.1 | 138633.3 | 132146.6 | TRUE |
| 376809.7 | 412643.8 | 396809.8 | 467253.2 | 433368.8 | 496904   | 501819.2 | 514232.5 | TRUE |
| 85544.5  | 98653.4  | 95389.6  | 93434.5  | 123394.5 | 112160.2 | 111412   | 132058.1 | TRUE |

|          |          |          |          |          |          |          |          |      |
|----------|----------|----------|----------|----------|----------|----------|----------|------|
| 120501.5 | 138846.8 | 99655.5  | 156762.5 | 140500.1 | 91335    | 81535.2  | 105604.6 | TRUE |
| 88236.4  | 63367.1  | 59685.6  | 77623.5  | 64632    | 96845    | 112232.9 | 106664   | TRUE |
| 295767.7 | 200780   | 250688.5 | 322665.6 | 298006.4 | 249974.1 | 229279.5 | 276200.6 | TRUE |
| 496735.4 | 474724.1 | 594718.9 | 495006.3 | 573508.5 | 556139.1 | 504528.4 | 533991.2 | TRUE |
| 537530.5 | 510370.8 | 479397.2 | 444331.1 | 562196.7 | 481171.4 | 539886.2 | 473736.2 | TRUE |
| 339703.5 | 299500.7 | 415126.2 | 328288.1 | 260946.4 | 466238.4 | 291405.2 | 269338.7 | TRUE |
| 45294.1  | 40270.2  | 52477.4  | 44271.6  | 43654.1  | 61056.9  | 38317.3  | 38023.6  | TRUE |
| 119415.9 | 100252   | 119166.2 | 114462.2 | 132641.4 | 138895.4 | 119387.7 | 137087.4 | TRUE |
| 185133.6 | 196591.6 | 194668.9 | 199470.6 | 199913.1 | 187570.9 | 202628.9 | 205365.9 | TRUE |
| 339564.3 | 333125.2 | 324070.7 | 407425.1 | 384121.4 | 336124.4 | 360266.8 | 419350.7 | TRUE |
| 356451.6 | 383911.6 | 381031   | 431206   | 330520.6 | 416989.5 | 426653   | 320739   | TRUE |
| 388045.5 | 431091.2 | 416812.6 | 408079.5 | 403342.4 | 436184.9 | 416447.7 | 451027.9 | TRUE |
| 39583.7  | 34663    | 35268.3  | 22929.9  | 42081    | 58746.3  | 44959.7  | 57690    | TRUE |
| 127642.9 | 122353.6 | 107136.2 | 144185.1 | 143878.8 | 154989.6 | 141167   | 151170.9 | TRUE |
| 56480.3  | 56534.9  | 51902.6  | 58146.9  | 67921.1  | 97262.9  | 90564.6  | 65022.3  | TRUE |
| 248396   | 241339.3 | 251631.1 | 248752.8 | 270802   | 274621.9 | 237561.6 | 291534.5 | TRUE |
| 26272.6  | 11910.8  | 40750.7  | 48410.7  | 45168.5  | 43340.1  | 49402.5  | 54842.9  | TRUE |
| 74097.1  | 93231.2  | 73921.4  | 88443.5  | 90670.6  | 59112.3  | 81286    | 62628.3  | TRUE |
| 45665.9  | 64135    | 59391    | 42541.7  | 61407.2  | 49333.4  | 58623.9  | 38135.5  | TRUE |
| 60494.5  | 51400.9  | 70261.3  | 65326    | 59229.5  | 48419.2  | 62646    | 60376.6  | TRUE |
| 64013.2  | 42353.8  | 47405.9  | 57664.4  | 62292    | 67048    | 73376.6  | 61442    | TRUE |
| 64412.3  | 67731.1  | 48924.9  | 84024.1  | 77898    | 63282.5  | 65355.3  | 69726.1  | TRUE |
| 46200.4  | 35945    | 33341.9  | 46278.3  | 29267    | 46325.7  | 49486.3  | 54671    | TRUE |
| 56337    | 55475.1  | 40514.2  | 47935.2  | 57550.5  | 45307.6  | 47550    | 42984.1  | TRUE |
| 99536.7  | 54945.3  | 73912.9  | 73014.2  | 57421.1  | 132193.9 | 77207.5  | 74387.3  | TRUE |
| 71213.3  | 49105.6  | 71968.2  | 70338.4  | 59633.2  | 49478.7  | 58790.2  | 62065.5  | TRUE |
| 403410.6 | 405229   | 394532.5 | 447323.1 | 403116.5 | 398679   | 362715.8 | 407588.3 | TRUE |
| 265231.6 | 223652.1 | 290837   | 277018.1 | 258132.6 | 277410.6 | 268067.1 | 246623.5 | TRUE |
| 172323.7 | 123626   | 129136.9 | 152944.7 | 156670.4 | 133848   | 149547.1 | 130234.2 | TRUE |
| 382985.2 | 323100.5 | 320053   | 340335   | 371052.9 | 370577.1 | 362824.3 | 375602.6 | TRUE |
| 69709.2  | 72680.4  | 64801    | 73300.9  | 70598.2  | 87449.8  | 53972.3  | 73302.9  | TRUE |
| 33586.9  | 32187.5  | 27703.3  | 25573.3  | 36827.7  | 11684.6  | 28989.6  | 36346.7  | TRUE |
| 1345438  | 1183301  | 1089269  | 1545094  | 1303395  | 1181149  | 1240538  | 1280917  | TRUE |
| 1789075  | 1597460  | 1517465  | 1584552  | 1647317  | 1911917  | 1714144  | 1906465  | TRUE |
| 94114.6  | 74188.7  | 87428.6  | 95269.6  | 100059.4 | 84873.2  | 89200.8  | 92052.7  | TRUE |
| 43742.8  | 39117.3  | 47945.3  | 47625.2  | 61452.9  | 40612.3  | 48183.7  | 56332.3  | TRUE |
| 165110.6 | 151961.2 | 148929.3 | 189799.6 | 182369.6 | 178255.1 | 163591.3 | 176745.2 | TRUE |
| 172835.3 | 153246.7 | 182005.1 | 180273.8 | 151520.6 | 177422.5 | 156967.2 | 168021.7 | TRUE |

|          |          |          |          |          |          |          |          |      |
|----------|----------|----------|----------|----------|----------|----------|----------|------|
| 62798.7  | 56095.6  | 62364.6  | 69516    | 45082    | 63163.2  | 54535.2  | 58615.6  | TRUE |
| 199075   | 211483.6 | 162044.4 | 193669.7 | 185839.3 | 206610.3 | 167568.2 | 192644.2 | TRUE |
| 166761.2 | 163411.8 | 167123.8 | 170435.7 | 198105.3 | 169416.5 | 172741.9 | 180955.8 | TRUE |
| 182312.5 | 147549.1 | 175494   | 159470.3 | 182161.5 | 162119.2 | 160063.8 | 182869   | TRUE |
| 257792   | 253460.3 | 248876.9 | 247418.1 | 258459.1 | 290440.4 | 223423.5 | 299784.4 | TRUE |
| 991803.2 | 942937.6 | 1037821  | 1009573  | 893667.9 | 997280.2 | 975184.9 | 960060.9 | TRUE |
| 184303.9 | 185081.3 | 191952.7 | 205952.8 | 223008.7 | 186691.4 | 210160.2 | 221817.8 | TRUE |
| 811851.5 | 773360.9 | 665873   | 809219.3 | 920002.8 | 716231   | 847153   | 939752.5 | TRUE |
| 592256.5 | 563739.3 | 579042.8 | 562889.4 | 474095.5 | 585738.9 | 621123.9 | 629676.2 | TRUE |
| 24023.1  | 36431.7  | 31328.9  | 37961.5  | 27069.1  | 28685.8  | 35932.7  | 36143.4  | TRUE |
| 62715.2  | 56944    | 53829.4  | 52189.3  | 64331.9  | 50732.3  | 56210.8  | 59650.6  | TRUE |
| 42008.9  | 42455.7  | 42901.7  | 30261.8  | 39090.1  | 42721.7  | 36491.2  | 47963.7  | TRUE |
| 30019.2  | 28001.7  | 23426.6  | 67774.9  | 52878.8  | 33305.9  | 46855.5  | 36544.7  | TRUE |
| 31566.9  | 28333.1  | 40841.1  | 36882.9  | 32177.1  | 29535.2  | 32832.3  | 35704.3  | TRUE |
| 285005.1 | 270262.5 | 351329.9 | 287839.8 | 269185.9 | 300351.6 | 326085.8 | 283936.2 | TRUE |
| 96247.1  | 82018.6  | 94379    | 88605.8  | 85049.6  | 101922.8 | 85126.7  | 86280.2  | TRUE |
| 25583.8  | 35880.3  | 36272.3  | 43707.1  | 39811.1  | 42963.5  | 32651.5  | 33280.6  | TRUE |
|          |          |          |          |          |          |          |          |      |
| 286540.4 | 271373.9 | 292959.4 | 294216.9 | 304965.3 | 281353.2 | 282764.7 | 306044.2 | TRUE |
| 544833.9 | 516202.9 | 548180.6 | 533174.6 | 544066.8 | 536641.5 | 545709.6 | 537045   | TRUE |
| 231843.1 | 269573.1 | 256642.7 | 274620.6 | 230791.8 | 263847   | 277511.4 | 257678.8 | TRUE |
|          |          |          |          |          |          |          |          |      |
| 125113.2 | 133719.8 | 134704   | 77882.2  | 104442.8 | 130260.5 | 144641.7 | 159485.5 | TRUE |
| 496674   | 400594.7 | 368464.7 | 465088.9 | 441400.8 | 487524.8 | 537009.4 | 566557.2 | TRUE |
| 818216.3 | 830681.6 | 917438.6 | 772268.7 | 840774.5 | 807672.3 | 811631.6 | 712082   | TRUE |
| 114909.9 | 123809.1 | 107403.5 | 126647.1 | 117171.8 | 121508.6 | 150310.3 | 122386   | TRUE |
| 40591.9  | 40653.2  | 30547.2  | 38062.4  | 32791.9  | 23686.6  | 39624.6  | 44548.7  | TRUE |
| 49249.3  | 36595.4  | 28314    | 32117.1  | 34268.8  | 32474.1  | 37851.8  | 34164.1  | TRUE |
| 87601.4  | 103120.9 | 112782.9 | 95912.7  | 92916.8  | 138875.5 | 117506.5 | 74973.5  | TRUE |
| 57981.1  | 66609    | 65258.5  | 69326.4  | 60961.9  | 59200.2  | 61172    | 75672.6  | TRUE |
| 71412.2  | 78718.4  | 76399.8  | 59910.9  | 92167.6  | 76960.9  | 85981.2  | 80346.8  | TRUE |
| 115316.6 | 107314   | 99276.5  | 100078   | 102809.6 | 113825.7 | 106635.7 | 92894.7  | TRUE |
| 370661.7 | 311062.1 | 241815.3 | 345283.8 | 316693.9 | 390038.4 | 416788.9 | 455362.9 | TRUE |
| 582447.3 | 628697.1 | 1145182  | 619068.1 | 628699   | 703686.3 | 545504.5 | 651432.9 | TRUE |
| 142284.1 | 141640.4 | 174557.9 | 151411.7 | 162363.8 | 174978.2 | 146102   | 163649.7 | TRUE |
| 896835.9 | 1121894  | 1357345  | 927900.8 | 1060854  | 1017518  | 1031043  | 1010749  | TRUE |
| 231281.9 | 235040.4 | 250167.8 | 245094.3 | 293465.4 | 279932   | 279663.3 | 261187   | TRUE |
| 139728.1 | 148060.1 | 123275.5 | 107801.5 | 142716.9 | 82417.9  | 93030    | 76448.9  | TRUE |
| 112574   | 117316.3 | 98493.6  | 82880.5  | 113606.4 | 92531.1  | 91574.8  | 115993.2 | TRUE |
| 624885.6 | 703248.1 | 542424.2 | 601711.9 | 581750.1 | 624649.2 | 644342.8 | 681624.9 | TRUE |
| 165649.4 | 167355.2 | 120716.2 | 172541.8 | 183557.6 | 167410.2 | 184154.6 | 179276.8 | TRUE |
| 254591.7 | 213149.6 | 174011.4 | 218350.2 | 238146   | 257636.8 | 283048.2 | 286070.9 | TRUE |
| 128276.6 | 74392.2  | 109472.2 | 103356.6 | 103006.6 | 161897.7 | 118781.4 | 120588.3 | TRUE |
| 128339.7 | 109000.5 | 117725.9 | 74413.4  | 111501.9 | 113744   | 138066.6 | 89242.7  | TRUE |
| 10027.9  | 8273.3   | 8283.5   | 7827.1   | 12018.4  | 23753.8  | 17576.6  | 15558.1  | TRUE |

|          |          |          |          |          |          |          |          |      |
|----------|----------|----------|----------|----------|----------|----------|----------|------|
| 16803.3  | 16243.3  | 17576.8  | 24039.3  | 6133.7   | 14763.2  | 7725.6   | 8780.8   | TRUE |
| 23075.9  | 7948.2   | 22839.2  | 12157    | 25083    | 31042.6  | 14168.6  | 31729.2  | TRUE |
| 23072.5  | 9729.2   | 32861.5  | 6121     | 23874.5  | 37028    | 15118.1  | 25033.4  | TRUE |
| 146133.8 | 105929.3 | 151686.5 | 145844.5 | 122980.9 | 144572.6 | 145011.8 | 179862.2 | TRUE |
| 280250.4 | 411372.7 | 156651.5 | 277274   | 345348.3 | 163008.1 | 409317.3 | 372934.2 | TRUE |
| 321642.4 | 348248.6 | 421505.3 | 387344.6 | 198467   | 278578.7 | 380325.9 | 317519.6 | TRUE |
| 145880   | 171114.8 | 194231.3 | 189943.7 | 105498.6 | 133605.2 | 160276.2 | 168300.6 | TRUE |
| 39747.3  | 43668.5  | 36580.8  | 40304    | 45307.3  | 39744.2  | 45780.5  | 44471.9  | TRUE |
| 17702.8  | 20968.4  | 28041.2  | 20602.3  | 15404.6  | 18852.5  | 20875.3  | 20113.1  | TRUE |
| 47567.5  | 60639.3  | 50516.7  | 33069.9  | 42789.7  | 37732.7  | 48284    | 43224.6  | TRUE |
| 357610.8 | 390542.1 | 275802.8 | 275709.1 | 277335.9 | 290565.3 | 378771.2 | 308564.4 | TRUE |
| 748122.1 | 999920.7 | 732693.3 | 742064.2 | 777868.3 | 606127.2 | 1066798  | 586717.5 | TRUE |
| 381030.2 | 437055   | 391227   | 354872.2 | 383061.8 | 327979.8 | 412302.6 | 348454.6 | TRUE |
| 114000.3 | 127961.5 | 102793.4 | 114330.7 | 103538.7 | 109947.2 | 128520.8 | 116116.2 | TRUE |
| 181798.6 | 207786.9 | 214513.8 | 236656.9 | 205190.3 | 186986.7 | 180246.6 | 169849.8 | TRUE |
| 35781.3  | 23520.8  | 22378.2  | 26004.2  | 44278.4  | 40832    | 44011.8  | 60132.8  | TRUE |
| 47488.3  | 46483.7  | 37193.6  | 25992.6  | 39591.8  | 40087.2  | 47998.1  | 37294.6  | TRUE |
| 37740.9  | 53380.6  | 33117.8  | 37895.4  | 42711.6  | 37378.2  | 44844.5  | 48194.5  | TRUE |
| 421133.9 | 455433.4 | 352887.1 | 349070.8 | 409449.3 | 337412.6 | 505958.3 | 386194.7 | TRUE |
| 89320.2  | 112284.3 | 102678.6 | 103341.8 | 82853.7  | 73256    | 119389.8 | 83306.1  | TRUE |
| 543059   | 609376.7 | 628121.7 | 557924.8 | 619430.8 | 506566.5 | 662329.2 | 621995.2 | TRUE |
| 180417.3 | 175667.2 | 250224.4 | 227644.5 | 205412.1 | 198373.3 | 174904.9 | 218058.3 | TRUE |
| 113997.8 | 100700.3 | 53619.8  | 79052.5  | 85011.5  | 100847.4 | 118690.1 | 99177    | TRUE |
| 175271.6 | 120282.7 | 151831.7 | 162289.8 | 164545.2 | 140959.2 | 156028.3 | 140575.9 | TRUE |
| 97731.2  | 79168    | 89558    | 96093.6  | 76668.1  | 88164.5  | 115606.5 | 88327.8  | TRUE |
| 58980    | 61045.1  | 64426.2  | 41895.8  | 47520.7  | 53568.5  | 69312.9  | 62587.3  | TRUE |
| 50860.7  | 50009.2  | 60036.8  | 45873.7  | 31775.7  | 52198.6  | 49709.9  | 42530.5  | TRUE |
| 154708.7 | 185187.1 | 163349.8 | 147463.2 | 158848.8 | 175579.6 | 196667.2 | 165228.6 | TRUE |
| 46236.4  | 64088.5  | 50439.7  | 68645.9  | 43350.7  | 55160    | 58272.7  | 41859.3  | TRUE |
| 76914.5  | 64011    | 75673.9  | 79891.1  | 67800.5  | 98767.9  | 64639.4  | 71567.5  | TRUE |
| 159987.5 | 180632.3 | 138509.8 | 175065.7 | 123883   | 169124.8 | 193365.9 | 154146.8 | TRUE |
| 105229.7 | 113565.6 | 99565.6  | 97371.6  | 114258.7 | 106608.4 | 126785.5 | 133604.3 | TRUE |
| 152377.2 | 157437.4 | 204831.7 | 125072.7 | 122129.7 | 137686.4 | 163640.7 | 130776   | TRUE |
| 45466.8  | 47009.7  | 55278.7  | 64857.7  | 40343.8  | 55698.2  | 30238.7  | 38883.9  | TRUE |
| 170247.5 | 168385.3 | 205980.3 | 201948   | 145959   | 176522.7 | 181705.5 | 187780.3 | TRUE |
| 426253.9 | 342794.9 | 468136.3 | 391710.2 | 362830.5 | 514344.3 | 340618.3 | 388269.8 | TRUE |
| 168672.9 | 199779.3 | 172192.6 | 235650.5 | 174951.1 | 157018   | 232440.1 | 192089   | TRUE |
| 151525.6 | 156481.2 | 156200   | 185382.3 | 137850.5 | 146320.8 | 184768   | 143677.2 | TRUE |
| 134297.5 | 189692.4 | 112469.7 | 139394.6 | 172018.4 | 93706.1  | 223525.1 | 187894.5 | TRUE |
| 304806.3 | 353681.2 | 240501   | 270899.2 | 311950.1 | 263172.5 | 338545.2 | 324631.7 | TRUE |

|          |          |          |          |          |          |          |          |      |
|----------|----------|----------|----------|----------|----------|----------|----------|------|
| 176828.4 | 174668.4 | 129808.2 | 125325.9 | 169302   | 132649.3 | 174333.7 | 202744.9 | TRUE |
| 49969    | 77608.8  | 60032    | 47507.5  | 54654    | 34692.9  | 51599    | 47040.7  | TRUE |
| 97410.5  | 78689.5  | 90769.2  | 115678   | 101779.1 | 124674.3 | 122367.8 | 106598.6 | TRUE |
| 106837.1 | 98969.5  | 74700.7  | 103297.5 | 119343.2 | 129095.3 | 121839.7 | 173914.6 | TRUE |
| 33438.9  | 35368.3  | 37779.1  | 29635.9  | 40619.8  | 44765.1  | 49034.2  | 61326.8  | TRUE |
| 245031.7 | 231360.3 | 194181.4 | 260248.4 | 265130.1 | 196094.1 | 284991   | 278216   | TRUE |
| 63439.7  | 59377.7  | 63231.2  | 68564.9  | 52050.9  | 70949.2  | 75733.2  | 64173.5  | TRUE |
| 224259.8 | 263827.8 | 246399.9 | 286995.6 | 193050.3 | 227350   | 270817.9 | 265983.9 | TRUE |
| 54096.1  | 52581.1  | 51470.2  | 72754.6  | 60513.5  | 56476    | 45894.2  | 52565.4  | TRUE |
| 41805.4  | 39500.9  | 43312.1  | 29719.2  | 40368.8  | 37072.7  | 34037.9  | 33923.1  | TRUE |
| 540446.6 | 618077.6 | 638887.5 | 377340.6 | 361496.1 | 720423.7 | 597554   | 408092   | TRUE |
| 104684.2 | 76004.1  | 127056.9 | 136935.7 | 113875.6 | 105339.6 | 95027.6  | 109296.2 | TRUE |
| 255584.1 | 217397.4 | 282711.5 | 294272.1 | 289024.6 | 184060.2 | 232329.6 | 218247.4 | TRUE |
| 77338.7  | 109650.1 | 85797.7  | 55712.5  | 63515.9  | 82744.7  | 72960.8  | 65544    | TRUE |
| 23863.4  | 19930.5  | 32912.7  | 11735.4  | 24777.5  | 27349.5  | 34635.6  | 10279.5  | TRUE |
| 131410.6 | 127482   | 111610.3 | 145237   | 136596.4 | 141430   | 154535.8 | 155099.4 | TRUE |
| 21313.5  | 27171.4  | 25327.3  | 32886.6  | 25763.6  | 24083    | 22136.6  | 33285.8  | TRUE |
| 46629.4  | 42602.3  | 30662.8  | 40011.5  | 38392.1  | 38313.9  | 43442.6  | 40972.3  | TRUE |
| 23989.8  | 21933.7  | 22086.3  | 21672    | 27101.3  | 23402.6  | 22496.5  | 7574.9   | TRUE |
| 393853   | 448907.5 | 512475.6 | 331885.5 | 355407.4 | 534768.6 | 557805.5 | 301829.7 | TRUE |
| 195812.8 | 224428.2 | 248587.3 | 168193.2 | 185171.2 | 258324   | 259757.2 | 204769.8 | TRUE |
| 101716.4 | 82328.3  | 76153.1  | 61760.1  | 68224.3  | 74994.3  | 76157.7  | 53054    | TRUE |
| 40297.5  | 37240    | 62695.8  | 48607    | 43049.9  | 63193.2  | 67455.9  | 49051.8  | TRUE |
| 63155.1  | 111343.1 | 98590.6  | 78168.9  | 49949.1  | 97496    | 122711.4 | 60022.7  | TRUE |
| 256736   | 305768.9 | 260383.8 | 234715.6 | 236039.3 | 292046   | 331951.2 | 226029.1 | TRUE |
| 190316.4 | 138647.9 | 189206.8 | 242035.4 | 211938.4 | 126873.1 | 130558.3 | 142296.8 | TRUE |
| 74687.2  | 54291.6  | 61944    | 60100.2  | 77320.2  | 95846.2  | 78598.2  | 81345.9  | TRUE |
| 20552.4  | 9518.5   | 13302.3  | 12912.8  | 27705.1  | 19183    | 11123.7  | 15598.9  | TRUE |
| 185768.7 | 120371.1 | 227395.9 | 173286.6 | 110444.4 | 234877.8 | 139699.2 | 125845.1 | TRUE |
| 25064    | 37153.3  | 50407.7  | 33606    | 22599.7  | 66067.2  | 13963.9  | 28579.2  | TRUE |
| 85601.7  | 75636.3  | 108211.4 | 92263    | 52157.4  | 112404.5 | 60317.1  | 53943.7  | TRUE |
| 302342.3 | 144989.4 | 211782.5 | 212779.8 | 399347.5 | 334833.5 | 173238.4 | 341909.4 | TRUE |
| 83422.8  | 74893.1  | 92243.9  | 70451.8  | 69185    | 90796.9  | 59007    | 45350.7  | TRUE |
| 203180.3 | 131676.1 | 159725.6 | 187695.6 | 290527   | 216755.3 | 127657.2 | 238630.1 | TRUE |
| 15464.5  | 22928.4  | 30606.4  | 6588.9   | 28504.9  | 22022.7  | 19342.7  | 13398.9  | TRUE |
| 78707    | 68827.4  | 103198.6 | 86760.1  | 50763.2  | 130855.9 | 55631.8  | 67671.9  | TRUE |
| 37593.5  | 27545.3  | 44628.9  | 38650.8  | 18848.6  | 32642.2  | 28650.3  | 20666.1  | TRUE |

|          |          |          |          |          |          |          |          |      |
|----------|----------|----------|----------|----------|----------|----------|----------|------|
| 159298.6 | 135915.4 | 133983.9 | 129082.7 | 118615.1 | 141709   | 135638.2 | 142306.7 | TRUE |
| 119811.3 | 117575   | 110778.5 | 152798.1 | 137845.9 | 145241.6 | 131873.3 | 137848.8 | TRUE |
| 303507.7 | 254779.5 | 278573.8 | 260921.3 | 260597.7 | 295784.3 | 259176.2 | 276725.9 | TRUE |
| 49643    | 27849.7  | 23972.2  | 52381.3  | 49574.8  | 31333.6  | 41169.1  | 49593.7  | TRUE |
| 112641.7 | 108699.7 | 120835.3 | 158332.4 | 163646.2 | 123635.4 | 125284.9 | 161403.2 | TRUE |
| 23324.2  | 19952.8  | 23978.3  | 30114.8  | 30242.3  | 27522.9  | 34927    | 32406    | TRUE |
| 110595   | 119161   | 142447.6 | 150198.2 | 103796.3 | 115566.3 | 108554.8 | 92692.4  | TRUE |
| 156803.7 | 108580.8 | 103942.8 | 120555.8 | 147333.6 | 131478.2 | 134201.9 | 140288.3 | TRUE |
| 32704.8  | 25734.4  | 38587.7  | 34461.1  | 36497.1  | 50202.4  | 31043.1  | 34000.8  | TRUE |
| 89295.2  | 106227.8 | 81955.8  | 97228.7  | 101453.8 | 89770.3  | 90678.1  | 101359.2 | TRUE |
| 997115.3 | 1005445  | 937783.4 | 990467.8 | 1026631  | 938922   | 1032893  | 1027850  | TRUE |
| 14876.4  | 11571.8  | 5878.8   | 13357    | 29253.6  | 14570.4  | 30460    | 24002.4  | TRUE |
| 62545.1  | 81493.9  | 92421.8  | 99846.8  | 67660.4  | 72209    | 84096.9  | 85362.8  | TRUE |
| 56520.6  | 47278.9  | 31321.5  | 49319.7  | 52780.1  | 40565.7  | 34063.2  | 36012.4  | TRUE |
| 185700.1 | 195643.8 | 193059.1 | 224229.7 | 235754   | 216020.3 | 196159.6 | 250349.2 | TRUE |
| 82560.4  | 49946.8  | 113360.5 | 97368.7  | 85309.3  | 124588.1 | 51767.3  | 94349.6  | TRUE |
| 39351.3  | 26709.1  | 56744.3  | 47537.3  | 30275    | 74635.6  | 31722.6  | 45073.3  | TRUE |
| 357343.9 | 255073.9 | 521516.2 | 397502.4 | 319741.7 | 539856.8 | 298900.7 | 314206.6 | TRUE |
| 276593.8 | 200343.1 | 310885   | 296597.1 | 222646.2 | 319707.9 | 162064.3 | 229819.8 | TRUE |
| 365470.5 | 355980   | 234404.9 | 268510.6 | 436798.1 | 393909.8 | 340710.5 | 397730.8 | TRUE |
| 491998   | 488303.2 | 341803.6 | 350232.9 | 599835.2 | 556729.6 | 451294.9 | 519851.6 | TRUE |
| 17212    | 30138.4  | 9810.3   | 8991.9   | 37304.3  | 18255.5  | 24294.1  | 9618.2   | TRUE |
| 97920.4  | 124320.3 | 109654.3 | 85255.7  | 113356.5 | 117278.5 | 104388.5 | 116915.4 | TRUE |
| 136520.5 | 51423.3  | 194983.6 | 149051.8 | 115247.2 | 200607.3 | 73109.7  | 104780.8 | TRUE |
| 63134.9  | 32558.4  | 97077.4  | 94941.1  | 69241.9  | 87923.9  | 40247.3  | 63288.6  | TRUE |
| 348711.6 | 297759.8 | 437706   | 383947.5 | 328461   | 477174.6 | 280046.6 | 327593.6 | TRUE |
| 601934.5 | 541568.7 | 426660.9 | 427558.9 | 797524.8 | 714905.5 | 571089.3 | 701863.6 | TRUE |
| 60229.7  | 52731.2  | 79503.3  | 50666.2  | 58605.2  | 66013.9  | 34361.7  | 57264    | TRUE |
| 1006503  | 863995.9 | 699524.4 | 740394.1 | 1345893  | 1113570  | 894713.9 | 1100559  | TRUE |
| 305280.5 | 255643.7 | 209546.3 | 247975.4 | 372977.7 | 344098.3 | 362093.4 | 331274.2 | TRUE |
| 76596.9  | 60821.8  | 86380.4  | 41357.6  | 55811.3  | 75680.8  | 60463.1  | 54155.9  | TRUE |
| 33002.5  | 44054.2  | 57275.1  | 21323.3  | 33433.6  | 48287.8  | 29826.4  | 39199.4  | TRUE |
| 20966.2  | 30838    | 42174.4  | 9667.4   | 11817.6  | 38854.6  | 14255.4  | 11728.3  | TRUE |
| 205320.3 | 173371.8 | 190496.6 | 240880.3 | 243968.6 | 175331.3 | 157321.2 | 207956.6 | TRUE |
| 58773.9  | 58540.3  | 62466.6  | 47162.7  | 51246    | 87711.2  | 55763.9  | 58201.9  | TRUE |
| 211961.1 | 215995.4 | 191986.7 | 216095.2 | 186737.6 | 268755.3 | 230053.3 | 204699.2 | TRUE |
| 60043.7  | 72200.9  | 104086.2 | 39785.5  | 45839    | 91936.4  | 49450.5  | 43197.3  | TRUE |
| 294622   | 311544.4 | 447222.1 | 269439.7 | 240522.8 | 480746.7 | 319202   | 243178.6 | TRUE |
| 32354.8  | 28178    | 30226.7  | 30157.2  | 38796.6  | 24693.9  | 34330.1  | 38358.9  | TRUE |
| 31156.3  | 28507.8  | 47258.8  | 30214.2  | 24780.5  | 44332.8  | 44627.6  | 36101.7  | TRUE |
| 48555.3  | 31926.3  | 64771.2  | 52149.4  | 74170.3  | 25657.8  | 42094.6  | 25373.7  | TRUE |
| 32672.3  | 35212.5  | 50185.9  | 35007    | 46468    | 10235.9  | 28475.7  | 13576.2  | TRUE |

|          |          |          |          |          |          |          |          |      |
|----------|----------|----------|----------|----------|----------|----------|----------|------|
| 242434.6 | 150319.8 | 282419.9 | 286802.5 | 382234.5 | 172493.1 | 150167.8 | 164192   | TRUE |
| 73177.4  | 58083.7  | 132736   | 63093    | 55836.7  | 159406.8 | 85767.9  | 65020    | TRUE |
| 121969.2 | 117843.9 | 190134.5 | 96509.1  | 131128.7 | 184038.8 | 125821.1 | 104494.2 | TRUE |
| 133593.4 | 131230.8 | 152539.4 | 140626.7 | 137020.1 | 131815.7 | 121827.1 | 141058.1 | TRUE |
| 47890.5  | 45712.8  | 57118.4  | 26634.9  | 38547.8  | 28775.3  | 57922.3  | 44209    | TRUE |
| 94568.5  | 185923.6 | 96648.6  | 120527.7 | 109645.7 | 93363.8  | 93390.5  | 94845.7  | TRUE |
| 92816    | 110436.6 | 89491.1  | 80130.9  | 107444.9 | 98564.2  | 95684.2  | 90739    | TRUE |
| 191614.9 | 188695.4 | 212099.3 | 180266.2 | 190315.7 | 201502.4 | 222065.7 | 187395   | TRUE |
| 108622   | 113388.2 | 90523.1  | 93682.7  | 93676.3  | 122845.1 | 120384.8 | 103629.8 | TRUE |
| 40806.5  | 27201.3  | 33139.3  | 34151.5  | 34824.5  | 45759    | 26983.6  | 36005.2  | TRUE |
| 39393    | 51053.8  | 47636.5  | 44776.8  | 43795.3  | 46695.2  | 46811.2  | 46977    | TRUE |
| 328092.6 | 295557.7 | 356724.2 | 392504.8 | 394695.1 | 353162.3 | 337186.2 | 338684.6 | TRUE |
| 77002.4  | 71804.2  | 75690.2  | 73857    | 71799.5  | 55159.9  | 62533.6  | 63470.4  | TRUE |
| 239448.9 | 274537.5 | 239206.6 | 255810.1 | 242360.9 | 278107.3 | 272010.9 | 283705.5 | TRUE |
| 39319.3  | 42036.9  | 37247.2  | 48635.4  | 46385.2  | 36347.9  | 48400.3  | 48449.2  | TRUE |
| 43374.4  | 38607.1  | 35103.9  | 35176.8  | 37109.9  | 38304.5  | 54337.3  | 26897.5  | TRUE |
| 69848.9  | 73751.4  | 61299.7  | 90390.7  | 60155.4  | 65711.6  | 77598.1  | 62451.4  | TRUE |
| 95959.9  | 111132.8 | 71580.3  | 64561.4  | 81352.9  | 105384.1 | 132037.2 | 101542.9 | TRUE |
| 71455.5  | 52440.4  | 76565.7  | 67192.5  | 109398.1 | 89082.7  | 62359.5  | 87835.4  | TRUE |
| 103281.5 | 93175.6  | 77246.9  | 94494.4  | 89694.4  | 91262.2  | 112913   | 105928.7 | TRUE |
| 27165.8  | 35838.9  | 32176.3  | 25883.2  | 33339.6  | 33648.3  | 31524.9  | 50339.1  | TRUE |
| 46283.9  | 44285.3  | 37038.2  | 48945.9  | 37522.3  | 37428.1  | 39836.3  | 50039.5  | TRUE |
| 176425.9 | 176447.6 | 218868.6 | 196203.9 | 174728.4 | 244242.9 | 212108   | 239297.1 | TRUE |
| 64525.8  | 67206.9  | 67128.1  | 85538.5  | 72137.7  | 63696.9  | 70838.2  | 58836.2  | TRUE |
| 173133.6 | 127052.1 | 170522.1 | 116587.5 | 124020.7 | 156759.4 | 150420.2 | 141064.1 | TRUE |
| 15291.8  | 17621.6  | 6362     | 10325.6  | 15069.1  | 12242.1  | 18131    | 18963.9  | TRUE |
| 101607.8 | 105671.5 | 110410.9 | 93477.7  | 119293.2 | 104842.8 | 112036.2 | 110752.1 | TRUE |
| 94289.3  | 75584.4  | 64593.4  | 67235.5  | 54422.1  | 55397.6  | 70964.5  | 75526.3  | TRUE |
| 193709.7 | 150250.8 | 173139.6 | 231390   | 246229.2 | 200419.4 | 201955.3 | 253672.4 | TRUE |
| 193716.4 | 157039.9 | 170901.8 | 217356.8 | 231509.5 | 181772.8 | 162371.7 | 217869.5 | TRUE |
| 228928.4 | 198915.2 | 192080.3 | 253782.8 | 235103   | 242796.3 | 215282.9 | 254527.7 | TRUE |
| 611635.4 | 602247.3 | 481718.3 | 602586.3 | 537012.6 | 574034.6 | 664212.9 | 558016.8 | TRUE |
| 594031.5 | 670770.1 | 910879.2 | 863093.9 | 870368.4 | 961820.5 | 908329   | 824315.8 | TRUE |
| 10601.9  | 9108.7   | 16160.3  | 12043.8  | 21267.5  | 32258.5  | 28360.8  | 16231.2  | TRUE |
| 1567198  | 1738591  | 906840.5 | 2154166  | 2479503  | 998728.2 | 2001294  | 2352024  | TRUE |
| 1491076  | 1724070  | 810541.3 | 2048620  | 2256441  | 797018.3 | 1979026  | 2197631  | TRUE |
| 124875.2 | 143745.9 | 111822.1 | 182857.1 | 207178   | 116406.3 | 183023.3 | 199169.3 | TRUE |
| 52899.7  | 45685.8  | 33692.2  | 52381.7  | 47836.4  | 33328    | 48603.4  | 61029.3  | TRUE |
| 35178.6  | 68573.3  | 36084.6  | 48610.8  | 86721.3  | 23189.8  | 34686.9  | 25023.8  | TRUE |
| 44516.8  | 70079.1  | 46851.8  | 52703.1  | 64239.2  | 56245.6  | 43786.3  | 75670.7  | TRUE |
| 6053916  | 7920123  | 8120697  | 7551584  | 3919537  | 8056628  | 9014049  | 7687161  | TRUE |
| 981818.7 | 1178277  | 1093899  | 1175752  | 766867.3 | 1070801  | 1197910  | 1137493  | TRUE |
| 69932.6  | 138795.7 | 100913   | 121907.9 | 102875.7 | 58890.7  | 59372.2  | 58753    | TRUE |
| 53890.9  | 108302.4 | 54397.8  | 75699.7  | 67103.6  | 49325.9  | 44710.9  | 55078.2  | TRUE |

|          |          |          |          |          |          |          |          |      |
|----------|----------|----------|----------|----------|----------|----------|----------|------|
| 105574.5 | 91382.6  | 89564.5  | 95180.2  | 98455.5  | 101460.7 | 94645.8  | 111379.7 | TRUE |
| 430691.6 | 339044.2 | 411656.2 | 402292.5 | 439529.7 | 361968.4 | 359683.4 | 388550.4 | TRUE |
| 155737   | 93636.3  | 106522.5 | 125229.5 | 138291.6 | 115926.5 | 105709.8 | 102158.2 | TRUE |
| 284822   | 253480.2 | 233757.6 | 254730.1 | 265714.3 | 250612.1 | 262075.6 | 286211   | TRUE |
| 124181.5 | 106690   | 127037.6 | 124686.9 | 102040.9 | 140745.9 | 131221.2 | 145643.8 | TRUE |
| 359918.2 | 351272.4 | 346137.6 | 338292   | 408098.8 | 317721.1 | 385842.3 | 366299.9 | TRUE |
| 256754.5 | 282493.5 | 373748   | 438694.2 | 353081   | 402290   | 335127.4 | 349546.8 | TRUE |
| 242370.4 | 214358.7 | 231830.5 | 274228.5 | 313625.9 | 264581.8 | 246140.7 | 270198.5 | TRUE |
| 153474.2 | 254094.3 | 156160.8 | 234366.1 | 275130.5 | 86519.4  | 157987.2 | 147491.1 | TRUE |
| 96803.9  | 83438.8  | 77835.3  | 101324.4 | 98588.1  | 84817.7  | 109895.2 | 99345.4  | TRUE |
| 357176.6 | 340651.6 | 276823.6 | 381685.6 | 421663.9 | 302851.1 | 313673.6 | 433120.1 | TRUE |
| 131445.4 | 94747.5  | 92922.1  | 108075.8 | 107463.9 | 119700.9 | 107497.9 | 92715.5  | TRUE |
| 401416.6 | 316178   | 312463.3 | 394962.6 | 394079.2 | 341864.5 | 377626.9 | 360695.3 | TRUE |
| 135309.4 | 139846.6 | 151833.4 | 167635.2 | 168337.8 | 131948.7 | 133432   | 173668.6 | TRUE |
| 42482    | 62490.1  | 50869.1  | 47877.1  | 87334.7  | 27504.3  | 40832.9  | 32499.9  | TRUE |
| 51343.1  | 62430.8  | 42626.3  | 74317.5  | 78181    | 39136.9  | 51702.7  | 44734.7  | TRUE |
| 25345.7  | 13928.4  | 19246.8  | 12805.7  | 21861    | 21231.1  | 13430.5  | 14979    | TRUE |
| 32529.3  | 33065.4  | 38917.4  | 31472.2  | 41065.1  | 43763.1  | 46179    | 39223.6  | TRUE |
| 42244.8  | 23615.5  | 23698.5  | 23188.1  | 34078.8  | 32406.8  | 27767.3  | 29817.6  | TRUE |
| 84936.3  | 86260    | 85992.5  | 96906.9  | 87869.9  | 108446.4 | 102466   | 109998.9 | TRUE |
| 44171.5  | 61726.2  | 50386.7  | 72656.5  | 64936.5  | 72126    | 44440.2  | 60312.7  | TRUE |
| 178146.1 | 189138.7 | 148994.9 | 132868.3 | 159745.1 | 207733.8 | 200186.6 | 232877.8 | TRUE |
| 321531   | 321190.7 | 304702.9 | 354537.3 | 405607.1 | 316389.7 | 321975.7 | 394711.7 | TRUE |
| 82753.8  | 71766.8  | 55757.3  | 76570.5  | 75351.5  | 71785.1  | 87669.7  | 106366.5 | TRUE |
| 96772.8  | 239668.5 | 146774.4 | 249055   | 316288   | 74841.7  | 72355.7  | 98032    | TRUE |
| 1191907  | 1229083  | 1016584  | 977200   | 1096368  | 943741.2 | 1118204  | 991540   | TRUE |
| 15169.6  | 18404.5  | 8354.9   | 23423.7  | 6452.8   | 7407.6   | 24346.8  | 22610.5  | TRUE |
| 204029.3 | 232562.5 | 131079.6 | 159447.3 | 161301.8 | 185804.3 | 186410.7 | 165105.8 | TRUE |
| 36760.3  | 41478    | 26828.7  | 21589    | 28838.3  | 34646.1  | 39939.8  | 33189.3  | TRUE |
| 2949087  | 3061912  | 2677045  | 2895052  | 2786678  | 3275859  | 3630882  | 3543613  | TRUE |
| 1426627  | 1563454  | 1273842  | 1488636  | 1323710  | 1579277  | 1628436  | 1660053  | TRUE |
| 482261.4 | 500995.5 | 492228.8 | 539031.1 | 462273.8 | 584742.5 | 578189.7 | 565270.9 | TRUE |
| 90934.9  | 86617.9  | 83492.5  | 95921    | 112760.6 | 93497.2  | 100313.9 | 104191.5 | TRUE |
| 168079.9 | 193799.2 | 188568   | 175506.5 | 192884.1 | 187909.5 | 191466.2 | 174634.7 | TRUE |
| 81405.6  | 74434.9  | 51512.5  | 83188.7  | 87523.8  | 65038.5  | 80145.1  | 105984.6 | TRUE |
| 33673.3  | 13885.4  | 10626.2  | 10718.3  | 35984.5  | 19973.8  | 13854.9  | 33264.4  | TRUE |
| 159569   | 203581.5 | 137971.8 | 132819.1 | 183607.5 | 136525.6 | 189377.6 | 210989.8 | TRUE |
| 25024.8  | 7353.2   | 11553.1  | 7585.8   | 23705.4  | 23326.7  | 11105.2  | 15656.8  | TRUE |
| 103513.1 | 83364.8  | 120804.2 | 81090.9  | 113664.4 | 116327.3 | 107940   | 114998.1 | TRUE |
| 107638.2 | 107739.8 | 163442.5 | 260707.1 | 308679.2 | 203469.1 | 211754   | 277478.1 | TRUE |
| 118562.6 | 101578.7 | 130829.7 | 172171.1 | 143204.3 | 141549   | 126009.5 | 161408.2 | TRUE |



|          |          |          |          |          |          |          |          |      |
|----------|----------|----------|----------|----------|----------|----------|----------|------|
| 44854.5  | 44639.4  | 59569.7  | 58344    | 60509.9  | 51122.4  | 55975.2  | 67106.1  | TRUE |
| 51116.2  | 55443.3  | 28079.8  | 45903.8  | 51401.4  | 49908.5  | 70212.3  | 55996.6  | TRUE |
| 79995.3  | 66218.2  | 83430.1  | 68836.1  | 138148.8 | 101910.9 | 77911    | 98055.1  | TRUE |
| 30520.1  | 29095.1  | 41313.7  | 40634.6  | 43867.2  | 15350.6  | 39666.9  | 42679    | TRUE |
| 58337.5  | 47178.1  | 44349.8  | 58610.1  | 47905.7  | 72219.5  | 57604.9  | 52895.8  | TRUE |
| 92799.9  | 78527.6  | 81048.3  | 76163.6  | 62713.4  | 103776.2 | 76329.9  | 86869.4  | TRUE |
| 267223.1 | 146143.2 | 203047   | 214380.5 | 251954.4 | 332787.8 | 235052.8 | 312885.2 | TRUE |
| 121890.1 | 65089.9  | 87644.1  | 98560.5  | 145032.9 | 135130.3 | 119493.2 | 145684.1 | TRUE |
| 34150.9  | 23515.5  | 12128.2  | 39903.3  | 48209.8  | 25619.6  | 37244.9  | 43728.1  | TRUE |
| 2177660  | 1871380  | 2107568  | 2455785  | 2362420  | 1907896  | 1983492  | 2159098  | TRUE |
| 204109.3 | 180604.3 | 166672.6 | 210179.8 | 232194.4 | 195623.5 | 231032.4 | 224581   | TRUE |
| 137723.3 | 125074.6 | 122196.3 | 133616.3 | 127606.3 | 137170.3 | 124741.7 | 137487.9 | TRUE |
| 93758.6  | 65627.5  | 118737.7 | 90806.9  | 101602.7 | 92955.5  | 85297.8  | 96846.8  | TRUE |
| 110770.2 | 143862.8 | 196934.7 | 93588.3  | 91984.1  | 120575.9 | 100699.2 | 101799.5 | TRUE |
| 67811.7  | 164050.7 | 111161.9 | 200149.3 | 194896   | 65403.6  | 54756.5  | 50468    | TRUE |
| 72881.4  | 106860.4 | 90559.5  | 116469.9 | 123141.3 | 51244.5  | 39880.2  | 54840.1  | TRUE |
| 450614.2 | 408605.9 | 408009.8 | 459152.2 | 433399.7 | 479627.3 | 441323.4 | 500872.4 | TRUE |
| 14259049 | 14669452 | 12168650 | 13496146 | 12856663 | 14145373 | 14444827 | 14935029 | TRUE |
| 958929.7 | 1015798  | 838083.7 | 900756.5 | 868874.4 | 1009570  | 1028419  | 1122052  | TRUE |
| 339819.6 | 320366.6 | 325409.9 | 383153.7 | 369836   | 427223.3 | 375579.1 | 381573.2 | TRUE |
| 606114.1 | 546516.1 | 582374.4 | 578115.9 | 536550.4 | 603571.3 | 562957.8 | 608987.7 | TRUE |
| 4513357  | 5661147  | 1931923  | 6137456  | 8512486  | 2054415  | 5908460  | 8884114  | TRUE |
| 217205.7 | 262646.7 | 117483   | 282192.6 | 388126.1 | 145954.7 | 293714.4 | 446070.3 | TRUE |
| 280685.6 | 442146.1 | 354458.5 | 356350.8 | 246982.3 | 365376.3 | 457109.2 | 333212.4 | TRUE |
| 915657.6 | 1506409  | 1125835  | 1221342  | 538165.2 | 1236763  | 1545803  | 1126885  | TRUE |
| 79038    | 112385.9 | 63433.7  | 86471.1  | 123801   | 55141.8  | 122225.9 | 130394.3 | TRUE |
| 53896.7  | 44065.4  | 41273.2  | 42984.7  | 80638.2  | 29237.1  | 63565.7  | 66261.6  | TRUE |
| 79601.4  | 99638.9  | 39401.7  | 99609.7  | 139656.6 | 62363.5  | 113299.8 | 159721.5 | TRUE |
| 53420.7  | 54031.9  | 30177.8  | 72500.5  | 101826.1 | 33251.2  | 105032.3 | 125369.3 | TRUE |
| 181373.1 | 289627.7 | 192591.6 | 172050.4 | 87658.5  | 184899.9 | 266651.8 | 182793.9 | TRUE |
| 39688.2  | 58560.4  | 49302.1  | 64000.5  | 31410.1  | 56900.8  | 75860.9  | 63873.8  | TRUE |
| 156180.5 | 156915.4 | 70357.7  | 308457.6 | 154223.2 | 98504.5  | 209791.4 | 203667.8 | TRUE |
| 98338.6  | 108921.3 | 41601.6  | 98301.6  | 155426.5 | 54100.4  | 122131.7 | 165605.9 | TRUE |
| 261047.9 | 251055.6 | 201608.7 | 441806.1 | 392182.9 | 228063.7 | 313288.4 | 357899.5 | TRUE |
| 150021.4 | 116223.2 | 135406.3 | 257596.4 | 204183.8 | 149637.6 | 163124.1 | 241535.1 | TRUE |
| 53725    | 74314    | 39745    | 79454.1  | 107555.7 | 41499.7  | 78642.6  | 104603.3 | TRUE |
| 46915.3  | 65481.5  | 49742.9  | 66279.8  | 79732.1  | 52887.4  | 63083.3  | 90642.9  | TRUE |
| 239985.8 | 232483.1 | 208419   | 220133.5 | 171895.4 | 494848.7 | 288032.8 | 470754.2 | TRUE |
| 230226.9 | 276826.9 | 221724.3 | 259773.7 | 137173   | 251230.8 | 368433.8 | 256607.8 | TRUE |
| 382803.6 | 406205.8 | 322370.1 | 381003.3 | 273623.4 | 615223.6 | 438601.2 | 726471.9 | TRUE |

|          |          |          |          |          |          |          |          |      |
|----------|----------|----------|----------|----------|----------|----------|----------|------|
| 55694.5  | 84991.8  | 66311.3  | 85351.3  | 32230.4  | 51880.8  | 102009.5 | 68856.4  | TRUE |
| 1275982  | 2281064  | 1500650  | 1978343  | 588909.6 | 1430721  | 2396982  | 1488245  | TRUE |
| 32824    | 43152.7  | 44354.4  | 35482.5  | 31393.9  | 42950.1  | 43635.6  | 21108.3  | TRUE |
| 117730.8 | 147615   | 55824    | 119186.1 | 168707.2 | 57203.3  | 188200   | 200949.1 | TRUE |
| 49366.8  | 50224.2  | 31325.3  | 56093.7  | 71431.3  | 37912.7  | 59317.2  | 68686.7  | TRUE |
| 24768    | 65009.6  | 27744.3  | 81959.1  | 36302.2  | 23427.2  | 32351.7  | 29682    | TRUE |
| 272895.4 | 361166.2 | 288336.6 | 342834.1 | 148907.1 | 267508.8 | 500930.9 | 326006.5 | TRUE |
| 18651.4  | 34522.4  | 8975.4   | 12929.5  | 4465.7   | 22090.1  | 34374.9  | 24498.6  | TRUE |
| 98081.6  | 162215.8 | 101585   | 130755.4 | 66946.1  | 119513.8 | 142310.6 | 104631.5 | TRUE |
| 17763.8  | 17936.1  | 10315.8  | 27619.5  | 25714.6  | 31518.4  | 31805.9  | 29552.5  | TRUE |
| 630081.2 | 696130.5 | 407428.8 | 566078.1 | 577803.6 | 400357.8 | 688831.4 | 562039.4 | TRUE |
| 809290.7 | 754273.1 | 449220.1 | 663300.6 | 672708.1 | 401252.7 | 749954.3 | 679382.3 | TRUE |
| 236913.2 | 385600.7 | 263934.5 | 470270.1 | 350260.1 | 254100.8 | 345657.7 | 306615.4 | TRUE |
| 35265.9  | 56106.8  | 41780.9  | 56747.6  | 54872    | 23418.6  | 26437.4  | 24796.9  | TRUE |
| 328914   | 372763.3 | 249785.9 | 314639   | 321383.7 | 252819.4 | 328494.6 | 306546.7 | TRUE |
| 119426   | 117229.3 | 100445.2 | 111086.9 | 119759   | 93527.9  | 136851   | 102343.3 | TRUE |
| 98937.5  | 86587.1  | 85344.3  | 68564.7  | 106243.3 | 75450.9  | 96581.4  | 101070.8 | TRUE |
| 32344.9  | 103653.5 | 65606.7  | 73247    | 95775.7  | 22583.7  | 20586    | 19928.2  | TRUE |
| 288338.1 | 282925.5 | 379088.5 | 367300.9 | 327594.1 | 309265.8 | 320019.4 | 296485.1 | TRUE |
| 237781.5 | 229665   | 252303   | 294127.1 | 219215.3 | 257071.6 | 266299.4 | 245833.1 | TRUE |
| 27823.4  | 51147.1  | 59837.9  | 75186.7  | 51263.8  | 3423.5   | 51980    | 26854.1  | TRUE |
| 43521.2  | 33334    | 37616.9  | 43022.1  | 33486.7  | 61889.3  | 34664.6  | 43414.4  | TRUE |
| 46716.9  | 52656.2  | 71847    | 63596.9  | 63697.1  | 46028.2  | 45000.4  | 47817.9  | TRUE |
| 35390.8  | 53822.8  | 55908.1  | 39257.6  | 57593.6  | 51236.7  | 45934.5  | 45749.3  | TRUE |
| 29773.6  | 24909    | 23207.1  | 23653.9  | 24924.6  | 37814.3  | 33834.6  | 11690.3  | TRUE |
| 75678.8  | 71858.1  | 62243.1  | 86406.4  | 68655.9  | 116509.4 | 84026.6  | 90990.6  | TRUE |
| 26141.9  | 7456     | 9376.6   | 15254.1  | 8713.9   | 30383.4  | 17448.1  | 42923.6  | TRUE |
| 33097.6  | 38083.8  | 39656.8  | 39034.5  | 25845.3  | 44751.5  | 45796.1  | 36773.3  | TRUE |
| 76510.8  | 58399.8  | 63685.9  | 60425.9  | 67936.5  | 65443.8  | 81056.9  | 64523.3  | TRUE |
| 93676.9  | 93034.5  | 69378.8  | 72872.9  | 72065.2  | 105641.8 | 95606.6  | 103560.2 | TRUE |
| 36497.9  | 26185.8  | 42747.8  | 38545.7  | 31466.2  | 42570.9  | 43230    | 31548    | TRUE |
| 155210.1 | 182277.1 | 299583.9 | 159674.3 | 186406.5 | 202519.5 | 148416   | 182146.4 | TRUE |
| 76352.2  | 81703.8  | 111857.8 | 59246.7  | 68775.4  | 73994.4  | 55502.4  | 64528.8  | TRUE |
| 69663.7  | 76351.6  | 77283.6  | 90442.5  | 72212.7  | 63924.2  | 60101.3  | 76376.2  | TRUE |
| 250591.8 | 166552.4 | 219038.6 | 239028.7 | 166998.1 | 257508   | 206030.8 | 285098.1 | TRUE |
| 56353    | 45118.9  | 47777.3  | 36969.6  | 52429.7  | 48302.6  | 69818    | 69105.9  | TRUE |
| 55653.3  | 50861.2  | 52295.6  | 63519.3  | 70795.3  | 63843    | 70945    | 71154    | TRUE |
| 369419.2 | 423451.6 | 352616.6 | 350579.5 | 429206.1 | 332908.8 | 429263.1 | 399364.8 | TRUE |
| 398052.1 | 443334.3 | 338033.3 | 398942.7 | 490896.5 | 322491.6 | 543031   | 454269.9 | TRUE |
| 176682.3 | 200601   | 142447.2 | 195997.8 | 178499.8 | 156063.4 | 211738.3 | 212657.1 | TRUE |
| 200294.1 | 215003.8 | 186196   | 200566.8 | 207798.3 | 189292.9 | 195550.3 | 188133.7 | TRUE |
| 161210.1 | 183187.1 | 143531   | 201819.9 | 209391.6 | 147952.3 | 174937.3 | 160897.7 | TRUE |
| 182897.6 | 157175.3 | 167500.8 | 165068.8 | 187626.7 | 144027   | 204753.4 | 216323.4 | TRUE |
| 68407.5  | 69379.6  | 49414.3  | 68921.3  | 49526.4  | 57494.6  | 66519.5  | 65728.3  | TRUE |
| 70827.5  | 111649.1 | 65214    | 118768.3 | 125366.8 | 53312.7  | 57444    | 64975.4  | TRUE |

|          |          |          |          |          |          |          |          |      |
|----------|----------|----------|----------|----------|----------|----------|----------|------|
| 56434.6  | 63120.4  | 45233.3  | 49673.6  | 72484.6  | 57037.1  | 74641.4  | 74911.9  | TRUE |
| 472790   | 446663.7 | 545325.7 | 641286.5 | 406640.2 | 450459   | 555092.2 | 445983.9 | TRUE |
| 636045.9 | 720664.2 | 888402.3 | 853257.5 | 544523.7 | 581442.1 | 761237.8 | 558411   | TRUE |
| 230842.8 | 196943.6 | 214436.7 | 286512.9 | 325160.2 | 179253.9 | 207434   | 184939.6 | TRUE |
| 65344.9  | 122847.2 | 95059.9  | 126819.8 | 89407.4  | 68617.1  | 62601.3  | 38144.2  | TRUE |
| 40553.6  | 69798.4  | 53133.5  | 68808.8  | 56811.7  | 36690.5  | 36151.3  | 32354    | TRUE |
| 110632   | 108714.8 | 118192.6 | 136731.9 | 106521.6 | 119244   | 83569.3  | 95029.4  | TRUE |
| 119312.4 | 113721   | 113126.9 | 104823   | 107759.4 | 115644   | 86146    | 130249.5 | TRUE |
| 244794.9 | 261302.7 | 156642.7 | 236357.4 | 248661.5 | 189446   | 284209.6 | 259191.8 | TRUE |
| 362861.8 | 394840.9 | 224796.8 | 290081.6 | 401792.8 | 241886.3 | 393440.5 | 380235.4 | TRUE |
| 57830    | 59958    | 58823    | 57745.4  | 67889.2  | 50250.2  | 77472.5  | 66126.9  | TRUE |
| 980225.3 | 1164839  | 614245   | 848902.9 | 1091228  | 686156.1 | 1103706  | 1094799  | TRUE |
| 211385.6 | 243104.1 | 200987.3 | 331454.9 | 377301.1 | 245566   | 373145.4 | 333947.7 | TRUE |
| 304736.4 | 306643.4 | 250615   | 427143.4 | 513943.2 | 317913.1 | 521639.3 | 450249.1 | TRUE |
| 25638.2  | 40939.5  | 24571.2  | 16646.4  | 39010.7  | 22822.5  | 42767.5  | 37799    | TRUE |
| 94274.6  | 103894.4 | 112546.7 | 113989.8 | 118271.1 | 89176.9  | 85186    | 102922.6 | TRUE |
| 77505.9  | 105694.3 | 52640.8  | 103468.7 | 86452.4  | 64935.9  | 92941.9  | 87832.3  | TRUE |
| 56098.7  | 69206.6  | 34106.4  | 61518.4  | 61952.8  | 50544.4  | 66619.5  | 83714.3  | TRUE |
| 49111.4  | 83344.9  | 48875.8  | 66369.2  | 111444   | 32359.2  | 34583.5  | 33332    | TRUE |
| 58189.9  | 63438.2  | 51488.5  | 57804.8  | 58838.9  | 55702.8  | 62592.4  | 77178.4  | TRUE |
| 208930.9 | 218701.4 | 344352.6 | 341087.7 | 219699   | 279784.9 | 280174   | 250062.3 | TRUE |
| 109835.5 | 125877   | 131440.2 | 170756   | 101486   | 138284.4 | 179792.6 | 116177.5 | TRUE |
| 21588.8  | 25749.7  | 23017.7  | 37613.7  | 26452.1  | 11289.4  | 9399.8   | 8796.9   | TRUE |
| 102617.9 | 65750.5  | 85022.7  | 89958.9  | 75804.9  | 120393.9 | 87623.2  | 102697.3 | TRUE |
| 20988954 | 21093411 | 18735213 | 20864013 | 18655427 | 21263702 | 22405022 | 20101883 | TRUE |
| 37621284 | 33122190 | 39748626 | 40176247 | 30056578 | 35208206 | 35066957 | 34862018 | TRUE |
| 110101   | 102662.2 | 84871.5  | 96896.9  | 96188.3  | 99841    | 131860   | 117164.9 | TRUE |
| 98312.9  | 230293.6 | 99897.6  | 145146.7 | 173986.4 | 42621.6  | 47692.8  | 41180.5  | TRUE |
| 846495.7 | 738314.2 | 948193   | 949387   | 687033.9 | 784339.2 | 792528.4 | 744774.1 | TRUE |
| 91904.8  | 108165.2 | 77870.7  | 77650.5  | 89524.8  | 77277.2  | 112811.5 | 81601.7  | TRUE |
| 208316.8 | 222715.8 | 116081.6 | 144540.2 | 183710.4 | 127825.6 | 207868   | 194332.3 | TRUE |
| 129919.3 | 114275.7 | 124677.5 | 125242   | 99413.6  | 138494.9 | 120965.8 | 137776.8 | TRUE |
| 39810.3  | 42138.6  | 64508    | 46303    | 56287.1  | 52346.5  | 43131.1  | 48063.1  | TRUE |
| 63304.6  | 45565    | 59073.5  | 84151    | 45504.9  | 58567.8  | 47628.5  | 57084.5  | TRUE |
| 125477.2 | 169239   | 97613.5  | 125931.6 | 179934.2 | 113676.8 | 151392.4 | 164451.1 | TRUE |
| 570826.8 | 661430.2 | 448593.1 | 506242.5 | 598579.7 | 443410.8 | 666849.6 | 593535   | TRUE |
| 144274.1 | 156266   | 107425.7 | 117432.6 | 132139.2 | 104122.7 | 133167.3 | 129126   | TRUE |
| 650261.8 | 580980.6 | 720033.3 | 753249.6 | 416204   | 506310.6 | 583205.4 | 479614.4 | TRUE |
| 57231    | 41514.5  | 42116.1  | 50439.5  | 52128.9  | 44463.5  | 39920.6  | 63852.9  | TRUE |
| 198810.1 | 150242.7 | 154536.6 | 172246   | 165617.7 | 191431.7 | 161237.7 | 168344.3 | TRUE |

|          |          |          |          |          |          |          |          |      |
|----------|----------|----------|----------|----------|----------|----------|----------|------|
| 53786.6  | 47352.2  | 33707.2  | 46348.3  | 56304.5  | 28965.1  | 45580    | 65526.9  | TRUE |
| 15168.3  | 19287.8  | 5428.4   | 7973.2   | 8870.1   | 6240.7   | 19169.5  | 4635.4   | TRUE |
| 48137.4  | 41969.3  | 59581.5  | 57697.9  | 50205.9  | 50109.2  | 61603.8  | 53215.6  | TRUE |
| 43562.7  | 38526.4  | 41188.8  | 60626.6  | 58816.9  | 44403.7  | 59548.4  | 53750    | TRUE |
| 30137.5  | 24816.1  | 43155.3  | 56164.4  | 55237.8  | 36371.2  | 37025.3  | 53599.3  | TRUE |
| 30566.7  | 25603.6  | 32492.1  | 29979    | 42886.6  | 31321.5  | 33364    | 43393.8  | TRUE |
| 32101.6  | 54280.8  | 34273.7  | 78626.3  | 86415.3  | 4456.9   | 5341.3   | 6969.7   | TRUE |
| 18389.8  | 18335.9  | 5503.2   | 7597.7   | 15635    | 7585.9   | 12795.3  | 9481.2   | TRUE |
| 37299    | 36693.1  | 31913.1  | 26485.6  | 31075.5  | 34464.4  | 35420.9  | 41384.8  | TRUE |
| 91202.1  | 63410.8  | 71669.8  | 73141    | 83980.1  | 71928.5  | 79131.9  | 67923.1  | TRUE |
| 53516.6  | 43220.5  | 54952.7  | 45566.5  | 59688.7  | 53966.8  | 53319.8  | 52843.7  | TRUE |
| 53034.8  | 52647.7  | 42421    | 46319.8  | 58038.9  | 68380.5  | 50536.2  | 55931.1  | TRUE |
| 35985.8  | 32371.6  | 36477.1  | 9476.4   | 33169.9  | 33892.1  | 37373.9  | 33168.5  | TRUE |
| 322624   | 237061.6 | 255156.1 | 319695.7 | 273976.6 | 249104.6 | 274683.9 | 289414.5 | TRUE |
| 625280.5 | 576396.4 | 635247.4 | 677020.2 | 613227.6 | 631067.1 | 655705   | 612405.4 | TRUE |
| 149631.8 | 126667.9 | 134801.6 | 146274.9 | 143323.6 | 118833.7 | 136955   | 132316.1 | TRUE |
| 728712.5 | 573856.5 | 629297.7 | 724605.4 | 736866.2 | 699326.8 | 675036.2 | 641675.6 | TRUE |
| 26458.7  | 70497.3  | 47105.4  | 64344.3  | 101957   | 23277.5  | 7912.4   | 14772.5  | TRUE |
| 302921.9 | 253941.4 | 320786   | 286841.3 | 324722.3 | 335332   | 314259   | 314208   | TRUE |
| 489043.4 | 539297.7 | 458469.3 | 486887.4 | 502939.5 | 573578   | 492519.4 | 544216.7 | TRUE |
| 44367.1  | 91379.8  | 61317.5  | 108993.7 | 97299.7  | 47870.7  | 12964.8  | 31821.7  | TRUE |
| 229673.8 | 324296.6 | 108664.9 | 393893.1 | 454561   | 138143.4 | 412904.8 | 441897.3 | TRUE |
| 398512.5 | 456377.9 | 349204.1 | 467276.3 | 523793.7 | 355432.5 | 498423.7 | 477066.7 | TRUE |
| 151732.4 | 242509.1 | 150650.3 | 191545.5 | 98742.5  | 207953.6 | 197130.8 | 197523.8 | TRUE |
| 133076.2 | 148469.6 | 119687.9 | 114870.7 | 128496.6 | 130066.5 | 137985.3 | 135801.7 | TRUE |
| 98379.4  | 196320.6 | 132644.8 | 169119.3 | 64150.8  | 172623.3 | 181259.1 | 174416.4 | TRUE |
| 1034245  | 1179885  | 1097078  | 1282080  | 766957.8 | 1264423  | 1204211  | 1226285  | TRUE |
| 80569.7  | 98937.6  | 113172.1 | 108818.4 | 80180.3  | 109642   | 145710.7 | 131979.3 | TRUE |
| 468985.8 | 482283.2 | 556800   | 625798   | 443370   | 569423.3 | 553697.2 | 518913.6 | TRUE |
| 409021.2 | 352849.3 | 392471.6 | 403620.5 | 435570.6 | 399261.2 | 334463.6 | 357200.7 | TRUE |
| 747656.8 | 810835.6 | 867601.2 | 760350.1 | 803533.2 | 670328.5 | 797364.3 | 746120   | TRUE |
| 687709.5 | 588398   | 702010.4 | 665002.9 | 625199.9 | 719005.2 | 669104.6 | 670024   | TRUE |
| 1272154  | 1164153  | 997675.7 | 1908610  | 1243680  | 1308719  | 1272949  | 1405742  | TRUE |
| 87235.4  | 50343.7  | 48842.9  | 56187.2  | 38263.6  | 93377.8  | 56056.3  | 55097.7  | TRUE |
| 53991.8  | 54447.8  | 40158.6  | 67322    | 59209.8  | 53637.1  | 54542.1  | 61373.7  | TRUE |
| 340911.4 | 297786.8 | 431682.5 | 509815.5 | 434162.9 | 404667.2 | 419901.2 | 457899.7 | TRUE |
| 52863.4  | 103317.5 | 117415.2 | 116037.5 | 139159.7 | 47118    | 43055.1  | 50109.5  | TRUE |
| 134480.5 | 135282.3 | 150423.4 | 170891   | 119266.3 | 213369.9 | 163486.3 | 192682.2 | TRUE |
| 109886.3 | 103586.3 | 90470.2  | 111636   | 110317.9 | 145571.5 | 129897.2 | 117394.2 | TRUE |
| 102863.6 | 85210.4  | 86385.6  | 97730.9  | 103422.8 | 79402.7  | 101284.4 | 88173.7  | TRUE |
| 985083.2 | 1010483  | 708187.6 | 875555.3 | 1042381  | 836597.7 | 1094850  | 957226.3 | TRUE |

|          |          |          |          |          |          |          |          |      |
|----------|----------|----------|----------|----------|----------|----------|----------|------|
| 411619.6 | 423471.6 | 228580.1 | 278545.5 | 262988.9 | 295587   | 264482.2 | 283810.3 | TRUE |
| 456246.1 | 459554.6 | 350499.4 | 406339.8 | 429616.8 | 392471.9 | 485921.8 | 464261.4 | TRUE |
| 1021668  | 819705   | 1156579  | 1084400  | 876321.3 | 951630.2 | 898307.2 | 884468.6 | TRUE |
| 946802.8 | 839648.3 | 1102397  | 1104074  | 862856.6 | 904893.1 | 942239.1 | 895500.7 | TRUE |
| 29947.8  | 27104    | 15770.4  | 27883.5  | 20751.7  | 23284.5  | 28364.9  | 33243.6  | TRUE |
| 105828.8 | 119763.5 | 60783.9  | 183908.8 | 76295.7  | 77410.9  | 105623.2 | 85460.6  | TRUE |
| 73413.8  | 66431.3  | 61158.4  | 43672    | 49322.5  | 63841.8  | 50144    | 51600.9  | TRUE |
| 154136.1 | 158549.4 | 155111.3 | 105769.6 | 160605.4 | 137398.6 | 144953.1 | 132751.9 | TRUE |
| 419850.6 | 423742.9 | 424571.7 | 364192.9 | 335480.2 | 379912.7 | 397837.5 | 381096.6 | TRUE |
| 1599762  | 1344457  | 1687131  | 1747005  | 1551397  | 1560316  | 1370387  | 1489598  | TRUE |
| 433217.4 | 380253.7 | 368963.8 | 396694.5 | 358641.9 | 410073.1 | 427813.2 | 346353.9 | TRUE |
| 205114.6 | 194283.2 | 207408.7 | 206079.2 | 200422   | 184449.7 | 232027   | 194564.2 | TRUE |
| 27729.9  | 67880    | 46675.2  | 38144.5  | 46340.2  | 19240.8  | 11476.5  | 7912.1   | TRUE |
| 887610.8 | 1025870  | 739797.2 | 834538.1 | 909849.3 | 740642.7 | 1024285  | 936080.4 | TRUE |
| 463820.1 | 426331   | 569578.5 | 554890.1 | 408687.9 | 436312   | 431627.4 | 431067.2 | TRUE |
| 237097.4 | 229499.5 | 145833.3 | 169187.8 | 168436   | 158156.1 | 234473.9 | 204611.4 | TRUE |
| 195195.7 | 228274.6 | 165140.9 | 155892.5 | 230278.3 | 215279.7 | 270719.3 | 205786.1 | TRUE |
| 91924.4  | 121942.2 | 79868.9  | 90681.8  | 109700.3 | 108556.8 | 114665.4 | 96046.7  | TRUE |
| 65387.6  | 67301.4  | 76907.1  | 79286.2  | 131585.6 | 105271.7 | 113676.6 | 91086.6  | TRUE |
| 900302.3 | 864939.4 | 954343.2 | 1116603  | 806757.7 | 748045.1 | 955678.3 | 730268.1 | TRUE |
| 40668.9  | 55422.8  | 53234.8  | 75454.9  | 49023.7  | 44883.3  | 60362.3  | 46957.2  | TRUE |
| 105134.5 | 98273.8  | 79890.1  | 71783.1  | 85034.7  | 75362.2  | 92093    | 79972.5  | TRUE |
| 222890   | 244195.6 | 174639.4 | 141072.8 | 166010.4 | 180406.5 | 190614.2 | 150756.4 | TRUE |
| 135682.7 | 170636.4 | 60619.8  | 131112   | 111940   | 81382.5  | 120670.5 | 102656.6 | TRUE |
| 41261.7  | 39442.8  | 35749    | 34193.5  | 48419.6  | 31785.8  | 41921.3  | 50356.6  | TRUE |
| 241286.6 | 289968.4 | 224462.9 | 259857.8 | 286261.4 | 229027.8 | 311031   | 280823.7 | TRUE |
| 323569.8 | 340246.8 | 251698.2 | 319294.9 | 360202   | 303563   | 453104.5 | 375629.3 | TRUE |
| 77110.8  | 88699.8  | 89971.2  | 83724.6  | 75041.6  | 117487.6 | 65365.4  | 79851.5  | TRUE |
| 121161.8 | 119182.6 | 143621.2 | 147442.2 | 117398.2 | 140442.8 | 134724.9 | 145837.9 | TRUE |
| 590184.5 | 499763.1 | 591918.7 | 614989.9 | 524915.4 | 490601.8 | 535237   | 516374   | TRUE |
| 247824.3 | 229803.3 | 285425.7 | 295564.1 | 198353.8 | 242230.1 | 250994.3 | 229614   | TRUE |
| 39798.6  | 28140    | 37198.8  | 40298.7  | 29060.6  | 42435.1  | 37844    | 44285.8  | TRUE |
| 77877.4  | 125031.3 | 100590.7 | 156222.2 | 112816.5 | 53460.5  | 70818.8  | 51624.2  | TRUE |
| 476542.2 | 413090.9 | 435729.1 | 528234.3 | 378524.6 | 422715.9 | 516090.7 | 367731.3 | TRUE |
| 4694744  | 4501192  | 4115431  | 4314568  | 3900993  | 4279458  | 4722994  | 3896233  | TRUE |
| 413149.5 | 422091.2 | 344027.5 | 424347.9 | 351363.8 | 387193.6 | 428789.4 | 377649.2 | TRUE |
| 173503.6 | 136572.3 | 129711.7 | 152225.1 | 159233.3 | 175087.1 | 177830.8 | 166296.3 | TRUE |
| 101668.8 | 78911.8  | 68427    | 80856.9  | 81250.1  | 106023.9 | 90044.3  | 100907.7 | TRUE |

|          |          |          |          |          |          |          |          |      |
|----------|----------|----------|----------|----------|----------|----------|----------|------|
| 29011.7  | 50887    | 37452.6  | 58240    | 53851.7  | 16283.6  | 5442.7   | 25579.6  | TRUE |
| 471815.9 | 369346   | 482767.5 | 452409   | 430329.8 | 489543.3 | 373009.9 | 482071.4 | TRUE |
| 2858607  | 2239921  | 2437536  | 2562684  | 2538427  | 2702429  | 2365551  | 2858079  | TRUE |
| 986469.4 | 745339.7 | 857721   | 833336.2 | 940024.7 | 880299.4 | 809180   | 972854.2 | TRUE |
| 524785.2 | 491478.3 | 456534.4 | 476908.8 | 519666.9 | 514779.9 | 547637.7 | 520686.3 | TRUE |
| 728867.8 | 567746.8 | 834445.7 | 883278.5 | 763550.5 | 865585.6 | 717311   | 806553.2 | TRUE |
| 2059498  | 1602730  | 2378709  | 2517114  | 2285422  | 2588123  | 1994741  | 2485909  | TRUE |
| 82418.2  | 62682.1  | 45939.6  | 108540.9 | 64161.5  | 70209.1  | 99884.3  | 79612.4  | TRUE |
| 134399.2 | 98307.6  | 103731   | 127523.2 | 93041.2  | 104167.3 | 138402.8 | 122051.4 | TRUE |
| 173164.6 | 123301.5 | 89249.2  | 226845.1 | 164335.9 | 137676.4 | 202634.2 | 226023.7 | TRUE |
| 313783.7 | 239519.4 | 235131.3 | 266966.1 | 217368.7 | 308799.8 | 261800.6 | 369049.5 | TRUE |
| 329221.8 | 273104.6 | 295742.7 | 272459.1 | 246888.6 | 371560.8 | 354906.9 | 386136.2 | TRUE |
| 42406    | 50384.1  | 29457.5  | 47869    | 40750.7  | 44953.8  | 43366.3  | 45463.7  | TRUE |
| 57690.1  | 55585.3  | 39635    | 58222.3  | 59543.5  | 51216.5  | 69682    | 50488.1  | TRUE |
| 181734.4 | 163531.3 | 129179.6 | 179354.3 | 210382.3 | 197709.1 | 258672.6 | 287126.6 | TRUE |
| 151242.4 | 141455.6 | 109310.6 | 136930.8 | 173785.6 | 178412.3 | 181094.8 | 245560.1 | TRUE |
| 269062.5 | 271755.2 | 258662.8 | 273824   | 258612.3 | 294782.2 | 358376.4 | 416930.3 | TRUE |
| 407027.8 | 432713.6 | 275346.3 | 328676.8 | 327294.9 | 251205.8 | 347437   | 307808.7 | TRUE |
| 45608.8  | 89488.3  | 63247.5  | 56270    | 68945.9  | 35655.4  | 36324.4  | 38769.9  | TRUE |
| 1773396  | 1548157  | 1794254  | 1737126  | 1530452  | 1810844  | 1737783  | 1739617  | TRUE |
| 56494.4  | 55175.6  | 59534.8  | 67933.2  | 47372    | 66831    | 65095.7  | 53912.2  | TRUE |
| 50285.3  | 50302.7  | 42617.2  | 51530    | 49312.8  | 51272.6  | 60119.4  | 54129.3  | TRUE |
| 9935.5   | 21810.6  | 6013.7   | 23112    | 5358.8   | 21207.4  | 34249    | 19556.8  | TRUE |
| 244475.5 | 248761.4 | 204164.7 | 380135.8 | 243603.6 | 226069.4 | 287433.6 | 256306.5 | TRUE |
| 35774.6  | 40208.6  | 30978    | 25586.6  | 53102.3  | 15401.4  | 9504.7   | 21181.7  | TRUE |
| 5031.9   | 10534.2  | 13404.9  | 31420.9  | 7955.1   | 8814.4   | 8622.6   | 5692.7   | TRUE |
| 508631.7 | 494277.4 | 511629.7 | 385376.8 | 607746.3 | 557540.2 | 586703.4 | 593245.4 | TRUE |
| 222479.3 | 264938.3 | 264981.1 | 248474.7 | 241989.2 | 182398.8 | 258770.5 | 186897.6 | TRUE |
| 1014790  | 1226698  | 1004360  | 1043243  | 1061911  | 866981.4 | 1324341  | 863376.4 | TRUE |
| 160395.4 | 215087.1 | 183388.7 | 194777.1 | 94709.9  | 212362.1 | 231678.3 | 195957.5 | TRUE |
| 141081.7 | 227702.4 | 228721.8 | 195079.8 | 90857.7  | 220962.8 | 232640   | 239002.8 | TRUE |
| 16415    | 9390.3   | 8592.4   | 7030.9   | 3179.3   | 9593.7   | 10246.5  | 8953.3   | TRUE |
| 44879.9  | 34089.5  | 40896.5  | 47522.6  | 58537.4  | 38508.4  | 34415.9  | 41296.5  | TRUE |
| 86119.5  | 74075.2  | 67381.8  | 76118.1  | 78387.9  | 83460    | 83839.3  | 81687.5  | TRUE |
| 73233.5  | 63528.3  | 55769.5  | 80650    | 72917.9  | 58099.9  | 71909.8  | 58443.7  | TRUE |
| 116853.3 | 99316.3  | 96449.8  | 113389.2 | 110832.9 | 139837.1 | 104647.5 | 135484.2 | TRUE |
| 64099.9  | 61184.4  | 58489.2  | 68435.2  | 70681.2  | 63288.6  | 97767.6  | 98840.5  | TRUE |
| 243343.6 | 226023.3 | 238456.7 | 238680.7 | 216351.1 | 277751.7 | 282036.9 | 251074.3 | TRUE |
| 373649.4 | 297772.9 | 338901.5 | 386473.5 | 291769.7 | 362336.9 | 431544.9 | 375122.5 | TRUE |

|          |          |          |          |          |          |          |          |      |
|----------|----------|----------|----------|----------|----------|----------|----------|------|
| 449900.2 | 356529.9 | 327695.5 | 380822.1 | 404641.7 | 345318.7 | 383686.5 | 427512.9 | TRUE |
| 136857.5 | 137999.7 | 100997.5 | 96030.1  | 110525.2 | 101918.7 | 130277.6 | 120413.8 | TRUE |
| 51630.6  | 41761.5  | 32383.8  | 51221.9  | 47736.3  | 37925.5  | 44086    | 36355.9  | TRUE |
| 52783.5  | 38921.4  | 28210.2  | 45892.2  | 45861    | 28195.7  | 45155.4  | 36665.1  | TRUE |
| 452010.4 | 424724.5 | 270877.7 | 327020   | 357418.1 | 289174.7 | 326375.2 | 336196.7 | TRUE |
| 1590915  | 1448114  | 1500765  | 2053664  | 1842058  | 1556403  | 1814941  | 1773643  | TRUE |
| 167306.5 | 158599.8 | 159134.8 | 158872.6 | 161097.3 | 139843.6 | 113045.9 | 134702.6 | TRUE |
| 39645.3  | 31771.6  | 24924.7  | 37503.4  | 31814.4  | 22563.5  | 34021.7  | 43244.1  | TRUE |
| 126861.7 | 73973.1  | 154007.9 | 152417.1 | 172239.6 | 143324.1 | 111055.3 | 137345.8 | TRUE |
| 799574.9 | 827472.9 | 745659.5 | 746265   | 813183.8 | 791175.5 | 891144   | 803049.9 | TRUE |
| 456506.1 | 420392.2 | 323342.9 | 325870.8 | 480443.2 | 512263.9 | 603118.6 | 487782   | TRUE |
| 3289033  | 2369244  | 3410683  | 3269393  | 2906559  | 3549638  | 2168956  | 3019572  | TRUE |
| 2429015  | 2261125  | 1869514  | 1914855  | 2699274  | 2486468  | 2319815  | 2397508  | TRUE |
| 709453   | 717316.8 | 536568.4 | 619156.6 | 830030   | 743574.3 | 710998   | 797509   | TRUE |
| 599112.2 | 521821   | 481108.1 | 621379.2 | 547859.8 | 515136.5 | 442876.6 | 527232.5 | TRUE |
| 132349.7 | 86938.7  | 117076.3 | 115772.5 | 106865.9 | 150607.6 | 117891.3 | 135318.3 | TRUE |
| 148049.7 | 153691.9 | 162627   | 98313.3  | 167951.6 | 123925.4 | 177066.7 | 113319.3 | TRUE |
| 232106.5 | 215657.5 | 160127.9 | 296678.8 | 345623.4 | 162645.1 | 242764.8 | 309710   | TRUE |
| 23057    | 32019    | 17785.5  | 35618.8  | 33500.1  | 16061.4  | 36834.4  | 37055.8  | TRUE |
| 24527.3  | 21645    | 12257.7  | 27079.5  | 29922.7  | 16059.6  | 22664.1  | 31806.3  | TRUE |
| 55895.5  | 46139.8  | 49719.1  | 46453.2  | 61437.9  | 43777.4  | 55533.9  | 64676.8  | TRUE |
| 23553.3  | 35469    | 25201.1  | 32361.2  | 15266.9  | 43690    | 35998.9  | 27170.8  | TRUE |
| 264537.3 | 318235.2 | 273743.4 | 269230   | 156907.7 | 348114.7 | 370977.7 | 313576.3 | TRUE |
| 27585.4  | 34432.4  | 29852.2  | 10355.4  | 21152.6  | 29569    | 40134.7  | 38536.3  | TRUE |
| 146227.5 | 139124.4 | 121055.9 | 117779.8 | 127374.9 | 169747.8 | 163913.4 | 171142.5 | TRUE |
| 98017.5  | 86838.1  | 92094.3  | 102688.7 | 112169.8 | 105312.9 | 91847    | 125392.6 | TRUE |
| 36518.9  | 28914.4  | 47495.9  | 32536.9  | 37649.7  | 38580.1  | 26550.1  | 35528.2  | TRUE |
| 82044.1  | 136912.6 | 117218.1 | 90198.8  | 129181.3 | 90547.3  | 85968    | 73583.7  | TRUE |
| 103532.4 | 133002.5 | 90705.9  | 149842.1 | 143384.7 | 80249    | 102603.1 | 96539.7  | TRUE |
| 410858.8 | 324342.7 | 434296.2 | 434827.5 | 476893.8 | 462553.8 | 306644.7 | 456353.2 | TRUE |
| 205686.9 | 270464   | 149721.6 | 169718.7 | 222353.3 | 224469.8 | 289702.5 | 268017.1 | TRUE |
| 45869.4  | 48087.4  | 51659.9  | 37549.7  | 48894.8  | 42870.9  | 53576.5  | 60993.3  | TRUE |
| 109352.7 | 100283.3 | 80823.8  | 115047.6 | 117816.3 | 125644.5 | 95399.8  | 134216.8 | TRUE |
| 65955.8  | 50257.2  | 53008.6  | 68978.3  | 81157.6  | 61222.5  | 53482.7  | 64126.6  | TRUE |
| 166541   | 150493.4 | 104487.8 | 117115.5 | 136258   | 178915.2 | 146179.3 | 170073   | TRUE |
| 17947.9  | 25802    | 5851     | 25388.5  | 16968.5  | 29543.5  | 11450.5  | 28027.9  | TRUE |
| 94912    | 107825.2 | 75853    | 108468.8 | 117500   | 128269.1 | 133686.1 | 136156   | TRUE |
| 165588.9 | 132915.2 | 142230.4 | 114765.5 | 146220.3 | 116219   | 118227.1 | 124119.3 | TRUE |
| 52321    | 40792.1  | 74509.1  | 59179    | 57106.5  | 70391.3  | 51488.8  | 71208    | TRUE |

|          |          |          |          |          |          |          |          |      |
|----------|----------|----------|----------|----------|----------|----------|----------|------|
| 680768.8 | 725315.4 | 564549.7 | 549536.3 | 774600.2 | 727916.8 | 781623.4 | 730127.6 | TRUE |
| 682568.5 | 762401.1 | 442852.6 | 490359.5 | 747906.6 | 783581.3 | 741634.7 | 753321.2 | TRUE |
| 220999.7 | 221836.5 | 169736.9 | 213322.4 | 217299.9 | 195338   | 246939.7 | 211902.6 | TRUE |
| 138861.6 | 172795   | 101506.2 | 119944.9 | 120737.9 | 133809   | 154181.1 | 144988.7 | TRUE |
| 579138.2 | 646271.5 | 394070.4 | 595941   | 550684.5 | 444393.1 | 580863.1 | 596489.2 | TRUE |
| 297443.4 | 242188   | 218064.1 | 276356.4 | 240550.7 | 347007.6 | 328922.6 | 341896   | TRUE |
| 64633.2  | 54416.5  | 33570.4  | 27522.5  | 53888.4  | 38344.9  | 52608.4  | 57995.4  | TRUE |
| 69800.7  | 78075.9  | 52920.6  | 59517.3  | 77634.2  | 57464.1  | 61399.8  | 66540.1  | TRUE |
| 142389.5 | 115051.8 | 119199.4 | 142852.5 | 155421   | 116984.1 | 140105.7 | 126131.6 | TRUE |
| 293439.8 | 327306.7 | 294258.5 | 369684   | 361868.4 | 327549.7 | 315545.2 | 356055.9 | TRUE |
| 256490.5 | 247932.8 | 219908   | 257392.6 | 278412.3 | 279735.3 | 299878.2 | 278953.7 | TRUE |
| 284196.2 | 302636.4 | 283644.3 | 364312.6 | 337079.6 | 300537.2 | 412841   | 315700.7 | TRUE |
| 73085.3  | 93185.1  | 84941    | 108945.9 | 115176.2 | 53640.1  | 54009.9  | 63707.1  | TRUE |
| 2142101  | 1622556  | 2305333  | 2324717  | 1862130  | 2029131  | 1781248  | 1873376  | TRUE |
| 2287201  | 2015024  | 2120180  | 2029612  | 2184842  | 2444893  | 2226988  | 2483847  | TRUE |
| 256624.1 | 360142.8 | 251493.3 | 264750.1 | 240488.8 | 206473.5 | 272274.1 | 251999.3 | TRUE |
| 374922.2 | 454402.5 | 329220.6 | 332577.2 | 320534.9 | 311830.4 | 381601.7 | 348893.3 | TRUE |
| 59280.4  | 85429.3  | 68831.8  | 89996.1  | 112683.4 | 65053.1  | 104594.5 | 100377.6 | TRUE |
| 11751.9  | 14917.4  | 11937    | 14491.4  | 35273.9  | 25401.6  | 15148.9  | 32021.1  | TRUE |
| 240145.1 | 246997.8 | 230978.4 | 253008.3 | 205875.9 | 260736.8 | 225822.9 | 211391.7 | TRUE |
| 401513.4 | 409347.3 | 405478.4 | 349848.9 | 346906   | 402184.3 | 405995   | 357516.1 | TRUE |
| 243628.6 | 248981.2 | 211897.9 | 221067.8 | 207596.7 | 233235.5 | 282029   | 240440.8 | TRUE |
| 480693   | 467982.6 | 492602.5 | 490705.5 | 462449.4 | 448017.4 | 469951.5 | 438796   | TRUE |
| 196738.1 | 191180.6 | 191640.8 | 213082.8 | 191353.3 | 207120.2 | 214730.7 | 201818.2 | TRUE |
| 7741     | 9212.7   | 6382.9   | 7766.4   | 8605.5   | 20339.9  | 14351.5  | 23681.1  | TRUE |
| 55614    | 77129.3  | 45391.5  | 50609.4  | 77363.8  | 58144.5  | 82778.7  | 82756.9  | TRUE |
| 59707.1  | 85189.1  | 45171.2  | 72886.5  | 66135.2  | 58074.2  | 84259.3  | 79256    | TRUE |
| 70215.7  | 70435.3  | 39409.8  | 80606.1  | 78375.6  | 51224.3  | 95045.7  | 74175.2  | TRUE |
| 58977    | 67984.6  | 43511.1  | 62550.4  | 52645.5  | 61629.5  | 77694.5  | 63915.5  | TRUE |
| 118288.2 | 124162.4 | 96634.2  | 177265.3 | 86454.9  | 142204.2 | 158458.9 | 129543.4 | TRUE |
| 48431.5  | 54478.5  | 50245.1  | 50946.6  | 49081.8  | 42217.4  | 64388.2  | 57017.3  | TRUE |
| 70063.7  | 73655.2  | 51273.3  | 58503.4  | 84638    | 58669.8  | 45005    | 74354    | TRUE |
| 76524.9  | 71760.7  | 49991.3  | 71783.4  | 68381.3  | 54660.7  | 83000.2  | 70348    | TRUE |
| 103121.1 | 44368    | 58839.1  | 71894.9  | 58511.1  | 78496.6  | 67435    | 71524.8  | TRUE |
| 20731.3  | 24144.4  | 27950.4  | 34339.3  | 55705.2  | 44095.7  | 34734.7  | 33704    | TRUE |
| 81327.4  | 100912.6 | 71383    | 110356.1 | 112269.4 | 95260.5  | 126668.5 | 69986.6  | TRUE |
| 51005.7  | 52321.7  | 43864.7  | 44568.2  | 39714.7  | 53905.4  | 53318.7  | 34886.5  | TRUE |
| 531503.1 | 423936   | 450187.6 | 460094.5 | 611631.2 | 652922.1 | 432261.5 | 654802   | TRUE |
| 65399    | 57186.3  | 64704.5  | 77977.6  | 74367.3  | 50165.6  | 74158    | 73194.5  | TRUE |
| 1089256  | 547019.9 | 1261392  | 1342239  | 809553.6 | 1335701  | 704150.9 | 853179.3 | TRUE |



|          |          |          |          |          |          |          |          |      |
|----------|----------|----------|----------|----------|----------|----------|----------|------|
| 2285811  | 1102501  | 2683538  | 2933217  | 1701774  | 2838400  | 1318911  | 1849081  | TRUE |
| 973376.6 | 462686.2 | 413977.9 | 406613.4 | 782996.8 | 809603.5 | 515253.6 | 788339.4 | TRUE |
| 48031.6  | 91659.6  | 90642.3  | 59428.9  | 79966.4  | 38259.5  | 33676.1  | 38440.6  | TRUE |
| 364664.7 | 325548.3 | 340066.5 | 257155.6 | 376424.3 | 361002.5 | 344190.8 | 356416.2 | TRUE |
| 70034.6  | 46623.9  | 75256.9  | 54199    | 71699.1  | 70564.7  | 59606    | 74493.4  | TRUE |
| 48459.3  | 30773.3  | 38849    | 39346.7  | 41628.5  | 59065    | 39078    | 61314.8  | TRUE |
| 568808.5 | 427476.1 | 642127.6 | 845956.7 | 577107.6 | 776609.9 | 534762.1 | 610522.6 | TRUE |
| 344898.6 | 287305.3 | 424259.1 | 518182.6 | 389837.7 | 484426   | 300705.5 | 412867.6 | TRUE |
| 183101.2 | 128624.7 | 187983.2 | 228903.7 | 175259.2 | 222749.2 | 166353   | 190567.6 | TRUE |
| 93499.7  | 87573.4  | 56119.7  | 81883.3  | 112610.7 | 124572   | 86292.1  | 116847.6 | TRUE |
| 91750.7  | 81378.4  | 55497.7  | 74534.9  | 114338.5 | 120751.2 | 96581.5  | 106839.3 | TRUE |
| 211392.8 | 205983.9 | 172888.6 | 216753   | 277808.5 | 299315.7 | 226720.5 | 303313.6 | TRUE |
| 313282.3 | 292043.4 | 220124.6 | 262537.8 | 414199   | 438878.4 | 326781   | 421517.9 | TRUE |
| 71371.6  | 58092.2  | 80575.8  | 90565.8  | 73219.9  | 82355.9  | 63667.1  | 81188.7  | TRUE |
| 76733.5  | 74301    | 109814.1 | 111763.8 | 99488.4  | 98682.8  | 90173.6  | 93760.3  | TRUE |
| 260483.6 | 215960.6 | 314645.9 | 342379   | 285725.9 | 302276.4 | 256678   | 263735.9 | TRUE |
| 55858.1  | 73387.3  | 73861.6  | 50180.8  | 61445.6  | 58146.5  | 54721    | 54508.3  | TRUE |
| 56880.6  | 41765.1  | 57736    | 70508.3  | 46691.6  | 39809.4  | 39056.8  | 32018.4  | TRUE |
| 36162.6  | 41171.2  | 55279.4  | 53830.5  | 53057.2  | 43338.7  | 59301.2  | 33456.6  | TRUE |
| 396739.6 | 364886.9 | 349453.2 | 364058   | 465234.3 | 512647.3 | 396396.7 | 502041   | TRUE |
| 995455.7 | 897385.9 | 776801.2 | 775290.1 | 1174155  | 1113983  | 1000322  | 1074859  | TRUE |
| 54577.1  | 57562.5  | 24546.7  | 50055.6  | 50476.3  | 60898.6  | 48270.6  | 48758    | TRUE |
| 85618.6  | 140356.7 | 173735.1 | 121926.2 | 134532.4 | 72300    | 114482   | 85533.9  | TRUE |
| 44740.8  | 68778.1  | 59416.5  | 63112.7  | 98527.3  | 41312.9  | 43181.3  | 42423    | TRUE |
| 77003.8  | 126395.3 | 101643.7 | 102996.6 | 144886.7 | 71859.5  | 74464.4  | 74639.7  | TRUE |
| 247893.4 | 179884.5 | 192754.9 | 202447   | 256455   | 265587.7 | 196859.1 | 272729.2 | TRUE |
| 271663.6 | 214773.1 | 211411   | 336491   | 208100.9 | 195933.8 | 183910.4 | 170636.8 | TRUE |
| 649874.4 | 434851.6 | 476466   | 581017.1 | 632704.2 | 619412.2 | 462792.3 | 672735.9 | TRUE |
| 36474.6  | 29007.8  | 25838.1  | 30288.1  | 31142.5  | 30050.6  | 21208.1  | 38799.6  | TRUE |
| 72487.5  | 59779.4  | 59541.8  | 58853    | 70692.3  | 66431.7  | 51789.8  | 72902    | TRUE |
| 132858.9 | 113793.8 | 137006   | 149217.9 | 105766.5 | 171673.6 | 112760.5 | 128551.2 | TRUE |
| 146766   | 155044.8 | 133437.8 | 143159.1 | 135669.6 | 138823.9 | 121595.2 | 139147.4 | TRUE |
| 32463.7  | 42653.5  | 36090.4  | 39186.3  | 29293    | 30344.9  | 36630    | 26824.8  | TRUE |
| 37548.5  | 50007.2  | 65983.9  | 52477.1  | 44257.8  | 35335.9  | 52937.3  | 56101.8  | TRUE |
| 33307.9  | 35059    | 28148.9  | 49268.8  | 46454.1  | 38696.7  | 31602.6  | 38605.6  | TRUE |
| 36723.7  | 61654.1  | 48102.9  | 51567.6  | 51573.9  | 61119.4  | 33920.7  | 58972.8  | TRUE |
| 39041.9  | 53631.4  | 92409.7  | 48420.7  | 46842.5  | 38042.8  | 48705.4  | 56314.9  | TRUE |
| 6109.6   | 6021.8   | 7368.2   | 8181.1   | 6279     | 9849.8   | 9703.9   | 9774.8   | TRUE |
| 45959.7  | 37075.2  | 29672.1  | 54681.9  | 36242.3  | 34745.7  | 40113.8  | 44308.3  | TRUE |
| 194161.2 | 179382.9 | 172762.4 | 173208.1 | 142964.4 | 158084.1 | 206520.6 | 143321.3 | TRUE |

|          |          |          |          |          |          |          |          |      |
|----------|----------|----------|----------|----------|----------|----------|----------|------|
| 80068    | 46130.5  | 71010.6  | 100964.1 | 86219.7  | 82591.3  | 47318.9  | 96281.6  | TRUE |
| 253866.7 | 159448.9 | 239947.8 | 292304.5 | 245577.8 | 252208.9 | 158310.6 | 301737.7 | TRUE |
| 20761805 | 14347319 | 21987839 | 21746841 | 22075302 | 21257302 | 15419051 | 21675326 | TRUE |
| 194041.6 | 186926.7 | 180267.2 | 191724.4 | 140446.9 | 231872.5 | 178989.4 | 134010   | TRUE |
| 19327.1  | 21296.7  | 25976.2  | 25787.6  | 15492.3  | 24020.8  | 18277.6  | 15433    | TRUE |
| 510268.6 | 513569.4 | 475125   | 448038.3 | 370492.3 | 542898.1 | 520520.7 | 437356.4 | TRUE |
| 248277.4 | 207683.8 | 255846.2 | 288804.4 | 214458.1 | 254491.9 | 234050.7 | 227156.8 | TRUE |
| 144205.3 | 171018.5 | 161102   | 187244.4 | 181453.6 | 186320.2 | 215569.4 | 149490.3 | TRUE |
| 337009.6 | 384511.5 | 451857.1 | 486685.7 | 405407.1 | 517545.4 | 532474.1 | 408992.7 | TRUE |
| 184915.9 | 195800   | 207081.3 | 189273.1 | 160683.8 | 158592.4 | 147476   | 142598.8 | TRUE |
| 239844.6 | 228307.6 | 322976.9 | 258382.5 | 259599.9 | 290563.9 | 239242.5 | 266455.2 | TRUE |
| 517551.7 | 521207.7 | 522676.9 | 559419.8 | 456510   | 516441.4 | 534779.3 | 471863.6 | TRUE |
| 48885.2  | 50259.7  | 62456.2  | 42377.9  | 61796    | 46599.2  | 51874.7  | 46695    | TRUE |
| 549525.4 | 396209.6 | 554518.3 | 610042.8 | 590510.7 | 677528.9 | 456131.9 | 574503.9 | TRUE |
| 846171.4 | 831922   | 765795.7 | 738990.4 | 780350.2 | 714496.8 | 808524.2 | 725365   | TRUE |
| 586659.2 | 552476.3 | 577933.1 | 580949.4 | 419881   | 598842.6 | 576552.9 | 430598.2 | TRUE |
| 414611.4 | 456630.3 | 405595.8 | 471392.8 | 312286.8 | 430284.2 | 456586.8 | 307145.3 | TRUE |
| 21247.4  | 6024.4   | 34441.4  | 24494.3  | 19530.9  | 11538.8  | 9750.9   | 23004.6  | TRUE |
| 72694.3  | 68586.7  | 47971.4  | 66025.2  | 53120.2  | 47970.6  | 54568.2  | 62050.1  | TRUE |
| 13741.7  | 12749.5  | 19595.9  | 40273.2  | 22918.3  | 28561.5  | 14423.1  | 45044.5  | TRUE |
| 200466.9 | 182150.3 | 127406.3 | 203417.1 | 211223.1 | 250348.2 | 257549.4 | 257838.4 | TRUE |
| 330678.5 | 172481.9 | 222301.3 | 326594.5 | 263667.1 | 374343.7 | 303307.5 | 372433.7 | TRUE |
| 153197.9 | 100921.4 | 96281.4  | 124492.2 | 135401.5 | 146189.7 | 176847.8 | 193187.7 | TRUE |
| 144548.3 | 168791.8 | 138969.9 | 107251.4 | 185292.8 | 80046.4  | 158761.2 | 145476.1 | TRUE |
| 144391   | 156590.9 | 133897.7 | 133024.6 | 143804.6 | 134477.4 | 150457.1 | 137473.7 | TRUE |
| 171600.3 | 148830.2 | 178736.1 | 188656   | 201549.9 | 142841.6 | 193827.4 | 202461.6 | TRUE |
| 349157.7 | 342486.4 | 347496.4 | 335807.6 | 388861.7 | 309791   | 352993.4 | 410766.3 | TRUE |
| 100722.7 | 122441.2 | 91011.3  | 130150.6 | 109582.4 | 82068.8  | 93800.4  | 87140.8  | TRUE |
| 44216.8  | 65385.9  | 68736.7  | 41168.6  | 50939    | 33681.5  | 44052.9  | 40690.8  | TRUE |
| 41809.1  | 37992.9  | 52979.5  | 31762.2  | 49408.5  | 51551.9  | 38484.9  | 45886.1  | TRUE |
| 35351.9  | 41533.4  | 25008.1  | 53089    | 46376.2  | 40583.6  | 49598.3  | 50052.1  | TRUE |
| 60157.5  | 61712.6  | 36217.5  | 55166    | 96159.9  | 23521.8  | 43878.5  | 66659.9  | TRUE |
| 225593.2 | 198618.3 | 170294.2 | 187380.3 | 211139.7 | 159046.6 | 185810.6 | 221761.3 | TRUE |
| 72835.3  | 63000.7  | 73503.7  | 95817.9  | 81028.3  | 108087   | 105759.2 | 103372.2 | TRUE |
| 63236.8  | 94794.8  | 35550.5  | 55232    | 139425.4 | 34319.3  | 81836.3  | 115903.4 | TRUE |
| 63037.9  | 119094.6 | 92608.1  | 113292.8 | 42669.1  | 70937.1  | 123125.8 | 87065.5  | TRUE |

|          |          |          |          |          |          |          |          |      |
|----------|----------|----------|----------|----------|----------|----------|----------|------|
| 67751    | 48742.5  | 63096.5  | 66743.9  | 57355.4  | 77795.7  | 51176.6  | 50480.3  | TRUE |
| 396071.6 | 341901.1 | 364483.1 | 379644.4 | 435560.2 | 404671.2 | 346977.5 | 389835.6 | TRUE |
| 228902.7 | 118078.8 | 155098   | 137474.2 | 248890   | 177600.7 | 128141.5 | 184919.1 | TRUE |
| 158989   | 148318.8 | 111919   | 159779.7 | 139911.8 | 132514.3 | 135572.9 | 167224.8 | TRUE |
| 40147.5  | 32574.4  | 27703.6  | 48597    | 69201.5  | 75276.9  | 54042.2  | 53351.2  | TRUE |
| 192222.6 | 182464.3 | 197074.7 | 270949.7 | 265462.8 | 344118.8 | 277906.8 | 261404.6 | TRUE |
| 185353.4 | 176104.7 | 173891.3 | 198216.8 | 202814.5 | 218098.4 | 236452.7 | 185907   | TRUE |
| 117032.7 | 115120.9 | 96037.7  | 107905.3 | 111316.5 | 117513.6 | 100374.1 | 114873.7 | TRUE |
| 22201.7  | 32883.4  | 24443.6  | 24771.1  | 36683.3  | 15095.2  | 35582.5  | 32072.1  | TRUE |
| 49982.8  | 42421    | 69157.7  | 58098.9  | 50101.8  | 67912.3  | 52358.3  | 40479.6  | TRUE |
| 32913.6  | 42499.6  | 35923.7  | 32049.1  | 28206.2  | 25896.5  | 36601.7  | 29465.6  | TRUE |
| 640975.8 | 459732.5 | 602772.1 | 586040.1 | 716037.4 | 647609.6 | 526921.9 | 718390.7 | TRUE |
| 20761805 | 14347319 | 21987839 | 21746841 | 22075302 | 21257302 | 15419051 | 21675326 | TRUE |
| 391174.8 | 422814   | 395369.3 | 381948.9 | 326659.6 | 415314.6 | 378968   | 313965.6 | TRUE |
| 165159.1 | 156226.5 | 235460.9 | 221770.1 | 164375.7 | 226595.7 | 175150.7 | 137854   | TRUE |
| 327333.7 | 264630.4 | 376120.3 | 321915.7 | 271687.6 | 390811.2 | 298351.8 | 315244.1 | TRUE |
| 340628.4 | 254806.7 | 366168.6 | 395517   | 351373.1 | 359374   | 296705.7 | 351663.7 | TRUE |
| 47239.9  | 45873.9  | 46106.2  | 47674.9  | 37490    | 39095.4  | 48019.3  | 30668.2  | TRUE |
| 76040.2  | 64927.8  | 96424.8  | 77288    | 77173.4  | 71152.4  | 64405.3  | 77775.3  | TRUE |
| 510268.6 | 513569.4 | 475125   | 448038.3 | 370492.3 | 542898.1 | 520520.7 | 437356.4 | TRUE |
| 248277.4 | 207683.8 | 255846.2 | 288804.4 | 214458.1 | 254491.9 | 234050.7 | 227156.8 | TRUE |
| 144205.3 | 171018.5 | 161102   | 187244.4 | 181453.6 | 186320.2 | 215569.4 | 149490.3 | TRUE |
| 337009.6 | 384511.5 | 451857.1 | 486685.7 | 405407.1 | 517545.4 | 532474.1 | 408992.7 | TRUE |
| 184915.9 | 195800   | 207081.3 | 189273.1 | 160683.8 | 158592.4 | 147476   | 142598.8 | TRUE |
| 239844.6 | 228307.6 | 322976.9 | 258382.5 | 259599.9 | 290563.9 | 239242.5 | 266455.2 | TRUE |
| 116285.2 | 97362.6  | 120245   | 124850.4 | 117087.4 | 134256.7 | 117888.5 | 145267.1 | TRUE |
| 599951.3 | 588677.2 | 430053.7 | 482776.5 | 478349.4 | 452881.1 | 507253.7 | 491654.5 | TRUE |
| 341603.7 | 330291.6 | 369707   | 395680.1 | 338526.3 | 393592.6 | 342783.4 | 308590.7 | TRUE |
| 161799   | 177906   | 169855.2 | 170021.5 | 157890.9 | 162968.5 | 192707.4 | 155955.7 | TRUE |
| 46037.6  | 59193.6  | 29632.5  | 35151.6  | 51777.5  | 35401.4  | 60029.4  | 43529.3  | TRUE |
| 61669.2  | 69633.5  | 169233.9 | 53528.9  | 74936.9  | 66127    | 89818.8  | 61637.5  | TRUE |
| 2731088  | 2256391  | 2441366  | 2519721  | 2627554  | 2536931  | 2090035  | 2519132  | TRUE |
| 2249326  | 1829517  | 1873429  | 2001110  | 2114790  | 2091493  | 1687916  | 2158209  | TRUE |
| 112124.4 | 99335.3  | 132868.2 | 144262.9 | 115733.2 | 146920.1 | 121666.3 | 126890.9 | TRUE |
| 395030.8 | 313655.1 | 451222.5 | 510343.5 | 476019.9 | 481886.7 | 400437.1 | 412660.3 | TRUE |
| 117479.7 | 106595.4 | 111619.5 | 115590.1 | 105234.6 | 119443.1 | 120708.9 | 107037.2 | TRUE |
| 96032.4  | 80245.7  | 114857.6 | 112606.1 | 83498.2  | 123436.5 | 78039    | 104587.3 | TRUE |
| 8049.7   | 20094.1  | 24843    | 25702.7  | 26458.7  | 7079.8   | 24111.6  | 11503    | TRUE |
| 20731.3  | 24144.4  | 27950.4  | 34339.3  | 55705.2  | 44095.7  | 34734.7  | 33704    | TRUE |
| 81327.4  | 100912.6 | 71383    | 110356.1 | 112269.4 | 95260.5  | 126668.5 | 69986.6  | TRUE |

|          |          |          |          |          |          |          |          |      |
|----------|----------|----------|----------|----------|----------|----------|----------|------|
| 51005.7  | 52321.7  | 43864.7  | 44568.2  | 39714.7  | 53905.4  | 53318.7  | 34886.5  | TRUE |
| 531503.1 | 423936   | 450187.6 | 460094.5 | 611631.2 | 652922.1 | 432261.5 | 654802   | TRUE |
| 65399    | 57186.3  | 64704.5  | 77977.6  | 74367.3  | 50165.6  | 74158    | 73194.5  | TRUE |
| 233613.6 | 105344.9 | 271291.8 | 221260.4 | 185673   | 304693.8 | 146962.2 | 160935.8 | TRUE |
| 211989   | 166073.9 | 223653.3 | 214567.3 | 185605.8 | 236038.4 | 152062.4 | 194995   | TRUE |
| 332197.4 | 253982.9 | 384318.1 | 316972.4 | 300855.9 | 408525.8 | 307657.6 | 319095   | TRUE |
| 56274.5  | 87992.7  | 39183.1  | 45202    | 67649.7  | 62323.9  | 59780.5  | 63858    | TRUE |
| 2069378  | 1617477  | 2135698  | 2355941  | 1849862  | 2235272  | 1842518  | 1921386  | TRUE |
| 2291734  | 1902540  | 1827204  | 1820606  | 2318655  | 2728518  | 1962025  | 2566211  | TRUE |
| 531147.7 | 449199.3 | 553577.6 | 537656.5 | 594315.4 | 600422.8 | 504390.6 | 631472.1 | TRUE |
| 364664.7 | 325548.3 | 340066.5 | 257155.6 | 376424.3 | 361002.5 | 344190.8 | 356416.2 | TRUE |
| 70034.6  | 46623.9  | 75256.9  | 54199    | 71699.1  | 70564.7  | 59606    | 74493.4  | TRUE |
| 48459.3  | 30773.3  | 38849    | 39346.7  | 41628.5  | 59065    | 39078    | 61314.8  | TRUE |
| 220708.4 | 266087.4 | 404862.4 | 215894.1 | 195596.8 | 242499.6 | 183280.9 | 195174.5 | TRUE |
| 29138.6  | 9763.9   | 22565.1  | 5165.3   | 17783.4  | 42365.4  | 12649.9  | 15324.1  | TRUE |
| 71551.3  | 60622.3  | 60485    | 57565.1  | 59339.6  | 80103.8  | 74531.7  | 84802.2  | TRUE |
| 180178.9 | 180888.9 | 173241.6 | 170969.3 | 185538.3 | 223798   | 209886.6 | 207311.1 | TRUE |
| 568808.5 | 427476.1 | 642127.6 | 845956.7 | 577107.6 | 776609.9 | 534762.1 | 610522.6 | TRUE |
| 344898.6 | 287305.3 | 424259.1 | 518182.6 | 389837.7 | 484426   | 300705.5 | 412867.6 | TRUE |
| 183101.2 | 128624.7 | 187983.2 | 228903.7 | 175259.2 | 222749.2 | 166353   | 190567.6 | TRUE |
| 93499.7  | 87573.4  | 56119.7  | 81883.3  | 112610.7 | 124572   | 86292.1  | 116847.6 | TRUE |
| 91750.7  | 81378.4  | 55497.7  | 74534.9  | 114338.5 | 120751.2 | 96581.5  | 106839.3 | TRUE |
| 211392.8 | 205983.9 | 172888.6 | 216753   | 277808.5 | 299315.7 | 226720.5 | 303313.6 | TRUE |
| 313282.3 | 292043.4 | 220124.6 | 262537.8 | 414199   | 438878.4 | 326781   | 421517.9 | TRUE |
| 212872.5 | 153987.7 | 215036   | 252245.1 | 174078.5 | 239591.4 | 168793.8 | 170929.1 | TRUE |
| 37331.7  | 35680    | 31740.1  | 45058.8  | 38434.3  | 53105.1  | 35946.4  | 45636    | TRUE |
| 923033.1 | 758174.1 | 914467.3 | 1243132  | 938715.4 | 1072844  | 872048   | 1013401  | TRUE |
| 1105866  | 976276.8 | 910548.7 | 934984.9 | 1301833  | 1423872  | 1154666  | 1405929  | TRUE |
| 1137116  | 1032970  | 964643.6 | 980663.6 | 1440459  | 1488265  | 1161435  | 1476138  | TRUE |
| 44838.3  | 70098.8  | 53502.1  | 62955.7  | 70236.8  | 51387.4  | 51159.8  | 33213.6  | TRUE |
| 63726.4  | 86583.7  | 45693.3  | 51728.4  | 59792.7  | 52573.4  | 57017.2  | 57409.6  | TRUE |
| 164988.8 | 154868.1 | 171366.9 | 183184.7 | 220797.7 | 158886.8 | 197140.9 | 201568.3 | TRUE |
| 257996.5 | 256496.7 | 242472.3 | 258051.9 | 241463.7 | 261722   | 246457.9 | 253630.5 | TRUE |
| 679053.2 | 757162.5 | 375083.6 | 578313.4 | 899440.6 | 384539.6 | 805225   | 909862.7 | TRUE |
| 1202681  | 1435661  | 376469.9 | 881844.3 | 1739472  | 404365.7 | 1598753  | 1756375  | TRUE |
| 200893.1 | 321237.5 | 97286.5  | 147301.8 | 248178.2 | 85325.2  | 214595.8 | 214561.4 | TRUE |
| 70565.2  | 95140.5  | 59940.5  | 75882.3  | 113533.9 | 43154.7  | 92693.5  | 96510.3  | TRUE |
| 91742    | 132979.8 | 67088.9  | 76689.3  | 141760.8 | 74409.5  | 133651.1 | 149640.4 | TRUE |
| 370380.6 | 580470.5 | 462294.4 | 511026.3 | 221988.9 | 298276.8 | 530933.6 | 314181.5 | TRUE |
| 43092.9  | 64755.9  | 78583.1  | 63819.8  | 24487    | 34273.8  | 84585.4  | 48048.6  | TRUE |
| 189832.1 | 199030.5 | 141188.4 | 152509.9 | 225774.1 | 132316   | 227112   | 225657.3 | TRUE |
| 146306.9 | 178001.4 | 126570.9 | 154111.2 | 204764.8 | 131577   | 191898.4 | 216830.6 | TRUE |
| 100884   | 151697   | 117209.2 | 112068.4 | 147282.4 | 107338.9 | 148900.1 | 137459.9 | TRUE |
| 111484.8 | 141251.5 | 102499.3 | 94852    | 145698.3 | 135123.7 | 155208.2 | 145488.9 | TRUE |
| 37650.4  | 84179.6  | 38539.1  | 41833.5  | 106561.7 | 45220.5  | 50107.6  | 38371.3  | TRUE |
| 353854.2 | 450704.8 | 410081   | 459553.1 | 376011.6 | 287755.4 | 464777.3 | 321202.9 | TRUE |
| 197912.2 | 252976.1 | 252393.9 | 230840.8 | 158405   | 163924   | 291057.9 | 163210.9 | TRUE |
| 5076.5   | 23503.6  | 3088.6   | 13912.8  | 23180    | 4688.7   | 9910.2   | 20260.3  | TRUE |
| 71645.2  | 83988.7  | 48524.2  | 63546    | 74716    | 59646.7  | 99734.2  | 85582.7  | TRUE |

|          |          |          |          |          |          |          |          |      |
|----------|----------|----------|----------|----------|----------|----------|----------|------|
| 119295   | 109038   | 80719.8  | 115896.4 | 107136.4 | 85478.4  | 112940.3 | 125857.3 | TRUE |
| 68960.3  | 82714.1  | 95756.8  | 72993    | 42767    | 48731.9  | 90542.6  | 47275.6  | TRUE |
| 1078251  | 1369794  | 431809.2 | 927173.8 | 1728715  | 523694.3 | 1490281  | 1584499  | TRUE |
| 359930.4 | 502521.9 | 484386.2 | 559315.7 | 143045.8 | 283364.7 | 562593.7 | 289152.8 | TRUE |
| 163892.2 | 187886.3 | 342574.3 | 142094.7 | 137277.6 | 139085.2 | 228553.1 | 147199   | TRUE |
| 172787.3 | 182972.3 | 175342.5 | 167137.3 | 159163.7 | 181970.6 | 242990   | 199077.2 | TRUE |
| 35947.1  | 13347.2  | 33558.5  | 52168.1  | 11489.6  | 13104.8  | 34398.7  | 16260.5  | TRUE |
| 54173.7  | 80194.7  | 19961.9  | 63623.1  | 98724    | 30271.9  | 81371.6  | 74125.8  | TRUE |
| 65866.5  | 94479.9  | 28842.1  | 50640.3  | 97817    | 38451.1  | 112472.7 | 85113.3  | TRUE |
| 142895.5 | 183909.2 | 138058.4 | 154210.4 | 84185.6  | 112166.2 | 215702.9 | 125353.9 | TRUE |
| 348316   | 502022.5 | 449899.8 | 400318.9 | 191684.1 | 293056.6 | 507472   | 288501.6 | TRUE |
| 397377.3 | 469652   | 251686.2 | 329142.2 | 509597.6 | 254795.5 | 500762.3 | 556185.8 | TRUE |
| 117982.1 | 98330.6  | 96734.4  | 117758.2 | 76155.7  | 77530.3  | 125698.4 | 77612.2  | TRUE |
| 256610.6 | 271548.6 | 151327.1 | 222055.3 | 269994.8 | 175204.8 | 253277.2 | 256400.1 | TRUE |
| 192915.5 | 223469.9 | 131308.3 | 178970.3 | 189148.1 | 119597.9 | 210271.7 | 175166   | TRUE |
| 139310.8 | 155386.9 | 120507.3 | 210754.5 | 203587.2 | 133560.4 | 190044.6 | 192254.5 | TRUE |
| 461063.4 | 548607.3 | 393645.3 | 614321.8 | 642732.5 | 410585.2 | 691016.5 | 678698.8 | TRUE |
| 131126.6 | 174158.2 | 183147.6 | 191397.1 | 121161.8 | 171245.3 | 199918.9 | 160955.1 | TRUE |
| 547189.7 | 640402.8 | 756979.8 | 776012.7 | 497083.9 | 695131.1 | 765763.6 | 642674.2 | TRUE |
| 217458.7 | 214890.4 | 247329.1 | 223959.4 | 209620.6 | 227439.1 | 216889.5 | 225251.2 | TRUE |
| 85068.7  | 91118    | 68940.5  | 115385   | 83840.8  | 100022.5 | 99745.7  | 88167    | TRUE |
| 735243.7 | 684659.5 | 677126.7 | 711112.5 | 747839.3 | 680684.5 | 841615.3 | 788750.9 | TRUE |
| 37356.6  | 33164.6  | 27234    | 29475.1  | 27945.4  | 25174.2  | 23732.2  | 29948.7  | TRUE |
| 59214.5  | 44910.4  | 46069.8  | 52487.1  | 55627.8  | 44410    | 53830.4  | 46646.5  | TRUE |
| 33058.1  | 39138.6  | 35985.1  | 24561.2  | 32575.4  | 41199.3  | 45941.7  | 48814.3  | TRUE |
| 31911.5  | 34991.1  | 44949.9  | 50949.1  | 36977.3  | 20438.1  | 24958.8  | 49446.3  | TRUE |
| 15436.4  | 33415.3  | 23872.1  | 34784.8  | 32417.7  | 5526.3   | 10889.9  | 8075     | TRUE |
| 33370.6  | 28683.5  | 34142.2  | 32919.4  | 36295.6  | 18211.6  | 30747.7  | 29340.4  | TRUE |
| 67458.5  | 62628.4  | 49134.7  | 71493.5  | 61663.5  | 53828.3  | 58059.1  | 68180.4  | TRUE |
| 484095.6 | 464386.4 | 333243.7 | 404638.3 | 391011.5 | 343712.5 | 515264   | 428569.3 | TRUE |
| 74406.4  | 61683.8  | 87015.9  | 103639.6 | 90950.4  | 93319.3  | 96509.1  | 88899.4  | TRUE |
| 60813.7  | 60689.4  | 62167.1  | 75682.2  | 60684.1  | 56601.5  | 63064.2  | 52263.3  | TRUE |
| 1747624  | 1722297  | 1130838  | 1539951  | 1429625  | 1240471  | 1718986  | 1363326  | TRUE |

|          |          |          |          |          |          |          |          |      |
|----------|----------|----------|----------|----------|----------|----------|----------|------|
| 691434.5 | 518213.9 | 735060.3 | 692517.3 | 577347.9 | 783047.5 | 467089.5 | 594949.3 | TRUE |
| 633457.5 | 449270.1 | 573094.3 | 631385.3 | 472690.8 | 619218.1 | 422378.8 | 497813.2 | TRUE |
| 164535.8 | 125855.8 | 221077.9 | 196637.1 | 179003   | 214176.9 | 167256.1 | 158257.5 | TRUE |
| 1068695  | 842762.7 | 985618.8 | 988636.6 | 1169840  | 1155955  | 955222.1 | 1160975  | TRUE |
| 2598598  | 2170445  | 2052638  | 1856017  | 3095800  | 2796207  | 2381496  | 2846307  | TRUE |
| 43217.1  | 41152.9  | 50097    | 54589.1  | 59753.1  | 40018.9  | 39385    | 42469.4  | TRUE |
| 92488.1  | 128808.4 | 92951.1  | 126914.5 | 127491.7 | 131884.3 | 87307.9  | 98534.1  | TRUE |
| 247131.6 | 186474.5 | 189000.1 | 234808.5 | 192774   | 271443   | 232793.6 | 283953.5 | TRUE |
| 190837.5 | 135260.5 | 196182.2 | 216513.4 | 181546.5 | 203098.6 | 181300.4 | 219271.6 | TRUE |
| 704227.8 | 576694   | 494615.6 | 567382.3 | 704536.7 | 904042.3 | 668428.4 | 800428.1 | TRUE |
| 63732.4  | 60613.9  | 81372    | 67394.9  | 61666.4  | 83126.6  | 63991.5  | 55803.3  | TRUE |
| 32669.2  | 27559.9  | 25533.9  | 23321.7  | 23720.2  | 24472.4  | 17426.4  | 31011.1  | TRUE |
| 35927.7  | 32188.6  | 34399.3  | 37679.8  | 10901.1  | 33071.2  | 12930.3  | 30832.7  | TRUE |
| 29983.4  | 19895    | 30452.5  | 39520.6  | 24972.6  | 35469.5  | 20441.2  | 25355.7  | TRUE |
| 60341.9  | 41774.2  | 58323.9  | 92161.8  | 85277.8  | 72405.7  | 68733.1  | 82192    | TRUE |
| 37547.4  | 25081.9  | 32234.7  | 38885.8  | 41603.5  | 31407.2  | 32782.3  | 35384.7  | TRUE |
| 10037.3  | 10656    | 24685.2  | 28850.5  | 24838.7  | 24554.5  | 8898.6   | 26788.7  | TRUE |
| 2719232  | 2246077  | 1841658  | 2166473  | 3145443  | 2959432  | 2356930  | 3031271  | TRUE |
| 333580.2 | 259968.7 | 296579.4 | 353531   | 305610.9 | 346106.5 | 294785.4 | 267210.4 | TRUE |
| 316545.2 | 316510.5 | 355559.8 | 399931.3 | 324169.6 | 379044.9 | 289549.5 | 341202.9 | TRUE |
| 625165   | 476775.6 | 616206.6 | 655401.4 | 626178.3 | 651275.9 | 461352.4 | 604589   | TRUE |
| 32674.1  | 31577.5  | 34933.2  | 9901.1   | 27280.8  | 34375.6  | 27541.2  | 28157.4  | TRUE |
| 33035.3  | 26248.1  | 27110.1  | 44559.8  | 37550.5  | 25607.2  | 31855.6  | 21006.5  | TRUE |
| 22555.6  | 2852.8   | 9281.1   | 5500.5   | 25302.4  | 21840.4  | 7001.1   | 11758.8  | TRUE |
| 34502.2  | 60857.8  | 84900.9  | 60086.9  | 66132.6  | 20176.8  | 20087.2  | 11539.1  | TRUE |
| 268872.6 | 137040.9 | 194250.4 | 187003.1 | 150017.9 | 217129.2 | 106760.3 | 168878.1 | TRUE |
| 396836   | 277905.8 | 490451   | 487262.7 | 400281.8 | 477384.8 | 324720.7 | 400928.5 | TRUE |
| 656646.7 | 605637.4 | 484782.7 | 571018   | 713560.3 | 681750.5 | 615952.7 | 752868.2 | TRUE |
| 31834.8  | 13829.4  | 27101    | 16143.4  | 10434.8  | 34477.1  | 25238.1  | 14414.9  | TRUE |
| 62284.4  | 49721.4  | 52547.1  | 56495.9  | 54467    | 74537.2  | 75806.4  | 74191.6  | TRUE |
| 32921.1  | 55192.2  | 28609.1  | 51142.2  | 46973.6  | 53038.7  | 36831    | 50122.6  | TRUE |
| 39820.5  | 48723.2  | 46732.3  | 70007.5  | 58387.8  | 38936    | 53551.9  | 75885.3  | TRUE |
| 78477    | 88394.9  | 66946.9  | 102660.7 | 63850.4  | 100921.5 | 98339.8  | 107031.4 | TRUE |
| 311835.3 | 321095.5 | 322639.3 | 272033.1 | 313404.6 | 286731.1 | 322735.2 | 349882.1 | TRUE |
| 205485.9 | 230461.9 | 125940.9 | 186970.3 | 167106.6 | 149063.1 | 246429.5 | 225066.4 | TRUE |
| 132879.2 | 138992.5 | 127663   | 146011.6 | 127397   | 144360.9 | 123669.1 | 124358.4 | TRUE |
| 123772.5 | 96560    | 64353    | 94211    | 120547.9 | 115448.4 | 102818.7 | 125871.9 | TRUE |

|          |          |          |          |          |          |          |          |      |
|----------|----------|----------|----------|----------|----------|----------|----------|------|
| 37063.4  | 35945.9  | 23555.2  | 31528.6  | 43378.3  | 42190    | 48964.1  | 47962.9  | TRUE |
| 35394    | 30882.8  | 42002.9  | 34979.6  | 36754.8  | 33938    | 35927.7  | 38310.7  | TRUE |
| 92212.2  | 87624.3  | 79633.4  | 75054.3  | 91591.3  | 97885.8  | 75251.9  | 100233.1 | TRUE |
| 235918.5 | 165215.7 | 284527   | 310342.1 | 235490.4 | 303711.4 | 142261.5 | 226347.1 | TRUE |
| 205580.9 | 189580.7 | 224743.9 | 238996.9 | 202388.5 | 246105.8 | 188488.4 | 193281   | TRUE |
| 84355.9  | 53309.5  | 73388.1  | 72662.3  | 67609.9  | 98670.7  | 76588.1  | 80423.2  | TRUE |
| 255144.6 | 275574.7 | 152857.2 | 190351.2 | 308810.5 | 282241.9 | 230532.1 | 273413.3 | TRUE |
| 214669.9 | 131534.5 | 208734.8 | 239694.6 | 193133.4 | 241389.4 | 128654.8 | 211553.9 | TRUE |
| 120660.4 | 59866.9  | 152516.4 | 150414.7 | 126520   | 150283.8 | 73720.3  | 105405.3 | TRUE |
| 154839.6 | 133148.2 | 74678.4  | 76549.6  | 189051.3 | 204739   | 132002.9 | 168209.6 | TRUE |
| 672044.3 | 546264.7 | 539388   | 512717.3 | 849323.4 | 711965.6 | 598569.1 | 692123.9 | TRUE |
| 52525.8  | 62389.8  | 67439.2  | 58707.2  | 80961.2  | 62649.1  | 61498.7  | 95936.4  | TRUE |
| 299560.3 | 209379   | 292097   | 320966.3 | 227959.2 | 239999.3 | 288150.4 | 271712   | TRUE |
| 49764.2  | 44554.9  | 51110    | 78429.3  | 35975.9  | 48542.1  | 48882.9  | 53268.3  | TRUE |
| 180272.1 | 232955.4 | 134056.9 | 168304.6 | 206751.5 | 90679.2  | 216872.2 | 186580.6 | TRUE |
| 124138.6 | 147093.7 | 81690.4  | 128901   | 167682   | 94453.1  | 159396.9 | 160815.6 | TRUE |
| 36712.3  | 73828.9  | 8113.3   | 34710.1  | 56736.4  | 22580.8  | 50651.8  | 60428.5  | TRUE |
| 40390.4  | 52539.8  | 52588.6  | 48200.6  | 56176.3  | 58873.7  | 64604.3  | 62328.2  | TRUE |
| 179370.2 | 142865.4 | 177514.9 | 192701.5 | 152676.9 | 155153.9 | 180271.1 | 162306.8 | TRUE |
| 443587.8 | 437485.4 | 417398.2 | 383114.8 | 390788.5 | 419830.6 | 433740   | 425190.9 | TRUE |
| 124616.2 | 137756.6 | 140649.2 | 125569.8 | 125221.8 | 117670.3 | 121422.6 | 119036.8 | TRUE |
| 274039.1 | 279170.3 | 255444   | 268037.5 | 322394.1 | 223628.9 | 222000.5 | 201593.9 | TRUE |
| 179568.6 | 180404.2 | 153154.5 | 184074   | 177177.3 | 238453.8 | 220784.6 | 278390.7 | TRUE |
| 477318.1 | 418501.3 | 344038.7 | 455068.3 | 541690.3 | 503040.4 | 447008.1 | 528126.8 | TRUE |
| 152808.4 | 151038.2 | 150021.1 | 190329.3 | 181260.7 | 379511.1 | 186112.9 | 119160.9 | TRUE |
| 71631.8  | 73918.3  | 66728.6  | 59479.1  | 67549.7  | 47548.6  | 61530.6  | 66127.8  | TRUE |
| 38620.3  | 34480.9  | 42937    | 40576.7  | 35809.4  | 30110.1  | 25913.1  | 29723.4  | TRUE |
| 758703.4 | 678362.7 | 692300.3 | 677638   | 851395.6 | 753983.6 | 652595.2 | 704387.6 | TRUE |
| 15740    | 24118.5  | 7815.2   | 19693.8  | 24435.5  | 11315.4  | 26656    | 16759.3  | TRUE |
| 486635.1 | 470756.2 | 373348   | 431931.1 | 490769.6 | 429598.3 | 561815.6 | 526209.2 | TRUE |
| 152201.3 | 367551.3 | 294751.1 | 332047.7 | 427574   | 108837.7 | 87863    | 103214.4 | TRUE |
| 54853.4  | 106381.7 | 74839.5  | 79672    | 98373.7  | 30476    | 41776.4  | 20135.5  | TRUE |
| 98393.2  | 165282.3 | 149597.3 | 174559.9 | 238123.9 | 82303.9  | 64886.4  | 71302.4  | TRUE |
| 153847.9 | 190221.1 | 154329.6 | 158794.4 | 159539.7 | 143311   | 194987.6 | 204923   | TRUE |
| 2449161  | 3010368  | 2665833  | 2887945  | 1746545  | 2467281  | 2923990  | 2535658  | TRUE |
| 23604.2  | 26523.4  | 13025.3  | 15058    | 26976.2  | 10821.1  | 21490.1  | 24521.8  | TRUE |
| 529621.1 | 460233.1 | 476057.2 | 478231.8 | 562048.4 | 572313.5 | 494676   | 509365.3 | TRUE |
| 88502.1  | 103554.7 | 116541.5 | 140080.9 | 108377   | 137926.3 | 104281.7 | 128961.7 | TRUE |

|          |          |          |          |          |          |          |          |      |
|----------|----------|----------|----------|----------|----------|----------|----------|------|
| 77706.2  | 96870.7  | 120334.4 | 206072   | 60497.2  | 108243.4 | 187166.9 | 119670.4 | TRUE |
| 165032.3 | 127235.6 | 127537.5 | 107067.8 | 164186.8 | 167060.1 | 175489.1 | 180656   | TRUE |
| 71210.9  | 72609.5  | 83935.6  | 62629.2  | 89137.9  | 105530.5 | 80469.7  | 82226.8  | TRUE |
| 229643.6 | 157016.6 | 220458   | 210180.6 | 164502.6 | 250499.6 | 192787.1 | 168391.7 | TRUE |
| 315911.4 | 283276.9 | 269565.5 | 280326.2 | 297439.4 | 385863.5 | 304206.8 | 315537.7 | TRUE |
| 290100.9 | 261648.7 | 228744.6 | 242568.9 | 229314.4 | 273689.8 | 276266.5 | 282617.3 | TRUE |
| 119394.6 | 119691.9 | 107706.8 | 160742.6 | 134830.8 | 128556.7 | 130461.1 | 130669.8 | TRUE |
| 38212.7  | 45253.4  | 32361.5  | 34072.2  | 45225.9  | 39860    | 41056.4  | 42150    | TRUE |
| 36211.9  | 42588.4  | 50897.5  | 34539.8  | 33926.4  | 38932.8  | 48627    | 43423.5  | TRUE |
| 91250.5  | 68148.9  | 97700    | 66754.2  | 118756.1 | 89806.1  | 67137.8  | 124945.8 | TRUE |
| 60056.2  | 45766.3  | 63860.3  | 60802.4  | 83961    | 61083.2  | 55654.1  | 90751.3  | TRUE |
| 23844.6  | 26923.3  | 22715    | 37473.1  | 23693.8  | 25581.7  | 31453.2  | 29753.2  | TRUE |
| 43475.6  | 42887.6  | 29590.4  | 46240    | 48828.8  | 31153.4  | 43306.4  | 40784.6  | TRUE |
| 66384.3  | 100066.2 | 81660.5  | 72318.6  | 98217.8  | 59778.4  | 44330.3  | 60354.1  | TRUE |
| 235098.8 | 211787.4 | 219829.1 | 220332.5 | 198020.9 | 228806   | 215385.7 | 172936.4 | TRUE |
| 230009.2 | 201450.2 | 216758   | 261105.2 | 207480.9 | 237560.5 | 208755.5 | 212128.1 | TRUE |
| 37609.7  | 29100.7  | 27313.7  | 30508.7  | 31114.4  | 36590.5  | 29377.7  | 48141.5  | TRUE |
| 231769.7 | 300390.7 | 248875.8 | 348997.5 | 185550.1 | 278080.3 | 249589.3 | 174941.5 | TRUE |
| 582031.7 | 628957   | 625432.5 | 663533.3 | 591292.8 | 623315.6 | 648755.4 | 528935.8 | TRUE |
| 605363.5 | 528417.5 | 545940   | 528307   | 533676.5 | 559125.3 | 529288.7 | 559851.1 | TRUE |
| 792358.7 | 819397.8 | 750487.4 | 760103.1 | 718373.7 | 774311.7 | 688467.3 | 780302.9 | TRUE |
| 189269   | 173076.4 | 169542.2 | 176553.1 | 202917.9 | 177766.8 | 175844.2 | 200975.2 | TRUE |
| 3942844  | 3159329  | 2876079  | 4309285  | 4046269  | 3313319  | 3308524  | 4223087  | TRUE |
| 198842.1 | 206994.9 | 159537   | 178793.9 | 168826.7 | 229189.1 | 197159.8 | 211264.2 | TRUE |
| 522562.2 | 519368.8 | 493235.9 | 470447.7 | 423667.3 | 489190.1 | 479094.9 | 530890.4 | TRUE |
| 366777.6 | 354235.2 | 383485.2 | 404135.4 | 376868.5 | 495225.7 | 441712.6 | 550858.9 | TRUE |
| 75593.7  | 57691.1  | 76286.4  | 75946.2  | 81067.5  | 71070.2  | 75527.3  | 83223.5  | TRUE |
| 25184.5  | 38654.3  | 40278.3  | 28502.3  | 38934.2  | 39266.6  | 49490.5  | 55059.3  | TRUE |
| 498025.9 | 398226.1 | 400536   | 502664   | 512957.1 | 446391.1 | 442189.9 | 504615.5 | TRUE |
| 390023.9 | 474463.8 | 399148.5 | 449266.2 | 459962.8 | 405886.5 | 400438.2 | 440375.6 | TRUE |
| 81460.4  | 71187.1  | 79562.5  | 73935.2  | 70552.2  | 69920.5  | 65608.7  | 91177    | TRUE |
| 514359.5 | 394271.9 | 341376   | 335934.7 | 359314.5 | 362699.9 | 292420.3 | 350651   | TRUE |
| 206324.1 | 152231.6 | 224888.9 | 241372.5 | 193648.2 | 229795.1 | 167645.4 | 215126.3 | TRUE |
| 610749.8 | 514230.9 | 675053.7 | 715280.7 | 672500.4 | 703833.7 | 581026.2 | 624303.5 | TRUE |
| 113745.1 | 103266.9 | 152130.7 | 161918.3 | 149791.2 | 129881.5 | 139551.8 | 176510.5 | TRUE |
| 48423.5  | 69278    | 74956.2  | 73618.4  | 83134.1  | 48581.1  | 51047.3  | 39255.4  | TRUE |
| 207356.5 | 180690.1 | 162726.8 | 183399.3 | 235063.2 | 215684.5 | 185694.2 | 210764.4 | TRUE |
| 488296.3 | 461064.8 | 358561.2 | 405932.3 | 479417.7 | 498739   | 479945.2 | 536634.2 | TRUE |



|          |          |          |          |          |          |          |          |      |
|----------|----------|----------|----------|----------|----------|----------|----------|------|
| 84086.1  | 56750.8  | 76141    | 75540.2  | 73195.1  | 75895.4  | 78878.6  | 76328.6  | TRUE |
| 77534.1  | 82163.8  | 80160    | 79623.4  | 92652.2  | 97036.4  | 82645.4  | 106185.9 | TRUE |
| 190775.8 | 194753   | 216076   | 209114.9 | 188528.5 | 221149.2 | 193005.4 | 160726   | TRUE |
| 108959.5 | 80301.7  | 97373.2  | 132796.4 | 99922    | 121209.2 | 98186.5  | 103743.8 | TRUE |
| 76200.2  | 58056.8  | 92593.7  | 77549.3  | 79882.2  | 86998.9  | 71132.9  | 78778.1  | TRUE |
| 61697.2  | 51536    | 41667    | 76479.3  | 57616    | 65609.8  | 81031.5  | 77326.5  | TRUE |
| 146726   | 141413   | 90671.9  | 159330.7 | 157029.5 | 141216.3 | 141390.2 | 156636.3 | TRUE |
| 349780.6 | 271134.9 | 207388.2 | 246829.2 | 299811.4 | 214454.7 | 245111.2 | 274054.7 | TRUE |
| 240680.4 | 202287.3 | 159277.1 | 165957.8 | 197770.5 | 141143.9 | 164220.2 | 204928.9 | TRUE |
| 102692.8 | 99963.6  | 115359.6 | 111640.7 | 105040.2 | 107983.6 | 107420.2 | 122080.1 | TRUE |
| 63711.2  | 58641    | 59438.5  | 72177    | 66003    | 60751.1  | 60289.5  | 71820.2  | TRUE |
| 20369.4  | 47114.6  | 35738.2  | 35342.7  | 41877.6  | 9998.6   | 15369.1  | 43000.6  | TRUE |
| 128290.1 | 120737.9 | 93751.2  | 133784.4 | 192771.6 | 86860.2  | 179285   | 172493.4 | TRUE |
| 89806.6  | 87619.7  | 98619.7  | 85072.2  | 103288.3 | 88895.9  | 75999.7  | 110676.7 | TRUE |
| 135305.1 | 129304.4 | 114136.4 | 120761.9 | 137828.7 | 109584.3 | 108585.2 | 120697.7 | TRUE |
| 219247.5 | 238551.4 | 200667.1 | 248880.4 | 257484.5 | 240060.9 | 271425.3 | 270771.8 | TRUE |
| 405111.5 | 412144   | 351233.2 | 367099.9 | 442750.3 | 364925.9 | 381346.1 | 428125.1 | TRUE |
| 34331.6  | 49001.1  | 37160.6  | 45204.1  | 48865.3  | 32738.8  | 52566.9  | 40338.4  | TRUE |
| 89760.8  | 83150.7  | 65010    | 76297.6  | 84283.5  | 68837    | 78381.6  | 96985.1  | TRUE |
| 112887.2 | 124774   | 124193.6 | 134214.1 | 114152.6 | 106950.6 | 110623   | 104787.5 | TRUE |
| 231494.5 | 254157.8 | 235275.1 | 260714.8 | 241067.2 | 214144.4 | 256165.1 | 249427.5 | TRUE |
| 249237.3 | 219781.4 | 281770.9 | 264938.8 | 245111.7 | 274525.7 | 262702.8 | 268621   | TRUE |
| 74084.7  | 61433    | 52840.8  | 55826.2  | 67396.2  | 57948.8  | 67836    | 54468.3  | TRUE |
| 476698.3 | 372142   | 417493.9 | 547117.6 | 508949.5 | 488674.2 | 464072.7 | 493202.6 | TRUE |
| 245742.6 | 225722.9 | 267279.9 | 276667.8 | 266653.5 | 302135.8 | 295963   | 287316.8 | TRUE |
| 77982.1  | 276571.8 | 156147   | 98914.1  | 101810   | 92616.9  | 102666   | 61386.5  | TRUE |
| 19278.9  | 8739.4   | 27932.2  | 8875.3   | 17433    | 28984.8  | 10341.9  | 27523.6  | TRUE |
| 21685.5  | 7815.3   | 13360.5  | 9155.5   | 22135.9  | 12072.6  | 8499.7   | 10789.4  | TRUE |
| 118433.2 | 124843.7 | 160506.9 | 108207.7 | 167176.2 | 155606.4 | 135098.2 | 124312.7 | TRUE |
| 518248.9 | 406661.7 | 480353.7 | 561965.1 | 560552.3 | 405168.6 | 417886   | 441017.6 | TRUE |
| 45597.1  | 32323.8  | 41023    | 43917.7  | 26752.3  | 64552.2  | 45107.4  | 39308    | TRUE |
| 129846.2 | 113810.6 | 132399.9 | 141175.8 | 106543.2 | 244874.8 | 188354.4 | 141838.3 | TRUE |
| 75409.3  | 67783.9  | 81868.4  | 73490.2  | 71440.7  | 115425.8 | 91490    | 74569.2  | TRUE |
| 179182   | 121979.2 | 163839.5 | 237264.7 | 258638.7 | 178367.2 | 178641.3 | 201218.1 | TRUE |
| 108484   | 134463.4 | 85389.4  | 158404.9 | 97330.4  | 98891.3  | 91752.2  | 92953    | TRUE |
| 10136.1  | 6294.5   | 27923.2  | 6104     | 4727     | 42250.3  | 10682.5  | 11620.4  | TRUE |
| 17301.3  | 30070    | 25338.1  | 31813.5  | 18838.4  | 14754.7  | 13048.4  | 7955.4   | TRUE |
| 38905.5  | 35575    | 40494.5  | 49665.4  | 42453.1  | 60544    | 46666.7  | 42930.9  | TRUE |

|          |          |          |          |          |          |          |          |      |
|----------|----------|----------|----------|----------|----------|----------|----------|------|
| 104239.9 | 95101.3  | 84516.9  | 101616.6 | 96814.7  | 148286.6 | 142483.9 | 108287.2 | TRUE |
| 64010.6  | 32364.7  | 50698    | 60057.1  | 95022.3  | 67996.3  | 48363.9  | 43099.3  | TRUE |
| 83908.5  | 90125.5  | 103888.3 | 87258.2  | 69292.7  | 121522.1 | 88930    | 79515.5  | TRUE |
| 60357.2  | 48555.2  | 76332.2  | 49067.9  | 30079.5  | 82259.1  | 54382.8  | 45578.7  | TRUE |
| 163485.6 | 133119.5 | 203093.9 | 148043.2 | 147201.5 | 213461   | 162454.9 | 135266.4 | TRUE |
| 173172.3 | 193034.4 | 202829.9 | 188431.8 | 217840   | 161087.9 | 175475.4 | 178601   | TRUE |
| 88211.9  | 81359.9  | 93279.8  | 98526.4  | 126430.4 | 78238.3  | 79378.3  | 80375.3  | TRUE |
| 146606.1 | 137994.3 | 141710.2 | 145970.9 | 183880.2 | 126202.9 | 139619.2 | 138441.7 | TRUE |
| 252012.6 | 199878.5 | 262221.5 | 282134.1 | 318513.1 | 217041.6 | 209404.1 | 246130   | TRUE |
| 134376.3 | 130941.9 | 177940.6 | 125759.4 | 108902.7 | 172798.5 | 124022.1 | 100863.6 | TRUE |
| 316108.3 | 229086.1 | 316561.3 | 281555.4 | 583614.4 | 232391.3 | 221450.5 | 279653.8 | TRUE |
| 227148   | 218689.2 | 239938.4 | 216917   | 225401.6 | 239604.8 | 208260.8 | 210025.5 | TRUE |
| 747267.9 | 645220.2 | 705745.1 | 712354.6 | 555514.7 | 751558.6 | 729531.5 | 560898.1 | TRUE |
| 781523.5 | 663556.7 | 686125.4 | 781741   | 755202.3 | 685780.2 | 643948.3 | 749754.1 | TRUE |
| 371904.6 | 290001   | 342677.3 | 516606.9 | 361008.6 | 361850.3 | 347875.6 | 365838.7 | TRUE |
| 39993.3  | 14911.5  | 50564.7  | 17683.3  | 7204.5   | 70335.8  | 29857.6  | 30214.9  | TRUE |
| 241000   | 274995.7 | 368911.1 | 310782   | 261606.4 | 362200.2 | 323686.7 | 268558.4 | TRUE |
| 256747.6 | 285451   | 306147.7 | 305375.1 | 280801.3 | 347003   | 294168   | 304139.2 | TRUE |
| 289926.8 | 296384   | 289637.2 | 327741.8 | 357144   | 302439.4 | 292440.9 | 310602.3 | TRUE |
| 333748.8 | 266854.1 | 361086.2 | 383492.3 | 460688   | 346589.7 | 328819   | 352749.4 | TRUE |
| 42829.4  | 11887.9  | 39175.9  | 28381.3  | 37855.6  | 38553    | 31623.5  | 38494.8  | TRUE |
| 67137.1  | 82495.8  | 63103.8  | 50195    | 51076    | 70197.8  | 77128.9  | 68560.2  | TRUE |
| 466819.9 | 423054.2 | 470155   | 505902.8 | 492146.8 | 433399.5 | 464109.3 | 439421.3 | TRUE |
| 225785.8 | 170771.8 | 206837.1 | 214542.3 | 254893   | 203905.3 | 201380.3 | 213331.3 | TRUE |
| 189573.3 | 182787.9 | 239444.7 | 173507.2 | 164409.5 | 250560   | 182875   | 158932.8 | TRUE |
| 1321229  | 1078946  | 1371735  | 1308151  | 1423449  | 1280961  | 1140309  | 1272634  | TRUE |
| 97777.2  | 96623.7  | 104528.4 | 102358.1 | 90756.6  | 148105.7 | 99618.6  | 100595.7 | TRUE |
| 55781.9  | 62916.5  | 66408.6  | 81774.8  | 82242.2  | 65814.3  | 69726.2  | 69421.4  | TRUE |
| 70267.1  | 55633.2  | 38488.3  | 58158.7  | 43599.9  | 61806.4  | 62616.9  | 52549.2  | TRUE |
| 68374.9  | 53473.3  | 50774.9  | 62058.5  | 70909.9  | 39968.8  | 59141.4  | 58314.2  | TRUE |
| 17689.5  | 11666.3  | 34301.5  | 22402.3  | 21011.4  | 30369.3  | 26673.2  | 7051.4   | TRUE |
| 93462.1  | 80575.9  | 85303.2  | 79361.1  | 59916.2  | 102255.7 | 87484.1  | 71974.7  | TRUE |
| 106071.7 | 118958.4 | 74615.2  | 107012.1 | 96346.3  | 92172.1  | 135916.1 | 120061.3 | TRUE |
| 997528.4 | 1060609  | 514082   | 764779.7 | 929188.2 | 689915.1 | 1377890  | 1043857  | TRUE |
| 207852.1 | 243095.1 | 186528.9 | 179545.6 | 217014.7 | 160490   | 272605.4 | 201541.7 | TRUE |
| 2274644  | 3334925  | 1708682  | 2170667  | 2041812  | 1720496  | 3388005  | 2280868  | TRUE |
| 1651513  | 2509390  | 1008830  | 1289846  | 1569417  | 1025135  | 2513001  | 1565810  | TRUE |
| 29499.5  | 34472.6  | 29689.5  | 23704.1  | 26378.6  | 14243.3  | 26815.9  | 9708     | TRUE |
| 277384.6 | 223586   | 294630.9 | 360264.6 | 266724.7 | 268571.5 | 246159.6 | 310440.6 | TRUE |
| 141778.5 | 143638.5 | 147159.8 | 184730.6 | 146977.8 | 120581   | 140106.3 | 156495.3 | TRUE |
| 90068.8  | 128561.2 | 69732.1  | 84817.2  | 101261.2 | 63561.2  | 141487.5 | 85394    | TRUE |
| 186592.4 | 273271.8 | 140033.5 | 177945.5 | 213846.9 | 133743.3 | 324663.6 | 205877   | TRUE |
| 342438.2 | 374535.8 | 511541.5 | 455333.8 | 316978.1 | 361203.7 | 376198.3 | 357404   | TRUE |
| 305626.6 | 293843.4 | 391109.4 | 421962.4 | 248680.3 | 304342.4 | 328329.1 | 308434.8 | TRUE |
| 65655.4  | 45568.2  | 70005.8  | 67763.5  | 43903    | 55228    | 49743.5  | 50974.1  | TRUE |

|          |          |          |          |          |          |          |          |      |
|----------|----------|----------|----------|----------|----------|----------|----------|------|
| 117992.7 | 107293   | 48537.5  | 87648.4  | 104719.6 | 56063.9  | 86783.9  | 78779    | TRUE |
| 118494.1 | 110563.3 | 82608.1  | 125053.1 | 106893.6 | 123810.4 | 125521.6 | 140768.3 | TRUE |
| 133959   | 104694.8 | 93950.1  | 116762.6 | 114463.1 | 113977.3 | 142522.2 | 124181   | TRUE |
| 45285.2  | 46832.2  | 33057.2  | 36647.5  | 31857.8  | 32279.6  | 63456.8  | 39808.5  | TRUE |
| 134571.3 | 117619.6 | 128524.8 | 168282.8 | 137720.5 | 163740.6 | 133536.6 | 148299.1 | TRUE |
| 39642.1  | 34013.1  | 54961.3  | 43575.9  | 33122.5  | 31441.9  | 35854.9  | 27482.1  | TRUE |
| 50026.5  | 60621.1  | 26946.9  | 32779.6  | 34336.1  | 32705.3  | 62136.8  | 36979.8  | TRUE |
| 104428.2 | 134177.6 | 77930.8  | 97005.4  | 94986.5  | 90971    | 153931.6 | 100942.6 | TRUE |
| 1562826  | 2255562  | 911288.4 | 1225356  | 1588768  | 1024652  | 2345300  | 1457151  | TRUE |
| 118337.7 | 66541.7  | 68574.5  | 98938.9  | 56129.5  | 92980.2  | 86727.3  | 77045.3  | TRUE |
| 137610.1 | 114495.3 | 169582   | 108096.3 | 110268.4 | 182418.7 | 125229.6 | 128513.6 | TRUE |
| 341325.9 | 284799.1 | 599187.7 | 278183.4 | 255306.6 | 562413.8 | 317564.8 | 287680.6 | TRUE |
| 111353   | 101574.7 | 148420.5 | 108819.9 | 93912.7  | 123875.5 | 119272.4 | 108320   | TRUE |
| 185603.6 | 241849   | 211743.6 | 236301.4 | 291741.4 | 162613.2 | 208028   | 210031.3 | TRUE |
| 48764    | 44829.7  | 55974.7  | 38570    | 47501    | 47610.1  | 32131.8  | 48309.9  | TRUE |
| 32100.1  | 32285    | 24944.6  | 29383.7  | 11320.7  | 26630.7  | 22434.5  | 20880    | TRUE |
| 133108.1 | 136792.3 | 247226.1 | 100234.6 | 90403.5  | 251510.5 | 130752.7 | 88436.2  | TRUE |
| 461663.6 | 469839.5 | 550406.2 | 390678.7 | 397015.8 | 540715.8 | 473779.3 | 370527   | TRUE |
| 160573.5 | 105027   | 139921.5 | 116943.2 | 243125.6 | 150847.6 | 118004.5 | 121470.3 | TRUE |
| 147229.4 | 167522.7 | 174441.1 | 99083.1  | 114582.1 | 170579.6 | 148648.5 | 107863.3 | TRUE |
| 2141859  | 1776654  | 3631825  | 1682311  | 1280837  | 3840580  | 1869657  | 1424597  | TRUE |
| 1721858  | 1223013  | 1595332  | 1487875  | 2555432  | 1487035  | 1260112  | 1588360  | TRUE |
| 1067161  | 1018724  | 1672501  | 951146   | 727571.1 | 1695178  | 1043626  | 776089.7 | TRUE |
| 1521513  | 1081758  | 1452609  | 1360261  | 2736027  | 1303245  | 1057655  | 1273573  | TRUE |
| 123981.8 | 114415.9 | 115924.5 | 115967.4 | 102836.1 | 145220.3 | 128514.9 | 137016.6 | TRUE |
| 50179    | 45870.9  | 74072.5  | 32755.8  | 28224.2  | 63716    | 46054.7  | 37204.1  | TRUE |
| 18530.8  | 24446.2  | 40559.6  | 14081.7  | 9080.1   | 43266.9  | 11957.8  | 13499.9  | TRUE |
| 113185.9 | 149615.7 | 161286.4 | 75594    | 82111.7  | 175073.7 | 118354.8 | 104468.8 | TRUE |
| 1770987  | 1504059  | 2864506  | 1369583  | 1129130  | 3053116  | 1515476  | 1243995  | TRUE |
| 137610.1 | 114495.3 | 169582   | 108096.3 | 110268.4 | 182418.7 | 125229.6 | 128513.6 | TRUE |
| 341325.9 | 284799.1 | 599187.7 | 278183.4 | 255306.6 | 562413.8 | 317564.8 | 287680.6 | TRUE |
| 111353   | 101574.7 | 148420.5 | 108819.9 | 93912.7  | 123875.5 | 119272.4 | 108320   | TRUE |
| 185603.6 | 241849   | 211743.6 | 236301.4 | 291741.4 | 162613.2 | 208028   | 210031.3 | TRUE |
| 48764    | 44829.7  | 55974.7  | 38570    | 47501    | 47610.1  | 32131.8  | 48309.9  | TRUE |
| 32100.1  | 32285    | 24944.6  | 29383.7  | 11320.7  | 26630.7  | 22434.5  | 20880    | TRUE |
| 2141859  | 1776654  | 3631825  | 1682311  | 1280837  | 3840580  | 1869657  | 1424597  | TRUE |
| 1721858  | 1223013  | 1595332  | 1487875  | 2555432  | 1487035  | 1260112  | 1588360  | TRUE |
| 66287.8  | 72484.4  | 159754.9 | 94179.2  | 67646.2  | 174253.2 | 67901.7  | 70709.7  | TRUE |
| 1067161  | 1018724  | 1672501  | 951146   | 727571.1 | 1695178  | 1043626  | 776089.7 | TRUE |
| 1521513  | 1081758  | 1452609  | 1360261  | 2736027  | 1303245  | 1057655  | 1273573  | TRUE |
| 123981.8 | 114415.9 | 115924.5 | 115967.4 | 102836.1 | 145220.3 | 128514.9 | 137016.6 | TRUE |
| 69226.4  | 45919.6  | 122244.4 | 44083.1  | 51867.5  | 126871.6 | 55561.4  | 50791.3  | TRUE |
| 157265.5 | 140658.1 | 175698.1 | 121929.9 | 106423.1 | 177555.8 | 146015   | 111428.3 | TRUE |
| 91625.2  | 33971.8  | 176579   | 89836.7  | 61062.8  | 158697.6 | 71387.3  | 68804.2  | TRUE |

|          |          |          |          |          |          |          |          |      |
|----------|----------|----------|----------|----------|----------|----------|----------|------|
| 205211   | 152321.8 | 176399.3 | 153830.6 | 318780.3 | 187370.1 | 145072.3 | 190016.8 | TRUE |
| 1770987  | 1504059  | 2864506  | 1369583  | 1129130  | 3053116  | 1515476  | 1243995  | TRUE |
| 85764.7  | 137799   | 74287.1  | 111455.2 | 84363.8  | 103209.1 | 120903.7 | 98614.9  | TRUE |
| 106877.3 | 77716.1  | 71240.2  | 107437.7 | 86518.9  | 112875.2 | 120260.7 | 115171.8 | TRUE |
| 54626.7  | 59392.1  | 49091    | 59973.9  | 41811.1  | 71000.6  | 85936.1  | 66147.4  | TRUE |
| 59292.3  | 72287.3  | 59777.5  | 62113.1  | 60776.2  | 60448.9  | 88276.6  | 72522.5  | TRUE |
| 203180.4 | 197222.6 | 109769   | 150940.2 | 119541.6 | 138887.9 | 244729.4 | 136327.2 | TRUE |
| 86808.8  | 77071.5  | 51685.8  | 90267.9  | 55314.3  | 86949.3  | 98533.7  | 74198.5  | TRUE |
| 634199.5 | 360963.3 | 651925.2 | 769858.8 | 437797.1 | 544347.8 | 489852.5 | 598518.9 | TRUE |
| 170233.4 | 117786   | 149424.5 | 207829   | 127157   | 178898.8 | 139592   | 156678.2 | TRUE |
| 258467.7 | 275485.9 | 241037.9 | 247872.7 | 235874.1 | 239677.1 | 297367.1 | 248840.4 | TRUE |
| 46709.1  | 27976.9  | 67510.3  | 64961.9  | 37598    | 45927.7  | 48157.4  | 52319    | TRUE |
| 124778   | 109105.3 | 99168.7  | 85895.6  | 97006.3  | 101615.1 | 102246   | 103131.7 | TRUE |
| 23132    | 20884    | 12418.7  | 25153.9  | 4162.6   | 23316.5  | 28853.7  | 11370.4  | TRUE |
| 208957.3 | 246387.7 | 167636.4 | 195572.9 | 134332.6 | 176914.1 | 248431.2 | 143749.8 | TRUE |
| 339134   | 196711.8 | 435665.8 | 404059.2 | 235065.2 | 345446.7 | 238317.8 | 332239.3 | TRUE |
| 198528.3 | 258774.5 | 149543.2 | 191522   | 142314.5 | 140582.4 | 248215.8 | 143023.7 | TRUE |
| 36999    | 56705.9  | 36857.4  | 40403.2  | 51614.9  | 37974.7  | 47015.7  | 57160.7  | TRUE |
| 41081.7  | 36014.8  | 30838.6  | 37230.5  | 30532.7  | 38258.7  | 35190.6  | 32423.5  | TRUE |
| 169715   | 160274.2 | 182443.7 | 190792.5 | 167463.7 | 172802.3 | 143407.7 | 163932.4 | TRUE |
| 52853.9  | 62038.7  | 47301.5  | 68774.5  | 45017.1  | 57577    | 42285.2  | 48687.4  | TRUE |
| 24539.1  | 7519.3   | 13586.2  | 30434.2  | 36399.2  | 11956.1  | 25025    | 41863.4  | TRUE |
| 47366.8  | 40417.6  | 45788.6  | 45944.2  | 40085.1  | 41436.6  | 45423.4  | 37505.7  | TRUE |
| 435937.9 | 508079.8 | 405547   | 426102.1 | 447859   | 499411.1 | 523352.7 | 486771.1 | TRUE |
| 1513106  | 1629803  | 1578511  | 1473270  | 1388554  | 1482576  | 1704111  | 1424132  | TRUE |
| 99912.2  | 100769.5 | 99006.9  | 99150.6  | 100637.6 | 105787.9 | 98575.9  | 103505.1 | TRUE |
| 119098   | 122332.5 | 114577.1 | 117434.8 | 159571.8 | 126821.1 | 121863.7 | 132897.3 | TRUE |
| 237147.8 | 253424.7 | 252013.6 | 281860.9 | 233015.7 | 205334   | 223371.4 | 241997.5 | TRUE |
| 904204.8 | 780662.7 | 776180.5 | 992838.2 | 931579.3 | 848223.2 | 859292.1 | 960461.6 | TRUE |
| 570342.9 | 550494.3 | 559057.8 | 565657.6 | 527022.3 | 694803.6 | 633373.7 | 644576.2 | TRUE |
| 1295476  | 1031396  | 1191829  | 1331491  | 1373279  | 1150958  | 1189380  | 1285653  | TRUE |
| 813656.4 | 870848   | 820916.1 | 837049.1 | 828225.8 | 921961.5 | 877231   | 927964.5 | TRUE |
| 381123.8 | 716190.4 | 378798   | 423267.8 | 302605.5 | 419749.2 | 441909.1 | 413545.9 | TRUE |
| 54949.2  | 61005.3  | 51717.8  | 67086.4  | 45960    | 55358.3  | 76878.4  | 57446    | TRUE |
| 228928.2 | 210512.5 | 225654.4 | 210924.1 | 174308.8 | 228619.7 | 218016.3 | 187843.7 | TRUE |

|          |          |          |          |          |          |          |          |      |
|----------|----------|----------|----------|----------|----------|----------|----------|------|
| 169353.6 | 228076.3 | 180575.2 | 227449.3 | 171912.6 | 172246.8 | 232759   | 200290.2 | TRUE |
| 303019.9 | 322175.5 | 246984.7 | 289977.9 | 214442.7 | 266737.9 | 322230.7 | 253029.8 | TRUE |
| 265716   | 223466.5 | 239737.2 | 304074.9 | 276669.6 | 244544.9 | 224322.2 | 250314.7 | TRUE |
| 140714.2 | 184206.7 | 166305.8 | 135828.3 | 162908.8 | 126135.4 | 158012.8 | 149332   | TRUE |
| 136950.7 | 117996.6 | 136254.6 | 134479.5 | 114912.4 | 138714   | 130972.8 | 129614.8 | TRUE |
| 377150.6 | 433823.7 | 278472.9 | 422331.6 | 379116.4 | 316034.3 | 503050.8 | 412835.7 | TRUE |
| 196621.1 | 230892   | 155301.3 | 229054.2 | 190277.1 | 180758.8 | 249363.7 | 220876.5 | TRUE |
| 173300.3 | 156877.7 | 198172.7 | 204387.6 | 151836.4 | 161360.8 | 152163.5 | 184498.3 | TRUE |
| 249296.8 | 238303   | 290928.8 | 296889.2 | 209200.4 | 242947.6 | 260603   | 287481.8 | TRUE |
| 45809.3  | 37319.3  | 40617.6  | 31474.1  | 28176.7  | 40132.7  | 29365.3  | 42705.5  | TRUE |
| 354266.3 | 367731.8 | 371391   | 368595.2 | 382504   | 384356   | 437157.2 | 387275.8 | TRUE |
| 17513.1  | 29079.5  | 23266.8  | 11294.3  | 21566.2  | 25141.3  | 27086.3  | 10912    | TRUE |
| 205790   | 294079   | 249737.4 | 295430.8 | 266619.5 | 251629.4 | 313086.1 | 246419   | TRUE |
| 256051   | 311544.7 | 224694.6 | 281789.5 | 251999.5 | 256104.3 | 279829.4 | 256462.3 | TRUE |
| 286479.3 | 198399.8 | 210829.2 | 292074.2 | 304980.6 | 261206.1 | 225011.1 | 299284.5 | TRUE |
| 91534.5  | 55339.5  | 74547.8  | 47648.8  | 65141.8  | 51419.8  | 78646.6  | 65491.8  | TRUE |
| 208603   | 195521.9 | 233115.1 | 227584.9 | 272967.4 | 162752.3 | 234312.7 | 252446.1 | TRUE |
| 325038   | 301964.4 | 258217   | 346399.1 | 449573.2 | 242720.9 | 314082.5 | 417663.7 | TRUE |
| 154504.5 | 177716   | 164097.1 | 153518.5 | 135576.8 | 154372   | 173485.5 | 158284.7 | TRUE |
| 38529    | 43572    | 38050.4  | 54341.2  | 48444.6  | 41116.9  | 52788.7  | 59662.5  | TRUE |
| 650934.9 | 654064.1 | 408436.5 | 579866.3 | 699564.7 | 428379.4 | 601300.8 | 718393.4 | TRUE |
| 95376.8  | 75721.6  | 63180    | 78741.2  | 87670.4  | 82077.1  | 77757.4  | 84359.9  | TRUE |
| 61351.3  | 66880.2  | 78604.3  | 80795.9  | 65999    | 56086.8  | 77087.9  | 60072.3  | TRUE |
| 241825.6 | 172340.1 | 149372.1 | 200674.8 | 261045.4 | 179095.5 | 191560.1 | 276106.5 | TRUE |
| 114200.1 | 122070.1 | 83630.2  | 103921.4 | 91504    | 92234    | 99722.3  | 95062.9  | TRUE |
| 162766.4 | 134880.5 | 109616.9 | 171506.1 | 230739.3 | 111764.8 | 154610.7 | 218433.8 | TRUE |
| 43828.3  | 44142.9  | 40912.7  | 52783.5  | 43677.6  | 38071    | 46159.8  | 68785.2  | TRUE |
| 43977    | 39827.7  | 30963.8  | 56107.5  | 52021.3  | 23572.1  | 47733.9  | 58201    | TRUE |
| 32032.8  | 44016.4  | 21722.1  | 44163.3  | 50547.7  | 25498.9  | 40992.1  | 49477    | TRUE |
| 57750.9  | 56271.3  | 28175.9  | 60463.2  | 74690.6  | 34222.8  | 58165.4  | 71162.4  | TRUE |
| 35025.5  | 28656    | 34582    | 21865.2  | 21877.1  | 11165.8  | 33198.7  | 11607.8  | TRUE |
| 69469.1  | 81804.7  | 83068.7  | 68871.3  | 84632.7  | 82987.8  | 78622.5  | 98007.6  | TRUE |
| 94829.1  | 104012.2 | 99544.6  | 117298.8 | 114314.6 | 94649.5  | 107574   | 113166.9 | TRUE |
| 191998   | 188106.4 | 159102.7 | 193507.1 | 171141.1 | 218317.6 | 205153.9 | 223123.4 | TRUE |
| 49983.3  | 60238.9  | 80930.1  | 58081.6  | 55531.9  | 58268    | 75197    | 67084.8  | TRUE |
| 892319.4 | 925686.1 | 848818.6 | 847476.4 | 885135.7 | 898926.3 | 1075055  | 895116.9 | TRUE |
| 47614.2  | 153317.4 | 64427    | 105290.1 | 138375.1 | 34814    | 21005.2  | 25053.6  | TRUE |
| 47478.5  | 60920.6  | 65078.2  | 88763.9  | 78045.7  | 40916.7  | 28123.3  | 32651.1  | TRUE |

|          |          |          |          |          |          |          |          |      |
|----------|----------|----------|----------|----------|----------|----------|----------|------|
| 87497.5  | 100767.8 | 77885.2  | 121484   | 95807.1  | 86978.8  | 92628.7  | 92534.9  | TRUE |
| 209764.2 | 207172.3 | 162023.9 | 187874.5 | 234486.4 | 154599.4 | 202001.3 | 216588.3 | TRUE |
| 103797.3 | 99378.9  | 69989.4  | 84058.1  | 108766   | 78401.9  | 112755   | 127653.6 | TRUE |
| 130459.3 | 150934.1 | 164032.2 | 135328.7 | 99024.8  | 128026   | 147587.1 | 131645   | TRUE |
| 310607.2 | 236684.3 | 239819.3 | 245394.9 | 263960.4 | 293105.7 | 291705.9 | 343806.3 | TRUE |
| 461516.5 | 409628.4 | 1282944  | 421283   | 206514.8 | 1425599  | 493381.7 | 262977.1 | TRUE |
| 259637   | 251073.9 | 739935.8 | 274575.2 | 165102.1 | 748797.9 | 237292.7 | 170006.4 | TRUE |
| 345361.5 | 360301.6 | 345250.7 | 293375   | 339240.6 | 335218.7 | 400485.1 | 311658.4 | TRUE |
| 322405.4 | 331647.8 | 352409.7 | 265167.6 | 254798.5 | 373602.7 | 348464.9 | 264042.7 | TRUE |
| 148371.4 | 147857.2 | 131729.5 | 106324.9 | 120314.4 | 139645.3 | 146188.4 | 144063.9 | TRUE |
| 285865.2 | 295556.8 | 246113.9 | 255405.5 | 227985.1 | 259433.7 | 320997.5 | 275159.8 | TRUE |
| 159003.4 | 299914.8 | 305118.9 | 213328.7 | 152547.7 | 202554   | 180157.6 | 123091.6 | TRUE |
| 697288.5 | 714921.8 | 853291.4 | 502315.7 | 456928.6 | 834010.9 | 679168.3 | 524157.6 | TRUE |
| 255685.6 | 211545.7 | 313833.4 | 204748.3 | 208361.9 | 266807.4 | 237201.4 | 194667.4 | TRUE |
| 139691.5 | 136044.8 | 124809.8 | 108043.9 | 100978.9 | 168217.8 | 113132.6 | 106731.7 | TRUE |
| 462312.9 | 399075.6 | 596259.3 | 466356.2 | 599717.2 | 383013.2 | 382664.3 | 409704.1 | TRUE |
| 319621.9 | 309177.6 | 291501.7 | 306934.6 | 246682   | 331997.7 | 298681.3 | 261974   | TRUE |
| 214218.8 | 179377.3 | 246738.9 | 257499.4 | 288690.7 | 195903.8 | 226454.8 | 233251.2 | TRUE |
| 53245.7  | 42697.2  | 52315    | 51943.6  | 47997.5  | 63303.8  | 58059.7  | 47072.5  | TRUE |
| 76701    | 87288.2  | 88133.6  | 92970.5  | 100049.2 | 116602   | 93296.1  | 102500.5 | TRUE |
| 97385.9  | 75122.6  | 69517.4  | 103176.2 | 70509.5  | 120257.9 | 104284.6 | 93591.7  | TRUE |
| 155996.7 | 120599.8 | 138299   | 152312.4 | 147177.8 | 142031.6 | 172892.1 | 191728.8 | TRUE |
| 207060.1 | 266710.6 | 234575.4 | 213009.8 | 234653.3 | 258941.5 | 299043.9 | 227830.2 | TRUE |
| 148227.6 | 88488.7  | 125718.3 | 171257.3 | 296889.8 | 132034.2 | 105829.1 | 123783.2 | TRUE |
| 874779.6 | 547268.3 | 800057.2 | 878187.6 | 1785680  | 632516.2 | 542078.6 | 742184.9 | TRUE |
| 286271.5 | 210941.9 | 278456.5 | 291301.6 | 423940.2 | 270922.9 | 221457.4 | 228878.3 | TRUE |
| 26541.2  | 44762.6  | 48302.8  | 51863.9  | 49966.5  | 56256.6  | 26165.6  | 11644.1  | TRUE |
| 126578   | 115672.6 | 226649.9 | 114635.4 | 96895.4  | 248816.9 | 120643.7 | 115470.6 | TRUE |
| 71710.6  | 64684.2  | 110425.3 | 68024.4  | 60742.3  | 114206.5 | 74209.6  | 66925.9  | TRUE |
| 315819.5 | 270096.4 | 445503.8 | 262694.2 | 223169.1 | 446170.3 | 317257.4 | 213721.1 | TRUE |
| 406301.4 | 440663.1 | 645803.1 | 323062.2 | 341634.5 | 667488.4 | 423877.7 | 356090.8 | TRUE |
| 476355.6 | 496522.7 | 784762.6 | 370058.4 | 409793.7 | 780374.9 | 489415.7 | 405517.1 | TRUE |
| 875886.7 | 681803.1 | 933336.7 | 870604   | 1713183  | 634763.7 | 632170.2 | 654474.2 | TRUE |
| 649669.7 | 470903.2 | 728428.5 | 693876.1 | 1254874  | 461906.1 | 495908   | 455473.6 | TRUE |
| 680986.1 | 694127.6 | 1094098  | 516690.4 | 424049.9 | 1137373  | 608920.9 | 520968.3 | TRUE |
| 503859.4 | 398177.5 | 480553.7 | 479439.6 | 793194.8 | 472781.9 | 429530.6 | 468738.2 | TRUE |
| 341371.1 | 307610.7 | 490176.7 | 278319.6 | 202991.2 | 527408.9 | 310347   | 213285.4 | TRUE |
| 119105.3 | 144697.3 | 193021.5 | 181388.6 | 124171.4 | 184774.7 | 158563.3 | 127034.9 | TRUE |
| 1512492  | 802464.6 | 1539765  | 1402317  | 2903253  | 1085467  | 858033.9 | 1129539  | TRUE |
| 24314.5  | 26024.9  | 46147.7  | 31738.7  | 19695.4  | 41611.4  | 27658.9  | 16108.3  | TRUE |
| 26989.9  | 17224.8  | 13031.4  | 4829.9   | 21509.3  | 14454    | 21725.5  | 20139.4  | TRUE |
| 126998.4 | 128961.2 | 95079.9  | 96443.2  | 143027.4 | 121068.7 | 197860   | 181189.5 | TRUE |
| 21025.9  | 40171.9  | 25653.6  | 25321.3  | 38470.1  | 28290.8  | 30487    | 30270.1  | TRUE |

|          |          |          |          |          |          |          |          |      |
|----------|----------|----------|----------|----------|----------|----------|----------|------|
| 46596.6  | 43028.2  | 40377.7  | 49911.7  | 26803.3  | 24891.8  | 41037.8  | 47844.3  | TRUE |
| 66574    | 77672.4  | 67659.1  | 92776.6  | 65534.2  | 64818.7  | 86015.7  | 93386.3  | TRUE |
| 56803.5  | 81422.3  | 46149    | 46309.6  | 60895.6  | 34583.4  | 76759.2  | 65667    | TRUE |
| 148080.5 | 164258.2 | 122777.5 | 99110.2  | 153449.9 | 112193.8 | 189601.8 | 155541.7 | TRUE |
| 142764.2 | 172413.4 | 178254.1 | 167122.7 | 147568.5 | 123066.9 | 153329.1 | 118708   | TRUE |
| 93739.1  | 126933.8 | 91236.8  | 87876    | 115234.4 | 78320.8  | 117250.5 | 72806    | TRUE |
| 97656.7  | 129034.6 | 118683.5 | 167998   | 161233.3 | 87128.6  | 97944.8  | 67210.1  | TRUE |
| 20798.1  | 12645.1  | 9380.3   | 13976.3  | 26370.8  | 8395.3   | 11964.4  | 21845.8  | TRUE |
| 41208.4  | 37553.6  | 24758.2  | 23989.3  | 41531.1  | 22151    | 36328    | 44164.8  | TRUE |
| 102594.4 | 98264.5  | 61246.9  | 74902.4  | 89135.2  | 68820.4  | 105360.1 | 108487.2 | TRUE |
| 389175.8 | 477858.4 | 311632.7 | 289275.1 | 418794.9 | 320437.1 | 444777   | 389370.4 | TRUE |
| 41142.1  | 39388.7  | 13355.9  | 14154.8  | 29517.3  | 27282.2  | 48999.5  | 37765    | TRUE |
| 420511   | 339326.9 | 497013.7 | 473865.5 | 607569.4 | 344433.9 | 378955   | 385921.3 | TRUE |
| 424828.6 | 440662.8 | 488147.9 | 412501.5 | 284638.1 | 569712.3 | 472034.9 | 302516.6 | TRUE |
| 55765.3  | 27947.9  | 39984.8  | 48826.4  | 46255.7  | 90143    | 67865    | 75480.7  | TRUE |
| 32053.5  | 20159    | 24086.6  | 13432.8  | 37290.7  | 15179.6  | 23587.6  | 14884    | TRUE |
| 363442.7 | 318809.8 | 495177.4 | 313762.8 | 235495.1 | 553883.9 | 364259   | 278344.1 | TRUE |
| 56099.4  | 59360.6  | 90697.9  | 53726.5  | 67114.8  | 90900.7  | 76933.5  | 52670.6  | TRUE |
| 67201.5  | 52014    | 80057.5  | 41500    | 43993.4  | 76030    | 71224.7  | 48311.8  | TRUE |
| 140877.9 | 124734.8 | 180009.9 | 157915.9 | 135810.6 | 179497   | 157624.6 | 142864.3 | TRUE |
| 124238.8 | 135564.3 | 158148.4 | 159667.9 | 128871.6 | 170127.3 | 159064.6 | 139772.8 | TRUE |
| 221087   | 181102.3 | 224438.9 | 210766.2 | 305982.9 | 207792   | 191082.8 | 204764.9 | TRUE |
| 363586.8 | 312307   | 384910   | 408936.5 | 445234.3 | 377611.5 | 308113.4 | 376764.4 | TRUE |
| 88357.1  | 69507.3  | 71891.3  | 69475    | 129895.8 | 77838.7  | 70405.9  | 69077.5  | TRUE |
| 67280.8  | 66302    | 70207.3  | 73240.7  | 97349.7  | 49112.2  | 64796.6  | 65232.5  | TRUE |
| 333558.5 | 317752.2 | 307656.7 | 297880.4 | 343132.1 | 319885.2 | 302203.6 | 337381.4 | TRUE |
| 89635.8  | 66851    | 73006.4  | 65812.9  | 91782.4  | 85357.8  | 70440    | 98717.3  | TRUE |
| 47033.1  | 27365.5  | 41814.9  | 57071.9  | 49069.3  | 48734.6  | 53286.6  | 59923.1  | TRUE |
| 57609.5  | 68135.2  | 66073.7  | 32777.2  | 64367.8  | 71191.4  | 74668.3  | 65357.1  | TRUE |
| 65259    | 42093.7  | 70362.5  | 49061.9  | 57943.9  | 62156    | 48871.9  | 54833.3  | TRUE |
| 50337.6  | 21509.7  | 61821.2  | 54063.7  | 56835.1  | 66877.2  | 36770.5  | 55128.1  | TRUE |
| 309092.3 | 290187   | 289239.7 | 312569.5 | 259057.1 | 321892.2 | 253381.9 | 308287.3 | TRUE |
| 92696.7  | 64351.1  | 95445.4  | 82594.6  | 85924.2  | 93286.8  | 80007    | 93504.5  | TRUE |
| 27158.6  | 21528    | 43498.1  | 27924.7  | 23033.7  | 33750.2  | 28042.2  | 24133.9  | TRUE |
| 81260.9  | 63234.6  | 72406.9  | 45431.8  | 78604.1  | 66196.1  | 69317.6  | 67062.8  | TRUE |
| 281837.8 | 246207.4 | 314097.3 | 293768.2 | 282250.9 | 302086.5 | 203482.2 | 293050.3 | TRUE |
| 84065.8  | 81582.6  | 67619.4  | 88313.1  | 89616.8  | 68864.5  | 74949.3  | 91253.5  | TRUE |
| 48767.9  | 36635.4  | 45817.4  | 37093    | 38640.7  | 33621.7  | 37466    | 30940.7  | TRUE |
| 203461.9 | 201458.1 | 219483.9 | 197188   | 201380.6 | 200285.8 | 184186.2 | 189310.8 | TRUE |
| 52106.9  | 54478.2  | 70904.4  | 54882.2  | 77887.6  | 61529    | 67009    | 52465.6  | TRUE |
| 102381.2 | 89927.9  | 109666.7 | 119208.5 | 126560.7 | 114581.5 | 114858.9 | 133735.7 | TRUE |
| 587108.3 | 600817   | 622034.8 | 602720.1 | 577532.3 | 633355.7 | 547045.4 | 496944   | TRUE |
| 2034204  | 1885966  | 1923082  | 2015773  | 1942377  | 1965046  | 1916046  | 2004843  | TRUE |
| 114757.6 | 121197.7 | 151226.5 | 123641   | 130145.9 | 151541.4 | 167117.4 | 146862.6 | TRUE |
| 27956.9  | 31210.1  | 25744.9  | 33829.8  | 29141    | 31702.1  | 29106.8  | 29589    | TRUE |

|          |          |          |          |          |          |          |          |      |
|----------|----------|----------|----------|----------|----------|----------|----------|------|
| 58743.9  | 106827.4 | 89365.6  | 75235.9  | 97281.4  | 43670.5  | 48133.8  | 54650.1  | TRUE |
| 33354.7  | 36705.8  | 40517.2  | 40005.3  | 37339.6  | 34827.3  | 42265.3  | 36271.1  | TRUE |
| 330752.9 | 317366   | 295802.7 | 273553   | 336781.6 | 290242   | 322066.2 | 313767.2 | TRUE |
| 124805.9 | 147556.1 | 95579    | 99896.7  | 97635.7  | 110402.7 | 110111.3 | 114627.8 | TRUE |
| 18154.8  | 22697.9  | 4264.1   | 15164.5  | 9760.5   | 11313.9  | 16040.9  | 11367.6  | TRUE |
| 193062   | 232549.1 | 185689.6 | 214165.5 | 218571.6 | 180633.8 | 256094.7 | 233666.5 | TRUE |
| 278642.8 | 285326.8 | 306078.6 | 282905.9 | 241582.7 | 295924.9 | 298028.3 | 282915.6 | TRUE |
| 299812.2 | 281545.7 | 281366.2 | 299336.2 | 271030.2 | 298414.4 | 273731   | 312214.7 | TRUE |
| 279926   | 273530.6 | 284964.1 | 276314.8 | 316259.3 | 270059   | 286667.2 | 250894.5 | TRUE |
| 206143   | 199371.3 | 157768.4 | 177950   | 200064.1 | 183234.9 | 194098.3 | 220514.7 | TRUE |
| 82490.2  | 58276.5  | 74862.1  | 72241.9  | 62055.2  | 65151.8  | 75717.9  | 65811.4  | TRUE |
| 42612.1  | 50611    | 51190.8  | 50244    | 46939.9  | 41392.2  | 56977    | 34599.9  | TRUE |
| 113085.7 | 112028.3 | 126120.6 | 92389.6  | 106675.8 | 97903.1  | 116506.4 | 98159.5  | TRUE |
| 34384.8  | 35261.5  | 26179.6  | 17800.8  | 26596.1  | 54140.1  | 36093.8  | 50438    | TRUE |
| 638882.6 | 602631.8 | 606279.5 | 677176.1 | 644598.4 | 595068.7 | 640030.2 | 630024.7 | TRUE |
| 44127.5  | 50201.3  | 24934    | 44299.5  | 44306.4  | 41025.7  | 47439.4  | 44859.4  | TRUE |
| 115681.8 | 158940.2 | 129924.7 | 105245.8 | 92009    | 124255.6 | 149415.1 | 85748.5  | TRUE |
| 32818.4  | 22604.3  | 38675.8  | 39567    | 38614.6  | 32477.3  | 32050.9  | 38719.5  | TRUE |
| 84491.2  | 73128    | 64952.3  | 81626.8  | 63444.4  | 105790.6 | 104056.6 | 60076.5  | TRUE |
| 41434.7  | 48731.3  | 40890.9  | 32887.7  | 24535.3  | 51198.2  | 58517.7  | 29604.4  | TRUE |
| 60532    | 71404.5  | 90066.8  | 72488.9  | 60293.5  | 86127    | 89891.4  | 70616.8  | TRUE |
| 82658.5  | 88180.9  | 74730.2  | 53731.1  | 60104    | 128778.7 | 106451.1 | 80393.8  | TRUE |
| 31722.9  | 30271.1  | 31695.5  | 7871.5   | 26781.1  | 41797    | 31053.1  | 9196.9   | TRUE |
| 38600.6  | 46310.2  | 44829.4  | 20252.2  | 31930.4  | 46934.8  | 48153.9  | 35285    | TRUE |
| 275289.8 | 235722.7 | 263365.3 | 234398.1 | 196165.9 | 272564.2 | 277720.7 | 206437.7 | TRUE |
| 243367.1 | 190886.5 | 249626.8 | 242704.1 | 259106.9 | 239196.6 | 187621.3 | 233445.2 | TRUE |
| 338493.8 | 368336.4 | 380884.8 | 387920.5 | 338051.8 | 358370.1 | 384221.1 | 338473.3 | TRUE |
| 42598.6  | 54202.3  | 24620.9  | 49112.7  | 25656.8  | 41266.4  | 40850.5  | 34017.8  | TRUE |
| 174377.4 | 160311   | 169696   | 173830.7 | 172526.1 | 170547.6 | 165465.5 | 147814.2 | TRUE |
| 119561.6 | 96738.3  | 143315.1 | 134033.6 | 90955.5  | 148428.1 | 109190.1 | 165453.6 | TRUE |
| 49321.7  | 57461.3  | 48282.9  | 44922.6  | 50631.6  | 46420.1  | 43248.5  | 44346.1  | TRUE |
| 39111.3  | 38677    | 60919.2  | 51277.2  | 37237.7  | 46386.9  | 38967.4  | 28376.4  | TRUE |
| 97685.1  | 93715.1  | 86858.5  | 82417.3  | 94393.9  | 91364.1  | 108374.7 | 91671    | TRUE |
| 103544.9 | 97469.3  | 110727.4 | 140524.2 | 99037.9  | 120371.2 | 128687.7 | 106674.2 | TRUE |
| 186010.2 | 200355.9 | 175050.9 | 187421.5 | 170212.8 | 181234.5 | 184863.3 | 182920.2 | TRUE |
| 89833.3  | 80845.8  | 60451.5  | 33683.5  | 76581.8  | 106945.9 | 129235.2 | 91814    | TRUE |
| 46889.7  | 50927.1  | 42552    | 47244.3  | 40358.7  | 57744.6  | 81408.5  | 48898.4  | TRUE |
| 69009.1  | 113477.4 | 67355.6  | 48874.4  | 67509.7  | 127154   | 130546.3 | 98201.4  | TRUE |



|          |          |          |          |          |          |          |          |      |
|----------|----------|----------|----------|----------|----------|----------|----------|------|
| 28128.9  | 29553.9  | 20646.9  | 25108.5  | 29744.7  | 29532.9  | 56301.6  | 37912.6  | TRUE |
| 130378.4 | 161724.3 | 87718.4  | 84172.4  | 105993.1 | 165507.8 | 212266.3 | 130036.7 | TRUE |
| 115015.5 | 90449.8  | 72962.8  | 99178.2  | 98855.5  | 114791.5 | 163319.5 | 119359.3 | TRUE |
| 89263.9  | 101107.7 | 84882.5  | 75018    | 77426.7  | 119622   | 178640.2 | 111820   | TRUE |
| 10365.5  | 12073.6  | 22489.5  | 11433.8  | 16734.2  | 10457.5  | 10739.4  | 17334.3  | TRUE |
| 40905.7  | 57919    | 39022.7  | 43528.8  | 39147.2  | 85428.2  | 103190.1 | 59313.4  | TRUE |
| 35593.5  | 22772.8  | 44628    | 34924.9  | 31289.1  | 11777.6  | 24544.8  | 15075.3  | TRUE |
| 23335.5  | 42482.4  | 57588.5  | 63281.4  | 60020.5  | 9287.8   | 21938.9  | 22041.2  | TRUE |
| 11920044 | 17192597 | 9693068  | 7586223  | 10299798 | 10642569 | 17717471 | 10201898 | TRUE |
| 667978.7 | 401306.3 | 335429.5 | 287787.8 | 299945   | 320102.6 | 482767.1 | 271511   | TRUE |
| 109039.2 | 343934.3 | 178890.7 | 195878.1 | 306828.3 | 73221.8  | 60358.3  | 65779.8  | TRUE |
| 462204.8 | 988075.5 | 972654.8 | 1663599  | 1087728  | 447619.6 | 307152.4 | 424622.9 | TRUE |
| 322647.6 | 282692.9 | 290718.8 | 327859.1 | 284268.9 | 388183.3 | 379871.4 | 379558   | TRUE |
| 119520.9 | 153927.1 | 106827.4 | 110422.1 | 93481.7  | 117805.7 | 168165.7 | 94888.9  | TRUE |
| 278086.1 | 330541.4 | 260190.8 | 179334.7 | 178249.5 | 265936.7 | 348404.3 | 225433.3 | TRUE |
| 605045.9 | 793622.9 | 549671   | 329722.3 | 380646.1 | 591212.8 | 822356.6 | 389246.7 | TRUE |
| 39644.2  | 127722.1 | 55614.5  | 65287.2  | 65424.2  | 14481.3  | 12897.7  | 8172.8   | TRUE |
| 59599.9  | 47179.5  | 87084.8  | 87999.6  | 67137.6  | 35291.4  | 36455.2  | 43365    | TRUE |
| 171045.2 | 122300.4 | 257160.3 | 276431.4 | 184490.6 | 113008   | 133062.3 | 152234.5 | TRUE |
| 42726.8  | 152531.2 | 63151.3  | 69574.3  | 109173.1 | 38352.1  | 13218.9  | 14499.7  | TRUE |
| 194032.2 | 393417   | 278125.9 | 199918.6 | 294549.2 | 186005.3 | 165993.4 | 166369.4 | TRUE |
| 86256.9  | 92874.9  | 100858.9 | 89517.5  | 66026.1  | 69750.5  | 86122.7  | 73513.4  | TRUE |
| 2104057  | 1399130  | 3015795  | 3073113  | 1786951  | 1300203  | 1544310  | 1192178  | TRUE |
| 110283.2 | 103224   | 120613   | 83837.3  | 80676.4  | 153951.1 | 145660.2 | 94078.7  | TRUE |
| 96834.7  | 56438.5  | 83825.8  | 102799.4 | 82860.2  | 74930.8  | 78380.6  | 66365.9  | TRUE |
| 159425.6 | 116856.7 | 172741.2 | 190959.5 | 166083.1 | 152035.1 | 139779.9 | 164026.7 | TRUE |
| 21114.4  | 32785.8  | 19498    | 21063    | 16540.4  | 22452.2  | 27420.4  | 26821.6  | TRUE |

|          |          |          |          |          |          |          |          |      |
|----------|----------|----------|----------|----------|----------|----------|----------|------|
| 172592.8 | 194953.4 | 154683.5 | 144640.3 | 132878.2 | 157057.3 | 179271.3 | 124809.9 | TRUE |
| 22043    | 44264.1  | 32376.8  | 9146.1   | 29595.7  | 28893.6  | 16261.8  | 26624.3  | TRUE |
| 175650.6 | 242637.4 | 168370.2 | 95404.6  | 136780.3 | 174288.2 | 222706.7 | 148676.4 | TRUE |
| 36481.5  | 47724    | 39229    | 7597.6   | 31737.5  | 28085    | 52481.5  | 31666.7  | TRUE |
| 192999.3 | 236128.6 | 254587.5 | 192480.4 | 216211.5 | 254346.7 | 317835.5 | 221007.2 | TRUE |
| 70808.5  | 57637.6  | 70439.6  | 72021.9  | 61638.7  | 90422.7  | 72752.4  | 66073.7  | TRUE |
| 427931.1 | 475421.5 | 613764.8 | 444570.2 | 524945.5 | 686216.4 | 971340.2 | 583774.8 | TRUE |
| 78271.3  | 105957.3 | 58883.5  | 65450.9  | 64705.9  | 93691    | 93995.6  | 78683    | TRUE |
| 34663.5  | 89697.5  | 45043.6  | 45297.9  | 83741.4  | 28680.2  | 14194.8  | 35044.3  | TRUE |
| 48007.7  | 127294.2 | 124394.9 | 154622.9 | 130625.5 | 39507.2  | 23941.9  | 14266.9  | TRUE |
| 58344.3  | 70859.6  | 72243.6  | 59053    | 55813.5  | 77593.4  | 75850.2  | 73535.5  | TRUE |
| 75831.7  | 69228.7  | 68445    | 53348.7  | 76528.9  | 52202.3  | 56714.7  | 64879.5  | TRUE |
| 180518.9 | 158502.7 | 144956.1 | 149437.5 | 121735.7 | 136618.7 | 123735.4 | 132520.5 | TRUE |
| 137791.9 | 109689.5 | 151440.2 | 138456.8 | 158578.8 | 132078   | 121693.1 | 150143.9 | TRUE |
| 117922.7 | 80678.6  | 104739.3 | 105278.1 | 116874.3 | 89624.6  | 80944.1  | 101969   | TRUE |
| 355597.5 | 371355   | 345694.4 | 350372.9 | 381728.7 | 351114.4 | 369467.9 | 426495   | TRUE |
| 74750.3  | 151200   | 134292.2 | 175021   | 224010.5 | 64759.7  | 48826.7  | 62047.9  | TRUE |
| 351461   | 361397.1 | 344669.8 | 380013.1 | 358621.5 | 381786.1 | 363559   | 338691.3 | TRUE |
| 131050.5 | 269487.5 | 213624.8 | 325885.1 | 312910.5 | 101819.1 | 129215.7 | 93498.8  | TRUE |
| 211575   | 206732.9 | 178731.2 | 195350.2 | 247915.9 | 179731.8 | 220358.9 | 259965.7 | TRUE |
| 6348168  | 4307431  | 3638902  | 5659238  | 5214968  | 6106960  | 6160826  | 7641936  | TRUE |
| 87821.6  | 86343.1  | 81646.8  | 60801.3  | 103879.3 | 93485.2  | 88386.2  | 117981.3 | TRUE |
| 23642.9  | 25229.7  | 5336.1   | 23952.2  | 28719    | 26265.2  | 22347.8  | 33710.8  | TRUE |
| 19406    | 24261.5  | 20589.8  | 25532.6  | 41482.2  | 21660    | 28989.3  | 39011.2  | TRUE |
| 319685.6 | 353927   | 226447.1 | 323761.6 | 463423.2 | 250924.5 | 314935.5 | 455084.1 | TRUE |
| 204642.3 | 219872.3 | 203964.4 | 207826.6 | 210972.9 | 225203.6 | 224458.2 | 231825.4 | TRUE |
| 537652.4 | 427237.4 | 488059.3 | 529963   | 585325.3 | 464375.6 | 502306.7 | 512452   | TRUE |
| 1373863  | 1181435  | 1182944  | 1315143  | 1434159  | 1174872  | 1199510  | 1363902  | TRUE |
| 343725.8 | 300615.4 | 314304.6 | 304398.1 | 317216   | 299105.5 | 336295.5 | 298325.6 | TRUE |
| 2835245  | 2706588  | 2524514  | 2368831  | 2509455  | 2728493  | 3041256  | 2983892  | TRUE |
| 299169   | 310373.6 | 219287.6 | 354506.8 | 301266.6 | 228281.9 | 277399   | 300309.7 | TRUE |
| 106978.1 | 78560.9  | 48691.7  | 104308.3 | 69766.3  | 56394.3  | 90928    | 81450.3  | TRUE |
| 152167.9 | 140945.9 | 138516.4 | 162165.1 | 170849.3 | 150105.8 | 176728.3 | 165933   | TRUE |
| 252687.3 | 254522.7 | 224475.5 | 189363.3 | 249301.3 | 202520.7 | 216670.1 | 250034.1 | TRUE |
| 398261.1 | 403843.8 | 318889.7 | 328837.4 | 383775.2 | 337820.9 | 356170.9 | 398426.2 | TRUE |
| 286643.9 | 228228.5 | 165275.2 | 125110   | 228005.1 | 165211.8 | 201502.4 | 247473.4 | TRUE |
| 356803.4 | 330458.2 | 358617.1 | 337914   | 507558   | 386296.9 | 342930.1 | 465430.6 | TRUE |
| 477336   | 402572.8 | 486923.4 | 456433.5 | 702175.3 | 541474.5 | 503066.6 | 634851.4 | TRUE |
| 87660.6  | 135266.5 | 138075.7 | 121382.4 | 127390.6 | 59456.8  | 82280.6  | 78357.1  | TRUE |
| 309413   | 347452.8 | 336308.9 | 320432.1 | 338530.8 | 240895.6 | 391424.6 | 250835.3 | TRUE |
| 62455    | 41194    | 59730.7  | 37926.8  | 49368.6  | 55316.5  | 58166.9  | 49931    | TRUE |
| 98097.1  | 91549.5  | 110277.3 | 129503.7 | 124322.5 | 108953.5 | 127986.4 | 137341.6 | TRUE |

|          |          |          |          |          |          |          |          |      |
|----------|----------|----------|----------|----------|----------|----------|----------|------|
| 48070.1  | 52336.8  | 63589.9  | 74391    | 74860.1  | 56645.4  | 63054.4  | 58358.4  | TRUE |
| 32574.2  | 40578.8  | 48183.1  | 40540.6  | 41445.7  | 36467    | 35723.9  | 31081.1  | TRUE |
| 77072.6  | 112062.7 | 95762.5  | 99634.5  | 105519.7 | 72419.4  | 61682.4  | 64907.5  | TRUE |
| 26301.2  | 21797    | 24058.4  | 14263.9  | 21284.6  | 9300.6   | 23367.9  | 31517.3  | TRUE |
| 222624.5 | 206724.8 | 169036.5 | 143853   | 184467.8 | 148410.4 | 161936.1 | 200167.2 | TRUE |
| 42456.2  | 41410.2  | 47863.2  | 41139.2  | 59577.8  | 41974.4  | 51439.8  | 56574.8  | TRUE |
| 212362.3 | 173870   | 182171.3 | 231444.2 | 224323   | 193717.4 | 217350.8 | 206677.5 | TRUE |
| 1802040  | 1474269  | 1561389  | 1894501  | 2027067  | 1602135  | 1820469  | 1993477  | TRUE |
| 112099.4 | 217015.3 | 202442.4 | 218973.4 | 283093.9 | 108912   | 109889.3 | 97858    | TRUE |
| 121615.5 | 115863.5 | 117823.8 | 104245.3 | 107895.1 | 106853.1 | 121299.9 | 125525.1 | TRUE |
| 100649.9 | 90796.4  | 109289.3 | 72939    | 86442.6  | 102844.8 | 91541.5  | 99847    | TRUE |
| 159764.7 | 170445.8 | 172903.2 | 174653.7 | 148555.5 | 198915.4 | 195817.1 | 178731.3 | TRUE |
| 115800.5 | 126566.3 | 92673.2  | 111001.5 | 93657.3  | 120479.5 | 130913.7 | 119483.6 | TRUE |
| 102672.1 | 96502.6  | 99282.8  | 109728.5 | 98564.7  | 118809.4 | 112180.3 | 111916   | TRUE |
| 260227.8 | 258757.7 | 220546.9 | 222612.3 | 219091.2 | 290323.3 | 271130.3 | 307253.3 | TRUE |
| 176208   | 190542.2 | 173294   | 165028.5 | 147814.5 | 185310.1 | 195980.1 | 179941   | TRUE |
| 77750.1  | 80577.3  | 77598.4  | 76340    | 76922.6  | 86505.8  | 81018.4  | 88714    | TRUE |
| 99221.9  | 101901.7 | 99080.3  | 98276.4  | 77678.9  | 85454.6  | 92562.8  | 103868.4 | TRUE |
| 122643.8 | 155661.1 | 128826.3 | 131528.8 | 128940.1 | 157851.8 | 131197.7 | 145749   | TRUE |
| 52887    | 42061.3  | 35863.9  | 56719.2  | 41581.5  | 57838    | 55479.2  | 48696.8  | TRUE |
| 75244.3  | 90204.2  | 78032.6  | 119339.8 | 101784.5 | 68572.1  | 97363.8  | 98023.7  | TRUE |
| 74511.8  | 87750.4  | 82936.4  | 91275.5  | 107742.4 | 87610.9  | 104663   | 100296.9 | TRUE |
| 66439.5  | 66972    | 54003.3  | 66934.8  | 70425.7  | 70114.5  | 86076.8  | 79331.5  | TRUE |
| 76301    | 84914.2  | 70436.8  | 75078.2  | 79264.9  | 67100.8  | 88025.9  | 70909.3  | TRUE |
| 20880.5  | 11802.7  | 16592.2  | 26279.1  | 22388.2  | 20366.4  | 27467.3  | 26986.8  | TRUE |
| 28975    | 8528.6   | 9479.9   | 9207.8   | 12945.2  | 10467.3  | 10665.2  | 15532.2  | TRUE |
| 53299.3  | 54240.4  | 60664.6  | 90550.9  | 82789.9  | 72601.5  | 74842.3  | 65627.3  | TRUE |
| 57571.3  | 103752.2 | 83757.3  | 112136.6 | 71298    | 45936    | 46792.2  | 47225.2  | TRUE |
| 143214.1 | 124251.2 | 106640.1 | 118609.5 | 117364.4 | 146843   | 168083   | 131921.4 | TRUE |
| 311267.5 | 304423.1 | 257111.5 | 355675.9 | 394431.6 | 265603.1 | 311578.4 | 363879.2 | TRUE |
| 394368.4 | 411149.8 | 407334.1 | 432219.8 | 354272.5 | 430418   | 434929.8 | 415602.4 | TRUE |

|          |          |          |          |          |          |          |          |      |
|----------|----------|----------|----------|----------|----------|----------|----------|------|
| 234795   | 227913.1 | 210841.2 | 229354.4 | 238301.9 | 214533.7 | 251609   | 243487.9 | TRUE |
| 263330.5 | 241303.5 | 205522.8 | 236668.3 | 276244.2 | 222731.3 | 339188.6 | 308614.2 | TRUE |
| 227792.7 | 191423.8 | 170222.2 | 224050.6 | 167303.1 | 215917.1 | 235516   | 244625.9 | TRUE |
| 35266.3  | 42154.9  | 32249.5  | 33536.3  | 47494.8  | 36978.1  | 28148.3  | 49151.5  | TRUE |
| 85318.2  | 71116.8  | 67478.5  | 71981.1  | 76873    | 73910.6  | 72295.3  | 70334.9  | TRUE |
| 38530.9  | 42731.5  | 23494.1  | 31101.4  | 39221.9  | 22156.8  | 49411.7  | 46397.4  | TRUE |
| 142558   | 156702.2 | 118301.7 | 125932.2 | 154436.4 | 99593.6  | 170465   | 172615.1 | TRUE |
| 5178     | 11757.7  | 7797.4   | 6656.9   | 10602.2  | 9565.3   | 11112.5  | 18710.2  | TRUE |
| 87301.8  | 89291.7  | 71295.4  | 86711    | 90003.1  | 63269.9  | 102680.6 | 113629.7 | TRUE |
| 21296.3  | 25687.1  | 36267.4  | 35360.2  | 33983.2  | 20593.8  | 32628.1  | 31184.7  | TRUE |
| 108577.1 | 104993.3 | 135464.2 | 141668.1 | 189782.5 | 126395.4 | 193539.2 | 167843.7 | TRUE |
| 48558.1  | 81801.1  | 62784.3  | 86532.3  | 108238.7 | 27615.6  | 26369.5  | 38352.3  | TRUE |
| 376913.8 | 344285.8 | 224724.8 | 217364.2 | 247520.7 | 199393.1 | 228842.1 | 268264.2 | TRUE |
| 352936.2 | 335531.4 | 241394.2 | 254999.6 | 268255.8 | 265402.5 | 274576.6 | 278478.6 | TRUE |
| 227592.1 | 197494.7 | 196096.7 | 252323.8 | 261552   | 211391.6 | 218484.4 | 255975.1 | TRUE |
| 373393.5 | 364660.1 | 387119.9 | 392223.6 | 392238.8 | 399046.5 | 435193.8 | 387998.6 | TRUE |
| 187344.9 | 207270.5 | 163457.6 | 203948.5 | 202952.4 | 163690   | 193993.1 | 205327.8 | TRUE |
| 491440.9 | 501848.2 | 497405   | 518267.4 | 449211.8 | 540318.5 | 513206.1 | 492236.5 | TRUE |
| 437781.1 | 379382.2 | 427097.3 | 443061.9 | 409922.8 | 410444.2 | 437908.2 | 416236.2 | TRUE |
| 20389.5  | 11311.2  | 20673.1  | 6318.7   | 25317.1  | 19760.6  | 16402.4  | 9216.4   | TRUE |
| 62288.5  | 89093.3  | 79147.4  | 59497.5  | 74577.2  | 52993    | 64339.9  | 62631.5  | TRUE |
| 399816.1 | 412587   | 357153.2 | 369891.6 | 426910.2 | 378626.4 | 428130.4 | 386091.4 | TRUE |
| 103987.1 | 91883.2  | 65565.9  | 104945.1 | 111940.4 | 82772.9  | 106192.5 | 115036.9 | TRUE |
| 170410.9 | 142508.1 | 168804.7 | 170555.3 | 201823.7 | 136629.3 | 188384.2 | 200113.7 | TRUE |
| 801226.6 | 802096.7 | 559881.9 | 724383.2 | 819164.3 | 600374.7 | 904963.3 | 781475.2 | TRUE |
| 1749817  | 1680723  | 1238187  | 1561393  | 1960882  | 1305743  | 1877115  | 1914665  | TRUE |
| 41020.9  | 65378.7  | 41338.6  | 56716.7  | 58523.2  | 45179.2  | 61186.4  | 65178.2  | TRUE |
| 21392.2  | 74894.7  | 25322.2  | 44725    | 84669.2  | 8023.2   | 9923.9   | 9051     | TRUE |
| 109918   | 150991.6 | 257915.7 | 97964.7  | 73364.9  | 110663.6 | 82185.1  | 104256.3 | TRUE |
| 94099.6  | 89609.8  | 90009.1  | 89741.3  | 63382.7  | 98975.5  | 71037.7  | 99422    | TRUE |
| 57534.7  | 59947.4  | 54894.6  | 53491.1  | 77420.7  | 56916.2  | 58148.5  | 79804.9  | TRUE |
| 214563   | 200900.5 | 102499.2 | 111905.3 | 162423.6 | 90148.7  | 125202.6 | 153552.4 | TRUE |
| 2708395  | 2582917  | 1837960  | 2624833  | 2751865  | 2168377  | 3144615  | 3103118  | TRUE |
| 616244.8 | 609938.9 | 448747.7 | 565187.2 | 680786.8 | 525722.9 | 720145.4 | 652961.7 | TRUE |
| 190198.2 | 127208   | 150367.5 | 205909.6 | 203953.8 | 178655.5 | 166359.5 | 192267.5 | TRUE |
| 35651.1  | 97726.3  | 49442.7  | 79862.2  | 103810.8 | 21811.4  | 19682.9  | 19400.8  | TRUE |
| 105146.2 | 172408.8 | 87531.2  | 186310.4 | 199188.1 | 63669.8  | 66477.3  | 70556.5  | TRUE |
| 111287.6 | 238476.2 | 171164.6 | 265680.5 | 210753   | 105406.1 | 85983.9  | 82799    | TRUE |
| 202355.3 | 213134.8 | 127621.3 | 215885.7 | 225848.8 | 162515.5 | 253388.6 | 269650.3 | TRUE |

|          |          |          |          |          |          |          |          |      |
|----------|----------|----------|----------|----------|----------|----------|----------|------|
| 146883   | 152542.9 | 111293.4 | 125113.1 | 158243.8 | 106132.1 | 167871   | 207875   | TRUE |
| 56825.3  | 48587.9  | 34856.3  | 46387.1  | 63424.6  | 57282.4  | 61224    | 85850    | TRUE |
| 252015.2 | 252426.4 | 259996.4 | 342454.2 | 191921.9 | 241611.4 | 297972.5 | 236826.9 | TRUE |
| 1018748  | 964679.6 | 1122642  | 1258359  | 1003051  | 1083201  | 1100762  | 1063033  | TRUE |
| 264574.4 | 266133.2 | 248861.5 | 273294.8 | 280130.9 | 248540.7 | 285923.3 | 300913.5 | TRUE |
| 89683.3  | 75380.1  | 79780.9  | 74942.6  | 76504.9  | 65038    | 72395.2  | 77135    | TRUE |
| 218845.5 | 196667.6 | 186981.1 | 255829.7 | 237017.1 | 209845.9 | 255554.6 | 273062.9 | TRUE |
| 220735.7 | 194480.6 | 175462.9 | 234468.1 | 221440.7 | 218220.4 | 226682.5 | 231561.7 | TRUE |
| 43395.7  | 65763.9  | 52422.9  | 62866.1  | 55810.6  | 34713.2  | 35077.2  | 33532.2  | TRUE |
| 57115.9  | 47778.3  | 35280.2  | 55614.4  | 44599.6  | 45001.6  | 45113.8  | 45794.1  | TRUE |
| 258702.2 | 237609.1 | 222781   | 247890.1 | 315654.5 | 232164   | 284248.3 | 277087   | TRUE |
| 653285.5 | 642485.8 | 474205.6 | 634479.4 | 654029.4 | 573265.6 | 743291.8 | 689323.3 | TRUE |
| 74291    | 74961.1  | 52909.3  | 68741.3  | 86330.4  | 62106.7  | 69989.1  | 70141.4  | TRUE |
| 59645.7  | 60571.7  | 74656.7  | 101693   | 77004.8  | 67099.8  | 69438.2  | 88242.4  | TRUE |
| 16391.6  | 34052.3  | 26900.6  | 21791.7  | 39552.6  | 6596.6   | 9953.6   | 7912.9   | TRUE |
| 32250    | 10278.2  | 19200.2  | 9781     | 28468.5  | 7248.9   | 12667.3  | 23862.8  | TRUE |
| 21396.1  | 21663.9  | 19379.3  | 12089.2  | 25849    | 16062    | 28518.9  | 18982    | TRUE |
| 73867.4  | 96310.3  | 55252    | 93007.1  | 48093.9  | 71617.7  | 75627.5  | 75486.3  | TRUE |
| 48998.1  | 39816    | 38608.6  | 42577.7  | 42187.3  | 40054    | 48940.7  | 58415.1  | TRUE |
| 30536.4  | 34321.1  | 12351.6  | 14387.4  | 8651.5   | 13212    | 30578.2  | 18618    | TRUE |
| 167886.6 | 143633.8 | 131037.5 | 146147.2 | 149338.2 | 179533.2 | 158448.7 | 184495.1 | TRUE |
| 35789.2  | 23136    | 35531.8  | 39293.3  | 19982.8  | 48859.5  | 42078.1  | 32543.7  | TRUE |
| 197884.7 | 168399.7 | 231304.9 | 222509   | 178089   | 232556.7 | 221053.7 | 214538.2 | TRUE |
| 18584.9  | 24183.5  | 7057.3   | 13641    | 9543.1   | 12846.2  | 17956    | 8189.3   | TRUE |
| 512683.3 | 467704.5 | 431433.4 | 461609.6 | 430352.9 | 569007.8 | 567378.4 | 493743.8 | TRUE |
| 165758.7 | 153924.1 | 114384.7 | 137569.8 | 145280.6 | 155085.3 | 160611.1 | 155727   | TRUE |
| 78650.3  | 73400.5  | 66470.1  | 89742.5  | 73802.3  | 93032.9  | 99221.5  | 82181.5  | TRUE |
| 121160.4 | 173726.2 | 109752.7 | 166536.8 | 94319.2  | 115619.4 | 156957.3 | 132894.1 | TRUE |
| 206928.6 | 175155.7 | 144808.1 | 174947.9 | 128455.6 | 212365.4 | 197489.1 | 186329.3 | TRUE |
| 165559.6 | 113216.9 | 99465    | 133547.1 | 121267.8 | 121891.7 | 144295.1 | 137867   | TRUE |
| 281605.3 | 258013.3 | 281763.3 | 368789.2 | 222650.5 | 284099.8 | 285515.2 | 297644.7 | TRUE |
| 593064.7 | 622847.1 | 741710.5 | 1038288  | 719337.5 | 869075   | 805272.3 | 871669.4 | TRUE |
| 78821.3  | 69239.6  | 40824.9  | 60403.4  | 66941.7  | 85291.5  | 80285.7  | 74549.7  | TRUE |
| 668736.1 | 464120.8 | 406588.6 | 478190.6 | 417214.3 | 501914.6 | 522043   | 527065.3 | TRUE |
| 166997.7 | 106057.2 | 145884.2 | 185603.9 | 156950.5 | 170520.8 | 164360.6 | 183710.5 | TRUE |
| 551487.6 | 492280.2 | 416554.5 | 441706.9 | 531876.4 | 421457.9 | 502871.3 | 506273.1 | TRUE |
| 286811.6 | 226917.8 | 182788.4 | 274179.9 | 275985.5 | 226906.7 | 223049.5 | 291446.4 | TRUE |
| 941517.3 | 924005.8 | 797837.2 | 968863.2 | 946759.5 | 923219.1 | 1018202  | 892984.7 | TRUE |
| 1373398  | 1339312  | 1037546  | 1240211  | 1297760  | 1073824  | 1505197  | 1248633  | TRUE |
| 774566.9 | 825049.5 | 665008.7 | 730244.2 | 836944.4 | 608756   | 865101.7 | 807688   | TRUE |
| 215441.2 | 194905.1 | 183811.6 | 175834.5 | 242908.3 | 175944.2 | 251898.3 | 228056.5 | TRUE |
| 243511.1 | 238327.2 | 296392.1 | 284011.1 | 222581.6 | 293351.1 | 255534.7 | 239311.2 | TRUE |
| 2221282  | 1979765  | 2286688  | 2326510  | 1786561  | 2173502  | 2056465  | 1983285  | TRUE |
| 319141   | 321920.3 | 379048.8 | 288310.3 | 292463.7 | 301966.6 | 318944.1 | 300716.1 | TRUE |
| 76631.7  | 94619.2  | 65669.4  | 61084.8  | 78465.2  | 57514.7  | 83994.7  | 75159.1  | TRUE |
| 631759.2 | 708187.7 | 449154   | 564628.8 | 655855.6 | 484579.2 | 704779.5 | 691062.8 | TRUE |
| 51303.1  | 45242.1  | 64365.3  | 63832.6  | 60076.3  | 54262.5  | 68934.6  | 53504    | TRUE |
| 257776.5 | 189190.4 | 276215.1 | 293595.4 | 195190.3 | 255991.9 | 197538.4 | 189228.8 | TRUE |
| 308607.1 | 237501.1 | 310699.4 | 312042.6 | 214471.6 | 295573.2 | 233407   | 245342.5 | TRUE |
| 356549.1 | 257269.4 | 287839.9 | 291114.1 | 420682.4 | 368036.5 | 312612.8 | 351236.4 | TRUE |

|          |          |          |          |          |          |          |          |      |
|----------|----------|----------|----------|----------|----------|----------|----------|------|
| 322413.2 | 244006.6 | 272278.9 | 246160.7 | 323119   | 321397.7 | 257574   | 335157.3 | TRUE |
| 116346.3 | 103546   | 104579.7 | 119618.4 | 93726.5  | 111548.7 | 96819.9  | 88746.7  | TRUE |
| 752620.3 | 661379.8 | 497343.9 | 566638   | 528175.4 | 567724.9 | 620276.1 | 684897.1 | TRUE |
| 774289.9 | 703088.8 | 545217.4 | 660992.6 | 596880.7 | 621309.7 | 614069.2 | 654742.2 | TRUE |
| 113202.9 | 89203.5  | 88921.7  | 90695.1  | 109601.1 | 119699.4 | 92431.8  | 110314.5 | TRUE |
| 74548.6  | 51432.9  | 47081.4  | 64575.6  | 60265.4  | 84461.8  | 79220.3  | 91042.9  | TRUE |
| 95004.4  | 67900.5  | 67509    | 80824.9  | 81595.2  | 119352.3 | 121102   | 116566   | TRUE |
| 152510.6 | 167069.6 | 106276.7 | 154736.5 | 114487.5 | 87304.4  | 125769   | 111062.8 | TRUE |
| 109346.9 | 99062.8  | 98916.3  | 200365   | 127170.4 | 107114.7 | 143116.6 | 139125.6 | TRUE |
| 157525.4 | 121420   | 178608.7 | 137781.2 | 261275.6 | 171410.1 | 164762.6 | 251380.2 | TRUE |
| 358972.4 | 358988.5 | 399109.8 | 401275.2 | 518863.8 | 417340.3 | 430560.3 | 515768.9 | TRUE |
| 85088.7  | 61997.5  | 58782.4  | 74886.6  | 52203.9  | 151716.2 | 89971    | 131862.6 | TRUE |
| 145901.5 | 121713.2 | 156341.6 | 150679.8 | 111704   | 327661.4 | 164502.1 | 292826.7 | TRUE |
| 27554.1  | 36308.7  | 35443.1  | 29401.6  | 28171    | 27457.4  | 23476.9  | 26577.1  | TRUE |
| 110093.5 | 101675.7 | 63272.4  | 91193.7  | 94433.3  | 82453.6  | 86926.4  | 100204.1 | TRUE |
| 132244.5 | 108521.1 | 102764.6 | 71767.3  | 111877.7 | 90622    | 92860.8  | 116270.2 | TRUE |
| 175676.5 | 136760.6 | 199209.1 | 188697   | 268345.3 | 226427.1 | 193473.1 | 263109.7 | TRUE |
| 30175.4  | 33060.5  | 40035.8  | 57174.7  | 45982.9  | 42472.3  | 39918.1  | 48467.4  | TRUE |
| 19386.8  | 41269.2  | 34010.5  | 29644.5  | 47983.7  | 14145.7  | 29109.8  | 26585.5  | TRUE |
| 43326.6  | 49095.4  | 56408.3  | 66186.8  | 54899.1  | 25270.2  | 72784.1  | 43238.6  | TRUE |
| 27891    | 39856.8  | 33499.1  | 39899.9  | 45420    | 29824.2  | 44400.8  | 41004.3  | TRUE |
| 117604.4 | 114382.1 | 100104.2 | 75738.1  | 103134.5 | 80215.5  | 89422.5  | 102719   | TRUE |
| 438071.9 | 346162.7 | 335458.3 | 340281.6 | 331211.8 | 344501.1 | 295978.1 | 285721.5 | TRUE |
| 129528.5 | 129621.8 | 130655   | 129787.4 | 130352   | 121534.6 | 130361.3 | 122122.3 | TRUE |
| 65759.5  | 88962.3  | 107669.8 | 70994.2  | 90140.5  | 53078.1  | 59164.9  | 53978.4  | TRUE |
| 66705.1  | 83172.3  | 70982.1  | 142739.8 | 178581.2 | 62409.5  | 68618.4  | 62606.5  | TRUE |
| 2260236  | 1957128  | 2226565  | 2404142  | 2432481  | 2536459  | 2460840  | 2529814  | TRUE |
| 128467   | 157863   | 117330.9 | 302818.8 | 273911.1 | 100742.4 | 110471.8 | 127406   | TRUE |
| 243707.6 | 229242.6 | 193974.6 | 230586.3 | 290383.6 | 236966.6 | 246771   | 247606.5 | TRUE |
| 58614.6  | 65961.2  | 44306    | 50974.8  | 62708.8  | 52017.2  | 63373.3  | 57205    | TRUE |
| 154328.2 | 127681.5 | 125340.2 | 156639.3 | 137228.5 | 178249.9 | 142148.5 | 166031.6 | TRUE |
| 74865.1  | 45534.5  | 55792.4  | 58687.3  | 43242.4  | 51540.7  | 53287.8  | 71267    | TRUE |
| 106665.5 | 95510.3  | 70534    | 114932   | 79619.2  | 121642.1 | 108409.1 | 128311   | TRUE |
| 145988   | 122052.1 | 134950.2 | 147217.5 | 135948.8 | 107052   | 110960.7 | 126506.5 | TRUE |
| 740251.2 | 685390.3 | 700996.1 | 821094.4 | 793936   | 709297   | 687201.4 | 775511.8 | TRUE |
| 803833   | 637968.5 | 692052.3 | 788051.8 | 854892.4 | 751748.2 | 744649.9 | 832785.2 | TRUE |
| 790000.4 | 708414.2 | 656224.6 | 786518.2 | 817236   | 741641.8 | 761662.6 | 837122.7 | TRUE |
| 81368.9  | 67230.6  | 70737.7  | 71422.1  | 94199.8  | 71830.3  | 81679.2  | 65673.5  | TRUE |
| 44718    | 103228.2 | 59623.4  | 145189   | 162754   | 89841.9  | 33133.8  | 43735.5  | TRUE |
| 520482.4 | 488710.3 | 417440.2 | 443435.2 | 454254.5 | 526078.9 | 560520.2 | 547463.6 | TRUE |
| 701265.4 | 669870.3 | 687843.5 | 720474.4 | 652110.4 | 677038.5 | 718666.1 | 783269.4 | TRUE |
| 251051.8 | 223029.6 | 233168.9 | 248623   | 271585.3 | 220908.3 | 284630.6 | 244604.6 | TRUE |
| 414027.6 | 384519.7 | 314271.1 | 416746.9 | 367979.9 | 359286.8 | 408634.3 | 398341.4 | TRUE |
| 274142.7 | 244892   | 247124.9 | 271941.2 | 253798.4 | 322346.3 | 253555.5 | 282713   | TRUE |
| 1047079  | 959931.8 | 939460.5 | 948887.1 | 1036986  | 1208561  | 974976.1 | 1117708  | TRUE |
| 33868.1  | 34360.8  | 36487    | 31132.5  | 23809.4  | 32654.1  | 32930.4  | 23234.4  | TRUE |
| 45472.3  | 44156.7  | 41107.2  | 51810.5  | 65952.4  | 38573.2  | 45789.5  | 40089.3  | TRUE |
| 33951.4  | 20297.8  | 26494.2  | 35460.7  | 33901.6  | 36015.4  | 47694.2  | 72496.2  | TRUE |

|          |          |          |          |          |          |          |          |      |
|----------|----------|----------|----------|----------|----------|----------|----------|------|
| 64955    | 34348.5  | 45969.3  | 42959.2  | 57660.1  | 73652.8  | 76561    | 44356    | TRUE |
| 29223.7  | 20928.5  | 25107.4  | 20341.7  | 22313.5  | 23343.4  | 14139.2  | 26903.8  | TRUE |
| 20761805 | 14347319 | 21987839 | 21746841 | 22075302 | 21257302 | 15419051 | 21675326 | TRUE |
| 61963.3  | 57307.9  | 44122.8  | 56697    | 53857.5  | 62277    | 62617.1  | 58784.7  | TRUE |
| 111800.5 | 89874.5  | 83594.5  | 104287.2 | 84282    | 113793.4 | 118504.1 | 105437.9 | TRUE |
| 29267.2  | 41058.6  | 43511    | 44403.5  | 25848.4  | 60609.1  | 40412.7  | 41056.1  | TRUE |
| 88039.5  | 93102.8  | 86168.3  | 97474.6  | 108065.7 | 106925.6 | 92235.2  | 108986.4 | TRUE |
| 193710.6 | 154213.2 | 171557.9 | 250094.2 | 215514   | 271538.6 | 239468.7 | 247226.9 | TRUE |
| 58531.5  | 50231    | 56602.8  | 54070.1  | 53039.8  | 46755.1  | 63354    | 55914.3  | TRUE |
| 308846.3 | 266275.4 | 269657.2 | 316994.3 | 301812.6 | 260333   | 269223.6 | 294064.5 | TRUE |
| 537885.3 | 418088.5 | 530147.1 | 542941.7 | 424689.9 | 572685.9 | 491712.6 | 429449.5 | TRUE |
| 112061.1 | 108415.5 | 119139.5 | 117974.5 | 123810.7 | 123938.1 | 123114.8 | 128034.8 | TRUE |
| 623046.2 | 444960.9 | 521569.2 | 536657   | 728230.8 | 588626.9 | 447735.2 | 606293.4 | TRUE |
| 1047484  | 790107.7 | 1000202  | 1007783  | 1112826  | 1196688  | 839999.8 | 1184756  | TRUE |
| 510268.6 | 513569.4 | 475125   | 448038.3 | 370492.3 | 542898.1 | 520520.7 | 437356.4 | TRUE |
| 248277.4 | 207683.8 | 255846.2 | 288804.4 | 214458.1 | 254491.9 | 234050.7 | 227156.8 | TRUE |
| 144205.3 | 171018.5 | 161102   | 187244.4 | 181453.6 | 186320.2 | 215569.4 | 149490.3 | TRUE |
| 337009.6 | 384511.5 | 451857.1 | 486685.7 | 405407.1 | 517545.4 | 532474.1 | 408992.7 | TRUE |
| 184915.9 | 195800   | 207081.3 | 189273.1 | 160683.8 | 158592.4 | 147476   | 142598.8 | TRUE |
| 239844.6 | 228307.6 | 322976.9 | 258382.5 | 259599.9 | 290563.9 | 239242.5 | 266455.2 | TRUE |
| 599951.3 | 588677.2 | 430053.7 | 482776.5 | 478349.4 | 452881.1 | 507253.7 | 491654.5 | TRUE |
| 341603.7 | 330291.6 | 369707   | 395680.1 | 338526.3 | 393592.6 | 342783.4 | 308590.7 | TRUE |
| 161799   | 177906   | 169855.2 | 170021.5 | 157890.9 | 162968.5 | 192707.4 | 155955.7 | TRUE |
| 46037.6  | 59193.6  | 29632.5  | 35151.6  | 51777.5  | 35401.4  | 60029.4  | 43529.3  | TRUE |
| 61669.2  | 69633.5  | 169233.9 | 53528.9  | 74936.9  | 66127    | 89818.8  | 61637.5  | TRUE |
| 2731088  | 2256391  | 2441366  | 2519721  | 2627554  | 2536931  | 2090035  | 2519132  | TRUE |
| 2249326  | 1829517  | 1873429  | 2001110  | 2114790  | 2091493  | 1687916  | 2158209  | TRUE |
| 112124.4 | 99335.3  | 132868.2 | 144262.9 | 115733.2 | 146920.1 | 121666.3 | 126890.9 | TRUE |
| 395030.8 | 313655.1 | 451222.5 | 510343.5 | 476019.9 | 481886.7 | 400437.1 | 412660.3 | TRUE |
| 92302.4  | 71869.8  | 53732.4  | 81409    | 92550.9  | 104989.8 | 88484.1  | 101275   | TRUE |
| 199009.8 | 154918.4 | 173519.3 | 198342.5 | 160769.6 | 186527.2 | 203489.8 | 203329.4 | TRUE |
| 561672   | 565259.5 | 567683.8 | 593906.2 | 551417.4 | 592296.9 | 552955.2 | 530495.7 | TRUE |
| 181699.7 | 217577   | 183852.7 | 182473.7 | 179710.1 | 204714.4 | 220893.5 | 175880.2 | TRUE |
| 109924.4 | 308120   | 164765.4 | 270050.8 | 294937.1 | 66106.9  | 51807.6  | 77320.4  | TRUE |
| 565455.7 | 581705.8 | 619049.5 | 625036.4 | 630987.9 | 616948.6 | 595492.3 | 584231.1 | TRUE |
| 451628.6 | 538921.4 | 449952.5 | 596059.9 | 413185   | 469184.7 | 473998.5 | 426062.4 | TRUE |

|          |          |          |          |          |          |          |          |      |
|----------|----------|----------|----------|----------|----------|----------|----------|------|
| 18831.5  | 12920.7  | 10509.6  | 29726.4  | 32565.2  | 17533.6  | 13999.1  | 29738.4  | TRUE |
| 1776093  | 1749066  | 1568094  | 1957400  | 1827439  | 1791563  | 2004932  | 1894199  | TRUE |
| 127606.9 | 96590.7  | 113534   | 126950.6 | 104623.4 | 133740   | 123249.7 | 130711.3 | TRUE |
| 1673422  | 1560875  | 1975995  | 2186656  | 1989449  | 2192953  | 2045474  | 2103902  | TRUE |
| 502143.3 | 545210.9 | 560234.9 | 581996.7 | 551770.2 | 579118   | 540653.9 | 587399   | TRUE |
| 496729.2 | 451098.9 | 527837.6 | 556177.1 | 572971.2 | 569096.7 | 534896.4 | 542512.6 | TRUE |
| 910739   | 664667.5 | 920815.4 | 806121.5 | 708829.4 | 960499.3 | 899791.9 | 755797.6 | TRUE |
| 410609.4 | 311113.1 | 393679.9 | 350770.5 | 352747.8 | 395187   | 410611.6 | 370254   | TRUE |
| 35048    | 32397    | 31574.8  | 52035.9  | 32647.3  | 32540.8  | 15293.1  | 25512.1  | TRUE |
| 25260.8  | 43304.7  | 31629.3  | 49991.9  | 41334.9  | 14876.2  | 7065.3   | 11169.6  | TRUE |
| 102602.2 | 87972.6  | 86170.2  | 103903.2 | 111275.4 | 91404.5  | 81072.3  | 83028.4  | TRUE |
| 91669.4  | 85397.9  | 85955.2  | 67753.1  | 86368.9  | 84911.3  | 78972.8  | 83619.7  | TRUE |
| 338335.4 | 279798.3 | 311487.6 | 300213.1 | 308396.6 | 282570.3 | 297030.2 | 273643.7 | TRUE |
| 112218.5 | 101383.4 | 112387.3 | 94465.8  | 105817.4 | 116687.1 | 98819.4  | 88575.8  | TRUE |
| 688495.2 | 574273   | 638419.9 | 619221   | 649854.7 | 571855   | 666071.9 | 559753.9 | TRUE |
| 64325.5  | 59640.6  | 81580.4  | 99151.2  | 90932.1  | 100804.7 | 97018.9  | 96327.2  | TRUE |
| 320099.2 | 286499.9 | 406086   | 391556.2 | 360089.3 | 406824.7 | 356834.1 | 379855.6 | TRUE |
| 137465.6 | 136381.4 | 166156   | 177968.2 | 193433.5 | 190784.8 | 183659.1 | 182268.6 | TRUE |
| 233104.8 | 216001.5 | 240594.8 | 307695.9 | 281335   | 290223.8 | 258456.1 | 311833.7 | TRUE |
| 187010.5 | 194948   | 223626   | 184035.4 | 242009.8 | 219613.4 | 241151.4 | 234337.1 | TRUE |
| 191998.5 | 159146.3 | 215964.3 | 170679   | 193049.9 | 221681.1 | 203738   | 208188.9 | TRUE |
| 940742.1 | 963069.7 | 966095.5 | 969685   | 1000468  | 993304   | 1012168  | 960363.1 | TRUE |
| 151761.8 | 130323.6 | 112821.6 | 147756.1 | 131044.5 | 163582.7 | 165266.6 | 142738.7 | TRUE |
| 98397.9  | 123678.5 | 61046    | 107334.8 | 122348.1 | 64760.1  | 114178.6 | 107555.6 | TRUE |
| 231004.8 | 275556.5 | 194222.1 | 233707.6 | 275714.7 | 151632.3 | 237415.6 | 244816.4 | TRUE |
| 113748.7 | 117235.3 | 60738.1  | 99505.4  | 127988.2 | 70114.3  | 118765.6 | 127889.2 | TRUE |
| 1650585  | 1656366  | 1109041  | 1417046  | 1544565  | 1178021  | 1600949  | 1753110  | TRUE |
| 169789.8 | 240700.3 | 162369.9 | 261512.3 | 348687.7 | 148635.3 | 313729.6 | 348819.8 | TRUE |
| 525326.1 | 742620.3 | 716569.1 | 756627.9 | 340348.1 | 550962   | 741038.6 | 589411.2 | TRUE |
| 214919.8 | 201634.3 | 131408.2 | 273352.7 | 230957.6 | 158895.8 | 232662.2 | 270981.3 | TRUE |
| 578280.9 | 589437.6 | 411506.4 | 703833.1 | 674238.4 | 463353.3 | 619010.8 | 664985.7 | TRUE |
| 147586.7 | 168595.5 | 133216.4 | 164390.3 | 176115   | 137700.1 | 201024.2 | 184705.6 | TRUE |
| 185514.8 | 197803.6 | 159490.4 | 158519.2 | 210387.7 | 176939   | 213381.1 | 231862.3 | TRUE |
| 575490.1 | 538469.6 | 631064.2 | 612095.2 | 503131.3 | 696473.4 | 578614.5 | 677727   | TRUE |
| 393986.2 | 387108.3 | 417963.7 | 420264.9 | 302658.8 | 461038   | 456506.5 | 476642.6 | TRUE |
| 753363.7 | 746864.7 | 587105.7 | 864820.7 | 955074   | 655354.2 | 973931.6 | 941873.8 | TRUE |
| 487328.1 | 520496.9 | 415224.1 | 529905.2 | 540286.5 | 496301.3 | 679569.5 | 571114.3 | TRUE |
| 86176.1  | 70159.7  | 55842.2  | 76058.8  | 90764.9  | 76755.9  | 84925.3  | 97331.7  | TRUE |
| 147405.2 | 163752.1 | 136538.4 | 145634.5 | 168462.8 | 151024.4 | 186179.4 | 181541.8 | TRUE |
| 156430.7 | 146250.5 | 179126.5 | 176882.5 | 111371.5 | 156424.2 | 128849   | 156653.5 | TRUE |
| 516880.4 | 460620.4 | 227341   | 279401   | 331642.4 | 265182.9 | 328584.9 | 365923.9 | TRUE |



|          |          |          |          |          |          |          |          |      |
|----------|----------|----------|----------|----------|----------|----------|----------|------|
| 983168.8 | 1001732  | 698123.2 | 964537.6 | 1019049  | 740821.6 | 1054812  | 1042166  | TRUE |
| 1937482  | 1697947  | 1683150  | 1787313  | 1339697  | 1666780  | 1681513  | 1749261  | TRUE |
| 208799   | 178806.9 | 263034.5 | 246040   | 187174.2 | 222754.5 | 244661.1 | 199347.3 | TRUE |
| 116040.7 | 100547.3 | 88574.5  | 120067.9 | 116127.7 | 78984.8  | 133882.2 | 106815.4 | TRUE |
| 27369.7  | 31567.7  | 20143    | 31973.8  | 31594.5  | 15608.3  | 24818.8  | 29619.2  | TRUE |
| 16430.2  | 11622.7  | 7873     | 8041.9   | 10895.2  | 18192.2  | 22267.5  | 20795.8  | TRUE |
| 18895.6  | 9744     | 9751.3   | 12178.4  | 14836.8  | 6259.8   | 6858.3   | 4661.8   | TRUE |
| 24692.4  | 13178.9  | 8152.2   | 29501.2  | 26150.1  | 9261.7   | 26900.5  | 9890.9   | TRUE |
| 27775.2  | 9178.7   | 10423.7  | 25904.7  | 19424.6  | 7412     | 30034.4  | 26197.4  | TRUE |
| 103956   | 97797.2  | 65151.8  | 70347.8  | 84267.5  | 57732.3  | 100770.8 | 80206.2  | TRUE |
| 71070.4  | 58571.3  | 39253.8  | 60197.7  | 61145.9  | 43852.1  | 65016.8  | 62971.4  | TRUE |
| 120213.8 | 132157.8 | 88863.5  | 122787.9 | 147916   | 85344.8  | 141545.3 | 147497.3 | TRUE |
|          |          |          |          |          |          |          |          |      |
| 715015.4 | 784642.1 | 340911.3 | 621197.1 | 772514.7 | 353242.2 | 679815.3 | 827495.3 | TRUE |
| 165842.2 | 144239.5 | 64862.9  | 102216.9 | 118656.8 | 130745.4 | 128899.3 | 151075.9 | TRUE |
| 152840.4 | 164346.2 | 109052.1 | 129317.9 | 129673.1 | 157737.5 | 200604.6 | 193481.1 | TRUE |
|          |          |          |          |          |          |          |          |      |
| 28364.1  | 20179    | 25353.4  | 25897.6  | 30243.4  | 8700.1   | 21088.1  | 23364.9  | TRUE |
| 244472.3 | 259699.6 | 216738.7 | 234111   | 283022.4 | 245243   | 301380.9 | 261315.5 | TRUE |
| 104326   | 122184.7 | 78165.8  | 109707.8 | 113028.3 | 86977.4  | 125438.9 | 124325.1 | TRUE |
| 708582.8 | 732576.5 | 485753.2 | 600477.8 | 726796.4 | 533263.5 | 812970.5 | 754128.4 | TRUE |
| 371709.1 | 400330.5 | 293343.2 | 378984   | 409202.4 | 325995.8 | 491677.1 | 451098.6 | TRUE |
| 58901.3  | 48957.3  | 42811.1  | 40475.8  | 38515.5  | 58676    | 51646.9  | 49002.3  | TRUE |
| 31243.9  | 56452.2  | 30567.9  | 52377.7  | 68713.7  | 17214.2  | 10835.2  | 34775.6  | TRUE |
| 395947   | 422659.1 | 386645.2 | 340973.2 | 336591.9 | 375570.4 | 396495.2 | 328074.2 | TRUE |
| 608984.7 | 621152.7 | 513216.9 | 507663.5 | 570783.3 | 590501.9 | 635657.8 | 577314.5 | TRUE |
| 52987.9  | 84147.6  | 66057.6  | 56581.8  | 73708.6  | 36917.5  | 47093.9  | 38743    | TRUE |
| 1237730  | 1063491  | 990731   | 1014478  | 1027199  | 942425.7 | 1029374  | 1043368  | TRUE |
| 562628.7 | 530275.5 | 570504.2 | 578977   | 493762.9 | 474812.5 | 552493.4 | 446230.3 | TRUE |
| 1084888  | 1254027  | 567700.3 | 729426.6 | 824171.2 | 550088.5 | 878329.1 | 864648.1 | TRUE |
| 51137.3  | 36267.3  | 32408.6  | 31264.9  | 37506.6  | 42458    | 47135.1  | 46364.4  | TRUE |
| 115891.8 | 101226   | 86517.8  | 88464.4  | 74094.6  | 104466.9 | 118033.2 | 111400.2 | TRUE |
| 126699.3 | 101754.1 | 69230.5  | 100999.4 | 133678.5 | 99089.9  | 181857.2 | 165873.6 | TRUE |
| 86274.6  | 92172    | 75490.1  | 104127.5 | 96029.2  | 95032.1  | 116832   | 134788.8 | TRUE |
| 87507.2  | 67602.6  | 53255.8  | 87166.1  | 100397.1 | 81256.3  | 97721.3  | 130091.1 | TRUE |
| 165322.7 | 175332.9 | 167368.5 | 199708.3 | 146792.9 | 172083.6 | 184348.2 | 163341.9 | TRUE |
| 192505.7 | 182934.8 | 167116.1 | 234294   | 159211.7 | 203703.9 | 195353.9 | 210064.5 | TRUE |
| 89126.5  | 80905.1  | 90109.7  | 113124.6 | 73304.1  | 117558.6 | 121774.7 | 118846.5 | TRUE |
| 25703.4  | 28210.5  | 26249.9  | 31609.6  | 41230.7  | 38433.2  | 41879.9  | 36452.3  | TRUE |
|          |          |          |          |          |          |          |          |      |
| 129273.9 | 115890.2 | 99894.3  | 96073.5  | 155105   | 109110.6 | 161042.9 | 136852.8 | TRUE |
| 58344.3  | 58921.8  | 41238.8  | 45371.9  | 72785.3  | 33256.5  | 62921.4  | 65236.3  | TRUE |
| 135185   | 185730.5 | 113560.1 | 150594.7 | 139831.4 | 124631.6 | 141131.4 | 138155.4 | TRUE |
| 49877.7  | 54714.5  | 40232.5  | 45414.3  | 61011.3  | 37402.9  | 49970.9  | 48818    | TRUE |
| 258979.3 | 232007.6 | 281244.6 | 239920.6 | 279554.8 | 235137   | 271631.7 | 232160.3 | TRUE |
| 188744.4 | 123865.2 | 218773.5 | 192447.5 | 149457.6 | 152276   | 182556.4 | 151310.3 | TRUE |
|          |          |          |          |          |          |          |          |      |
| 204047.7 | 262389.1 | 199459.4 | 297451.6 | 194419.8 | 199937.2 | 256887.6 | 208714.3 | TRUE |
| 159212.6 | 142830.5 | 108009.2 | 118315.7 | 148524.7 | 131181.2 | 172058.8 | 171964.3 | TRUE |
| 98621.2  | 126335.6 | 75794.6  | 61763.3  | 142966.8 | 73398.4  | 108876.3 | 116403.5 | TRUE |

|          |          |          |          |          |          |          |          |      |
|----------|----------|----------|----------|----------|----------|----------|----------|------|
| 109426.9 | 120095.1 | 78405    | 90524    | 167096.4 | 92214.7  | 119786.7 | 122583.5 | TRUE |
| 276541.9 | 292065   | 222240.5 | 157616.9 | 364861.4 | 197939.4 | 334055.6 | 314164.2 | TRUE |
| 168811.6 | 201204.4 | 146911.3 | 195749.9 | 185298.8 | 148820.7 | 218976.1 | 180478.3 | TRUE |
| 57865.5  | 40457.8  | 70158.6  | 69828.4  | 57528.5  | 39490.1  | 63071.9  | 50038.4  | TRUE |
| 298481   | 303711.4 | 207026.3 | 238861.8 | 332663   | 249289.6 | 321948.3 | 346350.2 | TRUE |
| 51865.9  | 62274.2  | 43680.8  | 68599.3  | 77066    | 57682.2  | 74381    | 65757.2  | TRUE |
| 26147.4  | 59557.3  | 38146.7  | 56462    | 60059.4  | 5383.2   | 10679.5  | 12626.8  | TRUE |
| 24440.6  | 7564     | 30659.9  | 22715    | 19983.4  | 29425    | 27200.1  | 34519.6  | TRUE |
| 256610.6 | 271548.6 | 151327.1 | 222055.3 | 269994.8 | 175204.8 | 253277.2 | 256400.1 | TRUE |
| 192915.5 | 223469.9 | 131308.3 | 178970.3 | 189148.1 | 119597.9 | 210271.7 | 175166   | TRUE |
| 139310.8 | 155386.9 | 120507.3 | 210754.5 | 203587.2 | 133560.4 | 190044.6 | 192254.5 | TRUE |
| 461063.4 | 548607.3 | 393645.3 | 614321.8 | 642732.5 | 410585.2 | 691016.5 | 678698.8 | TRUE |
| 131126.6 | 174158.2 | 183147.6 | 191397.1 | 121161.8 | 171245.3 | 199918.9 | 160955.1 | TRUE |
| 547189.7 | 640402.8 | 756979.8 | 776012.7 | 497083.9 | 695131.1 | 765763.6 | 642674.2 | TRUE |
| 217458.7 | 214890.4 | 247329.1 | 223959.4 | 209620.6 | 227439.1 | 216889.5 | 225251.2 | TRUE |
| 141353.5 | 158362.8 | 112951.9 | 160006.3 | 172301.7 | 112603.4 | 180955.9 | 138714.6 | TRUE |
| 637074.6 | 589116.1 | 448315.5 | 584448   | 571284.6 | 510881.1 | 798743.7 | 586215   | TRUE |
| 35630.2  | 31650.3  | 43443.8  | 34440.4  | 35995.5  | 29976.5  | 34827.8  | 34838.4  | TRUE |
| 270798.1 | 277468.2 | 376250.4 | 305584.3 | 247548.5 | 302058.3 | 275914.2 | 278758.3 | TRUE |
| 1118395  | 951513.4 | 1321392  | 1273537  | 903246.6 | 1179895  | 1027411  | 1140736  | TRUE |
|          |          |          |          |          |          |          |          |      |
| 37356.6  | 33164.6  | 27234    | 29475.1  | 27945.4  | 25174.2  | 23732.2  | 29948.7  | TRUE |
| 59214.5  | 44910.4  | 46069.8  | 52487.1  | 55627.8  | 44410    | 53830.4  | 46646.5  | TRUE |
|          |          |          |          |          |          |          |          |      |
| 21839.1  | 21259.8  | 26808.2  | 19691.5  | 21439.6  | 28192.7  | 23740    | 19036.1  | TRUE |
| 34877.1  | 25736.7  | 22328.1  | 28665.2  | 40388.7  | 34058.9  | 34923.9  | 39935.5  | TRUE |
|          |          |          |          |          |          |          |          |      |
| 33370.6  | 28683.5  | 34142.2  | 32919.4  | 36295.6  | 18211.6  | 30747.7  | 29340.4  | TRUE |
| 67458.5  | 62628.4  | 49134.7  | 71493.5  | 61663.5  | 53828.3  | 58059.1  | 68180.4  | TRUE |
| 484095.6 | 464386.4 | 333243.7 | 404638.3 | 391011.5 | 343712.5 | 515264   | 428569.3 | TRUE |
| 74406.4  | 61683.8  | 87015.9  | 103639.6 | 90950.4  | 93319.3  | 96509.1  | 88899.4  | TRUE |
|          |          |          |          |          |          |          |          |      |
| 60813.7  | 60689.4  | 62167.1  | 75682.2  | 60684.1  | 56601.5  | 63064.2  | 52263.3  | TRUE |
| 1747624  | 1722297  | 1130838  | 1539951  | 1429625  | 1240471  | 1718986  | 1363326  | TRUE |
|          |          |          |          |          |          |          |          |      |
| 626961.3 | 516089.5 | 578642.3 | 643613.3 | 608355.9 | 586831.2 | 587079.2 | 555227.6 | TRUE |
| 424282.9 | 371021.3 | 377152.8 | 429956.9 | 383609.6 | 403287.3 | 373501.4 | 394065.4 | TRUE |
| 171886.2 | 180548.1 | 160986.1 | 306734.3 | 204504.3 | 158242.4 | 238044.9 | 186066.8 | TRUE |
| 48437.8  | 52041.9  | 53049    | 61741.7  | 57275.1  | 62822.8  | 57076.8  | 59442.3  | TRUE |
| 74824.7  | 55146.4  | 53191.6  | 61042.4  | 98901.5  | 53876.2  | 72022.1  | 64360.3  | TRUE |
| 140205.9 | 135869.7 | 122113.7 | 155495.8 | 120141.1 | 143114.7 | 141013.8 | 136005   | TRUE |
| 111931.6 | 109453.1 | 101817.9 | 104334.1 | 87775.4  | 113766.1 | 91734.3  | 136536.3 | TRUE |
| 176553.9 | 178043.8 | 197044.4 | 225202.6 | 159246.8 | 223440.4 | 257599   | 269091.1 | TRUE |

|          |          |          |          |          |          |          |          |      |
|----------|----------|----------|----------|----------|----------|----------|----------|------|
| 186754   | 140313.4 | 149282.1 | 180304.8 | 132627.3 | 158422.9 | 151505.8 | 172296.6 | TRUE |
| 91234.7  | 75219.5  | 71850.8  | 76749.3  | 98336    | 85550.1  | 91542.7  | 106176.4 | TRUE |
| 67871.4  | 94596.1  | 63068.9  | 89895.8  | 101263.6 | 49945.4  | 73357.4  | 59468.8  | TRUE |
| 567003.9 | 591382.7 | 541945.3 | 596342.2 | 442282.7 | 549559   | 599805.7 | 595084.5 | TRUE |
| 234777.1 | 250502.6 | 241852.2 | 235232.3 | 176534.6 | 265052.1 | 260866.1 | 251578.9 | TRUE |
| 222266   | 218135.4 | 210077.9 | 267815.9 | 240288.2 | 210568   | 251064.4 | 251512   | TRUE |
| 490973.6 | 442908   | 457760.6 | 484285.2 | 510870.5 | 552638.6 | 491511.8 | 534702.8 | TRUE |
| 118408   | 103033.2 | 124164.4 | 147431.8 | 141157.9 | 119611.6 | 122272.6 | 116266.6 | TRUE |
| 174224.9 | 152958.5 | 158049.2 | 176674   | 186205   | 141366.8 | 165530   | 156785.2 | TRUE |
| 208502.6 | 250164.9 | 216758.2 | 188722.8 | 198049.2 | 211568.2 | 205630.9 | 222419.7 | TRUE |
| 264538.9 | 210612.7 | 252482   | 264104.1 | 246745.2 | 240979.2 | 249659.5 | 281874.4 | TRUE |
| 53898.4  | 41013.3  | 31192.1  | 37826.2  | 53521.4  | 41021.8  | 52757.2  | 57036.2  | TRUE |
| 101864.8 | 103828.4 | 76109.8  | 103581.2 | 60919.5  | 96584.3  | 97887.4  | 77082    | TRUE |
| 395920.1 | 363242.7 | 298704.3 | 379336.7 | 318684.3 | 371134.2 | 430866.2 | 434424.9 | TRUE |
| 54518.5  | 51244.6  | 41086.7  | 53350.5  | 48540.3  | 51665.9  | 77411.9  | 63846.4  | TRUE |
| 221449.6 | 236445.8 | 170958.5 | 193333.3 | 269769.8 | 172706.3 | 252757.7 | 233607.5 | TRUE |
| 121671   | 149483   | 121205.9 | 141105.6 | 136249.7 | 119418.1 | 153882.3 | 161160.2 | TRUE |
| 25424.2  | 12476.2  | 19209.3  | 16194.7  | 41789.9  | 32710.8  | 27978.5  | 40510.2  | TRUE |
| 111416.6 | 114262.1 | 129243.9 | 181353.6 | 192053.3 | 148352.8 | 170384.7 | 190596.1 | TRUE |
| 35475.6  | 35720.8  | 45824.5  | 36462.2  | 41160.4  | 41826    | 28981.9  | 31668.6  | TRUE |
| 59549.8  | 57922.5  | 83404.5  | 72145.6  | 56219.2  | 65260.2  | 76585.7  | 57832.2  | TRUE |
| 187285.8 | 199248.6 | 130877.4 | 160609.4 | 157516.1 | 111258.2 | 281065.2 | 126564.4 | TRUE |
| 1073903  | 969640.6 | 1202608  | 1210823  | 923837.7 | 952174.3 | 1161508  | 950235.6 | TRUE |
| 399946.7 | 426735.9 | 323065.9 | 409016.6 | 457132.4 | 333604.8 | 468954.1 | 463231.4 | TRUE |
| 23273.6  | 62595.8  | 45142.1  | 52463.6  | 62241.5  | 17676.8  | 10953.6  | 24646.6  | TRUE |
| 95768.3  | 91264.6  | 97254.1  | 88172.3  | 85157.9  | 80919.8  | 102848.6 | 103805.1 | TRUE |
| 57694.7  | 56801.1  | 60357.4  | 75288.6  | 55843.7  | 65260.7  | 96374.8  | 65876.2  | TRUE |
| 158091.5 | 158137.5 | 125909.3 | 165678.2 | 175303.1 | 156343.7 | 163454.2 | 186687.4 | TRUE |
| 42528.8  | 45721.8  | 47170.5  | 60842.2  | 61260.6  | 36078.6  | 44909.5  | 29997.9  | TRUE |
| 108898.6 | 102866.2 | 87877.2  | 116828.8 | 123708.4 | 92544.9  | 108255.8 | 121549.2 | TRUE |
| 124851.7 | 150637   | 96639.9  | 123553.5 | 141582.2 | 102345.7 | 94852.9  | 123802.1 | TRUE |
| 88719.7  | 89877.6  | 42621    | 72410    | 103725.5 | 47788.7  | 94865.6  | 97419.6  | TRUE |
| 177269.6 | 170350.5 | 154876.5 | 164636.1 | 145289.7 | 163907.9 | 190219.2 | 157915.7 | TRUE |
| 463918.1 | 405134.5 | 463864.1 | 428250.5 | 536888.4 | 489276.7 | 429039.9 | 489959.6 | TRUE |
| 439935.2 | 397106.6 | 416424.1 | 412901.4 | 373052.8 | 355300.2 | 434029.3 | 355755.3 | TRUE |
| 14107.6  | 20275.7  | 15845.3  | 33578.5  | 34382.4  | 3949.6   | 8674     | 8597.2   | TRUE |
| 785197.9 | 826637   | 584271.2 | 944755.3 | 833149.8 | 659735.5 | 885465.3 | 894555.1 | TRUE |
| 117995.1 | 177817.6 | 98148.7  | 215289   | 137444   | 109484.6 | 128329.6 | 133239.1 | TRUE |
| 522902.2 | 569709   | 602220.1 | 668707.2 | 458410.9 | 497992.1 | 600612.2 | 549303.4 | TRUE |
| 201043.8 | 214091   | 224731.2 | 310126.7 | 202619.1 | 186734.7 | 229556.4 | 189044.1 | TRUE |
| 48764.1  | 25296.2  | 21283.3  | 26925.5  | 30884.5  | 34684.6  | 33586.9  | 31871.4  | TRUE |
| 66228.3  | 74395    | 52461.9  | 74451.5  | 85223.3  | 62789.4  | 92439.9  | 78516.9  | TRUE |
| 50767.6  | 36818.5  | 52737.6  | 40211.6  | 55183.3  | 29075.5  | 643272.8 | 66954.7  | TRUE |
| 123315.2 | 139301.2 | 97404    | 106280.3 | 135372.2 | 83251.3  | 128502.4 | 127534.4 | TRUE |
| 103027.4 | 103055.8 | 98659.4  | 105144.9 | 149930.4 | 79734.2  | 102912   | 146379.5 | TRUE |
| 1329151  | 1265344  | 1160264  | 1444293  | 1376560  | 1171383  | 1523402  | 1376600  | TRUE |

|          |          |          |          |          |          |          |          |      |
|----------|----------|----------|----------|----------|----------|----------|----------|------|
| 41209.6  | 44078.1  | 25429.8  | 41852    | 50710.1  | 37045.6  | 69618.3  | 48320.4  | TRUE |
| 50753.5  | 42392.8  | 30650.5  | 48177.7  | 31515.2  | 43241.7  | 34344.9  | 35578.3  | TRUE |
| 46563.5  | 42293.5  | 29935.7  | 50881.4  | 55582.3  | 45711.7  | 45819.2  | 55338.3  | TRUE |
| 31684.4  | 25359.8  | 25423.1  | 25707.5  | 32944.6  | 39482.5  | 51186.7  | 40274.1  | TRUE |
| 668247.8 | 594380.3 | 646909.7 | 722668.4 | 676256.3 | 719517.7 | 585218.3 | 689009.4 | TRUE |
| 216430.4 | 167151.2 | 245334.4 | 232227.4 | 214045.5 | 241543.4 | 174667   | 226778.7 | TRUE |
| 100751.1 | 103751.1 | 99223    | 106556.5 | 115007.8 | 107251.4 | 108340.9 | 101911   | TRUE |
| 70220    | 59619.3  | 75587.5  | 75718.8  | 67889.6  | 70702    | 68527.9  | 79336.3  | TRUE |
| 62420.9  | 49609.8  | 83711.2  | 71131.4  | 61825.3  | 67385.4  | 52930.7  | 68649.3  | TRUE |
| 626340.4 | 598879.4 | 432182.2 | 505855.9 | 670981.9 | 695605.4 | 582262.6 | 660725.2 | TRUE |
| 108379.3 | 95200    | 88496.3  | 80256.3  | 105836.2 | 102420.4 | 109895.5 | 135594.3 | TRUE |
| 784546.6 | 576221.5 | 562557.2 | 789544.5 | 647294.1 | 629276   | 538768.6 | 688858.9 | TRUE |
| 335938.8 | 260913.1 | 332062.6 | 408300.3 | 379971.1 | 382411.2 | 303568.7 | 333872.7 | TRUE |
| 305646.9 | 287526.8 | 344388.4 | 384394.1 | 347992.8 | 328914.7 | 281444.1 | 358730.2 | TRUE |
| 33172    | 33688.7  | 71052.7  | 33545.5  | 29367.8  | 38998.1  | 37598.5  | 47602.3  | TRUE |
| 29171.8  | 28197.8  | 19466.1  | 33420.8  | 26562.1  | 19074.3  | 30089.4  | 31978.5  | TRUE |
| 22444.8  | 25806.8  | 31633.1  | 39633.9  | 37109.3  | 32489.2  | 30552.5  | 40822.5  | TRUE |
| 23524.5  | 19245.5  | 15128.9  | 34600.1  | 24559.6  | 30726.9  | 35770.2  | 29031.4  | TRUE |
| 16642    | 18412.5  | 10787.6  | 23438.3  | 8605.3   | 16671.6  | 8651     | 14798.8  | TRUE |
| 32251.4  | 26207    | 28193.7  | 32595.9  | 27127.9  | 34916.6  | 87540.7  | 37001.4  | TRUE |
| 203859.5 | 171008.9 | 243790.9 | 211648.8 | 242366.7 | 223291.9 | 191504.8 | 241651   | TRUE |
| 29950.9  | 29008.6  | 29815.7  | 32902    | 28133.1  | 22849.3  | 26887.1  | 26797.7  | TRUE |
| 431420.7 | 354191.3 | 441933   | 517758   | 419496.4 | 423259.2 | 361762.8 | 426563.6 | TRUE |
| 358259.7 | 292982.1 | 343969.9 | 427490.9 | 378370.3 | 366292.1 | 290899.5 | 382748.3 | TRUE |
| 1821640  | 1577876  | 1387646  | 1300558  | 1999302  | 2020659  | 1644516  | 2004920  | TRUE |
| 107021.4 | 95774.1  | 129724.6 | 157629.4 | 125705.5 | 124980.7 | 107642.5 | 132212.7 | TRUE |
| 262522.3 | 225581.1 | 178457.2 | 208258.5 | 256006   | 240354.9 | 215303.3 | 250647.5 | TRUE |
| 57883.4  | 37696    | 40606.9  | 48116.7  | 54267.9  | 64094.7  | 61861.5  | 48741.4  | TRUE |
| 605758.4 | 578634.1 | 563741   | 555928   | 553553.1 | 522675.4 | 593860.2 | 575237.2 | TRUE |
| 27429.2  | 35201.6  | 33572    | 36810.5  | 26596.3  | 22851.7  | 30335.6  | 45841.1  | TRUE |
| 361247   | 407455.2 | 281383.7 | 396428.7 | 400811.1 | 340688.5 | 413956   | 408028.5 | TRUE |
| 128108.2 | 105476.7 | 114952.8 | 133363.6 | 124746.5 | 116517.5 | 118331.3 | 126135.1 | TRUE |
| 37657.9  | 31061.6  | 33496.3  | 35753.6  | 36526.2  | 35442.8  | 43253    | 50668    | TRUE |
| 508856.4 | 442681.4 | 496791.6 | 618227.1 | 592431.5 | 568730.1 | 590520.7 | 611503   | TRUE |
| 61342.9  | 41668    | 64944.6  | 55677.2  | 52848.9  | 77744    | 56920.6  | 41073.7  | TRUE |
| 98599.6  | 49428.1  | 74095.3  | 104068.2 | 55682.6  | 147405.4 | 85958.9  | 86771.8  | TRUE |
| 74709.5  | 74074.8  | 48280.7  | 91565.8  | 99332.7  | 58986.2  | 111542.2 | 145639.2 | TRUE |
| 125946.6 | 125633.7 | 43262.9  | 144772.2 | 108704.9 | 83178.5  | 156022   | 147249.2 | TRUE |
| 78263.5  | 48028.8  | 43421.4  | 79543.3  | 64504.8  | 76613.1  | 89535.5  | 95151.5  | TRUE |

|          |          |          |          |          |          |          |          |      |
|----------|----------|----------|----------|----------|----------|----------|----------|------|
| 260092.7 | 224127.6 | 135376.5 | 253132.3 | 251715.2 | 234102.2 | 277239   | 350959.3 | TRUE |
| 77742.4  | 85460.7  | 70039.5  | 79537.5  | 102468.3 | 72656.4  | 80546.9  | 95042.7  | TRUE |
| 203484.5 | 177588.6 | 171104.3 | 227377.7 | 200015.3 | 224704.6 | 220665.9 | 241317   | TRUE |
| 146612.5 | 105535.3 | 110661   | 132522.9 | 95480.5  | 166088.8 | 133994.1 | 131016.9 | TRUE |
| 151423.9 | 126668.1 | 121814.6 | 139468.1 | 120386.4 | 175944.2 | 168376.4 | 188800.1 | TRUE |
| 141791.7 | 125836.2 | 112655.5 | 164630.3 | 116559.3 | 150613.4 | 154030.8 | 154740.7 | TRUE |
| 3983736  | 3939390  | 3278082  | 4358531  | 3775068  | 3445569  | 4034021  | 3687083  | TRUE |
| 582409   | 793534.1 | 490849   | 613276.5 | 593197.6 | 541723.4 | 702230.8 | 599322.5 | TRUE |
| 162821.4 | 167406.1 | 122637.4 | 178313.2 | 174864.2 | 161778.4 | 170669.1 | 172363.1 | TRUE |
| 2213896  | 1832693  | 2136090  | 2138073  | 1992482  | 2187675  | 2048648  | 2061471  | TRUE |
| 654693.4 | 571714.8 | 672413.1 | 804921.3 | 657078.4 | 821754.2 | 745423.1 | 827960.8 | TRUE |
| 72365.5  | 42133.1  | 39763.6  | 60213.6  | 59652.3  | 65545.2  | 74239.6  | 88292.6  | TRUE |
| 1066933  | 894645.2 | 1008285  | 1168542  | 1142674  | 1058744  | 1093793  | 1069446  | TRUE |
| 887560   | 1007822  | 981342.8 | 949503.8 | 937945.1 | 1088550  | 986702.6 | 994067.6 | TRUE |
| 39804.4  | 30192    | 19718.7  | 9337.5   | 36947.7  | 25580.7  | 11005.7  | 44795.7  | TRUE |
| 169799.7 | 196307.7 | 124055.7 | 217112.4 | 307644   | 121527.1 | 205409.3 | 272137.8 | TRUE |
| 29310.7  | 30236.4  | 40818.8  | 40445    | 27052.4  | 43712.7  | 24324.7  | 37723.9  | TRUE |
| 193844.3 | 244150.2 | 211970.8 | 214472.3 | 162909.8 | 184059.2 | 226556.6 | 191439.9 | TRUE |
| 379455.5 | 310489.3 | 262887.8 | 420150   | 345144.5 | 312481.8 | 291554.1 | 339116.4 | TRUE |
| 348921.2 | 355401.5 | 333529.9 | 369346   | 368845.1 | 333053.9 | 324746.3 | 353957.2 | TRUE |
| 412064.1 | 367626.8 | 375215.8 | 436242.1 | 378411.9 | 382520.4 | 439020.1 | 435119.4 | TRUE |
| 1182831  | 1083212  | 1093349  | 1099538  | 1035944  | 1180480  | 1103260  | 1138878  | TRUE |
| 54510.7  | 62812.5  | 55014.3  | 53133.9  | 61644.5  | 66526.3  | 65702.7  | 64327.1  | TRUE |
| 176196.5 | 145579.3 | 141357.7 | 253235.7 | 178990.2 | 177739.4 | 181529.8 | 214623.4 | TRUE |
| 114956.2 | 80453.8  | 93546.7  | 89917.6  | 81955.7  | 126708.6 | 95523.2  | 120637   | TRUE |
| 114143.7 | 86202.6  | 86504.2  | 81857.4  | 134671.7 | 130123.4 | 137928.8 | 170190.5 | TRUE |
| 222009.7 | 181191.3 | 173433.4 | 170377.8 | 234321.7 | 229377.6 | 245208.3 | 318764.6 | TRUE |
| 62792.7  | 36188.2  | 32086.6  | 35755.9  | 52293.9  | 48003.5  | 60132.2  | 73390.6  | TRUE |
| 383703.5 | 421302.3 | 315724.5 | 388576.8 | 343763.7 | 349579.1 | 519656.2 | 372844.1 | TRUE |
| 126782.3 | 110284.1 | 105623   | 123559.8 | 107384.7 | 127570.2 | 119648.9 | 124891.1 | TRUE |
| 128169.1 | 106587.8 | 152068.6 | 84672.6  | 87445.3  | 98842.2  | 124268.7 | 112621.6 | TRUE |
| 77676.7  | 72778.8  | 74690    | 96175.2  | 85817    | 114761.3 | 77752.1  | 74121.4  | TRUE |
| 123495   | 101026.1 | 107145.5 | 153153.9 | 98215.8  | 277550.2 | 117181   | 119840.7 | TRUE |
| 70495.5  | 64188.9  | 50397.4  | 61170.6  | 59144.2  | 94887.8  | 74646.8  | 75234.5  | TRUE |
| 232333.1 | 164423.9 | 182684.9 | 205511.1 | 181556.7 | 235559.9 | 224771.1 | 227489   | TRUE |
| 888377.8 | 650739.1 | 573346.2 | 756948.9 | 831015.7 | 1068745  | 880030.5 | 984179.6 | TRUE |
| 44298.5  | 29603.1  | 38560.7  | 39236.1  | 23097.3  | 58733.9  | 38515.8  | 36722.7  | TRUE |
| 725065.1 | 555473.8 | 653278.5 | 661379.3 | 717058.7 | 777919.6 | 543732.2 | 766578   | TRUE |
| 483452.5 | 402834.5 | 411962.4 | 422829.3 | 455698.8 | 463436.1 | 362378.1 | 468955.3 | TRUE |
| 481165.8 | 404394.1 | 509998.1 | 582321.8 | 447716.9 | 547155   | 459308.7 | 389143.6 | TRUE |
| 624047.5 | 553176.3 | 536722.7 | 650868.2 | 590789.4 | 631258.9 | 595251.9 | 597264.5 | TRUE |
| 968402.5 | 819178.8 | 958014.1 | 1033419  | 817275.1 | 979102.2 | 866245.5 | 902533.9 | TRUE |
| 2211365  | 1637912  | 2021588  | 1938827  | 2154847  | 2243856  | 1852482  | 2279806  | TRUE |

|          |          |          |          |          |          |          |          |      |
|----------|----------|----------|----------|----------|----------|----------|----------|------|
| 33358.6  | 30717.5  | 34211.6  | 27322.6  | 19947.7  | 14398.4  | 8151.5   | 20620.2  | TRUE |
| 751944.6 | 724527.6 | 642350.5 | 826555.9 | 699987.1 | 616007.1 | 762146.5 | 649752.8 | TRUE |
| 63108.1  | 71638.9  | 70098.2  | 67339.7  | 59824.9  | 61887.4  | 54913.5  | 54099.4  | TRUE |
| 73426.7  | 78109.1  | 81882.8  | 87303.1  | 72984.6  | 102730.9 | 93218.2  | 88033.9  | TRUE |
| 184660.6 | 135833.6 | 180901   | 224925.7 | 159550.6 | 209165.1 | 188336   | 231266.5 | TRUE |
| 90980.8  | 76212    | 64615    | 57895.5  | 46155.4  | 59151.3  | 52650.5  | 41796.2  | TRUE |
| 159228.5 | 167283.3 | 176784   | 181361.8 | 142378.3 | 192938.9 | 182357.7 | 171330.8 | TRUE |
| 16828.3  | 20141    | 16118.8  | 20271.6  | 17439.1  | 20863.4  | 10309.2  | 8701.1   | TRUE |
| 40293.4  | 43967.9  | 37692.5  | 44500.9  | 39522.9  | 48076    | 40166.6  | 31474.1  | TRUE |
| 1216942  | 466860.7 | 1208355  | 549923.2 | 580491.6 | 665102.4 | 596175   | 486283   | TRUE |
| 734272.9 | 486126.7 | 742473.4 | 623796.3 | 524177.4 | 645385.6 | 467475.1 | 454517.9 | TRUE |
| 6778898  | 4306826  | 6735843  | 6668960  | 13928585 | 4313892  | 4373268  | 4847077  | TRUE |
| 641290.9 | 530869.5 | 1142919  | 399383.8 | 393545.7 | 1155896  | 618809.5 | 382513.2 | TRUE |
| 376868.7 | 357740.9 | 745980.1 | 248763.5 | 203326.9 | 736301.6 | 350289.5 | 256895.8 | TRUE |
| 207591   | 234073.8 | 225148.2 | 174898.9 | 170628   | 252549.2 | 209476.5 | 169757.1 | TRUE |
| 57483.1  | 81992.2  | 153579.3 | 71798.8  | 66674.9  | 169993.2 | 102320.6 | 68294.9  | TRUE |
| 101905.1 | 61222.4  | 140243.5 | 93078.3  | 198641.3 | 98598.6  | 87522.7  | 103508.9 | TRUE |
| 25049.9  | 22574.6  | 23224.5  | 10138.6  | 27476.3  | 21416.2  | 20070.1  | 26047.6  | TRUE |
| 66637.4  | 47264.3  | 107848.5 | 42844.2  | 33901.1  | 106933.9 | 66393.4  | 43311.4  | TRUE |
| 692777.8 | 633984.1 | 1420848  | 518041.1 | 502564.6 | 1412525  | 759542.2 | 603788.1 | TRUE |
| 488689.5 | 345960.1 | 526892.6 | 519326.2 | 911366.5 | 377772.3 | 388452.8 | 411652.9 | TRUE |
| 92304.8  | 98545.3  | 154947.4 | 72480.9  | 48481.8  | 148121.6 | 90151.3  | 56640.3  | TRUE |
| 156223.7 | 142911.9 | 249136.5 | 165830.2 | 118151.7 | 296198.3 | 166701   | 128669.5 | TRUE |
| 103741.3 | 114608   | 176972.3 | 109004.5 | 65383.7  | 234908.8 | 107417.6 | 75848.9  | TRUE |
| 57442.6  | 52919    | 106553.3 | 52786.4  | 46951.4  | 79847.3  | 58472.6  | 69452.7  | TRUE |
| 140964.8 | 100027.4 | 126635.6 | 150281.4 | 201453.9 | 82586.1  | 85047.1  | 79804.5  | TRUE |
| 106140.4 | 160188.2 | 92840    | 120930.8 | 136764.3 | 84938.9  | 151779.3 | 131429.2 | TRUE |
| 444654.4 | 508383.1 | 502780.1 | 398075.1 | 441654.5 | 501546.8 | 590237.4 | 483179.5 | TRUE |
| 115229.3 | 144442.1 | 181222.8 | 177073.2 | 203758.7 | 149650.2 | 177615.9 | 182153.3 | TRUE |
| 336584.8 | 318427.6 | 343491.8 | 393647.1 | 410934.2 | 452525   | 341403.3 | 433494.2 | TRUE |
| 133661   | 151779.7 | 188215.5 | 188853.7 | 136060   | 142330   | 161644.5 | 169511   | TRUE |
| 458919.2 | 456245.3 | 851991.1 | 407769.1 | 300620.2 | 884075.7 | 468606.9 | 331652.1 | TRUE |
| 195255.1 | 216667.8 | 221261.3 | 196315.8 | 158834.4 | 231163.8 | 209221   | 170351.1 | TRUE |
| 225859.2 | 184067.4 | 347981.6 | 193790.3 | 183913.4 | 382641.9 | 223154.8 | 210378.8 | TRUE |
| 543824   | 463062.3 | 468295.4 | 481912.4 | 813144.2 | 460251.2 | 489068.4 | 505159.8 | TRUE |
| 351947   | 305137.2 | 329754.6 | 368552.2 | 523961.9 | 370002   | 456426.4 | 372509.7 | TRUE |
| 39451.1  | 58861.9  | 43250    | 48095.9  | 75985.2  | 33555.7  | 77342.6  | 64303    | TRUE |
| 264309.7 | 234277.2 | 223670.3 | 231633.5 | 213836.9 | 259609.9 | 295360.7 | 213556.6 | TRUE |
| 331020.3 | 415835.4 | 287406.1 | 308960.9 | 300676.2 | 278205.2 | 376033.2 | 309441.6 | TRUE |
| 526973.5 | 552203.6 | 551810.3 | 553440   | 499921.6 | 496814.7 | 565496.6 | 556353.9 | TRUE |
| 106757.7 | 106344.1 | 126005   | 129240.8 | 88260.5  | 112121.9 | 108989.8 | 111538.6 | TRUE |

|          |          |          |          |          |          |          |          |      |
|----------|----------|----------|----------|----------|----------|----------|----------|------|
| 107951.7 | 131140.6 | 139269.9 | 113893   | 115413.1 | 123564.3 | 118455.6 | 126858   | TRUE |
| 33610    | 29469.1  | 28503.7  | 21083.6  | 44809.3  | 40857    | 40056.1  | 39716.9  | TRUE |
| 127746.2 | 145452.4 | 74404.6  | 100581.9 | 119190.7 | 82431.7  | 133081   | 112204   | TRUE |
| 128281.6 | 137162.9 | 112954.8 | 152688.8 | 193612.7 | 116566.1 | 187426.2 | 173019.4 | TRUE |
| 97737.7  | 80795.7  | 49094    | 91746.3  | 93629.1  | 64210.8  | 103295.6 | 91946.4  | TRUE |
| 160041.6 | 155201.8 | 171400.3 | 152679.1 | 112461.1 | 157329.3 | 154560.9 | 158807.5 | TRUE |
| 89839    | 90817.6  | 108400.7 | 121148.3 | 81331.5  | 79581.6  | 112038.7 | 84755.5  | TRUE |
| 241990.1 | 275165.1 | 266117.2 | 227390.3 | 212856.2 | 278897.6 | 246370.1 | 225117.1 | TRUE |
| 36470.8  | 68648.2  | 40817    | 54339.6  | 44929.7  | 43805.5  | 72309.3  | 43186.5  | TRUE |
| 83761.7  | 96019.2  | 82558.7  | 59239.1  | 78564.3  | 72978.8  | 90011.2  | 68846.3  | TRUE |
| 20425    | 47863.8  | 18276.8  | 32598.6  | 26543.2  | 32521.3  | 39016.9  | 16157.3  | TRUE |
| 18271.7  | 11088.6  | 20113.8  | 10073.2  | 11094.8  | 8827.3   | 14566.8  | 19591.4  | TRUE |
| 16307.2  | 25796.2  | 15371.5  | 25528.3  | 19758.7  | 17244.8  | 26452.5  | 24492.6  | TRUE |
| 127345.4 | 112944   | 150964.7 | 145164.4 | 96177.2  | 123149.3 | 138474   | 147391.8 | TRUE |
| 165849   | 158971.8 | 132553.5 | 138411.8 | 134162.1 | 140872.8 | 157562.3 | 150324   | TRUE |
| 73573.2  | 66545.3  | 67156.4  | 58985.2  | 73208.9  | 83122.3  | 94081.9  | 89126.3  | TRUE |
| 23946.2  | 12090.1  | 19041.8  | 13577.7  | 41016.5  | 47972    | 16184.5  | 17457.8  | TRUE |
| 85080.4  | 59395.4  | 82106.4  | 86070.2  | 63251.6  | 89798.8  | 65578.9  | 70582.6  | TRUE |
| 379299   | 361565.4 | 248757.6 | 323744.6 | 292454.7 | 269832.7 | 321072.4 | 306855.9 | TRUE |
| 82157.6  | 91230.6  | 82056    | 74349.7  | 76520    | 76776.1  | 87073.1  | 80355.8  | TRUE |
| 16171.9  | 11379.2  | 8794.5   | 11678.6  | 20910.2  | 5927.2   | 13059.1  | 8768.2   | TRUE |
| 136502.8 | 138421.4 | 220209.8 | 190569.3 | 117299.9 | 332837.2 | 163730.5 | 295171.6 | TRUE |
| 234633.8 | 199255.8 | 236023.1 | 260497.9 | 233835.4 | 239226   | 283182.3 | 218026.8 | TRUE |
| 158352.4 | 152577.2 | 185435.6 | 186660.9 | 142511.3 | 216360.9 | 167717.5 | 147955.3 | TRUE |
| 160965.3 | 147350.6 | 119138.1 | 125742.2 | 131501.5 | 98891    | 136066.1 | 120930.4 | TRUE |
| 3505445  | 3220674  | 3187193  | 4084305  | 3819616  | 3271037  | 3974867  | 3809372  | TRUE |
| 5909.8   | 79281    | 3081.3   | 6060     | 9048.7   | 7001.9   | 7581.3   | 17193.1  | TRUE |
| 271018.6 | 293349.9 | 197635   | 302210.2 | 322801.2 | 239132.2 | 321356.9 | 337748.9 | TRUE |
| 2478532  | 2391397  | 2082060  | 2452924  | 2149080  | 2074454  | 2346847  | 2171527  | TRUE |
| 951421.8 | 973655.4 | 781118.2 | 939808.4 | 886254.2 | 840698.9 | 899279.2 | 880190.9 | TRUE |
| 123987.2 | 100721.8 | 120232.7 | 119397.6 | 101681.2 | 125252.8 | 130262.3 | 116776.7 | TRUE |
| 2003037  | 1749994  | 2069473  | 2174847  | 1836900  | 2160774  | 1748353  | 2063106  | TRUE |
| 858500.8 | 940865.9 | 900299.1 | 945482.7 | 816578.3 | 819820.7 | 738571.5 | 852212.8 | TRUE |
| 13336.9  | 10755.6  | 20323.9  | 6226.8   | 7913     | 16729.3  | 17770    | 9308.1   | TRUE |
| 71512.2  | 72520.5  | 80526.9  | 62948.9  | 74046.7  | 77086.9  | 79846    | 64935.4  | TRUE |
| 45162.2  | 12243.8  | 26275.2  | 14675.1  | 22958.4  | 39942.2  | 46199.3  | 19287.7  | TRUE |
| 40649.8  | 68077.4  | 47537.4  | 41565.1  | 54673.8  | 47653.4  | 48261.8  | 44459.9  | TRUE |
| 94148.3  | 81747.5  | 82746.6  | 117915.5 | 85915    | 105208.9 | 80720.4  | 118571.9 | TRUE |

|          |          |          |          |          |          |          |          |      |
|----------|----------|----------|----------|----------|----------|----------|----------|------|
| 307503.6 | 383044.7 | 314846.1 | 259699   | 258617.3 | 262633.8 | 296507.4 | 255289.8 | TRUE |
| 327676.3 | 261169.8 | 351717   | 412253.8 | 385374.4 | 319348.8 | 370354.1 | 279069.2 | TRUE |
| 193738.7 | 136989.8 | 147607.7 | 197972.1 | 181873.1 | 181755.6 | 181368.9 | 162766.7 | TRUE |
| 89076.3  | 56359.1  | 61224    | 78374.2  | 64801.9  | 81896.6  | 98904.4  | 77480.3  | TRUE |
| 117253.8 | 93749.3  | 76983.1  | 127317.3 | 85151.6  | 116542.5 | 137251.6 | 118348.8 | TRUE |
| 364182.8 | 299108.5 | 357217.8 | 397078.6 | 377737.9 | 406933.7 | 347977.6 | 435804.1 | TRUE |
| 100651.1 | 76029.7  | 117973.9 | 130648.8 | 103050.9 | 104487.3 | 110656.8 | 136291.2 | TRUE |
| 407360   | 319403.3 | 475603.3 | 533210.6 | 377316.8 | 467776.1 | 379657.2 | 442018.2 | TRUE |
| 89951.9  | 132479.1 | 57399.9  | 65401.5  | 70777.6  | 73733.4  | 68191.6  | 83385.7  | TRUE |
| 247427   | 219531.5 | 278379.8 | 278199.4 | 266966.7 | 238251.4 | 228118.1 | 257448.2 | TRUE |
| 51268.4  | 36542.9  | 30839.3  | 35086.8  | 35527.7  | 45269.8  | 36773.9  | 37817    | TRUE |
| 102352.9 | 86411.8  | 79091.2  | 83088.6  | 85007.7  | 95127.7  | 97248.2  | 111099   | TRUE |
| 158681   | 127111.8 | 104658.2 | 152500.8 | 140693.9 | 148424.5 | 162923.9 | 149336   | TRUE |
| 95179.9  | 79475.3  | 69032.9  | 95148.9  | 92353.7  | 122035.7 | 112576.8 | 93080.1  | TRUE |
| 344457.3 | 245572.7 | 213549.1 | 291731.7 | 274797.2 | 335752.8 | 281988.6 | 332783.8 | TRUE |
| 360124.7 | 422960.4 | 334643.2 | 364611.6 | 322536.2 | 354148.9 | 379121.9 | 295422.7 | TRUE |
| 244895.7 | 279125.7 | 186438.7 | 222424.8 | 186255.5 | 218267.4 | 282586.5 | 192705.7 | TRUE |
| 150330   | 148646.2 | 183519.7 | 175884.8 | 158257   | 182220.8 | 210448   | 127186.1 | TRUE |
| 48729.3  | 116194   | 42399.7  | 93797.6  | 78955.1  | 30036.7  | 28983.7  | 30166.3  | TRUE |
| 127102.5 | 128807.6 | 114012.8 | 113447.6 | 111193.9 | 126940.6 | 125040.8 | 124659   | TRUE |
| 627360.8 | 602173.8 | 499894.7 | 459261.2 | 576799.6 | 583835.6 | 541610.2 | 525020.6 | TRUE |
| 152277.6 | 132099.3 | 128957   | 144678.5 | 154327.4 | 191401.8 | 147000.2 | 172386   | TRUE |
| 59705.1  | 78684    | 85113.7  | 62911.9  | 82273    | 81991.4  | 66609.9  | 60189.2  | TRUE |
| 154464.5 | 135089.8 | 120701.1 | 132230.6 | 156067.8 | 144499.6 | 140404.9 | 160798.6 | TRUE |
| 144799.3 | 153127.4 | 131158.2 | 144073.5 | 159968.1 | 157833.3 | 170592.1 | 150805   | TRUE |
| 229651.9 | 207545.5 | 251259   | 251469.4 | 223358.6 | 279103.9 | 251323.3 | 241164.9 | TRUE |
| 149723.9 | 102132.3 | 168787.8 | 160032   | 159523.2 | 151722.5 | 129120.3 | 175023.9 | TRUE |
| 37985.1  | 40497.1  | 42034    | 24939.4  | 38328.6  | 39404    | 34430.2  | 50463.4  | TRUE |
| 895639.3 | 836489.9 | 1182127  | 951837.1 | 791507.5 | 1116704  | 910441.3 | 789997.2 | TRUE |
| 206293.7 | 222685.3 | 222392.7 | 234442.9 | 252601.5 | 224737.3 | 216704.4 | 260105.8 | TRUE |
| 178443.2 | 149339   | 179772.2 | 192241.3 | 191459.6 | 179557.4 | 172244.1 | 210581.1 | TRUE |
| 313907.8 | 229191.3 | 374753.5 | 267360.1 | 326248.7 | 374380.3 | 248961.3 | 326569.2 | TRUE |
| 277836.5 | 300639.2 | 294297.2 | 273312.2 | 311517.6 | 343944.7 | 326182.6 | 271669.5 | TRUE |
| 378077.6 | 399532.7 | 331352.5 | 335438.2 | 474794.6 | 368724.7 | 431071.3 | 365244.3 | TRUE |
| 309428.2 | 337631.7 | 288086.8 | 299176.5 | 433406.8 | 387789.4 | 381606.8 | 349945.8 | TRUE |
| 58990.6  | 55743.4  | 68837    | 55280.9  | 47760    | 61862.9  | 48662.2  | 47296    | TRUE |
| 123170.2 | 122894.1 | 111794.4 | 138155   | 161986.3 | 110358.2 | 77866.3  | 103051.2 | TRUE |
| 79802.6  | 71198    | 97358.9  | 74151.1  | 66736.7  | 84395.1  | 72430.3  | 73560.7  | TRUE |
| 117885.2 | 102380.1 | 88900.2  | 116782.2 | 110827   | 111604.4 | 124333.7 | 141407.2 | TRUE |
| 340390.2 | 315477.9 | 430556.8 | 307472.6 | 295721.9 | 416257.9 | 275791.2 | 304149.2 | TRUE |
| 175790.9 | 171884.6 | 169684.7 | 174439.6 | 158662.4 | 193737.5 | 149300.9 | 178044   | TRUE |
| 1253988  | 1087777  | 1054315  | 1058153  | 1551353  | 1318983  | 1177156  | 1292108  | TRUE |
| 152919.1 | 180340.1 | 134762.8 | 163545.2 | 195445.1 | 158468.7 | 160021.9 | 182816.2 | TRUE |
| 136838.6 | 138410.6 | 132492.3 | 125035.1 | 179875.9 | 181703.1 | 174903.4 | 181162   | TRUE |
| 203340.4 | 230653.4 | 241935.7 | 260369.8 | 232987.5 | 283916.1 | 246341.9 | 297156.4 | TRUE |



|          |          |          |          |          |          |          |          |      |
|----------|----------|----------|----------|----------|----------|----------|----------|------|
| 88846.1  | 98507.3  | 77583.4  | 86654.7  | 97003.9  | 59519.6  | 98729.9  | 94512.8  | TRUE |
| 32834.7  | 38290.1  | 9371.9   | 25276.8  | 36377.1  | 24421.5  | 35893.7  | 25658.8  | TRUE |
| 75890.5  | 94899.6  | 53786.5  | 55697.6  | 83264.3  | 48372.1  | 79322.5  | 69859.4  | TRUE |
| 57884.8  | 41655    | 34993.6  | 50401.1  | 48319.7  | 39260.3  | 54119.4  | 53431.1  | TRUE |
| 21879.7  | 23272.5  | 40174.2  | 36807.5  | 19919.9  | 13673.5  | 24076.4  | 28220.4  | TRUE |
| 90871.4  | 59568.7  | 37816    | 62997.3  | 62997.2  | 75161.3  | 75435.4  | 66957    | TRUE |
| 263135.8 | 319318.4 | 170398.8 | 230644.4 | 176795.6 | 182083   | 212359.9 | 220819.4 | TRUE |
| 286435.3 | 311890.2 | 298225.3 | 238471.7 | 287575   | 346835.3 | 304351.8 | 286309.5 | TRUE |
|          |          |          |          |          |          |          |          |      |
| 263413.7 | 312671.3 | 173259.8 | 239032.2 | 231209   | 195028.6 | 318365.8 | 288139.1 | TRUE |
| 2453093  | 2530687  | 2536401  | 2956441  | 1864935  | 2389116  | 2570727  | 2460227  | TRUE |
| 3287237  | 3701014  | 2071297  | 2650279  | 3060760  | 2356358  | 3521591  | 3040032  | TRUE |
| 1135265  | 1022236  | 1369449  | 1520953  | 1081024  | 1321473  | 1254224  | 1167350  | TRUE |
| 637297.8 | 562843.2 | 699338.8 | 797401.3 | 568364.1 | 669038.9 | 660800.6 | 681860.8 | TRUE |
| 116816.5 | 137394.6 | 92623.6  | 112875.6 | 137420.5 | 91096.2  | 176940.7 | 146818   | TRUE |
| 128444.8 | 164416.3 | 82949.8  | 99003.3  | 127757.8 | 85406.9  | 141375.6 | 126228.9 | TRUE |
| 82037.4  | 75781.4  | 111009.9 | 85877.7  | 94228.3  | 102379.2 | 97890    | 85378.1  | TRUE |
| 58368.1  | 53137.3  | 62149.1  | 53780.3  | 46282.3  | 68616    | 61551.4  | 48512.5  | TRUE |
|          |          |          |          |          |          |          |          |      |
| 38320.3  | 32963.2  | 33647.2  | 29164.2  | 31681.3  | 47970    | 51135.5  | 42224.8  | TRUE |
| 53147.2  | 76253    | 41455.9  | 60333.6  | 41608.3  | 54109.1  | 50589.4  | 61397.5  | TRUE |
| 578009.5 | 617087.9 | 503980.9 | 483657   | 480731.6 | 518422.3 | 648902.7 | 468485.4 | TRUE |
| 143866.5 | 135025.8 | 133626.8 | 126577.4 | 111273   | 154683.5 | 136550.2 | 124336.8 | TRUE |
| 81100.1  | 85026.7  | 89000.6  | 85392.8  | 87290.8  | 76490.6  | 80718.5  | 88650    | TRUE |
|          |          |          |          |          |          |          |          |      |
| 335137.5 | 357176.9 | 362677.9 | 208726.3 | 192172.5 | 343644.9 | 293828.4 | 187884   | TRUE |
| 50191.4  | 74755.7  | 58329.4  | 49232.1  | 64600.9  | 63532.2  | 74550.4  | 59833.8  | TRUE |
| 609713.5 | 773037.6 | 596259.4 | 392719.6 | 613765.3 | 664839.3 | 707883.8 | 589290.7 | TRUE |
| 117107.7 | 153712.6 | 171770.5 | 124099.7 | 165856.1 | 158911.4 | 176965.8 | 143636.7 | TRUE |
| 24612.1  | 20628.6  | 31658    | 25785    | 21438.1  | 29910.3  | 36625    | 22404.2  | TRUE |
| 985595.6 | 956910.1 | 1295237  | 1209985  | 1165255  | 764339.5 | 1049432  | 742550.6 | TRUE |
| 108255.1 | 98829.9  | 120247.7 | 90242.8  | 69937.9  | 137884.3 | 104771   | 59325.6  | TRUE |
| 206991.4 | 154484.6 | 235020.4 | 202555.7 | 276724.1 | 164980.1 | 146686.2 | 173250.2 | TRUE |
| 218014.5 | 144638.3 | 226284   | 252901.1 | 316431   | 235953.2 | 197331.9 | 178390.7 | TRUE |
| 268280.1 | 299077.3 | 323938   | 251004.4 | 204390.5 | 362804.3 | 332447.4 | 234335.5 | TRUE |
| 933170.3 | 711359.8 | 1049685  | 1083360  | 1287837  | 808166.5 | 700884.3 | 829296.8 | TRUE |
| 284259   | 264225.1 | 315795.6 | 218463.7 | 215320.4 | 358181.3 | 311736.5 | 256447.8 | TRUE |
|          |          |          |          |          |          |          |          |      |
| 96532.8  | 91618    | 44220.7  | 62327.1  | 63839.8  | 72444.1  | 104829.9 | 95022.4  | TRUE |
| 155887   | 163885.8 | 148548   | 212589.6 | 147709.7 | 141935.3 | 171444.2 | 162626.7 | TRUE |
| 198436.2 | 217308.9 | 210080.9 | 183860.9 | 289041.2 | 184697   | 249445.6 | 244663.7 | TRUE |
| 145459.5 | 195801.4 | 221346.8 | 199437.4 | 147746   | 107864.9 | 183712.7 | 102292.3 | TRUE |
| 273357.3 | 368111.3 | 382532.5 | 385076.9 | 291565.7 | 249067.5 | 335791.7 | 234106.2 | TRUE |
| 93477.2  | 81217.2  | 59789.3  | 86880.6  | 98381.9  | 89562.1  | 105260.1 | 104777.7 | TRUE |
| 137841.2 | 104957.8 | 118947.9 | 141253.4 | 114583.4 | 112520.3 | 154113.5 | 142331   | TRUE |
| 95037.7  | 104442.7 | 89416.3  | 118657   | 79761.6  | 89175.1  | 118048.3 | 113036.3 | TRUE |

|          |          |          |          |          |          |          |          |      |
|----------|----------|----------|----------|----------|----------|----------|----------|------|
| 29066.3  | 45256.5  | 20895.8  | 32324.4  | 49044.5  | 28185.5  | 37612.1  | 38496.1  | TRUE |
| 135561.4 | 139599   | 92186.2  | 101637.7 | 109313.8 | 161120.8 | 159576.3 | 139385.8 | TRUE |
| 95773    | 98249.1  | 66199.9  | 104622.5 | 88565.2  | 93992.6  | 118762.1 | 137977.1 | TRUE |
| 39584.8  | 30111.4  | 37157.7  | 36020.8  | 24478.5  | 42376.2  | 34165.7  | 40337    | TRUE |
| 32969.9  | 24384.8  | 42562.2  | 46650.6  | 26142.7  | 45164.9  | 35495.1  | 38469.1  | TRUE |
| 48047.4  | 37639.9  | 32111.3  | 55820.3  | 41459.1  | 54147.1  | 51898    | 64361.2  | TRUE |
| 96675.9  | 102090.3 | 100601.9 | 89007.7  | 88517.3  | 106345.7 | 130438.6 | 100369.6 | TRUE |
| 48570.4  | 36024.9  | 47291.5  | 52491.6  | 44372    | 41955.9  | 70564.5  | 55238.1  | TRUE |
| 31252.6  | 41476.7  | 38639.4  | 52409.4  | 36772.1  | 32049.1  | 50453.1  | 27914.3  | TRUE |
| 411743   | 425374   | 471208.5 | 415632.9 | 355188.2 | 498618.5 | 438118.7 | 332186.7 | TRUE |
| 332907.2 | 346630.1 | 376817.1 | 224323.5 | 260939.3 | 411030.9 | 350315.2 | 298117.5 | TRUE |
| 793977.8 | 483647.4 | 832385   | 789222.6 | 1026840  | 581685   | 576820.2 | 576887.6 | TRUE |
| 29781.6  | 7164.6   | 14453.7  | 11791    | 7433.9   | 27331.8  | 34671    | 10381.4  | TRUE |
| 81710.4  | 72631.5  | 95497.6  | 54527.1  | 68378.4  | 105678.6 | 73898.5  | 61933.1  | TRUE |
| 249083   | 274528.1 | 246638.9 | 242880.8 | 167650.4 | 254592.2 | 277703.3 | 178798.6 | TRUE |
| 596469.3 | 619223.2 | 681533.9 | 456260.7 | 431392.8 | 722338   | 638691   | 454223.6 | TRUE |
| 311678.7 | 222890.4 | 347960.5 | 344276.4 | 419549.3 | 265016.3 | 234648.6 | 275551.9 | TRUE |
| 704626.9 | 524785.6 | 621042.9 | 681866.6 | 817336.8 | 520142.9 | 507427.4 | 570518.3 | TRUE |
| 156128.5 | 145980.6 | 193503.5 | 82608.8  | 97263.9  | 194582.7 | 133952.8 | 97223.2  | TRUE |
| 34613.5  | 39007    | 33284.1  | 27790    | 45182.3  | 39350.4  | 54075.9  | 46833.4  | TRUE |
| 179355.6 | 192266.3 | 236460.1 | 181078.5 | 186444.1 | 233506.3 | 234984.7 | 174632.6 | TRUE |
| 1043068  | 1197910  | 1425242  | 873709.3 | 844006.2 | 1555895  | 1243378  | 841404.5 | TRUE |
| 573858.8 | 685542.6 | 568057.1 | 616741.4 | 587444.8 | 418997.8 | 447431.6 | 428836.6 | TRUE |
| 641464.8 | 645117   | 793573.2 | 917761.5 | 931148.4 | 550318.3 | 611242.3 | 597764.3 | TRUE |
| 33306.1  | 44630.5  | 52442.4  | 65603.2  | 44111.7  | 30217    | 29017.8  | 14255.6  | TRUE |
| 51932.3  | 30584.5  | 57768.3  | 59596.6  | 75100    | 24923.8  | 60195.2  | 38794.3  | TRUE |
| 40033.9  | 28074.4  | 34530.8  | 26457.6  | 17877.1  | 73619.3  | 62762.2  | 30537.1  | TRUE |
| 81369.7  | 48466.9  | 74287.9  | 73320.2  | 108605.8 | 73736.3  | 62484.6  | 74673.2  | TRUE |
| 19996.5  | 31038.7  | 26829.3  | 24234.8  | 33440.8  | 22520.5  | 25098.7  | 26672.3  | TRUE |
| 58402.9  | 60683.4  | 58154.5  | 50666.9  | 32513.8  | 55453.7  | 45825.5  | 38090.4  | TRUE |
| 111985.3 | 103676.9 | 97309.7  | 130524.7 | 139722.7 | 118877.1 | 101831.9 | 103456.3 | TRUE |
| 113027.7 | 84834.6  | 112952.2 | 131419.8 | 159576.9 | 105403.2 | 100879.4 | 122453.2 | TRUE |
| 84076.8  | 124053.7 | 115760.1 | 94178.2  | 105393.3 | 77378.6  | 77327.9  | 91458.6  | TRUE |
| 267193.9 | 316372.8 | 327833.1 | 231249.9 | 225743.9 | 344436.1 | 282478.6 | 233059.8 | TRUE |
| 161167.9 | 184064.5 | 228606.7 | 163402.1 | 177966.9 | 222861.7 | 217298.4 | 192976.7 | TRUE |
| 247891.6 | 197066.4 | 270851.7 | 294284.8 | 310001.1 | 208041.3 | 205904.4 | 176474.2 | TRUE |
| 214717.8 | 244733.3 | 212733.3 | 167905.6 | 131337   | 227651.9 | 154199.7 | 138410.5 | TRUE |
| 241138.8 | 183384.7 | 291254.7 | 194754.6 | 166519.6 | 284837.8 | 196902   | 171206.6 | TRUE |
| 260494   | 200856.1 | 254644   | 235790.8 | 310413   | 212432.5 | 204231.5 | 227130.3 | TRUE |
| 802210.6 | 627195.8 | 796342.4 | 825066.9 | 970701   | 717667.1 | 645159.9 | 728846.7 | TRUE |
| 167501.9 | 208596.6 | 197895.4 | 141967.6 | 123334.3 | 197164.7 | 179384.2 | 139581   | TRUE |
| 374511.9 | 383678   | 368129.3 | 256222.6 | 283012.7 | 365430   | 339434.6 | 291579.9 | TRUE |
| 323804.2 | 314764.9 | 275065.8 | 220765.4 | 258636.8 | 318451.1 | 292988.8 | 242838.5 | TRUE |

|          |          |          |          |          |          |          |          |      |
|----------|----------|----------|----------|----------|----------|----------|----------|------|
| 24151.9  | 8303.2   | 57778.5  | 13658.7  | 30484.6  | 63827.4  | 16103.1  | 28753    | TRUE |
| 396099.1 | 344322.4 | 470456.2 | 393255   | 501975   | 342631.9 | 358673.2 | 317116.9 | TRUE |
| 25635.5  | 23901.4  | 27749.8  | 24237.4  | 27089    | 30424.3  | 27754.9  | 27799.6  | TRUE |
| 138570.1 | 124856.3 | 209703.1 | 165471.2 | 136097.5 | 217645.5 | 198798   | 139352.9 | TRUE |
| 130098.5 | 137494.7 | 140378.9 | 154945.9 | 148125   | 182240.9 | 156379.2 | 134440.4 | TRUE |
| 20024.7  | 21594.8  | 39796.8  | 21104.5  | 35072.6  | 29534.1  | 34738.2  | 31962.1  | TRUE |
| 77871.2  | 58416.4  | 106802.7 | 78179.6  | 59842.3  | 104381.3 | 81095.4  | 67653.1  | TRUE |
| 245265.3 | 165241.3 | 206078.7 | 211011.5 | 345768.3 | 211104.9 | 225156.3 | 213553.6 | TRUE |
| 35299.6  | 24123.6  | 41873.8  | 36779.7  | 33879    | 48991.6  | 66037.6  | 42548.1  | TRUE |
| 154126.9 | 176490.4 | 103832.8 | 151529.9 | 154100.9 | 108041.7 | 170038.2 | 186497.7 | TRUE |
| 225407.2 | 242703.1 | 191633   | 96653.1  | 74393.4  | 189780.4 | 230722.1 | 73904.3  | TRUE |
| 161531   | 209755.5 | 227720.9 | 126554.9 | 139225.7 | 239719.9 | 202623.2 | 142656   | TRUE |
| 64378.5  | 49799.4  | 78167.5  | 68936    | 76032.8  | 44798.1  | 49543.7  | 78247.3  | TRUE |
| 49576    | 22197.6  | 72065.8  | 45920.1  | 55117.1  | 36748.5  | 37269.8  | 30851.1  | TRUE |
| 300003.7 | 341845.7 | 305836.7 | 257468.3 | 210050.4 | 315370.3 | 346495   | 259343.6 | TRUE |
| 637932.9 | 435841.8 | 724254.9 | 752178.8 | 890252.9 | 488977.4 | 469012.9 | 482925.2 | TRUE |
| 615518.7 | 428575.1 | 680595.6 | 728590.2 | 747813.8 | 509675.1 | 480789.9 | 522487.3 | TRUE |
| 775859.2 | 869630.3 | 1020301  | 654249.6 | 499442.8 | 960375.6 | 961288.8 | 528212.4 | TRUE |
| 695981.2 | 751937.7 | 802444   | 648948.1 | 520666.7 | 851976.8 | 838748.7 | 531771.7 | TRUE |
| 703845.8 | 533621.1 | 875265.8 | 830327.3 | 875372.7 | 657322   | 518598.3 | 728384.5 | TRUE |
| 328535.8 | 376076.2 | 325561.7 | 293467.6 | 248251.8 | 365016   | 343383.8 | 280622.8 | TRUE |
| 238982.2 | 222096.9 | 268122.8 | 247858.3 | 266548.5 | 281456.7 | 276038.4 | 215868.3 | TRUE |
| 501100   | 399146.1 | 484317.3 | 427230   | 524724.8 | 529836.8 | 438983.5 | 450348.1 | TRUE |
| 25105.3  | 11782.3  | 25465.4  | 14112    | 23163    | 24176.5  | 11793.4  | 24469.6  | TRUE |
| 29411.1  | 34651    | 45191.2  | 36944.5  | 40055.7  | 42529    | 41190.9  | 37305.3  | TRUE |
| 322372.9 | 351654.3 | 300866.2 | 300880.1 | 354298   | 378264.8 | 375513.1 | 361455.5 | TRUE |
| 34143.7  | 33138.8  | 51351    | 38680.5  | 50217.2  | 38707.3  | 37808.3  | 56735.4  | TRUE |
| 48069.8  | 12506    | 45923.8  | 35677.1  | 34084.6  | 52885.2  | 27825.2  | 48350.3  | TRUE |
| 69654    | 88897.4  | 101047.1 | 85112.9  | 70729.9  | 79327.8  | 76962.1  | 74336.4  | TRUE |
| 98173.9  | 72716.5  | 74445.5  | 80197.8  | 89511.5  | 78428.5  | 111808.2 | 97294    | TRUE |
| 630558.2 | 681827.3 | 568698.1 | 676267.2 | 759072.9 | 654561.3 | 645691.2 | 759287.2 | TRUE |
| 278125.4 | 200006   | 297483.3 | 327799.5 | 346301.6 | 297854.5 | 229270.8 | 295327.5 | TRUE |
| 270077.6 | 239202.5 | 283324.6 | 251517   | 292955.7 | 250699.7 | 230830.8 | 256568.3 | TRUE |
| 643143.4 | 599017.2 | 586156.6 | 530373.2 | 697480.9 | 651953.1 | 649067.3 | 667267.5 | TRUE |
| 467896.7 | 484405.8 | 431302.5 | 432553.8 | 491266.7 | 469602.1 | 455886   | 468551.9 | TRUE |
| 51272    | 78284.8  | 41066.1  | 59944.4  | 80197.8  | 59232.7  | 51238.7  | 75330.6  | TRUE |
| 34022.8  | 42741.8  | 38281.2  | 31052.8  | 32959.9  | 33383    | 56418    | 41268.3  | TRUE |
| 26857.2  | 31280.1  | 28153.6  | 34902.3  | 40888.9  | 34918.7  | 37143.4  | 38452.3  | TRUE |
| 33254    | 28041.4  | 8814.8   | 24631.8  | 21066.7  | 24769.8  | 38274.9  | 7602.2   | TRUE |
| 283885.1 | 266700.1 | 202224.5 | 293428.9 | 244355.8 | 311675.5 | 319082.5 | 342928.5 | TRUE |

|          |          |          |          |          |          |          |          |      |
|----------|----------|----------|----------|----------|----------|----------|----------|------|
| 26052    | 8347.6   | 29751.7  | 29357.4  | 31780.8  | 30847.5  | 32196.8  | 35475.4  | TRUE |
| 232898.8 | 180615.6 | 201667.9 | 245419.3 | 244645.3 | 234541.4 | 209236.9 | 233913.7 | TRUE |
| 257605.1 | 198919.8 | 264396.1 | 218213.6 | 222784.1 | 275837.9 | 220082.5 | 228773.6 | TRUE |
| 268643   | 291445.6 | 161498.3 | 188589.5 | 305008.2 | 223613.2 | 292792.5 | 257612   | TRUE |
| 20447.6  | 7848.7   | 7889.1   | 6641.6   | 27237.5  | 9433.9   | 24879.9  | 10981    | TRUE |
| 83790.3  | 67958.1  | 156837.8 | 83121.7  | 67101.1  | 145110.1 | 62376.2  | 66717.9  | TRUE |
| 125588.9 | 80461.5  | 195954.3 | 140269.4 | 113237.4 | 182998.3 | 116592.8 | 124697.2 | TRUE |
| 370765.6 | 279920.7 | 519406.1 | 342060.4 | 289313.9 | 566183.6 | 318466.4 | 279905.5 | TRUE |
| 166769.4 | 126969.4 | 145347.9 | 170075.7 | 280513.4 | 189227   | 131458.3 | 169126.4 | TRUE |
| 875375.7 | 717646.2 | 793415.8 | 757982.6 | 1059187  | 806090.4 | 736517.3 | 923180.7 | TRUE |
| 629229.3 | 522456.3 | 938404.9 | 721740.5 | 469452.6 | 1003377  | 552703   | 509687   | TRUE |
| 493599.1 | 334332.7 | 495225.9 | 504783   | 893809.8 | 668934.3 | 414772.9 | 639421.3 | TRUE |
| 121875.2 | 88596.5  | 220893.4 | 95918.5  | 70270.2  | 222745.5 | 93448.9  | 81091.5  | TRUE |
| 107623.9 | 61490.3  | 77347.3  | 92397.2  | 175330.6 | 69567.9  | 71478.6  | 86624.9  | TRUE |
| 303472.9 | 219725   | 492702.6 | 261476.6 | 210346   | 506629   | 229892.1 | 221725.8 | TRUE |
| 396878.2 | 325463.2 | 688646   | 381754.1 | 308626.4 | 764885.5 | 383386.2 | 306110.9 | TRUE |
| 193814.9 | 148018   | 157518.7 | 131524.4 | 336528.1 | 164395.1 | 148272.9 | 179298.2 | TRUE |
| 317664.3 | 243927   | 255987.7 | 303211.7 | 504403.3 | 294494.7 | 271388.9 | 286474.7 | TRUE |
| 376608.9 | 289394.6 | 563783.3 | 368594.1 | 266088.5 | 584746.2 | 310675   | 285861   | TRUE |
| 405134.6 | 249818.1 | 322592   | 333801.8 | 721511   | 385208.2 | 306751   | 413622   | TRUE |
| 61468.8  | 34426.9  | 54264.6  | 64490.2  | 63412.5  | 82542.9  | 42586.6  | 86946.3  | TRUE |
| 30326.2  | 32597.8  | 33219.6  | 27826.5  | 18191.4  | 28305    | 44176.8  | 28981.5  | TRUE |
| 131504.1 | 140190.3 | 84648.1  | 128491.4 | 145314.6 | 123176   | 144590.1 | 184805   | TRUE |
| 243017.4 | 178485.6 | 207383.5 | 223886.7 | 278439.1 | 180271.5 | 240562.7 | 204868.6 | TRUE |
| 96742.2  | 91874.3  | 77270.3  | 69125.5  | 94986.9  | 52104.3  | 111190.7 | 96019.9  | TRUE |
| 266283.5 | 260937.5 | 252888.9 | 310344   | 198556.3 | 264364.5 | 288733.4 | 250506.3 | TRUE |
| 218128.2 | 215028.2 | 109358.7 | 138053.2 | 212047.2 | 158529.7 | 271096.7 | 269626.8 | TRUE |
| 60884.3  | 56885.3  | 39226.3  | 54595.4  | 72978    | 52870.3  | 92853.6  | 76918.9  | TRUE |
| 524999.1 | 729378.2 | 375579.6 | 502403.2 | 649227.5 | 397012.2 | 741004.2 | 599573   | TRUE |
| 25659.4  | 13372.8  | 16295.6  | 8679.2   | 26533.2  | 9051.2   | 42061.9  | 15840.8  | TRUE |
| 9331.5   | 19046.9  | 22837    | 11473.4  | 22598.7  | 9513.1   | 20066.1  | 11086.5  | TRUE |
| 114035   | 117929.5 | 97695    | 96412.9  | 107747.2 | 123410.2 | 144193.4 | 106985.1 | TRUE |
| 84468.6  | 80247.1  | 76463.3  | 76042.5  | 52951.2  | 84610.9  | 85383.7  | 81315    | TRUE |
| 53898.4  | 44189    | 71514.3  | 41472    | 48360.9  | 58730.5  | 60854.4  | 55059.4  | TRUE |
| 28283.2  | 10239.8  | 27258.2  | 13949.3  | 26341.1  | 13043.1  | 25642.7  | 10116.3  | TRUE |

|          |          |          |          |          |          |          |          |      |
|----------|----------|----------|----------|----------|----------|----------|----------|------|
| 161106.3 | 142115.6 | 158187.7 | 162941.2 | 149573.8 | 175531.2 | 161232.4 | 146735.2 | TRUE |
| 22930.7  | 28129.7  | 35890.1  | 11095.6  | 26391.4  | 35351.9  | 29125.8  | 27026.8  | TRUE |
| 119084.4 | 154111.9 | 166314.5 | 122898.3 | 79854    | 174032.6 | 129522.5 | 93241    | TRUE |
| 347009.6 | 313640.1 | 424009.2 | 400348.4 | 470045.5 | 335165.5 | 292950.9 | 347208.7 | TRUE |
| 232653.9 | 166199.9 | 210625.3 | 231807.3 | 365021.1 | 195314.7 | 159644.9 | 209289.6 | TRUE |
| 339940.8 | 360729.1 | 509782.1 | 313307.4 | 225344.1 | 510735.5 | 338306.2 | 269260.2 | TRUE |
| 41317.3  | 41902.6  | 72797.5  | 39849.8  | 29395.9  | 76375.2  | 48217.8  | 31369.3  | TRUE |
| 111862.4 | 93158.5  | 144962.1 | 88316.4  | 63893.7  | 168719   | 91735    | 63039.5  | TRUE |
| 566540.7 | 549933.4 | 480279.3 | 509018.9 | 391023.2 | 500791.1 | 451160.8 | 418852.1 | TRUE |
| 118286.5 | 62966.4  | 112369.5 | 114974   | 176515.8 | 84802.7  | 72178.7  | 93167.8  | TRUE |
| 109546.5 | 98214.9  | 121189.7 | 76546.5  | 91484.8  | 133846   | 122295.3 | 102949.7 | TRUE |
| 52120.7  | 67882.6  | 74467.9  | 45572.9  | 52346.5  | 65874.4  | 67912.7  | 44851.1  | TRUE |
| 22272    | 21669    | 30708.4  | 25408.4  | 23591.5  | 33516.2  | 25650.2  | 36786.3  | TRUE |
| 253679.5 | 206790.1 | 269325   | 211971   | 217015.6 | 267149.1 | 207631.8 | 231027.8 | TRUE |
| 381910.2 | 412737.3 | 356391.2 | 471768.1 | 368861.8 | 363679.9 | 432133.4 | 315895.7 | TRUE |
| 90045.9  | 79938.6  | 88278.9  | 93079.4  | 86478.3  | 101931.3 | 85023.3  | 82549.6  | TRUE |
| 70373.2  | 68122.6  | 84173.1  | 66700.3  | 63865.5  | 78666.7  | 49947.2  | 64318.4  | TRUE |
| 120253.9 | 131568.2 | 143524.6 | 142690.9 | 108874.9 | 148306   | 148975.4 | 118597.7 | TRUE |
| 29462.1  | 12960.6  | 21217.4  | 41026.7  | 28581.4  | 30678.1  | 38685.2  | 29875.4  | TRUE |
| 35801.4  | 19667.4  | 38337.4  | 13640.3  | 28728.8  | 40552.8  | 335692.3 | 28386.2  | TRUE |
| 107313.9 | 101849.8 | 115931.9 | 127049.8 | 121964.6 | 106260.1 | 93005.3  | 117515.6 | TRUE |
| 445766.7 | 415085.4 | 468854.1 | 409941.6 | 360805.2 | 432399.4 | 445943.5 | 372393.9 | TRUE |
| 58899.5  | 44380.1  | 48186.3  | 54362.1  | 45784.3  | 67719.3  | 65186.7  | 49572.1  | TRUE |
| 232500.5 | 185304.5 | 181238   | 217389.9 | 258144.2 | 270052.2 | 200476.5 | 254579.3 | TRUE |
| 125095.3 | 120767.6 | 173070.5 | 127750.5 | 121852.6 | 124630.6 | 117274.3 | 98125.2  | TRUE |
| 220246.4 | 218081.3 | 206215.7 | 211145.1 | 243899.9 | 228089.9 | 237608.1 | 225137.4 | TRUE |
| 77617.5  | 68214.5  | 91591    | 102039.8 | 122171.6 | 80221.1  | 76678    | 114338.8 | TRUE |
| 186583.6 | 162973.9 | 210701.5 | 210783   | 191015.9 | 203841.1 | 178632.1 | 186214.7 | TRUE |
| 39925.3  | 29860.7  | 47348    | 49160.6  | 42592.8  | 52657.9  | 42223.3  | 55266.4  | TRUE |
| 2464447  | 2251737  | 2279160  | 2403482  | 2398678  | 2227511  | 2238680  | 2268428  | TRUE |
| 725096.2 | 638005.8 | 637857.7 | 695988.6 | 643853.8 | 629954.1 | 675201.8 | 652270.4 | TRUE |
| 827119.4 | 801129.5 | 893934.8 | 817027.7 | 767259.4 | 892568.8 | 786104   | 888318.3 | TRUE |
| 56753.1  | 68917.7  | 71142.8  | 65177.1  | 65479    | 71666.1  | 68329.4  | 85526.7  | TRUE |
| 173984.6 | 171258.7 | 193102.4 | 168687.5 | 183292.3 | 171571.8 | 179239.3 | 164032.6 | TRUE |
| 121246.4 | 162355.8 | 136317.7 | 116420   | 142544.9 | 125321.6 | 141044.6 | 176462   | TRUE |
| 427470.2 | 367800.5 | 391126.3 | 414221   | 360882.9 | 423163.5 | 407897.3 | 357616.9 | TRUE |
| 354666.8 | 352841.2 | 404833.7 | 468112.6 | 394124.8 | 430156.5 | 408442.9 | 378408.8 | TRUE |
| 497899.1 | 468351.1 | 540509.1 | 523447.8 | 508578.1 | 567339.1 | 491564.6 | 481828.9 | TRUE |
| 587726.9 | 903990.1 | 670440.2 | 462397.7 | 531271.7 | 395964.4 | 469971   | 560816.1 | TRUE |
| 887085.2 | 945840   | 897713.6 | 840169   | 817042.6 | 823946.6 | 1043280  | 835977.3 | TRUE |
| 162764.4 | 144874.7 | 106550.5 | 116498.7 | 147913.9 | 117051.4 | 100452.3 | 130927.8 | TRUE |
| 653816.9 | 625419   | 556770   | 715333.3 | 770013.1 | 560193.6 | 689756.7 | 784411.4 | TRUE |
| 33136.2  | 17994.8  | 25029.5  | 13849.5  | 8470.2   | 28024.6  | 20802.3  | 14125    | TRUE |
| 117793.2 | 97007.7  | 95823.9  | 131299.4 | 163422.9 | 133743.2 | 104449.4 | 111108.1 | TRUE |

|          |          |          |          |          |          |          |          |      |
|----------|----------|----------|----------|----------|----------|----------|----------|------|
| 143985   | 110618.5 | 83923.6  | 115638.8 | 125057.6 | 145227.3 | 138367.4 | 155032.2 | TRUE |
| 277150.8 | 213679   | 213154.5 | 270304.5 | 240199.3 | 290948   | 304392.4 | 335116.4 | TRUE |
| 63561.6  | 74756.2  | 74054.7  | 56225.8  | 44989.8  | 53667.9  | 65508.1  | 59260.2  | TRUE |
| 64086.8  | 69773.7  | 84718.3  | 61351.9  | 68010.3  | 88949    | 93419.1  | 74708.2  | TRUE |
| 192725.8 | 204135.4 | 223561.2 | 280751.3 | 183885   | 192687.1 | 259436.7 | 201468.8 | TRUE |
| 148862.1 | 190984.5 | 152401   | 239388.8 | 333545.2 | 125177.1 | 143372.4 | 130806.5 | TRUE |
| 105048.6 | 73542.9  | 81625.1  | 99681.8  | 63110.3  | 85570.3  | 111684.6 | 91669.6  | TRUE |
| 194608.4 | 147397.9 | 123376.8 | 150930.5 | 174168   | 181674.5 | 201275.3 | 191711.3 | TRUE |
| 307854.5 | 280606.4 | 229298.2 | 308286.6 | 225024.7 | 263110.8 | 355802.9 | 271906.9 | TRUE |
| 277640.9 | 324057   | 336780   | 361974   | 170989.2 | 213893.7 | 258971.7 | 220399.5 | TRUE |
| 96046.1  | 100615.3 | 136797.3 | 57058.4  | 69295.7  | 96427.9  | 128274   | 70610.5  | TRUE |
| 115228.7 | 130453.5 | 101918.9 | 89547.5  | 91209.1  | 112329.8 | 168226.4 | 100851.7 | TRUE |
| 27705.7  | 38340.7  | 43314    | 47826.9  | 35458.7  | 26315.6  | 31659.4  | 28138.4  | TRUE |
| 712354.3 | 864076.3 | 679320   | 577444.8 | 933268.2 | 670864.9 | 946964.5 | 819243   | TRUE |
| 255667.2 | 206064.5 | 199204.7 | 259079.5 | 200092.5 | 310829   | 256246.9 | 243472.6 | TRUE |
| 116387.3 | 125477.7 | 98745.9  | 145201.1 | 123332.6 | 119355.6 | 143596.3 | 124323.2 | TRUE |
| 51547.3  | 61011.8  | 29541.3  | 41342.9  | 45601.2  | 48870.4  | 70701.2  | 61009.4  | TRUE |
| 677324.4 | 611033.6 | 818065.3 | 995621.2 | 570868.2 | 612130.8 | 789600.9 | 609591.9 | TRUE |
| 476791.7 | 263824.9 | 274263.7 | 328860.9 | 487291.5 | 511379.7 | 270889.1 | 504883.7 | TRUE |
| 63716.4  | 67832.1  | 91087.2  | 79385.9  | 62181.3  | 90204.6  | 82959.6  | 61749.8  | TRUE |
| 25973.5  | 20658.6  | 18707.5  | 24874.3  | 15368.5  | 24269.5  | 20148.4  | 19197.5  | TRUE |
| 113474   | 90318.7  | 134395.3 | 118528   | 111809.1 | 136876.7 | 99147.2  | 89979.6  | TRUE |
| 49757.4  | 43118.9  | 63540    | 53260.7  | 60305    | 63499.3  | 46234.4  | 56594.6  | TRUE |
| 49788.6  | 53201.9  | 44745.8  | 42666.7  | 35201.6  | 39238.7  | 24630.5  | 27702.7  | TRUE |
| 65658.9  | 59604.4  | 93531.7  | 69615.8  | 63017.9  | 75886.9  | 66196.2  | 57591.1  | TRUE |
| 180433.2 | 165238.5 | 194505.5 | 241458.3 | 203822.5 | 222487.4 | 204021.9 | 183229.2 | TRUE |
| 87089    | 69542.7  | 69300.7  | 63624.2  | 72743.7  | 84218.8  | 96477.3  | 88371.2  | TRUE |
| 16534.7  | 10566.4  | 10680.5  | 12382.5  | 17621.8  | 8993.6   | 7599.7   | 6838     | TRUE |
| 83478.6  | 77374.5  | 88220.8  | 115312.2 | 94098.1  | 87922.9  | 94810.4  | 98269.3  | TRUE |
| 54543.2  | 46332.1  | 44953.1  | 45164.2  | 57021.9  | 58986.4  | 33696.2  | 60791.1  | TRUE |
| 27713.1  | 28134.7  | 27094.7  | 11117.6  | 24424.7  | 19691.9  | 24907.6  | 25898.8  | TRUE |
| 84239.8  | 104109.5 | 121117.3 | 97038.3  | 81623.3  | 129934   | 89655.4  | 81030.4  | TRUE |
| 53662.5  | 51283    | 53971.7  | 86504.4  | 63752.6  | 60376.3  | 65879.4  | 80008.1  | TRUE |
| 78270    | 56882.4  | 75457.5  | 64699.6  | 79012.3  | 77338.6  | 69897.4  | 70236.6  | TRUE |
| 462159.2 | 463480.4 | 473602.5 | 361632.9 | 324270.8 | 538463.8 | 604551.9 | 379916.6 | TRUE |
| 505481.3 | 407754.4 | 633493.9 | 517880.4 | 607480.3 | 438942   | 454005.4 | 442413.7 | TRUE |
| 1291233  | 1029214  | 1657034  | 1479846  | 1591861  | 927143.7 | 1021047  | 938806   | TRUE |
| 336736.8 | 400307   | 370210   | 257763.4 | 280707.9 | 396559.5 | 401374.2 | 292684.6 | TRUE |
| 68992.4  | 91633.1  | 74695.1  | 56755.3  | 52031.6  | 76576.9  | 91945.6  | 56712.4  | TRUE |
| 343513.4 | 281985.6 | 438405   | 435359.6 | 419883.9 | 341504.9 | 315610.8 | 289915.2 | TRUE |
| 795302.1 | 533233   | 1027680  | 934860.4 | 886125.9 | 539753   | 624151   | 553829.3 | TRUE |
| 1137272  | 740257.6 | 1311936  | 1286865  | 1381152  | 788785.7 | 767804.8 | 771092.1 | TRUE |
| 395709.5 | 422404   | 458745.1 | 319732.4 | 368816.4 | 464995.2 | 486687.4 | 357592   | TRUE |
| 412618.4 | 328825.4 | 496833.5 | 576913.6 | 523541.2 | 378645.2 | 350179   | 356298.1 | TRUE |
| 689732.9 | 619180.3 | 904237.3 | 962915.6 | 907260.6 | 589802.6 | 667486   | 597170.3 | TRUE |

|          |          |          |          |          |          |          |          |      |
|----------|----------|----------|----------|----------|----------|----------|----------|------|
| 28497.3  | 31002.1  | 41881.8  | 38383    | 29118.5  | 36787.3  | 53893.4  | 39854.1  | TRUE |
| 35549.2  | 33601.5  | 40036.7  | 38146.6  | 30374.7  | 53153.4  | 48701.9  | 31961.1  | TRUE |
| 45388.6  | 63256.9  | 36400.2  | 13140    | 43365.4  | 45952.9  | 55773.2  | 40763.9  | TRUE |
| 46702.2  | 39397.5  | 44795.1  | 52660    | 41400.4  | 59790.9  | 62081.1  | 36636.3  | TRUE |
| 34767.6  | 48154.4  | 31961.9  | 28949.9  | 31594.2  | 37498.3  | 50492.8  | 27379.7  | TRUE |
| 45472.6  | 71783.2  | 59779.6  | 40105.1  | 36559.5  | 71956.5  | 59003.9  | 42574    | TRUE |
| 45828.4  | 31637    | 30098.6  | 40140.7  | 47387.7  | 44788.9  | 43314.5  | 48937.4  | TRUE |
| 83132.5  | 70785.5  | 72757.4  | 90212.4  | 93372.3  | 122197.7 | 122292   | 151625   | TRUE |
| 126128.9 | 97980    | 102644.5 | 98358.7  | 88677    | 120874.7 | 130784.1 | 108565.1 | TRUE |
| 174182.6 | 181287.4 | 145627   | 142472.2 | 150123.4 | 197481.2 | 200712.9 | 164740   | TRUE |
| 69486.4  | 156278.4 | 67639.9  | 83640.4  | 53478.8  | 101793.8 | 153066.6 | 78070.1  | TRUE |
| 330960.8 | 312634.1 | 261286.4 | 267641.6 | 341135.7 | 335898.9 | 347247.1 | 351875.1 | TRUE |
| 751275.5 | 675700.7 | 540157.8 | 582523.9 | 704006.9 | 788707.6 | 686608   | 770251.1 | TRUE |
| 439751.7 | 361468.7 | 452901.8 | 502967.2 | 470167.6 | 452868.8 | 390247.1 | 487302   | TRUE |
| 50774    | 54786.1  | 40310.5  | 39863.2  | 52948.3  | 24632.6  | 31149.9  | 31911.6  | TRUE |
| 25552.1  | 26757.4  | 23806.5  | 22987.6  | 20321.9  | 17914.5  | 24085.8  | 26711.9  | TRUE |
| 57458    | 60998.2  | 42096.9  | 55841.2  | 46363.8  | 81389.3  | 74841.8  | 69016.7  | TRUE |
| 843716   | 782494.4 | 793361.1 | 759039.3 | 857917.5 | 864038.6 | 814160.7 | 896109.7 | TRUE |
| 206907.9 | 207742.2 | 145478.6 | 212596.2 | 200609.5 | 257927.4 | 238080   | 274910.2 | TRUE |
| 90637.2  | 71119.4  | 67879.8  | 86543.2  | 95601.9  | 67518.9  | 66768.9  | 84465.2  | TRUE |
| 89210.3  | 104293.9 | 65227    | 88187.1  | 88120.9  | 82869.3  | 101060.8 | 107550.4 | TRUE |
| 21764.7  | 10251.3  | 14354.6  | 11158.2  | 12065.2  | 7074.9   | 29581.6  | 12560.8  | TRUE |
| 176470   | 147886.9 | 209930.8 | 181910.3 | 167899.7 | 220633.4 | 190101.7 | 181459.6 | TRUE |
| 159601.7 | 137087.9 | 142764.5 | 146804.7 | 134422.9 | 145285.2 | 155627   | 137685.5 | TRUE |
| 58495    | 67241.7  | 41064.2  | 46943.9  | 46179    | 29136.9  | 71829.3  | 68118.3  | TRUE |
| 58862.5  | 61990.9  | 30568.8  | 36062.5  | 53222.7  | 43266    | 57720    | 50931    | TRUE |
| 120711.9 | 125328.1 | 111702.4 | 144378.3 | 92623.5  | 114345.6 | 145992.3 | 121751.2 | TRUE |
| 47370.7  | 39663.6  | 55307.1  | 47374.6  | 27638.5  | 40202.6  | 41341.3  | 46660.3  | TRUE |
| 48203.4  | 55489.8  | 42868.3  | 41339.7  | 68197.6  | 46886.2  | 81124.5  | 76506.6  | TRUE |
| 255768.6 | 286838.2 | 208009.7 | 238272.1 | 259478.8 | 201053.7 | 256002.7 | 275709.2 | TRUE |
| 286925.5 | 323796.2 | 315764.7 | 327952   | 257096.1 | 261371.6 | 339534.6 | 268689   | TRUE |
| 61347.2  | 82737.1  | 40787.4  | 53119.7  | 77181.8  | 47544.4  | 80338.7  | 74522.4  | TRUE |
| 125290.6 | 116900.9 | 75303.1  | 95839    | 115439.1 | 106022.1 | 172975.7 | 168420.4 | TRUE |
| 138146.9 | 104579.2 | 130938.9 | 164046.7 | 74790.3  | 100806.9 | 150568.5 | 136636   | TRUE |
| 179885.8 | 179448.5 | 143456.7 | 164755.8 | 198457.3 | 155887.5 | 198886.6 | 180773.6 | TRUE |
| 120946.1 | 143870.6 | 92691.8  | 86624.9  | 108540.1 | 99040.7  | 139716.6 | 109666.9 | TRUE |
| 127298.4 | 110240   | 103292.6 | 150018.2 | 113598.6 | 112393.2 | 134837.7 | 113791.1 | TRUE |
| 193505.3 | 180444.4 | 163551.8 | 189533.8 | 209444.9 | 252105.9 | 200471.6 | 238330.7 | TRUE |
| 335597.2 | 325210.5 | 328187.3 | 355407.7 | 365086.5 | 351746.9 | 376512.1 | 348318.7 | TRUE |
| 71364.3  | 84281.3  | 62638.1  | 88401.3  | 79339.6  | 50077.3  | 108571   | 93285.5  | TRUE |
| 29766.5  | 39315.3  | 34225.4  | 25957.5  | 39323    | 33490.3  | 37464.9  | 39736    | TRUE |
| 110253.8 | 65840    | 62629.7  | 102297   | 85003.8  | 97264.1  | 108168.3 | 111109.6 | TRUE |
| 45240.2  | 33185.1  | 29211.7  | 47936.8  | 39341    | 49402.6  | 40870.6  | 54613.8  | TRUE |
| 1151078  | 948246   | 1076976  | 1066713  | 1078167  | 1118819  | 1037676  | 1179689  | TRUE |

|          |          |          |          |          |          |          |          |      |
|----------|----------|----------|----------|----------|----------|----------|----------|------|
| 1455014  | 1182323  | 1443807  | 1275850  | 1230587  | 1420738  | 1172344  | 1249681  | TRUE |
| 131592   | 104232.5 | 171489.3 | 91075.7  | 154954.8 | 130798.4 | 143779.3 | 146321.9 | TRUE |
| 145549.2 | 147771.3 | 114110.8 | 128105.4 | 128023.5 | 119609.8 | 144246.1 | 134390.6 | TRUE |
| 462966.3 | 478575.2 | 394429.9 | 433982.7 | 482493.4 | 408064.9 | 571888.1 | 489358   | TRUE |
| 23971.1  | 22201.9  | 28204.2  | 27211.4  | 27060.7  | 31650.3  | 34114.2  | 31274.8  | TRUE |
| 538200   | 499168.6 | 411695.4 | 445607.8 | 446752.9 | 376646.9 | 394625.8 | 397029.6 | TRUE |
| 957520.5 | 954453.5 | 799769.3 | 895937.5 | 822425.6 | 809784   | 799186.4 | 735617.7 | TRUE |
| 697961.5 | 777125   | 637862.4 | 666489   | 607291.4 | 687363.9 | 678935.7 | 636854.7 | TRUE |
| 344889.6 | 345833.4 | 345886.3 | 333660.3 | 257518.8 | 361059.4 | 329463.4 | 308021.8 | TRUE |
| 121059.2 | 108693.3 | 92993.8  | 113864.3 | 104055.2 | 107985.5 | 115617.3 | 113283.9 | TRUE |
| 193824   | 154875.1 | 180355.7 | 218261.6 | 205336.4 | 230524.3 | 168088.3 | 260373.1 | TRUE |
| 83159.8  | 61268.6  | 64828.6  | 78917.4  | 53333.6  | 84735.5  | 75149.8  | 55506.4  | TRUE |
| 74540.9  | 62708.8  | 79044    | 59681.8  | 67180.9  | 102930.6 | 98228.9  | 80437.8  | TRUE |
| 238265.4 | 208107.9 | 213460.6 | 286470.7 | 206153.6 | 241115.5 | 250308.9 | 168945.7 | TRUE |
| 248021.8 | 237673.6 | 216563   | 214323.9 | 217447.3 | 254614.4 | 243427.5 | 237960.6 | TRUE |
| 384285.9 | 320471.4 | 372448.7 | 369945   | 378376.5 | 426900.9 | 352957.6 | 422018.9 | TRUE |
| 237880.9 | 201350.8 | 200099.7 | 220192.8 | 171740.3 | 191994.9 | 187320.3 | 146665.1 | TRUE |
| 119954.6 | 79594    | 90960.8  | 125096.8 | 129509.1 | 141392.1 | 101838.7 | 145012.5 | TRUE |
| 546141.3 | 459589.1 | 535378.3 | 557713.2 | 438887.6 | 540214.6 | 552056.9 | 454646.3 | TRUE |
| 37676.2  | 43790.3  | 42631.4  | 44496.3  | 31774.7  | 40015.7  | 52933.7  | 24656.9  | TRUE |
| 19255.4  | 3169.5   | 6593.7   | 11557.6  | 7309.8   | 7447.7   | 10956    | 6619.2   | TRUE |
| 80278    | 48938    | 49986.3  | 72766.9  | 66379    | 57440.4  | 61785.4  | 77887.7  | TRUE |
| 113083   | 103498.9 | 162821   | 96496.7  | 96515    | 99084.3  | 92607.6  | 110063.5 | TRUE |
| 63005    | 54459.8  | 38292.9  | 80201.4  | 50693.3  | 77589.1  | 76804.5  | 61731.6  | TRUE |
| 180940.5 | 209629.3 | 206348.2 | 214001.1 | 177586.4 | 253433.1 | 197988.8 | 253563.3 | TRUE |
| 56418.9  | 48760.5  | 53262.2  | 58809.2  | 61720.2  | 63632.7  | 52157.9  | 69540.8  | TRUE |
| 44699.6  | 25417.7  | 33705.2  | 40645.9  | 37627.8  | 39818.1  | 15071.7  | 55051.8  | TRUE |
| 30415.8  | 11138.8  | 41411.5  | 35251.2  | 24355.8  | 37335.5  | 41651    | 39854.1  | TRUE |
| 69230.5  | 78940.3  | 70784.5  | 62478.2  | 80008.6  | 74998.9  | 81632.6  | 89184.6  | TRUE |
| 89474.3  | 70357.4  | 82375.2  | 104093.6 | 94946    | 103375.6 | 102742.1 | 118275.8 | TRUE |
| 78406.7  | 58669.4  | 77878    | 84278.9  | 99133.5  | 76312.3  | 56296.7  | 85846.9  | TRUE |
| 27477.9  | 35661.9  | 10459.8  | 25596.1  | 29515.2  | 46833.4  | 38266.5  | 44253.4  | TRUE |
| 8177     | 6545.1   | 8371.6   | 8117.7   | 5325.9   | 12020.7  | 6297.2   | 9387.4   | TRUE |
| 85022.5  | 76972.6  | 90159.9  | 101917.3 | 114680.8 | 85491.6  | 63595.3  | 101846.2 | TRUE |
| 55979.2  | 35160.7  | 53760.2  | 74726.5  | 62010.5  | 57085.8  | 49467.8  | 63449.1  | TRUE |
| 59186.4  | 45632.9  | 61706.9  | 81370.2  | 61840.9  | 64690.6  | 54655.1  | 70181.4  | TRUE |
| 66473.5  | 35210.3  | 73536.5  | 72297.9  | 63116.5  | 63602.5  | 38313.9  | 63040.2  | TRUE |
| 61291.2  | 70901.1  | 54144.6  | 39180.8  | 63437.2  | 73859.4  | 58660.5  | 74942.5  | TRUE |
| 398060.3 | 361647.2 | 346200.9 | 333749.7 | 366483.3 | 442337.5 | 351865.4 | 453447.8 | TRUE |
| 176337.5 | 152380.5 | 137527   | 173658.1 | 196060.6 | 165626.9 | 153428.2 | 168122.9 | TRUE |
| 796820   | 855156   | 838824.5 | 828397.7 | 763212.3 | 839174.5 | 895615.3 | 838803.1 | TRUE |
| 58398.2  | 66760    | 59406.8  | 57408    | 84011.8  | 55503.4  | 66297    | 78826.2  | TRUE |
| 68531.3  | 71765.7  | 74748.9  | 83615.7  | 84854.5  | 71873.8  | 58214.1  | 59981    | TRUE |
| 57664.8  | 62490.7  | 70302.7  | 89560.1  | 68357.2  | 74273    | 72688.3  | 73148.8  | TRUE |
| 61381    | 67701.9  | 54230.5  | 57291.9  | 65231.1  | 37677.1  | 74353.7  | 77566.9  | TRUE |
| 31213.1  | 36319.1  | 29986.6  | 35826.2  | 31695    | 31881.1  | 50264.2  | 47441.8  | TRUE |
| 45888.3  | 29052.2  | 38817.7  | 37073    | 52700.7  | 41446.3  | 33245.2  | 42302.1  | TRUE |



|          |          |          |          |          |          |          |          |      |
|----------|----------|----------|----------|----------|----------|----------|----------|------|
| 118669.7 | 118302.4 | 84649.4  | 106164.7 | 126939.9 | 102046.6 | 118067.6 | 125417.6 | TRUE |
| 318081.5 | 353377.2 | 266388.1 | 303556.7 | 254788   | 280340.9 | 316289.2 | 275852.6 | TRUE |
| 697746.2 | 854369.8 | 806787.3 | 717177.1 | 646656.9 | 625787.4 | 871205.3 | 634271.9 | TRUE |
| 84196.5  | 66178.1  | 99068.2  | 98006.5  | 74421.7  | 106598.1 | 85611.6  | 105530.8 | TRUE |
| 55564.8  | 50109.6  | 41525.5  | 59795.3  | 47110.7  | 60595.7  | 58947.3  | 62660.5  | TRUE |
| 148164.6 | 105169.5 | 150178.7 | 134244.8 | 114300.2 | 134476.5 | 123593   | 128285.6 | TRUE |
| 100063.2 | 83269.5  | 99382.6  | 82562.2  | 78989.1  | 96146.1  | 84622.8  | 73983    | TRUE |
| 22679.5  | 16124.6  | 16817.3  | 23291.6  | 18442.6  | 19623    | 17297.1  | 10203.8  | TRUE |
| 79406.5  | 75101    | 94023.5  | 85818.5  | 56003.4  | 87368.9  | 91540.2  | 57288.8  | TRUE |
| 31191.2  | 30762.4  | 40787.6  | 33946.7  | 44555.1  | 40339.1  | 42381.9  | 28572.3  | TRUE |
| 67910.5  | 57919.6  | 73007    | 77244.5  | 74388.4  | 83097.7  | 49514.9  | 66811.3  | TRUE |
| 760778.4 | 664441.4 | 749395.3 | 782250.8 | 819961.3 | 804250.5 | 678712.4 | 792305.6 | TRUE |
| 56619.7  | 24562.6  | 67052.2  | 62579.6  | 46752.8  | 61069.8  | 52358.1  | 55810.8  | TRUE |
| 72243.1  | 50075    | 65948.7  | 76177    | 85287.8  | 73316.3  | 57099.6  | 81786    | TRUE |
| 21459.3  | 32733.2  | 15010.8  | 7079.6   | 9337.9   | 21327.5  | 32605.7  | 13860.7  | TRUE |
| 89667.6  | 85108.3  | 56708.1  | 76845.9  | 69311.3  | 78361.6  | 80837.9  | 91376.8  | TRUE |
| 98764    | 93905.8  | 132284.2 | 133165.4 | 78215.3  | 92603.1  | 107975.6 | 76166.5  | TRUE |
| 230516.2 | 311742.5 | 362224.2 | 389137.9 | 140255.3 | 240265.6 | 278468.2 | 223310   | TRUE |
| 718797.5 | 927433.7 | 1251379  | 1291915  | 481875.8 | 762756.7 | 966943.8 | 736283   | TRUE |
| 80822.4  | 109642.7 | 93398.5  | 100052.2 | 89053.9  | 73817    | 134967.2 | 106578.3 | TRUE |
| 52522.7  | 56821.9  | 62368.9  | 50899.5  | 53184    | 55046.8  | 66234.7  | 44550.9  | TRUE |
| 320729.2 | 397303.9 | 271896.9 | 353636.1 | 322353   | 278412.5 | 424300.6 | 339467.6 | TRUE |
| 109136.8 | 101111.1 | 91407.7  | 127636.2 | 114087.9 | 102684.4 | 128937.9 | 154871.7 | TRUE |
| 38519.9  | 31185.6  | 13067.9  | 12324.8  | 51376.3  | 23919.6  | 41027.5  | 58451.5  | TRUE |
| 134903.6 | 89679.5  | 200128   | 114380   | 182021   | 266717.2 | 139228.4 | 124286.9 | TRUE |
| 27536.6  | 12986.3  | 25741.3  | 42933.8  | 73199.7  | 59961.5  | 47732.1  | 52898.1  | TRUE |
| 289358.5 | 428617.5 | 367789.4 | 380578.2 | 351499.2 | 342417.5 | 269642   | 298042.6 | TRUE |
| 74510.5  | 73718.5  | 96206.1  | 72892.1  | 93897.2  | 79310.9  | 78162    | 78340.3  | TRUE |
| 274524   | 209795.9 | 232546.1 | 255527   | 368334.9 | 247550.4 | 251037.8 | 229294.9 | TRUE |
| 36565.4  | 56046.5  | 43575.4  | 65650    | 50841.6  | 49309.5  | 91650.4  | 46419.4  | TRUE |
| 26229.6  | 27483.6  | 30660.4  | 26088.9  | 33130.4  | 34744.2  | 21653.9  | 26576.4  | TRUE |
| 16809.6  | 41297.9  | 21223.9  | 26464.9  | 24825.6  | 25406.9  | 19091.9  | 18417.2  | TRUE |
| 53317.5  | 46173.1  | 52110.8  | 53093.9  | 63306.6  | 48176.7  | 52689.7  | 40501.8  | TRUE |
| 252328.8 | 226859   | 203091   | 203340   | 213958.9 | 213602.9 | 217950.8 | 231988.5 | TRUE |
| 12376223 | 10297034 | 6923659  | 8563276  | 9124724  | 7661571  | 7992518  | 9914927  | TRUE |
| 19734691 | 17719563 | 19298656 | 24223418 | 25122520 | 21026249 | 22132397 | 25423806 | TRUE |

|          |          |          |          |          |          |          |          |      |
|----------|----------|----------|----------|----------|----------|----------|----------|------|
| 347580.3 | 303685.4 | 310327.5 | 375913.8 | 390283.8 | 344591.9 | 332347.9 | 405695   | TRUE |
| 156190.7 | 276157.5 | 194509.1 | 355646.3 | 408759.1 | 116799.9 | 128266.7 | 139978.1 | TRUE |
| 66771.7  | 185355.5 | 111823.9 | 223953.5 | 255755   | 25766.1  | 26253.1  | 32539.4  | TRUE |
| 986484.3 | 851998   | 517348.7 | 565174.4 | 714645.7 | 541604.1 | 651284   | 790651   | TRUE |
| 2920825  | 2758216  | 2549566  | 2828261  | 2608566  | 2969752  | 3066039  | 3066153  | TRUE |
| 34243021 | 32167746 | 26974329 | 30100472 | 29547294 | 33606064 | 33407158 | 35045003 | TRUE |
| 779596.6 | 761974.3 | 660313.7 | 901545   | 875255   | 682372.7 | 793911.3 | 903167.3 | TRUE |
| 598647.2 | 554585.2 | 564353.4 | 640151.7 | 626120   | 579065.1 | 552015.4 | 593046   | TRUE |
| 171781   | 135976.3 | 126429.1 | 168084.2 | 170161.6 | 151409   | 200560.2 | 199620.1 | TRUE |
| 80104.7  | 174276.4 | 105437   | 203456.9 | 201207.1 | 44151.3  | 42858.4  | 53418.7  | TRUE |
| 1017977  | 920968.8 | 951432.8 | 941609.6 | 909760.4 | 990501.9 | 981007.4 | 990771.4 | TRUE |
| 4051172  | 3841394  | 3730434  | 3854562  | 3499408  | 4142102  | 4135243  | 3922073  | TRUE |
| 1034314  | 997595.1 | 1113005  | 1195988  | 999045.3 | 1249160  | 1183601  | 1232199  | TRUE |
| 1404614  | 1382910  | 1625566  | 1712695  | 1485822  | 2061290  | 1718955  | 1709728  | TRUE |
| 85134.6  | 72445.9  | 50973.1  | 85557.4  | 77651.2  | 104257.2 | 90043.5  | 145191.4 | TRUE |
| 36516.3  | 64502.4  | 35425.1  | 44955.5  | 35131.7  | 33551.4  | 26054.7  | 49724.5  | TRUE |
| 103762.2 | 86611    | 69410.5  | 81520.7  | 73559.6  | 140199.9 | 116564.2 | 113563.1 | TRUE |
| 144294.9 | 142322.9 | 121288.1 | 136367.5 | 131498.4 | 187368   | 165096.3 | 155153.7 | TRUE |
| 74875.4  | 48390.2  | 58550.3  | 61974.7  | 67761.4  | 78498.3  | 78872.1  | 95578.1  | TRUE |
| 499674.8 | 419903.1 | 473469.9 | 483032.6 | 425767.3 | 649719.1 | 762151.2 | 688065.5 | TRUE |
| 58427.1  | 54538.5  | 58986.8  | 58631.9  | 59439.9  | 62191.2  | 77461    | 73179.8  | TRUE |
| 8452.9   | 11629.9  | 13306.7  | 5819     | 4123.8   | 14341.3  | 8215.4   | 4918.5   | TRUE |
| 106240.4 | 96607.2  | 95099.1  | 131610.5 | 105572.7 | 106874.1 | 110197.5 | 142080.8 | TRUE |
| 266395.7 | 213455.7 | 217673.7 | 259746.9 | 301828.7 | 228227.8 | 252777.8 | 255335.7 | TRUE |
| 6690659  | 5406954  | 5585044  | 7009426  | 7486488  | 5873942  | 6234272  | 7266928  | TRUE |
| 7896266  | 6914403  | 6977963  | 8437829  | 9149714  | 7462822  | 7734028  | 9034795  | TRUE |
| 1442736  | 1259064  | 1111906  | 1405363  | 1480089  | 1247207  | 1357941  | 1581281  | TRUE |
| 1254445  | 1059231  | 927469.6 | 1246735  | 1346912  | 1076196  | 1196051  | 1416262  | TRUE |
| 90177.5  | 92851.1  | 86586.2  | 103366   | 109639.3 | 81830.8  | 76165.8  | 104247.9 | TRUE |
| 63585.7  | 69960.2  | 53946.6  | 76080.8  | 83567.2  | 64887    | 67884.1  | 74695.6  | TRUE |
| 206033.2 | 156129   | 217976.2 | 219819.1 | 217154.6 | 225613.9 | 217644.8 | 227329.5 | TRUE |
| 42820    | 52792.4  | 39080.5  | 53204.4  | 55024.4  | 52190.6  | 49075.8  | 46036.2  | TRUE |
| 52723.8  | 71599.2  | 46496.3  | 64368.1  | 80881    | 16639.5  | 20346.6  | 9465.3   | TRUE |
| 81921    | 214714.9 | 100435.3 | 216018.4 | 260844.1 | 25404.9  | 22588.1  | 28868.2  | TRUE |
| 75873.2  | 62946.6  | 45585.9  | 87108.1  | 86635.3  | 60398.4  | 63562.1  | 81822.3  | TRUE |
| 8788.9   | 9380.6   | 14482.6  | 8935.5   | 23210.4  | 18163.7  | 11116.6  | 24235.8  | TRUE |
| 82341    | 54732    | 58161.1  | 73397    | 67222.1  | 63174.2  | 79751.5  | 76082.6  | TRUE |
| 28468.3  | 30431.7  | 17784.8  | 27613.2  | 18643    | 15415.4  | 36941.1  | 34599.6  | TRUE |
| 34790.2  | 11442.3  | 27757.6  | 40873.5  | 48454.7  | 26940.5  | 44605.6  | 56290.6  | TRUE |
| 35497.1  | 30553.1  | 36614.6  | 23991.1  | 43397    | 37688.2  | 34149.9  | 47483.3  | TRUE |
| 144381   | 121430.1 | 146739.9 | 139352.7 | 175605   | 116537.5 | 161043.7 | 163380.2 | TRUE |

|          |          |          |          |          |          |          |          |      |
|----------|----------|----------|----------|----------|----------|----------|----------|------|
| 33772.4  | 63688.8  | 43079.1  | 47921.7  | 43664.2  | 23811.3  | 26017.5  | 10027.4  | TRUE |
| 17467.3  | 21770    | 29703    | 24854.4  | 19019.2  | 6699.8   | 8803.4   | 11637.3  | TRUE |
| 36831.9  | 30515.9  | 30372.9  | 39476.7  | 30974.2  | 51784.3  | 31534.1  | 31864.4  | TRUE |
| 404409.3 | 362732.9 | 351722.9 | 327245.9 | 342465.8 | 437283.6 | 449119.4 | 439315.9 | TRUE |
| 2693708  | 2544494  | 2216430  | 2225966  | 1824695  | 2460600  | 2961259  | 2813231  | TRUE |
| 411954.9 | 391830.8 | 315907.9 | 336484.7 | 293140.2 | 430538.7 | 437609.8 | 464262.1 | TRUE |
| 52517.9  | 51171.1  | 45967.6  | 40192.5  | 39292.7  | 78783.5  | 50572.3  | 69657.2  | TRUE |
| 14587.3  | 16369.7  | 11270.9  | 23351.9  | 22394.4  | 22952.4  | 18930.7  | 24966.3  | TRUE |
| 26462.9  | 25563.6  | 12414.6  | 32462.2  | 17444.1  | 31478    | 18008.4  | 41953.5  | TRUE |
| 52119.8  | 47358.6  | 88232.4  | 72743.8  | 52814.1  | 84366.9  | 86745.1  | 103728   | TRUE |
| 47573.4  | 59987.2  | 79534.8  | 75157.8  | 68724.8  | 80732.7  | 97368.3  | 112647.8 | TRUE |
| 38823.1  | 46731.2  | 45527.5  | 52237.9  | 36432.7  | 57869    | 62690.1  | 58280.6  | TRUE |
| 198273   | 210100.8 | 128232.7 | 222472.6 | 262971.6 | 137699   | 251284.6 | 254776.3 | TRUE |
| 72657.9  | 72536.2  | 52554    | 89349.7  | 94260.4  | 44773.4  | 92763.9  | 85785.2  | TRUE |
| 876251   | 845221.3 | 670469.4 | 962828.2 | 1123162  | 598670.2 | 909354.9 | 1009027  | TRUE |
| 948226.3 | 1017083  | 701538.8 | 1071066  | 1327377  | 652192.8 | 1092951  | 1167002  | TRUE |
| 703571.2 | 769480.1 | 481411.4 | 764127.8 | 920310.6 | 546509.1 | 809563   | 983765.6 | TRUE |
| 29650.3  | 36666.8  | 23568.1  | 27279.4  | 45732    | 24486.2  | 34972.8  | 37665.2  | TRUE |
| 128965.3 | 138084.9 | 90178.3  | 121869.8 | 151158.4 | 99745.6  | 142841   | 157067.6 | TRUE |
| 20556.3  | 21765.5  | 7293.7   | 21386.8  | 25827.5  | 15121.1  | 23893.7  | 25004.1  | TRUE |
| 144788.7 | 135748.9 | 102802.1 | 167032.9 | 185923.4 | 115146.7 | 147127.2 | 162664.6 | TRUE |
| 132882.7 | 149011.1 | 106993.9 | 161599.2 | 180180.5 | 121824.8 | 154644.9 | 196464.3 | TRUE |
| 61471.3  | 61995.1  | 52335.4  | 67514.2  | 66062.6  | 50667.1  | 52188.1  | 69053.8  | TRUE |
| 92864.6  | 117325.7 | 153408   | 108515.5 | 143392.3 | 100800.9 | 130525.4 | 149807   | TRUE |
| 21710.8  | 32487.3  | 13909.2  | 31442.6  | 28148.3  | 21614.6  | 39170.9  | 35777.9  | TRUE |
| 33076.6  | 33663.5  | 30841.8  | 25718.3  | 44319.4  | 24408.2  | 38167.1  | 43956.8  | TRUE |
| 98137.2  | 129062.4 | 72193    | 139188   | 144213.2 | 85221.9  | 122902.8 | 140549.2 | TRUE |
| 103165   | 242952.1 | 98367.8  | 284859.1 | 317735   | 68279.3  | 73557.8  | 77495.2  | TRUE |
| 18978    | 78611.9  | 29087    | 87295.7  | 92752.8  | 4729.5   | 7909.7   | 8942     | TRUE |
| 133393.9 | 130845.7 | 68307.5  | 139435.9 | 179652.8 | 116812.1 | 169318.6 | 191466.4 | TRUE |
| 23501.8  | 14628.7  | 14309.5  | 25289.6  | 27325.8  | 16755.3  | 18725.3  | 42186.3  | TRUE |
| 266615.7 | 230154.9 | 141481.9 | 232312.9 | 278622.1 | 212922   | 371424.7 | 395664.9 | TRUE |
| 60501.5  | 70733.3  | 59334.3  | 75470.3  | 82755.5  | 57286.8  | 59410.9  | 95938.2  | TRUE |
| 26349.4  | 41568.3  | 11169.9  | 27461.2  | 32964.9  | 17822.6  | 22482.6  | 50849.7  | TRUE |
| 254786.3 | 319953.7 | 267575.4 | 331400.8 | 208394.7 | 288570   | 393481   | 313379.7 | TRUE |
| 1810811  | 2244699  | 2230420  | 2115826  | 1442520  | 2267275  | 2452104  | 2006393  | TRUE |
| 487921.7 | 580653.2 | 600453.7 | 543461.2 | 406275.2 | 578524.7 | 642850.5 | 534237   | TRUE |
| 229714.8 | 260484   | 256940.2 | 249535.8 | 179884.7 | 270946.3 | 317354.3 | 261934.1 | TRUE |
| 231714   | 251276.5 | 244383.7 | 239834.7 | 173747.7 | 266289.1 | 281830   | 229429.5 | TRUE |
| 59737.2  | 74168.1  | 77900.1  | 72565    | 49106.2  | 85734.6  | 88671    | 94217.8  | TRUE |
| 128509.2 | 148529.8 | 128763.6 | 127149.5 | 102857.7 | 136520   | 135284.2 | 145047.7 | TRUE |
| 145164.9 | 220498.8 | 174360.7 | 171966.9 | 143063.2 | 191571.3 | 170766.5 | 187052.6 | TRUE |
| 49195.2  | 149028.2 | 64095.4  | 132260.9 | 84944.9  | 23014.3  | 10810.7  | 26664.7  | TRUE |
| 57409.6  | 73621.7  | 46073.8  | 73185.7  | 57877.1  | 119726.7 | 119674   | 72919.2  | TRUE |

|          |          |          |          |          |          |          |          |      |
|----------|----------|----------|----------|----------|----------|----------|----------|------|
| 71507.5  | 77821    | 62480.5  | 63089    | 51839.1  | 51694    | 55867.9  | 42492.5  | TRUE |
| 77366.4  | 52716.2  | 56239.9  | 37670    | 48376.3  | 50786.8  | 55213.6  | 68134.6  | TRUE |
| 493769.8 | 238396.9 | 194996.7 | 225198.8 | 253250.9 | 207078.4 | 234912.9 | 237359   | TRUE |
| 13883928 | 11799645 | 10078533 | 11356727 | 11816518 | 10740090 | 11397169 | 12406034 | TRUE |
| 13055459 | 11838155 | 9710604  | 11328912 | 11627929 | 10278498 | 10862874 | 12176967 | TRUE |
| 61712.5  | 51740.9  | 76078.2  | 62028.6  | 58719.5  | 59248.7  | 55507.9  | 56553    | TRUE |
| 3163747  | 2676375  | 3657641  | 4215295  | 4044244  | 3562342  | 3486541  | 4015745  | TRUE |
| 87270.2  | 129429.2 | 98233.7  | 92074.5  | 74491.2  | 118894.7 | 92939.4  | 70269.3  | TRUE |
| 41508.7  | 38289.2  | 20138.2  | 28798.2  | 7785.1   | 10473.2  | 7047.4   | 26142.6  | TRUE |
| 189017   | 203957.4 | 120504.8 | 129431.5 | 129160.4 | 98651.2  | 160904   | 124317.1 | TRUE |
| 67730    | 43775.3  | 22352.8  | 30863.2  | 29753.4  | 25482.6  | 41342.6  | 13819.3  | TRUE |
| 190868.8 | 208201.1 | 171394.1 | 175091.7 | 155830.2 | 161332   | 204462.4 | 161627   | TRUE |
| 80176.1  | 73209.6  | 25280.7  | 40691.6  | 43100    | 37549.5  | 42725.3  | 50682    | TRUE |
| 82186.8  | 104213.9 | 96513.8  | 85615.5  | 83197.3  | 96456.3  | 98338.9  | 69702.8  | TRUE |
| 198267.8 | 213066.4 | 198298.5 | 210487.7 | 199446.2 | 198674.1 | 210953.1 | 181417.9 | TRUE |
| 75482.6  | 71222.9  | 84205.5  | 78291.1  | 74466.4  | 75661.6  | 75517.1  | 75075.7  | TRUE |
| 654799.4 | 697859.3 | 573375.8 | 719177.1 | 636753   | 596302.5 | 735894.1 | 630879.1 | TRUE |
| 337901.9 | 337545.3 | 321062.5 | 341742.9 | 329546.6 | 336554   | 406143.7 | 393342.2 | TRUE |
| 90350.4  | 114499.2 | 94904.8  | 113734.6 | 114677.8 | 85859    | 110994.4 | 93131.3  | TRUE |
| 318522.5 | 285775.5 | 259466.7 | 260551.3 | 299928.3 | 271124.9 | 333599.1 | 302336.6 | TRUE |
| 76388.8  | 71665.9  | 74730.4  | 74785.8  | 74138.4  | 64164.8  | 60662.9  | 78875.6  | TRUE |
| 75566.3  | 70649.2  | 52998.2  | 68235.7  | 80263.3  | 75654.9  | 82609.7  | 91530.9  | TRUE |
| 118943.8 | 139559.8 | 143880   | 121446.6 | 134480.4 | 134944.5 | 149651.2 | 139403.8 | TRUE |
| 62867.5  | 63968    | 59944.4  | 41290.7  | 61872.3  | 59672.8  | 58519.1  | 59114.8  | TRUE |
| 344930.4 | 321165.3 | 323592.3 | 332022.4 | 359308.8 | 319480   | 372081.6 | 334697.5 | TRUE |
| 64799.2  | 61205.3  | 35044.8  | 82555.4  | 60796.5  | 57236.1  | 65569.9  | 59189.1  | TRUE |
| 448353.2 | 455154.8 | 405317.5 | 416915.5 | 371208.2 | 466304.2 | 518038.3 | 432183.9 | TRUE |
| 17576.3  | 9618.2   | 24034.9  | 28209.3  | 19506.4  | 22316.4  | 16290.3  | 24078.3  | TRUE |
| 49739.4  | 63018.9  | 58037.1  | 55400.4  | 61514.9  | 51727.5  | 51205.1  | 40662.4  | TRUE |
| 89163.2  | 75443.7  | 95619.4  | 114697.6 | 79379.1  | 87213.9  | 86042.3  | 102332.8 | TRUE |
| 79539.2  | 46580.2  | 75328.6  | 87587.8  | 51011.8  | 69005.8  | 89121.7  | 81089.5  | TRUE |
| 412118.8 | 342601.5 | 438049.5 | 467276.8 | 375030.9 | 373532.5 | 380260.7 | 365622.8 | TRUE |
| 181254.9 | 125183.4 | 195407.8 | 185508.2 | 143174.9 | 126216.1 | 149047.6 | 131833.1 | TRUE |
| 830885.6 | 733934.1 | 950058.1 | 1022081  | 783935.2 | 966560.8 | 812997.2 | 808289.2 | TRUE |
| 306380.5 | 248957.7 | 320068.8 | 305219.4 | 277400.2 | 292877.1 | 290193.3 | 289073.7 | TRUE |
| 747565.9 | 678367.8 | 766895.2 | 809192.2 | 767803.7 | 746223   | 708007   | 708544.2 | TRUE |
| 128933.8 | 135766.5 | 125179.1 | 145152.3 | 112871.3 | 117053.1 | 158367.8 | 155282.6 | TRUE |
| 192983.2 | 250532.5 | 247621.1 | 363561.3 | 274126.9 | 199450.2 | 166521.5 | 203375.8 | TRUE |
| 35347.6  | 73073.1  | 39239.7  | 93536.2  | 81523.4  | 27980.8  | 11384.1  | 32687.5  | TRUE |
| 9711.7   | 12664.8  | 8142.8   | 8184.7   | 5939.9   | 9316.2   | 15897.3  | 28624.2  | TRUE |
| 47544.3  | 24433.5  | 38873.3  | 31367.8  | 43872.6  | 36592.7  | 37730.4  | 45625.7  | TRUE |
| 181827.1 | 160788.5 | 139026.2 | 152680.2 | 182485.5 | 140164   | 191660.3 | 180373.2 | TRUE |
| 261067   | 229597   | 295963.2 | 310891.2 | 221649.1 | 209369.5 | 247209.5 | 230720.2 | TRUE |
| 59030.6  | 71401.7  | 63167.4  | 73033.2  | 56130.4  | 63306.3  | 51017.8  | 63656.6  | TRUE |
| 1019971  | 1028636  | 789129.9 | 897395.7 | 868060.2 | 834859.6 | 1029214  | 865419.4 | TRUE |
| 70251.9  | 252138.6 | 136839.5 | 163178.7 | 235427.5 | 26221.4  | 27334.7  | 35185.9  | TRUE |
| 2706400  | 2242079  | 3108948  | 3025013  | 2282111  | 2498750  | 2524668  | 2300978  | TRUE |

|          |          |          |          |          |          |          |          |      |
|----------|----------|----------|----------|----------|----------|----------|----------|------|
| 989569.7 | 899137.2 | 938721.1 | 922891.2 | 835484.5 | 914283.2 | 983563.8 | 953725.8 | TRUE |
| 1006388  | 923931.8 | 1003295  | 983330.8 | 806091.2 | 903276.3 | 975826.8 | 943019.2 | TRUE |
| 88253    | 126820.2 | 109235.3 | 167745.2 | 150658.2 | 71544.5  | 69578.4  | 63617.4  | TRUE |
| 220210.7 | 220593.6 | 141388.8 | 120673.4 | 213765.4 | 150833   | 158327.5 | 215453.3 | TRUE |
| 1163290  | 1206963  | 1019252  | 914178.9 | 1809126  | 1011488  | 1489642  | 1875618  | TRUE |
| 31409.6  | 95048    | 32071.9  | 44460.9  | 100494.2 | 14132.3  | 9671     | 35632.1  | TRUE |
| 41944.8  | 38752.6  | 40646.6  | 41636.4  | 45690.8  | 41256.1  | 57058.5  | 39128    | TRUE |
| 228047.3 | 257763.9 | 200867.2 | 193076.3 | 275532.5 | 214927.2 | 264690.4 | 267050.5 | TRUE |
| 353134.7 | 352497.8 | 328012.1 | 458131.1 | 294000.7 | 301403   | 367737.1 | 328950   | TRUE |
| 179983.4 | 166649.1 | 162839.7 | 189769.3 | 161014.1 | 159161.3 | 190824.4 | 185911.4 | TRUE |
| 80147.8  | 101287   | 89725.7  | 78420.8  | 88073.5  | 75697    | 90243.2  | 65031.9  | TRUE |
| 92945.2  | 115054.5 | 98437.7  | 115066.5 | 90032.2  | 100643.6 | 93177.8  | 78556.3  | TRUE |
| 119158.2 | 128409.1 | 137187.8 | 144614.4 | 127253.9 | 97468.6  | 125930.4 | 107213.9 | TRUE |
| 625344   | 650017.6 | 585652.4 | 573921.1 | 538057.1 | 595549.8 | 637901.8 | 576372.9 | TRUE |
| 103340   | 119869   | 96112.7  | 101958.8 | 103363.3 | 127574.4 | 120267.4 | 103099.9 | TRUE |
| 400004   | 449172.3 | 306550.9 | 327448.2 | 353313.2 | 334228.4 | 405233.7 | 367589.5 | TRUE |
| 359605.9 | 367527.2 | 374209.3 | 339888.4 | 336038.8 | 369569   | 362021.7 | 310042.9 | TRUE |
| 289368   | 286950.5 | 286210.6 | 303725.5 | 296114.1 | 297278.4 | 275912.3 | 260113.8 | TRUE |
| 873981.2 | 826674.3 | 898806.6 | 845778.7 | 806067.5 | 938590.2 | 792599.1 | 808641.9 | TRUE |
| 152178.5 | 142341.9 | 209572.6 | 200247.6 | 145728.5 | 107793.9 | 170771.8 | 154906.5 | TRUE |
| 1076637  | 1007927  | 1257261  | 1212057  | 1061764  | 1122666  | 1122054  | 892744.5 | TRUE |
| 167079.8 | 148651.5 | 150314.1 | 200868.3 | 137825.9 | 145898.3 | 183217.2 | 204118.4 | TRUE |
| 84461.6  | 119997.5 | 72098.3  | 77775    | 125515.7 | 74526.6  | 96543.3  | 98061    | TRUE |
| 646833.1 | 899187   | 1683462  | 661027.4 | 923259.8 | 475389.6 | 1053971  | 856170   | TRUE |
| 122825.7 | 132285.4 | 96394    | 96686.1  | 138103.3 | 143540.4 | 152301.6 | 123729   | TRUE |
| 21665.6  | 38066.5  | 34598.2  | 13718.8  | 15001.2  | 27396.5  | 17325.9  | 15954.2  | TRUE |
| 22809.1  | 8292.5   | 8488.7   | 9409.4   | 8998.9   | 6679.5   | 24658    | 12135.2  | TRUE |
| 228873.7 | 236941.1 | 115667.5 | 182856.4 | 206123.9 | 189588.1 | 196720.6 | 182194.1 | TRUE |
| 238773.4 | 198809   | 223931.9 | 208876.6 | 192981.3 | 220918.9 | 213120.9 | 207631.6 | TRUE |
| 127467.4 | 142847.5 | 145171.6 | 136581.2 | 172819.7 | 133332.4 | 172302.8 | 142072.9 | TRUE |
| 472999.1 | 521852.5 | 452658.4 | 550788.2 | 527660.3 | 512678.4 | 525365.7 | 550151.2 | TRUE |
| 935224.6 | 962732   | 1016128  | 1051689  | 895878.2 | 960053.7 | 913342.8 | 1033761  | TRUE |
| 747957.7 | 598064.8 | 792429.6 | 809922.2 | 725580.6 | 749039.7 | 765386.4 | 749729.7 | TRUE |
| 39524.2  | 34301.5  | 26355.3  | 27397.3  | 30646    | 22492.5  | 42253    | 33825.7  | TRUE |
| 384667.7 | 399025.4 | 337595.2 | 345270.1 | 303326   | 367807   | 414691.4 | 343102.9 | TRUE |
| 172154.3 | 218618.8 | 179768.7 | 198641.6 | 174086.5 | 182580.8 | 228299.3 | 153146.6 | TRUE |
| 254381.5 | 255031.7 | 213944.4 | 281095.8 | 313387.7 | 238637   | 288769.3 | 298770.2 | TRUE |
| 283941.3 | 254773.2 | 225540.3 | 281558.6 | 341380.1 | 261870.4 | 297770.1 | 345525.9 | TRUE |
| 388512.5 | 368680.8 | 276962.7 | 378746.4 | 409594.3 | 298330.6 | 351211.4 | 409131.7 | TRUE |
| 397151   | 320063.9 | 316353.4 | 409769.3 | 469256   | 380124.7 | 357621.6 | 481808.8 | TRUE |
| 248996.9 | 317941.9 | 211561.5 | 251174.5 | 288039.8 | 217219.2 | 278514.4 | 319503.8 | TRUE |
| 179566.3 | 209559.4 | 132813.4 | 156326.1 | 162841.1 | 149956.9 | 183676.6 | 211384.2 | TRUE |
| 102048.5 | 101070   | 96959.6  | 119112.1 | 133579.5 | 84910.5  | 128052.2 | 125983   | TRUE |
| 100906.7 | 95399.6  | 95909.9  | 97185.6  | 115726.2 | 105019.8 | 96813.4  | 107379.1 | TRUE |
| 40000.8  | 58213    | 44985.2  | 49339.6  | 79600.7  | 23583.9  | 6978     | 12964.5  | TRUE |
| 31837.5  | 77192.5  | 34876.3  | 51754.4  | 83606.6  | 16369.6  | 11165.3  | 11663.9  | TRUE |
| 252269.1 | 277664.5 | 341031.2 | 292648.9 | 252942.2 | 287523.6 | 301641.6 | 293839.3 | TRUE |

|          |          |          |          |          |          |          |          |      |
|----------|----------|----------|----------|----------|----------|----------|----------|------|
| 367231.4 | 416844.2 | 327996.2 | 405549.6 | 359433.5 | 398040.2 | 450600.9 | 417113.5 | TRUE |
| 485532.3 | 596135   | 889248.8 | 518515.6 | 416096.1 | 460173.9 | 575021.3 | 451049.7 | TRUE |
| 553430.9 | 639699.6 | 513499.5 | 553675.5 | 492567.1 | 560341.1 | 643605.4 | 612004.7 | TRUE |
| 513178.8 | 611195.6 | 680070   | 518496.1 | 399025.9 | 478105.3 | 593558   | 551866.7 | TRUE |
| 486027.9 | 490997.1 | 481543.7 | 534070   | 417423.9 | 461880.4 | 518011.1 | 509027.2 | TRUE |
| 121721.8 | 129385.4 | 108114.9 | 99866.4  | 124620   | 116946.1 | 142879.2 | 123942.7 | TRUE |
| 1642547  | 1634317  | 1302691  | 1621119  | 1699726  | 1406326  | 1842917  | 1760923  | TRUE |
| 89398.9  | 136803.3 | 85262.6  | 110290.2 | 111096.2 | 50757.8  | 65707.8  | 71688.8  | TRUE |
| 2068338  | 2009355  | 2072889  | 2212348  | 1843305  | 1976514  | 1970223  | 2100147  | TRUE |
| 2018315  | 1810632  | 2167726  | 2278556  | 1899047  | 2137394  | 2157555  | 2157636  | TRUE |
| 317680.6 | 310494.4 | 263637.8 | 275076.7 | 298639.4 | 271134.7 | 333597.5 | 282390.1 | TRUE |
| 252521.5 | 245142.1 | 230760.7 | 223953.9 | 232748.5 | 205004.6 | 246517.9 | 225011.3 | TRUE |
| 66852.3  | 67459.1  | 44967.8  | 61549.8  | 51441.4  | 34619.9  | 36417.5  | 50330.6  | TRUE |
| 32792.2  | 56023.8  | 18312    | 31773.8  | 21040.2  | 20837.9  | 25637.6  | 35935.7  | TRUE |
| 41317.4  | 46504.4  | 32798.4  | 46605.9  | 34244.9  | 41172.1  | 38979.8  | 47009.3  | TRUE |
| 19195.9  | 14768.3  | 17002.6  | 9972     | 25916.5  | 11493.3  | 15793.8  | 24950    | TRUE |
| 55241    | 54259.2  | 36031.3  | 64705.2  | 52822.2  | 69638.5  | 76902.8  | 56743    | TRUE |
| 88343.6  | 91729.6  | 133005.6 | 81977.1  | 79742.8  | 136633.5 | 120269.7 | 112516.2 | TRUE |
| 43000.2  | 49568.9  | 57452.6  | 43478.3  | 38531    | 48981.6  | 47807.7  | 38145.2  | TRUE |
| 39304    | 41374.1  | 58842.3  | 38323.7  | 41716.9  | 43219.1  | 38278.3  | 34170.5  | TRUE |
| 185809.6 | 150992.3 | 194430.1 | 218199.5 | 153011.5 | 195882.7 | 208391.7 | 212784   | TRUE |
| 116002.6 | 93892.6  | 114037.7 | 119353.6 | 104037.9 | 144456.2 | 135709.3 | 140858.9 | TRUE |
| 78548.9  | 78554.8  | 49655    | 86433.7  | 68499.2  | 57294.1  | 91771.2  | 68824.7  | TRUE |
| 106966.5 | 142173.5 | 76684.2  | 89681.2  | 141214.8 | 91123.2  | 145944.5 | 142878.2 | TRUE |
| 47959.6  | 62563.4  | 66218.6  | 67675.7  | 88725.2  | 79736.1  | 69908.9  | 60248.3  | TRUE |
| 637128.7 | 573905.4 | 535564.2 | 632182.1 | 449615.1 | 544708.9 | 665559.8 | 659898.5 | TRUE |
| 379194.6 | 322055   | 283855.2 | 338481.8 | 230028.8 | 304282.6 | 326515   | 339164.8 | TRUE |
| 47186.7  | 48808.9  | 47848.6  | 54956.4  | 53400.1  | 57762.3  | 67460    | 55596    | TRUE |
| 42681.1  | 31340.6  | 25993.8  | 47082.2  | 25579.4  | 27643.9  | 38899.6  | 33453.8  | TRUE |
| 68562.7  | 48570.5  | 60725.6  | 45621.3  | 42943.3  | 58396.8  | 54783    | 44893.6  | TRUE |
| 13343.5  | 20370.7  | 22032.8  | 9798.1   | 19496.3  | 8364.7   | 9614     | 13222.2  | TRUE |
| 10593.6  | 12388.5  | 25631.5  | 8225.9   | 21660.7  | 22277.2  | 31185.8  | 22244.2  | TRUE |
| 49203.8  | 54985.9  | 46925.5  | 48871.5  | 64207.8  | 53757.7  | 63063.8  | 48885.2  | TRUE |
| 832862.4 | 727986.1 | 735966.2 | 880841.2 | 910287.4 | 784802.9 | 791349.8 | 933507.1 | TRUE |
| 374155.8 | 308533   | 337919.5 | 356846.5 | 436308.7 | 338700   | 360494.6 | 416924.4 | TRUE |
| 250090.4 | 227871.8 | 268997.1 | 256526.7 | 332616   | 282524.5 | 257868.8 | 276131.2 | TRUE |
| 74476    | 125257.8 | 68379.3  | 99831.4  | 115207.9 | 70368.8  | 88291    | 65848    | TRUE |
| 78883.9  | 105760.2 | 82441.9  | 78766.4  | 106875.8 | 74077.8  | 74015.5  | 72010.5  | TRUE |
| 115702   | 102141.9 | 72797.8  | 100244.4 | 96841.4  | 84894.2  | 101089   | 117898.9 | TRUE |
| 523817.5 | 600755.7 | 514039.1 | 516122.2 | 477858.6 | 547443.9 | 560943.2 | 559256.6 | TRUE |
| 1916959  | 1949893  | 1842313  | 2017868  | 1810544  | 2168112  | 2187873  | 2161851  | TRUE |
| 66302.2  | 82831.9  | 77992    | 86153.1  | 102228.6 | 54529.1  | 55384.6  | 46970.5  | TRUE |
| 153810.5 | 150631   | 89227.2  | 102402.7 | 105711.9 | 140617.2 | 173235.3 | 142514.4 | TRUE |
| 312316.6 | 252821   | 186970.5 | 208039.5 | 187297.7 | 232796.7 | 248451.8 | 278775.3 | TRUE |

|          |          |          |          |          |          |          |          |      |
|----------|----------|----------|----------|----------|----------|----------|----------|------|
| 141838.8 | 149307.4 | 129813.3 | 135676.8 | 112751.8 | 200625.8 | 187375.2 | 171154   | TRUE |
| 122088.1 | 136340.8 | 122779.5 | 89339.2  | 104342.6 | 131070.1 | 155940.8 | 123573.3 | TRUE |
| 135106.1 | 93976.7  | 139293.3 | 142627.6 | 130394   | 132809.9 | 107062   | 130397   | TRUE |
| 187977.9 | 170906.4 | 158866.3 | 181428.2 | 194017.9 | 169505.5 | 166452.5 | 164288.7 | TRUE |
| 1128537  | 927590.7 | 984865.1 | 1224967  | 1156265  | 1053152  | 1044810  | 1087389  | TRUE |
| 1832127  | 1542757  | 1571779  | 1842388  | 1824975  | 1697818  | 1606339  | 1790947  | TRUE |
| 585468.6 | 565819.3 | 553217   | 646414.4 | 620669.8 | 582208.1 | 638240.9 | 616518   | TRUE |
| 183810.4 | 179450.6 | 195241.6 | 223054.8 | 197486.8 | 187318.1 | 176700.4 | 214376.3 | TRUE |
| 73778.2  | 184020.5 | 154729.3 | 185271   | 250942   | 92440.3  | 93384.5  | 47982.6  | TRUE |
| 73455.3  | 70134.2  | 68216.4  | 80709.3  | 64964.1  | 73756    | 74054.6  | 77007.9  | TRUE |
| 321993.7 | 273489   | 257433.2 | 319889.4 | 286764.9 | 303270.4 | 342093.1 | 273310.9 | TRUE |
| 1386009  | 1337134  | 1300592  | 1278760  | 1263592  | 1391901  | 1332173  | 1303283  | TRUE |
|          |          |          |          |          |          |          |          |      |
| 924508.8 | 889303.2 | 888887   | 932720.2 | 941321.6 | 883941.2 | 887393.5 | 900308.6 | TRUE |
| 2522549  | 2467889  | 2406011  | 2820330  | 2951676  | 2562858  | 2669672  | 2930153  | TRUE |
| 3331346  | 3167868  | 2887219  | 3834835  | 3762574  | 3208522  | 3650514  | 3997012  | TRUE |
| 38580.6  | 32909.2  | 30612    | 45698.3  | 35902.3  | 38078.3  | 44481.5  | 49122.9  | TRUE |
| 7395.6   | 10497.1  | 6105.8   | 9475.7   | 3585.2   | 7927.3   | 7558.6   | 8912.6   | TRUE |
|          |          |          |          |          |          |          |          |      |
| 31603.1  | 31175.7  | 28617.2  | 44226.7  | 38813.5  | 23264.1  | 34150.1  | 35294.2  | TRUE |
|          |          |          |          |          |          |          |          |      |
| 222300   | 199701.8 | 263983.6 | 232269.6 | 213759.3 | 233694.6 | 256093.4 | 240258.2 | TRUE |
| 77279.2  | 193739.1 | 121480.5 | 135590.6 | 165122.3 | 53583.7  | 68985.2  | 67364.3  | TRUE |
| 28049.7  | 21711.7  | 17584.4  | 10348.5  | 22771.6  | 11746.1  | 24735    | 22484.4  | TRUE |
| 30021.2  | 25798.7  | 32375.5  | 30810.8  | 23325.4  | 45412.8  | 35202.3  | 39299.2  | TRUE |
|          |          |          |          |          |          |          |          |      |
| 1024535  | 824986.9 | 747726.9 | 839884.9 | 846518.3 | 707295.4 | 767702.1 | 762446.3 | TRUE |
| 123363.1 | 122052.6 | 109797.7 | 118256.5 | 122877.7 | 137194.2 | 145074.8 | 116064.7 | TRUE |
| 1407906  | 1506059  | 1333123  | 1409239  | 1352059  | 1440738  | 1393487  | 1481653  | TRUE |
| 1967732  | 1796827  | 1970555  | 1890962  | 1853765  | 1947610  | 1908235  | 1913580  | TRUE |
| 54978.9  | 139254.2 | 69366.4  | 140695.5 | 150931.2 | 99658.3  | 111378.9 | 66672.1  | TRUE |
| 96949    | 80914.6  | 83784.7  | 113977.6 | 102862.9 | 115804.5 | 126017.2 | 123767.3 | TRUE |
| 369741.9 | 255127.4 | 241877.3 | 359613.5 | 298598.5 | 411416.7 | 432443.7 | 464412.6 | TRUE |
| 104861.6 | 100907.7 | 72822.1  | 100820.1 | 107283.4 | 93434.6  | 121192.7 | 133749.4 | TRUE |
| 19583    | 85147.5  | 61473.2  | 79540.7  | 65537.7  | 46634.2  | 49838.5  | 15783    | TRUE |
| 172680.8 | 158085   | 174487.9 | 169289.1 | 152333   | 198473   | 187581.2 | 202579.6 | TRUE |
| 258811.3 | 232164   | 270023.6 | 245234   | 237487.3 | 359852.9 | 290834.4 | 305576.1 | TRUE |
| 155907.9 | 154419.2 | 182926.7 | 179031.9 | 134845.9 | 192838.4 | 192910.4 | 209049.8 | TRUE |
| 178330   | 168583.2 | 127208.4 | 136308.1 | 150116.1 | 120574.8 | 159996.4 | 148055.1 | TRUE |
| 336508.1 | 344573.6 | 276943.1 | 318224.3 | 288752.3 | 281992.2 | 364071.4 | 317914.7 | TRUE |
| 166067.6 | 179402.6 | 118827   | 136293.7 | 161920.1 | 146340.3 | 209492.7 | 176148.9 | TRUE |
| 65504.5  | 69904.4  | 52166.6  | 31764.1  | 57862.1  | 52972    | 60441.9  | 61460.4  | TRUE |
| 26382.6  | 60782.8  | 52300.5  | 61185.4  | 50635    | 22432.7  | 31362.6  | 28565.1  | TRUE |
| 340451.3 | 327050.3 | 342110.5 | 412274.5 | 288982.4 | 348632   | 326431.9 | 359156.1 | TRUE |
| 268852.9 | 233784.8 | 204128.4 | 245395.8 | 222904.1 | 253841.2 | 330311.4 | 269620.3 | TRUE |
|          |          |          |          |          |          |          |          |      |
| 32496.5  | 23833.8  | 7962     | 10764.8  | 7424.3   | 21286    | 16604.6  | 37806.1  | TRUE |
| 118341.2 | 139906.1 | 87452.7  | 132272.4 | 118033.7 | 89991.2  | 125835.6 | 134732   | TRUE |
| 704682.4 | 460188.1 | 595469.2 | 749032.4 | 641315.3 | 770011.1 | 620186.4 | 748968.5 | TRUE |

|          |          |          |          |          |          |          |          |      |
|----------|----------|----------|----------|----------|----------|----------|----------|------|
| 30412.1  | 27862.9  | 22884.3  | 38815.4  | 29600.5  | 17523    | 15656    | 19803.6  | TRUE |
| 47577    | 28820.1  | 42577.7  | 33814.6  | 38044.1  | 38133    | 47617.3  | 36607.4  | TRUE |
| 39021.6  | 28891.1  | 23472.2  | 27573    | 43539.6  | 27928    | 57345.9  | 31915.3  | TRUE |
| 189201.6 | 183010.1 | 140984.8 | 165542.3 | 223307.3 | 174149.3 | 241968.8 | 210189.3 | TRUE |
| 121029.6 | 123930.4 | 50501.4  | 57227.2  | 66023.3  | 49037.6  | 66550.8  | 84600.1  | TRUE |
| 166947.8 | 185625.4 | 127655   | 166346.4 | 162948.9 | 144856.7 | 196490.3 | 147355.8 | TRUE |
| 247300.1 | 224377.6 | 184264.8 | 200603.2 | 306842.4 | 185282   | 243585.6 | 317975.2 | TRUE |
| 829625   | 819084.7 | 678733   | 890984.2 | 853308   | 669185.7 | 872037.4 | 925441.7 | TRUE |
| 155485.9 | 161581.6 | 135610.4 | 177552.5 | 180131.1 | 147089.5 | 194128.8 | 181709.8 | TRUE |
| 173492.3 | 161001.6 | 152850.1 | 155047.7 | 173369.2 | 142531.7 | 195785.5 | 184324.1 | TRUE |
| 33624.5  | 58842.2  | 55290.2  | 57373.7  | 94364.6  | 21263.2  | 8929.9   | 14398.8  | TRUE |
| 17119.3  | 30076.5  | 28164    | 37577.5  | 36711.6  | 14099    | 8861.4   | 13964.2  | TRUE |
| 22634.2  | 19971.5  | 17588.2  | 26620.6  | 20622.4  | 18330.1  | 25036.4  | 29688.2  | TRUE |
| 47158.5  | 105405   | 61063.3  | 92340.6  | 72688.1  | 32263.2  | 34155.2  | 26349.5  | TRUE |
| 21786.3  | 7147.3   | 30094.2  | 11537.5  | 8827     | 18341.9  | 28504.8  | 28025.7  | TRUE |
| 16655    | 21088.1  | 20818.9  | 11160.8  | 17685    | 25541.8  | 20096.9  | 12589.7  | TRUE |
| 431401.2 | 437835.9 | 320197.2 | 474623.2 | 488679.4 | 333412.5 | 504618.9 | 506777.8 | TRUE |
| 889247.9 | 891922.5 | 820655.4 | 897285.9 | 564490   | 868187.4 | 923758   | 849788.8 | TRUE |
| 298455.2 | 305712.4 | 346010.2 | 373580.7 | 250940.6 | 379231.4 | 343733.6 | 345615.3 | TRUE |
| 53424.2  | 53622    | 35518.2  | 54251.1  | 36003.4  | 66218.8  | 61027    | 81751.4  | TRUE |
| 76456.9  | 45011.2  | 62409.4  | 73152.8  | 53867.3  | 74333.5  | 70828.4  | 73883.4  | TRUE |
| 180830.5 | 128655.6 | 172327.2 | 179118.6 | 154010.9 | 207997.8 | 210757.9 | 232332   | TRUE |
| 55515.9  | 38565.5  | 42802.6  | 47985.5  | 41799.1  | 51004.4  | 32077.8  | 44173.8  | TRUE |
| 17162.8  | 38838.8  | 43914.6  | 31741.6  | 46306.1  | 26293.7  | 34684.1  | 39333.3  | TRUE |
| 318208.2 | 291350.6 | 254970.4 | 317509.1 | 271798.2 | 313792.6 | 317838   | 322269.6 | TRUE |
| 1675332  | 1582053  | 1489538  | 1659406  | 1524048  | 1787397  | 1617535  | 1734119  | TRUE |
| 190668.4 | 203752.3 | 139045.2 | 193246.9 | 206251.3 | 152211.3 | 176313.2 | 211871.3 | TRUE |
| 45534.2  | 62554.3  | 31010.9  | 44016.4  | 56494.7  | 27877.4  | 53972.2  | 32847.1  | TRUE |
| 105262.6 | 77833.9  | 95126.2  | 165198.7 | 122516.8 | 97900.4  | 137991   | 114851.7 | TRUE |
| 104523   | 87035.1  | 94580.5  | 108295   | 113494.5 | 91464.8  | 104034.2 | 110444.8 | TRUE |
| 123769.4 | 95961.8  | 114131.9 | 125747.1 | 141913.2 | 120114.8 | 123261.3 | 161482.2 | TRUE |
| 131503.8 | 114476   | 84606.8  | 104696.2 | 148200.1 | 89468    | 129531.8 | 124057.1 | TRUE |
| 363548   | 323924.3 | 213713.8 | 227030.6 | 273982.5 | 236725.4 | 297467.1 | 312570   | TRUE |
| 145984.1 | 140976.5 | 164016.7 | 244577.2 | 356367.7 | 181209.4 | 260297   | 272095.3 | TRUE |
| 98292.4  | 88684.9  | 88626.3  | 142440.7 | 123385.6 | 102625.4 | 115464.3 | 103188.3 | TRUE |
| 72292.1  | 60225.9  | 79120.5  | 94123.7  | 70942.2  | 78350.8  | 89755.6  | 84897.7  | TRUE |
| 92124.8  | 84374.8  | 100313.8 | 93011.1  | 72378.1  | 106818.9 | 91997    | 94274.4  | TRUE |
| 62355.1  | 66812.7  | 50831.3  | 69412.8  | 61497    | 49117.4  | 67086.8  | 57868.4  | TRUE |
| 68672.1  | 70836.3  | 66040.5  | 63917.5  | 65954.6  | 90315.1  | 90312.6  | 72209.7  | TRUE |
| 494583.4 | 366602.5 | 476423.4 | 566654   | 438385.4 | 529994.7 | 427944.8 | 605526.9 | TRUE |
| 412915.4 | 292820.1 | 396899   | 446995.8 | 365569.2 | 450770.5 | 360517.5 | 351094.3 | TRUE |
| 1079666  | 790908.1 | 770155.1 | 768068.5 | 1106484  | 1283317  | 886083.7 | 1130707  | TRUE |
| 44538    | 28703.8  | 32662.3  | 39946.9  | 35211.9  | 39519    | 44188.5  | 40028.5  | TRUE |
| 31298.8  | 24537.8  | 22047.6  | 39826.6  | 36300.1  | 38522.6  | 28509.6  | 29777.5  | TRUE |
| 31512.1  | 28584.4  | 28320.5  | 43819.5  | 33060.9  | 38402.7  | 43023.9  | 36751.3  | TRUE |
| 21612.5  | 12082.4  | 20508.3  | 11687.5  | 30746.2  | 23934.7  | 27125.6  | 15381.9  | TRUE |
| 48951.2  | 49487.7  | 41046    | 66365.3  | 52208.9  | 42335.6  | 54089.6  | 56899.2  | TRUE |



|          |          |          |          |          |          |          |          |      |
|----------|----------|----------|----------|----------|----------|----------|----------|------|
| 35816.3  | 27351    | 43484.4  | 39211.3  | 31494.5  | 56402.7  | 44125.9  | 25142.6  | TRUE |
| 330824.5 | 215773.2 | 209271.3 | 309307.7 | 298966   | 349272.5 | 277544   | 382588.5 | TRUE |
| 55680.9  | 37743.8  | 21905.1  | 36738.2  | 38516.4  | 49066.9  | 34441    | 61354.7  | TRUE |
| 109087.8 | 84998.3  | 91398    | 73447.2  | 88348.2  | 81514.1  | 97537.6  | 110305.8 | TRUE |
| 42118.1  | 42430.6  | 39054.3  | 33099.6  | 41856.7  | 46374.5  | 34687.3  | 53694.8  | TRUE |
| 175335.2 | 152316.6 | 136804   | 161265.8 | 190295.4 | 245686.6 | 137517.6 | 205855.3 | TRUE |
| 75493.7  | 69281.6  | 45817.2  | 66977.6  | 54042.7  | 61309.7  | 74851.6  | 56443.2  | TRUE |
| 133395   | 127393.3 | 132348   | 124060.8 | 156469.6 | 114941.4 | 129891.1 | 127864.3 | TRUE |
| 46813.1  | 46365.1  | 65527.6  | 34029.8  | 44160.5  | 41383    | 31160.3  | 34578.1  | TRUE |
| 72043    | 94566.4  | 82855.1  | 80299.4  | 89222.1  | 58308.1  | 89558.5  | 57892.7  | TRUE |
| 100627   | 65021.4  | 82410.5  | 76288    | 68567.1  | 53586.5  | 67485    | 57741    | TRUE |
| 389199.9 | 233270.7 | 374676.6 | 478635.4 | 356625.7 | 392058.7 | 282217.8 | 376240.2 | TRUE |
| 76972.7  | 67109.1  | 64805    | 64453.6  | 72665.6  | 103226.4 | 71239.6  | 70088.2  | TRUE |
| 48686.9  | 56288.2  | 62708.3  | 64830.8  | 62283.9  | 51772.4  | 47300.5  | 74157.7  | TRUE |
| 108088.6 | 102393.7 | 119355.2 | 139611.2 | 148968.7 | 123655.6 | 112867.3 | 150160   | TRUE |
| 97499.2  | 81851.6  | 115576.3 | 115567.8 | 88935.5  | 102935.7 | 81712.1  | 98457.7  | TRUE |
| 38345.9  | 12291.7  | 30388.6  | 40518.4  | 36011.3  | 38229.1  | 35887    | 29890.4  | TRUE |
| 103887.8 | 89568.7  | 65882.3  | 87561.6  | 65912.9  | 97677.6  | 100694.2 | 84770.1  | TRUE |
| 227364.2 | 182411.3 | 207988.2 | 209287.3 | 235197.6 | 280203.6 | 254521.2 | 279218.9 | TRUE |
| 93673.4  | 80919.6  | 73124.6  | 80528.5  | 82770.8  | 87779.7  | 96601.2  | 85612    | TRUE |
| 29928.7  | 20113    | 13706.8  | 28454    | 22006.6  | 22244.6  | 8173.1   | 34064    | TRUE |
| 28944.5  | 24125    | 9168.3   | 21886.2  | 29614.2  | 32640.1  | 30773.8  | 28643    | TRUE |
| 193490.6 | 178909.4 | 216935.2 | 302510.3 | 214852.5 | 226129.4 | 175725.1 | 168997.7 | TRUE |
| 158394.8 | 116858.1 | 189813.7 | 141562.7 | 138256   | 157199.9 | 115975.1 | 140926.7 | TRUE |
| 518432.5 | 423633.9 | 673158.1 | 589678.1 | 503266.3 | 623736.2 | 395457.8 | 507111.5 | TRUE |
| 809792   | 850207.8 | 644731.4 | 692126.3 | 911351.5 | 981815.1 | 861660.2 | 907673.9 | TRUE |
| 3897303  | 2979009  | 3151134  | 3813429  | 3765305  | 3372290  | 3274548  | 3703418  | TRUE |
| 2384570  | 1994080  | 1864587  | 2276177  | 2286252  | 2033410  | 2047316  | 2399647  | TRUE |
| 991554.5 | 924324.2 | 1157900  | 1445476  | 1260717  | 1199684  | 1188477  | 1190258  | TRUE |
| 418954.5 | 406220.1 | 462465.9 | 503149.3 | 507720.2 | 542522.7 | 514410.3 | 504134.7 | TRUE |
| 3812544  | 3580409  | 3446377  | 3473700  | 3543371  | 4031264  | 3827198  | 3773810  | TRUE |
| 3955403  | 3627380  | 3406306  | 3552512  | 3729714  | 4040371  | 4077837  | 3776246  | TRUE |
| 219649.7 | 297156.5 | 192276.8 | 163178.7 | 195512.7 | 163659.2 | 344129.2 | 185674.9 | TRUE |
| 36741.5  | 26720.1  | 31520.4  | 24374.8  | 39388.5  | 35052.9  | 28464.2  | 37918.9  | TRUE |
| 26240.7  | 11581.7  | 8753.4   | 12269.2  | 31405.1  | 33773.6  | 14308.8  | 32912    | TRUE |
| 25214.1  | 9545.7   | 19284.1  | 10321.7  | 22506.6  | 22470    | 17394.1  | 37392.8  | TRUE |
| 496876.2 | 503519.9 | 338327.9 | 420490.3 | 378628.4 | 355340.8 | 437932.7 | 380103   | TRUE |
| 906253.5 | 862906.1 | 888608.8 | 944327.3 | 743293.8 | 832495.1 | 782817.5 | 793170.9 | TRUE |
| 6130082  | 5579599  | 4986235  | 5178941  | 5882685  | 6636500  | 5742100  | 6771126  | TRUE |
| 28401.1  | 6955.4   | 8837.4   | 16797.1  | 9662.9   | 31281.1  | 11262.8  | 18583    | TRUE |
| 234134.3 | 178105.1 | 178923.6 | 188810.8 | 235912.4 | 244573.3 | 235227.2 | 282235.2 | TRUE |

|          |          |          |          |          |          |          |          |      |
|----------|----------|----------|----------|----------|----------|----------|----------|------|
| 69829.8  | 52430.6  | 57070.4  | 72169.8  | 68957.4  | 80373.1  | 64899    | 81515.8  | TRUE |
| 2620048  | 2374735  | 2032129  | 2369695  | 2224843  | 2429537  | 2475132  | 2405783  | TRUE |
| 201517.7 | 183206.5 | 172036.2 | 184496.3 | 179394.9 | 228325   | 205661.1 | 213492.9 | TRUE |
| 114260.9 | 335578.6 | 175717.3 | 332923.5 | 361179   | 52492.3  | 56067.5  | 69793.6  | TRUE |
| 13140655 | 11499461 | 10998626 | 12285273 | 11584240 | 12405951 | 12277331 | 13110401 | TRUE |
| 454140.2 | 420318.1 | 423231.4 | 431469.7 | 438056.7 | 453495.2 | 464114.9 | 459575.4 | TRUE |
| 1332474  | 1138228  | 1209768  | 1281427  | 1177461  | 1306357  | 1159336  | 1283335  | TRUE |
| 30184.9  | 30626.1  | 30984.6  | 37081.2  | 32566.2  | 39559.6  | 21459.1  | 34560.9  | TRUE |
| 59007    | 50969.3  | 50208.3  | 68566.8  | 54043.2  | 70063.3  | 58412.8  | 74063.2  | TRUE |
| 25953.4  | 27349.9  | 21472.6  | 34561    | 24355.3  | 22207.9  | 18814.1  | 47896    | TRUE |
| 40905.5  | 46376.3  | 40644.9  | 52110.6  | 54243.9  | 48377.5  | 36737.5  | 55173.2  | TRUE |
| 115053.8 | 89169.9  | 86591.5  | 114833.9 | 148537.9 | 137226.2 | 145839.5 | 173976.3 | TRUE |
| 33190.8  | 35018.9  | 35424.7  | 41024.6  | 31894.7  | 22490.7  | 25273.6  | 42303.3  | TRUE |
| 142920.7 | 197130   | 203426.2 | 162757.6 | 203223.5 | 135973.9 | 134725.5 | 138036.1 | TRUE |
| 40344.1  | 38766.4  | 43997.2  | 42920.7  | 39999.6  | 64411.4  | 50193    | 49201.6  | TRUE |
| 99204.7  | 114437.1 | 89032    | 104621   | 106015.7 | 101993.2 | 99150.8  | 123593.1 | TRUE |
| 51537.5  | 44688.7  | 37153.6  | 42054.7  | 55333.3  | 50033.5  | 49965    | 68995.7  | TRUE |
| 89543.3  | 75079.9  | 73216.4  | 96020.6  | 74905.6  | 78874.3  | 88730.4  | 104415.3 | TRUE |
| 57859.5  | 52964.2  | 45218.1  | 84143.2  | 59473.6  | 77140.1  | 74520.1  | 85011.2  | TRUE |
| 54447.7  | 41089    | 39688.4  | 52524.2  | 51219.4  | 72843.1  | 58918    | 58049.2  | TRUE |
| 66742.9  | 67256.2  | 53093    | 54111.6  | 61387.6  | 81029.8  | 59858.5  | 65888.4  | TRUE |
| 85142.7  | 107444.1 | 80435.3  | 88862.4  | 77329.9  | 90298.3  | 84081.9  | 100166.1 | TRUE |
| 19905.2  | 12462.7  | 23600.8  | 24344.4  | 43371.8  | 33988.2  | 21883.5  | 29589.2  | TRUE |
| 69922.9  | 53152.1  | 40114.8  | 67611.2  | 85627.2  | 51992    | 59217.8  | 104105.6 | TRUE |
| 47756.5  | 43392.8  | 41493.2  | 57468.2  | 64474.4  | 42298.4  | 60247.4  | 65009.1  | TRUE |
| 240111.2 | 252665.3 | 180949.7 | 285669.4 | 409015.2 | 169789.5 | 273547.3 | 429021   | TRUE |
| 5576.8   | 28532.3  | 11398    | 8789.1   | 11907.8  | 9110     | 13115.6  | 13488.9  | TRUE |
| 183378.7 | 152353.4 | 158233.4 | 158967.3 | 179190.7 | 191833.1 | 171098   | 197001.9 | TRUE |
| 78422.2  | 62265    | 59342.1  | 78172.5  | 93159.9  | 67682.6  | 62412.8  | 73992.1  | TRUE |
| 65796.7  | 78691.9  | 59898.6  | 115612.9 | 84812.7  | 56540.5  | 100711.9 | 96512.2  | TRUE |
| 21938.1  | 23637.4  | 33050.7  | 43244.8  | 37860.5  | 20048.3  | 22765.1  | 24084.9  | TRUE |
| 44146.7  | 41132.5  | 27869.6  | 33641.7  | 35996.9  | 47460.9  | 38367.5  | 38168.1  | TRUE |
| 8646.9   | 7760.8   | 11893.4  | 13579.6  | 7477.3   | 12200.7  | 18131.1  | 8789.8   | TRUE |
| 2243249  | 2101814  | 1895417  | 1940069  | 2713242  | 2066177  | 2112951  | 2037196  | TRUE |
| 51663.5  | 52985.1  | 60808.8  | 44382.7  | 52272.9  | 51956.4  | 42132.7  | 44792.4  | TRUE |
| 73884    | 40275.6  | 71000.7  | 90582.8  | 71395.3  | 89817.9  | 62768.9  | 70684.1  | TRUE |
| 95904.5  | 78316.9  | 110631.1 | 102164.8 | 106291.4 | 107073   | 79193.2  | 101965.2 | TRUE |
| 34523.4  | 30775.2  | 42053    | 41189.2  | 41631.3  | 39212.3  | 30799.3  | 39874.3  | TRUE |
| 79222.8  | 91725.5  | 102040.8 | 130240.5 | 109185   | 79040.2  | 97224    | 99302.5  | TRUE |
| 2362252  | 2478094  | 2227547  | 2281509  | 2687338  | 2861123  | 2550895  | 2659257  | TRUE |

|          |          |          |          |          |          |          |          |      |
|----------|----------|----------|----------|----------|----------|----------|----------|------|
| 73060.5  | 67712.6  | 77157.5  | 103932.9 | 104871.2 | 108855.2 | 70307    | 83506.3  | TRUE |
| 60044.5  | 55522.3  | 45419.5  | 42644.4  | 45377    | 42839.1  | 41058.9  | 38946.4  | TRUE |
| 176463.6 | 140951.3 | 215142.1 | 209892   | 229550.8 | 245723.6 | 183974.6 | 203214.3 | TRUE |
| 80979.9  | 64081.9  | 96401.7  | 101609.9 | 112412.8 | 122165.1 | 63473.3  | 107620   | TRUE |
| 57434    | 37101.7  | 65388.2  | 71669.6  | 76132.9  | 70151.3  | 52914.2  | 60979.8  | TRUE |
| 184263.5 | 125767.3 | 182044.9 | 172769.4 | 118791   | 229061.8 | 182546.2 | 156137   | TRUE |
| 1359618  | 1357472  | 1484463  | 1277181  | 889947.7 | 1472334  | 1414653  | 957293.7 | TRUE |
| 36281.9  | 31271.8  | 29038.2  | 38752.8  | 11022.4  | 30291.2  | 36636.7  | 24749.6  | TRUE |
| 198404.7 | 188107.4 | 167207.5 | 139595.8 | 122072   | 186015.8 | 168175   | 130028.7 | TRUE |
| 1099617  | 302823.7 | 401627.3 | 370917.1 | 311143.4 | 394968.4 | 425835.3 | 335907.5 | TRUE |
| 262435.8 | 214395.8 | 343275.1 | 332690.5 | 249483.3 | 361528.5 | 326312.9 | 243592.4 | TRUE |
| 54710.8  | 38333.3  | 54089.1  | 32154.8  | 32505    | 54479.3  | 50900.6  | 46127.5  | TRUE |
| 145168.8 | 150221.6 | 156181.4 | 111061.8 | 92745.7  | 141728.3 | 149353.8 | 110588.1 | TRUE |
| 208885.2 | 210524.3 | 221772.5 | 206547   | 165427.8 | 223611.9 | 196355.6 | 179063.8 | TRUE |
| 438612.1 | 410273.3 | 445745.8 | 439136.1 | 448583.4 | 464193.2 | 448074   | 436137.9 | TRUE |
| 46755.5  | 56025.8  | 38098.5  | 49590.5  | 50494.4  | 53764.3  | 52926.4  | 39726.7  | TRUE |
| 611984.3 | 580533.5 | 702206.4 | 615772.6 | 504602.3 | 703518.4 | 706429.4 | 501586   | TRUE |
| 143149.4 | 123282.7 | 160464.1 | 170964.3 | 166580.3 | 166272.8 | 159479.6 | 138299.1 | TRUE |
| 151122.3 | 119315.7 | 130692.9 | 147107.8 | 145165.1 | 152300.4 | 165846   | 135265   | TRUE |
| 45728.6  | 69624.7  | 54363.9  | 49696.2  | 41713.6  | 34966.1  | 48843.6  | 41638.1  | TRUE |
| 247426.7 | 199507.9 | 299488.5 | 304754.1 | 304841.5 | 280176.5 | 214824.7 | 280957.6 | TRUE |
| 99169.7  | 82544.5  | 101961.3 | 101938.3 | 114302.4 | 92972.1  | 79971.7  | 110977.7 | TRUE |
| 69183.8  | 74733.5  | 64447.6  | 69603.2  | 61916.8  | 66426.5  | 86698.7  | 82407.6  | TRUE |
| 92862.5  | 112780.5 | 83815.3  | 126749.7 | 92403.6  | 119647.5 | 135816   | 85137.3  | TRUE |
| 160131.6 | 160512.5 | 151642   | 137096.7 | 95723.8  | 140650.4 | 162571.7 | 106610.8 | TRUE |
| 599856.8 | 568691.1 | 507212.1 | 461710.8 | 361941.1 | 514405.2 | 470183.4 | 381220.6 | TRUE |
| 1139976  | 1119383  | 1413205  | 1461476  | 993508.7 | 1512629  | 1426484  | 1056439  | TRUE |
| 565535.3 | 578263.9 | 712664.8 | 775530.9 | 561216.9 | 732078   | 795990.4 | 536630.1 | TRUE |
| 339180.3 | 283192.9 | 471721.5 | 454310.4 | 347153.3 | 422367.6 | 341029.9 | 419409.7 | TRUE |
| 204898.2 | 206045.3 | 201704.1 | 289445.2 | 195195.5 | 222417.1 | 212595.6 | 209708   | TRUE |
| 227589.3 | 237102.1 | 232087.2 | 189208.1 | 186904.6 | 244991.1 | 236512.5 | 187663.6 | TRUE |
| 195329.5 | 218226.8 | 206997.3 | 220016.2 | 264223.1 | 164155   | 191655.3 | 182951.8 | TRUE |
| 89484.1  | 95186.9  | 68882    | 98218.9  | 80290.3  | 136696.6 | 124720.8 | 142996.9 | TRUE |
| 297662.4 | 266354.9 | 301566.6 | 229018   | 250997.6 | 303615.2 | 239880.6 | 244412.5 | TRUE |
| 88938.1  | 74437.3  | 102281   | 55988.5  | 75076.9  | 83317.8  | 80884    | 85717.7  | TRUE |
| 266817.9 | 197859.2 | 257854.1 | 320566.6 | 299138.9 | 192737.4 | 232133.3 | 249066.5 | TRUE |
| 90825.2  | 98196.9  | 75572.3  | 99433.1  | 82013.1  | 94450.9  | 105221   | 57664.9  | TRUE |
| 61755.6  | 90194.3  | 67506    | 79690.3  | 64164.9  | 63799.1  | 55578    | 41363.4  | TRUE |
| 23636.1  | 25824.4  | 8567.8   | 16117.3  | 28469.5  | 13034.8  | 12393.9  | 16746    | TRUE |
| 1359618  | 1357472  | 1484463  | 1277181  | 889947.7 | 1472334  | 1414653  | 957293.7 | TRUE |
| 36281.9  | 31271.8  | 29038.2  | 38752.8  | 11022.4  | 30291.2  | 36636.7  | 24749.6  | TRUE |
| 198404.7 | 188107.4 | 167207.5 | 139595.8 | 122072   | 186015.8 | 168175   | 130028.7 | TRUE |
| 1099617  | 302823.7 | 401627.3 | 370917.1 | 311143.4 | 394968.4 | 425835.3 | 335907.5 | TRUE |

|          |          |          |          |          |          |          |          |      |
|----------|----------|----------|----------|----------|----------|----------|----------|------|
| 262435.8 | 214395.8 | 343275.1 | 332690.5 | 249483.3 | 361528.5 | 326312.9 | 243592.4 | TRUE |
| 54710.8  | 38333.3  | 54089.1  | 32154.8  | 32505    | 54479.3  | 50900.6  | 46127.5  | TRUE |
| 145168.8 | 150221.6 | 156181.4 | 111061.8 | 92745.7  | 141728.3 | 149353.8 | 110588.1 | TRUE |
| 208885.2 | 210524.3 | 221772.5 | 206547   | 165427.8 | 223611.9 | 196355.6 | 179063.8 | TRUE |
| 438612.1 | 410273.3 | 445745.8 | 439136.1 | 448583.4 | 464193.2 | 448074   | 436137.9 | TRUE |
| 46755.5  | 56025.8  | 38098.5  | 49590.5  | 50494.4  | 53764.3  | 52926.4  | 39726.7  | TRUE |
| 611984.3 | 580533.5 | 702206.4 | 615772.6 | 504602.3 | 703518.4 | 706429.4 | 501586   | TRUE |
| 143149.4 | 123282.7 | 160464.1 | 170964.3 | 166580.3 | 166272.8 | 159479.6 | 138299.1 | TRUE |
| 151122.3 | 119315.7 | 130692.9 | 147107.8 | 145165.1 | 152300.4 | 165846   | 135265   | TRUE |
| 45728.6  | 69624.7  | 54363.9  | 49696.2  | 41713.6  | 34966.1  | 48843.6  | 41638.1  | TRUE |
| 247426.7 | 199507.9 | 299488.5 | 304754.1 | 304841.5 | 280176.5 | 214824.7 | 280957.6 | TRUE |
| 99169.7  | 82544.5  | 101961.3 | 101938.3 | 114302.4 | 92972.1  | 79971.7  | 110977.7 | TRUE |
| 534883.1 | 422078.6 | 511924.7 | 538447.6 | 601100.4 | 576297.7 | 477276.9 | 569628.6 | TRUE |
| 69183.8  | 74733.5  | 64447.6  | 69603.2  | 61916.8  | 66426.5  | 86698.7  | 82407.6  | TRUE |
| 92862.5  | 112780.5 | 83815.3  | 126749.7 | 92403.6  | 119647.5 | 135816   | 85137.3  | TRUE |
| 160131.6 | 160512.5 | 151642   | 137096.7 | 95723.8  | 140650.4 | 162571.7 | 106610.8 | TRUE |
| 599856.8 | 568691.1 | 507212.1 | 461710.8 | 361941.1 | 514405.2 | 470183.4 | 381220.6 | TRUE |
| 1139976  | 1119383  | 1413205  | 1461476  | 993508.7 | 1512629  | 1426484  | 1056439  | TRUE |
| 565535.3 | 578263.9 | 712664.8 | 775530.9 | 561216.9 | 732078   | 795990.4 | 536630.1 | TRUE |
| 339180.3 | 283192.9 | 471721.5 | 454310.4 | 347153.3 | 422367.6 | 341029.9 | 419409.7 | TRUE |
| 204898.2 | 206045.3 | 201704.1 | 289445.2 | 195195.5 | 222417.1 | 212595.6 | 209708   | TRUE |
| 227589.3 | 237102.1 | 232087.2 | 189208.1 | 186904.6 | 244991.1 | 236512.5 | 187663.6 | TRUE |
| 195329.5 | 218226.8 | 206997.3 | 220016.2 | 264223.1 | 164155   | 191655.3 | 182951.8 | TRUE |
| 89484.1  | 95186.9  | 68882    | 98218.9  | 80290.3  | 136696.6 | 124720.8 | 142996.9 | TRUE |
| 297662.4 | 266354.9 | 301566.6 | 229018   | 250997.6 | 303615.2 | 239880.6 | 244412.5 | TRUE |
| 88938.1  | 74437.3  | 102281   | 55988.5  | 75076.9  | 83317.8  | 80884    | 85717.7  | TRUE |
| 266817.9 | 197859.2 | 257854.1 | 320566.6 | 299138.9 | 192737.4 | 232133.3 | 249066.5 | TRUE |
| 90825.2  | 98196.9  | 75572.3  | 99433.1  | 82013.1  | 94450.9  | 105221   | 57664.9  | TRUE |
| 61755.6  | 90194.3  | 67506    | 79690.3  | 64164.9  | 63799.1  | 55578    | 41363.4  | TRUE |
| 23636.1  | 25824.4  | 8567.8   | 16117.3  | 28469.5  | 13034.8  | 12393.9  | 16746    | TRUE |
| 26807.1  | 20003.8  | 11484    | 16037.1  | 23651.5  | 24863.9  | 10184.8  | 27621.1  | TRUE |
| 2580456  | 2269983  | 2795667  | 3062100  | 2119286  | 2987371  | 2899203  | 2319871  | TRUE |
| 74840.3  | 97684.6  | 49168.7  | 99728.2  | 118227.3 | 52462.5  | 126891.1 | 117829.6 | TRUE |
| 365259.7 | 708828.6 | 161143.2 | 699552.2 | 761637.5 | 162021.2 | 725536.6 | 757642.8 | TRUE |
| 417175.4 | 781302   | 202291.1 | 705707.2 | 868231.2 | 205214.6 | 823592.3 | 839035.5 | TRUE |
| 535886.5 | 472097   | 569505.4 | 549666.5 | 499071.2 | 528531.6 | 477971.9 | 615375.5 | TRUE |
| 988218.2 | 876013.5 | 1157341  | 993831.1 | 721935.5 | 1197678  | 875199   | 722217.6 | TRUE |
| 224563.4 | 194494.8 | 249465.7 | 178461.1 | 159590.4 | 245189   | 203065.1 | 198129.3 | TRUE |
| 480707.4 | 282388.7 | 426895.1 | 449878.7 | 547873.4 | 403153.6 | 320226.7 | 388552.9 | TRUE |
| 144739.5 | 90105    | 120298   | 122006.9 | 166870.6 | 128696.2 | 89734.6  | 151270.9 | TRUE |
| 29278.7  | 25447.6  | 45850.2  | 20694.3  | 42193.4  | 19361.7  | 31046.6  | 24821.5  | TRUE |
| 63697.7  | 38469.5  | 38072.1  | 60869.7  | 43945.9  | 70999.8  | 63919.6  | 74214.1  | TRUE |
| 361718   | 286681.2 | 342530   | 279270.5 | 208852.2 | 527918.5 | 390218.1 | 299887.1 | TRUE |
| 139175.1 | 82324.8  | 120608.4 | 131086.1 | 109839.5 | 127935.1 | 121348.2 | 155278.5 | TRUE |
| 627901.4 | 390734.1 | 616695.9 | 644070.7 | 909353.3 | 587121.3 | 534792.8 | 663353.3 | TRUE |
| 153443.3 | 147103.5 | 175476.4 | 139747.5 | 145866.1 | 158169.8 | 139446.8 | 151397.7 | TRUE |
| 112443.9 | 101880.8 | 94663.6  | 74930.3  | 82867.4  | 87118.3  | 120212.7 | 99674.7  | TRUE |

|          |          |          |          |          |          |          |          |      |
|----------|----------|----------|----------|----------|----------|----------|----------|------|
| 61572.8  | 58469.6  | 72289.1  | 47029.2  | 47496.6  | 82603.3  | 81978.1  | 64022.3  | TRUE |
| 63459.2  | 61691.7  | 60346.8  | 63322.7  | 66529.6  | 68082.7  | 54588.7  | 67315.9  | TRUE |
| 101903.7 | 98684.3  | 80778.8  | 91905.5  | 96483.4  | 73538.9  | 98317.3  | 75551.2  | TRUE |
| 105849.1 | 100572.6 | 87912.8  | 125046.5 | 101514.2 | 105914   | 94537.9  | 111044.6 | TRUE |
|          |          |          |          |          |          |          |          |      |
| 69349.1  | 45515.6  | 88718.9  | 69031.8  | 82364.3  | 116723.6 | 99162.5  | 75371.4  | TRUE |
| 48475.5  | 38338.3  | 50053.6  | 53192.9  | 43963.3  | 46709.5  | 54921.6  | 40704.3  | TRUE |
| 21319.8  | 28926    | 32569.8  | 10080.4  | 30207.4  | 18739.5  | 12314.7  | 6060.6   | TRUE |
| 55416.5  | 63320.8  | 46644.9  | 67103.9  | 55332.8  | 59927.5  | 72934.4  | 70383    | TRUE |
|          |          |          |          |          |          |          |          |      |
| 566450.4 | 719799.4 | 453340.8 | 533409.4 | 587224.8 | 462487.1 | 727128   | 631956.2 | TRUE |
| 72311.1  | 74388.4  | 57105.6  | 84471.3  | 76755.9  | 94245.5  | 94378.8  | 99334.3  | TRUE |
| 43144.6  | 42990.3  | 38326.9  | 39030.6  | 43490.1  | 36636    | 47429.4  | 55622.7  | TRUE |
|          |          |          |          |          |          |          |          |      |
| 15547    | 20753.9  | 9594.4   | 11400.4  | 5524.9   | 7529.7   | 10731.8  | 6763.2   | TRUE |
|          |          |          |          |          |          |          |          |      |
| 7479.4   | 9120     | 10023.8  | 24138.9  | 15429.7  | 10592.1  | 11755.8  | 10856.3  | TRUE |
|          |          |          |          |          |          |          |          |      |
| 154012.8 | 189537.2 | 136858.4 | 142188.3 | 200491.4 | 136442.5 | 208836   | 191550.2 | TRUE |
| 190722.1 | 213483   | 243587.9 | 258088.1 | 172886.9 | 202469.4 | 227744.5 | 209143.6 | TRUE |
| 242600   | 269832.8 | 256949.4 | 250069   | 225773.3 | 232668.8 | 274835.2 | 223975.1 | TRUE |
| 94819.4  | 139783.7 | 63075.5  | 88894.9  | 115112.8 | 50287    | 138294.9 | 99391.1  | TRUE |
| 110149.2 | 76973.6  | 40552.7  | 79824.2  | 111880.4 | 66350    | 151697.1 | 118946.8 | TRUE |
| 72201.7  | 74260.7  | 78744.8  | 86079.7  | 53136.3  | 81987.2  | 69535.2  | 92004    | TRUE |
| 371887.3 | 294396.5 | 371065.7 | 435943   | 289393.5 | 692993.2 | 425985.2 | 432981.3 | TRUE |
| 45571.2  | 36655.5  | 49556    | 53716.8  | 43029.7  | 16994.5  | 33284.1  | 40460.1  | TRUE |
|          |          |          |          |          |          |          |          |      |
| 49502    | 43374.4  | 39311.4  | 55815    | 58928.8  | 48591.6  | 64445.3  | 60528.1  | TRUE |
| 70274.8  | 93813.6  | 108646.9 | 71139.5  | 84605.6  | 57916.8  | 98365.3  | 83119.5  | TRUE |
| 362485.6 | 392121.8 | 440337.4 | 452501.7 | 347000.1 | 325344.1 | 400263.9 | 335966.6 | TRUE |
| 195612.4 | 231440.1 | 265490.7 | 271446.7 | 150169.1 | 192183.6 | 198623.4 | 167922.1 | TRUE |
| 72834.1  | 77310.7  | 79000.1  | 80221.4  | 53816.9  | 121601.5 | 112989.4 | 81083.4  | TRUE |
| 64080.7  | 64875    | 88541.3  | 59230.3  | 43179.1  | 76770.9  | 74015.2  | 51930.7  | TRUE |
| 370003.6 | 443183.4 | 266962.2 | 328300.5 | 405287.3 | 309759.5 | 437016.2 | 406878.8 | TRUE |
| 299025.4 | 333960.6 | 337530.2 | 341462.8 | 216625.6 | 227717.9 | 318371.1 | 232842   | TRUE |
| 501526.9 | 538823.2 | 555367.5 | 462420.1 | 419074.9 | 477019.4 | 490893.8 | 460455.4 | TRUE |
| 1217623  | 1204897  | 1632210  | 1956555  | 927311.1 | 1275541  | 1505614  | 1223027  | TRUE |
| 46731.3  | 61747.2  | 36072.9  | 46851    | 59949.4  | 36323.4  | 64763.9  | 56706.9  | TRUE |
| 29118.4  | 20333.3  | 10092.9  | 30258.9  | 28988.8  | 39766.4  | 16110    | 31547.5  | TRUE |

|          |          |          |          |          |          |          |          |      |
|----------|----------|----------|----------|----------|----------|----------|----------|------|
| 39101.7  | 27424.2  | 23113.4  | 37712    | 37872.8  | 28983.7  | 41460.9  | 31588    | TRUE |
| 54930.2  | 73065.6  | 81732.7  | 54056.8  | 73931.2  | 60916.2  | 63585.3  | 64022.7  | TRUE |
| 51441.8  | 68915.1  | 90874.4  | 66352.1  | 67699.8  | 34113.3  | 60879.5  | 55919    | TRUE |
| 12906.3  | 9700.8   | 9318.3   | 17117.3  | 11821.8  | 26450.5  | 12546.7  | 16809    | TRUE |
| 244475.5 | 248761.4 | 204164.7 | 380135.8 | 243603.6 | 226069.4 | 287433.6 | 256306.5 | TRUE |
| 35774.6  | 40208.6  | 30978    | 25586.6  | 53102.3  | 15401.4  | 9504.7   | 21181.7  | TRUE |
| 5031.9   | 10534.2  | 13404.9  | 31420.9  | 7955.1   | 8814.4   | 8622.6   | 5692.7   | TRUE |
| 508631.7 | 494277.4 | 511629.7 | 385376.8 | 607746.3 | 557540.2 | 586703.4 | 593245.4 | TRUE |
| 222479.3 | 264938.3 | 264981.1 | 248474.7 | 241989.2 | 182398.8 | 258770.5 | 186897.6 | TRUE |
| 1014790  | 1226698  | 1004360  | 1043243  | 1061911  | 866981.4 | 1324341  | 863376.4 | TRUE |
| 55688    | 44888.5  | 60464.8  | 69800.4  | 64867.5  | 49360.8  | 56107.2  | 53277.5  | TRUE |
| 84188.3  | 70849.5  | 75879    | 68590.5  | 82267    | 63360.8  | 79488.9  | 84908.6  | TRUE |
| 47309    | 52116.2  | 62248.4  | 64349.4  | 60540.2  | 70797.4  | 57924.2  | 61695.2  | TRUE |
| 121504.1 | 143218.1 | 151576.1 | 117761.8 | 117768.7 | 113084.5 | 131393.6 | 125295.8 | TRUE |
| 48609.9  | 72605.8  | 65225.1  | 71527.5  | 63409.8  | 45582.8  | 46712    | 51038.3  | TRUE |
| 91968.7  | 102129   | 128916.2 | 91372.7  | 99148.2  | 97527.1  | 94012.8  | 87173.1  | TRUE |
| 67772.2  | 120016.9 | 189501.4 | 66218.5  | 84234.2  | 65145.8  | 78115.9  | 59539.6  | TRUE |
| 40095.4  | 42318.1  | 33004.2  | 41012    | 41206    | 42061.1  | 35645.2  | 44307.5  | TRUE |
| 31835.4  | 30628.2  | 13600.8  | 23348.8  | 28965    | 30323.5  | 33106    | 34997.4  | TRUE |
| 106977.3 | 143896.3 | 139097.8 | 151072.1 | 149064.8 | 126622.8 | 113729.1 | 122021.3 | TRUE |
| 541048.6 | 564984.7 | 518163.3 | 544098.6 | 514117.4 | 541552.1 | 558024.1 | 498262.3 | TRUE |
| 626687.8 | 570001.5 | 615215.3 | 674700.7 | 650713.6 | 634432.3 | 617839.8 | 579107.2 | TRUE |
| 49366.3  | 40169.9  | 86273.2  | 78278.6  | 62261.6  | 85698.4  | 58697.3  | 47383.1  | TRUE |
| 391380   | 221753.4 | 231837.5 | 183109.3 | 165383   | 308070.2 | 220886.1 | 210181.5 | TRUE |
| 36044.3  | 26772.2  | 28014.7  | 25965.7  | 44079.9  | 34244    | 44849.7  | 42602.9  | TRUE |
| 132383.4 | 103105.6 | 146151.5 | 183216.5 | 142372.2 | 135430.2 | 138453.8 | 110768.7 | TRUE |
| 56721.7  | 36153.4  | 70256.3  | 37053    | 42193.6  | 72803.4  | 46880.7  | 42420    | TRUE |
| 27116.3  | 49139    | 45550.1  | 42408.1  | 31212    | 70695.5  | 51087.1  | 29458.6  | TRUE |
| 75921.5  | 79546.2  | 105555.5 | 84190.5  | 74759.9  | 114976   | 91316.3  | 73592.9  | TRUE |
| 84482.6  | 87217.7  | 85424.5  | 73793    | 80735.8  | 96247.6  | 94132.7  | 82191.8  | TRUE |
| 93765.3  | 82902.6  | 91745.6  | 91181.4  | 111024.4 | 132884.5 | 100620.8 | 110114.6 | TRUE |
| 20492.1  | 18064.3  | 23911.9  | 9764.8   | 24231.5  | 24543.3  | 26474.3  | 8240.7   | TRUE |
| 32194.7  | 40959.8  | 25651.9  | 49097.1  | 42815.6  | 41880.1  | 33573.6  | 44299.5  | TRUE |
| 83164.2  | 48809.3  | 108430.5 | 81608.5  | 55257.9  | 103755.4 | 68403.3  | 60406.1  | TRUE |
| 225899.7 | 205955.5 | 275295.4 | 185602.9 | 157193.2 | 260677.1 | 212895.4 | 156003.5 | TRUE |
| 32931    | 44519.4  | 48451.7  | 31512.2  | 38997.8  | 49511    | 32220.7  | 39240.2  | TRUE |

|          |          |          |          |          |          |          |          |      |
|----------|----------|----------|----------|----------|----------|----------|----------|------|
| 404341.7 | 324543.5 | 567081   | 448766.3 | 340674.2 | 658465.1 | 416708.9 | 415712.9 | TRUE |
| 226844.9 | 204749   | 274159   | 279679.2 | 178902   | 330305.8 | 225320.9 | 223809.9 | TRUE |
| 153714.4 | 123244.1 | 204097.8 | 173894.6 | 168694.8 | 202846.6 | 144276   | 203965   | TRUE |
| 129866   | 114098.9 | 173958   | 137883.8 | 114245.2 | 160598.1 | 145467   | 124839.7 | TRUE |
| 373732.1 | 316481.4 | 315592.3 | 366573.1 | 545255.2 | 330364.4 | 313925.8 | 362343.4 | TRUE |
| 406128.2 | 329196.4 | 332516.1 | 363099   | 501314.7 | 387650.9 | 363301.9 | 409137.7 | TRUE |
| 108847.9 | 76506.1  | 97843    | 139354.2 | 115151.5 | 86971.2  | 108086.7 | 115081.2 | TRUE |
| 359946.4 | 293471.6 | 180488.3 | 224892.8 | 324438.6 | 261008.1 | 271369.4 | 300067.8 | TRUE |
| 30033.1  | 24790.4  | 22841.7  | 32348.1  | 30780.1  | 37093    | 26905.3  | 24139.5  | TRUE |
| 54489.3  | 41031.2  | 64375.3  | 46356.8  | 39594.1  | 66764.8  | 41160.9  | 37247.9  | TRUE |
| 68275.5  | 73232.9  | 97002.6  | 93638.2  | 84004.2  | 110693.8 | 67071.7  | 73265.4  | TRUE |
| 1645718  | 958591.1 | 1429901  | 1268987  | 2341570  | 1518988  | 1102344  | 1485630  | TRUE |
| 46946.9  | 45852.1  | 52676.5  | 66752.8  | 39445.8  | 52699.4  | 52795.8  | 35565    | TRUE |
| 9492.2   | 8035.2   | 25032.1  | 6745.1   | 6399.8   | 22354.8  | 11654.4  | 11732.4  | TRUE |
| 50149.3  | 38150    | 68155.2  | 30981.1  | 43365.4  | 86185.9  | 50433.2  | 53499.4  | TRUE |
| 47552.1  | 35753.4  | 36643    | 28994.4  | 30955.9  | 31947.2  | 39445.3  | 35962.6  | TRUE |
| 28059.9  | 26292.4  | 23500.5  | 12819    | 25857.3  | 31366.3  | 29510.9  | 26248.3  | TRUE |
| 27773.4  | 24176.7  | 23911    | 10962.5  | 32928    | 41827.8  | 26339.4  | 39264.5  | TRUE |
| 60414.8  | 79964.6  | 37294    | 35891.8  | 89167.2  | 36886    | 66654.9  | 68240.6  | TRUE |
| 33048.9  | 54205.5  | 19354.4  | 24867.2  | 34826.2  | 13694.5  | 38126.8  | 40869    | TRUE |
| 460508.6 | 491910.7 | 422269.2 | 458780.3 | 393562.4 | 425991.3 | 534069.2 | 387106.1 | TRUE |
| 404305.6 | 296427.1 | 438860   | 438638   | 407819.1 | 371217.3 | 353494.6 | 426375.4 | TRUE |
| 321288.2 | 210481.3 | 314935.2 | 303622.6 | 281074.4 | 317966.6 | 229503.8 | 316875.6 | TRUE |
| 20761805 | 14347319 | 21987839 | 21746841 | 22075302 | 21257302 | 15419051 | 21675326 | TRUE |
| 221605   | 202946.4 | 214027.7 | 243329   | 205184.1 | 210940.2 | 229786.4 | 201588.3 | TRUE |
| 454356   | 374219.8 | 446045.5 | 484585.7 | 391865.3 | 445896.2 | 414574.5 | 453684.4 | TRUE |
| 510268.6 | 513569.4 | 475125   | 448038.3 | 370492.3 | 542898.1 | 520520.7 | 437356.4 | TRUE |
| 248277.4 | 207683.8 | 255846.2 | 288804.4 | 214458.1 | 254491.9 | 234050.7 | 227156.8 | TRUE |
| 144205.3 | 171018.5 | 161102   | 187244.4 | 181453.6 | 186320.2 | 215569.4 | 149490.3 | TRUE |
| 337009.6 | 384511.5 | 451857.1 | 486685.7 | 405407.1 | 517545.4 | 532474.1 | 408992.7 | TRUE |
| 184915.9 | 195800   | 207081.3 | 189273.1 | 160683.8 | 158592.4 | 147476   | 142598.8 | TRUE |
| 239844.6 | 228307.6 | 322976.9 | 258382.5 | 259599.9 | 290563.9 | 239242.5 | 266455.2 | TRUE |
| 240961.3 | 241209.1 | 212968.1 | 312046.8 | 241311.1 | 244300.6 | 256298.2 | 315115.3 | TRUE |
| 221027.1 | 187455.9 | 257834.6 | 272853.1 | 222615.8 | 304243.5 | 188236.4 | 226986.4 | TRUE |
| 324658.6 | 212182.2 | 469146.5 | 530359.7 | 258982.6 | 275989   | 207547.4 | 315584.6 | TRUE |
| 192332.7 | 210533.8 | 181382.5 | 210954.7 | 227185.2 | 185687.1 | 209559.4 | 195073.7 | TRUE |
| 411134.5 | 445978.7 | 367635.3 | 434269.6 | 371512.8 | 422428.2 | 449413   | 378603.6 | TRUE |
| 38874.4  | 38869.7  | 43360.4  | 48058.8  | 35163.4  | 43531.6  | 39846.6  | 35160.1  | TRUE |
| 238407.7 | 220789.7 | 187063.4 | 222202.6 | 215032.9 | 229032   | 220844.3 | 263528.5 | TRUE |
| 92116.3  | 77317.1  | 76395.4  | 80132.3  | 81059.8  | 77719.5  | 89419.1  | 86723.4  | TRUE |
| 575537.9 | 519349.8 | 506887.9 | 623834.5 | 490435.8 | 576262.2 | 689828.7 | 569228.4 | TRUE |

|          |          |          |          |          |          |          |          |      |
|----------|----------|----------|----------|----------|----------|----------|----------|------|
| 184083.4 | 155547.2 | 140812.5 | 200706.5 | 133037.4 | 165568.3 | 239109   | 209376.6 | TRUE |
| 566527   | 480166.4 | 487953.5 | 682017.4 | 632656.7 | 501424.6 | 640332.9 | 615708.7 | TRUE |
| 109696.5 | 128240.3 | 87056    | 103065.7 | 121866   | 128735.1 | 147929.7 | 176023.9 | TRUE |
| 65468.6  | 53964    | 44551.5  | 51342.1  | 49555.4  | 50038.2  | 69433.7  | 75613.5  | TRUE |
| 170010   | 154506.7 | 207784   | 164408.6 | 158046.4 | 226698   | 243974.5 | 213824.6 | TRUE |
| 214412.4 | 160553   | 171213.8 | 229567.9 | 184223.8 | 209590.2 | 213957.9 | 230642.8 | TRUE |
| 326285.5 | 300124.1 | 272315.2 | 327122.4 | 279138.1 | 353624   | 403418.7 | 387219   | TRUE |
| 140303.1 | 144366.7 | 114733.3 | 125350   | 134133.2 | 110471.7 | 107407   | 134912.2 | TRUE |
| 581026.3 | 542596.2 | 432804.2 | 497597.5 | 537040.3 | 429327.3 | 536084.5 | 559090.4 | TRUE |
| 554234.5 | 487798.9 | 523202.5 | 678453.2 | 649594.8 | 555094.8 | 629473.7 | 664498.4 | TRUE |
| 1332051  | 1282656  | 1376314  | 1299273  | 1111615  | 1333409  | 1408904  | 1361737  | TRUE |
| 1363372  | 1321140  | 1323725  | 1331643  | 1163257  | 1336484  | 1373637  | 1317467  | TRUE |
| 37053.5  | 42969.5  | 75195.2  | 44804.3  | 45526.9  | 57130.7  | 56290.5  | 50524.9  | TRUE |
| 144634.7 | 98570.7  | 147114.1 | 183020.8 | 142093.6 | 137897.1 | 117876.8 | 148744.2 | TRUE |
| 34992.8  | 30890.3  | 36250.3  | 36268.9  | 41212    | 41576.6  | 40724    | 40775.8  | TRUE |
| 32387.4  | 28684.8  | 42973.9  | 37784.9  | 34882.6  | 33221.8  | 13204.7  | 46983.9  | TRUE |
| 414546   | 354686   | 303403.3 | 351235.7 | 445735.8 | 433977.8 | 399088   | 523376.6 | TRUE |
| 41990.8  | 21640.9  | 25595.7  | 31196.7  | 37981.6  | 34759.9  | 43594.5  | 43950.1  | TRUE |
| 174364.2 | 165311.6 | 151762.5 | 184180.6 | 176425.4 | 151201.1 | 151030.7 | 168621.4 | TRUE |
| 648152.4 | 447840   | 655895.3 | 719484.6 | 644260.3 | 703985.1 | 487287.2 | 703848.1 | TRUE |
| 126920.1 | 74866.2  | 114371.4 | 149387.3 | 112086.7 | 132073   | 95148.6  | 116665.4 | TRUE |
| 1212545  | 1166319  | 951750.8 | 1298687  | 1399169  | 1342922  | 1321671  | 1406542  | TRUE |
| 61743.3  | 36561.7  | 37288.1  | 77873.7  | 40890.8  | 45667.8  | 46048.1  | 49178.2  | TRUE |
| 39650.3  | 29908    | 38075.6  | 43671.4  | 41324.9  | 44315.4  | 30576.6  | 56927.7  | TRUE |
| 20839.2  | 4989.8   | 13981.1  | 14763.8  | 23800.6  | 21134.8  | 17668.1  | 32293.7  | TRUE |
| 36348.8  | 56219.1  | 34871.1  | 34893.2  | 59348.6  | 35520.2  | 12827.9  | 38861.7  | TRUE |
| 20265    | 22010.2  | 14187.1  | 27939.6  | 19889.2  | 24472.5  | 13806.4  | 25115.4  | TRUE |
| 309234.2 | 203398.3 | 326844.8 | 331379.7 | 260395.4 | 325068.2 | 204921.1 | 265250.5 | TRUE |
| 520230.2 | 332973   | 550399.7 | 563487.3 | 495487.7 | 552694.6 | 384156.5 | 481331.6 | TRUE |
| 82414.9  | 63787.1  | 100120.9 | 149211.5 | 96272.2  | 98818.4  | 67750.4  | 87690.4  | TRUE |
| 105023   | 93392.2  | 135673.8 | 145932.9 | 112075.7 | 125060   | 124981.6 | 110825.6 | TRUE |
| 41117.2  | 33450.4  | 49718.7  | 52092.6  | 41194.5  | 58553.5  | 49094.1  | 44662    | TRUE |



|          |          |          |          |          |          |          |          |      |
|----------|----------|----------|----------|----------|----------|----------|----------|------|
| 299560.3 | 209379   | 292097   | 320966.3 | 227959.2 | 239999.3 | 288150.4 | 271712   | TRUE |
| 49764.2  | 44554.9  | 51110    | 78429.3  | 35975.9  | 48542.1  | 48882.9  | 53268.3  | TRUE |
| 180272.1 | 232955.4 | 134056.9 | 168304.6 | 206751.5 | 90679.2  | 216872.2 | 186580.6 | TRUE |
| 156632.2 | 180067.9 | 196243.5 | 150891.1 | 142878.1 | 226946.3 | 170368.8 | 166872.6 | TRUE |
| 213110.1 | 171236.2 | 154401.7 | 181189.6 | 165388.1 | 228919.4 | 235977   | 264071.3 | TRUE |
| 353681.5 | 227997.7 | 284134.3 | 330657.3 | 380003   | 332273.1 | 311546.9 | 355986.6 | TRUE |
| 100079.9 | 95955.5  | 135544.6 | 98436.8  | 145168.4 | 136886.5 | 112010.1 | 141006.1 | TRUE |
| 443587.8 | 437485.4 | 417398.2 | 383114.8 | 390788.5 | 419830.6 | 433740   | 425190.9 | TRUE |
| 124616.2 | 137756.6 | 140649.2 | 125569.8 | 125221.8 | 117670.3 | 121422.6 | 119036.8 | TRUE |
| 274039.1 | 279170.3 | 255444   | 268037.5 | 322394.1 | 223628.9 | 222000.5 | 201593.9 | TRUE |
| 179568.6 | 180404.2 | 153154.5 | 184074   | 177177.3 | 238453.8 | 220784.6 | 278390.7 | TRUE |
| 477318.1 | 418501.3 | 344038.7 | 455068.3 | 541690.3 | 503040.4 | 447008.1 | 528126.8 | TRUE |
| 152808.4 | 151038.2 | 150021.1 | 190329.3 | 181260.7 | 379511.1 | 186112.9 | 119160.9 | TRUE |
| 71631.8  | 73918.3  | 66728.6  | 59479.1  | 67549.7  | 47548.6  | 61530.6  | 66127.8  | TRUE |
| 38620.3  | 34480.9  | 42937    | 40576.7  | 35809.4  | 30110.1  | 25913.1  | 29723.4  | TRUE |
| 758703.4 | 678362.7 | 692300.3 | 677638   | 851395.6 | 753983.6 | 652595.2 | 704387.6 | TRUE |
| 157103.5 | 131145.7 | 189807.6 | 148081.2 | 161456.8 | 161647.4 | 157217   | 132874.4 | TRUE |
| 540668.6 | 416864.9 | 613657   | 385484.7 | 424966.1 | 623773.6 | 398820.3 | 449854.5 | TRUE |
| 1333076  | 1385052  | 1708801  | 1525841  | 1542359  | 2060933  | 1631712  | 1693873  | TRUE |
| 152201.3 | 367551.3 | 294751.1 | 332047.7 | 427574   | 108837.7 | 87863    | 103214.4 | TRUE |
| 54853.4  | 106381.7 | 74839.5  | 79672    | 98373.7  | 30476    | 41776.4  | 20135.5  | TRUE |
| 98393.2  | 165282.3 | 149597.3 | 174559.9 | 238123.9 | 82303.9  | 64886.4  | 71302.4  | TRUE |
| 23604.2  | 26523.4  | 13025.3  | 15058    | 26976.2  | 10821.1  | 21490.1  | 24521.8  | TRUE |
| 580838.5 | 606719.5 | 433224.4 | 612138.8 | 637739.3 | 464857.3 | 696056.2 | 658145.9 | TRUE |
| 388868.5 | 368908.8 | 388050.2 | 365702.2 | 375858.3 | 394543.1 | 367134.8 | 327281.1 | TRUE |
| 276047.9 | 248905   | 294171   | 333036.6 | 295073.3 | 353397.6 | 317410.6 | 296004.6 | TRUE |
| 1690760  | 1774239  | 1623314  | 1804843  | 1626765  | 1563430  | 1853610  | 1603276  | TRUE |
| 50951    | 45536.5  | 38580.6  | 29929.6  | 45712.7  | 42930.7  | 38857.3  | 46647.1  | TRUE |
| 50237.3  | 72714.6  | 39746.6  | 42929.8  | 48605.6  | 41041.4  | 52726    | 47507.7  | TRUE |
| 91581    | 84136.2  | 92573.6  | 101599.1 | 93828.1  | 113864   | 88235    | 94914.9  | TRUE |
| 397908.1 | 473697.8 | 323186.3 | 421276.4 | 433904.8 | 325032.4 | 465311.6 | 416005.3 | TRUE |
| 205981.4 | 208294.5 | 202210.2 | 269935.7 | 212661.2 | 212805.3 | 224107.9 | 226913.7 | TRUE |
| 658388.9 | 577351.9 | 555885.3 | 598895   | 689303.3 | 699804.4 | 598373   | 701208.2 | TRUE |
| 1856197  | 1447010  | 1622011  | 1725318  | 1852662  | 1742673  | 1599962  | 1758170  | TRUE |
| 121280.3 | 112915.6 | 115966.7 | 178635.3 | 146671.2 | 137338.7 | 122638.8 | 143153.5 | TRUE |
| 95789.7  | 79890.6  | 63573.7  | 109418.6 | 93024.7  | 79852    | 100015.7 | 95283.1  | TRUE |
| 41547.8  | 30540.2  | 45694.2  | 45649.7  | 47917.5  | 55045.9  | 37247.3  | 52051.2  | TRUE |
| 33888.4  | 33220.5  | 22577.8  | 35057.1  | 42588.7  | 25176.1  | 33116.8  | 34042.7  | TRUE |
| 103992.5 | 92030    | 77027.7  | 99674.5  | 119038.2 | 91313.4  | 129834.1 | 125836.5 | TRUE |
| 55119.7  | 52129.5  | 47307.3  | 53269    | 60175.8  | 44084.9  | 57506.4  | 67860.8  | TRUE |
| 36898.2  | 37839.3  | 34716.3  | 26998.4  | 37661.2  | 31872.5  | 40780.2  | 39852.2  | TRUE |
| 28481.9  | 33724.2  | 26015    | 23966    | 22156.7  | 23077.6  | 28404.8  | 25979.7  | TRUE |
| 933522.7 | 975064.1 | 943991.2 | 1022044  | 909590.7 | 1041421  | 1009924  | 1032783  | TRUE |

|          |          |          |          |          |          |          |          |      |
|----------|----------|----------|----------|----------|----------|----------|----------|------|
| 175657.9 | 165265   | 203212.3 | 175190.7 | 177667.2 | 174550.7 | 188739.4 | 188969.8 | TRUE |
| 482125.4 | 466055.9 | 481522.7 | 473154.5 | 532033.7 | 390274.7 | 504811.6 | 517338.6 | TRUE |
| 574507.8 | 568797   | 504526.3 | 642515.3 | 582023.5 | 595195.4 | 615918.5 | 638324.2 | TRUE |
| 675475.4 | 669874.4 | 661798.7 | 689260.4 | 603294.9 | 725033.4 | 658182.9 | 763740.7 | TRUE |
| 2228503  | 1930230  | 2219922  | 2319632  | 2192007  | 2114865  | 1911703  | 2251740  | TRUE |
| 1431077  | 1428447  | 1147854  | 1629019  | 1419538  | 1203890  | 1285820  | 1410089  | TRUE |
| 1878556  | 1760023  | 1547817  | 1583605  | 1435329  | 1807574  | 1818069  | 1924508  | TRUE |
| 36681.9  | 66613.9  | 49328.5  | 69268.9  | 60475.7  | 31220.3  | 30561    | 30429.8  | TRUE |
| 1141410  | 1019269  | 1084708  | 1065690  | 1084953  | 1114572  | 1114737  | 1081677  | TRUE |
| 544077.8 | 531782.5 | 521223.2 | 472919.2 | 501485.2 | 614774.6 | 587243.2 | 639868.3 | TRUE |
| 147497   | 120411.4 | 89884.8  | 145017.1 | 155315.3 | 132814.8 | 147391.7 | 181275   | TRUE |
| 379645.3 | 320705.5 | 334304.5 | 354070.9 | 351806.7 | 322732.5 | 346011.3 | 347902.7 | TRUE |
| 1270855  | 1190469  | 1019329  | 1111911  | 1007852  | 1168841  | 1147433  | 1158606  | TRUE |
| 394626.4 | 334006   | 263187.6 | 400400.9 | 332652.2 | 261982.1 | 337874.1 | 317168   | TRUE |
| 239364.1 | 180280   | 216746.7 | 251046.3 | 238416.1 | 258474   | 223482.5 | 233593.8 | TRUE |
| 1027686  | 643873.9 | 837288.9 | 1325716  | 880970   | 887721.3 | 639871.3 | 892407   | TRUE |
| 394653.7 | 310577.4 | 357059.6 | 453429.3 | 378542.3 | 341944.7 | 328971.6 | 361583.3 | TRUE |
| 453973.5 | 393889.9 | 406919.2 | 561920.8 | 462537.5 | 384529.3 | 471149.7 | 472958.1 | TRUE |
| 82644.8  | 52988.4  | 62436.9  | 67140.7  | 58099.9  | 60407.5  | 83122.2  | 71018.1  | TRUE |
| 1391504  | 1394149  | 1180029  | 1291379  | 1238547  | 1544376  | 1444167  | 1672536  | TRUE |
| 431458.9 | 487013.7 | 468182.6 | 523694.7 | 448609.6 | 612111.1 | 536122   | 563827.6 | TRUE |
| 66536.8  | 58261.6  | 67801.4  | 54083.7  | 46858.9  | 68356.9  | 57908.5  | 56850.8  | TRUE |
| 20731.3  | 24144.4  | 27950.4  | 34339.3  | 55705.2  | 44095.7  | 34734.7  | 33704    | TRUE |
| 81327.4  | 100912.6 | 71383    | 110356.1 | 112269.4 | 95260.5  | 126668.5 | 69986.6  | TRUE |
| 51005.7  | 52321.7  | 43864.7  | 44568.2  | 39714.7  | 53905.4  | 53318.7  | 34886.5  | TRUE |
| 531503.1 | 423936   | 450187.6 | 460094.5 | 611631.2 | 652922.1 | 432261.5 | 654802   | TRUE |
| 233613.6 | 105344.9 | 271291.8 | 221260.4 | 185673   | 304693.8 | 146962.2 | 160935.8 | TRUE |
| 211989   | 166073.9 | 223653.3 | 214567.3 | 185605.8 | 236038.4 | 152062.4 | 194995   | TRUE |
| 332197.4 | 253982.9 | 384318.1 | 316972.4 | 300855.9 | 408525.8 | 307657.6 | 319095   | TRUE |
| 56274.5  | 87992.7  | 39183.1  | 45202    | 67649.7  | 62323.9  | 59780.5  | 63858    | TRUE |
| 1089256  | 547019.9 | 1261392  | 1342239  | 809553.6 | 1335701  | 704150.9 | 853179.3 | TRUE |
| 2285811  | 1102501  | 2683538  | 2933217  | 1701774  | 2838400  | 1318911  | 1849081  | TRUE |
| 973376.6 | 462686.2 | 413977.9 | 406613.4 | 782996.8 | 809603.5 | 515253.6 | 788339.4 | TRUE |
| 48031.6  | 91659.6  | 90642.3  | 59428.9  | 79966.4  | 38259.5  | 33676.1  | 38440.6  | TRUE |
| 61280    | 50610.7  | 45975.6  | 63909.2  | 43586    | 63585.5  | 59296.5  | 71486.9  | TRUE |
| 181621.2 | 134026.2 | 238913.3 | 190904.7 | 178405.9 | 234426.5 | 139717.1 | 204842.5 | TRUE |
| 215876.6 | 165657.3 | 236443.6 | 253227.7 | 260311.9 | 218961.1 | 171469.3 | 248714.5 | TRUE |
| 95278.2  | 95697.1  | 110370.3 | 111412   | 107159.5 | 114241.5 | 83118.2  | 120160.6 | TRUE |
| 568808.5 | 427476.1 | 642127.6 | 845956.7 | 577107.6 | 776609.9 | 534762.1 | 610522.6 | TRUE |

|          |          |          |          |          |          |          |          |      |
|----------|----------|----------|----------|----------|----------|----------|----------|------|
| 344898.6 | 287305.3 | 424259.1 | 518182.6 | 389837.7 | 484426   | 300705.5 | 412867.6 | TRUE |
| 183101.2 | 128624.7 | 187983.2 | 228903.7 | 175259.2 | 222749.2 | 166353   | 190567.6 | TRUE |
| 93499.7  | 87573.4  | 56119.7  | 81883.3  | 112610.7 | 124572   | 86292.1  | 116847.6 | TRUE |
| 91750.7  | 81378.4  | 55497.7  | 74534.9  | 114338.5 | 120751.2 | 96581.5  | 106839.3 | TRUE |
| 211392.8 | 205983.9 | 172888.6 | 216753   | 277808.5 | 299315.7 | 226720.5 | 303313.6 | TRUE |
| 313282.3 | 292043.4 | 220124.6 | 262537.8 | 414199   | 438878.4 | 326781   | 421517.9 | TRUE |
| 75230.1  | 68047.8  | 53850.7  | 83863.4  | 67048.5  | 56075.2  | 62530.5  | 47368    | TRUE |
| 247893.4 | 179884.5 | 192754.9 | 202447   | 256455   | 265587.7 | 196859.1 | 272729.2 | TRUE |
| 223657.5 | 130202.8 | 184023   | 175135.8 | 280518.2 | 280204.9 | 144537.1 | 270101   | TRUE |
|          |          |          |          |          |          |          |          |      |
| 246383.4 | 264332.3 | 266742.6 | 287202.1 | 190175   | 225024.5 | 268484.9 | 227482   | TRUE |
| 51266.3  | 61728.2  | 47809.2  | 50491.3  | 42675.3  | 55849.6  | 63564.2  | 55057    | TRUE |
| 70485.9  | 66721.9  | 68995.3  | 73524.3  | 79428.4  | 59994.9  | 70745.7  | 58721.4  | TRUE |
|          |          |          |          |          |          |          |          |      |
| 21815.8  | 17110.4  | 19456.5  | 23269.6  | 24502    | 17240    | 25506.4  | 19076.1  | TRUE |
|          |          |          |          |          |          |          |          |      |
| 58166.3  | 41087.1  | 44917.6  | 57008    | 39935.3  | 45927    | 38512.2  | 36433.5  | TRUE |
| 81501.5  | 84923.2  | 86183.6  | 79344.8  | 72757.3  | 81749.4  | 95752.8  | 70225    | TRUE |
| 124423.6 | 92470.8  | 158985.5 | 132341   | 129758.7 | 144169.4 | 110432.4 | 144744.4 | TRUE |
| 50609.8  | 45000.9  | 69023.8  | 60900.3  | 46207.7  | 61870.4  | 49949.7  | 39129.5  | TRUE |
| 79649.3  | 77319.3  | 82325    | 82197.8  | 52420.8  | 83382.2  | 90018.3  | 95751.3  | TRUE |
| 229838.8 | 169568.2 | 170083.2 | 170658.9 | 173608   | 220545.4 | 194930   | 194812.4 | TRUE |
| 95742.1  | 101205.4 | 78574.5  | 93270.3  | 106286.6 | 128324.7 | 127422.7 | 122358.7 | TRUE |
|          |          |          |          |          |          |          |          |      |
| 22201.9  | 10127.3  | 19225.3  | 12718.7  | 16776.1  | 37579.9  | 22789    | 34690.9  | TRUE |
| 42170.3  | 56909    | 80137    | 61708.3  | 50733.2  | 84256.9  | 43878.5  | 53659.9  | TRUE |
| 36327.3  | 32062.1  | 26077.8  | 26224.7  | 23746.4  | 34412    | 39559    | 43220.7  | TRUE |
| 46703.5  | 54796    | 26819.4  | 44826.4  | 66288.1  | 26784.9  | 60914.5  | 69011.1  | TRUE |
| 94342.2  | 142838.5 | 98457.6  | 98087.6  | 64257.5  | 116458.2 | 137374   | 103898.8 | TRUE |
| 1339855  | 1017119  | 1236548  | 1507100  | 1328640  | 1373860  | 1220974  | 1386473  | TRUE |
| 202872.7 | 174396.6 | 188713.7 | 218934.9 | 198322.6 | 180372.4 | 206382.2 | 218160.3 | TRUE |
| 120000.7 | 111730.2 | 110824.8 | 142595.6 | 125977.9 | 131463.2 | 115256.4 | 118393.7 | TRUE |
|          |          |          |          |          |          |          |          |      |
| 63619.1  | 50318.6  | 40509.3  | 51729.2  | 57832    | 39867    | 48309.8  | 60305.2  | TRUE |
| 212055.4 | 133664   | 190996.9 | 227671.5 | 185281.9 | 198438.5 | 171273.7 | 204086.4 | TRUE |
| 499550   | 351696.1 | 502176.1 | 583105.6 | 504981.1 | 510077   | 398563.7 | 517382.1 | TRUE |
| 681780.5 | 629910.7 | 542571.3 | 602854.9 | 703715.9 | 726282.5 | 682730.3 | 784834.2 | TRUE |

|          |          |          |          |          |          |          |          |      |
|----------|----------|----------|----------|----------|----------|----------|----------|------|
| 136154.8 | 133783   | 164991   | 228891.8 | 163676.7 | 181404.9 | 150219.4 | 162635.8 | TRUE |
| 289045.6 | 234721.3 | 322908.8 | 357425.7 | 226502.3 | 377244.3 | 287847.2 | 293653.2 | TRUE |
| 539301.9 | 554467.9 | 420514.3 | 424199.3 | 530438.8 | 641979.9 | 516996.4 | 570126.5 | TRUE |
| 39028.1  | 32188    | 25983    | 14961.7  | 28544.9  | 44149    | 34162.4  | 53354.9  | TRUE |
| 188455.4 | 178263.6 | 198011.1 | 229660.7 | 187298.2 | 193162.3 | 190603.5 | 177802.8 | TRUE |
| 236308.6 | 165271.3 | 219156.5 | 242494.6 | 249452.5 | 240778.5 | 205957.7 | 240341.7 | TRUE |
| 181830.7 | 99169.8  | 173649.6 | 182757.2 | 171252   | 173735.8 | 123337.1 | 170394.5 | TRUE |
| 55648.2  | 35547.9  | 42435.9  | 50372.1  | 45085.7  | 48451.5  | 36952.8  | 49283.6  | TRUE |
| 165655.1 | 135420.7 | 108268.5 | 101540.3 | 161041   | 144038.4 | 125226.2 | 170844.7 | TRUE |
| 322809.6 | 297524.2 | 230041.8 | 256435.5 | 296843.8 | 293118   | 293190.1 | 346839.7 | TRUE |
| 65359.9  | 52343.8  | 60300.4  | 47678.2  | 71809.2  | 66217.1  | 63849.8  | 78715.8  | TRUE |
| 106681.8 | 83774.9  | 77611.9  | 98308.3  | 84131.3  | 97472.3  | 105634.6 | 100434.6 | TRUE |
| 20834.6  | 24390.8  | 24935    | 20440.4  | 24933.4  | 20702.9  | 17351    | 30013.8  | TRUE |
| 16038.2  | 7366.6   | 5054.2   | 4954.2   | 7258.2   | 13041.2  | 7678.2   | 14217.6  | TRUE |
| 5869.2   | 9321.5   | 8022.6   | 7254.5   | 12687.8  | 4525.7   | 9773.3   | 6546.9   | TRUE |
| 40947.7  | 34269.1  | 40829.2  | 46912.4  | 36030.7  | 41262.3  | 43812.3  | 45605.3  | TRUE |
| 273089.1 | 248854.4 | 243135.9 | 246705.5 | 237161.8 | 316515.6 | 391247.1 | 328812.7 | TRUE |
| 58966    | 49797.6  | 77049.8  | 72655.7  | 73857.2  | 65956.6  | 101086.5 | 84339.1  | TRUE |
| 13556    | 16037.5  | 9734.2   | 5115.2   | 6294.3   | 19019    | 15804.5  | 17703    | TRUE |
| 119930.7 | 138399.1 | 122638.6 | 149197.3 | 135439.5 | 138206.8 | 112118.4 | 114986.1 | TRUE |
| 305143.6 | 245659.3 | 279970.1 | 275530.6 | 241992.8 | 302390.2 | 316019   | 362065.5 | TRUE |
| 471193.7 | 591340.9 | 485156.5 | 510180.2 | 550767.4 | 472324.3 | 539983   | 413685.5 | TRUE |
| 72141.2  | 89122.1  | 53690.7  | 43366.3  | 67586.6  | 42065.7  | 60070.7  | 78286.7  | TRUE |
| 75429.2  | 60875.5  | 28589.1  | 63913.7  | 57310.4  | 42870.5  | 55711.3  | 59200.5  | TRUE |
| 135631.6 | 115456   | 146804.9 | 166526.8 | 126645.7 | 153166.7 | 166921.3 | 145270.9 | TRUE |
| 1452566  | 1636443  | 1359445  | 1583128  | 1236547  | 1634002  | 1762965  | 1515104  | TRUE |
| 92673    | 67667.5  | 91813.9  | 78511.7  | 106527   | 82526.1  | 71255.8  | 88008.5  | TRUE |
| 84208.3  | 115595.6 | 70431.4  | 76121    | 94270.5  | 49752.8  | 93951.8  | 67914.3  | TRUE |
| 37821.1  | 72557.7  | 35773.7  | 58151.5  | 52142.1  | 40764.7  | 62721    | 46266.7  | TRUE |
| 568464.5 | 489849.4 | 472946.7 | 596933   | 527278.5 | 513373.1 | 531604.1 | 528535   | TRUE |
| 167498.4 | 103176.5 | 202478   | 138989.9 | 261377.2 | 189487.5 | 103826.1 | 269029.5 | TRUE |
| 44819.8  | 60767.6  | 48037    | 40565.9  | 38576.5  | 42099.5  | 44417.2  | 35640.8  | TRUE |
| 443587.8 | 437485.4 | 417398.2 | 383114.8 | 390788.5 | 419830.6 | 433740   | 425190.9 | TRUE |
| 124616.2 | 137756.6 | 140649.2 | 125569.8 | 125221.8 | 117670.3 | 121422.6 | 119036.8 | TRUE |
| 274039.1 | 279170.3 | 255444   | 268037.5 | 322394.1 | 223628.9 | 222000.5 | 201593.9 | TRUE |
| 179568.6 | 180404.2 | 153154.5 | 184074   | 177177.3 | 238453.8 | 220784.6 | 278390.7 | TRUE |
| 477318.1 | 418501.3 | 344038.7 | 455068.3 | 541690.3 | 503040.4 | 447008.1 | 528126.8 | TRUE |
| 152808.4 | 151038.2 | 150021.1 | 190329.3 | 181260.7 | 379511.1 | 186112.9 | 119160.9 | TRUE |
| 71631.8  | 73918.3  | 66728.6  | 59479.1  | 67549.7  | 47548.6  | 61530.6  | 66127.8  | TRUE |
| 38620.3  | 34480.9  | 42937    | 40576.7  | 35809.4  | 30110.1  | 25913.1  | 29723.4  | TRUE |
| 220471.7 | 276664.5 | 112167.1 | 133843.1 | 220013.8 | 254057.5 | 310735   | 196418.5 | TRUE |
| 749649.3 | 498518.6 | 631866.5 | 659389.1 | 960557.4 | 715847.1 | 610652   | 986056.1 | TRUE |
| 703164.1 | 919023   | 514297.3 | 599771.2 | 718357.1 | 709931.8 | 1001426  | 731370.7 | TRUE |
| 876440.5 | 1040925  | 691080   | 749942   | 752044.5 | 787359.5 | 1052440  | 820083.4 | TRUE |
| 43678.8  | 53942.9  | 26064.8  | 37720.6  | 29133.8  | 28154.8  | 60118.3  | 36181.3  | TRUE |
| 153799.1 | 95680.9  | 123223.6 | 109954.9 | 150977.4 | 106426.3 | 93874.6  | 170359.7 | TRUE |

|          |          |          |          |          |          |          |          |      |
|----------|----------|----------|----------|----------|----------|----------|----------|------|
| 29806.8  | 16094.8  | 25354.7  | 17738    | 46190.1  | 22537    | 8719.9   | 44087.4  | TRUE |
| 76654.4  | 42262.3  | 76876.7  | 78828.1  | 79781.1  | 95018.6  | 50132.1  | 72782.1  | TRUE |
| 47172    | 38250.6  | 76630.4  | 58588.8  | 70800.4  | 66337.4  | 46746.3  | 74713.8  | TRUE |
| 111313.8 | 65793.5  | 159308.1 | 113775.9 | 215132.3 | 177560.3 | 82553.8  | 232036.9 | TRUE |
| 89194.1  | 120689.7 | 73158.1  | 62625    | 93022.7  | 75350.1  | 130853.8 | 71680.5  | TRUE |
| 164786.1 | 234217.9 | 109695.2 | 112190.9 | 193208.7 | 138040.5 | 264666.8 | 165492.5 | TRUE |
| 359545   | 430635.6 | 383176.5 | 249627.1 | 215609.4 | 410812.2 | 401216.8 | 214368.6 | TRUE |
| 8387.2   | 10920.6  | 10064.2  | 11933.5  | 17405.4  | 8938.1   | 11340.1  | 26030.8  | TRUE |
|          |          |          |          |          |          |          |          |      |
| 424453.9 | 552402.2 | 469006.9 | 356549.8 | 348107.7 | 391182.8 | 428693.7 | 288880.3 | TRUE |
| 56698.7  | 61782    | 47891.4  | 22736.5  | 29411.5  | 38717.5  | 66749.3  | 38172.9  | TRUE |
| 96101.3  | 154665.4 | 181712.2 | 94804    | 93345.8  | 202679   | 195985.8 | 66650    | TRUE |
| 85566.9  | 38074.9  | 71806    | 196726.9 | 116135.9 | 67257.3  | 68123.3  | 54637.5  | TRUE |
| 32020.1  | 30763.2  | 40290    | 45699.7  | 45405.4  | 24673.1  | 18223.1  | 30370.1  | TRUE |
|          |          |          |          |          |          |          |          |      |
| 139200.8 | 177646.3 | 109475.8 | 130775.3 | 85223.9  | 196481.7 | 232582.3 | 74669.7  | TRUE |
| 86626.9  | 86284.3  | 69903.2  | 55402.4  | 50229.3  | 119007.4 | 96503.8  | 48882.4  | TRUE |
| 46860.8  | 23958.4  | 51709    | 50529.2  | 47702.8  | 36904    | 12287.9  | 39699.6  | TRUE |
|          |          |          |          |          |          |          |          |      |
| 113833.6 | 69891.2  | 114961.2 | 132139.2 | 113935.9 | 110555.4 | 114438.3 | 131997.7 | TRUE |
| 21306.8  | 41474.4  | 19173.5  | 6622.5   | 8235.1   | 24710.8  | 34272.4  | 17429.5  | TRUE |
| 34628    | 70566.7  | 44775.4  | 25359.9  | 34297.1  | 31898.9  | 45331.5  | 24075    | TRUE |
| 40649.4  | 65085.7  | 58157.3  | 24769.1  | 19814    | 30757.6  | 46342.2  | 16440.2  | TRUE |
|          |          |          |          |          |          |          |          |      |
| 36396.5  | 35449    | 38617.7  | 53892.9  | 43346    | 39753.8  | 40899.5  | 43728.1  | TRUE |
| 37806.1  | 26865.8  | 21561.9  | 12409.3  | 27761.1  | 29117    | 26435    | 19817.1  | TRUE |
| 309603.5 | 393095.7 | 292528.9 | 356387.8 | 399158.3 | 327326.1 | 365343.7 | 419153   | TRUE |
| 30385.1  | 30163.1  | 23696.3  | 26328.9  | 23242    | 26372.3  | 21779.1  | 26920.3  | TRUE |
|          |          |          |          |          |          |          |          |      |
| 1086948  | 1151068  | 855751.2 | 1110655  | 1063090  | 916244.5 | 1056025  | 1119891  | TRUE |
| 157609.2 | 188007.6 | 122327.7 | 167635.5 | 180663.5 | 128892.3 | 205113.7 | 181926.1 | TRUE |
| 152066.8 | 145491.3 | 118001.4 | 143882.7 | 127533.7 | 144530   | 148718.5 | 119556   | TRUE |
| 34449.1  | 42105.3  | 45733    | 47607.7  | 38756.5  | 41772.2  | 51549.6  | 51342.4  | TRUE |
| 363938.9 | 426559.2 | 365822.5 | 447105.2 | 363808.3 | 348217.5 | 448102.6 | 406251.3 | TRUE |
| 85192    | 72159.3  | 63499.1  | 84760.1  | 77578.9  | 80238.9  | 108680.9 | 94425.5  | TRUE |
| 118074.5 | 87394    | 72801.7  | 123968.4 | 102693.5 | 133675   | 124130.7 | 110640.8 | TRUE |
| 110814.2 | 100631.3 | 92918.1  | 99437.8  | 102236.5 | 112712.6 | 102210.4 | 119088.9 | TRUE |
| 105931.1 | 114743.6 | 87909.3  | 115052.2 | 82990    | 122364.8 | 97363.5  | 120726.6 | TRUE |
| 145908.8 | 115129   | 125856   | 151301.3 | 122706.5 | 180969.2 | 161325.7 | 168507.5 | TRUE |
| 52128.4  | 47281.6  | 49185.7  | 55673.1  | 45821.6  | 44358.6  | 60125.9  | 46142    | TRUE |
| 363623.3 | 360061.8 | 300153.1 | 387305.8 | 343231.8 | 326745.1 | 370541.6 | 374132.9 | TRUE |
| 193437.4 | 226152.7 | 126749   | 192956.1 | 257124.5 | 124808.1 | 220110.8 | 195222.4 | TRUE |
| 135952.7 | 182286.7 | 80859.8  | 147978.3 | 161403.5 | 99967.6  | 155771.2 | 170150.5 | TRUE |
| 38560.5  | 46605.4  | 39919.3  | 57735.6  | 58148.2  | 37706.2  | 64782.3  | 60305.8  | TRUE |
| 159486.6 | 201783   | 166365.2 | 200004.9 | 115774.6 | 187751.4 | 188800.3 | 190825.9 | TRUE |
| 178003.6 | 186924.3 | 201207.6 | 224929.3 | 117327.4 | 196971.5 | 189769   | 191099   | TRUE |

|          |          |          |          |          |          |          |          |      |
|----------|----------|----------|----------|----------|----------|----------|----------|------|
| 339149.5 | 261180.6 | 297006.8 | 329190.2 | 287199.7 | 273833.1 | 296909.7 | 341094.5 | TRUE |
| 361175.3 | 362668.4 | 381165.4 | 375309.9 | 337798.1 | 352900.1 | 365659.2 | 374089   | TRUE |
| 169427.6 | 182077.3 | 164097.2 | 173169.7 | 181613.3 | 167457.2 | 208514.8 | 193548.7 | TRUE |
| 200907.8 | 199348.8 | 196060.8 | 219700   | 214537.7 | 184542.8 | 214452.3 | 202046.5 | TRUE |
| 72523    | 94414.1  | 117259.7 | 101368.6 | 86455.2  | 92602    | 76272    | 95274.3  | TRUE |
| 112572.4 | 142074.1 | 126653.2 | 121325.6 | 105788.6 | 161031.8 | 115155.2 | 136932   | TRUE |
| 63720.2  | 109555.7 | 88259.2  | 121798   | 67145.7  | 71549    | 93550.9  | 79536.8  | TRUE |
| 187751.9 | 294523.7 | 236988.7 | 268258.9 | 194265.3 | 210712.7 | 184009.5 | 237392.6 | TRUE |
| 139623.8 | 130924.7 | 93858.7  | 158163.7 | 128740.1 | 164767.7 | 143511.2 | 181224.8 | TRUE |
| 128034.3 | 100891.2 | 81641.2  | 122838   | 118727.8 | 142294.7 | 143853   | 125243.2 | TRUE |
| 577166.5 | 479189   | 462418.7 | 524629.8 | 471289.3 | 654144.4 | 579223.3 | 667584.6 | TRUE |
| 207549.8 | 198216.3 | 171121   | 180795.2 | 200453.4 | 212285.2 | 230915.6 | 255089.2 | TRUE |
| 81094    | 82638.5  | 75816.5  | 84397.4  | 109087.3 | 76060.1  | 88306.3  | 93854.8  | TRUE |
| 127791.8 | 128648.4 | 122244.6 | 179428.1 | 166383.6 | 121302   | 122333.6 | 157466.4 | TRUE |
| 51147.3  | 65686.5  | 53472.7  | 49339.4  | 54019.4  | 51142    | 63068.1  | 50094.9  | TRUE |
| 77581.3  | 72464.3  | 84434.9  | 81780.5  | 86123.8  | 79153    | 60654    | 93838.6  | TRUE |
| 105731   | 105825   | 74996.6  | 94201.5  | 98871.4  | 99023.5  | 93685.3  | 130156.5 | TRUE |
| 49342.8  | 48265.5  | 50427    | 43237.5  | 36796    | 40216.5  | 58275.2  | 51415.3  | TRUE |
| 73135.3  | 81543.4  | 82641.1  | 69822.4  | 66110.3  | 67207.1  | 65491.3  | 79936.5  | TRUE |
| 194606   | 238746.2 | 235512.9 | 238231.6 | 159882   | 298393.4 | 240415.4 | 296888.3 | TRUE |
| 196594.2 | 194524.9 | 226237.1 | 227570.8 | 209595.3 | 138963   | 204459.1 | 188872.2 | TRUE |
| 271687.9 | 282366.8 | 243629.1 | 233801.8 | 295683.3 | 224453.2 | 258443.9 | 303069   | TRUE |
| 94641.5  | 113333   | 121489.9 | 128586.8 | 126750.5 | 83911.7  | 106483.8 | 95327.7  | TRUE |
| 121138.6 | 125942.2 | 116820.9 | 135068.7 | 147447.6 | 117901.8 | 143022.8 | 163661.7 | TRUE |
| 256371.7 | 244543.7 | 224701.9 | 233635.5 | 216104.2 | 257464.9 | 270315.2 | 221862.6 | TRUE |
| 457701.7 | 518713.1 | 465905.2 | 484744.7 | 436250   | 487232.2 | 550756.6 | 500920.7 | TRUE |
| 197354.1 | 138742.4 | 130265.2 | 167834.4 | 133575.8 | 219536.5 | 224516.3 | 188994.7 | TRUE |
| 61565.9  | 52605.6  | 60185.6  | 70866.8  | 48972.3  | 62028.2  | 70380.5  | 54156.8  | TRUE |
| 54826.5  | 41607.9  | 51671.8  | 76932.9  | 36613.6  | 67508.7  | 66090    | 65423.1  | TRUE |
| 95513.8  | 81207.6  | 87194.8  | 80996.2  | 95232.6  | 80249.8  | 83421.2  | 84413.5  | TRUE |
| 32174.5  | 28876.3  | 19175.3  | 33050.2  | 26684.5  | 21464    | 27975.1  | 35722.1  | TRUE |
| 17126.2  | 23462.8  | 16445    | 16883.5  | 20803.9  | 15978.4  | 8771.8   | 20698.3  | TRUE |
| 33934.4  | 28110    | 21720.5  | 31172.7  | 24440.4  | 22328.7  | 32929.6  | 23246    | TRUE |
| 301754.7 | 331873.5 | 237476.8 | 290895.1 | 306651.6 | 266359.8 | 306423.9 | 308548.2 | TRUE |
| 27574.8  | 35951.9  | 14609.2  | 32271.7  | 34626.6  | 18571.7  | 32320.1  | 24675.8  | TRUE |
| 25120.5  | 21333    | 16854.3  | 8628.3   | 19508.8  | 20133.3  | 18832.8  | 20417.6  | TRUE |
| 441876.4 | 448947.9 | 361849.8 | 390213   | 494460.8 | 321363.5 | 438812.7 | 441309.7 | TRUE |
| 20391.9  | 5621.5   | 24919.4  | 23635.1  | 29579.5  | 11657.9  | 11885    | 32400.7  | TRUE |
| 23002.4  | 26144.2  | 17613.4  | 31275.7  | 28815.5  | 27704.2  | 9041.6   | 32359    | TRUE |
| 22474.2  | 23431.3  | 16768.6  | 21660.8  | 32440.7  | 35668.8  | 9953.3   | 29703    | TRUE |
| 25683.1  | 8182.5   | 7914.4   | 10511.7  | 15315.7  | 10908.5  | 8948.1   | 14281.2  | TRUE |
| 9686.4   | 8627.9   | 35202.4  | 8656.7   | 13576.1  | 35564    | 38776.5  | 36510.3  | TRUE |

|          |          |          |          |          |          |          |          |      |
|----------|----------|----------|----------|----------|----------|----------|----------|------|
| 211719.9 | 189167.7 | 198960   | 154767.9 | 175468.9 | 178464.1 | 174600.1 | 196728.2 | TRUE |
| 529195   | 490930.5 | 423946.4 | 468555.4 | 445157.9 | 451700.3 | 413107.3 | 474605   | TRUE |
| 66255.7  | 40035.4  | 37335.8  | 48898.8  | 47116.4  | 49476.5  | 41719.2  | 43713.3  | TRUE |
| 55595.9  | 42289    | 33754.4  | 41348.8  | 38804.3  | 73643.6  | 42032.7  | 53457.2  | TRUE |
| 53805.2  | 61336.7  | 100315.7 | 66911    | 54951.9  | 52691.8  | 60707.1  | 59155.1  | TRUE |
| 60571.9  | 73001.5  | 33508    | 61204.4  | 64933.9  | 33696.3  | 63691.1  | 65514.5  | TRUE |
| 253995.8 | 248645.5 | 175939.9 | 192367.2 | 203855.3 | 180076.6 | 200466.3 | 220427.4 | TRUE |
|          |          |          |          |          |          |          |          |      |
| 8772.9   | 5904.9   | 6179.5   | 8258.7   | 6938.1   | 16975.2  | 9082.6   | 9250.4   | TRUE |
| 50190.3  | 43522.9  | 57872.4  | 29935.4  | 30365.9  | 46011.5  | 36161.6  | 36087.3  | TRUE |
| 123687   | 102121.1 | 140491.2 | 136809.8 | 216019.9 | 112212.7 | 113892.8 | 123076.1 | TRUE |
| 28962.4  | 51919.8  | 80040.8  | 14360.9  | 38363.4  | 91129.2  | 35715.2  | 35026.8  | TRUE |
| 148886.2 | 140883.9 | 225876.8 | 137033.3 | 112562.1 | 243386.7 | 136968.3 | 110031.7 | TRUE |
| 181577.6 | 161561   | 269796.3 | 147674.1 | 142471.6 | 265480   | 173401.3 | 129602.6 | TRUE |
| 575567.9 | 562708.5 | 776765.7 | 585100.8 | 782861.4 | 501786.9 | 466567.7 | 501033.5 | TRUE |
| 99640.7  | 74298.7  | 165394   | 59850.3  | 80630.2  | 146099.1 | 102482.7 | 104775.4 | TRUE |
| 181411.7 | 129432.8 | 179879.5 | 116682.1 | 135864.9 | 228707.6 | 139923.8 | 131979.4 | TRUE |
| 178505.6 | 177817.3 | 285157.2 | 180886.8 | 164458.2 | 284626.3 | 189365.5 | 165829.5 | TRUE |
| 79426.2  | 75377.5  | 99878.7  | 64420.4  | 93575.3  | 100001.3 | 76499.3  | 79348.6  | TRUE |
| 329314.8 | 268808.2 | 376992.7 | 330735.3 | 545459.4 | 258244.3 | 277404.4 | 278639.2 | TRUE |
| 186868.5 | 138810.3 | 194589.8 | 212901.3 | 221897.1 | 148380.4 | 155806.5 | 179870.4 | TRUE |
| 1076562  | 743140.1 | 971778.8 | 963098.9 | 1473018  | 944669.6 | 789367   | 952760.7 | TRUE |
| 76993.7  | 71552.5  | 98827.3  | 63055.8  | 69607    | 101852.9 | 95840.5  | 69053.1  | TRUE |
| 93445    | 84434.6  | 95046.1  | 102922.8 | 125702.7 | 98345.5  | 87535.1  | 92258.3  | TRUE |
| 188763.6 | 158856.3 | 126411   | 109797.4 | 110758.2 | 120531   | 127699.9 | 126407   | TRUE |
| 49213.7  | 53304.7  | 39069.8  | 48414.2  | 53559.6  | 43588.3  | 53854.3  | 47388.7  | TRUE |
| 23394.9  | 30526.4  | 29948    | 37250.3  | 22994.9  | 23425    | 30857.6  | 25127.7  | TRUE |
| 85376.3  | 92453.9  | 64320.9  | 67823.6  | 69337.1  | 85717.9  | 84187.9  | 103764   | TRUE |
| 76802.1  | 67436.9  | 80529    | 64764.9  | 86728    | 85181.5  | 77827.5  | 89414.1  | TRUE |
| 19137.8  | 27535.2  | 28042.9  | 30537.4  | 22270.9  | 17747.9  | 26315.5  | 31290.1  | TRUE |
| 167410.1 | 180849.8 | 148783.5 | 128511.2 | 180990.5 | 180418.4 | 158451   | 182760   | TRUE |
| 29878.3  | 33689.9  | 12665.7  | 19378.6  | 30532.6  | 11086.7  | 17680.7  | 16869.1  | TRUE |
| 84418.8  | 82931.2  | 63646    | 77190.2  | 75584.7  | 68572.8  | 85703    | 92365.1  | TRUE |
|          |          |          |          |          |          |          |          |      |
| 18820.4  | 34805.5  | 23835.8  | 6670     | 32685.2  | 24522.4  | 10402.1  | 35250.2  | TRUE |
| 76524.3  | 70646.1  | 66010.6  | 60003.5  | 74522.1  | 83051.5  | 82577.3  | 102429.9 | TRUE |
| 130747.5 | 126160   | 125922.4 | 160982.1 | 167219.9 | 151743   | 170338.4 | 173852.1 | TRUE |
| 278161.9 | 373721   | 303289.6 | 283308.6 | 327212.1 | 285752.7 | 395025.8 | 278310.7 | TRUE |
|          |          |          |          |          |          |          |          |      |
| 42293.5  | 37657.7  | 45663.6  | 49188.7  | 41335.1  | 45217.8  | 36950.4  | 41504.8  | TRUE |
| 62662.5  | 73997.9  | 58527.6  | 54014.7  | 55006.3  | 54294.6  | 58482    | 65683.8  | TRUE |
|          |          |          |          |          |          |          |          |      |
| 329347.1 | 342206.5 | 262169.5 | 365036.3 | 376089.9 | 313138.6 | 352774.8 | 408482.1 | TRUE |

|          |          |          |          |          |          |          |          |      |
|----------|----------|----------|----------|----------|----------|----------|----------|------|
| 1315444  | 1326406  | 1390479  | 1555112  | 1306634  | 1474197  | 1534635  | 1708627  | TRUE |
| 111345.3 | 83163.7  | 64778    | 123193.9 | 102136.3 | 115946.1 | 131678.6 | 120962.5 | TRUE |
| 104427.6 | 111091.1 | 113411.3 | 131150.6 | 108520.6 | 112260.7 | 136201.3 | 110605.1 | TRUE |
| 75198.1  | 72364    | 75589.6  | 58173.6  | 87163    | 72994.2  | 92528.4  | 85149.3  | TRUE |
| 70339.3  | 66557.6  | 82008.5  | 115403.7 | 85999.8  | 97709.5  | 102757.3 | 98197.3  | TRUE |
| 30330.8  | 47082.1  | 39306.6  | 35745    | 34876.5  | 30921.9  | 45137.2  | 51949.6  | TRUE |
| 200492.6 | 287317.1 | 288278.9 | 244542.3 | 231577.7 | 317785.3 | 275527.1 | 271154.1 | TRUE |
| 59698.4  | 61529    | 69168.1  | 59183.9  | 54430.7  | 64682.7  | 77548.9  | 64805    | TRUE |
| 74879    | 57424.7  | 71557.4  | 88313.5  | 58182.6  | 88225.8  | 59433.3  | 78122.4  | TRUE |
| 194588.1 | 284590   | 132239.9 | 191181.8 | 185465.6 | 157058.2 | 289329.4 | 194431.5 | TRUE |
| 168208   | 207355.4 | 126225.5 | 159777.8 | 154357.9 | 156567.5 | 210273.2 | 151917.4 | TRUE |
| 480507.4 | 426831.4 | 388996   | 444466.3 | 486460.3 | 438100.2 | 456646.6 | 523952   | TRUE |
| 186443.8 | 206683   | 184785.7 | 214163.5 | 197096.5 | 196835.3 | 212147.8 | 182547.9 | TRUE |
| 441204.8 | 439966.1 | 463098.7 | 456908.5 | 455781.3 | 466526.8 | 464646   | 473294   | TRUE |
| 463742.8 | 426117.2 | 445001.2 | 440030.9 | 480714.8 | 489168.9 | 452932.2 | 485903.5 | TRUE |
| 181663   | 176924.6 | 179317.2 | 219009.8 | 222165.9 | 186917   | 198548.8 | 211823.9 | TRUE |
| 69505.9  | 67576.4  | 56376.9  | 78142.1  | 87304.7  | 58328    | 70345.8  | 84186.5  | TRUE |
| 52205.5  | 55820.9  | 66631.9  | 57395.7  | 44447.3  | 51396    | 55342.2  | 42228.1  | TRUE |
| 156335.3 | 200081.4 | 165221.8 | 168354.2 | 117716.4 | 175415.4 | 212807.9 | 180863   | TRUE |
| 639034.4 | 692400.9 | 674536.9 | 713943.4 | 615696.1 | 667564   | 720047.6 | 691677.2 | TRUE |
| 15204.1  | 5502.2   | 25073.9  | 6242.5   | 16674.9  | 20198.1  | 11111.1  | 7896.6   | TRUE |
| 34755.9  | 26857.3  | 32572.9  | 23819.8  | 30522.4  | 31507.1  | 19399.7  | 25618.6  | TRUE |
| 23746.2  | 19978.3  | 15607.3  | 36987.4  | 22462.3  | 34626.1  | 15335.5  | 38513.2  | TRUE |
| 217999.4 | 213606.6 | 190020.8 | 191800.5 | 231008.3 | 189804.6 | 211326.5 | 191898   | TRUE |
| 71139.5  | 115719.1 | 94683    | 96618.4  | 86822    | 72799.3  | 83334    | 82179.8  | TRUE |
| 125116.5 | 143440.6 | 116955.4 | 146114.8 | 140559.1 | 127289.2 | 136705.3 | 128574.5 | TRUE |
| 101833.8 | 159678.3 | 76257.9  | 191844.2 | 124782.8 | 89386.8  | 109638.5 | 111799   | TRUE |
| 78890.6  | 86833.5  | 101407.6 | 85364.6  | 122094.6 | 89219.9  | 92705.5  | 116361.6 | TRUE |
| 65263    | 49903.5  | 39377.7  | 62616.6  | 46799    | 71007.5  | 71818.3  | 77313.9  | TRUE |
| 92579.3  | 67413.6  | 55142.7  | 84998.9  | 85788.5  | 70321.2  | 84329.5  | 102984.8 | TRUE |
| 190443.3 | 222207.8 | 134755.2 | 151261.4 | 151905.6 | 167995   | 228222.4 | 207710.3 | TRUE |
| 264993.6 | 277067.8 | 212655.3 | 242171.8 | 248476.6 | 311376.3 | 331941.3 | 347692.4 | TRUE |
| 53115.9  | 39500.3  | 42869.6  | 41780.6  | 69815.9  | 50648.9  | 58888.9  | 67531.9  | TRUE |
| 23324.2  | 19021.2  | 21680.4  | 10647.7  | 26854.7  | 31809.5  | 24027.5  | 25229.2  | TRUE |
| 6694     | 17940.7  | 24456.9  | 10197.2  | 19507.4  | 14221.1  | 8765.6   | 7646.8   | TRUE |
| 294306.8 | 333293.3 | 236021.4 | 291109.2 | 314755.4 | 265276   | 368376.8 | 299902.5 | TRUE |
| 105457.1 | 95461.6  | 114753.3 | 135489.8 | 72590    | 91729.3  | 94964.6  | 123666   | TRUE |
| 183057.2 | 173313   | 167068.1 | 205280.4 | 191790.4 | 150366.2 | 210368.7 | 172588   | TRUE |
| 55955.3  | 53043.9  | 51811.5  | 65124.6  | 69548.9  | 45151.9  | 53241.3  | 51749.4  | TRUE |
| 61433.6  | 74996.1  | 131061.9 | 59602.4  | 62250.4  | 65968.9  | 60641.2  | 67685.8  | TRUE |
| 175976.9 | 156964.1 | 226850   | 222778.9 | 178713.5 | 191545.6 | 155728.9 | 148798.9 | TRUE |
| 702189   | 717706.7 | 827145.4 | 827430.4 | 593058.3 | 672280.5 | 750490.9 | 647545.6 | TRUE |
| 27424.8  | 10850    | 29751.4  | 31016.1  | 23868.8  | 29798    | 31684.9  | 28363.2  | TRUE |
| 155338.5 | 189325   | 237774.7 | 233646.7 | 180123   | 180795.5 | 212247.5 | 175740.9 | TRUE |



|          |          |          |          |          |          |          |          |      |
|----------|----------|----------|----------|----------|----------|----------|----------|------|
| 228740   | 270391.7 | 207719.1 | 250091   | 249889.4 | 201902.6 | 290534   | 230978.6 | TRUE |
| 306770.7 | 373594   | 296982.9 | 296401.9 | 315028.3 | 264679.3 | 363086.5 | 309999.7 | TRUE |
| 97033.8  | 73590.4  | 156146   | 129611.2 | 91233.6  | 84276.8  | 108802   | 124451.3 | TRUE |
| 192684.7 | 257302.1 | 150220.7 | 190454.4 | 222056.3 | 148731.8 | 241808.4 | 212905.2 | TRUE |
| 202702.3 | 233881.4 | 159190.4 | 168702.4 | 234605.6 | 167907.7 | 249850.2 | 241920.4 | TRUE |
| 43240.4  | 56713.9  | 32619.1  | 34849    | 59387.9  | 34392.4  | 53856.2  | 55997.9  | TRUE |
| 72292.1  | 90332.7  | 123755.2 | 100476.6 | 74970    | 68985.6  | 93159.6  | 89609.8  | TRUE |
| 147002.6 | 141082.7 | 179760.1 | 214387   | 114522.9 | 128287.4 | 138491.4 | 146729   | TRUE |
| 240897.5 | 193761.9 | 242784.5 | 262355.7 | 226893.6 | 326881.2 | 245418.4 | 298699.6 | TRUE |
| 216220.4 | 154306.7 | 175943.4 | 187466.4 | 157612.3 | 231737.9 | 186418   | 254267.1 | TRUE |
| 177727.4 | 197667.3 | 220970.3 | 242758.4 | 164614.5 | 183432.2 | 188550.6 | 219023.6 | TRUE |
| 35341.7  | 43109.6  | 39407.5  | 44257.9  | 37737.9  | 24014.2  | 43827.9  | 42715.6  | TRUE |
| 1311663  | 1164534  | 1217823  | 1394949  | 1217895  | 1262966  | 1292855  | 1318533  | TRUE |
| 550272   | 475472   | 514989.4 | 606774.5 | 537476.2 | 551324.2 | 553751.1 | 511697.2 | TRUE |
| 1040756  | 863352   | 945797   | 930894.3 | 977875.3 | 1073215  | 966232.9 | 1035721  | TRUE |
| 1104584  | 1001417  | 1007998  | 1094472  | 1188048  | 1231916  | 1132544  | 1156556  | TRUE |
| 213577.9 | 244234   | 224123.2 | 227474.9 | 238101.4 | 221525.2 | 217041   | 251685.6 | TRUE |
| 72743.9  | 51953.5  | 60317.3  | 92654.3  | 60576.5  | 65659.5  | 80760.4  | 61824.9  | TRUE |
| 29636.8  | 7637     | 25352.1  | 17115.9  | 40135.1  | 35383.5  | 40049.5  | 30391.6  | TRUE |
| 32705.5  | 28679    | 30165.8  | 13167.3  | 21727.4  | 30945.5  | 10842.7  | 17483.9  | TRUE |
| 56179.5  | 58650.6  | 26382.2  | 47953.2  | 44456.4  | 30382.2  | 43925.7  | 53429.2  | TRUE |
| 130292.9 | 138321.7 | 157833.6 | 127166.4 | 126698.3 | 184012.3 | 143217.5 | 125306.9 | TRUE |
| 118448.2 | 79433.7  | 92685.6  | 86628.2  | 90789.3  | 126376.7 | 116167.4 | 120361.9 | TRUE |
| 21439.1  | 7324     | 20769.7  | 7146.1   | 9471.9   | 40289.1  | 14937.8  | 28323.2  | TRUE |
| 87740.6  | 75549.3  | 85473.1  | 81827.6  | 80796.5  | 131554.6 | 121695.4 | 113750.1 | TRUE |
| 42255.8  | 31384.3  | 35551.4  | 36019.7  | 29999.6  | 36568.9  | 32784.9  | 36077.7  | TRUE |
| 28864.1  | 41479.8  | 42427.8  | 27130.9  | 29152.1  | 20703.8  | 38541.8  | 25435.5  | TRUE |
| 7535.8   | 10025.4  | 8582.1   | 13378.2  | 4399.4   | 15282.7  | 11017.9  | 19561.8  | TRUE |
| 23308.2  | 36579.3  | 38197.7  | 25546.8  | 23695.4  | 28997.4  | 34653.3  | 23234.6  | TRUE |
| 104767.3 | 29542.9  | 94735.6  | 67853.5  | 140518.5 | 50518.7  | 46615    | 51268.8  | TRUE |
| 245638   | 231627.6 | 286635.1 | 213463.8 | 197882.7 | 271245.8 | 274566.3 | 240012.5 | TRUE |
| 602942.5 | 585901.4 | 630158.9 | 634998.1 | 623602.5 | 738994.2 | 606854   | 604798.1 | TRUE |
| 279293.1 | 285501.8 | 282879.2 | 297161.8 | 264532.7 | 285134.1 | 273562.1 | 232026.7 | TRUE |
| 1251276  | 1020990  | 1179613  | 1024917  | 1369587  | 852078.8 | 866018.8 | 973111.4 | TRUE |
| 669217.2 | 472247.8 | 662459.5 | 627632.4 | 891217.5 | 588501.1 | 548388.3 | 555901.5 | TRUE |
| 56632.6  | 36109.6  | 57127.5  | 43278.3  | 37391.3  | 59640.2  | 49695.4  | 44536.4  | TRUE |
| 83954    | 81542.5  | 369787.8 | 72916    | 76925.3  | 110902.7 | 100694   | 105162.2 | TRUE |
| 808568.2 | 599920.9 | 574060.5 | 697019.4 | 829386.2 | 909583.2 | 799101   | 994298.7 | TRUE |
| 91206    | 88001.3  | 145377.1 | 99244.7  | 103222.7 | 95281.6  | 71165.8  | 104607.6 | TRUE |
| 237764   | 180014.5 | 171750.3 | 216536.9 | 220240.8 | 188333.2 | 248141.2 | 216135.8 | TRUE |

|          |          |          |          |          |          |          |          |      |
|----------|----------|----------|----------|----------|----------|----------|----------|------|
| 64836.8  | 46617.7  | 59342.2  | 54834.8  | 38601.1  | 60795.1  | 46664.9  | 64519.6  | TRUE |
| 124453.6 | 94280.7  | 109504.5 | 130845.7 | 111024.2 | 123954   | 115055.1 | 107625.5 | TRUE |
| 32607.2  | 27804.4  | 31393.9  | 34376.4  | 26410.2  | 25659.1  | 32282.9  | 11264.4  | TRUE |
| 174723.1 | 136620.1 | 128109.2 | 149088.8 | 164517.4 | 175766.2 | 173481.6 | 186134.9 | TRUE |
| 460862.3 | 362789   | 358310.5 | 507096.2 | 387879.5 | 429185.1 | 414895.4 | 407458.8 | TRUE |
| 490839.7 | 427681.8 | 415696.1 | 516719.1 | 382205.8 | 472577.8 | 449660.7 | 405396.2 | TRUE |
| 69066.7  | 68275.3  | 90989.8  | 100804   | 83443.5  | 70004.1  | 75998.9  | 79505.4  | TRUE |
| 397193.5 | 272824.5 | 327076.8 | 318441.8 | 328472.8 | 360178.6 | 328046.4 | 390347.2 | TRUE |
| 282041.5 | 268351.1 | 245728.5 | 239813.9 | 262109.6 | 307689   | 244280.2 | 278986.7 | TRUE |
| 52781.5  | 35773    | 34209.8  | 51657.6  | 35682.8  | 52266.8  | 62966.2  | 53709    | TRUE |
| 141906.9 | 96254    | 101580.2 | 123598   | 137127.6 | 166016.8 | 104703.7 | 164810.5 | TRUE |
| 627216.5 | 465986.1 | 643056   | 515238.8 | 595359.3 | 685897.1 | 503523   | 719730.6 | TRUE |
| 42348.2  | 22391.3  | 37081.1  | 34312.1  | 25891.5  | 45519.4  | 40064.8  | 33479.3  | TRUE |
| 69807.3  | 72559.7  | 82210.1  | 95457    | 70463.1  | 72427.5  | 72301.9  | 56999.6  | TRUE |
| 39780.9  | 42455.2  | 18047.2  | 35046.5  | 35135.6  | 45383.9  | 46307.8  | 43489.8  | TRUE |
| 213235.5 | 217376.8 | 179702.8 | 227424.2 | 227518.5 | 212478.4 | 230427.9 | 223958.6 | TRUE |
| 1416933  | 1260965  | 1116016  | 1491271  | 1463008  | 1224151  | 1326171  | 1461177  | TRUE |
| 830923.2 | 825517.8 | 735772.1 | 692100.4 | 739996.3 | 816160.2 | 824301.8 | 838923.1 | TRUE |
| 407021.2 | 390635.8 | 353103.3 | 448728.9 | 360726.4 | 392593.9 | 426552.5 | 394745.1 | TRUE |
| 1341474  | 1320476  | 1149150  | 1321375  | 1286006  | 1665598  | 1386881  | 1389838  | TRUE |
| 195333.7 | 221749.3 | 136579.9 | 251168.3 | 278836.2 | 123027.5 | 170873.4 | 239399.8 | TRUE |
| 44949.4  | 38022.2  | 44373.7  | 77087.8  | 57485    | 44634.2  | 51326    | 50759.5  | TRUE |
| 199346.8 | 206194.2 | 202141.3 | 205592   | 166027.8 | 257566.2 | 219224.9 | 246564.9 | TRUE |
| 536418.1 | 524659.3 | 483310.1 | 590126.9 | 546188.2 | 598037.2 | 530781.2 | 626523   | TRUE |
| 107665   | 73393.7  | 76785.4  | 99765.4  | 122094.8 | 115750.6 | 84086.3  | 125879.7 | TRUE |
| 59439.2  | 58974.7  | 55947.5  | 61333.3  | 57188.9  | 65040.8  | 48998    | 63810.9  | TRUE |
| 45255.5  | 54698.1  | 54469.8  | 60742.1  | 54018.4  | 31040.5  | 42845.6  | 36865.2  | TRUE |
| 78192.5  | 69965.1  | 71211.7  | 64291.1  | 62322    | 90671.5  | 71301.1  | 74310.8  | TRUE |
| 137760   | 96263.5  | 105266.1 | 133630.5 | 109830.1 | 132447.3 | 146945   | 145565.9 | TRUE |
| 160895.5 | 116619.7 | 185074.9 | 175734.8 | 211227.4 | 131533.8 | 120763.2 | 145249.4 | TRUE |
| 187512.8 | 165384.3 | 274708.3 | 150164.3 | 150447.5 | 285997   | 209095.7 | 170951.9 | TRUE |
| 498727   | 468270.7 | 668784   | 469380.4 | 449087.1 | 703969.2 | 482493.3 | 486387.4 | TRUE |
| 188939.9 | 141308.8 | 213744   | 211643.7 | 296848.6 | 151677   | 173399.1 | 176521.7 | TRUE |
| 878470.2 | 695305.4 | 881117.9 | 874700.3 | 1266834  | 707633.5 | 757527.5 | 792332.3 | TRUE |
| 66454.8  | 71629.5  | 121491.4 | 73032.5  | 55939    | 103849.6 | 71664.9  | 57564.3  | TRUE |
| 113567.6 | 123302.5 | 151531.1 | 84311.6  | 91321.4  | 138804.5 | 115937.2 | 97417.6  | TRUE |
| 123264.2 | 132938   | 117783.7 | 116699.6 | 152857.8 | 120809.3 | 136899.8 | 122392.2 | TRUE |
| 163918.6 | 138838.7 | 149948.7 | 176716.6 | 194011.3 | 145600.3 | 130639.6 | 160586   | TRUE |
| 345369.4 | 266571.7 | 332740.4 | 349449.6 | 585323.5 | 232168.1 | 290134.1 | 294779.3 | TRUE |
| 18605.8  | 7389.8   | 19533.4  | 12877.4  | 7557.8   | 31513.9  | 12247.4  | 20138.6  | TRUE |
| 116132.9 | 108022.3 | 134811.2 | 73481.1  | 82005.4  | 210338.8 | 142716.3 | 113217   | TRUE |
| 221187.9 | 165309.7 | 213144   | 253119.3 | 341387.7 | 201053.7 | 244104.8 | 254327.9 | TRUE |
| 1107626  | 1019984  | 1582886  | 919627.1 | 850523.6 | 1679716  | 1085542  | 856982.4 | TRUE |
| 154865.6 | 156049.4 | 229482   | 150059   | 143612.9 | 243514.7 | 213119.7 | 171071.1 | TRUE |
| 61613.3  | 65562.8  | 78428    | 45275.9  | 71655.5  | 109951.4 | 52346.5  | 78124.1  | TRUE |

|          |          |          |          |          |          |          |          |      |
|----------|----------|----------|----------|----------|----------|----------|----------|------|
| 44867.8  | 48753    | 45750.7  | 44767.6  | 55889    | 62389.3  | 49862.5  | 60169.7  | TRUE |
| 114850.5 | 141310.2 | 156640   | 158588.7 | 162178.4 | 120502.3 | 82316.6  | 116100.1 | TRUE |
| 564065.3 | 389292.5 | 592179.9 | 474067.5 | 516948   | 455646.4 | 414223.3 | 559125.4 | TRUE |
| 359083   | 395960.5 | 365992   | 361549.3 | 366142.1 | 413194.8 | 396974.2 | 408340.9 | TRUE |
| 29637.2  | 31938.7  | 41571    | 48057.2  | 42114.4  | 38861.5  | 35339.6  | 39343.5  | TRUE |
| 43547.3  | 32985.1  | 34091.3  | 41840.7  | 35583    | 37502.3  | 63100.2  | 48828.5  | TRUE |
| 251851.5 | 176257.7 | 185492.2 | 299789.4 | 226551   | 297816.1 | 212921.3 | 289084.5 | TRUE |
| 297470.7 | 279496.1 | 291405.3 | 319696.8 | 333423.7 | 364942.2 | 331294.5 | 357197.3 | TRUE |
| 50462.4  | 28740.5  | 28269.4  | 40333.9  | 41329.7  | 57636.4  | 39144.8  | 55102.4  | TRUE |
| 38150.8  | 33591.7  | 49841.8  | 38972.3  | 32003.8  | 35225.6  | 37345.9  | 47292    | TRUE |
| 252920.5 | 286776   | 238205.2 | 286045   | 241007.8 | 244168   | 321621.6 | 264365.7 | TRUE |
| 293079.9 | 271008.6 | 319079.7 | 394309.7 | 310414.2 | 334043.7 | 289626.5 | 259746.7 | TRUE |
| 615430.5 | 694888.9 | 611260.9 | 544014.3 | 543137.2 | 612143.9 | 542848.4 | 568367.9 | TRUE |
| 321186.3 | 316135.1 | 218061.5 | 329002.9 | 342361.4 | 326731.5 | 377694.9 | 380287.4 | TRUE |
| 68666.6  | 54203.7  | 70779.8  | 53087.3  | 67924.5  | 67907    | 70258.2  | 70941.6  | TRUE |
| 634937.3 | 622033.6 | 570030.5 | 549198.7 | 629963.5 | 748416.7 | 660304.5 | 687476.6 | TRUE |
| 114069.8 | 73896.7  | 68821.8  | 68789.2  | 74858.7  | 63316.5  | 53113.1  | 77032.1  | TRUE |
| 213512   | 227474.9 | 221906.8 | 308682.5 | 253587.2 | 219227.3 | 198402.3 | 218431   | TRUE |
| 123329.9 | 91947.3  | 108947.5 | 138870.7 | 131021.6 | 151327.7 | 100900.2 | 167147.6 | TRUE |
| 250288.2 | 249134.8 | 267707.7 | 273970.1 | 307022.4 | 272294.3 | 227869.8 | 293031.3 | TRUE |
| 164191.1 | 196794.3 | 91878.7  | 86733.4  | 114916.3 | 108716.3 | 107609.3 | 141043.6 | TRUE |
| 51377.9  | 32709.7  | 52795.4  | 62511.2  | 59904.5  | 65986.3  | 45738.6  | 51356    | TRUE |
| 42648.8  | 52065.6  | 62633.5  | 54608.4  | 57214.3  | 76958.9  | 50160.2  | 61392.7  | TRUE |
| 27814.4  | 21340.6  | 37835.8  | 44834.7  | 33620    | 32433.9  | 24968.8  | 25729.3  | TRUE |
| 148463.7 | 90781.5  | 142032.5 | 154283.8 | 148510.2 | 126449.6 | 104189.5 | 159013.6 | TRUE |
| 200173.6 | 211970.3 | 145728.2 | 151916.6 | 214907.1 | 202155   | 225753.7 | 216952.8 | TRUE |
| 277236.8 | 175157.9 | 193454.8 | 216819.9 | 195561.3 | 192997.1 | 162511.3 | 204611.2 | TRUE |
| 40412.5  | 43039.6  | 40168.8  | 68225.4  | 31813.3  | 39182.3  | 32504.7  | 54585.5  | TRUE |
| 1239370  | 1260509  | 967681.5 | 859989.6 | 1216802  | 1376696  | 1273089  | 1351765  | TRUE |
| 97160.1  | 88092.9  | 89355.3  | 106518.2 | 64436.3  | 140116   | 101362.7 | 95664.9  | TRUE |
| 56754.4  | 64717.1  | 68182.6  | 59229.8  | 52756.6  | 59768.2  | 54266.6  | 72086.7  | TRUE |
| 19407.8  | 14952.6  | 36188.3  | 11588.4  | 14706.3  | 25321    | 27683.1  | 13618    | TRUE |
| 94375.8  | 132032.5 | 68932.2  | 78912    | 131622.6 | 89210.9  | 144664   | 112392.2 | TRUE |
| 16215.4  | 5519.2   | 11445.4  | 6620.7   | 7233.9   | 10150.4  | 7448.4   | 8329     | TRUE |
| 197640   | 189665.8 | 306014.8 | 275797.3 | 152133.3 | 256109.4 | 208570.4 | 200349.6 | TRUE |
| 120575.4 | 116170   | 114124.9 | 151862.2 | 148870.8 | 118762.9 | 115804.5 | 167683   | TRUE |
| 214164.5 | 151966.3 | 255073.1 | 200248   | 124737.1 | 301625.1 | 147418.4 | 158265.4 | TRUE |
| 194997.3 | 167731   | 207599.6 | 207014.9 | 242678   | 216388.9 | 167333.9 | 224984.9 | TRUE |
| 46795.8  | 48577.1  | 41017.4  | 46160.2  | 40341.5  | 38944.4  | 54927    | 36017.5  | TRUE |
| 36934.2  | 24178.8  | 21450.3  | 30551.5  | 32689.8  | 34915.2  | 35225    | 33089.9  | TRUE |

|          |          |          |          |          |          |          |          |      |
|----------|----------|----------|----------|----------|----------|----------|----------|------|
| 81862.8  | 57232.6  | 87593.9  | 89008.2  | 75600.5  | 88619    | 63825.8  | 81004.9  | TRUE |
| 47225.7  | 39081.7  | 76475.2  | 82753.4  | 45550.1  | 80036.9  | 50650.7  | 41527.9  | TRUE |
| 424832.9 | 490315.4 | 362409   | 435715.9 | 418277.3 | 428118.9 | 520257.1 | 434609.1 | TRUE |
| 359930.3 | 425539.3 | 472644.6 | 356517.8 | 360941.9 | 381825.7 | 414191.8 | 367853.2 | TRUE |
| 57893.6  | 79621.6  | 86374.1  | 95137.2  | 78720.5  | 96524.5  | 94827.4  | 82448.4  | TRUE |
| 221858.1 | 174797.6 | 212281.2 | 204736.2 | 201282.4 | 179397.9 | 213544.9 | 210781.5 | TRUE |
| 1252987  | 1221959  | 944421.4 | 1232894  | 1034799  | 1019693  | 1343220  | 1024832  | TRUE |
| 430576.4 | 472410   | 391428   | 482979.2 | 358170.8 | 382555.5 | 513999.6 | 446553.5 | TRUE |
| 10396.8  | 29879.1  | 16336.9  | 26106.6  | 16862.6  | 18586.3  | 7871.3   | 10697.7  | TRUE |
| 32349.8  | 46851.9  | 33849.8  | 49670.4  | 45963.7  | 35477.5  | 32290.4  | 33033.8  | TRUE |
| 176756   | 180282.8 | 169006.2 | 184058.9 | 164410.2 | 177324.4 | 203578.2 | 166748   | TRUE |
| 160080.8 | 179045.6 | 125793.9 | 148249.5 | 106259   | 141289.8 | 153637   | 131460   | TRUE |
| 52865    | 66613.6  | 63328.4  | 64129.6  | 71484.1  | 80047.2  | 85128.9  | 49786.3  | TRUE |
| 71593.7  | 57768.2  | 58177.1  | 67773.4  | 56595.3  | 88689.6  | 74613.3  | 71451.3  | TRUE |
| 45555    | 40242.5  | 67925.6  | 69644.6  | 54129.8  | 41518.3  | 54686.3  | 55971.1  | TRUE |
| 166713.9 | 158912.8 | 160180   | 161573.2 | 147767.4 | 162453.2 | 168950.8 | 129494.7 | TRUE |
| 296100.2 | 255954.5 | 297394.1 | 335719.1 | 264954.5 | 285393.3 | 265932.6 | 268672.1 | TRUE |
| 241596.9 | 213512.9 | 243238.7 | 309647.7 | 247926.6 | 277398.7 | 244603.6 | 251895.7 | TRUE |
| 113861.9 | 135175.5 | 95959.5  | 103689.8 | 100065.4 | 108600.9 | 160464.2 | 101378.8 | TRUE |
| 151144.9 | 143248.3 | 234799   | 212427   | 178224   | 202771.3 | 167543.4 | 181152   | TRUE |
| 28406.1  | 32658    | 24385.3  | 31550.6  | 31823.9  | 29684.9  | 34355.7  | 33378    | TRUE |
| 39832.8  | 41273.9  | 53737.5  | 33984.9  | 29174.3  | 34490.4  | 32112.2  | 28357.8  | TRUE |
| 85804    | 78487.6  | 65952.6  | 58640.9  | 49692.4  | 64825.8  | 87877.3  | 53273.1  | TRUE |
| 527158.8 | 539481.9 | 571096.5 | 464364.7 | 489951.9 | 536876.3 | 523055.9 | 491840.7 | TRUE |
| 204091   | 224546.1 | 261426.6 | 193772.5 | 157196.1 | 259298.9 | 244054.2 | 156473.7 | TRUE |
| 161415.6 | 181927.3 | 167441.3 | 203980.1 | 204209.1 | 136067   | 149677.2 | 183432.3 | TRUE |
| 35954.6  | 67673.9  | 56484.6  | 41708.9  | 44974.5  | 40133.6  | 44204.3  | 34901.4  | TRUE |
| 85754.9  | 89515.8  | 72219    | 82249.8  | 80721.4  | 83766.9  | 113453.5 | 87137.4  | TRUE |
| 88445.1  | 83922.4  | 124465.5 | 103287.3 | 90034    | 76742.7  | 79967.3  | 71582.5  | TRUE |
| 141837.8 | 163663.9 | 191391   | 160753.3 | 157930.2 | 139748.6 | 131411   | 128134.5 | TRUE |
| 145346.2 | 124338.6 | 140860   | 122374   | 92215.9  | 176483   | 168532.8 | 105288.9 | TRUE |
| 87383    | 80585.9  | 70405    | 103108.6 | 61766.6  | 75373.7  | 89122.9  | 89526.6  | TRUE |
| 37531.2  | 30892.5  | 50246.7  | 55511.1  | 44963.6  | 33608.9  | 37594    | 44458.5  | TRUE |
| 152779   | 135368.7 | 155258.8 | 134635.1 | 155459.5 | 131114.2 | 150008.1 | 143817.8 | TRUE |
| 72355.5  | 71659.4  | 78235.9  | 75433.7  | 75728.8  | 80516.5  | 79538.4  | 86869    | TRUE |
| 94977    | 95196.3  | 81313.7  | 103085.7 | 72912.8  | 127973   | 105808.7 | 107952.9 | TRUE |
| 116065.7 | 115503.9 | 143233.3 | 119057.9 | 151091.6 | 126921.9 | 138230.1 | 168336.1 | TRUE |
| 172894.2 | 165697.4 | 143245.9 | 206926.5 | 180998.5 | 146027.7 | 259750   | 187039.9 | TRUE |
| 543796.8 | 668047.5 | 465271.2 | 425217.9 | 500208.7 | 496925.9 | 517006.4 | 542345.1 | TRUE |
| 80916.7  | 111278.4 | 118254.8 | 102601.3 | 138329.1 | 109282.4 | 93910.4  | 93060    | TRUE |
| 234166.9 | 176423.7 | 198167.4 | 249798.5 | 228608.7 | 299933   | 263405.7 | 292971.3 | TRUE |
| 643066.6 | 727784   | 695765.6 | 656250   | 539788.2 | 844856.5 | 731590.7 | 829845.8 | TRUE |

|          |          |          |          |          |          |          |          |      |
|----------|----------|----------|----------|----------|----------|----------|----------|------|
| 78683.4  | 71528.1  | 49914.4  | 84491.6  | 79123    | 88288.5  | 91287.3  | 94289    | TRUE |
| 38365.1  | 44036.7  | 48917.1  | 55051.2  | 40499.5  | 47250.4  | 39577.3  | 42834.4  | TRUE |
| 107005.2 | 69870.1  | 79180    | 131443.6 | 109462.2 | 83632.8  | 121648.9 | 124834.9 | TRUE |
| 24117.4  | 9827.7   | 30126.1  | 24301.5  | 23361.9  | 18652.4  | 12686.4  | 22899.7  | TRUE |
| 88765.4  | 80289.8  | 71622.2  | 82981    | 96989.4  | 78181.4  | 103133.6 | 102031.2 | TRUE |
| 70022    | 64449.5  | 42996.6  | 69907.8  | 54560.1  | 76167    | 62575.9  | 88072.3  | TRUE |
| 120548.7 | 154678.6 | 127902.2 | 148065.8 | 117365.7 | 119816.5 | 151402.2 | 152367.8 | TRUE |
| 132788.9 | 123881.3 | 111807.6 | 139277.9 | 123968.5 | 135989.3 | 133433.8 | 116554.3 | TRUE |
| 77869.3  | 87432.2  | 72264.9  | 79624.6  | 96181.7  | 69425.1  | 72511.8  | 93104.2  | TRUE |
| 100755.9 | 93603.9  | 100256.9 | 137825.9 | 122468.7 | 290132.3 | 145035.4 | 204275.1 | TRUE |
| 237891.2 | 240067.5 | 270671.9 | 321283.2 | 307098.2 | 723129.5 | 331818.2 | 468689.3 | TRUE |
| 154788.6 | 116737.8 | 139884.2 | 141868.5 | 128171.1 | 172213.5 | 152938.4 | 168158.4 | TRUE |
| 42870.5  | 61247.3  | 40170.8  | 46366.7  | 51266.7  | 45753.4  | 60650    | 56526.1  | TRUE |
| 66503.7  | 81294.1  | 67751.6  | 56594.1  | 61643.7  | 84476.1  | 72802.9  | 63606.9  | TRUE |
| 43846.4  | 19506.7  | 44570.2  | 49656.9  | 43426.6  | 48690.2  | 50073.1  | 58926    | TRUE |
| 86242.2  | 60088.6  | 61550.1  | 78552.8  | 83272.4  | 94704.7  | 82817.8  | 102794.7 | TRUE |
| 157293.9 | 149573.1 | 172418.2 | 212583.4 | 196987.5 | 190556.5 | 160074.1 | 186010.2 | TRUE |
| 97909.8  | 69358.5  | 83922.4  | 91771.2  | 81392.5  | 83492.5  | 77710.8  | 82039    | TRUE |
| 130585.9 | 110209.1 | 102014.8 | 118518.2 | 110922.5 | 120048.8 | 126920   | 95924.9  | TRUE |
| 188598.7 | 160725.7 | 198087.7 | 196574.1 | 189613.9 | 193202.7 | 159885.8 | 187166   | TRUE |
| 69799.2  | 56808.1  | 68784    | 71033.6  | 78140.8  | 82200.8  | 74986.5  | 74755.4  | TRUE |
| 67963.8  | 78173.9  | 81875.6  | 81984.1  | 68350.2  | 72762.5  | 61905.9  | 68281.4  | TRUE |
| 59156.3  | 53896.8  | 65794.7  | 60706.6  | 80360.8  | 70900.5  | 67514    | 66884.4  | TRUE |
| 127291.7 | 88715.8  | 80032.3  | 85970.1  | 106578.3 | 114949.5 | 129507.4 | 110711.9 | TRUE |
| 474325.7 | 423083   | 405084.1 | 504493.6 | 483313.2 | 466949.6 | 448376   | 529392.2 | TRUE |
| 361138.2 | 330441.1 | 306490.2 | 403189.8 | 354851   | 338497.4 | 402253.7 | 380392   | TRUE |
| 37870.9  | 42076.8  | 29997.7  | 44801.5  | 27042.9  | 29394.3  | 30266.1  | 34889.3  | TRUE |
| 29153.9  | 24744.4  | 20818.1  | 24610.7  | 15196.6  | 19990.3  | 11463.6  | 21285.5  | TRUE |
| 51623.4  | 45904.5  | 37699.9  | 41399.2  | 49388.1  | 43430.4  | 46714.8  | 31007.3  | TRUE |
| 77003.7  | 75928.1  | 64198.6  | 70120.6  | 67672.3  | 76180.6  | 78545    | 74315.8  | TRUE |
| 59809.3  | 46349    | 55609.6  | 52772.5  | 52678.5  | 50907.1  | 53928.4  | 59239.4  | TRUE |
| 110051.5 | 113964.3 | 102837.7 | 144509.1 | 116174.4 | 92022.1  | 120840.2 | 112124.3 | TRUE |
| 79271.9  | 89436    | 68741.4  | 64487.5  | 75270.6  | 70358.2  | 63275.7  | 77984.8  | TRUE |
| 448170.3 | 380859.6 | 462605   | 492994.4 | 425976.8 | 389252.6 | 435173.7 | 364385.7 | TRUE |
| 530355.5 | 508587.5 | 517839.6 | 573862.7 | 342497.4 | 438250.1 | 519164   | 446682.4 | TRUE |
| 55534.9  | 71056.5  | 44193.4  | 59158    | 55196.5  | 55485.1  | 70416.7  | 69924.4  | TRUE |

|          |          |          |          |          |          |          |          |      |
|----------|----------|----------|----------|----------|----------|----------|----------|------|
| 106115.9 | 136054.2 | 182110.3 | 221332.3 | 70815    | 71799.1  | 134501.7 | 70890.4  | TRUE |
| 194483.8 | 186998.9 | 166936.3 | 165728.4 | 167915.6 | 215411.3 | 177308.9 | 267473.6 | TRUE |
| 31516.3  | 47203.1  | 37348    | 45624.6  | 24830.2  | 29341.3  | 32488.5  | 35300.4  | TRUE |
| 61849.7  | 51783.5  | 78537.8  | 60867.3  | 37026.8  | 45290.4  | 66805.9  | 56168.5  | TRUE |
| 485051   | 542423.7 | 404680.5 | 501871.5 | 500779.7 | 398506.6 | 557529.1 | 464090.5 | TRUE |
| 32085.9  | 37080.5  | 20887.4  | 32897.7  | 31853    | 19877.8  | 16564.7  | 33447.5  | TRUE |
| 634876.4 | 554875   | 807464.7 | 773508.4 | 553457.1 | 568091.6 | 637816.6 | 567973.8 | TRUE |
| 467563   | 469241.7 | 374475.6 | 388908.8 | 467550   | 364599.1 | 427467.6 | 450136   | TRUE |
| 484071.9 | 710533   | 316910.1 | 684010.6 | 504930.1 | 331056.5 | 663924.5 | 505362.7 | TRUE |
| 499957.5 | 494362.1 | 742625.4 | 726733.7 | 384358.8 | 681099.6 | 502347.8 | 620594.5 | TRUE |
| 829953.4 | 794759.3 | 1035978  | 1040227  | 617280.2 | 1101203  | 804357.4 | 1075481  | TRUE |
| 235606.6 | 228825.6 | 198502.3 | 194765.3 | 172605.9 | 252780.6 | 283635.4 | 224956.9 | TRUE |
| 108894.6 | 71325.3  | 106532   | 96229.5  | 100335.7 | 137964.9 | 95125    | 112662.4 | TRUE |
| 335585.4 | 277659.6 | 364397.4 | 383130.7 | 314713.5 | 369389.3 | 333698.3 | 393637.5 | TRUE |
| 111270.4 | 72417.3  | 108578.5 | 130465.1 | 124904.3 | 172318.8 | 98544.1  | 159955.7 | TRUE |
| 40164.1  | 39162.9  | 41454.3  | 65643.9  | 44911.9  | 73374.9  | 42244.4  | 52239.9  | TRUE |
| 376065.7 | 393398.4 | 389622.2 | 395959.2 | 391336.5 | 403917.9 | 406901.2 | 382788.7 | TRUE |
| 147448.2 | 148349.8 | 125066.2 | 137079   | 112569.5 | 142382.2 | 126378.2 | 98561.2  | TRUE |
| 115795.7 | 109905.5 | 57498.8  | 93942    | 78903.1  | 110078   | 111631.9 | 98739    | TRUE |
| 192918.5 | 179786.7 | 109221.2 | 183699.5 | 159658.9 | 154136.6 | 215436.9 | 187006.7 | TRUE |
| 334960.3 | 359414.8 | 298193.8 | 431877.5 | 291217.7 | 410259.8 | 370177.8 | 418431.8 | TRUE |
| 96892.9  | 69726.1  | 80474.7  | 85265.6  | 68178.3  | 107683.5 | 91403.3  | 112815   | TRUE |
| 98306    | 56124.5  | 103736.9 | 115247.8 | 58829.7  | 97478.2  | 80023.7  | 63890    | TRUE |
| 360028.8 | 342568.5 | 296537   | 361919.4 | 284760.5 | 344652.2 | 350372.3 | 277204.4 | TRUE |
| 230972.9 | 225156   | 186033   | 228351.8 | 219538   | 214324.7 | 228064.2 | 204684.4 | TRUE |
| 94575.9  | 115670.2 | 78282.4  | 128465.5 | 109976.8 | 109243   | 116199.1 | 105964.2 | TRUE |
| 640668.7 | 456423.7 | 594623.3 | 592662.5 | 601588.3 | 741979.5 | 587501.3 | 671435   | TRUE |
| 363705.1 | 297681.3 | 304596.3 | 320066.8 | 295788.3 | 329553.7 | 353912.3 | 265491   | TRUE |
| 556042.4 | 434828.2 | 526529.9 | 550950.3 | 571111.6 | 651682.5 | 522452.7 | 597240   | TRUE |
| 388673.8 | 338451.4 | 367965.1 | 449603.1 | 372498.3 | 428165.4 | 330031.8 | 332027.5 | TRUE |
| 138501   | 103856.2 | 94764.9  | 126054   | 96527.7  | 112324.8 | 150535.3 | 126229.5 | TRUE |
| 127814.3 | 83913.5  | 98849    | 117807.2 | 107784.3 | 108647.9 | 148379.3 | 95261.9  | TRUE |
| 153623.6 | 130425.1 | 100850.5 | 132189.3 | 118677.3 | 118388.3 | 148573.9 | 146643.5 | TRUE |
| 164381.9 | 141948.4 | 128049.9 | 137099.3 | 159713.2 | 152845.3 | 179813.7 | 155751   | TRUE |
| 250133.5 | 220658   | 292660   | 218762.4 | 239248.7 | 235600.7 | 255570.3 | 228435.5 | TRUE |
| 88854.7  | 135518.8 | 388277.3 | 69874.7  | 109538.3 | 122097.3 | 93878.3  | 116338.4 | TRUE |
| 31163.1  | 31490.9  | 27758.2  | 33706.3  | 28529.7  | 26350.5  | 33937    | 28314.8  | TRUE |
| 186590.5 | 209898.6 | 148950.5 | 176834.2 | 184296.2 | 171117.2 | 189741.4 | 183310.3 | TRUE |
| 452827   | 435657.9 | 500925.3 | 472312.7 | 430885.7 | 487783.6 | 438371.7 | 523965.7 | TRUE |
| 32423    | 19860.5  | 30397.8  | 26512    | 18249    | 35854.2  | 27051.3  | 24950.1  | TRUE |
| 138715.5 | 119893.1 | 100496.7 | 112276.7 | 100989.6 | 120732.5 | 134356.9 | 105535.9 | TRUE |
| 132729.4 | 91772.6  | 89602.6  | 93236.1  | 89818.3  | 91881.2  | 94939.6  | 105198.5 | TRUE |
| 382305.1 | 360210.9 | 373513.6 | 365148.5 | 324260.7 | 368384.3 | 360127.1 | 346401.6 | TRUE |
| 307113.7 | 258172.6 | 298948.5 | 322723.9 | 340804.2 | 336080.2 | 278503.4 | 391148.5 | TRUE |
| 123507.4 | 120600.2 | 139750.3 | 142521.7 | 123636.7 | 143177   | 127707.6 | 113679.3 | TRUE |

|          |          |          |          |          |          |          |          |      |
|----------|----------|----------|----------|----------|----------|----------|----------|------|
| 646428.3 | 578315.6 | 543834.1 | 537589   | 540289.7 | 648236.6 | 523796.2 | 528824.9 | TRUE |
| 270198.3 | 275125.1 | 225472.3 | 274322.7 | 252461.9 | 297743.1 | 302194.1 | 284235.2 | TRUE |
| 153923.7 | 133975   | 109819.2 | 140088.3 | 132655.9 | 165469   | 130522.8 | 160251.9 | TRUE |
| 1075909  | 783448.5 | 925667.2 | 970363.3 | 1020312  | 1110833  | 733675.6 | 1068166  | TRUE |
| 610030.8 | 624568.4 | 575398.7 | 515408.2 | 608329.9 | 600761.7 | 437187.9 | 578792.9 | TRUE |
| 930742.8 | 670738.5 | 1058226  | 1075205  | 1093411  | 1227014  | 808412.5 | 1185845  | TRUE |
| 27963    | 25166.7  | 34740.5  | 33776.5  | 46607.8  | 31802.5  | 33521.3  | 38562.4  | TRUE |
| 24012.7  | 10889.5  | 28519.6  | 28945.2  | 17343.2  | 30487.3  | 25246.5  | 30187.7  | TRUE |
| 129723.1 | 121947   | 130621.6 | 149262.4 | 110058.5 | 142690.6 | 139596.3 | 150384.9 | TRUE |
| 31747.3  | 23121.9  | 29709.9  | 42760    | 22472.4  | 25222.9  | 29011.9  | 35933.3  | TRUE |
| 124766.3 | 113777.6 | 157970.7 | 159045.5 | 135300   | 157422.6 | 141032.9 | 160662.6 | TRUE |
| 260246.9 | 258191.6 | 142107.4 | 177789.8 | 176066.7 | 179616.4 | 190620.4 | 187392.5 | TRUE |
| 710869.1 | 741936.2 | 641685.8 | 870005.2 | 741859.7 | 662707.8 | 846855.3 | 781667.3 | TRUE |
| 126819.8 | 140081.3 | 97722.7  | 118732.2 | 100887.1 | 100282.9 | 122683.8 | 88393.2  | TRUE |
| 181929.5 | 209662   | 162804.1 | 161200   | 155997.1 | 169741.2 | 189576.8 | 143826.7 | TRUE |
| 119758   | 122926.7 | 119123.8 | 97747.2  | 93749.8  | 204458.5 | 129744.1 | 123025.9 | TRUE |
| 118905.5 | 140142.8 | 136495.4 | 127654.4 | 99113.2  | 104888.2 | 132533.3 | 126165.3 | TRUE |
| 23292    | 23563.4  | 27458    | 25205    | 23679.3  | 33670.2  | 31924.8  | 21811.2  | TRUE |
| 31982.7  | 25422.4  | 42793.4  | 39990.8  | 31535.7  | 46980.4  | 40151.8  | 27456.6  | TRUE |
| 205664.7 | 198928.3 | 225148.4 | 210993.1 | 210117.2 | 229811.2 | 239566.4 | 230283.2 | TRUE |
| 85141.5  | 77765.4  | 101872   | 95119    | 92484.7  | 87776.9  | 63592.7  | 78592.3  | TRUE |
| 62447.5  | 70800.3  | 88875    | 62636.9  | 48291.6  | 92285.3  | 77330.5  | 52959.7  | TRUE |
| 12949.1  | 27137.5  | 17304.5  | 22319.8  | 4276.5   | 21133.7  | 22523.3  | 9998.1   | TRUE |
| 19995.2  | 8655.7   | 10982.9  | 12774.9  | 19866.6  | 5056.3   | 8478.1   | 11559.3  | TRUE |
| 258542   | 167215.6 | 324773.1 | 262534.6 | 280016.2 | 217646.9 | 215911.7 | 227726.9 | TRUE |
| 352847.1 | 249580.7 | 359303.3 | 293123.8 | 314346.8 | 237692.4 | 236212.5 | 230090.1 | TRUE |
| 65879.7  | 70600.4  | 80288.2  | 55725.7  | 61750.6  | 88922.7  | 69681.8  | 63925.8  | TRUE |
| 360241.7 | 415006.8 | 465000.6 | 280495.6 | 290019.8 | 507731.8 | 441044.4 | 315032.4 | TRUE |
| 27581    | 30238.7  | 40151.2  | 23753.6  | 20561.6  | 33765.4  | 25882    | 9266.1   | TRUE |
| 175805.5 | 173649.1 | 223878.1 | 119773.6 | 100518.6 | 286744.2 | 261204.8 | 166491.9 | TRUE |
| 839148.4 | 390215.3 | 1028689  | 1073454  | 1149118  | 812027   | 537176.7 | 741024.5 | TRUE |
| 18825.5  | 16040.9  | 33985.1  | 35878.1  | 17075.7  | 10738.9  | 18544    | 25523.2  | TRUE |
| 16143.7  | 11948.7  | 27545    | 11861.9  | 6443.4   | 19573.4  | 24007    | 7078.8   | TRUE |
| 74889.7  | 68153.6  | 95084    | 61327.8  | 77766.6  | 78006.2  | 76119.6  | 74974.1  | TRUE |
| 366707.1 | 212938.8 | 308304.3 | 368897   | 337783.2 | 354917.8 | 290174.7 | 342360.9 | TRUE |
| 155648.9 | 143453.6 | 130170.7 | 91155.8  | 92241.4  | 124203.9 | 129970.8 | 97403.9  | TRUE |
| 230949.3 | 229518   | 253327.7 | 245638.6 | 249255.2 | 301479.1 | 283121.4 | 262914.7 | TRUE |

|          |          |          |          |          |          |          |          |      |
|----------|----------|----------|----------|----------|----------|----------|----------|------|
| 69753.2  | 97435.4  | 115668.5 | 71740.2  | 103097.1 | 90829.7  | 82010.6  | 78619.1  | TRUE |
| 82662.8  | 95129.4  | 76315.2  | 58982.2  | 52343.8  | 75254.4  | 93530.2  | 52748.3  | TRUE |
| 156625.5 | 118099.7 | 177309.4 | 163169   | 199210.4 | 138139.9 | 146851.5 | 160764   | TRUE |
| 41726.1  | 36541.1  | 27228.4  | 10672.9  | 28471.9  | 41691.3  | 43997.4  | 40413.1  | TRUE |
| 242429.8 | 172529.1 | 247283.5 | 249054   | 235294.1 | 226774.8 | 186543.1 | 218585.8 | TRUE |
| 479348.3 | 415865.2 | 544722.1 | 571684.9 | 488859.4 | 483477   | 454951.8 | 428276.7 | TRUE |
| 89751    | 57824.6  | 150280.9 | 51369.9  | 51641.2  | 241650.3 | 68244.7  | 62030.2  | TRUE |
| 246128.3 | 132357.1 | 156179.9 | 154900.2 | 579984.6 | 148407.6 | 137037.2 | 164674.7 | TRUE |
| 229393.3 | 180483.9 | 400517.6 | 154310.5 | 128281   | 399744.8 | 226114.7 | 161329.2 | TRUE |
| 56709.6  | 37943.2  | 115355.3 | 37929.6  | 28247    | 115096.3 | 46269.1  | 36510.8  | TRUE |
| 95891.8  | 82816    | 156665.9 | 89584.1  | 71393.8  | 182085   | 83809.3  | 88909.9  | TRUE |
| 168718.2 | 170521.6 | 260784.9 | 84694.7  | 108765.3 | 260103   | 140650   | 106485.8 | TRUE |
| 308723   | 252310.4 | 263284.1 | 272185.4 | 564246.7 | 250405.7 | 250492.7 | 270441   | TRUE |
| 50911.9  | 33951.5  | 86491.8  | 30025.2  | 17232.3  | 149144   | 53701.4  | 28065.3  | TRUE |
| 214286.8 | 81988    | 167978.7 | 142898.9 | 536886.1 | 126810   | 92823.3  | 115959.1 | TRUE |
| 41516.4  | 42265.7  | 26756.4  | 47490.9  | 28496.4  | 56936.2  | 50369.5  | 40301.5  | TRUE |
| 34726.3  | 37991.4  | 39742.1  | 35575.5  | 26500    | 49224.3  | 35693.8  | 41030.4  | TRUE |
| 57026    | 47468.7  | 55249    | 67259.4  | 53466.3  | 95899.1  | 68269.8  | 79967.2  | TRUE |
| 165406.2 | 163146.4 | 179306.2 | 143880.5 | 124588.9 | 196159.3 | 167146.6 | 149585   | TRUE |
| 77538.1  | 63980.6  | 71554    | 70565.7  | 69661.8  | 85177.8  | 78821    | 72292.9  | TRUE |
| 56917.8  | 76566.6  | 46902.6  | 69641.1  | 64669.6  | 67816.8  | 73384.8  | 44968.4  | TRUE |
| 75017.1  | 63843.9  | 55570.7  | 77751.9  | 69486.5  | 64578.7  | 70195.1  | 84713.3  | TRUE |
| 69843.5  | 76468.7  | 87757.7  | 74901.4  | 69364.1  | 70761.3  | 67784.7  | 78585.9  | TRUE |
| 115681.8 | 158940.2 | 129924.7 | 105245.8 | 92009    | 124255.6 | 149415.1 | 85748.5  | TRUE |
| 178071   | 178849.4 | 154516.1 | 198086.8 | 189265.7 | 173731.3 | 161905.5 | 174425   | TRUE |
| 41434.7  | 48731.3  | 40890.9  | 32887.7  | 24535.3  | 51198.2  | 58517.7  | 29604.4  | TRUE |
| 60532    | 71404.5  | 90066.8  | 72488.9  | 60293.5  | 86127    | 89891.4  | 70616.8  | TRUE |
| 82658.5  | 88180.9  | 74730.2  | 53731.1  | 60104    | 128778.7 | 106451.1 | 80393.8  | TRUE |
| 38600.6  | 46310.2  | 44829.4  | 20252.2  | 31930.4  | 46934.8  | 48153.9  | 35285    | TRUE |
| 1466385  | 738573.9 | 1137121  | 1398842  | 1190892  | 1114889  | 629551.9 | 1045422  | TRUE |
| 13030544 | 6045499  | 10124298 | 12803396 | 10417755 | 10069493 | 5566233  | 10092329 | TRUE |
| 10527200 | 5278975  | 7914178  | 10085061 | 9186162  | 8047031  | 4920228  | 9225623  | TRUE |
| 2170373  | 1109410  | 2545371  | 3388058  | 2594271  | 2603094  | 1326604  | 2493476  | TRUE |
| 902192.4 | 642205.1 | 1045492  | 1319455  | 994224.8 | 1098428  | 745663.4 | 1015389  | TRUE |
| 1334756  | 753832.6 | 1438237  | 1869058  | 1469119  | 1532571  | 926120.2 | 1436810  | TRUE |
| 353361.7 | 265634.5 | 379883.4 | 505570.8 | 362537.3 | 419307.3 | 265427.5 | 388989.4 | TRUE |
| 810640.1 | 710519.5 | 839439.2 | 926030.1 | 839268.5 | 877924.5 | 774435.9 | 844404.7 | TRUE |
| 161548.9 | 135392.2 | 156318.6 | 169993.2 | 146506.8 | 174638.7 | 128798.3 | 142014.6 | TRUE |
| 254377.6 | 149260   | 242432.3 | 353961.9 | 264054.4 | 322153.4 | 211546.3 | 288363.4 | TRUE |
| 145912.4 | 204090.5 | 225705.3 | 549557.3 | 430761.9 | 71597.6  | 37369.8  | 85032.5  | TRUE |
| 328328.2 | 476578.3 | 482701.4 | 1163917  | 1025470  | 201595.5 | 245713.2 | 214441.2 | TRUE |
| 125078.1 | 132662.3 | 165936.8 | 227009.7 | 202742.9 | 105587.1 | 67608    | 107917.7 | TRUE |



|          |          |          |          |          |          |          |          |      |
|----------|----------|----------|----------|----------|----------|----------|----------|------|
| 6195695  | 5549609  | 3555053  | 3622856  | 7109694  | 7919390  | 5730229  | 7435314  | TRUE |
| 1196202  | 1109339  | 649793.5 | 725659.8 | 1185936  | 1512353  | 1185746  | 1485203  | TRUE |
| 1031041  | 954966.7 | 586394   | 530292.9 | 986114.7 | 1331172  | 972428.4 | 1278910  | TRUE |
| 358043.5 | 326563.1 | 250696.9 | 324288.8 | 442945.2 | 641154.1 | 447048.2 | 553871.4 | TRUE |
| 2429830  | 2427110  | 2289459  | 2551106  | 2513521  | 3384401  | 2692004  | 3002155  | TRUE |
| 161423.7 | 138538.1 | 97091.7  | 95094    | 157415   | 194583.5 | 176331.4 | 214448.7 | TRUE |
| 155458.3 | 150365.2 | 111794.2 | 150270.3 | 184356.4 | 240770.8 | 192886.2 | 243767.4 | TRUE |
| 131764.4 | 104391.7 | 115336.7 | 113932.4 | 118189   | 158593.3 | 140876   | 134796.9 | TRUE |
|          |          |          |          |          |          |          |          |      |
| 1118824  | 628933.4 | 1195381  | 1538102  | 1180771  | 1184581  | 645711.3 | 1012820  | TRUE |
| 675136.1 | 393224.3 | 660869.5 | 781899   | 636046.6 | 694479.2 | 444373.7 | 640369.2 | TRUE |
|          |          |          |          |          |          |          |          |      |
| 911930.1 | 860738.7 | 561694.2 | 636692.2 | 929677.1 | 1196412  | 890606   | 1027635  | TRUE |
| 20604451 | 18693181 | 7483184  | 8916331  | 21082128 | 30138612 | 18484765 | 30431281 | TRUE |
| 2054642  | 1932556  | 787327.7 | 1080511  | 2201843  | 2736099  | 1954196  | 2847571  | TRUE |
| 1492253  | 1371658  | 630060.3 | 843012.4 | 1566155  | 2017817  | 1395866  | 2149791  | TRUE |
| 475988.5 | 494086   | 319037.4 | 380738.1 | 512613.9 | 564174.4 | 481638.3 | 563420.9 | TRUE |
| 761310.7 | 680392.5 | 424142.3 | 429725.1 | 760536.8 | 940499.1 | 696621.9 | 971490.5 | TRUE |
| 129634.1 | 117531.7 | 97788.5  | 115483.4 | 128251.8 | 175482.9 | 177274.1 | 163857.1 | TRUE |
|          |          |          |          |          |          |          |          |      |
| 152585.8 | 140336.9 | 154614.1 | 203040.7 | 202920.4 | 178648.9 | 153486.6 | 202499.9 | TRUE |
| 129777.4 | 81215.3  | 188511.2 | 151354.8 | 132602.2 | 130461.7 | 93105.2  | 165500.9 | TRUE |
| 101279.2 | 78510.4  | 93790.4  | 115978.6 | 109917.1 | 99239.4  | 69796.6  | 136093.2 | TRUE |
| 53466.8  | 62581.5  | 59667.2  | 78744.5  | 51259.9  | 63878.2  | 50671.3  | 59101.1  | TRUE |
| 95365.9  | 52507.3  | 60486.4  | 72731.3  | 61759.6  | 78571.6  | 57096.9  | 77750.1  | TRUE |
| 71504.9  | 48444.9  | 38212.7  | 70032    | 40826.5  | 66791.7  | 52759.3  | 67794.1  | TRUE |
| 105005.4 | 77109.5  | 171620.8 | 99964.5  | 82041.3  | 104602.1 | 70636    | 105303.8 | TRUE |
| 575928.6 | 294001.4 | 394394.6 | 879120.4 | 622055.7 | 649857.6 | 448683.1 | 737737.2 | TRUE |
| 160548.3 | 106592.7 | 117467.8 | 223545.2 | 172123.6 | 172113.6 | 120393.4 | 215721   | TRUE |
| 118443.2 | 66954.4  | 78681.9  | 177773   | 125937.7 | 128879.4 | 83020    | 142580.7 | TRUE |
| 350624.8 | 210879   | 259095.8 | 512209.6 | 381682.8 | 407441   | 268244   | 444901.2 | TRUE |
| 219059.4 | 127835.7 | 150534.7 | 336791.4 | 229715.8 | 244807.5 | 140453.6 | 284549.3 | TRUE |
| 251050   | 170336.6 | 170053.3 | 324439.9 | 291240.8 | 303307.6 | 248581.4 | 365227.1 | TRUE |
| 113435.2 | 69400.2  | 79453.2  | 143948.8 | 106357.7 | 110442.4 | 79942.5  | 120078.7 | TRUE |
| 77215.3  | 172115.7 | 71557.4  | 99171.8  | 153731.3 | 59849.9  | 53688.9  | 65284.5  | TRUE |
| 47339    | 93244.1  | 93335.7  | 64584.7  | 57687.2  | 90547.4  | 70085    | 59937.5  | TRUE |
| 1055743  | 1117842  | 497143.8 | 737956.6 | 1094764  | 1772971  | 1426544  | 1782466  | TRUE |
| 405973.1 | 422515.8 | 191774.3 | 309367.4 | 377091.6 | 634253.1 | 560332.3 | 620217   | TRUE |
| 276263.3 | 273533.1 | 160201.8 | 212317   | 258093.6 | 387466.1 | 308491.4 | 428289.1 | TRUE |
| 305560.2 | 270500   | 182445.6 | 222207.4 | 289840.8 | 406832.3 | 382061.4 | 437987.7 | TRUE |
| 1494921  | 1765785  | 794905.1 | 1041853  | 1446627  | 2277342  | 2137183  | 2374053  | TRUE |
| 184256.1 | 220950.2 | 93871.4  | 117618   | 171280.2 | 217703.7 | 199427.9 | 250135.3 | TRUE |
| 168964.8 | 173287.7 | 81313.5  | 96856.4  | 136341.2 | 195838.2 | 161795.2 | 211641.7 | TRUE |
|          |          |          |          |          |          |          |          |      |
| 45054.9  | 21479.3  | 35567.8  | 36841.5  | 28075.2  | 40181.1  | 26515.8  | 36059.5  | TRUE |
| 625367.4 | 328690.1 | 430457.8 | 593805.8 | 400405.8 | 567098   | 355160.4 | 549841.2 | TRUE |

|          |          |          |          |          |          |          |          |      |
|----------|----------|----------|----------|----------|----------|----------|----------|------|
| 55443.2  | 55539.8  | 71090.6  | 98114.5  | 77202.2  | 40126.7  | 36726.3  | 37902.3  | TRUE |
| 29440.6  | 45658.5  | 50480.1  | 121381.3 | 118775.5 | 40907.1  | 13959.4  | 45176.5  | TRUE |
| 33547.6  | 45758.5  | 40717    | 70389.4  | 80139.9  | 28090.5  | 10214.1  | 13705.1  | TRUE |
| 132611.9 | 92885.1  | 131665.8 | 143934.6 | 98250.3  | 150650.5 | 112386.9 | 128007.6 | TRUE |
| 128580.5 | 60718.2  | 116079.7 | 145837.9 | 131301.8 | 129139.2 | 54343.1  | 99251.1  | TRUE |
| 183130.2 | 122680.7 | 167621.6 | 234093.3 | 166417.3 | 189963.1 | 132673.1 | 189709   | TRUE |
| 192238.5 | 150633.9 | 184272.6 | 201265.2 | 198783.9 | 198820.6 | 169782.4 | 198026.3 | TRUE |
| 194761.2 | 123369.2 | 207333.2 | 276032   | 172246.2 | 231459.9 | 118005.8 | 184899.5 | TRUE |
| 1069806  | 508770   | 1025166  | 1365029  | 1099933  | 1223943  | 560615.3 | 1243771  | TRUE |
| 2868352  | 1268654  | 2599428  | 3842663  | 2735382  | 3170865  | 1438782  | 2976491  | TRUE |
| 79296.9  | 49296.3  | 86997.6  | 106277   | 79170.2  | 86618.8  | 61872.1  | 106513.6 | TRUE |
| 264447.5 | 164784.6 | 266717.8 | 268439.9 | 251931.1 | 275764.9 | 179273.4 | 263852.8 | TRUE |
|          |          |          |          |          |          |          |          |      |
| 109871.4 | 157364.9 | 114603.9 | 123572.2 | 176365.4 | 107473.8 | 79532    | 69419.3  | TRUE |
| 93568.4  | 124411.8 | 119353.7 | 111943.2 | 115223.4 | 110131   | 79901.7  | 104044.3 | TRUE |
| 79974.6  | 80304.4  | 52133.1  | 70418.3  | 72379.2  | 80326.5  | 87787.2  | 98353.1  | TRUE |
| 93231.7  | 76586.4  | 39744.7  | 60432.1  | 88402    | 96251.9  | 95050.5  | 99553.7  | TRUE |
| 174963.6 | 134766.1 | 109361.4 | 98159    | 163766.4 | 186385.5 | 144775.7 | 182887.9 | TRUE |
| 92055.6  | 82799.1  | 36829.4  | 49096.9  | 66382.7  | 75664.3  | 85114.1  | 81519.7  | TRUE |
| 171406   | 154412.4 | 65866.9  | 87329.6  | 163765.6 | 173317.9 | 140206.6 | 165930.3 | TRUE |
| 107814.6 | 103993.1 | 86914.5  | 90426.9  | 107772.4 | 130418.1 | 105630.4 | 124857.4 | TRUE |
| 111247.3 | 59613.9  | 63846.7  | 37931.8  | 89270.1  | 94805.5  | 80192    | 95423    | TRUE |
| 321025.6 | 265779.3 | 139133.6 | 151066.7 | 288330.4 | 365465.4 | 298719.1 | 399050.1 | TRUE |
|          |          |          |          |          |          |          |          |      |
| 90649.9  | 80036.4  | 53703.6  | 73489.9  | 161595.5 | 170702.5 | 128276.4 | 171026.6 | TRUE |
| 50543    | 55250.5  | 29565    | 43277.4  | 89519    | 84193.8  | 59315.8  | 93319.5  | TRUE |
| 3559540  | 1596903  | 3877636  | 4615809  | 3298017  | 4163428  | 1763391  | 3126450  | TRUE |
| 6725670  | 3112758  | 6434974  | 7915596  | 5645276  | 7195211  | 3262665  | 6350145  | TRUE |
| 1172975  | 681596.4 | 1148978  | 1361490  | 1078731  | 1196785  | 731713.3 | 1134841  | TRUE |
| 76474.3  | 50424.6  | 68665.3  | 111944.9 | 78092    | 93343.5  | 46649.8  | 86336.2  | TRUE |
| 105533.4 | 81397.9  | 131758.7 | 153597   | 112266.6 | 149918.3 | 101645.6 | 132932.4 | TRUE |
| 105239.1 | 43384.5  | 141359.2 | 116952.4 | 77495    | 141943.6 | 65760.5  | 98153.8  | TRUE |
| 141844.6 | 214509.7 | 220791.2 | 437565.8 | 400472.9 | 50919.3  | 25630    | 44517.1  | TRUE |
|          |          |          |          |          |          |          |          |      |
| 2725551  | 2424865  | 1638994  | 1746126  | 3257622  | 3623352  | 2707168  | 3437355  | TRUE |
| 48538602 | 41513125 | 19028855 | 19582311 | 52863083 | 62461702 | 43635160 | 61308405 | TRUE |
| 4982249  | 4640030  | 2058553  | 2323118  | 5714371  | 6545527  | 4791616  | 6929141  | TRUE |
| 936187.5 | 863303.1 | 494828.6 | 483454.7 | 1049647  | 1353058  | 913099.9 | 1324314  | TRUE |
| 282704   | 258599.9 | 205727.2 | 197653.3 | 293522.3 | 348111.2 | 266519.6 | 332808.5 | TRUE |
|          |          |          |          |          |          |          |          |      |
| 43542.4  | 45287.2  | 33804    | 51386.3  | 46984.2  | 27955.2  | 44630.8  | 37172.4  | TRUE |
|          |          |          |          |          |          |          |          |      |
| 38208.5  | 23319.6  | 23237.1  | 37610.2  | 18100.4  | 17827.7  | 16821.5  | 23543.9  | TRUE |
|          |          |          |          |          |          |          |          |      |
| 8215.1   | 6286.8   | 5321.2   | 6733.9   | 6094.7   | 11969.6  | 7952     | 7167.9   | TRUE |

|          |          |          |          |          |          |          |          |      |
|----------|----------|----------|----------|----------|----------|----------|----------|------|
| 722074.9 | 337234.4 | 467038.7 | 732451.5 | 686492.7 | 742494.1 | 392032.2 | 913743   | TRUE |
| 3980381  | 1618773  | 2490948  | 3641178  | 3788661  | 3764353  | 1771534  | 5198647  | TRUE |
| 305089.4 | 188614.9 | 303443.3 | 354310.9 | 364410.8 | 311744.1 | 206032.3 | 351873.6 | TRUE |
| 350865   | 199089.3 | 349202.3 | 418042.3 | 427353.5 | 363995.8 | 221826   | 442300.4 | TRUE |
| 1006687  | 1028504  | 426736.2 | 553032.2 | 934024.4 | 1141074  | 1105770  | 1090144  | TRUE |
| 717594.6 | 811707.2 | 397329.6 | 482005   | 638933.5 | 878957.4 | 965084.2 | 884778   | TRUE |
| 155701.6 | 144641.7 | 99337.6  | 102857.7 | 131142   | 192855.7 | 185089.1 | 193490.8 | TRUE |
| 626705.2 | 669105.2 | 277150.7 | 381747.4 | 567409   | 758573.4 | 833348   | 867114.5 | TRUE |
| 231424.4 | 258544.5 | 92842.6  | 113477.6 | 208354.5 | 234796.5 | 282450.5 | 282572.3 | TRUE |
| 50432.5  | 28529.1  | 31466.3  | 24769    | 26766.7  | 27184.8  | 40557.1  | 33143.3  | TRUE |
| 108760.6 | 117166.8 | 73974    | 88676.3  | 110514.7 | 139893   | 149149.1 | 146955.9 | TRUE |
| 26599.9  | 20566.8  | 20134.5  | 21974    | 15998.6  | 40242    | 24182.5  | 21850.7  | TRUE |
| 34537.9  | 9738.9   | 37223.4  | 48016.2  | 24163.4  | 49801.6  | 15927.7  | 27411.3  | TRUE |
| 19288    | 8221     | 15302.7  | 11633.7  | 9468.9   | 24785.7  | 8937.5   | 12505.6  | TRUE |
| 30274.2  | 9807.2   | 23016.5  | 29872.1  | 21072.4  | 49169.4  | 38832.6  | 36013.6  | TRUE |
| 1118824  | 628933.4 | 1195381  | 1538102  | 1180771  | 1184581  | 645711.3 | 1012820  | TRUE |
| 675136.1 | 393224.3 | 660869.5 | 781899   | 636046.6 | 694479.2 | 444373.7 | 640369.2 | TRUE |
| 911930.1 | 860738.7 | 561694.2 | 636692.2 | 929677.1 | 1196412  | 890606   | 1027635  | TRUE |
| 20604451 | 18693181 | 7483184  | 8916331  | 21082128 | 30138612 | 18484765 | 30431281 | TRUE |
| 2054642  | 1932556  | 787327.7 | 1080511  | 2201843  | 2736099  | 1954196  | 2847571  | TRUE |
| 1492253  | 1371658  | 630060.3 | 843012.4 | 1566155  | 2017817  | 1395866  | 2149791  | TRUE |
| 475988.5 | 494086   | 319037.4 | 380738.1 | 512613.9 | 564174.4 | 481638.3 | 563420.9 | TRUE |
| 761310.7 | 680392.5 | 424142.3 | 429725.1 | 760536.8 | 940499.1 | 696621.9 | 971490.5 | TRUE |
| 129634.1 | 117531.7 | 97788.5  | 115483.4 | 128251.8 | 175482.9 | 177274.1 | 163857.1 | TRUE |
| 70777.8  | 55744.3  | 90001.4  | 104201.9 | 97873.7  | 162827.4 | 42306.3  | 127806   | TRUE |
| 199165   | 122068.4 | 253437.2 | 205719.3 | 199605.8 | 253306.1 | 137853.2 | 230812.3 | TRUE |
| 152047.2 | 105086.6 | 322140.3 | 293886.4 | 336944.2 | 439824.5 | 152054.4 | 268701.9 | TRUE |
| 60379.1  | 30500    | 71414.2  | 71912.9  | 84943.5  | 133139.4 | 36119.4  | 82958.9  | TRUE |
| 173555.4 | 143727.7 | 69621.2  | 98924.8  | 166550.4 | 214394.3 | 156469.6 | 194472.6 | TRUE |
| 67464.4  | 77721.5  | 50251.2  | 59747.9  | 89506.4  | 79561.3  | 99631.2  | 79016.4  | TRUE |
| 45054.9  | 21479.3  | 35567.8  | 36841.5  | 28075.2  | 40181.1  | 26515.8  | 36059.5  | TRUE |
| 625367.4 | 328690.1 | 430457.8 | 593805.8 | 400405.8 | 567098   | 355160.4 | 549841.2 | TRUE |
| 55443.2  | 55539.8  | 71090.6  | 98114.5  | 77202.2  | 40126.7  | 36726.3  | 37902.3  | TRUE |
| 29440.6  | 45658.5  | 50480.1  | 121381.3 | 118775.5 | 40907.1  | 13959.4  | 45176.5  | TRUE |
| 33547.6  | 45758.5  | 40717    | 70389.4  | 80139.9  | 28090.5  | 10214.1  | 13705.1  | TRUE |
| 132611.9 | 92885.1  | 131665.8 | 143934.6 | 98250.3  | 150650.5 | 112386.9 | 128007.6 | TRUE |
| 128580.5 | 60718.2  | 116079.7 | 145837.9 | 131301.8 | 129139.2 | 54343.1  | 99251.1  | TRUE |
| 183130.2 | 122680.7 | 167621.6 | 234093.3 | 166417.3 | 189963.1 | 132673.1 | 189709   | TRUE |
| 192238.5 | 150633.9 | 184272.6 | 201265.2 | 198783.9 | 198820.6 | 169782.4 | 198026.3 | TRUE |
| 194761.2 | 123369.2 | 207333.2 | 276032   | 172246.2 | 231459.9 | 118005.8 | 184899.5 | TRUE |
| 1069806  | 508770   | 1025166  | 1365029  | 1099933  | 1223943  | 560615.3 | 1243771  | TRUE |

|          |          |          |          |          |          |          |          |      |
|----------|----------|----------|----------|----------|----------|----------|----------|------|
| 2868352  | 1268654  | 2599428  | 3842663  | 2735382  | 3170865  | 1438782  | 2976491  | TRUE |
| 79296.9  | 49296.3  | 86997.6  | 106277   | 79170.2  | 86618.8  | 61872.1  | 106513.6 | TRUE |
| 264447.5 | 164784.6 | 266717.8 | 268439.9 | 251931.1 | 275764.9 | 179273.4 | 263852.8 | TRUE |
| 109871.4 | 157364.9 | 114603.9 | 123572.2 | 176365.4 | 107473.8 | 79532    | 69419.3  | TRUE |
| 93568.4  | 124411.8 | 119353.7 | 111943.2 | 115223.4 | 110131   | 79901.7  | 104044.3 | TRUE |
| 79974.6  | 80304.4  | 52133.1  | 70418.3  | 72379.2  | 80326.5  | 87787.2  | 98353.1  | TRUE |
| 93231.7  | 76586.4  | 39744.7  | 60432.1  | 88402    | 96251.9  | 95050.5  | 99553.7  | TRUE |
| 174963.6 | 134766.1 | 109361.4 | 98159    | 163766.4 | 186385.5 | 144775.7 | 182887.9 | TRUE |
| 92055.6  | 82799.1  | 36829.4  | 49096.9  | 66382.7  | 75664.3  | 85114.1  | 81519.7  | TRUE |
| 171406   | 154412.4 | 65866.9  | 87329.6  | 163765.6 | 173317.9 | 140206.6 | 165930.3 | TRUE |
| 107814.6 | 103993.1 | 86914.5  | 90426.9  | 107772.4 | 130418.1 | 105630.4 | 124857.4 | TRUE |
| 111247.3 | 59613.9  | 63846.7  | 37931.8  | 89270.1  | 94805.5  | 80192    | 95423    | TRUE |
| 321025.6 | 265779.3 | 139133.6 | 151066.7 | 288330.4 | 365465.4 | 298719.1 | 399050.1 | TRUE |
| 90649.9  | 80036.4  | 53703.6  | 73489.9  | 161595.5 | 170702.5 | 128276.4 | 171026.6 | TRUE |
| 50543    | 55250.5  | 29565    | 43277.4  | 89519    | 84193.8  | 59315.8  | 93319.5  | TRUE |
| 3559540  | 1596903  | 3877636  | 4615809  | 3298017  | 4163428  | 1763391  | 3126450  | TRUE |
| 6725670  | 3112758  | 6434974  | 7915596  | 5645276  | 7195211  | 3262665  | 6350145  | TRUE |
| 1172975  | 681596.4 | 1148978  | 1361490  | 1078731  | 1196785  | 731713.3 | 1134841  | TRUE |
| 76474.3  | 50424.6  | 68665.3  | 111944.9 | 78092    | 93343.5  | 46649.8  | 86336.2  | TRUE |
| 105533.4 | 81397.9  | 131758.7 | 153597   | 112266.6 | 149918.3 | 101645.6 | 132932.4 | TRUE |
| 105239.1 | 43384.5  | 141359.2 | 116952.4 | 77495    | 141943.6 | 65760.5  | 98153.8  | TRUE |
| 141844.6 | 214509.7 | 220791.2 | 437565.8 | 400472.9 | 50919.3  | 25630    | 44517.1  | TRUE |
| 2725551  | 2424865  | 1638994  | 1746126  | 3257622  | 3623352  | 2707168  | 3437355  | TRUE |
| 48538602 | 41513125 | 19028855 | 19582311 | 52863083 | 62461702 | 43635160 | 61308405 | TRUE |
| 4982249  | 4640030  | 2058553  | 2323118  | 5714371  | 6545527  | 4791616  | 6929141  | TRUE |
| 936187.5 | 863303.1 | 494828.6 | 483454.7 | 1049647  | 1353058  | 913099.9 | 1324314  | TRUE |
| 282704   | 258599.9 | 205727.2 | 197653.3 | 293522.3 | 348111.2 | 266519.6 | 332808.5 | TRUE |
| 722074.9 | 337234.4 | 467038.7 | 732451.5 | 686492.7 | 742494.1 | 392032.2 | 913743   | TRUE |
| 3980381  | 1618773  | 2490948  | 3641178  | 3788661  | 3764353  | 1771534  | 5198647  | TRUE |
| 305089.4 | 188614.9 | 303443.3 | 354310.9 | 364410.8 | 311744.1 | 206032.3 | 351873.6 | TRUE |
| 350865   | 199089.3 | 349202.3 | 418042.3 | 427353.5 | 363995.8 | 221826   | 442300.4 | TRUE |
| 1006687  | 1028504  | 426736.2 | 553032.2 | 934024.4 | 1141074  | 1105770  | 1090144  | TRUE |
| 717594.6 | 811707.2 | 397329.6 | 482005   | 638933.5 | 878957.4 | 965084.2 | 884778   | TRUE |
| 155701.6 | 144641.7 | 99337.6  | 102857.7 | 131142   | 192855.7 | 185089.1 | 193490.8 | TRUE |
| 626705.2 | 669105.2 | 277150.7 | 381747.4 | 567409   | 758573.4 | 833348   | 867114.5 | TRUE |
| 231424.4 | 258544.5 | 92842.6  | 113477.6 | 208354.5 | 234796.5 | 282450.5 | 282572.3 | TRUE |
| 50432.5  | 28529.1  | 31466.3  | 24769    | 26766.7  | 27184.8  | 40557.1  | 33143.3  | TRUE |
| 108760.6 | 117166.8 | 73974    | 88676.3  | 110514.7 | 139893   | 149149.1 | 146955.9 | TRUE |
| 83346.3  | 71248.7  | 85575.6  | 131369.9 | 86991.1  | 85523.9  | 84345.4  | 100724.8 | TRUE |
| 222386.9 | 94299.6  | 138854.8 | 263735.4 | 193032.1 | 212150.3 | 142969.4 | 253411.7 | TRUE |
| 100431   | 50302.5  | 61151.1  | 126809.8 | 87458    | 116418.5 | 84009.8  | 167415.8 | TRUE |

|          |          |          |          |          |          |          |          |      |
|----------|----------|----------|----------|----------|----------|----------|----------|------|
| 168330.2 | 100124.6 | 93683.8  | 211503.5 | 126580.6 | 168104.1 | 116375   | 184092.1 | TRUE |
| 105522.9 | 81029.7  | 122485.4 | 169147.5 | 151612.5 | 253503.9 | 128678.4 | 223134.2 | TRUE |
| 34981.7  | 10498.4  | 38188    | 77293.3  | 69525.4  | 81986.4  | 33761.7  | 97140.4  | TRUE |
| 184946.8 | 96964.7  | 219165.1 | 360372.4 | 300318.6 | 403547.3 | 154635.6 | 298271.5 | TRUE |
| 72250.8  | 84565.9  | 94124.8  | 85617.8  | 99667.5  | 154498.1 | 90135.7  | 127229.2 | TRUE |
| 264606.4 | 270108.1 | 196426.3 | 310341.2 | 358948.6 | 682489   | 542390.4 | 560326.7 | TRUE |
| 436472.9 | 422178.9 | 202439.8 | 360342.5 | 497858.5 | 823531.7 | 643016.9 | 575484.3 | TRUE |
| 32376.7  | 30965.3  | 36603.7  | 39910.3  | 34793.2  | 34313.8  | 35452.2  | 25386.6  | TRUE |
| 105894.6 | 67571.5  | 103686.9 | 209838.8 | 97594.6  | 106877.3 | 79392.8  | 120976.2 | TRUE |
| 202111.4 | 106452.5 | 194195.8 | 370944.7 | 257956.7 | 414137.6 | 174223.2 | 254980.2 | TRUE |
| 113498   | 48351.3  | 137760.9 | 220613.1 | 178090.1 | 226302.1 | 96142.3  | 170260.1 | TRUE |
| 344994.8 | 305020.7 | 191980.9 | 232058.6 | 395045   | 547677.7 | 462108.8 | 437590   | TRUE |
| 158680.8 | 158383.4 | 61800.2  | 121277.6 | 228430.8 | 262195.8 | 227218.2 | 244201.2 | TRUE |
| 493010   | 519625.8 | 275758.8 | 421301.9 | 588140.9 | 842233.8 | 738410.8 | 741733.5 | TRUE |
| 578688.8 | 491705   | 417296.9 | 363947.7 | 482655.9 | 668346.7 | 444484.5 | 604075.2 | TRUE |
| 59607.5  | 36838.4  | 65032.5  | 5837.8   | 42398.8  | 59119.1  | 12619.6  | 29373.7  | TRUE |
| 676799.7 | 218013   | 664173.2 | 423357.8 | 263134.1 | 674954.1 | 203697   | 299112.8 | TRUE |
| 480855.5 | 175999.2 | 785310.9 | 699892.5 | 409199.4 | 877984.1 | 278582.7 | 407695.6 | TRUE |
| 80727.9  | 40011.6  | 103768.9 | 95456.5  | 61450.7  | 114831.7 | 61225.6  | 60413.9  | TRUE |
| 27432.9  | 5294.9   | 45756.6  | 45589    | 17622.5  | 41422    | 11342.6  | 17273.6  | TRUE |
| 101010.8 | 116053.2 | 307620.8 | 252955.4 | 210982.4 | 110294.4 | 58679.6  | 66159.6  | TRUE |
| 38222    | 8704.4   | 27907    | 27077.4  | 27875.4  | 56274    | 8054.3   | 35627.7  | TRUE |
| 51661.8  | 28207.7  | 38092.2  | 24958.9  | 51345.7  | 49107.4  | 35035.4  | 45802.2  | TRUE |
| 285294   | 133167.4 | 116375.3 | 86650    | 481819.1 | 329514.6 | 191188.7 | 312997.4 | TRUE |
| 17932.5  | 40105.7  | 5548     | 37032.4  | 119694.1 | 7367.7   | 5465.2   | 25246.8  | TRUE |
| 19647    | 32413.3  | 8474.2   | 30345.9  | 5473.1   | 10846    | 31379.7  | 11386.2  | TRUE |
| 56022.3  | 73668.5  | 32394.6  | 63209.3  | 128760   | 37241.2  | 77345.7  | 104352.4 | TRUE |
| 1398816  | 1682895  | 816901.7 | 1465967  | 2932993  | 949610.6 | 1799799  | 3033513  | TRUE |
| 38202.6  | 50707.5  | 30840.5  | 43127.6  | 96581.8  | 26371.6  | 49033.1  | 97642.6  | TRUE |
| 28882.7  | 23344.6  | 12540.7  | 27903.8  | 37100.5  | 17150.7  | 43846.2  | 52406.1  | TRUE |
| 9030.3   | 25751.4  | 10839.6  | 28324.4  | 6961.2   | 14683.4  | 36024.2  | 12194.4  | TRUE |
| 55583.8  | 76196.9  | 68962.4  | 59622.8  | 31077.9  | 60096.6  | 90852.4  | 52451.8  | TRUE |
| 35125.7  | 52697.4  | 29410.9  | 41113.2  | 22190.2  | 34742.2  | 58495.9  | 49830.1  | TRUE |
| 38244.4  | 36732.6  | 30136.5  | 25831.9  | 14646.7  | 30205.1  | 41031.5  | 26604.2  | TRUE |
| 156261.7 | 166361.9 | 177176.7 | 191288.8 | 213605.2 | 162289   | 198644.2 | 193721.7 | TRUE |
| 9225462  | 8230454  | 7704616  | 9011967  | 9206596  | 7496722  | 8220253  | 8606859  | TRUE |
| 169752.5 | 161217.1 | 139538.2 | 175467.7 | 151887.9 | 142919.7 | 149957   | 152527.1 | TRUE |
| 960435.1 | 861378.4 | 1110032  | 1347275  | 1305547  | 1114033  | 1271338  | 1228182  | TRUE |
| 177290.2 | 171668.2 | 132748.1 | 197953.5 | 179441   | 158550.2 | 170115.1 | 178791.2 | TRUE |

|          |          |          |          |          |          |          |          |      |
|----------|----------|----------|----------|----------|----------|----------|----------|------|
| 453406   | 403622.2 | 303659.6 | 407776.5 | 465157.9 | 451794.3 | 490905   | 527526.2 | TRUE |
| 141500.8 | 148443.7 | 144966.2 | 132450.7 | 143385   | 117821.8 | 130083.8 | 130731.3 | TRUE |
| 106426.7 | 119940.3 | 57550    | 90324.3  | 91984.5  | 78491.9  | 88359.5  | 93600.1  | TRUE |
| 1626390  | 1443266  | 1262972  | 1460300  | 1587906  | 1295564  | 1634660  | 1718613  | TRUE |
| 186869.1 | 501868.5 | 381675.6 | 417591.6 | 427480.7 | 97012.2  | 111754.3 | 97270.6  | TRUE |
| 107869.4 | 111213.7 | 147055.3 | 112620.7 | 104548.3 | 120107   | 134909.4 | 98729.3  | TRUE |
| 246195.3 | 407443.3 | 305682.2 | 313818.5 | 375800.4 | 215881.1 | 238354.6 | 241550.8 | TRUE |
| 189033.9 | 184502.7 | 270954   | 159461.9 | 195681   | 177784.8 | 182184.5 | 190627.5 | TRUE |
| 61628.3  | 83011.8  | 98181.2  | 69026.2  | 60019.5  | 60806.3  | 61390.4  | 61857.9  | TRUE |
| 95452.1  | 112052.6 | 109589.8 | 81059.5  | 82127.2  | 90283.8  | 120286.1 | 104607.9 | TRUE |
| 1580337  | 1467316  | 1252271  | 1641365  | 1603448  | 1643440  | 1730511  | 1996662  | TRUE |
| 172662.3 | 158345.8 | 138620.6 | 154662.1 | 157240.6 | 166312.2 | 195213.3 | 204623.7 | TRUE |
| 104008.5 | 121751.7 | 93494.5  | 136284.8 | 118865.6 | 111275.8 | 131218.2 | 131587.7 | TRUE |
| 44433.8  | 55344.2  | 39269.4  | 49288.9  | 51103.6  | 38326.8  | 61007.9  | 47960.5  | TRUE |
| 125289.2 | 107552.5 | 80000.9  | 76559.1  | 85214.8  | 115388.2 | 108881.9 | 111256.7 | TRUE |
| 733047.5 | 534385.5 | 277959.8 | 475478.9 | 441562.7 | 538942.2 | 532773.9 | 586326.1 | TRUE |
| 53701.9  | 63836.8  | 42955.3  | 33311.3  | 36522.1  | 42205.4  | 60539.2  | 45248.3  | TRUE |
| 104111.5 | 77935.5  | 83288.2  | 97022.7  | 94481.4  | 118004.9 | 99524.3  | 101401.6 | TRUE |
| 48540    | 34976.1  | 48307.5  | 82669.5  | 54980.2  | 70570.4  | 66464.9  | 53631.7  | TRUE |
| 180028.4 | 146281.3 | 148188   | 193550.5 | 157774   | 182436.2 | 206475.7 | 187943.9 | TRUE |
| 52086.3  | 46583.5  | 45353.4  | 72450.2  | 59961.5  | 60284    | 78419.3  | 63154.3  | TRUE |
| 107129   | 111398.3 | 97734.1  | 95605    | 98313.4  | 107284.8 | 139485.6 | 99805.7  | TRUE |
| 158685.6 | 322593.6 | 178259.5 | 323483   | 340988.5 | 106193.4 | 68627.3  | 94587    | TRUE |
| 57264    | 130526.7 | 63290.3  | 113825   | 121203.2 | 38159.7  | 33814.5  | 35216.8  | TRUE |
| 29974.8  | 25877    | 46222.1  | 14244.6  | 28563.3  | 32491.7  | 38004.8  | 18853.7  | TRUE |
| 454551.3 | 313347.7 | 417290.5 | 333659.6 | 308815.3 | 392964.8 | 416440   | 376138.3 | TRUE |
| 228826.9 | 187965.3 | 202875.8 | 242932.6 | 220009.5 | 275331   | 246000.2 | 262219.5 | TRUE |
| 485070.5 | 395290.3 | 376274.1 | 581209.2 | 430921.4 | 561528.1 | 601431.9 | 579882.8 | TRUE |
| 195594.5 | 206565.1 | 182947   | 241013.2 | 203746.5 | 279103   | 242965   | 256135.3 | TRUE |
| 131266.2 | 115098.3 | 117827.7 | 143580.9 | 107808.9 | 147787.2 | 142340.3 | 181686.4 | TRUE |
| 105056   | 113228.4 | 85999    | 120801.5 | 109367.8 | 127878.6 | 150447.1 | 118811.2 | TRUE |
| 134184.9 | 106604.4 | 100299.9 | 112701   | 113046.5 | 138037.6 | 112581.5 | 143313.6 | TRUE |
| 33674.2  | 30062.5  | 43796.1  | 12989.8  | 25337.4  | 42205.5  | 25197    | 28643.7  | TRUE |
| 585362.4 | 508778.9 | 548678.6 | 523990.7 | 517878.3 | 607733.4 | 558358.1 | 717836.5 | TRUE |
| 122633.5 | 110962.3 | 109419.4 | 137392.4 | 110385   | 101322.8 | 119557.8 | 126195   | TRUE |
| 209591.3 | 204201.3 | 207073.1 | 211722   | 220284.8 | 199259.6 | 231310.1 | 190633.1 | TRUE |
| 79884.1  | 70708.5  | 64798.1  | 73018.3  | 69040.9  | 80896.6  | 93909.4  | 86192.4  | TRUE |
| 1003063  | 847090.9 | 979259.6 | 988118.9 | 833992.8 | 1244800  | 1219098  | 1247333  | TRUE |
| 1828178  | 1926553  | 1631183  | 1972731  | 1515960  | 1857070  | 1736122  | 1728060  | TRUE |
| 91638.7  | 65453.1  | 51414.3  | 70010.5  | 66380.2  | 66485.3  | 81545.1  | 99318.9  | TRUE |
| 128890.6 | 159121.3 | 127627.1 | 173635.5 | 117180.9 | 160060.6 | 205523.2 | 178950.8 | TRUE |
| 99549.6  | 73735.5  | 71832    | 65014.9  | 96092.5  | 84150.4  | 77841.1  | 107386.6 | TRUE |
| 41034.5  | 20568.6  | 6284.8   | 18157.9  | 18554.1  | 33703.2  | 11090.2  | 37789.9  | TRUE |
| 28266.7  | 31832.6  | 37082.5  | 19071.9  | 33838.7  | 38495.8  | 29722.6  | 31260.2  | TRUE |
| 121300.8 | 134603.2 | 129213.1 | 130684.9 | 156691.6 | 126701.5 | 153390.1 | 147855.4 | TRUE |
| 105235.2 | 128044.2 | 106063.3 | 104538.8 | 132923   | 117165   | 141087.4 | 117796.7 | TRUE |

|          |          |          |          |          |          |          |          |      |
|----------|----------|----------|----------|----------|----------|----------|----------|------|
| 48046.5  | 58394.6  | 47985.7  | 89846.6  | 60877.8  | 56804.2  | 58573.9  | 61120.1  | TRUE |
| 27733    | 27636.1  | 22909.4  | 34167.1  | 26905.3  | 43863.9  | 26287.1  | 20362.2  | TRUE |
| 75936.9  | 94053.6  | 65209.9  | 76154.6  | 85919.6  | 70284.9  | 79652.9  | 69659    | TRUE |
| 24687.2  | 8151.8   | 8484.3   | 28296.8  | 21603    | 18990.4  | 13873.5  | 23276.4  | TRUE |
| 36907.7  | 33703.2  | 38785.2  | 36603    | 45125.6  | 45013    | 49692.9  | 47102.6  | TRUE |
| 46808.1  | 49231.9  | 32990.7  | 29465    | 46450.8  | 39066.1  | 50272.9  | 51083.7  | TRUE |
| 71275.4  | 63317.5  | 63047.1  | 71449.7  | 56130.8  | 79711.5  | 63438.3  | 64286.4  | TRUE |
| 719031.1 | 611264.7 | 630912.1 | 675265   | 772253.7 | 719529.1 | 692521.6 | 733747.3 | TRUE |
| 36693.6  | 32597.4  | 38903    | 46723.6  | 30035.9  | 38095.7  | 31922.5  | 18229.5  | TRUE |
| 64922.3  | 56596.7  | 44441.3  | 43875.6  | 59164.3  | 66080.9  | 67673.7  | 65264.7  | TRUE |
| 82682.6  | 64989.3  | 64165    | 53199.9  | 63498.7  | 94466.1  | 80948.3  | 105700.1 | TRUE |
| 65867.6  | 85607.5  | 58211.5  | 62244.2  | 75466.2  | 57238.2  | 64100.3  | 84193.2  | TRUE |
| 85523.4  | 61217    | 58069.8  | 64529.2  | 63408.6  | 92916.3  | 68350.6  | 94940.8  | TRUE |
| 192693.8 | 474957.4 | 164272.6 | 298967   | 363995.9 | 85507.6  | 119351.1 | 106801.7 | TRUE |
| 129515.8 | 284083.1 | 254640.5 | 326966.4 | 282566.7 | 101254.8 | 147641.3 | 110954.8 | TRUE |
| 19647    | 32413.3  | 8474.2   | 30345.9  | 5473.1   | 10846    | 31379.7  | 11386.2  | TRUE |
| 79941.6  | 85859.9  | 46857.7  | 40727.6  | 91477.6  | 52471.7  | 108815.4 | 99739.9  | TRUE |
| 24581.6  | 17195.1  | 15044.7  | 5724.4   | 22635.1  | 15874.3  | 19730.5  | 29855.7  | TRUE |
| 44543.7  | 49801.9  | 46290.2  | 31280.7  | 49584.3  | 39924.2  | 64442.3  | 48086.2  | TRUE |
| 60826.9  | 70593.7  | 55796.6  | 53094.5  | 91138.2  | 55502.7  | 53750    | 73002.4  | TRUE |
| 201076.9 | 229345.3 | 204015.3 | 174012.2 | 357413.3 | 225112.2 | 309161.1 | 362717.9 | TRUE |
| 153123.7 | 164830.3 | 166932.2 | 153406.4 | 274913.9 | 191572.7 | 207698.9 | 260944.1 | TRUE |
| 56346.3  | 64744.4  | 83851.2  | 41989.9  | 81334.8  | 54028.5  | 51565.4  | 52569.4  | TRUE |
| 35948    | 45996.8  | 79385.1  | 28279.3  | 26422.8  | 25709    | 36196.9  | 27341.3  | TRUE |
| 180340.4 | 193209.5 | 171838.9 | 164876.7 | 159119.4 | 64129    | 195720.3 | 75772.4  | TRUE |
| 664413.2 | 658291.6 | 587076.3 | 683673.3 | 480061.9 | 211455.2 | 720267.1 | 240132.6 | TRUE |
| 74019.2  | 78093    | 66979.5  | 87786.3  | 50825.1  | 16778.7  | 79484.4  | 9865.9   | TRUE |
| 3185323  | 3827377  | 2807886  | 3719892  | 2269099  | 724860.1 | 3978483  | 886447.3 | TRUE |
| 142084.8 | 146173   | 119649.8 | 128310.6 | 130474.4 | 73761.3  | 179724.5 | 101431.8 | TRUE |
| 39666.9  | 47757.4  | 51250.8  | 34840.9  | 39789    | 20152.4  | 30337.6  | 13601.1  | TRUE |
| 93995.6  | 95719.1  | 127623.2 | 138483.5 | 98033.1  | 51335.8  | 151810.5 | 54927.7  | TRUE |
| 32439    | 25105.5  | 23668.5  | 30614.3  | 23230.2  | 26963.9  | 32499.7  | 35333    | TRUE |
| 156261.7 | 166361.9 | 177176.7 | 191288.8 | 213605.2 | 162289   | 198644.2 | 193721.7 | TRUE |
| 9225462  | 8230454  | 7704616  | 9011967  | 9206596  | 7496722  | 8220253  | 8606859  | TRUE |
| 169752.5 | 161217.1 | 139538.2 | 175467.7 | 151887.9 | 142919.7 | 149957   | 152527.1 | TRUE |
| 960435.1 | 861378.4 | 1110032  | 1347275  | 1305547  | 1114033  | 1271338  | 1228182  | TRUE |
| 177290.2 | 171668.2 | 132748.1 | 197953.5 | 179441   | 158550.2 | 170115.1 | 178791.2 | TRUE |
| 453406   | 403622.2 | 303659.6 | 407776.5 | 465157.9 | 451794.3 | 490905   | 527526.2 | TRUE |
| 141500.8 | 148443.7 | 144966.2 | 132450.7 | 143385   | 117821.8 | 130083.8 | 130731.3 | TRUE |
| 106426.7 | 119940.3 | 57550    | 90324.3  | 91984.5  | 78491.9  | 88359.5  | 93600.1  | TRUE |
| 1626390  | 1443266  | 1262972  | 1460300  | 1587906  | 1295564  | 1634660  | 1718613  | TRUE |
| 186869.1 | 501868.5 | 381675.6 | 417591.6 | 427480.7 | 97012.2  | 111754.3 | 97270.6  | TRUE |

|          |          |          |          |          |          |          |          |      |
|----------|----------|----------|----------|----------|----------|----------|----------|------|
| 107869.4 | 111213.7 | 147055.3 | 112620.7 | 104548.3 | 120107   | 134909.4 | 98729.3  | TRUE |
| 22859.6  | 20333.6  | 27595.8  | 25052.1  | 25547.2  | 19655.8  | 24373.4  | 23376.8  | TRUE |
| 29192.8  | 23999.3  | 21069.1  | 29472.2  | 30828.6  | 21629.4  | 37540.6  | 33989.2  | TRUE |
| 633941.5 | 648277.8 | 575147.9 | 654315.8 | 658437.8 | 538065.3 | 657974.7 | 608310.8 | TRUE |
| 3317224  | 3386268  | 2095124  | 2935068  | 3283484  | 2415986  | 3436445  | 3417660  | TRUE |
| 949270.6 | 1078427  | 752737   | 905744.1 | 950010   | 770183.6 | 1022454  | 997514.8 | TRUE |
| 526975.7 | 499415.5 | 380383.7 | 469485.6 | 536741.6 | 417582.9 | 587310.6 | 524715.3 | TRUE |
| 95973.6  | 116861.7 | 62421    | 84723.9  | 94529.8  | 85223.2  | 96401.7  | 96694.3  | TRUE |
| 86116    | 84719.9  | 61499.8  | 57623.2  | 74649.8  | 62837.1  | 83531    | 69981.9  | TRUE |
| 115383.7 | 112905.3 | 129869.4 | 206817.9 | 160808.4 | 165931.2 | 193057.6 | 174305.9 | TRUE |
| 63307.5  | 205355.8 | 123125.9 | 192511.9 | 149189.8 | 37611    | 8111.2   | 15343.9  | TRUE |
| 78106.9  | 102547.3 | 58194.9  | 74645.6  | 99621.8  | 79115.1  | 101444.5 | 91150.2  | TRUE |
| 422884.5 | 436289.8 | 478385.2 | 416290.5 | 479463.8 | 443322.9 | 482097.3 | 458956.4 | TRUE |
| 951894.6 | 1008125  | 823515.8 | 976838.5 | 983120   | 840056.1 | 1029766  | 945351.4 | TRUE |
| 212458.8 | 235832.9 | 154279.3 | 217837.2 | 216786.1 | 205088.2 | 264648.7 | 275262.6 | TRUE |
| 373756.6 | 372497.2 | 441027.1 | 482246.3 | 332363.2 | 424002   | 373305.7 | 387784.7 | TRUE |
| 239897.1 | 244053.5 | 270525.7 | 295854.1 | 217005.1 | 256382.3 | 252012.3 | 256670.3 | TRUE |
| 533459.1 | 531751.2 | 509284.4 | 555965.2 | 442384.3 | 554878.2 | 546161.9 | 544348.1 | TRUE |
| 365755.5 | 357733.3 | 412967.5 | 403966.6 | 333795.4 | 449387.9 | 380386   | 388236   | TRUE |
| 16289.1  | 12709.7  | 5392.8   | 7180.3   | 22308    | 7152.9   | 7006.9   | 22409.3  | TRUE |
| 31134.2  | 13503.7  | 19877.2  | 25951.1  | 47360.6  | 22175.3  | 41586.6  | 41841.4  | TRUE |
| 76107.3  | 97481.8  | 69989.4  | 75022.3  | 74866.4  | 61181.1  | 89215.1  | 88122.3  | TRUE |
| 947753.9 | 1084581  | 546013   | 944991.1 | 1034423  | 619549.6 | 1090108  | 1024563  | TRUE |
| 665910.5 | 860988.7 | 384186.2 | 632546.3 | 739770.8 | 447403.2 | 814280.3 | 729368   | TRUE |
| 56991.5  | 76632.7  | 46569.6  | 65990.8  | 87488    | 50336.9  | 77100    | 94539    | TRUE |
| 31663.3  | 32163.5  | 44989.8  | 57862.3  | 42337.9  | 36693.8  | 49005.3  | 55275.5  | TRUE |
| 97742.6  | 91368.1  | 83431.2  | 111164.2 | 134986.8 | 82855.5  | 131611.8 | 137287.2 | TRUE |
| 53872.2  | 67012.6  | 55219.9  | 101927.6 | 98362.4  | 53782.3  | 86863.4  | 68025.1  | TRUE |
| 66460.3  | 184691.7 | 64297    | 149970.8 | 160140.5 | 41285.9  | 62922.9  | 62184.6  | TRUE |
| 104549.1 | 126351.7 | 70686.2  | 99191    | 127242.1 | 72152.1  | 132301.7 | 141009.6 | TRUE |
| 210407.9 | 231009.1 | 222509.2 | 263142.8 | 167220.9 | 215542.6 | 220459.3 | 214226.5 | TRUE |
| 559786.2 | 551793.8 | 609247.4 | 686766.8 | 392631.4 | 603834.6 | 611183.4 | 584657.8 | TRUE |
| 336703.6 | 375120.7 | 366387.3 | 455509.5 | 236780.6 | 350880.9 | 351300.8 | 331667.6 | TRUE |
| 39036.2  | 45305.2  | 40314.9  | 47061.2  | 7957.9   | 29268.8  | 41982.3  | 47203.8  | TRUE |
| 67259.8  | 48368.9  | 44448.5  | 52624.6  | 33153.7  | 38382.7  | 54989.3  | 50271.8  | TRUE |
| 91814.5  | 82897.3  | 92989    | 97813.2  | 46218    | 67086.9  | 74560.2  | 81409    | TRUE |
| 144365.6 | 123952.5 | 119366.2 | 106585.2 | 74427.2  | 107401.8 | 142062.2 | 115886.9 | TRUE |
| 54291.9  | 39713.7  | 14978.2  | 31651.5  | 40702.3  | 40690.2  | 56319.8  | 48823.8  | TRUE |
| 82572.2  | 66774.3  | 34661.4  | 79805.9  | 57493.8  | 76837.9  | 90066.6  | 96527.4  | TRUE |
| 624309.9 | 624713.7 | 251292.4 | 522342.3 | 540975.2 | 459923.9 | 809447   | 752903.7 | TRUE |
| 70074.9  | 72513.9  | 35997.2  | 57102.2  | 56447.9  | 51927.3  | 94736.1  | 84577.5  | TRUE |
| 76081    | 59141.8  | 58596    | 84409.9  | 56475.3  | 73861.2  | 75400.5  | 85184.9  | TRUE |
| 1233404  | 991296.8 | 1170520  | 1573717  | 841135.6 | 1217216  | 1266538  | 1318063  | TRUE |



|          |          |          |          |          |          |          |          |      |
|----------|----------|----------|----------|----------|----------|----------|----------|------|
| 215250.8 | 240699   | 110716.9 | 106608.4 | 157375.1 | 122599.8 | 163978.9 | 172220.7 | TRUE |
| 2060615  | 2057959  | 1789539  | 1881837  | 2034633  | 2003371  | 2418459  | 2017092  | TRUE |
| 140965.6 | 111571.9 | 102929.6 | 101497.3 | 121959   | 92696.9  | 115674.3 | 100842.1 | TRUE |
| 30736.1  | 52420.5  | 29080.1  | 24642.1  | 43851.9  | 15197.5  | 10586.8  | 33167.6  | TRUE |
| 55650.6  | 61033.2  | 26979.1  | 65251.7  | 59543.5  | 47685.6  | 54263    | 52070.4  | TRUE |
| 22066.4  | 31426.5  | 25380.4  | 28839.5  | 38763.1  | 15553.8  | 12164.2  | 10259.4  | TRUE |
| 38160.5  | 66582.5  | 43185.8  | 105355.2 | 82303.6  | 32414.1  | 41015.7  | 42906.5  | TRUE |
| 45225    | 42147    | 30238.6  | 42291.2  | 50499.7  | 42631.5  | 41815.3  | 50266.6  | TRUE |
| 7784350  | 6870954  | 9187699  | 9208673  | 7223776  | 6879628  | 7775314  | 7191406  | TRUE |
| 34035.7  | 49492.1  | 49136    | 43387.5  | 50694.2  | 43382    | 45063.8  | 40329.1  | TRUE |
| 31094.2  | 78453.6  | 59488    | 83189.2  | 76948.2  | 8617.8   | 11501.4  | 11627.5  | TRUE |
| 121439.3 | 40612.1  | 13426.3  | 33695.3  | 33213.5  | 35720.2  | 40076.9  | 26485.2  | TRUE |
| 107323.9 | 98153.6  | 75543.5  | 95951.7  | 86237.7  | 80475.3  | 102522.2 | 107595.1 | TRUE |
| 42053.9  | 26419.9  | 17975.1  | 24598.6  | 30783.3  | 31539.9  | 14301.6  | 13660.1  | TRUE |
| 42202.4  | 35721.9  | 34046.8  | 37929.1  | 26084.2  | 58249.9  | 34874.1  | 29315.2  | TRUE |
| 85074.5  | 53987.5  | 71529.4  | 67738.5  | 46993.1  | 91946.1  | 86913.1  | 39389.8  | TRUE |
| 373924.1 | 392311.3 | 264349.5 | 328154.4 | 233254.2 | 302077.5 | 358426.8 | 248300.9 | TRUE |
| 76328.6  | 88211.2  | 95414.5  | 95347.5  | 46037.9  | 111499.6 | 104130.4 | 69663.8  | TRUE |
| 34095.3  | 31625.1  | 33660.8  | 45959.4  | 24265.5  | 64246    | 49250.6  | 34852.5  | TRUE |
| 39181.8  | 23911.4  | 24084.8  | 24473.8  | 33561.7  | 45882.2  | 43204.4  | 25678    | TRUE |
| 104251.9 | 81301.4  | 65701.9  | 109657.8 | 68444.6  | 143738   | 129291.9 | 100665.4 | TRUE |
| 109040.1 | 101427.3 | 74811.3  | 135133.1 | 81458.7  | 116421.7 | 131038.1 | 80411.9  | TRUE |
| 77062.9  | 56600.8  | 57626.8  | 64799.9  | 49548.7  | 82889.7  | 70796.7  | 55680.5  | TRUE |
| 50378.5  | 36875    | 49104.3  | 51720.9  | 37291.6  | 66282.5  | 57125.4  | 60396.4  | TRUE |
| 151860.3 | 146637.7 | 109575.8 | 146060.1 | 110733   | 171697.4 | 222486   | 117481   | TRUE |
| 58923.9  | 75934.7  | 57071.7  | 69104    | 56737.8  | 76920.4  | 81923.1  | 74105.8  | TRUE |
| 53570.5  | 80941    | 63459.1  | 81411.1  | 76322.3  | 59745    | 51496.5  | 49762    | TRUE |
| 96755.5  | 79425    | 75265.3  | 89018.5  | 75855    | 69604.1  | 100449.7 | 49306.4  | TRUE |
| 44408.3  | 36721.2  | 39498.3  | 65588.2  | 37628.8  | 59069.8  | 61885.1  | 38536.5  | TRUE |
| 80587.5  | 48660.5  | 44495.3  | 63315.4  | 59643.8  | 105045.7 | 50402.2  | 114685.5 | TRUE |
| 168897.3 | 122273.4 | 129682.4 | 168845.4 | 162319.8 | 180433.2 | 125076.3 | 215001.3 | TRUE |
| 38948.9  | 28572.3  | 35591    | 36527.7  | 53393.5  | 60975.6  | 42320.2  | 37728.7  | TRUE |
| 61884.2  | 70639    | 64026.9  | 85940.4  | 68858.7  | 90649.9  | 47465.4  | 88182.4  | TRUE |
| 213319.7 | 142316.7 | 160023.8 | 164570.8 | 120850   | 191583.7 | 190196.1 | 115625.2 | TRUE |
| 3621142  | 3448447  | 4764903  | 3740516  | 2131531  | 4581465  | 4257727  | 2666430  | TRUE |
| 158424   | 141150.6 | 244913.3 | 131713.9 | 97720.9  | 179986.7 | 159242.2 | 92686.9  | TRUE |
| 152342.2 | 141909   | 127847.9 | 169376.8 | 147034.4 | 183921.9 | 178255.5 | 171985.1 | TRUE |
| 197196.1 | 229650.3 | 230611.9 | 325772.1 | 341912.2 | 169371.9 | 163342.7 | 141875.2 | TRUE |
| 458350.9 | 548545.3 | 607865.6 | 631897.6 | 783856.2 | 502297.7 | 407655.1 | 438229.3 | TRUE |
| 62000    | 81202.9  | 77259.6  | 69553.5  | 68051.3  | 58925.8  | 52134.8  | 57375.9  | TRUE |
| 168297.4 | 100194   | 115924.4 | 140497.2 | 117736.1 | 142817.1 | 111810.9 | 138882.9 | TRUE |
| 28221.4  | 16550    | 63731.1  | 24237.2  | 28003.7  | 30828.9  | 22822.9  | 29823.8  | TRUE |

|          |          |          |          |          |          |          |          |      |
|----------|----------|----------|----------|----------|----------|----------|----------|------|
| 60165.4  | 63622.6  | 76596.8  | 81158.5  | 65022.6  | 64492.4  | 60826.3  | 60767.1  | TRUE |
| 131612.1 | 64749.1  | 140950.7 | 152510.8 | 153855.8 | 165203.1 | 74261.5  | 146866.2 | TRUE |
| 66174.9  | 47606.8  | 137717.5 | 65828.8  | 67517.8  | 67501.6  | 47846.4  | 64746.1  | TRUE |
| 8643.5   | 4821.6   | 10010.7  | 6452.7   | 16641.6  | 6018.2   | 8946.8   | 9215.7   | TRUE |
| 715396.3 | 675586.6 | 664303.3 | 589555.2 | 518570   | 765329.5 | 692240   | 556071.4 | TRUE |
| 37807.8  | 100554.4 | 53167.8  | 156636.5 | 73873.9  | 29174.9  | 24163.5  | 27841    | TRUE |
| 29557.4  | 76079    | 39479.5  | 68006.5  | 61741.9  | 18603.8  | 7210.4   | 9878.7   | TRUE |
| 70229.5  | 166547.2 | 87180.6  | 114742.6 | 119100.5 | 48747.2  | 48697.4  | 48259.1  | TRUE |
| 385582.3 | 375337.7 | 450777.5 | 344473.6 | 320431.1 | 464735.9 | 430569.4 | 297889   | TRUE |
| 1799213  | 1682232  | 1773464  | 1228142  | 1274262  | 1927891  | 1829354  | 1436814  | TRUE |
| 51290    | 34895.3  | 39710.7  | 21541.6  | 30396.2  | 49730.5  | 52906.8  | 33190.5  | TRUE |
| 63772.8  | 71969.9  | 87702.9  | 74813.5  | 74972.2  | 69545    | 68954.2  | 60856.6  | TRUE |
| 83826.4  | 93360.6  | 103889.9 | 123455.8 | 110892.1 | 108495.6 | 99609    | 104568.3 | TRUE |
| 182021.5 | 168777.1 | 137588.8 | 151379.1 | 145145.3 | 220133.3 | 236803.5 | 234763.2 | TRUE |
| 98599.6  | 95124.3  | 72957.9  | 54029.7  | 69655    | 111035.7 | 124335.6 | 111776   | TRUE |
| 92012.8  | 133678.8 | 85583.3  | 83359.4  | 77581.3  | 78759.3  | 104697   | 70422.9  | TRUE |
| 62457.3  | 59785.3  | 64033.2  | 69324    | 56076.7  | 69762.7  | 60801    | 70197.8  | TRUE |
| 99220.8  | 90214.1  | 84920.3  | 52574.7  | 62435.5  | 70149.9  | 78881.7  | 61945.3  | TRUE |
| 61433.6  | 59968.2  | 44397.9  | 45718.9  | 52030.4  | 44086.1  | 57276.8  | 54014.6  | TRUE |
| 136654.9 | 145964.7 | 149624.9 | 132037.8 | 150873.6 | 138274.2 | 137413.9 | 143379.4 | TRUE |
| 182593.7 | 172408.1 | 129933.5 | 156235.7 | 158876.7 | 134883.5 | 159567.7 | 128357.8 | TRUE |
| 49380.3  | 43208.3  | 42498.3  | 46602.9  | 54365.4  | 39140.6  | 49501.5  | 47054.1  | TRUE |
| 111258.7 | 127591.9 | 138290.4 | 135121.8 | 107700.4 | 73251.8  | 139037.4 | 90225.6  | TRUE |
| 63814    | 52571.1  | 71383.9  | 62018.4  | 106222.5 | 82113.4  | 80284.6  | 103618.3 | TRUE |
| 56195.5  | 74399.9  | 45223.6  | 58135.9  | 64207.1  | 38919.5  | 70966.4  | 50612.9  | TRUE |
| 133713.2 | 106984.6 | 143027.1 | 168106.3 | 152760.3 | 155188.1 | 149894.7 | 163369.1 | TRUE |
| 28020    | 70359.2  | 36959.6  | 61341.6  | 59977.6  | 14038.5  | 12617.3  | 9409     | TRUE |
| 186808   | 132146.9 | 118143.4 | 146187.3 | 151203.4 | 129175.4 | 148141.5 | 161640.5 | TRUE |
| 86484.1  | 77889    | 88412.5  | 84701.8  | 96197    | 93897.1  | 75895.1  | 93031    | TRUE |
| 209764.3 | 218027.5 | 216463.1 | 246926.8 | 219686.3 | 244150.2 | 245011.8 | 226498.3 | TRUE |
| 223455   | 210943.5 | 234283.6 | 265444.2 | 297030   | 288087.1 | 258067.8 | 263985.7 | TRUE |
| 81907.8  | 75501.8  | 87841.4  | 114663.2 | 87892.4  | 84575.7  | 85016    | 109431   | TRUE |
| 61672.4  | 51617.9  | 47384.4  | 59841.4  | 48413.8  | 53307.6  | 59223.6  | 45887.3  | TRUE |
| 176825.5 | 183286.5 | 132305.8 | 155663.7 | 188280.7 | 155668.2 | 174413.9 | 195510.5 | TRUE |

|          |          |          |          |          |          |          |          |      |
|----------|----------|----------|----------|----------|----------|----------|----------|------|
| 66723    | 65374.7  | 39793    | 57663.3  | 67902.5  | 47115.7  | 62558.5  | 69168.1  | TRUE |
| 77981.8  | 79056.2  | 74016.3  | 67547.8  | 83787.7  | 76612.3  | 80459.1  | 99267.6  | TRUE |
| 146990.5 | 122894.1 | 141017.8 | 206586   | 220060.1 | 202976.3 | 205448   | 207720.1 | TRUE |
| 88764.1  | 116327.6 | 79500.5  | 146726.6 | 99346.8  | 62014.7  | 58289.7  | 73495    | TRUE |
| 60361.4  | 137158.1 | 108126   | 85201    | 123065.8 | 49776.8  | 57084    | 55695.6  | TRUE |
| 83754.5  | 101675   | 164984.7 | 83027    | 81938    | 78150.2  | 56809.7  | 63515.5  | TRUE |
| 443534.2 | 368399.7 | 358510.1 | 379556.7 | 326278   | 431346.9 | 522800.2 | 499337.2 | TRUE |
| 44017.4  | 41960.6  | 44613.6  | 24887.5  | 29859.4  | 70586.2  | 43445.2  | 62251    | TRUE |
| 69643.8  | 70934.8  | 67294.8  | 78055.2  | 69002.3  | 67757.9  | 79056.7  | 77247.3  | TRUE |
| 732965.7 | 690848.2 | 987417.8 | 1013318  | 931357.3 | 917173.9 | 896435.7 | 884905.4 | TRUE |
| 352371   | 321575.4 | 359502   | 350703.9 | 329712.4 | 374017.3 | 355942.7 | 342545.1 | TRUE |
| 624069.8 | 552835.1 | 572855.7 | 586192.9 | 504955.5 | 560823   | 534416.1 | 485518   | TRUE |
| 703775   | 596696.4 | 658506.5 | 724203.4 | 571460.4 | 635201.8 | 587908.9 | 561344.9 | TRUE |
| 198011.7 | 162385.2 | 190471.8 | 218551.5 | 184608.1 | 192132.5 | 206928.7 | 166682.8 | TRUE |
| 269772.4 | 292732.6 | 312087.2 | 364162.4 | 356676.9 | 349487.8 | 370366.9 | 358637.5 | TRUE |
| 45536.6  | 66234.8  | 64137.4  | 53404.9  | 52460.8  | 48856.9  | 64535.1  | 44667.4  | TRUE |
| 70470.7  | 140456.7 | 110687.2 | 153538.9 | 139398.3 | 42737.1  | 55579.7  | 56241    | TRUE |
| 37790.5  | 30893.5  | 26697.4  | 25440.6  | 30525.4  | 18230.1  | 11364.2  | 36362.5  | TRUE |
| 33631.8  | 91318.8  | 63168.2  | 59396.1  | 73002.1  | 7535.7   | 28800.7  | 12339.8  | TRUE |
| 141982.2 | 215919.5 | 199539   | 200258.6 | 174456.4 | 101699.3 | 132600.9 | 109415.4 | TRUE |
| 121079.3 | 106820.4 | 80341.5  | 89083    | 119479.2 | 108768.9 | 130126.2 | 120684.2 | TRUE |
| 40473.7  | 29383.8  | 50164.5  | 49069.3  | 47920.4  | 45788.6  | 50214.2  | 43982.1  | TRUE |
| 41522.4  | 31223.2  | 47703    | 47898.5  | 52767.3  | 39166    | 60255.3  | 29425.7  | TRUE |
| 28013    | 14092.3  | 23564.2  | 41565.4  | 23757.2  | 20070    | 35706.4  | 27888.7  | TRUE |
| 41255.8  | 60645.4  | 43872.4  | 70131.5  | 70608.7  | 37026.9  | 13091.1  | 23823.5  | TRUE |
| 29335.6  | 22607    | 16267.2  | 29166.9  | 27948    | 27914.8  | 34260.1  | 29670.4  | TRUE |
| 571991.7 | 466540.5 | 552950.8 | 525463.9 | 511649.6 | 606681.4 | 533357.9 | 610118   | TRUE |
| 122175.7 | 147199.1 | 137442.8 | 132866.1 | 115169.8 | 134028.5 | 132297.3 | 126463.8 | TRUE |
| 1326040  | 1316418  | 1086304  | 1183215  | 1279177  | 1162840  | 1357155  | 1348474  | TRUE |
| 24255.4  | 22235.9  | 27197.7  | 30769.4  | 44377.7  | 32172.5  | 41424.2  | 46983    | TRUE |
| 185925.3 | 211380.2 | 188383.4 | 190547.1 | 175548.1 | 207038.8 | 208945.3 | 220591.4 | TRUE |
| 28289.5  | 18941.7  | 12990.7  | 15267.4  | 9016.4   | 14912.3  | 20247.4  | 28434.4  | TRUE |
| 48719.3  | 62378.1  | 51392.4  | 42646.6  | 45160.3  | 36280.7  | 45653.9  | 48233    | TRUE |
| 47133.3  | 53906.1  | 69736.8  | 56753    | 55908.8  | 58752.6  | 67130.5  | 56691.4  | TRUE |
| 77615.4  | 91421    | 56141.9  | 79766.4  | 96829.7  | 51817.9  | 85076.7  | 86160.8  | TRUE |
| 71866.4  | 58339    | 61581.7  | 86306.8  | 52418.4  | 74499    | 60509.1  | 57425.6  | TRUE |

|          |          |          |          |          |          |          |          |      |
|----------|----------|----------|----------|----------|----------|----------|----------|------|
| 62012.9  | 42241.2  | 58296.5  | 62086.7  | 82143.7  | 76881.5  | 74121.9  | 79095.1  | TRUE |
| 69784.6  | 60677.3  | 41863.5  | 80134.4  | 73933.6  | 77460.2  | 69292.7  | 116082.4 | TRUE |
| 38703.3  | 38947.4  | 20628.4  | 30756    | 28830.2  | 37511.5  | 36819.2  | 47694.5  | TRUE |
| 47398    | 39508.9  | 31269.9  | 34805.7  | 25789.5  | 30817.4  | 31315.1  | 32213.7  | TRUE |
| 106589.9 | 82622.7  | 70782.3  | 88952.8  | 120683.1 | 87706.8  | 96425.3  | 102568.8 | TRUE |
| 73165.9  | 41290.5  | 58610.9  | 59849.9  | 58625.1  | 79208    | 68262.3  | 79586.1  | TRUE |
| 144714.5 | 90813    | 122419.4 | 124506.9 | 111087.9 | 137145.5 | 113841.1 | 132604.2 | TRUE |
| 189732.1 | 144909.4 | 125107.5 | 134154   | 184679.9 | 169420.6 | 207484.2 | 186199.5 | TRUE |
| 446163.5 | 328422.9 | 255445   | 297387.8 | 432891.5 | 297051.4 | 357028.7 | 344279   | TRUE |
| 890741.8 | 956309.4 | 874282.3 | 924098.2 | 742947.2 | 971460.7 | 1048147  | 918091.6 | TRUE |
| 278406.3 | 252768.8 | 257496.4 | 271932.6 | 284729   | 237671.1 | 242263.4 | 248446.7 | TRUE |
| 467085.9 | 496352.3 | 427991.3 | 500982.2 | 501579.7 | 452111.1 | 466735   | 501083.2 | TRUE |
| 76630.3  | 66305.1  | 80362.1  | 80036.8  | 82429.3  | 77967.2  | 62797.8  | 86545.7  | TRUE |
| 124178.5 | 169745.2 | 108639.1 | 183983.9 | 190046.7 | 97831.9  | 85352.7  | 96080    | TRUE |
| 354195.6 | 315628.9 | 389366.5 | 368080.6 | 338556.3 | 321787.1 | 341443.7 | 305024   | TRUE |
| 2452205  | 2280115  | 2066853  | 2118867  | 2209408  | 2348414  | 2501642  | 2450199  | TRUE |
| 46325    | 41374.6  | 46651.5  | 55618.9  | 63533.7  | 50547    | 56669.8  | 55535.6  | TRUE |
| 158166.3 | 162556.5 | 109968.7 | 123965.1 | 128195.5 | 186037.7 | 147957.3 | 171469.5 | TRUE |
| 45915.1  | 46932.7  | 24725.5  | 48791    | 37980.4  | 29810    | 65219.5  | 39832.8  | TRUE |
| 23762.9  | 10440.2  | 23868.4  | 14417.2  | 17136.3  | 13565.5  | 11206.5  | 28219.2  | TRUE |
| 39465.8  | 37591.3  | 31244.3  | 38802.5  | 40173.5  | 36354    | 42458.1  | 36446.9  | TRUE |
| 89401    | 73852    | 54371.8  | 101457.3 | 89618.6  | 77583    | 80590.2  | 109739.2 | TRUE |
| 366663.1 | 294953.1 | 203160.4 | 326933   | 333906.4 | 391261.9 | 388669.3 | 527005.7 | TRUE |
| 21627.1  | 9401.8   | 16391.9  | 10195.6  | 22516.5  | 21878.4  | 19826.4  | 11630.1  | TRUE |
| 196415.1 | 178522.5 | 157297.7 | 191520.1 | 163529   | 183558.3 | 204554.5 | 208596.2 | TRUE |
| 109838.1 | 84217.7  | 71990.8  | 113996.8 | 99127.1  | 99778.1  | 120932.2 | 122611   | TRUE |
| 237861.6 | 231484.5 | 215315.2 | 253919.8 | 221333.4 | 312440.9 | 318105   | 283614.6 | TRUE |
| 61240.7  | 62932.5  | 48529.7  | 54561.4  | 67763.8  | 85169.3  | 81856.3  | 69388.9  | TRUE |
| 332796.9 | 318398.6 | 415142.6 | 400469.2 | 428862.5 | 402572.9 | 408900.2 | 438087.1 | TRUE |
| 211109.3 | 182564.9 | 198450.4 | 203365.6 | 158443.4 | 219736.8 | 223714.9 | 241075.6 | TRUE |
| 118752.4 | 105592.2 | 104974.3 | 119635.7 | 144304.1 | 104614.6 | 102684.9 | 124656.9 | TRUE |
| 238346.7 | 212954.4 | 290446.3 | 240784.2 | 253232.5 | 272846.5 | 237278.4 | 232749.1 | TRUE |
| 168204.4 | 151172.4 | 124619.9 | 170405.2 | 165394.3 | 156111.6 | 168270.1 | 169938.3 | TRUE |
| 153951.1 | 149366.2 | 129984.2 | 148464.7 | 160702.8 | 139123.6 | 149684.8 | 189912.3 | TRUE |
| 73837.7  | 86182.4  | 55389.8  | 84364.3  | 91228    | 70638    | 68727.1  | 94795.2  | TRUE |
| 299823   | 276069.9 | 315250.1 | 314673   | 304659   | 274110.6 | 289960.9 | 336506.1 | TRUE |
| 132532.2 | 116255.8 | 161983.4 | 222053.7 | 209166   | 203498.3 | 170455.6 | 213744.2 | TRUE |
| 132081   | 118711.3 | 150079.6 | 172885.3 | 193196.5 | 166635.1 | 154720   | 217856.4 | TRUE |
| 53219.2  | 53843.7  | 67333.1  | 63517.9  | 74837.5  | 59728.9  | 59488    | 71245.1  | TRUE |
| 27407.7  | 61360.7  | 53208    | 53822    | 62362.7  | 27745.5  | 27544.2  | 31254    | TRUE |
| 36625.4  | 35056    | 26964    | 25637    | 30000.7  | 33614.4  | 39001.3  | 35094.8  | TRUE |
| 247113.1 | 222534.7 | 286583.3 | 313649   | 311798.8 | 461082.1 | 300006.5 | 526798.1 | TRUE |
| 38444.5  | 35701.1  | 41046.5  | 16539.4  | 44908.8  | 38894.1  | 41270.5  | 41926    | TRUE |

|          |          |          |          |          |          |          |          |      |
|----------|----------|----------|----------|----------|----------|----------|----------|------|
| 26575.7  | 7122.3   | 7315.7   | 33160    | 9126.1   | 5201.1   | 9353.6   | 12991.2  | TRUE |
| 2620048  | 2374735  | 2032129  | 2369695  | 2224843  | 2429537  | 2475132  | 2405783  | TRUE |
| 201517.7 | 183206.5 | 172036.2 | 184496.3 | 179394.9 | 228325   | 205661.1 | 213492.9 | TRUE |
| 114260.9 | 335578.6 | 175717.3 | 332923.5 | 361179   | 52492.3  | 56067.5  | 69793.6  | TRUE |
| 13140655 | 11499461 | 10998626 | 12285273 | 11584240 | 12405951 | 12277331 | 13110401 | TRUE |
| 454140.2 | 420318.1 | 423231.4 | 431469.7 | 438056.7 | 453495.2 | 464114.9 | 459575.4 | TRUE |
| 1332474  | 1138228  | 1209768  | 1281427  | 1177461  | 1306357  | 1159336  | 1283335  | TRUE |
| 134458.7 | 104318.9 | 103900.6 | 161169.9 | 145048.5 | 178751.8 | 185726.4 | 243439.2 | TRUE |
| 31547    | 29522.5  | 20275.3  | 50434.8  | 28414.6  | 28574.4  | 38903.6  | 51101.3  | TRUE |
| 170918.9 | 134726.8 | 109555.9 | 142332.5 | 165154.1 | 171923.9 | 171358.9 | 235515.1 | TRUE |
| 53554.1  | 37585.9  | 49171.2  | 47594.7  | 43076.3  | 69438.8  | 53962.6  | 89636.7  | TRUE |
| 111755.1 | 90382.2  | 85394.6  | 88797.1  | 95153.9  | 131471.6 | 152139.8 | 142600.9 | TRUE |
| 16424.1  | 20018.2  | 6236.7   | 26515.3  | 13915.1  | 22727.3  | 23174.4  | 25870.5  | TRUE |
| 39616.5  | 34906.7  | 14969.8  | 39855.7  | 35890.7  | 34809.6  | 60388.1  | 48910    | TRUE |
| 166890.6 | 114116.5 | 95238    | 149594   | 136843   | 151451.8 | 142747.6 | 162339   | TRUE |
| 33236.8  | 34817.5  | 31905    | 14744.3  | 42843.1  | 32687.5  | 15757.2  | 35502.1  | TRUE |
| 7952.4   | 12512.2  | 5012.5   | 11304.1  | 21144.3  | 6950.5   | 13815.5  | 8167     | TRUE |
| 41692.4  | 48414.7  | 35594.2  | 50651.8  | 58601.6  | 38059.4  | 56209.5  | 63921.6  | TRUE |
| 34813    | 53289.2  | 56328.6  | 92810.7  | 90333.5  | 63847.7  | 41475.4  | 80385    | TRUE |
| 372693.4 | 408817.4 | 256413.9 | 292162.1 | 293754.8 | 313123.7 | 330130   | 280904.5 | TRUE |
| 101809   | 94262.8  | 111003.5 | 74147    | 100722.7 | 106103.7 | 100884.2 | 102161.5 | TRUE |
| 29532.7  | 36741.2  | 28082.2  | 34663.2  | 41156.1  | 30875.9  | 33875.5  | 48172    | TRUE |
| 47101.5  | 48940.8  | 50945.6  | 57538.4  | 66978.3  | 45580.9  | 59155.1  | 66571.3  | TRUE |
| 42778.7  | 28617.8  | 41300.2  | 45608.2  | 60660.8  | 42460.4  | 43193    | 47017.3  | TRUE |
| 88394.8  | 82024.3  | 96354    | 95841.8  | 141302.8 | 114449.3 | 109348.6 | 149885.2 | TRUE |
| 1573482  | 1293949  | 1472028  | 1719683  | 1638502  | 1500371  | 1264188  | 1471360  | TRUE |
| 140281.3 | 97579.1  | 105014.9 | 135614.7 | 113032.2 | 113609.5 | 121437.2 | 126781.4 | TRUE |
| 3916781  | 3475990  | 3279103  | 3196999  | 3899069  | 3448379  | 3230327  | 3513201  | TRUE |
| 456551.1 | 478151.5 | 472418   | 552514.7 | 544003.8 | 664344   | 581801.3 | 547968.2 | TRUE |

|          |          |          |          |          |          |          |          |      |
|----------|----------|----------|----------|----------|----------|----------|----------|------|
| 853937.9 | 818913.3 | 808876.9 | 839889.9 | 875985.6 | 1036148  | 932374.3 | 962093.7 | TRUE |
| 51005.7  | 52321.7  | 43864.7  | 44568.2  | 39714.7  | 53905.4  | 53318.7  | 34886.5  | TRUE |
| 531503.1 | 423936   | 450187.6 | 460094.5 | 611631.2 | 652922.1 | 432261.5 | 654802   | TRUE |
| 65399    | 57186.3  | 64704.5  | 77977.6  | 74367.3  | 50165.6  | 74158    | 73194.5  | TRUE |
| 233613.6 | 105344.9 | 271291.8 | 221260.4 | 185673   | 304693.8 | 146962.2 | 160935.8 | TRUE |
| 211989   | 166073.9 | 223653.3 | 214567.3 | 185605.8 | 236038.4 | 152062.4 | 194995   | TRUE |
| 332197.4 | 253982.9 | 384318.1 | 316972.4 | 300855.9 | 408525.8 | 307657.6 | 319095   | TRUE |
| 56274.5  | 87992.7  | 39183.1  | 45202    | 67649.7  | 62323.9  | 59780.5  | 63858    | TRUE |
| 2069378  | 1617477  | 2135698  | 2355941  | 1849862  | 2235272  | 1842518  | 1921386  | TRUE |
| 2291734  | 1902540  | 1827204  | 1820606  | 2318655  | 2728518  | 1962025  | 2566211  | TRUE |
| 531147.7 | 449199.3 | 553577.6 | 537656.5 | 594315.4 | 600422.8 | 504390.6 | 631472.1 | TRUE |
| 61280    | 50610.7  | 45975.6  | 63909.2  | 43586    | 63585.5  | 59296.5  | 71486.9  | TRUE |
|          |          |          |          |          |          |          |          |      |
| 212872.5 | 153987.7 | 215036   | 252245.1 | 174078.5 | 239591.4 | 168793.8 | 170929.1 | TRUE |
| 71371.6  | 58092.2  | 80575.8  | 90565.8  | 73219.9  | 82355.9  | 63667.1  | 81188.7  | TRUE |
| 76733.5  | 74301    | 109814.1 | 111763.8 | 99488.4  | 98682.8  | 90173.6  | 93760.3  | TRUE |
| 260483.6 | 215960.6 | 314645.9 | 342379   | 285725.9 | 302276.4 | 256678   | 263735.9 | TRUE |
| 55858.1  | 73387.3  | 73861.6  | 50180.8  | 61445.6  | 58146.5  | 54721    | 54508.3  | TRUE |
| 56880.6  | 41765.1  | 57736    | 70508.3  | 46691.6  | 39809.4  | 39056.8  | 32018.4  | TRUE |
| 36162.6  | 41171.2  | 55279.4  | 53830.5  | 53057.2  | 43338.7  | 59301.2  | 33456.6  | TRUE |
|          |          |          |          |          |          |          |          |      |
| 396739.6 | 364886.9 | 349453.2 | 364058   | 465234.3 | 512647.3 | 396396.7 | 502041   | TRUE |
| 995455.7 | 897385.9 | 776801.2 | 775290.1 | 1174155  | 1113983  | 1000322  | 1074859  | TRUE |
| 54577.1  | 57562.5  | 24546.7  | 50055.6  | 50476.3  | 60898.6  | 48270.6  | 48758    | TRUE |
| 85618.6  | 140356.7 | 173735.1 | 121926.2 | 134532.4 | 72300    | 114482   | 85533.9  | TRUE |
| 44740.8  | 68778.1  | 59416.5  | 63112.7  | 98527.3  | 41312.9  | 43181.3  | 42423    | TRUE |
| 77003.8  | 126395.3 | 101643.7 | 102996.6 | 144886.7 | 71859.5  | 74464.4  | 74639.7  | TRUE |
| 896263.2 | 702776.6 | 816157.6 | 880311.3 | 696015.6 | 881708   | 719643.5 | 798131.9 | TRUE |
| 582510.7 | 635341.5 | 1069804  | 568619.3 | 643525.5 | 615018.3 | 492152.9 | 619006.9 | TRUE |
| 102292.9 | 82522.6  | 124336.1 | 98674.5  | 121778.2 | 127189.2 | 80190.8  | 117568.8 | TRUE |
| 854191   | 711681.1 | 446939.4 | 761145.3 | 946847.8 | 712297.1 | 1061374  | 1371135  | TRUE |
| 116861.7 | 112687.1 | 87207.8  | 109277.3 | 91854.5  | 139230.3 | 142514.1 | 129761.1 | TRUE |
|          |          |          |          |          |          |          |          |      |
| 217630   | 211691.8 | 207466.9 | 235717.3 | 191929.5 | 210187.6 | 239883.8 | 257373   | TRUE |
| 142486   | 130484.5 | 135903.3 | 162361.4 | 139401.5 | 128865   | 171431.7 | 153891.5 | TRUE |
| 45326.3  | 40287.5  | 46525.1  | 39027    | 39593.2  | 41456    | 52910    | 40446.9  | TRUE |
| 19062.6  | 21779.2  | 20777.2  | 20748.1  | 28892.4  | 6556.4   | 11261.5  | 9967.2   | TRUE |
|          |          |          |          |          |          |          |          |      |
| 50114.6  | 117587.7 | 69875.9  | 118650.5 | 146428.8 | 34737    | 23212.6  | 133330.9 | TRUE |
| 24090.3  | 29853.7  | 11473.4  | 7942.8   | 16356.2  | 27196.2  | 24439.5  | 29857    | TRUE |
| 133560   | 107765.4 | 176278.2 | 127040.8 | 118108.9 | 166407.9 | 129766   | 144427.9 | TRUE |
| 56775.8  | 56164    | 84233.2  | 73892.4  | 67087.8  | 78257.8  | 66800.8  | 88925.9  | TRUE |
| 21233.8  | 55934.8  | 25439.4  | 53726.4  | 45813.8  | 5098.1   | 11030.6  | 45529    | TRUE |
|          |          |          |          |          |          |          |          |      |
| 126509.8 | 75114.4  | 122619.9 | 68861.6  | 77607.7  | 157603.7 | 92967.5  | 105372.4 | TRUE |
| 110562.3 | 61089.5  | 82521    | 57361.3  | 64785.1  | 145103.8 | 76685.3  | 86022.6  | TRUE |
| 702415.7 | 440748.9 | 401551.6 | 489297.4 | 742826.2 | 290421.2 | 535113.7 | 430470.7 | TRUE |

|          |          |          |          |          |          |          |          |      |
|----------|----------|----------|----------|----------|----------|----------|----------|------|
| 305632.5 | 304611.1 | 291798.6 | 339458.6 | 201271.5 | 514769.3 | 372012.2 | 549335.9 | TRUE |
| 119821.4 | 169206.7 | 145470.8 | 159675.1 | 117740.9 | 113460.6 | 174252.8 | 126515.6 | TRUE |
| 2507642  | 2934437  | 2406930  | 2849518  | 1737337  | 2463022  | 3650009  | 2761038  | TRUE |
| 58686.3  | 53602.2  | 40022    | 72224.3  | 54856.5  | 42015.5  | 59446    | 67604.3  | TRUE |
| 547387   | 495172.5 | 432610   | 502645.7 | 493045.9 | 462168.7 | 490729.2 | 563478.5 | TRUE |
| 86946.5  | 127239.4 | 117628   | 139753.3 | 117122.2 | 69990    | 68120.3  | 74227.5  | TRUE |
| 52659.2  | 29707    | 44462.8  | 50638.9  | 48566.1  | 49073.1  | 49447.8  | 60908.7  | TRUE |
| 160232.5 | 115071   | 142031.5 | 114594.5 | 106660.8 | 274071.6 | 163883.7 | 182826.8 | TRUE |
| 9639.7   | 27969.6  | 33470.6  | 16585.7  | 7620.7   | 43648.3  | 41226.3  | 17848.5  | TRUE |
| 18634.2  | 22355    | 4639.8   | 13481.5  | 27725.6  | 18375.2  | 13435.6  | 24166.2  | TRUE |
| 20761805 | 14347319 | 21987839 | 21746841 | 22075302 | 21257302 | 15419051 | 21675326 | TRUE |
| 145308.2 | 164246.9 | 128175.4 | 167140   | 155403.6 | 142424.7 | 167760.1 | 164373.3 | TRUE |
| 93894.7  | 80032.2  | 98721.7  | 85906.6  | 75625.1  | 104193.1 | 100721.2 | 74263.6  | TRUE |
| 36419.1  | 39777.2  | 38028.9  | 43417.1  | 44423.4  | 45322.3  | 30430.4  | 38157.8  | TRUE |
| 59524.4  | 43157.4  | 41520.5  | 53740.4  | 43135.1  | 68951.8  | 51315.2  | 50668.7  | TRUE |
| 44841.8  | 44999.2  | 33861.1  | 40450.7  | 56537.7  | 30677.3  | 28418.9  | 34059.4  | TRUE |
| 391174.8 | 422814   | 395369.3 | 381948.9 | 326659.6 | 415314.6 | 378968   | 313965.6 | TRUE |
| 165159.1 | 156226.5 | 235460.9 | 221770.1 | 164375.7 | 226595.7 | 175150.7 | 137854   | TRUE |
| 327333.7 | 264630.4 | 376120.3 | 321915.7 | 271687.6 | 390811.2 | 298351.8 | 315244.1 | TRUE |
| 340628.4 | 254806.7 | 366168.6 | 395517   | 351373.1 | 359374   | 296705.7 | 351663.7 | TRUE |
| 599951.3 | 588677.2 | 430053.7 | 482776.5 | 478349.4 | 452881.1 | 507253.7 | 491654.5 | TRUE |
| 341603.7 | 330291.6 | 369707   | 395680.1 | 338526.3 | 393592.6 | 342783.4 | 308590.7 | TRUE |
| 161799   | 177906   | 169855.2 | 170021.5 | 157890.9 | 162968.5 | 192707.4 | 155955.7 | TRUE |
| 46037.6  | 59193.6  | 29632.5  | 35151.6  | 51777.5  | 35401.4  | 60029.4  | 43529.3  | TRUE |
| 61669.2  | 69633.5  | 169233.9 | 53528.9  | 74936.9  | 66127    | 89818.8  | 61637.5  | TRUE |
| 2731088  | 2256391  | 2441366  | 2519721  | 2627554  | 2536931  | 2090035  | 2519132  | TRUE |
| 2249326  | 1829517  | 1873429  | 2001110  | 2114790  | 2091493  | 1687916  | 2158209  | TRUE |
| 112124.4 | 99335.3  | 132868.2 | 144262.9 | 115733.2 | 146920.1 | 121666.3 | 126890.9 | TRUE |
| 395030.8 | 313655.1 | 451222.5 | 510343.5 | 476019.9 | 481886.7 | 400437.1 | 412660.3 | TRUE |
| 119701.6 | 146544.9 | 106968.4 | 137954.9 | 124450.8 | 105256.2 | 123395.1 | 146800   | TRUE |
| 107558.5 | 135617   | 109463.3 | 139258.3 | 131698.6 | 114298.6 | 127088.2 | 122052.9 | TRUE |
| 995377   | 915454.4 | 842056.6 | 1169700  | 1117457  | 877640.1 | 1022577  | 1140842  | TRUE |
| 82147.1  | 75084.4  | 56714.4  | 70602.5  | 90656.2  | 55155.8  | 66560.8  | 71798.6  | TRUE |
| 105322.4 | 95566    | 99217.3  | 120788   | 108211   | 104976.7 | 118926.9 | 147264.2 | TRUE |
| 119139.9 | 110129.6 | 118160.2 | 176543.5 | 152103.7 | 115641.1 | 133461.1 | 133396.1 | TRUE |
| 99434.6  | 74101.6  | 60355.7  | 106954.9 | 90877.4  | 90651.1  | 89691.3  | 102267.7 | TRUE |
| 50026.2  | 41647    | 50388.2  | 61668    | 42364.8  | 44089    | 44034.4  | 44910.3  | TRUE |
| 37586.1  | 28873.8  | 39086.1  | 31312.6  | 31642.5  | 29859.1  | 35957.6  | 30961.5  | TRUE |
| 41570.3  | 104744.6 | 135080.7 | 94738.7  | 101375.3 | 20782.7  | 8884.1   | 34812.9  | TRUE |
| 200037.2 | 200199.3 | 201039.3 | 211003.2 | 178292.8 | 263654.9 | 234583   | 218240.7 | TRUE |
| 361628.4 | 304263   | 375500.3 | 348958.3 | 333922.4 | 397157   | 357758.7 | 391650.9 | TRUE |

|          |          |          |          |          |          |          |          |      |
|----------|----------|----------|----------|----------|----------|----------|----------|------|
| 40432.7  | 126497.9 | 81957.2  | 140295.6 | 133148.3 | 32328.1  | 10711.4  | 29173.6  | TRUE |
| 1269121  | 1139062  | 1433747  | 1714567  | 1077401  | 1400670  | 1377211  | 1042457  | TRUE |
| 469309.5 | 383324.9 | 461468.2 | 432990.7 | 508507.4 | 509680.1 | 382866.6 | 490095.6 | TRUE |
| 103017.5 | 45379.1  | 53235.8  | 55373    | 145084.9 | 83341.9  | 63169.6  | 97508.5  | TRUE |
| 391664.9 | 375167.2 | 419301.5 | 474467.1 | 344140.2 | 424032.3 | 403035.2 | 361339   | TRUE |
| 263753.4 | 248266.4 | 270061.4 | 332015.8 | 232950.7 | 281245.6 | 265449   | 249497.2 | TRUE |
| 432646.2 | 385883   | 397194.6 | 508429.9 | 426577.6 | 427811.7 | 443322.6 | 417017.2 | TRUE |
| 2229041  | 1671079  | 2124213  | 2133229  | 2345491  | 2684498  | 1892346  | 2628239  | TRUE |
| 1324811  | 1093571  | 1304968  | 1297888  | 1335368  | 1439254  | 1220200  | 1479375  | TRUE |
| 237371.9 | 206772   | 168438.1 | 185172.5 | 171916.7 | 183988.8 | 179860.8 | 164362.5 | TRUE |
| 484407.2 | 518371.9 | 582385.9 | 753786.7 | 575787.8 | 616776.8 | 638123.7 | 589270.7 | TRUE |
| 103845.2 | 79368.8  | 109513.7 | 125429.1 | 66515.4  | 161471.3 | 110595   | 203400.1 | TRUE |
| 53162.2  | 73421.2  | 56370.9  | 41561.3  | 28588.5  | 45873.8  | 45234    | 31218.7  | TRUE |
| 86099.4  | 80081.4  | 99470.1  | 149324.6 | 79227.6  | 114960.6 | 78787.3  | 67227.4  | TRUE |
| 360754.8 | 281552.7 | 351753.7 | 417321.2 | 286105.5 | 382706.1 | 265659.4 | 270182.4 | TRUE |
| 107496.5 | 96016.6  | 141450.2 | 126606.4 | 168059.4 | 161147.1 | 111948.5 | 145031   | TRUE |
| 1219932  | 902061.3 | 818779.1 | 1088522  | 939197.9 | 874319.4 | 979517.1 | 1068972  | TRUE |
| 36688.9  | 13413.8  | 28894.1  | 6699.2   | 36766.3  | 31869.6  | 38870.4  | 34599.9  | TRUE |
| 22050.2  | 24327.3  | 15357.1  | 21979.8  | 22105.8  | 29275    | 27034.1  | 24505.1  | TRUE |
| 30051.1  | 34649.8  | 25191.5  | 39990.6  | 37632.1  | 43490.7  | 33925    | 40809.3  | TRUE |
| 17364.5  | 12085.7  | 17077.6  | 16455.3  | 20095.6  | 29345.4  | 22449.3  | 8714.8   | TRUE |
| 207440.1 | 158694.9 | 137583.6 | 283193.3 | 233740.7 | 175245   | 201808.2 | 252289   | TRUE |
| 157110.9 | 148543.5 | 129772.5 | 183238.9 | 146780.5 | 159235.1 | 165514.8 | 145876.7 | TRUE |
| 290179.5 | 250924.3 | 243953.4 | 305904.1 | 311401.5 | 265005.5 | 256241.4 | 322657.1 | TRUE |
| 124899.4 | 96143.8  | 89329.7  | 107978.4 | 119612.1 | 101905.9 | 90458.6  | 118063.1 | TRUE |
| 244567   | 171187.7 | 298440.8 | 327746   | 339281.5 | 289548   | 231437.9 | 301146.5 | TRUE |
| 181876.1 | 181753.5 | 243619.9 | 237172.5 | 236941.4 | 281638.7 | 236341.6 | 223708.4 | TRUE |
| 138359.4 | 154384.4 | 164066.4 | 152719.7 | 118843   | 155606.6 | 154145.7 | 137534.4 | TRUE |
| 65977.9  | 47518.8  | 58041.7  | 58337.6  | 65828.8  | 54231.2  | 42791.9  | 55670.8  | TRUE |
| 74905.4  | 54572.5  | 72678.8  | 104547.6 | 82518    | 61904.7  | 65500.1  | 66603.8  | TRUE |
| 58551.5  | 70328.1  | 69251.9  | 69142.1  | 67421    | 87591.2  | 86407.7  | 63749    | TRUE |
| 199809.4 | 208931.3 | 172222.3 | 162955.2 | 188318.1 | 221837.9 | 188055   | 195380.2 | TRUE |
| 827039.6 | 631380.6 | 516019   | 604829.9 | 637060.6 | 799114.4 | 623301.8 | 813838.8 | TRUE |
| 567104.3 | 348108.7 | 452917.1 | 437877.3 | 783796.9 | 545420.1 | 437002.4 | 602307.7 | TRUE |
| 969195.4 | 584712.3 | 676312.8 | 757381.2 | 1406417  | 1107106  | 711887.3 | 1030619  | TRUE |
| 1277838  | 1471380  | 1169150  | 1273083  | 887932.4 | 1555305  | 1577905  | 1496277  | TRUE |
| 12934.3  | 5714     | 8132.7   | 17854.4  | 27769.2  | 17124.7  | 9544.2   | 19802.1  | TRUE |
| 19814.3  | 17973.2  | 19933.4  | 22049.4  | 18030.2  | 23979.6  | 26592.1  | 26504.7  | TRUE |
| 106806.5 | 120643   | 97121.2  | 89150.4  | 119584.8 | 95428.9  | 121958.9 | 132649   | TRUE |
| 734643.6 | 601378.6 | 846043.3 | 910952.6 | 939965.3 | 856967.2 | 757098.4 | 923687   | TRUE |
| 2474352  | 2485145  | 2029934  | 2153096  | 2631305  | 2518637  | 2632734  | 2616449  | TRUE |
| 37327.1  | 45780.3  | 36580.9  | 45494    | 41248.2  | 39066.3  | 61354.1  | 35182.7  | TRUE |
| 29554.4  | 26210.5  | 34445.6  | 38293.2  | 38134.8  | 47911.2  | 23015.5  | 42599.2  | TRUE |
| 27045.7  | 6717.2   | 11741.2  | 10309.1  | 24327    | 21103.9  | 13225.1  | 8967.1   | TRUE |



|          |          |          |          |          |          |          |          |      |
|----------|----------|----------|----------|----------|----------|----------|----------|------|
| 136443.2 | 164666.8 | 110301.3 | 134387.3 | 129224   | 142165.2 | 157879.2 | 126106.2 | TRUE |
| 39490.6  | 12884.2  | 34083.1  | 45362.7  | 24166.2  | 25945.8  | 50813.9  | 27870.9  | TRUE |
| 161199.5 | 172420.4 | 142849.1 | 153410   | 152037.4 | 133013.1 | 202860.2 | 143817.2 | TRUE |
| 3326380  | 3724247  | 2595502  | 3211540  | 2726073  | 2740598  | 4200967  | 2730356  | TRUE |
| 255810.6 | 190676.6 | 268363.2 | 188683.3 | 149475.3 | 303176.5 | 224682.9 | 200210.1 | TRUE |
| 157036.7 | 162362.2 | 204516.5 | 157433   | 141540.4 | 261777.6 | 159398.4 | 146032.1 | TRUE |
| 117290.9 | 147532.1 | 141991.3 | 163959.1 | 169109.8 | 145058.1 | 145148   | 146084.5 | TRUE |
| 28681.4  | 5115.8   | 23580.3  | 21027.5  | 23058.3  | 9973.6   | 7099.9   | 8200.1   | TRUE |
| 182679.1 | 141423.5 | 176526.9 | 122143.5 | 95691.8  | 196127.9 | 155480.7 | 85196.9  | TRUE |
| 45897    | 37837.5  | 55349    | 34723.7  | 19963.1  | 44225.2  | 37559.1  | 27000    | TRUE |
| 21338.4  | 6747.4   | 23821.3  | 7544.4   | 19832.3  | 12502.4  | 11778.4  | 12958.2  | TRUE |
| 150224   | 159957.8 | 91574.7  | 87182.5  | 112487.3 | 100532.7 | 132517.3 | 113764.3 | TRUE |
| 257123.4 | 283640.4 | 246489.3 | 293603   | 315933.3 | 219611.2 | 366528.9 | 276431.6 | TRUE |
| 635513.1 | 589821.7 | 717107   | 784110.9 | 604615.6 | 657957.8 | 610023   | 657294.8 | TRUE |
| 90989    | 105752.8 | 103233   | 107217.2 | 101889.5 | 82072.5  | 70713.9  | 85352    | TRUE |
| 44018.6  | 48268.2  | 35338.3  | 32165    | 32065.5  | 32940.1  | 37160.3  | 36383.6  | TRUE |
| 78027.5  | 80612.4  | 70906.2  | 72100.3  | 76253.4  | 86236.5  | 70262.6  | 93325.5  | TRUE |
| 88726.2  | 154375.1 | 104993.3 | 122256.4 | 121905.8 | 52414.6  | 95799.5  | 98405.2  | TRUE |
| 109047.1 | 120266.2 | 103644.8 | 158188.4 | 107371.4 | 139496.3 | 131232.4 | 131635.5 | TRUE |
| 49999.5  | 46720.3  | 56740.4  | 92617    | 56600.2  | 68311.5  | 70997.4  | 80435    | TRUE |
| 42896.8  | 30359.9  | 35756.1  | 34347.1  | 56116.4  | 28783    | 43560    | 44527.6  | TRUE |
| 811888.3 | 828470.8 | 650911.4 | 772277.5 | 790270.1 | 660750.6 | 847224.6 | 764259.6 | TRUE |
| 19632.9  | 28529.5  | 24082    | 20896.9  | 39395.5  | 22454    | 7158.1   | 9199.7   | TRUE |
| 122826.2 | 134676   | 122029.3 | 114259.5 | 176492.4 | 117481.9 | 137093.7 | 189186.6 | TRUE |
| 182384.6 | 148526.8 | 146128   | 170855.9 | 178811.1 | 125157.3 | 160297.4 | 213133.4 | TRUE |
| 3057405  | 3170047  | 3336166  | 3347466  | 2455231  | 2967020  | 3374758  | 3186570  | TRUE |
| 165826.3 | 129792   | 93472.4  | 146237.8 | 144684.9 | 129667.3 | 149043.6 | 160728.5 | TRUE |
| 699717.2 | 615511.6 | 604076.8 | 716675.5 | 524512.2 | 640506.9 | 741295.7 | 766245.1 | TRUE |
| 236294.2 | 224499.3 | 205337.7 | 270982.4 | 213007   | 270261.5 | 258111.1 | 246019.1 | TRUE |
| 1157704  | 1028647  | 967208.9 | 1199147  | 831700   | 1221465  | 1247738  | 1207963  | TRUE |
| 81042.1  | 72252.4  | 82131.8  | 96761.8  | 76536.5  | 76069    | 99081.8  | 89286.2  | TRUE |
| 441004.2 | 498334.8 | 373126.1 | 433077.8 | 496834.9 | 384978.9 | 445605.3 | 456356.3 | TRUE |
| 136133.9 | 122206.5 | 111797.4 | 108240.6 | 108345.7 | 99031.4  | 112252.4 | 125042.8 | TRUE |
| 472516.8 | 521083.8 | 479626.2 | 549305   | 463674   | 474371.8 | 491986   | 501468.1 | TRUE |
| 15497.7  | 20923.6  | 17016.8  | 7305.6   | 27266    | 12503.5  | 23291.7  | 8188.5   | TRUE |
| 264284   | 153344.7 | 293964.4 | 333987.5 | 194039.7 | 164765.2 | 176270.1 | 174676.4 | TRUE |
| 79037    | 97545.2  | 61826.4  | 85641.6  | 76932.3  | 58807.5  | 100783.7 | 81210.5  | TRUE |
| 73665.2  | 135405.2 | 29297.3  | 107428.5 | 77223.3  | 34889.2  | 146664.8 | 93173.8  | TRUE |

|          |          |          |          |          |          |          |          |      |
|----------|----------|----------|----------|----------|----------|----------|----------|------|
| 28105.5  | 9344.7   | 19084.3  | 11337.8  | 24139.8  | 12742.2  | 27390.8  | 26594.6  | TRUE |
| 70607.8  | 64397.8  | 135587   | 140375.2 | 47691.5  | 63135    | 76985.9  | 76860.9  | TRUE |
| 171349.9 | 193842.2 | 147374.2 | 159323.1 | 163837.3 | 170499.7 | 186762.8 | 164370.7 | TRUE |
| 96933.9  | 120367.7 | 83073    | 99879.2  | 90889.5  | 88798.5  | 141769.5 | 98035.6  | TRUE |
| 110597.4 | 107873.4 | 138696.5 | 145315   | 109059.1 | 88433    | 89550.8  | 94953.9  | TRUE |
| 328524.5 | 293696.7 | 385146.5 | 403586.8 | 246323   | 285791.6 | 301802.2 | 277556.5 | TRUE |
| 179602.5 | 108639.6 | 179175.1 | 208607.2 | 142428   | 167670.8 | 158306.4 | 171974.6 | TRUE |
| 163592.9 | 218215.6 | 127601.2 | 183485.4 | 141084.5 | 124705.1 | 220055.7 | 144483.4 | TRUE |
| 153433.7 | 137501.6 | 175280.4 | 180725.8 | 161865.1 | 144871.1 | 138744.5 | 150017.7 | TRUE |
| 182724.7 | 223110.3 | 90214    | 108240.3 | 122917.6 | 79680.2  | 219314.6 | 123240   | TRUE |
| 120183   | 122894.6 | 78715.2  | 80350.6  | 106473.1 | 79268.3  | 119002.3 | 100465.1 | TRUE |
| 187148.7 | 270670.8 | 172115.1 | 232655.6 | 196778.5 | 190045.2 | 333623.4 | 187651.6 | TRUE |
| 155379.9 | 177812.4 | 122264.4 | 158770.4 | 175074.6 | 140994.4 | 276458.5 | 154087.8 | TRUE |
| 43250.5  | 69759.3  | 78586.7  | 82165.6  | 47927.3  | 28230    | 34278.5  | 33748.2  | TRUE |
| 24891.2  | 30416.6  | 44709.3  | 25968.7  | 18479.5  | 14541.7  | 18571.2  | 26884.6  | TRUE |
| 818848   | 750466   | 582584.7 | 811469.3 | 785918   | 650536   | 897858.9 | 849578.3 | TRUE |
| 246438.9 | 274639   | 159633.6 | 192208.1 | 192854.2 | 164992.7 | 267474.3 | 201121.2 | TRUE |
| 863547.4 | 953100.2 | 624357   | 843349.3 | 798480.4 | 738643.4 | 950797.9 | 787338.3 | TRUE |
| 147379.9 | 205551.9 | 209432.4 | 230118.3 | 271986.1 | 154006.7 | 209830.8 | 177217.8 | TRUE |
| 168658   | 173262.7 | 139477.6 | 167022.6 | 153916   | 159670.1 | 238792.8 | 187276.5 | TRUE |
| 359607.5 | 279609   | 397737.1 | 462386.2 | 253607.8 | 321816.1 | 330776.8 | 338427.9 | TRUE |
| 486125.2 | 369153.3 | 578653.7 | 579172.5 | 373996.4 | 464090.1 | 401757.2 | 435719.5 | TRUE |
| 64372.5  | 71934.6  | 89139.3  | 84501.3  | 66905.8  | 86136.1  | 63289.6  | 78851.4  | TRUE |
| 105365.5 | 76273.4  | 91426.7  | 107492.7 | 92198    | 157284.2 | 98707    | 106236.5 | TRUE |
| 166653.2 | 136521.6 | 197148.4 | 152748.4 | 110251.4 | 335990.6 | 163619.1 | 140967.1 | TRUE |
| 38518.6  | 26658.7  | 58712    | 35726.5  | 21113.2  | 67766.4  | 36917.4  | 28873.3  | TRUE |
| 350005   | 248356.5 | 418058.9 | 283050.3 | 281920.2 | 412150.9 | 262626.5 | 268223.9 | TRUE |
| 331683.8 | 255658.9 | 424114   | 283006.6 | 259192.6 | 431728.7 | 207275.5 | 244482.4 | TRUE |
| 190163.6 | 145415.2 | 328753.3 | 199243.2 | 180070.5 | 348002.8 | 188766.8 | 166643.7 | TRUE |
| 218534.9 | 166218.7 | 414800.6 | 255977.3 | 200391.2 | 406707.2 | 206203.5 | 215058.5 | TRUE |
| 27756.1  | 41527.7  | 51758.7  | 33168.9  | 39209.4  | 19491.2  | 11374.6  | 10126.7  | TRUE |
| 23180.4  | 15459.8  | 27234.6  | 25676.8  | 24787.9  | 17990.7  | 25111.6  | 6192     | TRUE |
| 340450.2 | 241911.4 | 328635.4 | 242531.5 | 564360.7 | 314304.8 | 244381.3 | 345436.3 | TRUE |
| 844674.9 | 606690.3 | 680407.7 | 556481.7 | 1442035  | 818636.8 | 661369.5 | 770735.8 | TRUE |
| 318293.1 | 240976.4 | 319540.4 | 297432.1 | 507428.1 | 301810.6 | 245969.5 | 326473.5 | TRUE |
| 82129.3  | 73230.4  | 86241.9  | 89357.1  | 101560.5 | 77275.3  | 70453.6  | 76202    | TRUE |
| 147911.9 | 144506.7 | 229264.7 | 121967.7 | 140390.7 | 261958.9 | 144911.7 | 92116.9  | TRUE |
| 420528.6 | 251270.8 | 301915.8 | 355096.3 | 720050   | 441001.2 | 308689.4 | 387188.2 | TRUE |
| 116363.4 | 85890.4  | 99312.7  | 85999.1  | 161656   | 94053.9  | 84202.4  | 87675.7  | TRUE |
| 1014587  | 856139.4 | 929552.9 | 1070265  | 955004.1 | 949332.9 | 921756.1 | 1033495  | TRUE |
| 427214.7 | 335911.6 | 368283.6 | 458130.5 | 398145.3 | 454772.4 | 386081.7 | 384343.6 | TRUE |
| 129753.8 | 98838.7  | 109445.8 | 120575.6 | 120655.7 | 139127.1 | 123022   | 107103.6 | TRUE |

|          |          |          |          |          |          |          |          |      |
|----------|----------|----------|----------|----------|----------|----------|----------|------|
| 810291.2 | 797664.7 | 687161.3 | 750201.8 | 735077   | 1043521  | 762516.4 | 813877.6 | TRUE |
| 34041.8  | 30166.9  | 29136.9  | 46161.2  | 41546.7  | 41695.4  | 34458.3  | 30650.9  | TRUE |
| 50050.9  | 42372.4  | 28041.2  | 45432.1  | 50650.5  | 37127.2  | 36518    | 53728.4  | TRUE |
| 93465.1  | 94671.5  | 56382.5  | 100897.7 | 83132.9  | 77343.6  | 109779.3 | 96932.6  | TRUE |
| 120297.3 | 97893.5  | 94181    | 157552.8 | 132253.8 | 135434   | 141370.2 | 179313.5 | TRUE |
| 21654    | 32941.2  | 26251.3  | 25279.8  | 16810.2  | 27215.1  | 42700.4  | 28861.1  | TRUE |
| 125494.1 | 112124.8 | 89620.7  | 128053.9 | 106924.7 | 188291.8 | 154925.5 | 158133.4 | TRUE |
| 95499.4  | 85691.7  | 55736.8  | 64044.3  | 79249.7  | 52649.2  | 78843.5  | 85032.9  | TRUE |
| 74928.2  | 76806    | 47038.7  | 65836.1  | 88865.9  | 64392.1  | 81721.8  | 83687    | TRUE |
| 168684.7 | 159091.6 | 153722.4 | 135897   | 132700.2 | 135698.3 | 168262.3 | 143315.7 | TRUE |
| 142215.4 | 135327.4 | 127001.9 | 152985.8 | 157351.2 | 127490.3 | 229865.9 | 153828.5 | TRUE |
| 86355.4  | 83481.6  | 77479.6  | 93158.4  | 104837.9 | 91379    | 82340.3  | 114813.5 | TRUE |
| 143489.7 | 144311.9 | 112893.3 | 152667.8 | 147147.4 | 131180.3 | 129894.9 | 160516   | TRUE |
| 180029.5 | 170329   | 160544.8 | 165079.9 | 181804.4 | 164081.3 | 173585.9 | 182628.2 | TRUE |
| 126630.7 | 86940.4  | 94011.8  | 87647.1  | 216812.3 | 105651.1 | 108924.5 | 124271.9 | TRUE |
| 57341.9  | 104648.7 | 179979.5 | 73675.6  | 84213.5  | 85031.9  | 62890.4  | 44336.4  | TRUE |
| 88427.9  | 103292.8 | 207420.6 | 118061.2 | 175072.5 | 80183.7  | 50986.9  | 97770.2  | TRUE |
| 273103.2 | 257618.1 | 355039.2 | 293145.7 | 321003.4 | 333877   | 337361.7 | 310161.4 | TRUE |
| 386295.1 | 317909.5 | 514053.2 | 335597.6 | 206144.4 | 547552.7 | 331369.5 | 201743.5 | TRUE |
| 211165.6 | 212048.2 | 319448.8 | 231197.8 | 189518.2 | 333390.1 | 211810.4 | 193884.1 | TRUE |
| 71108    | 76446.6  | 79677.4  | 70743.2  | 55423.2  | 92801.9  | 75337.1  | 52186.5  | TRUE |
| 104290.3 | 106830.3 | 146800.7 | 86019.3  | 72682.9  | 141170.2 | 72738.1  | 59965.7  | TRUE |
| 274562.8 | 193380.6 | 218225.4 | 224726.4 | 441470.2 | 223992.1 | 167558   | 232334.4 | TRUE |
| 35165.6  | 46718.5  | 59890.3  | 36298.9  | 36235.4  | 97678.3  | 57225    | 35086.5  | TRUE |
| 103540   | 87191.1  | 96088.9  | 99345.5  | 146631.3 | 111001.1 | 115136.1 | 105488.8 | TRUE |
| 67299.4  | 94408.6  | 104239.4 | 74384.6  | 79216.8  | 101151.5 | 104247.7 | 60119.2  | TRUE |
| 48817.5  | 50445.5  | 71177.1  | 41432    | 49253    | 66765.6  | 41279.4  | 31418.3  | TRUE |
| 130953.6 | 128346.1 | 132799.9 | 94031    | 158563.2 | 117832.8 | 108128.8 | 112441.6 | TRUE |
| 285399.2 | 294661   | 344408.3 | 220915.3 | 166470.2 | 315695.7 | 264316   | 195622.9 | TRUE |
| 1132366  | 639794.5 | 1037932  | 1025662  | 1919354  | 960825.4 | 723069.3 | 1009482  | TRUE |
| 948317.7 | 599654.4 | 964093.6 | 904066.4 | 1575930  | 954855.3 | 665821   | 985680.1 | TRUE |
| 594901.7 | 588073.8 | 897663.7 | 533289.8 | 421111.2 | 933925   | 604843.8 | 457888.8 | TRUE |
| 111254.2 | 80989.6  | 147426   | 77377.6  | 81857.9  | 185562.7 | 128648.4 | 75988.5  | TRUE |
| 418230.2 | 229954.4 | 406118.3 | 371604.1 | 965162.9 | 324761.1 | 246677.5 | 342039.6 | TRUE |
| 1601960  | 1357106  | 2837617  | 1448713  | 998784.2 | 3131156  | 1436522  | 1042742  | TRUE |
| 790923.8 | 582896.9 | 743684.1 | 1246860  | 1826388  | 468000.4 | 440515.4 | 572049.9 | TRUE |
| 1624937  | 693079.9 | 1286971  | 1224481  | 3480317  | 1042934  | 841366.4 | 1174607  | TRUE |
| 78042.7  | 80846.6  | 104448.1 | 73025.6  | 60573.6  | 103663.5 | 74753    | 68567.7  | TRUE |

|          |          |          |          |          |          |          |          |      |
|----------|----------|----------|----------|----------|----------|----------|----------|------|
| 224705.8 | 273939.3 | 318116   | 271419.5 | 209216.8 | 292063.2 | 274831.2 | 177600.2 | TRUE |
| 142362.2 | 101399.9 | 324123.2 | 121061.6 | 61626.7  | 315012.7 | 139907.7 | 84983.1  | TRUE |
| 126871.3 | 103261.4 | 180324.2 | 105151.8 | 82711.4  | 203461.5 | 113990   | 70863.2  | TRUE |
| 616476.2 | 358865.2 | 525811.8 | 549991.3 | 1178259  | 508597.6 | 427832   | 525645.1 | TRUE |
| 47787.1  | 22782.8  | 62751.5  | 23186.7  | 28553.8  | 73473.6  | 32345.1  | 35853.6  | TRUE |
| 20544    | 27515.2  | 38964.9  | 9775.8   | 7032.2   | 33692.9  | 9318.1   | 25653.3  | TRUE |
| 54975.7  | 61662.4  | 174882.4 | 33250.8  | 18555.3  | 149591.9 | 48387.4  | 39133.5  | TRUE |
| 31082.9  | 19958.1  | 39574.1  | 28583.6  | 20860.3  | 41578.6  | 22392.4  | 18721    | TRUE |
| 577895.7 | 256578.8 | 522542.4 | 415881.9 | 1350751  | 308421.4 | 264708.1 | 425296.7 | TRUE |
| 270069.8 | 111145.1 | 235189.8 | 197672   | 675530.1 | 181214.6 | 139552.9 | 189113.4 | TRUE |
| 229970.8 | 163552.2 | 344207.4 | 237185   | 202680.8 | 412593.4 | 249622.7 | 218001.3 | TRUE |
| 210955.9 | 154492.4 | 212213.4 | 204818.1 | 506948.9 | 172955.8 | 205657.7 | 204497.7 | TRUE |
| 79773.8  | 74949.3  | 102227.4 | 94528.4  | 64167    | 138793.1 | 112195.1 | 82969.5  | TRUE |
| 49595.9  | 56280.7  | 111789.5 | 47651.6  | 42634.6  | 136570.7 | 61982.3  | 36038.4  | TRUE |
| 18542.6  | 28501.5  | 36755.8  | 21904.2  | 18694.5  | 27259    | 41989.9  | 8788.4   | TRUE |
| 82253.6  | 88855.5  | 69981.6  | 85068.3  | 96355.6  | 82677.2  | 115157   | 77890.7  | TRUE |
| 209954.8 | 274934.5 | 219564.7 | 174844.4 | 161489.9 | 232190.7 | 251990.3 | 179038.5 | TRUE |
| 296111.9 | 234874.8 | 322643.8 | 323402.7 | 293754.1 | 269089.3 | 268450.6 | 260578.3 | TRUE |
| 729721.1 | 570298.3 | 923444.6 | 830955   | 707125   | 678951.2 | 536861.8 | 685322   | TRUE |
| 110118.1 | 134981.5 | 123650.5 | 114034   | 142423.4 | 115376.8 | 140613.1 | 107693.7 | TRUE |
| 114699.4 | 140061.2 | 143363.2 | 98034.8  | 101794.7 | 151364.5 | 161688.4 | 114924.1 | TRUE |
| 365176.3 | 338089.5 | 400875.8 | 380983.4 | 361463.2 | 333105.2 | 345373.1 | 315148.7 | TRUE |
| 168225.4 | 156646.3 | 185440.8 | 155033.7 | 144890.1 | 185235.2 | 187575.7 | 148718.1 | TRUE |
| 84722.7  | 98982.1  | 90489.3  | 79681.3  | 59604.5  | 93814.9  | 111674.5 | 74303.8  | TRUE |
| 289700.5 | 346056.6 | 245398.8 | 238266.1 | 184586.4 | 267412.4 | 289345.7 | 240772.1 | TRUE |
| 202376.1 | 141462.1 | 224028.5 | 243778.9 | 207795.4 | 159078.8 | 167344.8 | 194449.2 | TRUE |
| 48540.8  | 63017.9  | 53022.4  | 52665.1  | 55161.4  | 76167.2  | 76642.7  | 53313.6  | TRUE |
| 62217.8  | 69653.7  | 78058.6  | 85343.5  | 73997.6  | 65465.3  | 66983.8  | 80678    | TRUE |
| 31652.4  | 47759.4  | 34738.1  | 32683.8  | 8827.1   | 32780.5  | 11880.6  | 11202.7  | TRUE |
| 93733.3  | 83704.7  | 105259.2 | 100989.2 | 86518.4  | 86468.6  | 77553.7  | 63784.6  | TRUE |
| 212403.4 | 158841.5 | 281168.4 | 235958.7 | 221245.7 | 192278.1 | 156380   | 188745.3 | TRUE |
| 99857.8  | 136379.7 | 75902.5  | 96414.6  | 82171.9  | 95673.4  | 113566.7 | 111313.4 | TRUE |
| 81241.8  | 74259.7  | 75234.7  | 72629.7  | 33912.8  | 79273.1  | 56931.5  | 42204.8  | TRUE |
| 105709.1 | 91090.2  | 84338.5  | 87892.1  | 90620.3  | 69889.5  | 79959.3  | 85293.8  | TRUE |
| 17477.5  | 10181.4  | 29231.8  | 25305.9  | 20663.9  | 33916.9  | 14712.5  | 26429.9  | TRUE |
| 41837.4  | 30107.1  | 40034.7  | 41837.7  | 42675.8  | 31579.1  | 39548.3  | 40965.2  | TRUE |
| 218679.9 | 255071.8 | 300735.2 | 223526.8 | 251137.5 | 284415.3 | 192742.9 | 210252.9 | TRUE |
| 556620.6 | 531491.7 | 655741.4 | 483307.9 | 490090.4 | 698034.2 | 555966.7 | 508467.1 | TRUE |
| 999986.6 | 702004.6 | 982342.4 | 1040707  | 1348053  | 832604.3 | 760559.1 | 961280.5 | TRUE |
| 19741.4  | 25075.9  | 37187.7  | 30743.3  | 23543.8  | 31170    | 21552.6  | 23942.5  | TRUE |
| 99074.6  | 77210.8  | 105549.7 | 97675.8  | 122615.2 | 99030.9  | 129894   | 108389.3 | TRUE |
| 121698.2 | 106638.4 | 105434.5 | 98408.8  | 128928.9 | 137863.8 | 120506.3 | 152494   | TRUE |
| 34936.8  | 43906.7  | 40447.6  | 22547.8  | 42434.8  | 52494.3  | 44345.7  | 35000.7  | TRUE |

|          |          |          |          |          |          |          |          |      |
|----------|----------|----------|----------|----------|----------|----------|----------|------|
| 178463.8 | 148996.3 | 183424.1 | 160049.1 | 120401.2 | 184231.4 | 132940.5 | 145397.6 | TRUE |
| 191283.8 | 177635.9 | 359419.2 | 182804.7 | 173286.7 | 362903   | 210065.7 | 176117.2 | TRUE |
| 194054.5 | 145073   | 213333.1 | 197180.6 | 308166.6 | 190852.8 | 180241.2 | 200050.2 | TRUE |
| 51830.8  | 36625.9  | 63872.4  | 40567    | 51411.2  | 49947.3  | 38755.6  | 57613.3  | TRUE |
| 107415.4 | 127848.3 | 105941.5 | 138154.3 | 120121.3 | 114726.7 | 125537.8 | 134653.2 | TRUE |
| 105259.4 | 109559   | 102334   | 88144.6  | 100320   | 92830.7  | 112446.3 | 117104.9 | TRUE |
| 144831.3 | 158368.1 | 126751.6 | 121711.6 | 131110.5 | 116913.2 | 158389   | 121572.8 | TRUE |
| 172942.5 | 189460.5 | 119947.2 | 144844.4 | 141252.9 | 145722.6 | 179875.6 | 156628.8 | TRUE |
| 136619   | 141324   | 132717.5 | 142062.5 | 129393.1 | 116712.4 | 134454.7 | 117605.4 | TRUE |
| 104713.6 | 79586.2  | 73675.2  | 61180.5  | 86699.7  | 118062.5 | 81729.7  | 109720.6 | TRUE |
| 73727.2  | 79674    | 54783.8  | 70419.1  | 70850.2  | 54988.9  | 83822.5  | 82606.8  | TRUE |
| 152383.9 | 158808.7 | 126582.7 | 164997.1 | 149737.4 | 131844.5 | 178606.5 | 137635.3 | TRUE |
| 55014.6  | 69050.1  | 44672.1  | 63927.9  | 35641.2  | 52173.8  | 63808.9  | 67109.5  | TRUE |
| 94487.1  | 75062.5  | 57783.7  | 67264.7  | 59424.7  | 63138.4  | 77049.7  | 55136.3  | TRUE |
| 71463.9  | 50805.4  | 37369.7  | 64034.9  | 41746.5  | 39961    | 46986.1  | 45900.1  | TRUE |
| 65757.2  | 77247.2  | 83170.2  | 85238.5  | 86253.4  | 80406.2  | 87785.8  | 103723.3 | TRUE |
| 634430.3 | 594198.9 | 529341.8 | 558366   | 602676.3 | 651403.5 | 602796.1 | 603331.4 | TRUE |
| 438812.7 | 473488   | 414150.1 | 394996   | 432624.5 | 422232.9 | 431596.2 | 469192.7 | TRUE |
| 175699.9 | 167261.5 | 132680   | 149831.3 | 148468.9 | 146873.4 | 166659.9 | 172429.1 | TRUE |
| 394522.9 | 369097.7 | 334210.6 | 407811.1 | 363745.8 | 373877.4 | 404082.3 | 409839.9 | TRUE |
| 363734   | 336963.7 | 387103.1 | 367012   | 360788.8 | 380032.7 | 360163.7 | 399697.9 | TRUE |
| 308454.7 | 312930.9 | 338050   | 297531.2 | 299884.5 | 295237.6 | 320116.8 | 305257.2 | TRUE |
| 59027.9  | 55883.4  | 47131.5  | 75902.1  | 64431.9  | 55094.3  | 76685.7  | 67362.1  | TRUE |
| 181919.7 | 158297.3 | 135817.8 | 180593   | 183293.9 | 140282.5 | 202702.2 | 183267.1 | TRUE |
| 25114.7  | 16608.3  | 15336.1  | 21052.6  | 23049.7  | 26994.6  | 21875    | 31752.6  | TRUE |
| 118791.1 | 111800.1 | 112399.7 | 143701.6 | 130991.3 | 102160.2 | 116604.2 | 123378.3 | TRUE |
| 112958.6 | 116940.1 | 112942.6 | 133613.9 | 128988.9 | 130940.7 | 144201.3 | 121023.2 | TRUE |
| 206248.8 | 158072   | 211419.6 | 221216.3 | 206371.9 | 214495.8 | 222233.4 | 236640.7 | TRUE |
| 435948.5 | 370791.5 | 363892.7 | 397460.1 | 419144.2 | 413374   | 432717.4 | 417364.3 | TRUE |
| 374959.2 | 332224.9 | 330707.3 | 366862.2 | 389941.2 | 346251.2 | 383833   | 357027   | TRUE |
| 160722.2 | 129417   | 156549.3 | 182615.7 | 133884   | 140377.5 | 137991.6 | 144921.2 | TRUE |
| 164829.9 | 145665.3 | 169896.5 | 161298.9 | 177217.5 | 157960.6 | 155618.2 | 184622.3 | TRUE |
| 669323.5 | 690874.5 | 569174.6 | 640255.6 | 783684.6 | 634867   | 761166.8 | 696748.5 | TRUE |
| 225849   | 191973.3 | 244933.3 | 263035.9 | 254324.9 | 230465.9 | 229476.3 | 237977.9 | TRUE |
| 53961.2  | 67542.5  | 47139.3  | 53374.9  | 74714.8  | 52371.1  | 59793.1  | 54215.5  | TRUE |
| 20761805 | 14347319 | 21987839 | 21746841 | 22075302 | 21257302 | 15419051 | 21675326 | TRUE |

|          |          |          |          |          |          |          |          |      |
|----------|----------|----------|----------|----------|----------|----------|----------|------|
| 845580.9 | 543961.7 | 821088.1 | 786489.5 | 679497.4 | 820230.7 | 556356.9 | 849754.2 | TRUE |
| 510268.6 | 513569.4 | 475125   | 448038.3 | 370492.3 | 542898.1 | 520520.7 | 437356.4 | TRUE |
| 248277.4 | 207683.8 | 255846.2 | 288804.4 | 214458.1 | 254491.9 | 234050.7 | 227156.8 | TRUE |
| 144205.3 | 171018.5 | 161102   | 187244.4 | 181453.6 | 186320.2 | 215569.4 | 149490.3 | TRUE |
| 337009.6 | 384511.5 | 451857.1 | 486685.7 | 405407.1 | 517545.4 | 532474.1 | 408992.7 | TRUE |
| 184915.9 | 195800   | 207081.3 | 189273.1 | 160683.8 | 158592.4 | 147476   | 142598.8 | TRUE |
| 239844.6 | 228307.6 | 322976.9 | 258382.5 | 259599.9 | 290563.9 | 239242.5 | 266455.2 | TRUE |
| 240961.3 | 241209.1 | 212968.1 | 312046.8 | 241311.1 | 244300.6 | 256298.2 | 315115.3 | TRUE |
| 221027.1 | 187455.9 | 257834.6 | 272853.1 | 222615.8 | 304243.5 | 188236.4 | 226986.4 | TRUE |
| 324658.6 | 212182.2 | 469146.5 | 530359.7 | 258982.6 | 275989   | 207547.4 | 315584.6 | TRUE |
| 192332.7 | 210533.8 | 181382.5 | 210954.7 | 227185.2 | 185687.1 | 209559.4 | 195073.7 | TRUE |
| 411134.5 | 445978.7 | 367635.3 | 434269.6 | 371512.8 | 422428.2 | 449413   | 378603.6 | TRUE |
| 38874.4  | 38869.7  | 43360.4  | 48058.8  | 35163.4  | 43531.6  | 39846.6  | 35160.1  | TRUE |

|          |          |          |          |          |          |          |          |      |
|----------|----------|----------|----------|----------|----------|----------|----------|------|
| 65244.1  | 98077.7  | 51009.2  | 90742.4  | 60503.5  | 56786.1  | 91479.5  | 74531.1  | TRUE |
| 138655.9 | 153871.8 | 113237.4 | 138578.7 | 116468.4 | 120909.6 | 194850.6 | 130667.4 | TRUE |
| 29960.7  | 26890    | 22582    | 26910.8  | 11041.6  | 27055.9  | 24272.3  | 12848.7  | TRUE |
| 28084.6  | 20450.3  | 6033     | 27342.9  | 7442.4   | 20010.1  | 29729.9  | 28379.2  | TRUE |
| 5627.7   | 29418.7  | 15070.4  | 5547.5   | 16672.4  | 3938.8   | 7935.3   | 6791.3   | TRUE |
| 220442.1 | 202749.5 | 302312.7 | 323735.8 | 199635.7 | 220936.6 | 237798.4 | 218036.6 | TRUE |
| 85106.2  | 60774.3  | 59451    | 83535.8  | 84333    | 98659.2  | 104183.3 | 87909.1  | TRUE |
| 102494   | 110955.1 | 162214.3 | 110886.2 | 95191.7  | 109188   | 140277.6 | 106878.8 | TRUE |
| 20375    | 22363.7  | 24305.9  | 11575.1  | 24988.1  | 15193.7  | 28517.2  | 28042    | TRUE |
| 222044.9 | 264264.1 | 196172.2 | 217263.8 | 252418.2 | 207022.8 | 239428.5 | 231870.4 | TRUE |
| 177893.2 | 213449.9 | 160942.3 | 189362.6 | 147734.2 | 192589.2 | 188331.9 | 175884.5 | TRUE |
| 225465.5 | 228598.9 | 209484.2 | 220421.8 | 230514.9 | 239335.6 | 256006.4 | 232834.9 | TRUE |
| 120890.2 | 95481.8  | 127116.8 | 142837.3 | 127667.6 | 139461.9 | 121255.6 | 154373.7 | TRUE |
| 21156.8  | 28279.5  | 25038.3  | 8988.5   | 36554.8  | 30941    | 21217.8  | 20132.3  | TRUE |
| 109388.1 | 112932.5 | 66041.3  | 102026.6 | 76752.5  | 119766.9 | 138471.7 | 115691.4 | TRUE |
| 217805.8 | 203823   | 233270.1 | 204439.5 | 205492.3 | 270519.9 | 212956.7 | 227443.5 | TRUE |
| 277244.5 | 202267   | 261900.1 | 305099.6 | 245556.5 | 352427.8 | 288282.1 | 297851   | TRUE |
| 91301.6  | 63021.8  | 80266.1  | 99573.5  | 75623.1  | 98525.5  | 90049.1  | 96656.2  | TRUE |
| 166409.4 | 198711.9 | 180126.3 | 165816.7 | 146739.8 | 198218.3 | 215517.2 | 150843.1 | TRUE |
| 464553.9 | 362078.8 | 362332.2 | 513669.1 | 526058.4 | 436547.2 | 488525.7 | 523798.4 | TRUE |
| 51318.2  | 59840.6  | 47418    | 57137.1  | 49459.4  | 28534.8  | 43082.7  | 54035.1  | TRUE |

|          |          |          |          |          |          |          |          |      |
|----------|----------|----------|----------|----------|----------|----------|----------|------|
| 250264.7 | 221206.3 | 271683.1 | 314594.6 | 268078.4 | 245750.2 | 285615.2 | 289459.2 | TRUE |
| 245596   | 200276.1 | 215277.6 | 241431.2 | 235470.9 | 233500.2 | 222487.2 | 213796.5 | TRUE |
| 196111.1 | 155761.2 | 177008.9 | 185170.9 | 185898.9 | 175971.1 | 169348.1 | 230399.2 | TRUE |
| 1730723  | 1660646  | 1544176  | 1563206  | 1843497  | 2098904  | 1774418  | 2004812  | TRUE |
| 104035.6 | 114958.5 | 107322.5 | 147967.8 | 110530   | 105516.9 | 162985.3 | 116690.5 | TRUE |
| 463128.9 | 392144.3 | 334168.1 | 409969.1 | 379266.6 | 348561.9 | 340007.3 | 391207.5 | TRUE |
| 217548.3 | 163232.2 | 234487.1 | 207177.2 | 234880   | 213691.3 | 195490.9 | 212380.1 | TRUE |
| 165958.9 | 166672.6 | 168308.7 | 138300.1 | 182207.2 | 169643.4 | 179788.4 | 154571.4 | TRUE |
| 914248.6 | 847610.4 | 805272.6 | 786524.3 | 829452.6 | 852025.8 | 908749   | 890679.4 | TRUE |
| 121424.7 | 136180.4 | 135888.8 | 148667.6 | 154812.5 | 116652.2 | 136449.5 | 143952.6 | TRUE |

|          |          |          |          |          |          |          |          |      |
|----------|----------|----------|----------|----------|----------|----------|----------|------|
| 149564.5 | 138808.1 | 151797.3 | 169920.8 | 181112.8 | 124478.3 | 144377.8 | 156541.3 | TRUE |
| 437290.2 | 369783.7 | 406525   | 489330.7 | 350408.2 | 912036.8 | 451302.7 | 778966.3 | TRUE |
| 323128.1 | 376318.4 | 284230.8 | 316673.9 | 329769.5 | 257484.6 | 372018.9 | 237792.3 | TRUE |
| 391846.7 | 304492.7 | 406613.8 | 422026.1 | 357991.7 | 409787.2 | 340749.4 | 423663.9 | TRUE |
| 1028248  | 826533.5 | 1040886  | 1099329  | 948213.2 | 1102688  | 896329   | 1036941  | TRUE |
| 325364.3 | 279991.8 | 360352.9 | 354360.6 | 289892   | 377035.3 | 381626.6 | 266804.3 | TRUE |
| 104507.4 | 112290.7 | 97499.9  | 94382.1  | 104411.4 | 103794.7 | 125769   | 106515.1 | TRUE |
| 158425.9 | 165102.8 | 131433.2 | 171648.3 | 170567.8 | 138147.7 | 178249.7 | 139029   | TRUE |
| 249024.6 | 214643.7 | 261592.5 | 267664.3 | 258131.3 | 229970.7 | 225861.2 | 235409.3 | TRUE |
| 110534.7 | 97311.5  | 144172   | 121117.8 | 125249.3 | 131861.1 | 130205.9 | 119966.9 | TRUE |
| 436074   | 372949.6 | 370386.1 | 403680.7 | 271655.4 | 426764.1 | 397034.6 | 410576.7 | TRUE |
| 79474.8  | 69264.1  | 90477.8  | 71001    | 64337.2  | 84069.5  | 71892.5  | 91878.2  | TRUE |
| 26269.5  | 7645     | 32639.9  | 22244    | 16938.9  | 22860.2  | 11700.7  | 17356.5  | TRUE |
| 53868.7  | 23964.8  | 43791.9  | 33364.9  | 26216.9  | 21351.3  | 34585.1  | 10697.5  | TRUE |
| 31105    | 24510.2  | 25506.9  | 20367.4  | 22624.1  | 28874.9  | 22449.7  | 33189.7  | TRUE |
| 102345.6 | 115636.8 | 93076.8  | 108118.5 | 71104.5  | 101270.4 | 101847.4 | 88208.3  | TRUE |
| 609332.4 | 479363.7 | 671296.2 | 665647.5 | 510807.7 | 595946.4 | 500097.9 | 606679.3 | TRUE |
| 661678.1 | 475243.5 | 616136.9 | 719561.6 | 482125.7 | 540921.7 | 485657.8 | 599743.7 | TRUE |
| 149949.8 | 169770.9 | 141912.1 | 149091.6 | 139816.3 | 142261.7 | 193262.1 | 140880.3 | TRUE |
| 473871.4 | 435276.3 | 469376.3 | 497285.9 | 363220.5 | 471348.2 | 485279.4 | 356225.1 | TRUE |
| 502954.2 | 462004.3 | 566113.9 | 531984.2 | 466032.2 | 444617.9 | 478660.9 | 479586.1 | TRUE |
| 1502013  | 1311006  | 1623089  | 1783407  | 1289139  | 1493384  | 1504909  | 1424664  | TRUE |
| 56691.7  | 61715.8  | 62398.8  | 45437.3  | 48370.1  | 61188.3  | 34762.8  | 41604.6  | TRUE |
| 49157.1  | 38146.9  | 58747.1  | 59710    | 66760.7  | 80877.9  | 64489.2  | 77995.3  | TRUE |
| 33656.7  | 29366.2  | 31524.7  | 8235.8   | 19590.3  | 32162.4  | 30380    | 35341.4  | TRUE |
| 40280.7  | 52940.8  | 35409.5  | 50532.1  | 74863.8  | 33402.9  | 47131.2  | 58719.1  | TRUE |
| 68994.6  | 97011.4  | 97123.7  | 89396.9  | 77146.3  | 84768.6  | 125620.9 | 68291.7  | TRUE |
| 144572.1 | 169949.9 | 140571.5 | 120888.2 | 142543.2 | 124741.7 | 195292.6 | 117844.1 | TRUE |
| 96354.9  | 69440.6  | 137426.5 | 125890.4 | 88216.1  | 75615.8  | 81369.3  | 69345.8  | TRUE |
| 157347.8 | 126205.6 | 158408.7 | 168490.1 | 133208.4 | 151865.8 | 127723.8 | 144474.2 | TRUE |
| 28793.6  | 51921.7  | 29622.5  | 49907.7  | 38968.5  | 23428.1  | 34247.8  | 36021.1  | TRUE |
| 41602.8  | 33402.1  | 27835.5  | 41309.6  | 24790.5  | 39465.7  | 34843.2  | 38232    | TRUE |
| 143458.5 | 99281    | 84138.6  | 123829.3 | 130607.8 | 132866.5 | 184565.2 | 166299.1 | TRUE |
| 88104.7  | 70505.9  | 55050.5  | 90980.7  | 74343.3  | 129304.3 | 121826.9 | 138797.9 | TRUE |
| 102901.3 | 71154.8  | 68812    | 109004.1 | 114816.8 | 121716.9 | 121196.2 | 126986.8 | TRUE |
| 287299.6 | 274248.4 | 211693.6 | 294652.2 | 283922.2 | 254245.9 | 287400.5 | 328598.7 | TRUE |
| 127689   | 83369.3  | 204332.2 | 51984.9  | 52209.6  | 214192   | 65138.8  | 85785.2  | TRUE |
| 36353.2  | 31469.4  | 39189.9  | 27705.9  | 8759.4   | 45931    | 34957.2  | 24539.1  | TRUE |
| 43266.5  | 29381.8  | 29701.2  | 41616.2  | 58106.2  | 35091.7  | 32888.3  | 45041.7  | TRUE |
| 25985.6  | 51777.3  | 66869.5  | 46647.6  | 20668.3  | 41254.6  | 48206.6  | 28233.1  | TRUE |
| 67187.1  | 48153    | 87243.3  | 58109.6  | 32694.2  | 145633.3 | 61976.2  | 50015.9  | TRUE |
| 43967.6  | 25757.4  | 53340.3  | 40992.8  | 33502.1  | 60299.7  | 36706.3  | 35195.6  | TRUE |
| 203142.4 | 182233.9 | 253525.3 | 167752.4 | 150072.3 | 264579.3 | 160060.5 | 139247   | TRUE |

|          |          |          |          |          |          |          |          |      |
|----------|----------|----------|----------|----------|----------|----------|----------|------|
| 263145.1 | 276740   | 319459.1 | 263646.5 | 201784.5 | 343641.7 | 275522.7 | 222362.3 | TRUE |
| 242171.5 | 187173.7 | 384858.1 | 218850.4 | 141693.5 | 477298.7 | 197016.9 | 142346.2 | TRUE |
| 44030.3  | 63360.2  | 68480    | 81692.3  | 56219.5  | 72532.5  | 61482    | 50482.4  | TRUE |
|          |          |          |          |          |          |          |          |      |
| 124299.7 | 110458.7 | 171542   | 134793.2 | 137470.1 | 153620.4 | 134558   | 116841.7 | TRUE |
| 95066.4  | 83763.4  | 138392.2 | 101842.7 | 70502.3  | 136618.2 | 92384    | 75562.5  | TRUE |
|          |          |          |          |          |          |          |          |      |
| 30278.7  | 10112.8  | 32102.9  | 32982.2  | 22951.4  | 41634.4  | 16827.8  | 34702.7  | TRUE |
| 47014    | 64250.7  | 47800.5  | 30325.4  | 41325.6  | 41532.9  | 48357.6  | 36497.1  | TRUE |
| 50766.5  | 64281    | 51963    | 36990.8  | 43502.1  | 53674.2  | 40193    | 34865.5  | TRUE |
| 71171.1  | 37367.9  | 36318.9  | 28986.6  | 49743.2  | 34887.6  | 34326.9  | 41306.5  | TRUE |
| 263676.6 | 184105.9 | 214689.1 | 220693.1 | 286306.4 | 228452.1 | 202211.5 | 264259.1 | TRUE |
| 29934.9  | 34390.3  | 42872.5  | 30603.1  | 31004    | 53778.6  | 42686.4  | 32760    | TRUE |
| 379833.9 | 360061.8 | 395033.2 | 382225.6 | 289506.9 | 385466.3 | 344638.1 | 316372.1 | TRUE |
| 8266.5   | 3857.9   | 9959.9   | 7012.9   | 18155.9  | 11201.2  | 5448.7   | 19335.9  | TRUE |
| 365380.1 | 360322.9 | 379655.3 | 379718.5 | 315251.4 | 409781.2 | 337841.6 | 322778.9 | TRUE |
| 102017.1 | 94782.2  | 61115.3  | 71527.4  | 98246.1  | 103433.9 | 112497.1 | 111259.4 | TRUE |
| 38117.3  | 23124.2  | 47983.4  | 40869.3  | 35461.1  | 48284.1  | 39836.9  | 32422.2  | TRUE |
|          |          |          |          |          |          |          |          |      |
| 369263.2 | 334974.5 | 423354.6 | 314777   | 276822.4 | 441600.6 | 397619.2 | 345222.5 | TRUE |
| 177506.7 | 156156.2 | 187265.8 | 187437.6 | 137266.3 | 191526.9 | 186498.1 | 142211   | TRUE |
|          |          |          |          |          |          |          |          |      |
| 55250.5  | 35531    | 38397.9  | 58744.7  | 23221.5  | 54854.3  | 58745.4  | 41065.2  | TRUE |
| 242603.4 | 193960   | 204072.1 | 253758.2 | 181690.3 | 210732.8 | 208133.3 | 191090.8 | TRUE |
| 762430.1 | 795615.5 | 635205   | 776527.8 | 649254.7 | 706225.5 | 881510.7 | 654311.8 | TRUE |
| 76804.9  | 74057.5  | 79004.1  | 97432.5  | 72001.3  | 95182.5  | 91090.1  | 89169    | TRUE |
| 90903.3  | 75852.1  | 83518.3  | 79580.2  | 94049.8  | 92067    | 104190.9 | 93613.9  | TRUE |
| 599176.9 | 514721.5 | 749040.9 | 820411   | 603479.4 | 732937.3 | 589591.9 | 716772.3 | TRUE |
| 13344.5  | 21547.6  | 10891.3  | 29211    | 18098.1  | 33860.7  | 16569.5  | 25065.1  | TRUE |
| 97445.8  | 85363.8  | 122936.9 | 114307.3 | 99952.1  | 94101.7  | 101876.6 | 132767   | TRUE |
|          |          |          |          |          |          |          |          |      |
| 132733.5 | 98491.7  | 112143.7 | 115350.6 | 77294.5  | 198283.1 | 138562.8 | 120968.7 | TRUE |
| 167308.4 | 170990.1 | 154049.1 | 192143.7 | 169729.3 | 176401.5 | 169185.4 | 162178.8 | TRUE |
| 122659.6 | 112638   | 150515.2 | 118434.3 | 135658.6 | 134885.4 | 133449.3 | 123856.1 | TRUE |
|          |          |          |          |          |          |          |          |      |
| 1362004  | 1432253  | 1109493  | 1319876  | 1347987  | 1210853  | 1491459  | 1456505  | TRUE |
| 301320   | 267884.9 | 238375.8 | 267911.3 | 276960.7 | 248798   | 282722.6 | 260280.5 | TRUE |
| 572411.4 | 613287.9 | 619768.8 | 704251.2 | 520326.9 | 612044.2 | 574964.3 | 634152.2 | TRUE |



|          |          |          |          |          |          |          |          |      |
|----------|----------|----------|----------|----------|----------|----------|----------|------|
| 553370.8 | 569043.2 | 583982.4 | 676458   | 463925.9 | 591366   | 591244.4 | 542756.4 | TRUE |
| 121112.4 | 122277.5 | 75780.6  | 89766    | 107476.4 | 63890.4  | 100054.7 | 100957.2 | TRUE |
| 62525.5  | 50302.4  | 39498.3  | 48816.9  | 43553    | 41147.7  | 62788.4  | 63027.8  | TRUE |
| 103692.1 | 102909.9 | 110830.3 | 111380.3 | 104461.1 | 132742.9 | 112329.3 | 124556.8 | TRUE |
| 119207.1 | 95418.1  | 63829.4  | 143747.3 | 93999.8  | 103854.8 | 133626.6 | 121826.9 | TRUE |
| 172949.1 | 176946.1 | 208688.5 | 374034   | 292193.7 | 230387.8 | 246838.8 | 181503.6 | TRUE |
| 57186.5  | 57408.2  | 73822.1  | 84660.3  | 45536    | 70971.4  | 87212.7  | 62153.6  | TRUE |
| 61964.8  | 58581.5  | 65288.6  | 71300.2  | 56365.7  | 57952.5  | 51753.3  | 46928.5  | TRUE |
| 124632.8 | 134210.8 | 66822.7  | 75534.4  | 100696.1 | 71126    | 108909.9 | 95053.4  | TRUE |
| 23428.7  | 21357.5  | 26617.6  | 31687.6  | 9793.4   | 35022.7  | 31908.8  | 19799.3  | TRUE |
| 108838   | 64183.3  | 80314.3  | 76859.7  | 77049.1  | 69842.1  | 83487.2  | 79244.7  | TRUE |
| 172149.7 | 178086   | 222237.7 | 169524.3 | 189811.4 | 172275.9 | 159448.3 | 162657.2 | TRUE |
| 961345.4 | 909447.3 | 885197.4 | 1087489  | 1035765  | 946413.5 | 1025814  | 1018289  | TRUE |
| 823692.3 | 692198.7 | 729617.2 | 883693.6 | 868637   | 741843.3 | 764786.4 | 812958.5 | TRUE |
| 1162505  | 1151377  | 1050941  | 1042415  | 1142382  | 1195773  | 1248568  | 1236007  | TRUE |
| 40138.9  | 61399.2  | 43066.5  | 48056.3  | 25828.6  | 42306.5  | 41614    | 47143    | TRUE |
| 79354    | 81642.1  | 84817.8  | 119041.8 | 103295.2 | 88829.4  | 77343.6  | 104746   | TRUE |
| 108045.2 | 104712.8 | 131514.7 | 129511.9 | 127498.9 | 144190.1 | 134380.2 | 143333.1 | TRUE |
| 128711.8 | 101835   | 132055.3 | 115405   | 125712.8 | 106572.8 | 89134.7  | 122274   | TRUE |
| 449442.6 | 401977.7 | 436576.1 | 491837.5 | 479659.3 | 405568.4 | 451442.8 | 435755   | TRUE |
| 395913.5 | 300675.8 | 285519.1 | 245920.5 | 283849.9 | 255012.5 | 237780.3 | 266553.6 | TRUE |
| 2301469  | 2127621  | 2216999  | 2161028  | 2101331  | 2461156  | 2269963  | 2340252  | TRUE |
| 115962.9 | 128791   | 82278    | 104133.7 | 176774.2 | 94065.4  | 130914.3 | 175392   | TRUE |
| 65981.5  | 47915.2  | 34170    | 55813.2  | 69914.2  | 44499    | 77009.5  | 88654.1  | TRUE |
| 99708.6  | 80826.5  | 65942.4  | 62782.3  | 90660.7  | 58131    | 125385.6 | 112786.4 | TRUE |
| 172766.6 | 194309.4 | 145737.5 | 232611.9 | 177029.8 | 198565.5 | 223994.5 | 196554   | TRUE |
| 208337.6 | 241094.8 | 176053.9 | 199366.6 | 234331.5 | 195660.6 | 241373.1 | 241708.9 | TRUE |
| 172366.8 | 143910.5 | 160051.6 | 201063.7 | 124696.8 | 159396.9 | 219282   | 157398.9 | TRUE |
| 92661.8  | 100777.9 | 73732.7  | 98809.6  | 68829    | 93336.7  | 87191.1  | 97085.8  | TRUE |
| 1028833  | 1126922  | 1175460  | 1152978  | 765372.4 | 988521.5 | 1189818  | 974197.8 | TRUE |
| 466358.6 | 498544.7 | 496251.3 | 515505.6 | 343612.5 | 396541.3 | 530245.6 | 430738.9 | TRUE |
| 703333.4 | 736596.8 | 705844.5 | 782038.6 | 664118.2 | 560063.1 | 630362.5 | 567886.4 | TRUE |
| 1500913  | 1514367  | 1540677  | 1553891  | 1519306  | 1568668  | 1722754  | 1570642  | TRUE |
| 95499.4  | 94429.7  | 70132.2  | 92042.6  | 98411.3  | 58973.9  | 122866.9 | 105289.4 | TRUE |
| 395288.4 | 441574.7 | 317750.9 | 344375.9 | 459941.7 | 303724.1 | 397028.5 | 418065.2 | TRUE |
| 179919.8 | 208342.7 | 241993   | 229945.5 | 163689.6 | 180429.8 | 202183.1 | 171273   | TRUE |
| 267310.3 | 308876   | 332899.7 | 392754.7 | 247251.6 | 257518.5 | 360934.3 | 263646.9 | TRUE |
| 48647.9  | 51907.9  | 53107.4  | 40781.8  | 48018.6  | 63825.7  | 60344.7  | 46147.9  | TRUE |
| 91614.5  | 103971.9 | 95516.5  | 79777.9  | 81116.3  | 93316.1  | 94789.8  | 86240.3  | TRUE |
| 64162.8  | 57928.8  | 48152.6  | 49130.4  | 59659.3  | 60951.6  | 63687.5  | 69417.7  | TRUE |
| 150394.1 | 175517.4 | 163714.1 | 172651.3 | 154195.7 | 188464.7 | 190962   | 192333.3 | TRUE |
| 131306   | 111027.9 | 114132.7 | 117224.7 | 107271.2 | 109169.6 | 113639.9 | 117242   | TRUE |

|          |          |          |          |          |          |          |          |      |
|----------|----------|----------|----------|----------|----------|----------|----------|------|
| 22912.4  | 24303.8  | 22738.9  | 26588.3  | 19125.8  | 22648.3  | 15290.7  | 13560.6  | TRUE |
| 21312.4  | 19173.1  | 22674.2  | 25315    | 27997.6  | 12353    | 24064.8  | 19236.5  | TRUE |
| 92602.7  | 81451.1  | 86252.3  | 86501.6  | 84645.3  | 86469.1  | 93092.5  | 91787.2  | TRUE |
| 302547.2 | 347243.2 | 301307.2 | 319797.5 | 319311.6 | 287469.2 | 378467.6 | 315280   | TRUE |
| 25773.6  | 34045.7  | 21684.7  | 26834.1  | 38526.5  | 28691.2  | 26961.4  | 30460.2  | TRUE |
| 12072.3  | 7533.3   | 8347.5   | 10163.9  | 25775.2  | 8524.6   | 18052.9  | 15169.6  | TRUE |
| 76495.1  | 65035.7  | 82725.8  | 87696.3  | 83485.6  | 68505.2  | 67447.5  | 71826.3  | TRUE |
| 945745.6 | 913212.7 | 835883.2 | 908197.2 | 944965.4 | 935473.1 | 845125.9 | 898020.8 | TRUE |
| 216653.7 | 189818   | 244733.9 | 203956   | 216706   | 212493.6 | 201062.9 | 232143.4 | TRUE |
| 60476.9  | 65983.9  | 65472.5  | 63223    | 45355.2  | 77137.6  | 75880.8  | 53540.4  | TRUE |
| 60229.8  | 31056.4  | 53553    | 45945    | 74489.4  | 35164.4  | 37464.8  | 45500.8  | TRUE |
| 34549.8  | 16299    | 21431.3  | 31730.4  | 32898.6  | 21297.2  | 21698.2  | 10668.9  | TRUE |
| 58062.5  | 23987.5  | 58597.2  | 70461.7  | 98453.3  | 8986.6   | 35692.3  | 24075.1  | TRUE |
| 85173.3  | 59452.2  | 95085.8  | 84181.3  | 62418.5  | 106562.4 | 50198.5  | 134876.6 | TRUE |
| 595229.4 | 701597   | 898446.4 | 501052   | 280318.6 | 966454.8 | 764012.9 | 312559.6 | TRUE |
| 50596.8  | 57473.6  | 40637.9  | 58747.4  | 50041.7  | 56661.8  | 67185.3  | 50717    | TRUE |
| 26382.6  | 25028.7  | 31941.8  | 12155.1  | 10701.2  | 18551.3  | 37857.5  | 21887.7  | TRUE |
| 268891.6 | 270743.7 | 291689.9 | 256385.3 | 205515.3 | 324461.3 | 276235.7 | 235758   | TRUE |
| 143536.5 | 194574.2 | 152595.2 | 116679   | 137778.6 | 175275.8 | 233163.5 | 118165.8 | TRUE |
| 273666.8 | 361733   | 322597   | 197194.3 | 176882.2 | 347134.1 | 406739.8 | 182479.7 | TRUE |
| 65540.8  | 99389.4  | 110795.6 | 86872.4  | 70600.2  | 107548.1 | 88433.6  | 59223.6  | TRUE |
| 29613.4  | 39432.4  | 57830.6  | 45507.2  | 29964    | 85163.2  | 57558.9  | 29717.6  | TRUE |
| 109192.8 | 103536   | 109997.4 | 99513.9  | 82114.4  | 165611   | 143696.1 | 94698.7  | TRUE |
| 26291.8  | 35453.1  | 26929.8  | 9627.3   | 9892.1   | 47484.5  | 31635.3  | 13102.6  | TRUE |
| 58304.5  | 69304.3  | 88301.6  | 55614.3  | 35872.3  | 73076.9  | 69759    | 41272    | TRUE |
| 9896.8   | 8574.6   | 27978.8  | 8572.1   | 8402     | 27952.1  | 13092.7  | 11060.9  | TRUE |
| 314586.9 | 346225   | 355080.6 | 329247.6 | 261753.5 | 360524.2 | 364942.8 | 279046.1 | TRUE |
| 237405.9 | 225484.1 | 268218.9 | 223614.4 | 180943.9 | 309887.8 | 295909.1 | 216395.9 | TRUE |
| 86533.1  | 141028.3 | 365045   | 67682.4  | 96741.3  | 73824.6  | 85128.8  | 83612.1  | TRUE |
| 100011.8 | 83757.7  | 78669.7  | 90439.4  | 101432.9 | 54767.7  | 65340.5  | 65337.5  | TRUE |
| 14081.6  | 7241.2   | 23140.5  | 21530.3  | 16591.3  | 15905.4  | 7326.8   | 9273.6   | TRUE |
| 138025.1 | 109217.7 | 149824.3 | 158024.1 | 165856.2 | 135147.6 | 120220.8 | 149367.9 | TRUE |
| 79415.8  | 95604.3  | 86620.3  | 73992.7  | 58472.1  | 74348.1  | 87306.9  | 74214.9  | TRUE |
| 113343.1 | 113912   | 115676.6 | 106311   | 77397.6  | 130018.4 | 84792.2  | 102203.9 | TRUE |
| 61889.8  | 42309    | 41941.1  | 48912.6  | 64525.4  | 58609.7  | 48562.7  | 48170.8  | TRUE |
| 116990.5 | 88749.9  | 121479.5 | 124844.9 | 138464.3 | 97823.9  | 94108.8  | 93809.1  | TRUE |
| 149931.7 | 113004.3 | 182627.3 | 129466.7 | 133720.1 | 189392.7 | 141420   | 136096.8 | TRUE |
| 223554.4 | 256437.9 | 179365.7 | 211597   | 237114   | 207219.2 | 233359.2 | 276130.8 | TRUE |
| 126451.7 | 102586.6 | 84327.9  | 108932.5 | 133780.8 | 76865.6  | 122484.6 | 117003   | TRUE |
| 567331.1 | 579096.3 | 632973.5 | 689662.4 | 481294.7 | 592272   | 645198.1 | 600195   | TRUE |
| 200436.9 | 210759.9 | 198635.2 | 233801   | 185299.2 | 185256.5 | 258988.6 | 173783.4 | TRUE |
| 28006.2  | 34055.3  | 26814.4  | 23564.5  | 30482.7  | 34243    | 41872.7  | 32545.7  | TRUE |
| 375304.8 | 379572.3 | 514427.9 | 478611.8 | 391243.2 | 387563.9 | 446437.7 | 391094.6 | TRUE |
| 29419.6  | 45302.8  | 24642.2  | 27229.9  | 32666.7  | 27214.7  | 50676.3  | 40383.8  | TRUE |
| 13140.1  | 22547.8  | 4741.2   | 8801.1   | 4660.6   | 16684.7  | 26397.5  | 30344.2  | TRUE |

|          |          |          |          |          |          |          |          |      |
|----------|----------|----------|----------|----------|----------|----------|----------|------|
| 214785.5 | 254250.3 | 221430.1 | 169041.3 | 172810.9 | 230758.7 | 221082.1 | 174453.8 | TRUE |
| 520604.5 | 533753.8 | 414137.9 | 483148.9 | 510376.6 | 433597.7 | 563724.9 | 506760.9 | TRUE |
| 471908.6 | 488496.4 | 356447.6 | 450004.5 | 446423.6 | 388105.3 | 474667   | 443541.8 | TRUE |
| 278592.1 | 281024   | 282155.6 | 310602   | 272937.9 | 231904.5 | 307146.4 | 275454.8 | TRUE |
| 458519.4 | 476766   | 468986.9 | 506565.6 | 395844.8 | 389890.9 | 437957.5 | 409427.1 | TRUE |
| 39289.8  | 29218.8  | 46323.9  | 28510.2  | 24332.2  | 37231.2  | 32758.6  | 28155.6  | TRUE |
| 328928.2 | 268028   | 583655.4 | 236074.7 | 212222.4 | 647277.6 | 290405.3 | 193186.2 | TRUE |
| 66772.3  | 46342.9  | 72313.8  | 35444    | 33838.6  | 86999.6  | 53114.5  | 50302.6  | TRUE |
| 184927   | 184942   | 249022.6 | 159870.6 | 153888.9 | 207403.2 | 201828.8 | 148372.8 | TRUE |
| 160802.1 | 210058.8 | 193548.4 | 177064.9 | 154201.5 | 203546   | 171771.8 | 185434.1 | TRUE |
| 278521   | 254571.5 | 263600.1 | 319206.1 | 426328.5 | 256805.4 | 251724.9 | 264369.4 | TRUE |
| 441277.3 | 306532.5 | 404090.3 | 451543.3 | 815502   | 394551.7 | 298899.2 | 354194.6 | TRUE |
| 54374.6  | 55154.4  | 45905.5  | 40764.3  | 42304.7  | 39783.5  | 56211.8  | 40357.6  | TRUE |
| 160530.6 | 158245.3 | 272358.3 | 140794.1 | 129416.3 | 283261.2 | 174435.2 | 140900.4 | TRUE |
| 46897.9  | 45766.3  | 112845.4 | 57455.5  | 44014.6  | 117696.9 | 68364.1  | 35693.8  | TRUE |
| 701699.5 | 520514.5 | 824324   | 889074.9 | 636505.5 | 1735483  | 495630.7 | 1537673  | TRUE |
| 64847.1  | 38129.8  | 67263.9  | 19394.8  | 44351.9  | 101502.3 | 61295.3  | 72123.7  | TRUE |
| 203982.1 | 241662.7 | 146718.1 | 226958.9 | 244642   | 175389.7 | 228545   | 268589.2 | TRUE |
| 291797.2 | 251257.9 | 212415.1 | 295893.3 | 248767   | 211277.9 | 314884.5 | 295942.4 | TRUE |
| 301857.2 | 309612.1 | 337270.6 | 311737.8 | 238103.2 | 297879.1 | 368538.7 | 355402.9 | TRUE |
| 100884.6 | 99933.2  | 62155.6  | 101432.3 | 80289    | 107190.3 | 121289.9 | 140115.3 | TRUE |
| 124060.2 | 90933.1  | 67435.8  | 126741.8 | 109879.4 | 118766.5 | 155402.7 | 144666.1 | TRUE |
| 182872.2 | 162193.5 | 165044.7 | 144918.4 | 163373.5 | 159505.9 | 185164.7 | 155780.7 | TRUE |
| 250338.2 | 312271.6 | 225131.2 | 254359.5 | 263468.2 | 236900.2 | 301111   | 255165.7 | TRUE |
| 138647.7 | 140021.9 | 130731   | 149311   | 142169.2 | 141996.8 | 153669.6 | 141960.4 | TRUE |
| 228884.3 | 274608.2 | 179973.4 | 206867.3 | 184502.6 | 195749.7 | 245256.3 | 226439.8 | TRUE |
| 111314.1 | 107590.2 | 97231.9  | 112618.9 | 74987.7  | 91304.1  | 113762.1 | 90428.9  | TRUE |
| 20003.1  | 27747.4  | 44262.5  | 31992.8  | 33171.2  | 44679.9  | 22320.7  | 24818.7  | TRUE |
| 92797.4  | 90549.5  | 142885.5 | 65980.8  | 77050    | 135935.1 | 99510.8  | 69698    | TRUE |
| 141903.8 | 129666.9 | 221820.7 | 122874.3 | 132280.5 | 206590.4 | 134163.1 | 131481.4 | TRUE |
| 237307.8 | 235388.5 | 243574.5 | 189335   | 215771   | 266421.1 | 229035.6 | 218909.3 | TRUE |
| 42873.3  | 31771.8  | 46209.5  | 46588.3  | 67114.6  | 64988.8  | 32477.8  | 49450.5  | TRUE |
| 146164.9 | 132294.2 | 132621.9 | 133693.1 | 105044.7 | 252667.1 | 165956.6 | 145234.2 | TRUE |
| 102367.4 | 107586.1 | 133282   | 79813.6  | 75849.5  | 133448.5 | 92991.6  | 80009.2  | TRUE |
| 66141.1  | 124533.4 | 128994.2 | 102583.5 | 109415.9 | 69836.1  | 73649.7  | 55052.4  | TRUE |
| 76115.4  | 67810.3  | 85822.3  | 85953.7  | 80942.7  | 85739.5  | 79766.7  | 75473.6  | TRUE |
| 177274.4 | 146412.6 | 168210.7 | 169490.7 | 212807.7 | 187455.7 | 151800   | 196892.8 | TRUE |
| 155629.9 | 131826.9 | 136990.9 | 185578.7 | 177568.1 | 154212.7 | 175005.4 | 171717.2 | TRUE |
| 68288.6  | 61946    | 43780.4  | 61911.8  | 68999.1  | 65737.5  | 82719.6  | 82157.5  | TRUE |
| 50162.8  | 43695    | 29069.3  | 35576.3  | 37384    | 44719.3  | 60438.4  | 42807.6  | TRUE |

|          |          |          |          |          |          |          |          |      |
|----------|----------|----------|----------|----------|----------|----------|----------|------|
| 153191.6 | 141884   | 150498.1 | 168850.6 | 156395.1 | 161843.4 | 152242.7 | 164286.9 | TRUE |
| 99304.4  | 117790.1 | 91548    | 102308.3 | 109936.8 | 80165.8  | 123740.5 | 98864.7  | TRUE |
| 137437.8 | 130303.8 | 128176.9 | 139576.3 | 123917.3 | 127187.8 | 140536   | 124216.2 | TRUE |
| 101928.8 | 81743.7  | 94266.8  | 101190.2 | 84920.3  | 88292.9  | 85668.6  | 88194.2  | TRUE |
| 104112   | 122985.6 | 115837   | 85790.9  | 131493.9 | 111307.3 | 125917.9 | 115686.5 | TRUE |
| 86831.6  | 93821.3  | 82398.6  | 70575.6  | 82665.8  | 71433.8  | 87460.3  | 90833.3  | TRUE |
| 205398.3 | 218458.3 | 219849.8 | 250178   | 217888   | 258757.4 | 211830.3 | 227150.3 | TRUE |
| 277629.4 | 242078.1 | 257644.4 | 277514.6 | 264830.7 | 216977.9 | 269989.2 | 238729.4 | TRUE |
| 19490    | 7351.2   | 11777.5  | 11104.4  | 17966    | 14771.5  | 13296.4  | 12744.3  | TRUE |
| 144164.8 | 125061.4 | 152024.7 | 114605.2 | 131521.2 | 125754.1 | 151054.1 | 146539.6 | TRUE |
| 20471.1  | 8600.1   | 19494.3  | 18452.7  | 15019.9  | 14727    | 9336.3   | 18208.2  | TRUE |
| 190087.6 | 169594.6 | 161434.2 | 162595.1 | 207766.3 | 174427   | 160057.5 | 214715.6 | TRUE |
| 257628.6 | 299476.1 | 762866.6 | 341752.4 | 276020.6 | 254515.5 | 267429.3 | 259227.1 | TRUE |
| 305154.6 | 294114.3 | 285625.7 | 274208.2 | 247071.6 | 296138.6 | 305249.7 | 262511   | TRUE |
| 45210.7  | 45923.3  | 56414    | 60488.6  | 51974.5  | 48731.1  | 53391.5  | 37898.5  | TRUE |
| 35242.9  | 32016.7  | 30917    | 27499.6  | 31575.1  | 27085.3  | 19645.3  | 24781.9  | TRUE |
| 90158.9  | 71452.2  | 105753.2 | 125799.5 | 108581.2 | 113067.8 | 83293.5  | 75001    | TRUE |
| 115158.2 | 70931.4  | 152109.9 | 111300.6 | 105307.9 | 145047   | 123143.9 | 108302.8 | TRUE |
| 38688.8  | 31876.8  | 42681.1  | 29192    | 40244.8  | 57695.2  | 52247.6  | 39116.2  | TRUE |
| 11548.1  | 36097.8  | 33227.4  | 39586.8  | 25010.7  | 26147.5  | 14591.3  | 23184.5  | TRUE |
| 31286    | 26571    | 10039.7  | 13481.4  | 31312.3  | 33209.1  | 29021.2  | 15258.2  | TRUE |
| 47103.7  | 44655    | 28463.8  | 52719.5  | 55177.5  | 66827    | 50566.2  | 56373.6  | TRUE |
| 130917.8 | 80090.2  | 129512.6 | 139156.3 | 123174.5 | 119399.5 | 136200.1 | 110641   | TRUE |
| 244305.2 | 218614.9 | 224349   | 263054.2 | 184597.9 | 244535.5 | 205985.3 | 187333.6 | TRUE |
| 193130.4 | 168446.5 | 160717   | 153025.3 | 186799.3 | 199360.9 | 107828.4 | 195163.8 | TRUE |
| 48578.7  | 54374.5  | 46745.9  | 52374.1  | 40601.8  | 46225.6  | 38732.1  | 34300    | TRUE |
| 153977.6 | 71776.1  | 111763.9 | 173963.7 | 127643.7 | 191464.9 | 143841.3 | 146761.9 | TRUE |
| 116684.8 | 110435.7 | 132073.6 | 115441.5 | 80545    | 113645.1 | 104419.4 | 96335.6  | TRUE |
| 135919.2 | 153311.5 | 145932.1 | 160387.3 | 110447.1 | 173003.9 | 136405   | 133131.1 | TRUE |
| 185650.8 | 170120.8 | 173787.8 | 199695.2 | 137511   | 224046.8 | 148933.5 | 170411.1 | TRUE |
| 106255.6 | 117153.5 | 116533.7 | 120954   | 152701.9 | 128544.5 | 124250.7 | 155412.1 | TRUE |
| 146863.7 | 152350.8 | 184907.3 | 166322.6 | 165679   | 195394.1 | 197062.1 | 199780.8 | TRUE |
| 36292    | 64139.7  | 30789.9  | 54339.9  | 51737.7  | 48697.7  | 53679.5  | 45790.7  | TRUE |
| 74215.1  | 63953.1  | 47509.3  | 72228.5  | 89313.7  | 73154.7  | 54979.2  | 94644.7  | TRUE |
| 79975.6  | 67412    | 69326    | 67222.3  | 61293.9  | 94125.9  | 80231.6  | 87943.5  | TRUE |
| 46410.5  | 34765.3  | 30493.1  | 35948    | 39416.8  | 33443.1  | 41360.2  | 66136.1  | TRUE |
| 74203.6  | 75209.8  | 105687.3 | 81677.6  | 81313.6  | 103484.8 | 83932    | 70516.3  | TRUE |
| 304585.1 | 267548   | 449177.3 | 270634.4 | 192663   | 476834.4 | 280262.9 | 205275.7 | TRUE |
| 48698.7  | 48837.7  | 44458.7  | 19685.3  | 34575.9  | 54444.7  | 26071.3  | 37441.5  | TRUE |
| 102027.6 | 89829.1  | 201020.1 | 81629.8  | 58877    | 190754.6 | 105875.7 | 79655.9  | TRUE |
| 70623.1  | 55260.3  | 64657.9  | 44143.5  | 60030.1  | 69367.1  | 74021.1  | 64164.1  | TRUE |
| 206442.7 | 131223.6 | 187180.5 | 182550.5 | 261544.8 | 183711.8 | 177065.5 | 178199   | TRUE |
| 300369.5 | 260711.9 | 279004.4 | 302935.9 | 460212.4 | 286694.9 | 299282.9 | 301005.2 | TRUE |
| 296412.1 | 274378.7 | 412309.2 | 214081   | 200767.9 | 377966.7 | 267372.4 | 209515.8 | TRUE |
| 420442.1 | 404383.4 | 495077.8 | 287983.6 | 251073.6 | 449374.7 | 311371.2 | 298721.5 | TRUE |
| 350685.8 | 253562.9 | 345405.7 | 323802.5 | 497846   | 328743.8 | 291744.2 | 334686.6 | TRUE |
| 821881.5 | 722367.1 | 843646.8 | 760092.1 | 1006692  | 704684.5 | 700822.7 | 766359.9 | TRUE |
| 15972.2  | 8557.4   | 6776.7   | 10181    | 4070.5   | 20682.2  | 29248.2  | 8844.4   | TRUE |

|          |          |          |          |          |          |          |          |      |
|----------|----------|----------|----------|----------|----------|----------|----------|------|
| 105922.6 | 85097.5  | 129191   | 123052.1 | 115614.1 | 122941.6 | 115204.2 | 112518.1 | TRUE |
| 44447.5  | 57269.5  | 48410.1  | 71089    | 52553.6  | 49728    | 50284.2  | 61096.5  | TRUE |
| 294030   | 263588.4 | 242718.4 | 313848.9 | 293992   | 313145.5 | 291611.2 | 292321.7 | TRUE |
| 63775.6  | 44720.6  | 56770.7  | 88574.1  | 72894    | 60970.7  | 54465.5  | 69957.7  | TRUE |
| 220264   | 199442   | 172271.2 | 294079.9 | 241752.6 | 218072.8 | 252812.3 | 257187.1 | TRUE |
| 383111.3 | 335245.9 | 353338.7 | 362979.6 | 313942.8 | 368428   | 353933.3 | 340295.3 | TRUE |
| 366973.3 | 339744.2 | 361803.3 | 362675.6 | 383804.8 | 391470.3 | 346930.6 | 397944.5 | TRUE |
| 530584.4 | 437186.1 | 518242.7 | 493409.9 | 521062   | 535547.2 | 439449.5 | 608291.2 | TRUE |
| 42482.9  | 21003.3  | 28687.4  | 51223.7  | 29614.8  | 46945.4  | 41863.1  | 55831.1  | TRUE |
|          |          |          |          |          |          |          |          |      |
| 611607.8 | 553459.7 | 648662.5 | 635113.6 | 678434.6 | 714115.3 | 609599.9 | 671962.4 | TRUE |
| 784924.9 | 1045141  | 772097.3 | 929207.2 | 803315.6 | 827029.5 | 815017.7 | 836322.4 | TRUE |
| 164835.8 | 173929.5 | 143671.2 | 140197.8 | 142854.3 | 163774.1 | 157228.6 | 149372.1 | TRUE |
|          |          |          |          |          |          |          |          |      |
| 131002.8 | 118417.1 | 143116.4 | 131502.5 | 163125.3 | 109250.6 | 116781.9 | 136084   | TRUE |
| 126017.3 | 73397.1  | 69383.3  | 59776.2  | 89966.7  | 59490.1  | 78643.7  | 110462.6 | TRUE |
|          |          |          |          |          |          |          |          |      |
| 524521.3 | 518553.6 | 535174.7 | 425550.4 | 376929.2 | 539565.4 | 508490.7 | 383003.9 | TRUE |
| 36154    | 46220.6  | 70145.9  | 57691.4  | 41178.7  | 69636.7  | 54653.2  | 44497.4  | TRUE |
| 59061.4  | 58998.4  | 45814.2  | 50316.7  | 71688.8  | 42268.3  | 49353.8  | 49427.9  | TRUE |
| 49316.5  | 47753    | 55905.8  | 27023.4  | 33411.3  | 49094.3  | 42937.4  | 41167.4  | TRUE |
| 57215.6  | 63937.1  | 94588.8  | 38745.9  | 65377.6  | 97385.3  | 69621.8  | 62056.1  | TRUE |
| 131580.2 | 94668    | 110684.5 | 143531.3 | 182581.7 | 105872.7 | 117026.3 | 117559.6 | TRUE |
|          |          |          |          |          |          |          |          |      |
| 295185.7 | 225885.4 | 288516.2 | 308681.5 | 216820   | 171903.4 | 221127.7 | 155906   | TRUE |
| 84929.2  | 168565.4 | 117556.4 | 68753.7  | 104793   | 136075.4 | 183587.7 | 103700.4 | TRUE |
| 65300    | 67502.1  | 54081.3  | 47132.4  | 46403.5  | 61333.5  | 64612.1  | 59487    | TRUE |
| 88144.4  | 90659.4  | 110011.3 | 60269.8  | 65555.8  | 104197.4 | 111931.2 | 78593.9  | TRUE |
|          |          |          |          |          |          |          |          |      |
| 231074.2 | 330261.9 | 303429.5 | 198614.7 | 201695.3 | 293912.3 | 367859.9 | 223398.2 | TRUE |
| 237990.4 | 340229.2 | 227224.5 | 180218.5 | 214421.1 | 251700.8 | 315606.9 | 207379   | TRUE |
| 135182.6 | 169180.4 | 145408.7 | 134684.9 | 122677.4 | 161544   | 199391   | 114150.6 | TRUE |
| 78894.1  | 71507.1  | 92098.6  | 78263.4  | 81808.5  | 82669.8  | 89020.4  | 81788.1  | TRUE |
| 220808.9 | 270933.2 | 162173.7 | 118645.7 | 146538.7 | 178234.5 | 189051.9 | 144447   | TRUE |
| 230224.6 | 260665.4 | 214190.3 | 210365.4 | 194616.6 | 245381.9 | 251399.7 | 205840.8 | TRUE |
|          |          |          |          |          |          |          |          |      |
| 169633.6 | 172591.3 | 159839.7 | 198077.6 | 180079.2 | 145291.1 | 170638.5 | 164114.2 | TRUE |
| 132488.6 | 144047.5 | 107994.4 | 155309.8 | 115652   | 140599.7 | 137661.7 | 116997.6 | TRUE |
| 118905.5 | 140142.8 | 136495.4 | 127654.4 | 99113.2  | 104888.2 | 132533.3 | 126165.3 | TRUE |
| 119944.5 | 143864.4 | 104381.1 | 142127.6 | 119931.4 | 113956.4 | 142159.6 | 122803.3 | TRUE |
|          |          |          |          |          |          |          |          |      |
| 20214.4  | 7410.9   | 6695.4   | 24895.3  | 18490.4  | 18809.2  | 27986.5  | 24575.8  | TRUE |
| 109183.9 | 91258    | 60298.2  | 124348.3 | 80840.1  | 111815.1 | 126165.4 | 111055.9 | TRUE |
| 85911.8  | 66741.8  | 60718.3  | 63462.9  | 66672.2  | 73848.9  | 84016.3  | 94249.9  | TRUE |
| 42593    | 9362.8   | 20927.5  | 12029.6  | 7076.2   | 31931.4  | 39338.6  | 18166.4  | TRUE |

|          |          |          |          |          |          |          |          |      |
|----------|----------|----------|----------|----------|----------|----------|----------|------|
| 144406   | 158762   | 117837.8 | 164745.7 | 133294.7 | 120428.6 | 163837.3 | 154933.4 | TRUE |
| 118905.5 | 140142.8 | 136495.4 | 127654.4 | 99113.2  | 104888.2 | 132533.3 | 126165.3 | TRUE |
| 65738.5  | 77541.4  | 96819.1  | 69672.5  | 57403.4  | 93295.5  | 78780    | 57780.6  | TRUE |
| 131105.4 | 133175.1 | 145465.5 | 125346.6 | 94301.1  | 161107.9 | 138656.1 | 93162.7  | TRUE |
| 90517.8  | 116333.9 | 95277.8  | 81368.4  | 65161.9  | 91336.7  | 112535.1 | 70645.8  | TRUE |
| 670499.8 | 676196.8 | 671010.6 | 426821.6 | 457896   | 703176.1 | 627729.5 | 436320.7 | TRUE |
| 76502.5  | 112315.4 | 102236.2 | 82941.6  | 67458.7  | 91890.3  | 102921.7 | 54834.3  | TRUE |
| 239645.3 | 176035.3 | 217928.6 | 313902.1 | 285918.4 | 234923.9 | 205370.1 | 223416.8 | TRUE |
| 85141.5  | 77765.4  | 101872   | 95119    | 92484.7  | 87776.9  | 63592.7  | 78592.3  | TRUE |
| 268008.8 | 340654.5 | 192846.7 | 251727.9 | 236879.5 | 226471.8 | 307788.7 | 231208.2 | TRUE |
| 1479429  | 1166461  | 1825832  | 2459136  | 1308441  | 1385583  | 1252869  | 1368079  | TRUE |
| 41500.5  | 28479.2  | 29262.3  | 56857.7  | 35321.4  | 49720.3  | 51681.8  | 38273.5  | TRUE |
| 24127.6  | 19400.1  | 45812.3  | 29378.5  | 24007.4  | 10016.7  | 6814.8   | 6618.8   | TRUE |
| 70412.9  | 78604.8  | 94972.8  | 79953.6  | 72760    | 99824.3  | 89417.5  | 73733.4  | TRUE |
| 618298.8 | 803563.2 | 588435.1 | 583058   | 454338.9 | 559622.8 | 854427.3 | 446057.9 | TRUE |
| 60570.5  | 67976.7  | 43772.4  | 68883    | 65168.7  | 79456.4  | 94600.4  | 58145.4  | TRUE |
| 33421.6  | 26274.4  | 39476.7  | 30992.2  | 34989.7  | 30601.5  | 37720.3  | 50823.2  | TRUE |
| 60281.2  | 67528.2  | 36189.6  | 51281    | 48955.5  | 50876.4  | 65123.8  | 42838.7  | TRUE |
| 354660.8 | 534662.8 | 269436.1 | 323730.7 | 368774.4 | 252956.1 | 433579.5 | 380265.8 | TRUE |
| 699579.6 | 735565.8 | 1054102  | 1038153  | 506769.8 | 660303   | 664789.6 | 650240.4 | TRUE |
| 383127.8 | 386917.6 | 466361.4 | 433199   | 338101.6 | 368908.5 | 336160.2 | 328529.7 | TRUE |
| 23486    | 31605.8  | 30124.5  | 25361.2  | 29038.1  | 21077.9  | 33349.7  | 26381.7  | TRUE |
| 66708.4  | 60839.7  | 76476.6  | 68578.2  | 51755    | 67806.3  | 75551.7  | 64897.2  | TRUE |
| 15136.3  | 16779.3  | 19327.7  | 28142.8  | 16941.6  | 7605.1   | 18398.6  | 9694.7   | TRUE |
| 87551.3  | 110181.4 | 65650.5  | 82146.1  | 76347.3  | 57448.3  | 87532    | 92272.8  | TRUE |
| 591316.1 | 670407.9 | 403348.4 | 492214.5 | 514270   | 427393   | 693657.8 | 531743.3 | TRUE |
| 19785.6  | 26631.2  | 7878.7   | 14333.6  | 22358.5  | 6621.9   | 35520    | 24291.6  | TRUE |
| 368666.8 | 371297.3 | 482957.6 | 501795.3 | 306734.5 | 343356.1 | 414447.1 | 327048.9 | TRUE |
| 66372.9  | 98676.2  | 126609.2 | 71576.9  | 79805.8  | 52852    | 83055.6  | 55271.2  | TRUE |
| 51177.1  | 47104.9  | 33627    | 51185    | 35653.1  | 51052    | 65516    | 50225.1  | TRUE |
| 295198.1 | 274350.8 | 290093.3 | 294330.8 | 277247.7 | 301903.3 | 264122.9 | 323027.9 | TRUE |
| 188658.6 | 235697.3 | 169639.6 | 184508.6 | 166673.4 | 184059.4 | 200371.4 | 163061.9 | TRUE |
| 123399.9 | 102352.8 | 110224.7 | 128782.1 | 110932.4 | 108583.4 | 121473.7 | 137755.7 | TRUE |
| 47624.5  | 56670.6  | 36904.5  | 40571.6  | 38535    | 33387.4  | 51250.1  | 34294.8  | TRUE |
| 241506.1 | 219391   | 274266.5 | 224790.3 | 188889.7 | 292657.9 | 248475.2 | 201425.2 | TRUE |
| 283548.6 | 248366.8 | 343034.2 | 326592.4 | 315623.1 | 304443.9 | 295915.4 | 293853.5 | TRUE |
| 41434.7  | 43412.5  | 45525.4  | 51021.6  | 37904.8  | 31137.4  | 35347    | 41934.5  | TRUE |
| 397203.1 | 361534.7 | 330423.8 | 345127.4 | 426115.3 | 398079.2 | 369343.1 | 366693   | TRUE |
| 159800.9 | 126378.6 | 126707.3 | 146303.6 | 138245.6 | 127507.3 | 122353.1 | 138454.2 | TRUE |
| 85882.3  | 69587.3  | 80573.2  | 70897.5  | 76255.6  | 77391    | 68253.1  | 91386.9  | TRUE |

|          |          |          |          |          |          |          |          |      |
|----------|----------|----------|----------|----------|----------|----------|----------|------|
| 226957.6 | 216830.8 | 318645.8 | 219446.7 | 209400.9 | 272165.7 | 233172.1 | 236990.3 | TRUE |
| 281508.8 | 249392.4 | 303740.8 | 273772.8 | 384961.9 | 293269.7 | 403060.2 | 319338.4 | TRUE |
| 16653.9  | 34472.8  | 26447.9  | 25206.1  | 17957.3  | 13192.5  | 25498.8  | 12350.2  | TRUE |
| 25350.2  | 37707.4  | 26368    | 41024.1  | 31494.2  | 36936.3  | 35503.4  | 41123.4  | TRUE |
| 38392.7  | 59132.3  | 33482    | 48974.9  | 54410.9  | 31952.8  | 51587.5  | 40545.2  | TRUE |
| 69543.1  | 57496.6  | 60839.4  | 81524.7  | 109649.7 | 77753.1  | 63414.4  | 96867.8  | TRUE |
| 246403   | 261319.4 | 221723.5 | 216754.9 | 310566.9 | 200993.9 | 237059.5 | 212835.9 | TRUE |
| 124993.5 | 70508.9  | 133266.9 | 77999.3  | 111127.8 | 108648.1 | 95388.9  | 132057.8 | TRUE |
| 429536.7 | 362047.6 | 384246   | 423973.2 | 265527.5 | 423355.5 | 325917.6 | 314496.6 | TRUE |
| 28872.9  | 22528.8  | 36625.2  | 19321.5  | 16240.1  | 25818.2  | 31244.6  | 20615    | TRUE |
| 41614.6  | 39162    | 34577.5  | 35541.7  | 36353.4  | 27569.5  | 25685.6  | 38655.8  | TRUE |
| 38210.5  | 41219.6  | 47783.2  | 48258.9  | 37237.9  | 36280.9  | 34242.2  | 28520.3  | TRUE |
| 86075.8  | 61067.9  | 87951.2  | 87691.6  | 93079.2  | 97466.3  | 77134.3  | 123857.2 | TRUE |
| 819591.3 | 600731.1 | 802381.6 | 790407.2 | 822778.2 | 879310.8 | 640978.8 | 888957.3 | TRUE |
| 63328.3  | 40381.8  | 65871.4  | 79039.8  | 49468.4  | 76637.1  | 44521.2  | 64297.3  | TRUE |
| 82212    | 63117.2  | 55347.8  | 50641.4  | 73214.8  | 77904.7  | 59064.2  | 71097.6  | TRUE |
| 11646.5  | 12767.4  | 36684.8  | 28355.7  | 26596.3  | 62456.8  | 7245.3   | 31551.2  | TRUE |
| 70566.8  | 58302.9  | 39968.7  | 48336.5  | 108942.4 | 108042.1 | 76161.6  | 98672.8  | TRUE |
| 270939.2 | 144793.6 | 314676.3 | 344633.2 | 260980.8 | 315061.1 | 152494.2 | 237430.9 | TRUE |
| 359016.8 | 321744.1 | 177325.5 | 185938   | 497586.5 | 716893.4 | 371132.7 | 551602.7 | TRUE |
| 56251.5  | 52253.6  | 74181.2  | 71985.8  | 62243.7  | 85146.6  | 44677.3  | 61220    | TRUE |
| 83809.3  | 59546.9  | 90052.9  | 116528.3 | 83339    | 149556.4 | 57907.1  | 85267.9  | TRUE |
| 9152.9   | 5593.2   | 12030.1  | 27171.2  | 10107.1  | 21203.2  | 6889.5   | 7953.9   | TRUE |
| 259480.9 | 216444.8 | 256868   | 281517.8 | 226164.4 | 286144.1 | 208932.4 | 256551.8 | TRUE |
| 100541.6 | 100867.9 | 96354.1  | 103688.7 | 87342    | 103575.2 | 101605.9 | 86514.3  | TRUE |
| 99557.1  | 75909.6  | 87431.4  | 85894.3  | 71922.8  | 79727.1  | 78680.7  | 67951.8  | TRUE |
| 405307.5 | 366288.9 | 387389.3 | 455904.6 | 427131.8 | 417257.9 | 356795   | 446599.3 | TRUE |
| 97262.8  | 115679.7 | 93347.3  | 101990.2 | 100792.4 | 169622.3 | 133280   | 107992.7 | TRUE |
| 50098.3  | 50683.1  | 59338.8  | 52972.6  | 44050.5  | 45040.4  | 44147.1  | 34656.5  | TRUE |
| 140577.8 | 163168.4 | 160300.4 | 146799   | 128254.3 | 145211.7 | 122627.7 | 156932.4 | TRUE |
| 5847     | 8040.2   | 7787.1   | 8733.4   | 17323.8  | 14184.9  | 9475.2   | 8085.6   | TRUE |
| 52902.2  | 46419    | 48725.1  | 70296.1  | 50168    | 70552.5  | 59336.8  | 53717.8  | TRUE |
| 81146.4  | 49799.1  | 64035.7  | 64068.2  | 88190.9  | 81269.4  | 50086.5  | 77754.8  | TRUE |
| 181486.8 | 188393.3 | 230752.8 | 151995.9 | 141928.2 | 223319.8 | 175583.8 | 136058.7 | TRUE |

|          |          |          |          |          |          |          |          |      |
|----------|----------|----------|----------|----------|----------|----------|----------|------|
| 392831.2 | 336535.2 | 404935.6 | 404428.3 | 369595.5 | 440203   | 345848.1 | 388518.3 | TRUE |
| 211310.7 | 199681.9 | 222697.6 | 249251.9 | 264148.5 | 242420.5 | 206188.6 | 281553.1 | TRUE |
| 63602.9  | 46772.1  | 76320.4  | 84910.4  | 76827    | 82498.7  | 41183.1  | 62702    | TRUE |
| 226826.8 | 193923.2 | 145579.8 | 135660.9 | 281398.6 | 329108   | 202605.3 | 298220.4 | TRUE |
| 80366.8  | 77075    | 77493    | 90375.6  | 93488.6  | 56816.3  | 71760.3  | 77577.2  | TRUE |
| 106152.2 | 124084.8 | 93809.2  | 94246.9  | 104954.4 | 100810.6 | 124928.4 | 103249.8 | TRUE |
| 148716.9 | 136057.2 | 129661.9 | 141369.8 | 122016.7 | 144581.1 | 134712.2 | 173551.9 | TRUE |
| 98035.4  | 128104.8 | 79836.6  | 104571.4 | 111485.6 | 86629.4  | 140827.1 | 105582.3 | TRUE |
| 241500.1 | 206717   | 148881   | 216396   | 207093.5 | 212879.7 | 311547.2 | 264787.3 | TRUE |
| 337805.5 | 316417.4 | 324408.6 | 352781.5 | 252846.6 | 352678.6 | 465510.4 | 430431.8 | TRUE |
| 21188.2  | 14167.7  | 4481.7   | 7279.6   | 12946.8  | 13349    | 20656.8  | 14571.1  | TRUE |
| 187254.1 | 150212.6 | 220035.3 | 182594.3 | 140006.8 | 173884.6 | 161738.4 | 172436.1 | TRUE |
| 52904.9  | 36019.5  | 52166.9  | 37277.4  | 40587    | 44633.8  | 40839    | 39913.6  | TRUE |
| 35714.3  | 30133.8  | 30399.7  | 34850.1  | 26572.5  | 47577.8  | 28990.5  | 43879.1  | TRUE |
| 52308.1  | 44557.4  | 42435.7  | 47936.6  | 48509.5  | 69030.3  | 42420.3  | 73733.2  | TRUE |
| 185242   | 138499.3 | 134841.8 | 143502.4 | 227237.9 | 218669.6 | 179198   | 186068.1 | TRUE |
| 24294    | 22706.6  | 10189    | 13986.5  | 24136.6  | 14511.5  | 26156.4  | 35049.5  | TRUE |
| 95036.5  | 104366   | 85868.4  | 128024   | 91042.4  | 103186.8 | 79165.6  | 70689.2  | TRUE |
| 97766.1  | 88205    | 87126.7  | 112250.3 | 80276.3  | 91871.1  | 104872.9 | 80602.9  | TRUE |
| 386338.7 | 364118.9 | 393513   | 275282.6 | 337934.2 | 457888.8 | 406710.4 | 361276.1 | TRUE |
| 98475.2  | 113474.8 | 75127.1  | 100350   | 87845    | 120716.4 | 103809.7 | 127099.5 | TRUE |
| 43539.1  | 58958.1  | 38679.9  | 49542.6  | 43793.1  | 45836.3  | 57941.5  | 43891.8  | TRUE |
| 74876.4  | 54204.2  | 70122.6  | 74777.3  | 87946.6  | 84270.1  | 82013.5  | 86256.8  | TRUE |
| 408043.1 | 356921.2 | 354510.9 | 326509.9 | 316898.2 | 398105.3 | 415349.7 | 311772.4 | TRUE |
| 387769   | 255605.8 | 393416   | 433012.6 | 368896.1 | 282661   | 289108.3 | 282465.7 | TRUE |
| 118054.2 | 123685   | 123183   | 72524.3  | 103170.4 | 124793.8 | 100695.5 | 104448.7 | TRUE |
| 26905.7  | 45970.7  | 48830.3  | 41231.7  | 51989.9  | 42458.7  | 43727    | 37348    | TRUE |
| 48628.4  | 65328.5  | 72118.7  | 47021.7  | 63077    | 74113.8  | 48762.9  | 48837.1  | TRUE |
| 115681.8 | 158940.2 | 129924.7 | 105245.8 | 92009    | 124255.6 | 149415.1 | 85748.5  | TRUE |
| 30389.2  | 36945    | 13516.6  | 10154.4  | 25849.9  | 21986.6  | 58439.4  | 8365.5   | TRUE |
| 41434.7  | 48731.3  | 40890.9  | 32887.7  | 24535.3  | 51198.2  | 58517.7  | 29604.4  | TRUE |
| 82658.5  | 88180.9  | 74730.2  | 53731.1  | 60104    | 128778.7 | 106451.1 | 80393.8  | TRUE |
| 31722.9  | 30271.1  | 31695.5  | 7871.5   | 26781.1  | 41797    | 31053.1  | 9196.9   | TRUE |
| 38600.6  | 46310.2  | 44829.4  | 20252.2  | 31930.4  | 46934.8  | 48153.9  | 35285    | TRUE |
| 136287.8 | 146027.5 | 148985.4 | 150589.5 | 145472.3 | 173501   | 145830.4 | 133207.4 | TRUE |



|          |          |          |          |          |          |          |          |      |
|----------|----------|----------|----------|----------|----------|----------|----------|------|
| 155310.1 | 136974.6 | 141941   | 153613.5 | 188006   | 141732.4 | 137747.7 | 124911.3 | TRUE |
| 135696.6 | 128889.8 | 147512.3 | 154932.5 | 117268.3 | 154355.2 | 127089.3 | 136285   | TRUE |
| 112336.8 | 94627.1  | 131376   | 95808.1  | 99204.7  | 148283.4 | 103638.2 | 105333.9 | TRUE |
| 57394.7  | 67728.7  | 62479.6  | 72240.2  | 57520.8  | 80778.7  | 68134.4  | 59226    | TRUE |
| 109245.5 | 118985.2 | 143564.6 | 122308.3 | 97507.5  | 151519.3 | 114909   | 118900.6 | TRUE |
| 199996.8 | 654222.8 | 179883.2 | 396566.2 | 755621.4 | 80086.3  | 88918.9  | 118003.7 | TRUE |
| 301618.8 | 1321984  | 292943.8 | 728579.5 | 1366207  | 75475.4  | 121082.9 | 177202.4 | TRUE |
| 839592.3 | 1027993  | 493564.2 | 619225.2 | 1150571  | 468161.1 | 1026266  | 1002225  | TRUE |
| 1979224  | 2387717  | 1060235  | 1541841  | 2604377  | 1083171  | 2351000  | 2455999  | TRUE |
| 449401.3 | 555861   | 230668   | 293794.8 | 593851.7 | 288247   | 537507.7 | 690988.3 | TRUE |
| 2045948  | 2524159  | 1057040  | 1472747  | 2770244  | 1268568  | 2700854  | 3094177  | TRUE |
| 2963184  | 3859968  | 1621263  | 2283285  | 3996443  | 1796734  | 3800726  | 4286093  | TRUE |
| 3148518  | 3787430  | 1787483  | 2198819  | 3867286  | 1928050  | 4000634  | 4191330  | TRUE |
| 52958.6  | 197881.5 | 104084   | 177527.3 | 108184.4 | 28707    | 30325    | 32370.2  | TRUE |
| 74273.8  | 74400    | 92315.1  | 96784.4  | 64164.5  | 67837.5  | 103459.2 | 88043.3  | TRUE |
| 210949.7 | 228050.1 | 182866.9 | 216136.1 | 168914.7 | 199630.2 | 260644.7 | 202918.6 | TRUE |
| 239263.6 | 325384.2 | 292384.6 | 344809.9 | 138780   | 497477.1 | 302902.1 | 201833.4 | TRUE |
| 2180294  | 2792704  | 2058718  | 2626320  | 1252725  | 1425704  | 2582700  | 1717033  | TRUE |
| 290520.9 | 364365.4 | 244343.9 | 280172.3 | 310975.8 | 258456.9 | 395113.7 | 352056.8 | TRUE |
| 97878.6  | 281100.1 | 136780.7 | 187134.4 | 291299.2 | 74901.4  | 85137.9  | 77152.3  | TRUE |
| 99011.8  | 86717.4  | 80994.8  | 80518.8  | 120557.7 | 116593.1 | 115096.7 | 157609.9 | TRUE |
| 286041.7 | 597130.2 | 471552.8 | 557639.1 | 432977.8 | 215586.5 | 243290.3 | 223742.2 | TRUE |
| 55564.2  | 171809.5 | 110844.2 | 170134.2 | 111259.8 | 32468.4  | 38696.3  | 35601.5  | TRUE |
| 69169.2  | 48075.5  | 54874.5  | 45501.9  | 47440.3  | 50859.7  | 41366.9  | 58338.3  | TRUE |
| 152678.6 | 164793.9 | 141730   | 202682.4 | 148656.2 | 174040.4 | 201049.8 | 187219.8 | TRUE |
| 109539.5 | 123506.6 | 69783.7  | 100581.3 | 88388.5  | 55687.5  | 108618.1 | 92520.7  | TRUE |
| 82728.1  | 58653    | 28546.2  | 41437.9  | 43145    | 31500.3  | 66359.5  | 59118    | TRUE |
| 62649.4  | 65807.6  | 47732.6  | 30701.6  | 55612.1  | 46893.8  | 72068.5  | 62176.7  | TRUE |
| 23222.8  | 9309.3   | 16990.4  | 2854.9   | 21481.1  | 6586.5   | 20586.2  | 22741.9  | TRUE |
| 62292.1  | 83386.5  | 69052.4  | 97973.1  | 93291.7  | 49609.4  | 95576    | 88797.9  | TRUE |
| 616689.7 | 577253.2 | 468823.4 | 1009871  | 1011850  | 542502.3 | 816788.1 | 958722.9 | TRUE |
| 44785.1  | 43481.1  | 48629.8  | 29801.5  | 67995.4  | 34226.9  | 37597.4  | 55260.2  | TRUE |
| 194370.8 | 185540.5 | 173818.7 | 193672.5 | 416859.1 | 206266.2 | 267460.2 | 437894.8 | TRUE |
| 41079.1  | 28366.7  | 33155.8  | 24299.1  | 57036.4  | 31828.4  | 47679.2  | 65673.1  | TRUE |
| 108277.2 | 124227.8 | 109228.6 | 89283.7  | 174364.3 | 99200.4  | 156287.8 | 173516.6 | TRUE |
| 75633.2  | 60254.9  | 62591.7  | 48612.2  | 83684.9  | 51170.4  | 76729    | 95596.5  | TRUE |
| 59713.9  | 36566.5  | 41511.2  | 63644.2  | 32864.8  | 56007.4  | 53246.3  | 66773.1  | TRUE |
| 97783.7  | 126003.3 | 109601.6 | 131229.5 | 76790.3  | 163456.9 | 135341   | 141479.1 | TRUE |
| 50690.3  | 65043.7  | 54881.1  | 60898.8  | 32324.1  | 32060.6  | 60519.4  | 31561.8  | TRUE |
| 58178.7  | 85007.3  | 67127.8  | 81856.5  | 38076.2  | 31881.7  | 109697.8 | 39209.1  | TRUE |
| 166025.5 | 296138.4 | 217620.4 | 261311.6 | 128658   | 75245.6  | 323307.9 | 85239.4  | TRUE |
| 124104.1 | 95532.3  | 110354.6 | 128019.3 | 128669.4 | 119935.7 | 116771.6 | 129356.2 | TRUE |
| 19798.6  | 40158.1  | 21515.4  | 23173.1  | 17436    | 16087.1  | 39974.7  | 11066    | TRUE |

|          |          |          |          |          |          |          |          |      |
|----------|----------|----------|----------|----------|----------|----------|----------|------|
| 49131    | 51392    | 43625.9  | 10810.7  | 47844.5  | 28696.6  | 53644.9  | 63913.5  | TRUE |
| 31205.2  | 27259.9  | 31472.8  | 18506.7  | 69253.5  | 23980.5  | 51364.3  | 55589.6  | TRUE |
| 261193.2 | 286930.9 | 249705.7 | 223250.8 | 492360.2 | 237200   | 382457.2 | 512139.1 | TRUE |
| 58581.9  | 61630.4  | 65947.1  | 60544.3  | 141340.1 | 59296.1  | 117156   | 159381.5 | TRUE |
| 254861.8 | 316096.8 | 243347.3 | 306184.7 | 174189.6 | 137791.9 | 399969.3 | 152692.1 | TRUE |
| 1814602  | 2910350  | 2070610  | 2261989  | 1271987  | 770441.6 | 2905136  | 1009998  | TRUE |
| 84436.9  | 114608.6 | 129414.1 | 142406.6 | 103014.7 | 70864.6  | 149008.6 | 73352.3  | TRUE |
| 46012.6  | 48170.4  | 29976.7  | 30268.8  | 87024.5  | 40361.7  | 53116.1  | 68072.2  | TRUE |
| 813541.9 | 755741.4 | 543854.8 | 519960.9 | 1389616  | 558011   | 969145   | 1450215  | TRUE |
| 311840.4 | 311198.1 | 201320   | 245750.3 | 565702.5 | 180374.1 | 397033.3 | 580039.1 | TRUE |
| 45014.5  | 43131.8  | 31846.5  | 23714.3  | 65800.9  | 39149.8  | 57381.6  | 74139.2  | TRUE |
| 33025.3  | 37922.7  | 25764.2  | 21730.1  | 39436.5  | 20820.8  | 32080.7  | 38615.8  | TRUE |
| 17835.8  | 22808.3  | 6094.9   | 24098.8  | 28138.1  | 15323.1  | 25516.7  | 25469.5  | TRUE |
| 9699     | 4868.8   | 7254.7   | 8582.3   | 8700.7   | 8802.4   | 11567.5  | 24000.5  | TRUE |
| 155370.7 | 180571.6 | 129385.2 | 142395.2 | 200184.7 | 139807   | 153620.7 | 172121.7 | TRUE |
| 72065.3  | 51035    | 78062.5  | 81103.8  | 58294.3  | 91489.7  | 74292.7  | 85042.4  | TRUE |
| 58466.8  | 71472.9  | 54412.1  | 47485.2  | 69594.4  | 35673.7  | 58039.2  | 73669.5  | TRUE |
| 51307.1  | 45337.2  | 46148.5  | 50255.2  | 94143    | 57609.2  | 63348.7  | 81347.6  | TRUE |
| 363486.8 | 304726.4 | 299070.7 | 344692   | 401720.7 | 298491.5 | 350131.5 | 393071.4 | TRUE |
| 192631.2 | 218410.8 | 182193.4 | 199239.8 | 245301   | 163119   | 249607.8 | 263910.3 | TRUE |
| 1300363  | 1326150  | 800074.7 | 1051321  | 1640386  | 985907.4 | 1390987  | 1660030  | TRUE |
| 204678.8 | 203202.4 | 138836.7 | 153531   | 254774.3 | 134606.8 | 241116   | 233873.8 | TRUE |
| 340457   | 308210.4 | 231803   | 267955   | 441231.1 | 258534.7 | 338842.7 | 426725.6 | TRUE |
| 100675.2 | 91032.7  | 103523.5 | 99772.8  | 150143.1 | 145810   | 116974.7 | 145809.7 | TRUE |
| 88962.3  | 102641.8 | 70674.9  | 98221.6  | 140092.2 | 84222.7  | 106492.1 | 119343.9 | TRUE |
| 59425.4  | 70995    | 56807.2  | 65067.7  | 75870.6  | 56981.9  | 78386.3  | 87381.5  | TRUE |
| 75666.1  | 97889.9  | 63927    | 81245.8  | 141362.8 | 54229.2  | 79149.6  | 66733.3  | TRUE |
| 78372.7  | 88723.4  | 75149.2  | 90065.8  | 72671.5  | 73000.8  | 80689    | 72169.3  | TRUE |
| 133536.1 | 109843   | 97069.2  | 85455.8  | 157158.6 | 84294.8  | 121647.7 | 164216.4 | TRUE |
| 91463.3  | 96267.8  | 54948.1  | 77924.6  | 126163   | 62216.1  | 110511.4 | 122568.9 | TRUE |
| 1865876  | 2006366  | 1268356  | 1726820  | 2279404  | 1351529  | 2256628  | 2372560  | TRUE |
| 82430.3  | 101102   | 115085.4 | 116666   | 84415.6  | 66339.4  | 64809.5  | 71444.9  | TRUE |
| 55507.4  | 81769    | 91017.3  | 75642.7  | 113094.3 | 50980.7  | 65649.8  | 83828    | TRUE |
| 46695    | 63049.1  | 62368.3  | 48406.3  | 63171.2  | 42266.8  | 38893.1  | 45009.4  | TRUE |
| 7547.4   | 9432.2   | 26693.1  | 8740.9   | 17570.2  | 23690.1  | 10846.4  | 10505.6  | TRUE |
| 247192.7 | 223053.1 | 188306.3 | 220305.8 | 254676.6 | 176203.5 | 234830.9 | 287387.7 | TRUE |

|          |          |          |          |          |          |          |          |      |
|----------|----------|----------|----------|----------|----------|----------|----------|------|
| 59674.2  | 58619.2  | 26693.2  | 40897.2  | 63822.7  | 34185.5  | 51679.4  | 84026.8  | TRUE |
| 272822   | 282448.5 | 214191.9 | 175702.7 | 278738   | 195186.3 | 243963.5 | 313261.9 | TRUE |
| 41716.4  | 56771.9  | 60286.6  | 47418    | 107488.3 | 38988    | 28962    | 47900.7  | TRUE |
| 51789.3  | 48193.8  | 75772.9  | 51922.6  | 55035.8  | 58344.6  | 62546    | 68755.8  | TRUE |
| 92790.9  | 73899.1  | 65457.1  | 65572.3  | 127600.4 | 102191.4 | 116377.5 | 138673.5 | TRUE |
| 70900.9  | 80200    | 74853    | 72720.8  | 73279.9  | 76337.7  | 92649.4  | 51827    | TRUE |
| 195015.6 | 273464.8 | 211222.8 | 314189.2 | 183542.5 | 186309.1 | 327612.2 | 175142.6 | TRUE |
| 209592.6 | 307179.7 | 180570.7 | 293320.5 | 182691.3 | 160620.7 | 420759   | 153639   | TRUE |
| 171602.8 | 316492.1 | 332361   | 234849   | 156625.4 | 180351.4 | 342015.8 | 138198.5 | TRUE |
| 71809.7  | 49814.8  | 37938    | 64604.1  | 27630.3  | 64974.6  | 79849.9  | 45087.1  | TRUE |
| 106868.7 | 98297.2  | 107295.6 | 106167   | 79963.9  | 89689.6  | 127007.1 | 106398.8 | TRUE |
| 150657.2 | 172966   | 122397.4 | 144575.9 | 118273.4 | 119495.3 | 185223.6 | 159490   | TRUE |
| 85612.6  | 74968.6  | 85871.9  | 87174.2  | 54835.7  | 107195.1 | 99804.8  | 65572.3  | TRUE |
| 90728.5  | 81263    | 82494.6  | 71043.5  | 75352.3  | 88914.6  | 96589.4  | 95416.3  | TRUE |
| 198069.2 | 402643.6 | 247306.5 | 488274.7 | 280402.3 | 236049.7 | 636048.1 | 189380.2 | TRUE |
| 132992   | 230328.8 | 171619   | 271601   | 191269.9 | 177008.8 | 371184.4 | 137420.9 | TRUE |
| 114294.1 | 81003.8  | 88782.7  | 169283.2 | 75495.8  | 76038.7  | 107184.6 | 64611.7  | TRUE |
| 220338   | 159449.5 | 218882.1 | 179707.4 | 141761.8 | 290696.7 | 173792.5 | 160586.1 | TRUE |
| 130686.9 | 96094.1  | 134961.9 | 117426.3 | 118231.1 | 96398    | 88641.9  | 102447.4 | TRUE |
| 105238.9 | 58220.7  | 134422.4 | 86280.3  | 83422    | 156226.2 | 65888.6  | 90515.8  | TRUE |
| 58528.6  | 33412.2  | 81349.8  | 29375.8  | 40299    | 67614.6  | 47402.6  | 52524.5  | TRUE |
| 48661.5  | 30714.3  | 63105.7  | 6709.6   | 10829.7  | 68513.9  | 31423    | 15506.8  | TRUE |
| 57013.4  | 52355.3  | 74073.9  | 46239.3  | 54962.6  | 76639.7  | 49000.3  | 54539    | TRUE |
| 149867.9 | 70638.4  | 77394.8  | 63960.4  | 246120.4 | 38451.9  | 80477.3  | 36547.9  | TRUE |
| 164008.2 | 133838.4 | 133051.6 | 110717.2 | 92290.6  | 130267.5 | 122128.2 | 99888.6  | TRUE |
| 207625.5 | 133506.7 | 235191.7 | 234257   | 160554.2 | 228837.8 | 210206   | 160987.4 | TRUE |
| 349235.6 | 279613.9 | 295636.9 | 420536.5 | 259626.9 | 365090.5 | 320010.9 | 279258.4 | TRUE |
| 74744.1  | 88329.8  | 79223.2  | 89145.7  | 63888.4  | 102097.7 | 81046.4  | 81298.5  | TRUE |
| 51658.8  | 84866    | 68444.4  | 100069.8 | 75947    | 49429.3  | 57835.5  | 38691.1  | TRUE |
| 150477   | 101713.2 | 152814.4 | 144525.2 | 167842.2 | 153592.5 | 117491.5 | 155260.9 | TRUE |
| 142299.4 | 84376.5  | 141931.1 | 138876.1 | 90666.3  | 177361.9 | 113290   | 97353.5  | TRUE |
| 331704.3 | 245441.4 | 388034   | 379927.3 | 227429.1 | 360605.8 | 279503.2 | 261448.8 | TRUE |
| 98480.8  | 57336.6  | 117210.2 | 111932.3 | 64665.4  | 127797.7 | 88075.3  | 73338.5  | TRUE |
| 128397.8 | 122675   | 124148.5 | 128626.7 | 71570.8  | 126966.8 | 107014.2 | 81140.5  | TRUE |
| 57395.8  | 38631    | 71855.4  | 55940.7  | 64985.2  | 38602.8  | 46530.3  | 51481.8  | TRUE |
| 244766   | 180356.5 | 269125.6 | 259329.1 | 183879.6 | 242786.1 | 196317.7 | 163836.2 | TRUE |
| 143164.5 | 130942.1 | 142704.1 | 170145.2 | 110780.9 | 174201.4 | 127343.3 | 124103.7 | TRUE |
| 112334.7 | 144177.1 | 111791.6 | 144415.7 | 96126.6  | 141872.8 | 112155.4 | 118882   | TRUE |
| 254445.3 | 431658.7 | 314664.1 | 437905.3 | 351301.3 | 187934.1 | 214688.6 | 205514.1 | TRUE |
| 39403.5  | 31994.4  | 42941.5  | 47672.1  | 29716.6  | 38321.9  | 39917.8  | 14562.2  | TRUE |
| 46735    | 67190.5  | 75290    | 92629.1  | 74629.9  | 46406    | 39060.2  | 36779.8  | TRUE |
| 40373.2  | 49288.5  | 43497.7  | 35942.9  | 40260.4  | 33530.4  | 49536.1  | 37973.1  | TRUE |
| 43818.5  | 53032.1  | 38834.4  | 47754.1  | 44816.9  | 35638.8  | 42504.2  | 34940    | TRUE |
| 145144.9 | 109494.6 | 101075.7 | 124371.9 | 90868.9  | 121761.5 | 129064.8 | 118200.4 | TRUE |
| 204284   | 185344.8 | 308808.8 | 278258.5 | 245627.5 | 277759.6 | 235210.1 | 269483.4 | TRUE |
| 57996.8  | 41770.1  | 82404.2  | 71473.7  | 90035.7  | 98246.9  | 56820    | 94074.4  | TRUE |
| 80969.6  | 58742.3  | 69657.5  | 87685.3  | 47380.7  | 116636.5 | 56294.7  | 86311.1  | TRUE |
| 24680.3  | 9630.9   | 28580.3  | 11300    | 7861.5   | 52568.1  | 14316.6  | 12664.5  | TRUE |
| 255362.7 | 180231.8 | 194627.7 | 184260.7 | 234267.1 | 261323.6 | 246640   | 275608.9 | TRUE |

|          |          |          |          |          |          |          |          |      |
|----------|----------|----------|----------|----------|----------|----------|----------|------|
| 45429.4  | 36062.4  | 41091.6  | 51012.7  | 42135    | 55260.8  | 37536.5  | 53974.8  | TRUE |
| 217016.3 | 131954.3 | 100717.9 | 115291.6 | 170103.9 | 200594.4 | 138202.7 | 220959.4 | TRUE |
| 116789.5 | 80956.8  | 87398.3  | 106763.2 | 126877.1 | 154371.7 | 92340.9  | 137183.2 | TRUE |
| 167419.4 | 101464.4 | 110223.5 | 162095.6 | 161008.3 | 170752.5 | 123480.4 | 169948   | TRUE |
| 55364.8  | 95751.8  | 75832.7  | 129235.4 | 98786    | 39083    | 36947.6  | 40263.7  | TRUE |
| 226244.7 | 234141.8 | 301177.1 | 323913.2 | 262029.7 | 280092.3 | 262901.5 | 238987.6 | TRUE |
| 73237.6  | 57576.4  | 114747.5 | 107469.3 | 96090.6  | 124017   | 102407.9 | 82521.5  | TRUE |
| 114872   | 103657.8 | 152685.7 | 167186.7 | 134164   | 182302.6 | 147907   | 158582.8 | TRUE |
| 259792.4 | 297961.4 | 296751.6 | 338055.2 | 276764.4 | 329585.7 | 310854   | 303347.6 | TRUE |
| 290583.8 | 605137   | 433304.9 | 728433.8 | 883200.9 | 150510.9 | 131271.3 | 173369.8 | TRUE |
| 305037.5 | 679865.4 | 425192   | 611702.2 | 759615.7 | 153921.7 | 118302.9 | 154550.2 | TRUE |
| 37296.1  | 22422.1  | 29347.1  | 28815.8  | 34311.7  | 37677.5  | 23263.3  | 43753.4  | TRUE |
| 910634.3 | 700325.1 | 998374.9 | 1249057  | 1591487  | 1300390  | 880866.9 | 1300804  | TRUE |
| 19940092 | 15700372 | 21027021 | 21128373 | 19571855 | 26169665 | 19498295 | 27007957 | TRUE |
| 698947.4 | 1549534  | 1172990  | 2035155  | 1847047  | 498130.9 | 488345.5 | 562465.9 | TRUE |
| 759645.4 | 520647.2 | 677827.1 | 862170.7 | 639028   | 1037252  | 701197.3 | 913021.1 | TRUE |
| 1740867  | 1472033  | 1539197  | 1776704  | 1297307  | 1692205  | 1496099  | 1280756  | TRUE |
| 1577412  | 1438930  | 1512058  | 1744664  | 1257646  | 1628548  | 1376371  | 1173564  | TRUE |
| 211547.2 | 183061.8 | 188124.5 | 211878.6 | 143574.6 | 181960   | 166367.8 | 151220.6 | TRUE |
| 645609.7 | 516832.6 | 616548.6 | 632461.9 | 469756.3 | 605516.5 | 498451.3 | 476439.1 | TRUE |
| 426738.3 | 393212.1 | 473985.2 | 423193.4 | 326703.2 | 451099.8 | 406166.8 | 312762.1 | TRUE |
| 1134577  | 856779   | 1329194  | 1570034  | 988821.9 | 1399225  | 1048266  | 1008535  | TRUE |
| 848589.8 | 798443.2 | 979127.5 | 1169522  | 790608.8 | 1057463  | 868063.1 | 828640.4 | TRUE |
| 14618381 | 11591901 | 17165506 | 21958002 | 13119991 | 18241890 | 15422517 | 13995499 | TRUE |
| 94646    | 92068.7  | 94453.2  | 111462.8 | 81003.2  | 86736.7  | 95822.8  | 70388.8  | TRUE |
| 63442    | 57076.4  | 63408.5  | 84884.4  | 69658.6  | 65172.5  | 57369.3  | 46027.4  | TRUE |
| 16886428 | 14128508 | 16984318 | 19259308 | 14878152 | 17120215 | 15020594 | 15641347 | TRUE |
| 4572945  | 4219626  | 4321069  | 5577237  | 4116801  | 4540274  | 4458727  | 4322222  | TRUE |
| 523682.3 | 528590.8 | 504357.7 | 589223.3 | 480301.4 | 508027.1 | 553768.1 | 449268.1 | TRUE |
| 240950.7 | 213956.4 | 199618.9 | 237281.1 | 205518.5 | 240433.5 | 225937.5 | 210060.4 | TRUE |
| 225274.4 | 231653.8 | 229589.6 | 234442.1 | 191682   | 218025.4 | 228872.8 | 219114.5 | TRUE |
| 41330632 | 33610975 | 39454781 | 40093808 | 41615630 | 45872123 | 35857739 | 48640008 | TRUE |
| 1059020  | 934767.7 | 1046752  | 998050.8 | 1076435  | 1199348  | 1016227  | 1268495  | TRUE |
| 586132.5 | 501505.1 | 616269.1 | 577983.2 | 610671.4 | 650988.8 | 513122.8 | 628973.3 | TRUE |
| 203336.4 | 157753.7 | 201914.7 | 202689.7 | 206402.6 | 215674.9 | 182493.8 | 231778.1 | TRUE |
| 151125.4 | 159975.8 | 98270.2  | 169085.8 | 133693.5 | 108942.9 | 149381.8 | 141915.2 | TRUE |
| 274949.1 | 228196.6 | 303472.5 | 310104.8 | 262837.9 | 284538.9 | 288166.8 | 278903.9 | TRUE |
| 52726.9  | 64128.6  | 69962.4  | 81296.3  | 56544    | 66841.3  | 60963.2  | 69329.7  | TRUE |
| 132230.1 | 99955.5  | 161333.6 | 160351   | 149994.8 | 156179.4 | 127559.9 | 147963.3 | TRUE |
| 53005.9  | 103283.5 | 64896.1  | 90052.1  | 128908.4 | 42023    | 26607.7  | 43845    | TRUE |
| 116426.4 | 111949.2 | 120638.2 | 113071.8 | 116850.6 | 96896.7  | 118684.2 | 104845   | TRUE |
| 76119.5  | 80364.7  | 75273.6  | 58025.5  | 72191.2  | 79787.8  | 66049.8  | 59673.3  | TRUE |
| 248651.4 | 210908.5 | 225590.8 | 204650.3 | 217411.9 | 229168   | 211993.3 | 223794.4 | TRUE |
| 217353.2 | 209913.9 | 223239.1 | 180019.7 | 221342.9 | 248083.6 | 235092.8 | 238290.1 | TRUE |
| 136761   | 146594.7 | 132211.5 | 139535.6 | 142198   | 133409.2 | 135522.6 | 150425.3 | TRUE |
| 377054.4 | 355370.9 | 404690.3 | 372862.7 | 443924.2 | 361379   | 410783.6 | 446433   | TRUE |
| 613078.3 | 587764.3 | 819867   | 994050.8 | 890155.2 | 866544.6 | 805996.5 | 926927.2 | TRUE |
| 461303.6 | 466051.1 | 592757.9 | 692265.8 | 680152.5 | 640166   | 569183.8 | 688460.7 | TRUE |
| 108642.1 | 102697   | 95418    | 104391   | 86173.2  | 101257.3 | 95150.2  | 99161.6  | TRUE |

|          |          |          |          |          |          |          |          |      |
|----------|----------|----------|----------|----------|----------|----------|----------|------|
| 1234524  | 1164398  | 1211145  | 1174655  | 1241421  | 1393357  | 1337421  | 1214622  | TRUE |
| 563400.1 | 613790.4 | 574208.7 | 596884.9 | 542548.5 | 612564.2 | 576059.7 | 627810.1 | TRUE |
| 271354.9 | 289007.9 | 282515.1 | 275406.7 | 321829.9 | 375476.8 | 321270.3 | 306886.4 | TRUE |
| 328534.8 | 317616   | 349230.5 | 378099.5 | 392507.9 | 427713.1 | 381093.7 | 457476.1 | TRUE |
| 350400.6 | 326425   | 251298.1 | 269742.1 | 228408   | 254712.4 | 235110.7 | 248158.9 | TRUE |
| 125877.5 | 117334.6 | 125664.8 | 143297.4 | 124935.1 | 121973.6 | 107815.1 | 113524.2 | TRUE |
| 10112.9  | 31918.7  | 2882     | 44498.8  | 14180.6  | 11143.9  | 20177.6  | 32140.9  | TRUE |
| 20624.7  | 19069.8  | 15840.5  | 23915.2  | 21780.5  | 4916.6   | 13034.7  | 9466.4   | TRUE |
| 10281.3  | 29571.7  | 28505    | 23453    | 29898.6  | 26547.6  | 8900.7   | 13252.1  | TRUE |
| 5961.5   | 10074.2  | 4647.2   | 9094.4   | 17652.2  | 9169.5   | 7908.5   | 6075.1   | TRUE |
| 178714   | 121300.5 | 119324.5 | 745125.2 | 165962.6 | 223696.1 | 182278.8 | 252896.9 | TRUE |
| 28959.1  | 33810.7  | 25295.5  | 43658.5  | 33820.2  | 37157.5  | 33184.3  | 26639    | TRUE |
| 15006    | 9476.2   | 5390.1   | 12702.4  | 16243.4  | 14809    | 18285.9  | 12196.6  | TRUE |
| 220773.7 | 189827.4 | 175588.3 | 224665.5 | 172096.9 | 314190.1 | 219700.3 | 272974.6 | TRUE |
| 23495    | 25962.4  | 25844.7  | 3401.4   | 27752.6  | 30218.9  | 10905    | 22144.3  | TRUE |
| 30817.7  | 35870.9  | 19195.1  | 15470.5  | 31989.6  | 28021.3  | 30217.8  | 41407.4  | TRUE |
| 1486196  | 1256652  | 1887161  | 1690836  | 1197614  | 2032842  | 1352675  | 1224890  | TRUE |
| 72918.4  | 67025.8  | 95185.5  | 130492.9 | 99657.2  | 80901.1  | 67975.1  | 80248.4  | TRUE |
| 234624   | 211787.3 | 160467.6 | 237558.1 | 236578.3 | 219296   | 238994.1 | 257318.9 | TRUE |
| 27890.9  | 19231.1  | 26000.7  | 33239.1  | 25370.6  | 30683.1  | 10121.8  | 23353    | TRUE |
| 358784.5 | 433919   | 327872.2 | 348699.9 | 303581.1 | 505671.7 | 468284.1 | 508496.6 | TRUE |
| 245929.5 | 195333.4 | 158870.3 | 154586.6 | 213695.1 | 278753.8 | 215787.7 | 286549.9 | TRUE |
| 17543.9  | 18180.2  | 31619.7  | 16872.8  | 22822.4  | 33818.9  | 17813.1  | 30479.2  | TRUE |
| 30056.8  | 49883.7  | 41022.6  | 31783    | 36655.8  | 25772.9  | 30432.3  | 34998.9  | TRUE |
| 351902.5 | 341335.8 | 213936.8 | 319942.4 | 319635.6 | 202336.4 | 279705.1 | 352431.8 | TRUE |
| 70458.4  | 56693.5  | 31006.8  | 52817.4  | 76930.4  | 45176.7  | 63812.6  | 72250.6  | TRUE |
| 81773.3  | 66468.9  | 47660    | 39052.7  | 69302.5  | 46613.9  | 57338.3  | 71348.3  | TRUE |
| 451448.1 | 573082.1 | 329154.3 | 426322.9 | 483059.1 | 270054.4 | 477511.2 | 496118.6 | TRUE |
| 438483.3 | 519504.6 | 477666.7 | 511757.2 | 539375.7 | 414810.7 | 531116.4 | 535588   | TRUE |
| 494636.1 | 573853.2 | 313769.4 | 628468.8 | 716007.9 | 331306.5 | 621602.4 | 733860.2 | TRUE |
| 62120.6  | 119209.9 | 83746.4  | 104349.4 | 135107.2 | 46843.7  | 59245.2  | 60271.1  | TRUE |
| 407337.6 | 359990.7 | 337112.1 | 390048.3 | 454036.6 | 308512   | 372942.3 | 389654.9 | TRUE |

|          |          |          |          |          |          |          |          |      |
|----------|----------|----------|----------|----------|----------|----------|----------|------|
| 623605.2 | 568536.5 | 473770.6 | 588397   | 685500   | 476285.4 | 597973.6 | 662438.2 | TRUE |
| 107115.6 | 97053.3  | 95687.3  | 107776.5 | 106697.8 | 80560.6  | 113043   | 112916   | TRUE |
| 87660.4  | 138598.2 | 84097.6  | 141424.5 | 172221.8 | 74036.1  | 72118.6  | 78682    | TRUE |
| 43765.3  | 93273.1  | 61629.9  | 79199.4  | 123200.6 | 22038.2  | 24338    | 34480.7  | TRUE |
| 442065.3 | 437914.8 | 498752.5 | 471776.9 | 394115.4 | 446402.4 | 500637.6 | 427679.8 | TRUE |
| 2273808  | 2453531  | 2217769  | 2264631  | 1897923  | 2245033  | 2713618  | 2324767  | TRUE |
| 1187428  | 1224147  | 1185150  | 1200825  | 1015216  | 1258412  | 1369892  | 1200201  | TRUE |
| 720560.7 | 660529.5 | 707126.9 | 725662   | 725655.1 | 784222   | 747812.3 | 733643.5 | TRUE |
| 318822.5 | 317119   | 255807.8 | 275079.1 | 285020.9 | 246898   | 275944.1 | 292077.6 | TRUE |
| 194619.1 | 178017.6 | 150578.5 | 154855.2 | 152320.7 | 127916.8 | 148964.8 | 185751.1 | TRUE |
| 119243   | 110110.7 | 114260.2 | 120272.1 | 133500.7 | 107019.7 | 106987.4 | 101389   | TRUE |
| 1063172  | 1052702  | 803146.8 | 995015.1 | 1043992  | 865347.8 | 971910.4 | 987541.6 | TRUE |
| 277448.2 | 289175.3 | 260820.8 | 310131   | 333129.9 | 290174.7 | 322163.4 | 324173   | TRUE |
| 115154.6 | 182468.5 | 187083.1 | 164034.7 | 223202.4 | 138128.7 | 96254.1  | 125480.8 | TRUE |
| 63949.4  | 128664.7 | 76555.7  | 115864.5 | 123880.7 | 26190.7  | 36616.1  | 39400.1  | TRUE |
| 307564.5 | 284133.9 | 438582.3 | 378583.3 | 344555.9 | 410811.1 | 401069   | 423768.3 | TRUE |
| 763862.4 | 745396.5 | 871688.7 | 888917.8 | 859083.8 | 917745.8 | 946278.6 | 1006343  | TRUE |
| 375537.8 | 313736.7 | 318010.8 | 341071   | 373675   | 298019.4 | 356201   | 347826.6 | TRUE |
| 149397.9 | 144930.2 | 118661.9 | 146252   | 166680.1 | 147514.9 | 137785   | 134054.1 | TRUE |
| 1299056  | 1161701  | 850869.4 | 1065701  | 1248546  | 946405.2 | 1110312  | 1347656  | TRUE |
| 160792.1 | 148545.8 | 133707.8 | 188885.8 | 161020.4 | 136378.8 | 140051   | 177021.8 | TRUE |
| 353238.2 | 315896.2 | 394760.2 | 428994   | 448573.5 | 391082.7 | 376777.6 | 401677   | TRUE |
| 90893.9  | 178272.1 | 92068.3  | 135600.9 | 173459.9 | 67943.2  | 64330.8  | 63966.6  | TRUE |
| 87795.3  | 172447.2 | 94940.8  | 129474.7 | 160237.5 | 65764.8  | 45397.3  | 49649.7  | TRUE |
| 892760.7 | 833020.3 | 792590.7 | 965263.6 | 961630   | 844886.7 | 867597.2 | 882419.7 | TRUE |
| 1630791  | 1487896  | 1320626  | 1582149  | 1621432  | 1462099  | 1512482  | 1599968  | TRUE |
| 2055910  | 1958050  | 1910233  | 1992774  | 1775194  | 1986941  | 2029526  | 1965790  | TRUE |
| 820599.9 | 769050.7 | 748192   | 782589.9 | 776301.4 | 889335.7 | 832353.5 | 894728.5 | TRUE |
| 407563.6 | 405731.4 | 405531.4 | 415259.6 | 380599.2 | 453904.6 | 450402.4 | 414909.1 | TRUE |
| 536140.5 | 456441.6 | 431363.6 | 376597.2 | 390518.4 | 438457.4 | 393843.5 | 408429.2 | TRUE |
| 119701.6 | 146544.9 | 106968.4 | 137954.9 | 124450.8 | 105256.2 | 123395.1 | 146800   | TRUE |
| 107558.5 | 135617   | 109463.3 | 139258.3 | 131698.6 | 114298.6 | 127088.2 | 122052.9 | TRUE |
| 995377   | 915454.4 | 842056.6 | 1169700  | 1117457  | 877640.1 | 1022577  | 1140842  | TRUE |
| 82147.1  | 75084.4  | 56714.4  | 70602.5  | 90656.2  | 55155.8  | 66560.8  | 71798.6  | TRUE |
| 105322.4 | 95566    | 99217.3  | 120788   | 108211   | 104976.7 | 118926.9 | 147264.2 | TRUE |
| 119139.9 | 110129.6 | 118160.2 | 176543.5 | 152103.7 | 115641.1 | 133461.1 | 133396.1 | TRUE |
| 99434.6  | 74101.6  | 60355.7  | 106954.9 | 90877.4  | 90651.1  | 89691.3  | 102267.7 | TRUE |
| 50026.2  | 41647    | 50388.2  | 61668    | 42364.8  | 44089    | 44034.4  | 44910.3  | TRUE |
| 37586.1  | 28873.8  | 39086.1  | 31312.6  | 31642.5  | 29859.1  | 35957.6  | 30961.5  | TRUE |
| 41570.3  | 104744.6 | 135080.7 | 94738.7  | 101375.3 | 20782.7  | 8884.1   | 34812.9  | TRUE |
| 200037.2 | 200199.3 | 201039.3 | 211003.2 | 178292.8 | 263654.9 | 234583   | 218240.7 | TRUE |
| 361628.4 | 304263   | 375500.3 | 348958.3 | 333922.4 | 397157   | 357758.7 | 391650.9 | TRUE |
| 40432.7  | 126497.9 | 81957.2  | 140295.6 | 133148.3 | 32328.1  | 10711.4  | 29173.6  | TRUE |
| 300853   | 256899.8 | 270752.8 | 245455.9 | 247025.3 | 263446.2 | 209792.9 | 249302.4 | TRUE |
| 312598.2 | 269949.4 | 306423.8 | 323708.5 | 299655.5 | 346387   | 277887.4 | 306977   | TRUE |
| 440683.7 | 343405.4 | 400164.9 | 449671.1 | 404884.8 | 469449.9 | 337689.5 | 447114.6 | TRUE |
| 517466.2 | 427413.4 | 547909.3 | 622250.4 | 547304.6 | 582888.8 | 435423.9 | 543709.6 | TRUE |

|          |          |          |          |          |          |          |          |      |
|----------|----------|----------|----------|----------|----------|----------|----------|------|
| 200771.3 | 147600.2 | 243095.7 | 276599.1 | 212989.8 | 260434.9 | 211459.8 | 219162.9 | TRUE |
| 130731.3 | 113713.8 | 131692.7 | 143028.3 | 151185.3 | 122161.8 | 112888.4 | 151244.7 | TRUE |
| 763601.9 | 690325.3 | 540169.6 | 646378.7 | 876528.1 | 772187.2 | 721938   | 811822.9 | TRUE |
| 1209745  | 1136502  | 1001826  | 949758.1 | 1312778  | 1244426  | 1164863  | 1247284  | TRUE |
| 156096.6 | 135509.2 | 152257.4 | 172357.1 | 167744.7 | 160546.3 | 157481.1 | 169744.1 | TRUE |
| 56247.2  | 64768.6  | 75475.9  | 69687.8  | 79251.9  | 75576.5  | 71009.1  | 79411.8  | TRUE |
| 159046.3 | 143220.5 | 159054.1 | 191665.5 | 176597.7 | 177256.2 | 162188.7 | 198395.1 | TRUE |
| 167474.5 | 148405.2 | 157700.9 | 189847.2 | 180906   | 187401.1 | 141004   | 192045.6 | TRUE |
| 45119.4  | 41598.4  | 45681    | 40089.7  | 50080.5  | 32189.6  | 38154.2  | 36051.2  | TRUE |
| 29415.1  | 47619.1  | 34522.7  | 59021.9  | 64871.3  | 15960.9  | 13638.5  | 23539.5  | TRUE |
| 25040.2  | 22328    | 14788.1  | 11287.8  | 17562.5  | 20858.1  | 23343.7  | 26176.3  | TRUE |
| 314879.4 | 366968.3 | 356879.7 | 297148   | 342618.2 | 406004.8 | 342420.5 | 360024.7 | TRUE |
| 73281.7  | 93337.1  | 84932    | 94322.5  | 74047.8  | 86870.2  | 109629.5 | 65534.4  | TRUE |
| 21663.8  | 52758.4  | 31554.1  | 37274.4  | 41779    | 13994.4  | 22815.7  | 14680.6  | TRUE |
| 29044.9  | 33091    | 21474.7  | 44160.9  | 27768.1  | 26760    | 33982.6  | 33802    | TRUE |
| 88543    | 76921.8  | 76767.7  | 106055.9 | 96888.8  | 96791.1  | 92804.8  | 102946.8 | TRUE |
| 19390.3  | 6865.3   | 24840.5  | 14494.6  | 11046.5  | 23955.2  | 36403.2  | 11236.9  | TRUE |
| 87293.2  | 76066.4  | 99756.1  | 103802.4 | 88064.4  | 95952.8  | 89037.2  | 87567.6  | TRUE |
| 29781.7  | 29644.9  | 12744.2  | 39000.7  | 34695.7  | 37114    | 33267.7  | 31218.7  | TRUE |
| 34331.1  | 26062.1  | 20418.3  | 41356.2  | 18854.3  | 14433.6  | 24156.6  | 34573.4  | TRUE |
| 46323    | 27022.3  | 50855.6  | 31845.7  | 44230.3  | 39339.8  | 35871.5  | 43997.9  | TRUE |
| 336167.9 | 243869.3 | 350863.9 | 345443.4 | 353579.2 | 368394.9 | 292797.1 | 357433.8 | TRUE |
| 128530.1 | 90023.5  | 106206.3 | 128641.4 | 140968.6 | 129439.2 | 100670.9 | 130916.5 | TRUE |
| 105306.6 | 96164.5  | 59277.8  | 71673.2  | 95473.2  | 103656.5 | 119085.2 | 132440.5 | TRUE |
| 98323.3  | 70385.2  | 89763.6  | 89270.9  | 107120.7 | 113888.2 | 104130.7 | 106579.3 | TRUE |
| 85577.6  | 73724.1  | 75307.9  | 70186.9  | 50841.4  | 60216.5  | 76704.2  | 69159.9  | TRUE |
| 308756.2 | 307809   | 285767.1 | 242663.5 | 249094.2 | 288547.3 | 329516   | 279559.7 | TRUE |
| 391427.8 | 355524.5 | 329193.5 | 310819.9 | 337602.9 | 321454   | 393726.8 | 322001.7 | TRUE |
| 1655911  | 1669057  | 1275843  | 1372892  | 1220536  | 1267138  | 1606925  | 1309583  | TRUE |
| 490368.2 | 549163   | 252955.6 | 397330.8 | 482482.8 | 249685.5 | 452148.2 | 465336.1 | TRUE |
| 142462   | 181319   | 75789.9  | 145759.1 | 147892.5 | 98140.3  | 152907.5 | 155501.9 | TRUE |
| 761861.2 | 844673.9 | 333654.4 | 556714.6 | 729736.4 | 373948.8 | 660114.6 | 753525.6 | TRUE |
| 561413.7 | 639824.4 | 346960.8 | 538679.4 | 632067.5 | 407802.8 | 623508.4 | 640401.8 | TRUE |
| 115003.9 | 113291.9 | 98829    | 130157.3 | 146512.1 | 81227.9  | 149389.9 | 143373.9 | TRUE |
| 96854.6  | 108075   | 77634.3  | 111012.8 | 142372.7 | 80075.5  | 136698.4 | 130439.2 | TRUE |
| 134426.3 | 138603.7 | 118930.1 | 163114.4 | 192707.9 | 132758.7 | 172953.9 | 181592.6 | TRUE |
| 121390   | 140312.8 | 93942.4  | 186486.2 | 202853.2 | 112779.4 | 189421.4 | 208784.9 | TRUE |
| 227076   | 240792.3 | 156137.2 | 231165.2 | 258711.2 | 193950.2 | 269025.6 | 289984.5 | TRUE |
| 53877    | 48268.2  | 52093.8  | 85269.5  | 76621.4  | 55712.2  | 79669.5  | 63846.8  | TRUE |
| 50113    | 141325.4 | 52118.8  | 94408.8  | 115907.2 | 38857.3  | 36573.4  | 43444.5  | TRUE |
| 529477.9 | 594914.4 | 746424.2 | 700660.6 | 396960.2 | 668693.5 | 742986.4 | 606584.8 | TRUE |

|          |          |          |          |          |          |          |          |      |
|----------|----------|----------|----------|----------|----------|----------|----------|------|
| 249791.5 | 309197.1 | 311232.6 | 343117.7 | 198711.1 | 295578.1 | 308792   | 266185.5 | TRUE |
| 177230.4 | 212437   | 184479.4 | 232831.9 | 176991.7 | 198740.1 | 198408.5 | 219645.8 | TRUE |
| 77574    | 110912.1 | 93047.7  | 81460.3  | 71760.4  | 87617.3  | 111634.7 | 78552.8  | TRUE |
| 165858.4 | 167904.1 | 197872.9 | 149625.3 | 139211.7 | 169634.3 | 177909.8 | 172715.9 | TRUE |
| 66919.6  | 81325.4  | 93665.3  | 76000.1  | 62004.9  | 61636.5  | 58413    | 63249.5  | TRUE |
| 60585.7  | 104806.3 | 93724.9  | 113765.2 | 87210.8  | 64955    | 44658.8  | 52466.8  | TRUE |
| 53176.2  | 59011.1  | 88106.6  | 51250.4  | 49147.8  | 77558.6  | 61448.7  | 68351.8  | TRUE |
| 8182.6   | 7971.2   | 11115    | 9580.4   | 7266     | 5394     | 7971.5   | 7922.1   | TRUE |
| 91711.6  | 212610.7 | 123477.3 | 160925.5 | 233890   | 40270    | 39451.4  | 54630.1  | TRUE |
| 82754    | 218175.3 | 104933.8 | 189089.6 | 217468.2 | 55026.4  | 56069.5  | 57111    | TRUE |
| 554390.2 | 479058.8 | 427389.3 | 444977.1 | 473202.4 | 410868.5 | 543732.9 | 521695.7 | TRUE |
| 182157.4 | 189474.7 | 115247.1 | 143276.3 | 136249.5 | 146162.9 | 166630.9 | 155376.6 | TRUE |
| 880045.5 | 533690.8 | 2254488  | 636807.3 | 447038.7 | 2310358  | 548176   | 504653.3 | TRUE |
| 205308.6 | 120482.1 | 427592.4 | 115566.6 | 102030.7 | 434188   | 123761.4 | 131310.8 | TRUE |
| 959906.3 | 690302.4 | 714670.3 | 740733.4 | 2101412  | 735702.3 | 638815   | 913923.8 | TRUE |
| 531570.3 | 288761.4 | 380614.5 | 396298.9 | 1383431  | 399774.8 | 323913.6 | 491877.3 | TRUE |
| 4496549  | 2536250  | 3058000  | 2703624  | 10487692 | 2638903  | 2541282  | 3022896  | TRUE |
| 48056.9  | 63299.7  | 53931.1  | 59531.1  | 52600.4  | 52016.6  | 49270.6  | 43289    | TRUE |
| 62244.8  | 45417    | 60187.3  | 49241.1  | 40063.8  | 50197.8  | 30018.3  | 55642.5  | TRUE |
| 62143.4  | 117926.6 | 164022.7 | 51416.7  | 61431.2  | 98984.4  | 72069    | 44944.4  | TRUE |
| 30716.7  | 6707.1   | 39062    | 11966.3  | 24919.5  | 50468.3  | 30365.9  | 34097.7  | TRUE |
| 89945.8  | 105387.5 | 133501.8 | 121403.5 | 146562.1 | 105757.3 | 47384.4  | 73053.2  | TRUE |
| 118748.2 | 95340    | 122513.7 | 133564.4 | 126330.1 | 106591.5 | 88583.4  | 86369.3  | TRUE |
| 176274.4 | 169627.5 | 207197.1 | 165051.1 | 162475.5 | 288302.8 | 205028.1 | 192085.5 | TRUE |
| 77295.7  | 71015.3  | 106371.7 | 96232.7  | 79529.4  | 104250.1 | 88160.3  | 99444.9  | TRUE |
| 78442.8  | 85468    | 173162.4 | 109275.2 | 89691.3  | 116174.6 | 95565.3  | 80922.9  | TRUE |
| 48132.2  | 32311.3  | 77039.6  | 65353.1  | 38812.1  | 112754.4 | 56563.3  | 48476.4  | TRUE |
| 84994.2  | 59947.9  | 66140.7  | 63685.8  | 83494.8  | 78216.4  | 83543.6  | 66120.6  | TRUE |
| 206366.4 | 138551.1 | 176666.3 | 175140.8 | 208502.8 | 214811.7 | 175873.2 | 223788.1 | TRUE |
| 170470.9 | 89267.9  | 82305.7  | 136849   | 337851.9 | 157479.3 | 109094.9 | 144706.3 | TRUE |
| 26320.9  | 11303.4  | 24731.8  | 6133     | 8979.2   | 42530.9  | 31518.4  | 29272    | TRUE |
| 56687.4  | 27428.5  | 45736.1  | 24790.9  | 31070.3  | 66917.6  | 36422    | 37145    | TRUE |
| 56190.7  | 39288.6  | 77118.7  | 57416    | 46831.6  | 115428.3 | 57307.3  | 64722.9  | TRUE |
| 80349.1  | 63908.3  | 94739.3  | 82312    | 84585.7  | 157350.7 | 108489.1 | 120909.1 | TRUE |
| 85880.4  | 32997.4  | 72006.5  | 53845    | 44523.1  | 150756   | 64435.6  | 53214.4  | TRUE |
| 66817.6  | 27909.5  | 45309.1  | 25832    | 28410    | 80848.6  | 47686.3  | 41368.5  | TRUE |
| 97589.7  | 76204.3  | 164591   | 105146.7 | 101997.4 | 249837.6 | 108842.2 | 111522.8 | TRUE |
| 181283.8 | 159082.9 | 325578.3 | 226420.7 | 139254.5 | 510201.3 | 232748.7 | 243979.6 | TRUE |
| 22862    | 9406.4   | 58783.2  | 14398.3  | 3282.3   | 98047.5  | 15411.4  | 12907.6  | TRUE |
| 215424.7 | 171521.8 | 152449.5 | 190381.4 | 623249.5 | 194623.9 | 189647.3 | 252887.8 | TRUE |
| 766763   | 667385.2 | 980400.3 | 687299.5 | 604685.9 | 1012236  | 624255.2 | 660034.2 | TRUE |



|          |          |          |          |          |          |          |          |      |
|----------|----------|----------|----------|----------|----------|----------|----------|------|
| 191711.4 | 164794.7 | 256389.6 | 200588.5 | 160192   | 273201   | 191203.8 | 173264   | TRUE |
| 591080.6 | 532560.9 | 672536.2 | 516945.3 | 473142.3 | 701056.9 | 563184.9 | 478441.3 | TRUE |
| 93610    | 66625.1  | 165785   | 61784    | 64084.6  | 150366   | 81938.4  | 66053.2  | TRUE |
| 1253733  | 850966.1 | 882177.5 | 861944.6 | 2740277  | 917418.7 | 761519.4 | 933717.6 | TRUE |
| 263772.7 | 169077.9 | 227682.8 | 225313.7 | 733279.9 | 233059.4 | 196456.7 | 251705.3 | TRUE |
| 409773.1 | 341284   | 419791.3 | 338832.1 | 691707.6 | 386659.2 | 334350.6 | 394471.6 | TRUE |
| 233418.7 | 209841.8 | 434209.2 | 243986.2 | 193096   | 453021   | 218225.7 | 211921.5 | TRUE |
| 182369.4 | 137496.6 | 158525.6 | 149046   | 379611.4 | 185931.1 | 160636.7 | 175071.1 | TRUE |
| 30474.8  | 8985.3   | 11210.2  | 21205.6  | 66645.2  | 38488.2  | 25020.1  | 35871.8  | TRUE |
| 72374.2  | 57746    | 52811.2  | 60788.9  | 55780.7  | 66463.8  | 61455.2  | 54269.8  | TRUE |
| 107319.2 | 131909.6 | 81455.9  | 101185.9 | 73902    | 83458.4  | 116543.5 | 79867.1  | TRUE |
| 85147.6  | 70293.9  | 74359.9  | 101805.7 | 81394.6  | 101759.3 | 108566.6 | 102119.3 | TRUE |
| 32821.4  | 27723.5  | 24495    | 24192.8  | 24277.9  | 38027.1  | 27928.1  | 37567.6  | TRUE |
| 260797.1 | 232439.7 | 175144.2 | 233363.5 | 200761.6 | 278265.6 | 276689.9 | 268724.7 | TRUE |
| 59937.1  | 48589.4  | 42718.4  | 60486.5  | 47849    | 74995.9  | 63799.8  | 74581.2  | TRUE |
| 105208.9 | 140202.6 | 124702.9 | 159567.2 | 95586.1  | 153816.1 | 147341.7 | 109253   | TRUE |
| 142098.3 | 121869.6 | 106819.1 | 126053.6 | 113940.2 | 150877.1 | 149079.5 | 117338.2 | TRUE |
| 156369   | 178306.5 | 194615.3 | 194847.7 | 255449.3 | 124737.9 | 136426.5 | 148827.9 | TRUE |
| 2580456  | 2269983  | 2795667  | 3062100  | 2119286  | 2987371  | 2899203  | 2319871  | TRUE |
| 134644   | 168875.8 | 92803.3  | 157002.3 | 194139.1 | 100317.1 | 175649   | 184660.2 | TRUE |
| 337274.4 | 300254   | 234307   | 186556.8 | 187391   | 217686.8 | 214615.5 | 207975.7 | TRUE |
| 389037.6 | 372027.5 | 424123.8 | 438308.7 | 359066   | 445012.8 | 404630.9 | 336359.7 | TRUE |
| 486443.6 | 503128.6 | 491911.8 | 521238.3 | 420485.9 | 534563   | 461901.4 | 423026.8 | TRUE |
| 147400.2 | 117187.7 | 109707.1 | 128357.4 | 112879.8 | 126035.3 | 136573.7 | 125944.2 | TRUE |
| 925570.2 | 711349.8 | 890023.8 | 819944   | 932316.1 | 876133.2 | 779391.3 | 789137.6 | TRUE |
| 1530244  | 1208685  | 1472928  | 1520412  | 1407812  | 1538931  | 1225505  | 1431875  | TRUE |
| 63697.7  | 38469.5  | 38072.1  | 60869.7  | 43945.9  | 70999.8  | 63919.6  | 74214.1  | TRUE |
| 361718   | 286681.2 | 342530   | 279270.5 | 208852.2 | 527918.5 | 390218.1 | 299887.1 | TRUE |
| 139175.1 | 82324.8  | 120608.4 | 131086.1 | 109839.5 | 127935.1 | 121348.2 | 155278.5 | TRUE |
| 627901.4 | 390734.1 | 616695.9 | 644070.7 | 909353.3 | 587121.3 | 534792.8 | 663353.3 | TRUE |
| 52633.6  | 44131.1  | 36838.6  | 55755    | 34172.7  | 47329.3  | 81161    | 56217.1  | TRUE |
| 36026.7  | 32415    | 22159.2  | 24696.7  | 33386.2  | 33862.1  | 40148.1  | 30661.8  | TRUE |
| 59736.5  | 57753.4  | 47569.7  | 50619.9  | 35051.9  | 53751.5  | 46364.1  | 41055    | TRUE |
| 52316.3  | 45844.9  | 31626.9  | 60569.7  | 63415.7  | 71156.5  | 65200.1  | 70458.9  | TRUE |
| 22233.1  | 19647    | 17065.5  | 23733    | 18782.2  | 9807     | 25898.7  | 8100.1   | TRUE |
| 112576.3 | 130636.5 | 102259.1 | 83383.4  | 110211.2 | 92882    | 118038.2 | 113535.1 | TRUE |
| 33180.7  | 30476.9  | 25967.6  | 12868    | 35572.9  | 27959.7  | 25726.7  | 32034.3  | TRUE |

|          |          |          |          |          |          |          |          |      |
|----------|----------|----------|----------|----------|----------|----------|----------|------|
| 103726.1 | 78151.4  | 53063.5  | 65314.4  | 76361.2  | 56279.4  | 81172.8  | 89536.7  | TRUE |
| 964340.9 | 865901.9 | 1026278  | 1301623  | 1469038  | 1132284  | 1305096  | 1359900  | TRUE |
| 2113148  | 2012893  | 2270553  | 2853859  | 3029737  | 2365787  | 2879827  | 3081840  | TRUE |
| 55238.2  | 108653.6 | 66644.3  | 77202.7  | 100857.6 | 43132.9  | 51384.9  | 42976.8  | TRUE |
| 76685.7  | 105658.7 | 75025.7  | 106496.6 | 94210.7  | 69185.7  | 103907.5 | 82227.6  | TRUE |
| 75266.2  | 83142.3  | 60465.9  | 103465.3 | 88148.2  | 49471.2  | 75337.8  | 80174.3  | TRUE |
| 40589.4  | 97859    | 57625.2  | 107621.1 | 119951   | 17399.8  | 21692.4  | 28470    | TRUE |
| 78711.9  | 95142.6  | 68837.9  | 101390.9 | 105761.4 | 56166.2  | 58482.2  | 70073.5  | TRUE |
| 26067.2  | 22957.1  | 23427.7  | 33921.3  | 27359.2  | 23361    | 34492.6  | 22602.9  | TRUE |
| 47286    | 77998.8  | 70697.6  | 81935.9  | 79327.2  | 52236    | 35283.8  | 49048.8  | TRUE |
| 30019.3  | 78486.3  | 69696.1  | 63678    | 78808.7  | 34717.1  | 12206.9  | 16054.4  | TRUE |
| 46452.2  | 27712.3  | 40155.8  | 43200.5  | 35305.2  | 48143.3  | 40620.7  | 43536.9  | TRUE |
| 215535.2 | 194412.5 | 245396.3 | 252990.6 | 323754.8 | 233663.7 | 273401.9 | 252273.4 | TRUE |
|          |          |          |          |          |          |          |          |      |
| 130337.6 | 128411   | 129944.1 | 119531.2 | 103919.8 | 160773.5 | 148466.1 | 95824.8  | TRUE |
| 165177.1 | 201390.5 | 181186.6 | 164993.5 | 186443.4 | 192150.1 | 208851.7 | 186023.5 | TRUE |
| 159080.6 | 158632   | 134806.2 | 171952.2 | 148184.2 | 163343   | 170387   | 168634.8 | TRUE |
| 157423.1 | 146970.6 | 154898   | 178335.3 | 169455   | 153640.9 | 161816.6 | 184133.2 | TRUE |
| 131691   | 115899.2 | 148066.7 | 158808.7 | 190370.1 | 149688.8 | 162618.3 | 182401.6 | TRUE |
| 47065    | 74204.5  | 52514.2  | 62014.4  | 76173.3  | 63700.1  | 78676.2  | 62509.1  | TRUE |
|          |          |          |          |          |          |          |          |      |
| 170672.3 | 177513.4 | 137833.1 | 182049.5 | 177814.6 | 116738.7 | 130283.1 | 130486.8 | TRUE |
|          |          |          |          |          |          |          |          |      |
| 389014   | 312116.7 | 428102   | 434005.7 | 372460.2 | 436078   | 410531.6 | 401647.3 | TRUE |
| 319953.1 | 310776   | 318769.2 | 379928.8 | 320878.8 | 379655   | 374202   | 355315.1 | TRUE |
| 19690.5  | 20218.6  | 11251.9  | 10167.6  | 21444.7  | 26203.6  | 10227.3  | 20007.3  | TRUE |
| 138981.1 | 114925.1 | 127489.2 | 165097.4 | 155108.7 | 121789   | 99601.9  | 114168.8 | TRUE |
|          |          |          |          |          |          |          |          |      |
| 140915.7 | 155823   | 130525.9 | 162357.4 | 153983.8 | 141330   | 172262   | 168718.5 | TRUE |
| 275210   | 256562.8 | 245416.5 | 227794.3 | 282786.6 | 231612.8 | 315498.9 | 253303.5 | TRUE |
| 84981.8  | 105079   | 78939    | 92361.9  | 123351.3 | 80983.7  | 99979.1  | 108539.9 | TRUE |
| 85260.5  | 73318    | 67700.2  | 70095.5  | 91191.8  | 66189.2  | 61092.5  | 78165.4  | TRUE |
| 134452.3 | 132942   | 98952.8  | 135490.6 | 141217.3 | 101527.1 | 118635.9 | 110892.2 | TRUE |
| 479072.7 | 408374.9 | 381396.4 | 379259.4 | 473058.6 | 363565.2 | 389123.1 | 480462.5 | TRUE |
| 92635.2  | 92525.9  | 99220.5  | 93266    | 95471.1  | 90414.7  | 103807.8 | 101512.5 | TRUE |
| 21199.3  | 31767    | 23875.6  | 25953    | 24970.8  | 23125.9  | 36409.4  | 28015.8  | TRUE |
| 28875.7  | 31013.4  | 20078.3  | 28716.9  | 22294.4  | 26778.2  | 34115.3  | 37753.7  | TRUE |
|          |          |          |          |          |          |          |          |      |
| 134642.8 | 165932.1 | 152720.3 | 166346.8 | 148233   | 158103.5 | 201031.3 | 142822.4 | TRUE |
|          |          |          |          |          |          |          |          |      |
| 154893.2 | 159045.6 | 197987.8 | 181207   | 119010.3 | 189431   | 209092.4 | 122294   | TRUE |
| 235217   | 217218.4 | 290447.6 | 216440.2 | 149763.9 | 318289.6 | 251474.6 | 163135.1 | TRUE |
| 195663.9 | 201224.9 | 246493.8 | 180836.7 | 140954.1 | 254855.1 | 194967.3 | 154494.6 | TRUE |
|          |          |          |          |          |          |          |          |      |
| 259465.8 | 247285.6 | 188693.7 | 241899   | 169865.4 | 249633   | 351076.8 | 227579.3 | TRUE |
| 188314.8 | 190835.4 | 149560.1 | 185063.6 | 142688.2 | 212746.8 | 224697.1 | 218123.6 | TRUE |
| 252881.7 | 172447.4 | 229234.6 | 278298.6 | 260316   | 279883   | 217391.6 | 295910.6 | TRUE |

|          |          |          |          |          |          |          |          |      |
|----------|----------|----------|----------|----------|----------|----------|----------|------|
| 28628.4  | 4512.8   | 16350.2  | 31441.3  | 21007.9  | 25141.4  | 29018.7  | 20175.9  | TRUE |
| 275111.8 | 279028   | 223243.8 | 224057.2 | 174251.7 | 259471.6 | 289720   | 245517.6 | TRUE |
| 221261   | 254511.1 | 252707.4 | 246716.3 | 238107.8 | 378694.2 | 295092.6 | 235359.6 | TRUE |
| 469343.4 | 481413   | 480003.5 | 479637.5 | 478277.8 | 736700.8 | 608309.5 | 474946.4 | TRUE |
| 255203.6 | 213082.8 | 253913.1 | 343743.1 | 298552.6 | 258246   | 280108.4 | 256200.6 | TRUE |
| 1045091  | 873952.3 | 1071602  | 1394916  | 1207136  | 1072459  | 1013851  | 969720.1 | TRUE |
| 47134.1  | 40825.1  | 66998.2  | 55241.3  | 47883.1  | 54189.3  | 51278.7  | 48979.1  | TRUE |
| 35589.5  | 23852.4  | 39191.7  | 41208.9  | 33886.8  | 25239.8  | 30579.5  | 12260.7  | TRUE |
| 16922.2  | 18039.4  | 25978.8  | 8146.7   | 16455.7  | 23589.5  | 18844.8  | 11133.7  | TRUE |
| 57542.6  | 61096.1  | 81907.8  | 111040.7 | 81478.1  | 96963.5  | 84379.8  | 82627.6  | TRUE |
| 32361.2  | 21115.1  | 32225.5  | 22249.4  | 27702.7  | 30721.7  | 32763.7  | 23985.8  | TRUE |
| 27870.8  | 30223.4  | 27777.7  | 25672.4  | 25099.7  | 27770.8  | 27240.1  | 21066.6  | TRUE |
| 89799.5  | 98845.6  | 88467.1  | 90728.6  | 79824.8  | 100293.8 | 86973.9  | 57655.9  | TRUE |
| 719977.6 | 675070.8 | 996590.1 | 639507.7 | 504724.4 | 1182432  | 766833.1 | 509508.1 | TRUE |
| 628161.9 | 682686   | 722568.4 | 598476.1 | 452832.8 | 777244.9 | 739663.6 | 438558.6 | TRUE |
| 3607790  | 3539518  | 3953238  | 3126821  | 2318725  | 4090781  | 3673420  | 2391258  | TRUE |
| 111932   | 86114.8  | 118751.9 | 109429.2 | 98132.9  | 135925.5 | 138826.8 | 96208.9  | TRUE |
| 183512.9 | 190188.1 | 176922.9 | 147573.7 | 137902.1 | 155314   | 167991.4 | 109792.4 | TRUE |
| 164395.4 | 155779.7 | 177197.6 | 149878.5 | 115748.2 | 153845.2 | 187804.1 | 151629.7 | TRUE |
| 893321.8 | 493088.6 | 1022622  | 954750.9 | 1120795  | 760948.9 | 630707.4 | 739371.5 | TRUE |
| 62573.4  | 29047.4  | 58786.4  | 35556.6  | 47131.9  | 35114.8  | 34136.6  | 44891.1  | TRUE |
| 57362.7  | 77188.9  | 55432.7  | 64650    | 55402.5  | 52984.9  | 66101.5  | 58009.6  | TRUE |
| 187983   | 188826.7 | 138303.6 | 168835.5 | 148280.9 | 142458.4 | 189517.7 | 158519.2 | TRUE |
| 156021.9 | 179318.2 | 116293.4 | 129053   | 153960.1 | 106193.2 | 164511.6 | 162674.4 | TRUE |
| 151933.6 | 174823.5 | 148494.2 | 132421.5 | 139181.7 | 147968   | 190861.2 | 141638   | TRUE |
| 148351.2 | 158864.5 | 154773.2 | 159535.4 | 134744.8 | 141839.9 | 132089.6 | 126895.8 | TRUE |
| 168091   | 157823.8 | 195682.3 | 192022.7 | 188246.1 | 205139.9 | 214071.4 | 191775.3 | TRUE |
| 200947.3 | 173867.9 | 147829.4 | 187340.2 | 174102.7 | 142040   | 198216   | 186967.3 | TRUE |
| 56666.1  | 55325.7  | 55443.6  | 63312.4  | 62022    | 59731.8  | 75153.7  | 59531.5  | TRUE |
| 47576.7  | 41760.1  | 42906.4  | 45816.7  | 60065.9  | 55507.1  | 60697.6  | 43912.7  | TRUE |
| 193180.3 | 248645.9 | 162564.3 | 237277.1 | 269578.5 | 216230.2 | 241478.1 | 260034.4 | TRUE |
| 86099.5  | 87910.7  | 97711.8  | 109868.1 | 89528.5  | 74322    | 113265.4 | 107204   | TRUE |
| 109927.2 | 104442.7 | 87440.1  | 132634.2 | 116585   | 119792.1 | 131238   | 135201.3 | TRUE |
| 142952.8 | 137745.1 | 130118   | 149451.3 | 158950.1 | 157395.9 | 127102   | 162706.7 | TRUE |
| 154564.8 | 142983.6 | 184755.3 | 175113.7 | 202539.9 | 167620.3 | 147681.5 | 156917.4 | TRUE |
| 55704    | 67098.3  | 36605.3  | 33733.6  | 53230.8  | 45583.9  | 48479.6  | 52899.9  | TRUE |
| 165881.4 | 214357.8 | 143972.2 | 162369   | 206604   | 167196.9 | 236889.2 | 224315.3 | TRUE |
| 79123.9  | 76670.4  | 60335.8  | 70759.5  | 117356.9 | 74617.4  | 88375.6  | 104255   | TRUE |
| 47595.1  | 45975.1  | 64034.8  | 89039.7  | 52558    | 60744.7  | 63801.5  | 48459.4  | TRUE |
| 92083.9  | 112430.7 | 112685.7 | 110579.6 | 92554.5  | 89570.9  | 104165.2 | 89181.7  | TRUE |
| 738939.4 | 939693   | 984208.1 | 1023869  | 582051.6 | 764587.7 | 935459.6 | 699407.8 | TRUE |
| 130644.2 | 152051.6 | 97290.9  | 127292.7 | 136820.3 | 112296.6 | 126610   | 121861.7 | TRUE |
| 192811.7 | 230358.8 | 134787.4 | 158770.9 | 219794.8 | 124420.3 | 225733.6 | 196809.1 | TRUE |
| 107429.3 | 128496.9 | 66370.5  | 111958.4 | 118732.7 | 91861.3  | 100841.4 | 103412.9 | TRUE |
| 372863.5 | 426338.1 | 433448   | 446844.4 | 427487.6 | 449526   | 508492.7 | 439063.9 | TRUE |
| 158986.2 | 192703.1 | 150029.5 | 201801   | 254580.2 | 190726.6 | 204415.2 | 223336.3 | TRUE |
| 74613.5  | 121019.8 | 77825.2  | 100731.3 | 120761   | 54218.1  | 53975.5  | 69842.9  | TRUE |
| 32899    | 47638.1  | 30174.6  | 35808.1  | 39807.8  | 18028    | 33959.1  | 29077.5  | TRUE |
| 512757.9 | 457323.2 | 534419.2 | 522574.9 | 551411.7 | 476737.3 | 505471.4 | 471073.7 | TRUE |

|          |          |          |          |          |          |          |          |      |
|----------|----------|----------|----------|----------|----------|----------|----------|------|
| 558377.7 | 561641.2 | 686210.7 | 714005.2 | 618002.8 | 584800.6 | 626312.9 | 573781.9 | TRUE |
| 57675.6  | 76470.3  | 70802.5  | 95432.1  | 67186.8  | 52937.2  | 35629.4  | 29670.5  | TRUE |
| 52581.8  | 82132.4  | 85114.6  | 96206    | 68106.8  | 55369.4  | 39419.1  | 64344.7  | TRUE |
| 44198.5  | 43963.9  | 46602    | 56221.3  | 57017.5  | 60282.9  | 56594    | 60468    | TRUE |
| 143411.8 | 164275.2 | 145130.5 | 159518.6 | 164097.6 | 164139.8 | 148019.5 | 143953.6 | TRUE |
| 106504.6 | 97427.3  | 77677.8  | 102276.6 | 91352.9  | 72046.5  | 111445.3 | 110477.7 | TRUE |
| 2209793  | 1893664  | 1948171  | 1962207  | 4268415  | 2146958  | 1965088  | 4520803  | TRUE |
| 188553.9 | 203369.1 | 181370.9 | 210597.9 | 212998.8 | 226817   | 212135.6 | 229880.8 | TRUE |
| 62037.9  | 59867    | 67076.7  | 56739.3  | 77320    | 66945.3  | 63389.8  | 70944.3  | TRUE |
| 62140.3  | 147766.5 | 80555.7  | 126109.4 | 167687.5 | 35843.7  | 46294.4  | 55642.4  | TRUE |
| 193313   | 199825.3 | 219050.3 | 227667.8 | 189117   | 225523.1 | 250072.5 | 239419   | TRUE |
| 132291.4 | 144172.9 | 120947.2 | 150441.3 | 105976.2 | 162442.4 | 161607.5 | 157634.9 | TRUE |

|          |          |          |          |          |          |          |          |      |
|----------|----------|----------|----------|----------|----------|----------|----------|------|
| 56774.2  | 100629.4 | 65424.8  | 82984.4  | 69196    | 51563.5  | 67585.3  | 71207.6  | TRUE |
| 199758.5 | 186920   | 148823.2 | 175519.1 | 194726.6 | 159234.9 | 226481   | 225400.5 | TRUE |
| 50319.9  | 61275    | 42845    | 71075    | 50029.7  | 38371    | 58514.1  | 57210.7  | TRUE |
| 63861.9  | 55961.1  | 58053.6  | 66287.9  | 79812.6  | 40088.1  | 59691.3  | 53899.4  | TRUE |
| 420334.9 | 388406.8 | 344210.4 | 394055.7 | 383600   | 342770.5 | 401156.8 | 411416.9 | TRUE |
| 251418.6 | 258406.9 | 228266.6 | 231812.8 | 240144.4 | 231734.4 | 244168   | 271602.2 | TRUE |

|          |          |          |          |          |          |          |          |      |
|----------|----------|----------|----------|----------|----------|----------|----------|------|
| 63659.9  | 68056.6  | 59707.5  | 87217.2  | 66228.3  | 68652.3  | 65788.7  | 104792.9 | TRUE |
| 12583.6  | 14105    | 8109.6   | 12311.1  | 29625.6  | 22181.1  | 32534.8  | 35701.9  | TRUE |
| 39561.6  | 11439.1  | 29471.3  | 42508.7  | 31983.3  | 40161.2  | 35493    | 51015.8  | TRUE |
| 316296.5 | 217118.1 | 174833.3 | 285991.7 | 271755.2 | 257763.8 | 313375   | 345186.4 | TRUE |
| 629913.5 | 562998.1 | 403407.3 | 578077   | 459155.6 | 570930.9 | 680927.3 | 687266.8 | TRUE |
| 181795.4 | 221440.2 | 168138.4 | 256760.5 | 183061.6 | 189421.6 | 191134.5 | 207511.3 | TRUE |
| 136921.3 | 195819.6 | 191991.1 | 219607.3 | 217414.2 | 174592.8 | 131320.5 | 124031.6 | TRUE |
| 170013.3 | 169516.6 | 145272.8 | 176664.8 | 175538.2 | 166854.5 | 150028   | 151821.9 | TRUE |
| 751189.8 | 689912.5 | 526422.2 | 688399   | 723815.3 | 606334.3 | 780772.1 | 826444.5 | TRUE |
| 114877.6 | 100031.1 | 89534.7  | 110117.3 | 89500.8  | 128440.2 | 129684.7 | 134346.4 | TRUE |
| 1393851  | 1272041  | 950589.3 | 1480051  | 1426465  | 1015544  | 1235599  | 1190400  | TRUE |
| 141429.6 | 171099.8 | 114494   | 154493   | 145453.4 | 110142.4 | 159135.9 | 163897.5 | TRUE |

|          |          |          |          |          |          |          |          |      |
|----------|----------|----------|----------|----------|----------|----------|----------|------|
| 204235.4 | 360762.6 | 263619.7 | 371057.8 | 337186.2 | 133672.5 | 139058.5 | 172313.2 | TRUE |
| 211350.4 | 236360.9 | 176088.1 | 231369.7 | 110280.8 | 146525   | 164218.3 | 162477   | TRUE |
| 2023079  | 1801027  | 1437723  | 1733325  | 1432856  | 1774240  | 1951975  | 2137594  | TRUE |
| 143019.1 | 131054.1 | 166470.4 | 202494.1 | 179182.1 | 193998.9 | 177110.5 | 209256.5 | TRUE |
| 93822    | 96900.6  | 107433.6 | 119998.9 | 107537.1 | 93511.5  | 93037.5  | 87576    | TRUE |
| 223182   | 276386.6 | 116738.8 | 120274.7 | 196379.7 | 110328   | 159161.7 | 186775.7 | TRUE |
| 52861.2  | 62824.1  | 45680.9  | 47631.9  | 72375.9  | 35686.7  | 57370.6  | 77490.9  | TRUE |
| 143451.2 | 164848.8 | 137552.5 | 174538   | 101717   | 147431.4 | 178091.4 | 120913.4 | TRUE |
| 875479.1 | 878294.7 | 717035.8 | 820622.3 | 1038835  | 696073.6 | 955539.4 | 901163.4 | TRUE |

|          |          |          |          |          |          |          |          |      |
|----------|----------|----------|----------|----------|----------|----------|----------|------|
| 26946.3  | 22484.7  | 21051.2  | 18159.9  | 19278.2  | 17854.7  | 18516.3  | 20565.8  | TRUE |
| 6058.1   | 18415.1  | 19585.2  | 7615.5   | 5793.7   | 11891.2  | 9299.6   | 19751.1  | TRUE |
| 60328.4  | 51389.8  | 75722.1  | 42280.6  | 66637.2  | 86528.8  | 80097.5  | 93150.3  | TRUE |
| 120527.1 | 135182.2 | 162360.2 | 95589.5  | 134699.7 | 159619.3 | 119751.4 | 118264.1 | TRUE |
| 270496.5 | 316736.5 | 353159.7 | 166320.3 | 283866   | 489616   | 310065   | 410046.7 | TRUE |
| 263773.6 | 439525.9 | 224429.8 | 323885.7 | 378861.4 | 179721.3 | 300266.7 | 194657.8 | TRUE |
| 110377.4 | 109832.2 | 93015    | 75026.4  | 96818.3  | 85728.1  | 103635.1 | 101279.4 | TRUE |
| 39745.5  | 26224.9  | 15952.5  | 43463.2  | 28875    | 32364.7  | 35344.4  | 36111.8  | TRUE |
| 32897.5  | 45132.5  | 28357.4  | 36643.1  | 36121.8  | 50152.6  | 53361.3  | 56364.2  | TRUE |
| 44891.6  | 41609.8  | 43620.7  | 40745.3  | 32982.7  | 34202.4  | 41890.4  | 31527.6  | TRUE |
| 62832.1  | 80624.1  | 69570.9  | 68435.5  | 69779    | 51479.2  | 45641.1  | 62683.4  | TRUE |
| 56936.8  | 40263.6  | 28434.1  | 35363.5  | 28986.8  | 41366.6  | 44953.1  | 44159.9  | TRUE |
| 71994.3  | 73277.8  | 80777.6  | 81190.9  | 79641.6  | 92627.2  | 93024.9  | 70900.3  | TRUE |
| 218452.8 | 201227.3 | 177573.9 | 226330.4 | 230347.8 | 196538.3 | 202093.6 | 204483.1 | TRUE |
| 566763.1 | 484870.4 | 485844.3 | 623479.4 | 596396.3 | 501414.4 | 531254.8 | 576426.8 | TRUE |
| 232227.8 | 200771.6 | 220839   | 182021.6 | 235887.6 | 213427.2 | 198127.8 | 222723.9 | TRUE |
| 264146   | 247936.4 | 290493.7 | 247011.1 | 289011.9 | 321668.7 | 301198.6 | 297337.7 | TRUE |
| 356330.3 | 338454.9 | 339189.1 | 328151.5 | 355801.4 | 364198.3 | 360427.1 | 347884.2 | TRUE |
| 376320.2 | 339586.4 | 363565.4 | 368695   | 329931.4 | 374870.9 | 400676.9 | 351160.9 | TRUE |
| 28572.5  | 62167.8  | 95912.5  | 41491.8  | 40904.9  | 25483.2  | 21729.9  | 28980.3  | TRUE |
| 1061342  | 970658.9 | 840860   | 974518.6 | 1079737  | 893331   | 1022605  | 1198864  | TRUE |
| 273080.5 | 269371.9 | 226883.8 | 286420.9 | 226711.6 | 247569   | 265435   | 251944.5 | TRUE |
| 241530   | 219039.4 | 238603.7 | 280470.1 | 282852.2 | 248246.7 | 257485.6 | 271031.8 | TRUE |
| 165253.2 | 146049   | 184104.7 | 283824.4 | 227724   | 200937.3 | 227145   | 238707.9 | TRUE |
| 265485.8 | 200976.1 | 271301.1 | 220937.5 | 234679.5 | 297524.1 | 231426.5 | 271871.2 | TRUE |
| 169178.3 | 104132.2 | 95145.3  | 111194.6 | 100314.6 | 97272.8  | 98415.4  | 106558.1 | TRUE |
| 96492.4  | 50117.1  | 59020.6  | 89621.8  | 69970.4  | 102174.3 | 66369.6  | 95646.3  | TRUE |
| 162288.3 | 138485   | 119968.2 | 105768.5 | 110797.9 | 137661.6 | 157157   | 182765.9 | TRUE |
| 45199.3  | 50640.9  | 48471.6  | 50417.3  | 57209.4  | 64875.9  | 55325.6  | 64646.8  | TRUE |
| 70887.1  | 57995.7  | 51547.7  | 42892.1  | 100395.7 | 68615.2  | 66616.3  | 101184.5 | TRUE |
| 28889.9  | 29327.7  | 36170.7  | 38640.6  | 50154.9  | 34181    | 35803.7  | 31647.1  | TRUE |
| 711227.5 | 705289.9 | 576471.5 | 669702.6 | 683794.3 | 622655.9 | 689105.6 | 711631   | TRUE |
| 343402.7 | 290183.9 | 371686.7 | 351478.4 | 334133.1 | 370029.4 | 346063.9 | 331706.6 | TRUE |
| 785333.3 | 954450.7 | 807070.7 | 784399.6 | 795066.8 | 754928.6 | 760824   | 800389.6 | TRUE |
| 300203.1 | 336672.5 | 288364.6 | 296909.2 | 209246.4 | 274897   | 221183.3 | 235863.2 | TRUE |
| 364213.2 | 390420.3 | 370510.8 | 401337.7 | 440694.6 | 362487.2 | 361375.9 | 361959.5 | TRUE |
| 350098.7 | 318095.8 | 407602.5 | 429910.2 | 350147.6 | 440549.7 | 398643.3 | 347518.9 | TRUE |
| 442393.3 | 505997   | 449784.8 | 486196.8 | 455359.5 | 490679.9 | 591989.4 | 491518.8 | TRUE |
| 190810.2 | 185046.4 | 208724.7 | 163761.9 | 156607.3 | 200415.6 | 175855.3 | 171452.8 | TRUE |
| 152679.6 | 105168.4 | 92400.3  | 126918.7 | 126914   | 141629   | 131454.7 | 175977.6 | TRUE |
| 102346.2 | 71287    | 57998.2  | 108605.1 | 73709.4  | 98054.6  | 103754.3 | 150542.4 | TRUE |
| 268673   | 215950.9 | 186785.7 | 264995.4 | 261875.2 | 245233.4 | 278844   | 346671.5 | TRUE |
| 119156.5 | 92977.2  | 70630.1  | 120992.4 | 122757.5 | 100010.7 | 127072.6 | 163722.9 | TRUE |

|          |          |          |          |          |          |          |          |      |
|----------|----------|----------|----------|----------|----------|----------|----------|------|
| 405008.9 | 330590.4 | 294232.8 | 364505.8 | 335219.5 | 434536   | 442698.3 | 424384.7 | TRUE |
| 180000.7 | 173819.3 | 155625.6 | 191119.1 | 160412.2 | 206737.8 | 188940.7 | 241479.8 | TRUE |
| 183069.8 | 195303.1 | 143415.4 | 198838.8 | 189080   | 224916.2 | 188341.4 | 228561.4 | TRUE |
| 30222.3  | 27844    | 21684.6  | 33155.1  | 24510.4  | 31014.3  | 32608.2  | 11089.3  | TRUE |
| 86276.6  | 79549    | 79371.6  | 106274.7 | 78674.5  | 70252.1  | 66684.1  | 82758.3  | TRUE |
| 55388    | 64466.4  | 76999    | 62448.4  | 54979.7  | 46093.5  | 66752.4  | 53889    | TRUE |
| 174452.2 | 187526.9 | 143255.7 | 198653.9 | 151038.8 | 186055.6 | 207442.8 | 202486.2 | TRUE |
| 33849.5  | 73638.3  | 110923.1 | 54214.2  | 63230.2  | 51783.8  | 44930.4  | 47480.4  | TRUE |
| 68843.2  | 57307.7  | 61407.9  | 64980.7  | 46187.8  | 70997.8  | 74268.2  | 68641.7  | TRUE |
| 56524.2  | 43598.5  | 51203.1  | 44857    | 49888.8  | 47991.5  | 47495.4  | 54018.4  | TRUE |
| 369085.7 | 525384.7 | 267574.5 | 307283.9 | 278153.4 | 280367.4 | 296516.3 | 366337.7 | TRUE |
| 244865.7 | 308065.2 | 271693.5 | 284450.3 | 237099.8 | 311503   | 334799.8 | 234497.8 | TRUE |
| 378306.7 | 298093   | 499684.2 | 493292.4 | 328527.3 | 367010.7 | 339147.2 | 344466.6 | TRUE |
| 712807.2 | 566719.3 | 874326.2 | 954669.9 | 596500.9 | 763866.3 | 642150.8 | 632195.7 | TRUE |
| 22926.9  | 39078.9  | 22120.5  | 41716    | 23554.6  | 31615.8  | 28296.6  | 16731    | TRUE |
| 240995.6 | 221135.4 | 275153.4 | 285828.1 | 200355.9 | 392540.1 | 229754.1 | 214495.2 | TRUE |
| 79326    | 79678.7  | 48505.5  | 73214.7  | 57962.6  | 66926.3  | 118282.3 | 72458.1  | TRUE |
| 103822.5 | 103879.9 | 57246    | 106368.3 | 69685.8  | 81057    | 140886.9 | 101083.9 | TRUE |
| 198701   | 126077.5 | 174929.6 | 220505.2 | 189659.3 | 188288.6 | 159239   | 227788.3 | TRUE |
| 466241.5 | 345647.1 | 532019.6 | 608525.1 | 350083   | 496307.4 | 397502.6 | 523684   | TRUE |
| 201235.2 | 164230.3 | 216427.6 | 246007   | 153921.5 | 224075.6 | 194086.9 | 222306.7 | TRUE |
| 78362.2  | 59088.2  | 50246    | 64271.5  | 72575.1  | 81725.4  | 101069.5 | 89152.9  | TRUE |
| 194970.4 | 132911.1 | 190547.8 | 250644.6 | 152595.7 | 225177.2 | 224842.7 | 217731.7 | TRUE |
| 58472.4  | 62643.1  | 51783.7  | 72199.4  | 50626.2  | 57656.2  | 67183.7  | 74881.3  | TRUE |
| 167034.2 | 124390.8 | 229717.2 | 272822.1 | 138899.7 | 191523.3 | 187097.6 | 217402   | TRUE |
| 496876.2 | 503519.9 | 338327.9 | 420490.3 | 378628.4 | 355340.8 | 437932.7 | 380103   | TRUE |
| 906253.5 | 862906.1 | 888608.8 | 944327.3 | 743293.8 | 832495.1 | 782817.5 | 793170.9 | TRUE |
| 647558.9 | 505417   | 712816.9 | 652715.9 | 518674.2 | 646822.7 | 495140.8 | 640833.8 | TRUE |
| 341868.3 | 275821.2 | 376658.9 | 371610.5 | 295386.2 | 309193   | 265475.8 | 343876.5 | TRUE |
| 2620048  | 2374735  | 2032129  | 2369695  | 2224843  | 2429537  | 2475132  | 2405783  | TRUE |
| 201517.7 | 183206.5 | 172036.2 | 184496.3 | 179394.9 | 228325   | 205661.1 | 213492.9 | TRUE |
| 114260.9 | 335578.6 | 175717.3 | 332923.5 | 361179   | 52492.3  | 56067.5  | 69793.6  | TRUE |
| 13140655 | 11499461 | 10998626 | 12285273 | 11584240 | 12405951 | 12277331 | 13110401 | TRUE |
| 454140.2 | 420318.1 | 423231.4 | 431469.7 | 438056.7 | 453495.2 | 464114.9 | 459575.4 | TRUE |
| 1332474  | 1138228  | 1209768  | 1281427  | 1177461  | 1306357  | 1159336  | 1283335  | TRUE |

|          |          |          |          |          |          |          |          |      |
|----------|----------|----------|----------|----------|----------|----------|----------|------|
| 91965.3  | 116540   | 62199.3  | 67100.8  | 79974.9  | 70222.9  | 112892.2 | 82568.9  | TRUE |
| 193263.7 | 156928.6 | 313668   | 302435.5 | 150818   | 178541   | 163021   | 189530.9 | TRUE |
| 429452.4 | 378544.4 | 537391.4 | 559492.1 | 368751.9 | 393151.8 | 387486   | 387624.5 | TRUE |
| 55869.2  | 77380.8  | 62659.9  | 78003.1  | 75226.1  | 53442.5  | 62745.2  | 68742.2  | TRUE |
| 205715   | 234184.2 | 182865.4 | 254082.9 | 227173.8 | 175756.6 | 241693.7 | 273874.3 | TRUE |
| 272203.5 | 276408.7 | 200411.8 | 294329.5 | 286085.9 | 214274.2 | 322136.5 | 305761.1 | TRUE |
| 252584.8 | 273486.9 | 174805.1 | 280813.1 | 300113.8 | 195992.9 | 299041.6 | 292656.3 | TRUE |
| 91644.2  | 82391.3  | 64832.4  | 89210    | 103616.2 | 63117.7  | 109824.1 | 107759.4 | TRUE |
| 39102.3  | 47308.8  | 37826.9  | 31024.9  | 46014.7  | 20543.8  | 41376.1  | 37158.6  | TRUE |
| 37712.9  | 30764.5  | 38887.2  | 25623.5  | 42658.4  | 30794.9  | 44305.7  | 32834.3  | TRUE |
| 66951.6  | 110745.1 | 70673    | 94544    | 76973.8  | 54850.5  | 64424.9  | 56303    | TRUE |
| 30468.2  | 44120.5  | 27686.9  | 32221.7  | 47219.2  | 14873.3  | 12950.4  | 10936.9  | TRUE |
| 19460.3  | 4755.1   | 7251.4   | 9888.3   | 13824.9  | 10909.6  | 11949    | 12338.5  | TRUE |
| 232606.9 | 227020.2 | 182508.9 | 216460.2 | 226120.8 | 257059.5 | 241313.4 | 266936.5 | TRUE |
| 255807.3 | 173061.3 | 179083.6 | 238265.6 | 230662.9 | 234143.6 | 276716.3 | 264791.7 | TRUE |
| 41100.3  | 23161.4  | 9856.5   | 31507.5  | 19364.8  | 44873.8  | 45618.7  | 46154.6  | TRUE |
| 70538.1  | 73422.4  | 54590.8  | 88723.7  | 67060    | 61204.3  | 86822.4  | 79791.4  | TRUE |
| 78648    | 43975.2  | 73049.4  | 62691.2  | 43347.6  | 64730.2  | 49886.8  | 61504.3  | TRUE |
| 204952.3 | 259073   | 158349   | 193870.9 | 175815.2 | 155975.7 | 225780.3 | 182218.6 | TRUE |
| 356154.3 | 422955.7 | 588801.2 | 379132.6 | 336338   | 303629.4 | 338829.1 | 356458   | TRUE |
| 104997.8 | 103731.5 | 111272.1 | 115693   | 109730.4 | 108707.2 | 91665.7  | 105075.3 | TRUE |
| 184463   | 184771.6 | 156386.6 | 186727.3 | 166731.3 | 181018.3 | 150558.4 | 180632.1 | TRUE |
| 135887.9 | 125073.2 | 127730.8 | 124924.3 | 118864.9 | 148773.1 | 168427.8 | 142901.5 | TRUE |
| 404223.4 | 366243   | 394023.7 | 398680.1 | 385523   | 435845.8 | 399722   | 442017.1 | TRUE |
| 339408.6 | 333931.7 | 241289.2 | 308013.8 | 372204.2 | 307591.7 | 366041.4 | 331242.4 | TRUE |
| 136114.7 | 147380.2 | 135014.5 | 163613.2 | 152549   | 145116.8 | 192165.3 | 182059.2 | TRUE |
| 92792.7  | 82519    | 102567.7 | 144808.7 | 117211.2 | 125553.1 | 130264.3 | 151889.6 | TRUE |
| 70086.3  | 79781.9  | 80100.7  | 108393   | 109739.3 | 86145.4  | 94583.1  | 117208.2 | TRUE |
| 327385.8 | 401154.3 | 403279.9 | 387110.7 | 377204.6 | 381677.2 | 402658.2 | 410644   | TRUE |
| 282757.4 | 233328.7 | 289378.1 | 345652   | 284053   | 333988.9 | 299801.2 | 355442   | TRUE |
| 53463.5  | 55244.8  | 50235.6  | 50272.4  | 55352.7  | 76676.8  | 66069.7  | 66068.8  | TRUE |
| 366398.9 | 382903.4 | 289893.5 | 366015.7 | 395236   | 315100.8 | 409458.6 | 360530.6 | TRUE |
| 303707   | 261069.5 | 307306.1 | 340582   | 265438.5 | 269430.4 | 286778.6 | 269924.3 | TRUE |
| 542733.3 | 441252.9 | 538905   | 509663.6 | 543477   | 493838.6 | 471930.1 | 476467.1 | TRUE |
| 325214   | 369701.8 | 297832.9 | 304973.8 | 405105.3 | 304791.1 | 409275.4 | 389040.6 | TRUE |
| 103147.6 | 83691.4  | 75939.5  | 85626.4  | 93682    | 99064.9  | 83293.5  | 94562    | TRUE |
| 70453    | 105192.6 | 82214.7  | 86817.5  | 78389.3  | 89729.6  | 85568.4  | 79551.2  | TRUE |
| 35027.4  | 13973.7  | 37404.9  | 39339.7  | 39741.7  | 46372.8  | 46676.4  | 27796.3  | TRUE |
| 99041.6  | 107304.6 | 95588.8  | 137344.4 | 129625.1 | 100021.8 | 97947.7  | 94536.5  | TRUE |
| 158845.4 | 150459.4 | 96825    | 160907.3 | 144938.3 | 145181.5 | 163876.4 | 142400.7 | TRUE |
| 172408.5 | 173104.9 | 168650.4 | 185097.1 | 179081.9 | 180574.7 | 202586.4 | 191817.8 | TRUE |
| 37124.1  | 48854.7  | 39778.6  | 50030.5  | 61813.2  | 48074.1  | 67208.3  | 63611.1  | TRUE |
| 61443.3  | 48389    | 53125.1  | 71281.1  | 63365.6  | 58183.1  | 62940.9  | 56409.2  | TRUE |
| 63955.3  | 69114.5  | 58594.8  | 62342.5  | 61187.3  | 74813.3  | 69873.9  | 91358.1  | TRUE |
| 64597.1  | 72530.4  | 54888.5  | 52682    | 55347    | 56409.4  | 74199.5  | 78986.8  | TRUE |

|          |          |          |          |          |          |          |          |      |
|----------|----------|----------|----------|----------|----------|----------|----------|------|
| 92202.7  | 91315.7  | 94064.6  | 92748.5  | 88531.6  | 96119    | 89128.8  | 93171.2  | TRUE |
| 68100.3  | 67720    | 67997.1  | 51878.8  | 59620    | 72997    | 54494    | 57591.6  | TRUE |
| 219381.4 | 209784.1 | 212269.5 | 247404.1 | 217501.2 | 228268.4 | 238163.6 | 244620   | TRUE |
| 486754.7 | 442972.7 | 369186.7 | 505536.6 | 428495.3 | 392054.8 | 446808.1 | 430624.7 | TRUE |
| 181297.2 | 170127.6 | 199629.6 | 221926.7 | 178207.1 | 190742.6 | 169677.1 | 190544.2 | TRUE |
| 187808.3 | 157994.1 | 147618.3 | 199217.5 | 193344.9 | 203400.6 | 178093.1 | 192443.6 | TRUE |
| 52325.4  | 55746.7  | 49432.3  | 56434.2  | 70204.6  | 51970.5  | 64806.7  | 60054.2  | TRUE |
| 54207.3  | 48008.2  | 62738    | 70218.1  | 68674    | 67739.5  | 58159.2  | 68117.7  | TRUE |
| 292361.6 | 277377.3 | 297200.3 | 313234.6 | 289445.4 | 359331.6 | 318979.1 | 345729.6 | TRUE |
| 20273.7  | 18495.9  | 9217.8   | 24826.9  | 8429.9   | 8533.2   | 9561.8   | 30078.5  | TRUE |
| 354307.1 | 328367.2 | 296267.8 | 275050   | 345227.2 | 325125.4 | 287130.4 | 355768.2 | TRUE |
| 1047982  | 654587.8 | 785000.3 | 819785.4 | 1118706  | 1073217  | 736197.7 | 1023082  | TRUE |
| 76903.1  | 70159.4  | 99986.1  | 74023.5  | 70858.1  | 101024.1 | 69289    | 49417    | TRUE |
| 271161.7 | 189967   | 300752.9 | 242907.9 | 200508   | 339913.6 | 244258.4 | 216019.5 | TRUE |
| 154108.1 | 133090.1 | 184381.6 | 142493.7 | 141311.4 | 172963.6 | 148090.5 | 130361.5 | TRUE |
| 60829.7  | 47692.6  | 106439.8 | 92314.2  | 72755.9  | 108955.1 | 80785.7  | 84303.1  | TRUE |
| 37095.8  | 26004.3  | 36110.6  | 28406.2  | 24301.6  | 40032.9  | 31877.1  | 33455.6  | TRUE |
| 43898.6  | 66115.3  | 68490    | 70239.9  | 84816.7  | 41081.6  | 34621.6  | 30633.5  | TRUE |
| 79342.3  | 59078.2  | 76522.9  | 99456.2  | 108628   | 89060.9  | 102427.2 | 87363.7  | TRUE |
| 82219.8  | 74822.2  | 69439    | 83814.6  | 61143.4  | 76035.3  | 57030.7  | 87442.2  | TRUE |
| 63352    | 48326.1  | 65382.4  | 60830.9  | 62705.1  | 72663.5  | 51982.9  | 50302    | TRUE |
| 33563.3  | 26106.9  | 35236.7  | 29769.8  | 22956.8  | 45533.1  | 41296.5  | 31940.9  | TRUE |
| 102056.1 | 85930.9  | 93990.7  | 130273.4 | 98885.2  | 109218.6 | 104563.5 | 112006   | TRUE |
| 88988.8  | 77704.7  | 79432.1  | 79263.5  | 107061   | 114338.5 | 78374.4  | 95041.6  | TRUE |
| 348724.7 | 320453.5 | 433339.5 | 368484.6 | 277625.3 | 477303   | 325338   | 245520.4 | TRUE |
| 434143.4 | 329472.9 | 538308.1 | 346643.1 | 237865.8 | 527081.1 | 266896.9 | 246121.6 | TRUE |
| 495896.2 | 319657.7 | 718566.6 | 665703.4 | 485168.4 | 806123.9 | 495554.5 | 491857.1 | TRUE |
| 254908.5 | 194483.2 | 397684   | 341782   | 263895.8 | 427630.1 | 248842.5 | 225174.2 | TRUE |
| 130989.8 | 111889.4 | 99360    | 126283.5 | 148213   | 137998.6 | 127562.5 | 144625.9 | TRUE |
| 250587   | 170054.9 | 200190.5 | 161807.7 | 155659.4 | 188617.3 | 157797.8 | 203565.2 | TRUE |
| 350390   | 350352.1 | 308583.3 | 292252.4 | 284788.6 | 364871.6 | 277707.3 | 279187.3 | TRUE |
| 178339   | 129850.7 | 179789.3 | 166942.8 | 165464   | 203542.2 | 135719.2 | 169885.8 | TRUE |
| 367167.5 | 327660.3 | 270539.2 | 301747.4 | 349795   | 424310.8 | 338749.6 | 432782.2 | TRUE |
| 574456   | 418991   | 429276.6 | 477941.4 | 497489.1 | 480288.3 | 407973.8 | 516050.7 | TRUE |
| 129114.4 | 121637.9 | 167335.6 | 162532.3 | 142705.6 | 154105   | 127548.2 | 162989.7 | TRUE |
| 71507.5  | 122592.5 | 83710    | 105785.3 | 99797.5  | 67965.6  | 74887.6  | 71845    | TRUE |
| 29757.5  | 34917.7  | 36889.3  | 41844.9  | 42592.1  | 48408.7  | 41114.3  | 53300.1  | TRUE |
| 122955.6 | 113623.5 | 79874.3  | 103916.6 | 96538.6  | 119463.8 | 120749.7 | 129699.7 | TRUE |
| 71220.5  | 58069.9  | 71279.7  | 54621.4  | 75749.9  | 77468.8  | 75356.9  | 75436.3  | TRUE |



|          |          |          |          |          |          |          |          |      |
|----------|----------|----------|----------|----------|----------|----------|----------|------|
| 195149.9 | 134928.7 | 290083   | 244975.2 | 172573.7 | 305494.2 | 147583.2 | 206792   | TRUE |
| 25116.7  | 22175.9  | 31851    | 33561    | 22764.1  | 25249.9  | 30747.7  | 33171.4  | TRUE |
| 24373.5  | 25020.1  | 25826.2  | 30334.5  | 25803.2  | 28505.9  | 23661.6  | 25161.6  | TRUE |
| 83094.7  | 68702.7  | 77889.7  | 75430.5  | 66910.6  | 69770.9  | 64215.7  | 77163.3  | TRUE |
| 265678   | 236347.6 | 229001.5 | 233629.8 | 214112.8 | 234104.9 | 198456   | 210284.4 | TRUE |
| 289185.3 | 252645.4 | 325488.4 | 359419.6 | 304410.4 | 364261.1 | 288172.7 | 312775.3 | TRUE |
| 518734.8 | 438774.3 | 497216.2 | 489534.4 | 497738.4 | 564162.2 | 499053.6 | 551430.7 | TRUE |
| 78248.8  | 58878.8  | 53980.5  | 80065.7  | 44737.3  | 88266.9  | 78961.7  | 80730.4  | TRUE |
| 61778    | 52328.5  | 41077.7  | 80812    | 35107.6  | 67738.5  | 67564.4  | 76620.8  | TRUE |
| 33859.7  | 33119.8  | 26032.2  | 47653.2  | 26306.9  | 51290    | 46950.9  | 35459.1  | TRUE |
| 68955.2  | 58294.8  | 79656.1  | 58090.1  | 57536.9  | 89347    | 75076.3  | 62201.4  | TRUE |
| 36787.6  | 40986    | 35778.5  | 41945.6  | 36540.5  | 45933.5  | 39496    | 39841.8  | TRUE |
| 89863.7  | 75031.9  | 104884.4 | 91919    | 89180.4  | 118938.4 | 84014.1  | 108155.7 | TRUE |
| 61714.7  | 59212.5  | 58431.6  | 72089.3  | 47811.2  | 78037.8  | 78252.9  | 58352.6  | TRUE |
| 471546.2 | 423938.3 | 377633.6 | 401082.9 | 315367.6 | 364592.7 | 356690.2 | 318717.2 | TRUE |
| 148922.4 | 127052.1 | 173909.9 | 220884.9 | 161760.9 | 171928.5 | 178124.6 | 166258.2 | TRUE |
| 421273.1 | 455854.2 | 491368   | 563151.7 | 433899.3 | 482693.5 | 610866.8 | 462699.8 | TRUE |
| 77261.2  | 101032.1 | 81941.1  | 142406.6 | 137678   | 61671.5  | 52836.5  | 87150.3  | TRUE |
| 395028.6 | 316652.9 | 396451.8 | 405513.7 | 410941.4 | 440710.9 | 341247.5 | 406218.8 | TRUE |
| 1364049  | 1050187  | 1227971  | 1301608  | 1393038  | 1561821  | 1156997  | 1502566  | TRUE |
| 188350.9 | 162530.6 | 195548.6 | 203234.5 | 191395.8 | 252048.9 | 196312.3 | 265674.1 | TRUE |
| 35716.1  | 34035.2  | 28464.1  | 50281    | 26662.9  | 33699.6  | 42741.6  | 29464.3  | TRUE |
| 10667.9  | 12915.4  | 16813.8  | 25908.9  | 23001.9  | 39595.6  | 27891.5  | 28975.8  | TRUE |
| 25768.6  | 10062.8  | 17673.4  | 37235.4  | 8823.8   | 39288.5  | 35005.8  | 34608.2  | TRUE |
| 67916.9  | 36232.9  | 59410.9  | 41165.6  | 54730.3  | 91687.6  | 52139.4  | 80811.3  | TRUE |
| 31829.4  | 11810.5  | 41211.7  | 18289.3  | 26578.7  | 44026.2  | 10787.2  | 12349.7  | TRUE |
| 32701    | 26275.2  | 25478.2  | 32140.1  | 48948.2  | 29682.6  | 40409.8  | 42150.1  | TRUE |
| 18746.9  | 37433.5  | 28098.9  | 30800.6  | 37620.5  | 35019.4  | 14996.3  | 37687.8  | TRUE |
| 43271.1  | 46551.8  | 40653.4  | 50827    | 50060.1  | 40905.5  | 37667.1  | 57062    | TRUE |
| 767340.8 | 643682   | 729147.7 | 764016.8 | 762226.3 | 739159.5 | 667779.6 | 735553.7 | TRUE |
| 228186   | 182668.8 | 229910.7 | 234699   | 174669.4 | 204128.1 | 172028.7 | 176772   | TRUE |
| 268286.8 | 221496.8 | 238759.5 | 269042.8 | 290206.5 | 319159.8 | 218251.9 | 292885.8 | TRUE |
| 704545.4 | 667677.1 | 587123.3 | 558765.2 | 670906.3 | 749441.8 | 608657.7 | 734805.6 | TRUE |
| 197208.6 | 163962.8 | 134739.1 | 183989.6 | 134027.3 | 248102.7 | 218684.9 | 197103.4 | TRUE |
| 95281.5  | 82381.8  | 77917.5  | 101508.9 | 109972.5 | 124127.5 | 102985   | 116023.3 | TRUE |
| 30417    | 20622.4  | 16975.2  | 10384.7  | 25657.6  | 33035.8  | 28715.3  | 34219.1  | TRUE |
| 488884.8 | 412564.2 | 339221.2 | 440791.9 | 425181.8 | 581863.7 | 537809.6 | 716613.2 | TRUE |

|          |          |          |          |          |          |          |          |      |
|----------|----------|----------|----------|----------|----------|----------|----------|------|
| 427984.3 | 350381.4 | 436070.6 | 574859.2 | 482379.4 | 401074.6 | 373545.8 | 430099.7 | TRUE |
| 1221021  | 927067.4 | 1141770  | 1429506  | 1358380  | 1205413  | 1053856  | 1363096  | TRUE |
| 82011.7  | 67577    | 80708.4  | 112147.5 | 91611    | 86914.9  | 93647    | 97017.9  | TRUE |
| 137486.9 | 147617.6 | 140339.1 | 140874.1 | 147255.3 | 92202.3  | 117190.6 | 139729.3 | TRUE |
| 428104.2 | 335585.3 | 309912.1 | 387277.5 | 344523.7 | 325423.5 | 332739.1 | 349610.9 | TRUE |
| 493007.9 | 502721.6 | 404541.3 | 446861.3 | 447698.9 | 411576.6 | 440947.3 | 401286.4 | TRUE |
| 103962.2 | 92466.7  | 138238.2 | 139391.9 | 117584.8 | 127969.5 | 114789.6 | 110208   | TRUE |
| 337547.2 | 270491.4 | 329058.1 | 300077   | 354927.9 | 361137.4 | 304649.1 | 346098.5 | TRUE |
| 1001818  | 836155.3 | 809095.7 | 1103095  | 871868.6 | 846100.5 | 961350.3 | 854734.2 | TRUE |
| 1055453  | 921594.7 | 1076149  | 1013322  | 860252.2 | 1172893  | 917114   | 1090063  | TRUE |
| 1318059  | 1143359  | 1279472  | 1206672  | 1184958  | 1284397  | 1058045  | 1314791  | TRUE |
| 207594.9 | 216987.4 | 183082.6 | 226269.3 | 196406.5 | 215422.3 | 203273.5 | 222289.8 | TRUE |
| 746796.6 | 625960.2 | 641144.6 | 698340.6 | 708981.6 | 856817.9 | 715275.6 | 750603.3 | TRUE |
| 275172.6 | 221460.5 | 126317.7 | 459606.4 | 208985.7 | 227633   | 268901.9 | 264688.1 | TRUE |
| 186457   | 141177   | 129315.1 | 165482.8 | 175393.6 | 195517.9 | 197931.8 | 210188.3 | TRUE |
| 642386.5 | 495371.2 | 521769.2 | 649218.6 | 455053.3 | 1374245  | 534585.9 | 1291552  | TRUE |
| 576068.4 | 379836.4 | 309543.3 | 432584.3 | 469355.5 | 533328.7 | 566981.1 | 620195.7 | TRUE |
| 46253.4  | 28870.6  | 36338.9  | 38966.4  | 47844.6  | 57527.8  | 50551.4  | 61201.1  | TRUE |
| 70326.2  | 45561.6  | 45856.7  | 50413.7  | 58258    | 58206.8  | 73553.5  | 76821.2  | TRUE |
| 220941   | 237462.2 | 163976.6 | 172296.3 | 237015.7 | 182319   | 270665.7 | 207261.7 | TRUE |
| 847954.8 | 946005.2 | 565806.8 | 547781.2 | 701672.2 | 508609.2 | 761845.5 | 722472.7 | TRUE |
| 237530.2 | 237462   | 136291.4 | 160812.3 | 196293   | 138496   | 171940.3 | 187948.2 | TRUE |
| 610874   | 617619.4 | 309126.4 | 353699.5 | 448082.2 | 322281.6 | 466206.9 | 430910.5 | TRUE |
| 916530.7 | 836413.9 | 710646.7 | 885973.5 | 1014684  | 750749.4 | 1001454  | 965723.7 | TRUE |
| 340431.5 | 409830.2 | 276663.5 | 381027   | 375236.3 | 322461.4 | 453166.6 | 398016.2 | TRUE |
| 416681.5 | 422189.8 | 514545.6 | 513948.4 | 312786.3 | 433428.7 | 479743.4 | 419998.7 | TRUE |
| 42924    | 74026.7  | 82028.9  | 100180.3 | 67064.8  | 41941.9  | 40845    | 44290.1  | TRUE |
| 9525.1   | 18856.5  | 7691.5   | 15759.1  | 14444.2  | 9395.3   | 18910.5  | 10503    | TRUE |
| 89343.9  | 97542.6  | 67387.5  | 71489.6  | 91547.4  | 58631.4  | 86668.5  | 79319.7  | TRUE |
| 361471.1 | 391862.7 | 249671.6 | 302982.6 | 353018.8 | 249114.3 | 351425.8 | 333300   | TRUE |
| 279187.5 | 256329.4 | 259011.5 | 316978.9 | 314576.5 | 258981.3 | 321046.1 | 324097.3 | TRUE |
| 317341.2 | 289154.3 | 377988.1 | 376257.2 | 272566   | 348856.4 | 355918.7 | 309259.2 | TRUE |
| 559612   | 646532.8 | 727166.3 | 690876.1 | 538404.2 | 605757.1 | 716922.9 | 648659.1 | TRUE |
| 34715    | 37432.2  | 26393.2  | 9838.2   | 22946.9  | 33480.5  | 36145.4  | 28068.2  | TRUE |
| 68659.8  | 79485.1  | 73385.9  | 74322.2  | 84513.6  | 96130.7  | 60389.5  | 99917.3  | TRUE |
| 119331.9 | 135387   | 104345.2 | 100325.6 | 66458.4  | 111546.8 | 144389.1 | 88706.8  | TRUE |
| 81550.6  | 88380.9  | 74207.2  | 111039.9 | 81683.2  | 90194.3  | 100204.6 | 75136.8  | TRUE |
| 118943.2 | 112372.7 | 113472.2 | 124793.4 | 147267.7 | 118427.6 | 126609.3 | 139291.1 | TRUE |
| 2330023  | 2348224  | 2098472  | 2287616  | 2462303  | 2139817  | 2675498  | 2358329  | TRUE |
| 1119191  | 1214400  | 1043982  | 978380.8 | 1404149  | 1020127  | 1294236  | 1314424  | TRUE |
| 257135.9 | 286598   | 222709.7 | 222059.6 | 323078   | 238193.2 | 330607.9 | 360030.9 | TRUE |

|          |          |          |          |          |          |          |          |      |
|----------|----------|----------|----------|----------|----------|----------|----------|------|
| 2859103  | 3387367  | 3241696  | 3284424  | 2729649  | 2481141  | 3649047  | 2709948  | TRUE |
| 64173.8  | 71402.3  | 57175.2  | 62255.3  | 62050.8  | 60958.4  | 75298.8  | 59899.8  | TRUE |
| 103328.9 | 146930.5 | 133658.1 | 154851.5 | 111544.5 | 79607.8  | 171888.4 | 113490.3 | TRUE |
| 1114593  | 1134775  | 809592.2 | 1048251  | 1108546  | 874435.5 | 1182634  | 1126407  | TRUE |
| 138490.8 | 151757.4 | 120064.6 | 136962.9 | 181846.3 | 138285.3 | 153595.2 | 154781.4 | TRUE |
| 350620.1 | 345009.7 | 303714.8 | 352840.6 | 376170.6 | 331651.4 | 392400.4 | 396993.7 | TRUE |
| 69986.2  | 56622.5  | 64197.8  | 60894.2  | 55665    | 61896.5  | 66829.8  | 76312.1  | TRUE |
| 48038.2  | 38899.4  | 37712.9  | 52592.6  | 50619.4  | 43166.7  | 58311.1  | 62809.3  | TRUE |
| 91268.8  | 76169.6  | 56238    | 69885.6  | 93574.4  | 95299.9  | 77167.7  | 106701.6 | TRUE |
| 69442.6  | 60428.4  | 55039.9  | 53226    | 54329.6  | 81159    | 93928.8  | 72520.3  | TRUE |
| 27005.7  | 32131.3  | 35836.4  | 27062.6  | 36380.1  | 34575.1  | 47592.8  | 38799.1  | TRUE |
| 157480.5 | 147888   | 102875.6 | 152132.9 | 144349.3 | 144524.3 | 161041.7 | 174156.5 | TRUE |
| 91552.7  | 104739   | 60669.9  | 101059.5 | 93976.2  | 88914.6  | 126902.5 | 131554.7 | TRUE |
| 451435.1 | 379669.7 | 392206.6 | 511342.5 | 345306.9 | 414584.9 | 439912.2 | 439500.3 | TRUE |
| 181757.3 | 177335.9 | 181147.4 | 213364.8 | 167933.3 | 267147   | 221495.3 | 246789.4 | TRUE |
| 3044542  | 2649034  | 2611398  | 3425109  | 2184721  | 3154208  | 3382037  | 3231451  | TRUE |
| 12361    | 17713.5  | 9018.1   | 13947.1  | 23766.7  | 22546.8  | 14634.2  | 27150.6  | TRUE |
| 165893.1 | 179733.8 | 203096.6 | 196396.7 | 199433.7 | 184333.8 | 203729.2 | 182812   | TRUE |
| 194652.3 | 191558.9 | 190232.1 | 205309.5 | 195753.3 | 191610.9 | 231870.5 | 247523   | TRUE |
| 123026.9 | 143729.9 | 141835.7 | 132178   | 97426.1  | 109455.2 | 141367.1 | 119584.1 | TRUE |
| 427802.8 | 471259.8 | 360725.2 | 439093.8 | 541481.1 | 434195.7 | 489269.6 | 529098.7 | TRUE |
| 76404.7  | 89295.4  | 67840.4  | 95324.8  | 88097.5  | 87298.2  | 84621.3  | 97731.4  | TRUE |
| 101390.4 | 111688.8 | 97120.4  | 117702.6 | 109137.6 | 104552.8 | 105783.7 | 119746.7 | TRUE |
| 203398.8 | 207612.9 | 236101.1 | 256979   | 237142.1 | 200881.1 | 223546   | 209922.5 | TRUE |
| 59228.2  | 56153    | 70541.4  | 68791.6  | 46477.8  | 81949.2  | 50258.7  | 65166.7  | TRUE |
| 68305.2  | 88204    | 56766.3  | 55194.8  | 79088    | 61026.3  | 86837.5  | 77248.6  | TRUE |
| 191370.2 | 156481.1 | 144552.9 | 132892.9 | 197546   | 156421.7 | 199602.8 | 197003.8 | TRUE |
| 362205.5 | 364329   | 249458.9 | 335372.9 | 354507   | 300103.8 | 358255.9 | 335863   | TRUE |
| 548238.5 | 478817.2 | 598240.3 | 626572   | 488243.9 | 497067.7 | 546929.9 | 467332.8 | TRUE |
| 24403.4  | 31301.9  | 4650.5   | 25911.2  | 28670.2  | 7591.2   | 13019.3  | 26529.2  | TRUE |
| 19647    | 32413.3  | 8474.2   | 30345.9  | 5473.1   | 10846    | 31379.7  | 11386.2  | TRUE |
| 457124.9 | 812621.6 | 619356.1 | 622116.3 | 227527   | 444127   | 851029.5 | 408780.2 | TRUE |
| 209591.3 | 204201.3 | 207073.1 | 211722   | 220284.8 | 199259.6 | 231310.1 | 190633.1 | TRUE |
| 79884.1  | 70708.5  | 64798.1  | 73018.3  | 69040.9  | 80896.6  | 93909.4  | 86192.4  | TRUE |
| 1003063  | 847090.9 | 979259.6 | 988118.9 | 833992.8 | 1244800  | 1219098  | 1247333  | TRUE |

|          |          |          |          |          |          |          |          |      |
|----------|----------|----------|----------|----------|----------|----------|----------|------|
| 1828178  | 1926553  | 1631183  | 1972731  | 1515960  | 1857070  | 1736122  | 1728060  | TRUE |
| 443369.3 | 318792.7 | 430734.3 | 444477.4 | 351097.7 | 424456.2 | 356586.6 | 425902.2 | TRUE |
| 809356.1 | 928489   | 630561.1 | 810271.8 | 705263.5 | 659771.2 | 954147.1 | 663929.4 | TRUE |
| 312795.9 | 345157.3 | 214695.3 | 304458   | 241443.6 | 245007.3 | 295437.8 | 234705.9 | TRUE |
| 320226.9 | 382387.3 | 316083.5 | 311899.4 | 288169.7 | 329603.3 | 316502.7 | 267367.1 | TRUE |
| 430121.5 | 440277.8 | 480818.6 | 407770.6 | 386218.9 | 438985.4 | 470825.4 | 392817.5 | TRUE |
| 191773.5 | 202731.3 | 256129.3 | 232427.4 | 238425.7 | 241437.9 | 246402   | 238017.1 | TRUE |
| 662119.2 | 561491   | 719751.2 | 643960.7 | 618273.3 | 690620.3 | 557178.7 | 690791.8 | TRUE |
| 1001818  | 836155.3 | 809095.7 | 1103095  | 871868.6 | 846100.5 | 961350.3 | 854734.2 | TRUE |
| 1055453  | 921594.7 | 1076149  | 1013322  | 860252.2 | 1172893  | 917114   | 1090063  | TRUE |
| 1318059  | 1143359  | 1279472  | 1206672  | 1184958  | 1284397  | 1058045  | 1314791  | TRUE |
| 207594.9 | 216987.4 | 183082.6 | 226269.3 | 196406.5 | 215422.3 | 203273.5 | 222289.8 | TRUE |
| 746796.6 | 625960.2 | 641144.6 | 698340.6 | 708981.6 | 856817.9 | 715275.6 | 750603.3 | TRUE |
| 186751.4 | 143780   | 165250.5 | 204583.6 | 163430.3 | 147167.5 | 143768.9 | 155543.4 | TRUE |
| 275172.6 | 221460.5 | 126317.7 | 459606.4 | 208985.7 | 227633   | 268901.9 | 264688.1 | TRUE |
| 186457   | 141177   | 129315.1 | 165482.8 | 175393.6 | 195517.9 | 197931.8 | 210188.3 | TRUE |
| 642386.5 | 495371.2 | 521769.2 | 649218.6 | 455053.3 | 1374245  | 534585.9 | 1291552  | TRUE |
| 576068.4 | 379836.4 | 309543.3 | 432584.3 | 469355.5 | 533328.7 | 566981.1 | 620195.7 | TRUE |
| 46253.4  | 28870.6  | 36338.9  | 38966.4  | 47844.6  | 57527.8  | 50551.4  | 61201.1  | TRUE |
| 70326.2  | 45561.6  | 45856.7  | 50413.7  | 58258    | 58206.8  | 73553.5  | 76821.2  | TRUE |
| 104392.4 | 85824.3  | 62151.8  | 114320.2 | 129532.6 | 75726.3  | 105712.5 | 130935   | TRUE |
| 432834.4 | 364153   | 472799.7 | 445685.7 | 388811.9 | 504233.7 | 402875.3 | 494121.9 | TRUE |
| 443433.7 | 452599.1 | 451789.9 | 485119.5 | 405255.1 | 562746.2 | 566206.1 | 586972.2 | TRUE |
| 55505.3  | 47808.4  | 71033.6  | 45248.2  | 39921.1  | 64338.4  | 60692.4  | 76642.3  | TRUE |
| 65196.8  | 95773.4  | 91266.7  | 86700.3  | 61651.9  | 129777.7 | 125490.5 | 131559.1 | TRUE |
| 296899.4 | 270147.7 | 283798.1 | 299420.2 | 310491.5 | 272108.2 | 275581.7 | 292880   | TRUE |
| 220028.3 | 213056.1 | 238991.9 | 255939.2 | 241905.6 | 244211.7 | 202997.6 | 263193.3 | TRUE |
| 606374.3 | 413629.9 | 547347.7 | 553022.3 | 627166.7 | 588786.9 | 496715.1 | 595973.2 | TRUE |
| 434403.7 | 445170.2 | 355286.8 | 316810.1 | 418284.7 | 466644.4 | 442260.2 | 432681.1 | TRUE |
| 75792.8  | 75850.2  | 80721.3  | 90141.6  | 95007.2  | 70429.8  | 75077.9  | 81328.1  | TRUE |
| 253999.2 | 192367.7 | 254376.4 | 286052.9 | 285867.9 | 272038.4 | 241073.9 | 285485.5 | TRUE |
| 41679.2  | 57521    | 44366.8  | 38273.3  | 62639.7  | 57546.2  | 56557    | 59787.3  | TRUE |
| 67980.8  | 84052.7  | 45216.3  | 62869.9  | 53803.5  | 67439.1  | 61599.2  | 64680.7  | TRUE |
| 159731.1 | 215593.1 | 136366.3 | 172954.5 | 176796.7 | 165432.3 | 239656.4 | 159889.8 | TRUE |
| 134400.3 | 108270.7 | 147536.2 | 130456.2 | 136213.2 | 138249.3 | 132432   | 126393.6 | TRUE |
| 196431.8 | 185689.8 | 175121.7 | 191801.1 | 207594.7 | 192463.5 | 187979   | 187642.2 | TRUE |
| 425594.8 | 411147.2 | 389139.3 | 417998.8 | 385111.2 | 480827.2 | 471666.8 | 490105.2 | TRUE |
| 612636.9 | 721218.2 | 588692   | 596856.5 | 546569.5 | 717981.4 | 732334.3 | 723352.3 | TRUE |
| 78655.3  | 78547.5  | 59671.6  | 92435.3  | 71904.9  | 63586.3  | 83272.5  | 88854.9  | TRUE |
| 134807   | 111466.8 | 42910.6  | 137063.9 | 116712.8 | 58319.9  | 149712.8 | 128955.2 | TRUE |
| 56149.1  | 41089.8  | 41546.9  | 72375.6  | 65869.5  | 48781.9  | 75530.6  | 59259.8  | TRUE |
| 30303.5  | 31007.1  | 35289.8  | 24059.7  | 39903.2  | 46370.5  | 27952.5  | 40142.1  | TRUE |
| 523275.6 | 486159.2 | 421543.5 | 483749.4 | 459056.7 | 411869.4 | 445039.5 | 473920   | TRUE |
| 1378781  | 1488649  | 1010226  | 1227610  | 1713231  | 1121958  | 1632644  | 1777128  | TRUE |
| 261656.1 | 292511   | 291251.8 | 296177.4 | 246508.3 | 269042.1 | 293053.8 | 266703.3 | TRUE |
| 151168.2 | 159552.1 | 204597.6 | 206537.9 | 199058.7 | 175053   | 209825   | 185878.1 | TRUE |
| 158092.6 | 179164.6 | 164493.8 | 192656.2 | 190726.4 | 169223.5 | 193134.6 | 209373.5 | TRUE |
| 223420.8 | 224840.6 | 212274.1 | 245403.2 | 239665.5 | 251996.5 | 218828.5 | 258697.2 | TRUE |
| 423753.5 | 366419.7 | 445233.2 | 437359.9 | 400513.6 | 459292.2 | 415975.4 | 518914.2 | TRUE |
| 113196.7 | 148310.3 | 124290.2 | 129738   | 176916.7 | 147752   | 120461.3 | 146947.4 | TRUE |

|          |          |          |          |          |          |          |          |      |
|----------|----------|----------|----------|----------|----------|----------|----------|------|
| 198713.5 | 146010   | 149375.9 | 221970.3 | 185393.5 | 241081.7 | 233216.7 | 266848.8 | TRUE |
| 66307.1  | 71488.3  | 50775.1  | 67354.5  | 70559.5  | 64314.7  | 69756.3  | 77759.8  | TRUE |
| 30768    | 25444.8  | 21514.1  | 27255.5  | 22118    | 31336.9  | 39684.8  | 42216.6  | TRUE |
| 203867.8 | 142750.7 | 161586.8 | 234065.8 | 184522.2 | 202606.6 | 244282.9 | 253038.4 | TRUE |
| 708527.6 | 735541   | 736624.2 | 792268.7 | 659776.6 | 867570.3 | 800238.2 | 865073   | TRUE |
| 70540.5  | 80307.9  | 81651.8  | 98879    | 88826.7  | 94708.5  | 98726.3  | 98562.1  | TRUE |
| 8762.6   | 6541.9   | 10561.4  | 24803.3  | 14059.6  | 6539.4   | 20241.6  | 12378.2  | TRUE |
| 20521.6  | 10820.3  | 19667.7  | 9840.1   | 9410.2   | 21469.8  | 14538.8  | 26032.6  | TRUE |
| 147779.1 | 122957.8 | 104333.7 | 137296.6 | 138144.5 | 167383.2 | 166132.1 | 156581.7 | TRUE |
|          |          |          |          |          |          |          |          |      |
| 231378.8 | 256774.2 | 193259.6 | 210248.8 | 233815.3 | 180919.3 | 223409.7 | 222669.4 | TRUE |
| 109022.2 | 100383.9 | 94472.4  | 98033.4  | 127741.6 | 97574.8  | 119572.3 | 111631.2 | TRUE |
| 225314.1 | 228312.4 | 176665.4 | 177856.2 | 146124.6 | 167223.7 | 172720.2 | 191278   | TRUE |
| 115683.1 | 102593.6 | 94688.9  | 85545.2  | 81964.6  | 82296.6  | 118600.9 | 91039.3  | TRUE |
| 17633.2  | 39126    | 14117.2  | 26482.9  | 29138.4  | 21642.7  | 14728    | 31676.1  | TRUE |
| 18879.6  | 6970.4   | 18250.4  | 20693.1  | 16741.2  | 23918    | 24941.9  | 26115.5  | TRUE |
|          |          |          |          |          |          |          |          |      |
| 80195.4  | 88966.8  | 93536.1  | 91892.8  | 75974.3  | 100305.8 | 98883    | 108593.3 | TRUE |
| 7750.8   | 10175.9  | 16932.1  | 8785.4   | 20612.5  | 2980.9   | 20707.1  | 20821.1  | TRUE |
|          |          |          |          |          |          |          |          |      |
| 627360.8 | 602173.8 | 499894.7 | 459261.2 | 576799.6 | 583835.6 | 541610.2 | 525020.6 | TRUE |
| 152277.6 | 132099.3 | 128957   | 144678.5 | 154327.4 | 191401.8 | 147000.2 | 172386   | TRUE |
| 59705.1  | 78684    | 85113.7  | 62911.9  | 82273    | 81991.4  | 66609.9  | 60189.2  | TRUE |
| 132041.1 | 121429.9 | 114832   | 118332.3 | 116566.4 | 117549.3 | 113020.4 | 118952.4 | TRUE |
| 67362.5  | 59653.4  | 72549.2  | 50795.6  | 69504.8  | 87256.5  | 52432    | 61901.6  | TRUE |
| 39378.2  | 41260.6  | 34136.6  | 37205    | 34622.4  | 34230.7  | 45191.5  | 75539    | TRUE |
| 186648.8 | 139465.3 | 217112.9 | 206229.1 | 223752.4 | 256803.6 | 187936.9 | 206673.6 | TRUE |
| 177502.6 | 153623.4 | 291160.1 | 295592.8 | 253432.7 | 328205.1 | 208393.6 | 241313.7 | TRUE |
| 154464.5 | 135089.8 | 120701.1 | 132230.6 | 156067.8 | 144499.6 | 140404.9 | 160798.6 | TRUE |
| 144799.3 | 153127.4 | 131158.2 | 144073.5 | 159968.1 | 157833.3 | 170592.1 | 150805   | TRUE |
| 229651.9 | 207545.5 | 251259   | 251469.4 | 223358.6 | 279103.9 | 251323.3 | 241164.9 | TRUE |
| 149723.9 | 102132.3 | 168787.8 | 160032   | 159523.2 | 151722.5 | 129120.3 | 175023.9 | TRUE |
| 37985.1  | 40497.1  | 42034    | 24939.4  | 38328.6  | 39404    | 34430.2  | 50463.4  | TRUE |
| 309428.2 | 337631.7 | 288086.8 | 299176.5 | 433406.8 | 387789.4 | 381606.8 | 349945.8 | TRUE |
| 58990.6  | 55743.4  | 68837    | 55280.9  | 47760    | 61862.9  | 48662.2  | 47296    | TRUE |
| 123170.2 | 122894.1 | 111794.4 | 138155   | 161986.3 | 110358.2 | 77866.3  | 103051.2 | TRUE |
| 79802.6  | 71198    | 97358.9  | 74151.1  | 66736.7  | 84395.1  | 72430.3  | 73560.7  | TRUE |
| 117885.2 | 102380.1 | 88900.2  | 116782.2 | 110827   | 111604.4 | 124333.7 | 141407.2 | TRUE |
| 329258.8 | 288618.6 | 238026.7 | 262905.4 | 234478.3 | 250182.2 | 265822.3 | 265246.7 | TRUE |
| 668969.8 | 669890.3 | 676464.9 | 694382.3 | 670457.3 | 753960.1 | 836006.6 | 780284.9 | TRUE |
| 561741.3 | 535267.1 | 517878.1 | 629866.9 | 515370.5 | 545384.2 | 598696.6 | 578039.5 | TRUE |
| 47244.1  | 37016.1  | 40911.5  | 34780.5  | 52379.9  | 44928    | 49833.8  | 50830.5  | TRUE |
|          |          |          |          |          |          |          |          |      |
| 432381.9 | 443765.8 | 315325.6 | 424120.8 | 446878.8 | 372983.2 | 422253.2 | 423502.1 | TRUE |
|          |          |          |          |          |          |          |          |      |
| 38076.8  | 47186.2  | 101924.1 | 49633.3  | 49903.2  | 44057.8  | 34826.3  | 39576.9  | TRUE |
| 61185.7  | 83849.6  | 117700.2 | 69720.9  | 62020    | 69147.6  | 74762    | 69471.9  | TRUE |

|          |          |          |          |          |          |          |          |      |
|----------|----------|----------|----------|----------|----------|----------|----------|------|
| 27441.9  | 20317.2  | 18309.5  | 23635.5  | 28426.8  | 22207    | 25486.8  | 26384.6  | TRUE |
| 21286.3  | 24936.4  | 17750.4  | 26166.5  | 25604.2  | 10285.7  | 16205    | 27651.8  | TRUE |
| 71910    | 59058.4  | 35833.9  | 58924.1  | 62920.9  | 64736.3  | 66445.9  | 83623.9  | TRUE |
| 425141.5 | 359136.2 | 368661.5 | 495954.1 | 411514   | 434221.7 | 385892.8 | 448670.3 | TRUE |
| 233418.9 | 215964.6 | 177505.3 | 218926.3 | 223973.7 | 189714.7 | 251139.1 | 237090.8 | TRUE |
| 296965.5 | 256273.8 | 249269.9 | 283985.4 | 302246.2 | 264426   | 338045.4 | 275410.9 | TRUE |
| 138352   | 142756.8 | 119072.5 | 109209.7 | 119208   | 109691.5 | 132687.8 | 138182.5 | TRUE |
| 490795.3 | 467760.7 | 377549.2 | 341925   | 392987.1 | 475921.6 | 490894.6 | 437349.1 | TRUE |
| 760928.3 | 643305.5 | 682282.6 | 812868.8 | 700019.9 | 741887.6 | 703646.5 | 708240.8 | TRUE |
| 623949.6 | 527622.3 | 495968.2 | 483919   | 510660.3 | 590873.7 | 535238.3 | 516791.1 | TRUE |
| 12191.8  | 10196.9  | 9951.6   | 12455.6  | 14488.1  | 9957.2   | 10542.2  | 12796.1  | TRUE |
| 78979.5  | 97034.7  | 79720.7  | 76441    | 91519.5  | 87093.7  | 97834.6  | 89634.2  | TRUE |
| 23353.3  | 32396.3  | 21780.6  | 29903    | 10445.2  | 19739.1  | 15223.2  | 24615.1  | TRUE |
| 26844.5  | 30329.3  | 11864.7  | 12052.1  | 21668.2  | 14671.5  | 29595.4  | 40094.8  | TRUE |
| 5750.6   | 10792.6  | 7967.6   | 7519.7   | 4807.7   | 5081.4   | 7418.4   | 8695.6   | TRUE |
| 27988.8  | 28676.7  | 16371.7  | 49018.5  | 25371.2  | 18179.8  | 25369.9  | 37870.8  | TRUE |
| 93449.9  | 103965.2 | 98831    | 115750.7 | 71924.3  | 219200.2 | 151193.3 | 212283.1 | TRUE |
| 73609.4  | 78531.1  | 49923.6  | 60721.8  | 59399.8  | 57087.9  | 64665.7  | 76924.8  | TRUE |
| 139815.6 | 130007.3 | 93030.7  | 107431.8 | 138103.6 | 92350.5  | 115361.3 | 113965.3 | TRUE |
| 227895.4 | 197882.1 | 208010.2 | 169873.3 | 258642.2 | 236516.1 | 218540.6 | 235515.6 | TRUE |
| 153808.8 | 102387.9 | 185125.3 | 160159.8 | 145607.7 | 178622.3 | 141162.8 | 156629.6 | TRUE |
| 103365   | 100629.8 | 128067.4 | 111090.1 | 90716.7  | 144766.6 | 84571.4  | 104386   | TRUE |
| 191079.5 | 148199.9 | 253286.3 | 161101   | 156479.1 | 255679.2 | 174178.2 | 181097.8 | TRUE |
| 30196.2  | 4887.5   | 41534.1  | 29738.3  | 11875.7  | 42288.9  | 16218.8  | 29961    | TRUE |
| 109255.6 | 102174.7 | 85790.6  | 106246.1 | 89233.4  | 87958.3  | 81646.1  | 96593.5  | TRUE |
| 360447.3 | 344516.3 | 352410.5 | 280153.3 | 385528   | 419542.3 | 381274.4 | 396561.1 | TRUE |
| 479866.7 | 426841   | 368818   | 379126.5 | 539919.1 | 547273.9 | 447867.8 | 498435.2 | TRUE |
| 69021.6  | 62253    | 50013.4  | 102892.8 | 87769.8  | 58389.2  | 77135.7  | 81587.9  | TRUE |
| 19442.5  | 27172.7  | 20686.3  | 25954.3  | 23157.6  | 28155.6  | 23450.7  | 27022.4  | TRUE |
| 48780.6  | 58952    | 38626.6  | 45487    | 29452.8  | 46202.4  | 49480.8  | 50680    | TRUE |
| 834290.4 | 663891.6 | 838971.7 | 829603.1 | 753936.4 | 871689.8 | 699810.1 | 711436.7 | TRUE |
| 1600125  | 1312729  | 1392992  | 1468952  | 1796248  | 1661320  | 1339558  | 1573226  | TRUE |
| 48272    | 46341.1  | 70428.6  | 64918.1  | 62617.6  | 76665.9  | 45040.7  | 55197.1  | TRUE |
| 157161.3 | 117172.9 | 209252.4 | 209966.6 | 179809   | 236782.2 | 134580.2 | 193168.7 | TRUE |
| 114834.9 | 115619.2 | 96520.9  | 84513    | 149462.3 | 155656.3 | 121676.2 | 117590   | TRUE |
| 237944.7 | 350146.5 | 243877.6 | 291951.2 | 353418.6 | 271303.7 | 382639.3 | 364563.1 | TRUE |
| 389851.2 | 472218   | 393945.1 | 438660.2 | 520858.7 | 383674.9 | 537112.5 | 508176.3 | TRUE |
| 579409.4 | 705077.1 | 893601.2 | 904473   | 597661.6 | 591788.9 | 715244.4 | 584217.4 | TRUE |
| 376230.6 | 334514.4 | 369053   | 353506.1 | 328452.4 | 367158.2 | 344799.1 | 349078.2 | TRUE |

|          |          |          |          |          |          |          |          |      |
|----------|----------|----------|----------|----------|----------|----------|----------|------|
| 752476.5 | 1060247  | 617955.4 | 596417.7 | 476216.8 | 457177   | 528600.4 | 445393.5 | TRUE |
| 24152.5  | 27554.7  | 21802.1  | 11381.4  | 31609.7  | 20777.7  | 46366.2  | 43528.2  | TRUE |
| 43434.6  | 48938.1  | 34919.7  | 35899.3  | 61163.5  | 48831.5  | 55852.6  | 63870.7  | TRUE |
| 8964170  | 10440555 | 5154310  | 8039500  | 9547243  | 5529167  | 10357480 | 9166081  | TRUE |
| 1232945  | 1287787  | 1443263  | 1469593  | 816134   | 1204273  | 1381191  | 1304105  | TRUE |
| 201595.6 | 250809.5 | 177115.3 | 157124.3 | 243128.4 | 182994.1 | 232633.6 | 268326.4 | TRUE |
| 430534.2 | 398559.8 | 357168.6 | 426692.5 | 337651.7 | 274481.1 | 379844.3 | 298674.6 | TRUE |
| 85068.7  | 91118    | 68940.5  | 115385   | 83840.8  | 100022.5 | 99745.7  | 88167    | TRUE |
| 170410.1 | 189656.4 | 100135.9 | 157803.1 | 161527.2 | 125065.2 | 178956.7 | 155705   | TRUE |
| 112958.6 | 127222.3 | 132228.4 | 150341.5 | 143603.5 | 129138   | 161655.8 | 151072.7 | TRUE |
| 37356.6  | 33164.6  | 27234    | 29475.1  | 27945.4  | 25174.2  | 23732.2  | 29948.7  | TRUE |
| 33058.1  | 39138.6  | 35985.1  | 24561.2  | 32575.4  | 41199.3  | 45941.7  | 48814.3  | TRUE |
| 31911.5  | 34991.1  | 44949.9  | 50949.1  | 36977.3  | 20438.1  | 24958.8  | 49446.3  | TRUE |
| 15436.4  | 33415.3  | 23872.1  | 34784.8  | 32417.7  | 5526.3   | 10889.9  | 8075     | TRUE |
| 60813.7  | 60689.4  | 62167.1  | 75682.2  | 60684.1  | 56601.5  | 63064.2  | 52263.3  | TRUE |
| 1747624  | 1722297  | 1130838  | 1539951  | 1429625  | 1240471  | 1718986  | 1363326  | TRUE |
| 134911.3 | 120917.9 | 186995.6 | 140426.2 | 82622.6  | 203977.2 | 108322.8 | 90438.9  | TRUE |
| 378393.4 | 231071.5 | 352929.3 | 367861.4 | 637054.1 | 322614.9 | 298771.2 | 346196.7 | TRUE |
| 17075.9  | 8944.7   | 39527.2  | 9034.8   | 19479.6  | 27535.1  | 23781.9  | 19716.9  | TRUE |
| 24091    | 34812.8  | 28889.6  | 5963     | 5733.6   | 28499.5  | 8784     | 8207.9   | TRUE |
| 67495.1  | 49622    | 64709.1  | 60581    | 93922    | 38831.3  | 43329.4  | 44581.7  | TRUE |
| 169890.1 | 124110.2 | 167722.4 | 162799.4 | 321790.4 | 77606.6  | 127533.2 | 110880.6 | TRUE |
| 32808.7  | 13746.6  | 42501    | 5963.2   | 9685.7   | 54800    | 41822.1  | 12230.4  | TRUE |
| 26079.7  | 37417    | 51319.8  | 11927.4  | 17260.1  | 50529.8  | 36181.3  | 27943.6  | TRUE |
| 159275   | 145891.3 | 192837.7 | 128455.1 | 108026.6 | 185782.9 | 153633   | 119693.5 | TRUE |
| 93222.3  | 87429.4  | 118930.5 | 103391.2 | 80130.7  | 125586   | 108154.5 | 88035.3  | TRUE |
| 286010   | 288352.1 | 290362.1 | 242962.6 | 215267.5 | 315905.8 | 277742.7 | 239635.2 | TRUE |
| 140253.3 | 108212.1 | 234802.9 | 160924.1 | 79708.1  | 229770.1 | 194188.2 | 98981.4  | TRUE |
| 185587.9 | 106100.7 | 180288.6 | 179257.4 | 303594.1 | 127516.7 | 119712.1 | 173603.7 | TRUE |
| 123280.1 | 109605.2 | 176559.2 | 129381.7 | 119604.4 | 187038.1 | 126609.4 | 128710   | TRUE |
| 725042   | 518828.9 | 680727.3 | 631672.2 | 1093114  | 626555.8 | 549630.3 | 636916.2 | TRUE |
| 97062.3  | 177902.4 | 78285.3  | 156202.4 | 154457.2 | 61105.6  | 172546   | 133352.6 | TRUE |
| 119951   | 137174.5 | 124018.2 | 184039.3 | 175984.9 | 133105.6 | 171309.1 | 147339.9 | TRUE |
| 37093    | 31796.4  | 36540.3  | 28098.9  | 33641.1  | 33856.8  | 49190.9  | 38916.2  | TRUE |
| 45794.3  | 42344.1  | 28288.8  | 43134.8  | 34575.5  | 34271.1  | 55044.7  | 36989.4  | TRUE |
| 49567.1  | 48354.2  | 38254.1  | 38634.3  | 49806.7  | 52516.4  | 67561.1  | 54993.1  | TRUE |
| 28218.1  | 29093.1  | 19807.7  | 26242.4  | 22278.3  | 35660.1  | 24756.5  | 24989.5  | TRUE |

|          |          |          |          |          |          |          |          |      |
|----------|----------|----------|----------|----------|----------|----------|----------|------|
| 33863.7  | 30141.3  | 26593.4  | 24239.7  | 24455.1  | 31549.9  | 43317    | 31630.9  | TRUE |
| 60223.9  | 47592.5  | 52649.8  | 41630    | 56185.1  | 52431    | 59859.9  | 51109.3  | TRUE |
| 18548.6  | 4369     | 11850.3  | 5205.7   | 17772.1  | 17059.1  | 11369.3  | 6449.2   | TRUE |
| 30757.1  | 30955.2  | 27704    | 19234.3  | 26449.7  | 40964.2  | 29112.4  | 40979.1  | TRUE |
| 126214.4 | 158075.8 | 113162   | 157188.7 | 143444.3 | 112458.3 | 138146.2 | 124176.7 | TRUE |
| 150269   | 126096   | 143033.9 | 204876.8 | 134443.3 | 186685.8 | 151788.5 | 198810.5 | TRUE |
| 103332   | 93254.9  | 121525.9 | 106588.1 | 91529.5  | 116675   | 98743.5  | 117246.8 | TRUE |
| 42732    | 47398.2  | 31930.6  | 30190.3  | 43602.9  | 44972.1  | 36665.3  | 49302    | TRUE |
|          |          |          |          |          |          |          |          |      |
| 206943.1 | 253472.6 | 218816.3 | 256853.9 | 264451.9 | 301872   | 252094.5 | 245045.4 | TRUE |
| 215660.3 | 213859.4 | 220021.6 | 216870.6 | 233086.3 | 217765.9 | 212422.6 | 241145   | TRUE |
| 451206.3 | 498178.2 | 541838.1 | 449341.5 | 401808   | 415787.5 | 492504.1 | 418189.1 | TRUE |
| 27898    | 21984.2  | 27848.8  | 35178.1  | 23563    | 28787.2  | 41123    | 30282    | TRUE |
| 665217.6 | 637058.3 | 491014.1 | 343566.5 | 318460.4 | 400121.9 | 365961.6 | 389432.4 | TRUE |
| 313186.8 | 252067.3 | 217024.1 | 178715.7 | 140408.3 | 176556.5 | 134983.1 | 186114   | TRUE |
| 270150.3 | 222798.1 | 211286   | 235647.9 | 236093.7 | 287941.1 | 231329.1 | 311705.6 | TRUE |
| 177515.3 | 165662.7 | 168866.4 | 140289   | 190745.3 | 167513.7 | 153176.2 | 160361.9 | TRUE |
| 353492.3 | 299725.2 | 307121   | 429421.6 | 400538.3 | 316995.3 | 381090.3 | 380935.5 | TRUE |
| 578596.5 | 501487.7 | 521478.2 | 727768.2 | 688845.8 | 555865.2 | 590277.1 | 672065.2 | TRUE |
| 1687461  | 1800125  | 1516138  | 1592791  | 1419226  | 1693479  | 1689025  | 1673284  | TRUE |
| 157610.1 | 152486.6 | 169127.1 | 162904.8 | 168607.4 | 205869.5 | 169186.8 | 163117.1 | TRUE |
| 305021   | 304563.6 | 294001.7 | 367240.1 | 313450.4 | 359263.4 | 353307.8 | 332310.6 | TRUE |
| 310166.9 | 319158.1 | 264571.6 | 267113.2 | 287326.7 | 298703.9 | 268525.8 | 311725.1 | TRUE |
| 447147.7 | 406615.2 | 455427.5 | 450788.3 | 437132.9 | 439975.3 | 453797.2 | 454343.4 | TRUE |
| 329161.3 | 321479.7 | 313077.4 | 330317.3 | 289607.4 | 291617.2 | 353238.4 | 317655   | TRUE |
|          |          |          |          |          |          |          |          |      |
| 608993.5 | 532851.1 | 548217.3 | 574198.3 | 534195.3 | 607445.8 | 561868.4 | 622023.8 | TRUE |
| 247461   | 250316.4 | 291864.5 | 274307.1 | 255860   | 274298.5 | 249221.9 | 248205.4 | TRUE |
|          |          |          |          |          |          |          |          |      |
| 112946.6 | 103853   | 137735.6 | 122676   | 128473   | 127042.8 | 124956.2 | 120119.2 | TRUE |
| 432625.1 | 462396.7 | 387780.6 | 507807.3 | 430935.5 | 433957.6 | 491895.8 | 445345.8 | TRUE |
| 65456.2  | 54722.1  | 53395.4  | 76639.4  | 44934.8  | 37206.1  | 52885.5  | 65485    | TRUE |
| 35450    | 26721.6  | 21441.2  | 28114.4  | 29065.5  | 30523.5  | 27806    | 30007.6  | TRUE |
| 296270.5 | 316488.4 | 263503.3 | 237387.8 | 304196.8 | 308309.9 | 285475.6 | 312757.9 | TRUE |
| 329771.9 | 285933.2 | 328218.9 | 304395.7 | 341346.6 | 309323.2 | 302829.6 | 355440.2 | TRUE |
| 541867.7 | 488975.2 | 491090.3 | 492208.9 | 463540.3 | 456065.8 | 541249.6 | 486179.6 | TRUE |
| 520964.2 | 439922.8 | 418530.4 | 439555.2 | 435344   | 396124.9 | 476433.9 | 427470.8 | TRUE |
| 138445   | 100889.6 | 122708.7 | 116516.5 | 120640.4 | 139448.4 | 102042.8 | 118691.5 | TRUE |
| 140475.5 | 148650.7 | 133368   | 125773.7 | 130550   | 127896.3 | 147620.8 | 113004.5 | TRUE |
| 194933.5 | 177207.9 | 217395.4 | 272698.7 | 258480.5 | 218210.4 | 205971.7 | 248972.2 | TRUE |
| 59563.7  | 48450.6  | 57394.6  | 62410.2  | 72194.5  | 56589.1  | 48085.1  | 67724.6  | TRUE |
| 58243.8  | 65300.6  | 68924.3  | 53720.8  | 68209.5  | 67360    | 63631    | 80602    | TRUE |
| 102805.1 | 109464.3 | 103665.6 | 124036.2 | 103358.6 | 107702   | 112757.6 | 124037.5 | TRUE |
| 78848.5  | 85282.3  | 66047.6  | 76350.4  | 81715.7  | 85713.4  | 78952.9  | 78911.5  | TRUE |
| 378298.4 | 303681   | 328989.5 | 377370.6 | 302662.2 | 315780.4 | 307322.6 | 303122.9 | TRUE |
|          |          |          |          |          |          |          |          |      |
| 66388.7  | 52607.1  | 76284.3  | 55715.4  | 55041.2  | 57892.8  | 49014.7  | 60461    | TRUE |
| 91797    | 88637.3  | 96598.4  | 92357.4  | 92319.4  | 96132.9  | 83649.3  | 81690.3  | TRUE |



|          |          |          |          |          |          |          |          |      |
|----------|----------|----------|----------|----------|----------|----------|----------|------|
| 91264.3  | 103734.5 | 95542.5  | 70478.7  | 101601.3 | 80340.2  | 75445.5  | 84792.9  | TRUE |
| 174792.6 | 150170.3 | 112689   | 136273.5 | 105565.8 | 148044.8 | 119188.1 | 114592.3 | TRUE |
| 44537.1  | 37081.8  | 41845.2  | 35348    | 33777.3  | 59128.3  | 53195.2  | 51343.4  | TRUE |
| 17175.3  | 9251.2   | 11331.1  | 22574.5  | 28393.1  | 24313.1  | 12699.7  | 11023.5  | TRUE |
| 65545.2  | 63191.3  | 84333.1  | 83456.1  | 53250    | 96649.3  | 74658.2  | 66295.7  | TRUE |
| 73296.1  | 77572.7  | 87776.9  | 81774    | 57052.1  | 88189.4  | 99128.1  | 55304.7  | TRUE |
| 107324.9 | 88345.4  | 118540.5 | 135173.3 | 156434.6 | 155023.6 | 88360.8  | 123770   | TRUE |
| 25011.2  | 31042.2  | 33232.4  | 45735.4  | 30889.6  | 45522.5  | 33320.2  | 23323.9  | TRUE |
| 31530    | 44646.9  | 57644.3  | 26966.4  | 36161.9  | 32542.2  | 52381.9  | 35518.9  | TRUE |
| 217845.6 | 159970.5 | 216795.8 | 240078.9 | 221198.8 | 161719.3 | 184318.1 | 168154.6 | TRUE |
| 30739.8  | 27297.4  | 23945.5  | 29372.9  | 36681    | 35143.8  | 34872.1  | 30038.3  | TRUE |
| 300719.4 | 315192.7 | 355098.7 | 290594.5 | 235420.9 | 385524.7 | 326748.5 | 239895.4 | TRUE |
| 319225.8 | 231871.3 | 377684.2 | 353599.9 | 411575.3 | 265166.4 | 238676.2 | 306817.9 | TRUE |
| 389565.6 | 363167.1 | 433668.7 | 326293   | 290157.6 | 470438.8 | 373118.7 | 299189.8 | TRUE |
| 133572.8 | 167410.2 | 181370   | 154113.4 | 205316.9 | 178478.8 | 183937.4 | 142209.1 | TRUE |
| 461914.6 | 385897.3 | 491234   | 492958.5 | 627686   | 393774.6 | 414151.7 | 384042.5 | TRUE |
| 91258.7  | 122053.4 | 93678.8  | 90240.8  | 107690.1 | 105100.1 | 123201.5 | 96258.4  | TRUE |
| 140235.2 | 108975.7 | 129899.7 | 132671.9 | 298791.4 | 169684.6 | 179463.7 | 159663.7 | TRUE |
| 276775.4 | 241296.2 | 236681.7 | 290851.4 | 243027.7 | 244017.4 | 243962.3 | 275695.4 | TRUE |
| 278766.3 | 339994.7 | 250214.4 | 285279.9 | 316647.6 | 264940.7 | 387240.6 | 309141.1 | TRUE |
| 56723.4  | 57821.3  | 54945.6  | 74804.7  | 52722.7  | 48832.7  | 57091    | 68317.3  | TRUE |
| 383625   | 445321.4 | 288676.5 | 420267.4 | 406459.6 | 322871.3 | 429644.2 | 402270.7 | TRUE |
| 407448.8 | 442569.1 | 609249.6 | 638607   | 367934.5 | 438590.7 | 483222.6 | 458506.6 | TRUE |
| 67405.1  | 68543.4  | 75031.7  | 96073.1  | 60123.1  | 69944.3  | 79440.4  | 71495.9  | TRUE |
| 132004.3 | 129587.1 | 136793.8 | 166138.4 | 130937.8 | 152166.8 | 149676.2 | 141057.7 | TRUE |
| 136424   | 101004.2 | 118215.4 | 121070.9 | 122976.6 | 97059    | 118682.2 | 99240    | TRUE |
| 111402   | 91881.7  | 138899.2 | 149224.3 | 101655.7 | 81010.9  | 108045.5 | 93181.6  | TRUE |
| 650441.9 | 793951.6 | 461826.1 | 587034   | 685862.7 | 522878.5 | 865231.6 | 663336.3 | TRUE |
| 1001779  | 949525.7 | 1167422  | 1221977  | 913965.1 | 1072915  | 1046984  | 1062292  | TRUE |
| 969929.7 | 962890.6 | 1013558  | 1094066  | 839513.6 | 962715.7 | 969334.7 | 906522.1 | TRUE |
| 23047.8  | 36499.7  | 14830.4  | 9889.4   | 16340.2  | 11154.9  | 30180.4  | 21162.1  | TRUE |
| 942324.1 | 1351106  | 492394.9 | 630936.8 | 861940.4 | 495852.2 | 1335723  | 825997.3 | TRUE |
| 66096.3  | 89216.5  | 51670.4  | 68467.2  | 70833.6  | 45143.7  | 113174.5 | 64376.4  | TRUE |
| 384188.6 | 604370.8 | 318136.3 | 362787   | 472361.5 | 289717.1 | 710217.1 | 439866.4 | TRUE |
| 1786910  | 1587733  | 2835025  | 2890101  | 1140368  | 1368577  | 1736435  | 1399521  | TRUE |
| 42691.3  | 52240.2  | 23385    | 45902.2  | 78735.3  | 50892.6  | 92856.9  | 51022.6  | TRUE |
| 32027.7  | 21381.6  | 24943.2  | 42912.4  | 8158.4   | 16217.9  | 11671.6  | 27556.2  | TRUE |
| 425387.2 | 306339.3 | 400327.2 | 530161.3 | 220243.8 | 332518   | 409285.4 | 329610.9 | TRUE |
| 106182   | 136580   | 75685.7  | 64219.7  | 78043.6  | 73294.1  | 112359.5 | 98328.8  | TRUE |
| 152147.9 | 245855.6 | 136390   | 123664.9 | 194991.7 | 128359   | 222909.6 | 172625.5 | TRUE |
| 207565.2 | 290235.2 | 109170.9 | 168426   | 187640.5 | 113618.4 | 241391.3 | 153472.8 | TRUE |
| 179482.1 | 162008.1 | 202376.6 | 223300.7 | 98326.3  | 128259.7 | 153592.2 | 137932.2 | TRUE |
| 217624   | 175318.2 | 333415   | 351775.6 | 110340.5 | 163890.2 | 182048.5 | 165638.7 | TRUE |
| 92861.2  | 105079.1 | 58632.1  | 66276.1  | 77113.9  | 66958.9  | 109531.4 | 72440.7  | TRUE |
| 129226.1 | 129282.4 | 131299   | 114167.7 | 125631.7 | 155718   | 102389.5 | 116642.6 | TRUE |
| 102602.1 | 101204.5 | 90611.7  | 77805.7  | 88002.4  | 101424.7 | 90499.6  | 87978.5  | TRUE |
| 607872.6 | 489872.5 | 661215.7 | 691652.1 | 883067   | 1497275  | 963850.5 | 1033449  | TRUE |
| 735660.6 | 611461.1 | 852498.2 | 672243.4 | 557589.1 | 930271.8 | 699433   | 626378.5 | TRUE |

|          |          |          |          |          |          |          |          |      |
|----------|----------|----------|----------|----------|----------|----------|----------|------|
| 80792.4  | 60656.8  | 102260.8 | 54764.8  | 69154.2  | 134397.8 | 78612    | 71439.6  | TRUE |
| 1159119  | 1039867  | 1540727  | 1174248  | 889755.5 | 1693206  | 1042038  | 923185.1 | TRUE |
| 49118.9  | 44558    | 63193.7  | 61393.2  | 43732.7  | 61761    | 44478.2  | 44210    | TRUE |
| 67774.9  | 65995.9  | 53605.9  | 81768.8  | 69274.7  | 81107.3  | 84131.7  | 71479.9  | TRUE |
| 208337.7 | 199861.3 | 200169.2 | 206687.8 | 262044.7 | 194207.5 | 201341.7 | 191138.7 | TRUE |
| 310481.9 | 253742.6 | 409739   | 235723.9 | 223934.5 | 415490.1 | 309125   | 300916.9 | TRUE |
| 538543   | 566021.5 | 542103   | 507591.1 | 437550.3 | 684583.4 | 606845.8 | 418389   | TRUE |
| 70840.2  | 90620.3  | 81614.3  | 78751.3  | 79362    | 65943.8  | 71627.4  | 75071.5  | TRUE |
| 290939.2 | 225174.1 | 372326.6 | 268433.9 | 238306.2 | 401195.7 | 283937.8 | 261854.2 | TRUE |
| 341345.2 | 273138.5 | 352363.5 | 336284.6 | 270128.2 | 424503.4 | 323531.2 | 279853.5 | TRUE |
| 198628.3 | 144052.8 | 158230.7 | 169343.2 | 260409.4 | 181381.9 | 168214   | 203093.7 | TRUE |
| 38711.9  | 36782.8  | 32288.7  | 31991.8  | 30960.4  | 39458.7  | 28618.8  | 41720.9  | TRUE |
| 1551944  | 1318141  | 1484213  | 1548582  | 1415072  | 1412629  | 1462535  | 1447980  | TRUE |
| 120817   | 119642.9 | 67861.7  | 107730.1 | 135012.7 | 65864.6  | 110538.6 | 119462.5 | TRUE |
| 96767.2  | 133458   | 73616.6  | 112263   | 110374.3 | 78512.5  | 130828.2 | 117565.5 | TRUE |
| 102448.9 | 98569    | 108511.3 | 96964.4  | 90616.2  | 75717.3  | 104722.8 | 100152.7 | TRUE |
| 53032    | 80457.7  | 28317.3  | 61583.9  | 51170.7  | 35768.2  | 57410.8  | 67981.8  | TRUE |
| 110130.2 | 140875.6 | 152485.4 | 181752.6 | 97990.6  | 124358.5 | 154636.2 | 123321.2 | TRUE |
| 143028.4 | 154244.1 | 179290.8 | 164038.3 | 124345.9 | 162595.5 | 156555.1 | 149712.3 | TRUE |
| 26676.9  | 40960.8  | 23911.8  | 28299.5  | 31716.1  | 32380.4  | 35961.2  | 35342.2  | TRUE |
| 129641.4 | 165407.6 | 120275.1 | 125558.1 | 143569   | 140896.1 | 160071.5 | 160261.5 | TRUE |
| 92619.4  | 102615.9 | 61668.6  | 74899.2  | 97559.7  | 69106.6  | 121298.1 | 95472.5  | TRUE |
| 140556.1 | 145430.7 | 104385.5 | 132422.9 | 113080   | 105990   | 156327   | 140601.4 | TRUE |
| 243038.1 | 233829   | 170728.9 | 232933.1 | 231467.3 | 193682.8 | 235964.6 | 222589.1 | TRUE |
| 33180.6  | 38027.6  | 29810.6  | 32092.5  | 46102.3  | 28527.2  | 48587.6  | 45331.1  | TRUE |
| 58930.3  | 55309.2  | 43844    | 75772.8  | 52533.9  | 43037.7  | 49726.8  | 51440.5  | TRUE |
| 58544.1  | 62351.8  | 51250.6  | 58219.9  | 67141.7  | 59573.7  | 70003.3  | 88987.6  | TRUE |
| 124167.5 | 107395   | 107043.8 | 104397   | 93899.5  | 106776.3 | 105972.3 | 103648.4 | TRUE |
| 77021.6  | 76689.6  | 58261.1  | 57041.6  | 67318.6  | 79203    | 73797.7  | 73439.1  | TRUE |
| 6026.6   | 6965.4   | 8297.1   | 7198.3   | 6670.1   | 9408.8   | 7224.1   | 9085.7   | TRUE |
| 52263    | 53155.2  | 31597.4  | 87243.5  | 58039.3  | 47529.8  | 72130.7  | 51181.2  | TRUE |
| 34679.8  | 42005.8  | 37315.7  | 24497.8  | 58565.1  | 25703    | 38961.9  | 42901.3  | TRUE |
| 84713.4  | 102881   | 106205.9 | 109708.4 | 100671.5 | 119403.7 | 137801   | 96174.4  | TRUE |
| 109296.4 | 105854.7 | 95975.4  | 84557.2  | 134282.5 | 90639.8  | 115846   | 116328.4 | TRUE |
| 248265.7 | 251336.7 | 211647.5 | 230259.9 | 242919.8 | 260359.2 | 233762.8 | 251551.2 | TRUE |
| 96198.7  | 113254.5 | 126447.8 | 95740    | 75348    | 119647.7 | 93611.3  | 71016.3  | TRUE |
| 172949.1 | 176946.1 | 208688.5 | 374034   | 292193.7 | 230387.8 | 246838.8 | 181503.6 | TRUE |
| 57186.5  | 57408.2  | 73822.1  | 84660.3  | 45536    | 70971.4  | 87212.7  | 62153.6  | TRUE |
| 61964.8  | 58581.5  | 65288.6  | 71300.2  | 56365.7  | 57952.5  | 51753.3  | 46928.5  | TRUE |

|          |          |          |          |          |          |          |          |      |
|----------|----------|----------|----------|----------|----------|----------|----------|------|
| 50122.5  | 37163.6  | 49499.3  | 54846.7  | 54650.5  | 98166.2  | 43889.1  | 53896.1  | TRUE |
| 52311.4  | 36301    | 53761.6  | 50644.1  | 64277.6  | 62043.1  | 41849.3  | 42044.4  | TRUE |
| 61619.6  | 68753.1  | 86770.2  | 73744.5  | 56870    | 94245.8  | 61478.1  | 56218.9  | TRUE |
| 290995.5 | 307804.2 | 349341   | 246085.1 | 294533.1 | 335144.2 | 334066.2 | 289044.9 | TRUE |
| 300175.6 | 207385.5 | 191691.8 | 267836.9 | 360019   | 255332.8 | 278570.4 | 270124.6 | TRUE |
| 48866    | 37994.4  | 51422    | 49971.2  | 49996.8  | 67503.9  | 53602.1  | 52017.3  | TRUE |
| 96104.7  | 85038.2  | 108939.8 | 89433.6  | 72805.8  | 128680.5 | 108648.1 | 103039.5 | TRUE |
| 11420.1  | 7945.9   | 21129.8  | 11550.1  | 8510.5   | 49412    | 9603.7   | 8030.9   | TRUE |
| 70265.9  | 56300.5  | 58033.3  | 59661.7  | 47226.1  | 76412.7  | 68329.9  | 73211.6  | TRUE |
| 403922.6 | 271193.9 | 467646.7 | 445228.7 | 572036.5 | 373941.3 | 310451.8 | 364829.4 | TRUE |
| 38283    | 28664.7  | 40122.6  | 30824.9  | 32038    | 43783.4  | 32040.5  | 50688.4  | TRUE |
| 75635.4  | 67955.6  | 91597.6  | 73611.4  | 74924.8  | 93148.5  | 65156.2  | 81833.2  | TRUE |
| 122315.1 | 138234.3 | 128805.4 | 106223.3 | 108211.6 | 161550.9 | 143955.6 | 143160.2 | TRUE |
| 224610.5 | 141012   | 214448.8 | 231397.1 | 334121.4 | 219776.3 | 216457.3 | 234714.5 | TRUE |
| 187512.4 | 223639.5 | 173181.5 | 192890.2 | 175591.3 | 223547.4 | 247928   | 194371   | TRUE |
| 295918   | 306567   | 286800.4 | 295925   | 282415.7 | 326728.6 | 348399.9 | 281750.2 | TRUE |
| 126530   | 129737.6 | 143284.4 | 146849.2 | 131734.7 | 109939.3 | 109478.1 | 138355.3 | TRUE |
| 198134.8 | 158903.6 | 271368.7 | 217510   | 199834.1 | 182547.1 | 197770.3 | 176262   | TRUE |
| 17429    | 32163.6  | 21101.9  | 24167.9  | 23328.8  | 28222.6  | 30058.3  | 38520.7  | TRUE |
| 80040.8  | 77437.7  | 81788.7  | 68467.3  | 55729.3  | 83713.7  | 81709.4  | 76086.7  | TRUE |
| 45621.6  | 47776    | 33265.3  | 59265.7  | 49774    | 38518    | 51188.9  | 60311.5  | TRUE |
| 238231.1 | 283470.6 | 228328.8 | 248751.1 | 258169.3 | 206276.9 | 291095.3 | 248554   | TRUE |
| 85274    | 131733.3 | 86716.7  | 69481.7  | 100697.4 | 87186.9  | 103022.3 | 102237.3 | TRUE |
| 93145.1  | 104270.3 | 89746    | 570695.6 | 65365.6  | 69141.7  | 101231.9 | 86180.5  | TRUE |
| 128106.5 | 151650.9 | 186081.3 | 173208.7 | 114582   | 154515.8 | 142541.9 | 132702.7 | TRUE |
| 16267.9  | 12541.9  | 8668.1   | 9579.5   | 6669.6   | 19268.4  | 11405.2  | 8561.4   | TRUE |
| 142754.4 | 150870.6 | 155691.9 | 125028.5 | 137299.6 | 170431.1 | 198756.7 | 150901.3 | TRUE |
| 58460.7  | 55381.2  | 35121.8  | 58437.7  | 81296.2  | 61729.5  | 86125    | 72308.4  | TRUE |
| 159442.1 | 123730.6 | 145579.4 | 176483.9 | 139808   | 194163.4 | 177358.6 | 187404   | TRUE |
| 228578.1 | 253308   | 200076.7 | 204113.8 | 220051.6 | 199270.2 | 252565.1 | 220885.6 | TRUE |
| 206754.8 | 214193.8 | 179725   | 192440.3 | 154160.2 | 191512.3 | 212465.6 | 178581.4 | TRUE |
| 800265.6 | 628403.1 | 887010.7 | 868577.2 | 805830   | 683265.6 | 605930.8 | 638588.3 | TRUE |
| 54881.1  | 57705    | 44747.2  | 43804.6  | 55964.3  | 48233.7  | 48502    | 51292.1  | TRUE |
| 739187.4 | 776959.2 | 735760.7 | 742582.3 | 707729.2 | 701386   | 804105.6 | 720308.4 | TRUE |
| 554052.8 | 451804.1 | 488670.1 | 567252.7 | 461530.8 | 444781.8 | 430900.7 | 457856.8 | TRUE |
| 278270.7 | 252535.4 | 338004.3 | 348407.6 | 326516.4 | 311308.9 | 300967.5 | 347802.8 | TRUE |
| 349882.9 | 383687.5 | 357341.8 | 395937.4 | 325528.4 | 330505.7 | 321247.9 | 316583.6 | TRUE |
| 691847.4 | 631917.7 | 627514.9 | 687846.8 | 639693.3 | 688379.4 | 678423.9 | 657132.5 | TRUE |
| 419738.5 | 446226   | 416812.4 | 443701.4 | 431412.2 | 405713.1 | 456760.6 | 459004.3 | TRUE |
| 57839.3  | 66934.2  | 64348.5  | 61723.3  | 51975.6  | 66643.8  | 76103.4  | 55766.7  | TRUE |
| 167952.9 | 189120.3 | 131436.1 | 170128.4 | 158866.6 | 157948.9 | 200302.5 | 161091.9 | TRUE |
| 70125.8  | 39175.1  | 35720.2  | 39355.3  | 58553.7  | 50459.2  | 63486.1  | 64058.2  | TRUE |
| 219579.3 | 158227.5 | 166908.2 | 195214.9 | 189833.9 | 202752.8 | 198470   | 205742.5 | TRUE |

|          |          |          |          |          |          |          |          |      |
|----------|----------|----------|----------|----------|----------|----------|----------|------|
| 982909.5 | 848308.9 | 731691.9 | 992565.6 | 881185   | 980625.4 | 1008346  | 1045554  | TRUE |
| 507427.1 | 517447.6 | 551243   | 519885.6 | 549597.4 | 485225.4 | 554533.4 | 515795.5 | TRUE |
| 192559.8 | 176797.1 | 191630.5 | 217964.3 | 176107.9 | 166924.8 | 197369.1 | 192151.3 | TRUE |
| 853503.6 | 843674.8 | 903607.6 | 853793.2 | 808107.1 | 832727.6 | 799065   | 864277   | TRUE |
| 96604.7  | 72299.8  | 65395.2  | 53531.2  | 71504.7  | 77995.7  | 96936.5  | 99572.4  | TRUE |
| 64058.8  | 64726.9  | 76608.5  | 61011.9  | 65800.2  | 90283.6  | 65711.9  | 60819.4  | TRUE |
| 40739    | 43476.7  | 32889    | 30069.2  | 29444.2  | 37722.6  | 34791.6  | 39010.8  | TRUE |
| 52365.6  | 53587.3  | 64250.6  | 47042.3  | 54303.7  | 92304    | 65082.9  | 67901    | TRUE |
| 14440.9  | 10361.2  | 10251.2  | 14380    | 15350.8  | 9298.6   | 10464.9  | 11336.9  | TRUE |
| 81392.5  | 76047.2  | 89658.4  | 76379.9  | 68751.9  | 103584.8 | 63505.7  | 73379.2  | TRUE |
| 62778.2  | 67976.5  | 74222.7  | 58703.3  | 50898.5  | 74206.3  | 59608.5  | 60844.5  | TRUE |
| 228053.2 | 195305.8 | 210811.3 | 225099.6 | 289629.3 | 217950   | 224985.3 | 250127.1 | TRUE |
| 126972   | 61034    | 146847.2 | 102570.6 | 94454.8  | 130510.9 | 61338.4  | 96532.1  | TRUE |
| 324071.5 | 251019.4 | 474497.2 | 459269.4 | 373364   | 527990.4 | 268743.3 | 371898.2 | TRUE |
| 78417.3  | 58479.9  | 91938.3  | 65917.9  | 86598    | 80672.5  | 54773.4  | 90576.5  | TRUE |
| 18139.4  | 19648.7  | 9259     | 4860.3   | 11799.6  | 6808.8   | 18744.2  | 9329.6   | TRUE |
| 278071.6 | 159862.2 | 352196.1 | 285509.5 | 243144.7 | 365058.2 | 178798.3 | 250803.7 | TRUE |
| 231104   | 215430.1 | 154351.3 | 139649.7 | 325906.8 | 312837.1 | 221715.3 | 290625.6 | TRUE |
| 21808.7  | 5414.3   | 20990.8  | 28412.5  | 22303.3  | 20822.1  | 10808.2  | 12705.2  | TRUE |
| 866819.3 | 641830.7 | 903124.9 | 834256.5 | 743737.4 | 976617.3 | 606523.9 | 790498.5 | TRUE |
| 1103760  | 1004054  | 741074.8 | 725739.3 | 1396270  | 1252851  | 1064203  | 1355280  | TRUE |
| 341150.4 | 199997.6 | 333426.2 | 266839.4 | 264096.4 | 327568   | 199060   | 307148.9 | TRUE |
| 230583   | 123419.9 | 269258.5 | 245491.2 | 195997.6 | 278109.7 | 143105.3 | 197368.5 | TRUE |
| 84361.6  | 66142.4  | 154346.4 | 100257.5 | 112569.8 | 142926   | 73595.4  | 100297.2 | TRUE |
| 56235.3  | 71437.6  | 48411.1  | 37953.2  | 49683.3  | 46515.5  | 51562    | 42653.8  | TRUE |
| 214936.9 | 155813   | 290869.7 | 306183.3 | 228397.9 | 249431.1 | 187833.1 | 225149   | TRUE |
| 314639.2 | 257284.6 | 307406.6 | 381426.9 | 295213.4 | 346248.4 | 298565.5 | 328865.4 | TRUE |
| 228118.4 | 226406   | 282044.5 | 315803.4 | 221763   | 225334.7 | 227640.9 | 238787.3 | TRUE |
| 110566.7 | 115688.2 | 95481.7  | 120961.6 | 96685.3  | 94061    | 99013.1  | 111718.7 | TRUE |
| 219358.6 | 205463.4 | 265808.6 | 261393.5 | 213449   | 235881.5 | 208955.9 | 193489.8 | TRUE |
| 695024.3 | 835740.6 | 566988.1 | 684561.2 | 656571.8 | 632508.5 | 865900.6 | 696541.3 | TRUE |
| 513152.9 | 539249.6 | 441986.2 | 460301.8 | 460658.2 | 465244.9 | 603369.8 | 476241.8 | TRUE |
| 144593.2 | 166642.9 | 120799.5 | 120476.1 | 116066.2 | 119000.5 | 184039.2 | 151285.2 | TRUE |
| 584749.5 | 485699.4 | 641072.1 | 609365.6 | 512093.2 | 535292.4 | 526354.3 | 516309.1 | TRUE |
| 270768.1 | 198444.7 | 276812.6 | 298640.8 | 244209.9 | 241374.4 | 217796.2 | 249929.2 | TRUE |
| 71884.5  | 62977.6  | 101320.4 | 97818.9  | 72330.7  | 98207.9  | 73439.1  | 67201.3  | TRUE |
| 120831.9 | 129092.2 | 58495.9  | 111679.3 | 92851.3  | 103398.6 | 118849.5 | 111299.5 | TRUE |
| 26660.3  | 38906.7  | 29154.7  | 28589.8  | 20161.4  | 31763.4  | 32208.4  | 28161.4  | TRUE |
| 33467.9  | 47002.7  | 48188.9  | 34027.4  | 53341.3  | 33339.2  | 34723.2  | 28996    | TRUE |
| 21521.6  | 9984     | 37088.4  | 13108.3  | 26334.7  | 32274.6  | 17531.6  | 12218.7  | TRUE |
| 159845.3 | 96806.8  | 182809.9 | 52945.2  | 46596.9  | 108912.7 | 134087.4 | 291193.8 | TRUE |

|          |          |          |          |          |          |          |          |      |
|----------|----------|----------|----------|----------|----------|----------|----------|------|
| 512573.2 | 913030.4 | 896996.5 | 1037507  | 1118619  | 214268.8 | 266365.6 | 241843.6 | TRUE |
| 88737.2  | 67097.9  | 105411.4 | 141645.4 | 151687.3 | 47742.8  | 26098.3  | 69652.5  | TRUE |
| 50784.8  | 40768.3  | 50395.5  | 49447.8  | 36742.9  | 64879.7  | 79231.6  | 56497.7  | TRUE |
| 72541.4  | 76238.4  | 69973.4  | 47375.5  | 34483.7  | 115114   | 73627.6  | 43742    | TRUE |
| 43565.9  | 63412.4  | 71754.1  | 59695    | 24052.6  | 78042.2  | 57309.3  | 37583.1  | TRUE |
| 37229.5  | 32168.9  | 36194.2  | 34691.8  | 38235.7  | 34859.6  | 34700.9  | 30030.4  | TRUE |
| 50887.6  | 33188.7  | 43224    | 42255.8  | 65340.9  | 46215.3  | 67384.2  | 61404.4  | TRUE |
| 64528.6  | 89157.8  | 71181.6  | 54093.5  | 90734.2  | 57827.5  | 60591.3  | 72639    | TRUE |
| 53378    | 54083.5  | 42580.6  | 58224    | 57149.3  | 34174.5  | 52620.5  | 56448.3  | TRUE |
| 172279.6 | 203054.6 | 162899.3 | 225829.2 | 225832.7 | 154246   | 133431.7 | 127837.9 | TRUE |
| 1406877  | 572906.2 | 497341.1 | 409778.2 | 432613.4 | 320304.1 | 476015.1 | 416181   | TRUE |
| 108687.9 | 104861.8 | 102943.3 | 114372.2 | 132000.1 | 118427.5 | 106505.6 | 132130.9 | TRUE |
| 93991.8  | 80896    | 132492.5 | 106424.3 | 91291.6  | 97552.3  | 89960.7  | 104659.4 | TRUE |
| 29863.4  | 24042.8  | 44446.2  | 22768.6  | 23630.7  | 36428.7  | 34162.1  | 28611.4  | TRUE |
| 56860.7  | 50061.6  | 47101.6  | 59139.4  | 52565.4  | 62829.8  | 60539.2  | 60660.3  | TRUE |
| 215996.9 | 176144.3 | 197659.1 | 202397.3 | 149470.7 | 178880.8 | 218083.5 | 179381.8 | TRUE |
| 156392.1 | 172818.6 | 189918.7 | 173764.3 | 133731.9 | 158198.2 | 150661.9 | 140262.6 | TRUE |
| 766426.1 | 722367.2 | 817055.8 | 659473.8 | 909557.1 | 626497.5 | 648809.8 | 677655.4 | TRUE |
| 445243.4 | 403876.4 | 411472.5 | 362663.6 | 379208.5 | 439966.7 | 379922.2 | 370091.7 | TRUE |
| 87266    | 90027.9  | 103465.8 | 87026.5  | 77604.9  | 108604.7 | 88598.7  | 83720.5  | TRUE |
| 276730.4 | 350787.3 | 289332.2 | 298197.3 | 373270   | 309430.4 | 355960.5 | 271761.9 | TRUE |
| 200231.9 | 168782.8 | 259776.9 | 247114.4 | 202783.9 | 300657.9 | 213347.9 | 191041.9 | TRUE |
| 97358    | 73549    | 65677.2  | 101025.6 | 85781    | 94863.7  | 85529.1  | 95800.7  | TRUE |
| 196624   | 190598.4 | 202889.3 | 248758.1 | 268643.3 | 221736.2 | 209651.4 | 211182.1 | TRUE |
| 50693.9  | 33849.1  | 28700.3  | 42456.4  | 49326.2  | 61516.6  | 58677.1  | 60977.3  | TRUE |
| 329314.9 | 313398.2 | 291288.9 | 337363.9 | 353500.1 | 296647.7 | 307048.4 | 356977.9 | TRUE |
| 492628.3 | 473875   | 528838.6 | 518892.6 | 528579.6 | 556283.8 | 519110.7 | 538242.9 | TRUE |
| 864579.7 | 782048.1 | 657584.8 | 860553.4 | 817549.3 | 746139.2 | 823614.7 | 871651.4 | TRUE |
| 738805.7 | 684627.6 | 661889.2 | 713138   | 737301.3 | 676771.8 | 680500.3 | 686745.6 | TRUE |
| 164938.8 | 142160   | 177793.7 | 169019.3 | 144657.6 | 152139.7 | 142900.5 | 171575.1 | TRUE |
| 203340.1 | 222233.8 | 148516.3 | 203921.7 | 245064.6 | 153933.5 | 208423.9 | 233892.5 | TRUE |
| 68914.1  | 68366.3  | 47749.9  | 76861.7  | 59257.3  | 57558.7  | 89274.3  | 79437.3  | TRUE |
| 681651.6 | 626440   | 1079479  | 612777.6 | 400930.7 | 1153661  | 555679.5 | 440165   | TRUE |
| 179248   | 154460.8 | 238400.6 | 179888.7 | 149137   | 224417.6 | 196219.6 | 144663.7 | TRUE |
| 628519.8 | 323075.2 | 480207.7 | 452771.3 | 977621   | 487326   | 343980.4 | 492190   | TRUE |
| 8030.2   | 7675.7   | 17178.8  | 4884.5   | 4063.5   | 14723    | 6135.8   | 4601.6   | TRUE |
| 1016006  | 1038586  | 873780.8 | 877071.7 | 1363228  | 692065.3 | 1044981  | 686276.1 | TRUE |
| 128128.4 | 112047.9 | 182064.8 | 117123.6 | 104433.3 | 211365.2 | 137161.8 | 117397.6 | TRUE |
| 211063.9 | 182303.8 | 404184.5 | 183775.8 | 108514.6 | 466981.7 | 193637.9 | 148525.6 | TRUE |

|          |          |          |          |          |          |          |          |      |
|----------|----------|----------|----------|----------|----------|----------|----------|------|
| 59425.1  | 54858.9  | 85592.2  | 46828.6  | 57438.4  | 72556    | 77176.7  | 73346.6  | TRUE |
| 97227.9  | 74098.5  | 87140.1  | 79436.4  | 191562.7 | 73806.5  | 57442.7  | 106488.4 | TRUE |
| 400129   | 325912.3 | 632595.5 | 280304.8 | 254334.2 | 923413.7 | 448364.4 | 316247.7 | TRUE |
| 33227.7  | 21325.1  | 44904.9  | 26398.4  | 23799.6  | 60595.2  | 35130.1  | 26102.7  | TRUE |
| 78821.1  | 55122.9  | 70059.6  | 60208.3  | 81006.4  | 105790.3 | 65935.5  | 78774.1  | TRUE |
| 161108.6 | 137473.3 | 145269.5 | 177457.3 | 246898   | 140485   | 186847.3 | 179153.6 | TRUE |
| 142627.5 | 106420.4 | 253364.4 | 99773.8  | 94770.9  | 271374.6 | 144374.4 | 112969.1 | TRUE |
| 118607.9 | 101908.4 | 264924.2 | 69254    | 80817.4  | 239739.1 | 139048.4 | 89731.5  | TRUE |
| 58800.4  | 67812.6  | 141263.5 | 32150.1  | 47556.3  | 150447.5 | 64725.2  | 47291.2  | TRUE |
| 198217.4 | 124380.6 | 159935.8 | 157240.4 | 355540.1 | 87887.1  | 114770.6 | 100878.6 | TRUE |
| 241715   | 206957.4 | 422818.4 | 187473.3 | 119791.4 | 475803.9 | 232250.9 | 140232.6 | TRUE |
| 232372.4 | 235949.1 | 337523   | 238821.1 | 234770.4 | 362875.3 | 288104.2 | 259521.3 | TRUE |
| 100315.2 | 84103.7  | 175083.3 | 51849.9  | 65674    | 159848.8 | 85905.9  | 60236.1  | TRUE |
| 29932.3  | 18368    | 26017.8  | 29648.8  | 47948    | 28062.8  | 27819.8  | 21847.7  | TRUE |
| 70559    | 44328.1  | 70663.6  | 119400.1 | 68980.7  | 69961.4  | 51405.6  | 66838.5  | TRUE |
| 205573.1 | 269357   | 132584.2 | 159620.7 | 112665.5 | 151521.4 | 243094.6 | 132480.3 | TRUE |
| 84344.1  | 79746.1  | 88665.8  | 63079.9  | 66279.7  | 74946.4  | 74610.2  | 63646.1  | TRUE |
| 178094.3 | 206149   | 139836.2 | 173609.6 | 123430   | 141965.7 | 200416.1 | 125582.2 | TRUE |
| 630570   | 365901.4 | 691886.2 | 792184.3 | 536247.2 | 644892.1 | 439993   | 578381.8 | TRUE |
| 342809.4 | 212509.7 | 398952.7 | 402850.5 | 293520.3 | 333576.1 | 259399.6 | 324170.2 | TRUE |
| 26256.4  | 12763.2  | 8552.1   | 16196.1  | 47777    | 16030.7  | 26504.1  | 37170.7  | TRUE |
| 98448.2  | 78359.4  | 97226    | 103209.5 | 128772.8 | 70216    | 82165.4  | 68065.5  | TRUE |
| 108611.9 | 74247.9  | 97678.9  | 114329.4 | 141367.7 | 84042.1  | 115103.9 | 104267.4 | TRUE |
| 30058.8  | 28868    | 28932.6  | 24941.8  | 32801.8  | 20616.9  | 22733.1  | 11020.1  | TRUE |
| 44644.6  | 32959.4  | 50671.2  | 35735.4  | 23243.8  | 47632.9  | 41764.8  | 21838.1  | TRUE |
| 50611.5  | 240156   | 124013.7 | 47717.4  | 39556.1  | 130112.7 | 85913.8  | 40996.6  | TRUE |
| 16940.6  | 25543.3  | 30167.4  | 9132.3   | 17331.7  | 20278.6  | 9727.1   | 8297.3   | TRUE |
| 173979.1 | 177906.9 | 144492.2 | 170061.2 | 175609.5 | 165131.8 | 183252   | 128893.6 | TRUE |
| 130879.4 | 115889.3 | 140424.5 | 122896.9 | 72868.8  | 162472.5 | 152454   | 127407.2 | TRUE |
| 171866.4 | 152309.1 | 149688.8 | 174607.8 | 114679.3 | 192607.3 | 162595.8 | 135385.4 | TRUE |
| 74217.9  | 65127.3  | 64529.5  | 74796.8  | 62696.3  | 71215.6  | 63204.2  | 52630.8  | TRUE |
| 244233.1 | 215442.3 | 240955.7 | 293974.6 | 255470   | 263007.5 | 218254.7 | 218555.5 | TRUE |
| 66067.1  | 48732.1  | 51256.7  | 54924.4  | 48449.6  | 58535.9  | 50433.6  | 64862.1  | TRUE |
| 246700.3 | 249357.8 | 237334.4 | 242890.8 | 177597.8 | 233819.9 | 254130.3 | 182211.3 | TRUE |
| 325115.7 | 220923.8 | 295573   | 306509.3 | 429885.9 | 264330.7 | 217076.3 | 272504.4 | TRUE |
| 121143.1 | 90138.1  | 157461.1 | 104503   | 81265.6  | 158928.1 | 94176    | 91168.4  | TRUE |
| 178406   | 140140   | 170645.2 | 183678.2 | 113555   | 203839.6 | 138538.7 | 112062.5 | TRUE |
| 356753.9 | 343558.6 | 355605.9 | 339898.9 | 415362   | 368698   | 307231.9 | 361756.8 | TRUE |

|          |          |          |          |          |          |          |          |      |
|----------|----------|----------|----------|----------|----------|----------|----------|------|
| 54930.5  | 32979.1  | 52690.7  | 55309.4  | 41688.6  | 40066.3  | 59520    | 33683.4  | TRUE |
| 95480.7  | 80514.9  | 88670.6  | 95453.7  | 114347.9 | 100695.3 | 74739.2  | 104038.7 | TRUE |
| 49131.2  | 52674.2  | 52243.2  | 37371    | 61755.5  | 53630.2  | 43417.6  | 53749.7  | TRUE |
| 52933.9  | 57740.4  | 54467.4  | 47631    | 50389.6  | 43226.2  | 56924.2  | 36268.3  | TRUE |
| 223478   | 226460.9 | 217367.1 | 234622.4 | 212811.3 | 226951.9 | 270524.3 | 233776.3 | TRUE |
| 201450.8 | 196926.9 | 176329.6 | 186268.5 | 162586.9 | 189906.4 | 214468.2 | 185733.9 | TRUE |
| 607508.4 | 480830.9 | 638573.8 | 679281.5 | 586383.8 | 614759.9 | 531339.9 | 645662.9 | TRUE |
| 600877.8 | 679859.7 | 470309.4 | 511230   | 575145.7 | 724936.5 | 683674.7 | 688801.9 | TRUE |
| 120422.9 | 153033.1 | 127533.3 | 138136.5 | 143399.8 | 124909.7 | 139739   | 117813.4 | TRUE |
| 65179.7  | 61440    | 84381.4  | 92532.3  | 58275.5  | 84467.3  | 58540.8  | 79664.2  | TRUE |
| 395907.5 | 322456   | 436184.4 | 415129.5 | 419846.1 | 389483.5 | 321165.9 | 387387.5 | TRUE |
| 329439   | 297791   | 389642   | 434200.9 | 336329.7 | 375783.7 | 308594.2 | 369149.4 | TRUE |
| 156659.7 | 126047.1 | 183772.5 | 165433.9 | 119642.6 | 146675.3 | 132630.4 | 145498.7 | TRUE |
| 30698.2  | 18886.9  | 31540.7  | 23488.9  | 16575.2  | 23462.8  | 26051.1  | 24685.5  | TRUE |
| 1994432  | 1572196  | 2067198  | 1867560  | 1894015  | 2093250  | 1762708  | 2123105  | TRUE |
| 219253.6 | 228613.8 | 199547.4 | 215419.1 | 296858.5 | 299454.6 | 237582.7 | 301608.1 | TRUE |
| 27742.5  | 37271.3  | 31065.3  | 40697.7  | 59160.9  | 29360.9  | 42337.2  | 38601.5  | TRUE |
| 69005.8  | 94284.4  | 61017.8  | 90069.7  | 93877.7  | 66476.1  | 75536    | 68755.3  | TRUE |
| 124556.3 | 104462.9 | 121870.1 | 111282.9 | 120079.8 | 114632.7 | 121934.1 | 113110.7 | TRUE |
| 106584.8 | 137963.6 | 95132.9  | 117667.8 | 104021.1 | 76619.9  | 106059   | 84962.3  | TRUE |
| 408567.9 | 377033.7 | 370710.4 | 425046.6 | 321524.4 | 400744.1 | 431431.4 | 327815.5 | TRUE |
| 961272.8 | 747604.9 | 868131   | 995473.7 | 890583.4 | 1040493  | 767370.4 | 992816.9 | TRUE |
| 31010.4  | 27133.8  | 44439.2  | 29756.5  | 28829.2  | 43008    | 32700.1  | 41231.8  | TRUE |
| 33209.4  | 38120    | 43713.2  | 30639.4  | 34425.1  | 38229.2  | 36118.5  | 29368.7  | TRUE |
| 53087.4  | 38160.1  | 41441.2  | 29669.2  | 30184.1  | 38381.6  | 41607.8  | 19203.3  | TRUE |
| 39565.9  | 37256.7  | 30848.3  | 31393.8  | 18603.6  | 35172.8  | 28031.5  | 28524.5  | TRUE |
| 648725   | 490510   | 682555.2 | 637418.6 | 673652.9 | 715701.9 | 547292.8 | 647863.1 | TRUE |
| 58094.7  | 62794.1  | 68836.3  | 51239.1  | 34819.8  | 59298    | 50451    | 29659.5  | TRUE |
| 41832.2  | 51486.4  | 49072.4  | 53425    | 34709.7  | 37366    | 38359.5  | 21625.3  | TRUE |
| 255605.3 | 251131.9 | 246847.2 | 264247.4 | 204905   | 246951.6 | 238996.6 | 202011.6 | TRUE |
| 79940.1  | 95125.1  | 118248.2 | 45774.3  | 82531.5  | 106178.3 | 94736    | 57250.7  | TRUE |
| 295155.8 | 217975.3 | 457356.5 | 236789.5 | 200824.3 | 385539   | 277933.9 | 208389.1 | TRUE |
| 121614.5 | 92637    | 196606   | 100381.1 | 73419.2  | 177549.6 | 118855.3 | 88093.8  | TRUE |
| 166806.1 | 105075.5 | 181318.9 | 193195   | 341411.8 | 161525   | 131454.9 | 152447   | TRUE |
| 17075.9  | 8944.7   | 39527.2  | 9034.8   | 19479.6  | 27535.1  | 23781.9  | 19716.9  | TRUE |
| 24091    | 34812.8  | 28889.6  | 5963     | 5733.6   | 28499.5  | 8784     | 8207.9   | TRUE |
| 67495.1  | 49622    | 64709.1  | 60581    | 93922    | 38831.3  | 43329.4  | 44581.7  | TRUE |
| 169890.1 | 124110.2 | 167722.4 | 162799.4 | 321790.4 | 77606.6  | 127533.2 | 110880.6 | TRUE |
| 70833.8  | 48403.2  | 88736.9  | 46172.1  | 53451.9  | 129965.7 | 57639    | 61980    | TRUE |
| 73006.7  | 44581.2  | 79998.2  | 83564    | 141069   | 70670.9  | 70398.7  | 71028.2  | TRUE |
| 122947.8 | 171583.8 | 163670   | 151268.3 | 84067.4  | 181545.9 | 140172.5 | 89299.8  | TRUE |
| 311812.9 | 316116.3 | 299543.6 | 342753   | 280953.8 | 293023.3 | 311818.9 | 267434.4 | TRUE |
| 290668.6 | 246813   | 240823.1 | 280572.8 | 295512.2 | 314021.2 | 269211.7 | 313601.4 | TRUE |
| 310479   | 281491.4 | 316379.7 | 284975.3 | 298378.3 | 280196.1 | 264175.3 | 275065.1 | TRUE |

|          |          |          |          |          |          |          |          |      |
|----------|----------|----------|----------|----------|----------|----------|----------|------|
| 352969.7 | 363570.5 | 337604   | 341925.3 | 286982   | 340206.9 | 301763   | 318352   | TRUE |
| 277873.6 | 247924.4 | 281352.7 | 258620.4 | 267086.2 | 254722.5 | 239779.2 | 283488.9 | TRUE |
| 53875.4  | 44609.1  | 47296.7  | 44599.2  | 48986.1  | 49433.7  | 60102    | 50535.2  | TRUE |
| 54458.1  | 46284    | 41996.6  | 54191.1  | 40540.6  | 68875.7  | 57036.2  | 51625.3  | TRUE |
| 206747.8 | 187957.1 | 197860.4 | 163991.2 | 162252.6 | 244900.9 | 158620.8 | 198782.9 | TRUE |
| 83935.1  | 72578.7  | 54549.6  | 83625.3  | 71282.9  | 94065.8  | 91068.3  | 89314    | TRUE |
| 364267.3 | 401638.6 | 401115.9 | 636500.1 | 290762.5 | 428498.4 | 495943.1 | 320628.7 | TRUE |
| 75290.8  | 100661.3 | 42864.6  | 54289.4  | 71124.2  | 38794.7  | 101426.8 | 92579.4  | TRUE |
| 495418.1 | 661831.1 | 355019.6 | 573999.3 | 646373.6 | 357739.9 | 667077.9 | 619762.5 | TRUE |
| 121087.5 | 134331.4 | 118625.1 | 99217.6  | 121655.2 | 97062.5  | 142433.6 | 116832.9 | TRUE |
| 97165.6  | 125779   | 63798.6  | 84180.7  | 107634.4 | 56249.3  | 136641.3 | 92808.1  | TRUE |
| 50885.8  | 41334.6  | 23542.4  | 39258.9  | 45423.2  | 31850.9  | 59301    | 47995.4  | TRUE |
| 204688.1 | 225105.1 | 141341.4 | 194819.2 | 230481.1 | 175795   | 222528.1 | 229298.7 | TRUE |
| 130751.7 | 153815.9 | 92549    | 106390   | 153313.7 | 77416.9  | 153929.3 | 155799.6 | TRUE |
| 124650.2 | 151480.5 | 68450.6  | 104984.9 | 128681.8 | 84322.8  | 131348.3 | 139831.3 | TRUE |
| 459944.4 | 651183.6 | 400572.6 | 443078   | 525823.6 | 366595.1 | 647201.9 | 542459.3 | TRUE |
| 10900.7  | 14449    | 28767.4  | 10347.5  | 9591.4   | 9461.3   | 10291.3  | 14504.3  | TRUE |
| 92699.9  | 68655.3  | 93290.8  | 85669.8  | 86240.5  | 103519.8 | 92055.9  | 99122.3  | TRUE |
| 82061.9  | 71584.4  | 56752.5  | 74742    | 142998.3 | 82249    | 75657.7  | 100972.1 | TRUE |
| 262989.9 | 233277.5 | 268288.2 | 195223.9 | 167793.1 | 270692   | 195656.9 | 148206.5 | TRUE |
| 105113.1 | 102096.8 | 104362.3 | 85017.6  | 72810.3  | 126281.3 | 109569.4 | 80574    | TRUE |
| 100752.7 | 78287.1  | 108151   | 83833.1  | 77027.7  | 197452.1 | 114607.1 | 101623.1 | TRUE |
| 38622.5  | 26076.6  | 22606.6  | 36663.2  | 54100.2  | 40656.4  | 30069.2  | 45485.2  | TRUE |
| 335912.5 | 342383.3 | 410212.9 | 314558.5 | 247461.8 | 458634.6 | 325063.2 | 264654.6 | TRUE |
| 175636.4 | 143456   | 229911.6 | 148910.1 | 119833.7 | 230162.8 | 147124.2 | 125470.6 | TRUE |
| 378096.6 | 207173.8 | 338879.2 | 311012.2 | 585115.6 | 338108   | 240689.9 | 334084.7 | TRUE |
| 226000.9 | 226839.4 | 189103.6 | 206396.1 | 185408.8 | 209667.3 | 223284.8 | 248327.4 | TRUE |
| 104300.6 | 84812.4  | 76797.4  | 93031.8  | 67137.6  | 87892.6  | 74752.3  | 77768.7  | TRUE |
| 78027.4  | 79910.2  | 89581.8  | 101443.1 | 97517.4  | 105295.1 | 84918.3  | 80739.4  | TRUE |
| 191717   | 179321.2 | 225874.3 | 207317.6 | 168738.2 | 215172.2 | 192472.3 | 160908   | TRUE |
| 445008.4 | 470851.8 | 423103.2 | 464110.4 | 394916.5 | 485493.6 | 430589.1 | 360924.5 | TRUE |
| 221034.5 | 170159.4 | 186613.4 | 239837.6 | 213507.5 | 275165.3 | 194868.5 | 293627.2 | TRUE |
| 100214.7 | 96002.1  | 108508.1 | 108286.3 | 92439.2  | 112390.9 | 104866.3 | 88912.9  | TRUE |
| 291977.6 | 230083.6 | 259315.3 | 323016.1 | 271194.6 | 283228   | 310162.7 | 254665.9 | TRUE |
| 68756.2  | 72993.6  | 65191    | 73201.5  | 74803.7  | 77608.8  | 91083.8  | 69528.4  | TRUE |
| 102319.5 | 60849.5  | 101745.9 | 98925.3  | 103673   | 89304    | 101078.3 | 95197.8  | TRUE |
| 153669   | 176914.6 | 224719.7 | 193255.7 | 204119.6 | 185286.1 | 179335.2 | 187344.5 | TRUE |
| 189283.3 | 185014.1 | 216090.1 | 220933   | 198128.9 | 202851.2 | 233793.4 | 180690.7 | TRUE |
| 154736.6 | 176032.8 | 181811.1 | 166475.9 | 163574.2 | 160104.3 | 191070.9 | 170203.7 | TRUE |
| 103551.2 | 107650.1 | 124119.9 | 115006.4 | 104753.4 | 134680   | 120764.4 | 109201.8 | TRUE |
| 443411.1 | 374569.4 | 409858.9 | 431924.2 | 481710.7 | 408876.5 | 403717.2 | 417720.7 | TRUE |
| 65061.8  | 39062.8  | 61909.2  | 51362.7  | 43426.2  | 62044    | 43581.4  | 39269    | TRUE |
| 135073.4 | 108887.7 | 120182.7 | 137630.6 | 174020   | 144793.6 | 137972.8 | 129705   | TRUE |
| 103270.9 | 100862   | 104851.1 | 89012.6  | 103645.8 | 112734.3 | 100606.5 | 104599.5 | TRUE |
| 53420.5  | 46764.8  | 49780.8  | 62940.5  | 58574.8  | 78473.9  | 66775.5  | 71260.1  | TRUE |



|          |          |          |          |          |          |          |          |      |
|----------|----------|----------|----------|----------|----------|----------|----------|------|
| 223298.5 | 205951.5 | 239701.7 | 232626.7 | 195733.8 | 226897.5 | 230238.6 | 197034.1 | TRUE |
| 32607.5  | 23099.3  | 35005    | 34822.4  | 37204.4  | 27357.1  | 24805.4  | 32322.3  | TRUE |
| 36050.5  | 32173.9  | 43532.2  | 34366.5  | 36608.1  | 45072.8  | 33509.3  | 32962.2  | TRUE |
| 246507.1 | 247758.7 | 250245.1 | 254958.6 | 270720   | 238321   | 229123.9 | 273068.3 | TRUE |
| 76097.3  | 54792.8  | 57338.1  | 69186.1  | 72675.4  | 67887.6  | 77344.2  | 61234.6  | TRUE |
| 83561.6  | 69441.8  | 74272    | 101965.6 | 78270.9  | 88722.5  | 74697.2  | 94565.1  | TRUE |
| 222978.8 | 161851.9 | 196693.8 | 171932.4 | 172793   | 237652.1 | 187572.4 | 227236.5 | TRUE |
|          |          |          |          |          |          |          |          |      |
| 25360.1  | 28798    | 34235    | 32468.3  | 28780.9  | 37501.9  | 11531.3  | 37586.2  | TRUE |
| 99143.2  | 175805.6 | 167696.5 | 143626.4 | 114340.8 | 130999.6 | 89677.3  | 109999.9 | TRUE |
| 83904.9  | 151370.2 | 112378.2 | 55348.5  | 77105.7  | 32621.9  | 193735.5 | 35651.8  | TRUE |
| 70419.4  | 56917.6  | 77243.1  | 94198.1  | 76339.8  | 55167    | 42723.3  | 56345.7  | TRUE |
| 40349.2  | 51544.4  | 42424.7  | 35522.6  | 20730.6  | 30662.3  | 37575.5  | 23280.9  | TRUE |
| 196342.3 | 113669   | 350875   | 334809.2 | 148046.1 | 236641.8 | 179595.8 | 235909.1 | TRUE |
| 61411.6  | 61023.9  | 43159.8  | 68311.5  | 43984.4  | 55620.6  | 90973.9  | 53687.3  | TRUE |
|          |          |          |          |          |          |          |          |      |
| 91433.6  | 45953.3  | 92999    | 113765.3 | 44831.5  | 82313    | 63126.9  | 73418.5  | TRUE |
| 360910   | 466385.1 | 347317.2 | 444917.2 | 329317.2 | 353702.7 | 518280.2 | 332455.2 | TRUE |
| 64951.8  | 76394.2  | 57302.3  | 52915.7  | 46971.6  | 50298.6  | 76796.7  | 49794.4  | TRUE |
| 105187   | 126758.9 | 195140.5 | 96145.3  | 96556.9  | 203622.3 | 134958.9 | 101004.9 | TRUE |
| 334770.5 | 270698.3 | 822560.3 | 211850.6 | 162650   | 763721   | 361777   | 170637.4 | TRUE |
| 30273.5  | 31060.8  | 83991.7  | 7795.8   | 20778.8  | 66710.8  | 43724.7  | 23024.8  | TRUE |
| 785882.7 | 490738.3 | 734620.1 | 763565.5 | 1331524  | 476728.7 | 446678   | 560634.1 | TRUE |
| 314452.3 | 133431.1 | 303857.4 | 291185.2 | 706729.5 | 220873.8 | 180112.6 | 215476.2 | TRUE |
| 652676.1 | 567089.3 | 820675.3 | 610954.6 | 578068.7 | 840633.5 | 604599.4 | 603000.2 | TRUE |
| 62301.6  | 70872    | 100167.3 | 42025.3  | 48886.2  | 93160.8  | 43690.8  | 35870.9  | TRUE |
| 102768.8 | 98354.6  | 206538.2 | 73008.1  | 74111.3  | 229146.1 | 114743.7 | 72392    | TRUE |
| 102283.6 | 110886.1 | 183549.3 | 86915.8  | 106386.4 | 177390.6 | 119765   | 98582.4  | TRUE |
|          |          |          |          |          |          |          |          |      |
| 29604.7  | 44098    | 34523.6  | 15100.7  | 5478.6   | 30813.8  | 49565.7  | 7186.4   | TRUE |
| 304739.4 | 434253.6 | 318157   | 202660.9 | 184177.7 | 324433.2 | 475504.1 | 151607   | TRUE |
|          |          |          |          |          |          |          |          |      |
| 856622.1 | 424256.8 | 1077483  | 1143109  | 981138.2 | 876563.5 | 574187.5 | 837535.2 | TRUE |
| 87268.1  | 97153.1  | 73493.1  | 59075.5  | 75928.1  | 83865.3  | 107912.9 | 85739.2  | TRUE |
| 38167.5  | 36308.2  | 67152.6  | 33862.2  | 32415.9  | 61653.8  | 64303    | 33632.9  | TRUE |
| 82857.9  | 113772.9 | 87170.8  | 82284.9  | 57606.6  | 99739.7  | 139290.1 | 69768.6  | TRUE |
|          |          |          |          |          |          |          |          |      |
| 50309.6  | 47025.3  | 58378.2  | 59291.2  | 50213.2  | 60144.5  | 62617    | 45747.9  | TRUE |
| 212566.8 | 193430.9 | 250447.1 | 247721.9 | 323523.8 | 222424.4 | 205725.2 | 191465.9 | TRUE |
| 33002.5  | 44054.2  | 57275.1  | 21323.3  | 33433.6  | 48287.8  | 29826.4  | 39199.4  | TRUE |
| 20966.2  | 30838    | 42174.4  | 9667.4   | 11817.6  | 38854.6  | 14255.4  | 11728.3  | TRUE |
| 169855.1 | 182352.5 | 116663   | 120372.9 | 188248   | 107503.4 | 92784.2  | 88756.7  | TRUE |
|          |          |          |          |          |          |          |          |      |
| 73177.4  | 58083.7  | 132736   | 63093    | 55836.7  | 159406.8 | 85767.9  | 65020    | TRUE |
| 121969.2 | 117843.9 | 190134.5 | 96509.1  | 131128.7 | 184038.8 | 125821.1 | 104494.2 | TRUE |
|          |          |          |          |          |          |          |          |      |
| 123333.8 | 148058.8 | 126506.3 | 95387.8  | 111390.2 | 140205.7 | 115780.7 | 96498.6  | TRUE |
| 230888   | 223011.9 | 317055.3 | 194432.5 | 195130.7 | 322302.8 | 246979.8 | 191514.8 | TRUE |

|          |          |          |          |          |          |          |          |      |
|----------|----------|----------|----------|----------|----------|----------|----------|------|
| 282816.2 | 240984.6 | 228902.6 | 254536.4 | 331244.4 | 331249.9 | 252667.3 | 328986.3 | TRUE |
| 44227.3  | 43505.2  | 49796.8  | 61966.3  | 54085.8  | 49367.4  | 64208.3  | 50807.9  | TRUE |
| 38833.1  | 40435.3  | 35445.2  | 39307.5  | 30723.6  | 52197.3  | 50714.9  | 43898.3  | TRUE |
| 68883.1  | 81662.7  | 75038.8  | 81852.2  | 91053.1  | 67832.7  | 83130.5  | 89628.9  | TRUE |
| 632861.5 | 515954.5 | 576718.6 | 630588   | 684484.3 | 613615   | 523266.3 | 651455.2 | TRUE |
| 208176.4 | 192922.8 | 257461.6 | 233269.9 | 180211   | 233499   | 192664.3 | 207504.9 | TRUE |
| 197994.7 | 124265.9 | 160277.2 | 162254.3 | 220046.7 | 223796.4 | 150752   | 227982.2 | TRUE |
| 282204.5 | 257379.7 | 287412.8 | 291674.9 | 309367.5 | 326575.9 | 259997.3 | 299412.3 | TRUE |
| 95556.6  | 93962.1  | 111456.9 | 91995.8  | 112787.4 | 80566.4  | 98663.5  | 96034.1  | TRUE |
| 28295.6  | 39203.7  | 36238.7  | 27967.3  | 36225.1  | 33441    | 24207.4  | 27820.8  | TRUE |
| 16952.7  | 9646.1   | 17784.8  | 11032.3  | 16018.1  | 17841.1  | 18724.2  | 5688.5   | TRUE |
| 187551.7 | 189396.1 | 189808.1 | 173838.6 | 162136.9 | 167399.1 | 185578.8 | 170810.2 | TRUE |
| 150568.4 | 118209.5 | 129615.2 | 161963.9 | 119357   | 142272.4 | 169546.8 | 130788.8 | TRUE |
| 202395.6 | 236871.4 | 223340.1 | 202146.2 | 171741.1 | 221254.6 | 202781.8 | 191447.1 | TRUE |
| 74381.8  | 64115.7  | 43571    | 89977.3  | 70849.3  | 88649.1  | 73411.7  | 105588.9 | TRUE |
| 430501.6 | 485162.4 | 333865.6 | 442036.5 | 425873.3 | 369607.8 | 466137.4 | 391203   | TRUE |
| 33005.2  | 25340.3  | 22938    | 15290.4  | 31073.9  | 27309.4  | 20590.9  | 13377.1  | TRUE |
| 463739.1 | 546707.5 | 473167.6 | 329675   | 308533.8 | 489076.5 | 576564   | 322297.7 | TRUE |
| 60811.5  | 72872    | 61484.9  | 66009.9  | 64403.2  | 67043.7  | 64838.7  | 72260.4  | TRUE |
| 67823.4  | 82785.6  | 70559.7  | 68917.1  | 59844.7  | 67407    | 72636.6  | 73115.8  | TRUE |
| 76846.6  | 93668.8  | 78826.5  | 65962    | 64057    | 73573.7  | 99609.5  | 66333.9  | TRUE |
| 47032.3  | 48711.9  | 50230    | 73903.3  | 49843.7  | 47603.6  | 51951.6  | 51746.3  | TRUE |
| 74802.7  | 68855.3  | 69451    | 82609.7  | 72099.5  | 70098    | 81444.9  | 83876    | TRUE |
| 39147.9  | 37643.9  | 40807.1  | 29408.3  | 28903.2  | 55712.8  | 44182    | 49497.4  | TRUE |
| 50384.7  | 63034.6  | 49146.1  | 71907.5  | 65530    | 47615.1  | 58434.1  | 66195.3  | TRUE |
| 130850.7 | 129824.4 | 144825.3 | 161276.7 | 163758.3 | 147075.5 | 151270.2 | 138422.3 | TRUE |
| 370899.3 | 341417.8 | 339630.9 | 414841.7 | 371698.4 | 367195.6 | 358917.1 | 359107.1 | TRUE |
| 40689.9  | 33564.2  | 35481.2  | 40771.5  | 38354.8  | 30252.9  | 40497.7  | 44005.6  | TRUE |
| 43927.6  | 81730.5  | 48978.2  | 77346.9  | 61624.4  | 43401.2  | 43829    | 60978.5  | TRUE |
| 38107.1  | 40362.3  | 49408.7  | 56474.4  | 38298.5  | 43255    | 44510.3  | 43749.4  | TRUE |
| 127848.2 | 103480.1 | 133878.7 | 144874.2 | 108437.6 | 138227.6 | 132476.9 | 117209.9 | TRUE |
| 231437.9 | 212008.6 | 196371.5 | 244706.6 | 225911.8 | 226516.4 | 220602.3 | 233194.7 | TRUE |
| 130599.9 | 124625.9 | 101354.1 | 122006.9 | 145398.5 | 157749.6 | 149907.3 | 138522.9 | TRUE |
| 140582.9 | 162436.1 | 123279.9 | 120132.1 | 148742.2 | 122654.2 | 128958.8 | 119839.2 | TRUE |
| 266041.4 | 156324   | 150822.7 | 198315   | 218034   | 238680.9 | 192227.9 | 250403.6 | TRUE |
| 35254.8  | 36926.9  | 31391.5  | 36669    | 42357.7  | 31302    | 43412.9  | 40982    | TRUE |
| 145758.1 | 109412.9 | 126682.6 | 137153.4 | 144061.8 | 131817.5 | 143797.1 | 125517.6 | TRUE |
| 63360.7  | 62593.5  | 71005.8  | 83752.6  | 83989.7  | 82356.5  | 82026.9  | 82034.9  | TRUE |
| 37956.5  | 26904.7  | 46745.7  | 43846.3  | 34590.8  | 51601.8  | 36731.5  | 62755.5  | TRUE |
| 43227.5  | 32977.6  | 45052    | 43941.4  | 51126.3  | 50471.3  | 50180.7  | 47311.6  | TRUE |
| 159987.5 | 180632.3 | 138509.8 | 175065.7 | 123883   | 169124.8 | 193365.9 | 154146.8 | TRUE |
| 37632    | 41388.1  | 38496    | 47011.6  | 44970.1  | 45840.4  | 41975.1  | 24520.1  | TRUE |
| 226335.9 | 179400.8 | 218000.4 | 242301.6 | 206022.6 | 204999.8 | 175715.2 | 213370.7 | TRUE |
| 81162.6  | 81083.2  | 120142.5 | 80960.2  | 84302.2  | 115908.8 | 110933.7 | 84492.1  | TRUE |
| 153931.3 | 174828.8 | 185567.8 | 180261.3 | 159211   | 201467.3 | 181019.3 | 166551.4 | TRUE |
| 74409.7  | 71850.3  | 114215.2 | 70161.9  | 70767.5  | 112014   | 101145.9 | 70284.4  | TRUE |

|          |          |          |          |          |          |          |          |      |
|----------|----------|----------|----------|----------|----------|----------|----------|------|
| 105956.8 | 69627.2  | 127391.5 | 100303.2 | 168828.7 | 55581.9  | 74683.6  | 73002.7  | TRUE |
| 58183.7  | 60978.3  | 95974.7  | 64219.6  | 128405   | 52774.9  | 49144.1  | 59462.9  | TRUE |
| 123856.9 | 110042.7 | 134347.9 | 133086   | 109888.2 | 161447.4 | 124103.2 | 105023.8 | TRUE |
| 51635.3  | 42595.1  | 45489.4  | 50016.1  | 46338.4  | 76288.1  | 56324.7  | 64077.9  | TRUE |
| 32683    | 34095.4  | 39307.9  | 4956.7   | 27134.5  | 32894.6  | 32681.8  | 27610.6  | TRUE |
| 89751    | 57824.6  | 150280.9 | 51369.9  | 51641.2  | 241650.3 | 68244.7  | 62030.2  | TRUE |
| 246128.3 | 132357.1 | 156179.9 | 154900.2 | 579984.6 | 148407.6 | 137037.2 | 164674.7 | TRUE |
| 229393.3 | 180483.9 | 400517.6 | 154310.5 | 128281   | 399744.8 | 226114.7 | 161329.2 | TRUE |
| 95891.8  | 82816    | 156665.9 | 89584.1  | 71393.8  | 182085   | 83809.3  | 88909.9  | TRUE |
| 168718.2 | 170521.6 | 260784.9 | 84694.7  | 108765.3 | 260103   | 140650   | 106485.8 | TRUE |
| 308723   | 252310.4 | 263284.1 | 272185.4 | 564246.7 | 250405.7 | 250492.7 | 270441   | TRUE |
| 21835.3  | 25906.8  | 32748.3  | 20607.5  | 29431.2  | 45387.1  | 40441.6  | 28339.6  | TRUE |
| 214286.8 | 81988    | 167978.7 | 142898.9 | 536886.1 | 126810   | 92823.3  | 115959.1 | TRUE |
| 25934.7  | 23016.1  | 24571.3  | 31759.5  | 26889.3  | 16986    | 31026.2  | 20919.8  | TRUE |
| 34479.7  | 37100.6  | 26684.7  | 40899.9  | 30590.9  | 42216.5  | 51944.2  | 42809.7  | TRUE |
| 162503.1 | 121340.9 | 109619.6 | 136783.9 | 151822.7 | 142041.1 | 157217.2 | 139970.1 | TRUE |
| 25664.8  | 21485.2  | 8523     | 9219.9   | 11184.9  | 8780.8   | 13404.2  | 21423.7  | TRUE |
| 50789.1  | 66037.4  | 57679    | 79340.7  | 52622.9  | 61097.4  | 53951.6  | 62548.2  | TRUE |
| 188160.8 | 196419.2 | 155892.3 | 189990.2 | 261195.5 | 162982   | 215913.4 | 270577.6 | TRUE |
| 1168381  | 1134156  | 1062113  | 1173994  | 1258847  | 1012415  | 1265664  | 1205789  | TRUE |
| 197648   | 253818.7 | 196691.7 | 191525.8 | 195756.1 | 138532.6 | 206335.7 | 186520.4 | TRUE |
| 79586.1  | 78872.7  | 84521    | 83732.8  | 94936    | 62324.9  | 82897.4  | 77105.9  | TRUE |
| 38098    | 28838.4  | 21822.7  | 29515.1  | 36418    | 26764.5  | 31255.3  | 32845.8  | TRUE |
| 62261.3  | 48313.3  | 50194.7  | 46040.3  | 42145    | 63409.7  | 52485.4  | 62792.1  | TRUE |
| 71187.7  | 72625.7  | 92787.8  | 76025.7  | 60280.5  | 70444.5  | 70737    | 64461.3  | TRUE |
| 184479   | 157336.8 | 154311   | 164303.7 | 141140.2 | 139903.2 | 163860.2 | 137327.6 | TRUE |
| 81296.3  | 57823    | 67590.8  | 58797.2  | 81494.7  | 69142.2  | 63955.1  | 73563.5  | TRUE |
| 135413.9 | 119668.2 | 126004.9 | 134822.3 | 117756   | 148014.3 | 120930.8 | 124360.1 | TRUE |
| 266068.4 | 250450.3 | 227145.5 | 287462.4 | 296638.5 | 265080.5 | 259610.6 | 308530.9 | TRUE |
| 344610.1 | 507909.4 | 433572.6 | 416274.4 | 317180.4 | 299626.8 | 509931.2 | 327330.2 | TRUE |
| 16537.1  | 29044.2  | 6739.2   | 11268.8  | 22469.8  | 4375.3   | 27485    | 25778.4  | TRUE |
| 6809.4   | 5161.8   | 6330.1   | 4136.6   | 8183.2   | 6851.6   | 11429.6  | 8618.4   | TRUE |
| 441998   | 378796   | 491726.3 | 505021   | 340552.8 | 376020.9 | 434158.8 | 418048.6 | TRUE |
| 77031.4  | 107283   | 87976.4  | 57502.7  | 107387.7 | 87739.5  | 95532.1  | 102196.9 | TRUE |
| 90426.4  | 95502.1  | 130938.9 | 133456.6 | 88520.5  | 39315.3  | 113884.9 | 39756.7  | TRUE |
| 117543.3 | 105227.5 | 86412.5  | 65148.2  | 100028.9 | 94164.2  | 110494.6 | 88859.8  | TRUE |
| 37511.7  | 40342.9  | 28663.8  | 26123.4  | 35550.2  | 25125.1  | 33624.4  | 35992.5  | TRUE |
| 83755.7  | 97340    | 85998.8  | 107695   | 114022.9 | 83483    | 113425.6 | 109596   | TRUE |

|          |          |          |          |          |          |          |          |      |
|----------|----------|----------|----------|----------|----------|----------|----------|------|
| 38680.9  | 39038.5  | 30293.8  | 36242.7  | 38794.6  | 22887.1  | 41272.8  | 31739.1  | TRUE |
| 167598.6 | 167363.5 | 169151.5 | 144374.3 | 184668.6 | 132912.4 | 179506.7 | 187725.3 | TRUE |
| 22649.2  | 28431.5  | 8778.4   | 9515.7   | 25950.3  | 19062.3  | 9627     | 25536.8  | TRUE |
| 147814   | 176704.3 | 119965.4 | 150759.1 | 166240.5 | 110050.4 | 154472.7 | 139057.1 | TRUE |
| 158281.1 | 148951.9 | 167467.9 | 174644.6 | 152830.4 | 155336   | 169666.4 | 144772.3 | TRUE |
| 80867.2  | 96376.1  | 44646    | 67919.5  | 66632.1  | 34222.6  | 59959.3  | 81022.1  | TRUE |
| 158461.8 | 164697.1 | 153932.6 | 188659.6 | 98610    | 141923.4 | 155179.9 | 140369.8 | TRUE |
| 278457.5 | 187227   | 312018.6 | 296377.9 | 235785.4 | 235838   | 206753.6 | 250667.3 | TRUE |
| 35166.4  | 31933.9  | 37736.1  | 40432.8  | 38779    | 45878.7  | 36056.6  | 48157.6  | TRUE |
| 56585.7  | 36105.8  | 40309.3  | 42988.1  | 45826.5  | 32440.9  | 52510.3  | 39598.3  | TRUE |
| 17726.5  | 6922.9   | 12396.8  | 7774.8   | 15854.8  | 7667.2   | 9928.4   | 10599    | TRUE |
| 75158.4  | 79164.8  | 76205.2  | 86862.1  | 68999.6  | 81720.8  | 83181.9  | 71024.2  | TRUE |
| 354239.2 | 305609   | 329816.2 | 350932.2 | 317811.8 | 361369.3 | 326145.8 | 364695.2 | TRUE |
| 94538.2  | 108654.8 | 123039.3 | 86442.2  | 91346.4  | 123184.9 | 124395.7 | 67233.3  | TRUE |
| 133614.8 | 87131    | 119941.2 | 100853.9 | 87935.5  | 133150.7 | 97117.7  | 91555.3  | TRUE |
| 52771.4  | 52843.1  | 49119.7  | 38891.8  | 42042.3  | 42139.1  | 43102.7  | 30654    | TRUE |
| 241706.4 | 276676.2 | 232861.5 | 241305.1 | 283147.3 | 260327.9 | 318816.8 | 251010   | TRUE |
| 145844.1 | 123857.7 | 91027.7  | 130995.2 | 114511.4 | 147467.7 | 133299.9 | 164207.5 | TRUE |
| 237993.6 | 246192.8 | 157590.6 | 209058.3 | 211530.2 | 212771.9 | 263180   | 255339.6 | TRUE |
| 754237.8 | 610142.8 | 691020.9 | 948474.9 | 671089.7 | 875761.3 | 916770   | 809354.8 | TRUE |
| 238667.6 | 263912.1 | 172526.8 | 253857.8 | 266433.4 | 230339   | 300029.9 | 288416.1 | TRUE |
| 13696.7  | 6936.7   | 14295.4  | 5683.9   | 15647.6  | 12488    | 7595.8   | 8857.4   | TRUE |
| 59961.1  | 40631.7  | 74117.8  | 50705.4  | 42541.6  | 54150.6  | 37907.1  | 52106.8  | TRUE |
| 56387    | 54255.9  | 49769.4  | 47429.4  | 39274.8  | 54524.4  | 63299.5  | 44535.6  | TRUE |
| 25581.3  | 16892.6  | 20416.5  | 28950.2  | 20521.5  | 31223.3  | 16315    | 26109.9  | TRUE |
| 740616.9 | 721295.9 | 872282.6 | 795671.5 | 813298   | 709491.6 | 731546.8 | 680793.3 | TRUE |
| 173106.1 | 178485.5 | 148211.6 | 158487.4 | 116847.8 | 155067.5 | 156364.9 | 122844.9 | TRUE |
| 117561.1 | 130894.5 | 111943.6 | 148729.3 | 128937.3 | 140392.5 | 112162.7 | 126910.4 | TRUE |
| 446647.5 | 335011.1 | 392570   | 388270.8 | 393058.2 | 396258.7 | 338310.5 | 385376.9 | TRUE |
| 29896.3  | 37287.4  | 24036.6  | 36261.6  | 26063.2  | 30122.8  | 42116.3  | 26393.2  | TRUE |
| 208488.7 | 193476.7 | 161789.4 | 186026.9 | 177143.5 | 159880.2 | 207973.3 | 177905.9 | TRUE |
| 17452.9  | 9091.9   | 25661.8  | 18668.1  | 17000.3  | 21246.1  | 21195.6  | 30231.1  | TRUE |
| 388727.2 | 370728.7 | 332686.5 | 391530.4 | 291694.9 | 314745.2 | 366516.5 | 344527.6 | TRUE |
| 101094.7 | 95978.6  | 97717.4  | 85578.2  | 101704.1 | 97450.8  | 94541.2  | 98041.6  | TRUE |
| 62515.2  | 64172.9  | 51890.2  | 71086    | 88137.4  | 52141.4  | 69794.6  | 69791.6  | TRUE |

|          |          |          |          |          |          |          |          |      |
|----------|----------|----------|----------|----------|----------|----------|----------|------|
| 576277.9 | 565755.8 | 535031   | 510675.6 | 533228.6 | 649347.3 | 554427.9 | 582378.5 | TRUE |
| 195190.3 | 133572   | 148468   | 164738.1 | 170190.5 | 197434   | 176056   | 198236.5 | TRUE |
| 150472.5 | 141133.8 | 112000.3 | 158132.4 | 189352   | 138140.4 | 167600   | 195274.7 | TRUE |
| 226860.1 | 204126.9 | 156197.6 | 208720.5 | 226130   | 235752   | 303409.9 | 259035.1 | TRUE |
| 56337    | 94325    | 83150.2  | 97405.8  | 74660.3  | 91603.4  | 85431.1  | 76416.4  | TRUE |
| 39180    | 29830.3  | 30789.1  | 40663.7  | 36862.4  | 32517.7  | 30293.2  | 35856.4  | TRUE |
| 92406.6  | 90288.5  | 93210.3  | 99374.4  | 145868.9 | 92405.4  | 91155.6  | 86424.5  | TRUE |
| 211284   | 204347.6 | 184061.3 | 186296.7 | 196376.6 | 217632.8 | 182555.8 | 191418.9 | TRUE |
| 164581.8 | 162948.3 | 161913.2 | 163078.9 | 176113.5 | 161052.2 | 147419.1 | 159171.8 | TRUE |
| 170275.4 | 137989.8 | 133051.2 | 124967.5 | 159442   | 169573.6 | 139122.4 | 161129.1 | TRUE |
| 43280.7  | 50198.2  | 49746.3  | 44246.3  | 45044.4  | 37484.9  | 35238    | 54024.6  | TRUE |
| 176957.7 | 191024.9 | 174134.7 | 183661.3 | 194315.2 | 165980.1 | 172855.9 | 200896.6 | TRUE |
| 43359.7  | 43766.9  | 40194.6  | 45681.5  | 39996.4  | 35114.2  | 41452.9  | 40716.7  | TRUE |
| 67965.5  | 64367.1  | 44932.8  | 55944.5  | 63089.9  | 70927.7  | 82664.1  | 83973.1  | TRUE |
| 774411.9 | 509880.1 | 391454.6 | 763585   | 636389.9 | 678388.2 | 690789.2 | 941383.2 | TRUE |
| 35614    | 35051.9  | 21286.8  | 39785.1  | 42225    | 45564.6  | 44863.4  | 47001.3  | TRUE |
| 135946   | 96873.7  | 66662.9  | 88907.9  | 86194.1  | 107728.9 | 111480.2 | 142788   | TRUE |
| 197139.2 | 131307.2 | 158948.9 | 271814.5 | 207916.3 | 254818.8 | 246369.9 | 292682.8 | TRUE |
| 91073.2  | 66027.3  | 64194.8  | 93817.4  | 87394.4  | 108299.7 | 86225.6  | 108879.1 | TRUE |
| 1036254  | 740981.6 | 791310.1 | 1235703  | 1207112  | 1511598  | 1377543  | 1685697  | TRUE |
| 203124.4 | 151097.2 | 114963.2 | 167258   | 179907.3 | 198628.7 | 209955   | 216777.5 | TRUE |
| 61276.4  | 52043.7  | 43232.3  | 64729    | 59616.9  | 69508.6  | 51279.3  | 62685.6  | TRUE |
| 10071.7  | 15898    | 6757.3   | 9665.1   | 7023.2   | 13743    | 11421.9  | 13394.3  | TRUE |
| 223106.8 | 186459.8 | 193963.2 | 304962.7 | 268021.8 | 357527.6 | 349962.6 | 414677.8 | TRUE |
| 65826.6  | 76561.1  | 57477.8  | 38475.8  | 46445.9  | 54285.9  | 76117.5  | 51909.1  | TRUE |
| 88940.7  | 55013.3  | 56927.6  | 92683.5  | 99166.2  | 70640.7  | 52800.8  | 99611.2  | TRUE |
| 232126.8 | 208329.3 | 249266.9 | 215997.5 | 208627.9 | 285148.4 | 213908.5 | 229284.4 | TRUE |
| 82997.3  | 86523.4  | 85840.2  | 118889.4 | 96792.8  | 117819.3 | 69585.1  | 123941.1 | TRUE |
| 64695.7  | 120738.5 | 105927.6 | 118918.7 | 131697.8 | 54724.6  | 43924.1  | 63287.3  | TRUE |
| 4357478  | 4210376  | 3583362  | 4643208  | 4888399  | 3990615  | 4255326  | 4815308  | TRUE |
| 19709940 | 17245913 | 17032225 | 20057479 | 21621108 | 17082202 | 19808152 | 22070252 | TRUE |
| 92413.4  | 84779.7  | 84726.5  | 88295.9  | 104967.4 | 90210.2  | 85865    | 94850.9  | TRUE |
| 102401.7 | 98570.6  | 112176.9 | 105281.6 | 127293.7 | 112092.9 | 108819.4 | 118808.1 | TRUE |
| 222778.5 | 216874.1 | 196092.4 | 238926.7 | 240001.1 | 203382   | 213052.7 | 271872.4 | TRUE |

|          |          |          |          |          |          |          |          |      |
|----------|----------|----------|----------|----------|----------|----------|----------|------|
| 39877.6  | 34997.2  | 30492.1  | 40821.5  | 29574.2  | 38573.4  | 39464.3  | 42533.2  | TRUE |
| 109754.9 | 90318.2  | 107178.4 | 107121   | 120919.8 | 125659   | 111809.5 | 123649.6 | TRUE |
| 794636.6 | 788330.6 | 672712.2 | 890477.4 | 731503.3 | 863320.2 | 795042.4 | 916354.8 | TRUE |
| 40544.2  | 41124.2  | 19658.1  | 23638.9  | 32761.5  | 33878.1  | 29896.7  | 22187.7  | TRUE |
| 739585.1 | 760296.1 | 565611.7 | 770060.3 | 698824.3 | 792010.5 | 820411.8 | 918433.8 | TRUE |
| 176445.9 | 148729.5 | 140112   | 159291.9 | 141534   | 224479.9 | 144044.8 | 204136.7 | TRUE |
| 246874.4 | 191852.6 | 236700.5 | 189236.4 | 200290.9 | 285084.5 | 177329.6 | 218979.3 | TRUE |
| 218023.8 | 196207   | 185164.5 | 199563.3 | 315823.8 | 209349.3 | 206611.7 | 195714.3 | TRUE |
| 185250.9 | 149459.7 | 154499.4 | 181861.9 | 132940.2 | 163999.2 | 146355   | 163637.3 | TRUE |
| 3863309  | 2719448  | 3024364  | 4254706  | 2798044  | 3407458  | 3351994  | 2816636  | TRUE |
| 271412.5 | 233019.1 | 270553.6 | 315154.2 | 261689.3 | 304581.7 | 267097.5 | 280724.7 | TRUE |
| 216140.3 | 187607.1 | 188935.1 | 213578.2 | 190637   | 218764.6 | 203551.2 | 219456.1 | TRUE |
| 208049.5 | 178366.9 | 194493.8 | 216124.8 | 192684.4 | 204996   | 191700.8 | 208755.2 | TRUE |
| 197627.2 | 158997.7 | 161931.6 | 193083.6 | 187946.4 | 171859.9 | 181009.8 | 196326.9 | TRUE |
| 32409.6  | 30162.5  | 54675.9  | 51398.4  | 56029.3  | 41120.4  | 44605    | 31459.1  | TRUE |
| 127423.7 | 100921   | 143637.1 | 135601.3 | 156662.5 | 126490.1 | 130408.5 | 127589.7 | TRUE |
| 33504.7  | 36953.8  | 22176.8  | 42310.5  | 27322.8  | 33854.1  | 15997.4  | 28274    | TRUE |
| 55291.2  | 64038.8  | 61713.4  | 56758.5  | 77416.5  | 29934    | 32736.5  | 45408.4  | TRUE |
| 94833.3  | 125896.1 | 85339.3  | 166193.3 | 150984.6 | 58251.6  | 79515.7  | 72484.4  | TRUE |
| 34565.1  | 46670.4  | 30126.8  | 61064.5  | 44629.5  | 48986.3  | 48088.4  | 54438.8  | TRUE |
| 55896.9  | 40103.6  | 36526.1  | 43443.2  | 40675.1  | 51057.6  | 40343.9  | 50839.1  | TRUE |
| 120352.3 | 89796.1  | 107545   | 123165.3 | 124879.9 | 102062.2 | 118392.9 | 131283.3 | TRUE |
| 531648.4 | 406952.3 | 411924.2 | 461713.3 | 464281.6 | 543773.8 | 468162.7 | 545380.4 | TRUE |
| 322634.2 | 239749.4 | 268218   | 249436.8 | 331577.9 | 362295.5 | 236787.2 | 333800.2 | TRUE |
| 176506.6 | 220453.5 | 173057.3 | 164360.4 | 178100.2 | 172523.4 | 169295.9 | 178688.9 | TRUE |
| 113707.8 | 121763   | 118125.7 | 137791.5 | 132733.5 | 123839.7 | 125715.1 | 119003.7 | TRUE |
| 39448.4  | 63139.5  | 48908.7  | 63916.5  | 76945.4  | 40226.3  | 45092.8  | 36650.9  | TRUE |
| 209420.4 | 129942.5 | 159423.5 | 146993.8 | 148702.7 | 176436   | 147221.5 | 224063.8 | TRUE |
| 99535.3  | 61617.1  | 70684.6  | 63004.2  | 72121.4  | 83998.3  | 63782.2  | 108291.8 | TRUE |
| 172533.3 | 156169.8 | 137498.1 | 153056   | 148278.1 | 161151   | 169422.1 | 214763.7 | TRUE |
| 762829.7 | 497705.5 | 560462.9 | 713343.7 | 581965   | 615094.1 | 438304.1 | 621423.1 | TRUE |
| 175594.1 | 157329.2 | 135927.4 | 165841.7 | 125751.4 | 139760.5 | 107889.6 | 140163.3 | TRUE |
| 603864.2 | 456053.9 | 721052.6 | 745430   | 504104   | 780685.8 | 521770.4 | 489624.8 | TRUE |
| 203388.9 | 151074.5 | 190529.6 | 223518.5 | 172364.3 | 215321.8 | 192523.7 | 162054.6 | TRUE |
| 224233.1 | 225169.1 | 220153.7 | 264345.6 | 237053.6 | 246176.6 | 214732.3 | 210977.8 | TRUE |
| 77537.3  | 49039.8  | 74841.5  | 103232.1 | 62630.9  | 79941.6  | 60352    | 49934.3  | TRUE |
| 49285.6  | 101767.2 | 79000.8  | 114636.4 | 107938.2 | 17176.3  | 19023.7  | 20077.4  | TRUE |
| 35622    | 25447.2  | 33783.6  | 25411.9  | 21676.9  | 43492.9  | 25024.1  | 30233.2  | TRUE |
| 44271.5  | 83318.8  | 116307.9 | 128777.7 | 96822.1  | 18972.7  | 12424.8  | 19392.8  | TRUE |
| 31166.5  | 24150.4  | 17576.5  | 25266.3  | 17191.3  | 28610.1  | 11208.6  | 19386    | TRUE |
| 2268855  | 1752414  | 1756229  | 1669357  | 2465111  | 2859680  | 1945409  | 2572836  | TRUE |
| 5025598  | 3409839  | 3232214  | 3367384  | 5268352  | 5990204  | 3925772  | 5898957  | TRUE |
| 252050.1 | 232340.9 | 182963.4 | 197252.6 | 278073.7 | 302670.5 | 208475.2 | 315302.1 | TRUE |
| 28443    | 36090.9  | 27340.6  | 24587.6  | 35141.1  | 51813.7  | 33636.5  | 52419.4  | TRUE |
| 33408.5  | 33993.9  | 22626.4  | 22820.9  | 30046.4  | 46907.3  | 33456.4  | 38375.6  | TRUE |

|          |          |          |          |          |          |          |          |      |
|----------|----------|----------|----------|----------|----------|----------|----------|------|
| 164008.2 | 133838.4 | 133051.6 | 110717.2 | 92290.6  | 130267.5 | 122128.2 | 99888.6  | TRUE |
| 207625.5 | 133506.7 | 235191.7 | 234257   | 160554.2 | 228837.8 | 210206   | 160987.4 | TRUE |
| 349235.6 | 279613.9 | 295636.9 | 420536.5 | 259626.9 | 365090.5 | 320010.9 | 279258.4 | TRUE |
| 74744.1  | 88329.8  | 79223.2  | 89145.7  | 63888.4  | 102097.7 | 81046.4  | 81298.5  | TRUE |
| 51658.8  | 84866    | 68444.4  | 100069.8 | 75947    | 49429.3  | 57835.5  | 38691.1  | TRUE |
| 150477   | 101713.2 | 152814.4 | 144525.2 | 167842.2 | 153592.5 | 117491.5 | 155260.9 | TRUE |
| 142299.4 | 84376.5  | 141931.1 | 138876.1 | 90666.3  | 177361.9 | 113290   | 97353.5  | TRUE |
| 331704.3 | 245441.4 | 388034   | 379927.3 | 227429.1 | 360605.8 | 279503.2 | 261448.8 | TRUE |
| 98480.8  | 57336.6  | 117210.2 | 111932.3 | 64665.4  | 127797.7 | 88075.3  | 73338.5  | TRUE |
| 128397.8 | 122675   | 124148.5 | 128626.7 | 71570.8  | 126966.8 | 107014.2 | 81140.5  | TRUE |
| 57395.8  | 38631    | 71855.4  | 55940.7  | 64985.2  | 38602.8  | 46530.3  | 51481.8  | TRUE |
| 244766   | 180356.5 | 269125.6 | 259329.1 | 183879.6 | 242786.1 | 196317.7 | 163836.2 | TRUE |
| 143164.5 | 130942.1 | 142704.1 | 170145.2 | 110780.9 | 174201.4 | 127343.3 | 124103.7 | TRUE |
| 112334.7 | 144177.1 | 111791.6 | 144415.7 | 96126.6  | 141872.8 | 112155.4 | 118882   | TRUE |
| 254445.3 | 431658.7 | 314664.1 | 437905.3 | 351301.3 | 187934.1 | 214688.6 | 205514.1 | TRUE |
| 39403.5  | 31994.4  | 42941.5  | 47672.1  | 29716.6  | 38321.9  | 39917.8  | 14562.2  | TRUE |
| 46735    | 67190.5  | 75290    | 92629.1  | 74629.9  | 46406    | 39060.2  | 36779.8  | TRUE |
| 40373.2  | 49288.5  | 43497.7  | 35942.9  | 40260.4  | 33530.4  | 49536.1  | 37973.1  | TRUE |
| 43818.5  | 53032.1  | 38834.4  | 47754.1  | 44816.9  | 35638.8  | 42504.2  | 34940    | TRUE |
| 145144.9 | 109494.6 | 101075.7 | 124371.9 | 90868.9  | 121761.5 | 129064.8 | 118200.4 | TRUE |
| 204284   | 185344.8 | 308808.8 | 278258.5 | 245627.5 | 277759.6 | 235210.1 | 269483.4 | TRUE |
| 57996.8  | 41770.1  | 82404.2  | 71473.7  | 90035.7  | 98246.9  | 56820    | 94074.4  | TRUE |
| 80969.6  | 58742.3  | 69657.5  | 87685.3  | 47380.7  | 116636.5 | 56294.7  | 86311.1  | TRUE |
| 24680.3  | 9630.9   | 28580.3  | 11300    | 7861.5   | 52568.1  | 14316.6  | 12664.5  | TRUE |
| 255362.7 | 180231.8 | 194627.7 | 184260.7 | 234267.1 | 261323.6 | 246640   | 275608.9 | TRUE |
| 45429.4  | 36062.4  | 41091.6  | 51012.7  | 42135    | 55260.8  | 37536.5  | 53974.8  | TRUE |
| 893460.5 | 835811.6 | 1097362  | 1432083  | 922483.1 | 1345384  | 1245735  | 1053943  | TRUE |
| 61487.1  | 70248.8  | 94691.4  | 113121.9 | 95033.3  | 101114.7 | 117256.7 | 95840.4  | TRUE |
| 222463.8 | 447572.9 | 297788.8 | 489344.6 | 526864.8 | 117843.4 | 116085.5 | 147928.4 | TRUE |
| 1707775  | 1244153  | 961679.4 | 1213665  | 1266292  | 1532149  | 1071106  | 1875020  | TRUE |
| 672897.2 | 473135   | 527895.1 | 633710.5 | 619639.3 | 742460.1 | 535366   | 768562.8 | TRUE |
| 285557.6 | 257335.4 | 330159.6 | 309014.8 | 326963.4 | 360589.6 | 225797.9 | 301084.5 | TRUE |
| 4536621  | 4354663  | 4420780  | 4851826  | 4380694  | 6962902  | 4905835  | 6311084  | TRUE |
| 116438.8 | 86282.2  | 106756   | 136407.6 | 87231.8  | 114536.2 | 96739.8  | 106413.1 | TRUE |
| 4065183  | 2628063  | 5662472  | 7068206  | 4366771  | 5902372  | 4210638  | 4616289  | TRUE |
| 54333.1  | 48640.7  | 62117.7  | 53629.8  | 49329.6  | 63816.7  | 49914.8  | 36245.8  | TRUE |
| 30678597 | 22573556 | 37040266 | 38596994 | 25851299 | 37872859 | 26455511 | 28915680 | TRUE |
| 146434.1 | 134135.3 | 155664.8 | 171393.9 | 140255.9 | 189239.3 | 133805.5 | 125900.6 | TRUE |
| 105793.3 | 84401    | 105646.6 | 81211.8  | 100021.2 | 85394.2  | 87532.3  | 96498.9  | TRUE |
| 237335.9 | 204285.5 | 151921.5 | 201139.2 | 182950.4 | 137660.7 | 183315   | 162044.5 | TRUE |
| 256541.8 | 282076.9 | 185591.5 | 269925.1 | 290893   | 217968.5 | 255470.3 | 328489.9 | TRUE |
| 433492   | 400210.2 | 381817.6 | 395894   | 430277.2 | 420228.3 | 449599.4 | 491957.4 | TRUE |
| 65014    | 93704.9  | 57706.5  | 109664.4 | 94779.8  | 43581.3  | 54377.5  | 66705.9  | TRUE |
| 112691.3 | 199029.8 | 167109   | 158589.3 | 160755.6 | 75598.5  | 102224.9 | 68641.4  | TRUE |
| 309823.2 | 312711.1 | 284332.7 | 296145.8 | 312796.9 | 322868.1 | 342682.7 | 290150.1 | TRUE |

|          |          |          |          |          |          |          |          |      |
|----------|----------|----------|----------|----------|----------|----------|----------|------|
| 348516.5 | 366665.4 | 320588.3 | 350360.5 | 330610   | 311272.3 | 336529.3 | 323468.8 | TRUE |
| 2329738  | 2240267  | 1671055  | 2356718  | 2247427  | 1788460  | 2312136  | 2273200  | TRUE |
| 39062.5  | 73912.3  | 54684.4  | 83535.2  | 91995.2  | 31726.8  | 12991    | 29463.1  | TRUE |
| 603265.3 | 536814.7 | 567894.9 | 581754.1 | 505876.6 | 587649.7 | 580111.6 | 565526.2 | TRUE |
| 1288213  | 1207864  | 1205035  | 1286136  | 1156295  | 1308357  | 1321781  | 1332711  | TRUE |
| 47630.8  | 51835.5  | 37222.2  | 39057.1  | 47854    | 45195.2  | 35465.5  | 46007.2  | TRUE |
| 33103.3  | 34441.7  | 33322.6  | 43240.7  | 27920.8  | 39577    | 33054.6  | 31613.8  | TRUE |
| 44271.3  | 50202.9  | 44184.1  | 34917.3  | 45226    | 41231.9  | 53861    | 44821.7  | TRUE |
| 55140.3  | 50641.4  | 46516.4  | 43078    | 47041.6  | 60553.2  | 47144.4  | 64854.8  | TRUE |
| 45389.9  | 49925.7  | 33519.2  | 55178.6  | 34279.6  | 33595.6  | 45851.3  | 50167.7  | TRUE |
| 42125.9  | 41269.7  | 31909.8  | 32550.1  | 36095.1  | 35875.1  | 33627.1  | 30721.5  | TRUE |

|          |          |          |          |          |          |          |          |      |
|----------|----------|----------|----------|----------|----------|----------|----------|------|
| 146318.2 | 142797.4 | 112691.2 | 148921.4 | 127213.5 | 168985.7 | 178999.9 | 149184.6 | TRUE |
| 110988.5 | 107808.4 | 71111.8  | 95081.6  | 104764   | 125867.5 | 106655.7 | 134132.2 | TRUE |
| 193781.8 | 157258.1 | 123807.5 | 194047.7 | 182221.1 | 249617.4 | 213227.8 | 270513.3 | TRUE |
| 19831    | 18876.6  | 4309     | 13960    | 21772.3  | 21962.7  | 25893.4  | 27200.3  | TRUE |
| 194325.9 | 143309.6 | 162431.5 | 202372.4 | 164815.1 | 230275.3 | 222020.9 | 232876.2 | TRUE |
| 98038.1  | 89721    | 98493.2  | 92633.9  | 83423.6  | 92995.9  | 111257.4 | 122557.1 | TRUE |
| 796189.6 | 615559.6 | 403340.2 | 684314.1 | 609873.5 | 708970.2 | 836757.2 | 905065.8 | TRUE |

|          |          |          |          |          |          |          |          |      |
|----------|----------|----------|----------|----------|----------|----------|----------|------|
| 151287.3 | 93594.2  | 111807.4 | 151401.4 | 121659.3 | 137782.2 | 133247.2 | 159059.8 | TRUE |
| 231452.9 | 151142.6 | 193002.2 | 178242.5 | 240121.8 | 253585.5 | 238041.2 | 259882.6 | TRUE |

|          |          |          |          |          |          |          |          |      |
|----------|----------|----------|----------|----------|----------|----------|----------|------|
| 55986.7  | 57284.7  | 57651.6  | 70574.4  | 65290.3  | 49181.6  | 53442.2  | 44707.5  | TRUE |
| 113582.1 | 126363.3 | 103021   | 183105   | 106068.3 | 87948.6  | 123527.9 | 86610.3  | TRUE |
| 316653.8 | 304108.2 | 125634.4 | 514137.9 | 232378.6 | 180091.7 | 305398.1 | 251742   | TRUE |
| 104834.2 | 83831.5  | 71471.5  | 57620.7  | 97875    | 75585.9  | 81616.7  | 102997.4 | TRUE |
| 340672.1 | 368281.7 | 268026   | 648588.7 | 379805   | 299481.1 | 463520.5 | 363852.3 | TRUE |
| 130448.9 | 125248.9 | 128590.7 | 129733.2 | 210860.5 | 174011   | 183638.6 | 213661.9 | TRUE |
| 546153   | 489114.9 | 613818.3 | 650859.2 | 387156.4 | 1172541  | 522706.7 | 1120809  | TRUE |
| 130509.3 | 160299.1 | 137652.6 | 129149   | 128620   | 106462.7 | 156125.6 | 101269.3 | TRUE |
| 23588.4  | 39988.2  | 31576.2  | 41028    | 32670.9  | 12017    | 23440.2  | 33026.5  | TRUE |

|          |          |          |          |          |          |          |          |      |
|----------|----------|----------|----------|----------|----------|----------|----------|------|
| 375110.3 | 381636.5 | 243364.2 | 246565.2 | 352333.9 | 285549.9 | 292103.5 | 375559.3 | TRUE |
| 83273.3  | 74686.7  | 54110.6  | 67655.8  | 75881.9  | 51058.4  | 59041.3  | 80279.1  | TRUE |
| 104803.6 | 106563.5 | 82524.2  | 61952.1  | 109673.1 | 94133.4  | 85957.9  | 85929.5  | TRUE |
| 276590.6 | 261755   | 264336.5 | 252191.6 | 376040.7 | 278026.2 | 337336.4 | 329414.4 | TRUE |
| 76472.6  | 74184.4  | 78234.2  | 52654.7  | 132888.5 | 79804.3  | 94071.5  | 131662.9 | TRUE |
| 74236.4  | 74644.4  | 87070.7  | 79941.4  | 112209.5 | 92413.4  | 75569.5  | 120050.5 | TRUE |

|          |          |          |          |          |          |          |          |      |
|----------|----------|----------|----------|----------|----------|----------|----------|------|
| 148246.1 | 185413.4 | 166151.3 | 158828.3 | 175900.9 | 99668    | 209584.1 | 116933.7 | TRUE |
| 164008.2 | 133838.4 | 133051.6 | 110717.2 | 92290.6  | 130267.5 | 122128.2 | 99888.6  | TRUE |
| 207625.5 | 133506.7 | 235191.7 | 234257   | 160554.2 | 228837.8 | 210206   | 160987.4 | TRUE |
| 349235.6 | 279613.9 | 295636.9 | 420536.5 | 259626.9 | 365090.5 | 320010.9 | 279258.4 | TRUE |



|          |          |          |          |          |          |          |          |      |
|----------|----------|----------|----------|----------|----------|----------|----------|------|
| 74744.1  | 88329.8  | 79223.2  | 89145.7  | 63888.4  | 102097.7 | 81046.4  | 81298.5  | TRUE |
| 51658.8  | 84866    | 68444.4  | 100069.8 | 75947    | 49429.3  | 57835.5  | 38691.1  | TRUE |
| 150477   | 101713.2 | 152814.4 | 144525.2 | 167842.2 | 153592.5 | 117491.5 | 155260.9 | TRUE |
| 142299.4 | 84376.5  | 141931.1 | 138876.1 | 90666.3  | 177361.9 | 113290   | 97353.5  | TRUE |
| 331704.3 | 245441.4 | 388034   | 379927.3 | 227429.1 | 360605.8 | 279503.2 | 261448.8 | TRUE |
| 98480.8  | 57336.6  | 117210.2 | 111932.3 | 64665.4  | 127797.7 | 88075.3  | 73338.5  | TRUE |
| 128397.8 | 122675   | 124148.5 | 128626.7 | 71570.8  | 126966.8 | 107014.2 | 81140.5  | TRUE |
| 57395.8  | 38631    | 71855.4  | 55940.7  | 64985.2  | 38602.8  | 46530.3  | 51481.8  | TRUE |
| 244766   | 180356.5 | 269125.6 | 259329.1 | 183879.6 | 242786.1 | 196317.7 | 163836.2 | TRUE |
| 143164.5 | 130942.1 | 142704.1 | 170145.2 | 110780.9 | 174201.4 | 127343.3 | 124103.7 | TRUE |
| 112334.7 | 144177.1 | 111791.6 | 144415.7 | 96126.6  | 141872.8 | 112155.4 | 118882   | TRUE |
| 254445.3 | 431658.7 | 314664.1 | 437905.3 | 351301.3 | 187934.1 | 214688.6 | 205514.1 | TRUE |
| 39403.5  | 31994.4  | 42941.5  | 47672.1  | 29716.6  | 38321.9  | 39917.8  | 14562.2  | TRUE |
| 46735    | 67190.5  | 75290    | 92629.1  | 74629.9  | 46406    | 39060.2  | 36779.8  | TRUE |
| 40373.2  | 49288.5  | 43497.7  | 35942.9  | 40260.4  | 33530.4  | 49536.1  | 37973.1  | TRUE |
| 43818.5  | 53032.1  | 38834.4  | 47754.1  | 44816.9  | 35638.8  | 42504.2  | 34940    | TRUE |
| 145144.9 | 109494.6 | 101075.7 | 124371.9 | 90868.9  | 121761.5 | 129064.8 | 118200.4 | TRUE |
| 204284   | 185344.8 | 308808.8 | 278258.5 | 245627.5 | 277759.6 | 235210.1 | 269483.4 | TRUE |
| 57996.8  | 41770.1  | 82404.2  | 71473.7  | 90035.7  | 98246.9  | 56820    | 94074.4  | TRUE |
| 80969.6  | 58742.3  | 69657.5  | 87685.3  | 47380.7  | 116636.5 | 56294.7  | 86311.1  | TRUE |
| 24680.3  | 9630.9   | 28580.3  | 11300    | 7861.5   | 52568.1  | 14316.6  | 12664.5  | TRUE |
| 255362.7 | 180231.8 | 194627.7 | 184260.7 | 234267.1 | 261323.6 | 246640   | 275608.9 | TRUE |
| 45429.4  | 36062.4  | 41091.6  | 51012.7  | 42135    | 55260.8  | 37536.5  | 53974.8  | TRUE |
| 893460.5 | 835811.6 | 1097362  | 1432083  | 922483.1 | 1345384  | 1245735  | 1053943  | TRUE |
| 61487.1  | 70248.8  | 94691.4  | 113121.9 | 95033.3  | 101114.7 | 117256.7 | 95840.4  | TRUE |
| 222463.8 | 447572.9 | 297788.8 | 489344.6 | 526864.8 | 117843.4 | 116085.5 | 147928.4 | TRUE |
| 1707775  | 1244153  | 961679.4 | 1213665  | 1266292  | 1532149  | 1071106  | 1875020  | TRUE |
| 672897.2 | 473135   | 527895.1 | 633710.5 | 619639.3 | 742460.1 | 535366   | 768562.8 | TRUE |
| 285557.6 | 257335.4 | 330159.6 | 309014.8 | 326963.4 | 360589.6 | 225797.9 | 301084.5 | TRUE |
| 4536621  | 4354663  | 4420780  | 4851826  | 4380694  | 6962902  | 4905835  | 6311084  | TRUE |
| 3866072  | 3364673  | 3662435  | 4894023  | 3599446  | 3813189  | 4352926  | 3703739  | TRUE |
| 140473.5 | 294806.6 | 197394.5 | 304316.3 | 308888.7 | 151847.2 | 137162   | 124872.5 | TRUE |
| 373873.5 | 337502.5 | 377828.5 | 443574.4 | 306667   | 484039.3 | 400544.9 | 447523.9 | TRUE |
| 94105.2  | 82745.3  | 90855.6  | 74517.8  | 66901.8  | 75943.1  | 75713    | 61723.4  | TRUE |
| 208630   | 180220.1 | 161853.2 | 147680.6 | 131624.4 | 176480.5 | 145801.9 | 155456.3 | TRUE |
| 253119.5 | 164947.1 | 204241   | 178389.1 | 159946.8 | 205626.1 | 180989   | 141243.5 | TRUE |
| 164008.2 | 133838.4 | 133051.6 | 110717.2 | 92290.6  | 130267.5 | 122128.2 | 99888.6  | TRUE |
| 207625.5 | 133506.7 | 235191.7 | 234257   | 160554.2 | 228837.8 | 210206   | 160987.4 | TRUE |
| 349235.6 | 279613.9 | 295636.9 | 420536.5 | 259626.9 | 365090.5 | 320010.9 | 279258.4 | TRUE |
| 74744.1  | 88329.8  | 79223.2  | 89145.7  | 63888.4  | 102097.7 | 81046.4  | 81298.5  | TRUE |

|          |          |          |          |          |          |          |          |      |
|----------|----------|----------|----------|----------|----------|----------|----------|------|
| 51658.8  | 84866    | 68444.4  | 100069.8 | 75947    | 49429.3  | 57835.5  | 38691.1  | TRUE |
|          |          |          |          |          |          |          |          |      |
| 150477   | 101713.2 | 152814.4 | 144525.2 | 167842.2 | 153592.5 | 117491.5 | 155260.9 | TRUE |
| 142299.4 | 84376.5  | 141931.1 | 138876.1 | 90666.3  | 177361.9 | 113290   | 97353.5  | TRUE |
| 331704.3 | 245441.4 | 388034   | 379927.3 | 227429.1 | 360605.8 | 279503.2 | 261448.8 | TRUE |
| 98480.8  | 57336.6  | 117210.2 | 111932.3 | 64665.4  | 127797.7 | 88075.3  | 73338.5  | TRUE |
| 128397.8 | 122675   | 124148.5 | 128626.7 | 71570.8  | 126966.8 | 107014.2 | 81140.5  | TRUE |
| 57395.8  | 38631    | 71855.4  | 55940.7  | 64985.2  | 38602.8  | 46530.3  | 51481.8  | TRUE |
| 244766   | 180356.5 | 269125.6 | 259329.1 | 183879.6 | 242786.1 | 196317.7 | 163836.2 | TRUE |
| 143164.5 | 130942.1 | 142704.1 | 170145.2 | 110780.9 | 174201.4 | 127343.3 | 124103.7 | TRUE |
| 112334.7 | 144177.1 | 111791.6 | 144415.7 | 96126.6  | 141872.8 | 112155.4 | 118882   | TRUE |
| 254445.3 | 431658.7 | 314664.1 | 437905.3 | 351301.3 | 187934.1 | 214688.6 | 205514.1 | TRUE |
| 39403.5  | 31994.4  | 42941.5  | 47672.1  | 29716.6  | 38321.9  | 39917.8  | 14562.2  | TRUE |
| 46735    | 67190.5  | 75290    | 92629.1  | 74629.9  | 46406    | 39060.2  | 36779.8  | TRUE |
|          |          |          |          |          |          |          |          |      |
| 40373.2  | 49288.5  | 43497.7  | 35942.9  | 40260.4  | 33530.4  | 49536.1  | 37973.1  | TRUE |
| 43818.5  | 53032.1  | 38834.4  | 47754.1  | 44816.9  | 35638.8  | 42504.2  | 34940    | TRUE |
| 145144.9 | 109494.6 | 101075.7 | 124371.9 | 90868.9  | 121761.5 | 129064.8 | 118200.4 | TRUE |
| 204284   | 185344.8 | 308808.8 | 278258.5 | 245627.5 | 277759.6 | 235210.1 | 269483.4 | TRUE |
| 57996.8  | 41770.1  | 82404.2  | 71473.7  | 90035.7  | 98246.9  | 56820    | 94074.4  | TRUE |
| 80969.6  | 58742.3  | 69657.5  | 87685.3  | 47380.7  | 116636.5 | 56294.7  | 86311.1  | TRUE |
| 24680.3  | 9630.9   | 28580.3  | 11300    | 7861.5   | 52568.1  | 14316.6  | 12664.5  | TRUE |
| 255362.7 | 180231.8 | 194627.7 | 184260.7 | 234267.1 | 261323.6 | 246640   | 275608.9 | TRUE |
| 45429.4  | 36062.4  | 41091.6  | 51012.7  | 42135    | 55260.8  | 37536.5  | 53974.8  | TRUE |
|          |          |          |          |          |          |          |          |      |
| 217016.3 | 131954.3 | 100717.9 | 115291.6 | 170103.9 | 200594.4 | 138202.7 | 220959.4 | TRUE |
| 116789.5 | 80956.8  | 87398.3  | 106763.2 | 126877.1 | 154371.7 | 92340.9  | 137183.2 | TRUE |
| 167419.4 | 101464.4 | 110223.5 | 162095.6 | 161008.3 | 170752.5 | 123480.4 | 169948   | TRUE |
| 55364.8  | 95751.8  | 75832.7  | 129235.4 | 98786    | 39083    | 36947.6  | 40263.7  | TRUE |
| 226244.7 | 234141.8 | 301177.1 | 323913.2 | 262029.7 | 280092.3 | 262901.5 | 238987.6 | TRUE |
| 73237.6  | 57576.4  | 114747.5 | 107469.3 | 96090.6  | 124017   | 102407.9 | 82521.5  | TRUE |
| 114872   | 103657.8 | 152685.7 | 167186.7 | 134164   | 182302.6 | 147907   | 158582.8 | TRUE |
| 259792.4 | 297961.4 | 296751.6 | 338055.2 | 276764.4 | 329585.7 | 310854   | 303347.6 | TRUE |
| 290583.8 | 605137   | 433304.9 | 728433.8 | 883200.9 | 150510.9 | 131271.3 | 173369.8 | TRUE |
| 305037.5 | 679865.4 | 425192   | 611702.2 | 759615.7 | 153921.7 | 118302.9 | 154550.2 | TRUE |
| 37296.1  | 22422.1  | 29347.1  | 28815.8  | 34311.7  | 37677.5  | 23263.3  | 43753.4  | TRUE |
| 910634.3 | 700325.1 | 998374.9 | 1249057  | 1591487  | 1300390  | 880866.9 | 1300804  | TRUE |
| 19940092 | 15700372 | 21027021 | 21128373 | 19571855 | 26169665 | 19498295 | 27007957 | TRUE |
| 698947.4 | 1549534  | 1172990  | 2035155  | 1847047  | 498130.9 | 488345.5 | 562465.9 | TRUE |
| 759645.4 | 520647.2 | 677827.1 | 862170.7 | 639028   | 1037252  | 701197.3 | 913021.1 | TRUE |
| 55466.6  | 32580.1  | 34558.1  | 58974.6  | 10594.2  | 56357.6  | 40351.5  | 51368.9  | TRUE |
| 44061.5  | 38976.9  | 75618.1  | 81696.5  | 51378.4  | 60130.7  | 55869    | 54528.3  | TRUE |
| 151125.4 | 159975.8 | 98270.2  | 169085.8 | 133693.5 | 108942.9 | 149381.8 | 141915.2 | TRUE |
| 127335.5 | 122742.3 | 157608.6 | 88323.9  | 97277.9  | 172568   | 101563.4 | 111306.2 | TRUE |
| 41648.7  | 36760.7  | 10645.6  | 15465.6  | 11644.8  | 23331.6  | 13409.7  | 10078.4  | TRUE |
| 1160740  | 1101513  | 890991   | 1183754  | 1208873  | 953957.4 | 1239948  | 1225271  | TRUE |
| 491394.3 | 474272.5 | 365494.4 | 492441.6 | 516319   | 372161.3 | 541657.1 | 536985.5 | TRUE |
| 118416.8 | 159408.9 | 136050.3 | 122975.3 | 186291.2 | 91524    | 89080.8  | 109781.9 | TRUE |
| 107139.1 | 157332.8 | 76541.8  | 98128.3  | 135189.6 | 78314.9  | 95471.3  | 90538.4  | TRUE |
| 269816.9 | 279200.8 | 194435.4 | 253240.5 | 296421.4 | 200260.2 | 345495   | 291333.8 | TRUE |
| 160162.6 | 208203.8 | 137778.8 | 163401.9 | 185995.9 | 128640   | 188407.2 | 179777.1 | TRUE |

|          |          |          |          |          |          |          |          |      |
|----------|----------|----------|----------|----------|----------|----------|----------|------|
| 2355648  | 705400.7 | 640023.5 | 454855   | 534636.8 | 363891.9 | 488492   | 467055.5 | TRUE |
| 47879.2  | 63902.1  | 43960.2  | 69655.8  | 81914.4  | 28503.4  | 38927.3  | 50824.7  | TRUE |
| 103844.4 | 116381   | 75198.9  | 104577.7 | 144581   | 90435.8  | 147658.8 | 121325.5 | TRUE |
| 116633.1 | 142052.2 | 94265.3  | 128453.7 | 123716.6 | 96670.7  | 145842   | 136771.7 | TRUE |
| 11601.5  | 16080.7  | 24961.2  | 7356.2   | 12036    | 24853.7  | 33274.1  | 11194.4  | TRUE |
| 145865.2 | 137812.1 | 173480.7 | 130015.7 | 208042.5 | 164807.6 | 173432.8 | 189264   | TRUE |
| 150517.6 | 148618   | 120404.6 | 154452.9 | 157760.1 | 124218.7 | 183508.3 | 147309.4 | TRUE |
| 800763.6 | 834534   | 591361.7 | 833982.4 | 855577.2 | 612283.1 | 879228.3 | 898720.2 | TRUE |
| 223196   | 201187.7 | 299425.2 | 261270   | 163990.6 | 209763.1 | 223586.4 | 200615   | TRUE |
| 487943.2 | 487441.2 | 603101.2 | 614126.4 | 441439.4 | 501241.3 | 520041.8 | 468407.7 | TRUE |
| 318635.6 | 327460.2 | 193614.7 | 204035.5 | 286934.2 | 201697.2 | 277541   | 273923   | TRUE |
| 734113.4 | 802965   | 319930.5 | 370049.5 | 562417.8 | 321544.8 | 599788.5 | 583728.7 | TRUE |
| 290816.2 | 309967.4 | 246534   | 261482.3 | 362083.6 | 242714   | 311068.9 | 331427.6 | TRUE |
| 210628.7 | 272827.7 | 201954.2 | 188220.4 | 257823.6 | 138963.1 | 240187.6 | 201550.3 | TRUE |
| 279992.2 | 307641.2 | 282827.7 | 258045.7 | 281008.5 | 320327.2 | 315578.1 | 279075.8 | TRUE |
| 117254.5 | 121433   | 119726.6 | 93416.3  | 143759.6 | 90721.1  | 90171    | 135665.6 | TRUE |
| 32327.3  | 42959.3  | 29453.5  | 30784.9  | 47729.3  | 14324.9  | 27583    | 34517.8  | TRUE |
| 1237679  | 1187655  | 1343904  | 1244185  | 1016669  | 1097687  | 1280213  | 997897.3 | TRUE |
| 1409168  | 1397402  | 1594436  | 1543799  | 1109606  | 1240490  | 1589607  | 1207975  | TRUE |
| 393589.6 | 450219.5 | 329853   | 315519.9 | 356312.9 | 336948.2 | 390230.5 | 385970.3 | TRUE |
| 132535.6 | 152935.7 | 120860.5 | 113583.7 | 117411.8 | 117306.2 | 150805.1 | 119644.8 | TRUE |
| 383826.5 | 346451.6 | 529641   | 425426.6 | 399139.4 | 491038.3 | 407057.6 | 379397.4 | TRUE |
| 30422.4  | 46412.2  | 36322.9  | 42336.6  | 42259.3  | 18585.8  | 26416.9  | 8744.3   | TRUE |
| 3169823  | 2848610  | 3649131  | 3601177  | 2755852  | 3025270  | 3039411  | 3016449  | TRUE |
| 515794.8 | 479110.5 | 521777.3 | 596693.2 | 414905.7 | 449419.5 | 544139.8 | 506495   | TRUE |
| 14854.6  | 6631.7   | 11024.8  | 22216    | 14046.3  | 5479.2   | 5602     | 20846.2  | TRUE |
| 171820.3 | 179015.4 | 175291.6 | 210569.5 | 191174.7 | 202851.9 | 221502.2 | 200207.8 | TRUE |
| 105842.2 | 120875.9 | 68735.5  | 89483    | 69421    | 65763    | 81363.8  | 82678.9  | TRUE |
| 282528   | 275926.5 | 241507.1 | 236263.8 | 276221   | 237536.2 | 295503.3 | 268620.9 | TRUE |
| 269768   | 260228.1 | 218563.7 | 233502.5 | 225164.1 | 246406.1 | 273034.8 | 239060.4 | TRUE |
| 386722.3 | 362688.5 | 396387.8 | 445367.2 | 353110   | 377961.5 | 392998.2 | 377165.5 | TRUE |
| 627754.7 | 576335.4 | 601850.7 | 563008.9 | 564673.9 | 587883.8 | 586741.2 | 591683.4 | TRUE |
| 959563.9 | 739686.9 | 953255.6 | 1040709  | 739536.1 | 820343.3 | 822492.2 | 739912.8 | TRUE |
| 1623226  | 1623466  | 1744453  | 1760708  | 1409718  | 1631724  | 1552118  | 1481698  | TRUE |
| 1412333  | 1435582  | 883340.5 | 1022678  | 1129193  | 887074.2 | 1257750  | 1098305  | TRUE |
| 1340272  | 1356105  | 1262956  | 1471563  | 1562535  | 1300304  | 1750594  | 1523834  | TRUE |
| 437842.3 | 446443.2 | 404101.3 | 517275.4 | 513605.8 | 440250.5 | 583885.7 | 544053.3 | TRUE |
| 1521061  | 1383407  | 1649745  | 1721166  | 1280102  | 1479654  | 1470747  | 1436172  | TRUE |
| 4183669  | 3660932  | 4390861  | 4631657  | 3477942  | 3978085  | 4019148  | 4014362  | TRUE |
| 314579.4 | 286666.4 | 260012.1 | 324682.3 | 382148.5 | 312582.4 | 324844.5 | 382206.5 | TRUE |

|          |          |          |          |          |          |          |          |      |
|----------|----------|----------|----------|----------|----------|----------|----------|------|
| 349286.8 | 305209.1 | 253550.8 | 301453.1 | 369905.1 | 253481.8 | 341003.1 | 439164.3 | TRUE |
| 78071.7  | 66270.8  | 69723.2  | 82508.5  | 112406.6 | 63539.9  | 99778.3  | 114772.8 | TRUE |
| 220636.7 | 285003.8 | 252425.2 | 296950.5 | 167773.3 | 305846.4 | 322810.8 | 266304   | TRUE |
| 48288.5  | 34092.9  | 37938.5  | 56803.2  | 55771.4  | 36510.3  | 57027.9  | 59416.9  | TRUE |
| 956518.2 | 894345.4 | 808349.6 | 1092802  | 956495.2 | 830779.8 | 922075.9 | 964739.9 | TRUE |
| 631778.9 | 631184.9 | 558268.9 | 699501.6 | 625108.7 | 577177.2 | 594854.7 | 681079.7 | TRUE |
| 66156.6  | 57503.9  | 56080.5  | 73705.5  | 86351.2  | 23709    | 27718.8  | 24975.5  | TRUE |
| 1060810  | 1053907  | 1193290  | 1064912  | 921181.6 | 1152667  | 1021717  | 1109256  | TRUE |
| 151125.4 | 141250.2 | 114181.8 | 127048.2 | 139378.4 | 112040.7 | 116166.3 | 140841.1 | TRUE |
| 141399.3 | 145668.3 | 90109.4  | 111672.6 | 122782.6 | 85607.2  | 103715.1 | 101827.5 | TRUE |
| 620466   | 530552.5 | 550788.6 | 747700.9 | 823893.3 | 608306.8 | 641486.1 | 802648.9 | TRUE |
| 169032.6 | 151875.6 | 158524.8 | 204256.1 | 181557.7 | 167723.5 | 199612.4 | 225027.8 | TRUE |
| 55200.4  | 62001.7  | 64213.2  | 77788.7  | 64940.9  | 53615    | 52159.7  | 62237.2  | TRUE |
| 48054.7  | 120349.8 | 55668.8  | 68775.6  | 82486.2  | 44497.9  | 35984.9  | 48338.4  | TRUE |
| 221929.6 | 228691.9 | 285732.7 | 252627.3 | 225849.4 | 265193.2 | 260640.5 | 252527.6 | TRUE |
| 147021.4 | 117690.4 | 173552   | 177295.1 | 173240.8 | 164950.9 | 157658.1 | 136183.5 | TRUE |
| 204958.7 | 274215.3 | 168478.6 | 210544.8 | 221548.2 | 206269.1 | 202751.3 | 243560.7 | TRUE |
| 151606.4 | 142313.9 | 162572.1 | 153447.2 | 133789.4 | 150378.1 | 167111.5 | 133651.8 | TRUE |
| 64516.9  | 63010.7  | 55487    | 55059.4  | 52571.3  | 38508    | 45957.1  | 56217.5  | TRUE |
| 82333.9  | 75712.6  | 93937.6  | 98066.4  | 88093    | 99381.9  | 85600.4  | 95479.9  | TRUE |
| 52719    | 47627.1  | 68396.3  | 60993.9  | 61729.9  | 84253.7  | 80797.7  | 57356.4  | TRUE |
| 75240.8  | 76652.4  | 80510.3  | 102709.8 | 82758.3  | 90640.2  | 92469.3  | 83731.3  | TRUE |
| 202748.9 | 206460.9 | 210353.9 | 197224.8 | 214427.5 | 204548.9 | 181545.1 | 180717.7 | TRUE |
| 162905.8 | 137647.3 | 91934.3  | 135878.2 | 187667   | 148777.2 | 173897.1 | 241576.1 | TRUE |
| 72607.5  | 74373.6  | 47360.4  | 71276.2  | 85347    | 81818.9  | 82184.9  | 146582.6 | TRUE |
| 122931.1 | 136342   | 95315.6  | 133436.9 | 96043.2  | 117965.9 | 188632.1 | 130033   | TRUE |
| 95518.9  | 116365.8 | 111341.1 | 100859.6 | 79412.1  | 102784.9 | 142418.8 | 137698.9 | TRUE |
| 76700.3  | 64821.1  | 55281.8  | 72169.1  | 60628.1  | 90581.6  | 75976.6  | 77312.8  | TRUE |
| 410417   | 342401.3 | 482370.5 | 357890.2 | 400303.6 | 456707.1 | 419596.2 | 360297.3 | TRUE |
| 41420.7  | 41924    | 48100.5  | 53145.8  | 50841.7  | 54096.5  | 62469.2  | 56666.9  | TRUE |
| 562904.2 | 444064.1 | 516460.5 | 573475.8 | 550312   | 555698   | 531303.3 | 519264.2 | TRUE |
| 521043.8 | 502028.9 | 531096.4 | 506862.9 | 532751.5 | 568037.2 | 475320.2 | 657022.3 | TRUE |
| 14761.3  | 9166.2   | 8656.9   | 13784.7  | 15877.3  | 18333    | 12390.9  | 8512.9   | TRUE |
| 54359.1  | 35111.1  | 63103.4  | 49220.8  | 37792.2  | 43239.1  | 38709.7  | 48321.1  | TRUE |
| 3289033  | 2369244  | 3410683  | 3269393  | 2906559  | 3549638  | 2168956  | 3019572  | TRUE |
| 2429015  | 2261125  | 1869514  | 1914855  | 2699274  | 2486468  | 2319815  | 2397508  | TRUE |

|          |          |          |          |          |          |          |          |      |
|----------|----------|----------|----------|----------|----------|----------|----------|------|
| 709453   | 717316.8 | 536568.4 | 619156.6 | 830030   | 743574.3 | 710998   | 797509   | TRUE |
| 34547.7  | 35926.6  | 31967.3  | 41992.6  | 42531.3  | 55239.6  | 43898    | 36513.4  | TRUE |
| 85297.2  | 53904.6  | 73594    | 88198.9  | 84760.9  | 81497.7  | 74483.5  | 89283.5  | TRUE |
| 43892.7  | 11310.3  | 40423.6  | 49270.2  | 41810.7  | 45975.7  | 27501.5  | 47306.1  | TRUE |
| 14471.6  | 20550.2  | 16118.7  | 7855.9   | 10519.7  | 12750.9  | 11213.5  | 20538.2  | TRUE |
| 128110.3 | 125665.3 | 103690.3 | 134364.8 | 105325.6 | 125370.9 | 135551.6 | 148966.3 | TRUE |
| 232106.5 | 215657.5 | 160127.9 | 296678.8 | 345623.4 | 162645.1 | 242764.8 | 309710   | TRUE |
| 23057    | 32019    | 17785.5  | 35618.8  | 33500.1  | 16061.4  | 36834.4  | 37055.8  | TRUE |
| 24527.3  | 21645    | 12257.7  | 27079.5  | 29922.7  | 16059.6  | 22664.1  | 31806.3  | TRUE |
| 55895.5  | 46139.8  | 49719.1  | 46453.2  | 61437.9  | 43777.4  | 55533.9  | 64676.8  | TRUE |
| 23553.3  | 35469    | 25201.1  | 32361.2  | 15266.9  | 43690    | 35998.9  | 27170.8  | TRUE |
| 264537.3 | 318235.2 | 273743.4 | 269230   | 156907.7 | 348114.7 | 370977.7 | 313576.3 | TRUE |
| 27585.4  | 34432.4  | 29852.2  | 10355.4  | 21152.6  | 29569    | 40134.7  | 38536.3  | TRUE |
| 146227.5 | 139124.4 | 121055.9 | 117779.8 | 127374.9 | 169747.8 | 163913.4 | 171142.5 | TRUE |
| 82044.1  | 136912.6 | 117218.1 | 90198.8  | 129181.3 | 90547.3  | 85968    | 73583.7  | TRUE |
| 103532.4 | 133002.5 | 90705.9  | 149842.1 | 143384.7 | 80249    | 102603.1 | 96539.7  | TRUE |
| 1497690  | 1456233  | 903572   | 1031922  | 1630154  | 1484436  | 1679944  | 1658249  | TRUE |
| 181730.1 | 161886.7 | 210753.2 | 232991.9 | 168735.1 | 202526.5 | 181905.8 | 180359.3 | TRUE |
| 184018.4 | 141844.8 | 126136.6 | 149100.5 | 170542.7 | 198691.2 | 136814.2 | 219149.9 | TRUE |
| 294768.1 | 215100.3 | 313380.7 | 334316.8 | 227540.6 | 319030.9 | 179610.9 | 212459.5 | TRUE |
| 346387.1 | 263622.4 | 334259.7 | 380856.1 | 270476.6 | 383435.8 | 243621.7 | 263470.6 | TRUE |
| 239685.8 | 166471.5 | 172702.7 | 184528.8 | 256903.9 | 295791.4 | 184640.9 | 297250.1 | TRUE |
| 196224.8 | 176600.7 | 164823.9 | 158261.3 | 215974.5 | 266330.6 | 194220.3 | 259912.3 | TRUE |
| 1045502  | 845577.9 | 809570.4 | 750766.5 | 1086033  | 1406063  | 902292.1 | 1338920  | TRUE |
| 139081.6 | 77946.1  | 81406.7  | 114734.8 | 101368.4 | 143066.1 | 108950.2 | 125892   | TRUE |
| 99017.4  | 44756.9  | 53851.8  | 92987.9  | 67316.8  | 111289.4 | 46511.5  | 102149.5 | TRUE |
| 132297.7 | 96346.6  | 98786.2  | 146721.4 | 110315.7 | 173998.5 | 128840.8 | 155896.7 | TRUE |
| 679649.1 | 404642.7 | 557698.4 | 985974.9 | 621729   | 1015276  | 707123.5 | 979179.8 | TRUE |
| 65482.5  | 70642.6  | 75817.4  | 94494.6  | 108131.8 | 63806.1  | 54070.3  | 66871    | TRUE |
| 4536621  | 4354663  | 4420780  | 4851826  | 4380694  | 6962902  | 4905835  | 6311084  | TRUE |
| 18990876 | 12860630 | 18402183 | 22229113 | 13332961 | 18933267 | 13591359 | 14975058 | TRUE |
| 188238.5 | 152653.9 | 194332.3 | 207739.2 | 178857.4 | 277612.8 | 189357.9 | 224092.5 | TRUE |
| 54333.1  | 48640.7  | 62117.7  | 53629.8  | 49329.6  | 63816.7  | 49914.8  | 36245.8  | TRUE |
| 30678597 | 22573556 | 37040266 | 38596994 | 25851299 | 37872859 | 26455511 | 28915680 | TRUE |
| 146434.1 | 134135.3 | 155664.8 | 171393.9 | 140255.9 | 189239.3 | 133805.5 | 125900.6 | TRUE |
| 950924.7 | 886145.7 | 943098.1 | 957369.5 | 997964.5 | 892513.4 | 955347.3 | 1010738  | TRUE |
| 25387.4  | 25059.4  | 26154.6  | 11128.5  | 33376.6  | 37499.2  | 25593.2  | 21865.5  | TRUE |
| 17747.2  | 24730    | 6806.6   | 22102.4  | 9317.2   | 15383.8  | 10669.3  | 8652.3   | TRUE |
| 38270.4  | 30861.8  | 17433.2  | 28658.8  | 27777.2  | 19713    | 30682    | 23509.3  | TRUE |
| 16835.1  | 8539.5   | 8788.5   | 26081.8  | 18321.5  | 16839.6  | 20899.1  | 9304.5   | TRUE |
| 222349   | 223556.6 | 183874.3 | 274960.2 | 281555.8 | 204522.3 | 254217.9 | 260664.4 | TRUE |
| 221664.9 | 239021.2 | 224226.9 | 232027.7 | 232799.5 | 213189.3 | 262459.6 | 223111.9 | TRUE |
| 52150.4  | 51631.1  | 21640.6  | 36020.7  | 32166.6  | 29977.3  | 44113.1  | 49552.4  | TRUE |

|          |          |          |          |          |          |          |          |      |
|----------|----------|----------|----------|----------|----------|----------|----------|------|
| 86810.4  | 90395.8  | 106093.6 | 131084   | 109172.2 | 118063.6 | 116392.8 | 137946.4 | TRUE |
| 40811.9  | 37425.3  | 54169.4  | 63022    | 60296.3  | 48138.9  | 58139.5  | 59375.2  | TRUE |
| 16931.3  | 10505.7  | 9858.9   | 9569.1   | 20348.6  | 13770.6  | 7907.5   | 17900    | TRUE |
| 57568.7  | 56439.9  | 72605    | 66028.6  | 51626.5  | 60123.4  | 74894.7  | 56602.6  | TRUE |
| 64791.3  | 61131.7  | 70678.5  | 63073.4  | 58704.8  | 51240.3  | 58446.7  | 60173.3  | TRUE |
| 261116.5 | 308991.8 | 264100.1 | 323985.9 | 308570.7 | 265698.5 | 281109.7 | 305228.4 | TRUE |
| 33136.9  | 30780.3  | 24110.7  | 28529    | 26502.1  | 19537.7  | 29304    | 29573.1  | TRUE |
| 200977.9 | 180468   | 147738.5 | 174109.4 | 147585.8 | 201928.2 | 164047   | 176096.9 | TRUE |
| 68174.1  | 70646.7  | 85829.9  | 95213.8  | 80820.7  | 81584.3  | 86195.6  | 65322.2  | TRUE |
| 65874.8  | 104587   | 85165.9  | 97088.5  | 97476.1  | 74618.8  | 95378.4  | 71793.2  | TRUE |
| 37598.7  | 57506.9  | 49477.3  | 61526.1  | 65668    | 41028.9  | 59259.1  | 47397.7  | TRUE |
| 748889.9 | 752526.7 | 766853.1 | 739501.3 | 692704.3 | 815564.9 | 813119.5 | 660084.5 | TRUE |
| 210787.5 | 252687.6 | 255263.7 | 239832.1 | 213439.3 | 313571.4 | 271017.3 | 233761.3 | TRUE |
| 465208.2 | 336749.3 | 449398.8 | 478668   | 550552.4 | 405697.4 | 383834.3 | 407323.6 | TRUE |
| 18831.5  | 12920.7  | 10509.6  | 29726.4  | 32565.2  | 17533.6  | 13999.1  | 29738.4  | TRUE |
| 390191.4 | 352327.2 | 544791.9 | 278989.5 | 224463.1 | 599713.7 | 379095.3 | 249841.9 | TRUE |
| 680042.1 | 716733.3 | 985590.5 | 592529.3 | 405443.5 | 1018909  | 792085.4 | 425836.5 | TRUE |
| 28056.1  | 42757    | 31386.2  | 35539.5  | 41861    | 24952.6  | 13127    | 9574.1   | TRUE |
| 20539.7  | 27499.8  | 17347.1  | 7190.2   | 20088.1  | 18206.5  | 13126.1  | 24492    | TRUE |
| 81706.2  | 84365.5  | 113307.7 | 87786.4  | 83633.6  | 97748.6  | 101709.9 | 88445.9  | TRUE |
| 55077    | 41126.6  | 56125.9  | 49606.7  | 34858.8  | 77827.7  | 72854.8  | 56653.9  | TRUE |
| 93358.1  | 97043.4  | 127754.5 | 84330.1  | 83818.7  | 126363   | 106357.9 | 69881.3  | TRUE |
| 53565.9  | 51069.9  | 70403.4  | 42234.4  | 40681.4  | 85371.8  | 63979.3  | 40899.6  | TRUE |
| 36625.4  | 35056    | 26964    | 25637    | 30000.7  | 33614.4  | 39001.3  | 35094.8  | TRUE |
| 247113.1 | 222534.7 | 286583.3 | 313649   | 311798.8 | 461082.1 | 300006.5 | 526798.1 | TRUE |
| 496876.2 | 503519.9 | 338327.9 | 420490.3 | 378628.4 | 355340.8 | 437932.7 | 380103   | TRUE |
| 906253.5 | 862906.1 | 888608.8 | 944327.3 | 743293.8 | 832495.1 | 782817.5 | 793170.9 | TRUE |
| 319189.3 | 375720.1 | 358853.1 | 197484.7 | 186248   | 391327.2 | 350519.9 | 204837.2 | TRUE |
| 269600.2 | 305030.5 | 426073.9 | 271751.4 | 264588.8 | 441486.3 | 422751.1 | 243188.3 | TRUE |
| 185521.7 | 185841.8 | 227126.8 | 150755.6 | 176896.1 | 222462   | 215697.4 | 168743.6 | TRUE |
| 202579   | 141825.4 | 257476.7 | 242916.3 | 247750.7 | 165140.3 | 159358.3 | 173369.9 | TRUE |
| 2620048  | 2374735  | 2032129  | 2369695  | 2224843  | 2429537  | 2475132  | 2405783  | TRUE |
| 201517.7 | 183206.5 | 172036.2 | 184496.3 | 179394.9 | 228325   | 205661.1 | 213492.9 | TRUE |
| 114260.9 | 335578.6 | 175717.3 | 332923.5 | 361179   | 52492.3  | 56067.5  | 69793.6  | TRUE |
| 13140655 | 11499461 | 10998626 | 12285273 | 11584240 | 12405951 | 12277331 | 13110401 | TRUE |
| 454140.2 | 420318.1 | 423231.4 | 431469.7 | 438056.7 | 453495.2 | 464114.9 | 459575.4 | TRUE |
| 1332474  | 1138228  | 1209768  | 1281427  | 1177461  | 1306357  | 1159336  | 1283335  | TRUE |

|          |          |          |          |          |          |          |          |      |
|----------|----------|----------|----------|----------|----------|----------|----------|------|
| 855056.2 | 938284.2 | 970259.6 | 695603.3 | 543015.1 | 1107929  | 979515.3 | 641328.1 | TRUE |
| 511146.9 | 395993.3 | 523263.6 | 520302.1 | 606356.8 | 436932.1 | 401545.4 | 460810.2 | TRUE |
| 585507.2 | 479417.2 | 694855.6 | 663366.9 | 700207.2 | 474162.7 | 440938.9 | 547588.9 | TRUE |
| 103268.6 | 121739.8 | 161606.8 | 107515.5 | 109899.6 | 95436.3  | 124940.4 | 119116.2 | TRUE |
| 53230.2  | 47512.5  | 32806    | 45920.6  | 45593.3  | 56593.8  | 41043.4  | 68351.6  | TRUE |
| 67687.4  | 89154.3  | 41084.7  | 52015.6  | 89073.3  | 68980.4  | 108337.3 | 106013.3 | TRUE |
| 791058.9 | 764352.3 | 570863.2 | 753619.1 | 713685.3 | 667836.7 | 756859.8 | 830534.8 | TRUE |
| 5802.4   | 10232.5  | 11248.9  | 3571.4   | 13165.7  | 6800.7   | 6632.2   | 9337     | TRUE |
| 25547.1  | 25924    | 16564.6  | 19666.7  | 26987    | 19828.1  | 30845.1  | 11655.5  | TRUE |
| 52866.6  | 45593.2  | 42185.1  | 49716.3  | 52618.2  | 61129    | 53042.4  | 55222.1  | TRUE |
| 22335.7  | 26538    | 23260.4  | 28111.7  | 14244.5  | 21361.4  | 28749    | 32978.7  | TRUE |
| 301714.8 | 249874.6 | 213857.5 | 321886.6 | 254095.8 | 253246.9 | 245989.7 | 261960.6 | TRUE |
| 47275.5  | 65542.6  | 32134.8  | 36886.2  | 37790.2  | 52596.5  | 41818.5  | 46030.5  | TRUE |
| 430241.3 | 382567   | 385590.9 | 403911.9 | 363830   | 486768.2 | 392978.7 | 501273.3 | TRUE |
| 68276.5  | 63828.7  | 41837.6  | 41883.1  | 40487.2  | 34604.6  | 38521.7  | 42236.4  | TRUE |
| 73788.8  | 76565.2  | 64059.5  | 72775.6  | 76600.1  | 78797    | 75783.2  | 68361.8  | TRUE |
| 81230.3  | 90911    | 84773.2  | 93606.8  | 104181.6 | 79089.7  | 117525.3 | 83458    | TRUE |
| 74351.6  | 97168.9  | 62353.8  | 83127.6  | 92208.6  | 93760.8  | 74336.1  | 93116.8  | TRUE |
| 35207.5  | 39645.8  | 35687.3  | 30197.4  | 41496.6  | 26102    | 47435.6  | 37717.1  | TRUE |
| 367635.1 | 384460.2 | 418237.5 | 424359.3 | 365752.2 | 459504   | 410091.5 | 409997.8 | TRUE |
| 1573765  | 1411899  | 1353067  | 2509142  | 1536561  | 1458597  | 1450080  | 1386487  | TRUE |
| 35461.2  | 28419.7  | 29130.7  | 14867.6  | 28770.9  | 19106.8  | 14215.8  | 30282.6  | TRUE |
| 31164.8  | 37285.7  | 31329.4  | 35953.5  | 42288.6  | 37608.6  | 39867.2  | 43453.4  | TRUE |
| 36939.6  | 9419.9   | 25982.5  | 37345.2  | 31781.9  | 31258.4  | 38679    | 39187.2  | TRUE |
| 20987.3  | 13465.2  | 22822.8  | 24894    | 16659.2  | 22801.5  | 13008    | 21983.6  | TRUE |
| 23782.8  | 26787.9  | 33934.2  | 32896.2  | 35061    | 20317.5  | 10670.8  | 22209.2  | TRUE |
| 21412.6  | 19196.2  | 4615.1   | 12199.7  | 19475.2  | 9050.2   | 10124    | 13895.8  | TRUE |
| 154126.9 | 176490.4 | 103832.8 | 151529.9 | 154100.9 | 108041.7 | 170038.2 | 186497.7 | TRUE |
| 2649275  | 2495854  | 2113954  | 2499363  | 2792563  | 2288143  | 2546639  | 2913892  | TRUE |
| 36876.3  | 37470.8  | 41015.6  | 44239.7  | 38406.3  | 34132.3  | 42109.2  | 35724.9  | TRUE |
| 6283606  | 5609516  | 6544413  | 6727967  | 7309711  | 6292119  | 5984001  | 7389750  | TRUE |
| 27727.4  | 31271.4  | 37170.3  | 40899.4  | 31987.2  | 40515.3  | 45691.3  | 29686.4  | TRUE |
| 27910.3  | 26611.4  | 24838.4  | 24195.2  | 22259.2  | 26294.6  | 35593.7  | 29770.6  | TRUE |
| 145434.7 | 110277.6 | 163864.7 | 112137.1 | 105670.8 | 156046.3 | 127601.8 | 90355.6  | TRUE |
| 195156   | 147530.9 | 232959.1 | 160738.2 | 129574.2 | 241914.7 | 166053.8 | 137161.9 | TRUE |
| 295486.5 | 216800.3 | 272145.3 | 294063.6 | 412775.1 | 250026.9 | 228072.7 | 267533.6 | TRUE |
| 224499   | 178679.2 | 244532.8 | 222147.1 | 374528.5 | 202622.4 | 188611.2 | 275641.3 | TRUE |
| 148026.5 | 188890.6 | 210142.5 | 139369.2 | 142900   | 237595.8 | 169205.9 | 131987.3 | TRUE |
| 243680.3 | 229819   | 329162.7 | 199613.4 | 179493.7 | 347851.1 | 292756.3 | 195696.6 | TRUE |
| 178908.6 | 121959.4 | 208392.8 | 201714.3 | 205495.7 | 144124.5 | 166071.3 | 152610.8 | TRUE |
| 290940.7 | 225439.6 | 410085.5 | 268201.8 | 348545.4 | 231437.4 | 226092.1 | 230240.9 | TRUE |
| 297643.8 | 223234.4 | 312667.4 | 309489.4 | 401979.4 | 266900.8 | 217199.6 | 276256.3 | TRUE |

|          |          |          |          |          |          |          |          |      |
|----------|----------|----------|----------|----------|----------|----------|----------|------|
| 216314   | 218326.7 | 270771.3 | 217540.2 | 326120.5 | 213646.7 | 203197.8 | 221774.6 | TRUE |
| 33813.9  | 39521.3  | 46324.6  | 36270.8  | 79866.3  | 27265    | 25260.6  | 24571    | TRUE |
| 793825.2 | 703988   | 1514750  | 690980.4 | 554138.1 | 1609905  | 825763.3 | 605798.8 | TRUE |
| 624902.4 | 590693.8 | 1153130  | 538885   | 430656.8 | 1256234  | 677973.8 | 520466.6 | TRUE |
| 1658145  | 1258440  | 1611164  | 1587849  | 2532533  | 1157532  | 1368625  | 1320654  | TRUE |
| 98294.9  | 95869.1  | 161730.9 | 104330.7 | 78102.8  | 173452.8 | 114760   | 87734    | TRUE |
| 51364.5  | 29513.4  | 35047.1  | 46206.7  | 40166.5  | 51022.8  | 39127.3  | 55676.5  | TRUE |
| 124721.4 | 114449.8 | 83277.3  | 117604.4 | 82592.8  | 134491   | 119124.2 | 117440.3 | TRUE |
| 174237.3 | 132819.8 | 130731.6 | 169493.7 | 161933.8 | 169608.3 | 159799   | 178864.9 | TRUE |
| 58407    | 100556.8 | 90353.8  | 121394.8 | 125652.8 | 48685.8  | 40364.9  | 53158.4  | TRUE |
| 87788.2  | 80026.5  | 61486.4  | 72125.3  | 68761.1  | 70068    | 71201.8  | 61227.5  | TRUE |
| 305151   | 318629.4 | 298811.7 | 337375.5 | 297046.2 | 338832.6 | 333645.1 | 292509.8 | TRUE |
| 526904.3 | 494352   | 514910.1 | 557124   | 433548.6 | 549531.9 | 543642.3 | 528821.9 | TRUE |
| 195107.6 | 145918.2 | 210756.2 | 195690.5 | 198570.9 | 198650.2 | 191525.9 | 210587.1 | TRUE |
| 139087   | 127839.1 | 124930.2 | 123451.7 | 123539.1 | 136897.1 | 142090.7 | 113528.1 | TRUE |
| 116127.4 | 123720.6 | 95483    | 112201.9 | 148979.7 | 102036.4 | 137088.6 | 138465.1 | TRUE |
| 49826.5  | 43604.2  | 41994.8  | 54461.9  | 38609.6  | 39219.1  | 38303.3  | 40125.2  | TRUE |
| 372407.6 | 471630.2 | 435727.4 | 299148.3 | 182772.3 | 474726.8 | 449347.9 | 230284.1 | TRUE |
| 318755.6 | 372604.9 | 383566.4 | 280982.5 | 189656.5 | 387343   | 444039.9 | 191748.4 | TRUE |
| 265848.7 | 154493   | 347752.9 | 326236.9 | 300677.2 | 240150.3 | 194193.1 | 226435.6 | TRUE |
| 704380.3 | 321585.8 | 927783.2 | 891882.7 | 865479   | 497732.9 | 428930.9 | 559918.2 | TRUE |
| 216747   | 160403   | 182415.8 | 208872.7 | 194131.1 | 206266.7 | 178502.1 | 169557.7 | TRUE |
| 56698.7  | 61782    | 47891.4  | 22736.5  | 29411.5  | 38717.5  | 66749.3  | 38172.9  | TRUE |
| 96101.3  | 154665.4 | 181712.2 | 94804    | 93345.8  | 202679   | 195985.8 | 66650    | TRUE |
| 85566.9  | 38074.9  | 71806    | 196726.9 | 116135.9 | 67257.3  | 68123.3  | 54637.5  | TRUE |
| 32020.1  | 30763.2  | 40290    | 45699.7  | 45405.4  | 24673.1  | 18223.1  | 30370.1  | TRUE |
| 16394.4  | 10803.3  | 12239.2  | 4916.2   | 3888.5   | 21726.5  | 13446.3  | 7544.2   | TRUE |
| 99660.7  | 99090.8  | 76113.9  | 65544.2  | 60394    | 118648.1 | 135710.5 | 73968.8  | TRUE |
| 15389.3  | 14999.3  | 10202.8  | 20671.4  | 17059    | 11686.1  | 6621.6   | 9274.3   | TRUE |
| 86970    | 95945.4  | 100653.1 | 88244.5  | 99147.5  | 108907.9 | 129420.3 | 67696    | TRUE |
| 133939   | 195565.3 | 187721   | 107503.9 | 79154.8  | 190875.8 | 237352.8 | 94137.5  | TRUE |
| 97403.3  | 46824.9  | 94786.1  | 99671.9  | 87351.6  | 70137.7  | 71125.1  | 89031.1  | TRUE |
| 90000.6  | 145521.2 | 101573.6 | 76045.7  | 58273.2  | 101496.9 | 120480.7 | 58845.2  | TRUE |
| 89946.2  | 97199    | 82472.4  | 88989.4  | 94703.4  | 86775.9  | 91630.3  | 76331.3  | TRUE |
| 63091    | 67952.6  | 54682    | 51254.2  | 61808.2  | 53260.9  | 46083.3  | 70378.6  | TRUE |
| 343001.6 | 310205.2 | 283105   | 371565.2 | 362814.2 | 308305.5 | 348317.3 | 300610.5 | TRUE |
| 95792.2  | 75309.3  | 94595.4  | 125617.5 | 112542.6 | 102661.8 | 87339.9  | 110102.2 | TRUE |
| 92938.5  | 62696.2  | 67942.4  | 92155.2  | 87566.6  | 69474.9  | 98537.2  | 109355.5 | TRUE |



|          |          |          |          |          |          |          |          |      |
|----------|----------|----------|----------|----------|----------|----------|----------|------|
| 81608.4  | 69311.5  | 81439    | 69235.8  | 78544    | 33778.1  | 70834.2  | 103751.7 | TRUE |
| 94736.1  | 76684.6  | 72053.9  | 63333.9  | 108837.2 | 67172.1  | 83882.3  | 138435.7 | TRUE |
| 98610.8  | 103773.5 | 121926.4 | 96309.5  | 113536.4 | 108655.9 | 94603.4  | 101921.7 | TRUE |
| 149045.2 | 144589.4 | 141699   | 147532.3 | 145585.5 | 143529.3 | 148961.3 | 165100.3 | TRUE |
| 375539.2 | 385214.2 | 333627.5 | 357759.4 | 360364.8 | 386665.5 | 430729.6 | 408365.1 | TRUE |
| 221593.8 | 291987.7 | 109002.5 | 275154.1 | 476818   | 134204.7 | 380196.5 | 461949   | TRUE |
| 86440.5  | 102973.7 | 41367.6  | 92601.1  | 187790.5 | 49490.4  | 147367.7 | 165809.1 | TRUE |
| 71352.6  | 95050.9  | 34019.4  | 60068.4  | 170284.7 | 49486.3  | 93398.7  | 162794.9 | TRUE |
| 49329.3  | 93511.8  | 25627.9  | 63182.2  | 131734.2 | 25896.2  | 88812.1  | 132771.3 | TRUE |
| 43195.5  | 78262    | 29471.2  | 66087.7  | 153504.5 | 33272.7  | 85273.6  | 132506.1 | TRUE |
| 21547.2  | 39715.6  | 21567.9  | 28845    | 46347.7  | 4803.5   | 44443.8  | 49329    | TRUE |
| 758131.1 | 927812.5 | 376278.3 | 675068.3 | 1206747  | 348192   | 913627.8 | 1159516  | TRUE |
| 2955053  | 3586065  | 1849959  | 3740378  | 4650492  | 2002432  | 3827447  | 4405788  | TRUE |
| 90858    | 93080.4  | 57336.4  | 60522.7  | 67829.5  | 54938.8  | 60722.8  | 72419.5  | TRUE |
| 239790.2 | 230251.2 | 231288.7 | 289898   | 539385.7 | 327082.8 | 309036   | 333894.1 | TRUE |
| 93275    | 84496.8  | 89863.3  | 92382.3  | 82645.3  | 83072    | 96500.4  | 82825.7  | TRUE |
| 159879.9 | 156620.2 | 262979.6 | 160091.4 | 133816.1 | 162625.7 | 198180.5 | 154819.8 | TRUE |
| 191110.9 | 276158.8 | 193542.4 | 270784.3 | 213510.4 | 184132.9 | 283309.9 | 145603.4 | TRUE |
| 293937.9 | 307834.5 | 299166   | 319889.1 | 212655   | 289941.5 | 315044.3 | 254943.8 | TRUE |
| 276384.4 | 241226.9 | 286380.5 | 252574.1 | 228517.1 | 281326.8 | 272995.4 | 235817.9 | TRUE |
| 335402.6 | 332404.7 | 303263   | 330125.9 | 278742.4 | 311186.2 | 357303   | 280399.3 | TRUE |
| 95367.9  | 115114.9 | 112321.5 | 124217.4 | 95374.2  | 123520.5 | 99451    | 113217.9 | TRUE |
| 133521.6 | 104044.8 | 114101.1 | 160338.3 | 133337   | 140735.6 | 153724.4 | 127478.3 | TRUE |
| 281938.3 | 274159.1 | 249528.6 | 238947.6 | 217927.9 | 215710.3 | 253022.1 | 237570.5 | TRUE |
| 188963.8 | 145947.1 | 213156.3 | 231947.4 | 259333.3 | 237607   | 182371.3 | 226334.4 | TRUE |
| 1399433  | 948115.8 | 1363851  | 1391413  | 1472285  | 1362934  | 1018541  | 1308121  | TRUE |
| 178064.1 | 140813.7 | 136598.8 | 119308.4 | 132108.6 | 136451.2 | 132441.7 | 176628.5 | TRUE |
| 94256.1  | 70510.6  | 94304.5  | 117902.1 | 101112.5 | 117960.6 | 110471.6 | 116574.7 | TRUE |
| 172435.4 | 152573.3 | 193238.9 | 214508.4 | 186934.9 | 189370   | 138890   | 194013.2 | TRUE |
| 1283765  | 1351503  | 1327114  | 1468322  | 1263110  | 1505160  | 1431141  | 1247377  | TRUE |
| 80059.9  | 65098.5  | 71314.8  | 50641.5  | 66701.8  | 58831.4  | 80618.4  | 65853.4  | TRUE |
| 327964.3 | 347868.9 | 353473.9 | 342590.4 | 248258   | 367335.2 | 385741.6 | 297707.8 | TRUE |
| 24196.4  | 47204.2  | 61732.3  | 31238.6  | 35686.4  | 37279.9  | 33232.4  | 34955.7  | TRUE |
| 109073.8 | 91365.7  | 214993.8 | 110687   | 107494.4 | 233754.8 | 103465.7 | 83558.7  | TRUE |
| 445151.1 | 382122.5 | 253636.9 | 287446   | 501042.8 | 342184.4 | 279150.6 | 383913.6 | TRUE |
| 199592.7 | 156844   | 309964   | 157466.3 | 125975.2 | 388390.4 | 205024.6 | 158688.5 | TRUE |

|          |          |          |          |          |          |          |          |      |
|----------|----------|----------|----------|----------|----------|----------|----------|------|
| 50557.8  | 40560.3  | 67335.5  | 35936.2  | 20464.7  | 93841.6  | 45112    | 24016.7  | TRUE |
| 295003.1 | 239563.1 | 410868.4 | 305997.4 | 192541.5 | 584889.6 | 334422.2 | 308311.7 | TRUE |
| 65619.2  | 49860.3  | 50346.2  | 58778.7  | 111122.2 | 52075.8  | 52080.2  | 64162.4  | TRUE |
| 37392.7  | 46222.8  | 55207.2  | 64014.1  | 38223.4  | 62411.1  | 55339.7  | 37452.5  | TRUE |
| 65208.4  | 66114.8  | 94118.3  | 110908.2 | 60811.6  | 90850.9  | 58604.3  | 49798.6  | TRUE |
| 220613.8 | 205153.5 | 241988.7 | 224209.7 | 184140.3 | 303122.6 | 190672.8 | 207122.6 | TRUE |
| 977041.7 | 644794.3 | 815462.9 | 801231.2 | 1285258  | 976702.4 | 686941.4 | 909041.9 | TRUE |
| 135966.3 | 79170.5  | 95013.9  | 75690    | 185792   | 142574.8 | 91931.4  | 155161.5 | TRUE |
| 55570    | 51156.4  | 66564    | 63378.4  | 42334    | 75401.9  | 44577.9  | 41046.3  | TRUE |
| 87291.9  | 96637.1  | 143511.1 | 105087.2 | 67276.4  | 162831.9 | 72932.9  | 46469.3  | TRUE |
| 125530.6 | 98251.5  | 89931.9  | 128984.9 | 188453.8 | 119615.1 | 109200.8 | 138512.2 | TRUE |
| 36242.4  | 34209.2  | 58982    | 33761.5  | 37614.6  | 56800.1  | 41878    | 32231.2  | TRUE |
| 60807.1  | 53865.2  | 87421.8  | 69713.2  | 61555.4  | 100088.9 | 75577.9  | 69736.2  | TRUE |
| 34359.7  | 32467.3  | 73585.3  | 48812.5  | 20088.9  | 84532.8  | 51697.8  | 32229.8  | TRUE |
| 42511.3  | 38850.3  | 66910.1  | 42995.3  | 35591.8  | 67859.4  | 48598.9  | 35263.5  | TRUE |
| 150312.5 | 111242.1 | 213645.2 | 105397.1 | 107345.3 | 224853   | 128779.4 | 100471.5 | TRUE |
| 84722    | 61902.1  | 112298.1 | 54577.5  | 70608.3  | 103415.8 | 66539.6  | 58488.6  | TRUE |
| 50054.4  | 24211    | 78923.4  | 66545.7  | 44421.5  | 83947.8  | 58989.2  | 51707.7  | TRUE |
| 14937.2  | 9439.3   | 38066.1  | 11877.2  | 7730.4   | 36228.5  | 28843.4  | 18994.6  | TRUE |
| 20004.3  | 23575.8  | 21558.1  | 30720.8  | 18405.6  | 26385.6  | 22096.8  | 16944.2  | TRUE |
| 25269.2  | 30585.3  | 35813.7  | 22279.6  | 23913    | 29297.8  | 30794.5  | 30216.6  | TRUE |
| 40500.7  | 26916.4  | 41604.3  | 43731.9  | 27969.7  | 50099    | 36379.6  | 26350.7  | TRUE |
| 47676.7  | 46403.5  | 79855.1  | 37062    | 34414.8  | 100636.6 | 48481.2  | 43733    | TRUE |
| 332391.9 | 356065.6 | 240038.8 | 344313.3 | 440152.9 | 256114.3 | 395147.8 | 509206.6 | TRUE |
| 368353.9 | 345444   | 347032   | 388176.3 | 358683.1 | 364431   | 367489   | 409317.3 | TRUE |
| 217245   | 215209.4 | 228221.6 | 271702.7 | 262139.9 | 196216.9 | 247181.3 | 249874.3 | TRUE |
| 111174.5 | 112554.7 | 76331.5  | 98843    | 114619.5 | 109626.6 | 85827.1  | 135959.7 | TRUE |
| 580470.9 | 658822.7 | 548541.4 | 531972.5 | 532891.5 | 548602.1 | 604190.1 | 602851.2 | TRUE |
| 89270.9  | 75665.3  | 94065.6  | 112948.6 | 100804.1 | 116937.5 | 128298.7 | 135798.9 | TRUE |
| 87464.3  | 56813.5  | 33854.8  | 66643.7  | 65782.2  | 61240.2  | 64315.2  | 77717.8  | TRUE |
| 80177.9  | 69457    | 37694.3  | 49898.9  | 60331.3  | 55423.4  | 68525.9  | 85094.4  | TRUE |
| 35241.8  | 34178.7  | 25337.9  | 29151.6  | 36285.9  | 27206.4  | 35081.3  | 58242.2  | TRUE |
| 292520.2 | 195005.4 | 177059.8 | 329036.1 | 322924.1 | 338349.1 | 348408.9 | 462261.9 | TRUE |
| 7125.7   | 23186.6  | 13329.6  | 5729.8   | 18643.4  | 10247.3  | 14759.3  | 16219.3  | TRUE |
| 12386.7  | 5001.4   | 7337.1   | 8256.9   | 22113.3  | 11551.5  | 17660.5  | 21599    | TRUE |
| 28005.3  | 55344.8  | 26613.1  | 28038.6  | 19095.1  | 20881.8  | 55091    | 24248.5  | TRUE |
| 137622.1 | 114695.9 | 118301.4 | 126533.1 | 119054.9 | 199127.3 | 188716.7 | 170783   | TRUE |
| 224095.9 | 190216.5 | 219325   | 209032.9 | 230961.3 | 242191.3 | 227775.7 | 233270.6 | TRUE |
| 210941.4 | 229452.1 | 230381.3 | 244400.1 | 231097.2 | 237825.5 | 242301.1 | 236307.9 | TRUE |
| 431274.8 | 459072.1 | 359176.4 | 492507.7 | 435701.4 | 432290   | 508811.3 | 425288   | TRUE |
| 453924.2 | 477090.6 | 402815.3 | 475655.8 | 389563.4 | 391316.7 | 465175.1 | 372721.4 | TRUE |

|          |          |          |          |          |          |          |          |      |
|----------|----------|----------|----------|----------|----------|----------|----------|------|
| 38874.1  | 70316.5  | 41805.5  | 81278.1  | 72765.9  | 37871.5  | 17015.2  | 16005.2  | TRUE |
| 566515.6 | 498361.5 | 617238.9 | 625740.5 | 565700.6 | 646236.6 | 525032.5 | 638292.8 | TRUE |
| 878644.2 | 694321.3 | 855325.8 | 858448.9 | 893661.8 | 814381.6 | 782436.4 | 911822   | TRUE |
| 284684.5 | 280308.2 | 277659.4 | 295594.1 | 247073.5 | 261852   | 306592.2 | 236823.9 | TRUE |
| 248951.1 | 282927.9 | 240590.7 | 214459.3 | 221503.6 | 241667.8 | 257961.8 | 227434.4 | TRUE |
| 574297.9 | 422386.8 | 586394.1 | 665341.2 | 464133.1 | 528717.2 | 409174.6 | 518874.6 | TRUE |
| 257849.8 | 254294.3 | 300174   | 287847.3 | 235473.4 | 235430.6 | 212594.4 | 257043.9 | TRUE |
| 31533.1  | 52282.5  | 15538.7  | 22484    | 41766.5  | 32607.6  | 26464.8  | 37977.7  | TRUE |
| 196805.9 | 188071.8 | 157367   | 172072.7 | 158013.5 | 193465.5 | 192539   | 153785.9 | TRUE |
| 309603.5 | 393095.7 | 292528.9 | 356387.8 | 399158.3 | 327326.1 | 365343.7 | 419153   | TRUE |
| 122446.7 | 118149.1 | 135932   | 128025.1 | 129176.3 | 135593.8 | 151646.4 | 167308.9 | TRUE |
| 316937.2 | 319411.7 | 307692.4 | 354932.9 | 388480.6 | 283737   | 337089.2 | 311718.9 | TRUE |
| 1086948  | 1151068  | 855751.2 | 1110655  | 1063090  | 916244.5 | 1056025  | 1119891  | TRUE |
| 85192    | 72159.3  | 63499.1  | 84760.1  | 77578.9  | 80238.9  | 108680.9 | 94425.5  | TRUE |
| 118074.5 | 87394    | 72801.7  | 123968.4 | 102693.5 | 133675   | 124130.7 | 110640.8 | TRUE |
| 110814.2 | 100631.3 | 92918.1  | 99437.8  | 102236.5 | 112712.6 | 102210.4 | 119088.9 | TRUE |
| 105931.1 | 114743.6 | 87909.3  | 115052.2 | 82990    | 122364.8 | 97363.5  | 120726.6 | TRUE |
| 145908.8 | 115129   | 125856   | 151301.3 | 122706.5 | 180969.2 | 161325.7 | 168507.5 | TRUE |
| 193437.4 | 226152.7 | 126749   | 192956.1 | 257124.5 | 124808.1 | 220110.8 | 195222.4 | TRUE |
| 135952.7 | 182286.7 | 80859.8  | 147978.3 | 161403.5 | 99967.6  | 155771.2 | 170150.5 | TRUE |
| 38560.5  | 46605.4  | 39919.3  | 57735.6  | 58148.2  | 37706.2  | 64782.3  | 60305.8  | TRUE |
| 159486.6 | 201783   | 166365.2 | 200004.9 | 115774.6 | 187751.4 | 188800.3 | 190825.9 | TRUE |
| 178003.6 | 186924.3 | 201207.6 | 224929.3 | 117327.4 | 196971.5 | 189769   | 191099   | TRUE |
| 240429.5 | 273451.6 | 172643.8 | 136760.4 | 150672.4 | 188175.1 | 234389.8 | 148936.7 | TRUE |
| 261288   | 315572.6 | 207336.5 | 175249.2 | 167615.3 | 232907.3 | 236458.8 | 171598   | TRUE |
| 425150.2 | 536337.3 | 487901.6 | 438893.6 | 379319.6 | 521362.7 | 621418.3 | 401461   | TRUE |
| 415350.4 | 517016.8 | 494751.1 | 424980.5 | 367846.4 | 521032.1 | 582804.8 | 384119.4 | TRUE |
| 401718.4 | 327513.8 | 467990.9 | 487977.3 | 521357.7 | 380081.4 | 354930.6 | 389335.1 | TRUE |
| 304360.8 | 519988.3 | 357881.1 | 297506.3 | 247075.5 | 337750.8 | 393750.9 | 245702.2 | TRUE |
| 1197802  | 1123501  | 1353508  | 1259413  | 1128252  | 1206717  | 1235903  | 1236181  | TRUE |
| 1021231  | 1056804  | 1219057  | 1214728  | 1024935  | 958952.3 | 1120690  | 990194.8 | TRUE |
| 53013.2  | 44669.4  | 37452.9  | 35245.1  | 34185.3  | 58526.1  | 90725.4  | 71848.9  | TRUE |
| 353988   | 383876.5 | 219760.8 | 273160.7 | 241162.3 | 370627.6 | 539662.1 | 332424.9 | TRUE |
| 1033789  | 696272.1 | 1302312  | 1506931  | 1030286  | 899826.3 | 968020.1 | 1193736  | TRUE |
| 116151.2 | 65056.4  | 148288.9 | 133850.7 | 96282.7  | 115252.6 | 105569.6 | 115474.2 | TRUE |
| 59142.8  | 80258.4  | 55328.8  | 47608.1  | 62337.7  | 49247.6  | 65474.6  | 57896.6  | TRUE |
| 59529.9  | 74106.3  | 57749.4  | 47855    | 67660.4  | 78941.7  | 85134.1  | 46631    | TRUE |
| 61882.2  | 91232.5  | 142590.6 | 91484.1  | 76066.4  | 97037.2  | 69776.1  | 55443.8  | TRUE |
| 75793.8  | 41901.7  | 46588.7  | 38433.9  | 50558.3  | 70193    | 63182.8  | 70078.9  | TRUE |
| 159556.9 | 140525.4 | 129685.9 | 142783.8 | 158133.8 | 159893.8 | 171418.1 | 186774.8 | TRUE |
| 34834.4  | 31364.5  | 38253.2  | 29409.2  | 25756.8  | 35325.1  | 30576.1  | 32310.4  | TRUE |
| 6377.7   | 7739.9   | 14774.9  | 18966.6  | 6445.7   | 17105.3  | 7172.2   | 17881.2  | TRUE |

|          |          |          |          |          |          |          |          |      |
|----------|----------|----------|----------|----------|----------|----------|----------|------|
| 361007.2 | 393022.9 | 284090.3 | 355951.8 | 266461.7 | 341189.3 | 421393.5 | 303954.9 | TRUE |
| 47556.5  | 47524    | 44255    | 47727    | 31058.6  | 47790.6  | 38821.3  | 33730.9  | TRUE |
| 95224.4  | 69550.3  | 136610.4 | 123220.2 | 81982.1  | 122686.1 | 103736.6 | 92305.8  | TRUE |
| 118404.2 | 140659.7 | 140282.3 | 124386   | 102446.1 | 136553.9 | 149355.3 | 90271.4  | TRUE |
| 34102.1  | 33188.5  | 38255.7  | 36727.6  | 34765.1  | 43445    | 32929.9  | 31859.7  | TRUE |
| 78664.1  | 62072.7  | 76118.6  | 71841    | 78230.8  | 68804.7  | 77323.4  | 70819.3  | TRUE |
| 238800.6 | 261264.8 | 221671.8 | 197933.9 | 216474.8 | 213395.2 | 249821.2 | 252042.1 | TRUE |
| 602035   | 509762.7 | 679035.4 | 692829.7 | 572834.9 | 554359.9 | 580413.8 | 539122.5 | TRUE |
| 1712671  | 1523719  | 1949354  | 1984999  | 1657193  | 1675037  | 1595192  | 1697949  | TRUE |
| 59343.9  | 47825.7  | 61923.3  | 60913.3  | 61044.6  | 66021.7  | 61619.1  | 57562.3  | TRUE |
| 1537062  | 1457203  | 1370790  | 1403479  | 1636173  | 1714039  | 1448186  | 1686352  | TRUE |
|          |          |          |          |          |          |          |          |      |
| 348368.1 | 324300.3 | 326037.8 | 398873.9 | 371532.7 | 341519.4 | 349575.3 | 387627.3 | TRUE |
| 148496.7 | 111708.5 | 128738.2 | 126012.4 | 127431.4 | 127387.9 | 123877.3 | 142537.1 | TRUE |
| 345677.4 | 240710.1 | 253742.4 | 291623.1 | 273088   | 331066.9 | 318116.7 | 352672.7 | TRUE |
| 940963.9 | 819676.7 | 730822.9 | 1009583  | 1116388  | 1022843  | 922590.9 | 1040713  | TRUE |
|          |          |          |          |          |          |          |          |      |
| 224837.4 | 212357.6 | 199576.2 | 213284.8 | 201141.6 | 219285.9 | 193573.9 | 240775   | TRUE |
| 225947.7 | 219220.9 | 219030.4 | 195061.8 | 221664.7 | 239151.5 | 199019.5 | 256192.1 | TRUE |
|          |          |          |          |          |          |          |          |      |
| 17747.5  | 7058.7   | 33943.8  | 23869.6  | 9900.1   | 22381.2  | 8984.2   | 9867     | TRUE |
| 86698.9  | 90942.6  | 129853.2 | 72539.2  | 74442.1  | 139832.7 | 77891.7  | 72771.8  | TRUE |
| 210477.5 | 174165.8 | 316431.9 | 174120.2 | 162557.2 | 298156.3 | 149645.1 | 152824.4 | TRUE |
| 711823.3 | 753028.1 | 524770.8 | 621264.2 | 694897.2 | 570374.8 | 711363.6 | 673608.1 | TRUE |
| 1520954  | 1347976  | 1797178  | 1783499  | 1379197  | 1206546  | 1574225  | 1318371  | TRUE |
| 854512.2 | 829564.4 | 902465.3 | 957199.7 | 734975.4 | 741871.1 | 864004   | 748693.1 | TRUE |
| 57837.9  | 48062.9  | 52301.4  | 59822.8  | 51861.6  | 49701.8  | 44839.7  | 52598.2  | TRUE |
|          |          |          |          |          |          |          |          |      |
| 65416.3  | 112375.2 | 31107.5  | 74094.1  | 121368.2 | 45648.5  | 97864.4  | 105078.2 | TRUE |
| 64405.8  | 111685.5 | 47811.6  | 91967.4  | 107170.4 | 50159.9  | 104001.5 | 108771.8 | TRUE |
|          |          |          |          |          |          |          |          |      |
| 243578.6 | 276866.5 | 303541.2 | 279729.5 | 226028.2 | 271377.9 | 248793   | 259388.8 | TRUE |
| 56511.7  | 62494.5  | 81174    | 52391.7  | 51821    | 74457.6  | 71775.4  | 57362.4  | TRUE |
| 95891.3  | 98874.1  | 76634.6  | 60121.4  | 80708.5  | 97723.5  | 103135.7 | 84124.9  | TRUE |
| 15853.3  | 26474.9  | 21681.7  | 14226.5  | 22059.7  | 23093.4  | 23143.6  | 11726.4  | TRUE |
| 50177.7  | 52209.9  | 52108.1  | 48237.2  | 63013.1  | 42117.6  | 48717.8  | 45527.3  | TRUE |
| 113861.9 | 135175.5 | 95959.5  | 103689.8 | 100065.4 | 108600.9 | 160464.2 | 101378.8 | TRUE |
| 151144.9 | 143248.3 | 234799   | 212427   | 178224   | 202771.3 | 167543.4 | 181152   | TRUE |
| 28406.1  | 32658    | 24385.3  | 31550.6  | 31823.9  | 29684.9  | 34355.7  | 33378    | TRUE |
| 39832.8  | 41273.9  | 53737.5  | 33984.9  | 29174.3  | 34490.4  | 32112.2  | 28357.8  | TRUE |
| 292482.6 | 333115.3 | 265621.3 | 254812.5 | 240963.6 | 321726.9 | 321268.9 | 239733.9 | TRUE |
| 109945.3 | 115932.6 | 134181.2 | 122537   | 90807.9  | 145442.4 | 125334.3 | 120268.2 | TRUE |
| 263532.9 | 250351   | 276078.5 | 295091.5 | 256672.1 | 222963   | 220876.6 | 252608.7 | TRUE |
| 35954.6  | 67673.9  | 56484.6  | 41708.9  | 44974.5  | 40133.6  | 44204.3  | 34901.4  | TRUE |
|          |          |          |          |          |          |          |          |      |
| 85754.9  | 89515.8  | 72219    | 82249.8  | 80721.4  | 83766.9  | 113453.5 | 87137.4  | TRUE |
| 88445.1  | 83922.4  | 124465.5 | 103287.3 | 90034    | 76742.7  | 79967.3  | 71582.5  | TRUE |
| 141837.8 | 163663.9 | 191391   | 160753.3 | 157930.2 | 139748.6 | 131411   | 128134.5 | TRUE |

|          |          |          |          |          |          |          |          |      |
|----------|----------|----------|----------|----------|----------|----------|----------|------|
| 145346.2 | 124338.6 | 140860   | 122374   | 92215.9  | 176483   | 168532.8 | 105288.9 | TRUE |
| 87383    | 80585.9  | 70405    | 103108.6 | 61766.6  | 75373.7  | 89122.9  | 89526.6  | TRUE |
| 37531.2  | 30892.5  | 50246.7  | 55511.1  | 44963.6  | 33608.9  | 37594    | 44458.5  | TRUE |
| 443369.3 | 318792.7 | 430734.3 | 444477.4 | 351097.7 | 424456.2 | 356586.6 | 425902.2 | TRUE |
| 268323.2 | 273409.1 | 302517.5 | 321757.8 | 303975.7 | 304256.6 | 268377.6 | 287601.3 | TRUE |
| 112969.9 | 109112.7 | 106075.8 | 125866.7 | 102325.6 | 102933.9 | 118453.8 | 110365.4 | TRUE |
| 1001818  | 836155.3 | 809095.7 | 1103095  | 871868.6 | 846100.5 | 961350.3 | 854734.2 | TRUE |
| 1055453  | 921594.7 | 1076149  | 1013322  | 860252.2 | 1172893  | 917114   | 1090063  | TRUE |
| 1318059  | 1143359  | 1279472  | 1206672  | 1184958  | 1284397  | 1058045  | 1314791  | TRUE |
| 207594.9 | 216987.4 | 183082.6 | 226269.3 | 196406.5 | 215422.3 | 203273.5 | 222289.8 | TRUE |
| 746796.6 | 625960.2 | 641144.6 | 698340.6 | 708981.6 | 856817.9 | 715275.6 | 750603.3 | TRUE |
| 275172.6 | 221460.5 | 126317.7 | 459606.4 | 208985.7 | 227633   | 268901.9 | 264688.1 | TRUE |
| 186457   | 141177   | 129315.1 | 165482.8 | 175393.6 | 195517.9 | 197931.8 | 210188.3 | TRUE |
| 642386.5 | 495371.2 | 521769.2 | 649218.6 | 455053.3 | 1374245  | 534585.9 | 1291552  | TRUE |
| 576068.4 | 379836.4 | 309543.3 | 432584.3 | 469355.5 | 533328.7 | 566981.1 | 620195.7 | TRUE |
| 46253.4  | 28870.6  | 36338.9  | 38966.4  | 47844.6  | 57527.8  | 50551.4  | 61201.1  | TRUE |
| 70326.2  | 45561.6  | 45856.7  | 50413.7  | 58258    | 58206.8  | 73553.5  | 76821.2  | TRUE |
| 445442.9 | 436577.6 | 450903.5 | 379681   | 367526   | 460479.1 | 431634.3 | 341110.6 | TRUE |
| 126813.7 | 109206   | 140339.4 | 118876.6 | 155433.7 | 125663.9 | 114539.2 | 139990.8 | TRUE |
| 50735.9  | 56591.8  | 35805.6  | 42119.2  | 45840    | 45044.4  | 58757    | 47401.1  | TRUE |
| 43242.2  | 40294.1  | 41810    | 50981.5  | 32589.1  | 57138.6  | 40921.6  | 44583.3  | TRUE |
| 410417   | 342401.3 | 482370.5 | 357890.2 | 400303.6 | 456707.1 | 419596.2 | 360297.3 | TRUE |
| 41420.7  | 41924    | 48100.5  | 53145.8  | 50841.7  | 54096.5  | 62469.2  | 56666.9  | TRUE |
| 14761.3  | 9166.2   | 8656.9   | 13784.7  | 15877.3  | 18333    | 12390.9  | 8512.9   | TRUE |
| 54359.1  | 35111.1  | 63103.4  | 49220.8  | 37792.2  | 43239.1  | 38709.7  | 48321.1  | TRUE |
| 35044.3  | 31004.3  | 25432.1  | 40453.2  | 30838.8  | 24916.5  | 14654.7  | 14035.6  | TRUE |
| 136403.6 | 149221.2 | 141598.6 | 154193.4 | 119395.1 | 137004.1 | 162062.7 | 130980.2 | TRUE |
| 51735.2  | 35925.1  | 36449    | 54260.1  | 59436.2  | 77517.9  | 57270.2  | 60036.1  | TRUE |
| 29638.5  | 21186.5  | 21642.1  | 30961.4  | 41528    | 26463.4  | 16836.3  | 45137.2  | TRUE |
| 75344.3  | 41030.6  | 45400.3  | 58110    | 52388.1  | 70579.4  | 66393.5  | 71324.4  | TRUE |
| 20546.1  | 10345.8  | 15413.7  | 31361.3  | 22950.9  | 29075.1  | 30220.4  | 34536.9  | TRUE |
| 34245.3  | 28521.6  | 25807.9  | 26908.6  | 31943.8  | 37635.1  | 30041.7  | 34943.1  | TRUE |
| 18041.4  | 36982.9  | 38066.5  | 34006.6  | 25676    | 31843    | 23787    | 28114    | TRUE |
| 45973.5  | 33893.4  | 39328.3  | 13188.1  | 36616.3  | 34761.3  | 26553.2  | 37926.5  | TRUE |
| 80779.5  | 71037.7  | 89457.5  | 64435.7  | 67234.8  | 82993.4  | 62698    | 74873.1  | TRUE |
| 77791.4  | 80743.6  | 75679.3  | 101269.3 | 87695.4  | 92399.2  | 100550.9 | 75315.6  | TRUE |
| 12172.3  | 11601.1  | 8187.8   | 9367.8   | 11509    | 21579.6  | 14193.8  | 18214.6  | TRUE |
| 114326.8 | 100737.1 | 108479.4 | 123365.9 | 97900.3  | 123251.2 | 110449.3 | 98936.6  | TRUE |
| 99177.1  | 137093.4 | 114586.6 | 136803.3 | 69678.7  | 79113.3  | 154318.4 | 87002.7  | TRUE |
| 239774.2 | 223467.9 | 154354.2 | 163517.2 | 130792.9 | 154929.1 | 175218.7 | 150530.8 | TRUE |
| 189832.1 | 199030.5 | 141188.4 | 152509.9 | 225774.1 | 132316   | 227112   | 225657.3 | TRUE |
| 146306.9 | 178001.4 | 126570.9 | 154111.2 | 204764.8 | 131577   | 191898.4 | 216830.6 | TRUE |

|          |          |          |          |          |          |          |          |      |
|----------|----------|----------|----------|----------|----------|----------|----------|------|
| 100884   | 151697   | 117209.2 | 112068.4 | 147282.4 | 107338.9 | 148900.1 | 137459.9 | TRUE |
| 111484.8 | 141251.5 | 102499.3 | 94852    | 145698.3 | 135123.7 | 155208.2 | 145488.9 | TRUE |
| 37650.4  | 84179.6  | 38539.1  | 41833.5  | 106561.7 | 45220.5  | 50107.6  | 38371.3  | TRUE |
| 353854.2 | 450704.8 | 410081   | 459553.1 | 376011.6 | 287755.4 | 464777.3 | 321202.9 | TRUE |
| 197912.2 | 252976.1 | 252393.9 | 230840.8 | 158405   | 163924   | 291057.9 | 163210.9 | TRUE |
| 5076.5   | 23503.6  | 3088.6   | 13912.8  | 23180    | 4688.7   | 9910.2   | 20260.3  | TRUE |
| 397377.3 | 469652   | 251686.2 | 329142.2 | 509597.6 | 254795.5 | 500762.3 | 556185.8 | TRUE |
| 117982.1 | 98330.6  | 96734.4  | 117758.2 | 76155.7  | 77530.3  | 125698.4 | 77612.2  | TRUE |
| 51621.9  | 50588.4  | 32608.1  | 41878.6  | 53129    | 50427.3  | 57281.6  | 45393.3  | TRUE |
| 17850.2  | 10714.8  | 17123.5  | 26590    | 23252.7  | 10347.6  | 13171.3  | 11440.7  | TRUE |
| 42634.1  | 43902.8  | 38323.1  | 40683.1  | 57441.6  | 53652.5  | 50436.4  | 53411.4  | TRUE |
| 46264    | 60765.6  | 33427.3  | 52251.1  | 45147.6  | 46066.7  | 49563.9  | 54214.1  | TRUE |
| 67964.8  | 73636    | 49751.8  | 66623    | 69356.8  | 108189.7 | 79796.9  | 81065.6  | TRUE |
| 96329.2  | 112188.5 | 93083    | 106358.1 | 103036   | 97528.1  | 110468.2 | 104226.5 | TRUE |
| 123653.5 | 104150.1 | 96944.3  | 98451.2  | 104195.5 | 233616.1 | 137107.4 | 147439.9 | TRUE |
| 126654.6 | 113341   | 134090.5 | 120405.8 | 95112.2  | 144090.6 | 148009.7 | 112194.4 | TRUE |
| 40810.3  | 25690.1  | 30827.9  | 35101.1  | 46880.8  | 50185.9  | 32752.2  | 38439.5  | TRUE |
| 23533.6  | 43568.5  | 29695.8  | 20549.6  | 21000.1  | 24162.4  | 28015.8  | 33587.2  | TRUE |
| 176500.6 | 187871.8 | 138520.1 | 143884.5 | 151275.1 | 169409.1 | 149730.2 | 164900.4 | TRUE |
| 350658.9 | 356219.9 | 476740.5 | 317213.9 | 230347.2 | 487128.9 | 431359.7 | 283064.8 | TRUE |
| 956970.7 | 586920.1 | 1052252  | 1029799  | 1229991  | 812312.7 | 652780.6 | 844252.4 | TRUE |
| 424684.7 | 569187.3 | 414798.6 | 250282.1 | 244005.3 | 373637.6 | 385427.9 | 229502.8 | TRUE |
| 597206.6 | 625757.5 | 787067.9 | 539176.2 | 397552.3 | 898814   | 764226.5 | 423614.6 | TRUE |
| 434645.9 | 380235   | 548287.7 | 441302.7 | 550476.3 | 413990.9 | 335610.6 | 405871.7 | TRUE |
| 645232.1 | 414279   | 766157   | 782435.4 | 928858   | 528255.3 | 348554.9 | 541142.8 | TRUE |
| 390191.4 | 352327.2 | 544791.9 | 278989.5 | 224463.1 | 599713.7 | 379095.3 | 249841.9 | TRUE |
| 680042.1 | 716733.3 | 985590.5 | 592529.3 | 405443.5 | 1018909  | 792085.4 | 425836.5 | TRUE |
| 28056.1  | 42757    | 31386.2  | 35539.5  | 41861    | 24952.6  | 13127    | 9574.1   | TRUE |
| 118834   | 75117.2  | 127089.1 | 145427.4 | 167201.4 | 96516.8  | 74125.3  | 107011.5 | TRUE |
| 115056.5 | 82253.8  | 146094.1 | 134736.5 | 171951.1 | 80805.5  | 76611.5  | 82253.4  | TRUE |
| 137004.7 | 126494.7 | 199967.9 | 92325.3  | 89993.5  | 217437.4 | 139615.7 | 106763.5 | TRUE |
| 312305.6 | 325956.3 | 389424.9 | 315780.6 | 322977   | 408262.6 | 397441.4 | 318705.9 | TRUE |
| 90374.3  | 79859.6  | 109320.6 | 100705.6 | 122503.1 | 89362.6  | 93146.9  | 84843.6  | TRUE |
| 31306    | 29879.7  | 46484.8  | 32949.7  | 22604.5  | 44146.9  | 39514.4  | 23105.3  | TRUE |
| 593641.7 | 687642.2 | 969077.5 | 394646.1 | 361691.4 | 1018790  | 643617.5 | 435895.4 | TRUE |
| 982683.6 | 637392.4 | 1058681  | 991426.8 | 1696483  | 673915.3 | 707359.9 | 819286.6 | TRUE |
| 151360.3 | 157377.6 | 192108.1 | 125668   | 101658.9 | 238014.7 | 156759.6 | 123520.7 | TRUE |
| 1195569  | 860768.2 | 1002472  | 980836   | 1676780  | 1098443  | 940834.6 | 1509202  | TRUE |
| 25894.8  | 12187.9  | 21722.9  | 6449.2   | 19523.3  | 42179.6  | 12621.3  | 16552.9  | TRUE |

|          |          |          |          |          |          |          |          |      |
|----------|----------|----------|----------|----------|----------|----------|----------|------|
| 31524.1  | 30886.3  | 24154.8  | 27633    | 29780.8  | 41713.4  | 15705.3  | 33034.9  | TRUE |
| 228741.8 | 222462.3 | 200685.4 | 204987.9 | 202315.9 | 236939.3 | 251940.8 | 224940.8 | TRUE |
| 246304.6 | 204044.3 | 235299.8 | 271821.4 | 264390.6 | 319967.1 | 296618.4 | 291796.1 | TRUE |
| 85141.8  | 76666.1  | 84636    | 69307.6  | 77456.6  | 96892.8  | 75804.1  | 81978.9  | TRUE |
| 157397.9 | 116034.9 | 102200.2 | 122243.5 | 108357.3 | 229381.1 | 152627.3 | 136160.3 | TRUE |
| 257561   | 187674.3 | 256811.4 | 266664.9 | 324855.8 | 215359.1 | 231623.9 | 241114.9 | TRUE |
| 107238   | 141021.1 | 115454.2 | 142661.3 | 102538.8 | 130925   | 120726.5 | 111368.8 | TRUE |
| 471803.2 | 534682.2 | 428284.2 | 423607.7 | 392584.7 | 414534.6 | 599197.6 | 435462.2 | TRUE |
| 396200.9 | 466137.2 | 376323.7 | 398854.4 | 357669.6 | 434769.3 | 506309.2 | 418745   | TRUE |
| 92862    | 99602    | 84837.1  | 107969.7 | 123224.6 | 81871.6  | 94826    | 98481    | TRUE |
| 33747.3  | 49986.6  | 79149.7  | 34463.7  | 45682.3  | 30769.1  | 43225.9  | 33885.5  | TRUE |
| 42812.5  | 86552.6  | 222045.8 | 47503.1  | 51448.5  | 48444.5  | 57944.5  | 58341.8  | TRUE |
| 27773.8  | 12205    | 6827.9   | 36737.2  | 19613.9  | 22501.5  | 11076.9  | 12837.4  | TRUE |
| 45055    | 141207.2 | 207399.2 | 35814.5  | 29547.6  | 31166.8  | 29916.2  | 32121.6  | TRUE |
| 219178.3 | 228374.6 | 191537.7 | 237550.8 | 180598.3 | 196447.8 | 236734.8 | 200315.3 | TRUE |
| 259142   | 251275.2 | 268833.9 | 333741.2 | 270141   | 267880.2 | 235507.2 | 293978.4 | TRUE |
| 50462.9  | 60967.9  | 44931.9  | 37488.1  | 38248.2  | 50878.2  | 49734.3  | 37737.2  | TRUE |
| 244390.4 | 217921.9 | 232881.2 | 216094.7 | 239798.8 | 229960.9 | 254847.4 | 218865.8 | TRUE |
| 124279.9 | 158237.8 | 122523.1 | 119689.5 | 121255.1 | 148661.9 | 144663.9 | 126714.2 | TRUE |
| 124501.9 | 124611.9 | 188677.3 | 127100.5 | 101778.7 | 180711.1 | 116961.7 | 97013.3  | TRUE |
| 186796.8 | 227245.7 | 300548.6 | 229526.1 | 170535   | 340327   | 257477.9 | 185492.6 | TRUE |
| 20838.7  | 20217.4  | 20650.5  | 6830.2   | 3906     | 14782.7  | 8851.3   | 9633.9   | TRUE |
| 200071.5 | 190483.9 | 249328.8 | 120163.8 | 157232.4 | 313985.1 | 192589.5 | 149831.2 | TRUE |
| 151262.2 | 156695.2 | 241669.4 | 126776.5 | 134127.3 | 229566.2 | 166760.7 | 109798.5 | TRUE |
| 87060    | 84739.3  | 107842.4 | 74717.4  | 87752.7  | 134393   | 88897.6  | 81827.4  | TRUE |
| 51041.1  | 56977.4  | 101977.1 | 53104.9  | 62081.2  | 107340   | 76971.6  | 56185.9  | TRUE |
| 119238.9 | 126869.6 | 136304.2 | 119524.8 | 105550.7 | 149312.2 | 131334.8 | 102147.4 | TRUE |
| 94752.1  | 74702.3  | 126946.5 | 112868.6 | 73538.3  | 139473.2 | 107247.1 | 104183.8 | TRUE |
| 59524.2  | 56521    | 103991.7 | 53893.1  | 52993.7  | 92030.7  | 77146.8  | 70226.7  | TRUE |
| 328019.1 | 381936.8 | 470604.9 | 265793.5 | 262721.5 | 534302.2 | 405290.9 | 275584.2 | TRUE |
| 562757.2 | 449816.6 | 647222.5 | 618373.3 | 989311.5 | 488280   | 480148.6 | 471234   | TRUE |
| 31269.5  | 33318.8  | 51411.7  | 9544     | 20260.3  | 66965.1  | 14574.4  | 10707.6  | TRUE |
| 220583.1 | 176329.6 | 306532.7 | 193073.9 | 136066.8 | 324606.7 | 214343.2 | 146766.4 | TRUE |
| 113984.6 | 128527.5 | 142818.8 | 103980.1 | 101944.7 | 144535.9 | 136192.3 | 77933.2  | TRUE |
| 45929    | 37834.3  | 63510.4  | 33299.8  | 19137.8  | 62729.3  | 47474    | 31227.4  | TRUE |
| 175081.3 | 205979.3 | 219955.9 | 141351.7 | 150232   | 208372.6 | 185214.2 | 144691.7 | TRUE |
| 66703.8  | 77035.4  | 107124.9 | 63628.8  | 54927.7  | 107349.3 | 92424.6  | 55835.4  | TRUE |
| 155448.2 | 157417.5 | 249083.1 | 57036.1  | 124250.1 | 285549.6 | 156357.4 | 130069.4 | TRUE |
| 235538.1 | 147689.9 | 201418.8 | 190111.9 | 494031.5 | 70252.5  | 172870   | 118118.7 | TRUE |
| 24929.4  | 34431.5  | 45515.7  | 34746.3  | 27367    | 33537.1  | 21738.3  | 27914.8  | TRUE |
| 56395.6  | 48549.4  | 41569.4  | 94242.5  | 38670.2  | 63945.9  | 66859.8  | 49620.1  | TRUE |
| 26516.5  | 10088.3  | 29304.4  | 6229.1   | 11726.2  | 23919.7  | 23707.9  | 26552.2  | TRUE |
| 342993.4 | 410711.5 | 280899.5 | 328372.4 | 378168.3 | 277526.7 | 431064.4 | 386513.2 | TRUE |

|          |          |          |          |          |          |          |          |      |
|----------|----------|----------|----------|----------|----------|----------|----------|------|
| 56907.1  | 59595.8  | 67004.4  | 63709.9  | 60242.9  | 59663    | 64031    | 54205    | TRUE |
| 50276.8  | 49468.8  | 52250.4  | 57295    | 40746.1  | 50405.3  | 48726.6  | 42432.9  | TRUE |
| 75995.1  | 75297.9  | 67889.5  | 76658.8  | 60487.7  | 79629.5  | 71393.2  | 63351.2  | TRUE |
| 2130152  | 2024748  | 3258706  | 1331745  | 1377263  | 3196801  | 2041951  | 1344522  | TRUE |
| 349413.7 | 386420.7 | 300754.6 | 336674.6 | 374557.4 | 298162.8 | 375642.4 | 326916.9 | TRUE |
| 1121777  | 1095314  | 1750761  | 825590.9 | 793346   | 1726048  | 1088617  | 760269.1 | TRUE |
| 401874.4 | 401522.4 | 364993.9 | 431036.1 | 351855.6 | 365378.5 | 393218.6 | 368285   | TRUE |
| 849216.2 | 672891.7 | 975555.2 | 905991.6 | 1445278  | 664945.5 | 632181.8 | 694412.9 | TRUE |
| 944113.1 | 777887.2 | 889339.7 | 938591.7 | 1506485  | 770136.4 | 718900.8 | 736049.4 | TRUE |
| 569838.8 | 607463   | 471700.9 | 627574.5 | 631733.5 | 519885   | 614411.4 | 637188.9 | TRUE |
| 128027   | 119895.4 | 116724.9 | 140392.2 | 117895.3 | 99655.6  | 147593   | 146893.8 | TRUE |
| 428291.7 | 401513.4 | 487414.1 | 453550.8 | 384434.5 | 425244.7 | 422066.5 | 443748.3 | TRUE |
| 76847.6  | 63070.2  | 79166.8  | 63776.5  | 57865.2  | 78881.6  | 98615.6  | 90349.3  | TRUE |
| 54216.8  | 58833.8  | 62950.7  | 46942.6  | 48342.6  | 63204.3  | 55939.8  | 59849    | TRUE |
| 583051.8 | 569814.6 | 513029.5 | 628416   | 500645.7 | 539989.9 | 562579.5 | 466745.9 | TRUE |
| 1565656  | 1606847  | 1205672  | 1713893  | 1528124  | 1301733  | 1642231  | 1399361  | TRUE |
| 424588.7 | 328849.3 | 410792.6 | 435885.5 | 340049.2 | 443866.6 | 391100.4 | 434975   | TRUE |
| 486883.9 | 426789.7 | 429769.3 | 469571.1 | 338865.6 | 407190.7 | 422950.7 | 370002.8 | TRUE |
| 372710.6 | 273986.4 | 397386.8 | 400766.9 | 343502.8 | 358683.8 | 306902.5 | 373191.4 | TRUE |
| 190165   | 205127   | 128615.5 | 175864.8 | 171487.4 | 164482.8 | 183287   | 162451   | TRUE |
| 44739.1  | 57177.6  | 36630    | 39731.7  | 50862.6  | 36078.3  | 44140    | 48045.1  | TRUE |
| 168329.3 | 175974.1 | 144861.3 | 158536.4 | 163228.6 | 157739   | 174244.3 | 185156.7 | TRUE |
| 52421.4  | 52818.9  | 64118.1  | 46846.4  | 69586.3  | 70742.1  | 69553.6  | 72861.8  | TRUE |
| 229378.9 | 208547.8 | 273629.4 | 209752.7 | 225821.9 | 242087.8 | 205710.7 | 224691.1 | TRUE |
| 88534.5  | 72406.3  | 90485    | 122212.7 | 86301.9  | 99147.4  | 82231.3  | 96141.9  | TRUE |
| 64696.9  | 74966.8  | 72345.4  | 55453.8  | 80367.6  | 60022.4  | 66750.8  | 76561.9  | TRUE |
| 49998.5  | 64307.1  | 56681    | 91971.8  | 123011.1 | 34752.9  | 46587.8  | 51561.3  | TRUE |
| 54807.1  | 60904.5  | 46838.1  | 49091.2  | 43850.7  | 55181.9  | 83530.5  | 42700    | TRUE |
| 448509.5 | 234129.5 | 250322.2 | 298690.7 | 305012.5 | 433721.2 | 270386.5 | 503772.8 | TRUE |
| 258510.2 | 240636.8 | 255546.8 | 299535.7 | 238169.2 | 255612.9 | 262775.7 | 257765.9 | TRUE |
| 763494.4 | 681640.8 | 757765.6 | 708143.9 | 713639.8 | 851343.8 | 764765   | 830373.9 | TRUE |
| 252533.2 | 245659.4 | 273494   | 175699.3 | 229714.8 | 262896.5 | 249831.7 | 195095.3 | TRUE |
| 125821.2 | 110160   | 129306.3 | 86973.4  | 108494.9 | 120835.7 | 133728.3 | 106184.3 | TRUE |
| 209748.7 | 278456.6 | 230913.7 | 195953.9 | 208972.2 | 230825.6 | 248049.7 | 220026.6 | TRUE |
| 68507.6  | 58991.1  | 60126.3  | 56860.4  | 61741.7  | 76966.1  | 45454.7  | 58238.9  | TRUE |
| 531529.1 | 510155.8 | 620738.5 | 393885.4 | 389275.6 | 645857.8 | 494692.2 | 396712.7 | TRUE |
| 208125.4 | 192951.4 | 217632.9 | 186146.5 | 165254.2 | 234558.9 | 202853   | 210988.1 | TRUE |
| 60466.3  | 48367.4  | 60689.4  | 61392.1  | 76253.4  | 50982.5  | 45283.1  | 55487.9  | TRUE |
| 73199.1  | 65461.9  | 67433.6  | 87930.9  | 43625.1  | 118051.8 | 112388.9 | 73403.7  | TRUE |
| 97405    | 95184.2  | 94439.6  | 89801.6  | 89685.3  | 167906.4 | 139635.7 | 100517.6 | TRUE |



|          |          |          |          |          |          |          |          |      |
|----------|----------|----------|----------|----------|----------|----------|----------|------|
| 131060.7 | 151109.5 | 110905.8 | 160195.6 | 129075.2 | 117014.5 | 151143.2 | 106579.8 | TRUE |
| 83765.4  | 80569.1  | 90404.6  | 79769.9  | 73273    | 91713.8  | 68214.6  | 87107.2  | TRUE |
| 59385.1  | 45620.1  | 54709.9  | 51174.9  | 37180.9  | 55152.9  | 64716.4  | 64265.7  | TRUE |
| 41489.6  | 60630.8  | 36151.1  | 62367.4  | 44349.1  | 48437    | 57620.2  | 58602.1  | TRUE |
| 170221.9 | 142854.9 | 144603.3 | 159957.7 | 127578.8 | 162603.5 | 144039.6 | 161071.5 | TRUE |
| 55469.9  | 43633.6  | 63812.6  | 56978.9  | 30388.7  | 70483    | 69070.3  | 47987.3  | TRUE |
| 41145.4  | 29474.9  | 30649.2  | 40155.7  | 27273.8  | 33342    | 36927.3  | 28739.9  | TRUE |
| 86269.2  | 73976.8  | 82673.8  | 120754   | 91506.4  | 75585    | 84643.5  | 66819.9  | TRUE |
| 287386.1 | 301818.9 | 245162.2 | 272117.7 | 254098.2 | 248687.8 | 289125.1 | 230489.8 | TRUE |
| 231394.3 | 169232.8 | 276489.9 | 263463.8 | 239794.5 | 261528.1 | 171373.6 | 226160.3 | TRUE |
| 77303.2  | 66759.4  | 60817.1  | 69525.2  | 70898.5  | 59765.8  | 67081.4  | 65340.9  | TRUE |
| 92040.4  | 71213.8  | 77652.6  | 91835.1  | 95990.2  | 86878.7  | 89121.9  | 94627.6  | TRUE |
| 134240.2 | 101235.4 | 149121.8 | 161175.4 | 138374.4 | 141843.5 | 118133.7 | 148950.4 | TRUE |
| 159265.6 | 146154   | 149809.3 | 153282   | 189079.2 | 186504.3 | 191820.3 | 208769.1 | TRUE |
| 524844.3 | 398794.2 | 473548.3 | 425478.3 | 878346.1 | 528435.4 | 435972.4 | 867216.9 | TRUE |
| 336182.5 | 350605.2 | 301927.8 | 362408.2 | 338828.6 | 315188.8 | 308433.8 | 358908.8 | TRUE |
| 325734.9 | 324451.9 | 261753.3 | 277104.9 | 313632.4 | 327006.9 | 321003.5 | 358130.8 | TRUE |
| 703130.2 | 706475.9 | 665837.3 | 603462.9 | 628830.7 | 738039.2 | 729756.7 | 733745.2 | TRUE |
| 19314.5  | 8778.7   | 21812.5  | 8395     | 19905.3  | 16636.3  | 7634.8   | 10277.4  | TRUE |
| 69129.9  | 72094.4  | 64031.8  | 87948.4  | 75074.3  | 71707    | 75924.7  | 76044    | TRUE |
| 78636.2  | 52911.5  | 48825    | 51692.8  | 44615.2  | 59837.6  | 46146.3  | 41924.4  | TRUE |
| 118889.5 | 98325.2  | 146753.6 | 113004.7 | 128204.6 | 129681.3 | 116390.9 | 128195.9 | TRUE |
| 120016.9 | 145772.2 | 121831.9 | 177333.4 | 166460.8 | 148394.5 | 220047   | 168338.1 | TRUE |
| 72716.3  | 74674.6  | 57803.8  | 91528.1  | 86174.6  | 54682.2  | 112173.6 | 88386.7  | TRUE |
| 536528.3 | 550508.7 | 469222.1 | 465193.6 | 384005.9 | 508204.2 | 536859   | 406297.4 | TRUE |
| 319967.8 | 279602.9 | 332246.7 | 271553.2 | 162572.1 | 390361.2 | 269956.4 | 178796.8 | TRUE |
| 17875.5  | 16231.1  | 20454.9  | 19479.4  | 20188    | 6928.1   | 14228    | 19237.3  | TRUE |
| 389499.2 | 478839.5 | 473429.2 | 425181.4 | 446032.8 | 479965.1 | 543831.6 | 427449.5 | TRUE |
| 58658.6  | 64677.3  | 46105.1  | 47424.6  | 30459.3  | 44279    | 54517.8  | 34614.9  | TRUE |
| 175752.7 | 155232.6 | 181066.3 | 156113.9 | 135704.9 | 198826.7 | 162563.3 | 136030.9 | TRUE |
| 199431.3 | 148377.2 | 230136.1 | 261831.7 | 253260   | 196843.5 | 162319   | 190708.6 | TRUE |
| 66089.8  | 61600.9  | 70456.4  | 86561.4  | 81784.2  | 69552    | 67957.8  | 68488.7  | TRUE |
| 238420.6 | 176249.3 | 236432.3 | 252954.7 | 273582.9 | 242601.7 | 220071.4 | 262746.4 | TRUE |
| 85402.4  | 103523.2 | 144628.1 | 73497.7  | 83560.7  | 118657.5 | 84381.1  | 136203.9 | TRUE |
| 32792.2  | 48467    | 36490.8  | 37323.1  | 42023    | 56369.5  | 33362.8  | 42256    | TRUE |
| 117013.2 | 106815.6 | 81904.5  | 106185.3 | 157905.4 | 78924.2  | 111362.9 | 174066   | TRUE |
| 120945.3 | 109772.5 | 95076.3  | 111951   | 102874.1 | 153509.3 | 107326.9 | 146670.7 | TRUE |
| 451938.5 | 399770.5 | 294961.2 | 377485.8 | 404764.9 | 407499.2 | 481005.8 | 443960.6 | TRUE |
| 179446.9 | 137080.2 | 164140.3 | 190963.2 | 222416.9 | 202766.8 | 177187.6 | 237805.6 | TRUE |
| 802506.6 | 765513.3 | 624159.6 | 732817.7 | 714774.8 | 725163.2 | 993251.5 | 771883.8 | TRUE |
| 157181.5 | 142092.1 | 117310   | 130381.9 | 149046.7 | 147439.5 | 197669.6 | 172725.6 | TRUE |
| 564065.3 | 389292.5 | 592179.9 | 474067.5 | 516948   | 455646.4 | 414223.3 | 559125.4 | TRUE |
| 359083   | 395960.5 | 365992   | 361549.3 | 366142.1 | 413194.8 | 396974.2 | 408340.9 | TRUE |
| 29637.2  | 31938.7  | 41571    | 48057.2  | 42114.4  | 38861.5  | 35339.6  | 39343.5  | TRUE |
| 43547.3  | 32985.1  | 34091.3  | 41840.7  | 35583    | 37502.3  | 63100.2  | 48828.5  | TRUE |

|          |          |          |          |          |          |          |          |      |
|----------|----------|----------|----------|----------|----------|----------|----------|------|
| 251851.5 | 176257.7 | 185492.2 | 299789.4 | 226551   | 297816.1 | 212921.3 | 289084.5 | TRUE |
| 297470.7 | 279496.1 | 291405.3 | 319696.8 | 333423.7 | 364942.2 | 331294.5 | 357197.3 | TRUE |
| 50462.4  | 28740.5  | 28269.4  | 40333.9  | 41329.7  | 57636.4  | 39144.8  | 55102.4  | TRUE |
| 35328.5  | 22424.7  | 40826.9  | 48875.7  | 43391.8  | 38371    | 38225    | 42258.7  | TRUE |
| 38150.8  | 33591.7  | 49841.8  | 38972.3  | 32003.8  | 35225.6  | 37345.9  | 47292    | TRUE |
| 293079.9 | 271008.6 | 319079.7 | 394309.7 | 310414.2 | 334043.7 | 289626.5 | 259746.7 | TRUE |
| 615430.5 | 694888.9 | 611260.9 | 544014.3 | 543137.2 | 612143.9 | 542848.4 | 568367.9 | TRUE |
| 321186.3 | 316135.1 | 218061.5 | 329002.9 | 342361.4 | 326731.5 | 377694.9 | 380287.4 | TRUE |
| 90599.7  | 78978    | 70795.9  | 81597.1  | 64024.1  | 125589.4 | 99925.2  | 94006.3  | TRUE |
| 118372.1 | 103065   | 86910.7  | 105509.8 | 96946.4  | 102037.1 | 120592.1 | 86791.7  | TRUE |
| 50322.5  | 45031.7  | 35752.4  | 40197.3  | 37430    | 36048.4  | 44786.6  | 23763.4  | TRUE |
| 108602.4 | 112077.9 | 104390.4 | 102744.7 | 95036.6  | 121131.7 | 109195.9 | 108076.1 | TRUE |
| 114641   | 105121.6 | 115370.7 | 149945.3 | 137633.7 | 145895.7 | 122449.1 | 119167   | TRUE |
| 345034.7 | 283430.9 | 378450.4 | 370949.4 | 381749.4 | 360344.8 | 315135.1 | 359450.2 | TRUE |
| 256670.6 | 257276.3 | 250196.5 | 273161.8 | 271818.6 | 253049.4 | 205157.3 | 246456.1 | TRUE |
| 7811.5   | 9936.9   | 10239.3  | 12536.4  | 23890.2  | 20922.6  | 18034.8  | 13598.1  | TRUE |
| 90229.5  | 93203.5  | 94621.3  | 117165.8 | 57353.9  | 108411.4 | 113655.6 | 94189    | TRUE |
| 221339.2 | 152764.3 | 180949.1 | 186779.2 | 203371.9 | 210676.9 | 170906.4 | 205989.9 | TRUE |
| 138249.5 | 167223.9 | 120406   | 143698   | 114796.4 | 179454.1 | 190079.7 | 125481.2 | TRUE |
| 727449.5 | 485250.5 | 890378.8 | 923777.1 | 1002875  | 625734.2 | 497838.3 | 618361.1 | TRUE |
| 598681.9 | 274146.9 | 820153.6 | 775055.5 | 807973.5 | 448727.1 | 293014.5 | 458525.1 | TRUE |
| 90851.4  | 61678.4  | 84384.3  | 104661.5 | 97286.4  | 96831.8  | 65705.6  | 103253   | TRUE |
| 60799    | 67988.1  | 77727.9  | 48287.3  | 28053.9  | 84296    | 80790.5  | 33617.2  | TRUE |
| 118184.9 | 67829.2  | 130771.6 | 142339.6 | 192318.9 | 59896.8  | 56882.6  | 69650.8  | TRUE |
| 69320.9  | 120507.2 | 95146.7  | 54558.6  | 52150.4  | 102212.5 | 119879.1 | 51873.5  | TRUE |
| 140527.5 | 191826.2 | 146117.5 | 115433.8 | 121338.5 | 195242.9 | 165544.7 | 118141.2 | TRUE |
| 141528   | 179961.5 | 223293.5 | 162504.6 | 144552.3 | 202691.9 | 193475.1 | 158607   | TRUE |
| 364596.5 | 262946   | 502427.5 | 471137.8 | 518239.6 | 296154.1 | 272600.3 | 356085.8 | TRUE |
| 162419.9 | 103108.2 | 205030.1 | 227859.4 | 232344.6 | 146137.8 | 140276.8 | 155546.7 | TRUE |
| 45936.5  | 38854.4  | 41714.2  | 48434.6  | 39267.4  | 83077.2  | 46863.7  | 75291.8  | TRUE |
| 335364.2 | 187101.8 | 216748.9 | 229794.9 | 371010   | 325467.4 | 253375.2 | 379228.5 | TRUE |
| 115420.6 | 137495.5 | 216941.8 | 170787.8 | 129909.6 | 256124.7 | 146657   | 125749   | TRUE |
| 117029.3 | 198867.1 | 135193.2 | 113322.3 | 192302.4 | 152110.4 | 154667.2 | 159700.2 | TRUE |
| 380712.7 | 411883.9 | 432304.1 | 531679.2 | 636207.6 | 515570.9 | 415001.5 | 494131.3 | TRUE |
| 93340.8  | 59069.4  | 63715.9  | 79630.2  | 107259.5 | 104221.2 | 73462.1  | 90849    | TRUE |
| 30506.3  | 27693.8  | 41960.9  | 27842.7  | 19637.3  | 57148.8  | 15389.4  | 31685.5  | TRUE |
| 124680.8 | 102505.3 | 146539   | 127004   | 104013.5 | 154930.1 | 112783.4 | 87549.4  | TRUE |
| 115769.1 | 110744.7 | 151287.6 | 111066.2 | 80208.4  | 156346.5 | 111737.1 | 79534    | TRUE |
| 213075.1 | 372453.9 | 202286.1 | 341549.7 | 409199.7 | 147540.3 | 151176.4 | 152742.8 | TRUE |
| 61386.5  | 115264.7 | 83567.6  | 95105.2  | 98265    | 43413.5  | 51146.5  | 46730.4  | TRUE |
| 166355.3 | 184701.9 | 128375   | 164809.9 | 141118.4 | 145364.8 | 157146.6 | 137215   | TRUE |
| 20331    | 12695.2  | 19831.3  | 14887.3  | 33391.9  | 9722.1   | 11122.9  | 32306    | TRUE |
| 93553.6  | 84796.8  | 67859.6  | 93837.4  | 75838    | 91121.2  | 100081.9 | 95266    | TRUE |
| 61074.5  | 35537.4  | 38521.6  | 44043.9  | 51515.1  | 52669.8  | 61274.2  | 90492.5  | TRUE |

|          |          |          |          |          |          |          |          |      |
|----------|----------|----------|----------|----------|----------|----------|----------|------|
| 336870.1 | 276985.4 | 192187.9 | 300190.5 | 284528.1 | 323441.3 | 345775.2 | 383478.7 | TRUE |
| 433295.8 | 329732.1 | 371349.2 | 419345.7 | 383998.3 | 482881.4 | 515599.7 | 510126.5 | TRUE |
| 107061   | 102900.5 | 89273    | 101558.7 | 83609.2  | 91304.6  | 134760.1 | 126346.5 | TRUE |
| 358577.7 | 289251.7 | 342954.1 | 397443.1 | 336183.8 | 361632.7 | 328471.3 | 333266.8 | TRUE |
| 81672.6  | 116434.7 | 93977.5  | 65819.4  | 67594.7  | 76313.9  | 80215.6  | 60206.1  | TRUE |
| 50449.9  | 43132.9  | 35519.2  | 40075.4  | 38560.6  | 32991.3  | 48060.5  | 47535.3  | TRUE |
| 73185.3  | 96309.2  | 58677.3  | 66635.5  | 64343.3  | 69345.7  | 78624.3  | 45563.3  | TRUE |
| 155151.5 | 91221.1  | 145042.3 | 159685.9 | 163056   | 154637   | 111019.3 | 159443.6 | TRUE |
| 53546.8  | 57979.7  | 42588.7  | 49048.3  | 18554.7  | 51908.9  | 53695    | 36259.2  | TRUE |
| 47367.3  | 46220.7  | 41738.4  | 39510.3  | 29794.9  | 73213.8  | 76418.9  | 51493.6  | TRUE |
| 20855.5  | 35252.9  | 14570.7  | 26587.2  | 8989.5   | 37666.9  | 28954.9  | 34165.6  | TRUE |
| 124225.3 | 135971.7 | 102258.4 | 110156.7 | 120389.4 | 126744.3 | 143180.5 | 119547.6 | TRUE |
| 41061.8  | 28739.4  | 33227.2  | 38438.1  | 30583.3  | 35995.7  | 44843.7  | 41772.6  | TRUE |
| 297621.3 | 236807.7 | 235908.3 | 232189.8 | 205274.6 | 250498.8 | 303153.7 | 279315   | TRUE |
| 141146.6 | 111880   | 129167.1 | 136284.5 | 123601.3 | 174761.9 | 127976   | 199073.7 | TRUE |
| 11665.1  | 10003.1  | 24874.5  | 7420.4   | 9924.1   | 40707.4  | 15058.8  | 31936.1  | TRUE |
| 44891.7  | 29861.9  | 41354    | 44202.4  | 39183.2  | 37720.2  | 49750.7  | 43164    | TRUE |
| 37495.1  | 45658.3  | 37174.4  | 46623.1  | 45777.5  | 32775.5  | 44465.7  | 43481.6  | TRUE |
| 68463.8  | 94503.3  | 78582.9  | 72027.3  | 67501.5  | 66573.6  | 70402.9  | 71635.2  | TRUE |
| 17358.7  | 8634.6   | 8271.2   | 10463    | 6114.9   | 6464.9   | 11468.4  | 11042.7  | TRUE |
| 166847.3 | 142990.2 | 141083.5 | 135224.4 | 151226.7 | 176726.2 | 187181.5 | 169471.5 | TRUE |
| 350658.9 | 356219.9 | 476740.5 | 317213.9 | 230347.2 | 487128.9 | 431359.7 | 283064.8 | TRUE |
| 956970.7 | 586920.1 | 1052252  | 1029799  | 1229991  | 812312.7 | 652780.6 | 844252.4 | TRUE |
| 424684.7 | 569187.3 | 414798.6 | 250282.1 | 244005.3 | 373637.6 | 385427.9 | 229502.8 | TRUE |
| 597206.6 | 625757.5 | 787067.9 | 539176.2 | 397552.3 | 898814   | 764226.5 | 423614.6 | TRUE |
| 434645.9 | 380235   | 548287.7 | 441302.7 | 550476.3 | 413990.9 | 335610.6 | 405871.7 | TRUE |
| 645232.1 | 414279   | 766157   | 782435.4 | 928858   | 528255.3 | 348554.9 | 541142.8 | TRUE |
| 118834   | 75117.2  | 127089.1 | 145427.4 | 167201.4 | 96516.8  | 74125.3  | 107011.5 | TRUE |
| 180755.1 | 191489.9 | 170156.8 | 148487   | 208344.2 | 135087   | 196393.2 | 177872.5 | TRUE |
| 52542.9  | 72146.3  | 50639.1  | 54686.8  | 52520.4  | 84242.7  | 84210.7  | 229701.9 | TRUE |
| 348319.3 | 357403.1 | 258330.6 | 345101.4 | 400073.4 | 281914.8 | 366903.8 | 411078.6 | TRUE |
| 266879   | 271843.2 | 191621.9 | 266765.6 | 282761.7 | 216895.8 | 297430.8 | 288490.8 | TRUE |
| 196637.1 | 192764.9 | 230459.2 | 220861.9 | 179644.9 | 194725.6 | 235208.2 | 189136.9 | TRUE |
| 594756.1 | 579430.3 | 624738.6 | 610046.2 | 687379.1 | 548289.2 | 584087.3 | 576114   | TRUE |
| 29392.3  | 27376.3  | 22679.4  | 32039.7  | 29312.9  | 18280.4  | 26945.3  | 20361.5  | TRUE |
| 123492   | 143468.7 | 123406   | 141628.3 | 131235.4 | 124519.2 | 139941.1 | 119226.7 | TRUE |
| 107999.8 | 96658    | 123722.1 | 107407.4 | 93065    | 142887.6 | 102889.9 | 131863.6 | TRUE |

|          |          |          |          |          |          |          |          |      |
|----------|----------|----------|----------|----------|----------|----------|----------|------|
| 46480.5  | 40563.3  | 33147.1  | 58499    | 59945.4  | 47421    | 57431.2  | 49357.7  | TRUE |
| 194831   | 138960.5 | 144438.3 | 137518.6 | 145130.5 | 183576.9 | 185633.8 | 221894.1 | TRUE |
| 1200233  | 1181049  | 1095732  | 1206240  | 1029474  | 1135709  | 1322671  | 1080922  | TRUE |
| 327496.8 | 265545.8 | 312313.3 | 359323.7 | 288567.1 | 339664.6 | 311627   | 309358   | TRUE |
| 868724.1 | 692635.9 | 849166.9 | 1010984  | 890137.2 | 868014.8 | 722560.6 | 868644.1 | TRUE |
| 16035.6  | 8715.7   | 18949.2  | 12620.2  | 7284.8   | 10163.6  | 7086.8   | 27126.7  | TRUE |
| 189192   | 194340.4 | 186031.7 | 141046.6 | 116809.4 | 204987.8 | 213694.6 | 115475.3 | TRUE |
| 543338   | 663154.5 | 718087.9 | 472592.1 | 357139.1 | 810684.5 | 677326.8 | 370574.2 | TRUE |
| 981260.1 | 610405.6 | 1135274  | 1052345  | 1240993  | 796394.3 | 611779.5 | 830114   | TRUE |
| 615848.1 | 409878.8 | 721851.5 | 679302.8 | 816941.9 | 523790.6 | 467220.9 | 518823.1 | TRUE |
| 444649.3 | 256305.8 | 540753.6 | 507069.3 | 620463   | 414017   | 284492.1 | 406797.3 | TRUE |
| 239938.8 | 262531   | 275692.1 | 195891.9 | 155714.8 | 290150.2 | 253689.4 | 160031.6 | TRUE |
| 275689.7 | 147085.2 | 297840.4 | 310169.9 | 317095.9 | 184661.7 | 179284.9 | 202496.6 | TRUE |
| 54889.2  | 52894.8  | 95225.6  | 58047.1  | 41812.2  | 111934.2 | 48463.7  | 49804    | TRUE |
| 40163.1  | 48302.5  | 45329.3  | 45734.5  | 47734.3  | 27329.8  | 25210.1  | 42253.6  | TRUE |
| 180174.3 | 142002.3 | 174401.1 | 138998.7 | 182796.2 | 166283.8 | 152468.4 | 157007.5 | TRUE |
| 47273.1  | 38568.7  | 37161.8  | 44842.9  | 37196.7  | 41792.2  | 44367.6  | 41337.8  | TRUE |
| 59499.6  | 47167.3  | 40234.9  | 65131.6  | 47977.2  | 68923.2  | 47980.5  | 57218.6  | TRUE |
| 102290.6 | 70968.4  | 73230.1  | 98108.8  | 73648    | 108521.3 | 68137.6  | 109766.2 | TRUE |
| 102398   | 90837.8  | 107522.3 | 95011.1  | 99922.4  | 105878.4 | 106408.8 | 124210.4 | TRUE |
| 25212.6  | 23967.9  | 29250.2  | 34188.7  | 26968.5  | 34656.8  | 19884.1  | 28599.1  | TRUE |
| 55707.9  | 43846.5  | 61664.2  | 59643.3  | 54152.3  | 61823.4  | 55796.2  | 49440.2  | TRUE |
| 73371.6  | 101098.3 | 71710.9  | 85707.8  | 83026.7  | 96387.8  | 99616    | 74640.6  | TRUE |
| 37721.4  | 36415    | 40320.3  | 32017.7  | 32947.5  | 30735.3  | 27645    | 32526.8  | TRUE |
| 60702.7  | 51085.8  | 41042.4  | 63012.4  | 65161.5  | 46705    | 59454.2  | 80471.6  | TRUE |
| 165256.7 | 160123.3 | 140642.8 | 157900   | 139689.5 | 175043.7 | 222505.3 | 199880.2 | TRUE |
| 64465.4  | 96275.5  | 60035.9  | 109731.6 | 88134.9  | 69192.7  | 83086.7  | 102178.3 | TRUE |
| 110077.1 | 120784.8 | 104598.3 | 143028.1 | 139647.9 | 99734.9  | 135888.1 | 143759.1 | TRUE |
| 172500.7 | 127973.2 | 139905.3 | 167866.2 | 147006.4 | 172803.7 | 192925.4 | 220454.2 | TRUE |
| 27851.3  | 24024.4  | 30353.7  | 26852.1  | 35331.7  | 25210.1  | 36672.1  | 30427.3  | TRUE |
| 75516.5  | 69145.8  | 63846.7  | 78864.4  | 66813.2  | 75827.5  | 85543.8  | 63317.2  | TRUE |
| 251737.3 | 196793.4 | 217717.1 | 243642.5 | 183159.2 | 242832.7 | 241358.8 | 201410.6 | TRUE |
| 122915.1 | 127693.8 | 125186.2 | 108009.3 | 121709.8 | 119875.2 | 130871.2 | 141338.3 | TRUE |
| 172860.7 | 145032.8 | 165176.9 | 170705.8 | 163356.4 | 198660.6 | 158099.6 | 184813.9 | TRUE |
| 123888.7 | 105490.4 | 111164.7 | 120428.9 | 116555.1 | 129967.5 | 112667.9 | 136778.3 | TRUE |
| 231295.8 | 162218.2 | 172845.5 | 180696.2 | 192345.6 | 202761.8 | 223579.8 | 233428.9 | TRUE |
| 20928.1  | 19897.1  | 21914.9  | 30829.1  | 18881.9  | 10606.1  | 17335.5  | 12634.7  | TRUE |
| 625743.5 | 443186.9 | 475794.7 | 503215.8 | 476849.3 | 638650.9 | 445635   | 633348.7 | TRUE |
| 893433.4 | 781439.8 | 828952.9 | 815910.7 | 753729.9 | 849303   | 810862.1 | 922481.2 | TRUE |
| 49779.4  | 45948.6  | 42091.1  | 40773.4  | 48324.4  | 44768.2  | 49459.7  | 28279.9  | TRUE |

|          |          |          |          |          |          |          |          |      |
|----------|----------|----------|----------|----------|----------|----------|----------|------|
| 196528.3 | 201766.1 | 160384.7 | 205018.6 | 194066.2 | 155529   | 213678.1 | 183505.4 | TRUE |
| 89193.4  | 101875.7 | 100317.5 | 92787.7  | 97146.8  | 104116.5 | 89921.8  | 86726.4  | TRUE |
| 165712   | 117846   | 140845.7 | 134895.5 | 173264.6 | 134090   | 137607.5 | 162644.6 | TRUE |
| 61319.1  | 77448.2  | 68678    | 61373.9  | 52329.3  | 57630.8  | 77059.7  | 78588.4  | TRUE |
| 47170.4  | 87443.2  | 54239.8  | 59726.2  | 73469    | 59592.8  | 49294.5  | 65155.6  | TRUE |
| 98590.5  | 99763.6  | 197415.4 | 84178.1  | 109470.4 | 65491.8  | 81872.6  | 89696.1  | TRUE |
| 199610   | 251157.3 | 241847.8 | 132519   | 112736.8 | 124042.2 | 135697   | 127528.7 | TRUE |
| 59096.4  | 67437.8  | 56056.2  | 69892    | 75648.7  | 48458.8  | 51236.1  | 56392.8  | TRUE |
| 184392.5 | 136793.2 | 190430.3 | 192358.1 | 138570   | 196748.5 | 153292.3 | 144059.4 | TRUE |
| 119743.3 | 105635.5 | 127472.4 | 143578.9 | 101576.9 | 126618.8 | 99710.7  | 111815.6 | TRUE |
| 145010.2 | 117831.4 | 169472.9 | 133537.1 | 200998.3 | 236753.2 | 141700.5 | 223646.5 | TRUE |
| 41331.5  | 40257.2  | 29064.1  | 42100    | 36966    | 47237    | 29495.9  | 41455.9  | TRUE |
| 55769.4  | 40494.9  | 45546.7  | 66340.4  | 49992.9  | 76495.8  | 54978.7  | 62068.8  | TRUE |
| 105888.2 | 80962.1  | 89314    | 83892.1  | 91053.5  | 92692.7  | 84971.6  | 114472.5 | TRUE |
| 109203.5 | 73913.4  | 54171.7  | 81601.6  | 89743.6  | 123920   | 91482.9  | 127058.7 | TRUE |
| 14259.8  | 28887    | 30449.2  | 23849.2  | 27373.6  | 22606.9  | 22539.6  | 18645.7  | TRUE |
| 40318.6  | 45333.2  | 39491.4  | 12480.6  | 27527.4  | 53908.1  | 38379.3  | 36454    | TRUE |
| 369150.2 | 380697.6 | 309265.7 | 416069.1 | 454447.4 | 349840.1 | 417391.8 | 510297.5 | TRUE |
| 513824.5 | 509485.2 | 470699.2 | 473161   | 423991.3 | 494565.7 | 537609.4 | 533059.8 | TRUE |
| 364761.7 | 344853.4 | 332694.1 | 297844.4 | 292003.2 | 305074.6 | 354922.6 | 323287   | TRUE |
| 272532.1 | 233869.1 | 316282.3 | 292164.1 | 237534.3 | 324609.3 | 286904.2 | 294372.2 | TRUE |
| 344979.6 | 397557.7 | 316832.3 | 314289.1 | 303683.7 | 298414.5 | 357640.6 | 324258.7 | TRUE |
| 117897.4 | 133880.3 | 110699.8 | 123143.2 | 121093.2 | 100872.8 | 117496.3 | 115863.9 | TRUE |
| 251534.8 | 242190.2 | 282036.6 | 286664.8 | 240601   | 279050.7 | 231057   | 217495.8 | TRUE |
| 345558.5 | 274275.6 | 341519   | 319751.3 | 388339.4 | 357898.2 | 301495   | 360010.9 | TRUE |
| 193783.5 | 213881   | 278956.6 | 245356.6 | 148947.4 | 362120.5 | 191781.7 | 199938.9 | TRUE |
| 441485.8 | 369332.9 | 396226.2 | 297572.6 | 670643.1 | 525983.7 | 348141.4 | 544107.6 | TRUE |
| 119268.8 | 100392.1 | 135662.6 | 143136.9 | 98806.4  | 169878.4 | 101007.8 | 84832.2  | TRUE |
| 90598.4  | 59843.8  | 148918.7 | 130443.5 | 66258.3  | 164391.4 | 61933.4  | 74793.8  | TRUE |
| 964148.1 | 741259.4 | 902771   | 975775.7 | 988398.7 | 881195.5 | 762683.2 | 856900.1 | TRUE |
| 2066200  | 1493730  | 1893320  | 1872123  | 2213040  | 2031602  | 1608272  | 2024580  | TRUE |
| 40092.4  | 7360.4   | 29902.8  | 28045.4  | 24006    | 41072.2  | 26382.8  | 28337.5  | TRUE |
| 108905.2 | 112382.6 | 63859.2  | 113790.6 | 85110.2  | 88115.8  | 123386   | 121208.2 | TRUE |
| 202787.2 | 163984   | 161348.6 | 189103.8 | 143760.7 | 188909.7 | 190536.9 | 216462.1 | TRUE |
| 67225.5  | 58380.1  | 45335.3  | 41030.1  | 52749.1  | 58190.3  | 53496.3  | 51059.4  | TRUE |
| 32524.1  | 28680.1  | 20246.6  | 23226.9  | 26771.9  | 17855.7  | 24055.5  | 31443.1  | TRUE |
| 582417.4 | 566112.2 | 545194.9 | 516539.7 | 517933.6 | 596517.1 | 577454.2 | 598971.5 | TRUE |
| 150878.5 | 144278.8 | 152126   | 146684.1 | 166774.2 | 153558.6 | 175106.6 | 175091.7 | TRUE |
| 195686.8 | 182225.2 | 171189.7 | 218302.6 | 153524.2 | 181259   | 196406.3 | 180243.3 | TRUE |
| 24139.2  | 33336.4  | 27439.2  | 23986.8  | 31875.7  | 24293.7  | 28958.6  | 28440.5  | TRUE |
| 141310.5 | 130646.3 | 111386.9 | 113275.8 | 118968.3 | 154273.9 | 139024.7 | 147354.8 | TRUE |
| 70559    | 44328.1  | 70663.6  | 119400.1 | 68980.7  | 69961.4  | 51405.6  | 66838.5  | TRUE |

|          |          |          |          |          |          |          |          |      |
|----------|----------|----------|----------|----------|----------|----------|----------|------|
| 205573.1 | 269357   | 132584.2 | 159620.7 | 112665.5 | 151521.4 | 243094.6 | 132480.3 | TRUE |
| 240504.4 | 307452.5 | 213562.6 | 249238.5 | 178134.6 | 222572.4 | 331684.9 | 188438.5 | TRUE |
| 630570   | 365901.4 | 691886.2 | 792184.3 | 536247.2 | 644892.1 | 439993   | 578381.8 | TRUE |
| 342809.4 | 212509.7 | 398952.7 | 402850.5 | 293520.3 | 333576.1 | 259399.6 | 324170.2 | TRUE |
| 114480.5 | 106007.8 | 130829.8 | 130072.2 | 115307.4 | 121304.9 | 150957.5 | 144230.1 | TRUE |
| 606924.5 | 537668   | 650969.7 | 625997.7 | 914537.5 | 544800.1 | 469692   | 553040   | TRUE |
| 137296.1 | 113532.8 | 126187.2 | 146246.8 | 96401.8  | 227824.1 | 196110.8 | 134330.1 | TRUE |
| 17476.3  | 9945.3   | 6476.5   | 23990.3  | 7932.2   | 27188.4  | 14090    | 8814.3   | TRUE |
| 17641.5  | 6211.2   | 8063     | 10633.1  | 7796.2   | 29559.8  | 10010.4  | 8475.5   | TRUE |
| 100206.2 | 105878.6 | 100888.4 | 95811.3  | 88605.8  | 104640.7 | 86806    | 104569.7 | TRUE |
| 116290.6 | 121750.4 | 116355.4 | 112479.6 | 89952.6  | 137028.4 | 117345.9 | 90034.3  | TRUE |
| 838749.6 | 714519.6 | 947142.7 | 892513.9 | 803567.3 | 867808.2 | 702285.3 | 848170   | TRUE |
| 118249.2 | 120135   | 87091.2  | 88026.7  | 78978.4  | 118272.9 | 112075.4 | 84523.3  | TRUE |
| 176038.9 | 176601.5 | 158741.1 | 171431.2 | 125519.5 | 164248.7 | 168624.2 | 156411   | TRUE |
| 105741.7 | 114030.8 | 91431.7  | 128086.3 | 90291.5  | 125868.3 | 120518.5 | 92783.8  | TRUE |
| 118604.7 | 130549.4 | 111472.9 | 129691.7 | 93600    | 127299.1 | 138600.9 | 106671.2 | TRUE |
| 121187.1 | 100116.4 | 105517.1 | 118157.5 | 118223.4 | 123794.7 | 93793.3  | 107078.7 | TRUE |
| 306578.9 | 249332.1 | 341570.1 | 308796.3 | 288035.7 | 313430.4 | 285440.6 | 311855.7 | TRUE |
| 29825.1  | 31275    | 8880.7   | 38408.9  | 21137.1  | 23796.1  | 28863.4  | 25202.8  | TRUE |
| 50559    | 62486.7  | 51167.4  | 54775.8  | 55228.8  | 47271.7  | 65028.1  | 61249.9  | TRUE |
| 179047.6 | 152577.6 | 151785.6 | 201074.9 | 187940.8 | 144208.7 | 166396.7 | 198790.3 | TRUE |
| 400096.4 | 392552.2 | 432655.3 | 395784.9 | 362395.2 | 428469.6 | 423516.8 | 379085.8 | TRUE |
| 30615.2  | 28424.9  | 30112.2  | 17636.2  | 34175.1  | 26868.1  | 29564.1  | 27506.5  | TRUE |
| 101222.3 | 102149.4 | 67522.4  | 78407.7  | 61090.3  | 67206.9  | 76204.6  | 60231.3  | TRUE |
| 47315.7  | 39886.7  | 38324.7  | 32267.5  | 30773.5  | 47477.6  | 35007.6  | 42902.1  | TRUE |
| 59311.6  | 53569.7  | 50979.9  | 55993.4  | 44987.2  | 40490.4  | 68502.2  | 47089.4  | TRUE |
| 37182.2  | 25158.4  | 27402.5  | 31142    | 22289.5  | 30743.7  | 26591.2  | 32779.7  | TRUE |
| 20383.1  | 13274.3  | 18195    | 25984.3  | 18669.9  | 30156.1  | 25760.7  | 26595.2  | TRUE |
| 243430.9 | 294448.6 | 187701.5 | 229753   | 215500.2 | 199940.8 | 281658.1 | 219296   | TRUE |
| 32265.2  | 27960.5  | 28582.4  | 40753.3  | 33649    | 34715.8  | 50542.1  | 40930.4  | TRUE |
| 23348.8  | 18290.6  | 16763.9  | 8925.3   | 19024.8  | 23539.9  | 20586.9  | 26941.8  | TRUE |
| 78706.8  | 61056.5  | 90337.7  | 67737.3  | 99804.5  | 75370.5  | 84154.9  | 88102.9  | TRUE |
| 65756.2  | 61966.9  | 59258.8  | 76138.6  | 75330.1  | 59376.7  | 75575.5  | 72134.8  | TRUE |
| 220256.3 | 171458.8 | 241841.8 | 247453.8 | 225223.8 | 186441.9 | 157089.8 | 199025.1 | TRUE |
| 19794.6  | 25738.7  | 32550.7  | 9713.2   | 10087.4  | 29366.8  | 30274.4  | 21105.3  | TRUE |
| 659278.7 | 759048   | 661898   | 532150.7 | 578863.7 | 569756.2 | 735776.7 | 527529.7 | TRUE |
| 99263.1  | 81388.4  | 118905   | 87000    | 86602.2  | 102837.3 | 92504.9  | 81536.4  | TRUE |
| 67064.5  | 70010    | 57111.3  | 89091.3  | 58026.2  | 42334.4  | 67119.2  | 54606.5  | TRUE |
| 216989.4 | 269090   | 225278.8 | 201650.2 | 178565.8 | 210472.1 | 289824.7 | 201580.4 | TRUE |

|          |          |          |          |          |          |          |          |      |
|----------|----------|----------|----------|----------|----------|----------|----------|------|
| 723377   | 703153.4 | 640913   | 684151   | 681353.9 | 647844.6 | 775816.6 | 656762.5 | TRUE |
| 78562.2  | 76900    | 76395.7  | 75715.7  | 82426.5  | 60341.3  | 66870.6  | 64345.3  | TRUE |
| 43773.1  | 37986.4  | 44185.8  | 41646.2  | 41730.6  | 35390.1  | 40401.4  | 28286.7  | TRUE |
| 62267    | 69804.5  | 49160.6  | 57475.4  | 65684    | 56781.5  | 62001    | 54842.3  | TRUE |
| 138315.7 | 131724.2 | 126287.3 | 140533.3 | 133716.4 | 149505.4 | 131995.1 | 130824.4 | TRUE |
| 199182   | 97694.7  | 118529.2 | 142757.2 | 142494.2 | 127981.1 | 106659.1 | 99553.2  | TRUE |
| 25099.1  | 23584.3  | 37766.2  | 34718.3  | 23975.5  | 31112.6  | 21964.1  | 19531.8  | TRUE |
| 223870.9 | 248551.9 | 220009.7 | 249139.7 | 231461.3 | 246097   | 240930.4 | 227420.5 | TRUE |
| 53322    | 43718    | 42223.8  | 50475.2  | 46097.9  | 73662.4  | 61549    | 50933.9  | TRUE |
| 53591.9  | 77240.6  | 27756.1  | 63669.2  | 63471.6  | 42092.7  | 50588.9  | 72580.2  | TRUE |
| 944840.5 | 981349   | 990092.1 | 1159484  | 944103.3 | 866966.9 | 1049438  | 899763.9 | TRUE |
| 39807.4  | 30567    | 22313    | 38995.2  | 34368.3  | 30734.3  | 48307.5  | 44456.2  | TRUE |
| 70493.7  | 89906.1  | 70610.5  | 80649.8  | 89467.8  | 70177.2  | 76755.3  | 70836.8  | TRUE |
| 237477.1 | 239044.3 | 161942.4 | 195336   | 253350.2 | 174467.3 | 240740.1 | 232956.8 | TRUE |
| 160718.3 | 152049.9 | 119928.4 | 175669.3 | 159604.2 | 123812.5 | 169788.6 | 182575.8 | TRUE |
| 37805.5  | 31904    | 25513.3  | 31890.6  | 36492.2  | 31005.8  | 33688.7  | 24811.7  | TRUE |
| 33409.4  | 40308.3  | 26495.4  | 52509.1  | 41177.1  | 25340.1  | 33852.6  | 43029.2  | TRUE |
| 155957.1 | 165527.1 | 129477   | 149683   | 117983   | 155460.3 | 150895.5 | 180539.2 | TRUE |
| 46313.5  | 51838    | 55721.8  | 61355.5  | 50540.3  | 46052.4  | 63669    | 44053.4  | TRUE |
| 137093.2 | 142323.8 | 130724   | 145855.8 | 110970.7 | 139451.8 | 140757.7 | 109715.3 | TRUE |
| 298938.5 | 219982.1 | 349479.4 | 334464.1 | 293337.1 | 288087.5 | 257570.1 | 325862.7 | TRUE |
| 134904.6 | 179830.6 | 150990   | 124901.3 | 116389.1 | 153866   | 150834.8 | 108699.9 | TRUE |
| 270470.2 | 350728.1 | 313811.7 | 341037.6 | 282166.2 | 339428.7 | 335871.3 | 346087.6 | TRUE |
| 76876.8  | 77955.6  | 75087.1  | 77454.5  | 78920.6  | 73127.4  | 93500.2  | 88556    | TRUE |
| 56988.3  | 65500.1  | 41784.8  | 77642.4  | 72004.5  | 50591.1  | 47009.6  | 60386.3  | TRUE |
| 39446.6  | 34403.3  | 49236.9  | 38396.8  | 34426.2  | 47333.9  | 46528.3  | 47309.9  | TRUE |
| 189164.7 | 90411    | 104786.6 | 123140.1 | 170348.3 | 138229.5 | 120904.3 | 161284.8 | TRUE |
| 25379.6  | 33440.2  | 26704.5  | 26070.7  | 29542.2  | 30966.6  | 32846.1  | 24213.9  | TRUE |
| 36211.8  | 47342.6  | 58866.3  | 82471.8  | 42790.2  | 50665.6  | 69404.8  | 43365.3  | TRUE |
| 159200.5 | 173994.9 | 179000.7 | 198281.2 | 208944.4 | 198182.2 | 225393.1 | 197469.5 | TRUE |
| 191025   | 175104.6 | 187746.3 | 175484.2 | 159934.1 | 190743.1 | 180791.4 | 148851   | TRUE |
| 87956.7  | 100219.2 | 89550    | 104447.9 | 105262   | 101669.2 | 113309   | 96484.3  | TRUE |
| 28326.8  | 26793.4  | 37017.7  | 30789.2  | 22851.6  | 33795.8  | 33558    | 28838.8  | TRUE |
| 36765.8  | 35100.1  | 31197.5  | 7620.4   | 34256.9  | 31355.2  | 33832.3  | 33185.4  | TRUE |
| 431825.7 | 414451.8 | 287559.1 | 361797.3 | 456685.3 | 288648.7 | 479672.6 | 439813.7 | TRUE |
| 187604.2 | 158990.5 | 135760.3 | 176102   | 146412.3 | 145400.4 | 169947.4 | 155745.8 | TRUE |
| 164275   | 117468.1 | 176428.7 | 145763.5 | 128930.4 | 148869.3 | 142762.9 | 153632   | TRUE |
| 210887.9 | 192976.7 | 142171.4 | 230489   | 205155.7 | 161934.8 | 216465.7 | 227371.2 | TRUE |
| 132137.4 | 127796.1 | 119792.7 | 105149.2 | 127528.8 | 116405.8 | 103967.4 | 105395.7 | TRUE |
| 52046    | 52961    | 61950.7  | 43614.5  | 67537.4  | 71711.5  | 55102.8  | 73217.9  | TRUE |
| 51260    | 46455.1  | 54634    | 57331.4  | 66833.7  | 70011.2  | 65322.4  | 72290.6  | TRUE |
| 22592.3  | 19227.9  | 15328.7  | 9086.3   | 31115.7  | 15647.3  | 25961.7  | 22490.7  | TRUE |

|          |          |          |          |          |          |          |          |      |
|----------|----------|----------|----------|----------|----------|----------|----------|------|
| 33930.3  | 36891.4  | 30142.5  | 32045.9  | 33726.4  | 46921.8  | 33054.2  | 35585.2  | TRUE |
| 131282.5 | 74371.1  | 36547.7  | 80909.6  | 67816.4  | 68264.2  | 118884.5 | 69752.5  | TRUE |
| 1579291  | 1352892  | 1938183  | 1863727  | 1648862  | 1517096  | 1447567  | 1564479  | TRUE |
| 48341.5  | 54718.2  | 43818.4  | 42468.4  | 44031.9  | 45709    | 54585    | 33383    | TRUE |
| 161552.4 | 206426.4 | 133410.9 | 146617.2 | 156966.8 | 160084.9 | 211722.4 | 159351.4 | TRUE |
| 13696.7  | 6936.7   | 14295.4  | 5683.9   | 15647.6  | 12488    | 7595.8   | 8857.4   | TRUE |
|          |          |          |          |          |          |          |          |      |
| 50178.2  | 66385.1  | 39244.5  | 45103.9  | 34236.4  | 46056.1  | 59548.8  | 43640.4  | TRUE |
| 39779.6  | 61776.3  | 30357.5  | 40197.5  | 24689.6  | 30105.3  | 51457.5  | 22795.9  | TRUE |
| 200332.6 | 246560   | 200695.4 | 173673.3 | 160743.9 | 164280   | 212628   | 154525   | TRUE |
| 299207.2 | 189308.4 | 386137.8 | 415146.8 | 246111.1 | 294156.6 | 202566.6 | 304958.2 | TRUE |
| 127706.9 | 91606    | 156271.8 | 191832.2 | 107274.5 | 131970.1 | 96013.6  | 130817.4 | TRUE |
| 871278.4 | 882422.3 | 678507.8 | 858162.1 | 696176.5 | 687507.9 | 895161.8 | 670161.2 | TRUE |
| 749055.8 | 612691   | 865457.5 | 817063.9 | 725326.1 | 719290.4 | 637283.5 | 767926.8 | TRUE |
|          |          |          |          |          |          |          |          |      |
| 139539.9 | 108591.3 | 133003.8 | 153917   | 112586.4 | 150615.6 | 117939.5 | 125080.9 | TRUE |
| 120283   | 90067.2  | 87982.8  | 89105.3  | 89120.6  | 106418.5 | 92025    | 89327.9  | TRUE |
| 41955.9  | 49041.7  | 48059.1  | 45745.1  | 45374.1  | 39976.9  | 53004.4  | 31687.2  | TRUE |
| 66403.8  | 69157.2  | 60005.8  | 58061.4  | 61825.3  | 65012.8  | 64314.7  | 58775.8  | TRUE |
| 31078.3  | 18410.8  | 24548    | 24971.9  | 36844.1  | 33285.6  | 26325    | 31618.8  | TRUE |
| 159704.3 | 158663.2 | 162146.4 | 128025.8 | 173921.5 | 156993   | 174120.9 | 174489   | TRUE |
| 21703.4  | 5327.9   | 26552.9  | 24281.8  | 14565.3  | 22930.8  | 8504.4   | 19822.3  | TRUE |
| 21793.2  | 21481.7  | 27814.5  | 27261.6  | 29298.9  | 27640.5  | 22916.7  | 36652.6  | TRUE |
| 154763.2 | 182108.6 | 176874.3 | 183020.7 | 170114.6 | 179713   | 161230.2 | 154616.2 | TRUE |
| 70956.7  | 72743.4  | 56462.9  | 69372.5  | 68753.7  | 60038.7  | 70754.1  | 66253.1  | TRUE |
| 141846.9 | 221433.5 | 99841.4  | 133603   | 156795.8 | 105340.6 | 254698.6 | 143050.1 | TRUE |
| 400875.3 | 550609.6 | 308898.6 | 368020.3 | 379995.7 | 303340   | 491859.3 | 353025   | TRUE |
|          |          |          |          |          |          |          |          |      |
| 78823    | 104834.3 | 78564.7  | 68338    | 72576.5  | 66665.4  | 102244.2 | 77099.2  | TRUE |
| 197692.2 | 222366   | 110553   | 174047.2 | 173336.1 | 155757.2 | 233942.3 | 165905.5 | TRUE |
| 246624.2 | 250172.8 | 334343.9 | 345046.7 | 191544.2 | 258825   | 212870.8 | 239666.3 | TRUE |
| 155290.7 | 142392.4 | 241520.6 | 231750.9 | 162609.7 | 133315.3 | 178032.2 | 150887.1 | TRUE |
| 226722.2 | 136468.7 | 166364   | 204170.8 | 325879.6 | 203720.6 | 187490.7 | 235338.1 | TRUE |
| 35402.6  | 27484    | 49816.4  | 21882.7  | 14818    | 56591.8  | 31650.9  | 22187.9  | TRUE |
| 330806.8 | 289844.8 | 524221.3 | 269124.6 | 231504.5 | 468425.3 | 277871.3 | 233037.3 | TRUE |
| 503605.3 | 455293.8 | 974437.6 | 344006.6 | 299167.4 | 1040591  | 442790.6 | 307021.7 | TRUE |
| 265244.8 | 257610.1 | 379087.2 | 213496.3 | 204091.2 | 409983.3 | 247159.3 | 231856.7 | TRUE |
| 145992.1 | 127023.4 | 265132.1 | 119657.1 | 100591   | 296370.7 | 165463.7 | 119349.7 | TRUE |
| 27120.6  | 21298.6  | 32918.2  | 24334.5  | 25008.8  | 33592.3  | 30155.6  | 29664.1  | TRUE |
| 147709.3 | 157758   | 306772.3 | 150196.8 | 110656.2 | 324301.8 | 153920   | 141400   | TRUE |
| 94659.3  | 65741.7  | 109218.1 | 127419.7 | 71703.6  | 115552.6 | 78427    | 78580.4  | TRUE |
| 35056.4  | 36278.6  | 46161    | 29070.6  | 38745.2  | 46480.2  | 42655.6  | 40728    | TRUE |
| 142934.6 | 151455.4 | 209311.4 | 148943.3 | 142148.6 | 148441.7 | 157276   | 156137.7 | TRUE |
| 173151.3 | 253909.4 | 167267.2 | 181144.4 | 180009   | 166500.8 | 166208.9 | 164839.6 | TRUE |
|          |          |          |          |          |          |          |          |      |
| 516322.5 | 450474.1 | 542474   | 568239.4 | 505022.4 | 522014   | 470465.8 | 487562.3 | TRUE |
| 214032.4 | 226772.7 | 197832.7 | 193750.5 | 238385.7 | 236243.5 | 212725.3 | 245424.1 | TRUE |
| 46870.4  | 79187.8  | 114015.2 | 46737.3  | 44904.2  | 62827.5  | 68398.6  | 56092.3  | TRUE |



|          |          |          |          |          |          |          |          |      |
|----------|----------|----------|----------|----------|----------|----------|----------|------|
| 91330.5  | 89572.2  | 104653.8 | 100778.3 | 105965.8 | 62758.6  | 94352.4  | 90251.5  | TRUE |
| 43078.6  | 56350.9  | 35348.1  | 50431.3  | 36912    | 44931.8  | 57960.2  | 38034.2  | TRUE |
| 20098.9  | 6278.7   | 19875.4  | 9654.7   | 23183    | 17932.3  | 13674    | 14317.9  | TRUE |
| 27410.6  | 32310.5  | 7538.1   | 26679.3  | 19743.9  | 32903.3  | 12134.5  | 12371.1  | TRUE |
| 89013.3  | 89871.5  | 96708.6  | 103360.9 | 61126.5  | 81383.5  | 93535.5  | 79832.5  | TRUE |
| 78636.7  | 59240.6  | 94762    | 68993.2  | 71201.2  | 78122.3  | 169404.7 | 57050.1  | TRUE |
| 178083.1 | 157134.6 | 160951   | 190694.6 | 188401.7 | 202570.2 | 188115.7 | 231279.4 | TRUE |
| 289746.2 | 272101.9 | 254526.3 | 310235.2 | 276784.5 | 286500.9 | 281493.5 | 303192.2 | TRUE |
| 31182.1  | 27015.5  | 39709.6  | 29129.6  | 26438    | 28107.4  | 39009.9  | 26805.7  | TRUE |
| 170118.9 | 187528.1 | 168151.6 | 130726.3 | 146418.5 | 147997.7 | 153932.4 | 125834.4 | TRUE |
| 80917.7  | 54967.2  | 52648.3  | 65627.9  | 55003.6  | 67418.3  | 49464.6  | 75618.1  | TRUE |
| 59198.2  | 59360.5  | 47258.8  | 61880.3  | 48576.9  | 70511.4  | 93492.2  | 60361.2  | TRUE |
| 90235.2  | 98268.1  | 71275.2  | 77618.7  | 87045.1  | 78274.3  | 127965.8 | 87468.2  | TRUE |
| 30052.9  | 31215    | 23066.1  | 27353.4  | 29094.1  | 18762.3  | 22305.3  | 24175.9  | TRUE |
| 196301.5 | 178665   | 108135.5 | 154880.6 | 131436.8 | 163733.5 | 218857   | 165737.5 | TRUE |
| 7451     | 24858.5  | 17294.6  | 8927.8   | 6007.1   | 19079.4  | 8617.4   | 9514.4   | TRUE |
| 63214.5  | 62513.2  | 51484.3  | 56833.1  | 43550.8  | 61546.4  | 74902.8  | 49965.7  | TRUE |
| 73361.9  | 83193.1  | 69886.1  | 88639.5  | 79853.9  | 74741.5  | 98977.1  | 76656.1  | TRUE |
| 166559   | 188930   | 156747.8 | 152093   | 122181   | 141198.9 | 171664.8 | 126823.3 | TRUE |
| 57171.4  | 45417.6  | 50024.8  | 66347.3  | 34314.2  | 53128.7  | 71586.9  | 53636.4  | TRUE |
| 36479.4  | 41536.5  | 34834.1  | 36439.9  | 38488.6  | 37996.9  | 54554.7  | 36721.2  | TRUE |
| 426021.4 | 293579.8 | 397648.7 | 388587.3 | 453201.5 | 407995.3 | 346648.5 | 397565.2 | TRUE |
| 167965.3 | 237194.3 | 181952.2 | 179943.6 | 189226.6 | 157861.5 | 162510.9 | 181873.8 | TRUE |
| 66000.7  | 67656.8  | 72920.4  | 74691.8  | 75365.8  | 70447.6  | 74041.3  | 96253.4  | TRUE |
| 48985.7  | 57045    | 34885.5  | 51991    | 38772.2  | 46275.8  | 49281    | 44791.7  | TRUE |
| 106073.6 | 126210.7 | 118917.6 | 104899.3 | 136269.1 | 109335.4 | 122159.8 | 125547.8 | TRUE |
| 38182.1  | 41931.5  | 38130.4  | 41908.9  | 43659.9  | 38352.5  | 48575.7  | 51803.1  | TRUE |
| 418241.9 | 409081.8 | 478041.5 | 505580   | 368959.4 | 429583.9 | 450843.7 | 413363.5 | TRUE |
| 139372.7 | 154227.4 | 114150.3 | 131207.7 | 159519.3 | 149760.6 | 158497.9 | 192668.8 | TRUE |
| 58458.3  | 56255.5  | 58960.8  | 58662.3  | 72213    | 62258.7  | 77722.3  | 77771    | TRUE |
| 71708    | 84244.1  | 66997.5  | 62761.8  | 58263.8  | 63402.4  | 64542.6  | 70850.7  | TRUE |
| 21453.7  | 36454.2  | 24947.4  | 27224.3  | 26009.8  | 23918.6  | 39671.3  | 18989.3  | TRUE |
| 261497.7 | 313494.6 | 310586.8 | 332929.9 | 237958.8 | 240100.9 | 248301.4 | 251803.3 | TRUE |
| 130984   | 167553   | 125307.7 | 134060.3 | 188543.7 | 106095.3 | 154129.9 | 182917.2 | TRUE |
| 107101.4 | 117617.2 | 102843   | 97576.6  | 125486.3 | 104568.2 | 128716.8 | 117250.1 | TRUE |
| 119781.1 | 140935.1 | 99811    | 145957.6 | 160099.3 | 99263.1  | 148991.7 | 151835.2 | TRUE |
| 511071.8 | 499517.3 | 450171.1 | 443752.1 | 424907.6 | 535462.8 | 503792.6 | 546482.7 | TRUE |
| 42790.5  | 56948.4  | 40538.2  | 27151.6  | 36384.1  | 32894.1  | 54690.1  | 35268.2  | TRUE |
| 61962.9  | 57174.4  | 74382.8  | 53953.2  | 60419.1  | 80504.1  | 68971.4  | 57944.8  | TRUE |
| 42003.1  | 53708.8  | 39814.9  | 50149    | 48859.7  | 42878.8  | 53694.2  | 45683.5  | TRUE |
| 60181.7  | 54924    | 62796.2  | 65447.3  | 52409.7  | 65567    | 60321.9  | 44449.6  | TRUE |

|          |          |          |          |          |          |          |          |      |
|----------|----------|----------|----------|----------|----------|----------|----------|------|
| 80998.2  | 116937.4 | 111500.4 | 106022.3 | 201668.9 | 120205.6 | 100670.7 | 101274.9 | TRUE |
| 81288.2  | 72325.7  | 75178.7  | 53726.3  | 66562.1  | 74908.4  | 68449    | 57254.6  | TRUE |
| 315462.1 | 296107.8 | 221828.3 | 304290.8 | 232853.7 | 241803   | 355572.1 | 257734.4 | TRUE |
| 131830.9 | 136209.6 | 176591.9 | 160471.8 | 98828.9  | 154564.2 | 193150.8 | 162921.8 | TRUE |
| 46785.7  | 45252.9  | 43857    | 41867.7  | 39725.3  | 27160.9  | 39958.7  | 39110.1  | TRUE |
| 84543.4  | 103783.5 | 131646.2 | 112606.4 | 102320   | 123350.3 | 74418.4  | 129500.3 | TRUE |
| 127453.1 | 105972.8 | 103757.3 | 119898.9 | 91206.3  | 133991.2 | 126009.3 | 114127.9 | TRUE |
| 79246.8  | 60522    | 135100.7 | 45946.4  | 35864.7  | 129164.7 | 76998.2  | 37939    | TRUE |
| 131774.9 | 80087.8  | 101485.8 | 117109.5 | 138349   | 107506.8 | 79402.5  | 105567.8 | TRUE |
| 134285.6 | 67118.5  | 125275.3 | 110538.7 | 171708   | 102764.7 | 112558.5 | 91775    | TRUE |
| 270643.2 | 148191.5 | 221887.4 | 258355.3 | 496774.6 | 195672.9 | 174487.8 | 249191.6 | TRUE |
| 124497.2 | 93635.6  | 112255.9 | 109478.3 | 122665.3 | 103989.4 | 103895   | 125022.2 | TRUE |
| 27138.1  | 8171.6   | 43659.6  | 37626.3  | 28363.6  | 20790.8  | 43231    | 34645.2  | TRUE |
| 80844.7  | 93259.4  | 54683.3  | 69432.6  | 76360.2  | 72692    | 82686.7  | 80522.4  | TRUE |
| 199216.8 | 224192.2 | 154644.4 | 198318.2 | 159147.3 | 151312.6 | 228243.1 | 146228.9 | TRUE |
| 70106.6  | 65678.6  | 84836.9  | 111980   | 85958.2  | 97551.2  | 70201.7  | 111103.4 | TRUE |
| 69441.1  | 69483.8  | 62598.1  | 76836.9  | 88786.4  | 76574.4  | 68872.4  | 66262.7  | TRUE |
| 253406.2 | 265801.1 | 265784.4 | 289018.6 | 269370.4 | 290638.3 | 271506.6 | 235367.3 | TRUE |
| 123802.1 | 128431.7 | 131455.9 | 157066.3 | 142525.1 | 150640.9 | 143910.6 | 142441.2 | TRUE |
| 356638.4 | 309414.6 | 308226   | 337790.4 | 374476.2 | 387924.5 | 336757.1 | 383876.2 | TRUE |
| 164008.2 | 133838.4 | 133051.6 | 110717.2 | 92290.6  | 130267.5 | 122128.2 | 99888.6  | TRUE |
| 207625.5 | 133506.7 | 235191.7 | 234257   | 160554.2 | 228837.8 | 210206   | 160987.4 | TRUE |
| 349235.6 | 279613.9 | 295636.9 | 420536.5 | 259626.9 | 365090.5 | 320010.9 | 279258.4 | TRUE |
| 74744.1  | 88329.8  | 79223.2  | 89145.7  | 63888.4  | 102097.7 | 81046.4  | 81298.5  | TRUE |
| 51658.8  | 84866    | 68444.4  | 100069.8 | 75947    | 49429.3  | 57835.5  | 38691.1  | TRUE |
| 150477   | 101713.2 | 152814.4 | 144525.2 | 167842.2 | 153592.5 | 117491.5 | 155260.9 | TRUE |
| 142299.4 | 84376.5  | 141931.1 | 138876.1 | 90666.3  | 177361.9 | 113290   | 97353.5  | TRUE |
| 331704.3 | 245441.4 | 388034   | 379927.3 | 227429.1 | 360605.8 | 279503.2 | 261448.8 | TRUE |
| 98480.8  | 57336.6  | 117210.2 | 111932.3 | 64665.4  | 127797.7 | 88075.3  | 73338.5  | TRUE |
| 128397.8 | 122675   | 124148.5 | 128626.7 | 71570.8  | 126966.8 | 107014.2 | 81140.5  | TRUE |
| 57395.8  | 38631    | 71855.4  | 55940.7  | 64985.2  | 38602.8  | 46530.3  | 51481.8  | TRUE |
| 244766   | 180356.5 | 269125.6 | 259329.1 | 183879.6 | 242786.1 | 196317.7 | 163836.2 | TRUE |
| 143164.5 | 130942.1 | 142704.1 | 170145.2 | 110780.9 | 174201.4 | 127343.3 | 124103.7 | TRUE |
| 112334.7 | 144177.1 | 111791.6 | 144415.7 | 96126.6  | 141872.8 | 112155.4 | 118882   | TRUE |
| 254445.3 | 431658.7 | 314664.1 | 437905.3 | 351301.3 | 187934.1 | 214688.6 | 205514.1 | TRUE |
| 39403.5  | 31994.4  | 42941.5  | 47672.1  | 29716.6  | 38321.9  | 39917.8  | 14562.2  | TRUE |
| 46735    | 67190.5  | 75290    | 92629.1  | 74629.9  | 46406    | 39060.2  | 36779.8  | TRUE |
| 40373.2  | 49288.5  | 43497.7  | 35942.9  | 40260.4  | 33530.4  | 49536.1  | 37973.1  | TRUE |
| 43818.5  | 53032.1  | 38834.4  | 47754.1  | 44816.9  | 35638.8  | 42504.2  | 34940    | TRUE |
| 145144.9 | 109494.6 | 101075.7 | 124371.9 | 90868.9  | 121761.5 | 129064.8 | 118200.4 | TRUE |
| 204284   | 185344.8 | 308808.8 | 278258.5 | 245627.5 | 277759.6 | 235210.1 | 269483.4 | TRUE |
| 57996.8  | 41770.1  | 82404.2  | 71473.7  | 90035.7  | 98246.9  | 56820    | 94074.4  | TRUE |
| 80969.6  | 58742.3  | 69657.5  | 87685.3  | 47380.7  | 116636.5 | 56294.7  | 86311.1  | TRUE |

|          |          |          |          |          |          |          |          |      |
|----------|----------|----------|----------|----------|----------|----------|----------|------|
| 24680.3  | 9630.9   | 28580.3  | 11300    | 7861.5   | 52568.1  | 14316.6  | 12664.5  | TRUE |
| 255362.7 | 180231.8 | 194627.7 | 184260.7 | 234267.1 | 261323.6 | 246640   | 275608.9 | TRUE |
| 45429.4  | 36062.4  | 41091.6  | 51012.7  | 42135    | 55260.8  | 37536.5  | 53974.8  | TRUE |
| 893460.5 | 835811.6 | 1097362  | 1432083  | 922483.1 | 1345384  | 1245735  | 1053943  | TRUE |
| 61487.1  | 70248.8  | 94691.4  | 113121.9 | 95033.3  | 101114.7 | 117256.7 | 95840.4  | TRUE |
| 222463.8 | 447572.9 | 297788.8 | 489344.6 | 526864.8 | 117843.4 | 116085.5 | 147928.4 | TRUE |
| 1707775  | 1244153  | 961679.4 | 1213665  | 1266292  | 1532149  | 1071106  | 1875020  | TRUE |
| 672897.2 | 473135   | 527895.1 | 633710.5 | 619639.3 | 742460.1 | 535366   | 768562.8 | TRUE |
| 285557.6 | 257335.4 | 330159.6 | 309014.8 | 326963.4 | 360589.6 | 225797.9 | 301084.5 | TRUE |
| 3866072  | 3364673  | 3662435  | 4894023  | 3599446  | 3813189  | 4352926  | 3703739  | TRUE |
| 140473.5 | 294806.6 | 197394.5 | 304316.3 | 308888.7 | 151847.2 | 137162   | 124872.5 | TRUE |
| 373873.5 | 337502.5 | 377828.5 | 443574.4 | 306667   | 484039.3 | 400544.9 | 447523.9 | TRUE |
| 94017.4  | 55880.6  | 163080.7 | 95047.5  | 54952.2  | 164407.6 | 91113.5  | 74201.2  | TRUE |
| 349355.1 | 244920   | 542932.7 | 330218.8 | 241482.7 | 546581.3 | 268732.9 | 189909.5 | TRUE |
| 1902020  | 1073910  | 1297964  | 1273967  | 3046789  | 1633004  | 1227842  | 1724832  | TRUE |
| 44078.7  | 35091.4  | 31124.7  | 26702.4  | 36105.7  | 38496.5  | 38893.5  | 23838.4  | TRUE |
| 82111    | 76034.3  | 81852.6  | 96720.3  | 69326.5  | 129565.8 | 105974.3 | 78506.1  | TRUE |
| 152451.5 | 98511.3  | 171879.8 | 133108.3 | 108038.8 | 211926.2 | 123429.3 | 105097.4 | TRUE |
| 238883.9 | 207975.8 | 266064.3 | 193808.5 | 161728.3 | 414353.5 | 234572.7 | 222566.1 | TRUE |
| 113232.1 | 71319.7  | 125345.4 | 100693   | 60435.3  | 203846.3 | 101644.2 | 98168.2  | TRUE |
| 163220.6 | 125263.1 | 142341.5 | 119189.6 | 90401.5  | 272754.8 | 154163.8 | 145859.4 | TRUE |
| 184549.3 | 193151.7 | 238209.6 | 207198   | 151661.4 | 253844.2 | 194926.8 | 147786.8 | TRUE |
| 112558   | 92430.1  | 103674.8 | 106158.3 | 89025.7  | 156339.4 | 118392.4 | 122131   | TRUE |
| 92071.3  | 75922.2  | 91432.3  | 88828.9  | 66900.7  | 122735.2 | 77233.7  | 81969.1  | TRUE |
| 290060.8 | 204644.5 | 231532.1 | 235530.9 | 419974.5 | 278732.2 | 234567.4 | 276791.3 | TRUE |
| 379742.9 | 258433.7 | 272890.3 | 315289.1 | 578140.6 | 349946.5 | 312533.7 | 338240.7 | TRUE |
| 579713.5 | 409981.1 | 411856.5 | 454150.5 | 755825.9 | 495753.5 | 511440.8 | 634459.3 | TRUE |
| 213433.6 | 170755.7 | 133367.6 | 201469.5 | 289588.1 | 227451.4 | 193974.6 | 242856.6 | TRUE |
| 106813.4 | 93565    | 89993.5  | 107786   | 126522.6 | 106972.4 | 96517.6  | 106718.8 | TRUE |
| 134575.9 | 90194.2  | 134624.9 | 156004.1 | 234689.4 | 148151.7 | 119670.8 | 149677.8 | TRUE |
| 114564.8 | 82586.7  | 238521.7 | 118536.7 | 93722.4  | 245287.8 | 113042   | 115095.8 | TRUE |
| 97271.4  | 63381.3  | 140948   | 98775.6  | 76330    | 151985.7 | 87859.1  | 73026.1  | TRUE |
| 36180.6  | 41101.4  | 51699.2  | 36073    | 38320    | 64163.4  | 30254.4  | 41164.1  | TRUE |
| 51445.9  | 42543.9  | 63687.1  | 58620.8  | 39603.1  | 91309.4  | 53806.4  | 48028.8  | TRUE |
| 95070.6  | 115202.4 | 159080.7 | 101988.8 | 102377.8 | 115224.8 | 109266   | 89440.6  | TRUE |
| 55950.8  | 32692.6  | 53917.6  | 30682.8  | 30258.4  | 68896.1  | 64401.9  | 49648.4  | TRUE |

|          |          |          |          |          |          |          |          |      |
|----------|----------|----------|----------|----------|----------|----------|----------|------|
| 74339    | 99272.7  | 319746.7 | 59646.2  | 50841.3  | 148035.1 | 78359.4  | 88554.8  | TRUE |
| 104049   | 66225.9  | 109121   | 88722.8  | 69937.5  | 145058.7 | 79449.8  | 103823.7 | TRUE |
| 35409.6  | 8354.7   | 28870.7  | 30035.4  | 11137.3  | 52534.2  | 13842    | 31291.4  | TRUE |
| 118873.6 | 65542.9  | 75548.2  | 72010.4  | 149905.9 | 119891.6 | 92182.5  | 113084.8 | TRUE |
| 332444.9 | 199387   | 182246.8 | 213818.8 | 406293.7 | 295957.1 | 273444.8 | 317236.3 | TRUE |
| 35476.7  | 14052.2  | 17986.7  | 12405.2  | 72931.4  | 40013.7  | 48878.5  | 50924.4  | TRUE |
| 560211.5 | 493880.9 | 780711.9 | 583323.5 | 536271.2 | 871936.9 | 502271.9 | 497965.9 | TRUE |
| 35332.3  | 90028    | 92226.6  | 62783.4  | 72532.4  | 27455.1  | 18333.8  | 10847.8  | TRUE |
| 99023.8  | 91589.7  | 128964.7 | 95676.2  | 85312.9  | 108327.2 | 106404.8 | 90375.2  | TRUE |
| 4138161  | 3188428  | 3572162  | 3785889  | 6319166  | 4089102  | 3561109  | 4100386  | TRUE |
| 73899.6  | 101432.4 | 109915   | 106956.8 | 160843.4 | 44771.5  | 45004.3  | 39594    | TRUE |
| 51362.2  | 44690.4  | 41758.5  | 36760.9  | 48360.4  | 39180.5  | 35411.5  | 41812    | TRUE |
| 12587814 | 12386845 | 13901167 | 14748983 | 9880263  | 12004698 | 13073563 | 11975098 | TRUE |
| 372769   | 431664.7 | 271204.8 | 326051.3 | 392978.8 | 315105.3 | 426294   | 396583.2 | TRUE |
| 39535.1  | 68191.4  | 46967    | 54908    | 78590    | 43036.7  | 69115.4  | 63161.1  | TRUE |
| 133605.5 | 163570.4 | 132618   | 115377   | 143396.1 | 120165.2 | 149395   | 137984.3 | TRUE |
| 260249   | 364133.9 | 224032.2 | 247263.4 | 263683.4 | 213565.3 | 291010.1 | 263274.1 | TRUE |
| 46619.7  | 89146.4  | 46514.2  | 64967.5  | 77657.4  | 28654.7  | 29000.3  | 31120.9  | TRUE |
| 83740.5  | 93530.1  | 91224.2  | 64196.3  | 79401.7  | 66048.2  | 70500.9  | 86684.5  | TRUE |
| 42903.1  | 62336.4  | 47596.7  | 44174.7  | 39196.5  | 29267.5  | 48336    | 48431.9  | TRUE |
| 63584.8  | 162631.2 | 62736.6  | 136299.1 | 152352.3 | 36141.9  | 42370.5  | 42662.7  | TRUE |
| 66023.7  | 74785.8  | 59855.8  | 75181    | 74341.8  | 62382.3  | 96617.2  | 85516.7  | TRUE |
| 43560.8  | 43064.2  | 40226.5  | 43895.8  | 43917.5  | 42952.3  | 49866.9  | 29943.9  | TRUE |
| 45930.8  | 42903.8  | 43639.1  | 29643    | 47961.8  | 28237.5  | 44397    | 41983.3  | TRUE |
| 74075.3  | 97744.8  | 63180.6  | 80941.6  | 102600.5 | 56356.6  | 109321.8 | 101672.1 | TRUE |
| 372953.8 | 395700.6 | 266858.5 | 301028.5 | 386460.9 | 237985.5 | 426286.8 | 419551.2 | TRUE |
| 373260   | 388871.4 | 413930   | 439135.1 | 349405.9 | 350167.8 | 405188   | 359457.4 | TRUE |
| 451078.3 | 509774.6 | 541848.3 | 531516.7 | 367116.5 | 422983.1 | 468432.9 | 404163.4 | TRUE |
| 74525.2  | 175849.4 | 122438.5 | 161018.2 | 109926.1 | 59230.9  | 51646    | 47015.1  | TRUE |
| 81500.1  | 198123.2 | 127501.8 | 219361.7 | 152090.7 | 52988.6  | 52944.5  | 57334    | TRUE |
| 41623.5  | 58404.8  | 71764.5  | 52360    | 56533    | 60483.5  | 80764.9  | 58346.4  | TRUE |
| 225020   | 219127.9 | 253731.6 | 291882.4 | 171275.1 | 199602.7 | 264750   | 210047.4 | TRUE |
| 323395.8 | 337873   | 250892.7 | 283886.7 | 277945.5 | 280914.4 | 346811.1 | 289874.3 | TRUE |
| 234647.8 | 535405.3 | 332162.4 | 406742.7 | 586800.4 | 182129.2 | 174043.2 | 211703.7 | TRUE |
| 77324.2  | 75648.9  | 75269.9  | 86388.6  | 70228.3  | 85357.8  | 91588.6  | 81295.8  | TRUE |
| 143281   | 333397.4 | 294066.5 | 406151.5 | 312393   | 69997    | 103135.9 | 98648.5  | TRUE |
| 121299.6 | 135285.8 | 224942.6 | 125903.6 | 111810.6 | 134012.7 | 175246   | 177873.2 | TRUE |
| 223291.2 | 241482.3 | 185193.8 | 192856.9 | 217694.1 | 211365   | 225634.9 | 224359.7 | TRUE |
| 142660.9 | 163588   | 97666.8  | 151311.9 | 141630.3 | 87433.5  | 143282.2 | 149393.7 | TRUE |
| 150989.1 | 139189.8 | 145338.2 | 156198.1 | 127962.4 | 156460.7 | 182561.9 | 170688   | TRUE |
| 323378.6 | 294984.7 | 343450.6 | 344840.7 | 293152.9 | 307768.3 | 329908.8 | 295286.5 | TRUE |

|          |          |          |          |          |          |          |          |      |
|----------|----------|----------|----------|----------|----------|----------|----------|------|
| 66587.7  | 86459.4  | 40372.2  | 48350.7  | 50000.5  | 49721.2  | 59320.2  | 41609    | TRUE |
| 247821.2 | 231746.5 | 197589.2 | 227410.1 | 223210.1 | 207500.7 | 267486.5 | 212032.7 | TRUE |
| 1202309  | 1253509  | 877388.2 | 1162079  | 1147812  | 923083.9 | 1275853  | 1114128  | TRUE |
| 125649.5 | 126868.3 | 100655.6 | 138617.8 | 115422   | 88130.8  | 126963.5 | 139615.9 | TRUE |
| 506568.8 | 502941.7 | 581587.8 | 570860.7 | 490191.8 | 530579.4 | 556234.1 | 531316.9 | TRUE |
| 127000.3 | 188453.5 | 123148.8 | 156289.2 | 155780.9 | 102692   | 165321.7 | 94627.1  | TRUE |
| 612764.6 | 615437.6 | 506059.7 | 569983.9 | 487676.9 | 554777.7 | 652800.3 | 576512.9 | TRUE |
| 446033.3 | 435405.3 | 439081.2 | 417924.9 | 513830   | 455213.4 | 413111.4 | 507024.2 | TRUE |
| 172526.8 | 186722.6 | 151645.5 | 205461   | 211635   | 144200   | 165001.3 | 136178.8 | TRUE |
| 647144.4 | 1025658  | 1052454  | 1210547  | 634911.2 | 1107956  | 1392964  | 1022060  | TRUE |
| 47088.5  | 44857.3  | 34211.6  | 49369    | 36179.3  | 49294.1  | 45494.1  | 61443.2  | TRUE |
| 28888.2  | 44179.7  | 25028.1  | 31019.8  | 33788.7  | 32655.6  | 33499.9  | 50750    | TRUE |
| 24501.7  | 22129    | 20597.5  | 29139.6  | 14953.4  | 26038.7  | 38686.6  | 26253.7  | TRUE |
| 46745    | 31529.6  | 29734.5  | 30130.1  | 23255.2  | 38743.2  | 37766.7  | 55583.3  | TRUE |
| 30185.6  | 19901.4  | 18315.8  | 22860    | 25376.8  | 21925.8  | 26138.3  | 32879.9  | TRUE |
| 26134.7  | 42122.3  | 70266.9  | 31833.7  | 20313.4  | 27030.6  | 36015.6  | 47298.8  | TRUE |
| 8410.9   | 8838.7   | 5515.2   | 15583.1  | 14415    | 8538     | 13495.6  | 10757.7  | TRUE |

|       |         |         |         |         |         |         |         |      |
|-------|---------|---------|---------|---------|---------|---------|---------|------|
| 33386 | 25892.5 | 27940.6 | 34230.6 | 19570.1 | 33426.6 | 35753.8 | 34983.4 | TRUE |
|-------|---------|---------|---------|---------|---------|---------|---------|------|

|          |          |          |          |          |          |          |          |      |
|----------|----------|----------|----------|----------|----------|----------|----------|------|
| 318136.2 | 267166.9 | 278633.9 | 352667.8 | 296541.6 | 229143.7 | 268171.8 | 294836.8 | TRUE |
| 692299.9 | 616391.4 | 577449.5 | 826695.5 | 708577.4 | 660020.6 | 620366.4 | 661853   | TRUE |
| 186267.6 | 181569.3 | 139681.9 | 168865.2 | 165096.4 | 171364.5 | 185179.5 | 169982.6 | TRUE |
| 532463.6 | 468711.9 | 500042.5 | 475998.3 | 414533.4 | 545236.2 | 494243.2 | 507374.4 | TRUE |
| 2432050  | 2381775  | 2297442  | 2595707  | 1975616  | 2200753  | 2270472  | 2499363  | TRUE |
| 343219.7 | 310786.8 | 279704   | 361910.9 | 252333.6 | 374571.7 | 373112.8 | 266615.7 | TRUE |
| 186645   | 167897.8 | 149715.6 | 162053.4 | 199351.6 | 145667.7 | 204177.7 | 184890.8 | TRUE |
| 59145.1  | 69750.9  | 74009.4  | 60046.4  | 63783    | 59066.1  | 99913.1  | 64954.1  | TRUE |
| 93692.3  | 87361.2  | 76312.2  | 87784.9  | 57966.9  | 67527.4  | 95664.1  | 74205.9  | TRUE |
| 72480.9  | 65894.4  | 64268.8  | 75262.8  | 42198.3  | 74154.3  | 54821.8  | 45932.6  | TRUE |
| 71451    | 84374.2  | 56580.9  | 63536    | 68086.8  | 62529.1  | 64126.6  | 58391.3  | TRUE |
| 83854.4  | 74117.6  | 70351.5  | 73860.1  | 76059.6  | 88802.6  | 82124.2  | 63801.4  | TRUE |
| 193519.7 | 203256.8 | 230187.5 | 261729.6 | 239395.5 | 264845.7 | 212963.2 | 230108.6 | TRUE |
| 173403.4 | 140819.9 | 196030.6 | 198152   | 137886.6 | 193447.3 | 173122.4 | 173272   | TRUE |
| 133478   | 124929.8 | 157466.8 | 144896.9 | 123272.5 | 135493.6 | 152853   | 128957.4 | TRUE |
| 83484.5  | 76889.6  | 66381.4  | 80476.3  | 58612    | 92803.2  | 72754.2  | 69180.5  | TRUE |
| 57741.4  | 43260.6  | 55283.7  | 87179.4  | 61429.6  | 55797.2  | 72591.6  | 53666.1  | TRUE |
| 373816.6 | 324440.2 | 421081.4 | 452819.3 | 339417.4 | 396217   | 433222.8 | 388326.5 | TRUE |
| 25632.2  | 57782.4  | 39568.6  | 67121.3  | 43862.1  | 22906    | 13349.6  | 14565    | TRUE |

|          |          |          |          |          |          |          |          |      |
|----------|----------|----------|----------|----------|----------|----------|----------|------|
| 150714.6 | 136659.2 | 142544.8 | 149057.1 | 168902.9 | 135613.4 | 126065.1 | 128638.4 | TRUE |
| 893460.5 | 835811.6 | 1097362  | 1432083  | 922483.1 | 1345384  | 1245735  | 1053943  | TRUE |
| 61487.1  | 70248.8  | 94691.4  | 113121.9 | 95033.3  | 101114.7 | 117256.7 | 95840.4  | TRUE |
| 222463.8 | 447572.9 | 297788.8 | 489344.6 | 526864.8 | 117843.4 | 116085.5 | 147928.4 | TRUE |
| 1707775  | 1244153  | 961679.4 | 1213665  | 1266292  | 1532149  | 1071106  | 1875020  | TRUE |
| 672897.2 | 473135   | 527895.1 | 633710.5 | 619639.3 | 742460.1 | 535366   | 768562.8 | TRUE |
| 285557.6 | 257335.4 | 330159.6 | 309014.8 | 326963.4 | 360589.6 | 225797.9 | 301084.5 | TRUE |
| 3866072  | 3364673  | 3662435  | 4894023  | 3599446  | 3813189  | 4352926  | 3703739  | TRUE |
| 140473.5 | 294806.6 | 197394.5 | 304316.3 | 308888.7 | 151847.2 | 137162   | 124872.5 | TRUE |
| 373873.5 | 337502.5 | 377828.5 | 443574.4 | 306667   | 484039.3 | 400544.9 | 447523.9 | TRUE |
| 94105.2  | 82745.3  | 90855.6  | 74517.8  | 66901.8  | 75943.1  | 75713    | 61723.4  | TRUE |
| 208630   | 180220.1 | 161853.2 | 147680.6 | 131624.4 | 176480.5 | 145801.9 | 155456.3 | TRUE |
| 253119.5 | 164947.1 | 204241   | 178389.1 | 159946.8 | 205626.1 | 180989   | 141243.5 | TRUE |
| 475231.3 | 347621.8 | 406723.3 | 400132.5 | 333797.2 | 371615.4 | 375614.4 | 299537.2 | TRUE |
| 224700.6 | 121057.4 | 234715.7 | 311904.9 | 172797.5 | 242472.5 | 268943.1 | 187146   | TRUE |
| 426772.4 | 314586.7 | 455568.6 | 393832.9 | 406097.4 | 481961.7 | 323280.1 | 495437.3 | TRUE |
| 105745.4 | 131000.7 | 117454.5 | 116540.2 | 119743.7 | 111156.4 | 111023.4 | 126132.4 | TRUE |
| 31356.7  | 43799.9  | 23475.7  | 25558.8  | 23041.4  | 28067.7  | 24177.9  | 21457    | TRUE |
| 106625   | 85197.8  | 53498.5  | 56578.6  | 53884.3  | 57950.9  | 70103.5  | 69024.4  | TRUE |
| 103796.6 | 85263.5  | 88627.2  | 117867.2 | 93723.1  | 84447.5  | 88913.7  | 90180.4  | TRUE |
| 422703.3 | 396310.3 | 417586.9 | 496931.3 | 486191.7 | 419590.7 | 441993.9 | 441036.3 | TRUE |
| 2438045  | 1925743  | 2130192  | 2466355  | 2427832  | 2122868  | 2435408  | 2535051  | TRUE |
| 117376.9 | 103114.1 | 127727.5 | 115422   | 137591.4 | 97020.1  | 114486.9 | 105975.1 | TRUE |
| 102611.1 | 160921.8 | 115924   | 189175.7 | 198320.1 | 66037.2  | 99455.4  | 108098.5 | TRUE |
| 47005.5  | 101167.6 | 77541    | 85888.7  | 71262.9  | 35939.6  | 27425.8  | 35429.6  | TRUE |
| 149270.4 | 261794.1 | 214945.3 | 213883.9 | 229618.4 | 86723.8  | 99642.6  | 100370.6 | TRUE |
| 75092.2  | 62781.1  | 71611    | 75068.2  | 77414.4  | 67905.1  | 59906.1  | 60638.7  | TRUE |
| 47164.3  | 53161.9  | 50490.4  | 38889.5  | 48400.5  | 46619    | 36742.9  | 45043.1  | TRUE |
| 24626    | 40545.9  | 25360.8  | 30630.1  | 36904.1  | 29734.9  | 36297.3  | 37471.2  | TRUE |
| 55396    | 60212.2  | 65263.9  | 76095.6  | 70667.9  | 63975.1  | 69753.8  | 77249.1  | TRUE |
| 33588.8  | 46238.4  | 46359.1  | 43421.7  | 59162.7  | 25389    | 30663.7  | 37862.5  | TRUE |
| 53698.5  | 44752.8  | 55820.9  | 31796.1  | 27346.3  | 51035.3  | 33444.7  | 30233.6  | TRUE |
| 171706   | 132631   | 142342.3 | 178947.2 | 214005   | 131684.2 | 112220.4 | 161781.5 | TRUE |
| 67668.9  | 49379.8  | 60551    | 69963.3  | 65213.1  | 72897.4  | 80938.7  | 68953.1  | TRUE |
| 84652.4  | 69187    | 77485.9  | 129978.7 | 74319.1  | 127031.4 | 103704   | 104944.9 | TRUE |
| 33820.6  | 37271.7  | 40150    | 30214.1  | 39061    | 41916.7  | 33904.5  | 43920.6  | TRUE |

|          |          |          |          |          |          |          |          |      |
|----------|----------|----------|----------|----------|----------|----------|----------|------|
| 117707.9 | 103127.2 | 100059.6 | 107905.7 | 141950.8 | 143767.3 | 119038.6 | 129696   | TRUE |
| 178434   | 154520.7 | 140198.9 | 163145.2 | 211403   | 237010.4 | 189441.2 | 230328.2 | TRUE |
| 248607.6 | 290695.8 | 277316.9 | 397622.3 | 321876.7 | 300134.7 | 400054.9 | 310011.1 | TRUE |
| 58798.5  | 50816    | 106251.9 | 83025.7  | 54863.5  | 97245.8  | 47511.5  | 55802.3  | TRUE |
| 166145.6 | 208676.6 | 288107.1 | 239579.5 | 176532.1 | 245864.6 | 190581.9 | 157723.8 | TRUE |
| 250907.2 | 253759.5 | 264126.3 | 259292.4 | 169888.5 | 283139.2 | 200883.1 | 193714.5 | TRUE |
| 347843   | 246210.4 | 237929.3 | 315347.6 | 400238.7 | 475678.4 | 365001   | 440682.9 | TRUE |
| 150504.6 | 116094.5 | 207917.6 | 204188.3 | 138182   | 194261   | 159683.1 | 161949.4 | TRUE |
| 183756.3 | 133764.2 | 211300.5 | 192304   | 124438.9 | 220493.6 | 137881.8 | 142397.7 | TRUE |
| 455964   | 321653.4 | 459167.9 | 361436.4 | 326343.3 | 450738.9 | 290167.1 | 287046.3 | TRUE |
| 456072.7 | 370113.8 | 674504.1 | 611676.7 | 456029.5 | 770060.1 | 490616.7 | 505873.6 | TRUE |
| 198100.8 | 196877.6 | 195883.2 | 199347.3 | 274069.6 | 272486.9 | 225628.1 | 244279.1 | TRUE |
| 563397   | 591886.5 | 538121.8 | 560048   | 703569.6 | 603481.8 | 588899.3 | 612672.2 | TRUE |
| 54527.3  | 63665.2  | 43107.8  | 63713.5  | 40840.1  | 63880.5  | 64818    | 52079.9  | TRUE |
| 2665149  | 2381489  | 2776244  | 2444186  | 2668805  | 2444335  | 2388805  | 2388858  | TRUE |
| 80465.6  | 91904.8  | 67621.3  | 75956.5  | 102614.4 | 68406.6  | 81897.2  | 84018.5  | TRUE |
| 271042.2 | 293751.7 | 197123.6 | 236583.7 | 272016   | 209427.2 | 283813.2 | 308215.9 | TRUE |
| 108300.8 | 92494.9  | 87117.1  | 83138.8  | 137097.2 | 162124   | 127615.5 | 129683.4 | TRUE |
| 135858.5 | 100926.3 | 116427.9 | 116256.8 | 157953.9 | 197887.7 | 165461.8 | 197936.3 | TRUE |
| 38873.2  | 82990.4  | 64110.6  | 75134.4  | 75583.5  | 19914.1  | 29501.2  | 24062.7  | TRUE |
| 99486.6  | 137925.3 | 110724.6 | 109882.5 | 140258.6 | 112134.3 | 170980.6 | 98783    | TRUE |
| 1008584  | 1412976  | 1019802  | 1566724  | 1309013  | 1043570  | 2008332  | 896353.1 | TRUE |
| 158288.2 | 162216   | 132327.6 | 154627.1 | 164055.3 | 143386.6 | 187855.7 | 183994.4 | TRUE |
| 28480    | 33600.6  | 33798.6  | 37402.7  | 27812.6  | 45421.9  | 37648.3  | 32137.6  | TRUE |
| 44118.2  | 27045.3  | 47861.3  | 35039.3  | 43277.1  | 40875.6  | 47767.3  | 49866.3  | TRUE |
| 79007    | 74756    | 92577.2  | 103710.1 | 110808.6 | 113234.5 | 114910.8 | 99731.8  | TRUE |
| 26602.9  | 13900.3  | 37021.2  | 56895.3  | 44473.5  | 45200.5  | 45433.1  | 44371.5  | TRUE |
| 23243.5  | 50774.7  | 50552.3  | 42793.2  | 53106.3  | 17473.4  | 11878.2  | 31379.3  | TRUE |
| 254375.7 | 262728.8 | 197750.4 | 210917   | 172631.9 | 214281.7 | 213437   | 190473   | TRUE |
| 222538.1 | 185825.4 | 139486.7 | 162150.5 | 122188   | 147912.6 | 134711.4 | 133925.5 | TRUE |
| 61845.7  | 53914.6  | 61053.4  | 72826.7  | 54365.1  | 67837.7  | 61120.5  | 51938.7  | TRUE |
| 800549.8 | 653635.6 | 807320.7 | 1026215  | 696411.5 | 891031.9 | 834473.9 | 652024.4 | TRUE |
| 324300.6 | 229960.2 | 357147.9 | 363350.4 | 323576.2 | 333371.4 | 313423.6 | 373192.5 | TRUE |
| 3662210  | 3488398  | 3101844  | 3488360  | 3245114  | 4034102  | 3787758  | 4287698  | TRUE |
| 86089.8  | 97966.4  | 90727.2  | 115544.8 | 108609.3 | 56137.2  | 66314.3  | 58674.4  | TRUE |
| 222649.8 | 207253.1 | 207309.3 | 216567.2 | 225074.4 | 251014   | 215710.7 | 302671.3 | TRUE |
| 59195.1  | 62758.2  | 54271    | 61577.9  | 44555.6  | 66973.4  | 61804.7  | 49421.5  | TRUE |
| 59888.1  | 54658    | 71263.3  | 56459.8  | 44050.3  | 66242.2  | 73911.9  | 55559.8  | TRUE |
| 468987.5 | 373691.5 | 401625.1 | 469322   | 352931.3 | 384344.3 | 427169.2 | 360984.8 | TRUE |
| 178634.5 | 134069.8 | 170389.4 | 194035.9 | 145686.7 | 176661.9 | 154249.2 | 137766.9 | TRUE |
| 43816.9  | 92663.8  | 62899    | 57566.4  | 73153.5  | 34742.4  | 33857.9  | 25680.6  | TRUE |
| 654778.4 | 529231.9 | 684632.2 | 756834.3 | 488455   | 704949.8 | 631905   | 525020.8 | TRUE |
| 76236.5  | 81071.6  | 38190.9  | 92883    | 69908.4  | 42071.6  | 104447.5 | 90546.6  | TRUE |

|          |          |          |          |          |          |          |          |      |
|----------|----------|----------|----------|----------|----------|----------|----------|------|
| 100531.6 | 69103.3  | 64339.1  | 94432.1  | 50573.2  | 115858.6 | 137834.6 | 86760.3  | TRUE |
| 26428.1  | 34641.3  | 32937    | 24976.7  | 26423.8  | 26633.3  | 25850.1  | 29955.9  | TRUE |
| 50106.8  | 85604.1  | 45151.2  | 63845.8  | 93802.3  | 44612.8  | 50458.1  | 40828    | TRUE |
| 246383.4 | 264332.3 | 266742.6 | 287202.1 | 190175   | 225024.5 | 268484.9 | 227482   | TRUE |
| 79752    | 45225.4  | 83911.2  | 92729    | 59756.9  | 124305.6 | 68458.9  | 96892    | TRUE |
| 65469.5  | 61052.8  | 82154.1  | 70664.3  | 76253.6  | 80158.9  | 82694    | 118598.8 | TRUE |
| 163773.6 | 178366.8 | 195397.3 | 245990.3 | 208890.1 | 218893.1 | 240480   | 298248.6 | TRUE |
| 51088.6  | 67138.6  | 43344.3  | 60424.5  | 49431.3  | 42803.2  | 51125.3  | 52062.4  | TRUE |
| 27013.7  | 19918.1  | 23073.7  | 23669.6  | 25676    | 30948.6  | 22971.9  | 29852.6  | TRUE |
| 125755.4 | 118286   | 114814.4 | 150783.5 | 115039.8 | 142273   | 130088.5 | 130299.3 | TRUE |
| 132228.8 | 106965.7 | 105776.8 | 150197.9 | 114272.4 | 138743.9 | 111518.4 | 94247.9  | TRUE |
| 20761805 | 14347319 | 21987839 | 21746841 | 22075302 | 21257302 | 15419051 | 21675326 | TRUE |
| 308846.3 | 266275.4 | 269657.2 | 316994.3 | 301812.6 | 260333   | 269223.6 | 294064.5 | TRUE |
| 537885.3 | 418088.5 | 530147.1 | 542941.7 | 424689.9 | 572685.9 | 491712.6 | 429449.5 | TRUE |
| 112061.1 | 108415.5 | 119139.5 | 117974.5 | 123810.7 | 123938.1 | 123114.8 | 128034.8 | TRUE |
| 623046.2 | 444960.9 | 521569.2 | 536657   | 728230.8 | 588626.9 | 447735.2 | 606293.4 | TRUE |
| 1047484  | 790107.7 | 1000202  | 1007783  | 1112826  | 1196688  | 839999.8 | 1184756  | TRUE |
| 599951.3 | 588677.2 | 430053.7 | 482776.5 | 478349.4 | 452881.1 | 507253.7 | 491654.5 | TRUE |
| 341603.7 | 330291.6 | 369707   | 395680.1 | 338526.3 | 393592.6 | 342783.4 | 308590.7 | TRUE |
| 161799   | 177906   | 169855.2 | 170021.5 | 157890.9 | 162968.5 | 192707.4 | 155955.7 | TRUE |
| 46037.6  | 59193.6  | 29632.5  | 35151.6  | 51777.5  | 35401.4  | 60029.4  | 43529.3  | TRUE |
| 61669.2  | 69633.5  | 169233.9 | 53528.9  | 74936.9  | 66127    | 89818.8  | 61637.5  | TRUE |
| 2731088  | 2256391  | 2441366  | 2519721  | 2627554  | 2536931  | 2090035  | 2519132  | TRUE |
| 2249326  | 1829517  | 1873429  | 2001110  | 2114790  | 2091493  | 1687916  | 2158209  | TRUE |
| 112124.4 | 99335.3  | 132868.2 | 144262.9 | 115733.2 | 146920.1 | 121666.3 | 126890.9 | TRUE |
| 395030.8 | 313655.1 | 451222.5 | 510343.5 | 476019.9 | 481886.7 | 400437.1 | 412660.3 | TRUE |
| 24519.7  | 28668.8  | 18879.1  | 34859.4  | 28960.2  | 27298.2  | 33119.2  | 28764    | TRUE |
| 197361.4 | 149950   | 206127.4 | 206752.6 | 188534.3 | 191210.2 | 191719.6 | 184263.4 | TRUE |
| 71674.8  | 83449.7  | 73334.1  | 95377.7  | 94338.6  | 103209.9 | 69908.3  | 79385.9  | TRUE |
| 93622.6  | 94018.5  | 78375.5  | 79587.5  | 104569.6 | 100585   | 123960.7 | 93355.3  | TRUE |
| 16089.6  | 14529.3  | 6480.2   | 6921     | 12382.8  | 7276.4   | 16167.7  | 7568.1   | TRUE |
| 151212.7 | 127610.2 | 120167.5 | 126955.1 | 145157.1 | 134382   | 132351   | 150995   | TRUE |



|          |          |          |          |          |          |          |          |      |
|----------|----------|----------|----------|----------|----------|----------|----------|------|
| 152732.5 | 109815   | 135022.2 | 177436   | 195602.2 | 144521.1 | 127510   | 170286.3 | TRUE |
| 18518.4  | 26208.4  | 20319.4  | 25901.5  | 27362.6  | 19163    | 24782    | 27860.6  | TRUE |
| 116197.3 | 130685.8 | 133869.7 | 120134.1 | 128539   | 127993.6 | 110186.9 | 132789.2 | TRUE |
| 153758.4 | 131832.7 | 147878.7 | 169511.2 | 193488.5 | 139550.2 | 157012.2 | 202032.2 | TRUE |
| 1153525  | 1023882  | 949370.8 | 1042600  | 973352.4 | 1141641  | 1064950  | 1167370  | TRUE |
| 88221    | 58787.4  | 72277.6  | 75073.7  | 74866.4  | 83622.7  | 96089.9  | 91277.1  | TRUE |
| 21047.2  | 21821.1  | 12669.4  | 12267.1  | 7378.8   | 26113.4  | 19396.7  | 16989.5  | TRUE |
| 177728.2 | 154487.7 | 135878.3 | 175396.5 | 194929.6 | 227421.5 | 168966.5 | 232945   | TRUE |
| 72484.3  | 63012.7  | 57584.5  | 71332.1  | 67496.3  | 97910.5  | 86026.7  | 89109.9  | TRUE |
| 96670.7  | 116143.5 | 65700.6  | 112002.2 | 108965.3 | 120472.4 | 138018   | 114082.9 | TRUE |
| 836606.8 | 710077.2 | 594949.5 | 726150.6 | 734516.1 | 930797.7 | 895282.6 | 966588.7 | TRUE |
| 109000.1 | 112831.7 | 111300.3 | 101826.6 | 84156.6  | 110622   | 113409.8 | 109132.4 | TRUE |
| 109467.3 | 137717.3 | 125418.9 | 113452   | 124220.8 | 134703.8 | 140733.9 | 130912.2 | TRUE |
| 84726.5  | 101004.8 | 171726.3 | 40653.5  | 68362.8  | 181285.8 | 127335.2 | 76301.4  | TRUE |
| 133554.2 | 141318.9 | 176688   | 119583.9 | 105381.6 | 229832.8 | 157621.7 | 109438.1 | TRUE |
| 247743.7 | 134632   | 234630.4 | 201130.4 | 331728   | 147116.3 | 152611.1 | 149794.3 | TRUE |
| 46819.2  | 40714.6  | 56352.2  | 97551.7  | 134726.9 | 33262.6  | 47350.5  | 64530.8  | TRUE |
| 81662.7  | 49027.7  | 94797.5  | 72062.5  | 50512.4  | 127303.7 | 77468.1  | 63772    | TRUE |
| 55830.4  | 38682.2  | 51542.4  | 43824.6  | 54096.7  | 45587.2  | 41072.8  | 51302.5  | TRUE |
| 22409.8  | 27176.3  | 19504.8  | 29116.3  | 28721.3  | 23739.9  | 17907.5  | 35139.9  | TRUE |
| 90170.9  | 74649.8  | 73216.8  | 81891.8  | 105754.9 | 79773.6  | 76317.7  | 101826.5 | TRUE |
| 101404.4 | 101779.5 | 106663.9 | 128376.3 | 116294.1 | 106084   | 146000.1 | 96153.2  | TRUE |
| 294719.1 | 320367.8 | 323010.8 | 331892.9 | 254043.5 | 324036.9 | 360035.8 | 331357.7 | TRUE |
| 43000.9  | 11173.6  | 30788.3  | 53352.4  | 54837.7  | 28155.5  | 33924.1  | 49157.4  | TRUE |
| 52985.2  | 38453.1  | 48268.2  | 38136.5  | 32173.6  | 56673.7  | 48866.7  | 60849.3  | TRUE |
| 126026.2 | 147015.3 | 139621.2 | 165290.1 | 105667.8 | 161162.2 | 152375.9 | 166274.9 | TRUE |
| 20575.7  | 7750.4   | 36876.3  | 26390.1  | 29150.9  | 8012.3   | 28808.6  | 13579    | TRUE |
| 118789.9 | 103570.2 | 87277.7  | 126517.4 | 122611.7 | 88062    | 122588   | 128286.1 | TRUE |
| 268886.5 | 309104.9 | 227995.4 | 272136.6 | 279536.1 | 210531.3 | 278733.8 | 273179.8 | TRUE |
| 61977.7  | 59882.2  | 70164.5  | 74321.4  | 76605.6  | 86067.6  | 71347.4  | 99173.5  | TRUE |
| 29494    | 51816.5  | 36800    | 68129.6  | 70414    | 27056.9  | 34771.7  | 30788.2  | TRUE |
| 121451.4 | 159741.4 | 45903.3  | 83836    | 114846.1 | 53346.7  | 79070.4  | 105689.5 | TRUE |
| 92656.8  | 97420.3  | 64378.2  | 106165.2 | 100190.5 | 81727.8  | 119689.6 | 108606.5 | TRUE |
| 835334.1 | 1089831  | 967982.4 | 991260.9 | 472075.9 | 965558.4 | 1132013  | 945457.6 | TRUE |
| 649747.9 | 697377.6 | 465679.7 | 905469.6 | 883517.8 | 548565.2 | 861638.2 | 883494.8 | TRUE |
| 294813.3 | 288124.3 | 257794.7 | 271372.3 | 245317.1 | 278801.8 | 314227.3 | 309018.9 | TRUE |
| 518799.6 | 308362.1 | 225549.4 | 244502.8 | 395912.3 | 398469.2 | 299307.8 | 385594.2 | TRUE |
| 316534.9 | 270759   | 312285.3 | 390244.8 | 304844.2 | 346709.2 | 272031.9 | 330440.6 | TRUE |
| 34672.2  | 36821.2  | 55841.1  | 59457.7  | 58176.6  | 32312.1  | 8342.7   | 20954    | TRUE |
| 533211.8 | 473179.9 | 371886.4 | 343713.1 | 622857.3 | 593233.5 | 479451.4 | 591919.3 | TRUE |

|          |          |          |          |          |          |          |          |      |
|----------|----------|----------|----------|----------|----------|----------|----------|------|
| 524852.1 | 435776.1 | 343914   | 333100.2 | 687284.8 | 633005.9 | 455243.4 | 585012.7 | TRUE |
| 24466.7  | 34474.5  | 29904.7  | 37107.7  | 36400.8  | 6404.2   | 11178.1  | 13477.6  | TRUE |
| 178160.2 | 116592.5 | 100765.5 | 133151.5 | 96873.4  | 129594.9 | 85599.2  | 107165.4 | TRUE |
| 283274.3 | 177517.3 | 255939.5 | 260558.7 | 223086.3 | 251026.5 | 178707.4 | 223673.7 | TRUE |
| 327650.9 | 242831.9 | 363629   | 344858.5 | 314373.1 | 402524.4 | 236168.3 | 282447.7 | TRUE |
| 202527.7 | 132325.1 | 236481.5 | 245803.8 | 185322.5 | 241527.9 | 155272.7 | 184917.9 | TRUE |
| 91926.1  | 83501.8  | 83249.9  | 102196.8 | 82625.1  | 79772.5  | 54538.5  | 49861    | TRUE |
| 426123.4 | 372155.5 | 297718.3 | 273386.5 | 588243.5 | 606191.8 | 424018.6 | 611289.3 | TRUE |
| 95122    | 114735.9 | 94689    | 90350.5  | 179163.1 | 97184.8  | 88301.8  | 87209.5  | TRUE |
| 34568.8  | 18229.5  | 28656    | 32527    | 27370.3  | 26648.3  | 145203.6 | 31880.3  | TRUE |
| 16165.2  | 22696.6  | 21623    | 23867.2  | 19946.9  | 23328.5  | 29697.9  | 23965.6  | TRUE |
| 14383    | 10489.5  | 21156.4  | 21231.9  | 19604.9  | 27964.5  | 11294.9  | 5756.3   | TRUE |
| 78918.6  | 56996    | 74970    | 80439.9  | 66313.4  | 103644   | 52999.6  | 90204.3  | TRUE |
| 102386.7 | 108501.3 | 97104.9  | 134192.2 | 72350.5  | 105627.8 | 103921.2 | 86334    | TRUE |
| 335833.7 | 324857.1 | 245988.3 | 294712.4 | 283676.2 | 340735   | 343096.3 | 355428.9 | TRUE |
| 1105074  | 1297897  | 837876.1 | 1071263  | 997875.1 | 841579.6 | 1337225  | 961171.4 | TRUE |
| 1190750  | 1181013  | 886457.6 | 1144965  | 1164943  | 968414.4 | 1304888  | 1169415  | TRUE |
| 1095139  | 937673.1 | 1204009  | 1211994  | 1064378  | 1279406  | 1135129  | 1185959  | TRUE |
| 23113.4  | 32253.8  | 30620.3  | 47972.8  | 55252.9  | 18824.4  | 32905.4  | 12371.9  | TRUE |
| 34916.9  | 46971.1  | 35174.2  | 45668    | 37525.5  | 35277.2  | 47239.5  | 40243.2  | TRUE |
| 59630.9  | 44177.9  | 32486    | 31612.3  | 47828.7  | 39896.7  | 60505.5  | 43819.6  | TRUE |
| 162145.8 | 170629.7 | 128785.8 | 133560.7 | 198437.4 | 139383.3 | 175036.2 | 175574.5 | TRUE |
| 474827   | 481282.8 | 470977.8 | 434936.6 | 308359   | 359064.4 | 380415   | 338830.9 | TRUE |
| 520382.6 | 566526.2 | 544286.2 | 533616.7 | 431618.4 | 459224.4 | 498219.4 | 454095.3 | TRUE |
| 147941.4 | 143877.4 | 207802.6 | 188277   | 125529.5 | 149988.1 | 156524.1 | 135201.5 | TRUE |
| 825267   | 1036925  | 893892.8 | 937370   | 695544.7 | 885594.6 | 886595.1 | 722064.2 | TRUE |
| 155006.2 | 111098.1 | 162778.5 | 165301.6 | 126612.7 | 101618.3 | 135010.8 | 135701.3 | TRUE |
| 257677.3 | 247482.6 | 189014.1 | 223216.2 | 151151   | 183826.9 | 242269   | 217683.3 | TRUE |
| 674839.8 | 542870.8 | 404930.4 | 448841   | 339048.8 | 433140.8 | 536568   | 466980.3 | TRUE |
| 115735   | 86475.5  | 219042.5 | 92317    | 50301.4  | 215443.7 | 100085.2 | 59932.4  | TRUE |
| 127845.6 | 95356.6  | 184362.4 | 95224    | 62099.9  | 215613.8 | 103527.2 | 72887    | TRUE |
| 83590.4  | 50295    | 112073.8 | 97777.6  | 181531.8 | 105140.1 | 69329.1  | 71860.3  | TRUE |
| 360428.8 | 265427.6 | 711244.7 | 295800.9 | 261356.6 | 746795.8 | 343908.1 | 242822.5 | TRUE |
| 103215.8 | 120897.2 | 115402.4 | 86152.3  | 80211.7  | 130474.9 | 94146.1  | 78718.6  | TRUE |
| 19283.6  | 7494.9   | 28067    | 7415.3   | 4944.2   | 27572.5  | 12765.6  | 6953.8   | TRUE |
| 39291.1  | 34974.1  | 49250.8  | 35483.3  | 22868    | 55847.6  | 38187.7  | 24362.8  | TRUE |
| 77817.5  | 58285.1  | 88952.6  | 57586.6  | 96914.5  | 78145.4  | 57355.2  | 80597.2  | TRUE |
| 56238.3  | 39080.5  | 45230.9  | 50806.5  | 69404.6  | 43345.6  | 36043.1  | 41500.1  | TRUE |
| 28508.4  | 49062.9  | 59070.9  | 21764.3  | 26970    | 45101.7  | 30604.4  | 22296.4  | TRUE |
| 225268.8 | 259866.6 | 309518.8 | 281481.3 | 241576.9 | 307048.3 | 244197.1 | 202610.8 | TRUE |
| 56170.4  | 54499    | 69590.9  | 55117.3  | 40409.8  | 163979.6 | 74440.5  | 47097.3  | TRUE |
| 101347.7 | 132026.3 | 154562.9 | 110277   | 100690.7 | 157669   | 161448.8 | 95578.2  | TRUE |
| 207613   | 236749.8 | 217049.2 | 223846.3 | 212477.8 | 217621.8 | 261833   | 209913.2 | TRUE |
| 77151.4  | 76587.6  | 47589.1  | 85319.7  | 65088.5  | 62922.4  | 62695.6  | 85933.6  | TRUE |
| 219811.6 | 169674.5 | 196134.9 | 187280.4 | 178916.7 | 200791.5 | 205501.3 | 181946.2 | TRUE |
| 175156.5 | 199063.3 | 167142.6 | 165300.5 | 168576   | 198833.2 | 204687.8 | 165223   | TRUE |

|          |          |          |          |          |          |          |          |      |
|----------|----------|----------|----------|----------|----------|----------|----------|------|
| 241466   | 211893.6 | 220245   | 214247.2 | 251808.6 | 251766   | 273820.4 | 274139.4 | TRUE |
| 74788.6  | 63992.3  | 46274.3  | 75385.3  | 59513.6  | 71262.5  | 81558.5  | 81803    | TRUE |
| 33110.9  | 29669.7  | 19520.1  | 22161.9  | 21485.8  | 35373.1  | 31082.1  | 34503.2  | TRUE |
| 150290.9 | 165667   | 135482.4 | 130008.1 | 141545.5 | 121847.2 | 149341.2 | 163768   | TRUE |
| 142804.8 | 194359   | 260584   | 171959.9 | 161735.6 | 142161.7 | 146081.7 | 137953.4 | TRUE |
| 535528.6 | 385537.1 | 458762.1 | 581893   | 506538.6 | 697794.9 | 523689.5 | 678976.8 | TRUE |
| 395408.4 | 361898   | 406661.6 | 523992.5 | 393047.3 | 379047.5 | 445282.9 | 344832.6 | TRUE |
| 100119.9 | 98167.4  | 101704.5 | 112806.5 | 119404.5 | 107869.1 | 97266.8  | 103353.4 | TRUE |
| 238369.9 | 240026.3 | 228639.8 | 295455.7 | 302170.6 | 234876.7 | 220321.1 | 319119.6 | TRUE |
| 82567.1  | 59878.9  | 56929.5  | 76459.8  | 119298.5 | 80058.8  | 63244.5  | 113569   | TRUE |
| 232044.5 | 176536.8 | 167529.7 | 278011   | 209577.5 | 217238.7 | 246436.7 | 285280   | TRUE |
| 97986.7  | 76043    | 68618    | 97698.7  | 75834    | 103087.9 | 113048.2 | 124860.4 | TRUE |
| 146230.9 | 121343.9 | 109756   | 140545.4 | 140561.2 | 188848.8 | 184835   | 163688.7 | TRUE |
| 466025.9 | 444424.7 | 424301.1 | 461202.2 | 499044.2 | 471629.2 | 391228.8 | 453060   | TRUE |
| 155014.1 | 126212   | 159913.3 | 197112.9 | 191301.5 | 197617.6 | 156144.6 | 159723.1 | TRUE |
| 228297.9 | 77385.1  | 86319.3  | 93794.4  | 107669   | 119735.5 | 105110.6 | 114372   | TRUE |
| 39666.3  | 60040.7  | 45776.1  | 46131.9  | 56728.7  | 39183.6  | 31160.5  | 24716.5  | TRUE |
| 139811.5 | 134029.8 | 162906.6 | 167867.4 | 145904.8 | 160335.3 | 125598.7 | 162407.3 | TRUE |
| 131078.1 | 130535.7 | 137482.8 | 180476.2 | 154793.2 | 128633.2 | 157212.3 | 155417.7 | TRUE |
| 304845.9 | 318402.4 | 248315.2 | 258477.3 | 270959.3 | 311346.8 | 340027.2 | 325586.7 | TRUE |
| 43125.2  | 24937.7  | 38709.5  | 55654.8  | 38028    | 56475.4  | 47052.2  | 64113.5  | TRUE |
| 70535.8  | 67986.8  | 49318.1  | 64823.5  | 63126.4  | 60584.4  | 51419.4  | 59449.5  | TRUE |
| 85439.4  | 105817.6 | 89650.6  | 101662   | 97161.3  | 105277.3 | 112655.9 | 70077.1  | TRUE |
| 553779.5 | 450310.4 | 535539.6 | 674563.7 | 653237.6 | 591290.1 | 597770.8 | 662860.7 | TRUE |
| 75942.7  | 67502.5  | 55600.1  | 87990.5  | 77458.9  | 101068.2 | 94443.7  | 100794.6 | TRUE |
| 66926.8  | 35638.4  | 48207.3  | 87130.3  | 53845    | 63310.2  | 71197.9  | 83761.6  | TRUE |
| 359740.8 | 273896.8 | 239094   | 358472.3 | 305951.1 | 399775.4 | 378271.6 | 424688   | TRUE |
| 160612.5 | 155614.6 | 176188.4 | 169289.4 | 149783.2 | 159064.7 | 161332.1 | 178204.7 | TRUE |
| 774597.6 | 750145.4 | 689752.5 | 861064.8 | 732588   | 695679.8 | 746114.1 | 744804.8 | TRUE |
| 1557102  | 1229079  | 1587603  | 1573719  | 1460494  | 1569310  | 1362410  | 1611987  | TRUE |
| 39270.5  | 32648    | 33646.7  | 35047.2  | 21633.1  | 47790.8  | 46295.8  | 29979    | TRUE |
| 38073.7  | 29512.3  | 36290.2  | 32666.5  | 36002.8  | 56702.7  | 34842.2  | 55054.9  | TRUE |
| 135050.1 | 84157.8  | 133969.6 | 132378.3 | 146267.2 | 142067.9 | 101697.8 | 141613.8 | TRUE |
| 223672.4 | 254463.9 | 149592.9 | 195290.5 | 207142.3 | 151528.4 | 234410.1 | 228699.2 | TRUE |
| 84652.8  | 93901.4  | 108236.2 | 99467.1  | 87569.8  | 104621.1 | 99484.8  | 102463.8 | TRUE |
| 65813.3  | 57113.5  | 80202.4  | 77843.5  | 65475.1  | 85384.6  | 63468    | 78729.8  | TRUE |
| 101263.3 | 74121.4  | 85697.9  | 98337.8  | 89503.2  | 89276.8  | 75594.9  | 105589.3 | TRUE |
| 132026.8 | 111336.8 | 131983.7 | 129976.6 | 108491.9 | 128736   | 137292.8 | 100387   | TRUE |
| 100625.1 | 78657.9  | 93276.8  | 105468.5 | 98077    | 102291.9 | 74489    | 96160.6  | TRUE |

|          |          |          |          |          |          |          |          |      |
|----------|----------|----------|----------|----------|----------|----------|----------|------|
| 477710.9 | 479434.7 | 342033.7 | 350631.3 | 320811.1 | 364228.1 | 398904.1 | 334602   | TRUE |
| 198535.7 | 221988.2 | 169526.8 | 211724.8 | 179853   | 177496.1 | 203499   | 176112.8 | TRUE |
| 476566.2 | 538230   | 495843.7 | 517857.4 | 446810.4 | 528990.1 | 521103.1 | 443174.1 | TRUE |
| 504115.8 | 439735   | 608780.4 | 639441.1 | 489479.6 | 537449.7 | 443481.6 | 510261.8 | TRUE |
| 568372.4 | 582359.5 | 777582.8 | 859176.9 | 657338.2 | 686957.1 | 547519.4 | 664304.5 | TRUE |
| 189509.4 | 201052   | 181962.6 | 214929.3 | 214945.4 | 198100.9 | 208424.2 | 203587.8 | TRUE |
| 14578.4  | 23114.9  | 2791.5   | 7725.2   | 34137    | 5561.3   | 26599.3  | 50927.8  | TRUE |
| 19470.2  | 7410.7   | 18687.2  | 9814.5   | 8346.5   | 9043.3   | 11882.8  | 12564.7  | TRUE |
| 1131329  | 1162800  | 922187.2 | 1187499  | 1566728  | 961743.3 | 1168299  | 1453754  | TRUE |
| 659202.9 | 659938.8 | 479620.9 | 641459.9 | 824243.2 | 559223.1 | 668929.2 | 803707.4 | TRUE |
| 1444953  | 1700886  | 1437303  | 1492995  | 1164033  | 1594486  | 1856806  | 1575183  | TRUE |
| 333146.3 | 250572.6 | 200717   | 318870.3 | 309998.9 | 303075.4 | 364905.6 | 433074.9 | TRUE |
| 136836.7 | 86843.9  | 84879.9  | 102832.5 | 96156.6  | 126260.5 | 120642.2 | 130537.6 | TRUE |
| 287069.3 | 256275.8 | 234844.2 | 265478.1 | 245877.9 | 268523.7 | 362951.5 | 302816.6 | TRUE |
| 119341.7 | 133804   | 101012.6 | 105615.2 | 115260.4 | 130002.9 | 111656.8 | 120058.5 | TRUE |
| 73462.2  | 62143.2  | 66159.9  | 61991.3  | 51755.4  | 56130.6  | 73918.1  | 68515.2  | TRUE |
| 226462.9 | 188602.9 | 215565.8 | 268294.6 | 223925.7 | 223525.9 | 213807.7 | 204237.7 | TRUE |
| 550283.2 | 534959.1 | 483074.5 | 596177.2 | 505365.6 | 535216.1 | 525614   | 497004.2 | TRUE |
| 912280.5 | 761025.8 | 840301.7 | 926311.9 | 842421.1 | 910205.5 | 796508   | 909643.3 | TRUE |
| 78193.2  | 102835.9 | 81824.1  | 110665   | 85689.8  | 77590.3  | 67849.3  | 93700.3  | TRUE |
| 75412.7  | 67242.6  | 56266.6  | 70038.4  | 65562.3  | 87969.7  | 62690.6  | 89887.8  | TRUE |
| 142096.3 | 105604.8 | 128582.4 | 153897.5 | 132323.2 | 129046.6 | 113876.3 | 139934.8 | TRUE |
| 759754.4 | 728822.5 | 660099.4 | 853233.5 | 828859   | 750479.2 | 685660.3 | 789742.6 | TRUE |
| 34628.6  | 5746.6   | 36049.6  | 37418.8  | 34859.8  | 29346.7  | 36859.1  | 33209.4  | TRUE |
| 64752.8  | 66443.4  | 231949.1 | 69141.5  | 51399.9  | 54776.4  | 48179.1  | 59944.9  | TRUE |
| 34866.4  | 27965.2  | 36401.7  | 43948.2  | 40263.8  | 31148.6  | 34163.5  | 35753    | TRUE |
| 40611.5  | 38935.3  | 152668.9 | 33900.7  | 45335.3  | 53295.4  | 41654.4  | 37352    | TRUE |
| 353066   | 259900.1 | 365561.5 | 323427.9 | 309951.3 | 384603.3 | 261660.3 | 282326.3 | TRUE |
| 208247.8 | 141455   | 171938.7 | 176448.2 | 230900.9 | 204145.6 | 167276.2 | 223260   | TRUE |
| 7781.4   | 10969.3  | 17955.8  | 22376.1  | 21410.8  | 15898.5  | 10999.9  | 26309.8  | TRUE |
| 21355.6  | 33944.2  | 26528.1  | 26956.9  | 21406.6  | 34551.4  | 37226.6  | 31339.2  | TRUE |
| 46040.5  | 45071.3  | 50364.8  | 39816    | 59079    | 75817.1  | 61827.8  | 57572.5  | TRUE |
| 28139.7  | 45150.6  | 45379.9  | 49877    | 35193    | 52239.8  | 50004.4  | 60952.5  | TRUE |
| 70944.8  | 52062.9  | 63962.4  | 58362    | 72089.5  | 53368.8  | 65010.9  | 59408.2  | TRUE |
| 50756.1  | 37379.5  | 59426.1  | 69864.9  | 67406.3  | 54860.2  | 61576.1  | 53971.3  | TRUE |
| 298284.2 | 206716.9 | 281224.4 | 298930.7 | 209309.9 | 307761   | 236627.7 | 243961.1 | TRUE |
| 34864.6  | 30509.5  | 31788.6  | 42659.5  | 43351    | 44129.8  | 41715.5  | 67495.7  | TRUE |
| 34167.6  | 35007.5  | 23996.3  | 27111.7  | 27565.5  | 29757.6  | 37991.6  | 28732.8  | TRUE |
| 21958.1  | 21808.3  | 7931.3   | 27395.2  | 21617.8  | 32512.4  | 37181.5  | 27906.8  | TRUE |
| 28540.7  | 36866.4  | 18016.1  | 30149.3  | 23248.6  | 37963.2  | 35718    | 37754.1  | TRUE |
| 149284.6 | 120870.1 | 151794.1 | 142079.5 | 130305.3 | 161519.2 | 126651.6 | 163701.8 | TRUE |
| 428474.6 | 469705.4 | 408409   | 360603.1 | 449916.9 | 431339.7 | 431271.3 | 404171.6 | TRUE |
| 1396886  | 1560100  | 1211710  | 1236326  | 1498197  | 1463105  | 1406628  | 1463682  | TRUE |
| 99983.5  | 93543.8  | 80231.7  | 94413.8  | 89576.3  | 105693.3 | 100505.6 | 112644.8 | TRUE |

|          |          |          |          |          |          |          |          |      |
|----------|----------|----------|----------|----------|----------|----------|----------|------|
| 129456.4 | 119418.6 | 134411.5 | 123490.8 | 106932.8 | 141277.9 | 142922.6 | 134683.6 | TRUE |
| 87338.5  | 91163.7  | 58662.5  | 84393.3  | 69295.9  | 73968.3  | 119413.7 | 96199.8  | TRUE |
| 72028    | 73556.5  | 47728.1  | 56518.4  | 69389.3  | 75951    | 94023.2  | 94807.9  | TRUE |
| 54057.6  | 76187.1  | 46647.3  | 70973.1  | 91887.3  | 68280    | 65135.8  | 69057.4  | TRUE |
| 219235.1 | 280168.1 | 317070.7 | 269169.3 | 153140.3 | 221726.9 | 320257.6 | 229990.8 | TRUE |
| 96015.3  | 113303   | 95822    | 110898   | 65492.5  | 91968    | 114115.1 | 100670.6 | TRUE |
| 125455.8 | 104612.1 | 77045.3  | 122528.6 | 112534   | 120112.6 | 152611.7 | 149225.9 | TRUE |
| 83086.6  | 60441    | 56534    | 70881.6  | 83839.5  | 72163.3  | 113283.3 | 82936.2  | TRUE |
| 35438.4  | 11165.6  | 19821.1  | 34917.4  | 36971.1  | 25210.7  | 13650.6  | 43270.8  | TRUE |
| 216597.7 | 218986.4 | 191565   | 229190.8 | 169283.4 | 185563.4 | 231937.9 | 224821.7 | TRUE |
| 231098.7 | 171701.4 | 299547.9 | 225239.6 | 167159   | 216869.8 | 255181.9 | 252479.1 | TRUE |
| 278987.7 | 159114.3 | 313072   | 378407.2 | 242960.8 | 395043.8 | 271087.3 | 277049.3 | TRUE |
| 74224.3  | 93287.6  | 66319.6  | 75132.8  | 65682    | 73186.6  | 137836.5 | 75046.8  | TRUE |
| 131364.2 | 124130.3 | 74684.3  | 114468.9 | 65096.8  | 132204.1 | 152352.6 | 109102.1 | TRUE |
| 87458.9  | 75539.6  | 90283.6  | 101929.8 | 74894.4  | 121072.7 | 82476.7  | 96598.8  | TRUE |
| 74314.1  | 61529    | 51676.6  | 79350.5  | 39898.8  | 46024.9  | 74383.8  | 36135.7  | TRUE |
| 55479    | 49307.5  | 41909    | 70809.3  | 47074.8  | 57135.2  | 59504.6  | 64245.7  | TRUE |
| 100522.1 | 52161    | 53259.9  | 78722.6  | 79014.6  | 80749.4  | 56580.3  | 79775.3  | TRUE |
| 286233.9 | 337379.2 | 200965.3 | 308338.9 | 195278   | 231038.7 | 309915.6 | 237306.4 | TRUE |
| 359024.8 | 263270.9 | 456196.9 | 469780.1 | 264936.3 | 446177.1 | 251322.8 | 439629.1 | TRUE |
| 104056.1 | 171678.1 | 164241.5 | 159317.7 | 115642   | 138448.9 | 169499.4 | 113113.7 | TRUE |
| 164974.8 | 121906.7 | 202860.4 | 273903.5 | 149244   | 225237.7 | 153063.7 | 224953.6 | TRUE |
| 125392.5 | 101186.9 | 160469.6 | 191170.2 | 123885.4 | 152355.5 | 97425.5  | 118726   | TRUE |
| 97422.9  | 88984.3  | 77235.7  | 76147.1  | 74335.4  | 112356.5 | 93849.6  | 90264.3  | TRUE |
| 1069587  | 909284.1 | 691569.8 | 963362.6 | 879896.7 | 723212.4 | 760253.8 | 913512.5 | TRUE |
| 188484.1 | 172245   | 117908.7 | 178366.6 | 158279.3 | 132533.2 | 142830.5 | 158839.2 | TRUE |
| 418531.4 | 392785   | 432023.8 | 503552.9 | 473479.4 | 440610.8 | 423663.6 | 461165.2 | TRUE |
| 336574.9 | 278278.8 | 345927.4 | 377409.5 | 301528.6 | 375669.8 | 322869.6 | 347212.4 | TRUE |
| 119476.3 | 116146.1 | 91334.6  | 125738.9 | 120659.6 | 133177.8 | 119518.1 | 130737.5 | TRUE |
| 5866666  | 5538944  | 5126792  | 5142907  | 5112621  | 6394671  | 6143198  | 6494918  | TRUE |
| 176514.8 | 186943.4 | 181705.4 | 192405.5 | 281806.7 | 210200.4 | 203957.2 | 246549.4 | TRUE |
| 221094.1 | 225441.4 | 216205.9 | 283765.8 | 377843.7 | 249726.1 | 288463.5 | 350356.9 | TRUE |
| 212195.9 | 174148.6 | 225580.8 | 213542.3 | 142996.3 | 197795.6 | 196718.9 | 179485.3 | TRUE |
| 32773.7  | 9848.9   | 23475.8  | 29296.4  | 11240.6  | 30667.3  | 16695.8  | 22583.5  | TRUE |
| 61850.9  | 42631.9  | 64681.7  | 65720.4  | 60098    | 75063.9  | 54165.9  | 60854.2  | TRUE |
| 134976.5 | 167390   | 163305.7 | 162603.2 | 144166   | 176792.4 | 158093   | 149628.2 | TRUE |
| 71596.1  | 82213    | 59299.4  | 62156.6  | 43104.7  | 62640    | 57588.6  | 47897    | TRUE |
| 536496.1 | 526471.1 | 544581.4 | 534533.4 | 456171.1 | 523146.9 | 540947.3 | 490585.9 | TRUE |
| 648506.2 | 571579   | 776905.5 | 723782.8 | 664201.2 | 653263.8 | 600045.3 | 678800.5 | TRUE |
| 1607350  | 1273083  | 1917800  | 1851162  | 1767886  | 1723267  | 1382448  | 1535586  | TRUE |
| 36986.2  | 28117.4  | 30475.1  | 28838.8  | 35447.7  | 26438.8  | 34108.2  | 40512.4  | TRUE |

|          |          |          |          |          |          |          |          |      |
|----------|----------|----------|----------|----------|----------|----------|----------|------|
| 195842.5 | 185617.9 | 183395.8 | 199648.9 | 151030.1 | 216449.5 | 194295.6 | 146669.9 | TRUE |
| 319267.9 | 354329.6 | 291308.8 | 275126   | 268262.5 | 304710.2 | 330492   | 281896.5 | TRUE |
| 144693.7 | 122256.9 | 167537   | 118324   | 138608.5 | 180494.4 | 106706.1 | 147289.4 | TRUE |
| 211054.1 | 141784.5 | 183639.3 | 257748.1 | 243370.4 | 203761.1 | 208179.9 | 204620.3 | TRUE |
| 664714   | 563817.2 | 614087.3 | 649669   | 703366.6 | 651714.9 | 559559.6 | 673447.6 | TRUE |
| 60152.9  | 60675.6  | 63111.6  | 51960.9  | 48869.6  | 65809.8  | 73883.4  | 48759.1  | TRUE |
| 35964.9  | 29082.4  | 28696.4  | 31516.9  | 29867.4  | 25612.7  | 30611.3  | 34619.3  | TRUE |
| 114588.1 | 141381.7 | 104539.1 | 141930.6 | 128343.8 | 106308.4 | 136579.1 | 121125   | TRUE |
| 51653.3  | 73649.2  | 52008.5  | 60727.7  | 62898.8  | 50829.9  | 60212.2  | 56694.4  | TRUE |
| 155277.5 | 163745.8 | 157968.6 | 164864   | 137184.5 | 141515.7 | 166247.9 | 137610.8 | TRUE |
| 65245.1  | 77940.3  | 48237.1  | 53060.7  | 73114.2  | 61917.4  | 59326.3  | 47250.8  | TRUE |
| 132759.4 | 140776.6 | 149319.2 | 131959.2 | 119590.2 | 143608.3 | 120270   | 112942.9 | TRUE |
| 127932   | 144307.5 | 138531.3 | 122160.3 | 144958.8 | 128662   | 157225.3 | 157682.5 | TRUE |
| 55300.2  | 71294.8  | 37744.4  | 28820.2  | 48086.9  | 49025.2  | 31535.3  | 38263.5  | TRUE |
| 126592.2 | 112144   | 125292   | 113016.2 | 143615.2 | 124920.3 | 149607.9 | 143673.7 | TRUE |
| 41062.4  | 34203.2  | 34779.8  | 53993.7  | 55754.1  | 61312.2  | 56779.8  | 62125.5  | TRUE |
| 186660.9 | 176173.9 | 171015.6 | 180364.1 | 178272   | 190803.6 | 213396.1 | 204236   | TRUE |
| 16281.5  | 19821.4  | 16051    | 9132     | 24272.7  | 18294.7  | 10930.5  | 16430.1  | TRUE |
| 17711.8  | 32139.6  | 15881.8  | 22595    | 22183.9  | 17374.7  | 22548.1  | 20003.1  | TRUE |
| 3318191  | 2504762  | 2681680  | 3090428  | 3553716  | 4278924  | 2514920  | 3923971  | TRUE |
| 684338.5 | 551124   | 567087.2 | 757085.5 | 513995.3 | 758847.8 | 703061.2 | 625179.4 | TRUE |
| 106362.4 | 99242.3  | 98382.8  | 127842.2 | 76187    | 112802   | 104991.8 | 94509.7  | TRUE |
| 76292.9  | 53702.5  | 63725.5  | 54883.8  | 63690.5  | 59222    | 56085.5  | 87416.5  | TRUE |
| 82123.2  | 60846.5  | 63497.7  | 70111.1  | 73548.5  | 83382.4  | 62914.9  | 87367.1  | TRUE |
| 98265.3  | 68888    | 70729.9  | 97601    | 74441.3  | 112496   | 87231.9  | 109137.1 | TRUE |
| 198573.8 | 169369.7 | 138983.6 | 201309.9 | 176917.7 | 268043.5 | 197579.5 | 253603.2 | TRUE |
| 92296.6  | 80246.5  | 102755.3 | 84425.1  | 48686.1  | 125527.5 | 83844    | 66862.3  | TRUE |
| 63946    | 82438.2  | 73504.1  | 110146.4 | 61203.4  | 80908.7  | 84406.4  | 90897    | TRUE |
| 27562.2  | 24580.6  | 34117.9  | 36230.1  | 37497.6  | 32299.4  | 29024.6  | 27769.6  | TRUE |
| 101976.5 | 116001.3 | 107852.1 | 107214.4 | 102555.7 | 126357.7 | 125309.5 | 120861.2 | TRUE |
| 36625.4  | 35056    | 26964    | 25637    | 30000.7  | 33614.4  | 39001.3  | 35094.8  | TRUE |
| 247113.1 | 222534.7 | 286583.3 | 313649   | 311798.8 | 461082.1 | 300006.5 | 526798.1 | TRUE |
| 496876.2 | 503519.9 | 338327.9 | 420490.3 | 378628.4 | 355340.8 | 437932.7 | 380103   | TRUE |
| 906253.5 | 862906.1 | 888608.8 | 944327.3 | 743293.8 | 832495.1 | 782817.5 | 793170.9 | TRUE |
| 228637.3 | 207717.1 | 278168.1 | 244295.8 | 254295.1 | 204075.1 | 213131.8 | 209401.3 | TRUE |
| 2620048  | 2374735  | 2032129  | 2369695  | 2224843  | 2429537  | 2475132  | 2405783  | TRUE |
| 201517.7 | 183206.5 | 172036.2 | 184496.3 | 179394.9 | 228325   | 205661.1 | 213492.9 | TRUE |
| 114260.9 | 335578.6 | 175717.3 | 332923.5 | 361179   | 52492.3  | 56067.5  | 69793.6  | TRUE |
| 13140655 | 11499461 | 10998626 | 12285273 | 11584240 | 12405951 | 12277331 | 13110401 | TRUE |
| 454140.2 | 420318.1 | 423231.4 | 431469.7 | 438056.7 | 453495.2 | 464114.9 | 459575.4 | TRUE |
| 1332474  | 1138228  | 1209768  | 1281427  | 1177461  | 1306357  | 1159336  | 1283335  | TRUE |
| 68385.2  | 48983.1  | 55210.2  | 51202.1  | 49592.9  | 62416.1  | 56950.3  | 71795.8  | TRUE |
| 103217.6 | 102671.6 | 126210.8 | 109526.6 | 128653.9 | 127968.7 | 109461.6 | 117933.9 | TRUE |
| 57952.1  | 31427.7  | 56554.1  | 68292.7  | 72200.4  | 74295.5  | 57877    | 63313.9  | TRUE |
| 305714.9 | 224632.2 | 308717.1 | 343613   | 320718.1 | 361612.5 | 284258.9 | 328664.4 | TRUE |

|          |          |          |          |          |          |          |          |      |
|----------|----------|----------|----------|----------|----------|----------|----------|------|
| 186281.8 | 195674.4 | 180543.8 | 197013.3 | 229490.7 | 225769.6 | 200094.7 | 197078.9 | TRUE |
| 93124    | 59439.9  | 99505.5  | 96762.9  | 86091.6  | 97802.3  | 101158.7 | 83229.6  | TRUE |
| 616533.7 | 728672.4 | 554902   | 560433.1 | 541183.1 | 603568.3 | 634646.9 | 646879.3 | TRUE |
| 76696.5  | 51388.8  | 42029    | 78242    | 65300.2  | 69093.9  | 76558.4  | 86222.6  | TRUE |
| 72867.4  | 63680.1  | 97141.7  | 75011.2  | 95034.2  | 90023.8  | 83775.6  | 96334.5  | TRUE |
| 83286.7  | 76221.3  | 129071.9 | 85924.4  | 124019.4 | 99635.5  | 107897.6 | 115715.4 | TRUE |
| 201000.4 | 173299.6 | 112120.1 | 169811.5 | 155561.7 | 174713.8 | 164298.2 | 226720.3 | TRUE |
| 44041.6  | 62997.1  | 56011.6  | 70188.7  | 48786.3  | 45337.9  | 52965.1  | 53286.3  | TRUE |
| 26727.1  | 6924.1   | 9188.7   | 13056.9  | 21477.3  | 23686.4  | 9999.3   | 23638.7  | TRUE |
| 29092.7  | 35127.5  | 25140.1  | 27361    | 37937.1  | 28741.5  | 32472    | 41381.4  | TRUE |
| 30245.1  | 20988.3  | 27712.9  | 27659.7  | 26977    | 33358.5  | 27040.7  | 30365.3  | TRUE |
| 125558.2 | 113419.1 | 107723.4 | 84497.4  | 124730.4 | 108513.9 | 141408.6 | 127974.5 | TRUE |
| 61946.5  | 74838.9  | 65385    | 70970.5  | 72166.3  | 66801.3  | 75647.8  | 75340    | TRUE |
| 84449.4  | 81517.5  | 66148.5  | 112658.1 | 89660    | 97109.3  | 110292.5 | 112413.6 | TRUE |
| 129858   | 114129.7 | 97069.8  | 131976.9 | 114417.1 | 100500.9 | 132666.7 | 127470.2 | TRUE |
| 42031    | 44049    | 47161.1  | 27349.3  | 59990.9  | 42081.8  | 38714.7  | 42012.5  | TRUE |
| 88438.7  | 99351.2  | 101482.6 | 87499.7  | 79101.2  | 78499.7  | 132930.6 | 85837.8  | TRUE |
| 71289.6  | 105218.8 | 68545.3  | 45988    | 61306.8  | 68574.6  | 104055.7 | 48431.6  | TRUE |
| 189805.2 | 254879.3 | 132499.6 | 166416.6 | 180915.3 | 148617.6 | 277804.5 | 192726.7 | TRUE |
| 67142.9  | 45384.9  | 72685.6  | 108746.7 | 62131.1  | 45329.1  | 69065.5  | 60848.3  | TRUE |
| 299491   | 228701.5 | 267338.9 | 351515.9 | 314303.7 | 327212.6 | 285619   | 275143.1 | TRUE |
| 8868.4   | 29140.5  | 16315.4  | 26080.2  | 21803.1  | 18031.4  | 10976.8  | 12999.4  | TRUE |
| 143142.4 | 166079.6 | 128476.2 | 114890.6 | 115761.9 | 114925.5 | 162584   | 142468.7 | TRUE |
| 142964.4 | 178573.5 | 123435.2 | 117663.5 | 207487.8 | 141883   | 148450.8 | 212168.4 | TRUE |
| 201650.3 | 175039.3 | 219945.3 | 218383.8 | 165381.6 | 155319.8 | 168757.7 | 188685.4 | TRUE |
| 226624.4 | 223132.6 | 241913   | 312059.3 | 210011.7 | 258418.5 | 198269.1 | 251070.4 | TRUE |
| 41854.1  | 43816    | 28004.3  | 45388.6  | 46729.1  | 49728.2  | 40173.4  | 49915.8  | TRUE |
| 37825.3  | 23055.1  | 40232.3  | 26493.3  | 28472.3  | 42510    | 33675    | 37829.7  | TRUE |
| 46507.4  | 33267.1  | 29970.5  | 44602.1  | 53939.3  | 58379.2  | 49018.5  | 40599.3  | TRUE |
| 99101.4  | 145421.5 | 136084.2 | 180930.4 | 157634   | 110591.3 | 132776.9 | 97693.7  | TRUE |
| 53434.3  | 47553.3  | 39853.2  | 58354.6  | 36303.5  | 37582.6  | 44995.8  | 47558.2  | TRUE |
| 338969.8 | 300601.7 | 281726   | 335183.6 | 360508.2 | 298343.6 | 358803   | 349239.3 | TRUE |
| 314111.9 | 326937.4 | 293675.8 | 364232.6 | 362941.1 | 340082.5 | 328328.5 | 323246.6 | TRUE |
| 117576   | 80293.1  | 88838.5  | 104963.7 | 84878.4  | 97409.2  | 91602.6  | 88159.1  | TRUE |
| 2558801  | 2112858  | 2237065  | 2463823  | 2436077  | 2256396  | 2318033  | 2357470  | TRUE |
| 168451.2 | 167216.1 | 151861.2 | 162904.9 | 202135   | 140341.1 | 161157.4 | 171844.4 | TRUE |
| 80030.1  | 73703.8  | 64343.3  | 94539.9  | 76413.9  | 68425    | 76926.5  | 72862.7  | TRUE |
| 144715.8 | 139448.4 | 137822.5 | 158870.1 | 144082   | 154267.5 | 169194.1 | 145660.6 | TRUE |

|          |          |          |          |          |          |          |          |      |
|----------|----------|----------|----------|----------|----------|----------|----------|------|
| 426268.2 | 313049   | 567111.2 | 353942.8 | 457011.1 | 447895   | 385774.1 | 455294.9 | TRUE |
| 59064.8  | 51514.7  | 53609.9  | 50569.2  | 63687.2  | 42693.6  | 56517.6  | 46671.4  | TRUE |
| 193761.7 | 166703.2 | 171949.2 | 191496.1 | 210683.3 | 268604.9 | 188651.4 | 231658.7 | TRUE |
| 544980   | 555729.4 | 561696.8 | 548001.4 | 590810.3 | 629642.7 | 553608.2 | 611802.5 | TRUE |
| 56080.8  | 9708.1   | 33698.1  | 30550.6  | 30548.4  | 50070.2  | 32992.5  | 42227.8  | TRUE |
| 75106.5  | 79388.5  | 66085.9  | 59525.4  | 85715.9  | 68908.3  | 63846.2  | 92346.6  | TRUE |
| 594823.6 | 452549.1 | 533182.6 | 492135.3 | 718490   | 536579   | 477635.9 | 517203.9 | TRUE |
| 366336   | 290641.1 | 460497.8 | 330265.3 | 347588.6 | 473978.4 | 394678.9 | 349956.7 | TRUE |
| 166589   | 143141   | 207988.8 | 163502.2 | 126445.8 | 208866.8 | 157806.6 | 132949.3 | TRUE |
| 408653.5 | 372837.7 | 538069.3 | 344998.9 | 336713.9 | 639025.6 | 360603.6 | 346146.9 | TRUE |
| 139466.2 | 128304.9 | 225860.5 | 130341.7 | 142903.1 | 228447.6 | 154080.3 | 142769.2 | TRUE |
| 24251.8  | 47925.8  | 30659    | 42038.4  | 39410.6  | 19179.6  | 10913.8  | 18080.7  | TRUE |
|          |          |          |          |          |          |          |          |      |
| 787254.3 | 633266.6 | 962846.9 | 803152.1 | 657443.5 | 1089329  | 767426.8 | 676099.3 | TRUE |
| 82879.3  | 60436.7  | 120282.2 | 70086.9  | 73569.5  | 152500.5 | 75026.4  | 69451.3  | TRUE |
| 461781.1 | 395681.1 | 385695.7 | 439944.6 | 611256.4 | 457596.6 | 403301.9 | 467545.4 | TRUE |
| 41482.1  | 31261.8  | 41092.2  | 39548.6  | 59783.4  | 37408.6  | 46130.3  | 41920.1  | TRUE |
| 283803.3 | 276860.9 | 417348.4 | 321164.5 | 275217.9 | 459532.2 | 290709.5 | 279289.8 | TRUE |
| 78143.7  | 74536.8  | 95233.8  | 79748.6  | 63802.9  | 108925.9 | 69478.6  | 50417.8  | TRUE |
| 106199.6 | 91875.5  | 110813.5 | 92174.9  | 84747    | 111081.9 | 93174.6  | 102447.3 | TRUE |
| 44507.4  | 35600.7  | 51649.7  | 45537.9  | 39397.3  | 53516.4  | 40884.2  | 49346.9  | TRUE |
|          |          |          |          |          |          |          |          |      |
| 53350.6  | 44370.4  | 50350.8  | 43939.9  | 76127.8  | 42910.8  | 47555.1  | 49475.8  | TRUE |
|          |          |          |          |          |          |          |          |      |
| 213621.1 | 154383.7 | 344915   | 177260.1 | 141042.7 | 391937.3 | 168723.3 | 181583.3 | TRUE |
| 319519.5 | 299898   | 272643.7 | 252597.5 | 501426.4 | 304377.9 | 292961.3 | 384100.8 | TRUE |
| 91331.3  | 73612.4  | 103164.4 | 71684.5  | 72481.4  | 116987.9 | 75775.2  | 75194.9  | TRUE |
|          |          |          |          |          |          |          |          |      |
| 594823.6 | 452549.1 | 533182.6 | 492135.3 | 718490   | 536579   | 477635.9 | 517203.9 | TRUE |
| 366336   | 290641.1 | 460497.8 | 330265.3 | 347588.6 | 473978.4 | 394678.9 | 349956.7 | TRUE |
| 166589   | 143141   | 207988.8 | 163502.2 | 126445.8 | 208866.8 | 157806.6 | 132949.3 | TRUE |
| 408653.5 | 372837.7 | 538069.3 | 344998.9 | 336713.9 | 639025.6 | 360603.6 | 346146.9 | TRUE |
| 139466.2 | 128304.9 | 225860.5 | 130341.7 | 142903.1 | 228447.6 | 154080.3 | 142769.2 | TRUE |
| 24251.8  | 47925.8  | 30659    | 42038.4  | 39410.6  | 19179.6  | 10913.8  | 18080.7  | TRUE |
|          |          |          |          |          |          |          |          |      |
| 787254.3 | 633266.6 | 962846.9 | 803152.1 | 657443.5 | 1089329  | 767426.8 | 676099.3 | TRUE |
| 82879.3  | 60436.7  | 120282.2 | 70086.9  | 73569.5  | 152500.5 | 75026.4  | 69451.3  | TRUE |
| 461781.1 | 395681.1 | 385695.7 | 439944.6 | 611256.4 | 457596.6 | 403301.9 | 467545.4 | TRUE |
| 41482.1  | 31261.8  | 41092.2  | 39548.6  | 59783.4  | 37408.6  | 46130.3  | 41920.1  | TRUE |
| 123492   | 143468.7 | 123406   | 141628.3 | 131235.4 | 124519.2 | 139941.1 | 119226.7 | TRUE |
| 107999.8 | 96658    | 123722.1 | 107407.4 | 93065    | 142887.6 | 102889.9 | 131863.6 | TRUE |
| 40404.9  | 36468.3  | 45370.8  | 46788.6  | 25616    | 59183.7  | 45836.7  | 51249.7  | TRUE |
|          |          |          |          |          |          |          |          |      |
| 194831   | 138960.5 | 144438.3 | 137518.6 | 145130.5 | 183576.9 | 185633.8 | 221894.1 | TRUE |
| 1200233  | 1181049  | 1095732  | 1206240  | 1029474  | 1135709  | 1322671  | 1080922  | TRUE |
| 327496.8 | 265545.8 | 312313.3 | 359323.7 | 288567.1 | 339664.6 | 311627   | 309358   | TRUE |



|          |          |          |          |          |          |          |          |      |
|----------|----------|----------|----------|----------|----------|----------|----------|------|
| 868724.1 | 692635.9 | 849166.9 | 1010984  | 890137.2 | 868014.8 | 722560.6 | 868644.1 | TRUE |
| 30498.8  | 7921.9   | 9796.1   | 12950.8  | 11147.6  | 7509.7   | 17110.3  | 8668.1   | TRUE |
| 137825.8 | 163694.9 | 105487.4 | 175226   | 152895.6 | 126241.3 | 200434.5 | 167343.9 | TRUE |
| 72297.5  | 56772.1  | 60943.2  | 106634.9 | 64685.6  | 60851.7  | 93122.4  | 88394.3  | TRUE |
| 218674.2 | 215192.6 | 200972   | 237612.8 | 225063.3 | 197609.2 | 256229.9 | 210371.5 | TRUE |
| 34634.1  | 27012.7  | 31494.6  | 26006.5  | 8567.8   | 29675.7  | 36483    | 47049.9  | TRUE |
| 117904.2 | 73760.7  | 66941.6  | 96945.9  | 91186.7  | 103780.8 | 109688.2 | 112536.7 | TRUE |
| 41759.7  | 24496.3  | 39811.9  | 50043.8  | 30956.2  | 47014    | 60092    | 54922.2  | TRUE |
| 272129.6 | 245777.3 | 208422.1 | 323126.8 | 305164.6 | 329528.6 | 345351.7 | 379736.5 | TRUE |
| 106612.1 | 105891.9 | 94861.9  | 88005.1  | 96568.3  | 96231.9  | 81728.2  | 85825.6  | TRUE |
| 259486.5 | 242725.6 | 254203.3 | 266822.1 | 245212.6 | 314164.2 | 309184.4 | 319366   | TRUE |
| 411626.8 | 430148.9 | 335944.9 | 375325   | 353852.8 | 368370.4 | 365682.2 | 404787.9 | TRUE |
| 39074.2  | 17471.5  | 15361.6  | 15697.8  | 23353.4  | 29215    | 19497.8  | 30025.7  | TRUE |
| 829669.9 | 1298748  | 1318067  | 1361764  | 447279.5 | 998110.9 | 1390656  | 1063681  | TRUE |
| 154979.7 | 216126.1 | 185865.5 | 223389.9 | 104219.8 | 196026.1 | 215547.1 | 180177.1 | TRUE |
| 594908.7 | 501087.8 | 566998.6 | 578708.8 | 552789.9 | 548287.6 | 527218.5 | 555296.9 | TRUE |
| 42141.9  | 27643.8  | 24170.6  | 31007.7  | 24107.9  | 37568.5  | 46344.7  | 25415.6  | TRUE |
| 10430.5  | 8090.5   | 9776.2   | 8871.8   | 9763.2   | 10407    | 9541.3   | 10528.5  | TRUE |
| 61300.1  | 32513.6  | 40104.9  | 65349.4  | 37835.7  | 48856.3  | 55104    | 47459.5  | TRUE |
| 42310.6  | 47330.8  | 28775.9  | 38249.2  | 64558    | 33022.1  | 67938.1  | 67284.3  | TRUE |
| 18634.6  | 30820.5  | 31293.5  | 7270.1   | 17414.5  | 22853.6  | 18840.9  | 19750.8  | TRUE |
| 78158.7  | 81961.2  | 93506.4  | 68709.8  | 79690.8  | 105713.6 | 100279.1 | 96687.2  | TRUE |
| 605022.6 | 571646.7 | 628810.1 | 552597.5 | 587903.5 | 571056.4 | 541166.1 | 512280   | TRUE |
| 386890.3 | 305035.4 | 318784   | 347489.4 | 458877.9 | 362582.3 | 346443.4 | 442979.9 | TRUE |
| 83150.1  | 98493    | 44518.8  | 124621.6 | 106176.3 | 59397.6  | 90841.6  | 100341.7 | TRUE |
| 125692   | 115368.4 | 67217    | 155213.5 | 151805.8 | 72455.5  | 144234.4 | 154505.5 | TRUE |
| 133383.8 | 147138.3 | 155505.5 | 173702.5 | 79773.2  | 191612   | 152272.3 | 178407.6 | TRUE |
| 425402.1 | 394715   | 317276.2 | 429414.4 | 361689.4 | 368520.3 | 392739.3 | 375184.6 | TRUE |
| 539541.2 | 600923.4 | 626595.6 | 650171.1 | 564033.5 | 511216   | 488414.9 | 485495.4 | TRUE |
| 44379.8  | 112333.7 | 54447.9  | 109072.4 | 80999    | 22489.2  | 36036.6  | 29288.6  | TRUE |
| 123856.8 | 238743.8 | 144692.2 | 313313.2 | 249513.5 | 88109    | 54939.8  | 99242.7  | TRUE |
| 70594.2  | 105451.1 | 96282.2  | 145146   | 129214.9 | 49713.5  | 45926.5  | 53607.7  | TRUE |
| 13358.2  | 10862    | 6160.6   | 13696.4  | 28625    | 6903.4   | 13053.1  | 24040.4  | TRUE |
| 36924    | 18012.7  | 45651.1  | 39964.1  | 38823.4  | 30706.3  | 36646.3  | 28210.5  | TRUE |
| 204514   | 157046.6 | 201156.6 | 182633.8 | 167082.6 | 208793.1 | 184386.6 | 235921   | TRUE |
| 183494.8 | 174850   | 188821.7 | 184002.6 | 149536.5 | 233200   | 226044.6 | 242992.6 | TRUE |
| 235005.2 | 221806   | 287687.9 | 247115.9 | 200716.1 | 292823.7 | 238197   | 225673   | TRUE |
| 253792.2 | 209381.9 | 208082.5 | 215425.9 | 303239.3 | 274133.2 | 206937.6 | 238995.9 | TRUE |
| 224421.9 | 194303.5 | 198277.4 | 156523.4 | 281185.3 | 246925.8 | 204107.6 | 242539.5 | TRUE |
| 54489.3  | 41031.2  | 64375.3  | 46356.8  | 39594.1  | 66764.8  | 41160.9  | 37247.9  | TRUE |
| 68275.5  | 73232.9  | 97002.6  | 93638.2  | 84004.2  | 110693.8 | 67071.7  | 73265.4  | TRUE |
| 1645718  | 958591.1 | 1429901  | 1268987  | 2341570  | 1518988  | 1102344  | 1485630  | TRUE |

|          |          |          |          |          |          |          |          |      |
|----------|----------|----------|----------|----------|----------|----------|----------|------|
| 92630.7  | 82062.5  | 88973.7  | 73773.3  | 69301.1  | 101303.1 | 94068.2  | 85395.7  | TRUE |
| 110067.6 | 101489.5 | 93109.3  | 129710.8 | 151203.5 | 100358.9 | 95158.7  | 107357.1 | TRUE |
| 181633.8 | 138749   | 136269   | 136913.8 | 207973   | 176223.5 | 140608.4 | 165463.8 | TRUE |
| 75900.9  | 46799.6  | 51713.5  | 71552.5  | 110651.1 | 72569.6  | 45803.4  | 84784.5  | TRUE |
| 208880.8 | 177067.7 | 238969.4 | 197620.4 | 158459.6 | 305539.7 | 207930   | 197677.8 | TRUE |
| 50242.1  | 61691.7  | 59777.4  | 51058.1  | 29946.2  | 55956.3  | 57298.7  | 45474.1  | TRUE |
| 153421.2 | 94150.4  | 162665.3 | 145898.2 | 91183.9  | 236079   | 138064.2 | 131863.7 | TRUE |
| 219426.5 | 195859.5 | 171443.8 | 187070.4 | 300423.1 | 212570.8 | 189503.8 | 220752.7 | TRUE |
| 124658   | 100339   | 154475.6 | 129537.2 | 115076.3 | 148360.5 | 103875.9 | 121718.7 | TRUE |
| 229525.1 | 175708.5 | 139247.8 | 177907.1 | 213217.6 | 259790   | 193178.2 | 248849.9 | TRUE |
| 363017.7 | 311719   | 424495.8 | 389825.3 | 383162   | 425906.2 | 275741.3 | 396417.8 | TRUE |
| 257163.7 | 225094.3 | 182852.9 | 196568.8 | 250399.4 | 290973.2 | 246893.8 | 297271.2 | TRUE |
| 92401.9  | 89534.5  | 52392.1  | 66295.5  | 90144.4  | 117218.4 | 99404.8  | 107971.5 | TRUE |
| 31102.1  | 25323.6  | 34381.5  | 37493.8  | 29727.1  | 19572.6  | 13767.9  | 25136    | TRUE |
| 120631.9 | 73205    | 73018.1  | 108853   | 102565.8 | 124004.7 | 106344.4 | 144097.2 | TRUE |
| 34562.9  | 26831.6  | 35345.7  | 14700.1  | 19770    | 45254.5  | 29290.6  | 22268.9  | TRUE |
| 61383.6  | 42316.4  | 54450.1  | 53002    | 51961.5  | 104917.9 | 82909.2  | 60394.9  | TRUE |
| 10512.2  | 7896.9   | 7776.9   | 8907.1   | 21368.1  | 7105.7   | 16206.8  | 15883.9  | TRUE |
| 101673.6 | 82676.9  | 90123    | 100036.4 | 95629.8  | 105821.9 | 88329.8  | 74900    | TRUE |
| 151240.3 | 144600   | 157201.9 | 162296.1 | 156147.1 | 159278.2 | 162620.5 | 163092.1 | TRUE |
| 116739.7 | 101513.5 | 280353.3 | 84754.6  | 122515.7 | 83922    | 95176.1  | 113457.6 | TRUE |
| 305798.6 | 320473.5 | 266709.2 | 364610.5 | 363716.1 | 255173.6 | 343249.5 | 405065.6 | TRUE |
| 259142.7 | 207437.7 | 230778   | 226082.7 | 236724.2 | 210537.4 | 256660.9 | 237291.1 | TRUE |
| 1251511  | 1086340  | 1106075  | 1093372  | 1205191  | 1158533  | 1148782  | 1106015  | TRUE |
| 187508.8 | 217014.7 | 243802.7 | 217040.3 | 209810.8 | 200743.3 | 217435   | 238546   | TRUE |
| 18804.4  | 23534    | 4508.4   | 14088.1  | 21337.7  | 6654.3   | 23453.6  | 24486.9  | TRUE |
| 427447.5 | 421678.1 | 268613.2 | 311432.4 | 309856.6 | 283282.6 | 326816.2 | 341581.6 | TRUE |
| 325467.4 | 271521.2 | 300745.9 | 334657.2 | 368854.8 | 295874.6 | 311268.6 | 333293.1 | TRUE |
| 628986.8 | 554882.2 | 602175.9 | 725951.2 | 715571.4 | 602551.4 | 595793.6 | 655213.5 | TRUE |
| 191964.1 | 186313   | 184173   | 169472.1 | 144864.8 | 188923.9 | 210827.6 | 144399.7 | TRUE |
| 221230.3 | 150986.9 | 144416.2 | 166769.6 | 165107.1 | 241956   | 226369.9 | 226589   | TRUE |
| 156654.5 | 137837.5 | 152391.9 | 172267.9 | 173147.5 | 163700.9 | 180860.8 | 217732   | TRUE |
| 37203.4  | 22711.8  | 36474.8  | 29938.3  | 35896.2  | 37412.1  | 39850.1  | 51194    | TRUE |
| 69951.7  | 76093.5  | 67932.1  | 89809.8  | 82767.8  | 91873.5  | 86186.4  | 86370.6  | TRUE |
| 63861.8  | 63760.3  | 44409.1  | 43886.7  | 52843.6  | 51870.6  | 52414.7  | 42448.7  | TRUE |
| 29904.8  | 32564.2  | 41484.8  | 36757    | 24803.8  | 25253.7  | 35162.5  | 28870    | TRUE |
| 58297    | 46491.4  | 48528.5  | 51790.8  | 34744    | 68244.4  | 55693    | 61320.5  | TRUE |
| 84422.3  | 61623.1  | 53347.8  | 91644.4  | 87292.9  | 83081.3  | 85120    | 97296.1  | TRUE |
| 548434.3 | 327264.8 | 497772.9 | 487549.1 | 596816.3 | 589834.7 | 410593.5 | 628160.5 | TRUE |
| 166840.5 | 151911.7 | 107932.1 | 173196.7 | 154079.2 | 163013.4 | 132291.3 | 156704.3 | TRUE |
| 87684.9  | 58545.1  | 161401.4 | 67063.5  | 49414.3  | 151114.7 | 58089.3  | 50942.8  | TRUE |
| 245408.8 | 192026.7 | 381539   | 192046.1 | 168437.2 | 392093.1 | 196171.8 | 199750.2 | TRUE |
| 350157   | 215365   | 291772.2 | 325620   | 690786.4 | 279054.3 | 258501.1 | 277156.1 | TRUE |
| 514072.1 | 331454.4 | 979001.6 | 315754.7 | 237510.5 | 1142618  | 363200.6 | 273147.8 | TRUE |

|          |          |          |          |          |          |          |          |      |
|----------|----------|----------|----------|----------|----------|----------|----------|------|
| 108852   | 70309.4  | 90148.8  | 78957.2  | 147986.6 | 50060.3  | 87189.4  | 67503.2  | TRUE |
| 258071.1 | 111330.6 | 164886.5 | 200688.4 | 523414.9 | 210216.9 | 151640.8 | 234252   | TRUE |
| 129226.1 | 129282.4 | 131299   | 114167.7 | 125631.7 | 155718   | 102389.5 | 116642.6 | TRUE |
| 102602.1 | 101204.5 | 90611.7  | 77805.7  | 88002.4  | 101424.7 | 90499.6  | 87978.5  | TRUE |
| 607872.6 | 489872.5 | 661215.7 | 691652.1 | 883067   | 1497275  | 963850.5 | 1033449  | TRUE |
| 42083.3  | 37409.2  | 57113.2  | 53196.3  | 47888.7  | 55715.7  | 41733.1  | 40600.6  | TRUE |
| 1159119  | 1039867  | 1540727  | 1174248  | 889755.5 | 1693206  | 1042038  | 923185.1 | TRUE |
| 310481.9 | 253742.6 | 409739   | 235723.9 | 223934.5 | 415490.1 | 309125   | 300916.9 | TRUE |
| 538543   | 566021.5 | 542103   | 507591.1 | 437550.3 | 684583.4 | 606845.8 | 418389   | TRUE |
| 70840.2  | 90620.3  | 81614.3  | 78751.3  | 79362    | 65943.8  | 71627.4  | 75071.5  | TRUE |
| 290939.2 | 225174.1 | 372326.6 | 268433.9 | 238306.2 | 401195.7 | 283937.8 | 261854.2 | TRUE |
| 341345.2 | 273138.5 | 352363.5 | 336284.6 | 270128.2 | 424503.4 | 323531.2 | 279853.5 | TRUE |
| 198628.3 | 144052.8 | 158230.7 | 169343.2 | 260409.4 | 181381.9 | 168214   | 203093.7 | TRUE |
| 80030.1  | 73703.8  | 64343.3  | 94539.9  | 76413.9  | 68425    | 76926.5  | 72862.7  | TRUE |
| 144715.8 | 139448.4 | 137822.5 | 158870.1 | 144082   | 154267.5 | 169194.1 | 145660.6 | TRUE |
| 916973.4 | 948911.7 | 1006678  | 1045367  | 905337.5 | 1392658  | 1027896  | 1386010  | TRUE |
| 88140.3  | 100952.1 | 102065.8 | 82456.9  | 104754.3 | 98067.6  | 77223.5  | 133905.7 | TRUE |
| 264358.2 | 220718.1 | 195042.6 | 259391.8 | 227744.4 | 241983.1 | 320949.4 | 268044.8 | TRUE |
| 120013.4 | 121780.7 | 106376.6 | 119866.5 | 122177.8 | 118211.8 | 131038.5 | 113045.4 | TRUE |
| 109688.3 | 120926.4 | 120640.3 | 127944   | 132005.4 | 112102.6 | 130580.7 | 127545.5 | TRUE |
| 218674.2 | 215192.6 | 200972   | 237612.8 | 225063.3 | 197609.2 | 256229.9 | 210371.5 | TRUE |
| 34634.1  | 27012.7  | 31494.6  | 26006.5  | 8567.8   | 29675.7  | 36483    | 47049.9  | TRUE |
| 117904.2 | 73760.7  | 66941.6  | 96945.9  | 91186.7  | 103780.8 | 109688.2 | 112536.7 | TRUE |
| 41759.7  | 24496.3  | 39811.9  | 50043.8  | 30956.2  | 47014    | 60092    | 54922.2  | TRUE |
| 272129.6 | 245777.3 | 208422.1 | 323126.8 | 305164.6 | 329528.6 | 345351.7 | 379736.5 | TRUE |
| 106612.1 | 105891.9 | 94861.9  | 88005.1  | 96568.3  | 96231.9  | 81728.2  | 85825.6  | TRUE |
| 259486.5 | 242725.6 | 254203.3 | 266822.1 | 245212.6 | 314164.2 | 309184.4 | 319366   | TRUE |
| 411626.8 | 430148.9 | 335944.9 | 375325   | 353852.8 | 368370.4 | 365682.2 | 404787.9 | TRUE |
| 39074.2  | 17471.5  | 15361.6  | 15697.8  | 23353.4  | 29215    | 19497.8  | 30025.7  | TRUE |
| 443455.6 | 374500.4 | 507649.9 | 442923.9 | 455759.7 | 509470.5 | 383364.6 | 453299   | TRUE |
| 320754.3 | 273584.8 | 300872.1 | 368388.4 | 337202.7 | 313218.5 | 273535.2 | 327360.5 | TRUE |
| 380256.7 | 334056.4 | 308804.3 | 332700.1 | 431396.9 | 390252.8 | 377699.8 | 421196.1 | TRUE |
| 109742.6 | 120178.3 | 97318.8  | 94468.5  | 134146.8 | 80723.1  | 99392.1  | 120417.6 | TRUE |
| 442167.3 | 366555.1 | 437091.1 | 570806.5 | 439714.6 | 469309.3 | 385729.2 | 487083.1 | TRUE |
| 352534.3 | 290802.2 | 365106.2 | 371793.7 | 324699.3 | 372373.1 | 298960.1 | 312796.9 | TRUE |
| 471442.6 | 431579.4 | 339937.6 | 390104.9 | 515512.1 | 494859   | 460131.6 | 542488   | TRUE |
| 507765.3 | 494345.6 | 430178.3 | 337355.9 | 325446.5 | 405027.1 | 381120.6 | 320717.1 | TRUE |
| 311942.5 | 180091.8 | 326438.7 | 302045.2 | 382399.1 | 243767.1 | 208817.5 | 261804.8 | TRUE |
| 1759731  | 1137202  | 1708972  | 1665008  | 2372229  | 1476591  | 1267076  | 1473491  | TRUE |

|          |          |          |          |          |          |          |          |      |
|----------|----------|----------|----------|----------|----------|----------|----------|------|
| 182746.6 | 138390.2 | 217075.8 | 207552.7 | 196865.9 | 154392.4 | 155572   | 145351.4 | TRUE |
| 98431.6  | 73670.6  | 184248.4 | 82526.2  | 61183.9  | 155958.7 | 81634.3  | 58746.8  | TRUE |
| 101352.2 | 98184.9  | 165408.8 | 85939.2  | 85796.7  | 151002.8 | 106127.3 | 73817    | TRUE |
| 71091.9  | 70311    | 107314.8 | 62766.1  | 79545.7  | 103682.6 | 76377.1  | 65812.7  | TRUE |
| 364748.4 | 292914.1 | 303271.4 | 320727   | 581587.9 | 303686.6 | 249430.9 | 315835.5 | TRUE |
| 256020.9 | 219762.4 | 285648.7 | 174203.4 | 158606.8 | 312742.6 | 191184.7 | 145286.1 | TRUE |
| 555445.4 | 520659.7 | 861162.2 | 596546.3 | 428289.8 | 954314.8 | 614022.9 | 511176.5 | TRUE |
| 182876.9 | 160770.6 | 215643.4 | 184501.4 | 173937.4 | 245432.3 | 177129.9 | 173806.4 | TRUE |
| 86154.8  | 89117    | 108585.8 | 77904.9  | 81958    | 130304   | 92685.1  | 77427    | TRUE |
| 137066.8 | 89055.4  | 158521.1 | 130295.2 | 255790.7 | 91437.2  | 106775.9 | 101246.1 | TRUE |
| 235630.1 | 190568.3 | 238251.9 | 242338.8 | 397369.1 | 186804.4 | 179026.5 | 188404.3 | TRUE |
| 80935.7  | 61607.7  | 150120.2 | 86241.1  | 66045    | 154755.9 | 86923    | 42930    | TRUE |
| 1354755  | 1244709  | 2572126  | 1040413  | 771003.3 | 2849812  | 1386820  | 905639.5 | TRUE |
| 56101.5  | 44539    | 56192.1  | 46830.7  | 36404.7  | 37117.8  | 50704.2  | 53395.3  | TRUE |
| 38419.4  | 50690.7  | 28277.8  | 31766    | 51744.7  | 37461.5  | 45698.9  | 43839.3  | TRUE |
| 124574.4 | 99284.9  | 106407   | 132191.7 | 106118.8 | 105993.7 | 124846.5 | 127275.7 | TRUE |
| 25908.7  | 36520.9  | 14890.3  | 9925.6   | 40771.6  | 38037.3  | 40175.9  | 49689.3  | TRUE |
| 51927.2  | 41616.7  | 34321.8  | 53968.7  | 42047.1  | 55082.9  | 59861.5  | 57657.5  | TRUE |
| 86080.2  | 116752.5 | 73160.3  | 83676.1  | 85160.3  | 78597.5  | 113402.2 | 89189.2  | TRUE |
| 446633.7 | 463121.2 | 420658.4 | 486454.7 | 610910.4 | 432607.5 | 425825   | 438056.5 | TRUE |
| 166589   | 143141   | 207988.8 | 163502.2 | 126445.8 | 208866.8 | 157806.6 | 132949.3 | TRUE |
| 408653.5 | 372837.7 | 538069.3 | 344998.9 | 336713.9 | 639025.6 | 360603.6 | 346146.9 | TRUE |
| 139466.2 | 128304.9 | 225860.5 | 130341.7 | 142903.1 | 228447.6 | 154080.3 | 142769.2 | TRUE |
| 24251.8  | 47925.8  | 30659    | 42038.4  | 39410.6  | 19179.6  | 10913.8  | 18080.7  | TRUE |
| 494155.3 | 385336.9 | 442412   | 440520.5 | 599019.7 | 470699.7 | 376660.5 | 467574.1 | TRUE |
| 275993.5 | 205914.7 | 265407.3 | 266688.8 | 383939.6 | 287002.1 | 207612.6 | 273253.2 | TRUE |
| 72954    | 63321.1  | 73954.2  | 89201.9  | 68379.2  | 61099.3  | 75895.4  | 73894.5  | TRUE |
| 154304.8 | 142580   | 137425.2 | 145823   | 165388.8 | 142844.5 | 151503.9 | 174096.6 | TRUE |
| 182082.3 | 165954.5 | 165131.1 | 167257.8 | 186561.7 | 167545.1 | 183229.8 | 190131.4 | TRUE |
| 101624.4 | 111024.5 | 50708.6  | 84831.9  | 88896.6  | 64190.7  | 84592.8  | 76401.1  | TRUE |
| 196815.1 | 177378   | 177234.9 | 226790.1 | 286227   | 178484.2 | 220964.3 | 276514.7 | TRUE |
| 83178.8  | 88156.7  | 84731.2  | 103273.9 | 133854.9 | 89329.7  | 102270.8 | 150354.3 | TRUE |
| 67416.9  | 62797.7  | 82659.1  | 95073.2  | 59683.1  | 63910.7  | 81242.9  | 85094.7  | TRUE |
| 143337.3 | 121273.8 | 117950.7 | 139482.9 | 160427.2 | 151090.5 | 126802.7 | 136882.2 | TRUE |
| 44210.4  | 31993    | 40983.7  | 48319.7  | 48316.1  | 60340.2  | 54829.3  | 52238.8  | TRUE |
| 188224.6 | 190055.9 | 142510.3 | 162994   | 176343.5 | 210625.4 | 266817.5 | 252879.9 | TRUE |
| 167843.1 | 167184.3 | 121173.2 | 127343.1 | 119203.7 | 140664.9 | 178087.7 | 125585   | TRUE |
| 43321.1  | 45668.2  | 46261.8  | 57060.3  | 42030.3  | 54390.1  | 44305.4  | 53422    | TRUE |
| 143629   | 125079.9 | 131069.1 | 132716.4 | 127013.1 | 159370.6 | 150456.4 | 97519.2  | TRUE |

|          |          |          |          |          |          |          |          |      |
|----------|----------|----------|----------|----------|----------|----------|----------|------|
| 80657.3  | 70020.5  | 80440.7  | 93996.7  | 57571.2  | 98420    | 83725.8  | 59766.1  | TRUE |
| 58444.1  | 64021.2  | 46826.2  | 65214.2  | 39506.2  | 67212.2  | 65178.4  | 57490.9  | TRUE |
| 16772.4  | 24237.2  | 23206.4  | 7416.9   | 28406.8  | 16172.2  | 8196.2   | 8835.6   | TRUE |
| 97694.1  | 96477.3  | 102279.8 | 95348.7  | 83404.9  | 96485    | 97147    | 98876.5  | TRUE |
| 72808.1  | 74364.7  | 66507.7  | 84104    | 64128.4  | 82247.8  | 67456.7  | 68399.3  | TRUE |
| 252350.9 | 222331.9 | 235019.2 | 307020.6 | 288041.5 | 314300.5 | 258607   | 312373.9 | TRUE |
| 45951.8  | 56964.3  | 31286.8  | 34958.4  | 9318.1   | 42483.6  | 49725.7  | 34008.3  | TRUE |
| 355628.4 | 341761.2 | 392752.1 | 462580.2 | 393895   | 315264.7 | 354047.1 | 337742.7 | TRUE |
| 202153.3 | 192774.6 | 206224.8 | 245717.1 | 224530.3 | 194977.6 | 191528.7 | 216624.1 | TRUE |
| 218568.8 | 212039.7 | 211060.9 | 237468   | 277860.3 | 202215.5 | 171197   | 213167.2 | TRUE |
| 1197802  | 1123501  | 1353508  | 1259413  | 1128252  | 1206717  | 1235903  | 1236181  | TRUE |
| 1021231  | 1056804  | 1219057  | 1214728  | 1024935  | 958952.3 | 1120690  | 990194.8 | TRUE |
| 53013.2  | 44669.4  | 37452.9  | 35245.1  | 34185.3  | 58526.1  | 90725.4  | 71848.9  | TRUE |
| 353988   | 383876.5 | 219760.8 | 273160.7 | 241162.3 | 370627.6 | 539662.1 | 332424.9 | TRUE |
| 1033789  | 696272.1 | 1302312  | 1506931  | 1030286  | 899826.3 | 968020.1 | 1193736  | TRUE |
| 116151.2 | 65056.4  | 148288.9 | 133850.7 | 96282.7  | 115252.6 | 105569.6 | 115474.2 | TRUE |
| 246935.3 | 230260.9 | 193152.3 | 192834.1 | 182677.2 | 249605.4 | 205944   | 176243.5 | TRUE |
| 82630.4  | 58881.7  | 81796.5  | 79642.7  | 73127.6  | 85579.3  | 74805.1  | 62624    | TRUE |
| 40270    | 32621.9  | 34395    | 36978.8  | 34628.2  | 12815    | 42638.1  | 38426.4  | TRUE |
| 522449.9 | 424343.5 | 466176.8 | 501043.6 | 546774.6 | 548210.2 | 425894.5 | 521839.4 | TRUE |
| 136134.1 | 152874.9 | 110962.7 | 127433.4 | 103323   | 157383.8 | 96546.2  | 120907   | TRUE |
| 62170.5  | 78872    | 119215.4 | 90225.8  | 80883    | 111254   | 73834.5  | 80078.8  | TRUE |
| 211387.5 | 168225.1 | 166657.4 | 239110.2 | 261251.3 | 227039.1 | 199573.3 | 222535.3 | TRUE |
| 40501.9  | 27276.4  | 54016.6  | 59800.6  | 66428.1  | 44798.6  | 50282.4  | 28600.4  | TRUE |
| 41481    | 35112.6  | 52036.9  | 32904.2  | 32647.6  | 39454.9  | 44397.6  | 31061    | TRUE |
| 314746   | 370189.7 | 391859.6 | 303867.4 | 255985.6 | 395796.5 | 332577.6 | 248182.5 | TRUE |
| 101665.6 | 87671.8  | 88518.3  | 84788.7  | 83724.9  | 84197.8  | 93853.9  | 92108.1  | TRUE |
| 88543.8  | 107758.8 | 119612   | 117942.9 | 138934.3 | 65356.1  | 70043.5  | 84677.3  | TRUE |
| 584084.5 | 401060.8 | 604991.4 | 597258.3 | 856696.4 | 425264.3 | 438958.8 | 379438.7 | TRUE |
| 80620    | 89528.8  | 99855.7  | 72033.3  | 71758    | 125051.2 | 117128.3 | 86743.1  | TRUE |
| 36116.2  | 18162.2  | 33190.3  | 30206.6  | 34528.4  | 12228.5  | 11777.8  | 11284.5  | TRUE |
| 256292   | 242015.3 | 194587   | 336020.1 | 279103.8 | 200772.3 | 256537.1 | 262969.2 | TRUE |
| 42360    | 39202.4  | 26747.7  | 40130.3  | 54555.7  | 28622.6  | 34163.6  | 39052.2  | TRUE |
| 42158.3  | 54070.6  | 60415.2  | 45813.1  | 35071    | 56561.2  | 64496.1  | 65743.7  | TRUE |
| 95012.7  | 101019.1 | 83561.1  | 87160.9  | 57150.6  | 124444.8 | 111240.8 | 117009.6 | TRUE |
| 66770.4  | 61929.2  | 58051.6  | 95810.9  | 69527.2  | 79864.1  | 64596.3  | 78447.5  | TRUE |
| 81668.7  | 98255.2  | 93243.8  | 115239.9 | 86004.6  | 90486.5  | 80515.2  | 95163.9  | TRUE |
| 96761.6  | 101829.2 | 117935.2 | 96245.7  | 108807   | 76774    | 75613.7  | 76955.7  | TRUE |
| 111752.5 | 90948.8  | 87901.9  | 135560.5 | 103419.9 | 98485.7  | 104100   | 96050.3  | TRUE |
| 759722.2 | 809256.3 | 529958.9 | 584360.7 | 806813.1 | 544050.4 | 877834   | 834334.3 | TRUE |
| 321182.4 | 373992.2 | 373017.4 | 418910   | 311134.9 | 326642.3 | 361017.6 | 304818.1 | TRUE |
| 81842.3  | 66763.4  | 68317.3  | 97197.6  | 84461.2  | 59479.9  | 80675.2  | 98318.6  | TRUE |
| 97009.5  | 97230.2  | 71507.9  | 91666.3  | 109668.5 | 97406.3  | 103419.1 | 145631.4 | TRUE |

|          |          |          |          |          |          |          |          |      |
|----------|----------|----------|----------|----------|----------|----------|----------|------|
| 231325.1 | 191816.3 | 233099.7 | 254369.5 | 185170   | 211605.4 | 217255.9 | 193541.2 | TRUE |
| 584797   | 620708.3 | 661476.5 | 699143.6 | 531140.1 | 609510   | 596317.3 | 638014   | TRUE |
| 418176.9 | 388227.4 | 432754.4 | 459302.7 | 353953.7 | 382548.5 | 459913.8 | 436482.9 | TRUE |
| 134385   | 101472.4 | 130619.1 | 124443.3 | 121558   | 125145.6 | 132486.1 | 108757.8 | TRUE |
| 47759.8  | 51940.8  | 38471.5  | 49529.3  | 43759.6  | 45868.5  | 45046.2  | 54055.9  | TRUE |
| 237680.3 | 265869.5 | 154494   | 163706.6 | 270876   | 143002.8 | 281293.5 | 289702.8 | TRUE |
| 172894.5 | 215423.6 | 239463.1 | 201981.2 | 171665.3 | 145499.2 | 186931   | 163073   | TRUE |
| 161293.5 | 161883.3 | 125587.1 | 137673.7 | 157562.8 | 153691   | 154652.6 | 153117.4 | TRUE |
| 238899.5 | 198282.4 | 244709.7 | 306352.9 | 225569.4 | 236732.1 | 202810.7 | 254706.3 | TRUE |
| 47422.6  | 61613.5  | 43153.8  | 72382.7  | 36891    | 42281.9  | 68662.6  | 47137.4  | TRUE |
| 129860.3 | 137104.4 | 90379.9  | 123107.5 | 98878.3  | 111089.8 | 112175.8 | 90638.8  | TRUE |
| 44266.8  | 49466.3  | 36605.8  | 41467.7  | 41589.5  | 47081.2  | 53366.3  | 62090.3  | TRUE |
| 225798.5 | 246261   | 254222.1 | 275117.2 | 217136.1 | 264802   | 268414.3 | 259108.3 | TRUE |
| 31888.6  | 51330.7  | 29855.2  | 40553.7  | 26960.7  | 31408.8  | 56780.9  | 35441.8  | TRUE |
| 101389.8 | 134865.9 | 99407.8  | 106840.3 | 115072.5 | 115168.6 | 146409.7 | 97736.3  | TRUE |
| 122030.9 | 122072.5 | 105864   | 141391.9 | 101634.7 | 108863.9 | 149675.5 | 95150.4  | TRUE |
| 300206.9 | 300215   | 356870.4 | 211322.9 | 216102.1 | 403133.9 | 323463   | 234146.6 | TRUE |
| 105022.3 | 144866.1 | 119330.2 | 75051.9  | 85061.8  | 124442.1 | 149881.8 | 74088.3  | TRUE |
| 466258.5 | 360595.7 | 705002.8 | 603006.1 | 569898.3 | 352671.5 | 387948.4 | 362895.3 | TRUE |
| 869381.1 | 702775.7 | 1038254  | 1043106  | 796679.5 | 877672.6 | 703393.9 | 901683.2 | TRUE |
| 47067.1  | 46696.6  | 34307.8  | 43939    | 33515.6  | 21774.8  | 23203    | 31173.7  | TRUE |
| 153201.4 | 173489   | 137285.8 | 137685.1 | 131307.8 | 124246.6 | 180617   | 141086.8 | TRUE |
| 131647.5 | 171797.8 | 120632   | 118093.4 | 107067   | 122346.8 | 159199.8 | 107187.6 | TRUE |
| 663654.1 | 559079.1 | 852685.7 | 851157   | 717501.9 | 569004.5 | 596083.4 | 611937.7 | TRUE |
| 1147278  | 872302.4 | 1518698  | 1461176  | 1160472  | 984999.2 | 964444.4 | 936169.8 | TRUE |
| 87347.7  | 99769    | 72509    | 79064.6  | 111291.7 | 80790    | 115730.6 | 99553.6  | TRUE |
| 440292   | 438046.2 | 443082.3 | 558603.5 | 368506.3 | 456741.8 | 592910.3 | 533257.6 | TRUE |
| 195148.8 | 171043.3 | 120189.7 | 153870.3 | 175948   | 188952.7 | 253135.4 | 253425.8 | TRUE |
| 219684   | 227223.1 | 221295.5 | 239417.2 | 179011   | 224253.3 | 254428.4 | 211631.6 | TRUE |
| 52987.3  | 67328    | 57690.7  | 60238.3  | 52535.7  | 53607.2  | 59996.7  | 69845    | TRUE |
| 72565.6  | 78437.1  | 53740.8  | 58869.1  | 66511.8  | 80205.3  | 110741.7 | 97012.7  | TRUE |
| 230747.7 | 225689.7 | 248815.9 | 250474   | 250307.1 | 239368.4 | 287095.6 | 263401.4 | TRUE |
| 194231.2 | 206272.8 | 150906.3 | 147486.6 | 212767.9 | 188967.7 | 225725.2 | 185633.7 | TRUE |
| 116357.1 | 86102.6  | 169794.9 | 103603.5 | 88613.8  | 174336.8 | 112717.5 | 109008.1 | TRUE |
| 129373.5 | 100215.7 | 246444   | 125044.1 | 112044.1 | 230395.2 | 118404   | 107826   | TRUE |
| 64758.8  | 50893.8  | 47761.2  | 51892    | 89909.2  | 39692.5  | 38947.4  | 57277.6  | TRUE |
| 1067475  | 839434.4 | 1579026  | 1040214  | 928245.3 | 1681659  | 960155.2 | 924908.6 | TRUE |
| 439797.2 | 358178.5 | 667080.2 | 434706.5 | 434316.5 | 678569.9 | 382763.4 | 408372.3 | TRUE |
| 110788.8 | 97168.3  | 107892.5 | 97575.2  | 180093.6 | 156714.8 | 130960.7 | 131981.3 | TRUE |
| 110046.8 | 104187.8 | 159252   | 101880.4 | 90470    | 166046.7 | 115112.4 | 122335.4 | TRUE |
| 27614    | 11559.3  | 56460.8  | 12616.6  | 26205.6  | 52899.5  | 29121.8  | 33169.3  | TRUE |
| 89833.8  | 70500.9  | 119008.5 | 108570.4 | 60695.4  | 109895.4 | 74467.4  | 102457.2 | TRUE |
| 33784.9  | 47144.2  | 23749.6  | 47743.3  | 52155.8  | 13784.9  | 40245.2  | 36628.9  | TRUE |
| 63224.7  | 87378.3  | 43160.3  | 109422.4 | 100965.5 | 29387.4  | 98902.3  | 99797.9  | TRUE |
| 20530.5  | 23490.7  | 12566.6  | 13947.2  | 5890.1   | 32003.2  | 18372.1  | 20945.8  | TRUE |
| 20332.7  | 33694.4  | 26336.3  | 30006.6  | 26275.4  | 26680.4  | 38980.9  | 24717.8  | TRUE |
| 121370   | 102700.9 | 118595.6 | 128812.7 | 107654.4 | 129510.4 | 113629.7 | 114783.2 | TRUE |

|          |          |          |          |          |          |          |          |      |
|----------|----------|----------|----------|----------|----------|----------|----------|------|
| 65879.8  | 65675.4  | 49664.2  | 43934.6  | 71468.7  | 80654.9  | 75336.7  | 68458.1  | TRUE |
| 133548.7 | 119580.8 | 101863.5 | 107328.1 | 86376.9  | 98093.5  | 111671.3 | 89815.7  | TRUE |
| 142073.7 | 144682.9 | 101124.9 | 154040.3 | 121949   | 128015   | 121060.9 | 128003.1 | TRUE |
| 60598    | 62577.8  | 66587.5  | 56435.4  | 64888.3  | 62328.8  | 61833.2  | 66891.1  | TRUE |
| 97353.3  | 94654.1  | 118736.6 | 83159.4  | 80634.8  | 95968.6  | 82138.9  | 89618.8  | TRUE |
| 98959.4  | 111355.7 | 107294   | 125392   | 84585.3  | 124729   | 93536.2  | 102215.6 | TRUE |
| 348368.1 | 324300.3 | 326037.8 | 398873.9 | 371532.7 | 341519.4 | 349575.3 | 387627.3 | TRUE |
| 148496.7 | 111708.5 | 128738.2 | 126012.4 | 127431.4 | 127387.9 | 123877.3 | 142537.1 | TRUE |
| 345677.4 | 240710.1 | 253742.4 | 291623.1 | 273088   | 331066.9 | 318116.7 | 352672.7 | TRUE |
| 940963.9 | 819676.7 | 730822.9 | 1009583  | 1116388  | 1022843  | 922590.9 | 1040713  | TRUE |
| 154430.9 | 164999.4 | 152887.5 | 167412.5 | 142647.4 | 137229.6 | 193597.2 | 132706.1 | TRUE |
| 72675.3  | 47131.7  | 50967.8  | 71069.6  | 69266.1  | 63531.5  | 62722.6  | 67107.3  | TRUE |
| 192869.2 | 143845.4 | 177863.9 | 202660.4 | 194591.5 | 193426   | 172795.3 | 196492.6 | TRUE |
| 172590   | 232005.4 | 130834.4 | 170311   | 159760.2 | 153497.4 | 223797.9 | 174200.6 | TRUE |
| 105417.2 | 130289.6 | 85890.6  | 77437.5  | 75725.4  | 106381.2 | 112442.8 | 79951.5  | TRUE |
| 55738.9  | 70112.6  | 50483.4  | 52801.1  | 61382.9  | 52426.3  | 58666    | 50645.3  | TRUE |
| 233210.3 | 179658.6 | 300426.7 | 337501.3 | 214724.1 | 206450.6 | 181118.8 | 220031.3 | TRUE |
| 9220.8   | 9192.3   | 10964.6  | 32001.9  | 9592.7   | 6742.9   | 10456.8  | 11277.7  | TRUE |
| 105210   | 111522.8 | 122219.3 | 106802.3 | 100489.2 | 98556.7  | 115457.2 | 90530.9  | TRUE |
| 9797.2   | 25996.3  | 8429.5   | 33141.3  | 22604.5  | 23835.6  | 22819.6  | 26305    | TRUE |
| 173702.3 | 163695.1 | 186848.2 | 198475.5 | 141107.6 | 204467.6 | 145139.6 | 163196.4 | TRUE |
| 158708.3 | 128016.9 | 194952.8 | 262444.3 | 184931.2 | 230713.2 | 181815.5 | 182235   | TRUE |
| 205028.1 | 176201.7 | 172105.7 | 212206.3 | 174871.3 | 185672.1 | 187704.8 | 177459.3 | TRUE |
| 86111.1  | 81828.1  | 119442.9 | 134970.6 | 85573.4  | 120798.8 | 89878.8  | 100740.2 | TRUE |
| 400720.2 | 282431.4 | 314442   | 329964.5 | 378059.6 | 447168.6 | 286706   | 440150.5 | TRUE |
| 46547.9  | 49098.6  | 38333.3  | 38415.6  | 61158.3  | 32976.8  | 66938.3  | 59472.8  | TRUE |
| 63854    | 68387.9  | 53737.5  | 69631.1  | 55593    | 61379.5  | 65403.6  | 63003.2  | TRUE |
| 73614.6  | 86479.7  | 47271.7  | 64123.5  | 109579.2 | 55040.1  | 99644.5  | 102948.2 | TRUE |
| 73750.8  | 72377.7  | 105209   | 99424.3  | 66324.2  | 68854.8  | 92161.1  | 80656.4  | TRUE |
| 55261.8  | 41306.5  | 56464.3  | 44413.1  | 40716.9  | 51813.6  | 41209.5  | 52803    | TRUE |
| 95674.3  | 83972    | 78518.3  | 76016.8  | 99308.2  | 110600.6 | 121385.1 | 115384   | TRUE |
| 43116.8  | 26644.5  | 40847.5  | 39893.3  | 33013.6  | 52154.4  | 65400.9  | 57585.7  | TRUE |
| 229769.3 | 200374   | 249071.5 | 280507.6 | 231281.9 | 178690.7 | 207727.9 | 220249.6 | TRUE |
| 18084.1  | 32149.8  | 25294.7  | 22922.6  | 29177.6  | 26317.8  | 33218.7  | 22998    | TRUE |
| 180029.9 | 178850.1 | 175118.3 | 184868.9 | 155342.1 | 204069.4 | 203982.7 | 152734.8 | TRUE |
| 142102.6 | 132199.5 | 154170.1 | 126545.8 | 97075.7  | 148107   | 145670.5 | 104703.5 | TRUE |
| 166883.5 | 116385.8 | 185631.8 | 159008.7 | 207040.5 | 187989   | 133361.7 | 201276.9 | TRUE |
| 138215.4 | 97608.5  | 132102.8 | 130066.2 | 102603.8 | 139281.6 | 128927.6 | 105391.7 | TRUE |
| 161955.2 | 136533.5 | 145969.5 | 164579.9 | 188073.1 | 186690.4 | 135671.5 | 196115.2 | TRUE |
| 75526.6  | 89311    | 76199.4  | 70450.7  | 78377.3  | 74608.7  | 98502.9  | 82089.4  | TRUE |
| 70908.8  | 72800.5  | 72267.2  | 75175.1  | 86838.1  | 86908.1  | 81290.2  | 85483.5  | TRUE |
| 202352.5 | 222305.3 | 230373   | 251369.2 | 183363.5 | 201832   | 212607.7 | 226697.3 | TRUE |
| 42820.1  | 26206.4  | 30470.1  | 32101.4  | 30411.1  | 26416.8  | 33497.3  | 29830.5  | TRUE |
| 26459.1  | 31027.4  | 23360.4  | 32765.4  | 27132.8  | 22898.5  | 22700.6  | 27897.8  | TRUE |
| 31561.2  | 38395.8  | 24286.7  | 43098.6  | 47174.6  | 29836    | 42723.6  | 38202    | TRUE |

|          |          |          |          |          |          |          |          |      |
|----------|----------|----------|----------|----------|----------|----------|----------|------|
| 1150429  | 937830.8 | 1043146  | 1338467  | 980600.5 | 1184461  | 1109811  | 1308119  | TRUE |
| 204851.8 | 177366.9 | 183563.9 | 214421.3 | 185780.9 | 184132.9 | 218957.7 | 220263.3 | TRUE |
| 92562.7  | 96433.5  | 81297    | 94095.8  | 67235.8  | 84389.4  | 105231.9 | 71448.7  | TRUE |
| 365489.1 | 314718.5 | 411533.7 | 417280.3 | 331993   | 431723.9 | 327058.5 | 358352   | TRUE |
| 56840.2  | 59267.3  | 48842.5  | 59824.1  | 45331.2  | 39582.3  | 62863.5  | 56459.3  | TRUE |
| 120827.7 | 160337.2 | 122410   | 145782.1 | 123409.4 | 145571.8 | 163999.2 | 125128   | TRUE |
| 61160    | 53211    | 60741.8  | 65655.3  | 77059.6  | 81580.3  | 77473.6  | 71929.3  | TRUE |
| 165999.4 | 170963.1 | 176445.3 | 206522.2 | 192416.7 | 146087.7 | 171688.4 | 164016.8 | TRUE |
| 338730   | 345250.9 | 321690.9 | 307691   | 305534.1 | 316205.1 | 362863.9 | 296911.3 | TRUE |
| 376901.9 | 268467.8 | 398271   | 405805.4 | 391549.6 | 385566.6 | 277853.8 | 320900   | TRUE |
| 590921.3 | 440097.1 | 690526.7 | 660654.8 | 501361.3 | 508549.4 | 464987.7 | 481375.6 | TRUE |
| 131247.5 | 134621.1 | 91018    | 121946.1 | 123276.3 | 141211.9 | 191325.2 | 155092.5 | TRUE |
| 663814.5 | 552997.9 | 591676.7 | 595738.6 | 809590.3 | 679344.1 | 553488.1 | 685726.7 | TRUE |
| 248607.6 | 290695.8 | 277316.9 | 397622.3 | 321876.7 | 300134.7 | 400054.9 | 310011.1 | TRUE |
| 114239.2 | 110369.8 | 117119.1 | 101182.4 | 97002.3  | 106914.3 | 105964.9 | 76800.6  | TRUE |
| 132470   | 76859.5  | 120373.6 | 127652.8 | 135554   | 129588   | 140640   | 129927.5 | TRUE |
| 11678.1  | 5389.4   | 6686     | 7119.8   | 15558.8  | 12666.9  | 9788.2   | 9519.9   | TRUE |
| 351849.4 | 282648.2 | 378548.5 | 381793.1 | 335200.4 | 366204.3 | 291823.2 | 363902.2 | TRUE |
| 357325   | 308248.5 | 364337.7 | 362103.4 | 342661.3 | 426669.5 | 290686.4 | 342003.1 | TRUE |
| 21775.3  | 18321    | 19752.9  | 16764.8  | 23097.9  | 6216.9   | 22897.6  | 17752.5  | TRUE |
| 35129    | 34112    | 41960.7  | 42638.1  | 44971.3  | 41061.4  | 33980.1  | 49268.4  | TRUE |
| 64572.5  | 56030.1  | 44636.3  | 57943.8  | 36687.8  | 62666.4  | 80632.7  | 72126.1  | TRUE |
| 194361   | 171158.6 | 125463.1 | 192335.1 | 136774.2 | 232731.5 | 233501.2 | 227130.4 | TRUE |
| 1502935  | 1417229  | 1907284  | 1865188  | 1625261  | 1814574  | 1534877  | 1595625  | TRUE |
| 95513.4  | 79334.8  | 48637.5  | 72108.4  | 106427   | 88447.7  | 87976.8  | 116178.5 | TRUE |
| 200364.5 | 155677.4 | 154871.8 | 211805.7 | 196378.6 | 194852.5 | 127613.5 | 180335.8 | TRUE |
| 450114.5 | 282553.2 | 203554.7 | 212353.1 | 322223.1 | 323321   | 261701.3 | 306722.9 | TRUE |
| 247483.6 | 172461.5 | 199370.3 | 313409   | 279574.1 | 224896.8 | 226076.9 | 293376.4 | TRUE |
| 45719.5  | 30034.5  | 63962.5  | 75869.2  | 61582.5  | 64387.4  | 43275.9  | 49370.8  | TRUE |
| 81210.5  | 68208.1  | 77702.3  | 73372.3  | 84081.5  | 76301.1  | 77820.3  | 85096.9  | TRUE |
| 52793.4  | 44842    | 65418.7  | 73703.6  | 61646    | 71386.6  | 42254.8  | 59251.8  | TRUE |
| 64449.7  | 48904.6  | 77052.3  | 101382.8 | 97594.2  | 92623.8  | 53909.9  | 91049.9  | TRUE |
| 79381.7  | 85562.9  | 81018.8  | 100104.8 | 91130.7  | 86005.3  | 112605.6 | 98198.3  | TRUE |
| 104066.9 | 107247.4 | 114885.3 | 131514.4 | 94400.6  | 74209.2  | 100909.3 | 104257   | TRUE |
| 41795.2  | 29905.6  | 60710    | 38872.9  | 40838    | 43283.6  | 31426.4  | 37795.6  | TRUE |
| 57191.4  | 42779    | 42903.9  | 64492.3  | 52511.6  | 64593.2  | 57979.6  | 61708.1  | TRUE |
| 51129.2  | 74830.3  | 58434.7  | 66794.4  | 46548.1  | 59130.3  | 54783.2  | 60634.7  | TRUE |
| 29561.7  | 26287.8  | 40282.1  | 39215.5  | 34563.7  | 30938.7  | 27959.9  | 25198    | TRUE |



|          |          |          |          |          |          |          |          |      |
|----------|----------|----------|----------|----------|----------|----------|----------|------|
| 508512.8 | 507732.9 | 436772   | 634146.9 | 524166.1 | 430266.7 | 557241.5 | 503597.3 | TRUE |
| 187459   | 227237.5 | 174977.6 | 245623.9 | 168115.9 | 179766.2 | 200869.8 | 180228.1 | TRUE |
| 422972.6 | 463031.3 | 375117.2 | 445891   | 331042.2 | 403665.9 | 436353.9 | 338980.1 | TRUE |
| 224426.3 | 187984.1 | 198284.8 | 288123.7 | 225852.7 | 214159.5 | 242022.8 | 227825.5 | TRUE |
| 27464.1  | 5785.5   | 22983.1  | 19410.8  | 21393.6  | 16220    | 25809.5  | 25423.8  | TRUE |
| 27084.2  | 21941.1  | 18541.2  | 11832.4  | 29011    | 8738.3   | 9893.2   | 32813.2  | TRUE |
| 37345.2  | 38161.8  | 34177.3  | 33115.3  | 37262.4  | 26017.9  | 39157    | 31781.3  | TRUE |
| 80603.9  | 79670.6  | 91411.8  | 86713.7  | 79116.4  | 77199.4  | 88182.1  | 83328.4  | TRUE |
| 54832.1  | 52784.7  | 67864.9  | 35374.7  | 34193.1  | 83773.6  | 48568.6  | 41341.3  | TRUE |
| 59089.6  | 39713.7  | 48482.5  | 53547.5  | 56292.1  | 45652.8  | 46145.5  | 45295.9  | TRUE |
| 26337.6  | 15089.4  | 11319.3  | 22237.1  | 22761    | 18176.2  | 20292.8  | 19742.6  | TRUE |
| 36519.9  | 36128.1  | 42075    | 42680.6  | 35372.8  | 51561.2  | 51709.3  | 54123.6  | TRUE |
| 24823.1  | 29251.8  | 30812.5  | 25177.5  | 19833.8  | 40482.2  | 22014.9  | 27977.9  | TRUE |
| 72188.2  | 44850.3  | 48057.3  | 72143.8  | 89725.3  | 53684.1  | 53869.6  | 56046.9  | TRUE |
| 284213.9 | 208251   | 187944.7 | 239333.4 | 239433.1 | 226692.1 | 236098.8 | 239164.8 | TRUE |
| 547264.5 | 516132.5 | 542130.9 | 549688.3 | 464863.5 | 549226.1 | 570439.6 | 453937.1 | TRUE |
| 999911.7 | 782923.3 | 1126604  | 1111510  | 1099333  | 1025808  | 850373.7 | 1023030  | TRUE |
| 16750.8  | 10258    | 6378.4   | 8276.5   | 8054.4   | 8511.2   | 9552.8   | 8220     | TRUE |
| 103270.2 | 122692.4 | 133310.2 | 129501.7 | 117706   | 142533.4 | 125112.4 | 101182.1 | TRUE |
| 60407.1  | 63798.8  | 55522.9  | 67408.4  | 60371.7  | 50757.1  | 63667.3  | 62711.1  | TRUE |
| 157896.9 | 135891.4 | 171352.6 | 170005.5 | 123545.8 | 157086.7 | 158172.1 | 122690.7 | TRUE |
| 152959.7 | 114816.2 | 157096   | 180135.1 | 168951.2 | 186816.1 | 135646.4 | 182572.4 | TRUE |
| 18865.2  | 14186.3  | 12462.9  | 14265.2  | 14416.3  | 26485.3  | 9499.3   | 26236.4  | TRUE |
| 99541.3  | 117529.7 | 143027.9 | 99466.7  | 125299.5 | 127124.8 | 115416.2 | 114947.4 | TRUE |
| 568379.9 | 562928.5 | 439345.1 | 429093.9 | 455028.6 | 468039.9 | 507222   | 458015.5 | TRUE |
| 256245.5 | 264417.7 | 176244.7 | 176838.3 | 187915.8 | 188429.4 | 213011.2 | 186830.3 | TRUE |
| 86012    | 79180.9  | 95383.2  | 101726.4 | 85581.7  | 98006.7  | 99285.3  | 98488.3  | TRUE |
| 329806.6 | 302455.4 | 321345   | 349598.4 | 322534.7 | 297981.8 | 307962.9 | 325753.9 | TRUE |
| 458618.2 | 460808   | 423318.9 | 436628.7 | 411895.1 | 404257.5 | 412571.4 | 396131.8 | TRUE |
| 205954.8 | 203282.5 | 168021.2 | 220707.7 | 254098.9 | 336645.2 | 277755.2 | 293114.6 | TRUE |
| 78636.2  | 52911.5  | 48825    | 51692.8  | 44615.2  | 59837.6  | 46146.3  | 41924.4  | TRUE |
| 118889.5 | 98325.2  | 146753.6 | 113004.7 | 128204.6 | 129681.3 | 116390.9 | 128195.9 | TRUE |
| 536528.3 | 550508.7 | 469222.1 | 465193.6 | 384005.9 | 508204.2 | 536859   | 406297.4 | TRUE |
| 319967.8 | 279602.9 | 332246.7 | 271553.2 | 162572.1 | 390361.2 | 269956.4 | 178796.8 | TRUE |
| 17875.5  | 16231.1  | 20454.9  | 19479.4  | 20188    | 6928.1   | 14228    | 19237.3  | TRUE |
| 7113.9   | 9741     | 10264.5  | 5205.7   | 7197.8   | 14920.2  | 6423     | 19257    | TRUE |
| 58658.6  | 64677.3  | 46105.1  | 47424.6  | 30459.3  | 44279    | 54517.8  | 34614.9  | TRUE |
| 175752.7 | 155232.6 | 181066.3 | 156113.9 | 135704.9 | 198826.7 | 162563.3 | 136030.9 | TRUE |
| 199431.3 | 148377.2 | 230136.1 | 261831.7 | 253260   | 196843.5 | 162319   | 190708.6 | TRUE |
| 524521.3 | 518553.6 | 535174.7 | 425550.4 | 376929.2 | 539565.4 | 508490.7 | 383003.9 | TRUE |
| 36154    | 46220.6  | 70145.9  | 57691.4  | 41178.7  | 69636.7  | 54653.2  | 44497.4  | TRUE |
| 59061.4  | 58998.4  | 45814.2  | 50316.7  | 71688.8  | 42268.3  | 49353.8  | 49427.9  | TRUE |
| 252645.7 | 154695.8 | 177519.1 | 211820.2 | 296906.1 | 209341   | 195606.5 | 225595.5 | TRUE |

|          |          |          |          |          |          |          |          |      |
|----------|----------|----------|----------|----------|----------|----------|----------|------|
| 49316.5  | 47753    | 55905.8  | 27023.4  | 33411.3  | 49094.3  | 42937.4  | 41167.4  | TRUE |
| 57215.6  | 63937.1  | 94588.8  | 38745.9  | 65377.6  | 97385.3  | 69621.8  | 62056.1  | TRUE |
| 144265.9 | 142850.8 | 118893.7 | 129289.4 | 140047.7 | 153863.7 | 135667.4 | 122428.4 | TRUE |
| 77219.5  | 73083.6  | 69507.2  | 61895.6  | 76210    | 51739.2  | 87566.6  | 73046.1  | TRUE |
| 141829.4 | 131485.1 | 113589.1 | 174422.8 | 125410.3 | 109057.4 | 142760.6 | 131855.7 | TRUE |
| 51458.3  | 59568.3  | 57272.3  | 40058    | 46774.1  | 50564.1  | 62637.4  | 49436.1  | TRUE |
| 50649.6  | 44966.3  | 32805.9  | 30425.2  | 49751    | 41544.9  | 39475.7  | 40947.4  | TRUE |
| 70254.3  | 61371.2  | 55867.9  | 78533.8  | 79886.6  | 73384.8  | 93427.3  | 98064.8  | TRUE |
| 74677.8  | 103951.1 | 58478.6  | 61871.6  | 61510.8  | 65141.5  | 84395.8  | 60988.7  | TRUE |
| 155226.5 | 154514.1 | 130971.5 | 165923.7 | 223445.8 | 131676.5 | 136736.8 | 198610.8 | TRUE |
| 47418.3  | 48877.7  | 34565.5  | 50675.6  | 47848.9  | 50879.7  | 56458.7  | 46972.7  | TRUE |
| 36506.8  | 69274.2  | 34776.3  | 46263.9  | 59340.9  | 47322.7  | 32195    | 56168    | TRUE |
| 110577.8 | 89619.8  | 59346.4  | 145153.5 | 92252.7  | 81446.8  | 126674.7 | 107907.7 | TRUE |
| 178681.6 | 187730.4 | 129613.9 | 168157.3 | 121386.1 | 299385.3 | 214896.7 | 237918.2 | TRUE |
| 118818.1 | 95728.1  | 83965.4  | 101980.7 | 124506.8 | 114846.4 | 137881.2 | 197268.3 | TRUE |
| 116886.5 | 103266.7 | 88752.6  | 108783.1 | 113411.9 | 106440.4 | 143648.6 | 133317   | TRUE |
| 219743.4 | 184369.9 | 100463   | 187986.1 | 178772.2 | 173807.7 | 221098.1 | 253650.7 | TRUE |
| 149006.7 | 121185.5 | 257694.6 | 111913.3 | 95253.9  | 278644.6 | 160547.4 | 103174   | TRUE |
| 121107.8 | 74382.3  | 101445.7 | 109810.6 | 195370.9 | 105718.6 | 78037    | 122590.5 | TRUE |
| 75811.8  | 52298.2  | 85380.2  | 80805.9  | 157919.1 | 76775.9  | 74227.7  | 106461.2 | TRUE |
| 50513.4  | 35748.2  | 49250.8  | 46380.4  | 40260.8  | 52322    | 46123.1  | 44379.6  | TRUE |
| 181053.3 | 181149.6 | 262060.8 | 138945.2 | 125336.6 | 252804.9 | 159289.4 | 132459.3 | TRUE |
| 224688   | 129522.1 | 219124.4 | 189068   | 464679.7 | 177952.2 | 128476.2 | 158098.2 | TRUE |
| 22844.8  | 40294.1  | 26382.1  | 17881.7  | 27911    | 31885    | 43144.7  | 15533.5  | TRUE |
| 130761.8 | 159296.7 | 115787.7 | 126567.5 | 145268.5 | 127895.9 | 141596.7 | 139742.9 | TRUE |
| 60286.1  | 70008.1  | 70605.1  | 59339.7  | 67782.7  | 52399.8  | 53442.7  | 58885.4  | TRUE |
| 304412.1 | 297082.4 | 322873.9 | 318117.3 | 275113.7 | 313893.8 | 338307.4 | 290317.1 | TRUE |
| 22431.6  | 25082.5  | 18560.9  | 29709.3  | 28796.2  | 23674.6  | 33023.5  | 26605.4  | TRUE |
| 18465.1  | 11441.8  | 11619.1  | 25992.8  | 10394.3  | 17150.1  | 24685.8  | 13059.9  | TRUE |
| 52657.7  | 59658.1  | 71577.8  | 43138.8  | 37929.3  | 50063.4  | 52604.5  | 38638.8  | TRUE |
| 68942.3  | 111467.5 | 118122.4 | 62935.4  | 64550.9  | 127584.3 | 99822    | 60725.6  | TRUE |
| 164073.5 | 168459.9 | 248369.5 | 152233.8 | 138778.6 | 229525.3 | 198352.1 | 143070.2 | TRUE |
| 163031.9 | 133466.6 | 182660.6 | 198657.5 | 186308.9 | 172246.4 | 144488.3 | 159445.2 | TRUE |
| 27353.9  | 26194.5  | 28362.1  | 8651.6   | 9360.4   | 46142.8  | 32026.6  | 10645.5  | TRUE |
| 47778.8  | 30989.5  | 43393.8  | 78124.3  | 67663.2  | 40316.7  | 24836.7  | 34070.6  | TRUE |
| 137297.7 | 124767.3 | 145393.7 | 129917.1 | 94880.9  | 188791.9 | 145204.8 | 123252.5 | TRUE |
| 22615.6  | 25701.6  | 22012.4  | 11093.8  | 23748.1  | 37423.5  | 28108.3  | 23251.3  | TRUE |
| 62747.3  | 77794.1  | 83342.1  | 93712.7  | 120259.7 | 88221.6  | 54795.2  | 53407.1  | TRUE |
| 87306.3  | 74268.3  | 89256    | 92977.1  | 62684    | 152737.8 | 107516.4 | 110890.5 | TRUE |
| 168596.2 | 151732.2 | 168824.1 | 224412.5 | 223006.1 | 189562.6 | 157976.1 | 210317.5 | TRUE |
| 196379.6 | 176216   | 157274.3 | 193029.7 | 254977.9 | 170974.8 | 145648.6 | 172845.1 | TRUE |
| 377644   | 302305.5 | 347571   | 361328.1 | 550266.4 | 339824   | 275895.6 | 311034.1 | TRUE |
| 154168.9 | 133555.9 | 148641.4 | 147989.6 | 161564.4 | 146252   | 154916.2 | 184509   | TRUE |

|          |          |          |          |          |          |          |          |      |
|----------|----------|----------|----------|----------|----------|----------|----------|------|
| 228605.7 | 202918.1 | 223805.9 | 276536   | 276331.8 | 195812.1 | 165167.5 | 188339.5 | TRUE |
| 114573.1 | 121217.2 | 101879.2 | 114146.3 | 115031.2 | 116693.5 | 123166.7 | 123786   | TRUE |
| 86437.7  | 81668.9  | 60283.9  | 78947.1  | 94077.5  | 95752.7  | 89172.8  | 82321.4  | TRUE |
| 64291.1  | 49830.4  | 47280.8  | 44870.5  | 55558.1  | 47115.8  | 56355.5  | 71811.1  | TRUE |
| 276472.9 | 278505   | 189115.8 | 208299.9 | 240699.3 | 316427.2 | 404887.9 | 381493.9 | TRUE |
| 61038.4  | 69746.9  | 48146.9  | 63578.6  | 50065    | 80431.3  | 59595.1  | 92747.4  | TRUE |
| 89751    | 57824.6  | 150280.9 | 51369.9  | 51641.2  | 241650.3 | 68244.7  | 62030.2  | TRUE |
| 246128.3 | 132357.1 | 156179.9 | 154900.2 | 579984.6 | 148407.6 | 137037.2 | 164674.7 | TRUE |
| 96294.8  | 68905.2  | 128850.3 | 78738.1  | 69138.3  | 206383.7 | 88437.2  | 91319.5  | TRUE |
| 186278.7 | 131353.8 | 128794.2 | 156789.1 | 324791.3 | 168481.2 | 165705.9 | 192014.2 | TRUE |
| 168718.2 | 170521.6 | 260784.9 | 84694.7  | 108765.3 | 260103   | 140650   | 106485.8 | TRUE |
| 308723   | 252310.4 | 263284.1 | 272185.4 | 564246.7 | 250405.7 | 250492.7 | 270441   | TRUE |
| 214286.8 | 81988    | 167978.7 | 142898.9 | 536886.1 | 126810   | 92823.3  | 115959.1 | TRUE |
| 397155.3 | 276492.7 | 436261.6 | 364630   | 354395.4 | 376713.3 | 254071.5 | 314686.6 | TRUE |
| 711495   | 529532.7 | 785345.8 | 772406.3 | 719159.7 | 771858   | 520622.6 | 748009.2 | TRUE |
| 38434    | 35607.8  | 41153.9  | 41485.6  | 34557.7  | 43157.3  | 33035.3  | 36449.7  | TRUE |
| 19313.4  | 5355.9   | 9548.1   | 22291.3  | 13306.1  | 9622.7   | 8284.1   | 18535.9  | TRUE |
| 1245360  | 978716.8 | 1265235  | 1308039  | 1244413  | 1354388  | 1049968  | 1344845  | TRUE |
| 53748.4  | 58047.7  | 40605.5  | 41382.1  | 31557    | 34410    | 46572.8  | 32358.8  | TRUE |
| 3141923  | 2141394  | 3200294  | 3057634  | 3014896  | 3130310  | 2391055  | 3122090  | TRUE |
| 112191.3 | 138221.7 | 92981.6  | 91093.4  | 85228.3  | 101502   | 161984.2 | 70321.7  | TRUE |
| 290465.8 | 313564.2 | 340200.4 | 351076.5 | 295838.4 | 363194.8 | 350939.9 | 321033.3 | TRUE |
| 137963.1 | 180684.7 | 158644.5 | 157284.9 | 117425.4 | 193045.8 | 165250   | 118634.5 | TRUE |
| 399767.2 | 323992.3 | 431377.1 | 448687.1 | 416774.9 | 361474.7 | 302937.7 | 358959.9 | TRUE |
| 202635.1 | 230857.5 | 222330.2 | 155282.4 | 138850.5 | 244650.4 | 242827.6 | 152339.2 | TRUE |
| 293993.5 | 380784.2 | 272152.8 | 281825.2 | 294666.1 | 310177.6 | 300242   | 264398   | TRUE |
| 183137.9 | 152904.1 | 233940.7 | 206339   | 191111.8 | 159865.8 | 174117.3 | 159147   | TRUE |
| 115860.7 | 145543.3 | 94366.3  | 67960.4  | 91555    | 83517.5  | 114984.7 | 93968    | TRUE |
| 185761.8 | 229912.1 | 107573.5 | 169070.6 | 127122   | 124759.4 | 214835.4 | 144610.9 | TRUE |
| 108440.8 | 124753.7 | 94173.9  | 107958   | 98315    | 89369.2  | 135993.7 | 105244.4 | TRUE |
| 189904   | 177065.3 | 200896.2 | 223702.2 | 141496.9 | 190117.6 | 177181.4 | 203028.7 | TRUE |
| 31944.3  | 32227    | 21335.1  | 39382.6  | 37030.3  | 37868.7  | 45042.7  | 28264    | TRUE |
| 170544.6 | 107487.4 | 165314.9 | 178711.6 | 124158.4 | 125779.9 | 159485   | 154951   | TRUE |
| 55238.1  | 55860.3  | 42754.9  | 46892.4  | 31637.1  | 44121.5  | 59077.5  | 37651.5  | TRUE |
| 75728.3  | 23695.9  | 62651.9  | 81284.4  | 55562.8  | 80876.8  | 36931.2  | 63580.6  | TRUE |
| 114382.3 | 68251.8  | 111620.2 | 119800   | 112379.1 | 79661.3  | 103613.6 | 81083.3  | TRUE |
| 17612.6  | 28339.7  | 18817.3  | 12032.5  | 9986.5   | 16094.3  | 26739.3  | 24731    | TRUE |
| 40404.9  | 36468.3  | 45370.8  | 46788.6  | 25616    | 59183.7  | 45836.7  | 51249.7  | TRUE |
| 194831   | 138960.5 | 144438.3 | 137518.6 | 145130.5 | 183576.9 | 185633.8 | 221894.1 | TRUE |

|          |          |          |          |          |          |          |          |      |
|----------|----------|----------|----------|----------|----------|----------|----------|------|
| 1200233  | 1181049  | 1095732  | 1206240  | 1029474  | 1135709  | 1322671  | 1080922  | TRUE |
| 327496.8 | 265545.8 | 312313.3 | 359323.7 | 288567.1 | 339664.6 | 311627   | 309358   | TRUE |
| 868724.1 | 692635.9 | 849166.9 | 1010984  | 890137.2 | 868014.8 | 722560.6 | 868644.1 | TRUE |
| 167791.2 | 169199.8 | 156261.7 | 175061.1 | 156253.8 | 181528.9 | 203423.2 | 147975.9 | TRUE |
| 69155.5  | 50147.3  | 86171.4  | 71493.3  | 63979.2  | 57453.8  | 59531    | 54287.9  | TRUE |
| 206496   | 195319.4 | 138554   | 172490.9 | 156046.2 | 221346.1 | 223814.7 | 176468.5 | TRUE |
| 171604.5 | 111571.4 | 171569   | 174059.5 | 161605.1 | 176128.7 | 144255.8 | 195227   | TRUE |
| 117811.9 | 114056.1 | 105634.6 | 112040.9 | 87102.1  | 93671.7  | 111697.4 | 76525.3  | TRUE |
| 50694.1  | 50754.8  | 55465.5  | 61351.1  | 50763.3  | 74123.8  | 61715.6  | 44982.1  | TRUE |
| 130341.1 | 91537.7  | 132936.8 | 122679.1 | 160488.7 | 132551.9 | 99862.4  | 150386.2 | TRUE |
| 72263.5  | 64034    | 58610.3  | 54006.3  | 67180.6  | 93494.7  | 80030.3  | 88130.4  | TRUE |
| 36590.5  | 26256.3  | 29663.8  | 31584.7  | 38506.8  | 35020.5  | 42819.9  | 36052.9  | TRUE |
| 1188093  | 682245.5 | 1194952  | 1108785  | 912999.8 | 1185717  | 761584.3 | 936398.1 | TRUE |
| 185139.6 | 157873.4 | 269265.6 | 237395   | 204814.5 | 259741.7 | 184521.4 | 190871.1 | TRUE |
| 95643    | 134341.4 | 159246.3 | 140566.4 | 77027.3  | 126463   | 181325.7 | 137243.6 | TRUE |
| 206414.5 | 162291.2 | 151833.9 | 160902.2 | 161675.5 | 157100   | 167775.1 | 174513.7 | TRUE |
| 147893.6 | 156641.7 | 129556.2 | 147797.4 | 129959.8 | 106688.7 | 136643.8 | 123015.4 | TRUE |
| 327848.6 | 221969.3 | 290985.5 | 303113.9 | 423715.7 | 266654.9 | 220986.6 | 310730.5 | TRUE |
| 123969.9 | 90804.6  | 133972.5 | 143034.4 | 126828.4 | 178476.8 | 139618.1 | 139681.3 | TRUE |
| 225373.2 | 168698.9 | 165377.4 | 213764.8 | 303085.4 | 208275   | 182388.4 | 220355.5 | TRUE |
| 117589.6 | 87875.3  | 110408.6 | 138693.2 | 116386.9 | 117411.5 | 125729   | 135941.6 | TRUE |
| 58633    | 56624    | 61333.7  | 57876.2  | 36888.8  | 125980   | 84291    | 61164    | TRUE |
| 74755.8  | 72631.3  | 76233    | 65149.9  | 94409.1  | 77004    | 76661.1  | 101611.4 | TRUE |
| 224289.8 | 245635.2 | 330434.5 | 238644.1 | 213133.5 | 349196.1 | 256063.8 | 203873.4 | TRUE |
| 403836.2 | 428435.2 | 576606.5 | 358413   | 282129.7 | 639062.5 | 495254.6 | 337097.3 | TRUE |
| 327432.4 | 319862.1 | 342742.2 | 361585.5 | 484753.7 | 304792.3 | 291506.1 | 300964   | TRUE |
| 105744.7 | 105280.5 | 234387   | 110776.9 | 111526.6 | 252632.1 | 167180.8 | 128950.6 | TRUE |
| 169062.3 | 166166.8 | 260954.7 | 109842.3 | 139838.5 | 248031.4 | 144855.2 | 126431   | TRUE |
| 53544.6  | 45057.4  | 45305.4  | 45237.1  | 37198.1  | 49263.8  | 44395.3  | 32189.6  | TRUE |
| 86216.6  | 67297.3  | 78536.5  | 107140.9 | 60309.9  | 81888.8  | 69515.9  | 65880.8  | TRUE |
| 78429.8  | 57949.2  | 83168.5  | 62059.1  | 55028.9  | 69626.9  | 69552    | 52424.8  | TRUE |
| 147840.7 | 152576.6 | 130550.5 | 166194.2 | 151979.4 | 164611.4 | 128871.7 | 130585.2 | TRUE |
| 78744.6  | 69218.6  | 64205.4  | 71309.8  | 76164.3  | 92869    | 87299.9  | 71685.4  | TRUE |
| 229614.3 | 192357.4 | 130233.2 | 166685.6 | 217232.2 | 222392.4 | 257543.7 | 250471.9 | TRUE |
| 106113   | 88646.3  | 106311.2 | 112022.7 | 99556.2  | 119082.6 | 86618.2  | 88383.5  | TRUE |
| 130202.7 | 142372.7 | 163247.2 | 113463.2 | 121666.1 | 155182.7 | 131850.5 | 122430.4 | TRUE |
| 105826   | 78685.2  | 165457.6 | 81098.9  | 86635.7  | 183081.6 | 80797.4  | 95543.6  | TRUE |
| 37316.5  | 34330.1  | 60021.7  | 12582.5  | 37686.9  | 76791.1  | 30035.9  | 30742    | TRUE |

|          |          |          |          |          |          |          |          |      |
|----------|----------|----------|----------|----------|----------|----------|----------|------|
| 63206.8  | 75126.5  | 49383    | 41410.8  | 63013.2  | 62687.1  | 54276.1  | 72177.9  | TRUE |
| 299552.5 | 295396.9 | 480173.8 | 278677.9 | 282930.9 | 488278.3 | 291283.2 | 288997.7 | TRUE |
| 118721.2 | 92440.7  | 84977.4  | 101125.8 | 154461.4 | 111825.6 | 116072.8 | 97539    | TRUE |
| 40564.7  | 50800.1  | 7080.2   | 21965.9  | 36800.2  | 27621.4  | 72180.5  | 38798.7  | TRUE |
| 54542.1  | 82601.6  | 38007.5  | 45667.7  | 58853.7  | 28471.4  | 99200.6  | 57613.4  | TRUE |
| 60576.4  | 87217.5  | 50778    | 55779.6  | 43213.7  | 51821.3  | 111820   | 62234.2  | TRUE |
| 157820.6 | 153711.4 | 209261.2 | 276837.4 | 139392.9 | 175441.6 | 152587.8 | 175779.4 | TRUE |
| 61138.1  | 96830.6  | 41047.3  | 54401.8  | 85985.4  | 47278.5  | 97250.2  | 64708.8  | TRUE |
| 253177.9 | 291960.7 | 220842.2 | 223001   | 187538.5 | 223940.8 | 267249.9 | 185404.6 | TRUE |
| 102308.4 | 143109.4 | 111746.3 | 119746.2 | 92802.5  | 102374.9 | 102416.3 | 69026.5  | TRUE |
| 40598.6  | 51095    | 43256.5  | 56202.4  | 41063.7  | 45583.6  | 62341.6  | 43793.5  | TRUE |
| 193875.3 | 179898.3 | 173560   | 210821   | 225340.6 | 206155.7 | 184458.2 | 256984   | TRUE |
| 152299.9 | 142635.2 | 149561.8 | 125085.4 | 141068.4 | 143244.7 | 148738.2 | 122432.2 | TRUE |
| 136877.5 | 100464.4 | 101252.2 | 101447.4 | 118674.9 | 141354.3 | 126840.4 | 123276.9 | TRUE |
| 74407.4  | 55384.7  | 64829.4  | 46618.7  | 64237.1  | 57131    | 66248.2  | 64870.6  | TRUE |
| 235610.6 | 271289.1 | 214915.5 | 257213.1 | 237569.9 | 230711.3 | 246866.2 | 243987.5 | TRUE |
| 83215.7  | 69066.7  | 67753.7  | 63911.4  | 69356.6  | 64447.9  | 66980.2  | 68356.1  | TRUE |
| 114340.2 | 85660.4  | 187021.8 | 76862.6  | 78024.8  | 159559.7 | 98560.2  | 77625.5  | TRUE |
| 88936.2  | 121490.3 | 113245.3 | 87350.1  | 82028    | 135471.3 | 88398.3  | 83508.7  | TRUE |
| 59586.5  | 56168.6  | 71769.5  | 49382.2  | 52842.5  | 71228.8  | 63461.2  | 62834.5  | TRUE |
| 31557.8  | 28570.5  | 24269.1  | 25760    | 27897.6  | 35193.4  | 24816.6  | 30588.6  | TRUE |
| 37458.2  | 41197.5  | 29733.3  | 26725.8  | 44380.7  | 43143    | 39775    | 35117.4  | TRUE |
| 68049.3  | 55124.2  | 89435.3  | 67129.6  | 45584.3  | 110308.1 | 52371.9  | 55888.9  | TRUE |
| 269994.9 | 242242.6 | 261072.2 | 298333.6 | 252662.8 | 233931   | 280451   | 273060.5 | TRUE |
| 134931.4 | 123041.7 | 89774.8  | 134864.9 | 104568.9 | 167969   | 167304.8 | 138292.6 | TRUE |
| 9876.8   | 9792.9   | 15842.1  | 16992    | 9858.7   | 33880.7  | 13201.7  | 13302.2  | TRUE |
| 212439.7 | 146124.5 | 186204.5 | 216212.7 | 215605.5 | 206863.6 | 194319.1 | 228982.9 | TRUE |
| 54160.8  | 39006.4  | 52592.2  | 35283    | 39668.5  | 44050.8  | 52358.1  | 61425.3  | TRUE |
| 58154.3  | 47109    | 45856.7  | 64277.3  | 72147.3  | 51174.5  | 45992.7  | 44344    | TRUE |
| 54175    | 40333.8  | 76390.9  | 47649.7  | 37410.2  | 75346.2  | 59473.3  | 38721.7  | TRUE |
| 10024.5  | 17482.9  | 23745.8  | 14937.2  | 12966.2  | 23786.5  | 22357.8  | 25903.2  | TRUE |
| 88931.2  | 90399.9  | 82587.9  | 85729    | 115854.4 | 82048.4  | 69418.6  | 49948    | TRUE |
| 24419    | 26962.9  | 18491.1  | 24618.1  | 19907.7  | 24661.7  | 24129.6  | 24211.3  | TRUE |
| 142269   | 133382.5 | 242373.8 | 127430.3 | 113203.1 | 271622.5 | 166840.6 | 137255.6 | TRUE |
| 293466.7 | 218622.5 | 324249.2 | 282911.4 | 484966.7 | 212885.8 | 249349   | 274882.7 | TRUE |
| 238253.9 | 228117.8 | 200070.3 | 221834.2 | 192590.4 | 198113.1 | 270246.1 | 196277.7 | TRUE |
| 345700.6 | 228384   | 347142.7 | 465974.9 | 316871.8 | 317031.5 | 291135.7 | 364848.2 | TRUE |
| 149208.9 | 108264.8 | 131422.9 | 182097.7 | 135288.7 | 196475.1 | 179880.8 | 160279.3 | TRUE |
| 327325.5 | 245151.9 | 334854.7 | 389108.8 | 346817.6 | 333199.2 | 283975.5 | 289607.1 | TRUE |

|          |          |          |          |          |          |          |          |      |
|----------|----------|----------|----------|----------|----------|----------|----------|------|
| 147927.5 | 193018   | 117011.5 | 137338.6 | 169671   | 134258.7 | 194261.7 | 175070   | TRUE |
| 191300.8 | 181132   | 255786.3 | 252837.5 | 159544   | 199686.1 | 189258.4 | 196709.7 | TRUE |
| 538302.7 | 486537.2 | 599147   | 550905.9 | 421604.6 | 440592.3 | 501263.1 | 458981.5 | TRUE |
| 64705.9  | 63526.6  | 109717.3 | 82171.7  | 58797.2  | 70523    | 81895.1  | 70825.1  | TRUE |
| 23964.7  | 25821.7  | 18079.6  | 29207.6  | 48192.7  | 33377.2  | 27281.1  | 31347.6  | TRUE |
| 105303   | 128071.7 | 87874.4  | 123280.4 | 89439.6  | 104525.1 | 118815.6 | 95893.2  | TRUE |
| 168171.2 | 179879.3 | 114573.7 | 130896.9 | 154266.5 | 189692.4 | 255864.7 | 248031.2 | TRUE |
| 411770.2 | 324993.4 | 365859.4 | 463387.3 | 325779.6 | 385746.1 | 490680.2 | 383086.9 | TRUE |
| 235037   | 202735   | 108063.7 | 146128.9 | 223273.4 | 243512.4 | 256914.2 | 270245.7 | TRUE |
| 20806.2  | 42717.5  | 7942.3   | 29656    | 52609.6  | 15812.3  | 40309    | 31954.6  | TRUE |
| 29602.2  | 51685.2  | 73642.9  | 64430.8  | 20465.4  | 20151.3  | 48055.7  | 26955.2  | TRUE |
| 312671.3 | 347598   | 298619.6 | 281403.2 | 281976   | 265291.6 | 301748.5 | 275370.6 | TRUE |
| 291020.5 | 191511.7 | 290669.9 | 304000.3 | 249387.7 | 237286   | 205707.3 | 216885.8 | TRUE |
| 42310.6  | 47330.8  | 28775.9  | 38249.2  | 64558    | 33022.1  | 67938.1  | 67284.3  | TRUE |
| 42702.9  | 61919.3  | 34750.6  | 47742.3  | 49977.8  | 36822.7  | 57293.5  | 50583.6  | TRUE |
| 50303    | 34510.1  | 47190.4  | 48310.7  | 58655.4  | 46972.2  | 63527.1  | 41185.8  | TRUE |
| 172836.4 | 174473.1 | 151102.5 | 176516.4 | 199911.5 | 147704.4 | 253781   | 209169.7 | TRUE |
| 153907.7 | 193755.4 | 132169   | 138643.7 | 153175.2 | 146192.7 | 199869.4 | 175481.4 | TRUE |
| 57726.5  | 58639.4  | 27561.8  | 47436.3  | 44749.4  | 28711.4  | 62507    | 35784.7  | TRUE |
| 193299.9 | 214174.1 | 159520.2 | 188646.4 | 179453   | 168551.5 | 227737   | 197268.4 | TRUE |
| 96754.3  | 87084    | 94180.3  | 93118.5  | 77538.3  | 109533   | 92692.7  | 93390    | TRUE |
| 7665.5   | 6186     | 9638.1   | 7276.3   | 7626.1   | 9817     | 8191.4   | 7022.2   | TRUE |
| 24012    | 12266.1  | 28541.2  | 31987.8  | 20659.1  | 31493.7  | 22670.3  | 21505.8  | TRUE |
| 273139   | 265610.7 | 280487.5 | 250391.3 | 220327   | 301704.5 | 326589.8 | 229667.6 | TRUE |
| 70733.4  | 61496.2  | 94137.2  | 80121    | 66727.9  | 80114.5  | 64420    | 57057.9  | TRUE |
| 36997.5  | 24677.1  | 36460    | 37703    | 33173.8  | 37187.6  | 45583.1  | 30818.8  | TRUE |
| 21279.6  | 21582    | 21134.4  | 20359.9  | 19079    | 24477.3  | 11671.7  | 35411    | TRUE |
| 141979.6 | 136987.5 | 258796.7 | 136547.4 | 93614.8  | 250125.3 | 189612.1 | 105443.6 | TRUE |
| 580613.7 | 438322.5 | 600382.3 | 568690.3 | 875241.5 | 486928.2 | 462214   | 484923.1 | TRUE |
| 119249.6 | 107282   | 165254.4 | 94187.9  | 78187.8  | 181341.2 | 117597.7 | 90313.1  | TRUE |
| 330391.8 | 244889.3 | 288976.6 | 327977.2 | 433181.2 | 289454.9 | 255444.8 | 316509.6 | TRUE |
| 173586.9 | 211429.4 | 380510   | 156388.5 | 175727.3 | 168011.4 | 153011.1 | 155692.7 | TRUE |
| 172575   | 132633   | 119815.9 | 103315.7 | 125366.6 | 134953.2 | 111384   | 117979.7 | TRUE |
| 95295.5  | 99440.7  | 85012.2  | 76263.3  | 106397   | 107564   | 79361.9  | 95845.4  | TRUE |
| 185680.9 | 163121   | 186283.3 | 184444.4 | 180015.7 | 235510.7 | 196311.2 | 205972.7 | TRUE |
| 41067.1  | 39890.4  | 31339.8  | 27180.8  | 30316.9  | 37302.5  | 41290.8  | 37054.8  | TRUE |
| 116006.5 | 124292.5 | 103906.6 | 129147.4 | 104082.6 | 118165.8 | 117058.5 | 107338.1 | TRUE |
| 108011.7 | 57560.8  | 60070.4  | 82308.1  | 79888.2  | 84383.1  | 89637    | 102901.8 | TRUE |
| 87580.4  | 74777.9  | 58975.7  | 67431.8  | 66973.7  | 85195.4  | 88929.1  | 120832.2 | TRUE |
| 135534.8 | 104214.3 | 119107.7 | 142960.7 | 165389.7 | 150748.5 | 122225.7 | 145210.9 | TRUE |
| 100517.6 | 104238.3 | 104108.6 | 118331.5 | 95434.1  | 84783.6  | 83565.4  | 120306.4 | TRUE |

|          |          |          |          |          |          |          |          |      |
|----------|----------|----------|----------|----------|----------|----------|----------|------|
| 74849.3  | 86006.8  | 47466.4  | 56659.5  | 54312.4  | 62485.2  | 62051.2  | 77687.3  | TRUE |
| 173847.3 | 224019.4 | 215163.7 | 166826.9 | 190324.7 | 177021.1 | 210670.5 | 178847.4 | TRUE |
| 461981.6 | 441161.1 | 451547.1 | 539757.1 | 603908.7 | 464359.2 | 585042.7 | 554654.8 | TRUE |
| 99491.8  | 101967.5 | 72324.4  | 94360    | 118856.9 | 70549.8  | 92560.6  | 101438.3 | TRUE |
| 90615.4  | 79135.5  | 82872    | 100942.7 | 105362.7 | 89813.5  | 100052.4 | 97927.7  | TRUE |
| 228277   | 198991.8 | 178611.5 | 215999.3 | 221952.4 | 199197.9 | 188819   | 205632   | TRUE |
| 254487.9 | 285374.5 | 309370.8 | 361909   | 250403.4 | 447994.9 | 289672.2 | 459290.5 | TRUE |
| 23163    | 25204.8  | 19460.1  | 29610.8  | 20510.1  | 30345.7  | 27187.2  | 23048.8  | TRUE |
| 166437.9 | 165742.1 | 190206.4 | 212815.9 | 200195.2 | 179013.8 | 212960.8 | 197245.4 | TRUE |
| 214166.9 | 210831.8 | 215530.9 | 246022.4 | 210771.7 | 205661.3 | 235250.7 | 205928.8 | TRUE |
| 13673.1  | 4562     | 17841.2  | 28597.2  | 6925.9   | 24193    | 11891.8  | 21305.8  | TRUE |
| 39771.7  | 60337.6  | 46974.1  | 47860.6  | 38586.2  | 60100.9  | 45871.5  | 38196.1  | TRUE |
| 85579.2  | 93166.1  | 108512.8 | 91206.8  | 98339.2  | 117238   | 122873.1 | 96026.4  | TRUE |
| 111308   | 81998.6  | 104277.9 | 78664    | 79892.4  | 104980   | 88035.1  | 89068.1  | TRUE |
| 67554.8  | 52004.1  | 106167.2 | 66205.5  | 64667.6  | 85133.6  | 77617.2  | 72003    | TRUE |
| 73496.4  | 58188.6  | 98097.8  | 64582.8  | 55062.7  | 92921    | 85047.4  | 69895.2  | TRUE |
| 187862   | 245608.8 | 257639.1 | 208113.9 | 178270   | 287470.4 | 217525   | 175563.8 | TRUE |
| 15071    | 19801    | 57348.7  | 4310.5   | 5891     | 60619.2  | 23125.9  | 10772.9  | TRUE |
| 11226.7  | 10187.2  | 6478.3   | 7531.7   | 14013.6  | 18558.3  | 12489.9  | 14678.9  | TRUE |
| 145974.2 | 132143.3 | 136491.7 | 128305.3 | 103854.1 | 156312.7 | 158088.3 | 127000.6 | TRUE |
| 92533.2  | 95005    | 120020.7 | 65468.9  | 80840.5  | 126240.4 | 111550.4 | 73559.2  | TRUE |
| 17494.1  | 13664.7  | 14351.5  | 11829.6  | 10166.1  | 26331.6  | 30184.1  | 17534.8  | TRUE |
| 30135    | 26078.1  | 39265.3  | 30844.2  | 41011.8  | 40996.2  | 38547.3  | 42410    | TRUE |
| 60828    | 58370.1  | 51332.6  | 67065.1  | 71257.6  | 60234.6  | 67614.1  | 69720.4  | TRUE |
| 272497.3 | 283726.2 | 221266   | 255477.8 | 255195.1 | 327322.6 | 277635   | 310665.2 | TRUE |
| 545327.8 | 452417.1 | 433757.6 | 481810.9 | 485725.4 | 562319   | 555469.7 | 584104.6 | TRUE |
| 24358    | 11185.3  | 21998.8  | 34232    | 20436.6  | 40922    | 12441.1  | 12193.7  | TRUE |
| 52119.7  | 59618.4  | 56905.1  | 64811.3  | 27016.3  | 69075.8  | 78115.7  | 70049.9  | TRUE |
| 251634.5 | 188175.4 | 221926.4 | 248017.8 | 264039.7 | 244202.5 | 224408.6 | 279704.8 | TRUE |
| 174481.3 | 173097.1 | 181057.6 | 189328.9 | 176055.1 | 192352.8 | 187888.7 | 159820.7 | TRUE |
| 177269.1 | 215817.5 | 222437.1 | 197132.9 | 198707.5 | 214146.1 | 204762   | 264387.2 | TRUE |
| 179011.5 | 215255.6 | 172773.8 | 182341.4 | 125239.6 | 180228.5 | 170862.8 | 124691.5 | TRUE |
| 180433.4 | 194376   | 169128.7 | 152302.9 | 125007   | 179078.3 | 156602.6 | 131028.5 | TRUE |
| 142627.5 | 106420.4 | 253364.4 | 99773.8  | 94770.9  | 271374.6 | 144374.4 | 112969.1 | TRUE |
| 241715   | 206957.4 | 422818.4 | 187473.3 | 119791.4 | 475803.9 | 232250.9 | 140232.6 | TRUE |
| 232372.4 | 235949.1 | 337523   | 238821.1 | 234770.4 | 362875.3 | 288104.2 | 259521.3 | TRUE |
| 100315.2 | 84103.7  | 175083.3 | 51849.9  | 65674    | 159848.8 | 85905.9  | 60236.1  | TRUE |
| 29932.3  | 18368    | 26017.8  | 29648.8  | 47948    | 28062.8  | 27819.8  | 21847.7  | TRUE |
| 284452.1 | 226569.4 | 319930.1 | 364723.7 | 267412.5 | 331627.4 | 254868.2 | 266387.9 | TRUE |

|          |          |          |          |          |          |          |          |      |
|----------|----------|----------|----------|----------|----------|----------|----------|------|
| 52057.8  | 59908.7  | 76683.2  | 60609.4  | 76036    | 62956.4  | 39975.4  | 64710.7  | TRUE |
| 83018.3  | 54726.1  | 63344.4  | 81792    | 77226.9  | 65636.9  | 73967.1  | 80714.3  | TRUE |
| 23480    | 6681.8   | 19259.4  | 24012.5  | 13930.6  | 19802.9  | 27609.3  | 21343.5  | TRUE |
| 1894621  | 1709226  | 1659873  | 1759480  | 1884046  | 1931446  | 1852187  | 2007591  | TRUE |
| 31425.4  | 25773.4  | 31298.4  | 29697.2  | 25396.6  | 28642.7  | 19706.2  | 28256.8  | TRUE |
| 157085.1 | 134524.2 | 125392   | 152514.8 | 140792.3 | 158472   | 135865.2 | 161255.5 | TRUE |
| 58527.9  | 52507.3  | 42795.2  | 42928.6  | 57493.2  | 41381.4  | 42460.9  | 48971.7  | TRUE |
| 224136.7 | 216080.1 | 249104.3 | 228195.5 | 217633.5 | 204241   | 240840.9 | 232968.9 | TRUE |
| 34432.4  | 30521.1  | 31768.8  | 43332.9  | 52861.9  | 36882.6  | 31759.1  | 46427.8  | TRUE |
| 88237.1  | 65068    | 61495.7  | 75971.8  | 96539.5  | 60973.8  | 85140.3  | 108858.6 | TRUE |
| 65473.1  | 71507.4  | 56927.2  | 60955.7  | 53821.8  | 59686    | 59157.8  | 63681.8  | TRUE |
| 50520.1  | 52227.8  | 52631    | 48508.7  | 51826.9  | 50916.8  | 63797.6  | 58611.5  | TRUE |
| 49825.8  | 50656.4  | 61200.7  | 58265.6  | 52123.5  | 45863.6  | 57177    | 55349.5  | TRUE |
| 156875.2 | 169626   | 158585.9 | 159242.4 | 135490.4 | 161012.3 | 174916.7 | 138680.5 | TRUE |
| 136100   | 129010.9 | 153197.8 | 134126.1 | 131491.6 | 162276.5 | 146435.6 | 117580.8 | TRUE |
| 98242.9  | 48832    | 97950.4  | 113550.9 | 68357    | 106408.6 | 67977.6  | 75138    | TRUE |
| 153216.1 | 164355.3 | 139147.7 | 142644.7 | 211408.4 | 191129.6 | 165385   | 199162.8 | TRUE |
| 24022.6  | 33965.2  | 30639.3  | 45617.5  | 36253    | 51712.4  | 41159.9  | 41143.3  | TRUE |
| 269407.1 | 253757.1 | 174489.3 | 213662   | 332080.1 | 338887.5 | 238530.7 | 321284.1 | TRUE |
| 129347.9 | 197015.2 | 90276.2  | 134666.1 | 107910   | 85506.4  | 186197.7 | 74862.3  | TRUE |
| 56361.4  | 86956.1  | 60242.4  | 48149.4  | 50310.5  | 58903.7  | 84650.5  | 54757.8  | TRUE |
| 57782.6  | 85574    | 37518.6  | 95490.2  | 60190.6  | 67003.4  | 89216.4  | 54909.1  | TRUE |
| 32926.7  | 46862.7  | 35735.3  | 26403    | 22822.9  | 34647.7  | 49243.7  | 24037.6  | TRUE |
| 608393.7 | 599514.5 | 490018.4 | 575416.1 | 611557.3 | 655877.5 | 608443.7 | 671681.6 | TRUE |
| 19663    | 27492.3  | 7590.5   | 23413.1  | 41065.9  | 15948.2  | 36609.3  | 41088    | TRUE |
| 29837.6  | 31539.7  | 7549.2   | 14073    | 43372.9  | 17946.3  | 29355.4  | 40279.5  | TRUE |
| 75826.6  | 68040.5  | 79901.7  | 82138.9  | 50189.5  | 65217.2  | 58990.9  | 66885.4  | TRUE |
| 86634.2  | 83303.6  | 80623.1  | 79702.1  | 84403.6  | 74262.9  | 103158.2 | 69201.8  | TRUE |
| 67523    | 65378.4  | 57319.5  | 74430.9  | 63509.8  | 77740.7  | 78849.1  | 75037.1  | TRUE |
| 208771.8 | 161745.7 | 195387.6 | 169382.8 | 158337.3 | 222676.1 | 207805.5 | 163600.8 | TRUE |
| 617727.8 | 439989.2 | 439366.5 | 644247.3 | 684096.2 | 610450.2 | 561423.9 | 629615.5 | TRUE |
| 204665.5 | 162845.1 | 170261.5 | 212225.5 | 220481   | 229373.4 | 227969.3 | 222940.4 | TRUE |
| 114208.2 | 110960.1 | 94920.9  | 105172.5 | 102129.8 | 105454.2 | 113080.3 | 115941.2 | TRUE |
| 228403.4 | 230958.9 | 226133.3 | 201267.2 | 193009.4 | 214536.4 | 245876.6 | 190689.6 | TRUE |
| 399486.4 | 348048.4 | 424972.4 | 419872.8 | 383414.2 | 369993.6 | 324924.4 | 368836.7 | TRUE |
| 1831419  | 1594957  | 1607081  | 1763023  | 1678752  | 1886027  | 1654048  | 1784216  | TRUE |
| 22220.6  | 30708.4  | 24835.4  | 26428.3  | 33097.9  | 24164.5  | 23679.1  | 23858    | TRUE |



|          |          |          |          |          |          |          |          |      |
|----------|----------|----------|----------|----------|----------|----------|----------|------|
| 53223.4  | 50333.6  | 56504.1  | 50960.3  | 50195    | 64440.6  | 57429    | 48913.1  | TRUE |
| 414858.6 | 364354.2 | 444293.1 | 457107.7 | 552793.3 | 357244.5 | 425127.9 | 395199.8 | TRUE |
| 400332.7 | 440387.6 | 761957   | 316751.5 | 282026.4 | 739038.4 | 425471.3 | 274457   | TRUE |
| 1331200  | 876479.2 | 1440727  | 1254550  | 2481509  | 879575.1 | 938412.7 | 968990   | TRUE |
| 193121.7 | 161889.5 | 365776.4 | 113346.1 | 102409.2 | 341830.6 | 184698.3 | 108912.1 | TRUE |
| 74804.9  | 87734.5  | 111833.3 | 69169.1  | 65937.3  | 143541.3 | 91465.3  | 71263.4  | TRUE |
| 152002.9 | 148660.9 | 203515.6 | 115507.4 | 89866.1  | 341837.7 | 194965.5 | 136259.7 | TRUE |
| 20640.4  | 44032.7  | 38145.6  | 46963.6  | 19214.3  | 24176.7  | 37980.5  | 28236.8  | TRUE |
| 232108.9 | 257691.8 | 289947.4 | 260014.6 | 185830.2 | 233829.3 | 258744.1 | 232710.2 | TRUE |
| 175000.2 | 154122.9 | 204889.2 | 231146.5 | 155478.9 | 149822.2 | 156397.7 | 162552   | TRUE |
| 131082.1 | 153266.8 | 91583.2  | 114953.8 | 152690.1 | 96242.2  | 134001.1 | 134380.3 | TRUE |
| 58496    | 57594.4  | 29079.2  | 51077.5  | 39147.6  | 35859.4  | 69673    | 48124.4  | TRUE |
| 451452.7 | 401273.9 | 439313.3 | 392120.3 | 437620.9 | 507484.2 | 496899.6 | 470307.2 | TRUE |
| 245805.1 | 230518.5 | 256546.5 | 262716.1 | 217220.1 | 247364.4 | 232485.2 | 242885.7 | TRUE |
| 196892.7 | 195631.8 | 212290.2 | 235553.2 | 235958.6 | 180667.4 | 189081.7 | 192982.5 | TRUE |
| 79921    | 66622.4  | 77706.1  | 89636.4  | 66727.6  | 82355.7  | 52549.9  | 65486.6  | TRUE |
| 36612.3  | 45376.2  | 13321.9  | 39487.8  | 40540.1  | 32836.2  | 41377.5  | 50703.7  | TRUE |
| 37148.7  | 26469.6  | 38259.3  | 24370.7  | 31936    | 35541.8  | 29034.3  | 30126.9  | TRUE |
| 86144.7  | 79049.2  | 91879.3  | 84627.3  | 94220.5  | 68722.1  | 98693.3  | 106778.2 | TRUE |
| 204560   | 191255   | 262908.9 | 226859.7 | 208588.1 | 214961.8 | 191923.6 | 195159   | TRUE |
| 191220   | 168016.2 | 195551.4 | 192863.6 | 195832.1 | 187344.4 | 140775.1 | 176504.9 | TRUE |
| 48733.4  | 37912.5  | 47264.3  | 57744.9  | 49815.2  | 50063.3  | 36848.1  | 58914.8  | TRUE |
| 105961.1 | 96746.8  | 98682.4  | 102020.4 | 118672.2 | 114126   | 92621.3  | 120693.6 | TRUE |
| 42227.9  | 42803.3  | 43016.1  | 59923.1  | 42146.7  | 60120.6  | 50326.5  | 40591.3  | TRUE |
| 460300.2 | 387056.4 | 474103   | 453169.1 | 460978.9 | 469314.2 | 450979.6 | 462886.2 | TRUE |
| 47187.5  | 48747.8  | 40437.1  | 46300.4  | 36861.9  | 44823.9  | 35766.2  | 43755.7  | TRUE |
| 30741.5  | 40271.4  | 22678.1  | 57592.2  | 33382.1  | 23700.3  | 37748.3  | 25620.8  | TRUE |
| 51174.1  | 72491.4  | 65167.3  | 65524.5  | 78861.1  | 64932.8  | 81715.3  | 60595.7  | TRUE |
| 94892.2  | 122574.1 | 109576.5 | 78176.8  | 65112.3  | 121007.9 | 124773.9 | 107164.8 | TRUE |
| 164766.9 | 167253.4 | 116293.3 | 167690.7 | 197468.2 | 140098.1 | 156980.8 | 208376.1 | TRUE |
| 140219.1 | 175298.5 | 137740.6 | 146580.7 | 115042.1 | 148897.2 | 166125.6 | 177884.7 | TRUE |
| 39068.4  | 51029.6  | 32475    | 44952.4  | 49453.4  | 32186.5  | 51345.2  | 31524.6  | TRUE |
| 44472.8  | 48148.5  | 48720    | 57566.7  | 50919.3  | 39277.9  | 65791.4  | 49986    | TRUE |
| 269951.5 | 189068.6 | 308487.1 | 319549   | 223828.1 | 243839.7 | 198589.8 | 224116.5 | TRUE |
| 87657.7  | 94157.5  | 99658.6  | 96909.7  | 63830.6  | 108711.1 | 113835.6 | 68374.6  | TRUE |
| 106518.4 | 86756.9  | 137915   | 148077.7 | 96838.3  | 121509.9 | 97360.6  | 102185.1 | TRUE |
| 759170.4 | 742154.4 | 731968.2 | 547392.8 | 396227.9 | 715449.6 | 666082.3 | 464430   | TRUE |
| 461551.7 | 285408.6 | 473337.9 | 449906.7 | 454141.5 | 407165.2 | 293048.9 | 407946.4 | TRUE |
| 33174.1  | 30407.2  | 32044.8  | 34610.9  | 33824.9  | 32577.7  | 38995    | 47774.5  | TRUE |

|          |          |          |          |          |          |          |          |      |
|----------|----------|----------|----------|----------|----------|----------|----------|------|
| 130426.1 | 134759   | 143381.2 | 128850.8 | 120734.5 | 128617.5 | 136581.9 | 152504   | TRUE |
| 18605.8  | 27950.6  | 6526.7   | 36519.4  | 39316    | 29426.4  | 32682.3  | 27198.8  | TRUE |
| 19963.5  | 21207.4  | 18517.4  | 12034.9  | 28950.5  | 15513.2  | 32768.4  | 32942    | TRUE |
| 62062.5  | 71937.3  | 44505.1  | 59535.5  | 68844.7  | 66270    | 63637.1  | 72423.4  | TRUE |
| 161536.6 | 122682.8 | 159280.1 | 157792.8 | 147793.5 | 159252.6 | 135108.7 | 181223.6 | TRUE |
| 79522.1  | 128669.4 | 83936.4  | 119081.2 | 98157.7  | 86522.5  | 92413.2  | 106683.1 | TRUE |
| 75035.5  | 70101.9  | 64856.6  | 60287.5  | 75693.1  | 69745.1  | 79639    | 78570.7  | TRUE |
| 159703.9 | 146875.3 | 152425.5 | 173291.9 | 164744.1 | 160960.8 | 182176.7 | 179164.6 | TRUE |
| 48824.3  | 50881.4  | 45451.5  | 44354.9  | 41551.8  | 43120.8  | 36229.6  | 33275.4  | TRUE |
| 63386    | 52090    | 50943.1  | 79240.1  | 60830.6  | 79033.6  | 80857.8  | 97382    | TRUE |
| 42319.2  | 28399.2  | 17785.1  | 12250.6  | 30135.4  | 16921.5  | 57977.6  | 38859.8  | TRUE |
| 353312.7 | 233914.1 | 608572.8 | 717992.7 | 195234.7 | 260056.5 | 344714.6 | 252489.8 | TRUE |
| 52739.2  | 40177.6  | 87112.4  | 33582.8  | 28675.3  | 112212.3 | 39031.3  | 44778.9  | TRUE |
| 51190.7  | 78021.3  | 20857.2  | 27479.3  | 39399.5  | 22762.6  | 72779.3  | 38645.4  | TRUE |
| 56034.4  | 72192.8  | 51350.8  | 55964.1  | 57104.1  | 63804.4  | 84442.7  | 82142.7  | TRUE |
| 223376.9 | 203606.1 | 220922.9 | 262751.2 | 204171.8 | 195864.6 | 257756.7 | 197823.2 | TRUE |
| 87247.4  | 51182.7  | 84921.6  | 85225.6  | 70361.6  | 68738.9  | 65873.8  | 75160.1  | TRUE |
| 54144.9  | 45469    | 29369.3  | 51163.4  | 43673.7  | 43758.7  | 68438.2  | 58957.4  | TRUE |
| 113521.7 | 124578.7 | 111047.9 | 108670.5 | 164678.5 | 115832.2 | 114923.7 | 122873.2 | TRUE |
| 319556   | 232744.7 | 281576   | 291988.1 | 428959.6 | 311310.4 | 284593.3 | 361110.5 | TRUE |
| 40811.3  | 28216.1  | 64120.5  | 49085.4  | 40778.8  | 59375.5  | 38666.8  | 39751.8  | TRUE |
| 328803.2 | 292138   | 284425.9 | 273163.3 | 328620.6 | 256809.4 | 242341.3 | 272015.2 | TRUE |
| 52526.8  | 48451.5  | 75921    | 78044.9  | 48398    | 84976.4  | 52226.8  | 64593.7  | TRUE |
| 111527.4 | 93051    | 171669.2 | 99597.1  | 62691.4  | 189300.7 | 134647.4 | 92620.9  | TRUE |
| 47135.9  | 26059.6  | 47539.9  | 48387.9  | 61198    | 41266.1  | 37163.1  | 47651.1  | TRUE |
| 109861.3 | 85514.9  | 94725.6  | 131802.5 | 125752.6 | 111671.1 | 121378.1 | 131017.7 | TRUE |
| 202484   | 211504   | 268803.2 | 230659.8 | 479342.8 | 131950.6 | 176606.7 | 151995.3 | TRUE |
| 228586.1 | 235019.5 | 224696.9 | 246735.1 | 202238.5 | 244526.2 | 255449.3 | 248352.6 | TRUE |
| 139731   | 150860   | 158111.1 | 114557.4 | 109985.7 | 152907.8 | 125436.1 | 114547.1 | TRUE |
| 104892.7 | 114607.2 | 172792.2 | 113395.7 | 92912.3  | 169715.2 | 110676.2 | 115942.1 | TRUE |
| 145335.7 | 116662.2 | 165741.5 | 111104.2 | 104496.8 | 169916.9 | 133509.6 | 99976.9  | TRUE |
| 41856.5  | 21117.3  | 46199    | 27278    | 34559.9  | 39582.8  | 34929.4  | 20237.5  | TRUE |
| 25985.6  | 12827.2  | 32987.3  | 13573    | 24874.6  | 23366.9  | 26856.7  | 24548.2  | TRUE |
| 210748.6 | 222431.6 | 192000.9 | 151456.8 | 146224.5 | 174316.1 | 199372.1 | 151006.4 | TRUE |
| 276532.7 | 239948.6 | 297418.8 | 367113.7 | 285021   | 336412.3 | 310624.9 | 366929.5 | TRUE |
| 102331.4 | 84782.3  | 131911.3 | 101054.9 | 111785.9 | 108695.2 | 80295.8  | 113289.3 | TRUE |
| 70050.1  | 65096.5  | 71384.3  | 49478.6  | 81596.2  | 69691.9  | 82206.8  | 85869.9  | TRUE |
| 142814   | 194691.2 | 133860.9 | 121414.2 | 111242.2 | 137116.1 | 191561.6 | 132017.9 | TRUE |
| 42253.2  | 54134.9  | 43858.9  | 51427.7  | 40353.1  | 59128.9  | 35336.7  | 38989.7  | TRUE |
| 182272   | 156772.8 | 148280.4 | 182967.4 | 199449.1 | 181462.4 | 181901.8 | 193876.1 | TRUE |

|          |          |          |          |          |          |          |          |      |
|----------|----------|----------|----------|----------|----------|----------|----------|------|
| 209585.5 | 172971   | 195667.6 | 725447.6 | 209128.8 | 222681.6 | 217741.3 | 192294.1 | TRUE |
| 42872.7  | 35505.4  | 32263.2  | 31502.7  | 32143.5  | 44517.1  | 40272.8  | 39851.1  | TRUE |
| 400464.6 | 387991   | 379784.5 | 372926.4 | 458746.4 | 387455.7 | 398892.4 | 438715.1 | TRUE |
| 10996.7  | 14635.2  | 21433.1  | 36070.6  | 4383.6   | 40749.8  | 32655.7  | 33282.9  | TRUE |
| 776944.7 | 611732.4 | 813067.9 | 779689.3 | 836067.4 | 780481.8 | 659841.5 | 745922.3 | TRUE |
| 324822.4 | 332032.8 | 333436.2 | 351702   | 377202.6 | 311771.1 | 315711.7 | 377450.7 | TRUE |
| 479235.3 | 366888.5 | 440171.1 | 485859.2 | 646110.9 | 438711   | 414641.3 | 565893   | TRUE |
| 16508307 | 13277862 | 14226345 | 16672491 | 16247511 | 15176420 | 13643688 | 17295599 | TRUE |
| 9213462  | 7091346  | 8009034  | 9790044  | 10020538 | 8819299  | 7747365  | 9672793  | TRUE |
| 1118436  | 1054962  | 966961.6 | 1151289  | 1140502  | 966194   | 1000370  | 1163487  | TRUE |
| 1297117  | 1132344  | 1212564  | 1354567  | 1345193  | 1241569  | 1178762  | 1324466  | TRUE |
| 1024290  | 885838.2 | 887675.4 | 1080925  | 1061229  | 956859.6 | 851985.3 | 1073509  | TRUE |
| 911954.6 | 826543.3 | 827969.4 | 1154689  | 1035889  | 769789.5 | 885012.3 | 1009439  | TRUE |
| 1232838  | 1178668  | 1053153  | 1257866  | 1228661  | 1118621  | 1116952  | 1255594  | TRUE |
| 443504.5 | 380165.1 | 405623.7 | 458617.7 | 413874.7 | 407020.4 | 426649.3 | 425894.4 | TRUE |
| 519867.4 | 468531.7 | 478831.4 | 525395.7 | 499370.9 | 495150.3 | 464999   | 524980   | TRUE |
| 248372.7 | 243713.7 | 258700.3 | 314401.4 | 273367.9 | 246457.9 | 242339   | 251978.5 | TRUE |
| 176247.7 | 172144.1 | 150615.6 | 172507.5 | 146488.3 | 164479.7 | 154554.4 | 173975.2 | TRUE |
| 262459   | 305562.8 | 322929.2 | 255410.1 | 293799.5 | 253062.7 | 225988.1 | 304106.8 | TRUE |
| 28904.4  | 22512.3  | 14191.7  | 37119.5  | 15585.5  | 27398.2  | 8008     | 38457.3  | TRUE |
| 19203.4  | 18518.7  | 3836.5   | 22070.9  | 14488.1  | 21161.4  | 8870.7   | 29695.7  | TRUE |
| 7902     | 5124     | 4508.8   | 5942.6   | 7504.5   | 8109.6   | 9799.2   | 10501.4  | TRUE |
| 137885.3 | 102434   | 120336.9 | 147825.2 | 163606.3 | 128649.4 | 113467.5 | 148393.9 | TRUE |
| 58062.7  | 60330.1  | 63602.1  | 66399    | 62717.4  | 56620.4  | 55581.7  | 63039.1  | TRUE |
| 237103   | 169459   | 175707.4 | 239016.2 | 201905.2 | 267322.5 | 226869   | 289000.8 | TRUE |
| 90464.1  | 155552.4 | 106592.8 | 149274.2 | 159764.7 | 98858.3  | 84315.2  | 103115.8 | TRUE |
| 63142.2  | 95263.9  | 82583.8  | 124372.6 | 154309.2 | 39757.2  | 54513    | 50862.7  | TRUE |
| 90600.7  | 137976   | 140249.5 | 193390.8 | 215682.9 | 88083.4  | 62980.3  | 61772.2  | TRUE |
| 287517.3 | 772709.2 | 421675.8 | 933409.1 | 1010928  | 124427.3 | 76536.9  | 132741.2 | TRUE |
| 302758.1 | 586615.2 | 328454   | 636180.6 | 658565.3 | 197766.5 | 159060.3 | 207863.3 | TRUE |
| 178034.9 | 131869.1 | 134782.8 | 195140.6 | 171175.7 | 179987   | 177189.1 | 197184.6 | TRUE |
| 6765683  | 6538949  | 4768324  | 4904878  | 5132350  | 5929796  | 6089146  | 6238558  | TRUE |
| 4940154  | 4957205  | 3181673  | 3391741  | 3581614  | 4027259  | 4304225  | 4424583  | TRUE |
| 487201.1 | 468930.3 | 377655.5 | 395045.7 | 397733.5 | 434790.2 | 449868   | 476956   | TRUE |
| 78548.4  | 123271.3 | 83685    | 66794.5  | 110859.2 | 67880.9  | 113965   | 113072.9 | TRUE |
| 90287.4  | 99388.6  | 91749.2  | 57841.5  | 104044.4 | 81902.8  | 112670.4 | 104096.3 | TRUE |
| 50835.9  | 58898.2  | 46579.8  | 47863.2  | 59795    | 59888.5  | 50805.2  | 65624.7  | TRUE |
| 53279.4  | 53503.8  | 45584    | 57140.5  | 51506.6  | 53855.7  | 50482.9  | 55834.7  | TRUE |
| 57783.4  | 45694    | 45623.1  | 49373.1  | 44171.3  | 57996.2  | 52948.9  | 72117.1  | TRUE |
| 1577835  | 1614811  | 1304688  | 1287222  | 1569170  | 1672374  | 1635981  | 1530669  | TRUE |
| 462000.9 | 486041.7 | 392720.3 | 438354.8 | 488310.6 | 517107   | 509935.9 | 503871.1 | TRUE |
| 279580.6 | 334001.2 | 279093.9 | 260770.3 | 298119.2 | 315844.9 | 317915.9 | 299488.4 | TRUE |
| 645335.2 | 935140.4 | 515709.3 | 575311.6 | 757300.9 | 639824.6 | 996501   | 607914.9 | TRUE |
| 13890539 | 14123099 | 10777913 | 11742595 | 13214709 | 15582320 | 15116790 | 16095574 | TRUE |
| 15378353 | 16433154 | 11882720 | 13432115 | 14958906 | 19200580 | 17456442 | 18209369 | TRUE |
| 396262   | 397202.4 | 359832.5 | 394926.1 | 401223.5 | 487896   | 417261.2 | 430059.2 | TRUE |
| 1236703  | 1238996  | 1014106  | 1108809  | 1152142  | 1333722  | 1304276  | 1397640  | TRUE |

|          |          |          |          |          |          |          |          |      |
|----------|----------|----------|----------|----------|----------|----------|----------|------|
| 616385.6 | 647966.4 | 585057.8 | 625848.3 | 599055.8 | 670250   | 756568.3 | 684123.6 | TRUE |
| 262990.3 | 265676.9 | 238523.9 | 273842.9 | 251587.2 | 321160.9 | 316180   | 291931.7 | TRUE |
| 6966.5   | 4747.1   | 5142.8   | 9838.2   | 7136.3   | 6769     | 8416.4   | 7108.7   | TRUE |
| 80887.3  | 60851.8  | 49867.6  | 74473.6  | 75785.2  | 96354.9  | 114024.7 | 98051    | TRUE |
| 153863.6 | 136205.2 | 114592.5 | 152096   | 131567   | 208474.6 | 175325.1 | 199438.5 | TRUE |
| 21177.7  | 24065.4  | 20661.8  | 23242.4  | 25516.5  | 37991.1  | 31680.6  | 28372.4  | TRUE |
| 92350.5  | 80645.5  | 76547.1  | 77058.2  | 68466.8  | 92760.8  | 107990.2 | 104844.2 | TRUE |
| 120764.8 | 96833.4  | 117995.5 | 103835.6 | 106958   | 146933.2 | 130460.2 | 125915.7 | TRUE |
|          |          |          |          |          |          |          |          |      |
| 235600.6 | 288040   | 191996.6 | 207169.4 | 367468   | 155558.4 | 313446.7 | 173621.4 | TRUE |
| 2949798  | 2145114  | 2931213  | 3568767  | 3618535  | 3099175  | 2823026  | 3476673  | TRUE |
| 2037036  | 2046596  | 1826779  | 1904532  | 1965141  | 2133407  | 2169676  | 2146162  | TRUE |
| 7658979  | 7444384  | 6173043  | 6170975  | 7478033  | 7885568  | 7785004  | 8576581  | TRUE |
|          |          |          |          |          |          |          |          |      |
| 19860.5  | 24376    | 23835.2  | 11870.8  | 17250    | 24524.3  | 15790.7  | 28626.7  | TRUE |
|          |          |          |          |          |          |          |          |      |
| 154893.2 | 159045.6 | 197987.8 | 181207   | 119010.3 | 189431   | 209092.4 | 122294   | TRUE |
| 235217   | 217218.4 | 290447.6 | 216440.2 | 149763.9 | 318289.6 | 251474.6 | 163135.1 | TRUE |
| 195663.9 | 201224.9 | 246493.8 | 180836.7 | 140954.1 | 254855.1 | 194967.3 | 154494.6 | TRUE |
|          |          |          |          |          |          |          |          |      |
| 28628.4  | 4512.8   | 16350.2  | 31441.3  | 21007.9  | 25141.4  | 29018.7  | 20175.9  | TRUE |
| 275111.8 | 279028   | 223243.8 | 224057.2 | 174251.7 | 259471.6 | 289720   | 245517.6 | TRUE |
| 221261   | 254511.1 | 252707.4 | 246716.3 | 238107.8 | 378694.2 | 295092.6 | 235359.6 | TRUE |
| 469343.4 | 481413   | 480003.5 | 479637.5 | 478277.8 | 736700.8 | 608309.5 | 474946.4 | TRUE |
| 255203.6 | 213082.8 | 253913.1 | 343743.1 | 298552.6 | 258246   | 280108.4 | 256200.6 | TRUE |
| 1045091  | 873952.3 | 1071602  | 1394916  | 1207136  | 1072459  | 1013851  | 969720.1 | TRUE |
| 47134.1  | 40825.1  | 66998.2  | 55241.3  | 47883.1  | 54189.3  | 51278.7  | 48979.1  | TRUE |
| 35589.5  | 23852.4  | 39191.7  | 41208.9  | 33886.8  | 25239.8  | 30579.5  | 12260.7  | TRUE |
| 16922.2  | 18039.4  | 25978.8  | 8146.7   | 16455.7  | 23589.5  | 18844.8  | 11133.7  | TRUE |
| 57542.6  | 61096.1  | 81907.8  | 111040.7 | 81478.1  | 96963.5  | 84379.8  | 82627.6  | TRUE |
| 719977.6 | 675070.8 | 996590.1 | 639507.7 | 504724.4 | 1182432  | 766833.1 | 509508.1 | TRUE |
| 628161.9 | 682686   | 722568.4 | 598476.1 | 452832.8 | 777244.9 | 739663.6 | 438558.6 | TRUE |
| 3607790  | 3539518  | 3953238  | 3126821  | 2318725  | 4090781  | 3673420  | 2391258  | TRUE |
| 111932   | 86114.8  | 118751.9 | 109429.2 | 98132.9  | 135925.5 | 138826.8 | 96208.9  | TRUE |
| 183512.9 | 190188.1 | 176922.9 | 147573.7 | 137902.1 | 155314   | 167991.4 | 109792.4 | TRUE |
| 164395.4 | 155779.7 | 177197.6 | 149878.5 | 115748.2 | 153845.2 | 187804.1 | 151629.7 | TRUE |
| 893321.8 | 493088.6 | 1022622  | 954750.9 | 1120795  | 760948.9 | 630707.4 | 739371.5 | TRUE |
| 62573.4  | 29047.4  | 58786.4  | 35556.6  | 47131.9  | 35114.8  | 34136.6  | 44891.1  | TRUE |
| 35493.2  | 87893    | 32877.7  | 33586.2  | 38961.4  | 40700.7  | 67665    | 32820.2  | TRUE |
| 45164.8  | 67123    | 21935.4  | 26327.8  | 23039.3  | 18531    | 12783.8  | 31337.2  | TRUE |
|          |          |          |          |          |          |          |          |      |
| 29066.3  | 39378.4  | 33272.3  | 14045.8  | 24869.8  | 18547.1  | 26730.2  | 23594.3  | TRUE |
| 44418.5  | 40306.6  | 60660.7  | 34341.3  | 51849.6  | 52977.9  | 37058.8  | 48837.3  | TRUE |

|          |          |          |          |          |          |          |          |      |
|----------|----------|----------|----------|----------|----------|----------|----------|------|
| 25068.7  | 37394.3  | 36341.2  | 22350.1  | 29807.9  | 30532.9  | 28786.1  | 44668.3  | TRUE |
| 51093.4  | 47562.9  | 35683.2  | 59511.9  | 54451    | 66894    | 47533.5  | 54233.6  | TRUE |
| 23994    | 11888.3  | 21098.3  | 31474.5  | 21439.5  | 22957.3  | 32463.6  | 25672.9  | TRUE |
| 79208.2  | 49849.3  | 84490.3  | 96743.2  | 79346.7  | 165498.3 | 69443.4  | 94812.6  | TRUE |
| 83312.5  | 94952.2  | 75981.7  | 86434    | 103150.3 | 70586.3  | 72424.1  | 58420.4  | TRUE |
| 28179.3  | 21989.7  | 28813.5  | 28217.1  | 29292.8  | 33269.2  | 28273.3  | 16546    | TRUE |
| 3349967  | 2986560  | 3485782  | 3496180  | 3018191  | 3231294  | 3348607  | 3187262  | TRUE |
| 309367.9 | 304939.1 | 261164.5 | 281197.5 | 295168.6 | 285372.5 | 318329.4 | 326702.3 | TRUE |
| 283880.4 | 268187.3 | 221004.7 | 270995.4 | 257408   | 252232.7 | 240515.7 | 252190.3 | TRUE |
| 189978.9 | 194591.6 | 213789.6 | 175473   | 312493.2 | 232419.1 | 247654.5 | 212187.3 | TRUE |
| 119701.6 | 146544.9 | 106968.4 | 137954.9 | 124450.8 | 105256.2 | 123395.1 | 146800   | TRUE |
| 107558.5 | 135617   | 109463.3 | 139258.3 | 131698.6 | 114298.6 | 127088.2 | 122052.9 | TRUE |
| 995377   | 915454.4 | 842056.6 | 1169700  | 1117457  | 877640.1 | 1022577  | 1140842  | TRUE |
| 82147.1  | 75084.4  | 56714.4  | 70602.5  | 90656.2  | 55155.8  | 66560.8  | 71798.6  | TRUE |
| 105322.4 | 95566    | 99217.3  | 120788   | 108211   | 104976.7 | 118926.9 | 147264.2 | TRUE |
| 119139.9 | 110129.6 | 118160.2 | 176543.5 | 152103.7 | 115641.1 | 133461.1 | 133396.1 | TRUE |
| 99434.6  | 74101.6  | 60355.7  | 106954.9 | 90877.4  | 90651.1  | 89691.3  | 102267.7 | TRUE |
| 50026.2  | 41647    | 50388.2  | 61668    | 42364.8  | 44089    | 44034.4  | 44910.3  | TRUE |
| 37586.1  | 28873.8  | 39086.1  | 31312.6  | 31642.5  | 29859.1  | 35957.6  | 30961.5  | TRUE |
| 41570.3  | 104744.6 | 135080.7 | 94738.7  | 101375.3 | 20782.7  | 8884.1   | 34812.9  | TRUE |
| 200037.2 | 200199.3 | 201039.3 | 211003.2 | 178292.8 | 263654.9 | 234583   | 218240.7 | TRUE |
| 361628.4 | 304263   | 375500.3 | 348958.3 | 333922.4 | 397157   | 357758.7 | 391650.9 | TRUE |
| 40432.7  | 126497.9 | 81957.2  | 140295.6 | 133148.3 | 32328.1  | 10711.4  | 29173.6  | TRUE |
| 760344.4 | 689080.9 | 854325.4 | 631573.9 | 572221.4 | 922219.8 | 684124   | 614587.9 | TRUE |
| 312598.2 | 269949.4 | 306423.8 | 323708.5 | 299655.5 | 346387   | 277887.4 | 306977   | TRUE |
| 440683.7 | 343405.4 | 400164.9 | 449671.1 | 404884.8 | 469449.9 | 337689.5 | 447114.6 | TRUE |
| 517466.2 | 427413.4 | 547909.3 | 622250.4 | 547304.6 | 582888.8 | 435423.9 | 543709.6 | TRUE |
| 200771.3 | 147600.2 | 243095.7 | 276599.1 | 212989.8 | 260434.9 | 211459.8 | 219162.9 | TRUE |
| 130731.3 | 113713.8 | 131692.7 | 143028.3 | 151185.3 | 122161.8 | 112888.4 | 151244.7 | TRUE |
| 763601.9 | 690325.3 | 540169.6 | 646378.7 | 876528.1 | 772187.2 | 721938   | 811822.9 | TRUE |
| 1209745  | 1136502  | 1001826  | 949758.1 | 1312778  | 1244426  | 1164863  | 1247284  | TRUE |
| 20065.4  | 26930.4  | 21293.9  | 28691.6  | 37109.8  | 25173.7  | 15738.9  | 26430.2  | TRUE |
| 43031.9  | 65397.2  | 37082.9  | 66090    | 31221.5  | 38902.5  | 50279.1  | 41354.6  | TRUE |
| 74618.2  | 93327.1  | 58288.1  | 76291.5  | 94604.1  | 68954.5  | 81118.2  | 70120.5  | TRUE |
| 104813.5 | 148605.6 | 84676.7  | 108211   | 147389.3 | 73654.7  | 153022.8 | 166756.1 | TRUE |
| 143460.5 | 152158.6 | 76649.8  | 118699.8 | 152792.7 | 85585.8  | 143151   | 155725.9 | TRUE |
| 807088.6 | 957955.2 | 483295.2 | 781235.8 | 915594.2 | 510043.3 | 1062921  | 947210.8 | TRUE |
| 1732807  | 1832997  | 891609.9 | 1345167  | 2010344  | 975088.1 | 2135083  | 1960366  | TRUE |
| 102489.4 | 136619.8 | 84093.2  | 135997.2 | 141406.8 | 89085.3  | 75631    | 104736.1 | TRUE |
| 59790.6  | 112373.9 | 46515.1  | 71015.6  | 99395.3  | 37057.6  | 16795.5  | 29627.1  | TRUE |

|          |          |          |          |          |          |          |          |      |
|----------|----------|----------|----------|----------|----------|----------|----------|------|
| 197279.9 | 202238.1 | 123695   | 154030.8 | 179392.2 | 120416.1 | 205574.6 | 209712.1 | TRUE |
| 218437.4 | 195342.4 | 123048.9 | 185081.7 | 246567.4 | 140642.9 | 249058.4 | 267222.4 | TRUE |
| 459100.8 | 486101.2 | 591755.8 | 549768.5 | 391773.2 | 427539   | 540364.7 | 462345.5 | TRUE |
| 38130.7  | 29237    | 44500.2  | 54919    | 27752.3  | 43331.3  | 36258.2  | 32771.9  | TRUE |
| 1372979  | 1694825  | 848176.8 | 1207940  | 1561764  | 875174.2 | 1713114  | 1514954  | TRUE |
| 42041.5  | 64241.2  | 30089.1  | 51624.5  | 79662.7  | 20803.8  | 32626.6  | 27523    | TRUE |
| 498732.8 | 476521   | 484617.8 | 555444.1 | 445830.6 | 489559.5 | 509607.8 | 453193.6 | TRUE |
| 481903.4 | 357641.4 | 488886.4 | 539497.4 | 382290.6 | 502992.4 | 437139.3 | 405755.8 | TRUE |
| 418512.6 | 346670.3 | 388803   | 472257.6 | 349458.8 | 437885.4 | 377869   | 312585.8 | TRUE |
| 711241.5 | 586029.7 | 589267.2 | 617348.3 | 749877.1 | 743923.8 | 594762.7 | 800370.4 | TRUE |
| 739483.4 | 563520.6 | 681834.7 | 622094.4 | 805352.6 | 834734.4 | 643854.8 | 837470.9 | TRUE |
| 206492.7 | 190919.5 | 263965.8 | 237782.4 | 182917.6 | 258827.4 | 208218.6 | 192143.6 | TRUE |
| 414078.7 | 767933.3 | 545483.2 | 438049.6 | 325997.1 | 487064.4 | 418644.8 | 309418.9 | TRUE |
| 177439.9 | 170153.8 | 196346.7 | 202767   | 176617.7 | 189615.6 | 172905.1 | 187039.8 | TRUE |
| 1142288  | 853910.8 | 1031133  | 1067216  | 1215049  | 1180060  | 890459.8 | 1154557  | TRUE |
| 523360.4 | 385295.2 | 541132.7 | 484929.7 | 601844.9 | 582565.6 | 420538.1 | 562906.3 | TRUE |
| 779156.8 | 724050.6 | 768266   | 752893.8 | 789466.6 | 767604   | 670881.9 | 695594.5 | TRUE |
| 312898.5 | 258540.6 | 291926.2 | 269646.8 | 365842.9 | 318957.9 | 289902.6 | 314489.9 | TRUE |
| 119165.5 | 142891.1 | 139885.3 | 137050.5 | 165981.7 | 117714.1 | 118580.9 | 125146.3 | TRUE |
| 2180131  | 1733648  | 2113500  | 2073111  | 1997943  | 2410479  | 1871976  | 2508087  | TRUE |
| 444698.8 | 455105.3 | 572598.8 | 453290.7 | 334452.8 | 546970.4 | 442044.1 | 358329   | TRUE |
| 111375.9 | 127947.4 | 130222.8 | 145325.8 | 118536.2 | 126729.3 | 143529.6 | 89039.4  | TRUE |
| 295849.4 | 248864.3 | 268185   | 270266.8 | 320236   | 314043.7 | 242456.3 | 325834.8 | TRUE |
| 87081.2  | 83431.6  | 94121.7  | 113814.5 | 88292.6  | 111666.1 | 109301.6 | 93266.6  | TRUE |
| 38827.6  | 73079.9  | 69818.4  | 103052.8 | 91196.4  | 30380.5  | 17531    | 32350    | TRUE |
| 702395.3 | 587763.2 | 667393.6 | 818677.1 | 718329.4 | 633931.9 | 644430.7 | 737477.9 | TRUE |
| 409474.2 | 477961.9 | 416582.7 | 380185.4 | 444639.6 | 518450.3 | 461382.3 | 475621.7 | TRUE |
| 116701.9 | 80197.9  | 111444.6 | 131411.7 | 109736.3 | 119732   | 106134.5 | 117017.3 | TRUE |
| 48885.7  | 47211.2  | 36215.7  | 106596.1 | 34903.3  | 45657.3  | 32327.2  | 35734.4  | TRUE |
| 23361.9  | 7480.9   | 19567.3  | 7237.1   | 23539.7  | 8338.9   | 8091     | 14390.5  | TRUE |
| 29079.4  | 10408.6  | 31122.5  | 12783.4  | 20799.8  | 23720.4  | 38226.2  | 28955.8  | TRUE |
| 93020.4  | 43973.3  | 68577.5  | 63775.5  | 59203.1  | 68771.8  | 51575.6  | 84256.2  | TRUE |
| 42835.5  | 10506.3  | 35435.8  | 26625.5  | 25005.4  | 38212    | 26140.6  | 34266.8  | TRUE |
| 50648.3  | 88908.2  | 68247.1  | 82974.4  | 75659.3  | 67339.9  | 57143.1  | 56539.5  | TRUE |
| 923069.1 | 837304.3 | 755125.7 | 1073440  | 1149489  | 777862.2 | 903859.9 | 1206936  | TRUE |
| 93429    | 82428.4  | 96203.2  | 85763.1  | 81842.6  | 90173.8  | 97370.2  | 101937.8 | TRUE |
| 2744082  | 2912845  | 2043917  | 2380513  | 2112641  | 3092705  | 3091683  | 3080274  | TRUE |
| 249552   | 155784.6 | 211838   | 225506.3 | 229444.2 | 217367.5 | 190510.6 | 205399.7 | TRUE |
| 339627.3 | 285522.8 | 296514.7 | 334269.5 | 330263.9 | 307651.4 | 318474.6 | 331169.9 | TRUE |
| 85416.7  | 60410.8  | 90675.3  | 81232.7  | 94760.4  | 93900.6  | 72090.4  | 79921    | TRUE |
| 702187.2 | 625301.6 | 573716.9 | 604011.5 | 666424.9 | 837659.6 | 643665.7 | 671051.7 | TRUE |
| 2414206  | 2389029  | 2044842  | 1874966  | 2293328  | 2810159  | 2445329  | 2539883  | TRUE |
| 122305.5 | 126596.7 | 140566.2 | 129194.3 | 118090   | 152668.3 | 124271.3 | 105181.2 | TRUE |
| 33819.1  | 36034.5  | 56109.2  | 7315.7   | 33543.1  | 57007.5  | 43691.3  | 21582    | TRUE |
| 46967.3  | 60959.2  | 83984.1  | 26480.2  | 34964.6  | 78096.8  | 61854.8  | 35797.6  | TRUE |
| 41704.8  | 56899.1  | 66565.4  | 37364.9  | 35154.5  | 57521    | 60599.1  | 36111.9  | TRUE |
| 48018.4  | 25166.7  | 57460.6  | 52207.6  | 62959.2  | 21263.9  | 74123    | 37236.3  | TRUE |

|          |          |          |          |          |          |          |          |      |
|----------|----------|----------|----------|----------|----------|----------|----------|------|
| 684229.3 | 658106   | 941818.5 | 493949.4 | 416307.4 | 981419.8 | 618909.4 | 404380.8 | TRUE |
| 176447   | 190687.5 | 280643.2 | 156780.2 | 188262.9 | 291851.8 | 231229.9 | 163607.3 | TRUE |
| 127431.9 | 95676.8  | 139890.7 | 86280.2  | 88949.9  | 157259.7 | 127787.6 | 87782.3  | TRUE |
| 535953.2 | 326920.1 | 517442.6 | 544001.1 | 826638.7 | 371031.8 | 359828.5 | 398178.7 | TRUE |
| 624104.7 | 555235   | 668906.4 | 702710.2 | 924524   | 538255.6 | 584965.6 | 637216.4 | TRUE |
| 117721.2 | 113235.4 | 166662.6 | 69518.4  | 77335.4  | 181511.7 | 106010.2 | 85395.8  | TRUE |
| 41522    | 36545.7  | 63585.1  | 26556.9  | 20574.6  | 63152.5  | 45752.7  | 24184.2  | TRUE |
| 647317.4 | 692555.1 | 1120504  | 392719.4 | 409846.7 | 1174135  | 647397.7 | 475959.4 | TRUE |
| 229787.2 | 264171.9 | 322171.1 | 131427.1 | 155206.1 | 338514.8 | 248794.8 | 158227.1 | TRUE |
| 152150   | 186074.6 | 332007.7 | 185651.2 | 166712.1 | 346691.3 | 227890.6 | 180285.2 | TRUE |
| 69616.8  | 76396.6  | 126562.5 | 52662.4  | 66125.2  | 123139.8 | 104046.3 | 74794.9  | TRUE |
| 43826.6  | 20461.8  | 31550.4  | 39400.8  | 24580.9  | 49147.4  | 28799.8  | 57904.7  | TRUE |
| 92597.7  | 71915.4  | 92563.6  | 97624.2  | 80690.7  | 114434.9 | 109925.5 | 106245.3 | TRUE |
| 42107.9  | 35248.2  | 27948.9  | 34857.3  | 32983.4  | 35468.5  | 45738.4  | 38412.2  | TRUE |
| 31245.2  | 62087.9  | 57716.4  | 59589.8  | 49728    | 51508.3  | 40298.8  | 37137.1  | TRUE |
| 43822.3  | 30895.5  | 46143.1  | 43623.5  | 54451.7  | 39644.5  | 57739.7  | 64030    | TRUE |
| 112617.2 | 106861.2 | 110523.7 | 116720.1 | 120965.3 | 115122.7 | 121554.6 | 115556.7 | TRUE |
| 1281599  | 1045826  | 1293161  | 1285507  | 1193407  | 1318858  | 1044873  | 1194718  | TRUE |
| 240812.6 | 260115.1 | 266569.9 | 239583.4 | 286510.9 | 234547.9 | 243057   | 227840.7 | TRUE |
| 404734.2 | 338397.5 | 332534.3 | 355445.3 | 337946   | 372205.1 | 391335.3 | 358229.9 | TRUE |
| 27375.1  | 28876.4  | 16628.3  | 28907.3  | 26575    | 26775    | 13216.4  | 32115.9  | TRUE |
| 51915.6  | 60732.1  | 61886.2  | 52652.9  | 48836.9  | 59796.7  | 64084    | 65924.2  | TRUE |
| 51383.3  | 55018.7  | 44619.2  | 41301.1  | 43247.7  | 25396.9  | 58258.2  | 57802.9  | TRUE |
| 959230.9 | 906718.4 | 1017886  | 963750.9 | 1212300  | 1007345  | 897410.6 | 1208404  | TRUE |
| 235524.2 | 257069.4 | 250113.3 | 247972.1 | 284187.4 | 248395.9 | 301845.2 | 206462.7 | TRUE |
| 121092.7 | 106654.5 | 120082.6 | 119204.4 | 110055.9 | 120582   | 124937.1 | 149975.6 | TRUE |
| 32872.2  | 21192.5  | 25281.1  | 34744    | 41677    | 38487.3  | 40569.3  | 38766.4  | TRUE |
| 55849.4  | 56719.7  | 62314.9  | 55432    | 43337    | 64631    | 64382.4  | 50673.6  | TRUE |
| 61283.9  | 57496.8  | 50633.1  | 54205.7  | 54243.5  | 97684.8  | 106680.8 | 84276.3  | TRUE |
| 39295.5  | 46031.6  | 30035.2  | 28838.1  | 42627.2  | 38136.9  | 47533    | 42649.2  | TRUE |
| 22685.1  | 6954.9   | 14013.1  | 15766.2  | 8356.3   | 12884.4  | 23749.1  | 29291.2  | TRUE |
| 21933.9  | 15821.7  | 8011.9   | 13208.7  | 25276.4  | 34792.7  | 30751.5  | 38329.3  | TRUE |
| 173373.6 | 174726   | 188685.7 | 273330.1 | 266628.4 | 229951.3 | 249532.6 | 255827.6 | TRUE |
| 50214.9  | 63106.1  | 57696.8  | 57980.4  | 67205    | 45288    | 41289.6  | 29249.2  | TRUE |
| 461557   | 520520.6 | 454435.5 | 511411.9 | 512589.1 | 431561.4 | 516285   | 499938.6 | TRUE |
| 419789   | 487936.2 | 401974.8 | 432633.5 | 422655.2 | 401443.2 | 537295.6 | 401680.3 | TRUE |
| 23731    | 20646.2  | 23328.3  | 23414    | 23063.6  | 11066.7  | 19636.1  | 11875    | TRUE |
| 31927.7  | 48424.9  | 31486.1  | 36847.3  | 46671.2  | 34177.7  | 48252.9  | 33148.1  | TRUE |
| 174664.6 | 142722.8 | 161692.8 | 177472   | 180858.3 | 191540.6 | 176137   | 195853.7 | TRUE |
| 145864   | 128912.3 | 91057.6  | 92200    | 85177.8  | 83938.2  | 90916.6  | 98065.5  | TRUE |
| 229331.9 | 216256.5 | 217788.2 | 256740.9 | 263411.1 | 235297.9 | 233680.2 | 221999.9 | TRUE |
| 218726.4 | 202289.4 | 215899.2 | 238612.5 | 198084   | 182723.9 | 214555.9 | 189038.5 | TRUE |
| 395850.6 | 400379.7 | 374461   | 427922.1 | 357473.5 | 376216.1 | 404597.4 | 368217.2 | TRUE |

|          |          |          |          |          |          |          |          |      |
|----------|----------|----------|----------|----------|----------|----------|----------|------|
| 169225.4 | 165320.1 | 199483.9 | 228429.6 | 184417.5 | 229254.6 | 203668.4 | 215425.8 | TRUE |
| 362940.5 | 360032.6 | 357547.2 | 454969   | 343906.6 | 397373.8 | 358873.3 | 374595.1 | TRUE |
| 156676.3 | 135648.2 | 137238.6 | 122634.9 | 141642   | 128016   | 136570.7 | 160335.3 | TRUE |
| 149251.4 | 142000   | 176431   | 196639.8 | 156684.7 | 194837.4 | 173318.8 | 146061.3 | TRUE |
| 112596.8 | 64670.4  | 105566.8 | 78997.9  | 87185.1  | 104772.8 | 99083    | 98622.7  | TRUE |
| 154972   | 135465.1 | 160757.3 | 165633.5 | 147503.7 | 171581.4 | 157394.3 | 151595.7 | TRUE |
| 218230.6 | 167936.4 | 239368.8 | 218786.2 | 245425.9 | 199847.1 | 200839.6 | 219386   | TRUE |
| 42018    | 30650.8  | 44026.7  | 49731.4  | 31428.3  | 28263.3  | 42920.6  | 36650    | TRUE |
| 486419.9 | 443861.3 | 384003.9 | 469379.1 | 432211.3 | 396769.5 | 471201.3 | 475613.9 | TRUE |
| 211541.1 | 204318.4 | 246189.7 | 221981.1 | 230446.8 | 269565.5 | 211146.2 | 224560.7 | TRUE |
| 43059.6  | 77611.5  | 59621.9  | 73439.9  | 62526.1  | 25436.2  | 38230.2  | 33918.9  | TRUE |
| 355212.2 | 252616.1 | 274294.8 | 261428.7 | 293092.1 | 352741.8 | 299255.8 | 355214.3 | TRUE |
| 91359.6  | 94209.4  | 101745.8 | 108444.3 | 88351.9  | 102231.5 | 118872.3 | 91138.8  | TRUE |
| 6980182  | 5571042  | 5413703  | 6692495  | 6951345  | 5791270  | 6407979  | 7292512  | TRUE |
| 124787.2 | 203517.3 | 113596.8 | 173664.5 | 170185.5 | 103728.6 | 74676.8  | 114115.7 | TRUE |
| 231910.3 | 209443.5 | 193894.4 | 234567.8 | 245330.9 | 198433.4 | 226463.5 | 254098.6 | TRUE |
| 78802.5  | 63538.3  | 63218.1  | 95031.5  | 91114.1  | 42999.4  | 72687.2  | 78144.6  | TRUE |
| 78337.7  | 78476.9  | 67694.6  | 107020.4 | 91333.4  | 72111.4  | 71804.8  | 81892    | TRUE |
| 460479.5 | 426038.3 | 382034.6 | 501294.7 | 512434.3 | 467618.6 | 479422.3 | 485308.6 | TRUE |
| 50700.3  | 79771.1  | 61105.8  | 94389.2  | 61087.9  | 51567    | 56190.3  | 51471.8  | TRUE |
| 953320.3 | 916802.6 | 852718.7 | 1071458  | 1144067  | 901851.6 | 1034501  | 1127450  | TRUE |
| 198126.3 | 154249.9 | 238644   | 235970.1 | 218215.5 | 243032.3 | 228392.2 | 203607.9 | TRUE |
| 303527.6 | 309972.4 | 283855.5 | 366955.5 | 309046.3 | 325953.4 | 380128   | 321206.3 | TRUE |
| 361552.7 | 370628.8 | 360198   | 361766.1 | 321483.5 | 352013.9 | 309915.6 | 402963   | TRUE |
| 337772.8 | 316671.2 | 413008.4 | 424437.6 | 311427.2 | 412527   | 313681.9 | 433297.2 | TRUE |
| 3192156  | 2322112  | 3442982  | 3129515  | 2881086  | 3645108  | 2607572  | 3669108  | TRUE |
| 118447   | 78962.1  | 97423.5  | 150676.2 | 95194    | 74793.4  | 57778.8  | 62838.1  | TRUE |
| 21659.9  | 30045.8  | 20908.9  | 25143.7  | 17671.2  | 17960.7  | 8980.3   | 9057.8   | TRUE |
| 25554.2  | 21717.3  | 27091.8  | 44728.9  | 25491.7  | 40238.6  | 25601.8  | 32717.5  | TRUE |
| 31972.6  | 23549.8  | 32402.2  | 24733.6  | 33772.6  | 26019.1  | 37066.8  | 32599.8  | TRUE |
| 151558.4 | 151596.1 | 135804.3 | 154785.8 | 125454.1 | 153444.5 | 151689.2 | 137043.8 | TRUE |
| 67098.2  | 54897    | 47137.7  | 65257.2  | 47247.5  | 78448.6  | 71434.8  | 71929    | TRUE |
| 121648.3 | 121639.7 | 111424.4 | 112039.8 | 117256   | 154305.5 | 139809.8 | 125795.5 | TRUE |
| 22853.8  | 27327.1  | 22280.7  | 30267.9  | 42632.1  | 31946.8  | 37072.8  | 30567.3  | TRUE |
| 125632.9 | 116328.7 | 118725.3 | 176318.8 | 139939.8 | 153536.9 | 145761.7 | 145652.3 | TRUE |
| 261969.1 | 243892.1 | 250628.6 | 279776.8 | 235453.8 | 249442   | 254980.8 | 231919.2 | TRUE |
| 71694.2  | 54191.5  | 88100.9  | 115748.9 | 75702    | 66135.3  | 86734.2  | 65675    | TRUE |
| 226602.6 | 188306.5 | 215394.5 | 292479.7 | 228474.8 | 254139.1 | 216389.3 | 182417.2 | TRUE |
| 611099   | 534398.5 | 589891.2 | 572747.7 | 553991.7 | 557464.8 | 513608.7 | 547813.9 | TRUE |
| 184991.9 | 170430.4 | 150858.9 | 167324.4 | 180663.8 | 179692   | 146466.9 | 161864   | TRUE |
| 53946.9  | 42444.9  | 41685.7  | 32366.8  | 50704    | 45393.7  | 49082.1  | 35864.5  | TRUE |
| 137323.8 | 129282.8 | 144721.3 | 130820.9 | 122130.4 | 146328.6 | 161570.5 | 143688.5 | TRUE |



|          |          |          |          |          |          |          |          |      |
|----------|----------|----------|----------|----------|----------|----------|----------|------|
| 71117.4  | 69799.9  | 104976   | 45784.3  | 65775.8  | 72030.9  | 79953.5  | 84145.4  | TRUE |
| 88190.1  | 85159.3  | 64308.6  | 68430.6  | 84178.1  | 78925.9  | 93753.5  | 89588.7  | TRUE |
| 145270.3 | 149425   | 124962.9 | 185133.9 | 149783.7 | 118568.8 | 139643.5 | 123358.1 | TRUE |
| 66234.1  | 128239.4 | 272809.5 | 84013.5  | 60114.8  | 81093.1  | 69389.1  | 84012.2  | TRUE |
| 82289.9  | 174851.1 | 400595.2 | 101779.6 | 93011.8  | 84917.9  | 95645.4  | 96791.1  | TRUE |
| 68406.1  | 137091   | 294777.2 | 91581.9  | 121035.8 | 82724.7  | 58093.7  | 85954.1  | TRUE |
| 247323.5 | 284338.6 | 298654.5 | 303503.8 | 281369.8 | 221540.6 | 259287.5 | 253440.3 | TRUE |
| 42761.1  | 57543.8  | 59201.3  | 48736.9  | 45126.7  | 36158.2  | 48527.2  | 40017    | TRUE |
| 47164.9  | 45088.8  | 42416.2  | 48054    | 54675.3  | 52758.3  | 50273.9  | 66354.5  | TRUE |
| 135455.2 | 108334.6 | 87744.9  | 148083.1 | 116062.3 | 137312.5 | 152423.3 | 152694.9 | TRUE |
| 331239.1 | 318524.2 | 255229.1 | 301001.9 | 299240.3 | 339042.2 | 376155   | 358655.6 | TRUE |
| 1395519  | 1199088  | 845231.9 | 980915.9 | 1014478  | 944840.4 | 963836.3 | 1064052  | TRUE |
| 767147.2 | 649403.6 | 665807.7 | 675922.2 | 716357.2 | 753124.3 | 702949   | 733208.1 | TRUE |
| 25820.6  | 33378.6  | 37679.4  | 29903.7  | 63080.5  | 27783.2  | 26350    | 44323.6  | TRUE |
| 86247.5  | 83622    | 72295.9  | 73627.1  | 59160.6  | 40720.6  | 88648.7  | 45859.6  | TRUE |
| 112889.5 | 119293.7 | 99100.8  | 98440.3  | 109261.6 | 81651.3  | 123038.3 | 77338.1  | TRUE |
| 477340.6 | 684124.5 | 489114.2 | 495326.6 | 492814.3 | 327488.9 | 665372.9 | 361100.6 | TRUE |
| 62478.8  | 64875.5  | 44341.2  | 42254.5  | 47995.6  | 68338.9  | 69843.5  | 57879.1  | TRUE |
| 79169.6  | 65106.8  | 131939.9 | 78989.6  | 67262.9  | 82653.6  | 96629.9  | 92167.3  | TRUE |
| 35284.9  | 39032.5  | 32378.5  | 31877    | 25094.1  | 44682.2  | 44055    | 35502.1  | TRUE |
| 153972.5 | 160373.6 | 115346.9 | 140077.4 | 108021.4 | 179400.9 | 197272.3 | 148058.9 | TRUE |
| 137047.8 | 105380.5 | 140437.4 | 156513.2 | 127315.7 | 171644.6 | 145530.1 | 191289.6 | TRUE |
| 38961.4  | 29530.9  | 25287.7  | 35434.1  | 23552.3  | 49974.8  | 42693.4  | 46490.1  | TRUE |
| 129029.5 | 122923.6 | 93492.4  | 145120.8 | 135850.7 | 119076   | 124310.6 | 105743.8 | TRUE |
| 151995.7 | 115651.3 | 126802.9 | 193252.6 | 158287.8 | 141475   | 144734.4 | 193387.8 | TRUE |
| 219561.4 | 183244.5 | 217841.3 | 254840.8 | 200094.3 | 217618.8 | 229274   | 219130.2 | TRUE |
| 230415   | 184780.2 | 284784.3 | 254750.1 | 231078.2 | 193207.9 | 198885.9 | 206192.8 | TRUE |
| 471279.8 | 465861.6 | 573664.5 | 592924.8 | 503674.6 | 466344.5 | 490826.5 | 475755.6 | TRUE |
| 311322.3 | 269749.7 | 331666.6 | 296562.6 | 328216   | 330743   | 310437.4 | 299894.3 | TRUE |
| 156996.3 | 161713.1 | 130523.2 | 137916.4 | 126058.3 | 120860.9 | 128807.5 | 144760.1 | TRUE |
| 207286.2 | 200315.8 | 196003.1 | 221270.6 | 218280.2 | 194985.4 | 213044.5 | 216080.8 | TRUE |
| 628580.4 | 563400.4 | 687885.2 | 759820.7 | 720401.3 | 758871.5 | 663311.5 | 752487.9 | TRUE |
| 37753.3  | 31575.3  | 41523.4  | 42386.8  | 40139.8  | 38877.9  | 28108    | 40577.8  | TRUE |
| 315688.1 | 295141   | 352404.1 | 211238.8 | 359793.3 | 370453.5 | 311636.3 | 380617   | TRUE |
| 32248    | 37854.4  | 32694    | 44313.5  | 55269.3  | 41064    | 43043.8  | 46093.8  | TRUE |
| 910525.6 | 781888.6 | 709068   | 857020.4 | 897956   | 1077023  | 1042424  | 1197601  | TRUE |
| 13159.7  | 14145.2  | 8267     | 7844     | 8036     | 18529.3  | 8925.3   | 6341.2   | TRUE |
| 6349.1   | 8621     | 12965.1  | 7000.3   | 7081.2   | 6324.9   | 7689.6   | 8390.8   | TRUE |
| 90991.3  | 83437.6  | 72487.7  | 81732.6  | 100184.4 | 87412.5  | 111056.4 | 98820.5  | TRUE |
| 25162.1  | 30159.5  | 40391.6  | 24422.9  | 31584.3  | 41416.1  | 13746.8  | 37027    | TRUE |
| 67277.4  | 65524.4  | 53958.1  | 65522.2  | 58281.1  | 82916.5  | 75501.6  | 73761.9  | TRUE |
| 52392.3  | 47999    | 51394.6  | 51717.4  | 48486    | 54141.7  | 56357.6  | 45644.5  | TRUE |
| 56655.6  | 40228.1  | 41535.7  | 42169    | 46916.6  | 30877.7  | 51763.7  | 36178.6  | TRUE |
| 60774.6  | 58687.6  | 39345.3  | 59212.8  | 41862.3  | 76466.5  | 54716.1  | 51680.8  | TRUE |

|          |          |          |          |          |          |          |          |      |
|----------|----------|----------|----------|----------|----------|----------|----------|------|
| 57778.9  | 58141.3  | 51661    | 54783.6  | 46527.7  | 48998.7  | 68296.3  | 51406.1  | TRUE |
| 55322    | 66517.4  | 125163.8 | 89450.4  | 60372.6  | 80545.8  | 57815.8  | 71593.8  | TRUE |
| 290220.4 | 236118.6 | 199237.9 | 226172.7 | 358235   | 320109.8 | 310961.8 | 300236.8 | TRUE |
| 70339.2  | 51105.4  | 51203.2  | 79101.1  | 59778.7  | 69979.9  | 72140.5  | 78943.7  | TRUE |
| 196515.2 | 155120.2 | 114584.2 | 189016.3 | 173299.3 | 195158   | 203539.9 | 213771.9 | TRUE |
| 211692.8 | 134983.2 | 162450.4 | 157706.1 | 204503.7 | 185177.2 | 166059   | 182560   | TRUE |
|          |          |          |          |          |          |          |          |      |
| 37313.6  | 21947    | 27216.5  | 26686.4  | 29503    | 32210.9  | 22623.3  | 31862    | TRUE |
| 65382.1  | 55909.2  | 68521.2  | 72849.4  | 43753.6  | 51592.7  | 57053.8  | 63366.7  | TRUE |
| 70286.2  | 84423.4  | 58480.6  | 86641    | 78534.1  | 61542.7  | 91448.3  | 76669.6  | TRUE |
| 43558.8  | 38540.2  | 6597     | 52415    | 35544.1  | 26407.3  | 37212.1  | 45563.9  | TRUE |
| 235751.8 | 243970.1 | 237603.7 | 241527   | 207186.5 | 268809.1 | 270803.7 | 257790.6 | TRUE |
| 121669   | 126018.3 | 143840   | 151147.2 | 91916.2  | 106898.6 | 151185.5 | 139349.5 | TRUE |
| 284617.7 | 241449.9 | 205399.7 | 267568   | 286091.2 | 275411.7 | 310221.4 | 318990.8 | TRUE |
| 203251.4 | 206564.7 | 192161.2 | 224681.1 | 178039.2 | 207073.8 | 219853.8 | 226128.2 | TRUE |
| 68959.8  | 85638    | 55758.8  | 70172.8  | 58484    | 65511    | 59232.6  | 49297.6  | TRUE |
| 136164.6 | 203963.1 | 283607.6 | 284751   | 264383.3 | 326752.2 | 271777.5 | 239166.4 | TRUE |
| 63302.6  | 63203    | 79278.6  | 72377.9  | 86526.7  | 115962.9 | 72707.4  | 117463.2 | TRUE |
| 112971.2 | 99707.3  | 102471.4 | 110951.4 | 133477   | 154561.4 | 145985.7 | 123298.2 | TRUE |
| 776017.8 | 793088.1 | 614518.9 | 882267.1 | 904789.2 | 839260.6 | 1123818  | 699535.9 | TRUE |
|          |          |          |          |          |          |          |          |      |
| 80121.4  | 93225.4  | 67271.2  | 66446.3  | 108913.4 | 54047.3  | 107689.3 | 72612.1  | TRUE |
| 261777.1 | 355159.7 | 252844.4 | 288698.8 | 306822.1 | 253423.3 | 279589.7 | 312089.3 | TRUE |
| 82911.6  | 110894.2 | 138702.4 | 72576.4  | 74355.6  | 90459.3  | 99121.7  | 92423.6  | TRUE |
|          |          |          |          |          |          |          |          |      |
| 19441.3  | 28036.7  | 17665.3  | 30989.6  | 41541.5  | 5137.9   | 9415     | 36845.8  | TRUE |
| 60657.8  | 59832.5  | 53821.2  | 66995.7  | 71080.9  | 48879    | 51331.4  | 83394.6  | TRUE |
|          |          |          |          |          |          |          |          |      |
| 7306.3   | 4120.4   | 5853.4   | 6492.1   | 6071.3   | 6181.6   | 6349.4   | 4093.2   | TRUE |
| 1885873  | 1848019  | 1487398  | 1920112  | 1388221  | 1791983  | 1955026  | 2854304  | TRUE |
| 566163.8 | 402109.4 | 349568.7 | 478877.5 | 527967.7 | 528383.7 | 559993.5 | 571942.4 | TRUE |
| 135070.1 | 109450.6 | 87578.2  | 143818.5 | 119157.5 | 145222.3 | 132651.1 | 138809.8 | TRUE |
| 35288    | 7405.8   | 14980.9  | 15139.7  | 22744.1  | 10589.2  | 34957.4  | 30121.9  | TRUE |
| 70681.8  | 60930.3  | 51714.2  | 56965.5  | 66094.5  | 58479.6  | 68710.4  | 84188.7  | TRUE |
| 35755    | 35870.6  | 19154    | 42372.6  | 32114.3  | 30169.2  | 37748.7  | 25413.4  | TRUE |
| 69061.7  | 71269.3  | 67181    | 93831.4  | 62791.7  | 62470.7  | 75517.5  | 65809.6  | TRUE |
|          |          |          |          |          |          |          |          |      |
| 56613.8  | 55121.1  | 54941.3  | 48722.9  | 44836    | 51543.2  | 57402.4  | 48995.6  | TRUE |
| 56618.4  | 83168.6  | 43551.7  | 66459.8  | 56223.9  | 50225    | 67938.3  | 76905.5  | TRUE |
| 43262    | 71952.2  | 39179    | 41163.6  | 62535.2  | 40969.5  | 49549.6  | 59550    | TRUE |
| 41197.1  | 31784.8  | 41789    | 36594.5  | 29519.3  | 46671.9  | 46314.5  | 32863.1  | TRUE |
| 171641.7 | 124153.1 | 128009   | 122373.6 | 121176.6 | 118133.9 | 162399.4 | 159005.3 | TRUE |
| 65933.8  | 41277    | 39821.4  | 46701.3  | 71518.5  | 47355.3  | 57286.5  | 62076.9  | TRUE |
| 10938.5  | 15599.9  | 37343.5  | 41207.3  | 34380.5  | 34126.7  | 31363.8  | 31752.5  | TRUE |
| 5526.2   | 6564.1   | 9423.4   | 6520.9   | 21946.2  | 7462.1   | 10427.9  | 6896.4   | TRUE |

|          |          |          |          |          |          |          |          |      |
|----------|----------|----------|----------|----------|----------|----------|----------|------|
| 77071.8  | 54217    | 82719.9  | 58351.7  | 56989.9  | 74228.8  | 65971.4  | 63609.1  | TRUE |
| 67442.4  | 63708.9  | 72123    | 62788.9  | 49738.5  | 93917    | 67043.5  | 66938.9  | TRUE |
| 29381.5  | 26624.6  | 15406    | 28309.2  | 18091.3  | 15666.2  | 23740.7  | 26490.3  | TRUE |
| 19904    | 15221.1  | 27370.1  | 23683    | 19164.9  | 37206.7  | 22971.7  | 29880.3  | TRUE |
| 425402.1 | 394715   | 317276.2 | 429414.4 | 361689.4 | 368520.3 | 392739.3 | 375184.6 | TRUE |
| 539541.2 | 600923.4 | 626595.6 | 650171.1 | 564033.5 | 511216   | 488414.9 | 485495.4 | TRUE |
| 44379.8  | 112333.7 | 54447.9  | 109072.4 | 80999    | 22489.2  | 36036.6  | 29288.6  | TRUE |
| 123856.8 | 238743.8 | 144692.2 | 313313.2 | 249513.5 | 88109    | 54939.8  | 99242.7  | TRUE |
| 70594.2  | 105451.1 | 96282.2  | 145146   | 129214.9 | 49713.5  | 45926.5  | 53607.7  | TRUE |
| 854823.9 | 650960.9 | 845759.1 | 879222.1 | 856681   | 778378   | 662267.3 | 815710.1 | TRUE |
| 1215830  | 959868.3 | 1186644  | 1398898  | 1206418  | 1275494  | 1029216  | 1305339  | TRUE |
| 830442.8 | 776223.5 | 630111   | 647779.8 | 839376   | 903710   | 717405.7 | 909605   | TRUE |
| 128026.8 | 209771.8 | 156248   | 185618.5 | 257728.1 | 107022.2 | 124224.5 | 110214.5 | TRUE |
| 509525.6 | 425537.5 | 420027.6 | 424013.7 | 512197.2 | 589593.1 | 479715.5 | 536193.9 | TRUE |
| 286689.6 | 240419.5 | 294623.5 | 329506.8 | 305723.3 | 290620.5 | 256310.8 | 376271.9 | TRUE |
| 29168.8  | 32167.4  | 37884.7  | 34274.2  | 35440.8  | 39208.5  | 34962.4  | 45232.3  | TRUE |
| 45579    | 34687.8  | 35659.5  | 39019.4  | 65210.2  | 38412.8  | 44704.4  | 42858    | TRUE |
| 86520.1  | 62368.5  | 40336.8  | 64503.8  | 46666.5  | 38604.1  | 62919.4  | 42140.9  | TRUE |
| 45293.5  | 43365.7  | 51366.9  | 33938.6  | 41358.2  | 40366    | 49587.7  | 27801.1  | TRUE |
| 53954.9  | 44500.1  | 51644.8  | 48087.8  | 43579    | 49008.1  | 35609.6  | 48440.3  | TRUE |
| 138987.4 | 148450.1 | 208184.5 | 153712.2 | 149456.6 | 134888.3 | 164463.2 | 134262.7 | TRUE |
| 63840.6  | 90323.8  | 48380.8  | 48949.4  | 55231.2  | 53759.2  | 69142.1  | 52502    | TRUE |
| 180404.4 | 210274.3 | 161808.2 | 198507.3 | 158659.5 | 180176.5 | 225361.2 | 150732.8 | TRUE |
| 345874.8 | 310898.4 | 353090.5 | 312005.5 | 253081.9 | 339982.4 | 325409.1 | 323761   | TRUE |
| 31988    | 27875.7  | 31973.3  | 20883.1  | 30120    | 27013.9  | 27019.5  | 24224.5  | TRUE |
| 37746.8  | 37395.6  | 30020.2  | 41211.6  | 28407.7  | 36165.7  | 37497.3  | 24030.1  | TRUE |
| 141002.9 | 115394.2 | 115347.4 | 118818.2 | 79499.2  | 125108.1 | 96827.2  | 72347.6  | TRUE |
| 141134.2 | 150464.1 | 171862.3 | 146382   | 164687   | 160103.8 | 152098.3 | 137098.9 | TRUE |
| 1105656  | 755877.3 | 1147545  | 1188665  | 1215426  | 1277474  | 868059.3 | 1301347  | TRUE |
| 306196   | 337698.5 | 334833   | 421818.3 | 474282   | 296052.6 | 361604   | 406697.1 | TRUE |
| 529219.5 | 496199.8 | 529752.1 | 588622.4 | 653393   | 526885.7 | 592305.2 | 625973.3 | TRUE |
| 131941.9 | 168711.1 | 128811.4 | 156390.9 | 142474.4 | 111565.9 | 174010.8 | 121688.8 | TRUE |
| 149870.4 | 107130.7 | 108479.6 | 125101.3 | 111105.9 | 131199.8 | 133084.6 | 138853.6 | TRUE |
| 100433.5 | 77733.7  | 74121.7  | 85387.7  | 66832.6  | 71595.1  | 82022.5  | 70198.2  | TRUE |
| 55748.8  | 60081.9  | 46637.6  | 61773.2  | 71485.5  | 90997.3  | 81138.2  | 115309.4 | TRUE |
| 134050.7 | 246595.3 | 796227.1 | 103678.5 | 134609.7 | 123336.9 | 130681.1 | 113419.3 | TRUE |
| 50898.6  | 50443.2  | 61116.3  | 58176.8  | 47487.1  | 52578.2  | 58331    | 45734.6  | TRUE |
| 170470.5 | 147272.2 | 145302.6 | 172275.5 | 123395.4 | 158584.3 | 193829.8 | 163621.4 | TRUE |
| 174815.5 | 153227.9 | 120538.1 | 200419.5 | 147290.5 | 154809.2 | 192080.4 | 181890.6 | TRUE |
| 79522    | 100463.4 | 70500.6  | 114264.9 | 113117.2 | 62403.3  | 124288.3 | 126191.3 | TRUE |
| 81273.7  | 100307   | 64038.7  | 97860    | 113892.6 | 53617    | 97106.2  | 104562.2 | TRUE |
| 42308.3  | 41788    | 72163.2  | 60303.6  | 48304.5  | 38784.9  | 31159.9  | 35844.5  | TRUE |
| 123039.1 | 104700.8 | 128944.7 | 135185.9 | 93341.3  | 119157.4 | 112237.5 | 108891.1 | TRUE |

|          |          |          |          |          |          |          |          |      |
|----------|----------|----------|----------|----------|----------|----------|----------|------|
| 246835.5 | 239299.3 | 211252   | 272479   | 250220.1 | 203586.3 | 298341.8 | 299385.9 | TRUE |
| 35436.3  | 60067.9  | 58812.3  | 47567.4  | 42533.1  | 29476    | 28381.7  | 26345.5  | TRUE |
| 113409.5 | 105998.8 | 127225.4 | 108858   | 100168.2 | 98358.6  | 79367.6  | 97081.8  | TRUE |
| 1463227  | 1225892  | 1561392  | 1599328  | 1208357  | 1404720  | 1200611  | 1400071  | TRUE |
| 129347   | 144075.2 | 106911.9 | 115728   | 101034.9 | 113645.7 | 136828.1 | 113912.3 | TRUE |
| 163990.2 | 151392.8 | 125808.3 | 115310.5 | 147232.2 | 134305   | 141086.9 | 167363.7 | TRUE |
| 499383.5 | 554962.2 | 426412.8 | 492902   | 501538.7 | 395776.9 | 559069.6 | 506171.4 | TRUE |
| 51258.1  | 60982.7  | 84627.8  | 91256.6  | 68316.9  | 70642.2  | 72012.9  | 88436.4  | TRUE |
| 260989.9 | 206938.5 | 235573.1 | 296091.1 | 182886.2 | 269212.4 | 285595.1 | 281908.5 | TRUE |
| 39433.6  | 35885.7  | 63689.2  | 23599    | 46246.5  | 19767.3  | 40682.6  | 37184.7  | TRUE |
| 31148.8  | 46003.5  | 20675.7  | 22344.7  | 25017.6  | 20912.8  | 35078.9  | 29297.7  | TRUE |
| 115335.8 | 100587.6 | 102874.7 | 127074   | 109151.7 | 100019.8 | 119494.6 | 121416.7 | TRUE |
| 324622.4 | 374702.2 | 326015.1 | 311322   | 304238   | 336018.9 | 392616.7 | 302738.5 | TRUE |
| 75075.6  | 56741.5  | 100310.2 | 53464.9  | 87757.3  | 82188.3  | 85561.3  | 92135.2  | TRUE |
| 232420.3 | 190115.9 | 211694   | 233062.8 | 214052.3 | 228389.9 | 225917.9 | 205580.6 | TRUE |
| 3615366  | 3267739  | 2691733  | 2859197  | 2822906  | 2937953  | 3158605  | 3285881  | TRUE |
| 156455.9 | 132154.5 | 119964.7 | 140441.3 | 141748   | 175422.4 | 164166.2 | 189402.8 | TRUE |
| 160729.6 | 133349.6 | 136584.7 | 190528.4 | 161678.9 | 170894.7 | 154175   | 214596.4 | TRUE |
| 254933.1 | 204051.9 | 215028.1 | 227248   | 251564.8 | 272937.7 | 252100.7 | 272627.2 | TRUE |
| 83950.5  | 67078.1  | 80648.1  | 91009.1  | 91464.5  | 90465.6  | 82121.2  | 93222.7  | TRUE |
| 289124.7 | 223697.6 | 345096.7 | 368245.6 | 204356.7 | 331107.6 | 216652.2 | 193534.1 | TRUE |
| 441692.1 | 413357.8 | 433613   | 435206.5 | 320212   | 453778.4 | 392647.7 | 370352.7 | TRUE |
| 227652.6 | 140412.9 | 183115   | 172795.5 | 272064.5 | 284197.4 | 150991.4 | 268209   | TRUE |
| 732431.8 | 517474   | 568618.9 | 551427.3 | 739016.1 | 847692.6 | 485705.2 | 766254.6 | TRUE |
| 559706.3 | 538772.3 | 493474.8 | 630723.5 | 430147.5 | 553569.8 | 479422.2 | 471900.9 | TRUE |
| 218598.5 | 162512.5 | 196916.5 | 201383.8 | 153481.4 | 208228.7 | 164889.9 | 150762.3 | TRUE |
| 1218105  | 925459.6 | 1019029  | 1134239  | 1326585  | 1374313  | 879286   | 1414240  | TRUE |
| 300199.6 | 253153.1 | 251720.9 | 271172.5 | 282288.5 | 260126.1 | 261007.2 | 286568   | TRUE |
| 463610.4 | 511109.8 | 427363.1 | 449116.2 | 523942.4 | 531431.5 | 524169.8 | 542236.6 | TRUE |
| 269599.9 | 265757   | 197994.1 | 222842.7 | 270099.7 | 213656.5 | 272983.4 | 267922   | TRUE |
| 221200.3 | 195298.4 | 204001.5 | 188364.1 | 178042.5 | 193076.9 | 193818.4 | 194807.1 | TRUE |
| 172535.2 | 173258.8 | 188122   | 182141.6 | 183507.8 | 169957.2 | 195725.7 | 201643.2 | TRUE |
| 743868.9 | 704738.5 | 676013.4 | 726878.3 | 757371.4 | 749570.3 | 768030.5 | 786621.6 | TRUE |
| 105292.3 | 97392    | 93140.5  | 101132.6 | 111248.4 | 117195.4 | 105013.1 | 100493.9 | TRUE |
| 310986.5 | 330200.3 | 311762.6 | 284024.1 | 321461.7 | 306495.4 | 287757.5 | 297593   | TRUE |
| 47979.8  | 46531.6  | 45357.5  | 47509.1  | 40302    | 35092.5  | 39807.6  | 39547.2  | TRUE |
| 161427.8 | 130463.3 | 128854.3 | 147216.8 | 132800.5 | 274463.4 | 157339.1 | 193688.4 | TRUE |
| 325471.8 | 287063.9 | 327194.9 | 268309   | 231746.8 | 318893.1 | 291130.3 | 252421.4 | TRUE |
| 178690.9 | 188148.7 | 196549.5 | 168021   | 151116.7 | 235309.2 | 189092.7 | 166703.5 | TRUE |

|          |          |          |          |          |          |          |          |      |
|----------|----------|----------|----------|----------|----------|----------|----------|------|
| 94458.3  | 136232.8 | 134529.7 | 123461.9 | 150707.6 | 102881   | 119982.9 | 99927.4  | TRUE |
| 30376.1  | 40346.3  | 54449.8  | 22181    | 36913.6  | 58944.7  | 40132    | 32499.1  | TRUE |
| 44637.7  | 35847.5  | 52575.9  | 35649.7  | 49716.7  | 62502.6  | 50732.4  | 46726.4  | TRUE |
| 58730.3  | 54110.3  | 45755.5  | 54957.2  | 58009.8  | 51263.4  | 75092.7  | 74688.1  | TRUE |
| 48163.5  | 21264.6  | 26095.8  | 51755.1  | 42213.5  | 25918.3  | 35091.4  | 47141.3  | TRUE |
| 149445.5 | 150540   | 108245.1 | 156443.4 | 154551.1 | 136047.7 | 175710.6 | 154875.7 | TRUE |
| 38199.8  | 50177.8  | 42012.3  | 37776.6  | 67801.9  | 42019.7  | 55159.8  | 46870.9  | TRUE |
| 1546773  | 1684076  | 1856458  | 1805743  | 1474852  | 1511071  | 1801629  | 1560678  | TRUE |
| 35673.4  | 38229.6  | 29977.5  | 33085.7  | 34118.8  | 32277.9  | 42576.7  | 37744    | TRUE |
| 150870.6 | 173078.3 | 127224.9 | 122803.1 | 135871.1 | 103346.7 | 161975.1 | 141301.6 | TRUE |
| 248912.8 | 297077.1 | 200352.3 | 214625.8 | 240646.9 | 187457.7 | 282086.1 | 243361.7 | TRUE |
| 1438671  | 2353516  | 1133790  | 1685810  | 2043852  | 945960   | 2535179  | 1038002  | TRUE |
| 121412.9 | 185549.7 | 114727.6 | 165598   | 137105.6 | 142785.1 | 126149.4 | 119631.6 | TRUE |
| 186311.4 | 349931.7 | 1313309  | 261709   | 183093.3 | 177120.5 | 207165.1 | 181902.5 | TRUE |
| 230950.4 | 204501.2 | 223947.3 | 253022.3 | 179016.1 | 191055.2 | 257514.2 | 218481.3 | TRUE |
| 284796.6 | 247980.1 | 256859.9 | 284312.9 | 195355.4 | 271617.1 | 310292.5 | 326093.3 | TRUE |
| 272901.5 | 274341.1 | 202087.4 | 201760.8 | 194214.8 | 198989.6 | 234642.1 | 191745.4 | TRUE |
| 229088.5 | 254208.9 | 234287.4 | 272378.2 | 237838   | 238803.6 | 305158.4 | 231787.3 | TRUE |
| 1297094  | 950505.5 | 1499137  | 1458478  | 1166299  | 1485211  | 1071949  | 1471756  | TRUE |
| 41081.3  | 55162.8  | 29777.7  | 28652.6  | 34543.2  | 48088.1  | 54443.6  | 30241    | TRUE |
| 35424.1  | 30827.1  | 41138.8  | 32224.4  | 33664    | 33800.3  | 27579.7  | 31434.7  | TRUE |
| 70667.7  | 79525.1  | 66112.1  | 90571.5  | 68770.5  | 78284.9  | 84685.5  | 68455.9  | TRUE |
| 693035.1 | 661515   | 672254.3 | 682866.2 | 516297.7 | 608727.1 | 650799.8 | 534523.1 | TRUE |
| 185081   | 164426.4 | 136785.8 | 177195.1 | 152584   | 165137   | 179130.2 | 163260.5 | TRUE |
| 149864.1 | 155211.4 | 124272.2 | 170415.7 | 149585.3 | 122824.8 | 162287.6 | 141402.3 | TRUE |
| 169502.2 | 176463.2 | 146195.2 | 206162.6 | 181623.5 | 165813.9 | 218665.2 | 183710.9 | TRUE |
| 174880.2 | 150808.2 | 158444.1 | 148360.5 | 145979.2 | 201121.6 | 152805   | 169554.6 | TRUE |
| 258890.9 | 237250.2 | 278045.5 | 273994.7 | 226516.2 | 292450.5 | 249745.5 | 290594.2 | TRUE |
| 370083.4 | 290642.4 | 299550.5 | 334297.5 | 367946   | 336833.8 | 377284.7 | 385170.4 | TRUE |
| 413335.5 | 388313.8 | 371554.2 | 407378.1 | 428251.8 | 386570.8 | 444524.8 | 499864   | TRUE |
| 498999.5 | 512204.3 | 504233.9 | 542992.5 | 494934.6 | 569900.7 | 590644   | 553775.5 | TRUE |

|          |          |          |          |          |          |          |          |      |
|----------|----------|----------|----------|----------|----------|----------|----------|------|
| 486640   | 541015.5 | 450037.6 | 520823.6 | 654122   | 483017.5 | 520462.2 | 625905   | TRUE |
| 160234.2 | 185176.9 | 129081.7 | 165679.7 | 148611.9 | 177188.4 | 164655.5 | 154717.9 | TRUE |
| 198031.5 | 237903   | 224040.4 | 254202.3 | 180041.9 | 245448.4 | 261529   | 231653.3 | TRUE |
| 27464.1  | 5785.5   | 22983.1  | 19410.8  | 21393.6  | 16220    | 25809.5  | 25423.8  | TRUE |
| 27084.2  | 21941.1  | 18541.2  | 11832.4  | 29011    | 8738.3   | 9893.2   | 32813.2  | TRUE |
| 667730.3 | 632771.8 | 801510.4 | 715126.3 | 648192.8 | 772105.4 | 657464.2 | 704295.8 | TRUE |
| 1389412  | 811396.1 | 1311254  | 1261783  | 2522622  | 984840.7 | 940445.5 | 1063858  | TRUE |
| 9869.4   | 8979.5   | 10937.4  | 12977.6  | 20274.2  | 25385.4  | 6367.5   | 8468.1   | TRUE |
| 22630.3  | 6055.5   | 21191.1  | 10874.9  | 25214    | 10645.3  | 11484.8  | 11688.2  | TRUE |
| 254809.3 | 268361.7 | 271362.7 | 213461.2 | 206314.2 | 316957.8 | 249858.5 | 225532.3 | TRUE |
| 312821.7 | 307394.4 | 335128.4 | 321208.3 | 428560   | 279235.2 | 336870.6 | 294333.7 | TRUE |
| 161089.3 | 171599   | 152644.5 | 185138   | 239882   | 196228.3 | 178494.9 | 188081.2 | TRUE |
| 79307.4  | 122150.5 | 134799.9 | 104789.9 | 88329.5  | 107419.1 | 96428.3  | 65603.1  | TRUE |
| 120932   | 200783.9 | 142112.8 | 131008   | 136445.8 | 123676.2 | 108778.9 | 123808.8 | TRUE |
| 32390.7  | 22239    | 34768.3  | 34091.9  | 31257.8  | 28996.4  | 28715.4  | 30850.9  | TRUE |
| 553730.1 | 551271.5 | 506966.6 | 580778.7 | 553879.7 | 486059.9 | 582352.6 | 520018.2 | TRUE |
| 67005.6  | 68860.2  | 54343    | 65127.8  | 84310.7  | 62354.1  | 80509.9  | 76216.9  | TRUE |
| 220130.2 | 232350.9 | 225262   | 367837   | 267439.6 | 216280.9 | 245897.5 | 235954.7 | TRUE |
| 216316.3 | 208775.4 | 216586   | 282070.4 | 245328.8 | 232305   | 279566.1 | 221999.3 | TRUE |
| 451172.8 | 458921.4 | 493667.8 | 890365.1 | 687921   | 523881   | 500524   | 515843.6 | TRUE |
| 100298.5 | 96642.2  | 65399.9  | 158442   | 114770   | 78594.2  | 107786.6 | 102335.8 | TRUE |
| 141130.9 | 147387   | 108360.6 | 130846.9 | 151608.1 | 132208.3 | 149498.8 | 161857.8 | TRUE |
| 53413.2  | 59263.3  | 49776.1  | 81937    | 51856.3  | 41945.8  | 74454.7  | 52570.5  | TRUE |
| 313556.6 | 282125.1 | 299304.7 | 340640.3 | 343500.8 | 314053.7 | 320312.9 | 354319.7 | TRUE |
| 151220.8 | 126867.5 | 143754.5 | 150232.9 | 111644.4 | 161329.9 | 133803.4 | 117013.6 | TRUE |
| 91200.2  | 97559.3  | 105095.1 | 108997.6 | 95446.4  | 107858.5 | 119500.3 | 100403.1 | TRUE |
| 516782.4 | 454648.7 | 629473.8 | 541196.2 | 368537.5 | 699183.8 | 518032   | 399279.6 | TRUE |
| 265701.3 | 204147.9 | 255056.1 | 296842.8 | 353749.2 | 265267.9 | 240322.8 | 298146.1 | TRUE |
| 10806.7  | 12048.8  | 7826.2   | 17575.1  | 27815.1  | 9083.7   | 11793.7  | 32533.7  | TRUE |
| 38654    | 28301.5  | 25316.9  | 33220.1  | 33910.7  | 35821.7  | 40276.8  | 35837.3  | TRUE |
| 28598.1  | 36535.2  | 32531.2  | 44577.6  | 38821.5  | 43941    | 36313.3  | 33355.4  | TRUE |
| 101140.3 | 68622.9  | 63431.7  | 98025.9  | 90396.7  | 102548.5 | 91517.9  | 123782.7 | TRUE |
| 107514.6 | 115332   | 105530.5 | 97270.6  | 107409.4 | 100202.3 | 92404.4  | 127651.6 | TRUE |
| 78773.7  | 63289.2  | 77507.2  | 78928.3  | 77217.3  | 69665.4  | 86897.3  | 66197.3  | TRUE |
| 43609.7  | 32915.8  | 45018.3  | 43965.4  | 33605    | 47527.3  | 36578.8  | 60816.4  | TRUE |
| 100265.6 | 92982.9  | 92145.8  | 108164.7 | 116038.5 | 107483.8 | 107564.4 | 134224   | TRUE |
| 31526.8  | 38416.4  | 59799.2  | 33981.4  | 44767.8  | 28111.5  | 42937.8  | 30997.9  | TRUE |
| 74009.5  | 58663.3  | 49084.5  | 53115.8  | 77964.3  | 48990.7  | 40788.4  | 71428.3  | TRUE |
| 38793.6  | 42340.6  | 57151.7  | 39663    | 43426.9  | 35794.4  | 62613.4  | 41297.5  | TRUE |
| 67296.8  | 45065.6  | 47593.2  | 93994.2  | 65189.5  | 69508.9  | 73845.2  | 60153    | TRUE |
| 183320.3 | 204551.6 | 171615.4 | 228519.6 | 197623.4 | 179901.4 | 192202.6 | 206739.5 | TRUE |
| 347750.1 | 355433.5 | 275344   | 305777.6 | 342618.7 | 263016.1 | 308915.9 | 340690.1 | TRUE |
| 780352.7 | 693815.4 | 865834.6 | 880078.6 | 674793.5 | 718778.1 | 739055.6 | 739813.8 | TRUE |
| 38659.2  | 38290.9  | 43871.3  | 45542.5  | 50083.5  | 43716.4  | 50227.9  | 37893    | TRUE |
| 117762.7 | 108265.3 | 117724   | 109701.5 | 108471.9 | 111019.4 | 138959.7 | 118754.6 | TRUE |

|          |          |          |          |          |          |          |          |      |
|----------|----------|----------|----------|----------|----------|----------|----------|------|
| 258132.2 | 285570.6 | 258964.9 | 308831   | 225404.6 | 304233.2 | 264052.4 | 240141.4 | TRUE |
| 175115.4 | 172473.6 | 161282.1 | 179599.4 | 141621.3 | 162563.4 | 199109   | 149069.8 | TRUE |
| 92575    | 92309.5  | 70816.8  | 87190.6  | 77859.4  | 102516.9 | 120189.2 | 109702   | TRUE |
| 55297.2  | 41010.2  | 34288.3  | 42308.1  | 23209.1  | 49166.9  | 48071.7  | 45597.3  | TRUE |
| 295421.5 | 172413.4 | 260425.9 | 338332.4 | 265526.1 | 292340.1 | 248189.8 | 309824.6 | TRUE |
| 118796   | 144112.9 | 122822   | 99524.3  | 98594.6  | 122805.3 | 126822.9 | 88730    | TRUE |
| 235653.3 | 279415.1 | 230055.7 | 255124.1 | 234588.6 | 259211.9 | 296994.6 | 241708.6 | TRUE |
| 53766.2  | 67053.1  | 44095.9  | 67494.9  | 76098.4  | 57167.5  | 41938    | 65755.3  | TRUE |
| 85191.8  | 69469    | 95275.8  | 85213.6  | 85039.2  | 79436.8  | 78007.6  | 70868.3  | TRUE |
| 575365   | 488238.2 | 585274.2 | 624268.7 | 599499.3 | 567276.8 | 524614.8 | 584576.5 | TRUE |
| 227268.5 | 291130.9 | 263997.4 | 208809.6 | 277627.4 | 198159.3 | 258072.6 | 261637.5 | TRUE |
| 119151   | 122673.5 | 84476.9  | 105408.1 | 128754.3 | 103559.9 | 140172.8 | 108015.3 | TRUE |
| 593710.7 | 1460632  | 580930.7 | 627750.5 | 563347.3 | 628041.7 | 745608.8 | 563769.7 | TRUE |
| 40741.6  | 50948.2  | 36724.8  | 30840.6  | 32995.1  | 43960.2  | 56695.8  | 32327.5  | TRUE |
| 1811709  | 2021441  | 1744766  | 1800498  | 1622917  | 1784369  | 2019538  | 1652933  | TRUE |
| 60113    | 45507.2  | 66778.9  | 58952.5  | 50652.5  | 48595.4  | 71014.6  | 55904.8  | TRUE |
| 421226.4 | 449509.9 | 449282.8 | 466360.8 | 404611   | 424645.7 | 418719.2 | 440527.4 | TRUE |
| 223672.4 | 254463.9 | 149592.9 | 195290.5 | 207142.3 | 151528.4 | 234410.1 | 228699.2 | TRUE |
| 136048.2 | 128958.9 | 107439.1 | 139704.2 | 160197.4 | 123220.3 | 190003.2 | 158261.9 | TRUE |
| 295444.5 | 244695.9 | 276914.9 | 388557.5 | 385030.6 | 292375   | 293389.9 | 401217.2 | TRUE |
| 103050.6 | 136729   | 106655.8 | 104558.8 | 94370.6  | 140320   | 154423.1 | 125945.1 | TRUE |
| 1072908  | 1050941  | 705071.8 | 733699   | 973256   | 1089153  | 1029635  | 1050536  | TRUE |
| 330275.7 | 199533.9 | 298129.5 | 322093.9 | 304632.1 | 345425.1 | 198406.1 | 308804.8 | TRUE |
| 632470.3 | 604963.6 | 414877   | 417358.4 | 630027   | 669284.5 | 619447.1 | 633237.6 | TRUE |
| 111578.5 | 82709    | 109830.2 | 107857.7 | 112031   | 130687.5 | 71802.5  | 118647.8 | TRUE |
| 41021.2  | 29638.6  | 48218.8  | 35984.2  | 34887.3  | 29356.5  | 42309    | 48598.6  | TRUE |
| 30577.2  | 26327.2  | 29112.7  | 41348.2  | 40289.9  | 30484.1  | 25123.4  | 27099.6  | TRUE |
| 149146.1 | 137682.1 | 118159   | 115571.9 | 131159.9 | 183250.9 | 171589   | 169643   | TRUE |
| 162405.2 | 207102.4 | 176474.8 | 148848.8 | 152464   | 168546.2 | 190961.1 | 138404   | TRUE |
| 176815.3 | 187904.7 | 159881   | 147446.7 | 111672   | 165442.4 | 213125.3 | 123461.1 | TRUE |
| 22654.4  | 36793    | 18017.2  | 31909.3  | 30217.4  | 28527.8  | 40196.5  | 29646.9  | TRUE |
| 22772.9  | 13387    | 11802.1  | 8752.4   | 8348.6   | 7174.4   | 9231.7   | 10663.4  | TRUE |
| 144202.5 | 144680.5 | 107413.9 | 90408.5  | 89614.3  | 99938.5  | 118347.3 | 96937.3  | TRUE |
| 148260.6 | 173301.7 | 119531.3 | 144144.5 | 81234.8  | 123787.3 | 166915.6 | 104005.9 | TRUE |
| 258299.8 | 336963.7 | 207025.9 | 246269.4 | 200851.7 | 230159.6 | 320792.8 | 216792.3 | TRUE |
| 131093.7 | 95860.7  | 176861.1 | 164301.4 | 126513.4 | 132656.6 | 91902.6  | 137228.5 | TRUE |
| 54639.9  | 49110.3  | 63230.4  | 69642.2  | 53268.3  | 54573.3  | 44342.6  | 56587.6  | TRUE |
| 29161.7  | 41970.5  | 40365.9  | 55726.9  | 56981    | 53806.2  | 30794.7  | 24028.7  | TRUE |
| 47195.4  | 54048.9  | 42088.4  | 50206    | 41761.5  | 32329.6  | 44856.6  | 27542.6  | TRUE |
| 29969.8  | 35540.8  | 37944.7  | 26987.2  | 33680.3  | 29977.2  | 26030.5  | 49649.7  | TRUE |
| 20087    | 37362.5  | 37865    | 40079.6  | 38811.6  | 26668.8  | 28209.8  | 32755.3  | TRUE |
| 20798.4  | 47165    | 22316.6  | 49411    | 28564.5  | 49362.2  | 32328.1  | 17763.4  | TRUE |
| 207006.2 | 184831.4 | 85861    | 178860.6 | 189976.2 | 103003.2 | 188259.4 | 210057.2 | TRUE |
| 314002.1 | 295558.6 | 188127.7 | 315352   | 354092.7 | 188000.6 | 318497.1 | 359713.9 | TRUE |
| 46194.4  | 56272.3  | 50785.7  | 43118.8  | 34117.2  | 78823.3  | 42664.6  | 46490    | TRUE |
| 101941.6 | 130421.6 | 100413.5 | 114083.5 | 127067.1 | 94896.9  | 98152.2  | 114752.9 | TRUE |
| 31765.9  | 10834.8  | 32839.8  | 33217    | 64496.5  | 47092.5  | 33573.1  | 40951.1  | TRUE |

|          |          |          |          |          |          |          |          |      |
|----------|----------|----------|----------|----------|----------|----------|----------|------|
| 86207.9  | 68622.6  | 121719.1 | 71003.4  | 68909.5  | 120480.6 | 95118.1  | 76799.3  | TRUE |
| 368621.1 | 339558.8 | 478030.6 | 239501.4 | 296943.6 | 526016.3 | 338408.4 | 297155.7 | TRUE |
| 97904.8  | 55813.7  | 84358.4  | 71920.9  | 78134.4  | 126689.6 | 103653.9 | 89698.7  | TRUE |
| 113041.6 | 92466.9  | 171249.6 | 95461    | 88258.8  | 160506.6 | 128453.8 | 103562.3 | TRUE |
| 1694290  | 1446813  | 1902938  | 1812914  | 1620130  | 2029206  | 1623248  | 1781181  | TRUE |
| 113377.9 | 89796.9  | 71528.4  | 86033.4  | 101967.9 | 95100.7  | 93877.3  | 105997.5 | TRUE |
| 143132.3 | 188657.9 | 152349.8 | 158426.4 | 171757.3 | 170907.5 | 183350.9 | 194865.1 | TRUE |
| 70383.5  | 63963.1  | 45592.6  | 65796.5  | 53934.2  | 65966.7  | 77333.6  | 68141.1  | TRUE |
| 48687.2  | 44858.3  | 31551.5  | 35415.8  | 27449.8  | 24083.2  | 45327.4  | 56097.8  | TRUE |
| 102874.9 | 71051    | 84723.5  | 123718.1 | 128866.5 | 94736.1  | 98629.1  | 95977.6  | TRUE |
| 139787.4 | 129237   | 129028.9 | 149644.2 | 169779.8 | 141037.4 | 170977.9 | 165545.3 | TRUE |
| 74474.1  | 75847.5  | 70861.5  | 75541.5  | 54041.7  | 65007.5  | 91201.1  | 55432    | TRUE |
| 47755.8  | 57490.2  | 44216.3  | 35089.2  | 46917.4  | 60688.9  | 45102.7  | 43937.8  | TRUE |
| 373231.9 | 433392.3 | 328913.9 | 305901.3 | 397559.6 | 345569.4 | 347359.1 | 411493.1 | TRUE |
| 72346.8  | 66218.1  | 78873.2  | 71677.6  | 90751.6  | 61776    | 74460    | 98245.4  | TRUE |
| 95752.8  | 96251.5  | 85026.6  | 84725.9  | 80930.8  | 88768.7  | 102071.9 | 83720.9  | TRUE |
| 71918.4  | 55505.3  | 103055.5 | 93202.7  | 87382.9  | 91774.9  | 70289.8  | 77777.5  | TRUE |
| 386694.1 | 385023.1 | 410394.8 | 418728.9 | 441684.8 | 410118.2 | 337482.7 | 424411.9 | TRUE |
| 101560.6 | 97760.9  | 135308.8 | 157930.7 | 133910.3 | 130625.7 | 103929.2 | 109386.8 | TRUE |
| 110949.9 | 102115.7 | 142747.2 | 113363.3 | 120379.1 | 113556.8 | 179878.4 | 101768   | TRUE |
| 125043.5 | 124542.2 | 140639.8 | 137389.5 | 99893.9  | 156879.2 | 126958.4 | 118558.1 | TRUE |
| 148146.4 | 116719.9 | 149583.1 | 129823.1 | 119916.6 | 147635.2 | 136521.8 | 141570.7 | TRUE |
| 137560.4 | 114799   | 161017.3 | 147264   | 128362.9 | 159097.4 | 113110.4 | 144039   | TRUE |
| 458701.2 | 331110.4 | 514772.7 | 440413.2 | 470298.8 | 452285.6 | 396927.1 | 463233.3 | TRUE |
| 63286.6  | 63908.9  | 48386.3  | 53331.8  | 39662.7  | 46209.9  | 60325.9  | 73591.6  | TRUE |
| 1119961  | 1027957  | 1196468  | 1292304  | 1108096  | 1101000  | 1043316  | 1051558  | TRUE |
| 166605.3 | 156201.5 | 158072.5 | 140122   | 185921.1 | 148142.7 | 200636.8 | 179669.4 | TRUE |
| 97567.2  | 116787.9 | 112926.1 | 96911.4  | 136133.9 | 94432.1  | 114923.3 | 113682.9 | TRUE |
| 93062.2  | 87449.7  | 81964.2  | 77179.6  | 103908   | 91415.2  | 107734.9 | 105421.1 | TRUE |
| 45672.3  | 55517.4  | 58754.6  | 56508.7  | 74685.6  | 38797.5  | 58188.8  | 42216.2  | TRUE |
| 87668.3  | 98121    | 96858.8  | 125338.5 | 69043.2  | 87670.3  | 92460.2  | 81199.7  | TRUE |
| 126235.7 | 142487.5 | 142081.5 | 124008.7 | 109744.9 | 147744   | 148845.9 | 104426.2 | TRUE |
| 101157.8 | 130280.1 | 74538.5  | 90576.2  | 136452.3 | 92395.8  | 127563.3 | 141938.6 | TRUE |
| 62623.5  | 57069.8  | 55671.9  | 63299.8  | 58417.6  | 52956.2  | 59811.9  | 70335.9  | TRUE |
| 232448.7 | 253558.8 | 233614.3 | 231786   | 230475.8 | 212293.6 | 243420.6 | 233821   | TRUE |
| 86980.1  | 101735.3 | 101138   | 122573   | 70168.3  | 65888.5  | 123035.6 | 84279.9  | TRUE |
| 103767.8 | 150991.3 | 124547.1 | 114395.3 | 114312.5 | 104360.7 | 154027.1 | 121681.1 | TRUE |
| 791059   | 739681.5 | 884133   | 874403.4 | 850153.8 | 677797.8 | 699740.2 | 647740.8 | TRUE |
| 79681.7  | 95788.3  | 32496.9  | 68342.6  | 77483    | 48808.7  | 112831.2 | 109473.9 | TRUE |
| 134027.8 | 135344.7 | 80211.7  | 119222.1 | 112352.8 | 108128.9 | 153111.4 | 118952.7 | TRUE |
| 149078.1 | 155379.3 | 138227.1 | 139818.9 | 151729.1 | 162181.7 | 196513.1 | 140899.6 | TRUE |
| 389508.1 | 335371.2 | 414301   | 422254.9 | 393836.4 | 433282.2 | 352451.9 | 423301.5 | TRUE |
| 267108.6 | 221383.3 | 291546.3 | 285405.3 | 264488.1 | 296530.1 | 292447.4 | 247542.4 | TRUE |



|          |          |          |          |          |          |          |          |      |
|----------|----------|----------|----------|----------|----------|----------|----------|------|
| 200913.5 | 182507.2 | 153108.5 | 156241.3 | 126763.2 | 159304.5 | 142630.9 | 123769.3 | TRUE |
| 212144.8 | 219288.6 | 234121.4 | 246031.5 | 228515.2 | 199124.5 | 216615.9 | 201138   | TRUE |
| 457084.6 | 304232   | 454326.7 | 553450.1 | 443774   | 411343.5 | 334427.7 | 407653.1 | TRUE |
| 91115.1  | 63686.5  | 58368.6  | 76029.5  | 64478.3  | 108640.6 | 107477.4 | 88711.2  | TRUE |
| 194153.8 | 145451.3 | 193376.1 | 215945.8 | 216869.7 | 253188.9 | 248076.5 | 210242.8 | TRUE |
| 23539.6  | 43712.7  | 31558.5  | 79442.8  | 31727.2  | 36659.8  | 43790.7  | 34321.1  | TRUE |
| 16702.6  | 6560.9   | 11252.3  | 9474.6   | 19206.7  | 18909.8  | 9524     | 20424.5  | TRUE |
| 247195.8 | 145965.9 | 261781.4 | 320405.7 | 257331.9 | 281321.7 | 187967.1 | 249431.4 | TRUE |
| 30337.7  | 32647.7  | 27891.4  | 37663.6  | 34447.1  | 33784.6  | 28013.3  | 32048.2  | TRUE |
| 109663.5 | 84695.8  | 67624.7  | 101530.9 | 102917.7 | 95404.6  | 92439.7  | 109716.6 | TRUE |
| 63580.8  | 71699.7  | 58569.3  | 60601.4  | 63200.2  | 57216.7  | 69985.5  | 67485.9  | TRUE |
| 15928.9  | 7174.7   | 18006.4  | 19227.8  | 7151.3   | 8000.5   | 17092.4  | 6265.8   | TRUE |
| 227110.6 | 307909.1 | 136416.6 | 209126.4 | 208689   | 168173.5 | 245938.1 | 215943.3 | TRUE |
| 206938.4 | 196175.3 | 200479.8 | 230094.7 | 229508.6 | 192567.9 | 281648.6 | 220543   | TRUE |
| 53715.7  | 48754.4  | 56224.3  | 52861.2  | 68536.3  | 52270.2  | 49667    | 68553.7  | TRUE |
| 332994.8 | 314578.2 | 457994   | 401559.6 | 292162.9 | 315262.3 | 334589.1 | 300823.4 | TRUE |
| 310873.2 | 275976.5 | 399577.2 | 348226.2 | 308303.7 | 300302.8 | 315686.5 | 271592.8 | TRUE |
| 186228.5 | 174590.6 | 179214.5 | 206150   | 168371.1 | 181666.1 | 219410.4 | 200898.4 | TRUE |
| 204900.7 | 229512.1 | 179432.1 | 208250.3 | 221790.5 | 176183.4 | 249113.3 | 193465.2 | TRUE |
| 195488.9 | 228463.7 | 190708.4 | 190553.3 | 199403.5 | 209406.8 | 211657.8 | 208411.9 | TRUE |
| 254971.8 | 222013.1 | 268308.8 | 299253.4 | 196921.9 | 240439.5 | 234492.3 | 290952.5 | TRUE |
| 415862.4 | 453549.7 | 521692.9 | 506289.5 | 321637.1 | 536976   | 400602.9 | 515696.6 | TRUE |
| 10151.4  | 6281.8   | 15166.8  | 6003.8   | 4673.4   | 20899.8  | 8949.3   | 7995     | TRUE |
| 235469.7 | 234541.4 | 217458.2 | 228294.3 | 174616.4 | 239342.5 | 267595.5 | 171058.1 | TRUE |
| 201263.7 | 176495.9 | 233931.9 | 230228.6 | 204001.3 | 197822.2 | 176444.6 | 214574.5 | TRUE |
| 218411.5 | 244710.5 | 242359.4 | 186109.7 | 214911.7 | 238817.4 | 256200.7 | 229839   | TRUE |
| 115783   | 141739.3 | 168419.1 | 105765.8 | 124937.9 | 168235   | 126687.6 | 114657.7 | TRUE |
| 78906.7  | 59591.2  | 80201.5  | 45277.1  | 56703.5  | 86429    | 54016.3  | 61275.8  | TRUE |
| 159814   | 157018.3 | 227927.1 | 97709.4  | 94446.4  | 222373.5 | 128928.3 | 99931.4  | TRUE |
| 115029.5 | 71651.7  | 108420.1 | 82929    | 116803   | 88394.8  | 85081.2  | 98959.1  | TRUE |
| 29775.2  | 32980.1  | 36890.6  | 30588.4  | 29198.8  | 54011.6  | 28595.6  | 24746.2  | TRUE |
| 135469.7 | 99069.7  | 118678.7 | 119941.7 | 157767.2 | 131276.4 | 120774.7 | 129400.3 | TRUE |
| 69594.2  | 53374.7  | 107681.4 | 67781.2  | 54046.5  | 114296.2 | 82151.9  | 56096.6  | TRUE |
| 186057.7 | 148712.7 | 178561.6 | 156120.2 | 129457.3 | 200865.3 | 245227.2 | 193780.5 | TRUE |
| 212639.5 | 245765.9 | 216297.6 | 298561.3 | 281119.2 | 209721.1 | 267061   | 358666.4 | TRUE |
| 1986650  | 2435946  | 1970039  | 1976511  | 1492086  | 2334547  | 2352334  | 2242034  | TRUE |
| 104569   | 99449.1  | 80154.9  | 97629.7  | 99368.7  | 81051.9  | 100573   | 126677.4 | TRUE |
| 553050.5 | 503570.2 | 425183   | 601064.1 | 580430.9 | 466228.9 | 594003   | 613078.8 | TRUE |
| 172949.9 | 203396.1 | 164318.6 | 179698.8 | 185429.1 | 158363.4 | 171851.4 | 180856.9 | TRUE |
| 157926.8 | 169281.7 | 124896.2 | 154635.9 | 161079.6 | 116838.6 | 169014.9 | 151545.4 | TRUE |
| 74307.2  | 103259.3 | 90021.3  | 97629.8  | 106749.7 | 68517.3  | 94884.7  | 84470    | TRUE |
| 165688.1 | 148598.7 | 144223.5 | 182707.2 | 131068.8 | 163495.3 | 165104.6 | 167916   | TRUE |
| 237258.6 | 227591   | 252836.5 | 262172   | 187921   | 229692.9 | 230372.3 | 245521.4 | TRUE |

|          |          |          |          |          |          |          |          |      |
|----------|----------|----------|----------|----------|----------|----------|----------|------|
| 739057.7 | 716836.8 | 885861.2 | 757679.4 | 654317.7 | 847881.6 | 705324.9 | 608801   | TRUE |
| 57888.6  | 99038    | 19729.6  | 39856.4  | 39509.8  | 28493.4  | 135807.6 | 46805.4  | TRUE |
| 107194.1 | 79902.7  | 174281.5 | 190819.6 | 77664.7  | 106927.3 | 72480.3  | 87889.1  | TRUE |
| 366147.9 | 304598.1 | 475734.1 | 539929.7 | 278596.4 | 345943.3 | 280397.2 | 317411.2 | TRUE |
| 30672.2  | 37735.4  | 50075.9  | 35259.2  | 27946.1  | 18162.6  | 18098.8  | 18657.6  | TRUE |
| 98767.4  | 40310.6  | 133894.2 | 126687.5 | 53744.2  | 93089.6  | 45596.8  | 82047.6  | TRUE |
| 75879.7  | 114509.3 | 83842.4  | 83198.3  | 57633.4  | 69981    | 87236.7  | 66806    | TRUE |
| 197468   | 314909.3 | 134666.6 | 123958.9 | 141410   | 118220.5 | 279737.5 | 142909.1 | TRUE |
| 84340.8  | 83902.3  | 84222.2  | 100755.2 | 80520.9  | 95146    | 90485.7  | 109115.3 | TRUE |
| 231378.8 | 256774.2 | 193259.6 | 210248.8 | 233815.3 | 180919.3 | 223409.7 | 222669.4 | TRUE |
| 109022.2 | 100383.9 | 94472.4  | 98033.4  | 127741.6 | 97574.8  | 119572.3 | 111631.2 | TRUE |
| 225314.1 | 228312.4 | 176665.4 | 177856.2 | 146124.6 | 167223.7 | 172720.2 | 191278   | TRUE |
| 115683.1 | 102593.6 | 94688.9  | 85545.2  | 81964.6  | 82296.6  | 118600.9 | 91039.3  | TRUE |
| 7750.8   | 10175.9  | 16932.1  | 8785.4   | 20612.5  | 2980.9   | 20707.1  | 20821.1  | TRUE |
| 191295.1 | 163489.8 | 151915.1 | 160281.1 | 144428.7 | 150537.9 | 171611.3 | 145255.3 | TRUE |
| 171594.6 | 179059.1 | 173751.1 | 187594.9 | 175046.7 | 173224.7 | 158378.8 | 174564.5 | TRUE |
| 117390.2 | 135269.6 | 114221   | 112599.7 | 105480.5 | 109066   | 112797.8 | 108623.7 | TRUE |
| 51460.8  | 44174.3  | 43402.4  | 50132.4  | 48857.6  | 51418.9  | 66424.2  | 58400.1  | TRUE |
| 133475.9 | 98075.3  | 71406.6  | 106234.6 | 80958.7  | 113287.8 | 97534.7  | 102549.8 | TRUE |
| 290902.2 | 213480.8 | 263242.1 | 288458   | 244083.9 | 286262.2 | 267069.9 | 298297.6 | TRUE |
| 75988.6  | 106445.2 | 75834.6  | 106805   | 51534    | 124173.4 | 121184.5 | 114725.2 | TRUE |
| 5544.8   | 8837.8   | 16029.2  | 5223     | 9518.1   | 6839     | 10233.4  | 18377.8  | TRUE |
| 20849.1  | 32007.4  | 22646    | 11421.2  | 8615.6   | 23795.6  | 26829    | 13318.6  | TRUE |
| 305271.9 | 267449.7 | 266525.8 | 318729   | 275528.3 | 297629.3 | 234170.5 | 282985.7 | TRUE |
| 147396.3 | 134162.7 | 158137   | 178829.6 | 169777.2 | 177454.5 | 157480.3 | 138690.9 | TRUE |
| 250878.5 | 179361.3 | 209896.5 | 236361.8 | 276801.4 | 283883.5 | 195295.4 | 231780.2 | TRUE |
| 109235.1 | 88664.4  | 71335    | 97779.2  | 58048.3  | 134429.2 | 96103.8  | 93827.3  | TRUE |
| 446511.5 | 362802.9 | 340560   | 432812.7 | 417019   | 473734.9 | 406582.3 | 531958   | TRUE |
| 213880.5 | 154064.4 | 174319.4 | 169853.7 | 190149.5 | 238461.8 | 188198.5 | 202452.6 | TRUE |
| 938604   | 851054.4 | 909317.7 | 1122422  | 1036760  | 938019.5 | 895826.8 | 1026721  | TRUE |
| 157818.3 | 189298.8 | 135743.4 | 187980.5 | 179100.8 | 153065   | 138938.6 | 159036   | TRUE |
| 60282.1  | 53169    | 51297.1  | 52807.2  | 47314.2  | 83952.9  | 74076.6  | 86230.8  | TRUE |
| 66166.7  | 61657.7  | 58478.7  | 57619.5  | 79773.7  | 100263.5 | 65336.4  | 89190    | TRUE |
| 158078.1 | 101520.8 | 178147.1 | 119708.8 | 115030.3 | 171495.2 | 99065.3  | 125835.7 | TRUE |
| 93496    | 77308.1  | 133072.6 | 104402.6 | 88486.3  | 154785.3 | 93055.1  | 109520.5 | TRUE |
| 123706   | 100055.7 | 102252.4 | 84274.4  | 171251.5 | 106361.1 | 132812.9 | 97398.9  | TRUE |
| 35600.3  | 24295.3  | 34369.5  | 34637.5  | 25920.7  | 33195.5  | 33704    | 25466.6  | TRUE |
| 124791.2 | 94614.6  | 202987   | 185763.8 | 135553   | 102889.1 | 84824.4  | 103684.6 | TRUE |
| 78207.6  | 86011.2  | 60758.3  | 72178.8  | 75894.8  | 89438.7  | 106275.8 | 83979.2  | TRUE |
| 111400.8 | 119548.1 | 75050.8  | 74136.9  | 58161.6  | 127651.8 | 146682.6 | 71003.2  | TRUE |
| 84833.8  | 65979.4  | 106548.1 | 102123.1 | 84231.1  | 73122.8  | 64462.1  | 81222.9  | TRUE |
| 185262.3 | 138490.8 | 177905.1 | 211893.7 | 166279.7 | 165480.8 | 166658.6 | 183262.9 | TRUE |
| 118853.5 | 134665   | 110508.5 | 85911.7  | 96839.5  | 178941.6 | 191225.8 | 146175.7 | TRUE |
| 127302.6 | 144824.1 | 121881.8 | 95004.7  | 112298.6 | 135307   | 161377.3 | 117328.4 | TRUE |
| 82798.8  | 62977.5  | 122598.3 | 120241   | 98471.6  | 52526.3  | 67640.6  | 77186.8  | TRUE |
| 465171.3 | 429500   | 432690.7 | 454866.2 | 483894.6 | 428257.5 | 505684   | 477117   | TRUE |

|          |          |          |          |          |          |          |          |      |
|----------|----------|----------|----------|----------|----------|----------|----------|------|
| 138308.5 | 154849.8 | 134765.2 | 125954.5 | 130036.5 | 128455.7 | 135334.3 | 128635.3 | TRUE |
| 158825.6 | 180010.1 | 174688.7 | 213254.7 | 193223.5 | 190214.8 | 191740.2 | 224612.3 | TRUE |
| 67541    | 51763.6  | 82241.4  | 86500    | 69154.8  | 73740.3  | 74707.1  | 76108.8  | TRUE |
| 182145.8 | 145091.9 | 181359.8 | 146802.9 | 168589.5 | 174046.1 | 193380.8 | 179052.1 | TRUE |
| 173240.5 | 148958.7 | 136967.5 | 151370.1 | 161126.5 | 158030.4 | 153723.8 | 152451.2 | TRUE |
| 107406.2 | 103456.3 | 115466.4 | 83110    | 97155.5  | 105672.8 | 113106   | 72908    | TRUE |
| 62306.5  | 88843.7  | 57136.8  | 70183.6  | 111796.9 | 63407    | 93784.7  | 80592.5  | TRUE |
| 185002.4 | 135286.7 | 172124.2 | 215886.1 | 187710.7 | 204084.8 | 155805.5 | 151878.2 | TRUE |
| 155245.5 | 86373    | 158484.8 | 175050.8 | 99557.8  | 157344.5 | 94521.7  | 109395.7 | TRUE |
| 77482.9  | 41523    | 69247.7  | 78646.3  | 81502.8  | 103899.2 | 64543.7  | 87463.4  | TRUE |
| 342152.9 | 286184.7 | 163544   | 230641.5 | 347498.3 | 400028   | 371596.6 | 387511.4 | TRUE |
| 154116.5 | 139559.6 | 98596.9  | 118714.7 | 164854.7 | 189098.4 | 164238.7 | 175356.5 | TRUE |
| 49120    | 29555.8  | 32798.1  | 58496.6  | 42096.8  | 67268.6  | 33899.7  | 51599.8  | TRUE |
| 72409.8  | 55863.9  | 76488.9  | 117733.3 | 55948.7  | 72953.6  | 53968.1  | 60069.7  | TRUE |
| 31254.6  | 27249.2  | 26101.7  | 26796.8  | 25064.7  | 33577.2  | 19600.6  | 24417.4  | TRUE |
| 123550.9 | 104709.7 | 103789.1 | 97759.9  | 77471.1  | 134290   | 132270.9 | 122353.1 | TRUE |
| 88087    | 121420.5 | 76180.1  | 84086.4  | 81499.1  | 90453.1  | 81864.4  | 91666.4  | TRUE |
| 32650    | 11818.5  | 23740.1  | 5236.6   | 13360.9  | 19048.4  | 11034.8  | 7158.7   | TRUE |
| 71174.1  | 83669.2  | 92944.4  | 72122.6  | 96185.7  | 95272.1  | 87740.2  | 78061.1  | TRUE |
| 93283.9  | 154610   | 129665.4 | 96147.3  | 97971.3  | 67402.9  | 34216.1  | 21305.6  | TRUE |
| 185466.2 | 146797.5 | 212054.2 | 244112.4 | 182374.2 | 199703.7 | 177644.2 | 233322.9 | TRUE |
| 111175.7 | 82078.1  | 134172.8 | 134265.5 | 106605.3 | 112939.1 | 108841.6 | 99955.9  | TRUE |
| 90346.7  | 86090.9  | 54896.8  | 78605.5  | 82213.1  | 75682.9  | 143713.7 | 101089.1 | TRUE |
| 110972.6 | 144575.3 | 141917   | 117250.6 | 132811.9 | 140116.7 | 136800.7 | 124824.9 | TRUE |
| 27031.3  | 38666.9  | 36172    | 8829.3   | 29610.6  | 47290.3  | 28659.9  | 14695.1  | TRUE |
| 150669.6 | 153805.3 | 157763.5 | 134843.8 | 141918.1 | 155566.1 | 146268.7 | 113282   | TRUE |
| 39639.4  | 45465.6  | 52285.1  | 33792.3  | 33171.4  | 51912.6  | 57772.7  | 39463.5  | TRUE |
| 178348.2 | 162487.9 | 170054.6 | 135370.4 | 149227.8 | 220723.7 | 187883.4 | 158884.4 | TRUE |
| 119971.6 | 115084.5 | 145782.4 | 120064.4 | 121954.1 | 147498.5 | 148438.5 | 117314.8 | TRUE |
| 168989.1 | 219757.1 | 142221.7 | 148280.4 | 198210.5 | 156157.6 | 219418.9 | 129610.5 | TRUE |
| 122679   | 102799   | 130743.2 | 150754.8 | 100408.2 | 151076.6 | 123503.5 | 114481.8 | TRUE |
| 888335.1 | 682901.9 | 852071.3 | 745175.2 | 668060.6 | 948537.5 | 724571.7 | 777905.8 | TRUE |
| 596366.8 | 554689.7 | 383635.1 | 430638.6 | 506206.2 | 485546   | 509564.6 | 545639.2 | TRUE |
| 55003.2  | 39593.4  | 50950.7  | 42039.1  | 46330.7  | 55293.3  | 48631.6  | 43295.9  | TRUE |
| 69288.9  | 70025.3  | 97295.7  | 67390.8  | 34332    | 118255.8 | 66501.6  | 31738.1  | TRUE |
| 256435.9 | 237070.9 | 232128.7 | 230114.1 | 268832.6 | 241770.2 | 227057.4 | 253872.1 | TRUE |
| 173196.7 | 135372.8 | 239086   | 149632.6 | 96144.2  | 365353.8 | 197970.1 | 146993.8 | TRUE |
| 269968.8 | 188331.6 | 303337.8 | 269859.7 | 440876.4 | 245583.7 | 190738.4 | 226916.2 | TRUE |
| 118640.6 | 72185.1  | 104896.6 | 117215.6 | 220630.6 | 105034.9 | 86028.7  | 116206.4 | TRUE |
| 23671.6  | 11237.7  | 22548.4  | 12364.5  | 16718.5  | 26506.4  | 9288.4   | 10439.6  | TRUE |
| 222878.6 | 234574   | 184761   | 253889.7 | 177971.8 | 218964.2 | 278607.7 | 191829.1 | TRUE |
| 82424.8  | 101739.5 | 97168.2  | 84959.9  | 89147.8  | 97824.7  | 96431.2  | 83569.4  | TRUE |
| 111545.8 | 89447.3  | 107369.2 | 129867.4 | 123041   | 131156.8 | 94829.7  | 122709.5 | TRUE |
| 151535.8 | 178045.2 | 133636.2 | 149824.9 | 141814.8 | 128863.7 | 154635.9 | 146738.5 | TRUE |

|          |          |          |          |          |          |          |          |      |
|----------|----------|----------|----------|----------|----------|----------|----------|------|
| 189488.8 | 171610.1 | 246250.7 | 215044.5 | 225183.6 | 197665.6 | 155348.4 | 171178.5 | TRUE |
| 338614.9 | 300254.5 | 389391.8 | 405295.9 | 338611.1 | 332091.4 | 313441.2 | 328317.6 | TRUE |
| 1295360  | 984587.7 | 1790465  | 1038269  | 954885.4 | 997398.8 | 1048468  | 882578.1 | TRUE |
| 163194.5 | 190943.5 | 142725.2 | 148170.1 | 139335.3 | 163293.9 | 174237   | 136017.5 | TRUE |
| 89837.5  | 116164   | 71902.3  | 95250.5  | 78006.4  | 89465.6  | 107889.3 | 84437.1  | TRUE |
| 148880.9 | 96273    | 171335.9 | 153967.9 | 118295.4 | 123109.4 | 96671.2  | 156591.7 | TRUE |
| 355737.4 | 259457.1 | 375536.1 | 351267.4 | 323962.6 | 336070.9 | 268180.2 | 324208.8 | TRUE |
| 69101.1  | 76501.6  | 88825.7  | 78224.7  | 72489.7  | 71491    | 96843.8  | 85088.9  | TRUE |
| 92746.6  | 100954.3 | 90075.3  | 89395    | 87718.3  | 92824.9  | 113496.7 | 92511.9  | TRUE |
| 296779   | 306877.5 | 244447.3 | 256889.7 | 308048   | 249367.5 | 271293.4 | 283487.9 | TRUE |
| 234225.6 | 224319.1 | 208439.9 | 201841   | 188017.2 | 200653.4 | 235767.2 | 193562.5 | TRUE |
| 1194806  | 875209.4 | 515851.8 | 565149.7 | 473850.3 | 468491.7 | 529043.2 | 451197.6 | TRUE |
| 73602.3  | 106936.2 | 67053.5  | 69774.4  | 92282.8  | 63594.3  | 80039.8  | 69227.2  | TRUE |
| 81933.6  | 93118.4  | 79438.4  | 77978    | 91642.2  | 67040    | 91935.2  | 90570.4  | TRUE |
| 36051.8  | 26379.6  | 30469.5  | 32355.7  | 30092    | 32292.5  | 36960.6  | 29424.6  | TRUE |
| 90844.2  | 83831.1  | 101545   | 117418.9 | 106146.4 | 96411.1  | 84234.5  | 111404.9 | TRUE |
| 181901.8 | 201522.4 | 228188.2 | 198917.2 | 210240.4 | 206002.5 | 186526.7 | 182026.9 | TRUE |
| 502182.6 | 532331   | 507593.9 | 521376.3 | 476520.7 | 497590.1 | 503365.9 | 470777.1 | TRUE |
| 38739.3  | 46551.2  | 32297.9  | 41720.7  | 55247.1  | 37239.5  | 44872    | 38442    | TRUE |
| 198511.9 | 213449.1 | 175295.6 | 210181.3 | 166179.5 | 194501   | 189239.9 | 198790.4 | TRUE |
| 381802.3 | 316521.4 | 337160.9 | 363974.9 | 392151.1 | 396652.9 | 388252.4 | 391640.9 | TRUE |
| 218969   | 237190.3 | 182950.9 | 180261.2 | 228370.2 | 249917.4 | 214558.1 | 221280.5 | TRUE |
| 54694.6  | 54242.7  | 49195.3  | 41958.8  | 69830.8  | 54770.3  | 40057.6  | 63343    | TRUE |
| 142861.4 | 76695.2  | 106630.4 | 126273.8 | 131390.6 | 138574.3 | 129106.8 | 163988.8 | TRUE |
| 112570   | 65790.6  | 62143.9  | 83458    | 79008.6  | 98579    | 96692.4  | 112156.6 | TRUE |
| 215396.4 | 161929.1 | 142055.2 | 151451   | 182730.6 | 256373.8 | 231770   | 230203.3 | TRUE |
| 118198.1 | 138206.2 | 143380.8 | 108461.9 | 108641.1 | 144548.7 | 147537.9 | 109475.6 | TRUE |
| 58704    | 82693.4  | 66703.4  | 41556.9  | 29253.4  | 65729.1  | 63888.6  | 42421.8  | TRUE |
| 114461.7 | 81664.4  | 126440.5 | 115643   | 131023.9 | 91193.6  | 105561.4 | 83933.7  | TRUE |
| 47298.7  | 48551    | 38546.7  | 28100.5  | 36048    | 67503.6  | 70429.5  | 35634.5  | TRUE |
| 132642.7 | 107893.4 | 115256.4 | 125545.8 | 208118.2 | 158304.7 | 99697.5  | 114607.6 | TRUE |
| 67545.5  | 72434.7  | 96903.3  | 62729.5  | 71685.2  | 75903.4  | 80362    | 60090    | TRUE |
| 243208.8 | 292389.4 | 282533.1 | 209287.7 | 218445.3 | 330559.8 | 315175.5 | 250315.6 | TRUE |
| 55082.8  | 64649.2  | 67453.6  | 70456.7  | 53529.8  | 74448.4  | 55382.9  | 54079    | TRUE |
| 146640.7 | 156588   | 261050   | 117978.1 | 115509   | 284812.6 | 154772.1 | 127879.3 | TRUE |
| 302447.7 | 383666.8 | 414064.9 | 266458.8 | 222044.4 | 328464.5 | 402911   | 249942.9 | TRUE |
| 448549.6 | 291909.7 | 603770.2 | 613318.7 | 471405.4 | 319817.5 | 315858.5 | 341228.1 | TRUE |
| 279800.3 | 246448.9 | 348752.8 | 306055.4 | 276979   | 243175.3 | 246168.1 | 207651.1 | TRUE |
| 71042.6  | 57582    | 83653    | 104832.4 | 75236.2  | 84124.4  | 44696    | 71689.3  | TRUE |

|          |          |          |          |          |          |          |          |      |
|----------|----------|----------|----------|----------|----------|----------|----------|------|
| 156138.9 | 167478   | 143148.8 | 147152.5 | 160499.2 | 149452.1 | 156714   | 171620.5 | TRUE |
| 70464.6  | 68194.9  | 67054.7  | 80531.3  | 72280.9  | 69516.4  | 73209    | 55025.9  | TRUE |
| 82011.3  | 61658.3  | 117836.8 | 61225.9  | 75884.6  | 43079    | 54446.8  | 50246.8  | TRUE |
| 25584.8  | 9066.3   | 10165.6  | 12913.3  | 23871.9  | 14802.9  | 34921.5  | 23065.8  | TRUE |
| 143406.7 | 164159.3 | 146046.3 | 122161.3 | 145082.2 | 147571.9 | 168957.9 | 132057.8 | TRUE |
| 222953.8 | 169638.2 | 229934.5 | 237136.9 | 241164.3 | 205772.2 | 191150.1 | 221405.3 | TRUE |
| 57571.8  | 65256.1  | 43137.5  | 52458.8  | 65082.8  | 45093.5  | 60305.5  | 44746.8  | TRUE |
| 38847.1  | 40730    | 40140.1  | 43247.2  | 41473.4  | 40516.2  | 42253.7  | 50873.6  | TRUE |
| 158265.2 | 113016.6 | 124144.9 | 168689.7 | 155632.2 | 155453.9 | 129229.2 | 172668.5 | TRUE |
| 264190.2 | 300543.3 | 255230.3 | 262857.5 | 263819.9 | 264159.4 | 303267.4 | 260588.7 | TRUE |
| 155232.3 | 170318.3 | 157455.5 | 177124.7 | 154166.9 | 170149.8 | 160622   | 157227.4 | TRUE |
| 12259.2  | 4126.8   | 5576.1   | 11037.2  | 14321.8  | 7327.1   | 6132.5   | 7547.4   | TRUE |
| 109018.2 | 179686.7 | 81429.6  | 107690.1 | 143179.2 | 87897.3  | 185641.9 | 152782   | TRUE |
| 119334.5 | 133821.3 | 152045.5 | 166832.5 | 86946.1  | 94015    | 167661.4 | 80546.4  | TRUE |
| 239069.5 | 257995.8 | 327663.5 | 302912.7 | 181291.1 | 171966.8 | 284833.7 | 181141.1 | TRUE |
| 225172   | 179789.8 | 208389.2 | 223948.4 | 192813.7 | 195770.2 | 222447.7 | 183912.9 | TRUE |
| 263208.8 | 253606.6 | 391950.2 | 369222.3 | 196638.6 | 215579   | 296677.9 | 243992.5 | TRUE |
| 286322.6 | 316000.6 | 381751.5 | 387128.8 | 261741.2 | 286787.4 | 322761.2 | 285074.7 | TRUE |
| 195411.4 | 172834.6 | 180832.2 | 175116.5 | 178979.5 | 172870   | 210854.5 | 191431.1 | TRUE |
| 430900.6 | 435900.2 | 588131.2 | 610066.7 | 401048.8 | 395725.5 | 422935   | 406801.4 | TRUE |
| 304303.7 | 276106.9 | 419455.8 | 450737   | 252756.4 | 247642.9 | 266314.1 | 241161.6 | TRUE |
| 243139.2 | 335474.5 | 400864.3 | 359544.5 | 210803.4 | 227545.3 | 331572.6 | 239651.9 | TRUE |
| 104257.3 | 98084.1  | 98330.3  | 109743.8 | 93080.8  | 90229.6  | 99352.6  | 97208.5  | TRUE |
| 296363.8 | 330150.7 | 343627.6 | 291026.6 | 295117.1 | 298042.5 | 298300.1 | 297134.6 | TRUE |
| 154542.1 | 171035.1 | 161910.4 | 169441.7 | 164769.4 | 178358.7 | 192480.8 | 143624.3 | TRUE |
| 18821.3  | 25749.9  | 17458.4  | 38003.2  | 26233.1  | 23471.9  | 29390    | 26554.8  | TRUE |
| 608056.1 | 718135.6 | 510874.7 | 657604.2 | 670659.3 | 580458.4 | 811947.4 | 647577   | TRUE |
| 439809.7 | 548640.7 | 349312.7 | 532194.4 | 457114.7 | 398040.9 | 616726.6 | 441723.4 | TRUE |
| 493599.7 | 463250.5 | 653290.9 | 676478.3 | 474146.9 | 557586.1 | 550974.6 | 535065.5 | TRUE |
| 20538.6  | 10756    | 16027.5  | 11624.1  | 7472.2   | 6729.8   | 10729.3  | 9672.6   | TRUE |
| 39840.9  | 41701.8  | 28544.6  | 36994.8  | 42513.3  | 38038.3  | 46235.4  | 46482.6  | TRUE |
| 83388.6  | 65742.1  | 83149.1  | 89085.3  | 92396.9  | 86210.7  | 78601    | 84319.6  | TRUE |
| 20778.7  | 24026.9  | 9983.6   | 32165.6  | 25238.4  | 22745.8  | 18500    | 21682.1  | TRUE |
| 37621    | 35248.3  | 46331.4  | 23153.4  | 46095.8  | 41262.6  | 44327.2  | 30147.1  | TRUE |
| 31909.5  | 43600.4  | 31373.4  | 29145.5  | 43336.6  | 33046.7  | 48403.5  | 44605.2  | TRUE |

|          |          |          |          |          |          |          |          |      |
|----------|----------|----------|----------|----------|----------|----------|----------|------|
| 10509.3  | 22177.3  | 16123.3  | 8354.3   | 22480.8  | 18131.3  | 15541.8  | 38298.1  | TRUE |
| 153902.3 | 145101.9 | 111632.9 | 163865.7 | 156214   | 204961.5 | 193146.6 | 189886.9 | TRUE |
| 205931.6 | 204808.7 | 217405.1 | 237031.5 | 205096.5 | 209757.3 | 205313.8 | 214678.5 | TRUE |
| 322084.3 | 303336.4 | 279654   | 295113.4 | 345635.4 | 340921.7 | 327561.5 | 327775.5 | TRUE |
| 514554.2 | 565718.6 | 545908.3 | 610359.1 | 664522.8 | 573827.4 | 559898.4 | 624193.1 | TRUE |
| 278189   | 134001.7 | 467744   | 228987.7 | 199686.4 | 598147.1 | 187150.2 | 247480.9 | TRUE |
| 497988.2 | 270363.6 | 616362.8 | 315146.8 | 217366.1 | 621222.7 | 244923.8 | 251922.4 | TRUE |
| 781456.3 | 402127.2 | 1498751  | 773017.3 | 496019.6 | 1563554  | 486797.2 | 512493.5 | TRUE |
| 3598452  | 1582600  | 5592272  | 2849441  | 2351320  | 6024022  | 1910724  | 2744228  | TRUE |
| 163747.3 | 83783.3  | 237422.1 | 141366.7 | 78262.2  | 402120.8 | 92056.3  | 148089.6 | TRUE |
| 118066.3 | 40981.8  | 153277.8 | 81747.4  | 43119.8  | 274033.1 | 82419.2  | 154564.1 | TRUE |
| 15400.3  | 19632.8  | 8894.1   | 23835.2  | 13033.1  | 5158.5   | 24793.2  | 10901.7  | TRUE |
| 386801.5 | 318017   | 357246.1 | 496851.4 | 423544.2 | 407679   | 362222.1 | 398156.4 | TRUE |
| 414074.6 | 416072.3 | 360711.3 | 317390.6 | 416602.2 | 440744.1 | 381192.8 | 430881.9 | TRUE |
| 86148.7  | 85570.1  | 90069.9  | 80595.2  | 84508.2  | 64867.4  | 103583   | 87786.3  | TRUE |
| 151616.2 | 184122.8 | 127833.7 | 114824.2 | 88889.9  | 118903.1 | 142062.4 | 90440.2  | TRUE |
| 584275.7 | 437151   | 735824.8 | 706575.8 | 631871.7 | 541097.3 | 429131.3 | 535125   | TRUE |
| 47618.1  | 60405.2  | 47279.7  | 29924.4  | 32352.4  | 49134.1  | 51857.7  | 33666.7  | TRUE |
| 76465.4  | 82173.6  | 84554.5  | 71694.8  | 70138.8  | 76048.8  | 106011.4 | 78413.6  | TRUE |
| 112819.1 | 86804.9  | 89648.3  | 82067.9  | 100234   | 80098.7  | 73789.9  | 100305.7 | TRUE |
| 232846.7 | 135947.3 | 260944.3 | 265102.8 | 242942.3 | 204980.1 | 163379.2 | 197910.5 | TRUE |
| 61478.4  | 36187    | 40693.8  | 42980    | 46454.6  | 40165.9  | 55859.1  | 62506.1  | TRUE |
| 33682.5  | 34052.7  | 38741.4  | 8459.9   | 30823.5  | 41287.6  | 33491.6  | 31165.1  | TRUE |
| 44462.1  | 44594.9  | 53999.7  | 33034.9  | 29804.9  | 52038    | 41029.6  | 31366.8  | TRUE |
| 592037.8 | 544923.4 | 995750.3 | 383282   | 380164.1 | 1097289  | 593867.4 | 359589.4 | TRUE |
| 282973.7 | 199619.9 | 299180.8 | 295640.2 | 415404.1 | 288529.3 | 326031.6 | 269084.7 | TRUE |
| 68955.4  | 67000    | 79833.7  | 63634.8  | 86087.2  | 97802.1  | 70091.4  | 61656.4  | TRUE |
| 28208.9  | 18380.2  | 30323.5  | 17550.7  | 24524.8  | 25604.5  | 23747.4  | 20543.7  | TRUE |
| 820767.8 | 719489.5 | 869067.9 | 898971.1 | 1294354  | 646763.5 | 789931.2 | 722348   | TRUE |
| 62169.4  | 66997.1  | 54404    | 30702.6  | 76253    | 79191.5  | 73865    | 54238.8  | TRUE |
| 100645.8 | 114557.3 | 151556   | 104607.6 | 118551.2 | 47223.5  | 109628.3 | 44827.3  | TRUE |
| 212190.2 | 159574.4 | 244767.7 | 261354.8 | 212565.9 | 205809   | 178594.2 | 217584.6 | TRUE |
| 1129831  | 789721.8 | 1353904  | 1290856  | 1003390  | 997100.6 | 770118.4 | 964393.7 | TRUE |
| 393948.4 | 526171.3 | 351136.7 | 415118.5 | 326889.3 | 344001.7 | 291205.8 | 341798.3 | TRUE |
| 140719.3 | 122212.4 | 150943.9 | 150944.4 | 149103.4 | 123188   | 150922.3 | 150355.2 | TRUE |
| 58524.6  | 31122.9  | 46212.3  | 44762.8  | 57215.1  | 42167.3  | 46283.5  | 51087.9  | TRUE |
| 127323.7 | 98539.1  | 76631.7  | 113696.9 | 88468.3  | 132907.7 | 115970.2 | 114622.3 | TRUE |
| 77155.3  | 56665.7  | 54883.5  | 67077.4  | 50079.9  | 74965.2  | 81078.6  | 78528.4  | TRUE |
| 180440.2 | 195088.7 | 150471.3 | 166946.7 | 148232.4 | 131509   | 161018.6 | 141342.2 | TRUE |
| 277413.5 | 286231.6 | 333526.9 | 225845.2 | 170312   | 333543.2 | 306358.7 | 216311.2 | TRUE |
| 596695.4 | 521245.7 | 564613.8 | 572595.3 | 673734.1 | 596748.6 | 584489   | 628374.6 | TRUE |
| 87523.9  | 106319.2 | 96001.2  | 101530   | 64191.2  | 136394.2 | 97705.8  | 87598.4  | TRUE |
| 58618.9  | 59765.2  | 73846.1  | 60735.2  | 68845    | 44602    | 46281.8  | 45791.8  | TRUE |

|          |          |          |          |          |          |          |          |      |
|----------|----------|----------|----------|----------|----------|----------|----------|------|
| 121423.2 | 106838   | 162748   | 80927.3  | 83937.5  | 113865.3 | 108640   | 86571.2  | TRUE |
| 163935.7 | 104670.6 | 195783.1 | 179445.7 | 231160.7 | 142324   | 115672.9 | 133325   | TRUE |
| 114056.5 | 91793.1  | 98999.1  | 115661.3 | 102406.3 | 166370   | 124105.1 | 81168.1  | TRUE |
| 38468.2  | 93005    | 60804.7  | 51342.8  | 51418.7  | 47911.4  | 51778.2  | 43032.5  | TRUE |
| 77869.3  | 87432.2  | 72264.9  | 79624.6  | 96181.7  | 69425.1  | 72511.8  | 93104.2  | TRUE |
| 100755.9 | 93603.9  | 100256.9 | 137825.9 | 122468.7 | 290132.3 | 145035.4 | 204275.1 | TRUE |
| 237891.2 | 240067.5 | 270671.9 | 321283.2 | 307098.2 | 723129.5 | 331818.2 | 468689.3 | TRUE |
| 103360.7 | 155811.3 | 76407    | 66191.8  | 105371.4 | 69923.3  | 147523   | 99598.4  | TRUE |
| 386812.7 | 203731.3 | 449254.2 | 565865.1 | 352721.9 | 389804.5 | 251589.2 | 447274.4 | TRUE |
| 534265.9 | 348788.3 | 730833.6 | 762509.9 | 465150.9 | 485155.3 | 361571   | 521840.6 | TRUE |
| 132716.8 | 143572.1 | 104723   | 145187   | 140516.6 | 123813.6 | 131509.6 | 148680.3 | TRUE |
| 120643.5 | 116357.1 | 154057.4 | 141297.2 | 110927   | 133375.1 | 127536.6 | 136776.4 | TRUE |
| 258506   | 287857.7 | 230435.3 | 268442.5 | 218333.8 | 296415.4 | 278472.1 | 340008.9 | TRUE |
| 100520.3 | 108264.7 | 95394.8  | 131699.1 | 102645.2 | 114063.4 | 140255.7 | 87417.4  | TRUE |
| 194478.4 | 124726.2 | 302577.1 | 268504.7 | 216927.6 | 224264.7 | 154424.4 | 207754.6 | TRUE |
| 403749   | 309624.1 | 486885.5 | 440015.1 | 384896.6 | 345613.5 | 300595.4 | 361784.4 | TRUE |
| 95494.8  | 68885.5  | 101531.6 | 79428.1  | 99145.6  | 109853.9 | 101729.3 | 104357.7 | TRUE |
| 159280.2 | 202748   | 131803.4 | 135583   | 144145.2 | 147991.9 | 158619.1 | 96473.6  | TRUE |
| 232014.5 | 246031.7 | 207481.1 | 207290.4 | 152910.6 | 215572.9 | 213845.3 | 171212.3 | TRUE |
| 140068.3 | 133490.1 | 154391   | 172898.1 | 183802.6 | 161222.4 | 157813.9 | 195080.8 | TRUE |
| 114289.7 | 70678.7  | 89607.8  | 106292   | 88702.6  | 90105.5  | 85751.6  | 79003.3  | TRUE |
| 201092   | 148660.8 | 208020   | 230710.3 | 284433.3 | 200667.7 | 158006.1 | 175243.4 | TRUE |
| 82105    | 54198.6  | 51395.4  | 90422    | 69614.1  | 98641.3  | 86495.1  | 139821.4 | TRUE |
| 168708.7 | 129969.1 | 90272.7  | 126313.7 | 145312.1 | 171696.3 | 174223.6 | 212525   | TRUE |
| 99865.9  | 107380.2 | 96149.4  | 113935.9 | 126366.8 | 95847.2  | 109685.4 | 112895.6 | TRUE |
| 168973   | 218396.7 | 105566   | 129984.5 | 117970.9 | 108198   | 174088   | 107430.8 | TRUE |
| 111050.3 | 127552   | 70365    | 70596.5  | 69695.3  | 71253.8  | 100127.6 | 83084    | TRUE |
| 345704.3 | 429991.2 | 300194.4 | 339746.3 | 291721   | 290421.9 | 499877   | 305061.4 | TRUE |
| 261708.1 | 295719   | 227190.3 | 260641.2 | 262933.9 | 259541   | 338238   | 285673.3 | TRUE |
| 89184.2  | 83847.2  | 125007.4 | 138572.7 | 106809.3 | 82351    | 86694.6  | 87707.2  | TRUE |
| 81576.4  | 73924.3  | 113392.9 | 108626   | 69674.3  | 80918.3  | 70091.4  | 81682.8  | TRUE |
| 74751.6  | 67964    | 61073.8  | 57873    | 50209.7  | 40756    | 45650.6  | 58448.9  | TRUE |
| 45731.2  | 26826.2  | 26215.1  | 47089.1  | 47133.9  | 39682.6  | 40250.8  | 56684.4  | TRUE |
| 108885.4 | 143205   | 60455.2  | 102218.7 | 100531.5 | 131975.9 | 166735.3 | 100646.2 | TRUE |
| 73490.1  | 47884.4  | 51917.3  | 54297.1  | 63064.1  | 52165.3  | 55517.3  | 52190.2  | TRUE |
| 501969.6 | 412996.3 | 370485.2 | 404889   | 523391.3 | 535744   | 449558.2 | 538744.3 | TRUE |
| 150784.8 | 111675.9 | 94825    | 135005.4 | 120688   | 149257.6 | 152581.7 | 163359.5 | TRUE |
| 20580.5  | 13657.1  | 19562.9  | 12682.4  | 28231.6  | 22168.1  | 27834.8  | 20432.9  | TRUE |
| 102919.4 | 101628.7 | 73755.6  | 90509.7  | 82670.7  | 91728    | 77518.2  | 84823    | TRUE |
| 104626.5 | 96978.4  | 97753.8  | 95335.7  | 75475.1  | 118335.2 | 91708.8  | 114306.6 | TRUE |
| 324565.1 | 254011.3 | 293979.6 | 283773.8 | 294890.6 | 281110.5 | 280042.2 | 310023.5 | TRUE |
| 398642.8 | 350777.8 | 315350.4 | 364960.7 | 410979.1 | 376464.3 | 382210.9 | 427588.2 | TRUE |
| 1118213  | 1053868  | 991313.7 | 1006801  | 950859.1 | 1115869  | 1061968  | 1228060  | TRUE |
| 344303.6 | 278859.4 | 227561.4 | 301393.5 | 308641.7 | 341782.6 | 336613.5 | 369029.8 | TRUE |
| 384643.7 | 274265.2 | 292826.4 | 356461.4 | 317998.6 | 468243.8 | 381199.8 | 474737.6 | TRUE |

|          |          |          |          |          |          |          |          |      |
|----------|----------|----------|----------|----------|----------|----------|----------|------|
| 81331.2  | 76548.1  | 75594.3  | 78273.7  | 63010.1  | 83507.5  | 79045.6  | 81707    | TRUE |
| 6297     | 6754.3   | 8564     | 11956.8  | 10370.9  | 7546.2   | 7302.7   | 20957.4  | TRUE |
| 20234    | 12397.9  | 7813.8   | 15840.7  | 11523    | 21144.8  | 12586.5  | 18921.2  | TRUE |
| 22172.2  | 8530.2   | 13989.1  | 19415.9  | 8579.2   | 15276.4  | 18691.5  | 16113.1  | TRUE |
| 469176.4 | 470004.5 | 422119   | 443815.7 | 539601.3 | 455508.9 | 519614.9 | 556058.1 | TRUE |
| 113428.8 | 113332.6 | 124923.7 | 148827.4 | 128869.7 | 113221.7 | 117952.7 | 126806.8 | TRUE |
| 29641.3  | 42381.2  | 24322.1  | 46993    | 35494.8  | 31261.8  | 52795.9  | 49784.4  | TRUE |
| 61332.7  | 42266.4  | 57257.8  | 61754.7  | 37865    | 67240.9  | 43554.2  | 73804.1  | TRUE |
| 119887.4 | 130930   | 111871.7 | 108622.5 | 121061.4 | 106217.1 | 108480.6 | 113263.5 | TRUE |
| 196753.9 | 183403.8 | 203233.1 | 209910.2 | 187822.8 | 211400.8 | 180777.7 | 205169.5 | TRUE |
| 53033.2  | 49610.9  | 53603.3  | 64575.8  | 44099.1  | 48793.4  | 57450.1  | 55147.8  | TRUE |
| 67966.7  | 58680    | 69395.1  | 56810.8  | 64387.1  | 69478.5  | 59279.8  | 51423.8  | TRUE |
| 516782.4 | 454648.7 | 629473.8 | 541196.2 | 368537.5 | 699183.8 | 518032   | 399279.6 | TRUE |
| 265701.3 | 204147.9 | 255056.1 | 296842.8 | 353749.2 | 265267.9 | 240322.8 | 298146.1 | TRUE |
| 223572.6 | 188686.2 | 275492.3 | 217046.9 | 202977.7 | 299990.4 | 187710.9 | 209712.2 | TRUE |
| 337896.5 | 233578.6 | 433193.3 | 321057.2 | 246383.4 | 476258.9 | 295701.1 | 303313   | TRUE |
| 91500.2  | 86335.7  | 70088.3  | 89617.7  | 103336.2 | 100217   | 103109.4 | 96604.2  | TRUE |
| 327081.2 | 423384.2 | 202231   | 263142   | 291777.6 | 252804.4 | 396234.9 | 302547.7 | TRUE |
| 204432   | 165776.7 | 279442.6 | 385775.5 | 144577.4 | 194928.8 | 218503.8 | 181370.5 | TRUE |
| 42324.2  | 40227.8  | 17198.1  | 18040    | 14438.1  | 12904.4  | 43344.9  | 24238.5  | TRUE |
| 19314.8  | 22052.9  | 36242.6  | 26909.8  | 18619.6  | 7130.4   | 24642.4  | 18136.8  | TRUE |
| 41204.5  | 48637.8  | 49119.4  | 56745.1  | 24887    | 37223.1  | 48344.4  | 27786.3  | TRUE |
| 114965.5 | 105516   | 94561.1  | 123874.5 | 99257.5  | 118448.5 | 121276.4 | 115044.4 | TRUE |
| 61643.8  | 68920    | 125695.3 | 70931.6  | 64423.6  | 47354    | 56207.9  | 53613.3  | TRUE |
| 72651.6  | 102463.4 | 54742.2  | 84626.5  | 72149.6  | 62012    | 62914.1  | 61781.6  | TRUE |
| 55012.2  | 38964.9  | 61198.2  | 32379    | 63723.3  | 66019.3  | 70709.8  | 58452.9  | TRUE |
| 69295.8  | 75487    | 78146    | 65020.7  | 49484.2  | 73035.7  | 63779.3  | 66017.4  | TRUE |
| 26714.3  | 23690.7  | 18155.5  | 35641.1  | 18547.6  | 36500.5  | 35241.2  | 11941.8  | TRUE |
| 40831    | 45065.1  | 53188.6  | 57019.2  | 39842.2  | 85346.8  | 73277.4  | 54044.7  | TRUE |
| 207609   | 153565.8 | 165250   | 193724   | 201926.9 | 185674   | 188140.2 | 214991.8 | TRUE |
| 137302.8 | 115341.9 | 123585.6 | 114378.9 | 131128.7 | 138324.4 | 132299.9 | 142012.5 | TRUE |
| 197658.6 | 141125.5 | 184737.8 | 199861.9 | 193158.7 | 156765.4 | 214314.7 | 230789   | TRUE |
| 155648.9 | 143453.6 | 130170.7 | 91155.8  | 92241.4  | 124203.9 | 129970.8 | 97403.9  | TRUE |
| 230949.3 | 229518   | 253327.7 | 245638.6 | 249255.2 | 301479.1 | 283121.4 | 262914.7 | TRUE |
| 69753.2  | 97435.4  | 115668.5 | 71740.2  | 103097.1 | 90829.7  | 82010.6  | 78619.1  | TRUE |
| 132089.4 | 145526.4 | 163653.9 | 208697   | 156352.9 | 199147   | 208657.7 | 154925.7 | TRUE |
| 689993.1 | 530479   | 748725.6 | 762656.3 | 713505.9 | 689467.1 | 526819.1 | 612600.5 | TRUE |
| 220941   | 237462.2 | 163976.6 | 172296.3 | 237015.7 | 182319   | 270665.7 | 207261.7 | TRUE |
| 1916034  | 1597373  | 2122511  | 2187807  | 1847256  | 1664611  | 1766802  | 1599563  | TRUE |
| 329091   | 306889.9 | 382152.7 | 348836.3 | 294171.1 | 329548   | 294351.5 | 321895.5 | TRUE |
| 873507.4 | 807424.3 | 782400.9 | 830059.5 | 943387.4 | 801688.8 | 847793.8 | 908518   | TRUE |
| 668429   | 663532.4 | 643581.3 | 715241.8 | 697612.4 | 676109.5 | 684470.2 | 724604.8 | TRUE |
| 787549.3 | 675110.5 | 762104.8 | 711901.5 | 845378.4 | 713452.5 | 793354.2 | 760099.2 | TRUE |
| 92572.6  | 90006.8  | 97154.3  | 125109.5 | 115730.4 | 121622.9 | 129163.6 | 90275.3  | TRUE |



|          |          |          |          |          |          |          |          |      |
|----------|----------|----------|----------|----------|----------|----------|----------|------|
| 30055    | 28320.3  | 25507.4  | 26281.8  | 8197.6   | 45849    | 29403.8  | 25741.9  | TRUE |
| 57923.7  | 42376.6  | 42730.6  | 38205.4  | 63812.2  | 61524.5  | 67984    | 54445.6  | TRUE |
| 61437.9  | 58887.9  | 100626.3 | 48510.5  | 48028.1  | 103787.8 | 72512.4  | 58965.4  | TRUE |
| 147885.2 | 133186.5 | 270042.8 | 166012.5 | 275076.6 | 286568.7 | 146643.7 | 107002   | TRUE |
| 55581.5  | 62451.6  | 55744    | 50974.2  | 71257.8  | 43696.2  | 72669.8  | 92800.8  | TRUE |
| 56119.2  | 59229.7  | 64666.6  | 62396.5  | 62444.2  | 107214   | 54110    | 92568    | TRUE |
| 412606.8 | 339653   | 541052.8 | 447423.4 | 402312.3 | 529696.2 | 347602.9 | 414234.8 | TRUE |
| 208853.6 | 184501.3 | 221930.7 | 205688.5 | 265142.1 | 219595.4 | 193850.1 | 235520   | TRUE |
| 47387.5  | 40909.5  | 60263.5  | 48529.3  | 64106.9  | 52843.3  | 42959.8  | 49397.3  | TRUE |
| 111547.3 | 103821.3 | 116531.9 | 94824.5  | 101556.2 | 111403.9 | 102325.4 | 97505.5  | TRUE |
| 71914.1  | 135234.7 | 133837.9 | 98383.9  | 109767.5 | 77856.7  | 63037.7  | 57664.2  | TRUE |
| 161637.7 | 203774.8 | 190425.8 | 165938.2 | 184542.9 | 146389.3 | 142052.8 | 155564.8 | TRUE |
| 106659.6 | 97752.6  | 78449.8  | 115927.1 | 98462.9  | 83812.3  | 119741.9 | 98062.7  | TRUE |
| 129813.2 | 92602.7  | 150505   | 151651.4 | 106074.8 | 184541.9 | 114711   | 126271   | TRUE |
| 287049.8 | 261759.2 | 263503.1 | 242725.8 | 252029.3 | 278278.5 | 244920.2 | 259709.1 | TRUE |
| 159411.5 | 131961.2 | 115445   | 119256   | 187705.5 | 128348.7 | 153294.9 | 180697.4 | TRUE |
| 413886.4 | 465725.1 | 392487.7 | 323612.2 | 544311.5 | 437105.4 | 399072.9 | 413718.7 | TRUE |
| 38304.5  | 28644.9  | 44631.6  | 34659.8  | 34229.5  | 41797.7  | 30176.7  | 44544.4  | TRUE |
| 103572.2 | 111609.5 | 105005.2 | 136660.5 | 99902.3  | 95165.9  | 97300.7  | 105336.1 | TRUE |
| 69469.6  | 61386.3  | 27363.2  | 48190.7  | 50881.3  | 36644.4  | 54214.4  | 47286.7  | TRUE |
| 96651    | 116608.9 | 49515.8  | 75233.2  | 84486.9  | 59121.6  | 81405.6  | 90143.4  | TRUE |
| 26870.5  | 21175    | 34866.1  | 35538.4  | 8745     | 30068.1  | 31181.7  | 32588.5  | TRUE |
| 72796.6  | 72395.2  | 85153.3  | 86003.5  | 66993.4  | 74928.6  | 78400.3  | 75288.4  | TRUE |
| 42728.4  | 34694.7  | 18479.8  | 32664.8  | 29097.9  | 31002.7  | 33725.7  | 47373.4  | TRUE |
| 29273.4  | 23797.5  | 17025.7  | 23645.9  | 17680.7  | 20513.8  | 25547.7  | 36779.7  | TRUE |
| 81753.6  | 70877.8  | 53128.9  | 63744.1  | 37345.7  | 55867.1  | 57399.5  | 32984.3  | TRUE |
| 537216.2 | 672942   | 301778   | 519132.3 | 633512.3 | 328621.2 | 653033.9 | 625969.8 | TRUE |
| 627646.3 | 678439.9 | 668903.1 | 682134.8 | 399590.5 | 596446.8 | 669721.9 | 632502.2 | TRUE |
| 76943.4  | 73854.6  | 61267.9  | 57637.9  | 58408.5  | 65554.3  | 92972.1  | 98969.1  | TRUE |
| 151902.6 | 141237.8 | 163059.3 | 136056.5 | 135779.7 | 133145.2 | 160146.6 | 121379.7 | TRUE |
| 1215072  | 1403667  | 971513.8 | 1275971  | 1354018  | 976197.4 | 1510111  | 1307459  | TRUE |
| 147676.3 | 140401.1 | 157070.9 | 149029.4 | 158266.5 | 143487.3 | 141880.7 | 152252.4 | TRUE |
| 48873.3  | 41993.3  | 40619.8  | 46862.1  | 33785.7  | 66759.7  | 52114    | 35726.4  | TRUE |
| 135737.5 | 82002.2  | 127061.9 | 156799   | 133177.9 | 111190.1 | 100112.3 | 132851.8 | TRUE |
| 34279    | 40371.9  | 39859    | 41828.8  | 33890.1  | 36867.8  | 43516.7  | 30016.5  | TRUE |
| 46572    | 52004.8  | 53161.3  | 64622.4  | 68767.7  | 39365.2  | 31727.1  | 34397.4  | TRUE |
| 259656.9 | 286278.1 | 289466.1 | 202828.6 | 196153.1 | 270250.2 | 287334   | 193331.4 | TRUE |
| 433606.8 | 337201.5 | 510759   | 530155.7 | 401703.2 | 440021.4 | 383857.7 | 410900.5 | TRUE |

|          |          |          |          |          |          |          |          |      |
|----------|----------|----------|----------|----------|----------|----------|----------|------|
| 1295024  | 1059485  | 1572496  | 1617382  | 1150109  | 1328837  | 1071675  | 1412416  | TRUE |
| 762273.6 | 643695   | 763892.6 | 878609   | 780140.8 | 672833.1 | 670542.5 | 685531.1 | TRUE |
| 724160.1 | 905867.8 | 809480.4 | 951053.7 | 514338.5 | 636681.8 | 812706   | 655383.6 | TRUE |
| 403133   | 415508.6 | 325813.5 | 415395.9 | 408106.2 | 348410.8 | 439822.1 | 385999.1 | TRUE |
| 180311.5 | 165350.7 | 206865.8 | 201480.2 | 174983.8 | 208720.6 | 197439.6 | 175998.4 | TRUE |
| 66550.3  | 67504.7  | 64021.5  | 67569.1  | 39739.4  | 56627.9  | 80547.9  | 61129.3  | TRUE |
| 158953.7 | 214626.6 | 136957.6 | 145534.5 | 142300.1 | 159111.1 | 221471.3 | 156242.4 | TRUE |
| 122768.1 | 153160   | 140231.6 | 114211   | 77353.5  | 171847   | 163618.4 | 100949.4 | TRUE |
| 297342.6 | 351150.2 | 251944.8 | 283854.1 | 312258.1 | 272804.7 | 365645.4 | 349396.3 | TRUE |
| 49776.5  | 34535.3  | 63329    | 47694.2  | 46994.6  | 70152.6  | 50833.7  | 54801.6  | TRUE |
| 89410.8  | 80240.9  | 105406.5 | 87597.9  | 63856.7  | 118938   | 82840    | 68093.6  | TRUE |
| 64060.4  | 43059.4  | 57802.6  | 48414.2  | 41478.7  | 78446.2  | 64624.5  | 63739    | TRUE |
| 142754.6 | 123211.8 | 131210.7 | 139845.2 | 142122.3 | 128954   | 122867   | 132934.4 | TRUE |
| 27623.8  | 24427.3  | 12992    | 29616    | 27319.3  | 21421.6  | 24976.6  | 37594.6  | TRUE |
| 60754.1  | 50786.2  | 63499    | 54551.1  | 38872    | 61796    | 63092    | 62560.2  | TRUE |
| 439896.8 | 401392   | 400693.7 | 481701.6 | 398743.2 | 407142.6 | 454937.9 | 418650.2 | TRUE |
| 338222.8 | 358467.4 | 302712.5 | 327011.9 | 348828.7 | 280783.9 | 343445.1 | 331998.1 | TRUE |
| 227132.5 | 238301.6 | 265017.9 | 256238.1 | 202211.3 | 244103.3 | 240842   | 242665.4 | TRUE |
| 24592    | 23216.4  | 18309    | 36115.8  | 26393.6  | 18158.2  | 7767.4   | 21723.5  | TRUE |
| 28710.4  | 37878.2  | 42023.4  | 31116.1  | 29156    | 39590.5  | 57626.1  | 23890.3  | TRUE |
| 28382.2  | 18816.7  | 47238.6  | 22816    | 30208.6  | 54793.7  | 11988.8  | 21894.1  | TRUE |
| 230888   | 223011.9 | 317055.3 | 194432.5 | 195130.7 | 322302.8 | 246979.8 | 191514.8 | TRUE |
| 21225.4  | 6607.2   | 18526.6  | 31235    | 8324.2   | 6789.2   | 30816.3  | 14624    | TRUE |
| 42351.6  | 71222.8  | 42224.3  | 48372.6  | 43596.6  | 52173.7  | 62306.7  | 39090.5  | TRUE |
| 120230.3 | 69034.4  | 66070.5  | 51345.9  | 49615.2  | 63643.5  | 100601.1 | 37952.3  | TRUE |
| 90975.6  | 70725.8  | 87445.2  | 78753.9  | 76306.8  | 81435.5  | 92552.4  | 71843.3  | TRUE |
| 273124.1 | 190767.3 | 240994.9 | 308191   | 217443   | 268967.8 | 214309.8 | 247349.8 | TRUE |
| 32650.6  | 25747.9  | 36105.2  | 33949.1  | 29872.8  | 38799.2  | 28110.1  | 33099    | TRUE |
| 89385.1  | 98654.8  | 104187   | 114994.1 | 91237.8  | 114965.6 | 80303.3  | 113223.1 | TRUE |
| 23095.5  | 9577.9   | 27296.7  | 37621.1  | 21980    | 33403.3  | 26611.3  | 24234.3  | TRUE |
| 42467.7  | 59992.9  | 43218.9  | 42127.1  | 56052.9  | 48556.9  | 47046.8  | 41441.9  | TRUE |
| 223298.5 | 205951.5 | 239701.7 | 232626.7 | 195733.8 | 226897.5 | 230238.6 | 197034.1 | TRUE |
| 53410.6  | 56003.7  | 43256.1  | 50514    | 37908.3  | 43102    | 49729.5  | 53408.2  | TRUE |
| 43259.2  | 31202.9  | 47643.9  | 41679.1  | 34455.5  | 40655.1  | 39600.8  | 52145.7  | TRUE |
| 65141.3  | 58991.7  | 74934.9  | 66643.5  | 62709.6  | 68501.8  | 62421    | 71240.9  | TRUE |
| 1603176  | 1406421  | 1421653  | 1562862  | 2019164  | 1441318  | 1540864  | 1469254  | TRUE |

|          |          |          |          |          |          |          |          |      |
|----------|----------|----------|----------|----------|----------|----------|----------|------|
| 217871.3 | 140743.3 | 162960.3 | 200237.3 | 212989.7 | 173061   | 204269.6 | 230270.1 | TRUE |
| 86059.1  | 116035.9 | 73630.4  | 129531.2 | 97635.8  | 108064.7 | 111784.2 | 98688    | TRUE |
| 127727.5 | 103032.7 | 394533.4 | 78154.1  | 40747.4  | 451217.2 | 89081.9  | 65348.6  | TRUE |
| 38720.8  | 18481.3  | 13540.5  | 6896     | 74402    | 22257.8  | 19065.8  | 26151.4  | TRUE |
| 125822.8 | 104661.3 | 314896.7 | 113608.9 | 89445.3  | 330501.9 | 121846.4 | 149981.8 | TRUE |
| 345516.5 | 198663.1 | 261665   | 204786.9 | 778556   | 242850.2 | 206359.9 | 231130.4 | TRUE |
| 349459.7 | 249168.5 | 361538.2 | 343918.3 | 660758.6 | 302087.2 | 253956.6 | 334767   | TRUE |
| 114616.5 | 111087.4 | 63609.1  | 87000.8  | 88483.4  | 110400.4 | 151505.2 | 161956.6 | TRUE |
| 358853.4 | 505156   | 288592   | 269536.4 | 324592.7 | 274510.3 | 490773.2 | 355822.8 | TRUE |
| 190438.9 | 221425.7 | 140825.7 | 195351.8 | 205622.7 | 148827.5 | 232065.4 | 225450.2 | TRUE |
| 156377.2 | 138491.9 | 239789.4 | 208369.9 | 137821.2 | 130217.6 | 146379.9 | 132451.4 | TRUE |
| 83925.2  | 141717.6 | 81158.3  | 68938.7  | 76185.4  | 78306.3  | 113993.1 | 85745.7  | TRUE |
| 162992.5 | 136824.6 | 150619.4 | 185219.1 | 170351.3 | 214437.6 | 188608.9 | 201365.8 | TRUE |
| 28552.7  | 22715.1  | 50559.4  | 21245.6  | 36287.1  | 30343.3  | 22504.8  | 23114.3  | TRUE |
| 201523.5 | 187212.9 | 234225   | 237458.9 | 204807.2 | 264592.7 | 213297.3 | 235094   | TRUE |
| 106017.3 | 99873.4  | 96243.8  | 123020.6 | 129765.7 | 115888.1 | 110419.5 | 121254.5 | TRUE |
| 53513.9  | 62877.6  | 72688.9  | 61039.1  | 44104.3  | 80663.5  | 47223.2  | 38724.6  | TRUE |
| 78444.6  | 85469.9  | 78051.1  | 96147.1  | 91288.5  | 83504.6  | 95755.2  | 93349.3  | TRUE |
| 63127.2  | 75522.5  | 71696.9  | 68728.5  | 82448.8  | 70239.5  | 67915.2  | 65695.2  | TRUE |
| 99207.8  | 93194.6  | 77144.2  | 58733    | 95368.7  | 89711.5  | 111493   | 90905.4  | TRUE |
| 135602.2 | 127664.8 | 126643.7 | 148883.8 | 137702   | 130942.3 | 153333.8 | 142845   | TRUE |
| 466468   | 435184.4 | 318562.8 | 420519.4 | 421662.3 | 328093.7 | 393472.9 | 505123.5 | TRUE |
| 175046   | 137609.4 | 156793.1 | 170981.9 | 126125.4 | 176706.4 | 149463.3 | 146769.8 | TRUE |
| 65884.6  | 55152.8  | 53210.6  | 60102.8  | 69251.9  | 89002.3  | 74289    | 97858.3  | TRUE |
| 41996.1  | 41201.6  | 66980.8  | 42045.3  | 39623.4  | 39343.4  | 34800.8  | 33725.5  | TRUE |
| 24269.5  | 22792.9  | 27103    | 19518.7  | 13559    | 29998.6  | 29173.5  | 8092.9   | TRUE |
| 24879    | 18445    | 25181.4  | 24886.1  | 13814.1  | 28722.2  | 32186.3  | 19837.1  | TRUE |
| 349524.6 | 272823.9 | 320442.1 | 401995.8 | 432261.2 | 391989.9 | 293810.5 | 365763.7 | TRUE |
| 152565   | 134563.4 | 213571.8 | 175968.3 | 151803.7 | 135703.1 | 141717.9 | 158917.9 | TRUE |
| 143915.9 | 139878.9 | 183683.3 | 148147.1 | 140913.6 | 165690.5 | 143760   | 156813.1 | TRUE |
| 311838.8 | 337130.8 | 379452.3 | 342543.4 | 309484.3 | 359371.3 | 328039.2 | 285789.6 | TRUE |
| 59460.7  | 73623.9  | 83107    | 69749.6  | 76827.3  | 84918.7  | 73494.2  | 69781.6  | TRUE |
| 47905.9  | 66101.5  | 70101.5  | 57323.5  | 68151.1  | 77035.8  | 71443.6  | 66791.2  | TRUE |
| 57182.1  | 47549.2  | 41913.6  | 43546.5  | 37533    | 44813.6  | 51227    | 45362.1  | TRUE |
| 343389.7 | 252032.2 | 356096.4 | 293198.7 | 344941   | 351133.7 | 263339.2 | 357971.1 | TRUE |
| 48711.4  | 28456.3  | 23883.7  | 31540.5  | 29313.7  | 35516.7  | 45211.9  | 35621.8  | TRUE |
| 122260.2 | 95930.6  | 113115.8 | 139552.3 | 111091.8 | 157504.8 | 140751.7 | 142221.4 | TRUE |
| 158985   | 137256.1 | 145784   | 210246.9 | 182323.1 | 162359   | 151553.6 | 161516.6 | TRUE |
| 210109.1 | 194997.8 | 237006.1 | 225784.9 | 215757.8 | 233391.4 | 197123.9 | 227150.5 | TRUE |
| 77887.9  | 67491.7  | 60075.6  | 78349    | 70253    | 71133.2  | 72693.1  | 71114.4  | TRUE |
| 79001.1  | 49690.1  | 77886.2  | 77432.9  | 69246.1  | 66769    | 68386.3  | 60353.9  | TRUE |
| 8722.4   | 5617     | 26160.9  | 7283.3   | 5827.8   | 26147.4  | 10120.8  | 8187.7   | TRUE |

|          |          |          |          |          |          |          |          |      |
|----------|----------|----------|----------|----------|----------|----------|----------|------|
| 197463.4 | 179953.8 | 261110.4 | 181620.3 | 161098.6 | 267769.1 | 177806.3 | 166517.8 | TRUE |
| 67512.4  | 45257.1  | 60733.1  | 53365.9  | 49869.3  | 84546.2  | 66550.4  | 68767.2  | TRUE |
| 151157.1 | 108580.3 | 119548   | 69877    | 133590.1 | 122430.4 | 105336.6 | 177330   | TRUE |
| 78106.9  | 102547.3 | 58194.9  | 74645.6  | 99621.8  | 79115.1  | 101444.5 | 91150.2  | TRUE |
| 73826.5  | 56757.9  | 94396.3  | 79208.7  | 64654.3  | 88198.1  | 51416.7  | 63914.8  | TRUE |
| 48128.7  | 23367.7  | 39496.9  | 53815.7  | 30442.7  | 62368.1  | 30827.8  | 38628.9  | TRUE |
| 198920.5 | 168131.5 | 227181.4 | 241649.6 | 176149.5 | 238685.3 | 201757.4 | 191370.1 | TRUE |
| 78845.7  | 63991.8  | 87829.6  | 88293.9  | 66945.6  | 101775.8 | 76747.3  | 62984.7  | TRUE |
| 161378.3 | 198072.4 | 144279.3 | 125606.8 | 178237.6 | 155589.5 | 180254.7 | 166622.3 | TRUE |
| 22078.3  | 21787.1  | 20212.9  | 7326.4   | 25197.3  | 17996.7  | 22757.6  | 22760.3  | TRUE |
| 419027.8 | 404762.2 | 361146   | 414250.8 | 304714.9 | 459050   | 563038   | 473269   | TRUE |
| 152019.5 | 149957   | 146051.6 | 158930.8 | 162713.6 | 147321.4 | 156870.1 | 149109.5 | TRUE |
| 143691.1 | 163885.9 | 134242.7 | 140530.9 | 127493.3 | 157341.5 | 167622.4 | 129204   | TRUE |
| 32083.3  | 35461.2  | 29520.5  | 33455    | 30943.1  | 29668.3  | 26683.7  | 30808.5  | TRUE |
| 315272   | 236593.6 | 377520.5 | 332373.1 | 296971.6 | 304077.7 | 243610.7 | 322178.3 | TRUE |
| 130049.9 | 155046.3 | 130545.7 | 173751.9 | 155036.5 | 142306.8 | 170254.8 | 160211.9 | TRUE |
| 28334.5  | 28682.2  | 37260.3  | 25107.3  | 33589.4  | 20405.3  | 37940.7  | 30171.8  | TRUE |
| 61851.8  | 75524.3  | 81002.2  | 65109    | 71403.9  | 71085.1  | 89412.1  | 77266.5  | TRUE |
| 29635.7  | 34742.3  | 44735.6  | 53551.7  | 37060.5  | 43770.5  | 43819.3  | 35282.5  | TRUE |
| 332063.2 | 212315.8 | 358289.5 | 346604.1 | 345574.2 | 250058.4 | 464756.7 | 317010.4 | TRUE |
| 47605.4  | 44103.5  | 36260.8  | 37344.3  | 56522.2  | 35937    | 43391.7  | 34325.1  | TRUE |
| 59171    | 58683.1  | 61230.1  | 48388.3  | 69759.8  | 49146.6  | 61397.6  | 61375    | TRUE |
| 58208.9  | 50444.3  | 50397.8  | 61458.2  | 39632    | 84394.1  | 77959.4  | 55397.8  | TRUE |
| 104468   | 88109.3  | 111705.2 | 115943.5 | 148380.7 | 115557.9 | 87491.5  | 102873.7 | TRUE |
| 102136.6 | 96012.5  | 109607.6 | 90619.6  | 87851.1  | 133042.2 | 91342.8  | 99954.6  | TRUE |
| 229678.8 | 196906.3 | 245603.3 | 252376   | 251357.7 | 192380.6 | 206546.3 | 226865.8 | TRUE |
| 42728.4  | 34694.7  | 18479.8  | 32664.8  | 29097.9  | 31002.7  | 33725.7  | 47373.4  | TRUE |
| 29273.4  | 23797.5  | 17025.7  | 23645.9  | 17680.7  | 20513.8  | 25547.7  | 36779.7  | TRUE |
| 129727.5 | 150699.2 | 129670.2 | 138011.5 | 119028.6 | 175883.9 | 183613.3 | 147880.1 | TRUE |
| 556571   | 939076.3 | 479458.7 | 437627.5 | 320489.8 | 497103.8 | 955950.6 | 323641.2 | TRUE |
| 245074.7 | 162035.1 | 399172.9 | 364816.7 | 223955.5 | 222018   | 183287.5 | 210107.2 | TRUE |
| 53291.7  | 48160.2  | 76186.5  | 56606.2  | 38369.1  | 48669.8  | 48159.4  | 29578.9  | TRUE |
| 98611.3  | 120877.8 | 60646.7  | 70126.8  | 89824    | 62242.5  | 123688   | 91313.4  | TRUE |
| 47888.3  | 86822.7  | 39876.6  | 36983.9  | 45735.8  | 32364.6  | 74150.4  | 55202.7  | TRUE |
| 137661.1 | 141867.3 | 182401.6 | 256221.5 | 96478.1  | 130048.9 | 133533.5 | 115240.4 | TRUE |
| 384857   | 497949.4 | 250308.6 | 267932.4 | 346404.4 | 208415.7 | 521042.5 | 326117   | TRUE |
| 465518.5 | 580505.4 | 355960.5 | 423598.1 | 561681.3 | 365759.3 | 593622.8 | 449724.1 | TRUE |
| 116313.4 | 154454.1 | 83114.5  | 116875.5 | 76594.5  | 88220.9  | 169070.4 | 86245.5  | TRUE |
| 142172.3 | 100224.1 | 206737.8 | 244921.8 | 125329.9 | 139711.3 | 118288.1 | 145888   | TRUE |

|          |          |          |          |          |          |          |          |      |
|----------|----------|----------|----------|----------|----------|----------|----------|------|
| 26163.5  | 56161.8  | 23869.3  | 27118    | 28058.4  | 17294.8  | 48917.8  | 26154.2  | TRUE |
| 218132.3 | 138331.9 | 297385   | 358390   | 163325.2 | 209927   | 164429.5 | 229286.4 | TRUE |
| 116146.9 | 96532    | 65585.9  | 73217.5  | 69549.4  | 90057.4  | 119576.5 | 93818.9  | TRUE |
| 74315.2  | 56577.9  | 84536.3  | 84524.2  | 45312.3  | 64601.6  | 61420.3  | 61413.3  | TRUE |
| 69335.8  | 95040.5  | 30525.8  | 53886.3  | 58635.9  | 48448.6  | 98477.1  | 76682.4  | TRUE |
| 414211.3 | 318385.5 | 458877.3 | 555315.2 | 346918.7 | 339089   | 349627.4 | 395271.1 | TRUE |
| 275117.4 | 329333.3 | 230542.9 | 266479.7 | 238260.4 | 218556.5 | 279668.4 | 244325   | TRUE |
| 416057.1 | 351309.5 | 425303.5 | 422954.7 | 356563.2 | 386965.6 | 393544.4 | 380436   | TRUE |
| 50448    | 63236.1  | 51856.9  | 57602.2  | 51815.1  | 45226.3  | 86410    | 66529.5  | TRUE |
| 27144.8  | 27832.8  | 9361.1   | 30967.4  | 34460    | 7535.2   | 33382.4  | 40391.3  | TRUE |
| 37450.1  | 19894.8  | 29664.2  | 33383.6  | 38453.2  | 36504.8  | 35765.8  | 38347.9  | TRUE |
| 1586663  | 1551006  | 1410553  | 1416895  | 1510234  | 1687599  | 1467247  | 1615547  | TRUE |
| 55248.4  | 56931.7  | 111163.8 | 63683.9  | 56928.5  | 58496.4  | 66938.9  | 56340.1  | TRUE |
| 262320.2 | 211767.3 | 139678   | 150975.1 | 185114.9 | 157802.5 | 257460.8 | 186404.5 | TRUE |
| 169403.2 | 162239   | 139435   | 177270.4 | 157624.9 | 206225.6 | 169329.7 | 148762.8 | TRUE |
| 107214.3 | 85734.2  | 93570.5  | 115926.1 | 133147.6 | 107211.8 | 92526    | 104544.8 | TRUE |
| 313802.7 | 247694.9 | 306476.3 | 280453.4 | 474108.9 | 316179.8 | 240593.1 | 332490.3 | TRUE |
| 29585.5  | 22513.2  | 38254.8  | 46525.1  | 38763.7  | 31442.1  | 37794.9  | 43694.8  | TRUE |
| 76327.8  | 62723    | 97721.2  | 70739    | 85875    | 50695.5  | 64993.3  | 58306.2  | TRUE |
| 220088.1 | 190037.4 | 307316.2 | 181021.2 | 109981.9 | 336861.8 | 219265.4 | 151096.9 | TRUE |
| 120495.7 | 110258.5 | 111534.3 | 111673.8 | 98136.8  | 120283.9 | 172218.8 | 137893.4 | TRUE |
| 153014.9 | 113776.8 | 191643.9 | 169978.5 | 104171   | 121124.1 | 115202.8 | 132821.4 | TRUE |
| 381029.2 | 298517.5 | 433188.9 | 469704.9 | 352810.4 | 385819.7 | 315800.9 | 386074.2 | TRUE |
| 123128.1 | 126334.3 | 129227.2 | 97094.2  | 162172.7 | 141380.5 | 116941.8 | 166369.8 | TRUE |
| 86975.4  | 72633.8  | 71741.5  | 54790.4  | 70003.2  | 68582.4  | 62340.3  | 82602.9  | TRUE |
| 19867.4  | 7675.3   | 15108.9  | 4227.3   | 23173.8  | 15456    | 7963.8   | 38064.4  | TRUE |
| 136053.7 | 130530.2 | 252498.3 | 268943.8 | 60985    | 83475.5  | 130463.4 | 74010.3  | TRUE |
| 143204.3 | 128966.4 | 280043   | 324674.9 | 45732.8  | 67955.4  | 133733.2 | 61446.1  | TRUE |
| 31182.2  | 45378.5  | 13268.3  | 20966    | 38020.2  | 16682.8  | 55221.8  | 38980.2  | TRUE |
| 142741.9 | 162502.8 | 167503.5 | 116797.8 | 139320.4 | 194761.4 | 148342.7 | 143250.2 | TRUE |
| 138166.3 | 107839.5 | 146291.8 | 143376.2 | 129011.8 | 202669.6 | 161448.6 | 118123.1 | TRUE |
| 416778   | 360276.6 | 415861.5 | 377877.9 | 451603.8 | 438952.5 | 376355.3 | 372627.7 | TRUE |
| 147298.1 | 129862   | 148689.6 | 120759.7 | 122609.8 | 129599.7 | 144099.5 | 106291.8 | TRUE |
| 7377.6   | 4516.4   | 7959.6   | 8519.3   | 6343.6   | 5390.3   | 5453.6   | 7084.2   | TRUE |
| 67671.8  | 76650.3  | 58829.9  | 64327.3  | 65480    | 77825.6  | 97698.7  | 89053.7  | TRUE |
| 169955.1 | 133972   | 140426.2 | 176452.2 | 139501.6 | 163508   | 172226.8 | 164494.4 | TRUE |
| 51770.1  | 34472.6  | 41699.1  | 44717.8  | 39457.8  | 43988.6  | 44377.2  | 57771.8  | TRUE |
| 81632.5  | 46004.4  | 92326.8  | 98199.1  | 100740.9 | 85141.2  | 64923.4  | 74795.1  | TRUE |
| 30042.9  | 23307.8  | 33797.5  | 30384.5  | 41662.5  | 39152.5  | 12326.7  | 39197.3  | TRUE |
| 26345.9  | 31112.7  | 18975.4  | 37159.5  | 25526.8  | 34250.1  | 31992.3  | 34478.3  | TRUE |

|          |          |          |          |          |          |          |          |      |
|----------|----------|----------|----------|----------|----------|----------|----------|------|
| 529455.8 | 466742.4 | 561360.5 | 556859   | 467026.4 | 521145.8 | 488890.4 | 493511.5 | TRUE |
| 115053.8 | 107973.1 | 93052.6  | 87507    | 84025.5  | 92914.7  | 79644.2  | 114516.2 | TRUE |
| 152172.9 | 191170.9 | 330018.2 | 186558.1 | 140499   | 181222   | 173479.2 | 190611.2 | TRUE |
| 532042.2 | 413866.5 | 495246.4 | 494484.4 | 475797.6 | 573779.8 | 457302.1 | 574244.5 | TRUE |
| 212627.5 | 200847.8 | 207351.9 | 201824.4 | 216857.7 | 213883.1 | 187950.5 | 239802.3 | TRUE |
| 58906.8  | 59311.6  | 56085.9  | 59925.4  | 49752    | 62940.7  | 54085.9  | 55190.9  | TRUE |
| 20833.3  | 21102    | 8113.8   | 12707.5  | 18838    | 17396.3  | 11385.5  | 8149.7   | TRUE |
| 124694.1 | 135908.5 | 115823.8 | 130016.4 | 119063.8 | 132968.5 | 133228.9 | 109883.8 | TRUE |
| 108534.8 | 108304   | 110053.6 | 125191.2 | 112183.2 | 107368.1 | 103558.6 | 106161.2 | TRUE |
| 49852.1  | 28013.9  | 36811.2  | 54156    | 45202    | 45981.5  | 53836.1  | 55225.2  | TRUE |
| 136377.1 | 130484.3 | 148696.8 | 114471.3 | 125162.2 | 140493.8 | 138403.6 | 138770.8 | TRUE |
| 163046.4 | 152662   | 120131   | 120675   | 112123.5 | 113135.9 | 162298.2 | 121366.6 | TRUE |
| 35894.8  | 31966.5  | 30742.3  | 52837.1  | 31624.8  | 33425    | 30589.1  | 21311    | TRUE |
| 71847.3  | 50090.8  | 67687.8  | 67083.3  | 59766.1  | 91801    | 59843.3  | 90728.9  | TRUE |
| 120372.7 | 112273.9 | 100859.7 | 148988.1 | 106263.3 | 97269.4  | 125446.1 | 92485.3  | TRUE |
| 84939.6  | 81427.1  | 71721.1  | 100280.7 | 80380.1  | 89350.6  | 98720.6  | 92991.1  | TRUE |
| 38028.4  | 44098.6  | 28248.3  | 42241.3  | 47998.2  | 37963.7  | 45169    | 40299.9  | TRUE |
| 209023.2 | 231529.2 | 206711.6 | 231517   | 205812.6 | 194527   | 207619.1 | 200215.4 | TRUE |
| 191100.7 | 206203.2 | 182545   | 169272.8 | 201183.2 | 183672.5 | 196731.5 | 203463.9 | TRUE |
| 107232.4 | 121027.4 | 76261.1  | 95841.1  | 87304.7  | 72328    | 134587.4 | 79502.2  | TRUE |
| 31315    | 11214.9  | 21543    | 16867.7  | 9140.5   | 36947.8  | 12564.5  | 19037.1  | TRUE |
| 56538.9  | 51084.9  | 63191.8  | 50821.2  | 47221.6  | 67223.7  | 62569.6  | 46441.6  | TRUE |
| 34867.6  | 23729.1  | 20152.9  | 22385.3  | 6980.9   | 20762.7  | 7424.8   | 16944.2  | TRUE |
| 573866   | 459854.8 | 614727.1 | 610964.5 | 857009.7 | 499618.4 | 604090.6 | 496209.8 | TRUE |
| 120542.3 | 115976.4 | 156383.8 | 97797    | 84502.5  | 181629.9 | 121208.7 | 72136.6  | TRUE |
| 181030.6 | 213905.3 | 202448.9 | 140215.7 | 144432   | 267601.9 | 193919.4 | 139132.4 | TRUE |
| 137966.3 | 118419.9 | 126200.4 | 118352.7 | 109837.5 | 187509.1 | 154845.6 | 137449.6 | TRUE |
| 341137.9 | 362217.3 | 287491.1 | 354751.6 | 297335.4 | 319263.5 | 306088.5 | 285466.7 | TRUE |
| 73974.7  | 66076    | 57708    | 60049.1  | 53719.6  | 57843.4  | 82021.5  | 61779    | TRUE |
| 159507.8 | 151195.3 | 131393.1 | 115708.6 | 108038.8 | 127661.8 | 156675.9 | 118348.6 | TRUE |
| 50332.3  | 45712.9  | 50498.9  | 60984.1  | 49927.7  | 53064.7  | 44881.1  | 45779    | TRUE |
| 218608.9 | 231408.2 | 244701.7 | 227902.9 | 237146.8 | 271341.1 | 246449.8 | 257759.7 | TRUE |
| 92875.5  | 96827.8  | 90839.7  | 102401.9 | 100999.3 | 99868.8  | 108055.4 | 83883.1  | TRUE |
| 89635.4  | 99622.4  | 104833.2 | 101086.6 | 112562.6 | 120775   | 121927.8 | 130739.4 | TRUE |
| 110224.9 | 100346.5 | 142412.5 | 110860   | 93459.3  | 176221.1 | 88838.5  | 83129.8  | TRUE |
| 51104.5  | 46992.6  | 78715.5  | 51638.2  | 49802.1  | 85309.7  | 60376.8  | 44018.9  | TRUE |
| 32362.4  | 20360.2  | 22233.2  | 37238.8  | 36817.5  | 35522.1  | 12210    | 32596    | TRUE |
| 56807.9  | 59299.2  | 49846.3  | 63090.3  | 54395.7  | 63862.3  | 63170.2  | 52022.5  | TRUE |
| 90235.2  | 98268.1  | 71275.2  | 77618.7  | 87045.1  | 78274.3  | 127965.8 | 87468.2  | TRUE |
| 196301.5 | 178665   | 108135.5 | 154880.6 | 131436.8 | 163733.5 | 218857   | 165737.5 | TRUE |
| 7451     | 24858.5  | 17294.6  | 8927.8   | 6007.1   | 19079.4  | 8617.4   | 9514.4   | TRUE |
| 24560.8  | 27776.6  | 33136.4  | 32611.8  | 38191.9  | 38732    | 41055.2  | 39168.3  | TRUE |
| 105662.5 | 93397.7  | 114827.5 | 150417.5 | 115329.2 | 122439.9 | 106743.4 | 119297.6 | TRUE |
| 465207.6 | 414545.2 | 443570.7 | 466181.8 | 441235.3 | 485490.8 | 546510.8 | 513799   | TRUE |

|          |          |          |          |          |          |          |          |      |
|----------|----------|----------|----------|----------|----------|----------|----------|------|
| 77968.1  | 64197.9  | 87414.7  | 77332.9  | 54864.1  | 94937.3  | 79058.2  | 53327.4  | TRUE |
| 104664.7 | 97413.7  | 136251.3 | 84531.9  | 116039.9 | 108952.5 | 108380.3 | 81973    | TRUE |
| 43214.2  | 30200.3  | 55513.9  | 32199    | 34144.6  | 49549    | 24348.8  | 27384.4  | TRUE |
| 232360   | 178671.3 | 247783   | 231883.3 | 211629.2 | 221482.8 | 196958.6 | 215265.7 | TRUE |
| 494461.1 | 430812.1 | 515136.7 | 544288.6 | 501720.4 | 484130.9 | 446098.1 | 528186.7 | TRUE |
| 106022.6 | 144557.5 | 112033.3 | 139545.2 | 116043.9 | 131537   | 124289.6 | 110379.2 | TRUE |
| 83900.8  | 93400.5  | 71726.3  | 82884.6  | 57870.4  | 92112.3  | 88758.7  | 74422    | TRUE |
| 13929.2  | 9775.8   | 14952.7  | 5551.2   | 8274.4   | 17109.1  | 6909.3   | 8937.2   | TRUE |
| 152683.2 | 175871   | 185924.5 | 172507.5 | 147879.8 | 185732.1 | 209484.7 | 184150.7 | TRUE |
| 178874.8 | 145286.9 | 181779.4 | 219887   | 175733.5 | 134717   | 129745.7 | 161543.7 | TRUE |
| 36414.5  | 32747.3  | 31269.7  | 38724.4  | 36851.8  | 40466.9  | 44423.3  | 39878.6  | TRUE |
| 64929    | 89470.1  | 42452.5  | 43672.6  | 49398.2  | 43591.5  | 88041.6  | 64533.5  | TRUE |
| 59231.6  | 40895.7  | 55410.9  | 81417.1  | 41662.6  | 52226.6  | 58450.6  | 58897.2  | TRUE |
| 134145   | 109048.2 | 194179.4 | 183656.3 | 124373.7 | 128483.7 | 95377.1  | 125210.8 | TRUE |
| 83851    | 80160.8  | 88834.1  | 95141.7  | 72443.9  | 87250.4  | 72946    | 69659.1  | TRUE |
| 78428.8  | 58194.7  | 81064.4  | 70939.3  | 67241.9  | 88545.5  | 60321.3  | 57832.1  | TRUE |
| 52075.8  | 47843.9  | 61882.5  | 54183.7  | 47170.5  | 65091    | 41919    | 56440.2  | TRUE |
| 101967.5 | 190176.8 | 107788.7 | 250345.4 | 123728.4 | 123752.1 | 134266.4 | 108732.3 | TRUE |
| 24363.1  | 21327.6  | 8463.5   | 13302.1  | 23327.3  | 15127.9  | 30048.6  | 33074.5  | TRUE |
| 269258.6 | 259986.7 | 296852.1 | 285112.3 | 266299.8 | 302436.5 | 310375.5 | 283031.6 | TRUE |
| 197780.6 | 216956.7 | 217590.9 | 271909.5 | 211205.3 | 259406.1 | 242300.9 | 221196   | TRUE |
| 170009.2 | 129838.1 | 161243.1 | 175949.6 | 136127.5 | 166654.9 | 148069.5 | 147552.8 | TRUE |
| 309080.7 | 255813.6 | 265413.3 | 290415.8 | 238379.9 | 299815.1 | 309804.6 | 242644   | TRUE |
| 246623.1 | 280446.2 | 205122.4 | 245016.3 | 216148.7 | 212705.7 | 266487.4 | 191739.8 | TRUE |
| 48074.9  | 59840    | 47600.2  | 44642.6  | 64457.1  | 27982.5  | 41775.6  | 45292.5  | TRUE |
| 165573.2 | 244401.6 | 128247   | 146225.7 | 166098.1 | 139309.4 | 268179.6 | 176312.4 | TRUE |
| 282298.7 | 246184.4 | 251115.5 | 310505.9 | 243189   | 246129.2 | 273017   | 252953.8 | TRUE |
| 629570.1 | 588995.7 | 752854.8 | 721357.1 | 701350.1 | 566549.9 | 595753.5 | 604655.2 | TRUE |
| 119708.5 | 87731.8  | 80309.1  | 99192.7  | 93145.8  | 117633.2 | 116669.8 | 129958.9 | TRUE |
| 55024.6  | 62933.2  | 67420.2  | 57841.6  | 60596.3  | 71106.3  | 47798.3  | 74396.7  | TRUE |
| 83910.6  | 79579.7  | 95063.2  | 96349.8  | 88256.1  | 89079.6  | 90318.7  | 109762.2 | TRUE |
| 108110.6 | 122103   | 132258.9 | 76182.7  | 98117.8  | 106940.6 | 109911.9 | 94908.2  | TRUE |
| 390383.5 | 421525.9 | 379708.9 | 464932.2 | 484419.9 | 441850.9 | 487804.3 | 475024.1 | TRUE |
| 215425.2 | 262477.7 | 251269.9 | 258035   | 245621.6 | 229975.7 | 354537.7 | 248522.3 | TRUE |
| 43131.5  | 41112.1  | 35808.2  | 45865.6  | 41123.8  | 47274.5  | 50731.7  | 47131.5  | TRUE |
| 21571.5  | 22513.4  | 19902.4  | 11299.2  | 26740.5  | 16268.4  | 23958.9  | 24101.1  | TRUE |
| 29025    | 22942.2  | 34332.5  | 24141.7  | 17592.4  | 22286.8  | 23260.5  | 25234.5  | TRUE |
| 171310.6 | 139617   | 158523.7 | 149312.6 | 135065.7 | 187836.5 | 159167.1 | 140740.7 | TRUE |
| 54446.5  | 66452.3  | 55197.1  | 80475.1  | 78830.4  | 49606.2  | 64334.5  | 63897.6  | TRUE |
| 46352.1  | 46757.2  | 34539.3  | 41897.4  | 37030.6  | 43126.5  | 45750.2  | 48389.8  | TRUE |

|          |          |          |          |          |          |          |          |      |
|----------|----------|----------|----------|----------|----------|----------|----------|------|
| 34935.6  | 43066.5  | 27433.8  | 30891.4  | 37741.5  | 30299.1  | 28709.8  | 37802    | TRUE |
| 16194.2  | 8944.5   | 15951.6  | 9754.8   | 19699.8  | 6817.7   | 24537.6  | 10242.8  | TRUE |
| 101985.8 | 149449.8 | 81148.1  | 90630.5  | 112534.9 | 101348.8 | 109839.3 | 104916.3 | TRUE |
| 395164.6 | 351393.7 | 369138.7 | 323461.6 | 427123.1 | 398240.3 | 303851.4 | 392699   | TRUE |
| 86612.3  | 56117.3  | 68596.1  | 81998.4  | 56484.9  | 79284.7  | 78743.7  | 74854.5  | TRUE |
| 225556.2 | 208289.4 | 260170.5 | 255900.9 | 269348.5 | 281434   | 204163   | 270307.8 | TRUE |
| 16980.2  | 21369.7  | 32568.2  | 13583.2  | 21147.8  | 22914.2  | 23909.9  | 25268.3  | TRUE |
| 69668.1  | 75283.6  | 80830.3  | 92948.6  | 63276.4  | 77890.1  | 74263.9  | 58801.2  | TRUE |
| 101568.6 | 73162.8  | 81115.6  | 100667   | 116183.6 | 122127.1 | 100261   | 127069.3 | TRUE |
| 155936.8 | 152399.1 | 229450.2 | 261964.1 | 264954.5 | 270629.1 | 229481   | 273537.5 | TRUE |
| 110879.1 | 85647    | 176575.3 | 192156   | 159809.8 | 187972.3 | 145106.2 | 173652.1 | TRUE |
| 105558.1 | 92737.9  | 114198.5 | 152430.3 | 138436.5 | 147721.5 | 134194   | 166621.9 | TRUE |
| 174076.7 | 142625.2 | 212993.3 | 223806   | 233729.1 | 180604.8 | 220654   | 232426.2 | TRUE |
| 12966.6  | 13686.5  | 53786.9  | 13447.8  | 42247.5  | 32394.2  | 30155    | 39079    | TRUE |
| 157705.2 | 130296.4 | 140244   | 151189.9 | 151337.8 | 143348.8 | 147280.6 | 166503.8 | TRUE |
| 89748    | 93531.3  | 96764.6  | 93355.8  | 104900.1 | 89742.3  | 88885.2  | 110761.7 | TRUE |
| 79970    | 100105.4 | 111197.4 | 134864.6 | 109912.9 | 95263.6  | 74731.4  | 87898.6  | TRUE |
| 93484.5  | 106368.8 | 59931.6  | 80464.9  | 69165.1  | 90593.6  | 117425.1 | 102379.7 | TRUE |
| 75046.9  | 56441.5  | 59389.1  | 60239.3  | 67634.2  | 64454.1  | 63650.6  | 69638    | TRUE |
| 43536.6  | 12697.7  | 33340.4  | 43245.6  | 40239.5  | 39257.6  | 52818.6  | 57393.9  | TRUE |
| 134790.7 | 119331.9 | 106600.8 | 153292.2 | 107645.4 | 144662.8 | 152067.3 | 155003.9 | TRUE |
| 67646.2  | 60170    | 54877.9  | 58759.9  | 70042.9  | 76147.2  | 82681.6  | 80798.8  | TRUE |
| 43255.9  | 151967   | 69617.4  | 94110.3  | 121244.5 | 10159.7  | 11854.9  | 37246.8  | TRUE |
| 75366.1  | 72802.2  | 73275.3  | 82702.6  | 78009    | 70056.9  | 97457.7  | 97348.4  | TRUE |
| 30144.1  | 7750.9   | 10917.6  | 37237.4  | 19659.2  | 46011.3  | 12040.1  | 42055.3  | TRUE |
| 150512.1 | 147892.6 | 238642.1 | 178782.8 | 132515   | 229766.8 | 151469.8 | 205471.9 | TRUE |
| 108929.7 | 87015.3  | 90190.2  | 112303.6 | 83832.3  | 125612.6 | 147669.7 | 142390.4 | TRUE |



|          |          |          |          |          |          |          |          |      |
|----------|----------|----------|----------|----------|----------|----------|----------|------|
| 325000.8 | 259282.6 | 245215   | 284486   | 235544.9 | 387054.4 | 315189.3 | 371109.8 | TRUE |
| 2281556  | 2301458  | 2000942  | 2172066  | 2242626  | 2336943  | 2337824  | 2507580  | TRUE |
| 892136.3 | 821359.5 | 803839.1 | 1049084  | 1047060  | 783882   | 875183.9 | 941277.2 | TRUE |
| 457224.9 | 417785.9 | 387859   | 529727.9 | 504470.4 | 413393.9 | 432152.1 | 481278.1 | TRUE |
| 264575   | 251191.4 | 263223.8 | 366053.3 | 339027.9 | 286654.6 | 291880.2 | 303285   | TRUE |
| 33043.8  | 71017.6  | 44659.6  | 69384.1  | 79890.7  | 16674.3  | 28341.3  | 24928.2  | TRUE |
| 108648.5 | 195616.9 | 107913   | 195892.8 | 201671.4 | 90073    | 93914.1  | 76268    | TRUE |
| 75070.9  | 81011.3  | 73953.1  | 69395.1  | 68149.1  | 65804.2  | 75006.2  | 82763.7  | TRUE |
| 411496.3 | 394063.6 | 349998.5 | 358177.6 | 358815.9 | 439091.8 | 408064.2 | 407196.9 | TRUE |
| 1393059  | 1373816  | 1353618  | 1331775  | 1245154  | 1467034  | 1478266  | 1464939  | TRUE |
| 64942.4  | 57980.4  | 47562.5  | 65593.7  | 62634.2  | 74911.5  | 77980.9  | 73714.6  | TRUE |
| 36672.3  | 55050.4  | 46062.2  | 49100.4  | 40166.4  | 64637.9  | 49604.1  | 49130.8  | TRUE |
| 69034.3  | 75538.1  | 72959.8  | 96556.4  | 69503.8  | 89660.1  | 83697.9  | 79143.9  | TRUE |
| 46558.9  | 51717.7  | 46445.3  | 64039    | 47208.7  | 58684.5  | 52947.6  | 55782.3  | TRUE |
| 57846.5  | 71915.9  | 54683.9  | 74082.2  | 69808.7  | 56071.9  | 63094.2  | 56602.8  | TRUE |
| 59132.8  | 55484.7  | 56126.3  | 56837.7  | 50972.5  | 53284.2  | 66033.8  | 57673.4  | TRUE |
| 65154.7  | 62515.8  | 66634.7  | 64231.5  | 63332.2  | 72156.6  | 69083.4  | 58506.3  | TRUE |
| 80369.5  | 85323.4  | 63868.5  | 83918.7  | 73077.5  | 103165.3 | 98535.9  | 87934.4  | TRUE |
|          |          |          |          |          |          |          |          |      |
| 1001004  | 795356.2 | 895628.3 | 1125189  | 1009633  | 976450.8 | 846623.3 | 1001458  | TRUE |
| 29713.8  | 53155.9  | 48535.8  | 53425.2  | 48874.3  | 19922    | 10430.9  | 24968.5  | TRUE |
| 36000.3  | 33837.7  | 28698.3  | 33311.4  | 37016.1  | 29930.6  | 30608.9  | 27337.5  | TRUE |
| 557017.5 | 510088.9 | 432824.8 | 487913   | 494739.7 | 537492.6 | 558757.2 | 617964.1 | TRUE |
| 61280    | 50610.7  | 45975.6  | 63909.2  | 43586    | 63585.5  | 59296.5  | 71486.9  | TRUE |
|          |          |          |          |          |          |          |          |      |
| 71371.6  | 58092.2  | 80575.8  | 90565.8  | 73219.9  | 82355.9  | 63667.1  | 81188.7  | TRUE |
| 76733.5  | 74301    | 109814.1 | 111763.8 | 99488.4  | 98682.8  | 90173.6  | 93760.3  | TRUE |
| 260483.6 | 215960.6 | 314645.9 | 342379   | 285725.9 | 302276.4 | 256678   | 263735.9 | TRUE |
| 55858.1  | 73387.3  | 73861.6  | 50180.8  | 61445.6  | 58146.5  | 54721    | 54508.3  | TRUE |
| 56880.6  | 41765.1  | 57736    | 70508.3  | 46691.6  | 39809.4  | 39056.8  | 32018.4  | TRUE |
| 36162.6  | 41171.2  | 55279.4  | 53830.5  | 53057.2  | 43338.7  | 59301.2  | 33456.6  | TRUE |
|          |          |          |          |          |          |          |          |      |
| 396739.6 | 364886.9 | 349453.2 | 364058   | 465234.3 | 512647.3 | 396396.7 | 502041   | TRUE |
| 995455.7 | 897385.9 | 776801.2 | 775290.1 | 1174155  | 1113983  | 1000322  | 1074859  | TRUE |
| 54577.1  | 57562.5  | 24546.7  | 50055.6  | 50476.3  | 60898.6  | 48270.6  | 48758    | TRUE |
| 85618.6  | 140356.7 | 173735.1 | 121926.2 | 134532.4 | 72300    | 114482   | 85533.9  | TRUE |
| 44740.8  | 68778.1  | 59416.5  | 63112.7  | 98527.3  | 41312.9  | 43181.3  | 42423    | TRUE |
| 77003.8  | 126395.3 | 101643.7 | 102996.6 | 144886.7 | 71859.5  | 74464.4  | 74639.7  | TRUE |
| 208621.1 | 168257.6 | 223505.3 | 270602.6 | 172487   | 215148.7 | 130563.1 | 180750.8 | TRUE |
| 98118.9  | 79143.4  | 108447.4 | 140775.6 | 99973.3  | 112715.9 | 72017.2  | 104920   | TRUE |
| 132702.3 | 150638.2 | 111663.2 | 96768.3  | 100949.5 | 113866   | 111771.8 | 127377.4 | TRUE |
| 114139.6 | 99687.4  | 105150.8 | 103100.2 | 119210.1 | 143340.3 | 98019.5  | 170684   | TRUE |
| 72766.6  | 68187    | 95631.8  | 110270.9 | 79051.4  | 113098.8 | 79499.3  | 67456.4  | TRUE |
| 712878.5 | 263614.3 | 418440.3 | 459339.6 | 1028779  | 951707.5 | 320740.9 | 915202.6 | TRUE |
| 113319   | 56878.8  | 83120    | 96748.9  | 169257.4 | 140939.2 | 71273.4  | 144457.5 | TRUE |
| 36346.1  | 53620.8  | 52573.5  | 58256.7  | 56802.5  | 52352.8  | 34829.8  | 41640.3  | TRUE |
| 603865.4 | 333184.9 | 1214461  | 855624.3 | 323250.8 | 1465818  | 579581.2 | 400673.8 | TRUE |
| 133195.8 | 103560.3 | 92804.9  | 83687.1  | 164559.2 | 165704.2 | 100834   | 143982.6 | TRUE |

|          |          |          |          |          |          |          |          |      |
|----------|----------|----------|----------|----------|----------|----------|----------|------|
| 462024.2 | 204076.3 | 364790.2 | 346745.7 | 738946.2 | 524452.9 | 243981.2 | 547520.6 | TRUE |
| 38619.3  | 7830.5   | 30814.4  | 56052    | 3109.6   | 64702.8  | 14154.7  | 16864.2  | TRUE |
| 122982.8 | 87070    | 150691.5 | 117808.4 | 79866    | 168181.7 | 86020.3  | 71070.9  | TRUE |
| 230455.7 | 177613   | 238123.3 | 240767.2 | 172787   | 368604.5 | 223676.6 | 207114.4 | TRUE |
| 220825.1 | 168926.3 | 207355.5 | 241000.5 | 156823.4 | 309353.1 | 216568   | 205040.9 | TRUE |
| 526054.3 | 288103.3 | 680128.8 | 580652.4 | 188739.8 | 763004.7 | 351282.6 | 237133.3 | TRUE |
| 613979.7 | 226131.8 | 307824.8 | 368460.4 | 909267.1 | 807222.5 | 309772.3 | 852393.5 | TRUE |
| 513143.6 | 314980.1 | 384200   | 388615   | 649300.7 | 620288   | 367988   | 587189   | TRUE |
| 343232.2 | 121878.4 | 143374.9 | 156897   | 540236.9 | 357935.9 | 152034.8 | 314689.4 | TRUE |
| 155377.8 | 136440.5 | 183533.2 | 145693.7 | 166850.6 | 168657   | 158111.1 | 155536.7 | TRUE |
| 53206.3  | 50632.6  | 48690.8  | 47719.1  | 55197.4  | 51613.3  | 44476.2  | 62016.2  | TRUE |
| 61236.2  | 76995    | 79228.2  | 71346.3  | 76157.7  | 48957.9  | 47461.2  | 58889    | TRUE |
| 177009.7 | 194529.5 | 241546.4 | 244991.7 | 225093.7 | 230128.5 | 251949.6 | 228865.4 | TRUE |
| 21309    | 9256.6   | 20090.9  | 11434.5  | 8509.9   | 16086.8  | 8706.2   | 18902.6  | TRUE |
| 29712.6  | 42399.6  | 30140    | 47569.6  | 36172.3  | 31886.4  | 38837.3  | 21407.8  | TRUE |
| 212872.5 | 153987.7 | 215036   | 252245.1 | 174078.5 | 239591.4 | 168793.8 | 170929.1 | TRUE |
| 71371.6  | 58092.2  | 80575.8  | 90565.8  | 73219.9  | 82355.9  | 63667.1  | 81188.7  | TRUE |
| 76733.5  | 74301    | 109814.1 | 111763.8 | 99488.4  | 98682.8  | 90173.6  | 93760.3  | TRUE |
| 260483.6 | 215960.6 | 314645.9 | 342379   | 285725.9 | 302276.4 | 256678   | 263735.9 | TRUE |
| 55858.1  | 73387.3  | 73861.6  | 50180.8  | 61445.6  | 58146.5  | 54721    | 54508.3  | TRUE |
| 56880.6  | 41765.1  | 57736    | 70508.3  | 46691.6  | 39809.4  | 39056.8  | 32018.4  | TRUE |
| 36162.6  | 41171.2  | 55279.4  | 53830.5  | 53057.2  | 43338.7  | 59301.2  | 33456.6  | TRUE |
| 396739.6 | 364886.9 | 349453.2 | 364058   | 465234.3 | 512647.3 | 396396.7 | 502041   | TRUE |
| 995455.7 | 897385.9 | 776801.2 | 775290.1 | 1174155  | 1113983  | 1000322  | 1074859  | TRUE |
| 54577.1  | 57562.5  | 24546.7  | 50055.6  | 50476.3  | 60898.6  | 48270.6  | 48758    | TRUE |
| 85618.6  | 140356.7 | 173735.1 | 121926.2 | 134532.4 | 72300    | 114482   | 85533.9  | TRUE |
| 44740.8  | 68778.1  | 59416.5  | 63112.7  | 98527.3  | 41312.9  | 43181.3  | 42423    | TRUE |
| 77003.8  | 126395.3 | 101643.7 | 102996.6 | 144886.7 | 71859.5  | 74464.4  | 74639.7  | TRUE |
| 63726.4  | 86583.7  | 45693.3  | 51728.4  | 59792.7  | 52573.4  | 57017.2  | 57409.6  | TRUE |
| 164988.8 | 154868.1 | 171366.9 | 183184.7 | 220797.7 | 158886.8 | 197140.9 | 201568.3 | TRUE |
| 257996.5 | 256496.7 | 242472.3 | 258051.9 | 241463.7 | 261722   | 246457.9 | 253630.5 | TRUE |
| 97987.7  | 103729.8 | 100114.6 | 102492.1 | 79977.1  | 95881.1  | 116181.6 | 92237.3  | TRUE |
| 56713.4  | 58377.9  | 47917.8  | 49562.3  | 47550    | 52581.2  | 68905.8  | 49649.9  | TRUE |
| 140919.7 | 162249.4 | 124866.3 | 147775.6 | 132030.9 | 139676.8 | 169116.1 | 124466.7 | TRUE |
| 25241.3  | 10155.6  | 36656.3  | 34710.7  | 23918    | 30307.8  | 15661.3  | 25854.7  | TRUE |
| 123463.4 | 137455.4 | 119056.3 | 129517.1 | 146737.6 | 126183.7 | 163305   | 139209.5 | TRUE |

|          |          |          |          |          |          |          |          |      |
|----------|----------|----------|----------|----------|----------|----------|----------|------|
| 88817.1  | 83507.9  | 145087.4 | 61686    | 78196.8  | 84265.7  | 85036    | 83057.7  | TRUE |
| 633439.9 | 670491.2 | 636717.3 | 449052.4 | 391382.7 | 453053.1 | 491413.8 | 331824.7 | TRUE |
| 136717.2 | 109687.4 | 103375   | 129104.4 | 100999.9 | 152607.4 | 151539.2 | 124876.3 | TRUE |
| 91237.2  | 115015.8 | 100863.2 | 81845    | 82044.1  | 63364.9  | 72507.9  | 53547.3  | TRUE |
| 53369    | 106145.4 | 60425.1  | 83367.4  | 79593.6  | 34228.6  | 33935.8  | 42847.7  | TRUE |
| 1859620  | 1510225  | 1951801  | 1835333  | 1946259  | 1742350  | 1409830  | 1716970  | TRUE |
| 70896.1  | 80921    | 73480.4  | 71204.9  | 54708.4  | 64138    | 80779    | 55393.6  | TRUE |
| 58821.3  | 50019.6  | 58317.4  | 62470.8  | 57974.3  | 51747.8  | 56704.1  | 58137.7  | TRUE |
| 86240.5  | 86037.3  | 97884.6  | 98193.2  | 101441.9 | 124158.5 | 122731.1 | 115804.8 | TRUE |
| 56992.9  | 73148.1  | 72610.6  | 50633.8  | 61726.7  | 69451.2  | 63893    | 43001.6  | TRUE |
| 99069.4  | 114587.1 | 113522.3 | 114123.6 | 97305.8  | 98249.5  | 112714.2 | 88548.1  | TRUE |
| 119063   | 95146.5  | 98320.3  | 113749.5 | 83124.6  | 118990.5 | 107039.3 | 108702.9 | TRUE |
| 163387.9 | 143703.7 | 124913.8 | 170360.2 | 186646.7 | 151188.2 | 162412.5 | 167861.6 | TRUE |
| 172877.5 | 147197.1 | 136029.1 | 169428   | 165740.3 | 134626.1 | 131259.8 | 165484.9 | TRUE |
| 248676.6 | 270050.8 | 253981   | 284477.4 | 277962.7 | 273694.5 | 241225.5 | 261349.1 | TRUE |
| 266347.9 | 274802.1 | 233988   | 272081   | 270654.7 | 318068.9 | 296714.7 | 308435.4 | TRUE |
| 37881.9  | 19488.2  | 29929    | 11214.5  | 25820.5  | 30024.3  | 29364.6  | 25280.3  | TRUE |
| 184070.7 | 179040   | 165935   | 155437.7 | 154619.9 | 167593.3 | 194910.9 | 221312.6 | TRUE |
| 35627.2  | 12095.2  | 6364.6   | 31320.4  | 10605.7  | 20883.5  | 16873.2  | 16566.3  | TRUE |
| 142746.9 | 105078.1 | 115516.8 | 113779.5 | 100785.4 | 131346.4 | 126319.4 | 143453   | TRUE |
| 52123.9  | 39796    | 32891.2  | 15438.1  | 38760.1  | 55263.2  | 35018.6  | 39207.7  | TRUE |
| 91963.9  | 86985.4  | 102625.8 | 92890.8  | 76769.1  | 95340.2  | 100114.5 | 98239.5  | TRUE |
| 48138.1  | 48824.3  | 53497.1  | 43521.8  | 48737.4  | 42501.2  | 46392    | 48654.5  | TRUE |
| 368042.1 | 255868.7 | 288961.4 | 355274.5 | 290693.7 | 306134.2 | 328774.4 | 279813.1 | TRUE |
| 91632    | 126665.8 | 112988.9 | 129897.9 | 124242.1 | 117240.2 | 97500.2  | 99345.4  | TRUE |
| 55215    | 41160.5  | 57244.7  | 37082.8  | 45859.7  | 53524    | 53519.1  | 53798.7  | TRUE |
| 366592.9 | 305229.2 | 388425.9 | 341257.6 | 346541.3 | 416493   | 342958.4 | 372169.3 | TRUE |
| 119873.6 | 115711.6 | 116422.4 | 133001.9 | 227461.2 | 104734.5 | 92240.8  | 111441.6 | TRUE |
| 813558.3 | 697816.8 | 735056.3 | 845892.3 | 1049484  | 793980   | 675271.7 | 801517.5 | TRUE |
| 125949.8 | 103374   | 207501   | 105205.4 | 99085.2  | 209777.8 | 108102.4 | 97522.3  | TRUE |
| 120841.9 | 124493.7 | 188286.4 | 91053.1  | 88432.4  | 210313.3 | 135442.7 | 104484.1 | TRUE |
| 16102.2  | 8875.8   | 17370.9  | 6997     | 18457.3  | 21149.6  | 8547.5   | 17264    | TRUE |
| 64767.4  | 45638.3  | 60060    | 49730.1  | 101973.2 | 51766.9  | 54841.9  | 45919.2  | TRUE |
| 228983.7 | 180699.7 | 272228.5 | 224847.2 | 474897   | 216883.2 | 211123   | 211054.6 | TRUE |
| 14757.6  | 5885.5   | 7653.2   | 5282.7   | 19838.5  | 6539.2   | 7715     | 8412.7   | TRUE |
| 28283.9  | 8694.5   | 11570.1  | 10561    | 34614.6  | 29532.3  | 9557.5   | 25162.1  | TRUE |
| 212154.4 | 162078.3 | 225640   | 163985.9 | 97834.9  | 249875.4 | 155014   | 129477.4 | TRUE |
| 93554    | 78568.2  | 132635.6 | 86449.3  | 86730.6  | 158034.8 | 62999.5  | 61850.8  | TRUE |
| 148580.3 | 104042.6 | 139380.8 | 156032.4 | 312518.2 | 128395.5 | 106714.5 | 124316.2 | TRUE |
| 157161.3 | 117172.9 | 209252.4 | 209966.6 | 179809   | 236782.2 | 134580.2 | 193168.7 | TRUE |
| 114834.9 | 115619.2 | 96520.9  | 84513    | 149462.3 | 155656.3 | 121676.2 | 117590   | TRUE |
| 131630.4 | 27076.1  | 118418.5 | 65454.8  | 210281.6 | 186123.4 | 40372    | 303823   | TRUE |
| 148770.7 | 121804   | 249804.5 | 193915.1 | 204140.2 | 317440   | 69052.9  | 202252.6 | TRUE |
| 168592.8 | 231962.5 | 173485   | 195404   | 349398.8 | 189395.9 | 154641.7 | 171726.9 | TRUE |
| 59988.1  | 58759.4  | 32357.7  | 52846.5  | 121359.5 | 100219.3 | 60692.7  | 77063.9  | TRUE |
| 84090.9  | 65062.1  | 146031.1 | 90955.7  | 97310.6  | 135924   | 58994.2  | 83538.4  | TRUE |

|          |          |          |          |          |          |          |          |      |
|----------|----------|----------|----------|----------|----------|----------|----------|------|
| 127532.1 | 67858.5  | 177466.6 | 112918.7 | 86001.8  | 268946.9 | 79773.8  | 112266.5 | TRUE |
| 276531.7 | 223180.9 | 72927.4  | 62949.7  | 616533.7 | 327866.2 | 255356.5 | 297763.1 | TRUE |
| 122341.4 | 78477.9  | 69160.1  | 71915.8  | 174888.1 | 141809.2 | 111049   | 139124.3 | TRUE |
| 73349.9  | 47257.6  | 38274.2  | 49988.6  | 101149.5 | 95293.1  | 56449.9  | 102055.5 | TRUE |
| 95449.8  | 74559.5  | 189951.1 | 81168.2  | 70603.3  | 207099.8 | 108805.2 | 85778    | TRUE |
| 196160.5 | 233208.4 | 204400.4 | 206812.7 | 235090.9 | 338518.8 | 314439.6 | 266266   | TRUE |
| 45148.3  | 53605.4  | 83880.5  | 50272.2  | 47918.3  | 39749    | 53294.7  | 34715.8  | TRUE |
| 66665.2  | 52282.6  | 76088.7  | 69325.2  | 87171.1  | 56238.6  | 67714.4  | 58170.3  | TRUE |
|          |          |          |          |          |          |          |          |      |
| 141756.9 | 131606.7 | 158333.6 | 149269.7 | 154521.8 | 164144.9 | 148875.3 | 176637.5 | TRUE |
| 23423.4  | 24318.9  | 34148.3  | 31814.7  | 21914.5  | 27499.1  | 23640.7  | 22201.8  | TRUE |
| 27701.6  | 27094.1  | 43919.3  | 29651    | 22746.6  | 36359    | 39654.1  | 32165.2  | TRUE |
| 42692.8  | 30973    | 32986.3  | 41459.7  | 50957.8  | 28606.4  | 37686.9  | 29888.3  | TRUE |
|          |          |          |          |          |          |          |          |      |
| 54543.1  | 68574.1  | 76649.5  | 53736    | 43591    | 72063.3  | 52522.2  | 67799.3  | TRUE |
| 125949.8 | 103374   | 207501   | 105205.4 | 99085.2  | 209777.8 | 108102.4 | 97522.3  | TRUE |
| 120841.9 | 124493.7 | 188286.4 | 91053.1  | 88432.4  | 210313.3 | 135442.7 | 104484.1 | TRUE |
| 16102.2  | 8875.8   | 17370.9  | 6997     | 18457.3  | 21149.6  | 8547.5   | 17264    | TRUE |
| 64767.4  | 45638.3  | 60060    | 49730.1  | 101973.2 | 51766.9  | 54841.9  | 45919.2  | TRUE |
| 228983.7 | 180699.7 | 272228.5 | 224847.2 | 474897   | 216883.2 | 211123   | 211054.6 | TRUE |
|          |          |          |          |          |          |          |          |      |
| 14757.6  | 5885.5   | 7653.2   | 5282.7   | 19838.5  | 6539.2   | 7715     | 8412.7   | TRUE |
| 28283.9  | 8694.5   | 11570.1  | 10561    | 34614.6  | 29532.3  | 9557.5   | 25162.1  | TRUE |
| 212154.4 | 162078.3 | 225640   | 163985.9 | 97834.9  | 249875.4 | 155014   | 129477.4 | TRUE |
| 93554    | 78568.2  | 132635.6 | 86449.3  | 86730.6  | 158034.8 | 62999.5  | 61850.8  | TRUE |
| 148580.3 | 104042.6 | 139380.8 | 156032.4 | 312518.2 | 128395.5 | 106714.5 | 124316.2 | TRUE |
|          |          |          |          |          |          |          |          |      |
|          |          |          |          |          |          |          |          |      |
| 314811.9 | 283975.7 | 311622.9 | 275236.7 | 322709.8 | 325494.3 | 336302.2 | 319776   | TRUE |
| 66083.7  | 65789.8  | 71358.6  | 99883.1  | 69442.3  | 78576.5  | 70169.9  | 61835    | TRUE |
| 35924.4  | 31770.5  | 29082.8  | 31919.1  | 33519.3  | 26852.5  | 40473.3  | 25297.1  | TRUE |
| 75818    | 62889.9  | 58366.7  | 65742.8  | 60914.5  | 59850.8  | 67979.2  | 58937.4  | TRUE |
| 14522.8  | 21949.6  | 22068.8  | 9299     | 16931.4  | 23163.1  | 12078.2  | 11162.5  | TRUE |
| 650274.1 | 603657.5 | 658553.4 | 530368.9 | 636097.9 | 609608.9 | 689566.7 | 587785.4 | TRUE |
| 42458.5  | 38334.1  | 45294.6  | 35184.5  | 45399.5  | 41676.1  | 41816.3  | 38227.8  | TRUE |
| 37574.8  | 39282.8  | 27450.6  | 37211.6  | 28042.1  | 33455.6  | 26032    | 37678.8  | TRUE |
| 566256   | 545366.3 | 472607.5 | 515394.3 | 541204.9 | 547103.5 | 500100.4 | 508306.5 | TRUE |
| 221746.1 | 209103.3 | 204236.6 | 222516.7 | 253674.9 | 254359.8 | 261715.7 | 258370.8 | TRUE |
| 394379.2 | 385476.4 | 360781.1 | 334986.6 | 393042.5 | 419551.3 | 382825.7 | 459046.2 | TRUE |
| 79038    | 112385.9 | 63433.7  | 86471.1  | 123801   | 55141.8  | 122225.9 | 130394.3 | TRUE |
| 53896.7  | 44065.4  | 41273.2  | 42984.7  | 80638.2  | 29237.1  | 63565.7  | 66261.6  | TRUE |
| 79601.4  | 99638.9  | 39401.7  | 99609.7  | 139656.6 | 62363.5  | 113299.8 | 159721.5 | TRUE |
| 53420.7  | 54031.9  | 30177.8  | 72500.5  | 101826.1 | 33251.2  | 105032.3 | 125369.3 | TRUE |
| 181373.1 | 289627.7 | 192591.6 | 172050.4 | 87658.5  | 184899.9 | 266651.8 | 182793.9 | TRUE |

|          |          |          |          |          |          |          |          |      |
|----------|----------|----------|----------|----------|----------|----------|----------|------|
| 39688.2  | 58560.4  | 49302.1  | 64000.5  | 31410.1  | 56900.8  | 75860.9  | 63873.8  | TRUE |
| 80660.1  | 80601.5  | 91001.6  | 112378.1 | 78598.4  | 76096.4  | 80711.5  | 87612.4  | TRUE |
| 145493.7 | 104901.1 | 150198.3 | 173652.4 | 159760.7 | 150506.4 | 148740.5 | 155295.9 | TRUE |
| 97415.8  | 47624.4  | 88774.8  | 105852.4 | 89674.9  | 97706.6  | 90170.7  | 119201.8 | TRUE |
| 428865.6 | 399649.5 | 306600.4 | 313388.9 | 466266.4 | 316193.4 | 426163.9 | 431800.8 | TRUE |
| 350495.7 | 414184.2 | 430604.6 | 431587.1 | 343401.9 | 378874.1 | 455339.9 | 365957   | TRUE |
| 344915.9 | 328516.7 | 238795.3 | 260148.8 | 244119.3 | 292482.1 | 352206.2 | 294524   | TRUE |
| 41474    | 57179.7  | 55170.5  | 62513    | 74669.3  | 48030.1  | 71840.6  | 44752.9  | TRUE |
| 421416.1 | 508112.2 | 390639.7 | 455711.9 | 502372   | 470024.5 | 578509.5 | 516964.3 | TRUE |
| 36052.4  | 45685.9  | 26248    | 22582.7  | 61787.9  | 42022.5  | 70225    | 88020.9  | TRUE |
| 591697.2 | 589051.4 | 369546.9 | 398619.1 | 725135.5 | 607647.3 | 827558.1 | 1112924  | TRUE |
| 471161   | 495468.5 | 390441.7 | 509468.6 | 411987.3 | 377254   | 606717.6 | 412965.8 | TRUE |
| 58384.1  | 87244    | 60818.5  | 67158.7  | 61543.4  | 47737.6  | 100193.5 | 40894.1  | TRUE |
| 57863.6  | 64515.5  | 67358.8  | 63326.6  | 70260.4  | 68808.7  | 94227.9  | 66052.2  | TRUE |
| 127323.7 | 98539.1  | 76631.7  | 113696.9 | 88468.3  | 132907.7 | 115970.2 | 114622.3 | TRUE |
| 77155.3  | 56665.7  | 54883.5  | 67077.4  | 50079.9  | 74965.2  | 81078.6  | 78528.4  | TRUE |
| 221449.6 | 236445.8 | 170958.5 | 193333.3 | 269769.8 | 172706.3 | 252757.7 | 233607.5 | TRUE |
| 121671   | 149483   | 121205.9 | 141105.6 | 136249.7 | 119418.1 | 153882.3 | 161160.2 | TRUE |
| 25424.2  | 12476.2  | 19209.3  | 16194.7  | 41789.9  | 32710.8  | 27978.5  | 40510.2  | TRUE |
| 111416.6 | 114262.1 | 129243.9 | 181353.6 | 192053.3 | 148352.8 | 170384.7 | 190596.1 | TRUE |
| 35475.6  | 35720.8  | 45824.5  | 36462.2  | 41160.4  | 41826    | 28981.9  | 31668.6  | TRUE |
| 59549.8  | 57922.5  | 83404.5  | 72145.6  | 56219.2  | 65260.2  | 76585.7  | 57832.2  | TRUE |
| 162314.1 | 171581.6 | 111191.7 | 169144.6 | 168075.1 | 109129.2 | 182980.2 | 161648.8 | TRUE |
| 583048.2 | 459081.3 | 518633.8 | 533923.8 | 351120.8 | 568226.7 | 476824   | 546907.3 | TRUE |
| 6550333  | 6079238  | 6064596  | 6098322  | 4250695  | 6407289  | 5921372  | 6143116  | TRUE |
| 294766.3 | 274804.6 | 299737.1 | 342039.6 | 212326   | 350503   | 312026.1 | 336520.9 | TRUE |
| 139104   | 119983.8 | 108031.1 | 126781.2 | 112959.3 | 158096.9 | 159526.8 | 194706.5 | TRUE |
| 139072.9 | 111675.9 | 65703.7  | 104291.2 | 79305.9  | 96717.8  | 120050.1 | 96723    | TRUE |
| 45535.6  | 44991.3  | 35579.3  | 53099.2  | 38433.7  | 52435.6  | 52827.8  | 44914.4  | TRUE |
| 74201.5  | 68089.5  | 58405    | 62105.4  | 69819.9  | 73366    | 81438.7  | 88528.7  | TRUE |
| 99302.6  | 72544.8  | 78094.1  | 82441.5  | 71781.7  | 99003.7  | 107337.4 | 106904.1 | TRUE |
| 278189   | 134001.7 | 467744   | 228987.7 | 199686.4 | 598147.1 | 187150.2 | 247480.9 | TRUE |
| 497988.2 | 270363.6 | 616362.8 | 315146.8 | 217366.1 | 621222.7 | 244923.8 | 251922.4 | TRUE |
| 781456.3 | 402127.2 | 1498751  | 773017.3 | 496019.6 | 1563554  | 486797.2 | 512493.5 | TRUE |
| 118929.9 | 82660.4  | 164767.4 | 123525.9 | 65463.1  | 241761.3 | 97657.2  | 94682.6  | TRUE |
| 170001.1 | 42307.5  | 386260.4 | 89034.8  | 35927.8  | 672122.7 | 47461.7  | 64663.1  | TRUE |
| 53474    | 32168.2  | 138992   | 32795.7  | 36597.1  | 227683.7 | 26871.6  | 100338.6 | TRUE |
| 82654    | 19409.8  | 157230   | 48498.9  | 12070    | 243480.7 | 28199.5  | 46218    | TRUE |
| 75545    | 52259.5  | 121141.6 | 67652.1  | 52060.2  | 149034.5 | 57785.5  | 55740.9  | TRUE |
| 39527    | 4546.7   | 7162.6   | 6758.6   | 111282   | 7660     | 10779    | 47061.7  | TRUE |

|          |          |          |          |          |          |          |          |      |
|----------|----------|----------|----------|----------|----------|----------|----------|------|
| 80686.3  | 149230.2 | 41438    | 57590.9  | 49689.6  | 38119.3  | 72126.5  | 43450.3  | TRUE |
| 147562   | 204542.1 | 94559.6  | 112956.6 | 137999.4 | 94728.9  | 136258.1 | 103966.6 | TRUE |
| 230523.9 | 362859.4 | 132360.1 | 150474.1 | 178735   | 120699.3 | 408655.5 | 143683.3 | TRUE |
| 598681.1 | 975244.4 | 295314.9 | 359074.4 | 356825.7 | 300069.3 | 1048104  | 311939.4 | TRUE |
| 227062.1 | 333735.2 | 187133.4 | 232420.2 | 252657.2 | 200663.3 | 492728.1 | 272089.2 | TRUE |
| 179920.1 | 259593.6 | 156940.2 | 177484.1 | 177226   | 156602   | 383679.6 | 168155.8 | TRUE |
| 25332.2  | 80611.7  | 24965.9  | 30643.3  | 30646.3  | 15250.6  | 12240.1  | 29559.8  | TRUE |
| 155062   | 117170.5 | 233399   | 218040.5 | 108767.5 | 100465.8 | 114556.9 | 94971.1  | TRUE |
| 241989.2 | 158327.9 | 390668   | 459003.3 | 157714.4 | 152335.8 | 207943.2 | 155572.8 | TRUE |
| 112177.6 | 78221.2  | 70226    | 94901.3  | 91478.4  | 131279.2 | 130853.9 | 122534.7 | TRUE |
| 28790.8  | 30343    | 31833.1  | 30168.1  | 29339    | 36022.6  | 35798.1  | 37464.7  | TRUE |
| 88357.7  | 77816.1  | 51553.2  | 65093.9  | 66492.4  | 101256.1 | 111272.4 | 99263.8  | TRUE |
| 30571.6  | 8404.6   | 17386.6  | 13672.3  | 11806.9  | 42688.8  | 12331.3  | 36265.2  | TRUE |
| 199727.2 | 191422.9 | 194378.6 | 266186   | 209924.4 | 275751.9 | 228902   | 258391   | TRUE |
| 1583897  | 1515611  | 1463142  | 1808928  | 1677853  | 1493133  | 1586295  | 1656586  | TRUE |
| 94637    | 78930.4  | 59321.6  | 80169.4  | 66089.4  | 89828.4  | 78602.4  | 86912.7  | TRUE |
| 183262.7 | 132404.6 | 144024   | 160216   | 136872.9 | 161936   | 148512   | 169359.6 | TRUE |
| 87542    | 65004.6  | 88420    | 85567.6  | 70437.7  | 96785.4  | 75476.1  | 84998.2  | TRUE |
| 42319.2  | 28399.2  | 17785.1  | 12250.6  | 30135.4  | 16921.5  | 57977.6  | 38859.8  | TRUE |
| 70255.3  | 70236.4  | 74498.1  | 73911.5  | 67103.7  | 65861.4  | 75002.7  | 71839.8  | TRUE |
| 48006.4  | 35613.3  | 72790.4  | 60681.6  | 46064.1  | 39653.3  | 44984.8  | 26616.6  | TRUE |
| 131833.7 | 127788.4 | 166233.8 | 152685.2 | 119494.8 | 222843.5 | 148768.6 | 133498.8 | TRUE |
| 108965.2 | 112116.3 | 117175.9 | 69614    | 95775.8  | 76602.3  | 83124.7  | 71284.8  | TRUE |
| 86296.8  | 90120.2  | 78384.9  | 54336.8  | 73243.1  | 74715.1  | 98216.5  | 94988.7  | TRUE |
| 47190    | 43456.8  | 42326.9  | 46980.5  | 47595.7  | 56592    | 44414.3  | 57684.3  | TRUE |
| 159217.9 | 146337   | 132902.3 | 163352.1 | 148544   | 144739.5 | 151499.7 | 152323.5 | TRUE |
| 171754   | 170674.5 | 134872.6 | 168966.1 | 168329.8 | 181916.1 | 206523.3 | 163343.3 | TRUE |
| 361785.1 | 308552.9 | 301681   | 336036.6 | 342214.3 | 338137.9 | 322415.5 | 323886.5 | TRUE |
| 480719.2 | 497858.3 | 436939.2 | 461707.9 | 472748.1 | 428442.7 | 473783   | 487705.9 | TRUE |
| 508641.1 | 518945.1 | 515691   | 560266.1 | 493753.2 | 564370.3 | 486161.6 | 514757.4 | TRUE |
| 356444.4 | 407806.9 | 335431.8 | 310660.7 | 350098.6 | 351799.7 | 362446.9 | 365420.2 | TRUE |
| 73570.6  | 69583.7  | 92833.6  | 86960.5  | 88573.6  | 91695.4  | 70763.5  | 98375.4  | TRUE |
| 210725   | 201028.7 | 187715.7 | 215996.4 | 231830.3 | 242595.6 | 226122.3 | 216223.4 | TRUE |
| 354301.4 | 413515.1 | 349403.1 | 322193.7 | 324194.4 | 316644.9 | 411247.3 | 373862   | TRUE |
| 859876.2 | 769337.2 | 830852   | 842485.8 | 906423   | 780780.6 | 861599.6 | 914086.5 | TRUE |
| 527227   | 557642.4 | 596642.3 | 547386.4 | 520937.9 | 1128066  | 618432.1 | 595651.8 | TRUE |
| 690016.2 | 599999.6 | 626899.3 | 826218.8 | 631572.6 | 816671.9 | 740087.5 | 723607.5 | TRUE |
| 78990.7  | 82086.9  | 79867.1  | 70740.1  | 76019.1  | 82459.3  | 71126.1  | 70412.7  | TRUE |
| 111977.7 | 102327.1 | 83408.9  | 111908.4 | 126204   | 107304.4 | 101045.5 | 122311.3 | TRUE |
| 38806.8  | 36255.5  | 52788.1  | 49642.4  | 25128.1  | 45695.7  | 37994.2  | 25199.4  | TRUE |

|          |          |          |          |          |          |          |          |      |
|----------|----------|----------|----------|----------|----------|----------|----------|------|
| 20462.7  | 26601.7  | 27822.9  | 16399.1  | 18745    | 17459.6  | 36358.4  | 17634.9  | TRUE |
| 32051    | 25940    | 35906.1  | 34777.5  | 35712.2  | 30277.5  | 25646.2  | 32199.1  | TRUE |
| 49257.2  | 39406.6  | 59395.2  | 46344.7  | 55483.3  | 44086.2  | 40577.4  | 35785.2  | TRUE |
| 20742.4  | 21233.1  | 9211.5   | 7659.6   | 20726.9  | 19993.2  | 19362.1  | 9047.7   | TRUE |
| 190247.2 | 207681.1 | 191385.6 | 218304.2 | 166068.8 | 189196.6 | 216741.7 | 132925.8 | TRUE |
| 347867.7 | 349710.8 | 300629.5 | 381298   | 404291.7 | 310670.1 | 393506.5 | 365529.9 | TRUE |
| 143965.9 | 135655.8 | 152586.9 | 163126.4 | 164890.8 | 194204   | 109254.6 | 142467.6 | TRUE |
| 699501.6 | 614741.8 | 645062.2 | 773617.5 | 716976.4 | 702201.2 | 653574.8 | 702906.5 | TRUE |
| 180609.3 | 185637.9 | 122954.8 | 158709.4 | 156103   | 192874.2 | 151076.6 | 178407.1 | TRUE |
| 45874.8  | 41525.8  | 29548.2  | 35728.7  | 24639.8  | 56678.5  | 37226.1  | 50776    | TRUE |
| 398409.3 | 246279.2 | 344299.5 | 371142   | 340522.9 | 398377.2 | 292377.7 | 423365.5 | TRUE |
| 75829.4  | 49782.3  | 69110.6  | 75847.7  | 82396    | 111153   | 90264.3  | 92112.5  | TRUE |
| 212305.7 | 198165.4 | 232947.4 | 221055.1 | 193362.7 | 223934.1 | 207878.7 | 198965.2 | TRUE |
| 409443   | 365609.7 | 413773.8 | 416507.6 | 340119.5 | 454993.9 | 403729.9 | 362892.1 | TRUE |
| 862944.6 | 723760.1 | 867977.5 | 842996.8 | 926977.8 | 829801.3 | 712512   | 880153.7 | TRUE |
| 58024.8  | 49128.5  | 51326.1  | 61220.4  | 74651.5  | 66061.5  | 51463.5  | 64814.2  | TRUE |
| 255372.6 | 331233.6 | 266664.8 | 321383.5 | 203795   | 244404   | 267408.9 | 203478.3 | TRUE |
| 273353.9 | 307749.6 | 355934   | 383554.2 | 278446.1 | 329288.4 | 298584.4 | 271159.9 | TRUE |
| 1001622  | 869801   | 950903.1 | 971580.9 | 1062494  | 1026722  | 796801.2 | 1013114  | TRUE |
| 44899.4  | 48169    | 31301.9  | 53049.1  | 30156.9  | 42509    | 55551    | 39636.6  | TRUE |
| 146284.1 | 53725.1  | 55634.3  | 46898.2  | 60248.9  | 80034.8  | 52643.9  | 63390.6  | TRUE |
| 82949.9  | 91499.2  | 104717.1 | 109692.5 | 117461.5 | 104342.8 | 94369.3  | 107343.4 | TRUE |
| 429603.1 | 327879.6 | 402010.7 | 364188.3 | 460294.2 | 444310.3 | 412886.4 | 417426   | TRUE |
| 349161.6 | 357008.8 | 350363   | 382431.6 | 388205.6 | 398928.4 | 376242.7 | 348931.9 | TRUE |
| 106229.5 | 109092.7 | 115545.2 | 94675.4  | 77038.7  | 149908   | 110094.4 | 92266.6  | TRUE |
| 11105.7  | 9250.3   | 7322.6   | 10602    | 11974.8  | 8679     | 9755.8   | 6808     | TRUE |
| 38489.9  | 34839.6  | 30504.1  | 21845.3  | 45840.3  | 44128.7  | 37358.9  | 47527.8  | TRUE |
| 43375.7  | 31199.1  | 46177.2  | 29086.4  | 44495    | 24208.5  | 36375.9  | 38749.8  | TRUE |
| 333014.3 | 347350.8 | 293598.9 | 298635.5 | 324596.8 | 389785.9 | 358930.6 | 347723.4 | TRUE |
| 22926.9  | 39078.9  | 22120.5  | 41716    | 23554.6  | 31615.8  | 28296.6  | 16731    | TRUE |
| 240995.6 | 221135.4 | 275153.4 | 285828.1 | 200355.9 | 392540.1 | 229754.1 | 214495.2 | TRUE |
| 2620048  | 2374735  | 2032129  | 2369695  | 2224843  | 2429537  | 2475132  | 2405783  | TRUE |
| 201517.7 | 183206.5 | 172036.2 | 184496.3 | 179394.9 | 228325   | 205661.1 | 213492.9 | TRUE |
| 114260.9 | 335578.6 | 175717.3 | 332923.5 | 361179   | 52492.3  | 56067.5  | 69793.6  | TRUE |
| 13140655 | 11499461 | 10998626 | 12285273 | 11584240 | 12405951 | 12277331 | 13110401 | TRUE |
| 454140.2 | 420318.1 | 423231.4 | 431469.7 | 438056.7 | 453495.2 | 464114.9 | 459575.4 | TRUE |
| 1332474  | 1138228  | 1209768  | 1281427  | 1177461  | 1306357  | 1159336  | 1283335  | TRUE |
| 475680.9 | 421760.3 | 578991.1 | 444550.2 | 498439.9 | 594965.9 | 432151.5 | 474129.7 | TRUE |
| 296832.8 | 307754.7 | 265292.6 | 361852.9 | 341825.2 | 284498.8 | 325197   | 358157.9 | TRUE |
| 151676.2 | 139993.1 | 136247   | 200737.2 | 178238.1 | 223774.5 | 159001   | 201348   | TRUE |
| 40626.6  | 64116.6  | 73461    | 61232.4  | 79415    | 41568.5  | 34358.4  | 43564.7  | TRUE |
| 397809.1 | 383444   | 384198.7 | 438669.5 | 521070.6 | 372735.6 | 398913.7 | 520561.7 | TRUE |
| 25991.7  | 24325.7  | 30137.8  | 31879.6  | 35706.9  | 25049.3  | 23340    | 24872.2  | TRUE |
| 199932.7 | 205859   | 359586.2 | 164537.1 | 172922.4 | 181397.1 | 177997   | 212600   | TRUE |
| 60624.7  | 51089.6  | 41744.6  | 49923.4  | 60166.5  | 74619.9  | 53291.7  | 88475.4  | TRUE |

|          |          |          |          |          |          |          |          |      |
|----------|----------|----------|----------|----------|----------|----------|----------|------|
| 343560.4 | 242314.2 | 230399.5 | 303655.9 | 319104.6 | 402305.1 | 284451.9 | 417604.9 | TRUE |
| 100207.5 | 99723.7  | 73478.5  | 95778.7  | 111212.6 | 111743.6 | 143704.3 | 135880   | TRUE |
| 58531.5  | 35405.8  | 35102.2  | 54574.3  | 55785.7  | 56168.7  | 63387.2  | 73644    | TRUE |
| 59776.5  | 36503.2  | 41384.2  | 61348.8  | 43312.9  | 59168.6  | 59238.4  | 69017.1  | TRUE |
| 380263.9 | 263768.7 | 238795.1 | 413878.2 | 398743.6 | 468292.3 | 451062   | 523401.1 | TRUE |
| 95256.9  | 69430.1  | 66690.9  | 84506.7  | 89932.8  | 89108.3  | 89500.1  | 90776.3  | TRUE |
| 365870.2 | 378250.8 | 277621.7 | 376478.5 | 358402.2 | 436855.6 | 444704   | 505435.8 | TRUE |
| 47074.9  | 41512.8  | 44770    | 35291.4  | 39839.5  | 35543.5  | 42505.8  | 41676.6  | TRUE |
| 41838.4  | 42539.5  | 25574.2  | 38113.1  | 31681.7  | 50983.8  | 39712.2  | 42938.2  | TRUE |
| 7838.2   | 10621.2  | 14422.1  | 7885     | 21119.7  | 10709.8  | 11961.9  | 17185    | TRUE |
| 182396.1 | 138262.5 | 216696.6 | 216112.3 | 166721.2 | 248783.5 | 131607   | 166306.4 | TRUE |
| 650628.8 | 584512.1 | 521484.6 | 520907.3 | 832202.2 | 713573.5 | 639691.7 | 690309.9 | TRUE |
| 95593.7  | 72883.9  | 95536.3  | 100601.9 | 110455.4 | 126015.9 | 116644.3 | 104302.6 | TRUE |
| 298396.7 | 285534.3 | 365089.6 | 329367.5 | 319284.5 | 279281.3 | 266604.1 | 312514.3 | TRUE |
| 118475.4 | 106034.7 | 174767.5 | 185798.4 | 124178.6 | 217528.5 | 129328.5 | 150141.6 | TRUE |
| 215322.7 | 188416.2 | 244589.1 | 215964.3 | 235746.9 | 268661.4 | 209468.7 | 252455.9 | TRUE |
| 150210.6 | 111288.9 | 189177.3 | 172276.2 | 164876.7 | 193102   | 135937.3 | 182728.5 | TRUE |
| 145321.2 | 125115.2 | 87045.3  | 87736.2  | 167137.1 | 143843.9 | 133063.7 | 123653.3 | TRUE |
| 248871.4 | 214909   | 179432.2 | 188308.5 | 287097.5 | 228253.1 | 227470   | 255723.3 | TRUE |
| 174037.3 | 107457   | 137699.8 | 158708   | 254653.6 | 188785   | 136255.6 | 176731.3 | TRUE |
| 82822    | 34983.6  | 60362.6  | 63816.2  | 99184.9  | 61301    | 53793.3  | 87583    | TRUE |
| 94731.4  | 55565.2  | 92819.9  | 77823.5  | 116555.1 | 72877.3  | 74136.5  | 82397.1  | TRUE |
| 180420   | 140995.9 | 141125.5 | 167523.4 | 206334.3 | 180863.6 | 146178.1 | 191167.6 | TRUE |
| 92237.4  | 46822.6  | 76045.1  | 78124.2  | 120275.7 | 96947.7  | 63799.7  | 74334.4  | TRUE |
| 34296.8  | 23853    | 34558.8  | 21265.5  | 7044.3   | 46649.5  | 28045.4  | 23639.1  | TRUE |
| 111215.7 | 121891.8 | 272180.6 | 221202.4 | 130015.8 | 306238.2 | 187548.7 | 147647.6 | TRUE |
| 68440.6  | 51533.6  | 153747.3 | 77866.9  | 68284.4  | 158348.6 | 96024    | 60086.6  | TRUE |
| 31238.4  | 36940.2  | 36334.6  | 9826.4   | 23463.9  | 46549.8  | 54692.8  | 24660.2  | TRUE |
| 15691.7  | 11291.8  | 16702.1  | 18613    | 6505.3   | 17010.1  | 31069.1  | 7304.4   | TRUE |
| 32821.9  | 23669.8  | 47767.4  | 51440.7  | 30111    | 28044.9  | 23883.2  | 19385.4  | TRUE |
| 151558.4 | 151596.1 | 135804.3 | 154785.8 | 125454.1 | 153444.5 | 151689.2 | 137043.8 | TRUE |
| 67098.2  | 54897    | 47137.7  | 65257.2  | 47247.5  | 78448.6  | 71434.8  | 71929    | TRUE |
| 268573   | 235171.1 | 157586.3 | 279648   | 229010.9 | 264578.8 | 290605.6 | 325491.8 | TRUE |
| 37890.7  | 33755    | 27446.8  | 46439.8  | 37692.7  | 39100.2  | 44299.4  | 36145.8  | TRUE |
| 312518   | 269816.6 | 240744.5 | 266834.9 | 262066.3 | 350055.9 | 307568.8 | 345586.3 | TRUE |
| 72067.3  | 61542.4  | 47427.9  | 56548.8  | 69835.2  | 65328.2  | 71297.6  | 67774.4  | TRUE |
| 58062    | 53803.2  | 67703.6  | 43433.3  | 45268    | 53542.9  | 51602.7  | 49088.6  | TRUE |
| 106437.3 | 97824.3  | 127756   | 115280.9 | 99319.2  | 132307.6 | 109450   | 102200.3 | TRUE |
| 83388.6  | 116041.6 | 70424.3  | 111399.4 | 133339.4 | 80348.6  | 105634.7 | 128734.6 | TRUE |
| 23134.6  | 26314.5  | 23073.6  | 28762.1  | 42096.9  | 19964.1  | 51297.3  | 38574.2  | TRUE |
| 310198.9 | 231531.9 | 256164.4 | 356307.4 | 221090.5 | 253954.3 | 269210.3 | 232983.5 | TRUE |
| 258413.7 | 220609.1 | 204798.4 | 298250.3 | 201522.7 | 209731.6 | 226347.4 | 218983   | TRUE |
| 120746.1 | 117874.9 | 77321.3  | 178398.9 | 112487.8 | 92279.9  | 116994.9 | 144205.5 | TRUE |



|          |          |          |          |          |          |          |          |      |
|----------|----------|----------|----------|----------|----------|----------|----------|------|
| 175246.6 | 157284.5 | 131812.7 | 210290.1 | 137967.9 | 157197.9 | 155656.5 | 154417.8 | TRUE |
| 117235.2 | 98899.1  | 111859.3 | 117517.6 | 108438.5 | 145378.3 | 90454.4  | 171353.4 | TRUE |
| 198965.8 | 161285.5 | 147718.8 | 261650.9 | 179481.5 | 164349.4 | 190647.3 | 162573.8 | TRUE |
| 415023.3 | 281735.2 | 335957.4 | 362901.7 | 271721   | 496399.2 | 265810   | 485115.1 | TRUE |
| 135620.5 | 161036.9 | 151496   | 135725.9 | 178337.6 | 150208.9 | 143180.1 | 182092   | TRUE |
| 109409   | 122041.4 | 86895.8  | 109098   | 105066.9 | 118468.9 | 112419.6 | 112772.9 | TRUE |
| 99733.2  | 76811.2  | 89306.3  | 119200   | 98755.8  | 98486.1  | 95726.5  | 97615.9  | TRUE |
| 15856.2  | 20114.4  | 11670.9  | 11375.5  | 8757.3   | 10196.3  | 10567.7  | 9329.4   | TRUE |
| 56623.7  | 31158.1  | 26646.5  | 54805.6  | 45104.4  | 47393.8  | 67887    | 60875.5  | TRUE |
| 20191.2  | 6243.8   | 23187    | 23695.4  | 20739.9  | 6434.4   | 6208.7   | 12940.1  | TRUE |
| 9385.1   | 24150.7  | 8076.4   | 28332.1  | 14671.7  | 10576    | 25757.2  | 27229.7  | TRUE |
| 103030.3 | 82894.6  | 92369.1  | 120658.3 | 77781.6  | 127595.5 | 118391.2 | 139747.8 | TRUE |
| 51005.7  | 52321.7  | 43864.7  | 44568.2  | 39714.7  | 53905.4  | 53318.7  | 34886.5  | TRUE |
| 531503.1 | 423936   | 450187.6 | 460094.5 | 611631.2 | 652922.1 | 432261.5 | 654802   | TRUE |
| 1089256  | 547019.9 | 1261392  | 1342239  | 809553.6 | 1335701  | 704150.9 | 853179.3 | TRUE |
| 2285811  | 1102501  | 2683538  | 2933217  | 1701774  | 2838400  | 1318911  | 1849081  | TRUE |
| 973376.6 | 462686.2 | 413977.9 | 406613.4 | 782996.8 | 809603.5 | 515253.6 | 788339.4 | TRUE |
| 48031.6  | 91659.6  | 90642.3  | 59428.9  | 79966.4  | 38259.5  | 33676.1  | 38440.6  | TRUE |
| 587726.9 | 903990.1 | 670440.2 | 462397.7 | 531271.7 | 395964.4 | 469971   | 560816.1 | TRUE |
| 887085.2 | 945840   | 897713.6 | 840169   | 817042.6 | 823946.6 | 1043280  | 835977.3 | TRUE |
| 519087.5 | 448872   | 574133.9 | 552222.4 | 536694.7 | 618534.7 | 562403.8 | 512953.2 | TRUE |
| 102547.2 | 101112.9 | 96714    | 106462.1 | 98459.2  | 134876.7 | 111103.5 | 116038   | TRUE |
|          |          |          |          |          |          |          |          |      |
| 116149.7 | 121836.3 | 136495   | 136475   | 153587.6 | 140837.7 | 154206.2 | 132799.9 | TRUE |
| 48133.4  | 65835.7  | 31614.1  | 75748.9  | 51932.1  | 47881.6  | 38616.9  | 70483.6  | TRUE |
|          |          |          |          |          |          |          |          |      |
| 123747.7 | 99567.4  | 125175.8 | 138156.6 | 120612.6 | 138591.5 | 116830.2 | 108094.5 | TRUE |
| 173254.2 | 150257.8 | 185228.6 | 196169.6 | 156960.5 | 175960.5 | 131360   | 158678.3 | TRUE |
| 74253.7  | 57557.9  | 67592.6  | 72906.1  | 57911.5  | 79474.3  | 55532.9  | 80480.1  | TRUE |
| 59316.1  | 67967.3  | 83224.6  | 103348.8 | 89310.4  | 104757.8 | 72261.1  | 78358.8  | TRUE |
| 89155.9  | 91035.7  | 123148   | 144993.1 | 104644.7 | 123873.1 | 103954.4 | 111878.4 | TRUE |
| 102590.3 | 66397.8  | 88916.7  | 79617.4  | 87507.8  | 114864.7 | 88529.2  | 85539.7  | TRUE |
|          |          |          |          |          |          |          |          |      |
| 112222.3 | 111667.4 | 92412.7  | 109070   | 120075.7 | 92391.7  | 133985.3 | 114600.3 | TRUE |
| 80013.7  | 82613.9  | 89340.4  | 98876.2  | 61704.1  | 97480    | 103121.9 | 98099.4  | TRUE |
| 29796    | 36009.4  | 28738.7  | 8527.6   | 18501.1  | 23402.3  | 28907    | 26280.3  | TRUE |
| 371736.4 | 366499   | 349857   | 433064.6 | 362602.5 | 356093.1 | 407102.5 | 392056   | TRUE |
| 413382.7 | 458845.9 | 366731.8 | 430646   | 410112.2 | 386330.5 | 409431.7 | 395049.1 | TRUE |
| 1854077  | 1628101  | 1657030  | 1624090  | 1449848  | 1812197  | 1688230  | 1676012  | TRUE |
|          |          |          |          |          |          |          |          |      |
| 207034.6 | 132383.6 | 370669.1 | 230495.8 | 185969.8 | 334103.6 | 177604.8 | 136472   | TRUE |
| 455856.5 | 442494   | 834795.5 | 407873.5 | 222831.6 | 855601.4 | 330125.3 | 292227.9 | TRUE |
| 459115   | 391221   | 385061.5 | 377865.3 | 630388.4 | 407019.3 | 410413.7 | 412535.8 | TRUE |
| 680703.2 | 580725   | 616594.9 | 522100.3 | 1123353  | 681585.5 | 575705.1 | 710663.4 | TRUE |

|          |          |          |          |          |          |          |          |      |
|----------|----------|----------|----------|----------|----------|----------|----------|------|
| 230971.8 | 223958.9 | 282924   | 242042.9 | 208879.4 | 253595.1 | 228886.7 | 220728.7 | TRUE |
| 486596.2 | 503293.5 | 439966.9 | 490753   | 524257.5 | 472591.5 | 531557.2 | 484404.4 | TRUE |
| 203455.3 | 198474.4 | 172973.1 | 222752.4 | 200644.2 | 177769.4 | 220227.9 | 200907.1 | TRUE |
| 126455.7 | 122353.2 | 118303.4 | 130521.7 | 99326.5  | 146391.8 | 135906.6 | 103939.4 | TRUE |

|          |          |          |          |          |          |          |          |      |
|----------|----------|----------|----------|----------|----------|----------|----------|------|
| 236738.7 | 265698.9 | 234866.7 | 246483.3 | 203543.6 | 248553   | 293377.9 | 205790.4 | TRUE |
| 337154   | 446047.9 | 358864.9 | 362865.8 | 318529.9 | 400149.3 | 385744.1 | 284768   | TRUE |
| 120663.2 | 128586.7 | 104330.4 | 143683.4 | 138566.5 | 123953.1 | 116211.1 | 159058.3 | TRUE |
| 188535.5 | 197781.7 | 159591.7 | 167869.8 | 162517.8 | 189619.3 | 211491.8 | 167633.2 | TRUE |
| 102298.1 | 127980.7 | 117612.1 | 108325   | 67885.3  | 144365.1 | 115308.9 | 104294.5 | TRUE |
| 84645.4  | 95947.2  | 68775.3  | 84627.2  | 49284.6  | 94972.1  | 101712.7 | 59659.2  | TRUE |
| 381996.1 | 513564.8 | 350952.4 | 322554.7 | 214978.8 | 418385   | 481723.8 | 251323.4 | TRUE |
| 538271.2 | 346032   | 582306.9 | 577107   | 497497.3 | 1054516  | 396559   | 572722.3 | TRUE |
| 244564.8 | 233137.6 | 195686.9 | 210051.5 | 181967.9 | 172021.3 | 170850.8 | 215654   | TRUE |
| 326721.5 | 322712.5 | 333545.7 | 363487.9 | 286739.3 | 325531.9 | 311705.7 | 285583.4 | TRUE |
| 154335.7 | 246978.8 | 171153   | 245498.6 | 255578.2 | 155523.7 | 162750.5 | 139122.9 | TRUE |
| 2514568  | 2296339  | 2451336  | 2582795  | 2012891  | 2913758  | 2541275  | 2889761  | TRUE |
| 102907.9 | 77501.6  | 95823.5  | 101221.7 | 95195.7  | 91600.9  | 118861.6 | 92090.4  | TRUE |
| 390627   | 415483.9 | 385782.6 | 499668.3 | 502868.9 | 377709.3 | 479897.6 | 478825.6 | TRUE |
| 195308.7 | 202438.8 | 229463.7 | 268197.5 | 296384.7 | 257708.9 | 303458.7 | 280447.5 | TRUE |
| 687072.4 | 686110.6 | 623870.7 | 680544.3 | 623405.6 | 819437.2 | 785553.5 | 793415.7 | TRUE |
| 129226.1 | 129282.4 | 131299   | 114167.7 | 125631.7 | 155718   | 102389.5 | 116642.6 | TRUE |
| 102602.1 | 101204.5 | 90611.7  | 77805.7  | 88002.4  | 101424.7 | 90499.6  | 87978.5  | TRUE |
| 607872.6 | 489872.5 | 661215.7 | 691652.1 | 883067   | 1497275  | 963850.5 | 1033449  | TRUE |
| 274764.4 | 268344.9 | 371019.6 | 215608.2 | 196906.7 | 377757.4 | 264975.5 | 232052.4 | TRUE |
| 290939.2 | 225174.1 | 372326.6 | 268433.9 | 238306.2 | 401195.7 | 283937.8 | 261854.2 | TRUE |
| 341345.2 | 273138.5 | 352363.5 | 336284.6 | 270128.2 | 424503.4 | 323531.2 | 279853.5 | TRUE |
| 198628.3 | 144052.8 | 158230.7 | 169343.2 | 260409.4 | 181381.9 | 168214   | 203093.7 | TRUE |
| 118591.5 | 65643.6  | 68210.1  | 117935.9 | 126694.8 | 114717.2 | 119869.1 | 151951.5 | TRUE |
| 57530.7  | 32099.5  | 42435    | 53407.8  | 63638.6  | 71215.1  | 53858.9  | 75540.7  | TRUE |
| 276700.8 | 281615.1 | 250212.2 | 272627.1 | 320869.1 | 267615.2 | 287431.8 | 326293.6 | TRUE |
| 458498.1 | 468962.1 | 448499   | 406338.3 | 441651   | 505108.4 | 492572.9 | 484524.8 | TRUE |
| 70585.7  | 82300.5  | 47870.5  | 51360.1  | 88233.2  | 38121.5  | 73429.5  | 49993.4  | TRUE |
| 43705.1  | 35300.5  | 55350.8  | 28539.1  | 72602.6  | 59737.8  | 43877.6  | 61838.3  | TRUE |
| 41952.8  | 53061.3  | 35875.4  | 32115.9  | 51019.3  | 36437.5  | 52860.6  | 46891    | TRUE |
| 47903.4  | 42688.9  | 50558.5  | 45368    | 31729.1  | 44492.8  | 51352.3  | 34624.7  | TRUE |
| 42556    | 47882.3  | 43845.8  | 34247.1  | 44551.4  | 45116.5  | 49329.7  | 42229    | TRUE |
| 62218.5  | 59884.4  | 72888.6  | 65011.3  | 67497.1  | 60996.7  | 50607.3  | 63398.5  | TRUE |
| 65827    | 82231.7  | 71936.6  | 77054.4  | 74667.9  | 99479.7  | 98079.4  | 81383.7  | TRUE |
| 54554.9  | 66697.1  | 52354.2  | 65071.5  | 60979.3  | 61051.3  | 71968.5  | 53403.7  | TRUE |
| 35657.9  | 54891.7  | 53155.8  | 47863    | 35797.8  | 35910.6  | 44743.4  | 26263.9  | TRUE |
| 45367.2  | 48350.4  | 37261.9  | 33949.3  | 51801.9  | 34526.8  | 28892.4  | 33529    | TRUE |
| 38660.1  | 40303.8  | 30415.1  | 28541.3  | 36368.1  | 39016.7  | 31711.8  | 32174.9  | TRUE |
| 79690.9  | 67189.5  | 82705.2  | 63022.9  | 78907.2  | 62923.2  | 87306.6  | 73845.7  | TRUE |

|          |          |          |          |          |          |          |          |      |
|----------|----------|----------|----------|----------|----------|----------|----------|------|
| 587306.2 | 495227.8 | 620678.1 | 717619.3 | 556422.4 | 644994.9 | 663652.6 | 667931.3 | TRUE |
| 75008.9  | 62841    | 53128.2  | 75073.8  | 66483.4  | 86266.4  | 117095.9 | 142536.6 | TRUE |
| 166589   | 143141   | 207988.8 | 163502.2 | 126445.8 | 208866.8 | 157806.6 | 132949.3 | TRUE |
| 408653.5 | 372837.7 | 538069.3 | 344998.9 | 336713.9 | 639025.6 | 360603.6 | 346146.9 | TRUE |
| 139466.2 | 128304.9 | 225860.5 | 130341.7 | 142903.1 | 228447.6 | 154080.3 | 142769.2 | TRUE |
| 24251.8  | 47925.8  | 30659    | 42038.4  | 39410.6  | 19179.6  | 10913.8  | 18080.7  | TRUE |
| 18797.5  | 8711     | 32919.4  | 25629.4  | 8583.2   | 24919.2  | 12470    | 20349.2  | TRUE |
| 80030.1  | 73703.8  | 64343.3  | 94539.9  | 76413.9  | 68425    | 76926.5  | 72862.7  | TRUE |
| 144715.8 | 139448.4 | 137822.5 | 158870.1 | 144082   | 154267.5 | 169194.1 | 145660.6 | TRUE |
| 498071.3 | 437975.3 | 463051.9 | 411811.8 | 514252.3 | 571065.8 | 487346   | 586726   | TRUE |
| 62911.9  | 61053.9  | 51465.1  | 54658    | 67586.2  | 75390.4  | 49305.8  | 66607.1  | TRUE |
| 37325.3  | 25507    | 33340    | 51991.3  | 39327.9  | 45852.3  | 30929.4  | 40955.8  | TRUE |
| 46181.6  | 59184.6  | 57240.6  | 62561.9  | 54630.1  | 73088.4  | 53102    | 54509.8  | TRUE |
| 223292.5 | 224473.8 | 277914.2 | 197311.2 | 177104.9 | 312934.9 | 252406.7 | 170875.4 | TRUE |
| 79554.7  | 50790.1  | 76592    | 80007.7  | 56219.4  | 90553.8  | 69006.1  | 66452.2  | TRUE |
| 169273.2 | 138266.8 | 205217.8 | 136238.7 | 224045.6 | 142004   | 130708.9 | 120531.8 | TRUE |
| 142980.2 | 139277.8 | 158594.3 | 138058.2 | 177652.7 | 137258.8 | 121779.4 | 170017.4 | TRUE |
| 118515.7 | 103030.2 | 93468.6  | 106582.9 | 95020.9  | 131569.8 | 136134.2 | 106551.1 | TRUE |
| 303494.5 | 258991.8 | 259150.3 | 283874.6 | 381049   | 343374.4 | 287676.8 | 309738.1 | TRUE |
| 451285.5 | 393742.1 | 419964.4 | 440208.6 | 566284.8 | 474121.7 | 410999.3 | 470578.2 | TRUE |
| 334111.3 | 324659   | 311466.8 | 456711.6 | 299453.9 | 297009.3 | 362167.1 | 317024   | TRUE |
| 82610    | 71749.3  | 44650.5  | 55175.2  | 47082.5  | 46146.8  | 69454.2  | 64665.8  | TRUE |
| 36271.8  | 41858.8  | 27769.3  | 38281    | 48151.3  | 31547.2  | 44900.5  | 50290.1  | TRUE |
| 23577.1  | 23800.6  | 36580.9  | 38148.4  | 17380    | 6414.5   | 22104.3  | 10113.8  | TRUE |
| 31474.9  | 41029.4  | 22270.3  | 41722.1  | 44394.1  | 25930.6  | 51210.3  | 41192.6  | TRUE |
| 20151    | 25709.1  | 15377.3  | 9753.3   | 17938    | 12748.8  | 30070.2  | 32654.4  | TRUE |
| 65116.1  | 54090.9  | 96863.2  | 83552.4  | 43671.6  | 45522.6  | 51857.4  | 28767.6  | TRUE |
| 49452.7  | 49910.9  | 42784.7  | 55279.7  | 80277.3  | 37295.9  | 59653.4  | 56355.6  | TRUE |
| 7694.9   | 10563.2  | 6349.6   | 9350.8   | 10254.8  | 4134.7   | 5711.3   | 7396.1   | TRUE |
| 22513.7  | 25161.2  | 10385.1  | 4562.3   | 23355.9  | 7633.9   | 19177.3  | 20954.3  | TRUE |
| 20411    | 22820.8  | 8711.2   | 15102.4  | 17108.1  | 9575.6   | 24659.3  | 22490.6  | TRUE |
| 90729.9  | 88184.1  | 88320.5  | 122395.7 | 103934.2 | 80263.9  | 108171.3 | 107043.8 | TRUE |
| 400261.5 | 382538.6 | 307304.1 | 449988.8 | 412656   | 311708.8 | 429634.4 | 396416.5 | TRUE |
| 769676   | 817479.6 | 662398.6 | 798028.3 | 775176   | 668493.5 | 814096.1 | 759425.1 | TRUE |
| 498497   | 526107.4 | 404477.2 | 520633.9 | 532732.3 | 422887.9 | 537988.2 | 484508.7 | TRUE |
| 709787.6 | 707041.5 | 728798.7 | 691023.8 | 551096.5 | 614635.4 | 636455.8 | 647712   | TRUE |
| 189487.7 | 183865.6 | 226665.9 | 231535.4 | 175171.4 | 194912.5 | 194443.5 | 192539.7 | TRUE |
| 1807435  | 1830949  | 1954220  | 1864946  | 1844733  | 1742138  | 1806874  | 1741638  | TRUE |

|          |          |          |          |          |          |          |          |      |
|----------|----------|----------|----------|----------|----------|----------|----------|------|
| 67284.2  | 45620.7  | 82891    | 66486.4  | 55733.3  | 64999.1  | 53630.7  | 62936.5  | TRUE |
| 84888.2  | 81289.2  | 112200   | 72004.4  | 58410.1  | 109594.6 | 70866    | 65086.3  | TRUE |
| 618423.8 | 503579.8 | 1598080  | 337004.1 | 311348   | 1679658  | 584039.6 | 344410.3 | TRUE |
| 307985.7 | 137523.3 | 245913.1 | 246043.9 | 858747.2 | 159184.1 | 133396.2 | 167295.9 | TRUE |
| 406410.9 | 194173.5 | 391190.1 | 325135.2 | 1087778  | 194617.5 | 202627.4 | 273325.3 | TRUE |
| 100182.7 | 89581.7  | 160368.2 | 63979.9  | 74318.5  | 146135.8 | 93192.3  | 71189.7  | TRUE |
| 110273   | 104927.1 | 166649.2 | 59143.8  | 55826.8  | 181490.5 | 102802.9 | 75877.6  | TRUE |
| 241150.6 | 249338.9 | 226901.3 | 222024.6 | 246475.2 | 222608.9 | 226455.8 | 230250.5 | TRUE |
| 359526.6 | 367911.5 | 295737   | 339790   | 351126.3 | 326320.4 | 379640   | 313257.1 | TRUE |
| 555598.2 | 688233.8 | 606222.2 | 637283.7 | 578084.2 | 627668.1 | 669072.2 | 631845   | TRUE |
| 248340.8 | 231991.9 | 240345.7 | 271049.9 | 222863.9 | 269155.4 | 271046.4 | 216560.7 | TRUE |
| 460638.3 | 455056.1 | 457891.8 | 440227.3 | 485608.6 | 414361.1 | 472182.6 | 485744.9 | TRUE |
| 121396.4 | 98349.1  | 62638.4  | 108717.6 | 110780.9 | 102335.9 | 142871.8 | 129328.8 | TRUE |
| 138527.7 | 88630.1  | 108066.5 | 114772.7 | 172771.7 | 198361.4 | 121945.5 | 189311.9 | TRUE |
| 67839.8  | 91149.8  | 85653    | 75663.8  | 80442.2  | 111626.9 | 92795.9  | 75251.4  | TRUE |
| 67286.2  | 76575.9  | 91942.4  | 74280.6  | 71538.3  | 70917.1  | 69517.3  | 88118.1  | TRUE |
| 140135   | 137050.2 | 115223.1 | 145613.9 | 136851.8 | 153217.8 | 158626.7 | 137582   | TRUE |
| 80368.6  | 60031.1  | 94322.8  | 116512   | 89852.2  | 99660.6  | 92442    | 92650.8  | TRUE |
| 42215.2  | 35150.6  | 41970.3  | 30155.3  | 39036.5  | 33814.1  | 46377.8  | 37953.5  | TRUE |
| 40880.1  | 43173    | 31316.6  | 50021.2  | 39649.3  | 40062.3  | 59427.7  | 43596.5  | TRUE |
| 72019.6  | 53393.6  | 45283.6  | 69198.4  | 56022.6  | 58092.7  | 96964.1  | 75932.6  | TRUE |
| 156394.4 | 127977   | 130286.1 | 187056.1 | 142066.5 | 136935.8 | 143136   | 187901.5 | TRUE |
| 133091.1 | 118207.1 | 186748.5 | 87916.8  | 171805.5 | 174280.1 | 121053   | 181369.1 | TRUE |
| 33870.5  | 29310.5  | 24703.1  | 28510.2  | 36817.9  | 33301.2  | 37068.9  | 36425.6  | TRUE |
| 78736.3  | 98224    | 75161.5  | 92617.9  | 99735.7  | 71205.3  | 109845.8 | 88160.8  | TRUE |
| 113302.5 | 98147.8  | 108486.3 | 126815.2 | 89169.5  | 117333.8 | 122154.2 | 102747.4 | TRUE |
| 437684.5 | 369995.2 | 427381.9 | 464485.8 | 512914.5 | 506346.2 | 418956.9 | 494480.9 | TRUE |
| 240855.7 | 181049   | 242666.5 | 248498.3 | 259404.3 | 259504.9 | 192322.9 | 258004.7 | TRUE |
| 257929.3 | 234877.2 | 317350.3 | 301785.8 | 328741.1 | 268657.5 | 211918.4 | 248482.3 | TRUE |
| 34745.4  | 55208    | 32603.8  | 37421.5  | 37035.5  | 43422.3  | 38440.3  | 35890.6  | TRUE |
| 60384.5  | 62232.2  | 91928.2  | 46936.7  | 46117.2  | 40470.3  | 54847.9  | 45921.3  | TRUE |
| 114690.4 | 130333.8 | 162981   | 81589.7  | 97708.3  | 131351.6 | 118152.6 | 87065.8  | TRUE |
| 874665.5 | 925809.8 | 1146830  | 777768.8 | 780575.1 | 1137892  | 992348.2 | 746356.7 | TRUE |
| 151107.8 | 180667.6 | 205413.4 | 112527.3 | 104457.8 | 223125.5 | 208242.5 | 116737.1 | TRUE |
| 2277314  | 1614304  | 2439058  | 2322211  | 3008105  | 1920452  | 1780290  | 1981318  | TRUE |
| 101327   | 82407.8  | 105971.9 | 115373.3 | 148500.2 | 90765.4  | 95775.8  | 91002.7  | TRUE |
| 191023.4 | 144495.5 | 195992.6 | 200392.4 | 335541.4 | 130910   | 150518.9 | 170866.3 | TRUE |
| 307388.9 | 172908.9 | 275675.3 | 254650.6 | 643213.3 | 164267   | 188977.7 | 193184   | TRUE |
| 148913.2 | 153360.7 | 266022.1 | 122416.7 | 140176.3 | 279478.1 | 159468.1 | 121291.5 | TRUE |
| 254750.1 | 216975   | 359065.2 | 237303.3 | 226512   | 387454.1 | 271850.6 | 217996.3 | TRUE |
| 202054.7 | 241547.9 | 192194.5 | 190512.9 | 267849.5 | 186730.8 | 215976.9 | 236383.7 | TRUE |

|          |          |          |          |          |          |          |          |      |
|----------|----------|----------|----------|----------|----------|----------|----------|------|
| 54873.9  | 49906.6  | 37561.8  | 46294.8  | 51756.8  | 52335.7  | 65861.8  | 63839.9  | TRUE |
| 191672.2 | 139162.1 | 89396.6  | 151472.3 | 155088.2 | 171523.4 | 221447.1 | 208482.1 | TRUE |
| 56447.6  | 31771.9  | 43676.3  | 56541.6  | 52548.4  | 45271    | 73404.5  | 50652.8  | TRUE |
| 117376.4 | 81634.6  | 91875.4  | 119936.6 | 95129.2  | 119035.4 | 119727.2 | 127473.6 | TRUE |
| 39663.7  | 34166.2  | 28387.1  | 37629    | 43365.7  | 26669.6  | 34816.1  | 35633.5  | TRUE |
| 117533.9 | 132580.8 | 120973.3 | 103863.7 | 98734.7  | 112213.6 | 116356.1 | 108844.4 | TRUE |
| 128024.6 | 141099.3 | 118179.6 | 120469.3 | 95660.6  | 162628.6 | 157100.7 | 114796.4 | TRUE |
| 225147.2 | 240469.2 | 231347.9 | 181305.9 | 185686.2 | 228590.6 | 264580.7 | 192539.5 | TRUE |
| 249899.1 | 249369.7 | 197473   | 186024.6 | 170666.3 | 212444.2 | 246364.2 | 152043.8 | TRUE |
| 143467.4 | 150649.1 | 166812.1 | 117758.8 | 131247.9 | 151783.7 | 171238.1 | 125432.7 | TRUE |
| 190685.6 | 174522.6 | 233569.3 | 235869.5 | 193740   | 190790.3 | 180489.4 | 168252.1 | TRUE |
| 67643.2  | 56466.8  | 65203.3  | 76174.9  | 72509.5  | 74066.2  | 56222.4  | 69576.4  | TRUE |
| 459070.2 | 448098.3 | 424514.6 | 432540.1 | 452997.5 | 486063.8 | 439749   | 497314.1 | TRUE |
| 700387.5 | 731629.1 | 681429.1 | 759030.5 | 689346.2 | 718726.6 | 667588.5 | 724977.1 | TRUE |
| 121552.3 | 122592.3 | 104922   | 152779.5 | 124359.9 | 120207.1 | 117411.3 | 140334.5 | TRUE |
| 96708.7  | 97148.9  | 87698.1  | 103230.5 | 97828.6  | 117809.3 | 109477.4 | 110023.7 | TRUE |
| 43096.7  | 40159.3  | 38924    | 39193.2  | 43366    | 30328.9  | 34482.7  | 36733.5  | TRUE |
| 538762.7 | 524449.9 | 494205.7 | 462044.8 | 375017.4 | 523462.3 | 563374.2 | 422261.8 | TRUE |
| 308030.3 | 403686.9 | 306906.2 | 325275.1 | 269916.8 | 328289.1 | 374101.2 | 263535.5 | TRUE |
| 70326.7  | 100862.7 | 78862.2  | 80476.1  | 89562.4  | 76555.6  | 96918.5  | 97116.1  | TRUE |
| 425319   | 431659.2 | 517434.4 | 534199.6 | 494492.4 | 434821.1 | 444681.7 | 435997.9 | TRUE |
| 683570.4 | 635693.3 | 768268.4 | 808622.4 | 694077   | 611435.2 | 630103.8 | 689507.8 | TRUE |
| 176623.5 | 180099.4 | 155253.8 | 178793.9 | 194088.6 | 154392.2 | 178415.8 | 194069.7 | TRUE |
| 25733.4  | 17912.8  | 20601.1  | 28807.5  | 26827.2  | 18891.8  | 24118.6  | 25192.5  | TRUE |
| 119657.5 | 109983.8 | 105209.3 | 108646.1 | 119439.3 | 98067.3  | 121874.3 | 113693   | TRUE |
| 28471.5  | 21767.2  | 26547    | 27025.9  | 16643.9  | 29674.4  | 57545    | 27208.3  | TRUE |
| 187554.3 | 198241.6 | 218422.7 | 255126.9 | 240165.9 | 234982.7 | 235906   | 249482.1 | TRUE |
| 99967.3  | 102576.4 | 109400.1 | 108693.4 | 92573.7  | 120358.3 | 109681.6 | 103584.7 | TRUE |
| 71595.1  | 67731    | 67047.5  | 70139.3  | 65355.2  | 66713.1  | 51563.1  | 63730.8  | TRUE |
| 589288.1 | 822046.1 | 367577.4 | 476937.4 | 529397.9 | 415344.7 | 903012.6 | 506831.4 | TRUE |
| 264278.7 | 264599.4 | 243135.6 | 318894.8 | 250172.5 | 266073.5 | 300646   | 262195.6 | TRUE |
| 178695.4 | 227322.3 | 162913.9 | 164867.6 | 204053.8 | 152564.3 | 243510.6 | 200214.6 | TRUE |
| 48883.9  | 35525.1  | 42709.9  | 42203.7  | 47254.5  | 35856.1  | 47221.6  | 42849.4  | TRUE |
| 101623   | 117066.5 | 85157.6  | 115021.4 | 104652.1 | 89612.7  | 116332.1 | 93444.8  | TRUE |
| 40700.9  | 50333.5  | 26124.9  | 47266.4  | 43704.7  | 26054.1  | 75043.1  | 41956.1  | TRUE |
| 43404.1  | 78594.2  | 39960.8  | 41740.7  | 42999.9  | 64936.6  | 65134.2  | 56600.1  | TRUE |
| 87283.2  | 84310.8  | 87408.4  | 41235.3  | 41881    | 104428.2 | 119423.2 | 56800.2  | TRUE |
| 110675.5 | 51770.3  | 128534.6 | 148024.2 | 137788.1 | 90999    | 76665.6  | 131659.5 | TRUE |
| 84051    | 73573.4  | 84605.2  | 64616.7  | 58058.1  | 83448.3  | 69487.9  | 58893.1  | TRUE |
| 199232.6 | 199167.5 | 265283.6 | 261173.5 | 237381   | 172265.2 | 204360.9 | 168297.5 | TRUE |
| 69469.6  | 61386.3  | 27363.2  | 48190.7  | 50881.3  | 36644.4  | 54214.4  | 47286.7  | TRUE |
| 96651    | 116608.9 | 49515.8  | 75233.2  | 84486.9  | 59121.6  | 81405.6  | 90143.4  | TRUE |

|          |          |          |          |          |          |          |          |      |
|----------|----------|----------|----------|----------|----------|----------|----------|------|
| 22782.4  | 34103.7  | 19611.8  | 13589.1  | 26159.5  | 27032.2  | 30987.9  | 29165.6  | TRUE |
| 51196.8  | 57732.3  | 39025.1  | 42422.4  | 54845.3  | 62848.5  | 65417.9  | 68891.8  | TRUE |
| 161821.1 | 133046.2 | 135263.9 | 147964.1 | 151167.9 | 164708.1 | 183890   | 210735.7 | TRUE |
| 14792.4  | 18992.9  | 10456.4  | 9976.4   | 19664.3  | 20399.1  | 19574.9  | 9643.2   | TRUE |
| 24901.1  | 26828.6  | 23680.3  | 32206.2  | 10745.1  | 28915.9  | 14258.8  | 11768.1  | TRUE |
| 43881.9  | 53080.2  | 61314    | 64769.5  | 58107.2  | 61123.9  | 53664.5  | 66353.2  | TRUE |
| 145256.1 | 127129.2 | 147386.5 | 188946.3 | 152650   | 151050.3 | 138458.3 | 182719.9 | TRUE |
| 280362.8 | 198872.2 | 320457.1 | 275213   | 258010.7 | 344558.2 | 202941.1 | 243806.6 | TRUE |
| 253927.8 | 242162.5 | 245872.8 | 223210.4 | 335601.1 | 314185.4 | 245650.9 | 285557.8 | TRUE |
| 220272   | 160624.8 | 136339.2 | 160794.7 | 331050.7 | 249739.1 | 179048.7 | 262331.4 | TRUE |
| 132492.3 | 118022.7 | 255447.8 | 83714.1  | 89381.6  | 320977   | 134212.5 | 94065.4  | TRUE |
| 186270.5 | 171260.2 | 298964.5 | 173417.2 | 99504.9  | 530131.7 | 208087.3 | 114851   | TRUE |
| 467728.6 | 239667.1 | 357691.6 | 386123   | 1095107  | 255646.8 | 305811.9 | 358704   | TRUE |
| 99673.8  | 58596.8  | 190787.4 | 46561.6  | 57530.2  | 150892.2 | 79998.9  | 64224.5  | TRUE |
| 69827.2  | 74095.9  | 89322.3  | 60149.8  | 55196.5  | 107277   | 83347    | 52680.1  | TRUE |
| 34298.4  | 34070.7  | 30200.3  | 42739.1  | 34687.9  | 36014.7  | 27733.8  | 24674    | TRUE |
| 119297   | 99605.8  | 195278.9 | 140241.5 | 94605.5  | 180530   | 114064.4 | 99035.5  | TRUE |
| 131184.7 | 115856.2 | 204759.8 | 127821.8 | 100435.3 | 245563.9 | 128222.5 | 114727.6 | TRUE |
| 172398.6 | 134134.6 | 147927.4 | 130783.7 | 280927.8 | 161093.3 | 152591.4 | 154071.2 | TRUE |
| 210968   | 166497.1 | 247691.8 | 178679.1 | 170801.7 | 302108.3 | 183619   | 184477.4 | TRUE |
| 299780.4 | 207905.2 | 259080.7 | 244242.2 | 485594.4 | 253654.7 | 236258.7 | 291249.9 | TRUE |
| 227176.5 | 223634.5 | 295348.2 | 247215.4 | 267025.3 | 271441.1 | 264914.6 | 252697.6 | TRUE |
| 594579.9 | 464156.5 | 677851.6 | 633761.2 | 803061.9 | 492415.4 | 478445.4 | 458600.9 | TRUE |
| 590421.6 | 517938.4 | 693000.4 | 709456.2 | 845009.4 | 564076.5 | 560182.9 | 566341   | TRUE |
| 343103.9 | 368393.3 | 516534.1 | 263339.2 | 231081.7 | 528989.7 | 431494.3 | 239534.3 | TRUE |
| 42784    | 39213.5  | 41578    | 17513    | 32531    | 41821.7  | 35200.1  | 33263.2  | TRUE |
| 42352.5  | 42485.7  | 51043.3  | 35997.1  | 36795.9  | 47097.8  | 53498.5  | 36812.8  | TRUE |
| 1068240  | 823520.9 | 938250.4 | 985852.3 | 1221194  | 843398.5 | 850871.6 | 858532   | TRUE |
| 15455.6  | 6518.6   | 7127.9   | 6455.4   | 4729.6   | 7486.6   | 9775.1   | 6145.8   | TRUE |
| 87775.2  | 91348.2  | 104231.1 | 80743.6  | 58601.1  | 106788.7 | 94163    | 70450.4  | TRUE |
| 84627.4  | 69076.5  | 59270.6  | 74147.6  | 46379.4  | 80526.7  | 78190.6  | 55093.7  | TRUE |
| 343022.9 | 360400.2 | 311672.6 | 330237.4 | 280653.7 | 339166.7 | 378022.2 | 275163.1 | TRUE |
| 143343.1 | 145358.4 | 350242.8 | 73532.5  | 75091.4  | 390977.3 | 169813.9 | 97797.3  | TRUE |
| 222465   | 193724.1 | 398525.7 | 145544.1 | 190161.3 | 464253.3 | 197093.2 | 184811.2 | TRUE |
| 77584.4  | 63304.4  | 111581   | 86856    | 77621.7  | 106043.9 | 67935.5  | 98338.4  | TRUE |
| 52312.9  | 47840.9  | 72851.1  | 41070.6  | 50793.5  | 80100.3  | 39276.1  | 46237    | TRUE |
| 400838.6 | 342587.6 | 390279.7 | 383307.1 | 312274   | 412291.4 | 351381.9 | 338517.5 | TRUE |

|          |          |          |          |          |          |          |          |      |
|----------|----------|----------|----------|----------|----------|----------|----------|------|
| 183234.9 | 159024.8 | 160321.2 | 198931.1 | 190717.6 | 226540.8 | 217107.3 | 232447.5 | TRUE |
| 318514   | 314423.3 | 302305.2 | 315268.3 | 264064.4 | 331540.4 | 303363.5 | 288440.1 | TRUE |
| 340706.4 | 253126.7 | 283969.2 | 239986.4 | 256545   | 236741.2 | 219247.9 | 260044.8 | TRUE |
| 300701.8 | 229068.1 | 329540.8 | 300644.9 | 325126.1 | 334890.9 | 238060.7 | 271750.4 | TRUE |
| 780696.4 | 660336.4 | 584090.5 | 641743.4 | 627894.7 | 592671.6 | 589865   | 650239.2 | TRUE |
| 328703.2 | 369652.7 | 333274.5 | 344689.2 | 305727.7 | 353459.9 | 381833   | 309614.1 | TRUE |
| 598882.7 | 443667.2 | 734226   | 678153   | 696379.5 | 500395.9 | 449164.6 | 492001.9 | TRUE |
| 819305   | 689761.8 | 933175.8 | 947801.9 | 894535.6 | 707559.6 | 726237.4 | 729759.2 | TRUE |
| 136597.6 | 85015.7  | 179836.7 | 155779.1 | 109534.5 | 91770.8  | 108294.2 | 76992.8  | TRUE |
| 35866.6  | 24045.4  | 37170    | 36920.4  | 29216.8  | 43764.1  | 42643.8  | 35109.2  | TRUE |
| 138675.2 | 135628.8 | 135322.2 | 175143.8 | 156676.4 | 149469.8 | 169396.3 | 153785.9 | TRUE |
| 168303.4 | 173926.6 | 182356.7 | 169507.5 | 168625.1 | 192144.5 | 176523.2 | 194807.4 | TRUE |
| 226706.2 | 226529.8 | 211471.2 | 228210.5 | 246895   | 224183.6 | 240811   | 227217.8 | TRUE |
| 114502.2 | 124564.9 | 156171.2 | 151003.2 | 138816.2 | 128605.6 | 116663.4 | 127742.1 | TRUE |
| 41073.4  | 55396.1  | 56240.6  | 78667.3  | 67261.2  | 65471.3  | 69423.8  | 57275.8  | TRUE |
| 49140.4  | 50079.4  | 52723.8  | 47257.8  | 40447.1  | 57758.3  | 59992.1  | 38112.2  | TRUE |
| 142292   | 99179.2  | 134142.9 | 168179.1 | 149412.3 | 146472.1 | 150419.8 | 130483.8 | TRUE |
| 33713.1  | 28942.1  | 27180    | 28461.9  | 19670    | 37661.2  | 24794.7  | 25670.5  | TRUE |
| 36228    | 44340    | 45097.6  | 40965    | 30669    | 45652    | 44228.7  | 36654.8  | TRUE |
| 82983.2  | 70564.9  | 72792.5  | 65142    | 58384.6  | 130837.2 | 137306.6 | 72485.7  | TRUE |
| 89989.1  | 134752.4 | 85069.2  | 144768   | 134785.4 | 101011.8 | 66114.6  | 90509.9  | TRUE |
| 63069.1  | 42785.3  | 78696.6  | 52214    | 44650.9  | 83768.4  | 51308.6  | 46125.2  | TRUE |
| 311250.9 | 292945   | 371267   | 297282   | 269071.2 | 382929.9 | 314978.3 | 307513.5 | TRUE |
| 175594.1 | 177998   | 237347.6 | 167236.9 | 154725.7 | 253036.8 | 196743.9 | 143026.8 | TRUE |
| 69393    | 51433.6  | 77752    | 95374.1  | 91970.2  | 80713.1  | 53872    | 76263.1  | TRUE |
| 36695.2  | 86258.6  | 55544.7  | 89587.6  | 59622.6  | 71045.7  | 67940.3  | 46485.5  | TRUE |
| 163712.1 | 144347.1 | 133180.5 | 156582.6 | 152586.7 | 164328.1 | 178229.2 | 156386.2 | TRUE |
| 57778.6  | 54927    | 137387.7 | 60744.4  | 68785.4  | 71122.3  | 67418.7  | 70016.3  | TRUE |
| 83468.7  | 79354.5  | 99187.3  | 99566.1  | 81029.8  | 94245    | 66199.3  | 91481.9  | TRUE |
| 57540.3  | 61442.6  | 58086.5  | 62490.3  | 34138.1  | 75332.5  | 70592.7  | 58931.2  | TRUE |
| 68951.8  | 91416.4  | 72597.4  | 65894.9  | 51925.7  | 80746.2  | 95360.5  | 61523.9  | TRUE |
| 93024.6  | 96636    | 124846   | 105627.8 | 95091.5  | 121792.2 | 96618.5  | 107026   | TRUE |
| 27918.2  | 21532.5  | 32608.1  | 14369.5  | 30847.1  | 32813.7  | 33802.5  | 31533.2  | TRUE |
| 140268.4 | 114332.5 | 123659.9 | 132120.4 | 129512.9 | 125817   | 111217.4 | 124307.8 | TRUE |
| 938435.4 | 857019   | 912870.2 | 1017659  | 1106498  | 1033105  | 909718.6 | 1035440  | TRUE |
| 552941.1 | 559616.5 | 511939.6 | 604400.1 | 575676.4 | 616742.3 | 618664.1 | 611160.3 | TRUE |
| 33002.5  | 44054.2  | 57275.1  | 21323.3  | 33433.6  | 48287.8  | 29826.4  | 39199.4  | TRUE |
| 20966.2  | 30838    | 42174.4  | 9667.4   | 11817.6  | 38854.6  | 14255.4  | 11728.3  | TRUE |
| 28382.2  | 18816.7  | 47238.6  | 22816    | 30208.6  | 54793.7  | 11988.8  | 21894.1  | TRUE |
| 48495    | 41379.4  | 32701.1  | 34633.9  | 42748.4  | 27232.3  | 40543    | 37410.5  | TRUE |
| 298571   | 263764.6 | 386404.8 | 335730.4 | 284769.1 | 301460.3 | 303112.6 | 283698.1 | TRUE |
| 51030.7  | 42073.9  | 38980.4  | 65151.7  | 70645.8  | 51330.3  | 61381.7  | 65491.6  | TRUE |
| 49846.8  | 60156.1  | 47583.8  | 58511.4  | 54257.4  | 48522.4  | 47891.6  | 64357    | TRUE |
| 518654.8 | 426361.9 | 411598.6 | 549693.8 | 527214   | 451805.6 | 466442.6 | 580888.9 | TRUE |
| 170525.9 | 154321.1 | 142453.3 | 164648.2 | 166845.7 | 190606.9 | 187808   | 190046.2 | TRUE |
| 140584.4 | 118714.1 | 153727.4 | 129562.3 | 135442.7 | 160829.3 | 116932.1 | 146183.9 | TRUE |

|          |          |          |          |          |          |          |          |      |
|----------|----------|----------|----------|----------|----------|----------|----------|------|
| 118793.8 | 110502.3 | 123015.1 | 104008.3 | 103618.7 | 133300.5 | 127650.1 | 102697.4 | TRUE |
| 190957.6 | 170562.6 | 214944.3 | 204035.8 | 237498.8 | 182459.2 | 167729.3 | 202958.5 | TRUE |
| 174742.6 | 115114.3 | 145662.7 | 151673.4 | 249882   | 125141.5 | 141904.4 | 114053.5 | TRUE |
| 112524.2 | 115508.6 | 155422.4 | 130525.9 | 98545.2  | 135102.1 | 140590.7 | 108318.6 | TRUE |
| 941999.3 | 403629.4 | 1184166  | 1085483  | 1347534  | 721558.1 | 511830.4 | 793234.1 | TRUE |
| 653697.2 | 322148.8 | 791208.2 | 750049.9 | 875758.2 | 473571.6 | 327824.2 | 482524.7 | TRUE |
| 32164    | 35237.3  | 51453.7  | 32929.1  | 24661.9  | 47565.8  | 51100.6  | 33439.4  | TRUE |
| 138307.7 | 108214.8 | 124921.9 | 125738.2 | 108686.1 | 138506.9 | 120542.7 | 100024.9 | TRUE |
| 100575.2 | 126536.2 | 105093.3 | 126807.2 | 139262.3 | 123184.7 | 97966.8  | 133449.2 | TRUE |
| 30155.4  | 25208.2  | 26817.7  | 22399.3  | 31152.8  | 23245.4  | 20445.4  | 25451    | TRUE |
| 23541.9  | 14960.5  | 23409.9  | 42982.9  | 33168.2  | 27376.5  | 23670.7  | 22057.7  | TRUE |
| 63034.7  | 42027.5  | 63948.6  | 90636.6  | 66694.4  | 77060.4  | 84085.3  | 67232    | TRUE |
| 128905   | 134105.1 | 129050.8 | 123605.5 | 113313.7 | 116180   | 144428.7 | 127204.8 | TRUE |
| 62362.1  | 88071    | 40181.2  | 61928.1  | 35304.7  | 58486.4  | 71901.6  | 37291.6  | TRUE |
| 30339.6  | 34457.2  | 20586.4  | 31225.4  | 19055.3  | 42528.6  | 43348    | 28055    | TRUE |
| 36796.6  | 27440.6  | 34732.4  | 24260.8  | 26906.6  | 34149.8  | 37228.5  | 21404.5  | TRUE |
| 35169.6  | 38873    | 41823.2  | 44097.6  | 25081.5  | 41464.9  | 42770.5  | 30155    | TRUE |
| 20332.7  | 33694.4  | 26336.3  | 30006.6  | 26275.4  | 26680.4  | 38980.9  | 24717.8  | TRUE |
| 121370   | 102700.9 | 118595.6 | 128812.7 | 107654.4 | 129510.4 | 113629.7 | 114783.2 | TRUE |
| 82585.5  | 55741.3  | 63116.9  | 70501.1  | 75006.7  | 54582.7  | 60550.8  | 76516.2  | TRUE |
| 133548.7 | 119580.8 | 101863.5 | 107328.1 | 86376.9  | 98093.5  | 111671.3 | 89815.7  | TRUE |
| 142073.7 | 144682.9 | 101124.9 | 154040.3 | 121949   | 128015   | 121060.9 | 128003.1 | TRUE |
| 295080.1 | 245203.8 | 260559.5 | 279797   | 216302.2 | 252473.8 | 281383.1 | 235406.9 | TRUE |
| 312011.1 | 220947.1 | 302530.8 | 309693.8 | 272028.1 | 251698   | 234832.1 | 268791.6 | TRUE |
| 51181.7  | 53230    | 50475.9  | 43071.1  | 43965.1  | 24352.9  | 48593.3  | 31752    | TRUE |
| 44285.6  | 36848.6  | 31868.4  | 40697.9  | 33092    | 22241.4  | 28459.6  | 30315.7  | TRUE |
| 48251.8  | 54993.7  | 51169.8  | 49263.1  | 49033.5  | 58290.1  | 62495.4  | 52420.7  | TRUE |
| 183964.8 | 169591.9 | 172340.8 | 150703.2 | 163705.9 | 207462.2 | 186392.8 | 203068.4 | TRUE |
| 107158.5 | 114203.7 | 97963.6  | 112732.2 | 119717.9 | 91263.2  | 103757.2 | 97467    | TRUE |
| 89488.8  | 62009.2  | 66076.3  | 72233.7  | 74763.4  | 83120.2  | 80015.1  | 86724.5  | TRUE |
| 154219.7 | 126411.1 | 147235.5 | 173242.4 | 131906.4 | 143921.5 | 127149.2 | 141223.7 | TRUE |
| 137252.8 | 107756.5 | 124687.9 | 126704.8 | 144139.2 | 173254.6 | 121072.6 | 155097.2 | TRUE |
| 67434.3  | 77740.6  | 53898.1  | 63902.2  | 68568.1  | 48437.5  | 63245    | 76164.3  | TRUE |
| 108930.9 | 126929.1 | 110338.7 | 100171.7 | 108937.2 | 117670.6 | 128630.4 | 114242.6 | TRUE |
| 100660   | 106076.7 | 39207.9  | 84116    | 92808    | 79025.8  | 178752.2 | 121992.2 | TRUE |
| 33710.4  | 28721.3  | 49698.3  | 28268.4  | 34438    | 50585.9  | 48570.4  | 32535.5  | TRUE |
| 119802.2 | 93116    | 166463.5 | 126609   | 99739.8  | 170396.2 | 104563.4 | 103043   | TRUE |
| 118845.1 | 108708   | 117990.3 | 107974   | 108156.7 | 113311.1 | 134100.5 | 104300   | TRUE |
| 71966.7  | 109400.2 | 99313.1  | 69028.6  | 60863.3  | 84978.9  | 102978.1 | 70436.3  | TRUE |
| 151535.8 | 178045.2 | 133636.2 | 149824.9 | 141814.8 | 128863.7 | 154635.9 | 146738.5 | TRUE |
| 189488.8 | 171610.1 | 246250.7 | 215044.5 | 225183.6 | 197665.6 | 155348.4 | 171178.5 | TRUE |



|          |          |          |          |          |          |          |          |      |
|----------|----------|----------|----------|----------|----------|----------|----------|------|
| 338614.9 | 300254.5 | 389391.8 | 405295.9 | 338611.1 | 332091.4 | 313441.2 | 328317.6 | TRUE |
| 80258.5  | 74360.9  | 51255.8  | 50761.1  | 59947.7  | 52307.7  | 53336.5  | 58234    | TRUE |
| 108465.5 | 74502.2  | 165790.2 | 94989.5  | 78981.3  | 110626.8 | 88670.9  | 102831.5 | TRUE |
| 389027.1 | 257857.4 | 250264.3 | 301928.5 | 405212.9 | 385045.9 | 296513.9 | 414253.9 | TRUE |
| 21273.1  | 9044.6   | 20504    | 10449.2  | 10517.2  | 25635.1  | 10803.9  | 10964.6  | TRUE |
| 19972    | 12565.2  | 14108.6  | 10879.3  | 10073    | 20759.2  | 16282.9  | 13038.7  | TRUE |
| 119105.7 | 102169.5 | 172929.1 | 103202.6 | 94066.3  | 154159.4 | 97236.2  | 92919.1  | TRUE |
| 74994.2  | 41651    | 53811.6  | 54764.9  | 123409.6 | 60983    | 50334.7  | 78290.9  | TRUE |
| 409641.9 | 279262   | 297540.2 | 312689   | 510999.1 | 306403.6 | 306652.4 | 333889   | TRUE |
| 253718.8 | 163489.2 | 192030   | 184203   | 417863.7 | 239943.3 | 209892.3 | 262774.1 | TRUE |
| 131940.6 | 67390    | 88330.3  | 92716    | 56299.6  | 120581.8 | 87777.9  | 100304.8 | TRUE |
| 151535.8 | 178045.2 | 133636.2 | 149824.9 | 141814.8 | 128863.7 | 154635.9 | 146738.5 | TRUE |
| 189488.8 | 171610.1 | 246250.7 | 215044.5 | 225183.6 | 197665.6 | 155348.4 | 171178.5 | TRUE |
| 338614.9 | 300254.5 | 389391.8 | 405295.9 | 338611.1 | 332091.4 | 313441.2 | 328317.6 | TRUE |
| 302830.5 | 319656.9 | 257515.7 | 292799.6 | 228526   | 275854.3 | 334537.2 | 258615.5 | TRUE |
| 895038.2 | 1068817  | 597414.1 | 737231.1 | 999768.5 | 582557.2 | 1163725  | 1035539  | TRUE |
| 99276.8  | 129465.2 | 73167.6  | 98462.5  | 105691   | 84712.5  | 125947.8 | 118131   | TRUE |
| 95924.8  | 142604.8 | 88058.2  | 83095.2  | 116865.4 | 53093    | 55803.4  | 51685.6  | TRUE |
| 979718.3 | 992395.1 | 872620.4 | 964556.2 | 794014.2 | 868567.9 | 1095812  | 766237.9 | TRUE |
| 76298.2  | 93784.6  | 74235    | 70415.5  | 81196.8  | 81716    | 51980.7  | 54706.2  | TRUE |
| 66637.5  | 71447.7  | 64512.3  | 71206.3  | 47404    | 93298.6  | 82863.1  | 68207.6  | TRUE |
| 243667.9 | 281625.5 | 204351.1 | 283940.9 | 204603.7 | 218533.1 | 283418.6 | 205538.9 | TRUE |
| 67322.6  | 88966.6  | 75146.8  | 83359.3  | 76342.3  | 92964.8  | 78900.2  | 103966.4 | TRUE |
| 43980.4  | 36386.8  | 22070.1  | 34588.3  | 47921.8  | 25201.9  | 36844.4  | 51564.6  | TRUE |
| 85953.5  | 84066.8  | 78463.6  | 87740.9  | 101177.2 | 80148.8  | 75823.1  | 81662.3  | TRUE |
| 153676.6 | 150067.7 | 157206.2 | 170023.4 | 190999.5 | 154084   | 159202.4 | 190863.6 | TRUE |
| 276800   | 240563.4 | 235286.8 | 276177.1 | 226865   | 251278.6 | 275475.8 | 239524.1 | TRUE |
| 332269.3 | 243739.2 | 308079.3 | 344525.5 | 342953.3 | 350326.5 | 283232.9 | 311134.5 | TRUE |
| 109059   | 129099   | 128992.5 | 138023.9 | 131552.2 | 142928.6 | 125322.2 | 144942.7 | TRUE |
| 205205.9 | 171158.7 | 194701.6 | 196859.5 | 203409.2 | 187981.5 | 182064   | 201389   | TRUE |
| 286571.4 | 296682.7 | 245870.2 | 349582   | 362235   | 284015.2 | 395765.5 | 396621.5 | TRUE |
| 668645.2 | 626030.1 | 779587.3 | 726859.6 | 597556.1 | 650422.4 | 605968.6 | 671948.7 | TRUE |
| 80767.6  | 80527.2  | 67685    | 88228.4  | 90432.3  | 96318.8  | 94172    | 82843.2  | TRUE |
| 42763    | 45337.1  | 54344.7  | 52329.4  | 64840.9  | 45524.8  | 39404.2  | 54686.6  | TRUE |
| 299194.8 | 263538.3 | 297458.7 | 332901.7 | 316539   | 308999.1 | 275650.6 | 298133.4 | TRUE |
| 365451.2 | 291941.5 | 360184.1 | 352565.3 | 369684.2 | 378177.2 | 311933.8 | 369497.1 | TRUE |
| 37195.7  | 40419.5  | 30470.5  | 41312.8  | 47909.5  | 34260.5  | 31083.3  | 38664.2  | TRUE |
| 168113.2 | 204330.1 | 172783.4 | 185345.5 | 143686.4 | 218973.4 | 153628.3 | 157488.1 | TRUE |
| 367276.8 | 295320.7 | 356995   | 364343.7 | 462608.8 | 328873.4 | 282087.8 | 309547.1 | TRUE |

|          |          |          |          |          |          |          |          |      |
|----------|----------|----------|----------|----------|----------|----------|----------|------|
| 157349.8 | 159373.3 | 156277.6 | 183916.2 | 162500.8 | 145060   | 157730.9 | 160834   | TRUE |
| 289327.3 | 256745.3 | 265150   | 314949.3 | 270347.7 | 284554.7 | 272263.1 | 281110.2 | TRUE |
| 40893.4  | 43916.9  | 62966.9  | 43381.6  | 46279.6  | 66324.3  | 40403.4  | 46894.8  | TRUE |
| 448441.1 | 407688.9 | 384001.8 | 464950.9 | 447902.7 | 364437   | 466570.1 | 426377.2 | TRUE |
| 436769.2 | 444993   | 461933.2 | 483391.3 | 469582   | 516938.5 | 445258.8 | 527096.5 | TRUE |
| 41136.5  | 31601.5  | 40861.8  | 29259.5  | 23235.7  | 29528.3  | 41804.7  | 28031.4  | TRUE |
| 450882.6 | 490430.7 | 423758.2 | 381858.9 | 438973.6 | 430412   | 449875.7 | 429753.9 | TRUE |
| 1044495  | 1026491  | 1173215  | 1102116  | 979192.6 | 1058751  | 1017917  | 1038340  | TRUE |
| 89489.9  | 88270.2  | 81582.1  | 110010.8 | 76811.3  | 101396   | 99565.3  | 87495.2  | TRUE |
| 157172.8 | 194707.8 | 148253.4 | 153440   | 139005.2 | 157853.9 | 182273   | 158223   | TRUE |
| 111762.4 | 98632.8  | 84608.5  | 84678.2  | 78747.5  | 136658.8 | 116521.2 | 147284.6 | TRUE |
| 174908   | 142072   | 152345.8 | 196563.9 | 178195.5 | 146031.1 | 151698.6 | 148753.4 | TRUE |
| 230829.4 | 226544.6 | 238630.3 | 221927.9 | 267026   | 227394.7 | 254003.4 | 219584   | TRUE |
| 171056.2 | 169356.8 | 168638.4 | 134017.7 | 156102   | 207902.8 | 171084.3 | 186229   | TRUE |
| 454301.9 | 432161.1 | 406986   | 443147.1 | 494262.2 | 414072.9 | 448266.9 | 516599   | TRUE |
| 112988.7 | 85993.8  | 68196.1  | 86911.3  | 84837.9  | 125642   | 111363.8 | 88407.4  | TRUE |
| 304608   | 205361.3 | 291003   | 315585   | 288164.2 | 303458.7 | 328319.4 | 369666.9 | TRUE |
| 135975.5 | 149767.2 | 163923.4 | 161011   | 97318.3  | 159496.2 | 160656.1 | 148571.1 | TRUE |
| 31451.8  | 48799.8  | 29020.5  | 34517.6  | 30971.8  | 30358.2  | 36491.3  | 36075.2  | TRUE |
| 61386.5  | 68528    | 48879.4  | 44897.6  | 64875.1  | 66701.7  | 81380    | 56333.2  | TRUE |
| 160350.9 | 130493.3 | 156651.5 | 156670.8 | 136864.9 | 157170.6 | 151705.8 | 137224   | TRUE |
| 152563.3 | 162219.2 | 153617.1 | 169078.3 | 174853   | 151437.7 | 171393.9 | 162069.7 | TRUE |
| 43154.3  | 46236.1  | 46692.5  | 64168.4  | 72458.2  | 50738.8  | 61147    | 58544    | TRUE |
| 141632.8 | 136751.6 | 155005.3 | 135614.1 | 132178.4 | 165003.9 | 158368.4 | 145367   | TRUE |
| 458387   | 452923.2 | 471645.6 | 442343.1 | 422743.9 | 490837.2 | 452109   | 497704.3 | TRUE |
| 481242.7 | 406281.2 | 502807.3 | 532034   | 558094   | 472252.2 | 417798.7 | 446622.3 | TRUE |
| 46701    | 61900    | 40394.1  | 50571.5  | 37556.4  | 46724.5  | 59844.8  | 54418.2  | TRUE |
| 84905.3  | 95566.7  | 74613.2  | 97376.5  | 69835.4  | 75753.4  | 83540.4  | 78020.1  | TRUE |
| 96795.3  | 92774.5  | 76596    | 86149.9  | 67334.7  | 99469.3  | 112689.9 | 91488.4  | TRUE |
| 334646.9 | 230614   | 261331.9 | 339043.9 | 309423.6 | 316097.9 | 317405.4 | 409786.6 | TRUE |
| 135975.5 | 149767.2 | 163923.4 | 161011   | 97318.3  | 159496.2 | 160656.1 | 148571.1 | TRUE |
| 79784.4  | 100308.3 | 110052.4 | 110878.2 | 96944.1  | 116049.4 | 112076.2 | 99439.9  | TRUE |
| 117645.3 | 109890.4 | 133398.5 | 143166.4 | 98272.4  | 152931.2 | 149649.6 | 133247.6 | TRUE |
| 195635.3 | 138175.1 | 387530.8 | 119663.3 | 88268.6  | 534931.6 | 177964.4 | 117007   | TRUE |
| 41821.6  | 32284.2  | 107139.2 | 27931.4  | 18702.9  | 110332.7 | 27961.4  | 25738.4  | TRUE |
| 31989.8  | 52884.3  | 29222.9  | 9850.9   | 13116.4  | 39594.6  | 38330.7  | 30639.1  | TRUE |
| 534577.3 | 581335.5 | 624445.2 | 601229.5 | 545807.9 | 606292.5 | 621913.7 | 576721   | TRUE |
| 924744.7 | 742969.3 | 814715.5 | 867863.2 | 1092738  | 814376.3 | 767567   | 883999.4 | TRUE |
| 38238.8  | 36358.1  | 25535.8  | 28002.3  | 25175    | 45271    | 38111.1  | 39786.9  | TRUE |
| 26130.2  | 8521.2   | 22110.6  | 27742.1  | 18276.4  | 37154.2  | 34906.1  | 32352.6  | TRUE |
| 223472.6 | 232680.6 | 260524.8 | 218808.8 | 184066.1 | 271012.6 | 232394.3 | 199625.1 | TRUE |

|          |          |          |          |          |          |          |          |      |
|----------|----------|----------|----------|----------|----------|----------|----------|------|
| 385558.1 | 307603.9 | 421938.9 | 381167.1 | 436803.1 | 367852.7 | 295111.5 | 374703.8 | TRUE |
| 72079.8  | 67819.1  | 54834.1  | 50947.8  | 44866.4  | 92611    | 74946.8  | 69316.2  | TRUE |
| 112786.2 | 84406.2  | 93758.9  | 97397.4  | 134326.2 | 96246    | 99705.8  | 129588.9 | TRUE |
| 311398   | 205431.9 | 316351.7 | 326690.7 | 386885   | 347032   | 219444.8 | 304909.7 | TRUE |
| 40620.7  | 43532.8  | 55197.4  | 52121.5  | 44065.6  | 67732.8  | 50141.7  | 44858.3  | TRUE |
| 38122.3  | 40915.9  | 58447.2  | 49021.7  | 43100.1  | 75369.4  | 54877.5  | 51800.1  | TRUE |
| 98365.1  | 109091.1 | 99370.4  | 99557.6  | 92799.6  | 103676.1 | 98464.8  | 99891.8  | TRUE |
| 29490.3  | 8768.4   | 51351    | 48488.1  | 45086.6  | 52454.9  | 35583.7  | 38277.3  | TRUE |
| 49140.4  | 50079.4  | 52723.8  | 47257.8  | 40447.1  | 57758.3  | 59992.1  | 38112.2  | TRUE |
| 142292   | 99179.2  | 134142.9 | 168179.1 | 149412.3 | 146472.1 | 150419.8 | 130483.8 | TRUE |
| 33713.1  | 28942.1  | 27180    | 28461.9  | 19670    | 37661.2  | 24794.7  | 25670.5  | TRUE |
| 36228    | 44340    | 45097.6  | 40965    | 30669    | 45652    | 44228.7  | 36654.8  | TRUE |
| 71525.7  | 52252.7  | 93172.6  | 48690.7  | 78836.1  | 109019.1 | 106934.7 | 68749.9  | TRUE |
| 38780.8  | 36554.6  | 21830    | 30886.7  | 23996.9  | 40834.4  | 49734.1  | 40024.7  | TRUE |
| 86107.9  | 122162.9 | 57775.6  | 106502.1 | 82824.8  | 47934.5  | 121687.6 | 54635.9  | TRUE |
| 536639.7 | 333605   | 797911.3 | 794441.4 | 361241.8 | 588758.1 | 378119.3 | 584907   | TRUE |
| 1443343  | 1114484  | 2020005  | 2045611  | 1127226  | 1523502  | 1199911  | 1492052  | TRUE |
| 260115.2 | 139060.1 | 374832.9 | 336012   | 173139.4 | 259145.1 | 142339.5 | 275798.2 | TRUE |
| 272831.7 | 305234.3 | 409231.8 | 152880.4 | 164895.7 | 409968.4 | 259056.8 | 192030.4 | TRUE |
| 151027.6 | 154745.1 | 288840.7 | 160800.9 | 110375   | 309825.7 | 180575.3 | 135651   | TRUE |
| 89810.7  | 78182.8  | 64414    | 47738.3  | 48373    | 69447.4  | 69596.7  | 61057.9  | TRUE |
| 57475.2  | 61041.2  | 58093.1  | 50596    | 52497.4  | 42396.6  | 59669.6  | 70013.5  | TRUE |
| 46023.4  | 44826.6  | 44514.2  | 35582.5  | 41932.2  | 51336.3  | 50838.9  | 34668.3  | TRUE |
| 36805.6  | 47270.4  | 58767.1  | 48175.9  | 61190.6  | 39656.9  | 59884.1  | 51823.8  | TRUE |
| 29424.9  | 11776.1  | 19471.6  | 30627.3  | 19661.4  | 35191.6  | 30051    | 16495.1  | TRUE |
| 79386.2  | 64361.6  | 77416.6  | 65135    | 39967.4  | 72495.1  | 52401.4  | 63910.7  | TRUE |
| 18613.3  | 15234.5  | 6633     | 9835.6   | 19175    | 10681    | 6780.6   | 4627.9   | TRUE |
| 34678    | 47051.4  | 25378.9  | 40418    | 41833.5  | 34443    | 38047.7  | 42371.8  | TRUE |
| 61007.1  | 72208.3  | 61030.9  | 57873.1  | 75736.8  | 62483.5  | 59290.2  | 71748    | TRUE |
| 117560   | 100649.7 | 93771.7  | 120536.9 | 94043.5  | 133501.2 | 124806.8 | 175264.3 | TRUE |
| 218293.5 | 212596.1 | 238438.2 | 275711.2 | 206499.3 | 227899.1 | 224982   | 219459.2 | TRUE |
| 240640.3 | 232217.4 | 260204   | 180539.5 | 229837   | 274540.1 | 220034.5 | 235198.9 | TRUE |
| 18821.3  | 10692.4  | 15763.6  | 9622.9   | 8880.7   | 19034.2  | 17671    | 18313.8  | TRUE |
| 26822.5  | 17018.8  | 24388    | 28984.9  | 22593.5  | 34641.3  | 29241.1  | 30356.1  | TRUE |
| 262543.7 | 200647.6 | 191298.9 | 239880.9 | 294082.3 | 253379.9 | 236042.5 | 285725   | TRUE |
| 30855.8  | 33464.5  | 36282.1  | 36793.1  | 19209.7  | 37709.9  | 36442.4  | 17940.7  | TRUE |
| 127620.4 | 104877.5 | 128855.7 | 133896.1 | 174763.1 | 116522.6 | 104401.3 | 103832.5 | TRUE |

|          |          |          |          |          |          |          |          |      |
|----------|----------|----------|----------|----------|----------|----------|----------|------|
| 95836.8  | 124224   | 118691.7 | 89175    | 85914.4  | 145817.2 | 138970.4 | 108192.4 | TRUE |
| 33593.7  | 31510.5  | 27096.1  | 24804    | 32023.9  | 37401.3  | 32669    | 33144.5  | TRUE |
| 90019    | 122776.5 | 111099.4 | 95544.8  | 79485.7  | 161911.9 | 158804.3 | 91823    | TRUE |
| 25219.7  | 12597.1  | 14993    | 26296.2  | 10538    | 26578.6  | 29260.4  | 15527    | TRUE |
| 693500.7 | 573135.5 | 781997.2 | 756698.4 | 633506   | 856819.9 | 573140.5 | 837781.1 | TRUE |
| 56630    | 54100.6  | 57178.1  | 65775.8  | 53628.9  | 66616    | 49122.3  | 46123.7  | TRUE |
| 37788.2  | 40911.5  | 51419.4  | 45747.9  | 31002.5  | 47929.7  | 37789.5  | 30409.4  | TRUE |
| 133521.9 | 116646.3 | 169373.7 | 106324.2 | 120074   | 169662.1 | 149189.8 | 125044.8 | TRUE |
| 33101.1  | 38720.3  | 35853    | 43033.7  | 45282.3  | 36221.5  | 48490.6  | 38515.7  | TRUE |
| 19896    | 24804.9  | 8867.3   | 10482.3  | 24198.6  | 15915.1  | 27727.6  | 21196.8  | TRUE |
| 27321.2  | 31810    | 11225.6  | 37274.6  | 27944.9  | 22304.5  | 37024.9  | 35588.6  | TRUE |
| 99611.5  | 99260.6  | 119508.5 | 106896.4 | 79295.5  | 72369.7  | 101609.8 | 77562.6  | TRUE |
| 93283.9  | 154610   | 129665.4 | 96147.3  | 97971.3  | 67402.9  | 34216.1  | 21305.6  | TRUE |
| 131364.7 | 137803.5 | 135630   | 120827.2 | 131608.2 | 141790.5 | 132147   | 126886.7 | TRUE |
| 75209.8  | 81721.1  | 61154.5  | 68487.3  | 53892.7  | 65612.1  | 101985.6 | 80320.7  | TRUE |
| 94832.2  | 92395    | 80392.9  | 75332.1  | 80730.7  | 79915.5  | 114487.1 | 84014.5  | TRUE |
| 143776.3 | 155003.3 | 165921.2 | 148236.2 | 119889.8 | 154355.5 | 154142.2 | 125250.2 | TRUE |
| 48140.6  | 38442    | 56855.3  | 63793.1  | 52214.7  | 42365.7  | 60055.6  | 60653.2  | TRUE |
| 60881.4  | 49911.5  | 79305.2  | 88350.8  | 58177.8  | 65775.6  | 65186.3  | 64064.5  | TRUE |
| 140566.5 | 142552.4 | 130709.6 | 113992.8 | 148234.6 | 131312.1 | 145021.1 | 117644.6 | TRUE |
| 137335.4 | 90175.1  | 143673   | 134395.8 | 141009.2 | 133738.6 | 86070.6  | 114379.5 | TRUE |
| 138547.9 | 140120.2 | 153693.5 | 141453.6 | 102871.3 | 176389.2 | 152460.1 | 112636.3 | TRUE |
| 50535.7  | 51611.3  | 59945    | 59110.6  | 43260.9  | 52282.3  | 56554.9  | 50253.9  | TRUE |
| 28735.6  | 10244.1  | 42264    | 52417.6  | 38373.4  | 42003    | 44370.7  | 41571.8  | TRUE |
| 23954.1  | 8527     | 22837.1  | 29317.8  | 17588.2  | 16795.7  | 32803.7  | 23163.9  | TRUE |
| 82887    | 42805.6  | 79942.3  | 90923.2  | 51662.5  | 81097.7  | 66212.3  | 75690.6  | TRUE |
| 35097.4  | 45267.4  | 29364.9  | 39722.7  | 39085.2  | 31621.2  | 42989.5  | 30862.9  | TRUE |
| 7436.8   | 5038.9   | 12501.1  | 5598.4   | 7505.6   | 8041.1   | 12018.4  | 6081.5   | TRUE |
| 237753.5 | 222412.8 | 204098.6 | 191014   | 184473.2 | 187815.8 | 233803.7 | 203168.2 | TRUE |
| 195937.2 | 163110.5 | 197864.4 | 195925.9 | 167863.4 | 202067.3 | 166863.8 | 214368.2 | TRUE |
| 537374.3 | 409371.1 | 647694.1 | 513173.6 | 758840.7 | 569368.9 | 433545.1 | 496727.2 | TRUE |
| 15842.8  | 8170.3   | 34577.9  | 8592.9   | 9925.6   | 26820.5  | 11312.5  | 11663.1  | TRUE |
| 84067.6  | 85928    | 113110.2 | 80089.3  | 73083.1  | 111295.7 | 76962.9  | 65455.7  | TRUE |
| 103771.7 | 116444.1 | 170795.4 | 77902.2  | 81643.8  | 181524.3 | 113006   | 83170.5  | TRUE |
| 87356.3  | 100402.5 | 105906.9 | 75891.5  | 94230.1  | 99669.9  | 100937   | 97728.7  | TRUE |
| 149534.4 | 161266.2 | 162248.9 | 165452.6 | 136247.2 | 118487.1 | 153085.9 | 107606   | TRUE |
| 23700.2  | 28047.8  | 17735.2  | 8615.9   | 26347.2  | 22411.5  | 11993.2  | 32184.7  | TRUE |
| 22442.5  | 10307.8  | 20336.4  | 9576     | 26055.4  | 9803.4   | 30935.1  | 26052.2  | TRUE |
| 331686.5 | 898449.7 | 38307.9  | 290642.3 | 145144   | 75450.9  | 988657.2 | 144568.7 | TRUE |
| 93790.8  | 101868.7 | 72433.1  | 68108.7  | 59633.1  | 46250    | 133960.2 | 58002    | TRUE |
| 100843.9 | 58359.8  | 115925.8 | 106173.3 | 62937.6  | 63762.9  | 56046.3  | 63683.7  | TRUE |
| 69658    | 38686.2  | 90102.6  | 113355.2 | 62732.8  | 52693.1  | 37683    | 59124.2  | TRUE |
| 42522    | 36123.9  | 39132.5  | 36667.1  | 51986.5  | 36784.5  | 42259.2  | 47813.5  | TRUE |
| 75525.4  | 64900    | 70467.6  | 58695.8  | 52788.8  | 90106.6  | 77333.5  | 67102.2  | TRUE |

|          |          |          |          |          |          |          |          |      |
|----------|----------|----------|----------|----------|----------|----------|----------|------|
| 252333.3 | 257864.4 | 259275.3 | 209500.5 | 160878.6 | 242839   | 255870.7 | 180481.8 | TRUE |
| 40764.5  | 63588.1  | 61618.1  | 48031.4  | 54202.5  | 75083.8  | 46851.7  | 52273.9  | TRUE |
| 220118.3 | 234991.7 | 262289.8 | 272939.8 | 298329.5 | 155296.5 | 279795.3 | 166492   | TRUE |
| 70370.3  | 66797.9  | 80388.3  | 28285.6  | 48065    | 81193    | 57458    | 52898.2  | TRUE |
| 161836.4 | 199628.1 | 225499.2 | 160275.5 | 171877.1 | 209206.7 | 197281   | 186866.7 | TRUE |
| 127239.1 | 143325.7 | 159899.3 | 111583   | 124901.6 | 165825.3 | 171184.6 | 119427.9 | TRUE |
| 82337    | 82608.4  | 63098.8  | 95434.7  | 82098    | 83266.6  | 107504.2 | 95927    | TRUE |
| 118342.6 | 104142   | 123474.7 | 122627.5 | 113106.9 | 127807.3 | 130908.8 | 127635.9 | TRUE |
| 33587    | 38040.9  | 31822.4  | 47960.4  | 51943.2  | 41772.1  | 52345.7  | 43312.1  | TRUE |
| 193469.8 | 174989.6 | 138994.8 | 218162.5 | 145206.7 | 298831.5 | 258773.1 | 217900.4 | TRUE |
| 116474.8 | 116485.9 | 170639.9 | 108814.2 | 109130.9 | 186402.8 | 136643.4 | 123672.4 | TRUE |
| 162729.8 | 149299.4 | 230056.9 | 130156   | 110952   | 218613.1 | 186423.4 | 119338   | TRUE |
| 75214.2  | 81579.3  | 79847.8  | 78373.5  | 59631.7  | 92045.8  | 108453.9 | 73476.8  | TRUE |
|          |          |          |          |          |          |          |          |      |
| 51318.8  | 46822.5  | 42590.7  | 42768.7  | 44684.5  | 54037.7  | 47811.3  | 60696.4  | TRUE |
| 144000.4 | 173783.9 | 269852.4 | 135957.3 | 148487.9 | 190129.1 | 138691.1 | 169363.2 | TRUE |
| 111010.4 | 107669.5 | 106165.7 | 94908.4  | 88324.6  | 129450.5 | 118915.1 | 99599.2  | TRUE |
| 134884.3 | 121339.2 | 119384.8 | 106652.8 | 82649.3  | 126186.2 | 119844.9 | 118944.3 | TRUE |
| 186524.2 | 183091.8 | 204276.6 | 213948.1 | 169416.3 | 228391.8 | 219332.7 | 217636.1 | TRUE |
| 33671.4  | 23734    | 51357.5  | 46170.7  | 30768.4  | 50537.1  | 45690.9  | 45759.2  | TRUE |
| 70738.6  | 94146.8  | 69306.6  | 88182.4  | 99075.4  | 75017    | 76845.6  | 80361.6  | TRUE |
| 75259.2  | 67433.3  | 92463.8  | 79460.3  | 69097.2  | 69119    | 78669    | 67872.6  | TRUE |
| 38433.2  | 52700.7  | 59278.9  | 58493.8  | 50013.4  | 53845.1  | 64534.6  | 60416.7  | TRUE |
|          |          |          |          |          |          |          |          |      |
| 381399.2 | 339785.8 | 422771   | 426745.6 | 459967.4 | 389450.4 | 351220   | 374008.2 | TRUE |
| 46804.9  | 47268.1  | 68682.2  | 15227.5  | 49962.9  | 65307.7  | 66123.4  | 46647.8  | TRUE |
|          |          |          |          |          |          |          |          |      |
| 77601.4  | 66133.5  | 75915.7  | 97037.7  | 91881.9  | 90011.7  | 78146.3  | 94909.6  | TRUE |
| 51293.2  | 29474.5  | 44177    | 48197    | 59093.8  | 59046.4  | 48318.6  | 52053    | TRUE |
|          |          |          |          |          |          |          |          |      |
| 541402.8 | 437246.4 | 527916.8 | 622560.8 | 516280   | 615680.1 | 453509.1 | 596166.9 | TRUE |
| 37394.1  | 24005.1  | 20301.6  | 51196.9  | 32280    | 50254.3  | 62586.6  | 40694.2  | TRUE |
| 44262.5  | 41138.1  | 38801.5  | 41160.8  | 33436.2  | 44144.7  | 45195.3  | 48489.6  | TRUE |
|          |          |          |          |          |          |          |          |      |
| 37546.3  | 32064.6  | 38889.7  | 40879.9  | 42147.2  | 40904.4  | 41009.5  | 33866.7  | TRUE |
|          |          |          |          |          |          |          |          |      |
| 101314   | 115059.4 | 114851   | 162248.4 | 105668.4 | 142184.7 | 154173.1 | 98981.4  | TRUE |
| 22724.4  | 9777.2   | 23613.2  | 20326.1  | 20220.1  | 15581.1  | 20252.7  | 6229.5   | TRUE |
|          |          |          |          |          |          |          |          |      |
| 15539.9  | 12121    | 8373.6   | 12448.3  | 7374.1   | 22182    | 12874.4  | 9399.5   | TRUE |
|          |          |          |          |          |          |          |          |      |
| 7696.2   | 18239.9  | 6193.1   | 7668.8   | 17480.8  | 9608.5   | 6752.3   | 11434.6  | TRUE |
| 129748.6 | 116057.3 | 117034.1 | 119131.9 | 129069.5 | 141057   | 130700.2 | 163035.6 | TRUE |
| 50727.7  | 44433.3  | 64270.3  | 34620.4  | 35911.7  | 42849.1  | 36123.7  | 50995.4  | TRUE |
| 47069.6  | 36813.1  | 35708    | 81579.9  | 39232    | 46852    | 56720.1  | 43042.2  | TRUE |

|          |          |          |          |          |          |          |          |      |
|----------|----------|----------|----------|----------|----------|----------|----------|------|
| 96947.8  | 79832.6  | 119220.5 | 116363.4 | 79458    | 86925.5  | 86135.1  | 100313.4 | TRUE |
| 77798.4  | 106697.9 | 70997.1  | 82676.5  | 86990    | 91785.2  | 127740.2 | 93608.9  | TRUE |
| 471715.6 | 556640.1 | 486856.5 | 551089.8 | 406373.3 | 385336.3 | 620388.6 | 368480.9 | TRUE |
| 74920.9  | 68582.7  | 144645.6 | 76615    | 61423.5  | 167029.5 | 104296.3 | 72966.1  | TRUE |
| 259989.7 | 244994.4 | 412374   | 166514.5 | 128096.5 | 413390.9 | 206976.2 | 140350.5 | TRUE |
| 29168.3  | 19103.1  | 34181.4  | 32471.9  | 29960.8  | 27271.5  | 27746.4  | 32314    | TRUE |
| 23135.1  | 7278.4   | 15071.5  | 8810.2   | 8480.8   | 5084.8   | 8158     | 7078.7   | TRUE |
| 26430    | 19275.5  | 9996.9   | 4882.2   | 32821.3  | 10703.7  | 21071.9  | 12118.2  | TRUE |
| 45826.7  | 41153    | 41172.9  | 37085.6  | 46537.4  | 65616.7  | 59771.1  | 45535.3  | TRUE |
| 127638   | 90969.9  | 118255.5 | 118958.5 | 142205.8 | 133880.4 | 117824.3 | 122108.3 | TRUE |
| 25636.9  | 10679.3  | 26819.7  | 12041.6  | 20827    | 35488.1  | 26056.4  | 17633.1  | TRUE |
| 21124.4  | 15176    | 26006.2  | 21351.2  | 28738.3  | 10549.6  | 18767.1  | 19199.3  | TRUE |
| 52789.9  | 42496.2  | 61339.6  | 57214    | 51909.6  | 82138.4  | 38402    | 43948.1  | TRUE |
| 260049.8 | 251007.3 | 274125.4 | 227193.8 | 239392.3 | 327260.4 | 268593.5 | 257639   | TRUE |
| 280944.3 | 252798.2 | 287131.9 | 289233   | 301542.3 | 285109.5 | 274000.8 | 286891.1 | TRUE |
| 925443.5 | 909582.7 | 773712.6 | 922179.7 | 834145.6 | 870936.2 | 825426.2 | 934436   | TRUE |
| 156899   | 150611.7 | 133548.1 | 191452.4 | 178642.3 | 165325   | 157622.5 | 162792.8 | TRUE |
| 183925.4 | 183203.9 | 193902.6 | 225561.4 | 165195.1 | 176407.4 | 178380.1 | 201082.5 | TRUE |
| 476239.8 | 467176.6 | 484812.7 | 490795.5 | 462155.7 | 513467.2 | 478157.2 | 520452   | TRUE |
| 303019.9 | 322175.5 | 246984.7 | 289977.9 | 214442.7 | 266737.9 | 322230.7 | 253029.8 | TRUE |
| 265716   | 223466.5 | 239737.2 | 304074.9 | 276669.6 | 244544.9 | 224322.2 | 250314.7 | TRUE |
| 354266.3 | 367731.8 | 371391   | 368595.2 | 382504   | 384356   | 437157.2 | 387275.8 | TRUE |
| 729705.1 | 749131.4 | 710638.7 | 681140.8 | 493152.9 | 694836.8 | 794695.7 | 508418.2 | TRUE |
| 53423.9  | 54113.3  | 50364.8  | 75265.1  | 64916.5  | 71244.8  | 100557.7 | 97310.3  | TRUE |
| 19827.8  | 21856.8  | 15432.9  | 9743.6   | 16230.3  | 17891.4  | 24717.2  | 8764.3   | TRUE |
| 14983.5  | 19251.7  | 6928.6   | 8165.9   | 14770.8  | 20819.1  | 24674.9  | 8770     | TRUE |
| 94050.8  | 56528.4  | 100073.5 | 60543.1  | 58388.6  | 181584   | 62679.8  | 67978.4  | TRUE |
| 79814.1  | 73579.7  | 155506.4 | 32615.2  | 36434.1  | 144793.8 | 50862.1  | 51590.3  | TRUE |
| 119357.2 | 73289.9  | 112653.3 | 132990.3 | 248065.8 | 68849    | 94416.2  | 91031.2  | TRUE |
| 168945.7 | 174209.6 | 234980.1 | 232725.3 | 279349   | 332546.2 | 219727.2 | 150514   | TRUE |
| 28842.4  | 10396.6  | 24785.8  | 27671.3  | 29559.7  | 32418.8  | 41371.2  | 25901.5  | TRUE |
| 34126.6  | 33543.7  | 38684.1  | 47655.2  | 23905.6  | 57156.9  | 25442.7  | 26434.9  | TRUE |
| 34834.4  | 31364.5  | 38253.2  | 29409.2  | 25756.8  | 35325.1  | 30576.1  | 32310.4  | TRUE |
| 6377.7   | 7739.9   | 14774.9  | 18966.6  | 6445.7   | 17105.3  | 7172.2   | 17881.2  | TRUE |
| 25505.4  | 22762.8  | 32650.7  | 24659.2  | 30307.7  | 31597.7  | 30949.5  | 24855.9  | TRUE |
| 95977    | 106590.7 | 141271.9 | 120457.8 | 96703.7  | 147261.1 | 107214.7 | 110469.5 | TRUE |

|          |          |          |          |          |          |          |          |      |
|----------|----------|----------|----------|----------|----------|----------|----------|------|
| 220348.3 | 148761.4 | 248299.6 | 235309.3 | 365700.8 | 210053.5 | 198920.7 | 177960.4 | TRUE |
| 407263.2 | 296302.8 | 359570.5 | 423170.4 | 668834.7 | 355073.3 | 329585.9 | 422770.4 | TRUE |
| 49023.7  | 32932.4  | 53041.1  | 57256.5  | 72256.2  | 36592.4  | 46026.7  | 42900.8  | TRUE |
| 73788.2  | 73341.5  | 81093.5  | 91428.5  | 112456.4 | 74345    | 66630.2  | 50664.4  | TRUE |
| 64159.9  | 45432.5  | 91573.3  | 86992.3  | 43903    | 73551.6  | 46495.4  | 124514.6 | TRUE |
| 117325.5 | 67660.5  | 127522.4 | 137819   | 93610.8  | 115612.5 | 57384.9  | 94772    | TRUE |
| 109805.2 | 121975.5 | 107908.1 | 147220.1 | 90814.1  | 100784.3 | 115727.5 | 100708.6 | TRUE |
| 148611   | 114434.3 | 134747.8 | 140227.2 | 197161.9 | 132345.4 | 113532.8 | 129867.6 | TRUE |
| 122182.5 | 106107   | 126329.4 | 117487.8 | 106954.6 | 142004.5 | 145435.8 | 131023.1 | TRUE |
| 92959.1  | 87178.8  | 107286.1 | 109364.3 | 97663.2  | 109110.6 | 102938.8 | 101557.2 | TRUE |
| 126433.5 | 111482.5 | 163128   | 144766.5 | 188346.5 | 112094.3 | 118572   | 146921.3 | TRUE |
| 82542    | 59022.7  | 87661.4  | 77750.4  | 63866.4  | 101095   | 77154    | 71488.3  | TRUE |
| 116449.7 | 105219.6 | 115699.1 | 126272.9 | 146055.8 | 92456.9  | 90249.8  | 126671.6 | TRUE |
| 115913.6 | 112007.1 | 132248.2 | 100127.5 | 133905.1 | 120201   | 139427.5 | 112807.4 | TRUE |
| 56419.8  | 50577.3  | 50281.4  | 56958.6  | 57159.9  | 66332.6  | 62081.2  | 60622.4  | TRUE |
| 130332.5 | 103100.8 | 130239.9 | 133882.3 | 115930.4 | 130550.5 | 118298.9 | 139571.4 | TRUE |
| 82495.8  | 128713.1 | 74129.7  | 59937.7  | 75584.7  | 63991.3  | 110580   | 98255.8  | TRUE |
| 35955.4  | 37534.8  | 24255.5  | 31968.9  | 41198.1  | 33945    | 38696.6  | 43828.7  | TRUE |
| 147245.2 | 134089.6 | 76645.9  | 155025.1 | 139451.1 | 146791.4 | 165103.5 | 201679.8 | TRUE |
| 736834.4 | 663843.9 | 610113.7 | 706214.8 | 668223.4 | 650043   | 691592.8 | 683312   | TRUE |
| 488394.8 | 478311.4 | 433672.6 | 497419.8 | 474688.2 | 505923.1 | 477738.6 | 506324.3 | TRUE |
| 110832.1 | 182981   | 113616.3 | 139102.7 | 116837.7 | 125389   | 114040   | 99998.1  | TRUE |
| 141938.6 | 136531.5 | 197934.5 | 176901.5 | 167227.8 | 158789.6 | 148816.5 | 162536   | TRUE |
| 80998.2  | 116937.4 | 111500.4 | 106022.3 | 201668.9 | 120205.6 | 100670.7 | 101274.9 | TRUE |
| 131830.9 | 136209.6 | 176591.9 | 160471.8 | 98828.9  | 154564.2 | 193150.8 | 162921.8 | TRUE |
| 88420.4  | 100585.7 | 70928.6  | 65513.2  | 98313.7  | 87188.3  | 102006.7 | 95040.5  | TRUE |
| 21295.9  | 24510.5  | 19592.2  | 12601.8  | 15202.7  | 9794.1   | 19547.3  | 11109.3  | TRUE |
| 94477.2  | 123627.8 | 50779.9  | 77795.1  | 53715.8  | 80371.9  | 136575   | 97399.4  | TRUE |
| 76821.8  | 77786.8  | 62021.7  | 88125.9  | 78772.1  | 95305    | 57978.2  | 79423.1  | TRUE |
| 100057   | 59535.5  | 66310.2  | 83553.3  | 79077.7  | 127435.5 | 105431.8 | 109138.2 | TRUE |
| 105853.5 | 91750.5  | 102902.2 | 85226.1  | 92147.3  | 100435.8 | 82204.9  | 94471.1  | TRUE |
| 182572.1 | 221559.9 | 221812.8 | 135935.4 | 113545.4 | 223049.3 | 206779.9 | 121226.6 | TRUE |
| 142906.7 | 98364.2  | 151192.2 | 146554.6 | 154056.9 | 151193.9 | 119776.6 | 155859.1 | TRUE |
| 51386.7  | 53977.2  | 43584    | 56516.2  | 56294.9  | 55455.3  | 51366.2  | 52562.9  | TRUE |
| 49027.4  | 51538    | 56240    | 65074.6  | 75965.5  | 48648.3  | 60773.6  | 82180.9  | TRUE |
| 91881    | 100081.6 | 64433    | 107848.6 | 178199.8 | 60270.7  | 95964.1  | 163074.2 | TRUE |
| 82905    | 72770.5  | 97557.2  | 77605.8  | 76947.2  | 78082.1  | 73496    | 81803.9  | TRUE |
| 29280.4  | 43989.2  | 64992.3  | 25509.2  | 36935.8  | 67477.4  | 57522.5  | 46829.3  | TRUE |
| 139932.9 | 125205.4 | 146318.2 | 121738.2 | 103936   | 195667.1 | 145652.2 | 106362.2 | TRUE |
| 51179.6  | 54804.4  | 44307.8  | 36660.3  | 38919.5  | 96034    | 74695.3  | 56894.1  | TRUE |

|          |          |          |          |          |          |          |          |      |
|----------|----------|----------|----------|----------|----------|----------|----------|------|
| 64371    | 58170.1  | 50343.2  | 47331.1  | 78384.8  | 112840.8 | 69990.1  | 70716.2  | TRUE |
| 66443.5  | 18867.1  | 32259.8  | 41409.5  | 26488.2  | 46906.2  | 42844.1  | 34678.3  | TRUE |
| 20438.9  | 35017.5  | 27418.9  | 28756.8  | 19948    | 35477    | 27590.3  | 31779.9  | TRUE |
| 219937.5 | 169598.1 | 156583.2 | 231477.9 | 140191.2 | 384640.9 | 244454.3 | 200126.8 | TRUE |
| 472086.9 | 466740.3 | 316732.1 | 302001.4 | 378673.8 | 344666.6 | 389804.8 | 337183   | TRUE |
| 134633.1 | 180237.2 | 106355.5 | 98889.6  | 128426.5 | 106419.2 | 149233.7 | 148488.8 | TRUE |
| 70852.9  | 73754.6  | 38457.1  | 53202.9  | 56793.4  | 41187.2  | 82259.4  | 56737.1  | TRUE |
| 198647   | 223147.8 | 282237.6 | 258508.4 | 152254.1 | 197986   | 209715.2 | 145944.9 | TRUE |
| 46814.4  | 37856.1  | 68252.7  | 44475.4  | 32223.8  | 60615.3  | 52079.7  | 12415.6  | TRUE |
| 25006.9  | 7660.9   | 30854.9  | 28377.7  | 7646.4   | 32193    | 31580.3  | 34089.4  | TRUE |
| 17389.1  | 21943.4  | 28324.6  | 8976     | 7660     | 24139.9  | 13324.8  | 21474    | TRUE |
| 40102    | 38477    | 51340.5  | 41679.9  | 55235.1  | 49527.3  | 45008.2  | 43059.5  | TRUE |
| 86869.3  | 75211.1  | 121559.6 | 70247.4  | 52675.3  | 124440.8 | 89688    | 67355.5  | TRUE |
| 254117.1 | 290529.5 | 194188.3 | 276643.9 | 223743.8 | 216473   | 275641.8 | 240837.2 | TRUE |
| 219459.7 | 231761.1 | 228377.7 | 255090.2 | 209563.3 | 265536.3 | 214768.3 | 246540.4 | TRUE |
| 209054.2 | 179935.9 | 234696.9 | 277467.5 | 229743.3 | 218287.3 | 197981.9 | 225078.1 | TRUE |
| 21531.1  | 35612.3  | 27077.5  | 25294.2  | 20201.6  | 28962.2  | 13630.5  | 29924.9  | TRUE |
| 37992.3  | 25101.4  | 36693.6  | 25195.4  | 27668.2  | 55780.8  | 41933.6  | 43626.9  | TRUE |
| 47689.1  | 49055.5  | 58628.3  | 29020.3  | 26312    | 58960.3  | 34774.8  | 28323.1  | TRUE |
| 15095.7  | 21047.9  | 24428.3  | 22464    | 14138.5  | 21561.8  | 21775.4  | 19361.3  | TRUE |
| 152804.8 | 127744.1 | 184043.9 | 147637.9 | 164883.1 | 172618   | 136590.2 | 164189.9 | TRUE |
| 141059.1 | 157670.2 | 128195.9 | 160361.7 | 137098.7 | 171750.9 | 147943.3 | 128158.3 | TRUE |
| 256985.8 | 249513   | 308916.7 | 258311.9 | 229171.3 | 315871.5 | 265786.7 | 262089.7 | TRUE |
| 71702.7  | 69888.1  | 128009.5 | 102426.9 | 103819.8 | 85154.5  | 69647.8  | 92341.3  | TRUE |
| 33445    | 35026.7  | 70294.9  | 29469    | 28367    | 63398.6  | 39534.7  | 35824.4  | TRUE |
| 282705.7 | 203045.7 | 196001.1 | 245965.1 | 301737.1 | 221254.8 | 205727.3 | 249160.3 | TRUE |
| 77021.3  | 99889.7  | 137227.6 | 99305.4  | 74603.5  | 134030.2 | 75794.2  | 83727.2  | TRUE |
| 92418    | 84658.2  | 67998.8  | 81071.6  | 70392.4  | 83610.8  | 83082.6  | 66672    | TRUE |
| 8190.6   | 10518.8  | 7427.1   | 8860.6   | 10088.5  | 6566.5   | 22470.8  | 6642     | TRUE |
| 35684.2  | 49154.2  | 40077.8  | 27421.5  | 44739.1  | 24688.2  | 38235.5  | 38891.3  | TRUE |
| 87297.4  | 117146.1 | 75615    | 103803.5 | 74717.9  | 80613.5  | 108006.1 | 67930    | TRUE |
| 254091.8 | 239284.5 | 223656.7 | 257891.5 | 211557   | 212848.5 | 245842.3 | 235779.9 | TRUE |
| 18645.9  | 25958    | 26268.4  | 20502.2  | 26641.9  | 23334.1  | 29330.1  | 20332.3  | TRUE |
| 154721.9 | 161932.6 | 225609.8 | 201387.2 | 153658.3 | 198584.2 | 137079.8 | 181976.5 | TRUE |
| 39337.3  | 37426.7  | 28630.7  | 37821.6  | 44123.4  | 43825.5  | 32053.9  | 43152.1  | TRUE |
| 168200   | 142092.3 | 117565.8 | 142519.6 | 154887.2 | 170969   | 199131.5 | 182050.1 | TRUE |
| 121570.5 | 95691.7  | 130628.9 | 121124.6 | 98587.1  | 138430.7 | 101002.3 | 95939.7  | TRUE |
| 34957.2  | 7514.7   | 46256.9  | 60497.6  | 8562.4   | 40928.3  | 12646    | 13946.8  | TRUE |
| 97483.7  | 97193.1  | 77980.7  | 74851.5  | 92020.9  | 88532.4  | 98296.1  | 88418.8  | TRUE |
| 193121.7 | 161889.5 | 365776.4 | 113346.1 | 102409.2 | 341830.6 | 184698.3 | 108912.1 | TRUE |
| 247337.1 | 288207   | 326797.9 | 250360.8 | 224352.5 | 361520.4 | 284772   | 229806.1 | TRUE |
| 296982.9 | 207665   | 236868   | 276711.5 | 412671.8 | 299696.7 | 266897.2 | 318276.2 | TRUE |



|          |          |          |          |          |          |          |          |      |
|----------|----------|----------|----------|----------|----------|----------|----------|------|
| 35718.4  | 53884.9  | 39500.3  | 32253.4  | 30679.9  | 31301    | 31642.7  | 32498.3  | TRUE |
| 8774     | 6133.6   | 11890.7  | 9225.1   | 14755.8  | 22256.7  | 6687     | 6587.3   | TRUE |
| 93709.2  | 73293.3  | 82494.2  | 86688.5  | 44780.2  | 65703.9  | 71260.5  | 63981.4  | TRUE |
| 29567.6  | 33720.2  | 36032.2  | 29679.9  | 29817.5  | 29407.9  | 35500.6  | 28424.4  | TRUE |
| 8433.6   | 12542.7  | 18190.7  | 6934.1   | 26696.1  | 32866.9  | 16722.5  | 14876.9  | TRUE |
| 19478.9  | 9549.5   | 25469.1  | 38772.1  | 32815.8  | 31561.6  | 27553.7  | 8083.5   | TRUE |
| 59928.1  | 47846.1  | 47205.8  | 49373    | 141336.4 | 43131.4  | 41894    | 55398.5  | TRUE |
| 80242.1  | 72599.4  | 77038.3  | 68197.9  | 77036.3  | 84835.5  | 67798.7  | 58276.7  | TRUE |
| 75723    | 75061.6  | 83662.9  | 60036.2  | 59228    | 63274.6  | 63045.9  | 50466.1  | TRUE |
| 146579.5 | 109742.7 | 114097.6 | 106119   | 86526.8  | 121107.9 | 103687   | 120424.8 | TRUE |
| 16533.1  | 21043.1  | 10698.9  | 10808.7  | 5503.2   | 8481     | 9887.1   | 6564.8   | TRUE |
| 86879.4  | 62881.1  | 96414.2  | 118542.5 | 89247.9  | 106102.1 | 108928   | 108603.2 | TRUE |
| 123087   | 148354.2 | 177029.7 | 128889.8 | 136814.7 | 171190.7 | 136059.1 | 127443.1 | TRUE |
| 23775.2  | 18847.4  | 8247.1   | 13430.3  | 17786.2  | 10352.1  | 13103    | 11935.5  | TRUE |
| 281668.6 | 200321.6 | 237925.4 | 290209.4 | 183437.5 | 294135.9 | 320059.4 | 316425.8 | TRUE |
| 302611.1 | 247443.6 | 312022   | 327043.6 | 255981.3 | 362391.5 | 260761.1 | 337872.3 | TRUE |
| 16035.6  | 8715.7   | 18949.2  | 12620.2  | 7284.8   | 10163.6  | 7086.8   | 27126.7  | TRUE |
| 30147.7  | 19576.5  | 34601.2  | 21813.7  | 7756.2   | 56371.8  | 14892.5  | 15973.6  | TRUE |
| 173157.5 | 168076.8 | 192143.5 | 186942.8 | 287204.1 | 168660.9 | 182518.3 | 190461   | TRUE |
| 16330.5  | 11511.5  | 27399.9  | 4728.3   | 6664.5   | 36477.8  | 8109.4   | 7426.6   | TRUE |
| 54675    | 86060.9  | 131735   | 74840.8  | 48491.5  | 56619    | 49554.6  | 48685.4  | TRUE |
| 251783.6 | 367851.5 | 180950.4 | 200397.6 | 260946.2 | 197484.3 | 341047.7 | 253870.6 | TRUE |
| 46127.3  | 71720.4  | 46575.4  | 40186.6  | 52567.7  | 28533.5  | 80997.8  | 48751.4  | TRUE |
| 527220.6 | 923790.2 | 240301.2 | 264505.7 | 263650.3 | 266902.7 | 362254.1 | 302781.3 | TRUE |
| 240640.3 | 232217.4 | 260204   | 180539.5 | 229837   | 274540.1 | 220034.5 | 235198.9 | TRUE |
| 136500.8 | 85654.7  | 98097.7  | 111833.9 | 117419.6 | 82043.8  | 114645.4 | 111069.8 | TRUE |
| 29881.8  | 33000.6  | 41548.6  | 32513    | 26889    | 38908.5  | 41295.6  | 27354.8  | TRUE |
| 262520.1 | 359766.2 | 288156.5 | 242644.9 | 248751.8 | 293820.8 | 341645.3 | 226893.8 | TRUE |
| 170665.5 | 216128.4 | 210423.9 | 154245.4 | 137823.7 | 172980.5 | 208726   | 139339.5 | TRUE |
| 62251.9  | 56762.1  | 60126.9  | 75324.5  | 53008.8  | 58538.1  | 57357.3  | 65608.2  | TRUE |
| 23800    | 10662.1  | 20645.2  | 9581.5   | 25941    | 19581    | 11330.8  | 9537.3   | TRUE |
| 151469.7 | 141519.6 | 150779.3 | 122000.9 | 84060.2  | 189025.7 | 144838.7 | 109986.4 | TRUE |
| 38997.5  | 30212.4  | 68560.2  | 34458.5  | 33152.2  | 71263.6  | 39833.2  | 28929    | TRUE |
| 101860.8 | 94777.8  | 180774.1 | 89034.6  | 62616    | 176099.5 | 76097.3  | 60677.3  | TRUE |
| 20193.3  | 9641.6   | 30185    | 35175.3  | 21066.1  | 8147     | 14436.5  | 12596.6  | TRUE |
| 47876.1  | 36822    | 43652.9  | 57348.9  | 40457.3  | 44950.2  | 52825.9  | 54389.3  | TRUE |
| 61507.8  | 64110.5  | 62231.6  | 72637.8  | 65718.9  | 68194.4  | 56179.2  | 57449.5  | TRUE |
| 9342.1   | 10201.7  | 24148.9  | 11536.8  | 4396.3   | 8705.1   | 9026.7   | 8076.6   | TRUE |
| 43469.7  | 27122.8  | 31512.4  | 40180.2  | 46029.9  | 54914    | 28341.3  | 45621.3  | TRUE |
| 124487.3 | 133312   | 195721.9 | 114309.2 | 103666.4 | 192239.3 | 134667.6 | 106996.4 | TRUE |
| 19376.5  | 16725    | 33566.5  | 9402.9   | 19256.3  | 47785.1  | 31054.4  | 14483.7  | TRUE |

|          |          |          |          |          |          |          |          |      |
|----------|----------|----------|----------|----------|----------|----------|----------|------|
| 370982.3 | 312112.6 | 277973.4 | 340755.6 | 265580.4 | 294444.1 | 348737.9 | 307392.6 | TRUE |
| 67332.5  | 75193.8  | 70890.8  | 61387.9  | 73774    | 70407.9  | 64625    | 73059.5  | TRUE |
| 248222.9 | 248250.3 | 302956.6 | 233326   | 250968.7 | 202088.1 | 243483.8 | 254373.8 | TRUE |
| 144282.9 | 121523.3 | 156233.5 | 145175.3 | 104905.1 | 152965.3 | 107713.7 | 122285.5 | TRUE |
| 138094.3 | 119247.5 | 162153.2 | 141763.4 | 115175.9 | 175121.2 | 119311.6 | 112401.8 | TRUE |
| 31656.7  | 35407.3  | 36895.9  | 35116.3  | 27667.6  | 48604.5  | 32021.6  | 47595.5  | TRUE |
| 23687.2  | 11017.4  | 9087.1   | 11688.4  | 20322.7  | 33514.3  | 10242.3  | 26639.9  | TRUE |
| 365926.4 | 288307.3 | 309578   | 340279   | 402650.9 | 407212.3 | 355981.2 | 384821.5 | TRUE |
| 278517.9 | 306507   | 324948.6 | 277419.8 | 240102.8 | 305971.1 | 322755.6 | 257729.6 | TRUE |
| 143211.2 | 100348.1 | 132557.5 | 138323.3 | 174663.4 | 125969.7 | 130720.5 | 152047.7 | TRUE |
| 38614.9  | 23264.1  | 40997.5  | 33776.8  | 25617.4  | 48270.2  | 36587.9  | 26879.4  | TRUE |
| 132171.4 | 145277.4 | 182230.1 | 127460   | 95664.7  | 198326.6 | 130065.3 | 116524.7 | TRUE |
| 380375.6 | 341534.5 | 384650.5 | 367943.4 | 428025.7 | 407264.6 | 332966.8 | 400361.5 | TRUE |
| 130292.5 | 146749   | 97468.6  | 137641.2 | 132907.2 | 121448.6 | 134348.6 | 123844.2 | TRUE |
| 61923.8  | 70209.3  | 79086.2  | 65216.7  | 65116.4  | 63206.7  | 71455.7  | 67717.5  | TRUE |
| 414101.2 | 276237.2 | 349181.9 | 335493.2 | 360468.3 | 377279.1 | 363642.8 | 381319.8 | TRUE |
| 209524.3 | 188033.7 | 186637.4 | 176316.6 | 211092.3 | 222634.6 | 167469.7 | 200479.7 | TRUE |
| 349548.8 | 309447.1 | 339183.5 | 336534.2 | 367406.2 | 314493.9 | 286164.5 | 315995.6 | TRUE |
| 95844.8  | 88219    | 110700   | 80405.6  | 60431.2  | 194383.4 | 99092    | 111745.6 | TRUE |
| 819511.7 | 737862.1 | 978676.5 | 997564   | 849648.4 | 683461.8 | 593006.9 | 719224.9 | TRUE |
| 204562.3 | 206251.7 | 198231.2 | 202489.9 | 215297   | 196214.7 | 210206.4 | 220223.9 | TRUE |
| 37264.3  | 29661.9  | 44734.3  | 44037.3  | 42052.5  | 43071.5  | 42351.6  | 48506    | TRUE |
| 43426.4  | 36981.8  | 35679.8  | 30974.1  | 51449.7  | 32897.6  | 31843    | 35899.4  | TRUE |
| 384658.4 | 323107.5 | 424664.8 | 434378.7 | 369886.1 | 452380.4 | 335138.9 | 391971   | TRUE |
| 150305.1 | 113720.9 | 85728.1  | 96250    | 153740.1 | 149769.7 | 114807.6 | 185453.8 | TRUE |
| 469593.3 | 357808.7 | 405393   | 487022.9 | 481642.1 | 504663   | 389993.1 | 456573.9 | TRUE |
| 15744.8  | 28977.3  | 14464    | 8323.5   | 15222.6  | 13866    | 35503.8  | 13082    | TRUE |
| 56871.8  | 101696.1 | 62137.7  | 71134.9  | 42141.4  | 49515.1  | 81935.1  | 36351.5  | TRUE |
| 59901.5  | 94276.8  | 41446.2  | 39047.8  | 60277.8  | 46823.8  | 73083.1  | 60127.4  | TRUE |
| 41872    | 45251.5  | 51298.6  | 54786.4  | 49548    | 53579.2  | 33673.3  | 43307.8  | TRUE |
| 144759.6 | 129345.4 | 116955.1 | 112340.4 | 169556.5 | 158441.3 | 128378.8 | 172007.3 | TRUE |
| 87459.9  | 96506    | 76187.2  | 89736.5  | 63414    | 96558.1  | 114775.5 | 80883.7  | TRUE |
| 74407.5  | 42859.2  | 80553.6  | 70399.1  | 42110.6  | 71337.7  | 58082.7  | 73098.5  | TRUE |
| 89180.4  | 81190    | 64559.4  | 71741.3  | 78574.5  | 58542.5  | 84140    | 84656.4  | TRUE |
| 125947.2 | 117338.6 | 86023.3  | 111636.7 | 101229.7 | 105909.9 | 132040.4 | 132830.4 | TRUE |
| 332484.9 | 214261.5 | 376767.5 | 432600.5 | 227761.7 | 323913.8 | 317935.6 | 341902.5 | TRUE |
| 51180    | 32694.7  | 56291.8  | 43004.9  | 43151.2  | 62528.1  | 46225.8  | 40695.4  | TRUE |
| 21914.5  | 15336.9  | 22530.1  | 25049    | 27917.9  | 8253.3   | 19750.7  | 9668.1   | TRUE |
| 86293.6  | 85645.7  | 123464.8 | 88145.6  | 85413.5  | 127259.9 | 92223.2  | 78699.6  | TRUE |
| 109111.7 | 133360.8 | 119622.1 | 115728.8 | 97922.7  | 119905.6 | 139920.7 | 137457.3 | TRUE |
| 83176.5  | 105011.3 | 99945.6  | 90836    | 124019.4 | 112781.9 | 80212.8  | 95654    | TRUE |
| 78997.2  | 95854.8  | 65518    | 125008.1 | 56129.1  | 64808.6  | 78117.2  | 52304    | TRUE |

|          |          |          |          |          |          |          |          |      |
|----------|----------|----------|----------|----------|----------|----------|----------|------|
| 111594   | 99826.1  | 82181.9  | 88187.1  | 82076.8  | 101381.4 | 118557.7 | 98934.3  | TRUE |
| 53589.3  | 36376.1  | 74479    | 64927.3  | 43558.3  | 38984.8  | 46019.6  | 46580.9  | TRUE |
| 24624    | 33147.7  | 9223.9   | 28778.3  | 22492.6  | 28384.2  | 26418    | 23117.3  | TRUE |
| 58834.1  | 35437    | 58816.1  | 100756   | 65863.1  | 144933.5 | 97564.2  | 60824.1  | TRUE |
| 32451    | 37408.3  | 28053.6  | 32063.4  | 65813.2  | 27108.6  | 38915.2  | 66627.4  | TRUE |
| 55596.6  | 52643.9  | 36388.8  | 57769    | 50497.7  | 64127.2  | 61448.6  | 74023.8  | TRUE |
| 128043.5 | 135886.3 | 113912.4 | 142052.9 | 143207.7 | 117019.5 | 117322.9 | 134464.5 | TRUE |
| 221766.2 | 266130.4 | 263694.6 | 190488.6 | 174131.4 | 279384.4 | 220911.7 | 188110   | TRUE |
| 23555.6  | 21013.8  | 31205.8  | 37872    | 17370.8  | 23298.1  | 29797.9  | 21991.3  | TRUE |
| 123399.5 | 90697.2  | 136924.4 | 119651.1 | 210082.4 | 100298.1 | 115601.6 | 106517.5 | TRUE |
| 228274.2 | 222939.5 | 239051.1 | 255761.4 | 270754   | 206286.7 | 217501.3 | 256863.7 | TRUE |
| 12847.7  | 22426.5  | 26983.7  | 4696.3   | 6958.4   | 7333.1   | 5103.3   | 7418     | TRUE |
| 413233.3 | 368648.7 | 403834.9 | 378404   | 316860   | 476445.3 | 394936   | 306879.4 | TRUE |
| 8531.4   | 10071.7  | 9255     | 10285    | 7074.8   | 7866     | 7182.9   | 6470.9   | TRUE |
| 257313   | 271028.6 | 195939.7 | 272183.7 | 278663.6 | 334807.2 | 358441.8 | 356381.6 | TRUE |
| 114112.8 | 81113.3  | 167130.9 | 111799.8 | 91109.7  | 167010.4 | 113999.6 | 90952.3  | TRUE |
| 275269.7 | 272670.1 | 281886.3 | 247846.8 | 211858.4 | 331413.2 | 255970.1 | 233695.2 | TRUE |
| 37413.2  | 26318.3  | 37712.9  | 30491.7  | 47178.1  | 48580.3  | 38538.5  | 27187.6  | TRUE |
| 119360.2 | 92686.1  | 195578.9 | 103223.2 | 120703.8 | 187708.3 | 127959   | 120061.7 | TRUE |
| 35804.4  | 39059.8  | 54628.8  | 31769.8  | 38897.8  | 53630.3  | 31561.4  | 35405.7  | TRUE |
| 9526.8   | 11998.9  | 5956.7   | 9200.7   | 6204.4   | 17892.4  | 10077.4  | 9112.5   | TRUE |
| 94305.7  | 84073.3  | 114145.3 | 74801.7  | 85822.4  | 123063.6 | 109816.1 | 82863.2  | TRUE |
| 398736.4 | 356701   | 371543.7 | 418975.2 | 431938.3 | 428566   | 356607.9 | 408094.7 | TRUE |
| 47826    | 67104.6  | 33874.2  | 78234.1  | 78083.5  | 30906.6  | 58537.1  | 57442.1  | TRUE |
| 118355.8 | 94867.8  | 104762.6 | 133496.4 | 131039.6 | 120516.2 | 93043.2  | 138376.4 | TRUE |
| 195478.5 | 259751.3 | 136740.3 | 159022.2 | 178155.9 | 143398.7 | 234056.6 | 185194.7 | TRUE |
| 194893   | 181270.6 | 171647.4 | 170274.1 | 183931.7 | 173159.7 | 226916.7 | 185614.8 | TRUE |
| 108929.7 | 117503.3 | 65990.5  | 109753.9 | 87647.4  | 81964.5  | 149846.2 | 125234.9 | TRUE |
| 379521   | 410266   | 345131.7 | 318900.8 | 346812.7 | 419263.2 | 393619.4 | 408998   | TRUE |
| 83799.1  | 84071.5  | 60278.7  | 75654.1  | 68267.3  | 72129.7  | 89115.7  | 80487.4  | TRUE |
| 126068.6 | 140547.7 | 101608   | 121673.2 | 134574.6 | 96675    | 117943.8 | 139617.3 | TRUE |
| 94709.4  | 94044.3  | 123527.8 | 78021.8  | 70757.1  | 121209.1 | 90459.3  | 84966.4  | TRUE |
| 64685.2  | 73456.6  | 80370.4  | 43315.6  | 42279.3  | 88435.4  | 45338.7  | 42602.9  | TRUE |
| 34767.9  | 11664.4  | 36527.2  | 39424.5  | 50570.1  | 31552.2  | 36039.8  | 41609.4  | TRUE |
| 9931     | 11590.7  | 7649.1   | 29017    | 6103.3   | 9652.4   | 13809.7  | 14205.9  | TRUE |
| 88008.3  | 62070.9  | 94478.7  | 104750.9 | 79476.6  | 99669.3  | 76340.2  | 101311.6 | TRUE |
| 105905.6 | 119395.2 | 138150   | 103824   | 115819.1 | 121848.6 | 131812.3 | 137015.3 | TRUE |
| 52410.4  | 53021.1  | 72426.3  | 58076.7  | 44985    | 38920.1  | 53634.7  | 53402.4  | TRUE |
| 102850.3 | 145440.8 | 86880.1  | 104713.4 | 131856.9 | 95192.5  | 133574.6 | 127557.8 | TRUE |

|          |          |          |          |          |          |          |          |      |
|----------|----------|----------|----------|----------|----------|----------|----------|------|
| 104290.5 | 97029.5  | 138800.8 | 99724.4  | 89954.4  | 152258.1 | 78554.7  | 78319.3  | TRUE |
| 71691.3  | 59672.5  | 66011.9  | 66459.8  | 56144.8  | 76067.4  | 89462    | 67697.2  | TRUE |
| 312919.7 | 296331.4 | 266145   | 254131.7 | 248812.3 | 294561.2 | 285204.7 | 268215.9 | TRUE |
| 88397.2  | 90330.4  | 89138.3  | 82805.9  | 94435.1  | 124787.1 | 84300.4  | 79744.8  | TRUE |
| 555129   | 407869   | 570403.7 | 631328.4 | 635216.5 | 560671.4 | 493516.9 | 594042.8 | TRUE |
| 340357.6 | 240243.1 | 353090.3 | 414924.6 | 383901   | 365146.8 | 297818.2 | 377515.1 | TRUE |
| 503487   | 646354.9 | 671574.8 | 400547.8 | 460780.7 | 681740.8 | 672391.5 | 450809.9 | TRUE |
| 793802.9 | 898772.4 | 894804.6 | 658148.5 | 614120.4 | 997056.5 | 967015.9 | 689225.1 | TRUE |
| 702266.1 | 542557   | 759501.5 | 824221   | 877598.7 | 797925.1 | 704599.2 | 826059.8 | TRUE |
| 34329.8  | 32394.4  | 32740.8  | 33695    | 41989    | 42246.7  | 24991.9  | 40245.2  | TRUE |
| 141079.1 | 169982.5 | 128246.3 | 215433.1 | 216022.5 | 81939    | 77365.3  | 92333.9  | TRUE |
| 92999.2  | 201608.9 | 135980.4 | 249579.7 | 276632.9 | 30368.3  | 10825.3  | 32628.9  | TRUE |
| 27064.6  | 42191    | 40589.2  | 40364    | 44131.6  | 24578.7  | 32800    | 35829.8  | TRUE |
| 54579.1  | 26011.6  | 44696.3  | 35380.8  | 46341.7  | 44452.8  | 53330.6  | 44184.4  | TRUE |
| 99423.7  | 85218.6  | 95342.9  | 100916.4 | 98103.9  | 104384.9 | 87403.3  | 97875.1  | TRUE |
| 1261112  | 1302416  | 1006141  | 1101186  | 1286440  | 1493222  | 1415376  | 1484829  | TRUE |
| 1663256  | 1240202  | 1865747  | 1866474  | 2042725  | 1398955  | 1264342  | 1409433  | TRUE |
| 45992.7  | 42635    | 31999.6  | 40112.2  | 48315.3  | 59147.1  | 42095.5  | 60475.4  | TRUE |
| 129038.9 | 154186.1 | 98806.9  | 138232   | 152829.4 | 188115.4 | 151956.9 | 169946.3 | TRUE |
| 181234.6 | 187864.7 | 133221.6 | 138844.8 | 177359.9 | 219746   | 189975.5 | 184872.5 | TRUE |
| 121633.7 | 115245.8 | 82954.8  | 95079.8  | 108088.5 | 122240.5 | 108065   | 129174.2 | TRUE |
| 216777.4 | 228757.7 | 167361.8 | 177985.6 | 205381.4 | 265766.8 | 241043.7 | 231527   | TRUE |
| 154964.7 | 148077   | 123726   | 118452   | 143368.9 | 168561.2 | 162174.5 | 176367.5 | TRUE |
| 200183.8 | 187311.4 | 121806.3 | 165150.8 | 184538.2 | 251251.7 | 210606.5 | 244773.7 | TRUE |
| 85209.6  | 109061.6 | 79142.1  | 74521.7  | 92999.1  | 121658.9 | 109186.7 | 108627.7 | TRUE |
| 123533   | 125204.4 | 101323.9 | 91358.7  | 99143    | 152087.9 | 133369.7 | 128421.8 | TRUE |
| 67532.1  | 91415.7  | 57502.6  | 81951.3  | 83048.8  | 92275.9  | 73969.9  | 93992.1  | TRUE |
| 75495.3  | 91553.6  | 68616.6  | 76191.5  | 72590.7  | 92225.5  | 82582.7  | 109505   | TRUE |
| 82788.6  | 83252.3  | 68439.2  | 78772.5  | 66639.1  | 106117.2 | 80956.5  | 93495.4  | TRUE |
| 109454.6 | 107643.3 | 91621.3  | 87143.1  | 104672.3 | 124877.5 | 123337.2 | 126444.7 | TRUE |
| 82595.6  | 85490.7  | 53023    | 61612.4  | 87233.8  | 90740.7  | 76067.1  | 95702.8  | TRUE |
| 49121.6  | 38392.7  | 32203.9  | 39279.3  | 36917.1  | 46208.8  | 35015.2  | 50854.3  | TRUE |
| 86958.5  | 131033.3 | 102194.2 | 95107.3  | 127055.8 | 93874.7  | 65056.1  | 96539.5  | TRUE |
| 49567.1  | 44207.2  | 40023.8  | 44557.1  | 54461.8  | 45435.1  | 51601.3  | 39332.4  | TRUE |
| 129294.6 | 106864.2 | 92957.7  | 89512.5  | 112714.9 | 116120.2 | 115157   | 99466    | TRUE |
| 32824.7  | 65159.7  | 141538.6 | 11195.8  | 19694.4  | 15982    | 7300.3   | 9421.3   | TRUE |
| 34355.6  | 114568.1 | 276757.7 | 19892.5  | 16124.4  | 10910.4  | 11702.1  | 23423.3  | TRUE |
| 32715.7  | 153375.1 | 276912.1 | 32857.2  | 21837.3  | 47179.7  | 27871.1  | 21273.8  | TRUE |
| 203475.7 | 124170   | 187414.3 | 109941.9 | 179570.7 | 193751.8 | 135652.5 | 162384.5 | TRUE |
| 815469.5 | 585554   | 738066   | 522683.5 | 810304.3 | 767393.5 | 594777   | 711809.2 | TRUE |
| 61844.4  | 69417.6  | 77122.9  | 89117.5  | 95473.4  | 102445.1 | 82557.2  | 94733.7  | TRUE |
| 57090.1  | 71577.6  | 66266.7  | 83619.9  | 104494.3 | 40417    | 44542.1  | 45901.6  | TRUE |
| 77743.7  | 124520.5 | 76836.7  | 85714.4  | 90639.6  | 61651.8  | 70240.3  | 40269.4  | TRUE |
| 33590.3  | 90245    | 43506.6  | 44143.9  | 94331.8  | 28138.4  | 16384.3  | 15192.5  | TRUE |
| 219235.7 | 200746.8 | 217969.7 | 200625.2 | 266049.9 | 189599.5 | 238895.3 | 179015   | TRUE |
| 37059.1  | 33602.8  | 67746.1  | 59662.9  | 58919.7  | 10814.1  | 22422.7  | 13459.5  | TRUE |
| 33453    | 57604.4  | 44623.5  | 47125    | 61285    | 24150.5  | 22176.5  | 15264.6  | TRUE |
| 73662.5  | 68334.3  | 69185.6  | 75016    | 67759    | 61655.7  | 68703.6  | 73242    | TRUE |

|          |          |          |          |          |          |          |          |      |
|----------|----------|----------|----------|----------|----------|----------|----------|------|
| 203526.3 | 158945.6 | 168336.7 | 182342.1 | 154872.6 | 152056.3 | 164043.6 | 170861.8 | TRUE |
| 27096.7  | 26005.3  | 22438    | 20869.5  | 26620.7  | 25024.5  | 25241.2  | 34668.4  | TRUE |
| 107693.3 | 76739.8  | 92443.2  | 86265.5  | 151060   | 76738.8  | 123969.8 | 104717.2 | TRUE |
| 113898   | 90011.2  | 118152.7 | 99357    | 96591.3  | 99725.4  | 97395    | 117777.6 | TRUE |
| 294003.4 | 212366.6 | 245718   | 237866.6 | 229133.9 | 384456.4 | 288352.8 | 292261   | TRUE |
| 171024.4 | 112230.3 | 117620.3 | 115931.5 | 126731.4 | 158950.8 | 122366.1 | 147551.5 | TRUE |
| 92879.7  | 54816.5  | 83448.6  | 70981.2  | 78944.7  | 103980.7 | 81666.3  | 91496.7  | TRUE |
| 137467.4 | 87171.7  | 110632.8 | 112214.5 | 90767.6  | 130896.3 | 106655.7 | 95749.8  | TRUE |
| 121199.8 | 244315.4 | 178697.8 | 225885.9 | 289013   | 108549.2 | 133801   | 117183.7 | TRUE |
| 154690.3 | 228195   | 394487.4 | 167703.7 | 127224.8 | 157773.1 | 150511.5 | 141379.2 | TRUE |
| 105737.9 | 83991.2  | 100135.5 | 105982.1 | 123210.8 | 112250.2 | 105416.3 | 112459.1 | TRUE |
| 239879.8 | 382973.9 | 425579.7 | 206827.4 | 245742.4 | 204006.2 | 281871.4 | 239966.7 | TRUE |
| 177110.3 | 156259.5 | 152833.1 | 157190.3 | 165590.5 | 173058.3 | 172016.1 | 167816.6 | TRUE |
| 204304.5 | 163236.6 | 125228   | 120980.9 | 200594.2 | 186747.1 | 200505.9 | 179436   | TRUE |
| 60165.2  | 61678.4  | 55879.5  | 75718.3  | 60915.7  | 60034.5  | 69281.6  | 68423.4  | TRUE |
| 408615.2 | 373268.4 | 402355.9 | 487181.3 | 468557   | 417154.3 | 538226.9 | 480609   | TRUE |
| 51026.8  | 56756.5  | 65099.5  | 84121.9  | 68390.8  | 42575.2  | 78451.9  | 54681.8  | TRUE |
| 331191.1 | 374963.1 | 345785.4 | 437766.9 | 438433.2 | 405546.2 | 469748.7 | 451073   | TRUE |
| 95486.6  | 107088.1 | 167995.7 | 113735.7 | 119305.2 | 331158.5 | 120880.5 | 100450.6 | TRUE |
| 109361   | 114068.4 | 105401   | 133451.9 | 113151.6 | 87296.6  | 89646.8  | 97460.8  | TRUE |
| 77533.5  | 80742.9  | 82638    | 62056.7  | 92273.4  | 47758.6  | 38257.2  | 38601.9  | TRUE |
| 402812.7 | 344224   | 297344.4 | 403377.2 | 274744.9 | 382347.7 | 359757.2 | 330822.4 | TRUE |
| 5096314  | 5418737  | 6235005  | 4801024  | 3952793  | 6698781  | 4996353  | 4460992  | TRUE |
| 86984.4  | 92933.4  | 119417.6 | 81562.9  | 75591.9  | 97824.8  | 104219   | 82396.2  | TRUE |
| 278030.1 | 164263.6 | 181747.9 | 126913.8 | 121751.4 | 154071.3 | 141342.2 | 160395.7 | TRUE |
| 141286.1 | 121996.9 | 178851.5 | 162379.5 | 120793.3 | 169037   | 149841.6 | 132069.8 | TRUE |
| 170460.4 | 179569.1 | 218859.1 | 161403.3 | 140950   | 196027.2 | 185449.6 | 151894.7 | TRUE |
| 211648   | 198928.1 | 224432.9 | 258999.9 | 231240.4 | 215308.3 | 206207.7 | 210398.5 | TRUE |
| 175744.8 | 165299.9 | 212263.8 | 191197.3 | 136453.2 | 203215.5 | 210172.1 | 142632.7 | TRUE |
| 254810.7 | 242712.1 | 285959.6 | 254391.1 | 220515.6 | 307792.4 | 248757.3 | 224269.9 | TRUE |
| 164872.9 | 96432    | 113642.5 | 157459   | 137878.6 | 147109.7 | 123736.8 | 161333.8 | TRUE |
| 33130.4  | 22034.9  | 31737.8  | 18093.4  | 40003.3  | 29257.5  | 29337.1  | 24889.9  | TRUE |
| 85923.8  | 86443.4  | 100478.1 | 115336.3 | 97072.6  | 111602.9 | 99417.9  | 99512.1  | TRUE |
| 100391.8 | 131444.4 | 114543.8 | 125574.9 | 108839.2 | 77192.6  | 92524.5  | 82621    | TRUE |
| 63166.4  | 67791.3  | 47187.5  | 52209.1  | 68247.7  | 56415.1  | 64852.5  | 68364.8  | TRUE |
| 82801.9  | 79712.4  | 57838.4  | 71748.3  | 84368.5  | 108314.2 | 94535.1  | 121240.6 | TRUE |
| 225459.5 | 262662.7 | 223027.5 | 319159.7 | 262215.6 | 229717.9 | 254471.7 | 245413.9 | TRUE |
| 78555.8  | 57258.5  | 39691.2  | 59418.6  | 65301.6  | 73332.2  | 100510.3 | 82951.5  | TRUE |
| 124421.6 | 104947.4 | 143208.4 | 176655.5 | 113290.9 | 110663.2 | 171815.4 | 158341   | TRUE |
| 271920.4 | 285726.8 | 166650   | 192978.7 | 246383   | 220498.2 | 239570.1 | 233768.4 | TRUE |
| 232658.5 | 220177   | 188631.9 | 142407   | 182188.5 | 232057.6 | 226641.9 | 202495.5 | TRUE |
| 356343.1 | 399711.8 | 392309.3 | 394611.4 | 306763.1 | 317801.5 | 371314.3 | 319684.9 | TRUE |
| 209657.2 | 205511.2 | 284615.7 | 341455.4 | 206308.1 | 256258.7 | 272367.5 | 226048.6 | TRUE |
| 83547.7  | 67041.6  | 55246.8  | 75045    | 58340    | 79272    | 96729.3  | 78709.3  | TRUE |

|          |          |          |          |          |          |          |          |      |
|----------|----------|----------|----------|----------|----------|----------|----------|------|
| 79540.3  | 78129.4  | 82202.7  | 81929.2  | 66030.8  | 95110.3  | 101698   | 119613.9 | TRUE |
| 108541   | 114710.9 | 69425.5  | 100064.7 | 81729.4  | 141844.5 | 153274.4 | 131422.2 | TRUE |
| 94686    | 89013.1  | 85885    | 88426.5  | 87796.4  | 100973.8 | 114260.4 | 95936    | TRUE |
| 331357.3 | 282787.2 | 425789.2 | 245747.1 | 215233.4 | 427003.7 | 292224.4 | 232895.2 | TRUE |
| 346177.7 | 332350.2 | 438787   | 295367.3 | 287113.6 | 399049.8 | 341506.9 | 270226.5 | TRUE |
| 257583.2 | 274025.8 | 452961.3 | 291163.5 | 275731.5 | 460442.4 | 322218.5 | 260926.5 | TRUE |
| 40727.5  | 87027.6  | 77313.3  | 68909.6  | 62978.2  | 51699.8  | 51130.8  | 27488.5  | TRUE |
| 143536   | 135631   | 190695.2 | 117207.1 | 127220.8 | 178142.3 | 123682   | 122100.2 | TRUE |
| 1175678  | 721260.7 | 1187753  | 1138544  | 1683220  | 984677.3 | 848726.3 | 1037069  | TRUE |
| 2928599  | 2129184  | 2752128  | 2707941  | 3868548  | 3243232  | 2189265  | 3263607  | TRUE |
| 40439.2  | 23128.8  | 43872.8  | 11058.4  | 44718.1  | 25598.3  | 24720    | 36845.8  | TRUE |
| 207720   | 180783.3 | 242697.2 | 166924.7 | 115969.8 | 263175.8 | 180674.3 | 139135.4 | TRUE |
| 183089.4 | 166567.2 | 279979.5 | 164821.4 | 145164.7 | 279700.7 | 178550.8 | 154561.6 | TRUE |
| 610960.2 | 582974.6 | 817067.4 | 598060.8 | 578653.9 | 828048.9 | 620739   | 616937.2 | TRUE |
| 205715   | 234184.2 | 182865.4 | 254082.9 | 227173.8 | 175756.6 | 241693.7 | 273874.3 | TRUE |
| 272203.5 | 276408.7 | 200411.8 | 294329.5 | 286085.9 | 214274.2 | 322136.5 | 305761.1 | TRUE |
| 252584.8 | 273486.9 | 174805.1 | 280813.1 | 300113.8 | 195992.9 | 299041.6 | 292656.3 | TRUE |
| 91644.2  | 82391.3  | 64832.4  | 89210    | 103616.2 | 63117.7  | 109824.1 | 107759.4 | TRUE |
| 39102.3  | 47308.8  | 37826.9  | 31024.9  | 46014.7  | 20543.8  | 41376.1  | 37158.6  | TRUE |
| 37712.9  | 30764.5  | 38887.2  | 25623.5  | 42658.4  | 30794.9  | 44305.7  | 32834.3  | TRUE |
| 66951.6  | 110745.1 | 70673    | 94544    | 76973.8  | 54850.5  | 64424.9  | 56303    | TRUE |
| 30468.2  | 44120.5  | 27686.9  | 32221.7  | 47219.2  | 14873.3  | 12950.4  | 10936.9  | TRUE |
| 19460.3  | 4755.1   | 7251.4   | 9888.3   | 13824.9  | 10909.6  | 11949    | 12338.5  | TRUE |
| 59312.4  | 70059.1  | 70347.8  | 57777.4  | 54114.8  | 56169.2  | 59049.4  | 51498.1  | TRUE |
| 893460.5 | 835811.6 | 1097362  | 1432083  | 922483.1 | 1345384  | 1245735  | 1053943  | TRUE |
| 61487.1  | 70248.8  | 94691.4  | 113121.9 | 95033.3  | 101114.7 | 117256.7 | 95840.4  | TRUE |
| 222463.8 | 447572.9 | 297788.8 | 489344.6 | 526864.8 | 117843.4 | 116085.5 | 147928.4 | TRUE |
| 1707775  | 1244153  | 961679.4 | 1213665  | 1266292  | 1532149  | 1071106  | 1875020  | TRUE |
| 672897.2 | 473135   | 527895.1 | 633710.5 | 619639.3 | 742460.1 | 535366   | 768562.8 | TRUE |
| 285557.6 | 257335.4 | 330159.6 | 309014.8 | 326963.4 | 360589.6 | 225797.9 | 301084.5 | TRUE |
| 71728.6  | 50876.2  | 71096.2  | 91912.1  | 59420.6  | 93428.4  | 68954.3  | 61261.3  | TRUE |
| 163173.8 | 146266.1 | 145917.8 | 174730.3 | 160674.8 | 156577.2 | 153414.9 | 154311.3 | TRUE |
| 325418   | 304198.4 | 329414.2 | 320108.9 | 284297.7 | 340615.5 | 354183.6 | 260250.1 | TRUE |
| 812160.7 | 567879.5 | 800581.6 | 778377.3 | 795649.7 | 812213.6 | 644572.3 | 813147.9 | TRUE |
| 66847.3  | 48857.2  | 58202.1  | 64768.7  | 61926.5  | 87123.2  | 57988.7  | 67084.2  | TRUE |
| 223922   | 212662.3 | 162805.9 | 206672.5 | 183144.4 | 219991.2 | 209030.9 | 245050.9 | TRUE |
| 29007.5  | 21288.6  | 8804.6   | 22180    | 27983.9  | 30961.5  | 16095.7  | 33531.5  | TRUE |
| 84582.7  | 78866.3  | 60915.9  | 60653.4  | 81895.3  | 104524.8 | 105144.4 | 98671.7  | TRUE |

|          |          |          |          |          |          |          |          |      |
|----------|----------|----------|----------|----------|----------|----------|----------|------|
| 26725.4  | 29930.5  | 32261.7  | 33827.8  | 32462.6  | 29979.4  | 27576.5  | 39161.5  | TRUE |
| 113637.3 | 138422.6 | 184885.1 | 137313.5 | 111415.7 | 130153   | 117543.3 | 120506.9 | TRUE |
| 85465.2  | 72418.6  | 69321.4  | 70202.6  | 69014.9  | 75510.7  | 72371.7  | 80035.9  | TRUE |
| 63536.7  | 67241.5  | 57456.6  | 44676.6  | 54548.1  | 44899.5  | 76191.1  | 58869.1  | TRUE |
| 146072.9 | 125628.7 | 148487.6 | 151295   | 141732.7 | 102595.5 | 111308.9 | 119487.7 | TRUE |
| 207334.8 | 151457.3 | 271774.8 | 284108.4 | 203629.4 | 197086.7 | 210874.5 | 207587.2 | TRUE |
| 910376.5 | 757464.5 | 1159555  | 1241014  | 883980.3 | 893348.2 | 873578.9 | 863487.8 | TRUE |
| 148348.5 | 186686.1 | 105778.2 | 145271.9 | 99760    | 110840.8 | 184350.4 | 123219.9 | TRUE |
| 302817.2 | 225535.6 | 300148   | 309728.7 | 268609.6 | 256172.9 | 255037   | 268770.3 | TRUE |
| 134185.9 | 105156.1 | 147134.3 | 170263.8 | 125900.2 | 146781.3 | 136930   | 152014.8 | TRUE |
| 38161.6  | 31015.4  | 41997.5  | 41094    | 43926.8  | 34777.8  | 36495.8  | 48214.5  | TRUE |
| 424085.4 | 379576.2 | 364434.6 | 362007   | 329229.4 | 435393   | 422103   | 441458.5 | TRUE |
| 108373.5 | 88944.2  | 102591.6 | 119298.6 | 81233.8  | 134462.8 | 113078.2 | 106802.7 | TRUE |
| 99536.9  | 86188.3  | 79654.6  | 91810.7  | 88851.4  | 82617.7  | 104600.1 | 110547.8 | TRUE |
| 27022.6  | 30560.3  | 23336.7  | 9868.2   | 9926.5   | 46347.4  | 38308.4  | 16430.3  | TRUE |
| 116543.9 | 78549.7  | 97352.9  | 99491    | 101461.4 | 169450   | 126103.2 | 106924.1 | TRUE |
| 78081.9  | 44670.4  | 67802.6  | 72088.4  | 77928    | 79770.4  | 59750.1  | 56679.3  | TRUE |
| 141401.4 | 119560.8 | 141130   | 127068.2 | 123462.2 | 115740   | 104112.5 | 98652.8  | TRUE |
| 228098.3 | 229636   | 300520.2 | 204719.6 | 179869.1 | 318740.1 | 263674.3 | 193638.4 | TRUE |
| 250339.3 | 253385.4 | 304197   | 240220.1 | 199907.3 | 346174   | 266655.4 | 191564.5 | TRUE |
| 16411.8  | 12117.4  | 4582.7   | 10878.9  | 6185.2   | 4242.1   | 7159.7   | 5356.8   | TRUE |
| 93815.9  | 80120.6  | 73691.4  | 121369.5 | 88503.3  | 68269.2  | 96520.1  | 91334.3  | TRUE |
| 47698.1  | 48193.8  | 31440.2  | 45186    | 50393.2  | 41164    | 46410    | 38421.1  | TRUE |
| 90565.4  | 76805.6  | 58741.1  | 64792.4  | 69781.1  | 73544.5  | 78422.3  | 82581    | TRUE |
| 246237.6 | 227932.6 | 231330   | 229356.7 | 210806   | 261379.9 | 238914.4 | 224597.4 | TRUE |
| 272859.6 | 275268.7 | 246952.6 | 241708   | 285116.7 | 254817.8 | 289623.5 | 259281.8 | TRUE |
| 109785.5 | 79342.1  | 126031.7 | 69613.3  | 76710.6  | 189258   | 122934.8 | 108310.3 | TRUE |
| 66376.3  | 52882.2  | 66968.2  | 58929.3  | 90098.4  | 58970.2  | 54870.2  | 58699    | TRUE |
| 51267    | 30891.8  | 51270    | 42026.4  | 50957.9  | 34938.4  | 32937.5  | 47182.6  | TRUE |
| 34153.8  | 31192.2  | 30377.5  | 32493    | 27256.3  | 40267    | 16023.4  | 28761.1  | TRUE |
| 8307.8   | 22875.2  | 16570.6  | 27539.4  | 29392    | 4451.3   | 31685.8  | 10880.4  | TRUE |
| 271257.1 | 316868.5 | 277435.6 | 228059.8 | 220035.3 | 304165.6 | 285457.2 | 222145.5 | TRUE |
| 218948.8 | 261089.8 | 213591.8 | 226863.3 | 246119.9 | 245497.4 | 280251.4 | 259244.6 | TRUE |
| 371157.8 | 320519.7 | 441755.2 | 500254.2 | 382071.7 | 377648.4 | 289881.9 | 354207.9 | TRUE |
| 24428.4  | 26301.9  | 35167.5  | 29578.5  | 28228.3  | 36777    | 33876.3  | 25251.9  | TRUE |
| 29865    | 28796.1  | 28617.6  | 23488.6  | 26264.1  | 35455.3  | 22451    | 18649.8  | TRUE |
| 149078.1 | 155379.3 | 138227.1 | 139818.9 | 151729.1 | 162181.7 | 196513.1 | 140899.6 | TRUE |
| 389508.1 | 335371.2 | 414301   | 422254.9 | 393836.4 | 433282.2 | 352451.9 | 423301.5 | TRUE |
| 195842.5 | 185617.9 | 183395.8 | 199648.9 | 151030.1 | 216449.5 | 194295.6 | 146669.9 | TRUE |

|          |          |          |          |          |          |          |          |      |
|----------|----------|----------|----------|----------|----------|----------|----------|------|
| 319267.9 | 354329.6 | 291308.8 | 275126   | 268262.5 | 304710.2 | 330492   | 281896.5 | TRUE |
| 144693.7 | 122256.9 | 167537   | 118324   | 138608.5 | 180494.4 | 106706.1 | 147289.4 | TRUE |
| 211054.1 | 141784.5 | 183639.3 | 257748.1 | 243370.4 | 203761.1 | 208179.9 | 204620.3 | TRUE |
| 664714   | 563817.2 | 614087.3 | 649669   | 703366.6 | 651714.9 | 559559.6 | 673447.6 | TRUE |
| 65978    | 61676.4  | 65080    | 53145.5  | 48905.2  | 47876.3  | 58619.5  | 56584.8  | TRUE |
| 1144599  | 1100877  | 1231000  | 1273503  | 1047111  | 1269566  | 1314391  | 1019612  | TRUE |
| 90852.3  | 82804.9  | 92213.5  | 117599.4 | 86314.4  | 118454.6 | 105670.9 | 88560.6  | TRUE |
| 11153.5  | 10546.1  | 17439.2  | 8841.9   | 12125.5  | 30454.1  | 13392.5  | 11920.1  | TRUE |
| 76088.6  | 65605.6  | 79997    | 76394.8  | 80635.9  | 72134.2  | 80821.7  | 88274.3  | TRUE |
| 100412.7 | 114955.1 | 107043   | 110254.2 | 127309.4 | 123359.3 | 99788.9  | 135467.8 | TRUE |
| 23078.6  | 25547.2  | 22978.2  | 37052.8  | 35337.5  | 26597.8  | 41267    | 46328.9  | TRUE |
| 183432.7 | 201223.1 | 178038.9 | 226483.3 | 214456.4 | 222821.3 | 228038.8 | 226670.1 | TRUE |
| 68370.2  | 73230.2  | 52587.6  | 81864    | 98336.7  | 55732.3  | 66953.7  | 80067    | TRUE |
| 122335.8 | 91972.6  | 81544.6  | 113235.3 | 124516.5 | 116903.5 | 117555.9 | 127643.9 | TRUE |
| 331265.7 | 290368.6 | 246455.5 | 264903.1 | 272336.5 | 424777.9 | 400998.5 | 454867.2 | TRUE |
| 477690   | 489247.8 | 424932.4 | 471169.4 | 458697   | 499129.2 | 501697.7 | 461146.1 | TRUE |
| 66574.7  | 77419.4  | 81894.4  | 57210.1  | 97012.2  | 69545.3  | 81264.6  | 110244.3 | TRUE |
| 40082.7  | 46572.9  | 30975.4  | 29551.6  | 37145    | 32174.2  | 35157.5  | 38055    | TRUE |
| 237275.1 | 222741.9 | 197033.9 | 229632.3 | 203801.6 | 224768.9 | 220040.9 | 236972.2 | TRUE |
| 35809    | 54246.3  | 44692.1  | 39915.1  | 31911.8  | 40590.3  | 31058.7  | 29837.4  | TRUE |
| 115602   | 102183   | 131785.5 | 116099.4 | 127792.9 | 123869.3 | 120980.9 | 115514.5 | TRUE |
| 123005.4 | 102293.2 | 110478.3 | 134042.6 | 108547.3 | 108386.8 | 91009.6  | 110020.5 | TRUE |
| 549706.6 | 452706.1 | 546794.4 | 528528.8 | 501059.2 | 554331   | 521539.9 | 548286.7 | TRUE |
| 22857.9  | 26929.2  | 26514.5  | 23080.1  | 27509.3  | 27446.2  | 16434.6  | 20113.2  | TRUE |
| 4271442  | 3961829  | 4045153  | 4141251  | 4325227  | 4267474  | 4024192  | 4300278  | TRUE |
| 141600.8 | 184063.3 | 162725.3 | 162121.6 | 136539.3 | 156787   | 145271.7 | 148772.2 | TRUE |
| 157056.5 | 122030.1 | 117481.8 | 156885.6 | 139266.9 | 161104.3 | 153981.9 | 135051.2 | TRUE |
| 321149.7 | 323858   | 267560.8 | 334122.9 | 349707.8 | 296170.9 | 326381.5 | 334653.2 | TRUE |
| 219175   | 183539.1 | 191291.8 | 207716.6 | 234675.5 | 232989.8 | 217360.7 | 244354.8 | TRUE |
| 43869.2  | 44367.5  | 27911.1  | 28935.3  | 45993.8  | 37927.4  | 68668.7  | 76735.5  | TRUE |
| 74764    | 57446.2  | 50763.8  | 61644.4  | 53166.2  | 76579.2  | 76328.1  | 76185.4  | TRUE |
| 177392.3 | 121031.3 | 160312.3 | 176088   | 221856.2 | 156867.7 | 145566.6 | 169549.6 | TRUE |
| 18830.6  | 17868.9  | 16188.7  | 20159.2  | 8585.8   | 14920.8  | 15080.3  | 17932.5  | TRUE |
| 51433.4  | 62608.6  | 66899.4  | 73250.7  | 67275.1  | 58859.9  | 67969.1  | 66771.9  | TRUE |
| 196018.9 | 218623.8 | 259281.4 | 219308.9 | 147998.1 | 264958.5 | 234315.7 | 146734   | TRUE |
| 46188.6  | 29404.7  | 35096.6  | 9264.2   | 18268.8  | 21301.6  | 27794.4  | 10688    | TRUE |
| 438516.4 | 386932.6 | 509993.3 | 466740.4 | 694395.3 | 410938.6 | 345991.9 | 415941.3 | TRUE |
| 658085.1 | 698114.1 | 647147.2 | 620640.3 | 793310.3 | 650015.9 | 764684.8 | 747128.1 | TRUE |
| 92842.4  | 84712.6  | 92252.2  | 66490.5  | 65788.8  | 102151.8 | 83665.3  | 55745.6  | TRUE |
| 213797.8 | 264086   | 187928.5 | 197688.4 | 222544.6 | 186150   | 224492.4 | 236377.6 | TRUE |
| 1422408  | 1330310  | 1434821  | 1489738  | 1254993  | 1308218  | 1395596  | 1305858  | TRUE |
| 206791.6 | 238840   | 290663   | 279906.5 | 218312.8 | 235695.9 | 254228.1 | 224756.4 | TRUE |
| 1012979  | 1013961  | 1204272  | 1183448  | 963047.1 | 963240.1 | 972177.6 | 902502.7 | TRUE |
| 59525    | 92507.3  | 105200.4 | 67774    | 56577.3  | 60127.4  | 63737.3  | 53106.2  | TRUE |
| 28563.4  | 29373.5  | 22561.1  | 43054.4  | 22827.6  | 43494.7  | 46263.9  | 42962.3  | TRUE |
| 85203.5  | 83519.4  | 55153.2  | 94896.6  | 83327    | 96547.3  | 107797.5 | 108801.8 | TRUE |
| 246730.8 | 231560.3 | 193412   | 254618.7 | 251465.3 | 268588.9 | 255718.2 | 253410.2 | TRUE |
| 502746.9 | 469450.5 | 479619.9 | 503899.6 | 413851.8 | 511763   | 528838.3 | 434939.5 | TRUE |



|          |          |          |          |          |          |          |          |      |
|----------|----------|----------|----------|----------|----------|----------|----------|------|
| 491195.8 | 412501.1 | 508533   | 507735.9 | 486192.9 | 501227.3 | 422173.8 | 515199.5 | TRUE |
| 31780.5  | 25655    | 36574.7  | 31089    | 24266.2  | 20793.2  | 24081.1  | 29655.4  | TRUE |
| 41766.4  | 41703.1  | 44029.9  | 61811.2  | 47316.2  | 38110.6  | 38854.6  | 47676.1  | TRUE |
| 25153.7  | 21287.4  | 21848.6  | 33071.5  | 21625.3  | 25522    | 23610.8  | 24814.3  | TRUE |
| 211279.3 | 180009.7 | 234548   | 333155.2 | 292327.1 | 231373.9 | 202002.1 | 236265.1 | TRUE |
| 215178.1 | 139102.3 | 190764.1 | 185182.6 | 195559.2 | 242165   | 159431.3 | 200004.8 | TRUE |
| 128113.1 | 122559.9 | 173198.1 | 182524.9 | 190434.4 | 192962.3 | 136855.8 | 166915.2 | TRUE |
|          |          |          |          |          |          |          |          |      |
| 125113.8 | 95942.7  | 104216.2 | 126631.3 | 134681.2 | 109788.1 | 124729.7 | 117695.4 | TRUE |
| 104264.4 | 110300.1 | 92935.7  | 106757.2 | 115896   | 108233.7 | 108623.4 | 112169.5 | TRUE |
| 116407.8 | 122505.9 | 123080.1 | 119888   | 119724.2 | 133135.9 | 140227.7 | 104728.9 | TRUE |
| 153930.9 | 169002.3 | 158139   | 147952.8 | 154723.4 | 164049.6 | 163889.1 | 178421   | TRUE |
| 70016.6  | 40200.5  | 84201.5  | 69799.7  | 116216   | 89270.1  | 75922.4  | 121498.4 | TRUE |
|          |          |          |          |          |          |          |          |      |
| 198586.5 | 181719.5 | 192659.1 | 196609.6 | 224099.4 | 194384.7 | 184052.1 | 192496.4 | TRUE |
| 169939.9 | 118286.3 | 178760   | 159850.4 | 222801   | 162265.5 | 147869.5 | 204911.9 | TRUE |
| 133219.5 | 111163.7 | 133004.8 | 113817   | 124849   | 125039.7 | 121223.9 | 138937   | TRUE |
| 37138.1  | 98012    | 57175.6  | 39886.7  | 79901.5  | 29869.3  | 27332.1  | 16014.6  | TRUE |
| 99798.7  | 110865.4 | 71377.4  | 97863.2  | 87212.9  | 111149.2 | 128923.6 | 90350.9  | TRUE |
| 66347.9  | 67735.1  | 49584.2  | 54746.2  | 39580.7  | 67220.8  | 92949.8  | 50104.5  | TRUE |
| 77111.9  | 62611.8  | 70140.2  | 62333.4  | 57865.4  | 76110.4  | 83725.2  | 78169.4  | TRUE |
| 180467.6 | 221218.1 | 145743.3 | 185190.1 | 152857   | 172758.6 | 172021   | 162464.8 | TRUE |
| 242030.6 | 242228.3 | 249678.6 | 229180.7 | 211359.5 | 255362.2 | 302573.7 | 239210.3 | TRUE |
| 96116.1  | 125785.7 | 67287.7  | 79036.3  | 69227.4  | 76715.4  | 107257.8 | 88324.4  | TRUE |
| 63164    | 76645.2  | 82211.3  | 63849.9  | 70701    | 87069    | 75259    | 65400.1  | TRUE |
| 129666.4 | 113157   | 132571.5 | 113665.4 | 98600.4  | 148501.3 | 122156.9 | 106940.3 | TRUE |
| 175712.9 | 168847.5 | 188793.1 | 224775.7 | 207937.2 | 158460.5 | 155997.3 | 181768.8 | TRUE |
| 67349.5  | 66237.2  | 96165.2  | 99320.3  | 56386.1  | 117561.1 | 87454.7  | 63021.9  | TRUE |
| 53814.6  | 68181.7  | 60958.5  | 43979.8  | 49919.5  | 64172    | 59844.4  | 41656.7  | TRUE |
| 56081.9  | 42977.2  | 51731.9  | 42152.9  | 58682.8  | 56005.5  | 42471    | 57158.5  | TRUE |
|          |          |          |          |          |          |          |          |      |
| 43315    | 50874.2  | 50266.5  | 66229.2  | 72498.5  | 35403.9  | 62121.4  | 64136.6  | TRUE |
| 47817.1  | 61692.4  | 27044.6  | 79396.6  | 73470.2  | 36474.7  | 90230.3  | 128047.3 | TRUE |
| 26540.6  | 28151.8  | 21223.7  | 29281.1  | 20365    | 35130.8  | 40131.3  | 35050.2  | TRUE |
| 56332.3  | 62712.3  | 61525.8  | 41642.4  | 38817    | 78049.8  | 86992.7  | 48746.6  | TRUE |
| 33183.5  | 22482.4  | 47881.3  | 21771.8  | 31522.8  | 42068    | 40647.2  | 24180.7  | TRUE |
| 60453.3  | 42505.6  | 65645.4  | 40395.7  | 30841.9  | 74809    | 77943.9  | 48415    | TRUE |
| 36500.6  | 28611.8  | 42540.4  | 27006.3  | 28146.7  | 46513.9  | 25078.1  | 30231    | TRUE |
| 83954.4  | 57056.7  | 107220.7 | 79704.2  | 108742.3 | 51217.1  | 66719    | 118124.7 | TRUE |
| 220903.2 | 233057.6 | 219515.1 | 222980.5 | 215631.6 | 218795.5 | 234858.4 | 239673   | TRUE |
| 16060.5  | 31186.7  | 14774.9  | 7967.9   | 20693.5  | 7908.7   | 22900.9  | 17826    | TRUE |
| 44821.6  | 50583    | 39284.9  | 37707.5  | 45969.2  | 45488.6  | 58369.5  | 52465.8  | TRUE |
|          |          |          |          |          |          |          |          |      |
| 51647.1  | 65170.9  | 186451.6 | 81319.1  | 61508.1  | 67564.7  | 79894.7  | 61779.5  | TRUE |
| 40929.6  | 33331.7  | 40982.5  | 34810.2  | 36956.5  | 45992.6  | 48286.7  | 44727.2  | TRUE |
| 43798.5  | 64628    | 62918.8  | 49050.5  | 43854.5  | 70225.3  | 59180.1  | 40081.5  | TRUE |
| 35265.7  | 21718.5  | 24923.2  | 26590.1  | 45127.2  | 8897.1   | 35481.9  | 26251.1  | TRUE |
| 53441.6  | 56074.7  | 59085.5  | 60168.4  | 82004.6  | 52094.6  | 45119    | 46958.3  | TRUE |
| 161976   | 147292.2 | 199345.3 | 169624.7 | 149802.8 | 224324.4 | 164152.9 | 149733   | TRUE |

|          |          |          |          |          |          |          |          |      |
|----------|----------|----------|----------|----------|----------|----------|----------|------|
| 10477.1  | 13225    | 9018.9   | 27484.5  | 9006.1   | 17555    | 7127.9   | 12288.4  | TRUE |
| 45084.9  | 45252.3  | 33133.8  | 36072.1  | 46552.3  | 37133    | 53044.9  | 35673    | TRUE |
| 104095.9 | 105168.1 | 109296.7 | 96981.5  | 114230.3 | 111182.3 | 98212.4  | 95154.7  | TRUE |
| 50571.9  | 63621.1  | 40075.5  | 59753.3  | 28788.6  | 59507    | 46856    | 51229.9  | TRUE |
| 5411661  | 4967207  | 5090044  | 4865246  | 5501258  | 5131145  | 5347590  | 5668997  | TRUE |
| 647791.7 | 651906.8 | 665163.4 | 687090.4 | 653916.2 | 702879.9 | 742786.8 | 723448.8 | TRUE |
| 105301.1 | 115975.6 | 101088.2 | 114864.3 | 94383.8  | 121483   | 129769.6 | 106353.5 | TRUE |
| 84694.5  | 99143.2  | 78361.2  | 66312.6  | 90943.9  | 72952.1  | 79785.4  | 96490.5  | TRUE |
| 193286   | 210700.6 | 162448.3 | 210382.7 | 235896.9 | 177543.9 | 204674.4 | 225583.4 | TRUE |
| 37510.7  | 34058.1  | 36993.4  | 46007.4  | 49141.3  | 30389.5  | 48030.9  | 33616.4  | TRUE |
| 98070.7  | 127246.2 | 132278.5 | 145574.1 | 109923   | 116139.4 | 138130.6 | 115478   | TRUE |
| 238553.9 | 229557.4 | 198758.6 | 219247.5 | 274985.2 | 222133.1 | 243475.8 | 280784.8 | TRUE |
| 421976.1 | 424535.1 | 434221.3 | 457981.1 | 381484.9 | 383189.1 | 442290.5 | 418706.4 | TRUE |
| 49339.5  | 49517.7  | 72303.1  | 51927.8  | 54203.7  | 49604.8  | 48696.1  | 47096.7  | TRUE |
| 268755   | 210254.6 | 253192.7 | 282098.9 | 234360.6 | 354588.1 | 247227.9 | 267355   | TRUE |
| 105239.3 | 80631.7  | 115525.3 | 118868.8 | 87729.7  | 143844.5 | 103778   | 115496.8 | TRUE |
| 116582   | 100174   | 55362.6  | 74533.5  | 169995.5 | 117364.5 | 148588.8 | 88600    | TRUE |
| 86178.1  | 77642.9  | 73771    | 63230.8  | 111929.6 | 73065.6  | 89272.5  | 77872.6  | TRUE |
| 146912   | 90062.9  | 228930.3 | 123137.1 | 132821.1 | 232173.2 | 103680.6 | 128325.2 | TRUE |
| 44254.4  | 59666.7  | 68557.9  | 47802.2  | 70314.6  | 38375.8  | 46902.6  | 38399.5  | TRUE |
| 104374.9 | 112396.6 | 139062.3 | 138344.2 | 117090.1 | 156876.4 | 117235.1 | 131512   | TRUE |
| 55049    | 57795.4  | 70729.1  | 59636.4  | 47861.4  | 77844    | 66914.9  | 50181.6  | TRUE |
| 470544.7 | 354768.3 | 798735.2 | 454961.6 | 413125.1 | 776050.5 | 390087   | 443038.6 | TRUE |
| 294151.8 | 331089.8 | 256296.8 | 283987.9 | 285113.5 | 273062.1 | 341563   | 280234.9 | TRUE |
| 768416.2 | 704742.3 | 933138.9 | 968522.6 | 642058   | 766762.5 | 717542.8 | 681553.4 | TRUE |
| 583737.5 | 590160   | 660129.5 | 662106.1 | 509727.8 | 519218.9 | 577920.9 | 540818   | TRUE |
| 337432.9 | 405964.6 | 262652.6 | 313663.3 | 325495.3 | 285116.6 | 413972.3 | 307157.4 | TRUE |
| 320531.8 | 312957.6 | 409722.8 | 389473.3 | 278155.8 | 343348.1 | 352224.6 | 323097   | TRUE |
| 140448.4 | 131591.3 | 126436.7 | 137556.8 | 138915.9 | 132226.8 | 125487.4 | 137040.3 | TRUE |
| 187265.9 | 183122.9 | 180997.7 | 199769.6 | 191552.1 | 173847.5 | 169607.2 | 186497.6 | TRUE |
| 342749.7 | 316389.8 | 338421.4 | 331768   | 363450.8 | 370665   | 367961.4 | 359145.2 | TRUE |
| 231497.2 | 272155.8 | 257478.7 | 279531.6 | 289059.2 | 244516.5 | 235575.1 | 279361.4 | TRUE |
| 150021.4 | 139904.7 | 150664.2 | 163363.1 | 163205.4 | 116267.6 | 175810.6 | 175352.4 | TRUE |
| 66050.6  | 84964.2  | 44924    | 73301.9  | 55158.5  | 47175.6  | 73940.4  | 51993.2  | TRUE |
| 99638.9  | 96569.7  | 81569.8  | 149120.1 | 86546.9  | 78109.2  | 130830   | 96020.6  | TRUE |
| 48496.9  | 53345.8  | 39740.9  | 67188.2  | 45017.2  | 50410.5  | 62636.6  | 57316.8  | TRUE |
| 123957   | 119388   | 69912.8  | 130607.6 | 101350.6 | 123948.2 | 121854.3 | 124610.3 | TRUE |
| 76128.6  | 75240.6  | 61076.8  | 98330.1  | 73986.1  | 84209.2  | 88281.7  | 114341.6 | TRUE |
| 322081.9 | 267458.5 | 442411.8 | 157008.8 | 195398.3 | 454578   | 221574.5 | 212530.3 | TRUE |
| 367657.5 | 318543.3 | 612866.8 | 276165.3 | 261403.7 | 610469.1 | 287486.6 | 305072.2 | TRUE |
| 618423.8 | 503579.8 | 1598080  | 337004.1 | 311348   | 1679658  | 584039.6 | 344410.3 | TRUE |
| 307985.7 | 137523.3 | 245913.1 | 246043.9 | 858747.2 | 159184.1 | 133396.2 | 167295.9 | TRUE |
| 406410.9 | 194173.5 | 391190.1 | 325135.2 | 1087778  | 194617.5 | 202627.4 | 273325.3 | TRUE |
| 66105.8  | 56215.8  | 52325.9  | 54520.9  | 62465.5  | 70193.2  | 84404.1  | 73700.4  | TRUE |
| 11453.6  | 15825.5  | 4154.5   | 11127.7  | 20267.2  | 12901.2  | 16024.7  | 15975.5  | TRUE |
| 121687.5 | 95569.1  | 147093.1 | 83874.9  | 69389.5  | 135268.8 | 107591.4 | 82768    | TRUE |

|          |          |          |          |          |          |          |          |      |
|----------|----------|----------|----------|----------|----------|----------|----------|------|
| 396917.9 | 286912.1 | 341525.7 | 353804.9 | 754594.9 | 317070   | 292930.1 | 344036   | TRUE |
| 368226   | 220225.9 | 360088   | 330079   | 829077.2 | 286504.7 | 227990.1 | 289791.8 | TRUE |
| 55501.9  | 30697.8  | 43367.6  | 50567.7  | 73854.1  | 37962.8  | 36123    | 34083.6  | TRUE |
| 46589.6  | 38343.3  | 47773.8  | 35216.4  | 51076.9  | 50470    | 47761.2  | 46009.8  | TRUE |
| 48228.9  | 49249.4  | 50987.1  | 51249.8  | 50424.6  | 54811.7  | 38302    | 42327.5  | TRUE |
| 63362.5  | 72504    | 73516.6  | 63481.7  | 57019.1  | 86536.1  | 56569.4  | 54047    | TRUE |
| 262262.6 | 236192.4 | 261369.3 | 302748.6 | 335466.7 | 266104.7 | 279362.8 | 250623.7 | TRUE |
| 265233.9 | 247665.6 | 247821.4 | 275893.6 | 267464.1 | 279626.5 | 268349.1 | 262096.8 | TRUE |
| 164039.1 | 141302.8 | 128244.7 | 143878.6 | 180889   | 146144.2 | 153792.8 | 156791.4 | TRUE |
| 136751.3 | 128908.2 | 130985.3 | 124932.5 | 151169.6 | 129636.1 | 136765.4 | 166822.5 | TRUE |
| 58300.3  | 70060    | 47325.9  | 51496    | 72733.8  | 42845.8  | 70663.2  | 58814.6  | TRUE |
| 139215   | 132601.5 | 111980.7 | 124962.1 | 125665   | 150731.9 | 143601.1 | 172469.8 | TRUE |
| 107945.7 | 98112    | 110206.7 | 100883   | 113835.5 | 91332.7  | 104756.2 | 114187.6 | TRUE |
| 51446.6  | 45821.1  | 47000.7  | 51800.7  | 55619.1  | 42003.3  | 50483.4  | 61662.2  | TRUE |
| 207569.9 | 222529.9 | 226436.5 | 177440   | 185229.2 | 171648.9 | 192677.2 | 181667.8 | TRUE |
| 65002    | 69445.8  | 108032.4 | 74040.8  | 55904.9  | 114620.2 | 66576.6  | 61313.8  | TRUE |
| 150395.3 | 115615.4 | 194687.5 | 125118.3 | 113651.2 | 205046.6 | 126964.7 | 127720.6 | TRUE |
| 268847.4 | 108964.1 | 109054.2 | 99968.7  | 85297.9  | 190258.5 | 159265.6 | 128961.8 | TRUE |
| 80685    | 80240.9  | 62938.2  | 54923.2  | 57847    | 89977.9  | 81041.6  | 93498.1  | TRUE |
| 194095.9 | 195811.6 | 168736.3 | 226741.1 | 179205.1 | 189713   | 233533.5 | 210858.3 | TRUE |
| 23357.7  | 24553.6  | 24496.8  | 39648.2  | 30220    | 34998.1  | 30595.5  | 24953.6  | TRUE |
| 154515   | 153695.1 | 150494.5 | 159339.7 | 151544   | 125226.5 | 133022.2 | 135209.6 | TRUE |
| 33882.5  | 39220.2  | 21076.5  | 46462.8  | 29979.2  | 23176.5  | 41500.6  | 30204.5  | TRUE |
| 19722.2  | 25641.9  | 26186.5  | 20167.8  | 18088.2  | 24375.2  | 41000    | 12388.7  | TRUE |
| 114659.9 | 93179.8  | 88621.6  | 132957.7 | 89844.7  | 107210.3 | 103379.5 | 145488.2 | TRUE |
| 189885.2 | 215266.4 | 246346.4 | 183735.9 | 155305.8 | 274933.2 | 200272   | 141496.2 | TRUE |
| 84267.1  | 84129.1  | 98219.3  | 79372.2  | 61083.9  | 99109.4  | 96371.1  | 65238.6  | TRUE |
| 154951.7 | 141364.5 | 297646.4 | 113293.8 | 120678   | 311330.1 | 187552.7 | 116819.8 | TRUE |
| 146056.1 | 167216.1 | 138821.3 | 156540.6 | 132632.6 | 187517.9 | 184072.4 | 128501.8 | TRUE |
| 526386   | 570685.5 | 497905.5 | 612549.4 | 538266.8 | 525419.6 | 621156.5 | 584381.4 | TRUE |
| 625540.7 | 512857.9 | 618670.9 | 621434.5 | 603911.1 | 664194.2 | 597263.6 | 698405.2 | TRUE |
| 151535.8 | 178045.2 | 133636.2 | 149824.9 | 141814.8 | 128863.7 | 154635.9 | 146738.5 | TRUE |
| 189488.8 | 171610.1 | 246250.7 | 215044.5 | 225183.6 | 197665.6 | 155348.4 | 171178.5 | TRUE |
| 338614.9 | 300254.5 | 389391.8 | 405295.9 | 338611.1 | 332091.4 | 313441.2 | 328317.6 | TRUE |

|          |          |          |          |          |          |          |          |      |
|----------|----------|----------|----------|----------|----------|----------|----------|------|
| 29493.6  | 39562.7  | 37426    | 9674.6   | 30949.2  | 38925.5  | 32821.9  | 28889.8  | TRUE |
| 18005.1  | 32690.1  | 12796.2  | 9331.9   | 24842.4  | 20203.1  | 12594.4  | 13459.6  | TRUE |
| 49254.2  | 73066.6  | 61276.5  | 65560.2  | 66448.7  | 61432.9  | 85405.3  | 61639.7  | TRUE |
| 52189.1  | 38758.2  | 49320.9  | 51427.6  | 46839.1  | 64933.2  | 60882    | 67383.6  | TRUE |
| 262596.7 | 378750   | 221902.7 | 215963.6 | 254695.4 | 205441.4 | 333865.5 | 236460.7 | TRUE |
| 478676.9 | 378212.1 | 638004.4 | 710614.9 | 391172   | 362068.7 | 413805.9 | 371122.8 | TRUE |
| 513353   | 391357.1 | 467040.9 | 646033   | 405761.5 | 458494.2 | 471826.9 | 443828.3 | TRUE |
| 138599.7 | 163933.6 | 139756.6 | 96377.1  | 119173.4 | 141591.9 | 144734   | 107474.7 | TRUE |
| 47001    | 48232.2  | 19615.7  | 32238.1  | 30102.2  | 31290.8  | 60225.8  | 37137.7  | TRUE |
| 147092.1 | 167176.3 | 136641.9 | 163725.4 | 159652.1 | 154545.7 | 187557.9 | 162163.8 | TRUE |
| 406730.3 | 344257.7 | 402901.7 | 389117.1 | 533130.1 | 444532.2 | 399894.6 | 404306.2 | TRUE |
| 229433   | 173742.2 | 176601.6 | 187637.8 | 287361.4 | 227216.6 | 196981.9 | 204023.7 | TRUE |
| 35189.2  | 29321.7  | 42949.7  | 40976    | 32531    | 49541    | 38285    | 29244    | TRUE |
| 33115.9  | 41937.1  | 33665.3  | 23980.6  | 35741.8  | 37142.6  | 33019.3  | 27082.1  | TRUE |
| 64237.3  | 66879.5  | 52808.2  | 62191.2  | 82551.9  | 54948.2  | 70257.4  | 65209.7  | TRUE |
| 40255.1  | 75228.7  | 35135.7  | 63033.1  | 36529.5  | 40086.8  | 58935.3  | 37768.3  | TRUE |
| 86063.5  | 64776.9  | 70783.8  | 61871.3  | 51572.5  | 50514.8  | 53868.4  | 45484.5  | TRUE |
| 47839.5  | 65314.9  | 64095    | 56113.4  | 56252.6  | 78049    | 48923.3  | 46954.5  | TRUE |
| 70912.7  | 49045.8  | 121742   | 50518.5  | 35633.8  | 121565   | 80113.2  | 64237.8  | TRUE |
| 243836.5 | 241614.9 | 284358.9 | 242808.7 | 212858.6 | 309486.5 | 267850   | 205346.7 | TRUE |
| 108070.2 | 131092.6 | 67359.2  | 97513.4  | 80891.1  | 103182   | 172082.1 | 108972.4 | TRUE |
| 9897.3   | 7592.2   | 5780.6   | 12203.7  | 18958.4  | 12136.8  | 9395.5   | 9611     | TRUE |
| 180440.2 | 195088.7 | 150471.3 | 166946.7 | 148232.4 | 131509   | 161018.6 | 141342.2 | TRUE |
| 24330    | 27138    | 20312.3  | 25598.3  | 21148.6  | 22503.4  | 27268.3  | 22800.8  | TRUE |
| 73357.2  | 80160.2  | 67567.5  | 67281.3  | 94530.8  | 100032.2 | 94198.4  | 108474.6 | TRUE |
| 205996.5 | 244997.3 | 223683.6 | 231151   | 250410.3 | 269860.1 | 216472.6 | 221991.1 | TRUE |
| 259429.5 | 259719   | 270301.1 | 246002.2 | 234407.4 | 281010.3 | 296714.8 | 257597.7 | TRUE |
| 225306.8 | 251509.7 | 226531.4 | 233792   | 253505.9 | 251020.5 | 213778.1 | 219788.4 | TRUE |
| 59595    | 26551    | 33833.9  | 50962.5  | 59703.7  | 35465.3  | 40144.5  | 45608.5  | TRUE |
| 76966.1  | 61970.7  | 95170    | 88886.2  | 67413.6  | 104894.1 | 89948    | 81576.9  | TRUE |
| 177803.2 | 190428.6 | 204377.9 | 162572.2 | 180489.2 | 224721.4 | 213369.7 | 174444.6 | TRUE |
| 148724.3 | 128340.6 | 128280.7 | 168869.1 | 175186.8 | 106571.4 | 133616.1 | 132926.6 | TRUE |
| 15381.9  | 9216.8   | 10279    | 6390.9   | 9020.2   | 8451.8   | 9465.3   | 12695.6  | TRUE |
| 72586.1  | 44273.7  | 82451.7  | 87626.1  | 75137.9  | 81081.1  | 52040.5  | 59321.4  | TRUE |
| 138044.7 | 143384.6 | 176181.6 | 163099.2 | 144449   | 191170.8 | 147665.1 | 168208.3 | TRUE |
| 45600.1  | 38426.3  | 72848.7  | 37850.7  | 33369    | 72284.8  | 55957.2  | 47714.1  | TRUE |
| 52054.5  | 50910.7  | 77891.9  | 45949.5  | 23931.4  | 84537.8  | 48220.7  | 34775.3  | TRUE |
| 63040.2  | 61879.5  | 63854.5  | 65594.7  | 75037.6  | 31098.5  | 46464.8  | 48829.9  | TRUE |
| 17756.1  | 27684.4  | 41526.3  | 7474     | 18315.8  | 25570.4  | 25417.3  | 6859.1   | TRUE |
| 60991.1  | 60507.6  | 36538.5  | 42861.5  | 45056.9  | 46306    | 55488.6  | 44521.7  | TRUE |
| 67410.7  | 51761.6  | 29643.8  | 67225.4  | 47518.1  | 57894.6  | 91423.5  | 66871.6  | TRUE |
| 18661.8  | 20292.4  | 26243.3  | 23805    | 20238.2  | 30436.7  | 23006.7  | 21748.8  | TRUE |
| 154556.1 | 156364.1 | 90246.9  | 146464.3 | 186589.1 | 120976.6 | 200063.1 | 173275.4 | TRUE |

|          |          |          |          |          |          |          |          |      |
|----------|----------|----------|----------|----------|----------|----------|----------|------|
| 362057.4 | 444311.3 | 289942.3 | 366782.9 | 522475.8 | 284385.3 | 478430.8 | 553838.9 | TRUE |
| 314229.4 | 288891.8 | 266752.2 | 206252.3 | 351494.4 | 288782   | 302321.4 | 374205   | TRUE |
| 226169.7 | 243240.8 | 215578.1 | 189824.3 | 205391.5 | 135885.1 | 250400.8 | 136361   | TRUE |
| 56031.1  | 45581    | 41320.5  | 45282.7  | 43616.9  | 39491.8  | 35320.9  | 44111.5  | TRUE |
| 45777.5  | 32864.9  | 42377.9  | 47499.1  | 41880.7  | 42155.4  | 36477.2  | 46949.6  | TRUE |
| 9330     | 11019.2  | 21772.5  | 27095.5  | 12245.2  | 20350.2  | 12585.1  | 24868.9  | TRUE |
| 247195.8 | 145965.9 | 261781.4 | 320405.7 | 257331.9 | 281321.7 | 187967.1 | 249431.4 | TRUE |
| 140268.4 | 114332.5 | 123659.9 | 132120.4 | 129512.9 | 125817   | 111217.4 | 124307.8 | TRUE |
| 938435.4 | 857019   | 912870.2 | 1017659  | 1106498  | 1033105  | 909718.6 | 1035440  | TRUE |
| 552941.1 | 559616.5 | 511939.6 | 604400.1 | 575676.4 | 616742.3 | 618664.1 | 611160.3 | TRUE |
| 18265.9  | 21089.9  | 14183.6  | 19788.7  | 16005.5  | 14576.2  | 24435.8  | 6865.8   | TRUE |
| 40888.3  | 31964.7  | 48832.8  | 71605.1  | 33622.4  | 35087.6  | 30532.4  | 36939    | TRUE |
| 78898.7  | 91643.9  | 71743.3  | 85456.5  | 125355   | 102844.2 | 91613.7  | 97842.1  | TRUE |
| 33592.9  | 25895.2  | 31417.7  | 30365.5  | 33880.4  | 19954.1  | 17339.7  | 28156.6  | TRUE |
| 184392.5 | 136793.2 | 190430.3 | 192358.1 | 138570   | 196748.5 | 153292.3 | 144059.4 | TRUE |
| 119743.3 | 105635.5 | 127472.4 | 143578.9 | 101576.9 | 126618.8 | 99710.7  | 111815.6 | TRUE |
| 145010.2 | 117831.4 | 169472.9 | 133537.1 | 200998.3 | 236753.2 | 141700.5 | 223646.5 | TRUE |
| 225471   | 206128.5 | 195445.6 | 165628.4 | 163980.3 | 222151.9 | 191794.4 | 178675.1 | TRUE |
| 100733.3 | 66818    | 95666    | 98084.7  | 88785.3  | 78852.4  | 88201    | 79158.1  | TRUE |
| 152061.4 | 130587.1 | 148255.6 | 186237.2 | 138933.7 | 150863.6 | 150371.4 | 164952.2 | TRUE |
| 1318895  | 1304866  | 1034866  | 1175107  | 1190428  | 1052020  | 1353301  | 1163101  | TRUE |
| 1377470  | 1276974  | 1525117  | 1550743  | 1135059  | 1420558  | 1199157  | 1232363  | TRUE |
| 400332.7 | 440387.6 | 761957   | 316751.5 | 282026.4 | 739038.4 | 425471.3 | 274457   | TRUE |
| 1331200  | 876479.2 | 1440727  | 1254550  | 2481509  | 879575.1 | 938412.7 | 968990   | TRUE |
| 435860.4 | 391438.1 | 428063.7 | 398028.4 | 607961.5 | 391615.6 | 351135   | 402678.8 | TRUE |
| 636731.1 | 504817.7 | 583575.4 | 613595.7 | 931723.7 | 517750.8 | 508011.6 | 560982.3 | TRUE |
| 9386.7   | 8792.3   | 24825.2  | 11967.4  | 19953.1  | 13877.8  | 11547.3  | 22807.2  | TRUE |
| 50404.4  | 36171.8  | 46106.8  | 54409.2  | 44961.2  | 41564.3  | 45822.3  | 40778.9  | TRUE |
| 46443.3  | 47305.6  | 38362.6  | 50260.3  | 55467    | 49085.9  | 41771.3  | 48510.9  | TRUE |
| 128034.3 | 148531.5 | 142707.9 | 126198.5 | 122119.2 | 150120   | 139940.8 | 128837   | TRUE |
| 17316.8  | 9759.8   | 13863    | 9765     | 5268.2   | 6887.7   | 11973.1  | 7996.4   | TRUE |
| 329135.3 | 309519.9 | 427262.2 | 268530.8 | 241386.2 | 504271.1 | 320618.3 | 279937.5 | TRUE |
| 90385.6  | 104605.7 | 113539.3 | 110376.2 | 70981    | 132851.9 | 94117.4  | 98905.5  | TRUE |
| 647131.1 | 599229.3 | 681763.7 | 804619.7 | 788497.4 | 661710.1 | 620176.8 | 622388.9 | TRUE |
| 23126.2  | 27075.5  | 21553.1  | 7923.8   | 8923.7   | 19380.7  | 11930.3  | 23653.8  | TRUE |
| 39313.1  | 43274.9  | 37922.5  | 42345.9  | 37795.5  | 40783.7  | 43196.5  | 51352.7  | TRUE |
| 107658.3 | 123302.5 | 100309.5 | 100894.8 | 109541.2 | 99152.6  | 119487.6 | 112213.5 | TRUE |
| 280562.9 | 244218.8 | 230080.5 | 310166   | 198458.9 | 292467.9 | 345436.3 | 272188.1 | TRUE |
| 56603.6  | 52957.3  | 60358.7  | 61920.2  | 54118    | 51384    | 55357    | 70586.1  | TRUE |
| 11394.6  | 11808.7  | 8585.8   | 10861    | 8966.3   | 11061.9  | 9341     | 9697.3   | TRUE |
| 209471.8 | 144787.5 | 246810   | 233768.6 | 169842.2 | 251805.4 | 166690.9 | 206163.9 | TRUE |
| 83704    | 78607.5  | 80544.1  | 87667.2  | 110639.2 | 85225.3  | 81999.2  | 96816.4  | TRUE |
| 15082.9  | 10878    | 11604.6  | 7043.8   | 8660.9   | 15158.9  | 9984.9   | 26208.4  | TRUE |
| 11669.2  | 30089.9  | 9262.6   | 14565.8  | 9964.8   | 19635.1  | 30749.8  | 8877.7   | TRUE |
| 34512.7  | 36908.8  | 37116.7  | 32281.9  | 29075.6  | 41112.6  | 29428.6  | 19356.4  | TRUE |
| 44927    | 65198.1  | 54409.5  | 63773.8  | 35469    | 74557    | 48793.1  | 38859.9  | TRUE |

|          |          |          |          |          |          |          |          |      |
|----------|----------|----------|----------|----------|----------|----------|----------|------|
| 73359.3  | 62696.6  | 68150.8  | 84285.5  | 62595.4  | 62407.4  | 86469.5  | 70642    | TRUE |
| 139914.8 | 140932.7 | 154888.9 | 151823.7 | 122648.7 | 159673.6 | 124559.9 | 140469.6 | TRUE |
| 209084.5 | 210613.3 | 193088   | 181470.2 | 227150.2 | 171233.3 | 192616.9 | 195272.5 | TRUE |
| 75411.7  | 64576.8  | 59901.2  | 70527.2  | 82155.4  | 56040.1  | 66395.7  | 69691.3  | TRUE |
| 20032.2  | 4352.8   | 15023.7  | 5668     | 8175.6   | 18701.3  | 11529    | 16804.2  | TRUE |
| 67582.3  | 55708.5  | 53973.3  | 68794.5  | 48133.9  | 40409.8  | 79094.3  | 53391.1  | TRUE |
| 46914    | 33818.9  | 40201.4  | 52899.8  | 42052.6  | 32829.2  | 70270.5  | 62016.8  | TRUE |
| 87474.1  | 95925.7  | 75027.1  | 117587.3 | 117823.2 | 72767.4  | 122830.5 | 129513.5 | TRUE |
| 215439.8 | 235098.1 | 203299.2 | 210609.7 | 262214.7 | 226004.7 | 243549.6 | 248263.5 | TRUE |
| 48450.7  | 39395.8  | 36913.1  | 35029.7  | 48093.5  | 42742.4  | 47909.1  | 51497.5  | TRUE |
|          |          |          |          |          |          |          |          |      |
| 140764   | 111699.9 | 132356.2 | 105016.9 | 170888.4 | 146824.6 | 121846.8 | 140263.5 | TRUE |
| 168960.9 | 138927   | 137160.2 | 148975.2 | 191290.6 | 149278.2 | 134706.9 | 168810.1 | TRUE |
| 35260.3  | 9256.7   | 27246.8  | 34243    | 11827.9  | 24159.3  | 43582.3  | 38359.4  | TRUE |
| 287758.5 | 349399.9 | 302904.9 | 290243.3 | 282879.8 | 271981.2 | 331920.9 | 279620.9 | TRUE |
| 1432066  | 1409535  | 1319110  | 1388048  | 1287984  | 1384664  | 1556256  | 1394709  | TRUE |
| 1062922  | 931287.8 | 1187831  | 1328677  | 976953.7 | 1089734  | 1020843  | 971845.4 | TRUE |
| 44532.2  | 26297.9  | 33238.8  | 36635.8  | 33769    | 23074    | 46299.8  | 42992.6  | TRUE |
|          |          |          |          |          |          |          |          |      |
| 6467.2   | 14075.5  | 17067.8  | 10134    | 7720.3   | 5616.1   | 6842.2   | 6637.8   | TRUE |
|          |          |          |          |          |          |          |          |      |
| 132454   | 105045.5 | 137654.8 | 176639   | 111717   | 117683.9 | 97738.2  | 139923.3 | TRUE |
|          |          |          |          |          |          |          |          |      |
| 53842.7  | 44111.8  | 100200.2 | 33437    | 36829.9  | 93865.3  | 44609.4  | 38162    | TRUE |
| 138841.2 | 138230.1 | 189797.4 | 108089.9 | 107011.9 | 193448.5 | 143780.7 | 107308.4 | TRUE |
| 68192.9  | 83984.8  | 120149.3 | 105356.1 | 85167.4  | 78235    | 78766.9  | 87297.6  | TRUE |
| 68159.3  | 58087.7  | 48703.5  | 62569.3  | 59465.8  | 39535    | 60852.2  | 60942.5  | TRUE |
| 94274.2  | 64107.7  | 118466.9 | 74536.4  | 96464.5  | 95973    | 89574.8  | 106411   | TRUE |
|          |          |          |          |          |          |          |          |      |
| 205790   | 294079   | 249737.4 | 295430.8 | 266619.5 | 251629.4 | 313086.1 | 246419   | TRUE |
| 256051   | 311544.7 | 224694.6 | 281789.5 | 251999.5 | 256104.3 | 279829.4 | 256462.3 | TRUE |
|          |          |          |          |          |          |          |          |      |
| 31652.9  | 55204.7  | 22465.5  | 27106    | 20988.8  | 17176.3  | 35833.6  | 18288.3  | TRUE |
| 516385.3 | 430450   | 815028.7 | 463880.7 | 392724   | 921887.4 | 411177.8 | 403166.2 | TRUE |
| 49136.3  | 46201.2  | 50381.6  | 42765.8  | 58598    | 81501.7  | 53302.3  | 51145.3  | TRUE |
|          |          |          |          |          |          |          |          |      |
| 165792.9 | 160463.4 | 247010.6 | 173072.2 | 170920   | 211340.2 | 176096.5 | 156144.3 | TRUE |
| 64579.3  | 53043.3  | 102142.5 | 58454.8  | 34720.2  | 113934.5 | 66116.9  | 49113.8  | TRUE |
|          |          |          |          |          |          |          |          |      |
| 63705.4  | 46733.2  | 71575.2  | 33809.4  | 56532.6  | 125144.2 | 71255.6  | 63803.3  | TRUE |
| 198559   | 145351.3 | 179057.9 | 187744.3 | 240375.1 | 211463.5 | 183729.3 | 197703.8 | TRUE |
| 513784.8 | 328260.8 | 469412.8 | 501925.7 | 862555.8 | 379136.6 | 341677.7 | 378710.7 | TRUE |
| 146769.6 | 145572.9 | 196527.8 | 124680.2 | 135171   | 253644.3 | 141116.2 | 135637.8 | TRUE |
| 70370.3  | 66797.9  | 80388.3  | 28285.6  | 48065    | 81193    | 57458    | 52898.2  | TRUE |
| 161836.4 | 199628.1 | 225499.2 | 160275.5 | 171877.1 | 209206.7 | 197281   | 186866.7 | TRUE |

|          |          |          |          |          |          |          |          |      |
|----------|----------|----------|----------|----------|----------|----------|----------|------|
| 197739   | 162987.7 | 209395.4 | 209089   | 209462.4 | 173907.6 | 193802.5 | 191151.6 | TRUE |
| 427917.1 | 340759.1 | 382330   | 350240.3 | 437723   | 434624.5 | 350120.2 | 385401   | TRUE |
| 51178.2  | 48410.4  | 54585    | 57917    | 53194.7  | 48828.4  | 55044.5  | 49694.5  | TRUE |
| 43496.9  | 42653.2  | 49553    | 37411.3  | 31497.9  | 33233.6  | 33100.5  | 29457.4  | TRUE |
| 158653.3 | 198086.1 | 132067.1 | 153655.5 | 122170.7 | 137500.1 | 168513.8 | 135260.3 | TRUE |
| 593313.3 | 561783.9 | 531252.3 | 601119.6 | 578476.4 | 550179.5 | 627115.6 | 578199.5 | TRUE |
| 37105.4  | 26540.2  | 29653.4  | 44672.4  | 31010.4  | 33125.8  | 30231.2  | 27379.7  | TRUE |
| 284056   | 316423.8 | 345389   | 282810.1 | 315457.5 | 329453.5 | 292276.5 | 339505.2 | TRUE |
| 95692.5  | 72704.4  | 92213.5  | 93808.8  | 87462.9  | 91861    | 100971.6 | 89725.4  | TRUE |
| 328129.5 | 241374.8 | 314836.8 | 289423.9 | 610255.1 | 246138.9 | 254852.4 | 304758.9 | TRUE |
| 100499.4 | 87339.8  | 183927.3 | 41780.3  | 66632.3  | 208100   | 97638.5  | 78541.3  | TRUE |
| 128087.1 | 64437.2  | 122670.2 | 129071.7 | 257335.7 | 103556.5 | 92578.4  | 80357.5  | TRUE |
| 211007.2 | 188231.7 | 129869   | 203335   | 181547.7 | 228680.3 | 276737.9 | 261012.4 | TRUE |
| 89517.9  | 67375.4  | 87702.6  | 92707.9  | 82449.9  | 83535.6  | 92316.2  | 90338.9  | TRUE |
| 22096.2  | 29203.6  | 41930.7  | 22333.9  | 7104.6   | 36706.2  | 10696.1  | 11265.4  | TRUE |
| 112654   | 84494.1  | 122913.4 | 122689.7 | 97396.9  | 195101.1 | 132204   | 132435.5 | TRUE |
| 175471.4 | 141844.6 | 142494   | 156406.7 | 265852.3 | 158184.4 | 145273.9 | 164564.5 | TRUE |
| 55700.5  | 33273.2  | 40865.4  | 36735.4  | 50933.4  | 43507.4  | 50298.9  | 47306    | TRUE |
| 30871.2  | 28225.1  | 23329.4  | 37153.9  | 50159.1  | 21613    | 39632.7  | 13780.6  | TRUE |
| 129090.5 | 121443.2 | 116555.4 | 131943.6 | 121788.5 | 156858.7 | 126846.5 | 131774.9 | TRUE |
| 66860.8  | 79605.6  | 97165.6  | 82168.7  | 75990.8  | 120269.6 | 88078.1  | 122373   | TRUE |
| 6629.1   | 6543.9   | 14528.4  | 8710.7   | 4181.1   | 16616.3  | 8127.7   | 8103.1   | TRUE |
| 284961.8 | 239382   | 305707.8 | 360046.9 | 253533.2 | 326841.2 | 281825.9 | 302773.6 | TRUE |
| 26938.9  | 27703.3  | 25680.5  | 11922.8  | 6542.7   | 37463.9  | 13986.9  | 25228.7  | TRUE |
| 39904.1  | 38264.9  | 55436.7  | 40031.7  | 48550    | 62317.8  | 35172.5  | 33999.5  | TRUE |
| 64882.7  | 46964.7  | 61997.8  | 76261.4  | 62252.3  | 66188.5  | 61661.4  | 69534.1  | TRUE |
| 161994.8 | 123768.6 | 148690.3 | 201916.7 | 120161.8 | 131257.6 | 116973   | 125663.7 | TRUE |
| 291642.5 | 285316.3 | 273505.8 | 272701.2 | 301838.7 | 445922   | 296845   | 426667.3 | TRUE |
| 350010.8 | 253232.5 | 274579.5 | 290097.6 | 382945.5 | 386328.2 | 323805.6 | 400419.8 | TRUE |
| 87831.5  | 75293.8  | 99507.2  | 108041.5 | 74531.7  | 91769.9  | 89275.8  | 75337.6  | TRUE |
| 223243.7 | 204573.8 | 198586.2 | 222030.5 | 213961.5 | 249153.4 | 212703.7 | 201803.4 | TRUE |
| 58636.4  | 71721.8  | 70760.7  | 66668.9  | 72789    | 56680.8  | 56295.2  | 44701    | TRUE |
| 168945.7 | 174209.6 | 234980.1 | 232725.3 | 279349   | 332546.2 | 219727.2 | 150514   | TRUE |
| 190468   | 184969.1 | 210685.8 | 183278.1 | 161683.8 | 232697.1 | 208038.1 | 165129   | TRUE |
| 53954    | 43945.4  | 42072.5  | 45980    | 61769.8  | 54680.5  | 51137.2  | 57143.6  | TRUE |
| 80756.8  | 114052.3 | 113722.8 | 43101.2  | 126409.2 | 133990   | 110844.1 | 106550.7 | TRUE |
| 80664.5  | 83998.3  | 99433.5  | 64403.1  | 85985.7  | 119565.8 | 78530.8  | 89969.5  | TRUE |
| 40492.7  | 61733.1  | 42540.2  | 52576.4  | 69178.1  | 26505.2  | 53456.6  | 37073.3  | TRUE |
| 146244.9 | 179219.2 | 131337.3 | 128092.9 | 159768.9 | 126669.2 | 168349.1 | 165209.1 | TRUE |
| 20120.5  | 19384.9  | 15611.7  | 25574    | 28595.8  | 18204.7  | 21876.3  | 24726.5  | TRUE |
| 53485.8  | 47167.8  | 54010.1  | 70041.1  | 42403.5  | 59065.3  | 59053.2  | 55194.5  | TRUE |
| 62437.4  | 53552.4  | 52506.2  | 74393.4  | 60438.4  | 96915.7  | 67251.6  | 64098.1  | TRUE |
| 66550.1  | 57037.9  | 51364.7  | 64963.9  | 57452.3  | 71842    | 36922.2  | 67249.7  | TRUE |
| 147289   | 118761.7 | 118533.3 | 262389.8 | 230710.9 | 143176.6 | 151249.9 | 159699.6 | TRUE |

|          |          |          |          |          |          |          |          |      |
|----------|----------|----------|----------|----------|----------|----------|----------|------|
| 293431   | 280679.9 | 282314.4 | 322768.5 | 262138.1 | 281557.8 | 293637.8 | 246373.8 | TRUE |
| 384126.6 | 418032.6 | 459309.7 | 453379.9 | 335547.8 | 412248.5 | 380084.2 | 386359.4 | TRUE |
| 5753.8   | 11019.9  | 19886.7  | 6875.1   | 6817.1   | 6306.7   | 7461.8   | 6112.9   | TRUE |
| 86079.8  | 76452.5  | 76062.9  | 103924.7 | 68882.3  | 91728.7  | 84890.7  | 106521.6 | TRUE |
| 117569.9 | 85810.7  | 102365.1 | 147092.5 | 102158.9 | 129230.6 | 140512.6 | 102932.7 | TRUE |
| 193645.8 | 194607.3 | 138980.9 | 169492.1 | 127603.1 | 135299.4 | 151452.1 | 141286   | TRUE |
| 403085.5 | 394258.4 | 444908.9 | 462901.6 | 385383.7 | 406198.3 | 491287.3 | 464664.4 | TRUE |
| 76486.4  | 89517.5  | 70304.1  | 79976.8  | 73366.7  | 70657.3  | 87385.5  | 83594.9  | TRUE |
| 78888.9  | 52720.9  | 87446    | 95237.8  | 62177.3  | 86482.5  | 61593.9  | 74064.7  | TRUE |
| 32653.2  | 52720.8  | 56028.1  | 40721.2  | 42265.4  | 36188.9  | 34669.1  | 46261    | TRUE |
| 23041.3  | 43075.8  | 26200    | 39503.3  | 28049.1  | 25379.5  | 29333.1  | 24623.4  | TRUE |
| 200880.1 | 98169.5  | 292197.8 | 97061.7  | 80296.3  | 475029.7 | 122616.3 | 125512.3 | TRUE |
| 211741.8 | 189174.7 | 188038.1 | 227007.5 | 428141.6 | 212287.4 | 235730.6 | 262058.1 | TRUE |
| 272670.1 | 248895.8 | 266440.8 | 189546.4 | 492628.4 | 261705.7 | 214854.1 | 244025.3 | TRUE |
| 97700.5  | 127319.3 | 102912.3 | 82967.4  | 114160.1 | 98761.4  | 122278.6 | 120144.6 | TRUE |
| 50515.3  | 62979.2  | 53477.6  | 59586.6  | 60527.9  | 54378.1  | 65896.9  | 73468.2  | TRUE |
| 312213.1 | 234471.4 | 526457.3 | 354551.8 | 260047.7 | 515003.2 | 298192.6 | 294187.6 | TRUE |
| 56141    | 74897.6  | 82330.5  | 90500.5  | 70432.7  | 76197    | 81341.9  | 63664.8  | TRUE |
| 58876.2  | 65899.3  | 62693.8  | 60934.9  | 68940.7  | 61981.7  | 47931.8  | 53624.9  | TRUE |
| 121314.2 | 101769.5 | 118861.4 | 152257.3 | 132514.7 | 123935.1 | 103890.7 | 124744.8 | TRUE |
| 57741.7  | 38091.1  | 55001.6  | 54738.6  | 63068.9  | 56824.3  | 49354.1  | 58588.3  | TRUE |
| 78980.4  | 58659.5  | 85753.9  | 81801.3  | 81923.2  | 69546.2  | 60915.2  | 66000.5  | TRUE |
| 135817.8 | 138947.1 | 127053.2 | 149648.4 | 140671   | 124214   | 93826.1  | 105154.6 | TRUE |
| 166607.3 | 154458.7 | 222997.7 | 141377.5 | 190780.4 | 147710.3 | 183575.8 | 168756.7 | TRUE |
| 152105.8 | 155768.7 | 211369.3 | 114235.1 | 138040.5 | 220230.9 | 144917.7 | 147104.8 | TRUE |
| 163806   | 130761.8 | 225908.1 | 143790.8 | 153894.7 | 224535.7 | 145286.3 | 154753.9 | TRUE |
| 67049.3  | 33019.8  | 88551.5  | 67928.1  | 87777.4  | 58670    | 53741.4  | 55283.6  | TRUE |
| 150426.7 | 59596.7  | 84834.5  | 119055.4 | 63455.4  | 122254.7 | 114168.6 | 69239.3  | TRUE |
| 503296.5 | 167732   | 289357   | 380823.4 | 402746.3 | 560017.8 | 270553.9 | 611690.2 | TRUE |
| 204680.8 | 116524.3 | 311061.7 | 378300.9 | 128252.1 | 174810.7 | 159932.2 | 175244.8 | TRUE |
| 19064.4  | 22107.1  | 24524.5  | 10431.3  | 17989.8  | 10017.5  | 10225.1  | 12254.6  | TRUE |
| 50154.4  | 35209.2  | 47392.9  | 44198.7  | 49621.4  | 53185.5  | 70119.5  | 46017.1  | TRUE |
| 108448.5 | 88660.8  | 85378.3  | 94749.3  | 100373   | 100531.2 | 119738.5 | 102302.2 | TRUE |
| 159108.2 | 154975.1 | 146226.4 | 157133.6 | 113379.9 | 155285.3 | 139322.9 | 120966.8 | TRUE |
| 92874.1  | 103833.9 | 125817.2 | 112895.5 | 85245.2  | 113104.3 | 101905.7 | 92437.5  | TRUE |
| 94662.2  | 67311    | 91123.3  | 102788.9 | 88183.8  | 90406.1  | 83720    | 93407.2  | TRUE |
| 32964.3  | 43425.9  | 38279.3  | 37533.7  | 34946.1  | 31045    | 37315.9  | 48409.6  | TRUE |
| 62578.2  | 58155.9  | 50171.2  | 50987.3  | 72439.2  | 61139.8  | 62891.3  | 61989.8  | TRUE |
| 91234.7  | 92647.1  | 128501   | 100144.2 | 78086.6  | 165015   | 81670.5  | 93570.9  | TRUE |
| 60505.4  | 54728.5  | 90568.5  | 39267.5  | 30355.2  | 116562.1 | 56514.9  | 35714.8  | TRUE |
| 93644.7  | 69930.3  | 95487.7  | 88851.8  | 120830.1 | 103643   | 102686.9 | 96121.4  | TRUE |
| 158682.3 | 145440.1 | 159973.2 | 155638.9 | 168618.1 | 129638.8 | 136901   | 165537.9 | TRUE |



|          |          |          |          |          |          |          |          |      |
|----------|----------|----------|----------|----------|----------|----------|----------|------|
| 125293.2 | 168406.8 | 100089.2 | 137215.5 | 147232.4 | 105934.1 | 179894.6 | 141316.7 | TRUE |
| 56242.8  | 64467.1  | 41188.8  | 44552.2  | 55885.4  | 41990.5  | 66290.3  | 57521.6  | TRUE |
| 748381.6 | 663788.3 | 796852.4 | 770585.1 | 674735.9 | 733635.1 | 680395.7 | 788788.1 | TRUE |
| 272110.8 | 275120.1 | 255015.8 | 284315.9 | 227180.1 | 260149.8 | 273829   | 279852.3 | TRUE |
| 259989.7 | 244994.4 | 412374   | 166514.5 | 128096.5 | 413390.9 | 206976.2 | 140350.5 | TRUE |
| 27291.6  | 26282.4  | 49306    | 41208.7  | 47925.1  | 38880.1  | 29717.8  | 44244.1  | TRUE |
| 36400.8  | 21358.2  | 36561    | 44655    | 34907.1  | 43455.6  | 25692.3  | 27946.8  | TRUE |
| 26445.4  | 28389.7  | 30906.5  | 30940.3  | 20575.8  | 40295    | 32224.5  | 28499.4  | TRUE |
| 94229.1  | 38476.7  | 61318.5  | 58965.2  | 94626.6  | 81996.1  | 66231.4  | 75502.5  | TRUE |
| 36491.2  | 44567.9  | 23650.3  | 45680.8  | 33415.6  | 33742.3  | 48263.2  | 46511.5  | TRUE |
| 85160.4  | 89968.1  | 116584.7 | 116033.5 | 90143.2  | 81458.5  | 111232.5 | 79311.2  | TRUE |
| 35683.8  | 35303.7  | 23664    | 31854.4  | 20874.3  | 30186.2  | 35709.3  | 12737    | TRUE |
| 246768.5 | 226182.1 | 229276.7 | 261261.6 | 212650.6 | 222555.2 | 254179.1 | 244211   | TRUE |
| 259919.8 | 212043   | 243422.4 | 265295.3 | 238282.1 | 269898.9 | 214393.5 | 251741.5 | TRUE |
| 300902.7 | 251168.9 | 304100.8 | 282399.8 | 247773.6 | 308473.7 | 269812.9 | 294694.4 | TRUE |
| 441684.9 | 413985.5 | 415684.4 | 450905.2 | 446405.8 | 441746.9 | 462758.7 | 435130   | TRUE |
| 32525.9  | 28455.6  | 58772.6  | 27196.8  | 42548.9  | 35499.9  | 42949.6  | 24722.2  | TRUE |
| 95369.3  | 67104    | 72540.1  | 100696.5 | 113162.2 | 165969.2 | 147494.1 | 109975.8 | TRUE |
| 36012.5  | 57820.5  | 25956.2  | 35245.7  | 23453.8  | 24450.6  | 60262.4  | 20860.2  | TRUE |
| 97825.8  | 146450.4 | 54750.4  | 77352.3  | 65196    | 62583.9  | 148325.8 | 84012.1  | TRUE |
| 186029.9 | 268527.2 | 125088.2 | 146241.1 | 122177.4 | 124808.1 | 295324.1 | 121937.3 | TRUE |
| 23101.3  | 31666.8  | 52972.2  | 6642     | 18674.2  | 52369.7  | 31435.2  | 21138.2  | TRUE |
| 126335.9 | 103123.7 | 233010.7 | 71371.9  | 39443.3  | 230883.4 | 115398.4 | 70424.6  | TRUE |
| 202157   | 124775.9 | 222916   | 193402.5 | 441595.2 | 142953.9 | 121652.2 | 163290   | TRUE |
| 698089.8 | 538922.5 | 818292.9 | 895135.3 | 664007.5 | 618684.4 | 601402.3 | 607652.7 | TRUE |
| 89837.2  | 95120.7  | 68532.6  | 91271.2  | 76368.1  | 62494.1  | 88071.3  | 74644.8  | TRUE |
| 208586.3 | 178941.7 | 193410.8 | 208517.9 | 174582.6 | 210689.6 | 184158.5 | 234288.9 | TRUE |
| 362557.2 | 235185.8 | 308323.4 | 274757.3 | 581555.8 | 320637.3 | 221061.9 | 277339.5 | TRUE |
| 248756.3 | 209642.1 | 204548.6 | 225047   | 383478.8 | 215613.6 | 194471.9 | 206029.3 | TRUE |
| 253264.6 | 237436.3 | 252553.7 | 229921.9 | 299839.7 | 237464.9 | 248124.3 | 233396.1 | TRUE |
| 222988.1 | 195423.3 | 210590   | 236321.8 | 237595.9 | 212891.6 | 212027.6 | 251705.1 | TRUE |
| 186705.8 | 192832.8 | 219738.5 | 202787   | 190963.9 | 209533   | 228932.7 | 215224.9 | TRUE |
| 122316.8 | 115214.5 | 120024.9 | 126515.6 | 130161.2 | 131052.9 | 133805   | 148003   | TRUE |
| 835477.5 | 683586.7 | 963026.4 | 909012.7 | 761152.2 | 948544.9 | 650095.5 | 819787.2 | TRUE |
| 1010064  | 807811.7 | 755434.7 | 687344.3 | 1138986  | 992477.7 | 763059.7 | 935552.7 | TRUE |
| 196937   | 173495.5 | 169321.5 | 248418.2 | 229412.5 | 189806.2 | 216545.9 | 222241.5 | TRUE |
| 290476   | 324100.9 | 352537.6 | 359470.3 | 320443.9 | 350499.7 | 332663.4 | 352865.9 | TRUE |
| 158717.2 | 169513   | 167370.9 | 156152.2 | 202557.6 | 194344.4 | 170243.1 | 212292.8 | TRUE |
| 120754   | 121600.8 | 102142.6 | 117452.6 | 142223.2 | 128078.9 | 129731.3 | 130437.9 | TRUE |
| 78997.2  | 95854.8  | 65518    | 125008.1 | 56129.1  | 64808.6  | 78117.2  | 52304    | TRUE |
| 92388.9  | 95459.5  | 150511.9 | 105430.2 | 67693.9  | 155766.1 | 83655.5  | 80755.3  | TRUE |
| 91030.2  | 107005.3 | 135640.8 | 90102.4  | 84435.5  | 134640.4 | 86927.5  | 80195    | TRUE |
| 63944.7  | 64689.2  | 131766.8 | 48632.9  | 36837.3  | 134171.9 | 53530.7  | 39141.5  | TRUE |

|          |          |          |          |          |          |          |          |      |
|----------|----------|----------|----------|----------|----------|----------|----------|------|
| 39293.3  | 47993.1  | 35918.5  | 47714.8  | 58659.8  | 36491.5  | 50854.8  | 60084.3  | TRUE |
| 273237.6 | 291565.7 | 267845.5 | 252050.8 | 281274.2 | 314576.6 | 301686.7 | 288273.5 | TRUE |
| 512060   | 503505.1 | 469407   | 476875.6 | 517749.8 | 421210.7 | 527868.8 | 384036.1 | TRUE |
| 104408.7 | 125434.2 | 102105.7 | 103186.5 | 67271.8  | 104490.9 | 156214.2 | 81774.5  | TRUE |
| 143350.5 | 170943   | 114601.3 | 140490.2 | 112366.2 | 141215.3 | 166583.5 | 138790.8 | TRUE |
| 37528.1  | 37401.7  | 25729.1  | 22934.1  | 41428.8  | 37419.8  | 40138.1  | 34765.1  | TRUE |
| 533859.2 | 524607.9 | 507226.1 | 538600.5 | 528461.9 | 533760.6 | 532000.5 | 521498.8 | TRUE |
| 4087588  | 3564669  | 4714631  | 5948901  | 4976710  | 5168713  | 4822580  | 5465731  | TRUE |
| 34819.2  | 45455.8  | 57447    | 43453.8  | 28771.5  | 46759.6  | 42729.2  | 41131    | TRUE |
| 209385.9 | 198342.1 | 199672.1 | 264099.2 | 260846.3 | 205502.8 | 196502.4 | 224696.2 | TRUE |
| 20806.2  | 42717.5  | 7942.3   | 29656    | 52609.6  | 15812.3  | 40309    | 31954.6  | TRUE |
| 29602.2  | 51685.2  | 73642.9  | 64430.8  | 20465.4  | 20151.3  | 48055.7  | 26955.2  | TRUE |
| 18586.6  | 29106.4  | 29607    | 25915.1  | 20835.4  | 27221.6  | 33167.4  | 27227.5  | TRUE |
| 271757.8 | 141313.2 | 849202   | 122288.8 | 67219.3  | 903228.6 | 193801.8 | 104720.9 | TRUE |
| 447017.2 | 228323.3 | 336160.2 | 315750.5 | 1194899  | 281669   | 246317   | 284331.9 | TRUE |
| 271757.8 | 141313.2 | 849202   | 122288.8 | 67219.3  | 903228.6 | 193801.8 | 104720.9 | TRUE |
| 447017.2 | 228323.3 | 336160.2 | 315750.5 | 1194899  | 281669   | 246317   | 284331.9 | TRUE |
| 109403.5 | 185960.8 | 98517    | 92806.2  | 74324.7  | 111847.6 | 147193   | 110046.4 | TRUE |
| 167645.1 | 166890.4 | 187162.6 | 175436.8 | 149959.4 | 182032.7 | 162243.5 | 165845.2 | TRUE |
| 551859.7 | 492300.3 | 436148.8 | 444032.3 | 568237.4 | 582216.8 | 525720.6 | 564582.5 | TRUE |
| 32392    | 34992.2  | 31454.9  | 45641.5  | 44510.8  | 35912.2  | 36749.6  | 40341    | TRUE |
| 18997.4  | 12983.3  | 7731     | 25195.2  | 16850.5  | 16585.2  | 22786.6  | 25101.1  | TRUE |
| 223026.6 | 197658.4 | 338415.5 | 178312.4 | 197407   | 400633.1 | 195938   | 222054.1 | TRUE |
| 79200.6  | 96434.2  | 103183.1 | 72982.1  | 66027.5  | 128184   | 84149.1  | 66079.3  | TRUE |
| 141219.6 | 120405.6 | 198700.9 | 117967.1 | 126924.2 | 203782.3 | 131116.1 | 138744.5 | TRUE |
| 426116.4 | 383973.6 | 385646   | 369980.1 | 400572.1 | 411956.4 | 381043.3 | 414756.6 | TRUE |
| 116401.4 | 105102.7 | 99224.8  | 116823.7 | 115245.7 | 87720.2  | 120721.5 | 106818.6 | TRUE |
| 171929.9 | 200052.6 | 130023.4 | 143588.4 | 180466.9 | 125911.9 | 188688.7 | 168974.5 | TRUE |
| 296064.7 | 276829.2 | 266231.1 | 269391.3 | 242536.8 | 215235.3 | 262279.9 | 224843.8 | TRUE |
| 70697.6  | 62490.9  | 59985.6  | 88776.5  | 74009    | 61789.1  | 80311.6  | 74494.4  | TRUE |
| 80970.6  | 69722.7  | 74580.6  | 99382.4  | 75305.2  | 76506.8  | 80003    | 62018.2  | TRUE |
| 22153.7  | 28635.6  | 27810.7  | 28079.2  | 21849.6  | 21032.6  | 31512.4  | 17705.7  | TRUE |
| 51590.2  | 25682.2  | 30443    | 22543.2  | 35388    | 34680.5  | 43167.6  | 28877.8  | TRUE |
| 364299.9 | 441477.4 | 314837.5 | 340073.2 | 366656.2 | 283637.7 | 424240.6 | 350806.3 | TRUE |
| 269921.4 | 252186.6 | 427803.7 | 374108.1 | 198705.3 | 271355   | 249037.5 | 231729.3 | TRUE |
| 119466.8 | 147577.3 | 107526.6 | 122441.3 | 115418.4 | 113841.3 | 158361   | 129305.5 | TRUE |
| 140105.9 | 134702.4 | 188962.1 | 149069.5 | 126301.3 | 201180.6 | 141906.4 | 121604.7 | TRUE |
| 258230.9 | 273328.2 | 320942.1 | 310290.7 | 385062   | 215583.7 | 233207.5 | 231655.8 | TRUE |
| 57094.4  | 52488.1  | 82830.8  | 86290.6  | 106750.6 | 37598.6  | 46337.9  | 41902.2  | TRUE |

|          |          |          |          |          |          |          |          |      |
|----------|----------|----------|----------|----------|----------|----------|----------|------|
| 2445806  | 1796253  | 2360008  | 2323508  | 2709393  | 2648364  | 2021096  | 2590990  | TRUE |
| 166832.9 | 119476.1 | 173690.5 | 108528.5 | 119096.6 | 199805.7 | 153885.1 | 123294.6 | TRUE |
| 199195.2 | 140783.2 | 179090.6 | 173134.8 | 247738.2 | 189297.4 | 144255.6 | 180227.1 | TRUE |
| 49611.8  | 57652    | 86614.7  | 67047.8  | 62563.2  | 47915.3  | 49229.6  | 45536.7  | TRUE |
| 24514.2  | 27406.8  | 22367.1  | 48592.5  | 30191.7  | 50059.5  | 33519.8  | 36522.2  | TRUE |
| 67564.9  | 53195.5  | 62553    | 62200.4  | 54142    | 56514.3  | 59723.4  | 51485.8  | TRUE |
| 84285    | 70110.7  | 84958.8  | 103066.5 | 90374.9  | 75379.1  | 87340    | 75415    | TRUE |
| 158831.6 | 163034.2 | 145858.7 | 204931.3 | 135560   | 135069.9 | 221479.4 | 116112.1 | TRUE |
| 74435.1  | 74288.9  | 67307.8  | 73352.7  | 64171    | 60182.8  | 79373.3  | 70996.8  | TRUE |
| 188658.9 | 190679.7 | 128053.4 | 211290.4 | 117728.4 | 167371.3 | 208158.9 | 127435.5 | TRUE |
| 26851    | 33765.1  | 24626.1  | 11782.9  | 29212.7  | 19958.9  | 35465.3  | 26418    | TRUE |
| 40361.2  | 19053.9  | 78924.3  | 60906.2  | 23286.5  | 35476.6  | 41130.7  | 36763.8  | TRUE |
| 61753.9  | 78187.5  | 60659.4  | 65899.9  | 51760.5  | 48173.6  | 84645.9  | 64274.7  | TRUE |
| 20426.6  | 8188.5   | 67758.3  | 23266.2  | 30289.9  | 25666.6  | 22148.4  | 23083.2  | TRUE |
| 134844.1 | 113560   | 153480.7 | 119986.2 | 141374.2 | 152556.9 | 125049.6 | 113476.3 | TRUE |
| 26445.4  | 28389.7  | 30906.5  | 30940.3  | 20575.8  | 40295    | 32224.5  | 28499.4  | TRUE |
| 94229.1  | 38476.7  | 61318.5  | 58965.2  | 94626.6  | 81996.1  | 66231.4  | 75502.5  | TRUE |
| 197463.4 | 179953.8 | 261110.4 | 181620.3 | 161098.6 | 267769.1 | 177806.3 | 166517.8 | TRUE |
| 26445.4  | 28389.7  | 30906.5  | 30940.3  | 20575.8  | 40295    | 32224.5  | 28499.4  | TRUE |
| 94229.1  | 38476.7  | 61318.5  | 58965.2  | 94626.6  | 81996.1  | 66231.4  | 75502.5  | TRUE |
| 35419.3  | 49372.3  | 39440.9  | 35510.7  | 37885.2  | 39261.8  | 52581.3  | 32496.9  | TRUE |
| 496876.2 | 503519.9 | 338327.9 | 420490.3 | 378628.4 | 355340.8 | 437932.7 | 380103   | TRUE |
| 906253.5 | 862906.1 | 888608.8 | 944327.3 | 743293.8 | 832495.1 | 782817.5 | 793170.9 | TRUE |
| 119801.6 | 93518.2  | 70497.6  | 113890.8 | 177960.1 | 183052.5 | 129059.9 | 213653.6 | TRUE |
| 185066.8 | 132100   | 204657.5 | 202112.8 | 153830   | 206905.3 | 160328.1 | 165703.3 | TRUE |
| 69290.1  | 34652.5  | 68089.8  | 97772.4  | 73646.2  | 81775.8  | 56367.6  | 61565.9  | TRUE |
| 20987.2  | 8973.4   | 14749.7  | 10012.7  | 18635.1  | 18341.4  | 13801.8  | 13362.4  | TRUE |
| 90901.9  | 120313   | 107592.8 | 96611.7  | 95508.3  | 107196.4 | 129360.7 | 97253.7  | TRUE |
| 248057   | 287134.6 | 274672.3 | 318702.4 | 266361.3 | 279505.1 | 327543.8 | 258622.4 | TRUE |
| 201611.6 | 174182.7 | 203583.7 | 208638.5 | 222524.5 | 194860.1 | 187425.3 | 206547.9 | TRUE |
| 614272.2 | 373875.7 | 637453.7 | 608406.2 | 615028   | 568031.8 | 417786.5 | 545400.2 | TRUE |
| 211659.3 | 219946.4 | 203280.5 | 187235.8 | 186565.9 | 223330.3 | 228838.6 | 208043.9 | TRUE |
| 206336.3 | 182305   | 224916.1 | 244740.1 | 204008   | 197479.2 | 193196.6 | 219493.9 | TRUE |
| 20874.4  | 6276.8   | 16249.1  | 17992.4  | 7506     | 10845.7  | 17179.4  | 20492.9  | TRUE |
| 47837.7  | 30230.1  | 33553.5  | 42583.5  | 40649.6  | 48977.3  | 38291.9  | 32666.1  | TRUE |
| 82889.6  | 85709.1  | 68646.2  | 101410.7 | 78267.1  | 93529    | 86271.4  | 102925.7 | TRUE |
| 48971.4  | 36409.8  | 77370.2  | 52837    | 54530.5  | 74904    | 60547.8  | 61704.1  | TRUE |
| 82983.2  | 70564.9  | 72792.5  | 65142    | 58384.6  | 130837.2 | 137306.6 | 72485.7  | TRUE |
| 89989.1  | 134752.4 | 85069.2  | 144768   | 134785.4 | 101011.8 | 66114.6  | 90509.9  | TRUE |
| 19272.6  | 8928.5   | 22112.6  | 22655.5  | 22964.7  | 22112.8  | 23481.2  | 11261.5  | TRUE |
| 21225.3  | 30640.9  | 34717.3  | 23032.5  | 38800.1  | 25460.4  | 18612.8  | 21433    | TRUE |
| 75772.7  | 78264.5  | 92035.5  | 62584.7  | 52791.1  | 93007.1  | 83318.9  | 55046.8  | TRUE |
| 94273.2  | 78202.7  | 89737.8  | 80079.9  | 87072.2  | 80205.5  | 87141.4  | 82262    | TRUE |
| 119058.9 | 89680.7  | 130432.2 | 130573.3 | 138552.8 | 108588   | 91123.7  | 127668.2 | TRUE |
| 39407.9  | 33335.8  | 43766.1  | 39215    | 45821    | 37287.9  | 33032.6  | 37307.8  | TRUE |

|          |          |          |          |          |          |          |          |      |
|----------|----------|----------|----------|----------|----------|----------|----------|------|
| 211456.5 | 249859.8 | 190258.5 | 280867.3 | 203280   | 235931.9 | 286291.2 | 225777.7 | TRUE |
| 67960    | 89212.3  | 59608.7  | 79298.4  | 71835.5  | 87412.2  | 94843.2  | 105872.3 | TRUE |
| 162310.5 | 138181.7 | 129373.7 | 150121.1 | 136047.5 | 143922.2 | 152767   | 155328.9 | TRUE |
| 160462.3 | 205771.7 | 163005.2 | 151870.6 | 151442.9 | 146592.6 | 182031.3 | 161363.2 | TRUE |
| 186713.2 | 155857.1 | 259972.7 | 237339.9 | 128898.8 | 147852.1 | 147782.9 | 155966.3 | TRUE |
| 74753.2  | 104435   | 128428.5 | 134547.6 | 81326    | 86618    | 92377.6  | 78833.5  | TRUE |
| 33510.2  | 34065.6  | 35533.8  | 35513.1  | 32426    | 30548.3  | 41312.8  | 28723.7  | TRUE |
| 316903.6 | 450856.3 | 263419.4 | 550975.1 | 313053.3 | 266790.8 | 373536.6 | 254872.2 | TRUE |
| 438921.9 | 379999.7 | 384778.5 | 438462.2 | 380250.5 | 447593.9 | 381711.8 | 439954.1 | TRUE |
| 245986.7 | 261274.9 | 207851.3 | 244895.8 | 450566.8 | 329772.4 | 234600.6 | 366533.3 | TRUE |
| 104773.6 | 61960.3  | 73197.5  | 79086.1  | 84067.7  | 147181   | 90076.6  | 147996.8 | TRUE |
| 195677.7 | 158917.3 | 238491.7 | 215136.1 | 172777.2 | 248045.3 | 176973.3 | 205815.2 | TRUE |
| 53895.5  | 35824.8  | 39749    | 27552.1  | 32486.4  | 43765.5  | 53976.4  | 37800.3  | TRUE |
| 35771.1  | 47096.2  | 46370.5  | 55653.9  | 30367.3  | 44911.2  | 44865.6  | 40456.3  | TRUE |
| 35856.2  | 44356.3  | 53601.9  | 33566.8  | 45042.5  | 54746    | 38930.6  | 37698.9  | TRUE |
| 63644.4  | 46333.5  | 51677.7  | 55762.2  | 49612.6  | 84262.2  | 56690.1  | 78709.9  | TRUE |
| 129455.2 | 145736.8 | 88926.5  | 136586.1 | 103236.2 | 105074.6 | 158916.6 | 101408.9 | TRUE |
| 259564.5 | 234577.4 | 372473.5 | 276974.3 | 237304.4 | 291269.6 | 232991.5 | 286950.9 | TRUE |
| 267123.4 | 360647.9 | 187554.7 | 307308.9 | 188583.2 | 229671.4 | 339771.5 | 225795.4 | TRUE |
| 23296.6  | 29188.8  | 13527.8  | 24850.2  | 22529.3  | 16249.2  | 33516.8  | 30546.1  | TRUE |
| 32385.7  | 39300.4  | 36533.7  | 11829.1  | 29997    | 35825.6  | 41985.3  | 30283.2  | TRUE |
| 25377    | 27577.6  | 8861     | 8219.3   | 29225.8  | 16995.5  | 29027.6  | 30879.2  | TRUE |
| 77869.6  | 89582.3  | 55412.1  | 71834.1  | 88307.6  | 74228.6  | 107547.3 | 70678.2  | TRUE |
| 20803.7  | 22263.9  | 25375.1  | 27345.6  | 6404.1   | 24510.9  | 28277.5  | 6830.2   | TRUE |
| 130416.3 | 111359.1 | 150683.4 | 142828.9 | 149472.8 | 154388.3 | 135852.5 | 145803.4 | TRUE |
| 160785.8 | 195147.5 | 127036.4 | 140035.8 | 153204.5 | 152362.7 | 166715.2 | 155566.6 | TRUE |
| 107868.9 | 96783.9  | 108585.3 | 115025.7 | 93609.4  | 104988.2 | 97889    | 94723.3  | TRUE |
| 19911.6  | 22946.8  | 11743.3  | 11320.1  | 18879.2  | 28089.9  | 26128.9  | 28943.5  | TRUE |
| 34182.4  | 37249.3  | 34496.6  | 32831.6  | 36904.8  | 40931.4  | 33698.3  | 32393.8  | TRUE |
| 58574.3  | 43041.6  | 45359    | 36440.9  | 52082.6  | 30863.5  | 53564.6  | 41384.9  | TRUE |
| 19723.1  | 7468.3   | 5440.3   | 10383.7  | 8668.4   | 24934.9  | 8713.9   | 10690.4  | TRUE |
| 43521.5  | 25324.9  | 34256.8  | 38312.9  | 37234.7  | 37420    | 30987.7  | 38128.5  | TRUE |
| 70201.6  | 79005.6  | 100759.2 | 106530.9 | 122984.7 | 92720.5  | 74362.3  | 71823    | TRUE |
| 44167    | 55433    | 47463.3  | 28689    | 36885.8  | 54881.5  | 45036.4  | 29213.9  | TRUE |
| 122829.2 | 114994.1 | 121209.7 | 100866.1 | 99089    | 126692.6 | 131501.4 | 101079.2 | TRUE |
| 160133.6 | 120544.3 | 128079.1 | 148821.7 | 143720.7 | 144712.8 | 138648.2 | 145429.5 | TRUE |
| 68551.7  | 74371.7  | 65306.8  | 76852.5  | 78653.1  | 70111.4  | 93913.7  | 86393.7  | TRUE |
| 24043    | 31497.3  | 30367.2  | 26891.7  | 27400    | 33110.9  | 30711.4  | 23310.4  | TRUE |
| 23320    | 32081.1  | 8620.6   | 16972.9  | 6965.9   | 33592.3  | 14010.1  | 9524.4   | TRUE |
| 66173.9  | 55478.2  | 62998    | 69267.1  | 71468.5  | 62191.3  | 66149.2  | 64927.3  | TRUE |
| 86058.1  | 157068.6 | 81966.1  | 77387.2  | 82618.2  | 121240.8 | 125035.3 | 76870    | TRUE |
| 466418   | 906572   | 253200.1 | 216734   | 220031.6 | 263354.8 | 822494.9 | 220646.1 | TRUE |
| 60009.2  | 71464.9  | 88875.1  | 55966.7  | 57904.7  | 100001.2 | 62090    | 57162.8  | TRUE |
| 224623.2 | 191986   | 297267.9 | 195133.3 | 163438.5 | 379317.9 | 234741   | 209049.8 | TRUE |

|          |          |          |          |          |          |          |          |      |
|----------|----------|----------|----------|----------|----------|----------|----------|------|
| 110103.8 | 58432.7  | 57770.4  | 44827.6  | 54254.6  | 54601    | 53035    | 56775.1  | TRUE |
| 9153.3   | 12420.3  | 9821.6   | 8027.7   | 10899    | 6609.8   | 22778.1  | 8561.5   | TRUE |
| 21662.7  | 34873.4  | 12242.2  | 8850.9   | 23630.3  | 13008.8  | 34535    | 20862.8  | TRUE |
| 126057   | 163579.1 | 194753.6 | 182459.5 | 95980.7  | 99717.5  | 156009.3 | 86673.1  | TRUE |
| 279608   | 242656.5 | 294394.9 | 267496.8 | 281489.1 | 261238.8 | 285481.6 | 282781.5 | TRUE |
| 53456    | 42896.1  | 49939.6  | 50245.1  | 40560.4  | 45424.9  | 47132.4  | 41449.7  | TRUE |
| 75680.1  | 61424.6  | 79788.1  | 87602.8  | 94106.3  | 90517.1  | 54174.7  | 79668.1  | TRUE |
| 10434.3  | 7327.8   | 11438.4  | 31968.8  | 23753.3  | 10385.7  | 23102.3  | 33877.2  | TRUE |
| 114244.1 | 134518.2 | 111323.5 | 120595.3 | 121745.4 | 132907.4 | 112821.9 | 112840.9 | TRUE |
| 162533.3 | 203657.8 | 120874.2 | 124613.6 | 145623   | 117523.7 | 201399.2 | 128094.2 | TRUE |
| 30497    | 23849.4  | 36410.6  | 27376.6  | 12470.5  | 27568.7  | 23431.2  | 27648.8  | TRUE |
| 50306.2  | 61444.1  | 75617.4  | 46841.4  | 58777.4  | 65162.9  | 46844.1  | 62564    | TRUE |
| 123677   | 117124.3 | 124650.1 | 129270.2 | 106193.3 | 112162.6 | 101593.1 | 121168.3 | TRUE |
| 171297   | 134943.3 | 133470.1 | 138297.3 | 153659.6 | 139585.2 | 125400.8 | 150580.7 | TRUE |
| 118856.4 | 98945.1  | 84206    | 111582.3 | 94435.3  | 119073.8 | 117249.6 | 121114.4 | TRUE |
| 23862.3  | 34847.3  | 28185.8  | 8153.2   | 22266.3  | 21949.6  | 12668.4  | 28334.8  | TRUE |
| 1724167  | 857091.5 | 863363.6 | 664954   | 675931.8 | 661087.8 | 655019.6 | 626499.7 | TRUE |
| 77714.6  | 47226.8  | 97245.8  | 112204.8 | 56456.9  | 94673.7  | 53605.9  | 72942.2  | TRUE |
| 22371.8  | 36671.8  | 11188.6  | 25395.9  | 5442.1   | 10411.2  | 33270.3  | 7903.4   | TRUE |
| 176580.8 | 180124.8 | 185657   | 180560.1 | 164655.6 | 165071.3 | 157688.9 | 165086.1 | TRUE |
| 36487.9  | 33764.5  | 43865.8  | 40950.9  | 35709.6  | 37634.7  | 32075    | 28157.9  | TRUE |
| 17473.7  | 24121    | 23823    | 24997.5  | 17821.9  | 18593.7  | 22832.2  | 20439.8  | TRUE |
| 255326.1 | 264063.2 | 265065.9 | 256116.3 | 256217.8 | 259996.8 | 255554.3 | 260975   | TRUE |
| 468321.9 | 426271.3 | 551982.7 | 575958.2 | 503393.7 | 479609.6 | 511941.6 | 504364.9 | TRUE |
| 75488.8  | 60428.9  | 84989.3  | 87139.3  | 69919.8  | 94560    | 80522.9  | 92587.2  | TRUE |
| 61463.9  | 60826.3  | 39917.4  | 45411.2  | 47280.3  | 55783.8  | 81710.2  | 73812.6  | TRUE |
| 336756.3 | 318853.9 | 383879.6 | 275329   | 327467.6 | 359485.8 | 341656.3 | 356253.4 | TRUE |
| 148422.2 | 153462.8 | 126122.8 | 115860.8 | 147951.1 | 183541   | 174870.6 | 157885.1 | TRUE |
| 60785.9  | 55281.3  | 59208.4  | 58563.5  | 37626.8  | 53531.2  | 48511.4  | 41437.5  | TRUE |
| 25457.5  | 23302.4  | 15011.4  | 27832.9  | 22854.1  | 21751.1  | 11489.9  | 31009.1  | TRUE |
| 217826.3 | 198359.9 | 192308.1 | 239001.4 | 212305.2 | 211293.6 | 212787.7 | 213691.9 | TRUE |
| 44146.2  | 49194.4  | 44881.8  | 74006.3  | 48487.1  | 50894.7  | 57673.3  | 52022.4  | TRUE |
| 46541.9  | 38954    | 43243.2  | 45502.7  | 51581.9  | 30032.5  | 43243.3  | 37077.1  | TRUE |
| 80756.8  | 114052.3 | 113722.8 | 43101.2  | 126409.2 | 133990   | 110844.1 | 106550.7 | TRUE |
| 25559.4  | 26281.2  | 48659.2  | 39420.7  | 22273.8  | 18218.5  | 25820.7  | 10599.1  | TRUE |
| 152025.6 | 185854.4 | 136387.7 | 170156.3 | 107527.3 | 154210.3 | 205630.5 | 130680.6 | TRUE |
| 261474.2 | 265629.6 | 292209.7 | 302005.1 | 267392.5 | 271916.9 | 255031.2 | 276626.2 | TRUE |
| 16828.1  | 9987.6   | 21263.6  | 9695.8   | 8735.7   | 19697.5  | 9733.8   | 21882.3  | TRUE |
| 27987.5  | 22567.8  | 28654.2  | 9798.5   | 23387.6  | 27108.4  | 21284.7  | 24544    | TRUE |
| 93278.2  | 95041.2  | 71631.5  | 96595.9  | 96451.7  | 67676.7  | 119442.6 | 98675.5  | TRUE |

|          |          |          |          |          |          |          |          |      |
|----------|----------|----------|----------|----------|----------|----------|----------|------|
| 92341    | 77439.8  | 143354.2 | 132791.1 | 67611.4  | 83576    | 99049    | 97146.2  | TRUE |
| 353221.5 | 170730.5 | 527957.5 | 493795.1 | 284770.5 | 303431.8 | 246647.8 | 317303   | TRUE |
| 54851.3  | 55517.2  | 34569.6  | 33166.5  | 48272.8  | 38037.3  | 59210.5  | 50940    | TRUE |
| 31485.2  | 9492.2   | 20340.5  | 31560.6  | 19273.1  | 21698.9  | 12497.4  | 32201.2  | TRUE |
| 16275.4  | 8040     | 13013.5  | 10152.2  | 9604.2   | 7197.1   | 15868.3  | 12019.5  | TRUE |
| 12894.9  | 7171.6   | 21172.1  | 7751.9   | 19791.9  | 22348.5  | 8264.6   | 12308    | TRUE |
| 94478.4  | 79330.2  | 97746.1  | 83405    | 61972.5  | 106728.6 | 72087.9  | 70407.1  | TRUE |
| 259656.9 | 286278.1 | 289466.1 | 202828.6 | 196153.1 | 270250.2 | 287334   | 193331.4 | TRUE |
| 260998.7 | 272410.3 | 262674.2 | 254310.6 | 263171.4 | 269129.5 | 282443.9 | 286821.2 | TRUE |
| 27954.8  | 3286.3   | 32485    | 10177.1  | 18261.7  | 60306.2  | 11593.7  | 30712.5  | TRUE |
| 137899.5 | 163144.1 | 118571.2 | 124327.2 | 125090.2 | 141941.2 | 228286.9 | 125990.8 | TRUE |
| 52466.9  | 86426.9  | 33541.3  | 32269.2  | 30390.2  | 39179.1  | 78340.4  | 38248.1  | TRUE |
| 66459.3  | 80007    | 72962.5  | 67318.2  | 64259.4  | 88352.1  | 71531.9  | 62183.7  | TRUE |
| 40235.7  | 39683.4  | 42101    | 37655    | 39736.5  | 41876.8  | 44624.3  | 35892.6  | TRUE |
| 89822.2  | 91774.9  | 70953.5  | 77142.7  | 91957.3  | 73268.9  | 97177.7  | 73485    | TRUE |
| 1651401  | 2085725  | 1606269  | 1557809  | 1453813  | 1713931  | 2113204  | 1580571  | TRUE |
| 283583.7 | 227006.2 | 277500.7 | 298508.1 | 290753.5 | 302575.5 | 249872.7 | 315257.5 | TRUE |
| 50185.3  | 60985.8  | 50667.5  | 63881.5  | 43362.4  | 61436.8  | 57843.6  | 52882.2  | TRUE |
| 377956.7 | 313512.4 | 376244.3 | 371378.3 | 405054.6 | 330192.5 | 346665.1 | 413631.7 | TRUE |
| 61380.8  | 88623.6  | 33503    | 52947.5  | 50419.8  | 42161.8  | 71283.5  | 31862.7  | TRUE |
| 252384   | 141903.6 | 461245.6 | 479013.2 | 140255.2 | 201143.2 | 189790   | 191585.7 | TRUE |
| 63963.9  | 50200.7  | 40784.9  | 70304.5  | 60614.8  | 58206.3  | 58124.7  | 65150.6  | TRUE |
| 85010.6  | 68862.1  | 91022.5  | 106199.9 | 65153.2  | 95582.7  | 87087.7  | 80148.8  | TRUE |
| 32574.9  | 34412.5  | 26021.2  | 27363.5  | 31111.5  | 30092.8  | 43303.7  | 26981.6  | TRUE |
| 135770.9 | 131519.9 | 136575.6 | 116645   | 132063   | 131430.6 | 126063.3 | 112927.2 | TRUE |
| 22948.6  | 31625.5  | 21967.6  | 16783.6  | 13450.2  | 21605.3  | 27625.4  | 16741.6  | TRUE |
| 6212.5   | 19471    | 21656.8  | 8895.3   | 7258.1   | 13617.2  | 9565.7   | 9490.1   | TRUE |
| 26345    | 19124    | 28389.3  | 10969.4  | 17410.6  | 22217.2  | 28199.3  | 19623.3  | TRUE |
| 105431   | 119435.9 | 111792.9 | 125388.6 | 89950.1  | 131498   | 110455.1 | 116699.9 | TRUE |
| 167908.2 | 191087.3 | 165055.2 | 148427.3 | 144515.4 | 158112.1 | 160242.5 | 132355.5 | TRUE |
| 21725.1  | 10795.7  | 24021.1  | 6333.9   | 19120.5  | 9063.6   | 12813.6  | 11358    | TRUE |
| 49574.9  | 59061.7  | 76085.4  | 54654.6  | 50982.3  | 84989.3  | 55585.4  | 50307.4  | TRUE |
| 62799.3  | 44290.8  | 74549.7  | 58127    | 61895.7  | 76444.5  | 53972.8  | 58997.6  | TRUE |
| 176604.1 | 248641.6 | 174228.3 | 192580.8 | 191330.7 | 166693.1 | 194777.1 | 187117   | TRUE |

|          |          |          |          |          |          |          |          |      |
|----------|----------|----------|----------|----------|----------|----------|----------|------|
| 81927.3  | 82977.5  | 62852.5  | 64999.3  | 76877.6  | 78727.7  | 62079.4  | 88032.1  | TRUE |
| 42489.8  | 68042.6  | 54652.6  | 41036.8  | 50198    | 44110.5  | 40027.2  | 48623.7  | TRUE |
| 140048.3 | 201914.4 | 131467   | 151434.2 | 180914.1 | 145504.3 | 175444.4 | 156089.8 | TRUE |
| 245988.2 | 147464.5 | 212023   | 218957.3 | 264023.8 | 188391.6 | 163311.1 | 249591.4 | TRUE |
| 155973   | 156237.6 | 152996.6 | 155443.7 | 185108.2 | 195911.3 | 156977   | 168178   | TRUE |
| 49824    | 43894.4  | 55230.7  | 66977.8  | 42688.9  | 50895.4  | 59228.3  | 46893.3  | TRUE |
| 85097.2  | 57583    | 62911.7  | 69435.8  | 70718.4  | 81683.2  | 64482.6  | 71211.4  | TRUE |
| 65783.8  | 52602.9  | 54269.9  | 66629.6  | 91751.5  | 75220    | 78783.7  | 85187.6  | TRUE |
| 1436398  | 1585587  | 1087057  | 1155696  | 1247164  | 1061650  | 1563420  | 1185691  | TRUE |
| 43525.3  | 59696.7  | 33135.6  | 38077.3  | 44757.3  | 31152.7  | 51273.5  | 50165.9  | TRUE |
| 17310.5  | 18036.5  | 35978.4  | 7057.1   | 7500.2   | 38779.4  | 22993.6  | 21318.5  | TRUE |
| 70494.3  | 50679.5  | 110291.5 | 58603.3  | 67252    | 84900.4  | 55294    | 70405.1  | TRUE |
| 66479.3  | 78632.9  | 70580.3  | 66631    | 57888.8  | 61436.9  | 70842.9  | 61679.5  | TRUE |
| 86993.3  | 74471.1  | 92350.5  | 75824.7  | 85170.1  | 94972.1  | 111778.6 | 83119.3  | TRUE |
| 98418.1  | 75121.3  | 74325.5  | 95541.4  | 84789.6  | 99831.2  | 99868.4  | 95344.8  | TRUE |
| 52210.5  | 51889    | 84774.2  | 42665    | 41019.5  | 77903.8  | 47186.9  | 49613.3  | TRUE |
| 16239.2  | 12024.1  | 9229.2   | 9930.6   | 29504.5  | 2810.2   | 23786.3  | 24567.8  | TRUE |
| 20418.8  | 28908.8  | 17861.3  | 9510.4   | 22731.4  | 15052.6  | 20935.8  | 18978.2  | TRUE |
| 124943.9 | 153700.7 | 138389.3 | 160127.5 | 142365.8 | 125484   | 134349.3 | 128058   | TRUE |
| 88866.3  | 90525.2  | 65083    | 63928.3  | 84606.3  | 61049.8  | 94797.9  | 88014    | TRUE |
| 26323.1  | 41933.7  | 37006.9  | 30938.4  | 22897.6  | 38429.2  | 39328    | 26938.9  | TRUE |
| 52210.5  | 51889    | 84774.2  | 42665    | 41019.5  | 77903.8  | 47186.9  | 49613.3  | TRUE |
| 195991.9 | 152359.5 | 162263.8 | 201213.7 | 151394   | 174203.4 | 172631.9 | 209503   | TRUE |
| 124487.3 | 133312   | 195721.9 | 114309.2 | 103666.4 | 192239.3 | 134667.6 | 106996.4 | TRUE |
| 135084   | 144005.6 | 146634.2 | 131719.5 | 122083.1 | 119571.8 | 165639.8 | 109576.2 | TRUE |
| 25800.8  | 29363.5  | 35008    | 29322.9  | 39924    | 37442.9  | 36663.5  | 35974.6  | TRUE |
| 243972.1 | 213353.4 | 318519.9 | 224815.2 | 181291.1 | 320408   | 227082   | 188918.1 | TRUE |
| 119359.1 | 98181.5  | 193860.5 | 108524.3 | 79432.2  | 209840.8 | 103040.3 | 78786.2  | TRUE |
| 34684    | 27803.1  | 31289.6  | 49273.6  | 31809.2  | 56894.4  | 35077.8  | 38869.9  | TRUE |
| 148345.4 | 100731.2 | 105986.6 | 136723.7 | 140764.2 | 151220.8 | 124566.4 | 182645.3 | TRUE |
| 78445.1  | 77269.2  | 61760.1  | 76452.6  | 83630.9  | 117049.5 | 101003.7 | 119170.5 | TRUE |
| 182484.7 | 169670.1 | 188458.4 | 216546.7 | 170411.9 | 197122.7 | 256068.9 | 180234.6 | TRUE |
| 116170.7 | 128620.4 | 131581   | 119267.5 | 127697.9 | 120615   | 127632.9 | 118491.9 | TRUE |
| 60135.8  | 48894.1  | 59636.7  | 66102    | 43831.8  | 48274.6  | 56875.2  | 63494.1  | TRUE |
| 116170.7 | 128620.4 | 131581   | 119267.5 | 127697.9 | 120615   | 127632.9 | 118491.9 | TRUE |
| 571720.6 | 401020.8 | 520151.1 | 523514   | 766456.7 | 376534.2 | 446720.1 | 452216.3 | TRUE |
| 246939.5 | 219593.1 | 249375.9 | 270491.3 | 236230.1 | 300834.5 | 223800.9 | 277251.7 | TRUE |
| 46346    | 47966.9  | 27637.9  | 53316.5  | 30481.5  | 51508.9  | 43430.4  | 54280    | TRUE |
| 81254.4  | 62451.4  | 99702.2  | 79706.9  | 82914    | 90248.9  | 87880.3  | 79809.1  | TRUE |
| 258545.2 | 276268.6 | 332103.6 | 251686.7 | 191587.4 | 342977   | 282201.8 | 207658.3 | TRUE |
| 108780   | 191192.2 | 113799.4 | 98453.2  | 88442.1  | 118460.7 | 117832.7 | 78273.5  | TRUE |

|          |          |          |          |          |          |          |          |      |
|----------|----------|----------|----------|----------|----------|----------|----------|------|
| 45450.1  | 51563.1  | 58674    | 54779.5  | 59717.8  | 38585.9  | 50377.5  | 36467.2  | TRUE |
| 105595.7 | 99633.2  | 118152.4 | 100197.6 | 90214.5  | 119606   | 113545.7 | 97221.7  | TRUE |
| 150475.5 | 127536.7 | 128998.3 | 135966.6 | 151257.5 | 145406.8 | 130603.6 | 149868.6 | TRUE |
| 53958.7  | 67931    | 62248.1  | 50345.9  | 43559.7  | 49862.6  | 46752.8  | 57442.9  | TRUE |
| 224013.5 | 181382.2 | 253441   | 241717.3 | 320588.9 | 204227.2 | 180732.8 | 213739.9 | TRUE |
| 89864    | 60558.8  | 56880.8  | 86231.1  | 82055.9  | 65073.2  | 72304.1  | 60948.1  | TRUE |
| 354415.4 | 363918.2 | 399115.6 | 407528.2 | 365943.8 | 402682.2 | 370733.9 | 375852.3 | TRUE |
| 61923.8  | 70209.3  | 79086.2  | 65216.7  | 65116.4  | 63206.7  | 71455.7  | 67717.5  | TRUE |
| 37133.9  | 54048.6  | 35119.4  | 32544.5  | 31855.3  | 36753.3  | 47193.8  | 35826.1  | TRUE |
| 48210.7  | 35325.4  | 69956.5  | 42455.4  | 35848.6  | 79953.1  | 43667.5  | 30217.9  | TRUE |
| 167582.7 | 171993.3 | 161832   | 154570   | 127316.9 | 196890.2 | 169080.9 | 154415.7 | TRUE |
| 22508.7  | 6860.9   | 17113    | 6375.7   | 21650.5  | 18325.2  | 26526.4  | 20197.6  | TRUE |
| 41941.8  | 35373.9  | 37556.8  | 55788.2  | 47253.9  | 56677.3  | 40426.1  | 50515.8  | TRUE |
| 17223.5  | 10832.5  | 12973.4  | 11730    | 41930.9  | 24588.8  | 10755.8  | 21920.7  | TRUE |
| 17383.2  | 8437     | 20078.2  | 6975.6   | 17579.4  | 16154.5  | 11606    | 18138.5  | TRUE |
| 107647.3 | 57316.4  | 151440.5 | 108673.6 | 71797.5  | 165103.3 | 76481.6  | 61044.4  | TRUE |
| 16002.5  | 4189.6   | 19332.9  | 11368.6  | 18286.7  | 34002.6  | 6430.7   | 8062.8   | TRUE |
| 98418.1  | 75121.3  | 74325.5  | 95541.4  | 84789.6  | 99831.2  | 99868.4  | 95344.8  | TRUE |
| 107647.3 | 57316.4  | 151440.5 | 108673.6 | 71797.5  | 165103.3 | 76481.6  | 61044.4  | TRUE |
| 162979.5 | 136865.6 | 200656.2 | 183367.1 | 177453.2 | 201464.4 | 156013.4 | 176122.3 | TRUE |
| 162328.1 | 119842.9 | 128865.5 | 151724.7 | 162496.5 | 159747.7 | 123312.1 | 170438.1 | TRUE |
| 272831.7 | 305234.3 | 409231.8 | 152880.4 | 164895.7 | 409968.4 | 259056.8 | 192030.4 | TRUE |
| 1590829  | 1480178  | 1585173  | 1513092  | 1577593  | 1605453  | 1552861  | 1595791  | TRUE |
| 54408.5  | 35475.2  | 45069.9  | 39100.4  | 34037.7  | 56235.5  | 63661    | 49833    | TRUE |
| 104883.8 | 89769.4  | 96211.8  | 85869.2  | 93180.1  | 101360.1 | 98305.2  | 117698   | TRUE |
| 58432.8  | 50726.6  | 31650.7  | 49192.2  | 46052.8  | 38304.8  | 51649.4  | 37497.6  | TRUE |
| 5164     | 7877.3   | 6947.4   | 15840.6  | 5812.1   | 3385.1   | 16740.9  | 7041.5   | TRUE |
| 192338.9 | 272853.5 | 135795   | 186520.6 | 189987.3 | 148940.9 | 251806.5 | 184676.6 | TRUE |
| 35707.6  | 32475.5  | 31821.6  | 38965.9  | 36812.5  | 44237    | 30987.6  | 33099.5  | TRUE |
| 191157.5 | 116234.3 | 195273.3 | 163431.6 | 256128.7 | 179453.2 | 119015   | 147984.2 | TRUE |
| 24043    | 31497.3  | 30367.2  | 26891.7  | 27400    | 33110.9  | 30711.4  | 23310.4  | TRUE |
| 44291    | 70743    | 72408.8  | 59765.5  | 54589.7  | 61399.9  | 58947.9  | 55305.3  | TRUE |
| 182081.1 | 186199.2 | 316392.6 | 142347.4 | 128279   | 323504.1 | 187040.3 | 116699.9 | TRUE |
| 148283.1 | 147576.5 | 246369.6 | 134283.6 | 109544.5 | 251947   | 142395.9 | 145679   | TRUE |
| 88118.8  | 61891    | 113230.1 | 71640.2  | 54722.7  | 135754.1 | 49898    | 75298    | TRUE |
| 103677.8 | 70770    | 109211.8 | 88296.6  | 88883.1  | 131481.5 | 82185.1  | 103821.8 | TRUE |
| 52280.4  | 60699.7  | 58364.2  | 63858    | 35542.3  | 51605.2  | 54513.1  | 47478.1  | TRUE |
| 23853.6  | 25671.1  | 21592.8  | 22680.4  | 24738.8  | 16909.8  | 11554.9  | 21568.1  | TRUE |
| 59469.2  | 27612.3  | 42647.8  | 39002.6  | 121175.8 | 28008.5  | 32158.3  | 46035.9  | TRUE |
| 29691.9  | 43003.2  | 73308.1  | 9764.2   | 22951.5  | 61266.5  | 25729.7  | 22454.8  | TRUE |
| 193967.9 | 196326.3 | 149464.1 | 172099   | 209271.9 | 134054.9 | 174333.4 | 200776.1 | TRUE |
| 51976.7  | 57038    | 66417.2  | 49108.8  | 60966    | 66494.8  | 60334.4  | 64079.2  | TRUE |



|          |          |          |          |          |          |          |          |      |
|----------|----------|----------|----------|----------|----------|----------|----------|------|
| 73662.9  | 70076.1  | 82968.5  | 75689.7  | 72343.9  | 37343.1  | 89355.2  | 43170.4  | TRUE |
| 92343.7  | 75054.2  | 108484.4 | 88096    | 92086.3  | 64774.1  | 65242.9  | 79381.4  | TRUE |
| 37084.2  | 30058.2  | 27870.7  | 33765    | 28061.3  | 49017.5  | 56528.3  | 38505.2  | TRUE |
| 511071.8 | 499517.3 | 450171.1 | 443752.1 | 424907.6 | 535462.8 | 503792.6 | 546482.7 | TRUE |
| 26587.5  | 37676.9  | 19927.9  | 55087.8  | 36667.9  | 40016.4  | 34334.5  | 31335.4  | TRUE |
| 71508.6  | 84978.2  | 100590.1 | 95060.4  | 68007.3  | 109138.4 | 77277.6  | 71555.5  | TRUE |
| 49803.3  | 38368.8  | 24418    | 24418.1  | 33837.4  | 29551.5  | 22018.9  | 30623.2  | TRUE |
| 118378.8 | 138791.7 | 130404.3 | 131209.8 | 127246.7 | 136945.4 | 153357.4 | 97729.1  | TRUE |
| 29794.2  | 37283.6  | 38502.6  | 32852.3  | 36595.5  | 36429.5  | 29970.6  | 26926.7  | TRUE |
| 234051.8 | 238345.4 | 193181.5 | 226953.8 | 211429.3 | 228946   | 234612.6 | 224131   | TRUE |
| 43682.4  | 54520.8  | 63498.1  | 42044.3  | 45110.1  | 56082.4  | 51586.3  | 36680.7  | TRUE |
| 64000.9  | 39930.1  | 68745    | 62270.4  | 78152.8  | 62484.6  | 57832.8  | 50886.9  | TRUE |
| 70799.2  | 75226.3  | 74736.1  | 49859.1  | 58250.8  | 86044.9  | 75071.7  | 64272.3  | TRUE |
| 111161.6 | 127957.7 | 108480.8 | 98720.8  | 105112.4 | 125456.5 | 146147   | 93218.7  | TRUE |
| 58999.9  | 69838.7  | 43374.8  | 64685    | 48574.6  | 74806.5  | 79938    | 63226.9  | TRUE |
| 320847.2 | 367133.4 | 348679   | 421826   | 389129.1 | 304138.4 | 259391.3 | 313747.5 | TRUE |
| 211703.6 | 165871.5 | 163839.5 | 185909.4 | 264496.9 | 210096.2 | 197097.5 | 226468.1 | TRUE |
| 59000.4  | 61793.1  | 58277.8  | 55413.4  | 60365.8  | 39455.4  | 59045.5  | 62455.7  | TRUE |
| 130552.1 | 121996.6 | 123876.5 | 130316.6 | 127231.9 | 142419   | 133929   | 158062   | TRUE |
| 57531.9  | 70373.7  | 66713.5  | 74048.7  | 61904.2  | 85000.1  | 95710.5  | 74083    | TRUE |
| 29307.4  | 11970.1  | 38103.3  | 14169.1  | 28181.3  | 31900.5  | 29219.9  | 28105.4  | TRUE |
| 67103.3  | 90783.3  | 95679.4  | 68279.1  | 59933.2  | 68000.1  | 87013    | 83703.6  | TRUE |
| 68516    | 78241.1  | 79338    | 80322.3  | 95905.4  | 86767.6  | 90546.9  | 106094.3 | TRUE |
| 147986.5 | 121162.9 | 139124.6 | 164928.2 | 139275.1 | 135323   | 130009   | 152553.9 | TRUE |
| 107409.7 | 92998.3  | 143984.1 | 92517.2  | 76751.1  | 147891.9 | 88024.7  | 78752.4  | TRUE |
| 189235.1 | 281185.6 | 149432.2 | 118840.5 | 83887    | 179991.2 | 274036.1 | 103279.6 | TRUE |
| 19191.6  | 28520.6  | 31266.5  | 20982.9  | 19932.3  | 29017.7  | 22952.8  | 21357.3  | TRUE |
| 77878.3  | 48190.5  | 82388.2  | 105288.3 | 101259.8 | 59526.6  | 58593.6  | 62613.7  | TRUE |
| 86257.8  | 94794.4  | 76336.2  | 57742.6  | 55673.7  | 76039.2  | 70319.4  | 39726.5  | TRUE |
| 37133.9  | 54048.6  | 35119.4  | 32544.5  | 31855.3  | 36753.3  | 47193.8  | 35826.1  | TRUE |

|          |          |          |          |          |          |          |          |      |
|----------|----------|----------|----------|----------|----------|----------|----------|------|
| 209524.3 | 188033.7 | 186637.4 | 176316.6 | 211092.3 | 222634.6 | 167469.7 | 200479.7 | TRUE |
| 219063.4 | 249502.3 | 335175.7 | 317821   | 272412   | 201023.2 | 223785.4 | 162269.7 | TRUE |
| 87023.6  | 105411   | 91965.5  | 75162.9  | 113718   | 105902.8 | 95119.3  | 99359.2  | TRUE |
| 215761.3 | 238544.4 | 280828.1 | 181866   | 194563.1 | 292715   | 254593.5 | 214376.9 | TRUE |
| 364077.5 | 349459.1 | 305404.8 | 344501.9 | 282514.6 | 329930.7 | 338942.8 | 344964.8 | TRUE |
| 110036.7 | 84614.5  | 108584.2 | 104649.1 | 109788.4 | 85903.3  | 89432.6  | 95643.9  | TRUE |
| 92922.6  | 92056.1  | 93202.9  | 91685.6  | 69075.1  | 139110.3 | 92771    | 66523.8  | TRUE |
| 81941.8  | 98545.5  | 100114   | 82085.8  | 72753.3  | 94394.1  | 100667.9 | 74932    | TRUE |
| 117550.6 | 191501.3 | 92831.6  | 157819.6 | 145143.7 | 74984.3  | 214913.6 | 137708.2 | TRUE |
| 61659    | 75652.6  | 67633.4  | 67003.5  | 57256.8  | 75847.6  | 52949.1  | 73276.2  | TRUE |
| 647131.1 | 599229.3 | 681763.7 | 804619.7 | 788497.4 | 661710.1 | 620176.8 | 622388.9 | TRUE |
| 1657421  | 1131386  | 1759005  | 1622834  | 1558551  | 1526335  | 1165897  | 1555200  | TRUE |
| 76521.2  | 66571.9  | 65758.6  | 61585.5  | 82000.3  | 64588.8  | 69466    | 125153.4 | TRUE |
| 118196   | 108216.4 | 125344.8 | 116175   | 95746.8  | 164020.3 | 122236.5 | 112812.4 | TRUE |
| 27699.6  | 6463.4   | 15783.3  | 10677.8  | 26189.1  | 25239.4  | 10065.1  | 19687.7  | TRUE |
| 48696.6  | 40465.1  | 86011.1  | 30110.8  | 33021.4  | 88394.1  | 51188.8  | 38793.3  | TRUE |
| 81219.9  | 79691.9  | 118639.4 | 85538.6  | 69665    | 112112   | 64166.8  | 73986.4  | TRUE |
| 57451.3  | 60308.1  | 88458.4  | 56573.4  | 45600.4  | 106689.3 | 52146    | 54224.7  | TRUE |
| 13939.2  | 28234.8  | 9403.8   | 30072.9  | 24009.7  | 26089.1  | 28047.4  | 22336.4  | TRUE |
| 117479.4 | 129535.7 | 148485.4 | 119186   | 139998.2 | 145032   | 106813   | 136983.2 | TRUE |
| 320997.1 | 212971.3 | 1106980  | 125995.6 | 74743.1  | 1079229  | 206091.5 | 102260.6 | TRUE |
| 147940.8 | 74389.5  | 106266.5 | 100987.7 | 506292.8 | 94268.9  | 96357.2  | 106665.1 | TRUE |
| 246386.8 | 198907   | 221100.7 | 273551.8 | 226756.9 | 263742.6 | 186530.2 | 243575.7 | TRUE |
| 90119.9  | 114817.1 | 66876    | 102869.1 | 95559.6  | 81808.2  | 84654.6  | 89427.4  | TRUE |
| 40243.4  | 29597    | 27840    | 33436.1  | 37398.5  | 39892.6  | 41776.5  | 46725.7  | TRUE |
| 82478.8  | 61831.6  | 98045.9  | 88552.5  | 83685.6  | 95244.7  | 97552.1  | 69963.1  | TRUE |
| 72701.5  | 71908.3  | 89792.7  | 61254.4  | 75970.7  | 88354.6  | 84133.3  | 99243.4  | TRUE |
| 441649.4 | 272923.4 | 387020.5 | 468253.1 | 782792.9 | 422335   | 341228.2 | 432476   | TRUE |
| 675349.5 | 711513.1 | 786997.5 | 696733.9 | 1006413  | 575873.6 | 566192.2 | 618500.1 | TRUE |
| 66615.7  | 50807.1  | 50203.5  | 61340.5  | 61031.8  | 55200.2  | 51202.9  | 56493.3  | TRUE |
| 135963.5 | 108824.2 | 113911.4 | 89776.9  | 120940.1 | 164888   | 156823.1 | 165604.9 | TRUE |
| 228261.3 | 201147.5 | 128415.7 | 171633.6 | 138051.6 | 215603.3 | 259736.3 | 208022.7 | TRUE |
| 49582    | 67586.4  | 57722.5  | 35347.7  | 44099.6  | 118876.6 | 78924.4  | 46884.7  | TRUE |
| 58258.2  | 77148.3  | 88926.6  | 59898.4  | 67453.9  | 83274.1  | 56248.8  | 63155    | TRUE |
| 442030.3 | 473544.1 | 410905.1 | 382303.1 | 361642.2 | 484230.1 | 443833.5 | 403175.8 | TRUE |
| 65618.4  | 52642    | 51700.1  | 59638.8  | 57200.7  | 57160.7  | 62075    | 61306.8  | TRUE |
| 35702.8  | 28975    | 30839.8  | 37712.6  | 31515    | 44662.7  | 30642    | 45767.3  | TRUE |
| 212528.6 | 202449.2 | 186737.3 | 211679.7 | 161019.7 | 212067.3 | 180867.1 | 201642   | TRUE |
| 51066.4  | 54618.7  | 53274.3  | 48916.9  | 39894.5  | 45608.8  | 40549.2  | 48196.4  | TRUE |
| 140719.3 | 122212.4 | 150943.9 | 150944.4 | 149103.4 | 123188   | 150922.3 | 150355.2 | TRUE |
| 30947.2  | 36250    | 25262    | 31164.4  | 34576.1  | 35048.9  | 27662.7  | 27370.5  | TRUE |
| 97454.8  | 111621.3 | 64263.1  | 90875.4  | 123897.3 | 67540.4  | 118156.8 | 114917   | TRUE |
| 140729.4 | 138294.9 | 131011.2 | 175037.5 | 128987.2 | 137099.3 | 127303   | 114265.5 | TRUE |
| 8430.4   | 14938.3  | 10858.7  | 11513.3  | 24630.4  | 7703     | 14688    | 8677.9   | TRUE |

|          |          |          |          |          |          |          |          |      |
|----------|----------|----------|----------|----------|----------|----------|----------|------|
| 379181.1 | 382383.3 | 337351.1 | 353633.9 | 419337.6 | 464334.1 | 418805.7 | 434198.8 | TRUE |
| 148273   | 118538.5 | 187835.7 | 179459.6 | 142845.2 | 160175.7 | 124582.1 | 139537.6 | TRUE |
| 91078.3  | 123055   | 113104.6 | 120609.5 | 92063.5  | 60568.3  | 116189.1 | 70585.2  | TRUE |
| 26297.9  | 21608.3  | 20768    | 4583.8   | 32939.8  | 16833.6  | 9601.7   | 29194.8  | TRUE |
| 51677.3  | 58999.8  | 69229.6  | 55422.2  | 46284.7  | 57301.9  | 57364.5  | 61241.8  | TRUE |
| 11181    | 11808.9  | 7872.4   | 12331.7  | 21767.4  | 7702     | 29922.4  | 11882.6  | TRUE |
| 7583.4   | 9679.6   | 14499.2  | 9591     | 17079.3  | 13313.3  | 10572.2  | 16970.3  | TRUE |
| 103730.8 | 79994.5  | 105980.2 | 87264.3  | 92225.4  | 85594.8  | 64606.4  | 74557.7  | TRUE |
| 108907.2 | 90382.2  | 69004.9  | 103179.2 | 88474.7  | 82632    | 110188.4 | 147650.2 | TRUE |
| 978701.7 | 852864.7 | 989285.8 | 940578.8 | 1074305  | 953379.2 | 845479   | 1105201  | TRUE |
| 85767.6  | 99235.8  | 85960.8  | 86558.5  | 70807.8  | 86315.7  | 110514.5 | 71845.3  | TRUE |
| 52385    | 37884.5  | 44597.3  | 41960.2  | 80729.1  | 25520.8  | 55666.8  | 36189.7  | TRUE |
| 372567.3 | 350585.7 | 427329.3 | 347427.1 | 284298.1 | 473621   | 400546.2 | 297803.7 | TRUE |
| 54557.2  | 34297.4  | 43963.1  | 46945.6  | 53469    | 62274    | 49863.5  | 55893.8  | TRUE |
| 386571.5 | 327349.1 | 371103.7 | 373210.1 | 431155.9 | 406722.8 | 341454.1 | 402385.4 | TRUE |
| 21155.9  | 25605.2  | 24176.5  | 23607.7  | 27233.6  | 23876.9  | 21728.9  | 24302.1  | TRUE |
| 60135.8  | 48894.1  | 59636.7  | 66102    | 43831.8  | 48274.6  | 56875.2  | 63494.1  | TRUE |
| 377356.6 | 158687   | 450443.3 | 485647.2 | 553414.9 | 284850.5 | 210376.4 | 285326.2 | TRUE |
| 928636.3 | 445853.3 | 957202.2 | 1095891  | 1281887  | 697235   | 511098.2 | 722135.8 | TRUE |
| 94584.4  | 74603.4  | 109199.4 | 115362.7 | 134949.5 | 107995.8 | 95586.5  | 114260.7 | TRUE |
| 366987.8 | 306239.2 | 356100.6 | 346038   | 315057.4 | 450516   | 283501.9 | 412979.2 | TRUE |
| 114129.5 | 114751.8 | 126607.2 | 126678   | 109508.7 | 114156.8 | 123536.1 | 112614.5 | TRUE |
| 104445.7 | 100852.9 | 119802   | 136171.1 | 135316   | 110647.7 | 237094.8 | 117043.7 | TRUE |
| 106934.3 | 102542.1 | 155706.8 | 131062.5 | 94658.5  | 157799.2 | 177644.9 | 99796    | TRUE |
| 281170.6 | 219812.3 | 234923.9 | 271911.4 | 240402.6 | 305267.4 | 283119.1 | 245673.8 | TRUE |
| 526177.4 | 614814.3 | 409980.4 | 601894.7 | 317225.4 | 397429.4 | 722605.9 | 305123.7 | TRUE |
| 63427.6  | 58099.4  | 87331.7  | 73658.1  | 51718.9  | 90177.6  | 63915.9  | 66717.8  | TRUE |
| 134167.8 | 141929   | 160232.1 | 161905.7 | 135938.2 | 134958.6 | 153252.1 | 134154.8 | TRUE |
| 108639.7 | 86548.4  | 84536.6  | 88728.7  | 85126.7  | 94292.2  | 101244.9 | 98590.2  | TRUE |
| 94323.9  | 61574.2  | 65587.6  | 63737.5  | 57174.7  | 73737.3  | 47965.6  | 66413.2  | TRUE |
| 109735.4 | 102136.5 | 142129.4 | 170079.9 | 104114   | 70594.7  | 118433.4 | 90064.3  | TRUE |
| 342358.2 | 275445.1 | 360005.2 | 354685.5 | 351468.5 | 366296.7 | 269498.1 | 315209.8 | TRUE |
| 146827   | 158227   | 99663.1  | 147672.9 | 134048.3 | 121635   | 114896.6 | 116192.1 | TRUE |
| 192828.4 | 161026.6 | 187203   | 181405.4 | 213326.3 | 204776.4 | 176820.5 | 256182.6 | TRUE |
| 333080.4 | 304010.7 | 361977.6 | 358594.8 | 331709.7 | 323905.2 | 321673.3 | 344178.8 | TRUE |
| 323714.3 | 249134   | 361842.2 | 382608.5 | 377489.9 | 304083.9 | 265810.4 | 309054.8 | TRUE |

|          |          |          |          |          |          |          |          |      |
|----------|----------|----------|----------|----------|----------|----------|----------|------|
| 107775.7 | 95713.7  | 105885.5 | 75754.1  | 117040.7 | 106614.3 | 86647    | 95711.5  | TRUE |
| 354749.9 | 311516.2 | 370952.8 | 353073.7 | 375050.7 | 466395.1 | 331998.7 | 436999.8 | TRUE |
| 213935.5 | 187884.2 | 226844.4 | 191390   | 235745.7 | 166446   | 178143.1 | 177414.2 | TRUE |
| 15443.8  | 16511.1  | 17597.8  | 10059.8  | 15172.4  | 20776.2  | 7246.9   | 20605.4  | TRUE |
| 56582.9  | 56048.8  | 41021.2  | 51639.2  | 58310.7  | 55600.3  | 86784    | 67136.5  | TRUE |
| 128185.7 | 88893.9  | 122787.8 | 150841.9 | 205803.6 | 128679.9 | 150173.6 | 128236.5 | TRUE |
| 45703    | 36659.8  | 82378.9  | 30875.1  | 38853.2  | 79318    | 69371.7  | 34747.4  | TRUE |
| 90910.2  | 77511.8  | 93371.2  | 101680.7 | 121215   | 94015.8  | 95003.8  | 108548.2 | TRUE |
| 61760.7  | 52082.7  | 49227.6  | 29907.4  | 62113.8  | 48135.5  | 50358.9  | 51431    | TRUE |
| 190164.8 | 225985   | 237409.1 | 231720.1 | 227504.6 | 200585   | 228181.7 | 214423.6 | TRUE |
| 84014.5  | 81536.7  | 74519.7  | 106767.9 | 92764.8  | 97890.8  | 104200.7 | 85384    | TRUE |
| 98418.1  | 75121.3  | 74325.5  | 95541.4  | 84789.6  | 99831.2  | 99868.4  | 95344.8  | TRUE |
| 146517.6 | 150029.1 | 165402.8 | 145280.5 | 131280.7 | 174265.6 | 152657.4 | 117055.1 | TRUE |
| 113890.3 | 123902.3 | 100161   | 94861.9  | 84179    | 181398.1 | 186266.7 | 118273.3 | TRUE |
| 994827.3 | 562047   | 1422329  | 848607   | 872065.2 | 1305606  | 572451.2 | 818150   | TRUE |
| 172096.1 | 119625.2 | 190287.1 | 257408.7 | 154932.8 | 220175.9 | 174910.5 | 178491.1 | TRUE |
| 59515.8  | 99373    | 131623.1 | 165598.5 | 183783.1 | 45966.2  | 13011.3  | 27897    | TRUE |
| 158566.1 | 194054.5 | 225315.8 | 273803.2 | 280952.5 | 135099.7 | 104579.8 | 67300.1  | TRUE |
| 576244.6 | 501366.8 | 276403   | 281946.3 | 634943.9 | 368612.5 | 391477.4 | 375809.6 | TRUE |
| 580330.9 | 533225.2 | 485487.4 | 417756   | 934398.5 | 636956.5 | 563589.6 | 562951.2 | TRUE |
| 2979657  | 2665226  | 1976553  | 2045275  | 4329123  | 3178068  | 2820387  | 3044999  | TRUE |
| 623924.2 | 499592.6 | 397406.5 | 455339.1 | 883749.8 | 544255.2 | 631796.3 | 606257   | TRUE |
| 233407.5 | 213539.9 | 136278.8 | 180558.8 | 321383.7 | 226381.5 | 255440.5 | 245549.4 | TRUE |
| 136770   | 139710.7 | 267446.9 | 107924.5 | 103151   | 273126.2 | 162037.4 | 119173.3 | TRUE |
| 240330   | 323493.8 | 289002.7 | 170279.4 | 242256.3 | 312405.7 | 329332.3 | 234986.2 | TRUE |
| 185638.5 | 151922.8 | 288382.8 | 180896.2 | 223231.2 | 287720.9 | 241403.1 | 250667.1 | TRUE |
| 261949.6 | 234121.1 | 231963.4 | 278935.8 | 305448.1 | 230474.5 | 282444.9 | 299024.9 | TRUE |
| 209822.5 | 217133.5 | 303101   | 281614.6 | 323571.3 | 208770.2 | 228182.5 | 215114.9 | TRUE |
| 37213.1  | 41092    | 43793.9  | 38563.7  | 19833.9  | 49490.6  | 35352.6  | 19710.6  | TRUE |
| 115624   | 123037.1 | 173288.1 | 102731.2 | 123748.7 | 175677.8 | 147540.8 | 121205.5 | TRUE |
| 119267.2 | 149303.7 | 148189.4 | 124207.3 | 147621.9 | 153544.5 | 130917.3 | 125711.2 | TRUE |
| 53552.3  | 60073.5  | 64562.5  | 54002.1  | 66862    | 46585.3  | 38176.1  | 52394.5  | TRUE |
| 71058.6  | 78417.2  | 90281.7  | 75140    | 100520.7 | 59522.1  | 72498.5  | 70473.7  | TRUE |
| 124708.4 | 111374.1 | 97473.7  | 118842.7 | 130453.6 | 132118.3 | 114873.6 | 130682.8 | TRUE |
| 69619.2  | 85402    | 68436.9  | 67423.7  | 89945.7  | 66847.3  | 78925.3  | 56873.8  | TRUE |
| 36170.5  | 46155.7  | 37117.8  | 31607.6  | 28097.8  | 36942.9  | 40690.4  | 26853.2  | TRUE |
| 45050.8  | 48486.8  | 60898.8  | 61510.9  | 62984.4  | 50324    | 61607.3  | 53788.8  | TRUE |
| 36597.8  | 28682.2  | 47279.5  | 27855.8  | 25636.5  | 26633.1  | 45331.6  | 21956    | TRUE |
| 90924.1  | 90875.2  | 85544.3  | 151420.7 | 94153.9  | 87597.5  | 153185.1 | 134421.5 | TRUE |
| 129583.4 | 177880.9 | 106988   | 169865.2 | 200180.1 | 111709.1 | 200787.8 | 214313.5 | TRUE |
| 111099   | 139293.8 | 141190.5 | 135221.8 | 109806.7 | 145090.9 | 133990.6 | 152889   | TRUE |
| 69747    | 72511    | 72880.7  | 89021.1  | 58859.9  | 95954.9  | 81577.9  | 85259.6  | TRUE |
| 126211.8 | 130498   | 121892.3 | 128432.6 | 135124.2 | 116236.2 | 127571.8 | 138221.7 | TRUE |
| 36542.3  | 52112.3  | 29475.1  | 43684.4  | 56084    | 44072.1  | 44733.6  | 54771.6  | TRUE |
| 52285    | 52915    | 36652.4  | 67721.2  | 69748.3  | 58919    | 52543.8  | 61495.5  | TRUE |

|          |          |          |          |          |          |          |          |      |
|----------|----------|----------|----------|----------|----------|----------|----------|------|
| 115814   | 81980.9  | 123645.1 | 143271.1 | 111609.6 | 142432.4 | 81278.3  | 118831.6 | TRUE |
| 42120.5  | 43607.8  | 39789.8  | 46470.7  | 53934.9  | 65872.4  | 46902.7  | 52746.7  | TRUE |
| 94126.8  | 86432.2  | 137176.4 | 95121.3  | 80402.9  | 153511.7 | 80477    | 86678.9  | TRUE |
| 143161.7 | 105403.1 | 104514.2 | 115093.3 | 245354   | 145411.4 | 114363.7 | 151167.1 | TRUE |
| 209875.4 | 142154   | 184593.8 | 167932.5 | 439112.3 | 221545.2 | 169792.2 | 224744.4 | TRUE |
| 51607.4  | 33276.6  | 45094.4  | 44353.3  | 60557.7  | 43233.6  | 47171.5  | 57029.3  | TRUE |
| 53548.6  | 39878.4  | 58600.9  | 56440    | 57245.6  | 53417.8  | 53842.7  | 49610.2  | TRUE |
| 78238.2  | 51524.4  | 69462.8  | 66239.7  | 62216.7  | 57286.6  | 51783.8  | 59802    | TRUE |
| 164952.7 | 170467.2 | 119480.4 | 226966.5 | 171081   | 132470.3 | 191344   | 165839.8 | TRUE |
| 274564.7 | 283241.4 | 176236.5 | 228365.2 | 281654.7 | 201717.7 | 268013.3 | 305957.5 | TRUE |
| 40767.8  | 37813.3  | 18126.8  | 25000.3  | 18509.3  | 27963    | 37438.4  | 29666.9  | TRUE |
| 27125    | 10112.4  | 26947.1  | 37538    | 28788.8  | 28595    | 32857.9  | 32426.6  | TRUE |
| 19600.7  | 36178    | 31614.3  | 29713.9  | 42566.3  | 17829.6  | 11120    | 20011    | TRUE |
| 22806.7  | 18695.9  | 24985.6  | 24567.9  | 20558.1  | 12704.7  | 9708.4   | 25521.5  | TRUE |
| 52645.2  | 56008.6  | 77161.8  | 67912.4  | 66779.2  | 86020.6  | 103994.6 | 76511.2  | TRUE |
| 135402.6 | 130369.1 | 125218.9 | 153581.9 | 158298.2 | 126691.3 | 177502   | 169392.4 | TRUE |
| 110456.2 | 154280.5 | 97378.4  | 131529.3 | 121351   | 98601.1  | 146487.5 | 130817.2 | TRUE |
| 60422.2  | 64085.8  | 53003.1  | 44812.2  | 62283.4  | 57000    | 65169.4  | 70564.7  | TRUE |
| 123135.5 | 104011.4 | 102974.5 | 111071.3 | 109186.6 | 115344.8 | 114271.7 | 137599.4 | TRUE |
| 20490.2  | 25222.9  | 37093.6  | 8820.2   | 8064.4   | 33427    | 24337.9  | 12414.5  | TRUE |
| 85683.7  | 86481.7  | 93678.1  | 88046.8  | 64050.7  | 84435.1  | 71968.5  | 75124.2  | TRUE |
| 205364.9 | 156688   | 206638   | 192225.2 | 198649.8 | 203444.9 | 194062.9 | 214080.5 | TRUE |
| 57773.7  | 62461.4  | 95541    | 45417.2  | 39797.8  | 92334.3  | 54793.2  | 63678.9  | TRUE |
| 455956.1 | 252605.4 | 382173.9 | 345476.3 | 903219.4 | 385533   | 283321.9 | 434660.2 | TRUE |
| 38379.6  | 57368.8  | 63351.2  | 57867.1  | 82968.5  | 41733.5  | 38209.1  | 29739.8  | TRUE |
| 111029.6 | 68705.4  | 94346.4  | 123663.9 | 101771.4 | 78370.7  | 87028.8  | 96921.7  | TRUE |
| 262843.4 | 225438.5 | 228186.5 | 294901   | 221045.6 | 259596.3 | 232987   | 220217.5 | TRUE |
| 45491    | 34553.2  | 67204.6  | 52617.7  | 38367.3  | 124265   | 28213.4  | 54853.6  | TRUE |
| 72831.5  | 75696    | 40442.6  | 55179.1  | 37147.5  | 68052.3  | 58984.7  | 58260.2  | TRUE |
| 45801    | 54518.7  | 44026.2  | 58601    | 50653.5  | 65605.5  | 73996.1  | 55564.3  | TRUE |
| 30287.8  | 23319.7  | 24644.1  | 21148.6  | 29302.7  | 38811.7  | 12894.6  | 33227.6  | TRUE |
| 59728.6  | 58586.1  | 42784.6  | 58430    | 67680.5  | 49386.2  | 81531.4  | 71311.4  | TRUE |
| 24934.7  | 21696.6  | 6382.5   | 11695.1  | 19582.3  | 21466.8  | 20762.2  | 24856.9  | TRUE |
| 98785.7  | 101027.1 | 106678.4 | 62085.5  | 45666.2  | 158075.7 | 97160    | 51707.6  | TRUE |
| 78845.3  | 94724.7  | 90001.3  | 54824.4  | 35509.3  | 105907.6 | 95100.6  | 43977.4  | TRUE |
| 340620.4 | 363748.8 | 339518   | 282612.2 | 325254.6 | 289917.4 | 357560.4 | 316616.3 | TRUE |
| 94495.4  | 69401.3  | 59753.9  | 69549.6  | 70917.3  | 63271.9  | 70173.2  | 67612.5  | TRUE |

|          |          |          |          |          |          |          |          |      |
|----------|----------|----------|----------|----------|----------|----------|----------|------|
| 96011.5  | 60213.8  | 72206.2  | 95871.4  | 62913.1  | 72300.1  | 72113.3  | 63667.1  | TRUE |
| 81569.1  | 71977.2  | 108199.7 | 63953.3  | 67929.6  | 99032.6  | 74842.6  | 75992.6  | TRUE |
| 58793.5  | 62848.5  | 68730    | 43629.1  | 55547.8  | 52407.3  | 63433.4  | 46254.3  | TRUE |
| 101086.1 | 100256.2 | 92960.3  | 107086.1 | 90207.9  | 110317.9 | 111181.1 | 94514.1  | TRUE |
| 152370.6 | 109159.9 | 127654.2 | 127695.7 | 154051.4 | 180620.4 | 106685.8 | 155864.6 | TRUE |
| 61416    | 56858.4  | 80404.9  | 69986.2  | 43245.3  | 52453.1  | 67355.5  | 48750    | TRUE |
| 84939.6  | 74834    | 104755.2 | 79805.9  | 81389.2  | 76725.1  | 81002.1  | 83700.2  | TRUE |
| 52590.1  | 55965.1  | 60236.3  | 46525.1  | 60782.7  | 45655.9  | 70427    | 51017.8  | TRUE |
| 51966.9  | 56127.1  | 115565.7 | 61617    | 53581.2  | 49172.7  | 51589.8  | 49978    | TRUE |
| 84123.6  | 81287.8  | 58620.8  | 61033.5  | 40048.7  | 88817.3  | 117156.5 | 58972.9  | TRUE |
| 181760.8 | 100685.2 | 191923.9 | 214042.7 | 152278.4 | 137398.6 | 106202.1 | 147140   | TRUE |
| 19062.4  | 19830.7  | 21947.4  | 18372.1  | 28517.8  | 30741.1  | 25105    | 35288.9  | TRUE |
| 52252    | 43136    | 44249.1  | 39552.4  | 45834.2  | 67630.1  | 67868.1  | 61954.3  | TRUE |
| 60668    | 99842    | 51585.5  | 51596.3  | 56135.8  | 46574.9  | 79784.4  | 62720.9  | TRUE |
| 78744.1  | 71850.8  | 103560.8 | 134565.8 | 69093    | 72262.6  | 75557    | 83407.5  | TRUE |
| 119435.5 | 86256.3  | 94625.5  | 115288.8 | 108121.4 | 103230.1 | 116761.7 | 109598.4 | TRUE |
| 123150.2 | 106458.4 | 147154.1 | 148245.7 | 134640   | 129128.3 | 140140.8 | 165388.2 | TRUE |
| 111135.6 | 78652.7  | 108600.8 | 107314.4 | 63378.3  | 165254.5 | 63759.2  | 90187.8  | TRUE |
| 36235.8  | 37426.4  | 95096.4  | 28945.2  | 17325.3  | 43552.2  | 24787.2  | 28046.1  | TRUE |
| 56327.8  | 49365.2  | 112778.1 | 49631.8  | 49412.4  | 119212   | 44425.1  | 77647.8  | TRUE |
| 54737.1  | 39692.7  | 58261.8  | 45189.6  | 93847.1  | 35694.8  | 61784.6  | 42888.7  | TRUE |
| 58521.4  | 55111.4  | 64914.5  | 44976.8  | 72929.1  | 71921.5  | 63148.1  | 79137.8  | TRUE |
| 44587.2  | 45896.2  | 36983.5  | 37867.8  | 51889.2  | 42903.8  | 49739    | 54745.5  | TRUE |
| 78480.7  | 68430.5  | 57505.8  | 74532    | 62211.8  | 67112    | 78612.4  | 70607.6  | TRUE |
| 68910.4  | 78884.9  | 44038.4  | 59658.2  | 66024.9  | 64736.5  | 87981    | 76461.8  | TRUE |
| 96950.6  | 84888.5  | 70682.2  | 90941.3  | 103022.5 | 81550.9  | 104355   | 97924.1  | TRUE |
| 131297.8 | 124717.6 | 99103.3  | 115823.9 | 106014.8 | 108218.2 | 115692.6 | 116633.1 | TRUE |
| 207815.8 | 222892.7 | 162707.9 | 198455.3 | 220418   | 186810.6 | 240566.6 | 194993.4 | TRUE |
| 206801.3 | 240296.6 | 256455   | 256737.7 | 179005.4 | 235498.6 | 249862.4 | 241735.5 | TRUE |
| 75274.8  | 48735.4  | 55944.6  | 64294.9  | 52298.1  | 77307    | 80152    | 73075.8  | TRUE |
| 188184.5 | 174425   | 174213.9 | 203704.8 | 176711.3 | 202915.4 | 186991.6 | 202213.2 | TRUE |
| 81916.2  | 143545.6 | 174625.9 | 113633.2 | 67548.6  | 79218.9  | 127398.3 | 61817.9  | TRUE |
| 68097.6  | 76300.4  | 83274.9  | 106725.4 | 75780    | 67638.6  | 57504.8  | 72482.9  | TRUE |
| 55700.7  | 28864.6  | 45747.9  | 39005.3  | 34064.2  | 39265    | 39794.1  | 40744.1  | TRUE |
| 97867.8  | 164009.6 | 75837.2  | 55661.8  | 83518.6  | 64770.5  | 121566.5 | 83423.8  | TRUE |
| 155386.5 | 155207   | 233251.9 | 189006.3 | 113095.2 | 123830.7 | 137249.8 | 116438.6 | TRUE |
| 24583.3  | 6805.8   | 87082    | 3786.8   | 1732     | 96540.4  | 19582.6  | 6727.9   | TRUE |
| 112128.4 | 75452.8  | 103120.7 | 81832.9  | 59612    | 178835.8 | 121950.5 | 89044.6  | TRUE |
| 244911.1 | 183735.4 | 220310.3 | 286767.9 | 219090.2 | 224235.7 | 218935.7 | 248600.7 | TRUE |
| 158779.2 | 100958.6 | 374833.1 | 100242.3 | 137281.9 | 373676   | 121607.2 | 133524.2 | TRUE |

|          |          |          |          |          |          |          |          |      |
|----------|----------|----------|----------|----------|----------|----------|----------|------|
| 24175.3  | 21887.7  | 7281.7   | 28661.4  | 23332.7  | 14434    | 31551.3  | 25013.6  | TRUE |
| 41310    | 41204    | 34683.9  | 41535.2  | 48902.8  | 37708.2  | 44392.8  | 51990.9  | TRUE |
| 22315    | 29615.1  | 19526.4  | 10473.6  | 22057.2  | 17217.5  | 17114.9  | 28697.7  | TRUE |
| 98721.3  | 82855.6  | 114518.2 | 107879.6 | 87547.5  | 123137   | 88474.9  | 109088.1 | TRUE |
| 75999.6  | 76489    | 76292.2  | 89423    | 82020    | 61845.4  | 88450.6  | 73711.7  | TRUE |
| 129997.4 | 110974   | 105604.7 | 117782.8 | 129587.9 | 142998.2 | 120590.3 | 143173.8 | TRUE |
| 32040.9  | 37236    | 23508.8  | 30182.6  | 20631.6  | 20739.4  | 57406.3  | 27748.7  | TRUE |
| 105292.3 | 90097    | 90556.2  | 89061.6  | 96573.3  | 96132.4  | 105530.5 | 106386.1 | TRUE |
| 25153.5  | 26024.8  | 31600.9  | 26605.2  | 25272.5  | 38016.5  | 36619.8  | 42254.9  | TRUE |
| 60852    | 73269.3  | 42579.8  | 50406.2  | 56812.3  | 54723.9  | 55905    | 57599.1  | TRUE |
| 104914.8 | 82881.5  | 98827    | 100503.7 | 100612.8 | 110807.8 | 103635.8 | 105515.7 | TRUE |
| 45608.6  | 34306.5  | 42788.3  | 47353.5  | 38973.9  | 46200.4  | 37611.1  | 45220    | TRUE |
| 39597.9  | 26113.2  | 32322.4  | 20360.5  | 32644    | 29775.1  | 32934.1  | 26693    | TRUE |
| 126548.8 | 103464.8 | 204969.3 | 79139.5  | 69110.4  | 292948.4 | 101498   | 77965.9  | TRUE |
| 39287.7  | 46206.9  | 50647.7  | 42016.3  | 51798.9  | 48764.9  | 37686.3  | 57581.6  | TRUE |
| 39807.1  | 47723.7  | 44159    | 30951.2  | 29775.6  | 50469.2  | 41698    | 33875.9  | TRUE |
| 161147.5 | 102731.1 | 142526   | 179840.8 | 130251.5 | 110803.4 | 154327.6 | 140756.1 | TRUE |
| 92102.9  | 85731.5  | 121316.3 | 99565.5  | 91674.4  | 96294.6  | 75691.9  | 65507.2  | TRUE |
| 20129.5  | 13603.6  | 17084.4  | 7358.2   | 14176.9  | 5680.5   | 8775.8   | 8631.3   | TRUE |
| 144000.4 | 132293.1 | 131306.9 | 151701.4 | 144865.1 | 131384.7 | 127060.8 | 160338.1 | TRUE |
| 101049.4 | 79858.9  | 101725.6 | 111722   | 108777.6 | 132452.6 | 82938.1  | 117969.3 | TRUE |
| 227222.5 | 196590.8 | 204315.6 | 186428.2 | 225130.1 | 223752.7 | 176161.2 | 246670.5 | TRUE |
| 20428.4  | 30782.9  | 17152    | 6615.7   | 31094.4  | 7643.2   | 31144.3  | 11558    | TRUE |
| 32936.9  | 20974    | 27998.1  | 39346    | 22731.4  | 48689.1  | 25923.8  | 37118.1  | TRUE |
| 23284.2  | 36953.2  | 24907.6  | 12829.4  | 23755.9  | 21163.5  | 33304.8  | 38802.1  | TRUE |
| 82725    | 82057.9  | 119129.6 | 53902.5  | 64382.5  | 115802.6 | 71825.1  | 57497.1  | TRUE |
| 7126.6   | 24879.9  | 15098.9  | 23251.4  | 8391.2   | 6128.2   | 12074.8  | 22052.4  | TRUE |
| 108814.3 | 70240.3  | 80522.7  | 93245.3  | 119382.6 | 137038.5 | 105405.9 | 106940.1 | TRUE |
| 126835.9 | 95000.2  | 147076.7 | 125956.3 | 90972.8  | 149392.4 | 125290.8 | 113696.1 | TRUE |
| 21085    | 22457.1  | 25732.2  | 10047.7  | 23561.4  | 22866    | 23867.1  | 19091.5  | TRUE |
| 527066.1 | 465601.2 | 502541.2 | 570417.2 | 470854.3 | 603908.5 | 502662.1 | 448734.3 | TRUE |
| 31471    | 32280.2  | 11648.2  | 32369.8  | 24277.7  | 28083.7  | 36190.9  | 45387.8  | TRUE |
| 91322    | 134991.5 | 64262.8  | 59393.5  | 58126.4  | 68571.2  | 136656.1 | 68318.9  | TRUE |
| 174876   | 205208.2 | 145325.1 | 173129.2 | 186894.8 | 153612.6 | 219899.1 | 169938.6 | TRUE |
| 71208.3  | 96403.2  | 55680.6  | 52367.3  | 74596.8  | 62787.3  | 101893.3 | 71041.5  | TRUE |
| 107159   | 105224.5 | 145494   | 140234.2 | 136595.3 | 130858.8 | 121051.9 | 113158.4 | TRUE |
| 21478.3  | 9165.7   | 39821.6  | 14392.6  | 9802.1   | 45496.1  | 11851.9  | 9663.8   | TRUE |
| 15635.3  | 7330.7   | 8440.5   | 11509.6  | 17567.5  | 21909.3  | 24659.6  | 10548.3  | TRUE |
| 248985.7 | 175532.8 | 208094.9 | 223900.4 | 338735.3 | 169767.6 | 187777   | 186445.7 | TRUE |
| 28019.2  | 33804.4  | 22524.2  | 12640.8  | 7766.5   | 26911.6  | 34864.7  | 21673.3  | TRUE |

|          |          |          |          |          |          |          |          |      |
|----------|----------|----------|----------|----------|----------|----------|----------|------|
| 36474.7  | 43799.6  | 21482.6  | 26552.8  | 24964.4  | 19202.9  | 58563.2  | 24424.9  | TRUE |
| 51899    | 43370.3  | 67045    | 61799.7  | 86663.3  | 43886.6  | 48186.7  | 42362.6  | TRUE |
| 41860.6  | 33312.7  | 39738.7  | 36526.6  | 38894.2  | 44525.8  | 38868.4  | 51875.9  | TRUE |
| 154197   | 153967.6 | 189830.7 | 166762.8 | 134847.4 | 168696.5 | 188561.6 | 138715.3 | TRUE |
| 18806    | 20205    | 24338.9  | 10952.4  | 24017.9  | 18594.2  | 18059.2  | 19134.4  | TRUE |
| 19173    | 35727.9  | 6543.9   | 12162.8  | 21941    | 9072.1   | 12010.6  | 34226.7  | TRUE |
| 135761.7 | 127918.7 | 155757.7 | 171778.2 | 104098.5 | 160446   | 128966.3 | 146543.8 | TRUE |
| 185816   | 122745.4 | 116111.9 | 165400.7 | 156666.8 | 193484.3 | 156932.3 | 203373.7 | TRUE |
| 49125.7  | 65750.5  | 81281.3  | 80005.8  | 78402.6  | 80846.9  | 75776.5  | 68494.1  | TRUE |
| 37773.1  | 27833.3  | 30211.5  | 45890.2  | 29184.7  | 26283.1  | 30666.6  | 35350.2  | TRUE |
| 137670.2 | 119690.6 | 131372   | 118553.6 | 110106.5 | 131971.5 | 126194.6 | 108572.9 | TRUE |
| 35248.3  | 27951.9  | 73066.4  | 29804.1  | 38109    | 65575.6  | 31246.9  | 38333.3  | TRUE |
| 48643    | 29885.8  | 35203.9  | 33069.7  | 31425.4  | 28527    | 14439.2  | 29366.3  | TRUE |
| 135389.9 | 134134.4 | 148335.4 | 131086.8 | 145611.7 | 139849.4 | 140629.5 | 152869.4 | TRUE |
| 138462   | 179718.6 | 192974.4 | 138935.1 | 136926.9 | 212206.6 | 179960.1 | 122474.7 | TRUE |
| 59990    | 54527.6  | 70337.1  | 65580.8  | 67710.8  | 79728.1  | 62343.2  | 72641.5  | TRUE |
| 8534     | 22739.8  | 24448.8  | 20653.6  | 9312.7   | 17692.3  | 10732.5  | 9605.3   | TRUE |
| 42393.5  | 46474.8  | 37095.3  | 35604    | 45579.9  | 43677.7  | 48282.4  | 56117.7  | TRUE |
| 8769     | 7489     | 4919.9   | 9862.3   | 11138.3  | 6880.3   | 21903.7  | 18886.3  | TRUE |
| 27911.8  | 19726.9  | 27948.1  | 24955.1  | 23080.9  | 6961.6   | 21682.5  | 9559.2   | TRUE |
| 16787.1  | 12386    | 26741.9  | 8829     | 17929.1  | 19756.8  | 11425.8  | 18328.1  | TRUE |
| 117974.4 | 75570.5  | 85837.5  | 93505.4  | 73988.7  | 129903.9 | 113557.5 | 114587.2 | TRUE |
| 75767.5  | 49058.4  | 101428.4 | 94655.1  | 85810.4  | 97605.7  | 81566.5  | 94115.1  | TRUE |
| 81990.5  | 81324.6  | 227721.5 | 58558    | 49755.5  | 240812.3 | 90852.8  | 74369.7  | TRUE |
| 333230.4 | 295612.3 | 328587.6 | 356816.6 | 304287.1 | 357159.5 | 345436.3 | 348342   | TRUE |
| 47973    | 41789.7  | 52348.3  | 60406.5  | 51309.9  | 39394.1  | 59807.5  | 38910.2  | TRUE |
| 49055.7  | 43449.8  | 75908.5  | 42350.3  | 54022.1  | 69477.1  | 37291.8  | 56478.3  | TRUE |
| 37591.9  | 57200.3  | 42657.2  | 42667.3  | 79334    | 35189.7  | 79215.9  | 69456.4  | TRUE |
| 39469.1  | 39830.4  | 25397.7  | 24675.4  | 33686.5  | 29789.4  | 34309.5  | 61020.1  | TRUE |
| 124866.1 | 92226.8  | 109430.7 | 154725.5 | 140303.8 | 136375.4 | 114239.9 | 154741.4 | TRUE |
| 42018.6  | 74125    | 26910    | 36220.3  | 19754    | 35241.2  | 59194    | 33701.2  | TRUE |
| 60054.5  | 69692.5  | 61365.8  | 55081    | 47339.5  | 60779.6  | 64836.5  | 53257.1  | TRUE |
| 472936.5 | 401188   | 419820.5 | 463301.7 | 396032.2 | 627456.4 | 593753.9 | 502091.3 | TRUE |
| 141292.9 | 88900.5  | 128063.8 | 158609.1 | 110749.4 | 123493.6 | 85350.8  | 133558.7 | TRUE |
| 168749.3 | 93295    | 347061.7 | 112351.8 | 78154.4  | 335948.8 | 94165.8  | 83885.3  | TRUE |
| 31972.2  | 39595.9  | 21204.9  | 47480.9  | 42071.5  | 33714.6  | 42133.8  | 44041.1  | TRUE |
| 48792.8  | 69652.8  | 81146.4  | 59629.6  | 74608.2  | 62979.2  | 50905.9  | 58265.2  | TRUE |
| 87837.3  | 103093.7 | 89507.1  | 109382.4 | 93596.8  | 117336.8 | 81498.5  | 85983.9  | TRUE |
| 156686.5 | 203217.2 | 102734.9 | 198121.1 | 87826.9  | 127583.2 | 280659.4 | 104453   | TRUE |



|          |          |          |          |          |          |          |          |      |
|----------|----------|----------|----------|----------|----------|----------|----------|------|
| 94654.5  | 96801.2  | 124218.2 | 87933.6  | 104298.1 | 116830.1 | 90817.4  | 88213.7  | TRUE |
| 26799.5  | 28372.1  | 35476.7  | 30455.1  | 18166.9  | 38424.6  | 32392.4  | 24768.2  | TRUE |
| 22943.5  | 8165.1   | 17374    | 9299.7   | 21166.8  | 20080.4  | 29303.9  | 14407.8  | TRUE |
| 45041.9  | 51525.8  | 48833.9  | 44247.6  | 37340.2  | 54296    | 51398.2  | 61628.8  | TRUE |
| 12987.5  | 7548.5   | 23327.6  | 17162.9  | 13682.3  | 14808.3  | 8014.6   | 8454.6   | TRUE |
| 27198.5  | 12984.6  | 42515.2  | 8309.9   | 8612     | 38558    | 28879.7  | 14058    | TRUE |
| 125954.7 | 103653.6 | 92678.6  | 96502.7  | 73769    | 135131.9 | 130956.7 | 101891.2 | TRUE |
| 64200.8  | 66870.1  | 65201.3  | 59633.4  | 53866.5  | 53067.9  | 59406.9  | 61540.2  | TRUE |
| 27885.9  | 51339    | 57025.4  | 49066.6  | 33972    | 48585    | 31158.4  | 29147.1  | TRUE |
| 58013.4  | 38635.8  | 59169.9  | 68863.3  | 48678.5  | 71559.7  | 53120.3  | 63966.3  | TRUE |
| 68062.3  | 62254.6  | 93942.3  | 62949.8  | 60152.1  | 113738.6 | 100889.6 | 89848.1  | TRUE |
| 162900.1 | 120925.4 | 192865.3 | 152749.5 | 142720.3 | 187289   | 171000.3 | 134632   | TRUE |
| 45167.4  | 34896.6  | 42108.7  | 48228.2  | 47816.7  | 44754.8  | 41123.3  | 41296.2  | TRUE |
| 58851.7  | 77132.2  | 49440.4  | 77279.7  | 66737.6  | 63133    | 60661.6  | 67175.2  | TRUE |
| 136350   | 104880.7 | 204477.9 | 244031.2 | 136626   | 112742.6 | 158340.7 | 122851.9 | TRUE |
| 63817.5  | 55215.5  | 51317.4  | 44041.9  | 55900.8  | 40543.3  | 47763.1  | 40674.7  | TRUE |
| 59660.2  | 41198.1  | 52892.8  | 41389    | 66211.4  | 101309.5 | 60153.3  | 86905.1  | TRUE |
| 42326.4  | 73034.4  | 65967.3  | 44633.5  | 58933.9  | 46997.8  | 66284.4  | 58000.6  | TRUE |
| 37864.5  | 79679.8  | 17603.5  | 30983.4  | 27292.7  | 18244    | 83306.3  | 37656.5  | TRUE |
| 68424.3  | 71420.6  | 33079.5  | 44114.7  | 91909.4  | 60681.7  | 72836.8  | 111626.9 | TRUE |
| 54498.6  | 73570.2  | 86198.2  | 54055.1  | 72562    | 85213.9  | 60317.5  | 46322.5  | TRUE |
| 73678.3  | 62740.9  | 72190.5  | 52039.5  | 39451.5  | 50773.1  | 47614.6  | 31793.9  | TRUE |
| 146597.8 | 94797    | 133360.1 | 100504   | 214860.3 | 170562.9 | 115238.5 | 176601   | TRUE |
| 20548.8  | 24714.7  | 17975.1  | 13257.6  | 25660.8  | 19920.6  | 24814.5  | 26193.4  | TRUE |
| 312032.3 | 394043.2 | 222069.6 | 257978.6 | 244480.5 | 226560.4 | 345948   | 228455.5 | TRUE |
| 215837.5 | 264763.5 | 305647.1 | 276015.7 | 198806.5 | 231489.4 | 253482.3 | 253137.7 | TRUE |
| 85790.4  | 90255.2  | 88654.2  | 112606.7 | 76580.4  | 107874.3 | 122332.4 | 113354.1 | TRUE |
| 54579.6  | 36235.2  | 64528.6  | 40380.3  | 27737.6  | 91704.9  | 40918.5  | 47540.2  | TRUE |
| 55267.9  | 73087.7  | 37977.3  | 62646.2  | 67809.3  | 59129    | 87115.2  | 66788.5  | TRUE |
| 58232.3  | 115507.7 | 72102.8  | 86386.5  | 81182.5  | 73245.8  | 73235.4  | 51805.5  | TRUE |
| 57891.3  | 48820.7  | 65140.7  | 76291    | 45044.1  | 70291.9  | 47827.9  | 60882.9  | TRUE |
| 101266.4 | 89450.1  | 70605.2  | 84444.9  | 63061    | 84615.8  | 101740   | 81610.5  | TRUE |
| 19816.8  | 22589.3  | 16776    | 9383     | 28852.9  | 19146.6  | 24014.5  | 26600.6  | TRUE |
| 25128.1  | 29112.2  | 35737.4  | 23232.5  | 29897.5  | 28517    | 24027.6  | 24203.2  | TRUE |
| 52910.9  | 51988.8  | 42072.2  | 53544.3  | 50439    | 49669.8  | 66285.7  | 56696.8  | TRUE |
| 240961.5 | 199995.1 | 224891.6 | 255709   | 199057.2 | 230318.1 | 219961.8 | 250543.2 | TRUE |
| 73308.4  | 87623.3  | 114242.8 | 60763.5  | 45809.3  | 114712.8 | 83317.8  | 51883.1  | TRUE |
| 339641.1 | 298166   | 249804.7 | 309302.8 | 276896.4 | 300902.8 | 322223.9 | 272438.2 | TRUE |

|          |          |          |          |          |          |          |          |      |
|----------|----------|----------|----------|----------|----------|----------|----------|------|
| 57236.5  | 60496.7  | 79262.6  | 46192.7  | 45508.5  | 105594.7 | 74026.3  | 68871.4  | TRUE |
| 104084.4 | 75068.5  | 104422.6 | 78252.9  | 195262.6 | 87362.5  | 76218.8  | 67190.8  | TRUE |
| 34857.4  | 10132.3  | 52378.4  | 12533.4  | 9653.7   | 50225    | 14022.6  | 26177.4  | TRUE |
| 50368.7  | 32567.7  | 60104.2  | 61093.1  | 43735.1  | 63196    | 38529.9  | 61816.2  | TRUE |
| 178608   | 137822.5 | 172130.5 | 174060.2 | 218668.5 | 119016.3 | 149688.3 | 156928.3 | TRUE |
| 53129    | 49936.1  | 59584.4  | 62035.7  | 48240.5  | 52939    | 56106.1  | 46829.6  | TRUE |
| 37502.3  | 32995.9  | 17500.3  | 29535.7  | 21719.3  | 26181.7  | 34428    | 37719.3  | TRUE |
| 38364.8  | 30789.8  | 27375.5  | 28094.9  | 31227.8  | 30071.6  | 35624.9  | 28144.1  | TRUE |
| 161525.6 | 131491   | 163048.1 | 166598.8 | 183597.2 | 174573.4 | 154911   | 200551.3 | TRUE |
| 10828.5  | 27142.4  | 31766.4  | 12454.4  | 12369.1  | 38700.5  | 15349.3  | 10062.5  | TRUE |
| 19699    | 7781.7   | 22079.1  | 23483    | 7365     | 22689.2  | 22998.1  | 11917.4  | TRUE |
| 175130.1 | 155668.5 | 139850.6 | 175382.7 | 142610.7 | 169429.2 | 174757.4 | 155216.4 | TRUE |
| 33420.8  | 27926.9  | 9540.6   | 14469.4  | 34522.4  | 32825.1  | 15797.6  | 41540.9  | TRUE |
| 24999.4  | 32317    | 18133.2  | 11654.1  | 23966.3  | 17538.8  | 24292.7  | 22648.2  | TRUE |
| 321280.8 | 262474.1 | 301661.6 | 299931.3 | 377717   | 329222.8 | 306357.7 | 349973   | TRUE |
| 100444.2 | 98452.7  | 108875   | 109789.8 | 79713.2  | 119931.7 | 114479.7 | 96532.9  | TRUE |
| 228229.4 | 174847.3 | 433694.6 | 182395.1 | 158812.6 | 432284.3 | 205569.6 | 199601.6 | TRUE |
| 58869.1  | 46071.1  | 69372.4  | 37500.7  | 46480.9  | 81029.9  | 58362.1  | 63278.7  | TRUE |
| 73680.7  | 57275.7  | 70256.8  | 61701.2  | 67534.6  | 81172.9  | 83029.9  | 73094.3  | TRUE |
| 19077    | 15876.1  | 6916.4   | 17190.8  | 11736.8  | 20638.6  | 27741.6  | 10517.2  | TRUE |
| 42368.6  | 35389.7  | 41353    | 37068.9  | 30400.4  | 22078.6  | 54517.4  | 38415.7  | TRUE |
| 645165.6 | 529331.7 | 650804.5 | 662155.8 | 1024338  | 601015.6 | 537263.2 | 577638.3 | TRUE |
| 55303.7  | 47177.8  | 40983.9  | 67361.8  | 46677.8  | 47583.8  | 46517.8  | 49307.4  | TRUE |
| 70711.4  | 64065.3  | 94930.1  | 100659.3 | 71690.2  | 91064.9  | 80938.9  | 69038.2  | TRUE |
| 38909.8  | 30140.4  | 33174    | 38503.4  | 42350.8  | 43721.3  | 41732.7  | 38424.8  | TRUE |
| 49784.1  | 20027.8  | 30445.1  | 33122.8  | 91991.4  | 40927.9  | 36858.7  | 38824.6  | TRUE |
| 156613.4 | 242411   | 160113.3 | 153421.3 | 156093.2 | 153490.6 | 195290.4 | 139871.6 | TRUE |
| 122688.9 | 112523.7 | 188923.8 | 86541.8  | 79125.4  | 210996.7 | 110489.7 | 101075.2 | TRUE |
| 114180.6 | 148260.1 | 96562.1  | 143266.5 | 90392.2  | 82340.1  | 95274.3  | 85397.6  | TRUE |
| 51710.3  | 56241.9  | 87688.8  | 95240.2  | 57529.9  | 79663.8  | 51216.1  | 52457.4  | TRUE |
| 82300.8  | 90467.9  | 106683.5 | 88985.1  | 74128.8  | 122916.4 | 81634.8  | 72004.5  | TRUE |
| 30103.2  | 36563.1  | 38720.4  | 47447.3  | 41144    | 33525.7  | 30963.7  | 31749.2  | TRUE |
| 26791.9  | 33530.3  | 22526.5  | 15839.7  | 13610.8  | 28643.1  | 30881.8  | 22711.6  | TRUE |
| 43722.4  | 33930.9  | 46339.1  | 42430.7  | 51074.5  | 28823.5  | 51361.7  | 55156.3  | TRUE |
| 81673.4  | 87308.3  | 81370    | 80775.7  | 71121.9  | 77061.5  | 91131.8  | 77325.2  | TRUE |
| 94652.1  | 108589.6 | 113404.6 | 92694.8  | 93069.6  | 122391.4 | 118897.6 | 102072.3 | TRUE |
| 93698    | 88816.3  | 64059.2  | 90631    | 80848.7  | 58823.6  | 86374.2  | 88180.6  | TRUE |
| 155124.1 | 209640.7 | 182839.5 | 168950.2 | 136608.4 | 139299.7 | 178326.5 | 138744.4 | TRUE |
| 29899.4  | 28836.6  | 66882.8  | 26944.1  | 19034.4  | 47826.6  | 30946.9  | 23089.8  | TRUE |
| 36723.4  | 88197.3  | 18599.1  | 57119.1  | 57358.2  | 20502    | 82398.3  | 61025.5  | TRUE |
| 154890   | 183214.7 | 134512.3 | 151966.5 | 134561.9 | 141128.3 | 168703.6 | 122633.5 | TRUE |

|          |          |          |          |          |          |          |          |      |
|----------|----------|----------|----------|----------|----------|----------|----------|------|
| 8684.3   | 11126.7  | 7554.6   | 5431     | 17320.9  | 6727.3   | 12738.4  | 17919.5  | TRUE |
| 37572.1  | 38792.4  | 50990.2  | 31727.8  | 26778.8  | 70865    | 21800.5  | 33376.9  | TRUE |
| 268174.9 | 257792.5 | 277708.9 | 227112.4 | 222358.9 | 310065.9 | 303793.4 | 207134.2 | TRUE |
| 41184.2  | 33984.8  | 40932.2  | 52219    | 24703.9  | 41673.4  | 43605.5  | 13415.6  | TRUE |
| 87382.2  | 91283.1  | 85535.2  | 69510.3  | 78433.4  | 97831.8  | 119047.4 | 79673.4  | TRUE |
| 181747.9 | 248855.5 | 118847.6 | 126602.8 | 198444.4 | 113720.3 | 225601.3 | 179904.4 | TRUE |
| 18038.6  | 23506.4  | 15593.2  | 27704.4  | 19114.7  | 14559    | 21981.8  | 23946    | TRUE |
| 41238.6  | 31383.2  | 29210.6  | 37097.5  | 28053    | 42145.2  | 28615.9  | 29777.6  | TRUE |
| 51791.4  | 25939    | 46192.2  | 50554.5  | 46313.6  | 38015.2  | 29988.6  | 52801.4  | TRUE |
| 144483.8 | 79202.2  | 147054.2 | 148525.6 | 221623.4 | 120633.2 | 129708.9 | 130464.7 | TRUE |
| 221855.7 | 129027.2 | 265092.2 | 271665.8 | 162159.3 | 276339.4 | 156009.4 | 191683.6 | TRUE |
| 74339.6  | 79215.8  | 70580.1  | 80755.4  | 65601    | 76841    | 96680.2  | 81947.8  | TRUE |
| 18981.8  | 10499.4  | 16359.8  | 24510    | 18064.8  | 28004.2  | 12360.2  | 12801.7  | TRUE |
| 97867.5  | 104295.8 | 101393.2 | 77769.5  | 108771.8 | 100782.1 | 82243.8  | 116514.2 | TRUE |
| 63918.8  | 65579.2  | 48260    | 73170.9  | 68008.6  | 55173.1  | 62107.9  | 64811.7  | TRUE |
| 182333.6 | 144589.8 | 207175.5 | 279659   | 138681.2 | 138780.7 | 179602.9 | 155172.1 | TRUE |
| 36465.6  | 32957.3  | 34034.1  | 40798    | 21038.9  | 42616.5  | 12931.3  | 30701.7  | TRUE |
| 29967.1  | 24310.2  | 20425.7  | 6680     | 10578.3  | 19415.2  | 34804.8  | 9498.8   | TRUE |
| 67114    | 53863.3  | 54902.9  | 58904.5  | 56982.1  | 43767.7  | 57714.7  | 48775.9  | TRUE |
| 47851.1  | 34110.8  | 31177.4  | 40374.3  | 41867.7  | 48486.3  | 53896.5  | 48095.6  | TRUE |
| 55055.7  | 76188.8  | 45481.1  | 56403    | 45593.3  | 44875.1  | 83421.1  | 33006.8  | TRUE |
| 71266.7  | 64215.1  | 109773.8 | 63046.1  | 47101    | 138971.8 | 50622.2  | 47718.3  | TRUE |
| 117858.7 | 106604.7 | 101467.1 | 119615.4 | 129651.3 | 114936.9 | 116227.1 | 139880.5 | TRUE |
| 78075.2  | 55964.2  | 102376.1 | 82707.5  | 74077.9  | 87837.6  | 90520.7  | 78967.1  | TRUE |
| 132358.8 | 137895.1 | 151085.2 | 125678.7 | 112385.6 | 112977.2 | 151688   | 140395.3 | TRUE |
| 70348.2  | 70537.1  | 69536.6  | 81522.4  | 72801.7  | 76559.6  | 70115.5  | 67955.5  | TRUE |
| 41492.5  | 32103.3  | 47446.2  | 35007.3  | 52649.1  | 33079.3  | 33752.6  | 34498    | TRUE |
| 40661.7  | 41679.2  | 38816    | 57771.4  | 35487.6  | 58964.6  | 29572.9  | 51885.3  | TRUE |
| 353124.2 | 280357.2 | 295398.9 | 405259.5 | 418216.6 | 299871.5 | 347167.3 | 420401.4 | TRUE |
| 72277.4  | 68736.5  | 94676.2  | 86865.6  | 68320.9  | 91253.8  | 73559.3  | 57129.5  | TRUE |
| 73396.5  | 95837.9  | 70057.2  | 80343.8  | 91152.5  | 92186.7  | 90425.4  | 97172.1  | TRUE |
| 18807.3  | 8786.7   | 23332    | 10658.8  | 34196    | 21583.5  | 23313.1  | 22515.8  | TRUE |
| 215611.9 | 190853.7 | 215211.7 | 238053.4 | 202752   | 223227.9 | 173155.3 | 203851.9 | TRUE |
| 107898.2 | 109539.3 | 117173.2 | 109537.2 | 120117.1 | 119557   | 125197   | 109050.3 | TRUE |

IInvalidProb IPrecursorPercentage

|          |      |
|----------|------|
| 1.00E+00 | 1    |
| 1.00E+00 | 0.92 |
| 1.00E+00 | 0.94 |
| 1.00E+00 | 0.9  |
| 1.00E+00 | 0.9  |
| 1.00E+00 | 0.68 |
| 1.00E+00 | 0.44 |
| 1.00E+00 | 0.96 |
| 1.00E+00 | 0.67 |
| 1.00E+00 | 0.76 |
| 1.00E+00 | 0.9  |
| 1.00E+00 | 1    |
| 1.00E+00 | 0.92 |

|          |      |
|----------|------|
| 1.00E+00 | 0.86 |
| 1.00E+00 | 0.94 |
| 1.00E+00 | 1    |
| 1.00E+00 | 0.95 |
| 1.00E+00 | 0.72 |
| 1.00E+00 | 1    |
| 1.00E+00 | 1    |
| 1.00E+00 | 0.91 |
| 1.00E+00 | 0.91 |
| 1.00E+00 | 0.76 |
| 1.00E+00 | 1    |
| 1.00E+00 | 0.76 |
| 1.00E+00 | 0.88 |
| 1.00E+00 | 0.83 |
| 1.00E+00 | 0.42 |
| 1.00E+00 | 1    |
| 1.00E+00 | 0.87 |
| 1.00E+00 | 0.94 |
| 1.00E+00 | 1    |
| 1.00E+00 | 0.51 |
| 1.00E+00 | 0.92 |
| 1.00E+00 | 0.93 |
| 1.00E+00 | 0.78 |
| 1.00E+00 | 0.84 |
| 1.00E+00 | 0.83 |
| 1.00E+00 | 0.86 |
| 1.00E+00 | 0.82 |
| 1.00E+00 | 0.9  |
| 1.00E+00 | 0.74 |
| 1.00E+00 | 0.94 |
| 1.00E+00 | 1    |

|          |      |
|----------|------|
| 1.00E+00 | 0.71 |
| 1.00E+00 | 0.85 |
| 1.00E+00 | 0.87 |
| 1.00E+00 | 0.64 |
| 1.00E+00 | 0.95 |
| 1.00E+00 | 0.76 |
| 1.00E+00 | 0.92 |
| 1.00E+00 | 0.94 |
| 1.00E+00 | 0.94 |
| 1.00E+00 | 0.88 |
| 1.00E+00 | 0.94 |
| 1.00E+00 | 1    |
| 1.00E+00 | 0.8  |
| 1.00E+00 | 0.94 |
| 1.00E+00 | 0.96 |
| 1.00E+00 | 0.72 |
| 1.00E+00 | 1    |
| 1.00E+00 | 0.45 |
| 1.00E+00 | 0.81 |
| 1.00E+00 | 0.92 |
| 1.00E+00 | 0.73 |
| 1.00E+00 | 0.63 |
| 1.00E+00 | 0.82 |
| 1.00E+00 | 0.87 |
| 1.00E+00 | 0.84 |
| 1.00E+00 | 0.97 |
| 1.00E+00 | 0.7  |
| 1.00E+00 | 0.88 |
| 1.00E+00 | 0.74 |
| 1.00E+00 | 0.49 |
| 1.00E+00 | 0.77 |
| 1.00E+00 | 0.85 |
| 1.00E+00 | 0.94 |

1.00E+00 0.88

1.00E+00 1

1.00E+00 1

1.00E+00 0.84

1.00E+00 0.83

1.00E+00 0.95

1.00E+00 0.95

1.00E+00 0.87

1.00E+00 0.95

1.00E+00 0.95

1.00E+00 0.87

1.00E+00 0.76

1.00E+00 0.9

1.00E+00 1

1.00E+00 0.92

1.00E+00 0.72

1.00E+00 0.85

1.00E+00 1

1.00E+00 0.95

1.00E+00 1

1.00E+00 0.93

1.00E+00 0.88

1.00E+00 0.81

1.00E+00 0.8

1.00E+00 0.93

1.00E+00 0.86

1.00E+00 0.93

1.00E+00 0.72

1.00E+00 0.66

1.00E+00 0.91

1.00E+00 0.93

1.00E+00 0.94

1.00E+00 0.97

1.00E+00 0.93

|          |      |
|----------|------|
| 1.00E+00 | 0.95 |
| 1.00E+00 | 0.48 |
| 1.00E+00 | 0.57 |
| 1.00E+00 | 0.91 |
| 1.00E+00 | 1    |
| 1.00E+00 | 1    |

|          |      |
|----------|------|
| 1.00E+00 | 0.92 |
| 1.00E+00 | 1    |
| 1.00E+00 | 0.96 |
| 1.00E+00 | 0.87 |
| 1.00E+00 | 0.84 |
| 1.00E+00 | 0.85 |
| 1.00E+00 | 0.78 |
| 1.00E+00 | 1    |
| 1.00E+00 | 0.82 |
| 1.00E+00 | 0.78 |
| 1.00E+00 | 1    |
| 1.00E+00 | 0.76 |
| 1.00E+00 | 0.93 |
| 1.00E+00 | 0.79 |
| 1.00E+00 | 0.88 |
| 1.00E+00 | 0.87 |
| 1.00E+00 | 0.88 |
| 1.00E+00 | 0.57 |
| 1.00E+00 | 0.65 |
| 1.00E+00 | 0.61 |
| 1.00E+00 | 0.69 |
| 1.00E+00 | 0.85 |
| 1.00E+00 | 1    |
| 1.00E+00 | 0.91 |
| 1.00E+00 | 0.91 |
| 1.00E+00 | 0.64 |
| 1.00E+00 | 0.82 |

|          |      |
|----------|------|
| 1.00E+00 | 0.95 |
| 1.00E+00 | 1    |
| 1.00E+00 | 0.9  |
| 1.00E+00 | 0.72 |
| 1.00E+00 | 0.71 |
| 1.00E+00 | 0.88 |
| 1.00E+00 | 1    |
| 1.00E+00 | 1    |
| 1.00E+00 | 1    |
| 1.00E+00 | 0.74 |

|          |      |
|----------|------|
| 1.00E+00 | 0.71 |
| 1.00E+00 | 0.9  |
| 1.00E+00 | 0.76 |
| 1.00E+00 | 0.79 |
| 1.00E+00 | 1    |
| 1.00E+00 | 0.54 |

|          |      |
|----------|------|
| 1.00E+00 | 0.46 |
| 1.00E+00 | 0.72 |
| 1.00E+00 | 0.74 |
| 1.00E+00 | 1    |
| 1.00E+00 | 0.94 |
| 1.00E+00 | 0.91 |
| 1.00E+00 | 1    |
| 1.00E+00 | 0.88 |

|          |      |
|----------|------|
| 1.00E+00 | 0.84 |
| 1.00E+00 | 0.46 |
| 1.00E+00 | 0.73 |

|          |      |
|----------|------|
| 1.00E+00 | 0.92 |
|----------|------|

|          |      |
|----------|------|
| 1.00E+00 | 0.64 |
| 1.00E+00 | 0.71 |
| 1.00E+00 | 0.89 |

|          |      |
|----------|------|
| 1.00E+00 | 1    |
| 1.00E+00 | 0.91 |
| 1.00E+00 | 1    |
| 1.00E+00 | 0.82 |
| 1.00E+00 | 0.76 |
| 1.00E+00 | 0.64 |
| 1.00E+00 | 0.68 |

|          |      |
|----------|------|
| 1.00E+00 | 1    |
| 1.00E+00 | 0.94 |
| 1.00E+00 | 0.84 |
| 1.00E+00 | 0.83 |
| 1.00E+00 | 0.94 |
| 1.00E+00 | 0.81 |
| 1.00E+00 | 0.81 |
| 1.00E+00 | 0.52 |
| 1.00E+00 | 1    |
| 1.00E+00 | 0.95 |
| 1.00E+00 | 0.73 |
| 1.00E+00 | 0.86 |
| 1.00E+00 | 1    |



|          |      |
|----------|------|
| 1.00E+00 | 1    |
| 1.00E+00 | 0.95 |
| 1.00E+00 | 0.9  |

|          |   |
|----------|---|
| 1.00E+00 | 1 |
|----------|---|

|          |      |
|----------|------|
| 1.00E+00 | 1    |
| 1.00E+00 | 0.94 |

|          |      |
|----------|------|
| 1.00E+00 | 0.76 |
| 1.00E+00 | 0.88 |
| 1.00E+00 | 0.62 |
| 1.00E+00 | 0.61 |
| 1.00E+00 | 1    |
| 1.00E+00 | 0.82 |
| 1.00E+00 | 0.67 |
| 1.00E+00 | 0.82 |
| 1.00E+00 | 1    |
| 1.00E+00 | 0.9  |
| 1.00E+00 | 0.91 |
| 1.00E+00 | 1    |
| 1.00E+00 | 0.79 |
| 1.00E+00 | 0.97 |
| 1.00E+00 | 0.71 |
| 1.00E+00 | 1    |
| 1.00E+00 | 1    |

|          |      |
|----------|------|
| 1.00E+00 | 0.61 |
| 1.00E+00 | 0.66 |
| 1.00E+00 | 0.78 |
| 1.00E+00 | 0.16 |
| 1.00E+00 | 0.83 |
| 1.00E+00 | 0.89 |
| 1.00E+00 | 1    |
| 1.00E+00 | 0.91 |

|          |      |
|----------|------|
| 1.00E+00 | 0.84 |
| 1.00E+00 | 0.9  |
| 1.00E+00 | 1    |
| 1.00E+00 | 0.9  |
| 1.00E+00 | 0.76 |
| 1.00E+00 | 0.93 |
| 1.00E+00 | 0.65 |
| 1.00E+00 | 0.83 |
| 1.00E+00 | 0.93 |
| 1.00E+00 | 0.9  |

|          |      |
|----------|------|
| 1.00E+00 | 0.68 |
| 1.00E+00 | 0.87 |
| 1.00E+00 | 0.93 |
| 1.00E+00 | 0.78 |
| 1.00E+00 | 0.78 |
| 1.00E+00 | 0.81 |
| 1.00E+00 | 0.75 |
| 1.00E+00 | 0.67 |
| 1.00E+00 | 0.62 |
| 1.00E+00 | 0.9  |
| 1.00E+00 | 0.78 |
| 1.00E+00 | 0.97 |
| 1.00E+00 | 0.88 |
| 1.00E+00 | 0.89 |
| 1.00E+00 | 0.73 |
| 1.00E+00 | 0.85 |
| 1.00E+00 | 1    |
| 1.00E+00 | 0.48 |
| 1.00E+00 | 0.92 |
| 1.00E+00 | 0.8  |
| 1.00E+00 | 0.8  |
| 1.00E+00 | 0.74 |
| 1.00E+00 | 0.95 |
| 1.00E+00 | 0.79 |
| 1.00E+00 | 0.82 |
| 1.00E+00 | 0.75 |
| 1.00E+00 | 0.82 |
| 1.00E+00 | 0.89 |
| 1.00E+00 | 0.92 |
| 1.00E+00 | 0.9  |
| 1.00E+00 | 0.52 |
| 1.00E+00 | 0.91 |
| 1.00E+00 | 0.84 |

|          |      |
|----------|------|
| 1.00E+00 | 0.91 |
| 1.00E+00 | 0.84 |
| 1.00E+00 | 0.83 |
| 1.00E+00 | 1    |
| 1.00E+00 | 0.95 |
| 1.00E+00 | 0.93 |

|          |      |
|----------|------|
| 1.00E+00 | 0.84 |
|----------|------|

|          |      |
|----------|------|
| 1.00E+00 | 0.9  |
| 1.00E+00 | 0.91 |
| 1.00E+00 | 0.84 |
| 1.00E+00 | 0.7  |
| 1.00E+00 | 0.64 |
| 1.00E+00 | 0.95 |
| 1.00E+00 | 0.83 |
| 1.00E+00 | 0.84 |
| 1.00E+00 | 0.7  |
| 1.00E+00 | 0.88 |
| 1.00E+00 | 0.63 |
| 1.00E+00 | 1    |
| 1.00E+00 | 0.9  |
| 1.00E+00 | 0.94 |
| 1.00E+00 | 0.94 |
| 1.00E+00 | 0.81 |
| 1.00E+00 | 0.78 |

|          |      |
|----------|------|
| 1.00E+00 | 0.71 |
| 1.00E+00 | 0.79 |
| 1.00E+00 | 0.96 |
| 1.00E+00 | 0.95 |
| 1.00E+00 | 0.89 |

|          |      |
|----------|------|
| 1.00E+00 | 0.88 |
|----------|------|

|          |      |
|----------|------|
| 1.00E+00 | 0.92 |
| 1.00E+00 | 0.75 |

|          |      |
|----------|------|
| 1.00E+00 | 0.75 |
| 1.00E+00 | 0.95 |

|          |      |
|----------|------|
| 1.00E+00 | 1    |
| 1.00E+00 | 0.49 |
| 1.00E+00 | 0.7  |
| 1.00E+00 | 0.96 |
| 1.00E+00 | 0.83 |
| 1.00E+00 | 0.78 |
| 1.00E+00 | 0.68 |
| 1.00E+00 | 0.73 |
| 1.00E+00 | 0.67 |
| 1.00E+00 | 0.75 |

|          |      |
|----------|------|
| 1.00E+00 | 0.94 |
| 1.00E+00 | 0.69 |

|          |      |
|----------|------|
| 1.00E+00 | 0.89 |
| 1.00E+00 | 0.88 |
| 1.00E+00 | 1    |
| 1.00E+00 | 1    |

|          |      |
|----------|------|
| 1.00E+00 | 0.64 |
| 1.00E+00 | 0.91 |
| 1.00E+00 | 0.9  |
| 1.00E+00 | 0.95 |
| 1.00E+00 | 0.92 |
| 1.00E+00 | 0.62 |
| 1.00E+00 | 0.97 |
| 1.00E+00 | 0.82 |
| 1.00E+00 | 0.82 |

|          |      |
|----------|------|
| 1.00E+00 | 1    |
| 1.00E+00 | 0.92 |
| 1.00E+00 | 0.94 |
| 1.00E+00 | 1    |
| 1.00E+00 | 0.67 |
| 1.00E+00 | 0.78 |
| 1.00E+00 | 0.88 |
| 1.00E+00 | 0.86 |
| 1.00E+00 | 0.85 |

|          |      |
|----------|------|
| 1.00E+00 | 0.93 |
| 1.00E+00 | 0.63 |
| 1.00E+00 | 0.97 |
| 1.00E+00 | 0.5  |
| 1.00E+00 | 1    |
| 1.00E+00 | 0.76 |
| 1.00E+00 | 0.95 |
| 1.00E+00 | 1    |
| 1.00E+00 | 0.55 |
| 1.00E+00 | 0.4  |
| 1.00E+00 | 0.61 |
| 1.00E+00 | 0.89 |
| 1.00E+00 | 0.39 |

|          |      |
|----------|------|
| 1.00E+00 | 0.95 |
| 1.00E+00 | 0.95 |
| 1.00E+00 | 0.96 |
| 1.00E+00 | 0.72 |
| 1.00E+00 | 0.82 |

|          |      |
|----------|------|
| 1.00E+00 | 0.77 |
|----------|------|

|          |      |
|----------|------|
| 1.00E+00 | 0.87 |
| 1.00E+00 | 0.98 |
| 1.00E+00 | 0.68 |
| 1.00E+00 | 0.93 |

|          |      |
|----------|------|
| 1.00E+00 | 0.81 |
|----------|------|

|          |      |
|----------|------|
| 1.00E+00 | 0.94 |
|----------|------|

|          |      |
|----------|------|
| 1.00E+00 | 0.8  |
| 1.00E+00 | 0.74 |

|          |      |
|----------|------|
| 1.00E+00 | 1    |
| 1.00E+00 | 0.63 |
| 1.00E+00 | 1    |
| 1.00E+00 | 0.96 |
| 1.00E+00 | 0.93 |

|          |      |
|----------|------|
| 1.00E+00 | 0.57 |
| 1.00E+00 | 1    |
| 1.00E+00 | 0.82 |
| 1.00E+00 | 0.84 |
| 1.00E+00 | 1    |
| 1.00E+00 | 0.93 |
| 1.00E+00 | 0.92 |
| 1.00E+00 | 0.86 |
| 1.00E+00 | 0.9  |
| 1.00E+00 | 0.75 |
| 1.00E+00 | 0.91 |
| 1.00E+00 | 0.81 |
| 1.00E+00 | 0.87 |
| 1.00E+00 | 0.7  |
| 1.00E+00 | 0.55 |
| 1.00E+00 | 0.7  |
| 1.00E+00 | 0.91 |
| 1.00E+00 | 0.85 |
| 1.00E+00 | 0.91 |
| 1.00E+00 | 0.94 |
| 1.00E+00 | 0.52 |
| 1.00E+00 | 0.49 |
| 1.00E+00 | 0.83 |
| 1.00E+00 | 0.84 |
| 1.00E+00 | 1    |
| 1.00E+00 | 0.79 |
| 1.00E+00 | 0.55 |
| 1.00E+00 | 1    |
| 1.00E+00 | 0.84 |
| 1.00E+00 | 0.48 |

|          |      |
|----------|------|
| 1.00E+00 | 0.93 |
| 1.00E+00 | 0.9  |
| 1.00E+00 | 1    |
| 1.00E+00 | 1    |
| 1.00E+00 | 0.84 |
| 1.00E+00 | 0.59 |
| 1.00E+00 | 0.92 |
| 1.00E+00 | 0.62 |
| 1.00E+00 | 0.96 |

|          |      |
|----------|------|
| 1.00E+00 | 0.97 |
| 1.00E+00 | 0.92 |
| 1.00E+00 | 1    |
| 1.00E+00 | 0.89 |
| 1.00E+00 | 0.93 |
| 1.00E+00 | 0.96 |
| 1.00E+00 | 0.92 |
| 1.00E+00 | 0.94 |
| 1.00E+00 | 0.96 |
| 1.00E+00 | 0.89 |
| 1.00E+00 | 0.75 |
| 1.00E+00 | 1    |
| 1.00E+00 | 0.92 |
| 1.00E+00 | 0.68 |
| 1.00E+00 | 0.68 |
| 1.00E+00 | 0.88 |
| 1.00E+00 | 0.67 |
| 1.00E+00 | 0.71 |
| 1.00E+00 | 1    |
| 1.00E+00 | 0.84 |
| 1.00E+00 | 0.86 |
| 1.00E+00 | 0.88 |
| 1.00E+00 | 1    |
| 1.00E+00 | 1    |
| 1.00E+00 | 0.74 |
| 1.00E+00 | 1    |
| 1.00E+00 | 0.73 |
| 1.00E+00 | 0.84 |
| 1.00E+00 | 1    |
| 1.00E+00 | 0.76 |
| 1.00E+00 | 0.87 |
| 1.00E+00 | 0.94 |
| 1.00E+00 | 0.73 |
| 1.00E+00 | 0.5  |
| 1.00E+00 | 0.61 |
| 1.00E+00 | 0.76 |
| 1.00E+00 | 0.97 |
| 1.00E+00 | 1    |
| 1.00E+00 | 0.84 |
| 1.00E+00 | 0.69 |

|          |      |
|----------|------|
| 1.00E+00 | 0.93 |
| 1.00E+00 | 0.97 |
| 1.00E+00 | 0.87 |
| 1.00E+00 | 0.92 |

|          |      |
|----------|------|
| 1.00E+00 | 1    |
| 1.00E+00 | 0.92 |
| 1.00E+00 | 0.51 |
| 1.00E+00 | 0.85 |
| 1.00E+00 | 0.73 |
| 1.00E+00 | 0.82 |
| 1.00E+00 | 0.68 |
| 1.00E+00 | 0.66 |
| 1.00E+00 | 0.94 |
| 1.00E+00 | 0.97 |
| 1.00E+00 | 0.92 |
| 1.00E+00 | 0.77 |
| 1.00E+00 | 0.84 |
| 1.00E+00 | 1    |
| 1.00E+00 | 0.91 |
| 1.00E+00 | 0.96 |
| 1.00E+00 | 1    |
| 1.00E+00 | 1    |
| 1.00E+00 | 0.89 |
| 1.00E+00 | 0.71 |
| 1.00E+00 | 0.97 |
| 1.00E+00 | 0.71 |
| 1.00E+00 | 0.96 |
| 1.00E+00 | 0.64 |
| 1.00E+00 | 0.94 |
| 1.00E+00 | 0.94 |
| 1.00E+00 | 0.98 |
| 1.00E+00 | 0.86 |
| 1.00E+00 | 1    |
| 1.00E+00 | 0.9  |
| 1.00E+00 | 0.91 |
| 1.00E+00 | 0.97 |
| 1.00E+00 | 0.76 |
| 1.00E+00 | 0.57 |
| 1.00E+00 | 0.65 |
| 1.00E+00 | 1    |
| 1.00E+00 | 0.78 |
| 1.00E+00 | 0.76 |
| 1.00E+00 | 1    |
| 1.00E+00 | 0.63 |



|          |      |
|----------|------|
| 1.00E+00 | 0.95 |
| 1.00E+00 | 1    |
| 1.00E+00 | 0.73 |
| 1.00E+00 | 0.68 |

|          |      |
|----------|------|
| 1.00E+00 | 0.9  |
| 1.00E+00 | 1    |
| 1.00E+00 | 0.91 |
| 1.00E+00 | 0.73 |
| 1.00E+00 | 0.9  |
| 1.00E+00 | 0.74 |
| 1.00E+00 | 0.83 |
| 1.00E+00 | 0.72 |
| 1.00E+00 | 1    |
| 1.00E+00 | 0.82 |
| 1.00E+00 | 0.59 |
| 1.00E+00 | 0.9  |
| 1.00E+00 | 1    |
| 1.00E+00 | 0.78 |
| 1.00E+00 | 0.93 |
| 1.00E+00 | 0.83 |
| 1.00E+00 | 0.84 |
| 1.00E+00 | 0.91 |
| 1.00E+00 | 0.88 |

|          |     |
|----------|-----|
| 1.00E+00 | 0.7 |
|----------|-----|

|          |      |
|----------|------|
| 1.00E+00 | 0.6  |
| 1.00E+00 | 0.49 |
| 1.00E+00 | 0.86 |
| 1.00E+00 | 0.67 |

|          |      |
|----------|------|
| 1.00E+00 | 0.96 |
| 1.00E+00 | 0.77 |
| 1.00E+00 | 0.95 |
| 1.00E+00 | 1    |
| 1.00E+00 | 1    |
| 1.00E+00 | 0.96 |
| 1.00E+00 | 0.61 |
| 1.00E+00 | 0.9  |
| 1.00E+00 | 1    |
| 1.00E+00 | 0.89 |
| 1.00E+00 | 0.72 |
| 1.00E+00 | 0.93 |
| 1.00E+00 | 0.77 |
| 1.00E+00 | 0.6  |
| 1.00E+00 | 0.76 |
| 1.00E+00 | 0    |

|          |      |
|----------|------|
| 1.00E+00 | 0.76 |
| 1.00E+00 | 1    |
| 1.00E+00 | 0.98 |
| 1.00E+00 | 0.87 |
| 1.00E+00 | 0.73 |
| 1.00E+00 | 0.78 |
| 1.00E+00 | 1    |
| 1.00E+00 | 0.88 |
| 1.00E+00 | 0.81 |
| 1.00E+00 | 1    |
| 1.00E+00 | 0.62 |
| 1.00E+00 | 0.85 |
| 1.00E+00 | 0.53 |
| 1.00E+00 | 0    |
| 1.00E+00 | 1    |
| 1.00E+00 | 0.83 |
| 1.00E+00 | 0.92 |
| 1.00E+00 | 0.97 |
| 1.00E+00 | 0.79 |
| 1.00E+00 | 0.79 |
| 1.00E+00 | 1    |
| 1.00E+00 | 0.89 |
| 1.00E+00 | 0.7  |
| 1.00E+00 | 0.61 |
| 1.00E+00 | 0.61 |
| 1.00E+00 | 0.85 |
| 1.00E+00 | 0    |
| 1.00E+00 | 0.91 |
| 1.00E+00 | 0.85 |
| 1.00E+00 | 0.96 |
| 1.00E+00 | 0.96 |
| 1.00E+00 | 0.86 |
| 1.00E+00 | 0.94 |
| 1.00E+00 | 0.89 |
| 1.00E+00 | 0.9  |
| 1.00E+00 | 0.85 |
| 1.00E+00 | 0.94 |
| 1.00E+00 | 0.93 |
| 1.00E+00 | 0.7  |
| 1.00E+00 | 0.92 |
| 1.00E+00 | 0.89 |
| 1.00E+00 | 0.94 |
| 1.00E+00 | 0.92 |
| 1.00E+00 | 0.78 |
| 1.00E+00 | 0.78 |
| 1.00E+00 | 0.85 |
| 1.00E+00 | 0.62 |

|          |      |
|----------|------|
| 1.00E+00 | 0.89 |
| 1.00E+00 | 0.96 |
| 1.00E+00 | 0.76 |
| 1.00E+00 | 0.85 |
| 1.00E+00 | 0.63 |
| 1.00E+00 | 0.96 |
| 1.00E+00 | 0.94 |
| 1.00E+00 | 0.7  |
| 1.00E+00 | 0.98 |

|          |      |
|----------|------|
| 1.00E+00 | 0.62 |
| 1.00E+00 | 0.95 |
| 1.00E+00 | 1    |
| 1.00E+00 | 1    |
| 1.00E+00 | 0.89 |

|          |      |
|----------|------|
| 1.00E+00 | 0.89 |
| 1.00E+00 | 0.7  |
| 1.00E+00 | 0.7  |
| 1.00E+00 | 0.6  |
| 1.00E+00 | 0.94 |
| 1.00E+00 | 0.88 |
| 1.00E+00 | 0.92 |
| 1.00E+00 | 0.72 |

|          |      |
|----------|------|
| 1.00E+00 | 0.59 |
| 1.00E+00 | 1    |
| 1.00E+00 | 0.77 |
| 1.00E+00 | 1    |
| 1.00E+00 | 0.93 |
| 1.00E+00 | 0.97 |
| 1.00E+00 | 0.9  |

|          |      |
|----------|------|
| 1.00E+00 | 0.93 |
| 1.00E+00 | 0.94 |
| 1.00E+00 | 0.93 |
| 1.00E+00 | 0.84 |
| 1.00E+00 | 0.76 |
| 1.00E+00 | 1    |
| 1.00E+00 | 1    |

|          |      |
|----------|------|
| 1.00E+00 | 0.77 |
| 1.00E+00 | 0.96 |
| 1.00E+00 | 0.97 |
| 1.00E+00 | 0.57 |
| 1.00E+00 | 0.8  |
| 1.00E+00 | 0.6  |
| 1.00E+00 | 0.96 |
| 1.00E+00 | 0.79 |
| 1.00E+00 | 0.98 |
| 1.00E+00 | 0.9  |
| 1.00E+00 | 0.59 |
| 1.00E+00 | 0.75 |
| 1.00E+00 | 1    |
| 1.00E+00 | 0.66 |
| 1.00E+00 | 0    |
| 1.00E+00 | 0.79 |
| 1.00E+00 | 0.69 |
| 1.00E+00 | 1    |
| 1.00E+00 | 0.56 |
| 1.00E+00 | 0.53 |
| 1.00E+00 | 0.69 |
| 1.00E+00 | 1    |
| 1.00E+00 | 0.66 |
| 1.00E+00 | 0.78 |
| 1.00E+00 | 0.74 |
| 1.00E+00 | 0.82 |
| 1.00E+00 | 1    |
| 1.00E+00 | 0.72 |
| 1.00E+00 | 1    |
| 1.00E+00 | 0.85 |
| 1.00E+00 | 0.8  |
| 1.00E+00 | 0.75 |
| 1.00E+00 | 1    |
| 1.00E+00 | 0.65 |
| 1.00E+00 | 0.64 |
| 1.00E+00 | 0.96 |
| 1.00E+00 | 1    |
| 1.00E+00 | 0    |
| 1.00E+00 | 0.94 |
| 1.00E+00 | 1    |
| 1.00E+00 | 0.64 |
| 1.00E+00 | 0.94 |
| 1.00E+00 | 0.74 |
| 1.00E+00 | 1    |

|          |      |
|----------|------|
| 1.00E+00 | 0.72 |
| 1.00E+00 | 0.65 |
| 1.00E+00 | 0.71 |
| 1.00E+00 | 1    |
| 1.00E+00 | 0.9  |
| 1.00E+00 | 1    |
| 1.00E+00 | 1    |
| 1.00E+00 | 1    |
| 1.00E+00 | 0.81 |
| 1.00E+00 | 1    |
| 1.00E+00 | 0.69 |
| 1.00E+00 | 0.68 |
| 1.00E+00 | 0.76 |
| 1.00E+00 | 0.44 |
| 1.00E+00 | 0.93 |
| 1.00E+00 | 0.95 |
| 1.00E+00 | 0.93 |
| 1.00E+00 | 0.87 |
| 1.00E+00 | 0.89 |
| 1.00E+00 | 1    |
| 1.00E+00 | 0.94 |
| 1.00E+00 | 0.97 |
| 1.00E+00 | 0.68 |
| 1.00E+00 | 0.73 |
| 1.00E+00 | 1    |
| 1.00E+00 | 1    |
| 1.00E+00 | 0.85 |
| 1.00E+00 | 0.97 |
| 1.00E+00 | 0.87 |
| 1.00E+00 | 0.71 |
| 1.00E+00 | 0.96 |
| 1.00E+00 | 0.47 |
| 1.00E+00 | 0.82 |
| 1.00E+00 | 0.71 |
| 1.00E+00 | 0.51 |
| 1.00E+00 | 0.9  |
| 1.00E+00 | 0.83 |
| 1.00E+00 | 0.85 |
| 1.00E+00 | 0.76 |
| 1.00E+00 | 0.65 |
| 1.00E+00 | 0.89 |
| 1.00E+00 | 0.74 |
| 1.00E+00 | 0.7  |
| 1.00E+00 | 0.93 |
| 1.00E+00 | 0.82 |
| 1.00E+00 | 0.68 |
| 1.00E+00 | 0.75 |

|          |      |
|----------|------|
| 1.00E+00 | 0.77 |
| 1.00E+00 | 0.71 |
| 1.00E+00 | 0.82 |
| 1.00E+00 | 0.82 |
| 1.00E+00 | 0.79 |
| 1.00E+00 | 0.85 |

|          |      |
|----------|------|
| 1.00E+00 | 0.85 |
| 1.00E+00 | 0.78 |
| 1.00E+00 | 0.9  |
| 1.00E+00 | 0.93 |
| 1.00E+00 | 0.95 |
| 1.00E+00 | 0.9  |
| 1.00E+00 | 0.82 |
| 1.00E+00 | 0.68 |
| 1.00E+00 | 0.88 |
| 1.00E+00 | 0.87 |
| 1.00E+00 | 0.81 |
| 1.00E+00 | 0.97 |
| 1.00E+00 | 0.86 |
| 1.00E+00 | 0.79 |
| 1.00E+00 | 0.72 |
| 1.00E+00 | 0.84 |
| 1.00E+00 | 0.86 |
| 1.00E+00 | 0    |
| 1.00E+00 | 0.97 |
| 1.00E+00 | 1    |
| 1.00E+00 | 1    |
| 1.00E+00 | 1    |
| 1.00E+00 | 1    |
| 1.00E+00 | 0.94 |

|          |      |
|----------|------|
| 1.00E+00 | 0.94 |
| 1.00E+00 | 0.7  |
| 1.00E+00 | 0.63 |
| 1.00E+00 | 0.64 |
| 1.00E+00 | 0.95 |
| 1.00E+00 | 0.72 |
| 1.00E+00 | 0.93 |
| 1.00E+00 | 0.77 |
| 1.00E+00 | 0.86 |
| 1.00E+00 | 0.68 |
| 1.00E+00 | 0.92 |
| 1.00E+00 | 0.73 |
| 1.00E+00 | 0.81 |
| 1.00E+00 | 0.94 |

|          |      |
|----------|------|
| 1.00E+00 | 0.6  |
| 1.00E+00 | 0.93 |
| 1.00E+00 | 0.59 |
| 1.00E+00 | 0.92 |
| 1.00E+00 | 0.89 |
| 1.00E+00 | 0.77 |
| 1.00E+00 | 0.85 |
| 1.00E+00 | 0.95 |
| 1.00E+00 | 0.94 |
| 1.00E+00 | 0.85 |
| 1.00E+00 | 1    |
| 1.00E+00 | 0.91 |
| 1.00E+00 | 0.5  |
| 1.00E+00 | 0.9  |
| 1.00E+00 | 0.54 |
| 1.00E+00 | 1    |

|          |      |
|----------|------|
| 1.00E+00 | 0.81 |
| 1.00E+00 | 1    |
| 1.00E+00 | 0.88 |
| 1.00E+00 | 1    |
| 1.00E+00 | 0.89 |
| 1.00E+00 | 0.81 |
| 1.00E+00 | 1    |
| 1.00E+00 | 0.73 |
| 1.00E+00 | 1    |
| 1.00E+00 | 1    |
| 1.00E+00 | 0.55 |
| 1.00E+00 | 0.59 |
| 1.00E+00 | 1    |
| 1.00E+00 | 1    |
| 1.00E+00 | 0.89 |
| 1.00E+00 | 0.87 |

|          |      |
|----------|------|
| 1.00E+00 | 0.67 |
| 1.00E+00 | 1    |
| 1.00E+00 | 1    |

|          |      |
|----------|------|
| 1.00E+00 | 0.96 |
| 1.00E+00 | 1    |
| 1.00E+00 | 1    |

|          |      |
|----------|------|
| 1.00E+00 | 0.82 |
| 1.00E+00 | 0.9  |
| 1.00E+00 | 0.93 |
| 1.00E+00 | 1    |
| 1.00E+00 | 0.91 |
| 1.00E+00 | 0.57 |
| 1.00E+00 | 0.67 |
| 1.00E+00 | 0.76 |
| 1.00E+00 | 0.93 |
| 1.00E+00 | 0.79 |
| 1.00E+00 | 0.39 |
| 1.00E+00 | 0.64 |
| 1.00E+00 | 0.52 |
| 1.00E+00 | 0.78 |
| 1.00E+00 | 0.93 |
| 1.00E+00 | 0.93 |
| 1.00E+00 | 0.89 |
| 1.00E+00 | 0.93 |
| 1.00E+00 | 0.74 |
| 1.00E+00 | 0.71 |
| 1.00E+00 | 0.86 |
| 1.00E+00 | 0.91 |
| 1.00E+00 | 0.75 |
| 1.00E+00 | 0.8  |
| 1.00E+00 | 0.84 |
| 1.00E+00 | 0.82 |
| 1.00E+00 | 0.91 |

|          |      |
|----------|------|
| 1.00E+00 | 1    |
| 1.00E+00 | 0.86 |
| 1.00E+00 | 0.77 |
| 1.00E+00 | 0.95 |
| 1.00E+00 | 0.6  |

|          |      |
|----------|------|
| 1.00E+00 | 0.97 |
| 1.00E+00 | 0.96 |
| 1.00E+00 | 0.89 |
| 1.00E+00 | 0.9  |
| 1.00E+00 | 0.92 |

|          |      |
|----------|------|
| 1.00E+00 | 0.96 |
| 1.00E+00 | 0.8  |
| 1.00E+00 | 0.97 |

|          |      |
|----------|------|
| 1.00E+00 | 0.92 |
| 1.00E+00 | 0.9  |
| 1.00E+00 | 0.82 |



|          |      |
|----------|------|
| 1.00E+00 | 0.93 |
| 1.00E+00 | 1    |
| 1.00E+00 | 0.88 |
| 1.00E+00 | 0.56 |
| 1.00E+00 | 0.56 |
| 1.00E+00 | 0.93 |
| 1.00E+00 | 0.98 |
| 1.00E+00 | 1    |
| 1.00E+00 | 0.77 |
| 1.00E+00 | 0.78 |
| 1.00E+00 | 0.85 |
| 1.00E+00 | 0.57 |
| 1.00E+00 | 0.74 |
| 1.00E+00 | 0.92 |
| 1.00E+00 | 0.93 |
| 1.00E+00 | 0.96 |
| 1.00E+00 | 0.71 |
| 1.00E+00 | 0.8  |
| 1.00E+00 | 0.94 |

|          |      |
|----------|------|
| 1.00E+00 | 0.94 |
| 1.00E+00 | 0.74 |
| 1.00E+00 | 0.95 |

|          |      |
|----------|------|
| 1.00E+00 | 0.73 |
| 1.00E+00 | 0.83 |
| 1.00E+00 | 0.87 |
| 1.00E+00 | 0.87 |
| 1.00E+00 | 0.93 |
| 1.00E+00 | 0.96 |
| 1.00E+00 | 0.87 |
| 1.00E+00 | 0.74 |
| 1.00E+00 | 0.69 |
| 1.00E+00 | 0.91 |
| 1.00E+00 | 0.89 |
| 1.00E+00 | 0.97 |
| 1.00E+00 | 0.98 |

|          |      |
|----------|------|
| 1.00E+00 | 0.97 |
| 1.00E+00 | 0.9  |
| 1.00E+00 | 1    |
| 1.00E+00 | 0.96 |
| 1.00E+00 | 0.94 |
| 1.00E+00 | 0.68 |
| 1.00E+00 | 0.9  |
| 1.00E+00 | 0.83 |
| 1.00E+00 | 0.83 |
| 1.00E+00 | 0.91 |
| 1.00E+00 | 0.96 |
| 1.00E+00 | 0.95 |
| 1.00E+00 | 1    |
| 1.00E+00 | 0.7  |
| 1.00E+00 | 0.86 |
| 1.00E+00 | 1    |
| 1.00E+00 | 0.81 |
| 1.00E+00 | 0.73 |
| 1.00E+00 | 0.77 |
| 1.00E+00 | 0.78 |
| 1.00E+00 | 1    |
| 1.00E+00 | 0.95 |
| 1.00E+00 | 0.89 |
| 1.00E+00 | 0.66 |
| 1.00E+00 | 0.95 |
| 1.00E+00 | 1    |
| 1.00E+00 | 0.86 |
| 1.00E+00 | 0.8  |
| 1.00E+00 | 0.83 |
| 1.00E+00 | 0.73 |
| 1.00E+00 | 0.74 |
| 1.00E+00 | 0.8  |
| 1.00E+00 | 0.96 |
| 1.00E+00 | 0.86 |
| 1.00E+00 | 0.89 |
| 1.00E+00 | 0.89 |
| 1.00E+00 | 1    |
| 1.00E+00 | 0.86 |
| 1.00E+00 | 0.64 |
| 1.00E+00 | 0.71 |
| 1.00E+00 | 0.91 |
| 1.00E+00 | 0.93 |
| 1.00E+00 | 0.81 |
| 1.00E+00 | 0.88 |

|          |      |
|----------|------|
| 1.00E+00 | 0.6  |
| 1.00E+00 | 0.91 |
| 1.00E+00 | 1    |
| 1.00E+00 | 0.9  |
| 1.00E+00 | 0.92 |
| 1.00E+00 | 0.9  |
| 1.00E+00 | 0.82 |
| 1.00E+00 | 0.76 |

|          |      |
|----------|------|
| 1.00E+00 | 0.85 |
| 1.00E+00 | 1    |
| 1.00E+00 | 0.88 |

|          |      |
|----------|------|
| 1.00E+00 | 0.94 |
| 1.00E+00 | 0.73 |
| 1.00E+00 | 0.94 |
| 1.00E+00 | 0.93 |
| 1.00E+00 | 0.75 |
| 1.00E+00 | 0.55 |
| 1.00E+00 | 0.63 |
| 1.00E+00 | 0.57 |
| 1.00E+00 | 0.95 |
| 1.00E+00 | 0.87 |
| 1.00E+00 | 0.92 |
| 1.00E+00 | 0.68 |
| 1.00E+00 | 0.92 |

|          |      |
|----------|------|
| 1.00E+00 | 1    |
| 1.00E+00 | 0.98 |
| 1.00E+00 | 0.9  |
| 1.00E+00 | 0.8  |
| 1.00E+00 | 0.76 |
| 1.00E+00 | 1    |
| 1.00E+00 | 0.92 |
| 1.00E+00 | 1    |

|          |      |
|----------|------|
| 1.00E+00 | 0.94 |
| 1.00E+00 | 0.9  |
| 1.00E+00 | 0.91 |
| 1.00E+00 | 0.69 |
| 1.00E+00 | 0.86 |

1.00E+00 0.87

1.00E+00 0.8

1.00E+00 0.78

1.00E+00 0.89

1.00E+00 0.85

1.00E+00 0.89

1.00E+00 0.93

1.00E+00 1

1.00E+00 0.88

1.00E+00 1

1.00E+00 0.95

1.00E+00 0.61

1.00E+00 0.67

1.00E+00 0.87

1.00E+00 0.82

1.00E+00 0.63

1.00E+00 1

1.00E+00 0.88

1.00E+00 0.91

1.00E+00 0.83

1.00E+00 1

1.00E+00 0.83

1.00E+00 0.93

1.00E+00 0.49

1.00E+00 0.77

1.00E+00 0.86

1.00E+00 0.92

1.00E+00 0.77

1.00E+00 0.68

1.00E+00 0.72

1.00E+00 0.62

1.00E+00 0.87

1.00E+00 1

1.00E+00 0.95

1.00E+00 1

1.00E+00 1

1.00E+00 0.93

1.00E+00 0.89

1.00E+00 0.82

1.00E+00 0.55

1.00E+00 0.7

1.00E+00 0.49

1.00E+00 0.97

1.00E+00 0.88

1.00E+00 0.58

1.00E+00 1

1.00E+00 0.87

1.00E+00 1

1.00E+00 0.93

1.00E+00 0.83

1.00E+00 0.5

1.00E+00 0.89

1.00E+00 1

1.00E+00 0.95

1.00E+00 0.91

1.00E+00 0.46

1.00E+00 0.69

1.00E+00 0.64

1.00E+00 0.62

1.00E+00 0.59

1.00E+00 0.76

1.00E+00 0.76

1.00E+00 0.7

1.00E+00 0.67

1.00E+00 0.9

1.00E+00 0.82

1.00E+00 0.7

1.00E+00 0.74

1.00E+00 0.67

1.00E+00 0.83

1.00E+00 0.84

1.00E+00 1

1.00E+00 0.96

1.00E+00 0.84

1.00E+00 1

1.00E+00 0.42

1.00E+00 1

1.00E+00 1

1.00E+00 0.67

1.00E+00 0.95

1.00E+00 0.5

1.00E+00 0.87

1.00E+00 0.63

1.00E+00 1

1.00E+00 0.8

1.00E+00 0.92

|          |      |
|----------|------|
| 1.00E+00 | 0.9  |
| 1.00E+00 | 0.93 |
| 1.00E+00 | 0.89 |

|          |     |
|----------|-----|
| 1.00E+00 | 0.9 |
| 1.00E+00 | 1   |

|          |      |
|----------|------|
| 1.00E+00 | 0.77 |
| 1.00E+00 | 0.92 |

|          |      |
|----------|------|
| 1.00E+00 | 0.9  |
| 1.00E+00 | 0.92 |
| 1.00E+00 | 0.76 |
| 1.00E+00 | 1    |
| 1.00E+00 | 0.59 |
| 1.00E+00 | 0.86 |

|          |      |
|----------|------|
| 1.00E+00 | 1    |
| 1.00E+00 | 0.94 |
| 1.00E+00 | 0.75 |
| 1.00E+00 | 0.88 |

|          |      |
|----------|------|
| 1.00E+00 | 0.93 |
| 1.00E+00 | 0.84 |
| 1.00E+00 | 0.93 |

|          |      |
|----------|------|
| 1.00E+00 | 0.9  |
| 1.00E+00 | 0.57 |
| 1.00E+00 | 0.95 |
| 1.00E+00 | 0.92 |
| 1.00E+00 | 0.81 |
| 1.00E+00 | 0.83 |
| 1.00E+00 | 0.81 |
| 1.00E+00 | 0.85 |
| 1.00E+00 | 0.95 |
| 1.00E+00 | 0.95 |
| 1.00E+00 | 0.7  |
| 1.00E+00 | 0.73 |
| 1.00E+00 | 0.61 |
| 1.00E+00 | 0.79 |

|          |      |
|----------|------|
| 1.00E+00 | 0.72 |
| 1.00E+00 | 0.65 |

|          |      |
|----------|------|
| 1.00E+00 | 0.85 |
| 1.00E+00 | 0.72 |
| 1.00E+00 | 0.9  |
| 1.00E+00 | 0.58 |
| 1.00E+00 | 0.76 |
| 1.00E+00 | 0.9  |
| 1.00E+00 | 1    |
| 1.00E+00 | 0.8  |

|          |      |
|----------|------|
| 1.00E+00 | 0.76 |
| 1.00E+00 | 0.56 |
| 1.00E+00 | 0.9  |
| 1.00E+00 | 0.6  |
| 1.00E+00 | 0.9  |
| 1.00E+00 | 0.68 |
| 1.00E+00 | 0.78 |
| 1.00E+00 | 0.65 |
| 1.00E+00 | 0.75 |
| 1.00E+00 | 0.91 |
| 1.00E+00 | 0.83 |

|          |      |
|----------|------|
| 1.00E+00 | 0.89 |
| 1.00E+00 | 1    |
| 1.00E+00 | 0.85 |
| 1.00E+00 | 0.85 |
| 1.00E+00 | 0.8  |
| 1.00E+00 | 0.64 |
| 1.00E+00 | 1    |
| 1.00E+00 | 0.65 |

|          |      |
|----------|------|
| 1.00E+00 | 0.68 |
| 1.00E+00 | 1    |
| 1.00E+00 | 0.89 |
| 1.00E+00 | 0.92 |

|          |      |
|----------|------|
| 1.00E+00 | 0.77 |
| 1.00E+00 | 1    |

|          |      |
|----------|------|
| 1.00E+00 | 0.94 |
| 1.00E+00 | 0.85 |
| 1.00E+00 | 0.84 |
| 1.00E+00 | 0.94 |
| 1.00E+00 | 0.94 |
| 1.00E+00 | 1    |
| 1.00E+00 | 0.94 |

|          |      |
|----------|------|
| 1.00E+00 | 0.51 |
| 1.00E+00 | 1    |
| 1.00E+00 | 1    |
| 1.00E+00 | 1    |

|          |      |
|----------|------|
| 1.00E+00 | 0.6  |
| 1.00E+00 | 1    |
| 1.00E+00 | 1    |
| 1.00E+00 | 0.75 |
| 1.00E+00 | 0.9  |
| 1.00E+00 | 0.62 |
| 1.00E+00 | 0.5  |
| 1.00E+00 | 0.82 |
| 1.00E+00 | 0.76 |
| 1.00E+00 | 0.73 |
| 1.00E+00 | 0.78 |
| 1.00E+00 | 0.81 |
| 1.00E+00 | 0.87 |
| 1.00E+00 | 0.65 |
| 1.00E+00 | 0.6  |
| 1.00E+00 | 0.73 |
| 1.00E+00 | 0.92 |
| 1.00E+00 | 0.94 |
| 1.00E+00 | 0.88 |
| 1.00E+00 | 0.89 |
| 1.00E+00 | 0.47 |

|          |      |
|----------|------|
| 1.00E+00 | 0.55 |
| 1.00E+00 | 0.88 |
| 1.00E+00 | 0.84 |
| 1.00E+00 | 0.77 |
| 1.00E+00 | 0.88 |
| 1.00E+00 | 0.66 |
| 1.00E+00 | 0.68 |
| 1.00E+00 | 0.68 |
| 1.00E+00 | 0.93 |
| 1.00E+00 | 0.83 |
| 1.00E+00 | 0.65 |
| 1.00E+00 | 0.68 |
| 1.00E+00 | 0.82 |
| 1.00E+00 | 0.91 |
| 1.00E+00 | 0.69 |

|          |      |
|----------|------|
| 1.00E+00 | 0.91 |
| 1.00E+00 | 0.73 |
| 1.00E+00 | 0.52 |
| 1.00E+00 | 0.88 |



1.00E+00 0.84

1.00E+00 0.93  
1.00E+00 0.62  
1.00E+00 0.69  
1.00E+00 0.81  
1.00E+00 0.95  
1.00E+00 1  
1.00E+00 0.89

1.00E+00 0.86  
1.00E+00 0.59  
1.00E+00 0.86  
1.00E+00 0.86  
1.00E+00 0.76  
1.00E+00 0.67  
1.00E+00 1

1.00E+00 0.81  
1.00E+00 0.82  
1.00E+00 1  
1.00E+00 0.92  
1.00E+00 0.9  
1.00E+00 0.71  
1.00E+00 0.73  
1.00E+00 0.91  
1.00E+00 0.93  
1.00E+00 0.93

1.00E+00 1

1.00E+00 0.92  
1.00E+00 0.93  
1.00E+00 0.93  
1.00E+00 0.89  
1.00E+00 0.92  
1.00E+00 1  
1.00E+00 0.8  
1.00E+00 0.86  
1.00E+00 0.89  
1.00E+00 0.92  
1.00E+00 0.87

|          |      |
|----------|------|
| 1.00E+00 | 0.75 |
| 1.00E+00 | 0.92 |
| 1.00E+00 | 0.84 |
| 1.00E+00 | 0.93 |
| 1.00E+00 | 0.9  |
| 1.00E+00 | 0.86 |

|          |      |
|----------|------|
| 1.00E+00 | 0.85 |
| 1.00E+00 | 1    |

|          |      |
|----------|------|
| 1.00E+00 | 0.87 |
| 1.00E+00 | 0.9  |
| 1.00E+00 | 0.91 |

|          |      |
|----------|------|
| 1.00E+00 | 1    |
| 1.00E+00 | 0.95 |
| 1.00E+00 | 0.88 |
| 1.00E+00 | 0.91 |
| 1.00E+00 | 0.93 |
| 1.00E+00 | 0.63 |
| 1.00E+00 | 0.83 |
| 1.00E+00 | 0.91 |
| 1.00E+00 | 0.94 |
| 1.00E+00 | 0.66 |
| 1.00E+00 | 1    |
| 1.00E+00 | 0.87 |
| 1.00E+00 | 0.92 |
| 1.00E+00 | 0.94 |

|          |      |
|----------|------|
| 1.00E+00 | 1    |
| 1.00E+00 | 1    |
| 1.00E+00 | 0.96 |
| 1.00E+00 | 0.96 |
| 1.00E+00 | 0.82 |

|          |      |
|----------|------|
| 1.00E+00 | 0.87 |
|----------|------|

|          |      |
|----------|------|
| 1.00E+00 | 0.77 |
| 1.00E+00 | 0.94 |
| 1.00E+00 | 1    |
| 1.00E+00 | 0.8  |
| 1.00E+00 | 1    |
| 1.00E+00 | 0.91 |
| 1.00E+00 | 0    |
| 1.00E+00 | 0.81 |
| 1.00E+00 | 0.75 |

|          |      |
|----------|------|
| 1.00E+00 | 1    |
| 1.00E+00 | 0.9  |
| 1.00E+00 | 0.77 |
| 1.00E+00 | 0.81 |
| 1.00E+00 | 0.95 |

|          |      |
|----------|------|
| 1.00E+00 | 0.89 |
| 1.00E+00 | 0.9  |
| 1.00E+00 | 0.88 |
| 1.00E+00 | 0.8  |
| 1.00E+00 | 0.96 |
| 1.00E+00 | 0.91 |
| 1.00E+00 | 1    |
| 1.00E+00 | 0.88 |

|          |      |
|----------|------|
| 1.00E+00 | 0.73 |
|----------|------|

|          |   |
|----------|---|
| 1.00E+00 | 1 |
|----------|---|

|          |      |
|----------|------|
| 1.00E+00 | 0.79 |
| 1.00E+00 | 1    |
| 1.00E+00 | 1    |
| 1.00E+00 | 0.95 |
| 1.00E+00 | 1    |
| 1.00E+00 | 0.66 |
| 1.00E+00 | 0.83 |
| 1.00E+00 | 0.94 |
| 1.00E+00 | 0.93 |
| 1.00E+00 | 0.82 |
| 1.00E+00 | 0.92 |
| 1.00E+00 | 0.93 |
| 1.00E+00 | 0.9  |

|          |      |
|----------|------|
| 1.00E+00 | 0.78 |
| 1.00E+00 | 1    |
| 1.00E+00 | 0.72 |

|          |      |
|----------|------|
| 1.00E+00 | 0.91 |
|----------|------|

|          |      |
|----------|------|
| 1.00E+00 | 0.94 |
| 1.00E+00 | 0.89 |
| 1.00E+00 | 0.87 |
| 1.00E+00 | 0.74 |
| 1.00E+00 | 0.93 |
| 1.00E+00 | 0.82 |
| 1.00E+00 | 0.94 |
| 1.00E+00 | 0.85 |
| 1.00E+00 | 1    |
| 1.00E+00 | 0.66 |
| 1.00E+00 | 0.9  |
| 1.00E+00 | 0.89 |
| 1.00E+00 | 0.93 |
| 1.00E+00 | 0.75 |
| 1.00E+00 | 0.41 |
| 1.00E+00 | 0.68 |
| 1.00E+00 | 0.8  |
| 1.00E+00 | 1    |
| 1.00E+00 | 0.88 |
| 1.00E+00 | 0.69 |
| 1.00E+00 | 1    |
| 1.00E+00 | 1    |
| 1.00E+00 | 0.76 |
| 1.00E+00 | 0.75 |
| 1.00E+00 | 0.86 |
| 1.00E+00 | 0.82 |
| 1.00E+00 | 0.92 |
| 1.00E+00 | 0.8  |
| 1.00E+00 | 0.85 |
| 1.00E+00 | 0.96 |
| 1.00E+00 | 1    |
| 1.00E+00 | 0.86 |
| 1.00E+00 | 0.72 |
| 1.00E+00 | 0.97 |
| 1.00E+00 | 0.91 |
| 1.00E+00 | 0.87 |
| 1.00E+00 | 0.78 |
| 1.00E+00 | 0.89 |
| 1.00E+00 | 0.91 |
| 1.00E+00 | 0.92 |
| 1.00E+00 | 0.7  |
| 1.00E+00 | 0.69 |
| 1.00E+00 | 0.61 |
| 1.00E+00 | 0.94 |

|          |      |
|----------|------|
| 1.00E+00 | 0.77 |
| 1.00E+00 | 0.92 |
| 1.00E+00 | 0.89 |
| 1.00E+00 | 0.71 |
| 1.00E+00 | 0.67 |
| 1.00E+00 | 0.87 |
| 1.00E+00 | 0.89 |
| 1.00E+00 | 0.78 |
| 1.00E+00 | 0.87 |
| 1.00E+00 | 0.7  |
| 1.00E+00 | 0.91 |
| 1.00E+00 | 0.79 |
| 1.00E+00 | 0.8  |
| 1.00E+00 | 0.63 |
| 1.00E+00 | 0.82 |
| 1.00E+00 | 0.81 |
| 1.00E+00 | 0.47 |
| 1.00E+00 | 0.8  |
| 1.00E+00 | 0.75 |
| 1.00E+00 | 0.81 |
| 1.00E+00 | 0.71 |
| 1.00E+00 | 0.83 |
| 1.00E+00 | 0.39 |
| 1.00E+00 | 0.75 |
| 1.00E+00 | 0.75 |
| 1.00E+00 | 0.85 |
| 1.00E+00 | 0.92 |
| 1.00E+00 | 0.85 |
| 1.00E+00 | 0.87 |
| 1.00E+00 | 0.64 |
| 1.00E+00 | 1    |
| 1.00E+00 | 1    |
| 1.00E+00 | 1    |
| 1.00E+00 | 0.85 |
| 1.00E+00 | 0.86 |
| 1.00E+00 | 0.82 |

|          |      |
|----------|------|
| 1.00E+00 | 0.87 |
| 1.00E+00 | 1    |
| 1.00E+00 | 0.98 |
| 1.00E+00 | 1    |
| 1.00E+00 | 0.89 |
| 1.00E+00 | 0.64 |
| 1.00E+00 | 0.92 |
| 1.00E+00 | 0.83 |
| 1.00E+00 | 0.93 |

|          |      |
|----------|------|
| 1.00E+00 | 0.63 |
| 1.00E+00 | 0.98 |
| 1.00E+00 | 1    |
| 1.00E+00 | 0.91 |
| 1.00E+00 | 0.54 |
| 1.00E+00 | 0.95 |
| 1.00E+00 | 0.83 |

|          |      |
|----------|------|
| 1.00E+00 | 0.51 |
| 1.00E+00 | 0.94 |
| 1.00E+00 | 0.62 |
| 1.00E+00 | 0.87 |
| 1.00E+00 | 0.55 |
| 1.00E+00 | 0.56 |
| 1.00E+00 | 0.75 |
| 1.00E+00 | 0.77 |
| 1.00E+00 | 0.91 |
| 1.00E+00 | 0.83 |
| 1.00E+00 | 0.8  |
| 1.00E+00 | 0.71 |
| 1.00E+00 | 0.56 |
| 1.00E+00 | 0.51 |
| 1.00E+00 | 0.82 |
| 1.00E+00 | 0.93 |
| 1.00E+00 | 0.4  |
| 1.00E+00 | 0.28 |
| 1.00E+00 | 0.79 |
| 1.00E+00 | 0.71 |
| 1.00E+00 | 0.43 |

|          |      |
|----------|------|
| 1.00E+00 | 1    |
| 1.00E+00 | 0.79 |
| 1.00E+00 | 0.73 |
| 1.00E+00 | 1    |

|          |      |
|----------|------|
| 1.00E+00 | 1    |
| 1.00E+00 | 0.58 |
| 1.00E+00 | 1    |
| 1.00E+00 | 1    |
| 1.00E+00 | 0.93 |
| 1.00E+00 | 0.85 |
| 1.00E+00 | 0.84 |
| 1.00E+00 | 1    |
| 1.00E+00 | 0    |
| 1.00E+00 | 1    |
| 1.00E+00 | 0.93 |
| 1.00E+00 | 0.93 |
| 1.00E+00 | 0.86 |
| 1.00E+00 | 0.87 |
| 1.00E+00 | 0.92 |
| 1.00E+00 | 0.95 |
| 1.00E+00 | 0.84 |
| 1.00E+00 | 1    |
| 1.00E+00 | 0.93 |
| 1.00E+00 | 0.92 |
| 1.00E+00 | 0.91 |
| 1.00E+00 | 1    |
| 1.00E+00 | 0.93 |
| 1.00E+00 | 0.93 |
| 1.00E+00 | 1    |
| 1.00E+00 | 0.76 |
| 1.00E+00 | 0.85 |
| 1.00E+00 | 1    |
| 1.00E+00 | 0.84 |
| 1.00E+00 | 0.64 |
| 1.00E+00 | 1    |
| 1.00E+00 | 0.71 |
| 1.00E+00 | 1    |
| 1.00E+00 | 0.93 |
| 1.00E+00 | 0.88 |
| 1.00E+00 | 0.68 |
| 1.00E+00 | 1    |
| 1.00E+00 | 0.74 |
| 1.00E+00 | 0.76 |
| 1.00E+00 | 0.65 |
| 1.00E+00 | 0.92 |
| 1.00E+00 | 0.93 |
| 1.00E+00 | 0.93 |
| 1.00E+00 | 0.92 |
| 1.00E+00 | 0.49 |
| 1.00E+00 | 0.86 |

|          |      |
|----------|------|
| 1.00E+00 | 1    |
| 1.00E+00 | 0.79 |
| 1.00E+00 | 0.93 |
| 1.00E+00 | 0.62 |
| 1.00E+00 | 0.79 |
| 1.00E+00 | 1    |
| 1.00E+00 | 0.75 |
| 1.00E+00 | 0.86 |
| 1.00E+00 | 0.95 |
| 1.00E+00 | 0.94 |
| 1.00E+00 | 0.82 |
| 1.00E+00 | 0.89 |

|          |      |
|----------|------|
| 1.00E+00 | 0.85 |
| 1.00E+00 | 0.91 |
| 1.00E+00 | 0.95 |
| 1.00E+00 | 0.91 |
| 1.00E+00 | 0.85 |
| 1.00E+00 | 0.93 |
| 1.00E+00 | 0.95 |
| 1.00E+00 | 0.59 |
| 1.00E+00 | 1    |
| 1.00E+00 | 0.93 |
| 1.00E+00 | 0.86 |
| 1.00E+00 | 0.81 |
| 1.00E+00 | 0.84 |
| 1.00E+00 | 0.92 |
| 1.00E+00 | 0.94 |
| 1.00E+00 | 0.92 |
| 1.00E+00 | 0.85 |
| 1.00E+00 | 0.92 |
| 1.00E+00 | 0.82 |
| 1.00E+00 | 0.91 |

|          |      |
|----------|------|
| 1.00E+00 | 0.61 |
| 1.00E+00 | 0.98 |
| 1.00E+00 | 0.91 |

|          |      |
|----------|------|
| 1.00E+00 | 0.83 |
| 1.00E+00 | 0.63 |
| 1.00E+00 | 0.74 |
| 1.00E+00 | 0.41 |
| 1.00E+00 | 0.83 |
| 1.00E+00 | 0.86 |
| 1.00E+00 | 0.69 |
| 1.00E+00 | 0.93 |
| 1.00E+00 | 0.89 |
| 1.00E+00 | 0.8  |
| 1.00E+00 | 0.86 |



|          |      |
|----------|------|
| 1.00E+00 | 0.53 |
| 1.00E+00 | 0.93 |
| 1.00E+00 | 0.95 |
| 1.00E+00 | 1    |
| 1.00E+00 | 1    |
| 1.00E+00 | 0.41 |
| 1.00E+00 | 0.49 |
| 1.00E+00 | 0.72 |
| 1.00E+00 | 0.8  |
| 1.00E+00 | 1    |
| 1.00E+00 | 1    |
| 1.00E+00 | 0.95 |
| 1.00E+00 | 0.81 |
| 1.00E+00 | 0.95 |
| 1.00E+00 | 0.88 |
| 1.00E+00 | 0.91 |
| 1.00E+00 | 0.94 |
| 1.00E+00 | 1    |
| 1.00E+00 | 0.96 |
| 1.00E+00 | 0.92 |
| 1.00E+00 | 0.92 |
| 1.00E+00 | 0.87 |
| 1.00E+00 | 0.89 |
| 1.00E+00 | 0.95 |
| 1.00E+00 | 0.65 |
| 1.00E+00 | 0.64 |
| 1.00E+00 | 0.89 |
| 1.00E+00 | 1    |
| 1.00E+00 | 0.87 |
| 1.00E+00 | 0.93 |
| 1.00E+00 | 0.94 |
| 1.00E+00 | 0.92 |
| 1.00E+00 | 0.94 |
| 1.00E+00 | 0.62 |
| 1.00E+00 | 0.97 |
| 1.00E+00 | 1    |
| 1.00E+00 | 0.91 |
| 1.00E+00 | 1    |
| 1.00E+00 | 0.68 |
| 1.00E+00 | 0.82 |
| 1.00E+00 | 0.51 |

1.00E+00 0.61

1.00E+00 0.92

1.00E+00 0.73

1.00E+00 0.93

1.00E+00 1

1.00E+00 0.72

1.00E+00 0.81

1.00E+00 0.92

1.00E+00 0.92

1.00E+00 0.65

1.00E+00 0.87

1.00E+00 0.72

1.00E+00 0.81

1.00E+00 1

1.00E+00 0.81

1.00E+00 0.73

1.00E+00 1

1.00E+00 0.76

1.00E+00 0.82

1.00E+00 0.97

1.00E+00 0.97

1.00E+00 0.62

1.00E+00 0.35

1.00E+00 0.64

1.00E+00 0.93

1.00E+00 0.94

1.00E+00 0.94

1.00E+00 0.68

1.00E+00 0.84

1.00E+00 0.92

1.00E+00 0.81

1.00E+00 0.4

1.00E+00 0.37

1.00E+00 0.71

1.00E+00 1

|          |      |
|----------|------|
| 1.00E+00 | 0.87 |
| 1.00E+00 | 0.94 |
| 1.00E+00 | 0.83 |
| 1.00E+00 | 0.77 |
| 1.00E+00 | 0.74 |

|          |      |
|----------|------|
| 1.00E+00 | 0.8  |
| 1.00E+00 | 0.57 |
| 1.00E+00 | 0.6  |

|          |      |
|----------|------|
| 1.00E+00 | 0.92 |
|----------|------|

|          |      |
|----------|------|
| 1.00E+00 | 0.54 |
| 1.00E+00 | 0.67 |
| 1.00E+00 | 0.8  |
| 1.00E+00 | 0.78 |
| 1.00E+00 | 0.94 |
| 1.00E+00 | 0.52 |
| 1.00E+00 | 0.77 |
| 1.00E+00 | 0.84 |
| 1.00E+00 | 0.74 |
| 1.00E+00 | 0.64 |
| 1.00E+00 | 0.77 |

|          |      |
|----------|------|
| 1.00E+00 | 0.77 |
| 1.00E+00 | 0.65 |
| 1.00E+00 | 0.75 |

|          |      |
|----------|------|
| 1.00E+00 | 0.86 |
| 1.00E+00 | 0.68 |
| 1.00E+00 | 0.82 |
| 1.00E+00 | 0.97 |

|          |      |
|----------|------|
| 1.00E+00 | 1    |
| 1.00E+00 | 0.91 |
| 1.00E+00 | 0.96 |
| 1.00E+00 | 0.95 |
| 1.00E+00 | 0.76 |
| 1.00E+00 | 0.91 |
| 1.00E+00 | 0.93 |
| 1.00E+00 | 0.72 |

|          |      |
|----------|------|
| 1.00E+00 | 0.84 |
|----------|------|

|          |      |
|----------|------|
| 1.00E+00 | 0.91 |
| 1.00E+00 | 0.82 |
| 1.00E+00 | 0.9  |
| 1.00E+00 | 0.78 |
| 1.00E+00 | 0.9  |
| 1.00E+00 | 0.57 |
| 1.00E+00 | 0.97 |
| 1.00E+00 | 0.92 |
| 1.00E+00 | 0.92 |
| 1.00E+00 | 0.64 |
| 1.00E+00 | 0.79 |
| 1.00E+00 | 0.94 |
| 1.00E+00 | 0.91 |
| 1.00E+00 | 0.9  |
| 1.00E+00 | 0.95 |
| 1.00E+00 | 0.93 |
| 1.00E+00 | 0.6  |
| 1.00E+00 | 0.92 |
| 1.00E+00 | 0.45 |
| 1.00E+00 | 0.56 |
| 1.00E+00 | 0.62 |
| 1.00E+00 | 0.93 |
| 1.00E+00 | 0.93 |
| 1.00E+00 | 0.51 |
| 1.00E+00 | 0.69 |
| 1.00E+00 | 0.92 |
| 1.00E+00 | 1    |
| 1.00E+00 | 0.91 |
| 1.00E+00 | 0.83 |
| 1.00E+00 | 0.86 |
| 1.00E+00 | 0.79 |
| 1.00E+00 | 0.84 |
| 1.00E+00 | 0.9  |
| 1.00E+00 | 0.82 |
| 1.00E+00 | 0.64 |
| 1.00E+00 | 0.93 |
| 1.00E+00 | 0.84 |
| 1.00E+00 | 0.94 |
| 1.00E+00 | 0.87 |
| 1.00E+00 | 0.93 |
| 1.00E+00 | 0    |
| 1.00E+00 | 0.92 |
| 1.00E+00 | 1    |

|          |      |
|----------|------|
| 1.00E+00 | 0.86 |
| 1.00E+00 | 0.93 |
| 1.00E+00 | 1    |
| 1.00E+00 | 0.86 |
| 1.00E+00 | 0.94 |
| 1.00E+00 | 0.64 |
| 1.00E+00 | 0.93 |
| 1.00E+00 | 0.64 |

|          |      |
|----------|------|
| 1.00E+00 | 0.81 |
|----------|------|

|          |      |
|----------|------|
| 1.00E+00 | 0.8  |
| 1.00E+00 | 0.87 |
| 1.00E+00 | 0.95 |
| 1.00E+00 | 0.9  |
| 1.00E+00 | 0.82 |
| 1.00E+00 | 0.88 |
| 1.00E+00 | 0.95 |

|          |      |
|----------|------|
| 1.00E+00 | 0.84 |
| 1.00E+00 | 0.94 |
| 1.00E+00 | 1    |
| 1.00E+00 | 0.68 |

|          |      |
|----------|------|
| 1.00E+00 | 0.56 |
| 1.00E+00 | 0.92 |

|          |      |
|----------|------|
| 1.00E+00 | 1    |
| 1.00E+00 | 1    |
| 1.00E+00 | 1    |
| 1.00E+00 | 0.45 |
| 1.00E+00 | 0.96 |
| 1.00E+00 | 0.82 |
| 1.00E+00 | 0.96 |
| 1.00E+00 | 0.92 |
| 1.00E+00 | 0.76 |
| 1.00E+00 | 0.82 |
| 1.00E+00 | 0.67 |
| 1.00E+00 | 0.87 |
| 1.00E+00 | 0.84 |
| 1.00E+00 | 1    |
| 1.00E+00 | 0.81 |

|          |      |
|----------|------|
| 1.00E+00 | 0.82 |
|----------|------|

|          |      |
|----------|------|
| 1.00E+00 | 0.78 |
| 1.00E+00 | 1    |
| 1.00E+00 | 0.9  |
| 1.00E+00 | 0.71 |
| 1.00E+00 | 0.84 |
| 1.00E+00 | 0.59 |
| 1.00E+00 | 0.92 |
| 1.00E+00 | 0.83 |
| 1.00E+00 | 0.91 |
| 1.00E+00 | 1    |
| 1.00E+00 | 1    |
| 1.00E+00 | 0.65 |
| 1.00E+00 | 0.56 |
| 1.00E+00 | 1    |
| 1.00E+00 | 1    |
| 1.00E+00 | 0.62 |
| 1.00E+00 | 0.66 |
| 1.00E+00 | 0.66 |
| 1.00E+00 | 0.57 |
| 1.00E+00 | 0    |
| 1.00E+00 | 0.75 |
| 1.00E+00 | 0.98 |
| 1.00E+00 | 0.85 |
| 1.00E+00 | 0.58 |
| 1.00E+00 | 0.84 |
| 1.00E+00 | 0.74 |
| 1.00E+00 | 0.76 |
| 1.00E+00 | 0.83 |
| 1.00E+00 | 0.89 |
| 1.00E+00 | 0.86 |
| 1.00E+00 | 0.44 |
| 1.00E+00 | 0.94 |
| 1.00E+00 | 0.91 |
| 1.00E+00 | 0.95 |
| 1.00E+00 | 0.66 |
| 1.00E+00 | 1    |
| 1.00E+00 | 1    |
| 1.00E+00 | 0.81 |
| 1.00E+00 | 0.95 |
| 1.00E+00 | 0.84 |
| 1.00E+00 | 0.83 |
| 1.00E+00 | 0.86 |
| 1.00E+00 | 1    |
| 1.00E+00 | 0.57 |

|          |      |
|----------|------|
| 1.00E+00 | 0.84 |
| 1.00E+00 | 0.92 |
| 1.00E+00 | 1    |
| 1.00E+00 | 0.96 |
| 1.00E+00 | 0.79 |
| 1.00E+00 | 0.76 |
| 1.00E+00 | 0.8  |

|          |      |
|----------|------|
| 1.00E+00 | 0.89 |
| 1.00E+00 | 1    |

|          |      |
|----------|------|
| 1.00E+00 | 0.65 |
|----------|------|

|          |      |
|----------|------|
| 1.00E+00 | 0.84 |
| 1.00E+00 | 0.43 |
| 1.00E+00 | 0.87 |
| 1.00E+00 | 0.94 |

|          |      |
|----------|------|
| 1.00E+00 | 1    |
| 1.00E+00 | 0.88 |
| 1.00E+00 | 0.74 |
| 1.00E+00 | 1    |
| 1.00E+00 | 0.97 |
| 1.00E+00 | 0.95 |
| 1.00E+00 | 0.84 |

|          |      |
|----------|------|
| 1.00E+00 | 0.54 |
| 1.00E+00 | 0.48 |
| 1.00E+00 | 0.95 |
| 1.00E+00 | 0.93 |
| 1.00E+00 | 0.94 |

|          |      |
|----------|------|
| 1.00E+00 | 0.35 |
| 1.00E+00 | 0.88 |

|          |      |
|----------|------|
| 1.00E+00 | 0.79 |
| 1.00E+00 | 0.53 |
| 1.00E+00 | 0.93 |
| 1.00E+00 | 0.92 |
| 1.00E+00 | 1    |
| 1.00E+00 | 0.82 |
| 1.00E+00 | 0.8  |
| 1.00E+00 | 1    |
| 1.00E+00 | 0.93 |
| 1.00E+00 | 0.92 |

|          |      |
|----------|------|
| 1.00E+00 | 0.94 |
| 1.00E+00 | 0.97 |
| 1.00E+00 | 0.82 |

|          |      |
|----------|------|
| 1.00E+00 | 0.96 |
| 1.00E+00 | 0.9  |
| 1.00E+00 | 0.89 |
| 1.00E+00 | 0.77 |
| 1.00E+00 | 0.84 |
| 1.00E+00 | 0.76 |
| 1.00E+00 | 0.94 |
| 1.00E+00 | 0.95 |
| 1.00E+00 | 0.96 |

|          |      |
|----------|------|
| 1.00E+00 | 0.93 |
|----------|------|

|          |      |
|----------|------|
| 1.00E+00 | 1    |
| 1.00E+00 | 0.81 |
| 1.00E+00 | 0.96 |
| 1.00E+00 | 0.59 |
| 1.00E+00 | 1    |

|          |      |
|----------|------|
| 1.00E+00 | 0.9  |
| 1.00E+00 | 0.83 |
| 1.00E+00 | 0.91 |

|          |      |
|----------|------|
| 1.00E+00 | 0.81 |
| 1.00E+00 | 0.89 |
| 1.00E+00 | 0.68 |
| 1.00E+00 | 0.61 |
| 1.00E+00 | 0.7  |
| 1.00E+00 | 0.56 |
| 1.00E+00 | 0.56 |
| 1.00E+00 | 1    |
| 1.00E+00 | 1    |
| 1.00E+00 | 1    |
| 1.00E+00 | 1    |
| 1.00E+00 | 0.86 |
| 1.00E+00 | 1    |
| 1.00E+00 | 0.89 |
| 1.00E+00 | 1    |

|          |      |
|----------|------|
| 1.00E+00 | 0.95 |
| 1.00E+00 | 0.9  |
| 1.00E+00 | 0.88 |
| 1.00E+00 | 0.92 |



|          |      |
|----------|------|
| 1.00E+00 | 0.76 |
| 1.00E+00 | 1    |
| 1.00E+00 | 0.98 |

|          |      |
|----------|------|
| 1.00E+00 | 0.88 |
| 1.00E+00 | 0.66 |
| 1.00E+00 | 0.64 |
| 1.00E+00 | 0.91 |
| 1.00E+00 | 0.62 |
| 1.00E+00 | 0.75 |
| 1.00E+00 | 0.8  |
| 1.00E+00 | 0.91 |

|          |      |
|----------|------|
| 1.00E+00 | 0.91 |
| 1.00E+00 | 0.94 |
| 1.00E+00 | 0.93 |
| 1.00E+00 | 1    |

|          |      |
|----------|------|
| 1.00E+00 | 1    |
| 1.00E+00 | 0.68 |
| 1.00E+00 | 0.6  |
| 1.00E+00 | 0.76 |

|          |      |
|----------|------|
| 1.00E+00 | 0.95 |
| 1.00E+00 | 0.94 |
| 1.00E+00 | 0.88 |
| 1.00E+00 | 0.63 |
| 1.00E+00 | 0.93 |
| 1.00E+00 | 0.93 |
| 1.00E+00 | 0.86 |
| 1.00E+00 | 0.95 |
| 1.00E+00 | 0.82 |
| 1.00E+00 | 0.93 |

|          |      |
|----------|------|
| 1.00E+00 | 0.63 |
| 1.00E+00 | 0.94 |
| 1.00E+00 | 0.94 |
| 1.00E+00 | 1    |
| 1.00E+00 | 0.9  |
| 1.00E+00 | 0.94 |
| 1.00E+00 | 0.93 |
| 1.00E+00 | 0.71 |
| 1.00E+00 | 0.84 |
| 1.00E+00 | 1    |
| 1.00E+00 | 0.88 |
| 1.00E+00 | 0.96 |
| 1.00E+00 | 1    |

|          |      |
|----------|------|
| 1.00E+00 | 0.86 |
| 1.00E+00 | 0.65 |
| 1.00E+00 | 0.64 |
| 1.00E+00 | 0.82 |

|          |      |
|----------|------|
| 1.00E+00 | 0.67 |
| 1.00E+00 | 0.92 |

|          |      |
|----------|------|
| 1.00E+00 | 0.7  |
| 1.00E+00 | 1    |
| 1.00E+00 | 0.82 |
| 1.00E+00 | 1    |
| 1.00E+00 | 0.93 |
| 1.00E+00 | 0.93 |
| 1.00E+00 | 0.8  |
| 1.00E+00 | 1    |
| 1.00E+00 | 0.85 |
| 1.00E+00 | 0.9  |
| 1.00E+00 | 0.93 |
| 1.00E+00 | 0.91 |
| 1.00E+00 | 0.92 |
| 1.00E+00 | 0.64 |
| 1.00E+00 | 0.95 |
| 1.00E+00 | 0.83 |
| 1.00E+00 | 1    |

|          |      |
|----------|------|
| 1.00E+00 | 0.85 |
| 1.00E+00 | 0.87 |
| 1.00E+00 | 0.95 |
| 1.00E+00 | 0.8  |
| 1.00E+00 | 0.95 |
| 1.00E+00 | 0.91 |
| 1.00E+00 | 0.95 |

|          |      |
|----------|------|
| 1.00E+00 | 0.89 |
|----------|------|

|          |      |
|----------|------|
| 1.00E+00 | 0.95 |
| 1.00E+00 | 0.71 |
| 1.00E+00 | 0.94 |
| 1.00E+00 | 0    |
| 1.00E+00 | 0.92 |

|          |      |
|----------|------|
| 1.00E+00 | 1    |
| 1.00E+00 | 0.93 |

|          |      |
|----------|------|
| 1.00E+00 | 0.93 |
| 1.00E+00 | 0.97 |
| 1.00E+00 | 1    |

|          |      |
|----------|------|
| 1.00E+00 | 0.77 |
| 1.00E+00 | 0.97 |
| 1.00E+00 | 0.91 |
| 1.00E+00 | 1    |
| 1.00E+00 | 0.65 |
| 1.00E+00 | 0.8  |
| 1.00E+00 | 0.77 |
| 1.00E+00 | 0.9  |
| 1.00E+00 | 0.92 |
| 1.00E+00 | 1    |
| 1.00E+00 | 0.76 |
| 1.00E+00 | 0    |
| 1.00E+00 | 0.83 |
| 1.00E+00 | 0.7  |
| 1.00E+00 | 0.94 |
| 1.00E+00 | 0.69 |
| 1.00E+00 | 0.91 |
| 1.00E+00 | 0.96 |
| 1.00E+00 | 0.92 |
| 1.00E+00 | 0.91 |
| 1.00E+00 | 0    |
| 1.00E+00 | 0.81 |
| 1.00E+00 | 1    |
| 1.00E+00 | 0.82 |
| 1.00E+00 | 0.88 |
| 1.00E+00 | 0.85 |
| 1.00E+00 | 0.88 |
| 1.00E+00 | 0.67 |
| 1.00E+00 | 0    |
| 1.00E+00 | 0.81 |
| 1.00E+00 | 1    |
| 1.00E+00 | 0.81 |
| 1.00E+00 | 0.81 |
| 1.00E+00 | 0.89 |
| 1.00E+00 | 0.92 |
| 1.00E+00 | 0.68 |
| 1.00E+00 | 1    |
| 1.00E+00 | 0.91 |
| 1.00E+00 | 0.92 |
| 1.00E+00 | 0.9  |
| 1.00E+00 | 0.96 |
| 1.00E+00 | 0.95 |

|          |      |
|----------|------|
| 1.00E+00 | 0.78 |
| 1.00E+00 | 0.71 |
| 1.00E+00 | 0.68 |
| 1.00E+00 | 0.57 |
| 1.00E+00 | 0.96 |
| 1.00E+00 | 0.8  |
| 1.00E+00 | 0.88 |

|          |      |
|----------|------|
| 1.00E+00 | 0.93 |
|----------|------|

|          |      |
|----------|------|
| 1.00E+00 | 0.86 |
| 1.00E+00 | 0.86 |
| 1.00E+00 | 0.54 |
| 1.00E+00 | 1    |
| 1.00E+00 | 0.59 |
| 1.00E+00 | 0.89 |
| 1.00E+00 | 1    |
| 1.00E+00 | 0.84 |
| 1.00E+00 | 0.95 |
| 1.00E+00 | 0.58 |
| 1.00E+00 | 0.76 |
| 1.00E+00 | 1    |
| 1.00E+00 | 0.9  |
| 1.00E+00 | 0.95 |
| 1.00E+00 | 1    |

|          |      |
|----------|------|
| 1.00E+00 | 0.63 |
|----------|------|

|          |      |
|----------|------|
| 1.00E+00 | 0.71 |
| 1.00E+00 | 0.36 |
| 1.00E+00 | 0.71 |
| 1.00E+00 | 0.88 |
| 1.00E+00 | 0.93 |
| 1.00E+00 | 1    |
| 1.00E+00 | 1    |
| 1.00E+00 | 0.88 |
| 1.00E+00 | 0.67 |
| 1.00E+00 | 0.9  |

|          |      |
|----------|------|
| 1.00E+00 | 0.95 |
|----------|------|

|          |      |
|----------|------|
| 1.00E+00 | 0.64 |
| 1.00E+00 | 0.71 |
| 1.00E+00 | 0.76 |
| 1.00E+00 | 1    |
| 1.00E+00 | 0.86 |
| 1.00E+00 | 0.92 |
| 1.00E+00 | 0.78 |

|          |      |
|----------|------|
| 1.00E+00 | 0.73 |
| 1.00E+00 | 0.91 |
| 1.00E+00 | 0.45 |
| 1.00E+00 | 0.63 |

|          |      |
|----------|------|
| 1.00E+00 | 0.66 |
| 1.00E+00 | 1    |
| 1.00E+00 | 0.76 |
| 1.00E+00 | 0.9  |
| 1.00E+00 | 0.84 |
| 1.00E+00 | 0.89 |
| 1.00E+00 | 0.81 |
| 1.00E+00 | 0.82 |
| 1.00E+00 | 0.81 |
| 1.00E+00 | 0.83 |
| 1.00E+00 | 1    |
| 1.00E+00 | 0.73 |
| 1.00E+00 | 0.69 |

|          |      |
|----------|------|
| 1.00E+00 | 1    |
| 1.00E+00 | 0.79 |
| 1.00E+00 | 0.82 |
| 1.00E+00 | 0.85 |
| 1.00E+00 | 0.87 |
| 1.00E+00 | 0.89 |
| 1.00E+00 | 0.74 |
| 1.00E+00 | 0.85 |
| 1.00E+00 | 1    |
| 1.00E+00 | 0.73 |
| 1.00E+00 | 1    |
| 1.00E+00 | 0.67 |
| 1.00E+00 | 0.93 |
| 1.00E+00 | 1    |
| 1.00E+00 | 0.81 |
| 1.00E+00 | 1    |
| 1.00E+00 | 0.75 |
| 1.00E+00 | 0.92 |

|          |      |
|----------|------|
| 1.00E+00 | 0.93 |
| 1.00E+00 | 0.87 |
| 1.00E+00 | 0.74 |
| 1.00E+00 | 0.87 |
| 1.00E+00 | 0.94 |
| 1.00E+00 | 0.9  |
| 1.00E+00 | 0.97 |

|          |      |
|----------|------|
| 1.00E+00 | 0.83 |
| 1.00E+00 | 0.63 |
| 1.00E+00 | 1    |
| 1.00E+00 | 0.67 |
| 1.00E+00 | 0.89 |

|          |      |
|----------|------|
| 1.00E+00 | 0.92 |
| 1.00E+00 | 0.78 |
| 1.00E+00 | 0.87 |

|          |      |
|----------|------|
| 1.00E+00 | 1    |
| 1.00E+00 | 0.91 |
| 1.00E+00 | 0.71 |
| 1.00E+00 | 0.76 |
| 1.00E+00 | 0.61 |
| 1.00E+00 | 1    |
| 1.00E+00 | 0.82 |
| 1.00E+00 | 1    |
| 1.00E+00 | 1    |

|          |      |
|----------|------|
| 1.00E+00 | 0.57 |
| 1.00E+00 | 0.96 |

|          |      |
|----------|------|
| 1.00E+00 | 0.78 |
| 1.00E+00 | 0.61 |
| 1.00E+00 | 0.83 |
| 1.00E+00 | 0.9  |
| 1.00E+00 | 0.96 |
| 1.00E+00 | 0.85 |
| 1.00E+00 | 0.64 |

|          |      |
|----------|------|
| 1.00E+00 | 0.71 |
| 1.00E+00 | 0.81 |
| 1.00E+00 | 1    |
| 1.00E+00 | 0.79 |
| 1.00E+00 | 0.65 |
| 1.00E+00 | 0.85 |
| 1.00E+00 | 0.81 |
| 1.00E+00 | 0.82 |
| 1.00E+00 | 0.82 |
| 1.00E+00 | 0.74 |
| 1.00E+00 | 0.68 |
| 1.00E+00 | 0.78 |
| 1.00E+00 | 0.82 |
| 1.00E+00 | 0.8  |
| 1.00E+00 | 0.47 |
| 1.00E+00 | 0.89 |
| 1.00E+00 | 0.89 |
| 1.00E+00 | 0.56 |
| 1.00E+00 | 0.75 |
| 1.00E+00 | 0.56 |

|          |      |
|----------|------|
| 1.00E+00 | 0.95 |
|----------|------|

|          |      |
|----------|------|
| 1.00E+00 | 1    |
| 1.00E+00 | 1    |
| 1.00E+00 | 1    |
| 1.00E+00 | 0.92 |
| 1.00E+00 | 0.89 |

|          |      |
|----------|------|
| 1.00E+00 | 1    |
| 1.00E+00 | 0.76 |

|          |      |
|----------|------|
| 1.00E+00 | 0.94 |
| 1.00E+00 | 1    |
| 1.00E+00 | 0.8  |
| 1.00E+00 | 0.84 |
| 1.00E+00 | 0.79 |
| 1.00E+00 | 0.63 |
| 1.00E+00 | 0.82 |
| 1.00E+00 | 0.55 |

|          |      |
|----------|------|
| 1.00E+00 | 0.86 |
| 1.00E+00 | 0.92 |
| 1.00E+00 | 1    |
| 1.00E+00 | 0.81 |
| 1.00E+00 | 0.93 |
| 1.00E+00 | 1    |

|          |      |
|----------|------|
| 1.00E+00 | 0.88 |
| 1.00E+00 | 0.86 |
| 1.00E+00 | 0.66 |
| 1.00E+00 | 0.79 |

|          |     |
|----------|-----|
| 1.00E+00 | 0.9 |
|----------|-----|

|          |      |
|----------|------|
| 1.00E+00 | 0.89 |
|----------|------|

|          |      |
|----------|------|
| 1.00E+00 | 0.75 |
| 1.00E+00 | 0.65 |
| 1.00E+00 | 0.74 |

|          |      |
|----------|------|
| 1.00E+00 | 0.94 |
| 1.00E+00 | 0.69 |
| 1.00E+00 | 0.71 |
| 1.00E+00 | 0.75 |
| 1.00E+00 | 1    |
| 1.00E+00 | 0.74 |
| 1.00E+00 | 0.7  |
| 1.00E+00 | 0.73 |
| 1.00E+00 | 0.89 |

|          |      |
|----------|------|
| 1.00E+00 | 0.92 |
| 1.00E+00 | 0.85 |
| 1.00E+00 | 0.77 |
| 1.00E+00 | 0.59 |
| 1.00E+00 | 1    |
| 1.00E+00 | 0.96 |

|          |      |
|----------|------|
| 1.00E+00 | 1    |
| 1.00E+00 | 0.96 |
| 1.00E+00 | 0.96 |
| 1.00E+00 | 0.89 |
| 1.00E+00 | 0.92 |
| 1.00E+00 | 0.85 |
| 1.00E+00 | 0.94 |
| 1.00E+00 | 0.87 |
| 1.00E+00 | 1    |
| 1.00E+00 | 0.81 |
| 1.00E+00 | 1    |
| 1.00E+00 | 0.94 |
| 1.00E+00 | 0.85 |
| 1.00E+00 | 0.97 |
| 1.00E+00 | 0.89 |

|          |      |
|----------|------|
| 1.00E+00 | 0.81 |
|----------|------|

|          |      |
|----------|------|
| 1.00E+00 | 1    |
| 1.00E+00 | 1    |
| 1.00E+00 | 0.74 |
| 1.00E+00 | 1    |
| 1.00E+00 | 0.73 |
| 1.00E+00 | 0.97 |
| 1.00E+00 | 0.67 |
| 1.00E+00 | 1    |
| 1.00E+00 | 0.81 |
| 1.00E+00 | 1    |
| 1.00E+00 | 0.92 |
| 1.00E+00 | 1    |



|          |      |
|----------|------|
| 1.00E+00 | 0.81 |
| 1.00E+00 | 1    |
| 1.00E+00 | 1    |
| 1.00E+00 | 0.91 |
| 1.00E+00 | 0.69 |
| 1.00E+00 | 0.71 |
| 1.00E+00 | 0.67 |
| 1.00E+00 | 0.79 |
| 1.00E+00 | 1    |
| 1.00E+00 | 0.87 |
| 1.00E+00 | 0.41 |
| 1.00E+00 | 0.86 |
| 1.00E+00 | 0.92 |
| 1.00E+00 | 0.89 |
| 1.00E+00 | 0.95 |
| 1.00E+00 | 0.84 |
| 1.00E+00 | 0.84 |
| 1.00E+00 | 0.97 |
| 1.00E+00 | 0.52 |
| 1.00E+00 | 0.94 |
| 1.00E+00 | 0.93 |
| 1.00E+00 | 0.94 |
| 1.00E+00 | 0.89 |
| 1.00E+00 | 0.77 |
| 1.00E+00 | 0.66 |
| 1.00E+00 | 0.89 |
| 1.00E+00 | 0.67 |
| 1.00E+00 | 0.58 |
| 1.00E+00 | 0.94 |
| 1.00E+00 | 0.88 |
| 1.00E+00 | 0.53 |
| 1.00E+00 | 0.84 |
| 1.00E+00 | 0.93 |
| 1.00E+00 | 0.97 |
| 1.00E+00 | 0.94 |
| 1.00E+00 | 0.87 |
| 1.00E+00 | 0.93 |
| 1.00E+00 | 0.94 |
| 1.00E+00 | 0.91 |
| 1.00E+00 | 0.94 |
| 1.00E+00 | 0.94 |
| 1.00E+00 | 0.93 |
| 1.00E+00 | 0.91 |
| 1.00E+00 | 0.87 |
| 1.00E+00 | 1    |
| 1.00E+00 | 0.91 |
| 1.00E+00 | 0.72 |
| 1.00E+00 | 0.62 |

|          |      |
|----------|------|
| 1.00E+00 | 0.7  |
| 1.00E+00 | 0.92 |
| 1.00E+00 | 0.91 |
| 1.00E+00 | 0.73 |
| 1.00E+00 | 0.93 |
| 1.00E+00 | 0.48 |

|          |      |
|----------|------|
| 1.00E+00 | 0.96 |
| 1.00E+00 | 1    |
| 1.00E+00 | 0.91 |
| 1.00E+00 | 0.94 |
| 1.00E+00 | 0.86 |
| 1.00E+00 | 0.9  |
| 1.00E+00 | 0.82 |
| 1.00E+00 | 0.93 |
| 1.00E+00 | 0.63 |

|          |      |
|----------|------|
| 1.00E+00 | 0.86 |
| 1.00E+00 | 0.92 |
| 1.00E+00 | 0.79 |
| 1.00E+00 | 0.91 |
| 1.00E+00 | 0.86 |
| 1.00E+00 | 1    |
| 1.00E+00 | 0.85 |
| 1.00E+00 | 0.91 |
| 1.00E+00 | 0.88 |
| 1.00E+00 | 0.85 |
| 1.00E+00 | 1    |
| 1.00E+00 | 0.89 |
| 1.00E+00 | 1    |
| 1.00E+00 | 0.57 |
| 1.00E+00 | 0.56 |
| 1.00E+00 | 0.86 |
| 1.00E+00 | 0.57 |
| 1.00E+00 | 1    |
| 1.00E+00 | 1    |
| 1.00E+00 | 0.68 |
| 1.00E+00 | 0.83 |
| 1.00E+00 | 0.94 |
| 1.00E+00 | 0.68 |
| 1.00E+00 | 0.9  |
| 1.00E+00 | 0.52 |
| 1.00E+00 | 1    |
| 1.00E+00 | 0.45 |
| 1.00E+00 | 0.71 |

|          |      |
|----------|------|
| 1.00E+00 | 0.92 |
| 1.00E+00 | 1    |
| 1.00E+00 | 0.79 |
| 1.00E+00 | 0.77 |

|          |      |
|----------|------|
| 1.00E+00 | 0.79 |
| 1.00E+00 | 0.81 |
| 1.00E+00 | 1    |
| 1.00E+00 | 0.86 |
| 1.00E+00 | 0.87 |
| 1.00E+00 | 0.91 |
| 1.00E+00 | 0.67 |
| 1.00E+00 | 0.91 |
| 1.00E+00 | 1    |
| 1.00E+00 | 0.95 |
| 1.00E+00 | 0.79 |
| 1.00E+00 | 0.95 |
| 1.00E+00 | 1    |
| 1.00E+00 | 1    |
| 1.00E+00 | 0.74 |
| 1.00E+00 | 0.47 |

|          |      |
|----------|------|
| 1.00E+00 | 0.88 |
| 1.00E+00 | 1    |
| 1.00E+00 | 1    |
| 1.00E+00 | 0.85 |
| 1.00E+00 | 1    |
| 1.00E+00 | 0.73 |
| 1.00E+00 | 0.93 |
| 1.00E+00 | 0.75 |
| 1.00E+00 | 0.91 |
| 1.00E+00 | 0.85 |
| 1.00E+00 | 0.73 |
| 1.00E+00 | 0.9  |
| 1.00E+00 | 0.77 |
| 1.00E+00 | 0.94 |
| 1.00E+00 | 0.92 |
| 1.00E+00 | 1    |
| 1.00E+00 | 1    |
| 1.00E+00 | 0.85 |
| 1.00E+00 | 1    |
| 1.00E+00 | 0.76 |

|          |      |
|----------|------|
| 1.00E+00 | 0.97 |
| 1.00E+00 | 0.95 |
| 1.00E+00 | 0.96 |
| 1.00E+00 | 1    |
| 1.00E+00 | 1    |

|          |      |
|----------|------|
| 1.00E+00 | 0.75 |
|----------|------|

|          |      |
|----------|------|
| 1.00E+00 | 0.79 |
| 1.00E+00 | 0.67 |
| 1.00E+00 | 1    |
| 1.00E+00 | 0.73 |
| 1.00E+00 | 1    |
| 1.00E+00 | 0.93 |
| 1.00E+00 | 0.75 |
| 1.00E+00 | 0.79 |
| 1.00E+00 | 0.88 |
| 1.00E+00 | 0.95 |
| 1.00E+00 | 0.63 |
| 1.00E+00 | 0.59 |
| 1.00E+00 | 0.95 |
| 1.00E+00 | 0.65 |
| 1.00E+00 | 0.83 |
| 1.00E+00 | 1    |
| 1.00E+00 | 0.92 |
| 1.00E+00 | 0.65 |
| 1.00E+00 | 0.93 |
| 1.00E+00 | 0.71 |
| 1.00E+00 | 0.84 |
| 1.00E+00 | 0.92 |
| 1.00E+00 | 0.86 |
| 1.00E+00 | 0.67 |
| 1.00E+00 | 0.87 |
| 1.00E+00 | 0.94 |
| 1.00E+00 | 0.87 |
| 1.00E+00 | 1    |
| 1.00E+00 | 0.74 |
| 1.00E+00 | 1    |
| 1.00E+00 | 1    |
| 1.00E+00 | 0.95 |
| 1.00E+00 | 0.68 |
| 1.00E+00 | 1    |
| 1.00E+00 | 0.87 |
| 1.00E+00 | 0.89 |
| 1.00E+00 | 0.7  |
| 1.00E+00 | 1    |
| 1.00E+00 | 0.82 |
| 1.00E+00 | 1    |
| 1.00E+00 | 0.93 |
| 1.00E+00 | 0.93 |
| 1.00E+00 | 0.8  |

|          |      |
|----------|------|
| 1.00E+00 | 1    |
| 1.00E+00 | 0.85 |
| 1.00E+00 | 0.9  |

|          |      |
|----------|------|
| 1.00E+00 | 0.97 |
| 1.00E+00 | 0.95 |
| 1.00E+00 | 0.92 |
| 1.00E+00 | 0.95 |
| 1.00E+00 | 0.96 |
| 1.00E+00 | 0.96 |
| 1.00E+00 | 1    |
| 1.00E+00 | 1    |
| 1.00E+00 | 1    |
| 1.00E+00 | 0.9  |

|          |      |
|----------|------|
| 1.00E+00 | 0.93 |
| 1.00E+00 | 1    |

|          |      |
|----------|------|
| 1.00E+00 | 1    |
| 1.00E+00 | 0.79 |
| 1.00E+00 | 0.67 |
| 1.00E+00 | 1    |

|          |      |
|----------|------|
| 1.00E+00 | 1    |
| 1.00E+00 | 0.83 |
| 1.00E+00 | 0.88 |
| 1.00E+00 | 0.95 |

|          |      |
|----------|------|
| 1.00E+00 | 0.63 |
| 1.00E+00 | 1    |
| 1.00E+00 | 0.92 |
| 1.00E+00 | 0.65 |

|          |      |
|----------|------|
| 1.00E+00 | 0.93 |
| 1.00E+00 | 0.71 |
| 1.00E+00 | 0.84 |
| 1.00E+00 | 0.92 |
| 1.00E+00 | 0.86 |
| 1.00E+00 | 0.67 |
| 1.00E+00 | 0.87 |
| 1.00E+00 | 0.94 |
| 1.00E+00 | 1    |
| 1.00E+00 | 0.95 |
| 1.00E+00 | 1    |
| 1.00E+00 | 0.86 |
| 1.00E+00 | 0.68 |

|          |      |
|----------|------|
| 1.00E+00 | 0.9  |
| 1.00E+00 | 0.7  |
| 1.00E+00 | 1    |
| 1.00E+00 | 0.82 |
| 1.00E+00 | 1    |
| 1.00E+00 | 0.93 |
| 1.00E+00 | 0.93 |
| 1.00E+00 | 0.8  |
| 1.00E+00 | 1    |
| 1.00E+00 | 0.94 |
| 1.00E+00 | 0.93 |
| 1.00E+00 | 0.91 |
| 1.00E+00 | 0.92 |
| 1.00E+00 | 0.75 |
| 1.00E+00 | 1    |
| 1.00E+00 | 1    |
| 1.00E+00 | 0.88 |
| 1.00E+00 | 0.92 |
| 1.00E+00 | 0.88 |
| 1.00E+00 | 0.68 |
| 1.00E+00 | 0.95 |
| 1.00E+00 | 1    |
| 1.00E+00 | 0.81 |
| 1.00E+00 | 1    |
| 1.00E+00 | 1    |
| 1.00E+00 | 0.7  |
| 1.00E+00 | 1    |
| 1.00E+00 | 1    |
| 1.00E+00 | 1    |
| 1.00E+00 | 1    |
| 1.00E+00 | 0.97 |
| 1.00E+00 | 0.84 |
| 1.00E+00 | 0.86 |
| 1.00E+00 | 0.93 |
| 1.00E+00 | 0.82 |
| 1.00E+00 | 0.81 |
| 1.00E+00 | 0.75 |
| 1.00E+00 | 0.61 |
| 1.00E+00 | 1    |
| 1.00E+00 | 0.63 |
| 1.00E+00 | 0.52 |
| 1.00E+00 | 1    |
| 1.00E+00 | 1    |

|          |      |
|----------|------|
| 1.00E+00 | 1    |
| 1.00E+00 | 0.95 |
| 1.00E+00 | 0.73 |
| 1.00E+00 | 0.78 |
| 1.00E+00 | 0.88 |

|          |      |
|----------|------|
| 1.00E+00 | 0.95 |
| 1.00E+00 | 0.74 |
| 1.00E+00 | 0.93 |

|          |      |
|----------|------|
| 1.00E+00 | 1    |
| 1.00E+00 | 0.89 |
| 1.00E+00 | 0.55 |
| 1.00E+00 | 0.87 |
| 1.00E+00 | 0.77 |

|          |      |
|----------|------|
| 1.00E+00 | 0.94 |
| 1.00E+00 | 0.94 |
| 1.00E+00 | 1    |
| 1.00E+00 | 0.82 |

|          |      |
|----------|------|
| 1.00E+00 | 0.81 |
|----------|------|

|          |      |
|----------|------|
| 1.00E+00 | 0.89 |
| 1.00E+00 | 0.88 |
| 1.00E+00 | 1    |
| 1.00E+00 | 0.78 |
| 1.00E+00 | 0.93 |
| 1.00E+00 | 0.65 |
| 1.00E+00 | 0.92 |

|          |      |
|----------|------|
| 1.00E+00 | 0.75 |
| 1.00E+00 | 0.74 |
| 1.00E+00 | 0.83 |
| 1.00E+00 | 0.93 |
| 1.00E+00 | 0.85 |
| 1.00E+00 | 0.67 |
| 1.00E+00 | 0.53 |
| 1.00E+00 | 0.95 |
| 1.00E+00 | 1    |
| 1.00E+00 | 0.95 |
| 1.00E+00 | 0.97 |
| 1.00E+00 | 0.88 |
| 1.00E+00 | 1    |
| 1.00E+00 | 1    |
| 1.00E+00 | 0.85 |
| 1.00E+00 | 0.93 |

|          |      |
|----------|------|
| 1.00E+00 | 0.93 |
| 1.00E+00 | 0.92 |
| 1.00E+00 | 1    |

|          |      |
|----------|------|
| 1.00E+00 | 0.86 |
| 1.00E+00 | 0.93 |
| 1.00E+00 | 0.96 |
| 1.00E+00 | 0.93 |
| 1.00E+00 | 0.85 |

|          |      |
|----------|------|
| 1.00E+00 | 0.94 |
| 1.00E+00 | 0.91 |
| 1.00E+00 | 0.69 |
| 1.00E+00 | 0.77 |
| 1.00E+00 | 0.68 |
| 1.00E+00 | 0.74 |
| 1.00E+00 | 0.94 |
| 1.00E+00 | 0.84 |
| 1.00E+00 | 0.83 |

|          |      |
|----------|------|
| 1.00E+00 | 0.62 |
| 1.00E+00 | 0.91 |
| 1.00E+00 | 0.81 |
| 1.00E+00 | 0.94 |
| 1.00E+00 | 0.92 |
| 1.00E+00 | 0.94 |
| 1.00E+00 | 0.84 |
| 1.00E+00 | 0.95 |
| 1.00E+00 | 0.8  |
| 1.00E+00 | 0.85 |
| 1.00E+00 | 0.86 |
| 1.00E+00 | 0.89 |
| 1.00E+00 | 0.58 |
| 1.00E+00 | 0.71 |
| 1.00E+00 | 0.81 |
| 1.00E+00 | 0.69 |
| 1.00E+00 | 0.94 |
| 1.00E+00 | 0.8  |
| 1.00E+00 | 0.85 |
| 1.00E+00 | 0.7  |
| 1.00E+00 | 0.83 |

|          |      |
|----------|------|
| 1.00E+00 | 0.81 |
| 1.00E+00 | 0.96 |
| 1.00E+00 | 0.94 |
| 1.00E+00 | 0.7  |
| 1.00E+00 | 0.82 |
| 1.00E+00 | 0.63 |



|          |      |
|----------|------|
| 1.00E+00 | 0.8  |
| 1.00E+00 | 0.93 |
| 1.00E+00 | 0.83 |

|          |      |
|----------|------|
| 1.00E+00 | 1    |
| 1.00E+00 | 0.95 |
| 1.00E+00 | 1    |
| 1.00E+00 | 1    |
| 1.00E+00 | 0.85 |
| 1.00E+00 | 0.67 |
| 1.00E+00 | 0.8  |
| 1.00E+00 | 0.85 |
| 1.00E+00 | 0.52 |

|          |      |
|----------|------|
| 1.00E+00 | 0.56 |
| 1.00E+00 | 0.71 |
| 1.00E+00 | 1    |
| 1.00E+00 | 0.57 |
| 1.00E+00 | 1    |
| 1.00E+00 | 0.79 |
| 1.00E+00 | 0.68 |
| 1.00E+00 | 0.8  |
| 1.00E+00 | 0.8  |
| 1.00E+00 | 0.75 |
| 1.00E+00 | 0.93 |
| 1.00E+00 | 0.67 |
| 1.00E+00 | 0.92 |
| 1.00E+00 | 0.71 |
| 1.00E+00 | 0.95 |
| 1.00E+00 | 0.7  |
| 1.00E+00 | 1    |
| 1.00E+00 | 0.92 |
| 1.00E+00 | 0.71 |
| 1.00E+00 | 0.85 |
| 1.00E+00 | 0.89 |
| 1.00E+00 | 0.94 |

|          |      |
|----------|------|
| 1.00E+00 | 0.77 |
| 1.00E+00 | 0.52 |
| 1.00E+00 | 0.91 |

|          |      |
|----------|------|
| 1.00E+00 | 0.74 |
| 1.00E+00 | 1    |
| 1.00E+00 | 0.96 |
| 1.00E+00 | 0.96 |
| 1.00E+00 | 0.93 |
| 1.00E+00 | 0.83 |
| 1.00E+00 | 1    |
| 1.00E+00 | 0.76 |

|          |      |
|----------|------|
| 1.00E+00 | 0.61 |
| 1.00E+00 | 0.91 |
| 1.00E+00 | 0.87 |
| 1.00E+00 | 0.67 |
| 1.00E+00 | 1    |
| 1.00E+00 | 0.71 |
| 1.00E+00 | 1    |

|          |      |
|----------|------|
| 1.00E+00 | 0.96 |
| 1.00E+00 | 0.95 |

|          |      |
|----------|------|
| 1.00E+00 | 0.95 |
| 1.00E+00 | 0.86 |
| 1.00E+00 | 0.75 |

|          |      |
|----------|------|
| 1.00E+00 | 1    |
| 1.00E+00 | 0.76 |

|          |      |
|----------|------|
| 1.00E+00 | 0.9  |
| 1.00E+00 | 1    |
| 1.00E+00 | 1    |
| 1.00E+00 | 1    |
| 1.00E+00 | 0.81 |
| 1.00E+00 | 1    |
| 1.00E+00 | 0.69 |
| 1.00E+00 | 0.68 |
| 1.00E+00 | 0.76 |
| 1.00E+00 | 0.44 |
| 1.00E+00 | 1    |
| 1.00E+00 | 0.64 |
| 1.00E+00 | 0.86 |
| 1.00E+00 | 0.84 |
| 1.00E+00 | 1    |
| 1.00E+00 | 0.73 |

|          |      |
|----------|------|
| 1.00E+00 | 0.87 |
| 1.00E+00 | 0.82 |
| 1.00E+00 | 0.93 |
| 1.00E+00 | 0.93 |
| 1.00E+00 | 0.87 |
| 1.00E+00 | 0.94 |
| 1.00E+00 | 0.95 |
| 1.00E+00 | 0.96 |
| 1.00E+00 | 1    |
| 1.00E+00 | 0.95 |
| 1.00E+00 | 1    |
| 1.00E+00 | 0.88 |
| 1.00E+00 | 0.92 |
| 1.00E+00 | 1    |
| 1.00E+00 | 0.72 |
| 1.00E+00 | 0.96 |
| 1.00E+00 | 1    |
| 1.00E+00 | 1    |

|          |      |
|----------|------|
| 1.00E+00 | 0.9  |
| 1.00E+00 | 0.93 |
| 1.00E+00 | 1    |
| 1.00E+00 | 0.65 |
| 1.00E+00 | 0.61 |
| 1.00E+00 | 1    |

|          |      |
|----------|------|
| 1.00E+00 | 1    |
| 1.00E+00 | 0.86 |
| 1.00E+00 | 0.77 |
| 1.00E+00 | 0.95 |
| 1.00E+00 | 0.6  |

|          |      |
|----------|------|
| 1.00E+00 | 0.83 |
| 1.00E+00 | 0.84 |

|          |      |
|----------|------|
| 1.00E+00 | 1    |
| 1.00E+00 | 0.88 |
| 1.00E+00 | 0.56 |
| 1.00E+00 | 0.56 |
| 1.00E+00 | 0.93 |
| 1.00E+00 | 0.98 |

|          |      |
|----------|------|
| 1.00E+00 | 1    |
| 1.00E+00 | 0.77 |
| 1.00E+00 | 0.78 |
| 1.00E+00 | 0.85 |
| 1.00E+00 | 0.57 |
| 1.00E+00 | 0.74 |
| 1.00E+00 | 0.92 |
| 1.00E+00 | 0.93 |
| 1.00E+00 | 0.96 |
| 1.00E+00 | 0.71 |
| 1.00E+00 | 0.8  |

|          |      |
|----------|------|
| 1.00E+00 | 0.87 |
| 1.00E+00 | 0.73 |
| 1.00E+00 | 0.87 |
| 1.00E+00 | 0.93 |
| 1.00E+00 | 0.96 |
| 1.00E+00 | 0.87 |
| 1.00E+00 | 0.74 |
| 1.00E+00 | 0.69 |
| 1.00E+00 | 0.91 |
| 1.00E+00 | 0.89 |
| 1.00E+00 | 0.97 |
| 1.00E+00 | 0.98 |
| 1.00E+00 | 0.97 |
| 1.00E+00 | 0.9  |
| 1.00E+00 | 1    |
| 1.00E+00 | 0.96 |
| 1.00E+00 | 0.94 |
| 1.00E+00 | 0.68 |
| 1.00E+00 | 0.9  |
| 1.00E+00 | 0.83 |
| 1.00E+00 | 0.83 |
| 1.00E+00 | 0.91 |
| 1.00E+00 | 0.96 |
| 1.00E+00 | 0.95 |
| 1.00E+00 | 1    |
| 1.00E+00 | 0.7  |
| 1.00E+00 | 0.86 |
| 1.00E+00 | 1    |
| 1.00E+00 | 0.81 |

|          |      |
|----------|------|
| 1.00E+00 | 0.73 |
| 1.00E+00 | 0.77 |
| 1.00E+00 | 0.78 |
| 1.00E+00 | 1    |
| 1.00E+00 | 0.95 |
| 1.00E+00 | 0.89 |
| 1.00E+00 | 0.66 |
| 1.00E+00 | 0.87 |
| 1.00E+00 | 0.61 |
| 1.00E+00 | 0.78 |
| 1.00E+00 | 0.81 |
| 1.00E+00 | 1    |
| 1.00E+00 | 0.82 |
| 1.00E+00 | 0.75 |

|          |      |
|----------|------|
| 1.00E+00 | 0.91 |
| 1.00E+00 | 1    |
| 1.00E+00 | 0.48 |
| 1.00E+00 | 1    |
| 1.00E+00 | 0.96 |
| 1.00E+00 | 1    |
| 1.00E+00 | 0.85 |
| 1.00E+00 | 0.77 |
| 1.00E+00 | 0.74 |
| 1.00E+00 | 0.95 |

|          |      |
|----------|------|
| 1.00E+00 | 0.92 |
| 1.00E+00 | 0.91 |
| 1.00E+00 | 0.87 |

|          |      |
|----------|------|
| 1.00E+00 | 1    |
| 1.00E+00 | 0.81 |

|          |      |
|----------|------|
| 1.00E+00 | 0.94 |
| 1.00E+00 | 0.67 |

|          |      |
|----------|------|
| 1.00E+00 | 0.85 |
|----------|------|

|          |      |
|----------|------|
| 1.00E+00 | 0.98 |
| 1.00E+00 | 0.91 |
| 1.00E+00 | 0.72 |
| 1.00E+00 | 0.68 |
| 1.00E+00 | 0.7  |
| 1.00E+00 | 0.86 |

|          |      |
|----------|------|
| 1.00E+00 | 0.85 |
| 1.00E+00 | 0.84 |
| 1.00E+00 | 1    |
| 1.00E+00 | 0.96 |
| 1.00E+00 | 0.75 |
| 1.00E+00 | 0.55 |

|          |      |
|----------|------|
| 1.00E+00 | 0.85 |
| 1.00E+00 | 0.93 |
| 1.00E+00 | 0.88 |
| 1.00E+00 | 0.9  |
| 1.00E+00 | 0.93 |
| 1.00E+00 | 0.82 |
| 1.00E+00 | 1    |
| 1.00E+00 | 0.75 |
| 1.00E+00 | 0.62 |
| 1.00E+00 | 1    |
| 1.00E+00 | 0.67 |
| 1.00E+00 | 1    |
| 1.00E+00 | 1    |
| 1.00E+00 | 0.91 |
| 1.00E+00 | 0.92 |
| 1.00E+00 | 0.96 |

|          |      |
|----------|------|
| 1.00E+00 | 0.96 |
| 1.00E+00 | 0.86 |

|          |      |
|----------|------|
| 1.00E+00 | 1    |
| 1.00E+00 | 0.93 |
| 1.00E+00 | 0.92 |
| 1.00E+00 | 0.97 |
| 1.00E+00 | 0.95 |
| 1.00E+00 | 0.9  |
| 1.00E+00 | 0.94 |

|          |      |
|----------|------|
| 1.00E+00 | 0.8  |
| 1.00E+00 | 0.88 |
| 1.00E+00 | 0.79 |
| 1.00E+00 | 0.78 |
| 1.00E+00 | 0.89 |
| 1.00E+00 | 0.87 |
| 1.00E+00 | 0.85 |
| 1.00E+00 | 0.94 |
| 1.00E+00 | 0.76 |
| 1.00E+00 | 1    |
| 1.00E+00 | 0.62 |
| 1.00E+00 | 0.83 |
| 1.00E+00 | 0.87 |
| 1.00E+00 | 0.6  |
| 1.00E+00 | 0.88 |

|          |      |
|----------|------|
| 1.00E+00 | 1    |
| 1.00E+00 | 0.78 |
| 1.00E+00 | 0.9  |
| 1.00E+00 | 0.57 |
| 1.00E+00 | 1    |
| 1.00E+00 | 0.91 |
| 1.00E+00 | 1    |
| 1.00E+00 | 0.97 |
| 1.00E+00 | 0.92 |
| 1.00E+00 | 0.92 |
| 1.00E+00 | 0.64 |
| 1.00E+00 | 0.92 |
| 1.00E+00 | 0.95 |
| 1.00E+00 | 0.95 |
| 1.00E+00 | 0.97 |
| 1.00E+00 | 0.93 |
| 1.00E+00 | 0.6  |
| 1.00E+00 | 0.92 |
| 1.00E+00 | 0.45 |
| 1.00E+00 | 0.56 |
| 1.00E+00 | 0.62 |
| 1.00E+00 | 0.93 |
| 1.00E+00 | 0.73 |
| 1.00E+00 | 0.86 |
| 1.00E+00 | 0.85 |
| 1.00E+00 | 0.69 |
| 1.00E+00 | 0.92 |
| 1.00E+00 | 1    |
| 1.00E+00 | 0.91 |
| 1.00E+00 | 0.83 |
| 1.00E+00 | 0.86 |
| 1.00E+00 | 0.79 |
| 1.00E+00 | 0.84 |
| 1.00E+00 | 0.9  |
| 1.00E+00 | 0.82 |
| 1.00E+00 | 0.64 |
| 1.00E+00 | 0.93 |
| 1.00E+00 | 0.84 |
| 1.00E+00 | 0.94 |
| 1.00E+00 | 0.87 |
| 1.00E+00 | 0.93 |
| 1.00E+00 | 0.89 |
| 1.00E+00 | 0.88 |
| 1.00E+00 | 0.93 |

|          |      |
|----------|------|
| 1.00E+00 | 0.92 |
| 1.00E+00 | 0.9  |
| 1.00E+00 | 0.49 |
| 1.00E+00 | 0.89 |
| 1.00E+00 | 0.86 |
| 1.00E+00 | 1    |

|          |      |
|----------|------|
| 1.00E+00 | 0.75 |
| 1.00E+00 | 0.93 |
| 1.00E+00 | 0.89 |
| 1.00E+00 | 1    |
| 1.00E+00 | 1    |

|          |      |
|----------|------|
| 1.00E+00 | 0.93 |
| 1.00E+00 | 1    |
| 1.00E+00 | 0.89 |

|          |      |
|----------|------|
| 1.00E+00 | 0.81 |
|----------|------|

|          |     |
|----------|-----|
| 1.00E+00 | 0.8 |
|----------|-----|

|          |      |
|----------|------|
| 1.00E+00 | 0.79 |
| 1.00E+00 | 0.95 |

|          |      |
|----------|------|
| 1.00E+00 | 0.92 |
| 1.00E+00 | 0.72 |
| 1.00E+00 | 0.64 |
| 1.00E+00 | 0.84 |
| 1.00E+00 | 0.69 |
| 1.00E+00 | 0.92 |
| 1.00E+00 | 0.8  |
| 1.00E+00 | 0.95 |
| 1.00E+00 | 0.7  |
| 1.00E+00 | 0.79 |
| 1.00E+00 | 0.87 |

|          |   |
|----------|---|
| 1.00E+00 | 1 |
|----------|---|

|          |      |
|----------|------|
| 1.00E+00 | 0.78 |
| 1.00E+00 | 0.89 |
| 1.00E+00 | 0.91 |
| 1.00E+00 | 0.92 |
| 1.00E+00 | 0.7  |
| 1.00E+00 | 0.69 |
| 1.00E+00 | 0.61 |
| 1.00E+00 | 0.94 |
| 1.00E+00 | 0.77 |



|          |      |
|----------|------|
| 1.00E+00 | 0.92 |
| 1.00E+00 | 0.89 |
| 1.00E+00 | 0.71 |
| 1.00E+00 | 0.67 |
| 1.00E+00 | 0.87 |
| 1.00E+00 | 0.89 |
| 1.00E+00 | 0.78 |
| 1.00E+00 | 0.87 |
| 1.00E+00 | 0.7  |
| 1.00E+00 | 0.91 |
| 1.00E+00 | 0.79 |
| 1.00E+00 | 0.8  |
| 1.00E+00 | 0.63 |
| 1.00E+00 | 0.82 |
| 1.00E+00 | 0.81 |
| 1.00E+00 | 0.47 |
| 1.00E+00 | 0.8  |
| 1.00E+00 | 0.75 |
| 1.00E+00 | 0.81 |
| 1.00E+00 | 0.71 |
| 1.00E+00 | 0.83 |
| 1.00E+00 | 0.39 |
| 1.00E+00 | 0.85 |
| 1.00E+00 | 0.91 |
| 1.00E+00 | 0.96 |
| 1.00E+00 | 1    |
| 1.00E+00 | 0.92 |
| 1.00E+00 | 0.84 |
| 1.00E+00 | 0.91 |
| 1.00E+00 | 0.87 |
| 1.00E+00 | 0.94 |
| 1.00E+00 | 0.68 |
| 1.00E+00 | 0.84 |
| 1.00E+00 | 0.92 |
| 1.00E+00 | 0.7  |
| 1.00E+00 | 1    |
| 1.00E+00 | 1    |
| 1.00E+00 | 0.96 |
| 1.00E+00 | 0.91 |
| 1.00E+00 | 0.82 |
| 1.00E+00 | 0.65 |
| 1.00E+00 | 0.9  |
| 1.00E+00 | 0.7  |
| 1.00E+00 | 0.84 |
| 1.00E+00 | 0.63 |
| 1.00E+00 | 0.83 |
| 1.00E+00 | 0.61 |
| 1.00E+00 | 0.72 |
| 1.00E+00 | 1    |
| 1.00E+00 | 0.88 |

|          |      |
|----------|------|
| 1.00E+00 | 0.89 |
| 1.00E+00 | 0.87 |
| 1.00E+00 | 0.76 |
| 1.00E+00 | 0.79 |
| 1.00E+00 | 1    |
| 1.00E+00 | 0.95 |
| 1.00E+00 | 1    |
| 1.00E+00 | 0.9  |
| 1.00E+00 | 0.93 |

|          |      |
|----------|------|
| 1.00E+00 | 0    |
| 1.00E+00 | 0.84 |
| 1.00E+00 | 0.66 |
| 1.00E+00 | 0.73 |
| 1.00E+00 | 0.82 |
| 1.00E+00 | 0.76 |
| 1.00E+00 | 0.77 |
| 1.00E+00 | 0.96 |
| 1.00E+00 | 0.91 |

|          |     |
|----------|-----|
| 1.00E+00 | 0.9 |
| 1.00E+00 | 1   |
| 1.00E+00 | 1   |
| 1.00E+00 | 1   |

|          |      |
|----------|------|
| 1.00E+00 | 1    |
| 1.00E+00 | 0.87 |
| 1.00E+00 | 0.73 |
| 1.00E+00 | 1    |
| 1.00E+00 | 0.56 |
| 1.00E+00 | 0.94 |
| 1.00E+00 | 0.71 |
| 1.00E+00 | 1    |
| 1.00E+00 | 1    |
| 1.00E+00 | 0.73 |
| 1.00E+00 | 1    |
| 1.00E+00 | 1    |
| 1.00E+00 | 0.83 |
| 1.00E+00 | 0.76 |
| 1.00E+00 | 1    |
| 1.00E+00 | 1    |
| 1.00E+00 | 0.89 |
| 1.00E+00 | 0.69 |
| 1.00E+00 | 0.47 |
| 1.00E+00 | 0.74 |

|          |   |
|----------|---|
| 1.00E+00 | 1 |
|----------|---|

|          |      |
|----------|------|
| 1.00E+00 | 0.63 |
| 1.00E+00 | 0.94 |
| 1.00E+00 | 0.67 |
| 1.00E+00 | 0.95 |
| 1.00E+00 | 0.72 |
| 1.00E+00 | 0.93 |
| 1.00E+00 | 1    |
| 1.00E+00 | 1    |
| 1.00E+00 | 0.58 |
| 1.00E+00 | 0.67 |
| 1.00E+00 | 1    |
| 1.00E+00 | 0.69 |
| 1.00E+00 | 0.7  |
| 1.00E+00 | 0.79 |
| 1.00E+00 | 1    |
| 1.00E+00 | 0.68 |
| 1.00E+00 | 0.8  |
| 1.00E+00 | 0.91 |
| 1.00E+00 | 0.68 |
| 1.00E+00 | 0.86 |
| 1.00E+00 | 0.87 |
| 1.00E+00 | 0.8  |
| 1.00E+00 | 0.94 |
| 1.00E+00 | 0.96 |
| 1.00E+00 | 0.72 |
| 1.00E+00 | 1    |
| 1.00E+00 | 0.45 |
| 1.00E+00 | 0.81 |
| 1.00E+00 | 0.92 |
| 1.00E+00 | 0.73 |
| 1.00E+00 | 0.63 |
| 1.00E+00 | 0.39 |
| 1.00E+00 | 0.56 |
| 1.00E+00 | 0.76 |
| 1.00E+00 | 0.8  |
| 1.00E+00 | 0.7  |
| 1.00E+00 | 0.68 |
| 1.00E+00 | 1    |
| 1.00E+00 | 0.96 |
| 1.00E+00 | 0.87 |
| 1.00E+00 | 0.85 |
| 1.00E+00 | 0.74 |
| 1.00E+00 | 0.92 |

|          |      |
|----------|------|
| 1.00E+00 | 0.77 |
| 1.00E+00 | 0.84 |

|          |      |
|----------|------|
| 1.00E+00 | 0.74 |
| 1.00E+00 | 0.7  |

|          |      |
|----------|------|
| 1.00E+00 | 0.94 |
|----------|------|

|          |      |
|----------|------|
| 1.00E+00 | 0.9  |
| 1.00E+00 | 0.89 |
| 1.00E+00 | 0.94 |

|          |      |
|----------|------|
| 1.00E+00 | 0.92 |
| 1.00E+00 | 0.93 |
| 1.00E+00 | 0.82 |
| 1.00E+00 | 0.85 |

|          |      |
|----------|------|
| 1.00E+00 | 0.83 |
| 1.00E+00 | 0.87 |

|          |      |
|----------|------|
| 1.00E+00 | 1    |
| 1.00E+00 | 0.84 |
| 1.00E+00 | 0.87 |
| 1.00E+00 | 0.87 |
| 1.00E+00 | 1    |
| 1.00E+00 | 1    |
| 1.00E+00 | 0.83 |
| 1.00E+00 | 0.93 |
| 1.00E+00 | 0.93 |
| 1.00E+00 | 1    |
| 1.00E+00 | 0.97 |

|          |      |
|----------|------|
| 1.00E+00 | 1    |
| 1.00E+00 | 0.62 |
| 1.00E+00 | 0.84 |

|          |      |
|----------|------|
| 1.00E+00 | 0.77 |
| 1.00E+00 | 1    |
| 1.00E+00 | 0.84 |
| 1.00E+00 | 0.63 |
| 1.00E+00 | 1    |
| 1.00E+00 | 0.74 |
| 1.00E+00 | 0.89 |
| 1.00E+00 | 0.5  |
| 1.00E+00 | 0.55 |

|          |      |
|----------|------|
| 1.00E+00 | 1    |
| 1.00E+00 | 0.94 |
| 1.00E+00 | 0.8  |
| 1.00E+00 | 0.94 |
| 1.00E+00 | 0.89 |

|          |      |
|----------|------|
| 1.00E+00 | 0.79 |
| 1.00E+00 | 0.94 |
| 1.00E+00 | 1    |
| 1.00E+00 | 1    |
| 1.00E+00 | 0.84 |
| 1.00E+00 | 0.6  |

|          |      |
|----------|------|
| 1.00E+00 | 0.8  |
| 1.00E+00 | 0.95 |
| 1.00E+00 | 0.61 |
| 1.00E+00 | 0.71 |
| 1.00E+00 | 0.94 |
| 1.00E+00 | 0.83 |
| 1.00E+00 | 1    |
| 1.00E+00 | 0.87 |
| 1.00E+00 | 0.92 |
| 1.00E+00 | 0.95 |
| 1.00E+00 | 0.78 |
| 1.00E+00 | 1    |
| 1.00E+00 | 0.93 |
| 1.00E+00 | 0.89 |
| 1.00E+00 | 0.58 |
| 1.00E+00 | 0.93 |
| 1.00E+00 | 0.74 |
| 1.00E+00 | 0.51 |
| 1.00E+00 | 1    |
| 1.00E+00 | 1    |

|          |      |
|----------|------|
| 1.00E+00 | 0.71 |
| 1.00E+00 | 0.59 |
| 1.00E+00 | 1    |
| 1.00E+00 | 0.94 |
| 1.00E+00 | 0.95 |
| 1.00E+00 | 0.8  |
| 1.00E+00 | 0.83 |
| 1.00E+00 | 0.8  |
| 1.00E+00 | 0.93 |
| 1.00E+00 | 0.84 |
| 1.00E+00 | 0.95 |
| 1.00E+00 | 0.81 |
| 1.00E+00 | 0.83 |
| 1.00E+00 | 1    |
| 1.00E+00 | 0.9  |
| 1.00E+00 | 0.9  |
| 1.00E+00 | 0.84 |
| 1.00E+00 | 1    |
| 1.00E+00 | 1    |
| 1.00E+00 | 0.56 |
| 1.00E+00 | 0.79 |
| 1.00E+00 | 0.91 |
| 1.00E+00 | 1    |
| 1.00E+00 | 0.89 |
| 1.00E+00 | 0.92 |
| 1.00E+00 | 1    |
| 1.00E+00 | 0.91 |
| 1.00E+00 | 0.72 |
| 1.00E+00 | 0.84 |
| 1.00E+00 | 0.71 |
| 1.00E+00 | 1    |
| 1.00E+00 | 0.9  |
| 1.00E+00 | 1    |
| 1.00E+00 | 0.71 |
| 1.00E+00 | 0.88 |
| 1.00E+00 | 0.85 |
| 1.00E+00 | 0.93 |
| 1.00E+00 | 0.94 |
| 1.00E+00 | 0.59 |

|          |      |
|----------|------|
| 1.00E+00 | 0.56 |
| 1.00E+00 | 0.88 |
| 1.00E+00 | 1    |
| 1.00E+00 | 0.75 |
| 1.00E+00 | 0.83 |
| 1.00E+00 | 0.95 |
| 1.00E+00 | 0.89 |
| 1.00E+00 | 0.76 |
| 1.00E+00 | 0.68 |
| 1.00E+00 | 0.9  |
| 1.00E+00 | 0.94 |
| 1.00E+00 | 0.91 |
| 1.00E+00 | 0.94 |
| 1.00E+00 | 0.42 |
| 1.00E+00 | 1    |
| 1.00E+00 | 0.74 |
| 1.00E+00 | 0.67 |
| 1.00E+00 | 1    |
| 1.00E+00 | 0.88 |
| 1.00E+00 | 0.91 |
| 1.00E+00 | 0.9  |
| 1.00E+00 | 0.83 |
| 1.00E+00 | 0.85 |
| 1.00E+00 | 0.83 |
| 1.00E+00 | 1    |
| 1.00E+00 | 0.63 |

|          |      |
|----------|------|
| 1.00E+00 | 0.85 |
| 1.00E+00 | 0.57 |
| 1.00E+00 | 1    |
| 1.00E+00 | 0.88 |
| 1.00E+00 | 0.78 |
| 1.00E+00 | 0.92 |

|          |      |
|----------|------|
| 1.00E+00 | 0.95 |
| 1.00E+00 | 0.78 |
| 1.00E+00 | 0.89 |
| 1.00E+00 | 1    |
| 1.00E+00 | 0.86 |
| 1.00E+00 | 0.67 |
| 1.00E+00 | 1    |
| 1.00E+00 | 0.83 |
| 1.00E+00 | 0.89 |

|          |      |
|----------|------|
| 1.00E+00 | 0.75 |
| 1.00E+00 | 0.87 |
| 1.00E+00 | 0.92 |

1.00E+00 1

1.00E+00 0.9

1.00E+00 0.68

1.00E+00 0.74

1.00E+00 0.95

1.00E+00 0.71

1.00E+00 0.88

1.00E+00 0.8

1.00E+00 0.8

1.00E+00 0.81

1.00E+00 0.92

1.00E+00 0.68

1.00E+00 0.95

1.00E+00 0.9

1.00E+00 0.94

1.00E+00 0.96

1.00E+00 0.92

1.00E+00 0.72

1.00E+00 0.83

1.00E+00 0.46

1.00E+00 0.94

1.00E+00 0.84

1.00E+00 0.72

1.00E+00 0.68

1.00E+00 0.92

1.00E+00 0.64

1.00E+00 0.82

1.00E+00 0.91

1.00E+00 0.97

1.00E+00 0.94

1.00E+00 0.83

1.00E+00 0.91

1.00E+00 0.8

1.00E+00 0.55

1.00E+00 0.96



|          |      |
|----------|------|
| 1.00E+00 | 0.89 |
| 1.00E+00 | 0.67 |

|          |      |
|----------|------|
| 1.00E+00 | 0.8  |
| 1.00E+00 | 0.66 |
| 1.00E+00 | 1    |
| 1.00E+00 | 0.68 |
| 1.00E+00 | 0.97 |
| 1.00E+00 | 0.95 |

|          |      |
|----------|------|
| 1.00E+00 | 0.67 |
| 1.00E+00 | 0.6  |

|          |      |
|----------|------|
| 1.00E+00 | 0.94 |
| 1.00E+00 | 0.85 |

|          |      |
|----------|------|
| 1.00E+00 | 0.76 |
|----------|------|

|          |      |
|----------|------|
| 1.00E+00 | 1    |
| 1.00E+00 | 0.8  |
| 1.00E+00 | 0.85 |
| 1.00E+00 | 0.94 |
| 1.00E+00 | 0.93 |
| 1.00E+00 | 1    |
| 1.00E+00 | 0.79 |
| 1.00E+00 | 0.85 |
| 1.00E+00 | 0.87 |
| 1.00E+00 | 0.95 |
| 1.00E+00 | 0.97 |
| 1.00E+00 | 0.87 |
| 1.00E+00 | 0.94 |
| 1.00E+00 | 0.73 |
| 1.00E+00 | 0.57 |
| 1.00E+00 | 1    |
| 1.00E+00 | 0.86 |
| 1.00E+00 | 0.46 |
| 1.00E+00 | 0.95 |

|          |      |
|----------|------|
| 1.00E+00 | 0.82 |
| 1.00E+00 | 0.92 |
| 1.00E+00 | 0    |
| 1.00E+00 | 0.61 |
| 1.00E+00 | 0.92 |
| 1.00E+00 | 0.71 |
| 1.00E+00 | 0.71 |
| 1.00E+00 | 0.77 |
| 1.00E+00 | 0.77 |
| 1.00E+00 | 0.82 |
| 1.00E+00 | 0.55 |
| 1.00E+00 | 0.66 |
| 1.00E+00 | 0.95 |
| 1.00E+00 | 0.89 |
| 1.00E+00 | 1    |
| 1.00E+00 | 0.89 |
| 1.00E+00 | 0.91 |
| 1.00E+00 | 1    |
| 1.00E+00 | 0.82 |
| 1.00E+00 | 0.95 |
| 1.00E+00 | 0.9  |
| 1.00E+00 | 0.76 |
| 1.00E+00 | 1    |
| 1.00E+00 | 1    |
| 1.00E+00 | 0.74 |
| 1.00E+00 | 0.96 |
| 1.00E+00 | 0.96 |
| 1.00E+00 | 0.79 |
| 1.00E+00 | 0.76 |
| 1.00E+00 | 0.93 |
| 1.00E+00 | 0.85 |
| 1.00E+00 | 0.8  |
| 1.00E+00 | 0.82 |
| 1.00E+00 | 0.64 |
| 1.00E+00 | 0.72 |
| 1.00E+00 | 0.89 |
| 1.00E+00 | 0.51 |
| 1.00E+00 | 0.76 |
| 1.00E+00 | 0.65 |
| 1.00E+00 | 0.81 |

|          |      |
|----------|------|
| 1.00E+00 | 0.93 |
| 1.00E+00 | 0.81 |
| 1.00E+00 | 0.43 |
| 1.00E+00 | 0.83 |
| 1.00E+00 | 0.81 |
| 1.00E+00 | 0.87 |
| 1.00E+00 | 0.66 |
| 1.00E+00 | 0.82 |
| 1.00E+00 | 0.53 |
| 1.00E+00 | 1    |

|          |      |
|----------|------|
| 1.00E+00 | 0.72 |
| 1.00E+00 | 0.96 |

|          |      |
|----------|------|
| 1.00E+00 | 0.53 |
| 1.00E+00 | 0.82 |

|          |      |
|----------|------|
| 1.00E+00 | 0.93 |
| 1.00E+00 | 0.88 |
| 1.00E+00 | 0.58 |

|          |      |
|----------|------|
| 1.00E+00 | 0.89 |
| 1.00E+00 | 0.94 |

|          |      |
|----------|------|
| 1.00E+00 | 0.61 |
| 1.00E+00 | 0.89 |
| 1.00E+00 | 0.91 |
| 1.00E+00 | 0.86 |
| 1.00E+00 | 0.87 |
| 1.00E+00 | 0.7  |
| 1.00E+00 | 0.78 |
| 1.00E+00 | 0.84 |
| 1.00E+00 | 0.94 |
| 1.00E+00 | 0.95 |
| 1.00E+00 | 0.89 |
| 1.00E+00 | 0.98 |

|          |      |
|----------|------|
| 1.00E+00 | 0.92 |
| 1.00E+00 | 1    |
| 1.00E+00 | 0.97 |

|          |      |
|----------|------|
| 1.00E+00 | 0.81 |
| 1.00E+00 | 0.72 |
| 1.00E+00 | 0.73 |
| 1.00E+00 | 0.64 |
| 1.00E+00 | 0.73 |
| 1.00E+00 | 0.71 |

|          |      |
|----------|------|
| 1.00E+00 | 0.78 |
| 1.00E+00 | 0.64 |
| 1.00E+00 | 0.57 |

|          |      |
|----------|------|
| 1.00E+00 | 0.92 |
|----------|------|

|          |      |
|----------|------|
| 1.00E+00 | 0.89 |
| 1.00E+00 | 0    |
| 1.00E+00 | 0.94 |
| 1.00E+00 | 0.94 |
| 1.00E+00 | 1    |
| 1.00E+00 | 0.96 |
| 1.00E+00 | 0.81 |
| 1.00E+00 | 0.92 |
| 1.00E+00 | 0.93 |
| 1.00E+00 | 0.86 |
| 1.00E+00 | 1    |
| 1.00E+00 | 0.53 |
| 1.00E+00 | 0.48 |
| 1.00E+00 | 0.41 |
| 1.00E+00 | 0.79 |
| 1.00E+00 | 1    |
| 1.00E+00 | 0.93 |
| 1.00E+00 | 1    |
| 1.00E+00 | 0.9  |
| 1.00E+00 | 0.82 |
| 1.00E+00 | 0.87 |
| 1.00E+00 | 1    |
| 1.00E+00 | 0.66 |

|          |      |
|----------|------|
| 1.00E+00 | 0.79 |
| 1.00E+00 | 0.93 |

|          |      |
|----------|------|
| 1.00E+00 | 0.84 |
| 1.00E+00 | 0.71 |
| 1.00E+00 | 0.88 |

|          |      |
|----------|------|
| 1.00E+00 | 0.81 |
| 1.00E+00 | 0.7  |
| 1.00E+00 | 0.82 |
| 1.00E+00 | 0.85 |
| 1.00E+00 | 0.91 |
| 1.00E+00 | 0.77 |
| 1.00E+00 | 1    |
| 1.00E+00 | 0.72 |
| 1.00E+00 | 0.91 |
| 1.00E+00 | 1    |
| 1.00E+00 | 0.29 |
| 1.00E+00 | 0.73 |
| 1.00E+00 | 0.53 |
| 1.00E+00 | 0.5  |
| 1.00E+00 | 0.7  |
| 1.00E+00 | 0.66 |
| 1.00E+00 | 0.67 |
| 1.00E+00 | 0.67 |
| 1.00E+00 | 0.65 |
| 1.00E+00 | 0.94 |
| 1.00E+00 | 0.6  |
| 1.00E+00 | 0.67 |
| 1.00E+00 | 0.92 |
| 1.00E+00 | 0.85 |
| 1.00E+00 | 0.68 |
| 1.00E+00 | 0.85 |
| 1.00E+00 | 0.92 |
| 1.00E+00 | 1    |
| 1.00E+00 | 1    |
| 1.00E+00 | 0.47 |
| 1.00E+00 | 1    |
| 1.00E+00 | 0.75 |
| 1.00E+00 | 0.84 |
| 1.00E+00 | 0.95 |
| 1.00E+00 | 0.96 |
| 1.00E+00 | 0.9  |
| 1.00E+00 | 0.85 |
| 1.00E+00 | 0.76 |
| 1.00E+00 | 1    |
| 1.00E+00 | 0.83 |
| 1.00E+00 | 0.82 |
| 1.00E+00 | 0.95 |
| 1.00E+00 | 1    |
| 1.00E+00 | 0.85 |
| 1.00E+00 | 0.81 |

|          |      |
|----------|------|
| 1.00E+00 | 0.83 |
| 1.00E+00 | 0.67 |
| 1.00E+00 | 0.75 |
| 1.00E+00 | 0.91 |
| 1.00E+00 | 0.92 |
| 1.00E+00 | 1    |

|          |      |
|----------|------|
| 1.00E+00 | 0.8  |
| 1.00E+00 | 0.84 |
| 1.00E+00 | 0.95 |
| 1.00E+00 | 0.73 |
| 1.00E+00 | 0.92 |
| 1.00E+00 | 0.7  |
| 1.00E+00 | 0.75 |
| 1.00E+00 | 0.76 |
| 1.00E+00 | 0.61 |
| 1.00E+00 | 0.72 |
| 1.00E+00 | 0.93 |
| 1.00E+00 | 0.92 |
| 1.00E+00 | 0.8  |
| 1.00E+00 | 0.95 |
| 1.00E+00 | 0.96 |
| 1.00E+00 | 0.82 |
| 1.00E+00 | 0.81 |

|          |      |
|----------|------|
| 1.00E+00 | 0.76 |
| 1.00E+00 | 0.79 |
| 1.00E+00 | 0.92 |
| 1.00E+00 | 0.85 |
| 1.00E+00 | 0.82 |
| 1.00E+00 | 0.75 |
| 1.00E+00 | 0.91 |
| 1.00E+00 | 0.84 |
| 1.00E+00 | 0.88 |
| 1.00E+00 | 0.89 |

|          |      |
|----------|------|
| 1.00E+00 | 0.98 |
| 1.00E+00 | 0.9  |
| 1.00E+00 | 0.67 |

|          |      |
|----------|------|
| 1.00E+00 | 0.7  |
| 1.00E+00 | 0.84 |
| 1.00E+00 | 0.88 |
| 1.00E+00 | 0.93 |
| 1.00E+00 | 0.77 |
| 1.00E+00 | 0.63 |
| 1.00E+00 | 0.54 |
| 1.00E+00 | 0.95 |
| 1.00E+00 | 0.82 |
| 1.00E+00 | 0.85 |
| 1.00E+00 | 0.77 |
| 1.00E+00 | 0.95 |
| 1.00E+00 | 1    |
| 1.00E+00 | 0.86 |
| 1.00E+00 | 0.93 |
| 1.00E+00 | 0.94 |
| 1.00E+00 | 0.95 |
| 1.00E+00 | 0.77 |
| 1.00E+00 | 1    |
| 1.00E+00 | 0.57 |
| 1.00E+00 | 0.76 |
| 1.00E+00 | 0.85 |
| 1.00E+00 | 1    |
| 1.00E+00 | 0.69 |
| 1.00E+00 | 0.93 |
| 1.00E+00 | 0.95 |
| 1.00E+00 | 0.93 |
| 1.00E+00 | 1    |
| 1.00E+00 | 1    |
| 1.00E+00 | 0.92 |
| 1.00E+00 | 1    |
| 1.00E+00 | 0.95 |
| 1.00E+00 | 0.75 |
| 1.00E+00 | 1    |
| 1.00E+00 | 0.74 |
| 1.00E+00 | 0.91 |
| 1.00E+00 | 0.86 |
| 1.00E+00 | 1    |
| 1.00E+00 | 0.75 |
| 1.00E+00 | 0.89 |
| 1.00E+00 | 0.78 |
| 1.00E+00 | 0.95 |
| 1.00E+00 | 0.58 |
| 1.00E+00 | 0.66 |
| 1.00E+00 | 0.81 |

|          |      |
|----------|------|
| 1.00E+00 | 0.93 |
| 1.00E+00 | 0.97 |
| 1.00E+00 | 0.63 |
| 1.00E+00 | 0.76 |
| 1.00E+00 | 0.7  |
| 1.00E+00 | 0.6  |
| 1.00E+00 | 0.82 |
| 1.00E+00 | 0.82 |
| 1.00E+00 | 0.8  |
| 1.00E+00 | 0.64 |
| 1.00E+00 | 0.67 |
| 1.00E+00 | 0.8  |
| 1.00E+00 | 0.88 |
| 1.00E+00 | 0.59 |
| 1.00E+00 | 0.86 |
| 1.00E+00 | 0.62 |
| 1.00E+00 | 0    |
| 1.00E+00 | 0.64 |
| 1.00E+00 | 0    |
| 1.00E+00 | 1    |
| 1.00E+00 | 0.95 |
| 1.00E+00 | 0.82 |
| 1.00E+00 | 0.8  |
| 1.00E+00 | 0.81 |
| 1.00E+00 | 0.7  |
| 1.00E+00 | 0.88 |
| 1.00E+00 | 0.92 |
| 1.00E+00 | 0.76 |
| 1.00E+00 | 0.94 |
| 1.00E+00 | 0.97 |
| 1.00E+00 | 0.84 |
| 1.00E+00 | 0.87 |
| 1.00E+00 | 0.72 |
| 1.00E+00 | 0.93 |
| 1.00E+00 | 0.95 |
| 1.00E+00 | 0.79 |
| 1.00E+00 | 0.75 |
| 1.00E+00 | 0.65 |
| 1.00E+00 | 0.76 |
| 1.00E+00 | 0.5  |
| 1.00E+00 | 0.58 |
| 1.00E+00 | 0.64 |
| 1.00E+00 | 1    |
| 1.00E+00 | 1    |
| 1.00E+00 | 0.77 |
| 1.00E+00 | 0.81 |
| 1.00E+00 | 0.9  |
| 1.00E+00 | 0.98 |
| 1.00E+00 | 0.69 |
| 1.00E+00 | 0.71 |



|          |      |
|----------|------|
| 1.00E+00 | 0.73 |
| 1.00E+00 | 0.83 |
| 1.00E+00 | 0.92 |

|          |      |
|----------|------|
| 1.00E+00 | 0.8  |
| 1.00E+00 | 0.93 |
| 1.00E+00 | 0.82 |
| 1.00E+00 | 0.9  |

|          |      |
|----------|------|
| 1.00E+00 | 0.96 |
|----------|------|

|          |      |
|----------|------|
| 1.00E+00 | 0.76 |
| 1.00E+00 | 0.89 |
| 1.00E+00 | 0.68 |
| 1.00E+00 | 0.87 |
| 1.00E+00 | 0.93 |
| 1.00E+00 | 0.84 |
| 1.00E+00 | 0.92 |

|          |      |
|----------|------|
| 1.00E+00 | 0.69 |
| 1.00E+00 | 1    |
| 1.00E+00 | 0.77 |
| 1.00E+00 | 0.95 |
| 1.00E+00 | 1    |
| 1.00E+00 | 0.86 |

|          |      |
|----------|------|
| 1.00E+00 | 0.76 |
| 1.00E+00 | 0.96 |
| 1.00E+00 | 0.91 |

|          |      |
|----------|------|
| 1.00E+00 | 0.81 |
| 1.00E+00 | 0.87 |
| 1.00E+00 | 0.72 |
| 1.00E+00 | 0.84 |
| 1.00E+00 | 0.71 |
| 1.00E+00 | 1    |
| 1.00E+00 | 0.9  |
| 1.00E+00 | 1    |
| 1.00E+00 | 0.71 |
| 1.00E+00 | 0.88 |

|          |      |
|----------|------|
| 1.00E+00 | 0.85 |
|----------|------|

1.00E+00 0.93

1.00E+00 1  
1.00E+00 1  
1.00E+00 0.9  
1.00E+00 0.68  
1.00E+00 0.9  
1.00E+00 0.94  
1.00E+00 0.91  
1.00E+00 0.94  
1.00E+00 0.42  
1.00E+00 1  
1.00E+00 0.74  
1.00E+00 0.67  
1.00E+00 0.88  
1.00E+00 0.91  
1.00E+00 0.9  
1.00E+00 0.83  
1.00E+00 0.85  
1.00E+00 0.83  
1.00E+00 0.86  
1.00E+00 1  
1.00E+00 0.92  
1.00E+00 1  
1.00E+00 0.84  
1.00E+00 1  
1.00E+00 0.63

1.00E+00 0.85  
1.00E+00 0.57  
1.00E+00 1  
1.00E+00 1  
1.00E+00 0.94  
1.00E+00 0.86  
1.00E+00 0.8  
1.00E+00 1  
1.00E+00 1  
1.00E+00 0.97  
1.00E+00 0.74  
1.00E+00 1  
1.00E+00 0.9  
1.00E+00 1  
1.00E+00 0.94  
1.00E+00 1  
1.00E+00 0.97  
1.00E+00 1

|          |      |
|----------|------|
| 1.00E+00 | 1    |
| 1.00E+00 | 0.47 |
| 1.00E+00 | 0.65 |
| 1.00E+00 | 0.92 |
| 1.00E+00 | 0    |
| 1.00E+00 | 0.89 |
| 1.00E+00 | 0.94 |

|          |      |
|----------|------|
| 1.00E+00 | 1    |
| 1.00E+00 | 0.75 |
| 1.00E+00 | 0.87 |
| 1.00E+00 | 0.92 |
| 1.00E+00 | 1    |

|          |      |
|----------|------|
| 1.00E+00 | 1    |
| 1.00E+00 | 0.89 |
| 1.00E+00 | 1    |
| 1.00E+00 | 0.84 |
| 1.00E+00 | 0.75 |
| 1.00E+00 | 0.72 |
| 1.00E+00 | 0.71 |
| 1.00E+00 | 0.88 |
| 1.00E+00 | 0.8  |
| 1.00E+00 | 0.8  |

|          |      |
|----------|------|
| 1.00E+00 | 1    |
| 1.00E+00 | 1    |
| 1.00E+00 | 0.62 |
| 1.00E+00 | 0.66 |
| 1.00E+00 | 0.81 |
| 1.00E+00 | 0.53 |
| 1.00E+00 | 0.96 |

|          |      |
|----------|------|
| 1.00E+00 | 0.85 |
| 1.00E+00 | 0.67 |
| 1.00E+00 | 1    |

|          |      |
|----------|------|
| 1.00E+00 | 0.71 |
| 1.00E+00 | 0.81 |

|          |      |
|----------|------|
| 1.00E+00 | 0.79 |
| 1.00E+00 | 0.78 |
| 1.00E+00 | 0.72 |
| 1.00E+00 | 0.71 |
| 1.00E+00 | 0.72 |
| 1.00E+00 | 0.92 |
| 1.00E+00 | 0.64 |
| 1.00E+00 | 0.84 |

|          |      |
|----------|------|
| 1.00E+00 | 0.97 |
| 1.00E+00 | 0.72 |
| 1.00E+00 | 0.85 |
| 1.00E+00 | 1    |
| 1.00E+00 | 0.97 |
| 1.00E+00 | 1    |
| 1.00E+00 | 0.91 |
| 1.00E+00 | 0.73 |
| 1.00E+00 | 0.87 |
| 1.00E+00 | 0.91 |
| 1.00E+00 | 1    |
| 1.00E+00 | 0.77 |
| 1.00E+00 | 1    |
| 1.00E+00 | 1    |
| 1.00E+00 | 0.92 |
| 1.00E+00 | 0.86 |
| 1.00E+00 | 0    |

|          |      |
|----------|------|
| 1.00E+00 | 1    |
| 1.00E+00 | 0.77 |
| 1.00E+00 | 0.81 |
| 1.00E+00 | 0.93 |
| 1.00E+00 | 0.84 |
| 1.00E+00 | 0.74 |
| 1.00E+00 | 0.83 |
| 1.00E+00 | 1    |
| 1.00E+00 | 0.94 |

|          |      |
|----------|------|
| 1.00E+00 | 0.96 |
|----------|------|

|          |      |
|----------|------|
| 1.00E+00 | 0.9  |
| 1.00E+00 | 0.6  |
| 1.00E+00 | 0.58 |
| 1.00E+00 | 0.84 |
| 1.00E+00 | 1    |

|          |   |
|----------|---|
| 1.00E+00 | 1 |
| 1.00E+00 | 1 |
| 1.00E+00 | 1 |

|          |      |
|----------|------|
| 1.00E+00 | 1    |
| 1.00E+00 | 0.89 |
| 1.00E+00 | 0.94 |
| 1.00E+00 | 0.76 |
| 1.00E+00 | 0.94 |
| 1.00E+00 | 0.87 |
| 1.00E+00 | 0.06 |
| 1.00E+00 | 0.72 |
| 1.00E+00 | 0.86 |
| 1.00E+00 | 0.64 |
| 1.00E+00 | 1    |
| 1.00E+00 | 0.91 |
| 1.00E+00 | 0.94 |
| 1.00E+00 | 1    |
| 1.00E+00 | 0.81 |
| 1.00E+00 | 0.9  |
| 1.00E+00 | 0.79 |
| 1.00E+00 | 0.86 |
| 1.00E+00 | 0.82 |
| 1.00E+00 | 0.77 |
| 1.00E+00 | 0.92 |

|          |      |
|----------|------|
| 1.00E+00 | 1    |
| 1.00E+00 | 1    |
| 1.00E+00 | 0.96 |
| 1.00E+00 | 0.91 |
| 1.00E+00 | 0.92 |
| 1.00E+00 | 0.94 |

|          |      |
|----------|------|
| 1.00E+00 | 0.83 |
| 1.00E+00 | 0.66 |
| 1.00E+00 | 0.75 |
| 1.00E+00 | 0.93 |
| 1.00E+00 | 0.86 |
| 1.00E+00 | 0.91 |
| 1.00E+00 | 0.96 |
| 1.00E+00 | 0.94 |
| 1.00E+00 | 1    |
| 1.00E+00 | 0.85 |
| 1.00E+00 | 0.93 |
| 1.00E+00 | 0.93 |
| 1.00E+00 | 0.96 |
| 1.00E+00 | 0.9  |
| 1.00E+00 | 0.85 |
| 1.00E+00 | 0.93 |
| 1.00E+00 | 0.94 |

|          |      |
|----------|------|
| 1.00E+00 | 0.86 |
| 1.00E+00 | 0.85 |
| 1.00E+00 | 0.64 |
| 1.00E+00 | 0.79 |
| 1.00E+00 | 0.92 |
| 1.00E+00 | 0.94 |
| 1.00E+00 | 0.57 |
| 1.00E+00 | 0.79 |
| 1.00E+00 | 0.65 |
| 1.00E+00 | 0.72 |
| 1.00E+00 | 0.87 |
| 1.00E+00 | 0.94 |
| 1.00E+00 | 0.82 |
| 1.00E+00 | 0.49 |
| 1.00E+00 | 0.55 |
| 1.00E+00 | 0.93 |

|          |      |
|----------|------|
| 1.00E+00 | 0.87 |
| 1.00E+00 | 0.86 |
| 1.00E+00 | 0.95 |
| 1.00E+00 | 0.89 |
| 1.00E+00 | 0.88 |

|          |      |
|----------|------|
| 1.00E+00 | 0.47 |
| 1.00E+00 | 0.54 |
| 1.00E+00 | 0.85 |
| 1.00E+00 | 0.93 |
| 1.00E+00 | 0.9  |
| 1.00E+00 | 0.78 |
| 1.00E+00 | 1    |
| 1.00E+00 | 0.78 |
| 1.00E+00 | 0.83 |
| 1.00E+00 | 0.86 |
| 1.00E+00 | 0.92 |
| 1.00E+00 | 0.52 |

|          |      |
|----------|------|
| 1.00E+00 | 0.82 |
| 1.00E+00 | 0.88 |
| 1.00E+00 | 0.78 |
| 1.00E+00 | 0.84 |

|          |      |
|----------|------|
| 1.00E+00 | 0.78 |
| 1.00E+00 | 1    |
| 1.00E+00 | 0.65 |

|          |      |
|----------|------|
| 1.00E+00 | 1    |
| 1.00E+00 | 0.74 |
| 1.00E+00 | 1    |
| 1.00E+00 | 0.84 |
| 1.00E+00 | 0.69 |
| 1.00E+00 | 0.94 |
| 1.00E+00 | 0.89 |
| 1.00E+00 | 1    |
| 1.00E+00 | 0.59 |
| 1.00E+00 | 1    |
| 1.00E+00 | 0.96 |
| 1.00E+00 | 0.78 |
| 1.00E+00 | 0.92 |
| 1.00E+00 | 1    |
| 1.00E+00 | 0.94 |
| 1.00E+00 | 0.95 |
| 1.00E+00 | 0.9  |
| 1.00E+00 | 0.9  |
| 1.00E+00 | 0.92 |
| 1.00E+00 | 0.92 |
| 1.00E+00 | 1    |
| 1.00E+00 | 0.91 |
| 1.00E+00 | 0.86 |
| 1.00E+00 | 0.74 |
| 1.00E+00 | 0.61 |
| 1.00E+00 | 0.9  |
| 1.00E+00 | 0.86 |
| 1.00E+00 | 0.77 |
| 1.00E+00 | 0.5  |
| 1.00E+00 | 0.66 |
| 1.00E+00 | 0.88 |
| 1.00E+00 | 0.93 |
| 1.00E+00 | 1    |
| 1.00E+00 | 0.88 |
| 1.00E+00 | 0.74 |
| 1.00E+00 | 0.54 |
| 1.00E+00 | 0.76 |
| 1.00E+00 | 0.56 |
| 1.00E+00 | 0.85 |
| 1.00E+00 | 0.75 |
| 1.00E+00 | 0.97 |
| 1.00E+00 | 1    |
| 1.00E+00 | 0.86 |
| 1.00E+00 | 0.85 |
| 1.00E+00 | 0.54 |
| 1.00E+00 | 0.88 |
| 1.00E+00 | 0.78 |
| 1.00E+00 | 0.8  |
| 1.00E+00 | 1    |
| 1.00E+00 | 0.83 |

|          |      |
|----------|------|
| 1.00E+00 | 0.54 |
| 1.00E+00 | 1    |
| 1.00E+00 | 0.59 |
| 1.00E+00 | 0.91 |
| 1.00E+00 | 1    |
| 1.00E+00 | 0.83 |
| 1.00E+00 | 0.71 |
| 1.00E+00 | 0.78 |
| 1.00E+00 | 0.65 |
| 1.00E+00 | 1    |
| 1.00E+00 | 1    |
| 1.00E+00 | 0.89 |

|          |      |
|----------|------|
| 1.00E+00 | 1    |
| 1.00E+00 | 0.7  |
| 1.00E+00 | 1    |
| 1.00E+00 | 0.77 |

|          |      |
|----------|------|
| 1.00E+00 | 0.78 |
| 1.00E+00 | 1    |
| 1.00E+00 | 0.7  |

|          |      |
|----------|------|
| 1.00E+00 | 0.95 |
| 1.00E+00 | 0.76 |
| 1.00E+00 | 1    |
| 1.00E+00 | 0.85 |
| 1.00E+00 | 1    |
| 1.00E+00 | 0.79 |
| 1.00E+00 | 0.89 |
| 1.00E+00 | 0.9  |
| 1.00E+00 | 0.66 |
| 1.00E+00 | 0.88 |
| 1.00E+00 | 1    |
| 1.00E+00 | 0.67 |
| 1.00E+00 | 0.9  |

|          |      |
|----------|------|
| 1.00E+00 | 0.83 |
| 1.00E+00 | 0.92 |
| 1.00E+00 | 0.64 |
| 1.00E+00 | 0.89 |
| 1.00E+00 | 1    |
| 1.00E+00 | 0.84 |
| 1.00E+00 | 1    |
| 1.00E+00 | 0.96 |
| 1.00E+00 | 0.89 |
| 1.00E+00 | 1    |



|          |      |
|----------|------|
| 1.00E+00 | 0.92 |
| 1.00E+00 | 1    |
| 1.00E+00 | 0.62 |
| 1.00E+00 | 0.92 |
| 1.00E+00 | 0.76 |
| 1.00E+00 | 0.85 |
| 1.00E+00 | 0.7  |

|          |      |
|----------|------|
| 1.00E+00 | 1    |
| 1.00E+00 | 0.78 |
| 1.00E+00 | 1    |
| 1.00E+00 | 0.82 |
| 1.00E+00 | 0.95 |
| 1.00E+00 | 0.65 |
| 1.00E+00 | 0.72 |
| 1.00E+00 | 0.81 |
| 1.00E+00 | 0.89 |
| 1.00E+00 | 1    |
| 1.00E+00 | 0.83 |
| 1.00E+00 | 0.82 |

|          |     |
|----------|-----|
| 1.00E+00 | 0.7 |
|----------|-----|

|          |      |
|----------|------|
| 1.00E+00 | 0.76 |
| 1.00E+00 | 1    |
| 1.00E+00 | 0.92 |
| 1.00E+00 | 0.63 |
| 1.00E+00 | 0.85 |
| 1.00E+00 | 0.86 |
| 1.00E+00 | 0.8  |
| 1.00E+00 | 0.83 |
| 1.00E+00 | 1    |

|          |      |
|----------|------|
| 1.00E+00 | 0.75 |
| 1.00E+00 | 0.47 |
| 1.00E+00 | 0.91 |
| 1.00E+00 | 0.89 |
| 1.00E+00 | 0.74 |

|          |      |
|----------|------|
| 1.00E+00 | 0.67 |
| 1.00E+00 | 0.91 |
| 1.00E+00 | 0.86 |

|          |      |
|----------|------|
| 1.00E+00 | 0.98 |
|----------|------|

|          |   |
|----------|---|
| 1.00E+00 | 1 |
| 1.00E+00 | 1 |

|          |      |
|----------|------|
| 1.00E+00 | 0.91 |
| 1.00E+00 | 0.74 |
| 1.00E+00 | 0.65 |
| 1.00E+00 | 1    |
| 1.00E+00 | 1    |
| 1.00E+00 | 1    |
| 1.00E+00 | 1    |
| 1.00E+00 | 0.93 |
| 1.00E+00 | 0.94 |
| 1.00E+00 | 1    |
| 1.00E+00 | 1    |
| 1.00E+00 | 0.77 |
| 1.00E+00 | 0.67 |
| 1.00E+00 | 1    |
| 1.00E+00 | 0.78 |
| 1.00E+00 | 0.72 |
| 1.00E+00 | 1    |
| 1.00E+00 | 1    |
| 1.00E+00 | 0.94 |
| 1.00E+00 | 0.76 |
| 1.00E+00 | 1    |
| 1.00E+00 | 0.9  |
| 1.00E+00 | 0.63 |
| 1.00E+00 | 0.87 |
| 1.00E+00 | 0.66 |
| 1.00E+00 | 0.88 |
| 1.00E+00 | 0.89 |
| 1.00E+00 | 0.55 |
| 1.00E+00 | 0.83 |
| 1.00E+00 | 0.82 |
| 1.00E+00 | 0.78 |
| 1.00E+00 | 0.69 |
| 1.00E+00 | 0.66 |
| 1.00E+00 | 0.87 |
| 1.00E+00 | 0.6  |
| 1.00E+00 | 0.91 |
| 1.00E+00 | 1    |
| 1.00E+00 | 0.52 |

|          |      |
|----------|------|
| 1.00E+00 | 0.67 |
| 1.00E+00 | 0.63 |
| 1.00E+00 | 0.86 |
| 1.00E+00 | 0.94 |
| 1.00E+00 | 0.8  |
| 1.00E+00 | 1    |

|          |      |
|----------|------|
| 1.00E+00 | 0.77 |
| 1.00E+00 | 0.46 |
| 1.00E+00 | 0.94 |
| 1.00E+00 | 0.95 |
| 1.00E+00 | 0.82 |

|          |      |
|----------|------|
| 1.00E+00 | 0.8  |
| 1.00E+00 | 0.72 |
| 1.00E+00 | 0.76 |
| 1.00E+00 | 0.94 |
| 1.00E+00 | 0.87 |
| 1.00E+00 | 0.89 |
| 1.00E+00 | 0.94 |

|          |      |
|----------|------|
| 1.00E+00 | 0.92 |
| 1.00E+00 | 0.88 |
| 1.00E+00 | 0.87 |
| 1.00E+00 | 0.93 |
| 1.00E+00 | 0.9  |
| 1.00E+00 | 0.83 |
| 1.00E+00 | 0.72 |
| 1.00E+00 | 0.94 |
| 1.00E+00 | 0.91 |
| 1.00E+00 | 0.95 |
| 1.00E+00 | 0.83 |
| 1.00E+00 | 0.92 |
| 1.00E+00 | 0.88 |
| 1.00E+00 | 0.87 |
| 1.00E+00 | 0.95 |
| 1.00E+00 | 0.81 |
| 1.00E+00 | 0.73 |
| 1.00E+00 | 0.8  |
| 1.00E+00 | 0.9  |
| 1.00E+00 | 0.93 |
| 1.00E+00 | 1    |
| 1.00E+00 | 0.96 |
| 1.00E+00 | 0.85 |
| 1.00E+00 | 0.55 |
| 1.00E+00 | 0.74 |
| 1.00E+00 | 0.69 |
| 1.00E+00 | 0.72 |
| 1.00E+00 | 0.88 |
| 1.00E+00 | 0.49 |

|          |      |
|----------|------|
| 1.00E+00 | 0.55 |
| 1.00E+00 | 0.87 |
| 1.00E+00 | 0.9  |
| 1.00E+00 | 0.87 |
| 1.00E+00 | 0.62 |
| 1.00E+00 | 0.84 |
| 1.00E+00 | 0.89 |
| 1.00E+00 | 0.77 |
| 1.00E+00 | 0.69 |
| 1.00E+00 | 0.88 |
| 1.00E+00 | 0.9  |
| 1.00E+00 | 0.78 |
| 1.00E+00 | 0.87 |
| 1.00E+00 | 0.86 |
| 1.00E+00 | 0.9  |
| 1.00E+00 | 0.91 |
| 1.00E+00 | 0.91 |
| 1.00E+00 | 0.97 |
| 1.00E+00 | 0.79 |
| 1.00E+00 | 0.67 |
| 1.00E+00 | 0.83 |
| 1.00E+00 | 0.72 |
| 1.00E+00 | 0.94 |
| 1.00E+00 | 0.93 |
| 1.00E+00 | 0.83 |
| 1.00E+00 | 0.96 |
| 1.00E+00 | 0.77 |
| 1.00E+00 | 0.94 |
| 1.00E+00 | 0.85 |
| 1.00E+00 | 0.93 |
| 1.00E+00 | 0.94 |
| 1.00E+00 | 0.75 |
| 1.00E+00 | 0.91 |
| 1.00E+00 | 0.8  |
| 1.00E+00 | 0.92 |
| 1.00E+00 | 0.82 |
| 1.00E+00 | 0.81 |
| 1.00E+00 | 0.71 |
| 1.00E+00 | 0.78 |
| 1.00E+00 | 0.58 |
| 1.00E+00 | 0.89 |

|          |      |
|----------|------|
| 1.00E+00 | 0.51 |
| 1.00E+00 | 0.77 |
| 1.00E+00 | 0.58 |
| 1.00E+00 | 0.88 |
| 1.00E+00 | 0.84 |
| 1.00E+00 | 1    |
| 1.00E+00 | 0.61 |
| 1.00E+00 | 0.9  |
| 1.00E+00 | 0.71 |
| 1.00E+00 | 0.81 |
| 1.00E+00 | 0.95 |
| 1.00E+00 | 0.74 |
| 1.00E+00 | 0.91 |
| 1.00E+00 | 0.74 |
| 1.00E+00 | 0.71 |
| 1.00E+00 | 0.42 |
| 1.00E+00 | 0.48 |
| 1.00E+00 | 0.85 |
| 1.00E+00 | 0.89 |
| 1.00E+00 | 0.69 |
| 1.00E+00 | 0.83 |
| 1.00E+00 | 0.91 |
| 1.00E+00 | 1    |
| 1.00E+00 | 1    |
| 1.00E+00 | 0.89 |
| 1.00E+00 | 0.69 |
| 1.00E+00 | 1    |
| 1.00E+00 | 0.96 |
| 1.00E+00 | 1    |
| 1.00E+00 | 0.93 |
| 1.00E+00 | 0.89 |
| 1.00E+00 | 1    |
| 1.00E+00 | 0.82 |
| 1.00E+00 | 0.64 |
| 1.00E+00 | 0.85 |
| 1.00E+00 | 0.62 |
| 1.00E+00 | 0.75 |
| 1.00E+00 | 0.83 |
| 1.00E+00 | 0.89 |
| 1.00E+00 | 0.86 |
| 1.00E+00 | 0.81 |
| 1.00E+00 | 0.79 |
| 1.00E+00 | 0.96 |
| 1.00E+00 | 0.73 |
| 1.00E+00 | 0.82 |
| 1.00E+00 | 1    |

|          |      |
|----------|------|
| 1.00E+00 | 0.95 |
| 1.00E+00 | 0.9  |
| 1.00E+00 | 1    |

|          |      |
|----------|------|
| 1.00E+00 | 0.73 |
| 1.00E+00 | 0.94 |
| 1.00E+00 | 1    |
| 1.00E+00 | 0.87 |
| 1.00E+00 | 1    |

|          |      |
|----------|------|
| 1.00E+00 | 1    |
| 1.00E+00 | 0.76 |

|          |      |
|----------|------|
| 1.00E+00 | 0.63 |
| 1.00E+00 | 0.91 |
| 1.00E+00 | 1    |
| 1.00E+00 | 0.88 |
| 1.00E+00 | 0.86 |
| 1.00E+00 | 0.59 |
| 1.00E+00 | 0.81 |
| 1.00E+00 | 0.5  |
| 1.00E+00 | 0.47 |
| 1.00E+00 | 0.92 |
| 1.00E+00 | 0.7  |
| 1.00E+00 | 0.91 |
| 1.00E+00 | 0.75 |
| 1.00E+00 | 0.76 |
| 1.00E+00 | 0.84 |
| 1.00E+00 | 0.72 |
| 1.00E+00 | 1    |
| 1.00E+00 | 0.95 |
| 1.00E+00 | 0.93 |
| 1.00E+00 | 0.95 |
| 1.00E+00 | 0.86 |
| 1.00E+00 | 1    |
| 1.00E+00 | 0.85 |
| 1.00E+00 | 0.86 |
| 1.00E+00 | 0.86 |
| 1.00E+00 | 0.94 |
| 1.00E+00 | 0.93 |
| 1.00E+00 | 0.87 |
| 1.00E+00 | 0.81 |
| 1.00E+00 | 0.76 |
| 1.00E+00 | 0.9  |
| 1.00E+00 | 1    |
| 1.00E+00 | 1    |
| 1.00E+00 | 1    |
| 1.00E+00 | 0.89 |

|          |      |
|----------|------|
| 1.00E+00 | 0.84 |
| 1.00E+00 | 0.78 |
| 1.00E+00 | 0.73 |
| 1.00E+00 | 0.94 |
| 1.00E+00 | 0.94 |
| 1.00E+00 | 0.74 |
| 1.00E+00 | 0.83 |
| 1.00E+00 | 0.52 |
| 1.00E+00 | 1    |

|          |      |
|----------|------|
| 1.00E+00 | 1    |
| 1.00E+00 | 0.82 |
| 1.00E+00 | 0.83 |
| 1.00E+00 | 0.53 |
| 1.00E+00 | 0.67 |
| 1.00E+00 | 0.51 |
| 1.00E+00 | 0.53 |
| 1.00E+00 | 0.43 |
| 1.00E+00 | 0.52 |
| 1.00E+00 | 0.94 |
| 1.00E+00 | 0.59 |
| 1.00E+00 | 0.83 |
| 1.00E+00 | 1    |
| 1.00E+00 | 0.9  |
| 1.00E+00 | 0.81 |
| 1.00E+00 | 0.97 |

|          |      |
|----------|------|
| 1.00E+00 | 0.83 |
| 1.00E+00 | 0.93 |
| 1.00E+00 | 1    |
| 1.00E+00 | 0.84 |
| 1.00E+00 | 0.94 |
| 1.00E+00 | 0.95 |
| 1.00E+00 | 0.79 |
| 1.00E+00 | 1    |
| 1.00E+00 | 0.6  |

|          |      |
|----------|------|
| 1.00E+00 | 0.62 |
| 1.00E+00 | 0.64 |
| 1.00E+00 | 0.73 |
| 1.00E+00 | 1    |
| 1.00E+00 | 1    |

|          |      |
|----------|------|
| 1.00E+00 | 0.95 |
| 1.00E+00 | 0.84 |
| 1.00E+00 | 0.69 |
| 1.00E+00 | 0.65 |
| 1.00E+00 | 1    |
| 1.00E+00 | 0.81 |

|          |      |
|----------|------|
| 1.00E+00 | 0.89 |
| 1.00E+00 | 0.91 |
| 1.00E+00 | 0.92 |
| 1.00E+00 | 0.88 |
| 1.00E+00 | 0.67 |
| 1.00E+00 | 0.81 |
| 1.00E+00 | 0.75 |
| 1.00E+00 | 0.96 |
| 1.00E+00 | 0.81 |
| 1.00E+00 | 1    |
| 1.00E+00 | 0.69 |
| 1.00E+00 | 0.89 |
| 1.00E+00 | 0.92 |
| 1.00E+00 | 0.84 |
| 1.00E+00 | 0.78 |
| 1.00E+00 | 0.85 |
| 1.00E+00 | 0    |
| 1.00E+00 | 0.9  |
| 1.00E+00 | 0.95 |
| 1.00E+00 | 0.92 |
| 1.00E+00 | 0.73 |
| 1.00E+00 | 0.77 |
| 1.00E+00 | 0.95 |
| 1.00E+00 | 0.89 |
| 1.00E+00 | 0.94 |
| 1.00E+00 | 0.93 |
| 1.00E+00 | 0.95 |
| 1.00E+00 | 0.94 |
| 1.00E+00 | 0.71 |
| 1.00E+00 | 0.66 |
| 1.00E+00 | 0.8  |
| 1.00E+00 | 0.88 |
| 1.00E+00 | 0.4  |
| 1.00E+00 | 0.37 |
| 1.00E+00 | 1    |
| 1.00E+00 | 0.63 |
| 1.00E+00 | 0.9  |
| 1.00E+00 | 0.95 |
| 1.00E+00 | 0.72 |



|          |      |
|----------|------|
| 1.00E+00 | 1    |
| 1.00E+00 | 0.93 |
| 1.00E+00 | 0.9  |
| 1.00E+00 | 1    |
| 1.00E+00 | 0.91 |
| 1.00E+00 | 1    |
| 1.00E+00 | 0.7  |
| 1.00E+00 | 0.94 |
| 1.00E+00 | 0.79 |
| 1.00E+00 | 0.84 |
| 1.00E+00 | 0.85 |
| 1.00E+00 | 0.87 |
| 1.00E+00 | 1    |
| 1.00E+00 | 0.73 |
| 1.00E+00 | 0.95 |
| 1.00E+00 | 0.93 |
| 1.00E+00 | 0.88 |
| 1.00E+00 | 0.91 |
| 1.00E+00 | 0.69 |
| 1.00E+00 | 0.87 |
| 1.00E+00 | 0.73 |
| 1.00E+00 | 0.95 |
| 1.00E+00 | 0.94 |
| 1.00E+00 | 0.94 |
| 1.00E+00 | 0.81 |
| 1.00E+00 | 0.8  |
| 1.00E+00 | 0.73 |
| 1.00E+00 | 0.96 |
| 1.00E+00 | 0.6  |
| 1.00E+00 | 0.86 |
| 1.00E+00 | 0.9  |
| 1.00E+00 | 0.84 |
| 1.00E+00 | 0.83 |
| 1.00E+00 | 0.75 |

|          |      |
|----------|------|
| 1.00E+00 | 1    |
| 1.00E+00 | 1    |
| 1.00E+00 | 0.89 |
| 1.00E+00 | 1    |
| 1.00E+00 | 0.93 |
| 1.00E+00 | 0.93 |
| 1.00E+00 | 0.86 |
| 1.00E+00 | 0.45 |
| 1.00E+00 | 0.88 |
| 1.00E+00 | 0.91 |
| 1.00E+00 | 0.87 |
| 1.00E+00 | 0.93 |
| 1.00E+00 | 0.92 |
| 1.00E+00 | 0.8  |
| 1.00E+00 | 1    |
| 1.00E+00 | 0.71 |
| 1.00E+00 | 1    |
| 1.00E+00 | 0.65 |
| 1.00E+00 | 0.86 |
| 1.00E+00 | 0.78 |
| 1.00E+00 | 1    |
| 1.00E+00 | 1    |
| 1.00E+00 | 0.83 |
| 1.00E+00 | 0.67 |
| 1.00E+00 | 0.85 |
| 1.00E+00 | 0.82 |
| 1.00E+00 | 1    |
| 1.00E+00 | 0.82 |
| 1.00E+00 | 0.81 |
| 1.00E+00 | 0.96 |
| 1.00E+00 | 0.56 |
| 1.00E+00 | 0.85 |
| 1.00E+00 | 0.61 |
| 1.00E+00 | 0.86 |
| 1.00E+00 | 0.91 |
| 1.00E+00 | 0.7  |
| 1.00E+00 | 0.59 |
| 1.00E+00 | 0.94 |
| 1.00E+00 | 0.86 |

|          |      |
|----------|------|
| 1.00E+00 | 0.79 |
| 1.00E+00 | 0.84 |
| 1.00E+00 | 0.82 |
| 1.00E+00 | 0.75 |
| 1.00E+00 | 0.73 |
| 1.00E+00 | 0.61 |

|          |      |
|----------|------|
| 1.00E+00 | 0.82 |
| 1.00E+00 | 0.93 |
| 1.00E+00 | 0.91 |
| 1.00E+00 | 0.92 |
| 1.00E+00 | 0.64 |
| 1.00E+00 | 0.55 |
| 1.00E+00 | 0.88 |
| 1.00E+00 | 0    |

|          |      |
|----------|------|
| 1.00E+00 | 0.89 |
| 1.00E+00 | 0.73 |
| 1.00E+00 | 0.93 |
| 1.00E+00 | 0.59 |
| 1.00E+00 | 0.82 |
| 1.00E+00 | 0.87 |
| 1.00E+00 | 0.72 |
| 1.00E+00 | 0.71 |
| 1.00E+00 | 0.82 |
| 1.00E+00 | 0.86 |
| 1.00E+00 | 0.74 |
| 1.00E+00 | 0.7  |
| 1.00E+00 | 0.69 |
| 1.00E+00 | 0.57 |

|          |      |
|----------|------|
| 1.00E+00 | 0.92 |
|----------|------|

|          |      |
|----------|------|
| 1.00E+00 | 0.93 |
| 1.00E+00 | 0.85 |
| 1.00E+00 | 0.97 |
| 1.00E+00 | 0.92 |

|          |      |
|----------|------|
| 1.00E+00 | 0.9  |
| 1.00E+00 | 0.92 |

|          |      |
|----------|------|
| 1.00E+00 | 0.87 |
| 1.00E+00 | 0.85 |
| 1.00E+00 | 0.81 |

|          |      |
|----------|------|
| 1.00E+00 | 0.84 |
| 1.00E+00 | 0.9  |
| 1.00E+00 | 0.88 |
| 1.00E+00 | 0.65 |
| 1.00E+00 | 0.65 |
| 1.00E+00 | 0.87 |
| 1.00E+00 | 1    |
| 1.00E+00 | 0.96 |
| 1.00E+00 | 0.64 |
| 1.00E+00 | 0.66 |
| 1.00E+00 | 0.62 |
| 1.00E+00 | 0.86 |
| 1.00E+00 | 0.71 |
| 1.00E+00 | 0.6  |
| 1.00E+00 | 0.68 |
| 1.00E+00 | 0    |
| 1.00E+00 | 0.48 |
| 1.00E+00 | 0.81 |

|          |      |
|----------|------|
| 1.00E+00 | 0.81 |
| 1.00E+00 | 0.63 |
| 1.00E+00 | 0.86 |

|          |      |
|----------|------|
| 1.00E+00 | 0.74 |
| 1.00E+00 | 0.91 |
| 1.00E+00 | 0.88 |
| 1.00E+00 | 0.62 |
| 1.00E+00 | 1    |
| 1.00E+00 | 1    |
| 1.00E+00 | 0.9  |
| 1.00E+00 | 0.83 |
| 1.00E+00 | 0.6  |

|          |      |
|----------|------|
| 1.00E+00 | 0.88 |
| 1.00E+00 | 0.87 |
| 1.00E+00 | 0.75 |
| 1.00E+00 | 0.95 |
| 1.00E+00 | 0.78 |
| 1.00E+00 | 0.56 |
| 1.00E+00 | 0.51 |
| 1.00E+00 | 0.88 |

|          |      |
|----------|------|
| 1.00E+00 | 0.75 |
| 1.00E+00 | 1    |
| 1.00E+00 | 0.94 |
| 1.00E+00 | 0.93 |

|          |      |
|----------|------|
| 1.00E+00 | 0.93 |
| 1.00E+00 | 0.43 |
| 1.00E+00 | 0    |
| 1.00E+00 | 0.89 |
| 1.00E+00 | 1    |
| 1.00E+00 | 0.83 |
| 1.00E+00 | 1    |
| 1.00E+00 | 1    |

|          |   |
|----------|---|
| 1.00E+00 | 1 |
| 1.00E+00 | 1 |

|          |      |
|----------|------|
| 1.00E+00 | 0.89 |
| 1.00E+00 | 1    |
| 1.00E+00 | 0.97 |
| 1.00E+00 | 1    |

|          |      |
|----------|------|
| 1.00E+00 | 0.83 |
| 1.00E+00 | 0.85 |
| 1.00E+00 | 0.93 |
| 1.00E+00 | 0.9  |

|          |      |
|----------|------|
| 1.00E+00 | 0.87 |
| 1.00E+00 | 0.7  |
| 1.00E+00 | 0.88 |
| 1.00E+00 | 0.89 |
| 1.00E+00 | 0.69 |

|          |      |
|----------|------|
| 1.00E+00 | 0.96 |
|----------|------|

|          |      |
|----------|------|
| 1.00E+00 | 0.71 |
|----------|------|

|          |      |
|----------|------|
| 1.00E+00 | 0.91 |
| 1.00E+00 | 0.94 |
| 1.00E+00 | 0.79 |

|          |      |
|----------|------|
| 1.00E+00 | 0.96 |
| 1.00E+00 | 0.94 |
| 1.00E+00 | 0.8  |
| 1.00E+00 | 1    |
| 1.00E+00 | 0.61 |
| 1.00E+00 | 0.93 |
| 1.00E+00 | 0.91 |
| 1.00E+00 | 0.96 |
| 1.00E+00 | 0.92 |
| 1.00E+00 | 0.57 |
| 1.00E+00 | 0.9  |
| 1.00E+00 | 0.93 |
| 1.00E+00 | 0.93 |
| 1.00E+00 | 0.79 |
| 1.00E+00 | 1    |
| 1.00E+00 | 0.9  |
| 1.00E+00 | 0.79 |
| 1.00E+00 | 0.45 |
| 1.00E+00 | 0.91 |
| 1.00E+00 | 1    |
| 1.00E+00 | 0.91 |
| 1.00E+00 | 0.67 |
| 1.00E+00 | 0.93 |
| 1.00E+00 | 0.89 |
| 1.00E+00 | 0.96 |
| 1.00E+00 | 0.43 |
| 1.00E+00 | 0.69 |
| 1.00E+00 | 0.62 |
| 1.00E+00 | 0.86 |
| 1.00E+00 | 0.92 |
| 1.00E+00 | 1    |
| 1.00E+00 | 0.7  |
| 1.00E+00 | 0.72 |
| 1.00E+00 | 0.96 |
| 1.00E+00 | 0.9  |
| 1.00E+00 | 0    |
| 1.00E+00 | 0.84 |

|          |      |
|----------|------|
| 1.00E+00 | 1    |
| 1.00E+00 | 0.65 |
| 1.00E+00 | 0.95 |
| 1.00E+00 | 0.95 |
| 1.00E+00 | 0.82 |
| 1.00E+00 | 1    |
| 1.00E+00 | 1    |
| 1.00E+00 | 0.93 |
| 1.00E+00 | 0.62 |
| 1.00E+00 | 0.91 |
| 1.00E+00 | 0.82 |
| 1.00E+00 | 1    |
| 1.00E+00 | 0.91 |

|          |      |
|----------|------|
| 1.00E+00 | 0.85 |
| 1.00E+00 | 0.72 |

|          |      |
|----------|------|
| 1.00E+00 | 0.67 |
|----------|------|

|          |      |
|----------|------|
| 1.00E+00 | 1    |
| 1.00E+00 | 0.92 |

|          |      |
|----------|------|
| 1.00E+00 | 0.66 |
| 1.00E+00 | 0.89 |

|          |      |
|----------|------|
| 1.00E+00 | 0.89 |
| 1.00E+00 | 0.95 |
| 1.00E+00 | 0.92 |
| 1.00E+00 | 0.93 |
| 1.00E+00 | 0.91 |

|          |      |
|----------|------|
| 1.00E+00 | 0.83 |
| 1.00E+00 | 0.9  |
| 1.00E+00 | 0.74 |
| 1.00E+00 | 0.69 |
| 1.00E+00 | 0.64 |

|          |      |
|----------|------|
| 1.00E+00 | 0.86 |
|----------|------|

|          |      |
|----------|------|
| 1.00E+00 | 0.85 |
| 1.00E+00 | 0.73 |
| 1.00E+00 | 0.94 |
| 1.00E+00 | 0.89 |
| 1.00E+00 | 0.8  |

|          |      |
|----------|------|
| 1.00E+00 | 0.91 |
| 1.00E+00 | 1    |

|          |      |
|----------|------|
| 1.00E+00 | 0.94 |
| 1.00E+00 | 0.76 |
| 1.00E+00 | 0.88 |
| 1.00E+00 | 0.86 |
| 1.00E+00 | 0.69 |
| 1.00E+00 | 0.68 |
| 1.00E+00 | 0.75 |
| 1.00E+00 | 0.48 |
| 1.00E+00 | 0.77 |
| 1.00E+00 | 0.94 |
| 1.00E+00 | 0.94 |
| 1.00E+00 | 1    |
| 1.00E+00 | 0.83 |
| 1.00E+00 | 1    |
| 1.00E+00 | 0.71 |
| 1.00E+00 | 1    |
| 1.00E+00 | 0.86 |
| 1.00E+00 | 0.87 |
| 1.00E+00 | 1    |
| 1.00E+00 | 0.7  |
| 1.00E+00 | 1    |
| 1.00E+00 | 0.97 |

|          |      |
|----------|------|
| 1.00E+00 | 0.79 |
| 1.00E+00 | 1    |
| 1.00E+00 | 0.83 |
| 1.00E+00 | 1    |
| 1.00E+00 | 0.83 |
| 1.00E+00 | 1    |
| 1.00E+00 | 0.8  |
| 1.00E+00 | 1    |
| 1.00E+00 | 0.98 |
| 1.00E+00 | 0.82 |
| 1.00E+00 | 0.66 |
| 1.00E+00 | 0.98 |
| 1.00E+00 | 0.97 |
| 1.00E+00 | 0.83 |
| 1.00E+00 | 0.99 |
| 1.00E+00 | 0.98 |



|          |      |
|----------|------|
| 1.00E+00 | 0.97 |
| 1.00E+00 | 0.99 |
| 1.00E+00 | 1    |
| 1.00E+00 | 0.98 |
| 1.00E+00 | 0.97 |
| 1.00E+00 | 0.94 |
| 1.00E+00 | 1    |
| 1.00E+00 | 0.98 |
| 1.00E+00 | 1    |
| 1.00E+00 | 0.95 |
| 1.00E+00 | 0.98 |
| 1.00E+00 | 0.82 |
| 1.00E+00 | 0.69 |
| 1.00E+00 | 0.89 |
| 1.00E+00 | 0.85 |
| 1.00E+00 | 0.98 |
| 1.00E+00 | 0.9  |

|          |      |
|----------|------|
| 1.00E+00 | 0.78 |
|----------|------|

|          |      |
|----------|------|
| 1.00E+00 | 1    |
| 1.00E+00 | 0.98 |
| 1.00E+00 | 1    |
| 1.00E+00 | 0.94 |

|          |      |
|----------|------|
| 1.00E+00 | 0.73 |
| 1.00E+00 | 1    |
| 1.00E+00 | 0.65 |
| 1.00E+00 | 0.76 |
| 1.00E+00 | 0.93 |

|          |      |
|----------|------|
| 1.00E+00 | 0.97 |
|----------|------|

|          |      |
|----------|------|
| 1.00E+00 | 0.94 |
| 1.00E+00 | 0.97 |
| 1.00E+00 | 0.97 |
| 1.00E+00 | 0.9  |
| 1.00E+00 | 0.98 |
| 1.00E+00 | 0.99 |
| 1.00E+00 | 0    |
| 1.00E+00 | 1    |
| 1.00E+00 | 0.95 |
| 1.00E+00 | 0.97 |
| 1.00E+00 | 0.98 |
| 1.00E+00 | 0.93 |
| 1.00E+00 | 0.92 |
| 1.00E+00 | 0.81 |

|          |      |
|----------|------|
| 1.00E+00 | 0.8  |
| 1.00E+00 | 0.97 |
| 1.00E+00 | 0.99 |
| 1.00E+00 | 0.9  |

|          |      |
|----------|------|
| 1.00E+00 | 1    |
| 1.00E+00 | 0.99 |
| 1.00E+00 | 0.93 |

|          |      |
|----------|------|
| 1.00E+00 | 0.96 |
| 1.00E+00 | 0.95 |
| 1.00E+00 | 1    |
| 1.00E+00 | 1    |
| 1.00E+00 | 0.86 |
| 1.00E+00 | 0.63 |
| 1.00E+00 | 0.91 |
| 1.00E+00 | 0.97 |
| 1.00E+00 | 0.9  |

|          |      |
|----------|------|
| 1.00E+00 | 0.74 |
|----------|------|

|          |      |
|----------|------|
| 1.00E+00 | 0.83 |
| 1.00E+00 | 0.75 |

|          |      |
|----------|------|
| 1.00E+00 | 0.83 |
|----------|------|

|          |      |
|----------|------|
| 1.00E+00 | 0.93 |
| 1.00E+00 | 0.8  |
| 1.00E+00 | 0.93 |
| 1.00E+00 | 0.9  |
| 1.00E+00 | 0.94 |
| 1.00E+00 | 0.94 |
| 1.00E+00 | 0.94 |

1.00E+00 0.89

1.00E+00 0.95  
1.00E+00 0.76  
1.00E+00 0.63  
1.00E+00 0.8  
1.00E+00 0.94  
1.00E+00 0.94  
1.00E+00 0.94  
1.00E+00 0.95  
1.00E+00 0.94  
1.00E+00 0.94  
1.00E+00 0.93  
1.00E+00 0.95  
1.00E+00 0.94  
1.00E+00 0.79  
1.00E+00 0.77  
1.00E+00 0.76  
1.00E+00 0.96  
1.00E+00 0.91  
1.00E+00 1  
1.00E+00 0.84  
1.00E+00 0.63  
1.00E+00 0.78  
1.00E+00 0.94  
1.00E+00 0.92

1.00E+00 1  
1.00E+00 0.87  
1.00E+00 1  
1.00E+00 0.97  
1.00E+00 1  
1.00E+00 1  
1.00E+00 0.9  
1.00E+00 0.83  
1.00E+00 0.75  
1.00E+00 0.97  
1.00E+00 0.91  
1.00E+00 0.96  
1.00E+00 0.94  
1.00E+00 1  
1.00E+00 0.83  
1.00E+00 0.88  
1.00E+00 0.89  
1.00E+00 0.93  
1.00E+00 1  
1.00E+00 0.75

1.00E+00 0.91

1.00E+00 0.8

1.00E+00 0.85

1.00E+00 0.95

1.00E+00 0.94

1.00E+00 0.94

1.00E+00 0.95

1.00E+00 0.94

1.00E+00 0.97

1.00E+00 1

1.00E+00 0.77

1.00E+00 1

1.00E+00 1

1.00E+00 0.95

1.00E+00 1

1.00E+00 0.68

1.00E+00 0.83

1.00E+00 1

1.00E+00 0.92

1.00E+00 0.72

1.00E+00 0.91

1.00E+00 0.91

1.00E+00 1

1.00E+00 1

1.00E+00 0.97

1.00E+00 1

1.00E+00 1

1.00E+00 0

1.00E+00 0.94

1.00E+00 0.94

1.00E+00 0.97

1.00E+00 0.9

1.00E+00 0.96

1.00E+00 0.67

1.00E+00 0.94

1.00E+00 0.74

1.00E+00 0.94

|          |      |
|----------|------|
| 1.00E+00 | 0.95 |
| 1.00E+00 | 0.91 |
| 1.00E+00 | 0.68 |
| 1.00E+00 | 0.8  |
| 1.00E+00 | 0.87 |
| 1.00E+00 | 0.66 |
| 1.00E+00 | 0.91 |

|          |      |
|----------|------|
| 1.00E+00 | 0.78 |
| 1.00E+00 | 0.83 |
| 1.00E+00 | 1    |

|          |      |
|----------|------|
| 1.00E+00 | 0.91 |
| 1.00E+00 | 0.93 |
| 1.00E+00 | 0.93 |
| 1.00E+00 | 0.85 |
| 1.00E+00 | 0.92 |
| 1.00E+00 | 1    |
| 1.00E+00 | 0.83 |
| 1.00E+00 | 0.91 |
| 1.00E+00 | 0.94 |
| 1.00E+00 | 0.93 |
| 1.00E+00 | 1    |
| 1.00E+00 | 0.94 |
| 1.00E+00 | 0.94 |
| 1.00E+00 | 0.95 |
| 1.00E+00 | 0.94 |
| 1.00E+00 | 0.94 |
| 1.00E+00 | 0.94 |
| 1.00E+00 | 1    |
| 1.00E+00 | 0.92 |
| 1.00E+00 | 0.93 |
| 1.00E+00 | 0.92 |
| 1.00E+00 | 0.92 |
| 1.00E+00 | 0.94 |
| 1.00E+00 | 0.94 |
| 1.00E+00 | 0.91 |
| 1.00E+00 | 1    |
| 1.00E+00 | 0.74 |
| 1.00E+00 | 1    |
| 1.00E+00 | 0.9  |
| 1.00E+00 | 0.88 |
| 1.00E+00 | 1    |

|          |      |
|----------|------|
| 1.00E+00 | 0.88 |
| 1.00E+00 | 1    |
| 1.00E+00 | 0.79 |
| 1.00E+00 | 0.86 |
| 1.00E+00 | 0.91 |
| 1.00E+00 | 1    |
| 1.00E+00 | 0.73 |
| 1.00E+00 | 0.87 |
| 1.00E+00 | 0.9  |
| 1.00E+00 | 0.89 |
| 1.00E+00 | 0.8  |
| 1.00E+00 | 0.61 |
| 1.00E+00 | 1    |
| 1.00E+00 | 0.88 |
| 1.00E+00 | 0.84 |
| 1.00E+00 | 1    |
| 1.00E+00 | 0.89 |
| 1.00E+00 | 1    |
| 1.00E+00 | 0.86 |
| 1.00E+00 | 0.9  |
| 1.00E+00 | 0.76 |
| 1.00E+00 | 1    |
| 1.00E+00 | 0.87 |
| 1.00E+00 | 0.91 |
| 1.00E+00 | 0.82 |
| 1.00E+00 | 0.79 |
| 1.00E+00 | 0.82 |
| 1.00E+00 | 0.94 |
| 1.00E+00 | 0.88 |
| 1.00E+00 | 0.88 |
| 1.00E+00 | 0.76 |
| 1.00E+00 | 0.89 |

|          |      |
|----------|------|
| 1.00E+00 | 0.79 |
| 1.00E+00 | 1    |
| 1.00E+00 | 0.94 |
| 1.00E+00 | 0.81 |
| 1.00E+00 | 0.65 |
| 1.00E+00 | 0.67 |
| 1.00E+00 | 0.59 |
| 1.00E+00 | 1    |
| 1.00E+00 | 0.93 |
| 1.00E+00 | 1    |
| 1.00E+00 | 0.62 |
| 1.00E+00 | 0.9  |
| 1.00E+00 | 0.87 |
| 1.00E+00 | 0.92 |
| 1.00E+00 | 0.94 |
| 1.00E+00 | 0.96 |
| 1.00E+00 | 0.87 |
| 1.00E+00 | 1    |
| 1.00E+00 | 0.62 |
| 1.00E+00 | 0.71 |
| 1.00E+00 | 0.65 |
| 1.00E+00 | 0.83 |
| 1.00E+00 | 0.66 |
| 1.00E+00 | 0.76 |
| 1.00E+00 | 1    |
| 1.00E+00 | 1    |
| 1.00E+00 | 0.93 |
| 1.00E+00 | 0.94 |

|          |      |
|----------|------|
| 1.00E+00 | 0.95 |
| 1.00E+00 | 1    |
| 1.00E+00 | 0.85 |
| 1.00E+00 | 0.85 |
| 1.00E+00 | 0.67 |
| 1.00E+00 | 0.75 |
| 1.00E+00 | 0.85 |
| 1.00E+00 | 0.68 |
| 1.00E+00 | 0.86 |
| 1.00E+00 | 0.63 |
| 1.00E+00 | 0.64 |
| 1.00E+00 | 0.71 |
| 1.00E+00 | 0.79 |
| 1.00E+00 | 0.11 |
| 1.00E+00 | 0.9  |
| 1.00E+00 | 0.94 |
| 1.00E+00 | 0.8  |
| 1.00E+00 | 0.68 |
| 1.00E+00 | 0.72 |
| 1.00E+00 | 0.48 |

|          |      |
|----------|------|
| 1.00E+00 | 0.71 |
| 1.00E+00 | 1    |
| 1.00E+00 | 0.94 |
| 1.00E+00 | 1    |
| 1.00E+00 | 0.64 |
| 1.00E+00 | 0.7  |
| 1.00E+00 | 0.52 |

|          |      |
|----------|------|
| 1.00E+00 | 0.73 |
| 1.00E+00 | 0.95 |
| 1.00E+00 | 0.69 |
| 1.00E+00 | 0.96 |
| 1.00E+00 | 0.75 |
| 1.00E+00 | 1    |
| 1.00E+00 | 0.93 |
| 1.00E+00 | 0.62 |
| 1.00E+00 | 0.71 |



|          |      |
|----------|------|
| 1.00E+00 | 0.91 |
| 1.00E+00 | 1    |
| 1.00E+00 | 1    |
| 1.00E+00 | 0.96 |
| 1.00E+00 | 0.97 |
| 1.00E+00 | 1    |
| 1.00E+00 | 0.74 |
| 1.00E+00 | 0.61 |
| 1.00E+00 | 0.69 |
| 1.00E+00 | 0.72 |
| 1.00E+00 | 0.64 |
| 1.00E+00 | 0.97 |
| 1.00E+00 | 0.9  |
| 1.00E+00 | 0.79 |
| 1.00E+00 | 0.95 |
| 1.00E+00 | 0.66 |
| 1.00E+00 | 0.92 |
| 1.00E+00 | 1    |
| 1.00E+00 | 0.61 |
| 1.00E+00 | 0.83 |
| 1.00E+00 | 0.93 |
| 1.00E+00 | 0.72 |
| 1.00E+00 | 0.63 |
| 1.00E+00 | 0.88 |
| 1.00E+00 | 0.55 |
| 1.00E+00 | 0.89 |
| 1.00E+00 | 1    |
| 1.00E+00 | 0.59 |
| 1.00E+00 | 1    |
| 1.00E+00 | 0.68 |
| 1.00E+00 | 1    |
| 1.00E+00 | 1    |
| 1.00E+00 | 0.81 |
| 1.00E+00 | 0.66 |
| 1.00E+00 | 1    |
| 1.00E+00 | 0.7  |
| 1.00E+00 | 1    |
| 1.00E+00 | 0.94 |
| 1.00E+00 | 1    |
| 1.00E+00 | 0.95 |
| 1.00E+00 | 0.86 |
| 1.00E+00 | 0.86 |
| 1.00E+00 | 1    |
| 1.00E+00 | 0.77 |
| 1.00E+00 | 1    |
| 1.00E+00 | 0.59 |
| 1.00E+00 | 0.83 |
| 1.00E+00 | 0.68 |

|          |      |
|----------|------|
| 1.00E+00 | 0.82 |
| 1.00E+00 | 0.98 |
| 1.00E+00 | 0.89 |
| 1.00E+00 | 0.89 |
| 1.00E+00 | 1    |
| 1.00E+00 | 0.83 |
| 1.00E+00 | 0.97 |
| 1.00E+00 | 1    |
| 1.00E+00 | 0.85 |
| 1.00E+00 | 1    |
| 1.00E+00 | 1    |
| 1.00E+00 | 0.48 |
| 1.00E+00 | 1    |
| 1.00E+00 | 0.74 |
| 1.00E+00 | 0.62 |
| 1.00E+00 | 0.63 |
| 1.00E+00 | 0.95 |
| 1.00E+00 | 0.65 |
| 1.00E+00 | 0.58 |
| 1.00E+00 | 0.75 |
| 1.00E+00 | 0.97 |
| 1.00E+00 | 0.74 |
| 1.00E+00 | 0.97 |
| 1.00E+00 | 0.73 |
| 1.00E+00 | 0.73 |
| 1.00E+00 | 0.79 |
| 1.00E+00 | 1    |
| 1.00E+00 | 0.68 |
| 1.00E+00 | 0.64 |
| 1.00E+00 | 0.64 |
| 1.00E+00 | 0.75 |
| 1.00E+00 | 0.57 |
| 1.00E+00 | 0.97 |
| 1.00E+00 | 0.87 |
| 1.00E+00 | 0.91 |
| 1.00E+00 | 0.95 |
| 1.00E+00 | 0.95 |
| 1.00E+00 | 0.82 |
| 1.00E+00 | 0.95 |
| 1.00E+00 | 0.63 |
| 1.00E+00 | 0.88 |
| 1.00E+00 | 1    |
| 1.00E+00 | 1    |
| 1.00E+00 | 0.96 |
| 1.00E+00 | 1    |
| 1.00E+00 | 0.64 |
| 1.00E+00 | 0.96 |
| 1.00E+00 | 0.94 |
| 1.00E+00 | 1    |
| 1.00E+00 | 0.6  |
| 1.00E+00 | 0.97 |

|          |      |
|----------|------|
| 1.00E+00 | 0.7  |
| 1.00E+00 | 1    |
| 1.00E+00 | 1    |
| 1.00E+00 | 0.76 |
| 1.00E+00 | 0.72 |
| 1.00E+00 | 0.77 |
| 1.00E+00 | 1    |
| 1.00E+00 | 0.69 |
| 1.00E+00 | 0.49 |
| 1.00E+00 | 0.63 |
| 1.00E+00 | 0.96 |
| 1.00E+00 | 0.68 |







|          |      |
|----------|------|
| 1.00E+00 | 1    |
| 1.00E+00 | 0.7  |
| 1.00E+00 | 0.73 |
| 1.00E+00 | 0.94 |
| 1.00E+00 | 0.73 |
| 1.00E+00 | 0.86 |
| 1.00E+00 | 0.57 |
| 1.00E+00 | 0.89 |
| 1.00E+00 | 0.64 |
| 1.00E+00 | 0.61 |
| 1.00E+00 | 0.65 |
| 1.00E+00 | 1    |
| 1.00E+00 | 1    |
| 1.00E+00 | 0.76 |
| 1.00E+00 | 1    |
| 1.00E+00 | 0.74 |
| 1.00E+00 | 1    |
| 1.00E+00 | 0.73 |
| 1.00E+00 | 1    |
| 1.00E+00 | 1    |
| 1.00E+00 | 0.82 |
| 1.00E+00 | 0.97 |
| 1.00E+00 | 1    |
| 1.00E+00 | 1    |
| 1.00E+00 | 0.84 |
| 1.00E+00 | 0.75 |
| 1.00E+00 | 1    |
| 1.00E+00 | 0.64 |
| 1.00E+00 | 0.81 |
| 1.00E+00 | 0.48 |
| 1.00E+00 | 0.5  |
| 1.00E+00 | 0.55 |
| 1.00E+00 | 0.6  |
| 1.00E+00 | 0.92 |
| 1.00E+00 | 0.9  |
| 1.00E+00 | 0.79 |
| 1.00E+00 | 0.76 |
| 1.00E+00 | 0.86 |
| 1.00E+00 | 0.96 |
| 1.00E+00 | 0.72 |
| 1.00E+00 | 0.87 |
| 1.00E+00 | 0.94 |
| 1.00E+00 | 0.95 |
| 1.00E+00 | 0.73 |
| 1.00E+00 | 1    |
| 1.00E+00 | 0.92 |
| 1.00E+00 | 0.69 |
| 1.00E+00 | 0.96 |

|          |      |
|----------|------|
| 1.00E+00 | 0.7  |
| 1.00E+00 | 0.9  |
| 1.00E+00 | 0.93 |
| 1.00E+00 | 0.93 |
| 1.00E+00 | 1    |
| 1.00E+00 | 0.82 |
| 1.00E+00 | 0.95 |
| 1.00E+00 | 0.62 |
| 1.00E+00 | 1    |
| 1.00E+00 | 0.95 |
| 1.00E+00 | 0.96 |
| 1.00E+00 | 0.89 |
| 1.00E+00 | 0.84 |
| 1.00E+00 | 0.54 |
| 1.00E+00 | 1    |
| 1.00E+00 | 0.77 |
| 1.00E+00 | 0.71 |
| 1.00E+00 | 0.68 |
| 1.00E+00 | 1    |
| 1.00E+00 | 0.83 |
| 1.00E+00 | 0.56 |
| 1.00E+00 | 1    |
| 1.00E+00 | 0.81 |
| 1.00E+00 | 0    |
| 1.00E+00 | 0    |
| 1.00E+00 | 1    |
| 1.00E+00 | 0.8  |
| 1.00E+00 | 0.88 |
| 1.00E+00 | 1    |

|          |      |
|----------|------|
| 1.00E+00 | 1    |
| 1.00E+00 | 0.53 |
| 1.00E+00 | 0.75 |
| 1.00E+00 | 0.8  |
| 1.00E+00 | 0.88 |
| 1.00E+00 | 1    |
| 1.00E+00 | 0.96 |
| 1.00E+00 | 0.99 |
| 1.00E+00 | 0.65 |
| 1.00E+00 | 0.94 |



|          |      |
|----------|------|
| 1.00E+00 | 0.49 |
| 1.00E+00 | 0.88 |
| 1.00E+00 | 0.49 |

|          |      |
|----------|------|
| 1.00E+00 | 0.96 |
| 1.00E+00 | 0.94 |
| 1.00E+00 | 0.72 |
| 1.00E+00 | 0.94 |
| 1.00E+00 | 0.88 |
| 1.00E+00 | 0.83 |
| 1.00E+00 | 0.78 |
| 1.00E+00 | 0.83 |
| 1.00E+00 | 0.89 |
| 1.00E+00 | 0.88 |
| 1.00E+00 | 1    |
| 1.00E+00 | 0.53 |
| 1.00E+00 | 0.57 |
| 1.00E+00 | 0.83 |
| 1.00E+00 | 0.7  |

|          |      |
|----------|------|
| 1.00E+00 | 0.92 |
| 1.00E+00 | 0.94 |
| 1.00E+00 | 1    |
| 1.00E+00 | 0.94 |
| 1.00E+00 | 0.94 |
| 1.00E+00 | 0.71 |
| 1.00E+00 | 0.85 |
| 1.00E+00 | 0.03 |
| 1.00E+00 | 0.89 |
| 1.00E+00 | 0.92 |
| 1.00E+00 | 0.9  |
| 1.00E+00 | 0.87 |
| 1.00E+00 | 0.93 |
| 1.00E+00 | 0.87 |
| 1.00E+00 | 0.91 |
| 1.00E+00 | 0.92 |
| 1.00E+00 | 0.92 |
| 1.00E+00 | 0.9  |
| 1.00E+00 | 0.9  |
| 1.00E+00 | 0.75 |
| 1.00E+00 | 0.85 |
| 1.00E+00 | 0.91 |

|          |      |
|----------|------|
| 1.00E+00 | 0.94 |
| 1.00E+00 | 0.93 |
| 1.00E+00 | 0.93 |
| 1.00E+00 | 0.89 |
| 1.00E+00 | 0.92 |
| 1.00E+00 | 0.94 |
| 1.00E+00 | 0.81 |
| 1.00E+00 | 0.83 |
| 1.00E+00 | 0.92 |
| 1.00E+00 | 0.81 |
| 1.00E+00 | 0.92 |
| 1.00E+00 | 1    |
| 1.00E+00 | 1    |
| 1.00E+00 | 0.94 |
| 1.00E+00 | 0.89 |
| 1.00E+00 | 0.96 |
| 1.00E+00 | 0.86 |
| 1.00E+00 | 0.95 |
| 1.00E+00 | 0.87 |
| 1.00E+00 | 0.91 |
| 1.00E+00 | 0.87 |
| 1.00E+00 | 0.9  |
| 1.00E+00 | 0.8  |
| 1.00E+00 | 0.94 |
| 1.00E+00 | 0.89 |
| 1.00E+00 | 0.92 |
| 1.00E+00 | 0.86 |
| 1.00E+00 | 0.91 |
| 1.00E+00 | 0.88 |
| 1.00E+00 | 0.91 |
| 1.00E+00 | 0.89 |
| 1.00E+00 | 0.86 |
| 1.00E+00 | 0.77 |
| 1.00E+00 | 0.84 |
| 1.00E+00 | 0.55 |
| 1.00E+00 | 0.8  |
| 1.00E+00 | 0.66 |
| 1.00E+00 | 0.94 |
| 1.00E+00 | 0.98 |
| 1.00E+00 | 0.9  |
| 1.00E+00 | 0.6  |
| 1.00E+00 | 0.84 |
| 1.00E+00 | 0.89 |
| 1.00E+00 | 0.89 |
| 1.00E+00 | 0.9  |
| 1.00E+00 | 0.8  |
| 1.00E+00 | 0.74 |
| 1.00E+00 | 0.59 |
| 1.00E+00 | 0.62 |

|          |      |
|----------|------|
| 1.00E+00 | 0.89 |
| 1.00E+00 | 1    |
| 1.00E+00 | 0.83 |
| 1.00E+00 | 0.88 |

|          |      |
|----------|------|
| 1.00E+00 | 0.81 |
| 1.00E+00 | 0.79 |
| 1.00E+00 | 0.89 |
| 1.00E+00 | 0.89 |
| 1.00E+00 | 0.83 |
| 1.00E+00 | 0.89 |
| 1.00E+00 | 0.86 |
| 1.00E+00 | 0.87 |
| 1.00E+00 | 0.88 |
| 1.00E+00 | 0.83 |
| 1.00E+00 | 0.81 |
| 1.00E+00 | 0.89 |
| 1.00E+00 | 0.79 |
| 1.00E+00 | 0.89 |
| 1.00E+00 | 0.91 |
| 1.00E+00 | 0.82 |
| 1.00E+00 | 0.92 |
| 1.00E+00 | 0.66 |
| 1.00E+00 | 0.92 |
| 1.00E+00 | 0.89 |
| 1.00E+00 | 0.68 |
| 1.00E+00 | 0.84 |
| 1.00E+00 | 0.79 |
| 1.00E+00 | 0.85 |
| 1.00E+00 | 0.66 |

|          |      |
|----------|------|
| 1.00E+00 | 0.68 |
| 1.00E+00 | 0.94 |
| 1.00E+00 | 0.95 |
| 1.00E+00 | 0.93 |
| 1.00E+00 | 0.94 |
| 1.00E+00 | 0.57 |
| 1.00E+00 | 0.89 |
| 1.00E+00 | 0.95 |
| 1.00E+00 | 0.95 |
| 1.00E+00 | 0.94 |
| 1.00E+00 | 0.75 |
| 1.00E+00 | 0.92 |
| 1.00E+00 | 0.92 |
| 1.00E+00 | 0.93 |
| 1.00E+00 | 0.93 |

|          |      |
|----------|------|
| 1.00E+00 | 0.83 |
| 1.00E+00 | 0.87 |

|          |      |
|----------|------|
| 1.00E+00 | 0.89 |
| 1.00E+00 | 0.9  |
| 1.00E+00 | 0.87 |
| 1.00E+00 | 0.59 |
| 1.00E+00 | 0.6  |
| 1.00E+00 | 0.94 |
| 1.00E+00 | 0.93 |
| 1.00E+00 | 0.85 |
| 1.00E+00 | 0.55 |
| 1.00E+00 | 0.8  |
| 1.00E+00 | 0.94 |
| 1.00E+00 | 0.76 |
| 1.00E+00 | 0.68 |
| 1.00E+00 | 0.94 |
| 1.00E+00 | 0.92 |
| 1.00E+00 | 0.94 |
| 1.00E+00 | 0.6  |
| 1.00E+00 | 0.93 |
| 1.00E+00 | 0.67 |
| 1.00E+00 | 0.92 |
| 1.00E+00 | 0.71 |
| 1.00E+00 | 0.89 |
| 1.00E+00 | 0.81 |
| 1.00E+00 | 0.93 |

|          |      |
|----------|------|
| 1.00E+00 | 0.72 |
| 1.00E+00 | 0.93 |
| 1.00E+00 | 0.88 |
| 1.00E+00 | 0.76 |
| 1.00E+00 | 0.64 |

|          |      |
|----------|------|
| 1.00E+00 | 0.75 |
| 1.00E+00 | 0.92 |
| 1.00E+00 | 0.98 |
| 1.00E+00 | 1    |
| 1.00E+00 | 0.93 |
| 1.00E+00 | 0.94 |
| 1.00E+00 | 0.7  |
| 1.00E+00 | 0.78 |
| 1.00E+00 | 0.88 |
| 1.00E+00 | 0.8  |
| 1.00E+00 | 0.86 |
| 1.00E+00 | 0.92 |

|          |      |
|----------|------|
| 1.00E+00 | 0.61 |
|----------|------|

|          |      |
|----------|------|
| 1.00E+00 | 0.75 |
| 1.00E+00 | 0.69 |
| 1.00E+00 | 0.97 |
| 1.00E+00 | 0.96 |
| 1.00E+00 | 0.94 |
| 1.00E+00 | 0.96 |
| 1.00E+00 | 0.97 |
| 1.00E+00 | 0.92 |
| 1.00E+00 | 0.98 |
| 1.00E+00 | 0.91 |
| 1.00E+00 | 1    |
| 1.00E+00 | 0.67 |
| 1.00E+00 | 0.83 |
| 1.00E+00 | 0.67 |
| 1.00E+00 | 0.77 |
| 1.00E+00 | 0.9  |
| 1.00E+00 | 0.86 |
| 1.00E+00 | 0.95 |
| 1.00E+00 | 0.92 |
| 1.00E+00 | 0.95 |

|          |      |
|----------|------|
| 1.00E+00 | 0.9  |
| 1.00E+00 | 0.95 |
| 1.00E+00 | 0.6  |
| 1.00E+00 | 0.95 |
| 1.00E+00 | 0.8  |
| 1.00E+00 | 0.83 |
| 1.00E+00 | 1    |
| 1.00E+00 | 0.96 |
| 1.00E+00 | 0.82 |

|          |      |
|----------|------|
| 1.00E+00 | 0.9  |
| 1.00E+00 | 0.65 |
| 1.00E+00 | 0.95 |
| 1.00E+00 | 0.76 |
| 1.00E+00 | 0.95 |
| 1.00E+00 | 0.7  |
| 1.00E+00 | 0.78 |
| 1.00E+00 | 0.95 |
| 1.00E+00 | 0.96 |
| 1.00E+00 | 0.78 |
| 1.00E+00 | 0.72 |
| 1.00E+00 | 0.68 |
| 1.00E+00 | 0.64 |
| 1.00E+00 | 0.77 |
| 1.00E+00 | 0.84 |
| 1.00E+00 | 0.73 |
| 1.00E+00 | 0.93 |
| 1.00E+00 | 0.89 |
| 1.00E+00 | 0.93 |

|          |      |
|----------|------|
| 1.00E+00 | 0.97 |
| 1.00E+00 | 0.97 |
| 1.00E+00 | 0.96 |
| 1.00E+00 | 0.7  |
| 1.00E+00 | 0.95 |
| 1.00E+00 | 0.95 |
| 1.00E+00 | 0.58 |
| 1.00E+00 | 0.78 |
| 1.00E+00 | 0.94 |
| 1.00E+00 | 0.51 |
| 1.00E+00 | 0.89 |
| 1.00E+00 | 0.89 |

|          |      |
|----------|------|
| 1.00E+00 | 1    |
| 1.00E+00 | 0.73 |
| 1.00E+00 | 0.94 |
| 1.00E+00 | 0.94 |
| 1.00E+00 | 0.94 |
| 1.00E+00 | 0.95 |
| 1.00E+00 | 0.92 |
| 1.00E+00 | 0.94 |
| 1.00E+00 | 0.95 |
| 1.00E+00 | 0.96 |
| 1.00E+00 | 0.92 |
| 1.00E+00 | 0.94 |
| 1.00E+00 | 0.93 |
| 1.00E+00 | 0.92 |
| 1.00E+00 | 0.73 |
| 1.00E+00 | 0.94 |
| 1.00E+00 | 0.53 |
| 1.00E+00 | 0.7  |
| 1.00E+00 | 0.87 |
| 1.00E+00 | 1    |
| 1.00E+00 | 1    |
| 1.00E+00 | 0.88 |
| 1.00E+00 | 0.54 |
| 1.00E+00 | 0.9  |
| 1.00E+00 | 0.79 |
| 1.00E+00 | 0.73 |
| 1.00E+00 | 0.88 |
| 1.00E+00 | 0.65 |
| 1.00E+00 | 0.94 |
| 1.00E+00 | 0.89 |
| 1.00E+00 | 0.95 |
| 1.00E+00 | 0.89 |



|          |      |
|----------|------|
| 1.00E+00 | 0.9  |
| 1.00E+00 | 1    |
| 1.00E+00 | 0.82 |
| 1.00E+00 | 0.91 |
| 1.00E+00 | 0.75 |
| 1.00E+00 | 0.85 |
| 1.00E+00 | 0.93 |
| 1.00E+00 | 0.76 |
| 1.00E+00 | 0    |
| 1.00E+00 | 0.92 |
| 1.00E+00 | 0.82 |
| 1.00E+00 | 0.97 |
| 1.00E+00 | 0.84 |
| 1.00E+00 | 0.92 |
| 1.00E+00 | 0.9  |
| 1.00E+00 | 0.85 |
| 1.00E+00 | 0.83 |
| 1.00E+00 | 0.89 |
| 1.00E+00 | 0.94 |
| 1.00E+00 | 0.95 |
| 1.00E+00 | 0.92 |
| 1.00E+00 | 0.94 |
| 1.00E+00 | 1    |
| 1.00E+00 | 0.95 |
| 1.00E+00 | 0.94 |
| 1.00E+00 | 0.76 |
| 1.00E+00 | 0.89 |
| 1.00E+00 | 0.94 |
| 1.00E+00 | 0.89 |
| 1.00E+00 | 0.94 |
| 1.00E+00 | 0.93 |
| 1.00E+00 | 1    |
| 1.00E+00 | 1    |
| 1.00E+00 | 0.94 |
| 1.00E+00 | 0.78 |
| 1.00E+00 | 0.93 |
| 1.00E+00 | 0.92 |
| 1.00E+00 | 0.93 |
| 1.00E+00 | 0.92 |
| 1.00E+00 | 0.92 |
| 1.00E+00 | 0.91 |
| 1.00E+00 | 0.94 |
| 1.00E+00 | 0.91 |
| 1.00E+00 | 0.93 |
| 1.00E+00 | 0.9  |
| 1.00E+00 | 0.93 |
| 1.00E+00 | 0.91 |
| 1.00E+00 | 0.93 |
| 1.00E+00 | 0.93 |

|          |      |
|----------|------|
| 1.00E+00 | 0.93 |
| 1.00E+00 | 0.9  |
| 1.00E+00 | 0.93 |
| 1.00E+00 | 0.92 |
| 1.00E+00 | 0.94 |
| 1.00E+00 | 0.91 |
| 1.00E+00 | 0.93 |
| 1.00E+00 | 0.84 |
| 1.00E+00 | 0.92 |
| 1.00E+00 | 0.83 |
| 1.00E+00 | 0.82 |
| 1.00E+00 | 0.87 |
| 1.00E+00 | 1    |
| 1.00E+00 | 0.93 |
| 1.00E+00 | 0.91 |
| 1.00E+00 | 0.56 |
| 1.00E+00 | 0.93 |
| 1.00E+00 | 0.9  |
| 1.00E+00 | 0.93 |

|          |      |
|----------|------|
| 1.00E+00 | 0.75 |
| 1.00E+00 | 0.87 |
| 1.00E+00 | 0.82 |
| 1.00E+00 | 0.8  |

|          |      |
|----------|------|
| 1.00E+00 | 0.84 |
| 1.00E+00 | 0.95 |
| 1.00E+00 | 0.87 |
| 1.00E+00 | 0.91 |
| 1.00E+00 | 0.85 |
| 1.00E+00 | 0.65 |
| 1.00E+00 | 0.84 |
| 1.00E+00 | 0.81 |
| 1.00E+00 | 1    |
| 1.00E+00 | 0.89 |
| 1.00E+00 | 0.67 |
| 1.00E+00 | 0.93 |

1.00E+00 0.81

1.00E+00 0.98

1.00E+00 1

1.00E+00 0.82

1.00E+00 0.69

1.00E+00 0.82

1.00E+00 0.94

1.00E+00 0.98

1.00E+00 0.97

1.00E+00 0.98

1.00E+00 0.98

1.00E+00 0.87

1.00E+00 0.93

1.00E+00 0.98

1.00E+00 0.96

1.00E+00 0.94

1.00E+00 0.87

|          |      |
|----------|------|
| 1.00E+00 | 0.97 |
| 1.00E+00 | 1    |

|          |      |
|----------|------|
| 1.00E+00 | 0.96 |
| 1.00E+00 | 1    |

|          |      |
|----------|------|
| 1.00E+00 | 0.66 |
| 1.00E+00 | 0.91 |

|          |      |
|----------|------|
| 1.00E+00 | 0.98 |
|----------|------|

|          |      |
|----------|------|
| 1.00E+00 | 0.82 |
| 1.00E+00 | 0.57 |
| 1.00E+00 | 0.59 |
| 1.00E+00 | 0.93 |
| 1.00E+00 | 0.94 |
| 1.00E+00 | 0.85 |
| 1.00E+00 | 0.84 |
| 1.00E+00 | 0.85 |
| 1.00E+00 | 0.88 |
| 1.00E+00 | 0.54 |
| 1.00E+00 | 0.75 |
| 1.00E+00 | 0.76 |
| 1.00E+00 | 0.7  |
| 1.00E+00 | 0.58 |
| 1.00E+00 | 1    |
| 1.00E+00 | 0.64 |
| 1.00E+00 | 0.65 |
| 1.00E+00 | 0.7  |
| 1.00E+00 | 0.8  |
| 1.00E+00 | 0.9  |
| 1.00E+00 | 0.77 |
| 1.00E+00 | 0.76 |
| 1.00E+00 | 0.71 |
| 1.00E+00 | 0.8  |
| 1.00E+00 | 0.86 |
| 1.00E+00 | 0.88 |
| 1.00E+00 | 0.59 |

|          |      |
|----------|------|
| 1.00E+00 | 0.86 |
| 1.00E+00 | 0.77 |
| 1.00E+00 | 1    |
| 1.00E+00 | 0.58 |
| 1.00E+00 | 1    |
| 1.00E+00 | 0.6  |
| 1.00E+00 | 0.63 |
| 1.00E+00 | 0.81 |

|          |      |
|----------|------|
| 1.00E+00 | 0.87 |
| 1.00E+00 | 0.91 |
| 1.00E+00 | 0.73 |
| 1.00E+00 | 0.6  |
| 1.00E+00 | 0.94 |
| 1.00E+00 | 0.94 |
| 1.00E+00 | 0.95 |
| 1.00E+00 | 0.8  |
| 1.00E+00 | 0.84 |
| 1.00E+00 | 0.92 |
| 1.00E+00 | 0.69 |
| 1.00E+00 | 0.84 |
| 1.00E+00 | 0.88 |
| 1.00E+00 | 0.69 |
| 1.00E+00 | 0.85 |
| 1.00E+00 | 0.84 |

|          |      |
|----------|------|
| 1.00E+00 | 0.93 |
| 1.00E+00 | 0.91 |
| 1.00E+00 | 1    |
| 1.00E+00 | 0.95 |
| 1.00E+00 | 0.93 |
| 1.00E+00 | 0.94 |
| 1.00E+00 | 0.92 |
| 1.00E+00 | 0.92 |
| 1.00E+00 | 0.73 |

|          |      |
|----------|------|
| 1.00E+00 | 0.9  |
| 1.00E+00 | 0.76 |
| 1.00E+00 | 1    |
| 1.00E+00 | 0.97 |
| 1.00E+00 | 0.86 |
| 1.00E+00 | 0.54 |
| 1.00E+00 | 0.76 |
| 1.00E+00 | 0.66 |
| 1.00E+00 | 0.67 |
| 1.00E+00 | 0.83 |

|          |      |
|----------|------|
| 1.00E+00 | 1    |
| 1.00E+00 | 0.94 |
| 1.00E+00 | 1    |
| 1.00E+00 | 1    |
| 1.00E+00 | 0.93 |
| 1.00E+00 | 0.92 |
| 1.00E+00 | 0.94 |
| 1.00E+00 | 0.93 |
| 1.00E+00 | 0.67 |
| 1.00E+00 | 0.74 |
| 1.00E+00 | 0.67 |
| 1.00E+00 | 1    |
| 1.00E+00 | 0.94 |
| 1.00E+00 | 0.8  |
| 1.00E+00 | 0.96 |
| 1.00E+00 | 0.92 |
| 1.00E+00 | 0.93 |
| 1.00E+00 | 0.98 |
| 1.00E+00 | 0.83 |
| 1.00E+00 | 0.94 |
| 1.00E+00 | 0.99 |
| 1.00E+00 | 0.82 |
| 1.00E+00 | 0.91 |
| 1.00E+00 | 0.97 |
| 1.00E+00 | 0.85 |
| 1.00E+00 | 0.89 |
| 1.00E+00 | 0.78 |
| 1.00E+00 | 1    |
| 1.00E+00 | 1    |
| 1.00E+00 | 0.96 |
| 1.00E+00 | 0.94 |
| 1.00E+00 | 0.94 |
| 1.00E+00 | 0.9  |
| 1.00E+00 | 0.92 |
| 1.00E+00 | 0.85 |
| 1.00E+00 | 0.86 |
| 1.00E+00 | 0.87 |
| 1.00E+00 | 0.86 |
| 1.00E+00 | 0.89 |
| 1.00E+00 | 0.92 |
| 1.00E+00 | 0.88 |
| 1.00E+00 | 0.79 |
| 1.00E+00 | 0.93 |
| 1.00E+00 | 0.63 |
| 1.00E+00 | 0.94 |
| 1.00E+00 | 0.71 |

|          |      |
|----------|------|
| 1.00E+00 | 0.77 |
| 1.00E+00 | 0.96 |
| 1.00E+00 | 0.92 |
| 1.00E+00 | 0.93 |
| 1.00E+00 | 0.83 |
| 1.00E+00 | 1    |
| 1.00E+00 | 0.91 |
| 1.00E+00 | 0.94 |
| 1.00E+00 | 0.92 |
| 1.00E+00 | 0.9  |
| 1.00E+00 | 1    |
| 1.00E+00 | 0.73 |
| 1.00E+00 | 0.95 |
| 1.00E+00 | 0.61 |
| 1.00E+00 | 0.93 |
| 1.00E+00 | 0.83 |
| 1.00E+00 | 0.81 |
| 1.00E+00 | 0.91 |
| 1.00E+00 | 1    |
| 1.00E+00 | 0.85 |
| 1.00E+00 | 0.91 |
| 1.00E+00 | 0.82 |
| 1.00E+00 | 0.84 |
| 1.00E+00 | 0.7  |
| 1.00E+00 | 0.85 |
| 1.00E+00 | 0.68 |
| 1.00E+00 | 0.8  |
| 1.00E+00 | 0.81 |
| 1.00E+00 | 0.72 |
| 1.00E+00 | 0.91 |
| 1.00E+00 | 0.59 |
| 1.00E+00 | 0.76 |
| 1.00E+00 | 0.5  |
| 1.00E+00 | 0.79 |
| 1.00E+00 | 0.84 |
| 1.00E+00 | 0.65 |
| 1.00E+00 | 0.61 |
| 1.00E+00 | 0.85 |
| 1.00E+00 | 0.93 |
| 1.00E+00 | 0.88 |
| 1.00E+00 | 0.84 |
| 1.00E+00 | 0.7  |
| 1.00E+00 | 0.86 |
| 1.00E+00 | 0.88 |
| 1.00E+00 | 0.85 |

|          |      |
|----------|------|
| 1.00E+00 | 0.89 |
| 1.00E+00 | 0.72 |
| 1.00E+00 | 0.94 |
| 1.00E+00 | 0.81 |
| 1.00E+00 | 0.78 |
| 1.00E+00 | 0.89 |
| 1.00E+00 | 0.86 |
| 1.00E+00 | 0.88 |

|          |      |
|----------|------|
| 1.00E+00 | 0.73 |
| 1.00E+00 | 1    |
| 1.00E+00 | 0.97 |
| 1.00E+00 | 0.95 |
| 1.00E+00 | 0.95 |
| 1.00E+00 | 0.95 |
| 1.00E+00 | 1    |
| 1.00E+00 | 0.89 |
| 1.00E+00 | 0.96 |
| 1.00E+00 | 0.95 |
| 1.00E+00 | 0.97 |
| 1.00E+00 | 1    |
| 1.00E+00 | 0.81 |
| 1.00E+00 | 1    |
| 1.00E+00 | 0.92 |
| 1.00E+00 | 0.81 |
| 1.00E+00 | 1    |
| 1.00E+00 | 1    |
| 1.00E+00 | 0.79 |
| 1.00E+00 | 0.9  |
| 1.00E+00 | 0.49 |
| 1.00E+00 | 0.74 |
| 1.00E+00 | 1    |
| 1.00E+00 | 0.87 |

|          |      |
|----------|------|
| 1.00E+00 | 0.83 |
| 1.00E+00 | 1    |
| 1.00E+00 | 1    |

|          |      |
|----------|------|
| 1.00E+00 | 0.98 |
|----------|------|

|          |      |
|----------|------|
| 1.00E+00 | 0.82 |
| 1.00E+00 | 1    |
| 1.00E+00 | 1    |

|          |   |
|----------|---|
| 1.00E+00 | 1 |
|----------|---|



|          |      |
|----------|------|
| 1.00E+00 | 1    |
| 1.00E+00 | 0.96 |
| 1.00E+00 | 0.95 |

|          |      |
|----------|------|
| 1.00E+00 | 1    |
| 1.00E+00 | 0.82 |
| 1.00E+00 | 1    |

|          |      |
|----------|------|
| 1.00E+00 | 0.93 |
| 1.00E+00 | 0.94 |
| 1.00E+00 | 0.86 |
| 1.00E+00 | 0.84 |
| 1.00E+00 | 0.9  |
| 1.00E+00 | 0.72 |
| 1.00E+00 | 0.91 |
| 1.00E+00 | 0.92 |

|          |      |
|----------|------|
| 1.00E+00 | 0.96 |
| 1.00E+00 | 0.72 |
| 1.00E+00 | 0.91 |
| 1.00E+00 | 0.8  |
| 1.00E+00 | 0.94 |
| 1.00E+00 | 0.96 |
| 1.00E+00 | 0.92 |

|          |      |
|----------|------|
| 1.00E+00 | 0.77 |
| 1.00E+00 | 1    |
| 1.00E+00 | 0.78 |
| 1.00E+00 | 0.85 |
| 1.00E+00 | 0.83 |

|          |      |
|----------|------|
| 1.00E+00 | 0.63 |
| 1.00E+00 | 0.74 |
| 1.00E+00 | 0.62 |
| 1.00E+00 | 0.77 |

|          |      |
|----------|------|
| 1.00E+00 | 0.94 |
|----------|------|

|          |      |
|----------|------|
| 1.00E+00 | 0.74 |
| 1.00E+00 | 0.9  |
| 1.00E+00 | 1    |
| 1.00E+00 | 0.84 |
| 1.00E+00 | 1    |
| 1.00E+00 | 0.92 |
| 1.00E+00 | 0.93 |
| 1.00E+00 | 0.83 |
| 1.00E+00 | 0.88 |
| 1.00E+00 | 0.88 |
| 1.00E+00 | 0.64 |
| 1.00E+00 | 0.94 |
| 1.00E+00 | 0.72 |

|          |      |
|----------|------|
| 1.00E+00 | 0.72 |
| 1.00E+00 | 0.9  |
| 1.00E+00 | 1    |
| 1.00E+00 | 0.95 |
| 1.00E+00 | 0.95 |

|          |      |
|----------|------|
| 1.00E+00 | 0.7  |
| 1.00E+00 | 0.59 |
| 1.00E+00 | 0.62 |
| 1.00E+00 | 0.78 |
| 1.00E+00 | 0.91 |
| 1.00E+00 | 0.45 |
| 1.00E+00 | 0.96 |
| 1.00E+00 | 0.71 |
| 1.00E+00 | 0.82 |
| 1.00E+00 | 0.5  |
| 1.00E+00 | 0.72 |
| 1.00E+00 | 0.68 |
| 1.00E+00 | 1    |

|          |      |
|----------|------|
| 1.00E+00 | 0.38 |
| 1.00E+00 | 0.81 |
| 1.00E+00 | 0.93 |
| 1.00E+00 | 0.84 |

|          |      |
|----------|------|
| 1.00E+00 | 0.83 |
| 1.00E+00 | 1    |
| 1.00E+00 | 0.7  |
| 1.00E+00 | 1    |
| 1.00E+00 | 0.95 |
| 1.00E+00 | 1    |
| 1.00E+00 | 0.9  |
| 1.00E+00 | 1    |

|          |      |
|----------|------|
| 1.00E+00 | 0.47 |
|----------|------|

|          |      |
|----------|------|
| 1.00E+00 | 0.92 |
| 1.00E+00 | 0.97 |
| 1.00E+00 | 0.71 |
| 1.00E+00 | 0.75 |
| 1.00E+00 | 0.64 |
| 1.00E+00 | 0.58 |
| 1.00E+00 | 0.95 |
| 1.00E+00 | 0.94 |
| 1.00E+00 | 0.7  |
| 1.00E+00 | 0.77 |
| 1.00E+00 | 0.84 |
| 1.00E+00 | 0.64 |
| 1.00E+00 | 0.97 |
| 1.00E+00 | 0.78 |

|          |      |
|----------|------|
| 1.00E+00 | 0.92 |
| 1.00E+00 | 0.73 |
| 1.00E+00 | 1    |
| 1.00E+00 | 1    |
| 1.00E+00 | 0.86 |
| 1.00E+00 | 0.88 |
| 1.00E+00 | 0.93 |
| 1.00E+00 | 0.88 |
| 1.00E+00 | 1    |
| 1.00E+00 | 0.93 |
| 1.00E+00 | 0.91 |
| 1.00E+00 | 0.65 |
| 1.00E+00 | 0.9  |
| 1.00E+00 | 0.96 |
| 1.00E+00 | 0.91 |
| 1.00E+00 | 0.71 |
| 1.00E+00 | 0.82 |

|          |      |
|----------|------|
| 1.00E+00 | 0.78 |
| 1.00E+00 | 0.94 |
| 1.00E+00 | 0.75 |
| 1.00E+00 | 1    |
| 1.00E+00 | 0.89 |
| 1.00E+00 | 0.72 |
| 1.00E+00 | 0.77 |
| 1.00E+00 | 0.96 |
| 1.00E+00 | 0.63 |

|          |      |
|----------|------|
| 1.00E+00 | 0.74 |
|----------|------|

|          |      |
|----------|------|
| 1.00E+00 | 0.77 |
| 1.00E+00 | 0.98 |
| 1.00E+00 | 0.88 |
| 1.00E+00 | 0.92 |
| 1.00E+00 | 0.83 |
| 1.00E+00 | 0.89 |
| 1.00E+00 | 0.79 |
| 1.00E+00 | 0.84 |
| 1.00E+00 | 0.92 |
| 1.00E+00 | 0.94 |
| 1.00E+00 | 0.95 |
| 1.00E+00 | 0.94 |
| 1.00E+00 | 1    |
| 1.00E+00 | 0.74 |
| 1.00E+00 | 0.78 |
| 1.00E+00 | 0.66 |
| 1.00E+00 | 0.87 |

|          |      |
|----------|------|
| 1.00E+00 | 0.92 |
| 1.00E+00 | 0.91 |

|          |      |
|----------|------|
| 1.00E+00 | 0.75 |
|----------|------|

|          |      |
|----------|------|
| 1.00E+00 | 0.63 |
| 1.00E+00 | 0.83 |
| 1.00E+00 | 0.89 |
| 1.00E+00 | 0    |
| 1.00E+00 | 0.71 |
| 1.00E+00 | 0.65 |

|          |      |
|----------|------|
| 1.00E+00 | 0.94 |
| 1.00E+00 | 0.44 |
| 1.00E+00 | 0.5  |
| 1.00E+00 | 0.69 |
| 1.00E+00 | 0.89 |

|          |      |
|----------|------|
| 1.00E+00 | 0.44 |
| 1.00E+00 | 1    |
| 1.00E+00 | 0.44 |
| 1.00E+00 | 0.9  |
| 1.00E+00 | 0.47 |
| 1.00E+00 | 0.51 |
| 1.00E+00 | 1    |
| 1.00E+00 | 0.63 |
| 1.00E+00 | 0.69 |
| 1.00E+00 | 0.97 |
| 1.00E+00 | 0.49 |
| 1.00E+00 | 0.77 |
| 1.00E+00 | 0.78 |
| 1.00E+00 | 0.97 |
| 1.00E+00 | 0.92 |
| 1.00E+00 | 0.92 |
| 1.00E+00 | 0.95 |
| 1.00E+00 | 0.85 |
| 1.00E+00 | 0.92 |
| 1.00E+00 | 0.93 |
| 1.00E+00 | 0.61 |
| 1.00E+00 | 1    |
| 1.00E+00 | 0.91 |
| 1.00E+00 | 0.93 |
| 1.00E+00 | 0.71 |
| 1.00E+00 | 0.41 |
| 1.00E+00 | 1    |
| 1.00E+00 | 0.92 |
| 1.00E+00 | 0.7  |
| 1.00E+00 | 1    |
| 1.00E+00 | 0.73 |
| 1.00E+00 | 0.45 |
| 1.00E+00 | 0.72 |
| 1.00E+00 | 0.91 |
| 1.00E+00 | 0.84 |
| 1.00E+00 | 0.95 |
| 1.00E+00 | 0.87 |
| 1.00E+00 | 0.62 |
| 1.00E+00 | 0.81 |
| 1.00E+00 | 0.94 |
| 1.00E+00 | 0.85 |
| 1.00E+00 | 0.77 |
| 1.00E+00 | 0.89 |
| 1.00E+00 | 0.9  |
| 1.00E+00 | 0.83 |
| 1.00E+00 | 0.8  |
| 1.00E+00 | 0.67 |
| 1.00E+00 | 1    |
| 1.00E+00 | 0.91 |
| 1.00E+00 | 0.84 |

|          |      |
|----------|------|
| 1.00E+00 | 0.64 |
| 1.00E+00 | 0.61 |
| 1.00E+00 | 0.82 |
| 1.00E+00 | 0.84 |
| 1.00E+00 | 0.7  |
| 1.00E+00 | 0.96 |
| 1.00E+00 | 0.95 |
| 1.00E+00 | 0.79 |
| 1.00E+00 | 1    |
| 1.00E+00 | 0.97 |
| 1.00E+00 | 1    |

|          |      |
|----------|------|
| 1.00E+00 | 1    |
| 1.00E+00 | 0.93 |
| 1.00E+00 | 0.73 |
| 1.00E+00 | 0    |
| 1.00E+00 | 1    |

|          |      |
|----------|------|
| 1.00E+00 | 0.96 |
| 1.00E+00 | 0.81 |
| 1.00E+00 | 1    |
| 1.00E+00 | 0.96 |
| 1.00E+00 | 0.93 |
| 1.00E+00 | 0.89 |
| 1.00E+00 | 0.98 |
| 1.00E+00 | 0.97 |
| 1.00E+00 | 0.95 |
| 1.00E+00 | 0.52 |
| 1.00E+00 | 0.94 |
| 1.00E+00 | 0.93 |
| 1.00E+00 | 0.72 |
| 1.00E+00 | 0.8  |
| 1.00E+00 | 0.67 |

|          |      |
|----------|------|
| 1.00E+00 | 0.73 |
| 1.00E+00 | 0.32 |
| 1.00E+00 | 0.91 |

|          |      |
|----------|------|
| 1.00E+00 | 0.87 |
| 1.00E+00 | 0.85 |
| 1.00E+00 | 0.85 |
| 1.00E+00 | 0.71 |
| 1.00E+00 | 0.91 |
| 1.00E+00 | 0.59 |
| 1.00E+00 | 1    |
| 1.00E+00 | 0.77 |
| 1.00E+00 | 0.9  |
| 1.00E+00 | 0.95 |
| 1.00E+00 | 0.78 |
| 1.00E+00 | 0.82 |
| 1.00E+00 | 0.33 |
| 1.00E+00 | 0.85 |
| 1.00E+00 | 0.54 |
| 1.00E+00 | 0.95 |
| 1.00E+00 | 0.97 |
| 1.00E+00 | 0.75 |
| 1.00E+00 | 0.43 |
| 1.00E+00 | 0.73 |

|          |      |
|----------|------|
| 1.00E+00 | 0.81 |
| 1.00E+00 | 0.91 |

|          |      |
|----------|------|
| 1.00E+00 | 0    |
| 1.00E+00 | 1    |
| 1.00E+00 | 1    |
| 1.00E+00 | 0.86 |
| 1.00E+00 | 0.93 |
| 1.00E+00 | 0.88 |
| 1.00E+00 | 1    |
| 1.00E+00 | 0.92 |
| 1.00E+00 | 0.64 |
| 1.00E+00 | 0.51 |
| 1.00E+00 | 1    |
| 1.00E+00 | 0.94 |
| 1.00E+00 | 0.79 |
| 1.00E+00 | 0.64 |

|          |      |
|----------|------|
| 1.00E+00 | 0.94 |
| 1.00E+00 | 0.61 |
| 1.00E+00 | 0.94 |
| 1.00E+00 | 1    |

|          |      |
|----------|------|
| 1.00E+00 | 0.89 |
| 1.00E+00 | 0.82 |
| 1.00E+00 | 1    |
| 1.00E+00 | 0.65 |
| 1.00E+00 | 0.65 |
| 1.00E+00 | 1    |
| 1.00E+00 | 0.77 |
| 1.00E+00 | 0.6  |
| 1.00E+00 | 0.82 |
| 1.00E+00 | 0.95 |
| 1.00E+00 | 0.62 |
| 1.00E+00 | 0.95 |
| 1.00E+00 | 0.68 |
| 1.00E+00 | 0.89 |
| 1.00E+00 | 0.63 |
| 1.00E+00 | 0.67 |
| 1.00E+00 | 0.7  |
| 1.00E+00 | 0.43 |
| 1.00E+00 | 0.96 |
| 1.00E+00 | 0.86 |
| 1.00E+00 | 0.74 |
| 1.00E+00 | 0.86 |
| 1.00E+00 | 0.83 |
| 1.00E+00 | 0.4  |
| 1.00E+00 | 0.98 |
| 1.00E+00 | 0.96 |
| 1.00E+00 | 0.87 |
| 1.00E+00 | 1    |
| 1.00E+00 | 1    |
| 1.00E+00 | 1    |
| 1.00E+00 | 1    |
| 1.00E+00 | 0.93 |
| 1.00E+00 | 0.93 |
| 1.00E+00 | 1    |
| 1.00E+00 | 0.92 |
| 1.00E+00 | 0.89 |
| 1.00E+00 | 1    |
| 1.00E+00 | 0.72 |
| 1.00E+00 | 1    |
| 1.00E+00 | 0.86 |
| 1.00E+00 | 0.94 |
| 1.00E+00 | 0.83 |
| 1.00E+00 | 0.82 |
| 1.00E+00 | 0.9  |



|          |      |
|----------|------|
| 1.00E+00 | 0.82 |
| 1.00E+00 | 0.84 |
| 1.00E+00 | 0.79 |
| 1.00E+00 | 0.95 |
| 1.00E+00 | 0.85 |
| 1.00E+00 | 0.95 |
| 1.00E+00 | 1    |
| 1.00E+00 | 0.58 |
| 1.00E+00 | 0.79 |
| 1.00E+00 | 0.94 |
| 1.00E+00 | 0.9  |
| 1.00E+00 | 0.74 |
| 1.00E+00 | 0.76 |

|          |      |
|----------|------|
| 1.00E+00 | 0.86 |
| 1.00E+00 | 0.82 |

|          |      |
|----------|------|
| 1.00E+00 | 1    |
| 1.00E+00 | 0.59 |
| 1.00E+00 | 0.83 |
| 1.00E+00 | 0.63 |
| 1.00E+00 | 0.93 |
| 1.00E+00 | 1    |

|          |      |
|----------|------|
| 1.00E+00 | 0.54 |
|----------|------|

|          |      |
|----------|------|
| 1.00E+00 | 0.77 |
| 1.00E+00 | 1    |
| 1.00E+00 | 0.97 |
| 1.00E+00 | 0.79 |
| 1.00E+00 | 0.81 |
| 1.00E+00 | 0    |

|          |      |
|----------|------|
| 1.00E+00 | 0.53 |
| 1.00E+00 | 0.92 |
| 1.00E+00 | 1    |
| 1.00E+00 | 0.64 |
| 1.00E+00 | 0.91 |
| 1.00E+00 | 0.87 |
| 1.00E+00 | 0.91 |

|          |     |
|----------|-----|
| 1.00E+00 | 0.9 |
|----------|-----|

|          |      |
|----------|------|
| 1.00E+00 | 0.84 |
| 1.00E+00 | 0.84 |
| 1.00E+00 | 0.91 |
| 1.00E+00 | 0.54 |
| 1.00E+00 | 0.8  |

|          |      |
|----------|------|
| 1.00E+00 | 0.84 |
| 1.00E+00 | 0.88 |
| 1.00E+00 | 0.67 |
| 1.00E+00 | 0.62 |
| 1.00E+00 | 0    |

|          |      |
|----------|------|
| 1.00E+00 | 0.91 |
| 1.00E+00 | 0.76 |
| 1.00E+00 | 0.92 |
| 1.00E+00 | 1    |
| 1.00E+00 | 0.89 |
| 1.00E+00 | 0.92 |
| 1.00E+00 | 0.62 |
| 1.00E+00 | 0.86 |
| 1.00E+00 | 1    |
| 1.00E+00 | 0.5  |

|          |      |
|----------|------|
| 1.00E+00 | 0.92 |
| 1.00E+00 | 0.61 |
| 1.00E+00 | 0.51 |
| 1.00E+00 | 0.88 |
| 1.00E+00 | 0.85 |
| 1.00E+00 | 1    |

|          |      |
|----------|------|
| 1.00E+00 | 0.75 |
| 1.00E+00 | 0.9  |
| 1.00E+00 | 1    |
| 1.00E+00 | 0.57 |
| 1.00E+00 | 0.73 |
| 1.00E+00 | 1    |
| 1.00E+00 | 1    |

|          |      |
|----------|------|
| 1.00E+00 | 0.95 |
| 1.00E+00 | 0.91 |
| 1.00E+00 | 1    |
| 1.00E+00 | 0.73 |
| 1.00E+00 | 1    |
| 1.00E+00 | 1    |
| 1.00E+00 | 1    |
| 1.00E+00 | 0.93 |
| 1.00E+00 | 0.88 |
| 1.00E+00 | 1    |
| 1.00E+00 | 0.74 |
| 1.00E+00 | 1    |

|          |      |
|----------|------|
| 1.00E+00 | 0.91 |
| 1.00E+00 | 0.94 |

|          |      |
|----------|------|
| 1.00E+00 | 0.86 |
|----------|------|

|          |      |
|----------|------|
| 1.00E+00 | 0.95 |
| 1.00E+00 | 0.06 |

|          |      |
|----------|------|
| 1.00E+00 | 0.42 |
| 1.00E+00 | 0.68 |
| 1.00E+00 | 0.71 |
| 1.00E+00 | 0.41 |
| 1.00E+00 | 0.75 |
| 1.00E+00 | 0.54 |
| 1.00E+00 | 0.64 |
| 1.00E+00 | 0.58 |
| 1.00E+00 | 0.54 |
| 1.00E+00 | 0.87 |
| 1.00E+00 | 1    |

|          |      |
|----------|------|
| 1.00E+00 | 0.93 |
| 1.00E+00 | 0.66 |

|          |      |
|----------|------|
| 1.00E+00 | 0.47 |
| 1.00E+00 | 0.94 |
| 1.00E+00 | 0.84 |
| 1.00E+00 | 1    |

|          |      |
|----------|------|
| 1.00E+00 | 0.74 |
| 1.00E+00 | 0.81 |
| 1.00E+00 | 1    |
| 1.00E+00 | 0.93 |
| 1.00E+00 | 0.82 |
| 1.00E+00 | 0.57 |
| 1.00E+00 | 0.89 |
| 1.00E+00 | 0.98 |
| 1.00E+00 | 0.82 |

|          |      |
|----------|------|
| 1.00E+00 | 0.93 |
| 1.00E+00 | 0.89 |
| 1.00E+00 | 1    |

|          |      |
|----------|------|
| 1.00E+00 | 1    |
| 1.00E+00 | 0.84 |
| 1.00E+00 | 1    |

|          |      |
|----------|------|
| 1.00E+00 | 0.6  |
| 1.00E+00 | 0.92 |
| 1.00E+00 | 0.49 |
| 1.00E+00 | 0.85 |
| 1.00E+00 | 0.92 |
| 1.00E+00 | 0.97 |
| 1.00E+00 | 0.8  |
| 1.00E+00 | 0.84 |

|          |      |
|----------|------|
| 1.00E+00 | 0.7  |
| 1.00E+00 | 0.93 |
| 1.00E+00 | 0.66 |
| 1.00E+00 | 0.82 |
| 1.00E+00 | 0.82 |
| 1.00E+00 | 0.63 |

|          |      |
|----------|------|
| 1.00E+00 | 0.87 |
|----------|------|

|          |      |
|----------|------|
| 1.00E+00 | 0.88 |
| 1.00E+00 | 0.97 |
| 1.00E+00 | 0.76 |
| 1.00E+00 | 0.64 |
| 1.00E+00 | 1    |

|          |      |
|----------|------|
| 1.00E+00 | 0.98 |
| 1.00E+00 | 0.93 |
| 1.00E+00 | 0.7  |

|          |      |
|----------|------|
| 1.00E+00 | 0.94 |
| 1.00E+00 | 0.74 |
| 1.00E+00 | 1    |
| 1.00E+00 | 0.53 |
| 1.00E+00 | 1    |

|          |      |
|----------|------|
| 1.00E+00 | 0.86 |
| 1.00E+00 | 0.94 |
| 1.00E+00 | 0.89 |
| 1.00E+00 | 0.9  |

|          |      |
|----------|------|
| 1.00E+00 | 0.9  |
| 1.00E+00 | 0.76 |
| 1.00E+00 | 1    |
| 1.00E+00 | 0.9  |
| 1.00E+00 | 0.89 |
| 1.00E+00 | 1    |

|          |      |
|----------|------|
| 1.00E+00 | 0.66 |
| 1.00E+00 | 0.93 |
| 1.00E+00 | 0.93 |
| 1.00E+00 | 0.91 |
| 1.00E+00 | 0.95 |
| 1.00E+00 | 0.92 |
| 1.00E+00 | 1    |

|          |   |
|----------|---|
| 1.00E+00 | 1 |
| 1.00E+00 | 1 |
| 1.00E+00 | 1 |

|          |      |
|----------|------|
| 1.00E+00 | 0.77 |
| 1.00E+00 | 0.73 |
| 1.00E+00 | 0.87 |
| 1.00E+00 | 0.81 |
| 1.00E+00 | 0.75 |
| 1.00E+00 | 1    |
| 1.00E+00 | 0.77 |
| 1.00E+00 | 0.94 |
| 1.00E+00 | 0.88 |
| 1.00E+00 | 0.89 |
| 1.00E+00 | 0.7  |
| 1.00E+00 | 0.93 |
| 1.00E+00 | 0.92 |
| 1.00E+00 | 0.87 |
| 1.00E+00 | 0.82 |
| 1.00E+00 | 1    |
| 1.00E+00 | 0.93 |
| 1.00E+00 | 0.95 |
| 1.00E+00 | 0.96 |
| 1.00E+00 | 0.59 |
| 1.00E+00 | 0.88 |
| 1.00E+00 | 0.82 |
| 1.00E+00 | 0.84 |
| 1.00E+00 | 0.77 |
| 1.00E+00 | 0.81 |
| 1.00E+00 | 1    |
| 1.00E+00 | 1    |
| 1.00E+00 | 0.86 |
| 1.00E+00 | 0.96 |
| 1.00E+00 | 1    |
| 1.00E+00 | 0.86 |
| 1.00E+00 | 0.72 |
| 1.00E+00 | 0.8  |
| 1.00E+00 | 1    |
| 1.00E+00 | 0.62 |
| 1.00E+00 | 0.89 |
| 1.00E+00 | 0.62 |
| 1.00E+00 | 0.94 |
| 1.00E+00 | 0.77 |
| 1.00E+00 | 1    |
| 1.00E+00 | 0.63 |
| 1.00E+00 | 0.83 |
| 1.00E+00 | 0.52 |
| 1.00E+00 | 0.65 |
| 1.00E+00 | 0.91 |
| 1.00E+00 | 0.88 |

|          |      |
|----------|------|
| 1.00E+00 | 0.92 |
| 1.00E+00 | 1    |
| 1.00E+00 | 0.68 |
| 1.00E+00 | 0.7  |
| 1.00E+00 | 0.75 |

|          |   |
|----------|---|
| 1.00E+00 | 1 |
|----------|---|

|          |      |
|----------|------|
| 1.00E+00 | 0.75 |
|----------|------|

|          |      |
|----------|------|
| 1.00E+00 | 0.93 |
|----------|------|

|          |     |
|----------|-----|
| 1.00E+00 | 0.7 |
|----------|-----|

|          |      |
|----------|------|
| 1.00E+00 | 0.89 |
|----------|------|

|          |      |
|----------|------|
| 1.00E+00 | 0.89 |
|----------|------|

|          |   |
|----------|---|
| 1.00E+00 | 1 |
|----------|---|

|          |      |
|----------|------|
| 1.00E+00 | 0.95 |
|----------|------|

|          |      |
|----------|------|
| 1.00E+00 | 0.59 |
|----------|------|

|          |      |
|----------|------|
| 1.00E+00 | 0.74 |
|----------|------|

|          |      |
|----------|------|
| 1.00E+00 | 0.74 |
|----------|------|

|          |      |
|----------|------|
| 1.00E+00 | 0.89 |
|----------|------|

|          |      |
|----------|------|
| 1.00E+00 | 0.82 |
|----------|------|

|          |      |
|----------|------|
| 1.00E+00 | 0.98 |
|----------|------|

|          |      |
|----------|------|
| 1.00E+00 | 0.78 |
|----------|------|

|          |      |
|----------|------|
| 1.00E+00 | 0.74 |
|----------|------|

|          |      |
|----------|------|
| 1.00E+00 | 0.94 |
|----------|------|

|          |      |
|----------|------|
| 1.00E+00 | 0.89 |
|----------|------|

|          |      |
|----------|------|
| 1.00E+00 | 0.92 |
|----------|------|

|          |      |
|----------|------|
| 1.00E+00 | 0.57 |
|----------|------|

|          |      |
|----------|------|
| 1.00E+00 | 0.94 |
|----------|------|

|          |      |
|----------|------|
| 1.00E+00 | 0.47 |
|----------|------|

|          |      |
|----------|------|
| 1.00E+00 | 0.63 |
|----------|------|

|          |      |
|----------|------|
| 1.00E+00 | 0.81 |
|----------|------|

|          |   |
|----------|---|
| 1.00E+00 | 1 |
|----------|---|

|          |      |
|----------|------|
| 1.00E+00 | 0.95 |
|----------|------|

|          |      |
|----------|------|
| 1.00E+00 | 0.74 |
|----------|------|

|          |      |
|----------|------|
| 1.00E+00 | 0.74 |
| 1.00E+00 | 0.75 |
| 1.00E+00 | 0.66 |
| 1.00E+00 | 0.83 |

|          |      |
|----------|------|
| 1.00E+00 | 0.82 |
| 1.00E+00 | 0.68 |
| 1.00E+00 | 0.93 |
| 1.00E+00 | 0.46 |
| 1.00E+00 | 0.84 |
| 1.00E+00 | 0.76 |
| 1.00E+00 | 0.89 |

|          |      |
|----------|------|
| 1.00E+00 | 0.98 |
| 1.00E+00 | 0.94 |
| 1.00E+00 | 0.89 |
| 1.00E+00 | 0.76 |
| 1.00E+00 | 0.9  |
| 1.00E+00 | 0.72 |

|          |      |
|----------|------|
| 1.00E+00 | 0.8  |
| 1.00E+00 | 0.83 |
| 1.00E+00 | 0.79 |
| 1.00E+00 | 0.78 |
| 1.00E+00 | 0.97 |
| 1.00E+00 | 0.72 |

|          |      |
|----------|------|
| 1.00E+00 | 0.79 |
| 1.00E+00 | 1    |
| 1.00E+00 | 0.91 |
| 1.00E+00 | 0.63 |

|          |      |
|----------|------|
| 1.00E+00 | 0.93 |
| 1.00E+00 | 1    |
| 1.00E+00 | 0.92 |
| 1.00E+00 | 0.94 |
| 1.00E+00 | 0.93 |
| 1.00E+00 | 0.91 |
| 1.00E+00 | 0.88 |
| 1.00E+00 | 0.93 |
| 1.00E+00 | 1    |
| 1.00E+00 | 1    |
| 1.00E+00 | 0.87 |

|          |      |
|----------|------|
| 1.00E+00 | 0.93 |
|----------|------|

|          |      |
|----------|------|
| 1.00E+00 | 0.92 |
|----------|------|

|          |      |
|----------|------|
| 1.00E+00 | 1    |
| 1.00E+00 | 0.8  |
| 1.00E+00 | 0.76 |
| 1.00E+00 | 0.75 |

|          |      |
|----------|------|
| 1.00E+00 | 0.92 |
| 1.00E+00 | 0.72 |
| 1.00E+00 | 0.94 |
| 1.00E+00 | 0.6  |

|          |      |
|----------|------|
| 1.00E+00 | 0.96 |
|----------|------|

|          |      |
|----------|------|
| 1.00E+00 | 0.89 |
| 1.00E+00 | 1    |
| 1.00E+00 | 1    |
| 1.00E+00 | 0.9  |
| 1.00E+00 | 0.96 |
| 1.00E+00 | 0.93 |
| 1.00E+00 | 0.86 |
| 1.00E+00 | 0.92 |
| 1.00E+00 | 0.83 |
| 1.00E+00 | 1    |
| 1.00E+00 | 0.81 |
| 1.00E+00 | 0.69 |
| 1.00E+00 | 1    |
| 1.00E+00 | 1    |
| 1.00E+00 | 0.79 |

|          |      |
|----------|------|
| 1.00E+00 | 0.79 |
|----------|------|

|          |      |
|----------|------|
| 1.00E+00 | 0.57 |
| 1.00E+00 | 0.88 |
| 1.00E+00 | 0.62 |
| 1.00E+00 | 0.88 |

|          |      |
|----------|------|
| 1.00E+00 | 0.82 |
| 1.00E+00 | 0.92 |
| 1.00E+00 | 0.85 |
| 1.00E+00 | 1    |
| 1.00E+00 | 0.83 |
| 1.00E+00 | 0.9  |
| 1.00E+00 | 0.92 |
| 1.00E+00 | 0.92 |
| 1.00E+00 | 0.78 |
| 1.00E+00 | 0.66 |



|          |      |
|----------|------|
| 1.00E+00 | 0.83 |
| 1.00E+00 | 0.91 |
| 1.00E+00 | 1    |
| 1.00E+00 | 0.94 |
| 1.00E+00 | 0.89 |
| 1.00E+00 | 0.52 |
| 1.00E+00 | 0.9  |
| 1.00E+00 | 0.86 |
| 1.00E+00 | 0.95 |
| 1.00E+00 | 0.89 |
| 1.00E+00 | 0.82 |
| 1.00E+00 | 0.97 |
| 1.00E+00 | 1    |
| 1.00E+00 | 0.94 |
| 1.00E+00 | 1    |
| 1.00E+00 | 0.7  |
| 1.00E+00 | 0.93 |
| 1.00E+00 | 0.75 |
| 1.00E+00 | 1    |
| 1.00E+00 | 0.88 |
| 1.00E+00 | 0.59 |
| 1.00E+00 | 0.74 |
| 1.00E+00 | 1    |
| 1.00E+00 | 1    |
| 1.00E+00 | 0.73 |
| 1.00E+00 | 0.9  |
| 1.00E+00 | 1    |
| 1.00E+00 | 0.92 |
| 1.00E+00 | 0.94 |
| 1.00E+00 | 0.9  |
| 1.00E+00 | 0.91 |
| 1.00E+00 | 0.81 |
| 1.00E+00 | 0.9  |
| 1.00E+00 | 0.94 |
| 1.00E+00 | 0.76 |
| 1.00E+00 | 0.76 |
| 1.00E+00 | 0.64 |
| 1.00E+00 | 1    |
| 1.00E+00 | 0.98 |
| 1.00E+00 | 0.86 |
| 1.00E+00 | 0.94 |
| 1.00E+00 | 0.7  |
| 1.00E+00 | 0.92 |
| 1.00E+00 | 0.86 |
| 1.00E+00 | 0.66 |
| 1.00E+00 | 1    |

|          |      |
|----------|------|
| 1.00E+00 | 0.86 |
| 1.00E+00 | 0.55 |
| 1.00E+00 | 0.97 |

|          |      |
|----------|------|
| 1.00E+00 | 0.76 |
| 1.00E+00 | 0.88 |
| 1.00E+00 | 0.89 |
| 1.00E+00 | 0.71 |
| 1.00E+00 | 0.88 |
| 1.00E+00 | 0.89 |

|          |      |
|----------|------|
| 1.00E+00 | 0.72 |
| 1.00E+00 | 0.94 |
| 1.00E+00 | 1    |
| 1.00E+00 | 0.46 |
| 1.00E+00 | 0.64 |
| 1.00E+00 | 0.95 |

|          |      |
|----------|------|
| 1.00E+00 | 0.93 |
| 1.00E+00 | 0.92 |
| 1.00E+00 | 0.78 |
| 1.00E+00 | 0.76 |
| 1.00E+00 | 0.89 |
| 1.00E+00 | 0.88 |
| 1.00E+00 | 0.69 |
| 1.00E+00 | 0.75 |
| 1.00E+00 | 0.8  |
| 1.00E+00 | 0.78 |
| 1.00E+00 | 0.95 |
| 1.00E+00 | 0.71 |
| 1.00E+00 | 0.95 |
| 1.00E+00 | 0.81 |
| 1.00E+00 | 0.96 |
| 1.00E+00 | 0.73 |

|          |      |
|----------|------|
| 1.00E+00 | 0.94 |
| 1.00E+00 | 0.53 |
| 1.00E+00 | 0.54 |
| 1.00E+00 | 0.8  |
| 1.00E+00 | 0.67 |
| 1.00E+00 | 0.91 |
| 1.00E+00 | 1    |
| 1.00E+00 | 1    |
| 1.00E+00 | 0.85 |
| 1.00E+00 | 0.61 |
| 1.00E+00 | 0.95 |

|          |      |
|----------|------|
| 1.00E+00 | 0.92 |
|----------|------|

|          |      |
|----------|------|
| 1.00E+00 | 0.95 |
| 1.00E+00 | 0.89 |
| 1.00E+00 | 0.71 |
| 1.00E+00 | 0.8  |
| 1.00E+00 | 1    |

|          |      |
|----------|------|
| 1.00E+00 | 0.9  |
| 1.00E+00 | 0.93 |
| 1.00E+00 | 0.89 |
| 1.00E+00 | 0.95 |

|          |      |
|----------|------|
| 1.00E+00 | 0.8  |
| 1.00E+00 | 0.9  |
| 1.00E+00 | 0.58 |
| 1.00E+00 | 0.77 |

|          |      |
|----------|------|
| 1.00E+00 | 0.76 |
| 1.00E+00 | 0.77 |
| 1.00E+00 | 0.96 |

|          |      |
|----------|------|
| 1.00E+00 | 0.78 |
|----------|------|

|          |      |
|----------|------|
| 1.00E+00 | 0.73 |
| 1.00E+00 | 0.82 |
| 1.00E+00 | 0.48 |
| 1.00E+00 | 0.96 |
| 1.00E+00 | 0.94 |

|          |      |
|----------|------|
| 1.00E+00 | 1    |
| 1.00E+00 | 0.68 |
| 1.00E+00 | 0.72 |
| 1.00E+00 | 1    |
| 1.00E+00 | 1    |
| 1.00E+00 | 0.69 |
| 1.00E+00 | 0.91 |
| 1.00E+00 | 0.84 |
| 1.00E+00 | 0.89 |

|          |      |
|----------|------|
| 1.00E+00 | 0.89 |
| 1.00E+00 | 0.95 |
| 1.00E+00 | 0.61 |
| 1.00E+00 | 0.84 |
| 1.00E+00 | 1    |
| 1.00E+00 | 0.68 |
| 1.00E+00 | 0.89 |
| 1.00E+00 | 0.61 |

|          |      |
|----------|------|
| 1.00E+00 | 0.82 |
| 1.00E+00 | 0.62 |
| 1.00E+00 | 1    |
| 1.00E+00 | 0.65 |
| 1.00E+00 | 0.88 |
| 1.00E+00 | 0.74 |
| 1.00E+00 | 1    |
| 1.00E+00 | 1    |
| 1.00E+00 | 0.57 |
| 1.00E+00 | 0.93 |

|          |      |
|----------|------|
| 1.00E+00 | 0.96 |
| 1.00E+00 | 1    |
| 1.00E+00 | 0.93 |
| 1.00E+00 | 0.83 |
| 1.00E+00 | 0.62 |

|          |      |
|----------|------|
| 1.00E+00 | 0.78 |
| 1.00E+00 | 0.51 |
| 1.00E+00 | 1    |
| 1.00E+00 | 0.95 |
| 1.00E+00 | 0.88 |
| 1.00E+00 | 0.8  |

|          |      |
|----------|------|
| 1.00E+00 | 0.85 |
| 1.00E+00 | 0.98 |

|          |      |
|----------|------|
| 1.00E+00 | 0.51 |
|----------|------|

|          |      |
|----------|------|
| 1.00E+00 | 0.92 |
|----------|------|

|          |      |
|----------|------|
| 1.00E+00 | 0.53 |
|----------|------|

|          |      |
|----------|------|
| 1.00E+00 | 0.91 |
|----------|------|

|          |      |
|----------|------|
| 1.00E+00 | 0.88 |
| 1.00E+00 | 0.86 |
| 1.00E+00 | 0.74 |
| 1.00E+00 | 0.94 |
| 1.00E+00 | 0.73 |
| 1.00E+00 | 1    |

|          |      |
|----------|------|
| 1.00E+00 | 0.9  |
| 1.00E+00 | 0.68 |

|          |      |
|----------|------|
| 1.00E+00 | 0.81 |
| 1.00E+00 | 0.81 |
| 1.00E+00 | 1    |
| 1.00E+00 | 0.88 |
| 1.00E+00 | 1    |
| 1.00E+00 | 0.95 |
| 1.00E+00 | 0.81 |
| 1.00E+00 | 0.94 |

|          |      |
|----------|------|
| 1.00E+00 | 0.96 |
| 1.00E+00 | 1    |
| 1.00E+00 | 0.68 |
| 1.00E+00 | 1    |
| 1.00E+00 | 0.55 |
| 1.00E+00 | 1    |
| 1.00E+00 | 0.9  |
| 1.00E+00 | 0.87 |
| 1.00E+00 | 1    |
| 1.00E+00 | 0.96 |

|          |      |
|----------|------|
| 1.00E+00 | 0.71 |
| 1.00E+00 | 0.95 |
| 1.00E+00 | 0.87 |
| 1.00E+00 | 0.88 |
| 1.00E+00 | 0.88 |
| 1.00E+00 | 1    |
| 1.00E+00 | 0.78 |
| 1.00E+00 | 0.71 |

|          |      |
|----------|------|
| 1.00E+00 | 0.93 |
| 1.00E+00 | 0.58 |

|          |      |
|----------|------|
| 1.00E+00 | 0.79 |
| 1.00E+00 | 0.71 |
| 1.00E+00 | 0.75 |
| 1.00E+00 | 0.83 |
| 1.00E+00 | 1    |
| 1.00E+00 | 0.95 |
| 1.00E+00 | 0.79 |

|          |      |
|----------|------|
| 1.00E+00 | 0.75 |
| 1.00E+00 | 0.86 |
| 1.00E+00 | 1    |
| 1.00E+00 | 0.96 |
| 1.00E+00 | 0.93 |
| 1.00E+00 | 0.54 |
| 1.00E+00 | 0.79 |
| 1.00E+00 | 1    |

|          |      |
|----------|------|
| 1.00E+00 | 0.63 |
| 1.00E+00 | 1    |
| 1.00E+00 | 0.51 |
| 1.00E+00 | 0.76 |
| 1.00E+00 | 0.6  |
| 1.00E+00 | 0.93 |
| 1.00E+00 | 0.8  |
| 1.00E+00 | 0.6  |
| 1.00E+00 | 0.65 |

|          |      |
|----------|------|
| 1.00E+00 | 0.92 |
|----------|------|

|          |      |
|----------|------|
| 1.00E+00 | 0.61 |
| 1.00E+00 | 0.91 |
| 1.00E+00 | 0.91 |
| 1.00E+00 | 0.63 |
| 1.00E+00 | 0.79 |
| 1.00E+00 | 0.72 |
| 1.00E+00 | 0.86 |
| 1.00E+00 | 0.87 |
| 1.00E+00 | 0.65 |
| 1.00E+00 | 0.95 |
| 1.00E+00 | 0.83 |
| 1.00E+00 | 1    |
| 1.00E+00 | 0.56 |
| 1.00E+00 | 0.64 |
| 1.00E+00 | 0.77 |
| 1.00E+00 | 0.75 |

|          |   |
|----------|---|
| 1.00E+00 | 1 |
|----------|---|

|          |      |
|----------|------|
| 1.00E+00 | 0.89 |
| 1.00E+00 | 0.93 |
| 1.00E+00 | 0.89 |

|          |      |
|----------|------|
| 1.00E+00 | 0.89 |
| 1.00E+00 | 0.86 |
| 1.00E+00 | 1    |
| 1.00E+00 | 0.94 |
| 1.00E+00 | 0.92 |
| 1.00E+00 | 0.67 |
| 1.00E+00 | 0.79 |
| 1.00E+00 | 0.97 |
| 1.00E+00 | 0.67 |
| 1.00E+00 | 0.92 |
| 1.00E+00 | 0.75 |
| 1.00E+00 | 1    |
| 1.00E+00 | 1    |
| 1.00E+00 | 1    |
| 1.00E+00 | 0.96 |
| 1.00E+00 | 0.9  |
| 1.00E+00 | 0.84 |
| 1.00E+00 | 0.9  |
| 1.00E+00 | 0.81 |
| 1.00E+00 | 0.47 |
| 1.00E+00 | 0.7  |
| 1.00E+00 | 0.91 |
| 1.00E+00 | 0.74 |
| 1.00E+00 | 0.87 |
| 1.00E+00 | 0.89 |
| 1.00E+00 | 0.74 |
| 1.00E+00 | 0.96 |
| 1.00E+00 | 1    |
| 1.00E+00 | 0.8  |
| 1.00E+00 | 0.77 |
| 1.00E+00 | 1    |
| 1.00E+00 | 0.94 |
| 1.00E+00 | 0.58 |
| 1.00E+00 | 0.93 |
| 1.00E+00 | 0.93 |
| 1.00E+00 | 0.76 |
| 1.00E+00 | 0.59 |
| 1.00E+00 | 0.87 |
| 1.00E+00 | 0.92 |
| 1.00E+00 | 1    |
| 1.00E+00 | 0.95 |
| 1.00E+00 | 0.95 |
| 1.00E+00 | 1    |
| 1.00E+00 | 0.74 |

|          |      |
|----------|------|
| 1.00E+00 | 0.84 |
| 1.00E+00 | 0.84 |
| 1.00E+00 | 0.83 |
| 1.00E+00 | 1    |
| 1.00E+00 | 0.72 |
| 1.00E+00 | 1    |
| 1.00E+00 | 0.93 |
| 1.00E+00 | 0.97 |
| 1.00E+00 | 1    |
| 1.00E+00 | 0.92 |
| 1.00E+00 | 0.9  |
| 1.00E+00 | 0.84 |
| 1.00E+00 | 1    |
| 1.00E+00 | 0.95 |
| 1.00E+00 | 0.81 |
| 1.00E+00 | 1    |
| 1.00E+00 | 0.84 |
| 1.00E+00 | 0.97 |
| 1.00E+00 | 0.74 |
| 1.00E+00 | 0.9  |

|          |      |
|----------|------|
| 1.00E+00 | 0.73 |
| 1.00E+00 | 0.94 |
| 1.00E+00 | 1    |
| 1.00E+00 | 1    |

|          |      |
|----------|------|
| 1.00E+00 | 0.93 |
| 1.00E+00 | 1    |
| 1.00E+00 | 0.79 |
| 1.00E+00 | 1    |
| 1.00E+00 | 0.84 |
| 1.00E+00 | 1    |
| 1.00E+00 | 0.9  |
| 1.00E+00 | 1    |
| 1.00E+00 | 0.64 |
| 1.00E+00 | 1    |

|          |      |
|----------|------|
| 1.00E+00 | 1    |
| 1.00E+00 | 1    |
| 1.00E+00 | 1    |
| 1.00E+00 | 0.94 |
| 1.00E+00 | 0.82 |



|          |      |
|----------|------|
| 1.00E+00 | 1    |
| 1.00E+00 | 0.85 |
| 1.00E+00 | 0.9  |
| 1.00E+00 | 0.95 |
| 1.00E+00 | 0.81 |
| 1.00E+00 | 0.92 |
| 1.00E+00 | 0.95 |
| 1.00E+00 | 0.9  |
| 1.00E+00 | 0.87 |
| 1.00E+00 | 0.92 |
| 1.00E+00 | 0.69 |

|          |      |
|----------|------|
| 1.00E+00 | 0.76 |
| 1.00E+00 | 1    |
| 1.00E+00 | 0.91 |
| 1.00E+00 | 0.93 |
| 1.00E+00 | 0.97 |
| 1.00E+00 | 0.61 |
| 1.00E+00 | 0.93 |
| 1.00E+00 | 0.54 |
| 1.00E+00 | 0.81 |
| 1.00E+00 | 0.68 |
| 1.00E+00 | 0.81 |
| 1.00E+00 | 0.81 |

|          |     |
|----------|-----|
| 1.00E+00 | 0.8 |
|----------|-----|

|          |      |
|----------|------|
| 1.00E+00 | 0.51 |
| 1.00E+00 | 0.93 |
| 1.00E+00 | 0.9  |
| 1.00E+00 | 0.91 |

|          |      |
|----------|------|
| 1.00E+00 | 0.8  |
| 1.00E+00 | 0.95 |
| 1.00E+00 | 0.93 |
| 1.00E+00 | 0.69 |
| 1.00E+00 | 0.9  |

|          |      |
|----------|------|
| 1.00E+00 | 0.84 |
|----------|------|

|          |      |
|----------|------|
| 1.00E+00 | 0.97 |
| 1.00E+00 | 0.97 |
| 1.00E+00 | 1    |
| 1.00E+00 | 1    |

|          |      |
|----------|------|
| 1.00E+00 | 0.68 |
| 1.00E+00 | 0.76 |
| 1.00E+00 | 0.94 |

|          |      |
|----------|------|
| 1.00E+00 | 0.79 |
| 1.00E+00 | 0.95 |
| 1.00E+00 | 0.78 |
| 1.00E+00 | 1    |
| 1.00E+00 | 1    |
| 1.00E+00 | 0.86 |
| 1.00E+00 | 0.92 |
| 1.00E+00 | 1    |
| 1.00E+00 | 0.74 |
| 1.00E+00 | 1    |
| 1.00E+00 | 0.94 |
| 1.00E+00 | 0.95 |
| 1.00E+00 | 0.8  |
| 1.00E+00 | 0.7  |
| 1.00E+00 | 0.81 |
| 1.00E+00 | 0.71 |
| 1.00E+00 | 0.66 |

|          |      |
|----------|------|
| 1.00E+00 | 0.85 |
| 1.00E+00 | 0.89 |
| 1.00E+00 | 0.92 |
| 1.00E+00 | 0.97 |
| 1.00E+00 | 0.84 |

|          |      |
|----------|------|
| 1.00E+00 | 0.84 |
| 1.00E+00 | 0.79 |

|          |      |
|----------|------|
| 1.00E+00 | 0.94 |
| 1.00E+00 | 0.8  |
| 1.00E+00 | 1    |
| 1.00E+00 | 0.93 |
| 1.00E+00 | 0.63 |
| 1.00E+00 | 0.86 |
| 1.00E+00 | 0.54 |

|          |      |
|----------|------|
| 1.00E+00 | 1    |
| 1.00E+00 | 0.89 |
| 1.00E+00 | 1    |
| 1.00E+00 | 0.91 |
| 1.00E+00 | 0.57 |
| 1.00E+00 | 0.89 |
| 1.00E+00 | 0.93 |
| 1.00E+00 | 0.85 |
| 1.00E+00 | 0.93 |
| 1.00E+00 | 0.85 |
| 1.00E+00 | 1    |
| 1.00E+00 | 0.88 |
| 1.00E+00 | 0.73 |
| 1.00E+00 | 0.98 |
| 1.00E+00 | 0.8  |
| 1.00E+00 | 0.94 |
| 1.00E+00 | 0.69 |
| 1.00E+00 | 0.54 |
| 1.00E+00 | 0.54 |
| 1.00E+00 | 0.72 |
| 1.00E+00 | 0.76 |
| 1.00E+00 | 0.9  |
| 1.00E+00 | 0.84 |
| 1.00E+00 | 0.92 |
| 1.00E+00 | 0.9  |
| 1.00E+00 | 0.94 |
| 1.00E+00 | 0.72 |
| 1.00E+00 | 1    |
| 1.00E+00 | 0.92 |
| 1.00E+00 | 0.93 |
| 1.00E+00 | 0.63 |
| 1.00E+00 | 0.79 |
| 1.00E+00 | 0.73 |
| 1.00E+00 | 1    |
| 1.00E+00 | 0.48 |
| 1.00E+00 | 0.83 |
| 1.00E+00 | 0.92 |
| 1.00E+00 | 0.93 |
| 1.00E+00 | 0.94 |
| 1.00E+00 | 0.86 |
| 1.00E+00 | 0.74 |
| 1.00E+00 | 0.58 |
| 1.00E+00 | 1    |
| 1.00E+00 | 0.91 |

|          |      |
|----------|------|
| 1.00E+00 | 0.93 |
| 1.00E+00 | 0.76 |
| 1.00E+00 | 1    |
| 1.00E+00 | 0.88 |
| 1.00E+00 | 0.48 |
| 1.00E+00 | 0.84 |
| 1.00E+00 | 0.9  |
| 1.00E+00 | 0.86 |
| 1.00E+00 | 1    |
| 1.00E+00 | 0.94 |
| 1.00E+00 | 0.87 |
| 1.00E+00 | 0.73 |
| 1.00E+00 | 0.83 |
| 1.00E+00 | 0.67 |
| 1.00E+00 | 0.95 |
| 1.00E+00 | 0.79 |
| 1.00E+00 | 0.95 |
| 1.00E+00 | 1    |
| 1.00E+00 | 1    |
| 1.00E+00 | 0.68 |

|          |      |
|----------|------|
| 1.00E+00 | 0.83 |
| 1.00E+00 | 1    |
| 1.00E+00 | 1    |
| 1.00E+00 | 0.71 |
| 1.00E+00 | 0.76 |
| 1.00E+00 | 0.91 |
| 1.00E+00 | 0.79 |
| 1.00E+00 | 1    |

|          |      |
|----------|------|
| 1.00E+00 | 0.75 |
| 1.00E+00 | 0.67 |
| 1.00E+00 | 0.61 |
| 1.00E+00 | 0.9  |
| 1.00E+00 | 0.93 |
| 1.00E+00 | 0.92 |
| 1.00E+00 | 0.71 |
| 1.00E+00 | 1    |
| 1.00E+00 | 1    |
| 1.00E+00 | 0.91 |
| 1.00E+00 | 0.82 |

|          |      |
|----------|------|
| 1.00E+00 | 0.96 |
| 1.00E+00 | 0.94 |
| 1.00E+00 | 0.87 |
| 1.00E+00 | 0.75 |

|          |   |
|----------|---|
| 1.00E+00 | 1 |
|----------|---|

|          |      |
|----------|------|
| 1.00E+00 | 0.85 |
| 1.00E+00 | 0.69 |

|          |      |
|----------|------|
| 1.00E+00 | 0.95 |
| 1.00E+00 | 0.6  |
| 1.00E+00 | 0.58 |
| 1.00E+00 | 0.77 |
| 1.00E+00 | 0.91 |
| 1.00E+00 | 1    |
| 1.00E+00 | 1    |
| 1.00E+00 | 1    |

|          |      |
|----------|------|
| 1.00E+00 | 1    |
| 1.00E+00 | 1    |
| 1.00E+00 | 0.81 |
| 1.00E+00 | 0.66 |
| 1.00E+00 | 1    |

|          |      |
|----------|------|
| 1.00E+00 | 0.56 |
| 1.00E+00 | 0.73 |
| 1.00E+00 | 0.96 |
| 1.00E+00 | 1    |
| 1.00E+00 | 0.91 |
| 1.00E+00 | 0.84 |
| 1.00E+00 | 0.81 |
| 1.00E+00 | 0.75 |

|          |      |
|----------|------|
| 1.00E+00 | 0.73 |
| 1.00E+00 | 0.62 |

|          |      |
|----------|------|
| 1.00E+00 | 0.72 |
| 1.00E+00 | 1    |
| 1.00E+00 | 0.52 |
| 1.00E+00 | 0.79 |
| 1.00E+00 | 0.78 |
| 1.00E+00 | 0.87 |
| 1.00E+00 | 0.71 |
| 1.00E+00 | 0.64 |
| 1.00E+00 | 0.97 |
| 1.00E+00 | 0.98 |
| 1.00E+00 | 0.88 |
| 1.00E+00 | 0.94 |
| 1.00E+00 | 0.93 |
| 1.00E+00 | 0.88 |
| 1.00E+00 | 0.59 |
| 1.00E+00 | 0.96 |
| 1.00E+00 | 0.79 |
| 1.00E+00 | 0.66 |

|          |      |
|----------|------|
| 1.00E+00 | 0.41 |
| 1.00E+00 | 1    |
| 1.00E+00 | 1    |
| 1.00E+00 | 0.94 |
| 1.00E+00 | 0.96 |
| 1.00E+00 | 0.59 |
| 1.00E+00 | 0.81 |
| 1.00E+00 | 0.94 |
| 1.00E+00 | 0.55 |
| 1.00E+00 | 0.79 |
| 1.00E+00 | 1    |
| 1.00E+00 | 1    |
| 1.00E+00 | 0.57 |
| 1.00E+00 | 0.71 |
| 1.00E+00 | 0.8  |
| 1.00E+00 | 0.74 |
| 1.00E+00 | 1    |
| 1.00E+00 | 0.79 |
| 1.00E+00 | 0.82 |
| 1.00E+00 | 0.67 |
| 1.00E+00 | 0.92 |
| 1.00E+00 | 0.58 |
| 1.00E+00 | 0.76 |
| 1.00E+00 | 1    |
| 1.00E+00 | 0.87 |
| 1.00E+00 | 0.96 |
| 1.00E+00 | 0.85 |
| 1.00E+00 | 0.87 |
| 1.00E+00 | 0.46 |
| 1.00E+00 | 0.52 |
| 1.00E+00 | 0.96 |
| 1.00E+00 | 0.9  |
| 1.00E+00 | 0.89 |
| 1.00E+00 | 0.89 |
| 1.00E+00 | 0.89 |
| 1.00E+00 | 0.67 |
| 1.00E+00 | 0.75 |
| 1.00E+00 | 0    |
| 1.00E+00 | 0.71 |
| 1.00E+00 | 1    |
| 1.00E+00 | 1    |
| 1.00E+00 | 0.85 |
| 1.00E+00 | 0.74 |

|          |      |
|----------|------|
| 1.00E+00 | 0.8  |
| 1.00E+00 | 0.78 |
| 1.00E+00 | 1    |
| 1.00E+00 | 0.88 |
| 1.00E+00 | 0.89 |
| 1.00E+00 | 0.9  |
| 1.00E+00 | 0.72 |
| 1.00E+00 | 0.94 |
| 1.00E+00 | 0.85 |
| 1.00E+00 | 0.88 |
| 1.00E+00 | 0.53 |
| 1.00E+00 | 0.79 |
| 1.00E+00 | 0.88 |
| 1.00E+00 | 0.79 |
| 1.00E+00 | 0.86 |
| 1.00E+00 | 0.68 |
| 1.00E+00 | 0.73 |
| 1.00E+00 | 0.87 |
| 1.00E+00 | 0.77 |
| 1.00E+00 | 0.82 |
| 1.00E+00 | 0.83 |
| 1.00E+00 | 0.92 |
| 1.00E+00 | 0.88 |
| 1.00E+00 | 0.83 |
| 1.00E+00 | 0.94 |
| 1.00E+00 | 0.78 |
| 1.00E+00 | 0.93 |
| 1.00E+00 | 0.96 |
| 1.00E+00 | 1    |
| 1.00E+00 | 0.96 |
| 1.00E+00 | 0.93 |
| 1.00E+00 | 0.86 |
| 1.00E+00 | 0.92 |
| 1.00E+00 | 0.83 |
| 1.00E+00 | 1    |

|          |      |
|----------|------|
| 1.00E+00 | 0.69 |
| 1.00E+00 | 0.75 |
| 1.00E+00 | 0.79 |
| 1.00E+00 | 0.57 |
| 1.00E+00 | 0.88 |
| 1.00E+00 | 0.88 |
| 1.00E+00 | 0.82 |
| 1.00E+00 | 0.83 |
| 1.00E+00 | 0.92 |
| 1.00E+00 | 0.64 |
| 1.00E+00 | 0.84 |
| 1.00E+00 | 1    |
| 1.00E+00 | 0.96 |
| 1.00E+00 | 0.89 |
| 1.00E+00 | 1    |
| 1.00E+00 | 0.92 |
| 1.00E+00 | 1    |
| 1.00E+00 | 0.62 |
| 1.00E+00 | 0.85 |
| 1.00E+00 | 0.7  |
| 1.00E+00 | 1    |
| 1.00E+00 | 0.78 |
| 1.00E+00 | 1    |
| 1.00E+00 | 0.82 |
| 1.00E+00 | 0.95 |
| 1.00E+00 | 0.65 |
| 1.00E+00 | 0.94 |
| 1.00E+00 | 0.83 |
| 1.00E+00 | 0.82 |
| 1.00E+00 | 0.89 |
| 1.00E+00 | 0.91 |
| 1.00E+00 | 0.91 |
| 1.00E+00 | 0.75 |
| 1.00E+00 | 0.69 |
| 1.00E+00 | 0.86 |
| 1.00E+00 | 0.88 |
| 1.00E+00 | 0.75 |
| 1.00E+00 | 0.93 |
| 1.00E+00 | 0.64 |
| 1.00E+00 | 0.94 |
| 1.00E+00 | 1    |
| 1.00E+00 | 1    |



|          |      |
|----------|------|
| 1.00E+00 | 0.73 |
| 1.00E+00 | 0.78 |
| 1.00E+00 | 0.96 |

|          |      |
|----------|------|
| 1.00E+00 | 0.93 |
| 1.00E+00 | 0.73 |

|          |      |
|----------|------|
| 1.00E+00 | 0.94 |
| 1.00E+00 | 0.84 |
| 1.00E+00 | 1    |
| 1.00E+00 | 0.87 |
| 1.00E+00 | 0.56 |
| 1.00E+00 | 0.92 |
| 1.00E+00 | 0.89 |
| 1.00E+00 | 0.84 |
| 1.00E+00 | 0.89 |
| 1.00E+00 | 0.86 |
| 1.00E+00 | 1    |
| 1.00E+00 | 1    |

|          |      |
|----------|------|
| 1.00E+00 | 0.66 |
| 1.00E+00 | 0.88 |
| 1.00E+00 | 0.85 |
| 1.00E+00 | 0.73 |
| 1.00E+00 | 1    |
| 1.00E+00 | 0.83 |
| 1.00E+00 | 0.94 |
| 1.00E+00 | 0.57 |
| 1.00E+00 | 0.97 |

|          |      |
|----------|------|
| 1.00E+00 | 1    |
| 1.00E+00 | 0.97 |
| 1.00E+00 | 0.6  |
| 1.00E+00 | 1    |
| 1.00E+00 | 0.59 |
| 1.00E+00 | 0.95 |
| 1.00E+00 | 0.95 |
| 1.00E+00 | 0.76 |
| 1.00E+00 | 0.8  |
| 1.00E+00 | 0.66 |
| 1.00E+00 | 0.56 |
| 1.00E+00 | 0.97 |
| 1.00E+00 | 0.75 |
| 1.00E+00 | 0.49 |
| 1.00E+00 | 0.74 |
| 1.00E+00 | 0.93 |
| 1.00E+00 | 0.71 |
| 1.00E+00 | 0.63 |
| 1.00E+00 | 0.79 |
| 1.00E+00 | 0.91 |
| 1.00E+00 | 0.93 |
| 1.00E+00 | 0.92 |
| 1.00E+00 | 1    |
| 1.00E+00 | 0.85 |
| 1.00E+00 | 0.92 |
| 1.00E+00 | 0.7  |
| 1.00E+00 | 0.78 |
| 1.00E+00 | 0.83 |
| 1.00E+00 | 0.79 |
| 1.00E+00 | 0.91 |
| 1.00E+00 | 1    |
| 1.00E+00 | 0.93 |
| 1.00E+00 | 0.78 |
| 1.00E+00 | 0.78 |
| 1.00E+00 | 1    |
| 1.00E+00 | 0.87 |
| 1.00E+00 | 0.79 |
| 1.00E+00 | 0.86 |
| 1.00E+00 | 0.94 |
| 1.00E+00 | 0.83 |
| 1.00E+00 | 1    |
| 1.00E+00 | 0.91 |
| 1.00E+00 | 0.91 |
| 1.00E+00 | 0.82 |
| 1.00E+00 | 0.79 |
| 1.00E+00 | 0.44 |

|          |      |
|----------|------|
| 1.00E+00 | 0.53 |
| 1.00E+00 | 0.68 |
| 1.00E+00 | 0.91 |
| 1.00E+00 | 0.82 |
| 1.00E+00 | 0.91 |
| 1.00E+00 | 0.95 |
| 1.00E+00 | 0.91 |
| 1.00E+00 | 0.8  |
| 1.00E+00 | 1    |
| 1.00E+00 | 0.9  |
| 1.00E+00 | 0.86 |
| 1.00E+00 | 1    |
| 1.00E+00 | 0.97 |
| 1.00E+00 | 0.8  |
| 1.00E+00 | 0.8  |
| 1.00E+00 | 0.95 |
| 1.00E+00 | 0.66 |
| 1.00E+00 | 0.62 |
| 1.00E+00 | 0.75 |
| 1.00E+00 | 0.75 |
| 1.00E+00 | 0.93 |
| 1.00E+00 | 0.79 |
| 1.00E+00 | 0.75 |
| 1.00E+00 | 0.82 |
| 1.00E+00 | 0.76 |
| 1.00E+00 | 1    |
| 1.00E+00 | 0.5  |
| 1.00E+00 | 1    |
| 1.00E+00 | 0.82 |
| 1.00E+00 | 0.98 |
| 1.00E+00 | 0.94 |
| 1.00E+00 | 0.9  |
| 1.00E+00 | 0.86 |
| 1.00E+00 | 0.82 |
| 1.00E+00 | 0.81 |
| 1.00E+00 | 0.94 |
| 1.00E+00 | 0.81 |
| 1.00E+00 | 0.84 |
| 1.00E+00 | 1    |
| 1.00E+00 | 0.86 |
| 1.00E+00 | 0.72 |
| 1.00E+00 | 0.97 |
| 1.00E+00 | 0.89 |
| 1.00E+00 | 0.82 |
| 1.00E+00 | 0.92 |
| 1.00E+00 | 0.92 |

|          |      |
|----------|------|
| 1.00E+00 | 0.79 |
| 1.00E+00 | 0.96 |
| 1.00E+00 | 1    |

|          |      |
|----------|------|
| 1.00E+00 | 0.87 |
| 1.00E+00 | 0.95 |
| 1.00E+00 | 0.85 |
| 1.00E+00 | 0.66 |
| 1.00E+00 | 0.58 |
| 1.00E+00 | 0.92 |
| 1.00E+00 | 0.93 |
| 1.00E+00 | 0.92 |

|          |      |
|----------|------|
| 1.00E+00 | 1    |
| 1.00E+00 | 0.83 |
| 1.00E+00 | 0.94 |

|          |      |
|----------|------|
| 1.00E+00 | 1    |
| 1.00E+00 | 0.91 |
| 1.00E+00 | 0.95 |
| 1.00E+00 | 0.89 |
| 1.00E+00 | 0.94 |
| 1.00E+00 | 1    |
| 1.00E+00 | 0.92 |
| 1.00E+00 | 0.78 |
| 1.00E+00 | 0.88 |

|          |      |
|----------|------|
| 1.00E+00 | 0.92 |
| 1.00E+00 | 0.77 |
| 1.00E+00 | 0.86 |

|          |      |
|----------|------|
| 1.00E+00 | 0.82 |
| 1.00E+00 | 0.95 |
| 1.00E+00 | 0.92 |
| 1.00E+00 | 0.8  |
| 1.00E+00 | 1    |

|          |      |
|----------|------|
| 1.00E+00 | 0.84 |
| 1.00E+00 | 0.94 |
| 1.00E+00 | 0.92 |

|          |      |
|----------|------|
| 1.00E+00 | 0.9  |
| 1.00E+00 | 0.84 |
| 1.00E+00 | 0.72 |
| 1.00E+00 | 0.92 |
| 1.00E+00 | 0.86 |
| 1.00E+00 | 1    |
| 1.00E+00 | 0.66 |
| 1.00E+00 | 0.76 |
| 1.00E+00 | 0.8  |
| 1.00E+00 | 0.9  |
| 1.00E+00 | 0.77 |
| 1.00E+00 | 0.81 |
| 1.00E+00 | 1    |
| 1.00E+00 | 0.89 |
| 1.00E+00 | 1    |
| 1.00E+00 | 1    |
| 1.00E+00 | 0.68 |
| 1.00E+00 | 0.91 |
| 1.00E+00 | 1    |
| 1.00E+00 | 0.9  |
| 1.00E+00 | 1    |
| 1.00E+00 | 0.8  |
| 1.00E+00 | 0.47 |
| 1.00E+00 | 1    |
| 1.00E+00 | 0.75 |
| 1.00E+00 | 0.94 |
| 1.00E+00 | 0.85 |
| 1.00E+00 | 0.8  |
| 1.00E+00 | 0.93 |
| 1.00E+00 | 1    |
| 1.00E+00 | 0.55 |
| 1.00E+00 | 0.94 |

|          |      |
|----------|------|
| 1.00E+00 | 0.82 |
|----------|------|

|          |      |
|----------|------|
| 1.00E+00 | 1    |
| 1.00E+00 | 0.83 |
| 1.00E+00 | 0.6  |

|          |      |
|----------|------|
| 1.00E+00 | 0.67 |
| 1.00E+00 | 1    |
| 1.00E+00 | 0.94 |
| 1.00E+00 | 0.94 |
| 1.00E+00 | 0.94 |
| 1.00E+00 | 0.94 |
| 1.00E+00 | 1    |
| 1.00E+00 | 0.84 |
| 1.00E+00 | 0.86 |
| 1.00E+00 | 0.88 |
| 1.00E+00 | 0.93 |
| 1.00E+00 | 0.87 |
| 1.00E+00 | 0.79 |

|          |      |
|----------|------|
| 1.00E+00 | 0.93 |
| 1.00E+00 | 0.94 |
| 1.00E+00 | 0.98 |
| 1.00E+00 | 0.91 |

|          |      |
|----------|------|
| 1.00E+00 | 0.93 |
| 1.00E+00 | 0.86 |
| 1.00E+00 | 0.71 |

|          |      |
|----------|------|
| 1.00E+00 | 0.96 |
| 1.00E+00 | 0.84 |
| 1.00E+00 | 0.94 |

|          |      |
|----------|------|
| 1.00E+00 | 1    |
| 1.00E+00 | 0.94 |
| 1.00E+00 | 0.94 |

|          |   |
|----------|---|
| 1.00E+00 | 1 |
| 1.00E+00 | 1 |

|          |      |
|----------|------|
| 1.00E+00 | 1    |
| 1.00E+00 | 0.96 |

|          |      |
|----------|------|
| 1.00E+00 | 1    |
| 1.00E+00 | 0.63 |
| 1.00E+00 | 0.82 |
| 1.00E+00 | 0.97 |
| 1.00E+00 | 0.94 |

|          |      |
|----------|------|
| 1.00E+00 | 0.96 |
| 1.00E+00 | 0.92 |
| 1.00E+00 | 0.95 |
| 1.00E+00 | 0.94 |
| 1.00E+00 | 1    |
| 1.00E+00 | 1    |
| 1.00E+00 | 0.91 |
| 1.00E+00 | 0.99 |
| 1.00E+00 | 0.93 |
| 1.00E+00 | 0.91 |
| 1.00E+00 | 1    |
| 1.00E+00 | 0.95 |
| 1.00E+00 | 1    |
| 1.00E+00 | 0.89 |
| 1.00E+00 | 0.94 |
| 1.00E+00 | 0.94 |
| 1.00E+00 | 0.9  |
| 1.00E+00 | 0.62 |
| 1.00E+00 | 0.85 |
| 1.00E+00 | 0.63 |
| 1.00E+00 | 0.72 |
| 1.00E+00 | 0.94 |
| 1.00E+00 | 1    |
| 1.00E+00 | 0.9  |
| 1.00E+00 | 1    |
| 1.00E+00 | 1    |
| 1.00E+00 | 0.91 |
| 1.00E+00 | 0.91 |
| 1.00E+00 | 0.94 |
| 1.00E+00 | 0.7  |
| 1.00E+00 | 1    |
| 1.00E+00 | 0.82 |
| 1.00E+00 | 1    |
| 1.00E+00 | 0.89 |
| 1.00E+00 | 0.92 |
| 1.00E+00 | 0.95 |
| 1.00E+00 | 0.86 |
| 1.00E+00 | 0.96 |
| 1.00E+00 | 0.81 |
| 1.00E+00 | 0.91 |
| 1.00E+00 | 0.96 |
| 1.00E+00 | 0.74 |
| 1.00E+00 | 0.94 |
| 1.00E+00 | 0.96 |
| 1.00E+00 | 0.91 |
| 1.00E+00 | 0.66 |
| 1.00E+00 | 0.75 |

|          |      |
|----------|------|
| 1.00E+00 | 0.74 |
| 1.00E+00 | 0.96 |
| 1.00E+00 | 0.95 |
| 1.00E+00 | 0.92 |
| 1.00E+00 | 1    |
| 1.00E+00 | 0.98 |
| 1.00E+00 | 0.96 |
| 1.00E+00 | 0.82 |
| 1.00E+00 | 0.95 |
| 1.00E+00 | 0.9  |
| 1.00E+00 | 1    |
| 1.00E+00 | 0.65 |
| 1.00E+00 | 0.84 |
| 1.00E+00 | 0.71 |

|          |      |
|----------|------|
| 1.00E+00 | 0.65 |
| 1.00E+00 | 0.8  |
| 1.00E+00 | 0.66 |
| 1.00E+00 | 0.92 |
| 1.00E+00 | 0.92 |
| 1.00E+00 | 0.93 |
| 1.00E+00 | 0.95 |
| 1.00E+00 | 0.92 |
| 1.00E+00 | 0.8  |
| 1.00E+00 | 0.75 |
| 1.00E+00 | 1    |
| 1.00E+00 | 0.75 |
| 1.00E+00 | 0.85 |
| 1.00E+00 | 0.72 |
| 1.00E+00 | 0.76 |
| 1.00E+00 | 0.93 |
| 1.00E+00 | 0.98 |
| 1.00E+00 | 0.96 |
| 1.00E+00 | 0.93 |
| 1.00E+00 | 0.92 |

|          |      |
|----------|------|
| 1.00E+00 | 0.91 |
| 1.00E+00 | 0.69 |

|          |      |
|----------|------|
| 1.00E+00 | 0.93 |
| 1.00E+00 | 0.95 |
| 1.00E+00 | 0.9  |

|          |      |
|----------|------|
| 1.00E+00 | 0.86 |
| 1.00E+00 | 1    |
| 1.00E+00 | 0.95 |
| 1.00E+00 | 1    |



|          |      |
|----------|------|
| 1.00E+00 | 0.92 |
| 1.00E+00 | 0.84 |
| 1.00E+00 | 0.76 |
| 1.00E+00 | 0.83 |
| 1.00E+00 | 0.93 |
| 1.00E+00 | 1    |
| 1.00E+00 | 0.95 |

|          |      |
|----------|------|
| 1.00E+00 | 0.92 |
| 1.00E+00 | 0.81 |
| 1.00E+00 | 0.84 |
| 1.00E+00 | 0.93 |
| 1.00E+00 | 0.95 |
| 1.00E+00 | 0.93 |
| 1.00E+00 | 0.85 |
| 1.00E+00 | 1    |
| 1.00E+00 | 0.93 |
| 1.00E+00 | 1    |
| 1.00E+00 | 0.91 |
| 1.00E+00 | 0.95 |
| 1.00E+00 | 0.93 |
| 1.00E+00 | 0.93 |

|          |      |
|----------|------|
| 1.00E+00 | 0.7  |
| 1.00E+00 | 0.85 |

|          |      |
|----------|------|
| 1.00E+00 | 1    |
| 1.00E+00 | 0.89 |
| 1.00E+00 | 0.9  |

|          |      |
|----------|------|
| 1.00E+00 | 1    |
| 1.00E+00 | 0.97 |
| 1.00E+00 | 0.62 |
| 1.00E+00 | 0.89 |
| 1.00E+00 | 0.88 |
| 1.00E+00 | 0.7  |
| 1.00E+00 | 0.9  |
| 1.00E+00 | 0.57 |
| 1.00E+00 | 1    |
| 1.00E+00 | 0.93 |
| 1.00E+00 | 0.95 |
| 1.00E+00 | 0.7  |

|          |      |
|----------|------|
| 1.00E+00 | 1    |
| 1.00E+00 | 0.92 |
| 1.00E+00 | 0.94 |
| 1.00E+00 | 0.86 |
| 1.00E+00 | 0.74 |
| 1.00E+00 | 0.94 |
| 1.00E+00 | 0.84 |

|          |      |
|----------|------|
| 1.00E+00 | 0.82 |
| 1.00E+00 | 0.93 |
| 1.00E+00 | 0.62 |
| 1.00E+00 | 0.88 |
| 1.00E+00 | 0.71 |
| 1.00E+00 | 1    |

|          |      |
|----------|------|
| 1.00E+00 | 0.76 |
| 1.00E+00 | 0.68 |

|          |      |
|----------|------|
| 1.00E+00 | 0.62 |
| 1.00E+00 | 0.81 |
| 1.00E+00 | 0.85 |

|          |      |
|----------|------|
| 1.00E+00 | 0.64 |
| 1.00E+00 | 0.76 |
| 1.00E+00 | 0.75 |
| 1.00E+00 | 0.89 |

|          |      |
|----------|------|
| 1.00E+00 | 0.88 |
| 1.00E+00 | 0.83 |

|          |      |
|----------|------|
| 1.00E+00 | 0.96 |
| 1.00E+00 | 0.94 |
| 1.00E+00 | 0.85 |
| 1.00E+00 | 0.92 |

|          |      |
|----------|------|
| 1.00E+00 | 0.82 |
| 1.00E+00 | 0.87 |

|          |      |
|----------|------|
| 1.00E+00 | 1    |
| 1.00E+00 | 0.72 |
| 1.00E+00 | 0.84 |
| 1.00E+00 | 0.71 |
| 1.00E+00 | 1    |
| 1.00E+00 | 0.9  |
| 1.00E+00 | 1    |
| 1.00E+00 | 0.71 |
| 1.00E+00 | 0.88 |

|          |      |
|----------|------|
| 1.00E+00 | 0.85 |
|----------|------|

1.00E+00 0.93

1.00E+00 1

1.00E+00 0.89

1.00E+00 0.88

1.00E+00 0.91

1.00E+00 0.9

1.00E+00 0.83

1.00E+00 0.85

1.00E+00 0.83

1.00E+00 0.86

1.00E+00 1

1.00E+00 0.92

1.00E+00 1

1.00E+00 0.84

1.00E+00 1

1.00E+00 0.63

1.00E+00 0.85

1.00E+00 0.57

1.00E+00 1

1.00E+00 1

1.00E+00 0.94

1.00E+00 0.86

1.00E+00 0.8

1.00E+00 1

1.00E+00 1

1.00E+00 0.97

1.00E+00 0.74

1.00E+00 1

1.00E+00 0.91

1.00E+00 0.73

1.00E+00 1

1.00E+00 0.74

1.00E+00 1

1.00E+00 0.75

1.00E+00 0.87

1.00E+00 0.92

1.00E+00 1

1.00E+00 1

|          |      |
|----------|------|
| 1.00E+00 | 0.89 |
| 1.00E+00 | 1    |
| 1.00E+00 | 0.84 |
| 1.00E+00 | 0.75 |
| 1.00E+00 | 0.72 |

|          |      |
|----------|------|
| 1.00E+00 | 0.93 |
| 1.00E+00 | 0.96 |

|          |      |
|----------|------|
| 1.00E+00 | 0.83 |
| 1.00E+00 | 0.85 |
| 1.00E+00 | 0.94 |
| 1.00E+00 | 0.61 |
| 1.00E+00 | 1    |
| 1.00E+00 | 0.97 |
| 1.00E+00 | 0.9  |
| 1.00E+00 | 0.78 |
| 1.00E+00 | 1    |
| 1.00E+00 | 0.76 |

|          |      |
|----------|------|
| 1.00E+00 | 0.93 |
| 1.00E+00 | 1    |
| 1.00E+00 | 0.96 |
| 1.00E+00 | 0.87 |
| 1.00E+00 | 0.55 |

|          |      |
|----------|------|
| 1.00E+00 | 1    |
| 1.00E+00 | 0.69 |
| 1.00E+00 | 0.61 |
| 1.00E+00 | 0.87 |
| 1.00E+00 | 0.94 |
| 1.00E+00 | 0.68 |
| 1.00E+00 | 0.6  |
| 1.00E+00 | 0.72 |
| 1.00E+00 | 0.84 |
| 1.00E+00 | 0.58 |
| 1.00E+00 | 0.9  |
| 1.00E+00 | 0.83 |

|          |      |
|----------|------|
| 1.00E+00 | 0.83 |
|----------|------|

|          |      |
|----------|------|
| 1.00E+00 | 0.87 |
|----------|------|

|          |      |
|----------|------|
| 1.00E+00 | 0.97 |
| 1.00E+00 | 0.8  |
| 1.00E+00 | 0.57 |
| 1.00E+00 | 0.84 |
| 1.00E+00 | 0.72 |
| 1.00E+00 | 1    |
| 1.00E+00 | 0.89 |
| 1.00E+00 | 0.88 |
| 1.00E+00 | 0.8  |
| 1.00E+00 | 1    |
| 1.00E+00 | 0.97 |
| 1.00E+00 | 1    |
| 1.00E+00 | 0.91 |
| 1.00E+00 | 0.86 |
| 1.00E+00 | 0.84 |
| 1.00E+00 | 1    |
| 1.00E+00 | 1    |
| 1.00E+00 | 0.92 |
| 1.00E+00 | 0.9  |
| 1.00E+00 | 0.88 |
| 1.00E+00 | 0.9  |
| 1.00E+00 | 0    |
| 1.00E+00 | 0.58 |
| 1.00E+00 | 0.94 |
| 1.00E+00 | 0.83 |
| 1.00E+00 | 1    |
| 1.00E+00 | 0.74 |
| 1.00E+00 | 1    |
| 1.00E+00 | 0.93 |
| 1.00E+00 | 0.74 |
| 1.00E+00 | 0.94 |
| 1.00E+00 | 0.95 |
| 1.00E+00 | 0.71 |
| 1.00E+00 | 0.82 |
| 1.00E+00 | 0.93 |
| 1.00E+00 | 0.85 |
| 1.00E+00 | 0.55 |
| 1.00E+00 | 0.73 |
| 1.00E+00 | 0.81 |
| 1.00E+00 | 0.57 |
| 1.00E+00 | 0.47 |
| 1.00E+00 | 0.9  |
| 1.00E+00 | 0.8  |
| 1.00E+00 | 0.75 |
| 1.00E+00 | 0.76 |
| 1.00E+00 | 0.94 |

|          |      |
|----------|------|
| 1.00E+00 | 0.72 |
| 1.00E+00 | 0.87 |
| 1.00E+00 | 0.95 |
| 1.00E+00 | 0.86 |
| 1.00E+00 | 0.85 |
| 1.00E+00 | 0.63 |
| 1.00E+00 | 0.92 |
| 1.00E+00 | 0.52 |

|          |      |
|----------|------|
| 1.00E+00 | 0.97 |
| 1.00E+00 | 1    |
| 1.00E+00 | 0.97 |
| 1.00E+00 | 1    |
| 1.00E+00 | 1    |
| 1.00E+00 | 0.72 |
| 1.00E+00 | 0.95 |
| 1.00E+00 | 0.94 |
| 1.00E+00 | 0.71 |
| 1.00E+00 | 0.69 |
| 1.00E+00 | 0.88 |
| 1.00E+00 | 0.87 |
| 1.00E+00 | 0.89 |
| 1.00E+00 | 1    |
| 1.00E+00 | 0.97 |
| 1.00E+00 | 1    |
| 1.00E+00 | 0.95 |
| 1.00E+00 | 0.78 |
| 1.00E+00 | 0.94 |
| 1.00E+00 | 0.96 |
| 1.00E+00 | 1    |
| 1.00E+00 | 0.86 |
| 1.00E+00 | 0.58 |
| 1.00E+00 | 0    |
| 1.00E+00 | 0.77 |
| 1.00E+00 | 0.98 |
| 1.00E+00 | 0.84 |
| 1.00E+00 | 0.78 |
| 1.00E+00 | 1    |
| 1.00E+00 | 0.79 |

|          |     |
|----------|-----|
| 1.00E+00 | 0.9 |
| 1.00E+00 | 1   |
| 1.00E+00 | 1   |

|          |      |
|----------|------|
| 1.00E+00 | 0.88 |
| 1.00E+00 | 0.74 |
| 1.00E+00 | 0.9  |
| 1.00E+00 | 0.72 |

|          |      |
|----------|------|
| 1.00E+00 | 0.74 |
| 1.00E+00 | 0.68 |
| 1.00E+00 | 0.63 |
| 1.00E+00 | 0.65 |
| 1.00E+00 | 0.96 |
| 1.00E+00 | 0.93 |
| 1.00E+00 | 0.83 |
| 1.00E+00 | 0.61 |
| 1.00E+00 | 0.8  |
| 1.00E+00 | 0.66 |
| 1.00E+00 | 1    |
| 1.00E+00 | 0.68 |
| 1.00E+00 | 0.97 |
| 1.00E+00 | 0.95 |

|          |      |
|----------|------|
| 1.00E+00 | 0.75 |
| 1.00E+00 | 0.89 |
| 1.00E+00 | 0.93 |
| 1.00E+00 | 1    |
| 1.00E+00 | 0.83 |
| 1.00E+00 | 0.86 |
| 1.00E+00 | 0.66 |
| 1.00E+00 | 1    |
| 1.00E+00 | 0.91 |
| 1.00E+00 | 0.83 |
| 1.00E+00 | 0.67 |
| 1.00E+00 | 0.95 |
| 1.00E+00 | 0.92 |
| 1.00E+00 | 0.82 |
| 1.00E+00 | 0.92 |
| 1.00E+00 | 0.97 |
| 1.00E+00 | 0.8  |
| 1.00E+00 | 0.77 |
| 1.00E+00 | 0.61 |
| 1.00E+00 | 0.92 |
| 1.00E+00 | 0.71 |
| 1.00E+00 | 0.71 |

|          |      |
|----------|------|
| 1.00E+00 | 0.94 |
| 1.00E+00 | 0.94 |
| 1.00E+00 | 0.65 |
| 1.00E+00 | 0.48 |
| 1.00E+00 | 0.82 |

|          |      |
|----------|------|
| 1.00E+00 | 0.91 |
|----------|------|

|          |      |
|----------|------|
| 1.00E+00 | 0.77 |
| 1.00E+00 | 0.81 |
| 1.00E+00 | 1    |

|          |      |
|----------|------|
| 1.00E+00 | 0.7  |
| 1.00E+00 | 0.59 |
| 1.00E+00 | 0.62 |
| 1.00E+00 | 0.78 |
| 1.00E+00 | 0.91 |
| 1.00E+00 | 0.45 |
| 1.00E+00 | 0.96 |
| 1.00E+00 | 0.71 |
| 1.00E+00 | 0.82 |
| 1.00E+00 | 0.5  |
| 1.00E+00 | 0.72 |
| 1.00E+00 | 0.68 |
| 1.00E+00 | 1    |
| 1.00E+00 | 0.38 |
| 1.00E+00 | 0.81 |
| 1.00E+00 | 0.93 |
| 1.00E+00 | 0.84 |

|          |      |
|----------|------|
| 1.00E+00 | 0.75 |
| 1.00E+00 | 0.86 |
| 1.00E+00 | 0.89 |
| 1.00E+00 | 0.92 |
| 1.00E+00 | 1    |
| 1.00E+00 | 0.89 |

|          |      |
|----------|------|
| 1.00E+00 | 0.93 |
| 1.00E+00 | 0.91 |
| 1.00E+00 | 0.65 |
| 1.00E+00 | 0.9  |
| 1.00E+00 | 0.96 |
| 1.00E+00 | 0.91 |
| 1.00E+00 | 0.71 |
| 1.00E+00 | 0.82 |
| 1.00E+00 | 0.78 |
| 1.00E+00 | 0.94 |
| 1.00E+00 | 0.83 |
| 1.00E+00 | 0.92 |
| 1.00E+00 | 0.78 |
| 1.00E+00 | 0.66 |
| 1.00E+00 | 0.87 |

|          |      |
|----------|------|
| 1.00E+00 | 0.92 |
| 1.00E+00 | 0.91 |



1.00E+00 0.75

1.00E+00 0.65

1.00E+00 0.94

1.00E+00 0.91

1.00E+00 0.95

1.00E+00 1

1.00E+00 1

1.00E+00 0.9

1.00E+00 0.82

1.00E+00 0.88

1.00E+00 0.95

1.00E+00 0.74

1.00E+00 0.73

1.00E+00 0.94

1.00E+00 0.96

1.00E+00 0.46

1.00E+00 0.5

1.00E+00 0.94

1.00E+00 0.74

1.00E+00 0.85

1.00E+00 0.92

1.00E+00 0.49

1.00E+00 0.48

1.00E+00 0.87

1.00E+00 0.72

1.00E+00 0.57

1.00E+00 0.94

1.00E+00 0.83

1.00E+00 1

1.00E+00 0.94

1.00E+00 0.95

1.00E+00 0.9

1.00E+00 0.91

1.00E+00 0.92

1.00E+00 1

1.00E+00 0.8

1.00E+00 0.83

1.00E+00 0.81

1.00E+00 0.75

1.00E+00 0.47

1.00E+00 0.67

1.00E+00 0.8

1.00E+00 0.86

1.00E+00 0.94

1.00E+00 0.93

1.00E+00 0.79

1.00E+00 0.68

1.00E+00 0.71

1.00E+00 0.91

1.00E+00 0.85

1.00E+00 0.93

1.00E+00 0.89

1.00E+00 0.84

1.00E+00 0.74

1.00E+00 0.88

1.00E+00 0.54

1.00E+00 0.77

1.00E+00 0.88

1.00E+00 0.86

1.00E+00 0.89

1.00E+00 0.81

1.00E+00 0.83

1.00E+00 0.99

1.00E+00 0.59

1.00E+00 0.96

1.00E+00 1

1.00E+00 0.86

1.00E+00 1

1.00E+00 0.91

1.00E+00 0.9

1.00E+00 0.58

1.00E+00 0.89

1.00E+00 0.86

1.00E+00 1

1.00E+00 0.84

1.00E+00 1

|          |      |
|----------|------|
| 1.00E+00 | 0.88 |
| 1.00E+00 | 0.74 |
| 1.00E+00 | 0.74 |
| 1.00E+00 | 0.84 |
| 1.00E+00 | 0.87 |
| 1.00E+00 | 0.9  |
| 1.00E+00 | 0.94 |
| 1.00E+00 | 0.82 |
| 1.00E+00 | 0.79 |
| 1.00E+00 | 0.84 |
| 1.00E+00 | 1    |
| 1.00E+00 | 0.64 |
| 1.00E+00 | 0.66 |
| 1.00E+00 | 0.91 |
| 1.00E+00 | 1    |
| 1.00E+00 | 0.76 |
| 1.00E+00 | 0.8  |
| 1.00E+00 | 0.89 |
| 1.00E+00 | 0.95 |
| 1.00E+00 | 1    |
| 1.00E+00 | 0.94 |
| 1.00E+00 | 0.87 |
| 1.00E+00 | 0.75 |
| 1.00E+00 | 0.92 |
| 1.00E+00 | 0.95 |
| 1.00E+00 | 0.73 |
| 1.00E+00 | 0.89 |
| 1.00E+00 | 0.78 |
| 1.00E+00 | 0.65 |
| 1.00E+00 | 0.65 |
| 1.00E+00 | 1    |
| 1.00E+00 | 1    |
| 1.00E+00 | 1    |
| 1.00E+00 | 0.72 |
| 1.00E+00 | 1    |
| 1.00E+00 | 0.81 |
| 1.00E+00 | 0.68 |
| 1.00E+00 | 0.91 |
| 1.00E+00 | 0.96 |
| 1.00E+00 | 1    |
| 1.00E+00 | 0.94 |

|          |      |
|----------|------|
| 1.00E+00 | 0.85 |
| 1.00E+00 | 0.66 |
| 1.00E+00 | 1    |
| 1.00E+00 | 0.87 |
| 1.00E+00 | 0.84 |
| 1.00E+00 | 0.94 |
| 1.00E+00 | 1    |
| 1.00E+00 | 0.9  |
| 1.00E+00 | 0.94 |
| 1.00E+00 | 1    |
| 1.00E+00 | 0.82 |
| 1.00E+00 | 0.95 |
| 1.00E+00 | 0.78 |
| 1.00E+00 | 0.91 |
| 1.00E+00 | 0.47 |
| 1.00E+00 | 0.68 |
| 1.00E+00 | 0.5  |
| 1.00E+00 | 0.61 |
| 1.00E+00 | 1    |
| 1.00E+00 | 0.9  |
| 1.00E+00 | 0.89 |
| 1.00E+00 | 0.84 |
| 1.00E+00 | 0.82 |
| 1.00E+00 | 0.94 |
| 1.00E+00 | 0.6  |
| 1.00E+00 | 1    |
| 1.00E+00 | 0.94 |
| 1.00E+00 | 0.98 |
| 1.00E+00 | 0.89 |
| 1.00E+00 | 0.93 |
| 1.00E+00 | 0.98 |
| 1.00E+00 | 1    |
| 1.00E+00 | 0.72 |
| 1.00E+00 | 0.93 |
| 1.00E+00 | 1    |
| 1.00E+00 | 0.84 |
| 1.00E+00 | 0.88 |
| 1.00E+00 | 0.91 |
| 1.00E+00 | 0.72 |
| 1.00E+00 | 0.7  |
| 1.00E+00 | 0.62 |

|          |      |
|----------|------|
| 1.00E+00 | 0.86 |
| 1.00E+00 | 0.89 |
| 1.00E+00 | 0.65 |
| 1.00E+00 | 0.51 |
| 1.00E+00 | 0.64 |
| 1.00E+00 | 0.8  |
| 1.00E+00 | 1    |
| 1.00E+00 | 0.79 |
| 1.00E+00 | 0.85 |
| 1.00E+00 | 0.91 |
| 1.00E+00 | 0.79 |
| 1.00E+00 | 0.75 |
| 1.00E+00 | 0.92 |
| 1.00E+00 | 1    |
| 1.00E+00 | 0.78 |
| 1.00E+00 | 1    |
| 1.00E+00 | 1    |
| 1.00E+00 | 0.29 |
| 1.00E+00 | 0.73 |
| 1.00E+00 | 0.53 |
| 1.00E+00 | 0.5  |
| 1.00E+00 | 0.7  |
| 1.00E+00 | 0.66 |
| 1.00E+00 | 0.67 |
| 1.00E+00 | 0.67 |
| 1.00E+00 | 0.65 |
| 1.00E+00 | 0.94 |
| 1.00E+00 | 0.6  |
| 1.00E+00 | 0.67 |
| 1.00E+00 | 0.92 |
| 1.00E+00 | 0.85 |
| 1.00E+00 | 0.68 |
| 1.00E+00 | 0.85 |
| 1.00E+00 | 0.61 |
| 1.00E+00 | 0.9  |
| 1.00E+00 | 0.41 |
| 1.00E+00 | 0.68 |
| 1.00E+00 | 0.76 |
| 1.00E+00 | 1    |
| 1.00E+00 | 0.84 |
| 1.00E+00 | 0.91 |
| 1.00E+00 | 0.92 |

|          |      |
|----------|------|
| 1.00E+00 | 0.82 |
| 1.00E+00 | 0.71 |
| 1.00E+00 | 0.52 |
| 1.00E+00 | 0.55 |
| 1.00E+00 | 0.93 |
| 1.00E+00 | 0.83 |
| 1.00E+00 | 0.62 |
| 1.00E+00 | 0.74 |
| 1.00E+00 | 1    |
| 1.00E+00 | 1    |
| 1.00E+00 | 0.93 |
| 1.00E+00 | 1    |
| 1.00E+00 | 0.92 |
| 1.00E+00 | 0.55 |
| 1.00E+00 | 0.75 |
| 1.00E+00 | 0.82 |
| 1.00E+00 | 0.95 |
| 1.00E+00 | 0.74 |
| 1.00E+00 | 0.81 |
| 1.00E+00 | 0.84 |
| 1.00E+00 | 0.69 |
| 1.00E+00 | 0.95 |
| 1.00E+00 | 1    |
| 1.00E+00 | 1    |
| 1.00E+00 | 0.73 |
| 1.00E+00 | 0.57 |
| 1.00E+00 | 1    |
| 1.00E+00 | 0.77 |
| 1.00E+00 | 0.74 |
| 1.00E+00 | 0.91 |
| 1.00E+00 | 0.83 |
| 1.00E+00 | 0.79 |
| 1.00E+00 | 0.89 |
| 1.00E+00 | 0.64 |
| 1.00E+00 | 0.69 |
| 1.00E+00 | 0.79 |
| 1.00E+00 | 0.74 |
| 1.00E+00 | 0.91 |
| 1.00E+00 | 0.79 |
| 1.00E+00 | 0.78 |
| 1.00E+00 | 0.6  |

|          |      |
|----------|------|
| 1.00E+00 | 0.92 |
| 1.00E+00 | 1    |

|          |      |
|----------|------|
| 1.00E+00 | 0.44 |
| 1.00E+00 | 0.93 |
| 1.00E+00 | 0.74 |
| 1.00E+00 | 0.79 |
| 1.00E+00 | 0.74 |
| 1.00E+00 | 0.65 |
| 1.00E+00 | 0.82 |
| 1.00E+00 | 1    |
| 1.00E+00 | 0.95 |
| 1.00E+00 | 0.86 |
| 1.00E+00 | 0.93 |
| 1.00E+00 | 0.63 |
| 1.00E+00 | 0.75 |
| 1.00E+00 | 0.93 |
| 1.00E+00 | 0.68 |
| 1.00E+00 | 0.68 |
| 1.00E+00 | 1    |
| 1.00E+00 | 0.85 |
| 1.00E+00 | 0.76 |
| 1.00E+00 | 0.9  |
| 1.00E+00 | 0.63 |
| 1.00E+00 | 0.96 |
| 1.00E+00 | 0.92 |
| 1.00E+00 | 1    |
| 1.00E+00 | 0.95 |
| 1.00E+00 | 0.7  |
| 1.00E+00 | 0.58 |
| 1.00E+00 | 0.62 |
| 1.00E+00 | 1    |
| 1.00E+00 | 1    |
| 1.00E+00 | 0.74 |
| 1.00E+00 | 0.92 |
| 1.00E+00 | 1    |
| 1.00E+00 | 0.95 |
| 1.00E+00 | 0.96 |
| 1.00E+00 | 0.81 |
| 1.00E+00 | 0.69 |

|          |      |
|----------|------|
| 1.00E+00 | 0.76 |
|----------|------|

|          |      |
|----------|------|
| 1.00E+00 | 0.77 |
|----------|------|

|          |      |
|----------|------|
| 1.00E+00 | 0.66 |
| 1.00E+00 | 0.7  |
| 1.00E+00 | 0.92 |
| 1.00E+00 | 0.75 |
| 1.00E+00 | 0.87 |
| 1.00E+00 | 1    |
| 1.00E+00 | 0.87 |
| 1.00E+00 | 1    |
| 1.00E+00 | 1    |
| 1.00E+00 | 1    |
| 1.00E+00 | 1    |
| 1.00E+00 | 1    |
| 1.00E+00 | 0.95 |
| 1.00E+00 | 0.74 |
| 1.00E+00 | 0.59 |
| 1.00E+00 | 1    |
| 1.00E+00 | 0.83 |
| 1.00E+00 | 1    |
| 1.00E+00 | 1    |
| 1.00E+00 | 0.91 |
| 1.00E+00 | 0.8  |
| 1.00E+00 | 0.58 |
| 1.00E+00 | 0.88 |
| 1.00E+00 | 0.85 |
| 1.00E+00 | 0.47 |
| 1.00E+00 | 1    |
| 1.00E+00 | 1    |
| 1.00E+00 | 0.65 |
| 1.00E+00 | 0.9  |
| 1.00E+00 | 1    |
| 1.00E+00 | 0.56 |
| 1.00E+00 | 1    |
| 1.00E+00 | 0.97 |
| 1.00E+00 | 0.94 |
| 1.00E+00 | 0.92 |
| 1.00E+00 | 0.75 |



|          |      |
|----------|------|
| 1.00E+00 | 0.78 |
| 1.00E+00 | 0.89 |
| 1.00E+00 | 0.92 |
| 1.00E+00 | 0.79 |
| 1.00E+00 | 0.88 |
| 1.00E+00 | 0.87 |
| 1.00E+00 | 0.9  |
| 1.00E+00 | 0.86 |
| 1.00E+00 | 0.75 |
| 1.00E+00 | 0.89 |
| 1.00E+00 | 1    |
| 1.00E+00 | 0.89 |
| 1.00E+00 | 0.83 |
| 1.00E+00 | 0.93 |
| 1.00E+00 | 1    |
| 1.00E+00 | 0.89 |
| 1.00E+00 | 0.95 |
| 1.00E+00 | 0.9  |
| 1.00E+00 | 0.88 |
| 1.00E+00 | 0.81 |
| 1.00E+00 | 0.81 |
| 1.00E+00 | 0.8  |
| 1.00E+00 | 0.67 |
| 1.00E+00 | 1    |
| 1.00E+00 | 0.69 |
| 1.00E+00 | 0.78 |
| 1.00E+00 | 0.86 |
| 1.00E+00 | 1    |
| 1.00E+00 | 0.62 |
| 1.00E+00 | 1    |
| 1.00E+00 | 1    |
| 1.00E+00 | 1    |
| 1.00E+00 | 0.9  |
| 1.00E+00 | 0.61 |
| 1.00E+00 | 0.92 |
| 1.00E+00 | 0.86 |
| 1.00E+00 | 1    |
| 1.00E+00 | 0.87 |
| 1.00E+00 | 0.87 |
| 1.00E+00 | 0.84 |
| 1.00E+00 | 0.87 |
| 1.00E+00 | 1    |

|          |      |
|----------|------|
| 1.00E+00 | 1    |
| 1.00E+00 | 0.84 |
| 1.00E+00 | 0.66 |
| 1.00E+00 | 1    |
| 1.00E+00 | 0.85 |
| 1.00E+00 | 0.92 |
| 1.00E+00 | 1    |
| 1.00E+00 | 0.82 |
| 1.00E+00 | 1    |
| 1.00E+00 | 0.88 |
| 1.00E+00 | 0.63 |
| 1.00E+00 | 0.8  |
| 1.00E+00 | 0.68 |
| 1.00E+00 | 0.93 |
| 1.00E+00 | 0.85 |
| 1.00E+00 | 0.86 |
| 1.00E+00 | 0.91 |
| 1.00E+00 | 1    |
| 1.00E+00 | 0.9  |
| 1.00E+00 | 0.88 |
| 1.00E+00 | 0.91 |
| 1.00E+00 | 0.94 |
| 1.00E+00 | 0.88 |
| 1.00E+00 | 0.94 |
| 1.00E+00 | 0.86 |
| 1.00E+00 | 0.92 |
| 1.00E+00 | 0.95 |
| 1.00E+00 | 0.65 |
| 1.00E+00 | 0.82 |
| 1.00E+00 | 0.91 |
| 1.00E+00 | 0.9  |
| 1.00E+00 | 1    |
| 1.00E+00 | 0.9  |
| 1.00E+00 | 0.81 |
| 1.00E+00 | 0.91 |
| 1.00E+00 | 0.9  |
| 1.00E+00 | 0.93 |
| 1.00E+00 | 0.9  |
| 1.00E+00 | 1    |
| 1.00E+00 | 1    |
| 1.00E+00 | 0.94 |
| 1.00E+00 | 0.92 |
| 1.00E+00 | 0.93 |
| 1.00E+00 | 0.75 |
| 1.00E+00 | 0.87 |
| 1.00E+00 | 0.83 |
| 1.00E+00 | 0.64 |

|          |      |
|----------|------|
| 1.00E+00 | 0.82 |
| 1.00E+00 | 0.81 |
| 1.00E+00 | 0.82 |
| 1.00E+00 | 0.57 |
| 1.00E+00 | 1    |
| 1.00E+00 | 0.75 |
| 1.00E+00 | 0.77 |
| 1.00E+00 | 0.62 |
| 1.00E+00 | 0.68 |
| 1.00E+00 | 0.94 |
| 1.00E+00 | 0.69 |
| 1.00E+00 | 0.92 |
| 1.00E+00 | 0.79 |
| 1.00E+00 | 0.91 |
| 1.00E+00 | 0.75 |
| 1.00E+00 | 0.94 |
| 1.00E+00 | 0    |
| 1.00E+00 | 0.92 |
| 1.00E+00 | 0.75 |
| 1.00E+00 | 0.84 |
| 1.00E+00 | 0.91 |
| 1.00E+00 | 1    |
| 1.00E+00 | 0.96 |
| 1.00E+00 | 1    |
| 1.00E+00 | 0.54 |
| 1.00E+00 | 0.93 |
| 1.00E+00 | 1    |
| 1.00E+00 | 0.75 |
| 1.00E+00 | 0.86 |
| 1.00E+00 | 0.92 |
| 1.00E+00 | 0.83 |
| 1.00E+00 | 0.68 |
| 1.00E+00 | 0.6  |
| 1.00E+00 | 0.72 |
| 1.00E+00 | 0.61 |
| 1.00E+00 | 0.84 |
| 1.00E+00 | 0.83 |
| 1.00E+00 | 0.45 |
| 1.00E+00 | 0.59 |
| 1.00E+00 | 0.81 |

|          |      |
|----------|------|
| 1.00E+00 | 0.84 |
| 1.00E+00 | 0.8  |
| 1.00E+00 | 0.82 |
| 1.00E+00 | 0.95 |
| 1.00E+00 | 0.97 |
| 1.00E+00 | 0.71 |
| 1.00E+00 | 0.8  |
| 1.00E+00 | 0.67 |
| 1.00E+00 | 0.61 |
| 1.00E+00 | 0.79 |
| 1.00E+00 | 0.75 |
| 1.00E+00 | 0.78 |
| 1.00E+00 | 0.71 |

|          |      |
|----------|------|
| 1.00E+00 | 1    |
| 1.00E+00 | 0.74 |
| 1.00E+00 | 0.93 |
| 1.00E+00 | 0.92 |
| 1.00E+00 | 0.74 |
| 1.00E+00 | 0.92 |

|          |      |
|----------|------|
| 1.00E+00 | 0.91 |
| 1.00E+00 | 0.88 |
| 1.00E+00 | 1    |
| 1.00E+00 | 1    |

|          |      |
|----------|------|
| 1.00E+00 | 0.64 |
| 1.00E+00 | 0.75 |
| 1.00E+00 | 0.76 |
| 1.00E+00 | 0.94 |
| 1.00E+00 | 0.77 |
| 1.00E+00 | 0.88 |
| 1.00E+00 | 0.95 |
| 1.00E+00 | 0.89 |
| 1.00E+00 | 0.95 |
| 1.00E+00 | 1    |
| 1.00E+00 | 0.83 |
| 1.00E+00 | 0.94 |
| 1.00E+00 | 0.95 |
| 1.00E+00 | 0.73 |
| 1.00E+00 | 0.83 |

|          |      |
|----------|------|
| 1.00E+00 | 0.94 |
| 1.00E+00 | 0.86 |
| 1.00E+00 | 0.75 |
| 1.00E+00 | 0.72 |
| 1.00E+00 | 0.89 |
| 1.00E+00 | 0.83 |

|          |      |
|----------|------|
| 1.00E+00 | 0.9  |
| 1.00E+00 | 0.94 |

|          |      |
|----------|------|
| 1.00E+00 | 0.93 |
| 1.00E+00 | 0.95 |
| 1.00E+00 | 0.93 |

|          |      |
|----------|------|
| 1.00E+00 | 0.87 |
| 1.00E+00 | 0.82 |

|          |      |
|----------|------|
| 1.00E+00 | 0.95 |
| 1.00E+00 | 0.92 |
| 1.00E+00 | 1    |
| 1.00E+00 | 0.94 |
| 1.00E+00 | 0.84 |
| 1.00E+00 | 0.72 |
| 1.00E+00 | 0.75 |
| 1.00E+00 | 1    |
| 1.00E+00 | 0.9  |
| 1.00E+00 | 0.67 |
| 1.00E+00 | 0.89 |
| 1.00E+00 | 0.68 |
| 1.00E+00 | 0.83 |
| 1.00E+00 | 0.63 |
| 1.00E+00 | 0.73 |

|          |      |
|----------|------|
| 1.00E+00 | 0.84 |
| 1.00E+00 | 0.91 |
| 1.00E+00 | 0.75 |
| 1.00E+00 | 0.88 |
| 1.00E+00 | 0.89 |
| 1.00E+00 | 0.88 |
| 1.00E+00 | 0.88 |
| 1.00E+00 | 0.94 |
| 1.00E+00 | 0.92 |
| 1.00E+00 | 0.77 |
| 1.00E+00 | 0.94 |
| 1.00E+00 | 0.93 |

|          |      |
|----------|------|
| 1.00E+00 | 0.96 |
| 1.00E+00 | 1    |
| 1.00E+00 | 1    |
| 1.00E+00 | 0.61 |

|          |      |
|----------|------|
| 1.00E+00 | 0.79 |
| 1.00E+00 | 0.96 |
| 1.00E+00 | 0.97 |
| 1.00E+00 | 0.83 |
| 1.00E+00 | 0.93 |
| 1.00E+00 | 0.97 |
| 1.00E+00 | 0.93 |
| 1.00E+00 | 0.83 |
| 1.00E+00 | 0.97 |
| 1.00E+00 | 0.86 |
| 1.00E+00 | 0.84 |
| 1.00E+00 | 0.87 |
| 1.00E+00 | 0.82 |
| 1.00E+00 | 0.88 |
| 1.00E+00 | 0.88 |
| 1.00E+00 | 0.8  |
| 1.00E+00 | 0.51 |
| 1.00E+00 | 0.83 |
| 1.00E+00 | 0.83 |

|          |      |
|----------|------|
| 1.00E+00 | 0.96 |
| 1.00E+00 | 0.8  |
| 1.00E+00 | 0.84 |
| 1.00E+00 | 0.65 |
| 1.00E+00 | 0.9  |
| 1.00E+00 | 0.91 |

|          |      |
|----------|------|
| 1.00E+00 | 0.61 |
| 1.00E+00 | 0.6  |
| 1.00E+00 | 0.97 |

|          |      |
|----------|------|
| 1.00E+00 | 1    |
| 1.00E+00 | 0.96 |
| 1.00E+00 | 0.96 |
| 1.00E+00 | 0.92 |

|          |      |
|----------|------|
| 1.00E+00 | 0.8  |
| 1.00E+00 | 0.91 |
| 1.00E+00 | 0.9  |
| 1.00E+00 | 1    |
| 1.00E+00 | 0.79 |
| 1.00E+00 | 0.9  |
| 1.00E+00 | 0.96 |
| 1.00E+00 | 0.68 |
| 1.00E+00 | 0.84 |
| 1.00E+00 | 0.66 |
| 1.00E+00 | 1    |
| 1.00E+00 | 0.83 |
| 1.00E+00 | 0.93 |
| 1.00E+00 | 0.78 |
| 1.00E+00 | 0.59 |
| 1.00E+00 | 0.96 |

|          |      |
|----------|------|
| 1.00E+00 | 0.94 |
| 1.00E+00 | 0.96 |
| 1.00E+00 | 0.96 |
| 1.00E+00 | 0.91 |
| 1.00E+00 | 1    |
| 1.00E+00 | 0.78 |
| 1.00E+00 | 1    |
| 1.00E+00 | 0.97 |
| 1.00E+00 | 0.93 |
| 1.00E+00 | 0.88 |
| 1.00E+00 | 1    |
| 1.00E+00 | 0.86 |
| 1.00E+00 | 0.81 |
| 1.00E+00 | 1    |
| 1.00E+00 | 1    |
| 1.00E+00 | 1    |
| 1.00E+00 | 1    |
| 1.00E+00 | 0.63 |
| 1.00E+00 | 0.66 |
| 1.00E+00 | 0.91 |
| 1.00E+00 | 1    |
| 1.00E+00 | 1    |
| 1.00E+00 | 0.94 |
| 1.00E+00 | 0.96 |
| 1.00E+00 | 0.96 |
| 1.00E+00 | 0.73 |
| 1.00E+00 | 0.97 |
| 1.00E+00 | 0.95 |
| 1.00E+00 | 1    |
| 1.00E+00 | 0.9  |
| 1.00E+00 | 1    |

|          |      |
|----------|------|
| 1.00E+00 | 0.73 |
| 1.00E+00 | 1    |

|          |      |
|----------|------|
| 1.00E+00 | 0.89 |
| 1.00E+00 | 0.8  |
| 1.00E+00 | 0.79 |
| 1.00E+00 | 0.78 |
| 1.00E+00 | 0.91 |
| 1.00E+00 | 0.73 |
| 1.00E+00 | 0.93 |
| 1.00E+00 | 0.92 |
| 1.00E+00 | 0.83 |
| 1.00E+00 | 0.95 |
| 1.00E+00 | 0.91 |
| 1.00E+00 | 0.92 |
| 1.00E+00 | 0.87 |
| 1.00E+00 | 0.61 |
| 1.00E+00 | 0.87 |
| 1.00E+00 | 0.75 |
| 1.00E+00 | 0.89 |
| 1.00E+00 | 0.89 |
| 1.00E+00 | 0.84 |
| 1.00E+00 | 0.79 |
| 1.00E+00 | 0.79 |
| 1.00E+00 | 0.86 |
| 1.00E+00 | 0.93 |
| 1.00E+00 | 0.5  |
| 1.00E+00 | 0.69 |
| 1.00E+00 | 0.85 |

|          |      |
|----------|------|
| 1.00E+00 | 0.92 |
| 1.00E+00 | 0.82 |
| 1.00E+00 | 0.89 |
| 1.00E+00 | 0.9  |
| 1.00E+00 | 0.9  |
| 1.00E+00 | 0.89 |
| 1.00E+00 | 0.83 |
| 1.00E+00 | 0.9  |
| 1.00E+00 | 0.43 |
| 1.00E+00 | 0.9  |
| 1.00E+00 | 0.78 |
| 1.00E+00 | 0.62 |
| 1.00E+00 | 0.58 |
| 1.00E+00 | 0.79 |
| 1.00E+00 | 0.86 |
| 1.00E+00 | 0.78 |
| 1.00E+00 | 0.52 |



|          |      |
|----------|------|
| 1.00E+00 | 0.91 |
| 1.00E+00 | 0.93 |
| 1.00E+00 | 0.95 |
| 1.00E+00 | 0.87 |
| 1.00E+00 | 0.9  |
| 1.00E+00 | 0.87 |
| 1.00E+00 | 0.91 |
| 1.00E+00 | 0.9  |
| 1.00E+00 | 0.94 |
| 1.00E+00 | 0.94 |
| 1.00E+00 | 0.68 |
| 1.00E+00 | 0.58 |
| 1.00E+00 | 0.64 |
| 1.00E+00 | 0.83 |
| 1.00E+00 | 0.93 |
| 1.00E+00 | 0.93 |
| 1.00E+00 | 0.9  |
| 1.00E+00 | 0.83 |
| 1.00E+00 | 0.93 |
| 1.00E+00 | 0.84 |
| 1.00E+00 | 0.75 |
| 1.00E+00 | 0.83 |
| 1.00E+00 | 0.8  |
| 1.00E+00 | 0.66 |
| 1.00E+00 | 0.69 |
| 1.00E+00 | 0.78 |
| 1.00E+00 | 0.74 |
| 1.00E+00 | 0.79 |
| 1.00E+00 | 0.88 |
| 1.00E+00 | 0.77 |
| 1.00E+00 | 0.92 |
| 1.00E+00 | 0.71 |
| 1.00E+00 | 0.95 |
| 1.00E+00 | 0.95 |
| 1.00E+00 | 0.94 |
| 1.00E+00 | 0.51 |
| 1.00E+00 | 0.78 |
| 1.00E+00 | 1    |
| 1.00E+00 | 0.93 |
| 1.00E+00 | 0.81 |
| 1.00E+00 | 0.85 |
| 1.00E+00 | 0.84 |
| 1.00E+00 | 0.89 |
| 1.00E+00 | 1    |
| 1.00E+00 | 0.73 |
| 1.00E+00 | 0.86 |
| 1.00E+00 | 0.47 |
| 1.00E+00 | 1    |
| 1.00E+00 | 0.94 |

|          |      |
|----------|------|
| 1.00E+00 | 1    |
| 1.00E+00 | 0.9  |
| 1.00E+00 | 1    |
| 1.00E+00 | 0.91 |
| 1.00E+00 | 1    |
| 1.00E+00 | 0.78 |
| 1.00E+00 | 0.93 |
| 1.00E+00 | 0.93 |
| 1.00E+00 | 0.79 |
| 1.00E+00 | 0.84 |

|          |      |
|----------|------|
| 1.00E+00 | 0.9  |
| 1.00E+00 | 0.47 |
| 1.00E+00 | 0.96 |
| 1.00E+00 | 0.9  |
| 1.00E+00 | 0.62 |
| 1.00E+00 | 0.63 |
| 1.00E+00 | 0.85 |
| 1.00E+00 | 0.82 |
| 1.00E+00 | 0.72 |
| 1.00E+00 | 0.75 |
| 1.00E+00 | 0.78 |
| 1.00E+00 | 0.86 |
| 1.00E+00 | 0.75 |

|          |      |
|----------|------|
| 1.00E+00 | 1    |
| 1.00E+00 | 1    |
| 1.00E+00 | 1    |
| 1.00E+00 | 1    |
| 1.00E+00 | 0.51 |
| 1.00E+00 | 0.92 |
| 1.00E+00 | 1    |
| 1.00E+00 | 0.85 |
| 1.00E+00 | 0.94 |
| 1.00E+00 | 0.94 |
| 1.00E+00 | 0.95 |

|          |      |
|----------|------|
| 1.00E+00 | 0.57 |
| 1.00E+00 | 0.53 |
| 1.00E+00 | 0.9  |
| 1.00E+00 | 0.69 |
| 1.00E+00 | 0.61 |

|          |      |
|----------|------|
| 1.00E+00 | 0.61 |
| 1.00E+00 | 0.55 |
| 1.00E+00 | 0.85 |

|          |      |
|----------|------|
| 1.00E+00 | 0.56 |
| 1.00E+00 | 0.93 |

|          |      |
|----------|------|
| 1.00E+00 | 0.74 |
| 1.00E+00 | 0.55 |
| 1.00E+00 | 0.9  |
| 1.00E+00 | 0.65 |
| 1.00E+00 | 0.38 |
| 1.00E+00 | 0.78 |
| 1.00E+00 | 0.6  |

|          |      |
|----------|------|
| 1.00E+00 | 0.88 |
| 1.00E+00 | 0.79 |
| 1.00E+00 | 0.92 |
| 1.00E+00 | 0.87 |
| 1.00E+00 | 0.9  |

|          |      |
|----------|------|
| 1.00E+00 | 0.79 |
| 1.00E+00 | 0.89 |
| 1.00E+00 | 0.45 |
| 1.00E+00 | 0.81 |
| 1.00E+00 | 0.89 |
| 1.00E+00 | 0.54 |
| 1.00E+00 | 0.5  |
| 1.00E+00 | 1    |

|          |      |
|----------|------|
| 1.00E+00 | 0.95 |
| 1.00E+00 | 0.85 |
| 1.00E+00 | 0.88 |
| 1.00E+00 | 1    |
| 1.00E+00 | 0.95 |
| 1.00E+00 | 0.68 |
| 1.00E+00 | 0.95 |
| 1.00E+00 | 0.78 |
| 1.00E+00 | 1    |
| 1.00E+00 | 0.57 |
| 1.00E+00 | 1    |
| 1.00E+00 | 1    |

|          |      |
|----------|------|
| 1.00E+00 | 0.78 |
| 1.00E+00 | 0.9  |
| 1.00E+00 | 0.9  |
| 1.00E+00 | 0.86 |
| 1.00E+00 | 0.92 |

|          |      |
|----------|------|
| 1.00E+00 | 0.83 |
| 1.00E+00 | 0.84 |

|          |      |
|----------|------|
| 1.00E+00 | 0.93 |
| 1.00E+00 | 0.94 |

|          |      |
|----------|------|
| 1.00E+00 | 0.98 |
| 1.00E+00 | 0.96 |
| 1.00E+00 | 0.82 |
| 1.00E+00 | 0.95 |
| 1.00E+00 | 0.9  |
| 1.00E+00 | 1    |
| 1.00E+00 | 0.65 |
| 1.00E+00 | 0.84 |
| 1.00E+00 | 0.71 |

|          |      |
|----------|------|
| 1.00E+00 | 0.65 |
| 1.00E+00 | 0.8  |
| 1.00E+00 | 0.66 |
| 1.00E+00 | 0.92 |
| 1.00E+00 | 0.92 |
| 1.00E+00 | 0.93 |
| 1.00E+00 | 0.95 |
| 1.00E+00 | 0.92 |
| 1.00E+00 | 0.8  |
| 1.00E+00 | 0.75 |
| 1.00E+00 | 1    |
| 1.00E+00 | 0.75 |
| 1.00E+00 | 0.85 |
| 1.00E+00 | 0.72 |
| 1.00E+00 | 0.76 |
| 1.00E+00 | 0.93 |
| 1.00E+00 | 0.98 |
| 1.00E+00 | 0.96 |
| 1.00E+00 | 0.93 |
| 1.00E+00 | 0.92 |

|          |      |
|----------|------|
| 1.00E+00 | 0.91 |
| 1.00E+00 | 0.69 |

|          |      |
|----------|------|
| 1.00E+00 | 0.93 |
| 1.00E+00 | 0.95 |
| 1.00E+00 | 0.9  |

|          |      |
|----------|------|
| 1.00E+00 | 0.92 |
| 1.00E+00 | 0.81 |
| 1.00E+00 | 0.84 |
| 1.00E+00 | 0.53 |
| 1.00E+00 | 0.94 |

|          |      |
|----------|------|
| 1.00E+00 | 1    |
| 1.00E+00 | 0.92 |
| 1.00E+00 | 1    |
| 1.00E+00 | 1    |
| 1.00E+00 | 0.56 |
| 1.00E+00 | 0.92 |
| 1.00E+00 | 0.94 |
| 1.00E+00 | 0.86 |
| 1.00E+00 | 0.74 |
| 1.00E+00 | 0.94 |
| 1.00E+00 | 0.84 |
| 1.00E+00 | 0.82 |
| 1.00E+00 | 0.93 |
| 1.00E+00 | 0.62 |
| 1.00E+00 | 0.88 |
| 1.00E+00 | 0.71 |
| 1.00E+00 | 1    |
| 1.00E+00 | 0.76 |
| 1.00E+00 | 0.68 |
| 1.00E+00 | 0.62 |
| 1.00E+00 | 0.81 |
| 1.00E+00 | 0.85 |
| 1.00E+00 | 0.64 |
| 1.00E+00 | 0.76 |
| 1.00E+00 | 0.75 |
| 1.00E+00 | 0.89 |
| 1.00E+00 | 0.88 |
| 1.00E+00 | 0.83 |
| 1.00E+00 | 0.96 |
| 1.00E+00 | 1    |
| 1.00E+00 | 1    |
| 1.00E+00 | 0.8  |
| 1.00E+00 | 0.88 |
| 1.00E+00 | 0.75 |
| 1.00E+00 | 0.83 |
| 1.00E+00 | 0.88 |
| 1.00E+00 | 0.85 |
| 1.00E+00 | 1    |
| 1.00E+00 | 1    |

|          |      |
|----------|------|
| 1.00E+00 | 0.68 |
| 1.00E+00 | 0.71 |
| 1.00E+00 | 1    |
| 1.00E+00 | 0.69 |
| 1.00E+00 | 0.77 |
| 1.00E+00 | 1    |
| 1.00E+00 | 0.71 |
| 1.00E+00 | 0.74 |
| 1.00E+00 | 0.54 |
| 1.00E+00 | 1    |
| 1.00E+00 | 0.48 |
| 1.00E+00 | 0.52 |
| 1.00E+00 | 0.81 |
| 1.00E+00 | 0.89 |
| 1.00E+00 | 0.88 |

|          |      |
|----------|------|
| 1.00E+00 | 0.68 |
| 1.00E+00 | 0.86 |
| 1.00E+00 | 1    |
| 1.00E+00 | 0.96 |
| 1.00E+00 | 0.63 |
| 1.00E+00 | 0.81 |
| 1.00E+00 | 0.79 |
| 1.00E+00 | 0.93 |
| 1.00E+00 | 0.96 |
| 1.00E+00 | 0.61 |

|          |      |
|----------|------|
| 1.00E+00 | 0.89 |
| 1.00E+00 | 0.56 |
| 1.00E+00 | 0.98 |
| 1.00E+00 | 0.97 |
| 1.00E+00 | 0.96 |
| 1.00E+00 | 0.88 |
| 1.00E+00 | 0.82 |
| 1.00E+00 | 0.81 |
| 1.00E+00 | 0.87 |
| 1.00E+00 | 0.88 |
| 1.00E+00 | 1    |
| 1.00E+00 | 0.58 |
| 1.00E+00 | 0.69 |
| 1.00E+00 | 0.89 |
| 1.00E+00 | 0.75 |
| 1.00E+00 | 1    |
| 1.00E+00 | 0.81 |
| 1.00E+00 | 0.9  |
| 1.00E+00 | 0.89 |

|          |      |
|----------|------|
| 1.00E+00 | 0.78 |
| 1.00E+00 | 0.96 |
| 1.00E+00 | 0.9  |
| 1.00E+00 | 0.81 |
| 1.00E+00 | 0.7  |

|          |      |
|----------|------|
| 1.00E+00 | 0.71 |
| 1.00E+00 | 0.77 |
| 1.00E+00 | 1    |
| 1.00E+00 | 1    |
| 1.00E+00 | 1    |
| 1.00E+00 | 0.65 |

|          |      |
|----------|------|
| 1.00E+00 | 0.49 |
| 1.00E+00 | 1    |
| 1.00E+00 | 0.89 |
| 1.00E+00 | 0.85 |
| 1.00E+00 | 0.64 |
| 1.00E+00 | 0.9  |

|          |      |
|----------|------|
| 1.00E+00 | 0.92 |
| 1.00E+00 | 0.9  |
| 1.00E+00 | 0.66 |
| 1.00E+00 | 0.91 |
| 1.00E+00 | 0.91 |
| 1.00E+00 | 0.68 |
| 1.00E+00 | 0.6  |
| 1.00E+00 | 0.75 |
| 1.00E+00 | 0.79 |
| 1.00E+00 | 0.82 |
| 1.00E+00 | 0.79 |
| 1.00E+00 | 0.95 |
| 1.00E+00 | 0.84 |
| 1.00E+00 | 0.82 |
| 1.00E+00 | 0.72 |
| 1.00E+00 | 0.94 |
| 1.00E+00 | 1    |

|          |      |
|----------|------|
| 1.00E+00 | 0.95 |
| 1.00E+00 | 0.91 |
| 1.00E+00 | 1    |
| 1.00E+00 | 0.93 |
| 1.00E+00 | 0.88 |
| 1.00E+00 | 1    |
| 1.00E+00 | 1    |
| 1.00E+00 | 1    |
| 1.00E+00 | 0.66 |
| 1.00E+00 | 1    |
| 1.00E+00 | 0.87 |
| 1.00E+00 | 0.9  |
| 1.00E+00 | 0.96 |
| 1.00E+00 | 0.8  |
| 1.00E+00 | 0.95 |
| 1.00E+00 | 1    |
| 1.00E+00 | 0.81 |
| 1.00E+00 | 1    |
| 1.00E+00 | 1    |
| 1.00E+00 | 0.76 |
| 1.00E+00 | 0.63 |
| 1.00E+00 | 0.74 |
| 1.00E+00 | 0.62 |
| 1.00E+00 | 1    |
| 1.00E+00 | 0.74 |
| 1.00E+00 | 0.74 |
| 1.00E+00 | 0.57 |
| 1.00E+00 | 1    |
| 1.00E+00 | 0.74 |
| 1.00E+00 | 0.94 |
| 1.00E+00 | 0.92 |
| 1.00E+00 | 0.77 |
| 1.00E+00 | 1    |
| 1.00E+00 | 0.93 |
| 1.00E+00 | 0.86 |
| 1.00E+00 | 1    |
| 1.00E+00 | 0.96 |
| 1.00E+00 | 0.94 |
| 1.00E+00 | 0.95 |
| 1.00E+00 | 0.83 |
| 1.00E+00 | 0.86 |



|          |      |
|----------|------|
| 1.00E+00 | 0.88 |
| 1.00E+00 | 0.94 |
| 1.00E+00 | 1    |
| 1.00E+00 | 0.71 |
| 1.00E+00 | 0.95 |
| 1.00E+00 | 0.79 |
| 1.00E+00 | 0.86 |
| 1.00E+00 | 0.85 |
| 1.00E+00 | 1    |
| 1.00E+00 | 0.78 |
| 1.00E+00 | 0.61 |
| 1.00E+00 | 0.77 |
| 1.00E+00 | 0.62 |
| 1.00E+00 | 0.73 |
| 1.00E+00 | 0.88 |
| 1.00E+00 | 0.71 |
| 1.00E+00 | 0.74 |
| 1.00E+00 | 0.57 |
| 1.00E+00 | 0.78 |
| 1.00E+00 | 0.75 |
| 1.00E+00 | 0.8  |
| 1.00E+00 | 0.75 |
| 1.00E+00 | 0.59 |
| 1.00E+00 | 0.76 |
| 1.00E+00 | 0.8  |
| 1.00E+00 | 0.84 |
| 1.00E+00 | 0.46 |
| 1.00E+00 | 0.83 |
| 1.00E+00 | 0.83 |
| 1.00E+00 | 0.9  |
| 1.00E+00 | 0.9  |
| 1.00E+00 | 0.58 |
| 1.00E+00 | 0.87 |
| 1.00E+00 | 0.89 |
| 1.00E+00 | 0.97 |
| 1.00E+00 | 0.94 |
| 1.00E+00 | 1    |
| 1.00E+00 | 0.91 |
| 1.00E+00 | 1    |
| 1.00E+00 | 0.83 |
| 1.00E+00 | 1    |
| 1.00E+00 | 0.68 |
| 1.00E+00 | 0.86 |
| 1.00E+00 | 1    |
| 1.00E+00 | 0.74 |
| 1.00E+00 | 0.89 |
| 1.00E+00 | 1    |
| 1.00E+00 | 0.71 |

|          |      |
|----------|------|
| 1.00E+00 | 1    |
| 1.00E+00 | 0.88 |
| 1.00E+00 | 0.83 |

|          |      |
|----------|------|
| 1.00E+00 | 0.69 |
|----------|------|

|          |      |
|----------|------|
| 1.00E+00 | 0.92 |
| 1.00E+00 | 0.89 |
| 1.00E+00 | 0.89 |
| 1.00E+00 | 0.45 |

|          |      |
|----------|------|
| 1.00E+00 | 0.9  |
| 1.00E+00 | 0.86 |
| 1.00E+00 | 0.96 |
| 1.00E+00 | 0.72 |
| 1.00E+00 | 0.93 |
| 1.00E+00 | 0.93 |
| 1.00E+00 | 0.91 |
| 1.00E+00 | 0.71 |
| 1.00E+00 | 0.9  |
| 1.00E+00 | 0.91 |

|          |      |
|----------|------|
| 1.00E+00 | 0    |
| 1.00E+00 | 0.78 |
| 1.00E+00 | 0.92 |

|          |      |
|----------|------|
| 1.00E+00 | 0.94 |
| 1.00E+00 | 0.92 |
| 1.00E+00 | 0.95 |
| 1.00E+00 | 0.87 |
| 1.00E+00 | 0.94 |
| 1.00E+00 | 0.94 |
| 1.00E+00 | 0.8  |
| 1.00E+00 | 0.72 |
| 1.00E+00 | 1    |
| 1.00E+00 | 1    |
| 1.00E+00 | 0.83 |

|          |      |
|----------|------|
| 1.00E+00 | 0.88 |
| 1.00E+00 | 0.92 |

|          |      |
|----------|------|
| 1.00E+00 | 0.85 |
| 1.00E+00 | 0.86 |
| 1.00E+00 | 0.67 |
| 1.00E+00 | 0.81 |
| 1.00E+00 | 0.77 |
| 1.00E+00 | 0.94 |

|          |      |
|----------|------|
| 1.00E+00 | 0.83 |
| 1.00E+00 | 0.6  |
| 1.00E+00 | 0.58 |
| 1.00E+00 | 0.9  |
| 1.00E+00 | 0.93 |
| 1.00E+00 | 0.68 |
| 1.00E+00 | 0.68 |
| 1.00E+00 | 0.93 |
| 1.00E+00 | 0.95 |
| 1.00E+00 | 0.79 |
| 1.00E+00 | 1    |

|          |      |
|----------|------|
| 1.00E+00 | 0.89 |
| 1.00E+00 | 1    |
| 1.00E+00 | 0.94 |
| 1.00E+00 | 0.71 |
| 1.00E+00 | 0.76 |
| 1.00E+00 | 0.88 |
| 1.00E+00 | 0.76 |
| 1.00E+00 | 0.9  |
| 1.00E+00 | 1    |
| 1.00E+00 | 0.78 |
| 1.00E+00 | 0.88 |
| 1.00E+00 | 0.93 |
| 1.00E+00 | 0.95 |
| 1.00E+00 | 0.94 |
| 1.00E+00 | 0.77 |
| 1.00E+00 | 0.72 |
| 1.00E+00 | 1    |
| 1.00E+00 | 0.83 |
| 1.00E+00 | 0.79 |
| 1.00E+00 | 0.66 |
| 1.00E+00 | 0.54 |
| 1.00E+00 | 0.89 |
| 1.00E+00 | 0.94 |
| 1.00E+00 | 0.81 |
| 1.00E+00 | 0    |
| 1.00E+00 | 0    |
| 1.00E+00 | 0.5  |
| 1.00E+00 | 0.46 |
| 1.00E+00 | 0.6  |
| 1.00E+00 | 0.9  |
| 1.00E+00 | 0.76 |
| 1.00E+00 | 0.81 |
| 1.00E+00 | 0.96 |
| 1.00E+00 | 0.69 |
| 1.00E+00 | 0.96 |
| 1.00E+00 | 0.65 |
| 1.00E+00 | 1    |

1.00E+00 1

1.00E+00 0.68

1.00E+00 0.86

1.00E+00 0.96

1.00E+00 1

1.00E+00 0.81

1.00E+00 1

1.00E+00 0.93

1.00E+00 0.88

1.00E+00 0.93

1.00E+00 0.55

1.00E+00 1

1.00E+00 1

1.00E+00 0.63

1.00E+00 0.74

1.00E+00 0.84

1.00E+00 0.78

1.00E+00 0.94

1.00E+00 0.93

1.00E+00 0.88

1.00E+00 0.66

1.00E+00 0.9

1.00E+00 0.69

1.00E+00 1

1.00E+00 0.53

1.00E+00 0.89

1.00E+00 1

1.00E+00 0.82

1.00E+00 0.69

1.00E+00 0.63

1.00E+00 0.67

1.00E+00 1

1.00E+00 0.52

1.00E+00 0.87

1.00E+00 0.66

1.00E+00 0.93

1.00E+00 0.9

1.00E+00 0.83

1.00E+00 0.86

1.00E+00 0.74

1.00E+00 1

1.00E+00 0.87

1.00E+00 0.93

1.00E+00 1

1.00E+00 1

1.00E+00 0.68

1.00E+00 0.8

1.00E+00 1

1.00E+00 0.75

1.00E+00 1

1.00E+00 0.89

1.00E+00 0

1.00E+00 0.96

1.00E+00 1

1.00E+00 0.88

1.00E+00 1

1.00E+00 1

1.00E+00 0.89

1.00E+00 0.83

1.00E+00 0.89

1.00E+00 0.91

1.00E+00 0.59

1.00E+00 0.88

1.00E+00 0.37

1.00E+00 1

1.00E+00 0.91

1.00E+00 0.79

1.00E+00 0.61

1.00E+00 0.93

1.00E+00 0.85

1.00E+00 0.97

1.00E+00 0.89

1.00E+00 0.73

1.00E+00 0.58

|          |      |
|----------|------|
| 1.00E+00 | 0.8  |
| 1.00E+00 | 0.85 |
| 1.00E+00 | 0.81 |
| 1.00E+00 | 0.97 |
| 1.00E+00 | 0.86 |
| 1.00E+00 | 0.71 |
| 1.00E+00 | 0.72 |
| 1.00E+00 | 0.6  |
| 1.00E+00 | 0.94 |
| 1.00E+00 | 1    |
| 1.00E+00 | 0.75 |
| 1.00E+00 | 0.75 |
| 1.00E+00 | 0.83 |
| 1.00E+00 | 0.61 |
| 1.00E+00 | 0.92 |
| 1.00E+00 | 0.66 |

|          |      |
|----------|------|
| 1.00E+00 | 0.6  |
| 1.00E+00 | 0.54 |
| 1.00E+00 | 1    |
| 1.00E+00 | 0.87 |

|          |      |
|----------|------|
| 1.00E+00 | 0.76 |
|----------|------|

|          |      |
|----------|------|
| 1.00E+00 | 0.82 |
|----------|------|

|          |      |
|----------|------|
| 1.00E+00 | 0.7  |
| 1.00E+00 | 0.75 |
| 1.00E+00 | 0.67 |
| 1.00E+00 | 0.86 |
| 1.00E+00 | 0.82 |

|          |      |
|----------|------|
| 1.00E+00 | 0.89 |
| 1.00E+00 | 0.96 |
| 1.00E+00 | 0.95 |
| 1.00E+00 | 0.84 |
| 1.00E+00 | 1    |
| 1.00E+00 | 1    |
| 1.00E+00 | 0.98 |
| 1.00E+00 | 1    |
| 1.00E+00 | 0.89 |
| 1.00E+00 | 0.94 |
| 1.00E+00 | 0.63 |

|          |      |
|----------|------|
| 1.00E+00 | 0.9  |
| 1.00E+00 | 0.83 |
| 1.00E+00 | 0.85 |
| 1.00E+00 | 0.93 |

|          |      |
|----------|------|
| 1.00E+00 | 0.96 |
| 1.00E+00 | 0.9  |
| 1.00E+00 | 1    |
| 1.00E+00 | 0.84 |
| 1.00E+00 | 0.86 |
| 1.00E+00 | 0.94 |
| 1.00E+00 | 0.95 |
| 1.00E+00 | 1    |
| 1.00E+00 | 0.45 |
| 1.00E+00 | 0.93 |
| 1.00E+00 | 0.74 |
| 1.00E+00 | 0.5  |
| 1.00E+00 | 0.51 |

|          |      |
|----------|------|
| 1.00E+00 | 0.64 |
| 1.00E+00 | 0.72 |

|          |      |
|----------|------|
| 1.00E+00 | 0.7  |
| 1.00E+00 | 0.56 |
| 1.00E+00 | 0.93 |

|          |      |
|----------|------|
| 1.00E+00 | 0.69 |
| 1.00E+00 | 0.82 |
| 1.00E+00 | 1    |
| 1.00E+00 | 0.93 |
| 1.00E+00 | 1    |
| 1.00E+00 | 1    |
| 1.00E+00 | 0.94 |
| 1.00E+00 | 1    |
| 1.00E+00 | 0.88 |

|          |      |
|----------|------|
| 1.00E+00 | 0.93 |
| 1.00E+00 | 0.64 |
| 1.00E+00 | 0.74 |
| 1.00E+00 | 0.66 |
| 1.00E+00 | 0.78 |

|          |      |
|----------|------|
| 1.00E+00 | 0.81 |
| 1.00E+00 | 0.79 |
| 1.00E+00 | 0.61 |
| 1.00E+00 | 0.7  |
| 1.00E+00 | 0.91 |
| 1.00E+00 | 0.87 |
| 1.00E+00 | 0.78 |
| 1.00E+00 | 0.52 |

|          |      |
|----------|------|
| 1.00E+00 | 0.51 |
| 1.00E+00 | 1    |
| 1.00E+00 | 0.92 |
| 1.00E+00 | 0.93 |
| 1.00E+00 | 0.92 |
| 1.00E+00 | 0.91 |
| 1.00E+00 | 0.83 |
| 1.00E+00 | 0.78 |
| 1.00E+00 | 0.76 |
| 1.00E+00 | 0.89 |
| 1.00E+00 | 0.95 |
| 1.00E+00 | 1    |
| 1.00E+00 | 0.96 |
| 1.00E+00 | 0.94 |
| 1.00E+00 | 1    |
| 1.00E+00 | 0.69 |
| 1.00E+00 | 0.93 |
| 1.00E+00 | 0.84 |
| 1.00E+00 | 0.83 |
| 1.00E+00 | 0.8  |
| 1.00E+00 | 0.63 |
| 1.00E+00 | 0.96 |
| 1.00E+00 | 0.81 |
| 1.00E+00 | 0.81 |
| 1.00E+00 | 0.78 |
| 1.00E+00 | 0.73 |
| 1.00E+00 | 0.79 |
| 1.00E+00 | 0.81 |
| 1.00E+00 | 0.76 |
| 1.00E+00 | 1    |
| 1.00E+00 | 0.74 |
| 1.00E+00 | 0.67 |
| 1.00E+00 | 1    |
| 1.00E+00 | 0.9  |
| 1.00E+00 | 0.89 |
| 1.00E+00 | 0.89 |
| 1.00E+00 | 0.95 |
| 1.00E+00 | 0.79 |
| 1.00E+00 | 0.92 |



|          |      |
|----------|------|
| 1.00E+00 | 0.76 |
| 1.00E+00 | 0.81 |
| 1.00E+00 | 0.93 |
| 1.00E+00 | 0.83 |
| 1.00E+00 | 0.81 |
| 1.00E+00 | 0.95 |

|          |      |
|----------|------|
| 1.00E+00 | 1    |
| 1.00E+00 | 0.85 |
| 1.00E+00 | 0.87 |
| 1.00E+00 | 0.87 |

|          |      |
|----------|------|
| 1.00E+00 | 0.5  |
| 1.00E+00 | 0.45 |
| 1.00E+00 | 0.69 |
| 1.00E+00 | 0.96 |
| 1.00E+00 | 0.78 |
| 1.00E+00 | 0.86 |
| 1.00E+00 | 0.97 |
| 1.00E+00 | 1    |
| 1.00E+00 | 1    |

|          |      |
|----------|------|
| 1.00E+00 | 0.88 |
| 1.00E+00 | 0.85 |

|          |      |
|----------|------|
| 1.00E+00 | 0.73 |
| 1.00E+00 | 0.94 |

|          |      |
|----------|------|
| 1.00E+00 | 0.68 |
| 1.00E+00 | 0.9  |
| 1.00E+00 | 0.77 |
| 1.00E+00 | 0.61 |
| 1.00E+00 | 0.93 |
| 1.00E+00 | 0.86 |
| 1.00E+00 | 0.84 |
| 1.00E+00 | 0.8  |
| 1.00E+00 | 1    |
| 1.00E+00 | 0.83 |
| 1.00E+00 | 0.91 |
| 1.00E+00 | 0.8  |

|          |      |
|----------|------|
| 1.00E+00 | 0.9  |
| 1.00E+00 | 0.45 |
| 1.00E+00 | 0.9  |
| 1.00E+00 | 0.95 |
| 1.00E+00 | 1    |
| 1.00E+00 | 0.94 |
| 1.00E+00 | 0.94 |

|          |      |
|----------|------|
| 1.00E+00 | 0.94 |
| 1.00E+00 | 0.76 |

|          |      |
|----------|------|
| 1.00E+00 | 0.74 |
| 1.00E+00 | 0.62 |

|          |      |
|----------|------|
| 1.00E+00 | 0.84 |
| 1.00E+00 | 0.96 |
| 1.00E+00 | 0.84 |
| 1.00E+00 | 0.97 |
| 1.00E+00 | 0.73 |
| 1.00E+00 | 0.8  |
| 1.00E+00 | 0.77 |
| 1.00E+00 | 0.54 |

|          |      |
|----------|------|
| 1.00E+00 | 0.84 |
| 1.00E+00 | 0.96 |
| 1.00E+00 | 0.91 |
| 1.00E+00 | 0.68 |
| 1.00E+00 | 0.64 |

|          |      |
|----------|------|
| 1.00E+00 | 0.91 |
| 1.00E+00 | 0.9  |
| 1.00E+00 | 0.79 |
| 1.00E+00 | 0.92 |
| 1.00E+00 | 0.93 |
| 1.00E+00 | 1    |
| 1.00E+00 | 0.97 |
| 1.00E+00 | 0.57 |
| 1.00E+00 | 1    |
| 1.00E+00 | 0.8  |
| 1.00E+00 | 0.58 |
| 1.00E+00 | 0.97 |
| 1.00E+00 | 0.81 |
| 1.00E+00 | 0.69 |
| 1.00E+00 | 0.67 |
| 1.00E+00 | 1    |
| 1.00E+00 | 0.88 |
| 1.00E+00 | 1    |

|          |      |
|----------|------|
| 1.00E+00 | 1    |
| 1.00E+00 | 0.51 |
| 1.00E+00 | 0.77 |
| 1.00E+00 | 0.54 |
| 1.00E+00 | 0.87 |

|          |      |
|----------|------|
| 1.00E+00 | 0.89 |
| 1.00E+00 | 0.96 |
| 1.00E+00 | 0.89 |
| 1.00E+00 | 1    |
| 1.00E+00 | 1    |
| 1.00E+00 | 0.84 |
| 1.00E+00 | 0.81 |
| 1.00E+00 | 0.9  |
| 1.00E+00 | 0.96 |
| 1.00E+00 | 0.93 |
| 1.00E+00 | 0.86 |
| 1.00E+00 | 0.92 |
| 1.00E+00 | 0.83 |
| 1.00E+00 | 1    |
| 1.00E+00 | 0.79 |
| 1.00E+00 | 0.57 |
| 1.00E+00 | 0.88 |
| 1.00E+00 | 0.62 |
| 1.00E+00 | 0.78 |
| 1.00E+00 | 0.8  |
| 1.00E+00 | 1    |
| 1.00E+00 | 0.64 |
| 1.00E+00 | 0.49 |
| 1.00E+00 | 1    |
| 1.00E+00 | 0.95 |
| 1.00E+00 | 0.71 |
| 1.00E+00 | 1    |
| 1.00E+00 | 0.58 |
| 1.00E+00 | 0.84 |
| 1.00E+00 | 0.92 |
| 1.00E+00 | 0.93 |
| 1.00E+00 | 0.85 |
| 1.00E+00 | 0.9  |
| 1.00E+00 | 0.91 |
| 1.00E+00 | 0.58 |
| 1.00E+00 | 1    |
| 1.00E+00 | 0.81 |
| 1.00E+00 | 0.91 |
| 1.00E+00 | 0.59 |
| 1.00E+00 | 0.67 |

|          |      |
|----------|------|
| 1.00E+00 | 0.69 |
| 1.00E+00 | 0.78 |
| 1.00E+00 | 0.72 |
| 1.00E+00 | 0.5  |
| 1.00E+00 | 0.91 |
| 1.00E+00 | 0.94 |
| 1.00E+00 | 0.81 |
| 1.00E+00 | 0.76 |
| 1.00E+00 | 0.52 |
| 1.00E+00 | 0.88 |
| 1.00E+00 | 0.88 |
| 1.00E+00 | 0.85 |

|          |      |
|----------|------|
| 1.00E+00 | 1    |
| 1.00E+00 | 0.95 |
| 1.00E+00 | 0.87 |
| 1.00E+00 | 1    |
| 1.00E+00 | 0.93 |
| 1.00E+00 | 0.68 |
| 1.00E+00 | 0.7  |
| 1.00E+00 | 0.66 |
| 1.00E+00 | 0.79 |
| 1.00E+00 | 0.96 |
| 1.00E+00 | 0.64 |

|          |      |
|----------|------|
| 1.00E+00 | 0.81 |
| 1.00E+00 | 0.95 |
| 1.00E+00 | 0.84 |
| 1.00E+00 | 1    |
| 1.00E+00 | 0.7  |
| 1.00E+00 | 0.94 |
| 1.00E+00 | 0.95 |
| 1.00E+00 | 0.82 |
| 1.00E+00 | 0.96 |
| 1.00E+00 | 1    |
| 1.00E+00 | 0.89 |
| 1.00E+00 | 1    |
| 1.00E+00 | 0.86 |
| 1.00E+00 | 0.95 |
| 1.00E+00 | 0.68 |
| 1.00E+00 | 0.95 |
| 1.00E+00 | 0.82 |
| 1.00E+00 | 0.54 |
| 1.00E+00 | 0.97 |
| 1.00E+00 | 1    |
| 1.00E+00 | 0.84 |
| 1.00E+00 | 0.58 |

|          |      |
|----------|------|
| 1.00E+00 | 1    |
| 1.00E+00 | 0.91 |
| 1.00E+00 | 0.81 |
| 1.00E+00 | 0.96 |
| 1.00E+00 | 0.72 |
| 1.00E+00 | 0.83 |
| 1.00E+00 | 1    |
| 1.00E+00 | 0.8  |
| 1.00E+00 | 0.92 |
| 1.00E+00 | 0.92 |
| 1.00E+00 | 0.89 |
| 1.00E+00 | 0.79 |

|          |      |
|----------|------|
| 1.00E+00 | 0.87 |
| 1.00E+00 | 0.94 |
| 1.00E+00 | 0.89 |
| 1.00E+00 | 0.71 |
| 1.00E+00 | 0.85 |
| 1.00E+00 | 0.73 |
| 1.00E+00 | 0.8  |
| 1.00E+00 | 0.6  |
| 1.00E+00 | 0.87 |
| 1.00E+00 | 0.75 |
| 1.00E+00 | 0.63 |

|          |      |
|----------|------|
| 1.00E+00 | 0.92 |
| 1.00E+00 | 0.9  |
| 1.00E+00 | 0.88 |
| 1.00E+00 | 0.92 |
| 1.00E+00 | 0.79 |
| 1.00E+00 | 1    |
| 1.00E+00 | 0.77 |
| 1.00E+00 | 0.67 |

|          |      |
|----------|------|
| 1.00E+00 | 0.72 |
| 1.00E+00 | 0.9  |
| 1.00E+00 | 0.78 |
| 1.00E+00 | 1    |
| 1.00E+00 | 0.94 |
| 1.00E+00 | 0.92 |
| 1.00E+00 | 0.81 |

|          |      |
|----------|------|
| 1.00E+00 | 0.94 |
| 1.00E+00 | 0.63 |
| 1.00E+00 | 0.54 |
| 1.00E+00 | 0.82 |
| 1.00E+00 | 0.76 |
| 1.00E+00 | 0.9  |
| 1.00E+00 | 0.92 |
| 1.00E+00 | 0.72 |
| 1.00E+00 | 0.51 |
| 1.00E+00 | 0.85 |
| 1.00E+00 | 0.67 |
| 1.00E+00 | 0.89 |
| 1.00E+00 | 0.83 |
| 1.00E+00 | 0.72 |
| 1.00E+00 | 0.76 |
| 1.00E+00 | 0.59 |
| 1.00E+00 | 0.89 |
| 1.00E+00 | 0.63 |
| 1.00E+00 | 1    |
| 1.00E+00 | 1    |
| 1.00E+00 | 0.95 |
| 1.00E+00 | 0.69 |
| 1.00E+00 | 0.44 |
| 1.00E+00 | 0.98 |
| 1.00E+00 | 0.88 |
| 1.00E+00 | 0.75 |
| 1.00E+00 | 0.92 |
| 1.00E+00 | 0.54 |
| 1.00E+00 | 0.66 |
| 1.00E+00 | 0.56 |
| 1.00E+00 | 0.58 |
| 1.00E+00 | 0.62 |
| 1.00E+00 | 0.9  |
| 1.00E+00 | 0.91 |
| 1.00E+00 | 0.76 |
| 1.00E+00 | 0.94 |

|          |      |
|----------|------|
| 1.00E+00 | 1    |
| 1.00E+00 | 0.95 |
| 1.00E+00 | 1    |
| 1.00E+00 | 0.72 |
| 1.00E+00 | 0.78 |
| 1.00E+00 | 0.92 |
| 1.00E+00 | 0.67 |
| 1.00E+00 | 0.67 |
| 1.00E+00 | 1    |
| 1.00E+00 | 0.89 |
| 1.00E+00 | 0.84 |
| 1.00E+00 | 0.66 |

|          |      |
|----------|------|
| 1.00E+00 | 0.87 |
| 1.00E+00 | 0.93 |
| 1.00E+00 | 0.86 |
| 1.00E+00 | 0.86 |
| 1.00E+00 | 0.89 |
| 1.00E+00 | 0.91 |
| 1.00E+00 | 0.92 |

|          |      |
|----------|------|
| 1.00E+00 | 0.97 |
| 1.00E+00 | 0.93 |
| 1.00E+00 | 0.69 |
| 1.00E+00 | 0.75 |
| 1.00E+00 | 0.93 |
| 1.00E+00 | 0.68 |
| 1.00E+00 | 0.94 |
| 1.00E+00 | 0.81 |
| 1.00E+00 | 0.93 |
| 1.00E+00 | 0.94 |
| 1.00E+00 | 0.9  |
| 1.00E+00 | 0.75 |
| 1.00E+00 | 0.78 |

|          |      |
|----------|------|
| 1.00E+00 | 0.66 |
| 1.00E+00 | 1    |
| 1.00E+00 | 0.55 |
| 1.00E+00 | 0.68 |

|          |   |
|----------|---|
| 1.00E+00 | 1 |
|----------|---|

|          |      |
|----------|------|
| 1.00E+00 | 0.74 |
|----------|------|

|          |      |
|----------|------|
| 1.00E+00 | 0.68 |
|----------|------|

|          |      |
|----------|------|
| 1.00E+00 | 0.58 |
| 1.00E+00 | 0.92 |
| 1.00E+00 | 0.93 |
| 1.00E+00 | 0.72 |
| 1.00E+00 | 1    |
| 1.00E+00 | 0.81 |
| 1.00E+00 | 1    |
| 1.00E+00 | 0.76 |

|          |      |
|----------|------|
| 1.00E+00 | 1    |
| 1.00E+00 | 0.83 |
| 1.00E+00 | 0.65 |
| 1.00E+00 | 1    |
| 1.00E+00 | 0.76 |
| 1.00E+00 | 0.79 |
| 1.00E+00 | 0.89 |
| 1.00E+00 | 1    |
| 1.00E+00 | 0.91 |
| 1.00E+00 | 0.93 |
| 1.00E+00 | 0.93 |
| 1.00E+00 | 0.93 |
| 1.00E+00 | 0.94 |
| 1.00E+00 | 1    |
| 1.00E+00 | 1    |
| 1.00E+00 | 0.8  |
| 1.00E+00 | 0.91 |
| 1.00E+00 | 0.62 |
| 1.00E+00 | 0.92 |
| 1.00E+00 | 0.94 |
| 1.00E+00 | 0.94 |
| 1.00E+00 | 0.96 |
| 1.00E+00 | 0.92 |
| 1.00E+00 | 1    |
| 1.00E+00 | 0.73 |
| 1.00E+00 | 0.6  |
| 1.00E+00 | 1    |
| 1.00E+00 | 0.86 |
| 1.00E+00 | 0.86 |
| 1.00E+00 | 0.64 |
| 1.00E+00 | 1    |
| 1.00E+00 | 0.93 |
| 1.00E+00 | 0.75 |
| 1.00E+00 | 0.7  |
| 1.00E+00 | 0.62 |
| 1.00E+00 | 0.8  |
| 1.00E+00 | 0.81 |
| 1.00E+00 | 0.59 |
| 1.00E+00 | 0.91 |
| 1.00E+00 | 0.97 |



|          |      |
|----------|------|
| 1.00E+00 | 0.76 |
| 1.00E+00 | 0.81 |
| 1.00E+00 | 0.83 |
| 1.00E+00 | 0.9  |
| 1.00E+00 | 0.67 |
| 1.00E+00 | 0.85 |
| 1.00E+00 | 0.66 |
| 1.00E+00 | 0.9  |
| 1.00E+00 | 0.83 |
| 1.00E+00 | 0.95 |
| 1.00E+00 | 0.47 |

|          |      |
|----------|------|
| 1.00E+00 | 0.69 |
| 1.00E+00 | 0.9  |
| 1.00E+00 | 1    |
| 1.00E+00 | 0.95 |

|          |      |
|----------|------|
| 1.00E+00 | 0.95 |
| 1.00E+00 | 0.5  |
| 1.00E+00 | 0.79 |
| 1.00E+00 | 0.91 |
| 1.00E+00 | 0.85 |
| 1.00E+00 | 0.96 |
| 1.00E+00 | 0.94 |
| 1.00E+00 | 0.7  |
| 1.00E+00 | 0.88 |
| 1.00E+00 | 0.61 |
| 1.00E+00 | 0.74 |
| 1.00E+00 | 0.94 |
| 1.00E+00 | 0.93 |
| 1.00E+00 | 0.88 |
| 1.00E+00 | 0.94 |
| 1.00E+00 | 0.74 |
| 1.00E+00 | 0.6  |
| 1.00E+00 | 0.75 |
| 1.00E+00 | 0.86 |
| 1.00E+00 | 0.66 |
| 1.00E+00 | 0.87 |

|          |      |
|----------|------|
| 1.00E+00 | 0.79 |
| 1.00E+00 | 0.9  |
| 1.00E+00 | 0.92 |
| 1.00E+00 | 0.9  |
| 1.00E+00 | 0.96 |
| 1.00E+00 | 0.87 |

1.00E+00 0.68

1.00E+00 0.77

1.00E+00 0.88

1.00E+00 0.89

1.00E+00 0.66

1.00E+00 0.96

1.00E+00 0.64

1.00E+00 0.92

1.00E+00 0.98

1.00E+00 0.98

1.00E+00 0.93

1.00E+00 0.94

1.00E+00 0.54

1.00E+00 1

1.00E+00 0.98

1.00E+00 0.96

1.00E+00 0.95

1.00E+00 0.99

1.00E+00 0.86

1.00E+00 0.58

1.00E+00 0.66

1.00E+00 0.47

1.00E+00 0.17

1.00E+00 0.59

1.00E+00 0.92

1.00E+00 0.92

1.00E+00 0.75

1.00E+00 0.85

1.00E+00 0.74

1.00E+00 0.67

1.00E+00 0.88

1.00E+00 0.94

1.00E+00 0.6

1.00E+00 1

1.00E+00 1

1.00E+00 0.59

1.00E+00 0.93

1.00E+00 0.72

|          |      |
|----------|------|
| 1.00E+00 | 1    |
| 1.00E+00 | 0.68 |
| 1.00E+00 | 1    |
| 1.00E+00 | 0.58 |
| 1.00E+00 | 0.89 |
| 1.00E+00 | 1    |
| 1.00E+00 | 0.95 |
| 1.00E+00 | 0.93 |

|          |      |
|----------|------|
| 1.00E+00 | 1    |
| 1.00E+00 | 0.97 |
| 1.00E+00 | 0.86 |
| 1.00E+00 | 1    |

|          |      |
|----------|------|
| 1.00E+00 | 0.88 |
| 1.00E+00 | 0.93 |
| 1.00E+00 | 0.79 |
| 1.00E+00 | 0.88 |
| 1.00E+00 | 1    |
| 1.00E+00 | 0.9  |
| 1.00E+00 | 0.78 |
| 1.00E+00 | 0.61 |
| 1.00E+00 | 0.71 |
| 1.00E+00 | 0.9  |
| 1.00E+00 | 0.73 |
| 1.00E+00 | 0.78 |
| 1.00E+00 | 0.81 |
| 1.00E+00 | 1    |
| 1.00E+00 | 0.93 |
| 1.00E+00 | 0.95 |
| 1.00E+00 | 0.56 |
| 1.00E+00 | 0.77 |
| 1.00E+00 | 0.9  |
| 1.00E+00 | 0.97 |

|          |      |
|----------|------|
| 1.00E+00 | 0.83 |
| 1.00E+00 | 0.62 |
| 1.00E+00 | 0.76 |
| 1.00E+00 | 1    |
| 1.00E+00 | 0.98 |
| 1.00E+00 | 0.84 |
| 1.00E+00 | 0.79 |

|          |      |
|----------|------|
| 1.00E+00 | 0.97 |
| 1.00E+00 | 0.76 |
| 1.00E+00 | 0.79 |
| 1.00E+00 | 0.83 |

|          |      |
|----------|------|
| 1.00E+00 | 0.86 |
| 1.00E+00 | 1    |
| 1.00E+00 | 0.6  |
| 1.00E+00 | 0.88 |
| 1.00E+00 | 0.92 |
| 1.00E+00 | 0.93 |
| 1.00E+00 | 0.78 |
| 1.00E+00 | 0.63 |
| 1.00E+00 | 1    |
| 1.00E+00 | 0.94 |
| 1.00E+00 | 0.94 |
| 1.00E+00 | 0.92 |
| 1.00E+00 | 0.94 |
| 1.00E+00 | 0.93 |
| 1.00E+00 | 0.94 |
| 1.00E+00 | 1    |
| 1.00E+00 | 0.78 |
| 1.00E+00 | 0.9  |
| 1.00E+00 | 1    |
| 1.00E+00 | 0.94 |
| 1.00E+00 | 0.66 |
| 1.00E+00 | 0.86 |
| 1.00E+00 | 1    |
| 1.00E+00 | 0.82 |
| 1.00E+00 | 0.93 |
| 1.00E+00 | 0.93 |
| 1.00E+00 | 0.92 |
| 1.00E+00 | 0.92 |
| 1.00E+00 | 0.97 |
| 1.00E+00 | 0.8  |
| 1.00E+00 | 0.69 |
| 1.00E+00 | 0.72 |
| 1.00E+00 | 1    |
| 1.00E+00 | 1    |
| 1.00E+00 | 1    |
| 1.00E+00 | 0.96 |
| 1.00E+00 | 0.72 |
| 1.00E+00 | 0.61 |
| 1.00E+00 | 0.95 |
| 1.00E+00 | 0.82 |
| 1.00E+00 | 0.91 |
| 1.00E+00 | 0.84 |

|          |      |
|----------|------|
| 1.00E+00 | 0.94 |
| 1.00E+00 | 0.77 |
| 1.00E+00 | 0.31 |
| 1.00E+00 | 0.73 |
| 1.00E+00 | 0.73 |
| 1.00E+00 | 0.89 |
| 1.00E+00 | 0.74 |
| 1.00E+00 | 0.76 |
| 1.00E+00 | 0.45 |
| 1.00E+00 | 0.67 |
| 1.00E+00 | 0.73 |
| 1.00E+00 | 0.65 |
| 1.00E+00 | 0.67 |
| 1.00E+00 | 0.61 |
| 1.00E+00 | 0.8  |
| 1.00E+00 | 0.6  |
| 1.00E+00 | 0.95 |
| 1.00E+00 | 0.89 |
| 1.00E+00 | 0.88 |
| 1.00E+00 | 0.84 |
| 1.00E+00 | 0.93 |
| 1.00E+00 | 0.94 |
| 1.00E+00 | 0.82 |
| 1.00E+00 | 0.9  |
| 1.00E+00 | 0.95 |
| 1.00E+00 | 0.83 |
| 1.00E+00 | 1    |
| 1.00E+00 | 0.94 |
| 1.00E+00 | 0    |
| 1.00E+00 | 0.86 |
| 1.00E+00 | 0.94 |
| 1.00E+00 | 0.92 |
| 1.00E+00 | 0.9  |
| 1.00E+00 | 1    |
| 1.00E+00 | 0.83 |
| 1.00E+00 | 1    |
| 1.00E+00 | 0.74 |
| 1.00E+00 | 0.78 |
| 1.00E+00 | 0.83 |
| 1.00E+00 | 0.86 |
| 1.00E+00 | 0.88 |
| 1.00E+00 | 0.92 |
| 1.00E+00 | 0.54 |
| 1.00E+00 | 0.82 |
| 1.00E+00 | 0.95 |
| 1.00E+00 | 0.96 |
| 1.00E+00 | 0.87 |
| 1.00E+00 | 0.9  |
| 1.00E+00 | 0.86 |
| 1.00E+00 | 0.91 |

|          |      |
|----------|------|
| 1.00E+00 | 0.83 |
| 1.00E+00 | 0.96 |
| 1.00E+00 | 0.93 |
| 1.00E+00 | 1    |
| 1.00E+00 | 0.89 |
| 1.00E+00 | 0.73 |
| 1.00E+00 | 1    |
| 1.00E+00 | 0.86 |
| 1.00E+00 | 1    |
| 1.00E+00 | 1    |
| 1.00E+00 | 0.96 |
| 1.00E+00 | 0.73 |
| 1.00E+00 | 1    |
| 1.00E+00 | 0.9  |
| 1.00E+00 | 0.72 |

|          |      |
|----------|------|
| 1.00E+00 | 0.87 |
| 1.00E+00 | 0.88 |
| 1.00E+00 | 0.86 |
| 1.00E+00 | 1    |
| 1.00E+00 | 1    |

|          |      |
|----------|------|
| 1.00E+00 | 0.72 |
| 1.00E+00 | 0.84 |
| 1.00E+00 | 0.71 |
| 1.00E+00 | 1    |
| 1.00E+00 | 0.9  |
| 1.00E+00 | 1    |
| 1.00E+00 | 0.71 |
| 1.00E+00 | 0.88 |

|          |      |
|----------|------|
| 1.00E+00 | 0.85 |
|----------|------|

|          |      |
|----------|------|
| 1.00E+00 | 0.93 |
|----------|------|

|          |      |
|----------|------|
| 1.00E+00 | 1    |
| 1.00E+00 | 0.89 |
| 1.00E+00 | 0.88 |
| 1.00E+00 | 0.91 |
| 1.00E+00 | 0.9  |
| 1.00E+00 | 0.83 |
| 1.00E+00 | 0.85 |

|          |      |
|----------|------|
| 1.00E+00 | 0.83 |
| 1.00E+00 | 0.86 |
| 1.00E+00 | 1    |
| 1.00E+00 | 0.92 |
| 1.00E+00 | 1    |
| 1.00E+00 | 0.84 |
| 1.00E+00 | 1    |
| 1.00E+00 | 0.63 |

|          |      |
|----------|------|
| 1.00E+00 | 0.85 |
| 1.00E+00 | 0.57 |
| 1.00E+00 | 0.73 |
| 1.00E+00 | 1    |
| 1.00E+00 | 0.74 |
| 1.00E+00 | 1    |

|          |      |
|----------|------|
| 1.00E+00 | 0.75 |
| 1.00E+00 | 0.87 |
| 1.00E+00 | 0.92 |
| 1.00E+00 | 1    |

|          |      |
|----------|------|
| 1.00E+00 | 1    |
| 1.00E+00 | 0.89 |
| 1.00E+00 | 1    |
| 1.00E+00 | 0.84 |
| 1.00E+00 | 0.75 |
| 1.00E+00 | 0.72 |
| 1.00E+00 | 0.71 |
| 1.00E+00 | 0.88 |
| 1.00E+00 | 0.8  |
| 1.00E+00 | 0.8  |

|          |      |
|----------|------|
| 1.00E+00 | 0.72 |
| 1.00E+00 | 0.84 |
| 1.00E+00 | 0.71 |
| 1.00E+00 | 1    |
| 1.00E+00 | 0.9  |
| 1.00E+00 | 1    |

|          |      |
|----------|------|
| 1.00E+00 | 0.71 |
| 1.00E+00 | 0.88 |
| 1.00E+00 | 0.85 |

|          |      |
|----------|------|
| 1.00E+00 | 0.93 |
|----------|------|

|          |      |
|----------|------|
| 1.00E+00 | 1    |
| 1.00E+00 | 0.89 |
| 1.00E+00 | 0.88 |
| 1.00E+00 | 0.91 |
| 1.00E+00 | 0.9  |
| 1.00E+00 | 0.83 |
| 1.00E+00 | 0.85 |
| 1.00E+00 | 0.83 |
| 1.00E+00 | 0.86 |
| 1.00E+00 | 1    |
| 1.00E+00 | 0.92 |
| 1.00E+00 | 1    |
| 1.00E+00 | 0.84 |
| 1.00E+00 | 1    |
| 1.00E+00 | 0.63 |

|          |      |
|----------|------|
| 1.00E+00 | 0.85 |
| 1.00E+00 | 0.57 |
| 1.00E+00 | 0.91 |
| 1.00E+00 | 1    |
| 1.00E+00 | 1    |
| 1.00E+00 | 0.47 |
| 1.00E+00 | 0.65 |
| 1.00E+00 | 0.92 |
| 1.00E+00 | 0    |

|          |      |
|----------|------|
| 1.00E+00 | 0.75 |
| 1.00E+00 | 0.87 |
| 1.00E+00 | 0.92 |
| 1.00E+00 | 1    |



|          |      |
|----------|------|
| 1.00E+00 | 1    |
| 1.00E+00 | 0.89 |
| 1.00E+00 | 1    |
| 1.00E+00 | 0.84 |
| 1.00E+00 | 0.75 |
| 1.00E+00 | 0.72 |

|          |      |
|----------|------|
| 1.00E+00 | 0.82 |
| 1.00E+00 | 0.71 |

|          |      |
|----------|------|
| 1.00E+00 | 0.96 |
| 1.00E+00 | 0.56 |
| 1.00E+00 | 0.53 |
| 1.00E+00 | 0.92 |
| 1.00E+00 | 0.92 |
| 1.00E+00 | 0.96 |
| 1.00E+00 | 0.86 |
| 1.00E+00 | 1    |
| 1.00E+00 | 1    |
| 1.00E+00 | 1    |
| 1.00E+00 | 0.84 |
| 1.00E+00 | 0.77 |
| 1.00E+00 | 0.68 |
| 1.00E+00 | 0.91 |
| 1.00E+00 | 0.8  |
| 1.00E+00 | 0.96 |
| 1.00E+00 | 0.65 |

|          |      |
|----------|------|
| 1.00E+00 | 0.96 |
| 1.00E+00 | 0.69 |
| 1.00E+00 | 0.85 |
| 1.00E+00 | 0.9  |
| 1.00E+00 | 0.86 |
| 1.00E+00 | 0.92 |
| 1.00E+00 | 0.88 |
| 1.00E+00 | 0.68 |
| 1.00E+00 | 0.78 |
| 1.00E+00 | 0.94 |
| 1.00E+00 | 0.99 |
| 1.00E+00 | 0.61 |
| 1.00E+00 | 0.95 |
| 1.00E+00 | 0.96 |
| 1.00E+00 | 0.95 |

|          |      |
|----------|------|
| 1.00E+00 | 0.87 |
| 1.00E+00 | 0.7  |
| 1.00E+00 | 0.93 |
| 1.00E+00 | 0.95 |

|          |      |
|----------|------|
| 1.00E+00 | 0.76 |
| 1.00E+00 | 0.92 |
| 1.00E+00 | 0.93 |
| 1.00E+00 | 1    |
| 1.00E+00 | 0.55 |
| 1.00E+00 | 1    |
| 1.00E+00 | 0.86 |
| 1.00E+00 | 0.93 |
| 1.00E+00 | 0.93 |
| 1.00E+00 | 0.87 |

|          |      |
|----------|------|
| 1.00E+00 | 0.91 |
|----------|------|

|          |      |
|----------|------|
| 1.00E+00 | 0.92 |
| 1.00E+00 | 1    |
| 1.00E+00 | 0.83 |
| 1.00E+00 | 0.8  |
| 1.00E+00 | 1    |
| 1.00E+00 | 0.94 |
| 1.00E+00 | 0.71 |
| 1.00E+00 | 0.81 |
| 1.00E+00 | 0.84 |

|          |      |
|----------|------|
| 1.00E+00 | 0.65 |
| 1.00E+00 | 0.64 |

|          |      |
|----------|------|
| 1.00E+00 | 1    |
| 1.00E+00 | 0.86 |
| 1.00E+00 | 0.87 |
| 1.00E+00 | 0.52 |
| 1.00E+00 | 0.92 |
| 1.00E+00 | 0.61 |
| 1.00E+00 | 0.94 |
| 1.00E+00 | 0.9  |
| 1.00E+00 | 0.94 |
| 1.00E+00 | 0.89 |
| 1.00E+00 | 0.45 |
| 1.00E+00 | 0.84 |

|          |     |
|----------|-----|
| 1.00E+00 | 0.7 |
|----------|-----|

|          |      |
|----------|------|
| 1.00E+00 | 0.62 |
| 1.00E+00 | 0.91 |
| 1.00E+00 | 0.71 |
| 1.00E+00 | 1    |
| 1.00E+00 | 0.94 |
| 1.00E+00 | 0.87 |
| 1.00E+00 | 0.81 |
| 1.00E+00 | 0.53 |
| 1.00E+00 | 0.8  |
| 1.00E+00 | 0.88 |
| 1.00E+00 | 1    |
| 1.00E+00 | 1    |
| 1.00E+00 | 0.95 |
| 1.00E+00 | 0.9  |
| 1.00E+00 | 0.94 |
| 1.00E+00 | 0.87 |
| 1.00E+00 | 0.7  |
| 1.00E+00 | 0.91 |
| 1.00E+00 | 0.65 |
| 1.00E+00 | 0.96 |
| 1.00E+00 | 0.93 |
| 1.00E+00 | 0.85 |
| 1.00E+00 | 0.94 |
| 1.00E+00 | 0.91 |
| 1.00E+00 | 0.87 |
| 1.00E+00 | 0.83 |
| 1.00E+00 | 1    |
| 1.00E+00 | 0.9  |
| 1.00E+00 | 0.52 |
| 1.00E+00 | 0.86 |
| 1.00E+00 | 0.92 |
| 1.00E+00 | 0.95 |
| 1.00E+00 | 0.85 |
| 1.00E+00 | 0.9  |
| 1.00E+00 | 0.9  |
| 1.00E+00 | 1    |
| 1.00E+00 | 0.59 |
| 1.00E+00 | 0.67 |
| 1.00E+00 | 0.75 |
| 1.00E+00 | 0.7  |
| 1.00E+00 | 0.62 |
| 1.00E+00 | 0.9  |
| 1.00E+00 | 0.89 |
| 1.00E+00 | 0.92 |
| 1.00E+00 | 0.73 |
| 1.00E+00 | 0.93 |
| 1.00E+00 | 0.7  |

|          |      |
|----------|------|
| 1.00E+00 | 0.71 |
| 1.00E+00 | 0.81 |
| 1.00E+00 | 0.94 |
| 1.00E+00 | 1    |
| 1.00E+00 | 0.8  |

|          |      |
|----------|------|
| 1.00E+00 | 0.81 |
| 1.00E+00 | 0.74 |
| 1.00E+00 | 0.86 |
| 1.00E+00 | 1    |
| 1.00E+00 | 1    |
| 1.00E+00 | 0.85 |
| 1.00E+00 | 0.96 |
| 1.00E+00 | 1    |

|          |      |
|----------|------|
| 1.00E+00 | 0.77 |
| 1.00E+00 | 1    |
| 1.00E+00 | 0.61 |
| 1.00E+00 | 0.75 |
| 1.00E+00 | 0.82 |
| 1.00E+00 | 1    |
| 1.00E+00 | 0.76 |
| 1.00E+00 | 1    |
| 1.00E+00 | 1    |
| 1.00E+00 | 0.54 |
| 1.00E+00 | 0.8  |
| 1.00E+00 | 1    |
| 1.00E+00 | 0.79 |
| 1.00E+00 | 0.78 |
| 1.00E+00 | 0.7  |

|          |      |
|----------|------|
| 1.00E+00 | 1    |
| 1.00E+00 | 0.97 |
| 1.00E+00 | 0.92 |
| 1.00E+00 | 0.98 |
| 1.00E+00 | 0.89 |
| 1.00E+00 | 0.97 |
| 1.00E+00 | 1    |
| 1.00E+00 | 1    |
| 1.00E+00 | 1    |
| 1.00E+00 | 0.89 |
| 1.00E+00 | 0.92 |

|          |      |
|----------|------|
| 1.00E+00 | 0.92 |
| 1.00E+00 | 1    |
| 1.00E+00 | 0.85 |

|          |      |
|----------|------|
| 1.00E+00 | 1    |
| 1.00E+00 | 1    |
| 1.00E+00 | 0.77 |
| 1.00E+00 | 0.92 |
| 1.00E+00 | 0.72 |
| 1.00E+00 | 0.96 |
| 1.00E+00 | 0.88 |
| 1.00E+00 | 0.82 |
| 1.00E+00 | 0.93 |
| 1.00E+00 | 0.93 |
| 1.00E+00 | 0.93 |
| 1.00E+00 | 0.9  |
| 1.00E+00 | 1    |
| 1.00E+00 | 0.74 |
| 1.00E+00 | 0.77 |
| 1.00E+00 | 0.63 |
| 1.00E+00 | 0.85 |
| 1.00E+00 | 0.8  |
| 1.00E+00 | 1    |
| 1.00E+00 | 0.96 |
| 1.00E+00 | 0.89 |
| 1.00E+00 | 0.86 |
| 1.00E+00 | 0.84 |
| 1.00E+00 | 0.86 |
| 1.00E+00 | 1    |
| 1.00E+00 | 1    |
| 1.00E+00 | 0.75 |
| 1.00E+00 | 0.65 |
| 1.00E+00 | 0.95 |
| 1.00E+00 | 0.81 |
| 1.00E+00 | 0.82 |
| 1.00E+00 | 0.93 |
| 1.00E+00 | 0.94 |
| 1.00E+00 | 0.73 |
| 1.00E+00 | 0.8  |

|          |      |
|----------|------|
| 1.00E+00 | 1    |
| 1.00E+00 | 0.83 |
| 1.00E+00 | 0.95 |

|          |      |
|----------|------|
| 1.00E+00 | 0.56 |
| 1.00E+00 | 0.9  |
| 1.00E+00 | 0.79 |
| 1.00E+00 | 0.51 |
| 1.00E+00 | 0.85 |
| 1.00E+00 | 0.86 |
| 1.00E+00 | 1    |
| 1.00E+00 | 1    |
| 1.00E+00 | 0.88 |
| 1.00E+00 | 0.93 |
| 1.00E+00 | 0.94 |
| 1.00E+00 | 0.97 |
| 1.00E+00 | 0.94 |
| 1.00E+00 | 0.95 |
| 1.00E+00 | 1    |
| 1.00E+00 | 0.86 |
| 1.00E+00 | 0.66 |
| 1.00E+00 | 0.76 |
| 1.00E+00 | 0.64 |
| 1.00E+00 | 0.5  |
| 1.00E+00 | 0.86 |
| 1.00E+00 | 1    |
| 1.00E+00 | 0.9  |
| 1.00E+00 | 0.99 |
| 1.00E+00 | 0.77 |
| 1.00E+00 | 0.91 |
| 1.00E+00 | 0.92 |
| 1.00E+00 | 0.55 |

|          |      |
|----------|------|
| 1.00E+00 | 0.72 |
| 1.00E+00 | 0.83 |
| 1.00E+00 | 0.75 |
| 1.00E+00 | 0.77 |
| 1.00E+00 | 0.9  |
| 1.00E+00 | 0.7  |
| 1.00E+00 | 0.55 |
| 1.00E+00 | 0.82 |
| 1.00E+00 | 0.92 |
| 1.00E+00 | 0.8  |
| 1.00E+00 | 0.74 |
| 1.00E+00 | 1    |

|          |      |
|----------|------|
| 1.00E+00 | 0.85 |
| 1.00E+00 | 0.93 |
| 1.00E+00 | 1    |

|          |      |
|----------|------|
| 1.00E+00 | 0.9  |
| 1.00E+00 | 0.89 |
| 1.00E+00 | 0.65 |
| 1.00E+00 | 0.72 |
| 1.00E+00 | 0.68 |

|          |      |
|----------|------|
| 1.00E+00 | 0.66 |
| 1.00E+00 | 0.7  |
| 1.00E+00 | 0.79 |

|          |      |
|----------|------|
| 1.00E+00 | 0.83 |
| 1.00E+00 | 0.88 |
| 1.00E+00 | 0.92 |
| 1.00E+00 | 1    |
| 1.00E+00 | 0.86 |

|          |      |
|----------|------|
| 1.00E+00 | 1    |
| 1.00E+00 | 0.91 |
| 1.00E+00 | 0.88 |
| 1.00E+00 | 1    |

|          |      |
|----------|------|
| 1.00E+00 | 1    |
| 1.00E+00 | 0.68 |
| 1.00E+00 | 0.93 |
| 1.00E+00 | 0.68 |
| 1.00E+00 | 0.67 |
| 1.00E+00 | 0.78 |
| 1.00E+00 | 0.9  |
| 1.00E+00 | 0.9  |
| 1.00E+00 | 0.82 |
| 1.00E+00 | 0.5  |
| 1.00E+00 | 1    |
| 1.00E+00 | 0.74 |

|          |   |
|----------|---|
| 1.00E+00 | 1 |
| 1.00E+00 | 0 |

|          |      |
|----------|------|
| 1.00E+00 | 0.82 |
| 1.00E+00 | 0.91 |
| 1.00E+00 | 0.87 |
| 1.00E+00 | 0.68 |
| 1.00E+00 | 0.9  |
| 1.00E+00 | 0.68 |
| 1.00E+00 | 0.78 |
| 1.00E+00 | 0.88 |
| 1.00E+00 | 0.8  |
| 1.00E+00 | 0.93 |
| 1.00E+00 | 0.77 |
| 1.00E+00 | 0.86 |
| 1.00E+00 | 1    |
| 1.00E+00 | 0.91 |
| 1.00E+00 | 0.81 |
| 1.00E+00 | 0.78 |
| 1.00E+00 | 1    |
| 1.00E+00 | 0.69 |
| 1.00E+00 | 0.91 |
| 1.00E+00 | 0.96 |
| 1.00E+00 | 0.64 |
| 1.00E+00 | 0.82 |
| 1.00E+00 | 0.78 |
| 1.00E+00 | 0.97 |
| 1.00E+00 | 0.92 |
| 1.00E+00 | 0.92 |
| 1.00E+00 | 0.64 |
| 1.00E+00 | 0.92 |
| 1.00E+00 | 0.66 |
| 1.00E+00 | 0.95 |
| 1.00E+00 | 0.93 |
| 1.00E+00 | 0.6  |
| 1.00E+00 | 0.92 |
| 1.00E+00 | 0.45 |
| 1.00E+00 | 0.56 |
| 1.00E+00 | 0.62 |
| 1.00E+00 | 0.93 |
| 1.00E+00 | 0.69 |
| 1.00E+00 | 0.92 |
| 1.00E+00 | 1    |
| 1.00E+00 | 0.82 |
| 1.00E+00 | 0.73 |
| 1.00E+00 | 0.94 |
| 1.00E+00 | 0.89 |
| 1.00E+00 | 0.64 |
| 1.00E+00 | 0.93 |
| 1.00E+00 | 0.84 |
| 1.00E+00 | 0.94 |
| 1.00E+00 | 0.87 |
| 1.00E+00 | 0.93 |



|          |      |
|----------|------|
| 1.00E+00 | 1    |
| 1.00E+00 | 1    |
| 1.00E+00 | 1    |
| 1.00E+00 | 0.81 |
| 1.00E+00 | 0.8  |
| 1.00E+00 | 0.91 |
| 1.00E+00 | 0.71 |
| 1.00E+00 | 1    |
| 1.00E+00 | 0.97 |
| 1.00E+00 | 1    |
| 1.00E+00 | 0.94 |
| 1.00E+00 | 0.95 |
| 1.00E+00 | 0.77 |
| 1.00E+00 | 0.9  |
| 1.00E+00 | 0.98 |
| 1.00E+00 | 0.9  |
| 1.00E+00 | 0.69 |
| 1.00E+00 | 1    |
| 1.00E+00 | 0.88 |
| 1.00E+00 | 0.89 |
| 1.00E+00 | 0.78 |
| 1.00E+00 | 1    |
| 1.00E+00 | 0.37 |
| 1.00E+00 | 0.92 |
| 1.00E+00 | 0.79 |
| 1.00E+00 | 0.86 |
| 1.00E+00 | 0.92 |
| 1.00E+00 | 0.61 |
| 1.00E+00 | 0.89 |
| 1.00E+00 | 0.83 |
| 1.00E+00 | 0.64 |
| 1.00E+00 | 1    |
| 1.00E+00 | 0.91 |
| 1.00E+00 | 0.76 |
| 1.00E+00 | 1    |
| 1.00E+00 | 0.82 |
| 1.00E+00 | 1    |
| 1.00E+00 | 0.76 |
| 1.00E+00 | 0.95 |

|          |      |
|----------|------|
| 1.00E+00 | 0.8  |
| 1.00E+00 | 0.96 |
| 1.00E+00 | 0.4  |
| 1.00E+00 | 0.72 |
| 1.00E+00 | 0.96 |
| 1.00E+00 | 0.53 |
| 1.00E+00 | 0.82 |
| 1.00E+00 | 0.93 |
| 1.00E+00 | 0.88 |
| 1.00E+00 | 0.58 |
| 1.00E+00 | 0.89 |
| 1.00E+00 | 0.94 |
| 1.00E+00 | 0.85 |
| 1.00E+00 | 1    |
| 1.00E+00 | 0.6  |
| 1.00E+00 | 0.6  |
| 1.00E+00 | 0.55 |
| 1.00E+00 | 1    |
| 1.00E+00 | 0    |
| 1.00E+00 | 0.88 |
| 1.00E+00 | 0.93 |
| 1.00E+00 | 0.83 |
| 1.00E+00 | 0.87 |
| 1.00E+00 | 0.92 |
| 1.00E+00 | 0.88 |
| 1.00E+00 | 0.89 |
| 1.00E+00 | 1    |
| 1.00E+00 | 0.93 |
| 1.00E+00 | 0.46 |
| 1.00E+00 | 0.51 |
| 1.00E+00 | 0.88 |
| 1.00E+00 | 0.82 |
| 1.00E+00 | 0.82 |
| 1.00E+00 | 0.93 |
| 1.00E+00 | 0.79 |

1.00E+00 0.91

1.00E+00 0.71  
1.00E+00 0.41  
1.00E+00 0.62  
1.00E+00 0.89  
1.00E+00 1  
1.00E+00 0.87  
1.00E+00 1  
1.00E+00 0.89  
1.00E+00 0.84  
1.00E+00 0.98

1.00E+00 0.75  
1.00E+00 0.87  
1.00E+00 0.92  
1.00E+00 1

1.00E+00 0.93  
1.00E+00 1  
1.00E+00 0.95  
1.00E+00 0.9  
1.00E+00 0.86  
1.00E+00 0.94  
1.00E+00 0.61

1.00E+00 0.71  
1.00E+00 0.41  
1.00E+00 0.62  
1.00E+00 1  
1.00E+00 0.9  
1.00E+00 0.89  
1.00E+00 1  
1.00E+00 0.94  
1.00E+00 1  
1.00E+00 0.75  
1.00E+00 0.87  
1.00E+00 0.92  
1.00E+00 1

|          |      |
|----------|------|
| 1.00E+00 | 0.93 |
| 1.00E+00 | 0.86 |
| 1.00E+00 | 0.94 |
| 1.00E+00 | 0.61 |

|          |      |
|----------|------|
| 1.00E+00 | 0.77 |
| 1.00E+00 | 0.73 |
| 1.00E+00 | 0.77 |
| 1.00E+00 | 0.73 |
| 1.00E+00 | 1    |
| 1.00E+00 | 0.86 |
| 1.00E+00 | 1    |
| 1.00E+00 | 0.64 |
| 1.00E+00 | 1    |
| 1.00E+00 | 0.86 |
| 1.00E+00 | 0.84 |
| 1.00E+00 | 0.78 |
| 1.00E+00 | 1    |
| 1.00E+00 | 0.96 |
| 1.00E+00 | 0.56 |
| 1.00E+00 | 0.85 |
| 1.00E+00 | 0.97 |
| 1.00E+00 | 0.82 |
| 1.00E+00 | 0    |
| 1.00E+00 | 0.91 |
| 1.00E+00 | 1    |
| 1.00E+00 | 0.78 |
| 1.00E+00 | 0.87 |
| 1.00E+00 | 0.74 |
| 1.00E+00 | 0.48 |
| 1.00E+00 | 0.65 |
| 1.00E+00 | 0.8  |
| 1.00E+00 | 1    |
| 1.00E+00 | 0.96 |
| 1.00E+00 | 0.66 |
| 1.00E+00 | 0.87 |
| 1.00E+00 | 1    |
| 1.00E+00 | 0.96 |
| 1.00E+00 | 0.93 |
| 1.00E+00 | 0.81 |
| 1.00E+00 | 0.85 |
| 1.00E+00 | 0.79 |

|          |      |
|----------|------|
| 1.00E+00 | 0.96 |
| 1.00E+00 | 1    |
| 1.00E+00 | 0.9  |
| 1.00E+00 | 0.95 |
| 1.00E+00 | 0.94 |

|          |      |
|----------|------|
| 1.00E+00 | 0.84 |
| 1.00E+00 | 0.65 |
| 1.00E+00 | 0.9  |
| 1.00E+00 | 0.75 |
| 1.00E+00 | 0.95 |
| 1.00E+00 | 0.9  |
| 1.00E+00 | 1    |
| 1.00E+00 | 0.71 |
| 1.00E+00 | 0.75 |
| 1.00E+00 | 0.88 |
| 1.00E+00 | 0.86 |

|          |      |
|----------|------|
| 1.00E+00 | 0.89 |
| 1.00E+00 | 0.85 |
| 1.00E+00 | 0.78 |
| 1.00E+00 | 0.89 |
| 1.00E+00 | 0.97 |
| 1.00E+00 | 1    |
| 1.00E+00 | 0.71 |
| 1.00E+00 | 0.75 |

|          |      |
|----------|------|
| 1.00E+00 | 0.8  |
| 1.00E+00 | 0.85 |
| 1.00E+00 | 1    |
| 1.00E+00 | 0.73 |
| 1.00E+00 | 0.87 |
| 1.00E+00 | 1    |
| 1.00E+00 | 0.94 |
| 1.00E+00 | 0.77 |
| 1.00E+00 | 0.8  |
| 1.00E+00 | 0.8  |
| 1.00E+00 | 0.5  |

|          |      |
|----------|------|
| 1.00E+00 | 0.95 |
| 1.00E+00 | 0.92 |
| 1.00E+00 | 0.95 |
| 1.00E+00 | 1    |
| 1.00E+00 | 0.95 |
| 1.00E+00 | 0.87 |
| 1.00E+00 | 0.97 |
| 1.00E+00 | 0.84 |
| 1.00E+00 | 0.95 |
| 1.00E+00 | 0.92 |

|          |      |
|----------|------|
| 1.00E+00 | 0.74 |
| 1.00E+00 | 0.92 |
| 1.00E+00 | 0.9  |
| 1.00E+00 | 1    |
| 1.00E+00 | 1    |
| 1.00E+00 | 0.82 |
| 1.00E+00 | 0.92 |
| 1.00E+00 | 0.78 |
| 1.00E+00 | 0.82 |
| 1.00E+00 | 1    |
| 1.00E+00 | 1    |
| 1.00E+00 | 0.88 |
| 1.00E+00 | 0.56 |
| 1.00E+00 | 1    |
| 1.00E+00 | 0.92 |
| 1.00E+00 | 0.96 |

|          |      |
|----------|------|
| 1.00E+00 | 0.95 |
|----------|------|

|          |      |
|----------|------|
| 1.00E+00 | 0.94 |
| 1.00E+00 | 0.87 |

|          |      |
|----------|------|
| 1.00E+00 | 0.93 |
| 1.00E+00 | 0.96 |
| 1.00E+00 | 0.74 |
| 1.00E+00 | 0.92 |
| 1.00E+00 | 0.9  |
| 1.00E+00 | 1    |
| 1.00E+00 | 1    |
| 1.00E+00 | 0.82 |
| 1.00E+00 | 0.92 |
| 1.00E+00 | 0.78 |
| 1.00E+00 | 0.82 |
| 1.00E+00 | 1    |
| 1.00E+00 | 1    |
| 1.00E+00 | 0.88 |
| 1.00E+00 | 0.56 |
| 1.00E+00 | 1    |

|          |      |
|----------|------|
| 1.00E+00 | 0.92 |
| 1.00E+00 | 0.96 |

|          |      |
|----------|------|
| 1.00E+00 | 0.94 |
|----------|------|

1.00E+00 0.87

1.00E+00 0.58

1.00E+00 0.96

1.00E+00 0.75

1.00E+00 0.58

1.00E+00 0.65

1.00E+00 0.91

1.00E+00 0.96

1.00E+00 0.87

1.00E+00 0.57

1.00E+00 0.86

1.00E+00 0.77

1.00E+00 0.86

1.00E+00 0.8

1.00E+00 0.56

1.00E+00 0.94

1.00E+00 0.88

1.00E+00 0.88

1.00E+00 0.94

1.00E+00 0.74

1.00E+00 0.88

1.00E+00 0.72

1.00E+00 0.94

1.00E+00 0.68

1.00E+00 0.87

1.00E+00 0.83

1.00E+00 0.87

1.00E+00 0.66

1.00E+00 0.8

1.00E+00 0.89

1.00E+00 0.81

1.00E+00 0.57

1.00E+00 0.66

1.00E+00 0.61

1.00E+00 1

1.00E+00 0.96

1.00E+00 0.88

1.00E+00 0.75

1.00E+00 1

1.00E+00 1

1.00E+00 1

|          |      |
|----------|------|
| 1.00E+00 | 0.89 |
| 1.00E+00 | 1    |
| 1.00E+00 | 1    |
| 1.00E+00 | 0.84 |
| 1.00E+00 | 1    |
| 1.00E+00 | 0.73 |
| 1.00E+00 | 1    |
| 1.00E+00 | 1    |
| 1.00E+00 | 0.89 |
| 1.00E+00 | 0.89 |
| 1.00E+00 | 1    |
| 1.00E+00 | 0.91 |
| 1.00E+00 | 0.75 |
| 1.00E+00 | 0.86 |
| 1.00E+00 | 0.56 |
| 1.00E+00 | 0.62 |
| 1.00E+00 | 0.58 |
| 1.00E+00 | 0.88 |
| 1.00E+00 | 0.82 |
| 1.00E+00 | 0.76 |
| 1.00E+00 | 1    |
| 1.00E+00 | 0.76 |
| 1.00E+00 | 1    |
| 1.00E+00 | 1    |
| 1.00E+00 | 0.58 |
| 1.00E+00 | 0.75 |
| 1.00E+00 | 0.74 |
| 1.00E+00 | 1    |
| 1.00E+00 | 0.92 |
| 1.00E+00 | 0.84 |
| 1.00E+00 | 0.62 |
| 1.00E+00 | 0.96 |
| 1.00E+00 | 1    |
| 1.00E+00 | 0.5  |
| 1.00E+00 | 1    |
| 1.00E+00 | 0.65 |
| 1.00E+00 | 0.84 |
| 1.00E+00 | 0.72 |
| 1.00E+00 | 0.66 |
| 1.00E+00 | 0.7  |
| 1.00E+00 | 0.8  |
| 1.00E+00 | 0.91 |



|          |      |
|----------|------|
| 1.00E+00 | 0.93 |
| 1.00E+00 | 0.84 |
| 1.00E+00 | 0.86 |
| 1.00E+00 | 0.52 |
| 1.00E+00 | 0.49 |
| 1.00E+00 | 0.53 |

|          |      |
|----------|------|
| 1.00E+00 | 0.46 |
| 1.00E+00 | 0.77 |
| 1.00E+00 | 1    |

|          |      |
|----------|------|
| 1.00E+00 | 0.96 |
|----------|------|

|          |      |
|----------|------|
| 1.00E+00 | 0.91 |
| 1.00E+00 | 1    |
| 1.00E+00 | 0.97 |
| 1.00E+00 | 0.6  |
| 1.00E+00 | 1    |

|          |      |
|----------|------|
| 1.00E+00 | 1    |
| 1.00E+00 | 1    |
| 1.00E+00 | 1    |
| 1.00E+00 | 0.84 |
| 1.00E+00 | 0.75 |
| 1.00E+00 | 0.13 |
| 1.00E+00 | 0.58 |
| 1.00E+00 | 0.75 |

|          |      |
|----------|------|
| 1.00E+00 | 1    |
| 1.00E+00 | 0.94 |
| 1.00E+00 | 0.69 |
| 1.00E+00 | 0.84 |

|          |      |
|----------|------|
| 1.00E+00 | 0.94 |
| 1.00E+00 | 0.68 |
| 1.00E+00 | 1    |

|          |      |
|----------|------|
| 1.00E+00 | 1    |
| 1.00E+00 | 0.92 |
| 1.00E+00 | 0.82 |
| 1.00E+00 | 0.91 |
| 1.00E+00 | 0.62 |
| 1.00E+00 | 0.68 |
| 1.00E+00 | 0.78 |
| 1.00E+00 | 0.9  |
| 1.00E+00 | 0.84 |
| 1.00E+00 | 0.91 |

|          |      |
|----------|------|
| 1.00E+00 | 0.73 |
| 1.00E+00 | 0.84 |
| 1.00E+00 | 0.6  |
| 1.00E+00 | 0.95 |
| 1.00E+00 | 0.92 |
| 1.00E+00 | 0.86 |
| 1.00E+00 | 0.92 |
| 1.00E+00 | 0.93 |
| 1.00E+00 | 0.87 |
| 1.00E+00 | 0.78 |
| 1.00E+00 | 0.84 |
| 1.00E+00 | 0.53 |
| 1.00E+00 | 0.68 |
| 1.00E+00 | 0.9  |
| 1.00E+00 | 0.98 |
| 1.00E+00 | 0.97 |
| 1.00E+00 | 0.79 |
| 1.00E+00 | 0.95 |
| 1.00E+00 | 0.94 |
| 1.00E+00 | 0.91 |
| 1.00E+00 | 0.96 |
| 1.00E+00 | 0.74 |
| 1.00E+00 | 0.64 |
| 1.00E+00 | 0.94 |
| 1.00E+00 | 0.84 |
| 1.00E+00 | 0.89 |
| 1.00E+00 | 0.67 |
| 1.00E+00 | 0.93 |
| 1.00E+00 | 0.8  |
| 1.00E+00 | 1    |
| 1.00E+00 | 1    |
| 1.00E+00 | 0.61 |
| 1.00E+00 | 0.8  |
| 1.00E+00 | 0.93 |
| 1.00E+00 | 1    |

|          |      |
|----------|------|
| 1.00E+00 | 0.92 |
| 1.00E+00 | 0.74 |
| 1.00E+00 | 0.96 |
| 1.00E+00 | 0.94 |
| 1.00E+00 | 0.91 |
| 1.00E+00 | 0.91 |
| 1.00E+00 | 0.39 |
| 1.00E+00 | 0.56 |
| 1.00E+00 | 0.95 |
| 1.00E+00 | 0.78 |
| 1.00E+00 | 0.83 |
| 1.00E+00 | 0.9  |
| 1.00E+00 | 0.88 |
| 1.00E+00 | 0.83 |
| 1.00E+00 | 0.94 |
| 1.00E+00 | 1    |
| 1.00E+00 | 0.85 |
| 1.00E+00 | 0.85 |
| 1.00E+00 | 0.95 |
| 1.00E+00 | 0.89 |

|          |      |
|----------|------|
| 1.00E+00 | 0.7  |
| 1.00E+00 | 0.81 |
| 1.00E+00 | 0.92 |
| 1.00E+00 | 0.64 |
| 1.00E+00 | 0.7  |
| 1.00E+00 | 0.85 |
| 1.00E+00 | 0.94 |
| 1.00E+00 | 0.89 |
| 1.00E+00 | 0.92 |
| 1.00E+00 | 0.93 |
| 1.00E+00 | 0.75 |
| 1.00E+00 | 0.92 |
| 1.00E+00 | 0.69 |
| 1.00E+00 | 0.93 |
| 1.00E+00 | 1    |
| 1.00E+00 | 0.87 |
| 1.00E+00 | 0.88 |
| 1.00E+00 | 0.79 |
| 1.00E+00 | 0.89 |
| 1.00E+00 | 0.93 |
| 1.00E+00 | 0.72 |
| 1.00E+00 | 1    |
| 1.00E+00 | 0.81 |
| 1.00E+00 | 0.92 |
| 1.00E+00 | 0.75 |
| 1.00E+00 | 0.72 |
| 1.00E+00 | 0.74 |
| 1.00E+00 | 0.85 |
| 1.00E+00 | 0.66 |
| 1.00E+00 | 0.6  |
| 1.00E+00 | 0.86 |
| 1.00E+00 | 0.66 |
| 1.00E+00 | 0.94 |
| 1.00E+00 | 1    |
| 1.00E+00 | 1    |
| 1.00E+00 | 0.57 |
| 1.00E+00 | 0.87 |
| 1.00E+00 | 0.95 |
| 1.00E+00 | 1    |
| 1.00E+00 | 0.73 |
| 1.00E+00 | 0.58 |
| 1.00E+00 | 0.53 |
| 1.00E+00 | 0.75 |

|          |      |
|----------|------|
| 1.00E+00 | 0.93 |
| 1.00E+00 | 0.88 |
| 1.00E+00 | 0.7  |
| 1.00E+00 | 0.72 |
| 1.00E+00 | 0.86 |
| 1.00E+00 | 0.91 |
| 1.00E+00 | 0.79 |
| 1.00E+00 | 0.69 |
| 1.00E+00 | 0.75 |
| 1.00E+00 | 0.87 |
| 1.00E+00 | 0.94 |

|          |      |
|----------|------|
| 1.00E+00 | 0.55 |
| 1.00E+00 | 0.75 |
| 1.00E+00 | 0.48 |

|          |      |
|----------|------|
| 1.00E+00 | 0.98 |
| 1.00E+00 | 0.83 |
| 1.00E+00 | 0.83 |
| 1.00E+00 | 0.84 |
| 1.00E+00 | 0.93 |
| 1.00E+00 | 0.9  |
| 1.00E+00 | 0.9  |
| 1.00E+00 | 0.85 |
| 1.00E+00 | 0.84 |
| 1.00E+00 | 0.77 |
| 1.00E+00 | 0.88 |
| 1.00E+00 | 1    |
| 1.00E+00 | 1    |
| 1.00E+00 | 0.82 |
| 1.00E+00 | 0.89 |
| 1.00E+00 | 0.91 |
| 1.00E+00 | 1    |
| 1.00E+00 | 0.91 |
| 1.00E+00 | 1    |
| 1.00E+00 | 0.86 |
| 1.00E+00 | 0.96 |
| 1.00E+00 | 0.97 |
| 1.00E+00 | 0.96 |
| 1.00E+00 | 0.97 |

|          |      |
|----------|------|
| 1.00E+00 | 0.87 |
| 1.00E+00 | 0.95 |
| 1.00E+00 | 0.87 |
| 1.00E+00 | 0.98 |
| 1.00E+00 | 0.92 |
| 1.00E+00 | 0.72 |
| 1.00E+00 | 0.93 |
| 1.00E+00 | 0.77 |

|          |      |
|----------|------|
| 1.00E+00 | 0.95 |
| 1.00E+00 | 0.9  |
| 1.00E+00 | 1    |
| 1.00E+00 | 0.93 |
| 1.00E+00 | 0.91 |
| 1.00E+00 | 0.97 |
| 1.00E+00 | 0.79 |
| 1.00E+00 | 0.92 |
| 1.00E+00 | 1    |
| 1.00E+00 | 1    |
| 1.00E+00 | 0.93 |
| 1.00E+00 | 0.94 |
| 1.00E+00 | 0.83 |
| 1.00E+00 | 0.87 |
| 1.00E+00 | 0.84 |
| 1.00E+00 | 0.92 |
| 1.00E+00 | 0.89 |
| 1.00E+00 | 0.7  |
| 1.00E+00 | 0.81 |
| 1.00E+00 | 0.92 |
| 1.00E+00 | 0.64 |
| 1.00E+00 | 0.7  |
| 1.00E+00 | 0.85 |
| 1.00E+00 | 0.94 |
| 1.00E+00 | 0.89 |
| 1.00E+00 | 0.92 |
| 1.00E+00 | 0.93 |
| 1.00E+00 | 0.75 |
| 1.00E+00 | 0.92 |

|          |      |
|----------|------|
| 1.00E+00 | 0.93 |
| 1.00E+00 | 1    |
| 1.00E+00 | 1    |
| 1.00E+00 | 1    |
| 1.00E+00 | 0.78 |
| 1.00E+00 | 0.74 |
| 1.00E+00 | 0.85 |
| 1.00E+00 | 0.66 |
| 1.00E+00 | 0.77 |
| 1.00E+00 | 0.78 |
| 1.00E+00 | 0.65 |
| 1.00E+00 | 0.6  |
| 1.00E+00 | 0.86 |
| 1.00E+00 | 0.66 |
| 1.00E+00 | 0.94 |
| 1.00E+00 | 1    |
| 1.00E+00 | 1    |
| 1.00E+00 | 0.57 |
| 1.00E+00 | 0.87 |
| 1.00E+00 | 0.95 |
| 1.00E+00 | 1    |
| 1.00E+00 | 0.73 |
| 1.00E+00 | 0.58 |
| 1.00E+00 | 0.53 |
| 1.00E+00 | 0.67 |
| 1.00E+00 | 0.84 |
| 1.00E+00 | 0.75 |
| 1.00E+00 | 0.75 |
| 1.00E+00 | 0.93 |
| 1.00E+00 | 0.88 |
| 1.00E+00 | 0.7  |
| 1.00E+00 | 0.72 |
| 1.00E+00 | 0.86 |
| 1.00E+00 | 0.91 |
| 1.00E+00 | 0.79 |
| 1.00E+00 | 0.69 |
| 1.00E+00 | 0.75 |
| 1.00E+00 | 0.87 |
| 1.00E+00 | 0.94 |
| 1.00E+00 | 0.76 |
| 1.00E+00 | 0    |
| 1.00E+00 | 1    |
| 1.00E+00 | 1    |
| 1.00E+00 | 0.63 |
| 1.00E+00 | 0.58 |
| 1.00E+00 | 1    |

|          |      |
|----------|------|
| 1.00E+00 | 0.87 |
| 1.00E+00 | 0.6  |
| 1.00E+00 | 0.88 |
| 1.00E+00 | 0.97 |
| 1.00E+00 | 0.85 |
| 1.00E+00 | 0.93 |
| 1.00E+00 | 0.57 |
| 1.00E+00 | 0.96 |

|          |      |
|----------|------|
| 1.00E+00 | 0.89 |
| 1.00E+00 | 0.66 |
| 1.00E+00 | 0.66 |

|          |      |
|----------|------|
| 1.00E+00 | 0.68 |
| 1.00E+00 | 1    |
| 1.00E+00 | 0.9  |
| 1.00E+00 | 0.83 |
| 1.00E+00 | 0.74 |
| 1.00E+00 | 1    |
| 1.00E+00 | 0.94 |
| 1.00E+00 | 0.89 |
| 1.00E+00 | 0.9  |
| 1.00E+00 | 0.93 |
| 1.00E+00 | 0.69 |
| 1.00E+00 | 0.72 |
| 1.00E+00 | 0.82 |
| 1.00E+00 | 0.64 |
| 1.00E+00 | 0.83 |
| 1.00E+00 | 0.88 |
| 1.00E+00 | 0.7  |
| 1.00E+00 | 0.65 |
| 1.00E+00 | 0.93 |
| 1.00E+00 | 0.92 |
| 1.00E+00 | 0.91 |
| 1.00E+00 | 0.89 |

|          |      |
|----------|------|
| 1.00E+00 | 0.6  |
| 1.00E+00 | 1    |
| 1.00E+00 | 0.64 |

|          |      |
|----------|------|
| 1.00E+00 | 0.81 |
| 1.00E+00 | 0.94 |
| 1.00E+00 | 0.95 |
| 1.00E+00 | 0.89 |
| 1.00E+00 | 0.98 |



|          |      |
|----------|------|
| 1.00E+00 | 1    |
| 1.00E+00 | 0.99 |
| 1.00E+00 | 0.96 |

|          |      |
|----------|------|
| 1.00E+00 | 1    |
| 1.00E+00 | 0.92 |

|          |      |
|----------|------|
| 1.00E+00 | 0.91 |
| 1.00E+00 | 0.72 |
| 1.00E+00 | 0.73 |
| 1.00E+00 | 0.64 |
| 1.00E+00 | 0.73 |
| 1.00E+00 | 0.71 |

|          |      |
|----------|------|
| 1.00E+00 | 0.93 |
| 1.00E+00 | 0.86 |
| 1.00E+00 | 0.69 |
| 1.00E+00 | 0.94 |
| 1.00E+00 | 0.94 |
| 1.00E+00 | 1    |
| 1.00E+00 | 0.96 |
| 1.00E+00 | 0.81 |
| 1.00E+00 | 0.92 |
| 1.00E+00 | 0.93 |
| 1.00E+00 | 0.86 |
| 1.00E+00 | 1    |
| 1.00E+00 | 0.53 |
| 1.00E+00 | 0.48 |
| 1.00E+00 | 0.41 |
| 1.00E+00 | 0.79 |
| 1.00E+00 | 1    |
| 1.00E+00 | 0.93 |
| 1.00E+00 | 1    |
| 1.00E+00 | 0.9  |
| 1.00E+00 | 0.91 |
| 1.00E+00 | 0.72 |
| 1.00E+00 | 0.89 |
| 1.00E+00 | 0.89 |
| 1.00E+00 | 0.84 |
| 1.00E+00 | 0.94 |
| 1.00E+00 | 0.95 |
| 1.00E+00 | 0.47 |
| 1.00E+00 | 0.81 |

|          |      |
|----------|------|
| 1.00E+00 | 0.61 |
| 1.00E+00 | 0.93 |
| 1.00E+00 | 0.88 |
| 1.00E+00 | 0.94 |
| 1.00E+00 | 0.89 |
| 1.00E+00 | 1    |
| 1.00E+00 | 0.57 |
| 1.00E+00 | 0.78 |
| 1.00E+00 | 0.94 |
| 1.00E+00 | 0.86 |
| 1.00E+00 | 0.82 |
| 1.00E+00 | 0.82 |
| 1.00E+00 | 0.77 |
| 1.00E+00 | 0.67 |
| 1.00E+00 | 0.76 |
| 1.00E+00 | 0.6  |
| 1.00E+00 | 0.61 |
| 1.00E+00 | 0.84 |
| 1.00E+00 | 0.71 |
| 1.00E+00 | 0.93 |
| 1.00E+00 | 0.94 |
| 1.00E+00 | 0.85 |
| 1.00E+00 | 0.93 |
| 1.00E+00 | 0.63 |
| 1.00E+00 | 0.72 |
| 1.00E+00 | 0.74 |
| 1.00E+00 | 0.79 |
| 1.00E+00 | 1    |
| 1.00E+00 | 1    |
| 1.00E+00 | 0.82 |
| 1.00E+00 | 0.92 |
| 1.00E+00 | 0.95 |
| 1.00E+00 | 0.8  |
| 1.00E+00 | 1    |
| 1.00E+00 | 0.75 |
| 1.00E+00 | 0.78 |
| 1.00E+00 | 0.84 |
| 1.00E+00 | 0.94 |
| 1.00E+00 | 0.67 |
| 1.00E+00 | 0.89 |

1.00E+00 0.79

1.00E+00 1  
1.00E+00 0.74  
1.00E+00 0.96  
1.00E+00 0.8  
1.00E+00 0.93  
1.00E+00 0.79  
1.00E+00 0.42  
1.00E+00 0.98  
1.00E+00 0.85  
1.00E+00 0.94  
1.00E+00 0.81  
1.00E+00 0.9  
1.00E+00 0.7  
1.00E+00 0.88  
1.00E+00 0.87  
1.00E+00 1  
1.00E+00 0.86  
1.00E+00 0.57  
1.00E+00 0.82

1.00E+00 1  
1.00E+00 0.89  
1.00E+00 0.94  
1.00E+00 0.88  
1.00E+00 0.85  
1.00E+00 0.78

1.00E+00 0.94  
1.00E+00 0.88  
1.00E+00 0.93  
1.00E+00 0.92  
1.00E+00 0.65  
1.00E+00 0.71  
1.00E+00 1  
1.00E+00 0.94  
1.00E+00 0.74  
1.00E+00 0.56  
1.00E+00 0.84  
1.00E+00 0.87

1.00E+00 1  
1.00E+00 0.83  
1.00E+00 0.74  
1.00E+00 0.64  
1.00E+00 0.86  
1.00E+00 1

|          |      |
|----------|------|
| 1.00E+00 | 0.85 |
| 1.00E+00 | 0.97 |
| 1.00E+00 | 0.46 |
| 1.00E+00 | 0.87 |
| 1.00E+00 | 0.75 |
| 1.00E+00 | 0.95 |
| 1.00E+00 | 0.89 |
| 1.00E+00 | 0.77 |
| 1.00E+00 | 0.82 |
| 1.00E+00 | 0.86 |
| 1.00E+00 | 0.85 |
| 1.00E+00 | 0.98 |
| 1.00E+00 | 0.67 |
| 1.00E+00 | 0.97 |
| 1.00E+00 | 0.86 |

|          |      |
|----------|------|
| 1.00E+00 | 0.87 |
| 1.00E+00 | 0.93 |
| 1.00E+00 | 0.78 |
| 1.00E+00 | 1    |
| 1.00E+00 | 0.93 |
| 1.00E+00 | 0.96 |
| 1.00E+00 | 0.98 |
| 1.00E+00 | 1    |
| 1.00E+00 | 0.95 |
| 1.00E+00 | 0.58 |
| 1.00E+00 | 0.95 |
| 1.00E+00 | 1    |
| 1.00E+00 | 0.89 |
| 1.00E+00 | 0.92 |
| 1.00E+00 | 0.77 |
| 1.00E+00 | 1    |
| 1.00E+00 | 0.93 |
| 1.00E+00 | 0.72 |
| 1.00E+00 | 1    |
| 1.00E+00 | 0.94 |
| 1.00E+00 | 1    |
| 1.00E+00 | 0.59 |
| 1.00E+00 | 0.85 |
| 1.00E+00 | 0.68 |
| 1.00E+00 | 0.59 |
| 1.00E+00 | 1    |
| 1.00E+00 | 1    |
| 1.00E+00 | 0.93 |
| 1.00E+00 | 0.86 |
| 1.00E+00 | 0.95 |
| 1.00E+00 | 0.89 |
| 1.00E+00 | 0.79 |

|          |      |
|----------|------|
| 1.00E+00 | 0.91 |
| 1.00E+00 | 0.93 |
| 1.00E+00 | 0.7  |
| 1.00E+00 | 0.66 |
| 1.00E+00 | 0.88 |
| 1.00E+00 | 0.66 |
| 1.00E+00 | 0    |
| 1.00E+00 | 0.85 |
| 1.00E+00 | 0.75 |
| 1.00E+00 | 0.62 |
| 1.00E+00 | 0    |
| 1.00E+00 | 0.62 |
| 1.00E+00 | 0.69 |
| 1.00E+00 | 1    |

|          |      |
|----------|------|
| 1.00E+00 | 0.71 |
| 1.00E+00 | 0.92 |
| 1.00E+00 | 0.94 |
| 1.00E+00 | 0.84 |

|          |      |
|----------|------|
| 1.00E+00 | 0.63 |
| 1.00E+00 | 0.97 |
| 1.00E+00 | 1    |
| 1.00E+00 | 0.59 |
| 1.00E+00 | 0.66 |

|          |      |
|----------|------|
| 1.00E+00 | 0.87 |
| 1.00E+00 | 1    |
| 1.00E+00 | 0    |
| 1.00E+00 | 0.96 |
| 1.00E+00 | 0.95 |
| 1.00E+00 | 1    |
| 1.00E+00 | 0.95 |
| 1.00E+00 | 1    |
| 1.00E+00 | 0.62 |
| 1.00E+00 | 0.96 |

|          |      |
|----------|------|
| 1.00E+00 | 0.84 |
| 1.00E+00 | 0.98 |

|          |      |
|----------|------|
| 1.00E+00 | 0.97 |
| 1.00E+00 | 0.94 |
| 1.00E+00 | 0.67 |
| 1.00E+00 | 0.77 |

|          |      |
|----------|------|
| 1.00E+00 | 0.91 |
| 1.00E+00 | 0.95 |
| 1.00E+00 | 0.78 |
| 1.00E+00 | 0.43 |
| 1.00E+00 | 0.72 |
| 1.00E+00 | 0.9  |
| 1.00E+00 | 0.58 |
| 1.00E+00 | 0.56 |
| 1.00E+00 | 0.47 |
| 1.00E+00 | 0.64 |
| 1.00E+00 | 0.87 |
| 1.00E+00 | 0.8  |
| 1.00E+00 | 0.75 |
| 1.00E+00 | 0.86 |
| 1.00E+00 | 0.91 |
| 1.00E+00 | 0.69 |
| 1.00E+00 | 0.88 |
| 1.00E+00 | 0.69 |
| 1.00E+00 | 1    |
| 1.00E+00 | 0.62 |
| 1.00E+00 | 0.75 |
| 1.00E+00 | 0.58 |
| 1.00E+00 | 0.75 |
| 1.00E+00 | 0.77 |
| 1.00E+00 | 0.56 |
| 1.00E+00 | 0.69 |
| 1.00E+00 | 0.5  |
| 1.00E+00 | 0.92 |
| 1.00E+00 | 0.93 |
| 1.00E+00 | 0.95 |
| 1.00E+00 | 0.81 |
| 1.00E+00 | 0.7  |
| 1.00E+00 | 0.77 |
| 1.00E+00 | 0.89 |
| 1.00E+00 | 0.93 |
| 1.00E+00 | 1    |
| 1.00E+00 | 0.6  |
| 1.00E+00 | 0.94 |
| 1.00E+00 | 1    |
| 1.00E+00 | 0.95 |
| 1.00E+00 | 0.85 |
| 1.00E+00 | 0.81 |
| 1.00E+00 | 0.66 |

|          |      |
|----------|------|
| 1.00E+00 | 0.69 |
| 1.00E+00 | 0.69 |
| 1.00E+00 | 0.63 |
| 1.00E+00 | 1    |
| 1.00E+00 | 0.93 |
| 1.00E+00 | 1    |

|          |      |
|----------|------|
| 1.00E+00 | 0.84 |
| 1.00E+00 | 0.66 |
| 1.00E+00 | 0.85 |
| 1.00E+00 | 0.79 |
| 1.00E+00 | 0.81 |

|          |      |
|----------|------|
| 1.00E+00 | 0.87 |
| 1.00E+00 | 0.94 |
| 1.00E+00 | 0.96 |
| 1.00E+00 | 1    |
| 1.00E+00 | 1    |
| 1.00E+00 | 0.7  |
| 1.00E+00 | 0.91 |
| 1.00E+00 | 0.64 |

|          |      |
|----------|------|
| 1.00E+00 | 0.75 |
| 1.00E+00 | 0.73 |
| 1.00E+00 | 0.82 |
| 1.00E+00 | 0.65 |
| 1.00E+00 | 0.64 |
| 1.00E+00 | 0    |
| 1.00E+00 | 0.69 |
| 1.00E+00 | 0.83 |
| 1.00E+00 | 0.96 |
| 1.00E+00 | 1    |
| 1.00E+00 | 1    |
| 1.00E+00 | 1    |
| 1.00E+00 | 0.98 |
| 1.00E+00 | 0.52 |
| 1.00E+00 | 0.96 |
| 1.00E+00 | 1    |
| 1.00E+00 | 1    |
| 1.00E+00 | 0.81 |

|          |      |
|----------|------|
| 1.00E+00 | 0.78 |
|----------|------|

|          |      |
|----------|------|
| 1.00E+00 | 1    |
| 1.00E+00 | 0.91 |

|          |      |
|----------|------|
| 1.00E+00 | 1    |
| 1.00E+00 | 0.61 |

|          |      |
|----------|------|
| 1.00E+00 | 1    |
| 1.00E+00 | 0.53 |
| 1.00E+00 | 1    |
| 1.00E+00 | 0.67 |
| 1.00E+00 | 1    |
| 1.00E+00 | 0.92 |
| 1.00E+00 | 0.62 |
| 1.00E+00 | 0.89 |
| 1.00E+00 | 0.84 |
| 1.00E+00 | 0.8  |
| 1.00E+00 | 0.72 |
| 1.00E+00 | 0.8  |
| 1.00E+00 | 0.93 |
| 1.00E+00 | 0.92 |
| 1.00E+00 | 0.72 |
| 1.00E+00 | 0.71 |

|          |      |
|----------|------|
| 1.00E+00 | 0.84 |
| 1.00E+00 | 0.6  |
| 1.00E+00 | 0.85 |
| 1.00E+00 | 0.94 |
| 1.00E+00 | 0.94 |
| 1.00E+00 | 0.86 |
| 1.00E+00 | 0.48 |
| 1.00E+00 | 0.9  |
| 1.00E+00 | 0.76 |
| 1.00E+00 | 0.5  |
| 1.00E+00 | 0.8  |
| 1.00E+00 | 0.91 |
| 1.00E+00 | 0.8  |
| 1.00E+00 | 0.67 |
| 1.00E+00 | 0.8  |

|          |      |
|----------|------|
| 1.00E+00 | 0.89 |
| 1.00E+00 | 0.73 |
| 1.00E+00 | 0.96 |
| 1.00E+00 | 0.91 |
| 1.00E+00 | 1    |

|          |      |
|----------|------|
| 1.00E+00 | 0.97 |
| 1.00E+00 | 0.68 |
| 1.00E+00 | 1    |
| 1.00E+00 | 0.85 |
| 1.00E+00 | 1    |
| 1.00E+00 | 1    |
| 1.00E+00 | 0.85 |



|          |      |
|----------|------|
| 1.00E+00 | 0.95 |
| 1.00E+00 | 0.93 |
| 1.00E+00 | 0.95 |
| 1.00E+00 | 0.54 |
| 1.00E+00 | 0.97 |
| 1.00E+00 | 1    |
| 1.00E+00 | 0.84 |
| 1.00E+00 | 1    |
| 1.00E+00 | 0.74 |
| 1.00E+00 | 0.83 |
| 1.00E+00 | 1    |
| 1.00E+00 | 0.67 |
| 1.00E+00 | 0.47 |
| 1.00E+00 | 0.87 |
| 1.00E+00 | 0.89 |
| 1.00E+00 | 0.85 |
| 1.00E+00 | 0.76 |
| 1.00E+00 | 0.67 |
| 1.00E+00 | 0.62 |
| 1.00E+00 | 0.78 |
| 1.00E+00 | 0.53 |
| 1.00E+00 | 0.7  |
| 1.00E+00 | 0.86 |
| 1.00E+00 | 0.55 |
| 1.00E+00 | 0.46 |
| 1.00E+00 | 0.9  |
| 1.00E+00 | 0.57 |
| 1.00E+00 | 1    |
| 1.00E+00 | 0.56 |
| 1.00E+00 | 0.83 |
| 1.00E+00 | 0.9  |
| 1.00E+00 | 0.92 |
| 1.00E+00 | 0.91 |
| 1.00E+00 | 0.85 |
| 1.00E+00 | 0.89 |
| 1.00E+00 | 1    |
| 1.00E+00 | 0.98 |
| 1.00E+00 | 1    |
| 1.00E+00 | 0.56 |
| 1.00E+00 | 0.81 |
| 1.00E+00 | 1    |
| 1.00E+00 | 0.78 |
| 1.00E+00 | 0.95 |

|          |      |
|----------|------|
| 1.00E+00 | 0.81 |
| 1.00E+00 | 1    |
| 1.00E+00 | 0.64 |
| 1.00E+00 | 0.88 |

|          |      |
|----------|------|
| 1.00E+00 | 0.57 |
| 1.00E+00 | 0.86 |
| 1.00E+00 | 0.86 |
| 1.00E+00 | 0.57 |
| 1.00E+00 | 1    |
| 1.00E+00 | 0.97 |
| 1.00E+00 | 0.96 |
| 1.00E+00 | 1    |
| 1.00E+00 | 1    |
| 1.00E+00 | 0.93 |
| 1.00E+00 | 1    |
| 1.00E+00 | 0.9  |
| 1.00E+00 | 0.91 |
| 1.00E+00 | 0.87 |
| 1.00E+00 | 0.79 |
| 1.00E+00 | 0.93 |
| 1.00E+00 | 0.8  |
| 1.00E+00 | 0.96 |
| 1.00E+00 | 0.96 |
| 1.00E+00 | 1    |
| 1.00E+00 | 0.95 |
| 1.00E+00 | 0.95 |
| 1.00E+00 | 0.86 |
| 1.00E+00 | 0.87 |
| 1.00E+00 | 1    |
| 1.00E+00 | 0.82 |
| 1.00E+00 | 0.9  |
| 1.00E+00 | 1    |
| 1.00E+00 | 0.9  |
| 1.00E+00 | 1    |
| 1.00E+00 | 1    |
| 1.00E+00 | 0.88 |
| 1.00E+00 | 0.7  |
| 1.00E+00 | 0.82 |
| 1.00E+00 | 0.85 |
| 1.00E+00 | 0.91 |
| 1.00E+00 | 1    |
| 1.00E+00 | 0.29 |
| 1.00E+00 | 0.73 |
| 1.00E+00 | 0.53 |
| 1.00E+00 | 0.5  |
| 1.00E+00 | 0.7  |
| 1.00E+00 | 0.66 |
| 1.00E+00 | 0.67 |
| 1.00E+00 | 0.67 |
| 1.00E+00 | 0.65 |
| 1.00E+00 | 0.94 |
| 1.00E+00 | 0.6  |

|          |      |
|----------|------|
| 1.00E+00 | 0.68 |
| 1.00E+00 | 0.85 |
| 1.00E+00 | 1    |
| 1.00E+00 | 0.96 |
| 1.00E+00 | 0.9  |
| 1.00E+00 | 0.85 |
| 1.00E+00 | 0.76 |
| 1.00E+00 | 0.68 |
| 1.00E+00 | 1    |
| 1.00E+00 | 0.85 |
| 1.00E+00 | 1    |
| 1.00E+00 | 0.6  |
| 1.00E+00 | 0.61 |
| 1.00E+00 | 0.7  |
| 1.00E+00 | 0.8  |
| 1.00E+00 | 0.74 |
| 1.00E+00 | 0.59 |
| 1.00E+00 | 0.58 |
| 1.00E+00 | 0.91 |
| 1.00E+00 | 1    |
| 1.00E+00 | 0.85 |
| 1.00E+00 | 0.88 |
| 1.00E+00 | 0.75 |
| 1.00E+00 | 0.95 |
| 1.00E+00 | 0.89 |
| 1.00E+00 | 0.75 |
| 1.00E+00 | 0.77 |
| 1.00E+00 | 0.94 |
| 1.00E+00 | 0.87 |
| 1.00E+00 | 0.47 |
| 1.00E+00 | 0.62 |
| 1.00E+00 | 0.91 |
| 1.00E+00 | 0.79 |
| 1.00E+00 | 0.88 |
| 1.00E+00 | 0.75 |
| 1.00E+00 | 0.78 |
| 1.00E+00 | 0.8  |
| 1.00E+00 | 0.93 |
| 1.00E+00 | 0.95 |
| 1.00E+00 | 1    |
| 1.00E+00 | 0.95 |
| 1.00E+00 | 0.73 |
| 1.00E+00 | 0.94 |

|          |      |
|----------|------|
| 1.00E+00 | 1    |
| 1.00E+00 | 0.93 |
| 1.00E+00 | 1    |
| 1.00E+00 | 0.76 |
| 1.00E+00 | 0.56 |
| 1.00E+00 | 0.77 |
| 1.00E+00 | 1    |
| 1.00E+00 | 0.88 |
| 1.00E+00 | 1    |
| 1.00E+00 | 0.88 |
| 1.00E+00 | 0.66 |

|          |      |
|----------|------|
| 1.00E+00 | 0.96 |
| 1.00E+00 | 0.64 |
| 1.00E+00 | 0.87 |
| 1.00E+00 | 0.68 |
| 1.00E+00 | 0.81 |

|          |      |
|----------|------|
| 1.00E+00 | 0.97 |
| 1.00E+00 | 0.81 |
| 1.00E+00 | 0.96 |
| 1.00E+00 | 1    |
| 1.00E+00 | 0.84 |
| 1.00E+00 | 0.64 |

|          |      |
|----------|------|
| 1.00E+00 | 0.57 |
| 1.00E+00 | 0.82 |
| 1.00E+00 | 0.76 |
| 1.00E+00 | 0.8  |
| 1.00E+00 | 0.87 |
| 1.00E+00 | 1    |
| 1.00E+00 | 0    |
| 1.00E+00 | 0.76 |
| 1.00E+00 | 0.83 |
| 1.00E+00 | 0.94 |
| 1.00E+00 | 0.93 |
| 1.00E+00 | 1    |
| 1.00E+00 | 0.89 |
| 1.00E+00 | 0.9  |
| 1.00E+00 | 0.93 |
| 1.00E+00 | 0.72 |
| 1.00E+00 | 0    |
| 1.00E+00 | 0.92 |

|          |      |
|----------|------|
| 1.00E+00 | 0.61 |
| 1.00E+00 | 0.85 |

|          |      |
|----------|------|
| 1.00E+00 | 0.78 |
|----------|------|

|          |      |
|----------|------|
| 1.00E+00 | 0.93 |
| 1.00E+00 | 0.92 |

|          |      |
|----------|------|
| 1.00E+00 | 0.71 |
| 1.00E+00 | 1    |
| 1.00E+00 | 0    |

|          |      |
|----------|------|
| 1.00E+00 | 0.83 |
| 1.00E+00 | 0.94 |
| 1.00E+00 | 0.8  |
| 1.00E+00 | 0.74 |
| 1.00E+00 | 0.81 |
| 1.00E+00 | 0.77 |
| 1.00E+00 | 0.69 |
| 1.00E+00 | 0.94 |
| 1.00E+00 | 1    |
| 1.00E+00 | 0.73 |
| 1.00E+00 | 1    |
| 1.00E+00 | 0.9  |
| 1.00E+00 | 0.86 |
| 1.00E+00 | 0.57 |
| 1.00E+00 | 1    |
| 1.00E+00 | 0.97 |

|          |      |
|----------|------|
| 1.00E+00 | 0.79 |
| 1.00E+00 | 1    |
| 1.00E+00 | 0.8  |
| 1.00E+00 | 0.84 |
| 1.00E+00 | 1    |
| 1.00E+00 | 0.79 |
| 1.00E+00 | 0.92 |
| 1.00E+00 | 1    |
| 1.00E+00 | 0.93 |
| 1.00E+00 | 0.95 |

|          |      |
|----------|------|
| 1.00E+00 | 0.79 |
| 1.00E+00 | 0.89 |
| 1.00E+00 | 0.92 |
| 1.00E+00 | 0.91 |

|          |      |
|----------|------|
| 1.00E+00 | 1    |
| 1.00E+00 | 0.57 |
| 1.00E+00 | 1    |
| 1.00E+00 | 0.79 |
| 1.00E+00 | 0.94 |
| 1.00E+00 | 0.67 |
| 1.00E+00 | 0.78 |
| 1.00E+00 | 0.57 |
| 1.00E+00 | 0.87 |
| 1.00E+00 | 0.9  |
| 1.00E+00 | 0.91 |
| 1.00E+00 | 0.87 |
| 1.00E+00 | 0.82 |
| 1.00E+00 | 0.81 |
| 1.00E+00 | 0.74 |
| 1.00E+00 | 0.86 |
| 1.00E+00 | 0.56 |

|          |      |
|----------|------|
| 1.00E+00 | 1    |
| 1.00E+00 | 0.87 |
| 1.00E+00 | 0.81 |

|          |      |
|----------|------|
| 1.00E+00 | 0.78 |
| 1.00E+00 | 0.26 |
| 1.00E+00 | 0.79 |
| 1.00E+00 | 0.76 |
| 1.00E+00 | 1    |
| 1.00E+00 | 1    |
| 1.00E+00 | 0.67 |
| 1.00E+00 | 0.88 |
| 1.00E+00 | 0.81 |
| 1.00E+00 | 0.79 |
| 1.00E+00 | 0.88 |
| 1.00E+00 | 0.64 |
| 1.00E+00 | 0.85 |
| 1.00E+00 | 0.64 |
| 1.00E+00 | 0.89 |
| 1.00E+00 | 0.77 |
| 1.00E+00 | 0.84 |
| 1.00E+00 | 0.87 |
| 1.00E+00 | 1    |
| 1.00E+00 | 0.54 |
| 1.00E+00 | 0.96 |
| 1.00E+00 | 0.88 |
| 1.00E+00 | 1    |

|          |      |
|----------|------|
| 1.00E+00 | 0.87 |
| 1.00E+00 | 1    |
| 1.00E+00 | 0.9  |
| 1.00E+00 | 0.59 |
| 1.00E+00 | 0.93 |
| 1.00E+00 | 0.93 |
| 1.00E+00 | 0.78 |
| 1.00E+00 | 1    |
| 1.00E+00 | 0.69 |
| 1.00E+00 | 0.84 |
| 1.00E+00 | 0.69 |
| 1.00E+00 | 1    |
| 1.00E+00 | 0.81 |
| 1.00E+00 | 0.92 |
| 1.00E+00 | 1    |
| 1.00E+00 | 0.95 |
| 1.00E+00 | 0.86 |
| 1.00E+00 | 1    |
| 1.00E+00 | 0.92 |
| 1.00E+00 | 0.66 |
| 1.00E+00 | 0.85 |
| 1.00E+00 | 0.73 |
| 1.00E+00 | 0.89 |
| 1.00E+00 | 0.77 |
| 1.00E+00 | 0.92 |
| 1.00E+00 | 1    |
| 1.00E+00 | 1    |
| 1.00E+00 | 0.82 |
| 1.00E+00 | 0.9  |
| 1.00E+00 | 0    |
| 1.00E+00 | 0.75 |
| 1.00E+00 | 0.86 |
| 1.00E+00 | 0.45 |
| 1.00E+00 | 1    |
| 1.00E+00 | 0.54 |
| 1.00E+00 | 0.8  |
| 1.00E+00 | 0.96 |
| 1.00E+00 | 1    |
| 1.00E+00 | 1    |
| 1.00E+00 | 0.76 |

|          |      |
|----------|------|
| 1.00E+00 | 1    |
| 1.00E+00 | 0.81 |
| 1.00E+00 | 0.49 |
| 1.00E+00 | 0.75 |
| 1.00E+00 | 1    |
| 1.00E+00 | 0.83 |
| 1.00E+00 | 0.94 |
| 1.00E+00 | 0.61 |
| 1.00E+00 | 0.71 |

|          |      |
|----------|------|
| 1.00E+00 | 0.6  |
| 1.00E+00 | 0.92 |
| 1.00E+00 | 1    |
| 1.00E+00 | 0.65 |
| 1.00E+00 | 0.87 |
| 1.00E+00 | 0.87 |
| 1.00E+00 | 0.64 |
| 1.00E+00 | 0.77 |
| 1.00E+00 | 0.78 |
| 1.00E+00 | 0.76 |

|          |      |
|----------|------|
| 1.00E+00 | 0.77 |
| 1.00E+00 | 0.83 |
| 1.00E+00 | 0.62 |
| 1.00E+00 | 1    |

|          |      |
|----------|------|
| 1.00E+00 | 1    |
| 1.00E+00 | 0.77 |
| 1.00E+00 | 1    |
| 1.00E+00 | 0.96 |

|          |      |
|----------|------|
| 1.00E+00 | 1    |
| 1.00E+00 | 0.98 |
| 1.00E+00 | 1    |
| 1.00E+00 | 1    |
| 1.00E+00 | 0.95 |
| 1.00E+00 | 0.88 |
| 1.00E+00 | 0.91 |

|          |      |
|----------|------|
| 1.00E+00 | 0.81 |
| 1.00E+00 | 0.87 |
| 1.00E+00 | 0.85 |



|          |      |
|----------|------|
| 1.00E+00 | 0.78 |
| 1.00E+00 | 0.83 |
| 1.00E+00 | 1    |
| 1.00E+00 | 0.91 |
| 1.00E+00 | 1    |
| 1.00E+00 | 1    |
| 1.00E+00 | 0.68 |
| 1.00E+00 | 0.93 |
| 1.00E+00 | 0.91 |

|          |      |
|----------|------|
| 1.00E+00 | 0.6  |
| 1.00E+00 | 0.82 |
| 1.00E+00 | 0    |
| 1.00E+00 | 0.88 |

|          |      |
|----------|------|
| 1.00E+00 | 0.77 |
| 1.00E+00 | 0.83 |
| 1.00E+00 | 0.49 |
| 1.00E+00 | 0.73 |

|          |      |
|----------|------|
| 1.00E+00 | 0.64 |
| 1.00E+00 | 0.77 |
| 1.00E+00 | 0.68 |
| 1.00E+00 | 0.8  |
| 1.00E+00 | 0.71 |

|          |      |
|----------|------|
| 1.00E+00 | 0.86 |
| 1.00E+00 | 0.92 |

|          |      |
|----------|------|
| 1.00E+00 | 1    |
| 1.00E+00 | 0.67 |
| 1.00E+00 | 0.69 |
| 1.00E+00 | 0.71 |
| 1.00E+00 | 0.61 |
| 1.00E+00 | 0.7  |

|          |      |
|----------|------|
| 1.00E+00 | 0.53 |
| 1.00E+00 | 0.94 |
| 1.00E+00 | 1    |
| 1.00E+00 | 0.88 |
| 1.00E+00 | 0.9  |
| 1.00E+00 | 0.75 |
| 1.00E+00 | 0.97 |
| 1.00E+00 | 0.62 |
| 1.00E+00 | 0.7  |

|          |      |
|----------|------|
| 1.00E+00 | 0.93 |
| 1.00E+00 | 0.59 |
| 1.00E+00 | 0.95 |

|          |      |
|----------|------|
| 1.00E+00 | 0.92 |
| 1.00E+00 | 1    |
| 1.00E+00 | 0.74 |

|          |      |
|----------|------|
| 1.00E+00 | 1    |
| 1.00E+00 | 0.56 |
| 1.00E+00 | 0.82 |
| 1.00E+00 | 1    |
| 1.00E+00 | 0.84 |
| 1.00E+00 | 0.51 |
| 1.00E+00 | 0.83 |
| 1.00E+00 | 0.95 |
| 1.00E+00 | 0.9  |

|          |      |
|----------|------|
| 1.00E+00 | 0.85 |
| 1.00E+00 | 0.45 |
| 1.00E+00 | 0.71 |
| 1.00E+00 | 0.94 |
| 1.00E+00 | 0.89 |
| 1.00E+00 | 0.66 |
| 1.00E+00 | 0.63 |
| 1.00E+00 | 0.83 |
| 1.00E+00 | 0.76 |
| 1.00E+00 | 0.68 |
| 1.00E+00 | 0.48 |
| 1.00E+00 | 0.79 |
| 1.00E+00 | 0.57 |
| 1.00E+00 | 0.94 |

|          |      |
|----------|------|
| 1.00E+00 | 0.77 |
| 1.00E+00 | 0.87 |
| 1.00E+00 | 0.84 |
| 1.00E+00 | 0.93 |
| 1.00E+00 | 0.92 |
| 1.00E+00 | 0    |
| 1.00E+00 | 0.87 |
| 1.00E+00 | 0.85 |
| 1.00E+00 | 0.94 |
| 1.00E+00 | 0.94 |
| 1.00E+00 | 0.78 |
| 1.00E+00 | 0.56 |
| 1.00E+00 | 0.66 |
| 1.00E+00 | 0.81 |

|          |      |
|----------|------|
| 1.00E+00 | 0.95 |
| 1.00E+00 | 0.8  |
| 1.00E+00 | 0.57 |
| 1.00E+00 | 0.75 |

|          |      |
|----------|------|
| 1.00E+00 | 0.92 |
| 1.00E+00 | 0.84 |
| 1.00E+00 | 0.94 |
| 1.00E+00 | 0.83 |
| 1.00E+00 | 0.9  |
| 1.00E+00 | 0.93 |
| 1.00E+00 | 1    |
| 1.00E+00 | 0.71 |
| 1.00E+00 | 0.71 |

|          |      |
|----------|------|
| 1.00E+00 | 0.84 |
| 1.00E+00 | 0.92 |
| 1.00E+00 | 1    |
| 1.00E+00 | 0.95 |
| 1.00E+00 | 0.96 |
| 1.00E+00 | 0.97 |

|          |      |
|----------|------|
| 1.00E+00 | 0.58 |
| 1.00E+00 | 1    |
| 1.00E+00 | 0.96 |
| 1.00E+00 | 0.83 |
| 1.00E+00 | 0.83 |

|          |      |
|----------|------|
| 1.00E+00 | 0.91 |
| 1.00E+00 | 0.9  |

|          |      |
|----------|------|
| 1.00E+00 | 0.82 |
| 1.00E+00 | 0.94 |
| 1.00E+00 | 0.68 |
| 1.00E+00 | 0.87 |
| 1.00E+00 | 0.86 |
| 1.00E+00 | 0.84 |
| 1.00E+00 | 0.75 |
| 1.00E+00 | 0.94 |
| 1.00E+00 | 0.94 |
| 1.00E+00 | 0.81 |

|          |      |
|----------|------|
| 1.00E+00 | 0.72 |
| 1.00E+00 | 0.75 |
| 1.00E+00 | 0.91 |
| 1.00E+00 | 0.96 |
| 1.00E+00 | 0.68 |
| 1.00E+00 | 1    |
| 1.00E+00 | 0.57 |
| 1.00E+00 | 1    |
| 1.00E+00 | 0.59 |

|          |      |
|----------|------|
| 1.00E+00 | 1    |
| 1.00E+00 | 1    |
| 1.00E+00 | 1    |
| 1.00E+00 | 1    |
| 1.00E+00 | 1    |
| 1.00E+00 | 0.96 |
| 1.00E+00 | 0.97 |
| 1.00E+00 | 0.8  |
| 1.00E+00 | 1    |
| 1.00E+00 | 0.93 |
| 1.00E+00 | 0.79 |
| 1.00E+00 | 0.81 |
| 1.00E+00 | 0.74 |
| 1.00E+00 | 0.52 |
| 1.00E+00 | 0.64 |
| 1.00E+00 | 0.64 |
| 1.00E+00 | 0.78 |
| 1.00E+00 | 0.64 |
| 1.00E+00 | 1    |
| 1.00E+00 | 0.87 |
| 1.00E+00 | 0.86 |
| 1.00E+00 | 0.93 |
| 1.00E+00 | 0.88 |
| 1.00E+00 | 0.65 |
| 1.00E+00 | 0.83 |
| 1.00E+00 | 0.73 |
| 1.00E+00 | 0.86 |
| 1.00E+00 | 0.8  |
| 1.00E+00 | 0.93 |
| 1.00E+00 | 0.87 |
| 1.00E+00 | 0.82 |
| 1.00E+00 | 0.77 |
| 1.00E+00 | 1    |
| 1.00E+00 | 0.66 |
| 1.00E+00 | 0.6  |
| 1.00E+00 | 0.91 |
| 1.00E+00 | 0.82 |
| 1.00E+00 | 0.84 |
| 1.00E+00 | 0.87 |
| 1.00E+00 | 0.92 |

|          |      |
|----------|------|
| 1.00E+00 | 0.85 |
| 1.00E+00 | 0.89 |
| 1.00E+00 | 0.84 |
| 1.00E+00 | 0.97 |
| 1.00E+00 | 0.94 |

|          |      |
|----------|------|
| 1.00E+00 | 0.61 |
| 1.00E+00 | 0.78 |
| 1.00E+00 | 0.93 |
| 1.00E+00 | 0.9  |
| 1.00E+00 | 0.75 |
| 1.00E+00 | 0.88 |
| 1.00E+00 | 0.93 |
| 1.00E+00 | 0.79 |
| 1.00E+00 | 0.88 |
| 1.00E+00 | 1    |
| 1.00E+00 | 0.9  |
| 1.00E+00 | 0.78 |
| 1.00E+00 | 0.61 |
| 1.00E+00 | 0.71 |
| 1.00E+00 | 0.9  |
| 1.00E+00 | 0.73 |
| 1.00E+00 | 0.78 |
| 1.00E+00 | 0.81 |
| 1.00E+00 | 1    |
| 1.00E+00 | 0.93 |
| 1.00E+00 | 0.95 |
| 1.00E+00 | 0.56 |
| 1.00E+00 | 0.77 |
| 1.00E+00 | 0.9  |
| 1.00E+00 | 0.97 |

|          |      |
|----------|------|
| 1.00E+00 | 0.83 |
| 1.00E+00 | 0.62 |
| 1.00E+00 | 0.76 |
| 1.00E+00 | 1    |
| 1.00E+00 | 0.98 |
| 1.00E+00 | 0.84 |
| 1.00E+00 | 0.79 |

|          |      |
|----------|------|
| 1.00E+00 | 0.93 |
| 1.00E+00 | 0.95 |
| 1.00E+00 | 0.93 |
| 1.00E+00 | 0.91 |
| 1.00E+00 | 0.89 |
| 1.00E+00 | 0.93 |
| 1.00E+00 | 1    |
| 1.00E+00 | 0.56 |

1.00E+00 0.93

1.00E+00 0.93

1.00E+00 0.94

1.00E+00 0.9

1.00E+00 0.91

1.00E+00 0.59

1.00E+00 0.55

1.00E+00 0.58

1.00E+00 0.94

1.00E+00 0.94

1.00E+00 0.92

1.00E+00 0.94

1.00E+00 0.93

1.00E+00 0.94

1.00E+00 1

1.00E+00 0.78

1.00E+00 0.9

1.00E+00 1

1.00E+00 0.94

1.00E+00 0.66

1.00E+00 0.86

1.00E+00 1

1.00E+00 0.82

1.00E+00 0.93

1.00E+00 0.93

1.00E+00 0.92

1.00E+00 0.8

1.00E+00 0.69

1.00E+00 0.72

1.00E+00 1

1.00E+00 0.93

1.00E+00 1

1.00E+00 0.89

1.00E+00 0.96

1.00E+00 0.61

1.00E+00 0.95

1.00E+00 0.82

1.00E+00 0.91

1.00E+00 0.74

1.00E+00 0.71

|          |      |
|----------|------|
| 1.00E+00 | 0.91 |
| 1.00E+00 | 0    |
| 1.00E+00 | 0.92 |
| 1.00E+00 | 0.72 |
| 1.00E+00 | 0.95 |
| 1.00E+00 | 0.84 |
| 1.00E+00 | 0.93 |

|          |      |
|----------|------|
| 1.00E+00 | 0.89 |
| 1.00E+00 | 1    |
| 1.00E+00 | 0.8  |
| 1.00E+00 | 0.94 |
| 1.00E+00 | 0.76 |

|          |      |
|----------|------|
| 1.00E+00 | 1    |
| 1.00E+00 | 0.85 |
| 1.00E+00 | 0.91 |
| 1.00E+00 | 0.86 |
| 1.00E+00 | 0.94 |
| 1.00E+00 | 0.9  |
| 1.00E+00 | 0.96 |
| 1.00E+00 | 0.52 |
| 1.00E+00 | 1    |
| 1.00E+00 | 1    |
| 1.00E+00 | 0.7  |

|          |      |
|----------|------|
| 1.00E+00 | 0.86 |
| 1.00E+00 | 0.79 |
| 1.00E+00 | 1    |
| 1.00E+00 | 0.64 |
| 1.00E+00 | 0.61 |

|          |      |
|----------|------|
| 1.00E+00 | 0.64 |
| 1.00E+00 | 1    |
| 1.00E+00 | 0.79 |
| 1.00E+00 | 0.87 |
| 1.00E+00 | 0.67 |

|          |      |
|----------|------|
| 1.00E+00 | 0.94 |
| 1.00E+00 | 0.75 |
| 1.00E+00 | 0.89 |
| 1.00E+00 | 1    |
| 1.00E+00 | 0.87 |
| 1.00E+00 | 0.76 |
| 1.00E+00 | 1    |
| 1.00E+00 | 0.95 |

|          |      |
|----------|------|
| 1.00E+00 | 0.94 |
| 1.00E+00 | 0.93 |

|          |      |
|----------|------|
| 1.00E+00 | 0.93 |
| 1.00E+00 | 0.96 |
| 1.00E+00 | 0.67 |

|          |      |
|----------|------|
| 1.00E+00 | 0.89 |
| 1.00E+00 | 0.93 |
| 1.00E+00 | 0.72 |
| 1.00E+00 | 1    |
| 1.00E+00 | 0.78 |
| 1.00E+00 | 0.92 |
| 1.00E+00 | 0.7  |
| 1.00E+00 | 0.57 |
| 1.00E+00 | 0.87 |
| 1.00E+00 | 0.85 |

|          |      |
|----------|------|
| 1.00E+00 | 0.97 |
| 1.00E+00 | 0.82 |
| 1.00E+00 | 0.88 |
| 1.00E+00 | 0.78 |
| 1.00E+00 | 1    |
| 1.00E+00 | 0.82 |
| 1.00E+00 | 0.81 |
| 1.00E+00 | 0.76 |
| 1.00E+00 | 1    |
| 1.00E+00 | 1    |
| 1.00E+00 | 0.95 |
| 1.00E+00 | 0.96 |
| 1.00E+00 | 0.59 |
| 1.00E+00 | 0.62 |
| 1.00E+00 | 0.98 |
| 1.00E+00 | 1    |
| 1.00E+00 | 0.71 |
| 1.00E+00 | 0.79 |
| 1.00E+00 | 0.75 |
| 1.00E+00 | 0.93 |
| 1.00E+00 | 0.88 |
| 1.00E+00 | 0.7  |
| 1.00E+00 | 0.72 |



|          |      |
|----------|------|
| 1.00E+00 | 0.86 |
| 1.00E+00 | 0.91 |
| 1.00E+00 | 0.79 |
| 1.00E+00 | 0.69 |
| 1.00E+00 | 0.75 |
| 1.00E+00 | 0.87 |
| 1.00E+00 | 0.94 |

|          |      |
|----------|------|
| 1.00E+00 | 0.9  |
| 1.00E+00 | 0.7  |
| 1.00E+00 | 0.97 |
| 1.00E+00 | 0.68 |
| 1.00E+00 | 0.65 |

|          |      |
|----------|------|
| 1.00E+00 | 0.83 |
| 1.00E+00 | 0.81 |
| 1.00E+00 | 0.53 |
| 1.00E+00 | 0.96 |
| 1.00E+00 | 0.91 |

|          |      |
|----------|------|
| 1.00E+00 | 0.9  |
| 1.00E+00 | 0.8  |
| 1.00E+00 | 0.85 |
| 1.00E+00 | 0.82 |
| 1.00E+00 | 0.96 |
| 1.00E+00 | 1    |
| 1.00E+00 | 0.49 |
| 1.00E+00 | 0.85 |

|          |      |
|----------|------|
| 1.00E+00 | 0.93 |
| 1.00E+00 | 0.84 |
| 1.00E+00 | 0.93 |
| 1.00E+00 | 0.54 |
| 1.00E+00 | 0.82 |
| 1.00E+00 | 0.89 |
| 1.00E+00 | 0.9  |
| 1.00E+00 | 0.89 |
| 1.00E+00 | 0.91 |
| 1.00E+00 | 0.67 |
| 1.00E+00 | 0.94 |
| 1.00E+00 | 0.92 |
| 1.00E+00 | 0.83 |
| 1.00E+00 | 0.96 |

|          |      |
|----------|------|
| 1.00E+00 | 0.5  |
| 1.00E+00 | 0.83 |
| 1.00E+00 | 0.79 |
| 1.00E+00 | 0.94 |

|          |      |
|----------|------|
| 1.00E+00 | 0.89 |
| 1.00E+00 | 0.92 |

|          |      |
|----------|------|
| 1.00E+00 | 0.83 |
| 1.00E+00 | 1    |
| 1.00E+00 | 0.68 |
| 1.00E+00 | 0.86 |
| 1.00E+00 | 1    |
| 1.00E+00 | 0.69 |
| 1.00E+00 | 0.77 |
| 1.00E+00 | 0.88 |
| 1.00E+00 | 0.88 |
| 1.00E+00 | 0.83 |

|          |      |
|----------|------|
| 1.00E+00 | 0.69 |
|----------|------|

|          |      |
|----------|------|
| 1.00E+00 | 0.92 |
| 1.00E+00 | 0.89 |
| 1.00E+00 | 0.89 |
| 1.00E+00 | 0.45 |

|          |      |
|----------|------|
| 1.00E+00 | 0.9  |
| 1.00E+00 | 0.86 |
| 1.00E+00 | 0.96 |
| 1.00E+00 | 0.72 |
| 1.00E+00 | 0.93 |
| 1.00E+00 | 0.93 |
| 1.00E+00 | 0.91 |
| 1.00E+00 | 0.71 |
| 1.00E+00 | 0.9  |
| 1.00E+00 | 0.91 |

|          |      |
|----------|------|
| 1.00E+00 | 0.87 |
| 1.00E+00 | 0.94 |
| 1.00E+00 | 0.94 |
| 1.00E+00 | 0.8  |
| 1.00E+00 | 0.72 |
| 1.00E+00 | 1    |
| 1.00E+00 | 1    |
| 1.00E+00 | 0.83 |

|          |      |
|----------|------|
| 1.00E+00 | 0.88 |
| 1.00E+00 | 0.92 |
| 1.00E+00 | 0.93 |
| 1.00E+00 | 1    |
| 1.00E+00 | 0.94 |
| 1.00E+00 | 0.97 |
| 1.00E+00 | 0.72 |
| 1.00E+00 | 1    |
| 1.00E+00 | 0.9  |
| 1.00E+00 | 0.88 |
| 1.00E+00 | 0.87 |
| 1.00E+00 | 0.89 |
| 1.00E+00 | 0.76 |
| 1.00E+00 | 0.87 |
| 1.00E+00 | 0.69 |
| 1.00E+00 | 0.89 |
| 1.00E+00 | 0.72 |
| 1.00E+00 | 0.84 |
| 1.00E+00 | 1    |
| 1.00E+00 | 0.49 |
| 1.00E+00 | 0.55 |
| 1.00E+00 | 0.89 |
| 1.00E+00 | 0.72 |
| 1.00E+00 | 1    |
| 1.00E+00 | 0.77 |
| 1.00E+00 | 1    |
| 1.00E+00 | 0.96 |
| 1.00E+00 | 0.97 |
| 1.00E+00 | 0.94 |
| 1.00E+00 | 0.98 |
| 1.00E+00 | 0.87 |
| 1.00E+00 | 0.92 |
| 1.00E+00 | 0.88 |
| 1.00E+00 | 0.74 |
| 1.00E+00 | 0.85 |
| 1.00E+00 | 0.86 |
| 1.00E+00 | 0.67 |
| 1.00E+00 | 0.81 |
| 1.00E+00 | 0.77 |
| 1.00E+00 | 0.9  |

|          |      |
|----------|------|
| 1.00E+00 | 0.93 |
| 1.00E+00 | 0.68 |
| 1.00E+00 | 0.68 |
| 1.00E+00 | 0.57 |
| 1.00E+00 | 1    |
| 1.00E+00 | 1    |

|          |      |
|----------|------|
| 1.00E+00 | 0.9  |
| 1.00E+00 | 1    |
| 1.00E+00 | 0.78 |
| 1.00E+00 | 0.88 |
| 1.00E+00 | 0.93 |
| 1.00E+00 | 0.95 |
| 1.00E+00 | 0.94 |
| 1.00E+00 | 0.6  |
| 1.00E+00 | 0.66 |
| 1.00E+00 | 0.57 |
| 1.00E+00 | 0.59 |
| 1.00E+00 | 0.62 |
| 1.00E+00 | 0.84 |

|          |      |
|----------|------|
| 1.00E+00 | 1    |
| 1.00E+00 | 0.54 |
| 1.00E+00 | 0.93 |
| 1.00E+00 | 0.6  |
| 1.00E+00 | 1    |
| 1.00E+00 | 0.64 |
| 1.00E+00 | 1    |
| 1.00E+00 | 0.72 |
| 1.00E+00 | 0.9  |
| 1.00E+00 | 1    |
| 1.00E+00 | 0.93 |
| 1.00E+00 | 0.91 |
| 1.00E+00 | 0.72 |
| 1.00E+00 | 0.95 |
| 1.00E+00 | 0.77 |
| 1.00E+00 | 0.67 |

|          |      |
|----------|------|
| 1.00E+00 | 0.95 |
| 1.00E+00 | 0.9  |
| 1.00E+00 | 0.83 |

|          |   |
|----------|---|
| 1.00E+00 | 1 |
|----------|---|

|          |      |
|----------|------|
| 1.00E+00 | 0.93 |
|----------|------|

|          |      |
|----------|------|
| 1.00E+00 | 0    |
| 1.00E+00 | 1    |
| 1.00E+00 | 0.97 |
| 1.00E+00 | 0.73 |
| 1.00E+00 | 0.76 |
| 1.00E+00 | 0.94 |
| 1.00E+00 | 0.89 |
| 1.00E+00 | 0.9  |
| 1.00E+00 | 0.93 |
| 1.00E+00 | 0.69 |
| 1.00E+00 | 0.72 |
| 1.00E+00 | 0.89 |
| 1.00E+00 | 0.84 |
| 1.00E+00 | 0.91 |
| 1.00E+00 | 0.79 |
| 1.00E+00 | 0.92 |
| 1.00E+00 | 0.95 |
| 1.00E+00 | 0.62 |
| 1.00E+00 | 0.87 |
| 1.00E+00 | 1    |
| 1.00E+00 | 0.96 |
| 1.00E+00 | 0.89 |
| 1.00E+00 | 0.78 |
| 1.00E+00 | 0.58 |
| 1.00E+00 | 0.83 |
| 1.00E+00 | 0.93 |
| 1.00E+00 | 0.72 |
| 1.00E+00 | 0.74 |
| 1.00E+00 | 0.83 |
| 1.00E+00 | 0.76 |
| 1.00E+00 | 1    |
| 1.00E+00 | 0.87 |
| 1.00E+00 | 0.63 |
| 1.00E+00 | 1    |
| 1.00E+00 | 0.84 |
| 1.00E+00 | 0.62 |

|          |      |
|----------|------|
| 1.00E+00 | 1    |
| 1.00E+00 | 0.83 |
| 1.00E+00 | 1    |
| 1.00E+00 | 0.92 |
| 1.00E+00 | 1    |
| 1.00E+00 | 0.74 |
| 1.00E+00 | 0.77 |
| 1.00E+00 | 0.76 |
| 1.00E+00 | 0.73 |
| 1.00E+00 | 0.79 |
| 1.00E+00 | 0.68 |
| 1.00E+00 | 0.84 |
| 1.00E+00 | 0.97 |
| 1.00E+00 | 0.68 |
| 1.00E+00 | 1    |
| 1.00E+00 | 0.9  |
| 1.00E+00 | 0.83 |
| 1.00E+00 | 1    |
| 1.00E+00 | 0.6  |
| 1.00E+00 | 0.94 |
| 1.00E+00 | 0.89 |
| 1.00E+00 | 0.9  |
| 1.00E+00 | 0.93 |
| 1.00E+00 | 0.69 |
| 1.00E+00 | 0.72 |
| 1.00E+00 | 0.81 |
| 1.00E+00 | 0.64 |
| 1.00E+00 | 0.83 |
| 1.00E+00 | 0.88 |
| 1.00E+00 | 0.7  |
| 1.00E+00 | 0.65 |
| 1.00E+00 | 0.93 |
| 1.00E+00 | 0.92 |
| 1.00E+00 | 0.91 |
| 1.00E+00 | 0.89 |
| 1.00E+00 | 0.6  |
| 1.00E+00 | 1    |
| 1.00E+00 | 0.64 |
| 1.00E+00 | 0.85 |
| 1.00E+00 | 0.86 |

|          |      |
|----------|------|
| 1.00E+00 | 0.67 |
| 1.00E+00 | 0.81 |
| 1.00E+00 | 0.77 |
| 1.00E+00 | 0.94 |
| 1.00E+00 | 0.83 |
| 1.00E+00 | 0.6  |
| 1.00E+00 | 0.58 |
| 1.00E+00 | 0.93 |
| 1.00E+00 | 0.95 |
| 1.00E+00 | 0.79 |
| 1.00E+00 | 0.57 |
| 1.00E+00 | 1    |
| 1.00E+00 | 1    |
| 1.00E+00 | 0.71 |
| 1.00E+00 | 0.76 |
| 1.00E+00 | 0.88 |
| 1.00E+00 | 0.76 |
| 1.00E+00 | 0.9  |
| 1.00E+00 | 1    |
| 1.00E+00 | 0.78 |
| 1.00E+00 | 0.88 |
| 1.00E+00 | 0.93 |
| 1.00E+00 | 0.95 |
| 1.00E+00 | 0.94 |
| 1.00E+00 | 0.77 |
| 1.00E+00 | 0.72 |
| 1.00E+00 | 1    |
| 1.00E+00 | 0.83 |
| 1.00E+00 | 0.79 |
| 1.00E+00 | 0.66 |
| 1.00E+00 | 1    |
| 1.00E+00 | 1    |
| 1.00E+00 | 0.93 |
| 1.00E+00 | 0.94 |
| 1.00E+00 | 0.94 |
| 1.00E+00 | 1    |
| 1.00E+00 | 0.58 |
| 1.00E+00 | 0.89 |
| 1.00E+00 | 0.9  |
| 1.00E+00 | 0.82 |
| 1.00E+00 | 0.83 |
| 1.00E+00 | 1    |
| 1.00E+00 | 1    |
| 1.00E+00 | 0.63 |
| 1.00E+00 | 0.57 |
| 1.00E+00 | 0.98 |
| 1.00E+00 | 1    |
| 1.00E+00 | 0.65 |
| 1.00E+00 | 0.58 |

|          |      |
|----------|------|
| 1.00E+00 | 0.58 |
| 1.00E+00 | 0.81 |
| 1.00E+00 | 0.86 |
| 1.00E+00 | 0.96 |

|          |      |
|----------|------|
| 1.00E+00 | 0.7  |
| 1.00E+00 | 0.69 |
| 1.00E+00 | 1    |
| 1.00E+00 | 0.85 |
| 1.00E+00 | 1    |
| 1.00E+00 | 1    |
| 1.00E+00 | 1    |
| 1.00E+00 | 0.72 |

|          |      |
|----------|------|
| 1.00E+00 | 1    |
| 1.00E+00 | 0.85 |
| 1.00E+00 | 0.86 |
| 1.00E+00 | 0.87 |
| 1.00E+00 | 0.94 |
| 1.00E+00 | 0.78 |
| 1.00E+00 | 0.91 |
| 1.00E+00 | 0.89 |
| 1.00E+00 | 0.78 |
| 1.00E+00 | 0.82 |

|          |      |
|----------|------|
| 1.00E+00 | 0.96 |
| 1.00E+00 | 1    |

|          |      |
|----------|------|
| 1.00E+00 | 0.95 |
| 1.00E+00 | 0.68 |
| 1.00E+00 | 0.92 |

|          |      |
|----------|------|
| 1.00E+00 | 1    |
| 1.00E+00 | 0.94 |
| 1.00E+00 | 0.93 |
| 1.00E+00 | 1    |

|          |      |
|----------|------|
| 1.00E+00 | 0.68 |
| 1.00E+00 | 0.94 |



|          |      |
|----------|------|
| 1.00E+00 | 0.94 |
| 1.00E+00 | 0.9  |
| 1.00E+00 | 0.74 |
| 1.00E+00 | 0.65 |
| 1.00E+00 | 0.86 |
| 1.00E+00 | 0.57 |
| 1.00E+00 | 0.76 |
| 1.00E+00 | 0.67 |
| 1.00E+00 | 0.66 |
| 1.00E+00 | 0.83 |
| 1.00E+00 | 0.83 |
| 1.00E+00 | 0.82 |
| 1.00E+00 | 0.91 |
| 1.00E+00 | 0.84 |
| 1.00E+00 | 1    |
| 1.00E+00 | 0.73 |
| 1.00E+00 | 1    |
| 1.00E+00 | 0.9  |
| 1.00E+00 | 0.67 |
| 1.00E+00 | 0.92 |
| 1.00E+00 | 0.73 |
| 1.00E+00 | 1    |
| 1.00E+00 | 0.72 |
| 1.00E+00 | 0.92 |
| 1.00E+00 | 0.92 |
| 1.00E+00 | 1    |
| 1.00E+00 | 0.89 |
| 1.00E+00 | 0.81 |
| 1.00E+00 | 1    |
| 1.00E+00 | 1    |
| 1.00E+00 | 1    |
| 1.00E+00 | 0.56 |
| 1.00E+00 | 1    |
| 1.00E+00 | 0.69 |
| 1.00E+00 | 0.55 |
| 1.00E+00 | 0.57 |
| 1.00E+00 | 0.95 |

|          |      |
|----------|------|
| 1.00E+00 | 0.75 |
| 1.00E+00 | 0.92 |
| 1.00E+00 | 0.83 |
| 1.00E+00 | 0.88 |
| 1.00E+00 | 0.87 |
| 1.00E+00 | 0.68 |
| 1.00E+00 | 1    |
| 1.00E+00 | 0.9  |
| 1.00E+00 | 0.91 |
| 1.00E+00 | 1    |
| 1.00E+00 | 0.9  |

|          |      |
|----------|------|
| 1.00E+00 | 0.83 |
|----------|------|

|          |      |
|----------|------|
| 1.00E+00 | 0.6  |
| 1.00E+00 | 1    |
| 1.00E+00 | 0.86 |

|          |      |
|----------|------|
| 1.00E+00 | 0.8  |
| 1.00E+00 | 0.89 |
| 1.00E+00 | 0.77 |
| 1.00E+00 | 0.8  |
| 1.00E+00 | 0.91 |
| 1.00E+00 | 0.65 |
| 1.00E+00 | 0.9  |
| 1.00E+00 | 0.96 |
| 1.00E+00 | 0.91 |
| 1.00E+00 | 0.71 |
| 1.00E+00 | 0.82 |
| 1.00E+00 | 0.78 |
| 1.00E+00 | 0.94 |
| 1.00E+00 | 0.91 |
| 1.00E+00 | 0.76 |

|          |      |
|----------|------|
| 1.00E+00 | 0.92 |
| 1.00E+00 | 0.91 |

|          |      |
|----------|------|
| 1.00E+00 | 0.75 |
|----------|------|

|          |      |
|----------|------|
| 1.00E+00 | 0.65 |
|----------|------|

|          |      |
|----------|------|
| 1.00E+00 | 0.94 |
| 1.00E+00 | 0.76 |
| 1.00E+00 | 0.86 |
| 1.00E+00 | 0.74 |

|          |      |
|----------|------|
| 1.00E+00 | 0.79 |
| 1.00E+00 | 0.88 |
| 1.00E+00 | 0.88 |
| 1.00E+00 | 0.51 |
| 1.00E+00 | 0.67 |
| 1.00E+00 | 0.64 |

|          |      |
|----------|------|
| 1.00E+00 | 1    |
| 1.00E+00 | 1    |
| 1.00E+00 | 0.93 |
| 1.00E+00 | 0.87 |
| 1.00E+00 | 1    |
| 1.00E+00 | 0    |
| 1.00E+00 | 0.62 |
| 1.00E+00 | 0.62 |
| 1.00E+00 | 0.71 |
| 1.00E+00 | 0.81 |

|          |      |
|----------|------|
| 1.00E+00 | 1    |
| 1.00E+00 | 0.45 |
| 1.00E+00 | 0.57 |
| 1.00E+00 | 0.67 |
| 1.00E+00 | 0.91 |
| 1.00E+00 | 0.85 |
| 1.00E+00 | 0.93 |

|          |      |
|----------|------|
| 1.00E+00 | 1    |
| 1.00E+00 | 0.7  |
| 1.00E+00 | 0.87 |

|          |   |
|----------|---|
| 1.00E+00 | 1 |
|----------|---|

|          |      |
|----------|------|
| 1.00E+00 | 0.87 |
| 1.00E+00 | 0.98 |
| 1.00E+00 | 0.62 |
| 1.00E+00 | 0.91 |

|          |      |
|----------|------|
| 1.00E+00 | 0.88 |
| 1.00E+00 | 0.88 |
| 1.00E+00 | 0.69 |
| 1.00E+00 | 1    |
| 1.00E+00 | 0.91 |
| 1.00E+00 | 1    |
| 1.00E+00 | 0.47 |

|          |      |
|----------|------|
| 1.00E+00 | 0.93 |
| 1.00E+00 | 1    |
| 1.00E+00 | 0.75 |
| 1.00E+00 | 0.91 |
| 1.00E+00 | 1    |
| 1.00E+00 | 0.84 |
| 1.00E+00 | 0.57 |
| 1.00E+00 | 0.96 |
| 1.00E+00 | 0.92 |
| 1.00E+00 | 0.94 |
| 1.00E+00 | 0.92 |
| 1.00E+00 | 1    |
| 1.00E+00 | 0.97 |
| 1.00E+00 | 1    |
| 1.00E+00 | 0.87 |
| 1.00E+00 | 0.83 |
| 1.00E+00 | 0.83 |
| 1.00E+00 | 0.77 |
| 1.00E+00 | 1    |
| 1.00E+00 | 1    |
| 1.00E+00 | 0.87 |
| 1.00E+00 | 1    |
| 1.00E+00 | 1    |
| 1.00E+00 | 0.86 |
| 1.00E+00 | 0.83 |
| 1.00E+00 | 0.7  |
| 1.00E+00 | 1    |
| 1.00E+00 | 0    |
| 1.00E+00 | 0.45 |
| 1.00E+00 | 0.39 |
| 1.00E+00 | 1    |
| 1.00E+00 | 0.87 |
| 1.00E+00 | 0.87 |
| 1.00E+00 | 0.84 |
| 1.00E+00 | 0.66 |
| 1.00E+00 | 1    |
| 1.00E+00 | 0.85 |
| 1.00E+00 | 0.92 |

|          |      |
|----------|------|
| 1.00E+00 | 0.8  |
| 1.00E+00 | 1    |
| 1.00E+00 | 0.82 |
| 1.00E+00 | 1    |
| 1.00E+00 | 0.89 |
| 1.00E+00 | 0.76 |
| 1.00E+00 | 1    |
| 1.00E+00 | 0.68 |
| 1.00E+00 | 0.93 |
| 1.00E+00 | 0.85 |
| 1.00E+00 | 1    |
| 1.00E+00 | 0.74 |
| 1.00E+00 | 0.92 |
| 1.00E+00 | 0.9  |
| 1.00E+00 | 1    |
| 1.00E+00 | 1    |
| 1.00E+00 | 0.92 |
| 1.00E+00 | 0.78 |
| 1.00E+00 | 0.82 |
| 1.00E+00 | 1    |
| 1.00E+00 | 1    |
| 1.00E+00 | 0.88 |
| 1.00E+00 | 0.56 |
| 1.00E+00 | 1    |
| 1.00E+00 | 0.92 |
| 1.00E+00 | 0.96 |
| 1.00E+00 | 0.99 |
| 1.00E+00 | 1    |
| 1.00E+00 | 0.94 |
| 1.00E+00 | 0.87 |

|          |      |
|----------|------|
| 1.00E+00 | 0.93 |
| 1.00E+00 | 0.96 |
| 1.00E+00 | 0.64 |
| 1.00E+00 | 0.72 |
| 1.00E+00 | 0.47 |
| 1.00E+00 | 0.91 |
| 1.00E+00 | 0.97 |
| 1.00E+00 | 0.88 |
| 1.00E+00 | 0    |
| 1.00E+00 | 0.9  |

|          |      |
|----------|------|
| 1.00E+00 | 0.86 |
| 1.00E+00 | 0.94 |
| 1.00E+00 | 0.85 |
| 1.00E+00 | 0.73 |
| 1.00E+00 | 0.87 |

|          |      |
|----------|------|
| 1.00E+00 | 0.69 |
| 1.00E+00 | 0.85 |
| 1.00E+00 | 0.57 |
| 1.00E+00 | 0.73 |
| 1.00E+00 | 1    |
| 1.00E+00 | 1    |
| 1.00E+00 | 0.94 |
| 1.00E+00 | 0.76 |
| 1.00E+00 | 0.95 |
| 1.00E+00 | 0.91 |

|          |      |
|----------|------|
| 1.00E+00 | 0.58 |
| 1.00E+00 | 0.66 |
| 1.00E+00 | 0.81 |
| 1.00E+00 | 0.52 |
| 1.00E+00 | 0.75 |
| 1.00E+00 | 1    |
| 1.00E+00 | 1    |
| 1.00E+00 | 0.8  |
| 1.00E+00 | 1    |

|          |      |
|----------|------|
| 1.00E+00 | 0.73 |
| 1.00E+00 | 0.91 |
| 1.00E+00 | 0.69 |
| 1.00E+00 | 0.93 |
| 1.00E+00 | 0.8  |
| 1.00E+00 | 0.83 |
| 1.00E+00 | 0.92 |
| 1.00E+00 | 1    |
| 1.00E+00 | 0.73 |

|          |      |
|----------|------|
| 1.00E+00 | 0.94 |
| 1.00E+00 | 0.58 |
| 1.00E+00 | 0.66 |
| 1.00E+00 | 0.81 |
| 1.00E+00 | 0.52 |
| 1.00E+00 | 0.75 |
| 1.00E+00 | 1    |
| 1.00E+00 | 0.91 |
| 1.00E+00 | 0.69 |
| 1.00E+00 | 1    |
| 1.00E+00 | 0.93 |
| 1.00E+00 | 0.8  |
| 1.00E+00 | 0.83 |
| 1.00E+00 | 1    |
| 1.00E+00 | 0.66 |
| 1.00E+00 | 1    |

1.00E+00 0.88

1.00E+00 0.94

1.00E+00 0.91

1.00E+00 0.58

1.00E+00 0.8

1.00E+00 0.86

1.00E+00 0.73

1.00E+00 1

1.00E+00 0.83

1.00E+00 1

1.00E+00 0.67

1.00E+00 1

1.00E+00 0.68

1.00E+00 0.55

1.00E+00 1

1.00E+00 0.91

1.00E+00 1

1.00E+00 0.76

1.00E+00 0.92

1.00E+00 1

1.00E+00 0.68

1.00E+00 0.94

1.00E+00 0.93

1.00E+00 0.81

1.00E+00 0.95

1.00E+00 1

1.00E+00 0.76

1.00E+00 0.83

1.00E+00 0.82

1.00E+00 0.97

1.00E+00 0.86

1.00E+00 0.91

1.00E+00 0.86

1.00E+00 1

1.00E+00 0.94

|          |      |
|----------|------|
| 1.00E+00 | 0.67 |
| 1.00E+00 | 0.71 |
| 1.00E+00 | 0.86 |
| 1.00E+00 | 0.49 |
| 1.00E+00 | 0.96 |
| 1.00E+00 | 0.87 |
| 1.00E+00 | 0.72 |
| 1.00E+00 | 0.76 |
| 1.00E+00 | 0.64 |
| 1.00E+00 | 0.66 |

|          |      |
|----------|------|
| 1.00E+00 | 0.9  |
| 1.00E+00 | 1    |
| 1.00E+00 | 0.92 |
| 1.00E+00 | 0.88 |
| 1.00E+00 | 0.86 |
| 1.00E+00 | 0.92 |

|          |      |
|----------|------|
| 1.00E+00 | 0.69 |
| 1.00E+00 | 0.91 |
| 1.00E+00 | 0.7  |
| 1.00E+00 | 1    |
| 1.00E+00 | 0.94 |

|          |      |
|----------|------|
| 1.00E+00 | 0.83 |
| 1.00E+00 | 0.69 |

|          |      |
|----------|------|
| 1.00E+00 | 0.93 |
| 1.00E+00 | 0.87 |

|          |      |
|----------|------|
| 1.00E+00 | 1    |
| 1.00E+00 | 0.85 |
| 1.00E+00 | 0.89 |
| 1.00E+00 | 0.89 |
| 1.00E+00 | 0.8  |
| 1.00E+00 | 0.78 |
| 1.00E+00 | 0.73 |
| 1.00E+00 | 0.64 |
| 1.00E+00 | 0.87 |
| 1.00E+00 | 0.72 |

|          |      |
|----------|------|
| 1.00E+00 | 0.93 |
| 1.00E+00 | 0.97 |
| 1.00E+00 | 0.61 |



|          |      |
|----------|------|
| 1.00E+00 | 0.78 |
| 1.00E+00 | 0.94 |
| 1.00E+00 | 0.89 |
| 1.00E+00 | 0.9  |
| 1.00E+00 | 0.45 |
| 1.00E+00 | 0.55 |
| 1.00E+00 | 0.73 |
| 1.00E+00 | 0.83 |
| 1.00E+00 | 0.73 |
| 1.00E+00 | 0.52 |
| 1.00E+00 | 0.48 |
| 1.00E+00 | 0.76 |
| 1.00E+00 | 0.86 |
| 1.00E+00 | 0.92 |
| 1.00E+00 | 0.85 |
| 1.00E+00 | 1    |
| 1.00E+00 | 0.74 |
| 1.00E+00 | 0.95 |
| 1.00E+00 | 0.86 |
| 1.00E+00 | 0.84 |
| 1.00E+00 | 0.7  |
| 1.00E+00 | 1    |
| 1.00E+00 | 1    |
| 1.00E+00 | 1    |
| 1.00E+00 | 0.93 |
| 1.00E+00 | 0.81 |
| 1.00E+00 | 0.76 |
| 1.00E+00 | 1    |
| 1.00E+00 | 0.72 |
| 1.00E+00 | 0.8  |
| 1.00E+00 | 0.82 |
| 1.00E+00 | 0.76 |
| 1.00E+00 | 0.84 |
| 1.00E+00 | 0.85 |
| 1.00E+00 | 0.68 |
| 1.00E+00 | 0.62 |
| 1.00E+00 | 0.76 |
| 1.00E+00 | 1    |
| 1.00E+00 | 0.93 |
| 1.00E+00 | 0.72 |
| 1.00E+00 | 0.9  |
| 1.00E+00 | 0.66 |
| 1.00E+00 | 1    |

|          |      |
|----------|------|
| 1.00E+00 | 1    |
| 1.00E+00 | 1    |
| 1.00E+00 | 1    |
| 1.00E+00 | 0.83 |
| 1.00E+00 | 0.61 |
| 1.00E+00 | 0.73 |
| 1.00E+00 | 0.79 |
| 1.00E+00 | 0.98 |
| 1.00E+00 | 0.94 |
| 1.00E+00 | 0.66 |
| 1.00E+00 | 0.85 |
| 1.00E+00 | 0.84 |
| 1.00E+00 | 0.96 |
| 1.00E+00 | 0.77 |
| 1.00E+00 | 1    |
| 1.00E+00 | 0.64 |
| 1.00E+00 | 0.87 |
| 1.00E+00 | 0.9  |
| 1.00E+00 | 0.95 |
| 1.00E+00 | 0.7  |
| 1.00E+00 | 0.88 |
| 1.00E+00 | 0.13 |
| 1.00E+00 | 0.89 |
| 1.00E+00 | 0.96 |
| 1.00E+00 | 0.77 |
| 1.00E+00 | 0.72 |
| 1.00E+00 | 0.75 |
| 1.00E+00 | 0.81 |
| 1.00E+00 | 0.7  |
| 1.00E+00 | 0.85 |
| 1.00E+00 | 1    |
| 1.00E+00 | 0.86 |
| 1.00E+00 | 0.97 |
| 1.00E+00 | 0.84 |
| 1.00E+00 | 0.67 |
| 1.00E+00 | 0.95 |
| 1.00E+00 | 1    |
| 1.00E+00 | 0.7  |
| 1.00E+00 | 0.85 |
| 1.00E+00 | 0.77 |
| 1.00E+00 | 0.84 |
| 1.00E+00 | 0.97 |
| 1.00E+00 | 0.77 |
| 1.00E+00 | 0.84 |
| 1.00E+00 | 0.9  |

|          |      |
|----------|------|
| 1.00E+00 | 0.61 |
| 1.00E+00 | 0.67 |
| 1.00E+00 | 0.89 |

|          |      |
|----------|------|
| 1.00E+00 | 1    |
| 1.00E+00 | 0.59 |
| 1.00E+00 | 0.84 |
| 1.00E+00 | 0.84 |
| 1.00E+00 | 0.81 |
| 1.00E+00 | 1    |
| 1.00E+00 | 0.75 |

|          |      |
|----------|------|
| 1.00E+00 | 1    |
| 1.00E+00 | 0.5  |
| 1.00E+00 | 0.5  |
| 1.00E+00 | 1    |
| 1.00E+00 | 0.89 |
| 1.00E+00 | 0.88 |
| 1.00E+00 | 0.87 |
| 1.00E+00 | 0.82 |

|          |      |
|----------|------|
| 1.00E+00 | 0.83 |
| 1.00E+00 | 0.94 |
| 1.00E+00 | 0.84 |
| 1.00E+00 | 0.94 |

|          |      |
|----------|------|
| 1.00E+00 | 0.93 |
| 1.00E+00 | 0.93 |
| 1.00E+00 | 0.87 |
| 1.00E+00 | 1    |
| 1.00E+00 | 0.89 |
| 1.00E+00 | 1    |
| 1.00E+00 | 0.61 |

|          |      |
|----------|------|
| 1.00E+00 | 0.74 |
| 1.00E+00 | 0.82 |
| 1.00E+00 | 0.84 |
| 1.00E+00 | 0.63 |
| 1.00E+00 | 0.96 |
| 1.00E+00 | 0.57 |
| 1.00E+00 | 0.95 |
| 1.00E+00 | 0.8  |
| 1.00E+00 | 1    |

|          |      |
|----------|------|
| 1.00E+00 | 1    |
| 1.00E+00 | 0.94 |

|          |      |
|----------|------|
| 1.00E+00 | 0.79 |
| 1.00E+00 | 0.95 |
| 1.00E+00 | 0.93 |

|          |   |
|----------|---|
| 1.00E+00 | 1 |
|----------|---|

|          |      |
|----------|------|
| 1.00E+00 | 0.94 |
| 1.00E+00 | 0.73 |

|          |      |
|----------|------|
| 1.00E+00 | 0.97 |
| 1.00E+00 | 0.75 |
| 1.00E+00 | 0.65 |
| 1.00E+00 | 0.65 |
| 1.00E+00 | 0.62 |
| 1.00E+00 | 0.89 |
| 1.00E+00 | 0.87 |
| 1.00E+00 | 0.91 |
| 1.00E+00 | 0.76 |
| 1.00E+00 | 0.74 |
| 1.00E+00 | 0.83 |
| 1.00E+00 | 1    |
| 1.00E+00 | 0.71 |

|          |      |
|----------|------|
| 1.00E+00 | 0.86 |
| 1.00E+00 | 0.9  |
| 1.00E+00 | 1    |
| 1.00E+00 | 1    |
| 1.00E+00 | 1    |

|          |      |
|----------|------|
| 1.00E+00 | 0.81 |
|----------|------|

|          |      |
|----------|------|
| 1.00E+00 | 0.69 |
| 1.00E+00 | 0.82 |
| 1.00E+00 | 0.92 |
| 1.00E+00 | 1    |
| 1.00E+00 | 0.79 |
| 1.00E+00 | 0.68 |
| 1.00E+00 | 0.94 |
| 1.00E+00 | 1    |
| 1.00E+00 | 1    |
| 1.00E+00 | 1    |
| 1.00E+00 | 1    |
| 1.00E+00 | 0.81 |
| 1.00E+00 | 0.78 |
| 1.00E+00 | 0.85 |
| 1.00E+00 | 0.73 |
| 1.00E+00 | 0.9  |
| 1.00E+00 | 0.71 |
| 1.00E+00 | 0.94 |
| 1.00E+00 | 1    |
| 1.00E+00 | 0.82 |
| 1.00E+00 | 0.94 |
| 1.00E+00 | 0.82 |
| 1.00E+00 | 0.86 |
| 1.00E+00 | 0.61 |
| 1.00E+00 | 0.92 |
| 1.00E+00 | 0.61 |
| 1.00E+00 | 0.93 |
| 1.00E+00 | 0.93 |
| 1.00E+00 | 0.84 |
| 1.00E+00 | 0.88 |
| 1.00E+00 | 0.65 |
| 1.00E+00 | 0.95 |
| 1.00E+00 | 0.7  |
| 1.00E+00 | 0.7  |
| 1.00E+00 | 0.68 |
| 1.00E+00 | 0.95 |
| 1.00E+00 | 1    |
| 1.00E+00 | 0.96 |
| 1.00E+00 | 0.63 |
| 1.00E+00 | 0.95 |
| 1.00E+00 | 0.86 |
| 1.00E+00 | 0.87 |

1.00E+00 0.96

1.00E+00 0.96

1.00E+00 1

1.00E+00 0.91

1.00E+00 0.79

1.00E+00 1

1.00E+00 0.83

1.00E+00 0.89

1.00E+00 0.8

1.00E+00 0.87

1.00E+00 0.94

1.00E+00 0.95

1.00E+00 0.97

1.00E+00 0.94

1.00E+00 0.96

1.00E+00 0.96

1.00E+00 0.95

1.00E+00 0.95

1.00E+00 0.95

1.00E+00 0.95

1.00E+00 1

1.00E+00 0.83

1.00E+00 0.78

1.00E+00 0.86

1.00E+00 0.68

1.00E+00 0.91

1.00E+00 0.68

1.00E+00 0.88

1.00E+00 0.87

1.00E+00 0.77

1.00E+00 0

|          |      |
|----------|------|
| 1.00E+00 | 0.94 |
| 1.00E+00 | 0.86 |
| 1.00E+00 | 0.96 |
| 1.00E+00 | 0.73 |

|          |      |
|----------|------|
| 1.00E+00 | 0.81 |
| 1.00E+00 | 0.84 |
| 1.00E+00 | 0.93 |
| 1.00E+00 | 0.87 |
| 1.00E+00 | 0.94 |

|          |      |
|----------|------|
| 1.00E+00 | 1    |
| 1.00E+00 | 0.88 |
| 1.00E+00 | 1    |

|          |      |
|----------|------|
| 1.00E+00 | 0.67 |
| 1.00E+00 | 0.89 |
| 1.00E+00 | 1    |
| 1.00E+00 | 0.62 |
| 1.00E+00 | 1    |
| 1.00E+00 | 0.93 |
| 1.00E+00 | 0.85 |
| 1.00E+00 | 1    |
| 1.00E+00 | 0.83 |
| 1.00E+00 | 0.89 |
| 1.00E+00 | 0.9  |
| 1.00E+00 | 0.95 |
| 1.00E+00 | 0.87 |
| 1.00E+00 | 0.95 |
| 1.00E+00 | 1    |
| 1.00E+00 | 0.91 |

|          |      |
|----------|------|
| 1.00E+00 | 0.66 |
|----------|------|

|          |      |
|----------|------|
| 1.00E+00 | 0.81 |
| 1.00E+00 | 0.73 |
| 1.00E+00 | 0.92 |
| 1.00E+00 | 0.94 |
| 1.00E+00 | 0.94 |
| 1.00E+00 | 0.39 |
| 1.00E+00 | 0.91 |
| 1.00E+00 | 0.7  |
| 1.00E+00 | 0.73 |

|          |      |
|----------|------|
| 1.00E+00 | 0.78 |
|----------|------|

|          |      |
|----------|------|
| 1.00E+00 | 0.88 |
| 1.00E+00 | 0.85 |
| 1.00E+00 | 0.92 |
| 1.00E+00 | 0.74 |
| 1.00E+00 | 0.9  |
| 1.00E+00 | 0.91 |
| 1.00E+00 | 0.83 |
| 1.00E+00 | 0.95 |
| 1.00E+00 | 0.59 |
| 1.00E+00 | 0.66 |
| 1.00E+00 | 0.87 |
| 1.00E+00 | 1    |
| 1.00E+00 | 0.6  |
| 1.00E+00 | 0.92 |
| 1.00E+00 | 0.55 |
| 1.00E+00 | 0.83 |
| 1.00E+00 | 0    |
| 1.00E+00 | 0.63 |
| 1.00E+00 | 0.67 |
| 1.00E+00 | 1    |
| 1.00E+00 | 0.45 |
| 1.00E+00 | 1    |
| 1.00E+00 | 0.89 |
| 1.00E+00 | 0.96 |
| 1.00E+00 | 0.92 |
| 1.00E+00 | 0.87 |
| 1.00E+00 | 0.95 |
| 1.00E+00 | 0.96 |
| 1.00E+00 | 0.93 |
| 1.00E+00 | 0.91 |
| 1.00E+00 | 1    |
| 1.00E+00 | 0.82 |
| 1.00E+00 | 1    |
| 1.00E+00 | 0.9  |
| 1.00E+00 | 0.92 |
| 1.00E+00 | 0.74 |
| 1.00E+00 | 1    |
| 1.00E+00 | 0.69 |
| 1.00E+00 | 0.77 |
| 1.00E+00 | 0.9  |
| 1.00E+00 | 0.89 |
| 1.00E+00 | 0.93 |
| 1.00E+00 | 0.9  |
| 1.00E+00 | 0.66 |
| 1.00E+00 | 0.82 |
| 1.00E+00 | 0.97 |
| 1.00E+00 | 0.87 |
| 1.00E+00 | 1    |
| 1.00E+00 | 0.85 |
| 1.00E+00 | 0.92 |



|          |      |
|----------|------|
| 1.00E+00 | 0.93 |
| 1.00E+00 | 0.67 |
| 1.00E+00 | 0.72 |
| 1.00E+00 | 0.84 |

|          |      |
|----------|------|
| 1.00E+00 | 0.85 |
| 1.00E+00 | 1    |
| 1.00E+00 | 0.68 |
| 1.00E+00 | 1    |
| 1.00E+00 | 0.88 |
| 1.00E+00 | 0.92 |
| 1.00E+00 | 1    |
| 1.00E+00 | 1    |
| 1.00E+00 | 0.9  |
| 1.00E+00 | 0.65 |
| 1.00E+00 | 0.98 |
| 1.00E+00 | 0.91 |
| 1.00E+00 | 0.73 |
| 1.00E+00 | 0.88 |
| 1.00E+00 | 0.65 |
| 1.00E+00 | 0.95 |
| 1.00E+00 | 0.92 |
| 1.00E+00 | 1    |
| 1.00E+00 | 0.94 |
| 1.00E+00 | 1    |
| 1.00E+00 | 0.74 |
| 1.00E+00 | 0.61 |
| 1.00E+00 | 0.91 |
| 1.00E+00 | 0.6  |
| 1.00E+00 | 0.52 |

|          |      |
|----------|------|
| 1.00E+00 | 0.76 |
| 1.00E+00 | 0.49 |
| 1.00E+00 | 1    |
| 1.00E+00 | 0.57 |
| 1.00E+00 | 0.85 |
| 1.00E+00 | 0.9  |
| 1.00E+00 | 0.93 |
| 1.00E+00 | 0.91 |
| 1.00E+00 | 0.85 |
| 1.00E+00 | 0.73 |
| 1.00E+00 | 0.85 |
| 1.00E+00 | 0.9  |
| 1.00E+00 | 0.81 |
| 1.00E+00 | 0.61 |
| 1.00E+00 | 1    |
| 1.00E+00 | 0.75 |
| 1.00E+00 | 0.95 |
| 1.00E+00 | 0.87 |
| 1.00E+00 | 0.91 |

|          |      |
|----------|------|
| 1.00E+00 | 1    |
| 1.00E+00 | 0.99 |

|          |      |
|----------|------|
| 1.00E+00 | 0.97 |
| 1.00E+00 | 0.89 |
| 1.00E+00 | 0.7  |
| 1.00E+00 | 1    |
| 1.00E+00 | 0.71 |
| 1.00E+00 | 0.86 |

|          |      |
|----------|------|
| 1.00E+00 | 1    |
| 1.00E+00 | 0.47 |
| 1.00E+00 | 0.82 |
| 1.00E+00 | 0.85 |
| 1.00E+00 | 0.95 |
| 1.00E+00 | 0.73 |
| 1.00E+00 | 0.94 |
| 1.00E+00 | 0.89 |
| 1.00E+00 | 0.9  |
| 1.00E+00 | 0.93 |
| 1.00E+00 | 0.69 |
| 1.00E+00 | 0.72 |
| 1.00E+00 | 0.64 |
| 1.00E+00 | 0.83 |
| 1.00E+00 | 0.88 |
| 1.00E+00 | 0.7  |
| 1.00E+00 | 0.65 |
| 1.00E+00 | 0.93 |
| 1.00E+00 | 0.92 |
| 1.00E+00 | 0.91 |
| 1.00E+00 | 0.89 |

|          |      |
|----------|------|
| 1.00E+00 | 1    |
| 1.00E+00 | 0.9  |
| 1.00E+00 | 0.65 |
| 1.00E+00 | 0.64 |
| 1.00E+00 | 0.83 |
| 1.00E+00 | 0.68 |
| 1.00E+00 | 0.9  |

1.00E+00 0.85

1.00E+00 0.69

1.00E+00 0.71

1.00E+00 0.67

1.00E+00 0.92

1.00E+00 0.87

1.00E+00 1

1.00E+00 0.71

1.00E+00 1

1.00E+00 0.88

1.00E+00 1

1.00E+00 0.95

1.00E+00 0.64

1.00E+00 0.75

1.00E+00 0.86

1.00E+00 1

1.00E+00 0.84

1.00E+00 1

1.00E+00 0.92

1.00E+00 0.95

1.00E+00 1

1.00E+00 0.94

1.00E+00 0.59

1.00E+00 0.9

1.00E+00 0.86

1.00E+00 0.94

1.00E+00 0.6

1.00E+00 1

1.00E+00 0.95

1.00E+00 1

1.00E+00 0.82

1.00E+00 0.87

1.00E+00 0.96

1.00E+00 0.77

1.00E+00 1

1.00E+00 1

1.00E+00 0.87

1.00E+00 1

1.00E+00 0.79

1.00E+00 0.97

1.00E+00 0.9

|          |      |
|----------|------|
| 1.00E+00 | 0.93 |
| 1.00E+00 | 0.91 |
| 1.00E+00 | 0.94 |
| 1.00E+00 | 0.85 |
| 1.00E+00 | 0.79 |
| 1.00E+00 | 0.93 |
| 1.00E+00 | 0.85 |
| 1.00E+00 | 0.92 |
| 1.00E+00 | 0.73 |
| 1.00E+00 | 0.63 |
| 1.00E+00 | 0.71 |
| 1.00E+00 | 0.97 |

|          |      |
|----------|------|
| 1.00E+00 | 0.86 |
| 1.00E+00 | 0.97 |
| 1.00E+00 | 0.78 |

|          |      |
|----------|------|
| 1.00E+00 | 0.74 |
| 1.00E+00 | 0.79 |
| 1.00E+00 | 0.96 |
| 1.00E+00 | 0.92 |
| 1.00E+00 | 1    |
| 1.00E+00 | 0.93 |
| 1.00E+00 | 1    |
| 1.00E+00 | 0.92 |
| 1.00E+00 | 0.93 |
| 1.00E+00 | 0.9  |
| 1.00E+00 | 0.99 |
| 1.00E+00 | 0.86 |
| 1.00E+00 | 0.86 |
| 1.00E+00 | 0.75 |
| 1.00E+00 | 0.72 |
| 1.00E+00 | 0.48 |
| 1.00E+00 | 0.9  |
| 1.00E+00 | 0.56 |
| 1.00E+00 | 0.64 |
| 1.00E+00 | 0.97 |
| 1.00E+00 | 0.93 |
| 1.00E+00 | 0.9  |

|          |      |
|----------|------|
| 1.00E+00 | 0.73 |
| 1.00E+00 | 0.69 |
| 1.00E+00 | 0.85 |
| 1.00E+00 | 1    |
| 1.00E+00 | 0.76 |
| 1.00E+00 | 0.94 |

|          |      |
|----------|------|
| 1.00E+00 | 0.76 |
| 1.00E+00 | 1    |
| 1.00E+00 | 0.7  |

|          |      |
|----------|------|
| 1.00E+00 | 0.78 |
| 1.00E+00 | 0.87 |
| 1.00E+00 | 0.92 |
| 1.00E+00 | 0.79 |
| 1.00E+00 | 0.92 |
| 1.00E+00 | 0.88 |
| 1.00E+00 | 0.85 |
| 1.00E+00 | 0.81 |
| 1.00E+00 | 0.85 |
| 1.00E+00 | 0.86 |
| 1.00E+00 | 0.87 |
| 1.00E+00 | 0.94 |
| 1.00E+00 | 0.78 |
| 1.00E+00 | 0.91 |
| 1.00E+00 | 0.89 |
| 1.00E+00 | 0.93 |
| 1.00E+00 | 0.93 |
| 1.00E+00 | 1    |
| 1.00E+00 | 0.93 |
| 1.00E+00 | 0.96 |

|          |      |
|----------|------|
| 1.00E+00 | 0.96 |
| 1.00E+00 | 1    |

|          |      |
|----------|------|
| 1.00E+00 | 0.83 |
| 1.00E+00 | 0.79 |

|          |      |
|----------|------|
| 1.00E+00 | 1    |
| 1.00E+00 | 0.94 |
| 1.00E+00 | 0.93 |
| 1.00E+00 | 1    |

|          |      |
|----------|------|
| 1.00E+00 | 0.68 |
| 1.00E+00 | 0.94 |

|          |      |
|----------|------|
| 1.00E+00 | 0.93 |
| 1.00E+00 | 0.66 |
| 1.00E+00 | 0.75 |
| 1.00E+00 | 0.68 |
| 1.00E+00 | 0.73 |
| 1.00E+00 | 0.7  |
| 1.00E+00 | 1    |
| 1.00E+00 | 0.65 |

|          |      |
|----------|------|
| 1.00E+00 | 0.65 |
| 1.00E+00 | 0.61 |
| 1.00E+00 | 0.78 |
| 1.00E+00 | 0.81 |
| 1.00E+00 | 0.91 |
| 1.00E+00 | 0.75 |
| 1.00E+00 | 0.73 |
| 1.00E+00 | 1    |
| 1.00E+00 | 0.9  |
| 1.00E+00 | 1    |
| 1.00E+00 | 0.63 |
| 1.00E+00 | 0.98 |
| 1.00E+00 | 0.93 |
| 1.00E+00 | 0.91 |
| 1.00E+00 | 0.96 |
| 1.00E+00 | 0.69 |
| 1.00E+00 | 0.73 |
| 1.00E+00 | 0.9  |
| 1.00E+00 | 0.91 |
| 1.00E+00 | 0.64 |
| 1.00E+00 | 0.95 |
| 1.00E+00 | 0.85 |
| 1.00E+00 | 0.88 |
| 1.00E+00 | 0.93 |
| 1.00E+00 | 0.78 |
| 1.00E+00 | 0.91 |
| 1.00E+00 | 1    |
| 1.00E+00 | 0.86 |
| 1.00E+00 | 0.61 |
| 1.00E+00 | 0.93 |
| 1.00E+00 | 0.94 |
| 1.00E+00 | 1    |
| 1.00E+00 | 0.75 |
| 1.00E+00 | 0.62 |
| 1.00E+00 | 1    |
| 1.00E+00 | 0.88 |
| 1.00E+00 | 0.91 |
| 1.00E+00 | 0.89 |
| 1.00E+00 | 0.71 |
| 1.00E+00 | 0.85 |
| 1.00E+00 | 1    |
| 1.00E+00 | 0.88 |
| 1.00E+00 | 0.73 |
| 1.00E+00 | 0.57 |
| 1.00E+00 | 0.69 |
| 1.00E+00 | 0.78 |

|          |      |
|----------|------|
| 1.00E+00 | 0.84 |
| 1.00E+00 | 0.97 |
| 1.00E+00 | 0.93 |
| 1.00E+00 | 1    |

|          |      |
|----------|------|
| 1.00E+00 | 0.77 |
| 1.00E+00 | 0.79 |
| 1.00E+00 | 0.81 |
| 1.00E+00 | 0.62 |
| 1.00E+00 | 0.48 |
| 1.00E+00 | 0.89 |
| 1.00E+00 | 0.84 |
| 1.00E+00 | 0.91 |
| 1.00E+00 | 0.8  |
| 1.00E+00 | 0.88 |
| 1.00E+00 | 0.76 |
| 1.00E+00 | 0.78 |
| 1.00E+00 | 0.96 |

|          |      |
|----------|------|
| 1.00E+00 | 0.88 |
| 1.00E+00 | 0.8  |

|          |      |
|----------|------|
| 1.00E+00 | 0.68 |
| 1.00E+00 | 0.92 |
| 1.00E+00 | 0.53 |

|          |      |
|----------|------|
| 1.00E+00 | 0.55 |
| 1.00E+00 | 0.9  |
| 1.00E+00 | 0.83 |

|          |      |
|----------|------|
| 1.00E+00 | 1    |
| 1.00E+00 | 1    |
| 1.00E+00 | 0.84 |
| 1.00E+00 | 0.85 |

|          |      |
|----------|------|
| 1.00E+00 | 0.89 |
| 1.00E+00 | 0.89 |
| 1.00E+00 | 0.68 |
| 1.00E+00 | 1    |
| 1.00E+00 | 0.9  |

|          |      |
|----------|------|
| 1.00E+00 | 0.93 |
| 1.00E+00 | 0.93 |
| 1.00E+00 | 0.9  |
| 1.00E+00 | 0.59 |
| 1.00E+00 | 0.86 |

|          |      |
|----------|------|
| 1.00E+00 | 0.9  |
| 1.00E+00 | 0.83 |

|          |      |
|----------|------|
| 1.00E+00 | 0.71 |
| 1.00E+00 | 1    |
| 1.00E+00 | 0.56 |
| 1.00E+00 | 0.78 |

|          |      |
|----------|------|
| 1.00E+00 | 0.89 |
| 1.00E+00 | 0.55 |
| 1.00E+00 | 0.87 |
| 1.00E+00 | 0.91 |
| 1.00E+00 | 0.91 |
| 1.00E+00 | 0.94 |
| 1.00E+00 | 0.94 |
| 1.00E+00 | 0.83 |
| 1.00E+00 | 0.72 |
| 1.00E+00 | 0.96 |

|          |      |
|----------|------|
| 1.00E+00 | 0.82 |
| 1.00E+00 | 0.94 |
| 1.00E+00 | 0.72 |
| 1.00E+00 | 0.76 |
| 1.00E+00 | 0.76 |
| 1.00E+00 | 0.8  |
| 1.00E+00 | 0.56 |
| 1.00E+00 | 0.78 |
| 1.00E+00 | 0.84 |
| 1.00E+00 | 0.77 |
| 1.00E+00 | 0.91 |
| 1.00E+00 | 0.9  |
| 1.00E+00 | 0.64 |
| 1.00E+00 | 0.77 |
| 1.00E+00 | 0.86 |
| 1.00E+00 | 0.62 |
| 1.00E+00 | 0.69 |
| 1.00E+00 | 0.89 |
| 1.00E+00 | 0.88 |
| 1.00E+00 | 0.83 |
| 1.00E+00 | 0.94 |
| 1.00E+00 | 0.94 |
| 1.00E+00 | 0.89 |
| 1.00E+00 | 0.92 |
| 1.00E+00 | 0.75 |
| 1.00E+00 | 0.76 |
| 1.00E+00 | 0.7  |



1.00E+00 0.91

1.00E+00 0.81

1.00E+00 0.68

1.00E+00 0.87

1.00E+00 0.88

1.00E+00 0.92

1.00E+00 1

1.00E+00 0.93

1.00E+00 0.68

1.00E+00 0.65

1.00E+00 0.86

1.00E+00 0.95

1.00E+00 0.93

1.00E+00 0.95

1.00E+00 0.54

1.00E+00 0.97

1.00E+00 1

1.00E+00 0.81

1.00E+00 0.74

1.00E+00 0.83

1.00E+00 1

1.00E+00 0.46

1.00E+00 0.89

1.00E+00 0.82

1.00E+00 0.47

1.00E+00 0.87

1.00E+00 0.89

1.00E+00 0.85

1.00E+00 0.76

1.00E+00 0.67

1.00E+00 0.62

1.00E+00 0.78

1.00E+00 0.7

1.00E+00 0.86

1.00E+00 0.55

1.00E+00 0.46

1.00E+00 0.83

1.00E+00 0.76

1.00E+00 0.59

1.00E+00 0.77

1.00E+00 0.85

|          |      |
|----------|------|
| 1.00E+00 | 0.64 |
| 1.00E+00 | 0.66 |
| 1.00E+00 | 0.88 |
| 1.00E+00 | 0.93 |
| 1.00E+00 | 0.88 |
| 1.00E+00 | 0.9  |
| 1.00E+00 | 0    |
| 1.00E+00 | 0.86 |
| 1.00E+00 | 0.96 |
| 1.00E+00 | 0.83 |
| 1.00E+00 | 0.71 |
| 1.00E+00 | 0    |
| 1.00E+00 | 0.78 |
| 1.00E+00 | 0.54 |
| 1.00E+00 | 0.76 |
| 1.00E+00 | 0.87 |
| 1.00E+00 | 0.94 |
| 1.00E+00 | 1    |
| 1.00E+00 | 0.91 |
| 1.00E+00 | 0.72 |
| 1.00E+00 | 0.76 |
| 1.00E+00 | 1    |
| 1.00E+00 | 0.95 |
| 1.00E+00 | 0.4  |
| 1.00E+00 | 0.72 |
| 1.00E+00 | 0.96 |
| 1.00E+00 | 0.53 |
| 1.00E+00 | 0.82 |
| 1.00E+00 | 0.93 |
| 1.00E+00 | 0.88 |
| 1.00E+00 | 0.58 |
| 1.00E+00 | 0.89 |
| 1.00E+00 | 0.94 |
| 1.00E+00 | 0.85 |
| 1.00E+00 | 1    |
| 1.00E+00 | 1    |
| 1.00E+00 | 0.77 |
| 1.00E+00 | 0.92 |

|          |      |
|----------|------|
| 1.00E+00 | 0.65 |
| 1.00E+00 | 0.9  |
| 1.00E+00 | 1    |
| 1.00E+00 | 0.49 |
| 1.00E+00 | 1    |
| 1.00E+00 | 0.85 |
| 1.00E+00 | 0.87 |
| 1.00E+00 | 0.83 |
| 1.00E+00 | 1    |
| 1.00E+00 | 0.9  |
| 1.00E+00 | 0.55 |
| 1.00E+00 | 0.55 |
| 1.00E+00 | 0.6  |
| 1.00E+00 | 0.72 |
| 1.00E+00 | 0.86 |
| 1.00E+00 | 0.78 |
| 1.00E+00 | 0.89 |
| 1.00E+00 | 0.92 |
| 1.00E+00 | 0.79 |
| 1.00E+00 | 0.88 |
| 1.00E+00 | 1    |
| 1.00E+00 | 0.92 |
| 1.00E+00 | 0.93 |
| 1.00E+00 | 0.86 |
| 1.00E+00 | 0.74 |
| 1.00E+00 | 0.58 |
| 1.00E+00 | 1    |
| 1.00E+00 | 0.91 |
| 1.00E+00 | 0.93 |
| 1.00E+00 | 0.48 |
| 1.00E+00 | 0.84 |
| 1.00E+00 | 0.9  |
| 1.00E+00 | 0.86 |
| 1.00E+00 | 1    |
| 1.00E+00 | 0.92 |
| 1.00E+00 | 0.87 |
| 1.00E+00 | 0.73 |
| 1.00E+00 | 0.83 |
| 1.00E+00 | 0.67 |
| 1.00E+00 | 0.95 |
| 1.00E+00 | 0.79 |
| 1.00E+00 | 0.95 |
| 1.00E+00 | 1    |
| 1.00E+00 | 1    |
| 1.00E+00 | 0.68 |

|          |      |
|----------|------|
| 1.00E+00 | 1    |
| 1.00E+00 | 0.95 |
| 1.00E+00 | 1    |
| 1.00E+00 | 0.88 |
| 1.00E+00 | 1    |
| 1.00E+00 | 0.78 |
| 1.00E+00 | 0.64 |
| 1.00E+00 | 0.57 |

|          |      |
|----------|------|
| 1.00E+00 | 0.89 |
| 1.00E+00 | 0    |
| 1.00E+00 | 0.94 |
| 1.00E+00 | 0.93 |
| 1.00E+00 | 0.95 |
| 1.00E+00 | 0.79 |
| 1.00E+00 | 0.93 |
| 1.00E+00 | 0.89 |
| 1.00E+00 | 0.88 |

|          |      |
|----------|------|
| 1.00E+00 | 0.59 |
| 1.00E+00 | 1    |
| 1.00E+00 | 0.93 |
| 1.00E+00 | 0.78 |
| 1.00E+00 | 0.66 |

|          |      |
|----------|------|
| 1.00E+00 | 1    |
| 1.00E+00 | 0.93 |
| 1.00E+00 | 0.93 |
| 1.00E+00 | 0.82 |
| 1.00E+00 | 0.83 |
| 1.00E+00 | 0.9  |
| 1.00E+00 | 0.55 |
| 1.00E+00 | 0.77 |
| 1.00E+00 | 0.59 |
| 1.00E+00 | 0.92 |
| 1.00E+00 | 0.82 |
| 1.00E+00 | 0.82 |

|          |      |
|----------|------|
| 1.00E+00 | 0.85 |
| 1.00E+00 | 0.85 |
| 1.00E+00 | 0.93 |
| 1.00E+00 | 0.95 |
| 1.00E+00 | 0.81 |
| 1.00E+00 | 0.97 |
| 1.00E+00 | 0.92 |
| 1.00E+00 | 0.65 |

|          |      |
|----------|------|
| 1.00E+00 | 1    |
| 1.00E+00 | 0.76 |
| 1.00E+00 | 0.73 |
| 1.00E+00 | 0.95 |
| 1.00E+00 | 1    |

|          |      |
|----------|------|
| 1.00E+00 | 1    |
| 1.00E+00 | 0.91 |

|          |      |
|----------|------|
| 1.00E+00 | 0    |
| 1.00E+00 | 0.79 |
| 1.00E+00 | 0.68 |
| 1.00E+00 | 0.88 |
| 1.00E+00 | 0.89 |
| 1.00E+00 | 0.95 |
| 1.00E+00 | 1    |
| 1.00E+00 | 0.79 |
| 1.00E+00 | 0.84 |
| 1.00E+00 | 1    |
| 1.00E+00 | 0.91 |
| 1.00E+00 | 0.84 |
| 1.00E+00 | 0.92 |
| 1.00E+00 | 0.74 |
| 1.00E+00 | 0.94 |
| 1.00E+00 | 0.68 |
| 1.00E+00 | 0.73 |
| 1.00E+00 | 0.73 |
| 1.00E+00 | 0.77 |
| 1.00E+00 | 1    |
| 1.00E+00 | 0.92 |
| 1.00E+00 | 0.4  |

|          |      |
|----------|------|
| 1.00E+00 | 0.89 |
| 1.00E+00 | 0.96 |
| 1.00E+00 | 0.89 |
| 1.00E+00 | 0.72 |
| 1.00E+00 | 0.93 |
| 1.00E+00 | 0.73 |
| 1.00E+00 | 0.91 |
| 1.00E+00 | 0.93 |
| 1.00E+00 | 1    |
| 1.00E+00 | 0.82 |
| 1.00E+00 | 0.76 |
| 1.00E+00 | 0.81 |
| 1.00E+00 | 0.75 |
| 1.00E+00 | 0.66 |

|          |      |
|----------|------|
| 1.00E+00 | 1    |
| 1.00E+00 | 0.91 |
| 1.00E+00 | 0.83 |
| 1.00E+00 | 0.91 |
| 1.00E+00 | 0.95 |
| 1.00E+00 | 0.79 |

|          |      |
|----------|------|
| 1.00E+00 | 0.85 |
| 1.00E+00 | 0.94 |

|          |      |
|----------|------|
| 1.00E+00 | 0.78 |
| 1.00E+00 | 0.62 |

|          |      |
|----------|------|
| 1.00E+00 | 0.94 |
| 1.00E+00 | 1    |
| 1.00E+00 | 0.65 |
| 1.00E+00 | 0.84 |

|          |      |
|----------|------|
| 1.00E+00 | 0.72 |
| 1.00E+00 | 0.66 |
| 1.00E+00 | 0.7  |
| 1.00E+00 | 0.93 |
| 1.00E+00 | 0.84 |
| 1.00E+00 | 0.86 |
| 1.00E+00 | 0.52 |
| 1.00E+00 | 0.49 |
| 1.00E+00 | 0.53 |

|          |   |
|----------|---|
| 1.00E+00 | 1 |
|----------|---|

|          |      |
|----------|------|
| 1.00E+00 | 0.81 |
| 1.00E+00 | 0.94 |
| 1.00E+00 | 0.94 |

|          |      |
|----------|------|
| 1.00E+00 | 1    |
| 1.00E+00 | 0.72 |
| 1.00E+00 | 0.54 |
| 1.00E+00 | 0.68 |
| 1.00E+00 | 0.87 |
| 1.00E+00 | 0.76 |
| 1.00E+00 | 0.92 |
| 1.00E+00 | 0.7  |
| 1.00E+00 | 0.87 |
| 1.00E+00 | 0.54 |
| 1.00E+00 | 0.73 |
| 1.00E+00 | 0.94 |
| 1.00E+00 | 0.81 |

|          |      |
|----------|------|
| 1.00E+00 | 0.9  |
| 1.00E+00 | 0.95 |
| 1.00E+00 | 0.29 |
| 1.00E+00 | 0.56 |
| 1.00E+00 | 0.77 |
| 1.00E+00 | 0.83 |
| 1.00E+00 | 0.83 |
| 1.00E+00 | 0.86 |
| 1.00E+00 | 1    |
| 1.00E+00 | 0.69 |
| 1.00E+00 | 0.7  |
| 1.00E+00 | 0.83 |
| 1.00E+00 | 0.95 |
| 1.00E+00 | 1    |
| 1.00E+00 | 0.9  |
| 1.00E+00 | 0.87 |
| 1.00E+00 | 1    |
| 1.00E+00 | 0.91 |
| 1.00E+00 | 0.8  |
| 1.00E+00 | 0.96 |
| 1.00E+00 | 0.79 |
| 1.00E+00 | 0.8  |
| 1.00E+00 | 0.78 |
| 1.00E+00 | 0.47 |
| 1.00E+00 | 0.71 |
| 1.00E+00 | 1    |
| 1.00E+00 | 0.97 |
| 1.00E+00 | 0.93 |
| 1.00E+00 | 1    |
| 1.00E+00 | 1    |
| 1.00E+00 | 0.65 |
| 1.00E+00 | 0.87 |
| 1.00E+00 | 0.82 |
| 1.00E+00 | 0.96 |
| 1.00E+00 | 0.79 |

|          |      |
|----------|------|
| 1.00E+00 | 0.75 |
| 1.00E+00 | 0.81 |
| 1.00E+00 | 0.87 |
| 1.00E+00 | 0.62 |
| 1.00E+00 | 0.9  |
| 1.00E+00 | 0.68 |
| 1.00E+00 | 0.85 |
| 1.00E+00 | 1    |
| 1.00E+00 | 0.59 |
| 1.00E+00 | 1    |
| 1.00E+00 | 0.72 |
| 1.00E+00 | 1    |
| 1.00E+00 | 0.82 |
| 1.00E+00 | 0.82 |
| 1.00E+00 | 0.8  |
| 1.00E+00 | 0.92 |
| 1.00E+00 | 1    |
| 1.00E+00 | 0.77 |
| 1.00E+00 | 0.6  |
| 1.00E+00 | 0    |
| 1.00E+00 | 0.92 |
| 1.00E+00 | 0.92 |
| 1.00E+00 | 0.82 |
| 1.00E+00 | 0.93 |
| 1.00E+00 | 0.78 |
| 1.00E+00 | 0.79 |
| 1.00E+00 | 0.86 |
| 1.00E+00 | 0.77 |
| 1.00E+00 | 0.96 |
| 1.00E+00 | 0.96 |
| 1.00E+00 | 0.82 |
| 1.00E+00 | 0.75 |
| 1.00E+00 | 0.59 |
| 1.00E+00 | 0.76 |
| 1.00E+00 | 0.67 |
| 1.00E+00 | 0.72 |
| 1.00E+00 | 0.83 |
| 1.00E+00 | 0.8  |
| 1.00E+00 | 0.82 |
| 1.00E+00 | 0.95 |
| 1.00E+00 | 1    |
| 1.00E+00 | 0.74 |
| 1.00E+00 | 0.94 |
| 1.00E+00 | 0.86 |



|          |      |
|----------|------|
| 1.00E+00 | 0.71 |
| 1.00E+00 | 0.79 |
| 1.00E+00 | 0.88 |
| 1.00E+00 | 0.75 |
| 1.00E+00 | 0.86 |

|          |      |
|----------|------|
| 1.00E+00 | 0.56 |
| 1.00E+00 | 1    |
| 1.00E+00 | 0.86 |
| 1.00E+00 | 0.88 |
| 1.00E+00 | 0.73 |
| 1.00E+00 | 0.79 |
| 1.00E+00 | 0.86 |
| 1.00E+00 | 0.74 |
| 1.00E+00 | 0.59 |
| 1.00E+00 | 0.63 |
| 1.00E+00 | 0.63 |
| 1.00E+00 | 0.69 |
| 1.00E+00 | 0.95 |
| 1.00E+00 | 0.95 |
| 1.00E+00 | 0.79 |
| 1.00E+00 | 0.52 |
| 1.00E+00 | 1    |
| 1.00E+00 | 1    |

|          |      |
|----------|------|
| 1.00E+00 | 0.82 |
| 1.00E+00 | 1    |
| 1.00E+00 | 0.73 |
| 1.00E+00 | 0.94 |
| 1.00E+00 | 1    |
| 1.00E+00 | 0.9  |
| 1.00E+00 | 0.95 |
| 1.00E+00 | 0.57 |
| 1.00E+00 | 0.66 |
| 1.00E+00 | 1    |
| 1.00E+00 | 0.92 |
| 1.00E+00 | 0.85 |
| 1.00E+00 | 0.92 |
| 1.00E+00 | 0.75 |
| 1.00E+00 | 0.87 |
| 1.00E+00 | 0.6  |
| 1.00E+00 | 1    |
| 1.00E+00 | 0.91 |
| 1.00E+00 | 0.87 |
| 1.00E+00 | 0.89 |
| 1.00E+00 | 0.86 |
| 1.00E+00 | 0.85 |

|          |      |
|----------|------|
| 1.00E+00 | 0.89 |
| 1.00E+00 | 0.73 |
| 1.00E+00 | 1    |
| 1.00E+00 | 1    |
| 1.00E+00 | 0.91 |
| 1.00E+00 | 0.94 |
| 1.00E+00 | 0.87 |
| 1.00E+00 | 0.84 |
| 1.00E+00 | 0.89 |
| 1.00E+00 | 0.89 |
| 1.00E+00 | 0.63 |
| 1.00E+00 | 0.66 |
| 1.00E+00 | 0.94 |
| 1.00E+00 | 0.95 |
| 1.00E+00 | 0.82 |
| 1.00E+00 | 0.67 |
| 1.00E+00 | 0.72 |
| 1.00E+00 | 0.58 |
| 1.00E+00 | 0.9  |
| 1.00E+00 | 0.91 |
| 1.00E+00 | 0.87 |
| 1.00E+00 | 1    |
| 1.00E+00 | 1    |
| 1.00E+00 | 0.64 |
| 1.00E+00 | 0.93 |
| 1.00E+00 | 0.58 |
| 1.00E+00 | 0.84 |
| 1.00E+00 | 0.87 |
| 1.00E+00 | 0.91 |
| 1.00E+00 | 1    |
| 1.00E+00 | 0.88 |
| 1.00E+00 | 0.7  |
| 1.00E+00 | 0.92 |
| 1.00E+00 | 0.97 |
| 1.00E+00 | 0.71 |
| 1.00E+00 | 1    |
| 1.00E+00 | 0.95 |
| 1.00E+00 | 1    |
| 1.00E+00 | 0.84 |
| 1.00E+00 | 1    |
| 1.00E+00 | 0.91 |
| 1.00E+00 | 1    |
| 1.00E+00 | 0.95 |
| 1.00E+00 | 0.93 |

|          |      |
|----------|------|
| 1.00E+00 | 0.87 |
| 1.00E+00 | 0.83 |
| 1.00E+00 | 0.82 |
| 1.00E+00 | 0.64 |
| 1.00E+00 | 0.94 |
| 1.00E+00 | 0.95 |
| 1.00E+00 | 0.82 |
| 1.00E+00 | 0.74 |
| 1.00E+00 | 0.76 |
| 1.00E+00 | 0.93 |
| 1.00E+00 | 1    |
| 1.00E+00 | 0.73 |
| 1.00E+00 | 0.67 |
| 1.00E+00 | 1    |
| 1.00E+00 | 0.71 |
| 1.00E+00 | 1    |
| 1.00E+00 | 0.89 |
| 1.00E+00 | 0.66 |
| 1.00E+00 | 0.74 |
| 1.00E+00 | 0.54 |
| 1.00E+00 | 0.77 |
| 1.00E+00 | 0.45 |
| 1.00E+00 | 0.72 |
| 1.00E+00 | 1    |
| 1.00E+00 | 0.77 |
| 1.00E+00 | 0.73 |
| 1.00E+00 | 1    |

|          |      |
|----------|------|
| 1.00E+00 | 0.94 |
| 1.00E+00 | 0.59 |
| 1.00E+00 | 0.86 |
| 1.00E+00 | 0.69 |
| 1.00E+00 | 0.67 |
| 1.00E+00 | 1    |
| 1.00E+00 | 0.86 |
| 1.00E+00 | 0.96 |
| 1.00E+00 | 0.88 |
| 1.00E+00 | 1    |
| 1.00E+00 | 0.81 |
| 1.00E+00 | 0.61 |
| 1.00E+00 | 0.84 |

|          |      |
|----------|------|
| 1.00E+00 | 0.81 |
| 1.00E+00 | 0.81 |
| 1.00E+00 | 0.78 |
| 1.00E+00 | 0.79 |
| 1.00E+00 | 0.98 |

|          |      |
|----------|------|
| 1.00E+00 | 0.81 |
| 1.00E+00 | 0.91 |

|          |      |
|----------|------|
| 1.00E+00 | 1    |
| 1.00E+00 | 0.78 |
| 1.00E+00 | 0.56 |

|          |      |
|----------|------|
| 1.00E+00 | 0.92 |
|----------|------|

|          |      |
|----------|------|
| 1.00E+00 | 0.58 |
| 1.00E+00 | 0.56 |
| 1.00E+00 | 0.93 |
| 1.00E+00 | 0.87 |

|          |      |
|----------|------|
| 1.00E+00 | 0.84 |
| 1.00E+00 | 0.62 |
| 1.00E+00 | 0.79 |
| 1.00E+00 | 0.8  |

|          |      |
|----------|------|
| 1.00E+00 | 0.89 |
| 1.00E+00 | 1    |
| 1.00E+00 | 0.85 |
| 1.00E+00 | 0.81 |

|          |      |
|----------|------|
| 1.00E+00 | 0.77 |
| 1.00E+00 | 0.93 |
| 1.00E+00 | 0.82 |
| 1.00E+00 | 0.8  |

|          |      |
|----------|------|
| 1.00E+00 | 0.68 |
| 1.00E+00 | 0.88 |

|          |      |
|----------|------|
| 1.00E+00 | 0.89 |
| 1.00E+00 | 1    |
| 1.00E+00 | 0.56 |
| 1.00E+00 | 1    |

|          |      |
|----------|------|
| 1.00E+00 | 0.84 |
| 1.00E+00 | 0.79 |
| 1.00E+00 | 0.7  |
| 1.00E+00 | 1    |

|          |      |
|----------|------|
| 1.00E+00 | 0.85 |
| 1.00E+00 | 0.67 |
| 1.00E+00 | 0.5  |

|          |      |
|----------|------|
| 1.00E+00 | 0.72 |
| 1.00E+00 | 0.93 |
| 1.00E+00 | 0.94 |

|          |      |
|----------|------|
| 1.00E+00 | 0.94 |
| 1.00E+00 | 0.76 |
| 1.00E+00 | 0.96 |
| 1.00E+00 | 0.92 |

|          |      |
|----------|------|
| 1.00E+00 | 0.93 |
| 1.00E+00 | 0.92 |

|          |      |
|----------|------|
| 1.00E+00 | 0.8  |
| 1.00E+00 | 0.61 |
| 1.00E+00 | 0.67 |
| 1.00E+00 | 0.67 |
| 1.00E+00 | 0.78 |
| 1.00E+00 | 0.86 |
| 1.00E+00 | 0.84 |
| 1.00E+00 | 0.81 |

|          |      |
|----------|------|
| 1.00E+00 | 0.75 |
| 1.00E+00 | 0.9  |
| 1.00E+00 | 1    |
| 1.00E+00 | 1    |
| 1.00E+00 | 0.94 |
| 1.00E+00 | 1    |
| 1.00E+00 | 0.72 |
| 1.00E+00 | 1    |
| 1.00E+00 | 1    |
| 1.00E+00 | 0.68 |
| 1.00E+00 | 0.94 |
| 1.00E+00 | 0.93 |
| 1.00E+00 | 0.94 |
| 1.00E+00 | 0.93 |
| 1.00E+00 | 0.84 |
| 1.00E+00 | 1    |
| 1.00E+00 | 0.8  |
| 1.00E+00 | 0.65 |
| 1.00E+00 | 0.65 |

|          |      |
|----------|------|
| 1.00E+00 | 0.92 |
| 1.00E+00 | 0.62 |
| 1.00E+00 | 0.94 |
| 1.00E+00 | 0.84 |
| 1.00E+00 | 0.6  |
| 1.00E+00 | 0.91 |
| 1.00E+00 | 0.85 |

|          |      |
|----------|------|
| 1.00E+00 | 0.54 |
|----------|------|

|          |      |
|----------|------|
| 1.00E+00 | 0.61 |
| 1.00E+00 | 0.61 |
| 1.00E+00 | 0.88 |
| 1.00E+00 | 0.89 |
| 1.00E+00 | 0.94 |
| 1.00E+00 | 0.93 |
| 1.00E+00 | 0.66 |
| 1.00E+00 | 0.8  |
| 1.00E+00 | 0.95 |
| 1.00E+00 | 0.87 |
| 1.00E+00 | 0.87 |
| 1.00E+00 | 0.89 |
| 1.00E+00 | 0.81 |
| 1.00E+00 | 0.89 |
| 1.00E+00 | 0.87 |
| 1.00E+00 | 1    |
| 1.00E+00 | 0.83 |
| 1.00E+00 | 0.91 |
| 1.00E+00 | 0.74 |
| 1.00E+00 | 1    |
| 1.00E+00 | 1    |
| 1.00E+00 | 0.93 |
| 1.00E+00 | 0.74 |
| 1.00E+00 | 0.68 |
| 1.00E+00 | 1    |
| 1.00E+00 | 0.76 |
| 1.00E+00 | 1    |
| 1.00E+00 | 0.76 |
| 1.00E+00 | 0.94 |
| 1.00E+00 | 0.84 |
| 1.00E+00 | 0.82 |
| 1.00E+00 | 0.83 |
| 1.00E+00 | 0.89 |
| 1.00E+00 | 0.93 |
| 1.00E+00 | 0.93 |
| 1.00E+00 | 0.53 |
| 1.00E+00 | 0.91 |
| 1.00E+00 | 0.67 |
| 1.00E+00 | 0.71 |
| 1.00E+00 | 0.76 |
| 1.00E+00 | 0.61 |
| 1.00E+00 | 0.8  |
| 1.00E+00 | 0.85 |
| 1.00E+00 | 0.81 |

|          |      |
|----------|------|
| 1.00E+00 | 0.73 |
| 1.00E+00 | 0.72 |
| 1.00E+00 | 0.97 |
| 1.00E+00 | 1    |
| 1.00E+00 | 0.96 |
| 1.00E+00 | 0.63 |
| 1.00E+00 | 0.91 |
| 1.00E+00 | 0.86 |
| 1.00E+00 | 1    |
| 1.00E+00 | 0.89 |
| 1.00E+00 | 1    |
| 1.00E+00 | 0.47 |
| 1.00E+00 | 1    |
| 1.00E+00 | 0.95 |
| 1.00E+00 | 0.84 |
| 1.00E+00 | 0.9  |
| 1.00E+00 | 0.91 |
| 1.00E+00 | 0.91 |
| 1.00E+00 | 0.94 |
| 1.00E+00 | 0.91 |
| 1.00E+00 | 0.69 |
| 1.00E+00 | 1    |
| 1.00E+00 | 0.93 |
| 1.00E+00 | 1    |
| 1.00E+00 | 0.88 |
| 1.00E+00 | 1    |
| 1.00E+00 | 0.58 |
| 1.00E+00 | 0.89 |
| 1.00E+00 | 0.79 |
| 1.00E+00 | 1    |
| 1.00E+00 | 1    |
| 1.00E+00 | 0.81 |
| 1.00E+00 | 1    |
| 1.00E+00 | 0.87 |
| 1.00E+00 | 0.83 |
| 1.00E+00 | 0.61 |
| 1.00E+00 | 1    |
| 1.00E+00 | 0.83 |
| 1.00E+00 | 1    |
| 1.00E+00 | 0.86 |
| 1.00E+00 | 0.56 |
| 1.00E+00 | 0.72 |
| 1.00E+00 | 0.81 |
| 1.00E+00 | 0.92 |
| 1.00E+00 | 0.84 |
| 1.00E+00 | 0.88 |
| 1.00E+00 | 0.92 |

|          |      |
|----------|------|
| 1.00E+00 | 0.83 |
| 1.00E+00 | 0.86 |
| 1.00E+00 | 0.83 |
| 1.00E+00 | 0.79 |
| 1.00E+00 | 0.84 |
| 1.00E+00 | 0.87 |
| 1.00E+00 | 0.84 |
| 1.00E+00 | 0.85 |
| 1.00E+00 | 0.78 |
| 1.00E+00 | 1    |
| 1.00E+00 | 0.78 |
| 1.00E+00 | 0.71 |
| 1.00E+00 | 1    |
| 1.00E+00 | 0.54 |
| 1.00E+00 | 0.81 |
| 1.00E+00 | 0.96 |
| 1.00E+00 | 0.93 |
| 1.00E+00 | 0.85 |
| 1.00E+00 | 0.88 |
| 1.00E+00 | 1    |
| 1.00E+00 | 0.81 |
| 1.00E+00 | 1    |
| 1.00E+00 | 0.88 |
| 1.00E+00 | 0.9  |
| 1.00E+00 | 0.74 |
| 1.00E+00 | 1    |
| 1.00E+00 | 0.93 |
| 1.00E+00 | 0.67 |
| 1.00E+00 | 0.76 |
| 1.00E+00 | 1    |
| 1.00E+00 | 0.86 |
| 1.00E+00 | 0.82 |
| 1.00E+00 | 0.86 |
| 1.00E+00 | 0.95 |
| 1.00E+00 | 0.68 |
| 1.00E+00 | 0.73 |
| 1.00E+00 | 0.72 |
| 1.00E+00 | 0.76 |
| 1.00E+00 | 0.79 |
| 1.00E+00 | 0.56 |
| 1.00E+00 | 0.76 |
| 1.00E+00 | 0.82 |
| 1.00E+00 | 0.6  |
| 1.00E+00 | 0.74 |
| 1.00E+00 | 0.74 |
| 1.00E+00 | 0.6  |
| 1.00E+00 | 0.93 |



|          |      |
|----------|------|
| 1.00E+00 | 0.4  |
| 1.00E+00 | 0.87 |
| 1.00E+00 | 0.63 |
| 1.00E+00 | 0.87 |
| 1.00E+00 | 0.74 |
| 1.00E+00 | 1    |
| 1.00E+00 | 0.93 |
| 1.00E+00 | 0.61 |
| 1.00E+00 | 0.72 |
| 1.00E+00 | 0.9  |
| 1.00E+00 | 0.67 |
| 1.00E+00 | 0.77 |
| 1.00E+00 | 0.9  |
| 1.00E+00 | 0.92 |
| 1.00E+00 | 0.84 |
| 1.00E+00 | 1    |
| 1.00E+00 | 1    |
| 1.00E+00 | 0.91 |
| 1.00E+00 | 0.8  |
| 1.00E+00 | 0.55 |
| 1.00E+00 | 0.93 |
| 1.00E+00 | 1    |
| 1.00E+00 | 0.78 |
| 1.00E+00 | 0.94 |
| 1.00E+00 | 1    |
| 1.00E+00 | 0.64 |
| 1.00E+00 | 0.84 |
| 1.00E+00 | 0.93 |
| 1.00E+00 | 1    |
| 1.00E+00 | 0    |
| 1.00E+00 | 0.95 |
| 1.00E+00 | 0.97 |
| 1.00E+00 | 0.94 |
| 1.00E+00 | 0.64 |
| 1.00E+00 | 0.9  |
| 1.00E+00 | 0.75 |
| 1.00E+00 | 0.67 |
| 1.00E+00 | 0.7  |
| 1.00E+00 | 1    |
| 1.00E+00 | 0.93 |
| 1.00E+00 | 0.95 |
| 1.00E+00 | 0.82 |
| 1.00E+00 | 1    |
| 1.00E+00 | 0.82 |

|          |      |
|----------|------|
| 1.00E+00 | 1    |
| 1.00E+00 | 0.75 |
| 1.00E+00 | 1    |
| 1.00E+00 | 0.89 |
| 1.00E+00 | 0.94 |
| 1.00E+00 | 0.95 |
| 1.00E+00 | 0.72 |
| 1.00E+00 | 0.95 |
| 1.00E+00 | 0.77 |
| 1.00E+00 | 1    |
| 1.00E+00 | 0.72 |
| 1.00E+00 | 0.9  |

|          |      |
|----------|------|
| 1.00E+00 | 0.88 |
| 1.00E+00 | 0.94 |
| 1.00E+00 | 0.92 |
| 1.00E+00 | 0.87 |
| 1.00E+00 | 0.77 |

|          |      |
|----------|------|
| 1.00E+00 | 0.91 |
|----------|------|

|          |      |
|----------|------|
| 1.00E+00 | 0.92 |
| 1.00E+00 | 0.83 |
| 1.00E+00 | 0.51 |
| 1.00E+00 | 1    |

|          |      |
|----------|------|
| 1.00E+00 | 0.92 |
| 1.00E+00 | 0.66 |
| 1.00E+00 | 0.93 |
| 1.00E+00 | 0.65 |
| 1.00E+00 | 0.59 |
| 1.00E+00 | 0.96 |
| 1.00E+00 | 0.89 |
| 1.00E+00 | 0.56 |
| 1.00E+00 | 0.78 |
| 1.00E+00 | 1    |
| 1.00E+00 | 0.82 |
| 1.00E+00 | 0.69 |
| 1.00E+00 | 0.41 |
| 1.00E+00 | 0.64 |
| 1.00E+00 | 0.95 |
| 1.00E+00 | 0.56 |
| 1.00E+00 | 0.8  |
| 1.00E+00 | 0.92 |
| 1.00E+00 | 0.72 |

|          |      |
|----------|------|
| 1.00E+00 | 1    |
| 1.00E+00 | 0.88 |
| 1.00E+00 | 0.93 |

|          |      |
|----------|------|
| 1.00E+00 | 1    |
| 1.00E+00 | 0.91 |
| 1.00E+00 | 1    |
| 1.00E+00 | 0.9  |
| 1.00E+00 | 0.68 |
| 1.00E+00 | 1    |
| 1.00E+00 | 0.85 |
| 1.00E+00 | 0.93 |
| 1.00E+00 | 1    |
| 1.00E+00 | 1    |
| 1.00E+00 | 0.77 |
| 1.00E+00 | 0.81 |
| 1.00E+00 | 0.84 |
| 1.00E+00 | 0.86 |
| 1.00E+00 | 1    |
| 1.00E+00 | 0.96 |
| 1.00E+00 | 0.9  |
| 1.00E+00 | 0.88 |
| 1.00E+00 | 0.88 |
| 1.00E+00 | 1    |
| 1.00E+00 | 1    |
| 1.00E+00 | 0.63 |
| 1.00E+00 | 0.95 |
| 1.00E+00 | 1    |
| 1.00E+00 | 0.94 |
| 1.00E+00 | 0.94 |
| 1.00E+00 | 0.81 |
| 1.00E+00 | 1    |
| 1.00E+00 | 1    |
| 1.00E+00 | 0.8  |
| 1.00E+00 | 0.93 |
| 1.00E+00 | 1    |
| 1.00E+00 | 0.93 |
| 1.00E+00 | 0.88 |
| 1.00E+00 | 1    |
| 1.00E+00 | 0.84 |
| 1.00E+00 | 1    |
| 1.00E+00 | 0.77 |
| 1.00E+00 | 0.58 |
| 1.00E+00 | 0.51 |
| 1.00E+00 | 0.76 |
| 1.00E+00 | 0.77 |
| 1.00E+00 | 0.7  |
| 1.00E+00 | 0.86 |
| 1.00E+00 | 0.82 |
| 1.00E+00 | 0.9  |
| 1.00E+00 | 0.88 |

|          |      |
|----------|------|
| 1.00E+00 | 0.86 |
| 1.00E+00 | 0.92 |
| 1.00E+00 | 0.96 |
| 1.00E+00 | 0.58 |
| 1.00E+00 | 0.57 |
| 1.00E+00 | 0.75 |
| 1.00E+00 | 0.72 |
| 1.00E+00 | 0.77 |
| 1.00E+00 | 0.91 |
| 1.00E+00 | 0.93 |
| 1.00E+00 | 0.65 |
| 1.00E+00 | 0.94 |
| 1.00E+00 | 0.86 |
| 1.00E+00 | 0.78 |
| 1.00E+00 | 0.94 |
| 1.00E+00 | 0.93 |
| 1.00E+00 | 1    |
| 1.00E+00 | 0.83 |
| 1.00E+00 | 0.88 |
| 1.00E+00 | 0.9  |
| 1.00E+00 | 0.96 |
| 1.00E+00 | 0.92 |
| 1.00E+00 | 0.67 |
| 1.00E+00 | 0.96 |
| 1.00E+00 | 0.72 |
| 1.00E+00 | 0.96 |
| 1.00E+00 | 0.9  |
| 1.00E+00 | 0.89 |
| 1.00E+00 | 0.94 |
| 1.00E+00 | 0.88 |
| 1.00E+00 | 0.91 |
| 1.00E+00 | 0.89 |
| 1.00E+00 | 0.76 |
| 1.00E+00 | 0.82 |
| 1.00E+00 | 0.93 |
| 1.00E+00 | 0.86 |
| 1.00E+00 | 0.68 |
| 1.00E+00 | 0.58 |
| 1.00E+00 | 0.51 |
| 1.00E+00 | 1    |
| 1.00E+00 | 0.96 |

|          |      |
|----------|------|
| 1.00E+00 | 1    |
| 1.00E+00 | 0.91 |
| 1.00E+00 | 0.86 |
| 1.00E+00 | 0.87 |
| 1.00E+00 | 0.93 |
| 1.00E+00 | 0.7  |
| 1.00E+00 | 0.95 |
| 1.00E+00 | 0.83 |
| 1.00E+00 | 0.75 |
| 1.00E+00 | 1    |
| 1.00E+00 | 0.96 |
| 1.00E+00 | 0.86 |
| 1.00E+00 | 0.87 |
| 1.00E+00 | 0.7  |
| 1.00E+00 | 0.95 |
| 1.00E+00 | 0.85 |
| 1.00E+00 | 0.78 |
| 1.00E+00 | 0.65 |
| 1.00E+00 | 0.91 |
| 1.00E+00 | 1    |
| 1.00E+00 | 0.71 |
| 1.00E+00 | 0.79 |
| 1.00E+00 | 0.84 |
| 1.00E+00 | 1    |
| 1.00E+00 | 0.93 |
| 1.00E+00 | 0.94 |
| 1.00E+00 | 0.95 |
| 1.00E+00 | 0.7  |
| 1.00E+00 | 0.65 |
| 1.00E+00 | 0.7  |
| 1.00E+00 | 0.89 |
| 1.00E+00 | 0.82 |
| 1.00E+00 | 0.95 |
| 1.00E+00 | 0.68 |
| 1.00E+00 | 0.66 |
| 1.00E+00 | 0.88 |
| 1.00E+00 | 0.96 |
| 1.00E+00 | 0.63 |
| 1.00E+00 | 0.8  |
| 1.00E+00 | 0.91 |

|          |      |
|----------|------|
| 1.00E+00 | 0.72 |
| 1.00E+00 | 0.96 |
| 1.00E+00 | 0.86 |
| 1.00E+00 | 1    |
| 1.00E+00 | 0.93 |
| 1.00E+00 | 0.4  |
| 1.00E+00 | 0.98 |
| 1.00E+00 | 1    |
| 1.00E+00 | 0.95 |
| 1.00E+00 | 0.58 |
| 1.00E+00 | 0.95 |
| 1.00E+00 | 1    |
| 1.00E+00 | 0.89 |
| 1.00E+00 | 0.92 |
| 1.00E+00 | 0.77 |
| 1.00E+00 | 1    |
| 1.00E+00 | 0.93 |
| 1.00E+00 | 0.72 |
| 1.00E+00 | 1    |
| 1.00E+00 | 0.94 |
| 1.00E+00 | 1    |
| 1.00E+00 | 0.59 |
| 1.00E+00 | 0.86 |
| 1.00E+00 | 0.95 |
| 1.00E+00 | 0.89 |
| 1.00E+00 | 0.79 |
| 1.00E+00 | 0.91 |
| 1.00E+00 | 0.93 |
| 1.00E+00 | 0.7  |
| 1.00E+00 | 0.88 |
| 1.00E+00 | 0.66 |
| 1.00E+00 | 0    |
| 1.00E+00 | 0.85 |
| 1.00E+00 | 0.75 |
| 1.00E+00 | 0.62 |
| 1.00E+00 | 0    |
| 1.00E+00 | 0.62 |
| 1.00E+00 | 0.69 |
| 1.00E+00 | 1    |
| 1.00E+00 | 0.98 |
| 1.00E+00 | 1    |
| 1.00E+00 | 0.95 |
| 1.00E+00 | 0.58 |

|          |      |
|----------|------|
| 1.00E+00 | 0.95 |
| 1.00E+00 | 1    |
| 1.00E+00 | 0.89 |
| 1.00E+00 | 0.92 |
| 1.00E+00 | 0.77 |
| 1.00E+00 | 1    |
| 1.00E+00 | 0.93 |
| 1.00E+00 | 0.72 |
| 1.00E+00 | 1    |
| 1.00E+00 | 0.94 |
| 1.00E+00 | 1    |
| 1.00E+00 | 0.59 |
| 1.00E+00 | 0.9  |
| 1.00E+00 | 0.86 |
| 1.00E+00 | 0.95 |
| 1.00E+00 | 0.89 |
| 1.00E+00 | 0.79 |
| 1.00E+00 | 0.91 |
| 1.00E+00 | 0.93 |
| 1.00E+00 | 0.7  |
| 1.00E+00 | 0.88 |
| 1.00E+00 | 0.66 |
| 1.00E+00 | 0    |
| 1.00E+00 | 0.85 |
| 1.00E+00 | 0.75 |
| 1.00E+00 | 0.62 |
| 1.00E+00 | 0    |
| 1.00E+00 | 0.62 |
| 1.00E+00 | 0.69 |
| 1.00E+00 | 1    |

|          |      |
|----------|------|
| 1.00E+00 | 1    |
| 1.00E+00 | 0.93 |
| 1.00E+00 | 1    |
| 1.00E+00 | 1    |
| 1.00E+00 | 0.9  |
| 1.00E+00 | 0.86 |
| 1.00E+00 | 0.86 |
| 1.00E+00 | 1    |
| 1.00E+00 | 0.92 |
| 1.00E+00 | 1    |
| 1.00E+00 | 0.84 |
| 1.00E+00 | 1    |
| 1.00E+00 | 0.63 |

|          |      |
|----------|------|
| 1.00E+00 | 0.85 |
| 1.00E+00 | 0.57 |
| 1.00E+00 | 1    |
| 1.00E+00 | 1    |

|          |      |
|----------|------|
| 1.00E+00 | 0.47 |
| 1.00E+00 | 0.65 |
| 1.00E+00 | 0.92 |
| 1.00E+00 | 0    |

|          |      |
|----------|------|
| 1.00E+00 | 0.75 |
| 1.00E+00 | 0.87 |
| 1.00E+00 | 0.92 |
| 1.00E+00 | 1    |

|          |      |
|----------|------|
| 1.00E+00 | 0.73 |
| 1.00E+00 | 0.56 |
| 1.00E+00 | 0.81 |

|          |      |
|----------|------|
| 1.00E+00 | 0.98 |
|----------|------|

|          |   |
|----------|---|
| 1.00E+00 | 1 |
|----------|---|

|          |      |
|----------|------|
| 1.00E+00 | 0.6  |
| 1.00E+00 | 1    |
| 1.00E+00 | 1    |
| 1.00E+00 | 0.84 |
| 1.00E+00 | 0.92 |
| 1.00E+00 | 0.77 |
| 1.00E+00 | 0.61 |
| 1.00E+00 | 1    |

|          |      |
|----------|------|
| 1.00E+00 | 0.75 |
| 1.00E+00 | 0.73 |
| 1.00E+00 | 0.92 |
| 1.00E+00 | 1    |
| 1.00E+00 | 0.57 |
| 1.00E+00 | 1    |
| 1.00E+00 | 0.94 |
| 1.00E+00 | 0.88 |
| 1.00E+00 | 0.48 |
| 1.00E+00 | 0.93 |
| 1.00E+00 | 0.89 |
| 1.00E+00 | 0.91 |



|          |      |
|----------|------|
| 1.00E+00 | 0.95 |
| 1.00E+00 | 0.81 |
| 1.00E+00 | 0.54 |
| 1.00E+00 | 1    |

|          |      |
|----------|------|
| 1.00E+00 | 0.49 |
| 1.00E+00 | 0.85 |

|          |      |
|----------|------|
| 1.00E+00 | 0.93 |
| 1.00E+00 | 0.84 |
| 1.00E+00 | 0.93 |
| 1.00E+00 | 0.54 |
| 1.00E+00 | 0.9  |
| 1.00E+00 | 0.68 |
| 1.00E+00 | 1    |
| 1.00E+00 | 0.97 |

|          |      |
|----------|------|
| 1.00E+00 | 0.85 |
| 1.00E+00 | 0.68 |
| 1.00E+00 | 0.68 |
| 1.00E+00 | 0.95 |
| 1.00E+00 | 1    |
| 1.00E+00 | 0.76 |

|          |      |
|----------|------|
| 1.00E+00 | 0.59 |
| 1.00E+00 | 0.71 |
| 1.00E+00 | 0    |

|          |      |
|----------|------|
| 1.00E+00 | 0.75 |
| 1.00E+00 | 0.91 |
| 1.00E+00 | 0.67 |
| 1.00E+00 | 1    |
| 1.00E+00 | 1    |
| 1.00E+00 | 0.92 |
| 1.00E+00 | 0.65 |
| 1.00E+00 | 1    |
| 1.00E+00 | 0    |

|          |      |
|----------|------|
| 1.00E+00 | 0.84 |
| 1.00E+00 | 1    |
| 1.00E+00 | 0.64 |
| 1.00E+00 | 1    |

|          |      |
|----------|------|
| 1.00E+00 | 0.77 |
| 1.00E+00 | 0.91 |
| 1.00E+00 | 0.78 |
| 1.00E+00 | 0.86 |
| 1.00E+00 | 0.73 |
| 1.00E+00 | 0.66 |
| 1.00E+00 | 0.54 |
| 1.00E+00 | 0.78 |
| 1.00E+00 | 0.84 |
| 1.00E+00 | 1    |
| 1.00E+00 | 1    |
| 1.00E+00 | 0.97 |
| 1.00E+00 | 0.88 |
| 1.00E+00 | 0.84 |
| 1.00E+00 | 0.87 |

|          |      |
|----------|------|
| 1.00E+00 | 1    |
| 1.00E+00 | 1    |
| 1.00E+00 | 0.98 |
| 1.00E+00 | 0.91 |
| 1.00E+00 | 1    |

|          |      |
|----------|------|
| 1.00E+00 | 1    |
| 1.00E+00 | 1    |
| 1.00E+00 | 1    |
| 1.00E+00 | 0.97 |
| 1.00E+00 | 1    |
| 1.00E+00 | 0.93 |
| 1.00E+00 | 0.94 |
| 1.00E+00 | 0.89 |
| 1.00E+00 | 0.9  |
| 1.00E+00 | 0.93 |
| 1.00E+00 | 0.69 |
| 1.00E+00 | 0.72 |
| 1.00E+00 | 0.75 |
| 1.00E+00 | 0.64 |
| 1.00E+00 | 0.55 |
| 1.00E+00 | 0.67 |
| 1.00E+00 | 0.65 |
| 1.00E+00 | 0.71 |

|          |      |
|----------|------|
| 1.00E+00 | 1    |
| 1.00E+00 | 1    |
| 1.00E+00 | 0.93 |

1.00E+00 0.95

1.00E+00 0.9

1.00E+00 0.95

1.00E+00 0.82

1.00E+00 0.62

1.00E+00 0.93

1.00E+00 0.87

1.00E+00 0.9

1.00E+00 0.81

1.00E+00 0.91

1.00E+00 0.91

1.00E+00 0.88

1.00E+00 0.73

1.00E+00 0.91

1.00E+00 0.86

1.00E+00 0.92

1.00E+00 0.94

1.00E+00 0.93

1.00E+00 1

1.00E+00 0.92

1.00E+00 0.9

1.00E+00 0

1.00E+00 0.78

1.00E+00 0.65

1.00E+00 0.82

1.00E+00 0.65

1.00E+00 0.84

1.00E+00 0.84

1.00E+00 0.87

1.00E+00 0.9

1.00E+00 0.66

1.00E+00 0.97

|          |      |
|----------|------|
| 1.00E+00 | 0.6  |
| 1.00E+00 | 1    |
| 1.00E+00 | 0.86 |
| 1.00E+00 | 0.75 |
| 1.00E+00 | 0.86 |
| 1.00E+00 | 0.89 |
| 1.00E+00 | 0.93 |
| 1.00E+00 | 0.91 |
| 1.00E+00 | 0.65 |
| 1.00E+00 | 0.9  |
| 1.00E+00 | 0.96 |
| 1.00E+00 | 0.91 |
| 1.00E+00 | 0.71 |
| 1.00E+00 | 0.82 |
| 1.00E+00 | 0.78 |
| 1.00E+00 | 0.94 |
| 1.00E+00 | 0.78 |
| 1.00E+00 | 0.66 |
| 1.00E+00 | 0.87 |
| 1.00E+00 | 0.92 |
| 1.00E+00 | 0.91 |
| 1.00E+00 | 0.75 |
| 1.00E+00 | 0.76 |
| 1.00E+00 | 0.84 |
| 1.00E+00 | 0.87 |
| 1.00E+00 | 1    |
| 1.00E+00 | 0.93 |
| 1.00E+00 | 0.74 |
| 1.00E+00 | 0.6  |
| 1.00E+00 | 0.9  |
| 1.00E+00 | 0.8  |
| 1.00E+00 | 1    |
| 1.00E+00 | 0.7  |
| 1.00E+00 | 0.48 |
| 1.00E+00 | 0.65 |
| 1.00E+00 | 1    |
| 1.00E+00 | 0.72 |
| 1.00E+00 | 0.95 |
| 1.00E+00 | 0.88 |
| 1.00E+00 | 0.89 |
| 1.00E+00 | 0.72 |
| 1.00E+00 | 0.64 |
| 1.00E+00 | 0.65 |

|          |      |
|----------|------|
| 1.00E+00 | 0.86 |
| 1.00E+00 | 0.59 |
| 1.00E+00 | 0.61 |
| 1.00E+00 | 0.42 |
| 1.00E+00 | 0.71 |
| 1.00E+00 | 0.92 |
| 1.00E+00 | 0.81 |
| 1.00E+00 | 0.69 |
| 1.00E+00 | 0.9  |
| 1.00E+00 | 0.93 |
| 1.00E+00 | 0.86 |

|          |      |
|----------|------|
| 1.00E+00 | 0.77 |
| 1.00E+00 | 0.86 |

|          |      |
|----------|------|
| 1.00E+00 | 0.92 |
| 1.00E+00 | 0.86 |
| 1.00E+00 | 0.9  |
| 1.00E+00 | 0.92 |
| 1.00E+00 | 0.88 |
| 1.00E+00 | 0.83 |
| 1.00E+00 | 0.93 |
| 1.00E+00 | 0.63 |

|          |      |
|----------|------|
| 1.00E+00 | 0.92 |
|----------|------|

|          |      |
|----------|------|
| 1.00E+00 | 0.85 |
| 1.00E+00 | 0.86 |
| 1.00E+00 | 0.67 |
| 1.00E+00 | 0.81 |
| 1.00E+00 | 0.94 |
| 1.00E+00 | 0.83 |
| 1.00E+00 | 0.6  |
| 1.00E+00 | 0.58 |
| 1.00E+00 | 0.9  |
| 1.00E+00 | 0.93 |
| 1.00E+00 | 0.68 |
| 1.00E+00 | 0.68 |
| 1.00E+00 | 1    |

|          |      |
|----------|------|
| 1.00E+00 | 0.89 |
| 1.00E+00 | 1    |
| 1.00E+00 | 0.94 |
| 1.00E+00 | 0.9  |

|          |      |
|----------|------|
| 1.00E+00 | 1    |
| 1.00E+00 | 0.78 |
| 1.00E+00 | 0.88 |
| 1.00E+00 | 0.93 |
| 1.00E+00 | 0.95 |
| 1.00E+00 | 0.94 |
| 1.00E+00 | 0.52 |
| 1.00E+00 | 1    |
| 1.00E+00 | 1    |

|          |      |
|----------|------|
| 1.00E+00 | 0.9  |
| 1.00E+00 | 0.84 |
| 1.00E+00 | 0.71 |

|          |   |
|----------|---|
| 1.00E+00 | 1 |
|----------|---|

|          |      |
|----------|------|
| 1.00E+00 | 1    |
| 1.00E+00 | 0.92 |
| 1.00E+00 | 0.8  |
| 1.00E+00 | 1    |
| 1.00E+00 | 0.72 |
| 1.00E+00 | 0.97 |
| 1.00E+00 | 1    |

|          |      |
|----------|------|
| 1.00E+00 | 0.79 |
| 1.00E+00 | 0.79 |
| 1.00E+00 | 0.86 |
| 1.00E+00 | 0.88 |
| 1.00E+00 | 0.89 |
| 1.00E+00 | 0.91 |
| 1.00E+00 | 0.73 |
| 1.00E+00 | 1    |

|          |      |
|----------|------|
| 1.00E+00 | 1    |
| 1.00E+00 | 0.73 |
| 1.00E+00 | 0.91 |
| 1.00E+00 | 0.71 |

|          |      |
|----------|------|
| 1.00E+00 | 0.91 |
| 1.00E+00 | 0.82 |
| 1.00E+00 | 0.69 |
| 1.00E+00 | 1    |
| 1.00E+00 | 0.82 |
| 1.00E+00 | 0.77 |
| 1.00E+00 | 0.91 |
| 1.00E+00 | 1    |
| 1.00E+00 | 1    |
| 1.00E+00 | 0.91 |
| 1.00E+00 | 0.63 |

|          |      |
|----------|------|
| 1.00E+00 | 0.74 |
| 1.00E+00 | 0.98 |
| 1.00E+00 | 0.81 |
| 1.00E+00 | 1    |
| 1.00E+00 | 1    |
| 1.00E+00 | 0.76 |
| 1.00E+00 | 0.64 |
| 1.00E+00 | 0.93 |

|          |      |
|----------|------|
| 1.00E+00 | 0.91 |
| 1.00E+00 | 0.9  |
| 1.00E+00 | 0.67 |
| 1.00E+00 | 1    |
| 1.00E+00 | 0.74 |
| 1.00E+00 | 0.88 |
| 1.00E+00 | 0.6  |

|          |      |
|----------|------|
| 1.00E+00 | 0.54 |
| 1.00E+00 | 0.73 |
| 1.00E+00 | 0.73 |
| 1.00E+00 | 0.78 |
| 1.00E+00 | 1    |
| 1.00E+00 | 0.9  |
| 1.00E+00 | 0.91 |
| 1.00E+00 | 0.65 |
| 1.00E+00 | 0.9  |
| 1.00E+00 | 0.96 |
| 1.00E+00 | 0.91 |
| 1.00E+00 | 0.71 |
| 1.00E+00 | 0.82 |
| 1.00E+00 | 0.78 |
| 1.00E+00 | 0.8  |
| 1.00E+00 | 0.75 |
| 1.00E+00 | 0.82 |
| 1.00E+00 | 0.63 |
| 1.00E+00 | 0.74 |
| 1.00E+00 | 0.81 |

|          |      |
|----------|------|
| 1.00E+00 | 0.93 |
| 1.00E+00 | 0.62 |
| 1.00E+00 | 0.94 |
| 1.00E+00 | 0.92 |
| 1.00E+00 | 0.81 |
| 1.00E+00 | 0.74 |
| 1.00E+00 | 0.94 |
| 1.00E+00 | 0.77 |

|          |      |
|----------|------|
| 1.00E+00 | 0.68 |
| 1.00E+00 | 0.63 |
| 1.00E+00 | 0.8  |
| 1.00E+00 | 0.56 |
| 1.00E+00 | 0.67 |

|          |      |
|----------|------|
| 1.00E+00 | 0.81 |
| 1.00E+00 | 0.94 |
| 1.00E+00 | 0.89 |

|          |      |
|----------|------|
| 1.00E+00 | 0.81 |
| 1.00E+00 | 0.94 |
| 1.00E+00 | 0.65 |
| 1.00E+00 | 0.81 |

|          |      |
|----------|------|
| 1.00E+00 | 0.82 |
| 1.00E+00 | 0.5  |
| 1.00E+00 | 0.75 |
| 1.00E+00 | 0.97 |

|          |      |
|----------|------|
| 1.00E+00 | 0.87 |
| 1.00E+00 | 0.64 |
| 1.00E+00 | 0.65 |
| 1.00E+00 | 0.87 |
| 1.00E+00 | 0.71 |
| 1.00E+00 | 0.71 |
| 1.00E+00 | 0.88 |
| 1.00E+00 | 0.85 |
| 1.00E+00 | 0.79 |
| 1.00E+00 | 0.92 |
| 1.00E+00 | 0.75 |
| 1.00E+00 | 0.97 |
| 1.00E+00 | 0.93 |
| 1.00E+00 | 0.79 |
| 1.00E+00 | 1    |
| 1.00E+00 | 0.93 |
| 1.00E+00 | 0.69 |



|          |      |
|----------|------|
| 1.00E+00 | 0.9  |
| 1.00E+00 | 0.74 |
| 1.00E+00 | 0.57 |
| 1.00E+00 | 0.78 |
| 1.00E+00 | 0.64 |
| 1.00E+00 | 0.79 |
| 1.00E+00 | 0.68 |
| 1.00E+00 | 0.65 |

|          |      |
|----------|------|
| 1.00E+00 | 0.89 |
| 1.00E+00 | 0.82 |
| 1.00E+00 | 0.7  |
| 1.00E+00 | 1    |
| 1.00E+00 | 0.9  |
| 1.00E+00 | 1    |
| 1.00E+00 | 1    |
| 1.00E+00 | 1    |
| 1.00E+00 | 0.87 |
| 1.00E+00 | 0.76 |

|          |      |
|----------|------|
| 1.00E+00 | 0.46 |
| 1.00E+00 | 0.68 |
| 1.00E+00 | 0.63 |
| 1.00E+00 | 0.89 |
| 1.00E+00 | 0.68 |
| 1.00E+00 | 0.94 |
| 1.00E+00 | 1    |
| 1.00E+00 | 0.8  |

|          |      |
|----------|------|
| 1.00E+00 | 0.86 |
| 1.00E+00 | 0.94 |
| 1.00E+00 | 1    |
| 1.00E+00 | 0.75 |
| 1.00E+00 | 0.97 |
| 1.00E+00 | 1    |
| 1.00E+00 | 0.9  |
| 1.00E+00 | 0.94 |

|          |      |
|----------|------|
| 1.00E+00 | 0.88 |
| 1.00E+00 | 0.55 |
| 1.00E+00 | 0.78 |

|          |      |
|----------|------|
| 1.00E+00 | 0.83 |
| 1.00E+00 | 0.67 |

|          |      |
|----------|------|
| 1.00E+00 | 0.86 |
| 1.00E+00 | 0.56 |
| 1.00E+00 | 0.72 |

|          |      |
|----------|------|
| 1.00E+00 | 0.84 |
| 1.00E+00 | 0.77 |
| 1.00E+00 | 1    |
| 1.00E+00 | 0.91 |
| 1.00E+00 | 0.69 |
| 1.00E+00 | 0.89 |
| 1.00E+00 | 0.77 |

|          |      |
|----------|------|
| 1.00E+00 | 0.73 |
| 1.00E+00 | 0.63 |
| 1.00E+00 | 0.54 |
| 1.00E+00 | 1    |
| 1.00E+00 | 0.95 |
| 1.00E+00 | 0.77 |
| 1.00E+00 | 0.58 |
| 1.00E+00 | 1    |
| 1.00E+00 | 1    |
| 1.00E+00 | 0.86 |
| 1.00E+00 | 0.91 |
| 1.00E+00 | 1    |
| 1.00E+00 | 1    |
| 1.00E+00 | 0.84 |
| 1.00E+00 | 0.95 |
| 1.00E+00 | 0    |
| 1.00E+00 | 1    |
| 1.00E+00 | 0.86 |
| 1.00E+00 | 1    |
| 1.00E+00 | 0.84 |
| 1.00E+00 | 0.94 |
| 1.00E+00 | 0.97 |
| 1.00E+00 | 0.81 |
| 1.00E+00 | 1    |
| 1.00E+00 | 0.94 |

|          |      |
|----------|------|
| 1.00E+00 | 0.96 |
| 1.00E+00 | 0.75 |
| 1.00E+00 | 0.71 |
| 1.00E+00 | 0.57 |

|          |      |
|----------|------|
| 1.00E+00 | 0.67 |
| 1.00E+00 | 0.89 |

|          |      |
|----------|------|
| 1.00E+00 | 0.81 |
|----------|------|

|          |      |
|----------|------|
| 1.00E+00 | 1    |
| 1.00E+00 | 0.67 |
| 1.00E+00 | 0.83 |
| 1.00E+00 | 0.84 |
| 1.00E+00 | 1    |
| 1.00E+00 | 0.84 |
| 1.00E+00 | 0.92 |
| 1.00E+00 | 1    |
| 1.00E+00 | 0.86 |
| 1.00E+00 | 0.71 |
| 1.00E+00 | 0.65 |
| 1.00E+00 | 0.95 |
| 1.00E+00 | 0.85 |
| 1.00E+00 | 0.47 |
| 1.00E+00 | 0.92 |
| 1.00E+00 | 1    |
| 1.00E+00 | 0.31 |
| 1.00E+00 | 0.83 |
| 1.00E+00 | 0.91 |
| 1.00E+00 | 0.7  |
| 1.00E+00 | 0.68 |
| 1.00E+00 | 0.79 |
| 1.00E+00 | 0.96 |
| 1.00E+00 | 0.93 |
| 1.00E+00 | 0.58 |
| 1.00E+00 | 0.77 |
| 1.00E+00 | 0    |
| 1.00E+00 | 0.86 |
| 1.00E+00 | 0.69 |
| 1.00E+00 | 0.71 |
| 1.00E+00 | 0.97 |
| 1.00E+00 | 0.95 |
| 1.00E+00 | 1    |
| 1.00E+00 | 0.93 |
| 1.00E+00 | 0.76 |
| 1.00E+00 | 0.7  |
| 1.00E+00 | 0.86 |
| 1.00E+00 | 0.8  |
| 1.00E+00 | 0.55 |
| 1.00E+00 | 0.84 |
| 1.00E+00 | 0.78 |
| 1.00E+00 | 0.8  |
| 1.00E+00 | 0.75 |
| 1.00E+00 | 1    |

|          |      |
|----------|------|
| 1.00E+00 | 0.91 |
| 1.00E+00 | 0.81 |
| 1.00E+00 | 0.92 |
| 1.00E+00 | 0.89 |
| 1.00E+00 | 1    |
| 1.00E+00 | 0.95 |
| 1.00E+00 | 1    |
| 1.00E+00 | 0.9  |

|          |      |
|----------|------|
| 1.00E+00 | 0.75 |
| 1.00E+00 | 0.97 |
| 1.00E+00 | 0.69 |
| 1.00E+00 | 0.79 |

|          |      |
|----------|------|
| 1.00E+00 | 0.9  |
| 1.00E+00 | 0.89 |
| 1.00E+00 | 0.98 |
| 1.00E+00 | 0.73 |

|          |      |
|----------|------|
| 1.00E+00 | 0.94 |
| 1.00E+00 | 0.73 |
| 1.00E+00 | 1    |
| 1.00E+00 | 0.67 |
| 1.00E+00 | 1    |

|          |      |
|----------|------|
| 1.00E+00 | 1    |
| 1.00E+00 | 0.73 |
| 1.00E+00 | 1    |

|          |      |
|----------|------|
| 1.00E+00 | 0.92 |
| 1.00E+00 | 0.55 |

|          |      |
|----------|------|
| 1.00E+00 | 0.88 |
| 1.00E+00 | 0.85 |
| 1.00E+00 | 0.77 |
| 1.00E+00 | 0.87 |
| 1.00E+00 | 0.7  |
| 1.00E+00 | 0.61 |
| 1.00E+00 | 0.52 |
| 1.00E+00 | 0.76 |
| 1.00E+00 | 0.81 |
| 1.00E+00 | 0.94 |
| 1.00E+00 | 0.62 |
| 1.00E+00 | 0.96 |

|          |      |
|----------|------|
| 1.00E+00 | 0.56 |
| 1.00E+00 | 0.94 |

|          |      |
|----------|------|
| 1.00E+00 | 0.56 |
| 1.00E+00 | 0.94 |
| 1.00E+00 | 1    |
| 1.00E+00 | 0.96 |
| 1.00E+00 | 0.87 |
| 1.00E+00 | 0.87 |
| 1.00E+00 | 0.75 |
| 1.00E+00 | 1    |
| 1.00E+00 | 1    |
| 1.00E+00 | 0.93 |
| 1.00E+00 | 0.88 |
| 1.00E+00 | 0.8  |
| 1.00E+00 | 1    |
| 1.00E+00 | 0.74 |
| 1.00E+00 | 0.74 |
| 1.00E+00 | 0.43 |
| 1.00E+00 | 0.87 |
| 1.00E+00 | 0.66 |
| 1.00E+00 | 0.47 |
| 1.00E+00 | 0.88 |
| 1.00E+00 | 0.84 |
| 1.00E+00 | 1    |
| 1.00E+00 | 0.89 |
| 1.00E+00 | 0.71 |
| 1.00E+00 | 1    |
| 1.00E+00 | 1    |
| 1.00E+00 | 0.66 |
| 1.00E+00 | 0.56 |
| 1.00E+00 | 0.9  |

|          |      |
|----------|------|
| 1.00E+00 | 1    |
| 1.00E+00 | 1    |
| 1.00E+00 | 0.85 |
| 1.00E+00 | 0.85 |
| 1.00E+00 | 0.69 |
| 1.00E+00 | 1    |
| 1.00E+00 | 0.8  |
| 1.00E+00 | 0.85 |
| 1.00E+00 | 0.7  |
| 1.00E+00 | 0.86 |
| 1.00E+00 | 0.9  |
| 1.00E+00 | 0.88 |
| 1.00E+00 | 0.73 |
| 1.00E+00 | 0.86 |
| 1.00E+00 | 0.86 |
| 1.00E+00 | 0.91 |

|          |      |
|----------|------|
| 1.00E+00 | 0.85 |
| 1.00E+00 | 0.74 |
| 1.00E+00 | 0.89 |
| 1.00E+00 | 0.91 |
| 1.00E+00 | 0.76 |
| 1.00E+00 | 1    |
| 1.00E+00 | 0.96 |
| 1.00E+00 | 0.75 |
| 1.00E+00 | 1    |

|          |      |
|----------|------|
| 1.00E+00 | 0.93 |
| 1.00E+00 | 0.86 |
| 1.00E+00 | 0.77 |
| 1.00E+00 | 0.94 |
| 1.00E+00 | 1    |
| 1.00E+00 | 0.81 |

|          |      |
|----------|------|
| 1.00E+00 | 1    |
| 1.00E+00 | 0.95 |
| 1.00E+00 | 0.87 |
| 1.00E+00 | 1    |
| 1.00E+00 | 0.88 |
| 1.00E+00 | 0.62 |
| 1.00E+00 | 0.92 |
| 1.00E+00 | 0.81 |
| 1.00E+00 | 0.85 |
| 1.00E+00 | 0.84 |
| 1.00E+00 | 0.83 |
| 1.00E+00 | 0.82 |
| 1.00E+00 | 0.85 |
| 1.00E+00 | 0.94 |

|          |      |
|----------|------|
| 1.00E+00 | 0.77 |
| 1.00E+00 | 0.87 |
| 1.00E+00 | 1    |

|          |      |
|----------|------|
| 1.00E+00 | 0.95 |
| 1.00E+00 | 0.94 |
| 1.00E+00 | 1    |
| 1.00E+00 | 1    |

|          |      |
|----------|------|
| 1.00E+00 | 0.55 |
| 1.00E+00 | 0.97 |

|          |      |
|----------|------|
| 1.00E+00 | 0.78 |
|----------|------|

|          |      |
|----------|------|
| 1.00E+00 | 0.95 |
|----------|------|

|          |      |
|----------|------|
| 1.00E+00 | 0.77 |
| 1.00E+00 | 0.9  |
| 1.00E+00 | 1    |
| 1.00E+00 | 0.74 |
| 1.00E+00 | 1    |
| 1.00E+00 | 1    |
| 1.00E+00 | 0.93 |
| 1.00E+00 | 0.82 |
| 1.00E+00 | 0.8  |
| 1.00E+00 | 0.75 |
| 1.00E+00 | 1    |

|          |      |
|----------|------|
| 1.00E+00 | 0.79 |
| 1.00E+00 | 1    |
| 1.00E+00 | 0.78 |
| 1.00E+00 | 1    |
| 1.00E+00 | 0.94 |
| 1.00E+00 | 0.94 |
| 1.00E+00 | 0.64 |
| 1.00E+00 | 1    |
| 1.00E+00 | 0.92 |
| 1.00E+00 | 0.67 |
| 1.00E+00 | 0.74 |
| 1.00E+00 | 1    |
| 1.00E+00 | 0.72 |
| 1.00E+00 | 0.77 |
| 1.00E+00 | 0.92 |
| 1.00E+00 | 0.68 |

|          |      |
|----------|------|
| 1.00E+00 | 0.56 |
| 1.00E+00 | 1    |
| 1.00E+00 | 0.83 |
| 1.00E+00 | 0.96 |
| 1.00E+00 | 0.66 |
| 1.00E+00 | 1    |
| 1.00E+00 | 0.51 |
| 1.00E+00 | 1    |
| 1.00E+00 | 0.82 |
| 1.00E+00 | 0.68 |
| 1.00E+00 | 0.64 |

|          |      |
|----------|------|
| 1.00E+00 | 0.72 |
| 1.00E+00 | 0.78 |
| 1.00E+00 | 0.84 |

|          |      |
|----------|------|
| 1.00E+00 | 0.79 |
|----------|------|

|          |      |
|----------|------|
| 1.00E+00 | 0.9  |
| 1.00E+00 | 1    |
| 1.00E+00 | 1    |
| 1.00E+00 | 0.94 |

|          |      |
|----------|------|
| 1.00E+00 | 0.79 |
| 1.00E+00 | 0.79 |
| 1.00E+00 | 1    |
| 1.00E+00 | 1    |
| 1.00E+00 | 0.45 |
| 1.00E+00 | 0.7  |
| 1.00E+00 | 0.67 |
| 1.00E+00 | 0.73 |
| 1.00E+00 | 0.85 |
| 1.00E+00 | 0.58 |
| 1.00E+00 | 0.91 |
| 1.00E+00 | 0.6  |
| 1.00E+00 | 0.75 |

|          |      |
|----------|------|
| 1.00E+00 | 0.85 |
| 1.00E+00 | 0.71 |
| 1.00E+00 | 0.95 |
| 1.00E+00 | 0.91 |
| 1.00E+00 | 0.98 |
| 1.00E+00 | 0.82 |
| 1.00E+00 | 0.95 |
| 1.00E+00 | 0.78 |
| 1.00E+00 | 0.64 |

|          |      |
|----------|------|
| 1.00E+00 | 0.81 |
| 1.00E+00 | 1    |
| 1.00E+00 | 0.58 |
| 1.00E+00 | 0    |
| 1.00E+00 | 0.77 |
| 1.00E+00 | 0.76 |

|          |      |
|----------|------|
| 1.00E+00 | 0.83 |
| 1.00E+00 | 0.88 |
| 1.00E+00 | 0.93 |

|          |      |
|----------|------|
| 1.00E+00 | 0.98 |
|----------|------|



|          |      |
|----------|------|
| 1.00E+00 | 0.53 |
| 1.00E+00 | 0.67 |
| 1.00E+00 | 0.7  |
| 1.00E+00 | 1    |
| 1.00E+00 | 0.79 |
| 1.00E+00 | 1    |
| 1.00E+00 | 0.47 |
| 1.00E+00 | 0.77 |
| 1.00E+00 | 0.73 |
| 1.00E+00 | 0.77 |
| 1.00E+00 | 0.76 |
| 1.00E+00 | 0.92 |
| 1.00E+00 | 0    |
| 1.00E+00 | 0.73 |
| 1.00E+00 | 1    |
| 1.00E+00 | 1    |
| 1.00E+00 | 0.87 |
| 1.00E+00 | 0.91 |
| 1.00E+00 | 0.94 |
| 1.00E+00 | 0.88 |
| 1.00E+00 | 0.84 |
| 1.00E+00 | 1    |
| 1.00E+00 | 0.97 |
| 1.00E+00 | 0.98 |
| 1.00E+00 | 0.92 |
| 1.00E+00 | 1    |
| 1.00E+00 | 0.89 |
| 1.00E+00 | 0.87 |
| 1.00E+00 | 0.94 |
| 1.00E+00 | 0.82 |
| 1.00E+00 | 0.54 |
| 1.00E+00 | 0.91 |
| 1.00E+00 | 0.38 |
| 1.00E+00 | 0.67 |
| 1.00E+00 | 0.78 |
| 1.00E+00 | 0.52 |
| 1.00E+00 | 0.74 |
| 1.00E+00 | 1    |
| 1.00E+00 | 0.93 |
| 1.00E+00 | 0.8  |
| 1.00E+00 | 0.87 |
| 1.00E+00 | 0.76 |
| 1.00E+00 | 0.71 |
| 1.00E+00 | 1    |
| 1.00E+00 | 0.93 |

|          |      |
|----------|------|
| 1.00E+00 | 0.72 |
| 1.00E+00 | 0.64 |
| 1.00E+00 | 0.83 |
| 1.00E+00 | 0.84 |
| 1.00E+00 | 0.75 |
| 1.00E+00 | 0.95 |
| 1.00E+00 | 0.8  |
| 1.00E+00 | 1    |
| 1.00E+00 | 0.95 |
| 1.00E+00 | 1    |
| 1.00E+00 | 0.81 |
| 1.00E+00 | 0.91 |
| 1.00E+00 | 0.94 |
| 1.00E+00 | 0.45 |
| 1.00E+00 | 0.68 |
| 1.00E+00 | 0.8  |
| 1.00E+00 | 0.59 |
| 1.00E+00 | 0.8  |
| 1.00E+00 | 0.97 |
| 1.00E+00 | 0.86 |
| 1.00E+00 | 0.83 |
| 1.00E+00 | 0.56 |
| 1.00E+00 | 0.96 |
| 1.00E+00 | 0.63 |
| 1.00E+00 | 1    |
| 1.00E+00 | 0.9  |
| 1.00E+00 | 0.82 |
| 1.00E+00 | 0.8  |
| 1.00E+00 | 0.94 |
| 1.00E+00 | 0.82 |
| 1.00E+00 | 0.87 |
| 1.00E+00 | 1    |
| 1.00E+00 | 0.94 |
| 1.00E+00 | 0.45 |
| 1.00E+00 | 1    |
| 1.00E+00 | 0.92 |
| 1.00E+00 | 0.56 |

|          |      |
|----------|------|
| 1.00E+00 | 0.65 |
| 1.00E+00 | 1    |
| 1.00E+00 | 0.75 |
| 1.00E+00 | 0.95 |
| 1.00E+00 | 1    |
| 1.00E+00 | 0.8  |
| 1.00E+00 | 0.82 |
| 1.00E+00 | 0.83 |
| 1.00E+00 | 0.61 |
| 1.00E+00 | 0.7  |
| 1.00E+00 | 0.81 |
| 1.00E+00 | 0.66 |
| 1.00E+00 | 0.8  |
| 1.00E+00 | 0.93 |
| 1.00E+00 | 0.94 |
| 1.00E+00 | 0.97 |
| 1.00E+00 | 0.62 |
| 1.00E+00 | 1    |
| 1.00E+00 | 0.69 |
| 1.00E+00 | 0.7  |
| 1.00E+00 | 0.69 |
| 1.00E+00 | 0.87 |
| 1.00E+00 | 0.64 |
| 1.00E+00 | 0.87 |
| 1.00E+00 | 0.61 |
| 1.00E+00 | 0.94 |
| 1.00E+00 | 0.84 |
| 1.00E+00 | 0.94 |
| 1.00E+00 | 0.93 |
| 1.00E+00 | 0.89 |
| 1.00E+00 | 0.92 |
| 1.00E+00 | 0.92 |
| 1.00E+00 | 0.94 |
| 1.00E+00 | 0.65 |
| 1.00E+00 | 0.91 |
| 1.00E+00 | 0.94 |
| 1.00E+00 | 0.6  |
| 1.00E+00 | 0.6  |
| 1.00E+00 | 0.7  |
| 1.00E+00 | 0.74 |
| 1.00E+00 | 0.85 |
| 1.00E+00 | 0.64 |

|          |      |
|----------|------|
| 1.00E+00 | 0.77 |
| 1.00E+00 | 0.92 |
| 1.00E+00 | 0.95 |
| 1.00E+00 | 0.86 |
| 1.00E+00 | 0.78 |
| 1.00E+00 | 1    |
| 1.00E+00 | 0.93 |
| 1.00E+00 | 0.83 |

|          |      |
|----------|------|
| 1.00E+00 | 0.9  |
| 1.00E+00 | 0.92 |

|          |      |
|----------|------|
| 1.00E+00 | 0.83 |
| 1.00E+00 | 0.93 |
| 1.00E+00 | 0.91 |
| 1.00E+00 | 0.84 |
| 1.00E+00 | 0.84 |
| 1.00E+00 | 0.85 |
| 1.00E+00 | 0.91 |

|          |      |
|----------|------|
| 1.00E+00 | 0.59 |
| 1.00E+00 | 0.66 |
| 1.00E+00 | 0.84 |
| 1.00E+00 | 0.82 |
| 1.00E+00 | 0.65 |
| 1.00E+00 | 0.93 |
| 1.00E+00 | 0.74 |
| 1.00E+00 | 0.92 |
| 1.00E+00 | 0.96 |
| 1.00E+00 | 0.65 |
| 1.00E+00 | 0.91 |
| 1.00E+00 | 0.84 |
| 1.00E+00 | 0.8  |
| 1.00E+00 | 0.82 |
| 1.00E+00 | 0.6  |
| 1.00E+00 | 0.63 |
| 1.00E+00 | 0.95 |
| 1.00E+00 | 0.94 |
| 1.00E+00 | 0.82 |
| 1.00E+00 | 0.93 |
| 1.00E+00 | 0.9  |
| 1.00E+00 | 1    |
| 1.00E+00 | 0.97 |

|          |      |
|----------|------|
| 1.00E+00 | 0.47 |
| 1.00E+00 | 0.86 |

|          |      |
|----------|------|
| 1.00E+00 | 0.75 |
| 1.00E+00 | 0.63 |
| 1.00E+00 | 1    |
| 1.00E+00 | 0.92 |
| 1.00E+00 | 0.95 |
| 1.00E+00 | 0.87 |
| 1.00E+00 | 0.7  |
| 1.00E+00 | 0.77 |
| 1.00E+00 | 0.93 |
| 1.00E+00 | 0.95 |
| 1.00E+00 | 1    |
| 1.00E+00 | 0.9  |

|          |      |
|----------|------|
| 1.00E+00 | 0.69 |
| 1.00E+00 | 0.73 |
| 1.00E+00 | 0.6  |
| 1.00E+00 | 0.71 |
| 1.00E+00 | 0.83 |
| 1.00E+00 | 0.89 |
| 1.00E+00 | 0.76 |
| 1.00E+00 | 0    |
| 1.00E+00 | 1    |
| 1.00E+00 | 0.91 |

|          |      |
|----------|------|
| 1.00E+00 | 0.89 |
| 1.00E+00 | 0.88 |
| 1.00E+00 | 0.94 |
| 1.00E+00 | 0.92 |
| 1.00E+00 | 0.9  |
| 1.00E+00 | 0.93 |
| 1.00E+00 | 1    |
| 1.00E+00 | 0.71 |
| 1.00E+00 | 0.97 |

|          |      |
|----------|------|
| 1.00E+00 | 0.76 |
| 1.00E+00 | 0.94 |
| 1.00E+00 | 0.93 |
| 1.00E+00 | 0.77 |
| 1.00E+00 | 0.89 |

|          |      |
|----------|------|
| 1.00E+00 | 0.76 |
|----------|------|

|          |      |
|----------|------|
| 1.00E+00 | 0.91 |
|----------|------|

|          |      |
|----------|------|
| 1.00E+00 | 0.83 |
|----------|------|

|          |      |
|----------|------|
| 1.00E+00 | 0.94 |
| 1.00E+00 | 0.88 |
| 1.00E+00 | 0.82 |
| 1.00E+00 | 1    |
| 1.00E+00 | 0.69 |
| 1.00E+00 | 0.72 |
| 1.00E+00 | 0.96 |
| 1.00E+00 | 0.91 |
| 1.00E+00 | 0.96 |
| 1.00E+00 | 0    |
| 1.00E+00 | 0.93 |

|          |      |
|----------|------|
| 1.00E+00 | 0.95 |
|----------|------|

|          |      |
|----------|------|
| 1.00E+00 | 0.98 |
| 1.00E+00 | 0.92 |
| 1.00E+00 | 0.9  |

|          |      |
|----------|------|
| 1.00E+00 | 0.9  |
| 1.00E+00 | 0.92 |

|          |      |
|----------|------|
| 1.00E+00 | 0.83 |
| 1.00E+00 | 0.93 |
| 1.00E+00 | 0.91 |
| 1.00E+00 | 0.84 |
| 1.00E+00 | 0.84 |
| 1.00E+00 | 0.85 |
| 1.00E+00 | 0.91 |

|          |      |
|----------|------|
| 1.00E+00 | 0.97 |
| 1.00E+00 | 0.96 |
| 1.00E+00 | 0.86 |
| 1.00E+00 | 1    |
| 1.00E+00 | 1    |
| 1.00E+00 | 0.97 |
| 1.00E+00 | 0.47 |
| 1.00E+00 | 0.86 |
| 1.00E+00 | 0.75 |
| 1.00E+00 | 0.63 |
| 1.00E+00 | 1    |
| 1.00E+00 | 0.92 |
| 1.00E+00 | 0.95 |
| 1.00E+00 | 0.87 |
| 1.00E+00 | 0.7  |
| 1.00E+00 | 0.77 |
| 1.00E+00 | 0.93 |

|          |      |
|----------|------|
| 1.00E+00 | 0.95 |
| 1.00E+00 | 1    |
| 1.00E+00 | 0.9  |

|          |      |
|----------|------|
| 1.00E+00 | 0.69 |
| 1.00E+00 | 0.73 |
| 1.00E+00 | 0.6  |
| 1.00E+00 | 0.71 |
| 1.00E+00 | 0.83 |
| 1.00E+00 | 0.89 |
| 1.00E+00 | 0.76 |
| 1.00E+00 | 0    |
| 1.00E+00 | 1    |
| 1.00E+00 | 0.91 |

|          |      |
|----------|------|
| 1.00E+00 | 0.89 |
| 1.00E+00 | 0.88 |
| 1.00E+00 | 0.94 |
| 1.00E+00 | 0.92 |
| 1.00E+00 | 0.9  |
| 1.00E+00 | 0.93 |
| 1.00E+00 | 1    |
| 1.00E+00 | 0.71 |
| 1.00E+00 | 0.97 |

|          |      |
|----------|------|
| 1.00E+00 | 0.76 |
| 1.00E+00 | 0.94 |
| 1.00E+00 | 0.93 |
| 1.00E+00 | 0.77 |
| 1.00E+00 | 0.89 |

|          |      |
|----------|------|
| 1.00E+00 | 0.94 |
| 1.00E+00 | 0.88 |
| 1.00E+00 | 0.82 |
| 1.00E+00 | 1    |
| 1.00E+00 | 0.69 |
| 1.00E+00 | 0.72 |
| 1.00E+00 | 0.96 |
| 1.00E+00 | 0.91 |
| 1.00E+00 | 0.96 |
| 1.00E+00 | 0    |
| 1.00E+00 | 0.93 |

|          |      |
|----------|------|
| 1.00E+00 | 0.84 |
| 1.00E+00 | 0.9  |
| 1.00E+00 | 0.74 |

|          |      |
|----------|------|
| 1.00E+00 | 0.87 |
| 1.00E+00 | 0.71 |
| 1.00E+00 | 1    |
| 1.00E+00 | 1    |
| 1.00E+00 | 0.93 |
| 1.00E+00 | 0.91 |
| 1.00E+00 | 0.94 |

|          |      |
|----------|------|
| 1.00E+00 | 0.77 |
| 1.00E+00 | 0.92 |
| 1.00E+00 | 1    |
| 1.00E+00 | 1    |
| 1.00E+00 | 1    |
| 1.00E+00 | 1    |
| 1.00E+00 | 0.75 |
| 1.00E+00 | 0.45 |
| 1.00E+00 | 0.78 |
| 1.00E+00 | 0.91 |
| 1.00E+00 | 0.94 |
| 1.00E+00 | 0.89 |

|          |      |
|----------|------|
| 1.00E+00 | 0.94 |
| 1.00E+00 | 0.78 |

|          |      |
|----------|------|
| 1.00E+00 | 0.56 |
| 1.00E+00 | 0.86 |
| 1.00E+00 | 0.94 |

|          |      |
|----------|------|
| 1.00E+00 | 0.86 |
|----------|------|

|          |      |
|----------|------|
| 1.00E+00 | 0.91 |
| 1.00E+00 | 0.87 |
| 1.00E+00 | 0.93 |
| 1.00E+00 | 0.91 |

|          |      |
|----------|------|
| 1.00E+00 | 0.76 |
|----------|------|

|          |      |
|----------|------|
| 1.00E+00 | 0.82 |
| 1.00E+00 | 0.93 |
| 1.00E+00 | 0.86 |
| 1.00E+00 | 0.6  |
| 1.00E+00 | 0.97 |
| 1.00E+00 | 0.94 |
| 1.00E+00 | 0.88 |
| 1.00E+00 | 0.84 |
| 1.00E+00 | 0.7  |



|          |      |
|----------|------|
| 1.00E+00 | 0.88 |
| 1.00E+00 | 0.92 |
| 1.00E+00 | 0.8  |
| 1.00E+00 | 0.96 |
| 1.00E+00 | 0.94 |
| 1.00E+00 | 0.78 |
| 1.00E+00 | 0.75 |
| 1.00E+00 | 0.79 |
| 1.00E+00 | 1    |
| 1.00E+00 | 0.77 |
| 1.00E+00 | 0.97 |
| 1.00E+00 | 0.97 |
| 1.00E+00 | 0.86 |
| 1.00E+00 | 0.77 |
| 1.00E+00 | 0.87 |
| 1.00E+00 | 0.96 |
| 1.00E+00 | 0.66 |
| 1.00E+00 | 0.7  |
| 1.00E+00 | 0.87 |
| 1.00E+00 | 0.9  |
| 1.00E+00 | 0.69 |
| 1.00E+00 | 0.57 |
| 1.00E+00 | 0.64 |
| 1.00E+00 | 1    |
| 1.00E+00 | 1    |
| 1.00E+00 | 0.71 |
| 1.00E+00 | 0.94 |
| 1.00E+00 | 0.98 |
| 1.00E+00 | 0.95 |
| 1.00E+00 | 1    |
| 1.00E+00 | 0.86 |
| 1.00E+00 | 0.57 |
| 1.00E+00 | 1    |
| 1.00E+00 | 0.96 |
| 1.00E+00 | 0.97 |
| 1.00E+00 | 0.88 |
| 1.00E+00 | 0.73 |
| 1.00E+00 | 0.94 |
| 1.00E+00 | 0.98 |
| 1.00E+00 | 0.89 |
| 1.00E+00 | 0.91 |
| 1.00E+00 | 1    |
| 1.00E+00 | 1    |
| 1.00E+00 | 0.79 |
| 1.00E+00 | 0.96 |
| 1.00E+00 | 0.9  |

|          |      |
|----------|------|
| 1.00E+00 | 1    |
| 1.00E+00 | 1    |
| 1.00E+00 | 0.96 |
| 1.00E+00 | 1    |
| 1.00E+00 | 0.92 |
| 1.00E+00 | 1    |
| 1.00E+00 | 0.95 |
| 1.00E+00 | 0.63 |

|          |      |
|----------|------|
| 1.00E+00 | 1    |
| 1.00E+00 | 0.76 |
| 1.00E+00 | 0.86 |
| 1.00E+00 | 1    |
| 1.00E+00 | 1    |
| 1.00E+00 | 1    |

|          |      |
|----------|------|
| 1.00E+00 | 0.91 |
|----------|------|

|          |      |
|----------|------|
| 1.00E+00 | 0.91 |
| 1.00E+00 | 0.9  |
| 1.00E+00 | 1    |
| 1.00E+00 | 0.72 |
| 1.00E+00 | 0.64 |
| 1.00E+00 | 0.98 |
| 1.00E+00 | 0.92 |
| 1.00E+00 | 0.61 |

|          |      |
|----------|------|
| 1.00E+00 | 1    |
| 1.00E+00 | 0.97 |
| 1.00E+00 | 0.85 |
| 1.00E+00 | 0.96 |
| 1.00E+00 | 0.94 |
| 1.00E+00 | 0.93 |
| 1.00E+00 | 0.61 |
| 1.00E+00 | 0.8  |

|          |      |
|----------|------|
| 1.00E+00 | 0.71 |
| 1.00E+00 | 0.97 |
| 1.00E+00 | 0.94 |
| 1.00E+00 | 0.88 |
| 1.00E+00 | 0.84 |
| 1.00E+00 | 0.7  |
| 1.00E+00 | 0.88 |
| 1.00E+00 | 0.92 |
| 1.00E+00 | 0.8  |
| 1.00E+00 | 0.96 |
| 1.00E+00 | 0.94 |

|          |      |
|----------|------|
| 1.00E+00 | 0.78 |
| 1.00E+00 | 0.54 |
| 1.00E+00 | 0.72 |

|          |      |
|----------|------|
| 1.00E+00 | 0.69 |
| 1.00E+00 | 0.91 |
| 1.00E+00 | 0.9  |
| 1.00E+00 | 0.93 |
| 1.00E+00 | 0.92 |
| 1.00E+00 | 1    |
| 1.00E+00 | 0.94 |
| 1.00E+00 | 0.94 |

|          |      |
|----------|------|
| 1.00E+00 | 0.92 |
| 1.00E+00 | 0.9  |
| 1.00E+00 | 0.9  |
| 1.00E+00 | 0.69 |
| 1.00E+00 | 1    |
| 1.00E+00 | 1    |
| 1.00E+00 | 0.88 |
| 1.00E+00 | 0.87 |
| 1.00E+00 | 0.96 |
| 1.00E+00 | 0.56 |
| 1.00E+00 | 0.7  |
| 1.00E+00 | 0.9  |
| 1.00E+00 | 0.92 |
| 1.00E+00 | 0.86 |
| 1.00E+00 | 0.9  |
| 1.00E+00 | 0.79 |
| 1.00E+00 | 0.91 |

|          |      |
|----------|------|
| 1.00E+00 | 0.83 |
| 1.00E+00 | 0.85 |
| 1.00E+00 | 0.85 |
| 1.00E+00 | 0.95 |
| 1.00E+00 | 0.85 |

|          |      |
|----------|------|
| 1.00E+00 | 0.93 |
| 1.00E+00 | 0.86 |
| 1.00E+00 | 0.95 |
| 1.00E+00 | 0.86 |
| 1.00E+00 | 1    |
| 1.00E+00 | 1    |
| 1.00E+00 | 0.89 |
| 1.00E+00 | 0.88 |
| 1.00E+00 | 1    |
| 1.00E+00 | 0.94 |

|          |      |
|----------|------|
| 1.00E+00 | 1    |
| 1.00E+00 | 0.84 |
| 1.00E+00 | 0.94 |
| 1.00E+00 | 0.68 |
| 1.00E+00 | 0.97 |
| 1.00E+00 | 0.68 |
| 1.00E+00 | 0.83 |
| 1.00E+00 | 0.94 |
| 1.00E+00 | 0.94 |
| 1.00E+00 | 1    |
| 1.00E+00 | 0.75 |
| 1.00E+00 | 0.84 |
| 1.00E+00 | 0.9  |
| 1.00E+00 | 1    |
| 1.00E+00 | 0.85 |
| 1.00E+00 | 0.98 |
| 1.00E+00 | 0.79 |
| 1.00E+00 | 1    |
| 1.00E+00 | 0.95 |
| 1.00E+00 | 0.93 |
| 1.00E+00 | 0.88 |
| 1.00E+00 | 0.77 |
| 1.00E+00 | 0.92 |
| 1.00E+00 | 0.9  |
| 1.00E+00 | 0.96 |
| 1.00E+00 | 0.88 |
| 1.00E+00 | 0.79 |
| 1.00E+00 | 0.82 |
| 1.00E+00 | 0.96 |
| 1.00E+00 | 1    |
| 1.00E+00 | 0.92 |
| 1.00E+00 | 0.71 |
| 1.00E+00 | 0.88 |
| 1.00E+00 | 0.91 |
| 1.00E+00 | 0.95 |
| 1.00E+00 | 0.96 |
| 1.00E+00 | 0.79 |
| 1.00E+00 | 0.94 |
| 1.00E+00 | 0.64 |
| 1.00E+00 | 0.43 |
| 1.00E+00 | 0.75 |
| 1.00E+00 | 0.92 |

|          |      |
|----------|------|
| 1.00E+00 | 0.72 |
| 1.00E+00 | 0.94 |
| 1.00E+00 | 0.96 |
| 1.00E+00 | 1    |

|          |      |
|----------|------|
| 1.00E+00 | 0.89 |
| 1.00E+00 | 1    |
| 1.00E+00 | 0.97 |
| 1.00E+00 | 0.78 |

|          |      |
|----------|------|
| 1.00E+00 | 0.9  |
| 1.00E+00 | 0.94 |
| 1.00E+00 | 0.91 |
| 1.00E+00 | 0.91 |
| 1.00E+00 | 1    |

|          |      |
|----------|------|
| 1.00E+00 | 0.91 |
| 1.00E+00 | 0.62 |

|          |      |
|----------|------|
| 1.00E+00 | 0.81 |
| 1.00E+00 | 1    |
| 1.00E+00 | 1    |
| 1.00E+00 | 0.96 |
| 1.00E+00 | 1    |

|          |      |
|----------|------|
| 1.00E+00 | 0.75 |
| 1.00E+00 | 1    |

|          |      |
|----------|------|
| 1.00E+00 | 0.93 |
| 1.00E+00 | 0.93 |
| 1.00E+00 | 1    |
| 1.00E+00 | 0.9  |
| 1.00E+00 | 0.98 |

|          |      |
|----------|------|
| 1.00E+00 | 0.88 |
| 1.00E+00 | 0.82 |
| 1.00E+00 | 0.88 |
| 1.00E+00 | 0.64 |
| 1.00E+00 | 0.92 |

|          |      |
|----------|------|
| 1.00E+00 | 0.96 |
| 1.00E+00 | 0.53 |

|          |      |
|----------|------|
| 1.00E+00 | 1    |
| 1.00E+00 | 0.63 |
| 1.00E+00 | 0.63 |
| 1.00E+00 | 0.61 |
| 1.00E+00 | 0.74 |
| 1.00E+00 | 0.56 |
| 1.00E+00 | 0.51 |
| 1.00E+00 | 0.72 |
| 1.00E+00 | 0.57 |
| 1.00E+00 | 0.95 |
| 1.00E+00 | 0.82 |
| 1.00E+00 | 0.94 |
| 1.00E+00 | 0.94 |
| 1.00E+00 | 0.88 |
| 1.00E+00 | 0.66 |
| 1.00E+00 | 0.96 |
| 1.00E+00 | 0.77 |
| 1.00E+00 | 0.74 |
| 1.00E+00 | 1    |
| 1.00E+00 | 0.73 |
| 1.00E+00 | 0.9  |
| 1.00E+00 | 0.94 |
| 1.00E+00 | 0.69 |
| 1.00E+00 | 0.96 |
| 1.00E+00 | 0.91 |
| 1.00E+00 | 0.73 |
| 1.00E+00 | 0.94 |
| 1.00E+00 | 0.65 |
| 1.00E+00 | 0.89 |
| 1.00E+00 | 0.73 |
| 1.00E+00 | 0.94 |
| 1.00E+00 | 1    |
| 1.00E+00 | 0.55 |
| 1.00E+00 | 0.91 |
| 1.00E+00 | 1    |
| 1.00E+00 | 0.85 |

|          |      |
|----------|------|
| 1.00E+00 | 0.96 |
| 1.00E+00 | 1    |
| 1.00E+00 | 1    |
| 1.00E+00 | 0.9  |
| 1.00E+00 | 0.84 |
| 1.00E+00 | 0.79 |
| 1.00E+00 | 0.65 |
| 1.00E+00 | 0.73 |
| 1.00E+00 | 0.62 |
| 1.00E+00 | 0.84 |
| 1.00E+00 | 0.96 |
| 1.00E+00 | 0.98 |
| 1.00E+00 | 0.77 |
| 1.00E+00 | 0.54 |
| 1.00E+00 | 1    |
| 1.00E+00 | 0.9  |
| 1.00E+00 | 0.96 |
| 1.00E+00 | 0.87 |
| 1.00E+00 | 0.65 |
| 1.00E+00 | 0.85 |
| 1.00E+00 | 0.89 |
| 1.00E+00 | 0.82 |
| 1.00E+00 | 1    |
| 1.00E+00 | 0.6  |
| 1.00E+00 | 0.82 |
| 1.00E+00 | 1    |
| 1.00E+00 | 0.93 |
| 1.00E+00 | 0.85 |
| 1.00E+00 | 0.89 |
| 1.00E+00 | 0.85 |
| 1.00E+00 | 0.92 |
| 1.00E+00 | 0.65 |
| 1.00E+00 | 0.68 |
| 1.00E+00 | 1    |
| 1.00E+00 | 0.76 |
| 1.00E+00 | 0.81 |
| 1.00E+00 | 0.77 |
| 1.00E+00 | 0.8  |
| 1.00E+00 | 1    |
| 1.00E+00 | 0.69 |
| 1.00E+00 | 0.72 |
| 1.00E+00 | 0.87 |
| 1.00E+00 | 1    |

|          |      |
|----------|------|
| 1.00E+00 | 1    |
| 1.00E+00 | 0.91 |
| 1.00E+00 | 0.86 |
| 1.00E+00 | 0.87 |
| 1.00E+00 | 0.93 |
| 1.00E+00 | 0.7  |
| 1.00E+00 | 0.95 |
| 1.00E+00 | 0.67 |
| 1.00E+00 | 1    |
| 1.00E+00 | 0.97 |

|          |      |
|----------|------|
| 1.00E+00 | 1    |
| 1.00E+00 | 0.94 |
| 1.00E+00 | 0.95 |
| 1.00E+00 | 1    |

|          |      |
|----------|------|
| 1.00E+00 | 0.95 |
| 1.00E+00 | 1    |
| 1.00E+00 | 0.86 |

|          |      |
|----------|------|
| 1.00E+00 | 1    |
| 1.00E+00 | 0.75 |

|          |      |
|----------|------|
| 1.00E+00 | 0    |
| 1.00E+00 | 0.87 |

|          |      |
|----------|------|
| 1.00E+00 | 1    |
| 1.00E+00 | 0.75 |
| 1.00E+00 | 1    |
| 1.00E+00 | 0.8  |
| 1.00E+00 | 0.94 |
| 1.00E+00 | 0.79 |
| 1.00E+00 | 0.77 |
| 1.00E+00 | 0.95 |



|          |      |
|----------|------|
| 1.00E+00 | 0.73 |
| 1.00E+00 | 0.67 |
| 1.00E+00 | 0.81 |
| 1.00E+00 | 0.77 |
| 1.00E+00 | 0.94 |
| 1.00E+00 | 0.83 |
| 1.00E+00 | 0.6  |
| 1.00E+00 | 0.58 |
| 1.00E+00 | 0.93 |
| 1.00E+00 | 0.95 |
| 1.00E+00 | 0.79 |
| 1.00E+00 | 1    |

|          |      |
|----------|------|
| 1.00E+00 | 0.77 |
| 1.00E+00 | 0.6  |
| 1.00E+00 | 0.66 |
| 1.00E+00 | 0.57 |
| 1.00E+00 | 0.59 |
| 1.00E+00 | 0.62 |
| 1.00E+00 | 0.84 |

|          |      |
|----------|------|
| 1.00E+00 | 1    |
| 1.00E+00 | 0.54 |
| 1.00E+00 | 0.93 |
| 1.00E+00 | 0.6  |
| 1.00E+00 | 1    |
| 1.00E+00 | 0.64 |
| 1.00E+00 | 0.81 |
| 1.00E+00 | 0    |
| 1.00E+00 | 0    |
| 1.00E+00 | 0.93 |
| 1.00E+00 | 1    |

|          |      |
|----------|------|
| 1.00E+00 | 0.89 |
| 1.00E+00 | 0.86 |
| 1.00E+00 | 0.75 |
| 1.00E+00 | 0.68 |

|          |      |
|----------|------|
| 1.00E+00 | 0.88 |
| 1.00E+00 | 0.87 |
| 1.00E+00 | 0.87 |
| 1.00E+00 | 0.9  |
| 1.00E+00 | 0.59 |

|          |      |
|----------|------|
| 1.00E+00 | 0.89 |
| 1.00E+00 | 0.84 |
| 1.00E+00 | 0.88 |

|          |      |
|----------|------|
| 1.00E+00 | 0.7  |
| 1.00E+00 | 0.86 |
| 1.00E+00 | 0.61 |
| 1.00E+00 | 0.95 |
| 1.00E+00 | 0.96 |
| 1.00E+00 | 0.78 |
| 1.00E+00 | 0.83 |
| 1.00E+00 | 0.83 |

|          |   |
|----------|---|
| 1.00E+00 | 1 |
|----------|---|

|          |      |
|----------|------|
| 1.00E+00 | 1    |
| 1.00E+00 | 0.97 |
| 1.00E+00 | 0.66 |
| 1.00E+00 | 1    |
| 1.00E+00 | 0.75 |
| 1.00E+00 | 0.9  |
| 1.00E+00 | 0.78 |

|          |      |
|----------|------|
| 1.00E+00 | 0.68 |
| 1.00E+00 | 1    |
| 1.00E+00 | 0.9  |
| 1.00E+00 | 0.83 |
| 1.00E+00 | 0.64 |
| 1.00E+00 | 0.83 |
| 1.00E+00 | 0.88 |
| 1.00E+00 | 0.7  |
| 1.00E+00 | 0.65 |
| 1.00E+00 | 0.93 |
| 1.00E+00 | 0.92 |
| 1.00E+00 | 0.91 |
| 1.00E+00 | 0.89 |

|          |      |
|----------|------|
| 1.00E+00 | 1    |
| 1.00E+00 | 0.9  |
| 1.00E+00 | 0.86 |
| 1.00E+00 | 0.91 |
| 1.00E+00 | 0.59 |
| 1.00E+00 | 0.68 |
| 1.00E+00 | 0.86 |
| 1.00E+00 | 0.91 |
| 1.00E+00 | 0.83 |
| 1.00E+00 | 0.72 |
| 1.00E+00 | 0.66 |
| 1.00E+00 | 0.81 |

|          |      |
|----------|------|
| 1.00E+00 | 0.75 |
| 1.00E+00 | 0.88 |
| 1.00E+00 | 0.89 |
| 1.00E+00 | 1    |
| 1.00E+00 | 0.76 |
| 1.00E+00 | 0.74 |
| 1.00E+00 | 0.89 |
| 1.00E+00 | 0.92 |
| 1.00E+00 | 0.65 |
| 1.00E+00 | 0.92 |
| 1.00E+00 | 0.87 |
| 1.00E+00 | 0.8  |
| 1.00E+00 | 1    |
| 1.00E+00 | 1    |
| 1.00E+00 | 0.95 |
| 1.00E+00 | 0.84 |
| 1.00E+00 | 0.86 |

|          |      |
|----------|------|
| 1.00E+00 | 1    |
| 1.00E+00 | 0.83 |
| 1.00E+00 | 0.87 |
| 1.00E+00 | 1    |
| 1.00E+00 | 0.98 |
| 1.00E+00 | 0.87 |
| 1.00E+00 | 0.95 |
| 1.00E+00 | 1    |
| 1.00E+00 | 0.94 |
| 1.00E+00 | 0.93 |
| 1.00E+00 | 0.8  |
| 1.00E+00 | 0.85 |
| 1.00E+00 | 0.64 |
| 1.00E+00 | 0.91 |
| 1.00E+00 | 0.78 |

|          |      |
|----------|------|
| 1.00E+00 | 0.68 |
| 1.00E+00 | 0.52 |
| 1.00E+00 | 0.6  |
| 1.00E+00 | 0.53 |
| 1.00E+00 | 1    |
| 1.00E+00 | 0.52 |
| 1.00E+00 | 0.39 |
| 1.00E+00 | 0.73 |
| 1.00E+00 | 0.9  |

|          |      |
|----------|------|
| 1.00E+00 | 0.94 |
| 1.00E+00 | 0.89 |

|          |   |
|----------|---|
| 1.00E+00 | 1 |
|----------|---|

|          |      |
|----------|------|
| 1.00E+00 | 0.92 |
| 1.00E+00 | 1    |
| 1.00E+00 | 0.91 |
| 1.00E+00 | 0.97 |
| 1.00E+00 | 0.69 |
| 1.00E+00 | 0.71 |
| 1.00E+00 | 0.89 |
| 1.00E+00 | 0.92 |
| 1.00E+00 | 0.91 |
| 1.00E+00 | 1    |
| 1.00E+00 | 1    |
| 1.00E+00 | 1    |
| 1.00E+00 | 0.6  |
| 1.00E+00 | 0.84 |
| 1.00E+00 | 0.89 |
| 1.00E+00 | 0.67 |
| 1.00E+00 | 1    |
| 1.00E+00 | 1    |
| 1.00E+00 | 0.94 |
| 1.00E+00 | 0.94 |
| 1.00E+00 | 0.71 |
| 1.00E+00 | 0.66 |
| 1.00E+00 | 1    |
| 1.00E+00 | 0.9  |
| 1.00E+00 | 0.54 |
| 1.00E+00 | 0.63 |
| 1.00E+00 | 0.85 |
| 1.00E+00 | 0.9  |
| 1.00E+00 | 0.68 |
| 1.00E+00 | 0.86 |
| 1.00E+00 | 0.84 |
| 1.00E+00 | 0.87 |
| 1.00E+00 | 0    |
| 1.00E+00 | 0.82 |
| 1.00E+00 | 0.95 |
| 1.00E+00 | 0.97 |
| 1.00E+00 | 0.74 |
| 1.00E+00 | 0.89 |

|          |      |
|----------|------|
| 1.00E+00 | 0.79 |
| 1.00E+00 | 0.84 |
| 1.00E+00 | 0.74 |
| 1.00E+00 | 0.93 |
| 1.00E+00 | 0.84 |
| 1.00E+00 | 0.63 |
| 1.00E+00 | 0.97 |
| 1.00E+00 | 0.73 |
| 1.00E+00 | 0    |
| 1.00E+00 | 0.84 |
| 1.00E+00 | 0.42 |
| 1.00E+00 | 0.83 |
| 1.00E+00 | 0.96 |
| 1.00E+00 | 0.92 |
| 1.00E+00 | 0.81 |
| 1.00E+00 | 0.66 |
| 1.00E+00 | 0.86 |
| 1.00E+00 | 0.75 |
| 1.00E+00 | 0.52 |
| 1.00E+00 | 0.88 |
| 1.00E+00 | 0.83 |
| 1.00E+00 | 0.9  |
| 1.00E+00 | 0.96 |
| 1.00E+00 | 0.85 |
| 1.00E+00 | 0.94 |
| 1.00E+00 | 0.92 |
| 1.00E+00 | 0.73 |
| 1.00E+00 | 0.49 |
| 1.00E+00 | 0.86 |
| 1.00E+00 | 0.91 |
| 1.00E+00 | 0.72 |
| 1.00E+00 | 0.63 |
| 1.00E+00 | 0.73 |
| 1.00E+00 | 0.87 |
| 1.00E+00 | 0.89 |
| 1.00E+00 | 0.54 |
| 1.00E+00 | 0.86 |
| 1.00E+00 | 0.85 |
| 1.00E+00 | 1    |
| 1.00E+00 | 0.89 |
| 1.00E+00 | 0.51 |
| 1.00E+00 | 0.89 |

|          |      |
|----------|------|
| 1.00E+00 | 0.88 |
| 1.00E+00 | 0.94 |
| 1.00E+00 | 0.96 |
| 1.00E+00 | 0.79 |
| 1.00E+00 | 0.83 |

|          |      |
|----------|------|
| 1.00E+00 | 0.51 |
| 1.00E+00 | 0.93 |

|          |      |
|----------|------|
| 1.00E+00 | 0.98 |
|----------|------|

|          |      |
|----------|------|
| 1.00E+00 | 0.82 |
| 1.00E+00 | 0.88 |
| 1.00E+00 | 0.85 |
| 1.00E+00 | 0.91 |
| 1.00E+00 | 0.74 |
| 1.00E+00 | 0.93 |

|          |      |
|----------|------|
| 1.00E+00 | 0.75 |
|----------|------|

|          |      |
|----------|------|
| 1.00E+00 | 0.87 |
| 1.00E+00 | 0.88 |

|          |      |
|----------|------|
| 1.00E+00 | 0.75 |
| 1.00E+00 | 0.79 |
| 1.00E+00 | 0.81 |
| 1.00E+00 | 0.93 |
| 1.00E+00 | 0.92 |
| 1.00E+00 | 0.87 |

|          |      |
|----------|------|
| 1.00E+00 | 0.66 |
| 1.00E+00 | 0.6  |
| 1.00E+00 | 0.85 |
| 1.00E+00 | 0.77 |
| 1.00E+00 | 0.87 |
| 1.00E+00 | 0.65 |
| 1.00E+00 | 0.82 |
| 1.00E+00 | 0.75 |

|          |      |
|----------|------|
| 1.00E+00 | 0.73 |
| 1.00E+00 | 1    |
| 1.00E+00 | 0.81 |
| 1.00E+00 | 0.75 |
| 1.00E+00 | 0.63 |
| 1.00E+00 | 0.92 |
| 1.00E+00 | 0.67 |

|          |      |
|----------|------|
| 1.00E+00 | 0.79 |
| 1.00E+00 | 0.94 |
| 1.00E+00 | 0.96 |
| 1.00E+00 | 0.93 |
| 1.00E+00 | 0.92 |
| 1.00E+00 | 0.9  |
| 1.00E+00 | 0.94 |
| 1.00E+00 | 0.77 |

|          |      |
|----------|------|
| 1.00E+00 | 0.93 |
| 1.00E+00 | 0.92 |
| 1.00E+00 | 0.69 |
| 1.00E+00 | 0.78 |
| 1.00E+00 | 0.59 |
| 1.00E+00 | 0.83 |

|          |      |
|----------|------|
| 1.00E+00 | 0.92 |
| 1.00E+00 | 0.57 |
| 1.00E+00 | 0.96 |
| 1.00E+00 | 0.63 |
| 1.00E+00 | 0.91 |
| 1.00E+00 | 0.82 |
| 1.00E+00 | 0.5  |
| 1.00E+00 | 0.76 |
| 1.00E+00 | 0.91 |
| 1.00E+00 | 1    |
| 1.00E+00 | 0.82 |
| 1.00E+00 | 1    |
| 1.00E+00 | 0.91 |
| 1.00E+00 | 0    |

|          |      |
|----------|------|
| 1.00E+00 | 0.82 |
|----------|------|

|          |      |
|----------|------|
| 1.00E+00 | 0.67 |
| 1.00E+00 | 0.94 |
| 1.00E+00 | 0.87 |
| 1.00E+00 | 0.88 |
| 1.00E+00 | 0.63 |
| 1.00E+00 | 0.91 |

|          |      |
|----------|------|
| 1.00E+00 | 0.6  |
| 1.00E+00 | 0.59 |
| 1.00E+00 | 0.66 |
| 1.00E+00 | 0.91 |
| 1.00E+00 | 0.75 |
| 1.00E+00 | 0.85 |
| 1.00E+00 | 0.91 |
| 1.00E+00 | 1    |

|          |      |
|----------|------|
| 1.00E+00 | 0.79 |
| 1.00E+00 | 0.95 |
| 1.00E+00 | 1    |

|          |   |
|----------|---|
| 1.00E+00 | 0 |
|----------|---|

|          |      |
|----------|------|
| 1.00E+00 | 0.67 |
| 1.00E+00 | 0.87 |
| 1.00E+00 | 0.89 |
| 1.00E+00 | 0.91 |
| 1.00E+00 | 1    |
| 1.00E+00 | 0    |

|          |      |
|----------|------|
| 1.00E+00 | 0.69 |
| 1.00E+00 | 0.87 |
| 1.00E+00 | 1    |
| 1.00E+00 | 0.92 |
| 1.00E+00 | 1    |
| 1.00E+00 | 1    |
| 1.00E+00 | 0.76 |
| 1.00E+00 | 0.68 |

|          |      |
|----------|------|
| 1.00E+00 | 0.93 |
| 1.00E+00 | 0.81 |
| 1.00E+00 | 0.8  |
| 1.00E+00 | 0.95 |

|          |      |
|----------|------|
| 1.00E+00 | 0.76 |
| 1.00E+00 | 0.89 |
| 1.00E+00 | 0.7  |

|          |      |
|----------|------|
| 1.00E+00 | 0.84 |
| 1.00E+00 | 1    |
| 1.00E+00 | 0.67 |
| 1.00E+00 | 0.78 |
| 1.00E+00 | 1    |

|          |      |
|----------|------|
| 1.00E+00 | 0.55 |
| 1.00E+00 | 0.69 |
| 1.00E+00 | 0.91 |

|          |      |
|----------|------|
| 1.00E+00 | 0.74 |
| 1.00E+00 | 0    |

|          |      |
|----------|------|
| 1.00E+00 | 0.97 |
|----------|------|



|          |      |
|----------|------|
| 1.00E+00 | 0.96 |
| 1.00E+00 | 0.94 |
| 1.00E+00 | 0.89 |
| 1.00E+00 | 0.9  |
| 1.00E+00 | 0.93 |
| 1.00E+00 | 0.69 |
| 1.00E+00 | 0.72 |
| 1.00E+00 | 0.75 |
| 1.00E+00 | 0.64 |
| 1.00E+00 | 0.55 |
| 1.00E+00 | 0.67 |
| 1.00E+00 | 0.65 |
| 1.00E+00 | 0.71 |

|          |      |
|----------|------|
| 1.00E+00 | 0.88 |
| 1.00E+00 | 0.8  |
| 1.00E+00 | 0.54 |
| 1.00E+00 | 0.97 |
| 1.00E+00 | 0.81 |
| 1.00E+00 | 0.79 |
| 1.00E+00 | 0.88 |
| 1.00E+00 | 0.96 |
| 1.00E+00 | 0.94 |
| 1.00E+00 | 0.86 |
| 1.00E+00 | 1    |
| 1.00E+00 | 0.89 |
| 1.00E+00 | 1    |
| 1.00E+00 | 0.94 |
| 1.00E+00 | 0.82 |
| 1.00E+00 | 0.96 |
| 1.00E+00 | 0.98 |
| 1.00E+00 | 0.88 |
| 1.00E+00 | 0.68 |
| 1.00E+00 | 0.96 |
| 1.00E+00 | 0.91 |

|          |      |
|----------|------|
| 1.00E+00 | 0.89 |
| 1.00E+00 | 0.95 |
| 1.00E+00 | 0.88 |
| 1.00E+00 | 0.93 |
| 1.00E+00 | 0.68 |
| 1.00E+00 | 0.95 |
| 1.00E+00 | 0.67 |
| 1.00E+00 | 1    |
| 1.00E+00 | 0.89 |
| 1.00E+00 | 1    |

|          |      |
|----------|------|
| 1.00E+00 | 0.69 |
| 1.00E+00 | 0.92 |
| 1.00E+00 | 0.72 |
| 1.00E+00 | 0.89 |
| 1.00E+00 | 0.93 |
| 1.00E+00 | 0.94 |
| 1.00E+00 | 0.81 |
| 1.00E+00 | 1    |
| 1.00E+00 | 0.8  |
| 1.00E+00 | 1    |

|          |      |
|----------|------|
| 1.00E+00 | 0.72 |
| 1.00E+00 | 1    |
| 1.00E+00 | 0.82 |
| 1.00E+00 | 0.71 |
| 1.00E+00 | 0.81 |
| 1.00E+00 | 0.87 |
| 1.00E+00 | 0.75 |
| 1.00E+00 | 0.81 |
| 1.00E+00 | 0.69 |
| 1.00E+00 | 0.92 |
| 1.00E+00 | 0.85 |
| 1.00E+00 | 0.9  |
| 1.00E+00 | 0.68 |
| 1.00E+00 | 0.9  |
| 1.00E+00 | 0.94 |
| 1.00E+00 | 0.61 |
| 1.00E+00 | 0.62 |
| 1.00E+00 | 0.64 |
| 1.00E+00 | 0.51 |
| 1.00E+00 | 0.94 |
| 1.00E+00 | 0.8  |
| 1.00E+00 | 1    |

|          |      |
|----------|------|
| 1.00E+00 | 0.98 |
| 1.00E+00 | 1    |

|          |      |
|----------|------|
| 1.00E+00 | 0.89 |
|----------|------|

|          |      |
|----------|------|
| 1.00E+00 | 0.81 |
| 1.00E+00 | 0.91 |
| 1.00E+00 | 1    |
| 1.00E+00 | 1    |

|          |      |
|----------|------|
| 1.00E+00 | 0.78 |
|----------|------|

|          |      |
|----------|------|
| 1.00E+00 | 0.96 |
| 1.00E+00 | 1    |

|          |      |
|----------|------|
| 1.00E+00 | 0.88 |
|----------|------|

|          |      |
|----------|------|
| 1.00E+00 | 0.83 |
| 1.00E+00 | 1    |
| 1.00E+00 | 0.93 |

|          |      |
|----------|------|
| 1.00E+00 | 0.83 |
| 1.00E+00 | 1    |

|          |      |
|----------|------|
| 1.00E+00 | 0.93 |
| 1.00E+00 | 0.89 |
| 1.00E+00 | 0.86 |
| 1.00E+00 | 0.77 |
| 1.00E+00 | 0.88 |
| 1.00E+00 | 0.88 |
| 1.00E+00 | 0.8  |
| 1.00E+00 | 0    |
| 1.00E+00 | 0.76 |
| 1.00E+00 | 1    |
| 1.00E+00 | 0.57 |

|          |      |
|----------|------|
| 1.00E+00 | 0.79 |
| 1.00E+00 | 0.93 |

|          |      |
|----------|------|
| 1.00E+00 | 0.69 |
| 1.00E+00 | 0.68 |
| 1.00E+00 | 0.88 |
| 1.00E+00 | 0.61 |
| 1.00E+00 | 0.66 |
| 1.00E+00 | 0.92 |
| 1.00E+00 | 0.6  |
| 1.00E+00 | 0.78 |

|          |      |
|----------|------|
| 1.00E+00 | 0.89 |
| 1.00E+00 | 0.82 |
| 1.00E+00 | 1    |

|          |      |
|----------|------|
| 1.00E+00 | 0.61 |
| 1.00E+00 | 0.5  |
| 1.00E+00 | 0.8  |

|          |      |
|----------|------|
| 1.00E+00 | 0.75 |
| 1.00E+00 | 0.91 |
| 1.00E+00 | 1    |
| 1.00E+00 | 1    |
| 1.00E+00 | 1    |
| 1.00E+00 | 0.84 |
| 1.00E+00 | 1    |
| 1.00E+00 | 1    |
| 1.00E+00 | 0.94 |

|          |      |
|----------|------|
| 1.00E+00 | 0.96 |
| 1.00E+00 | 1    |
| 1.00E+00 | 1    |
| 1.00E+00 | 0.9  |
| 1.00E+00 | 1    |
| 1.00E+00 | 0.88 |
| 1.00E+00 | 0.86 |
| 1.00E+00 | 0.75 |
| 1.00E+00 | 0.47 |
| 1.00E+00 | 0.59 |
| 1.00E+00 | 0.74 |

|          |     |
|----------|-----|
| 1.00E+00 | 0.9 |
| 1.00E+00 | 0.9 |

|          |      |
|----------|------|
| 1.00E+00 | 0.81 |
| 1.00E+00 | 0.96 |
| 1.00E+00 | 1    |
| 1.00E+00 | 0.87 |
| 1.00E+00 | 0.83 |
| 1.00E+00 | 0.95 |
| 1.00E+00 | 0.95 |

|          |      |
|----------|------|
| 1.00E+00 | 0.57 |
| 1.00E+00 | 0.8  |
| 1.00E+00 | 0.64 |
| 1.00E+00 | 0.72 |
| 1.00E+00 | 0.83 |
| 1.00E+00 | 0.78 |

|          |      |
|----------|------|
| 1.00E+00 | 0.74 |
| 1.00E+00 | 0.73 |
| 1.00E+00 | 0.66 |
| 1.00E+00 | 0.63 |
| 1.00E+00 | 0.94 |
| 1.00E+00 | 0.81 |
| 1.00E+00 | 0.46 |

|          |      |
|----------|------|
| 1.00E+00 | 1    |
| 1.00E+00 | 0.68 |
| 1.00E+00 | 1    |
| 1.00E+00 | 0.8  |
| 1.00E+00 | 0.81 |
| 1.00E+00 | 0.96 |
| 1.00E+00 | 0.82 |
| 1.00E+00 | 0.8  |
| 1.00E+00 | 0.93 |
| 1.00E+00 | 0.96 |
| 1.00E+00 | 0.81 |
| 1.00E+00 | 0.94 |
| 1.00E+00 | 0.94 |
| 1.00E+00 | 0.5  |
| 1.00E+00 | 1    |
| 1.00E+00 | 0.86 |
| 1.00E+00 | 0.91 |
| 1.00E+00 | 0.79 |
| 1.00E+00 | 0.87 |
| 1.00E+00 | 0.87 |
| 1.00E+00 | 0.76 |
| 1.00E+00 | 0.85 |
| 1.00E+00 | 0.6  |
| 1.00E+00 | 1    |
| 1.00E+00 | 0.59 |
| 1.00E+00 | 0.88 |
| 1.00E+00 | 0.63 |
| 1.00E+00 | 0.75 |
| 1.00E+00 | 0.74 |
| 1.00E+00 | 0.93 |
| 1.00E+00 | 1    |
| 1.00E+00 | 0.62 |
| 1.00E+00 | 0.81 |
| 1.00E+00 | 0.91 |
| 1.00E+00 | 0.78 |
| 1.00E+00 | 0.58 |
| 1.00E+00 | 0.63 |
| 1.00E+00 | 0.91 |
| 1.00E+00 | 0.93 |
| 1.00E+00 | 0.94 |
| 1.00E+00 | 1    |
| 1.00E+00 | 0.73 |
| 1.00E+00 | 0.93 |
| 1.00E+00 | 0.84 |
| 1.00E+00 | 0.78 |

|          |      |
|----------|------|
| 1.00E+00 | 0.8  |
| 1.00E+00 | 0.8  |
| 1.00E+00 | 0.71 |
| 1.00E+00 | 0.73 |
| 1.00E+00 | 0.86 |
| 1.00E+00 | 0.61 |
| 1.00E+00 | 0.88 |

|          |      |
|----------|------|
| 1.00E+00 | 0.67 |
|----------|------|

|          |      |
|----------|------|
| 1.00E+00 | 1    |
| 1.00E+00 | 0.7  |
| 1.00E+00 | 0.7  |
| 1.00E+00 | 0.92 |
| 1.00E+00 | 0.64 |
| 1.00E+00 | 0.91 |
| 1.00E+00 | 1    |
| 1.00E+00 | 0.93 |
| 1.00E+00 | 0.92 |
| 1.00E+00 | 0.56 |
| 1.00E+00 | 0.46 |
| 1.00E+00 | 0.83 |
| 1.00E+00 | 0.87 |
| 1.00E+00 | 0.73 |

|          |      |
|----------|------|
| 1.00E+00 | 1    |
| 1.00E+00 | 0.8  |
| 1.00E+00 | 1    |
| 1.00E+00 | 0.78 |
| 1.00E+00 | 0.85 |

|          |      |
|----------|------|
| 1.00E+00 | 0.96 |
| 1.00E+00 | 0.85 |
| 1.00E+00 | 0.92 |
| 1.00E+00 | 0.67 |
| 1.00E+00 | 1    |
| 1.00E+00 | 0.88 |

|          |      |
|----------|------|
| 1.00E+00 | 0.71 |
| 1.00E+00 | 0.57 |
| 1.00E+00 | 0.82 |
| 1.00E+00 | 0.63 |

|          |      |
|----------|------|
| 1.00E+00 | 0.74 |
| 1.00E+00 | 0.86 |
| 1.00E+00 | 0.97 |

|          |      |
|----------|------|
| 1.00E+00 | 0.71 |
| 1.00E+00 | 0.88 |
| 1.00E+00 | 0.91 |
| 1.00E+00 | 0.66 |
| 1.00E+00 | 0.44 |
| 1.00E+00 | 0.76 |
| 1.00E+00 | 0.75 |
| 1.00E+00 | 1    |
| 1.00E+00 | 1    |
| 1.00E+00 | 0.86 |
| 1.00E+00 | 0.83 |
| 1.00E+00 | 0.95 |
| 1.00E+00 | 0.84 |
| 1.00E+00 | 0.76 |
| 1.00E+00 | 1    |
| 1.00E+00 | 0.92 |
| 1.00E+00 | 0.79 |
| 1.00E+00 | 1    |
| 1.00E+00 | 0.75 |
| 1.00E+00 | 1    |
| 1.00E+00 | 1    |
| 1.00E+00 | 1    |
| 1.00E+00 | 1    |
| 1.00E+00 | 1    |
| 1.00E+00 | 0.75 |
| 1.00E+00 | 1    |
| 1.00E+00 | 0.9  |
| 1.00E+00 | 0.96 |
| 1.00E+00 | 0.87 |
| 1.00E+00 | 0.84 |
| 1.00E+00 | 0.91 |
| 1.00E+00 | 1    |
| 1.00E+00 | 0.93 |
| 1.00E+00 | 0.96 |
| 1.00E+00 | 0.93 |
| 1.00E+00 | 0.84 |
| 1.00E+00 | 1    |
| 1.00E+00 | 0.93 |
| 1.00E+00 | 0.87 |
| 1.00E+00 | 0.65 |
| 1.00E+00 | 1    |
| 1.00E+00 | 0.63 |
| 1.00E+00 | 0.76 |
| 1.00E+00 | 0.73 |
| 1.00E+00 | 1    |
| 1.00E+00 | 0.84 |
| 1.00E+00 | 0.8  |
| 1.00E+00 | 0.59 |
| 1.00E+00 | 0.68 |

|          |      |
|----------|------|
| 1.00E+00 | 0.79 |
| 1.00E+00 | 1    |
| 1.00E+00 | 0.77 |
| 1.00E+00 | 1    |
| 1.00E+00 | 0.86 |
| 1.00E+00 | 0.86 |
| 1.00E+00 | 0.86 |
| 1.00E+00 | 0.86 |
| 1.00E+00 | 0.66 |

|          |      |
|----------|------|
| 1.00E+00 | 0.79 |
| 1.00E+00 | 0.95 |
| 1.00E+00 | 0.71 |

|          |      |
|----------|------|
| 1.00E+00 | 0.66 |
| 1.00E+00 | 0.89 |

|          |      |
|----------|------|
| 1.00E+00 | 0.77 |
| 1.00E+00 | 1    |
| 1.00E+00 | 1    |
| 1.00E+00 | 0.88 |
| 1.00E+00 | 0.95 |
| 1.00E+00 | 0.71 |

|          |      |
|----------|------|
| 1.00E+00 | 0.5  |
| 1.00E+00 | 0.95 |
| 1.00E+00 | 0.87 |
| 1.00E+00 | 0.93 |

|          |      |
|----------|------|
| 1.00E+00 | 0.9  |
| 1.00E+00 | 0.89 |
| 1.00E+00 | 0.83 |
| 1.00E+00 | 0.67 |
| 1.00E+00 | 0.7  |
| 1.00E+00 | 0.9  |

|          |      |
|----------|------|
| 1.00E+00 | 0.92 |
| 1.00E+00 | 1    |
| 1.00E+00 | 0.59 |
| 1.00E+00 | 1    |

|          |      |
|----------|------|
| 1.00E+00 | 0.96 |
| 1.00E+00 | 0.96 |
| 1.00E+00 | 0.86 |
| 1.00E+00 | 1    |



|          |      |
|----------|------|
| 1.00E+00 | 0.74 |
| 1.00E+00 | 0.59 |
| 1.00E+00 | 1    |
| 1.00E+00 | 0.74 |
| 1.00E+00 | 0.92 |
| 1.00E+00 | 0.7  |
| 1.00E+00 | 0.76 |
| 1.00E+00 | 0.87 |
| 1.00E+00 | 0.83 |
| 1.00E+00 | 0.53 |
| 1.00E+00 | 0.79 |
| 1.00E+00 | 0.61 |
| 1.00E+00 | 0.64 |
| 1.00E+00 | 0.6  |
| 1.00E+00 | 0.95 |
| 1.00E+00 | 0.84 |
| 1.00E+00 | 1    |
| 1.00E+00 | 0.93 |
| 1.00E+00 | 0.85 |
| 1.00E+00 | 0.97 |
| 1.00E+00 | 0.86 |
| 1.00E+00 | 0.96 |
| 1.00E+00 | 0.87 |
| 1.00E+00 | 0.72 |
| 1.00E+00 | 0.76 |
| 1.00E+00 | 0.67 |
| 1.00E+00 | 0.68 |
| 1.00E+00 | 0.69 |
| 1.00E+00 | 0.62 |
| 1.00E+00 | 1    |
| 1.00E+00 | 0.79 |
| 1.00E+00 | 1    |
| 1.00E+00 | 0.79 |
| 1.00E+00 | 0.88 |
| 1.00E+00 | 0.59 |
| 1.00E+00 | 0.79 |
| 1.00E+00 | 0.86 |
| 1.00E+00 | 0.6  |
| 1.00E+00 | 0.82 |
| 1.00E+00 | 1    |

|          |      |
|----------|------|
| 1.00E+00 | 0.6  |
| 1.00E+00 | 0.59 |

|          |      |
|----------|------|
| 1.00E+00 | 0.79 |
| 1.00E+00 | 0.91 |
| 1.00E+00 | 0.95 |
| 1.00E+00 | 0.94 |
| 1.00E+00 | 0.76 |

|          |      |
|----------|------|
| 1.00E+00 | 1    |
| 1.00E+00 | 0.76 |
| 1.00E+00 | 1    |
| 1.00E+00 | 0.94 |

|          |      |
|----------|------|
| 1.00E+00 | 1    |
| 1.00E+00 | 0.55 |
| 1.00E+00 | 0.93 |
| 1.00E+00 | 1    |
| 1.00E+00 | 0.93 |

|          |      |
|----------|------|
| 1.00E+00 | 1    |
| 1.00E+00 | 0.69 |
| 1.00E+00 | 0.59 |

|          |      |
|----------|------|
| 1.00E+00 | 0.89 |
| 1.00E+00 | 0.72 |
| 1.00E+00 | 0.92 |
| 1.00E+00 | 0.95 |
| 1.00E+00 | 1    |

|          |      |
|----------|------|
| 1.00E+00 | 0.63 |
| 1.00E+00 | 1    |
| 1.00E+00 | 0.76 |
| 1.00E+00 | 0.64 |

|          |      |
|----------|------|
| 1.00E+00 | 0.94 |
|----------|------|

|          |      |
|----------|------|
| 1.00E+00 | 1    |
| 1.00E+00 | 0.91 |

|          |      |
|----------|------|
| 1.00E+00 | 0.96 |
| 1.00E+00 | 0.64 |
| 1.00E+00 | 0.91 |

1.00E+00 0.76

1.00E+00 0.79

1.00E+00 1

1.00E+00 0.94

1.00E+00 0.55

1.00E+00 1

1.00E+00 0.87

1.00E+00 0.75

1.00E+00 0.83

1.00E+00 0.68

1.00E+00 1

1.00E+00 1

1.00E+00 0.78

1.00E+00 0.79

1.00E+00 0.84

1.00E+00 0.92

1.00E+00 0.87

1.00E+00 0.79

1.00E+00 0.74

1.00E+00 0.77

1.00E+00 0.68

1.00E+00 1

1.00E+00 0.6

1.00E+00 0.82

1.00E+00 0.92

1.00E+00 0.93

1.00E+00 0.9

1.00E+00 1

1.00E+00 0.87

1.00E+00 0.87

1.00E+00 0.94

1.00E+00 0.94

1.00E+00 0.93

1.00E+00 0.93

1.00E+00 1

|          |      |
|----------|------|
| 1.00E+00 | 1    |
| 1.00E+00 | 1    |
| 1.00E+00 | 0.77 |
| 1.00E+00 | 1    |
| 1.00E+00 | 1    |
| 1.00E+00 | 0.85 |
| 1.00E+00 | 0.92 |
| 1.00E+00 | 0.9  |
| 1.00E+00 | 0.94 |
| 1.00E+00 | 0.86 |
| 1.00E+00 | 0.91 |
| 1.00E+00 | 0.93 |
| 1.00E+00 | 0.92 |
| 1.00E+00 | 0.91 |
| 1.00E+00 | 0.93 |
| 1.00E+00 | 0.69 |
| 1.00E+00 | 0.94 |
| 1.00E+00 | 0.92 |
| 1.00E+00 | 0.76 |
| 1.00E+00 | 0.79 |
| 1.00E+00 | 0.71 |
| 1.00E+00 | 0.53 |
| 1.00E+00 | 0.71 |
| 1.00E+00 | 0.78 |
| 1.00E+00 | 0.87 |
| 1.00E+00 | 0.73 |
| 1.00E+00 | 0.79 |
| 1.00E+00 | 0.75 |
| 1.00E+00 | 0.94 |
| 1.00E+00 | 0.96 |
| 1.00E+00 | 0.65 |
| 1.00E+00 | 0.73 |
| 1.00E+00 | 0.78 |
| 1.00E+00 | 0.82 |
| 1.00E+00 | 0.81 |
| 1.00E+00 | 0.64 |
| 1.00E+00 | 0.8  |
| 1.00E+00 | 0.92 |
| 1.00E+00 | 0    |
| 1.00E+00 | 1    |
| 1.00E+00 | 0.9  |
| 1.00E+00 | 0.59 |
| 1.00E+00 | 0.46 |

|          |      |
|----------|------|
| 1.00E+00 | 1    |
| 1.00E+00 | 0.94 |
| 1.00E+00 | 0.78 |
| 1.00E+00 | 0.93 |

|          |      |
|----------|------|
| 1.00E+00 | 1    |
| 1.00E+00 | 0.93 |
| 1.00E+00 | 0.76 |

|          |      |
|----------|------|
| 1.00E+00 | 0.86 |
| 1.00E+00 | 0.86 |
| 1.00E+00 | 0.84 |

|          |      |
|----------|------|
| 1.00E+00 | 0.87 |
| 1.00E+00 | 0.82 |

|          |      |
|----------|------|
| 1.00E+00 | 0.89 |
|----------|------|

|          |      |
|----------|------|
| 1.00E+00 | 0.85 |
|----------|------|

|          |      |
|----------|------|
| 1.00E+00 | 0.7  |
| 1.00E+00 | 0.92 |
| 1.00E+00 | 0.9  |
| 1.00E+00 | 1    |
| 1.00E+00 | 0.94 |
| 1.00E+00 | 0.82 |
| 1.00E+00 | 0.95 |
| 1.00E+00 | 0.96 |
| 1.00E+00 | 0.87 |
| 1.00E+00 | 0.91 |
| 1.00E+00 | 0.9  |
| 1.00E+00 | 1    |
| 1.00E+00 | 0.64 |
| 1.00E+00 | 0.78 |
| 1.00E+00 | 0.88 |
| 1.00E+00 | 0.91 |
| 1.00E+00 | 0.72 |
| 1.00E+00 | 0.76 |
| 1.00E+00 | 1    |

|          |      |
|----------|------|
| 1.00E+00 | 0.58 |
| 1.00E+00 | 0.66 |
| 1.00E+00 | 0.74 |

|          |      |
|----------|------|
| 1.00E+00 | 1    |
| 1.00E+00 | 0.8  |
| 1.00E+00 | 0.94 |
| 1.00E+00 | 0.88 |
| 1.00E+00 | 1    |
| 1.00E+00 | 0.85 |
| 1.00E+00 | 0.63 |
| 1.00E+00 | 0.93 |
| 1.00E+00 | 0.93 |
| 1.00E+00 | 1    |
| 1.00E+00 | 0.92 |
| 1.00E+00 | 0.76 |
| 1.00E+00 | 0.96 |
| 1.00E+00 | 1    |
| 1.00E+00 | 0.93 |
| 1.00E+00 | 0.97 |
| 1.00E+00 | 0.89 |
| 1.00E+00 | 0.85 |
| 1.00E+00 | 0.89 |
| 1.00E+00 | 0.74 |
| 1.00E+00 | 0.94 |
| 1.00E+00 | 1    |
| 1.00E+00 | 0.84 |
| 1.00E+00 | 0.85 |
| 1.00E+00 | 0.74 |
| 1.00E+00 | 1    |
| 1.00E+00 | 0.92 |
| 1.00E+00 | 0.91 |
| 1.00E+00 | 0.8  |
| 1.00E+00 | 0.6  |
| 1.00E+00 | 1    |
| 1.00E+00 | 0.61 |
| 1.00E+00 | 1    |
| 1.00E+00 | 0.9  |
| 1.00E+00 | 1    |
| 1.00E+00 | 0.89 |
| 1.00E+00 | 1    |
| 1.00E+00 | 0.74 |
| 1.00E+00 | 0.8  |
| 1.00E+00 | 1    |
| 1.00E+00 | 0.78 |
| 1.00E+00 | 0.76 |
| 1.00E+00 | 0.6  |
| 1.00E+00 | 0.84 |
| 1.00E+00 | 0.71 |
| 1.00E+00 | 0.96 |
| 1.00E+00 | 0.74 |
| 1.00E+00 | 0.93 |
| 1.00E+00 | 0.59 |

|          |      |
|----------|------|
| 1.00E+00 | 1    |
| 1.00E+00 | 1    |
| 1.00E+00 | 1    |
| 1.00E+00 | 0.93 |
| 1.00E+00 | 0.69 |
| 1.00E+00 | 0.91 |
| 1.00E+00 | 0.91 |
| 1.00E+00 | 1    |
| 1.00E+00 | 0.94 |
| 1.00E+00 | 0.94 |
| 1.00E+00 | 0.94 |
| 1.00E+00 | 0.92 |
| 1.00E+00 | 0.48 |
| 1.00E+00 | 0.96 |
| 1.00E+00 | 0.84 |
| 1.00E+00 | 0.85 |
| 1.00E+00 | 0.91 |
| 1.00E+00 | 0.93 |
| 1.00E+00 | 0.74 |
| 1.00E+00 | 0.97 |
| 1.00E+00 | 0.91 |
| 1.00E+00 | 0.98 |
| 1.00E+00 | 0.95 |
| 1.00E+00 | 0.91 |
| 1.00E+00 | 1    |
| 1.00E+00 | 0.97 |
| 1.00E+00 | 0.97 |
| 1.00E+00 | 0.84 |
| 1.00E+00 | 0.83 |
| 1.00E+00 | 0.8  |
| 1.00E+00 | 0.86 |
| 1.00E+00 | 0.96 |
| 1.00E+00 | 0.9  |
| 1.00E+00 | 0.83 |
| 1.00E+00 | 0.78 |
| 1.00E+00 | 0.64 |
| 1.00E+00 | 0.73 |
| 1.00E+00 | 1    |
| 1.00E+00 | 1    |
| 1.00E+00 | 0.62 |
| 1.00E+00 | 0.78 |
| 1.00E+00 | 0.97 |
| 1.00E+00 | 0.92 |
| 1.00E+00 | 1    |
| 1.00E+00 | 1    |
| 1.00E+00 | 0.77 |
| 1.00E+00 | 0.88 |
| 1.00E+00 | 0.91 |
| 1.00E+00 | 0.57 |

|          |      |
|----------|------|
| 1.00E+00 | 0.92 |
| 1.00E+00 | 0.64 |
| 1.00E+00 | 0.93 |
| 1.00E+00 | 0.88 |
| 1.00E+00 | 0.95 |
| 1.00E+00 | 0.61 |
| 1.00E+00 | 1    |
| 1.00E+00 | 0.84 |
| 1.00E+00 | 0.75 |
| 1.00E+00 | 0.85 |
| 1.00E+00 | 0.98 |
| 1.00E+00 | 0.63 |

|          |      |
|----------|------|
| 1.00E+00 | 0.94 |
|----------|------|

|          |      |
|----------|------|
| 1.00E+00 | 0.6  |
| 1.00E+00 | 0.82 |
| 1.00E+00 | 0.77 |

|          |      |
|----------|------|
| 1.00E+00 | 0.53 |
| 1.00E+00 | 0.88 |
| 1.00E+00 | 0.47 |
| 1.00E+00 | 0.79 |
| 1.00E+00 | 0.86 |
| 1.00E+00 | 1    |
| 1.00E+00 | 0.88 |

|          |      |
|----------|------|
| 1.00E+00 | 0.73 |
| 1.00E+00 | 0.85 |
| 1.00E+00 | 0.86 |
| 1.00E+00 | 0.78 |
| 1.00E+00 | 0.67 |
| 1.00E+00 | 0.71 |
| 1.00E+00 | 0.94 |
| 1.00E+00 | 0.47 |

|          |      |
|----------|------|
| 1.00E+00 | 0.95 |
|----------|------|



|          |      |
|----------|------|
| 1.00E+00 | 0.81 |
| 1.00E+00 | 0.74 |
| 1.00E+00 | 0.74 |
| 1.00E+00 | 0.89 |
| 1.00E+00 | 0.97 |
| 1.00E+00 | 0.95 |
| 1.00E+00 | 0.86 |

|          |      |
|----------|------|
| 1.00E+00 | 0.41 |
| 1.00E+00 | 0.91 |
| 1.00E+00 | 0.9  |
| 1.00E+00 | 0.91 |
| 1.00E+00 | 0.76 |
| 1.00E+00 | 0.85 |
| 1.00E+00 | 0.64 |
| 1.00E+00 | 1    |
| 1.00E+00 | 0.92 |
| 1.00E+00 | 0.67 |

|          |      |
|----------|------|
| 1.00E+00 | 0.93 |
| 1.00E+00 | 0.83 |
| 1.00E+00 | 0.93 |
| 1.00E+00 | 0.78 |
| 1.00E+00 | 0.91 |
| 1.00E+00 | 0.87 |
| 1.00E+00 | 0.9  |

|          |      |
|----------|------|
| 1.00E+00 | 0.98 |
| 1.00E+00 | 0.71 |
| 1.00E+00 | 0.82 |
| 1.00E+00 | 0.75 |
| 1.00E+00 | 0.78 |
| 1.00E+00 | 0.88 |
| 1.00E+00 | 1    |
| 1.00E+00 | 0.9  |
| 1.00E+00 | 0.86 |
| 1.00E+00 | 0.91 |
| 1.00E+00 | 0.59 |
| 1.00E+00 | 0.68 |
| 1.00E+00 | 0.86 |
| 1.00E+00 | 0.91 |
| 1.00E+00 | 0.83 |
| 1.00E+00 | 0.72 |
| 1.00E+00 | 0.66 |
| 1.00E+00 | 0.81 |
| 1.00E+00 | 0.75 |
| 1.00E+00 | 0.95 |
| 1.00E+00 | 0.65 |
| 1.00E+00 | 0.93 |
| 1.00E+00 | 0.9  |

|          |      |
|----------|------|
| 1.00E+00 | 0.71 |
| 1.00E+00 | 0.87 |
| 1.00E+00 | 0.87 |
| 1.00E+00 | 0.93 |

|          |      |
|----------|------|
| 1.00E+00 | 0.94 |
| 1.00E+00 | 0.86 |
| 1.00E+00 | 0.92 |
| 1.00E+00 | 0.89 |
| 1.00E+00 | 0.63 |
| 1.00E+00 | 0.88 |
| 1.00E+00 | 0.91 |
| 1.00E+00 | 0.94 |
| 1.00E+00 | 0.74 |
| 1.00E+00 | 0.81 |
| 1.00E+00 | 0.72 |

|          |      |
|----------|------|
| 1.00E+00 | 0.87 |
| 1.00E+00 | 1    |

|          |      |
|----------|------|
| 1.00E+00 | 1    |
| 1.00E+00 | 0.95 |
| 1.00E+00 | 0.74 |
| 1.00E+00 | 0.76 |
| 1.00E+00 | 0.9  |
| 1.00E+00 | 1    |
| 1.00E+00 | 1    |
| 1.00E+00 | 1    |
| 1.00E+00 | 0.97 |
| 1.00E+00 | 0.61 |
| 1.00E+00 | 0.9  |
| 1.00E+00 | 0.62 |

|          |      |
|----------|------|
| 1.00E+00 | 0.93 |
| 1.00E+00 | 0.97 |
| 1.00E+00 | 0.95 |
| 1.00E+00 | 0.7  |
| 1.00E+00 | 1    |
| 1.00E+00 | 1    |
| 1.00E+00 | 0.94 |
| 1.00E+00 | 1    |
| 1.00E+00 | 0.9  |
| 1.00E+00 | 1    |
| 1.00E+00 | 0.92 |
| 1.00E+00 | 0.92 |

|          |      |
|----------|------|
| 1.00E+00 | 1    |
| 1.00E+00 | 0.88 |
| 1.00E+00 | 0.94 |
| 1.00E+00 | 0.92 |
| 1.00E+00 | 0.49 |
| 1.00E+00 | 0.86 |
| 1.00E+00 | 0.73 |

|          |      |
|----------|------|
| 1.00E+00 | 0.81 |
| 1.00E+00 | 0.51 |
| 1.00E+00 | 0.69 |
| 1.00E+00 | 0.84 |

|          |      |
|----------|------|
| 1.00E+00 | 0.74 |
|----------|------|

|          |      |
|----------|------|
| 1.00E+00 | 0.94 |
| 1.00E+00 | 0.95 |
| 1.00E+00 | 0.88 |
| 1.00E+00 | 0.95 |
| 1.00E+00 | 0.92 |
| 1.00E+00 | 0.77 |
| 1.00E+00 | 0.81 |
| 1.00E+00 | 0.69 |
| 1.00E+00 | 0.78 |
| 1.00E+00 | 0.47 |
| 1.00E+00 | 0.6  |
| 1.00E+00 | 0.65 |
| 1.00E+00 | 0.66 |
| 1.00E+00 | 0.82 |
| 1.00E+00 | 0.91 |

|          |      |
|----------|------|
| 1.00E+00 | 0.61 |
| 1.00E+00 | 0.79 |
| 1.00E+00 | 0.89 |

|          |      |
|----------|------|
| 1.00E+00 | 1    |
| 1.00E+00 | 0.9  |
| 1.00E+00 | 0.85 |
| 1.00E+00 | 0.95 |
| 1.00E+00 | 0.83 |
| 1.00E+00 | 0.77 |
| 1.00E+00 | 0.93 |
| 1.00E+00 | 0.8  |
| 1.00E+00 | 1    |
| 1.00E+00 | 0.96 |
| 1.00E+00 | 0.91 |

|          |      |
|----------|------|
| 1.00E+00 | 0.88 |
| 1.00E+00 | 0.56 |
| 1.00E+00 | 0.94 |
| 1.00E+00 | 0.84 |
| 1.00E+00 | 1    |
| 1.00E+00 | 0.93 |

|          |      |
|----------|------|
| 1.00E+00 | 0.73 |
| 1.00E+00 | 1    |
| 1.00E+00 | 0.96 |
| 1.00E+00 | 0.72 |
| 1.00E+00 | 0.84 |
| 1.00E+00 | 0.71 |
| 1.00E+00 | 1    |
| 1.00E+00 | 0.9  |
| 1.00E+00 | 1    |
| 1.00E+00 | 0.71 |
| 1.00E+00 | 0.88 |

|          |      |
|----------|------|
| 1.00E+00 | 0.85 |
|----------|------|

|          |      |
|----------|------|
| 1.00E+00 | 0.93 |
| 1.00E+00 | 0.95 |
| 1.00E+00 | 0.88 |
| 1.00E+00 | 0.91 |
| 1.00E+00 | 0.9  |
| 1.00E+00 | 0.83 |
| 1.00E+00 | 0.85 |
| 1.00E+00 | 0.83 |
| 1.00E+00 | 1    |
| 1.00E+00 | 0.63 |

|          |      |
|----------|------|
| 1.00E+00 | 0.85 |
| 1.00E+00 | 0.57 |
| 1.00E+00 | 1    |
| 1.00E+00 | 0.67 |
| 1.00E+00 | 0.78 |
| 1.00E+00 | 0.69 |
| 1.00E+00 | 0.73 |
| 1.00E+00 | 0.51 |

|          |   |
|----------|---|
| 1.00E+00 | 1 |
|----------|---|

|          |      |
|----------|------|
| 1.00E+00 | 0.92 |
| 1.00E+00 | 0.94 |
| 1.00E+00 | 0.9  |
| 1.00E+00 | 0.9  |
| 1.00E+00 | 0.68 |
| 1.00E+00 | 0.44 |
| 1.00E+00 | 0.96 |
| 1.00E+00 | 0.67 |
| 1.00E+00 | 0.76 |
| 1.00E+00 | 0.9  |
| 1.00E+00 | 1    |
| 1.00E+00 | 0.92 |
| 1.00E+00 | 0.87 |

|          |      |
|----------|------|
| 1.00E+00 | 0.66 |
| 1.00E+00 | 0.8  |
| 1.00E+00 | 0.94 |
| 1.00E+00 | 0.96 |
| 1.00E+00 | 0.72 |
| 1.00E+00 | 1    |

|          |      |
|----------|------|
| 1.00E+00 | 0.45 |
|----------|------|

|          |      |
|----------|------|
| 1.00E+00 | 0.81 |
| 1.00E+00 | 0.92 |
| 1.00E+00 | 0.73 |
| 1.00E+00 | 0.63 |

|          |      |
|----------|------|
| 1.00E+00 | 0.77 |
| 1.00E+00 | 0.81 |
| 1.00E+00 | 0.84 |
| 1.00E+00 | 1    |
| 1.00E+00 | 0.92 |
| 1.00E+00 | 0.72 |
| 1.00E+00 | 0.85 |
| 1.00E+00 | 0.89 |
| 1.00E+00 | 0.72 |

|          |      |
|----------|------|
| 1.00E+00 | 0.79 |
|----------|------|

|          |      |
|----------|------|
| 1.00E+00 | 0.92 |
| 1.00E+00 | 0.94 |
| 1.00E+00 | 0.81 |

|          |      |
|----------|------|
| 1.00E+00 | 0.89 |
| 1.00E+00 | 0.69 |
| 1.00E+00 | 0.76 |

|          |      |
|----------|------|
| 1.00E+00 | 0.86 |
| 1.00E+00 | 0.88 |
| 1.00E+00 | 0.97 |
| 1.00E+00 | 0.79 |
| 1.00E+00 | 0.9  |
| 1.00E+00 | 0.96 |
| 1.00E+00 | 1    |
| 1.00E+00 | 0.73 |
| 1.00E+00 | 0.72 |
| 1.00E+00 | 0.91 |
| 1.00E+00 | 0.69 |
| 1.00E+00 | 0.59 |
| 1.00E+00 | 0.66 |
| 1.00E+00 | 0.75 |
| 1.00E+00 | 0.9  |
| 1.00E+00 | 0.91 |
| 1.00E+00 | 0.9  |
| 1.00E+00 | 1    |
| 1.00E+00 | 0.81 |
| 1.00E+00 | 0.91 |
| 1.00E+00 | 0.92 |
| 1.00E+00 | 0.79 |
| 1.00E+00 | 0.76 |
| 1.00E+00 | 0.6  |
| 1.00E+00 | 0.66 |
| 1.00E+00 | 0.62 |
| 1.00E+00 | 0.86 |

|          |      |
|----------|------|
| 1.00E+00 | 0.83 |
| 1.00E+00 | 0.97 |
| 1.00E+00 | 0.91 |
| 1.00E+00 | 0.86 |
| 1.00E+00 | 1    |
| 1.00E+00 | 0.86 |
| 1.00E+00 | 0.8  |
| 1.00E+00 | 0.54 |
| 1.00E+00 | 1    |
| 1.00E+00 | 0.76 |
| 1.00E+00 | 0.94 |
| 1.00E+00 | 0.92 |
| 1.00E+00 | 0.83 |
| 1.00E+00 | 0.9  |
| 1.00E+00 | 0.68 |
| 1.00E+00 | 0.87 |
| 1.00E+00 | 0.66 |
| 1.00E+00 | 0.36 |
| 1.00E+00 | 0.56 |
| 1.00E+00 | 0.89 |
| 1.00E+00 | 0.81 |
| 1.00E+00 | 0.47 |

|          |      |
|----------|------|
| 1.00E+00 | 0.71 |
| 1.00E+00 | 0.9  |
| 1.00E+00 | 0.68 |
| 1.00E+00 | 0.83 |
| 1.00E+00 | 0.55 |
| 1.00E+00 | 0.95 |
| 1.00E+00 | 0.78 |
| 1.00E+00 | 0.87 |
| 1.00E+00 | 0.68 |
| 1.00E+00 | 0.64 |
| 1.00E+00 | 0.65 |
| 1.00E+00 | 0.86 |

|          |      |
|----------|------|
| 1.00E+00 | 0.77 |
| 1.00E+00 | 0.91 |
| 1.00E+00 | 0.69 |
| 1.00E+00 | 0.96 |
| 1.00E+00 | 0.66 |
| 1.00E+00 | 0.87 |

|          |      |
|----------|------|
| 1.00E+00 | 0.82 |
| 1.00E+00 | 1    |
| 1.00E+00 | 1    |
| 1.00E+00 | 0.9  |
| 1.00E+00 | 0.81 |
| 1.00E+00 | 0.74 |
| 1.00E+00 | 0.71 |
| 1.00E+00 | 1    |
| 1.00E+00 | 0.9  |
| 1.00E+00 | 0.78 |
| 1.00E+00 | 0.82 |
| 1.00E+00 | 0.84 |

|          |      |
|----------|------|
| 1.00E+00 | 0.54 |
| 1.00E+00 | 0.65 |
| 1.00E+00 | 0.84 |
| 1.00E+00 | 0.53 |
| 1.00E+00 | 0.82 |
| 1.00E+00 | 0.86 |
| 1.00E+00 | 0.81 |
| 1.00E+00 | 0.9  |
| 1.00E+00 | 0.97 |

|          |      |
|----------|------|
| 1.00E+00 | 0.91 |
| 1.00E+00 | 0.66 |

|          |      |
|----------|------|
| 1.00E+00 | 0.9  |
| 1.00E+00 | 0.74 |
| 1.00E+00 | 0.98 |
| 1.00E+00 | 0.9  |

|          |      |
|----------|------|
| 1.00E+00 | 1    |
| 1.00E+00 | 1    |
| 1.00E+00 | 0.75 |
| 1.00E+00 | 0.82 |
| 1.00E+00 | 0.8  |
| 1.00E+00 | 1    |
| 1.00E+00 | 0.85 |
| 1.00E+00 | 0.67 |
| 1.00E+00 | 0.92 |
| 1.00E+00 | 0.81 |
| 1.00E+00 | 0.8  |
| 1.00E+00 | 0.69 |
| 1.00E+00 | 0.7  |
| 1.00E+00 | 0.7  |
| 1.00E+00 | 0.43 |
| 1.00E+00 | 0.68 |
| 1.00E+00 | 0.61 |
| 1.00E+00 | 0.95 |
| 1.00E+00 | 1    |
| 1.00E+00 | 0.64 |
| 1.00E+00 | 0.48 |

|          |      |
|----------|------|
| 1.00E+00 | 1    |
| 1.00E+00 | 0.96 |
| 1.00E+00 | 1    |
| 1.00E+00 | 1    |
| 1.00E+00 | 0.92 |
| 1.00E+00 | 0.95 |
| 1.00E+00 | 0.61 |
| 1.00E+00 | 0.6  |
| 1.00E+00 | 0.87 |
| 1.00E+00 | 1    |
| 1.00E+00 | 0.84 |
| 1.00E+00 | 1    |
| 1.00E+00 | 0.78 |
| 1.00E+00 | 1    |
| 1.00E+00 | 0.78 |
| 1.00E+00 | 0.54 |



|          |      |
|----------|------|
| 1.00E+00 | 0.7  |
| 1.00E+00 | 0.92 |
| 1.00E+00 | 0.92 |

|          |      |
|----------|------|
| 1.00E+00 | 0.55 |
| 1.00E+00 | 1    |
| 1.00E+00 | 0.52 |

|          |      |
|----------|------|
| 1.00E+00 | 0.92 |
| 1.00E+00 | 0.66 |
| 1.00E+00 | 0.81 |
| 1.00E+00 | 0.48 |

|          |      |
|----------|------|
| 1.00E+00 | 1    |
| 1.00E+00 | 0.65 |
| 1.00E+00 | 1    |
| 1.00E+00 | 0.8  |
| 1.00E+00 | 0.7  |
| 1.00E+00 | 0.68 |
| 1.00E+00 | 0.91 |
| 1.00E+00 | 0.86 |
| 1.00E+00 | 1    |
| 1.00E+00 | 0.95 |
| 1.00E+00 | 0.85 |
| 1.00E+00 | 0.52 |
| 1.00E+00 | 0.52 |
| 1.00E+00 | 0.92 |
| 1.00E+00 | 1    |

|          |      |
|----------|------|
| 1.00E+00 | 0.68 |
| 1.00E+00 | 0.58 |
| 1.00E+00 | 0.7  |
| 1.00E+00 | 0.81 |
| 1.00E+00 | 0.91 |
| 1.00E+00 | 0.86 |
| 1.00E+00 | 0.87 |
| 1.00E+00 | 0.93 |
| 1.00E+00 | 0.7  |
| 1.00E+00 | 0.95 |

|          |      |
|----------|------|
| 1.00E+00 | 0.94 |
| 1.00E+00 | 0.97 |
| 1.00E+00 | 0.97 |
| 1.00E+00 | 1    |
| 1.00E+00 | 0.94 |
| 1.00E+00 | 0.9  |
| 1.00E+00 | 0.96 |
| 1.00E+00 | 0.96 |
| 1.00E+00 | 0.77 |
| 1.00E+00 | 0.72 |
| 1.00E+00 | 0.47 |
| 1.00E+00 | 0.69 |
| 1.00E+00 | 0.69 |

|          |      |
|----------|------|
| 1.00E+00 | 0.92 |
| 1.00E+00 | 0.71 |
| 1.00E+00 | 0    |
| 1.00E+00 | 1    |
| 1.00E+00 | 0.84 |
| 1.00E+00 | 0.73 |
| 1.00E+00 | 0.72 |
| 1.00E+00 | 0.63 |
| 1.00E+00 | 0.86 |
| 1.00E+00 | 1    |
| 1.00E+00 | 0.59 |
| 1.00E+00 | 1    |
| 1.00E+00 | 0.87 |
| 1.00E+00 | 1    |
| 1.00E+00 | 0.84 |
| 1.00E+00 | 0.96 |
| 1.00E+00 | 1    |
| 1.00E+00 | 0.6  |
| 1.00E+00 | 0.86 |
| 1.00E+00 | 0.92 |
| 1.00E+00 | 0.91 |
| 1.00E+00 | 0.91 |
| 1.00E+00 | 0.97 |
| 1.00E+00 | 0.91 |
| 1.00E+00 | 0.66 |
| 1.00E+00 | 0.8  |
| 1.00E+00 | 0.86 |

|          |      |
|----------|------|
| 1.00E+00 | 0    |
| 1.00E+00 | 0.67 |
| 1.00E+00 | 0.72 |

|          |      |
|----------|------|
| 1.00E+00 | 0.76 |
| 1.00E+00 | 0.67 |

|          |      |
|----------|------|
| 1.00E+00 | 0.88 |
| 1.00E+00 | 0.77 |
| 1.00E+00 | 0.95 |
| 1.00E+00 | 0.67 |
| 1.00E+00 | 0.78 |
| 1.00E+00 | 0.82 |
| 1.00E+00 | 0.82 |
| 1.00E+00 | 0    |
| 1.00E+00 | 0.94 |
| 1.00E+00 | 0.75 |
| 1.00E+00 | 0.88 |
| 1.00E+00 | 0.83 |
| 1.00E+00 | 1    |
| 1.00E+00 | 0.95 |
| 1.00E+00 | 0.71 |
| 1.00E+00 | 0.96 |
| 1.00E+00 | 0.93 |
| 1.00E+00 | 0.76 |
| 1.00E+00 | 0.86 |
| 1.00E+00 | 0.8  |
| 1.00E+00 | 0.57 |
| 1.00E+00 | 0.79 |
| 1.00E+00 | 0.77 |
| 1.00E+00 | 1    |

|          |      |
|----------|------|
| 1.00E+00 | 0.81 |
| 1.00E+00 | 0.94 |
| 1.00E+00 | 0.92 |
| 1.00E+00 | 0.96 |
| 1.00E+00 | 1    |

|          |      |
|----------|------|
| 1.00E+00 | 1    |
| 1.00E+00 | 0.86 |
| 1.00E+00 | 1    |
| 1.00E+00 | 0.93 |
| 1.00E+00 | 0.94 |
| 1.00E+00 | 0.74 |
| 1.00E+00 | 0.67 |
| 1.00E+00 | 0.85 |
| 1.00E+00 | 0.84 |
| 1.00E+00 | 0.58 |

|          |      |
|----------|------|
| 1.00E+00 | 1    |
| 1.00E+00 | 0.93 |
| 1.00E+00 | 0.67 |

|          |      |
|----------|------|
| 1.00E+00 | 0.83 |
| 1.00E+00 | 0.56 |
| 1.00E+00 | 1    |
| 1.00E+00 | 0.85 |

|          |      |
|----------|------|
| 1.00E+00 | 0.79 |
| 1.00E+00 | 0.94 |
| 1.00E+00 | 0.89 |
| 1.00E+00 | 0.68 |
| 1.00E+00 | 0.69 |
| 1.00E+00 | 0.81 |
| 1.00E+00 | 0.57 |
| 1.00E+00 | 0.94 |
| 1.00E+00 | 0.9  |
| 1.00E+00 | 0.88 |
| 1.00E+00 | 0.67 |
| 1.00E+00 | 0.97 |
| 1.00E+00 | 0.92 |
| 1.00E+00 | 0.81 |
| 1.00E+00 | 1    |
| 1.00E+00 | 0.97 |
| 1.00E+00 | 0.91 |

|          |   |
|----------|---|
| 1.00E+00 | 1 |
| 1.00E+00 | 1 |

|          |      |
|----------|------|
| 1.00E+00 | 0.94 |
| 1.00E+00 | 0.9  |
| 1.00E+00 | 0.77 |
| 1.00E+00 | 0.81 |
| 1.00E+00 | 0.95 |
| 1.00E+00 | 0.96 |
| 1.00E+00 | 0.92 |
| 1.00E+00 | 0.6  |
| 1.00E+00 | 0.87 |
| 1.00E+00 | 0.82 |
| 1.00E+00 | 0.82 |

|          |      |
|----------|------|
| 1.00E+00 | 0.54 |
| 1.00E+00 | 0.55 |
| 1.00E+00 | 0.86 |

|          |      |
|----------|------|
| 1.00E+00 | 0.69 |
| 1.00E+00 | 1    |
| 1.00E+00 | 0.86 |
| 1.00E+00 | 1    |
| 1.00E+00 | 0.83 |
| 1.00E+00 | 0.81 |
| 1.00E+00 | 0.85 |
| 1.00E+00 | 0.81 |
| 1.00E+00 | 0.84 |
| 1.00E+00 | 0.67 |
| 1.00E+00 | 0.78 |
| 1.00E+00 | 0.72 |
| 1.00E+00 | 0.85 |
| 1.00E+00 | 0.95 |
| 1.00E+00 | 0.73 |
| 1.00E+00 | 0.78 |

|          |     |
|----------|-----|
| 1.00E+00 | 0.7 |
|----------|-----|

|          |      |
|----------|------|
| 1.00E+00 | 0.88 |
| 1.00E+00 | 0.7  |
| 1.00E+00 | 0.77 |
| 1.00E+00 | 0.74 |
| 1.00E+00 | 0.93 |
| 1.00E+00 | 0.92 |
| 1.00E+00 | 0.7  |
| 1.00E+00 | 1    |

|          |      |
|----------|------|
| 1.00E+00 | 1    |
| 1.00E+00 | 0.88 |
| 1.00E+00 | 0.88 |
| 1.00E+00 | 1    |
| 1.00E+00 | 0.82 |
| 1.00E+00 | 0.73 |
| 1.00E+00 | 0.77 |
| 1.00E+00 | 0.55 |
| 1.00E+00 | 1    |
| 1.00E+00 | 1    |
| 1.00E+00 | 0.94 |

|          |      |
|----------|------|
| 1.00E+00 | 0.69 |
| 1.00E+00 | 0.96 |

|          |      |
|----------|------|
| 1.00E+00 | 0.59 |
| 1.00E+00 | 0.59 |
| 1.00E+00 | 0.63 |

|          |      |
|----------|------|
| 1.00E+00 | 0.91 |
| 1.00E+00 | 1    |
| 1.00E+00 | 0.84 |
| 1.00E+00 | 0.74 |
| 1.00E+00 | 0.81 |
| 1.00E+00 | 0.58 |
| 1.00E+00 | 0.69 |
| 1.00E+00 | 0.73 |
| 1.00E+00 | 0.55 |
| 1.00E+00 | 1    |
| 1.00E+00 | 0.78 |
| 1.00E+00 | 0.78 |
| 1.00E+00 | 0.93 |
| 1.00E+00 | 1    |

|          |      |
|----------|------|
| 1.00E+00 | 0.97 |
| 1.00E+00 | 1    |

|          |      |
|----------|------|
| 1.00E+00 | 1    |
| 1.00E+00 | 0.87 |
| 1.00E+00 | 0.79 |
| 1.00E+00 | 0.85 |
| 1.00E+00 | 0.64 |
| 1.00E+00 | 1    |
| 1.00E+00 | 1    |
| 1.00E+00 | 1    |
| 1.00E+00 | 0.9  |
| 1.00E+00 | 0.94 |

|          |      |
|----------|------|
| 1.00E+00 | 0.94 |
|----------|------|

|          |      |
|----------|------|
| 1.00E+00 | 0.91 |
|----------|------|

|          |      |
|----------|------|
| 1.00E+00 | 0.91 |
| 1.00E+00 | 0.88 |

|          |      |
|----------|------|
| 1.00E+00 | 0.73 |
| 1.00E+00 | 0.94 |

|          |      |
|----------|------|
| 1.00E+00 | 0.98 |
| 1.00E+00 | 0.74 |
| 1.00E+00 | 0.92 |
| 1.00E+00 | 1    |
| 1.00E+00 | 1    |
| 1.00E+00 | 0.77 |
| 1.00E+00 | 0.68 |
| 1.00E+00 | 0.77 |
| 1.00E+00 | 0.81 |
| 1.00E+00 | 0.85 |
| 1.00E+00 | 0.81 |
| 1.00E+00 | 0.84 |
| 1.00E+00 | 0.67 |
| 1.00E+00 | 0.93 |
| 1.00E+00 | 0.78 |
| 1.00E+00 | 0.72 |
| 1.00E+00 | 0.85 |
| 1.00E+00 | 0.95 |
| 1.00E+00 | 0.73 |
| 1.00E+00 | 0.78 |
| 1.00E+00 | 0.91 |
| 1.00E+00 | 1    |
| 1.00E+00 | 0.93 |
| 1.00E+00 | 0.84 |
| 1.00E+00 | 0.93 |
| 1.00E+00 | 0.8  |
| 1.00E+00 | 0.92 |
| 1.00E+00 | 0.92 |
| 1.00E+00 | 1    |
| 1.00E+00 | 0.46 |
| 1.00E+00 | 0.97 |
| 1.00E+00 | 0.73 |
| 1.00E+00 | 0.72 |
| 1.00E+00 | 0.76 |
| 1.00E+00 | 1    |
| 1.00E+00 | 1    |
| 1.00E+00 | 0.79 |
| 1.00E+00 | 0.68 |
| 1.00E+00 | 0.94 |
| 1.00E+00 | 1    |
| 1.00E+00 | 0.75 |
| 1.00E+00 | 0.94 |
| 1.00E+00 | 0.79 |
| 1.00E+00 | 0.76 |
| 1.00E+00 | 0.72 |
| 1.00E+00 | 0.74 |
| 1.00E+00 | 1    |
| 1.00E+00 | 0.92 |
| 1.00E+00 | 0.88 |
| 1.00E+00 | 0.63 |

|          |      |
|----------|------|
| 1.00E+00 | 0.54 |
| 1.00E+00 | 0.56 |
| 1.00E+00 | 1    |
| 1.00E+00 | 0.86 |
| 1.00E+00 | 0.89 |
| 1.00E+00 | 0.75 |
| 1.00E+00 | 0.92 |
| 1.00E+00 | 0.69 |
| 1.00E+00 | 0.73 |

|          |      |
|----------|------|
| 1.00E+00 | 0.49 |
| 1.00E+00 | 1    |
| 1.00E+00 | 1    |
| 1.00E+00 | 0.89 |
| 1.00E+00 | 0.87 |
| 1.00E+00 | 1    |

|          |      |
|----------|------|
| 1.00E+00 | 0    |
| 1.00E+00 | 0.82 |

|          |      |
|----------|------|
| 1.00E+00 | 1    |
| 1.00E+00 | 0.92 |
| 1.00E+00 | 0.93 |
| 1.00E+00 | 0.77 |
| 1.00E+00 | 0.82 |
| 1.00E+00 | 0.52 |
| 1.00E+00 | 0.73 |
| 1.00E+00 | 0.98 |
| 1.00E+00 | 0.86 |
| 1.00E+00 | 0.74 |
| 1.00E+00 | 0.58 |
| 1.00E+00 | 1    |
| 1.00E+00 | 0.91 |
| 1.00E+00 | 0.92 |
| 1.00E+00 | 0.87 |
| 1.00E+00 | 0.73 |
| 1.00E+00 | 0.83 |
| 1.00E+00 | 0.67 |
| 1.00E+00 | 0.52 |
| 1.00E+00 | 0.7  |
| 1.00E+00 | 0.86 |
| 1.00E+00 | 0.82 |

|          |      |
|----------|------|
| 1.00E+00 | 0.96 |
|----------|------|

|          |      |
|----------|------|
| 1.00E+00 | 0.64 |
| 1.00E+00 | 0.6  |



|          |      |
|----------|------|
| 1.00E+00 | 0.93 |
| 1.00E+00 | 0.8  |
| 1.00E+00 | 0.9  |
| 1.00E+00 | 0.67 |
| 1.00E+00 | 0.87 |
| 1.00E+00 | 0.56 |
| 1.00E+00 | 0.76 |
| 1.00E+00 | 0.43 |
| 1.00E+00 | 0.87 |
| 1.00E+00 | 0.56 |
| 1.00E+00 | 1    |
| 1.00E+00 | 0.72 |
| 1.00E+00 | 0.88 |
| 1.00E+00 | 1    |
| 1.00E+00 | 0.53 |
| 1.00E+00 | 0.87 |
| 1.00E+00 | 0.73 |
| 1.00E+00 | 0.59 |
| 1.00E+00 | 0.83 |
| 1.00E+00 | 0.96 |
| 1.00E+00 | 0.9  |
| 1.00E+00 | 0.82 |
| 1.00E+00 | 0.7  |
| 1.00E+00 | 1    |
| 1.00E+00 | 1    |
| 1.00E+00 | 0.91 |
| 1.00E+00 | 0.87 |
| 1.00E+00 | 0.97 |
| 1.00E+00 | 0.84 |
| 1.00E+00 | 1    |
| 1.00E+00 | 0.89 |
| 1.00E+00 | 0.86 |
| 1.00E+00 | 0.97 |
| 1.00E+00 | 0.84 |
| 1.00E+00 | 0.85 |
| 1.00E+00 | 1    |
| 1.00E+00 | 0.91 |
| 1.00E+00 | 0.92 |
| 1.00E+00 | 0.61 |

|          |      |
|----------|------|
| 1.00E+00 | 0.62 |
| 1.00E+00 | 0.97 |
| 1.00E+00 | 0.86 |
| 1.00E+00 | 0.93 |
| 1.00E+00 | 0.87 |
| 1.00E+00 | 0.86 |
| 1.00E+00 | 0.91 |
| 1.00E+00 | 0.78 |
| 1.00E+00 | 1    |
| 1.00E+00 | 0.52 |
| 1.00E+00 | 0.96 |
| 1.00E+00 | 0.95 |
| 1.00E+00 | 0.68 |
| 1.00E+00 | 0.92 |
| 1.00E+00 | 0.68 |
| 1.00E+00 | 0.94 |
| 1.00E+00 | 0.9  |
| 1.00E+00 | 0.87 |
| 1.00E+00 | 0.9  |
| 1.00E+00 | 0.75 |
| 1.00E+00 | 0.78 |
| 1.00E+00 | 0.7  |
| 1.00E+00 | 1    |
| 1.00E+00 | 0.92 |
| 1.00E+00 | 0.82 |
| 1.00E+00 | 0.9  |
| 1.00E+00 | 0.66 |
| 1.00E+00 | 1    |
| 1.00E+00 | 1    |
| 1.00E+00 | 0.47 |
| 1.00E+00 | 0.72 |
| 1.00E+00 | 0.89 |
| 1.00E+00 | 0.68 |
| 1.00E+00 | 0.9  |
| 1.00E+00 | 0.69 |
| 1.00E+00 | 1    |
| 1.00E+00 | 0.63 |

|          |      |
|----------|------|
| 1.00E+00 | 0.89 |
| 1.00E+00 | 0.84 |
| 1.00E+00 | 0.97 |
| 1.00E+00 | 1    |
| 1.00E+00 | 0.8  |
| 1.00E+00 | 0.92 |
| 1.00E+00 | 0.91 |
| 1.00E+00 | 0.72 |

|          |      |
|----------|------|
| 1.00E+00 | 0.84 |
| 1.00E+00 | 1    |
| 1.00E+00 | 0.93 |
| 1.00E+00 | 0.89 |
| 1.00E+00 | 0.59 |
| 1.00E+00 | 1    |
| 1.00E+00 | 0.87 |
| 1.00E+00 | 1    |
| 1.00E+00 | 0.93 |
| 1.00E+00 | 0.87 |
| 1.00E+00 | 0.88 |
| 1.00E+00 | 1    |
| 1.00E+00 | 0.9  |
| 1.00E+00 | 0.45 |
| 1.00E+00 | 0.92 |
| 1.00E+00 | 0.77 |

|          |      |
|----------|------|
| 1.00E+00 | 0.84 |
| 1.00E+00 | 0.8  |

|          |      |
|----------|------|
| 1.00E+00 | 0.94 |
| 1.00E+00 | 0.68 |
| 1.00E+00 | 0.95 |
| 1.00E+00 | 0.94 |
| 1.00E+00 | 1    |
| 1.00E+00 | 0.58 |
| 1.00E+00 | 0.64 |
| 1.00E+00 | 0.89 |
| 1.00E+00 | 1    |
| 1.00E+00 | 0.9  |
| 1.00E+00 | 0.73 |
| 1.00E+00 | 0.76 |
| 1.00E+00 | 0.91 |
| 1.00E+00 | 0.93 |
| 1.00E+00 | 0.97 |
| 1.00E+00 | 0.94 |

|          |      |
|----------|------|
| 1.00E+00 | 0.65 |
|----------|------|

|          |     |
|----------|-----|
| 1.00E+00 | 0.6 |
|----------|-----|

|          |      |
|----------|------|
| 1.00E+00 | 0.66 |
| 1.00E+00 | 0.88 |
| 1.00E+00 | 0    |
| 1.00E+00 | 0.88 |
| 1.00E+00 | 0.83 |
| 1.00E+00 | 0.94 |
| 1.00E+00 | 1    |
| 1.00E+00 | 0.8  |
| 1.00E+00 | 0.93 |
| 1.00E+00 | 0.88 |
| 1.00E+00 | 0.74 |
| 1.00E+00 | 0.97 |
| 1.00E+00 | 1    |
| 1.00E+00 | 0.84 |
| 1.00E+00 | 0.84 |
| 1.00E+00 | 0.96 |
| 1.00E+00 | 0.68 |
| 1.00E+00 | 0.49 |
| 1.00E+00 | 0.66 |
| 1.00E+00 | 0.8  |
| 1.00E+00 | 0.89 |
| 1.00E+00 | 1    |
| 1.00E+00 | 0.57 |
| 1.00E+00 | 0.69 |
| 1.00E+00 | 0.72 |
| 1.00E+00 | 0    |
| 1.00E+00 | 0.8  |
| 1.00E+00 | 0.87 |
| 1.00E+00 | 0.81 |
| 1.00E+00 | 0.79 |
| 1.00E+00 | 0.72 |
| 1.00E+00 | 0.83 |
| 1.00E+00 | 0.76 |
| 1.00E+00 | 0.91 |
| 1.00E+00 | 0.97 |
| 1.00E+00 | 0.95 |
| 1.00E+00 | 0.85 |
| 1.00E+00 | 0.78 |
| 1.00E+00 | 0.86 |
| 1.00E+00 | 0.81 |
| 1.00E+00 | 1    |
| 1.00E+00 | 1    |
| 1.00E+00 | 1    |
| 1.00E+00 | 0.79 |
| 1.00E+00 | 0.88 |
| 1.00E+00 | 0.66 |
| 1.00E+00 | 0.64 |
| 1.00E+00 | 0.8  |

|          |      |
|----------|------|
| 1.00E+00 | 1    |
| 1.00E+00 | 0.96 |
| 1.00E+00 | 0.48 |
| 1.00E+00 | 1    |
| 1.00E+00 | 1    |
| 1.00E+00 | 0.84 |
| 1.00E+00 | 0.85 |
| 1.00E+00 | 0.59 |
| 1.00E+00 | 0.83 |
| 1.00E+00 | 1    |
| 1.00E+00 | 1    |
| 1.00E+00 | 0.85 |

|          |      |
|----------|------|
| 1.00E+00 | 0.84 |
| 1.00E+00 | 1    |
| 1.00E+00 | 0.78 |
| 1.00E+00 | 0.71 |
| 1.00E+00 | 1    |
| 1.00E+00 | 1    |
| 1.00E+00 | 0.9  |
| 1.00E+00 | 1    |
| 1.00E+00 | 0.94 |
| 1.00E+00 | 1    |
| 1.00E+00 | 0.92 |
| 1.00E+00 | 0.86 |
| 1.00E+00 | 0.97 |
| 1.00E+00 | 0.75 |
| 1.00E+00 | 0.9  |

|          |      |
|----------|------|
| 1.00E+00 | 0.63 |
| 1.00E+00 | 0.69 |
| 1.00E+00 | 0.73 |
| 1.00E+00 | 0.79 |
| 1.00E+00 | 0.84 |

|          |      |
|----------|------|
| 1.00E+00 | 1    |
| 1.00E+00 | 0.93 |
| 1.00E+00 | 0.53 |

|          |      |
|----------|------|
| 1.00E+00 | 0.57 |
|----------|------|

|          |      |
|----------|------|
| 1.00E+00 | 0.84 |
| 1.00E+00 | 1    |
| 1.00E+00 | 1    |

|          |      |
|----------|------|
| 1.00E+00 | 0.98 |
| 1.00E+00 | 1    |
| 1.00E+00 | 1    |
| 1.00E+00 | 0.53 |
| 1.00E+00 | 0.61 |
| 1.00E+00 | 0.57 |
| 1.00E+00 | 0.85 |
| 1.00E+00 | 1    |
| 1.00E+00 | 0.8  |

|          |      |
|----------|------|
| 1.00E+00 | 0.66 |
|----------|------|

|          |      |
|----------|------|
| 1.00E+00 | 0.74 |
| 1.00E+00 | 0.92 |
| 1.00E+00 | 0.76 |
| 1.00E+00 | 0.9  |
| 1.00E+00 | 0.82 |
| 1.00E+00 | 0.93 |
| 1.00E+00 | 0.72 |
| 1.00E+00 | 0.94 |
| 1.00E+00 | 0.85 |
| 1.00E+00 | 1    |

|          |      |
|----------|------|
| 1.00E+00 | 0.42 |
| 1.00E+00 | 0.64 |
| 1.00E+00 | 0.88 |
| 1.00E+00 | 0.73 |
| 1.00E+00 | 0.75 |
| 1.00E+00 | 1    |
| 1.00E+00 | 0.58 |
| 1.00E+00 | 0.76 |

|          |      |
|----------|------|
| 1.00E+00 | 1    |
| 1.00E+00 | 1    |
| 1.00E+00 | 0.74 |
| 1.00E+00 | 0.93 |
| 1.00E+00 | 0.48 |
| 1.00E+00 | 0.47 |
| 1.00E+00 | 1    |
| 1.00E+00 | 0.65 |
| 1.00E+00 | 0.66 |
| 1.00E+00 | 0.91 |
| 1.00E+00 | 0.67 |
| 1.00E+00 | 0.74 |
| 1.00E+00 | 0.94 |
| 1.00E+00 | 1    |
| 1.00E+00 | 0.9  |

|          |      |
|----------|------|
| 1.00E+00 | 0.93 |
| 1.00E+00 | 0.92 |
| 1.00E+00 | 0.98 |
| 1.00E+00 | 0.96 |
| 1.00E+00 | 0.91 |
| 1.00E+00 | 1    |
| 1.00E+00 | 0.56 |
| 1.00E+00 | 0.96 |
| 1.00E+00 | 1    |
| 1.00E+00 | 0.95 |
| 1.00E+00 | 0.81 |
| 1.00E+00 | 0.64 |
| 1.00E+00 | 1    |
| 1.00E+00 | 0.91 |
| 1.00E+00 | 1    |
| 1.00E+00 | 1    |
| 1.00E+00 | 1    |
| 1.00E+00 | 1    |
| 1.00E+00 | 0.93 |
| 1.00E+00 | 0.88 |
| 1.00E+00 | 0.95 |
| 1.00E+00 | 0.94 |
| 1.00E+00 | 0.6  |
| 1.00E+00 | 0.91 |
| 1.00E+00 | 0.86 |
| 1.00E+00 | 1    |
| 1.00E+00 | 1    |
| 1.00E+00 | 1    |
| 1.00E+00 | 1    |
| 1.00E+00 | 0.59 |
| 1.00E+00 | 0.62 |
| 1.00E+00 | 0.92 |
| 1.00E+00 | 0.9  |
| 1.00E+00 | 1    |
| 1.00E+00 | 0.66 |
| 1.00E+00 | 1    |
| 1.00E+00 | 1    |
| 1.00E+00 | 1    |
| 1.00E+00 | 0.51 |
| 1.00E+00 | 0.74 |
| 1.00E+00 | 1    |
| 1.00E+00 | 0.65 |

|          |      |
|----------|------|
| 1.00E+00 | 0.59 |
| 1.00E+00 | 0.77 |
| 1.00E+00 | 0.48 |

|          |   |
|----------|---|
| 1.00E+00 | 1 |
|----------|---|

|          |      |
|----------|------|
| 1.00E+00 | 0.94 |
|----------|------|

|          |   |
|----------|---|
| 1.00E+00 | 1 |
|----------|---|

|          |      |
|----------|------|
| 1.00E+00 | 0.58 |
|----------|------|

|          |      |
|----------|------|
| 1.00E+00 | 0.83 |
|----------|------|

|          |      |
|----------|------|
| 1.00E+00 | 0.95 |
|----------|------|

|          |      |
|----------|------|
| 1.00E+00 | 0.78 |
|----------|------|

|          |      |
|----------|------|
| 1.00E+00 | 0.81 |
|----------|------|

|          |      |
|----------|------|
| 1.00E+00 | 0.76 |
|----------|------|

|          |   |
|----------|---|
| 1.00E+00 | 1 |
|----------|---|

|          |      |
|----------|------|
| 1.00E+00 | 0.85 |
|----------|------|

|          |      |
|----------|------|
| 1.00E+00 | 0.81 |
|----------|------|

|          |      |
|----------|------|
| 1.00E+00 | 0.85 |
|----------|------|

|          |      |
|----------|------|
| 1.00E+00 | 0.56 |
|----------|------|

|          |      |
|----------|------|
| 1.00E+00 | 0.87 |
|----------|------|

|          |      |
|----------|------|
| 1.00E+00 | 0.86 |
|----------|------|

|          |      |
|----------|------|
| 1.00E+00 | 0.88 |
|----------|------|

|          |      |
|----------|------|
| 1.00E+00 | 0.96 |
|----------|------|

|          |     |
|----------|-----|
| 1.00E+00 | 0.6 |
|----------|-----|

|          |      |
|----------|------|
| 1.00E+00 | 0.52 |
|----------|------|

|          |      |
|----------|------|
| 1.00E+00 | 0.69 |
|----------|------|

|          |      |
|----------|------|
| 1.00E+00 | 0.94 |
|----------|------|

|          |      |
|----------|------|
| 1.00E+00 | 0.92 |
|----------|------|

|          |      |
|----------|------|
| 1.00E+00 | 0.68 |
|----------|------|

|          |      |
|----------|------|
| 1.00E+00 | 0.89 |
|----------|------|

|          |   |
|----------|---|
| 1.00E+00 | 0 |
|----------|---|

|          |      |
|----------|------|
| 1.00E+00 | 0.85 |
|----------|------|

|          |     |
|----------|-----|
| 1.00E+00 | 0.6 |
|----------|-----|

|          |      |
|----------|------|
| 1.00E+00 | 0.76 |
|----------|------|

|          |     |
|----------|-----|
| 1.00E+00 | 0.9 |
|----------|-----|

|          |   |
|----------|---|
| 1.00E+00 | 1 |
|----------|---|

|          |      |
|----------|------|
| 1.00E+00 | 0.86 |
|----------|------|

|          |   |
|----------|---|
| 1.00E+00 | 1 |
|----------|---|

|          |      |
|----------|------|
| 1.00E+00 | 0.53 |
|----------|------|

|          |      |
|----------|------|
| 1.00E+00 | 0.84 |
|----------|------|

|          |   |
|----------|---|
| 1.00E+00 | 1 |
|----------|---|



|          |      |
|----------|------|
| 1.00E+00 | 0.77 |
| 1.00E+00 | 1    |
| 1.00E+00 | 0.92 |

|          |      |
|----------|------|
| 1.00E+00 | 0.77 |
| 1.00E+00 | 0.59 |
| 1.00E+00 | 0.53 |

|          |      |
|----------|------|
| 1.00E+00 | 0.92 |
| 1.00E+00 | 0.83 |
| 1.00E+00 | 0.82 |
| 1.00E+00 | 0.96 |
| 1.00E+00 | 0.85 |
| 1.00E+00 | 0.7  |
| 1.00E+00 | 0.83 |
| 1.00E+00 | 0.64 |

|          |      |
|----------|------|
| 1.00E+00 | 0.86 |
|----------|------|

|          |      |
|----------|------|
| 1.00E+00 | 0.93 |
|----------|------|

|          |      |
|----------|------|
| 1.00E+00 | 0.65 |
| 1.00E+00 | 0.69 |
| 1.00E+00 | 1    |
| 1.00E+00 | 0.96 |
| 1.00E+00 | 1    |
| 1.00E+00 | 0.65 |
| 1.00E+00 | 0.81 |
| 1.00E+00 | 0.7  |
| 1.00E+00 | 0.56 |

|          |      |
|----------|------|
| 1.00E+00 | 0.91 |
|----------|------|

|          |      |
|----------|------|
| 1.00E+00 | 0.66 |
|----------|------|

|          |      |
|----------|------|
| 1.00E+00 | 0.71 |
|----------|------|

|          |      |
|----------|------|
| 1.00E+00 | 0.85 |
| 1.00E+00 | 0.84 |
| 1.00E+00 | 0.98 |
| 1.00E+00 | 0.83 |
| 1.00E+00 | 0    |
| 1.00E+00 | 0.95 |
| 1.00E+00 | 0    |
| 1.00E+00 | 0.9  |
| 1.00E+00 | 1    |
| 1.00E+00 | 0.69 |

|          |      |
|----------|------|
| 1.00E+00 | 0.72 |
| 1.00E+00 | 1    |
| 1.00E+00 | 0.89 |
| 1.00E+00 | 0.55 |
| 1.00E+00 | 0.84 |
| 1.00E+00 | 0.71 |
| 1.00E+00 | 0.9  |
| 1.00E+00 | 0.91 |
| 1.00E+00 | 0.79 |
| 1.00E+00 | 0.72 |
| 1.00E+00 | 0.84 |
| 1.00E+00 | 0.93 |
| 1.00E+00 | 0.75 |
| 1.00E+00 | 0.95 |
| 1.00E+00 | 0.86 |
| 1.00E+00 | 0.74 |
| 1.00E+00 | 0.56 |
| 1.00E+00 | 0.94 |
| 1.00E+00 | 0.88 |
| 1.00E+00 | 0.72 |
| 1.00E+00 | 0.94 |

|          |      |
|----------|------|
| 1.00E+00 | 0.87 |
| 1.00E+00 | 0.92 |

|          |      |
|----------|------|
| 1.00E+00 | 0.74 |
| 1.00E+00 | 0.57 |
| 1.00E+00 | 0.8  |
| 1.00E+00 | 0.88 |

|          |      |
|----------|------|
| 1.00E+00 | 0.84 |
| 1.00E+00 | 1    |
| 1.00E+00 | 0.7  |
| 1.00E+00 | 1    |
| 1.00E+00 | 0.63 |
| 1.00E+00 | 1    |
| 1.00E+00 | 1    |
| 1.00E+00 | 0.9  |
| 1.00E+00 | 0.75 |
| 1.00E+00 | 0.78 |
| 1.00E+00 | 0.7  |
| 1.00E+00 | 0.71 |
| 1.00E+00 | 0.88 |
| 1.00E+00 | 0.64 |
| 1.00E+00 | 0.86 |
| 1.00E+00 | 1    |
| 1.00E+00 | 0.74 |

|          |      |
|----------|------|
| 1.00E+00 | 0.48 |
| 1.00E+00 | 0.82 |
| 1.00E+00 | 0.66 |
| 1.00E+00 | 1    |
| 1.00E+00 | 0.73 |
| 1.00E+00 | 1    |
| 1.00E+00 | 0.93 |
| 1.00E+00 | 0.9  |
| 1.00E+00 | 0.89 |
| 1.00E+00 | 0.64 |
| 1.00E+00 | 0.83 |
| 1.00E+00 | 1    |
| 1.00E+00 | 0.86 |
| 1.00E+00 | 0.91 |
| 1.00E+00 | 0.84 |
| 1.00E+00 | 0.66 |
| 1.00E+00 | 1    |
| 1.00E+00 | 0.75 |
| 1.00E+00 | 0.95 |
| 1.00E+00 | 0.95 |
| 1.00E+00 | 1    |
| 1.00E+00 | 0.7  |
| 1.00E+00 | 0.93 |
| 1.00E+00 | 0.87 |
| 1.00E+00 | 1    |
| 1.00E+00 | 0.93 |
| 1.00E+00 | 0.75 |
| 1.00E+00 | 0.62 |
| 1.00E+00 | 1    |
| 1.00E+00 | 0.72 |
| 1.00E+00 | 0.74 |
| 1.00E+00 | 0.78 |
| 1.00E+00 | 0.89 |
| 1.00E+00 | 0.89 |
| 1.00E+00 | 0.86 |
| 1.00E+00 | 1    |
| 1.00E+00 | 0.81 |
| 1.00E+00 | 0.93 |
| 1.00E+00 | 1    |
| 1.00E+00 | 0.96 |
| 1.00E+00 | 0.96 |
| 1.00E+00 | 0.88 |
| 1.00E+00 | 0.92 |
| 1.00E+00 | 0.84 |
| 1.00E+00 | 0.91 |

|          |      |
|----------|------|
| 1.00E+00 | 0.66 |
| 1.00E+00 | 0.93 |
| 1.00E+00 | 1    |
| 1.00E+00 | 0.82 |
| 1.00E+00 | 1    |
| 1.00E+00 | 0.84 |
| 1.00E+00 | 0.88 |

|          |      |
|----------|------|
| 1.00E+00 | 1    |
| 1.00E+00 | 0.69 |
| 1.00E+00 | 0.87 |
| 1.00E+00 | 0.61 |
| 1.00E+00 | 0.7  |
| 1.00E+00 | 0.74 |
| 1.00E+00 | 1    |

|          |      |
|----------|------|
| 1.00E+00 | 0.93 |
| 1.00E+00 | 0.71 |
| 1.00E+00 | 0.55 |
| 1.00E+00 | 0.54 |
| 1.00E+00 | 0.9  |
| 1.00E+00 | 1    |
| 1.00E+00 | 0.84 |
| 1.00E+00 | 0.83 |
| 1.00E+00 | 0.75 |
| 1.00E+00 | 0.85 |
| 1.00E+00 | 0.75 |
| 1.00E+00 | 0.93 |

|          |      |
|----------|------|
| 1.00E+00 | 1    |
| 1.00E+00 | 0.92 |

|          |      |
|----------|------|
| 1.00E+00 | 0.58 |
| 1.00E+00 | 0.51 |
| 1.00E+00 | 0.8  |
| 1.00E+00 | 0.69 |

|          |      |
|----------|------|
| 1.00E+00 | 0.94 |
| 1.00E+00 | 0.89 |
| 1.00E+00 | 0.94 |
| 1.00E+00 | 1    |
| 1.00E+00 | 0.6  |

|          |      |
|----------|------|
| 1.00E+00 | 1    |
| 1.00E+00 | 0.74 |

|          |      |
|----------|------|
| 1.00E+00 | 0.5  |
| 1.00E+00 | 0.72 |

|          |      |
|----------|------|
| 1.00E+00 | 0.95 |
| 1.00E+00 | 0.59 |
| 1.00E+00 | 0.65 |
| 1.00E+00 | 0.62 |
| 1.00E+00 | 0.76 |
| 1.00E+00 | 0.86 |
| 1.00E+00 | 1    |
| 1.00E+00 | 0.94 |
| 1.00E+00 | 1    |
| 1.00E+00 | 0.75 |
| 1.00E+00 | 0.68 |
| 1.00E+00 | 0.95 |
| 1.00E+00 | 0.91 |
| 1.00E+00 | 0.68 |
| 1.00E+00 | 0.95 |
| 1.00E+00 | 0.93 |
| 1.00E+00 | 0.79 |
| 1.00E+00 | 0.51 |
| 1.00E+00 | 0.81 |
| 1.00E+00 | 0.89 |
| 1.00E+00 | 0.69 |
| 1.00E+00 | 0.86 |
| 1.00E+00 | 0.92 |
| 1.00E+00 | 0.96 |
| 1.00E+00 | 0.85 |
| 1.00E+00 | 1    |
| 1.00E+00 | 0.42 |
| 1.00E+00 | 0.77 |
| 1.00E+00 | 0.67 |
| 1.00E+00 | 1    |
| 1.00E+00 | 1    |
| 1.00E+00 | 0.93 |
| 1.00E+00 | 1    |
| 1.00E+00 | 0.65 |
| 1.00E+00 | 0.58 |
| 1.00E+00 | 0.9  |
| 1.00E+00 | 0.81 |
| 1.00E+00 | 0.95 |
| 1.00E+00 | 1    |
| 1.00E+00 | 1    |
| 1.00E+00 | 0.75 |
| 1.00E+00 | 1    |
| 1.00E+00 | 0.83 |
| 1.00E+00 | 0.56 |
| 1.00E+00 | 0.67 |
| 1.00E+00 | 0.8  |

|          |      |
|----------|------|
| 1.00E+00 | 0.88 |
| 1.00E+00 | 0.8  |
| 1.00E+00 | 1    |
| 1.00E+00 | 0.73 |
| 1.00E+00 | 0.88 |
| 1.00E+00 | 0.82 |
| 1.00E+00 | 0.83 |
| 1.00E+00 | 0.61 |
| 1.00E+00 | 0.81 |
| 1.00E+00 | 0.66 |
| 1.00E+00 | 0.8  |
| 1.00E+00 | 0.89 |
| 1.00E+00 | 0.94 |
| 1.00E+00 | 0.92 |
| 1.00E+00 | 0.94 |
| 1.00E+00 | 0.7  |
| 1.00E+00 | 0.98 |
| 1.00E+00 | 0.73 |
| 1.00E+00 | 0.9  |
| 1.00E+00 | 0.94 |
| 1.00E+00 | 0.84 |
| 1.00E+00 | 0.47 |
| 1.00E+00 | 0.82 |
| 1.00E+00 | 0.82 |
| 1.00E+00 | 0.78 |
| 1.00E+00 | 0.56 |
| 1.00E+00 | 0.8  |
| 1.00E+00 | 0.77 |
| 1.00E+00 | 1    |
| 1.00E+00 | 0.86 |
| 1.00E+00 | 0.79 |
| 1.00E+00 | 0.55 |
| 1.00E+00 | 1    |
| 1.00E+00 | 0.79 |
| 1.00E+00 | 0.86 |
| 1.00E+00 | 0.86 |
| 1.00E+00 | 1    |
| 1.00E+00 | 1    |

|          |      |
|----------|------|
| 1.00E+00 | 0.83 |
| 1.00E+00 | 0.66 |
| 1.00E+00 | 1    |
| 1.00E+00 | 0.5  |
| 1.00E+00 | 1    |
| 1.00E+00 | 0.75 |
| 1.00E+00 | 1    |

|          |      |
|----------|------|
| 1.00E+00 | 1    |
| 1.00E+00 | 1    |
| 1.00E+00 | 0.91 |
| 1.00E+00 | 0.89 |
| 1.00E+00 | 1    |

|          |      |
|----------|------|
| 1.00E+00 | 0.8  |
| 1.00E+00 | 1    |
| 1.00E+00 | 0.74 |
| 1.00E+00 | 1    |
| 1.00E+00 | 1    |

|          |      |
|----------|------|
| 1.00E+00 | 0.65 |
| 1.00E+00 | 0.51 |

|          |      |
|----------|------|
| 1.00E+00 | 0.48 |
| 1.00E+00 | 0.63 |
| 1.00E+00 | 0.59 |
| 1.00E+00 | 0.85 |
| 1.00E+00 | 0.86 |
| 1.00E+00 | 1    |
| 1.00E+00 | 0.9  |
| 1.00E+00 | 0.93 |
| 1.00E+00 | 0.45 |
| 1.00E+00 | 0.62 |
| 1.00E+00 | 1    |

|          |      |
|----------|------|
| 1.00E+00 | 0.67 |
| 1.00E+00 | 0.72 |

|          |      |
|----------|------|
| 1.00E+00 | 0.51 |
| 1.00E+00 | 1    |
| 1.00E+00 | 0.81 |

|          |      |
|----------|------|
| 1.00E+00 | 0.92 |
| 1.00E+00 | 0.78 |
| 1.00E+00 | 0.85 |
| 1.00E+00 | 0.67 |
| 1.00E+00 | 1    |

|          |      |
|----------|------|
| 1.00E+00 | 1    |
| 1.00E+00 | 0.55 |

|          |      |
|----------|------|
| 1.00E+00 | 0.78 |
| 1.00E+00 | 0.69 |
| 1.00E+00 | 1    |
| 1.00E+00 | 0.75 |
| 1.00E+00 | 0.71 |
| 1.00E+00 | 1    |
| 1.00E+00 | 0.9  |
| 1.00E+00 | 0.97 |
| 1.00E+00 | 0.83 |
| 1.00E+00 | 0.96 |
| 1.00E+00 | 0.93 |
| 1.00E+00 | 0.95 |
| 1.00E+00 | 1    |

|          |      |
|----------|------|
| 1.00E+00 | 0.92 |
| 1.00E+00 | 0.7  |
| 1.00E+00 | 1    |
| 1.00E+00 | 0.94 |

|          |      |
|----------|------|
| 1.00E+00 | 0.71 |
|----------|------|

|          |      |
|----------|------|
| 1.00E+00 | 0.87 |
| 1.00E+00 | 0.69 |
| 1.00E+00 | 1    |
| 1.00E+00 | 0.49 |
| 1.00E+00 | 0.93 |
| 1.00E+00 | 0.94 |
| 1.00E+00 | 0.65 |
| 1.00E+00 | 0.57 |
| 1.00E+00 | 0.91 |



|          |      |
|----------|------|
| 1.00E+00 | 0.8  |
| 1.00E+00 | 0.86 |
| 1.00E+00 | 0.92 |
| 1.00E+00 | 0.92 |
| 1.00E+00 | 0.98 |
| 1.00E+00 | 0.64 |
| 1.00E+00 | 0.62 |
| 1.00E+00 | 0.88 |
| 1.00E+00 | 1    |
| 1.00E+00 | 0.94 |
| 1.00E+00 | 0.9  |
| 1.00E+00 | 0.52 |
| 1.00E+00 | 0.9  |
| 1.00E+00 | 1    |
| 1.00E+00 | 1    |
| 1.00E+00 | 0.84 |
| 1.00E+00 | 1    |
| 1.00E+00 | 0.53 |
| 1.00E+00 | 0.61 |
| 1.00E+00 | 0.63 |
| 1.00E+00 | 0.74 |
| 1.00E+00 | 0.68 |
| 1.00E+00 | 0.89 |
| 1.00E+00 | 0.89 |
| 1.00E+00 | 0.82 |
| 1.00E+00 | 0.82 |
| 1.00E+00 | 0.83 |
| 1.00E+00 | 0.94 |
| 1.00E+00 | 0.94 |
| 1.00E+00 | 0.77 |
| 1.00E+00 | 0.61 |
| 1.00E+00 | 0.74 |
| 1.00E+00 | 0.8  |
| 1.00E+00 | 0.8  |
| 1.00E+00 | 0.79 |
| 1.00E+00 | 0.96 |
| 1.00E+00 | 0.84 |
| 1.00E+00 | 0.95 |
| 1.00E+00 | 0.89 |
| 1.00E+00 | 1    |
| 1.00E+00 | 0.78 |
| 1.00E+00 | 0.91 |
| 1.00E+00 | 0.84 |
| 1.00E+00 | 0.48 |
| 1.00E+00 | 0.63 |

|          |      |
|----------|------|
| 1.00E+00 | 0.74 |
| 1.00E+00 | 1    |
| 1.00E+00 | 0.92 |
| 1.00E+00 | 0.91 |
| 1.00E+00 | 0.8  |
| 1.00E+00 | 0.6  |
| 1.00E+00 | 1    |
| 1.00E+00 | 0.61 |
| 1.00E+00 | 1    |
| 1.00E+00 | 0.9  |
| 1.00E+00 | 1    |
| 1.00E+00 | 0.89 |
| 1.00E+00 | 1    |
| 1.00E+00 | 0.74 |
| 1.00E+00 | 0.8  |
| 1.00E+00 | 1    |
| 1.00E+00 | 0.78 |
| 1.00E+00 | 0.76 |
| 1.00E+00 | 0.6  |
| 1.00E+00 | 0.84 |
| 1.00E+00 | 0.71 |
| 1.00E+00 | 0.96 |
| 1.00E+00 | 0.74 |
| 1.00E+00 | 0.93 |
| 1.00E+00 | 0.59 |
| 1.00E+00 | 1    |
| 1.00E+00 | 0.91 |
| 1.00E+00 | 0.95 |
| 1.00E+00 | 0.89 |
| 1.00E+00 | 0.88 |
| 1.00E+00 | 0.91 |
| 1.00E+00 | 0.92 |
| 1.00E+00 | 0.8  |
| 1.00E+00 | 0.98 |
| 1.00E+00 | 0.97 |
| 1.00E+00 | 0.93 |
| 1.00E+00 | 0.95 |
| 1.00E+00 | 0.89 |
| 1.00E+00 | 1    |
| 1.00E+00 | 0.81 |
| 1.00E+00 | 0.79 |
| 1.00E+00 | 0.76 |
| 1.00E+00 | 0.82 |
| 1.00E+00 | 0.93 |
| 1.00E+00 | 0.86 |

|          |      |
|----------|------|
| 1.00E+00 | 0.73 |
| 1.00E+00 | 0.89 |
| 1.00E+00 | 1    |
| 1.00E+00 | 1    |
| 1.00E+00 | 0.92 |
| 1.00E+00 | 0.81 |
| 1.00E+00 | 0.87 |
| 1.00E+00 | 0.91 |
| 1.00E+00 | 0.92 |
| 1.00E+00 | 0.95 |
| 1.00E+00 | 1    |

|          |      |
|----------|------|
| 1.00E+00 | 0.81 |
| 1.00E+00 | 0.92 |
| 1.00E+00 | 0.8  |
| 1.00E+00 | 0.92 |
| 1.00E+00 | 0.88 |
| 1.00E+00 | 0.63 |
| 1.00E+00 | 0.94 |

|          |      |
|----------|------|
| 1.00E+00 | 0.87 |
| 1.00E+00 | 0.55 |

|          |      |
|----------|------|
| 1.00E+00 | 0.67 |
| 1.00E+00 | 0.86 |
| 1.00E+00 | 0.87 |
| 1.00E+00 | 0.96 |
| 1.00E+00 | 0.71 |
| 1.00E+00 | 0.92 |
| 1.00E+00 | 0.69 |
| 1.00E+00 | 0.94 |
| 1.00E+00 | 0.79 |

|          |      |
|----------|------|
| 1.00E+00 | 0.92 |
| 1.00E+00 | 0.72 |
| 1.00E+00 | 0.9  |
| 1.00E+00 | 0.9  |
| 1.00E+00 | 0.75 |
| 1.00E+00 | 0.96 |

|          |      |
|----------|------|
| 1.00E+00 | 0.74 |
| 1.00E+00 | 0.74 |
| 1.00E+00 | 1    |
| 1.00E+00 | 0.92 |

|          |      |
|----------|------|
| 1.00E+00 | 0.91 |
| 1.00E+00 | 0.8  |
| 1.00E+00 | 0.6  |
| 1.00E+00 | 1    |
| 1.00E+00 | 0.61 |
| 1.00E+00 | 1    |
| 1.00E+00 | 0.9  |
| 1.00E+00 | 1    |
| 1.00E+00 | 0.89 |
| 1.00E+00 | 1    |
| 1.00E+00 | 0.74 |
| 1.00E+00 | 0.8  |
| 1.00E+00 | 1    |
| 1.00E+00 | 0.78 |
| 1.00E+00 | 0.76 |
| 1.00E+00 | 0.6  |
| 1.00E+00 | 0.84 |
| 1.00E+00 | 0.71 |
| 1.00E+00 | 0.96 |
| 1.00E+00 | 0.74 |
| 1.00E+00 | 0.93 |
| 1.00E+00 | 0.59 |
| 1.00E+00 | 1    |
| 1.00E+00 | 0.91 |
| 1.00E+00 | 0.95 |
| 1.00E+00 | 0.89 |
| 1.00E+00 | 0.88 |
| 1.00E+00 | 0.91 |
| 1.00E+00 | 0.92 |
| 1.00E+00 | 0.8  |
| 1.00E+00 | 0.97 |
| 1.00E+00 | 0.73 |
| 1.00E+00 | 0.75 |
| 1.00E+00 | 0.96 |
| 1.00E+00 | 0.61 |
| 1.00E+00 | 0.92 |
| 1.00E+00 | 0.74 |
| 1.00E+00 | 1    |
| 1.00E+00 | 0.92 |
| 1.00E+00 | 0.91 |

|          |      |
|----------|------|
| 1.00E+00 | 0.8  |
| 1.00E+00 | 0.6  |
| 1.00E+00 | 1    |
| 1.00E+00 | 0.61 |
| 1.00E+00 | 1    |
| 1.00E+00 | 0.9  |
| 1.00E+00 | 1    |
| 1.00E+00 | 0.89 |
| 1.00E+00 | 1    |
| 1.00E+00 | 0.74 |
| 1.00E+00 | 0.8  |
| 1.00E+00 | 1    |
| 1.00E+00 | 0.78 |
| 1.00E+00 | 0.76 |
| 1.00E+00 | 0.6  |
| 1.00E+00 | 0.84 |
| 1.00E+00 | 0.71 |
| 1.00E+00 | 0.96 |
| 1.00E+00 | 0.74 |
| 1.00E+00 | 0.93 |
| 1.00E+00 | 0.59 |
| 1.00E+00 | 1    |
| 1.00E+00 | 1    |
| 1.00E+00 | 1    |
| 1.00E+00 | 0.93 |
| 1.00E+00 | 0.69 |
| 1.00E+00 | 0.91 |
| 1.00E+00 | 0.91 |
| 1.00E+00 | 1    |
| 1.00E+00 | 0.94 |
| 1.00E+00 | 0.94 |
| 1.00E+00 | 0.94 |
| 1.00E+00 | 0.94 |
| 1.00E+00 | 0.92 |
| 1.00E+00 | 0.48 |
| 1.00E+00 | 0.96 |
| 1.00E+00 | 0.84 |
| 1.00E+00 | 0.85 |
| 1.00E+00 | 1    |
| 1.00E+00 | 1    |
| 1.00E+00 | 0.64 |
| 1.00E+00 | 0.57 |
| 1.00E+00 | 1    |
| 1.00E+00 | 0.7  |
| 1.00E+00 | 0.91 |
| 1.00E+00 | 0.75 |
| 1.00E+00 | 0.53 |
| 1.00E+00 | 0.87 |
| 1.00E+00 | 0.88 |

|          |      |
|----------|------|
| 1.00E+00 | 0.68 |
| 1.00E+00 | 0.83 |
| 1.00E+00 | 0.91 |
| 1.00E+00 | 0.81 |
| 1.00E+00 | 1    |

|          |      |
|----------|------|
| 1.00E+00 | 0.6  |
| 1.00E+00 | 1    |
| 1.00E+00 | 0.83 |
| 1.00E+00 | 1    |
| 1.00E+00 | 0.93 |
| 1.00E+00 | 0.7  |
| 1.00E+00 | 0.94 |
| 1.00E+00 | 0.93 |
| 1.00E+00 | 0.89 |
| 1.00E+00 | 0.94 |
| 1.00E+00 | 1    |
| 1.00E+00 | 0.69 |
| 1.00E+00 | 0.73 |
| 1.00E+00 | 0.67 |

|          |      |
|----------|------|
| 1.00E+00 | 0.85 |
| 1.00E+00 | 0.94 |
| 1.00E+00 | 0.82 |
| 1.00E+00 | 0.91 |
| 1.00E+00 | 0.91 |
| 1.00E+00 | 0.82 |
| 1.00E+00 | 0.77 |
| 1.00E+00 | 1    |
| 1.00E+00 | 1    |
| 1.00E+00 | 0.83 |
| 1.00E+00 | 0.92 |
| 1.00E+00 | 0.57 |
| 1.00E+00 | 0.48 |
| 1.00E+00 | 0.86 |
| 1.00E+00 | 0.62 |

|          |      |
|----------|------|
| 1.00E+00 | 0.85 |
| 1.00E+00 | 0.78 |
| 1.00E+00 | 0.65 |
| 1.00E+00 | 0.81 |
| 1.00E+00 | 0.86 |

|          |      |
|----------|------|
| 1.00E+00 | 0.52 |
|----------|------|

|          |      |
|----------|------|
| 1.00E+00 | 0.79 |
| 1.00E+00 | 0.9  |
| 1.00E+00 | 1    |

|          |      |
|----------|------|
| 1.00E+00 | 1    |
| 1.00E+00 | 0.89 |
| 1.00E+00 | 0.92 |
| 1.00E+00 | 0.72 |
| 1.00E+00 | 0.82 |

|          |      |
|----------|------|
| 1.00E+00 | 0.85 |
| 1.00E+00 | 0.88 |
| 1.00E+00 | 0.92 |
| 1.00E+00 | 0.89 |
| 1.00E+00 | 0.56 |
| 1.00E+00 | 0.74 |
| 1.00E+00 | 0.95 |
| 1.00E+00 | 0.95 |

|          |      |
|----------|------|
| 1.00E+00 | 0.63 |
| 1.00E+00 | 0.68 |
| 1.00E+00 | 1    |
| 1.00E+00 | 0.82 |
| 1.00E+00 | 1    |
| 1.00E+00 | 1    |
| 1.00E+00 | 0.9  |
| 1.00E+00 | 0.72 |
| 1.00E+00 | 1    |
| 1.00E+00 | 0.86 |
| 1.00E+00 | 0.9  |
| 1.00E+00 | 0.54 |
| 1.00E+00 | 0.94 |
| 1.00E+00 | 0.93 |

|          |      |
|----------|------|
| 1.00E+00 | 0.91 |
| 1.00E+00 | 0.93 |

|          |      |
|----------|------|
| 1.00E+00 | 0.77 |
| 1.00E+00 | 0.81 |
| 1.00E+00 | 0.69 |
| 1.00E+00 | 0.77 |

|          |      |
|----------|------|
| 1.00E+00 | 0.88 |
| 1.00E+00 | 0.74 |
| 1.00E+00 | 0.89 |
| 1.00E+00 | 1    |
| 1.00E+00 | 0.71 |

|          |   |
|----------|---|
| 1.00E+00 | 1 |
|----------|---|

|          |      |
|----------|------|
| 1.00E+00 | 0.92 |
| 1.00E+00 | 0.89 |
| 1.00E+00 | 0.89 |
| 1.00E+00 | 0.45 |

|          |      |
|----------|------|
| 1.00E+00 | 0.9  |
| 1.00E+00 | 0.86 |
| 1.00E+00 | 0.96 |
| 1.00E+00 | 0.72 |
| 1.00E+00 | 0.91 |
| 1.00E+00 | 0.71 |
| 1.00E+00 | 0    |
| 1.00E+00 | 0.71 |
| 1.00E+00 | 1    |
| 1.00E+00 | 1    |
| 1.00E+00 | 0.88 |
| 1.00E+00 | 0.94 |
| 1.00E+00 | 1    |
| 1.00E+00 | 0.82 |
| 1.00E+00 | 0.66 |
| 1.00E+00 | 0.93 |
| 1.00E+00 | 0.74 |
| 1.00E+00 | 0.95 |
| 1.00E+00 | 0.9  |

|          |      |
|----------|------|
| 1.00E+00 | 0.8  |
| 1.00E+00 | 0.96 |
| 1.00E+00 | 0.82 |
| 1.00E+00 | 0.93 |
| 1.00E+00 | 0.95 |
| 1.00E+00 | 0.89 |
| 1.00E+00 | 0.86 |
| 1.00E+00 | 0.84 |
| 1.00E+00 | 1    |
| 1.00E+00 | 1    |
| 1.00E+00 | 0.78 |
| 1.00E+00 | 0.7  |
| 1.00E+00 | 0.5  |
| 1.00E+00 | 0.96 |



|          |      |
|----------|------|
| 1.00E+00 | 0.64 |
| 1.00E+00 | 0.95 |
| 1.00E+00 | 0.97 |

|          |      |
|----------|------|
| 1.00E+00 | 0.51 |
| 1.00E+00 | 0.82 |
| 1.00E+00 | 0.86 |
| 1.00E+00 | 0.83 |
| 1.00E+00 | 0.95 |
| 1.00E+00 | 0.75 |
| 1.00E+00 | 0.56 |
| 1.00E+00 | 0.84 |

|          |      |
|----------|------|
| 1.00E+00 | 0.7  |
| 1.00E+00 | 0.82 |
| 1.00E+00 | 0.82 |
| 1.00E+00 | 0.85 |

|          |      |
|----------|------|
| 1.00E+00 | 0.94 |
| 1.00E+00 | 0.94 |
| 1.00E+00 | 0.71 |
| 1.00E+00 | 0.96 |
| 1.00E+00 | 0.91 |
| 1.00E+00 | 0.98 |

|          |      |
|----------|------|
| 1.00E+00 | 0.9  |
| 1.00E+00 | 1    |
| 1.00E+00 | 0.72 |
| 1.00E+00 | 0.87 |

|          |      |
|----------|------|
| 1.00E+00 | 0.68 |
| 1.00E+00 | 0.58 |
| 1.00E+00 | 1    |
| 1.00E+00 | 0.9  |
| 1.00E+00 | 0.5  |
| 1.00E+00 | 0.85 |
| 1.00E+00 | 0.91 |
| 1.00E+00 | 0.86 |
| 1.00E+00 | 0.87 |
| 1.00E+00 | 0.93 |
| 1.00E+00 | 0.7  |
| 1.00E+00 | 0.95 |

|          |      |
|----------|------|
| 1.00E+00 | 0.94 |
| 1.00E+00 | 0.81 |
| 1.00E+00 | 0.63 |
| 1.00E+00 | 0.78 |
| 1.00E+00 | 0.92 |
| 1.00E+00 | 0.77 |
| 1.00E+00 | 0.86 |
| 1.00E+00 | 0.96 |
| 1.00E+00 | 0.74 |
| 1.00E+00 | 0.95 |
| 1.00E+00 | 0.87 |
| 1.00E+00 | 0.92 |
| 1.00E+00 | 0.93 |
| 1.00E+00 | 0.94 |
| 1.00E+00 | 1    |
| 1.00E+00 | 0.55 |
| 1.00E+00 | 0.81 |
| 1.00E+00 | 0.74 |
| 1.00E+00 | 0.7  |
| 1.00E+00 | 0.88 |
| 1.00E+00 | 0.85 |
| 1.00E+00 | 1    |
| 1.00E+00 | 0.86 |
| 1.00E+00 | 0.93 |
| 1.00E+00 | 0.96 |
| 1.00E+00 | 0.93 |
| 1.00E+00 | 0.85 |
| 1.00E+00 | 0.62 |
| 1.00E+00 | 0.91 |
| 1.00E+00 | 0.75 |
| 1.00E+00 | 0.96 |
| 1.00E+00 | 0.96 |
| 1.00E+00 | 0.95 |
| 1.00E+00 | 1    |
| 1.00E+00 | 1    |
| 1.00E+00 | 0.97 |
| 1.00E+00 | 1    |
| 1.00E+00 | 0.89 |
| 1.00E+00 | 1    |
| 1.00E+00 | 0.81 |
| 1.00E+00 | 1    |
| 1.00E+00 | 0.87 |

|          |      |
|----------|------|
| 1.00E+00 | 0.93 |
| 1.00E+00 | 0.83 |
| 1.00E+00 | 0.93 |
| 1.00E+00 | 0.87 |
| 1.00E+00 | 0.71 |
| 1.00E+00 | 0.84 |
| 1.00E+00 | 1    |
| 1.00E+00 | 0.91 |
| 1.00E+00 | 0.92 |
| 1.00E+00 | 1    |
| 1.00E+00 | 1    |
| 1.00E+00 | 0.87 |
| 1.00E+00 | 0.61 |
| 1.00E+00 | 0.93 |
| 1.00E+00 | 0.8  |
| 1.00E+00 | 0.75 |
| 1.00E+00 | 0.78 |
| 1.00E+00 | 0.96 |
| 1.00E+00 | 0.98 |
| 1.00E+00 | 1    |
| 1.00E+00 | 0.88 |
| 1.00E+00 | 0.86 |
| 1.00E+00 | 0.63 |
| 1.00E+00 | 0.8  |
| 1.00E+00 | 0.56 |
| 1.00E+00 | 0.67 |
| 1.00E+00 | 0.91 |
| 1.00E+00 | 0.93 |
| 1.00E+00 | 0.93 |
| 1.00E+00 | 0.92 |
| 1.00E+00 | 1    |
| 1.00E+00 | 0.9  |
| 1.00E+00 | 0.96 |
| 1.00E+00 | 0.72 |
| 1.00E+00 | 1    |
| 1.00E+00 | 0.94 |
| 1.00E+00 | 1    |
| 1.00E+00 | 0.66 |

1.00E+00 0.94

1.00E+00 0.66

1.00E+00 1

1.00E+00 0.8

1.00E+00 0.85

1.00E+00 0.84

1.00E+00 0.9

1.00E+00 0.54

1.00E+00 0.9

1.00E+00 0.89

1.00E+00 0.88

1.00E+00 0.96

1.00E+00 0.92

1.00E+00 0.78

1.00E+00 0.81

1.00E+00 0.84

1.00E+00 0.73

1.00E+00 0.68

1.00E+00 0.58

1.00E+00 0.84

1.00E+00 0.84

1.00E+00 1

1.00E+00 0.89

1.00E+00 0.88

1.00E+00 0.78

1.00E+00 0.87

1.00E+00 0.71

1.00E+00 0.72

1.00E+00 0.78

1.00E+00 0.79

1.00E+00 1

1.00E+00 0.94

1.00E+00 0.67

1.00E+00 0.64

1.00E+00 0.69

1.00E+00 0.98

|          |      |
|----------|------|
| 1.00E+00 | 1    |
| 1.00E+00 | 0.84 |
| 1.00E+00 | 0.79 |
| 1.00E+00 | 0.92 |
| 1.00E+00 | 0.9  |
| 1.00E+00 | 0.94 |
| 1.00E+00 | 0.87 |
| 1.00E+00 | 0.89 |
| 1.00E+00 | 0.95 |
| 1.00E+00 | 0.96 |
| 1.00E+00 | 0.76 |

|          |      |
|----------|------|
| 1.00E+00 | 0.96 |
|----------|------|

|          |      |
|----------|------|
| 1.00E+00 | 0.76 |
| 1.00E+00 | 1    |
| 1.00E+00 | 0.84 |
| 1.00E+00 | 0.95 |
| 1.00E+00 | 0.7  |
| 1.00E+00 | 0.87 |
| 1.00E+00 | 0.79 |
| 1.00E+00 | 0.87 |

|          |      |
|----------|------|
| 1.00E+00 | 0.91 |
| 1.00E+00 | 0.83 |
| 1.00E+00 | 0.48 |
| 1.00E+00 | 0.76 |
| 1.00E+00 | 0.83 |
| 1.00E+00 | 0.95 |
| 1.00E+00 | 0.81 |
| 1.00E+00 | 0.9  |
| 1.00E+00 | 1    |
| 1.00E+00 | 0.97 |
| 1.00E+00 | 0.97 |
| 1.00E+00 | 0.85 |
| 1.00E+00 | 0.91 |

|          |      |
|----------|------|
| 1.00E+00 | 0.94 |
| 1.00E+00 | 0.96 |
| 1.00E+00 | 0.93 |

|          |      |
|----------|------|
| 1.00E+00 | 0.45 |
| 1.00E+00 | 0.87 |
| 1.00E+00 | 0.75 |
| 1.00E+00 | 0.85 |
| 1.00E+00 | 0.95 |

|          |      |
|----------|------|
| 1.00E+00 | 0.8  |
| 1.00E+00 | 0.89 |
| 1.00E+00 | 0.81 |

|          |      |
|----------|------|
| 1.00E+00 | 1    |
| 1.00E+00 | 0.83 |
| 1.00E+00 | 0.9  |
| 1.00E+00 | 1    |
| 1.00E+00 | 0.87 |

|          |      |
|----------|------|
| 1.00E+00 | 1    |
| 1.00E+00 | 0.75 |
| 1.00E+00 | 1    |
| 1.00E+00 | 0.76 |
| 1.00E+00 | 0.87 |
| 1.00E+00 | 0.71 |
| 1.00E+00 | 0.88 |
| 1.00E+00 | 0.85 |
| 1.00E+00 | 0.79 |
| 1.00E+00 | 0.92 |
| 1.00E+00 | 0.93 |
| 1.00E+00 | 0.79 |
| 1.00E+00 | 1    |
| 1.00E+00 | 0.93 |
| 1.00E+00 | 0.69 |

|          |      |
|----------|------|
| 1.00E+00 | 0.84 |
| 1.00E+00 | 0.7  |
| 1.00E+00 | 0.89 |
| 1.00E+00 | 0.81 |
| 1.00E+00 | 0.88 |
| 1.00E+00 | 0.9  |
| 1.00E+00 | 0.51 |
| 1.00E+00 | 0.5  |
| 1.00E+00 | 1    |
| 1.00E+00 | 0.92 |
| 1.00E+00 | 0.93 |
| 1.00E+00 | 1    |
| 1.00E+00 | 0.88 |
| 1.00E+00 | 1    |
| 1.00E+00 | 0.55 |
| 1.00E+00 | 0.73 |
| 1.00E+00 | 0.74 |

|          |      |
|----------|------|
| 1.00E+00 | 0.78 |
| 1.00E+00 | 0.84 |

|          |      |
|----------|------|
| 1.00E+00 | 0.9  |
| 1.00E+00 | 0.97 |
| 1.00E+00 | 1    |
| 1.00E+00 | 0.8  |
| 1.00E+00 | 1    |
| 1.00E+00 | 0.61 |
| 1.00E+00 | 0.73 |
| 1.00E+00 | 0.75 |
| 1.00E+00 | 0.72 |
| 1.00E+00 | 0.74 |
| 1.00E+00 | 0.94 |

|          |      |
|----------|------|
| 1.00E+00 | 0.46 |
| 1.00E+00 | 0.84 |
| 1.00E+00 | 0.76 |
| 1.00E+00 | 0.89 |

|          |      |
|----------|------|
| 1.00E+00 | 0.9  |
| 1.00E+00 | 0.83 |

|          |      |
|----------|------|
| 1.00E+00 | 0.79 |
| 1.00E+00 | 0.94 |
| 1.00E+00 | 0.71 |
| 1.00E+00 | 0.61 |
| 1.00E+00 | 0.93 |
| 1.00E+00 | 0.88 |
| 1.00E+00 | 0.94 |

|          |      |
|----------|------|
| 1.00E+00 | 0.89 |
| 1.00E+00 | 1    |

|          |      |
|----------|------|
| 1.00E+00 | 0.57 |
| 1.00E+00 | 0.78 |
| 1.00E+00 | 0.94 |
| 1.00E+00 | 1    |
| 1.00E+00 | 1    |
| 1.00E+00 | 1    |
| 1.00E+00 | 0.92 |
| 1.00E+00 | 0.67 |
| 1.00E+00 | 0.74 |
| 1.00E+00 | 0.89 |
| 1.00E+00 | 1    |
| 1.00E+00 | 1    |
| 1.00E+00 | 0.68 |

|          |      |
|----------|------|
| 1.00E+00 | 0.56 |
| 1.00E+00 | 1    |
| 1.00E+00 | 0.83 |

|          |      |
|----------|------|
| 1.00E+00 | 0.96 |
| 1.00E+00 | 0.66 |
| 1.00E+00 | 1    |
| 1.00E+00 | 0.74 |
| 1.00E+00 | 0.93 |
| 1.00E+00 | 0.83 |
| 1.00E+00 | 0.81 |
| 1.00E+00 | 0.85 |
| 1.00E+00 | 0.81 |
| 1.00E+00 | 0.84 |
| 1.00E+00 | 0.67 |
| 1.00E+00 | 0.78 |
| 1.00E+00 | 0.72 |
| 1.00E+00 | 0.85 |
| 1.00E+00 | 0.95 |
| 1.00E+00 | 0.73 |
| 1.00E+00 | 0.78 |

|          |      |
|----------|------|
| 1.00E+00 | 0.78 |
| 1.00E+00 | 0.9  |
| 1.00E+00 | 1    |
| 1.00E+00 | 0.74 |
| 1.00E+00 | 0.94 |
| 1.00E+00 | 0.93 |

|          |      |
|----------|------|
| 1.00E+00 | 0.77 |
| 1.00E+00 | 0.81 |
| 1.00E+00 | 1    |
| 1.00E+00 | 0.51 |
| 1.00E+00 | 0.99 |
| 1.00E+00 | 0.82 |
| 1.00E+00 | 0.96 |
| 1.00E+00 | 0.86 |

|          |      |
|----------|------|
| 1.00E+00 | 0.84 |
| 1.00E+00 | 1    |
| 1.00E+00 | 0.82 |
| 1.00E+00 | 0.89 |
| 1.00E+00 | 0.94 |
| 1.00E+00 | 1    |
| 1.00E+00 | 0.78 |

|          |      |
|----------|------|
| 1.00E+00 | 0.8  |
| 1.00E+00 | 0.52 |
| 1.00E+00 | 0.83 |
| 1.00E+00 | 1    |



|          |      |
|----------|------|
| 1.00E+00 | 1    |
| 1.00E+00 | 0.63 |
| 1.00E+00 | 0.57 |
| 1.00E+00 | 0.98 |
| 1.00E+00 | 1    |
| 1.00E+00 | 0.65 |
| 1.00E+00 | 0.72 |

|          |      |
|----------|------|
| 1.00E+00 | 1    |
| 1.00E+00 | 1    |
| 1.00E+00 | 0.76 |

|          |      |
|----------|------|
| 1.00E+00 | 0.8  |
| 1.00E+00 | 0.87 |
| 1.00E+00 | 1    |
| 1.00E+00 | 0.9  |
| 1.00E+00 | 0.8  |

|          |      |
|----------|------|
| 1.00E+00 | 0.71 |
| 1.00E+00 | 0.86 |
| 1.00E+00 | 0    |
| 1.00E+00 | 0.83 |
| 1.00E+00 | 0.81 |
| 1.00E+00 | 0.76 |
| 1.00E+00 | 0.95 |
| 1.00E+00 | 0.74 |
| 1.00E+00 | 0.94 |
| 1.00E+00 | 0.91 |

|          |      |
|----------|------|
| 1.00E+00 | 0.94 |
| 1.00E+00 | 0.94 |
| 1.00E+00 | 0.71 |
| 1.00E+00 | 1    |

|          |      |
|----------|------|
| 1.00E+00 | 1    |
| 1.00E+00 | 1    |
| 1.00E+00 | 0.76 |
| 1.00E+00 | 0.66 |
| 1.00E+00 | 0.95 |
| 1.00E+00 | 0.92 |
| 1.00E+00 | 0.98 |
| 1.00E+00 | 0.73 |

|          |      |
|----------|------|
| 1.00E+00 | 0.51 |
| 1.00E+00 | 0.91 |

|          |      |
|----------|------|
| 1.00E+00 | 0.82 |
| 1.00E+00 | 0.72 |
| 1.00E+00 | 0.81 |
| 1.00E+00 | 0.67 |
| 1.00E+00 | 0.8  |
| 1.00E+00 | 0.49 |
| 1.00E+00 | 0.87 |
| 1.00E+00 | 0.4  |
| 1.00E+00 | 0.54 |
| 1.00E+00 | 0.76 |
| 1.00E+00 | 0.63 |
| 1.00E+00 | 0.45 |
| 1.00E+00 | 0.57 |
| 1.00E+00 | 0.55 |
| 1.00E+00 | 0.95 |
| 1.00E+00 | 0.77 |
| 1.00E+00 | 0.63 |
| 1.00E+00 | 0.65 |
| 1.00E+00 | 0.56 |
| 1.00E+00 | 1    |
| 1.00E+00 | 0.88 |
| 1.00E+00 | 0.95 |
| 1.00E+00 | 1    |
| 1.00E+00 | 0.87 |
| 1.00E+00 | 0.69 |
| 1.00E+00 | 1    |
| 1.00E+00 | 0.72 |
| 1.00E+00 | 0.84 |
| 1.00E+00 | 1    |
| 1.00E+00 | 0.81 |
| 1.00E+00 | 0.88 |
| 1.00E+00 | 1    |
| 1.00E+00 | 0.76 |
| 1.00E+00 | 0.94 |
| 1.00E+00 | 0.88 |
| 1.00E+00 | 0.64 |
| 1.00E+00 | 1    |
| 1.00E+00 | 0.72 |
| 1.00E+00 | 0.85 |
| 1.00E+00 | 1    |
| 1.00E+00 | 0.89 |
| 1.00E+00 | 0.98 |
| 1.00E+00 | 0.91 |

|          |      |
|----------|------|
| 1.00E+00 | 0.94 |
| 1.00E+00 | 0.8  |
| 1.00E+00 | 0.78 |
| 1.00E+00 | 0.94 |
| 1.00E+00 | 0.95 |
| 1.00E+00 | 0.74 |
| 1.00E+00 | 0.96 |
| 1.00E+00 | 0.89 |
| 1.00E+00 | 0.89 |
| 1.00E+00 | 0.52 |
| 1.00E+00 | 0.5  |
| 1.00E+00 | 0.72 |
| 1.00E+00 | 1    |
| 1.00E+00 | 1    |

|          |      |
|----------|------|
| 1.00E+00 | 0.81 |
| 1.00E+00 | 0.91 |
| 1.00E+00 | 0.91 |
| 1.00E+00 | 0.69 |
| 1.00E+00 | 0.92 |
| 1.00E+00 | 0.93 |
| 1.00E+00 | 1    |

|          |      |
|----------|------|
| 1.00E+00 | 0.92 |
| 1.00E+00 | 0.73 |
| 1.00E+00 | 0.89 |
| 1.00E+00 | 0.89 |
| 1.00E+00 | 0.78 |
| 1.00E+00 | 0.54 |
| 1.00E+00 | 0.39 |
| 1.00E+00 | 0.7  |

|          |      |
|----------|------|
| 1.00E+00 | 0.91 |
| 1.00E+00 | 0.48 |

|          |      |
|----------|------|
| 1.00E+00 | 0.77 |
| 1.00E+00 | 0.75 |
| 1.00E+00 | 0.66 |
| 1.00E+00 | 0.52 |
| 1.00E+00 | 0.94 |

|          |      |
|----------|------|
| 1.00E+00 | 0.88 |
| 1.00E+00 | 0.66 |
| 1.00E+00 | 0.94 |
| 1.00E+00 | 0.96 |

|          |      |
|----------|------|
| 1.00E+00 | 1    |
| 1.00E+00 | 0    |
| 1.00E+00 | 0.78 |
| 1.00E+00 | 0.81 |
| 1.00E+00 | 0.79 |
| 1.00E+00 | 1    |
| 1.00E+00 | 0.92 |
| 1.00E+00 | 0.82 |
| 1.00E+00 | 1    |
| 1.00E+00 | 0.59 |
| 1.00E+00 | 0.56 |
| 1.00E+00 | 1    |
| 1.00E+00 | 1    |
| 1.00E+00 | 1    |
| 1.00E+00 | 0.7  |
| 1.00E+00 | 0.88 |
| 1.00E+00 | 0.83 |
| 1.00E+00 | 0.97 |
| 1.00E+00 | 0.91 |
| 1.00E+00 | 0.82 |
| 1.00E+00 | 1    |
| 1.00E+00 | 1    |
| 1.00E+00 | 1    |
| 1.00E+00 | 0.94 |
| 1.00E+00 | 0.89 |
| 1.00E+00 | 0.79 |
| 1.00E+00 | 0    |
| 1.00E+00 | 0.8  |
| 1.00E+00 | 0.93 |
| 1.00E+00 | 0.62 |
| 1.00E+00 | 0.83 |
| 1.00E+00 | 0.8  |
| 1.00E+00 | 0.69 |
| 1.00E+00 | 0.9  |
| 1.00E+00 | 1    |
| 1.00E+00 | 0.81 |
| 1.00E+00 | 0.65 |
| 1.00E+00 | 0.77 |
| 1.00E+00 | 0.75 |
| 1.00E+00 | 0.89 |
| 1.00E+00 | 0.89 |
| 1.00E+00 | 0.89 |
| 1.00E+00 | 0.91 |
| 1.00E+00 | 0.76 |
| 1.00E+00 | 1    |

|          |      |
|----------|------|
| 1.00E+00 | 0.96 |
| 1.00E+00 | 0.75 |
| 1.00E+00 | 1    |
| 1.00E+00 | 0.93 |
| 1.00E+00 | 0.93 |
| 1.00E+00 | 0.77 |
| 1.00E+00 | 0.94 |
| 1.00E+00 | 1    |
| 1.00E+00 | 0.79 |

|          |      |
|----------|------|
| 1.00E+00 | 0.7  |
| 1.00E+00 | 0.71 |
| 1.00E+00 | 0.89 |
| 1.00E+00 | 1    |
| 1.00E+00 | 0.8  |
| 1.00E+00 | 0.85 |
| 1.00E+00 | 0.93 |
| 1.00E+00 | 0.62 |
| 1.00E+00 | 0.69 |
| 1.00E+00 | 0.91 |
| 1.00E+00 | 0.79 |
| 1.00E+00 | 0.91 |
| 1.00E+00 | 0.81 |

|          |      |
|----------|------|
| 1.00E+00 | 1    |
| 1.00E+00 | 0.82 |
| 1.00E+00 | 0.98 |
| 1.00E+00 | 0.84 |
| 1.00E+00 | 0.65 |
| 1.00E+00 | 0.93 |
| 1.00E+00 | 0.88 |
| 1.00E+00 | 0.96 |
| 1.00E+00 | 0.74 |
| 1.00E+00 | 0.74 |
| 1.00E+00 | 0.77 |
| 1.00E+00 | 0.52 |
| 1.00E+00 | 1    |
| 1.00E+00 | 0.97 |
| 1.00E+00 | 0.61 |

|          |     |
|----------|-----|
| 1.00E+00 | 0.8 |
|----------|-----|

|          |      |
|----------|------|
| 1.00E+00 | 0.55 |
| 1.00E+00 | 0.54 |
| 1.00E+00 | 0.59 |
| 1.00E+00 | 1    |
| 1.00E+00 | 0.69 |
| 1.00E+00 | 1    |

|          |      |
|----------|------|
| 1.00E+00 | 0.95 |
| 1.00E+00 | 0.74 |
| 1.00E+00 | 1    |
| 1.00E+00 | 0.83 |
| 1.00E+00 | 0.82 |
| 1.00E+00 | 0.81 |
| 1.00E+00 | 0.69 |
| 1.00E+00 | 0.97 |
| 1.00E+00 | 0.86 |
| 1.00E+00 | 0.95 |
| 1.00E+00 | 1    |
| 1.00E+00 | 0.81 |
| 1.00E+00 | 1    |
| 1.00E+00 | 0.57 |
| 1.00E+00 | 0.51 |
| 1.00E+00 | 1    |
| 1.00E+00 | 0.95 |
| 1.00E+00 | 1    |
| 1.00E+00 | 0.78 |
| 1.00E+00 | 1    |
| 1.00E+00 | 0.8  |
| 1.00E+00 | 0.81 |
| 1.00E+00 | 0.76 |
| 1.00E+00 | 0.95 |
| 1.00E+00 | 0.74 |
| 1.00E+00 | 0.94 |
| 1.00E+00 | 0.91 |
| 1.00E+00 | 1    |
| 1.00E+00 | 0.87 |
| 1.00E+00 | 0.81 |
| 1.00E+00 | 0.95 |
| 1.00E+00 | 0.95 |
| 1.00E+00 | 1    |
| 1.00E+00 | 0.87 |
| 1.00E+00 | 0.78 |
| 1.00E+00 | 1    |
| 1.00E+00 | 1    |

|          |      |
|----------|------|
| 1.00E+00 | 0.93 |
| 1.00E+00 | 0.85 |
| 1.00E+00 | 0.84 |
| 1.00E+00 | 0.83 |
| 1.00E+00 | 0.71 |
| 1.00E+00 | 0.89 |
| 1.00E+00 | 0.81 |
| 1.00E+00 | 0.81 |
| 1.00E+00 | 0.75 |
| 1.00E+00 | 0.74 |
| 1.00E+00 | 0.88 |
| 1.00E+00 | 0.87 |
| 1.00E+00 | 0.9  |
| 1.00E+00 | 0.79 |
| 1.00E+00 | 0.82 |
| 1.00E+00 | 1    |
| 1.00E+00 | 0.73 |
| 1.00E+00 | 0.94 |
| 1.00E+00 | 0.9  |
| 1.00E+00 | 1    |
| 1.00E+00 | 0.78 |
| 1.00E+00 | 1    |
| 1.00E+00 | 0.63 |
| 1.00E+00 | 0.62 |
| 1.00E+00 | 0.94 |
| 1.00E+00 | 1    |
| 1.00E+00 | 0.8  |
| 1.00E+00 | 0.82 |
| 1.00E+00 | 0.88 |
| 1.00E+00 | 0.59 |
| 1.00E+00 | 1    |
| 1.00E+00 | 1    |
| 1.00E+00 | 0.79 |
| 1.00E+00 | 0.89 |
| 1.00E+00 | 0.92 |
| 1.00E+00 | 0.71 |
| 1.00E+00 | 0.84 |
| 1.00E+00 | 0.89 |
| 1.00E+00 | 0.54 |
| 1.00E+00 | 0.86 |

|          |      |
|----------|------|
| 1.00E+00 | 0.61 |
| 1.00E+00 | 0.92 |
| 1.00E+00 | 0.86 |
| 1.00E+00 | 0.73 |
| 1.00E+00 | 0.85 |
| 1.00E+00 | 0.53 |
| 1.00E+00 | 0.56 |
| 1.00E+00 | 0.93 |
| 1.00E+00 | 0.9  |
| 1.00E+00 | 0.97 |
| 1.00E+00 | 0.93 |
| 1.00E+00 | 0.57 |
| 1.00E+00 | 0.7  |
| 1.00E+00 | 1    |
| 1.00E+00 | 0.82 |

|          |      |
|----------|------|
| 1.00E+00 | 0.87 |
| 1.00E+00 | 0.79 |
| 1.00E+00 | 0.97 |
| 1.00E+00 | 0.63 |

|          |      |
|----------|------|
| 1.00E+00 | 1    |
| 1.00E+00 | 0.79 |
| 1.00E+00 | 0.87 |
| 1.00E+00 | 0.77 |
| 1.00E+00 | 0.84 |
| 1.00E+00 | 0.79 |
| 1.00E+00 | 0.65 |
| 1.00E+00 | 0.8  |
| 1.00E+00 | 0.82 |
| 1.00E+00 | 0.97 |
| 1.00E+00 | 0.77 |
| 1.00E+00 | 0.93 |
| 1.00E+00 | 0.83 |

|          |      |
|----------|------|
| 1.00E+00 | 0.93 |
| 1.00E+00 | 0.72 |
| 1.00E+00 | 0.68 |
| 1.00E+00 | 0.58 |
| 1.00E+00 | 0.92 |
| 1.00E+00 | 0.99 |
| 1.00E+00 | 0.92 |
| 1.00E+00 | 0.93 |
| 1.00E+00 | 0.9  |

|          |      |
|----------|------|
| 1.00E+00 | 0.86 |
|----------|------|



1.00E+00 0.93

1.00E+00 0.55

1.00E+00 1

1.00E+00 0.96

1.00E+00 0.92

1.00E+00 0.9

1.00E+00 0.94

1.00E+00 0.9

1.00E+00 0.92

1.00E+00 0.85

1.00E+00 0.89

1.00E+00 0.96

1.00E+00 0.94

1.00E+00 0.76

1.00E+00 0.81

1.00E+00 1

1.00E+00 1

1.00E+00 0.79

1.00E+00 0.83

1.00E+00 0.71

1.00E+00 0.86

1.00E+00 0.93

1.00E+00 1

1.00E+00 0.86

1.00E+00 1

1.00E+00 0.93

1.00E+00 1

1.00E+00 0.8

1.00E+00 1

1.00E+00 1

1.00E+00 0.96

1.00E+00 1

1.00E+00 0.49

1.00E+00 1

1.00E+00 0.87

1.00E+00 0.91

1.00E+00 0.53

1.00E+00 0.81

1.00E+00 0.88

|          |      |
|----------|------|
| 1.00E+00 | 0.92 |
| 1.00E+00 | 0.82 |
| 1.00E+00 | 0.65 |
| 1.00E+00 | 0.83 |
| 1.00E+00 | 0.94 |
| 1.00E+00 | 0.49 |
| 1.00E+00 | 0.61 |
| 1.00E+00 | 0.67 |
| 1.00E+00 | 1    |
| 1.00E+00 | 0.85 |

|          |      |
|----------|------|
| 1.00E+00 | 0.79 |
| 1.00E+00 | 1    |
| 1.00E+00 | 0.94 |
| 1.00E+00 | 0.79 |
| 1.00E+00 | 0.83 |
| 1.00E+00 | 1    |
| 1.00E+00 | 1    |
| 1.00E+00 | 0.91 |
| 1.00E+00 | 0.73 |
| 1.00E+00 | 1    |
| 1.00E+00 | 1    |
| 1.00E+00 | 0.86 |
| 1.00E+00 | 0.74 |
| 1.00E+00 | 0.68 |
| 1.00E+00 | 1    |
| 1.00E+00 | 0.72 |
| 1.00E+00 | 0.65 |
| 1.00E+00 | 0.57 |
| 1.00E+00 | 1    |
| 1.00E+00 | 0.6  |
| 1.00E+00 | 0.71 |
| 1.00E+00 | 0.84 |
| 1.00E+00 | 0.91 |
| 1.00E+00 | 0.85 |
| 1.00E+00 | 0.91 |
| 1.00E+00 | 0.91 |
| 1.00E+00 | 0.74 |

|          |   |
|----------|---|
| 1.00E+00 | 1 |
|----------|---|

|          |      |
|----------|------|
| 1.00E+00 | 0.94 |
|----------|------|

|          |      |
|----------|------|
| 1.00E+00 | 0.56 |
| 1.00E+00 | 1    |
| 1.00E+00 | 0.74 |

|          |      |
|----------|------|
| 1.00E+00 | 1    |
| 1.00E+00 | 0.83 |
| 1.00E+00 | 0.89 |
| 1.00E+00 | 0.74 |
| 1.00E+00 | 0.87 |
| 1.00E+00 | 0.59 |

|          |      |
|----------|------|
| 1.00E+00 | 0.84 |
| 1.00E+00 | 0.89 |
| 1.00E+00 | 0.92 |
| 1.00E+00 | 0.89 |
| 1.00E+00 | 0.75 |
| 1.00E+00 | 0.76 |
| 1.00E+00 | 0.69 |

|          |      |
|----------|------|
| 1.00E+00 | 0.66 |
| 1.00E+00 | 0.9  |
| 1.00E+00 | 0.9  |
| 1.00E+00 | 0.88 |
| 1.00E+00 | 0.92 |
| 1.00E+00 | 0.75 |
| 1.00E+00 | 0.84 |
| 1.00E+00 | 0.81 |
| 1.00E+00 | 0.86 |
| 1.00E+00 | 0.72 |
| 1.00E+00 | 0.72 |
| 1.00E+00 | 0.55 |

|          |      |
|----------|------|
| 1.00E+00 | 0.81 |
| 1.00E+00 | 0.87 |
| 1.00E+00 | 1    |
| 1.00E+00 | 0.77 |
| 1.00E+00 | 0.78 |
| 1.00E+00 | 1    |
| 1.00E+00 | 0.73 |
| 1.00E+00 | 0.91 |
| 1.00E+00 | 0.49 |
| 1.00E+00 | 1    |
| 1.00E+00 | 0.83 |
| 1.00E+00 | 0.94 |
| 1.00E+00 | 0.92 |
| 1.00E+00 | 0.87 |
| 1.00E+00 | 0.78 |
| 1.00E+00 | 0.7  |

|          |      |
|----------|------|
| 1.00E+00 | 0.71 |
| 1.00E+00 | 0.85 |
| 1.00E+00 | 0.67 |

|          |      |
|----------|------|
| 1.00E+00 | 0.67 |
| 1.00E+00 | 1    |
| 1.00E+00 | 0.9  |
| 1.00E+00 | 1    |
| 1.00E+00 | 0.74 |
| 1.00E+00 | 0.79 |
| 1.00E+00 | 0.58 |
| 1.00E+00 | 0.61 |
| 1.00E+00 | 1    |
| 1.00E+00 | 0.48 |
| 1.00E+00 | 0.93 |
| 1.00E+00 | 0.97 |
| 1.00E+00 | 1    |
| 1.00E+00 | 0.9  |
| 1.00E+00 | 0.79 |
| 1.00E+00 | 0.92 |
| 1.00E+00 | 1    |
| 1.00E+00 | 0.81 |
| 1.00E+00 | 0.9  |
| 1.00E+00 | 0.91 |
| 1.00E+00 | 1    |
| 1.00E+00 | 0.96 |
| 1.00E+00 | 0.75 |
| 1.00E+00 | 0.88 |
| 1.00E+00 | 0.97 |
| 1.00E+00 | 0.88 |
| 1.00E+00 | 0.55 |
| 1.00E+00 | 1    |
| 1.00E+00 | 0.74 |
| 1.00E+00 | 0.56 |
| 1.00E+00 | 0.59 |
| 1.00E+00 | 0.78 |
| 1.00E+00 | 1    |
| 1.00E+00 | 1    |
| 1.00E+00 | 0.89 |
| 1.00E+00 | 0.62 |
| 1.00E+00 | 0.63 |
| 1.00E+00 | 1    |
| 1.00E+00 | 0.74 |
| 1.00E+00 | 0.72 |
| 1.00E+00 | 0.8  |

|          |      |
|----------|------|
| 1.00E+00 | 0.5  |
| 1.00E+00 | 1    |
| 1.00E+00 | 0.9  |
| 1.00E+00 | 0.51 |
| 1.00E+00 | 1    |
| 1.00E+00 | 1    |
| 1.00E+00 | 0.61 |
| 1.00E+00 | 0.93 |
| 1.00E+00 | 0.92 |
| 1.00E+00 | 0.66 |
| 1.00E+00 | 0.79 |
| 1.00E+00 | 0.78 |
| 1.00E+00 | 0.51 |
| 1.00E+00 | 0.78 |
| 1.00E+00 | 0.9  |
| 1.00E+00 | 1    |
| 1.00E+00 | 0.76 |
| 1.00E+00 | 0.88 |
| 1.00E+00 | 0.59 |
| 1.00E+00 | 0.57 |
| 1.00E+00 | 0.74 |
| 1.00E+00 | 1    |
| 1.00E+00 | 0.92 |
| 1.00E+00 | 0.91 |
| 1.00E+00 | 0.8  |
| 1.00E+00 | 0.6  |
| 1.00E+00 | 1    |
| 1.00E+00 | 0.61 |
| 1.00E+00 | 1    |
| 1.00E+00 | 0.9  |
| 1.00E+00 | 1    |
| 1.00E+00 | 0.89 |
| 1.00E+00 | 1    |
| 1.00E+00 | 0.74 |
| 1.00E+00 | 0.8  |
| 1.00E+00 | 1    |
| 1.00E+00 | 0.78 |
| 1.00E+00 | 0.76 |
| 1.00E+00 | 0.6  |
| 1.00E+00 | 0.84 |
| 1.00E+00 | 0.71 |
| 1.00E+00 | 0.96 |
| 1.00E+00 | 0.74 |

|          |      |
|----------|------|
| 1.00E+00 | 0.93 |
| 1.00E+00 | 0.59 |
| 1.00E+00 | 1    |

|          |      |
|----------|------|
| 1.00E+00 | 0.91 |
| 1.00E+00 | 0.95 |
| 1.00E+00 | 0.89 |
| 1.00E+00 | 0.88 |
| 1.00E+00 | 0.91 |

|          |      |
|----------|------|
| 1.00E+00 | 0.92 |
| 1.00E+00 | 0.97 |
| 1.00E+00 | 0.73 |

|          |      |
|----------|------|
| 1.00E+00 | 0.75 |
|----------|------|

|          |      |
|----------|------|
| 1.00E+00 | 1    |
| 1.00E+00 | 1    |
| 1.00E+00 | 0.92 |
| 1.00E+00 | 0.82 |
| 1.00E+00 | 0.71 |
| 1.00E+00 | 0.83 |
| 1.00E+00 | 0.86 |
| 1.00E+00 | 0.92 |
| 1.00E+00 | 0.9  |
| 1.00E+00 | 0.94 |
| 1.00E+00 | 0.76 |
| 1.00E+00 | 0.71 |

|          |      |
|----------|------|
| 1.00E+00 | 0.51 |
| 1.00E+00 | 0.92 |
| 1.00E+00 | 0.79 |
| 1.00E+00 | 1    |
| 1.00E+00 | 0.86 |
| 1.00E+00 | 0.82 |

|          |      |
|----------|------|
| 1.00E+00 | 0.67 |
|----------|------|

|          |      |
|----------|------|
| 1.00E+00 | 0.85 |
| 1.00E+00 | 1    |
| 1.00E+00 | 0.79 |
| 1.00E+00 | 0.68 |
| 1.00E+00 | 0.95 |

|          |      |
|----------|------|
| 1.00E+00 | 0.76 |
| 1.00E+00 | 0.97 |
| 1.00E+00 | 1    |
| 1.00E+00 | 1    |
| 1.00E+00 | 0.97 |
| 1.00E+00 | 1    |
| 1.00E+00 | 0.97 |
| 1.00E+00 | 0.72 |
| 1.00E+00 | 0.72 |
| 1.00E+00 | 0.94 |
| 1.00E+00 | 0.68 |
| 1.00E+00 | 0.56 |
| 1.00E+00 | 0.92 |
| 1.00E+00 | 0.55 |
| 1.00E+00 | 0.74 |
| 1.00E+00 | 0.69 |
| 1.00E+00 | 0.72 |
| 1.00E+00 | 0.88 |
| 1.00E+00 | 0.49 |
| 1.00E+00 | 0.55 |
| 1.00E+00 | 0.87 |
| 1.00E+00 | 0.9  |
| 1.00E+00 | 0.87 |
| 1.00E+00 | 0.62 |
| 1.00E+00 | 0.84 |
| 1.00E+00 | 0.89 |
| 1.00E+00 | 0.77 |
| 1.00E+00 | 0.69 |
| 1.00E+00 | 0.88 |
| 1.00E+00 | 0.9  |
| 1.00E+00 | 0.78 |
| 1.00E+00 | 0.87 |
| 1.00E+00 | 0.79 |
| 1.00E+00 | 0.67 |
| 1.00E+00 | 0.83 |
| 1.00E+00 | 0.72 |
| 1.00E+00 | 0.94 |
| 1.00E+00 | 0.89 |
| 1.00E+00 | 0.69 |
| 1.00E+00 | 1    |
| 1.00E+00 | 0.96 |

|          |      |
|----------|------|
| 1.00E+00 | 1    |
| 1.00E+00 | 0.93 |
| 1.00E+00 | 0.89 |
| 1.00E+00 | 1    |
| 1.00E+00 | 0.82 |
| 1.00E+00 | 0.64 |
| 1.00E+00 | 0.75 |
| 1.00E+00 | 0.66 |
| 1.00E+00 | 0.81 |
| 1.00E+00 | 0.79 |
| 1.00E+00 | 0.98 |
| 1.00E+00 | 0.94 |
| 1.00E+00 | 0.69 |
| 1.00E+00 | 0.81 |
| 1.00E+00 | 0.83 |
| 1.00E+00 | 0.84 |
| 1.00E+00 | 1    |

|          |      |
|----------|------|
| 1.00E+00 | 0.78 |
|----------|------|

|          |      |
|----------|------|
| 1.00E+00 | 0.76 |
| 1.00E+00 | 0.6  |
| 1.00E+00 | 1    |
| 1.00E+00 | 0.77 |
| 1.00E+00 | 0.92 |
| 1.00E+00 | 0.62 |
| 1.00E+00 | 0.56 |
| 1.00E+00 | 0.4  |

|          |      |
|----------|------|
| 1.00E+00 | 0.81 |
| 1.00E+00 | 1    |
| 1.00E+00 | 0.8  |
| 1.00E+00 | 0.86 |
| 1.00E+00 | 0.66 |
| 1.00E+00 | 0.9  |
| 1.00E+00 | 1    |
| 1.00E+00 | 1    |
| 1.00E+00 | 1    |
| 1.00E+00 | 0.82 |
| 1.00E+00 | 1    |



|          |      |
|----------|------|
| 1.00E+00 | 0.77 |
| 1.00E+00 | 0.91 |
| 1.00E+00 | 0.95 |
| 1.00E+00 | 0.89 |
| 1.00E+00 | 0.88 |
| 1.00E+00 | 0.91 |

|          |      |
|----------|------|
| 1.00E+00 | 0.92 |
| 1.00E+00 | 0.97 |
| 1.00E+00 | 0.73 |

|          |      |
|----------|------|
| 1.00E+00 | 0.75 |
|----------|------|

|          |      |
|----------|------|
| 1.00E+00 | 0.96 |
| 1.00E+00 | 0.61 |
| 1.00E+00 | 0.92 |

|          |      |
|----------|------|
| 1.00E+00 | 0.76 |
| 1.00E+00 | 1    |
| 1.00E+00 | 1    |
| 1.00E+00 | 0.63 |
| 1.00E+00 | 0.71 |
| 1.00E+00 | 0.57 |
| 1.00E+00 | 0.94 |
| 1.00E+00 | 0.81 |
| 1.00E+00 | 0.94 |
| 1.00E+00 | 0.73 |
| 1.00E+00 | 0.62 |
| 1.00E+00 | 0.88 |
| 1.00E+00 | 0.86 |
| 1.00E+00 | 0.66 |
| 1.00E+00 | 0.87 |
| 1.00E+00 | 0.94 |
| 1.00E+00 | 0.82 |
| 1.00E+00 | 0.81 |
| 1.00E+00 | 0.9  |

|          |      |
|----------|------|
| 1.00E+00 | 0    |
| 1.00E+00 | 0.86 |
| 1.00E+00 | 0.8  |
| 1.00E+00 | 0.73 |

|          |      |
|----------|------|
| 1.00E+00 | 0.6  |
| 1.00E+00 | 0.65 |

|          |      |
|----------|------|
| 1.00E+00 | 0.93 |
| 1.00E+00 | 1    |
| 1.00E+00 | 0.89 |
| 1.00E+00 | 0.79 |
| 1.00E+00 | 0.76 |
| 1.00E+00 | 1    |
| 1.00E+00 | 0.95 |
| 1.00E+00 | 0.8  |
| 1.00E+00 | 0.94 |
| 1.00E+00 | 0.8  |
| 1.00E+00 | 0.53 |
| 1.00E+00 | 0.71 |

|          |      |
|----------|------|
| 1.00E+00 | 0.89 |
|----------|------|

|          |      |
|----------|------|
| 1.00E+00 | 0.64 |
| 1.00E+00 | 0.83 |
| 1.00E+00 | 0.89 |
| 1.00E+00 | 0.67 |
| 1.00E+00 | 0.65 |
| 1.00E+00 | 0.89 |
| 1.00E+00 | 0.92 |
| 1.00E+00 | 0.88 |
| 1.00E+00 | 0.83 |

|          |      |
|----------|------|
| 1.00E+00 | 0.88 |
| 1.00E+00 | 0.92 |
| 1.00E+00 | 1    |
| 1.00E+00 | 0.89 |
| 1.00E+00 | 0.86 |
| 1.00E+00 | 0.97 |
| 1.00E+00 | 0.97 |
| 1.00E+00 | 0.94 |
| 1.00E+00 | 1    |
| 1.00E+00 | 0.65 |
| 1.00E+00 | 0.77 |
| 1.00E+00 | 0.79 |
| 1.00E+00 | 0.92 |
| 1.00E+00 | 0.9  |
| 1.00E+00 | 0.93 |
| 1.00E+00 | 0.94 |
| 1.00E+00 | 0.91 |
| 1.00E+00 | 0.87 |
| 1.00E+00 | 1    |

|          |      |
|----------|------|
| 1.00E+00 | 0.93 |
| 1.00E+00 | 0.55 |
| 1.00E+00 | 1    |

|          |     |
|----------|-----|
| 1.00E+00 | 0.9 |
| 1.00E+00 | 0.6 |

|          |      |
|----------|------|
| 1.00E+00 | 0.81 |
| 1.00E+00 | 0.73 |
| 1.00E+00 | 0.7  |

|          |      |
|----------|------|
| 1.00E+00 | 0.81 |
|----------|------|

|          |      |
|----------|------|
| 1.00E+00 | 0.88 |
| 1.00E+00 | 1    |

|          |      |
|----------|------|
| 1.00E+00 | 0.97 |
| 1.00E+00 | 0.47 |
| 1.00E+00 | 0.82 |
| 1.00E+00 | 0.85 |
| 1.00E+00 | 0.95 |
| 1.00E+00 | 0.73 |
| 1.00E+00 | 0.64 |
| 1.00E+00 | 0.83 |
| 1.00E+00 | 0.88 |
| 1.00E+00 | 0.7  |
| 1.00E+00 | 0.65 |
| 1.00E+00 | 0.93 |
| 1.00E+00 | 0.92 |
| 1.00E+00 | 0.91 |
| 1.00E+00 | 0.89 |

|          |      |
|----------|------|
| 1.00E+00 | 0.88 |
|----------|------|

|          |      |
|----------|------|
| 1.00E+00 | 1    |
| 1.00E+00 | 0.35 |
| 1.00E+00 | 0.87 |
| 1.00E+00 | 0.78 |

|          |      |
|----------|------|
| 1.00E+00 | 0.82 |
|----------|------|

|          |      |
|----------|------|
| 1.00E+00 | 0.6  |
| 1.00E+00 | 0.68 |
| 1.00E+00 | 0.68 |
| 1.00E+00 | 0.6  |
| 1.00E+00 | 0.77 |
| 1.00E+00 | 0.73 |
| 1.00E+00 | 1    |
| 1.00E+00 | 1    |
| 1.00E+00 | 1    |
| 1.00E+00 | 1    |
| 1.00E+00 | 0.81 |
| 1.00E+00 | 0.88 |
| 1.00E+00 | 0.97 |
| 1.00E+00 | 0.85 |
| 1.00E+00 | 1    |
| 1.00E+00 | 1    |
| 1.00E+00 | 0.79 |
| 1.00E+00 | 0.87 |
| 1.00E+00 | 0.59 |
| 1.00E+00 | 1    |
| 1.00E+00 | 0.96 |
| 1.00E+00 | 1    |
| 1.00E+00 | 0.89 |
| 1.00E+00 | 1    |
| 1.00E+00 | 1    |
| 1.00E+00 | 0.89 |
| 1.00E+00 | 0.84 |
| 1.00E+00 | 0.95 |
| 1.00E+00 | 0.96 |
| 1.00E+00 | 0.61 |
| 1.00E+00 | 0.47 |
| 1.00E+00 | 0.9  |
| 1.00E+00 | 0.71 |
| 1.00E+00 | 0.89 |
| 1.00E+00 | 0.9  |
| 1.00E+00 | 1    |
| 1.00E+00 | 0.81 |
| 1.00E+00 | 0.75 |
| 1.00E+00 | 0.93 |
| 1.00E+00 | 0.9  |

|          |      |
|----------|------|
| 1.00E+00 | 0.95 |
| 1.00E+00 | 0.91 |
| 1.00E+00 | 1    |
| 1.00E+00 | 0.56 |
| 1.00E+00 | 0.9  |
| 1.00E+00 | 1    |
| 1.00E+00 | 0.4  |
| 1.00E+00 | 0.74 |
| 1.00E+00 | 0.76 |
| 1.00E+00 | 0.72 |
| 1.00E+00 | 0.92 |
| 1.00E+00 | 0.8  |
| 1.00E+00 | 0.68 |
| 1.00E+00 | 0.89 |
| 1.00E+00 | 0.72 |
| 1.00E+00 | 0.64 |
| 1.00E+00 | 0.92 |
| 1.00E+00 | 0.74 |
| 1.00E+00 | 0.68 |
| 1.00E+00 | 0.88 |
| 1.00E+00 | 0.95 |
| 1.00E+00 | 1    |
| 1.00E+00 | 0.92 |
| 1.00E+00 | 0.75 |
| 1.00E+00 | 1    |
| 1.00E+00 | 0.71 |
| 1.00E+00 | 0.84 |
| 1.00E+00 | 0.93 |
| 1.00E+00 | 0.86 |
| 1.00E+00 | 0.9  |
| 1.00E+00 | 0.91 |
| 1.00E+00 | 0    |
| 1.00E+00 | 0.88 |
| 1.00E+00 | 0.84 |
| 1.00E+00 | 1    |
| 1.00E+00 | 0.92 |
| 1.00E+00 | 0.87 |
| 1.00E+00 | 0.94 |
| 1.00E+00 | 0.65 |
| 1.00E+00 | 0.7  |
| 1.00E+00 | 0.68 |
| 1.00E+00 | 0.78 |
| 1.00E+00 | 0.82 |
| 1.00E+00 | 0.95 |
| 1.00E+00 | 0.93 |
| 1.00E+00 | 0.77 |

|          |      |
|----------|------|
| 1.00E+00 | 0.77 |
| 1.00E+00 | 1    |
| 1.00E+00 | 0.72 |

|          |      |
|----------|------|
| 1.00E+00 | 0.96 |
| 1.00E+00 | 0.84 |
| 1.00E+00 | 0.76 |

|          |      |
|----------|------|
| 1.00E+00 | 0.88 |
| 1.00E+00 | 0.82 |
| 1.00E+00 | 0.92 |
| 1.00E+00 | 0.96 |
| 1.00E+00 | 0.95 |
| 1.00E+00 | 1    |
| 1.00E+00 | 1    |

|          |      |
|----------|------|
| 1.00E+00 | 0.92 |
| 1.00E+00 | 0.9  |
| 1.00E+00 | 0.71 |
| 1.00E+00 | 0.54 |
| 1.00E+00 | 0.92 |
| 1.00E+00 | 0.93 |
| 1.00E+00 | 0.87 |

|          |      |
|----------|------|
| 1.00E+00 | 1    |
| 1.00E+00 | 0.83 |
| 1.00E+00 | 1    |
| 1.00E+00 | 0.62 |
| 1.00E+00 | 0.95 |

|          |      |
|----------|------|
| 1.00E+00 | 0.85 |
| 1.00E+00 | 0.61 |

|          |      |
|----------|------|
| 1.00E+00 | 0.71 |
| 1.00E+00 | 0.81 |

|          |      |
|----------|------|
| 1.00E+00 | 0.53 |
| 1.00E+00 | 1    |
| 1.00E+00 | 1    |
| 1.00E+00 | 0.79 |
| 1.00E+00 | 0.89 |
| 1.00E+00 | 0.9  |
| 1.00E+00 | 0.99 |
| 1.00E+00 | 0.77 |
| 1.00E+00 | 0.91 |
| 1.00E+00 | 0.92 |

|          |      |
|----------|------|
| 1.00E+00 | 0.72 |
| 1.00E+00 | 0.83 |
| 1.00E+00 | 0.75 |
| 1.00E+00 | 0.77 |
| 1.00E+00 | 0.9  |
| 1.00E+00 | 0.57 |

|          |      |
|----------|------|
| 1.00E+00 | 0.84 |
| 1.00E+00 | 0.99 |

|          |      |
|----------|------|
| 1.00E+00 | 0.91 |
| 1.00E+00 | 0.88 |
| 1.00E+00 | 0.9  |
| 1.00E+00 | 0.87 |
| 1.00E+00 | 1    |
| 1.00E+00 | 0.7  |
| 1.00E+00 | 1    |
| 1.00E+00 | 0.69 |
| 1.00E+00 | 0.83 |
| 1.00E+00 | 0.77 |
| 1.00E+00 | 0.86 |
| 1.00E+00 | 0.59 |
| 1.00E+00 | 0.66 |
| 1.00E+00 | 1    |
| 1.00E+00 | 0.9  |
| 1.00E+00 | 1    |

|          |      |
|----------|------|
| 1.00E+00 | 0.79 |
| 1.00E+00 | 0.37 |
| 1.00E+00 | 0.7  |
| 1.00E+00 | 0.89 |
| 1.00E+00 | 1    |
| 1.00E+00 | 0.92 |
| 1.00E+00 | 0.83 |
| 1.00E+00 | 0.59 |
| 1.00E+00 | 0.7  |
| 1.00E+00 | 0.85 |
| 1.00E+00 | 0.89 |

|          |      |
|----------|------|
| 1.00E+00 | 0.86 |
| 1.00E+00 | 0.9  |
| 1.00E+00 | 0.88 |
| 1.00E+00 | 0.8  |
| 1.00E+00 | 0.92 |
| 1.00E+00 | 0.92 |
| 1.00E+00 | 0.94 |
| 1.00E+00 | 0.85 |
| 1.00E+00 | 0.56 |

|          |      |
|----------|------|
| 1.00E+00 | 0.71 |
| 1.00E+00 | 0.82 |
| 1.00E+00 | 1    |

|          |      |
|----------|------|
| 1.00E+00 | 0.73 |
| 1.00E+00 | 1    |
| 1.00E+00 | 0.92 |
| 1.00E+00 | 0.93 |
| 1.00E+00 | 0.98 |
| 1.00E+00 | 1    |
| 1.00E+00 | 0.83 |
| 1.00E+00 | 0.89 |

|          |      |
|----------|------|
| 1.00E+00 | 0.79 |
| 1.00E+00 | 0.67 |
| 1.00E+00 | 0.87 |
| 1.00E+00 | 0.64 |

|          |      |
|----------|------|
| 1.00E+00 | 1    |
| 1.00E+00 | 0.91 |
| 1.00E+00 | 0.87 |
| 1.00E+00 | 0.95 |
| 1.00E+00 | 0.9  |
| 1.00E+00 | 0.5  |
| 1.00E+00 | 0.86 |
| 1.00E+00 | 0.82 |

|          |      |
|----------|------|
| 1.00E+00 | 0.93 |
| 1.00E+00 | 0.9  |
| 1.00E+00 | 0.82 |
| 1.00E+00 | 0.93 |
| 1.00E+00 | 0.68 |
| 1.00E+00 | 1    |
| 1.00E+00 | 0.93 |
| 1.00E+00 | 0.53 |
| 1.00E+00 | 0.78 |

|          |      |
|----------|------|
| 1.00E+00 | 0.88 |
| 1.00E+00 | 1    |
| 1.00E+00 | 0.75 |
| 1.00E+00 | 0.72 |
| 1.00E+00 | 0.93 |
| 1.00E+00 | 0.7  |
| 1.00E+00 | 0.74 |
| 1.00E+00 | 0.89 |
| 1.00E+00 | 0.54 |



|          |      |
|----------|------|
| 1.00E+00 | 0.71 |
| 1.00E+00 | 0.72 |
| 1.00E+00 | 0.46 |
| 1.00E+00 | 0.94 |
| 1.00E+00 | 0.89 |
| 1.00E+00 | 0.8  |
| 1.00E+00 | 0.88 |
| 1.00E+00 | 0.93 |
| 1.00E+00 | 0.9  |
| 1.00E+00 | 0.78 |
| 1.00E+00 | 1    |
| 1.00E+00 | 1    |
| 1.00E+00 | 1    |
| 1.00E+00 | 1    |
| 1.00E+00 | 1    |
| 1.00E+00 | 1    |
| 1.00E+00 | 0.96 |
| 1.00E+00 | 0.94 |
| 1.00E+00 | 1    |

|          |      |
|----------|------|
| 1.00E+00 | 0.84 |
| 1.00E+00 | 0.88 |
| 1.00E+00 | 0.69 |
| 1.00E+00 | 0.79 |
| 1.00E+00 | 0.84 |
| 1.00E+00 | 0.56 |
| 1.00E+00 | 0.51 |
| 1.00E+00 | 0.89 |
| 1.00E+00 | 0.93 |
| 1.00E+00 | 0.88 |

|          |      |
|----------|------|
| 1.00E+00 | 0.79 |
|----------|------|

|          |      |
|----------|------|
| 1.00E+00 | 0.72 |
| 1.00E+00 | 0.87 |

|          |      |
|----------|------|
| 1.00E+00 | 0.68 |
| 1.00E+00 | 0.58 |
| 1.00E+00 | 1    |
| 1.00E+00 | 0.91 |
| 1.00E+00 | 0.86 |
| 1.00E+00 | 0.87 |
| 1.00E+00 | 0.93 |
| 1.00E+00 | 0.7  |
| 1.00E+00 | 0.95 |
| 1.00E+00 | 0.84 |
| 1.00E+00 | 0.81 |
| 1.00E+00 | 1    |
| 1.00E+00 | 0.97 |

|          |      |
|----------|------|
| 1.00E+00 | 0.54 |
| 1.00E+00 | 1    |
| 1.00E+00 | 0.8  |
| 1.00E+00 | 0.84 |

|          |      |
|----------|------|
| 1.00E+00 | 0.52 |
| 1.00E+00 | 0.72 |
| 1.00E+00 | 0.85 |
| 1.00E+00 | 0.96 |
| 1.00E+00 | 0.9  |
| 1.00E+00 | 1    |
| 1.00E+00 | 0.84 |
| 1.00E+00 | 1    |
| 1.00E+00 | 1    |

|          |      |
|----------|------|
| 1.00E+00 | 0.77 |
|----------|------|

|          |      |
|----------|------|
| 1.00E+00 | 0.98 |
| 1.00E+00 | 0.99 |
| 1.00E+00 | 0.9  |
| 1.00E+00 | 1    |

|          |      |
|----------|------|
| 1.00E+00 | 0.95 |
| 1.00E+00 | 0.85 |
| 1.00E+00 | 0.61 |

|          |      |
|----------|------|
| 1.00E+00 | 0.82 |
| 1.00E+00 | 1    |
| 1.00E+00 | 0.62 |
| 1.00E+00 | 1    |
| 1.00E+00 | 0.93 |

|          |      |
|----------|------|
| 1.00E+00 | 0.89 |
| 1.00E+00 | 0.94 |
| 1.00E+00 | 1    |

|          |      |
|----------|------|
| 1.00E+00 | 0.85 |
| 1.00E+00 | 0.85 |
| 1.00E+00 | 0.88 |
| 1.00E+00 | 0.92 |
| 1.00E+00 | 0.82 |
| 1.00E+00 | 0.96 |
| 1.00E+00 | 0.76 |
| 1.00E+00 | 0.78 |
| 1.00E+00 | 0.74 |

|          |      |
|----------|------|
| 1.00E+00 | 0.61 |
| 1.00E+00 | 1    |
| 1.00E+00 | 0.85 |
| 1.00E+00 | 0.73 |
| 1.00E+00 | 1    |
| 1.00E+00 | 0.9  |
| 1.00E+00 | 0.79 |
| 1.00E+00 | 0.77 |
| 1.00E+00 | 1    |
| 1.00E+00 | 0.95 |
| 1.00E+00 | 0.95 |
| 1.00E+00 | 0.94 |

|          |      |
|----------|------|
| 1.00E+00 | 0.83 |
| 1.00E+00 | 0.86 |
| 1.00E+00 | 0.63 |
| 1.00E+00 | 1    |
| 1.00E+00 | 0.74 |
| 1.00E+00 | 0.74 |
| 1.00E+00 | 0.61 |
| 1.00E+00 | 0.85 |

|          |   |
|----------|---|
| 1.00E+00 | 1 |
|----------|---|

|          |      |
|----------|------|
| 1.00E+00 | 1    |
| 1.00E+00 | 0.72 |
| 1.00E+00 | 0.72 |

|          |      |
|----------|------|
| 1.00E+00 | 0.79 |
| 1.00E+00 | 0.77 |
| 1.00E+00 | 1    |
| 1.00E+00 | 0.95 |
| 1.00E+00 | 0.95 |
| 1.00E+00 | 0.94 |

|          |      |
|----------|------|
| 1.00E+00 | 0.83 |
| 1.00E+00 | 0.86 |
| 1.00E+00 | 0.63 |
| 1.00E+00 | 1    |
| 1.00E+00 | 1    |
| 1.00E+00 | 1    |
| 1.00E+00 | 0.76 |

|          |      |
|----------|------|
| 1.00E+00 | 0.85 |
| 1.00E+00 | 0.84 |
| 1.00E+00 | 0.83 |

|          |      |
|----------|------|
| 1.00E+00 | 0.71 |
| 1.00E+00 | 0.9  |
| 1.00E+00 | 0.72 |
| 1.00E+00 | 0.83 |
| 1.00E+00 | 0.6  |
| 1.00E+00 | 0.71 |
| 1.00E+00 | 0.91 |
| 1.00E+00 | 1    |
| 1.00E+00 | 0.96 |
| 1.00E+00 | 0.85 |
| 1.00E+00 | 0.86 |
| 1.00E+00 | 0.55 |
| 1.00E+00 | 1    |
| 1.00E+00 | 0.9  |
| 1.00E+00 | 0.76 |
| 1.00E+00 | 0.93 |
| 1.00E+00 | 0.89 |
| 1.00E+00 | 0.93 |
| 1.00E+00 | 0.88 |
| 1.00E+00 | 0.73 |
| 1.00E+00 | 0.9  |
| 1.00E+00 | 1    |
| 1.00E+00 | 0.71 |
| 1.00E+00 | 0.7  |
| 1.00E+00 | 0.85 |
| 1.00E+00 | 0.9  |
| 1.00E+00 | 0.92 |
| 1.00E+00 | 0.85 |
| 1.00E+00 | 0.63 |
| 1.00E+00 | 0.64 |
| 1.00E+00 | 0.8  |
| 1.00E+00 | 0.52 |
| 1.00E+00 | 0.77 |
| 1.00E+00 | 0.9  |
| 1.00E+00 | 0.84 |
| 1.00E+00 | 0.87 |
| 1.00E+00 | 0.82 |
| 1.00E+00 | 0.92 |
| 1.00E+00 | 0.81 |
| 1.00E+00 | 1    |
| 1.00E+00 | 1    |
| 1.00E+00 | 0.97 |

|          |      |
|----------|------|
| 1.00E+00 | 0.54 |
| 1.00E+00 | 0.54 |
| 1.00E+00 | 0.74 |
| 1.00E+00 | 0.7  |
| 1.00E+00 | 0.76 |

|          |   |
|----------|---|
| 1.00E+00 | 1 |
|----------|---|

|          |      |
|----------|------|
| 1.00E+00 | 0.65 |
| 1.00E+00 | 0.7  |
| 1.00E+00 | 0.83 |
| 1.00E+00 | 0.94 |
| 1.00E+00 | 0.69 |
| 1.00E+00 | 0.95 |
| 1.00E+00 | 0.85 |

|          |      |
|----------|------|
| 1.00E+00 | 0.9  |
| 1.00E+00 | 1    |
| 1.00E+00 | 1    |
| 1.00E+00 | 0.93 |
| 1.00E+00 | 1    |
| 1.00E+00 | 0.77 |
| 1.00E+00 | 1    |
| 1.00E+00 | 0.85 |
| 1.00E+00 | 0.88 |
| 1.00E+00 | 0.86 |
| 1.00E+00 | 0.96 |
| 1.00E+00 | 1    |
| 1.00E+00 | 0.85 |
| 1.00E+00 | 1    |
| 1.00E+00 | 0.77 |
| 1.00E+00 | 0.88 |
| 1.00E+00 | 0.7  |
| 1.00E+00 | 0.98 |
| 1.00E+00 | 0.81 |
| 1.00E+00 | 0.79 |
| 1.00E+00 | 0.95 |
| 1.00E+00 | 0.86 |
| 1.00E+00 | 0.74 |
| 1.00E+00 | 0.91 |
| 1.00E+00 | 1    |
| 1.00E+00 | 0.91 |
| 1.00E+00 | 0.67 |
| 1.00E+00 | 0.87 |
| 1.00E+00 | 0.84 |
| 1.00E+00 | 0.82 |

|          |     |
|----------|-----|
| 1.00E+00 | 0.9 |
|----------|-----|

|          |      |
|----------|------|
| 1.00E+00 | 0.84 |
| 1.00E+00 | 0.92 |
| 1.00E+00 | 0.88 |
| 1.00E+00 | 0.66 |
| 1.00E+00 | 0.64 |
| 1.00E+00 | 0.88 |
| 1.00E+00 | 0.96 |
| 1.00E+00 | 0.84 |
| 1.00E+00 | 0.85 |
| 1.00E+00 | 0.59 |
| 1.00E+00 | 0.83 |
| 1.00E+00 | 1    |
| 1.00E+00 | 1    |
| 1.00E+00 | 0.78 |
| 1.00E+00 | 0.74 |
| 1.00E+00 | 0.51 |
| 1.00E+00 | 0.9  |

|          |      |
|----------|------|
| 1.00E+00 | 0.55 |
| 1.00E+00 | 1    |
| 1.00E+00 | 0.89 |
| 1.00E+00 | 0.6  |
| 1.00E+00 | 0.71 |

|          |      |
|----------|------|
| 1.00E+00 | 0.91 |
| 1.00E+00 | 1    |
| 1.00E+00 | 0.96 |
| 1.00E+00 | 0.85 |
| 1.00E+00 | 0.86 |

|          |      |
|----------|------|
| 1.00E+00 | 0.55 |
| 1.00E+00 | 1    |

|          |      |
|----------|------|
| 1.00E+00 | 0.78 |
| 1.00E+00 | 0.85 |
| 1.00E+00 | 0.91 |
| 1.00E+00 | 0.86 |
| 1.00E+00 | 0.77 |
| 1.00E+00 | 0.51 |
| 1.00E+00 | 0.56 |
| 1.00E+00 | 0.79 |
| 1.00E+00 | 0.68 |
| 1.00E+00 | 0.86 |

|          |      |
|----------|------|
| 1.00E+00 | 0.6  |
| 1.00E+00 | 0.81 |
| 1.00E+00 | 0.8  |

|          |      |
|----------|------|
| 1.00E+00 | 1    |
| 1.00E+00 | 0.81 |
| 1.00E+00 | 1    |
| 1.00E+00 | 0.85 |
| 1.00E+00 | 0.85 |
| 1.00E+00 | 0.93 |
| 1.00E+00 | 1    |
| 1.00E+00 | 0.9  |
| 1.00E+00 | 1    |
| 1.00E+00 | 0.94 |
| 1.00E+00 | 0    |

|          |      |
|----------|------|
| 1.00E+00 | 1    |
| 1.00E+00 | 0.93 |
| 1.00E+00 | 0.79 |
| 1.00E+00 | 0.77 |

|          |      |
|----------|------|
| 1.00E+00 | 0.46 |
|----------|------|

|          |      |
|----------|------|
| 1.00E+00 | 0.92 |
| 1.00E+00 | 1    |
| 1.00E+00 | 0.95 |
| 1.00E+00 | 0.95 |
| 1.00E+00 | 0.94 |

|          |      |
|----------|------|
| 1.00E+00 | 0.87 |
| 1.00E+00 | 1    |
| 1.00E+00 | 0.82 |
| 1.00E+00 | 1    |
| 1.00E+00 | 0.86 |
| 1.00E+00 | 0.85 |
| 1.00E+00 | 0.78 |
| 1.00E+00 | 0.94 |
| 1.00E+00 | 0.91 |
| 1.00E+00 | 0    |
| 1.00E+00 | 0.54 |
| 1.00E+00 | 0.71 |
| 1.00E+00 | 1    |
| 1.00E+00 | 0.89 |
| 1.00E+00 | 0.97 |

|          |      |
|----------|------|
| 1.00E+00 | 0.82 |
| 1.00E+00 | 0    |
| 1.00E+00 | 0.91 |
| 1.00E+00 | 0.63 |
| 1.00E+00 | 0.9  |
| 1.00E+00 | 0.48 |
| 1.00E+00 | 1    |
| 1.00E+00 | 0.86 |
| 1.00E+00 | 0.88 |
| 1.00E+00 | 0.66 |

|          |      |
|----------|------|
| 1.00E+00 | 0.51 |
| 1.00E+00 | 0.5  |
| 1.00E+00 | 1    |
| 1.00E+00 | 0.92 |
| 1.00E+00 | 0.93 |
| 1.00E+00 | 1    |
| 1.00E+00 | 0.77 |
| 1.00E+00 | 1    |
| 1.00E+00 | 1    |
| 1.00E+00 | 0.59 |
| 1.00E+00 | 0.85 |
| 1.00E+00 | 1    |
| 1.00E+00 | 1    |

|          |      |
|----------|------|
| 1.00E+00 | 0.89 |
| 1.00E+00 | 0.91 |

|          |      |
|----------|------|
| 1.00E+00 | 0.64 |
| 1.00E+00 | 0.84 |
| 1.00E+00 | 0.86 |
| 1.00E+00 | 0.67 |
| 1.00E+00 | 0.91 |
| 1.00E+00 | 0.86 |
| 1.00E+00 | 0.9  |

|          |      |
|----------|------|
| 1.00E+00 | 0.8  |
| 1.00E+00 | 1    |
| 1.00E+00 | 0.87 |
| 1.00E+00 | 0.87 |
| 1.00E+00 | 0.92 |
| 1.00E+00 | 0.66 |
| 1.00E+00 | 0.91 |
| 1.00E+00 | 0.92 |
| 1.00E+00 | 1    |
| 1.00E+00 | 0.6  |
| 1.00E+00 | 0.7  |



|          |      |
|----------|------|
| 1.00E+00 | 1    |
| 1.00E+00 | 0.75 |
| 1.00E+00 | 0.89 |
| 1.00E+00 | 1    |
| 1.00E+00 | 0.54 |
| 1.00E+00 | 0.86 |
| 1.00E+00 | 0.61 |
| 1.00E+00 | 0.91 |
| 1.00E+00 | 0.95 |
| 1.00E+00 | 0.62 |
| 1.00E+00 | 1    |
| 1.00E+00 | 0.96 |
| 1.00E+00 | 0.88 |
| 1.00E+00 | 0.92 |
| 1.00E+00 | 0.73 |
| 1.00E+00 | 0.91 |
| 1.00E+00 | 0.76 |
| 1.00E+00 | 0.86 |
| 1.00E+00 | 0.94 |
| 1.00E+00 | 0.6  |
| 1.00E+00 | 0.92 |

|          |      |
|----------|------|
| 1.00E+00 | 1    |
| 1.00E+00 | 0.85 |
| 1.00E+00 | 0.49 |
| 1.00E+00 | 0.58 |
| 1.00E+00 | 0.64 |
| 1.00E+00 | 0.52 |
| 1.00E+00 | 0.73 |
| 1.00E+00 | 0.63 |
| 1.00E+00 | 1    |

|          |      |
|----------|------|
| 1.00E+00 | 1    |
| 1.00E+00 | 0.48 |
| 1.00E+00 | 1    |
| 1.00E+00 | 0.87 |
| 1.00E+00 | 1    |
| 1.00E+00 | 0.97 |
| 1.00E+00 | 0.92 |
| 1.00E+00 | 0.87 |
| 1.00E+00 | 1    |
| 1.00E+00 | 0.9  |
| 1.00E+00 | 1    |

|          |      |
|----------|------|
| 1.00E+00 | 1    |
| 1.00E+00 | 0.94 |
| 1.00E+00 | 0.95 |
| 1.00E+00 | 0.87 |
| 1.00E+00 | 1    |
| 1.00E+00 | 0.72 |

|          |      |
|----------|------|
| 1.00E+00 | 0    |
| 1.00E+00 | 1    |
| 1.00E+00 | 1    |
| 1.00E+00 | 0.89 |
| 1.00E+00 | 0.5  |
| 1.00E+00 | 1    |
| 1.00E+00 | 0.46 |
| 1.00E+00 | 0.84 |
| 1.00E+00 | 0.76 |
| 1.00E+00 | 0.89 |

|          |      |
|----------|------|
| 1.00E+00 | 0.94 |
| 1.00E+00 | 0.72 |
| 1.00E+00 | 0.95 |
| 1.00E+00 | 0.81 |
| 1.00E+00 | 0.9  |
| 1.00E+00 | 0.75 |
| 1.00E+00 | 0.72 |
| 1.00E+00 | 1    |
| 1.00E+00 | 1    |
| 1.00E+00 | 0.66 |

|          |   |
|----------|---|
| 1.00E+00 | 1 |
| 1.00E+00 | 1 |

|          |      |
|----------|------|
| 1.00E+00 | 0.82 |
| 1.00E+00 | 0.91 |
| 1.00E+00 | 0.97 |
| 1.00E+00 | 1    |
| 1.00E+00 | 0.95 |
| 1.00E+00 | 0.84 |
| 1.00E+00 | 0.83 |
| 1.00E+00 | 1    |
| 1.00E+00 | 0.89 |
| 1.00E+00 | 1    |
| 1.00E+00 | 0.75 |
| 1.00E+00 | 0.61 |
| 1.00E+00 | 0.82 |
| 1.00E+00 | 0.92 |
| 1.00E+00 | 1    |
| 1.00E+00 | 0.85 |
| 1.00E+00 | 1    |
| 1.00E+00 | 0.88 |
| 1.00E+00 | 0.96 |
| 1.00E+00 | 0.71 |
| 1.00E+00 | 0.5  |
| 1.00E+00 | 0.64 |
| 1.00E+00 | 1    |

|          |      |
|----------|------|
| 1.00E+00 | 0.9  |
| 1.00E+00 | 0.84 |
| 1.00E+00 | 0.5  |
| 1.00E+00 | 0.75 |
| 1.00E+00 | 1    |
| 1.00E+00 | 0.84 |
| 1.00E+00 | 1    |
| 1.00E+00 | 0.92 |
| 1.00E+00 | 0.85 |
| 1.00E+00 | 0.94 |
| 1.00E+00 | 0.62 |
| 1.00E+00 | 0.69 |
| 1.00E+00 | 0.74 |
| 1.00E+00 | 0.93 |
| 1.00E+00 | 0.93 |
| 1.00E+00 | 0.92 |
| 1.00E+00 | 0.67 |
| 1.00E+00 | 1    |
| 1.00E+00 | 0.84 |
| 1.00E+00 | 0.41 |
| 1.00E+00 | 0.52 |
| 1.00E+00 | 1    |
| 1.00E+00 | 0.85 |
| 1.00E+00 | 0.95 |
| 1.00E+00 | 0.82 |
| 1.00E+00 | 0.81 |
| 1.00E+00 | 0.91 |
| 1.00E+00 | 0.56 |
| 1.00E+00 | 0.85 |
| 1.00E+00 | 0.7  |
| 1.00E+00 | 0.96 |
| 1.00E+00 | 0.97 |
| 1.00E+00 | 0.77 |
| 1.00E+00 | 0.66 |
| 1.00E+00 | 1    |
| 1.00E+00 | 0.78 |
| 1.00E+00 | 0.74 |
| 1.00E+00 | 0.91 |

|          |      |
|----------|------|
| 1.00E+00 | 0.67 |
| 1.00E+00 | 0.96 |
| 1.00E+00 | 0.79 |
| 1.00E+00 | 0.89 |
| 1.00E+00 | 0.73 |
| 1.00E+00 | 0.69 |
| 1.00E+00 | 0.97 |
| 1.00E+00 | 0.9  |
| 1.00E+00 | 0.86 |
| 1.00E+00 | 0.95 |
| 1.00E+00 | 1    |
| 1.00E+00 | 1    |
| 1.00E+00 | 0.8  |
| 1.00E+00 | 0.72 |
| 1.00E+00 | 0.94 |
| 1.00E+00 | 0.87 |
| 1.00E+00 | 0.92 |
| 1.00E+00 | 0.8  |
| 1.00E+00 | 0.8  |
| 1.00E+00 | 0.87 |
| 1.00E+00 | 1    |
| 1.00E+00 | 1    |
| 1.00E+00 | 1    |
| 1.00E+00 | 0.92 |
| 1.00E+00 | 0.94 |
| 1.00E+00 | 0.89 |
| 1.00E+00 | 0.72 |
| 1.00E+00 | 0.86 |
| 1.00E+00 | 0.87 |
| 1.00E+00 | 0.83 |
| 1.00E+00 | 1    |
| 1.00E+00 | 1    |
| 1.00E+00 | 0.89 |
| 1.00E+00 | 0.79 |
| 1.00E+00 | 0    |
| 1.00E+00 | 0.81 |
| 1.00E+00 | 0.93 |
| 1.00E+00 | 0.62 |
| 1.00E+00 | 0.83 |
| 1.00E+00 | 0.77 |
| 1.00E+00 | 1    |
| 1.00E+00 | 1    |
| 1.00E+00 | 0.75 |

|          |      |
|----------|------|
| 1.00E+00 | 0.88 |
| 1.00E+00 | 0.95 |
| 1.00E+00 | 0.71 |
| 1.00E+00 | 1    |
| 1.00E+00 | 0.95 |
| 1.00E+00 | 1    |
| 1.00E+00 | 0.87 |
| 1.00E+00 | 0.94 |
| 1.00E+00 | 0.63 |

|          |      |
|----------|------|
| 1.00E+00 | 0.59 |
| 1.00E+00 | 0.6  |
| 1.00E+00 | 0.74 |
| 1.00E+00 | 0.85 |
| 1.00E+00 | 0.6  |
| 1.00E+00 | 0.47 |
| 1.00E+00 | 0.66 |
| 1.00E+00 | 0.95 |
| 1.00E+00 | 0.93 |
| 1.00E+00 | 0.77 |
| 1.00E+00 | 0.96 |

|          |      |
|----------|------|
| 1.00E+00 | 0.72 |
| 1.00E+00 | 0.8  |
| 1.00E+00 | 0.92 |

|          |      |
|----------|------|
| 1.00E+00 | 1    |
| 1.00E+00 | 0.69 |
| 1.00E+00 | 0.78 |
| 1.00E+00 | 0.88 |
| 1.00E+00 | 0.92 |
| 1.00E+00 | 0.8  |

|          |      |
|----------|------|
| 1.00E+00 | 0.71 |
| 1.00E+00 | 0.97 |
| 1.00E+00 | 0.81 |
| 1.00E+00 | 1    |
| 1.00E+00 | 1    |
| 1.00E+00 | 0.75 |
| 1.00E+00 | 0.9  |
| 1.00E+00 | 0.94 |
| 1.00E+00 | 0.61 |
| 1.00E+00 | 0.74 |

|          |   |
|----------|---|
| 1.00E+00 | 1 |
|----------|---|

|          |      |
|----------|------|
| 1.00E+00 | 0.72 |
| 1.00E+00 | 0.92 |
| 1.00E+00 | 0.68 |

|          |      |
|----------|------|
| 1.00E+00 | 0.64 |
| 1.00E+00 | 0.69 |
| 1.00E+00 | 1    |
| 1.00E+00 | 0.93 |
| 1.00E+00 | 0.61 |
| 1.00E+00 | 0.93 |
| 1.00E+00 | 0.82 |
| 1.00E+00 | 0.83 |
| 1.00E+00 | 0.59 |
| 1.00E+00 | 0.49 |
| 1.00E+00 | 0.66 |
| 1.00E+00 | 0.8  |
| 1.00E+00 | 0.94 |
| 1.00E+00 | 0.85 |
| 1.00E+00 | 0.83 |
| 1.00E+00 | 0.85 |
| 1.00E+00 | 0.96 |
| 1.00E+00 | 0.93 |
| 1.00E+00 | 0.82 |
| 1.00E+00 | 0.78 |
| 1.00E+00 | 0.97 |
| 1.00E+00 | 0.55 |
| 1.00E+00 | 1    |
| 1.00E+00 | 1    |
| 1.00E+00 | 0.81 |
| 1.00E+00 | 0.84 |
| 1.00E+00 | 1    |
| 1.00E+00 | 0.71 |
| 1.00E+00 | 1    |
| 1.00E+00 | 1    |
| 1.00E+00 | 0.89 |
| 1.00E+00 | 0.83 |
| 1.00E+00 | 0.67 |
| 1.00E+00 | 1    |
| 1.00E+00 | 0.97 |
| 1.00E+00 | 0.59 |
| 1.00E+00 | 0.82 |
| 1.00E+00 | 0.76 |
| 1.00E+00 | 0.85 |

|          |      |
|----------|------|
| 1.00E+00 | 0.84 |
| 1.00E+00 | 0.83 |
| 1.00E+00 | 0.71 |
| 1.00E+00 | 0.74 |
| 1.00E+00 | 0.94 |
| 1.00E+00 | 0.47 |
| 1.00E+00 | 0.95 |
| 1.00E+00 | 0.52 |
| 1.00E+00 | 1    |
| 1.00E+00 | 1    |
| 1.00E+00 | 1    |
| 1.00E+00 | 0.83 |
| 1.00E+00 | 0.96 |
| 1.00E+00 | 0.85 |
| 1.00E+00 | 1    |
| 1.00E+00 | 1    |
| 1.00E+00 | 0.67 |
| 1.00E+00 | 0.82 |
| 1.00E+00 | 0.7  |
| 1.00E+00 | 0.88 |
| 1.00E+00 | 0.39 |
| 1.00E+00 | 0.9  |
| 1.00E+00 | 0.59 |
| 1.00E+00 | 0.84 |
| 1.00E+00 | 1    |
| 1.00E+00 | 0.97 |
| 1.00E+00 | 0.94 |
| 1.00E+00 | 0.89 |
| 1.00E+00 | 0.86 |
| 1.00E+00 | 1    |
| 1.00E+00 | 0.75 |
| 1.00E+00 | 0.72 |
| 1.00E+00 | 1    |
| 1.00E+00 | 0.47 |
| 1.00E+00 | 0.68 |
| 1.00E+00 | 0.64 |
| 1.00E+00 | 0.86 |
| 1.00E+00 | 1    |

|          |      |
|----------|------|
| 1.00E+00 | 0.82 |
| 1.00E+00 | 1    |
| 1.00E+00 | 0.82 |
| 1.00E+00 | 0.85 |
| 1.00E+00 | 0.69 |
| 1.00E+00 | 1    |
| 1.00E+00 | 0.69 |
| 1.00E+00 | 0.77 |
| 1.00E+00 | 0.88 |
| 1.00E+00 | 0.68 |
| 1.00E+00 | 0.92 |
| 1.00E+00 | 1    |
| 1.00E+00 | 1    |
| 1.00E+00 | 0.96 |
| 1.00E+00 | 1    |
| 1.00E+00 | 0.8  |
| 1.00E+00 | 0.6  |
| 1.00E+00 | 0.87 |
| 1.00E+00 | 0.5  |
| 1.00E+00 | 0.8  |
| 1.00E+00 | 0.82 |
| 1.00E+00 | 0.71 |
| 1.00E+00 | 1    |
| 1.00E+00 | 0.55 |
| 1.00E+00 | 0.86 |
| 1.00E+00 | 1    |
| 1.00E+00 | 0.69 |
| 1.00E+00 | 0.68 |
| 1.00E+00 | 0.87 |
| 1.00E+00 | 0.76 |
| 1.00E+00 | 1    |
| 1.00E+00 | 1    |
| 1.00E+00 | 0.77 |
| 1.00E+00 | 1    |
| 1.00E+00 | 1    |
| 1.00E+00 | 0.87 |
| 1.00E+00 | 0.59 |
| 1.00E+00 | 0    |
| 1.00E+00 | 1    |



|          |      |
|----------|------|
| 1.00E+00 | 0.66 |
| 1.00E+00 | 0.77 |
| 1.00E+00 | 0.97 |
| 1.00E+00 | 0.52 |
| 1.00E+00 | 0.83 |
| 1.00E+00 | 0.65 |
| 1.00E+00 | 0.82 |
| 1.00E+00 | 0.91 |
| 1.00E+00 | 0.38 |
| 1.00E+00 | 0.71 |
| 1.00E+00 | 0.79 |
| 1.00E+00 | 1    |
| 1.00E+00 | 1    |
| 1.00E+00 | 0.73 |
| 1.00E+00 | 0.94 |
| 1.00E+00 | 0.74 |

|          |      |
|----------|------|
| 1.00E+00 | 0.68 |
| 1.00E+00 | 0.73 |

|          |      |
|----------|------|
| 1.00E+00 | 0.92 |
| 1.00E+00 | 0.75 |
| 1.00E+00 | 0.54 |
| 1.00E+00 | 0.96 |
| 1.00E+00 | 0.78 |
| 1.00E+00 | 0.71 |
| 1.00E+00 | 0.89 |
| 1.00E+00 | 1    |

|          |      |
|----------|------|
| 1.00E+00 | 0.84 |
| 1.00E+00 | 1    |
| 1.00E+00 | 0.66 |
| 1.00E+00 | 1    |
| 1.00E+00 | 0.85 |

|          |      |
|----------|------|
| 1.00E+00 | 0.72 |
| 1.00E+00 | 0.58 |
| 1.00E+00 | 0.78 |
| 1.00E+00 | 0.91 |
| 1.00E+00 | 0.89 |

|          |      |
|----------|------|
| 1.00E+00 | 0.82 |
|----------|------|

|          |   |
|----------|---|
| 1.00E+00 | 1 |
| 1.00E+00 | 1 |

|          |      |
|----------|------|
| 1.00E+00 | 0.92 |
| 1.00E+00 | 0.78 |

|          |      |
|----------|------|
| 1.00E+00 | 0.89 |
| 1.00E+00 | 0.75 |
| 1.00E+00 | 0.86 |
| 1.00E+00 | 0.83 |
| 1.00E+00 | 0.69 |

|          |      |
|----------|------|
| 1.00E+00 | 0.95 |
| 1.00E+00 | 0.61 |
| 1.00E+00 | 0.93 |
| 1.00E+00 | 0.84 |
| 1.00E+00 | 0.94 |
| 1.00E+00 | 0.9  |

|          |      |
|----------|------|
| 1.00E+00 | 0.97 |
| 1.00E+00 | 1    |
| 1.00E+00 | 0.8  |
| 1.00E+00 | 0.76 |
| 1.00E+00 | 0.92 |
| 1.00E+00 | 0.73 |

|          |     |
|----------|-----|
| 1.00E+00 | 0.9 |
|----------|-----|

|          |   |
|----------|---|
| 1.00E+00 | 1 |
|----------|---|

|          |      |
|----------|------|
| 1.00E+00 | 0.85 |
| 1.00E+00 | 1    |
| 1.00E+00 | 1    |

|          |      |
|----------|------|
| 1.00E+00 | 0.9  |
| 1.00E+00 | 0.91 |
| 1.00E+00 | 0.76 |
| 1.00E+00 | 0.7  |
| 1.00E+00 | 0.88 |
| 1.00E+00 | 0.85 |
| 1.00E+00 | 0.88 |

|          |      |
|----------|------|
| 1.00E+00 | 0.77 |
| 1.00E+00 | 0.85 |
| 1.00E+00 | 0.86 |
| 1.00E+00 | 0.98 |
| 1.00E+00 | 0.92 |
| 1.00E+00 | 0.85 |
| 1.00E+00 | 0.7  |

|          |      |
|----------|------|
| 1.00E+00 | 0.83 |
| 1.00E+00 | 0.64 |
| 1.00E+00 | 0.84 |

|          |      |
|----------|------|
| 1.00E+00 | 0.94 |
| 1.00E+00 | 0.93 |

|          |     |
|----------|-----|
| 1.00E+00 | 0.9 |
|----------|-----|

|          |      |
|----------|------|
| 1.00E+00 | 0.87 |
| 1.00E+00 | 0.91 |

|          |      |
|----------|------|
| 1.00E+00 | 0.85 |
| 1.00E+00 | 0.93 |
| 1.00E+00 | 1    |
| 1.00E+00 | 0.88 |
| 1.00E+00 | 0.85 |
| 1.00E+00 | 1    |
| 1.00E+00 | 0.88 |
| 1.00E+00 | 1    |
| 1.00E+00 | 1    |

|          |      |
|----------|------|
| 1.00E+00 | 0.92 |
| 1.00E+00 | 0.92 |
| 1.00E+00 | 0.9  |

|          |      |
|----------|------|
| 1.00E+00 | 1    |
| 1.00E+00 | 0.94 |

|          |      |
|----------|------|
| 1.00E+00 | 0.97 |
| 1.00E+00 | 0.45 |
| 1.00E+00 | 0.82 |
| 1.00E+00 | 0.73 |
| 1.00E+00 | 0.7  |
| 1.00E+00 | 0.94 |
| 1.00E+00 | 0.46 |
| 1.00E+00 | 1    |
| 1.00E+00 | 0.83 |
| 1.00E+00 | 0.74 |
| 1.00E+00 | 0.66 |
| 1.00E+00 | 0.66 |
| 1.00E+00 | 0.84 |
| 1.00E+00 | 0.82 |
| 1.00E+00 | 0.95 |
| 1.00E+00 | 0.84 |
| 1.00E+00 | 0.88 |

|          |      |
|----------|------|
| 1.00E+00 | 0.77 |
|----------|------|

|          |      |
|----------|------|
| 1.00E+00 | 1    |
| 1.00E+00 | 0.6  |
| 1.00E+00 | 0.91 |
| 1.00E+00 | 0.94 |
| 1.00E+00 | 0.98 |
| 1.00E+00 | 1    |
| 1.00E+00 | 0.87 |
| 1.00E+00 | 0.91 |
| 1.00E+00 | 0.7  |
| 1.00E+00 | 1    |
| 1.00E+00 | 0.53 |
| 1.00E+00 | 0.95 |
| 1.00E+00 | 0.67 |
| 1.00E+00 | 1    |
| 1.00E+00 | 0.73 |
| 1.00E+00 | 0.86 |
| 1.00E+00 | 1    |
| 1.00E+00 | 0.88 |
| 1.00E+00 | 0.72 |
| 1.00E+00 | 0.8  |
| 1.00E+00 | 0.92 |
| 1.00E+00 | 0.68 |
| 1.00E+00 | 1    |
| 1.00E+00 | 1    |
| 1.00E+00 | 0.75 |
| 1.00E+00 | 0.89 |
| 1.00E+00 | 0.66 |
| 1.00E+00 | 0.58 |
| 1.00E+00 | 1    |
| 1.00E+00 | 0.82 |
| 1.00E+00 | 0.72 |
| 1.00E+00 | 1    |
| 1.00E+00 | 0.85 |
| 1.00E+00 | 0.78 |
| 1.00E+00 | 0.97 |
| 1.00E+00 | 0.64 |
| 1.00E+00 | 0.63 |
| 1.00E+00 | 0.78 |
| 1.00E+00 | 0.87 |

|          |      |
|----------|------|
| 1.00E+00 | 1    |
| 1.00E+00 | 0.64 |
| 1.00E+00 | 0.63 |
| 1.00E+00 | 0.82 |
| 1.00E+00 | 0.79 |
| 1.00E+00 | 0.8  |
| 1.00E+00 | 0.71 |
| 1.00E+00 | 0.86 |
| 1.00E+00 | 0.92 |
| 1.00E+00 | 0.96 |

|          |      |
|----------|------|
| 1.00E+00 | 1    |
| 1.00E+00 | 0.86 |

|          |      |
|----------|------|
| 1.00E+00 | 0.66 |
| 1.00E+00 | 1    |
| 1.00E+00 | 0.72 |

|          |      |
|----------|------|
| 1.00E+00 | 1    |
| 1.00E+00 | 0.83 |
| 1.00E+00 | 0.89 |
| 1.00E+00 | 1    |
| 1.00E+00 | 0.71 |
| 1.00E+00 | 1    |
| 1.00E+00 | 0.55 |
| 1.00E+00 | 0.91 |
| 1.00E+00 | 1    |

|          |      |
|----------|------|
| 1.00E+00 | 1    |
| 1.00E+00 | 1    |
| 1.00E+00 | 0.95 |

|          |      |
|----------|------|
| 1.00E+00 | 0.84 |
| 1.00E+00 | 0.52 |
| 1.00E+00 | 0.79 |
| 1.00E+00 | 0.72 |
| 1.00E+00 | 0.86 |
| 1.00E+00 | 0.85 |
| 1.00E+00 | 1    |
| 1.00E+00 | 0.83 |
| 1.00E+00 | 0.84 |

|          |      |
|----------|------|
| 1.00E+00 | 0.96 |
| 1.00E+00 | 1    |
| 1.00E+00 | 1    |

|          |      |
|----------|------|
| 1.00E+00 | 0.87 |
|----------|------|

|          |      |
|----------|------|
| 1.00E+00 | 0.68 |
| 1.00E+00 | 1    |
| 1.00E+00 | 0.68 |
| 1.00E+00 | 1    |
| 1.00E+00 | 0.82 |
| 1.00E+00 | 0.57 |
| 1.00E+00 | 0.59 |
| 1.00E+00 | 0.93 |
| 1.00E+00 | 0.94 |
| 1.00E+00 | 0.85 |
| 1.00E+00 | 0.84 |
| 1.00E+00 | 0.85 |
| 1.00E+00 | 0.88 |
| 1.00E+00 | 0.54 |
| 1.00E+00 | 0.75 |
| 1.00E+00 | 0.76 |
| 1.00E+00 | 0.7  |
| 1.00E+00 | 0.58 |
| 1.00E+00 | 1    |
| 1.00E+00 | 0.64 |
| 1.00E+00 | 0.65 |
| 1.00E+00 | 0.7  |
| 1.00E+00 | 0.8  |
| 1.00E+00 | 0.9  |
| 1.00E+00 | 0.77 |
| 1.00E+00 | 0.76 |
| 1.00E+00 | 0.71 |
| 1.00E+00 | 0.8  |
| 1.00E+00 | 0.86 |
| 1.00E+00 | 0.88 |
| 1.00E+00 | 0.59 |
| 1.00E+00 | 0.86 |
| 1.00E+00 | 0.77 |
| 1.00E+00 | 1    |
| 1.00E+00 | 0.58 |
| 1.00E+00 | 1    |
| 1.00E+00 | 0.6  |
| 1.00E+00 | 0.63 |
| 1.00E+00 | 0.81 |
| 1.00E+00 | 0.87 |
| 1.00E+00 | 0.91 |
| 1.00E+00 | 0.73 |
| 1.00E+00 | 0.6  |
| 1.00E+00 | 0.94 |
| 1.00E+00 | 0.94 |
| 1.00E+00 | 0.95 |
| 1.00E+00 | 0.8  |

|          |      |
|----------|------|
| 1.00E+00 | 0.84 |
| 1.00E+00 | 0.92 |
| 1.00E+00 | 0.69 |
| 1.00E+00 | 0.84 |
| 1.00E+00 | 0.88 |
| 1.00E+00 | 0.69 |
| 1.00E+00 | 0.85 |
| 1.00E+00 | 0.84 |

|          |      |
|----------|------|
| 1.00E+00 | 1    |
| 1.00E+00 | 0.86 |
| 1.00E+00 | 0.84 |
| 1.00E+00 | 0.94 |

|          |      |
|----------|------|
| 1.00E+00 | 1    |
| 1.00E+00 | 0.92 |
| 1.00E+00 | 0.94 |
| 1.00E+00 | 0.81 |

|          |      |
|----------|------|
| 1.00E+00 | 0.86 |
| 1.00E+00 | 0.88 |
| 1.00E+00 | 0.97 |
| 1.00E+00 | 0.79 |
| 1.00E+00 | 0.9  |
| 1.00E+00 | 0.96 |
| 1.00E+00 | 1    |
| 1.00E+00 | 0.73 |
| 1.00E+00 | 0.72 |
| 1.00E+00 | 0.91 |
| 1.00E+00 | 0.75 |
| 1.00E+00 | 0.9  |
| 1.00E+00 | 0.91 |
| 1.00E+00 | 0.9  |
| 1.00E+00 | 1    |
| 1.00E+00 | 0.81 |
| 1.00E+00 | 0.91 |
| 1.00E+00 | 0.92 |
| 1.00E+00 | 0.87 |
| 1.00E+00 | 0.6  |

|          |      |
|----------|------|
| 1.00E+00 | 1    |
| 1.00E+00 | 0.64 |

|          |      |
|----------|------|
| 1.00E+00 | 0.69 |
| 1.00E+00 | 0.95 |
| 1.00E+00 | 0.83 |
| 1.00E+00 | 0.94 |

|          |      |
|----------|------|
| 1.00E+00 | 0.86 |
| 1.00E+00 | 0.92 |

|          |      |
|----------|------|
| 1.00E+00 | 0.93 |
| 1.00E+00 | 0.84 |
| 1.00E+00 | 0.92 |
| 1.00E+00 | 0.83 |

|          |      |
|----------|------|
| 1.00E+00 | 1    |
| 1.00E+00 | 0.9  |
| 1.00E+00 | 0.86 |
| 1.00E+00 | 0.91 |
| 1.00E+00 | 0.59 |
| 1.00E+00 | 0.68 |
| 1.00E+00 | 0.86 |
| 1.00E+00 | 0.91 |
| 1.00E+00 | 0.83 |
| 1.00E+00 | 0.72 |
| 1.00E+00 | 0.66 |
| 1.00E+00 | 0.81 |
| 1.00E+00 | 0.75 |
| 1.00E+00 | 0.78 |
| 1.00E+00 | 0.65 |
| 1.00E+00 | 0.93 |
| 1.00E+00 | 0.9  |
| 1.00E+00 | 0.71 |
| 1.00E+00 | 0.87 |
| 1.00E+00 | 0.87 |
| 1.00E+00 | 0.93 |

|          |      |
|----------|------|
| 1.00E+00 | 0.76 |
| 1.00E+00 | 0.78 |
| 1.00E+00 | 0.55 |
| 1.00E+00 | 0.96 |

|          |      |
|----------|------|
| 1.00E+00 | 0.85 |
| 1.00E+00 | 0.89 |
| 1.00E+00 | 0.94 |
| 1.00E+00 | 0.44 |
| 1.00E+00 | 1    |



|          |      |
|----------|------|
| 1.00E+00 | 0.75 |
| 1.00E+00 | 1    |
| 1.00E+00 | 0.87 |
| 1.00E+00 | 0.84 |
| 1.00E+00 | 0.91 |
| 1.00E+00 | 0.9  |
| 1.00E+00 | 0.74 |
| 1.00E+00 | 0.65 |
| 1.00E+00 | 0.65 |
| 1.00E+00 | 0.85 |
| 1.00E+00 | 0.91 |
| 1.00E+00 | 0.9  |
| 1.00E+00 | 0.75 |
| 1.00E+00 | 1    |
| 1.00E+00 | 0.77 |
| 1.00E+00 | 1    |
| 1.00E+00 | 0.8  |
| 1.00E+00 | 1    |
| 1.00E+00 | 0.77 |
| 1.00E+00 | 0.86 |
| 1.00E+00 | 0.82 |
| 1.00E+00 | 0.83 |
| 1.00E+00 | 0.7  |
| 1.00E+00 | 1    |
| 1.00E+00 | 1    |
| 1.00E+00 | 0.88 |
| 1.00E+00 | 1    |
| 1.00E+00 | 0.72 |
| 1.00E+00 | 0.9  |
| 1.00E+00 | 1    |
| 1.00E+00 | 1    |
| 1.00E+00 | 0.96 |
| 1.00E+00 | 1    |
| 1.00E+00 | 0.87 |
| 1.00E+00 | 0.92 |
| 1.00E+00 | 1    |
| 1.00E+00 | 0.95 |
| 1.00E+00 | 1    |
| 1.00E+00 | 0.87 |
| 1.00E+00 | 0.85 |
| 1.00E+00 | 0.95 |
| 1.00E+00 | 0.76 |
| 1.00E+00 | 0.54 |
| 1.00E+00 | 0.79 |
| 1.00E+00 | 0.92 |
| 1.00E+00 | 0.74 |
| 1.00E+00 | 0.93 |

|          |      |
|----------|------|
| 1.00E+00 | 0.95 |
| 1.00E+00 | 1    |
| 1.00E+00 | 0.5  |
| 1.00E+00 | 1    |
| 1.00E+00 | 0.57 |
| 1.00E+00 | 0.94 |
| 1.00E+00 | 0.7  |
| 1.00E+00 | 0.86 |
| 1.00E+00 | 0.74 |
| 1.00E+00 | 0.86 |
| 1.00E+00 | 0.8  |
| 1.00E+00 | 0.95 |
| 1.00E+00 | 0.95 |
| 1.00E+00 | 0.89 |
| 1.00E+00 | 0.65 |
| 1.00E+00 | 1    |
| 1.00E+00 | 0.91 |
| 1.00E+00 | 0.95 |
| 1.00E+00 | 1    |
| 1.00E+00 | 0.74 |
| 1.00E+00 | 0.76 |
| 1.00E+00 | 0.87 |
| 1.00E+00 | 0.85 |
| 1.00E+00 | 0.93 |
| 1.00E+00 | 0.4  |
| 1.00E+00 | 0.65 |
| 1.00E+00 | 0.86 |
| 1.00E+00 | 0.86 |
| 1.00E+00 | 1    |
| 1.00E+00 | 0.95 |
| 1.00E+00 | 0.95 |
| 1.00E+00 | 1    |
| 1.00E+00 | 0.96 |
| 1.00E+00 | 0.87 |
| 1.00E+00 | 0.77 |
| 1.00E+00 | 0.93 |
| 1.00E+00 | 0.66 |
| 1.00E+00 | 1    |
| 1.00E+00 | 0.85 |
| 1.00E+00 | 1    |
| 1.00E+00 | 0.84 |
| 1.00E+00 | 1    |
| 1.00E+00 | 0.88 |

|          |      |
|----------|------|
| 1.00E+00 | 1    |
| 1.00E+00 | 0.88 |
| 1.00E+00 | 0.87 |
| 1.00E+00 | 0.89 |
| 1.00E+00 | 0.8  |
| 1.00E+00 | 0.82 |
| 1.00E+00 | 1    |
| 1.00E+00 | 1    |
| 1.00E+00 | 0.94 |
| 1.00E+00 | 0.71 |
| 1.00E+00 | 0.81 |
| 1.00E+00 | 0.84 |

|          |      |
|----------|------|
| 1.00E+00 | 0.93 |
| 1.00E+00 | 0.91 |
| 1.00E+00 | 0.71 |
| 1.00E+00 | 0.88 |
| 1.00E+00 | 1    |
| 1.00E+00 | 1    |
| 1.00E+00 | 0.95 |
| 1.00E+00 | 0.9  |
| 1.00E+00 | 0.94 |
| 1.00E+00 | 0.77 |
| 1.00E+00 | 0.93 |
| 1.00E+00 | 0.73 |
| 1.00E+00 | 0.89 |
| 1.00E+00 | 0.88 |
| 1.00E+00 | 0.84 |
| 1.00E+00 | 0.85 |
| 1.00E+00 | 0.92 |
| 1.00E+00 | 0.93 |

|          |      |
|----------|------|
| 1.00E+00 | 0.81 |
| 1.00E+00 | 1    |

|          |      |
|----------|------|
| 1.00E+00 | 0.95 |
| 1.00E+00 | 1    |
| 1.00E+00 | 0.92 |

|          |      |
|----------|------|
| 1.00E+00 | 1    |
| 1.00E+00 | 0.51 |
| 1.00E+00 | 1    |
| 1.00E+00 | 0.78 |

|          |      |
|----------|------|
| 1.00E+00 | 0.9  |
| 1.00E+00 | 1    |
| 1.00E+00 | 0.85 |

|          |      |
|----------|------|
| 1.00E+00 | 1    |
| 1.00E+00 | 0.92 |
| 1.00E+00 | 0.6  |
| 1.00E+00 | 0.58 |
| 1.00E+00 | 0.72 |
| 1.00E+00 | 0.9  |
| 1.00E+00 | 0.92 |
| 1.00E+00 | 0.71 |
| 1.00E+00 | 0.9  |
| 1.00E+00 | 0.94 |
| 1.00E+00 | 0.95 |
| 1.00E+00 | 0.82 |
| 1.00E+00 | 0.89 |
| 1.00E+00 | 0.84 |
| 1.00E+00 | 0.71 |
| 1.00E+00 | 0.87 |
| 1.00E+00 | 0.79 |
| 1.00E+00 | 1    |
| 1.00E+00 | 0.81 |

|          |      |
|----------|------|
| 1.00E+00 | 0.71 |
| 1.00E+00 | 0.92 |
| 1.00E+00 | 0.67 |

|          |      |
|----------|------|
| 1.00E+00 | 1    |
| 1.00E+00 | 0.77 |
| 1.00E+00 | 0.98 |
| 1.00E+00 | 0.87 |
| 1.00E+00 | 0.83 |
| 1.00E+00 | 0.75 |
| 1.00E+00 | 1    |
| 1.00E+00 | 0.71 |
| 1.00E+00 | 0.7  |
| 1.00E+00 | 0.93 |
| 1.00E+00 | 1    |
| 1.00E+00 | 0.94 |
| 1.00E+00 | 0.87 |
| 1.00E+00 | 0.93 |
| 1.00E+00 | 1    |
| 1.00E+00 | 0.75 |

|          |      |
|----------|------|
| 1.00E+00 | 0.91 |
|----------|------|

|          |      |
|----------|------|
| 1.00E+00 | 0.83 |
| 1.00E+00 | 0.91 |
| 1.00E+00 | 0.85 |
| 1.00E+00 | 1    |
| 1.00E+00 | 0.96 |

|          |      |
|----------|------|
| 1.00E+00 | 0.94 |
| 1.00E+00 | 0.78 |
| 1.00E+00 | 0.45 |
| 1.00E+00 | 0.81 |
| 1.00E+00 | 0.77 |
| 1.00E+00 | 0.76 |

|          |      |
|----------|------|
| 1.00E+00 | 0.67 |
| 1.00E+00 | 1    |
| 1.00E+00 | 0.68 |
| 1.00E+00 | 1    |
| 1.00E+00 | 0.9  |
| 1.00E+00 | 1    |
| 1.00E+00 | 0.59 |
| 1.00E+00 | 0.67 |
| 1.00E+00 | 0.75 |
| 1.00E+00 | 0.7  |
| 1.00E+00 | 0.62 |
| 1.00E+00 | 0.9  |
| 1.00E+00 | 0.89 |

|          |      |
|----------|------|
| 1.00E+00 | 1    |
| 1.00E+00 | 0.79 |
| 1.00E+00 | 0.65 |

|          |      |
|----------|------|
| 1.00E+00 | 0.81 |
| 1.00E+00 | 1    |

|          |      |
|----------|------|
| 1.00E+00 | 0.76 |
| 1.00E+00 | 0.94 |
| 1.00E+00 | 0.94 |
| 1.00E+00 | 0.61 |
| 1.00E+00 | 1    |
| 1.00E+00 | 0.59 |
| 1.00E+00 | 0.79 |
| 1.00E+00 | 0.72 |

|          |      |
|----------|------|
| 1.00E+00 | 0.84 |
| 1.00E+00 | 0.89 |
| 1.00E+00 | 1    |
| 1.00E+00 | 1    |
| 1.00E+00 | 0.9  |
| 1.00E+00 | 0.93 |
| 1.00E+00 | 1    |
| 1.00E+00 | 1    |

|          |      |
|----------|------|
| 1.00E+00 | 0.95 |
| 1.00E+00 | 0.89 |
| 1.00E+00 | 0.64 |
| 1.00E+00 | 0.49 |
| 1.00E+00 | 0.85 |
| 1.00E+00 | 0.63 |
| 1.00E+00 | 0.64 |
| 1.00E+00 | 0.8  |
| 1.00E+00 | 0.52 |
| 1.00E+00 | 0.75 |
| 1.00E+00 | 0.85 |
| 1.00E+00 | 1    |
| 1.00E+00 | 1    |

|          |      |
|----------|------|
| 1.00E+00 | 0.91 |
| 1.00E+00 | 0.85 |
| 1.00E+00 | 0.93 |
| 1.00E+00 | 0.94 |

|          |      |
|----------|------|
| 1.00E+00 | 0.92 |
| 1.00E+00 | 0.75 |
| 1.00E+00 | 0.59 |
| 1.00E+00 | 0.5  |
| 1.00E+00 | 0.93 |
| 1.00E+00 | 0.94 |
| 1.00E+00 | 0.56 |
| 1.00E+00 | 0.69 |
| 1.00E+00 | 0.7  |
| 1.00E+00 | 0.88 |
| 1.00E+00 | 0.88 |
| 1.00E+00 | 0.92 |
| 1.00E+00 | 0.52 |
| 1.00E+00 | 0.86 |
| 1.00E+00 | 0.6  |
| 1.00E+00 | 0.86 |
| 1.00E+00 | 0.83 |
| 1.00E+00 | 0.74 |
| 1.00E+00 | 0.68 |
| 1.00E+00 | 0.76 |
| 1.00E+00 | 0.78 |
| 1.00E+00 | 0.88 |
| 1.00E+00 | 0.86 |
| 1.00E+00 | 0.92 |

|          |      |
|----------|------|
| 1.00E+00 | 0.73 |
|----------|------|

|          |   |
|----------|---|
| 1.00E+00 | 1 |
|----------|---|

|          |      |
|----------|------|
| 1.00E+00 | 0.93 |
| 1.00E+00 | 0.74 |
| 1.00E+00 | 0.72 |
| 1.00E+00 | 0.92 |
| 1.00E+00 | 0.6  |

|          |      |
|----------|------|
| 1.00E+00 | 0.89 |
| 1.00E+00 | 0.94 |

|          |      |
|----------|------|
| 1.00E+00 | 0.97 |
| 1.00E+00 | 0.82 |

|          |      |
|----------|------|
| 1.00E+00 | 1    |
| 1.00E+00 | 0.94 |

|          |      |
|----------|------|
| 1.00E+00 | 1    |
| 1.00E+00 | 0.65 |
| 1.00E+00 | 1    |
| 1.00E+00 | 1    |
| 1.00E+00 | 0.66 |
| 1.00E+00 | 0.57 |
| 1.00E+00 | 0.89 |
| 1.00E+00 | 0.94 |
| 1.00E+00 | 0    |
| 1.00E+00 | 0.91 |
| 1.00E+00 | 0.66 |
| 1.00E+00 | 0.92 |
| 1.00E+00 | 0.96 |
| 1.00E+00 | 0.79 |
| 1.00E+00 | 0.84 |
| 1.00E+00 | 0.86 |

|          |      |
|----------|------|
| 1.00E+00 | 0.91 |
| 1.00E+00 | 0.72 |
| 1.00E+00 | 0.85 |
| 1.00E+00 | 0.79 |
| 1.00E+00 | 0.85 |
| 1.00E+00 | 0.84 |
| 1.00E+00 | 1    |
| 1.00E+00 | 0.9  |
| 1.00E+00 | 1    |
| 1.00E+00 | 0.8  |

|          |      |
|----------|------|
| 1.00E+00 | 0.5  |
| 1.00E+00 | 0.63 |

1.00E+00 0.5

1.00E+00 0.76  
1.00E+00 0.76

1.00E+00 0.87  
1.00E+00 1  
1.00E+00 0.85

1.00E+00 1  
1.00E+00 0.72  
1.00E+00 0.56  
1.00E+00 0.67  
1.00E+00 0.8  
1.00E+00 0.69  
1.00E+00 0.65  
1.00E+00 0.75  
1.00E+00 0.94  
1.00E+00 0.71

1.00E+00 1  
1.00E+00 0.8  
1.00E+00 0.82

1.00E+00 1  
  
1.00E+00 0.72  
1.00E+00 0.67  
1.00E+00 0.84

1.00E+00 0.9  
1.00E+00 0.85  
1.00E+00 1  
1.00E+00 0.78  
1.00E+00 1  
1.00E+00 0.8  
1.00E+00 0.8  
1.00E+00 0.69



|          |      |
|----------|------|
| 1.00E+00 | 0.88 |
| 1.00E+00 | 0.68 |
| 1.00E+00 | 0.81 |
| 1.00E+00 | 0.73 |
| 1.00E+00 | 0.69 |
| 1.00E+00 | 0.72 |
| 1.00E+00 | 0.93 |
| 1.00E+00 | 0.7  |
| 1.00E+00 | 0.85 |
| 1.00E+00 | 0.82 |
| 1.00E+00 | 0.89 |
| 1.00E+00 | 0.83 |
| 1.00E+00 | 0.87 |
| 1.00E+00 | 0.86 |
| 1.00E+00 | 1    |
| 1.00E+00 | 0.93 |
| 1.00E+00 | 0.93 |
| 1.00E+00 | 0.64 |
| 1.00E+00 | 0.46 |
| 1.00E+00 | 0.53 |
| 1.00E+00 | 0.85 |
| 1.00E+00 | 0.89 |
| 1.00E+00 | 0.85 |
| 1.00E+00 | 0.7  |
| 1.00E+00 | 0.94 |
| 1.00E+00 | 1    |

|          |      |
|----------|------|
| 1.00E+00 | 0.78 |
| 1.00E+00 | 1    |
| 1.00E+00 | 0.87 |
| 1.00E+00 | 0.91 |
| 1.00E+00 | 0.92 |
| 1.00E+00 | 0.53 |
| 1.00E+00 | 0.91 |
| 1.00E+00 | 1    |
| 1.00E+00 | 0.73 |
| 1.00E+00 | 0.79 |
| 1.00E+00 | 0.9  |
| 1.00E+00 | 0.62 |
| 1.00E+00 | 0.8  |
| 1.00E+00 | 0.87 |
| 1.00E+00 | 1    |
| 1.00E+00 | 0.61 |
| 1.00E+00 | 0.81 |
| 1.00E+00 | 0.95 |
| 1.00E+00 | 1    |

|          |      |
|----------|------|
| 1.00E+00 | 0.92 |
| 1.00E+00 | 0.94 |
| 1.00E+00 | 0.72 |
| 1.00E+00 | 0.92 |
| 1.00E+00 | 0.92 |
| 1.00E+00 | 0.93 |
| 1.00E+00 | 0.94 |
| 1.00E+00 | 1    |
| 1.00E+00 | 0.81 |
| 1.00E+00 | 0.9  |
| 1.00E+00 | 0.58 |
| 1.00E+00 | 0.61 |
| 1.00E+00 | 0.97 |
| 1.00E+00 | 0.94 |
| 1.00E+00 | 0.95 |
| 1.00E+00 | 1    |
| 1.00E+00 | 0.86 |
| 1.00E+00 | 0.89 |
| 1.00E+00 | 1    |
| 1.00E+00 | 0.7  |
| 1.00E+00 | 1    |
| 1.00E+00 | 0.84 |
| 1.00E+00 | 1    |
| 1.00E+00 | 0.95 |
| 1.00E+00 | 0.75 |
| 1.00E+00 | 0.9  |
| 1.00E+00 | 0.89 |
| 1.00E+00 | 0.93 |
| 1.00E+00 | 1    |
| 1.00E+00 | 0.62 |
| 1.00E+00 | 0.94 |
| 1.00E+00 | 1    |
| 1.00E+00 | 0.88 |
| 1.00E+00 | 1    |
| 1.00E+00 | 0.89 |
| 1.00E+00 | 1    |
| 1.00E+00 | 0.56 |
| 1.00E+00 | 0.66 |
| 1.00E+00 | 0.51 |
| 1.00E+00 | 0.93 |
| 1.00E+00 | 1    |
| 1.00E+00 | 0.92 |
| 1.00E+00 | 0.81 |
| 1.00E+00 | 0.89 |
| 1.00E+00 | 0.85 |
| 1.00E+00 | 0.61 |
| 1.00E+00 | 1    |

|          |      |
|----------|------|
| 1.00E+00 | 1    |
| 1.00E+00 | 0.88 |
| 1.00E+00 | 0.79 |
| 1.00E+00 | 1    |

|          |      |
|----------|------|
| 1.00E+00 | 0.69 |
|----------|------|

|          |   |
|----------|---|
| 1.00E+00 | 1 |
|----------|---|

|          |      |
|----------|------|
| 1.00E+00 | 0.84 |
|----------|------|

|          |      |
|----------|------|
| 1.00E+00 | 0.83 |
|----------|------|

|          |      |
|----------|------|
| 1.00E+00 | 0.86 |
|----------|------|

|          |      |
|----------|------|
| 1.00E+00 | 0.82 |
|----------|------|

|          |      |
|----------|------|
| 1.00E+00 | 0.76 |
|----------|------|

|          |      |
|----------|------|
| 1.00E+00 | 0.67 |
|----------|------|

|          |      |
|----------|------|
| 1.00E+00 | 0.79 |
|----------|------|

|          |   |
|----------|---|
| 1.00E+00 | 1 |
|----------|---|

|          |      |
|----------|------|
| 1.00E+00 | 0.78 |
|----------|------|

|          |      |
|----------|------|
| 1.00E+00 | 0.93 |
|----------|------|

|          |   |
|----------|---|
| 1.00E+00 | 1 |
|----------|---|

|          |      |
|----------|------|
| 1.00E+00 | 0.93 |
|----------|------|

|          |      |
|----------|------|
| 1.00E+00 | 0.98 |
|----------|------|

|          |   |
|----------|---|
| 1.00E+00 | 1 |
|----------|---|

|          |   |
|----------|---|
| 1.00E+00 | 1 |
|----------|---|

|          |   |
|----------|---|
| 1.00E+00 | 1 |
|----------|---|

|          |   |
|----------|---|
| 1.00E+00 | 1 |
|----------|---|

|          |      |
|----------|------|
| 1.00E+00 | 0.77 |
|----------|------|

|          |      |
|----------|------|
| 1.00E+00 | 0.88 |
|----------|------|

|          |      |
|----------|------|
| 1.00E+00 | 0.94 |
|----------|------|

|          |      |
|----------|------|
| 1.00E+00 | 0.77 |
|----------|------|

|          |      |
|----------|------|
| 1.00E+00 | 0.98 |
|----------|------|

|          |      |
|----------|------|
| 1.00E+00 | 0.91 |
|----------|------|

|          |     |
|----------|-----|
| 1.00E+00 | 0.7 |
|----------|-----|

|          |      |
|----------|------|
| 1.00E+00 | 0.82 |
|----------|------|

|          |   |
|----------|---|
| 1.00E+00 | 1 |
|----------|---|

|          |      |
|----------|------|
| 1.00E+00 | 0.94 |
|----------|------|

|          |      |
|----------|------|
| 1.00E+00 | 0.57 |
|----------|------|

|          |   |
|----------|---|
| 1.00E+00 | 1 |
|----------|---|

|          |   |
|----------|---|
| 1.00E+00 | 1 |
|----------|---|

|          |   |
|----------|---|
| 1.00E+00 | 1 |
|----------|---|

|          |      |
|----------|------|
| 1.00E+00 | 0.71 |
|----------|------|

|          |     |
|----------|-----|
| 1.00E+00 | 0.4 |
|----------|-----|

|          |     |
|----------|-----|
| 1.00E+00 | 0.7 |
|----------|-----|

|          |      |
|----------|------|
| 1.00E+00 | 0.69 |
|----------|------|

|          |     |
|----------|-----|
| 1.00E+00 | 0.6 |
|----------|-----|

|          |      |
|----------|------|
| 1.00E+00 | 0.86 |
|----------|------|

|          |      |
|----------|------|
| 1.00E+00 | 1    |
| 1.00E+00 | 0.94 |
| 1.00E+00 | 0.97 |
| 1.00E+00 | 0.58 |
| 1.00E+00 | 0.86 |
| 1.00E+00 | 0.59 |

|          |      |
|----------|------|
| 1.00E+00 | 0.85 |
| 1.00E+00 | 0.92 |
| 1.00E+00 | 0.81 |
| 1.00E+00 | 0.48 |
| 1.00E+00 | 0.64 |

|          |      |
|----------|------|
| 1.00E+00 | 0.9  |
| 1.00E+00 | 0.79 |
| 1.00E+00 | 0.85 |
| 1.00E+00 | 0.82 |
| 1.00E+00 | 0.81 |
| 1.00E+00 | 0.89 |

|          |      |
|----------|------|
| 1.00E+00 | 0.63 |
| 1.00E+00 | 0.68 |
| 1.00E+00 | 0.65 |
| 1.00E+00 | 0.93 |
| 1.00E+00 | 0.63 |
| 1.00E+00 | 0.97 |
| 1.00E+00 | 0.84 |
| 1.00E+00 | 0.88 |
| 1.00E+00 | 0.76 |
| 1.00E+00 | 0.9  |
| 1.00E+00 | 0.77 |
| 1.00E+00 | 0.89 |
| 1.00E+00 | 0.69 |
| 1.00E+00 | 0.88 |
| 1.00E+00 | 0.6  |
| 1.00E+00 | 1    |

|          |      |
|----------|------|
| 1.00E+00 | 0.9  |
| 1.00E+00 | 0.83 |
| 1.00E+00 | 0.95 |

|          |      |
|----------|------|
| 1.00E+00 | 1    |
| 1.00E+00 | 0.91 |
| 1.00E+00 | 1    |
| 1.00E+00 | 0.95 |
| 1.00E+00 | 0.65 |
| 1.00E+00 | 0.88 |
| 1.00E+00 | 1    |

|          |      |
|----------|------|
| 1.00E+00 | 0.93 |
| 1.00E+00 | 1    |
| 1.00E+00 | 1    |
| 1.00E+00 | 0.93 |
| 1.00E+00 | 0.66 |
| 1.00E+00 | 0.56 |
| 1.00E+00 | 0.52 |
| 1.00E+00 | 0.73 |
| 1.00E+00 | 0.5  |
| 1.00E+00 | 0.49 |
| 1.00E+00 | 1    |
| 1.00E+00 | 1    |
| 1.00E+00 | 0.89 |
| 1.00E+00 | 0.82 |
| 1.00E+00 | 0.85 |
| 1.00E+00 | 1    |
| 1.00E+00 | 0.53 |
| 1.00E+00 | 0.85 |
| 1.00E+00 | 0.94 |
| 1.00E+00 | 0.83 |
| 1.00E+00 | 0.7  |
| 1.00E+00 | 0.74 |
| 1.00E+00 | 0.96 |
| 1.00E+00 | 1    |
| 1.00E+00 | 1    |
| 1.00E+00 | 1    |
| 1.00E+00 | 0.84 |
| 1.00E+00 | 0.93 |
| 1.00E+00 | 0.92 |
| 1.00E+00 | 0.94 |
| 1.00E+00 | 0.89 |
| 1.00E+00 | 0.94 |
| 1.00E+00 | 1    |
| 1.00E+00 | 0.94 |
| 1.00E+00 | 1    |
| 1.00E+00 | 1    |
| 1.00E+00 | 1    |
| 1.00E+00 | 0.81 |
| 1.00E+00 | 0.49 |
| 1.00E+00 | 0.92 |
| 1.00E+00 | 0.82 |
| 1.00E+00 | 0.91 |
| 1.00E+00 | 0.96 |
| 1.00E+00 | 0.73 |
| 1.00E+00 | 0.72 |
| 1.00E+00 | 0.63 |

|          |      |
|----------|------|
| 1.00E+00 | 1    |
| 1.00E+00 | 0.54 |
| 1.00E+00 | 0.74 |
| 1.00E+00 | 0.88 |
| 1.00E+00 | 0.74 |
| 1.00E+00 | 1    |
| 1.00E+00 | 0.75 |
| 1.00E+00 | 1    |
| 1.00E+00 | 1    |
| 1.00E+00 | 0.76 |
| 1.00E+00 | 0.72 |
| 1.00E+00 | 0.56 |
| 1.00E+00 | 0.87 |
| 1.00E+00 | 0.96 |
| 1.00E+00 | 0.93 |
| 1.00E+00 | 0.88 |
| 1.00E+00 | 0.71 |
| 1.00E+00 | 1    |
| 1.00E+00 | 0.84 |
| 1.00E+00 | 0.87 |
| 1.00E+00 | 0.74 |
| 1.00E+00 | 0.94 |
| 1.00E+00 | 0.67 |
| 1.00E+00 | 0.78 |
| 1.00E+00 | 0.67 |
| 1.00E+00 | 0.65 |
| 1.00E+00 | 1    |
| 1.00E+00 | 0.8  |
| 1.00E+00 | 0.81 |
| 1.00E+00 | 0.45 |
| 1.00E+00 | 0.9  |
| 1.00E+00 | 0.61 |
| 1.00E+00 | 0.8  |
| 1.00E+00 | 0.73 |
| 1.00E+00 | 1    |
| 1.00E+00 | 0.95 |
| 1.00E+00 | 0.91 |
| 1.00E+00 | 0.96 |
| 1.00E+00 | 0.86 |
| 1.00E+00 | 0.9  |
| 1.00E+00 | 0.89 |
| 1.00E+00 | 0.71 |
| 1.00E+00 | 0.6  |
| 1.00E+00 | 0.63 |

|          |      |
|----------|------|
| 1.00E+00 | 0.95 |
| 1.00E+00 | 0.73 |
| 1.00E+00 | 0.49 |
| 1.00E+00 | 0.97 |
| 1.00E+00 | 1    |
| 1.00E+00 | 1    |
| 1.00E+00 | 0.92 |
| 1.00E+00 | 1    |

|          |      |
|----------|------|
| 1.00E+00 | 0.89 |
|----------|------|

|          |      |
|----------|------|
| 1.00E+00 | 0.78 |
| 1.00E+00 | 0.83 |
| 1.00E+00 | 0.69 |
| 1.00E+00 | 0.86 |

|          |      |
|----------|------|
| 1.00E+00 | 0.79 |
| 1.00E+00 | 0.79 |
| 1.00E+00 | 0.9  |
| 1.00E+00 | 1    |
| 1.00E+00 | 0.81 |
| 1.00E+00 | 0.7  |
| 1.00E+00 | 0.9  |
| 1.00E+00 | 0.95 |
| 1.00E+00 | 0.68 |
| 1.00E+00 | 0.93 |

|          |      |
|----------|------|
| 1.00E+00 | 0.93 |
| 1.00E+00 | 0.9  |
| 1.00E+00 | 0.86 |

|          |      |
|----------|------|
| 1.00E+00 | 0.62 |
| 1.00E+00 | 0.82 |
| 1.00E+00 | 0.76 |
| 1.00E+00 | 0.92 |
| 1.00E+00 | 0.75 |
| 1.00E+00 | 1    |
| 1.00E+00 | 0.85 |

|          |      |
|----------|------|
| 1.00E+00 | 0.85 |
| 1.00E+00 | 0.75 |

|          |      |
|----------|------|
| 1.00E+00 | 0.95 |
| 1.00E+00 | 0.8  |
| 1.00E+00 | 0.75 |
| 1.00E+00 | 0.62 |

|          |      |
|----------|------|
| 1.00E+00 | 0.67 |
| 1.00E+00 | 0.97 |
| 1.00E+00 | 0.87 |
| 1.00E+00 | 0.65 |
| 1.00E+00 | 0.72 |
| 1.00E+00 | 1    |
| 1.00E+00 | 0.85 |
| 1.00E+00 | 0.95 |
| 1.00E+00 | 0    |
| 1.00E+00 | 0.72 |
| 1.00E+00 | 0.63 |
| 1.00E+00 | 0.77 |
| 1.00E+00 | 0.95 |
| 1.00E+00 | 1    |
| 1.00E+00 | 0.89 |
| 1.00E+00 | 0.46 |
| 1.00E+00 | 1    |
| 1.00E+00 | 0.86 |
| 1.00E+00 | 0.75 |
| 1.00E+00 | 0.67 |
| 1.00E+00 | 0.77 |
| 1.00E+00 | 0.93 |
| 1.00E+00 | 0.61 |
| 1.00E+00 | 0.92 |
| 1.00E+00 | 1    |
| 1.00E+00 | 0.9  |
| 1.00E+00 | 0.7  |
| 1.00E+00 | 0.77 |
| 1.00E+00 | 0.74 |
| 1.00E+00 | 0.87 |
| 1.00E+00 | 0.76 |
| 1.00E+00 | 0.9  |
| 1.00E+00 | 0.82 |
| 1.00E+00 | 0.91 |
| 1.00E+00 | 0.77 |



|          |      |
|----------|------|
| 1.00E+00 | 0.91 |
| 1.00E+00 | 0.95 |
| 1.00E+00 | 0.97 |
| 1.00E+00 | 0.9  |
| 1.00E+00 | 0.95 |
| 1.00E+00 | 0.7  |

|          |      |
|----------|------|
| 1.00E+00 | 0.72 |
| 1.00E+00 | 0.8  |
| 1.00E+00 | 0.74 |
| 1.00E+00 | 0.83 |
| 1.00E+00 | 0.97 |
| 1.00E+00 | 0.97 |
| 1.00E+00 | 0.86 |
| 1.00E+00 | 1    |

|          |      |
|----------|------|
| 1.00E+00 | 0.86 |
| 1.00E+00 | 0.8  |
| 1.00E+00 | 0.87 |
| 1.00E+00 | 0.8  |
| 1.00E+00 | 1    |
| 1.00E+00 | 1    |
| 1.00E+00 | 1    |
| 1.00E+00 | 0.65 |
| 1.00E+00 | 1    |
| 1.00E+00 | 1    |
| 1.00E+00 | 0.77 |
| 1.00E+00 | 1    |
| 1.00E+00 | 1    |
| 1.00E+00 | 0.62 |
| 1.00E+00 | 0.81 |
| 1.00E+00 | 0.75 |
| 1.00E+00 | 0.78 |

|          |      |
|----------|------|
| 1.00E+00 | 1    |
| 1.00E+00 | 0.72 |
| 1.00E+00 | 0.78 |
| 1.00E+00 | 1    |
| 1.00E+00 | 0.8  |
| 1.00E+00 | 0.69 |
| 1.00E+00 | 1    |

|          |      |
|----------|------|
| 1.00E+00 | 0.75 |
| 1.00E+00 | 0.81 |
| 1.00E+00 | 0.46 |
| 1.00E+00 | 0.55 |
| 1.00E+00 | 0.58 |

|          |     |
|----------|-----|
| 1.00E+00 | 1   |
| 1.00E+00 | 0.9 |
| 1.00E+00 | 0.8 |

|          |      |
|----------|------|
| 1.00E+00 | 0.69 |
| 1.00E+00 | 0.45 |
| 1.00E+00 | 0.7  |
| 1.00E+00 | 0.67 |
| 1.00E+00 | 0.49 |
| 1.00E+00 | 0.84 |
| 1.00E+00 | 0.85 |
| 1.00E+00 | 0.59 |
| 1.00E+00 | 0.74 |
| 1.00E+00 | 0.44 |
| 1.00E+00 | 0.9  |
| 1.00E+00 | 0.9  |
| 1.00E+00 | 0.87 |

|          |      |
|----------|------|
| 1.00E+00 | 1    |
| 1.00E+00 | 1    |
| 1.00E+00 | 0.91 |
| 1.00E+00 | 0.75 |
| 1.00E+00 | 0.84 |
| 1.00E+00 | 0.8  |
| 1.00E+00 | 0.88 |
| 1.00E+00 | 0.97 |
| 1.00E+00 | 0.65 |
| 1.00E+00 | 0.67 |
| 1.00E+00 | 0.85 |
| 1.00E+00 | 0.86 |
| 1.00E+00 | 0.63 |
| 1.00E+00 | 0.67 |
| 1.00E+00 | 0.78 |
| 1.00E+00 | 0.75 |
| 1.00E+00 | 0.78 |
| 1.00E+00 | 0.72 |

|          |      |
|----------|------|
| 1.00E+00 | 0.83 |
| 1.00E+00 | 1    |
| 1.00E+00 | 0.9  |
| 1.00E+00 | 0.7  |
| 1.00E+00 | 0.88 |
| 1.00E+00 | 1    |
| 1.00E+00 | 0.61 |
| 1.00E+00 | 0.6  |

|          |      |
|----------|------|
| 1.00E+00 | 0.91 |
| 1.00E+00 | 0.92 |
| 1.00E+00 | 0.65 |

|          |      |
|----------|------|
| 1.00E+00 | 0.78 |
| 1.00E+00 | 0.97 |
| 1.00E+00 | 1    |
| 1.00E+00 | 1    |
| 1.00E+00 | 0.8  |
| 1.00E+00 | 1    |
| 1.00E+00 | 0.88 |
| 1.00E+00 | 0.91 |
| 1.00E+00 | 0.89 |
| 1.00E+00 | 1    |
| 1.00E+00 | 1    |
| 1.00E+00 | 0.57 |
| 1.00E+00 | 0.78 |
| 1.00E+00 | 1    |
| 1.00E+00 | 0.96 |
| 1.00E+00 | 0.93 |
| 1.00E+00 | 0.97 |
| 1.00E+00 | 0.66 |
| 1.00E+00 | 1    |
| 1.00E+00 | 0.87 |
| 1.00E+00 | 0.84 |
| 1.00E+00 | 0.94 |
| 1.00E+00 | 0.97 |
| 1.00E+00 | 0.69 |
| 1.00E+00 | 0.66 |
| 1.00E+00 | 0.87 |
| 1.00E+00 | 0.79 |
| 1.00E+00 | 1    |
| 1.00E+00 | 0.87 |
| 1.00E+00 | 0.91 |
| 1.00E+00 | 1    |
| 1.00E+00 | 0.82 |
| 1.00E+00 | 0.92 |
| 1.00E+00 | 0.56 |
| 1.00E+00 | 0.65 |
| 1.00E+00 | 1    |
| 1.00E+00 | 1    |
| 1.00E+00 | 0.7  |
| 1.00E+00 | 0.82 |
| 1.00E+00 | 0.92 |
| 1.00E+00 | 0.73 |
| 1.00E+00 | 0.87 |
| 1.00E+00 | 0.73 |
| 1.00E+00 | 0.69 |

|          |      |
|----------|------|
| 1.00E+00 | 1    |
| 1.00E+00 | 0    |
| 1.00E+00 | 0.78 |
| 1.00E+00 | 0.8  |
| 1.00E+00 | 0.89 |
| 1.00E+00 | 0.62 |
| 1.00E+00 | 0.92 |
| 1.00E+00 | 0.95 |
| 1.00E+00 | 0.67 |
| 1.00E+00 | 0.67 |
| 1.00E+00 | 0.7  |
| 1.00E+00 | 0.77 |
| 1.00E+00 | 0.66 |
| 1.00E+00 | 1    |
| 1.00E+00 | 0.65 |
| 1.00E+00 | 1    |
| 1.00E+00 | 0.5  |
| 1.00E+00 | 0    |
| 1.00E+00 | 0.76 |
| 1.00E+00 | 0.72 |
| 1.00E+00 | 0.86 |
| 1.00E+00 | 1    |
| 1.00E+00 | 0.81 |
| 1.00E+00 | 0.97 |
| 1.00E+00 | 0.95 |
| 1.00E+00 | 0.92 |
| 1.00E+00 | 0.91 |
| 1.00E+00 | 0.93 |
| 1.00E+00 | 0.8  |
| 1.00E+00 | 0.89 |
| 1.00E+00 | 0.79 |
| 1.00E+00 | 0.87 |
| 1.00E+00 | 0.69 |
| 1.00E+00 | 0.85 |
| 1.00E+00 | 0.75 |
| 1.00E+00 | 0.68 |
| 1.00E+00 | 0.94 |
| 1.00E+00 | 0.77 |

|          |      |
|----------|------|
| 1.00E+00 | 0.9  |
| 1.00E+00 | 0.59 |
| 1.00E+00 | 0.78 |

|          |      |
|----------|------|
| 1.00E+00 | 0.7  |
| 1.00E+00 | 1    |
| 1.00E+00 | 0.79 |
| 1.00E+00 | 0.88 |

|          |      |
|----------|------|
| 1.00E+00 | 0.93 |
|----------|------|

|          |      |
|----------|------|
| 1.00E+00 | 0.44 |
|----------|------|

|          |      |
|----------|------|
| 1.00E+00 | 1    |
| 1.00E+00 | 1    |
| 1.00E+00 | 0.77 |
| 1.00E+00 | 0.68 |
| 1.00E+00 | 0.74 |
| 1.00E+00 | 0.94 |
| 1.00E+00 | 0.86 |
| 1.00E+00 | 0.8  |
| 1.00E+00 | 0.83 |
| 1.00E+00 | 0.85 |
| 1.00E+00 | 0.88 |

|          |      |
|----------|------|
| 1.00E+00 | 0.92 |
| 1.00E+00 | 0.72 |
| 1.00E+00 | 1    |

|          |      |
|----------|------|
| 1.00E+00 | 0.94 |
| 1.00E+00 | 0.63 |
| 1.00E+00 | 0.72 |
| 1.00E+00 | 0.89 |
| 1.00E+00 | 1    |
| 1.00E+00 | 0.7  |
| 1.00E+00 | 0.86 |
| 1.00E+00 | 0.73 |
| 1.00E+00 | 0.66 |
| 1.00E+00 | 0.73 |
| 1.00E+00 | 0.42 |
| 1.00E+00 | 0.72 |

|          |      |
|----------|------|
| 1.00E+00 | 0.79 |
|----------|------|

|          |      |
|----------|------|
| 1.00E+00 | 0.87 |
| 1.00E+00 | 0.78 |
| 1.00E+00 | 0.88 |
| 1.00E+00 | 0.95 |
| 1.00E+00 | 1    |
| 1.00E+00 | 1    |
| 1.00E+00 | 0.76 |
| 1.00E+00 | 0.88 |
| 1.00E+00 | 0.89 |
| 1.00E+00 | 0.62 |
| 1.00E+00 | 1    |
| 1.00E+00 | 0.6  |
| 1.00E+00 | 0.86 |
| 1.00E+00 | 0.87 |
| 1.00E+00 | 0.71 |
| 1.00E+00 | 0.9  |
| 1.00E+00 | 1    |
| 1.00E+00 | 1    |
| 1.00E+00 | 0.64 |
| 1.00E+00 | 1    |
| 1.00E+00 | 0    |
| 1.00E+00 | 0.82 |
| 1.00E+00 | 0.84 |
| 1.00E+00 | 0.84 |
| 1.00E+00 | 0.77 |
| 1.00E+00 | 0.84 |
| 1.00E+00 | 1    |
| 1.00E+00 | 0.84 |
| 1.00E+00 | 0.79 |
| 1.00E+00 | 0.9  |
| 1.00E+00 | 0.94 |
| 1.00E+00 | 0.89 |
| 1.00E+00 | 0.71 |
| 1.00E+00 | 1    |
| 1.00E+00 | 0.73 |
| 1.00E+00 | 0.82 |
| 1.00E+00 | 0.6  |
| 1.00E+00 | 0.98 |
| 1.00E+00 | 0.77 |
| 1.00E+00 | 1    |
| 1.00E+00 | 1    |
| 1.00E+00 | 0.98 |

|          |      |
|----------|------|
| 1.00E+00 | 0.65 |
| 1.00E+00 | 0.74 |
| 1.00E+00 | 0.46 |
| 1.00E+00 | 0.92 |
| 1.00E+00 | 0.9  |
| 1.00E+00 | 1    |
| 1.00E+00 | 0.83 |
| 1.00E+00 | 0.83 |
| 1.00E+00 | 0.94 |
| 1.00E+00 | 1    |
| 1.00E+00 | 0.84 |
| 1.00E+00 | 0.69 |
| 1.00E+00 | 0.84 |
| 1.00E+00 | 1    |
| 1.00E+00 | 0.98 |
| 1.00E+00 | 1    |
| 1.00E+00 | 0.86 |
| 1.00E+00 | 0.7  |
| 1.00E+00 | 0.86 |
| 1.00E+00 | 0.96 |
| 1.00E+00 | 0.97 |
| 1.00E+00 | 1    |
| 1.00E+00 | 0.72 |
| 1.00E+00 | 0.81 |
| 1.00E+00 | 0.73 |
| 1.00E+00 | 0.76 |
| 1.00E+00 | 0.97 |
| 1.00E+00 | 0.95 |
| 1.00E+00 | 0.59 |
| 1.00E+00 | 0.85 |
| 1.00E+00 | 0.61 |
| 1.00E+00 | 0.73 |
| 1.00E+00 | 1    |
| 1.00E+00 | 1    |
| 1.00E+00 | 0.86 |
| 1.00E+00 | 0.95 |
| 1.00E+00 | 0.59 |
| 1.00E+00 | 0.81 |
| 1.00E+00 | 0.55 |

|          |      |
|----------|------|
| 1.00E+00 | 1    |
| 1.00E+00 | 0.68 |
| 1.00E+00 | 0.72 |
| 1.00E+00 | 0    |
| 1.00E+00 | 0.86 |
| 1.00E+00 | 0.9  |
| 1.00E+00 | 0.85 |
| 1.00E+00 | 0.58 |
| 1.00E+00 | 0.72 |
| 1.00E+00 | 1    |
| 1.00E+00 | 0.61 |
| 1.00E+00 | 0.9  |
| 1.00E+00 | 0.69 |
| 1.00E+00 | 0.96 |
| 1.00E+00 | 0.83 |
| 1.00E+00 | 0    |
| 1.00E+00 | 0.89 |
| 1.00E+00 | 0.76 |
| 1.00E+00 | 0.63 |
| 1.00E+00 | 0.9  |
| 1.00E+00 | 0.62 |
| 1.00E+00 | 0.58 |
| 1.00E+00 | 0.85 |
| 1.00E+00 | 0.96 |
| 1.00E+00 | 1    |
| 1.00E+00 | 0.8  |
| 1.00E+00 | 1    |
| 1.00E+00 | 1    |
| 1.00E+00 | 0.94 |
| 1.00E+00 | 0.71 |
| 1.00E+00 | 0.67 |
| 1.00E+00 | 0.87 |
| 1.00E+00 | 0.69 |
| 1.00E+00 | 0.91 |
| 1.00E+00 | 0.65 |
| 1.00E+00 | 0.76 |
| 1.00E+00 | 0.65 |
| 1.00E+00 | 1    |
| 1.00E+00 | 0.89 |
| 1.00E+00 | 1    |



|          |      |
|----------|------|
| 1.00E+00 | 0.61 |
| 1.00E+00 | 0.93 |
| 1.00E+00 | 0.94 |
| 1.00E+00 | 0.93 |
| 1.00E+00 | 1    |
| 1.00E+00 | 0.91 |
| 1.00E+00 | 0.88 |
| 1.00E+00 | 0.86 |
| 1.00E+00 | 1    |
| 1.00E+00 | 1    |
| 1.00E+00 | 1    |
| 1.00E+00 | 0.45 |
| 1.00E+00 | 0.56 |
| 1.00E+00 | 0.84 |
| 1.00E+00 | 0.89 |
| 1.00E+00 | 0.95 |
| 1.00E+00 | 0.91 |
| 1.00E+00 | 1    |
| 1.00E+00 | 0.84 |
| 1.00E+00 | 1    |
| 1.00E+00 | 1    |
| 1.00E+00 | 1    |
| 1.00E+00 | 0.78 |
| 1.00E+00 | 0.77 |
| 1.00E+00 | 0.94 |
| 1.00E+00 | 0.77 |
| 1.00E+00 | 0.68 |
| 1.00E+00 | 1    |
| 1.00E+00 | 1    |
| 1.00E+00 | 0.73 |
| 1.00E+00 | 0.92 |
| 1.00E+00 | 0.89 |
| 1.00E+00 | 0.47 |
| 1.00E+00 | 0.54 |
| 1.00E+00 | 0.69 |
| 1.00E+00 | 0.93 |
| 1.00E+00 | 0.83 |
| 1.00E+00 | 0.66 |
| 1.00E+00 | 1    |
| 1.00E+00 | 0.79 |
| 1.00E+00 | 0.92 |
| 1.00E+00 | 0.83 |
| 1.00E+00 | 0.7  |
| 1.00E+00 | 0.45 |

|          |      |
|----------|------|
| 1.00E+00 | 1    |
| 1.00E+00 | 0.73 |
| 1.00E+00 | 0.76 |

|          |      |
|----------|------|
| 1.00E+00 | 0.85 |
| 1.00E+00 | 0.6  |
| 1.00E+00 | 0.36 |
| 1.00E+00 | 1    |
| 1.00E+00 | 0.94 |
| 1.00E+00 | 0.87 |
| 1.00E+00 | 0.63 |
| 1.00E+00 | 0.77 |

|          |      |
|----------|------|
| 1.00E+00 | 0.69 |
| 1.00E+00 | 0.78 |
| 1.00E+00 | 1    |
| 1.00E+00 | 0.56 |
| 1.00E+00 | 0.84 |
| 1.00E+00 | 0.56 |
| 1.00E+00 | 0.59 |
| 1.00E+00 | 1    |
| 1.00E+00 | 0.82 |
| 1.00E+00 | 0.64 |
| 1.00E+00 | 0.72 |
| 1.00E+00 | 0.89 |
| 1.00E+00 | 0.89 |
| 1.00E+00 | 0.53 |

|          |      |
|----------|------|
| 1.00E+00 | 0.8  |
| 1.00E+00 | 1    |
| 1.00E+00 | 0.65 |

|          |      |
|----------|------|
| 1.00E+00 | 0.69 |
| 1.00E+00 | 0.92 |

|          |     |
|----------|-----|
| 1.00E+00 | 0.7 |
|----------|-----|

|          |      |
|----------|------|
| 1.00E+00 | 0.89 |
| 1.00E+00 | 0.87 |
| 1.00E+00 | 0.74 |
| 1.00E+00 | 0.89 |
| 1.00E+00 | 0.79 |
| 1.00E+00 | 0.95 |

|          |      |
|----------|------|
| 1.00E+00 | 0.92 |
| 1.00E+00 | 1    |
| 1.00E+00 | 0.91 |

|          |      |
|----------|------|
| 1.00E+00 | 0.87 |
| 1.00E+00 | 1    |
| 1.00E+00 | 0.92 |
| 1.00E+00 | 0.94 |
| 1.00E+00 | 0.72 |
| 1.00E+00 | 1    |
| 1.00E+00 | 0.82 |
| 1.00E+00 | 0.86 |
| 1.00E+00 | 0.96 |
| 1.00E+00 | 0.92 |
| 1.00E+00 | 0.96 |
| 1.00E+00 | 0.68 |
| 1.00E+00 | 0.68 |
| 1.00E+00 | 1    |
| 1.00E+00 | 0.68 |
| 1.00E+00 | 1    |
| 1.00E+00 | 1    |
| 1.00E+00 | 0.73 |
| 1.00E+00 | 0.71 |
| 1.00E+00 | 1    |
| 1.00E+00 | 0.94 |
| 1.00E+00 | 0.97 |

|          |      |
|----------|------|
| 1.00E+00 | 1    |
| 1.00E+00 | 0.66 |
| 1.00E+00 | 1    |
| 1.00E+00 | 0.84 |
| 1.00E+00 | 1    |

|          |      |
|----------|------|
| 1.00E+00 | 0.9  |
| 1.00E+00 | 0.81 |
| 1.00E+00 | 0.9  |
| 1.00E+00 | 0.9  |
| 1.00E+00 | 0.63 |
| 1.00E+00 | 0.88 |
| 1.00E+00 | 0.7  |
| 1.00E+00 | 0.86 |
| 1.00E+00 | 0.97 |
| 1.00E+00 | 0.94 |
| 1.00E+00 | 0.94 |
| 1.00E+00 | 0.85 |
| 1.00E+00 | 0.81 |
| 1.00E+00 | 0.9  |
| 1.00E+00 | 0.77 |
| 1.00E+00 | 0.83 |
| 1.00E+00 | 0.82 |
| 1.00E+00 | 0.88 |

|          |      |
|----------|------|
| 1.00E+00 | 0.93 |
| 1.00E+00 | 0.85 |
| 1.00E+00 | 0.93 |
| 1.00E+00 | 0.82 |
| 1.00E+00 | 1    |

|          |      |
|----------|------|
| 1.00E+00 | 0.6  |
| 1.00E+00 | 0.66 |
| 1.00E+00 | 0.57 |
| 1.00E+00 | 0.59 |
| 1.00E+00 | 0.62 |
| 1.00E+00 | 0.84 |

|          |      |
|----------|------|
| 1.00E+00 | 1    |
| 1.00E+00 | 0.54 |
| 1.00E+00 | 0.93 |
| 1.00E+00 | 0.6  |
| 1.00E+00 | 1    |
| 1.00E+00 | 0.64 |
| 1.00E+00 | 0.88 |
| 1.00E+00 | 0.78 |
| 1.00E+00 | 1    |
| 1.00E+00 | 0.64 |
| 1.00E+00 | 1    |
| 1.00E+00 | 0.75 |
| 1.00E+00 | 0.83 |
| 1.00E+00 | 1    |
| 1.00E+00 | 0.91 |
| 1.00E+00 | 1    |

|          |      |
|----------|------|
| 1.00E+00 | 0.88 |
| 1.00E+00 | 1    |
| 1.00E+00 | 0.72 |
| 1.00E+00 | 0.83 |
| 1.00E+00 | 0.71 |
| 1.00E+00 | 0.95 |

|          |      |
|----------|------|
| 1.00E+00 | 0.9  |
| 1.00E+00 | 0.96 |

|          |      |
|----------|------|
| 1.00E+00 | 0.96 |
| 1.00E+00 | 0.86 |
| 1.00E+00 | 0.64 |
| 1.00E+00 | 0.63 |
| 1.00E+00 | 1    |

|          |      |
|----------|------|
| 1.00E+00 | 0.83 |
|----------|------|

|          |      |
|----------|------|
| 1.00E+00 | 0.88 |
|----------|------|

|          |      |
|----------|------|
| 1.00E+00 | 0.77 |
| 1.00E+00 | 0.6  |
| 1.00E+00 | 0.66 |
| 1.00E+00 | 0.57 |
| 1.00E+00 | 0.59 |
| 1.00E+00 | 0.62 |
| 1.00E+00 | 0.84 |

|          |      |
|----------|------|
| 1.00E+00 | 1    |
| 1.00E+00 | 0.54 |
| 1.00E+00 | 0.93 |
| 1.00E+00 | 0.6  |
| 1.00E+00 | 1    |
| 1.00E+00 | 0.64 |
| 1.00E+00 | 1    |
| 1.00E+00 | 1    |
| 1.00E+00 | 0.93 |
| 1.00E+00 | 0.58 |
| 1.00E+00 | 0.95 |
| 1.00E+00 | 0.83 |
| 1.00E+00 | 1    |
| 1.00E+00 | 0.72 |

|          |      |
|----------|------|
| 1.00E+00 | 0.69 |
| 1.00E+00 | 0.82 |
| 1.00E+00 | 1    |
| 1.00E+00 | 0.6  |
| 1.00E+00 | 0.84 |
| 1.00E+00 | 0.68 |
| 1.00E+00 | 1    |
| 1.00E+00 | 1    |
| 1.00E+00 | 1    |
| 1.00E+00 | 1    |
| 1.00E+00 | 0.65 |
| 1.00E+00 | 1    |
| 1.00E+00 | 1    |
| 1.00E+00 | 1    |
| 1.00E+00 | 0.95 |
| 1.00E+00 | 1    |
| 1.00E+00 | 0.55 |
| 1.00E+00 | 0.93 |
| 1.00E+00 | 1    |
| 1.00E+00 | 0.93 |
| 1.00E+00 | 1    |
| 1.00E+00 | 1    |
| 1.00E+00 | 0.73 |
| 1.00E+00 | 0.93 |
| 1.00E+00 | 0.76 |
| 1.00E+00 | 0.92 |
| 1.00E+00 | 0.92 |
| 1.00E+00 | 1    |
| 1.00E+00 | 0.62 |
| 1.00E+00 | 0.89 |
| 1.00E+00 | 0.84 |
| 1.00E+00 | 0.69 |
| 1.00E+00 | 0.74 |
| 1.00E+00 | 0.89 |
| 1.00E+00 | 0.67 |
| 1.00E+00 | 0.85 |
| 1.00E+00 | 0.74 |
| 1.00E+00 | 1    |
| 1.00E+00 | 1    |
| 1.00E+00 | 0.84 |
| 1.00E+00 | 0.85 |
| 1.00E+00 | 0.6  |
| 1.00E+00 | 0.77 |
| 1.00E+00 | 0.71 |
| 1.00E+00 | 1    |
| 1.00E+00 | 1    |

|          |      |
|----------|------|
| 1.00E+00 | 0.84 |
| 1.00E+00 | 0.95 |
| 1.00E+00 | 0.89 |
| 1.00E+00 | 1    |
| 1.00E+00 | 0.89 |
| 1.00E+00 | 0.65 |
| 1.00E+00 | 0.91 |
| 1.00E+00 | 0.72 |

|          |      |
|----------|------|
| 1.00E+00 | 0.42 |
| 1.00E+00 | 0.35 |
| 1.00E+00 | 0.45 |
| 1.00E+00 | 0.43 |

|          |      |
|----------|------|
| 1.00E+00 | 0.68 |
| 1.00E+00 | 0.89 |
| 1.00E+00 | 0.84 |
| 1.00E+00 | 0.69 |
| 1.00E+00 | 0.74 |
| 1.00E+00 | 0.89 |

|          |      |
|----------|------|
| 1.00E+00 | 0.67 |
| 1.00E+00 | 0.85 |
| 1.00E+00 | 0.74 |
| 1.00E+00 | 1    |
| 1.00E+00 | 1    |

|          |      |
|----------|------|
| 1.00E+00 | 0.94 |
| 1.00E+00 | 0.62 |
| 1.00E+00 | 0.83 |
| 1.00E+00 | 1    |
| 1.00E+00 | 0.66 |
| 1.00E+00 | 0.97 |
| 1.00E+00 | 0.85 |
| 1.00E+00 | 1    |
| 1.00E+00 | 0.9  |
| 1.00E+00 | 0.88 |
| 1.00E+00 | 0.86 |
| 1.00E+00 | 0.73 |
| 1.00E+00 | 0.86 |
| 1.00E+00 | 0.8  |
| 1.00E+00 | 0.93 |
| 1.00E+00 | 0.87 |

|          |      |
|----------|------|
| 1.00E+00 | 0.82 |
| 1.00E+00 | 0.77 |
| 1.00E+00 | 0.91 |
| 1.00E+00 | 0.97 |
| 1.00E+00 | 1    |
| 1.00E+00 | 0.88 |
| 1.00E+00 | 0.62 |
| 1.00E+00 | 0.75 |
| 1.00E+00 | 0.92 |
| 1.00E+00 | 0.88 |
| 1.00E+00 | 0.79 |
| 1.00E+00 | 0.72 |
| 1.00E+00 | 0.96 |
| 1.00E+00 | 1    |
| 1.00E+00 | 0.69 |
| 1.00E+00 | 1    |
| 1.00E+00 | 0.69 |
| 1.00E+00 | 0.73 |
| 1.00E+00 | 0.9  |
| 1.00E+00 | 0.91 |
| 1.00E+00 | 0.64 |
| 1.00E+00 | 0.95 |
| 1.00E+00 | 0.95 |
| 1.00E+00 | 0.95 |
| 1.00E+00 | 0.75 |
| 1.00E+00 | 0.79 |
| 1.00E+00 | 0.78 |
| 1.00E+00 | 0.97 |
| 1.00E+00 | 0    |
| 1.00E+00 | 0.86 |
| 1.00E+00 | 1    |
| 1.00E+00 | 0.7  |
| 1.00E+00 | 0.72 |
| 1.00E+00 | 0.8  |
| 1.00E+00 | 0.76 |
| 1.00E+00 | 0.95 |
| 1.00E+00 | 0.88 |
| 1.00E+00 | 0.98 |
| 1.00E+00 | 0.81 |
| 1.00E+00 | 0.83 |



1.00E+00 0.7

1.00E+00 0.66

1.00E+00 0.89

1.00E+00 0.83

1.00E+00 0.89

1.00E+00 0.84

1.00E+00 0.85

1.00E+00 0.78

1.00E+00 0.9

1.00E+00 0.97

1.00E+00 1

1.00E+00 0.8

1.00E+00 1

1.00E+00 0.89

1.00E+00 0.66

1.00E+00 0.81

1.00E+00 1

1.00E+00 0.8

1.00E+00 1

1.00E+00 0.9

1.00E+00 0.82

1.00E+00 0.65

1.00E+00 0.56

1.00E+00 1

1.00E+00 1

1.00E+00 0.62

1.00E+00 0.66

1.00E+00 0.88

1.00E+00 0.85

1.00E+00 0.71

1.00E+00 1

1.00E+00 1

1.00E+00 0.92

1.00E+00 0.81

1.00E+00 0.84

1.00E+00 0.84

1.00E+00 0.91

1.00E+00 0.68

1.00E+00 0.75

1.00E+00 0.79

|          |      |
|----------|------|
| 1.00E+00 | 0.65 |
| 1.00E+00 | 1    |
| 1.00E+00 | 0.86 |
| 1.00E+00 | 0.89 |
| 1.00E+00 | 1    |
| 1.00E+00 | 0.71 |
| 1.00E+00 | 0.82 |
| 1.00E+00 | 0.81 |
| 1.00E+00 | 0.87 |
| 1.00E+00 | 1    |
| 1.00E+00 | 0.9  |
| 1.00E+00 | 1    |
| 1.00E+00 | 0.89 |
| 1.00E+00 | 0.67 |
| 1.00E+00 | 0.71 |
| 1.00E+00 | 1    |
| 1.00E+00 | 0.86 |
| 1.00E+00 | 0.88 |
| 1.00E+00 | 0.91 |
| 1.00E+00 | 0.86 |
| 1.00E+00 | 0.65 |
| 1.00E+00 | 0.95 |
| 1.00E+00 | 0.87 |
| 1.00E+00 | 0.74 |
| 1.00E+00 | 0.65 |
| 1.00E+00 | 1    |
| 1.00E+00 | 0.83 |
| 1.00E+00 | 0.87 |
| 1.00E+00 | 0.85 |
| 1.00E+00 | 0.7  |
| 1.00E+00 | 0.68 |
| 1.00E+00 | 0.91 |
| 1.00E+00 | 0.86 |
| 1.00E+00 | 0.87 |
| 1.00E+00 | 0.93 |
| 1.00E+00 | 0.7  |
| 1.00E+00 | 0.95 |
| 1.00E+00 | 0.72 |
| 1.00E+00 | 0.42 |
| 1.00E+00 | 0.38 |
| 1.00E+00 | 0.76 |
| 1.00E+00 | 0.67 |
| 1.00E+00 | 0.58 |
| 1.00E+00 | 0.67 |
| 1.00E+00 | 1    |

|          |      |
|----------|------|
| 1.00E+00 | 0.77 |
| 1.00E+00 | 1    |
| 1.00E+00 | 0.97 |
| 1.00E+00 | 0.82 |
| 1.00E+00 | 0.84 |
| 1.00E+00 | 0.7  |
| 1.00E+00 | 0.9  |
| 1.00E+00 | 0.74 |
| 1.00E+00 | 0.69 |

|          |      |
|----------|------|
| 1.00E+00 | 1    |
| 1.00E+00 | 0.9  |
| 1.00E+00 | 0.71 |
| 1.00E+00 | 0.92 |
| 1.00E+00 | 0.65 |
| 1.00E+00 | 1    |
| 1.00E+00 | 0.94 |
| 1.00E+00 | 1    |
| 1.00E+00 | 1    |
| 1.00E+00 | 0.83 |
| 1.00E+00 | 0.93 |
| 1.00E+00 | 0.62 |
| 1.00E+00 | 0.75 |
| 1.00E+00 | 0.67 |
| 1.00E+00 | 1    |
| 1.00E+00 | 1    |
| 1.00E+00 | 0.96 |
| 1.00E+00 | 0.89 |
| 1.00E+00 | 0.97 |
| 1.00E+00 | 0.86 |

|          |      |
|----------|------|
| 1.00E+00 | 0.89 |
|----------|------|

|          |      |
|----------|------|
| 1.00E+00 | 0.81 |
| 1.00E+00 | 1    |

|          |      |
|----------|------|
| 1.00E+00 | 0.93 |
| 1.00E+00 | 1    |
| 1.00E+00 | 0.94 |
| 1.00E+00 | 1    |

|          |      |
|----------|------|
| 1.00E+00 | 0.47 |
| 1.00E+00 | 0.51 |
| 1.00E+00 | 0.72 |
| 1.00E+00 | 0.91 |
| 1.00E+00 | 0.74 |
| 1.00E+00 | 0.73 |
| 1.00E+00 | 1    |

|          |      |
|----------|------|
| 1.00E+00 | 0.76 |
| 1.00E+00 | 1    |
| 1.00E+00 | 1    |
| 1.00E+00 | 0.92 |
| 1.00E+00 | 0.8  |
| 1.00E+00 | 0.72 |
| 1.00E+00 | 0.71 |
| 1.00E+00 | 0.86 |
| 1.00E+00 | 0.85 |
| 1.00E+00 | 0.75 |
| 1.00E+00 | 0.81 |
| 1.00E+00 | 0.94 |
| 1.00E+00 | 0.67 |
| 1.00E+00 | 0.81 |
| 1.00E+00 | 0.9  |
| 1.00E+00 | 0.93 |
| 1.00E+00 | 0.68 |
| 1.00E+00 | 0.68 |
| 1.00E+00 | 0.82 |
| 1.00E+00 | 0.95 |
| 1.00E+00 | 0.75 |
| 1.00E+00 | 1    |

|          |      |
|----------|------|
| 1.00E+00 | 0.92 |
| 1.00E+00 | 1    |

|          |      |
|----------|------|
| 1.00E+00 | 0.78 |
| 1.00E+00 | 0.87 |
| 1.00E+00 | 0.8  |
| 1.00E+00 | 0.59 |
| 1.00E+00 | 0.87 |
| 1.00E+00 | 0.94 |

|          |      |
|----------|------|
| 1.00E+00 | 0.81 |
| 1.00E+00 | 0.84 |
| 1.00E+00 | 0.79 |
| 1.00E+00 | 0.95 |
| 1.00E+00 | 0.58 |
| 1.00E+00 | 0.93 |

|          |      |
|----------|------|
| 1.00E+00 | 0.54 |
| 1.00E+00 | 0.89 |
| 1.00E+00 | 0.71 |
| 1.00E+00 | 0.63 |

|          |      |
|----------|------|
| 1.00E+00 | 0.77 |
| 1.00E+00 | 0.9  |
| 1.00E+00 | 0.96 |
| 1.00E+00 | 0.83 |

|          |      |
|----------|------|
| 1.00E+00 | 0.84 |
| 1.00E+00 | 0.76 |
| 1.00E+00 | 0.52 |
| 1.00E+00 | 0.79 |
| 1.00E+00 | 0.92 |
| 1.00E+00 | 0.81 |
| 1.00E+00 | 0.9  |
| 1.00E+00 | 0.71 |
| 1.00E+00 | 0.84 |
| 1.00E+00 | 0.92 |
| 1.00E+00 | 0.73 |
| 1.00E+00 | 0.93 |
| 1.00E+00 | 0.85 |
| 1.00E+00 | 0.87 |
| 1.00E+00 | 0.86 |
| 1.00E+00 | 0.66 |
| 1.00E+00 | 0.88 |
| 1.00E+00 | 0.66 |
| 1.00E+00 | 0.64 |
| 1.00E+00 | 0.48 |
| 1.00E+00 | 0.83 |
| 1.00E+00 | 1    |
| 1.00E+00 | 1    |
| 1.00E+00 | 0.98 |
| 1.00E+00 | 0.99 |
| 1.00E+00 | 0.83 |
| 1.00E+00 | 0.86 |
| 1.00E+00 | 0.88 |
| 1.00E+00 | 0.82 |
| 1.00E+00 | 1    |
| 1.00E+00 | 0.89 |
| 1.00E+00 | 0.87 |
| 1.00E+00 | 0.72 |
| 1.00E+00 | 0.7  |
| 1.00E+00 | 0.64 |
| 1.00E+00 | 0.69 |

|          |      |
|----------|------|
| 1.00E+00 | 0.84 |
| 1.00E+00 | 0.73 |
| 1.00E+00 | 0.82 |

|          |      |
|----------|------|
| 1.00E+00 | 0.9  |
| 1.00E+00 | 0.52 |

|          |      |
|----------|------|
| 1.00E+00 | 1    |
| 1.00E+00 | 0.95 |
| 1.00E+00 | 0.95 |
| 1.00E+00 | 0.94 |

|          |      |
|----------|------|
| 1.00E+00 | 0.94 |
| 1.00E+00 | 0.78 |
| 1.00E+00 | 0.74 |

|          |      |
|----------|------|
| 1.00E+00 | 0.98 |
| 1.00E+00 | 0.79 |
| 1.00E+00 | 0.87 |

|          |      |
|----------|------|
| 1.00E+00 | 0.88 |
|----------|------|

|          |      |
|----------|------|
| 1.00E+00 | 0.76 |
| 1.00E+00 | 0.87 |
| 1.00E+00 | 0.87 |
| 1.00E+00 | 0.93 |
| 1.00E+00 | 0.6  |
| 1.00E+00 | 0.47 |
| 1.00E+00 | 0.59 |
| 1.00E+00 | 0.73 |
| 1.00E+00 | 0.81 |
| 1.00E+00 | 0.75 |
| 1.00E+00 | 0.86 |
| 1.00E+00 | 0.75 |
| 1.00E+00 | 1    |
| 1.00E+00 | 0.61 |
| 1.00E+00 | 0.8  |

|          |      |
|----------|------|
| 1.00E+00 | 0.82 |
| 1.00E+00 | 0.85 |
| 1.00E+00 | 0.71 |
| 1.00E+00 | 0.93 |
| 1.00E+00 | 0.78 |
| 1.00E+00 | 0.77 |
| 1.00E+00 | 0.72 |
| 1.00E+00 | 0.79 |
| 1.00E+00 | 0.83 |

|          |      |
|----------|------|
| 1.00E+00 | 0.65 |
|----------|------|

|          |      |
|----------|------|
| 1.00E+00 | 0.65 |
| 1.00E+00 | 0.6  |
| 1.00E+00 | 0.75 |
| 1.00E+00 | 0.94 |
| 1.00E+00 | 0.84 |
| 1.00E+00 | 0.71 |
| 1.00E+00 | 1    |
| 1.00E+00 | 1    |
| 1.00E+00 | 0.67 |
| 1.00E+00 | 0.79 |
| 1.00E+00 | 0.89 |
| 1.00E+00 | 0.95 |
| 1.00E+00 | 0.95 |
| 1.00E+00 | 1    |
| 1.00E+00 | 0.63 |
| 1.00E+00 | 0.57 |
| 1.00E+00 | 0.95 |
| 1.00E+00 | 0.85 |
| 1.00E+00 | 0.76 |
| 1.00E+00 | 0.5  |
| 1.00E+00 | 0.75 |
| 1.00E+00 | 0.79 |
| 1.00E+00 | 0.67 |
| 1.00E+00 | 0.79 |
| 1.00E+00 | 0.72 |
| 1.00E+00 | 1    |
| 1.00E+00 | 0.63 |
| 1.00E+00 | 1    |
| 1.00E+00 | 0.82 |
| 1.00E+00 | 0.91 |
| 1.00E+00 | 0.73 |
| 1.00E+00 | 0.94 |
| 1.00E+00 | 0.86 |
| 1.00E+00 | 0.94 |
| 1.00E+00 | 0.61 |
| 1.00E+00 | 0.77 |
| 1.00E+00 | 0.87 |
| 1.00E+00 | 0.91 |
| 1.00E+00 | 0.89 |
| 1.00E+00 | 0.64 |
| 1.00E+00 | 0.9  |

|          |      |
|----------|------|
| 1.00E+00 | 0.84 |
| 1.00E+00 | 0.86 |
| 1.00E+00 | 0.92 |
| 1.00E+00 | 0.69 |
| 1.00E+00 | 0.85 |
| 1.00E+00 | 0.82 |
| 1.00E+00 | 0.66 |
| 1.00E+00 | 0.68 |
| 1.00E+00 | 0.8  |
| 1.00E+00 | 1    |
| 1.00E+00 | 0.84 |
| 1.00E+00 | 0.96 |
| 1.00E+00 | 0.93 |
| 1.00E+00 | 0.76 |
| 1.00E+00 | 0.36 |
| 1.00E+00 | 0.84 |
| 1.00E+00 | 0.68 |
| 1.00E+00 | 0.91 |
| 1.00E+00 | 0.9  |
| 1.00E+00 | 0.73 |
| 1.00E+00 | 0.54 |
| 1.00E+00 | 0.72 |
| 1.00E+00 | 0.76 |
| 1.00E+00 | 0.86 |
| 1.00E+00 | 0.81 |
| 1.00E+00 | 0.96 |
| 1.00E+00 | 0.85 |
| 1.00E+00 | 0.59 |
| 1.00E+00 | 0.71 |
| 1.00E+00 | 0.74 |
| 1.00E+00 | 1    |
| 1.00E+00 | 0.85 |
| 1.00E+00 | 0.62 |
| 1.00E+00 | 0.79 |
| 1.00E+00 | 0.9  |
| 1.00E+00 | 1    |
| 1.00E+00 | 0.92 |
| 1.00E+00 | 1    |
| 1.00E+00 | 1    |
| 1.00E+00 | 0.84 |
| 1.00E+00 | 0.72 |
| 1.00E+00 | 0.86 |



|          |      |
|----------|------|
| 1.00E+00 | 1    |
| 1.00E+00 | 0.59 |
| 1.00E+00 | 0.57 |
| 1.00E+00 | 0.65 |
| 1.00E+00 | 0.79 |
| 1.00E+00 | 0.95 |
| 1.00E+00 | 0.46 |
| 1.00E+00 | 0.57 |
| 1.00E+00 | 0.63 |
| 1.00E+00 | 0.77 |
| 1.00E+00 | 0.85 |
| 1.00E+00 | 0.52 |
| 1.00E+00 | 0.69 |
| 1.00E+00 | 0.85 |
| 1.00E+00 | 0.67 |
| 1.00E+00 | 0.87 |
| 1.00E+00 | 1    |
| 1.00E+00 | 0.9  |
| 1.00E+00 | 0.96 |
| 1.00E+00 | 0.67 |
| 1.00E+00 | 0.93 |
| 1.00E+00 | 0.66 |
| 1.00E+00 | 0.9  |
| 1.00E+00 | 0.85 |
| 1.00E+00 | 0.86 |
| 1.00E+00 | 0.66 |
| 1.00E+00 | 0.91 |
| 1.00E+00 | 0.51 |
| 1.00E+00 | 0.89 |
| 1.00E+00 | 0.87 |
| 1.00E+00 | 1    |
| 1.00E+00 | 0.88 |
| 1.00E+00 | 0.74 |
| 1.00E+00 | 0.85 |
| 1.00E+00 | 0    |
| 1.00E+00 | 0.81 |
| 1.00E+00 | 0.62 |

|          |      |
|----------|------|
| 1.00E+00 | 0.89 |
| 1.00E+00 | 1    |
| 1.00E+00 | 0.9  |
| 1.00E+00 | 1    |
| 1.00E+00 | 0.59 |
| 1.00E+00 | 0.8  |
| 1.00E+00 | 0.78 |
| 1.00E+00 | 0.89 |
| 1.00E+00 | 0.74 |
| 1.00E+00 | 0.68 |
| 1.00E+00 | 0.95 |
| 1.00E+00 | 0.91 |
| 1.00E+00 | 0.72 |
| 1.00E+00 | 0.91 |
| 1.00E+00 | 0.86 |
| 1.00E+00 | 0.86 |
| 1.00E+00 | 0.72 |
| 1.00E+00 | 0.84 |
| 1.00E+00 | 0.67 |
| 1.00E+00 | 0.96 |
| 1.00E+00 | 0.86 |
| 1.00E+00 | 0    |
| 1.00E+00 | 0.83 |
| 1.00E+00 | 0.88 |
| 1.00E+00 | 0.88 |
| 1.00E+00 | 0.89 |
| 1.00E+00 | 0.97 |
| 1.00E+00 | 0.82 |
| 1.00E+00 | 0.53 |
| 1.00E+00 | 0.8  |
| 1.00E+00 | 0.89 |
| 1.00E+00 | 1    |
| 1.00E+00 | 0.83 |
| 1.00E+00 | 0.63 |
| 1.00E+00 | 0.67 |
| 1.00E+00 | 0.62 |
| 1.00E+00 | 0.94 |
| 1.00E+00 | 1    |
| 1.00E+00 | 0.92 |
| 1.00E+00 | 1    |
| 1.00E+00 | 0.78 |
| 1.00E+00 | 1    |
| 1.00E+00 | 0.88 |
| 1.00E+00 | 0.79 |
| 1.00E+00 | 0.83 |
| 1.00E+00 | 0.78 |

|          |      |
|----------|------|
| 1.00E+00 | 0.72 |
| 1.00E+00 | 0.89 |
| 1.00E+00 | 0.91 |
| 1.00E+00 | 0.77 |
| 1.00E+00 | 0.83 |
| 1.00E+00 | 0.92 |
| 1.00E+00 | 0.76 |
| 1.00E+00 | 0.79 |
| 1.00E+00 | 0.7  |
| 1.00E+00 | 0.88 |
| 1.00E+00 | 0.74 |
| 1.00E+00 | 0.79 |
| 1.00E+00 | 0.85 |
| 1.00E+00 | 0.43 |
| 1.00E+00 | 0.94 |
| 1.00E+00 | 0.85 |
| 1.00E+00 | 0.76 |
| 1.00E+00 | 1    |
| 1.00E+00 | 0.72 |
| 1.00E+00 | 0.82 |
| 1.00E+00 | 1    |
| 1.00E+00 | 1    |
| 1.00E+00 | 0.82 |
| 1.00E+00 | 1    |
| 1.00E+00 | 0.81 |
| 1.00E+00 | 0.61 |
| 1.00E+00 | 0.92 |
| 1.00E+00 | 0.55 |
| 1.00E+00 | 1    |
| 1.00E+00 | 1    |
| 1.00E+00 | 0.89 |
| 1.00E+00 | 1    |
| 1.00E+00 | 0.87 |
| 1.00E+00 | 0.88 |

|          |   |
|----------|---|
| 1.00E+00 | 1 |
|----------|---|

|          |      |
|----------|------|
| 1.00E+00 | 0.83 |
| 1.00E+00 | 1    |

|          |      |
|----------|------|
| 1.00E+00 | 0.53 |
| 1.00E+00 | 0.9  |
| 1.00E+00 | 0.63 |
| 1.00E+00 | 0.95 |

|          |      |
|----------|------|
| 1.00E+00 | 0.73 |
| 1.00E+00 | 0.74 |
| 1.00E+00 | 0.52 |
| 1.00E+00 | 0.4  |
| 1.00E+00 | 0.78 |
| 1.00E+00 | 1    |
| 1.00E+00 | 0.89 |
| 1.00E+00 | 0.89 |

|          |      |
|----------|------|
| 1.00E+00 | 0.91 |
| 1.00E+00 | 1    |
| 1.00E+00 | 0.49 |
| 1.00E+00 | 0.63 |
| 1.00E+00 | 0.95 |
| 1.00E+00 | 0.73 |
| 1.00E+00 | 0.77 |

|          |      |
|----------|------|
| 1.00E+00 | 0.85 |
| 1.00E+00 | 0.78 |
| 1.00E+00 | 0.67 |
| 1.00E+00 | 0.68 |
| 1.00E+00 | 0.7  |
| 1.00E+00 | 1    |
| 1.00E+00 | 0.91 |
| 1.00E+00 | 1    |

|          |   |
|----------|---|
| 1.00E+00 | 1 |
|----------|---|

|          |      |
|----------|------|
| 1.00E+00 | 0.91 |
| 1.00E+00 | 0.91 |
| 1.00E+00 | 0.9  |
| 1.00E+00 | 1    |
| 1.00E+00 | 1    |

|          |      |
|----------|------|
| 1.00E+00 | 0.95 |
| 1.00E+00 | 0.65 |
| 1.00E+00 | 0.85 |
| 1.00E+00 | 0.89 |
| 1.00E+00 | 0.57 |

|          |      |
|----------|------|
| 1.00E+00 | 0.93 |
| 1.00E+00 | 0.84 |

|          |      |
|----------|------|
| 1.00E+00 | 0.62 |
|----------|------|

|          |      |
|----------|------|
| 1.00E+00 | 0.76 |
| 1.00E+00 | 0.69 |

|          |      |
|----------|------|
| 1.00E+00 | 1    |
| 1.00E+00 | 1    |
| 1.00E+00 | 1    |
| 1.00E+00 | 0.89 |
| 1.00E+00 | 0.75 |
| 1.00E+00 | 0.95 |
| 1.00E+00 | 0.87 |
| 1.00E+00 | 0.94 |
| 1.00E+00 | 0.81 |
| 1.00E+00 | 0.71 |
| 1.00E+00 | 0.94 |
| 1.00E+00 | 1    |
| 1.00E+00 | 0.81 |
| 1.00E+00 | 1    |
| 1.00E+00 | 0.73 |
| 1.00E+00 | 0.86 |
| 1.00E+00 | 0.85 |
| 1.00E+00 | 0.86 |
| 1.00E+00 | 1    |
| 1.00E+00 | 0.63 |
| 1.00E+00 | 0.76 |
| 1.00E+00 | 0.78 |
| 1.00E+00 | 1    |
| 1.00E+00 | 1    |
| 1.00E+00 | 0.94 |
| 1.00E+00 | 0.75 |
| 1.00E+00 | 0.94 |
| 1.00E+00 | 0.84 |
| 1.00E+00 | 0.68 |
| 1.00E+00 | 0.84 |
| 1.00E+00 | 0.86 |
| 1.00E+00 | 0.93 |
| 1.00E+00 | 0.65 |
| 1.00E+00 | 0.92 |
| 1.00E+00 | 0.97 |
| 1.00E+00 | 1    |
| 1.00E+00 | 0.89 |
| 1.00E+00 | 0.91 |
| 1.00E+00 | 0.9  |
| 1.00E+00 | 0.77 |
| 1.00E+00 | 0.87 |

|          |      |
|----------|------|
| 1.00E+00 | 0.72 |
| 1.00E+00 | 0.59 |
| 1.00E+00 | 0.69 |
| 1.00E+00 | 0.95 |
| 1.00E+00 | 0.61 |
| 1.00E+00 | 0.88 |

|          |      |
|----------|------|
| 1.00E+00 | 0.96 |
| 1.00E+00 | 0.89 |
| 1.00E+00 | 0.86 |
| 1.00E+00 | 0.72 |
| 1.00E+00 | 0.84 |
| 1.00E+00 | 0.67 |
| 1.00E+00 | 0.86 |
| 1.00E+00 | 0.92 |
| 1.00E+00 | 0    |
| 1.00E+00 | 0.87 |
| 1.00E+00 | 0.44 |
| 1.00E+00 | 0.93 |
| 1.00E+00 | 0.98 |
| 1.00E+00 | 1    |

|          |      |
|----------|------|
| 1.00E+00 | 0.85 |
|----------|------|

|          |      |
|----------|------|
| 1.00E+00 | 0.92 |
|----------|------|

|          |      |
|----------|------|
| 1.00E+00 | 0.77 |
| 1.00E+00 | 1    |
| 1.00E+00 | 0.94 |
| 1.00E+00 | 0.95 |

|          |      |
|----------|------|
| 1.00E+00 | 0.86 |
|----------|------|

|          |      |
|----------|------|
| 1.00E+00 | 0.76 |
| 1.00E+00 | 0.52 |
| 1.00E+00 | 0.5  |
| 1.00E+00 | 0.7  |
| 1.00E+00 | 0.55 |
| 1.00E+00 | 0.84 |
| 1.00E+00 | 0.9  |

|          |      |
|----------|------|
| 1.00E+00 | 0.82 |
| 1.00E+00 | 0.91 |
| 1.00E+00 | 0.92 |

|          |      |
|----------|------|
| 1.00E+00 | 0.68 |
| 1.00E+00 | 0.77 |
| 1.00E+00 | 0.78 |
| 1.00E+00 | 1    |
| 1.00E+00 | 0.83 |
| 1.00E+00 | 0.61 |
| 1.00E+00 | 1    |
| 1.00E+00 | 0.64 |
| 1.00E+00 | 0.9  |
| 1.00E+00 | 0.92 |
| 1.00E+00 | 1    |

|          |      |
|----------|------|
| 1.00E+00 | 0.66 |
| 1.00E+00 | 0.87 |
| 1.00E+00 | 0.79 |
| 1.00E+00 | 1    |
| 1.00E+00 | 0.91 |
| 1.00E+00 | 1    |
| 1.00E+00 | 0.64 |
| 1.00E+00 | 1    |
| 1.00E+00 | 0.6  |
| 1.00E+00 | 1    |
| 1.00E+00 | 1    |
| 1.00E+00 | 0.71 |
| 1.00E+00 | 0.79 |

|          |      |
|----------|------|
| 1.00E+00 | 0.92 |
| 1.00E+00 | 0.91 |
| 1.00E+00 | 0.95 |
| 1.00E+00 | 0.95 |
| 1.00E+00 | 0.91 |
| 1.00E+00 | 0.82 |

|          |      |
|----------|------|
| 1.00E+00 | 0.76 |
| 1.00E+00 | 0.81 |
| 1.00E+00 | 0.88 |
| 1.00E+00 | 1    |

|          |      |
|----------|------|
| 1.00E+00 | 1    |
| 1.00E+00 | 1    |
| 1.00E+00 | 0.78 |
| 1.00E+00 | 0.81 |
| 1.00E+00 | 0.86 |
| 1.00E+00 | 0.92 |
| 1.00E+00 | 0.84 |
| 1.00E+00 | 0.72 |
| 1.00E+00 | 0.58 |
| 1.00E+00 | 0.96 |

|          |      |
|----------|------|
| 1.00E+00 | 0.88 |
| 1.00E+00 | 1    |
| 1.00E+00 | 1    |
| 1.00E+00 | 0.87 |
| 1.00E+00 | 0.73 |
| 1.00E+00 | 1    |
| 1.00E+00 | 0.45 |
| 1.00E+00 | 0.74 |
| 1.00E+00 | 0.52 |
| 1.00E+00 | 0.81 |
| 1.00E+00 | 1    |
| 1.00E+00 | 0.84 |
| 1.00E+00 | 0.8  |

|          |      |
|----------|------|
| 1.00E+00 | 1    |
| 1.00E+00 | 0.84 |
| 1.00E+00 | 0.72 |
| 1.00E+00 | 0.81 |
| 1.00E+00 | 0.8  |
| 1.00E+00 | 0.89 |
| 1.00E+00 | 0.67 |
| 1.00E+00 | 0.65 |
| 1.00E+00 | 0.88 |

|          |      |
|----------|------|
| 1.00E+00 | 0.92 |
| 1.00E+00 | 0.9  |

|          |      |
|----------|------|
| 1.00E+00 | 0.89 |
| 1.00E+00 | 0.92 |

|          |      |
|----------|------|
| 1.00E+00 | 0.92 |
| 1.00E+00 | 0.68 |
| 1.00E+00 | 0.87 |

|          |     |
|----------|-----|
| 1.00E+00 | 0.7 |
|----------|-----|

|          |      |
|----------|------|
| 1.00E+00 | 0.43 |
| 1.00E+00 | 0.68 |

|          |      |
|----------|------|
| 1.00E+00 | 0.79 |
|----------|------|

|          |      |
|----------|------|
| 1.00E+00 | 0.82 |
| 1.00E+00 | 0.6  |
| 1.00E+00 | 0.68 |
| 1.00E+00 | 1    |



|          |      |
|----------|------|
| 1.00E+00 | 0.72 |
| 1.00E+00 | 0.94 |
| 1.00E+00 | 0.97 |
| 1.00E+00 | 0.79 |

|          |      |
|----------|------|
| 1.00E+00 | 0.87 |
| 1.00E+00 | 0.48 |
| 1.00E+00 | 0.78 |
| 1.00E+00 | 0.93 |
| 1.00E+00 | 0.69 |
| 1.00E+00 | 0.77 |
| 1.00E+00 | 0.74 |
| 1.00E+00 | 1    |

|          |     |
|----------|-----|
| 1.00E+00 | 0.6 |
|----------|-----|

|          |      |
|----------|------|
| 1.00E+00 | 0.93 |
| 1.00E+00 | 0.92 |
| 1.00E+00 | 0.82 |

|          |      |
|----------|------|
| 1.00E+00 | 0.91 |
| 1.00E+00 | 0.87 |
| 1.00E+00 | 0.71 |
| 1.00E+00 | 0.71 |
| 1.00E+00 | 0.86 |
| 1.00E+00 | 0.9  |

|          |      |
|----------|------|
| 1.00E+00 | 0.91 |
|----------|------|

|          |      |
|----------|------|
| 1.00E+00 | 1    |
| 1.00E+00 | 0.84 |

|          |      |
|----------|------|
| 1.00E+00 | 0.57 |
| 1.00E+00 | 0.71 |
| 1.00E+00 | 1    |
| 1.00E+00 | 0    |

|          |      |
|----------|------|
| 1.00E+00 | 0.92 |
| 1.00E+00 | 0.82 |
| 1.00E+00 | 0.77 |
| 1.00E+00 | 0.78 |
| 1.00E+00 | 0.84 |
| 1.00E+00 | 0.85 |
| 1.00E+00 | 1    |

|          |      |
|----------|------|
| 1.00E+00 | 1    |
| 1.00E+00 | 0.92 |
| 1.00E+00 | 0.86 |
| 1.00E+00 | 0.81 |
| 1.00E+00 | 0.85 |
| 1.00E+00 | 1    |
| 1.00E+00 | 0.8  |
| 1.00E+00 | 0.72 |
| 1.00E+00 | 0.83 |
| 1.00E+00 | 0.65 |
| 1.00E+00 | 0.89 |
| 1.00E+00 | 0.87 |
| 1.00E+00 | 0.76 |
| 1.00E+00 | 1    |
| 1.00E+00 | 0.84 |
| 1.00E+00 | 0.68 |
| 1.00E+00 | 0.78 |
| 1.00E+00 | 0.79 |
| 1.00E+00 | 0.95 |
| 1.00E+00 | 0.9  |
| 1.00E+00 | 0.96 |
| 1.00E+00 | 1    |
| 1.00E+00 | 1    |
| 1.00E+00 | 0.5  |
| 1.00E+00 | 0.51 |
| 1.00E+00 | 0.73 |
| 1.00E+00 | 0.87 |
| 1.00E+00 | 0.9  |
| 1.00E+00 | 0.86 |
| 1.00E+00 | 0.74 |
| 1.00E+00 | 0.81 |
| 1.00E+00 | 0.87 |
| 1.00E+00 | 0.56 |
| 1.00E+00 | 0.83 |
| 1.00E+00 | 0.75 |
| 1.00E+00 | 1    |
| 1.00E+00 | 0.64 |
| 1.00E+00 | 1    |
| 1.00E+00 | 0.84 |
| 1.00E+00 | 1    |

|          |      |
|----------|------|
| 1.00E+00 | 1    |
| 1.00E+00 | 0.55 |
| 1.00E+00 | 0.93 |
| 1.00E+00 | 0.91 |
| 1.00E+00 | 0.94 |
| 1.00E+00 | 0.83 |
| 1.00E+00 | 0.89 |
| 1.00E+00 | 0.85 |
| 1.00E+00 | 0.92 |
| 1.00E+00 | 1    |
| 1.00E+00 | 0.79 |
| 1.00E+00 | 0.81 |
| 1.00E+00 | 0.91 |
| 1.00E+00 | 0.63 |
| 1.00E+00 | 0.77 |
| 1.00E+00 | 0.9  |
| 1.00E+00 | 1    |
| 1.00E+00 | 0.98 |
| 1.00E+00 | 0.96 |
| 1.00E+00 | 0.83 |
| 1.00E+00 | 0.86 |
| 1.00E+00 | 0.62 |
| 1.00E+00 | 0.76 |
| 1.00E+00 | 1    |
| 1.00E+00 | 0.81 |
| 1.00E+00 | 0.85 |
| 1.00E+00 | 0.89 |
| 1.00E+00 | 0.78 |
| 1.00E+00 | 0.96 |
| 1.00E+00 | 0.69 |
| 1.00E+00 | 0.84 |
| 1.00E+00 | 0.65 |
| 1.00E+00 | 0.77 |
| 1.00E+00 | 0.73 |
| 1.00E+00 | 0.87 |
| 1.00E+00 | 0.77 |
| 1.00E+00 | 0.9  |
| 1.00E+00 | 1    |
| 1.00E+00 | 0.66 |
| 1.00E+00 | 0.98 |
| 1.00E+00 | 0.67 |
| 1.00E+00 | 0.52 |

|          |      |
|----------|------|
| 1.00E+00 | 0.85 |
| 1.00E+00 | 0.87 |
| 1.00E+00 | 1    |
| 1.00E+00 | 0.93 |
| 1.00E+00 | 0.84 |
| 1.00E+00 | 0.95 |
| 1.00E+00 | 0.72 |
| 1.00E+00 | 0.87 |
| 1.00E+00 | 0.87 |
| 1.00E+00 | 0.7  |
| 1.00E+00 | 0.87 |
| 1.00E+00 | 1    |
| 1.00E+00 | 1    |
| 1.00E+00 | 0.53 |
| 1.00E+00 | 0.9  |
| 1.00E+00 | 1    |
| 1.00E+00 | 0.89 |
| 1.00E+00 | 0.96 |
| 1.00E+00 | 0.82 |
| 1.00E+00 | 0.76 |
| 1.00E+00 | 0.63 |
| 1.00E+00 | 0.85 |
| 1.00E+00 | 0.95 |
| 1.00E+00 | 0.63 |
| 1.00E+00 | 0.55 |
| 1.00E+00 | 0.84 |
| 1.00E+00 | 0.74 |
| 1.00E+00 | 0.77 |
| 1.00E+00 | 0.74 |
| 1.00E+00 | 0.73 |
| 1.00E+00 | 0.96 |
| 1.00E+00 | 0.74 |
| 1.00E+00 | 1    |
| 1.00E+00 | 1    |
| 1.00E+00 | 0.7  |
| 1.00E+00 | 0.92 |
| 1.00E+00 | 1    |
| 1.00E+00 | 0.54 |
| 1.00E+00 | 0.92 |
| 1.00E+00 | 0.8  |
| 1.00E+00 | 0.96 |

|          |      |
|----------|------|
| 1.00E+00 | 0.94 |
| 1.00E+00 | 0.92 |
| 1.00E+00 | 0.8  |
| 1.00E+00 | 0.73 |
| 1.00E+00 | 0.67 |
| 1.00E+00 | 0.94 |
| 1.00E+00 | 0.75 |
| 1.00E+00 | 1    |
| 1.00E+00 | 0.57 |
| 1.00E+00 | 1    |
| 1.00E+00 | 1    |
| 1.00E+00 | 0.53 |
| 1.00E+00 | 0.74 |
| 1.00E+00 | 0.88 |
| 1.00E+00 | 1    |
| 1.00E+00 | 0.93 |
| 1.00E+00 | 1    |
| 1.00E+00 | 0.72 |
| 1.00E+00 | 1    |
| 1.00E+00 | 0.81 |
| 1.00E+00 | 0.94 |
| 1.00E+00 | 0.65 |
| 1.00E+00 | 0.61 |
| 1.00E+00 | 0.92 |
| 1.00E+00 | 0    |
| 1.00E+00 | 0.84 |
| 1.00E+00 | 0.87 |
| 1.00E+00 | 0.73 |
| 1.00E+00 | 0.57 |
| 1.00E+00 | 1    |
| 1.00E+00 | 0.93 |
| 1.00E+00 | 0.88 |
| 1.00E+00 | 0.91 |
| 1.00E+00 | 0.95 |
| 1.00E+00 | 0.86 |
| 1.00E+00 | 0.9  |
| 1.00E+00 | 0.44 |
| 1.00E+00 | 0.86 |
| 1.00E+00 | 0.79 |
| 1.00E+00 | 0.46 |
| 1.00E+00 | 0.88 |
| 1.00E+00 | 0.55 |

|          |      |
|----------|------|
| 1.00E+00 | 0.61 |
| 1.00E+00 | 1    |
| 1.00E+00 | 0.83 |
| 1.00E+00 | 1    |
| 1.00E+00 | 1    |
| 1.00E+00 | 0.82 |
| 1.00E+00 | 0.88 |
| 1.00E+00 | 0.9  |
| 1.00E+00 | 0.75 |
| 1.00E+00 | 1    |
| 1.00E+00 | 0.75 |
| 1.00E+00 | 0.85 |
| 1.00E+00 | 0.78 |
| 1.00E+00 | 0.81 |
| 1.00E+00 | 0.54 |
| 1.00E+00 | 0.89 |
| 1.00E+00 | 0.85 |
| 1.00E+00 | 1    |
| 1.00E+00 | 0.7  |
| 1.00E+00 | 0.96 |
| 1.00E+00 | 1    |
| 1.00E+00 | 0.57 |
| 1.00E+00 | 1    |
| 1.00E+00 | 0.57 |
| 1.00E+00 | 0.81 |
| 1.00E+00 | 0.89 |
| 1.00E+00 | 0.8  |
| 1.00E+00 | 0.94 |
| 1.00E+00 | 0.59 |
| 1.00E+00 | 0.89 |
| 1.00E+00 | 0.51 |
| 1.00E+00 | 0.74 |
| 1.00E+00 | 0.96 |
| 1.00E+00 | 1    |
| 1.00E+00 | 1    |
| 1.00E+00 | 1    |
| 1.00E+00 | 1    |
| 1.00E+00 | 0.83 |
| 1.00E+00 | 0.94 |

|          |      |
|----------|------|
| 1.00E+00 | 0.74 |
| 1.00E+00 | 0.7  |
| 1.00E+00 | 0.9  |
| 1.00E+00 | 0.58 |
| 1.00E+00 | 0.78 |
| 1.00E+00 | 0.89 |
| 1.00E+00 | 0.91 |
| 1.00E+00 | 0.92 |
| 1.00E+00 | 0.7  |
| 1.00E+00 | 0.69 |
| 1.00E+00 | 0.61 |
| 1.00E+00 | 0.94 |
| 1.00E+00 | 0.77 |
| 1.00E+00 | 0.92 |
| 1.00E+00 | 0.89 |
| 1.00E+00 | 0.71 |
| 1.00E+00 | 0.67 |
| 1.00E+00 | 0.87 |
| 1.00E+00 | 0.89 |
| 1.00E+00 | 0.78 |
| 1.00E+00 | 0.87 |
| 1.00E+00 | 0.7  |
| 1.00E+00 | 0.91 |
| 1.00E+00 | 0.79 |
| 1.00E+00 | 0.8  |
| 1.00E+00 | 0.63 |
| 1.00E+00 | 0.82 |
| 1.00E+00 | 0.81 |
| 1.00E+00 | 0.47 |
| 1.00E+00 | 0.8  |
| 1.00E+00 | 0.75 |
| 1.00E+00 | 0.81 |
| 1.00E+00 | 0.71 |
| 1.00E+00 | 0.83 |
| 1.00E+00 | 0.39 |
| 1.00E+00 | 0.86 |
| 1.00E+00 | 0.7  |
| 1.00E+00 | 0.5  |
| 1.00E+00 | 0.95 |
| 1.00E+00 | 0.95 |
| 1.00E+00 | 1    |
| 1.00E+00 | 0.96 |
| 1.00E+00 | 0.56 |
| 1.00E+00 | 1    |
| 1.00E+00 | 0.92 |
| 1.00E+00 | 0.89 |
| 1.00E+00 | 0.65 |
| 1.00E+00 | 0.89 |

|          |      |
|----------|------|
| 1.00E+00 | 0.85 |
| 1.00E+00 | 0.78 |
| 1.00E+00 | 1    |
| 1.00E+00 | 0.73 |
| 1.00E+00 | 0.63 |
| 1.00E+00 | 0.64 |
| 1.00E+00 | 0.9  |
| 1.00E+00 | 0.73 |
| 1.00E+00 | 0.76 |
| 1.00E+00 | 0.76 |
| 1.00E+00 | 0.63 |
| 1.00E+00 | 0.58 |
| 1.00E+00 | 0.74 |
| 1.00E+00 | 0.94 |
| 1.00E+00 | 0.89 |
| 1.00E+00 | 0.93 |
| 1.00E+00 | 0.93 |
| 1.00E+00 | 0.97 |
| 1.00E+00 | 0.57 |
| 1.00E+00 | 0.95 |
| 1.00E+00 | 0.98 |
| 1.00E+00 | 0.67 |
| 1.00E+00 | 0.96 |
| 1.00E+00 | 0.85 |
| 1.00E+00 | 0.96 |
| 1.00E+00 | 0.9  |
| 1.00E+00 | 0.91 |
| 1.00E+00 | 0.91 |
| 1.00E+00 | 0.9  |
| 1.00E+00 | 0.94 |
| 1.00E+00 | 0.46 |
| 1.00E+00 | 0.9  |
| 1.00E+00 | 1    |
| 1.00E+00 | 0.71 |
| 1.00E+00 | 0.77 |
| 1.00E+00 | 0.93 |
| 1.00E+00 | 0.95 |
| 1.00E+00 | 0.88 |
| 1.00E+00 | 1    |
| 1.00E+00 | 1    |
| 1.00E+00 | 0.74 |
| 1.00E+00 | 1    |
| 1.00E+00 | 0.88 |
| 1.00E+00 | 0.89 |



|          |      |
|----------|------|
| 1.00E+00 | 1    |
| 1.00E+00 | 0.85 |

|          |      |
|----------|------|
| 1.00E+00 | 1    |
| 1.00E+00 | 0.83 |
| 1.00E+00 | 0.76 |
| 1.00E+00 | 0.96 |
| 1.00E+00 | 0.71 |
| 1.00E+00 | 1    |
| 1.00E+00 | 0.89 |
| 1.00E+00 | 0.86 |

|          |      |
|----------|------|
| 1.00E+00 | 0    |
| 1.00E+00 | 0.62 |
| 1.00E+00 | 0.5  |
| 1.00E+00 | 0.8  |
| 1.00E+00 | 0.94 |
| 1.00E+00 | 0.9  |
| 1.00E+00 | 0.96 |
| 1.00E+00 | 0.96 |
| 1.00E+00 | 0.77 |
| 1.00E+00 | 0.72 |
| 1.00E+00 | 0.47 |
| 1.00E+00 | 0.69 |
| 1.00E+00 | 0.69 |
| 1.00E+00 | 0.63 |
| 1.00E+00 | 0.91 |
| 1.00E+00 | 0.95 |
| 1.00E+00 | 0.89 |
| 1.00E+00 | 0.88 |
| 1.00E+00 | 0.91 |

|          |      |
|----------|------|
| 1.00E+00 | 0.92 |
|----------|------|

|          |      |
|----------|------|
| 1.00E+00 | 0.62 |
| 1.00E+00 | 1    |
| 1.00E+00 | 0.7  |
| 1.00E+00 | 0.63 |
| 1.00E+00 | 0.75 |

|          |      |
|----------|------|
| 1.00E+00 | 0.89 |
|----------|------|

|          |      |
|----------|------|
| 1.00E+00 | 1    |
| 1.00E+00 | 0.96 |

|          |      |
|----------|------|
| 1.00E+00 | 0.91 |
| 1.00E+00 | 0.92 |
| 1.00E+00 | 0.94 |

|          |      |
|----------|------|
| 1.00E+00 | 0.93 |
| 1.00E+00 | 0.91 |
| 1.00E+00 | 0.83 |
| 1.00E+00 | 0.75 |
| 1.00E+00 | 0.87 |
| 1.00E+00 | 0.83 |
| 1.00E+00 | 1    |
| 1.00E+00 | 0    |
| 1.00E+00 | 0.49 |

|          |      |
|----------|------|
| 1.00E+00 | 1    |
| 1.00E+00 | 1    |
| 1.00E+00 | 1    |
| 1.00E+00 | 0.68 |
| 1.00E+00 | 0.89 |
| 1.00E+00 | 0.82 |

|          |      |
|----------|------|
| 1.00E+00 | 0.77 |
| 1.00E+00 | 0.86 |
| 1.00E+00 | 0.71 |
| 1.00E+00 | 0.65 |
| 1.00E+00 | 0.88 |

|          |      |
|----------|------|
| 1.00E+00 | 1    |
| 1.00E+00 | 0.96 |
| 1.00E+00 | 0.8  |
| 1.00E+00 | 0.97 |
| 1.00E+00 | 0.83 |
| 1.00E+00 | 0.93 |
| 1.00E+00 | 1    |

|          |      |
|----------|------|
| 1.00E+00 | 0.67 |
|----------|------|

|          |      |
|----------|------|
| 1.00E+00 | 0.7  |
| 1.00E+00 | 0.71 |
| 1.00E+00 | 0.95 |
| 1.00E+00 | 0.88 |
| 1.00E+00 | 0.93 |
| 1.00E+00 | 0.69 |
| 1.00E+00 | 0.6  |
| 1.00E+00 | 0.71 |

|          |      |
|----------|------|
| 1.00E+00 | 0.72 |
| 1.00E+00 | 0.46 |
| 1.00E+00 | 0.94 |
| 1.00E+00 | 0.89 |
| 1.00E+00 | 1    |
| 1.00E+00 | 0.96 |

|          |      |
|----------|------|
| 1.00E+00 | 0.77 |
| 1.00E+00 | 1    |
| 1.00E+00 | 0.87 |
| 1.00E+00 | 0.86 |
| 1.00E+00 | 0.95 |
| 1.00E+00 | 0.68 |
| 1.00E+00 | 1    |
| 1.00E+00 | 0.94 |
| 1.00E+00 | 0.97 |
| 1.00E+00 | 0.8  |
| 1.00E+00 | 0.61 |
| 1.00E+00 | 0.65 |
| 1.00E+00 | 0.86 |
| 1.00E+00 | 0.96 |
| 1.00E+00 | 0.9  |
| 1.00E+00 | 0.92 |
| 1.00E+00 | 0.96 |
| 1.00E+00 | 0.95 |
| 1.00E+00 | 0.96 |
| 1.00E+00 | 0.81 |
| 1.00E+00 | 0.85 |
| 1.00E+00 | 0.69 |
| 1.00E+00 | 0.65 |
| 1.00E+00 | 1    |

|          |      |
|----------|------|
| 1.00E+00 | 1    |
| 1.00E+00 | 0.78 |
| 1.00E+00 | 0.77 |
| 1.00E+00 | 0.7  |
| 1.00E+00 | 0.67 |
| 1.00E+00 | 0.76 |
| 1.00E+00 | 0.79 |
| 1.00E+00 | 0.84 |
| 1.00E+00 | 0.55 |
| 1.00E+00 | 0.83 |
| 1.00E+00 | 0.66 |
| 1.00E+00 | 0.96 |
| 1.00E+00 | 0.82 |
| 1.00E+00 | 0.74 |
| 1.00E+00 | 1    |
| 1.00E+00 | 0.83 |
| 1.00E+00 | 0.74 |
| 1.00E+00 | 0.92 |

|          |      |
|----------|------|
| 1.00E+00 | 0.92 |
| 1.00E+00 | 0.85 |
| 1.00E+00 | 0.48 |
| 1.00E+00 | 0.95 |
| 1.00E+00 | 0.78 |
| 1.00E+00 | 0.93 |
| 1.00E+00 | 0.87 |

|          |      |
|----------|------|
| 1.00E+00 | 0.75 |
| 1.00E+00 | 0.84 |
| 1.00E+00 | 0.92 |
| 1.00E+00 | 0.87 |
| 1.00E+00 | 0.95 |

|          |      |
|----------|------|
| 1.00E+00 | 0.66 |
| 1.00E+00 | 0.86 |
| 1.00E+00 | 1    |
| 1.00E+00 | 1    |
| 1.00E+00 | 0.83 |
| 1.00E+00 | 0.77 |
| 1.00E+00 | 0.51 |
| 1.00E+00 | 0.62 |
| 1.00E+00 | 0.86 |
| 1.00E+00 | 0.54 |
| 1.00E+00 | 0.76 |
| 1.00E+00 | 0.71 |
| 1.00E+00 | 0.68 |
| 1.00E+00 | 1    |
| 1.00E+00 | 0.81 |
| 1.00E+00 | 0.8  |

|          |      |
|----------|------|
| 1.00E+00 | 0.94 |
| 1.00E+00 | 0.97 |
| 1.00E+00 | 0.72 |
| 1.00E+00 | 0.64 |
| 1.00E+00 | 0.91 |
| 1.00E+00 | 0.78 |
| 1.00E+00 | 0.96 |
| 1.00E+00 | 0.83 |
| 1.00E+00 | 0.53 |
| 1.00E+00 | 0.62 |
| 1.00E+00 | 0.6  |

|          |      |
|----------|------|
| 1.00E+00 | 0.84 |
| 1.00E+00 | 0.86 |
| 1.00E+00 | 0.95 |
| 1.00E+00 | 0.9  |
| 1.00E+00 | 0.95 |
| 1.00E+00 | 1    |

|          |      |
|----------|------|
| 1.00E+00 | 1    |
| 1.00E+00 | 0.84 |
| 1.00E+00 | 0.94 |
| 1.00E+00 | 1    |
| 1.00E+00 | 0.97 |
| 1.00E+00 | 0.69 |
| 1.00E+00 | 0.84 |
| 1.00E+00 | 0.79 |
| 1.00E+00 | 0.58 |
| 1.00E+00 | 0.64 |
| 1.00E+00 | 1    |
| 1.00E+00 | 0.8  |
| 1.00E+00 | 0.7  |
| 1.00E+00 | 0.84 |
| 1.00E+00 | 0.85 |
| 1.00E+00 | 0.89 |
| 1.00E+00 | 0.84 |
| 1.00E+00 | 0    |
| 1.00E+00 | 1    |
| 1.00E+00 | 0.77 |
| 1.00E+00 | 0.84 |
| 1.00E+00 | 0.63 |
| 1.00E+00 | 0.94 |
| 1.00E+00 | 0.66 |
| 1.00E+00 | 0.84 |
| 1.00E+00 | 0.86 |
| 1.00E+00 | 0.91 |
| 1.00E+00 | 1    |
| 1.00E+00 | 0.91 |
| 1.00E+00 | 0.86 |
| 1.00E+00 | 0.94 |
| 1.00E+00 | 0.83 |
| 1.00E+00 | 0.69 |
| 1.00E+00 | 0.82 |
| 1.00E+00 | 0.82 |
| 1.00E+00 | 1    |
| 1.00E+00 | 0.91 |
| 1.00E+00 | 1    |
| 1.00E+00 | 1    |
| 1.00E+00 | 0.56 |
| 1.00E+00 | 0.75 |
| 1.00E+00 | 0.94 |
| 1.00E+00 | 0.84 |
| 1.00E+00 | 0.87 |
| 1.00E+00 | 1    |
| 1.00E+00 | 0.75 |

|          |      |
|----------|------|
| 1.00E+00 | 0.74 |
| 1.00E+00 | 0.94 |
| 1.00E+00 | 0.84 |
| 1.00E+00 | 0.87 |
| 1.00E+00 | 1    |
| 1.00E+00 | 1    |
| 1.00E+00 | 0.94 |

|          |      |
|----------|------|
| 1.00E+00 | 0.66 |
| 1.00E+00 | 0.87 |
| 1.00E+00 | 1    |
| 1.00E+00 | 0.92 |
| 1.00E+00 | 0.76 |
| 1.00E+00 | 0.6  |
| 1.00E+00 | 0.8  |
| 1.00E+00 | 0.7  |

|          |      |
|----------|------|
| 1.00E+00 | 0.87 |
|----------|------|

|          |      |
|----------|------|
| 1.00E+00 | 0.88 |
|----------|------|

|          |      |
|----------|------|
| 1.00E+00 | 0.85 |
| 1.00E+00 | 0.85 |

|          |      |
|----------|------|
| 1.00E+00 | 0.61 |
| 1.00E+00 | 0.77 |
| 1.00E+00 | 0.88 |
| 1.00E+00 | 1    |

|          |      |
|----------|------|
| 1.00E+00 | 0.87 |
| 1.00E+00 | 0.84 |
| 1.00E+00 | 0.59 |
| 1.00E+00 | 0.87 |
| 1.00E+00 | 0.98 |
| 1.00E+00 | 0.56 |

|          |      |
|----------|------|
| 1.00E+00 | 0.75 |
| 1.00E+00 | 0.85 |

|          |      |
|----------|------|
| 1.00E+00 | 0.63 |
| 1.00E+00 | 0.95 |
| 1.00E+00 | 0.73 |

|          |      |
|----------|------|
| 1.00E+00 | 0.86 |
| 1.00E+00 | 0.75 |
| 1.00E+00 | 1    |
| 1.00E+00 | 0.61 |
| 1.00E+00 | 0.97 |
| 1.00E+00 | 0.92 |
| 1.00E+00 | 0.79 |
| 1.00E+00 | 0.68 |
| 1.00E+00 | 0.92 |
| 1.00E+00 | 0.63 |
| 1.00E+00 | 0.78 |
| 1.00E+00 | 0.68 |
| 1.00E+00 | 0.89 |
| 1.00E+00 | 0.92 |
| 1.00E+00 | 0.63 |
| 1.00E+00 | 1    |
| 1.00E+00 | 0.74 |
| 1.00E+00 | 1    |
| 1.00E+00 | 1    |
| 1.00E+00 | 0.67 |
| 1.00E+00 | 0.93 |
| 1.00E+00 | 1    |
| 1.00E+00 | 0.75 |
| 1.00E+00 | 0.94 |
| 1.00E+00 | 0.73 |
| 1.00E+00 | 0.88 |
| 1.00E+00 | 0.93 |
| 1.00E+00 | 1    |
| 1.00E+00 | 1    |
| 1.00E+00 | 1    |
| 1.00E+00 | 0.82 |
| 1.00E+00 | 1    |
| 1.00E+00 | 0.86 |
| 1.00E+00 | 0.92 |
| 1.00E+00 | 0.88 |
| 1.00E+00 | 0.9  |
| 1.00E+00 | 1    |
| 1.00E+00 | 0.91 |
| 1.00E+00 | 0.93 |
| 1.00E+00 | 0.75 |
| 1.00E+00 | 0.98 |
| 1.00E+00 | 1    |
| 1.00E+00 | 0.95 |

|          |      |
|----------|------|
| 1.00E+00 | 0.94 |
| 1.00E+00 | 0.82 |
| 1.00E+00 | 0.92 |
| 1.00E+00 | 1    |
| 1.00E+00 | 1    |
| 1.00E+00 | 1    |
| 1.00E+00 | 0.92 |
| 1.00E+00 | 0.63 |
| 1.00E+00 | 0.67 |
| 1.00E+00 | 0.62 |
| 1.00E+00 | 0.73 |
| 1.00E+00 | 0.94 |
| 1.00E+00 | 0.63 |
| 1.00E+00 | 0.78 |
| 1.00E+00 | 0.9  |
| 1.00E+00 | 0.97 |
| 1.00E+00 | 0.93 |
| 1.00E+00 | 1    |
| 1.00E+00 | 0.96 |
| 1.00E+00 | 0.7  |
| 1.00E+00 | 0.92 |
| 1.00E+00 | 0.92 |
| 1.00E+00 | 0.91 |
| 1.00E+00 | 0.94 |
| 1.00E+00 | 0.58 |
| 1.00E+00 | 0.6  |
| 1.00E+00 | 0.97 |
| 1.00E+00 | 0.93 |
| 1.00E+00 | 0.8  |
| 1.00E+00 | 0.69 |
| 1.00E+00 | 0.96 |
| 1.00E+00 | 0.76 |
| 1.00E+00 | 0.82 |
| 1.00E+00 | 0.74 |
| 1.00E+00 | 1    |
| 1.00E+00 | 0.65 |
| 1.00E+00 | 0.79 |
| 1.00E+00 | 0.74 |
| 1.00E+00 | 0.58 |
| 1.00E+00 | 1    |
| 1.00E+00 | 0.94 |
| 1.00E+00 | 1    |
| 1.00E+00 | 0.77 |
| 1.00E+00 | 1    |
| 1.00E+00 | 0.55 |
| 1.00E+00 | 0.9  |



|          |      |
|----------|------|
| 1.00E+00 | 0.69 |
| 1.00E+00 | 1    |
| 1.00E+00 | 0.78 |
| 1.00E+00 | 0.96 |
| 1.00E+00 | 0.82 |
| 1.00E+00 | 0.44 |
| 1.00E+00 | 1    |
| 1.00E+00 | 0.94 |
| 1.00E+00 | 0.77 |
| 1.00E+00 | 0.92 |

|          |      |
|----------|------|
| 1.00E+00 | 0.67 |
| 1.00E+00 | 1    |
| 1.00E+00 | 1    |
| 1.00E+00 | 0.71 |
| 1.00E+00 | 0.37 |
| 1.00E+00 | 0.75 |
| 1.00E+00 | 0.9  |

|          |      |
|----------|------|
| 1.00E+00 | 0.96 |
|----------|------|

|          |   |
|----------|---|
| 1.00E+00 | 1 |
|----------|---|

|          |      |
|----------|------|
| 1.00E+00 | 1    |
| 1.00E+00 | 0.78 |
| 1.00E+00 | 0.77 |
| 1.00E+00 | 0.66 |
| 1.00E+00 | 1    |

|          |      |
|----------|------|
| 1.00E+00 | 0.92 |
| 1.00E+00 | 0.88 |

|          |      |
|----------|------|
| 1.00E+00 | 0.77 |
| 1.00E+00 | 0.82 |
| 1.00E+00 | 0.96 |

|          |     |
|----------|-----|
| 1.00E+00 | 0.9 |
| 1.00E+00 | 1   |

|          |      |
|----------|------|
| 1.00E+00 | 0.86 |
| 1.00E+00 | 0.77 |
| 1.00E+00 | 0.9  |
| 1.00E+00 | 0.83 |
| 1.00E+00 | 0.87 |
| 1.00E+00 | 0.73 |

|          |      |
|----------|------|
| 1.00E+00 | 0.84 |
| 1.00E+00 | 0.85 |
| 1.00E+00 | 0.87 |

|          |      |
|----------|------|
| 1.00E+00 | 0.92 |
| 1.00E+00 | 0.77 |
| 1.00E+00 | 0.85 |
| 1.00E+00 | 0.47 |
| 1.00E+00 | 0.77 |
| 1.00E+00 | 1    |
| 1.00E+00 | 0.76 |
| 1.00E+00 | 1    |
| 1.00E+00 | 0.94 |

|          |      |
|----------|------|
| 1.00E+00 | 0.75 |
| 1.00E+00 | 0.88 |
| 1.00E+00 | 0.89 |
| 1.00E+00 | 0.87 |
| 1.00E+00 | 0.97 |
| 1.00E+00 | 0.96 |
| 1.00E+00 | 1    |
| 1.00E+00 | 1    |
| 1.00E+00 | 0.57 |
| 1.00E+00 | 0.95 |
| 1.00E+00 | 0.88 |

|          |      |
|----------|------|
| 1.00E+00 | 0.87 |
| 1.00E+00 | 0.73 |
| 1.00E+00 | 0.57 |
| 1.00E+00 | 0.78 |
| 1.00E+00 | 0.84 |
| 1.00E+00 | 0.44 |
| 1.00E+00 | 0.89 |
| 1.00E+00 | 1    |
| 1.00E+00 | 1    |

|          |      |
|----------|------|
| 1.00E+00 | 0.92 |
| 1.00E+00 | 0.78 |
| 1.00E+00 | 0    |
| 1.00E+00 | 0.81 |
| 1.00E+00 | 0.53 |
| 1.00E+00 | 0.75 |
| 1.00E+00 | 1    |
| 1.00E+00 | 1    |
| 1.00E+00 | 0.74 |
| 1.00E+00 | 0.84 |
| 1.00E+00 | 0.8  |
| 1.00E+00 | 0.66 |

|          |      |
|----------|------|
| 1.00E+00 | 0.61 |
| 1.00E+00 | 0.65 |
| 1.00E+00 | 0.94 |
| 1.00E+00 | 0.92 |
| 1.00E+00 | 0.95 |
| 1.00E+00 | 0.81 |
| 1.00E+00 | 0.72 |
| 1.00E+00 | 1    |
| 1.00E+00 | 1    |
| 1.00E+00 | 0.49 |
| 1.00E+00 | 0.94 |
| 1.00E+00 | 0.93 |
| 1.00E+00 | 0.88 |
| 1.00E+00 | 1    |
| 1.00E+00 | 0.35 |
| 1.00E+00 | 0.95 |
| 1.00E+00 | 0.64 |
| 1.00E+00 | 1    |
| 1.00E+00 | 0.92 |
| 1.00E+00 | 0.68 |
| 1.00E+00 | 0.79 |
| 1.00E+00 | 0.9  |
| 1.00E+00 | 0.61 |
| 1.00E+00 | 0.89 |
| 1.00E+00 | 0.84 |
| 1.00E+00 | 1    |
| 1.00E+00 | 0    |
| 1.00E+00 | 0.63 |
| 1.00E+00 | 0.53 |
| 1.00E+00 | 0.9  |
| 1.00E+00 | 0.71 |
| 1.00E+00 | 0.95 |
| 1.00E+00 | 0.82 |
| 1.00E+00 | 0.91 |
| 1.00E+00 | 1    |
| 1.00E+00 | 0.86 |
| 1.00E+00 | 0.9  |
| 1.00E+00 | 1    |
| 1.00E+00 | 1    |
| 1.00E+00 | 0.96 |
| 1.00E+00 | 0.65 |
| 1.00E+00 | 0.68 |

|          |      |
|----------|------|
| 1.00E+00 | 0.79 |
| 1.00E+00 | 0.85 |
| 1.00E+00 | 0.91 |
| 1.00E+00 | 0.81 |
| 1.00E+00 | 0.87 |
| 1.00E+00 | 0.65 |
| 1.00E+00 | 1    |
| 1.00E+00 | 0.52 |
| 1.00E+00 | 0.47 |
| 1.00E+00 | 0.77 |
| 1.00E+00 | 0.49 |
| 1.00E+00 | 1    |
| 1.00E+00 | 0.8  |
| 1.00E+00 | 0.7  |
| 1.00E+00 | 0.7  |
| 1.00E+00 | 0.71 |
| 1.00E+00 | 0.66 |
| 1.00E+00 | 0.66 |
| 1.00E+00 | 0.92 |
| 1.00E+00 | 0.88 |
| 1.00E+00 | 0.82 |
| 1.00E+00 | 0.71 |
| 1.00E+00 | 0.74 |
| 1.00E+00 | 1    |
| 1.00E+00 | 0.77 |
| 1.00E+00 | 0.9  |
| 1.00E+00 | 0.79 |
| 1.00E+00 | 0.94 |
| 1.00E+00 | 1    |
| 1.00E+00 | 0.88 |
| 1.00E+00 | 0.97 |
| 1.00E+00 | 0.98 |
| 1.00E+00 | 1    |
| 1.00E+00 | 0.76 |
| 1.00E+00 | 0.81 |
| 1.00E+00 | 1    |
| 1.00E+00 | 0.66 |
| 1.00E+00 | 0.75 |
| 1.00E+00 | 1    |
| 1.00E+00 | 0.55 |
| 1.00E+00 | 0.89 |
| 1.00E+00 | 0.63 |
| 1.00E+00 | 1    |

|          |      |
|----------|------|
| 1.00E+00 | 0.87 |
| 1.00E+00 | 0.7  |
| 1.00E+00 | 0.89 |
| 1.00E+00 | 0.88 |
| 1.00E+00 | 0.56 |
| 1.00E+00 | 0.55 |
| 1.00E+00 | 0.86 |
| 1.00E+00 | 0.96 |
| 1.00E+00 | 0.97 |
| 1.00E+00 | 0.63 |
| 1.00E+00 | 0.71 |
| 1.00E+00 | 0.79 |
| 1.00E+00 | 0.73 |
| 1.00E+00 | 0.94 |
| 1.00E+00 | 0.9  |
| 1.00E+00 | 0.94 |
| 1.00E+00 | 0.9  |
| 1.00E+00 | 0.84 |
| 1.00E+00 | 0.92 |
| 1.00E+00 | 0.73 |
| 1.00E+00 | 0.89 |
| 1.00E+00 | 0.91 |
| 1.00E+00 | 0.67 |
| 1.00E+00 | 0.81 |
| 1.00E+00 | 0.64 |
| 1.00E+00 | 1    |
| 1.00E+00 | 0.79 |
| 1.00E+00 | 0.62 |
| 1.00E+00 | 0.87 |
| 1.00E+00 | 0.35 |
| 1.00E+00 | 0.95 |
| 1.00E+00 | 0.91 |
| 1.00E+00 | 0.67 |
| 1.00E+00 | 0.61 |
| 1.00E+00 | 0.93 |
| 1.00E+00 | 1    |
| 1.00E+00 | 0.49 |
| 1.00E+00 | 0.77 |
| 1.00E+00 | 1    |

|          |      |
|----------|------|
| 1.00E+00 | 0.72 |
| 1.00E+00 | 0.91 |
| 1.00E+00 | 1    |
| 1.00E+00 | 0.73 |
| 1.00E+00 | 1    |
| 1.00E+00 | 0.69 |
| 1.00E+00 | 0.77 |
| 1.00E+00 | 0.86 |
| 1.00E+00 | 0.88 |
| 1.00E+00 | 0.82 |
| 1.00E+00 | 0.81 |
| 1.00E+00 | 1    |
| 1.00E+00 | 0.95 |
| 1.00E+00 | 0.8  |
| 1.00E+00 | 1    |
| 1.00E+00 | 0.52 |
| 1.00E+00 | 0.47 |
| 1.00E+00 | 0.65 |
| 1.00E+00 | 0.52 |
| 1.00E+00 | 0.47 |
| 1.00E+00 | 0.63 |
| 1.00E+00 | 0.68 |
| 1.00E+00 | 0.58 |
| 1.00E+00 | 0.83 |
| 1.00E+00 | 0.56 |
| 1.00E+00 | 0.82 |
| 1.00E+00 | 0.91 |
| 1.00E+00 | 0.73 |
| 1.00E+00 | 0.88 |
| 1.00E+00 | 0.86 |
| 1.00E+00 | 0.91 |
| 1.00E+00 | 0.92 |
| 1.00E+00 | 0.63 |
| 1.00E+00 | 0.82 |
| 1.00E+00 | 1    |
| 1.00E+00 | 0.58 |
| 1.00E+00 | 0.87 |
| 1.00E+00 | 0.96 |
| 1.00E+00 | 0.86 |
| 1.00E+00 | 0.8  |
| 1.00E+00 | 0.63 |
| 1.00E+00 | 0.8  |
| 1.00E+00 | 0.75 |
| 1.00E+00 | 1    |
| 1.00E+00 | 0.58 |

|          |      |
|----------|------|
| 1.00E+00 | 0.66 |
| 1.00E+00 | 1    |
| 1.00E+00 | 0.57 |
| 1.00E+00 | 0.62 |
| 1.00E+00 | 0.93 |
| 1.00E+00 | 0.7  |
| 1.00E+00 | 0.73 |
| 1.00E+00 | 0.86 |
| 1.00E+00 | 0.79 |
| 1.00E+00 | 0.59 |
| 1.00E+00 | 1    |
| 1.00E+00 | 0.93 |
| 1.00E+00 | 0.79 |

|          |      |
|----------|------|
| 1.00E+00 | 0.89 |
| 1.00E+00 | 0.95 |
| 1.00E+00 | 0.72 |
| 1.00E+00 | 0.52 |
| 1.00E+00 | 0.75 |
| 1.00E+00 | 0.85 |
| 1.00E+00 | 0.78 |

|          |      |
|----------|------|
| 1.00E+00 | 0.92 |
| 1.00E+00 | 1    |
| 1.00E+00 | 0.81 |
| 1.00E+00 | 0.62 |
| 1.00E+00 | 0.86 |
| 1.00E+00 | 0.86 |
| 1.00E+00 | 0.69 |
| 1.00E+00 | 0.79 |
| 1.00E+00 | 0.87 |
| 1.00E+00 | 0.76 |
| 1.00E+00 | 0.85 |
| 1.00E+00 | 0.83 |

|          |      |
|----------|------|
| 1.00E+00 | 1    |
| 1.00E+00 | 1    |
| 1.00E+00 | 0.74 |
| 1.00E+00 | 0.77 |

|          |      |
|----------|------|
| 1.00E+00 | 0.75 |
| 1.00E+00 | 0.81 |
| 1.00E+00 | 1    |
| 1.00E+00 | 0.63 |
| 1.00E+00 | 0.95 |

|          |      |
|----------|------|
| 1.00E+00 | 0.8  |
| 1.00E+00 | 0.67 |

|          |     |
|----------|-----|
| 1.00E+00 | 0.9 |
|----------|-----|

|          |      |
|----------|------|
| 1.00E+00 | 0.7  |
| 1.00E+00 | 1    |
| 1.00E+00 | 0.88 |
| 1.00E+00 | 0.82 |
| 1.00E+00 | 1    |
| 1.00E+00 | 0.52 |
| 1.00E+00 | 1    |
| 1.00E+00 | 0.79 |
| 1.00E+00 | 1    |
| 1.00E+00 | 0.84 |
| 1.00E+00 | 1    |
| 1.00E+00 | 1    |
| 1.00E+00 | 0.65 |
| 1.00E+00 | 0.65 |
| 1.00E+00 | 0.82 |
| 1.00E+00 | 0.71 |
| 1.00E+00 | 0.88 |
| 1.00E+00 | 0.6  |
| 1.00E+00 | 0.82 |
| 1.00E+00 | 0.53 |
| 1.00E+00 | 0.84 |
| 1.00E+00 | 0.91 |
| 1.00E+00 | 0.75 |
| 1.00E+00 | 0.89 |
| 1.00E+00 | 1    |
| 1.00E+00 | 1    |
| 1.00E+00 | 0.71 |
| 1.00E+00 | 1    |
| 1.00E+00 | 0.87 |
| 1.00E+00 | 1    |
| 1.00E+00 | 0.68 |
| 1.00E+00 | 0.85 |
| 1.00E+00 | 0.91 |
| 1.00E+00 | 0.81 |
| 1.00E+00 | 0.81 |
| 1.00E+00 | 0.89 |
| 1.00E+00 | 0.71 |
| 1.00E+00 | 0.72 |
| 1.00E+00 | 0.63 |
| 1.00E+00 | 0.8  |



|          |      |
|----------|------|
| 1.00E+00 | 0.69 |
| 1.00E+00 | 0.81 |
| 1.00E+00 | 0.64 |
| 1.00E+00 | 0.92 |
| 1.00E+00 | 0.72 |
| 1.00E+00 | 0.88 |
| 1.00E+00 | 1    |
| 1.00E+00 | 0.94 |
| 1.00E+00 | 0.87 |
| 1.00E+00 | 0.96 |
| 1.00E+00 | 0.33 |
| 1.00E+00 | 0.97 |
| 1.00E+00 | 0.58 |
| 1.00E+00 | 0.86 |
| 1.00E+00 | 0.65 |
| 1.00E+00 | 0.94 |
| 1.00E+00 | 0.88 |
| 1.00E+00 | 1    |
| 1.00E+00 | 0.84 |
| 1.00E+00 | 0.91 |
| 1.00E+00 | 1    |
| 1.00E+00 | 0.73 |
| 1.00E+00 | 0.69 |
| 1.00E+00 | 0.89 |
| 1.00E+00 | 0.84 |
| 1.00E+00 | 0.9  |
| 1.00E+00 | 0.93 |
| 1.00E+00 | 0.66 |
| 1.00E+00 | 0.85 |
| 1.00E+00 | 0.73 |
| 1.00E+00 | 0.75 |
| 1.00E+00 | 0.6  |
| 1.00E+00 | 0.76 |
| 1.00E+00 | 1    |

|          |      |
|----------|------|
| 1.00E+00 | 0.77 |
| 1.00E+00 | 0.7  |
| 1.00E+00 | 0.72 |
| 1.00E+00 | 0.87 |
| 1.00E+00 | 0.65 |
| 1.00E+00 | 0.92 |
| 1.00E+00 | 0.55 |
| 1.00E+00 | 0.54 |
| 1.00E+00 | 0.86 |
| 1.00E+00 | 0.77 |
| 1.00E+00 | 1    |
| 1.00E+00 | 0.52 |
| 1.00E+00 | 0.62 |
| 1.00E+00 | 0.56 |
| 1.00E+00 | 0.73 |
| 1.00E+00 | 0.85 |
| 1.00E+00 | 0.85 |
| 1.00E+00 | 0.86 |
| 1.00E+00 | 0.85 |
| 1.00E+00 | 0.88 |
| 1.00E+00 | 0.93 |
| 1.00E+00 | 0.85 |
| 1.00E+00 | 0.75 |
| 1.00E+00 | 0.8  |
| 1.00E+00 | 0.92 |
| 1.00E+00 | 0.75 |
| 1.00E+00 | 0.79 |
| 1.00E+00 | 1    |
| 1.00E+00 | 0.97 |
| 1.00E+00 | 0.76 |
| 1.00E+00 | 1    |
| 1.00E+00 | 0.58 |
| 1.00E+00 | 1    |
| 1.00E+00 | 1    |
| 1.00E+00 | 1    |
| 1.00E+00 | 0.64 |
| 1.00E+00 | 0.67 |
| 1.00E+00 | 0.61 |
| 1.00E+00 | 1    |
| 1.00E+00 | 0.86 |
| 1.00E+00 | 0.84 |

|          |      |
|----------|------|
| 1.00E+00 | 0.89 |
| 1.00E+00 | 0.61 |
| 1.00E+00 | 0.66 |
| 1.00E+00 | 1    |
| 1.00E+00 | 1    |

|          |      |
|----------|------|
| 1.00E+00 | 0.97 |
| 1.00E+00 | 0.81 |
| 1.00E+00 | 1    |
| 1.00E+00 | 0.9  |
| 1.00E+00 | 0.84 |
| 1.00E+00 | 0.5  |

|          |      |
|----------|------|
| 1.00E+00 | 0.59 |
| 1.00E+00 | 0.87 |

|          |      |
|----------|------|
| 1.00E+00 | 0.8  |
| 1.00E+00 | 0.34 |
| 1.00E+00 | 0.83 |
| 1.00E+00 | 0.57 |
| 1.00E+00 | 0.73 |
| 1.00E+00 | 0.83 |
| 1.00E+00 | 0.94 |
| 1.00E+00 | 0.79 |
| 1.00E+00 | 0.98 |
| 1.00E+00 | 0.93 |
| 1.00E+00 | 0.65 |
| 1.00E+00 | 1    |

|          |      |
|----------|------|
| 1.00E+00 | 0.98 |
| 1.00E+00 | 1    |
| 1.00E+00 | 0.91 |
| 1.00E+00 | 0.74 |
| 1.00E+00 | 1    |
| 1.00E+00 | 0.81 |
| 1.00E+00 | 0.57 |
| 1.00E+00 | 1    |
| 1.00E+00 | 0.51 |
| 1.00E+00 | 1    |
| 1.00E+00 | 0.65 |

|          |      |
|----------|------|
| 1.00E+00 | 0.95 |
| 1.00E+00 | 0.71 |
| 1.00E+00 | 0.77 |
| 1.00E+00 | 1    |
| 1.00E+00 | 0.68 |
| 1.00E+00 | 0.66 |

|          |      |
|----------|------|
| 1.00E+00 | 0.84 |
| 1.00E+00 | 0.84 |
| 1.00E+00 | 0.94 |
| 1.00E+00 | 0.63 |
| 1.00E+00 | 1    |
| 1.00E+00 | 0.84 |
| 1.00E+00 | 0.54 |
| 1.00E+00 | 0.72 |
| 1.00E+00 | 0.55 |
| 1.00E+00 | 0.72 |
| 1.00E+00 | 0.74 |
| 1.00E+00 | 0.67 |
| 1.00E+00 | 0.85 |
| 1.00E+00 | 0.81 |
| 1.00E+00 | 0.61 |
| 1.00E+00 | 0.88 |
| 1.00E+00 | 0.66 |
| 1.00E+00 | 0.91 |
| 1.00E+00 | 0.68 |
| 1.00E+00 | 1    |
| 1.00E+00 | 1    |
| 1.00E+00 | 1    |
| 1.00E+00 | 0.73 |
| 1.00E+00 | 0.94 |
| 1.00E+00 | 0.8  |
| 1.00E+00 | 1    |
| 1.00E+00 | 0.83 |
| 1.00E+00 | 1    |
| 1.00E+00 | 0.78 |
| 1.00E+00 | 0.9  |

|          |      |
|----------|------|
| 1.00E+00 | 1    |
| 1.00E+00 | 0.43 |
| 1.00E+00 | 1    |
| 1.00E+00 | 0.86 |
| 1.00E+00 | 0.76 |
| 1.00E+00 | 1    |
| 1.00E+00 | 0.8  |
| 1.00E+00 | 0.83 |
| 1.00E+00 | 1    |
| 1.00E+00 | 0.91 |
| 1.00E+00 | 0.74 |
| 1.00E+00 | 0.89 |
| 1.00E+00 | 0.55 |
| 1.00E+00 | 0.74 |
| 1.00E+00 | 0.48 |
| 1.00E+00 | 1    |
| 1.00E+00 | 1    |
| 1.00E+00 | 0.92 |
| 1.00E+00 | 0.93 |
| 1.00E+00 | 0.89 |
| 1.00E+00 | 0.89 |
| 1.00E+00 | 0.94 |
| 1.00E+00 | 1    |
| 1.00E+00 | 0.78 |
| 1.00E+00 | 0.76 |
| 1.00E+00 | 0.81 |
| 1.00E+00 | 0.88 |
| 1.00E+00 | 0.9  |
| 1.00E+00 | 0.82 |
| 1.00E+00 | 0.71 |
| 1.00E+00 | 0.72 |
| 1.00E+00 | 0.91 |
| 1.00E+00 | 0.77 |
| 1.00E+00 | 0.88 |
| 1.00E+00 | 0.43 |
| 1.00E+00 | 0.78 |
| 1.00E+00 | 0.94 |
| 1.00E+00 | 0.84 |
| 1.00E+00 | 1    |
| 1.00E+00 | 1    |
| 1.00E+00 | 0.49 |
| 1.00E+00 | 0.88 |
| 1.00E+00 | 0.74 |
| 1.00E+00 | 0.77 |

|          |      |
|----------|------|
| 1.00E+00 | 0.84 |
| 1.00E+00 | 0.96 |
| 1.00E+00 | 0.8  |
| 1.00E+00 | 1    |
| 1.00E+00 | 1    |
| 1.00E+00 | 1    |
| 1.00E+00 | 0.6  |
| 1.00E+00 | 0.92 |
| 1.00E+00 | 0.95 |
| 1.00E+00 | 0.91 |
| 1.00E+00 | 1    |
| 1.00E+00 | 0.57 |
| 1.00E+00 | 1    |
| 1.00E+00 | 0.92 |
| 1.00E+00 | 0.83 |
| 1.00E+00 | 1    |
| 1.00E+00 | 1    |
| 1.00E+00 | 0.96 |
| 1.00E+00 | 1    |
| 1.00E+00 | 0.7  |
| 1.00E+00 | 1    |
| 1.00E+00 | 0.79 |
| 1.00E+00 | 0.73 |
| 1.00E+00 | 0.73 |
| 1.00E+00 | 0.58 |
| 1.00E+00 | 0.9  |
| 1.00E+00 | 0.75 |
| 1.00E+00 | 0.86 |
| 1.00E+00 | 0.87 |
| 1.00E+00 | 0    |
| 1.00E+00 | 0.94 |
| 1.00E+00 | 1    |
| 1.00E+00 | 1    |
| 1.00E+00 | 0.86 |
| 1.00E+00 | 0.88 |

|          |      |
|----------|------|
| 1.00E+00 | 0.84 |
| 1.00E+00 | 0.96 |
| 1.00E+00 | 0.61 |
| 1.00E+00 | 0.87 |
| 1.00E+00 | 0.65 |
| 1.00E+00 | 0.9  |
| 1.00E+00 | 1    |
| 1.00E+00 | 0.66 |
| 1.00E+00 | 1    |
| 1.00E+00 | 1    |
| 1.00E+00 | 1    |
| 1.00E+00 | 0.73 |
| 1.00E+00 | 0.67 |
| 1.00E+00 | 0.89 |
| 1.00E+00 | 0.95 |
| 1.00E+00 | 1    |
| 1.00E+00 | 0.82 |
| 1.00E+00 | 0.79 |
| 1.00E+00 | 0.93 |
| 1.00E+00 | 0.97 |
| 1.00E+00 | 0.87 |
| 1.00E+00 | 0.81 |
| 1.00E+00 | 1    |
| 1.00E+00 | 0.9  |
| 1.00E+00 | 0.79 |
| 1.00E+00 | 0.75 |
| 1.00E+00 | 0.5  |
| 1.00E+00 | 0.67 |
| 1.00E+00 | 0.93 |
| 1.00E+00 | 0.95 |
| 1.00E+00 | 0.93 |
| 1.00E+00 | 1    |
| 1.00E+00 | 0.95 |
| 1.00E+00 | 0.81 |
| 1.00E+00 | 0.8  |
| 1.00E+00 | 1    |
| 1.00E+00 | 0.84 |
| 1.00E+00 | 0.74 |
| 1.00E+00 | 1    |
| 1.00E+00 | 1    |
| 1.00E+00 | 0.81 |
| 1.00E+00 | 1    |
| 1.00E+00 | 0.85 |
| 1.00E+00 | 0.94 |
| 1.00E+00 | 0.89 |

|          |      |
|----------|------|
| 1.00E+00 | 1    |
| 1.00E+00 | 0.65 |
| 1.00E+00 | 0.91 |
| 1.00E+00 | 1    |
| 1.00E+00 | 1    |
| 1.00E+00 | 0.57 |
| 1.00E+00 | 0.64 |
| 1.00E+00 | 0.9  |
| 1.00E+00 | 0.82 |
| 1.00E+00 | 0.97 |
| 1.00E+00 | 0.88 |
| 1.00E+00 | 0.8  |
| 1.00E+00 | 0.84 |
| 1.00E+00 | 0.83 |
| 1.00E+00 | 1    |
| 1.00E+00 | 0.85 |
| 1.00E+00 | 1    |
| 1.00E+00 | 0.8  |
| 1.00E+00 | 0.94 |
| 1.00E+00 | 0.62 |
| 1.00E+00 | 0.68 |
| 1.00E+00 | 0.75 |
| 1.00E+00 | 0.7  |
| 1.00E+00 | 0.94 |
| 1.00E+00 | 0.68 |
| 1.00E+00 | 0.88 |
| 1.00E+00 | 0.91 |
| 1.00E+00 | 0.94 |
| 1.00E+00 | 1    |
| 1.00E+00 | 0.9  |
| 1.00E+00 | 0.76 |
| 1.00E+00 | 0.55 |
| 1.00E+00 | 0.61 |
| 1.00E+00 | 0.92 |
| 1.00E+00 | 0.92 |
| 1.00E+00 | 0.77 |
| 1.00E+00 | 0.67 |



|          |      |
|----------|------|
| 1.00E+00 | 0.96 |
| 1.00E+00 | 0.87 |
| 1.00E+00 | 0.73 |
| 1.00E+00 | 0.87 |
| 1.00E+00 | 1    |
| 1.00E+00 | 0.79 |
| 1.00E+00 | 0    |

|          |      |
|----------|------|
| 1.00E+00 | 0.74 |
| 1.00E+00 | 0.85 |

|          |      |
|----------|------|
| 1.00E+00 | 0.84 |
| 1.00E+00 | 0.66 |
| 1.00E+00 | 0.8  |
| 1.00E+00 | 0.85 |

|          |      |
|----------|------|
| 1.00E+00 | 0.64 |
| 1.00E+00 | 0.75 |
| 1.00E+00 | 0.85 |
| 1.00E+00 | 1    |
| 1.00E+00 | 0.97 |

|          |      |
|----------|------|
| 1.00E+00 | 0.74 |
|----------|------|

|          |      |
|----------|------|
| 1.00E+00 | 0.73 |
| 1.00E+00 | 0.8  |
| 1.00E+00 | 0.98 |
| 1.00E+00 | 0.6  |
| 1.00E+00 | 0.67 |
| 1.00E+00 | 0.9  |
| 1.00E+00 | 0.89 |
| 1.00E+00 | 0.91 |
| 1.00E+00 | 0.84 |
| 1.00E+00 | 0.92 |
| 1.00E+00 | 0.64 |
| 1.00E+00 | 0.82 |
| 1.00E+00 | 0.69 |
| 1.00E+00 | 0.61 |
| 1.00E+00 | 0.83 |

|          |      |
|----------|------|
| 1.00E+00 | 0.89 |
| 1.00E+00 | 1    |
| 1.00E+00 | 0.96 |
| 1.00E+00 | 0.87 |

|          |      |
|----------|------|
| 1.00E+00 | 0.79 |
|----------|------|

|          |      |
|----------|------|
| 1.00E+00 | 0.82 |
|----------|------|

|          |      |
|----------|------|
| 1.00E+00 | 1    |
| 1.00E+00 | 1    |
| 1.00E+00 | 0.78 |
| 1.00E+00 | 0.91 |
| 1.00E+00 | 1    |
| 1.00E+00 | 0.88 |
| 1.00E+00 | 0.8  |
| 1.00E+00 | 0.93 |
| 1.00E+00 | 0.65 |
| 1.00E+00 | 0.88 |
| 1.00E+00 | 0.8  |
| 1.00E+00 | 0.92 |
| 1.00E+00 | 0.94 |
| 1.00E+00 | 0.97 |
| 1.00E+00 | 0.63 |
| 1.00E+00 | 0.9  |
| 1.00E+00 | 0.86 |
| 1.00E+00 | 0.78 |
| 1.00E+00 | 0.94 |
| 1.00E+00 | 0.9  |
| 1.00E+00 | 1    |
| 1.00E+00 | 0.87 |
| 1.00E+00 | 0.84 |
| 1.00E+00 | 1    |
| 1.00E+00 | 0.75 |
| 1.00E+00 | 0.93 |
| 1.00E+00 | 0.74 |
| 1.00E+00 | 0.33 |
| 1.00E+00 | 0.89 |
| 1.00E+00 | 1    |
| 1.00E+00 | 0.9  |
| 1.00E+00 | 0.78 |
| 1.00E+00 | 0.95 |
| 1.00E+00 | 0.79 |
| 1.00E+00 | 1    |
| 1.00E+00 | 0.72 |
| 1.00E+00 | 0.97 |
| 1.00E+00 | 0.49 |
| 1.00E+00 | 0.87 |
| 1.00E+00 | 0.69 |

1.00E+00 0.92

1.00E+00 0.84

1.00E+00 0.96

1.00E+00 0.82

1.00E+00 0.89

1.00E+00 0.84

1.00E+00 1

1.00E+00 0.87

1.00E+00 0.67

1.00E+00 0.95

1.00E+00 0.48

1.00E+00 0.67

1.00E+00 1

1.00E+00 0.66

1.00E+00 0.83

1.00E+00 0.81

1.00E+00 0.68

1.00E+00 0.83

1.00E+00 0.93

1.00E+00 0.62

1.00E+00 0.93

1.00E+00 0.94

1.00E+00 0.88

1.00E+00 1

1.00E+00 0.63

1.00E+00 0.91

1.00E+00 1

1.00E+00 0.94

1.00E+00 0.88

1.00E+00 0.75

1.00E+00 0.86

1.00E+00 0.8

1.00E+00 0.73

1.00E+00 1

1.00E+00 0.94

1.00E+00 0.62

1.00E+00 0.52

1.00E+00 0.88

1.00E+00 0.78

|          |      |
|----------|------|
| 1.00E+00 | 0.82 |
| 1.00E+00 | 0.8  |
| 1.00E+00 | 0.61 |
| 1.00E+00 | 0.89 |
| 1.00E+00 | 1    |
| 1.00E+00 | 0.85 |
| 1.00E+00 | 0.92 |
| 1.00E+00 | 0.64 |
| 1.00E+00 | 0.71 |
| 1.00E+00 | 1    |
| 1.00E+00 | 0.88 |
| 1.00E+00 | 0.65 |
| 1.00E+00 | 0.62 |
| 1.00E+00 | 0.67 |
| 1.00E+00 | 0.91 |
| 1.00E+00 | 0.81 |
| 1.00E+00 | 0.89 |
| 1.00E+00 | 0.83 |
| 1.00E+00 | 0.95 |
| 1.00E+00 | 0.75 |
| 1.00E+00 | 0.78 |
| 1.00E+00 | 0.91 |
| 1.00E+00 | 0.79 |
| 1.00E+00 | 0.75 |
| 1.00E+00 | 0.67 |
| 1.00E+00 | 1    |
| 1.00E+00 | 0.68 |
| 1.00E+00 | 0.5  |
| 1.00E+00 | 0.93 |
| 1.00E+00 | 0.63 |
| 1.00E+00 | 0.85 |
| 1.00E+00 | 0.54 |
| 1.00E+00 | 0.93 |
| 1.00E+00 | 0.92 |
| 1.00E+00 | 0.84 |
| 1.00E+00 | 0.61 |
| 1.00E+00 | 0.94 |
| 1.00E+00 | 0.87 |

|          |      |
|----------|------|
| 1.00E+00 | 0.69 |
| 1.00E+00 | 0.87 |
| 1.00E+00 | 1    |
| 1.00E+00 | 0.88 |
| 1.00E+00 | 0.57 |
| 1.00E+00 | 0.87 |
| 1.00E+00 | 0.79 |
| 1.00E+00 | 0.79 |
| 1.00E+00 | 0.66 |
| 1.00E+00 | 1    |
| 1.00E+00 | 0.89 |
| 1.00E+00 | 1    |
| 1.00E+00 | 1    |
| 1.00E+00 | 0.76 |
| 1.00E+00 | 0.91 |
| 1.00E+00 | 0.9  |
| 1.00E+00 | 0.69 |
| 1.00E+00 | 0.67 |
| 1.00E+00 | 0.75 |
| 1.00E+00 | 0.94 |
| 1.00E+00 | 0.57 |
| 1.00E+00 | 0.81 |
| 1.00E+00 | 0.92 |
| 1.00E+00 | 0.93 |
| 1.00E+00 | 0.77 |
| 1.00E+00 | 0.93 |
| 1.00E+00 | 0.5  |
| 1.00E+00 | 0.89 |
| 1.00E+00 | 0.79 |
| 1.00E+00 | 0.9  |
| 1.00E+00 | 1    |
| 1.00E+00 | 0.83 |
| 1.00E+00 | 1    |
| 1.00E+00 | 0.85 |
| 1.00E+00 | 0.86 |
| 1.00E+00 | 1    |
| 1.00E+00 | 1    |
| 1.00E+00 | 0.57 |
| 1.00E+00 | 0.86 |
| 1.00E+00 | 1    |
| 1.00E+00 | 0.82 |

|          |      |
|----------|------|
| 1.00E+00 | 0.94 |
| 1.00E+00 | 0.77 |
| 1.00E+00 | 0.86 |
| 1.00E+00 | 1    |
| 1.00E+00 | 0.78 |
| 1.00E+00 | 1    |
| 1.00E+00 | 0.74 |
| 1.00E+00 | 0.82 |
| 1.00E+00 | 0.94 |
| 1.00E+00 | 1    |
| 1.00E+00 | 0.88 |
| 1.00E+00 | 0.95 |
| 1.00E+00 | 0.92 |
| 1.00E+00 | 0.7  |
| 1.00E+00 | 0.9  |
| 1.00E+00 | 0.93 |
| 1.00E+00 | 1    |
| 1.00E+00 | 0.68 |
| 1.00E+00 | 0.66 |
| 1.00E+00 | 0.59 |
| 1.00E+00 | 0.79 |
| 1.00E+00 | 0.75 |
| 1.00E+00 | 0.9  |
| 1.00E+00 | 0.79 |
| 1.00E+00 | 1    |
| 1.00E+00 | 0.76 |
| 1.00E+00 | 1    |
| 1.00E+00 | 0.87 |
| 1.00E+00 | 0.54 |
| 1.00E+00 | 0.84 |
| 1.00E+00 | 0.75 |
| 1.00E+00 | 0.93 |
| 1.00E+00 | 0.86 |
| 1.00E+00 | 0.9  |

**Supplemental Table S3.** iTRAQ data of proteomics analysis during primary of peptides and protein groups (A), and unique peptide, protein

ing chromoplast differentiation and list of quantitative proteins  
tein groups used for quantitative comparison are listed in the table



**Supplemental Table S4:** Characteristics of the 1386 citrus pulp plastid protein iTRAQ.

The raw data were searched against a non-redundant Protein Index *C.sinensis* p (Huazhong Agricultural University; <http://citrus.hzau.edu.cn>) and the proteome from the chloroplastic genome (accession no. NC\_008334). Identified proteins ("identifications") are depicted by the accession, molecular weight (MW), and the identified peptides per protein in two 8-plex iTRAQ experiments. The subcellular localization was predicted by the TargetP (<http://www.cbs.dtu.dk/services/TargetP/>), Predotar (<http://urgi.versailles.inra.fr/predotar/predotar.html>), and WoLF PSORT (<http://www.hgc.jp/~wolfpsort/>). Homologies of the detected proteins were searched against five plastidial databases: (i) two databases specific to plastids (Plprot, <http://www.plprot.ethz.ch/>; AT\_CHLORO, [http://www.grenoble.prabi.fr/at\\_chloro/](http://www.grenoble.prabi.fr/at_chloro/)); and (ii) three databases comprising plant databases (SUBA, <http://suba.plantenergy.uwa.edu.au/>; PPDB, <http://ppdb.tc.cornell.edu/>; Uniprot, <http://www.uniprot.org/>). We accepted those proteins as true plastid proteins (column "BLAST-search & subcellular localization") which (i) at least one targeting predictor predicted to localize in the plastid, and (ii) at least two of the five databases mentioned above (Plprot, AT\_CHLORO, SUBA, PPDB, UNIPROT). All proteins encoded by the plastid genome (listed as GI code) were retained. GI codes were added to novel putative plastid proteins (present research).

candidates identified by

protein database

sequences predicted

(column "protein

≠ number of different

lar localization was

(<http://wolfpsort.seq.cbrc.jp/>).

cases: (i) two that are

astidial subsets (SUBA,

<http://www.uniprot.org/>).

subcellular localization")

/or (ii) presence in at

, PPDB, and Uniprot).

gray-shaded proteins refer

| Accession  | MW     | Annotation                                      | AT homolog | Mapman class                    |
|------------|--------|-------------------------------------------------|------------|---------------------------------|
| Cs4g08160  | 57251  | Symbols: AtUK/UPRT1   AtUK/UPRT1 (Urid          | AT5G4087   | 23.3.2. nucleotide metabolis    |
| Cs9g09660  | 27540  | Symbols: DAL1, DAL   DAL1 (DIFFERENT            | AT2G3343   | 27.1.5 <sup>d</sup> RNA editing |
| Cs9g02160  | 28975  | Symbols: ECHIA, E-COAH-2   ECHIA (ENC           | AT4G1621   | 13.2.6. amino acid metabolis    |
| orange1.1t | 53112  | Symbols: HOG1, EMB1395, SAHH1, MEE5             | AT4G1394   | 13.2.3. amino acid metabolis    |
| Cs8g15790  | 27242  | lactoylglutathione lyase, putative / glyoxalase | AT1G0811   | 13.2.3. amino acid metabolis    |
| Cs2g02990  | 32579  | Symbols: ATGLX1   ATGLX1 (GLYOXAL               | AT1G1184   | 13.2.3. amino acid metabolis    |
| Cs4g19590  | 42363  | lactoylglutathione lyase, putative / glyoxalase | AT1G6728   | 13.2.3. amino acid metabolis    |
| orange1.1t | 39325  | lactoylglutathione lyase, putative / glyoxalase | AT1G6728   | 13.2.3. amino acid metabolis    |
| Cs5g14770  | 33153  | Symbols: GLX2-3, ETHE1, GLY3   GLY3 (C          | AT1G5358   | 13.2.3. amino acid metabolis    |
| Cs2g08060  | 51574  | Symbols: DELTA-OAT   delta-OAT; ornithin        | AT5G4618   | 13.2.2. amino acid metabolis    |
| orange1.1t | 36987  | arginase   chr4:5703347-5705346 FORWARD         | AT4G0890   | 13.2.2. amino acid metabolis    |
| Cs5g04170  | 61453  | Symbols: ALDH12A1, ATP5CDH, P5CDH               | AT5G6253   | 13.2.2. amino acid metabolis    |
| Cs4g12840  | 41146  | Symbols: ST1, ATMST1, MST1, ATRDH1,             | AT1G7923   | 13.2.5. amino acid metabolis    |
| Cs2g02890  | 44447  | aminomethyltransferase, putative   chr1:4001    | AT1G1186   | 13.2.5. amino acid metabolis    |
| orange1.1t | 55780  | Symbols: DHS2   DHS2 (3-deoxy-d-arabino-l       | AT4G3351   | 13.1.6. amino acid metabolis    |
| Cs3g18030  | 58542  | 2-dehydro-3-deoxyphosphoheptonate aldolase      | AT1G2241   | 13.1.6. amino acid metabolis    |
| orange1.1t | 55672  | 3-phosphoshikimate 1-carboxyvinyltransferas     | AT2G4530   | 13.1.6. amino acid metabolis    |
| Cs7g27180  | 47889  | Symbols: EMB1144   EMB1144 (embryo def          | AT1G4885   | 13.1.6. amino acid metabolis    |
| Cs9g05070  | 57478  | Symbols: EMB3004, MEE32   MEE32 (MAT            | AT3G0635   | 13.1.6. amino acid metabolis    |
| Cs6g21940  | 36617  | Symbols: CM1, ATCM1   CM1 (CHORISMA             | AT3G2920   | 13.1.6. amino acid metabolis    |
| orange1.1t | 42817  | prephenate dehydrogenase family protein   ch    | AT1G1571   | 13.1.6. amino acid metabolis    |
| Cs8g17280  | 43809  | Symbols: ADT2   ADT2 (arogenate dehydrata       | AT3G0763   | 13.1.6. amino acid metabolis    |
| Cs2g21240  | 41720  | Symbols: ADT1   ADT1 (arogenate dehydrata       | AT1G1179   | 13.1.6. amino acid metabolis    |
| Cs2g03010  | 43913  | Symbols: ADT1   ADT1 (arogenate dehydrata       | AT1G1179   | 13.1.6. amino acid metabolis    |
| Cs7g09290  | 65061  | anthranilate phosphoribosyltransferase, putati  | AT1G7057   | 13.1.6. amino acid metabolis    |
| Cs2g17930  | 31039  | Symbols: ASB1, TRP4, WEI7   ASB1 (ANTF          | AT1G2522   | 13.1.6. amino acid metabolis    |
| Cs2g19140  | 43921  | indole-3-glycerol phosphate synthase, putativ   | AT5G4822   | 13.1.6. amino acid metabolis    |
| Cs7g30990  | 30088  | Symbols: PAI1, TRP6   PAI1 (PHOSPHORIE          | AT1G0778   | 13.1.6. amino acid metabolis    |
| orange1.1t | 50589  | Symbols: TSB1, TRPB, TRP2, ATTSB1   TS          | AT5G5481   | 13.1.6. amino acid metabolis    |
| Cs8g07420  | 53524  | diaminopimelate decarboxylase, putative / D     | AT5G1188   | 13.1.3. amino acid metabolis    |
| Cs6g05610  | 45010  | diaminopimelate epimerase family protein   c    | AT3G5358   | 13.1.3. amino acid metabolis    |
| orange1.1t | 38151  | dihydrodipicolinate reductase family protein    | AT2G4404   | 13.1.3. amino acid metabolis    |
| Cs3g15560  | 38519  | Symbols: DHDPS2   DHDPS2 (DIHYDROD              | AT2G4544   | 13.1.3. amino acid metabolis    |
| Cs8g03280  | 50422  | Symbols: AGD2   AGD2 (ABERRANT GRO              | AT4G3368   | 13.1.3. amino acid metabolis    |
| Cs2g28930  | 90052  | Symbols: ATCIMS, ATMETS, ATMS1   AT             | AT5G1792   | 13.1.3. amino acid metabolis    |
| Cs5g27040  | 88213  | Symbols: ATCIMS, ATMETS, ATMS1   AT             | AT5G1792   | 13.1.3. amino acid metabolis    |
| Cs5g27000  | 84676  | Symbols: ATCIMS, ATMETS, ATMS1   AT             | AT5G1792   | 13.1.3. amino acid metabolis    |
| orange1.1t | 50130  | Symbols: CBL   CBL (cystathionine beta-lyas     | AT3G5705   | 13.1.3. amino acid metabolis    |
| Cs6g21540  | 63815  | Symbols: MTO1, CGS, ATCYS1, CGS1   M            | AT3G0112   | 13.1.3. amino acid metabolis    |
| Cs2g17560  | 41079  | semialdehyde dehydrogenase family protein       | AT1G1481   | 13.1.3. amino acid metabolis    |
| Cs5g19940  | 100758 | Symbols: AK-HSDH II, AK-HSDH   bifuncti         | AT4G1971   | 13.1.3. amino acid metabolis    |
| Cs7g04570  | 40818  | homoserine dehydrogenase family protein   ch    | AT5G2106   | 13.1.3. amino acid metabolis    |
| Cs8g01210  | 38134  | Symbols: HSK   HSK (HOMOSERINE KIN              | AT2G1726   | 13.1.3. amino acid metabolis    |
| Cs4g15090  | 57374  | Symbols: MTO2, TS   MTO2 (METHIONINI            | AT4G2984   | 13.1.3. amino acid metabolis    |
| Cs1g17840  | 105152 | Symbols: MTO2, TS   MTO2 (METHIONINI            | AT4G2984   | 13.1.3. amino acid metabolis    |
| Cs7g22130  | 71768  | Symbols: CSR1, ALS, AHAS, TZP5, IMR1            | AT3G4856   | 13.1.4. amino acid metabolis    |
| Cs2g30910  | 53766  | acetolactate synthase small subunit, putative   | AT2G3181   | 13.1.4. amino acid metabolis    |

Cs3g1643( 42563 Symbols: ATBCAT-2 | ATBCAT-2 (ARABII AT1G1007 13.1.4. amino acid metabolis

Cs3g1644( 38729 Symbols: ATBCAT-2 | ATBCAT-2 (ARABII AT1G1007 13.1.4. amino acid metabolis

Cs1g2119( 46239 Symbols: ATBCAT-3, BCAT3 | BCAT3 (BR AT3G4968 13.1.4. amino acid metabolis

Cs9g0353( 63470 ketol-acid reductoisomerase | chr3:21671433- AT3G5861 13.1.4. amino acid metabolis

Cs9g1462( 63280 ketol-acid reductoisomerase | chr3:21671433- AT3G5861 13.1.4. amino acid metabolis

Cs6g1574( 56653 Symbols: OMR1 | OMR1 (L-O-METHYLTH AT3G1005 13.1.4. amino acid metabolis

Cs5g0861( 26846 aconitase C-terminal domain-containing prote AT2G4309 13.1.4. amino acid metabolis

Cs5g3529( 55657 Symbols: IIL1 | IIL1 (ISOPROPYL MALATI AT4G1343 13.1.4. amino acid metabolis

Cs5g2436( 67180 Symbols: IMS1, MAML-3, IPMS2 | IMS1 (2- AT1G7404 13.1.4. amino acid metabolis

Cs1g1167( 43494 3-isopropylmalate dehydrogenase, chloroplast AT1G8056 13.1.4. amino acid metabolis

Cs1g1657( 58577 Symbols: ALAAT2 | ALAAT2 (ALANINE A AT1G7233 13.1.1. amino acid metabolis

Cs4g1605( 44630 Symbols: ASP3, YLS4 | ASP3 (ASPARTATE AT5G1152 13.1.1. amino acid metabolis

Cs4g1983( 49116 Symbols: ASP3, YLS4 | ASP3 (ASPARTATE AT5G1152 13.1.1. amino acid metabolis

Cs1g0176( 50788 Symbols: ATAAT, AAT, MEE17 | aminotran AT2G2225 13.1.1. amino acid metabolis

Cs7g0600( 109276 Symbols: ASP5, AAT3, ATAAT1 | ASP5 (A AT4G3199 13.1.1. amino acid metabolis

Cs1g1828( 37672 Symbols: GLYR2, GR2 | GLYR2 (GLYOXY AT1G1765 13.1.1. amino acid metabolis

Cs6g1137( 49128 Symbols: POP2, GABA-T, HER1 | POP2 (PC AT3G2220 13.1.1. amino acid metabolis

orange1.1t 56690 Symbols: ALDH5F1, SSADH1, SSADH | AL AT1G7944 13.1.1. amino acid metabolis

Cs5g3432( 44500 N-acetyl-gamma-glutamyl-phosphate reducta AT2G1994 13.1.2. amino acid metabolis

Cs6g0615( 49136 arginine biosynthesis protein ArgJ family | ch AT2G3750 13.1.2. amino acid metabolis

Cs4g1266( 50013 Symbols: WIN1 | WIN1 (HOPW1-1-INTERA AT1G8060 13.1.2. amino acid metabolis

Cs3g1720( 57898 argininosuccinate lyase, putative / arginosucci AT5G1092 13.1.2. amino acid metabolis

Cs5g0712( 54381 arginosuccinate synthase family | chr4:127928 AT4G2483 13.1.2. amino acid metabolis

Cs1g1308( 36315 aspartate-glutamate racemase family | chr1:52 AT1G1541 13.1.2. amino acid metabolis

Cs3g2508( 41630 Symbols: OTC | OTC (ORNITHINE CARBA AT1G7533 13.1.2. amino acid metabolis

orange1.1t 63934 Symbols: P5CS1, ATP5CS | P5CS1 (DELTA AT2G3980 13.1.2. amino acid metabolis

orange1.1t 45377 Symbols: ATATP-PRT2, HISN1B | ATATP-I AT1G0979 13.1.7. amino acid metabolis

Cs2g0994( 53372 Symbols: ATHDH | ATHDH (HISTIDINOL ) AT5G6389 13.1.7. amino acid metabolis

Cs8g0753( 37781 Symbols: IMPL2 | IMPL2 (MYO-INOSITOL AT4G3912 13.1.7. amino acid metabolis

Cs4g1009( 64172 Symbols: AT-HF, HISN4 | AT-HF (HIS HF); AT4G2690 13.1.7. amino acid metabolis

Cs9g0689( 30276 imidazoleglycerol-phosphate dehydratase, put AT4G1491 13.1.7. amino acid metabolis

Cs6g1459( 34312 Symbols: APG10, HISN3 | APG10 (ALBINO AT2G3623 13.1.7. amino acid metabolis

Cs3g0205( 30944 Symbols: AT-IE, HISN2 | AT-IE; phosphorib AT1G3186 13.1.7. amino acid metabolis

orange1.1t 41353 Symbols: OASB, ACS1, CPACS1, ATCS-B | AT2G4375 13.1.5. amino acid metabolis

Cs3g2309( 62960 Symbols: EDA9 | EDA9 (embryo sac develop AT4G3420 13.1.5. amino acid metabolis

orange1.1t 25406 Symbols: PGDH | PGDH (3-PHOSPHOGLY(AT1G1774 13.1.5. amino acid metabolis

orange1.1t 44797 Symbols: PGDH | PGDH (3-PHOSPHOGLY(AT1G1774 13.1.5. amino acid metabolis

Cs8g0506( 63252 Symbols: EDA9 | EDA9 (embryo sac develop AT4G3420 13.1.5. amino acid metabolis

Cs1g2640( 47720 phosphoserine aminotransferase, putative | ch AT2G1763 13.1.5. amino acid metabolis

Cs2g2821( 42359 Symbols: FDH | FDH (FORMATE DEHYDRAT5G1478 25.1 C1-metabolism.form:

orange1.1t 59761 Symbols: THFS | THFS (10-FORMYL TETR. AT1G5048 25.2 C1-metabolism.form:

Cs3g1686( 57382 Symbols: SHM1, STM, SHMT1 | SHM1 (SEI AT4G3793 25.1 C1-metabolism.glyci

Cs5g3285( 31754 tetrahydrofolate dehydrogenase/cyclohydrolas AT3G1229 25.5 C1-metabolism.Meth

orange1.1t 40067 tetrahydrofolate dehydrogenase/cyclohydrolas AT4G0062 25.5 C1-metabolism.Meth

Cs1g1589( 14103 Symbols: PFN2, PRO2, PRF2 | PFN2 (PROFI AT4G2935 31.6\* cell organization-cytc

Cs7g2983( 54916 Symbols: ATEXPA8, EXP8, ATEXP8, ATHI AT2G4061 10.7 cell wall.modificatio

Cs4g0663( 69599 Symbols: ATPME3 | ATPME3; pectinesteras AT3G1431 10.8.1 cell wall.pectin\*ester

Cs7g1699( 76199 Symbols: RHM1, ROL1, ATRHM1 | RHM1 ( AT1G7857 10.1.1( cell wall.precursor sy

Cs5g1330( 76595 Symbols: RHM1, ROL1, ATRHM1 | RHM1 ( AT1G7857 10.1.1( cell wall.precursor sy

Cs7g1777( 31924 Symbols: ATPHB2 | ATPHB2 (PROHIBITIN AT1G0386 31.3 cell.cycle

|            |        |                                                               |                        |
|------------|--------|---------------------------------------------------------------|------------------------|
| Cs2g16160  | 80653  | Symbols: ATPHB2   ATPHB2 (PROHIBITIN AT1G0386 31.3            | cell.cycle             |
| Cs5g05840  | 84910  | cell division cycle protein 48, putative / CDC2 AT5G0334 31.2 | cell.division          |
| orange1.1t | 89712  | cell division cycle protein 48, putative / CDC2 AT5G0334 31.2 | cell.division          |
| Cs6g14710  | 24073  | Symbols: FTSZ2-1, ATFTSZ2-1   FTSZ2-1; F AT2G3625 31.2.5      | cell.division.plastid  |
| Cs6g14700  | 62931  | Symbols: FTSZ2-2   FTSZ2-2; GTP binding / AT3G5275 31.2.5     | cell.division.plastid  |
| Cs4g09560  | 43514  | Symbols: FTSZ1-1, ATFTSZ1-1, CPFTSZ   F AT5G5528 31.2.5       | cell.division.plastid  |
| Cs3g25680  | 87745  | Symbols: ARC6   ARC6 (ACCUMULATION AT5G4248 31.2.5            | cell.division.plastid  |
| Cs3g18360  | 36096  | Symbols: ANNAT1, OXY5, ATOXY5   ANN AT1G3572 31.1             | cell.organisation      |
| Cs1g01540  | 35822  | Symbols: ANNAT2   ANNAT2 (Annexin Ara AT5G6502 31.1           | cell.organisation      |
| Cs5g15990  | 31612  | nuclear movement family protein   chr5:21661 AT5G5340 31.1    | cell.organisation      |
| orange1.1t | 41684  | Symbols: ACT11   ACT11 (actin-11); structur AT3G1211 31.1     | cell.organisation      |
| orange1.1t | 41590  | Symbols: ACT2, ACT7   ACT7 (ACTIN 7); s AT5G0981 31.1         | cell.organisation      |
| Cs3g26180  | 50375  | Symbols: TUB5   TUB5; structural constituen AT1G2001 31.1     | cell.organisation      |
| Cs8g18060  | 16268  | Symbols: ADF1, atadf, ATADF1   ADF1 (AC AT3G4601 31.1         | cell.organisation      |
| Cs2g09970  | 49862  | Symbols: TUB8   TUB8; structural constituen AT5G2386 31.1     | cell.organisation      |
| Cs9g03120  | 49751  | Symbols: TUA5   TUA5; structural constituen AT5G1978 31.1     | cell.organisation      |
| Cs1g05000  | 41709  | Symbols: ACT2, ACT7   ACT7 (ACTIN 7); s AT5G0981 31.1         | cell.organisation      |
| Cs5g26760  | 49546  | Symbols: TUA5   TUA5; structural constituen AT5G1978 31.1     | cell.organisation      |
| Cs7g30890  | 193814 | clathrin heavy chain, putative   chr3:3482149- AT3G1113 31.4  | cell.vesicle transport |
| Cs6g06560  | 38604  | Symbols: UNE18, ORP3A   UNE18 (UNFER AT5G0210 31.4            | cell.vesicle transport |
| Cs7g05630  | 25024  | vesicle-associated membrane protein 713 AT5G1115 31.4         | cell.vesicle transport |
| Cs2g06330  | 35887  | protein binding / structural molecule   chr2:16 AT2G4006 31.4 | cell.vesicle transport |
| Cs1g14600  | 103247 | coatomer protein complex, subunit beta 2 (bet AT1G5236 31.4   | cell.vesicle transport |
| Cs2g11320  | 58387  | clathrin adaptor complexes medium subunit-r AT5G0501 31.4     | cell.vesicle transport |
| Cs1g25760  | 48801  | 3-dehydroquinate synthase, putative   chr5:26- AT5G6612 18.5  | Co-factor and vitamini |
| Cs3g20150  | 98544  | Symbols: NADK2, ATNADK2   NADK2; N AT1G2164 18.21*            | Co-factor and vitamini |
| Cs6g02730  | 61646  | cytidine/deoxycytidylate deaminase family pr AT3G4739 18.3    | Co-factor and vitamini |
| Cs1g20020  | 57862  | Symbols: ATGCH, GCH, ATRIBA1, RFD1   AT5G6430 18.3.1          | Co-factor and vitamini |
| orange1.1t | 60615  | Symbols: ATGCH, GCH, ATRIBA1, RFD1   AT5G6430 18.3.1          | Co-factor and vitamini |
| orange1.1t | 23239  | Symbols: COS1   COS1 (COI1 SUPPRESSOR AT2G4405 18.3.2         | Co-factor and vitamini |
| Cs8g19910  | 71721  | Symbols: THIC   THIC (ThiaminC); ADP-rib AT2G2963 18.2        | Co-factor and vitamini |
| Cs4g11090  | 37595  | Symbols: THI1, TZ, THI4   THI1; protein hor AT5G5477 18.2     | Co-factor and vitamini |
| Cs3g03730  | 53739  | Symbols: TH1, TH-1, THIE   TH1 (THIAMIN AT1G2294 18.2.2       | Co-factor and vitamini |
| Cs5g26700  | 36238  | FMN binding   chr3:999467-1002484 REVER AT3G0389 18.20*       | Co-factor and vitamini |
| Cs1g10630  | 42266  | FMN binding   chr1:19119635-19121938 RE AT1G5156 18.20*       | Co-factor and vitamini |
| Cs7g07310  | 108786 | Symbols: CSN5A, JAB1, AJH1   CSN5A (CC AT1G2292 33.99         | development.unspeci    |
| Cs7g08090  | 64305  | Symbols: emb2004   emb2004 (embryo defect AT1G1051 33.99      | development.unspeci    |
| Cs4g06880  | 187190 | CAAX amino terminal protease family protein AT2G0314 33.99    | development.unspeci    |
| Cs1g26170  | 10013  | Symbols: SEN1, ATSEN1, DIN1   SEN1 (SEI AT4G3577 33.99        | development.unspeci    |
| orange1.1t | 80942  | Symbols: MFP1   MFP1 (MAR BINDING FIL AT3G1600 28.3*          | DNA.plastid nucleoi    |
| orange1.1t | 50314  | Symbols: PTAC17   PTAC17 (PLASTID TR AT1G8048 28.3*           | DNA.plastid nucleoi    |
| Cs7g21670  | 47268  | DNA binding   chr3:19346799-19349513 RE AT3G5217 28.3*        | DNA.plastid nucleoi    |
| orange1.1t | 23217  | unknown protein   chr5:19384368-19385869 I AT5G4787 28.2      | DNA.repair             |
| Cs4g03450  | 11409  | histone H4   chr5:24146175-24146726 REVE AT5G5997 28.1.3      | DNA.synthesis/chror    |
| Cs6g05810  | 15447  | Symbols: H2B, HTB9   HTB9; DNA binding AT3G4598 28.1.3        | DNA.synthesis/chror    |
| orange1.1t | 25454  | Symbols: VAP27-1, VAP, (AT)VAP, VAP27 AT3G6060 28.99          | DNA.unspecified        |
| Cs8g06460  | 51337  | Symbols: ATCAP1, CAP 1, CAP1   ATCAP1 AT4G3449 28.99          | DNA.unspecified        |
| Cs3g20830  | 43231  | Symbols: ADH1, ADH, ATADH, ATADH1   AT1G7712 5.3              | fermentation.ADH       |
| Cs3g20800  | 41305  | Symbols: ADH1, ADH, ATADH, ATADH1   AT1G7712 5.3              | fermentation.ADH       |
| Cs5g34690  | 37559  | Symbols: ADH1, ADH, ATADH, ATADH1   AT1G7712 5.3              | fermentation.ADH       |

|                          |        |                                                                |                       |
|--------------------------|--------|----------------------------------------------------------------|-----------------------|
| Cs3g1982(                | 43101  | Symbols: ALDH3H1, ALDH4   ALDH3H1 (AT1G4417 5.1                | fermentation.aldehyd  |
| Cs1g0848(                | 60403  | Symbols: ALDH3I1, ALDH3   ALDH3I1 (AI AT4G3424 5.1             | fermentation.aldehyd  |
| Cs6g0884(                | 65340  | pyruvate decarboxylase, putative   chr4:15952 AT4G3307 5.2     | fermentation.PDC      |
| Cs2g0505(                | 63360  | Symbols: PDC2   PDC2 (pyruvate decarboxyl AT5G5496 5.2         | fermentation.PDC      |
| orange1.lt               | 56684  | Symbols: CSY2   CSY2 (citrate synthase 2); c AT3G5875 6.1      | gluconeogenesis/ gly  |
| Cs1g2103(                | 37164  | Symbols: PMDH1   PMDH1 (PEROXISOMA AT2G2278 6.3                | gluconeogenesis.Mal   |
| Cs8g0323(                | 37384  | Symbols: PMDH1   PMDH1 (PEROXISOMA AT2G2278 6.3                | gluconeogenesis.Mal   |
| Cs6g1543(                | 38577  | fructose-bisphosphate aldolase, putative   chr2 AT2G3646 4.7   | glycolysis.aldolase   |
| Cs6g1554(                | 47788  | Symbols: LOS2   LOS2; copper ion binding / AT2G3653 4.12       | glycolysis.enolase    |
| Cs7g2618(                | 50557  | enolase, putative   chr1:27839184-27841939 FAT1G7403 4.12      | glycolysis.enolase    |
| Cs3g1743(                | 67825  | Symbols: PGI1, PGI   PGI1 (PHOSPHOGLUC AT4G2462 4.3            | glycolysis.G6Pisome   |
| Cs7g1022(                | 32301  | Symbols: GAPC, GAPC-1, GAPC1   GAPC1 AT3G0412 4.9              | glycolysis.glyceralde |
| Cs5g0687(                | 36676  | Symbols: GAPC-2, GAPC2   GAPC2 (GLYC AT1G1344 4.9              | glycolysis.glyceralde |
| orange1.lt               | 45013  | Symbols: GAPCP-2   GAPCP-2; NAD or NA AT1G1630 4.9             | glycolysis.glyceralde |
| Cs2g1552(                | 110154 | Symbols: ATPPC2   ATPPC2 (PHOSPHOEN AT2G4260 4.14              | glycolysis.PEPCase    |
| Cs8g0958(                | 111036 | Symbols: ATPPC2   ATPPC2 (PHOSPHOEN AT2G4260 4.14              | glycolysis.PEPCase    |
| orange1.lt               | 16198  | phosphoglucomutase, cytoplasmic, putative / ; AT1G2319 4.2     | glycolysis.PGM        |
| Cs2g1706(                | 27565  | phosphoglucomutase, cytoplasmic, putative / ; AT1G2319 4.2     | glycolysis.PGM        |
| Cs9g1653(                | 68861  | Symbols: PGM, ATPGMP, PGM1, STF1   PC AT5G5182 4.2             | glycolysis.PGM        |
| Cs7g2565(                | 66879  | phosphoglucosamine mutase family protein   c AT5G1753 4.2      | glycolysis.PGM        |
| orange1.lt               | 42333  | Symbols: PGK   PGK (PHOSPHOGLYCERA AT1G7955 4.1                | glycolysis.phosphogl  |
| Cs6g1060(                | 61028  | 2,3-biphosphoglycerate-independent phospho; AT1G0978 4.11      | glycolysis.phosphogl  |
| Cs4g1307(                | 61769  | Symbols: PFK4   PFK4 (PHOSPHOFRUCTO AT5G6158 4.4               | glycolysis.PPFK       |
| Cs4g1898(                | 51765  | Symbols: PFK4   PFK4 (PHOSPHOFRUCTO AT5G6158 4.4               | glycolysis.PPFK       |
| Cs9g1357(                | 18723  | Symbols: PFK4   PFK4 (PHOSPHOFRUCTO AT5G6158 4.4               | glycolysis.PPFK       |
| Cs1g2020(                | 58250  | Symbols: PFK5   PFK5 (PHOSPHOFRUCTO AT2G2248 4.4               | glycolysis.PPFK       |
| Cs9g0537(                | 108111 | Symbols: PPKK   PPKK (pyruvate orthophos; AT4G1553 4.4         | glycolysis.PPFK       |
| Cs2g0254(                | 61513  | pyrophosphate--fructose-6-phosphate 1-phosp AT1G1200 4.5       | glycolysis.pyrophosp  |
| Cs8g1856(                | 24279  | Symbols: ATCTIMC, TPI   TPI (TRIOSEPH AT3G5544 4.8             | glycolysis.TPI        |
| Cs7g3250(                | 26957  | Symbols: ATCTIMC, TPI   TPI (TRIOSEPH AT3G5544 4.8             | glycolysis.TPI        |
| Cs6g1403(                | 28700  | Symbols: ABA2, SIS4, GIN1, SDR1, ISI4, SI AT1G5234 17.1.1.     | hormone metabolism    |
| Cs8g0729(                | 37866  | aldo/keto reductase family protein   chr1:2234 AT1G6069 17.2.3 | hormone metabolism    |
| Cs7g1682(                | 25028  | Symbols: AIR12   AIR12; extracellular matrix AT3G0739 17.2.3   | hormone metabolism    |
| Cs3g1067(                | 38422  | aldo/keto reductase family protein   chr1:2234 AT1G6069 17.2.3 | hormone metabolism    |
| Cs8g1018(                | 37647  | aldo/keto reductase family protein   chr1:2234 AT1G6069 17.2.3 | hormone metabolism    |
| Cs8g1016(                | 37598  | aldo/keto reductase family protein   chr1:2234 AT1G6069 17.2.3 | hormone metabolism    |
| <a href="#">Cs6g1977</a> | 545653 | Symbols: BIG, DOC1, TIR3, UMB1, ASA1, l AT3G0226 17.2.2        | hormone metabolism    |
| Cs7g1503(                | 65818  | Symbols: DWF1, DIM, EVE1, DIM1, CBB1 AT3G1982 17.3.1.          | hormone metabolism    |
| Cs5g1251(                | 11258  | multi-protein bridging factor 1B AT3G5868 17.5.3               | hormone metabolism    |
| Cs5g1646(                | 15993  | Symbols: D-CDES   D-CDES (D-CYSTEINE AT1G4842 17.5.1           | hormone metabolism    |
| Cs2g1735(                | 43633  | 2-oxoglutarate-dependent dioxygenase, putati AT1G0340 17.5.1   | hormone metabolism    |
| Cs5g1648(                | 43954  | Symbols: D-CDES   D-CDES (D-CYSTEINE AT1G4842 17.5.1           | hormone metabolism    |
| Cs9g1609(                | 55383  | Symbols: ACS12   ACS12; 1-aminocycloprop AT5G5169 17.5.1.      | hormone metabolism    |
| Cs6g1891(                | 28142  | Symbols: AOC4   AOC4 (ALLENE OXIDE CAT1G1328 17.7.1.           | hormone metabolism    |
| Cs6g1890(                | 27513  | Symbols: AOC4   AOC4 (ALLENE OXIDE CAT1G1328 17.7.1.           | hormone metabolism    |
| Cs7g1289(                | 28564  | Symbols: AOC3   AOC3 (ALLENE OXIDE CAT3G2578 17.7.1.           | hormone metabolism    |
| Cs3g2423(                | 59499  | Symbols: AOS, CYP74A, DDE2   AOS (ALL AT5G4265 17.7.1.         | hormone metabolism    |
| Cs7g1036(                | 103747 | lipoxygenase family protein   chr1:25319899- AT1G6756 17.7.1.  | hormone metabolism    |
| orange1.lt               | 102272 | Symbols: LOX2, ATLOX2   LOX2 (LIPOXY AT3G4514 17.7.1.          | hormone metabolism    |
| orange1.lt               | 101859 | Symbols: LOX2, ATLOX2   LOX2 (LIPOXY AT3G4514 17.7.1.          | hormone metabolism    |

orange1.1t 101517 Symbols: LOX2, ATLOX2 | LOX2 (LIPOXY AT3G4514 17.7.1. hormone metabolism

orange1.1t 103175 Symbols: LOX2, ATLOX2 | LOX2 (LIPOXY AT3G4514 17.7.1. hormone metabolism

Cs3g2688( 33170 Symbols: ECH2, ATECH2 | maoC-like dehyd AT1G7615 11.8 lipid metabolism.exo

Cs8g1750( 43051 oxidoreductase, zinc-binding dehydrogenase f AT3G4577 11.8.7 lipid metabolism.exo

Cs5g3122( 24982 chalcone isomerase | chr3:23334352-2333610 AT3G6317 11.1 lipid metabolism.FA

Cs9g0247( 45876 Symbols: LPD1, ptlpd1 | LPD1 (LIPOAMIDE AT3G1695 11.1 lipid metabolism.FA

Cs6g2209( 25699 Symbols: BCCP2, CAC1-B | BCCP2 (BIOTIN AT5G1553 11.1.1 lipid metabolism.FA

gi|113952( 55371 acetyl-CoA carboxylase carboxyltransferase beta subunit 11.1.1 lipid metabolism.FA

Cs6g0761( 85897 Symbols: CAC3 | CAC3; acetyl-CoA carboxy AT2G3804 11.1.1 lipid metabolism.FA

Cs7g3037( 30468 biotin/lipoyl attachment domain-containing pr AT3G5613 11.1.1 lipid metabolism.FA

Cs4g0454( 58365 Symbols: CAC2 | CAC2; acetyl-CoA carboxy AT5G3536 11.1.1 lipid metabolism.FA

Cs6g0292( 29317 Symbols: CAC1, CAC1A, BCCP, BCCP1 | C AT5G1639 11.1.1 lipid metabolism.FA

Cs8g2081( 43206 [acyl-carrier-protein] S-malonyltransferase/ bi AT2G3020 11.1.2 lipid metabolism.FA

Cs7g1606( 44519 acyl-(acyl-carrier-protein) desaturase, putative AT3G0263 11.1.15 lipid metabolism.FA

Cs3g1554( 44988 acyl-(acyl-carrier-protein) desaturase, putative AT3G0263 11.1.15 lipid metabolism.FA

Cs3g1553( 44252 acyl-(acyl-carrier-protein) desaturase, putative AT3G0263 11.1.15 lipid metabolism.FA

Cs3g2084( 49456 acyl-(acyl-carrier-protein) desaturase, putative AT1G4380 11.1.15 lipid metabolism.FA

orange1.1t 45389 Symbols: SSI2, FAB2 | SSI2; acyl-[acyl-carri AT2G4371 11.1.15 lipid metabolism.FA

Cs7g1026( 34030 3-oxoacyl-(acyl-carrier protein) reductase, chl AT1G2436 11.1.4 lipid metabolism.FA

Cs9g0503( 14797 Symbols: ACP4 | ACP4 (acyl carrier protein 4 AT4G2505 11.1.12 lipid metabolism.FA

Cs5g2772( 29814 Symbols: AtFaTA | AtFaTA (Arabidopsis Fat AT3G2511 11.1.7 lipid metabolism.FA

Cs2g1502( 77560 acetyl-CoA synthetase, putative / acetate-CoA AT5G3688 11.1.8 lipid metabolism.FA

Cs9g0657( 76386 Symbols: LACS7, ATLACS7 | LACS7 (LON AT5G2760 11.1.8 lipid metabolism.FA

orange1.1t 76147 AMP-binding protein, putative | chr3:8575167 AT3G2379 11.1.8 lipid metabolism.FA

orange1.1t 25316 beta-hydroxyacyl-ACP dehydratase, putative | AT5G1016 11.1.5 lipid metabolism.FA

orange1.1t 41282 Symbols: MOD1, ENR1 | MOD1 (MOSAIC I AT2G0599 11.1.6 lipid metabolism.FA

Cs2g0362( 49827 Symbols: KAS I | KAS I (3-KETOACYL-AC AT5G4629 11.1.3 lipid metabolism.FA

Cs4g0700( 62358 Symbols: FAB1, KAS2 | FAB1 (FATTY ACI AT1G7496 11.1.3 lipid metabolism.FA

Cs2g1911( 78156 long-chain-fatty-acid--CoA ligase family prot AT2G0435 11.1.9 lipid metabolism.FA

Cs3g1960( 75422 Symbols: LACS9 | LACS9 (LONG CHAIN A AT1G7759 11.1.9 lipid metabolism.FA

Cs2g0326( 44588 transketolase family protein | chr2:14568811- AT2G3459 11.1.31 lipid metabolism.FA

Cs7g1317( 49944 Symbols: LTA2, PLE2 | LTA2; dihydrolipoyl AT3G2586 11.1.31 lipid metabolism.FA

orange1.1t 36030 Symbols: PDH-E1 ALPHA | PDH-E1 ALPH AT1G0109 11.1.31 lipid metabolism.FA

Cs3g2248( 48054 Symbols: EMB3003 | EMB3003 (embryo defi AT1G3443 11.1.31 lipid metabolism.FA

Cs5g3052( 63186 Symbols: PKP1, PKP-ALPHA | PKP-ALPHA AT3G2296 11.1.3( lipid metabolism.FA

Cs9g1871( 63365 Symbols: PKP1, PKP-BETA1, PKP2 | PKP-B AT5G5292 11.1.3( lipid metabolism.FA

Cs9g0788( 64348 Symbols: PKP1, PKP-ALPHA | PKP-ALPHA AT3G2296 11.1.3( lipid metabolism.FA

Cs7g2275( 49753 Symbols: PKp3 | PKp3 (plastidial pyruvate ki AT1G3244 11.1.3( lipid metabolism.FA

Cs9g0179( 62476 Symbols: SFR2 | SFR2 (SENSITIVE TO FRE AT3G0651 11.1 lipid metabolism.glyc

Cs3g1169( 84115 esterase/lipase/thioesterase family protein | ch AT1G5457 11.1 lipid metabolism.glyc

Cs7g0662( 51297 Symbols: MGD1, MGDA | MGD1 (MONOG AT4G3178 11.10.1 lipid metabolism.glyc

Cs4g1840( 53273 Symbols: SQD1 | SQD1; UDPsulfoquinovose AT4G3303 11.10.3 lipid metabolism.glyc

Cs9g1125( 48718 Symbols: PKT3, PED1, KAT2 | PKT3 (PERC AT2G3315 11.9.4. lipid metabolism.lipi

Cs5g3476( 48225 Symbols: PKT3, PED1, KAT2 | PKT3 (PERC AT2G3315 11.9.4. lipid metabolism.lipi

Cs4g1690( 47625 catalytic | chr4:7775128-7777895 FORWARD AT4G1336 11.9.4. lipid metabolism.lipi

Cs4g1608( 78196 Symbols: AIM1 | AIM1 (ABNORMAL INFL AT4G2901 11.9.4. lipid metabolism.lipi

Cs2g1536( 46845 lipase, putative | chr2:17776241-1777717 RE AT2G4269 11.9.2 lipid metabolism.lipi

orange1.1t 96379 triacylglycerol lipase | chr4:7871057-7876963 AT4G1355 11.9.2. lipid metabolism.lipi

Cs4g1741( 19406 phospholipase/carboxylesterase family proteir AT5G2006 11.9.3. lipid metabolism.lipi

Cs1g1260( 91198 Symbols: PLDALPHA1, PLD | PLDALPHA1 AT3G1573 11.9.3. lipid metabolism.lipi

orange1.1t 38228 apolipoprotein D-related | chr3:17656670-176 AT3G4786 11.6 lipid metabolism.lipi

Cs4g0431( 46874 choline monooxygenase, putative (CMO-like) AT4G2989 11.3.9 lipid metabolism.Phc

Cs5g2318( 41773 Symbols: TGD2 | TGD2 (TRIGALACTOSYI AT3G2032 11.15\* lipid metabolism.tran

Cs6g0243( 38402 Symbols: ATNAP11, TGD3 | ATNAP11 (AR AT1G6541 11.15\* lipid metabolism.tran

orange1.1t 65334 Symbols: DPE1 | DPE1 (DISPROPORTIONA AT5G6486 2.2.2.4 major CHO metaboli

orange1.1t 131302 Symbols: PWD, OK1, ATGWD3 | ATGWD3 AT5G2657 2.2.2.3 major CHO metaboli

Cs7g0906( 165270 Symbols: SEX1, SOP1, SOP, GWD1, GWD | AT1G1076 2.2.2.3 major CHO metaboli

Cs3g2356( 46914 Symbols: ATAMY1, AMY1 | AMY1 (ALPH. AT4G2500 2.2.2.1 major CHO metaboli

Cs9g0498( 59808 Symbols: BMY3, BAM9 | BMY3; beta-amylase AT5G1867 2.2.2.1 major CHO metaboli

orange1.1t 63740 Symbols: BAM2, BMY9 | BAM2 (BETA-AM AT4G0049 2.2.2.1 major CHO metaboli

Cs3g0975( 32009 Symbols: HGL1 | HGL1 (heteroglycan glucos AT3G2364 2.2.2.1 major CHO metaboli

Cs3g0977( 140816 Symbols: HGL1 | HGL1 (heteroglycan glucos AT3G2364 2.2.2.1 major CHO metaboli

Cs7g0431( 101967 Symbols: ATAMY3, AMY3 | AMY3 (ALPH. AT1G6983 2.2.2.1 major CHO metaboli

Cs2g2805( 65751 5'-AMP-activated protein kinase beta-1 subun AT3G0151 2.2.2.2 major CHO metaboli

Cs7g2165( 38718 Symbols: ATPTPKIS1, DSP4, SEX4 | SEX4 (AT3G5218 2.2.2.2 major CHO metaboli

Cs8g1980( 147038 Symbols: ATPHS2, PHS2 | PHS2 (ALPHA-G AT3G4697 2.2.2.2 major CHO metaboli

Cs6g2202( 108947 glucan phosphorylase, putative | chr3:112528( AT3G2932 2.2.2.2 major CHO metaboli

Cs5g2292( 35105 pfkB-type carbohydrate kinase family protein AT1G6643 2.2.1.1 major CHO metaboli

Cs6g1760( 40730 pfkB-type carbohydrate kinase family protein AT1G6643 2.2.1.1 major CHO metaboli

Cs4g1552( 54056 Symbols: ATHXK2, HXK2 | HXK2 (HEXOK AT2G1986 2.2.1.4 major CHO metaboli

Cs3g2605( 53654 Symbols: HXK3 | HXK3 (HEXOKINASE 3); AT1G4784 2.2.1.4 major CHO metaboli

Cs3g0759( 72180 beta-fructofuranosidase, putative / invertase, p AT5G2251 2.2.1.3 major CHO metaboli

Cs5g3347( 92605 Symbols: SUS4, ATSUS4 | SUS4; UDP-glycc AT3G4319 2.2.1.5 major CHO metaboli

Cs4g0685( 92027 Symbols: SUS4, ATSUS4 | SUS4; UDP-glycc AT3G4319 2.2.1.5 major CHO metaboli

Cs6g1755( 33679 5'-AMP-activated protein kinase beta-1 subun AT5G3979 2.1.2 major CHO metaboli

Cs3g2511( 58118 Symbols: APL2 | APL2 (ADPGLC-PPASE L. AT1G2768 2.1.2.1 major CHO metaboli

Cs8g0723( 54311 Symbols: APL3 | APL3; glucose-1-phosphate AT4G3921 2.1.2.1 major CHO metaboli

Cs2g1880( 57116 Symbols: ADG1, APS1 | ADG1 (ADP GLUC AT5G4830 2.1.2.1 major CHO metaboli

Cs7g2191( 104101 Symbols: ATPU1, ATLDA, PU1 | ATLDA (L AT5G0436 2.1.2.4 major CHO metaboli

Cs4g0443( 90967 Symbols: ISA1, ATISA1 | ISA1 (ISOAMYL AT2G3993 2.1.2.4 major CHO metaboli

Cs3g1784( 88732 Symbols: ATISA3, ISA3 | ISA3 (ISOAMYL AT4G0902 2.1.2.4 major CHO metaboli

Cs5g3169( 98610 Symbols: ATISA2, ISA2, DBE1, BE2 | isoam AT1G0331 2.1.2.4 major CHO metaboli

Cs6g1532( 94120 Symbols: SBE2.2 | SBE2.2 (starch branching AT5G0365 2.1.2.3 major CHO metaboli

Cs3g2722( 95086 Symbols: SBE2.2 | SBE2.2 (starch branching AT5G0365 2.1.2.3 major CHO metaboli

Cs4g0482( 51904 Symbols: ATSS4, SSIV, SS4 | ATSS4; transfr AT4G1824 2.1.2.2 major CHO metaboli

orange1.1t 72856 Symbols: SSII, SSI, ATSS1 | SSII (SUPPRE AT5G2430 2.1.2.2 major CHO metaboli

Cs1g2095( 66909 soluble glycogen synthase-related | chr5:2627. AT5G6568 2.1.2.2 major CHO metaboli

Cs2g0307( 132047 Symbols: ATSS3 | ATSS3 (starch synthase 3) AT1G1172 2.1.2.2 major CHO metaboli

Cs6g2137( 85469 Symbols: AtSS2 | AtSS2 (starch synthase 2); 1 AT3G0118 2.1.2.2 major CHO metaboli

Cs7g0569( 99766 Symbols: ATSPS1F | ATSPS1F (sucrose phos AT5G2028 2.1.1.1 major CHO metaboli

Cs9g0627( 25263 Symbols: ATAILP1, AILP1 | AILP1 | chr5:64 AT5G1914 15 metal handling

orange1.1t 9252.6 Symbols: ATX1, ATATX1 | ATX1 (ARABIL AT1G6624 15.2 metal handling.bindii

Cs6g0915( 24582 Symbols: ATFER1, FER1 | ATFER1; ferric ir AT5G0160 15.2 metal handling.bindii

Cs7g3063( 29465 Symbols: ATFER4 | ATFER4 (ferritin 4); bin AT2G4030 15.2 metal handling.bindii

Cs5g0990( 24133 Symbols: ATCCS | ATCCS (COPPER CHAP AT1G1252 15.2 metal handling.bindii

Cs3g1748( 17370 Symbols: CUTA | CUTA; copper ion binding AT2G3374 15.2 metal handling.bindii

Cs2g0605( 290386 glucan synthase-like 1 AT4G0497 3.6 minor CHO metaboli

Cs9g0199( 54465 Symbols: GAL1, GALK | GALK; ATP bindir AT3G0658 3.8.1 minor CHO metaboli

orange1.1t 30694 uridylyltransferase-related | chr1:5773592-577 AT1G1688 3.8.3 minor CHO metaboli

Cs2g1094( 39801 Symbols: IMPL1 | IMPL1 (MYO-INOSITOL AT1G3119 3.4.5 minor CHO metaboli



|            |        |                                                  |             |         |                         |
|------------|--------|--------------------------------------------------|-------------|---------|-------------------------|
| Cs9g06280  | 40793  | carbohydrate kinase family   chr5:6426071-64     | AT5G1915    | 3.5     | minor CHO metaboli      |
| Cs1g24260  | 34473  | aldose 1-epimerase family protein   chr5:2655    | AT5G6653    | 3.5     | minor CHO metaboli      |
| Cs3g07460  | 42957  | aldo/keto reductase family protein   chr2:1180   | AT2G2768    | 3.5     | minor CHO metaboli      |
| Cs5g15110  | 40084  | pfkB-type carbohydrate kinase family protein     | AT1G1716    | 3.5     | minor CHO metaboli      |
| Cs6g17790  | 33843  | Symbols: SOS4, ATSOS4   SOS4 (SALT OV            | AT5G3785    | 3.5     | minor CHO metaboli      |
| Cs9g10370  | 46722  | aldo/keto reductase family protein   chr1:1191   | AT1G0442    | 3.5     | minor CHO metaboli      |
| Cs4g02950  | 60238  | xylose isomerase family protein   chr5:233467    | AT5G5765    | 3.5.1   | minor CHO metaboli      |
| Cs1g19780  | 35824  | haloacid dehalogenase-like hydrolase family      | AT4G3997    | 3.2     | minor CHO metaboli      |
| Cs2g19200  | 71311  | ABC1 family protein   chr3:2459491-2463957       | AT3G0770    | 26.56*  | misc.ABC1k family       |
| Cs7g29500  | 60219  | ABC1 family protein   chr5:1544007-1547164       | AT5G0520    | 26.56*  | misc.ABC1k family       |
| Cs3g01840  | 77175  | ABC1 family protein   chr1:29949925-299526       | AT1G7960    | 26.56*  | misc.ABC1k family       |
| Cs7g07380  | 153114 | ABC1 family protein   chr4:15233075-152371       | AT4G3139    | 26.56*  | misc.ABC1k family       |
| Cs4g16910  | 36967  | Symbols: atnudt20   atnudt20 (Arabidopsis th     | AT5G1946    | 26.13   | misc.acid and other p   |
| Cs5g09890  | 34096  | Symbols: ATNUDT14, ATNUDX14   ATNU               | AT4G1198    | 26.13   | misc.acid and other p   |
| Cs2g30470  | 35643  | cinnamyl-alcohol dehydrogenase, putative (C.     | AT1G5141    | 26.11.1 | misc.alcohol dehydr     |
| Cs4g19780  | 35009  | aminotransferase class IV family protein   chr:  | AT5G5785    | 26.26.1 | misc.aminotransferas    |
| Cs5g14800  | 59909  | Symbols: CYP72A15   CYP72A15; electron c         | AT3G1469    | 26.1    | misc.cytochrome P45     |
| orange1.1t | 64362  | Symbols: CYP97A3, LUT5   CYP97A3 (CYT            | AT1G3180    | 26.1    | misc.cytochrome P45     |
| Cs1g19720  | 40220  | DNAJ heat shock family protein   chr2:94975      | AT2G2236    | 26.29*  | misc.DnaJ domain w      |
| Cs8g12670  | 23895  | unknown protein   chr1:2748398-2751278           | RE AT1G0864 | 26.29*  | misc.DnaJ domain w      |
| Cs1g12280  | 53688  | DNAJ heat shock protein, putative   chr1:301     | AT1G8003    | 26.29*  | misc.DnaJ domain w      |
| Cs5g02140  | 68456  | Symbols: ADL1, ADL1A, AG68, DRP1A, R             | AT5G4208    | 26.17   | misc.dynamain           |
| Cs5g31320  | 102638 | Symbols: FZL   FZL (FZO-LIKE); GTP bindi         | AT1G0316    | 26.17   | misc.dynamain           |
| Cs9g09850  | 35764  | plastid-lipid associated protein PAP / fibrillin | AT3G2340    | 26.31*  | misc.fibrillins         |
| orange1.1t | 33256  | Fibrillin 7                                      | AT2G4213    | 26.31*  | misc.fibrillins         |
| Cs3g09310  | 41193  | plastid-lipid associated protein PAP, putative   | AT2G3549    | 26.31*  | misc.fibrillins         |
| orange1.1t | 27514  | plastid-lipid associated protein PAP / fibrillin | AT3G2607    | 26.31*  | misc.fibrillins         |
| Cs2g02520  | 43180  | plastid-lipid associated protein PAP, putative   | AT4G2224    | 26.31*  | misc.fibrillins         |
| Cs1g21580  | 67112  | GCN5-related N-acetyltransferase (GNAT) fa       | AT2G2291    | 26.24   | misc.GCN5-related N     |
| Cs6g10350  | 32671  | Symbols: ATNSI   ATNSI (NUCLEAR SHU              | AT1G3207    | 26.24   | misc.GCN5-related N     |
| Cs2g12100  | 56722  | Symbols: BGLU42   BGLU42 (BETA GLUC              | AT5G3689    | 26.3    | misc.gluco-, galacto-   |
| Cs1g08360  | 106079 | Symbols: RSW3   RSW3 (RADIAL SWELLI              | AT5G6384    | 26.3    | misc.gluco-, galacto-   |
| Cs8g08270  | 80912  | Symbols: BGAL3   BGAL3 (beta-galactosida:        | AT4G3636    | 26.3    | misc.gluco-, galacto-   |
| Cs8g12140  | 95483  | glycoside hydrolase family 2 protein   chr3:20   | AT3G5444    | 26.3    | misc.gluco-, galacto-   |
| Cs8g12150  | 32107  | glycoside hydrolase family 2 protein   chr3:20   | AT3G5444    | 26.3    | misc.gluco-, galacto-   |
| Cs7g04600  | 25584  | Symbols: GST30, ATGSTU17, GST30B, ERI            | AT1G1037    | 26.9    | misc.glutathione S tr   |
| Cs7g18560  | 25123  | Symbols: ATGSTF9, GLUTTR, ATGSTF7                | AT2G3086    | 26.9    | misc.glutathione S tr   |
| Cs5g32800  | 23828  | Symbols: ATGSTF8, ATGSTF5, GST6, GST             | AT2G4773    | 26.9    | misc.glutathione S tr   |
| Cs9g10450  | 26503  | Symbols: GST30, ATGSTU17, GST30B, ERI            | AT1G1037    | 26.9    | misc.glutathione S tr   |
| Cs6g03820  | 27125  | Symbols: GSTL2   GSTL2   chr3:20398538-2         | AT3G5504    | 26.9    | misc.glutathione S tr   |
| Cs5g15160  | 25601  | Symbols: ATGSTU19, GST8   ATGSTU19 (C            | AT1G7838    | 26.9    | misc.glutathione S tr   |
| Cs5g29140  | 46165  | glutathione S-transferase C-terminal domain-c    | AT5G4400    | 26.9    | misc.glutathione S tr   |
| Cs5g15170  | 24958  | Symbols: ATGSTU19, GST8   ATGSTU19 (C            | AT1G7838    | 26.9    | misc.glutathione S tr   |
| Cs5g15190  | 25558  | Symbols: ATGSTU19, GST8   ATGSTU19 (C            | AT1G7838    | 26.9    | misc.glutathione S tr   |
| Cs2g21120  | 30198  | dienelactone hydrolase family protein   chr2:1   | AT2G3252    | 26.1    | misc.misc2              |
| Cs2g06370  | 35260  | epoxide hydrolase, putative   chr4:1035681-1     | AT4G0234    | 26.1    | misc.misc2              |
| Cs7g29350  | 34519  | oxidoreductase, zinc-binding dehydrogenase f     | AT3G5646    | 26.1    | misc.misc2              |
| Cs5g12830  | 43945  | Symbols: CYP77A5P   CYP77A5P; catalytic          | AT3G1827    | 26.1    | misc.misc2              |
| Cs2g10080  | 120877 | FAD-binding Berberine family protein             | AT4G2084    | 26.8    | misc.nitrilases, *nitri |
| Cs7g27990  | 36994  | nitrilase, putative   chr4:5608240-5611215       | RE AT4G0879 | 26.8    | misc.nitrilases, *nitri |

|            |        |                                                  |                  |                       |
|------------|--------|--------------------------------------------------|------------------|-----------------------|
| Cs2g28180  | 33013  | oxidoreductase, zinc-binding dehydrogenase f     | AT1G2374 26.7    | misc.oxidases - copp  |
| Cs9g15140  | 42211  | NADP-dependent oxidoreductase, putative   c      | AT5G6151 26.7    | misc.oxidases - copp  |
| Cs7g08640  | 41876  | oxidoreductase, zinc-binding dehydrogenase f     | AT1G2374 26.7    | misc.oxidases - copp  |
| Cs2g13560  | 31544  | oxidoreductase NAD-binding domain-contain        | AT1G1514 26.7    | misc.oxidases - copp  |
| Cs2g29530  | 41389  | rhodanese-like domain-containing protein / PI    | AT5G1937 26.23   | misc.rhodanese        |
| Cs6g16960  | 30204  | short-chain dehydrogenase/reductase (SDR) f      | AT3G5529 26.22   | misc.short chain dehy |
| orange1.1t | 32024  | Symbols: SDRB, DECR   SDRB (SHORT-CH             | AT3G1280 26.22   | misc.short chain dehy |
| orange1.1t | 63594  | Symbols: atToc64-III   atToc64-III (Arabidop     | AT3G1797 26.33*  | misc.tetrapetide      |
| Cs3g02510  | 34730  | tetrapetide repeat (TPR)-containing prot         | AT3G1842 26.33*  | misc.tetrapetide      |
| Cs6g11490  | 54021  | UDP-glucuronosyl/UDP-glucosyl transferase        | AT3G2176 26.2    | misc.UDP glucosyl a   |
| Cs8g04920  | 57478  | Symbols: UGT84A1   UGT84A1; UDP-glyco            | AT4G1548 26.2    | misc.UDP glucosyl a   |
| Cs8g20750  | 52366  | UDP-glucuronosyl/UDP-glucosyl transferase        | AT2G3014 26.2    | misc.UDP glucosyl a   |
| Cs3g17930  | 20873  | Symbols: COX6B, ATCOX6B2   COX6B (C'             | AT1G2245 9.7     | mitochondrial electr  |
| Cs1g13240  | 18087  | cytochrome c oxidase family protein   chr1:30    | AT1G8023 9.7     | mitochondrial electr  |
| Cs7g04890  | 14508  | ubiquinol-cytochrome C reductase complex 1       | AT5G2545 9.5     | mitochondrial electr  |
| Cs2g14600  | 30097  | ubiquinol-cytochrome C reductase iron-sulfur     | AT5G1343 9.5     | mitochondrial electr  |
| Cs1g04030  | 27522  | unknown protein   chr2:9320195-9322734 RE        | AT2G2187 9.9     | mitochondrial electr  |
| Cs7g27610  | 19659  | Symbols: ATPQ   ATPQ (ATP SYNTHASE I             | AT3G5230 9.9     | mitochondrial electr  |
| Cs7g01810  | 26334  | ATP synthase delta chain, mitochondrial, puta    | AT5G1345 9.9     | mitochondrial electr  |
| Cs2g13550  | 59850  | ATP synthase beta chain, mitochondrial, puta     | AT5G0868 9.9     | mitochondrial electr  |
| Cs3g25040  | 29400  | Symbols: APFI, GAMMA CA2   GAMMA C               | AT1G4726 9.1.1.5 | mitochondrial electr  |
| orange1.1t | 28025  | Symbols: GAMMA CAL2   GAMMA CAL2                 | AT3G4868 9.1.1.5 | mitochondrial electr  |
| Cs9g19060  | 19175  | NADH-ubiquinone oxidoreductase-related   cl      | AT5G5284 9.1.1   | mitochondrial electr  |
| Cs5g29000  | 44210  | binding / catalytic/ coenzyme binding   chr2:8   | AT2G2036 9.1.1   | mitochondrial electr  |
| Cs5g16400  | 80724  | Symbols: EMB1467   EMB1467 (embryo defi          | AT5G3751 9.1.1   | mitochondrial electr  |
| orange1.1t | 176342 | Symbols: GLU1, GLS1, GLUS, FD-GOGAT              | AT5G0414 12.2.1  | N-metabolism.ammo     |
| Cs9g17990  | 216375 | Symbols: GLT1   GLT1; glutamate synthase (       | AT5G5346 12.2.1  | N-metabolism.ammo     |
| Cs7g14020  | 35967  | Symbols: ATGSKB6, GLN1.3, GLN1;3   AT            | AT3G1782 12.2.2  | N-metabolism.ammo     |
| Cs9g06450  | 38850  | cell death associated protein-related   chr1:18  | AT1G4965 35.1    | not assigned.no ontol |
| Cs1g07130  | 32637  | cytidyltransferase family   chr1:19745046-1      | AT1G5300 35.1    | not assigned.no ontol |
| Cs6g12880  | 32527  | transferase family protein   chr3:9519741-952    | AT3G2604 35.1    | not assigned.no ontol |
| Cs2g11800  | 33921  | molybdenum cofactor sulfurase family proteir     | AT1G3091 35.1    | not assigned.no ontol |
| Cs6g12870  | 51262  | transferase family protein   chr3:9519741-952    | AT3G2604 35.1    | not assigned.no ontol |
| Cs2g12010  | 23338  | Symbols: ATPCAP1, PCAP1   DREPP plasm            | AT4G2026 35.1    | not assigned.no ontol |
| Cs2g24620  | 31301  | Symbols: ATPHB3   ATPHB3 (PROHIBITIN             | AT5G4077 35.1    | not assigned.no ontol |
| Cs2g31210  | 35670  | indigoidine synthase A family protein   chr1:1   | AT1G5051 35.1    | not assigned.no ontol |
| Cs7g15980  | 14459  | SWIB complex BAF60b domain-containing p          | AT3G0359 35.1    | not assigned.no ontol |
| Cs3g18390  | 38701  | methyltransferase-related   chr1:29401759-29     | AT1G7814 35.1    | not assigned.no ontol |
| Cs1g23810  | 46966  | 5-azacytidine resistance protein -related   chr5 | AT5G6672 35.1    | not assigned.no ontol |
| Cs9g08070  | 97142  | phosphotransferase-related   chr5:17569147-1     | AT5G4374 35.1    | not assigned.no ontol |
| Cs7g30090  | 42763  | haloacid dehalogenase-like hydrolase family ¶    | AT3G1097 35.1    | not assigned.no ontol |
| Cs7g03610  | 23278  | UbiE/COQ5 methyltransferase family protein       | AT1G6952 35.1    | not assigned.no ontol |
| Cs1g18210  | 39241  | metallo-beta-lactamase family protein   chr3:4   | AT3G1380 35.1    | not assigned.no ontol |
| Cs4g05970  | 30603  | carbon-nitrogen hydrolase family protein   chr   | AT5G1204 35.1    | not assigned.no ontol |
| Cs6g10380  | 41792  | alphavirus core protein family   chr3:2622880    | AT3G0864 35.1    | not assigned.no ontol |
| orange1.1t | 35809  | DJ-1 family protein   chr1:19864770-1986738      | AT1G5328 35.1    | not assigned.no ontol |
| Cs5g06660  | 26284  | haloacid dehalogenase-like hydrolase family ¶    | AT3G4842 35.1    | not assigned.no ontol |
| orange1.1t | 38319  | Symbols: QPT   QPT (QUINOLINATE PHO              | AT2G0135 35.1    | not assigned.no ontol |
| Cs2g03600  | 32858  | flavin reductase-related   chr2:14529608-1453    | AT2G3446 35.1    | not assigned.no ontol |
| orange1.1t | 38426  | cell death associated protein-related   chr1:18  | AT1G4965 35.1    | not assigned.no ontol |

|            |        |                                                             |        |                       |
|------------|--------|-------------------------------------------------------------|--------|-----------------------|
| Cs2g12680  | 23078  | thioesterase family protein   chr1:25585776-2:AT1G6826      | 35.1   | not assigned.no ontol |
| Cs3g22150  | 40115  | oxidoreductase family protein   chr4:6107150-AT4G0967       | 35.1   | not assigned.no ontol |
| Cs6g12030  | 10477  | DNA binding / sequence-specific DNA bindir AT2G3702         | 35.1   | not assigned.no ontol |
| Cs9g03090  | 123482 | Symbols: emb2734   emb2734 (embryo defect AT5G1982          | 35.1   | not assigned.no ontol |
| Cs3g07810  | 101486 | Symbols: emb1211   emb1211 (embryo defect AT5G2264          | 35.1   | not assigned.no ontol |
| Cs4g19010  | 66463  | haloacid dehalogenase-like hydrolase family Ꞥ AT2G2587      | 35.1   | not assigned.no ontol |
| orange1.1t | 40390  | DJ-1 family protein   chr1:19864770-1986738 AT1G5328        | 35.1   | not assigned.no ontol |
| orange1.1t | 47057  | DJ-1 family protein   chr1:19864770-1986738 AT1G5328        | 35.1   | not assigned.no ontol |
| Cs2g11720  | 22455  | YGGT family protein   chr4:13923773-13924-AT4G2799          | 35.1   | not assigned.no ontol |
| Cs2g26760  | 24751  | forkhead-associated domain-containing protei AT2G2153       | 35.1   | not assigned.no ontol |
| Cs6g09310  | 12166  | macrophage migration inhibitory factor family AT5G0165      | 35.1   | not assigned.no ontol |
| Cs2g21000  | 55759  | Symbols: HPL1, CYP74B2   HPL1 (HYDRO AT4G1544               | 35.1   | not assigned.no ontol |
| Cs6g09520  | 104579 | D-alanine--D-alanine ligase family   chr3:267-AT3G0884      | 35.1   | not assigned.no ontol |
| Cs6g05570  | 40412  | chloroplast lumen common family protein   ch AT2G3740       | 35.1   | not assigned.no ontol |
| Cs9g11200  | 65722  | dehydratase family   chr3:8648705-8652605 F AT3G2394        | 35.1   | not assigned.no ontol |
| Cs2g16990  | 94366  | armadillo/beta-catenin repeat family protein   AT1G2318     | 35.1.3 | not assigned.no ontol |
| Cs3g17100  | 23327  | binding   chr5:26189725-26190591 REVERS AT5G6552            | 35.2   | not assigned.unknow   |
| Cs9g07830  | 70429  | unknown protein   chr3:20700435-20703056 IAT3G5576          | 35.2   | not assigned.unknow   |
| orange1.1t | 23232  | unknown protein   chr2:18953280-18954619 IAT2G4610          | 35.2   | not assigned.unknow   |
| Cs8g10710  | 31908  | unknown protein   chr1:9832816-9834427 RE AT1G2814          | 35.2   | not assigned.unknow   |
| Cs9g04300  | 19021  | Symbols: TCTP   TCTP (TRANSLATIONAL AT3G1664                | 35.2   | not assigned.unknow   |
| Cs9g17220  | 25041  | Symbols: ACYB-2   ACYB-2; carbon-monox AT4G2557             | 35.2   | not assigned.unknow   |
| Cs6g15340  | 19886  | unknown protein   chr2:15278769-15280604 IAT2G3641          | 35.2   | not assigned.unknow   |
| Cs5g01600  | 35619  | unknown protein   chr4:12512736-12514592 IAT4G2409          | 35.2   | not assigned.unknow   |
| Cs1g07500  | 43722  | Symbols: emb2737   emb2737 (embryo defect AT5G5386          | 35.2   | not assigned.unknow   |
| Cs7g17050  | 31825  | LOCATED IN: mitochondrion, plastid; EXPF AT3G5884           | 35.2   | not assigned.unknow   |
| Cs6g04000  | 20366  | INVOLVED IN: biological_process unknown AT2G3724            | 35.2   | not assigned.unknow   |
| orange1.1t | 17400  | electron carrier/ iron-sulfur cluster binding   cl AT3G0748 | 35.2   | not assigned.unknow   |
| Cs6g21900  | 49386  | binding / catalytic   chr5:15768193-15770410 AT5G3941       | 35.2   | not assigned.unknow   |
| Cs5g27940  | 41776  | unknown protein   chr4:7650223-7652289 RE AT4G1315          | 35.2   | not assigned.unknow   |
| Cs3g09230  | 32552  | binding / catalytic/ coenzyme binding   chr1:1 AT1G3222     | 35.2   | not assigned.unknow   |
| Cs5g18250  | 38392  | unknown protein   chr1:12244585-12246188 IAT1G3378          | 35.2   | not assigned.unknow   |
| Cs6g21970  | 46690  | unknown protein   chr3:11154929-11157207 IAT3G2918          | 35.2   | not assigned.unknow   |
| orange1.1t | 25141  | unknown protein   chr3:21193780-21195716 IAT3G5728          | 35.2   | not assigned.unknow   |
| Cs5g26050  | 58260  | unknown protein   chr1:2701226-2703091 FO AT1G0853          | 35.2   | not assigned.unknow   |
| Cs7g14410  | 17261  | unknown protein   chr5:5465484-5467063 RE AT5G1666          | 35.2   | not assigned.unknow   |
| orange1.1t | 71684  | unknown protein   chr5:4133204-4136688 FO AT5G1303          | 35.2   | not assigned.unknow   |
| Cs2g12380  | 36951  | unknown protein   chr5:2763823-2765734 FO AT5G0854          | 35.2   | not assigned.unknow   |
| Cs1g08140  | 29921  | unknown protein   chr3:5084278-5085843 RE AT3G1511          | 35.2   | not assigned.unknow   |
| Cs6g10080  | 35578  | unknown protein   chr2:16132006-16134415 IAT2G3855          | 35.2   | not assigned.unknow   |
| Cs1g20240  | 32463  | unknown protein   chr4:17886869-17888204 IAT4G3810          | 35.2   | not assigned.unknow   |
| Cs1g26210  | 23118  | unknown protein   chr2:7684112-7685176 RE AT2G1769          | 35.2   | not assigned.unknow   |
| Cs5g18400  | 16170  | unknown protein   chr1:12265033-12266847 IAT1G3381          | 35.2   | not assigned.unknow   |
| Cs4g01860  | 20892  | unknown protein   chr2:10217701-10219352 IAT2G2402          | 35.2   | not assigned.unknow   |
| orange1.1t | 27396  | unknown protein   chr3:13489518-13490849 IAT3G3293          | 35.2   | not assigned.unknow   |
| Cs3g27110  | 37376  | unknown protein   chr1:23583521-23585723 IAT1G6361          | 35.2   | not assigned.unknow   |
| Cs5g28130  | 22339  | unknown protein   chr4:7668147-7669214 RE AT4G1320          | 35.2   | not assigned.unknow   |
| Cs7g12700  | 63127  | FUNCTIONS IN: molecular_function unknow AT3G2568            | 35.2   | not assigned.unknow   |
| Cs1g02860  | 52633  | FUNCTIONS IN: molecular_function unknow AT2G4464            | 35.2   | not assigned.unknow   |
| Cs2g04990  | 25858  | unknown protein   chr1:10134069-10136124 IAT1G2904          | 35.2   | not assigned.unknow   |

|            |        |                                                 |                        |                  |                       |                       |
|------------|--------|-------------------------------------------------|------------------------|------------------|-----------------------|-----------------------|
| Cs3g17280  | 14134  | unknown protein                                 | chr5:25913028-25914003 | IAT5G6481        | 35.2                  | not assigned.unknown  |
| Cs2g10870  | 41543  | CbbY protein-related                            | chr5:18270344-182731   | AT5G4517         | 35.2                  | not assigned.unknown  |
| Cs6g06590  | 36007  | binding / catalytic/ coenzyme binding           | chr2:1                 | AT2G3766         | 35.2                  | not assigned.unknown  |
| Cs1g25910  | 23436  | unknown protein                                 | chr5:26425736-26427172 | IAT5G6609        | 35.2                  | not assigned.unknown  |
| Cs7g12920  | 38085  | unknown protein                                 | chr1:10384981-10387441 | IAT1G2970        | 35.2                  | not assigned.unknown  |
| Cs9g16150  | 14162  | unknown protein                                 | chr5:21009592-21010345 | IAT5G5172        | 35.2                  | not assigned.unknown  |
| Cs6g09120  | 61087  | unknown protein                                 | chr5:224174-226926     | FOR\AT5G0159     | 35.2                  | not assigned.unknown  |
| Cs9g19340  | 48938  | unknown protein                                 | chr5:21321428-21323780 | IAT5G5254        | 35.2                  | not assigned.unknown  |
| orange1.1t | 34562  | unknown protein                                 | chr3:22902638-22904070 | IAT3G6187        | 35.2                  | not assigned.unknown  |
| Cs5g09380  | 27686  | unknown protein                                 | chr1:23249145-23251105 | IAT1G6278        | 35.2                  | not assigned.unknown  |
| Cs5g10660  | 41563  | unknown protein                                 | chr1:28032763-28034773 | IAT1G7464        | 35.2                  | not assigned.unknown  |
| orange1.1t | 28480  | Symbols: CDF1   CDF1 (CELL GROWTH D             | AT5G2304               | 35.2             | not assigned.unknown  |                       |
| Cs3g21020  | 36029  | antioxidant/ oxidoreductase                     | chr1:7476942-74        | AT1G2135         | 35.2                  | not assigned.unknown  |
| Cs7g04340  | 43560  | unknown protein                                 | chr1:2160938-2163308   | RE AT1G0704      | 35.2                  | not assigned.unknown  |
| Cs9g04960  | 37649  | binding / catalytic                             | chr2:16309798-16312541 | AT2G3908         | 35.2                  | not assigned.unknown  |
| Cs5g17070  | 14534  | unknown protein                                 | chr1:9834943-9835904   | RE AT1G2815      | 35.2                  | not assigned.unknown  |
| Cs3g18830  | 48144  | unknown protein                                 | chr1:13671814-13674098 | IAT1G3632        | 35.2                  | not assigned.unknown  |
| Cs7g02110  | 23257  | LOCATED IN: chloroplast, chloroplast inner      | AT5G1372               | 35.2             | not assigned.unknown  |                       |
| Cs8g01250  | 40825  | unknown protein                                 | chr4:17927198-17928901 | IAT4G3822        | 35.2                  | not assigned.unknown  |
| Cs3g04050  | 58135  | INVOLVED IN: biological_process unknown         | AT5G2469               | 35.2             | not assigned.unknown  |                       |
| Cs5g32640  | 66546  | catalytic                                       | chr4:1408159-1412756   | FORWARD AT4G0320 | 35.2                  | not assigned.unknown  |
| Cs6g19490  | 28369  | FUNCTIONS IN: molecular_function unknown        | AT2G3167               | 35.2             | not assigned.unknown  |                       |
| Cs5g24490  | 53545  | catalytic                                       | chr2:17953497-17955829 | REVERSE AT2G4318 | 35.2                  | not assigned.unknown  |
| Cs6g03310  | 31794  | unknown protein                                 | chr2:18197844-18200194 | IAT2G4394        | 35.2                  | not assigned.unknown  |
| orange1.1t | 46005  | dihydroorotate dehydrogenase family protein     | AT3G1781               | 23.2             | nucleotide metabolism |                       |
| Cs9g01190  | 70692  | 5' nucleotidase family protein                  | chr5:1984954           | AT5G4896         | 23.2                  | nucleotide metabolism |
| Cs1g09490  | 41321  | Symbols: SAL1, ALX8, ATSAL1, HOS2, FR           | AT5G6398               | 23.2             | nucleotide metabolism |                       |
| orange1.1t | 46678  | cytidine/deoxycytidylate deaminase family pr    | AT4G2096               | 23.5.3           | nucleotide metabolism |                       |
| Cs5g17500  | 33283  | Symbols: AMK2   AMK2 (Adenosine monophosphate   | AT5G4784               | 23.4.1           | nucleotide metabolism |                       |
| Cs4g05210  | 80332  | Symbols: AVP1, ATAVP3, AVP-3   AVP1; A          | AT1G1569               | 23.4.95          | nucleotide metabolism |                       |
| orange1.1t | 69677  | Symbols: AVP1, ATAVP3, AVP-3   AVP1; A          | AT1G1569               | 23.4.95          | nucleotide metabolism |                       |
| Cs8g03160  | 32672  | Symbols: AtPPa6   AtPPa6 (Arabidopsis thaliana) | AT5G0965               | 23.4.95          | nucleotide metabolism |                       |
| Cs5g02180  | 25932  | nucleoside diphosphate kinase 4 (NDK4)          | chr AT4G2390           | 23.4.10          | nucleotide metabolism |                       |
| Cs1g03110  | 12157  | Symbols: NDPK1   NDPK1; ATP binding / m         | AT4G0932               | 23.4.10          | nucleotide metabolism |                       |
| Cs5g06840  | 25528  | Symbols: NDPK2, NDPK1A, NDPK1A                  | AT5G6331               | 23.4.10          | nucleotide metabolism |                       |
| Cs7g24930  | 37511  | Symbols: ADK2   ADK2 (ADENOSINE KINASE)         | AT5G0330               | 23.3.2.          | nucleotide metabolism |                       |
| Cs5g30370  | 34693  | phosphoribulokinase/uridine kinase family pr    | AT1G0303               | 23.3.2.          | nucleotide metabolism |                       |
| Cs3g15910  | 29872  | Symbols: APT1, ATAPT1   APT1 (ADENINE PHOSPHATE | AT1G2745               | 23.3.1.          | nucleotide metabolism |                       |
| orange1.1t | 32114  | uracil phosphoribosyltransferase, putative / U  | AT3G5390               | 23.3.1.          | nucleotide metabolism |                       |
| Cs7g09280  | 44001  | ribose-phosphate pyrophosphokinase 3 / phos     | AT1G1070               | 23.1.3           | nucleotide metabolism |                       |
| Cs7g22730  | 31617  | ribose-phosphate pyrophosphokinase 1 / phos     | AT2G3539               | 23.1.3           | nucleotide metabolism |                       |
| Cs7g17080  | 36461  | ribose-phosphate pyrophosphokinase 3 / phos     | AT1G1070               | 23.1.3           | nucleotide metabolism |                       |
| orange1.1t | 53227  | Symbols: ADSS   ADSS (ADENYLOSUCCEINASE)        | AT3G5761               | 23.1.2.          | nucleotide metabolism |                       |
| Cs2g11440  | 65714  | AICARFT/IMPCHase bienzyme family prote          | AT2G3504               | 23.1.2.          | nucleotide metabolism |                       |
| Cs8g13200  | 60516  | phosphoribosylaminoimidazole carboxylase, I     | AT2G3769               | 23.1.2.          | nucleotide metabolism |                       |
| Cs9g09470  | 41390  | Symbols: ATPURM, PUR5   PUR5; ATP bin           | AT3G5501               | 23.1.2.          | nucleotide metabolism |                       |
| Cs8g07730  | 28988  | Symbols: ATASE2, CIA1, ATPURF2   ATAS           | AT4G3474               | 23.1.2.          | nucleotide metabolism |                       |
| Cs8g07660  | 34168  | Symbols: ATASE2, CIA1, ATPURF2   ATAS           | AT4G3474               | 23.1.2.          | nucleotide metabolism |                       |
| Cs7g31810  | 157039 | Symbols: PUR4   PUR4 (purine biosynthesis       | AT1G7426               | 23.1.2.          | nucleotide metabolism |                       |
| orange1.1t | 62361  | phosphoribosylamine--glycine ligase (PUR2)      | AT1G0983               | 23.1.2.          | nucleotide metabolism |                       |

Cs2g0232( 32306 phosphoribosylglycinamide formyltransferase AT1G3122 23.1.2. nucleotide metabolism  
 Cs7g3165( 61686 adenylosuccinate lyase, putative / adenylosucc AT1G3628 23.1.2. nucleotide metabolism  
 Cs3g1761( 46938 Symbols: PUR7, PURC, ATPURC | PUR7 (P AT3G2111 23.1.2. nucleotide metabolism  
 Cs1g1470( 42386 aspartate carbamoyltransferase, chloroplast / a AT3G2033 23.1.1. nucleotide metabolism  
 Cs1g0499( 47129 Symbols: CARA | CARA (CARBAMOYL PF AT3G2774 23.1.1. nucleotide metabolism  
 Cs8g1717( 130087 Symbols: CARB | CARB (CARBAMOYL PF AT1G2990 23.1.1. nucleotide metabolism  
 Cs2g2329( 34102 Symbols: PYR4, DHOASE | PYR4 (PYRIMI AT4G2293 23.1.1. nucleotide metabolism  
 Cs8g1496( 16026 Symbols: ATFD3 | ATFD3 (ferredoxin 3); 2 i AT2G2751 7.3 OPP.electron transfer  
 Cs7g2035( 15888 Symbols: ATFD3 | ATFD3 (ferredoxin 3); 2 i AT2G2751 7.3 OPP.electron transfer  
 Cs2g0979( 42138 Symbols: ATRFNR1 | ATRFNR1 (ROOT FN AT4G0539 7.3 OPP.electron transfer  
 Cs5g0921( 43620 transaldolase, putative | chr1:4148033-415102 AT1G1223 7.2.2 OPP.non-reductive P  
 Cs8g1079( 47764 transaldolase, putative | chr5:4301792-430431 AT5G1342 7.2.2 OPP.non-reductive P  
 Cs6g1931( 53713 6-phosphogluconate dehydrogenase family pr AT3G0236 7.1.3 OPP.oxidative PP.6-1  
 Cs7g1234( 53567 6-phosphogluconate dehydrogenase family pr AT3G0236 7.1.3 OPP.oxidative PP.6-1  
 Cs5g0272( 54206 6-phosphogluconate dehydrogenase family pr AT1G6419 7.1.3 OPP.oxidative PP.6-1  
 orange1.lt 35376 Symbols: emb2024 | emb2024 (embryo defect AT5G2440 7.1.2 OPP.oxidative PP.6-1  
 Cs2g2454( 59124 Symbols: G6PD5 | G6PD5 (glucose-6-phosph AT3G2730 7.1.1 OPP.oxidative PP.G6  
 Cs2g1944( 66532 Symbols: G6PD1 | G6PD1 (GLUCOSE-6-PH AT5G3579 7.1.1 OPP.oxidative PP.G6  
 Cs7g1111( 66949 Symbols: G6PD2 | G6PD2 (GLUCOSE-6-PH AT5G1311 7.1.1 OPP.oxidative PP.G6  
 Cs6g0106( 67143 Symbols: G6PD4 | G6PD4 (GLUCOSE-6-PH AT1G0942 7.1.1 OPP.oxidative PP.G6  
 Cs7g0989( 59028 Symbols: ALB4, ARTEMIS | ALB4 (ALBIN. AT1G2449 29.8 protein assembly and  
 Cs3g1144( 22217 rubredoxin family protein | chr1:20356954-20 AT1G5450 29.8 protein assembly and  
 gi|113952( 267988 hypothetical chloroplast RF2 [Citrus sinensis] 29.8 protein assembly and  
 Cs7g1114( 28056 peptidyl-prolyl cis-trans isomerase cyclophilin AT5G1312 29.8 protein assembly and  
 gi|113952( 217532 hypothetical chloroplast RF1 [Citrus sinensis] 29.8 protein assembly and  
 orange1.lt 25269 Symbols: NFU2, ATCNFU2 | NFU2 (NIFU-L AT5G4994 29.8.1<sup>4</sup> protein assembly and  
 orange1.lt 23880 Symbols: NFU1, AtCNFU1 | NFU1; structura AT4G0194 29.8.1<sup>4</sup> protein assembly and  
 Cs3g0473( 46672 aminomethyltransferase | chr1:22462640-224 AT1G6099 29.8.1<sup>4</sup> protein assembly and  
 Cs4g1560( 66679 Symbols: emb1027 | emb1027 (embryo defect AT4G2630 29.1.1<sup>5</sup> protein.aa activation.  
 Cs8g1073( 81890 glycyl-tRNA synthetase / glycine--tRNA ligase AT1G2988 29.1.1<sup>4</sup> protein.aa activation.  
 Cs1g0317( 91452 Symbols: EDD1, EDD | EDD1 (EMBRYO-D AT3G4811 29.1.1<sup>4</sup> protein.aa activation.  
 orange1.lt 33401 ATP binding / aminoacyl-tRNA ligase/ histidi AT5G0340 29.1.2<sup>1</sup> protein.aa activation.  
 orange1.lt 21470 Symbols: ATHRS1 | ATHRS1 (HISTIDYL-T AT3G4610 29.1.2<sup>1</sup> protein.aa activation.  
 Cs2g0272( 105403 Symbols: EMB2369 | EMB2369 (EMBRYO I AT4G0435 29.1.4 protein.aa activation.  
 Cs4g0369( 61482 Symbols: ATKRS-1 | ATKRS-1 (ARABIDOI AT3G1171 29.1.6 protein.aa activation.  
 Cs6g1740( 49345 phenylalanyl-tRNA synthetase class IIc family AT3G5814 29.1.2( protein.aa activation.  
 Cs3g1792( 56644 Symbols: ATSR5, SRS | SRS (SERYL-TRN AT1G1187 29.1.1<sup>1</sup> protein.aa activation.  
 Cs2g1493( 54909 Symbols: emb2768 | emb2768 (EMBRYO DE AT3G0266 29.1.1 protein.aa activation.  
 Cs4g0570( 98714 Symbols: APM1, ATAPM1 | APM1 (AMINC AT4G3309 29.5 protein.degradation  
 Cs6g2063( 31226 band 7 family protein | chr1:26293660-26295 AT1G6984 29.5 protein.degradation  
 Cs7g0433( 33783 band 7 family protein | chr1:26293660-26295 AT1G6984 29.5 protein.degradation  
 Cs6g2208( 58886 Symbols: MPPBETA | mitochondrial processi AT3G0209 29.5 protein.degradation  
 Cs4g1305( 55060 mitochondrial processing peptidase alpha sub AT1G5198 29.5 protein.degradation  
 Cs9g1620( 49581 peptidase M48 family protein | chr5:2101702 AT5G5174 29.5 protein.degradation  
 Cs8g0325( 44669 Symbols: PIP | PIP; aminopeptidase | chr2:60 AT2G1426 29.5 protein.degradation  
 orange1.lt 57641 peptidase family protein | chr3:22773386-227 AT3G6154 29.5 protein.degradation  
 orange1.lt 45461 Symbols: AtMC4 | AtMC4 (metacaspase 4); c AT1G7934 29.5 protein.degradation  
 Cs2g1244( 85651 prolyl oligopeptidase family protein | chr1:18 AT1G5038 29.5 protein.degradation  
 Cs3g2393( 81713 serine-type peptidase | chr5:14247913-142532 AT5G3621 29.5 protein.degradation  
 Cs7g2599( 77221 Symbols: SPPA | SPPA; serine-type endopept AT1G7399 29.5 protein.degradation

Cs4g0174( 60802 cytosol aminopeptidase family protein | chr4:1AT4G3092 29.5 protein.degradation  
 Cs3g1388( 78929 aminopeptidase/ hydrolase | chr3:1526963-15. AT3G0535 29.5 protein.degradation  
 Cs5g0340( 110629 peptidase M1 family protein | chr1:23657506- AT1G6377 29.5 protein.degradation  
 Cs2g2531( 37526 peptidase M48 family protein | chr3:9997895- AT3G2711 29.5 protein.degradation  
 Cs7g2073( 50291 aspartyl aminopeptidase, putative | chr5:13561 AT5G0471 29.5.4 protein.degradation.a  
 Cs3g0708( 26430 Symbols: ATCYSB | cysteine protease inhibit AT3G1249 29.5.3 protein.degradation.c  
 Cs2g2923( 11177 Symbols: ATCYSB | cysteine protease inhibit AT3G1249 29.5.3 protein.degradation.c  
 Cs4g1062( 23350 OTU-like cysteine protease family protein AT1G5067 29.5.3 protein.degradation.c  
 Cs2g1518( 116934 Symbols: VAR2, FTSH2 | VAR2 (VARIEGA AT2G3095 29.5.7 protein.degradation.n  
 Cs8g0572( 38928 Symbols: ATPREP2 | ATPREP2 (ARABIDO AT1G4963 29.5.7 protein.degradation.n  
 Cs5g0206( 105949 FtsHi1(FtsH protease, putative | chr4:124371( AT4G2394 29.5.7 protein.degradation.n  
 Cs7g1288( 39898 Symbols: MAP1C, MAP1B | MAP1C (METF AT1G1327 29.5.7 protein.degradation.n  
 Cs9g1842( 88610 Symbols: FTSH11 | FTSH11 (FtsH protease 1 AT5G5317 29.5.7 protein.degradation.n  
 Cs4g1351( 55400 M24 peptidase AT4G2949 29.5.7 protein.degradation.n  
 orange1.lt 114610 Symbols: EMB1047, FTSH12 | FTSH12 (FTS AT1G7956 29.5.7 protein.degradation.n  
 Cs3g2703( 77461 Symbols: VAR1, FTSH5 | VAR1 (VARIEGA AT5G4227 29.5.7 protein.degradation.n  
 Cs8g0573( 77691 Symbols: ATPREP2 | ATPREP2 (ARABIDO AT1G4963 29.5.7 protein.degradation.n  
 Cs7g1469( 149541 Symbols: emb2458 | emb2458 (embryo defect AT3G0434 29.5.7 protein.degradation.n  
 Cs8g0371( 66361 Symbols: ATEGY3, EGY3 | EGY3 (ETHYLI AT1G1787 29.5.7 protein.degradation.n  
 Cs1g2072( 91242 peptidase M3 family protein / thimet oligopep AT5G6562 29.5.7 protein.degradation.n  
 Cs8g0676( 29477 Symbols: CLPP6, NCLPP1, NCLPP6 | CLPP( AT1G1175 29.5.5 protein.degradation.s  
 orange1.lt 33197 Symbols: CLPP5, NCLPP5, NCLPP1 | CLPP: AT1G0256 29.5.5 protein.degradation.s  
 Cs5g0785( 32506 ClpR4 (ATP-dependent Clp protease proteoly AT4G1704 29.5.5 protein.degradation.s  
 Cs6g1792( 35892 Symbols: CLPP3, NCLPP3 | CLPP3; serine-ty AT1G6667 29.5.5 protein.degradation.s  
 Cs3g1020( 32581 Symbols: CLPP4, NCLPP4 | CLPP4 (CLP PR AT5G4539 29.5.5 protein.degradation.s  
 Cs3g1429( 48041 ClpR3 AT1G0913 29.5.5 protein.degradation.s  
 Cs8g0426( 37608 Symbols: CLPR1, NCLPP5, SVR2 | CLPR1; AT1G4997 29.5.5 protein.degradation.s  
 Cs9g1603( 25849 ClpT1 (Clp amino terminal domain-containin; AT4G2537 29.5.5 protein.degradation.s  
 Cs5g0970( 25934 ClpT2 (Clp amino terminal domain-containin; AT4G1206 29.5.5 protein.degradation.s  
 gj|113952( 21912 ClpP1 29.5.5 protein.degradation.s  
 Cs3g1516( 32759 Symbols: CLPP5, NCLPP5, NCLPP1 | CLPP: AT1G0256 29.5.5 protein.degradation.s  
 Cs5g0966( 31052 Symbols: CLPR2, NCLPP2, CLP2 | CLP2 (Cl AT1G1241 29.5.5 protein.degradation.s  
 Cs7g1980( 102261 Symbols: CLPC, ATHSP93-V, HSP93-V, DC AT5G5092 29.5.5 protein.degradation.s  
 Cs8g0961( 13645 Symbols: UBC36, UBC13B | ubiquitin-conju; AT1G1689 29.5.11 protein.degradation.u  
 Cs4g0771( 13381 Symbols: UBC28 | ubiquitin-conjugating enzy AT1G6423 29.5.11 protein.degradation.u  
 Cs4g0418( 47049 Symbols: ATS9, RPN6 | ATS9 (ARABIDOP; AT1G2915 29.5.11 protein.degradation.u  
 Cs1g2569( 27175 Symbols: PAD1 | PAD1 (20s proteasome alph; AT3G5126 29.5.11 protein.degradation.u  
 orange1.lt 27360 Symbols: PAC1 | PAC1; endopeptidase/ pepti AT3G2211 29.5.11 protein.degradation.u  
 Cs3g1438( 45210 Symbols: RPT5A, ATS6A.2 | RPT5A (REGU AT3G0553 29.5.11 protein.degradation.u  
 orange1.lt 109340 26S proteasome regulatory subunit, putative | AT2G3273 29.5.11 protein.degradation.u  
 Cs5g0193( 30790 Symbols: RPN12a | RPN12a (Regulatory Part AT1G6452 29.5.11 protein.degradation.u  
 Cs7g2894( 71463 Symbols: HSC70-1, HSP70-1, AT-HSC70-1, AT5G0250 29.6 protein.folding  
 Cs7g2901( 70991 Symbols: HSC70-1, HSP70-1, AT-HSC70-1, AT5G0250 29.6 protein.folding  
 orange1.lt 71925 Symbols: HSC70-1, HSP70-1, AT-HSC70-1, AT5G0250 29.6 protein.folding  
 orange1.lt 48152 Symbols: HSC70-1, HSP70-1, AT-HSC70-1, AT5G0250 29.6 protein.folding  
 Cs3g1448( 169777 Symbols: BIP1 | BIP1; ATP binding | chr5:10 AT5G2854 29.6 protein.folding  
 Cs3g1422( 72890 Symbols: BIP1 | BIP1; ATP binding | chr5:10 AT5G2854 29.6 protein.folding  
 Cs5g0184( 71725 Symbols: BIP, BIP2 | BIP2; ATP binding | chi AT5G4202 29.6 protein.folding  
 Cs3g2626( 94300 Symbols: SHD, HSP90.7 | SHD (SHEPHERC AT4G2419 29.6 protein.folding  
 Cs8g0301( 65395 Symbols: MTHSC70-2, HSC70-5 | MTHSC7( AT5G0959 29.6 protein.folding

|                     |        |                                                 |            |                     |                        |
|---------------------|--------|-------------------------------------------------|------------|---------------------|------------------------|
| Cs8g2021(orange1.1t | 22255  | Symbols: ROC7   ROC7; peptidyl-prolyl cis-t     | AT5G5871   | 29.6                | protein.folding        |
| Cs6g0589(orange1.1t | 61725  | Symbols: HSP60-2   HSP60-2 (HEAT SHOCK          | AT2G3321   | 29.6                | protein.folding        |
| Cs7g1593(orange1.1t | 12803  | Symbols: KIS, TFCA   KIS (KIESEL); unfold       | AT2G3041   | 29.6                | protein.folding        |
| Cs4g0968(orange1.1t | 61126  | trigger factor type chaperone family protein    | AT5G5522   | 29.6                | protein.folding        |
| Cs8g1825(orange1.1t | 64640  | Symbols: HSC70-1, HSP70-1, AT-HSC70-1,          | AT5G0250   | 29.6                | protein.folding        |
| Cs2g2677(orange1.1t | 44532  | TCP-1/cpn60 chaperonin family protein           | AT3G1183   | 29.6                | protein.folding        |
| Cs8g1826(orange1.1t | 70917  | Symbols: HSC70-1, HSP70-1, AT-HSC70-1,          | AT5G0250   | 29.6                | protein.folding        |
| Cs6g1881(orange1.1t | 50001  | chaperonin, putative   chr3:528574-532582       | RIAT3G0253 | 29.6                | protein.folding        |
| orange1.1t          | 76504  | Symbols: CPHSC70-2/EAT SHOCK PROTEI             | AT5G4991   | 29.6                | protein.folding        |
| orange1.1t          | 28855  | Symbols: ROC4   peptidyl-prolyl cis-trans iso   | AT3G6203   | 29.6                | protein.folding        |
| Cs8g1284(orange1.1t | 18970  | Symbols: ROC3   ROC3; peptidyl-prolyl cis-t     | AT2G1660   | 29.6                | protein.folding        |
| orange1.1t          | 57664  | chaperonin, putative   chr3:6232126-6234060     | AT3G1819   | 29.6                | protein.folding        |
| Cs9g0330(orange1.1t | 64784  | Symbols: CPN60B, LEN1   CPN60B (CHAPI           | AT1G5549   | 29.6                | protein.folding        |
| orange1.1t          | 76496  | Symbols: cpHsc70-1   cpHsc70-1 (chloroplast     | AT4G2428   | 29.6                | protein.folding        |
| Cs7g1632(orange1.1t | 38008  | Symbols: EMB1241   EMB1241 (embryo defi         | AT5G1771   | 29.6                | protein.folding        |
| Cs2g1117(orange1.1t | 61116  | Symbols: EMB3007   EMB3007 (embryo defi         | AT5G1882   | 29.6                | protein.folding        |
| Cs4g0703(orange1.1t | 26592  | Symbols: CPN20, CPN10, CHCPN10, ATCP            | AT5G2072   | 29.6                | protein.folding        |
| orange1.1t          | 51644  | Symbols: HSP21   HSP21 (HEAT SHOCK PI           | AT4G2767   | 29.6                | protein.folding        |
| Cs7g0624(orange1.1t | 110097 | Symbols: HSP98.7, CLPB-M, CLPB4   CLPB          | AT2G2514   | 29.6                | protein.folding        |
| Cs7g1213(orange1.1t | 90112  | Symbols: CR88, EMB1956, HSP90.5   CR88;         | AT2G0403   | 29.6                | protein.folding        |
| Cs6g2177(orange1.1t | 109531 | Symbols: APG6, CLPB3, CLPB-P   CLPB3 (          | AT5G1545   | 29.6                | protein.folding        |
| Cs8g1604(orange1.1t | 61501  | Symbols: CPN60A, CH-CPN60A, SLP   CPN           | AT2G2800   | 29.6                | protein.folding        |
| Cs8g0922(orange1.1t | 18093  | Symbols: ROC3   ROC3; peptidyl-prolyl cis-t     | AT2G1660   | 29.6                | protein.folding        |
| Cs7g3110(orange1.1t | 24455  | Symbols: ROC7   ROC7; peptidyl-prolyl cis-t     | AT5G5871   | 29.6                | protein.folding        |
| Cs1g0287(orange1.1t | 14956  | Symbols: CHL-CPN10, CPN10   CHL-CPN1            | AT2G4465   | 29.6                | protein.folding        |
| Cs3g1893(orange1.1t | 33622  | co-chaperone grpE family protein   chr1:1370    | AT1G3639   | 29.6                | protein.folding        |
| Cs5g2363(orange1.1t | 24665  | immunophilin / FKBP-type peptidyl-prolyl ci     | AT2G4356   | 29.6                | protein.folding        |
| Cs2g2436(orange1.1t | 25797  | Symbols: HSP21   HSP21 (HEAT SHOCK PI           | AT4G2767   | 29.6                | protein.folding        |
| Cs5g0658(orange1.1t | 21810  | peptide methionine sulfoxide reductase, putati  | AT4G2513   | 29.11*              | protein.methione sull  |
| Cs9g1376(orange1.1t | 29855  | peptide methionine sulfoxide reductase, putati  | AT4G2513   | 29.11*              | protein.methione sull  |
| Cs5g0646(orange1.1t | 33311  | Symbols: PIMT1, ATPIMT1   PIMT1 (PROT           | AT3G4833   | 29.4                | protein.postranslatior |
| Cs2g1676(orange1.1t | 17524  | 10 kDa chaperonin, putative   chr1:8195776-8    | AT1G2310   | 29.4                | protein.postranslatior |
| Cs1g1283(orange1.1t | 20950  | Symbols: PDF1A, ATDEF1   PDF1A (PEPTI           | AT1G1539   | 29.4                | protein.postranslatior |
| Cs7g0558(orange1.1t | 69573  | protein kinase family protein   chr4:15570044   | AT4G3225   | 29.4.1              | protein.postranslatior |
| Cs1g1233(orange1.1t | 109643 | protein kinase family protein   chr4:15570044   | AT4G3225   | 29.4.1              | protein.postranslatior |
| Cs9g1356(orange1.1t | 36975  | Symbols: PFK4   PFK4 (PHOSPHOFRUCTO             | AT5G6158   | 29.4.1              | protein.postranslatior |
| orange1.1t          | 36600  | fructosamine kinase family protein   chr3:226   | AT3G6108   | 29.4.1              | protein.postranslatior |
| Cs2g1121(orange1.1t | 18621  | zinc-binding protein, putative / protein kinase | AT1G3116   | 29.4.2 <sup>4</sup> | protein.postranslatior |
| Cs9g1833(orange1.1t | 39168  | protein phosphatase 2C, putative / PP2C, puta   | AT5G5314   | 29.4.5              | protein.postranslatior |
| Cs3g0755(orange1.1t | 28407  | protein tyrosine phosphatase   chr3:16193829-   | AT3G4462   | 29.4.5              | protein.postranslatior |
| orange1.1t          | 117328 | metalloendopeptidase   chr5:16945251-16953      | AT5G4239   | 29.9*               | protein.processing     |
| Cs5g0719(orange1.1t | 24506  | elongation factor 1-beta, putative / EF-1-beta, | AT2G1811   | 29.2.4              | protein.synthesis.eloi |
| Cs5g1592(orange1.1t | 94149  | Symbols: LOS1   LOS1; copper ion binding /      | AT1G5607   | 29.2.4              | protein.synthesis.eloi |
| Cs8g1700(orange1.1t | 49321  | elongation factor 1-alpha / EF-1-alpha   chr5:2 | AT5G6039   | 29.2.4              | protein.synthesis.eloi |
| Cs7g2747(orange1.1t | 97350  | elongation factor 1-alpha / EF-1-alpha   chr5:2 | AT5G6039   | 29.2.4              | protein.synthesis.eloi |
| Cs5g3177(orange1.1t | 58426  | elongation factor Tu, putative / EF-Tu, putativ | AT4G0293   | 29.2.4              | protein.synthesis.eloi |
| orange1.1t          | 28866  | elongation factor 1-beta, putative / EF-1-beta, | AT2G1811   | 29.2.4              | protein.synthesis.eloi |
| Cs9g1794(orange1.1t | 93825  | Symbols: LOS1   LOS1; copper ion binding /      | AT1G5607   | 29.2.4              | protein.synthesis.eloi |
| Cs4g1626(orange1.1t | 63775  | Symbols: emb2726   emb2726 (embryo defect       | AT4G2906   | 29.2.4              | protein.synthesis.eloi |

Cs2g2922( 34106 elongation factor 1B alpha-subunit 2 (eEF1Ba AT5G1951 29.2.4 protein.synthesis.eloi

Cs5g0619( 52273 Symbols: ATRAB8D, ATRABE1B | ATRAB AT4G2036 29.2.4 protein.synthesis.eloi

Cs5g0933( 85318 Symbols: ATSCO1, ATSCO1/CPEF-G, SCO AT1G6275 29.2.4 protein.synthesis.eloi

Cs1g1797( 46931 Symbols: EIF4A-2 | EIF4A-2; ATP-dependen AT1G5427 29.2.3 protein.synthesis.init

Cs5g1126( 17486 Symbols: FBR12, ATELF5A-2, ELF5A-2 | FIAT1G2663 29.2.3 protein.synthesis.init

Cs4g0724( 39307 eukaryotic translation initiation factor 2B fam AT2G0583 29.2.3 protein.synthesis.init

Cs4g0198( 31021 translation initiation factor 3 (IF-3) family prc AT4G3069 29.2.3 protein.synthesis.init

Cs5g2067( 29390 tRNA-binding region domain-containing prot AT3G5998 29.2.3 protein.synthesis.init

Cs5g3263( 46641 Symbols: APG3 | APG3 (ALBINO AND PAI AT3G6291 29.2.5 protein.synthesis.rele

orange1.lt 14781 40S ribosomal protein S12 (RPS12C) | chr2:1 AT2G3206 29.2.1. protein.synthesis.ribc

orange1.lt 17108 40S ribosomal protein S13 (RPS13A) | chr3:2 AT3G6077 29.2.1. protein.synthesis.ribc

Cs6g1433( 31935 40S ribosomal protein S14 (RPS14B) | chr3:3 AT3G1151 29.2.1. protein.synthesis.ribc

Cs8g0539( 16789 40S ribosomal protein S16 (RPS16A) | chr2:3 AT2G0999 29.2.1. protein.synthesis.ribc

Cs9g0691( 17557 Symbols: PFL, RPS18A, PFL1 | PFL (POINT AT1G2278 29.2.1. protein.synthesis.ribc

Cs3g1141( 15451 40S ribosomal protein S24 (RPS24A) | chr3:1 AT3G0492 29.2.1. protein.synthesis.ribc

Cs8g1457( 11965 40S ribosomal protein S25 (RPS25A) | chr2:7 AT2G1636 29.2.1. protein.synthesis.ribc

orange1.lt 26324 40S ribosomal protein S3 (RPS3A) | chr2:134 AT2G3161 29.2.1. protein.synthesis.ribc

Cs6g0914( 29726 40S ribosomal protein S4 (RPS4A) | chr2:754 AT2G1736 29.2.1. protein.synthesis.ribc

Cs8g2068( 30042 40S ribosomal protein S4 (RPS4A) | chr2:754 AT2G1736 29.2.1. protein.synthesis.ribc

Cs6g1324( 24029 Symbols: ATRPS5A, AML1 | ATRPS5A (RII AT3G1194 29.2.1. protein.synthesis.ribc

Cs1g1990( 28387 Symbols: RPS6 | RPS6 (RIBOSOMAL PROT AT4G3170 29.2.1. protein.synthesis.ribc

Cs7g0403( 23105 40S ribosomal protein S9 (RPS9B) | chr5:493 AT5G1520 29.2.1. protein.synthesis.ribc

Cs1g1676( 34556 Symbols: RPSAb | RPSAb (40S ribosomal prc AT3G0477 29.2.1. protein.synthesis.ribc

Cs7g2940( 25014 60S ribosomal protein L10 (RPL10B) | chr1:9 AT1G2691 29.2.1. protein.synthesis.ribc

Cs2g1525( 19699 Symbols: RPL16A | RPL16A; structural const AT2G4274 29.2.1. protein.synthesis.ribc

Cs8g1660( 17847 60S ribosomal protein L12 (RPL12A) | chr2:1 AT2G3719 29.2.1. protein.synthesis.ribc

Cs5g2796( 23549 60S ribosomal protein L13A (RPL13aA) | chr AT3G0711 29.2.1. protein.synthesis.ribc

orange1.lt 23564 60S ribosomal protein L13A (RPL13aD) | chr AT5G4876 29.2.1. protein.synthesis.ribc

Cs9g1014( 15443 60S ribosomal protein L14 (RPL14B) | chr4:1 AT4G2709 29.2.1. protein.synthesis.ribc

Cs7g1059( 19703 60S ribosomal protein L17 (RPL17A) | chr1:9 AT1G2740 29.2.1. protein.synthesis.ribc

orange1.lt 18694 60S ribosomal protein L21 (RPL21A) | chr1:3 AT1G0959 29.2.1. protein.synthesis.ribc

Cs1g2145( 16835 60S ribosomal protein L26 (RPL26A) | chr3:1 AT3G4991 29.2.1. protein.synthesis.ribc

Cs4g1330( 16733 60S ribosomal protein L28 (RPL28A) | chr2:8 AT2G1973 29.2.1. protein.synthesis.ribc

Cs9g1752( 14107 60S ribosomal protein L36 (RPL36B) | chr3:1 AT3G5374 29.2.1. protein.synthesis.ribc

Cs6g0407( 79305 60S ribosomal protein L4/L1 (RPL4A) | chr3: AT3G0963 29.2.1. protein.synthesis.ribc

Cs2g1845( 31536 Symbols: ATL5, PGY3, OLI5, RPL5A | ATL AT3G2552 29.2.1. protein.synthesis.ribc

orange1.lt 33749 Symbols: ATL5, PGY3, OLI5, RPL5A | ATL AT3G2552 29.2.1. protein.synthesis.ribc

Cs7g0147( 26139 60S ribosomal protein L6 (RPL6A) | chr1:637 AT1G1854 29.2.1. protein.synthesis.ribc

Cs1g1055( 28428 60S ribosomal protein L7 (RPL7D) | chr3:443 AT3G1358 29.2.1. protein.synthesis.ribc

Cs4g0428( 28229 60S ribosomal protein L7 (RPL7D) | chr3:443 AT3G1358 29.2.1. protein.synthesis.ribc

Cs2g2869( 14005 ribosomal protein L7Ae/L30e/S12e/Gadd45 f: AT4G2238 29.2.1. protein.synthesis.ribc

orange1.lt 24587 60S ribosomal protein L7A (RPL7aA) | chr2:1 AT2G4761 29.2.1. protein.synthesis.ribc

Cs1g2521( 28088 Symbols: EMB2296 | EMB2296 (embryo def: AT2G1802 29.2.1. Protein.synthesis.ribc

Cs4g1531( 27116 Symbols: PGY2 | PGY2 (PIGGYBACK2); str AT1G3314 29.2.1. protein.synthesis.ribc

Cs7g3134( 34110 60S acidic ribosomal protein P0 (RPP0A) | ch AT2G4001 29.2.1. protein.synthesis.ribc

Cs7g0143( 28528 PSRP-2 associates with 30S (substitute 16S?) AT3G5215 29.2.1. protein.synthesis.ribc

gi|113952( 10595 ribosomal protein S19 [Citrus sinensis] 29.2.1. protein.synthesis.ribc

gi|113952( 10922 ribosomal protein S15 [Citrus sinensis] 29.2.1. protein.synthesis.ribc

gi|113952( 25287 ribosomal protein S3 [Citrus sinensis] 29.2.1. protein.synthesis.ribc

Cs4g1236( 16975 Symbols: RPS7.1, RPS7 | encodes a chloropla ATCG009C 29.2.1. protein.synthesis.ribc



orange1.1t 35417 30S ribosomal protein, putative | chr5:836560 AT5G2449 29.2.1. protein.synthesis.ribc  
Cs2g05790 32933 ribosomal protein S5 family protein | chr2:14: AT2G3380 29.2.1. protein.synthesis.ribc  
Cs3g24320 22979 Symbols: RPS9, TWN3 | RPS9 (RIBOSOMA AT1G7497 29.2.1. protein.synthesis.ribc  
Cs9g05510 22683 Symbols: RPL22 | encodes a chloroplast ribos ATCG0081 29.2.1. protein.synthesis.ribc  
Cs7g02150 33297 ribosomal protein L1 family protein | chr3:23: AT3G6349 29.2.1. protein.synthesis.ribc  
Cs7g27880 24597 ribosomal protein L10 family protein | chr5:4: AT5G1351 29.2.1. protein.synthesis.ribc  
Cs5g16990 27478 Ribosomal protein L13 family protein AT1G7863 29.2.1. protein.synthesis.ribc  
Cs2g12550 28147 Symbols: 50S ribosomal protein L15 (RPL15 AT3G2592 29.2.1. protein.synthesis.ribc  
Cs5g20790 18844 ribosomal protein L18 family protein | chr1:1: AT1G4835 29.2.1. protein.synthesis.ribc  
gi|1139526 29831 ribosomal protein L2 [Citrus sinensis] 29.2.1. protein.synthesis.ribc  
Cs1g01660 19821 ribosomal protein L29 family protein | chr5:2: AT5G6522 29.2.1. protein.synthesis.ribc  
Cs7g16040 29979 ribosomal protein L3 family protein | chr2:17: AT2G4303 29.2.1. protein.synthesis.ribc  
Cs3g25120 15337 Ribosomal protein L31 AT1G7535 29.2.1. protein.synthesis.ribc  
Cs8g15500 25597 Symbols: RPL9 | RPL9 (RIBOSOMAL PRO1 AT3G4489 29.2.1. protein.synthesis.ribc  
Cs9g01720 45502 Symbols: RPS1, ARRPS1 | RPS1 (RIBOSOM AT5G3051 29.2.1. protein.synthesis.ribc  
Cs2g25350 26273 yrdC family protein | chr3:317432-319121 FC AT3G0192 29.2.7\* protein.synthesis.ribc  
Cs5g31240 31177 Symbols: RRF | RRF (RIBOSOME RECYCL AT3G6319 29.2.9\* protein.synthesis.ribc  
Cs8g12230 137330 Symbols: ATTOC120, TOC120 | ATTOC120 AT3G1662 29.3.3 protein.targeting.chlc  
Cs6g03010 22663 tic20 protein-related | chr2:19594187-195950 AT2G4784 29.3.3 protein.targeting.chlc  
Cs8g18910 89225 Symbols: TOC75-III | TOC75-III (TRANSLC AT3G4674 29.3.3 protein.targeting.chlc  
orange1.1t 19100 FUNCTIONS IN: molecular\_function unknov AT1G5090 29.3.3 protein.targeting.chlc  
Cs7g13480 77303 Symbols: OEP80, ATOEP80, TOC75 | OEP80 AT5G1962 29.3.3 protein.targeting.chlc  
orange1.1t 34304 chloroplast inner membrane import protein Ti AT3G2371 29.3.3 protein.targeting.chlc  
Cs7g06690 61919 Symbols: TIC55 | TIC55 (TRANSLOCON A' AT2G2482 29.3.3 protein.targeting.chlc  
Cs7g06680 59933 Symbols: TIC55 | TIC55 (TRANSLOCON A' AT2G2482 29.3.3 protein.targeting.chlc  
orange1.1t 91671 preprotein translocase secA subunit, putative | AT4G0180 29.3.3 protein.targeting.chlc  
Cs3g20120 198801 ATP binding / protein binding | chr1:7592664 AT1G2165 29.3.3 protein.targeting.chlc  
Cs5g21930 32907 Symbols: PTAC4 | PTAC4 (PLASTID TRAN AT1G6526 29.3.3 protein.targeting.chlc  
orange1.1t 34425 Symbols: TOC33, ATTOC33, PPI1 | TOC33 (AT1G0228 29.3.3 protein.targeting.chlc  
Cs2g09190 111317 Symbols: ATTIC110, TIC110 | TIC110 (TRA AT1G0695 29.3.3 protein.targeting.chlc  
Cs5g32980 144180 Symbols: TOC159, TOC86, PPI2, TOC160, AT4G0251 29.3.3 protein.targeting.chlc  
Cs6g10920 34484 Symbols: TOC34, ATTOC34, OEP34 | TOC3 AT5G0500 29.3.3 protein.targeting.chlc  
Cs6g17260 37022 Symbols: PDE120, TIC40, ATTIC40 | TIC40 AT5G1662 29.3.3 protein.targeting.chlc  
Cs7g13380 34611 translocase of the outer mitochondrial membr: AT3G2000 29.3.2 protein.targeting.mito  
Cs2g28780 32723 transducin family protein / WD-40 repeat fam AT2G3005 29.3.1 protein.targeting.nuc  
Cs9g02690 58668 Symbols: IMPA-2 | IMPA-2 (IMPORTIN AL AT4G1614 29.3.1 protein.targeting.nuc  
orange1.1t 96648 importin beta-2, putative | chr5:21713366-217 AT5G5348 29.3.1 protein.targeting.nuc  
Cs5g01850 96714 importin beta-2, putative | chr5:21713366-217 AT5G5348 29.3.1 protein.targeting.nuc  
Cs8g09020 32743 Symbols: TIM | TIM (TRIOSEPHOSPHATE AT2G2117 1.3.5 PS.calvin cycle.TPI  
orange1.1t 14393 Symbols: CP12-2, CP12 | CP12-2; protein bin AT3G6241 1.3 PS.calvin cyle  
Cs8g08710 42800 fructose-bisphosphate aldolase, putative | chr4: AT4G3897 1.3.6 PS.calvin cyle.aldola  
Cs2g13410 43033 fructose-bisphosphate aldolase, putative | chr2: AT2G0114 1.3.6 PS.calvin cyle.aldola  
orange1.1t 44918 fructose-1,6-bisphosphatase family protein | cl AT5G6438 1.3.7 PS.calvin cyle.FBPas  
orange1.1t 49446 phosphoglycerate kinase, putative | chr1:2102 AT1G5619 1.3.3 PS.calvin cyle.phosp  
Cs3g10480 29472 ribose 5-phosphate isomerase-related | chr3:1: AT3G0479 1.3.10 PS.calvin cyle.Rib5P  
Cs7g31800 46962 Symbols: RCA | RCA (RUBISCO ACTIVAS AT2G3973 1.3.13 PS.calvin cyle.rubisc  
Cs6g06660 52543 Symbols: RCA | RCA (RUBISCO ACTIVAS AT2G3973 1.3.13 PS.calvin cyle.rubisc  
gi|1139526 52518 ribulose-1,5-bisphosphate carboxylase/oxygenase large su 1.3.1 PS.calvin cyle.rubisc  
Cs4g03580 19456 ribulose bisphosphate carboxylase small chair AT5G3841 1.3.2 PS.calvin cyle.rubisc  
orange1.1t 80707 transketolase, putative | chr2:18672682-18675 AT2G4529 1.3.8 PS.calvin cyle.transk

|            |       |                                                          |           |                               |
|------------|-------|----------------------------------------------------------|-----------|-------------------------------|
| gi 1139526 | 55486 | ATP synthase CF1 alpha subunit [Citrus sinensis]         | 1.1.4     | PS.lightreaction.ATP          |
| gi 1139526 | 53636 | ATP synthase CF1 beta subunit [Citrus sinensis]          | 1.1.4     | PS.lightreaction.ATP          |
| Cs7g05570  | 23430 | ATP synthase family   chr4:15573636-155747               | AT4G3226  | 1.1.4 PS.lightreaction.ATP    |
| gi 1139526 | 18531 | NADH-plastoquinone oxidoreductase subunit J [Citrus sir  | 1.1.6     | PS.lightreaction.NAI          |
| Cs2g03780  | 28039 | Symbols: CAB2, AB165, LHCB1.1   CAB2 (AT1G2992           | 1.1.1.1   | PS.lightreaction.phot         |
| Cs2g19680  | 28708 | Symbols: LHCB2.1, LHCB2   LHCB2.1; chlo AT2G0510         | 1.1.1.1   | PS.lightreaction.phot         |
| gi 1139526 | 56114 | photosystem II CP47 chlorophyll apoprotein [Citrus sinei | 1.1.1.2   | PS.lightreaction.phot         |
| Cs1g08260  | 26236 | Encodes a PsbP domain-OEC23 like protein l               | AT2G2860  | 1.1.1.2 PS.lightreaction.phot |
| Cs1g23450  | 35377 | Symbols: PSBO2, PSBO-2, OEC33   PSBO2                    | AT3G5082  | 1.1.1.2 PS.lightreaction.phot |
| Cs7g18780  | 27867 | Symbols: PSBP-1, OEE2, PSII-P, OE23   PSE                | AT1G0668  | 1.1.1.2 PS.lightreaction.phot |
| Cs2g03230  | 33302 | (S)-2-hydroxy-acid oxidase, peroxisomal, put:            | AT3G1442  | 1.2.2 PS.photorespiration.g   |
| Cs1g15150  | 34498 | oxidoreductase family protein   chr1:3004474             | AT1G7987  | 1.2.6 PS.photorespiration.f   |
| Cs5g20740  | 50516 | Symbols: SHM3   SHM3 (SERINE HYDROX                      | AT4G3252  | 1.2.5 PS.photorespiration.s   |
| Cs1g21340  | 28234 | FUNCTIONS IN: molecular_function unknow                  | AT5G6584  | 21 redox                      |
| Cs5g27970  | 14801 | Symbols: B5 #4, ATCB5-B, CB5-B   CB5-B                   | (AT2G3272 | 21.2 redox.ascorbate and {    |
| Cs6g15230  | 47169 | Symbols: ATMDAR1   monodehydroascorbat                   | AT3G5288  | 21.2.1 redox.ascorbate and {  |
| Cs1g25730  | 31785 | Symbols: APX3   APX3 (ASCORBATE PER                      | AT4G3500  | 21.2.1 redox.ascorbate and {  |
| Cs8g02730  | 31760 | Symbols: APX3   APX3 (ASCORBATE PER                      | AT4G3500  | 21.2.1 redox.ascorbate and {  |
| Cs5g03080  | 54372 | Symbols: MDAR6   monodehydroascorbate re                 | AT1G6394  | 21.2.1 redox.ascorbate and {  |
| Cs6g17520  | 29230 | Symbols: DHAR3   DHAR3 (dehydroascorba                   | AT5G1671  | 21.2.1 redox.ascorbate and {  |
| Cs6g04140  | 27558 | Symbols: APX1, CS1   APX1 (ascorbate pero                | AT1G0789  | 21.2.1 redox.ascorbate and {  |
| Cs7g28340  | 23850 | Symbols: DHAR2   DHAR2 (DEHYDROAS                        | AT1G7527  | 21.2.1 redox.ascorbate and {  |
| Cs3g19810  | 47330 | Symbols: TAPX   TAPX (THYLAKOIDAL                        | AT1G7749  | 21.2.1 redox.ascorbate and {  |
| Cs8g17370  | 27570 | Symbols: APX1, CS1   APX1 (ascorbate pero                | AT1G0789  | 21.2.1 redox.ascorbate and {  |
| Cs2g02090  | 52546 | Symbols: VTC4   VTC4; 3'(2'),5'-bisphosphat              | AT3G0287  | 21.2.1 redox.ascorbate and {  |
| Cs5g03830  | 25376 | Symbols: ATGPX6, PHGPX, LSC803   ATGI                    | AT4G1160  | 21.2.2 redox.ascorbate and {  |
| Cs5g31640  | 19061 | Symbols: ATGPX6, PHGPX, LSC803   ATGI                    | AT4G1160  | 21.2.2 redox.ascorbate and {  |
| Cs7g06520  | 27025 | Symbols: ATGPX7   ATGPX7 (glutathione pe                 | AT4G3187  | 21.2.2 redox.ascorbate and {  |
| orange1.lt | 23228 | Symbols: ATGPX7   ATGPX7 (glutathione pe                 | AT4G3187  | 21.2.2 redox.ascorbate and {  |
| Cs5g03610  | 59363 | Symbols: RML1, PAD2, GSH1, CAD2, ATE                     | AT4G2310  | 21.2.2 redox.ascorbate and {  |
| Cs3g12590  | 64628 | Symbols: GSH2, GSHB   GSH2 (GLUTATHI                     | AT5G2738  | 21.2.2 redox.ascorbate and {  |
| orange1.lt | 44858 | Symbols: GR, EMB2360, ATGR2   GR (GLU                    | AT3G5466  | 21.2.2 redox.ascorbate and {  |
| Cs3g27290  | 56925 | Symbols: CAT2   CAT2 (CATALASE 2); cat                   | AT4G3509  | 21.6 redox.dismutases anc     |
| Cs3g12000  | 15094 | Symbols: CSD1   CSD1 (COPPER/ZINC SUI                    | AT1G0883  | 21.6 redox.dismutases anc     |
| Cs7g29850  | 31695 | Symbols: MSD1, MEE33, ATMSD1   MSD1                      | AT3G1092  | 21.6 redox.dismutases anc     |
| Cs3g27280  | 57191 | Symbols: CAT2   CAT2 (CATALASE 2); cat                   | AT4G3509  | 21.6 redox.dismutases anc     |
| Cs5g26750  | 16310 | Symbols: CSD2, CZSOD2   CSD2 (COPPER                     | AT2G2819  | 21.6 redox.dismutases anc     |
| Cs7g13550  | 22679 | Symbols: FSD3   FSD3 (FE SUPEROXIDE L                    | AT5G2331  | 21.6 redox.dismutases anc     |
| Cs8g15520  | 26002 | Symbols: CSD2, CZSOD2   CSD2 (COPPER                     | AT2G2819  | 21.6 redox.dismutases anc     |
| Cs7g19240  | 29414 | Symbols: FSD2   FSD2 (FE SUPEROXIDE L                    | AT5G5110  | 21.6 redox.dismutases anc     |
| Cs7g19250  | 26315 | Symbols: FSD2   FSD2 (FE SUPEROXIDE L                    | AT5G5110  | 21.6 redox.dismutases anc     |
| Cs5g05660  | 13006 | glutaredoxin, putative   chr5:16147594-16149             | AT5G4037  | 21.4 redox.glutaredoxins      |
| Cs2g27730  | 11250 | glutaredoxin, putative   chr5:16147594-16149             | AT5G4037  | 21.4 redox.glutaredoxins      |
| Cs5g34420  | 19092 | glutaredoxin family protein   chr4:14199096-1            | AT4G2873  | 21.4 redox.glutaredoxins      |
| Cs9g17130  | 25999 | Symbols: ATMP2, ATMAMP3, MSBP2, MAI                      | AT3G4889  | 21.3 redox.heme               |
| orange1.lt | 14674 | Symbols: ATB5-A, B5 #2, ATCB5-E, CB5-E                   | AT5G5356  | 21.3 redox.heme               |
| Cs6g14580  | 33636 | SOUL heme-binding family protein   chr3:31               | AT3G1013  | 21.3 redox.heme               |
| Cs5g28410  | 26102 | Symbols: GLB1, AHB1, ARATH GLB1, NSI                     | AT2G1606  | 21.3 redox.heme               |
| Cs7g16410  | 31164 | Symbols: ATCBR, CBR1   ATCBR (ARABII                     | AT5G1777  | 21.99 redox.misc              |
| Cs4g17550  | 36036 | NADH-cytochrome b5 reductase, putative   cl              | AT5G2008  | 21.99 redox.misc              |

|            |        |                                                |                  |                        |
|------------|--------|------------------------------------------------|------------------|------------------------|
| Cs4g16140  | 17322  | Symbols: TPX1   TPX1 (thioredoxin-depende      | AT1G6598 21.5    | redox.periredoxins     |
| Cs6g15550  | 24434  | peroxiredoxin type 2, putative   chr3:1963966  | AT3G5296 21.5    | redox.periredoxins     |
| Cs4g06940  | 23612  | Symbols: ATPRX Q   ATPRX Q; antioxidant        | AT3G2606 21.5    | redox.periredoxins     |
| Cs6g13880  | 29493  | Symbols: 2-Cys Prx B   2-Cys Prx B (2-Cyste    | AT5G0629 21.5    | redox.periredoxins     |
| Cs2g15050  | 19480  | Symbols: CXIP1, ATGRXCP   CXIP1 (CAX           | AT3G5490 21.5    | redox.periredoxins     |
| Cs2g20430  | 46864  | Symbols: ATPDIL2-2, ATPDI10, PDI10   AT        | AT1G0498 21.1    | redox.thioredoxin      |
| Cs5g33860  | 42564  | Symbols: ATPDIL2-1, UNE5, MEE30, PDI1          | AT2G4747 21.1    | redox.thioredoxin      |
| Cs8g16680  | 65512  | Symbols: ATPDIL1-4, PDI2, ATPDI2   ATPI        | AT5G6064 21.1    | redox.thioredoxin      |
| Cs3g19790  | 55616  | Symbols: ATPDIL1-1, ATPDI5, PDI5   ATPI        | AT1G2175 21.1    | redox.thioredoxin      |
| Cs1g08920  | 104260 | CBS domain-containing protein   chr5:342885    | AT5G1086 21.1    | redox.thioredoxin      |
| orange1.1t | 59455  | Symbols: NTRC   NTRC (NADPH-DEPEND             | AT2G4168 21.1    | redox.thioredoxin      |
| orange1.1t | 20924  | Symbols: LEJ2, CDCP2   LEJ2 (LOSS OF TF        | AT4G3691 21.1    | redox.thioredoxin      |
| Cs6g20130  | 14247  | ferredoxin thioredoxin reductase catalytic bet | AT2G0470 21.1    | redox.thioredoxin      |
| Cs8g06060  | 19073  | Symbols: ATHM3, ATM3   thioredoxin M-tyl       | AT2G1557 21.1    | redox.thioredoxin      |
| Cs3g25420  | 13477  | Symbols: ATTRX3, ATH3, ATTRXH3, TRX            | AT5G4298 21.1    | redox.thioredoxin      |
| Cs2g12260  | 17326  | Symbols: FTRA2   FTRA2 (ferredoxin/thiore      | AT5G0841 21.1    | redox.thioredoxin      |
| Cs3g21480  | 18800  | Symbols: ATY1, TRX-Y1   ATY1 (ARABID           | AT1G7676 21.1    | redox.thioredoxin      |
| Cs6g02830  | 19897  | Symbols: TRXF2, ATF2   ATF2; enzyme acti       | AT5G1640 21.1    | redox.thioredoxin      |
| Cs1g07120  | 20164  | Symbols: ATHM4, TRX-M4, ATM4   TRX-M           | AT3G1536 21.1    | redox.thioredoxin      |
| Cs7g13660  | 21442  | Symbols: ATHX, ATX   ATHX; enzyme activ        | AT1G5032 21.1    | redox.thioredoxin      |
| Cs7g24780  | 22455  | Symbols: WCRKC2   WCRKC2 (WCRKC Tl             | AT5G0426 21.1    | redox.thioredoxin      |
| Cs1g24740  | 13206  | Symbols: ATTRX1, ATTRX H1   ATTRX1; c          | AT3G5103 21.1    | redox.thioredoxin      |
| Cs5g06450  | 38055  | Symbols: RBP31, ATRBP31, CP31, ATRBP3          | AT4G2477 27.1.5* | RNA.editing            |
| orange1.1t | 19330  | thylakoid lumenal 17.4 kDa protein, chloropl   | AT5G5349 27.7*   | RNA.misc.pentatrico    |
| Cs8g05340  | 70702  | Symbols: PAB2, PABP2, ATPAB2   PAB2 (F         | AT4G3411 27.1    | RNA.processing         |
| Cs4g10610  | 20034  | endoribonuclease L-PSP family protein   chr3   | AT3G2039 27.1    | RNA.processing         |
| Cs7g15310  | 19434  | BolA-like family protein   chr5:5788454-5785   | AT5G1756 27.3    | RNA.regulation of tr   |
| orange1.1t | 64182  | Symbols: AKR2B   AKR2B (ANKYRIN REF            | AT2G1739 27.3.35 | RNA.regulation of tr   |
| Cs7g04270  | 25193  | Symbols: ATWHY1, PTAC1, WHY1   WHY             | AT1G1441 27.3.65 | RNA.regulation of tr   |
| Cs9g17210  | 20565  | remorin family protein   chr3:18142863-1814    | AT3G4894 27.3.95 | RNA.regulation of tr   |
| orange1.1t | 36100  | Symbols: ATARCA, RACK1A_AT   ATARC             | AT1G1808 27.3.95 | RNA.regulation of tr   |
| Cs1g05590  | 24051  | FUNCTIONS IN: molecular_function unknow        | AT4G0962 27.3.95 | RNA.regulation of tr   |
| Cs7g19370  | 108097 | tudor domain-containing protein / nuclease fai | AT5G0735 27.3.73 | RNA.regulation of tr   |
| Cs6g11900  | 31782  | 29 kDa ribonucleoprotein, chloroplast, putativ | AT2G3722 27.4    | RNA.RNA binding        |
| orange1.1t | 60879  | ubiquitin thiolesterase   chr4:451251-453243   | AT4G0103 27.4    | RNA.RNA binding        |
| Cs8g06360  | 16862  | Symbols: ATGRP7, CCR2, GR-RBP7, GRP7           | AT2G2166 27.4    | RNA.RNA binding        |
| orange1.1t | 31255  | 33 kDa ribonucleoprotein, chloroplast, putativ | AT1G0108 27.4    | RNA.RNA binding        |
| Cs6g13570  | 35097  | Symbols: CP33, PDE322   CP33; RNA bindin       | AT3G5238 27.4    | RNA.RNA binding        |
| Cs2g01780  | 78098  | LOCATED IN: chloroplast; EXPRESSED IN          | AT4G1639 27.4    | RNA.RNA binding        |
| Cs4g08130  | 39160  | Symbols: EMB1374, CPSUFE, ATSUFE, SU           | AT4G2650 14      | S-assimilation         |
| Cs2g07970  | 61967  | Symbols: ATABC1, LAF6, ATNAP1   ATAE           | AT4G0477 14      | S-assimilation         |
| Cs7g23800  | 35652  | Symbols: ATNAP7   ATNAP7; ATPase, coup         | AT3G1067 14      | S-assimilation         |
| Cs7g22890  | 53471  | Symbols: ATNAP6   ATNAP6 (NON-INTRII           | AT1G3250 14      | S-assimilation         |
| Cs2g29250  | 50173  | Symbols: ATSUF5, SUFS, ATCPNIFS, ATN           | AT1G0849 14      | S-assimilation         |
| Cs9g07750  | 51958  | Symbols: APS1   APS1 (ATP SULFURYLAS           | AT3G2289 14.1    | S-assimilation.APS     |
| Cs2g30390  | 78177  | Symbols: SIR   SIR; sulfite reductase (ferredo | AT5G0459 14.3    | S-assimilation.sulfite |
| Cs5g13060  | 30121  | chalcone-flavanone isomerase-related   chr1:1  | AT1G5352 16.8.2  | secondary metabolisr   |
| orange1.1t | 31607  | Symbols: BEN1   BEN1; binding / catalytic/ c   | AT2G4540 16.8.4  | secondary metabolisr   |
| Cs6g13340  | 74704  | Symbols: CRTISO, CCR2   CRTISO (CARO           | AT1G0682 16.1.4  | secondary metabolisr   |
| Cs6g18640  | 29399  | Symbols: ABA4   ABA4 (abscisic acid (ABA       | AT1G6708 16.1.4  | secondary metabolisr   |

Cs7g0171( 49996 Symbols: CCD1, ATCCD1, ATNCED1, NCE AT3G6352 16.1.4. secondary metabolis

Cs6g1591( 49507 phytoene synthase (PSY) / geranylgeranyl-dip AT5G1723 16.1.4. secondary metabolis

Cs3g1101( 217318 Symbols: ZDS, PDE181 | ZDS (ZETA-CARC AT3G0487 16.1.4. secondary metabolis

Cs3g1118( 63114 Symbols: ZDS, PDE181 | ZDS (ZETA-CARC AT3G0487 16.1.4. secondary metabolis

Cs2g1918( 41340 Symbols: EMB1276, ACAT2 | ACAT2 (ACE AT5G4823 16.1.2. secondary metabolis

Cs6g0269( 34499 Symbols: IPP1 | IPP1 (ISOPENTENYL DIPH AT5G1644 16.1.2. secondary metabolis

Cs7g2054( 41379 mevalonate diphosphate decarboxylase, putati AT3G5425 16.1.2. secondary metabolis

Cs2g2897( 46681 Symbols: ATCDPMEK, PDE277, ISPE | ATCAT2G2693 16.1.1. secondary metabolis

Cs3g0142( 32592 Symbols: ISPD, ATMEPCT, MCT | ISPD; 2-(AT2G0250 16.1.1. secondary metabolis

Cs5g0544( 51276 Symbols: DXR, PDE129 | DXR (1-DEOXY-I AT5G6279 16.1.1. secondary metabolis

Cs1g2053( 59547 Symbols: CLA1, DEF, CLA, DXS, DXPS2 | (AT4G1556 16.1.1. secondary metabolis

Cs8g0214( 36921 Symbols: GGR | GGR (geranylgeranyl reduct. AT4G3846 16.1.1. secondary metabolis

Cs1g2367( 39052 Symbols: GGPS1 | GGPS1 (GERANYLGER. AT4G3681 16.1.1. secondary metabolis

Cs8g0703( 33894 Symbols: CLB6, ISPH, HDR | HDR (4-HYDI AT4G3435 16.1.1. secondary metabolis

Cs8g0702( 52847 Symbols: CLB6, ISPH, HDR | HDR (4-HYDI AT4G3435 16.1.1. secondary metabolis

Cs5g2820( 52216 Symbols: CLB6, ISPH, HDR | HDR (4-HYDI AT4G3435 16.1.1. secondary metabolis

Cs8g1670( 82363 Symbols: GCPE, ISPG, CSB3, CLB4, HDS | . AT5G6060 16.1.1. secondary metabolis

Cs5g0305( 25575 Symbols: ISPF, MECPS | ISPF; 2-C-methyl-I AT1G6397 16.1.1. secondary metabolis

Cs3g0419( 55869 Symbols: ATTPS-CIN | ATTPS-CIN (terpene AT3G2583 16.1.5 secondary metabolis

Cs3g0436( 70372 Symbols: ATTPS-CIN | ATTPS-CIN (terpene AT3G2583 16.1.5 secondary metabolis

Cs3g0417( 70257 Symbols: ATTPS-CIN | ATTPS-CIN (terpene AT3G2583 16.1.5 secondary metabolis

Cs3g0467( 43479 Symbols: HPT1, TPT1, ATHPT, VTE2 | HPT AT2G1895 16.1.3. secondary metabolis

Cs7g0601( 44750 Symbols: HPT1, TPT1, ATHPT, VTE2 | HPT AT2G1895 16.1.3. secondary metabolis

Cs1g1053( 41811 Symbols: HPT1, TPT1, ATHPT, VTE2 | HPT AT2G1895 16.1.3. secondary metabolis

Cs5g3059( 37872 Symbols: APG1, VTE3, IEP37, E37 | APG1 ( AT3G6341 16.1.3. secondary metabolis

Cs9g0782( 38263 Symbols: APG1, VTE3, IEP37, E37 | APG1 ( AT3G6341 16.1.3. secondary metabolis

Cs4g1967( 53904 Symbols: VTE1, ATSDX1 | VTE1 (VITAMIN AT4G3277 16.1.3. secondary metabolis

Cs5g0488( 54951 Symbols: ALDH10A8 | ALDH10A8; 3-chloro AT1G7492 16.4.2. secondary metabolis

Cs3g1938( 51882 aminotransferase class I and II family protein AT1G7767 16.2 secondary metabolis

Cs3g1799( 29742 Symbols: GRF1, GF14 CHI | 14-3-3-like prot. AT4G0900 30.7 signalling.14-3-3 pro

Cs1g2022( 27688 Symbols: GRF8, 14-3-3KAPPA, GF14 KAPP AT5G6543 30.7 signalling.14-3-3 pro

Cs6g1883( 29740 Symbols: GRF3, RCI1 | GRF3 (GENERAL R AT5G3848 30.7 signalling.14-3-3 pro

Cs2g1555( 29950 Symbols: GRF9, GF14 MU | GRF9 (GENER. AT2G4259 30.7 signalling.14-3-3 pro

Cs3g1820( 28861 Symbols: GRF9, GF14 MU | GRF9 (GENER. AT2G4259 30.7 signalling.14-3-3 pro

orange1.lt 29442 Symbols: GRF1, GF14 CHI | 14-3-3-like prot. AT4G0900 30.7 signalling.14-3-3 pro

Cs3g1747( 28536 Symbols: GRF6, AFT1, 14-3-3lambda | GRF6 AT5G1045 30.7 signalling.14-3-3 pro

Cs2g0485( 29433 Symbols: GRF9, GF14 MU | GRF9 (GENER. AT2G4259 30.7 signalling.14-3-3 pro

Cs7g1940( 60990 Symbols: CNX1, ATCNX1 | calnexin 1 (CNX AT5G6179 30.3 signalling.calcium

Cs7g1574( 18787 calcium-binding EF hand family protein | chr1 AT1G6485 30.3 signalling.calcium

Cs5g3134( 71049 Symbols: MIRO2, ATCBG | MIRO2 (MIRO- AT3G6315 30.5 signalling.G-proteins

Cs9g0250( 22228 Symbols: ASAR1, ATSARA1C, ATSAR2 | A AT4G0208 30.5 signalling.G-proteins

Cs4g1594( 20892 Symbols: AtRABG3d | AtRABG3d (Arabidop AT1G5228 30.5 signalling.G-proteins

Cs8g0651( 23026 Symbols: ATRABG3F, ATRAB7B, RAB71, . AT3G1882 30.5 signalling.G-proteins

Cs2g0140( 23194 Symbols: AT-RAB2, ATRABB1C, ATRAB2 AT4G1717 30.5 signalling.G-proteins

Cs9g0249( 21542 Symbols: ASAR1, ATSARA1C, ATSAR2 | A AT4G0208 30.5 signalling.G-proteins

orange1.lt 22019 Symbols: ASAR1, ATSARA1C, ATSAR2 | A AT4G0208 30.5 signalling.G-proteins

Cs1g0389( 23711 Symbols: RAB7, ATRABG3B, RAB75, RAB AT1G2274 30.5 signalling.G-proteins

Cs5g1573( 45808 GTP-binding protein-related | chr1:20963719- AT1G5605 30.5 signalling.G-proteins

Cs4g0656( 196436 Symbols: ATMIN7 | ATMIN7 (ARABIDOPS AT3G4330 30.5 signalling.G-proteins

orange1.lt 21117 Symbols: PII, GLB1 | GLB1 (GLNB1 HOMC AT4G0190 30.1.1 signalling.in sugar ar

Cs5g0254( 124214 Symbols: CIP1 | CIP1 (COP1-INTERACTIV AT5G4179 30.11.1 signalling.light.COP1

Cs9g0234( 17829 universal stress protein (USP) family protein | AT3G1702 20.2.2 stress.abiotic.cold

Cs2g0832( 66951 Symbols: ERD4 | ERD4 (early-responsive to c AT1G3036 20.2.3 stress.abiotic.drought

Cs8g0277( 47216 Symbols: ERD7 | ERD7 (EARLY-RESPONS AT2G1784 20.2.3 stress.abiotic.drought

Cs1g1256( 26812 26.5 kDa class I small heat shock protein-like AT1G5256 20.2.1 stress.abiotic.heat

Cs4g0822( 80068 heat shock protein 81-4 (HSP81-4) | chr5:226' AT5G5600 20.2.1 stress.abiotic.heat

Cs6g1126( 76231 heat shock protein 70, putative / HSP70, putat AT4G1666 20.2.1 stress.abiotic.heat

Cs9g1469( 23371 Symbols: ATHSP23.6-MITO | ATHSP23.6-M AT4G2520 20.2.1 stress.abiotic.heat

Cs5g1172( 92490 Symbols: ATHSP101, HSP101, HOT1 | ATH AT1G7431 20.2.1 stress.abiotic.heat

Cs3g0766( 18075 17.8 kDa class I heat shock protein (HSP17.8- AT1G0740 20.2.1 stress.abiotic.heat

Cs5g0315( 80523 Symbols: HSP81-1, ATHS83, HSP81.1, HSP AT5G5264 20.2.1 stress.abiotic.heat

Cs9g1922( 80600 Symbols: HSP81-1, ATHS83, HSP81.1, HSP AT5G5264 20.2.1 stress.abiotic.heat

Cs3g2697( 26745 Symbols: LTI29, LTI45, ERD10 | ERD10 (E/ AT1G2045 20.2.99 stress.abiotic.unspeci

Cs5g2568( 24147 germin-like protein, putative | chr5:15657802- AT5G3911 20.2.99 stress.abiotic.unspeci

Cs2g0450( 65856 binding / catalytic/ transcription repressor | ch AT4G1881 20.2.99 stress.abiotic.unspeci

Cs1g2633( 35321 Symbols: ATHCHIB, PR3, PR-3, CHI-B, B-CAT3G1250 20.1 stress.biotic

Cs6g0669( 11544 protease inhibitor, putative | chr2:16236381-1 AT2G3887 20.1 stress.biotic

Cs7g0866( 28061 Symbols: CA2, CA18, BETA CA2 | CA2 (CA AT5G1474 8.3 TCA / org.transforma

Cs2g2143( 109020 aconitate hydratase, cytoplasmic, putative / ci AT2G0571 8.2.3 TCA / org.transforma

Cs1g2604( 90283 aconitate hydratase, cytoplasmic, putative / ci AT2G0571 8.2.3 TCA / org.transforma

Cs4g1028( 109648 aconitate hydratase, cytoplasmic, putative / ci AT2G0571 8.2.3 TCA / org.transforma

Cs6g0121( 46604 Symbols: ACLA-3 | ACLA-3; ATP citrate sy AT1G0943 8.2.11 TCA / org.transforma

Cs9g0223( 65954 Symbols: ACLB-2 | ACLB-2 (ATP CITRAT AT5G4946 8.2.11 TCA / org.transforma

Cs9g1047( 35540 malate dehydrogenase, cytosolic, putative | ch AT1G0441 8.2.9 TCA / org.transforma

Cs1g0361( 33505 malate dehydrogenase, cytosolic, putative | ch AT1G0441 8.2.9 TCA / org.transforma

Cs6g1197( 42726 isocitrate dehydrogenase, putative / NAD+ isc AT5G0329 8.2.4 TCA / org.transforma

Cs4g1527( 65329 Symbols: ATNADP-ME4 | ATNADP-ME4 ( AT1G7975 8.2.10 TCA / org.transforma

Cs4g1920( 61776 Symbols: ATNADP-ME3 | ATNADP-ME3 ( AT5G2588 8.2.10 TCA / org.transforma

Cs5g1073( 43422 Symbols: MDH | MDH (MALATE DEHYDRAT3G4752 8.2.99 TCA / org.transforma

Cs7g2182( 47942 malate dehydrogenase (NADP), chloroplast, p AT5G5833 8.2.99 TCA / org.transforma

Cs5g1981( 116080 2-oxoglutarate dehydrogenase E1 component, AT5G6575 8.1.5 TCA / org.transforma

Cs7g0117( 52176 Symbols: ATCS, CSY4 | ATCS; ATP binding AT2G4435 8.1.2 TCA / org.transforma

Cs5g3358( 104066 fumarate hydratase, putative / fumarase, putat AT5G5095 8.1.8 TCA / org.transforma

orange1.lt 46767 isocitrate dehydrogenase, putative / NADP+ i AT1G6593 8.1.4 TCA / org.transforma

orange1.lt 46535 isocitrate dehydrogenase, putative / NADP+ i AT1G6593 8.1.4 TCA / org.transforma

Cs2g2772( 55137 isocitrate dehydrogenase, putative / NADP+ i AT5G1459 8.1.4 TCA / org.transforma

Cs1g2638( 40270 Symbols: IDH1 | IDH1 (ISOCITRATE DEHY AT4G3526 8.1.4 TCA / org.transforma

Cs7g2539( 31645 malate dehydrogenase (NAD), mitochondrial, AT3G1502 8.1.9 TCA / org.transforma

Cs7g0291( 27348 Symbols: MAB1 | MAB1 (MACCI-BOU); ca AT5G5085 8.1.1.1 TCA / org.transforma

Cs7g0789( 43510 Symbols: AT-E1 ALPHA | AT-E1 ALPHA; o AT1G5990 8.1.1.1 TCA / org.transforma

Cs1g1793( 46031 dihydrolipoamide S-acetyltransferase, putativ AT3G1393 8.1.1.2 TCA / org.transforma

Cs9g0167( 53852 Symbols: mtLPD1 | mtLPD1 (mitochondrial l AT1G4803 8.1.1.3 TCA / org.transforma

Cs2g2410( 31522 Symbols: SDH2-2 | SDH2-2; electron carrier/ AT5G4065 8.1.7 TCA / org.transforma

Cs2g1409( 49851 Esterase 1; esterase/lipase/thioesterase family AT5G4112 19.50\* tetrapyrrole degradat

Cs8g1548( 60993 Symbols: ACD1, LLS1, PAO | ACD1 (ACCE AT3G4488 19.50\* tetrapyrrole degradat

Cs2g1411( 61467 Esterase 1; esterase/lipase/thioesterase family AT5G4112 19.50\* tetrapyrrole degradat

orange1.lt 49232 coenzyme F420 hydrogenase family / dehydr AT1G0462 19.50\* tetrapyrrole degradat

Cs2g1412( 64818 Esterase 1; esterase/lipase/thioesterase family AT5G4112 19.50\* tetrapyrrole degradat

Cs1g2267( 36775 Symbols: ACD2, ATRCCR | ACD2 (ACCEL AT4G3700 19.50\* tetrapyrrole degradat

Cs7g0224( 59095 hydrolase, alpha/beta fold family protein | chr. AT5G1380 19.50\* tetrapyrrole degradat

|                     |        |                                                 |                  |                        |
|---------------------|--------|-------------------------------------------------|------------------|------------------------|
| Cs6g0872(orange1.1t | 40602  | Symbols: ATG4, G4, CHLG   G4; chlorophyl        | AT3G5182 19.15   | tetrapyrrole synthesis |
| Cs4g1873(           | 53160  | Symbols: FC1, FC-I, ATFC-I   FC1 (ferrochel     | AT5G2603 19.2    | tetrapyrrole synthesis |
| Cs1g1936(           | 21520  | Symbols: FC2, FC-II, ATFC-II   FC2 (FERRC       | AT2G3039 19.2    | tetrapyrrole synthesis |
| Cs3g0310(           | 82231  | glutamate-tRNA ligase, putative / glutamyl-tR   | AT5G2671 19.1    | tetrapyrrole synthesis |
| Cs8g0136(orange1.1t | 63713  | Symbols: ATERS, OVA3, ERS   ERS (GLUT           | AT5G6405 19.1    | tetrapyrrole synthesis |
| Cs4g1785(           | 50449  | Symbols: GSA2   GSA2 (glutamate-1-semialc       | AT3G4873 19.3    | tetrapyrrole synthesis |
| Cs2g0510(           | 32992  | Symbols: ATHO1, HO1, TED4, GUN2, HY6            | AT2G2667 19.21   | tetrapyrrole synthesis |
| Cs7g1385(           | 46110  | Symbols: CHLI2, CHL I2, CHLI-2   CHLI2 (I       | AT5G4593 19.1    | tetrapyrrole synthesis |
| Cs1g0685(           | 40497  | Symbols: HEMC   HEMC (HYDROXYMETI               | AT5G0828 19.5    | tetrapyrrole synthesis |
| Cs2g2491(orange1.1t | 43181  | Symbols: PORA   PORA; oxidoreductase/ pro       | AT5G5419 19.14   | tetrapyrrole synthesis |
| Cs1g1719(           | 55751  | Symbols: HEMG2, MEE61, PPO2   HEMG2; AT         | 5G1422 19.9      | tetrapyrrole synthesis |
| Cs7g3008(           | 61326  | Symbols: PPOX, HEMG1, PPO1   PPOX; pro          | AT4G0169 19.9    | tetrapyrrole synthesis |
| Cs5g1244(           | 35892  | Symbols: FLU   FLU (FLUORESCENT IN B            | AT3G1411 19.4    | tetrapyrrole synthesis |
| Cs3g2388(           | 42741  | Symbols: HEME2   HEME2; uroporphyrinog          | AT2G4049 19.7    | tetrapyrrole synthesis |
| Cs7g0443(           | 45199  | Symbols: HEME1   HEME1; uroporphyrinog          | AT3G1493 19.7    | tetrapyrrole synthesis |
| Cs6g1528(           | 32361  | Symbols: HEMD   HEMD; uroporphyrinogen          | AT2G2654 19.6    | tetrapyrrole synthesis |
| Cs6g1530(           | 35377  | FUNCTIONS IN: molecular_function unknow         | AT2G0259 34      | transport              |
| Cs2g1373(           | 164377 | Symbols: PDR6, ATPDR6   PDR6; ATPase, c         | AT2G3638 34.16   | transport.ABC transp   |
| Cs6g0868(           | 156725 | Symbols: PDR6, ATPDR6   PDR6; ATPase, c         | AT2G3638 34.16   | transport.ABC transp   |
| Cs7g3142(orange1.1t | 79535  | ABC transporter family protein   chr2:154131    | AT2G0132 34.16   | transport.ABC transp   |
| Cs1g1887(           | 33240  | Symbols: CXIP2, ATGRX2   CXIP2 (CAX-IT          | AT2G3827 34.21   | transport.calcium      |
| Cs5g2487(           | 30434  | Symbols: TMP-C, PIP1;4, PIP1E   PIP1;4 (PL      | AT4G0043 34.19.1 | transport.Major Intri  |
| Cs5g0557(           | 26060  | Symbols: GAMMA-TIP, TIP1;1, GAMMA-T             | AT2G3683 34.19.2 | transport.Major Intri  |
| Cs2g3049(orange1.1t | 34360  | Symbols: SAMC1, SAMT1   SAMC1 (S-ADI            | AT4G3946 34.8    | transport.metabolite 1 |
| Cs1g1353(orange1.1t | 53825  | sugar transporter family protein   chr5:239038  | AT5G5925 34.8    | transport.metabolite 1 |
| Cs7g0216(           | 44699  | Symbols: CUE1, PPT, ARAPPT   CUE1 (CAI          | AT5G3332 34.8    | transport.metabolite 1 |
| Cs9g1678(           | 43491  | unknown protein   chr5:4044622-4047436 RE       | AT5G1247 34.8    | transport.metabolite 1 |
| Cs8g1897(           | 67717  | Symbols: NTT1, ATNTT1   NTT1 (NUCLEC            | AT1G8030 34.8    | transport.metabolite 1 |
| Cs3g2464(           | 27319  | mitochondrial import inner membrane translo     | AT5G2465 34.8    | transport.metabolite 1 |
| Cs2g3026(orange1.1t | 21186  | unknown protein   chr5:17235092-17236679 I      | AT5G4296 34.8    | transport.metabolite 1 |
| Cs9g1751(           | 59910  | Symbols: DiT1   DiT1 (dicarboxylate transpo     | AT5G1286 34.8    | transport.metabolite 1 |
| Cs3g2788(           | 38057  | Symbols: OEP37, ATOEP37   OEP37; ion ch         | AT2G4395 34.8    | transport.metabolite 1 |
| Cs7g2760(           | 85244  | Symbols: ATNAP8, NAP8   ATNAP8; ATPa:           | AT4G2545 34.8    | transport.metabolite 1 |
| Cs2g1112(           | 59967  | sugar transporter family protein   chr5:239038  | AT5G5925 34.8    | transport.metabolite 1 |
| Cs7g1538(           | 39835  | unknown protein   chr5:4044622-4047436 RE       | AT5G1247 34.8    | transport.metabolite 1 |
| Cs2g0553(           | 104992 | LOCATED IN: mitochondrion, chloroplast th       | AT5G2389 34.8    | transport.metabolite 1 |
| Cs6g1849(orange1.1t | 19427  | unknown protein   chr1:28661884-28663789 I      | AT1G7640 34.8    | transport.metabolite 1 |
| orange1.1t          | 91556  | mitochondrial substrate carrier family protein  | AT2G3580 34.8    | transport.metabolite 1 |
| orange1.1t          | 43094  | mitochondrial substrate carrier family protein  | AT5G4213 34.8    | transport.metabolite 1 |
| orange1.1t          | 44876  | Symbols: RCP1, MEX1   RCP1 (ROOT CAP            | AT5G1752 34.8    | transport.metabolite 1 |
| orange1.1t          | 45084  | Symbols: APE2, TPT   APE2 (ACCLIMATIC           | AT5G4611 34.8    | transport.metabolite 1 |
| orange1.1t          | 97981  | Symbols: GLT1, PGLCT   PGLCT (PLASTII           | AT5G1615 34.8    | transport.metabolite 1 |
| orange1.1t          | 42985  | Symbols: GPT2   GPT2; antiporter/ glucose-6     | AT1G6180 34.8    | transport.metabolite 1 |
| orange1.1t          | 60294  | Symbols: DCT, DIT2.1   DIT2.1 (DICARBO          | AT5G6429 34.8    | transport.metabolite 1 |
| orange1.1t          | 32662  | mitochondrial phosphate transporter   chr5:45:  | AT5G1404 34.9    | transport.metabolite 1 |
| orange1.1t          | 32054  | dicarboxylate/tricarboxylate carrier (DTC)   cl | AT5G1976 34.9    | transport.metabolite 1 |
| orange1.1t          | 40986  | Symbols: AAC3, ATAAC3   AAC3 (ADP/AT            | AT4G2839 34.9    | transport.metabolite 1 |
| orange1.1t          | 40916  | high-affinity nickel-transport family protein   | AT2G1680 34.12   | transport.metal        |
| orange1.1t          | 64259  | Symbols: HMA1, ATHMA1   HMA1; ATPas:            | AT4G3727 34.12   | transport.metal        |

|            |        |                                                          |          |         |                       |
|------------|--------|----------------------------------------------------------|----------|---------|-----------------------|
| Cs3g22850  | 64547  | SEC14 cytosolic factor family protein / phosph           | AT4G0916 | 34.99   | transport.misc        |
| Cs6g08310  | 40053  | binding / transporter   chr3:19243950-192469:            | AT3G5187 | 34.99   | transport.misc        |
| Cs6g11650  | 12332  | Symbols: VMA10, AVMA10   VMA10 (VACUOLAR A'              | AT3G0139 | 34.1    | transport.p- and v-A] |
| Cs1g10270  | 68681  | Symbols: VHA-A   VHA-A (VACUOLAR A'                      | AT1G7890 | 34.1    | transport.p- and v-A] |
| Cs8g08330  | 92787  | Symbols: VHA-A3   VHA-A3 (VACUOLAR                       | AT4G3908 | 34.1    | transport.p- and v-A] |
| Cs2g14330  | 42451  | Symbols: DET3, ATVHA-C   DET3 (DE-ETI                    | AT1G1284 | 34.1    | transport.p- and v-A] |
| Cs4g02110  | 29176  | vacuolar ATP synthase subunit D (VATD) / \               | AT3G5873 | 34.1.1  | transport.p- and v-A] |
| Cs8g02310  | 54362  | vacuolar ATP synthase subunit B, putative / \            | AT4G3851 | 34.1.1  | transport.p- and v-A] |
| Cs5g02680  | 26276  | Symbols: TUF, emb2448, TUFF, VHA-E1   T                  | AT4G1115 | 34.1.1  | transport.p- and v-A] |
| Cs6g20820  | 40652  | H <sup>+</sup> -transporting two-sector ATPase, putative | AT3G2871 | 34.1.1  | transport.p- and v-A] |
| Cs5g30450  | 17505  | vacuolar ATPase subunit F family protein   ch            | AT4G0262 | 34.1.1  | transport.p- and v-A] |
| Cs8g19810  | 57329  | Symbols: PHT4;3   transporter-related   chr3:1           | AT3G4698 | 34.7    | transport.phosphate   |
| Cs1g21440  | 29253  | Symbols: VDAC2, ATVDAC2   VDAC2 (VC                      | AT5G6750 | 34.2    | transport.porins      |
| Cs6g20640  | 29305  | Symbols: VDAC1, ATVDAC1   VDAC1 (VC                      | AT3G0128 | 34.2    | transport.porins      |
| orange1.1t | 130247 | Symbols: KEA2, ATKEA2   KEA2; potassiur                  | AT4G0063 | 34.15   | transport.potassium   |
| Cs7g24880  | 45112  | anion-transporting ATPase family protein   ch            | AT3G1035 | 34.18.1 | transport.unspecified |
| Cs7g01840  | 41898  | Symbols: AAC2   AAC2 (ADP/ATP carrier 2                  | AT5G1349 | 34.14   | transport.unspecified |
| Cs3g05350  | 46226  | bile acid:sodium symporter family protein   ch           | AT1G7856 | 34.14   | transport.unspecified |
| Cs5g19690  | 30094  |                                                          |          |         |                       |

**Supplemental Table S5. Set of 1,016 plastid proteins that have been quantified during c**

n. of identified pept

| Experiment | Experiment | Coverage | PI   | MG/113 |      |      |      | Br/113 |      |      |      | Ma/113 |      |      |  |
|------------|------------|----------|------|--------|------|------|------|--------|------|------|------|--------|------|------|--|
| 3          | 3          | 7.68%    | 6.7  | 1.12   | 0.93 | 0.74 | 0.91 | 0.51   | 0.9  | 0.71 | 0.69 | 1.29   | 1.3  | 1.06 |  |
| 8          | 4          | 18.29%   | 9.18 | 0.99   | 1.04 | 1.02 | 0.79 | 1.07   | 1.07 | 0.91 | 1.13 | 1.02   | 0.98 | 0.99 |  |
| 8          | 4          | 16.17%   | 8.86 | 1.15   | 1.26 | 1.4  | 1.31 | 0.96   | 1.04 | 0.87 | 0.84 | 0.77   | 0.89 | 0.95 |  |
| 54         | 16         | 34.77%   | 5.75 | 1.04   | 1.08 | 1.14 | 1.16 | 0.99   | 0.96 | 0.93 | 0.98 | 1.05   | 1.09 | 1.03 |  |
| 15         | 4          | 17.14%   | 8.43 | 1.06   | 1.01 | 0.9  | 0.96 | 1.06   | 1.23 | 1.26 | 1.14 | 1.25   | 0.9  | 0.95 |  |
| 20         | 8          | 31.16%   | 5.46 | 1.12   | 1.1  | 0.91 | 0.88 | 1.02   | 1.05 | 1.13 | 1.05 | 0.97   | 1.02 | 1.01 |  |
| 87         | 14         | 39.74%   | 6.56 | 0.91   | 0.94 | 0.88 | 0.99 | 1.22   | 1.17 | 1.13 | 1.21 | 1.18   | 1.04 | 0.99 |  |
| 131        | 15         | 44.54%   | 6.49 | 0.9    | 0.91 | 0.85 | 0.93 | 1.23   | 1.12 | 1.1  | 1.16 | 1.23   | 1.06 | 1.01 |  |
| 11         | 6          | 27.63%   | 8.28 | 0.92   | 1.06 | 0.94 | 0.77 | 1.06   | 1.06 | 0.91 | 1.09 | 1.03   | 1.27 | 1.42 |  |
| 3          | 3          | 6.79%    | 7.91 | 1.21   | 1.04 | 0.71 | 0.86 | 0.99   | 1.13 | 0.82 | 0.78 | 1.14   | 0.81 | 0.89 |  |
| 4          | 3          | 8.24%    | 5.89 | 0.85   | 0.98 | 1.17 | 1.1  | 1      | 1.02 | 1.02 | 0.91 | 1.11   | 0.86 | 1.13 |  |
| 13         | 8          | 16.27%   | 6.72 | 0.93   | 1    | 0.98 | 0.91 | 0.76   | 0.8  | 0.91 | 0.91 | 0.76   | 0.94 | 0.95 |  |
| 45         | 13         | 36.36%   | 6.56 | 1.04   | 1.01 | 0.85 | 0.98 | 1.15   | 1.08 | 1    | 1.26 | 1.12   | 1.19 | 1.12 |  |
| 4          | 4          | 10.24%   | 8.97 | 0.91   | 1    | 1.02 | 0.89 | 1.02   | 0.89 | 0.99 | 0.96 | 0.86   | 1.08 | 0.9  |  |
| 47         | 12         | 24.85%   | 9.15 | 1.31   | 1.22 | 1.21 | 1.15 | 1.13   | 1.05 | 1.18 | 1.1  | 1.06   | 0.91 | 1.01 |  |
| 15         | 6          | 10.61%   | 8.35 | 1.11   | 1.13 | 1.08 | 1.1  | 1.04   | 0.95 | 1.11 | 1.08 | 0.93   | 0.87 | 0.91 |  |
| 43         | 13         | 28.85%   | 8.4  | 1.03   | 0.94 | 1.05 | 1.04 | 1.19   | 1.09 | 1.08 | 1.1  | 1.18   | 1.04 | 1.02 |  |
| 39         | 13         | 32.73%   | 8.35 | 1.09   | 1.01 | 1.17 | 1.11 | 1.1    | 1.12 | 1.14 | 1.12 | 1.03   | 0.94 | 0.9  |  |
| 21         | 11         | 22.18%   | 6.14 | 1      | 0.89 | 1    | 0.97 | 1.09   | 1.04 | 1.2  | 1.17 | 1.15   | 1.13 | 1.13 |  |
| 22         | 7          | 25.15%   | 6.03 | 0.91   | 0.76 | 0.97 | 0.86 | 0.99   | 1.05 | 0.99 | 1.03 | 1.3    | 1.12 | 1.07 |  |
| 22         | 10         | 31.65%   | 6.28 | 0.85   | 0.98 | 0.95 | 0.91 | 1.25   | 1.11 | 1.18 | 1.23 | 1.18   | 1.04 | 1.17 |  |
| 41         | 12         | 33.17%   | 6.41 | 0.93   | 0.98 | 0.94 | 0.91 | 1.08   | 1    | 0.98 | 0.98 | 0.94   | 0.99 | 0.98 |  |
| 10         | 7          | 18.96%   | 6.54 | 0.93   | 0.89 | 0.9  | 0.98 | 1.16   | 0.99 | 0.89 | 0.92 | 1.09   | 1.09 | 1.08 |  |
| 5          | 4          | 12.03%   | 5.74 | 0.95   | 0.92 | 1.13 | 0.95 | 0.96   | 1.04 | 0.83 | 0.98 | 1.07   | 0.97 | 1.22 |  |
| 10         | 7          | 13.20%   | 7.18 | 1.1    | 1    | 0.71 | 0.46 | 0.99   | 0.95 | 0.88 | 0.67 | 1.05   | 0.85 | 0.41 |  |
| 5          | 4          | 12.68%   | 8.95 | 1.12   | 1.08 | 0.95 | 1.08 | 1.27   | 1.09 | 1.08 | 1.21 | 1.14   | 0.99 | 1.06 |  |
| 106        | 17         | 44.36%   | 7.62 | 1      | 1.01 | 1.06 | 1.06 | 1.23   | 1.08 | 1.12 | 1.19 | 1.12   | 1.05 | 1.05 |  |
| 10         | 3          | 12.59%   | 6.5  | 0.89   | 0.93 | 1.03 | 0.88 | 1.18   | 0.96 | 1.17 | 1.15 | 0.93   | 1.18 | 1.01 |  |
| 48         | 15         | 33.48%   | 7.26 | 1.07   | 1.12 | 0.99 | 1.01 | 1.25   | 1.24 | 1.13 | 1.18 | 1.12   | 0.96 | 1.04 |  |
| 34         | 13         | 28.25%   | 7.57 | 1.21   | 1.14 | 1.19 | 1.35 | 1.15   | 1.16 | 1.18 | 1.17 | 1.07   | 1.17 | 1.21 |  |
| 57         | 9          | 23.61%   | 6.65 | 1.06   | 1.01 | 1.07 | 1.06 | 1.14   | 1.12 | 1.18 | 1.19 | 1.03   | 1.05 | 1.06 |  |
| 12         | 4          | 12.00%   | 6.6  | 1.04   | 1.1  | 1    | 1.06 | 1.38   | 1.29 | 1.3  | 1.22 | 1.18   | 0.95 | 0.92 |  |
| 20         | 10         | 25.94%   | 6.12 | 1      | 0.94 | 0.95 | 0.96 | 1.21   | 0.99 | 1.06 | 1.04 | 1.01   | 1.04 | 1.03 |  |
| 65         | 14         | 34.05%   | 7.95 | 1.1    | 1.1  | 1.08 | 1.19 | 1.14   | 1.03 | 1.15 | 1.11 | 0.94   | 1.04 | 1.03 |  |
| 27         | 16         | 20.57%   | 6.73 | 0.99   | 0.99 | 1.1  | 1.05 | 1.01   | 1.02 | 1.05 | 0.98 | 1.14   | 1.18 | 1.12 |  |
| 23         | 14         | 17.93%   | 5.85 | 1.02   | 1.03 | 1.09 | 1.1  | 0.98   | 0.96 | 0.93 | 0.94 | 1.17   | 1.07 | 1.1  |  |
| 31         | 17         | 23.37%   | 6.47 | 1.03   | 1.1  | 1.09 | 1.1  | 1.02   | 1.05 | 0.96 | 0.99 | 1.19   | 1.19 | 1.12 |  |
| 20         | 6          | 12.07%   | 5.47 | 1.15   | 0.99 | 0.88 | 0.92 | 1.16   | 1.12 | 1.16 | 1.07 | 1      | 1.15 | 1.09 |  |
| 10         | 8          | 13.73%   | 8.45 | 1.08   | 1.01 | 0.97 | 1.11 | 0.97   | 1.05 | 1.15 | 1.11 | 1.01   | 0.92 | 0.88 |  |
| 42         | 12         | 34.48%   | 7.06 | 1.05   | 1.06 | 0.99 | 1.07 | 1.21   | 1.16 | 1.04 | 1.15 | 1.04   | 1.12 | 1.04 |  |
| 97         | 33         | 37.00%   | 6.43 | 0.9    | 0.9  | 0.9  | 0.93 | 1.1    | 1.04 | 1.07 | 1.11 | 1.12   | 1.12 | 1.13 |  |
| 11         | 8          | 22.51%   | 5.4  | 0.89   | 0.81 | 0.98 | 1.03 | 0.95   | 0.97 | 1.36 | 1.46 | 1.11   | 1.8  | 1.12 |  |
| 9          | 4          | 14.71%   | 8.33 | 0.95   | 0.87 | 1.1  | 1.88 | 1.23   | 1.2  | 1.65 | 1.13 | 1.05   | 1.9  | 0.83 |  |
| 13         | 4          | 8.43%    | 8.49 | 1.04   | 1.05 | 0.93 | 1.01 | 1.1    | 1.15 | 1.18 | 1.38 | 1.18   | 1.11 | 1.1  |  |
| 48         | 13         | 13.63%   | 8.14 | 0.99   | 0.99 | 0.94 | 0.99 | 1.09   | 1.13 | 1.17 | 1.25 | 1.12   | 1.04 | 1.04 |  |
| 20         | 10         | 16.01%   | 6.56 | 1.21   | 1.28 | 1.03 | 1.25 | 0.97   | 1    | 1.13 | 1.22 | 0.84   | 0.95 | 0.93 |  |
| 23         | 10         | 22.70%   | 6.35 | 1.05   | 1.16 | 1.06 | 1.34 | 0.98   | 1.26 | 1.2  | 1.31 | 1.06   | 0.94 | 1.04 |  |



|     |    |        |      |      |      |      |      |      |      |      |      |      |      |      |
|-----|----|--------|------|------|------|------|------|------|------|------|------|------|------|------|
| 5   | 5  | 12.31% | 8.32 | 0.83 | 0.93 | 0.9  | 0.9  | 1.05 | 1.15 | 1.02 | 0.95 | 1.41 | 1    | 1.09 |
| 3   | 2  | 7.30%  | 6.75 | 1.34 | 1.2  | 1.08 | 1.16 | 1.28 | 1.28 | 1.43 | 1.39 | 0.89 | 1.11 | 1.47 |
| 34  | 9  | 24.53% | 7.53 | 1.25 | 1.28 | 1.15 | 1.15 | 1.25 | 1.25 | 1.26 | 1.19 | 0.98 | 1.08 | 0.93 |
| 89  | 11 | 18.32% | 5.84 | 1.13 | 1.07 | 1.13 | 1.22 | 1.14 | 1.11 | 1.11 | 0.99 | 1.04 | 1    | 0.99 |
| 92  | 13 | 20.72% | 6.21 | 1.09 | 1.05 | 1.14 | 1.22 | 1.13 | 1.09 | 1.17 | 1.04 | 1.01 | 1    | 1.04 |
| 15  | 13 | 33.65% | 8.06 | 1.17 | 1.02 | 0.99 | 0.95 | 0.97 | 1.07 | 1.11 | 1    | 0.94 | 0.97 | 1    |
| 23  | 4  | 20.72% | 7.62 | 1.01 | 0.89 | 1.04 | 1.02 | 1.13 | 1.11 | 1.02 | 1.07 | 0.97 | 0.99 | 0.71 |
| 72  | 16 | 33.98% | 6.68 | 1    | 1.02 | 0.98 | 0.99 | 1.1  | 1.1  | 1.09 | 1.03 | 1.01 | 0.95 | 0.91 |
| 55  | 18 | 37.04% | 6.62 | 1.28 | 1.13 | 1.21 | 1.33 | 1.03 | 0.99 | 0.97 | 1.01 | 0.95 | 0.91 | 0.9  |
| 57  | 10 | 25.25% | 5.91 | 1    | 1.05 | 0.89 | 1.03 | 1.14 | 1.09 | 1.01 | 1.06 | 0.99 | 1.02 | 0.95 |
| 10  | 8  | 16.10% | 6.4  | 1.07 | 0.93 | 0.81 | 0.78 | 0.98 | 1.06 | 0.7  | 0.66 | 1.11 | 1.03 | 0.97 |
| 25  | 13 | 36.03% | 8.5  | 1.13 | 1.09 | 1.15 | 1.16 | 0.82 | 0.89 | 0.88 | 0.82 | 1    | 0.91 | 0.91 |
| 22  | 10 | 23.33% | 9.37 | 1.16 | 1.11 | 1.2  | 1.16 | 0.83 | 0.91 | 0.87 | 0.81 | 0.96 | 0.82 | 0.88 |
| 92  | 13 | 32.20% | 8.06 | 0.92 | 0.86 | 0.87 | 0.84 | 1.17 | 1.06 | 1.02 | 1.02 | 1.06 | 0.99 | 0.99 |
| 143 | 21 | 23.74% | 9.01 | 0.98 | 0.99 | 1.06 | 1.02 | 1.17 | 1.12 | 1.18 | 1.13 | 1.07 | 1.05 | 1.02 |
| 6   | 4  | 13.37% | 8.1  | 0.76 | 1.01 | 0.55 | 0.74 | 1.38 | 1.18 | 0.88 | 1.1  | 1.2  | 1.05 | 1.27 |
| 20  | 9  | 21.65% | 6.29 | 0.91 | 0.96 | 1.11 | 1.04 | 0.86 | 0.95 | 0.94 | 0.89 | 0.85 | 0.9  | 0.93 |
| 38  | 16 | 34.09% | 8.26 | 1.14 | 1.08 | 1.13 | 1.11 | 1    | 1.03 | 0.96 | 1.02 | 1.02 | 0.93 | 0.93 |
| 29  | 9  | 25.06% | 8.07 | 0.93 | 0.98 | 0.9  | 0.99 | 1.03 | 1.14 | 1.04 | 1.28 | 0.94 | 1.02 | 1.08 |
| 30  | 7  | 17.58% | 7.97 | 0.96 | 0.93 | 1.04 | 0.96 | 1.15 | 1.06 | 1.04 | 1.05 | 1.09 | 1.07 | 1.01 |
| 30  | 13 | 28.76% | 7.62 | 0.94 | 0.89 | 0.96 | 0.91 | 1.2  | 1.06 | 1.25 | 1.23 | 1.08 | 1.16 | 0.93 |
| 43  | 14 | 23.03% | 6.06 | 1.03 | 1.03 | 1.03 | 1.12 | 1.3  | 1.23 | 1.12 | 1.19 | 1.05 | 1.1  | 1.07 |
| 89  | 17 | 35.83% | 6.5  | 1.05 | 1.02 | 1    | 0.98 | 1.16 | 1.08 | 1.06 | 1.06 | 1.08 | 1.01 | 0.99 |
| 4   | 2  | 7.51%  | 6.66 | 0.93 | 0.94 | 0.97 | 0.86 | 1.17 | 1.18 | 1.16 | 1.04 | 1.02 | 0.98 | 1.07 |
| 36  | 8  | 22.63% | 8.51 | 0.89 | 0.9  | 0.81 | 0.91 | 1.15 | 1.25 | 1.04 | 1.13 | 1.09 | 0.94 | 1.02 |
| 5   | 3  | 5.43%  | 6.05 | 0.62 | 0.81 | 0.36 | 0.52 | 0.64 | 0.71 | 0.94 | 0.39 | 0.97 | 0.59 | 0.25 |
| 24  | 8  | 21.29% | 6.35 | 0.92 | 0.91 | 0.87 | 0.91 | 1.11 | 1.1  | 1.08 | 1.06 | 1.12 | 1.33 | 1.01 |
| 8   | 4  | 9.86%  | 6.48 | 1.24 | 1.21 | 1.14 | 1.09 | 1.06 | 1.22 | 1.25 | 1.12 | 0.94 | 0.88 | 0.98 |
| 11  | 6  | 19.83% | 5.65 | 1.05 | 1.04 | 1.14 | 1.06 | 1.16 | 1.08 | 1.12 | 1.16 | 1.05 | 0.98 | 0.97 |
| 37  | 14 | 25.17% | 6.42 | 0.98 | 0.98 | 0.87 | 0.88 | 1.03 | 1.12 | 0.99 | 1.01 | 1.01 | 1.09 | 1.12 |
| 2   | 2  | 5.40%  | 9.32 | 0.82 | 0.81 | 0.91 | 0.92 | 1.05 | 0.98 | 1.15 | 1.18 | 1.27 | 1.26 | 1.15 |
| 5   | 3  | 10.73% | 6.39 | 1.04 | 0.96 | 1.25 | 1.06 | 1.13 | 1.07 | 1.12 | 1.03 | 1.22 | 1.34 | 1.07 |
| 10  | 3  | 10.04% | 7.52 | 1.01 | 0.86 | 0.76 | 0.98 | 1.03 | 0.92 | 1.05 | 0.96 | 1.04 | 0.99 | 1.1  |
| 40  | 10 | 28.57% | 8.29 | 1.09 | 1.05 | 1.04 | 1.01 | 1.2  | 1.12 | 1.08 | 1.1  | 0.9  | 1.07 | 1    |
| 30  | 11 | 21.98% | 8.36 | 0.98 | 0.9  | 1.11 | 1.11 | 1.13 | 1.11 | 1.05 | 1.12 | 1.09 | 1.13 | 1.18 |
| 2   | 1  | 4.18%  | 9.02 | 1.72 | 1.19 | 1.53 | 1.2  | 0.93 | 0.89 | 1.14 | 0.94 | 0.6  | 0.82 | 0.76 |
| 42  | 5  | 11.40% | 6.23 | 1.16 | 1.07 | 1.2  | 1.16 | 1.08 | 1.08 | 1.28 | 1.13 | 1.03 | 0.97 | 0.93 |
| 189 | 18 | 27.45% | 6.75 | 1.09 | 1.07 | 1.16 | 1.17 | 1.17 | 1.11 | 1.19 | 1.11 | 1.05 | 0.98 | 0.96 |
| 121 | 18 | 48.26% | 8.54 | 1.01 | 1.04 | 1.15 | 1.14 | 1.2  | 1.09 | 1.23 | 1.15 | 1.05 | 0.99 | 0.97 |
| 23  | 10 | 29.27% | 8.33 | 1.03 | 1.1  | 1.14 | 1.14 | 0.86 | 0.95 | 0.87 | 0.96 | 0.94 | 0.89 | 0.84 |
| 4   | 2  | 3.72%  | 6.58 | 0.82 | 0.83 | 0.83 | 0.87 | 1.33 | 1.04 | 0.94 | 0.85 | 0.78 | 0.91 | 1.01 |
| 5   | 2  | 3.65%  | 8.16 | 0.93 | 1.13 | 0.93 | 0.92 | 1.01 | 0.97 | 0.95 | 0.99 | 1.1  | 0.63 | 0.82 |
| 11  | 7  | 23.00% | 7.65 | 0.93 | 0.96 | 1.03 | 0.92 | 0.89 | 0.98 | 1.02 | 0.92 | 1.01 | 0.94 | 1.03 |
| 30  | 7  | 20.74% | 8.79 | 0.95 | 1    | 0.88 | 0.99 | 0.93 | 1.28 | 1.03 | 1.15 | 1.09 | 1.08 | 1.03 |
| 12  | 2  | 24.24% | 5    | 0.96 | 1.23 | 0.99 | 0.97 | 0.79 | 1.12 | 1.1  | 1.32 | 0.95 | 1.16 | 1.27 |
| 4   | 2  | 7.39%  | 8.33 | 1.05 | 0.86 | 1.14 | 1.06 | 1.31 | 1.09 | 1.07 | 1.17 | 1.13 | 1.21 | 1.01 |
| 4   | 3  | 5.21%  | 8.61 | 1.16 | 1.17 | 1.22 | 1.22 | 1.07 | 0.98 | 1.22 | 1.35 | 0.92 | 0.73 | 0.76 |
| 2   | 2  | 2.66%  | 8.62 | 1.5  | 1.22 | 0.91 | 0.83 | 0.94 | 1.01 | 1.03 | 0.85 | 0.92 | 1.09 | 0.96 |
| 2   | 2  | 2.50%  | 7.22 | 1.5  | 1.22 | 1.31 | 1.04 | 0.94 | 1.01 | 1.3  | 1.23 | 0.92 | 1.05 | 1.1  |
| 6   | 5  | 21.11% | 9.33 | 1.07 | 1.1  | 1.1  | 1.01 | 0.71 | 0.83 | 0.88 | 0.92 | 0.81 | 0.78 | 0.85 |

|     |    |        |      |      |      |      |      |      |      |      |      |      |      |      |
|-----|----|--------|------|------|------|------|------|------|------|------|------|------|------|------|
| 3   | 3  | 4.44%  | 5.53 | 1.03 | 1.01 | 0.82 | 0.92 | 0.79 | 0.78 | 0.8  | 0.96 | 0.84 | 1.04 | 1.08 |
| 27  | 13 | 19.37% | 5.22 | 0.89 | 0.93 | 1.02 | 0.98 | 0.89 | 0.88 | 0.93 | 1    | 0.89 | 0.98 | 0.98 |
| 28  | 13 | 18.81% | 5.09 | 0.89 | 0.93 | 1.02 | 0.98 | 0.95 | 0.88 | 0.93 | 1    | 0.96 | 0.98 | 0.98 |
| 14  | 5  | 28.32% | 6.84 | 1.19 | 1.14 | 1.04 | 0.96 | 1.23 | 1.08 | 1.15 | 1.09 | 0.97 | 1.08 | 0.98 |
| 13  | 5  | 12.28% | 8.01 | 0.99 | 1.07 | 1.3  | 1.57 | 1.12 | 1.06 | 1.64 | 1.28 | 0.97 | 1.06 | 1.22 |
| 8   | 5  | 18.75% | 6.23 | 1.19 | 1.28 | 1.08 | 1.03 | 1.28 | 1.02 | 1.12 | 1.18 | 1.03 | 1.06 | 0.96 |
| 10  | 8  | 12.02% | 5.06 | 1.04 | 1.18 | 0.98 | 0.96 | 1.01 | 1.12 | 1.05 | 0.97 | 0.94 | 1    | 1.18 |
| 74  | 16 | 49.53% | 5.55 | 0.92 | 0.89 | 0.96 | 1.09 | 0.84 | 0.84 | 0.87 | 0.88 | 0.95 | 0.93 | 0.93 |
| 18  | 8  | 27.44% | 6.77 | 0.89 | 0.84 | 0.7  | 0.95 | 0.81 | 0.78 | 0.78 | 0.81 | 0.93 | 0.83 | 1.05 |
| 5   | 3  | 8.04%  | 5.65 | 0.89 | 0.96 | 0.97 | 1.02 | 0.9  | 0.9  | 0.95 | 0.95 | 1.05 | 1.09 | 0.99 |
| 36  | 9  | 27.51% | 5.31 | 1.02 | 1    | 1.07 | 1.14 | 0.95 | 0.89 | 0.96 | 0.93 | 1.05 | 0.96 | 1.13 |
| 36  | 9  | 25.93% | 5.31 | 1.03 | 1    | 1.05 | 1.11 | 0.97 | 0.89 | 0.95 | 0.95 | 1.05 | 1.04 | 1.1  |
| 10  | 9  | 21.60% | 4.75 | 1.21 | 1.24 | 0.89 | 1.09 | 0.87 | 0.95 | 1.15 | 0.97 | 0.83 | 1    | 0.99 |
| 4   | 2  | 16.20% | 6.6  | 1.2  | 0.5  | 1.03 | 1.14 | 0.42 | 1.07 | 1.16 | 1.1  | 0.36 | 1.06 | 1.14 |
| 13  | 11 | 27.87% | 4.82 | 1.21 | 1.24 | 1.2  | 1.19 | 0.87 | 0.77 | 0.79 | 1.04 | 0.89 | 1.02 | 1.19 |
| 16  | 6  | 15.11% | 4.99 | 1.28 | 1.36 | 1.22 | 1.15 | 0.89 | 0.97 | 0.93 | 1    | 0.84 | 0.97 | 0.99 |
| 42  | 12 | 36.24% | 5.31 | 1.01 | 1    | 1.07 | 1.09 | 0.98 | 0.88 | 0.95 | 0.93 | 1.05 | 0.96 | 1.02 |
| 10  | 5  | 11.11% | 4.97 | 0.99 | 1.55 | 1.15 | 1.17 | 0.73 | 1.2  | 1.1  | 1.01 | 0.75 | 0.97 | 1    |
| 39  | 23 | 14.44% | 5.3  | 1.03 | 1.03 | 1.11 | 1.06 | 1.03 | 0.96 | 0.98 | 0.99 | 1.09 | 1.1  | 1.03 |
| 4   | 3  | 9.47%  | 5.2  | 1.04 | 1.36 | 1.13 | 1.1  | 1.17 | 1.04 | 1.02 | 0.98 | 0.34 | 1.05 | 0.99 |
| 7   | 3  | 14.93% | 9.27 | 0.89 | 1.09 | 1.04 | 0.95 | 0.87 | 0.87 | 0.99 | 0.94 | 0.94 | 1.03 | 1.04 |
| 3   | 3  | 9.57%  | 5.44 | 1    | 0.99 | 1.82 | 1.41 | 0.98 | 1.07 | 1.12 | 1.04 | 1.05 | 1.22 | 1.3  |
| 5   | 3  | 3.28%  | 4.94 | 0.91 | 0.92 | 1    | 1    | 1    | 0.99 | 1.03 | 1.06 | 0.94 | 1.07 | 1.1  |
| 10  | 9  | 20.41% | 5.64 | 1.03 | 0.98 | 1.14 | 1.11 | 0.91 | 0.99 | 1.1  | 1.16 | 1.08 | 1.39 | 1.27 |
| 64  | 16 | 38.03% | 7.62 | 0.98 | 0.99 | 0.97 | 0.98 | 1.17 | 1.08 | 1.08 | 1.06 | 1.03 | 1    | 1.05 |
| 8   | 7  | 9.52%  | 7.98 | 1.15 | 1.02 | 1.08 | 1.09 | 1.22 | 1.09 | 1.08 | 1.14 | 0.94 | 1.01 | 0.92 |
| 18  | 10 | 18.12% | 6.29 | 0.86 | 0.88 | 0.81 | 0.88 | 1.15 | 1.1  | 1.11 | 1.16 | 0.97 | 1.08 | 1.07 |
| 15  | 9  | 20.52% | 5.57 | 0.95 | 1.04 | 0.86 | 1.03 | 1.12 | 1.25 | 1.07 | 1.24 | 1.21 | 1.05 | 1.16 |
| 7   | 4  | 7.43%  | 5.72 | 1.35 | 1.37 | 1.16 | 1.33 | 1.34 | 1.17 | 1.15 | 1.49 | 1.23 | 3.13 | 1.99 |
| 18  | 6  | 24.66% | 8.76 | 1.31 | 1.45 | 1.03 | 0.98 | 2.38 | 2.09 | 1.12 | 1.32 | 1.3  | 0.99 | 0.9  |
| 23  | 12 | 27.05% | 5.82 | 0.99 | 0.84 | 0.9  | 0.98 | 1.18 | 1.17 | 1.16 | 1.19 | 0.83 | 1.04 | 1.13 |
| 120 | 7  | 24.93% | 5.4  | 1.06 | 1.12 | 1.11 | 1.18 | 1.41 | 1.33 | 1.45 | 1.31 | 0.86 | 0.93 | 0.85 |
| 3   | 3  | 7.96%  | 5.96 | 1.31 | 0.57 | 0.8  | 0.71 | 0.36 | 0.41 | 0.86 | 0.75 | 0.68 | 0.85 | 0.83 |
| 15  | 7  | 17.07% | 6.6  | 1    | 0.97 | 0.92 | 0.91 | 1.12 | 1.06 | 0.97 | 0.98 | 1.05 | 0.88 | 0.96 |
| 13  | 7  | 17.05% | 6.6  | 1    | 1.01 | 0.78 | 0.98 | 1.01 | 1.02 | 0.99 | 1    | 1.09 | 1    | 1.02 |
| 4   | 2  | 1.80%  | 5.55 | 1.19 | 1.2  | 1.09 | 1.31 | 1.35 | 0.84 | 0.89 | 0.67 | 1.13 | 0.75 | 0.88 |
| 24  | 12 | 24.08% | 8.64 | 1.04 | 1.05 | 1.04 | 0.98 | 1.09 | 1.15 | 1.06 | 1.11 | 0.98 | 1.01 | 1.08 |
| 7   | 5  | 2.75%  | 5.32 | 0.95 | 0.91 | 0.83 | 0.76 | 1.1  | 1.08 | 0.95 | 0.99 | 1.14 | 0.97 | 0.83 |
| 4   | 2  | 27.37% | 9.1  | 1.04 | 1.16 | 1.07 | 1.67 | 1.01 | 1.13 | 1.2  | 1.4  | 1.22 | 1.54 | 1.08 |
| 14  | 11 | 17.37% | 6.46 | 1.17 | 0.96 | 1    | 0.98 | 1.06 | 0.96 | 1.14 | 1.12 | 0.92 | 1.02 | 1.04 |
| 15  | 5  | 11.04% | 6.04 | 0.76 | 1.15 | 0.89 | 0.86 | 1.11 | 1.15 | 1.25 | 1.33 | 1.28 | 1.37 | 1.26 |
| 6   | 5  | 13.95% | 5.09 | 1.11 | 1.06 | 1.28 | 1.3  | 1    | 0.96 | 1.27 | 1.19 | 0.92 | 1.04 | 1.01 |
| 17  | 3  | 15.64% | 7.62 | 0.94 | 0.77 | 1.22 | 1.47 | 1.17 | 1.02 | 1.45 | 1.46 | 0.96 | 1.22 | 1.02 |
| 4   | 3  | 28.85% | 11.5 | 1.95 | 2.12 | 1.25 | 1.32 | 0.59 | 0.55 | 0.65 | 0.58 | 0.84 | 0.71 | 0.75 |
| 11  | 3  | 20.00% | 10.1 | 1.56 | 1.69 | 1.59 | 1.62 | 1.02 | 0.74 | 0.81 | 0.85 | 0.8  | 0.66 | 0.63 |
| 3   | 2  | 8.62%  | 6.83 | 1.13 | 1    | 1.47 | 1.49 | 0.9  | 0.78 | 1.29 | 1.13 | 0.77 | 1.36 | 1.03 |
| 4   | 4  | 8.96%  | 6.77 | 0.99 | 1.11 | 0.36 | 0.54 | 1.08 | 1.1  | 1    | 1.31 | 1.11 | 0.64 | 1.37 |
| 41  | 13 | 34.59% | 6.57 | 1.03 | 1.07 | 1.09 | 1.08 | 0.99 | 0.96 | 0.9  | 0.95 | 1.04 | 1.1  | 1.05 |
| 15  | 5  | 12.34% | 6.24 | 1.15 | 1.03 | 1.03 | 1.01 | 0.99 | 0.93 | 0.9  | 0.94 | 1.03 | 1.09 | 1.05 |
| 9   | 4  | 9.54%  | 5.7  | 1.15 | 1.13 | 1.09 | 1.09 | 1.03 | 0.98 | 1.22 | 1.06 | 0.99 | 1.04 | 1.05 |

|     |    |        |      |      |      |      |      |      |      |      |      |      |      |      |
|-----|----|--------|------|------|------|------|------|------|------|------|------|------|------|------|
| 3   | 3  | 8.27%  | 9.13 | 0.99 | 0.88 | 0.73 | 0.81 | 1.04 | 1.02 | 0.72 | 0.9  | 0.79 | 0.62 | 0.82 |
| 4   | 3  | 6.07%  | 8    | 0.79 | 0.89 | 0.93 | 1.06 | 0.78 | 1.02 | 0.73 | 1.16 | 0.66 | 1.33 | 1.14 |
| 32  | 9  | 17.46% | 5.67 | 0.87 | 0.97 | 0.86 | 0.92 | 0.94 | 1.01 | 0.93 | 1.01 | 1.14 | 0.98 | 1.02 |
| 11  | 5  | 7.80%  | 6.08 | 0.88 | 0.95 | 0.89 | 0.76 | 0.91 | 1.06 | 0.94 | 0.87 | 1.08 | 1.11 | 0.95 |
| 12  | 6  | 12.65% | 9.07 | 1.36 | 1.29 | 1.27 | 1.26 | 0.88 | 0.83 | 0.74 | 0.75 | 0.83 | 0.89 | 0.91 |
| 13  | 6  | 18.26% | 8.11 | 1.08 | 1.12 | 1.17 | 1.13 | 0.65 | 0.66 | 0.72 | 0.7  | 0.93 | 0.84 | 0.9  |
| 11  | 6  | 19.44% | 8.36 | 1.06 | 1.13 | 1.17 | 1.13 | 0.72 | 0.79 | 0.72 | 0.7  | 0.95 | 0.84 | 0.9  |
| 107 | 14 | 36.77% | 7.55 | 0.89 | 0.84 | 0.89 | 0.9  | 0.88 | 0.85 | 0.92 | 0.89 | 1.01 | 1.06 | 1.04 |
| 124 | 24 | 63.23% | 5.54 | 1    | 1.02 | 0.98 | 1.02 | 0.97 | 0.91 | 0.95 | 0.94 | 1.09 | 1.08 | 1.03 |
| 69  | 18 | 39.96% | 5.6  | 0.94 | 0.97 | 0.9  | 0.9  | 1.14 | 1.15 | 1.12 | 1.12 | 1.1  | 1.08 | 1.09 |
| 95  | 27 | 42.58% | 5.3  | 0.92 | 0.92 | 0.96 | 0.94 | 1.33 | 1.14 | 1.13 | 1.14 | 1.14 | 1.06 | 1    |
| 64  | 12 | 41.08% | 7.02 | 0.89 | 0.91 | 0.9  | 0.98 | 0.89 | 0.87 | 0.92 | 0.94 | 1.05 | 1.18 | 1.07 |
| 72  | 12 | 29.59% | 7.71 | 0.99 | 0.97 | 1.06 | 0.98 | 0.92 | 0.88 | 0.94 | 0.94 | 1.07 | 1.09 | 1.02 |
| 54  | 11 | 26.06% | 8.82 | 1.04 | 0.97 | 1.12 | 1.06 | 1.02 | 0.99 | 0.96 | 0.98 | 0.98 | 0.98 | 0.95 |
| 9   | 7  | 7.87%  | 6.1  | 1.02 | 1.07 | 1.02 | 1.03 | 1.08 | 1.01 | 0.89 | 1.03 | 1.21 | 1.07 | 1.03 |
| 20  | 12 | 13.30% | 6.12 | 1.09 | 1.14 | 1.12 | 1.02 | 0.88 | 0.98 | 0.95 | 0.95 | 0.96 | 1.13 | 0.92 |
| 4   | 3  | 20.39% | 5.32 | 0.79 | 1.07 | 0.69 | 0.63 | 0.7  | 0.95 | 1.13 | 0.88 | 1.1  | 0.75 | 0.72 |
| 11  | 7  | 31.45% | 5.34 | 1.06 | 0.86 | 1.27 | 0.96 | 0.77 | 0.65 | 0.93 | 1.01 | 0.95 | 1.28 | 1.17 |
| 111 | 16 | 28.46% | 6.85 | 0.92 | 0.94 | 0.9  | 0.99 | 1.16 | 1.13 | 1.06 | 1.03 | 1.18 | 1.08 | 1.07 |
| 52  | 15 | 29.19% | 6.39 | 0.88 | 0.86 | 0.89 | 0.88 | 1.1  | 1.16 | 1.13 | 1.13 | 1.16 | 1.15 | 1.17 |
| 57  | 15 | 41.04% | 5.91 | 1    | 1.04 | 1.01 | 1.03 | 1.05 | 0.97 | 0.86 | 0.88 | 1.11 | 1.07 | 1.06 |
| 64  | 17 | 32.97% | 5.66 | 0.97 | 0.97 | 1.02 | 0.96 | 0.94 | 0.91 | 0.85 | 0.98 | 1.07 | 1.12 | 1.13 |
| 38  | 14 | 26.33% | 6.71 | 0.97 | 0.94 | 1.02 | 1.02 | 0.88 | 1    | 1    | 0.92 | 1.03 | 1.13 | 1.06 |
| 14  | 7  | 14.59% | 7.23 | 1.1  | 1.16 | 1.05 | 1.08 | 0.87 | 1.02 | 0.85 | 0.89 | 1.4  | 1.22 | 0.81 |
| 4   | 2  | 10.00% | 8.93 | 1.18 | 1.07 | 0.96 | 1.08 | 1.11 | 1.09 | 1.03 | 1.18 | 0.98 | 1    | 1.12 |
| 15  | 10 | 22.14% | 6.98 | 1.11 | 1.02 | 1.08 | 1.01 | 1.24 | 1.21 | 1.27 | 1.2  | 1.03 | 0.92 | 0.92 |
| 6   | 5  | 6.45%  | 5.65 | 1.04 | 0.91 | 1    | 1.03 | 1.31 | 1.32 | 1.48 | 1.4  | 1.07 | 1.09 | 1.14 |
| 5   | 5  | 10.78% | 6.3  | 0.94 | 1.21 | 0.99 | 0.96 | 1    | 1.14 | 0.67 | 0.8  | 1.05 | 0.81 | 0.87 |
| 27  | 9  | 46.19% | 5.99 | 0.94 | 1.02 | 0.84 | 0.86 | 0.99 | 0.91 | 1.03 | 1.03 | 1.09 | 1.14 | 1.07 |
| 20  | 5  | 23.02% | 5.73 | 0.96 | 0.98 | 0.99 | 1    | 1.03 | 1.18 | 1.04 | 1.03 | 1.22 | 1.06 | 1.02 |
| 3   | 2  | 7.25%  | 6.23 | 1.34 | 1.18 | 0.97 | 1.24 | 0.9  | 1.23 | 1.08 | 1    | 1.31 | 1.01 | 1.08 |
| 8   | 5  | 17.24% | 5.84 | 1.04 | 1.16 | 0.99 | 1.14 | 0.94 | 0.94 | 0.92 | 1.01 | 1.05 | 1.03 | 1.08 |
| 3   | 2  | 8.79%  | 9.52 | 0.99 | 0.97 | 1.38 | 1.33 | 0.99 | 0.91 | 1.13 | 0.91 | 1.11 | 0.77 | 0.82 |
| 9   | 5  | 13.87% | 5.5  | 0.93 | 0.94 | 0.8  | 0.81 | 1.01 | 1.2  | 0.81 | 0.76 | 1.64 | 1.15 | 1.11 |
| 11  | 6  | 19.48% | 5.65 | 1.01 | 1.09 | 1    | 0.98 | 1.16 | 1.01 | 0.91 | 1.02 | 1.2  | 1.05 | 1.15 |
| 12  | 5  | 15.99% | 6.08 | 1.1  | 1.16 | 1    | 1.11 | 1.07 | 1.14 | 0.93 | 1.02 | 1.27 | 1.07 | 1.15 |
| 3   | 2  | 0.29%  | 5.8  | 1.86 | 1.79 | 2.54 | 2.14 | 2    | 1.57 | 2    | 1.73 | 1.48 | 0.7  | 0.92 |
| 6   | 6  | 11.09% | 8.67 | 0.82 | 0.94 | 0.84 | 0.87 | 0.64 | 0.72 | 0.63 | 0.69 | 0.8  | 0.79 | 0.81 |
| 4   | 4  | 38.10% | 9.79 | 0.96 | 1    | 0.96 | 0.92 | 0.97 | 0.8  | 0.8  | 0.89 | 1.3  | 1.32 | 1.27 |
| 6   | 3  | 23.29% | 5.86 | 0.95 | 0.94 | 0.93 | 1    | 1.14 | 1.13 | 1.14 | 1.02 | 1.15 | 1.06 | 1.07 |
| 10  | 5  | 16.58% | 6.48 | 1.36 | 1.14 | 0.87 | 0.96 | 1.47 | 1.19 | 0.91 | 1.07 | 0.87 | 0.88 | 1.03 |
| 10  | 5  | 14.91% | 7.7  | 0.94 | 1    | 0.84 | 0.96 | 1.17 | 1.18 | 1.07 | 1.28 | 1.14 | 1.08 | 1.27 |
| 6   | 5  | 9.76%  | 6.42 | 1.14 | 1.35 | 1.07 | 0.97 | 1.4  | 1.52 | 1.03 | 1    | 1.05 | 1.01 | 1.16 |
| 20  | 7  | 30.86% | 9.3  | 1.03 | 1.03 | 1    | 1.09 | 1.15 | 1.08 | 1.01 | 1.27 | 0.97 | 1.04 | 0.93 |
| 68  | 8  | 39.29% | 8.63 | 1    | 1.06 | 0.93 | 1.06 | 1.1  | 1.09 | 1.02 | 1.15 | 1.06 | 1.06 | 1.06 |
| 63  | 8  | 31.40% | 9.1  | 1.08 | 1.01 | 0.9  | 0.93 | 1.22 | 1.13 | 1.18 | 1.13 | 1.05 | 0.74 | 0.72 |
| 42  | 15 | 31.89% | 9.1  | 1.26 | 1.21 | 1.16 | 1.18 | 1.21 | 1.19 | 1.2  | 1.19 | 0.93 | 1.03 | 0.98 |
| 46  | 19 | 19.85% | 7.02 | 0.88 | 0.89 | 0.89 | 0.88 | 1.16 | 1.12 | 1.13 | 1.09 | 1.11 | 1.09 | 1.06 |
| 62  | 24 | 26.53% | 5.88 | 1.05 | 0.99 | 0.97 | 1.1  | 1.07 | 1.05 | 1.12 | 1.28 | 1.06 | 1.17 | 1.11 |
| 6   | 5  | 5.68%  | 6.03 | 0.78 | 1.32 | 1.76 | 2    | 0.78 | 0.89 | 0.76 | 1.04 | 0.56 | 0.76 | 0.72 |

|     |    |        |      |      |      |      |      |      |      |      |      |      |      |      |
|-----|----|--------|------|------|------|------|------|------|------|------|------|------|------|------|
| 98  | 28 | 32.22% | 6    | 1.71 | 1.52 | 1.75 | 1.78 | 0.98 | 0.95 | 0.85 | 0.88 | 0.77 | 0.71 | 0.68 |
| 11  | 3  | 3.02%  | 5.88 | 1.03 | 1.05 | 0.85 | 1.01 | 0.98 | 1.06 | 1.05 | 1.01 | 0.86 | 0.94 | 0.96 |
| 3   | 2  | 7.41%  | 8.92 | 0.41 | 0.73 | 0.97 | 0.87 | 0.46 | 0.48 | 0.47 | 0.71 | 0.83 | 1.02 | 1.03 |
| 10  | 6  | 16.96% | 9.4  | 0.98 | 0.95 | 0.81 | 0.95 | 0.88 | 1.07 | 1.06 | 1.05 | 0.93 | 1    | 1.06 |
| 20  | 8  | 36.61% | 8.9  | 0.96 | 1.01 | 0.95 | 0.96 | 1.18 | 1.09 | 0.99 | 1.06 | 1.1  | 0.98 | 0.97 |
| 39  | 13 | 31.47% | 5.79 | 0.98 | 0.94 | 1    | 1.06 | 0.99 | 1.01 | 1.03 | 1.05 | 0.93 | 1.05 | 0.98 |
| 6   | 4  | 14.34% | 8.81 | 1.02 | 0.98 | 1.13 | 1.04 | 1.17 | 1.09 | 0.98 | 0.98 | 1    | 0.93 | 0.97 |
| 15  | 8  | 19.88% | 4.93 | 1.18 | 0.99 | 1.03 | 1.15 | 1.11 | 1.02 | 1.17 | 1.24 | 0.97 | 1.01 | 1.02 |
| 35  | 16 | 23.00% | 8.88 | 1.05 | 1.07 | 1.16 | 1.14 | 1.02 | 1    | 1.11 | 1.16 | 0.97 | 1.03 | 1.03 |
| 17  | 5  | 17.36% | 6.14 | 1.14 | 1.11 | 1.07 | 1.03 | 1.07 | 0.97 | 1.11 | 1.05 | 1.01 | 0.98 | 0.88 |
| 74  | 15 | 32.34% | 7.16 | 1.06 | 0.97 | 0.97 | 1.04 | 1.14 | 1.16 | 1.04 | 1.09 | 0.98 | 1.08 | 1.08 |
| 21  | 7  | 25.18% | 8.61 | 1.1  | 0.99 | 1.26 | 1.21 | 1.15 | 0.97 | 1.2  | 1.2  | 0.86 | 1.07 | 1.03 |
| 42  | 11 | 36.36% | 8.7  | 1.15 | 1.05 | 0.97 | 1.02 | 1.19 | 1.05 | 1.11 | 1.1  | 1.05 | 1.03 | 1.06 |
| 28  | 9  | 18.46% | 7.71 | 1.07 | 0.95 | 0.95 | 0.99 | 1.19 | 1.08 | 1.02 | 0.94 | 0.99 | 0.91 | 0.93 |
| 122 | 17 | 42.39% | 6.12 | 0.9  | 0.96 | 0.89 | 1    | 1.09 | 1.09 | 1.17 | 1.05 | 1.05 | 1.03 | 1.01 |
| 31  | 11 | 22.42% | 8.34 | 1.3  | 1.13 | 1    | 1.04 | 1.37 | 1.11 | 1.02 | 1.01 | 1.07 | 0.89 | 0.92 |
| 23  | 9  | 19.73% | 9.18 | 0.64 | 0.71 | 0.84 | 0.85 | 1.4  | 1.37 | 1.36 | 1.3  | 0.92 | 0.9  | 0.9  |
| 56  | 15 | 35.52% | 6.05 | 1.02 | 0.96 | 0.98 | 1.03 | 1.09 | 1.15 | 1.15 | 1.02 | 1    | 0.97 | 0.93 |
| 27  | 6  | 21.30% | 9.38 | 1.05 | 1    | 1.06 | 1.11 | 1.07 | 1.01 | 1.05 | 1.02 | 0.91 | 0.98 | 0.96 |
| 44  | 3  | 15.60% | 5.01 | 0.91 | 1.16 | 0.9  | 1.01 | 1.13 | 1.25 | 1.01 | 1.08 | 1.14 | 1.23 | 1.28 |
| 7   | 4  | 13.69% | 9.02 | 0.85 | 0.9  | 0.89 | 0.92 | 1.2  | 1.07 | 1.15 | 1.28 | 1.35 | 0.78 | 1.03 |
| 56  | 18 | 29.99% | 6.16 | 0.89 | 0.86 | 0.9  | 0.88 | 1.04 | 1.01 | 1.07 | 1.04 | 1.07 | 1.12 | 1.1  |
| 7   | 4  | 7.18%  | 6.86 | 0.98 | 1.06 | 1.22 | 1.02 | 0.78 | 0.74 | 1    | 0.84 | 0.96 | 0.89 | 0.82 |
| 34  | 18 | 28.24% | 8.8  | 0.98 | 1.02 | 1    | 0.96 | 1.08 | 1.16 | 0.98 | 0.81 | 1.06 | 1.11 | 1.1  |
| 30  | 8  | 33.77% | 9.12 | 0.94 | 0.97 | 0.98 | 1.11 | 0.97 | 1.13 | 1.14 | 1.09 | 0.96 | 1.12 | 1.14 |
| 66  | 10 | 25.45% | 8.75 | 0.97 | 0.93 | 1    | 0.97 | 1.18 | 1.06 | 1.16 | 1.11 | 1.02 | 1.08 | 1.04 |
| 20  | 4  | 8.10%  | 7.13 | 1.28 | 1.09 | 1.25 | 1.3  | 1.26 | 1.13 | 1.04 | 1.13 | 1.04 | 1.06 | 0.94 |
| 7   | 4  | 9.64%  | 8.74 | 1.69 | 1.63 | 1.38 | 1.35 | 1.44 | 1.46 | 1.25 | 1.2  | 1.03 | 0.84 | 0.82 |
| 9   | 7  | 10.85% | 7.99 | 1.01 | 1.09 | 1.46 | 1.01 | 1.01 | 1.04 | 0.98 | 0.83 | 1.04 | 0.74 | 0.86 |
| 13  | 6  | 10.81% | 6.5  | 0.96 | 0.85 | 0.98 | 1.02 | 0.97 | 1.01 | 0.83 | 0.96 | 0.89 | 0.95 | 1.19 |
| 15  | 5  | 12.25% | 6.09 | 1.02 | 0.95 | 0.93 | 1.13 | 0.92 | 1.09 | 1.03 | 1.15 | 0.99 | 1.02 | 1.06 |
| 50  | 11 | 28.13% | 9.06 | 0.95 | 0.99 | 0.95 | 1.01 | 1.07 | 1    | 1.06 | 1.23 | 1.03 | 1.05 | 1.03 |
| 9   | 4  | 10.74% | 9.07 | 1.1  | 1.13 | 1.11 | 1.27 | 1.22 | 1.18 | 1.17 | 1.06 | 0.96 | 1.02 | 0.94 |
| 34  | 9  | 28.98% | 7.71 | 1.06 | 1.01 | 1.25 | 1.01 | 1.29 | 1.14 | 1.27 | 1.19 | 1.05 | 1.04 | 0.96 |
| 2   | 2  | 2.41%  | 6.58 | 1.15 | 0.91 | 1.02 | 0.94 | 0.66 | 0.74 | 1.06 | 1.04 | 0.59 | 1.04 | 1.01 |
| 25  | 12 | 24.57% | 6.59 | 0.91 | 1    | 1.02 | 1.06 | 1.19 | 1.16 | 1.15 | 1.16 | 1.02 | 1.16 | 1.01 |
| 25  | 12 | 23.84% | 5.74 | 0.9  | 0.92 | 0.91 | 0.95 | 1.12 | 1.16 | 1.09 | 1.05 | 1.09 | 1.04 | 0.98 |
| 29  | 12 | 28.85% | 6.44 | 0.88 | 0.95 | 0.92 | 0.9  | 1.09 | 1.09 | 1.11 | 1.1  | 1.05 | 1.02 | 1.08 |
| 25  | 11 | 22.95% | 6.69 | 1.2  | 1.34 | 1.09 | 1.28 | 0.99 | 0.99 | 1    | 1.05 | 0.89 | 1    | 1.11 |
| 20  | 11 | 16.25% | 8.55 | 0.98 | 0.95 | 1.09 | 0.98 | 1.33 | 1.31 | 1.25 | 1.2  | 1.11 | 0.94 | 0.99 |
| 10  | 7  | 14.13% | 9.34 | 0.98 | 1.07 | 0.93 | 0.95 | 1.07 | 1.14 | 0.97 | 0.95 | 1.08 | 1.01 | 1.16 |
| 21  | 10 | 26.04% | 8.21 | 1.06 | 1.28 | 0.93 | 1.03 | 1.13 | 1.11 | 1.09 | 1.08 | 0.94 | 1.03 | 0.96 |
| 13  | 7  | 20.95% | 7.94 | 1.08 | 1    | 1.5  | 1.78 | 0.79 | 0.9  | 1.45 | 0.43 | 1.02 | 0.49 | 0.63 |
| 10  | 7  | 19.09% | 8.67 | 1.28 | 1.61 | 1.29 | 1.31 | 0.93 | 0.93 | 0.57 | 0.71 | 0.82 | 1.05 | 0.99 |
| 24  | 12 | 29.55% | 7.01 | 0.92 | 0.9  | 0.91 | 0.9  | 1.09 | 1.03 | 1.09 | 0.97 | 1.09 | 1.03 | 1.07 |
| 12  | 9  | 12.14% | 9.17 | 1.1  | 1.3  | 1.25 | 1    | 0.72 | 0.91 | 0.74 | 0.71 | 0.82 | 0.69 | 0.89 |
| 6   | 3  | 10.79% | 4.95 | 0.86 | 1.29 | 0.85 | 1.18 | 1.01 | 1.1  | 0.94 | 0.98 | 1.01 | 0.9  | 1.21 |
| 48  | 21 | 27.10% | 5.08 | 0.98 | 0.94 | 0.92 | 0.96 | 1.15 | 1.17 | 1.06 | 1.14 | 1.09 | 1.06 | 1.04 |
| 3   | 3  | 19.46% | 4.99 | 1.01 | 0.91 | 1.25 | 0.92 | 0.99 | 1    | 1.14 | 1.05 | 0.96 | 0.84 | 1.03 |
| 35  | 16 | 20.55% | 5.56 | 1.09 | 1.12 | 1.03 | 1.1  | 0.92 | 0.91 | 0.9  | 1.12 | 1.08 | 1.08 | 1.13 |

|     |    |        |      |      |      |      |      |      |      |      |      |      |      |      |
|-----|----|--------|------|------|------|------|------|------|------|------|------|------|------|------|
| 15  | 7  | 24.49% | 6.39 | 1.14 | 1.07 | 1.28 | 1.13 | 1.15 | 1.13 | 1.23 | 1.17 | 1    | 1.16 | 1.06 |
| 9   | 6  | 15.63% | 5.67 | 0.88 | 0.89 | 0.89 | 0.87 | 1.15 | 0.95 | 1.14 | 0.97 | 0.71 | 0.89 | 0.78 |
| 6   | 5  | 13.87% | 8.89 | 0.57 | 0.87 | 0.9  | 0.91 | 0.77 | 0.94 | 1.03 | 1.04 | 1.03 | 1.05 | 1.07 |
| 6   | 5  | 15.30% | 7.66 | 1    | 1.12 | 0.82 | 0.93 | 1.07 | 1.16 | 1.13 | 1.07 | 1.14 | 1.11 | 1.11 |
| 26  | 12 | 20.61% | 5.81 | 0.94 | 0.87 | 0.88 | 1.01 | 1.07 | 1.06 | 1.08 | 1.07 | 1.11 | 1.15 | 1.07 |
| 30  | 19 | 18.39% | 6.1  | 1    | 1.01 | 0.99 | 0.9  | 1.11 | 1.02 | 1.04 | 0.96 | 1.18 | 1.08 | 1.07 |
| 109 | 32 | 23.04% | 5.84 | 0.91 | 0.87 | 0.96 | 0.92 | 1.1  | 0.99 | 1.09 | 1.04 | 1.09 | 1.11 | 1.11 |
| 3   | 2  | 4.47%  | 5.34 | 1.05 | 0.66 | 1.24 | 0.93 | 1.13 | 0.81 | 0.96 | 1    | 1.15 | 0.91 | 0.93 |
| 12  | 8  | 19.49% | 6.6  | 1.15 | 1.21 | 1.26 | 1.2  | 0.95 | 0.93 | 0.9  | 0.9  | 1.09 | 0.94 | 0.93 |
| 6   | 5  | 11.19% | 5.29 | 0.96 | 1.12 | 0.96 | 0.98 | 1.1  | 1.4  | 1.12 | 1    | 1.31 | 0.97 | 0.91 |
| 16  | 6  | 21.80% | 5.22 | 1.09 | 1.1  | 0.87 | 1.07 | 1.3  | 1.16 | 1.2  | 1.14 | 1.1  | 1.19 | 1.15 |
| 22  | 9  | 6.68%  | 5.74 | 1.02 | 1.09 | 1.03 | 1.21 | 1.05 | 1.08 | 1.24 | 1.18 | 1.1  | 1.19 | 1.14 |
| 19  | 11 | 16.65% | 6.09 | 1.01 | 1.12 | 1.04 | 1.15 | 1.15 | 1.1  | 1.38 | 1.14 | 0.77 | 0.9  | 0.84 |
| 13  | 7  | 10.77% | 9.5  | 0.6  | 0.62 | 0.68 | 0.59 | 0.96 | 0.94 | 1.07 | 1.03 | 1.08 | 1.17 | 1.24 |
| 32  | 11 | 35.48% | 5.55 | 0.72 | 0.87 | 0.82 | 0.82 | 1.08 | 1    | 1.07 | 1    | 1.17 | 1.09 | 1.1  |
| 8   | 2  | 1.84%  | 8.96 | 0.96 | 1.19 | 1.03 | 1    | 1.06 | 1.22 | 1.13 | 1.1  | 0.75 | 1.15 | 1.12 |
| 98  | 19 | 21.33% | 5.11 | 1.07 | 1.08 | 1.12 | 1.12 | 1.16 | 1.09 | 1.18 | 1.1  | 1.09 | 1.03 | 1    |
| 6   | 5  | 17.58% | 4.98 | 0.82 | 0.86 | 1.14 | 1.06 | 1.03 | 0.98 | 1.04 | 0.88 | 1.34 | 1.03 | 1.12 |
| 16  | 9  | 27.23% | 5.38 | 1.02 | 1.06 | 0.86 | 1.06 | 1.14 | 1.2  | 1.12 | 1.2  | 1.07 | 1.35 | 1.2  |
| 19  | 9  | 21.04% | 6.3  | 1    | 1.06 | 0.94 | 0.84 | 1    | 1.05 | 0.85 | 0.78 | 0.98 | 0.89 | 0.85 |
| 7   | 7  | 15.09% | 5.27 | 1.02 | 0.98 | 0.91 | 0.93 | 1.32 | 1.09 | 1.11 | 1.02 | 1.04 | 1    | 0.96 |
| 3   | 2  | 3.42%  | 6.74 | 1.2  | 1.1  | 1.13 | 1.16 | 1.05 | 1.14 | 0.94 | 1.07 | 1.1  | 1.08 | 1.05 |
| 36  | 18 | 22.17% | 5.99 | 0.93 | 0.97 | 0.92 | 0.97 | 0.9  | 1.01 | 0.95 | 0.96 | 1.14 | 1.11 | 1.16 |
| 11  | 5  | 6.59%  | 6    | 0.82 | 0.98 | 0.96 | 1.07 | 0.83 | 1.07 | 1.02 | 1.15 | 0.84 | 1.01 | 1.16 |
| 5   | 3  | 8.75%  | 6.48 | 1.03 | 0.98 | 1.08 | 1.04 | 1.08 | 0.99 | 1.12 | 1.08 | 0.99 | 1.04 | 1    |
| 20  | 9  | 20.49% | 8.16 | 0.98 | 0.73 | 1.91 | 0.88 | 0.92 | 1    | 1.02 | 1.2  | 0.93 | 1.01 | 1.11 |
| 9   | 6  | 13.35% | 6.76 | 1.03 | 0.97 | 1.07 | 1.21 | 1.17 | 1.17 | 1.19 | 1.18 | 1.14 | 0.94 | 0.96 |
| 39  | 15 | 32.05% | 7.61 | 1.05 | 1.04 | 0.98 | 0.97 | 1.23 | 1.15 | 1.2  | 1.14 | 1.04 | 0.94 | 0.97 |
| 2   | 2  | 2.21%  | 5.46 | 0.79 | 0.78 | 0.86 | 0.93 | 1.09 | 0.91 | 1.1  | 0.99 | 1    | 0.93 | 0.96 |
| 7   | 7  | 10.05% | 5.74 | 0.87 | 0.91 | 0.9  | 0.98 | 1.2  | 1.16 | 1.07 | 1.24 | 1.09 | 1.04 | 1.09 |
| 12  | 10 | 12.13% | 6.1  | 1.27 | 1.27 | 1.61 | 1.66 | 1.1  | 1.06 | 1.48 | 1.29 | 1.09 | 1.07 | 0.98 |
| 8   | 7  | 9.44%  | 5.83 | 1.23 | 0.71 | 0.99 | 1.17 | 0.9  | 1.05 | 1.19 | 1.04 | 0.88 | 0.92 | 0.89 |
| 29  | 16 | 22.33% | 5.51 | 0.91 | 0.85 | 0.85 | 1.07 | 1.08 | 1.03 | 0.93 | 1.13 | 1.1  | 1.11 | 1.17 |
| 87  | 23 | 28.32% | 5.43 | 1.05 | 0.99 | 0.99 | 1.06 | 1.15 | 1.05 | 1.02 | 1.12 | 1.12 | 1.1  | 1.11 |
| 11  | 8  | 22.06% | 8.17 | 0.84 | 0.88 | 1.1  | 1.49 | 0.97 | 1.1  | 1.7  | 1.53 | 1.01 | 1.07 | 1.14 |
| 2   | 2  | 3.17%  | 5.61 | 1    | 1.19 | 1.28 | 1.2  | 1.21 | 1.06 | 1.36 | 1.28 | 1.33 | 1.09 | 1.14 |
| 6   | 6  | 9.18%  | 6.4  | 1.21 | 1.15 | 1.06 | 1.05 | 1.46 | 1.32 | 1.24 | 1.03 | 1.07 | 1.01 | 1.02 |
| 36  | 20 | 18.35% | 7.11 | 1    | 1.11 | 1.07 | 1.07 | 1.03 | 1.03 | 1.02 | 1.06 | 1.05 | 1.16 | 1.09 |
| 14  | 8  | 13.25% | 5.81 | 0.94 | 1.12 | 0.95 | 1    | 1.11 | 1.11 | 1.08 | 0.99 | 1    | 0.92 | 0.89 |
| 4   | 3  | 3.13%  | 6.02 | 0.32 | 0.34 | 0.92 | 0.8  | 0.4  | 0.32 | 0.83 | 0.98 | 0.4  | 1.08 | 0.96 |
| 3   | 2  | 6.75%  | 5.42 | 1.25 | 1.16 | 0.9  | 0.98 | 1.07 | 0.87 | 0.99 | 0.93 | 1.47 | 1.05 | 1.01 |
| 9   | 3  | 43.82% | 6.23 | 0.88 | 0.85 | 0.9  | 0.92 | 0.86 | 0.87 | 0.87 | 0.75 | 1.26 | 1.25 | 1.33 |
| 14  | 3  | 17.49% | 5.25 | 0.78 | 0.6  | 0.56 | 0.72 | 1.27 | 1.28 | 1.02 | 0.98 | 1.13 | 1.28 | 1.12 |
| 17  | 7  | 26.62% | 5.41 | 1.2  | 1.23 | 0.86 | 0.95 | 1.43 | 1.39 | 1.17 | 1.05 | 0.94 | 1    | 1.02 |
| 70  | 14 | 63.76% | 5.24 | 1.06 | 1.08 | 1.12 | 1.01 | 1.21 | 1.09 | 1.12 | 1.05 | 1.13 | 1.09 | 1.06 |
| 6   | 4  | 27.33% | 9.41 | 0.83 | 0.94 | 0.91 | 0.91 | 0.98 | 1.12 | 1.08 | 1.04 | 0.92 | 1.06 | 1.11 |
| 2   | 2  | 1.07%  | 8.58 | 0.31 | 0.38 | 0.64 | 0.59 | 0.67 | 1.07 | 1.16 | 1.15 | 1.05 | 0.71 | 0.94 |
| 7   | 5  | 9.40%  | 5.91 | 1    | 0.97 | 0.97 | 0.84 | 0.81 | 0.94 | 1.1  | 0.91 | 0.69 | 1.08 | 0.96 |
| 10  | 4  | 13.64% | 5.59 | 0.9  | 1    | 1.09 | 1.05 | 1.13 | 1.26 | 1.25 | 1.18 | 0.95 | 1.18 | 1.09 |
| 33  | 7  | 23.24% | 6.51 | 1.08 | 0.99 | 0.87 | 1.06 | 1.19 | 1.14 | 1.16 | 1.15 | 1.09 | 1.04 | 1.2  |

|     |    |        |      |      |      |      |      |      |      |      |      |      |      |      |
|-----|----|--------|------|------|------|------|------|------|------|------|------|------|------|------|
| 2   | 2  | 5.84%  | 8.22 | 1.82 | 1.67 | 0.95 | 1.22 | 3.19 | 1.07 | 1.12 | 0.96 | 1.43 | 1    | 0.82 |
| 10  | 3  | 9.58%  | 8.14 | 0.99 | 0.95 | 1    | 1.05 | 1.05 | 1.1  | 1.13 | 1.11 | 0.99 | 1.18 | 1.03 |
| 12  | 4  | 12.73% | 7.63 | 0.94 | 0.95 | 1.02 | 1.11 | 0.98 | 0.98 | 1.03 | 1.18 | 0.9  | 1.05 | 0.88 |
| 10  | 6  | 15.87% | 8.29 | 1.17 | 1    | 0.94 | 0.91 | 1.12 | 1.03 | 1.08 | 1.12 | 1.09 | 0.99 | 1.05 |
| 5   | 3  | 9.71%  | 5.7  | 1.01 | 1.07 | 0.87 | 0.85 | 0.94 | 1.02 | 1.21 | 1.17 | 1.29 | 1.15 | 1.17 |
| 30  | 10 | 23.86% | 8.18 | 1    | 1.04 | 0.84 | 1.02 | 1.06 | 1.2  | 1    | 1.16 | 1.1  | 1.15 | 1.15 |
| 19  | 12 | 23.23% | 5.61 | 1.17 | 1.24 | 1.13 | 1.25 | 0.99 | 0.92 | 0.97 | 0.97 | 0.9  | 1.04 | 1.05 |
| 2   | 2  | 6.77%  | 6.32 | 0.81 | 0.7  | 0.72 | 0.92 | 0.98 | 0.92 | 0.95 | 1.05 | 0.85 | 1.03 | 1.03 |
| 18  | 12 | 21.09% | 8.8  | 0.72 | 0.61 | 0.71 | 0.72 | 1    | 0.99 | 1.11 | 1    | 1.16 | 1.16 | 1.1  |
| 6   | 3  | 5.20%  | 6.59 | 0.81 | 0.81 | 0.81 | 0.79 | 1.08 | 1.11 | 0.96 | 0.95 | 1.2  | 1.22 | 1.17 |
| 10  | 8  | 12.25% | 6.55 | 0.88 | 0.85 | 0.82 | 0.85 | 1.32 | 1.03 | 1.04 | 0.95 | 1.24 | 1.11 | 1.15 |
| 16  | 10 | 7.52%  | 7.08 | 0.78 | 0.85 | 0.9  | 0.89 | 1.15 | 1.25 | 1.31 | 1.14 | 1.18 | 1.14 | 1.27 |
| 4   | 4  | 10.30% | 8.36 | 1.09 | 0.92 | 1.08 | 1.03 | 0.93 | 1.2  | 1.01 | 0.98 | 1.14 | 1.01 | 0.94 |
| 3   | 3  | 9.42%  | 5.92 | 1.16 | 0.99 | 1.03 | 0.95 | 1.12 | 0.99 | 1.03 | 0.93 | 1.11 | 1.1  | 1.06 |
| 3   | 2  | 9.45%  | 6.33 | 0.88 | 0.78 | 0.82 | 1.75 | 1    | 1.06 | 0.92 | 1.09 | 1.14 | 1    | 1.09 |
| 5   | 2  | 6.56%  | 8.56 | 0.99 | 1.02 | 1.21 | 1.26 | 1.33 | 1.22 | 1.32 | 1.31 | 1.14 | 1.08 | 1.09 |
| 12  | 7  | 14.72% | 9.18 | 0.87 | 0.99 | 0.89 | 0.97 | 0.76 | 0.82 | 0.72 | 0.99 | 0.77 | 0.9  | 0.74 |
| 3   | 3  | 4.32%  | 5.84 | 1.09 | 0.96 | 0.93 | 0.83 | 1.03 | 1.08 | 1.24 | 1.11 | 0.98 | 1.14 | 1.09 |
| 33  | 11 | 27.47% | 8.72 | 0.79 | 0.85 | 0.81 | 0.85 | 1.05 | 0.99 | 0.94 | 0.97 | 1.11 | 1.11 | 1.1  |
| 7   | 3  | 11.74% | 9.63 | 1.09 | 1.03 | 1.16 | 0.97 | 1.13 | 1.02 | 1.14 | 1.01 | 1.09 | 0.99 | 0.96 |
| 14  | 8  | 21.40% | 8.93 | 1.02 | 1.08 | 0.96 | 1.02 | 0.97 | 1.06 | 1.16 | 1.18 | 1.06 | 1.02 | 1.03 |
| 7   | 5  | 8.02%  | 8.29 | 0.93 | 0.83 | 0.81 | 0.7  | 0.97 | 0.98 | 1.26 | 1.13 | 0.87 | 1.19 | 0.95 |
| 20  | 14 | 16.38% | 5.54 | 0.96 | 1.01 | 1.03 | 1.05 | 1.22 | 1.16 | 1.14 | 1.15 | 1.05 | 1.09 | 1.16 |
| 18  | 5  | 15.60% | 8.63 | 0.75 | 0.67 | 0.71 | 0.63 | 1    | 0.9  | 1.01 | 0.96 | 1.16 | 1.15 | 1.02 |
| 41  | 8  | 26.16% | 5.14 | 0.94 | 1.04 | 1.04 | 1.01 | 1.05 | 1.03 | 1.3  | 0.99 | 1.15 | 0.74 | 1.04 |
| 25  | 6  | 17.06% | 4.6  | 0.93 | 0.93 | 1.17 | 1.12 | 1.26 | 1.22 | 1.18 | 1.25 | 1.17 | 1.23 | 1.15 |
| 4   | 2  | 6.17%  | 9.9  | 0.88 | 0.85 | 0.82 | 1    | 1.19 | 0.97 | 0.94 | 1.25 | 0.91 | 0.62 | 0.8  |
| 351 | 15 | 38.68% | 6.08 | 0.97 | 0.97 | 1.06 | 1.07 | 1.18 | 1.14 | 1.09 | 1.1  | 1.08 | 1.06 | 1.02 |
| 3   | 2  | 4.10%  | 7.88 | 0.92 | 1.26 | 1    | 1.02 | 0.94 | 1.29 | 0.86 | 1.1  | 1.01 | 0.96 | 1.02 |
| 3   | 3  | 11.76% | 8.7  | 0.94 | 0.91 | 1    | 0.97 | 0.96 | 0.99 | 0.96 | 1.12 | 0.84 | 1.06 | 0.96 |
| 3   | 2  | 2.84%  | 5.47 | 0.76 | 0.8  | 0.96 | 0.92 | 0.93 | 0.96 | 1.12 | 1.08 | 1.27 | 1.57 | 1.48 |
| 5   | 4  | 3.78%  | 5.84 | 1.36 | 1.93 | 0.76 | 1.44 | 1.11 | 0.87 | 1.08 | 0.34 | 1.14 | 0.76 | 0.89 |
| 5   | 4  | 6.81%  | 7.09 | 0.89 | 1.29 | 1.06 | 0.8  | 0.74 | 0.99 | 1.06 | 0.97 | 1.11 | 0.85 | 0.99 |
| 16  | 11 | 12.81% | 5.91 | 0.77 | 0.77 | 1.02 | 0.72 | 1.05 | 1.09 | 1.11 | 0.96 | 1.07 | 1    | 0.98 |
| 3   | 2  | 8.19%  | 5.09 | 0.44 | 0.63 | 1.21 | 1.05 | 0.97 | 0.66 | 1.51 | 1.52 | 0.5  | 1.21 | 1.08 |
| 10  | 6  | 24.14% | 5.86 | 0.93 | 0.81 | 0.95 | 0.91 | 0.84 | 0.86 | 0.89 | 0.84 | 1.29 | 1.04 | 1.02 |
| 10  | 3  | 12.44% | 6.02 | 1.1  | 1.01 | 1    | 1    | 0.91 | 0.93 | 0.97 | 0.91 | 1.24 | 1.11 | 1.08 |
| 27  | 8  | 43.93% | 6.17 | 1.1  | 1.04 | 1.16 | 1.19 | 0.94 | 0.86 | 1.16 | 0.86 | 1    | 0.93 | 0.95 |
| 12  | 7  | 21.49% | 5.24 | 1.07 | 1.07 | 1.1  | 1.04 | 1.17 | 1.06 | 0.98 | 0.94 | 1.03 | 1.03 | 1.03 |
| 20  | 5  | 24.47% | 5.26 | 0.86 | 0.94 | 1.01 | 1.03 | 0.82 | 0.84 | 1.2  | 1.04 | 1.11 | 1.05 | 1.15 |
| 19  | 7  | 22.27% | 6.23 | 1.05 | 0.95 | 0.95 | 0.96 | 0.97 | 1    | 0.92 | 0.89 | 1.02 | 1    | 1.01 |
| 7   | 3  | 7.23%  | 8.39 | 1    | 0.8  | 0.95 | 0.81 | 1.17 | 1.15 | 1.01 | 1.04 | 1.42 | 1.18 | 1.19 |
| 15  | 6  | 21.66% | 6.36 | 0.84 | 0.95 | 0.93 | 0.94 | 1.01 | 1.12 | 0.92 | 0.91 | 1.15 | 1    | 1.01 |
| 21  | 7  | 25.45% | 7.56 | 0.84 | 0.94 | 0.93 | 0.92 | 1.03 | 1.11 | 0.94 | 0.94 | 1.14 | 1.1  | 1.03 |
| 21  | 7  | 35.48% | 7.1  | 0.98 | 1.1  | 1.03 | 1.01 | 0.85 | 1.11 | 0.94 | 0.92 | 1.4  | 1.38 | 1.2  |
| 5   | 3  | 11.11% | 5.15 | 0.92 | 0.82 | 0.78 | 0.84 | 0.95 | 0.96 | 0.77 | 0.78 | 1.12 | 0.68 | 0.93 |
| 3   | 2  | 8.62%  | 9.03 | 1.29 | 1.27 | 2    | 1.48 | 1.19 | 1.03 | 0.54 | 1.09 | 0.46 | 0.9  | 0.92 |
| 7   | 4  | 13.17% | 5.77 | 0.81 | 0.91 | 0.49 | 1.52 | 1.17 | 1.06 | 1.32 | 0.95 | 0.97 | 1.13 | 1.05 |
| 7   | 5  | 5.72%  | 8.67 | 1.01 | 0.82 | 0.73 | 0.84 | 1.03 | 0.98 | 0.89 | 1.04 | 0.86 | 0.97 | 0.83 |
| 6   | 3  | 14.41% | 8.6  | 1.2  | 1.23 | 0.85 | 0.9  | 1.45 | 1.04 | 0.94 | 1.21 | 1.11 | 1.05 | 1.31 |

|     |    |        |      |      |      |      |      |      |      |      |      |      |      |      |
|-----|----|--------|------|------|------|------|------|------|------|------|------|------|------|------|
| 15  | 4  | 12.86% | 5.72 | 0.95 | 0.94 | 0.86 | 1.05 | 1.22 | 1.09 | 1.34 | 0.77 | 1.18 | 0.94 | 0.97 |
| 6   | 3  | 10.43% | 9.26 | 1.06 | 1.08 | 1.11 | 0.99 | 1.28 | 1.16 | 1.18 | 1.13 | 1.35 | 1.18 | 1.17 |
| 52  | 13 | 36.64% | 8.77 | 0.95 | 0.96 | 1.01 | 0.98 | 1.18 | 1.12 | 1.15 | 1.06 | 1.12 | 1.03 | 0.97 |
| 15  | 5  | 24.15% | 8.8  | 0.98 | 0.89 | 0.8  | 0.89 | 1.3  | 1.24 | 1.07 | 1.27 | 1.24 | 1.19 | 1.1  |
| 11  | 5  | 16.31% | 9.36 | 0.81 | 0.81 | 0.67 | 0.76 | 1.01 | 1.02 | 0.94 | 1.09 | 1.09 | 1.17 | 1.17 |
| 2   | 1  | 3.53%  | 8.14 | 0.99 | 1.34 | 1.08 | 1.16 | 0.52 | 0.73 | 0.63 | 0.62 | 0.76 | 0.78 | 0.82 |
| 4   | 3  | 10.33% | 9.46 | 1.25 | 1.09 | 1.08 | 1.01 | 0.68 | 0.69 | 0.79 | 0.89 | 0.78 | 1.09 | 1.1  |
| 14  | 7  | 14.46% | 8.65 | 1.15 | 1.16 | 1.28 | 1.14 | 1.18 | 1.09 | 1.23 | 1.11 | 1.06 | 0.92 | 0.99 |
| 17  | 10 | 32.90% | 5.13 | 0.95 | 1.05 | 0.93 | 0.92 | 1.14 | 1.1  | 1.07 | 1.04 | 0.98 | 1.01 | 0.92 |
| 7   | 6  | 18.31% | 5.03 | 1.34 | 0.97 | 1.14 | 1.11 | 0.99 | 0.83 | 1.14 | 1.11 | 1.04 | 0.82 | 0.95 |
| 10  | 5  | 9.57%  | 5.31 | 1.21 | 1.17 | 1.1  | 1.23 | 0.98 | 1    | 1.1  | 1.09 | 1.16 | 1.11 | 1.12 |
| 13  | 9  | 22.06% | 5.84 | 1.07 | 1    | 1.12 | 1.22 | 0.94 | 0.83 | 0.94 | 1.13 | 0.98 | 1.3  | 1.22 |
| 6   | 3  | 14.51% | 4.25 | 0.97 | 1.03 | 0.98 | 0.92 | 1    | 0.87 | 0.75 | 0.75 | 0.92 | 0.63 | 0.77 |
| 9   | 4  | 27.11% | 5.46 | 1.08 | 0.94 | 1.03 | 1.04 | 1.22 | 0.9  | 0.95 | 0.95 | 1.38 | 0.92 | 0.95 |
| 4   | 3  | 22.76% | 9.15 | 0.95 | 1.05 | 1.2  | 1.09 | 0.72 | 0.79 | 0.75 | 1.01 | 0.87 | 0.96 | 1.12 |
| 10  | 4  | 16.67% | 8.94 | 0.99 | 1.05 | 1.46 | 1.29 | 1.07 | 1.03 | 1.65 | 1.35 | 0.85 | 1.12 | 1.07 |
| 16  | 4  | 14.11% | 8.9  | 1.1  | 1.06 | 1.1  | 1.07 | 0.81 | 0.77 | 0.7  | 1    | 0.73 | 0.71 | 0.78 |
| 13  | 6  | 36.09% | 5.14 | 1.03 | 1.07 | 1.18 | 1.08 | 0.97 | 0.89 | 0.91 | 0.91 | 1    | 0.89 | 0.84 |
| 18  | 9  | 34.45% | 9.4  | 1    | 0.98 | 0.98 | 1.06 | 0.9  | 1.02 | 0.87 | 0.92 | 0.84 | 0.84 | 0.94 |
| 49  | 16 | 36.14% | 6.06 | 1    | 1.04 | 0.95 | 0.95 | 0.89 | 0.98 | 0.75 | 0.8  | 0.97 | 0.84 | 0.82 |
| 5   | 5  | 19.93% | 6.09 | 0.86 | 1.16 | 1.03 | 1.12 | 0.61 | 0.87 | 0.89 | 0.93 | 0.94 | 0.9  | 1.02 |
| 5   | 1  | 3.85%  | 8.76 | 1.14 | 1.05 | 1.27 | 1.02 | 1.17 | 1.09 | 1.27 | 0.92 | 1.09 | 0.88 | 0.99 |
| 2   | 2  | 13.61% | 4.92 | 0.97 | 1.03 | 0.87 | 0.79 | 0.83 | 0.83 | 0.83 | 1.13 | 0.98 | 0.5  | 0.7  |
| 4   | 4  | 9.23%  | 9.26 | 0.99 | 1.03 | 1.09 | 1.05 | 0.87 | 0.8  | 0.92 | 1.12 | 0.85 | 0.9  | 0.87 |
| 14  | 8  | 12.53% | 6.29 | 1    | 1.02 | 1.04 | 1    | 1.01 | 0.97 | 0.9  | 0.86 | 0.93 | 1.32 | 1.14 |
| 79  | 32 | 22.27% | 6.15 | 1.07 | 1    | 0.99 | 0.97 | 1.09 | 1.06 | 1.09 | 1.05 | 1.01 | 1.02 | 0.99 |
| 29  | 16 | 9.20%  | 6.03 | 1.04 | 0.97 | 0.91 | 0.92 | 0.97 | 1.12 | 0.85 | 0.93 | 1.07 | 1.02 | 1.01 |
| 14  | 5  | 16.82% | 6.33 | 0.93 | 0.97 | 0.81 | 0.92 | 0.82 | 1.06 | 0.86 | 0.81 | 1.13 | 1.21 | 1.16 |
| 3   | 2  | 5.71%  | 6.05 | 0.83 | 0.87 | 0.79 | 0.86 | 0.97 | 1.1  | 0.95 | 0.97 | 1.15 | 1.41 | 1.46 |
| 7   | 4  | 19.93% | 6.2  | 0.8  | 0.92 | 0.93 | 0.97 | 0.61 | 0.82 | 0.8  | 0.77 | 0.9  | 0.94 | 0.99 |
| 112 | 8  | 22.34% | 8.68 | 0.6  | 0.6  | 0.57 | 0.64 | 1.07 | 1.08 | 1.07 | 1.04 | 1.33 | 1.27 | 1.25 |
| 5   | 3  | 9.21%  | 9    | 0.97 | 0.86 | 0.93 | 0.81 | 1.08 | 0.95 | 0.9  | 0.95 | 1.14 | 1.16 | 1.11 |
| 136 | 8  | 16.08% | 8.68 | 0.64 | 0.64 | 0.59 | 0.64 | 1.07 | 1.08 | 1.06 | 1.07 | 1.24 | 1.31 | 1.27 |
| 23  | 8  | 33.94% | 5.03 | 0.92 | 0.94 | 0.92 | 0.87 | 0.75 | 0.77 | 0.63 | 0.57 | 0.96 | 0.69 | 0.74 |
| 13  | 6  | 24.48% | 8.01 | 1.07 | 1.04 | 1.24 | 1.1  | 0.73 | 0.81 | 0.82 | 0.77 | 0.87 | 0.72 | 0.84 |
| 7   | 4  | 12.94% | 6.8  | 1.3  | 1.28 | 1.27 | 1.34 | 0.8  | 0.86 | 0.93 | 0.75 | 0.92 | 0.89 | 0.77 |
| 2   | 2  | 15.94% | 10.6 | 1.13 | 0.78 | 1.08 | 1.33 | 0.71 | 0.48 | 0.71 | 0.8  | 0.7  | 0.79 | 0.81 |
| 3   | 2  | 5.97%  | 8.82 | 1.07 | 1.15 | 1.09 | 1.02 | 1.14 | 1.08 | 1.28 | 0.87 | 1.44 | 1.08 | 0.92 |
| 7   | 4  | 9.17%  | 6.86 | 1.12 | 1.04 | 0.68 | 0.66 | 1.13 | 1    | 0.97 | 0.77 | 0.99 | 0.64 | 0.61 |
| 4   | 4  | 4.77%  | 8.99 | 1.18 | 0.83 | 0.69 | 0.82 | 1.2  | 1.41 | 0.84 | 1.04 | 1.1  | 1.01 | 1.09 |
| 2   | 2  | 5.28%  | 7.01 | 0.94 | 0.99 | 0.88 | 0.79 | 0.89 | 1    | 1    | 0.97 | 1.03 | 0.87 | 1.65 |
| 9   | 5  | 24.31% | 8.7  | 0.79 | 0.84 | 0.49 | 0.6  | 1.26 | 1.15 | 0.83 | 0.8  | 1.39 | 0.85 | 0.96 |
| 3   | 2  | 5.70%  | 7.13 | 0.99 | 0.87 | 0.85 | 0.95 | 0.93 | 0.86 | 1.43 | 1.13 | 0.98 | 0.89 | 0.86 |
| 8   | 4  | 13.52% | 9.27 | 0.97 | 1.04 | 1.31 | 1.19 | 1.21 | 1.11 | 1.02 | 1.08 | 1.03 | 0.97 | 0.88 |
| 73  | 9  | 25.45% | 9.23 | 1.05 | 1.02 | 1.09 | 1.11 | 1.07 | 1    | 1.04 | 1.03 | 1.02 | 0.94 | 0.95 |
| 17  | 7  | 26.25% | 5.8  | 1.13 | 1    | 0.75 | 0.78 | 1.08 | 1.02 | 1.02 | 0.68 | 1.35 | 0.69 | 0.81 |
| 19  | 8  | 25.21% | 8.91 | 0.87 | 0.87 | 0.93 | 0.93 | 1.17 | 1.1  | 1.12 | 1.1  | 1.16 | 1.04 | 1.06 |
| 19  | 8  | 28.41% | 6.47 | 0.9  | 1.14 | 1.13 | 1.17 | 1.08 | 1.25 | 1    | 0.96 | 1.08 | 0.99 | 0.96 |
| 28  | 7  | 28.48% | 8.77 | 0.97 | 1.01 | 1.02 | 0.96 | 1.13 | 1.08 | 1.13 | 1.1  | 1.18 | 1.09 | 1.19 |
| 4   | 3  | 12.97% | 5.74 | 1.03 | 0.96 | 0.8  | 0.72 | 0.75 | 1.08 | 1.03 | 1.16 | 1.06 | 1.8  | 1.11 |

|    |    |        |      |      |      |      |      |      |      |      |      |      |      |      |
|----|----|--------|------|------|------|------|------|------|------|------|------|------|------|------|
| 20 | 7  | 40.98% | 9.4  | 1.13 | 1.12 | 1.1  | 1.13 | 1.26 | 1.33 | 1.1  | 1.18 | 1.16 | 1.04 | 1.06 |
| 19 | 9  | 27.82% | 5.67 | 0.91 | 1.02 | 0.94 | 1.01 | 1.04 | 1.02 | 1    | 1.08 | 1.13 | 1.06 | 1.19 |
| 6  | 2  | 27.78% | 8.64 | 1.04 | 1.24 | 0.79 | 0.87 | 1.17 | 1.46 | 0.92 | 1.07 | 0.89 | 1.07 | 1.08 |
| 6  | 5  | 4.04%  | 4.79 | 1.35 | 1.18 | 1.05 | 0.97 | 1.19 | 0.97 | 0.96 | 1.04 | 1.34 | 1.05 | 1.01 |
| 16 | 7  | 9.49%  | 4.45 | 1.02 | 1.15 | 0.97 | 1.01 | 1.05 | 1.13 | 1.03 | 1.02 | 0.79 | 1.28 | 1.14 |
| 2  | 1  | 1.51%  | 5.77 | 1.01 | 1.31 | 0.26 | 0.46 | 1.24 | 1.25 | 1    | 0.89 | 1.02 | 0.89 | 1.01 |
| 35 | 10 | 31.40% | 6.49 | 0.99 | 1.01 | 1.41 | 1.11 | 1.1  | 0.96 | 1.15 | 1.07 | 0.99 | 1.12 | 1.04 |
| 35 | 11 | 27.50% | 8.03 | 1.03 | 1.01 | 1.41 | 1.2  | 1.09 | 1.05 | 1.23 | 1.28 | 1.07 | 1.19 | 1.11 |
| 5  | 2  | 14.76% | 10.3 | 1.27 | 1.59 | 0.82 | 1.09 | 1.76 | 2.17 | 1.21 | 1.61 | 1.67 | 1.36 | 1.33 |
| 8  | 5  | 29.31% | 6.98 | 0.89 | 1.1  | 0.74 | 0.93 | 1.1  | 1.21 | 1.2  | 1.28 | 1.12 | 1.72 | 1.34 |
| 3  | 2  | 18.10% | 7.8  | 1.18 | 1.15 | 0.94 | 0.92 | 1.38 | 1.35 | 1.13 | 1.1  | 1.12 | 0.85 | 0.76 |
| 27 | 12 | 26.60% | 5.99 | 1.11 | 1.12 | 1.24 | 1.11 | 1.22 | 1.2  | 1.09 | 1.13 | 1.09 | 1    | 0.98 |
| 14 | 9  | 9.85%  | 5.7  | 0.92 | 0.89 | 0.9  | 1.03 | 1.06 | 1.03 | 1.16 | 1.02 | 0.87 | 0.87 | 0.99 |
| 21 | 7  | 19.66% | 8.51 | 1.05 | 1.07 | 1.03 | 1.04 | 1.16 | 1.18 | 1.31 | 1.4  | 1.03 | 0.94 | 1    |
| 51 | 15 | 25.90% | 6.66 | 1.03 | 1.08 | 1    | 1.08 | 1.2  | 1.2  | 1.1  | 1.08 | 1.07 | 0.97 | 1    |
| 19 | 12 | 16.30% | 5.62 | 0.97 | 1.09 | 1.04 | 1.26 | 1.18 | 1.19 | 1.18 | 1.29 | 1    | 1.04 | 1.02 |
| 8  | 5  | 23.94% | 8.95 | 0.84 | 0.88 | 1    | 0.89 | 0.76 | 0.76 | 0.7  | 0.69 | 0.8  | 0.9  | 1.02 |
| 45 | 22 | 42.05% | 5.13 | 0.76 | 0.78 | 0.7  | 0.67 | 1.14 | 0.98 | 0.98 | 1.09 | 1.22 | 1.28 | 1.25 |
| 2  | 2  | 6.73%  | 5.96 | 1.03 | 1.04 | 0.99 | 0.93 | 1.05 | 1.03 | 0.95 | 0.82 | 1.16 | 1.26 | 1.13 |
| 3  | 2  | 4.68%  | 8.33 | 0.62 | 0.81 | 0.6  | 0.94 | 1.04 | 0.93 | 0.89 | 1.15 | 1.31 | 1.57 | 1.8  |
| 10 | 4  | 22.49% | 4.39 | 1.06 | 1.04 | 1.01 | 0.94 | 1.06 | 0.99 | 1.02 | 0.98 | 1.19 | 1.17 | 1.05 |
| 2  | 1  | 4.76%  | 7.06 | 0.9  | 0.76 | 1.09 | 0.81 | 0.96 | 1.44 | 0.83 | 1.2  | 0.92 | 0.67 | 0.79 |
| 4  | 2  | 9.83%  | 6.79 | 1.01 | 1.18 | 1.04 | 1.02 | 0.8  | 0.7  | 1.12 | 0.79 | 0.87 | 0.51 | 0.78 |
| 3  | 2  | 4.33%  | 5.72 | 0.97 | 0.76 | 1.02 | 1.02 | 0.54 | 0.56 | 1.09 | 1.02 | 0.67 | 1    | 1.05 |
| 3  | 2  | 6.28%  | 6.68 | 0.98 | 1.01 | 0.73 | 0.9  | 1.24 | 1.26 | 0.98 | 0.95 | 1.22 | 0.6  | 0.9  |
| 3  | 2  | 4.95%  | 4.69 | 0.74 | 0.89 | 0.95 | 0.89 | 0.78 | 0.77 | 0.82 | 0.83 | 0.68 | 1.05 | 0.99 |
| 3  | 2  | 16.13% | 9.9  | 0.84 | 0.75 | 0.76 | 0.67 | 1    | 1.02 | 0.92 | 0.81 | 1.14 | 1.01 | 0.93 |
| 2  | 2  | 13.21% | 7.01 | 0.67 | 0.49 | 1.32 | 1.52 | 0.66 | 0.74 | 1.06 | 1.15 | 0.71 | 0.66 | 0.83 |
| 14 | 8  | 19.43% | 8.94 | 0.89 | 0.99 | 0.87 | 0.84 | 1.07 | 0.9  | 1.01 | 1.11 | 0.94 | 1.02 | 1.08 |
| 2  | 2  | 5.22%  | 8.59 | 0.86 | 0.92 | 0.81 | 0.92 | 1.19 | 1.13 | 0.84 | 0.81 | 1.18 | 1.01 | 1.06 |
| 24 | 5  | 19.74% | 7.62 | 0.96 | 0.93 | 1.14 | 1.08 | 1.12 | 1    | 1.42 | 0.81 | 1.19 | 0.93 | 0.81 |
| 7  | 4  | 16.14% | 8.44 | 1.21 | 1.28 | 0.89 | 1.05 | 1.41 | 1.27 | 1.08 | 1.16 | 0.89 | 1.15 | 1.22 |
| 6  | 5  | 14.25% | 5.15 | 1.2  | 1.03 | 0.9  | 0.95 | 1.33 | 1.04 | 1    | 0.96 | 1.12 | 1.06 | 0.98 |
| 16 | 4  | 22.55% | 9.39 | 0.91 | 0.97 | 1.07 | 1.07 | 1.04 | 1.05 | 1.06 | 1.09 | 1.12 | 0.94 | 0.94 |
| 6  | 4  | 10.88% | 6.35 | 1.2  | 0.92 | 2.08 | 1.13 | 1.01 | 0.97 | 1.28 | 0.97 | 1.17 | 0.79 | 0.88 |
| 13 | 3  | 22.64% | 9.62 | 0.93 | 0.98 | 0.93 | 1.23 | 1.1  | 0.88 | 1.17 | 0.94 | 0.91 | 1.07 | 0.98 |
| 24 | 14 | 22.36% | 5.58 | 0.89 | 0.94 | 0.92 | 0.85 | 1.21 | 1.11 | 1.14 | 1.08 | 1.13 | 1.1  | 1.08 |
| 18 | 6  | 17.22% | 8.8  | 0.94 | 0.98 | 0.98 | 0.99 | 0.88 | 1    | 0.87 | 0.9  | 0.99 | 0.93 | 0.98 |
| 2  | 2  | 7.22%  | 7.78 | 0.83 | 0.85 | 1.08 | 0.94 | 0.83 | 0.81 | 0.99 | 1.09 | 0.98 | 0.96 | 1.02 |
| 76 | 13 | 35.09% | 9.22 | 0.95 | 0.89 | 0.97 | 0.93 | 1.01 | 0.98 | 1.05 | 1.02 | 1.03 | 1.02 | 1.04 |
| 11 | 4  | 15.41% | 8.31 | 1.02 | 0.88 | 1.12 | 1.01 | 1.11 | 0.9  | 1.01 | 0.81 | 1.16 | 0.94 | 0.91 |
| 7  | 4  | 20.39% | 9.27 | 1.15 | 1.03 | 1.03 | 1.02 | 1.24 | 1.05 | 1.06 | 1.07 | 1.13 | 1.02 | 0.95 |
| 5  | 3  | 26.06% | 9.33 | 1.04 | 1.22 | 1.25 | 1.14 | 1.3  | 1.26 | 1.14 | 0.97 | 1.21 | 1.05 | 1.15 |
| 36 | 9  | 53.89% | 7.8  | 0.92 | 0.88 | 0.91 | 0.9  | 1.42 | 1.2  | 1.07 | 1    | 1.26 | 1.18 | 0.97 |
| 3  | 3  | 16.87% | 9.67 | 1.45 | 1.25 | 1.41 | 1.09 | 1.4  | 1.3  | 1.16 | 1.09 | 1.07 | 0.76 | 1.03 |
| 9  | 4  | 10.48% | 8.25 | 0.95 | 1.03 | 1.15 | 1.13 | 1.08 | 1.02 | 1.19 | 1.24 | 0.98 | 1.06 | 0.97 |
| 12 | 4  | 17.67% | 5.7  | 0.8  | 0.86 | 0.84 | 0.82 | 1.17 | 1.12 | 1.07 | 1    | 1.2  | 1.12 | 1.06 |
| 20 | 9  | 14.87% | 6.62 | 0.99 | 1.11 | 1.08 | 1    | 1.21 | 1.13 | 1.32 | 1.36 | 1.22 | 1.05 | 1.09 |
| 6  | 3  | 8.16%  | 9.11 | 1.02 | 1.01 | 1.11 | 1.13 | 1.07 | 1    | 1.42 | 1.28 | 0.98 | 1.16 | 1.15 |
| 5  | 4  | 13.28% | 5.73 | 0.66 | 0.9  | 0.89 | 1.22 | 1.07 | 1.1  | 1.27 | 1.2  | 0.96 | 1.11 | 1.04 |



|    |    |        |      |      |      |      |      |      |      |      |      |      |      |      |
|----|----|--------|------|------|------|------|------|------|------|------|------|------|------|------|
| 7  | 3  | 26.56% | 9.02 | 0.97 | 0.92 | 1.08 | 1.2  | 1.06 | 0.87 | 0.96 | 1.2  | 0.78 | 1.13 | 1.15 |
| 19 | 9  | 22.57% | 8.41 | 1.2  | 1.19 | 1.44 | 1.29 | 1.19 | 1.06 | 1.13 | 1.1  | 1.04 | 0.98 | 1.13 |
| 9  | 5  | 15.06% | 9.43 | 0.9  | 1.01 | 1.1  | 1.07 | 1.16 | 1.17 | 0.99 | 0.88 | 0.94 | 1.23 | 1.04 |
| 34 | 5  | 24.30% | 7.07 | 0.93 | 0.99 | 0.96 | 1.01 | 0.94 | 1.13 | 1.18 | 1.01 | 1.1  | 1.03 | 1.04 |
| 3  | 2  | 5.22%  | 7    | 1.06 | 1.02 | 0.92 | 0.85 | 1.12 | 0.99 | 1.03 | 0.95 | 0.96 | 1    | 0.98 |
| 10 | 3  | 27.48% | 9.5  | 0.96 | 0.86 | 0.75 | 0.94 | 1.26 | 1.26 | 1.14 | 1.53 | 1.16 | 1.15 | 1.37 |
| 7  | 5  | 9.73%  | 6.81 | 1.11 | 1.09 | 1.02 | 1.06 | 1    | 1.37 | 1.01 | 1.22 | 1.23 | 1.02 | 1.02 |
| 6  | 4  | 11.13% | 9.84 | 1.06 | 1.05 | 1.14 | 1.1  | 1.11 | 1    | 1.16 | 1.2  | 1.08 | 0.9  | 0.93 |
| 8  | 3  | 7.57%  | 9.93 | 1.04 | 1.11 | 1    | 1.01 | 1.01 | 0.92 | 1.14 | 1.12 | 1.17 | 1.19 | 1.16 |
| 10 | 6  | 23.55% | 7.84 | 1.05 | 0.89 | 1.16 | 0.94 | 1.17 | 1    | 1.44 | 1.04 | 0.99 | 0.97 | 1.17 |
| 18 | 9  | 24.40% | 8.75 | 1.03 | 0.9  | 0.9  | 0.96 | 1.24 | 1.12 | 1.12 | 1.1  | 1.23 | 1.13 | 1.06 |
| 5  | 3  | 13.39% | 9.55 | 1.31 | 0.99 | 0.97 | 1.13 | 1.34 | 1.25 | 1.05 | 1.12 | 1.11 | 1.12 | 1.26 |
| 6  | 3  | 9.66%  | 8.96 | 0.89 | 1.11 | 0.8  | 1.01 | 1.03 | 1.14 | 0.8  | 1.09 | 0.99 | 1.04 | 1.1  |
| 27 | 9  | 22.22% | 8.46 | 0.85 | 0.86 | 0.95 | 0.86 | 1.03 | 0.96 | 1.07 | 1.04 | 1.19 | 1.08 | 1.01 |
| 3  | 2  | 6.61%  | 7.59 | 0.88 | 0.9  | 0.91 | 1.23 | 0.92 | 1    | 1.43 | 1.47 | 0.97 | 1.24 | 1.32 |
| 6  | 2  | 13.74% | 4.99 | 1.13 | 0.94 | 0.76 | 0.79 | 1.39 | 1.26 | 1    | 1.29 | 1.25 | 1.32 | 1.38 |
| 14 | 6  | 17.45% | 5.5  | 0.81 | 0.85 | 0.84 | 1.02 | 0.96 | 1.03 | 1.14 | 1.31 | 1.1  | 1.52 | 1.24 |
| 6  | 4  | 17.97% | 9.43 | 1    | 1.03 | 1.18 | 1.09 | 1.23 | 1.4  | 1.21 | 1.03 | 1.05 | 1.97 | 1.66 |
| 3  | 3  | 6.50%  | 4.95 | 1.19 | 1.15 | 1.02 | 1.68 | 2.22 | 2.14 | 0.69 | 1.77 | 1.03 | 2.54 | 1.04 |
| 8  | 7  | 12.99% | 8.86 | 1.18 | 1.39 | 1.29 | 1.19 | 1.49 | 1.35 | 1.21 | 1.34 | 0.68 | 0.88 | 0.95 |
| 31 | 14 | 26.30% | 5.45 | 1.1  | 1.18 | 1.2  | 1.17 | 1.07 | 1.18 | 1.16 | 1.16 | 1.08 | 0.96 | 0.93 |
| 27 | 8  | 37.21% | 7.01 | 1.06 | 0.97 | 1    | 1.14 | 1.15 | 1.08 | 1.07 | 1.16 | 0.98 | 1.02 | 1.07 |
| 32 | 10 | 24.70% | 6.01 | 1.04 | 1.01 | 1.11 | 1.18 | 1.24 | 1.18 | 1.11 | 1.15 | 1.06 | 0.93 | 1    |
| 18 | 6  | 28.17% | 6.71 | 0.93 | 0.92 | 0.91 | 0.94 | 1.15 | 1.16 | 1.17 | 1.22 | 1.04 | 1.06 | 1.1  |
| 63 | 15 | 39.48% | 6.29 | 0.73 | 0.84 | 0.76 | 0.85 | 1.11 | 1.18 | 1.09 | 1.05 | 1.16 | 1.13 | 1.11 |
| 6  | 2  | 3.05%  | 5.67 | 0.94 | 0.98 | 1.07 | 0.98 | 1.2  | 1.05 | 1.23 | 1.21 | 1.07 | 1.14 | 1.04 |
| 6  | 6  | 15.98% | 6.62 | 1.17 | 1.18 | 1.17 | 1.19 | 1.33 | 1.21 | 1.12 | 1.15 | 1.02 | 1.06 | 1    |
| 4  | 4  | 9.58%  | 7.95 | 1.25 | 0.95 | 0.95 | 0.86 | 1.18 | 1.13 | 0.93 | 0.99 | 0.95 | 1.13 | 0.83 |
| 15 | 7  | 24.67% | 8.32 | 0.88 | 0.96 | 0.98 | 0.98 | 1.05 | 1.15 | 1.14 | 1.14 | 1.27 | 1.1  | 1.04 |
| 22 | 11 | 15.28% | 5.24 | 0.93 | 0.87 | 0.96 | 0.86 | 0.82 | 0.78 | 0.81 | 0.75 | 0.84 | 0.9  | 0.93 |
| 25 | 11 | 16.62% | 5.86 | 0.95 | 0.89 | 0.96 | 0.86 | 0.81 | 0.77 | 0.81 | 0.78 | 0.82 | 0.89 | 0.89 |
| 31 | 6  | 20.89% | 6.16 | 1.11 | 1.04 | 1.21 | 1.11 | 1.2  | 1.11 | 1.12 | 1.12 | 0.99 | 0.94 | 0.89 |
| 3  | 3  | 12.61% | 9.36 | 1.13 | 1.11 | 0.95 | 0.95 | 0.94 | 0.97 | 0.8  | 0.97 | 1.04 | 0.91 | 1.07 |
| 6  | 2  | 20.54% | 5.06 | 0.97 | 1.12 | 1.07 | 0.99 | 1.02 | 0.97 | 0.99 | 1.13 | 1    | 0.98 | 1.17 |
| 31 | 7  | 27.16% | 9.35 | 1.03 | 1.04 | 0.99 | 1.11 | 1.12 | 1.15 | 1.18 | 1.03 | 0.96 | 0.84 | 0.85 |
| 8  | 4  | 12.87% | 5.26 | 1.26 | 1.13 | 0.84 | 0.94 | 0.92 | 0.9  | 0.88 | 0.88 | 0.96 | 1.12 | 0.93 |
| 3  | 3  | 11.46% | 8.79 | 0.82 | 0.82 | 0.58 | 0.63 | 1.09 | 1.04 | 0.87 | 0.81 | 1.13 | 1.03 | 1.24 |
| 10 | 4  | 16.00% | 8.74 | 0.99 | 1.18 | 1.23 | 1.15 | 1.08 | 1.18 | 1.25 | 1.24 | 1.07 | 1.01 | 1.02 |
| 18 | 7  | 23.81% | 8.58 | 1.08 | 0.84 | 0.81 | 0.76 | 1.01 | 1.1  | 1.27 | 1.18 | 1.09 | 0.97 | 1.51 |
| 18 | 7  | 23.31% | 8.51 | 0.95 | 1.05 | 1.01 | 0.95 | 1.1  | 1.32 | 1.09 | 1.2  | 0.97 | 0.76 | 1.11 |
| 6  | 4  | 18.09% | 5.66 | 0.91 | 0.81 | 1.11 | 1.09 | 0.8  | 0.97 | 1.04 | 0.92 | 0.82 | 1.03 | 1.1  |
| 8  | 4  | 14.33% | 6.83 | 1.14 | 1.05 | 0.84 | 0.78 | 1.28 | 1.07 | 1.14 | 1.09 | 0.95 | 0.76 | 0.86 |
| 25 | 10 | 20.20% | 6.4  | 1.21 | 1.04 | 1.12 | 1.27 | 1.09 | 0.97 | 1.11 | 1.14 | 0.87 | 1.08 | 1.04 |
| 55 | 13 | 22.30% | 6.16 | 0.99 | 1.02 | 1    | 1.01 | 1.14 | 1.08 | 1.22 | 1.23 | 1.01 | 1    | 1.04 |
| 46 | 15 | 28.16% | 7.67 | 1.03 | 0.95 | 0.89 | 1.04 | 1.14 | 1.22 | 1.07 | 1.17 | 1.09 | 1.08 | 1.08 |
| 18 | 5  | 14.29% | 5.09 | 1.09 | 0.99 | 1.1  | 1.21 | 1.23 | 1.18 | 1.2  | 1.3  | 1.16 | 1.12 | 1.14 |
| 13 | 2  | 9.20%  | 9.07 | 1.04 | 0.96 | 1.15 | 1.39 | 1.05 | 1.01 | 1.2  | 1.29 | 0.83 | 0.98 | 1.09 |
| 6  | 4  | 13.55% | 5.62 | 1.19 | 1.17 | 1.09 | 0.97 | 1.22 | 1.22 | 1.15 | 1.13 | 1.01 | 0.94 | 0.91 |
| 78 | 34 | 27.42% | 5.38 | 1.04 | 1.04 | 1.02 | 1.07 | 1.17 | 1.13 | 1.11 | 1.06 | 1    | 0.96 | 0.95 |
| 18 | 7  | 14.78% | 6.75 | 0.95 | 0.92 | 0.99 | 1.06 | 1.11 | 1.06 | 1.12 | 1.23 | 0.98 | 1.08 | 1.11 |

|     |    |        |      |      |      |      |      |      |      |      |      |      |      |      |
|-----|----|--------|------|------|------|------|------|------|------|------|------|------|------|------|
| 21  | 6  | 24.75% | 7.12 | 1.01 | 0.97 | 1.29 | 1.13 | 1.29 | 1.05 | 1.19 | 1.35 | 1.17 | 1.1  | 0.99 |
| 31  | 12 | 24.13% | 6.89 | 0.88 | 0.9  | 0.93 | 0.93 | 1.17 | 1.18 | 1.28 | 1.19 | 1.16 | 1.14 | 1.08 |
| 39  | 11 | 30.70% | 6.24 | 0.96 | 1    | 0.94 | 0.92 | 1.24 | 1.18 | 1.09 | 0.93 | 1.03 | 1.05 | 0.99 |
| 24  | 9  | 22.22% | 7.61 | 0.88 | 0.9  | 0.95 | 1.07 | 1.02 | 1    | 1.29 | 1.24 | 0.97 | 1.13 | 1.2  |
| 12  | 7  | 19.95% | 6.71 | 0.89 | 0.9  | 1.2  | 1.09 | 1.37 | 1.22 | 1.07 | 1.04 | 0.93 | 0.99 | 1.02 |
| 49  | 23 | 19.23% | 5.37 | 1.07 | 1.12 | 1.08 | 1.11 | 1.17 | 1.14 | 1.09 | 1.1  | 1    | 1.01 | 1.03 |
| 10  | 6  | 23.55% | 7.63 | 0.99 | 1.21 | 0.87 | 0.94 | 1.24 | 1.33 | 1.11 | 1.44 | 1.09 | 1.09 | 1.22 |
| 12  | 1  | 6.62%  | 4.74 | 0.99 | 0.59 | 0.65 | 0.71 | 1.46 | 0.67 | 1.02 | 1.06 | 1.69 | 1    | 1.01 |
| 28  | 2  | 13.42% | 4.82 | 0.74 | 0.75 | 0.97 | 0.99 | 0.95 | 0.9  | 1.05 | 1.05 | 0.86 | 0.92 | 0.99 |
| 70  | 14 | 35.54% | 9.07 | 1.06 | 0.97 | 1.07 | 1.01 | 1.2  | 1.18 | 1.17 | 1.14 | 1.1  | 1.08 | 1.11 |
| 44  | 12 | 27.32% | 5.68 | 0.92 | 0.94 | 0.95 | 0.92 | 1.03 | 1.02 | 1.08 | 1.02 | 1.03 | 1.16 | 1.14 |
| 146 | 13 | 37.41% | 6.18 | 0.89 | 0.91 | 0.98 | 0.94 | 1.19 | 1.11 | 1.1  | 1.1  | 1.06 | 1.03 | 1.05 |
| 33  | 13 | 24.59% | 6.03 | 0.94 | 1.01 | 1.06 | 1.07 | 0.96 | 0.94 | 1.03 | 0.92 | 1.07 | 1.05 | 1.07 |
| 26  | 10 | 18.97% | 6.38 | 0.94 | 1.01 | 1.07 | 1.08 | 1    | 0.97 | 1.16 | 0.93 | 1.04 | 1.11 | 1.04 |
| 68  | 20 | 38.38% | 6.62 | 0.98 | 1.07 | 1.07 | 1.04 | 1.1  | 1.15 | 1.17 | 1.13 | 1.05 | 0.98 | 1.02 |
| 44  | 7  | 24.92% | 6.24 | 1.06 | 1.02 | 1.33 | 1.12 | 1.24 | 1.01 | 1.29 | 1.14 | 1.07 | 1.16 | 1.05 |
| 9   | 5  | 11.22% | 6.42 | 0.98 | 0.9  | 0.79 | 1.06 | 0.94 | 1.07 | 1    | 1.05 | 0.89 | 1.12 | 1.12 |
| 15  | 6  | 9.20%  | 8.27 | 0.83 | 0.86 | 0.85 | 0.98 | 0.98 | 1.09 | 1.04 | 1.02 | 0.99 | 1.13 | 1.11 |
| 43  | 17 | 29.39% | 7.68 | 0.89 | 0.93 | 0.91 | 0.96 | 1.12 | 1.07 | 0.97 | 1.06 | 1.07 | 1.08 | 1.07 |
| 21  | 9  | 15.72% | 6.45 | 1.07 | 0.95 | 1    | 1.09 | 1.19 | 1.05 | 1.03 | 1.17 | 1.02 | 1.04 | 0.93 |
| 9   | 6  | 9.65%  | 5.82 | 1.01 | 0.96 | 0.97 | 0.93 | 1.14 | 0.99 | 1.08 | 0.96 | 1.01 | 0.88 | 0.72 |
| 4   | 2  | 12.87% | 5.93 | 1.11 | 1.13 | 1.01 | 0.98 | 1.12 | 1.16 | 0.94 | 1.02 | 1.22 | 1.09 | 1.13 |
| 14  | 12 | 4.91%  | 9.01 | 1.07 | 1.11 | 1.05 | 1.01 | 1.08 | 1.13 | 0.99 | 1.06 | 0.96 | 1.13 | 1.07 |
| 36  | 8  | 41.83% | 9.28 | 0.93 | 0.97 | 0.93 | 0.93 | 1.17 | 1.18 | 0.99 | 1.09 | 1.15 | 1.03 | 1.24 |
| 36  | 22 | 11.80% | 9.83 | 1.12 | 1.1  | 1.13 | 1.17 | 1.14 | 1.08 | 1    | 1.08 | 1.09 | 1.07 | 1.06 |
| 5   | 2  | 12.02% | 8.36 | 1.05 | 0.86 | 1.02 | 1.14 | 1.14 | 0.92 | 1.03 | 1.14 | 1.05 | 1.04 | 0.96 |
| 8   | 5  | 37.05% | 5.49 | 0.74 | 0.96 | 0.83 | 0.74 | 1.15 | 1.03 | 1.01 | 1.18 | 0.98 | 1.33 | 1.23 |
| 8   | 3  | 8.78%  | 7.12 | 1.18 | 1    | 0.92 | 1.15 | 1.05 | 1.1  | 0.92 | 1.22 | 1.04 | 1.16 | 1.37 |
| 13  | 9  | 17.97% | 5.83 | 0.89 | 1.04 | 1.13 | 0.86 | 0.96 | 0.95 | 1.01 | 1.03 | 0.91 | 0.97 | 0.96 |
| 12  | 11 | 16.03% | 6.51 | 1    | 0.96 | 1.05 | 0.98 | 1.05 | 0.96 | 0.9  | 0.82 | 1.11 | 1.01 | 0.97 |
| 18  | 12 | 14.46% | 6.37 | 0.99 | 0.98 | 0.99 | 1.06 | 1.22 | 1.09 | 0.97 | 1.17 | 1.11 | 1.1  | 1.15 |
| 5   | 4  | 15.41% | 9.19 | 1.23 | 1.18 | 1.04 | 1    | 1.12 | 1.38 | 0.97 | 1.01 | 1.19 | 0.96 | 0.92 |
| 2   | 1  | 5.56%  | 5.16 | 1.1  | 1.11 | 1.27 | 1.22 | 1.16 | 0.98 | 1.33 | 1.29 | 1    | 1.17 | 1.18 |
| 2   | 2  | 3.24%  | 5.98 | 0.94 | 0.43 | 0.9  | 1.08 | 0.98 | 1.27 | 1.04 | 1.04 | 1.15 | 1    | 0.99 |
| 3   | 2  | 4.63%  | 5.98 | 0.86 | 1.09 | 0.8  | 0.86 | 0.93 | 0.88 | 0.94 | 1.18 | 0.98 | 0.95 | 0.95 |
| 20  | 9  | 23.78% | 6.09 | 1.11 | 1    | 1.09 | 1    | 1.15 | 1.14 | 1.15 | 1.08 | 0.93 | 1.1  | 1.17 |
| 9   | 5  | 11.61% | 6.78 | 1.09 | 1.34 | 1.11 | 1.2  | 1.29 | 1.33 | 1    | 0.96 | 0.94 | 0.96 | 0.97 |
| 6   | 4  | 9.07%  | 6.13 | 0.67 | 0.73 | 0.66 | 0.86 | 0.94 | 0.82 | 1.22 | 1.29 | 0.81 | 1.17 | 1.01 |
| 11  | 8  | 9.01%  | 5.38 | 0.87 | 0.86 | 1    | 0.87 | 0.68 | 0.76 | 0.84 | 0.83 | 1.03 | 0.89 | 1.07 |
| 3   | 2  | 10.88% | 5.39 | 0.53 | 0.68 | 0.77 | 0.69 | 0.27 | 0.4  | 0.58 | 0.59 | 0.47 | 0.65 | 0.64 |
| 3   | 2  | 7.17%  | 5.33 | 0.53 | 0.68 | 0.77 | 0.69 | 0.27 | 0.4  | 0.58 | 0.59 | 0.47 | 0.65 | 0.64 |
| 19  | 11 | 22.60% | 6.26 | 1.06 | 0.96 | 0.99 | 0.99 | 0.89 | 0.84 | 0.83 | 0.77 | 0.86 | 0.74 | 0.81 |
| 12  | 7  | 12.33% | 6.24 | 0.9  | 1.03 | 0.88 | 0.8  | 0.7  | 0.83 | 0.87 | 0.63 | 0.91 | 0.78 | 0.79 |
| 4   | 3  | 8.64%  | 9.46 | 0.89 | 1.14 | 0.93 | 0.93 | 0.96 | 1.12 | 0.88 | 0.81 | 1.01 | 0.92 | 0.88 |
| 9   | 7  | 20.51% | 5.7  | 0.89 | 0.86 | 0.85 | 0.76 | 0.88 | 0.95 | 0.87 | 0.87 | 0.99 | 0.88 | 0.91 |
| 32  | 10 | 21.24% | 8.3  | 0.86 | 0.89 | 0.72 | 0.79 | 1.11 | 1.15 | 1.01 | 0.98 | 1.16 | 1.03 | 0.96 |
| 8   | 7  | 20.33% | 5.01 | 1.05 | 1.06 | 0.9  | 0.86 | 1.01 | 1.02 | 0.86 | 0.81 | 1.2  | 0.91 | 0.87 |
| 15  | 9  | 12.12% | 5.57 | 0.85 | 0.93 | 1.04 | 1.01 | 1.08 | 1.08 | 1.04 | 1.22 | 1.02 | 1.14 | 1.14 |
| 25  | 13 | 21.15% | 5.95 | 1.11 | 1.05 | 1.18 | 1.09 | 1    | 0.99 | 0.9  | 0.94 | 1.1  | 0.95 | 0.97 |
| 6   | 5  | 5.64%  | 9.01 | 0.99 | 0.92 | 0.99 | 0.85 | 1.14 | 1.03 | 1.02 | 1.17 | 1.19 | 1.16 | 1.05 |

|    |    |        |      |      |      |      |      |      |      |      |      |      |      |      |
|----|----|--------|------|------|------|------|------|------|------|------|------|------|------|------|
| 47 | 17 | 34.08% | 6.99 | 0.96 | 0.97 | 1.03 | 0.99 | 1.13 | 1.12 | 1.11 | 1.14 | 1.13 | 1.13 | 1.07 |
| 22 | 9  | 12.10% | 6.69 | 1.02 | 1    | 1.07 | 0.98 | 1.16 | 1.27 | 1.25 | 1.14 | 1.1  | 1.04 | 1.16 |
| 8  | 5  | 4.99%  | 7.53 | 0.89 | 0.84 | 0.76 | 0.94 | 1.15 | 1.17 | 1.18 | 1.1  | 1.01 | 1.16 | 1.24 |
| 3  | 2  | 5.88%  | 9.14 | 1.13 | 1.07 | 1.03 | 1.29 | 1.37 | 1.23 | 1.01 | 1.18 | 1.12 | 1.14 | 1.04 |
| 2  | 1  | 2.18%  | 7.08 | 1.07 | 1.26 | 0.87 | 0.74 | 1.64 | 1.93 | 0.94 | 1.38 | 1.01 | 1.33 | 1.2  |
| 18 | 8  | 41.95% | 5.94 | 0.99 | 0.93 | 0.72 | 0.82 | 0.94 | 0.89 | 0.7  | 0.76 | 1.12 | 0.97 | 1.06 |
| 11 | 4  | 45.54% | 8.01 | 0.88 | 0.77 | 0.84 | 0.83 | 0.78 | 0.8  | 0.84 | 0.71 | 1.11 | 1.18 | 1.15 |
| 6  | 4  | 24.88% | 5.7  | 1.12 | 1.04 | 1    | 1.02 | 1.1  | 1.09 | 0.93 | 0.87 | 1.28 | 1.12 | 1.13 |
| 20 | 10 | 10.42% | 6.1  | 0.96 | 0.96 | 0.88 | 0.93 | 1.05 | 0.96 | 1.02 | 1.03 | 1.19 | 1.13 | 1.07 |
| 26 | 9  | 29.36% | 8.79 | 0.8  | 0.86 | 0.8  | 0.78 | 1.08 | 1.06 | 1.06 | 1.02 | 1.13 | 1.15 | 1.14 |
| 8  | 6  | 7.56%  | 8.57 | 0.99 | 1.02 | 0.28 | 0.61 | 1.42 | 1.1  | 0.65 | 0.97 | 0.93 | 0.54 | 0.54 |
| 4  | 3  | 9.26%  | 8.69 | 0.99 | 0.99 | 0.95 | 1    | 1.01 | 1.03 | 1.08 | 1    | 0.92 | 1.01 | 1.02 |
| 7  | 6  | 6.10%  | 6.16 | 1.13 | 1.08 | 1.11 | 0.97 | 1.25 | 1.42 | 1.36 | 1.03 | 1.15 | 0.99 | 1.09 |
| 2  | 2  | 5.24%  | 5.96 | 0.82 | 0.97 | 0.73 | 0.91 | 1    | 1.17 | 0.78 | 0.9  | 1.49 | 1.05 | 1.24 |
| 10 | 7  | 7.59%  | 6.12 | 1    | 1.05 | 1.06 | 0.92 | 1.13 | 1.16 | 1.4  | 1.26 | 1.16 | 1    | 0.98 |
| 32 | 13 | 19.34% | 6.17 | 0.91 | 1.01 | 1.07 | 0.98 | 1.03 | 1.04 | 1.07 | 0.99 | 1.18 | 0.99 | 1    |
| 60 | 23 | 36.82% | 4.95 | 0.84 | 0.83 | 0.91 | 0.82 | 1.12 | 0.98 | 1.13 | 1.11 | 1.17 | 1.19 | 1.18 |
| 4  | 3  | 2.08%  | 7.21 | 0.99 | 0.96 | 1.06 | 1.11 | 1.24 | 1.08 | 1.13 | 1.05 | 1.28 | 1.05 | 1.1  |
| 40 | 10 | 14.55% | 5.97 | 1.05 | 1.04 | 1.12 | 1.05 | 1.17 | 1.18 | 1.04 | 1.07 | 1.03 | 1.09 | 1.01 |
| 77 | 19 | 24.26% | 6.12 | 1.04 | 0.96 | 0.95 | 0.97 | 1.11 | 1.11 | 1.11 | 1.11 | 1.07 | 1.09 | 1.09 |
| 8  | 4  | 16.85% | 6.83 | 0.78 | 0.92 | 0.87 | 0.86 | 0.92 | 0.99 | 1.04 | 1.1  | 1.09 | 1.22 | 1.19 |
| 9  | 4  | 13.73% | 9.1  | 0.88 | 0.92 | 0.64 | 0.75 | 1.05 | 1.1  | 0.91 | 0.88 | 1.12 | 0.86 | 0.94 |
| 16 | 4  | 16.22% | 8.51 | 1.04 | 1.16 | 0.99 | 0.97 | 1.39 | 1.26 | 1.12 | 1.23 | 1.11 | 0.98 | 1.09 |
| 12 | 6  | 17.88% | 8.75 | 0.94 | 0.91 | 0.79 | 0.83 | 1.35 | 1.27 | 1.06 | 1.13 | 1.11 | 0.93 | 1.11 |
| 31 | 8  | 25.50% | 5.62 | 1.01 | 1.04 | 0.91 | 0.89 | 1.53 | 1.13 | 1.15 | 1.05 | 1.14 | 1.08 | 1.02 |
| 14 | 5  | 16.78% | 8.08 | 0.96 | 0.96 | 0.85 | 0.82 | 1.1  | 1.14 | 1.06 | 1.07 | 1.14 | 1.15 | 1.03 |
| 15 | 5  | 14.91% | 5.26 | 0.92 | 0.91 | 0.89 | 0.96 | 1.08 | 0.97 | 0.99 | 0.91 | 1.13 | 1.02 | 1.14 |
| 28 | 8  | 35.47% | 9.66 | 0.84 | 0.96 | 0.88 | 0.86 | 1.19 | 1.22 | 1.15 | 1.13 | 1.22 | 1.16 | 1.07 |
| 21 | 7  | 34.17% | 9.25 | 0.84 | 0.8  | 0.77 | 0.92 | 1.18 | 1.17 | 0.96 | 1.08 | 1.06 | 1.22 | 1.12 |
| 13 | 4  | 20.81% | 5.34 | 1.39 | 0.81 | 0.81 | 0.86 | 1.28 | 1.44 | 0.97 | 1.08 | 1.16 | 0.97 | 1.07 |
| 9  | 3  | 17.88% | 6.13 | 0.67 | 1.04 | 0.78 | 0.9  | 1.04 | 1.26 | 1.16 | 1.01 | 1.05 | 1.23 | 1.03 |
| 8  | 4  | 14.29% | 9.3  | 1.08 | 1.06 | 1    | 0.9  | 1.24 | 1.51 | 1.16 | 1.33 | 1.22 | 1.16 | 1.09 |
| 72 | 27 | 30.95% | 6.2  | 1.09 | 1.06 | 1.08 | 1.08 | 1.13 | 1.03 | 1.06 | 1.09 | 1.02 | 0.99 | 0.93 |
| 2  | 2  | 14.88% | 6.73 | 1.31 | 0.9  | 0.92 | 1.09 | 1.16 | 1.04 | 0.92 | 0.81 | 1.2  | 1.1  | 1    |
| 4  | 1  | 9.17%  | 7.81 | 1.22 | 1.55 | 1.18 | 1.23 | 1.41 | 1.64 | 1.31 | 1.27 | 1.56 | 1.38 | 1.31 |
| 4  | 3  | 6.62%  | 5.79 | 1.05 | 0.98 | 0.94 | 0.85 | 0.76 | 0.93 | 0.97 | 1.06 | 0.87 | 0.89 | 1.13 |
| 3  | 3  | 12.40% | 8.92 | 1.29 | 1.2  | 1.23 | 0.95 | 1.04 | 1.14 | 0.96 | 0.95 | 1.37 | 1.16 | 1.08 |
| 9  | 4  | 18.73% | 6.74 | 1.02 | 0.97 | 1.26 | 1.06 | 0.89 | 0.99 | 1    | 0.93 | 0.93 | 1.14 | 1.09 |
| 4  | 2  | 5.93%  | 4.91 | 1.21 | 0.98 | 1.25 | 1.15 | 1.02 | 1.01 | 1.03 | 0.93 | 1.04 | 1.04 | 0.94 |
| 9  | 6  | 5.58%  | 5.18 | 1.09 | 1.07 | 1.19 | 1.17 | 0.95 | 1.11 | 1.16 | 1.12 | 1.04 | 1.14 | 1.19 |
| 4  | 3  | 14.18% | 4.87 | 1.03 | 1.28 | 1.07 | 1.02 | 1.09 | 1.22 | 1.01 | 1.18 | 1.21 | 1.11 | 1.09 |
| 72 | 13 | 23.55% | 5.17 | 0.86 | 1.01 | 0.98 | 0.93 | 0.89 | 0.92 | 0.89 | 0.92 | 1.06 | 0.97 | 1.06 |
| 80 | 15 | 27.27% | 5.1  | 0.9  | 1    | 0.99 | 0.95 | 0.95 | 0.92 | 0.95 | 0.92 | 1.06 | 0.96 | 1.06 |
| 96 | 20 | 33.23% | 5.39 | 0.96 | 1.02 | 1    | 1    | 0.94 | 0.94 | 0.94 | 1.03 | 1.06 | 1.04 | 1.03 |
| 40 | 7  | 18.54% | 5.78 | 0.9  | 1.02 | 0.98 | 0.98 | 0.86 | 0.92 | 0.9  | 0.91 | 0.99 | 0.95 | 0.99 |
| 6  | 3  | 1.77%  | 8.96 | 1.13 | 1.04 | 1.08 | 1.06 | 0.88 | 0.79 | 0.87 | 0.92 | 0.8  | 0.9  | 0.89 |
| 31 | 13 | 22.04% | 5.22 | 1    | 1.09 | 1.07 | 1    | 0.98 | 0.94 | 0.93 | 0.83 | 0.78 | 0.87 | 0.88 |
| 32 | 13 | 22.12% | 5.03 | 1.09 | 1.13 | 1.07 | 1.02 | 0.97 | 0.88 | 1.06 | 0.83 | 0.78 | 0.91 | 0.85 |
| 35 | 19 | 23.21% | 4.86 | 1.24 | 1.25 | 1.31 | 1.32 | 0.96 | 0.87 | 0.9  | 0.85 | 0.8  | 0.8  | 0.86 |
| 26 | 13 | 24.51% | 5.28 | 1.12 | 1.1  | 1.08 | 1.03 | 0.93 | 0.9  | 0.9  | 0.93 | 0.92 | 0.87 | 0.94 |

|      |    |        |      |      |      |      |      |      |      |      |      |      |      |      |
|------|----|--------|------|------|------|------|------|------|------|------|------|------|------|------|
| 20   | 6  | 21.15% | 9.26 | 1.03 | 1.05 | 1    | 1    | 0.93 | 0.94 | 0.98 | 0.92 | 0.89 | 0.95 | 0.94 |
| 77   | 21 | 41.28% | 5.85 | 1.09 | 1.15 | 0.89 | 1    | 0.98 | 0.98 | 1.07 | 1.04 | 0.91 | 1.11 | 1.08 |
| 71   | 13 | 23.92% | 5.17 | 0.9  | 1.01 | 0.98 | 0.93 | 0.9  | 0.98 | 0.99 | 0.92 | 1.04 | 0.96 | 1.05 |
| 3    | 2  | 16.81% | 4.97 | 1.11 | 1.16 | 0.6  | 0.43 | 1.05 | 0.82 | 0.57 | 0.89 | 1.31 | 0.69 | 0.56 |
| 21   | 14 | 29.57% | 5.23 | 1.05 | 1.02 | 0.96 | 1.02 | 1.14 | 1.03 | 1.12 | 1.19 | 1.02 | 1.02 | 1.02 |
| 35   | 9  | 16.98% | 8.68 | 0.95 | 1.06 | 0.89 | 0.92 | 1.02 | 1.09 | 0.85 | 0.94 | 1.04 | 0.95 | 1.06 |
| 4    | 3  | 5.76%  | 8.42 | 1.08 | 1.01 | 1.27 | 1.37 | 1.03 | 0.89 | 0.93 | 1.24 | 0.96 | 1.01 | 1.17 |
| 105  | 19 | 35.23% | 5.18 | 0.95 | 1.03 | 0.98 | 0.95 | 1.04 | 1.04 | 1    | 0.93 | 1.06 | 0.96 | 1.06 |
| 4    | 4  | 7.54%  | 7.13 | 1.27 | 1.07 | 1.08 | 1.03 | 0.98 | 1.01 | 0.94 | 0.93 | 1.21 | 0.99 | 1.01 |
| 125  | 21 | 29.82% | 5.26 | 0.84 | 0.91 | 0.89 | 0.92 | 1.09 | 1.05 | 1.05 | 1.08 | 1.13 | 1.03 | 1.08 |
| 41   | 9  | 37.69% | 8.8  | 0.91 | 0.91 | 0.92 | 0.95 | 1.05 | 1.22 | 1.07 | 1    | 1.02 | 1.06 | 1.02 |
| 14   | 5  | 19.43% | 8.88 | 0.93 | 0.98 | 0.94 | 0.95 | 0.93 | 0.98 | 1.04 | 0.99 | 0.95 | 0.97 | 0.97 |
| 3    | 2  | 4.48%  | 7.11 | 1.25 | 1    | 1.1  | 1.06 | 1.04 | 1.01 | 1    | 1.04 | 0.91 | 1.11 | 1.01 |
| 211  | 27 | 43.84% | 5.85 | 0.8  | 0.79 | 0.89 | 0.85 | 1.13 | 1.04 | 1.07 | 1.03 | 1.2  | 1.16 | 1.09 |
| 279  | 30 | 39.72% | 5.36 | 0.9  | 0.93 | 0.96 | 0.97 | 1.1  | 1.06 | 1.05 | 1.1  | 1.1  | 1.03 | 1.05 |
| 61   | 11 | 30.72% | 4.63 | 0.9  | 0.98 | 1.01 | 0.98 | 1.14 | 1.03 | 1.14 | 1.09 | 1.07 | 1.14 | 1.07 |
| 35   | 2  | 3.13%  | 8.71 | 1.07 | 0.9  | 0.82 | 0.83 | 1.24 | 1.03 | 1.16 | 1.12 | 1.13 | 1.25 | 1.14 |
| 79   | 12 | 68.77% | 8.89 | 0.88 | 0.91 | 0.86 | 0.99 | 1.07 | 1.18 | 1.02 | 1.08 | 1.09 | 1.08 | 0.99 |
| 1426 | 17 | 32.00% | 5.39 | 0.82 | 0.82 | 0.83 | 0.86 | 1.29 | 1.18 | 1.22 | 1.2  | 1.17 | 1.16 | 1.15 |
| 37   | 7  | 6.71%  | 6.79 | 1    | 1.06 | 1.02 | 1.13 | 1.19 | 1.08 | 1.13 | 0.86 | 1.2  | 1.15 | 1.04 |
| 54   | 21 | 31.49% | 4.99 | 1.05 | 1.06 | 0.99 | 1.09 | 1.11 | 1.15 | 1.36 | 1.24 | 1.05 | 1.05 | 1.1  |
| 193  | 40 | 42.09% | 6.02 | 1.02 | 1.03 | 1    | 1.04 | 1.18 | 1.12 | 1.07 | 1.07 | 1.13 | 1.06 | 1.05 |
| 207  | 26 | 47.86% | 5.23 | 0.87 | 0.86 | 0.84 | 0.9  | 1.25 | 1.13 | 1.12 | 1.11 | 1.22 | 1.18 | 1.14 |
| 29   | 7  | 36.42% | 8.69 | 1.03 | 1.19 | 1.13 | 1.21 | 0.95 | 0.96 | 0.93 | 0.96 | 0.95 | 1.01 | 1.01 |
| 10   | 3  | 8.37%  | 9.28 | 1.34 | 0.98 | 0.94 | 0.93 | 0.97 | 0.86 | 1.03 | 1.01 | 1.43 | 1.01 | 0.99 |
| 23   | 3  | 15.33% | 9.1  | 0.97 | 0.87 | 0.97 | 0.99 | 1.28 | 1.04 | 1.11 | 1.19 | 1.23 | 1.14 | 1.1  |
| 8    | 6  | 20.46% | 8.81 | 0.94 | 0.99 | 1.1  | 0.87 | 1.06 | 1.06 | 0.82 | 0.93 | 0.98 | 0.93 | 0.94 |
| 6    | 5  | 22.84% | 8.33 | 0.91 | 0.86 | 1.14 | 1    | 1.14 | 1.18 | 1.1  | 1.15 | 0.96 | 0.94 | 1.05 |
| 386  | 14 | 63.04% | 6.77 | 0.96 | 0.93 | 0.96 | 0.95 | 1.22 | 1.14 | 1.24 | 1.18 | 1.1  | 1.09 | 1.04 |
| 10   | 2  | 8.67%  | 6.09 | 1.14 | 1.14 | 0.8  | 0.73 | 1.24 | 1.17 | 0.82 | 0.86 | 1.12 | 0.78 | 0.76 |
| 29   | 7  | 31.97% | 8.64 | 1.06 | 1.13 | 0.96 | 0.95 | 1.2  | 1.1  | 0.99 | 1.14 | 1.08 | 1.03 | 1.13 |
| 4    | 4  | 12.75% | 7.21 | 1.04 | 0.88 | 1    | 0.93 | 0.92 | 0.98 | 1.08 | 0.94 | 1.07 | 1.11 | 1.14 |
| 7    | 2  | 16.35% | 10   | 1.04 | 1.04 | 0.95 | 0.9  | 0.87 | 0.84 | 0.81 | 0.8  | 0.94 | 0.95 | 0.72 |
| 2    | 2  | 14.44% | 8.84 | 1.21 | 0.95 | 1.12 | 3.01 | 1.17 | 1.03 | 0.8  | 2.36 | 1.11 | 1.02 | 3.27 |
| 26   | 10 | 17.99% | 7.29 | 1.13 | 1.05 | 1.12 | 1.12 | 1.07 | 0.97 | 1.14 | 1.14 | 0.95 | 1    | 1.06 |
| 20   | 12 | 12.86% | 8.15 | 1.15 | 1.14 | 1.21 | 1.14 | 1.06 | 1.06 | 1.33 | 1.17 | 1.04 | 0.94 | 1    |
| 18   | 8  | 26.63% | 9.26 | 1.03 | 1.04 | 1.09 | 1.21 | 0.93 | 1.07 | 1.13 | 1.1  | 1.02 | 1.1  | 0.92 |
| 7    | 5  | 18.54% | 8.66 | 0.79 | 0.87 | 0.87 | 0.96 | 0.98 | 0.99 | 1.08 | 0.98 | 1.1  | 0.93 | 1.3  |
| 13   | 5  | 36.78% | 8.98 | 0.82 | 0.99 | 0.92 | 0.89 | 1.25 | 1.16 | 1.35 | 1.1  | 1.09 | 1.01 | 1.06 |
| 29   | 9  | 30.59% | 5.29 | 0.78 | 0.73 | 0.93 | 1.04 | 1.1  | 1.11 | 1.01 | 1.16 | 1.23 | 1.11 | 1.17 |
| 9    | 4  | 18.90% | 8.78 | 1.15 | 1.05 | 1    | 0.99 | 1.48 | 1.12 | 0.99 | 1.03 | 1.13 | 1.03 | 1.27 |
| 11   | 7  | 7.25%  | 5.56 | 0.95 | 1.03 | 1.17 | 1.06 | 1.11 | 1.06 | 1.12 | 1.24 | 1.06 | 1.1  | 0.96 |
| 14   | 5  | 21.15% | 4.55 | 0.99 | 0.92 | 0.94 | 1.1  | 0.92 | 0.92 | 0.91 | 0.98 | 1.04 | 1.02 | 1.02 |
| 27   | 16 | 19.55% | 5.8  | 1.15 | 1.01 | 1.13 | 1.09 | 0.98 | 0.96 | 0.9  | 0.89 | 1.06 | 1.04 | 0.99 |
| 47   | 12 | 27.23% | 9.15 | 1.12 | 1.08 | 1.09 | 1.12 | 0.89 | 0.88 | 0.86 | 0.84 | 1.13 | 1.07 | 1.06 |
| 64   | 20 | 23.87% | 8.94 | 1.14 | 1.08 | 1.09 | 1.1  | 0.96 | 0.98 | 0.89 | 0.84 | 1.01 | 1.07 | 1.01 |
| 27   | 14 | 27.22% | 8.89 | 1.05 | 1.05 | 1.08 | 1.08 | 0.95 | 0.82 | 0.87 | 0.91 | 0.85 | 0.95 | 0.92 |
| 7    | 2  | 7.22%  | 4.82 | 1.02 | 0.97 | 0.94 | 1.07 | 0.98 | 0.95 | 0.97 | 0.96 | 0.94 | 1.01 | 1.02 |
| 34   | 19 | 25.12% | 5.93 | 1.07 | 1.02 | 1.11 | 1.06 | 1.08 | 0.95 | 0.9  | 0.87 | 1.01 | 1.04 | 0.97 |
| 2    | 2  | 3.77%  | 4.65 | 1.14 | 1.05 | 1.01 | 1.08 | 1.2  | 1.07 | 0.93 | 1.01 | 1.08 | 0.83 | 1.06 |

|    |    |        |      |      |      |      |      |      |      |      |      |      |      |      |
|----|----|--------|------|------|------|------|------|------|------|------|------|------|------|------|
| 8  | 4  | 13.38% | 5.5  | 0.93 | 1.09 | 1.02 | 1.09 | 1.1  | 0.99 | 0.86 | 0.96 | 0.98 | 1.14 | 1.09 |
| 51 | 9  | 20.91% | 6.25 | 0.99 | 1.06 | 1.03 | 0.99 | 1.09 | 1.1  | 1.05 | 1.06 | 1.04 | 1.05 | 1.06 |
| 26 | 12 | 19.02% | 5.52 | 0.77 | 0.84 | 0.94 | 0.82 | 1.18 | 1.18 | 1.17 | 1.25 | 1.13 | 1.03 | 1.11 |
| 20 | 11 | 27.58% | 5.56 | 1.21 | 1.2  | 0.97 | 1.06 | 1.09 | 1.11 | 0.97 | 0.92 | 1.15 | 0.95 | 1    |
| 8  | 5  | 30.43% | 5.6  | 1.11 | 0.83 | 1.09 | 1.05 | 0.64 | 0.63 | 0.85 | 0.8  | 0.81 | 1.12 | 0.98 |
| 5  | 4  | 12.83% | 5.39 | 0.73 | 0.88 | 1    | 0.98 | 0.69 | 0.8  | 0.87 | 1.02 | 0.74 | 1.19 | 1.11 |
| 4  | 3  | 10.22% | 9.42 | 1.18 | 1.11 | 1.11 | 1.09 | 1.22 | 1.21 | 1.23 | 1.09 | 0.45 | 0.82 | 0.73 |
| 15 | 5  | 21.40% | 7.78 | 1.03 | 0.99 | 0.89 | 0.89 | 1.24 | 1.2  | 1.15 | 1.21 | 1    | 1.04 | 1.04 |
| 6  | 5  | 14.39% | 6.33 | 0.98 | 1.15 | 0.79 | 0.85 | 1.21 | 1.29 | 1.15 | 1.05 | 1.6  | 1.29 | 1.26 |
| 15 | 4  | 44.37% | 5.83 | 1.02 | 1.12 | 1.05 | 1.14 | 0.81 | 1.03 | 0.92 | 1.11 | 0.95 | 1.02 | 1.02 |
| 8  | 3  | 20.39% | 10.4 | 1.17 | 1.1  | 1.11 | 1.05 | 0.94 | 0.91 | 0.74 | 0.79 | 1.09 | 2.02 | 1.07 |
| 36 | 7  | 27.78% | 9.95 | 1.06 | 1.1  | 1.13 | 1.15 | 0.83 | 0.82 | 0.96 | 1.03 | 1    | 1.06 | 0.94 |
| 5  | 4  | 23.49% | 10.2 | 1.26 | 1.39 | 1.32 | 1.4  | 1.26 | 1.3  | 1.04 | 1.53 | 1.1  | 1.15 | 1.08 |
| 6  | 5  | 28.10% | 10.6 | 1.1  | 1.25 | 1.17 | 1.16 | 0.8  | 0.81 | 0.8  | 0.78 | 1.16 | 0.93 | 0.89 |
| 4  | 3  | 20.00% | 10.7 | 0.7  | 1.31 | 0.99 | 1.08 | 1.1  | 0.92 | 0.59 | 0.85 | 1.19 | 1.01 | 0.92 |
| 3  | 2  | 15.60% | 10.7 | 1.19 | 1.27 | 1.03 | 1.02 | 1.17 | 1.09 | 0.99 | 0.99 | 1.35 | 0.99 | 1.03 |
| 14 | 7  | 32.91% | 9.55 | 1.08 | 1.05 | 1.04 | 1.08 | 1.05 | 1.01 | 0.92 | 0.98 | 0.96 | 0.97 | 0.91 |
| 12 | 7  | 28.14% | 10.2 | 1.19 | 1.08 | 1.12 | 1.24 | 0.76 | 0.74 | 0.71 | 0.78 | 0.81 | 1.02 | 0.95 |
| 10 | 6  | 24.06% | 10.3 | 1.33 | 1.23 | 1.12 | 1.24 | 0.7  | 0.75 | 0.71 | 0.78 | 0.95 | 1.02 | 0.95 |
| 9  | 6  | 29.22% | 9.8  | 1.27 | 1.28 | 1.12 | 1.11 | 0.9  | 0.97 | 0.94 | 0.99 | 0.85 | 0.87 | 0.83 |
| 7  | 4  | 17.60% | 10.6 | 1.2  | 1.15 | 1.18 | 0.97 | 0.95 | 0.98 | 0.83 | 0.8  | 1.11 | 0.85 | 0.92 |
| 8  | 5  | 25.76% | 10.3 | 1.27 | 1.11 | 1.08 | 1.16 | 0.86 | 0.85 | 1.07 | 0.99 | 0.95 | 1.03 | 1.08 |
| 6  | 4  | 11.99% | 5.54 | 1.09 | 0.96 | 1.23 | 1.07 | 0.99 | 0.77 | 0.88 | 0.79 | 0.89 | 0.88 | 0.9  |
| 8  | 5  | 21.72% | 10.4 | 1.04 | 1.19 | 0.99 | 1.03 | 0.95 | 0.82 | 0.68 | 0.97 | 1.09 | 0.76 | 0.85 |
| 7  | 3  | 17.34% | 9.97 | 1.26 | 1.2  | 1.2  | 1.03 | 1.18 | 1.02 | 1.1  | 0.87 | 1.23 | 1.01 | 1.03 |
| 6  | 3  | 22.16% | 9.02 | 1.07 | 0.96 | 0.9  | 0.91 | 0.66 | 0.84 | 0.88 | 0.85 | 0.96 | 0.81 | 0.81 |
| 12 | 6  | 25.60% | 10.4 | 1.06 | 0.93 | 1.18 | 1.07 | 0.81 | 0.8  | 0.95 | 0.87 | 0.92 | 1.02 | 1.09 |
| 9  | 5  | 22.22% | 10.5 | 0.98 | 0.89 | 1.18 | 1.07 | 0.7  | 0.62 | 0.95 | 0.87 | 0.87 | 1.02 | 1.09 |
| 6  | 4  | 22.22% | 10.2 | 1.13 | 1.06 | 1.2  | 1.2  | 0.83 | 0.78 | 0.94 | 0.94 | 0.82 | 1.04 | 0.96 |
| 7  | 4  | 20.11% | 10.1 | 1.25 | 0.97 | 1.15 | 1.12 | 0.78 | 0.9  | 0.86 | 0.75 | 0.76 | 0.91 | 0.9  |
| 2  | 1  | 4.85%  | 10.4 | 1.8  | 1.49 | 1.25 | 1.54 | 0.9  | 0.79 | 1.28 | 0.9  | 1.45 | 1.02 | 1.07 |
| 2  | 2  | 11.56% | 10.9 | 1.69 | 1.43 | 1.28 | 1.42 | 0.27 | 0.37 | 0.7  | 0.74 | 1.19 | 1.25 | 0.95 |
| 6  | 3  | 19.21% | 10.9 | 1.1  | 1.13 | 1.25 | 1.22 | 0.9  | 0.92 | 1.05 | 1.01 | 0.86 | 1.03 | 0.89 |
| 3  | 2  | 17.32% | 11.3 | 1.27 | 1.2  | 1.47 | 1.05 | 0.82 | 0.85 | 1.03 | 0.96 | 1.16 | 1.16 | 1.11 |
| 8  | 5  | 7.03%  | 10.4 | 1.27 | 1.15 | 1.2  | 1.11 | 0.93 | 0.9  | 0.94 | 0.91 | 1    | 0.91 | 0.89 |
| 4  | 3  | 10.55% | 9.44 | 1.08 | 1.16 | 1.42 | 1.01 | 0.93 | 1.01 | 1.9  | 0.39 | 0.95 | 0.74 | 0.23 |
| 8  | 4  | 14.81% | 9.35 | 1.04 | 1.03 | 1.23 | 1.19 | 0.85 | 1.09 | 0.91 | 1.02 | 1    | 1.05 | 0.91 |
| 9  | 4  | 19.23% | 10.3 | 1.26 | 1.14 | 1.38 | 1.23 | 0.69 | 0.73 | 0.84 | 0.75 | 0.98 | 1.04 | 1.06 |
| 16 | 9  | 35.92% | 9.98 | 1.07 | 1.15 | 1.38 | 1.16 | 0.99 | 0.95 | 1.09 | 0.99 | 0.97 | 0.89 | 1.03 |
| 15 | 6  | 25.00% | 9.86 | 1.13 | 1.16 | 1.38 | 1.15 | 0.96 | 1.01 | 1.09 | 0.99 | 1    | 0.89 | 0.97 |
| 2  | 2  | 13.18% | 7.76 | 1.48 | 1.12 | 1.87 | 1.87 | 0.9  | 0.54 | 0.64 | 0.8  | 0.9  | 0.82 | 0.77 |
| 7  | 4  | 17.51% | 10.4 | 1.11 | 1.15 | 1.3  | 1.36 | 1.14 | 1.04 | 0.75 | 0.85 | 1.26 | 1.14 | 1.14 |
| 14 | 5  | 24.90% | 10.8 | 1.09 | 1.04 | 1.26 | 1.31 | 0.84 | 0.96 | 0.84 | 0.91 | 1.12 | 1.41 | 1.06 |
| 9  | 5  | 20.33% | 9.52 | 1.05 | 1.22 | 1.09 | 1.1  | 1.03 | 1.08 | 0.85 | 0.84 | 1.1  | 0.91 | 0.86 |
| 7  | 2  | 9.69%  | 5.26 | 1.21 | 1.12 | 1.22 | 1.19 | 1.06 | 1.05 | 1.1  | 0.83 | 0.98 | 1.22 | 0.96 |
| 4  | 3  | 11.20% | 7.78 | 1.41 | 1.58 | 1.05 | 1.18 | 1.22 | 1.26 | 0.94 | 1.28 | 1.11 | 0.92 | 0.92 |
| 5  | 4  | 43.01% | 11   | 1.13 | 1.18 | 1.15 | 1.22 | 0.79 | 1    | 0.88 | 0.89 | 0.74 | 0.87 | 0.9  |
| 3  | 2  | 17.58% | 11.2 | 1.15 | 1.21 | 1.25 | 1.29 | 1.25 | 1.11 | 1.22 | 1.45 | 0.65 | 1.21 | 0.33 |
| 5  | 4  | 18.64% | 9.95 | 1.28 | 1.26 | 1.35 | 1.83 | 1    | 0.99 | 1.18 | 1.03 | 0.78 | 0.97 | 0.84 |
| 7  | 4  | 19.61% | 11.1 | 0.91 | 1.04 | 1.41 | 1.45 | 1    | 1.02 | 1.16 | 1.05 | 0.94 | 0.95 | 0.95 |

|     |    |        |      |      |      |      |      |      |      |      |      |      |      |      |
|-----|----|--------|------|------|------|------|------|------|------|------|------|------|------|------|
| 13  | 6  | 19.38% | 9.21 | 1.06 | 0.95 | 1.09 | 1.01 | 1.01 | 0.93 | 0.94 | 1.05 | 1.15 | 1.06 | 1.04 |
| 11  | 8  | 27.69% | 9.44 | 1.38 | 1.17 | 1.3  | 1.34 | 1.14 | 1.12 | 1.16 | 1.2  | 0.96 | 0.98 | 0.92 |
| 4   | 2  | 13.21% | 10.2 | 1.48 | 1.22 | 1.36 | 1.46 | 1.06 | 1.31 | 0.9  | 0.92 | 1.03 | 0.78 | 0.78 |
| 3   | 2  | 8.42%  | 10.3 | 1.32 | 1.09 | 1.59 | 1.51 | 1.03 | 1.05 | 1.28 | 1.08 | 0.99 | 1    | 0.95 |
| 15  | 7  | 23.83% | 9.53 | 1.25 | 1.29 | 1.07 | 1.2  | 1.16 | 1.1  | 1.08 | 1.11 | 1.07 | 1.07 | 1.07 |
| 7   | 3  | 10.41% | 9.38 | 1.31 | 1.31 | 1.52 | 1.34 | 1.21 | 1.41 | 1.11 | 1    | 0.9  | 0.72 | 0.45 |
| 6   | 4  | 16.73% | 10   | 0.98 | 1.08 | 1.4  | 1.37 | 0.98 | 0.97 | 1.31 | 1.25 | 0.84 | 0.93 | 0.89 |
| 5   | 4  | 18.35% | 10.8 | 1.32 | 1.3  | 1.57 | 1.31 | 0.99 | 1.15 | 1.01 | 1    | 0.8  | 0.86 | 0.85 |
| 3   | 2  | 9.88%  | 9.81 | 0.84 | 0.79 | 0.99 | 0.98 | 1    | 1.01 | 1    | 1.03 | 1.07 | 0.99 | 0.99 |
| 5   | 4  | 20.36% | 10.8 | 1.79 | 1.6  | 1.44 | 1.66 | 0.95 | 0.91 | 0.77 | 0.85 | 1.07 | 1    | 1.05 |
| 3   | 3  | 19.19% | 10.4 | 1.22 | 1.09 | 1.45 | 1.28 | 0.96 | 0.99 | 1.29 | 1.13 | 0.78 | 1.03 | 0.74 |
| 3   | 2  | 7.61%  | 10.3 | 1.26 | 1.2  | 1.62 | 1.36 | 1.08 | 1.07 | 1.07 | 0.98 | 1.03 | 1.03 | 0.87 |
| 4   | 2  | 16.43% | 9.74 | 1.17 | 1.22 | 0.93 | 1.24 | 0.94 | 0.83 | 0.87 | 0.98 | 0.73 | 0.92 | 0.87 |
| 8   | 6  | 22.81% | 9.71 | 1.37 | 1.16 | 1.49 | 1.42 | 1.02 | 0.98 | 1.1  | 1.07 | 0.96 | 0.98 | 0.98 |
| 4   | 4  | 12.05% | 5.42 | 1.52 | 1.56 | 1.07 | 1.1  | 1.1  | 1.11 | 1.03 | 1.02 | 0.93 | 0.91 | 0.94 |
| 7   | 5  | 21.25% | 6.12 | 1.52 | 1.75 | 1.35 | 1.73 | 1.09 | 1.1  | 1.11 | 1.03 | 0.93 | 1.14 | 1.12 |
| 13  | 8  | 28.16% | 9.61 | 0.93 | 0.95 | 1.01 | 0.97 | 1.15 | 1.15 | 1.06 | 1.01 | 1.19 | 1.08 | 1.09 |
| 14  | 12 | 11.37% | 4.81 | 1.07 | 0.99 | 1.14 | 1.05 | 1.09 | 1.02 | 1.11 | 1.15 | 0.99 | 1.11 | 1.05 |
| 6   | 2  | 8.74%  | 10.1 | 0.86 | 0.91 | 0.97 | 0.98 | 1    | 1.04 | 1.06 | 1    | 1.14 | 1.06 | 0.89 |
| 35  | 15 | 25.52% | 8.82 | 1.09 | 1.04 | 0.93 | 1.05 | 1.19 | 1.03 | 1.09 | 1.12 | 1.18 | 0.95 | 1.06 |
| 4   | 2  | 13.22% | 6.13 | 1.01 | 1.11 | 1.14 | 1.23 | 0.98 | 1.02 | 1    | 1.02 | 1.02 | 1.06 | 0.92 |
| 15  | 11 | 15.68% | 7.2  | 1.13 | 1    | 1.21 | 1.02 | 1.22 | 1.11 | 1.2  | 1.19 | 1.26 | 1.16 | 1    |
| 2   | 2  | 4.81%  | 9.17 | 0.91 | 0.77 | 1.07 | 0.98 | 1.19 | 0.93 | 1    | 1    | 0.74 | 1.35 | 1.24 |
| 18  | 9  | 17.54% | 8.86 | 0.91 | 0.94 | 1.02 | 1.01 | 1    | 1.08 | 1.24 | 1.19 | 1.07 | 1.18 | 1.17 |
| 12  | 6  | 13.64% | 8.94 | 0.84 | 0.94 | 0.85 | 1.01 | 0.99 | 1.18 | 1.13 | 1.19 | 1.16 | 1.18 | 1.17 |
| 14  | 6  | 7.94%  | 6.06 | 1.08 | 1.09 | 0.98 | 0.97 | 1.12 | 0.98 | 1.15 | 1.22 | 1    | 1.05 | 1.15 |
| 4   | 4  | 2.38%  | 5.64 | 0.9  | 1.05 | 0.84 | 1.02 | 1    | 1.19 | 0.9  | 1.08 | 1.1  | 0.99 | 0.98 |
| 27  | 9  | 33.67% | 9.12 | 0.98 | 1.01 | 1.01 | 1.01 | 1.12 | 1.12 | 1.02 | 1    | 1.09 | 1.1  | 1.08 |
| 12  | 5  | 18.53% | 9.18 | 0.94 | 1.01 | 1.14 | 1.19 | 1.02 | 1.08 | 1.34 | 1.22 | 0.92 | 1.1  | 1.06 |
| 80  | 26 | 30.00% | 5.67 | 1.1  | 1.12 | 1.07 | 1.04 | 1.18 | 1.11 | 1.02 | 1.04 | 1.09 | 1    | 0.99 |
| 42  | 24 | 22.64% | 4.66 | 1.06 | 1.06 | 1.11 | 1.16 | 1.04 | 1.07 | 1.06 | 1    | 0.91 | 0.93 | 0.87 |
| 7   | 5  | 18.39% | 9.66 | 1.15 | 1.29 | 1.78 | 1.58 | 1.28 | 1.24 | 1.38 | 1.24 | 0.98 | 0.77 | 0.83 |
| 53  | 16 | 48.82% | 4.91 | 1.2  | 1.11 | 1.23 | 1.19 | 1.19 | 1.13 | 1.14 | 1.18 | 1.07 | 1    | 1.08 |
| 7   | 2  | 10.58% | 7.67 | 0.94 | 1.08 | 1.03 | 0.84 | 0.87 | 1.03 | 0.8  | 0.78 | 1    | 0.81 | 0.91 |
| 4   | 3  | 11.22% | 5.76 | 1.04 | 1.07 | 1.07 | 0.96 | 0.94 | 1.04 | 0.75 | 0.67 | 1.23 | 1    | 0.84 |
| 7   | 4  | 8.63%  | 5.07 | 0.8  | 0.87 | 0.95 | 0.9  | 0.76 | 0.94 | 0.8  | 0.99 | 0.94 | 0.82 | 0.98 |
| 4   | 3  | 2.98%  | 4.71 | 1.59 | 1.09 | 1.4  | 1.21 | 1.94 | 1.12 | 1.14 | 1.34 | 1.34 | 1.18 | 1.2  |
| 6   | 6  | 6.07%  | 4.65 | 0.97 | 0.95 | 1.48 | 1.25 | 0.9  | 0.86 | 1.29 | 1.25 | 0.97 | 1.35 | 1.4  |
| 92  | 13 | 47.87% | 6.96 | 0.98 | 0.93 | 1.05 | 1.12 | 1.18 | 1.02 | 1.08 | 1.11 | 1.12 | 0.99 | 1.01 |
| 6   | 2  | 14.50% | 5.3  | 0.79 | 0.87 | 1.57 | 1.06 | 1.33 | 1.17 | 3.02 | 0.78 | 1.01 | 0.83 | 0.43 |
| 64  | 4  | 9.52%  | 8.19 | 0.91 | 0.86 | 0.84 | 0.87 | 1.13 | 1.1  | 1.15 | 1.18 | 1.1  | 1.09 | 1.12 |
| 310 | 17 | 47.73% | 8.78 | 0.88 | 0.87 | 0.87 | 0.9  | 1.18 | 1.12 | 1.17 | 1.15 | 1.11 | 1.08 | 1.09 |
| 20  | 9  | 29.71% | 6.73 | 0.86 | 1.06 | 0.82 | 0.9  | 1.21 | 1.2  | 1.24 | 1.24 | 1.01 | 0.92 | 1.1  |
| 96  | 20 | 45.68% | 8.2  | 0.99 | 0.97 | 1.04 | 1.02 | 1.15 | 1.05 | 1.08 | 1.05 | 1.07 | 1    | 1.03 |
| 44  | 7  | 21.45% | 6.01 | 0.95 | 0.88 | 1.02 | 1    | 1.2  | 1.03 | 1.12 | 1.21 | 1.06 | 1.09 | 1.03 |
| 14  | 6  | 12.59% | 5.94 | 1.28 | 1.27 | 1.18 | 1.15 | 1.43 | 1.39 | 1.46 | 1.4  | 1.1  | 0.83 | 0.83 |
| 35  | 11 | 24.79% | 5.97 | 1.3  | 1.28 | 1.29 | 1.14 | 1.53 | 1.41 | 1.46 | 1.53 | 0.9  | 0.82 | 0.86 |
| 159 | 19 | 36.76% | 6.29 | 0.91 | 0.88 | 0.82 | 0.85 | 1.08 | 1.13 | 1.04 | 1.07 | 1.06 | 1.07 | 1.08 |
| 18  | 4  | 23.70% | 9.09 | 0.72 | 0.84 | 0.87 | 0.85 | 1.05 | 1    | 1.13 | 1.11 | 1.01 | 1.21 | 1.1  |
| 229 | 22 | 35.51% | 6.26 | 0.9  | 0.87 | 0.91 | 0.92 | 1.12 | 1.08 | 1.09 | 1.07 | 1.08 | 1.08 | 1.06 |

|     |    |        |      |      |      |      |      |      |      |      |      |      |      |      |
|-----|----|--------|------|------|------|------|------|------|------|------|------|------|------|------|
| 13  | 6  | 11.81% | 5.09 | 1.04 | 0.98 | 0.93 | 1.02 | 1.02 | 0.93 | 1.04 | 0.91 | 1.01 | 0.89 | 0.83 |
| 20  | 11 | 29.46% | 5.26 | 1.13 | 1.06 | 1.18 | 1.12 | 1.21 | 1.1  | 1.29 | 1.21 | 1.04 | 1.02 | 1.17 |
| 5   | 3  | 14.49% | 7.8  | 0.98 | 0.95 | 1.01 | 0.77 | 1.19 | 0.99 | 1.13 | 1.07 | 1.02 | 1.25 | 1.1  |
| 3   | 2  | 13.84% | 6.51 | 1.29 | 1.38 | 1.15 | 0.36 | 1.06 | 1.37 | 1.39 | 1.38 | 1.12 | 1.14 | 0.94 |
| 2   | 2  | 6.04%  | 5.02 | 1.45 | 1.32 | 1.95 | 1.52 | 1.71 | 1.38 | 1.18 | 1.08 | 0.56 | 0.73 | 0.42 |
| 3   | 2  | 6.02%  | 5.28 | 1.26 | 1.13 | 1.07 | 1.28 | 1.44 | 1.27 | 1.74 | 1.41 | 0.7  | 0.67 | 0.92 |
| 2   | 1  | 2.16%  | 6.4  | 0.97 | 1.04 | 0.85 | 0.84 | 1.36 | 1.41 | 1.18 | 1.19 | 0.81 | 0.99 | 1.24 |
| 4   | 2  | 10.42% | 7.78 | 0.96 | 0.97 | 0.98 | 0.9  | 1.21 | 1.03 | 1.08 | 1.07 | 0.93 | 0.98 | 1.23 |
| 4   | 4  | 16.72% | 5.83 | 1.5  | 1.7  | 1.95 | 2.09 | 1.33 | 1.31 | 1.06 | 1.01 | 0.7  | 0.56 | 0.49 |
| 2   | 2  | 6.18%  | 8.97 | 1.25 | 1.05 | 1.56 | 1.43 | 1.43 | 1.19 | 1.3  | 1.09 | 0.9  | 0.94 | 0.75 |
| 23  | 8  | 24.60% | 9.18 | 1.06 | 0.96 | 0.95 | 0.91 | 0.98 | 0.77 | 0.88 | 0.81 | 1.04 | 0.93 | 1.01 |
| 7   | 5  | 13.38% | 6.62 | 0.95 | 0.83 | 1.7  | 1.45 | 0.91 | 0.88 | 1.61 | 2.02 | 0.93 | 1.36 | 1.45 |
| 32  | 12 | 25.05% | 6.29 | 0.99 | 0.94 | 0.93 | 0.91 | 1.15 | 1.09 | 1.08 | 1.1  | 0.98 | 1.09 | 1.1  |
| 9   | 4  | 15.38% | 8.95 | 1.02 | 1.03 | 1.04 | 1.72 | 1.24 | 1.12 | 1.22 | 1.33 | 1.14 | 1    | 1.07 |
| 6   | 4  | 41.48% | 4.94 | 1.12 | 1.27 | 0.92 | 0.82 | 0.78 | 0.99 | 0.85 | 1.03 | 1.4  | 1.04 | 1.04 |
| 27  | 10 | 21.84% | 6.51 | 0.95 | 0.86 | 0.93 | 0.86 | 1.02 | 0.86 | 0.86 | 0.85 | 1.12 | 1.07 | 1.05 |
| 12  | 9  | 36.55% | 6.01 | 1.05 | 1.19 | 1.2  | 1.08 | 1.11 | 0.98 | 1.2  | 0.99 | 1.07 | 0.98 | 1    |
| 12  | 8  | 26.74% | 6.41 | 1.21 | 1.15 | 1.17 | 1.1  | 0.79 | 0.75 | 1.05 | 0.91 | 1    | 1.01 | 0.94 |
| 58  | 18 | 39.96% | 8.7  | 0.77 | 0.82 | 0.75 | 0.78 | 1.06 | 1.08 | 0.98 | 1.07 | 1.03 | 1.12 | 1.16 |
| 48  | 10 | 40.68% | 8.74 | 0.92 | 0.89 | 0.83 | 0.93 | 1.16 | 1.02 | 1.01 | 1.08 | 1.06 | 1.03 | 1.04 |
| 42  | 12 | 52.59% | 5.6  | 1.01 | 1.06 | 0.94 | 1.09 | 1.03 | 1.1  | 1.12 | 1.1  | 1.2  | 1.01 | 1.1  |
| 27  | 8  | 35.98% | 6.18 | 1.26 | 1.26 | 1.17 | 1.19 | 1.02 | 1.04 | 1.02 | 0.91 | 1.04 | 0.92 | 0.93 |
| 88  | 17 | 41.65% | 8.59 | 1.04 | 1.01 | 0.94 | 1.07 | 1.17 | 1.12 | 1.1  | 1.24 | 1.08 | 1.12 | 1.12 |
| 13  | 8  | 40.64% | 5.55 | 1.08 | 1.04 | 1.17 | 1.06 | 1    | 1.07 | 1.35 | 1.19 | 1.23 | 0.91 | 1.07 |
| 13  | 9  | 19.62% | 6.58 | 0.97 | 0.93 | 0.93 | 0.94 | 0.9  | 0.89 | 0.82 | 1    | 1.05 | 1.2  | 1.13 |
| 28  | 8  | 32.02% | 9    | 0.94 | 0.98 | 1.01 | 0.96 | 1    | 0.98 | 0.95 | 0.98 | 1.23 | 1.12 | 1.1  |
| 3   | 2  | 14.62% | 8.98 | 1.12 | 1.09 | 1.13 | 0.94 | 0.61 | 0.77 | 0.71 | 0.64 | 0.45 | 0.73 | 0.81 |
| 44  | 7  | 32.11% | 9.26 | 0.89 | 0.9  | 1.03 | 0.99 | 1.17 | 1.1  | 1.07 | 1.14 | 1.19 | 1.04 | 1.06 |
| 23  | 4  | 16.59% | 8.95 | 0.91 | 0.86 | 1.03 | 0.89 | 1.15 | 1.1  | 1.05 | 1.03 | 1.2  | 1.06 | 1.08 |
| 31  | 11 | 21.44% | 7.1  | 1.01 | 0.96 | 0.94 | 0.87 | 1.23 | 0.98 | 1.11 | 1.02 | 1.06 | 1.11 | 1.11 |
| 6   | 4  | 9.23%  | 8.2  | 0.78 | 0.9  | 0.88 | 0.9  | 0.88 | 1.02 | 1.03 | 0.98 | 0.92 | 1.07 | 1.09 |
| 15  | 5  | 15.66% | 7.66 | 1.01 | 1.21 | 1.06 | 1.04 | 1.02 | 1.24 | 1.16 | 1.18 | 1.02 | 0.99 | 1.05 |
| 18  | 6  | 12.17% | 6.91 | 1.2  | 1.31 | 0.99 | 1.25 | 0.66 | 0.7  | 0.66 | 0.78 | 0.84 | 0.79 | 0.8  |
| 15  | 4  | 27.45% | 5.47 | 1.03 | 1.06 | 1.08 | 1.11 | 0.91 | 1.09 | 0.91 | 0.99 | 1.22 | 1.09 | 1.16 |
| 18  | 5  | 20.70% | 7.25 | 1.09 | 1.13 | 1.1  | 1.42 | 0.86 | 0.94 | 0.81 | 0.87 | 0.96 | 0.67 | 1    |
| 23  | 9  | 18.62% | 6.64 | 1.34 | 1.13 | 1.13 | 1.4  | 0.66 | 0.7  | 0.7  | 0.85 | 0.73 | 0.81 | 0.91 |
| 9   | 3  | 18.40% | 7.92 | 0.84 | 1.02 | 1.49 | 1.54 | 0.77 | 0.94 | 0.83 | 0.78 | 1.07 | 0.88 | 0.6  |
| 5   | 2  | 11.06% | 6.07 | 0.98 | 0.86 | 1.03 | 1.07 | 1.1  | 1.03 | 1.07 | 1.14 | 1.07 | 1.09 | 1.18 |
| 12  | 3  | 13.44% | 6.52 | 0.89 | 1.07 | 0.93 | 1.03 | 0.89 | 1.12 | 1.07 | 1.05 | 0.88 | 1.1  | 0.95 |
| 13  | 3  | 10.98% | 4.91 | 1.03 | 1.13 | 0.94 | 0.91 | 1.64 | 1.28 | 1.1  | 1.26 | 1.25 | 1.09 | 1.17 |
| 132 | 11 | 40.43% | 6.09 | 0.99 | 1    | 0.98 | 1.11 | 1.34 | 1.2  | 1.29 | 1.29 | 1.15 | 1.14 | 1.2  |
| 6   | 4  | 36.89% | 7.69 | 0.89 | 0.84 | 0.98 | 1.1  | 0.89 | 0.87 | 0.88 | 0.96 | 1.01 | 1.03 | 1.13 |
| 9   | 4  | 47.22% | 6.07 | 0.9  | 0.96 | 0.98 | 1.1  | 0.81 | 0.81 | 0.88 | 0.96 | 1.1  | 1.03 | 1.13 |
| 3   | 2  | 11.43% | 9.45 | 0.9  | 0.91 | 1.1  | 1.04 | 1.17 | 1.18 | 1.13 | 1.24 | 1.11 | 1.13 | 1.19 |
| 13  | 6  | 30.00% | 4.55 | 1.1  | 0.99 | 0.87 | 0.79 | 0.81 | 0.87 | 0.72 | 0.78 | 0.88 | 0.31 | 0.51 |
| 9   | 4  | 37.12% | 4.94 | 0.84 | 1.02 | 1.03 | 1.06 | 0.87 | 0.96 | 0.93 | 1.08 | 0.86 | 1.24 | 1.22 |
| 15  | 7  | 19.19% | 9.39 | 0.91 | 0.87 | 1.07 | 0.87 | 1.06 | 1    | 1.2  | 0.93 | 0.99 | 0.99 | 0.92 |
| 59  | 8  | 35.93% | 9.17 | 1.09 | 1.09 | 1.07 | 1.19 | 1.19 | 1.15 | 1.12 | 1.09 | 1    | 1.01 | 1.04 |
| 7   | 4  | 15.66% | 7.09 | 1.02 | 0.96 | 1.08 | 1.05 | 0.95 | 0.76 | 0.91 | 1.13 | 0.73 | 0.93 | 0.92 |
| 8   | 4  | 13.37% | 8.51 | 1.07 | 0.99 | 0.93 | 0.79 | 0.96 | 0.85 | 0.77 | 0.87 | 0.92 | 0.89 | 0.92 |

|     |    |        |      |      |      |      |      |      |      |      |      |      |      |      |
|-----|----|--------|------|------|------|------|------|------|------|------|------|------|------|------|
| 10  | 4  | 21.47% | 5.35 | 1.14 | 1.27 | 1.18 | 1    | 0.92 | 0.77 | 0.92 | 0.86 | 0.77 | 1.08 | 1.02 |
| 68  | 6  | 29.18% | 8.91 | 0.89 | 0.91 | 0.83 | 0.89 | 1.06 | 1.1  | 1.03 | 1.02 | 1.08 | 1.05 | 1.08 |
| 12  | 7  | 40.74% | 9.54 | 0.95 | 0.95 | 1.01 | 1.02 | 1.12 | 1.17 | 1.08 | 1.05 | 1.05 | 0.95 | 1.08 |
| 129 | 9  | 27.21% | 7.65 | 0.96 | 0.98 | 1.03 | 1.04 | 1.34 | 1.21 | 1.12 | 1.19 | 1.12 | 1.22 | 1.14 |
| 7   | 3  | 17.78% | 8.52 | 0.7  | 0.97 | 0.87 | 0.75 | 1.21 | 1.35 | 1.33 | 1.15 | 1.03 | 0.89 | 1.07 |
| 7   | 4  | 13.05% | 5.62 | 1.2  | 1.2  | 1.13 | 0.99 | 0.83 | 0.79 | 0.82 | 0.98 | 0.74 | 0.82 | 0.74 |
| 23  | 10 | 29.27% | 6.92 | 1.07 | 1.07 | 1.1  | 1.06 | 0.86 | 0.8  | 0.84 | 0.82 | 0.84 | 0.88 | 0.82 |
| 13  | 8  | 14.31% | 4.64 | 1.26 | 1.22 | 1    | 1.03 | 0.95 | 0.93 | 0.88 | 0.8  | 0.85 | 0.6  | 0.53 |
| 22  | 10 | 21.96% | 4.84 | 1.07 | 1.02 | 1.02 | 1.06 | 0.92 | 0.91 | 0.89 | 0.97 | 0.91 | 0.91 | 0.9  |
| 12  | 6  | 6.70%  | 9.5  | 0.95 | 0.99 | 1.03 | 1    | 0.99 | 0.97 | 0.92 | 0.8  | 0.9  | 0.87 | 0.93 |
| 5   | 4  | 7.52%  | 6.27 | 0.8  | 1.04 | 0.73 | 0.72 | 1.12 | 1.07 | 1.02 | 1.02 | 1.07 | 0.86 | 0.87 |
| 8   | 4  | 14.74% | 4.78 | 0.83 | 0.87 | 0.76 | 0.79 | 0.86 | 0.94 | 1.28 | 1.15 | 1.08 | 0.89 | 0.85 |
| 11  | 5  | 27.34% | 8.94 | 0.86 | 0.82 | 0.83 | 0.85 | 1.11 | 1.07 | 1.05 | 1.04 | 1.15 | 1.06 | 1.12 |
| 7   | 3  | 15.61% | 8.83 | 1    | 1.14 | 0.45 | 0.46 | 1.35 | 1.11 | 1.28 | 1.1  | 1.23 | 0.42 | 1.02 |
| 12  | 4  | 31.45% | 5.22 | 1.15 | 0.85 | 1.4  | 1.6  | 1.14 | 0.93 | 1.29 | 0.96 | 1.24 | 1.32 | 1.14 |
| 7   | 4  | 21.74% | 8.85 | 0.6  | 0.82 | 0.85 | 0.81 | 1.01 | 1.2  | 0.95 | 1.08 | 0.8  | 1.17 | 1.03 |
| 11  | 5  | 27.65% | 9.69 | 0.91 | 0.92 | 1.12 | 1    | 1.15 | 1.07 | 1.16 | 1.11 | 1.03 | 1.03 | 1.09 |
| 9   | 4  | 16.13% | 9.45 | 0.76 | 0.79 | 0.74 | 0.72 | 1.1  | 1.11 | 1.09 | 1.14 | 1.02 | 1.18 | 1.08 |
| 56  | 6  | 27.27% | 9.54 | 1    | 0.95 | 0.99 | 0.98 | 1.04 | 1.04 | 1.09 | 1.08 | 0.96 | 0.98 | 1.06 |
| 9   | 3  | 17.62% | 8.44 | 0.94 | 1.04 | 0.73 | 0.81 | 1.05 | 1.13 | 0.98 | 1.05 | 1.21 | 1.04 | 1.03 |
| 18  | 5  | 22.22% | 9.05 | 0.89 | 0.92 | 0.73 | 0.85 | 1.2  | 1.16 | 1.03 | 1.14 | 1.08 | 1.13 | 1.09 |
| 11  | 5  | 34.71% | 5.37 | 1.05 | 0.89 | 1.29 | 1.65 | 1.36 | 1.07 | 1.49 | 0.96 | 1.28 | 1.1  | 1.06 |
| 46  | 8  | 25.59% | 4.55 | 0.98 | 1.04 | 0.83 | 0.93 | 1.21 | 1.2  | 1.1  | 1.05 | 1.16 | 0.85 | 0.91 |
| 2   | 2  | 11.17% | 4.82 | 0.82 | 0.89 | 1.22 | 1.19 | 0.86 | 0.95 | 1.21 | 1.22 | 0.86 | 1.04 | 1.01 |
| 6   | 5  | 7.74%  | 7.62 | 0.73 | 0.75 | 1.07 | 1.06 | 0.94 | 0.85 | 1.03 | 1    | 0.69 | 1.01 | 0.96 |
| 55  | 9  | 53.40% | 8.81 | 0.93 | 0.99 | 1.03 | 0.98 | 1.13 | 1.13 | 1.1  | 1.15 | 1.11 | 1.08 | 1.02 |
| 5   | 3  | 14.61% | 9.82 | 1.09 | 1.08 | 1.08 | 0.95 | 1.25 | 1.11 | 1.12 | 1.12 | 1.16 | 1.15 | 1.06 |
| 14  | 9  | 16.17% | 5.29 | 1.03 | 0.98 | 1.08 | 1.19 | 0.96 | 1    | 1.02 | 1.05 | 0.87 | 1.38 | 1.28 |
| 15  | 7  | 40.00% | 9.18 | 1.44 | 1.36 | 1.15 | 1.32 | 1    | 0.97 | 0.92 | 0.97 | 0.85 | 0.78 | 0.78 |
| 5   | 2  | 8.02%  | 5.55 | 0.85 | 0.75 | 0.9  | 0.79 | 0.66 | 0.69 | 0.53 | 0.5  | 0.57 | 0.51 | 0.61 |
| 22  | 8  | 31.71% | 7.62 | 1.26 | 1.25 | 1.14 | 1.08 | 0.96 | 0.99 | 0.91 | 0.88 | 1.01 | 0.94 | 0.89 |
| 5   | 4  | 15.02% | 7.57 | 1    | 0.92 | 1.07 | 1.08 | 1.1  | 1.22 | 1.04 | 1.11 | 1.07 | 1.05 | 1.04 |
| 21  | 14 | 14.92% | 6.15 | 0.97 | 1.08 | 1.16 | 1.05 | 0.99 | 1.03 | 0.89 | 0.87 | 1.03 | 0.97 | 1.01 |
| 5   | 2  | 7.38%  | 4.87 | 0.93 | 0.94 | 1.58 | 1.06 | 0.96 | 0.95 | 1.54 | 1.13 | 1.07 | 0.89 | 0.88 |
| 4   | 3  | 5.71%  | 9.05 | 0.96 | 1.11 | 1.02 | 1.01 | 1.19 | 1.07 | 0.91 | 0.97 | 0.98 | 1.03 | 1.08 |
| 12  | 4  | 27.22% | 7.85 | 1    | 0.99 | 1.04 | 0.97 | 0.95 | 0.73 | 0.99 | 0.92 | 0.84 | 1.01 | 0.94 |
| 10  | 5  | 18.25% | 6.92 | 1.09 | 1.25 | 1.03 | 1.12 | 1.19 | 1.19 | 1.18 | 1.23 | 0.85 | 1.05 | 1.22 |
| 11  | 7  | 22.84% | 4.82 | 1.23 | 1.13 | 1.13 | 1.72 | 1.17 | 1.17 | 1.26 | 1.45 | 0.89 | 1.21 | 0.89 |
| 17  | 10 | 17.82% | 5.84 | 1.12 | 1.11 | 1.05 | 1.17 | 1.02 | 1.07 | 1.07 | 1.21 | 0.9  | 0.91 | 1    |
| 17  | 7  | 20.33% | 8.95 | 0.94 | 0.88 | 0.89 | 0.78 | 1.01 | 1.05 | 1.02 | 1.02 | 1.07 | 1.07 | 1.05 |
| 12  | 7  | 11.49% | 5.54 | 0.93 | 0.97 | 1.06 | 1.02 | 0.97 | 1    | 1.08 | 1.08 | 1.09 | 1    | 0.99 |
| 47  | 9  | 36.81% | 6.33 | 0.81 | 0.87 | 0.81 | 0.84 | 1.01 | 1.02 | 0.99 | 1.08 | 1.12 | 1.19 | 0.96 |
| 18  | 9  | 20.12% | 6.36 | 0.78 | 0.85 | 0.77 | 0.71 | 1.22 | 1.09 | 1.19 | 1.11 | 1.23 | 1.14 | 1.09 |
| 14  | 7  | 16.78% | 6.15 | 1.04 | 1.02 | 1.28 | 1.17 | 1.21 | 1.06 | 1.32 | 1.28 | 0.97 | 1.45 | 1.14 |
| 2   | 2  | 3.23%  | 8.83 | 0.84 | 0.35 | 1.27 | 1.3  | 1.37 | 1.16 | 1.55 | 1.36 | 0.18 | 0.68 | 0.78 |
| 39  | 16 | 26.45% | 9.34 | 1.14 | 1.14 | 1.17 | 1.17 | 1.22 | 1.25 | 1.25 | 1.24 | 0.79 | 0.94 | 0.93 |
| 3   | 2  | 7.14%  | 9.23 | 1.26 | 1.27 | 1.04 | 1.11 | 1    | 1.33 | 1.17 | 1.23 | 1.31 | 0.93 | 0.65 |
| 3   | 2  | 9.44%  | 5.23 | 1.12 | 1.32 | 0.82 | 0.91 | 1.25 | 1.32 | 0.86 | 0.92 | 1.17 | 0.93 | 0.92 |
| 4   | 4  | 6.51%  | 6.62 | 1.04 | 1.29 | 0.97 | 0.99 | 1.45 | 1.42 | 1.02 | 1.25 | 1.44 | 1.07 | 1.11 |
| 4   | 2  | 6.37%  | 8.73 | 1.04 | 1.24 | 0.97 | 0.83 | 1.32 | 1.24 | 1.23 | 1.18 | 0.99 | 0.62 | 0.61 |



|     |    |        |      |      |      |      |      |      |      |      |      |      |      |      |
|-----|----|--------|------|------|------|------|------|------|------|------|------|------|------|------|
| 6   | 4  | 9.07%  | 6    | 0.98 | 1.04 | 0.75 | 0.65 | 1.11 | 0.95 | 0.84 | 1.25 | 1.05 | 1.09 | 0.95 |
| 10  | 5  | 10.98% | 6.4  | 0.96 | 0.87 | 0.87 | 0.92 | 0.97 | 0.77 | 0.93 | 1.07 | 1.01 | 1.08 | 1.01 |
| 12  | 3  | 1.91%  | 5.45 | 0.93 | 1.08 | 1.38 | 1.1  | 1.28 | 1.24 | 1.13 | 1.12 | 0.92 | 1.17 | 0.94 |
| 32  | 10 | 19.44% | 7.92 | 0.9  | 1.04 | 0.96 | 0.98 | 1.29 | 1.11 | 1.12 | 1.07 | 1.08 | 1.05 | 1.08 |
| 5   | 4  | 10.10% | 6.14 | 0.96 | 0.81 | 0.83 | 0.9  | 0.99 | 0.88 | 0.96 | 1.2  | 1.02 | 1.39 | 1.5  |
| 65  | 12 | 40.13% | 6.1  | 1.03 | 1.15 | 1.09 | 1.03 | 1.27 | 1.11 | 1.01 | 1.13 | 1    | 0.95 | 0.97 |
| 8   | 4  | 9.76%  | 7.04 | 0.88 | 0.89 | 1.02 | 1.08 | 0.9  | 0.88 | 1.19 | 0.98 | 0.94 | 1.04 | 1.03 |
| 11  | 4  | 10.05% | 4.96 | 0.9  | 1.08 | 0.82 | 0.88 | 1.03 | 1.1  | 0.95 | 1.05 | 1    | 1.06 | 1    |
| 34  | 7  | 24.75% | 8.29 | 1.19 | 1.09 | 1.24 | 1.25 | 1.22 | 1.01 | 1.14 | 1.2  | 1.06 | 1.08 | 1.04 |
| 104 | 17 | 40.51% | 6.1  | 0.9  | 0.82 | 0.89 | 0.89 | 1.1  | 1.03 | 1.06 | 1.09 | 1.11 | 1.12 | 1.13 |
| 7   | 5  | 11.99% | 5.99 | 0.75 | 1.08 | 0.91 | 0.93 | 1.12 | 1.18 | 0.86 | 0.86 | 1.21 | 0.95 | 0.99 |
| 10  | 5  | 13.13% | 5.53 | 1.11 | 1.02 | 1.06 | 1.08 | 1.16 | 1.25 | 1.06 | 1.09 | 0.99 | 0.95 | 0.96 |
| 17  | 8  | 20.78% | 6.32 | 1.14 | 1.12 | 1.09 | 1.1  | 1.13 | 1.18 | 1.25 | 1.21 | 0.97 | 0.99 | 0.95 |
| 18  | 7  | 23.28% | 5.68 | 0.94 | 0.9  | 0.87 | 0.95 | 1.12 | 1.13 | 1.06 | 1.05 | 1    | 1.03 | 1.05 |
| 25  | 10 | 21.02% | 7.6  | 0.97 | 0.9  | 0.93 | 0.91 | 1.12 | 1.09 | 1.16 | 1.22 | 1.11 | 1.09 | 1.05 |
| 38  | 16 | 38.71% | 6.6  | 0.97 | 0.93 | 0.9  | 0.91 | 1.13 | 1.14 | 1.14 | 1.12 | 1.11 | 1.01 | 1.04 |
| 251 | 33 | 48.38% | 5.83 | 0.8  | 0.81 | 0.78 | 0.8  | 1.1  | 1.07 | 1.07 | 1.03 | 1.14 | 1.09 | 1.05 |
| 55  | 7  | 34.87% | 8.93 | 0.97 | 0.96 | 1    | 0.96 | 1.13 | 1.06 | 1.11 | 1.12 | 1.25 | 1.17 | 1.13 |
| 23  | 6  | 12.30% | 5.39 | 0.93 | 0.89 | 0.87 | 1    | 1.2  | 1.21 | 1.27 | 1.16 | 1.17 | 1.08 | 1.16 |
| 55  | 14 | 23.19% | 5.76 | 0.84 | 0.83 | 0.85 | 0.81 | 1.2  | 1.18 | 1.22 | 1.19 | 1.1  | 1.11 | 1.11 |
| 44  | 11 | 19.24% | 5.72 | 0.84 | 0.84 | 0.85 | 0.84 | 1.19 | 1.16 | 1.25 | 1.19 | 1.1  | 1.13 | 1.1  |
| 8   | 4  | 8.06%  | 9    | 0.86 | 0.81 | 0.79 | 0.92 | 1.25 | 1.19 | 1.09 | 1.04 | 1.33 | 0.91 | 1.04 |
| 4   | 2  | 4.22%  | 9.53 | 0.84 | 0.76 | 0.95 | 1.08 | 1.14 | 1.05 | 1.16 | 1.19 | 1.14 | 1.15 | 1.11 |
| 5   | 3  | 7.43%  | 9.59 | 0.94 | 0.93 | 1.07 | 0.79 | 1.12 | 1.15 | 1.02 | 1.24 | 1.14 | 1.18 | 1.13 |
| 11  | 5  | 18.34% | 9.23 | 0.64 | 1.13 | 0.92 | 0.85 | 0.85 | 1    | 1.1  | 1.03 | 1.19 | 0.92 | 1.12 |
| 12  | 5  | 17.89% | 9.16 | 0.64 | 1.13 | 0.92 | 0.85 | 0.85 | 1    | 1.1  | 1.03 | 1.19 | 0.92 | 1.12 |
| 16  | 8  | 16.98% | 7.64 | 1.09 | 1.04 | 1    | 0.94 | 1.08 | 1.09 | 0.97 | 0.95 | 1.03 | 0.97 | 0.95 |
| 7   | 4  | 8.89%  | 5.4  | 1.25 | 1.31 | 1.35 | 1.35 | 1.17 | 1.08 | 1.07 | 1.19 | 1.15 | 1.16 | 1.09 |
| 27  | 10 | 27.66% | 8.22 | 0.85 | 0.98 | 0.85 | 0.98 | 1.06 | 1.18 | 1.03 | 1.04 | 1.06 | 1.04 | 1    |
| 38  | 11 | 36.09% | 4.69 | 1    | 0.98 | 1.12 | 1.02 | 1.02 | 0.95 | 0.94 | 0.89 | 1.08 | 1.04 | 1.05 |
| 46  | 10 | 42.68% | 4.87 | 0.99 | 1.03 | 0.98 | 1.01 | 0.99 | 0.99 | 0.95 | 0.99 | 1.05 | 1.19 | 1.05 |
| 51  | 12 | 39.02% | 4.75 | 1    | 0.98 | 1.04 | 1.01 | 0.99 | 0.95 | 0.92 | 0.85 | 1.09 | 1.02 | 1.05 |
| 31  | 9  | 31.09% | 4.72 | 1.03 | 1    | 1.14 | 1.05 | 1.01 | 0.98 | 0.97 | 0.93 | 1.11 | 1.01 | 1.04 |
| 40  | 11 | 38.58% | 4.92 | 1.06 | 1.01 | 1.06 | 1.11 | 1    | 0.95 | 0.82 | 0.82 | 1.24 | 1.04 | 1.07 |
| 29  | 8  | 30.92% | 4.84 | 1.07 | 0.95 | 1.09 | 1.09 | 1.09 | 0.97 | 0.92 | 0.87 | 0.99 | 1.07 | 1.05 |
| 19  | 5  | 17.00% | 4.76 | 1.01 | 1.05 | 0.98 | 0.95 | 1.08 | 0.99 | 0.91 | 0.8  | 1.08 | 1.05 | 1.05 |
| 19  | 8  | 28.96% | 4.7  | 1.12 | 1.03 | 1.14 | 1.04 | 1.1  | 1.06 | 1.03 | 0.88 | 1.22 | 1.03 | 1.01 |
| 40  | 14 | 30.61% | 4.73 | 1.06 | 1.12 | 0.95 | 1.08 | 0.98 | 0.88 | 0.87 | 0.82 | 1.01 | 0.73 | 0.75 |
| 11  | 3  | 23.49% | 7.87 | 0.95 | 1.16 | 0.87 | 0.91 | 0.89 | 1.24 | 0.9  | 0.89 | 0.89 | 0.97 | 0.96 |
| 2   | 1  | 1.40%  | 5.73 | 0.91 | 0.88 | 1.19 | 0.73 | 0.91 | 0.97 | 1.22 | 1.15 | 0.82 | 0.92 | 0.79 |
| 3   | 2  | 15.46% | 6.91 | 0.82 | 1.39 | 0.97 | 1.58 | 0.99 | 1.11 | 1.71 | 0.78 | 0.98 | 1.16 | 1.01 |
| 11  | 5  | 28.49% | 5.42 | 0.92 | 0.92 | 1.11 | 1.09 | 0.89 | 0.92 | 0.92 | 1.08 | 0.98 | 0.96 | 1.07 |
| 15  | 7  | 34.78% | 5.08 | 0.92 | 0.91 | 1.05 | 1.03 | 0.9  | 0.92 | 1.01 | 1.03 | 0.97 | 0.96 | 1.03 |
| 21  | 8  | 43.40% | 6.96 | 0.95 | 0.91 | 1.05 | 0.89 | 1.19 | 1    | 0.87 | 0.9  | 0.97 | 1    | 1.07 |
| 5   | 3  | 17.89% | 6.52 | 0.97 | 1.17 | 0.96 | 1.16 | 0.91 | 0.91 | 0.8  | 1.13 | 0.95 | 1.06 | 0.92 |
| 6   | 3  | 21.13% | 6.91 | 0.97 | 1.17 | 0.96 | 1.37 | 0.83 | 0.86 | 1.26 | 0.95 | 0.95 | 1.11 | 0.97 |
| 7   | 3  | 15.17% | 4.98 | 1.01 | 0.92 | 0.96 | 0.98 | 0.9  | 0.9  | 0.88 | 1.3  | 0.93 | 1.74 | 1.37 |
| 4   | 3  | 7.53%  | 5.83 | 0.94 | 0.89 | 1.91 | 0.93 | 0.95 | 1.24 | 1.38 | 1.03 | 0.87 | 1.36 | 1.19 |
| 3   | 3  | 2.48%  | 5.49 | 0.64 | 0.87 | 1.03 | 1.16 | 1.03 | 0.92 | 1.19 | 0.97 | 1.54 | 1.14 | 0.94 |
| 18  | 8  | 39.18% | 9.51 | 0.95 | 0.94 | 1.02 | 0.88 | 1.19 | 1.02 | 1.1  | 1.11 | 1.15 | 1.08 | 1.05 |

|    |    |        |      |      |      |      |      |      |      |      |      |      |      |      |
|----|----|--------|------|------|------|------|------|------|------|------|------|------|------|------|
| 8  | 8  | 8.16%  | 4.88 | 1.1  | 1.01 | 0.93 | 0.97 | 0.97 | 1.05 | 1.01 | 0.95 | 1.17 | 0.94 | 0.81 |
| 10 | 6  | 44.24% | 7.65 | 0.9  | 0.9  | 1.1  | 1.01 | 0.81 | 0.92 | 1.01 | 0.82 | 1.12 | 0.92 | 0.92 |
| 5  | 4  | 6.26%  | 9.33 | 0.84 | 0.8  | 0.77 | 0.58 | 0.56 | 0.89 | 0.66 | 0.64 | 0.79 | 0.72 | 0.68 |
| 6  | 3  | 7.48%  | 7.1  | 0.88 | 0.88 | 0.88 | 0.77 | 0.87 | 0.91 | 0.84 | 0.89 | 1.13 | 0.92 | 0.94 |
| 45 | 5  | 22.03% | 9.08 | 0.85 | 0.93 | 0.73 | 0.8  | 0.84 | 0.93 | 0.81 | 0.88 | 1.01 | 0.99 | 0.96 |
| 70 | 23 | 31.95% | 5.01 | 1.07 | 1.04 | 1.09 | 1.11 | 0.93 | 0.92 | 0.84 | 0.85 | 0.99 | 0.95 | 0.98 |
| 4  | 2  | 3.33%  | 6.19 | 0.96 | 1.14 | 0.88 | 1.12 | 1.03 | 1.07 | 0.99 | 0.96 | 1.08 | 0.74 | 0.9  |
| 6  | 3  | 12.02% | 5.44 | 0.92 | 1.13 | 1.25 | 1.12 | 0.95 | 1    | 0.85 | 0.85 | 1.09 | 0.86 | 0.83 |
| 61 | 21 | 28.85% | 5.93 | 1.07 | 1.04 | 1.08 | 1.1  | 0.98 | 1.01 | 0.98 | 0.9  | 1.09 | 1.03 | 1.03 |
| 9  | 2  | 14.65% | 5.7  | 0.96 | 1.34 | 0.99 | 1    | 1.13 | 1.23 | 0.83 | 0.76 | 1.68 | 1.03 | 1.11 |
| 67 | 22 | 29.34% | 5.03 | 1.17 | 1.17 | 1.06 | 1.13 | 1.03 | 0.92 | 0.94 | 0.99 | 1.01 | 0.96 | 1    |
| 63 | 22 | 29.43% | 5.01 | 1.15 | 1.19 | 1.17 | 1.24 | 0.98 | 0.92 | 0.93 | 0.92 | 0.93 | 0.96 | 0.92 |
| 49 | 8  | 42.98% | 5.56 | 0.93 | 1    | 1.19 | 1.04 | 0.79 | 0.77 | 0.83 | 0.87 | 0.99 | 1.11 | 1    |
| 11 | 3  | 14.67% | 5.33 | 0.54 | 0.54 | 0.19 | 0.17 | 0.72 | 0.73 | 0.13 | 0.29 | 0.76 | 0.2  | 1.2  |
| 38 | 16 | 25.62% | 8.5  | 0.79 | 0.87 | 0.77 | 0.79 | 1.16 | 1.07 | 1.07 | 1.03 | 1.17 | 1.15 | 1.09 |
| 9  | 5  | 14.24% | 8.27 | 0.81 | 0.9  | 0.87 | 0.83 | 0.95 | 0.97 | 0.95 | 0.95 | 1.01 | 1.04 | 1.05 |
| 3  | 3  | 50.94% | 8.03 | 1.11 | 0.77 | 0.83 | 0.76 | 1.29 | 1.08 | 1.02 | 0.95 | 1.37 | 1.13 | 1.2  |
| 18 | 8  | 38.91% | 5.51 | 0.9  | 1.02 | 1.28 | 1.25 | 0.85 | 0.95 | 1    | 1.14 | 1.1  | 1.13 | 1.29 |
| 80 | 21 | 21.18% | 7.34 | 1    | 1.02 | 1.11 | 1.09 | 1.07 | 1    | 0.97 | 0.98 | 0.96 | 0.95 | 0.96 |
| 38 | 13 | 14.94% | 6.28 | 1.01 | 1.01 | 1.1  | 1.11 | 1.06 | 1.06 | 0.99 | 0.94 | 1.09 | 0.99 | 1.01 |
| 70 | 24 | 24.73% | 6.9  | 1.05 | 1.04 | 0.95 | 0.99 | 1.11 | 1.1  | 1.1  | 1.05 | 1.07 | 0.98 | 0.99 |
| 2  | 1  | 2.59%  | 5.52 | 1.02 | 1.06 | 0.86 | 0.82 | 0.98 | 0.98 | 0.82 | 0.75 | 1.11 | 1.22 | 1.03 |
| 6  | 5  | 8.21%  | 7.58 | 0.92 | 0.94 | 0.95 | 0.95 | 1.1  | 1.13 | 1.04 | 0.93 | 1.36 | 1.11 | 1.15 |
| 27 | 13 | 37.54% | 6.1  | 1.05 | 1.03 | 1.09 | 0.97 | 1.11 | 1.06 | 1    | 1.05 | 1.1  | 1.1  | 1.04 |
| 11 | 7  | 21.61% | 6.4  | 1.38 | 1.01 | 0.96 | 0.94 | 1.28 | 0.94 | 0.9  | 0.99 | 1.26 | 1.1  | 1.06 |
| 14 | 7  | 19.02% | 7.61 | 0.91 | 1.05 | 0.91 | 0.95 | 0.97 | 1.12 | 0.78 | 1.03 | 0.97 | 0.98 | 0.98 |
| 35 | 17 | 31.25% | 5.89 | 0.99 | 1.01 | 0.9  | 0.96 | 0.9  | 0.87 | 0.92 | 0.95 | 1.15 | 1.07 | 1.04 |
| 9  | 5  | 10.27% | 5.75 | 1.1  | 1.22 | 0.92 | 0.92 | 1.17 | 1    | 0.81 | 1.01 | 1.3  | 1.03 | 1.02 |
| 42 | 10 | 25.67% | 8.16 | 0.94 | 0.95 | 1.09 | 1.05 | 1.08 | 0.97 | 1.05 | 1.14 | 1.08 | 1.15 | 1.07 |
| 31 | 11 | 26.59% | 7.53 | 0.82 | 0.9  | 0.89 | 0.88 | 1.14 | 1.09 | 1.11 | 1.05 | 1.11 | 1.13 | 1.05 |
| 32 | 15 | 17.76% | 6.55 | 0.94 | 0.95 | 0.99 | 1.01 | 0.9  | 0.99 | 0.87 | 0.95 | 1.06 | 0.96 | 0.95 |
| 15 | 7  | 16.63% | 6.9  | 1.08 | 1.21 | 1.05 | 1.09 | 0.85 | 1.02 | 0.94 | 0.89 | 1.09 | 1.03 | 0.9  |
| 15 | 8  | 9.52%  | 5.73 | 1    | 1.08 | 1.09 | 0.97 | 0.87 | 0.95 | 0.87 | 0.85 | 0.98 | 0.97 | 0.8  |
| 27 | 12 | 24.22% | 7.04 | 1.06 | 0.95 | 0.98 | 1.07 | 0.97 | 0.89 | 1.24 | 1.13 | 1.01 | 1.19 | 1.07 |
| 48 | 20 | 44.34% | 7.08 | 1.02 | 0.91 | 0.98 | 1.05 | 0.99 | 0.96 | 1.07 | 1.03 | 1.05 | 1.19 | 1.08 |
| 46 | 15 | 27.64% | 8.73 | 0.99 | 0.99 | 0.97 | 0.99 | 1.17 | 1.18 | 1.11 | 1.13 | 1.02 | 1.15 | 1.09 |
| 8  | 5  | 12.10% | 8.31 | 1.08 | 1.05 | 0.76 | 0.83 | 1.02 | 1    | 0.92 | 0.86 | 0.78 | 0.79 | 0.87 |
| 21 | 6  | 27.87% | 8.56 | 1.06 | 1.11 | 0.99 | 1.01 | 1.01 | 0.92 | 0.83 | 0.88 | 0.99 | 0.9  | 0.88 |
| 11 | 5  | 21.01% | 5.72 | 1    | 0.8  | 1.07 | 0.95 | 0.7  | 0.66 | 0.74 | 0.77 | 0.88 | 0.86 | 0.84 |
| 16 | 11 | 21.77% | 7.18 | 0.91 | 1.07 | 1.05 | 1.07 | 0.91 | 0.98 | 0.94 | 0.91 | 1    | 0.87 | 0.93 |
| 20 | 10 | 27.00% | 5.57 | 1.02 | 1.06 | 0.97 | 0.98 | 0.85 | 0.86 | 0.71 | 0.82 | 0.93 | 0.8  | 0.91 |
| 36 | 14 | 32.87% | 6.96 | 0.94 | 0.97 | 1.05 | 1.01 | 0.86 | 0.91 | 0.97 | 0.91 | 0.89 | 0.9  | 0.92 |
| 7  | 4  | 13.78% | 9.07 | 1.15 | 1.08 | 0.89 | 0.93 | 1.02 | 0.98 | 0.93 | 0.8  | 0.94 | 1.23 | 0.87 |
| 3  | 1  | 2.05%  | 6.4  | 0.73 | 0.67 | 0.97 | 1.09 | 1.05 | 1.07 | 1.18 | 1.19 | 1.3  | 1.61 | 1.26 |
| 42 | 14 | 26.75% | 6.55 | 0.94 | 0.92 | 0.93 | 0.95 | 1.14 | 1.08 | 1.1  | 1.04 | 1.05 | 0.98 | 1.05 |
| 3  | 3  | 6.46%  | 8.49 | 0.52 | 0.57 | 0.82 | 0.76 | 0.58 | 0.62 | 1.14 | 1.07 | 1.43 | 0.93 | 0.91 |
| 13 | 6  | 13.87% | 8.26 | 1.06 | 0.98 | 1.03 | 0.89 | 1.26 | 1.08 | 1.03 | 1.03 | 1.1  | 1.06 | 1.1  |
| 10 | 6  | 12.03% | 6.96 | 0.82 | 0.86 | 0.73 | 0.94 | 1.06 | 0.97 | 0.79 | 0.71 | 1.06 | 1.09 | 1.08 |
| 11 | 4  | 14.11% | 6.5  | 0.95 | 0.99 | 1.3  | 1.43 | 1.1  | 1.06 | 1.13 | 1.33 | 0.74 | 1.24 | 1.41 |
| 10 | 5  | 11.05% | 6.5  | 0.95 | 0.91 | 1.21 | 1.02 | 1.16 | 1.02 | 1.3  | 1.15 | 1.32 | 1.24 | 1.21 |

|    |    |        |      |      |      |      |      |      |      |      |      |      |      |      |
|----|----|--------|------|------|------|------|------|------|------|------|------|------|------|------|
| 8  | 3  | 10.93% | 8.91 | 1.02 | 1.05 | 0.99 | 0.86 | 1.08 | 1.07 | 1.18 | 1.03 | 1.09 | 1.01 | 0.91 |
| 47 | 15 | 36.11% | 7.63 | 0.82 | 0.81 | 0.76 | 0.71 | 1.07 | 1.1  | 1.03 | 1.02 | 1.15 | 1.14 | 1.07 |
| 8  | 5  | 13.03% | 6.48 | 1.11 | 1.14 | 1.04 | 1.4  | 0.92 | 0.92 | 0.84 | 0.75 | 0.96 | 0.98 | 0.85 |
| 3  | 2  | 13.57% | 9.71 | 0.74 | 0.78 | 1.11 | 0.97 | 0.91 | 0.77 | 1.07 | 1.11 | 1.26 | 1.09 | 1.08 |
| 3  | 3  | 3.46%  | 7.17 | 0.97 | 0.81 | 0.8  | 0.81 | 0.95 | 0.73 | 0.91 | 0.75 | 0.86 | 0.74 | 0.93 |
| 25 | 13 | 23.43% | 8.8  | 0.9  | 0.95 | 0.97 | 1    | 1.01 | 1.15 | 1.08 | 1.04 | 1.13 | 1.1  | 1.11 |
| 62 | 10 | 25.68% | 5.98 | 1.04 | 1.08 | 1    | 0.97 | 1.18 | 1.2  | 1.13 | 1.08 | 1.05 | 1.05 | 0.98 |
| 9  | 3  | 7.67%  | 8.29 | 0.9  | 0.87 | 0.78 | 0.77 | 1.18 | 1.22 | 0.99 | 0.98 | 1.18 | 1.07 | 1.07 |
| 11 | 6  | 15.09% | 5.77 | 0.84 | 0.96 | 0.85 | 0.95 | 0.92 | 1.13 | 1.19 | 1.14 | 0.99 | 0.89 | 1.01 |
| 6  | 4  | 13.03% | 9.04 | 0.91 | 0.88 | 1.2  | 1.01 | 1.43 | 1    | 1.44 | 0.94 | 1.05 | 0.93 | 0.97 |
| 2  | 2  | 3.50%  | 8.93 | 1.66 | 1.53 | 1.58 | 1.42 | 1.19 | 1.01 | 1.48 | 1.32 | 0.43 | 0.81 | 0.69 |
| 18 | 10 | 20.78% | 8.89 | 0.97 | 0.99 | 0.83 | 0.77 | 1.06 | 0.99 | 0.87 | 0.81 | 1.21 | 1.1  | 1.07 |
| 14 | 9  | 13.38% | 8.95 | 1.17 | 0.99 | 1.25 | 1.14 | 1.09 | 1.2  | 1    | 1.08 | 1.08 | 0.87 | 0.88 |
| 6  | 3  | 11.76% | 8.99 | 1.17 | 1.1  | 0.82 | 0.92 | 1.22 | 1.2  | 0.93 | 1.07 | 1.17 | 1.3  | 1.18 |
| 17 | 6  | 16.80% | 6.11 | 0.98 | 1.03 | 0.97 | 0.9  | 1.13 | 1.44 | 1.13 | 1.5  | 0.9  | 1.16 | 1.15 |
| 2  | 2  | 4.39%  | 6.79 | 0.69 | 0.77 | 1.15 | 1.13 | 1    | 0.71 | 1.17 | 1.12 | 1.01 | 1.17 | 1.07 |
| 12 | 6  | 25.83% | 8.31 | 0.8  | 0.84 | 0.94 | 0.9  | 1.13 | 1.11 | 1.14 | 1.08 | 0.99 | 1.06 | 1.08 |
| 3  | 2  | 4.64%  | 9.71 | 1.02 | 0.93 | 0.86 | 0.81 | 0.98 | 1.03 | 1.48 | 1.22 | 1.1  | 1.07 | 1.02 |
| 10 | 7  | 4.46%  | 8.79 | 1.11 | 0.95 | 0.95 | 0.92 | 0.96 | 0.88 | 1.13 | 0.81 | 0.83 | 0.86 | 0.72 |
| 18 | 12 | 9.28%  | 7.29 | 1.04 | 0.95 | 1.19 | 1.06 | 0.88 | 0.91 | 0.97 | 0.92 | 0.83 | 0.73 | 0.68 |
| 4  | 3  | 4.69%  | 8.22 | 1.24 | 1.32 | 1.23 | 1.06 | 1.22 | 1.24 | 1.14 | 1.09 | 0.99 | 0.75 | 0.79 |
| 19 | 7  | 21.59% | 6.91 | 0.89 | 0.9  | 1.01 | 0.96 | 1.2  | 1.08 | 1.17 | 1.23 | 1.1  | 1.19 | 1.18 |
| 6  | 3  | 12.89% | 9    | 0.93 | 1.02 | 0.78 | 0.81 | 0.68 | 0.71 | 0.59 | 0.7  | 0.78 | 0.56 | 0.77 |
| 17 | 2  | 6.75%  | 6.12 | 0.98 | 1.02 | 0.98 | 1.19 | 0.94 | 0.92 | 1.15 | 0.94 | 1.05 | 0.91 | 0.99 |
| 8  | 2  | 7.17%  | 9.3  | 0.92 | 0.9  | 0.88 | 0.93 | 1.01 | 0.99 | 0.94 | 0.92 | 1.03 | 1.02 | 1.06 |
| 3  | 1  | 1.97%  | 5.48 | 0.94 | 0.82 | 0.82 | 0.79 | 0.93 | 0.96 | 0.81 | 0.86 | 1.06 | 1.07 | 1.07 |
| 5  | 2  | 5.64%  | 9.99 | 0.8  | 0.95 | 0.68 | 0.68 | 0.95 | 1.04 | 1.01 | 1.23 | 1.1  | 0.95 | 0.84 |
| 14 | 6  | 13.05% | 6.72 | 1.01 | 0.98 | 1.13 | 0.92 | 0.99 | 0.98 | 0.74 | 0.89 | 0.89 | 1.02 | 0.9  |
| 45 | 12 | 21.06% | 9.47 | 1    | 0.82 | 0.81 | 0.8  | 1.1  | 1.03 | 1.11 | 1.1  | 1.02 | 1.15 | 1.08 |
| 15 | 4  | 17.12% | 9.43 | 1.06 | 0.95 | 0.97 | 1.05 | 1.16 | 1.32 | 1.05 | 1.12 | 1    | 0.99 | 1.1  |
| 15 | 4  | 26.04% | 9.45 | 0.98 | 1.05 | 0.97 | 1.32 | 1.03 | 1.07 | 0.98 | 1.13 | 0.96 | 1.05 | 0.91 |
| 16 | 4  | 7.28%  | 9.63 | 0.85 | 0.9  | 1.08 | 0.99 | 1.02 | 1.23 | 1.23 | 1.21 | 1.05 | 1.03 | 1.03 |
| 9  | 5  | 14.45% | 7.67 | 1.03 | 0.86 | 1    | 1.04 | 0.98 | 1.2  | 1.05 | 1    | 1    | 0.93 | 1    |
| 7  | 7  | 11.49% | 9.24 | 1.06 | 0.84 | 0.87 | 0.88 | 1.15 | 1.1  | 1.04 | 0.94 | 1.07 | 0.93 | 0.95 |
| 17 | 6  | 11.07% | 9.47 | 1.08 | 0.99 | 1.08 | 1.1  | 1.1  | 0.99 | 0.96 | 0.91 | 1.03 | 0.95 | 1.03 |
| 25 | 6  | 16.09% | 8.87 | 0.95 | 1.01 | 1.05 | 0.96 | 1.18 | 1.14 | 1.13 | 1.01 | 1.07 | 1.11 | 1.04 |
| 88 | 21 | 23.89% | 4.81 | 0.92 | 0.93 | 0.98 | 0.97 | 1.07 | 0.99 | 1.07 | 1.09 | 1.04 | 1.06 | 1.03 |
| 10 | 4  | 22.62% | 9.63 | 1.2  | 1.06 | 0.92 | 1.12 | 1.05 | 1.02 | 1.44 | 1.19 | 0.9  | 0.92 | 0.97 |
| 3  | 3  | 3.83%  | 8.87 | 1.15 | 1.03 | 1.42 | 1.19 | 0.9  | 0.95 | 0.78 | 0.92 | 1.03 | 0.75 | 0.88 |
| 6  | 5  | 14.89% | 9.41 | 0.89 | 1.07 | 0.83 | 0.92 | 1.28 | 1.2  | 1.19 | 1.09 | 1.15 | 1.24 | 1.15 |
| 4  | 2  | 4.40%  | 9.75 | 0.85 | 0.91 | 1.06 | 1.16 | 0.98 | 0.87 | 1.02 | 0.99 | 0.98 | 1.04 | 1    |
| 12 | 3  | 7.02%  | 9.55 | 1.13 | 1.33 | 1.13 | 1.1  | 1.32 | 1.2  | 1.31 | 1.56 | 0.77 | 0.98 | 0.97 |
| 6  | 2  | 1.68%  | 9.32 | 1.09 | 1.01 | 1.21 | 1.15 | 1.14 | 1.15 | 1.15 | 1.05 | 0.97 | 0.98 | 0.93 |
| 21 | 5  | 13.52% | 9.5  | 0.97 | 1.14 | 1.06 | 1.19 | 1.38 | 1.25 | 1.47 | 1.34 | 0.99 | 1.06 | 0.95 |
| 9  | 4  | 6.22%  | 9.61 | 0.94 | 0.99 | 0.96 | 0.86 | 1.33 | 1.2  | 1.27 | 1.16 | 1.04 | 1.1  | 0.84 |
| 10 | 5  | 16.29% | 9.25 | 0.94 | 1.03 | 1.03 | 0.93 | 0.89 | 0.96 | 0.92 | 0.81 | 0.95 | 0.82 | 0.81 |
| 8  | 6  | 22.67% | 9.5  | 0.9  | 0.89 | 0.75 | 0.89 | 0.79 | 0.85 | 0.69 | 0.88 | 0.85 | 0.92 | 1.05 |
| 30 | 12 | 30.00% | 9.74 | 1.14 | 1.11 | 1.06 | 1.05 | 0.89 | 0.94 | 0.97 | 0.95 | 0.93 | 0.93 | 0.99 |
| 3  | 2  | 4.94%  | 9.45 | 0.64 | 0.97 | 1    | 1.05 | 1.38 | 1.03 | 1.45 | 1.46 | 1.06 | 0.8  | 1.05 |
| 9  | 7  | 12.50% | 6.94 | 0.94 | 0.99 | 0.9  | 0.88 | 1.07 | 1.05 | 1.2  | 1.06 | 1.19 | 0.92 | 1.07 |

|    |    |        |      |      |      |      |      |      |      |      |      |      |      |      |
|----|----|--------|------|------|------|------|------|------|------|------|------|------|------|------|
| 48 | 23 | 45.78% | 4.88 | 0.77 | 0.8  | 0.78 | 0.77 | 0.63 | 0.75 | 0.67 | 0.74 | 0.79 | 0.81 | 0.88 |
| 5  | 4  | 11.44% | 9.32 | 1.14 | 1.03 | 0.93 | 1    | 1.23 | 1.08 | 1.12 | 1.27 | 0.58 | 1.06 | 1.06 |
| 17 | 6  | 62.16% | 8.12 | 0.95 | 0.86 | 0.73 | 0.81 | 0.84 | 0.8  | 0.87 | 0.75 | 1.09 | 0.98 | 0.99 |
| 54 | 18 | 31.41% | 5.29 | 0.87 | 0.93 | 0.81 | 0.8  | 0.86 | 0.96 | 0.85 | 0.94 | 1    | 0.96 | 1.01 |
| 26 | 14 | 20.27% | 5.56 | 0.88 | 0.92 | 0.88 | 0.86 | 0.98 | 0.88 | 0.79 | 0.96 | 1.03 | 0.95 | 1.09 |
| 11 | 5  | 14.10% | 5.42 | 0.89 | 0.97 | 0.78 | 0.88 | 0.73 | 0.95 | 0.95 | 0.92 | 0.99 | 1    | 1    |
| 21 | 10 | 37.69% | 9.4  | 0.79 | 0.82 | 0.83 | 0.85 | 0.85 | 0.81 | 0.82 | 0.84 | 1.01 | 0.95 | 1.02 |
| 30 | 13 | 26.99% | 4.91 | 0.9  | 0.87 | 0.77 | 0.86 | 0.89 | 0.9  | 0.78 | 0.73 | 1    | 0.9  | 0.93 |
| 25 | 8  | 38.10% | 7.74 | 0.78 | 0.94 | 0.93 | 0.78 | 1    | 0.8  | 0.83 | 0.8  | 1.07 | 0.98 | 0.93 |
| 12 | 5  | 13.07% | 4.86 | 0.86 | 0.85 | 0.92 | 0.79 | 0.88 | 0.95 | 1.01 | 0.96 | 0.99 | 0.9  | 1.07 |
| 5  | 3  | 22.44% | 6.9  | 1.25 | 0.88 | 0.92 | 1.03 | 0.93 | 0.98 | 1.08 | 0.85 | 1.15 | 0.93 | 0.95 |
| 2  | 2  | 3.61%  | 9.66 | 0.82 | 0.91 | 0.88 | 1.04 | 0.95 | 0.98 | 0.93 | 0.91 | 0.95 | 1.29 | 1.29 |
| 18 | 6  | 27.80% | 8.82 | 0.97 | 1.04 | 1.15 | 0.98 | 0.78 | 0.84 | 0.86 | 0.85 | 0.9  | 0.85 | 0.89 |
| 10 | 5  | 21.82% | 8.46 | 1.14 | 1.01 | 1.06 | 1.01 | 0.9  | 0.95 | 0.79 | 0.8  | 0.94 | 0.75 | 0.66 |
| 32 | 18 | 16.56% | 4.95 | 1.06 | 1.11 | 1.02 | 1.03 | 1.18 | 1.12 | 1.05 | 1    | 1    | 1.01 | 0.97 |
| 11 | 4  | 11.35% | 8.82 | 0.91 | 0.84 | 0.94 | 0.95 | 0.91 | 1    | 1.13 | 1.07 | 0.96 | 1.04 | 1    |
| 26 | 10 | 25.39% | 9.71 | 1.06 | 0.97 | 1.03 | 1.04 | 0.89 | 0.91 | 0.89 | 0.94 | 0.93 | 0.93 | 0.98 |
| 2  | 1  | 2.99%  | 9.71 | 1.09 | 1.04 | 0.85 | 0.89 | 1.13 | 1.22 | 0.97 | 0.99 | 0.78 | 0.96 | 1.13 |
| 6  | 2  | 8.06%  | 8.21 | 1.05 | 1    | 0.79 | 0.73 | 1.05 | 1.04 | 1.33 | 0.93 | 1.03 | 0.83 | 0.96 |

**chromoplast differentiation and senescence.**

|         |      | Average |        |        |         |      | Standard Deviation |        |         |        |        | p-value |        |       |    |
|---------|------|---------|--------|--------|---------|------|--------------------|--------|---------|--------|--------|---------|--------|-------|----|
| OMa/113 |      | MG/1    | Br/113 | Ma/113 | OMa/113 | MG/1 | Br/113             | Ma/113 | OMa/113 | pval(E | pval(N | pval(N  | pval(C | Trend |    |
| 2.62    | 0.88 | 1.03    | 0.93   | 0.71   | 1.22    | 1.51 | 0.16               | 0.16   | 0.14    | 0.96   | 0.1    | 0.01    | 0.05   | 0.63  | 0  |
| 0.99    | 0.93 | 0.9     | 0.96   | 1.05   | 1       | 0.94 | 0.11               | 0.09   | 0.02    | 0.04   | 0.29   | 0.44    | 0.6    | 0.1   | 0  |
| 0.87    | 1.08 | 1.02    | 1.28   | 0.93   | 0.87    | 0.99 | 0.1                | 0.09   | 0.09    | 0.11   | 0      | 0.44    | 0      | 0.23  | -1 |
| 0.94    | 0.95 | 0.98    | 1.1    | 0.97   | 1.06    | 0.96 | 0.06               | 0.03   | 0.03    | 0.02   | 0.01   | 0.01    | 0.27   | 0.01  | -1 |
| 0.91    | 0.99 | 0.95    | 0.98   | 1.17   | 1.03    | 0.95 | 0.07               | 0.09   | 0.19    | 0.04   | 0.02   | 0.26    | 0.62   | 0.5   | 1  |
| 0.83    | 0.81 | 0.93    | 1      | 1.06   | 1       | 0.86 | 0.13               | 0.05   | 0.03    | 0.06   | 0.43   | 0.11    | 0.98   | 0.02  | 0  |
| 0.92    | 0.89 | 0.9     | 0.93   | 1.18   | 1.07    | 0.9  | 0.05               | 0.04   | 0.1     | 0.02   | 0      | 0.09    | 0.05   | 0.04  | 1  |
| 0.92    | 0.88 | 0.88    | 0.9    | 1.15   | 1.1     | 0.89 | 0.03               | 0.06   | 0.11    | 0.02   | 0      | 0.44    | 0.02   | 0.04  | 1  |
| 0.93    | 0.83 | 0.83    | 0.92   | 1.03   | 1.24    | 0.86 | 0.12               | 0.08   | 0.2     | 0.06   | 0.19   | 0.1     | 0.04   | 0.03  | 0  |
| 1.97    | 1.71 | 1.04    | 0.95   | 0.93   | 0.94    | 1.58 | 0.22               | 0.16   | 0.17    | 0.48   | 0.87   | 0.91    | 0.96   | 0.1   | 0  |
| 1.12    | 1.13 | 1.34    | 1.02   | 0.99   | 1.04    | 1.2  | 0.14               | 0.05   | 0.15    | 0.12   | 0.66   | 0.57    | 0.91   | 0.22  | 0  |
| 1.32    | 1.2  | 1.31    | 0.95   | 0.85   | 0.88    | 1.28 | 0.04               | 0.08   | 0.11    | 0.07   | 0.05   | 0.61    | 0.28   | 0.01  | -1 |
| 0.91    | 0.89 | 0.86    | 0.97   | 1.12   | 1.14    | 0.89 | 0.08               | 0.11   | 0.04    | 0.02   | 0.07   | 0.76    | 0.02   | 0     | 0  |
| 1.07    | 1.29 | 1.06    | 0.95   | 0.97   | 0.95    | 1.14 | 0.06               | 0.05   | 0.12    | 0.13   | 0.78   | 0.79    | 0.94   | 0.13  | 0  |
| 0.77    | 0.77 | 0.86    | 1.22   | 1.12   | 0.99    | 0.8  | 0.06               | 0.05   | 0.07    | 0.05   | 0.04   | 0.05    | 0.01   | 0.02  | -1 |
| 1.1     | 1.1  | 0.88    | 1.1    | 1.05   | 0.91    | 1.03 | 0.02               | 0.07   | 0.03    | 0.13   | 0.15   | 0.02    | 0      | 0.18  | 0  |
| 0.86    | 0.88 | 0.82    | 1.02   | 1.12   | 1.08    | 0.85 | 0.05               | 0.05   | 0.09    | 0.03   | 0.03   | 0.51    | 0.27   | 0.01  | 1  |
| 1.04    | 0.91 | 0.84    | 1.09   | 1.12   | 0.95    | 0.93 | 0.07               | 0.01   | 0.07    | 0.1    | 0.49   | 0       | 0.04   | 0.76  | 0  |
| 0.97    | 0.92 | 0.95    | 0.97   | 1.12   | 1.14    | 0.95 | 0.05               | 0.07   | 0.01    | 0.02   | 0.01   | 0.79    | 0      | 0     | 1  |
| 1.14    | 0.98 | 0.93    | 0.87   | 1.02   | 1.16    | 1.02 | 0.09               | 0.03   | 0.12    | 0.11   | 0.02   | 0.07    | 0.01   | 0.21  | 1  |
| 1.05    | 1.02 | 1.04    | 0.92   | 1.19   | 1.13    | 1.04 | 0.06               | 0.06   | 0.08    | 0.01   | 0      | 0.3     | 0.01   | 0.1   | 1  |
| 0.89    | 0.83 | 0.89    | 0.94   | 1.01   | 0.97    | 0.87 | 0.03               | 0.05   | 0.02    | 0.03   | 0.05   | 0.26    | 0.2    | 0.01  | 1  |
| 1.09    | 0.94 | 0.84    | 0.93   | 0.99   | 1.09    | 0.95 | 0.04               | 0.12   | 0.01    | 0.13   | 0.34   | 0.22    | 0      | 0.14  | 0  |
| 1.09    | 0.96 | 0.78    | 0.99   | 0.95   | 1.08    | 0.94 | 0.09               | 0.09   | 0.12    | 0.16   | 0.62   | 0.16    | 0.28   | 0.28  | 0  |
| 1.03    | 0.99 | 0.92    | 0.82   | 0.87   | 0.77    | 0.98 | 0.29               | 0.14   | 0.33    | 0.06   | 0.75   | 0.6     | 0.85   | 0.33  | 0  |
| 1.01    | 1    | 0.99    | 1.06   | 1.16   | 1.07    | 1    | 0.07               | 0.09   | 0.07    | 0.01   | 0.14   | 0.21    | 0.9    | 0.21  | 0  |
| 0.9     | 0.87 | 0.96    | 1.03   | 1.16   | 1.07    | 0.91 | 0.03               | 0.06   | 0.04    | 0.05   | 0.01   | 0.11    | 0.21   | 0.01  | 1  |
| 0.88    | 1.03 | 1       | 0.93   | 1.11   | 1.04    | 0.97 | 0.07               | 0.1    | 0.12    | 0.08   | 0.02   | 0.42    | 0.19   | 0.46  | 1  |
| 0.9     | 0.94 | 0.83    | 1.05   | 1.2    | 1.04    | 0.89 | 0.06               | 0.06   | 0.08    | 0.05   | 0.01   | 0.02    | 0.87   | 0.05  | 1  |
| 0.72    | 0.83 | 0.79    | 1.22   | 1.16   | 1.15    | 0.78 | 0.09               | 0.01   | 0.07    | 0.05   | 0.24   | 0.68    | 0.29   | 0     | 0  |
| 0.89    | 0.81 | 0.87    | 1.05   | 1.16   | 1.05    | 0.86 | 0.03               | 0.03   | 0.01    | 0.05   | 0      | 0       | 0.84   | 0     | 1  |
| 0.82    | 0.83 | 0.95    | 1.05   | 1.3    | 1.02    | 0.87 | 0.04               | 0.07   | 0.14    | 0.07   | 0      | 0.02    | 0.69   | 0.18  | 1  |
| 1.01    | 0.87 | 0.9     | 0.96   | 1.07   | 1.02    | 0.93 | 0.03               | 0.09   | 0.01    | 0.07   | 0.06   | 0.42    | 0.01   | 0.08  | 0  |
| 0.75    | 0.75 | 0.85    | 1.12   | 1.1    | 1       | 0.78 | 0.05               | 0.06   | 0.05    | 0.06   | 0.74   | 0.06    | 0.03   | 0.01  | 0  |
| 0.86    | 0.96 | 0.92    | 1.03   | 1.01   | 1.15    | 0.91 | 0.05               | 0.03   | 0.03    | 0.05   | 0.55   | 0       | 0.02   | 0     | 0  |
| 0.88    | 0.88 | 0.89    | 1.06   | 0.95   | 1.11    | 0.88 | 0.04               | 0.02   | 0.06    | 0.01   | 0      | 0       | 0.2    | 0     | -1 |
| 0.86    | 1.03 | 0.86    | 1.08   | 1.01   | 1.17    | 0.92 | 0.04               | 0.04   | 0.04    | 0.1    | 0.03   | 0       | 0.03   | 0.01  | -1 |
| 0.85    | 0.92 | 0.96    | 0.99   | 1.13   | 1.08    | 0.91 | 0.12               | 0.04   | 0.07    | 0.06   | 0.06   | 0.3     | 0.29   | 0.04  | 0  |
| 1.03    | 1.12 | 0.96    | 1.04   | 1.07   | 0.94    | 1.04 | 0.06               | 0.08   | 0.07    | 0.08   | 0.63   | 0.07    | 0.09   | 0.18  | 0  |
| 0.83    | 0.82 | 0.96    | 1.04   | 1.14   | 1.07    | 0.87 | 0.04               | 0.07   | 0.04    | 0.08   | 0.05   | 0.17    | 0.47   | 0.02  | 1  |
| 0.91    | 0.94 | 0.96    | 0.91   | 1.08   | 1.12    | 0.94 | 0.02               | 0.03   | 0.01    | 0.03   | 0      | 0.09    | 0      | 0     | 1  |
| 0.97    | 0.97 | 1.01    | 0.93   | 1.18   | 1.34    | 0.98 | 0.1                | 0.26   | 0.39    | 0.02   | 0.12   | 0.55    | 0.09   | 0.19  | 0  |
| 1.17    | 0.94 | 1.34    | 1.2    | 1.3    | 1.26    | 1.15 | 0.46               | 0.24   | 0.56    | 0.2    | 0.71   | 0.9     | 0.88   | 0.77  | 0  |
| 0.84    | 0.9  | 1.14    | 1.01   | 1.2    | 1.13    | 0.96 | 0.06               | 0.12   | 0.04    | 0.16   | 0.03   | 0.38    | 0.02   | 0.14  | 1  |
| 0.86    | 0.93 | 0.91    | 0.98   | 1.16   | 1.06    | 0.9  | 0.02               | 0.07   | 0.05    | 0.04   | 0      | 0.09    | 0.02   | 0.01  | 1  |
| 1       | 0.89 | 0.79    | 1.19   | 1.08   | 0.91    | 0.89 | 0.11               | 0.12   | 0.06    | 0.1    | 0.22   | 0.07    | 0.01   | 0.85  | 0  |
| 0.69    | 0.91 | 0.89    | 1.15   | 1.19   | 1.01    | 0.83 | 0.13               | 0.15   | 0.07    | 0.12   | 0.75   | 0.12    | 0.15   | 0.09  | 0  |

|      |      |      |      |      |      |      |      |      |      |      |      |      |      |      |    |
|------|------|------|------|------|------|------|------|------|------|------|------|------|------|------|----|
| 1.53 | 1.45 | 1.31 | 0.89 | 1.04 | 1.17 | 1.43 | 0.04 | 0.08 | 0.21 | 0.11 | 0.02 | 0.32 | 0.05 | 0.13 | 1  |
| 1.07 | 0.95 | 1.17 | 1.2  | 1.34 | 1.15 | 1.06 | 0.11 | 0.08 | 0.29 | 0.11 | 0.06 | 0.25 | 0.8  | 0.64 | 0  |
| 0.8  | 0.78 | 0.76 | 1.21 | 1.24 | 1    | 0.78 | 0.06 | 0.03 | 0.07 | 0.02 | 0.45 | 0    | 0.01 | 0.01 | 0  |
| 0.86 | 0.84 | 0.91 | 1.14 | 1.09 | 1.01 | 0.87 | 0.06 | 0.06 | 0.03 | 0.04 | 0.27 | 0.11 | 0.02 | 0.01 | 0  |
| 0.8  | 0.84 | 0.9  | 1.12 | 1.11 | 1.01 | 0.85 | 0.07 | 0.06 | 0.02 | 0.05 | 0.68 | 0.05 | 0.05 | 0.01 | 0  |
| 1.28 | 1.24 | 1.35 | 1.03 | 1.04 | 0.97 | 1.29 | 0.1  | 0.07 | 0.03 | 0.06 | 0.94 | 0.17 | 0.34 | 0    | 0  |
| 0.94 | 1.1  | 1.02 | 0.99 | 1.08 | 0.89 | 1.02 | 0.07 | 0.05 | 0.16 | 0.08 | 0.08 | 0.07 | 0.28 | 0.27 | 0  |
| 0.96 | 0.9  | 0.94 | 1    | 1.08 | 0.96 | 0.93 | 0.02 | 0.03 | 0.05 | 0.04 | 0.01 | 0.01 | 0.17 | 0.55 | 1  |
| 0.88 | 0.79 | 0.81 | 1.24 | 1    | 0.92 | 0.83 | 0.09 | 0.03 | 0.03 | 0.05 | 0    | 0.02 | 0    | 0.05 | -1 |
| 0.84 | 0.78 | 0.79 | 1    | 1.08 | 0.99 | 0.8  | 0.07 | 0.05 | 0.04 | 0.04 | 0.12 | 0.06 | 0.91 | 0    | 0  |
| 1.2  | 1.16 | 1.06 | 0.89 | 0.85 | 1.03 | 1.14 | 0.13 | 0.2  | 0.07 | 0.07 | 0.72 | 0.19 | 0.16 | 0.14 | 0  |
| 1.15 | 1.15 | 1.12 | 1.13 | 0.85 | 0.94 | 1.14 | 0.03 | 0.04 | 0.05 | 0.02 | 0    | 0.05 | 0    | 0    | -1 |
| 1.14 | 1.11 | 1.17 | 1.16 | 0.85 | 0.89 | 1.14 | 0.04 | 0.05 | 0.07 | 0.03 | 0    | 0.49 | 0    | 0    | -1 |
| 0.99 | 0.92 | 0.97 | 0.87 | 1.07 | 1.01 | 0.96 | 0.03 | 0.07 | 0.04 | 0.03 | 0    | 0.27 | 0    | 0.13 | 1  |
| 0.9  | 0.87 | 0.9  | 1.01 | 1.15 | 1.05 | 0.89 | 0.04 | 0.03 | 0.03 | 0.01 | 0    | 0.01 | 0.24 | 0    | 1  |
| 0.98 | 0.94 | 0.84 | 0.76 | 1.14 | 1.17 | 0.92 | 0.19 | 0.21 | 0.11 | 0.07 | 0.04 | 0.8  | 0.02 | 0.03 | 1  |
| 1.4  | 1.38 | 1.33 | 1.01 | 0.91 | 0.89 | 1.37 | 0.09 | 0.04 | 0.04 | 0.04 | 0.1  | 0.58 | 0.1  | 0    | 0  |
| 0.93 | 0.96 | 0.99 | 1.12 | 1    | 0.96 | 0.96 | 0.03 | 0.03 | 0.06 | 0.03 | 0    | 0.23 | 0    | 0.93 | -1 |
| 0.82 | 0.82 | 0.83 | 0.95 | 1.12 | 1.01 | 0.82 | 0.04 | 0.12 | 0.07 | 0.01 | 0.03 | 0.22 | 0.19 | 0.01 | 1  |
| 0.96 | 0.91 | 0.95 | 0.97 | 1.08 | 1.06 | 0.94 | 0.05 | 0.05 | 0.04 | 0.03 | 0.03 | 0.6  | 0.06 | 0.02 | 1  |
| 0.91 | 0.9  | 0.87 | 0.92 | 1.19 | 1.06 | 0.9  | 0.03 | 0.09 | 0.11 | 0.02 | 0    | 0.15 | 0.07 | 0.07 | 1  |
| 0.88 | 0.84 | 0.87 | 1.05 | 1.21 | 1.07 | 0.87 | 0.05 | 0.08 | 0.03 | 0.02 | 0.01 | 0.03 | 0.62 | 0    | 1  |
| 0.86 | 0.79 | 0.87 | 1.01 | 1.09 | 1.03 | 0.84 | 0.03 | 0.05 | 0.04 | 0.04 | 0.03 | 0.13 | 0.63 | 0.01 | 1  |
| 0.98 | 0.78 | 0.88 | 0.92 | 1.14 | 1.02 | 0.88 | 0.04 | 0.06 | 0.04 | 0.1  | 0    | 0.04 | 0.03 | 0.08 | 1  |
| 0.87 | 0.96 | 0.88 | 0.88 | 1.14 | 1.02 | 0.9  | 0.05 | 0.09 | 0.08 | 0.05 | 0    | 0.11 | 0.03 | 0.09 | 1  |
| 0.83 | 0.99 | 1.01 | 0.58 | 0.67 | 0.61 | 0.94 | 0.19 | 0.23 | 0.36 | 0.1  | 0.56 | 0.78 | 0.9  | 0.19 | 0  |
| 0.87 | 0.87 | 0.83 | 0.9  | 1.09 | 1.15 | 0.86 | 0.02 | 0.02 | 0.16 | 0.02 | 0    | 0.44 | 0.02 | 0.03 | 1  |
| 0.75 | 0.8  | 0.97 | 1.17 | 1.16 | 0.93 | 0.84 | 0.07 | 0.09 | 0.05 | 0.12 | 0.92 | 0.01 | 0    | 0.26 | 0  |
| 0.78 | 0.73 | 1.01 | 1.07 | 1.13 | 1    | 0.84 | 0.04 | 0.04 | 0.04 | 0.15 | 0.1  | 0.01 | 0.08 | 0.15 | 0  |
| 0.9  | 0.8  | 0.85 | 0.93 | 1.04 | 1.07 | 0.85 | 0.06 | 0.06 | 0.06 | 0.05 | 0.04 | 0.45 | 0.03 | 0.01 | 1  |
| 1.28 | 1.02 | 1.08 | 0.86 | 1.09 | 1.23 | 1.13 | 0.06 | 0.09 | 0.06 | 0.14 | 0.01 | 0.08 | 0    | 0.32 | 1  |
| 1.01 | 0.87 | 1.01 | 1.08 | 1.09 | 1.21 | 0.96 | 0.12 | 0.05 | 0.14 | 0.08 | 0.91 | 0.14 | 0.24 | 0.05 | 0  |
| 1.26 | 0.94 | 1.1  | 0.91 | 0.99 | 1.04 | 1.1  | 0.12 | 0.06 | 0.06 | 0.16 | 0.26 | 0.28 | 0.13 | 0.59 | 0  |
| 0.79 | 0.79 | 0.81 | 1.05 | 1.12 | 0.99 | 0.8  | 0.03 | 0.06 | 0.08 | 0.01 | 0.06 | 0.05 | 0.26 | 0.02 | 0  |
| 0.86 | 0.85 | 1.01 | 1.03 | 1.1  | 1.13 | 0.91 | 0.1  | 0.03 | 0.04 | 0.09 | 0.2  | 0.38 | 0.16 | 0.02 | 0  |
| 0.79 | 0.62 | 0.71 | 1.41 | 0.98 | 0.72 | 0.71 | 0.26 | 0.11 | 0.12 | 0.08 | 0.02 | 0.03 | 0.01 | 0.85 | -1 |
| 0.92 | 0.74 | 0.93 | 1.15 | 1.14 | 0.98 | 0.86 | 0.05 | 0.1  | 0.05 | 0.1  | 0.94 | 0.05 | 0.01 | 0.17 | 0  |
| 0.84 | 0.79 | 0.83 | 1.12 | 1.15 | 0.99 | 0.82 | 0.05 | 0.04 | 0.05 | 0.03 | 0.48 | 0.01 | 0.02 | 0.01 | 0  |
| 0.95 | 0.89 | 0.92 | 1.09 | 1.17 | 1    | 0.92 | 0.07 | 0.06 | 0.04 | 0.03 | 0.14 | 0.01 | 0.15 | 0.05 | 0  |
| 1.11 | 1.16 | 1.31 | 1.1  | 0.91 | 0.89 | 1.19 | 0.05 | 0.05 | 0.05 | 0.1  | 0    | 0.66 | 0    | 0.01 | -1 |
| 0.95 | 0.98 | 1.11 | 0.84 | 1.04 | 0.9  | 1.01 | 0.02 | 0.21 | 0.11 | 0.08 | 0.1  | 0.34 | 0.31 | 0.23 | 0  |
| 1.25 | 1.31 | 1.37 | 0.98 | 0.98 | 0.85 | 1.31 | 0.1  | 0.03 | 0.23 | 0.06 | 0.99 | 0.31 | 0.36 | 0.03 | 0  |
| 0.97 | 0.9  | 0.94 | 0.96 | 0.95 | 1    | 0.94 | 0.05 | 0.06 | 0.05 | 0.04 | 0.83 | 0.34 | 0.41 | 0.15 | 0  |
| 0.72 | 0.88 | 0.87 | 0.95 | 1.1  | 1.07 | 0.82 | 0.05 | 0.15 | 0.03 | 0.09 | 0.13 | 0.76 | 0.02 | 0.01 | 0  |
| 0.66 | 1.06 | 0.86 | 1.04 | 1.09 | 1.13 | 0.86 | 0.13 | 0.22 | 0.16 | 0.2  | 0.72 | 0.79 | 0.44 | 0.15 | 0  |
| 0.84 | 1    | 0.93 | 1.03 | 1.16 | 1.12 | 0.92 | 0.12 | 0.11 | 0.1  | 0.08 | 0.15 | 0.63 | 0.33 | 0.05 | 0  |
| 1.27 | 1.22 | 1.32 | 1.19 | 1.16 | 0.8  | 1.27 | 0.03 | 0.16 | 0.1  | 0.05 | 0.7  | 0.02 | 0    | 0    | 0  |
| 0.96 | 0.93 | 0.98 | 1.11 | 0.96 | 0.99 | 0.96 | 0.31 | 0.08 | 0.09 | 0.03 | 0.36 | 0.6  | 0.54 | 0.57 | 0  |
| 0.96 | 0.93 | 1.03 | 1.26 | 1.12 | 1.02 | 0.97 | 0.19 | 0.17 | 0.1  | 0.05 | 0.3  | 0.44 | 0.11 | 0.46 | 0  |
| 1.72 | 1.78 | 1.56 | 1.07 | 0.83 | 0.81 | 1.69 | 0.04 | 0.09 | 0.03 | 0.11 | 0    | 0.74 | 0    | 0    | -1 |

|      |      |      |      |      |      |      |      |      |      |      |      |      |      |      |    |
|------|------|------|------|------|------|------|------|------|------|------|------|------|------|------|----|
| 1.63 | 1.52 | 1.36 | 0.94 | 0.83 | 0.99 | 1.5  | 0.1  | 0.09 | 0.13 | 0.14 | 0.14 | 0.11 | 0.64 | 0.01 | 0  |
| 0.96 | 1    | 1.05 | 0.95 | 0.92 | 0.95 | 1    | 0.06 | 0.05 | 0.05 | 0.05 | 0.48 | 0.57 | 0.91 | 0.27 | 0  |
| 1.01 | 1.01 | 1.05 | 0.96 | 0.94 | 0.97 | 1.03 | 0.06 | 0.05 | 0.01 | 0.02 | 0.67 | 0.29 | 0.63 | 0.02 | 0  |
| 0.96 | 0.93 | 0.91 | 1.09 | 1.14 | 1.01 | 0.93 | 0.1  | 0.07 | 0.06 | 0.03 | 0.43 | 0.06 | 0.32 | 0.12 | 0  |
| 0.88 | 0.94 | 1.08 | 1.23 | 1.27 | 1.08 | 0.97 | 0.26 | 0.26 | 0.13 | 0.11 | 0.83 | 0.3  | 0.41 | 0.28 | 0  |
| 0.9  | 0.92 | 0.88 | 1.15 | 1.15 | 1.02 | 0.9  | 0.11 | 0.11 | 0.05 | 0.02 | 0.96 | 0.12 | 0.13 | 0.02 | 0  |
| 0.83 | 0.83 | 0.73 | 1.04 | 1.04 | 1.04 | 0.8  | 0.1  | 0.07 | 0.12 | 0.06 | 0.94 | 0.98 | 0.98 | 0.04 | 0  |
| 1.55 | 1.41 | 1.43 | 0.97 | 0.86 | 0.94 | 1.46 | 0.09 | 0.02 | 0.01 | 0.08 | 0.05 | 0    | 0.64 | 0    | 0  |
| 1.32 | 1.5  | 1.31 | 0.85 | 0.79 | 0.94 | 1.38 | 0.1  | 0.02 | 0.11 | 0.11 | 0.36 | 0.04 | 0.31 | 0.01 | 0  |
| 0.86 | 0.86 | 1.01 | 0.96 | 0.92 | 1.04 | 0.91 | 0.05 | 0.03 | 0.05 | 0.09 | 0.29 | 0.01 | 0.09 | 0.08 | 0  |
| 1.03 | 0.99 | 1.13 | 1.06 | 0.93 | 1.05 | 1.05 | 0.07 | 0.03 | 0.08 | 0.07 | 0.01 | 0.04 | 0.89 | 1    | -1 |
| 1.03 | 0.98 | 1.11 | 1.05 | 0.94 | 1.06 | 1.04 | 0.05 | 0.04 | 0.03 | 0.07 | 0.01 | 0.01 | 0.61 | 0.63 | -1 |
| 1.14 | 1.17 | 1.04 | 1.11 | 0.99 | 0.94 | 1.11 | 0.16 | 0.12 | 0.1  | 0.07 | 0.26 | 0.62 | 0.17 | 0.06 | 0  |
| 0.95 | 0.79 | 1.06 | 0.97 | 0.94 | 0.85 | 0.93 | 0.32 | 0.35 | 0.43 | 0.14 | 0.9  | 0.79 | 0.7  | 0.78 | 0  |
| 1.01 | 1.18 | 1.15 | 1.21 | 0.87 | 1.03 | 1.11 | 0.02 | 0.12 | 0.15 | 0.09 | 0    | 0.17 | 0.06 | 0.46 | -1 |
| 0.95 | 1.04 | 0.97 | 1.25 | 0.95 | 0.94 | 0.99 | 0.09 | 0.05 | 0.08 | 0.05 | 0    | 0.83 | 0    | 0.39 | -1 |
| 1.03 | 0.98 | 1.1  | 1.04 | 0.94 | 1.01 | 1.03 | 0.04 | 0.04 | 0.04 | 0.06 | 0.01 | 0.06 | 0.41 | 0.63 | -1 |
| 0.67 | 1.01 | 0.98 | 1.22 | 1.01 | 0.91 | 0.89 | 0.24 | 0.2  | 0.14 | 0.19 | 0.23 | 0.49 | 0.1  | 0.9  | 0  |
| 1.03 | 1.06 | 1.17 | 1.06 | 0.99 | 1.07 | 1.09 | 0.04 | 0.03 | 0.04 | 0.08 | 0.04 | 0.03 | 0.65 | 0.79 | -1 |
| 1.49 | 1.32 | 1.18 | 1.16 | 1.05 | 0.79 | 1.33 | 0.14 | 0.08 | 0.39 | 0.16 | 0.24 | 0.24 | 0.14 | 0.09 | 0  |
| 0.98 | 1.07 | 1.23 | 0.99 | 0.92 | 1.01 | 1.09 | 0.09 | 0.06 | 0.06 | 0.13 | 0.19 | 0.09 | 0.83 | 0.34 | 0  |
| 1.22 | 1.16 | 1.41 | 1.31 | 1.05 | 1.19 | 1.26 | 0.4  | 0.06 | 0.13 | 0.13 | 0.25 | 0.1  | 0.66 | 0.53 | 0  |
| 1.08 | 1.07 | 1.09 | 0.96 | 1.02 | 1.04 | 1.08 | 0.05 | 0.03 | 0.08 | 0.01 | 0.07 | 0.74 | 0.18 | 0.43 | 0  |
| 0.89 | 1.12 | 0.94 | 1.06 | 1.04 | 1.25 | 0.98 | 0.07 | 0.11 | 0.16 | 0.12 | 0.73 | 0.09 | 0.09 | 0.08 | 0  |
| 0.96 | 0.92 | 0.87 | 0.98 | 1.1  | 1.02 | 0.92 | 0.01 | 0.05 | 0.03 | 0.04 | 0    | 0.06 | 0.02 | 0.02 | 1  |
| 0.81 | 0.73 | 0.94 | 1.09 | 1.13 | 0.96 | 0.83 | 0.05 | 0.06 | 0.05 | 0.11 | 0.31 | 0.01 | 0.02 | 0.13 | 0  |
| 0.85 | 0.81 | 0.92 | 0.86 | 1.13 | 1.04 | 0.86 | 0.04 | 0.03 | 0.06 | 0.05 | 0    | 0.04 | 0    | 0.02 | 1  |
| 0.97 | 0.94 | 1.07 | 0.97 | 1.17 | 1.14 | 0.99 | 0.08 | 0.09 | 0.08 | 0.07 | 0.02 | 0.68 | 0.04 | 0.07 | 1  |
| 0.97 | 1.01 | 1.26 | 1.3  | 1.29 | 2.12 | 1.08 | 0.1  | 0.16 | 0.95 | 0.16 | 0.87 | 0.14 | 0.14 | 0.14 | 0  |
| 0.58 | 0.57 | 0.87 | 1.19 | 1.73 | 1.06 | 0.67 | 0.22 | 0.6  | 0.21 | 0.17 | 0.15 | 0.13 | 0.47 | 0.07 | 0  |
| 1.03 | 1.18 | 1    | 0.93 | 1.17 | 1    | 1.07 | 0.07 | 0.01 | 0.15 | 0.09 | 0    | 0.07 | 0.44 | 0.56 | 1  |
| 0.82 | 0.73 | 0.85 | 1.12 | 1.38 | 0.88 | 0.8  | 0.05 | 0.06 | 0.04 | 0.06 | 0    | 0    | 0    | 0.15 | 1  |
| 0.66 | 0.48 | 0.58 | 0.85 | 0.6  | 0.79 | 0.57 | 0.32 | 0.24 | 0.09 | 0.09 | 0.26 | 0.26 | 0.77 | 0.04 | 0  |
| 1.01 | 0.93 | 0.84 | 0.95 | 1.03 | 0.96 | 0.92 | 0.04 | 0.07 | 0.09 | 0.09 | 0.1  | 0.3  | 0.82 | 0.63 | 0  |
| 0.96 | 0.89 | 0.88 | 0.94 | 1    | 1.04 | 0.91 | 0.11 | 0.02 | 0.05 | 0.05 | 0.32 | 0.21 | 0.23 | 0.03 | 0  |
| 0.85 | 0.99 | 0.89 | 1.2  | 0.94 | 0.92 | 0.91 | 0.09 | 0.29 | 0.2  | 0.07 | 0.14 | 0.93 | 0.05 | 0.96 | 0  |
| 0.99 | 0.99 | 0.95 | 1.03 | 1.1  | 1.02 | 0.98 | 0.03 | 0.04 | 0.05 | 0.02 | 0.03 | 0.07 | 0.86 | 0.23 | 1  |
| 0.91 | 0.92 | 0.85 | 0.86 | 1.03 | 0.98 | 0.89 | 0.09 | 0.07 | 0.16 | 0.04 | 0.03 | 0.58 | 0.27 | 0.41 | 1  |
| 0.88 | 0.92 | 1.26 | 1.23 | 1.19 | 1.28 | 1.02 | 0.29 | 0.16 | 0.24 | 0.21 | 0.79 | 0.55 | 0.83 | 0.23 | 0  |
| 0.94 | 0.86 | 0.87 | 1.03 | 1.07 | 0.99 | 0.89 | 0.1  | 0.08 | 0.07 | 0.05 | 0.52 | 0.24 | 0.61 | 0.09 | 0  |
| 0.99 | 1.02 | 1.03 | 0.91 | 1.21 | 1.3  | 1.01 | 0.17 | 0.1  | 0.06 | 0.02 | 0.02 | 0.22 | 0.01 | 0    | 1  |
| 0.61 | 0.64 | 0.87 | 1.19 | 1.11 | 0.99 | 0.7  | 0.12 | 0.15 | 0.06 | 0.14 | 0.43 | 0.25 | 0.05 | 0.03 | 0  |
| 1.08 | 0.83 | 1.22 | 1.1  | 1.27 | 1.07 | 1.04 | 0.31 | 0.21 | 0.14 | 0.19 | 0.38 | 0.2  | 0.87 | 0.87 | 0  |
| 0.45 | 0.34 | 0.74 | 1.66 | 0.59 | 0.77 | 0.51 | 0.44 | 0.04 | 0.06 | 0.21 | 0    | 0.01 | 0.02 | 0.11 | -1 |
| 0.65 | 0.57 | 0.66 | 1.62 | 0.85 | 0.7  | 0.63 | 0.05 | 0.12 | 0.09 | 0.05 | 0    | 0.12 | 0    | 0.3  | -1 |
| 1.05 | 1.07 | 1.71 | 1.27 | 1.02 | 1.05 | 1.28 | 0.24 | 0.23 | 0.3  | 0.38 | 0.19 | 0.88 | 0.33 | 0.47 | 0  |
| 1.12 | 1.06 | 0.94 | 0.75 | 1.12 | 1.04 | 1.04 | 0.36 | 0.13 | 0.37 | 0.09 | 0.1  | 0.68 | 0.34 | 0.99 | 0  |
| 0.97 | 0.93 | 0.97 | 1.07 | 0.95 | 1.06 | 0.96 | 0.03 | 0.04 | 0.03 | 0.02 | 0    | 0.01 | 0.76 | 0.01 | -1 |
| 0.87 | 0.92 | 0.95 | 1.05 | 0.94 | 1.06 | 0.91 | 0.06 | 0.04 | 0.03 | 0.04 | 0.02 | 0.01 | 0.94 | 0.01 | -1 |
| 0.95 | 0.84 | 0.94 | 1.11 | 1.07 | 1.03 | 0.91 | 0.03 | 0.1  | 0.03 | 0.06 | 0.46 | 0.53 | 0.01 | 0.04 | 0  |

|      |      |      |      |      |      |      |      |      |      |      |      |      |      |      |    |
|------|------|------|------|------|------|------|------|------|------|------|------|------|------|------|----|
| 1.1  | 1.08 | 0.84 | 0.85 | 0.92 | 0.74 | 1    | 0.11 | 0.15 | 0.11 | 0.14 | 0.5  | 0.14 | 0.24 | 0.06 | 0  |
| 0.97 | 1.02 | 0.82 | 0.92 | 0.92 | 1.04 | 0.94 | 0.11 | 0.2  | 0.34 | 0.1  | 0.97 | 0.58 | 0.51 | 0.63 | 0  |
| 1.33 | 1.23 | 1.18 | 0.91 | 0.97 | 1.04 | 1.25 | 0.05 | 0.04 | 0.08 | 0.08 | 0.09 | 0.18 | 0.04 | 0.04 | 0  |
| 1.22 | 1.17 | 1.22 | 0.87 | 0.95 | 1.05 | 1.2  | 0.08 | 0.08 | 0.09 | 0.03 | 0.22 | 0.18 | 0.04 | 0.04 | 0  |
| 1.34 | 1.33 | 1.39 | 1.29 | 0.8  | 0.88 | 1.35 | 0.04 | 0.07 | 0.04 | 0.03 | 0    | 0.15 | 0    | 0    | -1 |
| 1.36 | 1.42 | 1.32 | 1.12 | 0.68 | 0.89 | 1.36 | 0.04 | 0.03 | 0.04 | 0.05 | 0    | 0    | 0    | 0    | -1 |
| 1.16 | 1.15 | 1.32 | 1.12 | 0.73 | 0.9  | 1.21 | 0.04 | 0.04 | 0.05 | 0.09 | 0    | 0.01 | 0    | 0.01 | -1 |
| 1.13 | 1.05 | 1.11 | 0.88 | 0.89 | 1.03 | 1.09 | 0.03 | 0.03 | 0.02 | 0.04 | 0.85 | 0    | 0    | 0.1  | 0  |
| 1.05 | 0.99 | 0.93 | 1.01 | 0.94 | 1.07 | 0.99 | 0.02 | 0.03 | 0.03 | 0.06 | 0.01 | 0    | 0.02 | 0.13 | -1 |
| 0.86 | 0.95 | 0.87 | 0.93 | 1.13 | 1.09 | 0.89 | 0.03 | 0.02 | 0.01 | 0.05 | 0    | 0.01 | 0    | 0    | 1  |
| 0.97 | 0.84 | 0.9  | 0.93 | 1.19 | 1.06 | 0.91 | 0.02 | 0.1  | 0.07 | 0.06 | 0    | 0.12 | 0.01 | 0.04 | 1  |
| 0.97 | 0.98 | 0.95 | 0.92 | 0.9  | 1.1  | 0.97 | 0.04 | 0.03 | 0.07 | 0.02 | 0.54 | 0    | 0.01 | 0.03 | 0  |
| 0.93 | 0.97 | 0.95 | 1    | 0.92 | 1.06 | 0.95 | 0.04 | 0.03 | 0.03 | 0.02 | 0.02 | 0    | 0.11 | 0.01 | -1 |
| 0.86 | 0.84 | 0.89 | 1.05 | 0.99 | 0.97 | 0.87 | 0.06 | 0.02 | 0.02 | 0.02 | 0.12 | 0.34 | 0.1  | 0    | 0  |
| 1.04 | 1.15 | 1.02 | 1.03 | 1    | 1.1  | 1.07 | 0.02 | 0.08 | 0.1  | 0.07 | 0.48 | 0.2  | 0.23 | 0.67 | 0  |
| 1.11 | 0.96 | 0.85 | 1.09 | 0.94 | 1    | 0.97 | 0.05 | 0.04 | 0.11 | 0.13 | 0    | 0.34 | 0.21 | 0.78 | -1 |
| 0.72 | 1.65 | 0.78 | 0.79 | 0.91 | 0.86 | 1.05 | 0.19 | 0.18 | 0.21 | 0.52 | 0.4  | 0.72 | 0.69 | 0.58 | 0  |
| 1.08 | 0.88 | 0.96 | 1.04 | 0.84 | 1.13 | 0.97 | 0.18 | 0.16 | 0.17 | 0.1  | 0.15 | 0.07 | 0.5  | 0.24 | 0  |
| 0.96 | 0.91 | 0.91 | 0.94 | 1.1  | 1.11 | 0.93 | 0.04 | 0.06 | 0.06 | 0.03 | 0    | 0.76 | 0    | 0.01 | 1  |
| 0.93 | 0.92 | 0.99 | 0.88 | 1.13 | 1.16 | 0.95 | 0.01 | 0.02 | 0.01 | 0.04 | 0    | 0.15 | 0    | 0    | 1  |
| 1    | 0.96 | 0.96 | 1.02 | 0.94 | 1.08 | 0.97 | 0.02 | 0.09 | 0.02 | 0.03 | 0.12 | 0.05 | 0.01 | 0.01 | 0  |
| 0.96 | 1.05 | 1.07 | 0.98 | 0.92 | 1.11 | 1.03 | 0.03 | 0.05 | 0.03 | 0.06 | 0.09 | 0    | 0    | 0.11 | 0  |
| 0.93 | 1.05 | 0.98 | 0.99 | 0.95 | 1.07 | 0.99 | 0.04 | 0.06 | 0.05 | 0.06 | 0.33 | 0.04 | 0.06 | 0.13 | 0  |
| 1.32 | 1.21 | 1.07 | 1.1  | 0.91 | 1.14 | 1.2  | 0.05 | 0.08 | 0.3  | 0.13 | 0.01 | 0.19 | 0.77 | 0.78 | -1 |
| 0.94 | 0.87 | 0.81 | 1.07 | 1.1  | 1.03 | 0.88 | 0.09 | 0.06 | 0.07 | 0.07 | 0.58 | 0.23 | 0.57 | 0.05 | 0  |
| 0.94 | 0.89 | 0.91 | 1.06 | 1.23 | 0.96 | 0.91 | 0.05 | 0.03 | 0.06 | 0.02 | 0    | 0    | 0.06 | 0.3  | 1  |
| 0.72 | 0.8  | 0.8  | 1    | 1.38 | 1.1  | 0.77 | 0.06 | 0.08 | 0.04 | 0.05 | 0    | 0    | 0.05 | 0    | 1  |
| 0.93 | 0.83 | 0.79 | 1.03 | 0.9  | 0.91 | 0.85 | 0.13 | 0.21 | 0.12 | 0.07 | 0.35 | 0.97 | 0.27 | 0.5  | 0  |
| 1.02 | 0.97 | 0.92 | 0.92 | 0.99 | 1.1  | 0.97 | 0.08 | 0.06 | 0.03 | 0.05 | 0.22 | 0.03 | 0.02 | 0.02 | 0  |
| 1    | 1.11 | 0.84 | 0.98 | 1.07 | 1.1  | 0.98 | 0.02 | 0.07 | 0.1  | 0.14 | 0.06 | 0.65 | 0.07 | 0.3  | 0  |
| 1.67 | 1.27 | 1.22 | 1.18 | 1.06 | 1.13 | 1.39 | 0.16 | 0.14 | 0.15 | 0.25 | 0.26 | 0.52 | 0.69 | 0.21 | 0  |
| 0.94 | 0.89 | 0.79 | 1.08 | 0.95 | 1.05 | 0.88 | 0.08 | 0.04 | 0.03 | 0.08 | 0.03 | 0.02 | 0.6  | 0.02 | -1 |
| 1.37 | 1.35 | 1.64 | 1.17 | 0.98 | 0.9  | 1.45 | 0.22 | 0.1  | 0.19 | 0.16 | 0.18 | 0.48 | 0.15 | 0.02 | 0  |
| 1.09 | 1.32 | 0.92 | 0.87 | 0.94 | 1.3  | 1.11 | 0.07 | 0.2  | 0.3  | 0.2  | 0.51 | 0.12 | 0.04 | 0.42 | 0  |
| 0.93 | 0.95 | 0.84 | 1.02 | 1.02 | 1.13 | 0.91 | 0.05 | 0.1  | 0.08 | 0.06 | 0.93 | 0.19 | 0.06 | 0.02 | 0  |
| 0.89 | 0.88 | 0.84 | 1.09 | 1.04 | 1.16 | 0.87 | 0.07 | 0.09 | 0.1  | 0.03 | 0.36 | 0.15 | 0.33 | 0.01 | 0  |
| 1    | 1.05 | 0.68 | 2.08 | 1.82 | 1.03 | 0.91 | 0.34 | 0.21 | 0.4  | 0.2  | 0.24 | 0.02 | 0.01 | 0.66 | 0  |
| 1.28 | 1.26 | 1.25 | 0.87 | 0.67 | 0.8  | 1.26 | 0.05 | 0.04 | 0.01 | 0.01 | 0    | 0    | 0.08 | 0    | -1 |
| 0.86 | 0.88 | 0.81 | 0.96 | 0.86 | 1.29 | 0.85 | 0.03 | 0.08 | 0.02 | 0.03 | 0.07 | 0    | 0    | 0    | 0  |
| 0.95 | 1.09 | 0.97 | 0.95 | 1.11 | 1.09 | 1    | 0.03 | 0.06 | 0.05 | 0.08 | 0    | 0.72 | 0.01 | 0.17 | 1  |
| 0.67 | 1    | 0.83 | 1.08 | 1.16 | 0.92 | 0.83 | 0.21 | 0.24 | 0.09 | 0.17 | 0.64 | 0.17 | 0.29 | 0.46 | 0  |
| 0.92 | 0.87 | 0.92 | 0.93 | 1.18 | 1.17 | 0.9  | 0.07 | 0.09 | 0.1  | 0.03 | 0    | 0.92 | 0.01 | 0.01 | 1  |
| 0.94 | 0.97 | 0.9  | 1.13 | 1.24 | 1.07 | 0.94 | 0.16 | 0.26 | 0.07 | 0.03 | 0.52 | 0.35 | 0.6  | 0.04 | 0  |
| 0.8  | 0.81 | 0.83 | 1.04 | 1.13 | 0.98 | 0.81 | 0.04 | 0.11 | 0.06 | 0.01 | 0.19 | 0.1  | 0.17 | 0.01 | 0  |
| 0.83 | 0.87 | 0.85 | 1.01 | 1.09 | 1.06 | 0.85 | 0.06 | 0.06 | 0    | 0.02 | 0.1  | 0.41 | 0.23 | 0    | 0  |
| 0.92 | 0.85 | 0.86 | 0.98 | 1.16 | 0.84 | 0.88 | 0.08 | 0.04 | 0.19 | 0.04 | 0.01 | 0.02 | 0.21 | 0.71 | 1  |
| 0.71 | 0.71 | 0.76 | 1.21 | 1.2  | 0.98 | 0.73 | 0.04 | 0.01 | 0.05 | 0.03 | 0.67 | 0    | 0    | 0    | 0  |
| 0.97 | 0.96 | 0.96 | 0.88 | 1.12 | 1.09 | 0.96 | 0.01 | 0.03 | 0.02 | 0    | 0    | 0.14 | 0    | 0    | 1  |
| 0.92 | 0.9  | 0.94 | 1.03 | 1.13 | 1.11 | 0.92 | 0.06 | 0.1  | 0.06 | 0.02 | 0.13 | 0.76 | 0.12 | 0.01 | 0  |
| 0.43 | 0.42 | 0.54 | 1.46 | 0.87 | 0.68 | 0.46 | 0.54 | 0.13 | 0.1  | 0.07 | 0.07 | 0.1  | 0.06 | 0.04 | 0  |



|      |      |      |      |      |      |      |      |      |      |      |      |      |      |      |    |
|------|------|------|------|------|------|------|------|------|------|------|------|------|------|------|----|
| 0.58 | 0.54 | 0.57 | 1.69 | 0.91 | 0.72 | 0.56 | 0.11 | 0.06 | 0.04 | 0.02 | 0    | 0.01 | 0    | 0    | -1 |
| 1.08 | 0.85 | 0.94 | 0.99 | 1.03 | 0.92 | 0.95 | 0.09 | 0.04 | 0.05 | 0.11 | 0.45 | 0.03 | 0.3  | 0.63 | 0  |
| 0.57 | 0.77 | 1.03 | 0.74 | 0.53 | 0.96 | 0.79 | 0.24 | 0.12 | 0.11 | 0.23 | 0.17 | 0.01 | 0.22 | 0.31 | 0  |
| 0.68 | 0.82 | 0.77 | 0.92 | 1.01 | 1    | 0.76 | 0.08 | 0.09 | 0.07 | 0.07 | 0.18 | 0.79 | 0.24 | 0.01 | 0  |
| 0.91 | 0.89 | 0.94 | 0.97 | 1.08 | 1.02 | 0.92 | 0.03 | 0.08 | 0.08 | 0.03 | 0.04 | 0.32 | 0.29 | 0.1  | 1  |
| 0.9  | 0.85 | 0.9  | 1    | 1.02 | 0.99 | 0.88 | 0.05 | 0.03 | 0.06 | 0.03 | 0.44 | 0.37 | 0.85 | 0.06 | 0  |
| 0.91 | 0.87 | 0.94 | 1.04 | 1.06 | 0.97 | 0.91 | 0.06 | 0.09 | 0.03 | 0.04 | 0.85 | 0.18 | 0.11 | 0.1  | 0  |
| 0.81 | 0.87 | 0.93 | 1.09 | 1.13 | 1    | 0.87 | 0.09 | 0.09 | 0.03 | 0.06 | 0.5  | 0.07 | 0.18 | 0.03 | 0  |
| 0.81 | 0.87 | 0.94 | 1.11 | 1.07 | 1.01 | 0.87 | 0.05 | 0.08 | 0.04 | 0.06 | 0.49 | 0.23 | 0.04 | 0.03 | 0  |
| 0.79 | 0.77 | 0.81 | 1.09 | 1.05 | 0.96 | 0.79 | 0.05 | 0.06 | 0.07 | 0.02 | 0.37 | 0.11 | 0.03 | 0.01 | 0  |
| 0.83 | 0.79 | 0.87 | 1.01 | 1.11 | 1.05 | 0.83 | 0.05 | 0.05 | 0.05 | 0.04 | 0.04 | 0.22 | 0.38 | 0.01 | 1  |
| 0.76 | 0.71 | 0.84 | 1.14 | 1.13 | 0.99 | 0.77 | 0.12 | 0.11 | 0.11 | 0.06 | 0.86 | 0.15 | 0.14 | 0.04 | 0  |
| 0.84 | 0.87 | 0.93 | 1.05 | 1.11 | 1.05 | 0.88 | 0.07 | 0.06 | 0.02 | 0.05 | 0.21 | 0.11 | 0.99 | 0    | 0  |
| 1.19 | 0.93 | 1.01 | 0.99 | 1.06 | 0.94 | 1.04 | 0.06 | 0.1  | 0.04 | 0.13 | 0.29 | 0.14 | 0.29 | 0.28 | 0  |
| 1.02 | 1.11 | 1.09 | 0.94 | 1.1  | 1.03 | 1.07 | 0.05 | 0.05 | 0.02 | 0.05 | 0    | 0.08 | 0.03 | 0.22 | 1  |
| 0.87 | 0.7  | 0.94 | 1.12 | 1.13 | 0.96 | 0.84 | 0.13 | 0.16 | 0.09 | 0.13 | 0.92 | 0.18 | 0.15 | 0.24 | 0  |
| 1.02 | 0.9  | 0.97 | 0.76 | 1.36 | 0.91 | 0.96 | 0.1  | 0.04 | 0.01 | 0.06 | 0    | 0    | 0.06 | 0.17 | 1  |
| 1.04 | 0.99 | 0.96 | 1    | 1.1  | 0.97 | 1    | 0.04 | 0.06 | 0.03 | 0.04 | 0.02 | 0.02 | 0.29 | 0.33 | 1  |
| 0.92 | 0.83 | 0.85 | 1.06 | 1.04 | 0.95 | 0.87 | 0.04 | 0.03 | 0.04 | 0.05 | 0.51 | 0.01 | 0.02 | 0.09 | 0  |
| 1.1  | 1.01 | 0.86 | 1    | 1.12 | 1.22 | 0.99 | 0.12 | 0.1  | 0.07 | 0.12 | 0.18 | 0.21 | 0.04 | 0.05 | 0  |
| 0.94 | 0.99 | 0.96 | 0.89 | 1.18 | 1.05 | 0.96 | 0.03 | 0.09 | 0.29 | 0.03 | 0    | 0.43 | 0.3  | 0.63 | 1  |
| 0.96 | 0.92 | 0.98 | 0.88 | 1.04 | 1.09 | 0.95 | 0.02 | 0.02 | 0.02 | 0.03 | 0    | 0.04 | 0    | 0    | 1  |
| 1.17 | 1.26 | 1.15 | 1.07 | 0.84 | 0.89 | 1.19 | 0.1  | 0.11 | 0.07 | 0.06 | 0.02 | 0.54 | 0.05 | 0    | -1 |
| 0.9  | 0.88 | 0.74 | 0.99 | 1.01 | 1.09 | 0.84 | 0.03 | 0.15 | 0.03 | 0.09 | 0.8  | 0.42 | 0.01 | 0.01 | 0  |
| 0.97 | 0.85 | 0.88 | 1    | 1.08 | 1.07 | 0.9  | 0.07 | 0.07 | 0.1  | 0.06 | 0.16 | 0.88 | 0.3  | 0.06 | 0  |
| 0.92 | 0.83 | 0.88 | 0.97 | 1.13 | 1.05 | 0.88 | 0.03 | 0.05 | 0.03 | 0.04 | 0    | 0.06 | 0.02 | 0    | 1  |
| 0.68 | 0.6  | 0.77 | 1.23 | 1.14 | 1.02 | 0.68 | 0.09 | 0.09 | 0.07 | 0.09 | 0.21 | 0.09 | 0.02 | 0.01 | 0  |
| 0.76 | 0.76 | 0.74 | 1.52 | 1.34 | 0.9  | 0.75 | 0.17 | 0.13 | 0.12 | 0.01 | 0.15 | 0.01 | 0    | 0.09 | 0  |
| 1.22 | 1.29 | 1.86 | 1.14 | 0.96 | 0.88 | 1.46 | 0.21 | 0.09 | 0.15 | 0.35 | 0.18 | 0.43 | 0.14 | 0.06 | 0  |
| 0.85 | 1.25 | 1.23 | 0.95 | 0.94 | 1.01 | 1.11 | 0.07 | 0.07 | 0.16 | 0.23 | 0.82 | 0.49 | 0.56 | 0.56 | 0  |
| 0.9  | 0.9  | 0.99 | 1.01 | 1.05 | 1.02 | 0.93 | 0.09 | 0.1  | 0.04 | 0.05 | 0.59 | 0.73 | 0.78 | 0.07 | 0  |
| 0.74 | 0.81 | 0.84 | 0.98 | 1.09 | 1.04 | 0.8  | 0.03 | 0.1  | 0.01 | 0.05 | 0.06 | 0.39 | 0.02 | 0    | 0  |
| 1.05 | 0.88 | 0.87 | 1.15 | 1.16 | 0.97 | 0.93 | 0.08 | 0.07 | 0.04 | 0.1  | 0.95 | 0.01 | 0.02 | 0.57 | 0  |
| 1    | 0.89 | 1.02 | 1.08 | 1.22 | 1.02 | 0.97 | 0.11 | 0.07 | 0.05 | 0.07 | 0.08 | 0.01 | 0.41 | 0.38 | 0  |
| 1.52 | 1.42 | 0.97 | 1    | 0.88 | 0.88 | 1.3  | 0.11 | 0.21 | 0.25 | 0.29 | 0.31 | 0.98 | 0.41 | 0.13 | 0  |
| 1.01 | 1.04 | 1.02 | 1    | 1.16 | 1.06 | 1.02 | 0.06 | 0.02 | 0.08 | 0.02 | 0    | 0.06 | 0.29 | 0.47 | 1  |
| 0.93 | 1.01 | 1.02 | 0.92 | 1.1  | 1.04 | 0.99 | 0.02 | 0.05 | 0.06 | 0.05 | 0    | 0.16 | 0.01 | 0.32 | 1  |
| 0.98 | 0.97 | 0.99 | 0.91 | 1.1  | 1.05 | 0.98 | 0.03 | 0.01 | 0.03 | 0.01 | 0    | 0.03 | 0    | 0.01 | 1  |
| 0.71 | 0.67 | 0.9  | 1.23 | 1.01 | 1    | 0.76 | 0.11 | 0.03 | 0.11 | 0.12 | 0.01 | 0.87 | 0.04 | 0.07 | -1 |
| 0.7  | 0.72 | 0.86 | 1    | 1.27 | 1.01 | 0.76 | 0.06 | 0.06 | 0.09 | 0.09 | 0    | 0.01 | 0.8  | 0.02 | 1  |
| 1.09 | 1.06 | 1.14 | 0.98 | 1.04 | 1.09 | 1.1  | 0.06 | 0.09 | 0.07 | 0.04 | 0.37 | 0.47 | 0.1  | 0.84 | 0  |
| 0.69 | 0.82 | 0.92 | 1.07 | 1.1  | 0.98 | 0.81 | 0.15 | 0.02 | 0.05 | 0.12 | 0.73 | 0.01 | 0.34 | 0.09 | 0  |
| 1.16 | 1.21 | 1.9  | 1.34 | 0.9  | 0.72 | 1.42 | 0.37 | 0.42 | 0.27 | 0.42 | 0.16 | 0.55 | 0.06 | 0.07 | 0  |
| 1.07 | 1.07 | 1.12 | 1.37 | 0.79 | 0.95 | 1.08 | 0.16 | 0.18 | 0.12 | 0.03 | 0    | 0.23 | 0.01 | 0.14 | -1 |
| 1.01 | 0.95 | 0.92 | 0.91 | 1.05 | 1.07 | 0.96 | 0.01 | 0.06 | 0.03 | 0.04 | 0    | 0.6  | 0    | 0.02 | 1  |
| 1.33 | 1.3  | 0.97 | 1.16 | 0.77 | 0.8  | 1.2  | 0.14 | 0.1  | 0.1  | 0.2  | 0    | 0.73 | 0.01 | 0.04 | -1 |
| 0.78 | 0.76 | 0.89 | 1.04 | 1.01 | 1.04 | 0.81 | 0.22 | 0.07 | 0.16 | 0.07 | 0.76 | 0.71 | 0.98 | 0.08 | 0  |
| 0.82 | 0.82 | 0.8  | 0.95 | 1.13 | 1.06 | 0.81 | 0.03 | 0.05 | 0.03 | 0.01 | 0    | 0.07 | 0    | 0    | 1  |
| 0.91 | 0.87 | 0.99 | 1.02 | 1.04 | 0.94 | 0.92 | 0.16 | 0.07 | 0.1  | 0.06 | 0.8  | 0.17 | 0.48 | 0.78 | 0  |
| 1.17 | 1.2  | 1.03 | 1.08 | 0.96 | 1.1  | 1.13 | 0.04 | 0.11 | 0.03 | 0.09 | 0.07 | 0.09 | 0.65 | 0.54 | 0  |

|      |      |      |      |      |      |      |      |      |      |      |      |      |      |      |    |
|------|------|------|------|------|------|------|------|------|------|------|------|------|------|------|----|
| 0.77 | 0.73 | 0.87 | 1.15 | 1.17 | 1.07 | 0.79 | 0.09 | 0.05 | 0.08 | 0.07 | 0.77 | 0.1  | 0.28 | 0.01 | 0  |
| 0.86 | 0.83 | 0.74 | 0.88 | 1.05 | 0.79 | 0.81 | 0.01 | 0.11 | 0.09 | 0.06 | 0.02 | 0.02 | 0.11 | 0.85 | 1  |
| 0.92 | 0.83 | 0.97 | 0.81 | 0.95 | 1.05 | 0.91 | 0.16 | 0.13 | 0.02 | 0.07 | 0.24 | 0.23 | 0.06 | 0.03 | 0  |
| 0.9  | 0.81 | 0.98 | 0.97 | 1.1  | 1.12 | 0.9  | 0.12 | 0.05 | 0.02 | 0.09 | 0.09 | 0.57 | 0.09 | 0.01 | 0  |
| 0.84 | 0.82 | 0.86 | 0.92 | 1.07 | 1.11 | 0.84 | 0.07 | 0.01 | 0.04 | 0.02 | 0    | 0.1  | 0.01 | 0    | 1  |
| 0.98 | 0.93 | 1.08 | 0.98 | 1.03 | 1.11 | 1    | 0.05 | 0.06 | 0.06 | 0.07 | 0.2  | 0.16 | 0.03 | 0.11 | 0  |
| 0.97 | 0.98 | 0.98 | 0.91 | 1.06 | 1.1  | 0.97 | 0.04 | 0.05 | 0.01 | 0.01 | 0    | 0.2  | 0    | 0    | 1  |
| 0.95 | 0.86 | 1.07 | 0.97 | 0.97 | 1    | 0.96 | 0.24 | 0.13 | 0.14 | 0.1  | 0.98 | 0.82 | 0.86 | 0.71 | 0  |
| 0.73 | 0.99 | 0.97 | 1.2  | 0.92 | 0.99 | 0.9  | 0.04 | 0.02 | 0.09 | 0.15 | 0    | 0.19 | 0.01 | 0.41 | -1 |
| 0.88 | 1.03 | 0.92 | 1    | 1.16 | 1.06 | 0.94 | 0.07 | 0.17 | 0.21 | 0.08 | 0.15 | 0.55 | 0.62 | 0.4  | 0  |
| 0.8  | 0.89 | 0.77 | 1.03 | 1.2  | 1.15 | 0.82 | 0.11 | 0.07 | 0.05 | 0.06 | 0.04 | 0.32 | 0.16 | 0    | 1  |
| 0.79 | 0.83 | 0.82 | 1.09 | 1.14 | 1.14 | 0.81 | 0.09 | 0.09 | 0.04 | 0.02 | 0.44 | 0.92 | 0.36 | 0    | 0  |
| 0.68 | 0.63 | 1.01 | 1.08 | 1.19 | 0.84 | 0.77 | 0.07 | 0.13 | 0.07 | 0.21 | 0.16 | 0.01 | 0    | 0.64 | 0  |
| 1.18 | 1.06 | 1.24 | 0.62 | 1    | 1.16 | 1.16 | 0.04 | 0.06 | 0.08 | 0.09 | 0    | 0.03 | 0    | 1    | 1  |
| 0.99 | 1.13 | 1.06 | 0.81 | 1.04 | 1.12 | 1.06 | 0.06 | 0.04 | 0.04 | 0.07 | 0    | 0.05 | 0    | 0.26 | 1  |
| 0.73 | 1.17 | 0.95 | 1.05 | 1.13 | 1.01 | 0.95 | 0.1  | 0.07 | 0.22 | 0.22 | 0.24 | 0.35 | 0.77 | 0.76 | 0  |
| 0.89 | 0.83 | 0.86 | 1.1  | 1.13 | 1.04 | 0.86 | 0.03 | 0.04 | 0.04 | 0.03 | 0.25 | 0.04 | 0.09 | 0    | 0  |
| 1.14 | 1.1  | 1.17 | 0.97 | 0.98 | 1.16 | 1.14 | 0.16 | 0.07 | 0.16 | 0.03 | 0.9  | 0.09 | 0.17 | 0.79 | 0  |
| 1.1  | 1.03 | 0.89 | 1    | 1.17 | 1.21 | 1    | 0.09 | 0.04 | 0.14 | 0.11 | 0.02 | 0.57 | 0.06 | 0.11 | 1  |
| 1.04 | 1.16 | 1.07 | 0.96 | 0.92 | 0.91 | 1.09 | 0.09 | 0.13 | 0.07 | 0.06 | 0.64 | 0.86 | 0.44 | 0.02 | 0  |
| 0.91 | 0.85 | 0.82 | 0.96 | 1.13 | 1    | 0.86 | 0.05 | 0.13 | 0.04 | 0.05 | 0.05 | 0.15 | 0.34 | 0.02 | 1  |
| 0.93 | 0.87 | 0.85 | 1.15 | 1.05 | 1.08 | 0.89 | 0.05 | 0.08 | 0.02 | 0.04 | 0.08 | 0.6  | 0.06 | 0    | 0  |
| 1.02 | 1.13 | 1.15 | 0.95 | 0.95 | 1.14 | 1.1  | 0.03 | 0.05 | 0.02 | 0.07 | 0.79 | 0    | 0    | 0.48 | 0  |
| 0.84 | 0.95 | 1.04 | 0.96 | 1.02 | 1    | 0.94 | 0.11 | 0.14 | 0.16 | 0.1  | 0.53 | 0.91 | 0.66 | 0.59 | 0  |
| 0.91 | 0.83 | 0.92 | 1.03 | 1.07 | 1.01 | 0.89 | 0.04 | 0.05 | 0.03 | 0.05 | 0.3  | 0.15 | 0.51 | 0.02 | 0  |
| 0.76 | 0.8  | 1    | 1.12 | 1.04 | 1.01 | 0.85 | 0.53 | 0.12 | 0.09 | 0.13 | 0.76 | 0.8  | 0.75 | 0.15 | 0  |
| 0.69 | 0.73 | 0.98 | 1.07 | 1.18 | 1.02 | 0.8  | 0.1  | 0.01 | 0.11 | 0.16 | 0.08 | 0.03 | 0.52 | 0.12 | 0  |
| 0.8  | 0.77 | 0.77 | 1.01 | 1.18 | 0.98 | 0.78 | 0.04 | 0.04 | 0.05 | 0.02 | 0    | 0    | 0.51 | 0    | 1  |
| 1    | 0.74 | 0.76 | 0.84 | 1.02 | 0.96 | 0.83 | 0.07 | 0.09 | 0.03 | 0.15 | 0.02 | 0.32 | 0.04 | 0.21 | 1  |
| 0.78 | 0.82 | 1.13 | 0.92 | 1.17 | 1.07 | 0.91 | 0.05 | 0.07 | 0.03 | 0.19 | 0    | 0.09 | 0    | 0.22 | 1  |
| 0.86 | 0.86 | 0.65 | 1.45 | 1.23 | 1.04 | 0.79 | 0.21 | 0.19 | 0.06 | 0.12 | 0.17 | 0.17 | 0.02 | 0.03 | 0  |
| 0.56 | 0.4  | 0.61 | 1.03 | 1.05 | 0.9  | 0.52 | 0.23 | 0.12 | 0.02 | 0.11 | 0.88 | 0.09 | 0.4  | 0    | 0  |
| 1.05 | 1.06 | 0.96 | 0.92 | 1.04 | 1.13 | 1.03 | 0.1  | 0.08 | 0.03 | 0.05 | 0.12 | 0.17 | 0.02 | 0.05 | 0  |
| 0.82 | 0.78 | 0.9  | 1.02 | 1.08 | 1.11 | 0.83 | 0.04 | 0.06 | 0.01 | 0.06 | 0.14 | 0.51 | 0.02 | 0    | 0  |
| 0.89 | 0.85 | 1.21 | 1.08 | 1.33 | 1.08 | 0.98 | 0.3  | 0.35 | 0.07 | 0.2  | 0.32 | 0.28 | 1    | 0.49 | 0  |
| 0.9  | 1.1  | 1.17 | 1.17 | 1.23 | 1.18 | 1.06 | 0.12 | 0.13 | 0.13 | 0.14 | 0.51 | 0.68 | 0.85 | 0.31 | 0  |
| 0.97 | 0.78 | 0.85 | 1.12 | 1.27 | 1.04 | 0.87 | 0.08 | 0.18 | 0.03 | 0.1  | 0.18 | 0.09 | 0.15 | 0.04 | 0  |
| 0.83 | 0.82 | 0.94 | 1.06 | 1.04 | 1.1  | 0.86 | 0.04 | 0.02 | 0.06 | 0.07 | 0.26 | 0.08 | 0.37 | 0.01 | 0  |
| 0.95 | 0.87 | 0.89 | 1    | 1.07 | 0.94 | 0.91 | 0.08 | 0.05 | 0.05 | 0.04 | 0.2  | 0.02 | 0.28 | 0.46 | 0  |
| 0.66 | 0.21 | 1.09 | 0.59 | 0.63 | 0.81 | 0.65 | 0.31 | 0.32 | 0.36 | 0.44 | 0.86 | 0.52 | 0.42 | 0.65 | 0  |
| 0.96 | 0.83 | 0.85 | 1.07 | 0.96 | 1.18 | 0.88 | 0.16 | 0.09 | 0.25 | 0.07 | 0.28 | 0.17 | 0.54 | 0.12 | 0  |
| 0.76 | 0.77 | 0.77 | 0.89 | 0.84 | 1.28 | 0.77 | 0.03 | 0.06 | 0.04 | 0.01 | 0.17 | 0    | 0    | 0    | 0  |
| 1.41 | 1.52 | 1.69 | 0.67 | 1.14 | 1.18 | 1.54 | 0.1  | 0.16 | 0.09 | 0.14 | 0    | 0.73 | 0    | 0.02 | 1  |
| 0.92 | 0.93 | 0.81 | 1.06 | 1.26 | 0.99 | 0.88 | 0.18 | 0.18 | 0.04 | 0.07 | 0.17 | 0.05 | 0.54 | 0.08 | 0  |
| 0.9  | 0.87 | 0.92 | 1.07 | 1.12 | 1.09 | 0.9  | 0.05 | 0.07 | 0.04 | 0.03 | 0.28 | 0.63 | 0.45 | 0    | 0  |
| 0.67 | 0.94 | 0.81 | 0.9  | 1.05 | 1.03 | 0.8  | 0.05 | 0.06 | 0.1  | 0.13 | 0.01 | 0.68 | 0.06 | 0.08 | 1  |
| 0.66 | 0.65 | 0.86 | 0.48 | 1.01 | 0.9  | 0.72 | 0.16 | 0.23 | 0.17 | 0.12 | 0.01 | 0.52 | 0.02 | 0.21 | 1  |
| 0.77 | 0.86 | 0.97 | 0.94 | 0.94 | 0.91 | 0.87 | 0.07 | 0.12 | 0.2  | 0.1  | 0.98 | 0.81 | 0.77 | 0.74 | 0  |
| 0.85 | 0.87 | 0.93 | 1.01 | 1.21 | 1.07 | 0.88 | 0.08 | 0.06 | 0.12 | 0.04 | 0.01 | 0.11 | 0.46 | 0.06 | 1  |
| 0.92 | 0.87 | 0.79 | 1    | 1.16 | 1.11 | 0.86 | 0.09 | 0.02 | 0.08 | 0.07 | 0.01 | 0.29 | 0.15 | 0.01 | 1  |

|      |      |      |      |      |      |      |      |      |      |      |      |      |      |      |    |
|------|------|------|------|------|------|------|------|------|------|------|------|------|------|------|----|
| 1.31 | 0.86 | 0.9  | 1.42 | 1.59 | 1.08 | 1.02 | 0.4  | 1.07 | 0.31 | 0.25 | 0.77 | 0.47 | 0.29 | 0.8  | 0  |
| 0.95 | 0.85 | 0.96 | 1    | 1.1  | 1.07 | 0.92 | 0.04 | 0.03 | 0.1  | 0.06 | 0.01 | 0.59 | 0.26 | 0.1  | 1  |
| 0.74 | 0.82 | 0.79 | 1    | 1.04 | 0.94 | 0.78 | 0.07 | 0.09 | 0.09 | 0.04 | 0.52 | 0.22 | 0.38 | 0.05 | 0  |
| 0.93 | 0.82 | 0.81 | 1    | 1.09 | 1.04 | 0.85 | 0.12 | 0.04 | 0.05 | 0.07 | 0.22 | 0.29 | 0.59 | 0.02 | 0  |
| 0.92 | 1.07 | 0.78 | 0.95 | 1.09 | 1.2  | 0.92 | 0.11 | 0.13 | 0.08 | 0.15 | 0.16 | 0.23 | 0.02 | 0.04 | 0  |
| 0.85 | 0.88 | 0.84 | 0.98 | 1.1  | 1.13 | 0.86 | 0.09 | 0.09 | 0.03 | 0.02 | 0.1  | 0.61 | 0.04 | 0    | 0  |
| 1.2  | 1.08 | 1.09 | 1.2  | 0.96 | 1    | 1.12 | 0.06 | 0.03 | 0.08 | 0.07 | 0    | 0.48 | 0.01 | 0.11 | -1 |
| 0.79 | 0.77 | 0.78 | 0.79 | 0.98 | 0.97 | 0.78 | 0.1  | 0.06 | 0.11 | 0.01 | 0.02 | 0.91 | 0.07 | 0.04 | 1  |
| 1.42 | 1.31 | 1.19 | 0.69 | 1.03 | 1.14 | 1.31 | 0.05 | 0.06 | 0.03 | 0.11 | 0    | 0.03 | 0    | 0.07 | 1  |
| 1.09 | 1.07 | 1.38 | 0.81 | 1.02 | 1.19 | 1.18 | 0.01 | 0.08 | 0.03 | 0.17 | 0    | 0.02 | 0    | 0.9  | 1  |
| 1.07 | 1.08 | 1.17 | 0.85 | 1.09 | 1.17 | 1.11 | 0.02 | 0.16 | 0.06 | 0.06 | 0.03 | 0.46 | 0    | 0.32 | 1  |
| 1.02 | 1    | 1.03 | 0.85 | 1.21 | 1.2  | 1.02 | 0.05 | 0.08 | 0.06 | 0.02 | 0    | 0.77 | 0    | 0.01 | 1  |
| 0.78 | 0.99 | 0.86 | 1.03 | 1.03 | 1.03 | 0.88 | 0.08 | 0.12 | 0.1  | 0.11 | 0.99 | 0.99 | 0.99 | 0.15 | 0  |
| 0.76 | 0.88 | 1.1  | 1.03 | 1.02 | 1.09 | 0.91 | 0.09 | 0.08 | 0.02 | 0.17 | 0.79 | 0.18 | 0.34 | 0.15 | 0  |
| 0.82 | 1.24 | 1.53 | 1.06 | 1.02 | 1.08 | 1.2  | 0.46 | 0.08 | 0.07 | 0.36 | 0.87 | 0.36 | 0.95 | 0.6  | 0  |
| 0.85 | 0.87 | 0.99 | 1.12 | 1.3  | 1.1  | 0.9  | 0.14 | 0.05 | 0.03 | 0.08 | 0.06 | 0    | 0.84 | 0.01 | 0  |
| 1.77 | 1.76 | 1.56 | 0.93 | 0.82 | 0.8  | 1.7  | 0.06 | 0.12 | 0.09 | 0.12 | 0.16 | 0.78 | 0.06 | 0    | 0  |
| 0.77 | 0.77 | 0.89 | 0.95 | 1.11 | 1.07 | 0.81 | 0.11 | 0.09 | 0.08 | 0.07 | 0.06 | 0.52 | 0.18 | 0.01 | 0  |
| 1.01 | 1.02 | 1.1  | 0.82 | 0.99 | 1.11 | 1.04 | 0.03 | 0.05 | 0    | 0.05 | 0    | 0.01 | 0    | 0.1  | 1  |
| 0.85 | 0.81 | 0.86 | 1.06 | 1.08 | 1.01 | 0.84 | 0.08 | 0.07 | 0.07 | 0.02 | 0.8  | 0.28 | 0.45 | 0.01 | 0  |
| 0.74 | 0.82 | 0.77 | 1.02 | 1.09 | 1.04 | 0.78 | 0.05 | 0.1  | 0.02 | 0.04 | 0.22 | 0.39 | 0.55 | 0    | 0  |
| 1.31 | 1.32 | 1.16 | 0.82 | 1.09 | 1    | 1.26 | 0.09 | 0.14 | 0.17 | 0.09 | 0.02 | 0.49 | 0.12 | 0.07 | 1  |
| 0.82 | 1.01 | 0.92 | 1.01 | 1.17 | 1.1  | 0.91 | 0.04 | 0.03 | 0.06 | 0.09 | 0    | 0.11 | 0.07 | 0.04 | 1  |
| 1    | 1.03 | 1.31 | 0.69 | 0.97 | 1.11 | 1.12 | 0.05 | 0.05 | 0.08 | 0.17 | 0    | 0.03 | 0    | 0.96 | 1  |
| 1.03 | 0.89 | 0.92 | 1.01 | 1.09 | 0.98 | 0.95 | 0.05 | 0.14 | 0.21 | 0.07 | 0.27 | 0.41 | 0.8  | 0.85 | 0  |
| 0.86 | 0.84 | 0.85 | 1.04 | 1.23 | 1.18 | 0.85 | 0.13 | 0.04 | 0.04 | 0.01 | 0.03 | 0.18 | 0.12 | 0    | 1  |
| 0.81 | 0.77 | 0.7  | 0.89 | 1.09 | 0.77 | 0.76 | 0.08 | 0.15 | 0.15 | 0.06 | 0.06 | 0.04 | 0.25 | 0.87 | 0  |
| 0.96 | 0.9  | 0.95 | 1.02 | 1.13 | 1.05 | 0.94 | 0.06 | 0.04 | 0.03 | 0.03 | 0.02 | 0.05 | 0.35 | 0.01 | 1  |
| 0.62 | 1.02 | 0.9  | 1.05 | 1.05 | 1    | 0.85 | 0.15 | 0.19 | 0.03 | 0.2  | 0.99 | 0.66 | 0.57 | 0.28 | 0  |
| 0.73 | 0.62 | 0.63 | 0.95 | 1.01 | 0.96 | 0.66 | 0.04 | 0.07 | 0.11 | 0.06 | 0.23 | 0.48 | 0.96 | 0.02 | 0  |
| 0.95 | 0.86 | 1.01 | 0.86 | 1.02 | 1.44 | 0.94 | 0.09 | 0.09 | 0.16 | 0.07 | 0.05 | 0.01 | 0    | 0.01 | 1  |
| 1.48 | 1.3  | 1.05 | 1.37 | 0.85 | 0.93 | 1.28 | 0.48 | 0.36 | 0.19 | 0.22 | 0.13 | 0.74 | 0.2  | 0.11 | 0  |
| 0.88 | 1.37 | 1.16 | 1.01 | 0.94 | 0.98 | 1.14 | 0.21 | 0.14 | 0.13 | 0.25 | 0.61 | 0.69 | 0.86 | 0.4  | 0  |
| 1    | 0.98 | 0.99 | 0.82 | 1.05 | 1.02 | 0.99 | 0.14 | 0.06 | 0.05 | 0.01 | 0.02 | 0.42 | 0.07 | 0.36 | 1  |
| 0.71 | 0.82 | 1.03 | 0.83 | 1.17 | 0.93 | 0.85 | 0.36 | 0.42 | 0.38 | 0.16 | 0.27 | 0.48 | 0.74 | 0.76 | 0  |
| 1.15 | 1.34 | 1.05 | 0.9  | 0.86 | 1.12 | 1.18 | 0.06 | 0.03 | 0.15 | 0.15 | 0.26 | 0.02 | 0.04 | 0.63 | 0  |
| 1.09 | 0.99 | 1.15 | 1.03 | 0.93 | 1.14 | 1.08 | 0.05 | 0.03 | 0.08 | 0.08 | 0.01 | 0    | 0.07 | 0.39 | -1 |
| 0.97 | 0.86 | 0.93 | 1.12 | 0.96 | 0.96 | 0.92 | 0.06 | 0.14 | 0.04 | 0.06 | 0.07 | 0.96 | 0.01 | 0.38 | 0  |
| 1.03 | 0.97 | 0.94 | 1.07 | 1.04 | 1.03 | 0.98 | 0.03 | 0.1  | 0    | 0.05 | 0.59 | 0.88 | 0.06 | 0.13 | 0  |
| 0.95 | 1.02 | 0.98 | 0.96 | 0.98 | 1.1  | 0.98 | 0.08 | 0.18 | 0.05 | 0.03 | 0.87 | 0.29 | 0.04 | 0.03 | 0  |
| 0.8  | 0.96 | 0.83 | 0.98 | 0.94 | 1.01 | 0.86 | 0.05 | 0.05 | 0.01 | 0.09 | 0.42 | 0.08 | 0.29 | 0.04 | 0  |
| 0.91 | 1.16 | 1.01 | 0.89 | 1.09 | 1.26 | 1.02 | 0.1  | 0.08 | 0.14 | 0.13 | 0.02 | 0.09 | 0.01 | 0.09 | 1  |
| 0.81 | 0.93 | 0.8  | 0.92 | 0.99 | 1.05 | 0.85 | 0.05 | 0.1  | 0.08 | 0.07 | 0.25 | 0.39 | 0.04 | 0.03 | 0  |
| 0.83 | 0.88 | 0.84 | 0.91 | 1.01 | 1.09 | 0.85 | 0.05 | 0.08 | 0.05 | 0.03 | 0.08 | 0.17 | 0    | 0    | 0  |
| 0.96 | 1.08 | 1    | 1.03 | 0.95 | 1.33 | 1.01 | 0.05 | 0.11 | 0.11 | 0.06 | 0.27 | 0.01 | 0    | 0.01 | 0  |
| 0.88 | 0.93 | 0.89 | 0.84 | 0.87 | 0.91 | 0.9  | 0.06 | 0.11 | 0.22 | 0.03 | 0.66 | 0.73 | 0.55 | 0.92 | 0  |
| 0.93 | 0.7  | 0.56 | 1.51 | 0.96 | 0.76 | 0.73 | 0.34 | 0.29 | 0.26 | 0.19 | 0.05 | 0.39 | 0.02 | 0.88 | -1 |
| 0.79 | 0.9  | 1.19 | 0.93 | 1.12 | 1.05 | 0.96 | 0.43 | 0.16 | 0.08 | 0.2  | 0.44 | 0.5  | 0.67 | 0.51 | 0  |
| 1.63 | 1.54 | 1.27 | 0.85 | 0.99 | 0.89 | 1.48 | 0.12 | 0.07 | 0.07 | 0.18 | 0.1  | 0.12 | 0.69 | 0.01 | 0  |
| 0.87 | 1.23 | 0.91 | 1.05 | 1.16 | 1.16 | 1    | 0.2  | 0.22 | 0.14 | 0.2  | 0.47 | 0.98 | 0.44 | 0.33 | 0  |

|      |      |      |      |      |      |      |      |      |      |      |      |      |      |      |    |
|------|------|------|------|------|------|------|------|------|------|------|------|------|------|------|----|
| 0.86 | 0.87 | 1.07 | 0.95 | 1.1  | 1.03 | 0.93 | 0.08 | 0.25 | 0.13 | 0.12 | 0.27 | 0.65 | 0.36 | 0.41 | 0  |
| 1.19 | 1.04 | 1.06 | 1.06 | 1.19 | 1.23 | 1.1  | 0.05 | 0.06 | 0.1  | 0.08 | 0.02 | 0.53 | 0.03 | 0.15 | 1  |
| 0.84 | 0.81 | 0.85 | 0.98 | 1.13 | 1.04 | 0.83 | 0.03 | 0.05 | 0.07 | 0.02 | 0    | 0.12 | 0.16 | 0.01 | 1  |
| 0.97 | 0.94 | 0.9  | 0.89 | 1.22 | 1.18 | 0.94 | 0.07 | 0.1  | 0.07 | 0.03 | 0    | 0.56 | 0    | 0.01 | 1  |
| 1.08 | 1.12 | 0.95 | 0.76 | 1.01 | 1.14 | 1.05 | 0.06 | 0.06 | 0.04 | 0.09 | 0    | 0.03 | 0    | 0.2  | 1  |
| 0.71 | 1    | 0.82 | 1.14 | 0.63 | 0.78 | 0.84 | 0.15 | 0.09 | 0.03 | 0.15 | 0    | 0.03 | 0.01 | 0.55 | -1 |
| 1.23 | 1.15 | 1.05 | 1.11 | 0.76 | 0.99 | 1.15 | 0.1  | 0.1  | 0.18 | 0.09 | 0    | 0.09 | 0.32 | 0.25 | -1 |
| 0.98 | 1.01 | 0.93 | 1.18 | 1.15 | 0.99 | 0.98 | 0.06 | 0.07 | 0.07 | 0.04 | 0.53 | 0.03 | 0.01 | 0.76 | 0  |
| 0.86 | 0.83 | 0.86 | 0.96 | 1.09 | 0.97 | 0.85 | 0.06 | 0.04 | 0.04 | 0.02 | 0.02 | 0.02 | 0.91 | 0.01 | 1  |
| 0.92 | 1.06 | 0.9  | 1.14 | 1.02 | 0.94 | 0.96 | 0.15 | 0.14 | 0.11 | 0.09 | 0.28 | 0.46 | 0.11 | 0.82 | 0  |
| 0.88 | 0.87 | 0.93 | 1.18 | 1.04 | 1.13 | 0.89 | 0.06 | 0.06 | 0.03 | 0.03 | 0.02 | 0.07 | 0.25 | 0    | -1 |
| 0.91 | 0.88 | 0.77 | 1.1  | 0.96 | 1.17 | 0.85 | 0.09 | 0.13 | 0.17 | 0.07 | 0.12 | 0.12 | 0.55 | 0.04 | 0  |
| 1.62 | 1.6  | 1.88 | 0.97 | 0.84 | 0.77 | 1.7  | 0.04 | 0.12 | 0.15 | 0.16 | 0.08 | 0.5  | 0.04 | 0    | 0  |
| 1.12 | 1.28 | 1.22 | 1.02 | 1.01 | 1.08 | 1.21 | 0.06 | 0.14 | 0.25 | 0.08 | 0.83 | 0.62 | 0.65 | 0.47 | 0  |
| 1.78 | 1.8  | 1    | 1.07 | 0.82 | 0.98 | 1.53 | 0.1  | 0.13 | 0.12 | 0.46 | 0.02 | 0.16 | 0.33 | 0.12 | -1 |
| 1.12 | 1.28 | 1.56 | 1.2  | 1.28 | 1.01 | 1.32 | 0.21 | 0.29 | 0.14 | 0.22 | 0.67 | 0.21 | 0.26 | 0.12 | 0  |
| 1.61 | 1.45 | 1.45 | 1.08 | 0.82 | 0.74 | 1.5  | 0.02 | 0.13 | 0.04 | 0.09 | 0.01 | 0.37 | 0    | 0    | -1 |
| 1.45 | 1.46 | 1.72 | 1.09 | 0.92 | 0.91 | 1.54 | 0.06 | 0.03 | 0.08 | 0.15 | 0    | 0.83 | 0.02 | 0    | -1 |
| 1.36 | 1.47 | 1.41 | 1.01 | 0.93 | 0.87 | 1.41 | 0.04 | 0.06 | 0.06 | 0.06 | 0.07 | 0.32 | 0.01 | 0    | 0  |
| 1.15 | 1.39 | 1.51 | 0.98 | 0.86 | 0.88 | 1.35 | 0.04 | 0.1  | 0.08 | 0.19 | 0.06 | 0.77 | 0.07 | 0.02 | 0  |
| 1.56 | 1.6  | 1.27 | 1.04 | 0.83 | 0.95 | 1.48 | 0.13 | 0.14 | 0.06 | 0.18 | 0.07 | 0.22 | 0.34 | 0.01 | 0  |
| 1.26 | 1.25 | 1.3  | 1.12 | 1.12 | 0.99 | 1.27 | 0.11 | 0.15 | 0.1  | 0.03 | 0.98 | 0.25 | 0.17 | 0.01 | 0  |
| 1.16 | 1.2  | 1.51 | 0.91 | 0.91 | 0.72 | 1.29 | 0.11 | 0.15 | 0.24 | 0.19 | 0.94 | 0.27 | 0.21 | 0.03 | 0  |
| 1.13 | 1.39 | 1.46 | 1.04 | 0.93 | 0.87 | 1.33 | 0.04 | 0.14 | 0.02 | 0.17 | 0.17 | 0.53 | 0    | 0.01 | 0  |
| 1.44 | 1.3  | 1.35 | 1.02 | 0.93 | 1.13 | 1.36 | 0.02 | 0.07 | 0.2  | 0.07 | 0.05 | 0.11 | 0.27 | 0.13 | -1 |
| 0.81 | 0.91 | 0.86 | 1.01 | 1.07 | 1.01 | 0.86 | 0.04 | 0.02 | 0.01 | 0.05 | 0.03 | 0.01 | 0.91 | 0.01 | 1  |
| 0.99 | 0.99 | 0.97 | 0.96 | 0.97 | 1.04 | 0.99 | 0.06 | 0.11 | 0.03 | 0.01 | 0.9  | 0.36 | 0.1  | 0.07 | 0  |
| 1.01 | 1.12 | 0.87 | 0.9  | 0.89 | 1.16 | 1    | 0.07 | 0.11 | 0.04 | 0.13 | 0.82 | 0.01 | 0    | 0.1  | 0  |
| 1.24 | 1.2  | 1.29 | 0.84 | 0.99 | 1.34 | 1.24 | 0.04 | 0.07 | 0.17 | 0.05 | 0.01 | 0.01 | 0    | 0.36 | 1  |
| 1.4  | 1.61 | 1.6  | 0.91 | 0.75 | 0.94 | 1.53 | 0.07 | 0.1  | 0.04 | 0.12 | 0.04 | 0.03 | 0.46 | 0    | -1 |
| 1.02 | 0.98 | 1    | 0.6  | 1.07 | 1.28 | 1    | 0.03 | 0.02 | 0.04 | 0.02 | 0    | 0    | 0    | 0    | 1  |
| 0.95 | 0.84 | 0.87 | 0.89 | 0.97 | 1.14 | 0.89 | 0.07 | 0.08 | 0.02 | 0.05 | 0.18 | 0.02 | 0    | 0    | 0  |
| 0.97 | 1.02 | 0.97 | 0.63 | 1.07 | 1.27 | 0.99 | 0.03 | 0.01 | 0.04 | 0.03 | 0    | 0    | 0    | 0    | 1  |
| 1.44 | 1.56 | 2.26 | 0.91 | 0.68 | 0.79 | 1.75 | 0.03 | 0.1  | 0.14 | 0.44 | 0    | 0.26 | 0.15 | 0.02 | -1 |
| 1.48 | 1.48 | 1.46 | 1.11 | 0.78 | 0.81 | 1.47 | 0.09 | 0.04 | 0.08 | 0.01 | 0    | 0.54 | 0.01 | 0    | -1 |
| 1.39 | 1.02 | 1.03 | 1.3  | 0.84 | 0.86 | 1.15 | 0.03 | 0.08 | 0.08 | 0.21 | 0    | 0.69 | 0    | 0.09 | -1 |
| 0.9  | 0.83 | 1.27 | 1.08 | 0.67 | 0.77 | 1    | 0.23 | 0.14 | 0.06 | 0.24 | 0.02 | 0.33 | 0.07 | 0.17 | -1 |
| 1.6  | 1.42 | 1.14 | 1.08 | 1.09 | 1.15 | 1.39 | 0.06 | 0.17 | 0.27 | 0.23 | 0.91 | 0.76 | 0.65 | 0.3  | 0  |
| 0.92 | 0.82 | 0.59 | 0.87 | 0.97 | 0.75 | 0.77 | 0.24 | 0.15 | 0.21 | 0.17 | 0.53 | 0.17 | 0.51 | 0.87 | 0  |
| 1.24 | 1.22 | 0.76 | 0.88 | 1.12 | 1.07 | 1.07 | 0.21 | 0.24 | 0.05 | 0.27 | 0.18 | 0.73 | 0.19 | 0.98 | 0  |
| 1.08 | 1.31 | 1.05 | 0.9  | 0.96 | 1.18 | 1.14 | 0.09 | 0.05 | 0.41 | 0.14 | 0.28 | 0.32 | 0.23 | 0.89 | 0  |
| 1.09 | 1.1  | 0.89 | 0.68 | 1.01 | 1.07 | 1.03 | 0.16 | 0.23 | 0.29 | 0.12 | 0.06 | 0.79 | 0.07 | 0.84 | 0  |
| 1.03 | 0.8  | 0.75 | 0.92 | 1.09 | 0.91 | 0.86 | 0.07 | 0.25 | 0.06 | 0.15 | 0.24 | 0.3  | 0.91 | 0.62 | 0  |
| 0.98 | 0.88 | 0.86 | 1.13 | 1.11 | 0.96 | 0.91 | 0.15 | 0.08 | 0.08 | 0.07 | 0.8  | 0.06 | 0.15 | 0.39 | 0  |
| 0.94 | 0.9  | 0.87 | 1.07 | 1.03 | 0.97 | 0.9  | 0.04 | 0.03 | 0.04 | 0.04 | 0.22 | 0.06 | 0.02 | 0.11 | 0  |
| 1.07 | 0.79 | 0.73 | 0.91 | 0.95 | 0.95 | 0.86 | 0.18 | 0.18 | 0.35 | 0.18 | 0.8  | 0.99 | 0.86 | 0.72 | 0  |
| 0.94 | 0.89 | 1.04 | 0.9  | 1.12 | 1.09 | 0.96 | 0.03 | 0.03 | 0.06 | 0.07 | 0    | 0.35 | 0    | 0.08 | 1  |
| 0.82 | 0.88 | 0.89 | 1.09 | 1.07 | 1.01 | 0.87 | 0.12 | 0.13 | 0.06 | 0.04 | 0.89 | 0.47 | 0.38 | 0.03 | 0  |
| 0.98 | 0.97 | 0.94 | 0.99 | 1.11 | 1.15 | 0.96 | 0.03 | 0.02 | 0.06 | 0.02 | 0    | 0.24 | 0    | 0.01 | 1  |
| 0.93 | 1.15 | 1.19 | 0.88 | 1.01 | 1.33 | 1.09 | 0.14 | 0.18 | 0.42 | 0.14 | 0.29 | 0.22 | 0.09 | 0.4  | 0  |

|      |      |      |      |      |      |      |      |      |      |      |      |      |      |      |    |
|------|------|------|------|------|------|------|------|------|------|------|------|------|------|------|----|
| 0.9  | 0.97 | 0.77 | 1.12 | 1.22 | 1.08 | 0.88 | 0.02 | 0.1  | 0.06 | 0.1  | 0.1  | 0.1  | 0.32 | 0.04 | 0  |
| 0.94 | 0.88 | 0.92 | 0.97 | 1.04 | 1.13 | 0.91 | 0.05 | 0.03 | 0.06 | 0.03 | 0.07 | 0.05 | 0.01 | 0.01 | 0  |
| 0.74 | 0.84 | 0.87 | 0.99 | 1.15 | 1.01 | 0.82 | 0.2  | 0.23 | 0.11 | 0.07 | 0.3  | 0.37 | 0.84 | 0.06 | 0  |
| 0.87 | 0.9  | 0.98 | 1.14 | 1.04 | 1.13 | 0.91 | 0.16 | 0.1  | 0.18 | 0.06 | 0.36 | 0.42 | 0.99 | 0.11 | 0  |
| 0.82 | 0.87 | 0.87 | 1.04 | 1.06 | 1.07 | 0.85 | 0.08 | 0.05 | 0.25 | 0.03 | 0.73 | 0.9  | 0.81 | 0.2  | 0  |
| 0.73 | 0.78 | 0.77 | 0.76 | 1.09 | 0.97 | 0.76 | 0.48 | 0.18 | 0.08 | 0.03 | 0.25 | 0.33 | 0.5  | 0.01 | 0  |
| 0.8  | 0.75 | 0.89 | 1.13 | 1.07 | 1.05 | 0.82 | 0.19 | 0.08 | 0.06 | 0.07 | 0.58 | 0.72 | 0.52 | 0.01 | 0  |
| 0.87 | 0.73 | 0.9  | 1.16 | 1.16 | 1.13 | 0.83 | 0.19 | 0.11 | 0.06 | 0.09 | 1    | 0.63 | 0.76 | 0.01 | 0  |
| 0.88 | 0.75 | 0.75 | 1.19 | 1.69 | 1.45 | 0.79 | 0.33 | 0.4  | 0.19 | 0.07 | 0.1  | 0.4  | 0.27 | 0    | 0  |
| 0.74 | 0.86 | 0.66 | 0.91 | 1.2  | 1.4  | 0.75 | 0.15 | 0.07 | 0.31 | 0.1  | 0.01 | 0.26 | 0.04 | 0.03 | 1  |
| 0.96 | 0.98 | 0.99 | 1.05 | 1.24 | 0.91 | 0.98 | 0.14 | 0.15 | 0.19 | 0.01 | 0.1  | 0.05 | 0.31 | 0.56 | 0  |
| 0.89 | 0.83 | 0.82 | 1.14 | 1.16 | 1.02 | 0.84 | 0.06 | 0.06 | 0.06 | 0.04 | 0.78 | 0.03 | 0.05 | 0.01 | 0  |
| 0.87 | 0.84 | 0.86 | 0.93 | 1.07 | 0.91 | 0.85 | 0.06 | 0.06 | 0.07 | 0.02 | 0.02 | 0.02 | 0.63 | 0.26 | 1  |
| 0.9  | 0.88 | 0.94 | 1.05 | 1.26 | 0.99 | 0.91 | 0.02 | 0.12 | 0.05 | 0.03 | 0.01 | 0.01 | 0.07 | 0.06 | 1  |
| 0.82 | 0.86 | 0.85 | 1.05 | 1.15 | 1.01 | 0.84 | 0.04 | 0.06 | 0.06 | 0.02 | 0.04 | 0.03 | 0.36 | 0.01 | 1  |
| 0.85 | 0.81 | 0.89 | 1.09 | 1.21 | 1.02 | 0.85 | 0.12 | 0.05 | 0.02 | 0.04 | 0.13 | 0    | 0.37 | 0    | 0  |
| 1.47 | 1.32 | 2.02 | 0.9  | 0.73 | 0.91 | 1.6  | 0.07 | 0.04 | 0.11 | 0.37 | 0    | 0.03 | 0.92 | 0.04 | -1 |
| 1.09 | 0.99 | 1.01 | 0.73 | 1.05 | 1.25 | 1.03 | 0.05 | 0.08 | 0.03 | 0.05 | 0    | 0.01 | 0    | 0    | 1  |
| 1.12 | 0.94 | 0.84 | 1    | 0.96 | 1.19 | 0.97 | 0.05 | 0.1  | 0.07 | 0.14 | 0.58 | 0.02 | 0.01 | 0.08 | 0  |
| 1.06 | 1.08 | 1.45 | 0.74 | 1    | 1.56 | 1.2  | 0.16 | 0.11 | 0.24 | 0.22 | 0.04 | 0.01 | 0    | 0.13 | 1  |
| 0.87 | 0.84 | 0.84 | 1.01 | 1.01 | 1.14 | 0.85 | 0.05 | 0.04 | 0.07 | 0.02 | 0.96 | 0.03 | 0.05 | 0    | 0  |
| 2.03 | 2    | 1.67 | 0.89 | 1.11 | 0.79 | 1.9  | 0.14 | 0.27 | 0.13 | 0.2  | 0.2  | 0.13 | 0.41 | 0    | 0  |
| 1.62 | 1.5  | 1.16 | 1.06 | 0.85 | 0.72 | 1.43 | 0.08 | 0.19 | 0.19 | 0.24 | 0.08 | 0.4  | 0.02 | 0.02 | 0  |
| 1.61 | 1.5  | 0.85 | 0.94 | 0.8  | 0.91 | 1.32 | 0.12 | 0.29 | 0.21 | 0.41 | 0.4  | 0.62 | 0.77 | 0.19 | 0  |
| 1.53 | 1.02 | 0.85 | 0.91 | 1.11 | 0.91 | 1.13 | 0.13 | 0.17 | 0.31 | 0.35 | 0.1  | 0.32 | 1    | 0.45 | 0  |
| 1.06 | 1.13 | 1.15 | 0.87 | 0.8  | 0.91 | 1.11 | 0.09 | 0.03 | 0.2  | 0.05 | 0.22 | 0.32 | 0.74 | 0.15 | 0  |
| 1.17 | 1.07 | 1.1  | 0.76 | 0.94 | 1.03 | 1.11 | 0.07 | 0.1  | 0.1  | 0.05 | 0.02 | 0.28 | 0.01 | 0.27 | 1  |
| 0.71 | 0.74 | 0.93 | 1    | 0.9  | 0.73 | 0.79 | 0.5  | 0.24 | 0.09 | 0.12 | 0.73 | 0.3  | 0.41 | 0.54 | 0  |
| 1.12 | 1.1  | 1.05 | 0.9  | 1.02 | 1.01 | 1.09 | 0.07 | 0.09 | 0.07 | 0.04 | 0.07 | 0.92 | 0.07 | 0.18 | 0  |
| 1.25 | 1.17 | 0.98 | 0.88 | 0.99 | 1.08 | 1.13 | 0.05 | 0.19 | 0.09 | 0.14 | 0.3  | 0.49 | 0.01 | 0.64 | 0  |
| 1.05 | 0.82 | 1.11 | 1.03 | 1.09 | 0.98 | 0.99 | 0.1  | 0.26 | 0.19 | 0.15 | 0.69 | 0.57 | 0.66 | 0.92 | 0  |
| 1.16 | 0.98 | 1.05 | 1.11 | 1.23 | 1.09 | 1.06 | 0.17 | 0.14 | 0.17 | 0.09 | 0.31 | 0.29 | 0.9  | 0.82 | 0  |
| 1.1  | 1.08 | 0.9  | 1.02 | 1.08 | 1.06 | 1.03 | 0.13 | 0.17 | 0.07 | 0.12 | 0.56 | 0.81 | 0.67 | 0.74 | 0  |
| 0.96 | 1.03 | 0.88 | 1.01 | 1.06 | 1    | 0.96 | 0.08 | 0.02 | 0.1  | 0.07 | 0.25 | 0.31 | 0.94 | 0.62 | 0  |
| 0.8  | 0.89 | 1.02 | 1.33 | 1.06 | 0.95 | 0.9  | 0.51 | 0.15 | 0.2  | 0.11 | 0.34 | 0.44 | 0.28 | 0.75 | 0  |
| 1.02 | 0.91 | 0.88 | 1.02 | 1.02 | 0.99 | 0.93 | 0.15 | 0.14 | 0.08 | 0.07 | 0.98 | 0.73 | 0.76 | 0.45 | 0  |
| 1.1  | 1.03 | 0.99 | 0.9  | 1.14 | 1.1  | 1.04 | 0.04 | 0.05 | 0.03 | 0.06 | 0    | 0.4  | 0    | 0.15 | 1  |
| 0.83 | 0.94 | 0.91 | 0.97 | 0.91 | 0.96 | 0.89 | 0.02 | 0.06 | 0.03 | 0.05 | 0.1  | 0.23 | 0.66 | 0.11 | 0  |
| 0.95 | 0.8  | 0.98 | 0.92 | 0.93 | 0.99 | 0.91 | 0.11 | 0.13 | 0.03 | 0.1  | 0.93 | 0.5  | 0.38 | 0.25 | 0  |
| 0.96 | 0.93 | 0.94 | 0.94 | 1.01 | 1.03 | 0.95 | 0.03 | 0.03 | 0.01 | 0.01 | 0.01 | 0.51 | 0.01 | 0    | 1  |
| 1.06 | 0.83 | 0.83 | 1    | 0.96 | 1    | 0.91 | 0.1  | 0.13 | 0.13 | 0.13 | 0.59 | 0.67 | 0.99 | 0.43 | 0  |
| 0.94 | 0.92 | 0.93 | 1.06 | 1.1  | 1.03 | 0.93 | 0.06 | 0.09 | 0.09 | 0.01 | 0.47 | 0.36 | 0.64 | 0.12 | 0  |
| 0.86 | 1.03 | 1.18 | 1.16 | 1.17 | 1.14 | 1.02 | 0.09 | 0.15 | 0.08 | 0.16 | 0.94 | 0.75 | 0.72 | 0.33 | 0  |
| 1.11 | 0.97 | 0.98 | 0.9  | 1.17 | 1.13 | 1.02 | 0.01 | 0.18 | 0.15 | 0.08 | 0.03 | 0.79 | 0.02 | 0.3  | 1  |
| 0.86 | 0.87 | 0.84 | 1.3  | 1.24 | 0.95 | 0.86 | 0.17 | 0.14 | 0.16 | 0.02 | 0.57 | 0.06 | 0.04 | 0.37 | 0  |
| 0.8  | 0.89 | 0.97 | 1.06 | 1.13 | 1    | 0.89 | 0.09 | 0.1  | 0.05 | 0.09 | 0.36 | 0.09 | 0.35 | 0.12 | 0  |
| 1    | 0.96 | 0.99 | 0.83 | 1.09 | 1.13 | 0.98 | 0.03 | 0.07 | 0.07 | 0.02 | 0    | 0.51 | 0    | 0.03 | 1  |
| 1    | 0.99 | 0.91 | 1.04 | 1.25 | 1.12 | 0.97 | 0.06 | 0.1  | 0.09 | 0.05 | 0.01 | 0.13 | 0.24 | 0.06 | 1  |
| 0.97 | 0.85 | 1.02 | 1.07 | 1.19 | 1.1  | 0.95 | 0.06 | 0.19 | 0.1  | 0.08 | 0.27 | 0.48 | 0.68 | 0.12 | 0  |
| 0.76 | 0.75 | 1.17 | 0.92 | 1.16 | 1.04 | 0.89 | 0.23 | 0.09 | 0.07 | 0.24 | 0.1  | 0.11 | 0.43 | 0.37 | 0  |

|      |      |      |      |      |      |      |      |      |      |      |      |      |      |      |    |
|------|------|------|------|------|------|------|------|------|------|------|------|------|------|------|----|
| 0.82 | 0.85 | 0.93 | 1.04 | 1.02 | 1.02 | 0.86 | 0.13 | 0.14 | 0.2  | 0.06 | 0.85 | 0.98 | 0.86 | 0.27 | 0  |
| 0.92 | 0.78 | 0.95 | 1.28 | 1.12 | 1.05 | 0.88 | 0.12 | 0.06 | 0.07 | 0.09 | 0.05 | 0.19 | 0.03 | 0.07 | -1 |
| 0.7  | 1.06 | 0.94 | 1.02 | 1.05 | 1.07 | 0.9  | 0.09 | 0.14 | 0.15 | 0.18 | 0.72 | 0.85 | 0.58 | 0.28 | 0  |
| 0.83 | 0.93 | 0.88 | 0.97 | 1.06 | 1.06 | 0.88 | 0.03 | 0.11 | 0.04 | 0.05 | 0.15 | 0.89 | 0.03 | 0.01 | 0  |
| 0.82 | 0.7  | 0.92 | 0.97 | 1.02 | 0.98 | 0.81 | 0.09 | 0.07 | 0.02 | 0.11 | 0.37 | 0.35 | 0.82 | 0.06 | 0  |
| 0.98 | 0.97 | 1.08 | 0.88 | 1.3  | 1.22 | 1.01 | 0.09 | 0.16 | 0.12 | 0.07 | 0    | 0.55 | 0.01 | 0.06 | 1  |
| 0.76 | 1.06 | 0.83 | 1.07 | 1.15 | 1.09 | 0.89 | 0.04 | 0.18 | 0.12 | 0.16 | 0.41 | 0.63 | 0.79 | 0.15 | 0  |
| 0.82 | 0.82 | 0.69 | 1.09 | 1.12 | 0.97 | 0.78 | 0.04 | 0.09 | 0.1  | 0.07 | 0.57 | 0.09 | 0.08 | 0.05 | 0  |
| 1    | 0.91 | 0.89 | 1.04 | 1.05 | 1.17 | 0.93 | 0.05 | 0.1  | 0.02 | 0.06 | 0.86 | 0.1  | 0.01 | 0    | 0  |
| 0.86 | 0.76 | 0.83 | 1.01 | 1.16 | 1.04 | 0.82 | 0.12 | 0.2  | 0.11 | 0.05 | 0.24 | 0.4  | 0.72 | 0.03 | 0  |
| 0.9  | 0.88 | 0.87 | 0.95 | 1.15 | 1.14 | 0.88 | 0.06 | 0.06 | 0.09 | 0.02 | 0    | 0.9  | 0.02 | 0.01 | 1  |
| 0.88 | 0.95 | 0.85 | 1.1  | 1.19 | 1.16 | 0.89 | 0.16 | 0.13 | 0.08 | 0.05 | 0.41 | 0.78 | 0.55 | 0.01 | 0  |
| 0.76 | 0.84 | 0.79 | 0.95 | 1.01 | 1.04 | 0.8  | 0.14 | 0.15 | 0.05 | 0.04 | 0.56 | 0.76 | 0.32 | 0    | 0  |
| 0.82 | 0.8  | 0.88 | 0.88 | 1.02 | 1.1  | 0.84 | 0.04 | 0.05 | 0.09 | 0.04 | 0    | 0.24 | 0.01 | 0.01 | 1  |
| 0.81 | 0.84 | 0.99 | 0.98 | 1.2  | 1.18 | 0.88 | 0.17 | 0.28 | 0.18 | 0.1  | 0.22 | 0.9  | 0.2  | 0.07 | 0  |
| 0.98 | 1.12 | 0.8  | 0.9  | 1.23 | 1.32 | 0.97 | 0.17 | 0.16 | 0.07 | 0.16 | 0.03 | 0.44 | 0.01 | 0.02 | 1  |
| 0.76 | 0.97 | 1.01 | 0.88 | 1.11 | 1.29 | 0.91 | 0.1  | 0.15 | 0.22 | 0.13 | 0.04 | 0.25 | 0.02 | 0.06 | 1  |
| 1.17 | 0.98 | 1.09 | 1.08 | 1.22 | 1.56 | 1.08 | 0.08 | 0.15 | 0.47 | 0.1  | 0.15 | 0.22 | 0.09 | 0.16 | 0  |
| 0.88 | 0.79 | 1.09 | 1.26 | 1.7  | 1.54 | 0.92 | 0.29 | 0.71 | 0.86 | 0.16 | 0.29 | 0.79 | 0.57 | 0.29 | 0  |
| 0.84 | 0.95 | 0.9  | 1.26 | 1.35 | 0.83 | 0.9  | 0.1  | 0.11 | 0.14 | 0.05 | 0.3  | 0    | 0.01 | 0.52 | 0  |
| 0.84 | 0.86 | 0.78 | 1.16 | 1.14 | 0.99 | 0.83 | 0.04 | 0.05 | 0.08 | 0.04 | 0.63 | 0.03 | 0.02 | 0.03 | 0  |
| 0.85 | 0.8  | 0.9  | 1.04 | 1.12 | 1.02 | 0.85 | 0.07 | 0.05 | 0.05 | 0.05 | 0.13 | 0.04 | 0.7  | 0.01 | 0  |
| 0.81 | 0.8  | 0.86 | 1.09 | 1.17 | 1    | 0.82 | 0.08 | 0.06 | 0.06 | 0.03 | 0.12 | 0.01 | 0.18 | 0.01 | 0  |
| 0.93 | 0.85 | 0.94 | 0.92 | 1.18 | 1.06 | 0.9  | 0.01 | 0.03 | 0.03 | 0.05 | 0    | 0    | 0    | 0.01 | 1  |
| 1.1  | 1.16 | 1.05 | 0.79 | 1.11 | 1.14 | 1.11 | 0.06 | 0.06 | 0.02 | 0.05 | 0    | 0.47 | 0    | 0.42 | 1  |
| 0.87 | 0.9  | 0.99 | 0.99 | 1.17 | 1.08 | 0.92 | 0.05 | 0.08 | 0.05 | 0.06 | 0.01 | 0.15 | 0.07 | 0.03 | 1  |
| 0.99 | 1.01 | 0.86 | 1.18 | 1.2  | 1.02 | 0.95 | 0.01 | 0.09 | 0.03 | 0.08 | 0.64 | 0.03 | 0    | 0.23 | 0  |
| 0.8  | 0.86 | 0.77 | 1    | 1.06 | 0.97 | 0.81 | 0.17 | 0.12 | 0.15 | 0.05 | 0.61 | 0.41 | 0.8  | 0.16 | 0  |
| 0.9  | 0.91 | 1    | 0.95 | 1.12 | 1.14 | 0.94 | 0.05 | 0.05 | 0.12 | 0.06 | 0    | 0.82 | 0.03 | 0.06 | 1  |
| 1.59 | 1.5  | 1.53 | 0.91 | 0.79 | 0.89 | 1.54 | 0.05 | 0.03 | 0.05 | 0.05 | 0.01 | 0.02 | 0.64 | 0    | -1 |
| 1.44 | 1.25 | 1.48 | 0.92 | 0.79 | 0.87 | 1.39 | 0.05 | 0.02 | 0.04 | 0.12 | 0    | 0.02 | 0.18 | 0    | -1 |
| 0.84 | 0.73 | 0.79 | 1.12 | 1.14 | 0.94 | 0.78 | 0.07 | 0.04 | 0.05 | 0.06 | 0.68 | 0    | 0.01 | 0.02 | 0  |
| 1.18 | 1.04 | 1.19 | 1.03 | 0.92 | 1.01 | 1.14 | 0.1  | 0.08 | 0.09 | 0.09 | 0.13 | 0.24 | 0.71 | 0.14 | 0  |
| 1.03 | 1.14 | 1.04 | 1.04 | 1.03 | 1.05 | 1.07 | 0.07 | 0.07 | 0.1  | 0.06 | 0.88 | 0.75 | 0.84 | 0.82 | 0  |
| 0.83 | 0.76 | 1.08 | 1.04 | 1.12 | 0.88 | 0.89 | 0.05 | 0.07 | 0.07 | 0.17 | 0.11 | 0.01 | 0.01 | 0.97 | 0  |
| 1.09 | 1.16 | 0.88 | 1.04 | 0.89 | 1.01 | 1.05 | 0.19 | 0.02 | 0.1  | 0.15 | 0.16 | 0.07 | 0.77 | 0.71 | 0  |
| 1    | 1.06 | 1    | 0.71 | 0.95 | 1.13 | 1.02 | 0.12 | 0.13 | 0.11 | 0.04 | 0.04 | 0.11 | 0.01 | 0.16 | 1  |
| 0.76 | 0.84 | 0.93 | 1.14 | 1.19 | 1.03 | 0.84 | 0.1  | 0.08 | 0.03 | 0.08 | 0.45 | 0.02 | 0.15 | 0.02 | 0  |
| 0.87 | 0.78 | 0.79 | 0.87 | 1.14 | 1.19 | 0.81 | 0.14 | 0.11 | 0.28 | 0.05 | 0.03 | 0.74 | 0.1  | 0.08 | 1  |
| 0.86 | 1.03 | 0.81 | 0.99 | 1.18 | 0.95 | 0.9  | 0.05 | 0.11 | 0.17 | 0.11 | 0.02 | 0.08 | 0.66 | 0.7  | 1  |
| 0.52 | 0.58 | 0.91 | 0.98 | 0.93 | 0.98 | 0.67 | 0.15 | 0.1  | 0.15 | 0.21 | 0.63 | 0.63 | 0.99 | 0.1  | 0  |
| 0.88 | 0.74 | 0.69 | 0.95 | 1.15 | 0.86 | 0.77 | 0.17 | 0.09 | 0.09 | 0.1  | 0.1  | 0.01 | 0.44 | 0.32 | 0  |
| 0.66 | 0.66 | 0.88 | 1.16 | 1.08 | 1    | 0.73 | 0.1  | 0.08 | 0.11 | 0.13 | 0.23 | 0.31 | 0.1  | 0.05 | 0  |
| 0.81 | 0.81 | 0.84 | 1    | 1.17 | 1.02 | 0.82 | 0.01 | 0.07 | 0.02 | 0.02 | 0    | 0.02 | 0.27 | 0    | 1  |
| 0.9  | 0.97 | 0.9  | 0.98 | 1.15 | 1.08 | 0.92 | 0.07 | 0.06 | 0.01 | 0.04 | 0.01 | 0.15 | 0.05 | 0    | 1  |
| 0.84 | 0.8  | 0.82 | 1.1  | 1.23 | 1.14 | 0.82 | 0.09 | 0.05 | 0.02 | 0.02 | 0.04 | 0.04 | 0.48 | 0    | 1  |
| 0.73 | 0.86 | 0.93 | 1.14 | 1.14 | 0.97 | 0.84 | 0.19 | 0.13 | 0.13 | 0.1  | 0.98 | 0.15 | 0.25 | 0.25 | 0  |
| 0.81 | 0.76 | 0.75 | 1.11 | 1.18 | 0.95 | 0.77 | 0.1  | 0.05 | 0.05 | 0.03 | 0.22 | 0    | 0.06 | 0.01 | 0  |
| 0.83 | 0.84 | 0.88 | 1.04 | 1.12 | 0.97 | 0.85 | 0.02 | 0.04 | 0.03 | 0.03 | 0.02 | 0    | 0.01 | 0.01 | 1  |
| 0.81 | 0.84 | 0.94 | 0.98 | 1.13 | 1.06 | 0.86 | 0.06 | 0.07 | 0.07 | 0.06 | 0.02 | 0.23 | 0.17 | 0.02 | 1  |

|      |      |      |      |      |      |      |      |      |      |      |      |      |      |      |    |
|------|------|------|------|------|------|------|------|------|------|------|------|------|------|------|----|
| 0.92 | 0.88 | 1.03 | 1.1  | 1.22 | 1.09 | 0.94 | 0.14 | 0.13 | 0.09 | 0.08 | 0.27 | 0.21 | 0.91 | 0.1  | 0  |
| 1.02 | 0.98 | 0.96 | 0.91 | 1.21 | 1.13 | 0.99 | 0.02 | 0.05 | 0.04 | 0.03 | 0    | 0.07 | 0    | 0.01 | 1  |
| 0.93 | 0.86 | 1.07 | 0.96 | 1.11 | 1.03 | 0.95 | 0.03 | 0.13 | 0.03 | 0.11 | 0.07 | 0.34 | 0.04 | 0.32 | 0  |
| 0.94 | 0.85 | 0.86 | 0.95 | 1.14 | 1.1  | 0.88 | 0.09 | 0.15 | 0.12 | 0.05 | 0.07 | 0.7  | 0.11 | 0.04 | 0  |
| 0.97 | 0.86 | 1    | 1.02 | 1.17 | 0.98 | 0.94 | 0.15 | 0.15 | 0.05 | 0.08 | 0.21 | 0.09 | 0.67 | 0.51 | 0  |
| 0.89 | 0.89 | 0.9  | 1.09 | 1.13 | 1.01 | 0.9  | 0.02 | 0.04 | 0.01 | 0.01 | 0.22 | 0.01 | 0    | 0    | 0  |
| 0.96 | 0.85 | 0.83 | 1    | 1.28 | 1.13 | 0.88 | 0.15 | 0.14 | 0.08 | 0.07 | 0.03 | 0.17 | 0.23 | 0.01 | 1  |
| 1.45 | 1.01 | 1.4  | 0.74 | 1.05 | 1.23 | 1.28 | 0.17 | 0.32 | 0.4  | 0.24 | 0.13 | 0.54 | 0.07 | 0.85 | 0  |
| 0.93 | 0.89 | 1.06 | 0.86 | 0.99 | 0.92 | 0.96 | 0.14 | 0.08 | 0.07 | 0.09 | 0.16 | 0.3  | 0.52 | 0.59 | 0  |
| 0.9  | 0.9  | 0.93 | 1.03 | 1.17 | 1.1  | 0.91 | 0.05 | 0.02 | 0.02 | 0.02 | 0    | 0.01 | 0.06 | 0    | 1  |
| 0.89 | 0.89 | 0.91 | 0.93 | 1.04 | 1.11 | 0.9  | 0.01 | 0.03 | 0.07 | 0.01 | 0    | 0.12 | 0    | 0.01 | 1  |
| 0.92 | 0.89 | 0.96 | 0.93 | 1.13 | 1.04 | 0.92 | 0.04 | 0.04 | 0.01 | 0.04 | 0    | 0.03 | 0.01 | 0.01 | 1  |
| 0.92 | 0.96 | 0.93 | 1.02 | 0.96 | 1.06 | 0.94 | 0.06 | 0.05 | 0.01 | 0.02 | 0.17 | 0.02 | 0.31 | 0    | 0  |
| 0.89 | 0.88 | 0.9  | 1.03 | 1.01 | 1.06 | 0.89 | 0.06 | 0.1  | 0.04 | 0.01 | 0.83 | 0.49 | 0.47 | 0    | 0  |
| 0.85 | 0.85 | 0.88 | 1.04 | 1.14 | 1.02 | 0.86 | 0.04 | 0.03 | 0.04 | 0.02 | 0.01 | 0    | 0.56 | 0    | 1  |
| 0.83 | 0.71 | 0.9  | 1.13 | 1.17 | 1.09 | 0.82 | 0.14 | 0.12 | 0.06 | 0.1  | 0.7  | 0.36 | 0.66 | 0.01 | 0  |
| 1.02 | 0.92 | 1.16 | 0.93 | 1.01 | 1.04 | 1.04 | 0.11 | 0.06 | 0.13 | 0.12 | 0.25 | 0.69 | 0.27 | 0.95 | 0  |
| 0.92 | 0.92 | 1.1  | 0.88 | 1.03 | 1.08 | 0.98 | 0.07 | 0.05 | 0.08 | 0.1  | 0.01 | 0.37 | 0.01 | 0.26 | 1  |
| 0.99 | 0.96 | 0.94 | 0.92 | 1.06 | 1.07 | 0.97 | 0.03 | 0.06 | 0    | 0.03 | 0.01 | 0.71 | 0    | 0    | 1  |
| 0.83 | 0.79 | 0.8  | 1.03 | 1.11 | 0.99 | 0.81 | 0.06 | 0.08 | 0.06 | 0.02 | 0.14 | 0.09 | 0.52 | 0.01 | 0  |
| 0.93 | 1.02 | 0.93 | 0.97 | 1.04 | 0.87 | 0.96 | 0.03 | 0.08 | 0.15 | 0.05 | 0.14 | 0.1  | 0.24 | 0.37 | 0  |
| 0.96 | 0.94 | 0.94 | 1.06 | 1.06 | 1.15 | 0.95 | 0.08 | 0.1  | 0.07 | 0.01 | 0.99 | 0.25 | 0.18 | 0.01 | 0  |
| 0.82 | 0.87 | 0.9  | 1.06 | 1.06 | 1.05 | 0.87 | 0.04 | 0.06 | 0.08 | 0.04 | 0.94 | 0.85 | 0.87 | 0.02 | 0  |
| 0.88 | 0.95 | 0.86 | 0.94 | 1.11 | 1.14 | 0.9  | 0.02 | 0.09 | 0.11 | 0.05 | 0.01 | 0.68 | 0.01 | 0.02 | 1  |
| 0.81 | 0.83 | 0.8  | 1.13 | 1.08 | 1.07 | 0.82 | 0.03 | 0.05 | 0.02 | 0.02 | 0.13 | 0.96 | 0.04 | 0    | 0  |
| 1.07 | 1.07 | 1.25 | 1.02 | 1.06 | 1.02 | 1.13 | 0.12 | 0.11 | 0.05 | 0.1  | 0.62 | 0.6  | 0.96 | 0.16 | 0  |
| 1.02 | 0.94 | 0.91 | 0.81 | 1.09 | 1.18 | 0.96 | 0.1  | 0.08 | 0.18 | 0.06 | 0.01 | 0.43 | 0.02 | 0.11 | 1  |
| 0.81 | 0.93 | 1    | 1.06 | 1.07 | 1.19 | 0.91 | 0.13 | 0.13 | 0.16 | 0.1  | 0.91 | 0.33 | 0.3  | 0.07 | 0  |
| 0.79 | 0.82 | 0.93 | 0.98 | 0.99 | 0.95 | 0.85 | 0.13 | 0.04 | 0.03 | 0.07 | 0.91 | 0.2  | 0.7  | 0.09 | 0  |
| 0.99 | 0.93 | 1.04 | 1    | 0.93 | 1.03 | 0.99 | 0.04 | 0.1  | 0.08 | 0.06 | 0.27 | 0.21 | 0.46 | 0.46 | 0  |
| 0.95 | 0.95 | 0.99 | 1    | 1.11 | 1.12 | 0.96 | 0.04 | 0.11 | 0.03 | 0.02 | 0.11 | 0.95 | 0.01 | 0    | 0  |
| 0.85 | 0.75 | 0.84 | 1.11 | 1.12 | 1.02 | 0.81 | 0.11 | 0.18 | 0.15 | 0.05 | 0.97 | 0.5  | 0.4  | 0.08 | 0  |
| 0.79 | 0.85 | 0.85 | 1.18 | 1.19 | 1.12 | 0.83 | 0.08 | 0.16 | 0.1  | 0.03 | 0.88 | 0.52 | 0.43 | 0.01 | 0  |
| 0.6  | 0.81 | 0.95 | 0.84 | 1.08 | 1.04 | 0.79 | 0.28 | 0.13 | 0.09 | 0.18 | 0.16 | 0.67 | 0.28 | 0.09 | 0  |
| 0.95 | 0.96 | 0.9  | 0.9  | 0.98 | 0.96 | 0.94 | 0.13 | 0.13 | 0.02 | 0.03 | 0.45 | 0.83 | 0.49 | 0.26 | 0  |
| 0.9  | 0.9  | 0.97 | 1.05 | 1.13 | 1.07 | 0.92 | 0.06 | 0.03 | 0.12 | 0.04 | 0.06 | 0.37 | 0.82 | 0.13 | 0  |
| 0.84 | 1    | 0.88 | 1.19 | 1.14 | 0.96 | 0.9  | 0.11 | 0.19 | 0.01 | 0.08 | 0.73 | 0.16 | 0.02 | 0.35 | 0  |
| 0.72 | 0.67 | 0.96 | 0.73 | 1.07 | 1    | 0.78 | 0.09 | 0.23 | 0.18 | 0.16 | 0.03 | 0.68 | 0.05 | 0.19 | 1  |
| 1.27 | 0.9  | 0.98 | 0.9  | 0.78 | 1    | 1.05 | 0.07 | 0.08 | 0.09 | 0.2  | 0.06 | 0.02 | 0.15 | 0.71 | 0  |
| 3.17 | 3.14 | 2.61 | 0.67 | 0.46 | 0.59 | 2.97 | 0.1  | 0.15 | 0.1  | 0.31 | 0.06 | 0.28 | 0.32 | 0    | 0  |
| 3.17 | 3.14 | 2.61 | 0.67 | 0.46 | 0.59 | 2.97 | 0.1  | 0.15 | 0.1  | 0.31 | 0.06 | 0.28 | 0.32 | 0    | 0  |
| 1.64 | 1.55 | 1.91 | 1    | 0.83 | 0.8  | 1.7  | 0.04 | 0.05 | 0.06 | 0.19 | 0    | 0.51 | 0    | 0    | -1 |
| 1.6  | 1.6  | 1.52 | 0.9  | 0.76 | 0.83 | 1.57 | 0.09 | 0.11 | 0.07 | 0.05 | 0.09 | 0.38 | 0.31 | 0    | 0  |
| 1.05 | 1.1  | 1.3  | 0.97 | 0.94 | 0.94 | 1.15 | 0.11 | 0.13 | 0.06 | 0.13 | 0.75 | 0.93 | 0.64 | 0.07 | 0  |
| 0.85 | 0.96 | 0.98 | 0.84 | 0.89 | 0.93 | 0.93 | 0.06 | 0.04 | 0.06 | 0.07 | 0.17 | 0.42 | 0.1  | 0.94 | 0  |
| 1.04 | 1.02 | 0.95 | 0.81 | 1.06 | 1.05 | 1    | 0.08 | 0.08 | 0.1  | 0.04 | 0.01 | 0.93 | 0.02 | 0.49 | 1  |
| 0.89 | 1.04 | 0.86 | 0.97 | 0.92 | 0.99 | 0.93 | 0.11 | 0.11 | 0.18 | 0.1  | 0.6  | 0.55 | 0.81 | 0.61 | 0  |
| 0.96 | 1.02 | 0.97 | 0.96 | 1.11 | 1.1  | 0.98 | 0.08 | 0.08 | 0.07 | 0.04 | 0.04 | 0.96 | 0.06 | 0.05 | 1  |
| 0.87 | 0.91 | 0.86 | 1.11 | 0.96 | 1.01 | 0.88 | 0.06 | 0.05 | 0.08 | 0.03 | 0.01 | 0.35 | 0.1  | 0.07 | -1 |
| 1.08 | 0.91 | 0.95 | 0.94 | 1.09 | 1.13 | 0.98 | 0.07 | 0.08 | 0.07 | 0.09 | 0.03 | 0.5  | 0.01 | 0.08 | 1  |

|      |      |      |      |      |      |      |      |      |      |      |      |      |      |      |    |
|------|------|------|------|------|------|------|------|------|------|------|------|------|------|------|----|
| 0.99 | 0.92 | 0.95 | 0.99 | 1.12 | 1.11 | 0.95 | 0.03 | 0.01 | 0.03 | 0.04 | 0    | 0.4  | 0.01 | 0.01 | 1  |
| 0.96 | 0.93 | 0.92 | 1.02 | 1.21 | 1.1  | 0.93 | 0.04 | 0.07 | 0.06 | 0.02 | 0    | 0.09 | 0.08 | 0.01 | 1  |
| 0.98 | 0.81 | 0.92 | 0.86 | 1.15 | 1.14 | 0.9  | 0.08 | 0.04 | 0.12 | 0.09 | 0    | 0.84 | 0.01 | 0.05 | 1  |
| 0.85 | 0.84 | 0.77 | 1.13 | 1.2  | 1.1  | 0.82 | 0.11 | 0.15 | 0.05 | 0.04 | 0.5  | 0.34 | 0.7  | 0    | 0  |
| 1.17 | 1.52 | 0.86 | 0.99 | 1.47 | 1.18 | 1.18 | 0.23 | 0.42 | 0.16 | 0.33 | 0.09 | 0.31 | 0.27 | 0.99 | 0  |
| 1.05 | 1.17 | 1    | 0.87 | 0.82 | 1.05 | 1.07 | 0.12 | 0.11 | 0.08 | 0.08 | 0.6  | 0.03 | 0.08 | 0.72 | 0  |
| 0.95 | 0.95 | 1.06 | 0.83 | 0.78 | 1.14 | 0.99 | 0.04 | 0.06 | 0.04 | 0.06 | 0.21 | 0    | 0    | 0.02 | 0  |
| 0.95 | 0.87 | 0.77 | 1.05 | 1    | 1.18 | 0.86 | 0.05 | 0.12 | 0.09 | 0.09 | 0.46 | 0.08 | 0.06 | 0.01 | 0  |
| 1.1  | 1.01 | 1.08 | 0.93 | 1.02 | 1.13 | 1.06 | 0.04 | 0.04 | 0.06 | 0.05 | 0.02 | 0.03 | 0    | 0.21 | 1  |
| 0.94 | 0.96 | 0.92 | 0.81 | 1.05 | 1.14 | 0.94 | 0.03 | 0.02 | 0.01 | 0.02 | 0    | 0    | 0    | 0    | 1  |
| 0.92 | 1.3  | 0.5  | 0.73 | 1.03 | 0.67 | 0.91 | 0.35 | 0.32 | 0.23 | 0.4  | 0.24 | 0.16 | 0.82 | 0.42 | 0  |
| 1.07 | 1.19 | 0.96 | 0.98 | 1.03 | 0.98 | 1.07 | 0.02 | 0.04 | 0.06 | 0.11 | 0.07 | 0.25 | 0.99 | 0.28 | 0  |
| 1.01 | 0.95 | 1.1  | 1.07 | 1.26 | 1.08 | 1.02 | 0.07 | 0.17 | 0.08 | 0.08 | 0.08 | 0.14 | 0.94 | 0.44 | 0  |
| 0.91 | 1.55 | 0.93 | 0.86 | 0.96 | 1.26 | 1.13 | 0.1  | 0.17 | 0.22 | 0.36 | 0.33 | 0.09 | 0.02 | 0.62 | 0  |
| 1.01 | 0.94 | 0.84 | 1.01 | 1.24 | 1.05 | 0.93 | 0.06 | 0.12 | 0.1  | 0.09 | 0.02 | 0.08 | 0.54 | 0.19 | 1  |
| 0.91 | 0.92 | 0.95 | 0.99 | 1.03 | 1.06 | 0.93 | 0.07 | 0.03 | 0.11 | 0.02 | 0.29 | 0.69 | 0.36 | 0.11 | 0  |
| 0.96 | 1    | 0.95 | 0.85 | 1.09 | 1.18 | 0.97 | 0.04 | 0.07 | 0.01 | 0.02 | 0    | 0.07 | 0    | 0    | 1  |
| 0.86 | 0.99 | 0.91 | 1.03 | 1.13 | 1.14 | 0.92 | 0.07 | 0.08 | 0.12 | 0.07 | 0.12 | 0.85 | 0.17 | 0.05 | 0  |
| 0.68 | 0.67 | 0.75 | 1.07 | 1.11 | 1.04 | 0.7  | 0.04 | 0.07 | 0.04 | 0.04 | 0.28 | 0.18 | 0.47 | 0    | 0  |
| 0.88 | 0.82 | 0.9  | 0.98 | 1.11 | 1.08 | 0.87 | 0.04 | 0    | 0.01 | 0.04 | 0    | 0.01 | 0.01 | 0    | 1  |
| 1.06 | 0.94 | 1.14 | 0.86 | 1.01 | 1.17 | 1.05 | 0.06 | 0.08 | 0.06 | 0.1  | 0.02 | 0.04 | 0    | 0.17 | 1  |
| 1.14 | 1.13 | 0.88 | 0.8  | 0.98 | 0.98 | 1.05 | 0.13 | 0.1  | 0.13 | 0.15 | 0.06 | 0.94 | 0.13 | 0.56 | 0  |
| 1.01 | 0.94 | 0.97 | 1.04 | 1.25 | 1.06 | 0.97 | 0.09 | 0.11 | 0.07 | 0.03 | 0.02 | 0.05 | 0.74 | 0.1  | 1  |
| 0.93 | 1.03 | 0.9  | 0.87 | 1.2  | 1.05 | 0.95 | 0.07 | 0.13 | 0.1  | 0.07 | 0    | 0.15 | 0.04 | 0.25 | 1  |
| 0.97 | 0.91 | 0.99 | 0.96 | 1.22 | 1.08 | 0.96 | 0.07 | 0.21 | 0.06 | 0.04 | 0.06 | 0.34 | 0.07 | 0.04 | 0  |
| 1.04 | 1.05 | 0.8  | 0.9  | 1.1  | 1.11 | 0.96 | 0.08 | 0.04 | 0.07 | 0.14 | 0    | 0.78 | 0.01 | 0.2  | 1  |
| 0.97 | 0.92 | 0.99 | 0.92 | 0.99 | 1.1  | 0.96 | 0.03 | 0.07 | 0.07 | 0.04 | 0.14 | 0.09 | 0    | 0.03 | 0  |
| 0.85 | 0.91 | 1.04 | 0.88 | 1.17 | 1.15 | 0.93 | 0.05 | 0.04 | 0.08 | 0.1  | 0    | 0.62 | 0    | 0.04 | 1  |
| 0.99 | 0.87 | 0.89 | 0.83 | 1.1  | 1.13 | 0.92 | 0.06 | 0.1  | 0.08 | 0.06 | 0    | 0.63 | 0    | 0.02 | 1  |
| 0.92 | 0.76 | 0.84 | 0.97 | 1.19 | 1.07 | 0.84 | 0.29 | 0.21 | 0.09 | 0.08 | 0.25 | 0.39 | 0.6  | 0.03 | 0  |
| 0.67 | 0.92 | 0.83 | 0.85 | 1.12 | 1.11 | 0.81 | 0.16 | 0.12 | 0.11 | 0.13 | 0.03 | 0.89 | 0.06 | 0.03 | 1  |
| 0.9  | 0.83 | 0.71 | 1.01 | 1.31 | 1.16 | 0.81 | 0.08 | 0.15 | 0.07 | 0.1  | 0.01 | 0.17 | 0.05 | 0.01 | 1  |
| 0.94 | 0.86 | 0.88 | 1.08 | 1.08 | 0.98 | 0.89 | 0.01 | 0.04 | 0.05 | 0.04 | 0.96 | 0.03 | 0.01 | 0.08 | 0  |
| 0.75 | 0.86 | 0.9  | 1.06 | 0.98 | 1.1  | 0.84 | 0.19 | 0.15 | 0.1  | 0.08 | 0.57 | 0.3  | 0.74 | 0.02 | 0  |
| 0.9  | 0.86 | 0.89 | 1.3  | 1.41 | 1.42 | 0.88 | 0.17 | 0.16 | 0.13 | 0.02 | 0.39 | 0.93 | 0.36 | 0    | 0  |
| 1.04 | 1.13 | 1.19 | 0.96 | 0.93 | 0.96 | 1.12 | 0.08 | 0.12 | 0.15 | 0.08 | 0.75 | 0.75 | 0.92 | 0.18 | 0  |
| 1.28 | 1.25 | 1.05 | 1.17 | 1.02 | 1.21 | 1.19 | 0.15 | 0.09 | 0.15 | 0.12 | 0.15 | 0.1  | 0.74 | 0.92 | 0  |
| 1.02 | 0.94 | 1.09 | 1.08 | 0.95 | 1.05 | 1.02 | 0.12 | 0.06 | 0.11 | 0.07 | 0.11 | 0.18 | 0.78 | 0.68 | 0  |
| 0.89 | 0.8  | 1.07 | 1.15 | 1    | 1.01 | 0.92 | 0.12 | 0.05 | 0.05 | 0.14 | 0.06 | 0.81 | 0.12 | 0.37 | 0  |
| 0.99 | 0.94 | 0.99 | 1.13 | 1.09 | 1.12 | 0.97 | 0.06 | 0.09 | 0.08 | 0.03 | 0.43 | 0.59 | 0.9  | 0.04 | 0  |
| 0.78 | 1.17 | 0.93 | 1.1  | 1.12 | 1.14 | 0.96 | 0.12 | 0.09 | 0.07 | 0.2  | 0.78 | 0.83 | 0.66 | 0.22 | 0  |
| 1.03 | 1.08 | 1.1  | 0.95 | 0.91 | 1.03 | 1.07 | 0.07 | 0.02 | 0.05 | 0.04 | 0.28 | 0.01 | 0.14 | 0.33 | 0  |
| 0.99 | 1.09 | 1.12 | 0.96 | 0.93 | 1.03 | 1.07 | 0.05 | 0.02 | 0.06 | 0.07 | 0.32 | 0.02 | 0.15 | 0.46 | 0  |
| 0.93 | 0.93 | 0.9  | 1    | 0.96 | 1.04 | 0.92 | 0.02 | 0.05 | 0.01 | 0.02 | 0.25 | 0.04 | 0.04 | 0    | 0  |
| 0.76 | 1.02 | 0.96 | 0.97 | 0.9  | 0.98 | 0.91 | 0.05 | 0.03 | 0.02 | 0.14 | 0.04 | 0.01 | 0.8  | 0.45 | -1 |
| 1.41 | 1.15 | 1.36 | 1.08 | 0.87 | 0.86 | 1.31 | 0.04 | 0.05 | 0.06 | 0.14 | 0    | 0.89 | 0    | 0.01 | -1 |
| 1.18 | 1.22 | 1.29 | 1.04 | 0.92 | 0.84 | 1.23 | 0.05 | 0.06 | 0.05 | 0.06 | 0.02 | 0.14 | 0    | 0    | -1 |
| 1.25 | 1.21 | 1.23 | 1.08 | 0.94 | 0.84 | 1.23 | 0.05 | 0.1  | 0.06 | 0.02 | 0.05 | 0.23 | 0    | 0    | -1 |
| 1.09 | 1.01 | 1.19 | 1.28 | 0.89 | 0.82 | 1.1  | 0.04 | 0.05 | 0.03 | 0.09 | 0    | 0.07 | 0    | 0.01 | -1 |
| 1.17 | 1.17 | 1.15 | 1.08 | 0.91 | 0.91 | 1.16 | 0.04 | 0.02 | 0.04 | 0.02 | 0    | 0.81 | 0    | 0    | -1 |



|      |      |      |      |      |      |      |      |      |      |      |      |      |      |      |    |
|------|------|------|------|------|------|------|------|------|------|------|------|------|------|------|----|
| 1.15 | 1.1  | 0.94 | 1.02 | 0.94 | 0.93 | 1.06 | 0.03 | 0.03 | 0.03 | 0.11 | 0    | 0.47 | 0.01 | 0.1  | -1 |
| 1.15 | 1.09 | 1.03 | 1.03 | 1.02 | 1.03 | 1.09 | 0.11 | 0.05 | 0.11 | 0.06 | 0.86 | 0.79 | 0.95 | 0.48 | 0  |
| 1.03 | 1.09 | 1.09 | 0.96 | 0.95 | 1.02 | 1.07 | 0.05 | 0.05 | 0.05 | 0.04 | 0.84 | 0.11 | 0.16 | 0.26 | 0  |
| 1.1  | 0.89 | 0.67 | 0.82 | 0.83 | 0.85 | 0.89 | 0.36 | 0.2  | 0.4  | 0.22 | 0.97 | 0.92 | 0.92 | 0.9  | 0  |
| 0.97 | 1.01 | 1.02 | 1.01 | 1.12 | 1.02 | 1    | 0.04 | 0.07 | 0    | 0.03 | 0.04 | 0.06 | 0.81 | 0.22 | 1  |
| 1.01 | 1.02 | 0.94 | 0.95 | 0.97 | 1.02 | 0.99 | 0.07 | 0.1  | 0.06 | 0.04 | 0.76 | 0.56 | 0.3  | 0.55 | 0  |
| 1.06 | 0.95 | 1    | 1.18 | 1.02 | 1.05 | 1    | 0.17 | 0.15 | 0.11 | 0.05 | 0.21 | 0.82 | 0.28 | 0.54 | 0  |
| 0.89 | 0.98 | 1.04 | 0.98 | 1    | 1.02 | 0.97 | 0.04 | 0.05 | 0.05 | 0.08 | 0.55 | 0.57 | 0.25 | 0.35 | 0  |
| 0.97 | 1.1  | 0.94 | 1.11 | 0.96 | 1.07 | 1    | 0.11 | 0.03 | 0.12 | 0.09 | 0.04 | 0.14 | 0.63 | 0.49 | -1 |
| 0.96 | 1    | 1.08 | 0.89 | 1.07 | 1.08 | 1.01 | 0.04 | 0.02 | 0.05 | 0.06 | 0    | 0.71 | 0    | 0.23 | 1  |
| 0.83 | 1.04 | 0.93 | 0.92 | 1.09 | 1.03 | 0.93 | 0.02 | 0.09 | 0.02 | 0.1  | 0.01 | 0.4  | 0    | 0.17 | 1  |
| 0.83 | 0.87 | 0.86 | 0.95 | 0.99 | 0.96 | 0.85 | 0.02 | 0.05 | 0.01 | 0.02 | 0.21 | 0.47 | 0.38 | 0    | 0  |
| 0.8  | 0.89 | 0.98 | 1.1  | 1.02 | 1.01 | 0.89 | 0.11 | 0.02 | 0.1  | 0.09 | 0.19 | 0.79 | 0.29 | 0.21 | 0  |
| 1.02 | 0.95 | 1.02 | 0.83 | 1.07 | 1.15 | 0.99 | 0.05 | 0.05 | 0.05 | 0.04 | 0    | 0.07 | 0    | 0.02 | 1  |
| 0.92 | 0.89 | 0.95 | 0.94 | 1.08 | 1.06 | 0.92 | 0.03 | 0.02 | 0.04 | 0.03 | 0    | 0.54 | 0.01 | 0.01 | 1  |
| 0.94 | 0.91 | 0.95 | 0.97 | 1.1  | 1.09 | 0.93 | 0.05 | 0.05 | 0.04 | 0.02 | 0.01 | 0.82 | 0.02 | 0    | 1  |
| 1.05 | 0.99 | 0.94 | 0.9  | 1.14 | 1.17 | 0.99 | 0.11 | 0.09 | 0.07 | 0.06 | 0.02 | 0.57 | 0.02 | 0.02 | 1  |
| 0.78 | 0.94 | 0.9  | 0.91 | 1.09 | 1.05 | 0.88 | 0.06 | 0.07 | 0.05 | 0.08 | 0.01 | 0.44 | 0.02 | 0.04 | 1  |
| 1    | 0.93 | 0.94 | 0.83 | 1.22 | 1.16 | 0.96 | 0.02 | 0.05 | 0.01 | 0.03 | 0    | 0.08 | 0    | 0    | 1  |
| 0.94 | 0.85 | 0.99 | 1.05 | 1.07 | 1.13 | 0.93 | 0.06 | 0.14 | 0.08 | 0.07 | 0.87 | 0.53 | 0.21 | 0.03 | 0  |
| 0.84 | 0.9  | 0.89 | 1.05 | 1.22 | 1.07 | 0.87 | 0.04 | 0.11 | 0.03 | 0.03 | 0.03 | 0.08 | 0.54 | 0    | 1  |
| 0.9  | 0.85 | 0.86 | 1.02 | 1.11 | 1.08 | 0.87 | 0.02 | 0.05 | 0.05 | 0.03 | 0.01 | 0.39 | 0.08 | 0    | 1  |
| 0.96 | 0.89 | 1    | 0.87 | 1.15 | 1.18 | 0.95 | 0.02 | 0.07 | 0.04 | 0.06 | 0    | 0.51 | 0    | 0    | 1  |
| 0.74 | 0.84 | 0.82 | 1.14 | 0.95 | 0.99 | 0.8  | 0.08 | 0.01 | 0.03 | 0.05 | 0    | 0.07 | 0.03 | 0.01 | -1 |
| 0.92 | 0.97 | 0.86 | 1.05 | 0.97 | 1.14 | 0.92 | 0.2  | 0.07 | 0.25 | 0.05 | 0.46 | 0.23 | 0.6  | 0.2  | 0  |
| 0.96 | 0.83 | 0.94 | 0.95 | 1.16 | 1.16 | 0.91 | 0.06 | 0.1  | 0.07 | 0.07 | 0.01 | 0.99 | 0.01 | 0.01 | 1  |
| 0.68 | 0.72 | 0.77 | 0.97 | 0.97 | 0.95 | 0.72 | 0.09 | 0.12 | 0.03 | 0.04 | 0.94 | 0.84 | 0.73 | 0    | 0  |
| 0.78 | 0.81 | 0.95 | 0.98 | 1.14 | 0.98 | 0.84 | 0.12 | 0.03 | 0.06 | 0.09 | 0.04 | 0.01 | 0.95 | 0.09 | 1  |
| 0.91 | 0.84 | 0.84 | 0.95 | 1.2  | 1.08 | 0.86 | 0.02 | 0.04 | 0.03 | 0.04 | 0    | 0.01 | 0    | 0    | 1  |
| 0.91 | 0.76 | 0.79 | 0.95 | 1.02 | 0.88 | 0.82 | 0.22 | 0.21 | 0.2  | 0.08 | 0.66 | 0.44 | 0.7  | 0.64 | 0  |
| 0.91 | 0.81 | 0.93 | 1.02 | 1.11 | 1.08 | 0.88 | 0.09 | 0.09 | 0.05 | 0.07 | 0.22 | 0.66 | 0.36 | 0.02 | 0  |
| 0.97 | 1.01 | 0.9  | 0.96 | 0.98 | 1.1  | 0.96 | 0.07 | 0.07 | 0.04 | 0.05 | 0.7  | 0.04 | 0.02 | 0.02 | 0  |
| 1.05 | 1.32 | 0.91 | 0.98 | 0.83 | 0.87 | 1.1  | 0.07 | 0.03 | 0.13 | 0.21 | 0.01 | 0.6  | 0.19 | 0.18 | -1 |
| 0.99 | 1.1  | 2.22 | 1.57 | 1.34 | 1.8  | 1.44 | 0.97 | 0.7  | 1.28 | 0.68 | 0.71 | 0.56 | 0.8  | 0.68 | 0  |
| 0.89 | 1    | 0.81 | 1.11 | 1.08 | 1    | 0.9  | 0.04 | 0.08 | 0.06 | 0.09 | 0.56 | 0.21 | 0.03 | 0.17 | 0  |
| 0.89 | 0.8  | 0.85 | 1.16 | 1.16 | 0.99 | 0.85 | 0.03 | 0.12 | 0.05 | 0.05 | 0.94 | 0.09 | 0    | 0.02 | 0  |
| 0.8  | 0.82 | 0.89 | 1.09 | 1.06 | 1.01 | 0.84 | 0.08 | 0.09 | 0.09 | 0.05 | 0.58 | 0.54 | 0.26 | 0.04 | 0  |
| 0.89 | 0.96 | 0.84 | 0.87 | 1.01 | 1.11 | 0.9  | 0.07 | 0.05 | 0.18 | 0.06 | 0.02 | 0.32 | 0.06 | 0.12 | 1  |
| 1.01 | 1.13 | 0.86 | 0.91 | 1.21 | 1.05 | 1    | 0.07 | 0.11 | 0.04 | 0.14 | 0    | 0.06 | 0.02 | 0.55 | 1  |
| 0.97 | 1    | 1.05 | 0.87 | 1.09 | 1.17 | 1.01 | 0.14 | 0.06 | 0.06 | 0.04 | 0.03 | 0.16 | 0.02 | 0.02 | 1  |
| 0.7  | 0.86 | 0.97 | 1.05 | 1.16 | 1.14 | 0.84 | 0.07 | 0.23 | 0.12 | 0.13 | 0.39 | 0.94 | 0.23 | 0.04 | 0  |
| 0.96 | 1.05 | 1.05 | 1.05 | 1.13 | 1.04 | 1.02 | 0.09 | 0.08 | 0.07 | 0.05 | 0.23 | 0.19 | 0.89 | 0.66 | 0  |
| 1.03 | 0.92 | 1.03 | 0.99 | 0.93 | 1.03 | 0.99 | 0.08 | 0.03 | 0.01 | 0.06 | 0.25 | 0.01 | 0.42 | 0.41 | 0  |
| 1.01 | 0.92 | 1.08 | 1.09 | 0.94 | 1.03 | 1    | 0.06 | 0.05 | 0.04 | 0.08 | 0.01 | 0.03 | 0.18 | 0.64 | -1 |
| 1.02 | 0.9  | 0.96 | 1.1  | 0.87 | 1.09 | 0.96 | 0.02 | 0.02 | 0.04 | 0.06 | 0    | 0    | 0.56 | 0.04 | -1 |
| 0.89 | 0.89 | 0.92 | 1.1  | 0.92 | 1.03 | 0.9  | 0.03 | 0.06 | 0.03 | 0.02 | 0    | 0.04 | 0.02 | 0    | -1 |
| 1.06 | 1.07 | 1.34 | 1.07 | 0.89 | 0.91 | 1.16 | 0.02 | 0.06 | 0.05 | 0.16 | 0    | 0.66 | 0    | 0.06 | -1 |
| 0.94 | 1.03 | 1.03 | 1    | 0.97 | 0.99 | 1    | 0.05 | 0.01 | 0.04 | 0.05 | 0.27 | 0.34 | 0.79 | 0.78 | 0  |
| 0.99 | 0.9  | 1.07 | 1.06 | 0.95 | 1.01 | 0.99 | 0.04 | 0.09 | 0.03 | 0.08 | 0.07 | 0.4  | 0.09 | 0.74 | 0  |
| 1.15 | 0.98 | 0.71 | 1.07 | 1.05 | 0.99 | 0.95 | 0.05 | 0.11 | 0.14 | 0.22 | 0.76 | 0.54 | 0.32 | 0.79 | 0  |

|      |      |      |      |      |      |      |      |      |      |      |      |      |      |      |    |
|------|------|------|------|------|------|------|------|------|------|------|------|------|------|------|----|
| 0.94 | 1.03 | 0.99 | 1.03 | 0.98 | 1.07 | 0.98 | 0.08 | 0.1  | 0.08 | 0.04 | 0.39 | 0.23 | 0.55 | 0.18 | 0  |
| 0.78 | 0.77 | 0.83 | 1.02 | 1.08 | 1.05 | 0.8  | 0.03 | 0.02 | 0.01 | 0.03 | 0.03 | 0.2  | 0.14 | 0    | 1  |
| 0.95 | 0.98 | 1    | 0.84 | 1.2  | 1.09 | 0.98 | 0.07 | 0.03 | 0.05 | 0.03 | 0    | 0.02 | 0    | 0.03 | 1  |
| 0.98 | 0.94 | 0.84 | 1.11 | 1.02 | 1.04 | 0.92 | 0.12 | 0.09 | 0.1  | 0.07 | 0.27 | 0.85 | 0.42 | 0.18 | 0  |
| 0.77 | 0.6  | 0.94 | 1.02 | 0.73 | 0.97 | 0.77 | 0.13 | 0.11 | 0.16 | 0.17 | 0.01 | 0.06 | 0.65 | 0.2  | -1 |
| 0.62 | 0.71 | 0.93 | 0.9  | 0.84 | 1.01 | 0.76 | 0.13 | 0.14 | 0.24 | 0.16 | 0.59 | 0.29 | 0.44 | 0.2  | 0  |
| 0.92 | 0.89 | 0.89 | 1.12 | 1.19 | 0.66 | 0.9  | 0.04 | 0.07 | 0.19 | 0.02 | 0.14 | 0    | 0    | 0.1  | 0  |
| 0.78 | 0.86 | 0.81 | 0.95 | 1.2  | 1.03 | 0.82 | 0.07 | 0.04 | 0.02 | 0.04 | 0    | 0    | 0.13 | 0    | 1  |
| 1.15 | 1.53 | 1.28 | 0.94 | 1.17 | 1.38 | 1.32 | 0.16 | 0.1  | 0.19 | 0.19 | 0.05 | 0.12 | 0.02 | 0.7  | 0  |
| 0.73 | 1.07 | 0.98 | 1.08 | 0.97 | 1    | 0.93 | 0.06 | 0.13 | 0.04 | 0.17 | 0.15 | 0.72 | 0.07 | 0.53 | 0  |
| 0.93 | 1.03 | 0.9  | 1.11 | 0.84 | 1.39 | 0.96 | 0.05 | 0.1  | 0.54 | 0.07 | 0    | 0.09 | 0.32 | 0.24 | -1 |
| 1.09 | 1.07 | 1.01 | 1.11 | 0.91 | 1    | 1.05 | 0.04 | 0.1  | 0.06 | 0.04 | 0.01 | 0.26 | 0.03 | 0.25 | -1 |
| 1.33 | 1.08 | 1.12 | 1.34 | 1.28 | 1.11 | 1.18 | 0.07 | 0.2  | 0.03 | 0.13 | 0.61 | 0.21 | 0    | 0.45 | 0  |
| 1.11 | 0.89 | 0.89 | 1.17 | 0.8  | 0.99 | 0.96 | 0.06 | 0.01 | 0.14 | 0.13 | 0    | 0.04 | 0.07 | 0.8  | -1 |
| 0.97 | 0.85 | 0.61 | 1.02 | 0.87 | 1.04 | 0.81 | 0.26 | 0.21 | 0.14 | 0.18 | 0.39 | 0.28 | 0.91 | 0.15 | 0  |
| 1.12 | 1.06 | 1.08 | 1.13 | 1.06 | 1.12 | 1.09 | 0.12 | 0.09 | 0.19 | 0.03 | 0.41 | 0.58 | 0.99 | 0.76 | 0  |
| 0.88 | 0.88 | 0.91 | 1.06 | 0.99 | 0.95 | 0.89 | 0.02 | 0.06 | 0.03 | 0.01 | 0.05 | 0.3  | 0    | 0.05 | 0  |
| 0.8  | 0.75 | 0.84 | 1.16 | 0.74 | 0.93 | 0.79 | 0.07 | 0.03 | 0.11 | 0.04 | 0    | 0.02 | 0.02 | 0.11 | -1 |
| 0.78 | 0.78 | 0.84 | 1.23 | 0.73 | 0.97 | 0.8  | 0.09 | 0.03 | 0.04 | 0.03 | 0    | 0    | 0.01 | 0    | -1 |
| 1.05 | 0.91 | 0.85 | 1.2  | 0.95 | 0.85 | 0.94 | 0.1  | 0.04 | 0.02 | 0.1  | 0    | 0.01 | 0    | 0.2  | -1 |
| 0.89 | 0.94 | 0.78 | 1.13 | 0.89 | 0.96 | 0.87 | 0.11 | 0.09 | 0.13 | 0.09 | 0.01 | 0.45 | 0.12 | 0.38 | -1 |
| 0.83 | 0.68 | 0.73 | 1.16 | 0.94 | 1.02 | 0.74 | 0.08 | 0.11 | 0.06 | 0.07 | 0.02 | 0.32 | 0.07 | 0.01 | -1 |
| 0.91 | 0.88 | 0.93 | 1.09 | 0.86 | 0.89 | 0.9  | 0.11 | 0.1  | 0.01 | 0.03 | 0.02 | 0.59 | 0.03 | 0.5  | -1 |
| 0.73 | 0.94 | 0.72 | 1.06 | 0.85 | 0.9  | 0.79 | 0.09 | 0.13 | 0.17 | 0.12 | 0.04 | 0.71 | 0.15 | 0.44 | -1 |
| 1.06 | 0.97 | 1.06 | 1.17 | 1.04 | 1.09 | 1.03 | 0.1  | 0.13 | 0.12 | 0.05 | 0.18 | 0.67 | 0.36 | 0.49 | 0  |
| 0.82 | 0.93 | 1.12 | 0.96 | 0.81 | 0.86 | 0.96 | 0.08 | 0.1  | 0.09 | 0.15 | 0.05 | 0.49 | 0.19 | 0.41 | 0  |
| 0.96 | 0.98 | 1.1  | 1.06 | 0.86 | 1.01 | 1.01 | 0.1  | 0.07 | 0.08 | 0.08 | 0.02 | 0.04 | 0.51 | 0.92 | -1 |
| 0.97 | 0.98 | 1.1  | 1.03 | 0.78 | 0.99 | 1.02 | 0.12 | 0.15 | 0.11 | 0.08 | 0.04 | 0.1  | 0.68 | 0.75 | -1 |
| 1.13 | 0.98 | 0.91 | 1.15 | 0.87 | 0.94 | 1.01 | 0.07 | 0.08 | 0.11 | 0.11 | 0    | 0.38 | 0.03 | 0.52 | -1 |
| 0.93 | 0.84 | 1.02 | 1.12 | 0.82 | 0.86 | 0.93 | 0.11 | 0.07 | 0.08 | 0.09 | 0    | 0.58 | 0.02 | 0.34 | -1 |
| 2.16 | 0.91 | 1.09 | 1.52 | 0.97 | 1.18 | 1.39 | 0.23 | 0.22 | 0.24 | 0.68 | 0.01 | 0.26 | 0.11 | 0.65 | -1 |
| 0.51 | 0.44 | 0.71 | 1.45 | 0.52 | 1.13 | 0.55 | 0.17 | 0.23 | 0.16 | 0.14 | 0    | 0.01 | 0.05 | 0.01 | -1 |
| 1.04 | 0.96 | 0.99 | 1.17 | 0.97 | 0.93 | 1    | 0.07 | 0.07 | 0.09 | 0.04 | 0.01 | 0.49 | 0.01 | 0.29 | -1 |
| 0.7  | 0.79 | 0.89 | 1.25 | 0.92 | 1.14 | 0.8  | 0.17 | 0.1  | 0.02 | 0.09 | 0.02 | 0.01 | 0.35 | 0    | -1 |
| 1.11 | 1.14 | 1.02 | 1.18 | 0.92 | 0.94 | 1.09 | 0.07 | 0.02 | 0.06 | 0.06 | 0    | 0.62 | 0    | 0.04 | -1 |
| 0.86 | 0.82 | 1.03 | 1.17 | 1.06 | 0.64 | 0.9  | 0.18 | 0.62 | 0.37 | 0.11 | 0.74 | 0.36 | 0.05 | 0.31 | 0  |
| 0.86 | 1    | 0.96 | 1.12 | 0.97 | 0.98 | 0.94 | 0.1  | 0.11 | 0.07 | 0.07 | 0.08 | 0.81 | 0.11 | 0.49 | 0  |
| 0.82 | 0.86 | 0.94 | 1.25 | 0.75 | 1.03 | 0.87 | 0.1  | 0.06 | 0.04 | 0.06 | 0    | 0    | 0.01 | 0.03 | -1 |
| 0.93 | 0.97 | 1.09 | 1.19 | 1    | 0.97 | 1    | 0.13 | 0.06 | 0.07 | 0.08 | 0.04 | 0.48 | 0.04 | 0.67 | -1 |
| 0.9  | 1.04 | 0.99 | 1.2  | 1.01 | 0.95 | 0.98 | 0.12 | 0.05 | 0.06 | 0.07 | 0.02 | 0.23 | 0.02 | 0.71 | -1 |
| 0.55 | 0.65 | 0.54 | 1.58 | 0.72 | 0.83 | 0.58 | 0.36 | 0.16 | 0.07 | 0.06 | 0    | 0.33 | 0.02 | 0.01 | -1 |
| 0.88 | 0.98 | 0.89 | 1.23 | 0.94 | 1.18 | 0.92 | 0.12 | 0.18 | 0.07 | 0.05 | 0.04 | 0.08 | 0.56 | 0.01 | -1 |
| 0.71 | 0.94 | 0.84 | 1.17 | 0.89 | 1.2  | 0.83 | 0.13 | 0.06 | 0.18 | 0.11 | 0.01 | 0.02 | 0.87 | 0.04 | -1 |
| 0.96 | 1.01 | 1.01 | 1.11 | 0.95 | 0.96 | 1    | 0.07 | 0.12 | 0.13 | 0.03 | 0.06 | 0.95 | 0.09 | 0.61 | 0  |
| 1.01 | 1.06 | 1.01 | 1.19 | 1.01 | 1.06 | 1.03 | 0.05 | 0.12 | 0.14 | 0.03 | 0.03 | 0.67 | 0.14 | 0.74 | -1 |
| 0.93 | 1.11 | 0.81 | 1.31 | 1.18 | 0.99 | 0.95 | 0.23 | 0.16 | 0.11 | 0.15 | 0.39 | 0.14 | 0.08 | 0.76 | 0  |
| 0.51 | 0.7  | 0.71 | 1.17 | 0.89 | 0.83 | 0.64 | 0.04 | 0.09 | 0.09 | 0.11 | 0    | 0.45 | 0    | 0.07 | -1 |
| 0.54 | 0.77 | 0.3  | 1.23 | 1.26 | 0.73 | 0.53 | 0.06 | 0.14 | 0.45 | 0.23 | 0.68 | 0.07 | 0.07 | 0.53 | 0  |
| 0.72 | 0.62 | 0.68 | 1.43 | 1.05 | 0.86 | 0.67 | 0.27 | 0.09 | 0.1  | 0.05 | 0.04 | 0.05 | 0.02 | 0.04 | -1 |
| 0.94 | 0.83 | 0.85 | 1.2  | 1.06 | 0.95 | 0.87 | 0.27 | 0.07 | 0.01 | 0.06 | 0.34 | 0.04 | 0.17 | 0.09 | 0  |

|      |      |      |      |      |      |      |      |      |      |      |      |      |      |      |    |
|------|------|------|------|------|------|------|------|------|------|------|------|------|------|------|----|
| 0.84 | 0.79 | 0.87 | 1.03 | 0.98 | 1.08 | 0.83 | 0.06 | 0.06 | 0.06 | 0.04 | 0.34 | 0.07 | 0.26 | 0    | 0  |
| 0.76 | 0.68 | 0.81 | 1.3  | 1.15 | 0.95 | 0.75 | 0.09 | 0.03 | 0.03 | 0.07 | 0.02 | 0    | 0    | 0.01 | -1 |
| 0.96 | 1.17 | 0.8  | 1.38 | 1.05 | 0.86 | 0.98 | 0.12 | 0.19 | 0.15 | 0.19 | 0.02 | 0.22 | 0    | 0.46 | -1 |
| 1.03 | 0.86 | 0.87 | 1.38 | 1.11 | 0.98 | 0.92 | 0.22 | 0.11 | 0.03 | 0.1  | 0.08 | 0.12 | 0.03 | 0.33 | 0  |
| 0.91 | 0.81 | 0.88 | 1.2  | 1.11 | 1.07 | 0.87 | 0.1  | 0.03 | 0    | 0.05 | 0.14 | 0.06 | 0.07 | 0    | 0  |
| 0.77 | 0.69 | 0.72 | 1.37 | 1.18 | 0.69 | 0.73 | 0.1  | 0.17 | 0.23 | 0.04 | 0.11 | 0.02 | 0    | 0.79 | 0  |
| 0.63 | 0.73 | 0.69 | 1.21 | 1.12 | 0.89 | 0.68 | 0.21 | 0.18 | 0.04 | 0.05 | 0.57 | 0.08 | 0.05 | 0.01 | 0  |
| 0.78 | 0.81 | 0.86 | 1.38 | 1.04 | 0.84 | 0.82 | 0.13 | 0.08 | 0.03 | 0.04 | 0    | 0.01 | 0    | 0.59 | -1 |
| 0.95 | 0.98 | 0.82 | 0.9  | 1.01 | 1.02 | 0.92 | 0.1  | 0.01 | 0.04 | 0.08 | 0.07 | 0.76 | 0.12 | 0.14 | 0  |
| 0.82 | 0.67 | 0.8  | 1.62 | 0.87 | 1.04 | 0.76 | 0.14 | 0.08 | 0.03 | 0.08 | 0    | 0.02 | 0    | 0.01 | -1 |
| 0.68 | 0.65 | 0.75 | 1.26 | 1.09 | 0.85 | 0.69 | 0.15 | 0.15 | 0.15 | 0.05 | 0.16 | 0.09 | 0.02 | 0.17 | 0  |
| 0.89 | 0.82 | 0.72 | 1.36 | 1.05 | 0.98 | 0.81 | 0.19 | 0.04 | 0.1  | 0.09 | 0.02 | 0.22 | 0.02 | 0.09 | -1 |
| 0.94 | 0.96 | 0.77 | 1.14 | 0.9  | 0.84 | 0.89 | 0.14 | 0.07 | 0.1  | 0.1  | 0.03 | 0.35 | 0.03 | 0.56 | -1 |
| 0.78 | 0.74 | 0.89 | 1.36 | 1.04 | 0.97 | 0.81 | 0.14 | 0.06 | 0.01 | 0.08 | 0.01 | 0.1  | 0.01 | 0.02 | -1 |
| 0.79 | 0.79 | 0.96 | 1.31 | 1.07 | 0.92 | 0.85 | 0.26 | 0.05 | 0.01 | 0.1  | 0.11 | 0    | 0.05 | 0.27 | 0  |
| 0.71 | 0.69 | 0.86 | 1.59 | 1.08 | 1.07 | 0.75 | 0.19 | 0.04 | 0.12 | 0.1  | 0    | 0.79 | 0.01 | 0.02 | -1 |
| 0.89 | 0.97 | 1    | 0.96 | 1.09 | 1.12 | 0.95 | 0.03 | 0.07 | 0.06 | 0.06 | 0.02 | 0.54 | 0.01 | 0.02 | 1  |
| 1    | 1.03 | 1    | 1.06 | 1.09 | 1.05 | 1.01 | 0.06 | 0.06 | 0.06 | 0.02 | 0.51 | 0.37 | 0.77 | 0.33 | 0  |
| 1.01 | 0.95 | 0.99 | 0.93 | 1.03 | 1.03 | 0.98 | 0.06 | 0.03 | 0.13 | 0.03 | 0.03 | 0.97 | 0.22 | 0.59 | 1  |
| 1.04 | 0.96 | 1.05 | 1.03 | 1.11 | 1.06 | 1.01 | 0.07 | 0.06 | 0.11 | 0.05 | 0.13 | 0.53 | 0.6  | 0.53 | 0  |
| 0.93 | 0.89 | 0.9  | 1.12 | 1.01 | 1    | 0.91 | 0.09 | 0.02 | 0.07 | 0.02 | 0.04 | 0.82 | 0.1  | 0.1  | -1 |
| 1.09 | 0.98 | 1.03 | 1.09 | 1.18 | 1.14 | 1.04 | 0.1  | 0.05 | 0.13 | 0.05 | 0.18 | 0.64 | 0.58 | 0.25 | 0  |
| 1    | 0.93 | 1.03 | 0.93 | 1.03 | 1.11 | 0.99 | 0.12 | 0.11 | 0.33 | 0.05 | 0.29 | 0.66 | 0.36 | 0.56 | 0  |
| 1.06 | 0.94 | 1.02 | 0.97 | 1.13 | 1.14 | 1.01 | 0.06 | 0.11 | 0.06 | 0.06 | 0.04 | 0.87 | 0.01 | 0.06 | 1  |
| 1.08 | 0.98 | 1.02 | 0.91 | 1.12 | 1.17 | 1.03 | 0.08 | 0.09 | 0.01 | 0.05 | 0.01 | 0.43 | 0    | 0.01 | 1  |
| 0.75 | 1.07 | 0.96 | 1.03 | 1.12 | 1.06 | 0.93 | 0.06 | 0.1  | 0.08 | 0.16 | 0.19 | 0.48 | 0.56 | 0.26 | 0  |
| 0.99 | 0.89 | 0.8  | 0.95 | 1.04 | 1.02 | 0.89 | 0.1  | 0.12 | 0.07 | 0.09 | 0.29 | 0.82 | 0.34 | 0.12 | 0  |
| 0.93 | 0.8  | 0.97 | 1    | 1.07 | 1.09 | 0.9  | 0.01 | 0.06 | 0.01 | 0.08 | 0.11 | 0.54 | 0    | 0.02 | 0  |
| 0.82 | 0.89 | 0.78 | 1.07 | 1.16 | 1.03 | 0.83 | 0.12 | 0.14 | 0.1  | 0.06 | 0.34 | 0.21 | 0.62 | 0.04 | 0  |
| 0.84 | 0.85 | 0.76 | 1.08 | 1.09 | 1.03 | 0.82 | 0.03 | 0.07 | 0.05 | 0.05 | 0.94 | 0.29 | 0.13 | 0.01 | 0  |
| 0.87 | 0.88 | 1.04 | 1.1  | 1.04 | 0.9  | 0.93 | 0.05 | 0.03 | 0.03 | 0.09 | 0.11 | 0    | 0    | 0.64 | 0  |
| 0.83 | 0.8  | 0.76 | 1.45 | 1.28 | 0.86 | 0.79 | 0.29 | 0.06 | 0.11 | 0.03 | 0.3  | 0    | 0.02 | 0.36 | 0  |
| 0.93 | 0.8  | 0.74 | 1.18 | 1.16 | 1.05 | 0.83 | 0.05 | 0.03 | 0.05 | 0.09 | 0.5  | 0.01 | 0.02 | 0.02 | 0  |
| 1.16 | 1.11 | 1.15 | 0.97 | 0.87 | 0.9  | 1.14 | 0.1  | 0.11 | 0.09 | 0.03 | 0.25 | 0.7  | 0.43 | 0.01 | 0  |
| 1.2  | 1.2  | 1    | 1.04 | 0.85 | 1.02 | 1.14 | 0.05 | 0.17 | 0.19 | 0.11 | 0.08 | 0.26 | 0.89 | 0.43 | 0  |
| 0.72 | 0.92 | 1    | 0.88 | 0.87 | 0.91 | 0.88 | 0.07 | 0.11 | 0.08 | 0.14 | 0.91 | 0.64 | 0.6  | 0.73 | 0  |
| 1.22 | 1.23 | 0.94 | 1.32 | 1.39 | 1.24 | 1.13 | 0.22 | 0.38 | 0.09 | 0.16 | 0.78 | 0.56 | 0.58 | 0.37 | 0  |
| 0.94 | 0.8  | 0.96 | 1.16 | 1.08 | 1.24 | 0.9  | 0.25 | 0.23 | 0.23 | 0.09 | 0.63 | 0.39 | 0.69 | 0.08 | 0  |
| 0.97 | 0.86 | 0.93 | 1.02 | 1.1  | 1.04 | 0.92 | 0.08 | 0.06 | 0.07 | 0.06 | 0.18 | 0.27 | 0.79 | 0.09 | 0  |
| 1.04 | 0.9  | 2.1  | 1.07 | 1.58 | 0.76 | 1.35 | 0.35 | 0.99 | 0.29 | 0.66 | 0.37 | 0.23 | 0.27 | 0.23 | 0  |
| 0.93 | 0.9  | 0.95 | 0.87 | 1.14 | 1.1  | 0.93 | 0.03 | 0.03 | 0.01 | 0.02 | 0    | 0.15 | 0    | 0    | 1  |
| 0.95 | 0.9  | 0.93 | 0.88 | 1.15 | 1.09 | 0.93 | 0.01 | 0.03 | 0.02 | 0.02 | 0    | 0.02 | 0    | 0    | 1  |
| 0.94 | 1.03 | 0.92 | 0.91 | 1.22 | 1.01 | 0.96 | 0.1  | 0.02 | 0.09 | 0.06 | 0    | 0    | 0.24 | 0.49 | 1  |
| 0.87 | 0.84 | 0.85 | 1    | 1.08 | 1.03 | 0.85 | 0.03 | 0.05 | 0.03 | 0.02 | 0.03 | 0.18 | 0.32 | 0    | 1  |
| 0.88 | 0.73 | 0.87 | 0.96 | 1.14 | 1.06 | 0.83 | 0.06 | 0.08 | 0.03 | 0.09 | 0.01 | 0.17 | 0.06 | 0.01 | 1  |
| 0.88 | 0.87 | 0.69 | 1.22 | 1.42 | 0.92 | 0.81 | 0.06 | 0.03 | 0.16 | 0.11 | 0    | 0    | 0.02 | 0.38 | 1  |
| 0.69 | 0.66 | 0.6  | 1.25 | 1.48 | 0.86 | 0.65 | 0.08 | 0.06 | 0.04 | 0.05 | 0    | 0    | 0    | 0    | 1  |
| 0.97 | 0.93 | 0.86 | 0.86 | 1.08 | 1.07 | 0.92 | 0.04 | 0.04 | 0.01 | 0.06 | 0    | 0.8  | 0    | 0.01 | 1  |
| 0.87 | 0.85 | 0.93 | 0.82 | 1.07 | 1.11 | 0.88 | 0.07 | 0.06 | 0.1  | 0.04 | 0    | 0.56 | 0.01 | 0.02 | 1  |
| 0.93 | 0.93 | 0.96 | 0.9  | 1.09 | 1.07 | 0.94 | 0.02 | 0.02 | 0.01 | 0.01 | 0    | 0.3  | 0    | 0    | 1  |

|      |      |      |      |      |      |      |      |      |      |      |      |      |      |      |    |
|------|------|------|------|------|------|------|------|------|------|------|------|------|------|------|----|
| 1.12 | 0.97 | 1.21 | 0.99 | 0.97 | 0.91 | 1.1  | 0.05 | 0.07 | 0.09 | 0.12 | 0.65 | 0.31 | 0.17 | 0.09 | 0  |
| 0.96 | 0.94 | 1.02 | 1.12 | 1.2  | 1.08 | 0.98 | 0.05 | 0.08 | 0.08 | 0.04 | 0.12 | 0.09 | 0.39 | 0.14 | 0  |
| 0.91 | 0.86 | 0.89 | 0.93 | 1.1  | 1.12 | 0.89 | 0.11 | 0.08 | 0.12 | 0.02 | 0.05 | 0.73 | 0.07 | 0.03 | 1  |
| 0.59 | 0.66 | 0.9  | 1.05 | 1.3  | 1.07 | 0.72 | 0.47 | 0.16 | 0.11 | 0.17 | 0.34 | 0.08 | 0.94 | 0.04 | 0  |
| 1.43 | 1.57 | 0.85 | 1.56 | 1.34 | 0.57 | 1.28 | 0.27 | 0.28 | 0.16 | 0.38 | 0.3  | 0.01 | 0    | 0.04 | 0  |
| 1.34 | 1.48 | 1.67 | 1.18 | 1.47 | 0.76 | 1.5  | 0.1  | 0.2  | 0.14 | 0.17 | 0.05 | 0    | 0.01 | 0    | 1  |
| 1.12 | 1.16 | 1.14 | 0.92 | 1.29 | 1.01 | 1.14 | 0.1  | 0.12 | 0.22 | 0.02 | 0    | 0.08 | 0.49 | 0.36 | 1  |
| 0.82 | 0.84 | 1.08 | 0.95 | 1.1  | 1.04 | 0.91 | 0.04 | 0.08 | 0.16 | 0.14 | 0.01 | 0.59 | 0.31 | 0.36 | 1  |
| 0.43 | 0.5  | 0.37 | 1.81 | 1.18 | 0.58 | 0.44 | 0.26 | 0.17 | 0.11 | 0.07 | 0.01 | 0    | 0    | 0.11 | -1 |
| 1.07 | 1.15 | 1.21 | 1.32 | 1.25 | 0.87 | 1.14 | 0.22 | 0.15 | 0.1  | 0.07 | 0.63 | 0.01 | 0.02 | 0.02 | 0  |
| 1.45 | 1.31 | 1.6  | 0.97 | 0.86 | 0.99 | 1.45 | 0.06 | 0.09 | 0.06 | 0.14 | 0.1  | 0.09 | 0.66 | 0.01 | 0  |
| 0.82 | 0.7  | 0.79 | 1.23 | 1.35 | 1.25 | 0.77 | 0.41 | 0.56 | 0.28 | 0.06 | 0.74 | 0.78 | 0.96 | 0.04 | 0  |
| 0.85 | 0.8  | 0.81 | 0.94 | 1.1  | 1.05 | 0.82 | 0.04 | 0.03 | 0.06 | 0.03 | 0    | 0.23 | 0.03 | 0    | 1  |
| 0.93 | 0.88 | 1.22 | 1.2  | 1.23 | 1.07 | 1.01 | 0.35 | 0.09 | 0.07 | 0.18 | 0.9  | 0.05 | 0.55 | 0.62 | 0  |
| 1.14 | 1.29 | 0.95 | 1.03 | 0.91 | 1.16 | 1.13 | 0.2  | 0.12 | 0.21 | 0.17 | 0.34 | 0.1  | 0.45 | 0.85 | 0  |
| 1    | 0.95 | 0.94 | 0.9  | 0.9  | 1.08 | 0.97 | 0.04 | 0.08 | 0.03 | 0.04 | 0.94 | 0.01 | 0    | 0.01 | 0  |
| 1.2  | 1.39 | 0.94 | 1.13 | 1.07 | 1.02 | 1.17 | 0.08 | 0.1  | 0.05 | 0.22 | 0.4  | 0.48 | 0.09 | 0.31 | 0  |
| 1.13 | 1.13 | 1.06 | 1.16 | 0.87 | 0.98 | 1.11 | 0.05 | 0.13 | 0.04 | 0.04 | 0.01 | 0.24 | 0    | 0.02 | -1 |
| 1.02 | 1.03 | 0.96 | 0.78 | 1.05 | 1.1  | 1    | 0.03 | 0.04 | 0.07 | 0.04 | 0    | 0.23 | 0    | 0.09 | 1  |
| 0.94 | 0.89 | 0.89 | 0.89 | 1.07 | 1.04 | 0.9  | 0.05 | 0.07 | 0.02 | 0.03 | 0.01 | 0.52 | 0    | 0    | 1  |
| 0.94 | 0.87 | 0.86 | 1.02 | 1.09 | 1.1  | 0.89 | 0.07 | 0.04 | 0.1  | 0.04 | 0.14 | 0.81 | 0.26 | 0.02 | 0  |
| 0.79 | 0.76 | 0.73 | 1.22 | 1    | 0.96 | 0.76 | 0.05 | 0.06 | 0.07 | 0.03 | 0    | 0.48 | 0    | 0.01 | -1 |
| 0.84 | 0.85 | 0.86 | 1.01 | 1.16 | 1.11 | 0.85 | 0.06 | 0.06 | 0.02 | 0.01 | 0.01 | 0.24 | 0.04 | 0    | 1  |
| 0.77 | 0.84 | 0.81 | 1.09 | 1.15 | 1.07 | 0.81 | 0.06 | 0.15 | 0.16 | 0.04 | 0.47 | 0.51 | 0.82 | 0.05 | 0  |
| 0.84 | 0.9  | 0.88 | 0.94 | 0.91 | 1.13 | 0.88 | 0.02 | 0.07 | 0.07 | 0.03 | 0.35 | 0.01 | 0    | 0.01 | 0  |
| 1.03 | 0.93 | 1.03 | 0.97 | 0.98 | 1.15 | 1    | 0.03 | 0.02 | 0.07 | 0.05 | 0.72 | 0    | 0.01 | 0.04 | 0  |
| 2.1  | 1.93 | 2.13 | 1.07 | 0.68 | 0.66 | 2.05 | 0.09 | 0.07 | 0.19 | 0.11 | 0    | 0.86 | 0.01 | 0    | -1 |
| 1.01 | 0.96 | 0.96 | 0.95 | 1.12 | 1.1  | 0.98 | 0.07 | 0.04 | 0.08 | 0.03 | 0.01 | 0.61 | 0.05 | 0.07 | 1  |
| 1.02 | 0.93 | 0.98 | 0.92 | 1.08 | 1.12 | 0.98 | 0.07 | 0.05 | 0.08 | 0.05 | 0.01 | 0.52 | 0.02 | 0.06 | 1  |
| 0.97 | 0.97 | 0.9  | 0.95 | 1.08 | 1.09 | 0.95 | 0.06 | 0.11 | 0.03 | 0.04 | 0.07 | 0.9  | 0.01 | 0.01 | 0  |
| 0.82 | 0.89 | 0.86 | 0.87 | 0.98 | 1.03 | 0.86 | 0.06 | 0.07 | 0.09 | 0.03 | 0.05 | 0.45 | 0.03 | 0.04 | 1  |
| 0.68 | 0.9  | 0.71 | 1.08 | 1.15 | 1.02 | 0.76 | 0.09 | 0.09 | 0.03 | 0.12 | 0.33 | 0.08 | 0.33 | 0.02 | 0  |
| 1.17 | 1.18 | 1.1  | 1.19 | 0.7  | 0.81 | 1.15 | 0.14 | 0.06 | 0.03 | 0.04 | 0    | 0.02 | 0.01 | 0    | -1 |
| 0.95 | 1.01 | 0.89 | 1.07 | 0.97 | 1.15 | 0.95 | 0.03 | 0.09 | 0.06 | 0.06 | 0.08 | 0.03 | 0.07 | 0.02 | 0  |
| 1.18 | 1.47 | 2.06 | 1.19 | 0.87 | 0.88 | 1.57 | 0.16 | 0.05 | 0.18 | 0.45 | 0.01 | 0.94 | 0.06 | 0.07 | -1 |
| 1.08 | 1.08 | 1.33 | 1.25 | 0.73 | 0.81 | 1.16 | 0.14 | 0.08 | 0.09 | 0.14 | 0    | 0.25 | 0.01 | 0.02 | -1 |
| 0.91 | 1.02 | 0.9  | 1.22 | 0.83 | 0.85 | 0.94 | 0.35 | 0.08 | 0.24 | 0.07 | 0.07 | 0.88 | 0.17 | 0.55 | 0  |
| 0.95 | 0.88 | 1.06 | 0.99 | 1.09 | 1.11 | 0.96 | 0.09 | 0.05 | 0.06 | 0.09 | 0.1  | 0.53 | 0.09 | 0.08 | 0  |
| 0.8  | 0.93 | 0.67 | 0.98 | 1.03 | 0.97 | 0.8  | 0.08 | 0.1  | 0.11 | 0.13 | 0.45 | 0.5  | 0.95 | 0.16 | 0  |
| 0.81 | 0.74 | 0.93 | 1    | 1.32 | 1.17 | 0.83 | 0.1  | 0.23 | 0.08 | 0.1  | 0.04 | 0.34 | 0.06 | 0.01 | 1  |
| 0.87 | 0.83 | 0.88 | 1.02 | 1.28 | 1.16 | 0.86 | 0.06 | 0.06 | 0.03 | 0.03 | 0    | 0.02 | 0.01 | 0    | 1  |
| 1.25 | 1.28 | 1.3  | 0.95 | 0.9  | 1.06 | 1.28 | 0.11 | 0.04 | 0.07 | 0.03 | 0.46 | 0.01 | 0.23 | 0.01 | 0  |
| 1.17 | 1.12 | 1.3  | 0.99 | 0.86 | 1.09 | 1.19 | 0.08 | 0.07 | 0.05 | 0.1  | 0.07 | 0.01 | 0.13 | 0.16 | 0  |
| 0.96 | 0.9  | 1.02 | 0.99 | 1.18 | 1.14 | 0.96 | 0.1  | 0.04 | 0.04 | 0.06 | 0.01 | 0.35 | 0.06 | 0.01 | 1  |
| 1.41 | 1.28 | 2.05 | 0.94 | 0.79 | 0.56 | 1.58 | 0.13 | 0.06 | 0.29 | 0.41 | 0.1  | 0.17 | 0.07 | 0.03 | 0  |
| 1.31 | 1.34 | 1.6  | 0.99 | 0.96 | 1.11 | 1.42 | 0.1  | 0.09 | 0.21 | 0.16 | 0.67 | 0.25 | 0.36 | 0.11 | 0  |
| 0.97 | 0.92 | 1.04 | 0.93 | 1.05 | 0.97 | 0.98 | 0.1  | 0.12 | 0.04 | 0.06 | 0.18 | 0.32 | 0.59 | 0.83 | 0  |
| 0.74 | 0.76 | 0.78 | 1.11 | 1.14 | 1.01 | 0.76 | 0.05 | 0.04 | 0.02 | 0.02 | 0.4  | 0.01 | 0.03 | 0    | 0  |
| 1.17 | 1.16 | 1.49 | 1.03 | 0.94 | 0.86 | 1.27 | 0.05 | 0.15 | 0.11 | 0.19 | 0.3  | 0.51 | 0.05 | 0.03 | 0  |
| 1.35 | 1.34 | 1.06 | 0.94 | 0.86 | 0.91 | 1.25 | 0.12 | 0.08 | 0.02 | 0.16 | 0.3  | 0.36 | 0.66 | 0.02 | 0  |

|      |      |      |      |      |      |      |      |      |      |      |      |      |      |      |    |
|------|------|------|------|------|------|------|------|------|------|------|------|------|------|------|----|
| 0.75 | 0.98 | 0.9  | 1.15 | 0.87 | 0.96 | 0.88 | 0.11 | 0.07 | 0.16 | 0.12 | 0.01 | 0.34 | 0.12 | 0.53 | -1 |
| 0.88 | 0.93 | 0.91 | 0.88 | 1.05 | 1.07 | 0.91 | 0.04 | 0.04 | 0.02 | 0.03 | 0    | 0.49 | 0    | 0    | 1  |
| 0.76 | 0.83 | 0.92 | 0.98 | 1.1  | 1.02 | 0.83 | 0.04 | 0.05 | 0.07 | 0.08 | 0.01 | 0.13 | 0.35 | 0.04 | 1  |
| 0.85 | 0.8  | 0.88 | 1    | 1.22 | 1.16 | 0.84 | 0.04 | 0.09 | 0.05 | 0.04 | 0    | 0.38 | 0.01 | 0    | 1  |
| 0.83 | 1.04 | 1.19 | 0.82 | 1.26 | 1    | 1.02 | 0.12 | 0.1  | 0.09 | 0.18 | 0    | 0.02 | 0.09 | 0.85 | 1  |
| 1.15 | 1.15 | 1.12 | 1.13 | 0.85 | 0.77 | 1.14 | 0.1  | 0.09 | 0.05 | 0.02 | 0.01 | 0.18 | 0    | 0    | -1 |
| 1.16 | 1.14 | 1.3  | 1.08 | 0.83 | 0.84 | 1.2  | 0.02 | 0.03 | 0.03 | 0.09 | 0    | 0.44 | 0    | 0    | -1 |
| 1.09 | 1.01 | 0.72 | 1.13 | 0.89 | 0.66 | 0.94 | 0.13 | 0.07 | 0.17 | 0.2  | 0.02 | 0.05 | 0.01 | 0.13 | -1 |
| 1.22 | 1.17 | 1.22 | 1.04 | 0.92 | 0.9  | 1.2  | 0.03 | 0.03 | 0    | 0.03 | 0    | 0.31 | 0    | 0    | -1 |
| 1.05 | 1.06 | 1.23 | 0.99 | 0.92 | 0.9  | 1.11 | 0.03 | 0.08 | 0.03 | 0.1  | 0.15 | 0.75 | 0.01 | 0.02 | 0  |
| 1.42 | 0.96 | 0.81 | 0.82 | 1.06 | 0.93 | 1.06 | 0.15 | 0.05 | 0.12 | 0.32 | 0.02 | 0.11 | 0.34 | 0.54 | 1  |
| 1.03 | 1.08 | 0.99 | 0.81 | 1.06 | 0.94 | 1.03 | 0.05 | 0.19 | 0.12 | 0.05 | 0.05 | 0.41 | 0.11 | 0.3  | 1  |
| 1.03 | 1    | 1.11 | 0.84 | 1.06 | 1.11 | 1.04 | 0.02 | 0.03 | 0.05 | 0.06 | 0    | 0.19 | 0    | 0.21 | 1  |
| 0.86 | 0.72 | 0.92 | 0.77 | 1.21 | 0.89 | 0.83 | 0.36 | 0.13 | 0.42 | 0.1  | 0.06 | 0.2  | 0.69 | 0.83 | 0  |
| 1.18 | 0.89 | 1.36 | 1.25 | 1.08 | 1.23 | 1.15 | 0.32 | 0.17 | 0.09 | 0.24 | 0.4  | 0.22 | 0.95 | 0.59 | 0  |
| 0.76 | 0.91 | 1    | 0.77 | 1.06 | 1    | 0.89 | 0.12 | 0.11 | 0.19 | 0.12 | 0.01 | 0.64 | 0.1  | 0.44 | 1  |
| 0.9  | 0.82 | 1.02 | 0.98 | 1.12 | 1.05 | 0.91 | 0.1  | 0.04 | 0.03 | 0.1  | 0.04 | 0.06 | 0.33 | 0.09 | 1  |
| 0.96 | 0.96 | 0.89 | 0.75 | 1.11 | 1.09 | 0.94 | 0.03 | 0.02 | 0.08 | 0.04 | 0    | 0.68 | 0    | 0.04 | 1  |
| 0.8  | 0.82 | 0.92 | 0.98 | 1.06 | 1    | 0.84 | 0.02 | 0.03 | 0.05 | 0.06 | 0    | 0.11 | 0.6  | 0.04 | 1  |
| 0.93 | 0.92 | 0.88 | 0.88 | 1.06 | 1.09 | 0.91 | 0.14 | 0.06 | 0.1  | 0.03 | 0.06 | 0.55 | 0.07 | 0.04 | 0  |
| 0.9  | 0.98 | 0.86 | 0.85 | 1.14 | 1.1  | 0.91 | 0.09 | 0.07 | 0.02 | 0.06 | 0    | 0.47 | 0    | 0.01 | 1  |
| 0.8  | 0.67 | 1.19 | 1.22 | 1.22 | 1.15 | 0.88 | 0.33 | 0.25 | 0.12 | 0.27 | 0.99 | 0.67 | 0.73 | 0.2  | 0  |
| 1.06 | 1.02 | 0.85 | 0.94 | 1.14 | 0.97 | 0.98 | 0.09 | 0.08 | 0.17 | 0.11 | 0.02 | 0.13 | 0.76 | 0.96 | 1  |
| 0.79 | 0.82 | 0.99 | 1.03 | 1.06 | 0.97 | 0.87 | 0.2  | 0.18 | 0.1  | 0.11 | 0.85 | 0.47 | 0.64 | 0.3  | 0  |
| 1.04 | 0.9  | 1    | 0.9  | 0.95 | 0.89 | 0.98 | 0.19 | 0.08 | 0.17 | 0.07 | 0.63 | 0.51 | 0.91 | 0.42 | 0  |
| 0.9  | 0.92 | 0.89 | 0.98 | 1.13 | 1.07 | 0.9  | 0.04 | 0.02 | 0.04 | 0.01 | 0    | 0.05 | 0.04 | 0    | 1  |
| 1.02 | 0.94 | 0.91 | 1.05 | 1.15 | 1.13 | 0.95 | 0.07 | 0.07 | 0.05 | 0.06 | 0.09 | 0.62 | 0.18 | 0.02 | 0  |
| 0.83 | 0.9  | 0.91 | 1.07 | 1.01 | 1.18 | 0.88 | 0.09 | 0.03 | 0.27 | 0.04 | 0.23 | 0.26 | 0.49 | 0.13 | 0  |
| 0.65 | 0.65 | 0.52 | 1.32 | 0.96 | 0.8  | 0.61 | 0.12 | 0.03 | 0.04 | 0.08 | 0    | 0    | 0    | 0.02 | -1 |
| 1.69 | 1.57 | 2.67 | 0.82 | 0.59 | 0.57 | 1.98 | 0.07 | 0.1  | 0.05 | 0.6  | 0.01 | 0.66 | 0    | 0.02 | -1 |
| 1.11 | 1.04 | 0.97 | 1.18 | 0.93 | 0.95 | 1.04 | 0.09 | 0.05 | 0.06 | 0.07 | 0    | 0.75 | 0.01 | 0.16 | -1 |
| 0.69 | 0.76 | 0.87 | 1.02 | 1.12 | 1.05 | 0.77 | 0.07 | 0.07 | 0.02 | 0.09 | 0.09 | 0.19 | 0.46 | 0.01 | 0  |
| 0.98 | 1.09 | 0.99 | 1.06 | 0.94 | 1    | 1.02 | 0.08 | 0.08 | 0.03 | 0.06 | 0.08 | 0.27 | 0.27 | 0.67 | 0  |
| 1.47 | 1.45 | 1.55 | 1.13 | 1.15 | 0.95 | 1.49 | 0.31 | 0.28 | 0.11 | 0.05 | 0.93 | 0.3  | 0.39 | 0    | 0  |
| 1.03 | 1.04 | 0.87 | 1.02 | 1.03 | 1.03 | 0.98 | 0.06 | 0.12 | 0.05 | 0.1  | 0.91 | 0.99 | 0.88 | 0.47 | 0  |
| 0.87 | 0.84 | 0.92 | 1    | 0.9  | 0.93 | 0.88 | 0.03 | 0.12 | 0.08 | 0.04 | 0.13 | 0.69 | 0.16 | 0.36 | 0  |
| 0.79 | 0.92 | 0.82 | 1.12 | 1.2  | 1.04 | 0.84 | 0.09 | 0.02 | 0.19 | 0.07 | 0.15 | 0.14 | 0.48 | 0.16 | 0  |
| 0.68 | 0.66 | 0.78 | 1.3  | 1.26 | 1    | 0.71 | 0.28 | 0.13 | 0.18 | 0.06 | 0.82 | 0.08 | 0.17 | 0.06 | 0  |
| 0.78 | 0.79 | 0.66 | 1.11 | 1.1  | 0.93 | 0.74 | 0.05 | 0.08 | 0.05 | 0.07 | 0.77 | 0.03 | 0.01 | 0.02 | 0  |
| 1.22 | 1.26 | 1.1  | 0.87 | 1.03 | 1.06 | 1.19 | 0.07 | 0.02 | 0.01 | 0.09 | 0.01 | 0.04 | 0.01 | 0.06 | 1  |
| 1.2  | 1.04 | 1.16 | 1    | 1.03 | 1.03 | 1.13 | 0.06 | 0.05 | 0.05 | 0.08 | 0.42 | 0.94 | 0.5  | 0.13 | 0  |
| 0.97 | 1    | 1    | 0.83 | 1.02 | 1.09 | 0.99 | 0.03 | 0.04 | 0.12 | 0.02 | 0    | 0.33 | 0.01 | 0.21 | 1  |
| 1.04 | 1    | 0.97 | 0.78 | 1.15 | 1.15 | 1    | 0.06 | 0.06 | 0.07 | 0.04 | 0    | 0.96 | 0    | 0.03 | 1  |
| 0.88 | 0.81 | 1.08 | 1.13 | 1.22 | 1.19 | 0.92 | 0.12 | 0.12 | 0.24 | 0.14 | 0.33 | 0.84 | 0.68 | 0.18 | 0  |
| 0.8  | 0.6  | 0.99 | 0.94 | 1.36 | 0.55 | 0.8  | 0.45 | 0.16 | 0.32 | 0.19 | 0.13 | 0.01 | 0.26 | 0.32 | 0  |
| 0.72 | 0.73 | 0.84 | 1.16 | 1.24 | 0.89 | 0.76 | 0.02 | 0.01 | 0.08 | 0.06 | 0    | 0    | 0    | 0.11 | 1  |
| 0.66 | 0.87 | 0.8  | 1.17 | 1.18 | 0.96 | 0.78 | 0.11 | 0.14 | 0.33 | 0.11 | 0.87 | 0.28 | 0.29 | 0.41 | 0  |
| 0.97 | 0.96 | 0.88 | 1.04 | 1.09 | 1.01 | 0.94 | 0.22 | 0.23 | 0.15 | 0.05 | 0.77 | 0.62 | 0.83 | 0.47 | 0  |
| 1.23 | 1.29 | 0.93 | 1.07 | 1.29 | 1.21 | 1.15 | 0.15 | 0.2  | 0.2  | 0.2  | 0.13 | 0.64 | 0.34 | 0.73 | 0  |
| 0.81 | 0.74 | 0.89 | 1.02 | 1.24 | 0.74 | 0.81 | 0.17 | 0.06 | 0.22 | 0.07 | 0.05 | 0.01 | 0.11 | 0.61 | 0  |

|      |      |      |      |      |      |      |      |      |      |      |      |      |      |      |    |
|------|------|------|------|------|------|------|------|------|------|------|------|------|------|------|----|
| 1.36 | 1.52 | 1.08 | 0.86 | 1.04 | 1.03 | 1.32 | 0.19 | 0.18 | 0.07 | 0.22 | 0.21 | 0.95 | 0.19 | 0.1  | 0  |
| 1    | 1.01 | 0.93 | 0.91 | 0.93 | 1.03 | 0.98 | 0.04 | 0.12 | 0.04 | 0.04 | 0.7  | 0.25 | 0.01 | 0.22 | 0  |
| 0.77 | 0.96 | 1.03 | 1.12 | 1.19 | 1.01 | 0.92 | 0.19 | 0.08 | 0.14 | 0.13 | 0.49 | 0.08 | 0.44 | 0.45 | 0  |
| 0.94 | 0.88 | 0.85 | 0.97 | 1.15 | 1.07 | 0.89 | 0.06 | 0.1  | 0.02 | 0.04 | 0.02 | 0.24 | 0.04 | 0    | 1  |
| 0.91 | 0.88 | 1.03 | 0.87 | 1.01 | 1.3  | 0.94 | 0.07 | 0.14 | 0.25 | 0.08 | 0.14 | 0.1  | 0.02 | 0.07 | 0  |
| 0.74 | 0.77 | 0.74 | 1.08 | 1.13 | 0.97 | 0.75 | 0.06 | 0.11 | 0.02 | 0.02 | 0.41 | 0.06 | 0.03 | 0    | 0  |
| 0.83 | 0.84 | 0.82 | 0.97 | 0.99 | 1    | 0.83 | 0.1  | 0.14 | 0.06 | 0.01 | 0.78 | 0.89 | 0.57 | 0.01 | 0  |
| 0.9  | 0.99 | 0.89 | 0.92 | 1.03 | 1.02 | 0.93 | 0.11 | 0.06 | 0.03 | 0.05 | 0.13 | 0.76 | 0.2  | 0.06 | 0  |
| 0.9  | 0.88 | 1.08 | 1.19 | 1.14 | 1.06 | 0.95 | 0.07 | 0.1  | 0.02 | 0.11 | 0.42 | 0.22 | 0.03 | 0.18 | 0  |
| 1.12 | 1.02 | 1.06 | 0.88 | 1.07 | 1.12 | 1.06 | 0.04 | 0.03 | 0.01 | 0.05 | 0    | 0.06 | 0    | 0.14 | 1  |
| 1.1  | 1.36 | 1.26 | 0.92 | 1    | 1.05 | 1.24 | 0.13 | 0.17 | 0.14 | 0.13 | 0.46 | 0.72 | 0.27 | 0.16 | 0  |
| 0.75 | 0.69 | 0.88 | 1.07 | 1.14 | 0.97 | 0.77 | 0.04 | 0.09 | 0.02 | 0.1  | 0.16 | 0.02 | 0.01 | 0.03 | 0  |
| 0.78 | 0.74 | 0.72 | 1.11 | 1.19 | 0.97 | 0.75 | 0.02 | 0.05 | 0.02 | 0.03 | 0.03 | 0    | 0    | 0    | 1  |
| 1.12 | 1.07 | 0.95 | 0.91 | 1.09 | 1.03 | 1.05 | 0.04 | 0.04 | 0.03 | 0.08 | 0    | 0.07 | 0.01 | 0.72 | 1  |
| 1.12 | 1.03 | 1.1  | 0.93 | 1.15 | 1.08 | 1.08 | 0.03 | 0.05 | 0.03 | 0.04 | 0    | 0.13 | 0    | 0.94 | 1  |
| 1.09 | 0.98 | 1.03 | 0.93 | 1.13 | 1.06 | 1.04 | 0.03 | 0.01 | 0.05 | 0.06 | 0    | 0.03 | 0.01 | 0.67 | 1  |
| 1.13 | 1.11 | 1.09 | 0.8  | 1.07 | 1.09 | 1.11 | 0.01 | 0.03 | 0.05 | 0.02 | 0    | 0.39 | 0    | 0.61 | 1  |
| 1.05 | 1.04 | 0.99 | 0.97 | 1.11 | 1.18 | 1.03 | 0.02 | 0.03 | 0.06 | 0.03 | 0    | 0.07 | 0    | 0.02 | 1  |
| 0.9  | 0.83 | 0.96 | 0.92 | 1.21 | 1.14 | 0.9  | 0.06 | 0.04 | 0.05 | 0.06 | 0    | 0.09 | 0    | 0.01 | 1  |
| 0.94 | 0.94 | 0.99 | 0.83 | 1.2  | 1.11 | 0.96 | 0.01 | 0.02 | 0.01 | 0.03 | 0    | 0    | 0    | 0    | 1  |
| 0.9  | 0.88 | 1.04 | 0.84 | 1.2  | 1.11 | 0.94 | 0.01 | 0.04 | 0.02 | 0.09 | 0    | 0.01 | 0    | 0.03 | 1  |
| 1    | 1.07 | 0.94 | 0.84 | 1.14 | 1.09 | 1    | 0.06 | 0.1  | 0.21 | 0.06 | 0    | 0.71 | 0.07 | 0.53 | 1  |
| 0.99 | 1.04 | 1.02 | 0.91 | 1.14 | 1.13 | 1.01 | 0.14 | 0.06 | 0.02 | 0.03 | 0.02 | 0.94 | 0.04 | 0    | 1  |
| 0.99 | 1.04 | 1.05 | 0.93 | 1.13 | 1.15 | 1.02 | 0.11 | 0.09 | 0.03 | 0.03 | 0.03 | 0.81 | 0.03 | 0.01 | 1  |
| 0.78 | 0.85 | 0.88 | 0.89 | 1    | 1.08 | 0.84 | 0.2  | 0.11 | 0.14 | 0.06 | 0.36 | 0.44 | 0.22 | 0.05 | 0  |
| 0.78 | 0.85 | 0.88 | 0.89 | 1    | 1.08 | 0.84 | 0.2  | 0.11 | 0.14 | 0.06 | 0.36 | 0.44 | 0.22 | 0.05 | 0  |
| 1.01 | 0.93 | 0.98 | 1.02 | 1.02 | 0.98 | 0.97 | 0.07 | 0.07 | 0.04 | 0.04 | 0.97 | 0.47 | 0.47 | 0.74 | 0  |
| 0.9  | 0.99 | 0.94 | 1.32 | 1.13 | 1.13 | 0.94 | 0.05 | 0.06 | 0.04 | 0.05 | 0    | 0.86 | 0    | 0.01 | -1 |
| 0.79 | 0.94 | 0.87 | 0.92 | 1.08 | 1.03 | 0.86 | 0.08 | 0.07 | 0.03 | 0.07 | 0.02 | 0.33 | 0.06 | 0.02 | 1  |
| 1.06 | 1.01 | 1.01 | 1.03 | 0.95 | 1.06 | 1.03 | 0.06 | 0.06 | 0.02 | 0.03 | 0.1  | 0.03 | 0.52 | 0.24 | 0  |
| 0.94 | 0.96 | 1.04 | 1    | 0.98 | 1.1  | 0.98 | 0.02 | 0.02 | 0.08 | 0.05 | 0.19 | 0.03 | 0.06 | 0.09 | 0  |
| 1.03 | 1    | 1.01 | 1.01 | 0.93 | 1.05 | 1.01 | 0.02 | 0.06 | 0.03 | 0.02 | 0.05 | 0.02 | 0.07 | 0.14 | -1 |
| 0.94 | 0.97 | 0.98 | 1.06 | 0.97 | 1.05 | 0.97 | 0.06 | 0.03 | 0.05 | 0.02 | 0.05 | 0.04 | 1    | 0.04 | -1 |
| 1.09 | 0.97 | 0.99 | 1.06 | 0.9  | 1.12 | 1.02 | 0.04 | 0.09 | 0.11 | 0.06 | 0.02 | 0.03 | 0.35 | 0.23 | -1 |
| 1.06 | 1.01 | 1.01 | 1.05 | 0.96 | 1.04 | 1.03 | 0.07 | 0.09 | 0.04 | 0.03 | 0.17 | 0.25 | 0.79 | 0.75 | 0  |
| 0.94 | 1.01 | 1.04 | 1    | 0.95 | 1.06 | 1    | 0.05 | 0.12 | 0.01 | 0.05 | 0.47 | 0.17 | 0.07 | 0.1  | 0  |
| 0.95 | 0.97 | 0.93 | 1.08 | 1.02 | 1.09 | 0.95 | 0.05 | 0.1  | 0.11 | 0.02 | 0.26 | 0.41 | 0.97 | 0.11 | 0  |
| 1.39 | 1.34 | 1.31 | 1.05 | 0.89 | 0.83 | 1.34 | 0.07 | 0.07 | 0.15 | 0.04 | 0.02 | 0.51 | 0.05 | 0    | -1 |
| 0.61 | 1.18 | 0.76 | 0.97 | 0.98 | 0.94 | 0.85 | 0.13 | 0.17 | 0.05 | 0.29 | 0.94 | 0.71 | 0.69 | 0.64 | 0  |
| 1.35 | 1.15 | 0.92 | 0.93 | 1.06 | 0.84 | 1.14 | 0.19 | 0.15 | 0.07 | 0.21 | 0.31 | 0.06 | 0.51 | 0.08 | 0  |
| 1.25 | 1.46 | 1.46 | 1.19 | 1.15 | 1.05 | 1.39 | 0.36 | 0.4  | 0.09 | 0.13 | 0.89 | 0.69 | 0.54 | 0.02 | 0  |
| 1.17 | 1.25 | 1.28 | 1.01 | 0.95 | 1    | 1.23 | 0.11 | 0.09 | 0.06 | 0.06 | 0.41 | 0.43 | 0.88 | 0.01 | 0  |
| 1.18 | 1.19 | 1.25 | 0.98 | 0.96 | 0.99 | 1.21 | 0.07 | 0.07 | 0.04 | 0.04 | 0.78 | 0.66 | 0.89 | 0    | 0  |
| 1.19 | 1.23 | 1.12 | 0.95 | 0.99 | 1.01 | 1.18 | 0.07 | 0.14 | 0.05 | 0.05 | 0.63 | 0.8  | 0.24 | 0.02 | 0  |
| 1.18 | 1.15 | 1.03 | 1.07 | 0.94 | 0.98 | 1.12 | 0.12 | 0.14 | 0.07 | 0.08 | 0.2  | 0.67 | 0.3  | 0.09 | 0  |
| 0.99 | 1.15 | 1.24 | 1.12 | 0.98 | 1.01 | 1.13 | 0.2  | 0.19 | 0.09 | 0.13 | 0.34 | 0.81 | 0.41 | 0.25 | 0  |
| 1.05 | 1.17 | 1.35 | 0.97 | 0.99 | 1.35 | 1.19 | 0.04 | 0.2  | 0.41 | 0.15 | 0.84 | 0.18 | 0.12 | 0.57 | 0  |
| 0.84 | 0.99 | 1.01 | 1.17 | 1.15 | 1.14 | 0.95 | 0.5  | 0.2  | 0.25 | 0.09 | 0.94 | 0.96 | 0.93 | 0.27 | 0  |
| 1.22 | 0.63 | 1.04 | 0.93 | 1.03 | 1.21 | 0.97 | 0.22 | 0.12 | 0.3  | 0.3  | 0.45 | 0.32 | 0.22 | 0.38 | 0  |
| 0.96 | 0.89 | 0.95 | 0.95 | 1.1  | 1.09 | 0.93 | 0.06 | 0.07 | 0.05 | 0.04 | 0.01 | 0.84 | 0.01 | 0.01 | 1  |

|      |      |      |      |      |      |      |      |      |      |      |      |      |      |      |    |
|------|------|------|------|------|------|------|------|------|------|------|------|------|------|------|----|
| 1.1  | 1.25 | 1.18 | 1    | 0.99 | 0.97 | 1.18 | 0.07 | 0.05 | 0.18 | 0.07 | 0.8  | 0.84 | 0.77 | 0.15 | 0  |
| 1.02 | 1.29 | 1.47 | 0.98 | 0.89 | 0.99 | 1.26 | 0.1  | 0.1  | 0.11 | 0.23 | 0.24 | 0.27 | 0.92 | 0.14 | 0  |
| 2.83 | 2.9  | 1.88 | 0.75 | 0.69 | 0.73 | 2.54 | 0.11 | 0.14 | 0.06 | 0.57 | 0.51 | 0.62 | 0.82 | 0.01 | 0  |
| 1.39 | 1.39 | 1.59 | 0.85 | 0.88 | 0.99 | 1.45 | 0.05 | 0.03 | 0.11 | 0.12 | 0.45 | 0.1  | 0.08 | 0.01 | 0  |
| 1.2  | 1.47 | 1.41 | 0.83 | 0.86 | 0.99 | 1.36 | 0.08 | 0.05 | 0.02 | 0.14 | 0.47 | 0.01 | 0.03 | 0.01 | 0  |
| 0.93 | 0.98 | 0.96 | 1.08 | 0.88 | 0.97 | 0.96 | 0.03 | 0.05 | 0.02 | 0.03 | 0    | 0.04 | 0    | 0.48 | -1 |
| 1.21 | 1.24 | 1.15 | 1.02 | 1.01 | 0.91 | 1.2  | 0.12 | 0.05 | 0.17 | 0.04 | 0.84 | 0.29 | 0.34 | 0.05 | 0  |
| 1.04 | 1.08 | 1.07 | 1.11 | 0.91 | 0.93 | 1.06 | 0.14 | 0.08 | 0.14 | 0.02 | 0.05 | 0.88 | 0.15 | 0.17 | -1 |
| 1.06 | 1.01 | 1.01 | 1.07 | 0.97 | 1.05 | 1.03 | 0.02 | 0.05 | 0.04 | 0.03 | 0.01 | 0.06 | 0.4  | 0.44 | -1 |
| 1.25 | 1.42 | 1.01 | 1.07 | 0.99 | 1.27 | 1.22 | 0.18 | 0.23 | 0.35 | 0.21 | 0.58 | 0.25 | 0.37 | 0.85 | 0  |
| 0.86 | 0.84 | 0.88 | 1.13 | 0.97 | 0.99 | 0.86 | 0.05 | 0.05 | 0.02 | 0.02 | 0    | 0.54 | 0.01 | 0    | -1 |
| 0.8  | 0.77 | 0.86 | 1.19 | 0.94 | 0.94 | 0.81 | 0.04 | 0.03 | 0.02 | 0.04 | 0    | 0.87 | 0    | 0.01 | -1 |
| 0.9  | 1.05 | 1.08 | 1.04 | 0.82 | 1.03 | 1.01 | 0.11 | 0.05 | 0.07 | 0.1  | 0.01 | 0    | 0.92 | 0.76 | -1 |
| 1.82 | 1.97 | 2.75 | 0.36 | 0.47 | 0.72 | 2.18 | 0.21 | 0.3  | 0.5  | 0.5  | 0.58 | 0.44 | 0.24 | 0.02 | 0  |
| 1.04 | 1.01 | 1.01 | 0.8  | 1.08 | 1.14 | 1.02 | 0.04 | 0.05 | 0.04 | 0.02 | 0    | 0.23 | 0    | 0.01 | 1  |
| 1.49 | 1.46 | 1.47 | 0.85 | 0.96 | 1.03 | 1.47 | 0.04 | 0.01 | 0.02 | 0.02 | 0    | 0    | 0    | 0    | 1  |
| 1.24 | 1.21 | 1.14 | 0.87 | 1.09 | 1.23 | 1.2  | 0.16 | 0.15 | 0.13 | 0.05 | 0.1  | 0.23 | 0.02 | 0.69 | 0  |
| 0.93 | 0.99 | 1.04 | 1.11 | 0.98 | 1.17 | 0.99 | 0.18 | 0.12 | 0.1  | 0.05 | 0.28 | 0.08 | 0.64 | 0.05 | 0  |
| 1.04 | 1.01 | 1.08 | 1.06 | 1    | 0.96 | 1.04 | 0.05 | 0.05 | 0.01 | 0.04 | 0.2  | 0.14 | 0.03 | 0.02 | 0  |
| 1.07 | 1.01 | 0.98 | 1.06 | 1.01 | 1.03 | 1.02 | 0.05 | 0.06 | 0.05 | 0.04 | 0.32 | 0.69 | 0.57 | 0.79 | 0  |
| 1.01 | 0.99 | 0.93 | 1.01 | 1.09 | 1.01 | 0.98 | 0.05 | 0.03 | 0.05 | 0.04 | 0.02 | 0.05 | 0.9  | 0.41 | 1  |
| 0.93 | 1.03 | 0.99 | 0.94 | 0.88 | 1.12 | 0.98 | 0.12 | 0.12 | 0.09 | 0.05 | 0.49 | 0.03 | 0.08 | 0.09 | 0  |
| 1.01 | 1.16 | 1.09 | 0.94 | 1.05 | 1.21 | 1.09 | 0.01 | 0.09 | 0.14 | 0.07 | 0.04 | 0.13 | 0.01 | 0.25 | 1  |
| 1.11 | 0.94 | 1.02 | 1.03 | 1.06 | 1.08 | 1.02 | 0.05 | 0.04 | 0.03 | 0.09 | 0.53 | 0.51 | 0.24 | 0.37 | 0  |
| 0.91 | 0.93 | 0.93 | 1.08 | 1.03 | 1.14 | 0.92 | 0.21 | 0.17 | 0.11 | 0.01 | 0.73 | 0.37 | 0.65 | 0.03 | 0  |
| 1.11 | 1.2  | 1.38 | 0.95 | 0.97 | 0.98 | 1.23 | 0.07 | 0.15 | 0    | 0.14 | 0.81 | 0.97 | 0.58 | 0.03 | 0  |
| 1.06 | 0.98 | 0.99 | 0.96 | 0.91 | 1.08 | 1.01 | 0.05 | 0.03 | 0.06 | 0.04 | 0.11 | 0    | 0.03 | 0.14 | 0  |
| 1.09 | 1.01 | 1.1  | 1.04 | 1    | 1.12 | 1.06 | 0.15 | 0.15 | 0.16 | 0.05 | 0.72 | 0.36 | 0.53 | 0.62 | 0  |
| 1.02 | 0.97 | 1.01 | 1.01 | 1.06 | 1.1  | 1    | 0.07 | 0.07 | 0.04 | 0.03 | 0.32 | 0.44 | 0.11 | 0.03 | 0  |
| 1.03 | 0.96 | 0.98 | 0.88 | 1.09 | 1.1  | 0.99 | 0.03 | 0.04 | 0.04 | 0.03 | 0    | 0.97 | 0    | 0.03 | 1  |
| 1.28 | 1.33 | 1.32 | 0.97 | 0.93 | 0.99 | 1.31 | 0.03 | 0.05 | 0.06 | 0.03 | 0.2  | 0.21 | 0.69 | 0    | 0  |
| 1.26 | 1.23 | 1.29 | 1.11 | 0.92 | 1.01 | 1.26 | 0.07 | 0.07 | 0.09 | 0.03 | 0.01 | 0.24 | 0.16 | 0.01 | -1 |
| 1.14 | 1.08 | 1.12 | 1.04 | 0.88 | 0.92 | 1.12 | 0.06 | 0.04 | 0.1  | 0.03 | 0.01 | 0.58 | 0.11 | 0.03 | -1 |
| 1.04 | 0.82 | 1.03 | 1.01 | 1.06 | 1.09 | 0.96 | 0.06 | 0.16 | 0.09 | 0.12 | 0.61 | 0.77 | 0.24 | 0.22 | 0  |
| 0.97 | 0.87 | 1.04 | 0.99 | 1.01 | 1.11 | 0.96 | 0.06 | 0.05 | 0.07 | 0.08 | 0.59 | 0.09 | 0.07 | 0.08 | 0  |
| 0.95 | 0.89 | 0.96 | 0.99 | 1.15 | 1.08 | 0.93 | 0.01 | 0.03 | 0.07 | 0.04 | 0    | 0.15 | 0.03 | 0.03 | 1  |
| 1.41 | 1.29 | 1.17 | 0.93 | 0.95 | 0.82 | 1.29 | 0.16 | 0.07 | 0.05 | 0.12 | 0.83 | 0.04 | 0.3  | 0    | 0  |
| 1.28 | 1.28 | 1.16 | 1.04 | 0.91 | 0.92 | 1.24 | 0.05 | 0.08 | 0.06 | 0.07 | 0.03 | 0.81 | 0.04 | 0    | -1 |
| 1.65 | 1.41 | 1.2  | 0.95 | 0.72 | 0.86 | 1.42 | 0.12 | 0.05 | 0.02 | 0.23 | 0.01 | 0    | 0.24 | 0.01 | -1 |
| 1.29 | 1.29 | 1.41 | 1.03 | 0.93 | 0.94 | 1.33 | 0.08 | 0.03 | 0.06 | 0.07 | 0.07 | 0.94 | 0.17 | 0    | 0  |
| 1.38 | 1.29 | 1.46 | 1.01 | 0.81 | 0.88 | 1.37 | 0.04 | 0.07 | 0.07 | 0.09 | 0    | 0.24 | 0.03 | 0    | -1 |
| 1.36 | 1.28 | 1.32 | 0.99 | 0.91 | 0.9  | 1.32 | 0.05 | 0.04 | 0.01 | 0.04 | 0.05 | 0.74 | 0.03 | 0    | 0  |
| 1.35 | 1.28 | 1.53 | 1.01 | 0.93 | 1.01 | 1.39 | 0.12 | 0.1  | 0.19 | 0.13 | 0.35 | 0.49 | 1    | 0.05 | 0  |
| 1.08 | 1.16 | 1.25 | 0.86 | 1.12 | 1.39 | 1.16 | 0.19 | 0.07 | 0.19 | 0.08 | 0.05 | 0.05 | 0.02 | 0.14 | 1  |
| 1    | 1.01 | 1.07 | 0.94 | 1.09 | 1.03 | 1.02 | 0.01 | 0.04 | 0.04 | 0.04 | 0    | 0.09 | 0.01 | 0.94 | 1  |
| 1.22 | 1.09 | 0.92 | 0.67 | 0.85 | 1.09 | 1.08 | 0.14 | 0.3  | 0.29 | 0.15 | 0.3  | 0.34 | 0.05 | 0.93 | 0  |
| 1.08 | 0.91 | 0.93 | 0.99 | 1.1  | 1.09 | 0.97 | 0.07 | 0.11 | 0.02 | 0.09 | 0.15 | 0.86 | 0.08 | 0.1  | 0  |
| 1.02 | 1.01 | 0.7  | 0.84 | 0.88 | 1.08 | 0.91 | 0.09 | 0.16 | 0.02 | 0.18 | 0.63 | 0.1  | 0.01 | 0.19 | 0  |
| 0.87 | 0.75 | 0.99 | 1.17 | 1.16 | 1.13 | 0.87 | 0.24 | 0.12 | 0.35 | 0.12 | 0.92 | 0.9  | 0.87 | 0.29 | 0  |
| 0.78 | 0.79 | 0.92 | 1.02 | 1.16 | 1.26 | 0.83 | 0.13 | 0.11 | 0.06 | 0.08 | 0.17 | 0.22 | 0.04 | 0    | 0  |

|      |      |      |      |      |      |      |      |      |      |      |      |      |      |      |    |
|------|------|------|------|------|------|------|------|------|------|------|------|------|------|------|----|
| 0.9  | 0.88 | 0.75 | 0.98 | 1.09 | 1    | 0.84 | 0.08 | 0.06 | 0.09 | 0.08 | 0.08 | 0.18 | 0.75 | 0.08 | 0  |
| 1.19 | 1.14 | 1.22 | 0.77 | 1.06 | 1.12 | 1.18 | 0.05 | 0.04 | 0.05 | 0.04 | 0    | 0.08 | 0    | 0.15 | 1  |
| 1.23 | 1.44 | 1.25 | 1.17 | 0.86 | 0.93 | 1.31 | 0.16 | 0.08 | 0.07 | 0.12 | 0.01 | 0.27 | 0.06 | 0.01 | -1 |
| 0.81 | 0.84 | 0.99 | 0.9  | 0.97 | 1.14 | 0.88 | 0.17 | 0.16 | 0.1  | 0.1  | 0.59 | 0.15 | 0.09 | 0.03 | 0  |
| 1.05 | 0.89 | 2.3  | 0.85 | 0.83 | 0.84 | 1.41 | 0.08 | 0.11 | 0.1  | 0.77 | 0.85 | 0.91 | 0.95 | 0.27 | 0  |
| 1.22 | 1.1  | 0.97 | 0.96 | 1.07 | 1.11 | 1.09 | 0.04 | 0.06 | 0.02 | 0.13 | 0.02 | 0.3  | 0    | 0.8  | 1  |
| 0.91 | 0.83 | 0.84 | 1.02 | 1.15 | 1.03 | 0.86 | 0.05 | 0.05 | 0.04 | 0.04 | 0.01 | 0.02 | 0.9  | 0.01 | 1  |
| 1.22 | 1.21 | 1.13 | 0.83 | 1.09 | 1.11 | 1.19 | 0.07 | 0.13 | 0.06 | 0.05 | 0.01 | 0.87 | 0    | 0.16 | 1  |
| 0.85 | 0.91 | 0.83 | 0.9  | 1.09 | 0.96 | 0.86 | 0.07 | 0.12 | 0.07 | 0.04 | 0.03 | 0.15 | 0.27 | 0.08 | 1  |
| 1.18 | 1.01 | 1.12 | 1    | 1.2  | 0.98 | 1.1  | 0.15 | 0.27 | 0.06 | 0.09 | 0.24 | 0.24 | 0.88 | 0.13 | 0  |
| 0.57 | 0.57 | 0.74 | 1.55 | 1.25 | 0.65 | 0.63 | 0.1  | 0.2  | 0.2  | 0.1  | 0.04 | 0.01 | 0    | 0.9  | -1 |
| 1.08 | 1.08 | 1.01 | 0.89 | 0.93 | 1.13 | 1.06 | 0.11 | 0.12 | 0.07 | 0.04 | 0.62 | 0.05 | 0.02 | 0.21 | 0  |
| 0.85 | 0.86 | 0.71 | 1.14 | 1.09 | 0.94 | 0.81 | 0.11 | 0.08 | 0.12 | 0.08 | 0.54 | 0.11 | 0.08 | 0.18 | 0  |
| 1.28 | 1.17 | 1.09 | 1    | 1.11 | 1.22 | 1.18 | 0.16 | 0.14 | 0.07 | 0.1  | 0.37 | 0.26 | 0.09 | 0.61 | 0  |
| 0.71 | 0.87 | 0.87 | 0.97 | 1.3  | 1.07 | 0.82 | 0.05 | 0.2  | 0.15 | 0.09 | 0.02 | 0.15 | 0.25 | 0.06 | 1  |
| 0.64 | 0.68 | 1.01 | 0.94 | 1    | 1.08 | 0.78 | 0.24 | 0.21 | 0.08 | 0.2  | 0.71 | 0.55 | 0.37 | 0.07 | 0  |
| 0.93 | 0.92 | 0.96 | 0.87 | 1.12 | 1.04 | 0.94 | 0.06 | 0.03 | 0.04 | 0.02 | 0    | 0.04 | 0.01 | 0.02 | 1  |
| 1.13 | 1.02 | 0.83 | 0.91 | 1.18 | 1.06 | 1    | 0.09 | 0.23 | 0.04 | 0.15 | 0.07 | 0.43 | 0.04 | 0.5  | 0  |
| 1.67 | 1.4  | 1.28 | 0.98 | 0.94 | 0.8  | 1.45 | 0.09 | 0.14 | 0.08 | 0.2  | 0.65 | 0.18 | 0.04 | 0.01 | 0  |
| 1.56 | 1.42 | 1.39 | 1.06 | 0.92 | 0.75 | 1.45 | 0.1  | 0.04 | 0.08 | 0.09 | 0.04 | 0.01 | 0.01 | 0    | -1 |
| 0.43 | 0.76 | 0.78 | 1.21 | 1.17 | 0.84 | 0.66 | 0.11 | 0.07 | 0.13 | 0.19 | 0.58 | 0.01 | 0.01 | 0.25 | 0  |
| 1.02 | 0.93 | 0.91 | 0.94 | 1.17 | 1.16 | 0.95 | 0.06 | 0.07 | 0.05 | 0.06 | 0    | 0.81 | 0    | 0.01 | 1  |
| 1.78 | 1.87 | 2.29 | 0.89 | 0.67 | 0.71 | 1.98 | 0.11 | 0.06 | 0.12 | 0.27 | 0.01 | 0.61 | 0.1  | 0    | -1 |
| 1.18 | 1.09 | 1.1  | 1.04 | 0.99 | 0.98 | 1.13 | 0.1  | 0.11 | 0.07 | 0.05 | 0.5  | 0.92 | 0.41 | 0.04 | 0  |
| 0.91 | 0.99 | 0.88 | 0.91 | 0.97 | 1.04 | 0.92 | 0.02 | 0.04 | 0.02 | 0.06 | 0.05 | 0.05 | 0    | 0.03 | 1  |
| 1.48 | 1.54 | 1.86 | 0.84 | 0.89 | 1.07 | 1.63 | 0.07 | 0.07 | 0.01 | 0.2  | 0.38 | 0.01 | 0    | 0.01 | 0  |
| 1.11 | 1.24 | 1.35 | 0.78 | 1.06 | 0.97 | 1.23 | 0.13 | 0.12 | 0.13 | 0.12 | 0.02 | 0.38 | 0.12 | 0.06 | 1  |
| 1.03 | 1.05 | 1.05 | 1.01 | 0.9  | 0.94 | 1.04 | 0.09 | 0.11 | 0.07 | 0.01 | 0.18 | 0.65 | 0.3  | 0.07 | 0  |
| 1.21 | 1.12 | 1.21 | 0.86 | 1.09 | 1.08 | 1.18 | 0.1  | 0.04 | 0.06 | 0.05 | 0    | 0.91 | 0.02 | 0.12 | 1  |
| 1.08 | 1.11 | 1.08 | 1.01 | 1.16 | 1.03 | 1.09 | 0.06 | 0.11 | 0.06 | 0.02 | 0.05 | 0.12 | 0.65 | 0.16 | 1  |
| 0.95 | 0.94 | 1.01 | 1.08 | 1.05 | 0.97 | 0.96 | 0.17 | 0.06 | 0.07 | 0.04 | 0.74 | 0.2  | 0.35 | 0.85 | 0  |
| 1.01 | 0.98 | 1.05 | 0.95 | 1.17 | 1.04 | 1.01 | 0.1  | 0.1  | 0.01 | 0.03 | 0.02 | 0.08 | 0.21 | 0.33 | 1  |
| 0.83 | 1.07 | 0.96 | 0.98 | 1.06 | 0.97 | 0.95 | 0.08 | 0.1  | 0.04 | 0.12 | 0.29 | 0.24 | 0.89 | 0.78 | 0  |
| 1    | 0.9  | 0.91 | 0.92 | 1.06 | 0.98 | 0.94 | 0.1  | 0.09 | 0.08 | 0.05 | 0.08 | 0.29 | 0.37 | 0.43 | 0  |
| 0.98 | 0.93 | 0.93 | 1.06 | 0.99 | 1    | 0.95 | 0.05 | 0.08 | 0.05 | 0.03 | 0.19 | 0.85 | 0.17 | 0.18 | 0  |
| 1.09 | 1.05 | 0.91 | 0.99 | 1.12 | 1.07 | 1.02 | 0.05 | 0.07 | 0.04 | 0.1  | 0.03 | 0.4  | 0.06 | 0.38 | 1  |
| 0.96 | 0.96 | 0.98 | 0.95 | 1.05 | 1.04 | 0.97 | 0.03 | 0.04 | 0.01 | 0.01 | 0.01 | 0.62 | 0.01 | 0    | 1  |
| 0.85 | 0.78 | 0.86 | 1.07 | 1.18 | 0.93 | 0.83 | 0.12 | 0.19 | 0.04 | 0.04 | 0.4  | 0.08 | 0.1  | 0.04 | 0  |
| 0.56 | 0.97 | 0.79 | 1.2  | 0.89 | 0.88 | 0.78 | 0.16 | 0.08 | 0.14 | 0.2  | 0.01 | 0.97 | 0.05 | 0.49 | -1 |
| 0.92 | 1.28 | 0.87 | 0.93 | 1.19 | 1.18 | 1.02 | 0.1  | 0.08 | 0.05 | 0.23 | 0.01 | 0.88 | 0.01 | 0.3  | 1  |
| 0.88 | 0.75 | 0.85 | 1    | 0.96 | 1.01 | 0.82 | 0.14 | 0.07 | 0.03 | 0.07 | 0.7  | 0.38 | 0.91 | 0.02 | 0  |
| 0.72 | 1.01 | 0.99 | 1.17 | 1.35 | 0.9  | 0.91 | 0.11 | 0.15 | 0.12 | 0.16 | 0.1  | 0.01 | 0.02 | 0.96 | 0  |
| 1    | 0.93 | 0.93 | 1.12 | 1.12 | 0.96 | 0.95 | 0.09 | 0.05 | 0.03 | 0.04 | 0.92 | 0    | 0.03 | 0.86 | 0  |
| 0.86 | 1.11 | 1.14 | 1.09 | 1.36 | 1    | 1.04 | 0.09 | 0.09 | 0.06 | 0.15 | 0.01 | 0    | 0.21 | 0.74 | 1  |
| 0.89 | 0.88 | 0.83 | 0.94 | 1.24 | 0.99 | 0.87 | 0.05 | 0.08 | 0.14 | 0.03 | 0    | 0.03 | 0.49 | 0.2  | 1  |
| 1.53 | 1.43 | 1.65 | 0.99 | 0.9  | 0.86 | 1.53 | 0.05 | 0.06 | 0.08 | 0.11 | 0.08 | 0.49 | 0.05 | 0    | 0  |
| 1.61 | 1.51 | 1.4  | 0.86 | 0.8  | 0.94 | 1.51 | 0.07 | 0.09 | 0.1  | 0.1  | 0.37 | 0.1  | 0.25 | 0    | 0  |
| 1.53 | 1.29 | 1.46 | 1.09 | 0.94 | 0.95 | 1.43 | 0.04 | 0.03 | 0.03 | 0.13 | 0    | 0.54 | 0.01 | 0    | -1 |
| 2.26 | 1.13 | 0.82 | 0.91 | 1.33 | 0.97 | 1.4  | 0.19 | 0.2  | 0.15 | 0.76 | 0.02 | 0.05 | 0.68 | 0.39 | 1  |
| 1.06 | 1.02 | 1.09 | 0.93 | 1.1  | 1.06 | 1.06 | 0.05 | 0.07 | 0.13 | 0.03 | 0.01 | 0.65 | 0.13 | 0.98 | 1  |



|      |      |      |      |      |      |      |      |      |      |      |      |      |      |      |    |
|------|------|------|------|------|------|------|------|------|------|------|------|------|------|------|----|
| 1.67 | 1.92 | 1.77 | 0.78 | 0.7  | 0.83 | 1.79 | 0.02 | 0.06 | 0.05 | 0.13 | 0.03 | 0.03 | 0.13 | 0    | -1 |
| 0.92 | 0.84 | 0.88 | 1.03 | 1.17 | 0.9  | 0.88 | 0.09 | 0.09 | 0.28 | 0.04 | 0.06 | 0.12 | 0.43 | 0.89 | 0  |
| 1.46 | 1.75 | 1.33 | 0.84 | 0.82 | 1.02 | 1.52 | 0.09 | 0.05 | 0.06 | 0.21 | 0.7  | 0    | 0.03 | 0.02 | 0  |
| 1.28 | 1.36 | 1.19 | 0.85 | 0.9  | 0.99 | 1.28 | 0.06 | 0.06 | 0.03 | 0.09 | 0.27 | 0.07 | 0.02 | 0.01 | 0  |
| 1.47 | 1.31 | 1.17 | 0.89 | 0.9  | 1.02 | 1.31 | 0.03 | 0.08 | 0.07 | 0.15 | 0.74 | 0.1  | 0.01 | 0.04 | 0  |
| 1.12 | 1.22 | 1.34 | 0.88 | 0.89 | 1    | 1.22 | 0.08 | 0.1  | 0    | 0.11 | 0.9  | 0.14 | 0.05 | 0.02 | 0  |
| 1.58 | 1.5  | 1.57 | 0.82 | 0.83 | 0.99 | 1.55 | 0.03 | 0.02 | 0.04 | 0.04 | 0.7  | 0    | 0    | 0    | 0  |
| 1.39 | 1.4  | 1.6  | 0.85 | 0.82 | 0.94 | 1.46 | 0.06 | 0.08 | 0.05 | 0.12 | 0.67 | 0.08 | 0.07 | 0    | 0  |
| 1.4  | 1.41 | 1.62 | 0.86 | 0.86 | 0.99 | 1.48 | 0.09 | 0.1  | 0.07 | 0.12 | 0.98 | 0.1  | 0.09 | 0    | 0  |
| 1.21 | 1.26 | 1.46 | 0.85 | 0.95 | 0.99 | 1.31 | 0.05 | 0.05 | 0.08 | 0.14 | 0.04 | 0.5  | 0.05 | 0.03 | 1  |
| 1.04 | 1.23 | 1.24 | 1.02 | 0.96 | 1.01 | 1.17 | 0.17 | 0.09 | 0.12 | 0.11 | 0.58 | 0.56 | 0.96 | 0.17 | 0  |
| 0.8  | 0.82 | 0.86 | 0.91 | 0.94 | 1.18 | 0.83 | 0.09 | 0.03 | 0.2  | 0.03 | 0.56 | 0.06 | 0.06 | 0.04 | 0  |
| 1.44 | 1.51 | 1.42 | 1.04 | 0.83 | 0.88 | 1.46 | 0.08 | 0.04 | 0.03 | 0.05 | 0    | 0.13 | 0.03 | 0    | -1 |
| 1.26 | 1.19 | 1.43 | 1.06 | 0.86 | 0.78 | 1.29 | 0.06 | 0.08 | 0.14 | 0.13 | 0.01 | 0.39 | 0.02 | 0.01 | -1 |
| 0.92 | 0.9  | 0.92 | 1.05 | 1.09 | 0.99 | 0.91 | 0.04 | 0.07 | 0.02 | 0.01 | 0.47 | 0.09 | 0.08 | 0    | 0  |
| 0.94 | 0.82 | 1.01 | 0.91 | 1.03 | 1    | 0.92 | 0.05 | 0.09 | 0.04 | 0.1  | 0.07 | 0.66 | 0.05 | 0.27 | 0  |
| 1.63 | 1.51 | 1.46 | 1.02 | 0.91 | 0.95 | 1.53 | 0.04 | 0.02 | 0.03 | 0.09 | 0    | 0.07 | 0.03 | 0    | -1 |
| 0.89 | 0.89 | 0.87 | 0.97 | 1.08 | 0.96 | 0.88 | 0.11 | 0.12 | 0.18 | 0.01 | 0.24 | 0.33 | 0.92 | 0.51 | 0  |
| 1.16 | 0.99 | 0.91 | 0.89 | 1.09 | 0.94 | 1.02 | 0.16 | 0.17 | 0.1  | 0.13 | 0.14 | 0.24 | 0.69 | 0.47 | 0  |

| Trend |                            | Fold-change |
|-------|----------------------------|-------------|
| Trend | trend() Patterns           | OMa/Ma      |
| 1     | 0 increasing late          | 1.24159     |
| 0     | 0 stables                  | 0.94038     |
| 0     | -1 early decrease          | 1.13413     |
| 1     | 0 unclass                  | 0.90593     |
| 0     | 0 increasing early         | 0.91859     |
| 0     | 0 stables                  | 0.85514     |
| 0     | 0 increasing early         | 0.84344     |
| 0     | 1 increasing early         | 0.81376     |
| 0     | 1 increasing continuously  | 0.6953      |
| 0     | 0 stables                  | 1.66947     |
| 0     | 0 stables                  | 1.15647     |
| 0     | 0 early decrease           | 1.44944     |
| 0     | 1 increasing continuously  | 0.77647     |
| 0     | 0 stables                  | 1.20209     |
| -1    | -1 decreasing continuously | 0.8082      |
| -1    | -1 decreasing late         | 1.13445     |
| 0     | 0 increasing early         | 0.78861     |
| -1    | -1 decreasing late         | 0.97637     |
| 0     | 1 increasing early         | 0.8337      |
| 0     | 1 increasing early         | 0.87675     |
| 0     | 1 increasing early         | 0.91586     |
| 0     | 0 increasing early         | 0.89762     |
| 0     | 1 increasing continuously  | 0.87541     |
| 0     | 0 stables                  | 0.86802     |
| 0     | 0 stables                  | 1.27632     |
| 0     | 0 stables                  | 0.94006     |
| 0     | 0 increasing early         | 0.84767     |
| 0     | 0 increasing early         | 0.93253     |
| -1    | 0 unclass                  | 0.85578     |
| 0     | 0 stables                  | 0.68125     |
| -1    | 0 unclass                  | 0.82011     |
| -1    | 0 unclass                  | 0.85166     |
| 0     | 1 increasing continuously  | 0.90626     |
| 0     | -1 decreasing continuously | 0.78029     |
| 1     | 1 increasing late          | 0.79685     |
| 1     | 0 unclass                  | 0.79254     |
| 1     | 1 unclass                  | 0.78417     |
| 0     | 0 stables                  | 0.84514     |
| 0     | 0 stables                  | 1.10744     |
| 0     | 0 increasing early         | 0.81708     |
| 0     | 1 increasing early         | 0.83479     |
| 0     | 0 stables                  | 0.7344      |
| 0     | 0 stables                  | 0.91411     |
| 0     | 1 increasing early         | 0.84882     |
| 0     | 1 increasing early         | 0.847       |
| 0     | -1 decreasing continuously | 0.98416     |
| 0     | 0 stables                  | 0.82067     |

|    |                            |         |
|----|----------------------------|---------|
| 0  | 1 increasing early         | 1.22486 |
| 0  | 0 stables                  | 0.92148 |
| -1 | -1 decreasing late         | 0.78178 |
| 0  | -1 decreasing continuously | 0.85868 |
| -1 | 0 decreasing late          | 0.83511 |
| 0  | 0 stables                  | 1.32772 |
| 0  | 0 stables                  | 1.14648 |
| -1 | 0 unclass                  | 0.97619 |
| -1 | -1 decreasing continuously | 0.89921 |
| 0  | 0 stables                  | 0.81142 |
| 0  | 0 stables                  | 1.10266 |
| 1  | -1 unclass                 | 1.21379 |
| 0  | -1 early decrease          | 1.28633 |
| 0  | 1 increasing early         | 0.94517 |
| -1 | 0 unclass                  | 0.852   |
| 0  | 1 increasing early         | 0.78462 |
| 0  | 0 stables                  | 1.53437 |
| 0  | -1 early decrease          | 1.00344 |
| 0  | 0 increasing early         | 0.81106 |
| 0  | 0 increasing early         | 0.89193 |
| 0  | 0 increasing early         | 0.84546 |
| -1 | 0 unclass                  | 0.80889 |
| 0  | 0 increasing early         | 0.81486 |
| -1 | 1 unclass                  | 0.86172 |
| 0  | 1 increasing early         | 0.88618 |
| 0  | 0 stables                  | 1.55883 |
| 0  | 1 increasing early         | 0.7441  |
| -1 | -1 decreasing late         | 0.8986  |
| -1 | 0 decreasing late          | 0.8412  |
| 0  | 1 increasing early         | 0.79153 |
| 0  | 1 increasing early         | 0.91878 |
| 0  | 0 stables                  | 0.79429 |
| 0  | 0 stables                  | 1.05475 |
| -1 | 0 decreasing late          | 0.80516 |
| 0  | 0 stables                  | 0.79954 |
| -1 | -1 decreasing continuously | 0.9767  |
| -1 | -1 decreasing late         | 0.88492 |
| -1 | -1 decreasing late         | 0.82708 |
| -1 | 0 decreasing late          | 0.9141  |
| 0  | -1 early decrease          | 1.33628 |
| 0  | 0 stables                  | 1.12786 |
| 0  | 0 stables                  | 1.54266 |
| 0  | 0 stables                  | 0.93974 |
| 0  | 1 increasing continuously  | 0.76766 |
| 0  | 0 stables                  | 0.76237 |
| 0  | 0 stables                  | 0.82447 |
| -1 | -1 decreasing late         | 1.5858  |
| 0  | 0 stables                  | 0.96647 |
| 0  | 0 stables                  | 0.95064 |
| 0  | -1 early decrease          | 2.06935 |

|    |                            |         |
|----|----------------------------|---------|
| 0  | 0 stables                  | 1.5258  |
| 0  | 0 stables                  | 1.05527 |
| 0  | 0 stables                  | 1.05418 |
| 0  | 0 stables                  | 0.92187 |
| 0  | 0 stables                  | 0.8909  |
| 0  | 0 stables                  | 0.88517 |
| 0  | 0 stables                  | 0.76716 |
| 1  | 0 increasing late          | 1.55635 |
| 1  | 0 increasing late          | 1.46791 |
| 1  | 0 increasing late          | 0.87391 |
| 1  | 0 unclass                  | 0.9999  |
| 1  | 0 unclass                  | 0.97927 |
| 0  | 0 stables                  | 1.18393 |
| 0  | 0 stables                  | 1.09276 |
| 0  | 0 early decrease           | 1.07841 |
| 0  | -1 early decrease          | 1.05613 |
| 0  | 0 early decrease           | 1.02167 |
| 0  | 0 stables                  | 0.9803  |
| 1  | 0 unclass                  | 1.01292 |
| 0  | 0 stables                  | 1.67273 |
| 0  | 0 stables                  | 1.08571 |
| 0  | 0 stables                  | 1.06125 |
| 0  | 0 stables                  | 1.04105 |
| 0  | 0 stables                  | 0.78863 |
| 0  | 1 increasing early         | 0.89522 |
| -1 | -1 decreasing late         | 0.86174 |
| -1 | 1 unclass                  | 0.82393 |
| 0  | 1 increasing early         | 0.87162 |
| 0  | 0 stables                  | 0.51087 |
| 0  | 0 stables                  | 0.63278 |
| 0  | 0 increasing early         | 1.06694 |
| -1 | -1 unclass                 | 0.90859 |
| 0  | 0 stables                  | 0.72623 |
| 0  | 0 stables                  | 0.96148 |
| 0  | 0 stables                  | 0.87742 |
| 0  | 0 stables                  | 0.99279 |
| 0  | 0 increasing early         | 0.95533 |
| 0  | 0 increasing early         | 0.91245 |
| 0  | 0 stables                  | 0.79813 |
| 0  | 0 stables                  | 0.89432 |
| 0  | 1 increasing early         | 0.77712 |
| 0  | -1 decreasing continuously | 0.71159 |
| 0  | 0 stables                  | 0.97801 |
| 1  | -1 unclass                 | 0.66713 |
| 0  | -1 early decrease          | 0.89785 |
| 0  | 0 stables                  | 1.21121 |
| 0  | 0 stables                  | 0.99775 |
| 1  | 0 unclass                  | 0.90189 |
| 1  | 0 unclass                  | 0.86264 |
| 0  | -1 decreasing continuously | 0.88173 |

|    |                           |         |
|----|---------------------------|---------|
| 0  | 0 stables                 | 1.35413 |
| 0  | 0 stables                 | 0.89764 |
| 0  | 1 increasing continuously | 1.19302 |
| 0  | 1 increasing continuously | 1.15042 |
| 0  | -1 early decrease         | 1.54577 |
| 1  | -1 unclass                | 1.5311  |
| 1  | -1 unclass                | 1.35207 |
| 1  | 1 increasing late         | 1.05786 |
| 1  | 1 unclass                 | 0.92825 |
| -1 | 1 unclass                 | 0.82233 |
| 0  | 1 increasing early        | 0.8518  |
| 1  | 1 increasing late         | 0.87779 |
| 1  | 0 unclass                 | 0.8974  |
| 0  | 0 stables                 | 0.8911  |
| 0  | 0 stables                 | 0.97107 |
| 0  | 0 early decrease          | 0.97007 |
| 0  | 0 stables                 | 1.22576 |
| 0  | 0 stables                 | 0.85943 |
| 0  | 1 increasing early        | 0.83507 |
| 0  | 1 increasing early        | 0.81748 |
| 1  | 1 increasing late         | 0.89961 |
| 1  | 1 increasing late         | 0.92506 |
| 1  | 0 increasing late         | 0.91786 |
| 0  | 0 early decrease          | 1.04876 |
| 0  | 0 stables                 | 0.84622 |
| -1 | 0 unclass                 | 0.95161 |
| -1 | 1 unclass                 | 0.70325 |
| 0  | 0 stables                 | 0.93337 |
| 1  | 1 increasing late         | 0.88075 |
| 0  | 0 stables                 | 0.89346 |
| 0  | 0 stables                 | 1.22268 |
| 1  | 0 unclass                 | 0.83273 |
| 0  | 0 stables                 | 1.613   |
| 0  | 1 increasing continuously | 0.85574 |
| 0  | 0 stables                 | 0.8001  |
| 0  | 0 stables                 | 0.74952 |
| -1 | -1 decreasing late        | 0.8805  |
| 1  | 0 unclass                 | 1.5849  |
| 1  | 1 increasing late         | 0.65562 |
| 0  | 1 increasing early        | 0.92047 |
| 0  | 0 stables                 | 0.90292 |
| 0  | 1 increasing early        | 0.77162 |
| 0  | 0 stables                 | 0.87182 |
| 0  | 0 stables                 | 0.83161 |
| 0  | 0 stables                 | 0.80416 |
| -1 | 0 unclass                 | 1.05152 |
| -1 | -1 decreasing late        | 0.74561 |
| 0  | 1 increasing early        | 0.88638 |
| 0  | 0 stables                 | 0.82699 |
| 0  | 0 stables                 | 0.6789  |

|    |                            |         |
|----|----------------------------|---------|
| -1 | -1 decreasing continuously | 0.78273 |
| -1 | 0 decreasing late          | 1.04083 |
| 1  | 0 increasing late          | 0.82235 |
| 0  | 0 stables                  | 0.75802 |
| 0  | 0 increasing early         | 0.9018  |
| 0  | 0 stables                  | 0.89638 |
| 0  | 0 stables                  | 0.93616 |
| 0  | 0 stables                  | 0.86997 |
| 0  | -1 decreasing continuously | 0.86673 |
| 0  | -1 decreasing continuously | 0.8245  |
| 0  | 0 increasing early         | 0.79613 |
| 0  | 0 stables                  | 0.78083 |
| 0  | 0 stables                  | 0.84061 |
| 0  | 0 stables                  | 1.10385 |
| 0  | 1 increasing early         | 1.04282 |
| 0  | 0 stables                  | 0.86985 |
| -1 | 0 unclass                  | 1.06463 |
| -1 | 0 unclass                  | 1.03208 |
| -1 | -1 decreasing late         | 0.91608 |
| 0  | 1 increasing continuously  | 0.81341 |
| 0  | 0 increasing early         | 0.91769 |
| 1  | 1 increasing continuously  | 0.86939 |
| 0  | 0 early decrease           | 1.33574 |
| 0  | 1 increasing continuously  | 0.77449 |
| 0  | 0 stables                  | 0.84034 |
| 0  | 1 increasing early         | 0.83947 |
| 0  | -1 decreasing continuously | 0.67324 |
| -1 | -1 decreasing late         | 0.83612 |
| 0  | 0 stables                  | 1.65188 |
| 0  | 0 stables                  | 1.10087 |
| 0  | 0 stables                  | 0.91076 |
| 0  | 1 increasing continuously  | 0.76794 |
| -1 | -1 decreasing late         | 0.95838 |
| -1 | 0 decreasing late          | 0.95221 |
| 0  | 0 stables                  | 1.48148 |
| 0  | 0 increasing early         | 0.96326 |
| 0  | 1 increasing early         | 0.95289 |
| -1 | 1 unclass                  | 0.93028 |
| 0  | -1 early decrease          | 0.76402 |
| -1 | 0 unclass                  | 0.74976 |
| 0  | 0 stables                  | 1.00982 |
| -1 | 0 decreasing late          | 0.83013 |
| 0  | 0 stables                  | 1.98811 |
| 0  | -1 early decrease          | 1.13756 |
| 0  | 1 increasing early         | 0.90057 |
| 0  | -1 early decrease          | 1.5034  |
| 0  | 0 stables                  | 0.77744 |
| 0  | 1 increasing early         | 0.76469 |
| 0  | 0 stables                  | 0.97844 |
| 0  | 0 stables                  | 1.03302 |

|    |                            |         |
|----|----------------------------|---------|
| 0  | 0 stables                  | 0.73631 |
| -1 | 0 unclass                  | 1.01665 |
| 0  | 0 stables                  | 0.86392 |
| 0  | 0 stables                  | 0.79958 |
| 0  | 1 increasing early         | 0.75458 |
| 0  | 1 increasing continuously  | 0.89678 |
| 0  | 1 increasing early         | 0.88264 |
| 0  | 0 stables                  | 0.96044 |
| 0  | -1 early decrease          | 0.90892 |
| 0  | 0 stables                  | 0.88418 |
| 0  | 0 increasing early         | 0.71372 |
| 0  | 0 stables                  | 0.71319 |
| -1 | -1 decreasing late         | 0.92439 |
| 1  | 1 increasing continuously  | 1.00017 |
| 0  | 1 increasing early         | 0.94476 |
| 0  | 0 stables                  | 0.94135 |
| -1 | 0 decreasing late          | 0.82595 |
| 0  | 0 stables                  | 0.97673 |
| 0  | 0 increasing early         | 0.83033 |
| 0  | 0 stables                  | 1.20311 |
| 0  | 0 increasing early         | 0.86148 |
| 0  | 0 stables                  | 0.82144 |
| 1  | 1 increasing late          | 0.97005 |
| 0  | 0 stables                  | 0.93853 |
| 0  | 0 stables                  | 0.87722 |
| 0  | 0 stables                  | 0.83748 |
| -1 | 0 decreasing late          | 0.78532 |
| -1 | 0 unclass                  | 0.79179 |
| 0  | 1 increasing early         | 0.86499 |
| 0  | 1 increasing early         | 0.84842 |
| 0  | -1 decreasing continuously | 0.75797 |
| 0  | 0 stables                  | 0.58145 |
| 0  | 1 increasing continuously  | 0.91001 |
| 0  | 1 increasing continuously  | 0.75033 |
| 0  | 0 stables                  | 0.91338 |
| 0  | 0 stables                  | 0.89118 |
| 0  | 0 stables                  | 0.83721 |
| 0  | 0 stables                  | 0.7814  |
| -1 | 0 decreasing late          | 0.96601 |
| 0  | 0 stables                  | 0.80067 |
| 0  | 0 stables                  | 0.74654 |
| 1  | 1 increasing late          | 0.60111 |
| 0  | 1 increasing early         | 1.3101  |
| 0  | 0 stables                  | 0.89598 |
| 0  | 0 stables                  | 0.82112 |
| 0  | 0 increasing early         | 0.78349 |
| 0  | 1 increasing early         | 0.80171 |
| 0  | 0 stables                  | 0.95131 |
| 0  | 0 increasing early         | 0.82169 |
| 0  | 0 increasing early         | 0.77418 |

|    |                            |         |
|----|----------------------------|---------|
| 0  | 0 stables                  | 0.94194 |
| 0  | 0 increasing early         | 0.86092 |
| 0  | 0 stables                  | 0.8304  |
| 0  | 0 stables                  | 0.81551 |
| 0  | 1 increasing continuously  | 0.76798 |
| 0  | 1 increasing continuously  | 0.75591 |
| 0  | -1 early decrease          | 1.12727 |
| 0  | 0 increasing early         | 0.80394 |
| 1  | 1 increasing continuously  | 1.14819 |
| 1  | 1 increasing continuously  | 0.98898 |
| 0  | 1 increasing early         | 0.95114 |
| 0  | 1 increasing early         | 0.85024 |
| 0  | 0 stables                  | 0.85142 |
| 0  | 0 stables                  | 0.837   |
| 0  | 0 stables                  | 1.11146 |
| -1 | 0 decreasing late          | 0.81778 |
| 0  | 0 stables                  | 2.12251 |
| 0  | 0 stables                  | 0.76002 |
| 1  | 1 increasing continuously  | 0.94321 |
| 0  | 0 stables                  | 0.82662 |
| 0  | 0 stables                  | 0.74931 |
| 0  | 0 increasing early         | 1.2623  |
| 0  | 0 increasing early         | 0.83023 |
| 1  | 1 increasing continuously  | 1.00471 |
| 0  | 0 stables                  | 0.97303 |
| 0  | 0 increasing early         | 0.71901 |
| -1 | 0 decreasing late          | 0.97958 |
| -1 | 0 unclass                  | 0.88853 |
| 0  | 0 stables                  | 0.85221 |
| 0  | 0 stables                  | 0.69226 |
| 1  | 1 increasing continuously  | 0.65411 |
| 0  | 0 stables                  | 1.37588 |
| 0  | 0 stables                  | 1.15282 |
| 0  | 0 increasing early         | 0.97184 |
| 0  | 0 stables                  | 0.91799 |
| 1  | 1 increasing late          | 1.05767 |
| 1  | 0 unclass                  | 0.94321 |
| 0  | -1 decreasing continuously | 0.95841 |
| 0  | 0 stables                  | 0.94913 |
| 0  | 1 increasing continuously  | 0.88759 |
| 0  | 0 stables                  | 0.85336 |
| 0  | 1 increasing early         | 0.81148 |
| 0  | 1 increasing continuously  | 0.80164 |
| 0  | 1 increasing continuously  | 0.78115 |
| 1  | 1 increasing late          | 0.76431 |
| 0  | 0 stables                  | 0.98514 |
| 0  | -1 early decrease          | 0.96136 |
| 0  | 0 stables                  | 0.91328 |
| 0  | 0 stables                  | 1.66954 |
| 0  | 0 stables                  | 0.86703 |



|    |                            |         |
|----|----------------------------|---------|
| 0  | 0 stables                  | 0.90851 |
| 0  | 1 increasing early         | 0.89005 |
| 0  | 0 increasing early         | 0.80124 |
| 0  | 1 increasing early         | 0.79876 |
| 1  | 1 increasing continuously  | 0.92208 |
| 1  | -1 unclass                 | 1.07077 |
| 0  | 0 early decrease           | 1.15789 |
| -1 | -1 decreasing late         | 0.98439 |
| -1 | 0 unclass                  | 0.87953 |
| 0  | 0 stables                  | 1.02072 |
| 0  | 0 early decrease           | 0.79113 |
| 0  | 0 stables                  | 0.73016 |
| 0  | -1 decreasing continuously | 2.2051  |
| 0  | 0 stables                  | 1.11362 |
| 0  | 0 early decrease           | 1.55491 |
| 0  | 0 stables                  | 1.30203 |
| 0  | -1 early decrease          | 2.0268  |
| 0  | -1 early decrease          | 1.69121 |
| 0  | -1 decreasing continuously | 1.61782 |
| 0  | 0 stables                  | 1.53799 |
| 0  | 0 stables                  | 1.55117 |
| 0  | 0 stables                  | 1.28998 |
| 0  | 0 stables                  | 1.77841 |
| 0  | -1 decreasing continuously | 1.52307 |
| 0  | 0 early decrease           | 1.20443 |
| -1 | 0 unclass                  | 0.85432 |
| 0  | 0 stables                  | 0.95176 |
| 1  | 1 increasing late          | 0.8598  |
| 1  | 1 increasing continuously  | 0.92309 |
| 1  | 0 unclass                  | 1.62777 |
| 1  | 1 increasing continuously  | 0.78062 |
| 1  | 1 increasing late          | 0.77894 |
| 1  | 1 increasing continuously  | 0.77602 |
| 0  | 0 early decrease           | 2.20743 |
| 0  | -1 early decrease          | 1.81785 |
| 0  | -1 early decrease          | 1.33072 |
| 0  | 0 early decrease           | 1.30471 |
| 0  | 0 stables                  | 1.20904 |
| 0  | 0 stables                  | 1.03647 |
| 0  | 0 stables                  | 1.00443 |
| 0  | 0 stables                  | 0.96716 |
| 0  | 0 stables                  | 0.96369 |
| 0  | 0 stables                  | 0.94463 |
| 0  | 0 stables                  | 0.94141 |
| 0  | -1 decreasing continuously | 0.93151 |
| 0  | 0 stables                  | 0.90711 |
| 0  | 1 increasing early         | 0.87959 |
| 0  | 0 stables                  | 0.85795 |
| 0  | 1 increasing early         | 0.83421 |
| 0  | 0 stables                  | 0.8219  |

|    |                            |         |
|----|----------------------------|---------|
| 0  | 0 stables                  | 0.80904 |
| 0  | 1 increasing continuously  | 0.80883 |
| 0  | 0 stables                  | 0.80841 |
| 0  | 0 stables                  | 0.80573 |
| 0  | 0 stables                  | 0.793   |
| 0  | 0 stables                  | 0.77963 |
| 0  | 0 stables                  | 0.77675 |
| 0  | 0 stables                  | 0.74125 |
| 0  | 0 stables                  | 0.54301 |
| 0  | 1 increasing early         | 0.5402  |
| -1 | 0 decreasing late          | 1.07605 |
| -1 | 0 decreasing late          | 0.82546 |
| -1 | 0 unclass                  | 0.94127 |
| -1 | 0 unclass                  | 0.9151  |
| -1 | 0 unclass                  | 0.83165 |
| -1 | 0 decreasing late          | 0.83424 |
| 1  | 0 unclass                  | 1.76456 |
| 1  | 1 increasing continuously  | 0.82467 |
| 1  | 1 increasing late          | 0.81634 |
| 1  | 1 increasing continuously  | 0.76759 |
| 1  | 1 increasing late          | 0.74616 |
| 0  | 0 stables                  | 2.39124 |
| 0  | -1 decreasing continuously | 1.98211 |
| 0  | 0 stables                  | 1.45593 |
| 0  | 0 stables                  | 1.25057 |
| 0  | 0 stables                  | 1.22653 |
| 0  | 1 increasing early         | 1.08308 |
| 0  | 0 stables                  | 1.07813 |
| 0  | 0 stables                  | 1.07295 |
| 0  | 1 increasing continuously  | 1.04369 |
| 0  | 0 stables                  | 1.01527 |
| 0  | 0 stables                  | 0.97517 |
| 0  | 0 stables                  | 0.97395 |
| 0  | 0 stables                  | 0.9601  |
| 0  | 0 stables                  | 0.95299 |
| 0  | 0 stables                  | 0.94665 |
| 0  | 1 increasing early         | 0.94021 |
| 0  | 0 stables                  | 0.9255  |
| 0  | 0 stables                  | 0.92117 |
| 0  | 1 increasing early         | 0.91989 |
| 0  | 0 stables                  | 0.9055  |
| 0  | 0 stables                  | 0.89929 |
| 0  | 0 stables                  | 0.89909 |
| 0  | 1 increasing early         | 0.89894 |
| 0  | -1 decreasing continuously | 0.89847 |
| 0  | 0 stables                  | 0.88704 |
| 0  | 1 increasing early         | 0.87037 |
| 0  | 0 increasing early         | 0.86583 |
| 0  | 0 stables                  | 0.86302 |
| 0  | 0 stables                  | 0.86024 |

|    |                           |         |
|----|---------------------------|---------|
| 0  | 0 stables                 | 0.84583 |
| 0  | -1 early decrease         | 0.84337 |
| 0  | 0 stables                 | 0.84081 |
| 0  | 1 increasing continuously | 0.83105 |
| 0  | 0 stables                 | 0.82827 |
| 0  | 1 increasing early        | 0.82518 |
| 0  | 0 stables                 | 0.81507 |
| 0  | 0 stables                 | 0.80006 |
| 0  | 1 increasing continuously | 0.79614 |
| 0  | 0 stables                 | 0.78357 |
| 0  | 1 increasing early        | 0.77564 |
| 0  | 0 stables                 | 0.76915 |
| 0  | 0 stables                 | 0.76472 |
| 0  | 1 increasing early        | 0.76322 |
| 0  | 0 stables                 | 0.74543 |
| 0  | 1 increasing early        | 0.73349 |
| 0  | 1 increasing early        | 0.70999 |
| 0  | 0 stables                 | 0.69186 |
| 0  | 0 stables                 | 0.59789 |
| -1 | -1 decreasing late        | 1.07499 |
| -1 | -1 decreasing late        | 0.83345 |
| -1 | 0 decreasing late         | 0.83179 |
| -1 | 0 decreasing late         | 0.82411 |
| -1 | 1 unclass                 | 0.8504  |
| 0  | 1 increasing early        | 0.97268 |
| 0  | 0 increasing early        | 0.85487 |
| -1 | -1 decreasing late        | 0.93097 |
| 0  | 0 stables                 | 0.83542 |
| 0  | 1 increasing early        | 0.82259 |
| 1  | 0 unclass                 | 1.72909 |
| 1  | 0 unclass                 | 1.60624 |
| -1 | -1 decreasing late        | 0.8361  |
| 0  | 0 stables                 | 1.12964 |
| 0  | 0 stables                 | 1.0166  |
| -1 | -1 decreasing late        | 1.00509 |
| 0  | 0 stables                 | 1.03991 |
| 0  | 1 increasing early        | 0.89825 |
| -1 | 0 decreasing late         | 0.82053 |
| 0  | 0 increasing early        | 0.68266 |
| 0  | 0 increasing early        | 0.94782 |
| 0  | 0 stables                 | 0.67963 |
| -1 | 0 decreasing late         | 0.8975  |
| 0  | 0 stables                 | 0.73637 |
| -1 | 0 unclass                 | 0.80348 |
| 0  | 0 increasing early        | 0.85303 |
| -1 | 0 unclass                 | 0.72016 |
| 0  | 0 stables                 | 0.86746 |
| -1 | 0 decreasing late         | 0.80774 |
| -1 | -1 unclass                | 0.87544 |
| 0  | 0 increasing early        | 0.81883 |

|    |                            |         |
|----|----------------------------|---------|
| 0  | 0 stables                  | 0.86492 |
| 0  | 1 increasing early         | 0.87954 |
| 0  | 1 increasing continuously  | 0.92809 |
| 0  | 0 stables                  | 0.80401 |
| 0  | 0 stables                  | 0.96215 |
| -1 | -1 decreasing late         | 0.88299 |
| 0  | 0 increasing early         | 0.77823 |
| 0  | 0 stables                  | 1.04354 |
| 0  | 0 stables                  | 1.04103 |
| -1 | 0 unclass                  | 0.82536 |
| 0  | 1 increasing early         | 0.80735 |
| -1 | 1 unclass                  | 0.88275 |
| 1  | 0 increasing late          | 0.88312 |
| 0  | 0 stables                  | 0.83629 |
| -1 | 0 unclass                  | 0.84071 |
| 0  | 0 stables                  | 0.74632 |
| 0  | 0 stables                  | 0.99329 |
| 0  | 1 increasing early         | 0.91071 |
| 0  | 1 increasing early         | 0.90061 |
| 0  | 0 stables                  | 0.81189 |
| 0  | 0 stables                  | 1.10443 |
| 0  | 0 stables                  | 0.82726 |
| 0  | 0 stables                  | 0.82183 |
| 0  | 1 increasing early         | 0.78665 |
| 0  | -1 decreasing continuously | 0.75952 |
| 0  | 0 stables                  | 1.10993 |
| 0  | 1 increasing early         | 0.81079 |
| 0  | 0 stables                  | 0.76711 |
| 0  | 0 stables                  | 0.89274 |
| 0  | 0 stables                  | 0.95707 |
| 0  | 1 increasing continuously  | 0.86033 |
| 0  | 0 stables                  | 0.79244 |
| 0  | 0 stables                  | 0.74226 |
| 0  | 0 stables                  | 0.75199 |
| 0  | 0 stables                  | 0.97417 |
| 0  | 0 stables                  | 0.86379 |
| 0  | -1 decreasing continuously | 0.94551 |
| 0  | 1 increasing early         | 0.78433 |
| 1  | 0 increasing late          | 1.0502  |
| 0  | 0 stables                  | 5.06166 |
| 0  | 0 stables                  | 5.06166 |
| 0  | -1 early decrease          | 2.11269 |
| 0  | 0 stables                  | 1.90048 |
| 0  | 0 stables                  | 1.22656 |
| 0  | 0 stables                  | 1.0044  |
| 0  | 1 increasing early         | 0.95391 |
| 0  | 0 stables                  | 0.93614 |
| 0  | 0 increasing early         | 0.89147 |
| 0  | 0 early decrease           | 0.87736 |
| 0  | 1 increasing early         | 0.86334 |

|    |                           |         |
|----|---------------------------|---------|
| 0  | 1 increasing early        | 0.8579  |
| 0  | 0 increasing early        | 0.84847 |
| 0  | 1 increasing early        | 0.79327 |
| 0  | 0 stables                 | 0.74458 |
| 0  | 0 stables                 | 1.00229 |
| 1  | 0 increasing late         | 1.02401 |
| 1  | 1 increasing late         | 0.86632 |
| 0  | 0 stables                 | 0.7324  |
| 1  | 1 increasing continuously | 0.9419  |
| 1  | 1 increasing continuously | 0.82952 |
| 0  | 0 stables                 | 1.35864 |
| 0  | 0 stables                 | 1.09322 |
| 0  | 0 stables                 | 0.94832 |
| 0  | 1 increasing continuously | 0.89684 |
| 0  | 0 increasing early        | 0.88634 |
| 0  | 0 stables                 | 0.87402 |
| 0  | 1 increasing early        | 0.81935 |
| 0  | 0 stables                 | 0.80777 |
| 0  | 0 stables                 | 0.67333 |
| -1 | 1 unclass                 | 0.8016  |
| 1  | 1 increasing continuously | 0.90005 |
| 0  | 0 stables                 | 1.07527 |
| 0  | 0 increasing early        | 0.91444 |
| 0  | 1 increasing early        | 0.90722 |
| 0  | 0 stables                 | 0.88598 |
| 0  | 1 increasing early        | 0.87108 |
| 0  | 1 increasing continuously | 0.87002 |
| 0  | 1 increasing early        | 0.81176 |
| 0  | 1 increasing early        | 0.8101  |
| 0  | 0 stables                 | 0.78975 |
| 0  | 0 increasing early        | 0.72808 |
| 0  | 0 increasing early        | 0.7019  |
| -1 | -1 decreasing late        | 0.91426 |
| 0  | 0 stables                 | 0.76122 |
| 0  | 0 stables                 | 0.62398 |
| 0  | 0 stables                 | 1.16155 |
| 0  | 0 stables                 | 0.98953 |
| 0  | 0 stables                 | 0.96756 |
| 0  | 0 stables                 | 0.9152  |
| 0  | 0 stables                 | 0.86523 |
| 0  | 0 stables                 | 0.8449  |
| 1  | 0 increasing late         | 1.04074 |
| 1  | 0 increasing late         | 1.03964 |
| 1  | 1 increasing late         | 0.88374 |
| 1  | 0 unclass                 | 0.93078 |
| 0  | -1 early decrease         | 1.51893 |
| 0  | -1 early decrease         | 1.46196 |
| 0  | -1 early decrease         | 1.45997 |
| 0  | -1 early decrease         | 1.34122 |
| 0  | -1 early decrease         | 1.28043 |

|    |                            |         |
|----|----------------------------|---------|
| 0  | -1 early decrease          | 1.14861 |
| 0  | 0 stables                  | 1.05282 |
| 0  | 0 stables                  | 1.04565 |
| 0  | 0 stables                  | 1.04058 |
| 0  | 0 increasing early         | 0.97933 |
| 0  | 0 stables                  | 0.97262 |
| 0  | 0 stables                  | 0.95556 |
| 0  | 0 stables                  | 0.94476 |
| 0  | 0 early decrease           | 0.93941 |
| 0  | 1 increasing early         | 0.93899 |
| 0  | 1 increasing early         | 0.90289 |
| 0  | 0 stables                  | 0.88554 |
| 0  | 0 stables                  | 0.88438 |
| 0  | 1 increasing early         | 0.86517 |
| 0  | 1 increasing early         | 0.86323 |
| 0  | 1 increasing early         | 0.85203 |
| 0  | 1 increasing early         | 0.84743 |
| 0  | 1 increasing early         | 0.83441 |
| 0  | 1 increasing early         | 0.8239  |
| 0  | 0 stables                  | 0.82224 |
| 0  | 0 increasing early         | 0.82017 |
| 0  | 0 increasing early         | 0.80723 |
| 0  | 1 increasing early         | 0.80581 |
| 0  | -1 early decrease          | 0.80443 |
| 0  | 0 stables                  | 0.80342 |
| 0  | 1 increasing early         | 0.78456 |
| 0  | 0 stables                  | 0.76058 |
| -1 | 0 unclass                  | 0.86002 |
| -1 | 1 unclass                  | 0.80003 |
| 0  | 0 stables                  | 0.92722 |
| 0  | 0 stables                  | 0.81732 |
| 1  | 1 increasing late          | 0.86788 |
| 0  | 0 early decrease           | 1.26135 |
| 0  | 0 stables                  | 0.79738 |
| 0  | -1 decreasing continuously | 0.89567 |
| 0  | -1 decreasing continuously | 0.85261 |
| 0  | 0 stables                  | 0.82739 |
| 0  | 0 increasing early         | 0.80543 |
| 0  | 1 increasing early         | 0.94883 |
| 0  | 1 increasing early         | 0.85996 |
| 0  | 0 stables                  | 0.73488 |
| 0  | 0 stables                  | 0.97747 |
| 1  | 0 increasing late          | 0.96584 |
| 1  | 0 unclass                  | 0.97507 |
| 1  | 0 unclass                  | 0.88427 |
| 1  | -1 unclass                 | 0.87244 |
| 0  | -1 early decrease          | 1.27534 |
| 0  | 0 stables                  | 1.01174 |
| 0  | 0 stables                  | 0.98135 |
| 0  | 0 stables                  | 0.95735 |

|    |                            |         |
|----|----------------------------|---------|
| 0  | 0 stables                  | 0.91756 |
| 0  | 0 increasing early         | 0.75527 |
| -1 | 1 unclass                  | 0.89733 |
| 0  | 0 stables                  | 0.88702 |
| 0  | 0 early decrease           | 0.79346 |
| 0  | 0 stables                  | 0.74631 |
| -1 | -1 decreasing late         | 1.35855 |
| -1 | 0 unclass                  | 0.79517 |
| 0  | 1 increasing continuously  | 0.95376 |
| 0  | 0 stables                  | 0.92985 |
| 0  | 0 early decrease           | 0.68604 |
| 0  | -1 early decrease          | 1.0583  |
| 0  | -1 decreasing continuously | 1.05979 |
| 1  | 0 unclass                  | 0.96939 |
| 0  | 0 stables                  | 0.77901 |
| 0  | 0 stables                  | 0.96742 |
| 0  | -1 decreasing continuously | 0.94292 |
| 1  | -1 unclass                 | 0.85542 |
| 1  | -1 unclass                 | 0.82011 |
| -1 | -1 decreasing continuously | 1.10802 |
| 0  | 0 early decrease           | 0.90495 |
| 0  | 0 early decrease           | 0.72951 |
| 0  | -1 early decrease          | 1.01427 |
| 0  | 0 early decrease           | 0.88412 |
| 0  | 0 stables                  | 0.94774 |
| 0  | 0 stables                  | 1.10767 |
| 1  | 0 unclass                  | 1.00695 |
| 0  | 0 early decrease           | 1.02698 |
| 0  | -1 early decrease          | 1.0705  |
| 0  | -1 early decrease          | 1.08712 |
| 0  | 0 early decrease           | 1.17252 |
| 1  | 0 unclass                  | 0.48851 |
| 0  | -1 early decrease          | 1.07657 |
| 1  | 0 unclass                  | 0.69655 |
| 0  | -1 early decrease          | 1.16394 |
| 0  | 0 stables                  | 1.40492 |
| 0  | 0 stables                  | 0.95586 |
| 1  | -1 unclass                 | 0.85142 |
| 0  | -1 early decrease          | 1.03032 |
| 0  | -1 early decrease          | 1.02242 |
| 0  | -1 early decrease          | 0.70068 |
| 0  | 0 early decrease           | 0.77594 |
| 1  | 0 unclass                  | 0.69575 |
| 0  | 0 stables                  | 1.04385 |
| 0  | 0 early decrease           | 0.9713  |
| 0  | 0 stables                  | 0.96427 |
| 0  | -1 early decrease          | 0.76354 |
| 0  | 0 stables                  | 0.73024 |
| -1 | -1 decreasing continuously | 0.77828 |
| -1 | 0 decreasing late          | 0.9238  |

|    |                            |         |
|----|----------------------------|---------|
| 0  | 0 stables                  | 0.76945 |
| -1 | -1 decreasing continuously | 0.78869 |
| 0  | -1 early decrease          | 1.13027 |
| 0  | -1 decreasing continuously | 0.93633 |
| 0  | 0 stables                  | 0.81099 |
| -1 | -1 decreasing late         | 1.05475 |
| 0  | 0 stables                  | 0.76743 |
| -1 | -1 decreasing continuously | 0.97841 |
| 0  | 0 stables                  | 0.90126 |
| 1  | -1 unclass                 | 0.73478 |
| 0  | -1 decreasing continuously | 0.814   |
| 0  | -1 early decrease          | 0.83052 |
| 0  | -1 early decrease          | 1.06279 |
| 0  | -1 early decrease          | 0.82616 |
| -1 | 0 decreasing late          | 0.91745 |
| 0  | -1 early decrease          | 0.7049  |
| 0  | 1 increasing early         | 0.8502  |
| 0  | 0 stables                  | 0.96046 |
| 0  | 0 increasing early         | 0.95607 |
| 0  | 0 stables                  | 0.95355 |
| 0  | 0 early decrease           | 0.9095  |
| 0  | 0 stables                  | 0.90555 |
| 0  | 0 stables                  | 0.88906 |
| 0  | 1 increasing early         | 0.88337 |
| 0  | 1 increasing early         | 0.87902 |
| 0  | 0 stables                  | 0.87271 |
| 0  | 0 stables                  | 0.87213 |
| 0  | 1 increasing continuously  | 0.82514 |
| 0  | 0 stables                  | 0.80888 |
| 0  | 0 stables                  | 0.79609 |
| -1 | -1 decreasing late         | 1.03119 |
| -1 | -1 decreasing late         | 0.92267 |
| -1 | -1 decreasing late         | 0.78761 |
| 0  | 0 stables                  | 1.26169 |
| 0  | 0 stables                  | 1.11059 |
| 0  | 0 stables                  | 0.96246 |
| 0  | 0 stables                  | 0.91143 |
| 0  | 0 stables                  | 0.72447 |
| 0  | 0 stables                  | 0.88763 |
| 0  | 0 stables                  | 1.77759 |
| 0  | 1 increasing early         | 0.84102 |
| -1 | 1 unclass                  | 0.84558 |
| -1 | 0 unclass                  | 0.95353 |
| 0  | 0 increasing early         | 0.82659 |
| 0  | 0 increasing early         | 0.78021 |
| -1 | -1 unclass                 | 0.88089 |
| -1 | -1 unclass                 | 0.75294 |
| 0  | 1 increasing early         | 0.8587  |
| 0  | 1 increasing early         | 0.79703 |
| 0  | 1 increasing early         | 0.87702 |



|    |                            |         |
|----|----------------------------|---------|
| 0  | 0 stables                  | 1.20973 |
| 0  | 0 stables                  | 0.90626 |
| 0  | 0 increasing early         | 0.78908 |
| 0  | 0 stables                  | 0.6726  |
| -1 | -1 decreasing late         | 2.24696 |
| -1 | -1 unclass                 | 1.95642 |
| 0  | 0 increasing early         | 1.12767 |
| 0  | 0 increasing early         | 0.87617 |
| -1 | -1 decreasing continuously | 0.74704 |
| -1 | -1 decreasing late         | 1.32278 |
| 0  | 0 stables                  | 1.46408 |
| 0  | 0 stables                  | 0.61583 |
| 0  | 1 increasing early         | 0.77818 |
| 0  | 0 stables                  | 0.9435  |
| 0  | 0 stables                  | 0.97234 |
| 1  | 1 increasing late          | 0.89223 |
| 0  | 0 stables                  | 1.15002 |
| 0  | -1 early decrease          | 1.12489 |
| 0  | 1 increasing early         | 0.90896 |
| 0  | 1 increasing early         | 0.86898 |
| 0  | 0 stables                  | 0.80703 |
| 0  | -1 early decrease          | 0.78948 |
| 0  | 1 increasing early         | 0.76577 |
| 0  | 0 stables                  | 0.75857 |
| 1  | 1 increasing late          | 0.77664 |
| 1  | 1 increasing late          | 0.8645  |
| 0  | -1 early decrease          | 3.09871 |
| 0  | 0 increasing early         | 0.89197 |
| 0  | 1 increasing early         | 0.87599 |
| 0  | 1 increasing continuously  | 0.86988 |
| 0  | 1 increasing early         | 0.8328  |
| 0  | 0 stables                  | 0.74943 |
| 1  | -1 unclass                 | 1.42014 |
| 1  | 0 increasing late          | 0.82348 |
| 0  | 0 early decrease           | 1.79024 |
| 0  | -1 early decrease          | 1.42702 |
| 0  | 0 stables                  | 1.11102 |
| 0  | 0 stables                  | 0.86621 |
| 0  | 0 stables                  | 0.8219  |
| 0  | 0 increasing early         | 0.70665 |
| -1 | 1 unclass                  | 0.74012 |
| 1  | 0 increasing late          | 1.20884 |
| 1  | 0 increasing late          | 1.10089 |
| 0  | 0 increasing early         | 0.83882 |
| 0  | 0 stables                  | 2.7942  |
| 0  | 0 stables                  | 1.28069 |
| 0  | 0 stables                  | 1.0099  |
| -1 | -1 decreasing late         | 0.74644 |
| 0  | -1 decreasing continuously | 1.47722 |
| 0  | 0 stables                  | 1.37417 |

|    |                            |         |
|----|----------------------------|---------|
| 0  | 0 early decrease           | 0.91761 |
| 0  | 1 increasing early         | 0.84714 |
| 0  | 0 increasing early         | 0.81497 |
| 0  | 1 increasing early         | 0.72858 |
| -1 | 0 unclass                  | 1.02303 |
| 0  | -1 early decrease          | 1.48803 |
| 0  | -1 early decrease          | 1.42172 |
| 0  | -1 early decrease          | 1.42098 |
| 0  | -1 early decrease          | 1.33373 |
| 0  | -1 decreasing continuously | 1.23974 |
| 0  | 0 increasing early         | 1.13972 |
| 0  | 0 increasing early         | 1.09666 |
| 0  | 1 increasing early         | 0.94172 |
| 0  | 0 stables                  | 0.93627 |
| 0  | 0 stables                  | 0.92941 |
| 0  | 0 increasing early         | 0.88797 |
| 0  | 0 increasing early         | 0.87192 |
| 0  | 1 increasing early         | 0.85809 |
| 0  | 0 increasing early         | 0.84619 |
| 0  | 0 stables                  | 0.83312 |
| 0  | 1 increasing early         | 0.82706 |
| 0  | 0 stables                  | 0.77232 |
| 0  | 0 increasing early         | 1.00603 |
| 0  | 0 stables                  | 0.89597 |
| 0  | 0 stables                  | 1.10894 |
| 0  | 1 increasing early         | 0.84428 |
| 0  | 0 stables                  | 0.84812 |
| 0  | 0 stables                  | 0.74838 |
| -1 | -1 decreasing continuously | 0.75694 |
| 0  | -1 early decrease          | 3.49346 |
| 0  | -1 early decrease          | 1.09768 |
| 0  | 0 stables                  | 0.7355  |
| 0  | 0 stables                  | 1.0184  |
| 0  | 0 stables                  | 1.57388 |
| 0  | 0 stables                  | 0.95168 |
| 0  | 0 stables                  | 0.94184 |
| 0  | 0 stables                  | 0.80827 |
| 0  | 0 stables                  | 0.70906 |
| -1 | -1 decreasing late         | 0.79268 |
| 1  | 1 increasing continuously  | 1.12517 |
| 0  | 0 stables                  | 1.10417 |
| 0  | 1 increasing early         | 0.90602 |
| 0  | 1 increasing early         | 0.8687  |
| 0  | 0 stables                  | 0.77746 |
| -1 | 0 decreasing late          | 1.45087 |
| -1 | -1 unclass                 | 0.85841 |
| 0  | 0 stables                  | 0.8074  |
| 0  | 0 stables                  | 0.92951 |
| 0  | 0 stables                  | 0.95119 |
| -1 | 0 decreasing late          | 1.09959 |

|    |                            |         |
|----|----------------------------|---------|
| 0  | 0 stables                  | 1.28112 |
| 0  | 1 increasing continuously  | 0.95098 |
| 0  | 0 stables                  | 0.90844 |
| 0  | 1 increasing early         | 0.83671 |
| 0  | 1 increasing continuously  | 0.72063 |
| 0  | -1 decreasing continuously | 0.76992 |
| 0  | 0 stables                  | 0.82559 |
| 0  | 0 stables                  | 0.91101 |
| 0  | -1 decreasing continuously | 0.90027 |
| 0  | 1 increasing early         | 0.95268 |
| 0  | 0 stables                  | 1.18136 |
| -1 | -1 decreasing late         | 0.7997  |
| -1 | -1 unclass                 | 0.77092 |
| 0  | 1 increasing early         | 1.01934 |
| 0  | 1 increasing early         | 0.99791 |
| -1 | 1 unclass                  | 0.98083 |
| 0  | 1 increasing early         | 1.01518 |
| 0  | 1 increasing early         | 0.86669 |
| 0  | 1 increasing early         | 0.78933 |
| -1 | 1 unclass                  | 0.86325 |
| -1 | 1 unclass                  | 0.84868 |
| 0  | 0 increasing early         | 0.91931 |
| 0  | 1 increasing early         | 0.89501 |
| 0  | 1 increasing early         | 0.89287 |
| 0  | 0 stables                  | 0.77865 |
| 0  | 0 stables                  | 0.77865 |
| 0  | 0 stables                  | 0.98804 |
| 0  | -1 early decrease          | 0.83106 |
| 0  | 0 increasing early         | 0.8365  |
| 1  | 0 increasing late          | 0.97109 |
| 1  | 0 increasing late          | 0.89077 |
| 1  | 0 unclass                  | 0.96322 |
| 1  | 0 unclass                  | 0.91504 |
| 1  | 0 unclass                  | 0.90995 |
| 0  | 0 stables                  | 0.99063 |
| 0  | 0 stables                  | 0.94022 |
| 0  | 0 stables                  | 0.87496 |
| 0  | -1 early decrease          | 1.62134 |
| 0  | 0 stables                  | 0.90619 |
| 0  | 0 stables                  | 1.34804 |
| 0  | 0 stables                  | 1.32683 |
| 0  | 0 stables                  | 1.23243 |
| 0  | 0 stables                  | 1.22561 |
| 0  | 0 stables                  | 1.16415 |
| 0  | 0 stables                  | 1.14314 |
| 0  | 0 stables                  | 1.11877 |
| 0  | 0 stables                  | 0.88453 |
| 0  | 0 stables                  | 0.83153 |
| 0  | 0 stables                  | 0.7997  |
| 0  | 1 increasing early         | 0.85472 |

|    |                            |         |
|----|----------------------------|---------|
| 0  | 0 stables                  | 1.20811 |
| 0  | 0 stables                  | 1.27737 |
| 0  | 0 stables                  | 3.46571 |
| 0  | 0 stables                  | 1.46268 |
| 1  | 1 increasing late          | 1.37906 |
| 1  | -1 unclass                 | 0.98424 |
| 0  | 0 stables                  | 1.32198 |
| 0  | 0 early decrease           | 1.14834 |
| 0  | 0 early decrease           | 0.97639 |
| 0  | 0 stables                  | 0.96307 |
| 0  | -1 early decrease          | 0.86713 |
| 0  | -1 early decrease          | 0.86528 |
| 1  | 0 unclass                  | 0.97823 |
| 0  | 0 stables                  | 3.024   |
| 0  | 1 increasing early         | 0.89735 |
| 1  | 1 increasing continuously  | 1.42377 |
| 0  | 1 increasing continuously  | 0.97242 |
| 0  | 0 stables                  | 0.84358 |
| 0  | -1 decreasing continuously | 1.08994 |
| 0  | 0 stables                  | 0.98936 |
| -1 | 0 unclass                  | 0.9656  |
| 1  | 0 increasing late          | 0.87748 |
| 0  | 1 increasing early         | 0.89983 |
| 0  | 0 stables                  | 0.94929 |
| 0  | 0 stables                  | 0.80728 |
| 0  | 0 stables                  | 1.25901 |
| 1  | 1 increasing late          | 0.93018 |
| 0  | 0 stables                  | 0.95354 |
| 0  | 0 stables                  | 0.90853 |
| 0  | 1 increasing early         | 0.90535 |
| 0  | 0 stables                  | 1.32763 |
| 0  | 0 early decrease           | 1.25231 |
| 0  | 0 early decrease           | 1.21715 |
| 0  | 0 stables                  | 0.88132 |
| 0  | 0 stables                  | 0.86603 |
| 0  | 1 increasing early         | 0.85794 |
| -1 | 0 decreasing late          | 1.58094 |
| 0  | -1 early decrease          | 1.34013 |
| 1  | 0 unclass                  | 1.64628 |
| 0  | 0 stables                  | 1.42114 |
| 0  | -1 early decrease          | 1.56406 |
| 0  | -1 decreasing continuously | 1.46431 |
| 0  | 0 stables                  | 1.36964 |
| 1  | 1 increasing continuously  | 0.83813 |
| 0  | 1 increasing early         | 0.9976  |
| 0  | 1 increasing continuously  | 0.98459 |
| 0  | 0 stables                  | 0.89528 |
| 0  | 1 increasing continuously  | 0.8471  |
| 0  | 0 stables                  | 0.76866 |
| 0  | 1 increasing continuously  | 0.65956 |

|    |                            |         |
|----|----------------------------|---------|
| 0  | 0 stables                  | 0.84232 |
| 0  | 1 increasing early         | 1.05521 |
| 0  | 0 early decrease           | 1.40131 |
| 0  | 0 stables                  | 0.77066 |
| 0  | 0 stables                  | 1.67505 |
| 0  | 1 increasing early         | 0.98228 |
| -1 | 0 unclass                  | 0.83605 |
| 0  | 1 increasing early         | 1.07215 |
| 0  | 0 increasing early         | 0.89384 |
| 0  | 0 stables                  | 1.11862 |
| -1 | -1 decreasing continuously | 0.97298 |
| 0  | 1 increasing continuously  | 0.93769 |
| 0  | 0 stables                  | 0.85302 |
| 0  | 0 stables                  | 0.96829 |
| 0  | 0 increasing early         | 0.76335 |
| 0  | 0 stables                  | 0.71932 |
| -1 | 1 unclass                  | 0.8985  |
| 0  | 1 increasing continuously  | 0.93818 |
| 0  | -1 decreasing continuously | 1.80723 |
| -1 | -1 decreasing continuously | 1.93999 |
| -1 | -1 decreasing late         | 0.78232 |
| 0  | 1 increasing early         | 0.82104 |
| 0  | 0 early decrease           | 2.80391 |
| 0  | 0 stables                  | 1.14517 |
| 1  | 1 increasing continuously  | 0.89215 |
| 1  | 1 increasing late          | 1.52501 |
| 0  | 0 increasing early         | 1.27922 |
| 0  | 0 stables                  | 1.11306 |
| 0  | 1 increasing early         | 1.0888  |
| 0  | 0 increasing early         | 1.0587  |
| 0  | 0 stables                  | 0.99031 |
| 0  | 0 increasing early         | 0.97752 |
| 0  | 0 stables                  | 0.97749 |
| 0  | 0 stables                  | 0.95211 |
| 0  | 0 stables                  | 0.94664 |
| 0  | 0 increasing early         | 0.94518 |
| 0  | 1 increasing early         | 0.92935 |
| 0  | 0 stables                  | 0.89477 |
| 0  | -1 early decrease          | 0.87865 |
| 0  | 1 increasing early         | 0.86678 |
| 0  | 0 stables                  | 0.82012 |
| -1 | -1 decreasing late         | 1.00653 |
| -1 | -1 decreasing late         | 0.9946  |
| -1 | 0 unclass                  | 1.0331  |
| -1 | 0 unclass                  | 0.87464 |
| 0  | -1 decreasing continuously | 1.79209 |
| 0  | 0 stables                  | 1.60033 |
| 0  | -1 early decrease          | 1.49399 |
| 0  | 0 increasing early         | 1.44209 |
| 0  | 0 increasing early         | 0.99814 |

|   |                           |         |
|---|---------------------------|---------|
| 1 | 0 unclass                 | 2.16813 |
| 0 | 0 stables                 | 0.97289 |
| 1 | 1 increasing late         | 1.48994 |
| 0 | 1 increasing continuously | 1.29173 |
| 0 | 1 increasing continuously | 1.28292 |
| 0 | 1 increasing continuously | 1.22913 |
| 1 | 1 increasing late         | 1.56231 |
| 0 | 0 stables                 | 1.54711 |
| 0 | 0 stables                 | 1.4888  |
| 0 | 1 increasing early        | 1.32506 |
| 0 | 0 stables                 | 1.15678 |
| 0 | 0 stables                 | 0.70293 |
| 0 | -1 early decrease         | 1.65597 |
| 0 | -1 early decrease         | 1.65561 |
| 0 | 0 stables                 | 0.92037 |
| 0 | 1 increasing continuously | 0.92346 |
| 0 | -1 early decrease         | 1.61509 |
| 0 | 0 stables                 | 0.92248 |
| 0 | 0 stables                 | 1.08169 |

Accession MW

Cs5g1477( 33153  
Cs5g0417( 61453  
Cs8g0742( 53524  
Cs6g1137( 49128  
Cs3g1686( 57382  
Cs4g0663( 69599  
Cs7g1777( 31924  
Cs2g1616( 80653  
Cs3g1836( 36096  
Cs1g0154( 35822  
Cs7g2167( 47268  
orange1.1t 56684  
Cs1g2103( 37164  
Cs9g0537( 108111  
Cs7g1682( 25028  
Cs7g1503( 65818  
Cs5g1251( 11258  
orange1.1t 101859  
Cs2g0362( 49827  
Cs4g1608( 78196  
Cs3g0975( 32009  
Cs3g0977( 140816  
Cs5g3169( 98610  
orange1.1t 9252.6  
Cs5g1480( 59909  
Cs6g1035( 32671  
Cs2g1210( 56722  
Cs2g1008( 120877  
Cs3g1793( 20873  
Cs1g0403( 27522  
Cs7g2761( 19659  
Cs7g0181( 26334  
Cs2g1355( 59850  
Cs3g2504( 29400  
Cs9g1906( 19175  
Cs5g2900( 44210  
Cs2g1201( 23338  
Cs2g2462( 31301  
Cs1g0713( 32637  
Cs2g1172( 22455  
Cs2g2676( 24751  
Cs9g1722( 25041  
Cs6g1534( 19886  
Cs3g1710( 23327  
Cs4g0521( 80332  
orange1.1t 69677  
Cs6g2063( 31226

Cs7g0433( 33783  
Cs6g2208( 58886  
Cs4g1305( 55060  
Cs8g0371( 66361  
Cs5g0966( 31052  
Cs4g0771( 13381  
Cs3g1448( 169777  
Cs3g1422( 72890  
Cs5g0184( 71725  
Cs1g2145( 16835  
Cs9g1752( 14107  
Cs2g2869( 14005  
Cs1g2521( 28088  
Cs2g2535( 26273  
gij113952( 18531  
Cs2g0378( 28039  
Cs2g1968( 28708  
Cs2g0323( 33302  
Cs1g1515( 34498  
Cs5g3164( 19061  
Cs3g2728( 57191  
Cs3g2729( 56925  
Cs7g1924( 29414  
Cs9g1713( 25999  
Cs7g1641( 31164  
Cs2g2043( 46864  
Cs5g3386( 42564  
Cs2g0832( 66951  
Cs8g0277( 47216  
Cs5g2568( 24147  
Cs1g2633( 35321  
Cs9g1721( 20565  
Cs6g1190( 31782  
Cs7g1940( 60990  
Cs1g2638( 40270  
Cs7g0291( 27348  
Cs7g0789( 43510  
Cs1g1793( 46031  
Cs9g0167( 53852  
Cs7g0224( 59095  
Cs4g1873( 53160  
Cs6g1530( 156725  
Cs6g1528( 164377  
Cs7g3142( 30434  
Cs5g2487( 53825  
Cs2g1435( 32662  
Cs9g0313( 32054  
Cs2g2352( 40986  
Cs3g2285( 64547  
Cs6g1165( 12332



Cs4g02110 29176  
Cs8g02310 54362  
Cs5g02680 26276  
Cs8g19810 57329  
Cs1g21440 29253  
Cs6g20640 29305  
Cs7g01840 41898

## Annotation

Symbols: GLX2-3, ETHE1, GLY3 | GLY3 (GLYOXALASE II 3); hydrolase/ hydroxyacylglutathione hyd  
Symbols: ALDH12A1, ATP5CDH, P5CDH | ALDH12A1; 1-pyrroline-5-carboxylate dehydrogenase/ 3-ch  
diaminopimelate decarboxylase, putative / DAP carboxylase, putative | chr5:3827526-3829986 REVERSE  
Symbols: POP2, GABA-T, HER1 | POP2 (POLLEN-PISTIL INCOMPATIBILITY 2); 4-aminobutyrate tra  
Symbols: SHM1, STM, SHMT1 | SHM1 (SERINE TRANSHYDROXYMETHYLTRANSFERASE 1); gly  
Symbols: ATPME3 | ATPME3; pectinesterase | chr3:4771902-4775119 REVERSE  
Symbols: ATPHB2 | ATPHB2 (PROHIBITIN 2) | chr1:979308-981885 REVERSE  
Symbols: ATPHB2 | ATPHB2 (PROHIBITIN 2) | chr1:979308-981885 REVERSE  
Symbols: ANNAT1, OXY5, ATOXY5 | ANNAT1 (ANNEXIN ARABIDOPSIS 1); ATP binding / calcium  
Symbols: ANNAT2 | ANNAT2 (Annexin Arabidopsis 2); calcium ion binding / calcium-dependent phosph  
DNA binding | chr3:19346799-19349513 REVERSE  
Symbols: CSY2 | CSY2 (citrate synthase 2); citrate (SI)-synthase | chr3:21724314-21727690 REVERSE  
Symbols: PMDH1 | PMDH1 (PEROXISOMAL NAD-MALATE DEHYDROGENASE 1); L-malate dehy  
Symbols: PPK | PPK (pyruvate orthophosphate dikinase); kinase/ pyruvate, phosphate dikinase | chr4:8  
Symbols: AIR12 | AIR12; extracellular matrix structural constituent | chr3:2365301-2366496 FORWARD  
Symbols: DWF1, DIM, EVE1, DIM1, CBB1 | DWF1 (DWARF 1); calmodulin binding / catalytic | chr3:68  
multiprotein bridging factor 1B  
Symbols: LOX2, ATLOX2 | LOX2 (LIPOXYGENASE 2); lipoxygenase | chr3:16525410-16529352 FOR  
Symbols: KAS I | KAS I (3-KETOACYL-ACYL CARRIER PROTEIN SYNTHASE I); catalytic/ fatty-ac  
Symbols: AIM1 | AIM1 (ABNORMAL INFLORESCENCE MERISTEM); enoyl-CoA hydratase | chr4:14  
Symbols: HGL1 | HGL1 (heteroglycan glucosidase 1); hydrolase, hydrolyzing O-glycosyl compounds | chr  
Symbols: HGL1 | HGL1 (heteroglycan glucosidase 1); hydrolase, hydrolyzing O-glycosyl compounds | chr  
Symbols: ATISA2, ISA2, DBE1, BE2 | isoamylase, putative / starch debranching enzyme, putative | chr1:8  
Symbols: ATX1, ATATX1 | ATX1 (ARABIDOPSIS HOMOLOG OF ANTI-OXIDANT 1); metal ion bin  
Symbols: CYP72A15 | CYP72A15; electron carrier/ heme binding / iron ion binding / monooxygenase/ ox  
Symbols: ATNSI | ATNSI (NUCLEAR SHUTTLE INTERACTING); N-acetyltransferase | chr1:11534684  
Symbols: BGLU42 | BGLU42 (BETA GLUCOSIDASE 42); beta-glucosidase/ catalytic/ cation binding / h  
FAD-binding Berberine family protein  
Symbols: COX6B, ATCOX6B2 | COX6B (CYTOCHROME C OXIDASE 6B); cytochrome-c oxidase | ch  
unknown protein | chr2:9320195-9322734 REVERSE  
Symbols: ATPQ | ATPQ (ATP SYNTHASE D CHAIN, MITOCHONDRIAL); hydrogen ion transmembra  
ATP synthase delta chain, mitochondrial, putative / H(+)-transporting two-sector ATPase, delta (OSCP) su  
ATP synthase beta chain, mitochondrial, putative | chr5:2821928-2824966 FORWARD  
Symbols: APFI, GAMMA CA2 | GAMMA CA2 (GAMMA CARBONIC ANHYDRASE 2); carbonate del  
NADH-ubiquinone oxidoreductase-related | chr5:21413646-21415006 FORWARD  
binding / catalytic/ coenzyme binding | chr2:8785988-8789473 FORWARD  
Symbols: ATPCAP1, PCAP1 | DREPP plasma membrane polypeptide family protein | chr4:10940739-109  
Symbols: ATPHB3 | ATPHB3 (PROHIBITIN 3) | chr5:16314850-16316719 REVERSE  
cytidyltransferase family | chr1:19745046-19747245 REVERSE  
YGGT family protein | chr4:13923773-13924692 REVERSE  
forkhead-associated domain-containing protein / FHA domain-containing protein | chr2:9219324-9220590  
Symbols: ACYB-2 | ACYB-2; carbon-monoxide oxygenase | chr4:13053686-13055623 REVERSE  
unknown protein | chr2:15278769-15280604 FORWARD  
binding | chr5:26189725-26190591 REVERSE  
Symbols: AVP1, ATAVP3, AVP-3 | AVP1; ATPase/ hydrogen-translocating pyrophosphatase | chr1:53989  
Symbols: AVP1, ATAVP3, AVP-3 | AVP1; ATPase/ hydrogen-translocating pyrophosphatase | chr1:53989  
band 7 family protein | chr1:26293660-26295834 REVERSE

band 7 family protein | chr1:26293660-26295834 REVERSE  
 Symbols: MPPBETA | mitochondrial processing peptidase beta subunit, putative | chr3:365549-368911 FC  
 mitochondrial processing peptidase alpha subunit, putative | chr1:19323382-19326916 REVERSE  
 Symbols: ATEGY3, EGY3 | EGY3 (ETHYLENE-DEPENDENT GRAVITROPISM-DEFICIENT AND Y  
 Symbols: CLPR2, NCLPP2, CLP2 | CLP2 (CLP PROTEASE PROTEOLYTIC SUBUNIT 2); serine-type  
 Symbols: UBC28 | ubiquitin-conjugating enzyme, putative | chr1:23833563-23835536 FORWARD  
 Symbols: BIP1 | BIP1; ATP binding | chr5:10540460-10543375 REVERSE  
 Symbols: BIP1 | BIP1; ATP binding | chr5:10540460-10543375 REVERSE  
 Symbols: BIP, BIP2 | BIP2; ATP binding | chr5:16807483-16810646 REVERSE  
 60S ribosomal protein L26 (RPL26A) | chr3:18504256-18504967 FORWARD  
 60S ribosomal protein L36 (RPL36B) | chr3:19913707-19915016 REVERSE  
 ribosomal protein L7Ae/L30e/S12e/Gadd45 family protein | chr4:11811750-11813000 REVERSE  
 Symbols: EMB2296 | EMB2296 (embryo defective 2296); structural constituent of ribosome | chr2:78371C  
 yrdC family protein | chr3:317432-319121 FORWARD  
 NADH-plastoquinone oxidoreductase subunit J [Citrus sinensis]  
 Symbols: CAB2, AB165, LHCB1.1 | CAB2 (CHLOROPHYLL A/B-BINDING PROTEIN 2); chlorophyll  
 Symbols: LHCB2.1, LHCB2 | LHCB2.1; chlorophyll binding | chr2:1823240-1824425 REVERSE  
 (S)-2-hydroxy-acid oxidase, peroxisomal, putative / glycolate oxidase, putative / short chain alpha-hydroxy  
 oxidoreductase family protein | chr1:30044746-30046027 FORWARD  
 Symbols: ATGPX6, PHGPX, LSC803 | ATGPX6 (GLUTATHIONE PEROXIDASE 6); glutathione perox  
 Symbols: CAT2 | CAT2 (CATALASE 2); catalase | chr4:16700596-16703325 REVERSE  
 Symbols: CAT2 | CAT2 (CATALASE 2); catalase | chr4:16700596-16703325 REVERSE  
 Symbols: FSD2 | FSD2 (FE SUPEROXIDE DISMUTASE 2); superoxide dismutase | chr5:20773296-2077  
 Symbols: membrane-associated progesterone binding protein 3; ATMP2, ATMAPR3, MSBP2, MAPR3 | A  
 Symbols: ATCBR, CBR1 | ATCBR (ARABIDOPSIS THALIANA NADH:CYTOCHROME B5 REDUCT  
 Symbols: ATPDIL2-2, ATPDI10, PDI10 | ATPDIL2-2 (PDI-LIKE 2-2); protein disulfide isomerase | chr1:  
 Symbols: ATPDIL2-1, UNE5, MEE30, PDI11, ATPDI11 | UNE5 (UNFERTILIZED EMBRYO SAC 5); p  
 Symbols: ERD4 | ERD4 (early-responsive to dehydration 4); senescence/dehydration-associated protein-rel  
 Symbols: ERD7 | ERD7 (EARLY-RESPONSIVE TO DEHYDRATION 7); senescence/dehydration-assoc  
 RmlC-like cupins superfamily protein; germin-like protein, putative | chr5:15657802-15658584 REVERSE  
 Symbols: ATHCHIB, PR3, PR-3, CHI-B, B-CHI | ATHCHIB (ARABIDOPSIS THALIANA BASIC CHI  
 remorin family protein | chr3:18142863-18144163 REVERSE  
 29 kDa ribonucleoprotein, chloroplast, putative / RNA-binding protein cp29, putative | chr2:15634525-156  
 Symbols: CNX1, ATCNX1 | calnexin 1 (CNX1) | chr5:24827102-24829791 REVERSE  
 Symbols: IDH1 | IDH1 (ISOCITRATE DEHYDROGENASE 1); isocitrate dehydrogenase (NAD<sup>+</sup>)/ oxido  
 Symbols: MAB1 | MAB1 (MACCI-BOU); catalytic/ pyruvate dehydrogenase (acetyl-transferring) | chr5:20  
 Symbols: AT-E1 ALPHA | AT-E1 ALPHA; oxidoreductase, acting on the aldehyde or oxo group of donor:  
 dihydrolipoamide S-acetyltransferase, putative | chr3:4595876-4600469 FORWARD  
 Symbols: mtLPD1 | mtLPD1 (mitochondrial lipoamide dehydrogenase 1); ATP binding / dihydrolipoyl del  
 hydrolase, alpha/beta fold family protein | chr5:4451837-4454576 REVERSE  
 Symbols: FC1, FC-I, ATFC-I | FC1 (ferrochelatae 1); ferrochelatae | chr5:9096460-9099178 FORWARD  
 Symbols: PDR6, ATPDR6 | PDR6; ATPase, coupled to transmembrane movement of substances | chr2:152  
 Symbols: PDR6, ATPDR6 | PDR6; ATPase, coupled to transmembrane movement of substances | chr2:152  
 Symbols: TMP-C, PIP1;4, PIP1E | PIP1;4 (PLASMA MEMBRANE INTRINSIC PROTEIN 1;4); water ch  
 sugar transporter family protein | chr5:23903892-23906977 FORWARD  
 mitochondrial phosphate transporter | chr5:4530643-4533070 REVERSE  
 dicarboxylate/tricarboxylate carrier (DTC) | chr5:6679306-6682001 REVERSE  
 Symbols: AAC3, ATAAC3 | AAC3 (ADP/ATP CARRIER 3); ATP:ADP antiporter/ binding | chr4:140412  
 SEC14 cytosolic factor family protein / phosphoglyceride transfer family protein | chr4:5839683-5842394 |  
 Symbols: VMA10, AVMA10 | VMA10 (VACUOLAR MEMBRANE ATPASE 10); hydrogen ion transpo

vacuolar ATP synthase subunit D (VATD) / V-ATPase D subunit / vacuolar proton pump D subunit (VAT)  
vacuolar ATP synthase subunit B, putative / V-ATPase B subunit, putative / vacuolar proton pump B subunit  
Symbols: TUF, emb2448, TUFF, VHA-E1 | TUF (VACUOLAR ATP SYNTHASE SUBUNIT E1); protosp.  
Symbols: PHT4;3 | transporter-related | chr3:17307055-17309938 REVERSE  
Symbols: VDAC2, ATVDAC2 | VDAC2 (VOLTAGE DEPENDENT ANION CHANNEL 2); voltage-gated  
Symbols: VDAC1, ATVDAC1 | VDAC1 (VOLTAGE DEPENDENT ANION CHANNEL 1); voltage-gated  
Symbols: AAC2 | AAC2 (ADP/ATP carrier 2); ATP:ADP antiporter/ binding | chr5:4335467-4337628 FO

**Supplemental Table S6. Set of 104 differentially expressed proteins between OMa and Ma stage**

| AT homolog | Mapman class                                                                        | Number of identified peptides | Number of identified proteins |
|------------|-------------------------------------------------------------------------------------|-------------------------------|-------------------------------|
| AT1G5358   | 13.2.3. amino acid metabolism.degradation.aspartate family.threonine                | 11                            | 6                             |
| AT5G6253   | 13.2.2. amino acid metabolism.degradation.glutamate family.proline                  | 13                            | 8                             |
| AT5G1188   | 13.1.3. amino acid metabolism.synthesis.aspartate family.lysine.diaminopimelate     | 34                            | 13                            |
| AT3G2220   | 13.1.1. amino acid metabolism.synthesis.central amino acid metabolism.GABA.         | 20                            | 9                             |
| AT4G3793   | 25.1 C1-metabolism.glycine hydroxymethyltransferase                                 | 5                             | 2                             |
| AT3G1431   | 10.8.1 cell wall.pectin*esterases.PME                                               | 4                             | 3                             |
| AT1G0386   | 31.3 cell.cycle                                                                     | 6                             | 5                             |
| AT1G0386   | 31.3 cell.cycle                                                                     | 3                             | 3                             |
| AT1G3572   | 31.1 cell.organisation                                                              | 74                            | 16                            |
| AT5G6502   | 31.1 cell.organisation                                                              | 18                            | 8                             |
| AT3G5217   | 28.3* DNA.plastid nucleoid interacting                                              | 6                             | 5                             |
| AT3G5875   | 6.1 gluconeogenese/ glyoxylate cycle.citrate synthase                               | 12                            | 6                             |
| AT2G2278   | 6.3 gluconeogenesis.Malate DH                                                       | 13                            | 6                             |
| AT4G1553   | 4.4 glycolysis.PPFK                                                                 | 6                             | 5                             |
| AT3G0739   | 17.2.3 hormone metabolism.auxin.induced-regulated-responsive-activated              | 3                             | 2                             |
| AT3G1982   | 17.3.1. hormone metabolism.brassinosteroid.synthesis-degradation.sterols.DWF        | 6                             | 6                             |
| AT3G5868   | 17.5.3 hormone metabolism.ethylene.induced-regulated-responsive-activated           | 4                             | 4                             |
| AT3G4514   | 17.7.1. hormone metabolism.jasmonate.synthesis-degradation.lipoxygenase             | 6                             | 5                             |
| AT5G4629   | 11.1.3 lipid metabolism.FA synthesis and FA elongation.ketoacyl ACP synthase        | 20                            | 4                             |
| AT4G2901   | 11.9.4. lipid metabolism.lipid degradation.beta-oxidation.mutifunctional            | 12                            | 9                             |
| AT3G2364   | 2.2.2.1 major CHO metabolism.degradation.starch.starch cleavage                     | 16                            | 6                             |
| AT3G2364   | 2.2.2.1 major CHO metabolism.degradation.starch.starch cleavage                     | 22                            | 9                             |
| AT1G0331   | 2.1.2.4 major CHO metabolism.synthesis.starch.debranching                           | 8                             | 7                             |
| AT1G6624   | 15.2 metal handling.binding, chelation and storage                                  | 9                             | 3                             |
| AT3G1469   | 26.1 misc.cytochrome P450                                                           | 12                            | 7                             |
| AT1G3207   | 26.24 misc.GCN5-related N-acetyltransferase                                         | 3                             | 3                             |
| AT5G3689   | 26.3 misc.gluco-, galacto- and mannosidases                                         | 3                             | 2                             |
| AT4G2084   | 26.8 misc.nitrilases, *nitrile lyases, berberine bridge enzymes, reticuline oxidase | 7                             | 5                             |
| AT1G2245   | 9.7 Electron transport / ATP synthesis.cytochrome c oxidase                         | 6                             | 3                             |
| AT2G2187   | 9.9 Electron transport / ATP synthesis.F1-ATPase                                    | 16                            | 4                             |
| AT3G5230   | 9.9 Electron transport / ATP synthesis.F1-ATPase                                    | 13                            | 6                             |
| AT5G1345   | 9.9 Electron transport / ATP synthesis.F1-ATPase                                    | 18                            | 9                             |
| AT5G0868   | 9.9 Electron transport / ATP synthesis.F1-ATPase                                    | 49                            | 16                            |
| AT1G4726   | 9.1.1.5 Electron transport / ATP synthesis.NADH-DH.carbonic anhydrase               | 5                             | 5                             |
| AT5G5284   | 9.1.1 Electron transport / ATP synthesis.NADH-DH.complex I                          | 2                             | 2                             |
| AT2G2036   | 9.1.1 Electron transport / ATP synthesis.NADH-DH.complex I                          | 4                             | 4                             |
| AT4G2026   | 35.1 not assigned.no ontology                                                       | 23                            | 8                             |
| AT5G4077   | 35.1 not assigned.no ontology                                                       | 13                            | 6                             |
| AT1G5300   | 35.1 not assigned.no ontology                                                       | 7                             | 4                             |
| AT4G2799   | 35.1 not assigned.no ontology                                                       | 5                             | 2                             |
| AT2G2153   | 35.1 not assigned.no ontology                                                       | 8                             | 5                             |
| AT4G2557   | 35.2 not assigned.unknown                                                           | 2                             | 1                             |
| AT2G3641   | 35.2 not assigned.unknown                                                           | 4                             | 2                             |
| AT5G6552   | 35.2 not assigned.unknown                                                           | 8                             | 5                             |
| AT1G1569   | 23.4.9% nucleotide metabolism.phosphotransfer and pyrophosphatases.misc             | 22                            | 11                            |
| AT1G1569   | 23.4.9% nucleotide metabolism.phosphotransfer and pyrophosphatases.misc             | 25                            | 11                            |
| AT1G6984   | 29.5 protein.degradation                                                            | 3                             | 2                             |

|          |         |                                                                       |    |    |
|----------|---------|-----------------------------------------------------------------------|----|----|
| AT1G6984 | 29.5    | protein.degradation                                                   | 3  | 2  |
| AT3G0209 | 29.5    | protein.degradation                                                   | 19 | 11 |
| AT1G5198 | 29.5    | protein.degradation                                                   | 12 | 7  |
| AT1G1787 | 29.5.7  | protein.degradation.metalloprotease                                   | 40 | 10 |
| AT1G1241 | 29.5.5  | protein.degradation.serine protease                                   | 8  | 4  |
| AT1G6423 | 29.5.11 | protein.degradation.ubiquitin.E2                                      | 4  | 1  |
| AT5G2854 | 29.6    | protein.folding                                                       | 6  | 3  |
| AT5G2854 | 29.6    | protein.folding                                                       | 31 | 13 |
| AT5G4202 | 29.6    | protein.folding                                                       | 32 | 13 |
| AT3G4991 | 29.2.1. | protein.synthesis.ribosomal protein.eukaryotic.60S subunit.L26        | 2  | 2  |
| AT3G5374 | 29.2.1. | protein.synthesis.ribosomal protein.eukaryotic.60S subunit.L36        | 3  | 2  |
| AT4G2238 | 29.2.1. | protein.synthesis.ribosomal protein.eukaryotic.60S subunit.L7/L30/S12 | 2  | 2  |
| AT2G1802 | 29.2.1. | Protein.synthesis.ribosomal protein.eukaryotic.60S subunit.L8         | 14 | 5  |
| AT3G0192 | 29.2.7* | protein.synthesis.ribosome biogenesis                                 | 7  | 5  |
|          | 1.1.6   | PS.lightreaction.NADH DH                                              | 3  | 2  |
| AT1G2992 | 1.1.1.1 | PS.lightreaction.photosystem II.LHC-II                                | 2  | 2  |
| AT2G0510 | 1.1.1.1 | PS.lightreaction.photosystem II.LHC-II                                | 3  | 2  |
| AT3G1442 | 1.2.2   | PS.photorespiration.glycolate oxydase                                 | 23 | 8  |
| AT1G7987 | 1.2.6   | PS.photorespiration.hydroxypyruvate reductase                         | 7  | 5  |
| AT4G1160 | 21.2.2  | redox.ascorbate and glutathione.glutathione                           | 3  | 2  |
| AT4G3509 | 21.6    | redox.dismutases and catalases                                        | 23 | 9  |
| AT4G3509 | 21.6    | redox.dismutases and catalases                                        | 18 | 6  |
| AT5G5110 | 21.6    | redox.dismutases and catalases                                        | 13 | 3  |
| AT3G4889 | 21.3    | redox.heme                                                            | 13 | 6  |
| AT5G1777 | 21.99   | redox.misc                                                            | 7  | 4  |
| AT1G0498 | 21.1    | redox.thioredoxin                                                     | 7  | 4  |
| AT2G4747 | 21.1    | redox.thioredoxin                                                     | 23 | 10 |
| AT1G3036 | 20.2.3  | stress.abiotic.drought/salt                                           | 5  | 4  |
| AT2G1784 | 20.2.3  | stress.abiotic.drought/salt                                           | 6  | 3  |
| AT5G3911 | 20.2.9  | stress.abiotic.unspecified                                            | 11 | 3  |
| AT3G1250 | 20.1    | stress.biotic                                                         | 9  | 5  |
| AT3G4894 | 27.3.9  | RNA.regulation of transcription.unclassified                          | 5  | 2  |
| AT2G3722 | 27.4    | RNA.RNA binding                                                       | 5  | 2  |
| AT5G6179 | 30.3    | signalling.calcium                                                    | 40 | 14 |
| AT4G3526 | 8.1.4   | TCA / org.transformation.TCA.IDH                                      | 8  | 5  |
| AT5G5085 | 8.1.1.1 | TCA / org.transformation.TCA.pyruvate DH.E1                           | 11 | 5  |
| AT1G5990 | 8.1.1.1 | TCA / org.transformation.TCA.pyruvate DH.E1                           | 16 | 11 |
| AT3G1393 | 8.1.1.2 | TCA / org.transformation.TCA.pyruvate DH.E2                           | 20 | 10 |
| AT1G4803 | 8.1.1.3 | TCA / org.transformation.TCA.pyruvate DH.E3                           | 36 | 14 |
| AT5G1380 | 19.50*  | tetrapyrrole degradation                                              | 10 | 5  |
| AT5G2603 | 19.2    | tetrapyrrole synthesis.ferrochelatase                                 | 8  | 5  |
| AT2G3638 | 34.16   | transport.ABC transporters and multidrug resistance systems           | 18 | 12 |
| AT2G3638 | 34.16   | transport.ABC transporters and multidrug resistance systems           | 10 | 7  |
| AT4G0043 | 34.19.1 | transport.Major Intrinsic Proteins.PIP                                | 6  | 3  |
| AT5G5925 | 34.8    | transport.metabolite transporters at the envelope membrane            | 3  | 1  |
| AT5G1404 | 34.9    | transport.metabolite transporters at the mitochondrial membrane       | 10 | 5  |
| AT5G1976 | 34.9    | transport.metabolite transporters at the mitochondrial membrane       | 8  | 6  |
| AT4G2839 | 34.9    | transport.metabolite transporters at the mitochondrial membrane       | 30 | 12 |
| AT4G0916 | 34.99   | transport.misc                                                        | 48 | 23 |
| AT3G0139 | 34.1    | transport.p- and v-ATPases                                            | 17 | 6  |

|          |        |                                                              |    |    |
|----------|--------|--------------------------------------------------------------|----|----|
| AT3G5873 | 34.1.1 | transport.p- and v-ATPases.H+-transporting two-sector ATPase | 21 | 10 |
| AT4G3851 | 34.1.1 | transport.p- and v-ATPases.H+-transporting two-sector ATPase | 30 | 13 |
| AT4G1115 | 34.1.1 | transport.p- and v-ATPases.H+-transporting two-sector ATPase | 25 | 8  |
| AT3G4698 | 34.7   | transport.phosphate                                          | 2  | 2  |
| AT5G6750 | 34.2   | transport.porins                                             | 18 | 6  |
| AT3G0128 | 34.2   | transport.porins                                             | 10 | 5  |
| AT5G1349 | 34.14  | transport.unspecified cations                                | 26 | 10 |

| Coverage | PI   | Ma/113 |       |       | OMa/113 |       |       | Average |         | Standard Deviation |         | p-value  |
|----------|------|--------|-------|-------|---------|-------|-------|---------|---------|--------------------|---------|----------|
|          |      | Repea  | Repea | Repea | Repea   | Repea | Repea | Ma/113  | OMa/113 | Ma/113             | OMa/113 | pval(OMa |
| 27.63%   | 8.28 | 1.03   | 1.27  | 1.42  | 0.93    | 0.83  | 0.83  | 1.24263 | 0.864   | 0.19738            | 0.06066 | 0.03366  |
| 16.27%   | 6.72 | 0.76   | 0.94  | 0.95  | 1.32    | 1.2   | 1.31  | 0.88273 | 1.27947 | 0.10946            | 0.06672 | 0.00584  |
| 28.25%   | 7.57 | 1.07   | 1.17  | 1.21  | 0.72    | 0.83  | 0.79  | 1.1476  | 0.7818  | 0.07168            | 0.05183 | 0.00201  |
| 21.65%   | 6.29 | 0.85   | 0.9   | 0.93  | 1.4     | 1.38  | 1.33  | 0.89413 | 1.37193 | 0.04074            | 0.03619 | 0.00011  |
| 3.65%    | 8.16 | 1.1    | 0.63  | 0.82  | 1.25    | 1.31  | 1.37  | 0.8489  | 1.30957 | 0.2342             | 0.06336 | 0.03025  |
| 5.21%    | 8.61 | 0.92   | 0.73  | 0.76  | 1.27    | 1.22  | 1.32  | 0.80243 | 1.2725  | 0.10217            | 0.05237 | 0.00209  |
| 21.11%   | 9.33 | 0.81   | 0.78  | 0.85  | 1.72    | 1.78  | 1.56  | 0.81427 | 1.685   | 0.0321             | 0.11092 | 0.0002   |
| 4.44%    | 5.53 | 0.84   | 1.04  | 1.08  | 1.63    | 1.52  | 1.36  | 0.9856  | 1.50383 | 0.12997            | 0.13743 | 0.009    |
| 49.53%   | 5.55 | 0.95   | 0.93  | 0.93  | 1.55    | 1.41  | 1.43  | 0.93903 | 1.46147 | 0.00837            | 0.07579 | 0.00029  |
| 27.44%   | 6.77 | 0.93   | 0.83  | 1.05  | 1.32    | 1.5   | 1.31  | 0.93693 | 1.37533 | 0.1079             | 0.10583 | 0.00736  |
| 13.95%   | 5.09 | 0.92   | 1.04  | 1.01  | 0.61    | 0.64  | 0.87  | 0.98817 | 0.70317 | 0.06332            | 0.14341 | 0.03455  |
| 12.65%   | 9.07 | 0.83   | 0.89  | 0.91  | 1.34    | 1.33  | 1.39  | 0.8762  | 1.3544  | 0.04052            | 0.03027 | 8.1E-05  |
| 18.26%   | 8.11 | 0.93   | 0.84  | 0.9   | 1.36    | 1.42  | 1.32  | 0.89017 | 1.36293 | 0.04389            | 0.05093 | 0.00026  |
| 6.45%    | 5.65 | 1.07   | 1.09  | 1.14  | 0.72    | 0.8   | 0.8   | 1.09923 | 0.77303 | 0.03681            | 0.04974 | 0.0008   |
| 8.79%    | 9.52 | 1.11   | 0.77  | 0.82  | 1.37    | 1.35  | 1.64  | 0.90173 | 1.4545  | 0.18613            | 0.16217 | 0.01787  |
| 11.09%   | 8.67 | 0.8    | 0.79  | 0.81  | 1.28    | 1.26  | 1.25  | 0.79723 | 1.26353 | 0.01013            | 0.01398 | 1.2E-06  |
| 38.10%   | 9.79 | 1.3    | 1.32  | 1.27  | 0.86    | 0.88  | 0.81  | 1.29497 | 0.849   | 0.02089            | 0.03342 | 4E-05    |
| 5.68%    | 6.03 | 0.56   | 0.76  | 0.72  | 0.43    | 0.42  | 0.54  | 0.68017 | 0.46177 | 0.10374            | 0.06766 | 0.03787  |
| 8.10%    | 7.13 | 1.04   | 1.06  | 0.94  | 0.68    | 0.6   | 0.77  | 1.01583 | 0.6839  | 0.06562            | 0.08684 | 0.00616  |
| 12.14%   | 9.17 | 0.82   | 0.69  | 0.89  | 1.33    | 1.3   | 0.97  | 0.79903 | 1.20127 | 0.0985             | 0.20035 | 0.03551  |
| 21.80%   | 5.22 | 1.1    | 1.19  | 1.15  | 0.8     | 0.89  | 0.77  | 1.14517 | 0.81733 | 0.04588            | 0.06372 | 0.00194  |
| 6.68%    | 5.74 | 1.1    | 1.19  | 1.14  | 0.79    | 0.83  | 0.82  | 1.142   | 0.81447 | 0.04478            | 0.02297 | 0.00035  |
| 9.44%    | 5.83 | 0.88   | 0.92  | 0.89  | 0.56    | 0.4   | 0.61  | 0.89827 | 0.5223  | 0.02148            | 0.10929 | 0.00427  |
| 43.82%   | 6.23 | 1.26   | 1.25  | 1.33  | 0.76    | 0.77  | 0.77  | 1.27897 | 0.7688  | 0.04102            | 0.00538 | 2.8E-05  |
| 14.72%   | 9.18 | 0.77   | 0.9   | 0.74  | 1.77    | 1.76  | 1.56  | 0.79997 | 1.69793 | 0.08582            | 0.11552 | 0.00042  |
| 11.76%   | 8.7  | 0.84   | 1.06  | 0.96  | 0.73    | 0.62  | 0.63  | 0.95523 | 0.66127 | 0.10959            | 0.06325 | 0.01581  |
| 2.84%    | 5.47 | 1.27   | 1.57  | 1.48  | 0.95    | 0.86  | 1.01  | 1.4391  | 0.94133 | 0.15588            | 0.07426 | 0.00753  |
| 5.72%    | 8.67 | 0.86   | 0.97  | 0.83  | 1.63    | 1.54  | 1.27  | 0.88523 | 1.47793 | 0.07442            | 0.18451 | 0.0067   |
| 14.51%   | 4.25 | 0.92   | 0.63  | 0.77  | 1.62    | 1.6   | 1.88  | 0.77133 | 1.70087 | 0.14538            | 0.15539 | 0.00164  |
| 14.11%   | 8.9  | 0.73   | 0.71  | 0.78  | 1.61    | 1.45  | 1.45  | 0.7424  | 1.5047  | 0.03575            | 0.0936  | 0.00019  |
| 36.09%   | 5.14 | 1      | 0.89  | 0.84  | 1.45    | 1.46  | 1.72  | 0.91217 | 1.54267 | 0.07911            | 0.15124 | 0.00306  |
| 34.45%   | 9.4  | 0.84   | 0.84  | 0.94  | 1.36    | 1.47  | 1.41  | 0.8741  | 1.41413 | 0.0589             | 0.05734 | 0.00034  |
| 36.14%   | 6.06 | 0.97   | 0.84  | 0.82  | 1.15    | 1.39  | 1.51  | 0.87797 | 1.3503  | 0.08263            | 0.18703 | 0.01611  |
| 19.93%   | 6.09 | 0.94   | 0.9   | 1.02  | 1.56    | 1.6   | 1.27  | 0.95197 | 1.47667 | 0.06087            | 0.18157 | 0.009    |
| 13.61%   | 4.92 | 0.98   | 0.5   | 0.7   | 1.16    | 1.2   | 1.51  | 0.7249  | 1.28917 | 0.23891            | 0.18813 | 0.03247  |
| 9.23%    | 9.26 | 0.85   | 0.9   | 0.87  | 1.13    | 1.39  | 1.46  | 0.8726  | 1.32903 | 0.02316            | 0.17205 | 0.01039  |
| 33.94%   | 5.03 | 0.96   | 0.69  | 0.74  | 1.44    | 1.56  | 2.26  | 0.79383 | 1.75233 | 0.14156            | 0.44006 | 0.02293  |
| 24.48%   | 8.01 | 0.87   | 0.72  | 0.84  | 1.48    | 1.48  | 1.46  | 0.81103 | 1.47433 | 0.07777            | 0.01261 | 0.00013  |
| 19.93%   | 6.2  | 0.9    | 0.94  | 0.99  | 1.4     | 1.61  | 1.6   | 0.94297 | 1.53493 | 0.0418             | 0.11734 | 0.00119  |
| 14.76%   | 10.3 | 1.67   | 1.36  | 1.33  | 0.88    | 0.75  | 0.75  | 1.4548  | 0.78997 | 0.18726            | 0.07376 | 0.00462  |
| 29.31%   | 6.98 | 1.12   | 1.72  | 1.34  | 0.74    | 0.86  | 0.66  | 1.39553 | 0.75387 | 0.30599            | 0.09848 | 0.02588  |
| 4.76%    | 7.06 | 0.92   | 0.67  | 0.79  | 2.03    | 2     | 1.67  | 0.79473 | 1.9004  | 0.12591            | 0.19602 | 0.00119  |
| 9.83%    | 6.79 | 0.87   | 0.51  | 0.78  | 1.62    | 1.5   | 1.16  | 0.7194  | 1.42593 | 0.18858            | 0.23624 | 0.0155   |
| 23.94%   | 8.95 | 0.8    | 0.9   | 1.02  | 1.47    | 1.32  | 2.02  | 0.90767 | 1.60163 | 0.10874            | 0.37031 | 0.03572  |
| 15.28%   | 5.24 | 0.84   | 0.9   | 0.93  | 1.59    | 1.5   | 1.53  | 0.88947 | 1.53797 | 0.04573            | 0.04647 | 6.7E-05  |
| 16.62%   | 5.86 | 0.82   | 0.89  | 0.89  | 1.44    | 1.25  | 1.48  | 0.86627 | 1.39143 | 0.03765            | 0.12334 | 0.00213  |
| 10.88%   | 5.39 | 0.47   | 0.65  | 0.64  | 3.17    | 3.14  | 2.61  | 0.58707 | 2.97153 | 0.10032            | 0.3125  | 0.00023  |



|        |      |      |      |      |      |      |      |         |         |         |         |         |
|--------|------|------|------|------|------|------|------|---------|---------|---------|---------|---------|
| 7.17%  | 5.33 | 0.47 | 0.65 | 0.64 | 3.17 | 3.14 | 2.61 | 0.58707 | 2.97153 | 0.10032 | 0.3125  | 0.00023 |
| 22.60% | 6.26 | 0.86 | 0.74 | 0.81 | 1.64 | 1.55 | 1.91 | 0.8034  | 1.69733 | 0.06065 | 0.19029 | 0.00149 |
| 12.33% | 6.24 | 0.91 | 0.78 | 0.79 | 1.6  | 1.6  | 1.52 | 0.82767 | 1.57297 | 0.07316 | 0.04642 | 0.00012 |
| 14.55% | 5.97 | 1.03 | 1.09 | 1.01 | 0.68 | 0.67 | 0.75 | 1.04203 | 0.70163 | 0.04138 | 0.04243 | 0.00057 |
| 14.29% | 9.3  | 1.22 | 1.16 | 1.09 | 0.9  | 0.83 | 0.71 | 1.15957 | 0.8139  | 0.0651  | 0.09987 | 0.00737 |
| 9.17%  | 7.81 | 1.56 | 1.38 | 1.31 | 0.9  | 0.86 | 0.89 | 1.41633 | 0.88377 | 0.12815 | 0.01981 | 0.00206 |
| 1.77%  | 8.96 | 0.8  | 0.9  | 0.89 | 1.41 | 1.15 | 1.36 | 0.8612  | 1.3081  | 0.05554 | 0.1359  | 0.0062  |
| 22.04% | 5.22 | 0.78 | 0.87 | 0.88 | 1.18 | 1.22 | 1.29 | 0.84177 | 1.23063 | 0.05369 | 0.05522 | 0.00094 |
| 22.12% | 5.03 | 0.78 | 0.91 | 0.85 | 1.25 | 1.21 | 1.23 | 0.84347 | 1.23143 | 0.0632  | 0.01721 | 0.00051 |
| 11.56% | 10.9 | 1.19 | 1.25 | 0.95 | 0.51 | 0.44 | 0.71 | 1.12977 | 0.5519  | 0.16199 | 0.14085 | 0.00957 |
| 17.32% | 11.3 | 1.16 | 1.16 | 1.11 | 0.7  | 0.79 | 0.89 | 1.14163 | 0.7952  | 0.02324 | 0.09464 | 0.00353 |
| 13.18% | 7.76 | 0.9  | 0.82 | 0.77 | 0.55 | 0.65 | 0.54 | 0.82977 | 0.5814  | 0.06949 | 0.05783 | 0.00891 |
| 24.90% | 10.8 | 1.12 | 1.41 | 1.06 | 0.71 | 0.94 | 0.84 | 1.1954  | 0.8317  | 0.18465 | 0.11432 | 0.04409 |
| 21.25% | 6.12 | 0.93 | 1.14 | 1.12 | 0.71 | 0.69 | 0.86 | 1.06643 | 0.75173 | 0.1169  | 0.09675 | 0.02292 |
| 13.84% | 6.51 | 1.12 | 1.14 | 0.94 | 0.59 | 0.66 | 0.9  | 1.06627 | 0.71717 | 0.10737 | 0.16613 | 0.03777 |
| 6.04%  | 5.02 | 0.56 | 0.73 | 0.42 | 1.43 | 1.57 | 0.85 | 0.57027 | 1.28137 | 0.158   | 0.37871 | 0.03988 |
| 6.02%  | 5.28 | 0.7  | 0.67 | 0.92 | 1.34 | 1.48 | 1.67 | 0.76487 | 1.4964  | 0.13764 | 0.16555 | 0.00417 |
| 24.60% | 9.18 | 1.04 | 0.93 | 1.01 | 1.45 | 1.31 | 1.6  | 0.99343 | 1.45447 | 0.05769 | 0.14181 | 0.00645 |
| 13.38% | 6.62 | 0.93 | 1.36 | 1.45 | 0.82 | 0.7  | 0.79 | 1.2465  | 0.76763 | 0.27609 | 0.06117 | 0.04268 |
| 14.62% | 8.98 | 0.45 | 0.73 | 0.81 | 2.1  | 1.93 | 2.13 | 0.6629  | 2.05413 | 0.19244 | 0.10818 | 0.0004  |
| 18.62% | 6.64 | 0.73 | 0.81 | 0.91 | 1.08 | 1.08 | 1.33 | 0.81387 | 1.1614  | 0.0892  | 0.14247 | 0.02314 |
| 12.17% | 6.91 | 0.84 | 0.79 | 0.8  | 1.17 | 1.18 | 1.1  | 0.81203 | 1.1532  | 0.02578 | 0.04201 | 0.00028 |
| 10.98% | 4.91 | 1.25 | 1.09 | 1.17 | 0.81 | 0.74 | 0.93 | 1.1729  | 0.82883 | 0.0776  | 0.09822 | 0.0089  |
| 30.00% | 4.55 | 0.88 | 0.31 | 0.51 | 1.41 | 1.28 | 2.05 | 0.56463 | 1.5777  | 0.2916  | 0.41306 | 0.02557 |
| 15.66% | 7.09 | 0.73 | 0.93 | 0.92 | 1.17 | 1.16 | 1.49 | 0.86053 | 1.2712  | 0.11466 | 0.18728 | 0.0317  |
| 13.05% | 5.62 | 0.74 | 0.82 | 0.74 | 1.15 | 1.15 | 1.12 | 0.76697 | 1.14127 | 0.04594 | 0.01999 | 0.00021 |
| 29.27% | 6.92 | 0.84 | 0.88 | 0.82 | 1.16 | 1.14 | 1.3  | 0.84417 | 1.20017 | 0.02944 | 0.08585 | 0.00245 |
| 6.26%  | 9.33 | 0.79 | 0.72 | 0.68 | 2.83 | 2.9  | 1.88 | 0.73257 | 2.53887 | 0.05671 | 0.57418 | 0.00561 |
| 7.48%  | 7.1  | 1.13 | 0.92 | 0.94 | 1.39 | 1.39 | 1.59 | 0.9942  | 1.4542  | 0.11469 | 0.1151  | 0.00802 |
| 14.67% | 5.33 | 0.76 | 0.2  | 1.2  | 1.82 | 1.97 | 2.75 | 0.72087 | 2.1799  | 0.50185 | 0.50001 | 0.02343 |
| 14.24% | 8.27 | 1.01 | 1.04 | 1.05 | 1.49 | 1.46 | 1.47 | 1.03413 | 1.47237 | 0.01889 | 0.0172  | 7.6E-06 |
| 8.02%  | 5.55 | 0.57 | 0.51 | 0.61 | 1.69 | 1.57 | 2.67 | 0.5654  | 1.9752  | 0.05052 | 0.60421 | 0.01577 |
| 7.38%  | 4.87 | 1.07 | 0.89 | 0.88 | 1.47 | 1.45 | 1.55 | 0.94707 | 1.49057 | 0.11002 | 0.05358 | 0.00154 |
| 30.61% | 4.73 | 1.01 | 0.73 | 0.75 | 1.39 | 1.34 | 1.31 | 0.8288  | 1.34377 | 0.15356 | 0.03991 | 0.00492 |
| 12.10% | 8.31 | 0.78 | 0.79 | 0.87 | 1.41 | 1.29 | 1.17 | 0.81547 | 1.2892  | 0.04972 | 0.12296 | 0.00347 |
| 21.01% | 5.72 | 0.88 | 0.86 | 0.84 | 1.65 | 1.41 | 1.2  | 0.86207 | 1.4192  | 0.01695 | 0.22897 | 0.01366 |
| 21.77% | 7.18 | 1    | 0.87 | 0.93 | 1.29 | 1.29 | 1.41 | 0.9373  | 1.33203 | 0.06417 | 0.06874 | 0.0019  |
| 27.00% | 5.57 | 0.93 | 0.8  | 0.91 | 1.38 | 1.29 | 1.46 | 0.87887 | 1.3746  | 0.06828 | 0.08641 | 0.00146 |
| 32.87% | 6.96 | 0.89 | 0.9  | 0.92 | 1.36 | 1.28 | 1.32 | 0.90257 | 1.32163 | 0.01406 | 0.04053 | 7.2E-05 |
| 11.05% | 6.5  | 1.32 | 1.24 | 1.21 | 0.78 | 0.79 | 0.92 | 1.25817 | 0.82983 | 0.05802 | 0.0787  | 0.00162 |
| 13.03% | 6.48 | 0.96 | 0.98 | 0.85 | 1.23 | 1.44 | 1.25 | 0.93153 | 1.30537 | 0.06872 | 0.11738 | 0.0089  |
| 9.28%  | 7.29 | 0.83 | 0.73 | 0.68 | 1.56 | 1.42 | 1.39 | 0.74993 | 1.45487 | 0.07737 | 0.0918  | 0.00053 |
| 4.46%  | 8.79 | 0.83 | 0.86 | 0.72 | 1.67 | 1.4  | 1.28 | 0.80353 | 1.45217 | 0.0765  | 0.19759 | 0.00608 |
| 12.89% | 9    | 0.78 | 0.56 | 0.77 | 1.78 | 1.87 | 2.29 | 0.70597 | 1.97947 | 0.12424 | 0.26972 | 0.00175 |
| 1.97%  | 5.48 | 1.06 | 1.07 | 1.07 | 1.48 | 1.54 | 1.86 | 1.06557 | 1.625   | 0.00691 | 0.2049  | 0.00913 |
| 16.29% | 9.25 | 0.95 | 0.82 | 0.81 | 1.53 | 1.43 | 1.65 | 0.85647 | 1.53487 | 0.07864 | 0.11046 | 0.00098 |
| 22.67% | 9.5  | 0.85 | 0.92 | 1.05 | 1.61 | 1.51 | 1.4  | 0.9412  | 1.50623 | 0.09833 | 0.10136 | 0.00228 |
| 30.00% | 9.74 | 0.93 | 0.93 | 0.99 | 1.53 | 1.29 | 1.46 | 0.95413 | 1.42547 | 0.03479 | 0.12571 | 0.00332 |
| 45.78% | 4.88 | 0.79 | 0.81 | 0.88 | 1.67 | 1.92 | 1.77 | 0.82537 | 1.7895  | 0.04549 | 0.12597 | 0.00024 |
| 62.16% | 8.12 | 1.09 | 0.98 | 0.99 | 1.46 | 1.75 | 1.33 | 1.01773 | 1.51637 | 0.05961 | 0.21288 | 0.01744 |

|        |      |      |      |      |      |      |      |         |         |         |         |         |
|--------|------|------|------|------|------|------|------|---------|---------|---------|---------|---------|
| 37.69% | 9.4  | 1.01 | 0.95 | 1.02 | 1.58 | 1.5  | 1.57 | 0.9937  | 1.55247 | 0.03774 | 0.04223 | 6.9E-05 |
| 26.99% | 4.91 | 1    | 0.9  | 0.93 | 1.39 | 1.4  | 1.6  | 0.94387 | 1.46027 | 0.05189 | 0.11904 | 0.00233 |
| 38.10% | 7.74 | 1.07 | 0.98 | 0.93 | 1.4  | 1.41 | 1.62 | 0.99217 | 1.47713 | 0.06974 | 0.12322 | 0.00405 |
| 3.61%  | 9.66 | 0.95 | 1.29 | 1.29 | 0.8  | 0.82 | 0.86 | 1.1774  | 0.82763 | 0.19522 | 0.03211 | 0.03758 |
| 27.80% | 8.82 | 0.9  | 0.85 | 0.89 | 1.44 | 1.51 | 1.42 | 0.88007 | 1.45737 | 0.027   | 0.05013 | 6.2E-05 |
| 21.82% | 8.46 | 0.94 | 0.75 | 0.66 | 1.26 | 1.19 | 1.43 | 0.78013 | 1.2916  | 0.1429  | 0.12717 | 0.0098  |
| 25.39% | 9.71 | 0.93 | 0.93 | 0.98 | 1.63 | 1.51 | 1.46 | 0.9494  | 1.53337 | 0.02694 | 0.08744 | 0.00038 |

Fold-change

OMa/Ma

**0.6953**

**1.44944**

**0.68125**

**1.53437**

**1.54266**

**1.5858**

**2.06935**

**1.5258**

**1.55635**

**1.46791**

**0.71159**

**1.54577**

**1.5311**

**0.70325**

**1.613**

**1.5849**

**0.65562**

**0.6789**

**0.67324**

**1.5034**

**0.71372**

**0.71319**

**0.58145**

**0.60111**

**2.12251**

**0.69226**

**0.65411**

**1.66954**

**2.2051**

**2.0268**

**1.69121**

**1.61782**

**1.53799**

**1.55117**

**1.77841**

**1.52307**

**2.20743**

**1.81785**

**1.62777**

**0.54301**

**0.5402**

**2.39124**

**1.98211**

**1.76456**

**1.72909**

**1.60624**

**5.06166**

5.06166  
2.11269  
1.90048  
0.67333  
0.7019  
0.62398  
1.51893  
1.46196  
1.45997  
0.48851  
0.69655  
0.70068  
0.69575  
0.7049  
0.6726  
2.24696  
1.95642  
1.46408  
0.61583  
3.09871  
1.42702  
1.42014  
0.70665  
2.7942  
1.47722  
1.48803  
1.42172  
3.46571  
1.46268  
3.024  
1.42377  
3.49346  
1.57388  
1.62134  
1.58094  
1.64628  
1.42114  
1.56406  
1.46431  
0.65956  
1.40131  
1.93999  
1.80723  
2.80391  
1.52501  
1.79209  
1.60033  
1.49399  
2.16813  
1.48994

1.56231  
1.54711  
1.4888  
0.70293  
1.65597  
1.65561  
1.61509

**Supplemental Table S7. The core proteome of plastoglobules in citrus chromoplasts**

| Accession      | Homologies of AT | Protein description                          | Functional category             | PepCou |
|----------------|------------------|----------------------------------------------|---------------------------------|--------|
| Cs2g19200.4    | AT3G07700.1      | ABC1K7; ABC1 family protein                  | misc.ABC1k family               | 18     |
| Cs3g01840.1    | AT1G79600.1      | ABC1K3; ABC1 family protein                  | misc.ABC1k family               | 10     |
| Cs3g22140.3    | AT1G71810.1      | ABC1K5; ABC1 family protein                  | misc.ABC1k family               | 4      |
| Cs7g07380.1    | AT4G31390.1      | ABC1K1; ABC1 family protein                  | misc.ABC1k family               | 16     |
| Cs7g29500.1    | AT5G05200.1      | ABC1K9; ABC1 family protein                  | misc.ABC1k family               | 6      |
| Cs9g11110.2    | AT3G24190.1      | ABC1K6; ABC1 family protein                  | misc.ABC1k family               | 4      |
| Cs2g02520.1    | AT4G22240.1      | Fibrillin 1 (FBN1)                           | misc.fibrillins                 | 351    |
| Cs3g09310.1    | AT2G35490.1      | Fibrillin 2 (FBN2)                           | misc.fibrillins                 | 25     |
| Cs9g09850.1    | AT3G23400.1      | Fibrillin 4 (FBN4)                           | misc.fibrillins                 | 18     |
| orange1.1t0224 | AT2G42130.4      | Fibrillin 7b (FBN7b)                         | misc.fibrillins                 | 41     |
| Cs4g19670.2    | AT4G32770.1      | tocopherol cyclase                           | secondary metabolism            | 16     |
| Cs3g11690.3    | AT1G54570.1      | Diacylglycerol acyltransferase               | Diacylglycerol lipid metabolism | 20     |
| Cs1g08540.1    | AT5G08740.1      | NDC1   NDC1 (NAD(P)H dehydrogenase           | redox                           | 2      |
| Cs3g09230.1    | AT1G32220.1      | Flavin reductase-related 1                   | not assigned.unknown            | 24     |
| Cs5g28130.1    | AT4G13200.1      | unknown protein                              | not assigned.unknown            | 12     |
| Cs6g14580.1    | AT3G10130.1      | SOUL heme-binding family protein             | redox.heme                      | 15     |
| Cs3g18390.1    | AT1G78140.1      | UbiE methyltransferase-related 1             | not assigned.no ontolo          | 3      |
| Cs2g03600.1    | AT2G34460.1      | Flavin reductase-related 2; flavin reductase | not assigned.no ontolo          | 28     |
| Cs1g01370.1    | AT2G22170.1      | PLAT/LH2-1; lipid-associated family prot     | not assigned.no ontolo          | 1      |
| Cs2g13080.2    | AT1G15060.1      | Unknown SAGUncharacterised conserved         | not assigned.unknown            | 2      |
| Cs2g25310.1    | AT3G27110.1      | M48 protease                                 | protein.degradation             | 3      |
| Cs2g14090.1    | AT5G41120.1      | Esterase 1; esterase/lipase/thioesterase fam | tetrapyrrole degradatio         | 3      |
| Cs2g14110.1    | AT5G41120.1      | Esterase 1; esterase/lipase/thioesterase fam | tetrapyrrole degradatio         | 3      |
| Cs2g14120.1    | AT5G41120.1      | Esterase 1; esterase/lipase/thioesterase fam | tetrapyrrole degradatio         | 10     |

| Unique <sup>l</sup> | Average |        | Standard Deviation |        |        | p-value |          |                       | Trend                 |          |          |
|---------------------|---------|--------|--------------------|--------|--------|---------|----------|-----------------------|-----------------------|----------|----------|
|                     | MG/11   | Br/113 | Ma/113             | MG/113 | Br/113 | Ma/113  | pval(Br) | pval(M <sub>2</sub> ) | pval(M <sub>2</sub> ) | Trend(E) | Trend(N) |
| 12                  | 0.689   | 1.027  | 1.14               | 0.0549 | 0.0588 | 0.0344  | 0.0002   | 0.0328                | 6E-05                 | 1        | 1        |
| 8                   | 0.848   | 1.086  | 1.165              | 0.0247 | 0.1615 | 0.0639  | 0.0271   | 0.4648                | 0.0002                | 1        | 0        |
| 4                   |         |        |                    |        |        |         |          |                       |                       |          |          |
| 10                  | 0.855   | 1.214  | 1.195              | 0.0543 | 0.0837 | 0.0633  | 0.0004   | 0.7665                | 0.0006                | 1        | 0        |
| 3                   | 0.805   | 1.025  | 1.194              | 0.0102 | 0.0813 | 0.0264  | 0.0017   | 0.0191                | 1E-06                 | 1        | 1        |
| 4                   |         |        |                    |        |        |         |          |                       |                       |          |          |
| 15                  | 1.017   | 1.127  | 1.054              | 0.0553 | 0.0404 | 0.0307  | 0.0184   | 0.0492                | 0.3488                | 1        | -1       |
| 6                   | 1.036   | 1.229  | 1.181              | 0.1266 | 0.0374 | 0.0431  | 0.0265   | 0.1769                | 0.1206                | 1        | 0        |
| 5                   | 0.691   | 0.967  | 1.111              | 0.0518 | 0.0493 | 0.0773  | 0.0002   | 0.0288                | 0.0003                | 1        | 1        |
| 8                   | 1.005   | 1.095  | 0.976              | 0.0469 | 0.1397 | 0.2135  | 0.2709   | 0.4123                | 0.798                 | 0        | 0        |
| 8                   | 1.019   | 1.022  | 0.984              | 0.067  | 0.0727 | 0.0442  | 0.9652   | 0.4705                | 0.4695                | 0        | 0        |
| 11                  | 0.998   | 1.273  | 1.013              | 0.0601 | 0.063  | 0.0874  | 0.0007   | 0.0057                | 0.802                 | 1        | -1       |
| 2                   |         |        |                    |        |        |         |          |                       |                       |          |          |
| 5                   | 1.028   | 1.086  | 0.978              | 0.0969 | 0.256  | 0.192   | 0.6881   | 0.57                  | 0.6644                | 0        | 0        |
| 4                   | 0.829   | 1.09   | 1.129              | 0.0268 | 0.0699 | 0.072   | 0.0004   | 0.5073                | 0.0005                | 1        | 0        |
| 7                   | 0.932   | 1.046  | 0.966              | 0.0955 | 0.1174 | 0.0427  | 0.1809   | 0.3212                | 0.5883                | 0        | 0        |
| 2                   | 1.083   | 1.093  | 1.147              | 0.0561 | 0.1716 | 0.266   | 0.9116   | 0.7569                | 0.6499                | 0        | 0        |
| 7                   | 0.991   | 1.111  | 1.152              | 0.0293 | 0.0249 | 0.056   | 0.0008   | 0.2431                | 0.004                 | 1        | 0        |
| 1                   |         |        |                    |        |        |         |          |                       |                       |          |          |
| 2                   |         |        |                    |        |        |         |          |                       |                       |          |          |
| 2                   | 1.13    | 1.198  | 1.101              | 0.1121 | 0.1509 | 0.0523  | 0.4969   | 0.3422                | 0.6958                | 0        | 0        |
| 1                   | 0.863   | 1.124  | 1.389              | 0.1948 | 0.0715 | 0.1914  | 0.0455   | 0.0478                | 0.0162                | 1        | 1        |
| 3                   | 0.665   | 0.853  | 1.092              | 0.1442 | 0.2956 | 0.2908  | 0.2961   | 0.335                 | 0.0482                | 0        | 0        |
| 6                   | 0.837   | 0.884  | 1.077              | 0.0881 | 0.161  | 0.0177  | 0.6276   | 0.0988                | 0.0061                | 0        | 0        |

---

**trend(MPatterns**

1 increasing continuously

1 increasing early

1 increasing early

1 increasing continuously

0 unclass

0 increasing early

1 increasing continuously

0 stables

0 stables

0 unclass

0 stables

1 increasing early

0 stables

0 stables

1 increasing early

0 stables

1 increasing continuously

1 increasing continuously

1 increasing continuously
